# Supplementary material for: Predicting the Risk of Suicide by Analyzing the Text of Clinical Notes
Source: PLoS One. 2014 Jan 28;9(1):e85733. doi: 10.1371/journal.pone.0085733 (PMC3904866; doi:10.1371/journal.pone.0085733)
Supplement: Appendix S3 — Machine Learning Libraries and Methods: This section is provided to enclose the open source (Apache License) classifier used for the building of the statistical models, specifically for the purposes of study reproducibility. A detailed account of these tools is intended for another publication. (ZIP) [file pone.0085733.s003.zip]

Archive with 128 entries (117 files):
- Appendix3/
- Appendix3/Data_Analysis_HOWTO.pdf
- Appendix3/License.txt
- Appendix3/ML_libs/
- Appendix3/ML_libs/man.pdf
- Appendix3/ML_libs/Models/
- Appendix3/ML_libs/Models/model-va12-Hacc-C3000.mod
- Appendix3/ML_libs/Models/model-va12-words
- Appendix3/ML_libs/Models/model-va32-Hacc-C3000.mod
- Appendix3/ML_libs/Models/model-va32-words
- Appendix3/ML_libs/Models/README_Models
- Appendix3/ML_libs/Models/testcase.dat
- Appendix3/ML_libs/Models/va12_FINAL.mod
- Appendix3/ML_libs/Models/va32_FINAL.mod
- Appendix3/ML_libs/moses-3.4.0-1.x86_64.rpm
- Appendix3/ML_libs/moses-3.4.0.tar.bz2
- Appendix3/ML_libs/moses-devel-3.4.0-1.x86_64.rpm
- Appendix3/ML_libs/Poses_README.txt
- Appendix3/ML_libs/poulin-moses-1.r436-1.x86_64.rpm
- Appendix3/ML_libs/poulin-moses-1.r436.zip
- Appendix3/ML_libs/Regression_testing/
- Appendix3/ML_libs/Regression_testing/.DS_Store
- Appendix3/ML_libs/Regression_testing/conv.py
- Appendix3/ML_libs/Regression_testing/group1/
- Appendix3/ML_libs/Regression_testing/group1/.DS_Store
- Appendix3/ML_libs/Regression_testing/group1/grp1-pt-1001.xml
- Appendix3/ML_libs/Regression_testing/group1/grp1-pt-1001.xml.txt
- Appendix3/ML_libs/Regression_testing/group1/grp1-pt-1016.xml
- Appendix3/ML_libs/Regression_testing/group1/grp1-pt-1016.xml.txt
- Appendix3/ML_libs/Regression_testing/group1/grp1-pt-1036.xml
- Appendix3/ML_libs/Regression_testing/group1/grp1-pt-1036.xml.txt
- Appendix3/ML_libs/Regression_testing/group1/grp1-pt-1037.xml
- Appendix3/ML_libs/Regression_testing/group1/grp1-pt-1037.xml.txt
- Appendix3/ML_libs/Regression_testing/group1/grp1-pt-1047.xml
- Appendix3/ML_libs/Regression_testing/group1/grp1-pt-1047.xml.txt
- Appendix3/ML_libs/Regression_testing/group1/grp1-pt-1061.xml
- Appendix3/ML_libs/Regression_testing/group1/grp1-pt-1061.xml.txt
- Appendix3/ML_libs/Regression_testing/group1/grp1-pt-1064.xml
- Appendix3/ML_libs/Regression_testing/group1/grp1-pt-1064.xml.txt
- Appendix3/ML_libs/Regression_testing/group1/grp1-pt-1069.xml
- Appendix3/ML_libs/Regression_testing/group1/grp1-pt-1069.xml.txt
- Appendix3/ML_libs/Regression_testing/group1/grp1-pt-1080.xml
- Appendix3/ML_libs/Regression_testing/group1/grp1-pt-1080.xml.txt
- Appendix3/ML_libs/Regression_testing/group1/grp1-pt-1099.xml
- Appendix3/ML_libs/Regression_testing/group1/grp1-pt-1099.xml.txt
- Appendix3/ML_libs/Regression_testing/group1/processed/
- Appendix3/ML_libs/Regression_testing/group1/processed/grp1-pt-1001.dat
- Appendix3/ML_libs/Regression_testing/group1/processed/grp1-pt-1016.dat
- Appendix3/ML_libs/Regression_testing/group1/processed/grp1-pt-1036.dat
- Appendix3/ML_libs/Regression_testing/group1/processed/grp1-pt-1037.dat
- Appendix3/ML_libs/Regression_testing/group1/processed/grp1-pt-1047.dat
- Appendix3/ML_libs/Regression_testing/group1/processed/grp1-pt-1061.dat
- Appendix3/ML_libs/Regression_testing/group1/processed/grp1-pt-1064.dat
- Appendix3/ML_libs/Regression_testing/group1/processed/grp1-pt-1069.dat
- Appendix3/ML_libs/Regression_testing/group1/processed/grp1-pt-1080.dat
- Appendix3/ML_libs/Regression_testing/group1/processed/grp1-pt-1099.dat
- Appendix3/ML_libs/Regression_testing/group2/
- Appendix3/ML_libs/Regression_testing/group2/grp2-pt-1003.xml
- Appendix3/ML_libs/Regression_testing/group2/grp2-pt-1003.xml.txt
- Appendix3/ML_libs/Regression_testing/group2/grp2-pt-1012.xml
- Appendix3/ML_libs/Regression_testing/group2/grp2-pt-1012.xml.txt
- Appendix3/ML_libs/Regression_testing/group2/grp2-pt-1017.xml
- Appendix3/ML_libs/Regression_testing/group2/grp2-pt-1017.xml.txt
- Appendix3/ML_libs/Regression_testing/group2/grp2-pt-1018.xml
- Appendix3/ML_libs/Regression_testing/group2/grp2-pt-1018.xml.txt
- Appendix3/ML_libs/Regression_testing/group2/grp2-pt-1043.xml
- Appendix3/ML_libs/Regression_testing/group2/grp2-pt-1043.xml.txt
- Appendix3/ML_libs/Regression_testing/group2/grp2-pt-1049.xml
- Appendix3/ML_libs/Regression_testing/group2/grp2-pt-1049.xml.txt
- Appendix3/ML_libs/Regression_testing/group2/grp2-pt-1050.xml
- Appendix3/ML_libs/Regression_testing/group2/grp2-pt-1050.xml.txt
- Appendix3/ML_libs/Regression_testing/group2/grp2-pt-1081.xml
- Appendix3/ML_libs/Regression_testing/group2/grp2-pt-1081.xml.txt
- Appendix3/ML_libs/Regression_testing/group2/grp2-pt-1097.xml
- Appendix3/ML_libs/Regression_testing/group2/grp2-pt-1097.xml.txt
- Appendix3/ML_libs/Regression_testing/group2/grp2-pt-1099.xml
- Appendix3/ML_libs/Regression_testing/group2/grp2-pt-1099.xml.txt
- Appendix3/ML_libs/Regression_testing/group2/processed/
- Appendix3/ML_libs/Regression_testing/group2/processed/grp2-pt-1003.dat
- Appendix3/ML_libs/Regression_testing/group2/processed/grp2-pt-1012.dat
- Appendix3/ML_libs/Regression_testing/group2/processed/grp2-pt-1017.dat
- Appendix3/ML_libs/Regression_testing/group2/processed/grp2-pt-1018.dat
- Appendix3/ML_libs/Regression_testing/group2/processed/grp2-pt-1043.dat
- Appendix3/ML_libs/Regression_testing/group2/processed/grp2-pt-1049.dat
- Appendix3/ML_libs/Regression_testing/group2/processed/grp2-pt-1050.dat
- Appendix3/ML_libs/Regression_testing/group2/processed/grp2-pt-1081.dat
- Appendix3/ML_libs/Regression_testing/group2/processed/grp2-pt-1097.dat
- Appendix3/ML_libs/Regression_testing/group2/processed/grp2-pt-1099.dat
- Appendix3/ML_libs/Regression_testing/group3/
- Appendix3/ML_libs/Regression_testing/group3/grp3-pt-1004.xml
- Appendix3/ML_libs/Regression_testing/group3/grp3-pt-1004.xml.txt
- Appendix3/ML_libs/Regression_testing/group3/grp3-pt-1012.xml
- Appendix3/ML_libs/Regression_testing/group3/grp3-pt-1012.xml.txt
- Appendix3/ML_libs/Regression_testing/group3/grp3-pt-1023.xml
- Appendix3/ML_libs/Regression_testing/group3/grp3-pt-1023.xml.txt
- Appendix3/ML_libs/Regression_testing/group3/grp3-pt-1039.xml
- Appendix3/ML_libs/Regression_testing/group3/grp3-pt-1039.xml.txt
- Appendix3/ML_libs/Regression_testing/group3/grp3-pt-1045.xml
- Appendix3/ML_libs/Regression_testing/group3/grp3-pt-1045.xml.txt
- Appendix3/ML_libs/Regression_testing/group3/grp3-pt-1050.xml
- Appendix3/ML_libs/Regression_testing/group3/grp3-pt-1050.xml.txt
- Appendix3/ML_libs/Regression_testing/group3/grp3-pt-1055.xml
- Appendix3/ML_libs/Regression_testing/group3/grp3-pt-1055.xml.txt
- Appendix3/ML_libs/Regression_testing/group3/grp3-pt-1060.xml
- Appendix3/ML_libs/Regression_testing/group3/grp3-pt-1060.xml.txt
- Appendix3/ML_libs/Regression_testing/group3/grp3-pt-1084.xml
- Appendix3/ML_libs/Regression_testing/group3/grp3-pt-1084.xml.txt
- Appendix3/ML_libs/Regression_testing/group3/grp3-pt-1089.xml
- Appendix3/ML_libs/Regression_testing/group3/grp3-pt-1089.xml.txt
- Appendix3/ML_libs/Regression_testing/group3/processed/
- Appendix3/ML_libs/Regression_testing/group3/processed/grp3-pt-1004.dat
- Appendix3/ML_libs/Regression_testing/group3/processed/grp3-pt-1012.dat
- Appendix3/ML_libs/Regression_testing/group3/processed/grp3-pt-1023.dat
- Appendix3/ML_libs/Regression_testing/group3/processed/grp3-pt-1039.dat
- Appendix3/ML_libs/Regression_testing/group3/processed/grp3-pt-1045.dat
- Appendix3/ML_libs/Regression_testing/group3/processed/grp3-pt-1050.dat
- Appendix3/ML_libs/Regression_testing/group3/processed/grp3-pt-1055.dat
- Appendix3/ML_libs/Regression_testing/group3/processed/grp3-pt-1060.dat
- Appendix3/ML_libs/Regression_testing/group3/processed/grp3-pt-1084.dat
- Appendix3/ML_libs/Regression_testing/group3/processed/grp3-pt-1089.dat
- Appendix3/ML_libs/Regression_testing/inferGroups.php
- Appendix3/ML_libs/Regression_testing/ingestFiles.php
- Appendix3/ML_libs/Regression_testing/README_Regression.txt
- Appendix3/ML_libs/Regression_testing/run_all.php
- Appendix3/ML_libs/Word_extraction/
- Appendix3/ML_libs/Word_extraction/input_sample.xml
- Appendix3/ML_libs/Word_extraction/output_sample.dat
- Appendix3/ML_libs/Word_extraction/word_xtract.pl
