# Supplementary material for: Predicting the Risk of Suicide by Analyzing the Text of Clinical Notes
Source: PLoS One. 2014 Jan 28;9(1):e85733. doi: 10.1371/journal.pone.0085733 (PMC3904866; doi:10.1371/journal.pone.0085733)
Supplement: Appendix S3 — Machine Learning Libraries and Methods: This section is provided to enclose the open source (Apache License) classifier used for the building of the statistical models, specifically for the purposes of study reproducibility. A detailed account of these tools is intended for another publication. (ZIP) [file pone.0085733.s003.zip › Appendix3/ML_libs/Models/model-va12-Hacc-C3000.mod]

<ensemble>
group->1.4964028777
1 and(or(and(or($CATEGORY_t1.8921029074 $INTERPERSONAL_t0.4004232811 $SCREENED_t0.9408834269) !$EGGS_t0.6483113841 !$SHAMPOO_t0.5476744301) and($FILLED_t0.9820770222 $REASONS_t0.8811296703) $CLOTHES_t0.7391847579 $FATIGUE_t0.9995420519 $IMAGES_t0.9121148553 $NECK_t5.7950010625 $READ_t2.4746104325 $RECHECK_t0.8875842042 $REQUESTING_t4.1778483402 $TELL_t0.8373787918 $TRANSFERED_t0.3919122313 $UROLOGIC_t0.1334744270 $WISHES_t0.8499083390) !$LADDERS_t0.1668993516 !$OS_t3.0602502947 !$RART_t1.0315704359 !$STENOSIS_t1.1084844611 !$VERIFICATION_t1.0336684026 !$VESSEL_t0.6426959272) 
1 and(or(and(or($ABSENCE_t0.5623876904 $CATEGORY_t1.8921029074 $INTERPERSONAL_t0.4004232811 $SCREENED_t0.9408834269) !$EGGS_t0.6483113841 !$SHAMPOO_t0.5476744301) and($FILLED_t0.9820770222 $REASONS_t0.8811296703) $CLOTHES_t0.7391847579 $FATIGUE_t0.9995420519 $IMAGES_t0.9121148553 $NECK_t5.7950010625 $READ_t2.4746104325 $RECHECK_t0.8875842042 $REQUESTING_t4.1778483402 $TELL_t0.8373787918 $TRANSFERED_t0.3919122313 $UROLOGIC_t0.1334744270 $WISHES_t0.8499083390) !$LADDERS_t0.1668993516 !$OS_t3.0602502947 !$RART_t1.0315704359 !$STENOSIS_t1.1084844611 !$VERIFICATION_t1.0336684026 !$VESSEL_t0.6426959272) 
1 and(or(and(or($ADDITION_t0.7470311844 $CATEGORY_t1.8921029074 $INTERPERSONAL_t0.4004232811 $SCREENED_t0.9408834269) !$EGGS_t0.6483113841 !$SHAMPOO_t0.5476744301) and($FILLED_t0.9820770222 $REASONS_t0.8811296703) $CLOTHES_t0.7391847579 $FATIGUE_t0.9995420519 $IMAGES_t0.9121148553 $NECK_t5.7950010625 $READ_t2.4746104325 $RECHECK_t0.8875842042 $REQUESTING_t4.1778483402 $TELL_t0.8373787918 $TRANSFERED_t0.3919122313 $UROLOGIC_t0.1334744270 $WISHES_t0.8499083390) !$LADDERS_t0.1668993516 !$OS_t3.0602502947 !$RART_t1.0315704359 !$STENOSIS_t1.1084844611 !$VERIFICATION_t1.0336684026 !$VESSEL_t0.6426959272) 
1 and(or(and(or($ADEQUATELY_t0.9574882846 $CATEGORY_t1.8921029074 $INTERPERSONAL_t0.4004232811 $SCREENED_t0.9408834269) !$EGGS_t0.6483113841 !$SHAMPOO_t0.5476744301) and($FILLED_t0.9820770222 $REASONS_t0.8811296703) $CLOTHES_t0.7391847579 $FATIGUE_t0.9995420519 $IMAGES_t0.9121148553 $NECK_t5.7950010625 $READ_t2.4746104325 $RECHECK_t0.8875842042 $REQUESTING_t4.1778483402 $TELL_t0.8373787918 $TRANSFERED_t0.3919122313 $UROLOGIC_t0.1334744270 $WISHES_t0.8499083390) !$LADDERS_t0.1668993516 !$OS_t3.0602502947 !$RART_t1.0315704359 !$STENOSIS_t1.1084844611 !$VERIFICATION_t1.0336684026 !$VESSEL_t0.6426959272) 
1 and(or(and(or($AGGRAVATED_t0.2574791988 $CATEGORY_t1.8921029074 $INTERPERSONAL_t0.4004232811 $SCREENED_t0.9408834269) !$EGGS_t0.6483113841 !$SHAMPOO_t0.5476744301) and($FILLED_t0.9820770222 $REASONS_t0.8811296703) $CLOTHES_t0.7391847579 $FATIGUE_t0.9995420519 $IMAGES_t0.9121148553 $NECK_t5.7950010625 $READ_t2.4746104325 $RECHECK_t0.8875842042 $REQUESTING_t4.1778483402 $TELL_t0.8373787918 $TRANSFERED_t0.3919122313 $UROLOGIC_t0.1334744270 $WISHES_t0.8499083390) !$LADDERS_t0.1668993516 !$OS_t3.0602502947 !$RART_t1.0315704359 !$STENOSIS_t1.1084844611 !$VERIFICATION_t1.0336684026 !$VESSEL_t0.6426959272) 
1 and(or(and(or($AGITATION_t1.2315608341 $CATEGORY_t1.8921029074 $INTERPERSONAL_t0.4004232811 $SCREENED_t0.9408834269) !$EGGS_t0.6483113841 !$SHAMPOO_t0.5476744301) and($FILLED_t0.9820770222 $REASONS_t0.8811296703) $CLOTHES_t0.7391847579 $FATIGUE_t0.9995420519 $IMAGES_t0.9121148553 $NECK_t5.7950010625 $READ_t2.4746104325 $RECHECK_t0.8875842042 $REQUESTING_t4.1778483402 $TELL_t0.8373787918 $TRANSFERED_t0.3919122313 $UROLOGIC_t0.1334744270 $WISHES_t0.8499083390) !$LADDERS_t0.1668993516 !$OS_t3.0602502947 !$RART_t1.0315704359 !$STENOSIS_t1.1084844611 !$VERIFICATION_t1.0336684026 !$VESSEL_t0.6426959272) 
1 and(or(and(or($ALLOW_t0.9995420519 $CATEGORY_t1.8921029074 $INTERPERSONAL_t0.4004232811 $SCREENED_t0.9408834269) !$EGGS_t0.6483113841 !$SHAMPOO_t0.5476744301) and($FILLED_t0.9820770222 $REASONS_t0.8811296703) $CLOTHES_t0.7391847579 $FATIGUE_t0.9995420519 $IMAGES_t0.9121148553 $NECK_t5.7950010625 $READ_t2.4746104325 $RECHECK_t0.8875842042 $REQUESTING_t4.1778483402 $TELL_t0.8373787918 $TRANSFERED_t0.3919122313 $UROLOGIC_t0.1334744270 $WISHES_t0.8499083390) !$LADDERS_t0.1668993516 !$OS_t3.0602502947 !$RART_t1.0315704359 !$STENOSIS_t1.1084844611 !$VERIFICATION_t1.0336684026 !$VESSEL_t0.6426959272) 
1 and(or(and(or($ALPHABETIZED_t1.0315704359 $CATEGORY_t1.8921029074 $INTERPERSONAL_t0.4004232811 $SCREENED_t0.9408834269) !$EGGS_t0.6483113841 !$SHAMPOO_t0.5476744301) and($FILLED_t0.9820770222 $REASONS_t0.8811296703) $CLOTHES_t0.7391847579 $FATIGUE_t0.9995420519 $IMAGES_t0.9121148553 $NECK_t5.7950010625 $READ_t2.4746104325 $RECHECK_t0.8875842042 $REQUESTING_t4.1778483402 $TELL_t0.8373787918 $TRANSFERED_t0.3919122313 $UROLOGIC_t0.1334744270 $WISHES_t0.8499083390) !$LADDERS_t0.1668993516 !$OS_t3.0602502947 !$RART_t1.0315704359 !$STENOSIS_t1.1084844611 !$VERIFICATION_t1.0336684026 !$VESSEL_t0.6426959272) 
1 and(or(and(or($ANALGESIA_t0.7039515159 $CATEGORY_t1.8921029074 $INTERPERSONAL_t0.4004232811 $SCREENED_t0.9408834269) !$EGGS_t0.6483113841 !$SHAMPOO_t0.5476744301) and($FILLED_t0.9820770222 $REASONS_t0.8811296703) $CLOTHES_t0.7391847579 $FATIGUE_t0.9995420519 $IMAGES_t0.9121148553 $NECK_t5.7950010625 $READ_t2.4746104325 $RECHECK_t0.8875842042 $REQUESTING_t4.1778483402 $TELL_t0.8373787918 $TRANSFERED_t0.3919122313 $UROLOGIC_t0.1334744270 $WISHES_t0.8499083390) !$LADDERS_t0.1668993516 !$OS_t3.0602502947 !$RART_t1.0315704359 !$STENOSIS_t1.1084844611 !$VERIFICATION_t1.0336684026 !$VESSEL_t0.6426959272) 
1 and(or(and(or($APPROPRIATE_t4.8041389213 $CATEGORY_t1.8921029074 $INTERPERSONAL_t0.4004232811 $SCREENED_t0.9408834269) !$EGGS_t0.6483113841 !$SHAMPOO_t0.5476744301) and($FILLED_t0.9820770222 $REASONS_t0.8811296703) $CLOTHES_t0.7391847579 $FATIGUE_t0.9995420519 $IMAGES_t0.9121148553 $NECK_t5.7950010625 $READ_t2.4746104325 $RECHECK_t0.8875842042 $REQUESTING_t4.1778483402 $TELL_t0.8373787918 $TRANSFERED_t0.3919122313 $UROLOGIC_t0.1334744270 $WISHES_t0.8499083390) !$LADDERS_t0.1668993516 !$OS_t3.0602502947 !$RART_t1.0315704359 !$STENOSIS_t1.1084844611 !$VERIFICATION_t1.0336684026 !$VESSEL_t0.6426959272) 
1 and(or(and(or(and($ABSENCE_t0.5623876904 $ITEMS_t1.1458012304) $ADEQUATELY_t0.9574882846 $COMP_t0.3195272152 $DEGUZMAN_t0.2100115231 $DEMEROL_t0.8221000806 $GOT_t1.7809137290 $HELPING_t0.6964789090 $LABORATORY_t1.6011122749 $LIVE_t0.9526437275 $SCREENED_t0.9408834269 $TELL_t0.8373787918 $TETANUS_t1.3513182038 $TRIAGE_t5.7339848439 $TRIAL_t0.5725217620 $TRY_t1.5730032351 $UROLOGIC_t0.1334744270 $VERBALIZED_t3.7263172526 $YESTER_t4.0503765212) !$AFRICAN_t0.7039515159 !$DLCO_t0.3149743803 !$LADDERS_t0.1668993516 !$OS_t3.0602502947 !$POSTOP_t1.0608398788 !$SHAMPOO_t0.5476744301) $CLARIFY_t0.2997832493 $FEEDS_t0.2100115231) !$FATAL_t0.2878725381) 
1 and(or(and(or(and($ABSENCE_t0.5623876904 $ITEMS_t1.1458012304) $ADEQUATELY_t0.9574882846 $COMP_t0.3195272152 $DEGUZMAN_t0.2100115231 $DEMEROL_t0.8221000806 $GOT_t1.7809137290 $HELPING_t0.6964789090 $LABORATORY_t1.6011122749 $LIVE_t0.9526437275 $SCREENED_t0.9408834269 $TELL_t0.8373787918 $TETANUS_t1.3513182038 $TRIAGE_t5.7339848439 $TRIAL_t0.5725217620 $TRY_t1.5730032351 $UROLOGIC_t0.1334744270 $VERBALIZED_t3.7263172526 $YESTER_t4.0503765212) !$DLCO_t0.3149743803 !$LADDERS_t0.1668993516 !$MARIA_t0.5612568654 !$OS_t3.0602502947 !$POSTOP_t1.0608398788 !$SHAMPOO_t0.5476744301) $CLARIFY_t0.2997832493 $FEEDS_t0.2100115231) !$FATAL_t0.2878725381) 
1 and(or(and(or(and($ABSENCE_t0.5623876904 $ITEMS_t1.1458012304) $ADEQUATELY_t0.9574882846 $COMP_t0.3195272152 $DEGUZMAN_t0.2100115231 $DEMEROL_t0.8221000806 $GOT_t1.7809137290 $HELPING_t0.6964789090 $LABORATORY_t1.6011122749 $LIVE_t0.9526437275 $SCREENED_t0.9408834269 $TELL_t0.8373787918 $TETANUS_t1.3513182038 $TRIAGE_t5.7339848439 $TRIAL_t0.5725217620 $TRY_t1.5730032351 $UROLOGIC_t0.1334744270 $VERBALIZED_t3.7263172526 $YESTER_t4.0503765212) !$DLCO_t0.3149743803 !$LADDERS_t0.1668993516 !$OS_t3.0602502947 !$POSTOP_t1.0608398788 !$SHAMPOO_t0.5476744301) $CLARIFY_t0.2997832493 $FEEDS_t0.2100115231) !$FATAL_t0.2878725381 !$VERIFICATION_t1.0336684026) 
1 and(or(and(or(and($ABSENCE_t0.5623876904 $ITEMS_t1.1458012304) $ADEQUATELY_t0.9574882846 $COMP_t0.3195272152 $DEGUZMAN_t0.2100115231 $DEMEROL_t0.8221000806 $GOT_t1.7809137290 $HELPING_t0.6964789090 $LABORATORY_t1.6011122749 $LIVE_t0.9526437275 $SCREENED_t0.9408834269 $TELL_t0.8373787918 $TETANUS_t1.3513182038 $TRIAGE_t5.7339848439 $TRIAL_t0.5725217620 $TRY_t1.5730032351 $UROLOGIC_t0.1334744270 $VERBALIZED_t3.7263172526 $YESTER_t4.0503765212) !$DLCO_t0.3149743803 !$LADDERS_t0.1668993516 !$OS_t3.0602502947 !$POSTOP_t1.0608398788 !$SHAMPOO_t0.5476744301 !$VERIFICATION_t1.0336684026) $CLARIFY_t0.2997832493 $FEEDS_t0.2100115231) !$FATAL_t0.2878725381) 
1 and(or(and(or(and($ABSENCE_t0.5623876904 $ITEMS_t1.1458012304) $ADEQUATELY_t0.9574882846 $COMP_t0.3195272152 $DEGUZMAN_t0.2100115231 $DEMEROL_t0.8221000806 $GOT_t1.7809137290 $HELPING_t0.6964789090 $LABORATORY_t1.6011122749 $LIVE_t0.9526437275 $SCREENED_t0.9408834269 $TELL_t0.8373787918 $TETANUS_t1.3513182038 $TRIAGE_t5.7339848439 $TRIAL_t0.5725217620 $TRY_t1.5730032351 $UROLOGIC_t0.1334744270 $VERBALIZED_t3.7263172526 $YESTER_t4.0503765212) !$DLCO_t0.3149743803 !$LADDERS_t0.1668993516 !$MARIA_t0.5612568654 !$OS_t3.0602502947 !$POSTOP_t1.0608398788 !$SHAMPOO_t0.5476744301) $CLARIFY_t0.2997832493 $FEEDS_t0.2100115231) !$FATAL_t0.2878725381 !$VERIFICATION_t1.0336684026) 
1 and(or(and(or(and($ABSENCE_t0.5623876904 $ITEMS_t1.1458012304) $ADEQUATELY_t0.9574882846 $COMP_t0.3195272152 $DEGUZMAN_t0.2100115231 $DEMEROL_t0.8221000806 $GOT_t1.7809137290 $HELPING_t0.6964789090 $LABORATORY_t1.6011122749 $LIVE_t0.9526437275 $SCREENED_t0.9408834269 $TELL_t0.8373787918 $TETANUS_t1.3513182038 $TRIAGE_t5.7339848439 $TRIAL_t0.5725217620 $TRY_t1.5730032351 $UROLOGIC_t0.1334744270 $VERBALIZED_t3.7263172526 $YESTER_t4.0503765212) !$DLCO_t0.3149743803 !$LADDERS_t0.1668993516 !$MARIA_t0.5612568654 !$OS_t3.0602502947 !$POSTOP_t1.0608398788 !$SHAMPOO_t0.5476744301 !$VERIFICATION_t1.0336684026) $CLARIFY_t0.2997832493 $FEEDS_t0.2100115231) !$FATAL_t0.2878725381) 
1 or(and(or(and($ABSENCE_t0.5623876904 $ITEMS_t1.1458012304) $ADEQUATELY_t0.9574882846 $COMP_t0.3195272152 $DEGUZMAN_t0.2100115231 $DEMEROL_t0.8221000806 $GOT_t1.7809137290 $HELPING_t0.6964789090 $LABORATORY_t1.6011122749 $LIVE_t0.9526437275 $SCREENED_t0.9408834269 $TELL_t0.8373787918 $TETANUS_t1.3513182038 $TRIAGE_t5.7339848439 $TRIAL_t0.5725217620 $TRY_t1.5730032351 $UROLOGIC_t0.1334744270 $VERBALIZED_t3.7263172526 $YESTER_t4.0503765212) !$AFRICAN_t0.7039515159 !$DLCO_t0.3149743803 !$LADDERS_t0.1668993516 !$OS_t3.0602502947 !$POSTOP_t1.0608398788 !$SHAMPOO_t0.5476744301) $CLARIFY_t0.2997832493 $FEEDS_t0.2100115231) 
1 or(and(or(and($ABSENCE_t0.5623876904 $ITEMS_t1.1458012304) $ADEQUATELY_t0.9574882846 $COMP_t0.3195272152 $DEGUZMAN_t0.2100115231 $DEMEROL_t0.8221000806 $GOT_t1.7809137290 $HELPING_t0.6964789090 $LABORATORY_t1.6011122749 $LIVE_t0.9526437275 $SCREENED_t0.9408834269 $TELL_t0.8373787918 $TETANUS_t1.3513182038 $TRIAGE_t5.7339848439 $TRIAL_t0.5725217620 $TRY_t1.5730032351 $UROLOGIC_t0.1334744270 $VERBALIZED_t3.7263172526 $YESTER_t4.0503765212) !$DLCO_t0.3149743803 !$LADDERS_t0.1668993516 !$MARIA_t0.5612568654 !$OS_t3.0602502947 !$POSTOP_t1.0608398788 !$SHAMPOO_t0.5476744301) $CLARIFY_t0.2997832493 $FEEDS_t0.2100115231) 
1 or(and(or(and($ABSENCE_t0.5623876904 $ITEMS_t1.1458012304) $ADEQUATELY_t0.9574882846 $COMP_t0.3195272152 $DEGUZMAN_t0.2100115231 $DEMEROL_t0.8221000806 $GOT_t1.7809137290 $HELPING_t0.6964789090 $LABORATORY_t1.6011122749 $LIVE_t0.9526437275 $SCREENED_t0.9408834269 $TELL_t0.8373787918 $TETANUS_t1.3513182038 $TRIAGE_t5.7339848439 $TRIAL_t0.5725217620 $TRY_t1.5730032351 $UROLOGIC_t0.1334744270 $VERBALIZED_t3.7263172526 $YESTER_t4.0503765212) !$DLCO_t0.3149743803 !$LADDERS_t0.1668993516 !$OS_t3.0602502947 !$POSTOP_t1.0608398788 !$SHAMPOO_t0.5476744301 !$VERIFICATION_t1.0336684026) $CLARIFY_t0.2997832493 $FEEDS_t0.2100115231) 
1 and(or(and(or(and($ABSENCE_t0.5623876904 $ITEMS_t1.1458012304) $ADEQUATELY_t0.9574882846 $COMP_t0.3195272152 $DEGUZMAN_t0.2100115231 $DEMEROL_t0.8221000806 $GOT_t1.7809137290 $HELPING_t0.6964789090 $LABORATORY_t1.6011122749 $LIVE_t0.9526437275 $SCREENED_t0.9408834269 $TELL_t0.8373787918 $TETANUS_t1.3513182038 $TRIAGE_t5.7339848439 $TRIAL_t0.5725217620 $TRY_t1.5730032351 $UROLOGIC_t0.1334744270 $VERBALIZED_t3.7263172526 $YESTER_t4.0503765212) !$DLCO_t0.3149743803 !$LADDERS_t0.1668993516 !$OS_t3.0602502947 !$POSTOP_t1.0608398788 !$SHAMPOO_t0.5476744301) $CLARIFY_t0.2997832493 $FEEDS_t0.2100115231) !$FATAL_t0.2878725381) 
1 or(and(or(and(or($COMPREHENSIVE_t1.1523357750 $DECLINES_t0.6077820475 $EXERCISE_t2.2960921042 $FEEDS_t0.2100115231) !$EGGS_t0.6483113841 !$WHO_t8.2733954755) and(or($DOCUMENTS_t0.8275833403 $GOT_t1.7809137290 $NECK_t5.7950010625 $NOTHING_t0.8921999148 $SCREENED_t0.9408834269 $SOON_t0.7553034420 $TELL_t0.8373787918 $TETANUS_t1.3513182038 $TRIAL_t0.5725217620 $TRY_t1.5730032351 $VERBALLY_t0.9910051077 $WBC_t0.8069264209 $WISHES_t0.8499083390) or(!$FATAL_t0.2878725381 $REASONS_t0.8811296703) !$DFE_t0.4663391579 !$MODIFICATION_t0.2878725381 !$PERFUSION_t0.6798450809 !$PLS_t0.2345374050 !$VERIFICATION_t1.0336684026)) !$ARTHRALGIA_t0.8990536978 !$CATHETERIZATION_t0.3337987033 !$CCS_t0.3337987033 !$LAND_t0.4084193068 !$SHAMPOO_t0.5476744301 !$UARY_t1.4074369594) $ESCORT_t0.4663391579) 
1 or(and(or(and(or($COMPREHENSIVE_t1.1523357750 $DECLINES_t0.6077820475 $EXERCISE_t2.2960921042 $FEEDS_t0.2100115231) !$EGGS_t0.6483113841 !$WHO_t8.2733954755) and(or($DOCUMENTS_t0.8275833403 $GOT_t1.7809137290 $NECK_t5.7950010625 $NOTHING_t0.8921999148 $SCREENED_t0.9408834269 $SOON_t0.7553034420 $TELL_t0.8373787918 $TETANUS_t1.3513182038 $TRIAL_t0.5725217620 $TRY_t1.5730032351 $VERBALLY_t0.9910051077 $WBC_t0.8069264209 $WISHES_t0.8499083390) !$DFE_t0.4663391579 !$FATAL_t0.2878725381 !$MODIFICATION_t0.2878725381 !$PERFUSION_t0.6798450809 !$PLS_t0.2345374050 !$VERIFICATION_t1.0336684026)) !$ARTHRALGIA_t0.8990536978 !$CATHETERIZATION_t0.3337987033 !$CCS_t0.3337987033 !$LAND_t0.4084193068 !$UARY_t1.4074369594) $ESCORT_t0.4663391579) 
1 or(and(or(and(or($COMPREHENSIVE_t1.1523357750 $DECLINES_t0.6077820475 $EXERCISE_t2.2960921042 $FEEDS_t0.2100115231) !$EGGS_t0.6483113841 !$WHO_t8.2733954755) and(or($DOCUMENTS_t0.8275833403 $GOT_t1.7809137290 $NECK_t5.7950010625 $NOTHING_t0.8921999148 $SCREENED_t0.9408834269 $SOON_t0.7553034420 $TELL_t0.8373787918 $TETANUS_t1.3513182038 $TRIAL_t0.5725217620 $TRY_t1.5730032351 $VERBALLY_t0.9910051077 $WBC_t0.8069264209 $WISHES_t0.8499083390) or(!$FATAL_t0.2878725381 $REASONS_t0.8811296703) !$DFE_t0.4663391579 !$MODIFICATION_t0.2878725381 !$PERFUSION_t0.6798450809 !$PLS_t0.2345374050 !$VERIFICATION_t1.0336684026)) !$ARTHRALGIA_t0.8990536978 !$CATHETERIZATION_t0.3337987033 !$CCS_t0.3337987033 !$LAND_t0.4084193068 !$UARY_t1.4074369594) $ESCORT_t0.4663391579) 
1 or(and(or(and(or($COMPREHENSIVE_t1.1523357750 $DECLINES_t0.6077820475 $EXERCISE_t2.2960921042 $FEEDS_t0.2100115231) !$EGGS_t0.6483113841 !$WHO_t8.2733954755) and(or($DOCUMENTS_t0.8275833403 $GOT_t1.7809137290 $NECK_t5.7950010625 $NOTHING_t0.8921999148 $SCREENED_t0.9408834269 $SOON_t0.7553034420 $TELL_t0.8373787918 $TETANUS_t1.3513182038 $TRIAL_t0.5725217620 $TRY_t1.5730032351 $VERBALLY_t0.9910051077 $WBC_t0.8069264209 $WISHES_t0.8499083390) !$DFE_t0.4663391579 !$MODIFICATION_t0.2878725381 !$PERFUSION_t0.6798450809 !$PLS_t0.2345374050 !$VERIFICATION_t1.0336684026)) or(!$FATAL_t0.2878725381 $REVEALED_t0.9741146764) !$ARTHRALGIA_t0.8990536978 !$CATHETERIZATION_t0.3337987033 !$CCS_t0.3337987033 !$LAND_t0.4084193068 !$UARY_t1.4074369594) $ESCORT_t0.4663391579) 
1 or(and(or(and(or($DECLINES_t0.6077820475 $EXERCISE_t2.2960921042 $FEEDS_t0.2100115231 $PLENTY_t0.2791542369) !$EGGS_t0.6483113841 !$WHO_t8.2733954755) and(or($DOCUMENTS_t0.8275833403 $GOT_t1.7809137290 $NECK_t5.7950010625 $NOTHING_t0.8921999148 $SCREENED_t0.9408834269 $SOON_t0.7553034420 $TELL_t0.8373787918 $TETANUS_t1.3513182038 $TRIAL_t0.5725217620 $TRY_t1.5730032351 $VERBALLY_t0.9910051077 $WBC_t0.8069264209 $WISHES_t0.8499083390) or(!$FATAL_t0.2878725381 $REASONS_t0.8811296703) !$DFE_t0.4663391579 !$MODIFICATION_t0.2878725381 !$PERFUSION_t0.6798450809 !$PLS_t0.2345374050 !$VERIFICATION_t1.0336684026)) !$ARTHRALGIA_t0.8990536978 !$CATHETERIZATION_t0.3337987033 !$CCS_t0.3337987033 !$LAND_t0.4084193068 !$UARY_t1.4074369594) $ESCORT_t0.4663391579) 
1 or(and(or(and(or($DECLINES_t0.6077820475 $EXERCISE_t2.2960921042 $FEEDS_t0.2100115231 $PLENTY_t0.2791542369) !$EGGS_t0.6483113841 !$WHO_t8.2733954755) and(or($DOCUMENTS_t0.8275833403 $GOT_t1.7809137290 $NECK_t5.7950010625 $NOTHING_t0.8921999148 $SCREENED_t0.9408834269 $SOON_t0.7553034420 $TELL_t0.8373787918 $TETANUS_t1.3513182038 $TRIAL_t0.5725217620 $TRY_t1.5730032351 $VERBALLY_t0.9910051077 $WBC_t0.8069264209 $WISHES_t0.8499083390) !$DFE_t0.4663391579 !$MODIFICATION_t0.2878725381 !$PERFUSION_t0.6798450809 !$PLS_t0.2345374050 !$VERIFICATION_t1.0336684026)) or(!$FATAL_t0.2878725381 $REVEALED_t0.9741146764) !$ARTHRALGIA_t0.8990536978 !$CATHETERIZATION_t0.3337987033 !$CCS_t0.3337987033 !$LAND_t0.4084193068 !$UARY_t1.4074369594) $ESCORT_t0.4663391579) 
1 and(or(and(or(and(or($COMPREHENSIVE_t1.1523357750 $DECLINES_t0.6077820475 $EXERCISE_t2.2960921042 $FEEDS_t0.2100115231) !$EGGS_t0.6483113841 !$WHO_t8.2733954755) and(or($DOCUMENTS_t0.8275833403 $GOT_t1.7809137290 $NECK_t5.7950010625 $NOTHING_t0.8921999148 $SCREENED_t0.9408834269 $SOON_t0.7553034420 $TELL_t0.8373787918 $TETANUS_t1.3513182038 $TRIAL_t0.5725217620 $TRY_t1.5730032351 $VERBALLY_t0.9910051077 $WBC_t0.8069264209 $WISHES_t0.8499083390) or(!$FATAL_t0.2878725381 $REASONS_t0.8811296703) !$DFE_t0.4663391579 !$MODIFICATION_t0.2878725381 !$PERFUSION_t0.6798450809 !$PLS_t0.2345374050 !$VERIFICATION_t1.0336684026)) !$ARTHRALGIA_t0.8990536978 !$CATHETERIZATION_t0.3337987033 !$LAND_t0.4084193068 !$UARY_t1.4074369594) $ESCORT_t0.4663391579) !$CCS_t0.3337987033) 
1 and(or(and(or(and(or($COMPREHENSIVE_t1.1523357750 $DECLINES_t0.6077820475 $EXERCISE_t2.2960921042 $FEEDS_t0.2100115231) !$EGGS_t0.6483113841 !$WHO_t8.2733954755) and(or($DOCUMENTS_t0.8275833403 $GOT_t1.7809137290 $NECK_t5.7950010625 $NOTHING_t0.8921999148 $SCREENED_t0.9408834269 $SOON_t0.7553034420 $TELL_t0.8373787918 $TETANUS_t1.3513182038 $TRIAL_t0.5725217620 $TRY_t1.5730032351 $VERBALLY_t0.9910051077 $WBC_t0.8069264209 $WISHES_t0.8499083390) or(!$FATAL_t0.2878725381 $REASONS_t0.8811296703) !$DFE_t0.4663391579 !$MODIFICATION_t0.2878725381 !$PERFUSION_t0.6798450809 !$PLS_t0.2345374050 !$VERIFICATION_t1.0336684026)) !$CATHETERIZATION_t0.3337987033 !$CCS_t0.3337987033 !$LAND_t0.4084193068 !$UARY_t1.4074369594) $ESCORT_t0.4663391579) !$ARTHRALGIA_t0.8990536978) 
1 or(and(or(and(or($ACCEPTED_t0.9127332042 $DOCUMENTS_t0.8275833403 $GOT_t1.7809137290 $NECK_t5.7950010625 $NOTHING_t0.8921999148 $SCREENED_t0.9408834269 $SOON_t0.7553034420 $TELL_t0.8373787918 $TETANUS_t1.3513182038 $TRIAL_t0.5725217620 $TRY_t1.5730032351 $VERBALLY_t0.9910051077 $WBC_t0.8069264209 $WISHES_t0.8499083390) or(!$FATAL_t0.2878725381 $REASONS_t0.8811296703) !$DFE_t0.4663391579 !$MODIFICATION_t0.2878725381 !$PERFUSION_t0.6798450809 !$PLS_t0.2345374050 !$VERIFICATION_t1.0336684026) and(or($COMPREHENSIVE_t1.1523357750 $DECLINES_t0.6077820475 $EXERCISE_t2.2960921042 $FEEDS_t0.2100115231) !$EGGS_t0.6483113841 !$WHO_t8.2733954755)) !$ARTHRALGIA_t0.8990536978 !$CATHETERIZATION_t0.3337987033 !$CCS_t0.3337987033 !$LAND_t0.4084193068 !$UARY_t1.4074369594) $ESCORT_t0.4663391579) 
1 or(and(or(and(or($AFFECT_t5.0658657878 $DOCUMENTS_t0.8275833403 $GOT_t1.7809137290 $NECK_t5.7950010625 $NOTHING_t0.8921999148 $SCREENED_t0.9408834269 $SOON_t0.7553034420 $TELL_t0.8373787918 $TETANUS_t1.3513182038 $TRIAL_t0.5725217620 $TRY_t1.5730032351 $VERBALLY_t0.9910051077 $WBC_t0.8069264209 $WISHES_t0.8499083390) or(!$FATAL_t0.2878725381 $REASONS_t0.8811296703) !$DFE_t0.4663391579 !$MODIFICATION_t0.2878725381 !$PERFUSION_t0.6798450809 !$PLS_t0.2345374050 !$VERIFICATION_t1.0336684026) and(or($COMPREHENSIVE_t1.1523357750 $DECLINES_t0.6077820475 $EXERCISE_t2.2960921042 $FEEDS_t0.2100115231) !$EGGS_t0.6483113841 !$WHO_t8.2733954755)) !$ARTHRALGIA_t0.8990536978 !$CATHETERIZATION_t0.3337987033 !$CCS_t0.3337987033 !$LAND_t0.4084193068 !$UARY_t1.4074369594) $ESCORT_t0.4663391579) 
1 and(or(and(or($AGAIN_t3.4633314952 $GOT_t1.7809137290 $HELPING_t0.6964789090 $ISSUE_t2.3216007437 $LIVE_t0.9526437275 $MOVING_t0.7456915713 $POINTS_t0.7723481067 $POSTIVE_t0.1334744270 $PROTECTOR_t0.1334744270 $RECHECK_t0.8875842042 $TELCARE_t0.2954496834 $TN_t0.7258188505 $TRIAL_t0.5725217620 $TWISTING_t0.1334744270 $WISHES_t0.8499083390) !$GUILLAINBARRE_t0.4356780012 !$OS_t3.0602502947 !$POSTOP_t1.0608398788) and($CAMERA_t0.2997832493 !$WANTED_t1.6113990741) and(!$HALF_t0.9429395999 $WISH_t0.7402872895) and(!$REQUESTS_t1.5437932541 $SEES_t0.8044420938) $YEARS_t3.9579623624) !$ARTHRALGIA_t0.8990536978 !$LADDERS_t0.1668993516 !$NEUTRAL_t0.4862005499 !$PLASMA_t0.9724010998 !$PLS_t0.2345374050) 
1 and(or(and(or($AGAIN_t3.4633314952 $GOT_t1.7809137290 $HELPING_t0.6964789090 $ISSUE_t2.3216007437 $LIVE_t0.9526437275 $MOVING_t0.7456915713 $POINTS_t0.7723481067 $POSTIVE_t0.1334744270 $PROTECTOR_t0.1334744270 $RECHECK_t0.8875842042 $TELCARE_t0.2954496834 $TN_t0.7258188505 $TRIAL_t0.5725217620 $TWISTING_t0.1334744270 $WISHES_t0.8499083390) !$GUILLAINBARRE_t0.4356780012 !$OS_t3.0602502947 !$POSTOP_t1.0608398788) and($CAMERA_t0.2997832493 !$WANTED_t1.6113990741) and(!$MEMORIAL_t0.7159018302 $WISH_t0.7402872895) and(!$REQUESTS_t1.5437932541 $SEES_t0.8044420938) $YEARS_t3.9579623624) !$ARTHRALGIA_t0.8990536978 !$LADDERS_t0.1668993516 !$NEUTRAL_t0.4862005499 !$PLASMA_t0.9724010998 !$PLS_t0.2345374050) 
1 and(or(and(or($AGAIN_t3.4633314952 $GOT_t1.7809137290 $HELPING_t0.6964789090 $ISSUE_t2.3216007437 $LIVE_t0.9526437275 $MOVING_t0.7456915713 $POINTS_t0.7723481067 $POSTIVE_t0.1334744270 $PROTECTOR_t0.1334744270 $RECHECK_t0.8875842042 $TELCARE_t0.2954496834 $TN_t0.7258188505 $TRIAL_t0.5725217620 $TWISTING_t0.1334744270 $WISHES_t0.8499083390) !$GUILLAINBARRE_t0.4356780012 !$OS_t3.0602502947 !$POSTOP_t1.0608398788) and($CAMERA_t0.2997832493 !$WANTED_t1.6113990741) and(!$PRIVATE_t1.8910772397 $WISH_t0.7402872895) and(!$REQUESTS_t1.5437932541 $SEES_t0.8044420938) $YEARS_t3.9579623624) !$ARTHRALGIA_t0.8990536978 !$LADDERS_t0.1668993516 !$NEUTRAL_t0.4862005499 !$PLASMA_t0.9724010998 !$PLS_t0.2345374050) 
1 and(or(and(or($AGAIN_t3.4633314952 $GOT_t1.7809137290 $HELPING_t0.6964789090 $ISSUE_t2.3216007437 $LIVE_t0.9526437275 $LUMBAGO_t0.2878725381 $MOVING_t0.7456915713 $POINTS_t0.7723481067 $POSTIVE_t0.1334744270 $PROTECTOR_t0.1334744270 $RECHECK_t0.8875842042 $TELCARE_t0.2954496834 $TN_t0.7258188505 $TRIAL_t0.5725217620 $WISHES_t0.8499083390) !$GUILLAINBARRE_t0.4356780012 !$OS_t3.0602502947 !$POSTOP_t1.0608398788) and(!$REQUESTS_t1.5437932541 $SEES_t0.8044420938) $CAMERA_t0.2997832493 $WISH_t0.7402872895 $YEARS_t3.9579623624) !$ARTHRALGIA_t0.8990536978 !$LADDERS_t0.1668993516 !$NEUTRAL_t0.4862005499 !$PLASMA_t0.9724010998 !$PLS_t0.2345374050) 
1 and(or(and(or($AGAIN_t3.4633314952 $GOT_t1.7809137290 $HELPING_t0.6964789090 $ISSUE_t2.3216007437 $LIVE_t0.9526437275 $MOVING_t0.7456915713 $PERTAINING_t0.2345374050 $POINTS_t0.7723481067 $POSTIVE_t0.1334744270 $PROTECTOR_t0.1334744270 $RECHECK_t0.8875842042 $TELCARE_t0.2954496834 $TN_t0.7258188505 $TRIAL_t0.5725217620 $WISHES_t0.8499083390) !$GUILLAINBARRE_t0.4356780012 !$OS_t3.0602502947 !$POSTOP_t1.0608398788) and(!$REQUESTS_t1.5437932541 $SEES_t0.8044420938) $CAMERA_t0.2997832493 $WISH_t0.7402872895 $YEARS_t3.9579623624) !$ARTHRALGIA_t0.8990536978 !$LADDERS_t0.1668993516 !$NEUTRAL_t0.4862005499 !$PLASMA_t0.9724010998 !$PLS_t0.2345374050) 
1 and(or(and(or($AGAIN_t3.4633314952 $GOT_t1.7809137290 $HELPING_t0.6964789090 $ISSUE_t2.3216007437 $LIVE_t0.9526437275 $MOVING_t0.7456915713 $POINTS_t0.7723481067 $POSTIVE_t0.1334744270 $PROTECTOR_t0.1334744270 $RECHECK_t0.8875842042 $SECRETIONS_t0.3749788251 $TELCARE_t0.2954496834 $TN_t0.7258188505 $TRIAL_t0.5725217620 $WISHES_t0.8499083390) !$GUILLAINBARRE_t0.4356780012 !$OS_t3.0602502947 !$POSTOP_t1.0608398788) and(!$REQUESTS_t1.5437932541 $SEES_t0.8044420938) $CAMERA_t0.2997832493 $WISH_t0.7402872895 $YEARS_t3.9579623624) !$ARTHRALGIA_t0.8990536978 !$LADDERS_t0.1668993516 !$NEUTRAL_t0.4862005499 !$PLASMA_t0.9724010998 !$PLS_t0.2345374050) 
1 and(or(and(or($AGAIN_t3.4633314952 $GOT_t1.7809137290 $HELPING_t0.6964789090 $ISSUE_t2.3216007437 $LIVE_t0.9526437275 $MOVING_t0.7456915713 $POINTS_t0.7723481067 $POSTIVE_t0.1334744270 $PROTECTOR_t0.1334744270 $RECHECK_t0.8875842042 $TELCARE_t0.2954496834 $TN_t0.7258188505 $TRIAL_t0.5725217620 $TWISTING_t0.1334744270 $WISHES_t0.8499083390) !$GUILLAINBARRE_t0.4356780012 !$OS_t3.0602502947 !$POSTOP_t1.0608398788) and(!$REQUESTS_t1.5437932541 $SEES_t0.8044420938) $CAMERA_t0.2997832493 $WISH_t0.7402872895 $YEARS_t3.9579623624) !$ARTHRALGIA_t0.8990536978 !$LADDERS_t0.1668993516 !$NEUTRAL_t0.4862005499 !$PLASMA_t0.9724010998 !$PLS_t0.2345374050) 
1 and(or(and(or($AGAIN_t3.4633314952 $GOT_t1.7809137290 $HELPING_t0.6964789090 $ISSUE_t2.3216007437 $LIVE_t0.9526437275 $MOVING_t0.7456915713 $POINTS_t0.7723481067 $POSTIVE_t0.1334744270 $PROTECTOR_t0.1334744270 $RECHECK_t0.8875842042 $TELCARE_t0.2954496834 $TN_t0.7258188505 $TRIAL_t0.5725217620 $WISHES_t0.8499083390) !$GUILLAINBARRE_t0.4356780012 !$OS_t3.0602502947 !$POSTOP_t1.0608398788) and(!$REQUESTS_t1.5437932541 $SEES_t0.8044420938) $CAMERA_t0.2997832493 $LUMBAGO_t0.2878725381 $WISH_t0.7402872895 $YEARS_t3.9579623624) !$ARTHRALGIA_t0.8990536978 !$LADDERS_t0.1668993516 !$NEUTRAL_t0.4862005499 !$PLASMA_t0.9724010998 !$PLS_t0.2345374050) 
1 and(or(and(or($AGAIN_t3.4633314952 $GOT_t1.7809137290 $HELPING_t0.6964789090 $ISSUE_t2.3216007437 $LIVE_t0.9526437275 $MOVING_t0.7456915713 $POINTS_t0.7723481067 $POSTIVE_t0.1334744270 $PROTECTOR_t0.1334744270 $RECHECK_t0.8875842042 $TELCARE_t0.2954496834 $TN_t0.7258188505 $TRIAL_t0.5725217620 $WISHES_t0.8499083390) !$GUILLAINBARRE_t0.4356780012 !$OS_t3.0602502947 !$POSTOP_t1.0608398788) and(!$REQUESTS_t1.5437932541 $SEES_t0.8044420938) $CAMERA_t0.2997832493 $RETROFLEXION_t0.1334744270 $WISH_t0.7402872895 $YEARS_t3.9579623624) !$ARTHRALGIA_t0.8990536978 !$LADDERS_t0.1668993516 !$NEUTRAL_t0.4862005499 !$PLASMA_t0.9724010998 !$PLS_t0.2345374050) 
1 and(or(and(or($ADMITS_t1.4776445832 $AGAIN_t3.4633314952 $GOT_t1.7809137290 $HELPING_t0.6964789090 $ISSUE_t2.3216007437 $LIVE_t0.9526437275 $MOVING_t0.7456915713 $POINTS_t0.7723481067 $POSTIVE_t0.1334744270 $PROTECTOR_t0.1334744270 $RECHECK_t0.8875842042 $TELCARE_t0.2954496834 $TN_t0.7258188505 $TRIAL_t0.5725217620 $WISHES_t0.8499083390) !$GUILLAINBARRE_t0.4356780012 !$OS_t3.0602502947 !$POSTOP_t1.0608398788) and(!$REQUESTS_t1.5437932541 $SEES_t0.8044420938) $CAMERA_t0.2997832493 $RETROFLEXION_t0.1334744270 $WISH_t0.7402872895 $YEARS_t3.9579623624) !$ARTHRALGIA_t0.8990536978 !$LADDERS_t0.1668993516 !$NEUTRAL_t0.4862005499 !$PLASMA_t0.9724010998 !$PLS_t0.2345374050) 
1 and(or(and(or($FORMAT_t0.5185473192 $HABITUAL_t0.2100115231 $INTERMITTENT_t0.7789534458 $TERMINAL_t0.4480063483 $TETANUS_t1.3513182038) !$BRUIT_t0.4245338347 !$PERFUSION_t0.6798450809) and(!$CENTERS_t0.4855947014 $EARS_t0.8053369842) and(!$GUILLAINBARRE_t0.4356780012 $RECHECK_t0.8875842042) $DOOR_t2.2624264156 $ELSE_t0.7582662228 $FATIGUE_t0.9995420519 $LIFESUSTAINING_t0.1334744270 $REQUESTING_t4.1778483402 $RESPONSIBILITIES_t0.7845446674 $SCREENED_t0.9408834269 $SOON_t0.7553034420 $TELL_t0.8373787918 $THRU_t0.7705732571 $TN_t0.7258188505) !$FATAL_t0.2878725381 !$FLUVIRIN_t0.1668993516 !$MODIFICATION_t0.2878725381 !$MYALGIAS_t0.6910656108 !$OS_t3.0602502947 !$PLS_t0.2345374050 !$RIDING_t0.1668993516 !$SHAMPOO_t0.5476744301 !$STENOSIS_t1.1084844611 !$VESSEL_t0.6426959272) 
1 and(or(and(or($FORMAT_t0.5185473192 $HABITUAL_t0.2100115231 $INTERMITTENT_t0.7789534458 $TERMINAL_t0.4480063483 $TETANUS_t1.3513182038) !$BRUIT_t0.4245338347 !$PERFUSION_t0.6798450809) and(!$GUILLAINBARRE_t0.4356780012 $RECHECK_t0.8875842042) $DOOR_t2.2624264156 $EARS_t0.8053369842 $ELSE_t0.7582662228 $FATIGUE_t0.9995420519 $LIFESUSTAINING_t0.1334744270 $REQUESTING_t4.1778483402 $RESPONSIBILITIES_t0.7845446674 $SCREENED_t0.9408834269 $SOON_t0.7553034420 $TELL_t0.8373787918 $THRU_t0.7705732571 $TN_t0.7258188505) !$FLUVIRIN_t0.1668993516 !$MODIFICATION_t0.2878725381 !$MYALGIAS_t0.6910656108 !$OS_t3.0602502947 !$PLS_t0.2345374050 !$RIDING_t0.1668993516 !$SHAMPOO_t0.5476744301 !$STENOSIS_t1.1084844611 !$VESSEL_t0.6426959272) 
1 and(or(and(or($FORMAT_t0.5185473192 $HABITUAL_t0.2100115231 $INTERMITTENT_t0.7789534458 $TERMINAL_t0.4480063483 $TETANUS_t1.3513182038) !$BRUIT_t0.4245338347 !$PERFUSION_t0.6798450809) and(!$CENTERS_t0.4855947014 $EARS_t0.8053369842) and(!$GUILLAINBARRE_t0.4356780012 $RECHECK_t0.8875842042) $DOOR_t2.2624264156 $ELSE_t0.7582662228 $FATIGUE_t0.9995420519 $LIFESUSTAINING_t0.1334744270 $REQUESTING_t4.1778483402 $RESPONSIBILITIES_t0.7845446674 $SCREENED_t0.9408834269 $SOON_t0.7553034420 $TELL_t0.8373787918 $THRU_t0.7705732571 $TN_t0.7258188505) !$FLUVIRIN_t0.1668993516 !$MODIFICATION_t0.2878725381 !$MYALGIAS_t0.6910656108 !$OS_t3.0602502947 !$PLS_t0.2345374050 !$RIDING_t0.1668993516 !$SHAMPOO_t0.5476744301 !$STENOSIS_t1.1084844611 !$VESSEL_t0.6426959272) 
1 and(or(and(or($ACCIDENT_t2.6361963535 $FORMAT_t0.5185473192 $HABITUAL_t0.2100115231 $INTERMITTENT_t0.7789534458 $TERMINAL_t0.4480063483 $TETANUS_t1.3513182038) !$BRUIT_t0.4245338347 !$PERFUSION_t0.6798450809) and(!$CENTERS_t0.4855947014 $EARS_t0.8053369842) and(!$GUILLAINBARRE_t0.4356780012 $RECHECK_t0.8875842042) $DOOR_t2.2624264156 $ELSE_t0.7582662228 $FATIGUE_t0.9995420519 $LIFESUSTAINING_t0.1334744270 $REQUESTING_t4.1778483402 $RESPONSIBILITIES_t0.7845446674 $SCREENED_t0.9408834269 $SOON_t0.7553034420 $TELL_t0.8373787918 $THRU_t0.7705732571 $TN_t0.7258188505) !$FLUVIRIN_t0.1668993516 !$MODIFICATION_t0.2878725381 !$MYALGIAS_t0.6910656108 !$OS_t3.0602502947 !$PLS_t0.2345374050 !$RIDING_t0.1668993516 !$SHAMPOO_t0.5476744301 !$STENOSIS_t1.1084844611 !$VESSEL_t0.6426959272) 
1 and(or(and(or($AGAIN_t3.4633314952 $FORMAT_t0.5185473192 $HABITUAL_t0.2100115231 $INTERMITTENT_t0.7789534458 $TERMINAL_t0.4480063483 $TETANUS_t1.3513182038) !$BRUIT_t0.4245338347 !$PERFUSION_t0.6798450809) and(!$CENTERS_t0.4855947014 $EARS_t0.8053369842) and(!$GUILLAINBARRE_t0.4356780012 $RECHECK_t0.8875842042) $DOOR_t2.2624264156 $ELSE_t0.7582662228 $FATIGUE_t0.9995420519 $LIFESUSTAINING_t0.1334744270 $REQUESTING_t4.1778483402 $RESPONSIBILITIES_t0.7845446674 $SCREENED_t0.9408834269 $SOON_t0.7553034420 $TELL_t0.8373787918 $THRU_t0.7705732571 $TN_t0.7258188505) !$FLUVIRIN_t0.1668993516 !$MODIFICATION_t0.2878725381 !$MYALGIAS_t0.6910656108 !$OS_t3.0602502947 !$PLS_t0.2345374050 !$RIDING_t0.1668993516 !$SHAMPOO_t0.5476744301 !$STENOSIS_t1.1084844611 !$VESSEL_t0.6426959272) 
1 and(or(and(or($AGGRAVATED_t0.2574791988 $FORMAT_t0.5185473192 $HABITUAL_t0.2100115231 $INTERMITTENT_t0.7789534458 $TERMINAL_t0.4480063483 $TETANUS_t1.3513182038) !$BRUIT_t0.4245338347 !$PERFUSION_t0.6798450809) and(!$CENTERS_t0.4855947014 $EARS_t0.8053369842) and(!$GUILLAINBARRE_t0.4356780012 $RECHECK_t0.8875842042) $DOOR_t2.2624264156 $ELSE_t0.7582662228 $FATIGUE_t0.9995420519 $LIFESUSTAINING_t0.1334744270 $REQUESTING_t4.1778483402 $RESPONSIBILITIES_t0.7845446674 $SCREENED_t0.9408834269 $SOON_t0.7553034420 $TELL_t0.8373787918 $THRU_t0.7705732571 $TN_t0.7258188505) !$FLUVIRIN_t0.1668993516 !$MODIFICATION_t0.2878725381 !$MYALGIAS_t0.6910656108 !$OS_t3.0602502947 !$PLS_t0.2345374050 !$RIDING_t0.1668993516 !$SHAMPOO_t0.5476744301 !$STENOSIS_t1.1084844611 !$VESSEL_t0.6426959272) 
1 and(or(and(or($AGGRAVATED_t0.2574791988 $FORMAT_t0.5185473192 $INTERMITTENT_t0.7789534458 $TERMINAL_t0.4480063483 $TETANUS_t1.3513182038) !$ARTHRITIS_t1.7243616799 !$BRUIT_t0.4245338347 !$PERFUSION_t0.6798450809) and(!$CENTERS_t0.4855947014 $EARS_t0.8053369842) and(!$GUILLAINBARRE_t0.4356780012 $RECHECK_t0.8875842042) $DOOR_t2.2624264156 $ELSE_t0.7582662228 $FATIGUE_t0.9995420519 $LIFESUSTAINING_t0.1334744270 $REQUESTING_t4.1778483402 $RESPONSIBILITIES_t0.7845446674 $SCREENED_t0.9408834269 $SOON_t0.7553034420 $TELL_t0.8373787918 $THRU_t0.7705732571 $TN_t0.7258188505) !$FLUVIRIN_t0.1668993516 !$MODIFICATION_t0.2878725381 !$MYALGIAS_t0.6910656108 !$OS_t3.0602502947 !$PLS_t0.2345374050 !$RIDING_t0.1668993516 !$SHAMPOO_t0.5476744301 !$STENOSIS_t1.1084844611 !$VESSEL_t0.6426959272) 
1 and(or(and(or($AID_t4.8221687567 $FORMAT_t0.5185473192 $HABITUAL_t0.2100115231 $INTERMITTENT_t0.7789534458 $TERMINAL_t0.4480063483 $TETANUS_t1.3513182038) !$BRUIT_t0.4245338347 !$PERFUSION_t0.6798450809) and(!$CENTERS_t0.4855947014 $EARS_t0.8053369842) and(!$GUILLAINBARRE_t0.4356780012 $RECHECK_t0.8875842042) $DOOR_t2.2624264156 $ELSE_t0.7582662228 $FATIGUE_t0.9995420519 $LIFESUSTAINING_t0.1334744270 $REQUESTING_t4.1778483402 $RESPONSIBILITIES_t0.7845446674 $SCREENED_t0.9408834269 $SOON_t0.7553034420 $TELL_t0.8373787918 $THRU_t0.7705732571 $TN_t0.7258188505) !$FLUVIRIN_t0.1668993516 !$MODIFICATION_t0.2878725381 !$MYALGIAS_t0.6910656108 !$OS_t3.0602502947 !$PLS_t0.2345374050 !$RIDING_t0.1668993516 !$SHAMPOO_t0.5476744301 !$STENOSIS_t1.1084844611 !$VESSEL_t0.6426959272) 
1 and(or(and(or($ALLOW_t0.9995420519 $FORMAT_t0.5185473192 $HABITUAL_t0.2100115231 $INTERMITTENT_t0.7789534458 $TERMINAL_t0.4480063483 $TETANUS_t1.3513182038) !$BRUIT_t0.4245338347 !$PERFUSION_t0.6798450809) and(!$CENTERS_t0.4855947014 $EARS_t0.8053369842) and(!$GUILLAINBARRE_t0.4356780012 $RECHECK_t0.8875842042) $DOOR_t2.2624264156 $ELSE_t0.7582662228 $FATIGUE_t0.9995420519 $LIFESUSTAINING_t0.1334744270 $REQUESTING_t4.1778483402 $RESPONSIBILITIES_t0.7845446674 $SCREENED_t0.9408834269 $SOON_t0.7553034420 $TELL_t0.8373787918 $THRU_t0.7705732571 $TN_t0.7258188505) !$FLUVIRIN_t0.1668993516 !$MODIFICATION_t0.2878725381 !$MYALGIAS_t0.6910656108 !$OS_t3.0602502947 !$PLS_t0.2345374050 !$RIDING_t0.1668993516 !$SHAMPOO_t0.5476744301 !$STENOSIS_t1.1084844611 !$VESSEL_t0.6426959272) 
1 and(or(and(or($ALTERATION_t1.5955524335 $FORMAT_t0.5185473192 $HABITUAL_t0.2100115231 $INTERMITTENT_t0.7789534458 $TERMINAL_t0.4480063483 $TETANUS_t1.3513182038) !$BRUIT_t0.4245338347 !$PERFUSION_t0.6798450809) and(!$CENTERS_t0.4855947014 $EARS_t0.8053369842) and(!$GUILLAINBARRE_t0.4356780012 $RECHECK_t0.8875842042) $DOOR_t2.2624264156 $ELSE_t0.7582662228 $FATIGUE_t0.9995420519 $LIFESUSTAINING_t0.1334744270 $REQUESTING_t4.1778483402 $RESPONSIBILITIES_t0.7845446674 $SCREENED_t0.9408834269 $SOON_t0.7553034420 $TELL_t0.8373787918 $THRU_t0.7705732571 $TN_t0.7258188505) !$FLUVIRIN_t0.1668993516 !$MODIFICATION_t0.2878725381 !$MYALGIAS_t0.6910656108 !$OS_t3.0602502947 !$PLS_t0.2345374050 !$RIDING_t0.1668993516 !$SHAMPOO_t0.5476744301 !$STENOSIS_t1.1084844611 !$VESSEL_t0.6426959272) 
1 and(or(and(or($EDUCATED_t1.8267007636 $FEEDS_t0.2100115231) !$TECHNIQUES_t0.9502787643) and(or($TRANSFERED_t0.3919122313 $WENT_t2.5741148257) !$TRIED_t1.6231639979) $ELSE_t0.7582662228 $FATIGUE_t0.9995420519 $HELPING_t0.6964789090 $IMAGES_t0.9121148553 $INTERMITTENT_t0.7789534458 $ISSUE_t2.3216007437 $LABORATORY_t1.6011122749 $READ_t2.4746104325 $SYST_t0.6089650223 $TELL_t0.8373787918 $THRU_t0.7705732571 $TN_t0.7258188505) or(and(!$BRUIT_t0.4245338347 !$WALKIN_t1.0704599945) $LIPIDS_t0.7456915713 $WHOLE_t0.3568199982) !$CALCULATION_t0.1959561157 !$CATHETERIZATION_t0.3337987033 !$DFE_t0.4663391579 !$GRAM_t0.2345374050 !$LADDERS_t0.1668993516 !$OPTICAL_t0.1668993516 !$PLS_t0.2345374050 !$SUTURED_t0.2345374050 !$VERIFICATION_t1.0336684026) 
1 and(or(and(or($TRANSFERED_t0.3919122313 $WENT_t2.5741148257) !$TRIED_t1.6231639979) and($EDUCATED_t1.8267007636 !$TECHNIQUES_t0.9502787643) $ELSE_t0.7582662228 $FATIGUE_t0.9995420519 $FEEDS_t0.2100115231 $HELPING_t0.6964789090 $IMAGES_t0.9121148553 $INTERMITTENT_t0.7789534458 $ISSUE_t2.3216007437 $LABORATORY_t1.6011122749 $READ_t2.4746104325 $SYST_t0.6089650223 $TELL_t0.8373787918 $THRU_t0.7705732571 $TN_t0.7258188505) or(!$BRUIT_t0.4245338347 $LIPIDS_t0.7456915713) !$CALCULATION_t0.1959561157 !$CATHETERIZATION_t0.3337987033 !$DFE_t0.4663391579 !$GRAM_t0.2345374050 !$LADDERS_t0.1668993516 !$OPTICAL_t0.1668993516 !$PLS_t0.2345374050 !$SUTURED_t0.2345374050 !$VERIFICATION_t1.0336684026) 
1 and(or(and(or($EDUCATED_t1.8267007636 $ELSE_t0.7582662228) !$TECHNIQUES_t0.9502787643) and(or($TRANSFERED_t0.3919122313 $WENT_t2.5741148257) !$TRIED_t1.6231639979) $FATIGUE_t0.9995420519 $FEEDS_t0.2100115231 $HELPING_t0.6964789090 $IMAGES_t0.9121148553 $INTERMITTENT_t0.7789534458 $ISSUE_t2.3216007437 $LABORATORY_t1.6011122749 $READ_t2.4746104325 $SYST_t0.6089650223 $TELL_t0.8373787918 $THRU_t0.7705732571 $TN_t0.7258188505) or(!$BRUIT_t0.4245338347 $LIPIDS_t0.7456915713) !$CALCULATION_t0.1959561157 !$CATHETERIZATION_t0.3337987033 !$DFE_t0.4663391579 !$GRAM_t0.2345374050 !$LADDERS_t0.1668993516 !$OPTICAL_t0.1668993516 !$PLS_t0.2345374050 !$SUTURED_t0.2345374050 !$VERIFICATION_t1.0336684026) 
1 and(or(and(or($EDUCATED_t1.8267007636 $ELSE_t0.7582662228 $FEEDS_t0.2100115231) !$TECHNIQUES_t0.9502787643) and(or($TRANSFERED_t0.3919122313 $WENT_t2.5741148257) !$TRIED_t1.6231639979) $FATIGUE_t0.9995420519 $HELPING_t0.6964789090 $IMAGES_t0.9121148553 $INTERMITTENT_t0.7789534458 $ISSUE_t2.3216007437 $LABORATORY_t1.6011122749 $READ_t2.4746104325 $SYST_t0.6089650223 $TELL_t0.8373787918 $THRU_t0.7705732571 $TN_t0.7258188505) or(!$BRUIT_t0.4245338347 $LIPIDS_t0.7456915713) !$CALCULATION_t0.1959561157 !$CATHETERIZATION_t0.3337987033 !$DFE_t0.4663391579 !$GRAM_t0.2345374050 !$LADDERS_t0.1668993516 !$OPTICAL_t0.1668993516 !$PLS_t0.2345374050 !$SUTURED_t0.2345374050 !$VERIFICATION_t1.0336684026) 
1 and(or(and(or($EDUCATED_t1.8267007636 $ELSE_t0.7582662228 $FEEDS_t0.2100115231 $TN_t0.7258188505) !$TECHNIQUES_t0.9502787643) and(or($TRANSFERED_t0.3919122313 $WENT_t2.5741148257) !$TRIED_t1.6231639979) $FATIGUE_t0.9995420519 $HELPING_t0.6964789090 $IMAGES_t0.9121148553 $INTERMITTENT_t0.7789534458 $ISSUE_t2.3216007437 $LABORATORY_t1.6011122749 $READ_t2.4746104325 $SYST_t0.6089650223 $TELL_t0.8373787918 $THRU_t0.7705732571) or(!$BRUIT_t0.4245338347 $LIPIDS_t0.7456915713) !$CALCULATION_t0.1959561157 !$CATHETERIZATION_t0.3337987033 !$DFE_t0.4663391579 !$GRAM_t0.2345374050 !$LADDERS_t0.1668993516 !$OPTICAL_t0.1668993516 !$PLS_t0.2345374050 !$SUTURED_t0.2345374050 !$VERIFICATION_t1.0336684026) 
1 and(or(and(or($EDUCATED_t1.8267007636 $ELSE_t0.7582662228 $TN_t0.7258188505) !$TECHNIQUES_t0.9502787643) and(or($TRANSFERED_t0.3919122313 $WENT_t2.5741148257) !$TRIED_t1.6231639979) $FATIGUE_t0.9995420519 $FEEDS_t0.2100115231 $HELPING_t0.6964789090 $IMAGES_t0.9121148553 $INTERMITTENT_t0.7789534458 $ISSUE_t2.3216007437 $LABORATORY_t1.6011122749 $READ_t2.4746104325 $SYST_t0.6089650223 $TELL_t0.8373787918 $THRU_t0.7705732571) or(!$BRUIT_t0.4245338347 $LIPIDS_t0.7456915713) !$CALCULATION_t0.1959561157 !$CATHETERIZATION_t0.3337987033 !$DFE_t0.4663391579 !$GRAM_t0.2345374050 !$LADDERS_t0.1668993516 !$OPTICAL_t0.1668993516 !$PLS_t0.2345374050 !$SUTURED_t0.2345374050 !$VERIFICATION_t1.0336684026) 
1 and(or(and(or($EDUCATED_t1.8267007636 $FEEDS_t0.2100115231) !$TECHNIQUES_t0.9502787643) and(or($TRANSFERED_t0.3919122313 $WENT_t2.5741148257) !$TRIED_t1.6231639979) $ELSE_t0.7582662228 $FATIGUE_t0.9995420519 $HELPING_t0.6964789090 $IMAGES_t0.9121148553 $INTERMITTENT_t0.7789534458 $ISSUE_t2.3216007437 $LABORATORY_t1.6011122749 $READ_t2.4746104325 $SYST_t0.6089650223 $TELL_t0.8373787918 $THRU_t0.7705732571 $TN_t0.7258188505) or(!$BRUIT_t0.4245338347 $LIPIDS_t0.7456915713) !$CALCULATION_t0.1959561157 !$CATHETERIZATION_t0.3337987033 !$DFE_t0.4663391579 !$GRAM_t0.2345374050 !$LADDERS_t0.1668993516 !$OPTICAL_t0.1668993516 !$PLS_t0.2345374050 !$SUTURED_t0.2345374050 !$VERIFICATION_t1.0336684026) 
1 and(or(and(or($EDUCATED_t1.8267007636 $FEEDS_t0.2100115231 $TN_t0.7258188505) !$TECHNIQUES_t0.9502787643) and(or($TRANSFERED_t0.3919122313 $WENT_t2.5741148257) !$TRIED_t1.6231639979) $ELSE_t0.7582662228 $FATIGUE_t0.9995420519 $HELPING_t0.6964789090 $IMAGES_t0.9121148553 $INTERMITTENT_t0.7789534458 $ISSUE_t2.3216007437 $LABORATORY_t1.6011122749 $READ_t2.4746104325 $SYST_t0.6089650223 $TELL_t0.8373787918 $THRU_t0.7705732571) or(!$BRUIT_t0.4245338347 $LIPIDS_t0.7456915713) !$CALCULATION_t0.1959561157 !$CATHETERIZATION_t0.3337987033 !$DFE_t0.4663391579 !$GRAM_t0.2345374050 !$LADDERS_t0.1668993516 !$OPTICAL_t0.1668993516 !$PLS_t0.2345374050 !$SUTURED_t0.2345374050 !$VERIFICATION_t1.0336684026) 
1 and(or(and(or($EDUCATED_t1.8267007636 $ELSE_t0.7582662228 $FEEDS_t0.2100115231 $TN_t0.7258188505) !$TECHNIQUES_t0.9502787643) and(!$TRIED_t1.6231639979 $WENT_t2.5741148257) $FATIGUE_t0.9995420519 $HELPING_t0.6964789090 $IMAGES_t0.9121148553 $INTERMITTENT_t0.7789534458 $ISSUE_t2.3216007437 $LABORATORY_t1.6011122749 $READ_t2.4746104325 $SPINAL_t0.6863618773 $SYST_t0.6089650223 $TELL_t0.8373787918 $THRU_t0.7705732571 $TRANSFERED_t0.3919122313) or(!$BRUIT_t0.4245338347 $LIPIDS_t0.7456915713) !$CALCULATION_t0.1959561157 !$CATHETERIZATION_t0.3337987033 !$DFE_t0.4663391579 !$GRAM_t0.2345374050 !$LADDERS_t0.1668993516 !$OPTICAL_t0.1668993516 !$PLS_t0.2345374050 !$SUTURED_t0.2345374050 !$VERIFICATION_t1.0336684026) 
1 and(or(and(or($EDUCATED_t1.8267007636 $FEEDS_t0.2100115231) !$TECHNIQUES_t0.9502787643) and(!$TRIED_t1.6231639979 $WENT_t2.5741148257) $ELSE_t0.7582662228 $FATIGUE_t0.9995420519 $HELPING_t0.6964789090 $IMAGES_t0.9121148553 $INTERMITTENT_t0.7789534458 $ISSUE_t2.3216007437 $LABORATORY_t1.6011122749 $READ_t2.4746104325 $SYST_t0.6089650223 $TELL_t0.8373787918 $THRU_t0.7705732571 $TN_t0.7258188505 $TRANSFERED_t0.3919122313) or(!$BRUIT_t0.4245338347 $LIPIDS_t0.7456915713 $WHOLE_t0.3568199982) !$CALCULATION_t0.1959561157 !$CATHETERIZATION_t0.3337987033 !$DFE_t0.4663391579 !$GRAM_t0.2345374050 !$LADDERS_t0.1668993516 !$OPTICAL_t0.1668993516 !$PLS_t0.2345374050 !$SUTURED_t0.2345374050 !$VERIFICATION_t1.0336684026) 
1 and(or(and(or(and($DECLINES_t0.6077820475 !$MIW_t0.1668993516) $INTERMITTENT_t0.7789534458) !$EGGS_t0.6483113841 !$ISSUE_t2.3216007437 !$POLYPHAGIA_t0.1668993516) and(or($FATIGUE_t0.9995420519 $NOTHING_t0.8921999148 $PURPOSES_t0.9867669003 $REQUESTING_t4.1778483402 $RESPONSIBILITIES_t0.7845446674 $SEES_t0.8044420938 $SPECIALIST_t0.8177671383 $WHILE_t3.3191212803 $WISH_t0.7402872895) !$BLINDNESS_t0.3749788251 !$COMPENSATION_t0.6637144810 !$FOODS_t0.6320344015 !$MEMORIAL_t0.7159018302 !$VESSEL_t0.6426959272) and($PERIODICALLY_t0.3195272152 !$PLENTY_t0.2791542369) $BOTTOM_t0.3749788251 $LIVE_t0.9526437275 $SOON_t0.7553034420 $TRIAL_t0.5725217620 $UROLOGIC_t0.1334744270) or(!$ACCURACY_t0.2690458152 $WIFES_t0.4402849035) !$FINGERSTICK_t0.1668993516 !$LADDERS_t0.1668993516 !$MODIFICATION_t0.2878725381 !$NEUTRAL_t0.4862005499 !$PLS_t0.2345374050) 
1 and(or(and(or($DECLINES_t0.6077820475 $INTERMITTENT_t0.7789534458) !$EGGS_t0.6483113841 !$ISSUE_t2.3216007437 !$MIW_t0.1668993516 !$POLYPHAGIA_t0.1668993516) and(or($FATIGUE_t0.9995420519 $NOTHING_t0.8921999148 $PURPOSES_t0.9867669003 $REQUESTING_t4.1778483402 $RESPONSIBILITIES_t0.7845446674 $SEES_t0.8044420938 $SPECIALIST_t0.8177671383 $WHILE_t3.3191212803 $WISH_t0.7402872895) !$BLINDNESS_t0.3749788251 !$COMPENSATION_t0.6637144810 !$FOODS_t0.6320344015 !$MEMORIAL_t0.7159018302 !$VESSEL_t0.6426959272) and($PERIODICALLY_t0.3195272152 !$PLENTY_t0.2791542369) $BOTTOM_t0.3749788251 $LIVE_t0.9526437275 $SOON_t0.7553034420 $TRIAL_t0.5725217620 $UROLOGIC_t0.1334744270) or(!$ACCURACY_t0.2690458152 $WIFES_t0.4402849035) !$FINGERSTICK_t0.1668993516 !$LADDERS_t0.1668993516 !$MODIFICATION_t0.2878725381 !$NEUTRAL_t0.4862005499) 
1 and(or(and(or($DECLINES_t0.6077820475 $INTERMITTENT_t0.7789534458) !$EGGS_t0.6483113841 !$ISSUE_t2.3216007437 !$POLYPHAGIA_t0.1668993516) and(or($FATIGUE_t0.9995420519 $NOTHING_t0.8921999148 $PURPOSES_t0.9867669003 $REQUESTING_t4.1778483402 $RESPONSIBILITIES_t0.7845446674 $SEES_t0.8044420938 $SPECIALIST_t0.8177671383 $WHILE_t3.3191212803 $WISH_t0.7402872895) !$BLINDNESS_t0.3749788251 !$COMPENSATION_t0.6637144810 !$FOODS_t0.6320344015 !$MEMORIAL_t0.7159018302 !$VESSEL_t0.6426959272) and($PERIODICALLY_t0.3195272152 !$PLENTY_t0.2791542369) $BOTTOM_t0.3749788251 $LIVE_t0.9526437275 $SOON_t0.7553034420 $TRIAL_t0.5725217620 $UROLOGIC_t0.1334744270) or(!$ACCURACY_t0.2690458152 $WIFES_t0.4402849035) !$FINGERSTICK_t0.1668993516 !$LADDERS_t0.1668993516 !$MIW_t0.1668993516 !$MODIFICATION_t0.2878725381 !$NEUTRAL_t0.4862005499) 
1 and(or(and(or(and(!$BROCHURE_t0.6268391220 $DECLINES_t0.6077820475) $INTERMITTENT_t0.7789534458) !$EGGS_t0.6483113841 !$ISSUE_t2.3216007437 !$POLYPHAGIA_t0.1668993516) and(or($FATIGUE_t0.9995420519 $NOTHING_t0.8921999148 $PURPOSES_t0.9867669003 $REQUESTING_t4.1778483402 $RESPONSIBILITIES_t0.7845446674 $SEES_t0.8044420938 $SPECIALIST_t0.8177671383 $WHILE_t3.3191212803 $WISH_t0.7402872895) !$BLINDNESS_t0.3749788251 !$COMPENSATION_t0.6637144810 !$FOODS_t0.6320344015 !$MEMORIAL_t0.7159018302 !$VESSEL_t0.6426959272) and($PERIODICALLY_t0.3195272152 !$PLENTY_t0.2791542369) $BOTTOM_t0.3749788251 $LIVE_t0.9526437275 $SOON_t0.7553034420 $TRIAL_t0.5725217620 $UROLOGIC_t0.1334744270) or(!$ACCURACY_t0.2690458152 $WIFES_t0.4402849035) !$FINGERSTICK_t0.1668993516 !$LADDERS_t0.1668993516 !$MODIFICATION_t0.2878725381 !$NEUTRAL_t0.4862005499) 
1 and(or(and(or(and($DECLINES_t0.6077820475 !$MIW_t0.1668993516) $INTERMITTENT_t0.7789534458) !$EGGS_t0.6483113841 !$ISSUE_t2.3216007437 !$POLYPHAGIA_t0.1668993516) and(or($FATIGUE_t0.9995420519 $NOTHING_t0.8921999148 $PURPOSES_t0.9867669003 $REQUESTING_t4.1778483402 $RESPONSIBILITIES_t0.7845446674 $SEES_t0.8044420938 $SPECIALIST_t0.8177671383 $WHILE_t3.3191212803 $WISH_t0.7402872895) !$BLINDNESS_t0.3749788251 !$COMPENSATION_t0.6637144810 !$FOODS_t0.6320344015 !$MEMORIAL_t0.7159018302 !$VESSEL_t0.6426959272) and($PERIODICALLY_t0.3195272152 !$PLENTY_t0.2791542369) $BOTTOM_t0.3749788251 $LIVE_t0.9526437275 $SOON_t0.7553034420 $TRIAL_t0.5725217620 $UROLOGIC_t0.1334744270) or(!$ACCURACY_t0.2690458152 $CASUALLY_t0.2791542369) !$FINGERSTICK_t0.1668993516 !$LADDERS_t0.1668993516 !$MODIFICATION_t0.2878725381 !$NEUTRAL_t0.4862005499) 
1 and(or(and(or(and($DECLINES_t0.6077820475 !$MIW_t0.1668993516) $INTERMITTENT_t0.7789534458) !$EGGS_t0.6483113841 !$ISSUE_t2.3216007437 !$POLYPHAGIA_t0.1668993516) and(or($FATIGUE_t0.9995420519 $NOTHING_t0.8921999148 $PURPOSES_t0.9867669003 $REQUESTING_t4.1778483402 $RESPONSIBILITIES_t0.7845446674 $SEES_t0.8044420938 $SPECIALIST_t0.8177671383 $WHILE_t3.3191212803 $WISH_t0.7402872895) !$BLINDNESS_t0.3749788251 !$COMPENSATION_t0.6637144810 !$FOODS_t0.6320344015 !$MEMORIAL_t0.7159018302 !$VESSEL_t0.6426959272) and($PERIODICALLY_t0.3195272152 !$PLENTY_t0.2791542369) $BOTTOM_t0.3749788251 $LIVE_t0.9526437275 $SOON_t0.7553034420 $TRIAL_t0.5725217620 $UROLOGIC_t0.1334744270) or(!$ACCURACY_t0.2690458152 $ENDS_t0.4734991778) !$FINGERSTICK_t0.1668993516 !$LADDERS_t0.1668993516 !$MODIFICATION_t0.2878725381 !$NEUTRAL_t0.4862005499) 
1 and(or(and(or(and($DECLINES_t0.6077820475 !$MIW_t0.1668993516) $INTERMITTENT_t0.7789534458) !$EGGS_t0.6483113841 !$ISSUE_t2.3216007437 !$POLYPHAGIA_t0.1668993516) and(or($FATIGUE_t0.9995420519 $NOTHING_t0.8921999148 $PURPOSES_t0.9867669003 $REQUESTING_t4.1778483402 $RESPONSIBILITIES_t0.7845446674 $SEES_t0.8044420938 $SPECIALIST_t0.8177671383 $WHILE_t3.3191212803 $WISH_t0.7402872895) !$BLINDNESS_t0.3749788251 !$COMPENSATION_t0.6637144810 !$FOODS_t0.6320344015 !$MEMORIAL_t0.7159018302 !$VESSEL_t0.6426959272) and($PERIODICALLY_t0.3195272152 !$PLENTY_t0.2791542369) $BOTTOM_t0.3749788251 $LIVE_t0.9526437275 $SOON_t0.7553034420 $TRIAL_t0.5725217620 $UROLOGIC_t0.1334744270) or(!$ACCURACY_t0.2690458152 $SEEKING_t0.5979679530) !$FINGERSTICK_t0.1668993516 !$LADDERS_t0.1668993516 !$MODIFICATION_t0.2878725381 !$NEUTRAL_t0.4862005499) 
1 and(or(and(or(and($DECLINES_t0.6077820475 !$MIW_t0.1668993516) $INTERMITTENT_t0.7789534458) !$EGGS_t0.6483113841 !$ISSUE_t2.3216007437 !$POLYPHAGIA_t0.1668993516) and(or($FATIGUE_t0.9995420519 $NOTHING_t0.8921999148 $PURPOSES_t0.9867669003 $REQUESTING_t4.1778483402 $RESPONSIBILITIES_t0.7845446674 $SEES_t0.8044420938 $SPECIALIST_t0.8177671383 $WHILE_t3.3191212803 $WISH_t0.7402872895) !$BLINDNESS_t0.3749788251 !$COMPENSATION_t0.6637144810 !$FOODS_t0.6320344015 !$MEMORIAL_t0.7159018302 !$VESSEL_t0.6426959272) and($PERIODICALLY_t0.3195272152 !$PLENTY_t0.2791542369) $BOTTOM_t0.3749788251 $LIVE_t0.9526437275 $SOON_t0.7553034420 $TRIAL_t0.5725217620 $UROLOGIC_t0.1334744270) or(!$ACCURACY_t0.2690458152 $WIFES_t0.4402849035) !$FINGERSTICK_t0.1668993516 !$LADDERS_t0.1668993516 !$MODIFICATION_t0.2878725381 !$NEUTRAL_t0.4862005499) 
1 or(and(or(and(or(and($DECLINES_t0.6077820475 !$MIW_t0.1668993516) $INTERMITTENT_t0.7789534458) !$EGGS_t0.6483113841 !$ISSUE_t2.3216007437 !$POLYPHAGIA_t0.1668993516) and(or($FATIGUE_t0.9995420519 $NOTHING_t0.8921999148 $PURPOSES_t0.9867669003 $REQUESTING_t4.1778483402 $RESPONSIBILITIES_t0.7845446674 $SEES_t0.8044420938 $SPECIALIST_t0.8177671383 $WHILE_t3.3191212803 $WISH_t0.7402872895) !$BLINDNESS_t0.3749788251 !$COMPENSATION_t0.6637144810 !$FOODS_t0.6320344015 !$MEMORIAL_t0.7159018302 !$VESSEL_t0.6426959272) and($PERIODICALLY_t0.3195272152 !$PLENTY_t0.2791542369) $BOTTOM_t0.3749788251 $LIVE_t0.9526437275 $SOON_t0.7553034420 $TRIAL_t0.5725217620 $UROLOGIC_t0.1334744270) !$ACCURACY_t0.2690458152 !$FINGERSTICK_t0.1668993516 !$LADDERS_t0.1668993516 !$MODIFICATION_t0.2878725381 !$NEUTRAL_t0.4862005499) $CULTURAL_t1.3712378168) 
1 or(and(or(and(or(and($DECLINES_t0.6077820475 !$MIW_t0.1668993516) $INTERMITTENT_t0.7789534458) !$EGGS_t0.6483113841 !$ISSUE_t2.3216007437 !$POLYPHAGIA_t0.1668993516) and(or($FATIGUE_t0.9995420519 $NOTHING_t0.8921999148 $PURPOSES_t0.9867669003 $REQUESTING_t4.1778483402 $RESPONSIBILITIES_t0.7845446674 $SEES_t0.8044420938 $SPECIALIST_t0.8177671383 $WHILE_t3.3191212803 $WISH_t0.7402872895) !$BLINDNESS_t0.3749788251 !$COMPENSATION_t0.6637144810 !$FOODS_t0.6320344015 !$MEMORIAL_t0.7159018302 !$VESSEL_t0.6426959272) and($PERIODICALLY_t0.3195272152 !$PLENTY_t0.2791542369) $BOTTOM_t0.3749788251 $LIVE_t0.9526437275 $SOON_t0.7553034420 $TRIAL_t0.5725217620 $UROLOGIC_t0.1334744270) !$ACCURACY_t0.2690458152 !$FINGERSTICK_t0.1668993516 !$LADDERS_t0.1668993516 !$MODIFICATION_t0.2878725381 !$NEUTRAL_t0.4862005499) $DELUSIONAL_t0.6915355380) 
1 and(or(and(or($ALTERNATIVES_t0.9024346990 $CITY_t0.7617005805 $CLOTHES_t0.7391847579 $EDUCATED_t1.8267007636 $ONCE_t2.6627526125 $TRIGGERS_t0.7158165682) !$AFRICAN_t0.7039515159 !$NW_t0.4663391579 !$TRIGLYCERIDE_t0.5102580939) $BOTTOM_t0.3749788251 $EXTREME_t0.2791542369 $GOT_t1.7809137290 $HAPPENS_t0.3195272152 $HELPING_t0.6964789090 $LIVE_t0.9526437275 $RECHECK_t0.8875842042 $SEES_t0.8044420938 $TN_t0.7258188505 $TRIAL_t0.5725217620 $YEARS_t3.9579623624) !$ANOREXIA_t0.4357725248 !$ARTHRALGIA_t0.8990536978 !$MODIFICATION_t0.2878725381 !$PLASMA_t0.9724010998 !$POH_t0.3520036733 !$SHAMPOO_t0.5476744301 !$VESSEL_t0.6426959272) 
1 and(or(and(or($ALTERNATIVES_t0.9024346990 $ANOREXIA_t0.4357725248 $CITY_t0.7617005805 $CLOTHES_t0.7391847579 $EDUCATED_t1.8267007636 $ONCE_t2.6627526125 $TRIGGERS_t0.7158165682) !$AFRICAN_t0.7039515159 !$NW_t0.4663391579 !$TRIGLYCERIDE_t0.5102580939) $BOTTOM_t0.3749788251 $EXTREME_t0.2791542369 $GOT_t1.7809137290 $HAPPENS_t0.3195272152 $HELPING_t0.6964789090 $LIVE_t0.9526437275 $RECHECK_t0.8875842042 $SEES_t0.8044420938 $TN_t0.7258188505 $TRIAL_t0.5725217620 $YEARS_t3.9579623624) !$ANOREXIA_t0.4357725248 !$ARTHRALGIA_t0.8990536978 !$MODIFICATION_t0.2878725381 !$PLASMA_t0.9724010998 !$POH_t0.3520036733 !$SHAMPOO_t0.5476744301 !$VESSEL_t0.6426959272) 
1 and(or(and(or($ALTERNATIVES_t0.9024346990 $ARTHRALGIA_t0.8990536978 $CITY_t0.7617005805 $CLOTHES_t0.7391847579 $EDUCATED_t1.8267007636 $ONCE_t2.6627526125 $TRIGGERS_t0.7158165682) !$AFRICAN_t0.7039515159 !$NW_t0.4663391579 !$TRIGLYCERIDE_t0.5102580939) $BOTTOM_t0.3749788251 $EXTREME_t0.2791542369 $GOT_t1.7809137290 $HAPPENS_t0.3195272152 $HELPING_t0.6964789090 $LIVE_t0.9526437275 $RECHECK_t0.8875842042 $SEES_t0.8044420938 $TN_t0.7258188505 $TRIAL_t0.5725217620 $YEARS_t3.9579623624) !$ANOREXIA_t0.4357725248 !$ARTHRALGIA_t0.8990536978 !$MODIFICATION_t0.2878725381 !$PLASMA_t0.9724010998 !$POH_t0.3520036733 !$SHAMPOO_t0.5476744301 !$VESSEL_t0.6426959272) 
1 and(or(and(or($ALTERNATIVES_t0.9024346990 $BOTTOM_t0.3749788251 $CITY_t0.7617005805 $CLOTHES_t0.7391847579 $EDUCATED_t1.8267007636 $ONCE_t2.6627526125 $TRIGGERS_t0.7158165682) !$AFRICAN_t0.7039515159 !$NW_t0.4663391579 !$TRIGLYCERIDE_t0.5102580939) $BOTTOM_t0.3749788251 $EXTREME_t0.2791542369 $GOT_t1.7809137290 $HAPPENS_t0.3195272152 $HELPING_t0.6964789090 $LIVE_t0.9526437275 $RECHECK_t0.8875842042 $SEES_t0.8044420938 $TN_t0.7258188505 $TRIAL_t0.5725217620 $YEARS_t3.9579623624) !$ANOREXIA_t0.4357725248 !$ARTHRALGIA_t0.8990536978 !$MODIFICATION_t0.2878725381 !$PLASMA_t0.9724010998 !$POH_t0.3520036733 !$SHAMPOO_t0.5476744301 !$VESSEL_t0.6426959272) 
1 and(or(and(or($ALTERNATIVES_t0.9024346990 $CITY_t0.7617005805 $CLOTHES_t0.7391847579 $EDUCATED_t1.8267007636 $EXTREME_t0.2791542369 $ONCE_t2.6627526125 $TRIGGERS_t0.7158165682) !$AFRICAN_t0.7039515159 !$NW_t0.4663391579 !$TRIGLYCERIDE_t0.5102580939) $BOTTOM_t0.3749788251 $EXTREME_t0.2791542369 $GOT_t1.7809137290 $HAPPENS_t0.3195272152 $HELPING_t0.6964789090 $LIVE_t0.9526437275 $RECHECK_t0.8875842042 $SEES_t0.8044420938 $TN_t0.7258188505 $TRIAL_t0.5725217620 $YEARS_t3.9579623624) !$ANOREXIA_t0.4357725248 !$ARTHRALGIA_t0.8990536978 !$MODIFICATION_t0.2878725381 !$PLASMA_t0.9724010998 !$POH_t0.3520036733 !$SHAMPOO_t0.5476744301 !$VESSEL_t0.6426959272) 
1 and(or(and(or($ALTERNATIVES_t0.9024346990 $CITY_t0.7617005805 $CLOTHES_t0.7391847579 $EDUCATED_t1.8267007636 $GOT_t1.7809137290 $ONCE_t2.6627526125 $TRIGGERS_t0.7158165682) !$AFRICAN_t0.7039515159 !$NW_t0.4663391579 !$TRIGLYCERIDE_t0.5102580939) $BOTTOM_t0.3749788251 $EXTREME_t0.2791542369 $GOT_t1.7809137290 $HAPPENS_t0.3195272152 $HELPING_t0.6964789090 $LIVE_t0.9526437275 $RECHECK_t0.8875842042 $SEES_t0.8044420938 $TN_t0.7258188505 $TRIAL_t0.5725217620 $YEARS_t3.9579623624) !$ANOREXIA_t0.4357725248 !$ARTHRALGIA_t0.8990536978 !$MODIFICATION_t0.2878725381 !$PLASMA_t0.9724010998 !$POH_t0.3520036733 !$SHAMPOO_t0.5476744301 !$VESSEL_t0.6426959272) 
1 and(or(and(or($ALTERNATIVES_t0.9024346990 $CITY_t0.7617005805 $CLOTHES_t0.7391847579 $EDUCATED_t1.8267007636 $HAPPENS_t0.3195272152 $ONCE_t2.6627526125 $TRIGGERS_t0.7158165682) !$AFRICAN_t0.7039515159 !$NW_t0.4663391579 !$TRIGLYCERIDE_t0.5102580939) $BOTTOM_t0.3749788251 $EXTREME_t0.2791542369 $GOT_t1.7809137290 $HAPPENS_t0.3195272152 $HELPING_t0.6964789090 $LIVE_t0.9526437275 $RECHECK_t0.8875842042 $SEES_t0.8044420938 $TN_t0.7258188505 $TRIAL_t0.5725217620 $YEARS_t3.9579623624) !$ANOREXIA_t0.4357725248 !$ARTHRALGIA_t0.8990536978 !$MODIFICATION_t0.2878725381 !$PLASMA_t0.9724010998 !$POH_t0.3520036733 !$SHAMPOO_t0.5476744301 !$VESSEL_t0.6426959272) 
1 and(or(and(or($ALTERNATIVES_t0.9024346990 $CITY_t0.7617005805 $CLOTHES_t0.7391847579 $EDUCATED_t1.8267007636 $HELPING_t0.6964789090 $ONCE_t2.6627526125 $TRIGGERS_t0.7158165682) !$AFRICAN_t0.7039515159 !$NW_t0.4663391579 !$TRIGLYCERIDE_t0.5102580939) $BOTTOM_t0.3749788251 $EXTREME_t0.2791542369 $GOT_t1.7809137290 $HAPPENS_t0.3195272152 $HELPING_t0.6964789090 $LIVE_t0.9526437275 $RECHECK_t0.8875842042 $SEES_t0.8044420938 $TN_t0.7258188505 $TRIAL_t0.5725217620 $YEARS_t3.9579623624) !$ANOREXIA_t0.4357725248 !$ARTHRALGIA_t0.8990536978 !$MODIFICATION_t0.2878725381 !$PLASMA_t0.9724010998 !$POH_t0.3520036733 !$SHAMPOO_t0.5476744301 !$VESSEL_t0.6426959272) 
1 and(or(and(or($ALTERNATIVES_t0.9024346990 $CITY_t0.7617005805 $CLOTHES_t0.7391847579 $EDUCATED_t1.8267007636 $LIVE_t0.9526437275 $ONCE_t2.6627526125 $TRIGGERS_t0.7158165682) !$AFRICAN_t0.7039515159 !$NW_t0.4663391579 !$TRIGLYCERIDE_t0.5102580939) $BOTTOM_t0.3749788251 $EXTREME_t0.2791542369 $GOT_t1.7809137290 $HAPPENS_t0.3195272152 $HELPING_t0.6964789090 $LIVE_t0.9526437275 $RECHECK_t0.8875842042 $SEES_t0.8044420938 $TN_t0.7258188505 $TRIAL_t0.5725217620 $YEARS_t3.9579623624) !$ANOREXIA_t0.4357725248 !$ARTHRALGIA_t0.8990536978 !$MODIFICATION_t0.2878725381 !$PLASMA_t0.9724010998 !$POH_t0.3520036733 !$SHAMPOO_t0.5476744301 !$VESSEL_t0.6426959272) 
1 and(or(and(or($ALTERNATIVES_t0.9024346990 $CITY_t0.7617005805 $CLOTHES_t0.7391847579 $EDUCATED_t1.8267007636 $MODIFICATION_t0.2878725381 $ONCE_t2.6627526125 $TRIGGERS_t0.7158165682) !$AFRICAN_t0.7039515159 !$NW_t0.4663391579 !$TRIGLYCERIDE_t0.5102580939) $BOTTOM_t0.3749788251 $EXTREME_t0.2791542369 $GOT_t1.7809137290 $HAPPENS_t0.3195272152 $HELPING_t0.6964789090 $LIVE_t0.9526437275 $RECHECK_t0.8875842042 $SEES_t0.8044420938 $TN_t0.7258188505 $TRIAL_t0.5725217620 $YEARS_t3.9579623624) !$ANOREXIA_t0.4357725248 !$ARTHRALGIA_t0.8990536978 !$MODIFICATION_t0.2878725381 !$PLASMA_t0.9724010998 !$POH_t0.3520036733 !$SHAMPOO_t0.5476744301 !$VESSEL_t0.6426959272) 
1 and(or(and(or($EDUCATED_t1.8267007636 $ONCE_t2.6627526125) !$NECK_t5.7950010625) and(or($FATIGUE_t0.9995420519 $HELPING_t0.6964789090 $INTEGRATED_t0.2574791988 $NECK_t5.7950010625 $OW_t0.7843290400 $READY_t1.4368897015 $RECHECK_t0.8875842042 $SCREENING_t5.6428799580 $SERVED_t0.8174301882 $TETANUS_t1.3513182038 $THRU_t0.7705732571 $TN_t0.7258188505 $WISH_t0.7402872895 $WORRIED_t0.7261300020) or(!$RECIEVED_t0.8712380899 !$STARTLED_t0.4912483858) !$GUILLAINBARRE_t0.4356780012 !$HGBAC_t0.7276217401 !$OPTICAL_t0.1668993516 !$PERFUSION_t0.6798450809) and(!$CUTTING_t0.5309104434 $SEES_t0.8044420938)) !$LADDERS_t0.1668993516 !$NEUTRAL_t0.4862005499 !$NW_t0.4663391579) 
1 and(or(and(or($EDUCATED_t1.8267007636 $ONCE_t2.6627526125) !$NECK_t5.7950010625) and(or($FATIGUE_t0.9995420519 $HELPING_t0.6964789090 $INTEGRATED_t0.2574791988 $NECK_t5.7950010625 $OW_t0.7843290400 $READY_t1.4368897015 $RECHECK_t0.8875842042 $SCREENING_t5.6428799580 $SERVED_t0.8174301882 $TETANUS_t1.3513182038 $THRU_t0.7705732571 $TN_t0.7258188505 $WISH_t0.7402872895 $WORRIED_t0.7261300020) !$GUILLAINBARRE_t0.4356780012 !$HGBAC_t0.7276217401 !$OPTICAL_t0.1668993516 !$PERFUSION_t0.6798450809) and(!$CUTTING_t0.5309104434 $SEES_t0.8044420938)) !$LADDERS_t0.1668993516 !$NEUTRAL_t0.4862005499 !$NW_t0.4663391579) 
1 and(or(and(or($DIAGNOSTIC_t1.3807738713 $FATIGUE_t0.9995420519 $HELPING_t0.6964789090 $INTEGRATED_t0.2574791988 $NECK_t5.7950010625 $OW_t0.7843290400 $READY_t1.4368897015 $RECHECK_t0.8875842042 $SCREENING_t5.6428799580 $SERVED_t0.8174301882 $TETANUS_t1.3513182038 $THRU_t0.7705732571 $TN_t0.7258188505 $WISH_t0.7402872895 $WORRIED_t0.7261300020) !$GUILLAINBARRE_t0.4356780012 !$HGBAC_t0.7276217401 !$OPTICAL_t0.1668993516 !$PERFUSION_t0.6798450809) and(or($EDUCATED_t1.8267007636 $ONCE_t2.6627526125) !$NECK_t5.7950010625) and(!$CUTTING_t0.5309104434 $SEES_t0.8044420938)) !$LADDERS_t0.1668993516 !$NEUTRAL_t0.4862005499 !$NW_t0.4663391579) 
1 and(or(and(or($EDUCATED_t1.8267007636 $FATIGUE_t0.9995420519 $HELPING_t0.6964789090 $INTEGRATED_t0.2574791988 $NECK_t5.7950010625 $OW_t0.7843290400 $READY_t1.4368897015 $RECHECK_t0.8875842042 $SCREENING_t5.6428799580 $SERVED_t0.8174301882 $TETANUS_t1.3513182038 $THRU_t0.7705732571 $TN_t0.7258188505 $WISH_t0.7402872895 $WORRIED_t0.7261300020) !$GUILLAINBARRE_t0.4356780012 !$HGBAC_t0.7276217401 !$OPTICAL_t0.1668993516 !$PERFUSION_t0.6798450809) and(or($EDUCATED_t1.8267007636 $ONCE_t2.6627526125) !$NECK_t5.7950010625) and(!$CUTTING_t0.5309104434 $SEES_t0.8044420938)) !$LADDERS_t0.1668993516 !$NEUTRAL_t0.4862005499 !$NW_t0.4663391579) 
1 and(or(and(or($EDUCATED_t1.8267007636 $HES_t0.8396118859 $ONCE_t2.6627526125) !$NECK_t5.7950010625) and(or($FATIGUE_t0.9995420519 $HELPING_t0.6964789090 $INTEGRATED_t0.2574791988 $NECK_t5.7950010625 $OW_t0.7843290400 $READY_t1.4368897015 $RECHECK_t0.8875842042 $SCREENING_t5.6428799580 $SERVED_t0.8174301882 $TETANUS_t1.3513182038 $THRU_t0.7705732571 $TN_t0.7258188505 $WISH_t0.7402872895 $WORRIED_t0.7261300020) !$GUILLAINBARRE_t0.4356780012 !$HGBAC_t0.7276217401 !$OPTICAL_t0.1668993516 !$PERFUSION_t0.6798450809) and(!$CUTTING_t0.5309104434 $SEES_t0.8044420938)) !$LADDERS_t0.1668993516 !$NEUTRAL_t0.4862005499 !$NW_t0.4663391579) 
1 and(or(and(or($EDUCATED_t1.8267007636 $INTEGRATED_t0.2574791988 $ONCE_t2.6627526125) !$NECK_t5.7950010625) and(or($FATIGUE_t0.9995420519 $HELPING_t0.6964789090 $INTEGRATED_t0.2574791988 $NECK_t5.7950010625 $OW_t0.7843290400 $READY_t1.4368897015 $RECHECK_t0.8875842042 $SCREENING_t5.6428799580 $SERVED_t0.8174301882 $TETANUS_t1.3513182038 $THRU_t0.7705732571 $TN_t0.7258188505 $WISH_t0.7402872895 $WORRIED_t0.7261300020) !$GUILLAINBARRE_t0.4356780012 !$HGBAC_t0.7276217401 !$OPTICAL_t0.1668993516 !$PERFUSION_t0.6798450809) and(!$CUTTING_t0.5309104434 $SEES_t0.8044420938)) !$LADDERS_t0.1668993516 !$NEUTRAL_t0.4862005499 !$NW_t0.4663391579) 
1 and(or(and(or($EDUCATED_t1.8267007636 $LADDERS_t0.1668993516 $ONCE_t2.6627526125) !$NECK_t5.7950010625) and(or($FATIGUE_t0.9995420519 $HELPING_t0.6964789090 $INTEGRATED_t0.2574791988 $NECK_t5.7950010625 $OW_t0.7843290400 $READY_t1.4368897015 $RECHECK_t0.8875842042 $SCREENING_t5.6428799580 $SERVED_t0.8174301882 $TETANUS_t1.3513182038 $THRU_t0.7705732571 $TN_t0.7258188505 $WISH_t0.7402872895 $WORRIED_t0.7261300020) !$GUILLAINBARRE_t0.4356780012 !$HGBAC_t0.7276217401 !$OPTICAL_t0.1668993516 !$PERFUSION_t0.6798450809) and(!$CUTTING_t0.5309104434 $SEES_t0.8044420938)) !$LADDERS_t0.1668993516 !$NEUTRAL_t0.4862005499 !$NW_t0.4663391579) 
1 and(or(and(or($EDUCATED_t1.8267007636 $NEUTRAL_t0.4862005499 $ONCE_t2.6627526125) !$NECK_t5.7950010625) and(or($FATIGUE_t0.9995420519 $HELPING_t0.6964789090 $INTEGRATED_t0.2574791988 $NECK_t5.7950010625 $OW_t0.7843290400 $READY_t1.4368897015 $RECHECK_t0.8875842042 $SCREENING_t5.6428799580 $SERVED_t0.8174301882 $TETANUS_t1.3513182038 $THRU_t0.7705732571 $TN_t0.7258188505 $WISH_t0.7402872895 $WORRIED_t0.7261300020) !$GUILLAINBARRE_t0.4356780012 !$HGBAC_t0.7276217401 !$OPTICAL_t0.1668993516 !$PERFUSION_t0.6798450809) and(!$CUTTING_t0.5309104434 $SEES_t0.8044420938)) !$LADDERS_t0.1668993516 !$NEUTRAL_t0.4862005499 !$NW_t0.4663391579) 
1 and(or(and(or($EDUCATED_t1.8267007636 $NW_t0.4663391579 $ONCE_t2.6627526125) !$NECK_t5.7950010625) and(or($FATIGUE_t0.9995420519 $HELPING_t0.6964789090 $INTEGRATED_t0.2574791988 $NECK_t5.7950010625 $OW_t0.7843290400 $READY_t1.4368897015 $RECHECK_t0.8875842042 $SCREENING_t5.6428799580 $SERVED_t0.8174301882 $TETANUS_t1.3513182038 $THRU_t0.7705732571 $TN_t0.7258188505 $WISH_t0.7402872895 $WORRIED_t0.7261300020) !$GUILLAINBARRE_t0.4356780012 !$HGBAC_t0.7276217401 !$OPTICAL_t0.1668993516 !$PERFUSION_t0.6798450809) and(!$CUTTING_t0.5309104434 $SEES_t0.8044420938)) !$LADDERS_t0.1668993516 !$NEUTRAL_t0.4862005499 !$NW_t0.4663391579) 
1 and(or(and(or($EDUCATED_t1.8267007636 $ONCE_t2.6627526125) !$CUTTING_t0.5309104434 !$NECK_t5.7950010625) and(or($FATIGUE_t0.9995420519 $HELPING_t0.6964789090 $INTEGRATED_t0.2574791988 $NECK_t5.7950010625 $OW_t0.7843290400 $READY_t1.4368897015 $RECHECK_t0.8875842042 $SCREENING_t5.6428799580 $SERVED_t0.8174301882 $TETANUS_t1.3513182038 $THRU_t0.7705732571 $TN_t0.7258188505 $WISH_t0.7402872895 $WORRIED_t0.7261300020) !$GUILLAINBARRE_t0.4356780012 !$HGBAC_t0.7276217401 !$OPTICAL_t0.1668993516 !$PERFUSION_t0.6798450809) and(!$CUTTING_t0.5309104434 $SEES_t0.8044420938)) !$LADDERS_t0.1668993516 !$NEUTRAL_t0.4862005499 !$NW_t0.4663391579) 
1 and(or(and(or($INTERMITTENT_t0.7789534458 $RECHECK_t0.8875842042 $RETURNED_t2.1996655421 $RONCHI_t0.2878725381 $SOON_t0.7553034420 $TELL_t0.8373787918) !$BRUIT_t0.4245338347 !$EARS_t0.8053369842 !$GUILLAINBARRE_t0.4356780012 !$PLS_t0.2345374050) and(or($PYLORI_t0.3396672075 $READ_t2.4746104325 $REDUCING_t0.2791542369 $TENSE_t0.4882050088 $TRIAGE_t5.7339848439) !$ADR_t2.4924820541 !$EXPERIENCING_t0.8487187459) $FATIGUE_t0.9995420519 $RESPONSIBILITIES_t0.7845446674 $TAKES_t1.8887731639 $TELCARE_t0.2954496834 $TERMINAL_t0.4480063483 $TN_t0.7258188505 $UNSTEADY_t0.4324838625 $WISHES_t0.8499083390) !$OS_t3.0602502947 !$STENOSIS_t1.1084844611 !$UARY_t1.4074369594 !$VERIFICATION_t1.0336684026) 
1 and(or(and(or($INTERMITTENT_t0.7789534458 $RECHECK_t0.8875842042 $RETURNED_t2.1996655421 $RONCHI_t0.2878725381 $SCOOTER_t0.2669488541 $SOON_t0.7553034420 $TELL_t0.8373787918) !$BRUIT_t0.4245338347 !$EARS_t0.8053369842 !$GUILLAINBARRE_t0.4356780012 !$PLS_t0.2345374050) and(or($PYLORI_t0.3396672075 $READ_t2.4746104325 $REDUCING_t0.2791542369 $TENSE_t0.4882050088 $TRIAGE_t5.7339848439) !$ADR_t2.4924820541 !$EXPERIENCING_t0.8487187459) $FATIGUE_t0.9995420519 $RESPONSIBILITIES_t0.7845446674 $TAKES_t1.8887731639 $TELCARE_t0.2954496834 $TERMINAL_t0.4480063483 $TN_t0.7258188505 $WISHES_t0.8499083390) !$OS_t3.0602502947 !$STENOSIS_t1.1084844611 !$UARY_t1.4074369594) 
1 and(or(and(or($INTERMITTENT_t0.7789534458 $RECHECK_t0.8875842042 $RETURNED_t2.1996655421 $RONCHI_t0.2878725381 $SOON_t0.7553034420 $TELL_t0.8373787918) !$BRUIT_t0.4245338347 !$EARS_t0.8053369842 !$GUILLAINBARRE_t0.4356780012 !$PLS_t0.2345374050) and(or($PYLORI_t0.3396672075 $READ_t2.4746104325 $REDUCING_t0.2791542369 $TENSE_t0.4882050088 $TRIAGE_t5.7339848439) !$ADR_t2.4924820541 !$EXPERIENCING_t0.8487187459) $FATIGUE_t0.9995420519 $RESPONSIBILITIES_t0.7845446674 $TAKES_t1.8887731639 $TELCARE_t0.2954496834 $TERMINAL_t0.4480063483 $TN_t0.7258188505 $UNSTEADY_t0.4324838625 $WISHES_t0.8499083390) !$OS_t3.0602502947 !$STENOSIS_t1.1084844611 !$UARY_t1.4074369594) 
1 and(or(and(or($ACTIVITY_t7.4771302112 $INTERMITTENT_t0.7789534458 $RECHECK_t0.8875842042 $RETURNED_t2.1996655421 $RONCHI_t0.2878725381 $SOON_t0.7553034420 $TELL_t0.8373787918) !$BRUIT_t0.4245338347 !$EARS_t0.8053369842 !$GUILLAINBARRE_t0.4356780012 !$PLS_t0.2345374050) and(or($PYLORI_t0.3396672075 $READ_t2.4746104325 $REDUCING_t0.2791542369 $TENSE_t0.4882050088 $TRIAGE_t5.7339848439) !$ADR_t2.4924820541 !$EXPERIENCING_t0.8487187459) $FATIGUE_t0.9995420519 $RESPONSIBILITIES_t0.7845446674 $TAKES_t1.8887731639 $TELCARE_t0.2954496834 $TERMINAL_t0.4480063483 $TN_t0.7258188505 $UNSTEADY_t0.4324838625 $WISHES_t0.8499083390) !$OS_t3.0602502947 !$STENOSIS_t1.1084844611 !$UARY_t1.4074369594) 
1 and(or(and(or($ACTIVITY_t7.4771302112 $PYLORI_t0.3396672075 $READ_t2.4746104325 $REDUCING_t0.2791542369 $TENSE_t0.4882050088 $TRIAGE_t5.7339848439) !$ADR_t2.4924820541 !$EXPERIENCING_t0.8487187459) and(or($INTERMITTENT_t0.7789534458 $RECHECK_t0.8875842042 $RETURNED_t2.1996655421 $RONCHI_t0.2878725381 $SOON_t0.7553034420 $TELL_t0.8373787918) !$BRUIT_t0.4245338347 !$EARS_t0.8053369842 !$GUILLAINBARRE_t0.4356780012 !$PLS_t0.2345374050) $FATIGUE_t0.9995420519 $RESPONSIBILITIES_t0.7845446674 $TAKES_t1.8887731639 $TELCARE_t0.2954496834 $TERMINAL_t0.4480063483 $TN_t0.7258188505 $UNSTEADY_t0.4324838625 $WISHES_t0.8499083390) !$OS_t3.0602502947 !$STENOSIS_t1.1084844611 !$UARY_t1.4074369594) 
1 and(or(and(or($ACTUALLY_t0.5143722856 $INTERMITTENT_t0.7789534458 $RECHECK_t0.8875842042 $RETURNED_t2.1996655421 $RONCHI_t0.2878725381 $SOON_t0.7553034420 $TELL_t0.8373787918) !$BRUIT_t0.4245338347 !$EARS_t0.8053369842 !$GUILLAINBARRE_t0.4356780012 !$PLS_t0.2345374050) and(or($PYLORI_t0.3396672075 $READ_t2.4746104325 $REDUCING_t0.2791542369 $TENSE_t0.4882050088 $TRIAGE_t5.7339848439) !$ADR_t2.4924820541 !$EXPERIENCING_t0.8487187459) $FATIGUE_t0.9995420519 $RESPONSIBILITIES_t0.7845446674 $TAKES_t1.8887731639 $TELCARE_t0.2954496834 $TERMINAL_t0.4480063483 $TN_t0.7258188505 $UNSTEADY_t0.4324838625 $WISHES_t0.8499083390) !$OS_t3.0602502947 !$STENOSIS_t1.1084844611 !$UARY_t1.4074369594) 
1 and(or(and(or($ALREADY_t1.4178739706 $INTERMITTENT_t0.7789534458 $RECHECK_t0.8875842042 $RETURNED_t2.1996655421 $RONCHI_t0.2878725381 $SOON_t0.7553034420 $TELL_t0.8373787918) !$BRUIT_t0.4245338347 !$EARS_t0.8053369842 !$GUILLAINBARRE_t0.4356780012 !$PLS_t0.2345374050) and(or($PYLORI_t0.3396672075 $READ_t2.4746104325 $REDUCING_t0.2791542369 $TENSE_t0.4882050088 $TRIAGE_t5.7339848439) !$ADR_t2.4924820541 !$EXPERIENCING_t0.8487187459) $FATIGUE_t0.9995420519 $RESPONSIBILITIES_t0.7845446674 $TAKES_t1.8887731639 $TELCARE_t0.2954496834 $TERMINAL_t0.4480063483 $TN_t0.7258188505 $UNSTEADY_t0.4324838625 $WISHES_t0.8499083390) !$OS_t3.0602502947 !$STENOSIS_t1.1084844611 !$UARY_t1.4074369594) 
1 and(or(and(or($AM_t12.7197183381 $INTERMITTENT_t0.7789534458 $RECHECK_t0.8875842042 $RETURNED_t2.1996655421 $RONCHI_t0.2878725381 $SOON_t0.7553034420 $TELL_t0.8373787918) !$BRUIT_t0.4245338347 !$EARS_t0.8053369842 !$GUILLAINBARRE_t0.4356780012 !$PLS_t0.2345374050) and(or($PYLORI_t0.3396672075 $READ_t2.4746104325 $REDUCING_t0.2791542369 $TENSE_t0.4882050088 $TRIAGE_t5.7339848439) !$ADR_t2.4924820541 !$EXPERIENCING_t0.8487187459) $FATIGUE_t0.9995420519 $RESPONSIBILITIES_t0.7845446674 $TAKES_t1.8887731639 $TELCARE_t0.2954496834 $TERMINAL_t0.4480063483 $TN_t0.7258188505 $UNSTEADY_t0.4324838625 $WISHES_t0.8499083390) !$OS_t3.0602502947 !$STENOSIS_t1.1084844611 !$UARY_t1.4074369594) 
1 and(or(and(or($AND_t233.9588763676 $INTERMITTENT_t0.7789534458 $RECHECK_t0.8875842042 $RETURNED_t2.1996655421 $RONCHI_t0.2878725381 $SOON_t0.7553034420 $TELL_t0.8373787918) !$BRUIT_t0.4245338347 !$EARS_t0.8053369842 !$GUILLAINBARRE_t0.4356780012 !$PLS_t0.2345374050) and(or($PYLORI_t0.3396672075 $READ_t2.4746104325 $REDUCING_t0.2791542369 $TENSE_t0.4882050088 $TRIAGE_t5.7339848439) !$ADR_t2.4924820541 !$EXPERIENCING_t0.8487187459) $FATIGUE_t0.9995420519 $RESPONSIBILITIES_t0.7845446674 $TAKES_t1.8887731639 $TELCARE_t0.2954496834 $TERMINAL_t0.4480063483 $TN_t0.7258188505 $UNSTEADY_t0.4324838625 $WISHES_t0.8499083390) !$OS_t3.0602502947 !$STENOSIS_t1.1084844611 !$UARY_t1.4074369594) 
1 and(or(and(or($AND_t233.9588763676 $PYLORI_t0.3396672075 $READ_t2.4746104325 $REDUCING_t0.2791542369 $TENSE_t0.4882050088 $TRIAGE_t5.7339848439) !$ADR_t2.4924820541 !$EXPERIENCING_t0.8487187459) and(or($INTERMITTENT_t0.7789534458 $RECHECK_t0.8875842042 $RETURNED_t2.1996655421 $RONCHI_t0.2878725381 $SOON_t0.7553034420 $TELL_t0.8373787918) !$BRUIT_t0.4245338347 !$EARS_t0.8053369842 !$GUILLAINBARRE_t0.4356780012 !$PLS_t0.2345374050) $FATIGUE_t0.9995420519 $RESPONSIBILITIES_t0.7845446674 $TAKES_t1.8887731639 $TELCARE_t0.2954496834 $TERMINAL_t0.4480063483 $TN_t0.7258188505 $UNSTEADY_t0.4324838625 $WISHES_t0.8499083390) !$OS_t3.0602502947 !$STENOSIS_t1.1084844611 !$UARY_t1.4074369594) 
</ensemble>
<levels>
(ilevels
TargetLevels
p0
(dp1
S'maxval'
p2
F2.0
sS'labels'
p3
(lp4
S'1.24820143885'
p5
aS'1.74820143885'
p6
asS'minval'
p7
F1.0
sS'thresholds'
p8
(lp9
F1.4964028776978417
asS'numberOfLevels'
p10
I2
sS'targetIsEnum'
p11
I00
sS'__intervals__'
p12
(lp13
(F1.0
F1.4964028776978417
tp14
a(F1.4964028776978417
F2.0
tp15
asb.
