# Supplementary material for: Predicting the Risk of Suicide by Analyzing the Text of Clinical Notes
Source: PLoS One. 2014 Jan 28;9(1):e85733. doi: 10.1371/journal.pone.0085733 (PMC3904866; doi:10.1371/journal.pone.0085733)
Supplement: Appendix S3 — Machine Learning Libraries and Methods: This section is provided to enclose the open source (Apache License) classifier used for the building of the statistical models, specifically for the purposes of study reproducibility. A detailed account of these tools is intended for another publication. (ZIP) [file pone.0085733.s003.zip › Appendix3/ML_libs/Models/model-va12-words]

ABSENCE
ACCEPTED
ACCIDENT
ACCURACY
ACTIVITY
ACTUALLY
ADDITION
ADEQUATELY
ADMITS
ADR
AFFECT
AFRICAN
AGAIN
AGGRAVATED
AGITATION
AID
ALLOW
ALPHABETIZED
ALREADY
ALTERATION
ALTERNATIVES
AM
ANALGESIA
AND
ANOREXIA
APPROPRIATE
ARTHRALGIA
ARTHRITIS
BLINDNESS
BOTTOM
BROCHURE
BRUIT
CALCULATION
CAMERA
CASUALLY
CATEGORY
CATHETERIZATION
CCS
CENTERS
CITY
CLARIFY
CLOTHES
COMP
COMPENSATION
COMPREHENSIVE
CULTURAL
CUTTING
DECLINES
DEGUZMAN
DELUSIONAL
DEMEROL
DFE
DIAGNOSTIC
DLCO
DOCUMENTS
DOOR
EARS
EDUCATED
EGGS
ELSE
ENDS
ESCORT
EXERCISE
EXPERIENCING
EXTREME
FATAL
FATIGUE
FEEDS
FILLED
FINGERSTICK
FLUVIRIN
FOODS
FORMAT
GOT
GRAM
GUILLAINBARRE
HABITUAL
HALF
HAPPENS
HELPING
HES
HGBAC
IMAGES
INTEGRATED
INTERMITTENT
INTERPERSONAL
ISSUE
ITEMS
LABORATORY
LADDERS
LAND
LIFESUSTAINING
LIPIDS
LIVE
LUMBAGO
MARIA
MEMORIAL
MIW
MODIFICATION
MOVING
MYALGIAS
NECK
NEUTRAL
NOTHING
NW
ONCE
OPTICAL
OS
OW
PERFUSION
PERIODICALLY
PERTAINING
PLASMA
PLENTY
PLS
POH
POINTS
POLYPHAGIA
POSTIVE
POSTOP
PRIVATE
PROTECTOR
PURPOSES
PYLORI
RART
READ
READY
REASONS
RECHECK
RECIEVED
REDUCING
REQUESTING
REQUESTS
RESPONSIBILITIES
RETROFLEXION
RETURNED
REVEALED
RIDING
RONCHI
SCOOTER
SCREENED
SCREENING
SECRETIONS
SEEKING
SEES
SERVED
SHAMPOO
SOON
SPECIALIST
SPINAL
STARTLED
STENOSIS
SUTURED
SYST
TAKES
TECHNIQUES
TELCARE
TELL
TENSE
TERMINAL
TETANUS
THRU
TN
TRANSFERED
TRIAGE
TRIAL
TRIED
TRIGGERS
TRIGLYCERIDE
TRY
TWISTING
UARY
UNSTEADY
UROLOGIC
VERBALIZED
VERBALLY
VERIFICATION
VESSEL
WALKIN
WANTED
WBC
WENT
WHILE
WHO
WHOLE
WIFES
WISH
WISHES
WORRIED
YEARS
YESTER
