# Supplementary material for: Predicting the Risk of Suicide by Analyzing the Text of Clinical Notes
Source: PLoS One. 2014 Jan 28;9(1):e85733. doi: 10.1371/journal.pone.0085733 (PMC3904866; doi:10.1371/journal.pone.0085733)
Supplement: Appendix S3 — Machine Learning Libraries and Methods: This section is provided to enclose the open source (Apache License) classifier used for the building of the statistical models, specifically for the purposes of study reproducibility. A detailed account of these tools is intended for another publication. (ZIP) [file pone.0085733.s003.zip › Appendix3/ML_libs/Models/model-va32-Hacc-C3000.mod]

<ensemble>
group->0.992805755396
1 and(or(and(or($STREET_t0.4460431655 $VALLEY_t0.0647482014 !$YEAR_t4.5323741007) !$PSYCHIATRICALLY_t0.0647482014 !$QUADRANTS_t0.0791366906 !$RESIDENTIAL_t0.1079136691 !$STAIN_t0.0431654676 !$STRUGGLES_t0.0287769784 !$SUBLUXATION_t0.0143884892 !$SUPPLY_t0.4892086331 !$SYMPTOMS_t3.8633093525 !$TEACHER_t0.0287769784 !$TEASPOONFUL_t0.0215827338 !$THI_t0.0575539568 !$VET_t10.4676258993 !$VISIT_t9.2661870504 !$VIT_t0.1654676259 !$WOUNDED_t0.0575539568) $CANCERS_t0.0143884892 $LUQ_t0.0287769784 $STRAIGHTENED_t0.0215827338 $TELEMETRY_t0.7913669065 $TRAVELS_t0.0359712230 $UNDERGONE_t0.0431654676 $VISUALIZATION_t0.0215827338 $WHIP_t0.0215827338 $WORTHLESSNESS_t0.0791366906 $YE_t0.0503597122 $ZER_t0.0575539568) !$OUTSTANDING_t0.0359712230 !$WARRANT_t0.0503597122) 
1 and(or(and(or($STREET_t0.4460431655 $VALLEY_t0.0647482014 !$YEAR_t4.5323741007) !$PSYCHIATRICALLY_t0.0647482014 !$QUADRANTS_t0.0791366906 !$RESIDENTIAL_t0.1079136691 !$STAIN_t0.0431654676 !$STRUGGLES_t0.0287769784 !$SUBLUXATION_t0.0143884892 !$SUPPLY_t0.4892086331 !$SYMPTOMS_t3.8633093525 !$TEACHER_t0.0287769784 !$TEASPOONFUL_t0.0215827338 !$THI_t0.0575539568 !$VET_t10.4676258993 !$VISIT_t9.2661870504 !$VIT_t0.1654676259 !$WOUNDED_t0.0575539568) $DRUSEN_t0.0359712230 $LUQ_t0.0287769784 $STRAIGHTENED_t0.0215827338 $TELEMETRY_t0.7913669065 $TRAVELS_t0.0359712230 $UNDERGONE_t0.0431654676 $VISUALIZATION_t0.0215827338 $WHIP_t0.0215827338 $WORTHLESSNESS_t0.0791366906 $YE_t0.0503597122 $ZER_t0.0575539568) !$OUTSTANDING_t0.0359712230 !$WARRANT_t0.0503597122) 
1 and(or(and(or($STREET_t0.4460431655 $VALLEY_t0.0647482014 !$YEAR_t4.5323741007) !$RESIDENTIAL_t0.1079136691 !$STAIN_t0.0431654676 !$STRUGGLES_t0.0287769784 !$SUBLUXATION_t0.0143884892 !$SUPPLY_t0.4892086331 !$SYMPTOMS_t3.8633093525 !$TEACHER_t0.0287769784 !$TEASPOONFUL_t0.0215827338 !$THI_t0.0575539568 !$VET_t10.4676258993 !$VISIT_t9.2661870504 !$VIT_t0.1654676259 !$WOUNDED_t0.0575539568) $CANCERS_t0.0143884892 $LUQ_t0.0287769784 $STRAIGHTENED_t0.0215827338 $TELEMETRY_t0.7913669065 $TRAVELS_t0.0359712230 $UNDERGONE_t0.0431654676 $VISUALIZATION_t0.0215827338 $WHIP_t0.0215827338 $WORTHLESSNESS_t0.0791366906 $YE_t0.0503597122 $ZER_t0.0575539568) !$OUTSTANDING_t0.0359712230 !$WARRANT_t0.0503597122) 
1 and(or(and(or($STREET_t0.4460431655 $VALLEY_t0.0647482014 !$YEAR_t4.5323741007) !$RESIDENTIAL_t0.1079136691 !$STAIN_t0.0431654676 !$STRUGGLES_t0.0287769784 !$SUBLUXATION_t0.0143884892 !$SUPPLY_t0.4892086331 !$SYMPTOMS_t3.8633093525 !$TEACHER_t0.0287769784 !$TEASPOONFUL_t0.0215827338 !$THI_t0.0575539568 !$VET_t10.4676258993 !$VISIT_t9.2661870504 !$VIT_t0.1654676259 !$WOUNDED_t0.0575539568) $DRUSEN_t0.0359712230 $LUQ_t0.0287769784 $STRAIGHTENED_t0.0215827338 $TELEMETRY_t0.7913669065 $TRAVELS_t0.0359712230 $UNDERGONE_t0.0431654676 $VISUALIZATION_t0.0215827338 $WHIP_t0.0215827338 $WORTHLESSNESS_t0.0791366906 $YE_t0.0503597122 $ZER_t0.0575539568) !$OUTSTANDING_t0.0359712230 !$UES_t0.0215827338) 
1 and(or(and(or($STREET_t0.4460431655 $VALLEY_t0.0647482014 !$YEAR_t4.5323741007) !$RESIDENTIAL_t0.1079136691 !$STAIN_t0.0431654676 !$STRUGGLES_t0.0287769784 !$SUBLUXATION_t0.0143884892 !$SUPPLY_t0.4892086331 !$SYMPTOMS_t3.8633093525 !$TEACHER_t0.0287769784 !$TEASPOONFUL_t0.0215827338 !$THI_t0.0575539568 !$VET_t10.4676258993 !$VISIT_t9.2661870504 !$VIT_t0.1654676259 !$WOUNDED_t0.0575539568) $DRUSEN_t0.0359712230 $LUQ_t0.0287769784 $STRAIGHTENED_t0.0215827338 $TELEMETRY_t0.7913669065 $TRAVELS_t0.0359712230 $UNDERGONE_t0.0431654676 $VISUALIZATION_t0.0215827338 $WHIP_t0.0215827338 $WORTHLESSNESS_t0.0791366906 $YE_t0.0503597122 $ZER_t0.0575539568) !$OUTSTANDING_t0.0359712230 !$WARRANT_t0.0503597122) 
1 and(or(and(or($STREET_t0.4460431655 $VALLEY_t0.0647482014 !$YEAR_t4.5323741007) !$PSYCHIATRICALLY_t0.0647482014 !$QUADRANTS_t0.0791366906 !$RESIDENTIAL_t0.1079136691 !$STAIN_t0.0431654676 !$STRUGGLES_t0.0287769784 !$SUBLUXATION_t0.0143884892 !$SUPPLY_t0.4892086331 !$SYMPTOMS_t3.8633093525 !$TEACHER_t0.0287769784 !$TEASPOONFUL_t0.0215827338 !$THI_t0.0575539568 !$VET_t10.4676258993 !$VISIT_t9.2661870504 !$VIT_t0.1654676259 !$WOUNDED_t0.0575539568) $CANCERS_t0.0143884892 $STRAIGHTENED_t0.0215827338 $TELEMETRY_t0.7913669065 $TRAVELS_t0.0359712230 $UNDERGONE_t0.0431654676 $VISUALIZATION_t0.0215827338 $WHIP_t0.0215827338 $WORTHLESSNESS_t0.0791366906 $YE_t0.0503597122 $ZER_t0.0575539568) !$OUTSTANDING_t0.0359712230 !$WARRANT_t0.0503597122) 
1 and(or(and(or($STREET_t0.4460431655 $VALLEY_t0.0647482014 !$YEAR_t4.5323741007) !$PSYCHIATRICALLY_t0.0647482014 !$QUADRANTS_t0.0791366906 !$RESIDENTIAL_t0.1079136691 !$STAIN_t0.0431654676 !$STRUGGLES_t0.0287769784 !$SUBLUXATION_t0.0143884892 !$SUPPLY_t0.4892086331 !$SYMPTOMS_t3.8633093525 !$TEACHER_t0.0287769784 !$TEASPOONFUL_t0.0215827338 !$THI_t0.0575539568 !$VET_t10.4676258993 !$VISIT_t9.2661870504 !$VIT_t0.1654676259 !$WOUNDED_t0.0575539568) $DRUSEN_t0.0359712230 $STRAIGHTENED_t0.0215827338 $TELEMETRY_t0.7913669065 $TRAVELS_t0.0359712230 $UNDERGONE_t0.0431654676 $VISUALIZATION_t0.0215827338 $WHIP_t0.0215827338 $WORTHLESSNESS_t0.0791366906 $YE_t0.0503597122 $ZER_t0.0575539568) !$OUTSTANDING_t0.0359712230 !$WARRANT_t0.0503597122) 
1 and(or(and(or($STREET_t0.4460431655 $VALLEY_t0.0647482014 !$YEAR_t4.5323741007) !$RESIDENTIAL_t0.1079136691 !$STAIN_t0.0431654676 !$STRUGGLES_t0.0287769784 !$SUBLUXATION_t0.0143884892 !$SUPPLY_t0.4892086331 !$SYMPTOMS_t3.8633093525 !$TEACHER_t0.0287769784 !$TEASPOONFUL_t0.0215827338 !$THI_t0.0575539568 !$VET_t10.4676258993 !$VISIT_t9.2661870504 !$VIT_t0.1654676259 !$WOUNDED_t0.0575539568) $CANCERS_t0.0143884892 $DRUSEN_t0.0359712230 $LUQ_t0.0287769784 $STRAIGHTENED_t0.0215827338 $TELEMETRY_t0.7913669065 $TRAVELS_t0.0359712230 $UNDERGONE_t0.0431654676 $VISUALIZATION_t0.0215827338 $WHIP_t0.0215827338 $WORTHLESSNESS_t0.0791366906 $YE_t0.0503597122 $ZER_t0.0575539568) !$OUTSTANDING_t0.0359712230 !$WARRANT_t0.0503597122) 
1 and(or(and(or($STREET_t0.4460431655 $VALLEY_t0.0647482014 !$YEAR_t4.5323741007) !$PSYCHIATRICALLY_t0.0647482014 !$QUADRANTS_t0.0791366906 !$RESIDENTIAL_t0.1079136691 !$STAIN_t0.0431654676 !$STRUGGLES_t0.0287769784 !$SUBLUXATION_t0.0143884892 !$SUPPLY_t0.4892086331 !$SYMPTOMS_t3.8633093525 !$TEACHER_t0.0287769784 !$TEASPOONFUL_t0.0215827338 !$THI_t0.0575539568 !$VET_t10.4676258993 !$VISIT_t9.2661870504 !$VIT_t0.1654676259 !$WOUNDED_t0.0575539568) $CANCERS_t0.0143884892 $DRUSEN_t0.0359712230 $STRAIGHTENED_t0.0215827338 $TELEMETRY_t0.7913669065 $TRAVELS_t0.0359712230 $UNDERGONE_t0.0431654676 $VISUALIZATION_t0.0215827338 $WHIP_t0.0215827338 $WORTHLESSNESS_t0.0791366906 $YE_t0.0503597122 $ZER_t0.0575539568) !$OUTSTANDING_t0.0359712230 !$WARRANT_t0.0503597122) 
1 and(or(and(or($STREET_t0.4460431655 $VALLEY_t0.0647482014 !$YEAR_t4.5323741007) !$RESIDENTIAL_t0.1079136691 !$STAIN_t0.0431654676 !$STRUGGLES_t0.0287769784 !$SUBLUXATION_t0.0143884892 !$SUPPLY_t0.4892086331 !$SYMPTOMS_t3.8633093525 !$TEACHER_t0.0287769784 !$TEASPOONFUL_t0.0215827338 !$THI_t0.0575539568 !$VET_t10.4676258993 !$VISIT_t9.2661870504 !$VIT_t0.1654676259 !$WOUNDED_t0.0575539568) $CANCERS_t0.0143884892 $STRAIGHTENED_t0.0215827338 $TELEMETRY_t0.7913669065 $TRAVELS_t0.0359712230 $UNDERGONE_t0.0431654676 $VISUALIZATION_t0.0215827338 $WHIP_t0.0215827338 $WORTHLESSNESS_t0.0791366906 $YE_t0.0503597122 $ZER_t0.0575539568) !$OUTSTANDING_t0.0359712230 !$WARRANT_t0.0503597122) 
1 and(or(and(or(!$TEETH_t0.9352517986 !$VERIFIED_t1.3525179856) !$EPIDERMAL_t0.0431654676 !$SSN_t1.5899280576 !$STAIN_t0.0431654676 !$SUBLUXATION_t0.0143884892 !$SUPPLY_t0.4892086331 !$TEASPOONFUL_t0.0215827338 !$TEMPOPORMAND_t0.0503597122 !$THI_t0.0575539568 !$TRAZODONE_t0.4100719424 !$UNT_t0.2517985612 !$VOLUME_t0.5395683453 !$WOUNDED_t0.0575539568 !$YEAR_t4.5323741007) $NALCOHOL_t0.0143884892 $STRAIGHTENED_t0.0215827338 $STVHCS_t0.0215827338 $THY_t0.0503597122 $TURMOIL_t0.0143884892 $TWAVE_t0.0143884892 $UC_t0.0791366906 $UNDERGONE_t0.0431654676 $VIDEOS_t0.0143884892 $VISUALIZATION_t0.0215827338 $WHIP_t0.0215827338 $WORTHLESSNESS_t0.0791366906 $YE_t0.0503597122 $ZER_t0.0575539568) !$DISHEVELED_t0.1151079137) 
1 and(or(and(or(!$TEETH_t0.9352517986 !$VERIFIED_t1.3525179856) !$EPIDERMAL_t0.0431654676 !$SSN_t1.5899280576 !$STAIN_t0.0431654676 !$SUBLUXATION_t0.0143884892 !$SUPPLY_t0.4892086331 !$TEASPOONFUL_t0.0215827338 !$TEMPOPORMAND_t0.0503597122 !$THI_t0.0575539568 !$TRAZODONE_t0.4100719424 !$UNT_t0.2517985612 !$VOLUME_t0.5395683453 !$WOUNDED_t0.0575539568 !$YEAR_t4.5323741007) $NALCOHOL_t0.0143884892 $STRAIGHTENED_t0.0215827338 $STVHCS_t0.0215827338 $THY_t0.0503597122 $TURMOIL_t0.0143884892 $TWAVE_t0.0143884892 $UC_t0.0791366906 $UNDERGONE_t0.0431654676 $VIDEOS_t0.0143884892 $VISUALIZATION_t0.0215827338 $WHIP_t0.0215827338 $WORTHLESSNESS_t0.0791366906 $YE_t0.0503597122 $ZER_t0.0575539568) !$DISHEVELED_t0.1151079137 !$NEUT_t0.1798561151) 
1 and(or(and(or(!$TEETH_t0.9352517986 !$VERIFIED_t1.3525179856) !$EPIDERMAL_t0.0431654676 !$SSN_t1.5899280576 !$STAIN_t0.0431654676 !$SUBLUXATION_t0.0143884892 !$SUPPLY_t0.4892086331 !$TEASPOONFUL_t0.0215827338 !$TEMPOPORMAND_t0.0503597122 !$THI_t0.0575539568 !$TRAZODONE_t0.4100719424 !$UNT_t0.2517985612 !$VOLUME_t0.5395683453 !$WOUNDED_t0.0575539568 !$YEAR_t4.5323741007) $NALCOHOL_t0.0143884892 $STRAIGHTENED_t0.0215827338 $STVHCS_t0.0215827338 $THY_t0.0503597122 $TURMOIL_t0.0143884892 $TWAVE_t0.0143884892 $UC_t0.0791366906 $UNDERGONE_t0.0431654676 $VIDEOS_t0.0143884892 $VISUALIZATION_t0.0215827338 $WHIP_t0.0215827338 $WORTHLESSNESS_t0.0791366906 $YE_t0.0503597122 $ZER_t0.0575539568) !$DISHEVELED_t0.1151079137 !$OWEEN_t0.0143884892) 
1 and(or(and(or(!$TEETH_t0.9352517986 !$VERIFIED_t1.3525179856) !$EPIDERMAL_t0.0431654676 !$SSN_t1.5899280576 !$STAIN_t0.0431654676 !$SUBLUXATION_t0.0143884892 !$SUPPLY_t0.4892086331 !$TEASPOONFUL_t0.0215827338 !$TEMPOPORMAND_t0.0503597122 !$THI_t0.0575539568 !$TRAZODONE_t0.4100719424 !$UNT_t0.2517985612 !$VOLUME_t0.5395683453 !$WOUNDED_t0.0575539568 !$YEAR_t4.5323741007) $NALCOHOL_t0.0143884892 $STRAIGHTENED_t0.0215827338 $STVHCS_t0.0215827338 $THY_t0.0503597122 $TURMOIL_t0.0143884892 $TWAVE_t0.0143884892 $UC_t0.0791366906 $UNDERGONE_t0.0431654676 $VIDEOS_t0.0143884892 $VISUALIZATION_t0.0215827338 $WHIP_t0.0215827338 $WORTHLESSNESS_t0.0791366906 $YE_t0.0503597122 $ZER_t0.0575539568) !$DISHEVELED_t0.1151079137 !$PRACTICING_t0.0719424460) 
1 and(or(and(or(!$TEETH_t0.9352517986 !$VERIFIED_t1.3525179856) !$EPIDERMAL_t0.0431654676 !$SSN_t1.5899280576 !$STAIN_t0.0431654676 !$SUBLUXATION_t0.0143884892 !$SUPPLY_t0.4892086331 !$TEASPOONFUL_t0.0215827338 !$TEMPOPORMAND_t0.0503597122 !$THI_t0.0575539568 !$TRAZODONE_t0.4100719424 !$UNT_t0.2517985612 !$VOLUME_t0.5395683453 !$WOUNDED_t0.0575539568 !$YEAR_t4.5323741007) $NALCOHOL_t0.0143884892 $STRAIGHTENED_t0.0215827338 $STVHCS_t0.0215827338 $THY_t0.0503597122 $TURMOIL_t0.0143884892 $TWAVE_t0.0143884892 $UC_t0.0791366906 $UNDERGONE_t0.0431654676 $VIDEOS_t0.0143884892 $VISUALIZATION_t0.0215827338 $WHIP_t0.0215827338 $WORTHLESSNESS_t0.0791366906 $YE_t0.0503597122 $ZER_t0.0575539568) !$DISHEVELED_t0.1151079137 !$PRESBYOPIA_t0.0863309353) 
1 and(or(and(or(!$TEETH_t0.9352517986 !$VERIFIED_t1.3525179856) !$EPIDERMAL_t0.0431654676 !$SSN_t1.5899280576 !$STAIN_t0.0431654676 !$SUBLUXATION_t0.0143884892 !$SUPPLY_t0.4892086331 !$TEASPOONFUL_t0.0215827338 !$TEMPOPORMAND_t0.0503597122 !$THI_t0.0575539568 !$TRAZODONE_t0.4100719424 !$UNT_t0.2517985612 !$VOLUME_t0.5395683453 !$WOUNDED_t0.0575539568 !$YEAR_t4.5323741007) $NALCOHOL_t0.0143884892 $STRAIGHTENED_t0.0215827338 $STVHCS_t0.0215827338 $THY_t0.0503597122 $TURMOIL_t0.0143884892 $TWAVE_t0.0143884892 $UC_t0.0791366906 $UNDERGONE_t0.0431654676 $VIDEOS_t0.0143884892 $VISUALIZATION_t0.0215827338 $WHIP_t0.0215827338 $WORTHLESSNESS_t0.0791366906 $YE_t0.0503597122 $ZER_t0.0575539568) !$DISHEVELED_t0.1151079137 !$RUMINATES_t0.0143884892) 
1 and(or(and(or(!$TEETH_t0.9352517986 !$VERIFIED_t1.3525179856) !$EPIDERMAL_t0.0431654676 !$SSN_t1.5899280576 !$STAIN_t0.0431654676 !$SUBLUXATION_t0.0143884892 !$SUPPLY_t0.4892086331 !$TEASPOONFUL_t0.0215827338 !$TEMPOPORMAND_t0.0503597122 !$THI_t0.0575539568 !$TRAZODONE_t0.4100719424 !$UNT_t0.2517985612 !$VOLUME_t0.5395683453 !$WOUNDED_t0.0575539568 !$YEAR_t4.5323741007) $NALCOHOL_t0.0143884892 $STRAIGHTENED_t0.0215827338 $STVHCS_t0.0215827338 $THY_t0.0503597122 $TURMOIL_t0.0143884892 $TWAVE_t0.0143884892 $UC_t0.0791366906 $UNDERGONE_t0.0431654676 $VIDEOS_t0.0143884892 $VISUALIZATION_t0.0215827338 $WHIP_t0.0215827338 $WORTHLESSNESS_t0.0791366906 $YE_t0.0503597122 $ZER_t0.0575539568) !$DISHEVELED_t0.1151079137 !$SCHWARTZ_t0.0359712230) 
1 and(or(and(or(!$TEETH_t0.9352517986 !$VERIFIED_t1.3525179856) !$EPIDERMAL_t0.0431654676 !$SSN_t1.5899280576 !$STAIN_t0.0431654676 !$SUBLUXATION_t0.0143884892 !$SUPPLY_t0.4892086331 !$TEASPOONFUL_t0.0215827338 !$TEMPOPORMAND_t0.0503597122 !$THI_t0.0575539568 !$TRAZODONE_t0.4100719424 !$UNT_t0.2517985612 !$VOLUME_t0.5395683453 !$WOUNDED_t0.0575539568 !$YEAR_t4.5323741007) $NALCOHOL_t0.0143884892 $STRAIGHTENED_t0.0215827338 $STVHCS_t0.0215827338 $THY_t0.0503597122 $TURMOIL_t0.0143884892 $TWAVE_t0.0143884892 $UC_t0.0791366906 $UNDERGONE_t0.0431654676 $VIDEOS_t0.0143884892 $VISUALIZATION_t0.0215827338 $WHIP_t0.0215827338 $WORTHLESSNESS_t0.0791366906 $YE_t0.0503597122 $ZER_t0.0575539568) !$DISHEVELED_t0.1151079137 !$OWEEN_t0.0143884892 !$PRACTICING_t0.0719424460) 
1 and(or(and(or(!$TEETH_t0.9352517986 !$VERIFIED_t1.3525179856) !$EPIDERMAL_t0.0431654676 !$SSN_t1.5899280576 !$STAIN_t0.0431654676 !$SUBLUXATION_t0.0143884892 !$SUPPLY_t0.4892086331 !$TEASPOONFUL_t0.0215827338 !$TEMPOPORMAND_t0.0503597122 !$THI_t0.0575539568 !$TRAZODONE_t0.4100719424 !$UNT_t0.2517985612 !$VOLUME_t0.5395683453 !$WOUNDED_t0.0575539568 !$YEAR_t4.5323741007) $NALCOHOL_t0.0143884892 $STRAIGHTENED_t0.0215827338 $STVHCS_t0.0215827338 $THY_t0.0503597122 $TURMOIL_t0.0143884892 $TWAVE_t0.0143884892 $UC_t0.0791366906 $UNDERGONE_t0.0431654676 $VIDEOS_t0.0143884892 $VISUALIZATION_t0.0215827338 $WHIP_t0.0215827338 $WORTHLESSNESS_t0.0791366906 $YE_t0.0503597122 $ZER_t0.0575539568) !$DISHEVELED_t0.1151079137 !$OWEEN_t0.0143884892 !$PRESBYOPIA_t0.0863309353) 
1 and(or(and(or(!$TEETH_t0.9352517986 !$VERIFIED_t1.3525179856) !$EPIDERMAL_t0.0431654676 !$SSN_t1.5899280576 !$STAIN_t0.0431654676 !$SUBLUXATION_t0.0143884892 !$SUPPLY_t0.4892086331 !$TEASPOONFUL_t0.0215827338 !$TEMPOPORMAND_t0.0503597122 !$THI_t0.0575539568 !$TRAZODONE_t0.4100719424 !$UNT_t0.2517985612 !$VOLUME_t0.5395683453 !$WOUNDED_t0.0575539568 !$YEAR_t4.5323741007) $NALCOHOL_t0.0143884892 $STRAIGHTENED_t0.0215827338 $STVHCS_t0.0215827338 $THY_t0.0503597122 $TURMOIL_t0.0143884892 $TWAVE_t0.0143884892 $UC_t0.0791366906 $UNDERGONE_t0.0431654676 $VIDEOS_t0.0143884892 $VISUALIZATION_t0.0215827338 $WHIP_t0.0215827338 $WORTHLESSNESS_t0.0791366906 $YE_t0.0503597122 $ZER_t0.0575539568) !$DISHEVELED_t0.1151079137 !$OWEEN_t0.0143884892 !$SCHWARTZ_t0.0359712230) 
1 and(or(and(or($CONSISTANTLY_t0.0215827338 $LIPITOR_t0.0503597122 $STRAIGHTENED_t0.0215827338 $THY_t0.0503597122 $WORTHLESSNESS_t0.0791366906) !$VISA_t0.0143884892) and(!$SPLITTING_t0.0143884892 !$STAIN_t0.0431654676 !$SUPERVISORS_t0.0143884892 !$SUPPLY_t0.4892086331 !$SUSAN_t0.0935251799 !$SYMPTOMS_t3.8633093525 !$TEASPOONFUL_t0.0215827338 !$THI_t0.0575539568 !$TRAZODONE_t0.4100719424 !$VERIFIED_t1.3525179856 !$WELLGROOMED_t0.0143884892 !$WILLING_t0.4388489209 !$YEAR_t4.5323741007) $APPOINT_t0.0359712230 $SWABS_t0.0935251799 $TURMOIL_t0.0143884892 $TUSCON_t0.0215827338 $UNDERGONE_t0.0431654676 $YE_t0.0503597122 $YOUNGER_t0.0431654676 $ZER_t0.0575539568) !$AROUSE_t0.0143884892 !$DEMONSTRATING_t0.0503597122 !$EPIDERMAL_t0.0431654676) 
1 and(or(and(or($CONSISTANTLY_t0.0215827338 $STRAIGHTENED_t0.0215827338 $THY_t0.0503597122 $WORTHLESSNESS_t0.0791366906) !$VISA_t0.0143884892) and(!$SPLITTING_t0.0143884892 !$STAIN_t0.0431654676 !$SUPERVISORS_t0.0143884892 !$SUPPLY_t0.4892086331 !$SUSAN_t0.0935251799 !$SYMPTOMS_t3.8633093525 !$TEASPOONFUL_t0.0215827338 !$THI_t0.0575539568 !$TRAZODONE_t0.4100719424 !$VERIFIED_t1.3525179856 !$WELLGROOMED_t0.0143884892 !$WILLING_t0.4388489209 !$YEAR_t4.5323741007) $APPOINT_t0.0359712230 $LIPITOR_t0.0503597122 $SWABS_t0.0935251799 $TURMOIL_t0.0143884892 $TUSCON_t0.0215827338 $UNDERGONE_t0.0431654676 $YE_t0.0503597122 $YOUNGER_t0.0431654676 $ZER_t0.0575539568) !$AROUSE_t0.0143884892 !$DEMONSTRATING_t0.0503597122 !$EPIDERMAL_t0.0431654676) 
1 and(or(and(or($LIPITOR_t0.0503597122 $NALCOHOL_t0.0143884892 $STRAIGHTENED_t0.0215827338 $THY_t0.0503597122 $WORTHLESSNESS_t0.0791366906) !$VISA_t0.0143884892) and(!$SPLITTING_t0.0143884892 !$STAIN_t0.0431654676 !$SUPERVISORS_t0.0143884892 !$SUPPLY_t0.4892086331 !$SUSAN_t0.0935251799 !$SYMPTOMS_t3.8633093525 !$TEASPOONFUL_t0.0215827338 !$THI_t0.0575539568 !$TRAZODONE_t0.4100719424 !$VERIFIED_t1.3525179856 !$WELLGROOMED_t0.0143884892 !$WILLING_t0.4388489209 !$YEAR_t4.5323741007) $APPOINT_t0.0359712230 $SWABS_t0.0935251799 $TURMOIL_t0.0143884892 $TUSCON_t0.0215827338 $UNDERGONE_t0.0431654676 $YE_t0.0503597122 $YOUNGER_t0.0431654676 $ZER_t0.0575539568) !$AROUSE_t0.0143884892 !$DEMONSTRATING_t0.0503597122 !$EPIDERMAL_t0.0431654676) 
1 and(or(and(or($LIPITOR_t0.0503597122 $STRAIGHTENED_t0.0215827338 $THY_t0.0503597122 $WORTHLESSNESS_t0.0791366906) !$VISA_t0.0143884892) and(!$SPLITTING_t0.0143884892 !$STAIN_t0.0431654676 !$SUPERVISORS_t0.0143884892 !$SUPPLY_t0.4892086331 !$SUSAN_t0.0935251799 !$SYMPTOMS_t3.8633093525 !$TEASPOONFUL_t0.0215827338 !$THI_t0.0575539568 !$TRAZODONE_t0.4100719424 !$VERIFIED_t1.3525179856 !$WELLGROOMED_t0.0143884892 !$WILLING_t0.4388489209 !$YEAR_t4.5323741007) $APPOINT_t0.0359712230 $INTERMITTANT_t0.0143884892 $SWABS_t0.0935251799 $TURMOIL_t0.0143884892 $TUSCON_t0.0215827338 $UNDERGONE_t0.0431654676 $YE_t0.0503597122 $YOUNGER_t0.0431654676 $ZER_t0.0575539568) !$AROUSE_t0.0143884892 !$DEMONSTRATING_t0.0503597122 !$EPIDERMAL_t0.0431654676) 
1 and(or(and(or($NALCOHOL_t0.0143884892 $STRAIGHTENED_t0.0215827338 $THY_t0.0503597122 $WORTHLESSNESS_t0.0791366906) !$VISA_t0.0143884892) and(!$SPLITTING_t0.0143884892 !$STAIN_t0.0431654676 !$SUPERVISORS_t0.0143884892 !$SUPPLY_t0.4892086331 !$SUSAN_t0.0935251799 !$SYMPTOMS_t3.8633093525 !$TEASPOONFUL_t0.0215827338 !$THI_t0.0575539568 !$TRAZODONE_t0.4100719424 !$VERIFIED_t1.3525179856 !$WELLGROOMED_t0.0143884892 !$WILLING_t0.4388489209 !$YEAR_t4.5323741007) $APPOINT_t0.0359712230 $LIPITOR_t0.0503597122 $SWABS_t0.0935251799 $TURMOIL_t0.0143884892 $TUSCON_t0.0215827338 $UNDERGONE_t0.0431654676 $YE_t0.0503597122 $YOUNGER_t0.0431654676 $ZER_t0.0575539568) !$AROUSE_t0.0143884892 !$DEMONSTRATING_t0.0503597122 !$EPIDERMAL_t0.0431654676) 
1 and(or(and(or($STRAIGHTENED_t0.0215827338 $THY_t0.0503597122 $WORTHLESSNESS_t0.0791366906) !$VISA_t0.0143884892) and(!$SPLITTING_t0.0143884892 !$STAIN_t0.0431654676 !$SUPERVISORS_t0.0143884892 !$SUPPLY_t0.4892086331 !$SUSAN_t0.0935251799 !$SYMPTOMS_t3.8633093525 !$TEASPOONFUL_t0.0215827338 !$THI_t0.0575539568 !$TRAZODONE_t0.4100719424 !$VERIFIED_t1.3525179856 !$WELLGROOMED_t0.0143884892 !$WILLING_t0.4388489209 !$YEAR_t4.5323741007) $APPOINT_t0.0359712230 $INTERMITTANT_t0.0143884892 $LIPITOR_t0.0503597122 $SWABS_t0.0935251799 $TURMOIL_t0.0143884892 $TUSCON_t0.0215827338 $UNDERGONE_t0.0431654676 $YE_t0.0503597122 $YOUNGER_t0.0431654676 $ZER_t0.0575539568) !$AROUSE_t0.0143884892 !$DEMONSTRATING_t0.0503597122 !$EPIDERMAL_t0.0431654676) 
1 and(or(and(or($CONSISTANTLY_t0.0215827338 $LIPITOR_t0.0503597122 $STRAIGHTENED_t0.0215827338 $THY_t0.0503597122 $WORTHLESSNESS_t0.0791366906) !$VISA_t0.0143884892) and(!$SPLITTING_t0.0143884892 !$STAIN_t0.0431654676 !$SUPERVISORS_t0.0143884892 !$SUPPLY_t0.4892086331 !$SUSAN_t0.0935251799 !$SYMPTOMS_t3.8633093525 !$TEASPOONFUL_t0.0215827338 !$THI_t0.0575539568 !$TRAZODONE_t0.4100719424 !$VERIFIED_t1.3525179856 !$WELLGROOMED_t0.0143884892 !$WILLING_t0.4388489209 !$YEAR_t4.5323741007) $APPOINT_t0.0359712230 $INTERMITTANT_t0.0143884892 $SWABS_t0.0935251799 $TURMOIL_t0.0143884892 $TUSCON_t0.0215827338 $UNDERGONE_t0.0431654676 $YE_t0.0503597122 $YOUNGER_t0.0431654676 $ZER_t0.0575539568) !$AROUSE_t0.0143884892 !$DEMONSTRATING_t0.0503597122 !$EPIDERMAL_t0.0431654676) 
1 and(or(and(or($CONSISTANTLY_t0.0215827338 $LIPITOR_t0.0503597122 $STRAIGHTENED_t0.0215827338 $THY_t0.0503597122 $WORTHLESSNESS_t0.0791366906) !$VISA_t0.0143884892) and(!$SPLITTING_t0.0143884892 !$STAIN_t0.0431654676 !$SUPERVISORS_t0.0143884892 !$SUPPLY_t0.4892086331 !$SUSAN_t0.0935251799 !$SYMPTOMS_t3.8633093525 !$TEASPOONFUL_t0.0215827338 !$THI_t0.0575539568 !$TRAZODONE_t0.4100719424 !$VERIFIED_t1.3525179856 !$WELLGROOMED_t0.0143884892 !$WILLING_t0.4388489209 !$YEAR_t4.5323741007) $APPOINT_t0.0359712230 $LIPITOR_t0.0503597122 $SWABS_t0.0935251799 $TURMOIL_t0.0143884892 $TUSCON_t0.0215827338 $UNDERGONE_t0.0431654676 $YE_t0.0503597122 $YOUNGER_t0.0431654676 $ZER_t0.0575539568) !$AROUSE_t0.0143884892 !$DEMONSTRATING_t0.0503597122 !$EPIDERMAL_t0.0431654676) 
1 and(or(and(or($CONSISTANTLY_t0.0215827338 $STRAIGHTENED_t0.0215827338 $THY_t0.0503597122 $WORTHLESSNESS_t0.0791366906) !$VISA_t0.0143884892) and(!$SPLITTING_t0.0143884892 !$STAIN_t0.0431654676 !$SUPERVISORS_t0.0143884892 !$SUPPLY_t0.4892086331 !$SUSAN_t0.0935251799 !$SYMPTOMS_t3.8633093525 !$TEASPOONFUL_t0.0215827338 !$THI_t0.0575539568 !$TRAZODONE_t0.4100719424 !$VERIFIED_t1.3525179856 !$WELLGROOMED_t0.0143884892 !$WILLING_t0.4388489209 !$YEAR_t4.5323741007) $APPOINT_t0.0359712230 $INTERMITTANT_t0.0143884892 $LIPITOR_t0.0503597122 $SWABS_t0.0935251799 $TURMOIL_t0.0143884892 $TUSCON_t0.0215827338 $UNDERGONE_t0.0431654676 $YE_t0.0503597122 $YOUNGER_t0.0431654676 $ZER_t0.0575539568) !$AROUSE_t0.0143884892 !$DEMONSTRATING_t0.0503597122 !$EPIDERMAL_t0.0431654676) 
1 and(or(and(or($LIPITOR_t0.0503597122 $NALCOHOL_t0.0143884892 $STRAIGHTENED_t0.0215827338 $THY_t0.0503597122 $WORTHLESSNESS_t0.0791366906) !$VISA_t0.0143884892) and(!$SPLITTING_t0.0143884892 !$STAIN_t0.0431654676 !$SUPERVISORS_t0.0143884892 !$SUPPLY_t0.4892086331 !$SUSAN_t0.0935251799 !$SYMPTOMS_t3.8633093525 !$TEASPOONFUL_t0.0215827338 !$THI_t0.0575539568 !$TRAZODONE_t0.4100719424 !$VERIFIED_t1.3525179856 !$WELLGROOMED_t0.0143884892 !$WILLING_t0.4388489209 !$YEAR_t4.5323741007) $APPOINT_t0.0359712230 $INTERMITTANT_t0.0143884892 $SWABS_t0.0935251799 $TURMOIL_t0.0143884892 $TUSCON_t0.0215827338 $UNDERGONE_t0.0431654676 $YE_t0.0503597122 $YOUNGER_t0.0431654676 $ZER_t0.0575539568) !$AROUSE_t0.0143884892 !$DEMONSTRATING_t0.0503597122 !$EPIDERMAL_t0.0431654676) 
1 and(or(and(or($HC_t0.5539568345 !$SSN_t1.5899280576) !$STAIN_t0.0431654676 !$SUBLUXATION_t0.0143884892 !$SUPERVISOR_t0.2661870504 !$SUPPLY_t0.4892086331 !$SU_t0.0287769784 !$TEASPOONFUL_t0.0215827338 !$THI_t0.0575539568 !$TRAZODONE_t0.4100719424 !$UNHAPPY_t0.0503597122 !$UNSP_t0.2302158273 !$WELLGROOMED_t0.0143884892 !$YEAR_t4.5323741007) $INTERMITTANT_t0.0143884892 $KIMBERLY_t0.0287769784 $STRAIGHTENED_t0.0215827338 $STX_t0.0215827338 $SUBSALICYLATE_t0.0647482014 $THY_t0.0503597122 $UNDERGONE_t0.0431654676 $UNRESECTABLE_t0.0215827338 $VTACH_t0.1223021583 $YE_t0.0503597122 $YOUNGER_t0.0431654676 $ZER_t0.0575539568) !$BLOCKERS_t0.0575539568 !$BRONZE_t0.0719424460 !$EPIDERMAL_t0.0431654676) 
1 and(or(and(or($HC_t0.5539568345 !$SSN_t1.5899280576) !$STAIN_t0.0431654676 !$SUBLUXATION_t0.0143884892 !$SUPERVISOR_t0.2661870504 !$SUPPLY_t0.4892086331 !$SU_t0.0287769784 !$TEASPOONFUL_t0.0215827338 !$THI_t0.0575539568 !$TRAZODONE_t0.4100719424 !$UNHAPPY_t0.0503597122 !$UNSP_t0.2302158273 !$WELLGROOMED_t0.0143884892 !$YEAR_t4.5323741007) $KIMBERLY_t0.0287769784 $REORDER_t0.0863309353 $STRAIGHTENED_t0.0215827338 $STX_t0.0215827338 $SUBSALICYLATE_t0.0647482014 $THY_t0.0503597122 $UNDERGONE_t0.0431654676 $UNRESECTABLE_t0.0215827338 $VTACH_t0.1223021583 $YE_t0.0503597122 $YOUNGER_t0.0431654676 $ZER_t0.0575539568) !$BLOCKERS_t0.0575539568 !$BRONZE_t0.0719424460 !$EPIDERMAL_t0.0431654676) 
1 and(or(and(or($HC_t0.5539568345 !$SSN_t1.5899280576) !$STAIN_t0.0431654676 !$SUBLUXATION_t0.0143884892 !$SUPERVISOR_t0.2661870504 !$SUPPLY_t0.4892086331 !$SU_t0.0287769784 !$TEASPOONFUL_t0.0215827338 !$THI_t0.0575539568 !$TRAZODONE_t0.4100719424 !$UNHAPPY_t0.0503597122 !$UNSP_t0.2302158273 !$WELLGROOMED_t0.0143884892 !$YEAR_t4.5323741007) $KIMBERLY_t0.0287769784 $STRAIGHTENED_t0.0215827338 $STX_t0.0215827338 $SUBSALICYLATE_t0.0647482014 $THY_t0.0503597122 $UNDERGONE_t0.0431654676 $UNRESECTABLE_t0.0215827338 $VTACH_t0.1223021583 $YE_t0.0503597122 $YOUNGER_t0.0431654676 $ZER_t0.0575539568) !$BLOCKERS_t0.0575539568 !$EPIDERMAL_t0.0431654676) 
1 and(or(and(or($HC_t0.5539568345 !$SSN_t1.5899280576) !$STAIN_t0.0431654676 !$SUBLUXATION_t0.0143884892 !$SUPERVISOR_t0.2661870504 !$SUPPLY_t0.4892086331 !$SU_t0.0287769784 !$TEASPOONFUL_t0.0215827338 !$THI_t0.0575539568 !$TRAZODONE_t0.4100719424 !$UNHAPPY_t0.0503597122 !$UNSP_t0.2302158273 !$WELLGROOMED_t0.0143884892 !$YEAR_t4.5323741007) $KIMBERLY_t0.0287769784 $STRAIGHTENED_t0.0215827338 $STX_t0.0215827338 $SUBSALICYLATE_t0.0647482014 $THY_t0.0503597122 $UNDERGONE_t0.0431654676 $UNRESECTABLE_t0.0215827338 $VTACH_t0.1223021583 $YE_t0.0503597122 $YOUNGER_t0.0431654676 $ZER_t0.0575539568) !$BRONZE_t0.0719424460 !$EPIDERMAL_t0.0431654676) 
1 and(or(and(or($HC_t0.5539568345 !$SSN_t1.5899280576) !$EPIDERMAL_t0.0431654676 !$STAIN_t0.0431654676 !$SUBLUXATION_t0.0143884892 !$SUPERVISOR_t0.2661870504 !$SUPPLY_t0.4892086331 !$SU_t0.0287769784 !$TEASPOONFUL_t0.0215827338 !$THI_t0.0575539568 !$TRAZODONE_t0.4100719424 !$UNHAPPY_t0.0503597122 !$UNSP_t0.2302158273 !$WELLGROOMED_t0.0143884892 !$YEAR_t4.5323741007) $KIMBERLY_t0.0287769784 $STRAIGHTENED_t0.0215827338 $STX_t0.0215827338 $SUBSALICYLATE_t0.0647482014 $THY_t0.0503597122 $UNDERGONE_t0.0431654676 $UNRESECTABLE_t0.0215827338 $VTACH_t0.1223021583 $YE_t0.0503597122 $YOUNGER_t0.0431654676 $ZER_t0.0575539568) !$BLOCKERS_t0.0575539568 !$BRONZE_t0.0719424460) 
1 and(or(and(or($HC_t0.5539568345 !$SSN_t1.5899280576) !$EPIDERMAL_t0.0431654676 !$STAIN_t0.0431654676 !$SUBLUXATION_t0.0143884892 !$SUPERVISOR_t0.2661870504 !$SUPPLY_t0.4892086331 !$SU_t0.0287769784 !$TEASPOONFUL_t0.0215827338 !$THI_t0.0575539568 !$TRAZODONE_t0.4100719424 !$UNHAPPY_t0.0503597122 !$UNSP_t0.2302158273 !$WELLGROOMED_t0.0143884892 !$YEAR_t4.5323741007) $KIMBERLY_t0.0287769784 $STRAIGHTENED_t0.0215827338 $STX_t0.0215827338 $SUBSALICYLATE_t0.0647482014 $THY_t0.0503597122 $UNDERGONE_t0.0431654676 $UNRESECTABLE_t0.0215827338 $VTACH_t0.1223021583 $YE_t0.0503597122 $YOUNGER_t0.0431654676 $ZER_t0.0575539568) !$BLOCKERS_t0.0575539568 !$PREFILLED_t0.0143884892) 
1 and(or(and(or($HC_t0.5539568345 !$SSN_t1.5899280576) !$STAIN_t0.0431654676 !$SUBLUXATION_t0.0143884892 !$SUPERVISOR_t0.2661870504 !$SUPPLY_t0.4892086331 !$SU_t0.0287769784 !$TEASPOONFUL_t0.0215827338 !$THI_t0.0575539568 !$TRAZODONE_t0.4100719424 !$UNHAPPY_t0.0503597122 !$UNSP_t0.2302158273 !$WELLGROOMED_t0.0143884892 !$YEAR_t4.5323741007) $KIMBERLY_t0.0287769784 $STRAIGHTENED_t0.0215827338 $STX_t0.0215827338 $SUBSALICYLATE_t0.0647482014 $THY_t0.0503597122 $UNDERGONE_t0.0431654676 $UNRESECTABLE_t0.0215827338 $VTACH_t0.1223021583 $YE_t0.0503597122 $YOUNGER_t0.0431654676 $ZER_t0.0575539568) !$BLOCKERS_t0.0575539568 !$BRONZE_t0.0719424460 !$EPIDERMAL_t0.0431654676) 
1 and(or(and(or($HC_t0.5539568345 !$SSN_t1.5899280576) !$STAIN_t0.0431654676 !$SUBLUXATION_t0.0143884892 !$SUPERVISOR_t0.2661870504 !$SUPPLY_t0.4892086331 !$SU_t0.0287769784 !$TEASPOONFUL_t0.0215827338 !$THI_t0.0575539568 !$TRAZODONE_t0.4100719424 !$UNHAPPY_t0.0503597122 !$UNSP_t0.2302158273 !$WELLGROOMED_t0.0143884892 !$YEAR_t4.5323741007) $KIMBERLY_t0.0287769784 $STRAIGHTENED_t0.0215827338 $STX_t0.0215827338 $SUBSALICYLATE_t0.0647482014 $THY_t0.0503597122 $UNDERGONE_t0.0431654676 $UNRESECTABLE_t0.0215827338 $VTACH_t0.1223021583 $YE_t0.0503597122 $YOUNGER_t0.0431654676 $ZER_t0.0575539568) !$BLOCKERS_t0.0575539568 !$EPIDERMAL_t0.0431654676 !$PORTER_t0.0215827338) 
1 and(or(and(or($HC_t0.5539568345 !$SSN_t1.5899280576) !$STAIN_t0.0431654676 !$SUBLUXATION_t0.0143884892 !$SUPERVISOR_t0.2661870504 !$SUPPLY_t0.4892086331 !$SU_t0.0287769784 !$TEASPOONFUL_t0.0215827338 !$THI_t0.0575539568 !$TRAZODONE_t0.4100719424 !$UNHAPPY_t0.0503597122 !$UNSP_t0.2302158273 !$WELLGROOMED_t0.0143884892 !$YEAR_t4.5323741007) $KIMBERLY_t0.0287769784 $STRAIGHTENED_t0.0215827338 $STX_t0.0215827338 $SUBSALICYLATE_t0.0647482014 $THY_t0.0503597122 $UNDERGONE_t0.0431654676 $UNRESECTABLE_t0.0215827338 $VTACH_t0.1223021583 $YE_t0.0503597122 $YOUNGER_t0.0431654676 $ZER_t0.0575539568) !$BLOCKERS_t0.0575539568 !$EPIDERMAL_t0.0431654676 !$PREFILLED_t0.0143884892) 
1 and(or(and(or($HC_t0.5539568345 !$SSN_t1.5899280576) !$EPIDERMAL_t0.0431654676 !$STAIN_t0.0431654676 !$SUBLUXATION_t0.0143884892 !$SUPERVISOR_t0.2661870504 !$SUPPLY_t0.4892086331 !$SU_t0.0287769784 !$TEASPOONFUL_t0.0215827338 !$THI_t0.0575539568 !$TRAZODONE_t0.4100719424 !$UNHAPPY_t0.0503597122 !$UNSP_t0.2302158273 !$WELLGROOMED_t0.0143884892 !$YEAR_t4.5323741007) $KIMBERLY_t0.0287769784 $STRAIGHTENED_t0.0215827338 $STX_t0.0215827338 $SUBSALICYLATE_t0.0647482014 $THY_t0.0503597122 $UNDERGONE_t0.0431654676 $UNRESECTABLE_t0.0215827338 $VTACH_t0.1223021583 $YE_t0.0503597122 $YOUNGER_t0.0431654676 $ZER_t0.0575539568) or(!$BLOCKERS_t0.0575539568 !$GEROPSYCHIATRY_t0.0143884892)) 
1 and(or(and(or($ICDCM_t3.4892086331 !$SPECIMEN_t0.8561151079) !$NOCTURIA_t0.1366906475 !$STUDENT_t0.6043165468 !$TEASPOONFUL_t0.0215827338 !$THI_t0.0575539568 !$UNMARRIED_t0.0431654676 !$UNSP_t0.2302158273 !$USEFULNESS_t0.0143884892 !$VERIFIED_t1.3525179856 !$VISIT_t9.2661870504 !$VOIDING_t0.5395683453 !$WALKIN_t0.5539568345 !$WILLING_t0.4388489209 !$XPATIENT_t0.0215827338) $DRUSEN_t0.0359712230 $LIPITOR_t0.0503597122 $MONFRI_t0.0143884892 $TEMAZEPAM_t0.2086330935 $TE_t0.1510791367 $THY_t0.0503597122 $TIB_t0.0503597122 $TP_t0.1726618705 $TRANSFUSIONS_t0.0503597122 $UNDERGONE_t0.0431654676 $VALLEY_t0.0647482014 $VISUALIZATION_t0.0215827338 $ZER_t0.0575539568) !$DENT_t0.0287769784 !$MEALTIME_t0.0143884892 !$NOTABLY_t0.0431654676 !$RANGES_t0.0503597122) 
1 and(or(and(or($ICDCM_t3.4892086331 !$SPECIMEN_t0.8561151079) !$NOCTURIA_t0.1366906475 !$STUDENT_t0.6043165468 !$TEASPOONFUL_t0.0215827338 !$THI_t0.0575539568 !$UNMARRIED_t0.0431654676 !$UNSP_t0.2302158273 !$VERIFIED_t1.3525179856 !$VISIT_t9.2661870504 !$VOIDING_t0.5395683453 !$WALKIN_t0.5539568345 !$WILLING_t0.4388489209 !$XPATIENT_t0.0215827338) $DRUSEN_t0.0359712230 $MONFRI_t0.0143884892 $TEMAZEPAM_t0.2086330935 $TE_t0.1510791367 $THY_t0.0503597122 $TIB_t0.0503597122 $TP_t0.1726618705 $TRANSFUSIONS_t0.0503597122 $UNDERGONE_t0.0431654676 $VALLEY_t0.0647482014 $VISUALIZATION_t0.0215827338 $ZER_t0.0575539568) !$DENT_t0.0287769784 !$MEALTIME_t0.0143884892 !$NOTABLY_t0.0431654676 !$RANGES_t0.0503597122) 
1 and(or(and(or($ICDCM_t3.4892086331 !$SPECIMEN_t0.8561151079) !$NOCTURIA_t0.1366906475 !$STUDENT_t0.6043165468 !$TEASPOONFUL_t0.0215827338 !$THI_t0.0575539568 !$UNMARRIED_t0.0431654676 !$UNSP_t0.2302158273 !$USEFULNESS_t0.0143884892 !$VERIFIED_t1.3525179856 !$VISIT_t9.2661870504 !$VOIDING_t0.5395683453 !$WALKIN_t0.5539568345 !$WILLING_t0.4388489209 !$XPATIENT_t0.0215827338) $APPOINT_t0.0359712230 $DRUSEN_t0.0359712230 $TEMAZEPAM_t0.2086330935 $TE_t0.1510791367 $THY_t0.0503597122 $TIB_t0.0503597122 $TP_t0.1726618705 $TRANSFUSIONS_t0.0503597122 $UNDERGONE_t0.0431654676 $VALLEY_t0.0647482014 $VISUALIZATION_t0.0215827338 $ZER_t0.0575539568) !$DENT_t0.0287769784 !$MEALTIME_t0.0143884892 !$NOTABLY_t0.0431654676 !$RANGES_t0.0503597122) 
1 and(or(and(or($ICDCM_t3.4892086331 !$SPECIMEN_t0.8561151079) !$NOCTURIA_t0.1366906475 !$STUDENT_t0.6043165468 !$TEASPOONFUL_t0.0215827338 !$THI_t0.0575539568 !$UNMARRIED_t0.0431654676 !$UNSP_t0.2302158273 !$USEFULNESS_t0.0143884892 !$VERIFIED_t1.3525179856 !$VISIT_t9.2661870504 !$VOIDING_t0.5395683453 !$WALKIN_t0.5539568345 !$WILLING_t0.4388489209 !$XPATIENT_t0.0215827338) $APPOINT_t0.0359712230 $PUNCTUM_t0.0215827338 $TEMAZEPAM_t0.2086330935 $TE_t0.1510791367 $THY_t0.0503597122 $TIB_t0.0503597122 $TP_t0.1726618705 $TRANSFUSIONS_t0.0503597122 $UNDERGONE_t0.0431654676 $VALLEY_t0.0647482014 $VISUALIZATION_t0.0215827338 $ZER_t0.0575539568) !$DENT_t0.0287769784 !$MEALTIME_t0.0143884892 !$NOTABLY_t0.0431654676 !$RANGES_t0.0503597122) 
1 and(or(and(or($ICDCM_t3.4892086331 !$SPECIMEN_t0.8561151079) !$NOCTURIA_t0.1366906475 !$STUDENT_t0.6043165468 !$TEASPOONFUL_t0.0215827338 !$THI_t0.0575539568 !$UNMARRIED_t0.0431654676 !$UNSP_t0.2302158273 !$USEFULNESS_t0.0143884892 !$VERIFIED_t1.3525179856 !$VISIT_t9.2661870504 !$VOIDING_t0.5395683453 !$WALKIN_t0.5539568345 !$WILLING_t0.4388489209 !$XPATIENT_t0.0215827338) $DRUSEN_t0.0359712230 $MONFRI_t0.0143884892 $TEMAZEPAM_t0.2086330935 $TE_t0.1510791367 $THY_t0.0503597122 $TIB_t0.0503597122 $TP_t0.1726618705 $TRANSFUSIONS_t0.0503597122 $UNDERGONE_t0.0431654676 $VALLEY_t0.0647482014 $VISUALIZATION_t0.0215827338 $ZER_t0.0575539568) !$DENT_t0.0287769784 !$MEALTIME_t0.0143884892 !$NOTABLY_t0.0431654676 !$RANGES_t0.0503597122) 
1 and(or(and(or($ICDCM_t3.4892086331 !$SPECIMEN_t0.8561151079) !$NOCTURIA_t0.1366906475 !$STUDENT_t0.6043165468 !$TEASPOONFUL_t0.0215827338 !$THI_t0.0575539568 !$UNMARRIED_t0.0431654676 !$UNSP_t0.2302158273 !$USEFULNESS_t0.0143884892 !$VERIFIED_t1.3525179856 !$VISIT_t9.2661870504 !$VOIDING_t0.5395683453 !$WALKIN_t0.5539568345 !$WILLING_t0.4388489209 !$XPATIENT_t0.0215827338) $MONFRI_t0.0143884892 $PUNCTUM_t0.0215827338 $TEMAZEPAM_t0.2086330935 $TE_t0.1510791367 $THY_t0.0503597122 $TIB_t0.0503597122 $TP_t0.1726618705 $TRANSFUSIONS_t0.0503597122 $UNDERGONE_t0.0431654676 $VALLEY_t0.0647482014 $VISUALIZATION_t0.0215827338 $ZER_t0.0575539568) !$DENT_t0.0287769784 !$MEALTIME_t0.0143884892 !$NOTABLY_t0.0431654676 !$RANGES_t0.0503597122) 
1 and(or(and(or($ICDCM_t3.4892086331 !$SPECIMEN_t0.8561151079) !$NOCTURIA_t0.1366906475 !$STUDENT_t0.6043165468 !$TEASPOONFUL_t0.0215827338 !$THI_t0.0575539568 !$UNMARRIED_t0.0431654676 !$UNSP_t0.2302158273 !$USEFULNESS_t0.0143884892 !$VERIFIED_t1.3525179856 !$VISIT_t9.2661870504 !$VOIDING_t0.5395683453 !$WALKIN_t0.5539568345 !$WILLING_t0.4388489209 !$XPATIENT_t0.0215827338) $MONFRI_t0.0143884892 $SHAVE_t0.4028776978 $TEMAZEPAM_t0.2086330935 $TE_t0.1510791367 $THY_t0.0503597122 $TIB_t0.0503597122 $TP_t0.1726618705 $TRANSFUSIONS_t0.0503597122 $UNDERGONE_t0.0431654676 $VALLEY_t0.0647482014 $VISUALIZATION_t0.0215827338 $ZER_t0.0575539568) !$DENT_t0.0287769784 !$MEALTIME_t0.0143884892 !$NOTABLY_t0.0431654676 !$RANGES_t0.0503597122) 
1 and(or(and(or($ABOUT_t10.0000000000 $ICDCM_t3.4892086331 !$SPECIMEN_t0.8561151079) !$NOCTURIA_t0.1366906475 !$STUDENT_t0.6043165468 !$TEASPOONFUL_t0.0215827338 !$THI_t0.0575539568 !$UNMARRIED_t0.0431654676 !$UNSP_t0.2302158273 !$USEFULNESS_t0.0143884892 !$VERIFIED_t1.3525179856 !$VISIT_t9.2661870504 !$VOIDING_t0.5395683453 !$WALKIN_t0.5539568345 !$WILLING_t0.4388489209 !$XPATIENT_t0.0215827338) $DRUSEN_t0.0359712230 $MONFRI_t0.0143884892 $TEMAZEPAM_t0.2086330935 $TE_t0.1510791367 $THY_t0.0503597122 $TIB_t0.0503597122 $TP_t0.1726618705 $TRANSFUSIONS_t0.0503597122 $UNDERGONE_t0.0431654676 $VALLEY_t0.0647482014 $VISUALIZATION_t0.0215827338 $ZER_t0.0575539568) !$DENT_t0.0287769784 !$MEALTIME_t0.0143884892 !$NOTABLY_t0.0431654676 !$RANGES_t0.0503597122) 
1 and(or(and(or($ADULT_t0.3956834532 $ICDCM_t3.4892086331 !$SPECIMEN_t0.8561151079) !$NOCTURIA_t0.1366906475 !$STUDENT_t0.6043165468 !$TEASPOONFUL_t0.0215827338 !$THI_t0.0575539568 !$UNMARRIED_t0.0431654676 !$UNSP_t0.2302158273 !$USEFULNESS_t0.0143884892 !$VERIFIED_t1.3525179856 !$VISIT_t9.2661870504 !$VOIDING_t0.5395683453 !$WALKIN_t0.5539568345 !$WILLING_t0.4388489209 !$XPATIENT_t0.0215827338) $DRUSEN_t0.0359712230 $MONFRI_t0.0143884892 $TEMAZEPAM_t0.2086330935 $TE_t0.1510791367 $THY_t0.0503597122 $TIB_t0.0503597122 $TP_t0.1726618705 $TRANSFUSIONS_t0.0503597122 $UNDERGONE_t0.0431654676 $VALLEY_t0.0647482014 $VISUALIZATION_t0.0215827338 $ZER_t0.0575539568) !$DENT_t0.0287769784 !$MEALTIME_t0.0143884892 !$NOTABLY_t0.0431654676 !$RANGES_t0.0503597122) 
1 and(or(and(or($APPOINT_t0.0359712230 $ICDCM_t3.4892086331 !$SPECIMEN_t0.8561151079) !$NOCTURIA_t0.1366906475 !$STUDENT_t0.6043165468 !$TEASPOONFUL_t0.0215827338 !$THI_t0.0575539568 !$UNMARRIED_t0.0431654676 !$UNSP_t0.2302158273 !$USEFULNESS_t0.0143884892 !$VERIFIED_t1.3525179856 !$VISIT_t9.2661870504 !$VOIDING_t0.5395683453 !$WALKIN_t0.5539568345 !$WILLING_t0.4388489209 !$XPATIENT_t0.0215827338) $DRUSEN_t0.0359712230 $MONFRI_t0.0143884892 $TEMAZEPAM_t0.2086330935 $TE_t0.1510791367 $THY_t0.0503597122 $TIB_t0.0503597122 $TP_t0.1726618705 $TRANSFUSIONS_t0.0503597122 $UNDERGONE_t0.0431654676 $VALLEY_t0.0647482014 $VISUALIZATION_t0.0215827338 $ZER_t0.0575539568) !$DENT_t0.0287769784 !$MEALTIME_t0.0143884892 !$NOTABLY_t0.0431654676 !$RANGES_t0.0503597122) 
1 and(or(and(or($VALLEY_t0.0647482014 $WHEN_t7.6906474820 !$YEAR_t4.5323741007) !$FEAR_t0.2446043165 !$SSN_t1.5899280576 !$STAIN_t0.0431654676 !$STYLE_t0.1294964029 !$SUPERVISORS_t0.0143884892 !$SUPPLY_t0.4892086331 !$SU_t0.0287769784 !$TEASPOONFUL_t0.0215827338 !$TRAZODONE_t0.4100719424 !$VERIFIED_t1.3525179856 !$VIRTUE_t0.0215827338 !$VOLUME_t0.5395683453 !$WARRANT_t0.0503597122) $CAHNGE_t0.0143884892 $LIPITOR_t0.0503597122 $THY_t0.0503597122 $TIB_t0.0503597122 $TURMOIL_t0.0143884892 $TUSCON_t0.0215827338 $UC_t0.0791366906 $UNCOOPERATIVE_t0.0647482014 $UNDERGONE_t0.0431654676 $URINATED_t0.0215827338 $WTIH_t0.0431654676 $ZER_t0.0575539568) !$DIRECTORY_t0.0143884892 !$EPIDERMAL_t0.0431654676) 
1 and(or(and(or($VALLEY_t0.0647482014 $WHEN_t7.6906474820 !$YEAR_t4.5323741007) !$PREOCCUPIED_t0.0431654676 !$SSN_t1.5899280576 !$STAIN_t0.0431654676 !$STYLE_t0.1294964029 !$SUPERVISORS_t0.0143884892 !$SUPPLY_t0.4892086331 !$SU_t0.0287769784 !$TEASPOONFUL_t0.0215827338 !$TRAZODONE_t0.4100719424 !$VERIFIED_t1.3525179856 !$VIRTUE_t0.0215827338 !$VOLUME_t0.5395683453 !$WARRANT_t0.0503597122) $CAHNGE_t0.0143884892 $LIPITOR_t0.0503597122 $THY_t0.0503597122 $TIB_t0.0503597122 $TURMOIL_t0.0143884892 $TUSCON_t0.0215827338 $UC_t0.0791366906 $UNCOOPERATIVE_t0.0647482014 $UNDERGONE_t0.0431654676 $URINATED_t0.0215827338 $WTIH_t0.0431654676 $ZER_t0.0575539568) !$DIRECTORY_t0.0143884892 !$EPIDERMAL_t0.0431654676) 
1 and(or(and(or($VALLEY_t0.0647482014 $WHEN_t7.6906474820 !$YEAR_t4.5323741007) !$SSN_t1.5899280576 !$STAIN_t0.0431654676 !$STYLE_t0.1294964029 !$SUPERVISORS_t0.0143884892 !$SUPPLY_t0.4892086331 !$SU_t0.0287769784 !$TEASPOONFUL_t0.0215827338 !$TRAZODONE_t0.4100719424 !$VERIFIED_t1.3525179856 !$VIRTUE_t0.0215827338 !$VOLUME_t0.5395683453 !$WARRANT_t0.0503597122) $CAHNGE_t0.0143884892 $LIPITOR_t0.0503597122 $THY_t0.0503597122 $TIB_t0.0503597122 $TURMOIL_t0.0143884892 $TUSCON_t0.0215827338 $UC_t0.0791366906 $UNCOOPERATIVE_t0.0647482014 $UNDERGONE_t0.0431654676 $URINATED_t0.0215827338 $WTIH_t0.0431654676 $ZER_t0.0575539568) !$DIRECTORY_t0.0143884892 !$EPIDERMAL_t0.0431654676 !$PREOCCUPIED_t0.0431654676) 
1 and(or(and(or($VALLEY_t0.0647482014 $WHEN_t7.6906474820 !$YEAR_t4.5323741007) !$FEAR_t0.2446043165 !$PREOCCUPIED_t0.0431654676 !$SSN_t1.5899280576 !$STAIN_t0.0431654676 !$STYLE_t0.1294964029 !$SUPERVISORS_t0.0143884892 !$SUPPLY_t0.4892086331 !$SU_t0.0287769784 !$TEASPOONFUL_t0.0215827338 !$TRAZODONE_t0.4100719424 !$VERIFIED_t1.3525179856 !$VIRTUE_t0.0215827338 !$VOLUME_t0.5395683453 !$WARRANT_t0.0503597122) $CAHNGE_t0.0143884892 $LIPITOR_t0.0503597122 $THY_t0.0503597122 $TIB_t0.0503597122 $TURMOIL_t0.0143884892 $TUSCON_t0.0215827338 $UC_t0.0791366906 $UNCOOPERATIVE_t0.0647482014 $UNDERGONE_t0.0431654676 $URINATED_t0.0215827338 $WTIH_t0.0431654676 $ZER_t0.0575539568) !$DIRECTORY_t0.0143884892 !$EPIDERMAL_t0.0431654676) 
1 and(or(and(or($VALLEY_t0.0647482014 $WHEN_t7.6906474820 !$YEAR_t4.5323741007) !$FEAR_t0.2446043165 !$SSN_t1.5899280576 !$STAIN_t0.0431654676 !$STYLE_t0.1294964029 !$SUPERVISORS_t0.0143884892 !$SUPPLY_t0.4892086331 !$SU_t0.0287769784 !$TEASPOONFUL_t0.0215827338 !$TRAZODONE_t0.4100719424 !$VERIFIED_t1.3525179856 !$VIRTUE_t0.0215827338 !$VOLUME_t0.5395683453 !$WARRANT_t0.0503597122) $CAHNGE_t0.0143884892 $LIPITOR_t0.0503597122 $THY_t0.0503597122 $TIB_t0.0503597122 $TURMOIL_t0.0143884892 $TUSCON_t0.0215827338 $UC_t0.0791366906 $UNCOOPERATIVE_t0.0647482014 $UNDERGONE_t0.0431654676 $URINATED_t0.0215827338 $WTIH_t0.0431654676 $ZER_t0.0575539568) !$DIRECTORY_t0.0143884892 !$EPIDERMAL_t0.0431654676 !$PREOCCUPIED_t0.0431654676) 
1 and(or(and(or($VALLEY_t0.0647482014 $WHEN_t7.6906474820 !$YEAR_t4.5323741007) !$FEAR_t0.2446043165 !$SSN_t1.5899280576 !$STAIN_t0.0431654676 !$STYLE_t0.1294964029 !$SUPERVISORS_t0.0143884892 !$SUPPLY_t0.4892086331 !$SU_t0.0287769784 !$TEASPOONFUL_t0.0215827338 !$TRAZODONE_t0.4100719424 !$VERIFIED_t1.3525179856 !$VIRTUE_t0.0215827338 !$VOLUME_t0.5395683453 !$WARRANT_t0.0503597122) $CAHNGE_t0.0143884892 $LIPITOR_t0.0503597122 $THY_t0.0503597122 $TIB_t0.0503597122 $TURMOIL_t0.0143884892 $TUSCON_t0.0215827338 $UC_t0.0791366906 $UNCOOPERATIVE_t0.0647482014 $UNDERGONE_t0.0431654676 $URINATED_t0.0215827338 $WTIH_t0.0431654676 $ZER_t0.0575539568) !$DIRECTORY_t0.0143884892) 
1 and(or(and(or($VALLEY_t0.0647482014 $WHEN_t7.6906474820 !$YEAR_t4.5323741007) !$PREOCCUPIED_t0.0431654676 !$SSN_t1.5899280576 !$STAIN_t0.0431654676 !$STYLE_t0.1294964029 !$SUPERVISORS_t0.0143884892 !$SUPPLY_t0.4892086331 !$SU_t0.0287769784 !$TEASPOONFUL_t0.0215827338 !$TRAZODONE_t0.4100719424 !$VERIFIED_t1.3525179856 !$VIRTUE_t0.0215827338 !$VOLUME_t0.5395683453 !$WARRANT_t0.0503597122) $CAHNGE_t0.0143884892 $LIPITOR_t0.0503597122 $THY_t0.0503597122 $TIB_t0.0503597122 $TURMOIL_t0.0143884892 $TUSCON_t0.0215827338 $UC_t0.0791366906 $UNCOOPERATIVE_t0.0647482014 $UNDERGONE_t0.0431654676 $URINATED_t0.0215827338 $WTIH_t0.0431654676 $ZER_t0.0575539568) !$DIRECTORY_t0.0143884892) 
1 and(or(and(or($VALLEY_t0.0647482014 $WHEN_t7.6906474820 !$YEAR_t4.5323741007) !$SSN_t1.5899280576 !$STAIN_t0.0431654676 !$STYLE_t0.1294964029 !$SUPERVISORS_t0.0143884892 !$SUPPLY_t0.4892086331 !$SU_t0.0287769784 !$TEASPOONFUL_t0.0215827338 !$TRAZODONE_t0.4100719424 !$VERIFIED_t1.3525179856 !$VIRTUE_t0.0215827338 !$VOLUME_t0.5395683453 !$WARRANT_t0.0503597122) $CAHNGE_t0.0143884892 $LIPITOR_t0.0503597122 $THY_t0.0503597122 $TIB_t0.0503597122 $TURMOIL_t0.0143884892 $TUSCON_t0.0215827338 $UC_t0.0791366906 $UNCOOPERATIVE_t0.0647482014 $UNDERGONE_t0.0431654676 $URINATED_t0.0215827338 $WTIH_t0.0431654676 $ZER_t0.0575539568) !$DIRECTORY_t0.0143884892 !$EPIDERMAL_t0.0431654676) 
1 and(or(and(or($VALLEY_t0.0647482014 $WHEN_t7.6906474820 !$YEAR_t4.5323741007) !$SSN_t1.5899280576 !$STAIN_t0.0431654676 !$STYLE_t0.1294964029 !$SUPERVISORS_t0.0143884892 !$SUPPLY_t0.4892086331 !$SU_t0.0287769784 !$TEASPOONFUL_t0.0215827338 !$TRAZODONE_t0.4100719424 !$VERIFIED_t1.3525179856 !$VIRTUE_t0.0215827338 !$VOLUME_t0.5395683453 !$WARRANT_t0.0503597122) $CAHNGE_t0.0143884892 $LIPITOR_t0.0503597122 $THY_t0.0503597122 $TIB_t0.0503597122 $TURMOIL_t0.0143884892 $TUSCON_t0.0215827338 $UC_t0.0791366906 $UNCOOPERATIVE_t0.0647482014 $UNDERGONE_t0.0431654676 $URINATED_t0.0215827338 $WTIH_t0.0431654676 $ZER_t0.0575539568) !$DIRECTORY_t0.0143884892 !$PREOCCUPIED_t0.0431654676) 
1 and(or(and(or($VALLEY_t0.0647482014 $WHEN_t7.6906474820 !$YEAR_t4.5323741007) !$FEAR_t0.2446043165 !$PREOCCUPIED_t0.0431654676 !$SSN_t1.5899280576 !$STAIN_t0.0431654676 !$STYLE_t0.1294964029 !$SUPERVISORS_t0.0143884892 !$SUPPLY_t0.4892086331 !$SU_t0.0287769784 !$TEASPOONFUL_t0.0215827338 !$TRAZODONE_t0.4100719424 !$VERIFIED_t1.3525179856 !$VIRTUE_t0.0215827338 !$VOLUME_t0.5395683453 !$WARRANT_t0.0503597122) $CAHNGE_t0.0143884892 $LIPITOR_t0.0503597122 $THY_t0.0503597122 $TIB_t0.0503597122 $TURMOIL_t0.0143884892 $TUSCON_t0.0215827338 $UC_t0.0791366906 $UNCOOPERATIVE_t0.0647482014 $UNDERGONE_t0.0431654676 $URINATED_t0.0215827338 $WTIH_t0.0431654676 $ZER_t0.0575539568) !$DIRECTORY_t0.0143884892) 
1 and(or(and(!$STAIN_t0.0431654676 !$SUPPLY_t0.4892086331 !$SUSAN_t0.0935251799 !$SYMPTOMS_t3.8633093525 !$THI_t0.0575539568 !$TOP_t0.3309352518 !$UCINATIONS_t0.6618705036 !$UNCHANGED_t0.3237410072 !$WARNING_t0.1870503597 !$YEAR_t4.5323741007) $NALCOHOL_t0.0143884892 $NOBODY_t0.0359712230 $SPARE_t0.0431654676 $SPELL_t0.0359712230 $ULTIMATELY_t0.0215827338 $UNDERGONE_t0.0431654676 $WATCHES_t0.0575539568 $YE_t0.0503597122 $YOUNGER_t0.0431654676 $ZER_t0.0575539568) !$GEROPSYCHIATRY_t0.0143884892 !$MANKOWSKI_t0.0215827338) 
1 and(or(and(!$SUPPLY_t0.4892086331 !$SUSAN_t0.0935251799 !$SYMPTOMS_t3.8633093525 !$THI_t0.0575539568 !$TOP_t0.3309352518 !$UCINATIONS_t0.6618705036 !$UNCHANGED_t0.3237410072 !$WARNING_t0.1870503597 !$YEAR_t4.5323741007) $NALCOHOL_t0.0143884892 $NOBODY_t0.0359712230 $SPARE_t0.0431654676 $SPELL_t0.0359712230 $ULTIMATELY_t0.0215827338 $UNDERGONE_t0.0431654676 $WATCHES_t0.0575539568 $YE_t0.0503597122 $YOUNGER_t0.0431654676 $ZER_t0.0575539568) !$GEROPSYCHIATRY_t0.0143884892 !$MANKOWSKI_t0.0215827338 !$STAIN_t0.0431654676) 
1 or(and(or(and(!$STAIN_t0.0431654676 !$SUPPLY_t0.4892086331 !$SUSAN_t0.0935251799 !$SYMPTOMS_t3.8633093525 !$THI_t0.0575539568 !$TOP_t0.3309352518 !$UCINATIONS_t0.6618705036 !$UNCHANGED_t0.3237410072 !$WARNING_t0.1870503597 !$YEAR_t4.5323741007) $NALCOHOL_t0.0143884892 $NOBODY_t0.0359712230 $SPARE_t0.0431654676 $SPELL_t0.0359712230 $ULTIMATELY_t0.0215827338 $UNDERGONE_t0.0431654676 $WATCHES_t0.0575539568 $YE_t0.0503597122 $YOUNGER_t0.0431654676) !$GEROPSYCHIATRY_t0.0143884892 !$MANKOWSKI_t0.0215827338) $ZER_t0.0575539568) 
1 and(or(and(!$AFRAID_t0.1223021583 !$STAIN_t0.0431654676 !$SUPPLY_t0.4892086331 !$SUSAN_t0.0935251799 !$SYMPTOMS_t3.8633093525 !$THI_t0.0575539568 !$TOP_t0.3309352518 !$UCINATIONS_t0.6618705036 !$UNCHANGED_t0.3237410072 !$WARNING_t0.1870503597 !$YEAR_t4.5323741007) $NALCOHOL_t0.0143884892 $NOBODY_t0.0359712230 $SPARE_t0.0431654676 $SPELL_t0.0359712230 $ULTIMATELY_t0.0215827338 $UNDERGONE_t0.0431654676 $WATCHES_t0.0575539568 $YE_t0.0503597122 $YOUNGER_t0.0431654676 $ZER_t0.0575539568) !$GEROPSYCHIATRY_t0.0143884892 !$MANKOWSKI_t0.0215827338) 
1 and(or(and(!$AGGRAVATING_t0.1582733813 !$STAIN_t0.0431654676 !$SUPPLY_t0.4892086331 !$SUSAN_t0.0935251799 !$SYMPTOMS_t3.8633093525 !$THI_t0.0575539568 !$TOP_t0.3309352518 !$UCINATIONS_t0.6618705036 !$UNCHANGED_t0.3237410072 !$WARNING_t0.1870503597 !$YEAR_t4.5323741007) $NALCOHOL_t0.0143884892 $NOBODY_t0.0359712230 $SPARE_t0.0431654676 $SPELL_t0.0359712230 $ULTIMATELY_t0.0215827338 $UNDERGONE_t0.0431654676 $WATCHES_t0.0575539568 $YE_t0.0503597122 $YOUNGER_t0.0431654676 $ZER_t0.0575539568) !$GEROPSYCHIATRY_t0.0143884892 !$MANKOWSKI_t0.0215827338) 
1 and(or(and(!$ALIGNMENT_t0.0143884892 !$STAIN_t0.0431654676 !$SUPPLY_t0.4892086331 !$SUSAN_t0.0935251799 !$SYMPTOMS_t3.8633093525 !$THI_t0.0575539568 !$TOP_t0.3309352518 !$UCINATIONS_t0.6618705036 !$UNCHANGED_t0.3237410072 !$WARNING_t0.1870503597 !$YEAR_t4.5323741007) $NALCOHOL_t0.0143884892 $NOBODY_t0.0359712230 $SPARE_t0.0431654676 $SPELL_t0.0359712230 $ULTIMATELY_t0.0215827338 $UNDERGONE_t0.0431654676 $WATCHES_t0.0575539568 $YE_t0.0503597122 $YOUNGER_t0.0431654676 $ZER_t0.0575539568) !$GEROPSYCHIATRY_t0.0143884892 !$MANKOWSKI_t0.0215827338) 
1 and(or(and(!$ALOH_t0.0719424460 !$STAIN_t0.0431654676 !$SUPPLY_t0.4892086331 !$SUSAN_t0.0935251799 !$SYMPTOMS_t3.8633093525 !$THI_t0.0575539568 !$TOP_t0.3309352518 !$UCINATIONS_t0.6618705036 !$UNCHANGED_t0.3237410072 !$WARNING_t0.1870503597 !$YEAR_t4.5323741007) $NALCOHOL_t0.0143884892 $NOBODY_t0.0359712230 $SPARE_t0.0431654676 $SPELL_t0.0359712230 $ULTIMATELY_t0.0215827338 $UNDERGONE_t0.0431654676 $WATCHES_t0.0575539568 $YE_t0.0503597122 $YOUNGER_t0.0431654676 $ZER_t0.0575539568) !$GEROPSYCHIATRY_t0.0143884892 !$MANKOWSKI_t0.0215827338) 
1 and(or(and(!$ALOT_t0.1654676259 !$STAIN_t0.0431654676 !$SUPPLY_t0.4892086331 !$SUSAN_t0.0935251799 !$SYMPTOMS_t3.8633093525 !$THI_t0.0575539568 !$TOP_t0.3309352518 !$UCINATIONS_t0.6618705036 !$UNCHANGED_t0.3237410072 !$WARNING_t0.1870503597 !$YEAR_t4.5323741007) $NALCOHOL_t0.0143884892 $NOBODY_t0.0359712230 $SPARE_t0.0431654676 $SPELL_t0.0359712230 $ULTIMATELY_t0.0215827338 $UNDERGONE_t0.0431654676 $WATCHES_t0.0575539568 $YE_t0.0503597122 $YOUNGER_t0.0431654676 $ZER_t0.0575539568) !$GEROPSYCHIATRY_t0.0143884892 !$MANKOWSKI_t0.0215827338) 
1 and(or(and(!$ANAND_t0.0359712230 !$STAIN_t0.0431654676 !$SUPPLY_t0.4892086331 !$SUSAN_t0.0935251799 !$SYMPTOMS_t3.8633093525 !$THI_t0.0575539568 !$TOP_t0.3309352518 !$UCINATIONS_t0.6618705036 !$UNCHANGED_t0.3237410072 !$WARNING_t0.1870503597 !$YEAR_t4.5323741007) $NALCOHOL_t0.0143884892 $NOBODY_t0.0359712230 $SPARE_t0.0431654676 $SPELL_t0.0359712230 $ULTIMATELY_t0.0215827338 $UNDERGONE_t0.0431654676 $WATCHES_t0.0575539568 $YE_t0.0503597122 $YOUNGER_t0.0431654676 $ZER_t0.0575539568) !$GEROPSYCHIATRY_t0.0143884892 !$MANKOWSKI_t0.0215827338) 
1 and(or(and(!$ANT_t0.0863309353 !$STAIN_t0.0431654676 !$SUPPLY_t0.4892086331 !$SUSAN_t0.0935251799 !$SYMPTOMS_t3.8633093525 !$THI_t0.0575539568 !$TOP_t0.3309352518 !$UCINATIONS_t0.6618705036 !$UNCHANGED_t0.3237410072 !$WARNING_t0.1870503597 !$YEAR_t4.5323741007) $NALCOHOL_t0.0143884892 $NOBODY_t0.0359712230 $SPARE_t0.0431654676 $SPELL_t0.0359712230 $ULTIMATELY_t0.0215827338 $UNDERGONE_t0.0431654676 $WATCHES_t0.0575539568 $YE_t0.0503597122 $YOUNGER_t0.0431654676 $ZER_t0.0575539568) !$GEROPSYCHIATRY_t0.0143884892 !$MANKOWSKI_t0.0215827338) 
1 or(and(or($APPOINT_t0.0359712230 $DESPONDENT_t0.0143884892 $LIPITOR_t0.0503597122 $VALLEY_t0.0647482014 $YOUNGER_t0.0431654676) !$TON_t0.0863309353) and(or($PRIVATE_t0.5107913669 !$SSN_t1.5899280576) !$PSYCHIATRICALLY_t0.0647482014 !$STAIN_t0.0431654676 !$STYLES_t0.0143884892 !$SUPERVISORS_t0.0143884892 !$SUPPLY_t0.4892086331 !$SU_t0.0287769784 !$TEASPOONFUL_t0.0215827338 !$THI_t0.0575539568 !$TRAZODONE_t0.4100719424 !$UNHAPPY_t0.0503597122 !$VERIFIED_t1.3525179856 !$VOLUME_t0.5395683453 !$YEAR_t4.5323741007) $STANDARDS_t0.1007194245 $STRAIGHTENED_t0.0215827338 $STVHCS_t0.0215827338 $TACH_t0.0863309353 $THY_t0.0503597122 $TURMOIL_t0.0143884892 $UNDERGONE_t0.0431654676 $YE_t0.0503597122 $ZER_t0.0575539568) 
1 or(and(or($DESPONDENT_t0.0143884892 $LIPITOR_t0.0503597122 $VALLEY_t0.0647482014 $YOUNGER_t0.0431654676) !$TON_t0.0863309353) and(or($RESTRICTED_t0.2517985612 !$SSN_t1.5899280576) !$CRYING_t0.1079136691 !$STAIN_t0.0431654676 !$STYLES_t0.0143884892 !$SUPERVISORS_t0.0143884892 !$SUPPLY_t0.4892086331 !$SU_t0.0287769784 !$TEASPOONFUL_t0.0215827338 !$THI_t0.0575539568 !$TRAZODONE_t0.4100719424 !$UNHAPPY_t0.0503597122 !$VERIFIED_t1.3525179856 !$VOLUME_t0.5395683453 !$YEAR_t4.5323741007) $FRIGHTENING_t0.1294964029 $STANDARDS_t0.1007194245 $STRAIGHTENED_t0.0215827338 $STVHCS_t0.0215827338 $TACH_t0.0863309353 $THY_t0.0503597122 $TURMOIL_t0.0143884892 $UNDERGONE_t0.0431654676 $YE_t0.0503597122 $ZER_t0.0575539568) 
1 or(and(or($DESPONDENT_t0.0143884892 $LIPITOR_t0.0503597122 $VALLEY_t0.0647482014 $YOUNGER_t0.0431654676) !$TON_t0.0863309353) and(or($RESTRICTED_t0.2517985612 !$SSN_t1.5899280576) !$EPIDERMAL_t0.0431654676 !$STAIN_t0.0431654676 !$STYLES_t0.0143884892 !$SUPERVISORS_t0.0143884892 !$SUPPLY_t0.4892086331 !$SU_t0.0287769784 !$TEASPOONFUL_t0.0215827338 !$THI_t0.0575539568 !$TRAZODONE_t0.4100719424 !$UNHAPPY_t0.0503597122 !$VERIFIED_t1.3525179856 !$VOLUME_t0.5395683453 !$YEAR_t4.5323741007) $FRIGHTENING_t0.1294964029 $STANDARDS_t0.1007194245 $STRAIGHTENED_t0.0215827338 $STVHCS_t0.0215827338 $TACH_t0.0863309353 $THY_t0.0503597122 $TURMOIL_t0.0143884892 $UNDERGONE_t0.0431654676 $YE_t0.0503597122 $ZER_t0.0575539568) 
1 or(and(or($DESPONDENT_t0.0143884892 $LIPITOR_t0.0503597122 $VALLEY_t0.0647482014 $YOUNGER_t0.0431654676) !$TON_t0.0863309353) and(or($RESTRICTED_t0.2517985612 !$SSN_t1.5899280576) !$OBESITY_t0.7769784173 !$STAIN_t0.0431654676 !$STYLES_t0.0143884892 !$SUPERVISORS_t0.0143884892 !$SUPPLY_t0.4892086331 !$SU_t0.0287769784 !$TEASPOONFUL_t0.0215827338 !$THI_t0.0575539568 !$TRAZODONE_t0.4100719424 !$UNHAPPY_t0.0503597122 !$VERIFIED_t1.3525179856 !$VOLUME_t0.5395683453 !$YEAR_t4.5323741007) $FRIGHTENING_t0.1294964029 $STANDARDS_t0.1007194245 $STRAIGHTENED_t0.0215827338 $STVHCS_t0.0215827338 $TACH_t0.0863309353 $THY_t0.0503597122 $TURMOIL_t0.0143884892 $UNDERGONE_t0.0431654676 $YE_t0.0503597122 $ZER_t0.0575539568) 
1 or(and(or($DESPONDENT_t0.0143884892 $LIPITOR_t0.0503597122 $VALLEY_t0.0647482014 $YOUNGER_t0.0431654676) !$TON_t0.0863309353) and(or($RESTRICTED_t0.2517985612 !$SSN_t1.5899280576) !$PSYCHIATRICALLY_t0.0647482014 !$STAIN_t0.0431654676 !$STYLES_t0.0143884892 !$SUPERVISORS_t0.0143884892 !$SUPPLY_t0.4892086331 !$SU_t0.0287769784 !$TEASPOONFUL_t0.0215827338 !$THI_t0.0575539568 !$TRAZODONE_t0.4100719424 !$UNHAPPY_t0.0503597122 !$VERIFIED_t1.3525179856 !$VOLUME_t0.5395683453 !$YEAR_t4.5323741007) $FRIGHTENING_t0.1294964029 $STANDARDS_t0.1007194245 $STRAIGHTENED_t0.0215827338 $STVHCS_t0.0215827338 $TACH_t0.0863309353 $THY_t0.0503597122 $TURMOIL_t0.0143884892 $UNDERGONE_t0.0431654676 $YE_t0.0503597122 $ZER_t0.0575539568) 
1 or(and(or($LIPITOR_t0.0503597122 $MGOH_t0.0719424460 $VALLEY_t0.0647482014 $YOUNGER_t0.0431654676) !$TON_t0.0863309353) and(or($PRIVATE_t0.5107913669 !$SSN_t1.5899280576) !$CRYING_t0.1079136691 !$STAIN_t0.0431654676 !$STYLES_t0.0143884892 !$SUPERVISORS_t0.0143884892 !$SUPPLY_t0.4892086331 !$SU_t0.0287769784 !$TEASPOONFUL_t0.0215827338 !$THI_t0.0575539568 !$TRAZODONE_t0.4100719424 !$UNHAPPY_t0.0503597122 !$VERIFIED_t1.3525179856 !$VOLUME_t0.5395683453 !$YEAR_t4.5323741007) $FRIGHTENING_t0.1294964029 $STANDARDS_t0.1007194245 $STRAIGHTENED_t0.0215827338 $STVHCS_t0.0215827338 $TACH_t0.0863309353 $THY_t0.0503597122 $TURMOIL_t0.0143884892 $UNDERGONE_t0.0431654676 $YE_t0.0503597122 $ZER_t0.0575539568) 
1 or(and(or($LIPITOR_t0.0503597122 $MGOH_t0.0719424460 $VALLEY_t0.0647482014 $YOUNGER_t0.0431654676) !$TON_t0.0863309353) and(or($PRIVATE_t0.5107913669 !$SSN_t1.5899280576) !$EPIDERMAL_t0.0431654676 !$STAIN_t0.0431654676 !$STYLES_t0.0143884892 !$SUPERVISORS_t0.0143884892 !$SUPPLY_t0.4892086331 !$SU_t0.0287769784 !$TEASPOONFUL_t0.0215827338 !$THI_t0.0575539568 !$TRAZODONE_t0.4100719424 !$UNHAPPY_t0.0503597122 !$VERIFIED_t1.3525179856 !$VOLUME_t0.5395683453 !$YEAR_t4.5323741007) $FRIGHTENING_t0.1294964029 $STANDARDS_t0.1007194245 $STRAIGHTENED_t0.0215827338 $STVHCS_t0.0215827338 $TACH_t0.0863309353 $THY_t0.0503597122 $TURMOIL_t0.0143884892 $UNDERGONE_t0.0431654676 $YE_t0.0503597122 $ZER_t0.0575539568) 
1 or(and(or($LIPITOR_t0.0503597122 $MGOH_t0.0719424460 $VALLEY_t0.0647482014 $YOUNGER_t0.0431654676) !$TON_t0.0863309353) and(or($PRIVATE_t0.5107913669 !$SSN_t1.5899280576) !$OBESITY_t0.7769784173 !$STAIN_t0.0431654676 !$STYLES_t0.0143884892 !$SUPERVISORS_t0.0143884892 !$SUPPLY_t0.4892086331 !$SU_t0.0287769784 !$TEASPOONFUL_t0.0215827338 !$THI_t0.0575539568 !$TRAZODONE_t0.4100719424 !$UNHAPPY_t0.0503597122 !$VERIFIED_t1.3525179856 !$VOLUME_t0.5395683453 !$YEAR_t4.5323741007) $FRIGHTENING_t0.1294964029 $STANDARDS_t0.1007194245 $STRAIGHTENED_t0.0215827338 $STVHCS_t0.0215827338 $TACH_t0.0863309353 $THY_t0.0503597122 $TURMOIL_t0.0143884892 $UNDERGONE_t0.0431654676 $YE_t0.0503597122 $ZER_t0.0575539568) 
1 or(and(or($LIPITOR_t0.0503597122 $MGOH_t0.0719424460 $VALLEY_t0.0647482014 $YOUNGER_t0.0431654676) !$TON_t0.0863309353) and(or($PRIVATE_t0.5107913669 !$SSN_t1.5899280576) !$PSYCHIATRICALLY_t0.0647482014 !$STAIN_t0.0431654676 !$STYLES_t0.0143884892 !$SUPERVISORS_t0.0143884892 !$SUPPLY_t0.4892086331 !$SU_t0.0287769784 !$TEASPOONFUL_t0.0215827338 !$THI_t0.0575539568 !$TRAZODONE_t0.4100719424 !$UNHAPPY_t0.0503597122 !$VERIFIED_t1.3525179856 !$VOLUME_t0.5395683453 !$YEAR_t4.5323741007) $FRIGHTENING_t0.1294964029 $STANDARDS_t0.1007194245 $STRAIGHTENED_t0.0215827338 $STVHCS_t0.0215827338 $TACH_t0.0863309353 $THY_t0.0503597122 $TURMOIL_t0.0143884892 $UNDERGONE_t0.0431654676 $YE_t0.0503597122 $ZER_t0.0575539568) 
1 or(and(or($DESPONDENT_t0.0143884892 $LIPITOR_t0.0503597122 $VALLEY_t0.0647482014 $YOUNGER_t0.0431654676) !$TON_t0.0863309353) and(or($RESTRICTED_t0.2517985612 !$SSN_t1.5899280576) !$CRYING_t0.1079136691 !$EPIDERMAL_t0.0431654676 !$STAIN_t0.0431654676 !$STYLES_t0.0143884892 !$SUPERVISORS_t0.0143884892 !$SUPPLY_t0.4892086331 !$SU_t0.0287769784 !$TEASPOONFUL_t0.0215827338 !$THI_t0.0575539568 !$TRAZODONE_t0.4100719424 !$UNHAPPY_t0.0503597122 !$VERIFIED_t1.3525179856 !$VOLUME_t0.5395683453 !$YEAR_t4.5323741007) $FRIGHTENING_t0.1294964029 $STANDARDS_t0.1007194245 $STRAIGHTENED_t0.0215827338 $STVHCS_t0.0215827338 $TACH_t0.0863309353 $THY_t0.0503597122 $TURMOIL_t0.0143884892 $UNDERGONE_t0.0431654676 $YE_t0.0503597122 $ZER_t0.0575539568) 
1 and(or(and(or($DISORDER_t4.6474820144 !$SSN_t1.5899280576) !$PSYCHIATRICALLY_t0.0647482014 !$SUBLUXATION_t0.0143884892 !$SUPERVISORS_t0.0143884892 !$SUPPLY_t0.4892086331 !$SU_t0.0287769784 !$TEACHER_t0.0287769784 !$TEASPOONFUL_t0.0215827338 !$TEMPOPORMAND_t0.0503597122 !$THI_t0.0575539568 !$TOPICAL_t0.1870503597 !$TRAZODONE_t0.4100719424 !$UNIQUE_t0.1151079137 !$VOLUME_t0.5395683453 !$YEAR_t4.5323741007) $CONSISTANTLY_t0.0215827338 $STRAIGHTENED_t0.0215827338 $STX_t0.0215827338 $SUBSALICYLATE_t0.0647482014 $THY_t0.0503597122 $UNDERGONE_t0.0431654676 $VTACH_t0.1223021583 $WORTHLESSNESS_t0.0791366906 $YE_t0.0503597122 $YOUNGER_t0.0431654676 $ZER_t0.0575539568) !$DPT_t0.0143884892 !$UES_t0.0215827338) 
1 and(or(and(or($DISORDER_t4.6474820144 !$SSN_t1.5899280576) !$PSYCHIATRICALLY_t0.0647482014 !$SUBLUXATION_t0.0143884892 !$SUPERVISORS_t0.0143884892 !$SUPPLY_t0.4892086331 !$SU_t0.0287769784 !$TEACHER_t0.0287769784 !$TEASPOONFUL_t0.0215827338 !$TEMPOPORMAND_t0.0503597122 !$THI_t0.0575539568 !$TOPICAL_t0.1870503597 !$TRAZODONE_t0.4100719424 !$UNIQUE_t0.1151079137 !$VOLUME_t0.5395683453 !$YEAR_t4.5323741007) $INTERMITTANT_t0.0143884892 $STRAIGHTENED_t0.0215827338 $STX_t0.0215827338 $SUBSALICYLATE_t0.0647482014 $THY_t0.0503597122 $UNDERGONE_t0.0431654676 $VTACH_t0.1223021583 $WORTHLESSNESS_t0.0791366906 $YE_t0.0503597122 $YOUNGER_t0.0431654676 $ZER_t0.0575539568) !$DPT_t0.0143884892 !$UES_t0.0215827338) 
1 and(or(and(or($DISORDER_t4.6474820144 !$SSN_t1.5899280576) !$PSYCHIATRICALLY_t0.0647482014 !$SUBLUXATION_t0.0143884892 !$SUPERVISORS_t0.0143884892 !$SUPPLY_t0.4892086331 !$SU_t0.0287769784 !$TEACHER_t0.0287769784 !$TEASPOONFUL_t0.0215827338 !$TEMPOPORMAND_t0.0503597122 !$THI_t0.0575539568 !$TOPICAL_t0.1870503597 !$TRAZODONE_t0.4100719424 !$UNIQUE_t0.1151079137 !$VOLUME_t0.5395683453 !$YEAR_t4.5323741007) $NALCOHOL_t0.0143884892 $STRAIGHTENED_t0.0215827338 $STX_t0.0215827338 $SUBSALICYLATE_t0.0647482014 $THY_t0.0503597122 $UNDERGONE_t0.0431654676 $VTACH_t0.1223021583 $WORTHLESSNESS_t0.0791366906 $YE_t0.0503597122 $YOUNGER_t0.0431654676 $ZER_t0.0575539568) !$DPT_t0.0143884892 !$UES_t0.0215827338) 
1 and(or(and(or($DISORDER_t4.6474820144 !$SSN_t1.5899280576) !$PSYCHIATRICALLY_t0.0647482014 !$SUBLUXATION_t0.0143884892 !$SUPERVISORS_t0.0143884892 !$SUPPLY_t0.4892086331 !$SU_t0.0287769784 !$TEACHER_t0.0287769784 !$TEASPOONFUL_t0.0215827338 !$TEMPOPORMAND_t0.0503597122 !$THI_t0.0575539568 !$TOPICAL_t0.1870503597 !$TRAZODONE_t0.4100719424 !$UNIQUE_t0.1151079137 !$VOLUME_t0.5395683453 !$YEAR_t4.5323741007) $REGAINED_t0.0143884892 $STRAIGHTENED_t0.0215827338 $STX_t0.0215827338 $SUBSALICYLATE_t0.0647482014 $THY_t0.0503597122 $UNDERGONE_t0.0431654676 $VTACH_t0.1223021583 $WORTHLESSNESS_t0.0791366906 $YE_t0.0503597122 $YOUNGER_t0.0431654676 $ZER_t0.0575539568) !$DPT_t0.0143884892 !$UES_t0.0215827338) 
1 and(or(and(or($DISORDER_t4.6474820144 !$SSN_t1.5899280576) !$PSYCHIATRICALLY_t0.0647482014 !$SUBLUXATION_t0.0143884892 !$SUPERVISORS_t0.0143884892 !$SUPPLY_t0.4892086331 !$SU_t0.0287769784 !$TEACHER_t0.0287769784 !$TEASPOONFUL_t0.0215827338 !$TEMPOPORMAND_t0.0503597122 !$THI_t0.0575539568 !$TOPICAL_t0.1870503597 !$TRAZODONE_t0.4100719424 !$UNIQUE_t0.1151079137 !$VOLUME_t0.5395683453 !$YEAR_t4.5323741007) and(!$DOCUSATE_t0.3956834532 $REGAINED_t0.0143884892) $STRAIGHTENED_t0.0215827338 $STX_t0.0215827338 $SUBSALICYLATE_t0.0647482014 $THY_t0.0503597122 $UNDERGONE_t0.0431654676 $VTACH_t0.1223021583 $WORTHLESSNESS_t0.0791366906 $YE_t0.0503597122 $YOUNGER_t0.0431654676 $ZER_t0.0575539568) !$DPT_t0.0143884892 !$UES_t0.0215827338) 
1 and(or(and(or($ANTIPSYCHOTIC_t0.0503597122 !$SSN_t1.5899280576) !$PSYCHIATRICALLY_t0.0647482014 !$SUBLUXATION_t0.0143884892 !$SUPERVISORS_t0.0143884892 !$SUPPLY_t0.4892086331 !$SU_t0.0287769784 !$TEACHER_t0.0287769784 !$TEASPOONFUL_t0.0215827338 !$TEMPOPORMAND_t0.0503597122 !$THI_t0.0575539568 !$TOPICAL_t0.1870503597 !$TRAZODONE_t0.4100719424 !$UNIQUE_t0.1151079137 !$VOLUME_t0.5395683453 !$YEAR_t4.5323741007) $STRAIGHTENED_t0.0215827338 $STX_t0.0215827338 $SUBSALICYLATE_t0.0647482014 $THY_t0.0503597122 $UNDERGONE_t0.0431654676 $VTACH_t0.1223021583 $WORTHLESSNESS_t0.0791366906 $YE_t0.0503597122 $YOUNGER_t0.0431654676 $ZER_t0.0575539568) !$DPT_t0.0143884892 !$UES_t0.0215827338) 
1 and(or(and(or($DISORDER_t4.6474820144 !$SSN_t1.5899280576) !$PSYCHIATRICALLY_t0.0647482014 !$SUBLUXATION_t0.0143884892 !$SUPERVISORS_t0.0143884892 !$SUPPLY_t0.4892086331 !$SU_t0.0287769784 !$TEACHER_t0.0287769784 !$TEASPOONFUL_t0.0215827338 !$TEMPOPORMAND_t0.0503597122 !$THI_t0.0575539568 !$TOPICAL_t0.1870503597 !$TRAZODONE_t0.4100719424 !$UNIQUE_t0.1151079137 !$VOLUME_t0.5395683453 !$YEAR_t4.5323741007) $STRAIGHTENED_t0.0215827338 $STX_t0.0215827338 $SUBSALICYLATE_t0.0647482014 $THY_t0.0503597122 $UNDERGONE_t0.0431654676 $VTACH_t0.1223021583 $WORTHLESSNESS_t0.0791366906 $YE_t0.0503597122 $YOUNGER_t0.0431654676 $ZER_t0.0575539568) !$DPT_t0.0143884892 !$UES_t0.0215827338) 
1 and(or(and(!$PSYCHIATRICALLY_t0.0647482014 !$SSN_t1.5899280576 !$SUBLUXATION_t0.0143884892 !$SUPERVISORS_t0.0143884892 !$SUPPLY_t0.4892086331 !$SU_t0.0287769784 !$TEACHER_t0.0287769784 !$TEASPOONFUL_t0.0215827338 !$TEMPOPORMAND_t0.0503597122 !$THI_t0.0575539568 !$TOPICAL_t0.1870503597 !$TRAZODONE_t0.4100719424 !$UNIQUE_t0.1151079137 !$VOLUME_t0.5395683453 !$YEAR_t4.5323741007) $BARS_t0.0215827338 $STRAIGHTENED_t0.0215827338 $STX_t0.0215827338 $SUBSALICYLATE_t0.0647482014 $THY_t0.0503597122 $UNDERGONE_t0.0431654676 $VTACH_t0.1223021583 $WORTHLESSNESS_t0.0791366906 $YE_t0.0503597122 $YOUNGER_t0.0431654676 $ZER_t0.0575539568) !$DPT_t0.0143884892 !$EFFECTED_t0.0143884892 !$UES_t0.0215827338) 
1 and(or(and(or($AAA_t0.0647482014 $DISORDER_t4.6474820144 !$SSN_t1.5899280576) !$PSYCHIATRICALLY_t0.0647482014 !$SUBLUXATION_t0.0143884892 !$SUPERVISORS_t0.0143884892 !$SUPPLY_t0.4892086331 !$SU_t0.0287769784 !$TEACHER_t0.0287769784 !$TEASPOONFUL_t0.0215827338 !$TEMPOPORMAND_t0.0503597122 !$THI_t0.0575539568 !$TOPICAL_t0.1870503597 !$TRAZODONE_t0.4100719424 !$UNIQUE_t0.1151079137 !$VOLUME_t0.5395683453 !$YEAR_t4.5323741007) $STRAIGHTENED_t0.0215827338 $STX_t0.0215827338 $SUBSALICYLATE_t0.0647482014 $THY_t0.0503597122 $UNDERGONE_t0.0431654676 $VTACH_t0.1223021583 $WORTHLESSNESS_t0.0791366906 $YE_t0.0503597122 $YOUNGER_t0.0431654676 $ZER_t0.0575539568) !$DPT_t0.0143884892 !$UES_t0.0215827338) 
1 and(or(and(or($AA_t0.5323741007 $DISORDER_t4.6474820144 !$SSN_t1.5899280576) !$PSYCHIATRICALLY_t0.0647482014 !$SUBLUXATION_t0.0143884892 !$SUPERVISORS_t0.0143884892 !$SUPPLY_t0.4892086331 !$SU_t0.0287769784 !$TEACHER_t0.0287769784 !$TEASPOONFUL_t0.0215827338 !$TEMPOPORMAND_t0.0503597122 !$THI_t0.0575539568 !$TOPICAL_t0.1870503597 !$TRAZODONE_t0.4100719424 !$UNIQUE_t0.1151079137 !$VOLUME_t0.5395683453 !$YEAR_t4.5323741007) $STRAIGHTENED_t0.0215827338 $STX_t0.0215827338 $SUBSALICYLATE_t0.0647482014 $THY_t0.0503597122 $UNDERGONE_t0.0431654676 $VTACH_t0.1223021583 $WORTHLESSNESS_t0.0791366906 $YE_t0.0503597122 $YOUNGER_t0.0431654676 $ZER_t0.0575539568) !$DPT_t0.0143884892 !$UES_t0.0215827338) 
1 and(or(and(!$CRYING_t0.1079136691 !$STAIN_t0.0431654676 !$SUBLUXATION_t0.0143884892 !$SUPPLY_t0.4892086331 !$SUSAN_t0.0935251799 !$SYMPTOMS_t3.8633093525 !$TEASPOONFUL_t0.0215827338 !$TFTS_t0.0143884892 !$THI_t0.0575539568 !$UNPLEASANT_t0.0287769784 !$UNSP_t0.2302158273 !$UNT_t0.2517985612 !$UPCOMING_t0.3812949640 !$VOLUME_t0.5395683453 !$YEAR_t4.5323741007) $CONSISTANTLY_t0.0215827338 $STRANGE_t0.0215827338 $SWABS_t0.0935251799 $ULTIMATELY_t0.0215827338 $UNDERGONE_t0.0431654676 $VISUALIZATION_t0.0215827338 $WATCHES_t0.0575539568 $WORTHLESSNESS_t0.0791366906 $YE_t0.0503597122 $YOUNGER_t0.0431654676 $ZER_t0.0575539568) !$GEROPSYCHIATRY_t0.0143884892 !$JEF_t0.0143884892 !$MANKOWSKI_t0.0215827338) 
1 and(or(and(!$STAIN_t0.0431654676 !$SUBLUXATION_t0.0143884892 !$SUPPLY_t0.4892086331 !$SUSAN_t0.0935251799 !$SYMPTOMS_t3.8633093525 !$TEASPOONFUL_t0.0215827338 !$TFTS_t0.0143884892 !$THI_t0.0575539568 !$UNPLEASANT_t0.0287769784 !$UNSP_t0.2302158273 !$UNT_t0.2517985612 !$UPCOMING_t0.3812949640 !$VOLUME_t0.5395683453 !$YEAR_t4.5323741007) $CONSISTANTLY_t0.0215827338 $STRANGE_t0.0215827338 $SWABS_t0.0935251799 $ULTIMATELY_t0.0215827338 $UNDERGONE_t0.0431654676 $VISUALIZATION_t0.0215827338 $WATCHES_t0.0575539568 $WORTHLESSNESS_t0.0791366906 $YE_t0.0503597122 $YOUNGER_t0.0431654676 $ZER_t0.0575539568) !$EPIDERMAL_t0.0431654676 !$GEROPSYCHIATRY_t0.0143884892 !$JEF_t0.0143884892 !$MANKOWSKI_t0.0215827338) 
1 and(or(and(!$STAIN_t0.0431654676 !$SUBLUXATION_t0.0143884892 !$SUPPLY_t0.4892086331 !$SUSAN_t0.0935251799 !$SYMPTOMS_t3.8633093525 !$TEASPOONFUL_t0.0215827338 !$TFTS_t0.0143884892 !$THI_t0.0575539568 !$UNPLEASANT_t0.0287769784 !$UNSP_t0.2302158273 !$UNT_t0.2517985612 !$UPCOMING_t0.3812949640 !$VOLUME_t0.5395683453 !$YEAR_t4.5323741007) $INTERMITTANT_t0.0143884892 $STRANGE_t0.0215827338 $SWABS_t0.0935251799 $ULTIMATELY_t0.0215827338 $UNDERGONE_t0.0431654676 $VISUALIZATION_t0.0215827338 $WATCHES_t0.0575539568 $WORTHLESSNESS_t0.0791366906 $YE_t0.0503597122 $YOUNGER_t0.0431654676 $ZER_t0.0575539568) !$EPIDERMAL_t0.0431654676 !$GEROPSYCHIATRY_t0.0143884892 !$JEF_t0.0143884892 !$MANKOWSKI_t0.0215827338) 
1 and(or(and(!$CRYING_t0.1079136691 !$STAIN_t0.0431654676 !$SUBLUXATION_t0.0143884892 !$SUPPLY_t0.4892086331 !$SUSAN_t0.0935251799 !$SYMPTOMS_t3.8633093525 !$TEASPOONFUL_t0.0215827338 !$TFTS_t0.0143884892 !$THI_t0.0575539568 !$UNPLEASANT_t0.0287769784 !$UNSP_t0.2302158273 !$UNT_t0.2517985612 !$UPCOMING_t0.3812949640 !$VOLUME_t0.5395683453 !$YEAR_t4.5323741007) $STRANGE_t0.0215827338 $SWABS_t0.0935251799 $ULTIMATELY_t0.0215827338 $UNDERGONE_t0.0431654676 $VISUALIZATION_t0.0215827338 $WATCHES_t0.0575539568 $WORTHLESSNESS_t0.0791366906 $YE_t0.0503597122 $YOUNGER_t0.0431654676 $ZER_t0.0575539568) !$GEROPSYCHIATRY_t0.0143884892 !$JEF_t0.0143884892 !$MANKOWSKI_t0.0215827338) 
1 and(or(and(!$STAIN_t0.0431654676 !$SUBLUXATION_t0.0143884892 !$SUPPLY_t0.4892086331 !$SUSAN_t0.0935251799 !$SYMPTOMS_t3.8633093525 !$TEASPOONFUL_t0.0215827338 !$TFTS_t0.0143884892 !$THI_t0.0575539568 !$UNPLEASANT_t0.0287769784 !$UNSP_t0.2302158273 !$UNT_t0.2517985612 !$UPCOMING_t0.3812949640 !$VOLUME_t0.5395683453 !$YEAR_t4.5323741007) $CONSISTANTLY_t0.0215827338 $STRANGE_t0.0215827338 $SWABS_t0.0935251799 $ULTIMATELY_t0.0215827338 $UNDERGONE_t0.0431654676 $VISUALIZATION_t0.0215827338 $WATCHES_t0.0575539568 $WORTHLESSNESS_t0.0791366906 $YE_t0.0503597122 $YOUNGER_t0.0431654676 $ZER_t0.0575539568) !$EPIDERMAL_t0.0431654676 !$GEROPSYCHIATRY_t0.0143884892 !$JEF_t0.0143884892) 
1 and(or(and(!$STAIN_t0.0431654676 !$SUBLUXATION_t0.0143884892 !$SUPPLY_t0.4892086331 !$SUSAN_t0.0935251799 !$SYMPTOMS_t3.8633093525 !$TEASPOONFUL_t0.0215827338 !$TFTS_t0.0143884892 !$THI_t0.0575539568 !$UNPLEASANT_t0.0287769784 !$UNSP_t0.2302158273 !$UNT_t0.2517985612 !$UPCOMING_t0.3812949640 !$VOLUME_t0.5395683453 !$YEAR_t4.5323741007) $CONSISTANTLY_t0.0215827338 $STRANGE_t0.0215827338 $SWABS_t0.0935251799 $ULTIMATELY_t0.0215827338 $UNDERGONE_t0.0431654676 $VISUALIZATION_t0.0215827338 $WATCHES_t0.0575539568 $WORTHLESSNESS_t0.0791366906 $YE_t0.0503597122 $YOUNGER_t0.0431654676 $ZER_t0.0575539568) !$EPIDERMAL_t0.0431654676 !$GEROPSYCHIATRY_t0.0143884892 !$MANKOWSKI_t0.0215827338) 
1 and(or(and(!$STAIN_t0.0431654676 !$SUBLUXATION_t0.0143884892 !$SUPPLY_t0.4892086331 !$SUSAN_t0.0935251799 !$SYMPTOMS_t3.8633093525 !$TEASPOONFUL_t0.0215827338 !$TFTS_t0.0143884892 !$THI_t0.0575539568 !$UNPLEASANT_t0.0287769784 !$UNSP_t0.2302158273 !$UNT_t0.2517985612 !$UPCOMING_t0.3812949640 !$VOLUME_t0.5395683453 !$YEAR_t4.5323741007) $CONSISTANTLY_t0.0215827338 $STRANGE_t0.0215827338 $SWABS_t0.0935251799 $ULTIMATELY_t0.0215827338 $UNDERGONE_t0.0431654676 $VISUALIZATION_t0.0215827338 $WATCHES_t0.0575539568 $WORTHLESSNESS_t0.0791366906 $YE_t0.0503597122 $YOUNGER_t0.0431654676 $ZER_t0.0575539568) !$GEROPSYCHIATRY_t0.0143884892 !$JEF_t0.0143884892 !$MANKOWSKI_t0.0215827338) 
1 and(or(and(!$STAIN_t0.0431654676 !$SUBLUXATION_t0.0143884892 !$SUPPLY_t0.4892086331 !$SUSAN_t0.0935251799 !$SYMPTOMS_t3.8633093525 !$TEASPOONFUL_t0.0215827338 !$TFTS_t0.0143884892 !$THI_t0.0575539568 !$UNPLEASANT_t0.0287769784 !$UNSP_t0.2302158273 !$UNT_t0.2517985612 !$UPCOMING_t0.3812949640 !$VOLUME_t0.5395683453 !$YEAR_t4.5323741007) $INTERMITTANT_t0.0143884892 $STRANGE_t0.0215827338 $SWABS_t0.0935251799 $ULTIMATELY_t0.0215827338 $UNDERGONE_t0.0431654676 $VISUALIZATION_t0.0215827338 $WATCHES_t0.0575539568 $WORTHLESSNESS_t0.0791366906 $YE_t0.0503597122 $YOUNGER_t0.0431654676 $ZER_t0.0575539568) !$EPIDERMAL_t0.0431654676 !$GEROPSYCHIATRY_t0.0143884892 !$JEF_t0.0143884892) 
1 and(or(and(!$STAIN_t0.0431654676 !$SUBLUXATION_t0.0143884892 !$SUPPLY_t0.4892086331 !$SUSAN_t0.0935251799 !$SYMPTOMS_t3.8633093525 !$TEASPOONFUL_t0.0215827338 !$TFTS_t0.0143884892 !$THI_t0.0575539568 !$UNPLEASANT_t0.0287769784 !$UNSP_t0.2302158273 !$UNT_t0.2517985612 !$UPCOMING_t0.3812949640 !$VOLUME_t0.5395683453 !$YEAR_t4.5323741007) $INTERMITTANT_t0.0143884892 $STRANGE_t0.0215827338 $SWABS_t0.0935251799 $ULTIMATELY_t0.0215827338 $UNDERGONE_t0.0431654676 $VISUALIZATION_t0.0215827338 $WATCHES_t0.0575539568 $WORTHLESSNESS_t0.0791366906 $YE_t0.0503597122 $YOUNGER_t0.0431654676 $ZER_t0.0575539568) !$EPIDERMAL_t0.0431654676 !$GEROPSYCHIATRY_t0.0143884892 !$MANKOWSKI_t0.0215827338) 
1 and(or(and(!$STAIN_t0.0431654676 !$SUBLUXATION_t0.0143884892 !$SUPPLY_t0.4892086331 !$SUSAN_t0.0935251799 !$SYMPTOMS_t3.8633093525 !$TEASPOONFUL_t0.0215827338 !$TFTS_t0.0143884892 !$THI_t0.0575539568 !$UNPLEASANT_t0.0287769784 !$UNSP_t0.2302158273 !$UNT_t0.2517985612 !$UPCOMING_t0.3812949640 !$VOLUME_t0.5395683453 !$YEAR_t4.5323741007) $INTERMITTANT_t0.0143884892 $STRANGE_t0.0215827338 $SWABS_t0.0935251799 $ULTIMATELY_t0.0215827338 $UNDERGONE_t0.0431654676 $VISUALIZATION_t0.0215827338 $WATCHES_t0.0575539568 $WORTHLESSNESS_t0.0791366906 $YE_t0.0503597122 $YOUNGER_t0.0431654676 $ZER_t0.0575539568) !$GEROPSYCHIATRY_t0.0143884892 !$JEF_t0.0143884892 !$MANKOWSKI_t0.0215827338) 
</ensemble>
<levels>
(ilevels
TargetLevels
p0
(dp1
S'maxval'
p2
F2.0
sS'labels'
p3
(lp4
S'0.496402877698'
p5
aS'1.4964028777'
p6
asS'minval'
p7
F0.0
sS'thresholds'
p8
(lp9
F0.9928057553956835
asS'numberOfLevels'
p10
I2
sS'targetIsEnum'
p11
I00
sS'__intervals__'
p12
(lp13
(F0.0
F0.9928057553956835
tp14
a(F0.9928057553956835
F2.0
tp15
asb.
