# Supplementary material for: Predicting the Risk of Suicide by Analyzing the Text of Clinical Notes
Source: PLoS One. 2014 Jan 28;9(1):e85733. doi: 10.1371/journal.pone.0085733 (PMC3904866; doi:10.1371/journal.pone.0085733)
Supplement: Appendix S3 — Machine Learning Libraries and Methods: This section is provided to enclose the open source (Apache License) classifier used for the building of the statistical models, specifically for the purposes of study reproducibility. A detailed account of these tools is intended for another publication. (ZIP) [file pone.0085733.s003.zip › Appendix3/ML_libs/Models/model-va32-words]

AA
AAA
ABOUT
ADULT
AFRAID
AGGRAVATING
ALIGNMENT
ALOH
ALOT
ANAND
ANT
ANTIPSYCHOTIC
APPOINT
AROUSE
BARS
BLOCKERS
BRONZE
CAHNGE
CANCERS
CONSISTANTLY
CRYING
DEMONSTRATING
DENT
DESPONDENT
DIRECTORY
DISHEVELED
DISORDER
DOCUSATE
DPT
DRUSEN
EFFECTED
EPIDERMAL
FEAR
FRIGHTENING
GEROPSYCHIATRY
HC
ICDCM
INTERMITTANT
JEF
KIMBERLY
LIPITOR
LUQ
MANKOWSKI
MEALTIME
MGOH
MONFRI
NALCOHOL
NEUT
NOBODY
NOCTURIA
NOTABLY
OBESITY
OUTSTANDING
OWEEN
PORTER
PRACTICING
PREFILLED
PREOCCUPIED
PRESBYOPIA
PRIVATE
PSYCHIATRICALLY
PUNCTUM
QUADRANTS
RANGES
REGAINED
REORDER
RESIDENTIAL
RESTRICTED
RUMINATES
SCHWARTZ
SHAVE
SPARE
SPECIMEN
SPELL
SPLITTING
SSN
STAIN
STANDARDS
STRAIGHTENED
STRANGE
STREET
STRUGGLES
STUDENT
STVHCS
STX
STYLE
STYLES
SU
SUBLUXATION
SUBSALICYLATE
SUPERVISOR
SUPERVISORS
SUPPLY
SUSAN
SWABS
SYMPTOMS
TACH
TE
TEACHER
TEASPOONFUL
TEETH
TELEMETRY
TEMAZEPAM
TEMPOPORMAND
TFTS
THI
THY
TIB
TON
TOP
TOPICAL
TP
TRANSFUSIONS
TRAVELS
TRAZODONE
TURMOIL
TUSCON
TWAVE
UC
UCINATIONS
UES
ULTIMATELY
UNCHANGED
UNCOOPERATIVE
UNDERGONE
UNHAPPY
UNIQUE
UNMARRIED
UNPLEASANT
UNRESECTABLE
UNSP
UNT
UPCOMING
URINATED
USEFULNESS
VALLEY
VERIFIED
VET
VIDEOS
VIRTUE
VISA
VISIT
VISUALIZATION
VIT
VOIDING
VOLUME
VTACH
WALKIN
WARNING
WARRANT
WATCHES
WELLGROOMED
WHEN
WHIP
WILLING
WORTHLESSNESS
WOUNDED
WTIH
XPATIENT
YE
YEAR
YOUNGER
ZER
