# Supplementary material for: Predicting the Risk of Suicide by Analyzing the Text of Clinical Notes
Source: PLoS One. 2014 Jan 28;9(1):e85733. doi: 10.1371/journal.pone.0085733 (PMC3904866; doi:10.1371/journal.pone.0085733)
Supplement: Appendix S3 — Machine Learning Libraries and Methods: This section is provided to enclose the open source (Apache License) classifier used for the building of the statistical models, specifically for the purposes of study reproducibility. A detailed account of these tools is intended for another publication. (ZIP) [file pone.0085733.s003.zip › Appendix3/ML_libs/Models/README_Models]

Golden January dataset models
-----------------------------

model-va12-Hacc-C3000.mod -- trains with 10 restarts, with 240 dynamic
features, 2 thresholds, 320K train evals, 3K pre-filtered features.

Location: /home/linas/src/va-data-2013-01/va12/acc-C3000-240f-m320-thresh-2

Generated with:
/home/linas/src/poulin-moses-1.r436/src/poses.py moses -d ../../va-grp-12.csv
-m model-va12-Hacc-C3000.mod -p group -e320000 -n2 -s2 -f5 -F"-C3000 -asimple -j12"
-M"-j12 --hc-max-nn-evals=5000 --enable-fs=1 --fs-target-size=240" --restarts=10 -V |
tee knob-fs-Hacc-C3000-m320-f240-t2.out


model-va12-words contains only the words from the model.

===================================================================

model-va32-Hacc-C3000.mod -- trains with 10 restarts, with 500 dynamic
features, 1 threshold, 320K train evals, 3K pre-filtered features.

Location: /home/linas/src/va-data-2013-01/va32/acc-C3000-500f-m320-thresh-1

Generated with:
/home/linas/src/poulin-moses-1.r436/src/poses.py moses -d ../../va-grp-32.csv
-m model-va32-Hacc-C3000.mod -p group -e320000 -n2 -s1 -f5 -F"-C3000 -asimple -j12"
-M"-j12 --hc-max-nn-evals=5000 --enable-fs=1 --fs-target-size=500" --restarts=10 -V |
tee knob-fs-Hacc-C3000-m320-f500-t1.out


model-va32-words contains only the words from the model.

===================================================================

The files: 
    va1-model-word-counts
    va2-model-word-counts
    va3-model-word-counts

provide counts of how often each of the words used in the models occur
in the datasets. That is, va1-model-word-counts has counts for the words
occuring only in group-1 patient records, etc.
