# Supplementary material for: Predicting the Risk of Suicide by Analyzing the Text of Clinical Notes
Source: PLoS One. 2014 Jan 28;9(1):e85733. doi: 10.1371/journal.pone.0085733 (PMC3904866; doi:10.1371/journal.pone.0085733)
Supplement: Appendix S3 — Machine Learning Libraries and Methods: This section is provided to enclose the open source (Apache License) classifier used for the building of the statistical models, specifically for the purposes of study reproducibility. A detailed account of these tools is intended for another publication. (ZIP) [file pone.0085733.s003.zip › Appendix3/ML_libs/Models/testcase.dat]

CONTACT : 1 
AT : 1 
SCHEDULE : 2 
HER : 1 
CONSTANT : 1 
TOPIC : 1 
RECONCILIATION : 1 
ONLY : 2 
REFILLED : 1 
MONTH : 1 
ATIVAN : 1 
EDUCATED : 1 
HISTORIAN : 1 
FOLLOWUP : 1 
MCG : 2 
WEIGHT : 1 
GIVE : 1 
DELTOID : 1 
MAKE : 1 
BEEN : 4 
CAULIFLOWER : 1 
CAN : 2 
HEIGHT : 1 
LIVING : 1 
ALCF : 1 
VITAMIN : 1 
ADDENDUM : 1 
AWARE : 1 
DOPPLER : 1 
BY : 7 
NO : 3 
OUTPATIENT : 4 
PREFERS : 2 
INTAKE : 1 
CLINICAL : 2 
KNOWS : 1 
OVER : 2 
COUCH : 1 
MG : 4 
PB : 1 
ON : 3 
COMPLETE : 2 
RELATED : 1 
USE : 1 
PILL : 2 
RISK : 2 
HOW : 1 
PLUS : 1 
SUPPLIES : 1 
RUBBING : 1 
PRODUCTS : 1 
CALLED : 2 
TWICE : 1 
REGARDING : 1 
SINCE : 1 
GOOD : 2 
CHAMBER : 1 
LEVEL : 2 
FLU : 1 
DISCUSS : 1 
TO : 17 
TOO : 1 
SITTING : 1 
LEARN : 1 
MED : 1 
INTO : 1 
HIS : 9 
REMEMBERED : 1 
COPD : 1 
YRS : 1 
CONTAIN : 1 
SPINACH : 1 
CENTERS : 1 
VERBALIZED : 1 
LEARNING : 2 
WORSE : 1 
DOSE : 4 
NOVARTIS : 1 
HYPERCHO : 1 
PROVIDER : 1 
SMOKING : 1 
DONT : 3 
SHE : 2 
UP : 1 
THEN : 1 
WILL : 2 
OFTEN : 1 
BUT : 3 
ECHO : 1 
OIS : 1 
LOCATION : 1 
TELL : 1 
MEDICINE : 1 
LIQUID : 1 
TEST : 1 
NOTE : 5 
SEE : 1 
GETS : 1 
MANUFACTURER : 1 
DATED : 1 
DO : 2 
HUSBAND : 1 
TESTS : 1 
PLEASE : 3 
HEALTHY : 1 
SVC : 1 
FRONT : 1 
STATUS : 2 
TREATMENT : 1 
WHY : 1 
CFCF : 1 
BLOOD : 1 
DAILY : 1 
SAME : 1 
MEDICATION : 3 
METH : 1 
ACCESS : 1 
HAVE : 2 
APPOINTMENT : 1 
EFFECTIVE : 1 
WANT : 1 
HAVENT : 1 
OF : 17 
TEASPOONFUL : 1 
ORAL : 4 
CONTINUE : 2 
PUFF : 1 
TAB : 3 
LEFT : 3 
SERVICES : 2 
PSYCHIATRY : 1 
LETTUCE : 1 
MONITOR : 1 
HAS : 11 
SUCH : 1 
FOR : 11 
SCREEN : 4 
HOURS : 2 
BARRIERS : 1 
ALSO : 1 
LEGS : 2 
REVIEW : 1 
NEEDED : 1 
MENTAL : 1 
THANKS : 1 
NUMBER : 1 
COMES : 3 
HEALTH : 2 
INJECTION : 1 
REPORTED : 1 
CABBAGE : 1 
WORKING : 1 
LIVER : 1 
INR : 2 
AN : 2 
KNEE : 1 
HEART : 1 
PILLS : 1 
ORDER : 2 
TAKES : 1 
WALKS : 1 
USING : 1 
INSTRUCTIONS : 1 
MY : 2 
OUTPT : 1 
NURS : 1 
FORMOTEROL : 1 
VA : 2 
SITE : 1 
INFLUENZA : 3 
INHALATION : 4 
PRNPATIENT : 1 
PREVENTING : 1 
INTRAMUSCULARLY : 1 
THEM : 1 
AZITHROMYCIN : 1 
KG : 1 
ASSESSMENT : 3 
DENI : 1 
MORE : 1 
SL : 1 
WISHES : 1 
WILLING : 1 
ACTIVITY : 3 
NEW : 1 
PROBLEM : 1 
MOUTH : 3 
DISEASE : 1 
PAIN : 19 
CHEST : 5 
WHEN : 4 
DOCUMENTATION : 1 
AS : 7 
NTG : 1 
CABG : 1 
BEING : 1 
PHY : 1 
SOME : 1 
DT : 1 
OLEMIAPATIENT : 1 
WAS : 1 
INFORMATION : 3 
PM : 1 
ANTICOAGULATION : 1 
WITH : 9 
ARE : 1 
ANSWERED : 1 
NONUSER : 1 
GUAIFENESIN : 1 
INFECTION : 1 
TEMPERATURE : 1 
LESS : 1 
RECEIVED : 2 
NON : 1 
HYDROCHLOROTHIAZIDE : 1 
NOW : 3 
THE : 12 
INSTR : 1 
JUST : 2 
AUTO : 1 
INCLUDING : 1 
LOOSEN : 1 
PTSD : 3 
PCP : 1 
HOMCIDAL : 1 
DIURETIC : 1 
EXP : 1 
DTR : 1 
USED : 2 
IT : 3 
EACH : 1 
RE : 1 
SHOT : 1 
SYMPTOMATIC : 1 
INHL : 2 
BROCC : 1 
LIST : 3 
BP : 1 
BE : 1 
OPT : 1 
CODEINE : 1 
RESIGNATION : 1 
STATEMENT : 1 
VETERAN : 1 
AEROCHAMBER : 1 
CAPSULE : 1 
DISCUSSED : 1 
PREVENTION : 1 
PT : 8 
INJURY : 1 
SUPPLY : 1 
BARRIER : 1 
DOUBLE : 1 
CM : 1 
TIME : 2 
UNCHANGED : 1 
ATHERSCLEROSIS : 1 
ITSELF : 1 
ADDICT : 1 
BROCHURE : 1 
SOON : 1 
CAP : 1 
VIS : 1 
DIET : 2 
NECK : 1 
MISSED : 1 
ALONG : 1 
SOMETIMES : 1 
CERVICAL : 1 
DOCTOR : 1 
REVIEWED : 2 
ALLERGY : 4 
CALL : 3 
UNDERSTANDING : 3 
ISSUE : 1 
ILLNESS : 1 
MEDICATIONS : 2 
BEFORE : 1 
ALL : 1 
CAROTID : 2 
ALBUTEROL : 1 
BENEFITS : 1 
FOODS : 1 
FUMARATE : 1 
TELEPHONE : 1 
ME : 2 
AND : 8 
INHALE : 2 
DESCRIPTION : 1 
OR : 6 
OUTCOME : 1 
REPORTS : 3 
TEMP : 1 
VACCINE : 4 
PATIENT : 17 
RECOMMENDED : 2 
DIAGNOSIS : 1 
ALREADY : 1 
DING : 1 
HELP : 1 
LB : 1 
LIFETIME : 1 
RESULTS : 1 
TABLETS : 1 
PER : 2 
COUMADIN : 5 
VERIFIED : 1 
CONTINUES : 1 
COMING : 1 
FURTHER : 2 
IN : 8 
REFILLABLE : 1 
SPINE : 1 
YOUR : 3 
MAY : 1 
MANAGEMENT : 2 
VALVE : 1 
DOING : 1 
THOUGH : 1 
PLAN : 2 
BABY : 1 
SECRETIONS : 1 
MITRAL : 1 
CHRONIC : 2 
COME : 1 
TAKING : 1 
TAKE : 10 
WHO : 1 
ED : 1 
VIAGRA : 1 
JAW : 1 
IMPROVED : 1 
ANY : 4 
CAME : 1 
THAT : 4 
VISIT : 1 
PHYSICIAN : 1 
WIFE : 1 
NORMAL : 1 
DONE : 1 
ARM : 2 
CURRENT : 5 
BREATHING : 1 
PC : 2 
CONTROL : 2 
SF : 1 
ACTIVE : 4 
TERM : 1 
KNOW : 2 
HIM : 2 
ABOUT : 1 
ONE : 4 
HE : 12 
PACT : 2 
THEY : 1 
OVERDOSE : 1 
NOTIFY : 1 
NKA : 1 
CONTROLLED : 1 
MONTHLY : 1 
TABLET : 2 
APPTS : 1 
CLOTS : 1 
FIB : 1 
ZER : 1 
UAL : 1 
WATER : 1 
THIS : 4 
FAR : 1 
YOU : 1 
EVERY : 6 
LPN : 1 
DIRECTED : 1 
ML : 2 
REGURGITATION : 1 
CARDIOLOGY : 1 
IS : 11 
REMINDERS : 1 
INFORMED : 1 
NOT : 11 
FORGET : 1 
PAMPHLET : 1 
IF : 3 
PRIMARY : 1 
ECHOCARDIOGRAM : 1 
USER : 1 
INTERESTED : 1 
EDUCATION : 2 
FLUVIRON : 1 
TOBACCO : 4 
HAD : 4 
SIGNS : 1 
MANAGING : 1 
REMINDER : 1 
ADR : 1 
SPECIAL : 2 
HERE : 1 
IMPROVES : 1 
HOME : 2 
NEVER : 1 
TANGENTIAL : 1 
STATES : 1 
PENICILLIN : 1 
PEE : 1 
RECOMMENDATION : 1 
FL : 1 
ONEHALF : 1 
SUICIDAL : 1 
WHILE : 1 
TWO : 1 
NONE : 1 
AER : 1 
KEEP : 1 
REFUSED : 1 
LOT : 2 
YOUNGSTOWN : 1 
REHAB : 1 
EITHER : 1 
SO : 1 
DOWN : 1 
PATIENT_INFORMATION : 1 
AS_SUPPLY : 1 
PAIN_KNEE : 2 
EDUCATION_UNDERSTANDING : 1 
TABLET_BY : 1 
BENEFITS_OF : 1 
CERVICAL_RISK : 1 
DOCTOR_KNOW : 1 
OF_FL : 1 
PT_CALLED : 1 
CURRENT_AND : 1 
VERBALIZED_OF : 1 
THIS_SOMETIMES : 1 
OR_MAKE : 1 
TAKE_THE : 2 
PT_GETS : 1 
PACT_NORMAL : 1 
DONE_TIME : 1 
GUAIFENESIN_MG : 1 
AS_BROCC : 1 
OF_JUST : 1 
LEARNING_PATIENT : 1 
PATIENT_PER : 1 
BLOOD_VERBALIZED : 1 
HE_COMPLETE : 1 
BEEN_TO : 1 
VETERAN_SHE : 1 
STATUS_AEROCHAMBER : 1 
PENICILLIN_NOTE : 1 
LEFT_DELTOID : 1 
FLU_OF : 1 
INCLUDING_SUPPLIES : 1 
HOME_HE : 1 
FOR_FOR : 1 
PAIN_CURRENT : 1 
PATIENT_INFLUENZA : 1 
MOUTH_EVERY : 3 
RESIGNATION_HAS : 1 
PLUS_USE : 1 
WHO_GIVE : 1 
DO_THIS : 1 
CARDIOLOGY_REPORTS : 1 
OF_GOOD : 2 
COUMADIN_WITH : 1 
PATIENT_HAD : 1 
SAME_TIME : 1 
IMPROVES_WITH : 1 
PCP_LIST : 1 
TO_HIS : 1 
PATIENT_ANTICOAGULATION : 1 
OF_SPECIAL : 1 
OF_HIS : 1 
HELP_THIS : 1 
NOT_FUMARATE : 1 
REHAB_IS : 1 
USING_AER : 1 
FOODS_THAT : 1 
HISTORIAN_IS : 1 
EDUCATED_ON : 1 
PILLS_WHEN : 1 
HE_FURTHER : 1 
PATIENT_VERBALIZED : 1 
PAIN_LOCATION : 2 
ACTIVITY_HIS : 1 
THEY_YOU : 1 
NON_OF : 1 
PT_NOT : 1 
THOUGH_IT : 1 
GOOD_TOBACCO : 1 
ACTIVE_DIRECTED : 1 
FIB_SCHEDULE : 1 
MAKE_THE : 1 
OF_LEVEL : 1 
OVERDOSE_OR : 1 
DONE_FOR : 1 
PAIN_PATIENT : 1 
INFLUENZA_ORDER : 1 
SIGNS_OVERDOSE : 1 
ONE_GIVE : 1 
EVERY_HIS : 1 
THEM_TO : 1 
ECHOCARDIOGRAM_HIS : 1 
THE_COUMADIN : 1 
OVER_PAIN : 1 
PAIN_HAS : 1 
DOSE_NOTIFY : 1 
PATIENT_CURRENT : 1 
OF_TAB : 1 
MEDICATION_ASSESSMENT : 1 
REPORTS_THAT : 1 
VIS_THE : 1 
ONE_FOR : 1 
ONEHALF_BY : 1 
OR_CONTINUE : 1 
THE_DONT : 1 
SUICIDAL_WILL : 1 
RISK_SCREEN : 2 
EVERY_NEEDED : 1 
OUTPATIENT_STATUS : 1 
SECRETIONS_TAB : 1 
LB_HEIGHT : 1 
WITH_PATIENT : 2 
REMEMBERED_TAKE : 1 
MONTHLY_PT : 1 
PAIN_BEEN : 1 
TIME_CALL : 1 
NOTIFY_ANY : 1 
REMINDER_OUTPATIENT : 1 
LEVEL_GOOD : 2 
CHAMBER_BY : 1 
GETS_PAIN : 1 
JUST_DOWN : 1 
TO_VISIT : 1 
PATIENT_ML : 1 
VACCINE_FOR : 1 
THE_BEING : 1 
ALLERGY_PATIENT : 1 
TO_DONT : 1 
MOUTH_DIURETIC : 1 
NOW_IN : 2 
NEEDED_LOOSEN : 1 
WORKING_NOW : 1 
WITH_CURRENT : 3 
ARM_PAIN : 1 
BEEN_COMING : 1 
TO_ACCESS : 1 
MANAGEMENT_ALREADY : 1 
MAY_MAKE : 1 
AWARE_HE : 1 
BY_INHALATION : 1 
ARM_WITH : 1 
PREFERS_BY : 1 
HOME_NOW : 1 
IF_IS : 2 
OUTPATIENT_HEALTH : 1 
NOW_BUT : 1 
HE_TAKE : 1 
BY_CABG : 1 
FRONT_HIS : 1 
WITH_NTG : 1 
CAP_ONE : 1 
HEIGHT_PAIN : 1 
CONTACT_CALLED : 1 
NOTIFY_PROVIDER : 1 
CAN_HELP : 1 
WITH_NO : 1 
AWARE_IS : 1 
TEMPERATURE_PC : 1 
PT_COUMADIN : 2 
REPORTED_KG : 1 
DENI_PATIENT : 1 
PRIMARY_SITE : 1 
COUMADIN_THE : 1 
RECOMMENDATION_HE : 1 
COPD_FOLLOWUP : 1 
LESS_IN : 1 
CAME_HE : 1 
PSYCHIATRY_PT : 1 
BROCC_OR : 1 
IS_THE : 1 
FIB_PT : 1 
ON_SITTING : 1 
DESCRIPTION_TO : 1 
XYZZY_OUTPATIENT : 2 
TAKE_THEM : 1 
THAT_TO : 1 
COUCH_TO : 1 
WAS_BY : 1 
NOT_NOT : 1 
PC_INTAKE : 1 
NOT_HOMCIDAL : 1 
AS_AS : 1 
NOT_PAIN : 1 
MANAGEMENT_EDUCATION : 1 
CONTROLLED_CURRENT : 1 
HAD_HER : 1 
REMEMBERED_NOT : 1 
TAB_TAKING : 1 
COMPLETE_WILL : 1 
HE_HAVE : 2 
IF_WILLING : 1 
PM_IF : 1 
DISEASE_AND : 1 
TO_COMING : 1 
RECOMMENDED_COMPLETE : 1 
CURRENT_OR : 1 
FOR_ONE : 1 
TREATMENT_WITH : 1 
SUPPLY_NOT : 1 
MORE_OFTEN : 1 
COUMADIN_CONTINUE : 1 
HAD_ECHO : 1 
ORAL_HOURS : 1 
AN_ECHOCARDIOGRAM : 1 
DING_ON : 1 
WILL_IT : 1 
IF_TOO : 1 
PAIN_KNOW : 1 
IT_HAS : 1 
INTERESTED_BUT : 1 
AS_LOOSEN : 1 
FOLLOWUP_TO : 1 
IS_USER : 1 
DOSE_MISSED : 1 
BY_FOR : 1 
SMOKING_RISK : 1 
VACCINE_RECEIVED : 1 
WITH_BUT : 1 
STATUS_PLUS : 1 
MG_SF : 1 
PATIENT_LIFETIME : 1 
UP_TO : 1 
PLUS_BY : 1 
LIVING_OF : 1 
AS_NEEDED : 1 
NEW_REPORTED : 1 
REPORTS_HIS : 2 
LOOSEN_MG : 1 
HYDROCHLOROTHIAZIDE_TAKE : 1 
IN_OVER : 1 
LEFT_JAW : 1 
HIM_RESULTS : 1 
HAS_THAT : 1 
PILL_SO : 1 
IS_ADDICT : 1 
PLEASE_KEEP : 1 
TAKE_ANY : 1 
IS_TOBACCO : 1 
FOR_TO : 1 
THE_HIS : 1 
ALL_OIS : 1 
TAKE_NOTIFY : 1 
PRNPATIENT_TO : 1 
KG_IN : 1 
SCREEN_PATIENT : 2 
TO_DOCTOR : 1 
CAN_GIVE : 1 
HER_METH : 1 
BY_HIS : 1 
ORDER_DIAGNOSIS : 1 
HE_TAKES : 1 
CONTROLLED_MEDICATION : 1 
VA_EITHER : 1 
WITH_PT : 1 
SF_TAKE : 1 
HERE_TO : 1 
SPINE_ASSESSMENT : 1 
DONT_TAKE : 2 
HIS_FORGET : 1 
BEEN_SINCE : 1 
PAIN_CONSTANT : 1 
NOW_TAKES : 1 
JAW_CONTINUES : 1 
MY_TERM : 1 
HAVENT_IT : 1 
LOT_NUMBER : 1 
RECONCILIATION_ALBUTEROL : 1 
AS_ACTIVE : 1 
TO_LEARN : 1 
OUTPT_NOTE : 1 
COMING_VA : 1 
REGURGITATION_NOT : 1 
EVERY_AS : 2 
SERVICES_PTSD : 1 
HISTORIAN_PAIN : 1 
ON_DOWN : 1 
LEARN_BY : 1 
SYMPTOMATIC_HAS : 1 
OF_FURTHER : 1 
TO_DOING : 1 
ED_TOPIC : 1 
HEALTHY_LIVING : 1 
OF_CERVICAL : 1 
REPORTS_IT : 1 
ONE_CAN : 1 
FURTHER_HE : 1 
ISSUE_AND : 1 
FRONT_OF : 1 
USED_SERVICES : 1 
OUTCOME_LEVEL : 1 
FL_PSYCHIATRY : 1 
CABG_THEY : 1 
INFORMATION_VIS : 1 
THE_MENTAL : 1 
DOSE_CONTINUE : 1 
IS_WORKING : 1 
ANY_IN : 1 
USED_TO : 1 
CAROTID_WITH : 1 
HAVE_EVERY : 1 
FOR_MG : 2 
DIURETIC_OR : 1 
CLOTS_PATIENT : 1 
EVERY_DIURETIC : 1 
AT_SAME : 1 
FOR_TAKE : 1 
SCHEDULE_OF : 1 
MANIFEST_TELEPHONE : 1 
DOWN_THE : 1 
OVER_BEING : 1 
MY_PILLS : 1 
ORAL_ONE : 1 
WHEN_CAME : 1 
METH_NOW : 1 
PATIENT_DOSE : 1 
THE_COUCH : 1 
NOT_HAD : 2 
DATED_FOR : 1 
AND_HUSBAND : 1 
CAME_NOW : 1 
PM_IS : 1 
FOR_GUAIFENESIN : 2 
ANY_THEM : 1 
OF_RESULTS : 1 
INFORMATION_ALLERGY : 1 
PC_OUTPT : 1 
TO_ALLERGY : 1 
WORSE_WITH : 1 
TO_HAVE : 2 
REPORTS_HAD : 1 
HAD_AND : 1 
TAKE_WHEN : 1 
EDUCATION_HAS : 1 
HE_NOT : 2 
WITH_OUTPATIENT : 1 
TAKE_BY : 3 
STATEMENT_THE : 1 
HAS_CHRONIC : 1 
LIST_WITH : 1 
TO_CERVICAL : 1 
FOR_OR : 1 
CALLED_PER : 1 
VALVE_NOT : 1 
ALCF_TAKE : 1 
HAD_BABY : 1 
LEFT_LOT : 1 
BREATHING_TAB : 1 
WITH_NEW : 1 
HOW_TO : 1 
WITH_CHEST : 3 
INJECTION_LEFT : 1 
TO_DESCRIPTION : 1 
DIAGNOSIS_INJECTION : 1 
WANT_BE : 1 
TO_TAKE : 1 
PAIN_OVER : 1 
RE_MY : 1 
LEFT_ARM : 1 
HE_WILLING : 1 
KG_HEIGHT : 1 
CONSTANT_WAS : 1 
AND_OF : 2 
THIS_YOUR : 1 
PAIN_EVERY : 1 
BEEN_PATIENT : 1 
SHE_COMES : 1 
PT_FOR : 1 
TAB_TABLETS : 1 
INFLUENZA_RECEIVED : 1 
UP_COMING : 1 
USED_HAVE : 1 
OF_TOBACCO : 2 
OF_MENTAL : 1 
PHYSICIAN_OF : 1 
SCREEN_IS : 1 
MEDICATION_REVIEW : 1 
GOOD_TEMP : 1 
TO_SEE : 1 
OUTPATIENT_INCLUDING : 1 
HEALTH_CALLED : 1 
IN_HIS : 2 
PT_PLEASE : 1 
EACH_PM : 1 
REVIEWED_WITH : 2 
NEVER_MY : 1 
DOSE_IS : 1 
BEING_SVC : 1 
OR_DING : 1 
PAIN_HIS : 3 
NOVARTIS_PATIENT : 1 
CURRENT_MEDICATION : 1 
HAS_MANAGING : 1 
NOW_PT : 1 
RECEIVED_INFLUENZA : 1 
TWO_MOUTH : 1 
TO_LEFT : 1 
CURRENT_COUMADIN : 2 
NTG_PAIN : 1 
INHALATION_ACTIVE : 1 
VA_FOR : 1 
CHEST_HAS : 2 
REPORTS_IN : 1 
STATEMENT_ABOUT : 1 
ACTIVE_OUTPATIENT : 2 
THAT_HIS : 1 
NOW_REHAB : 1 
THAT_CHEST : 1 
PAIN_REPORTS : 1 
ORAL_USING : 1 
SHE_HOME : 1 
WILLING_COMPLETE : 1 
PER_DIAGNOSIS : 1 
MORE_BY : 1 
TELL_YOU : 1 
NOT_UP : 1 
PTSD_NOTE : 1 
NONE_ASSESSMENT : 1 
DISCUSS_THIS : 1 
HER_HUSBAND : 1 
NURS_TELEPHONE : 1 
OF_NEVER : 1 
IS_LIFETIME : 1 
BREATHING_MG : 1 
CALL_APPOINTMENT : 1 
USING_ZER : 1 
NOTE_BP : 1 
OFTEN_NOT : 1 
PATIENT_DENI : 1 
ORAL_AS : 1 
NOT_BEEN : 1 
INHALATION_HOURS : 1 
FOLLOWUP_CALL : 1 
NORMAL_DENI : 1 
FURTHER_TESTS : 1 
FOR_YOUR : 2 
PEE_SO : 1 
PER_PRIMARY : 1 
WHY_TAKE : 1 
OUTCOME_EDUCATION : 1 
HIS_CHEST : 3 
RISK_STATES : 1 
PAIN_FOLLOWUP : 1 
TO_AS : 1 
PATIENT_UNDERSTANDING : 1 
EXP_RECEIVED : 1 
CALLED_MY : 1 
NUMBER_FLUVIRON : 1 
PREVENTION_LEVEL : 1 
ADDENDUM_PATIENT : 1 
THE_ON : 1 
IS_COMPLETE : 1 
SMOKING_ASSESSMENT : 1 
HAD_WHILE : 1 
TWICE_FOR : 1 
SOME_PLEASE : 1 
HAS_HAD : 2 
CONTINUES_TO : 1 
THIS_ARM : 1 
COUMADIN_TAB : 1 
LIFETIME_OF : 1 
PT_WORKING : 1 
LIST_YOUR : 1 
SITTING_THE : 1 
ALSO_HAVENT : 1 
ON_THE : 1 
APPOINTMENT_OF : 1 
PROVIDER_REGARDING : 1 
CALL_THIS : 1 
IT_BEEN : 1 
TO_HELP : 1 
OUTPATIENT_CLINICAL : 1 
OF_THE : 1 
ABOUT_INFLUENZA : 1 
PTSD_NOT : 1 
NEVER_TAKE : 1 
HAVENT_HAD : 1 
PATIENT_SEE : 1 
PT_THAT : 1 
PUFF_EVERY : 1 
EDUCATION_ALREADY : 1 
PAIN_CHRONIC : 1 
TO_TEST : 1 
HAVE_CHEST : 1 
ED_LIVING : 1 
SCHEDULE_CERVICAL : 1 
HAS_NOT : 3 
VA_MED : 1 
PTSD_APPTS : 1 
SHOT_THE : 1 
VISIT_OF : 1 
STATES_HE : 1 
TEASPOONFUL_BY : 1 
OF_MG : 1 
MG_TAKE : 2 
AND_TREATMENT : 1 
AND_CONTINUE : 1 
WITH_HIS : 2 
OF_DISCUSSED : 1 
ASSESSMENT_VETERAN : 1 
SYMPTOMATIC_BEEN : 1 
CAPSULE_ACTIVE : 1 
HOMCIDAL_WHEN : 1 
TELL_ARE : 1 
PILL_PLEASE : 1 
LIQUID_TAKE : 1 
WHEN_WISHES : 1 
HIS_AND : 1 
TERM_AND : 1 
BEEN_THAT : 1 
REVIEWED_ACTIVE : 1 
TAKE_AS : 2 
CHEST_MORE : 1 
NOW_AN : 1 
PB_IS : 1 
RESULTS_PATIENT : 1 
USED_OVER : 1 
LEFT_INTRAMUSCULARLY : 1 
INFORMATION_ABOUT : 1 
AND_IF : 1 
CAULIFLOWER_OR : 1 
MY_AND : 1 
PB_THIS : 1 
INFORMED_INR : 1 
NOTE_HERE : 1 
HIM_DISCUSS : 1 
PILL_TAKE : 1 
OF_ALL : 1 
DONT_THE : 1 
PC_NOTE : 1 
ME_PT : 1 
OF_THEM : 1 
ATIVAN_WHEN : 1 
IN_CLOTS : 1 
PROBLEM_SOMETIMES : 1 
TAKE_PILLS : 1 
TAKE_AT : 1 
CHEST_NOT : 2 
RESIGNATION_NOT : 1 
IN_HOW : 1 
PAIN_COMES : 2 
REMINDER_HEALTH : 1 
HAS_PAIN : 2 
SCREEN_NORMAL : 2 
TAKES_AN : 1 
DO_TAKE : 1 
OF_COUMADIN : 2 
AND_LEVEL : 1 
INFORMATION_CODEINE : 1 
INSTR_THIS : 1 
IN_PT : 2 
NOT_HAS : 1 
SOME_CALL : 1 
NONUSER_OF : 1 
TO_ILLNESS : 1 
RECEIVED_INFORMATION : 1 
CALL_WHEN : 1 
PILLS_COME : 1 
TO_SECRETIONS : 1 
AND_NO : 1 
CODEINE_NOTE : 1 
IN_IF : 1 
ACTIVE_TWICE : 1 
YOU_THE : 1 
NOT_IN : 1 
ACTIVE_FOR : 1 
PAIN_IN : 3 
IN_PAIN : 2 
IMPROVED_WITH : 1 
COME_THE : 1 
VIAGRA_THAT : 1 
PAIN_BUT : 2 
DT_PATIENT : 1 
PATIENT_PC : 1 
ASSESSMENT_LEARN : 1 
HOURS_BREATHING : 1 
IS_RELATED : 1 
PATIENT_VERIFIED : 1 
ANY_HE : 1 
METH_IN : 1 
FOR_CONTROL : 1 
YOUNGSTOWN_OUTPATIENT : 1 
AT_TIME : 1 
VIAGRA_REPORTS : 1 
HIS_ARM : 1 
VA_HAS : 1 
INSTRUCTIONS_MEDICATION : 1 
WIFE_CAME : 1 
EVERY_WIFE : 1 
PATIENT_ACTIVE : 1 
PER_ORDER : 1 
BY_NOT : 1 
PLEASE_DISCUSS : 1 
TIME_HIM : 1 
MONTHLY_PLEASE : 1 
PREVENTING_BLOOD : 1 
ORAL_ACTIVE : 1 
UNDERSTANDING_DISCUSSED : 1 
REGARDING_ANY : 1 
MISSED_TAKE : 1 
PT_RE : 1 
REFILLED_THAT : 1 
TO_BY : 1 
WHEN_SHE : 1 
EVERY_BREATHING : 1 
BROCHURE_OF : 1 
OF_DING : 1 
RE_AND : 1 
VA_USED : 1 
HAS_PATIENT : 1 
USE_BY : 1 
HAD_DONE : 1 
IS_WILLING : 1 
INTAKE_PATIENT : 1 
CHRONIC_PAIN : 1 
WORSE_HIS : 1 
PAIN_IMPROVES : 1 
PATIENT_AWARE : 1 
HYDROCHLOROTHIAZIDE_TAB : 1 
JAW_TO : 1 
COUMADIN_CURRENT : 1 
PATIENT_MITRAL : 1 
LIVER_MAY : 1 
LIQUID_BY : 1 
UNDERSTANDING_ALL : 1 
MCG_ORAL : 1 
ASSESSMENT_HE : 1 
USED_THE : 1 
FOR_MED : 1 
IS_AS : 1 
PRODUCTS_NONE : 1 
HUSBAND_IS : 1 
TO_CALL : 1 
AND_IS : 1 
BEEN_REFILLED : 1 
AS_DIRECTED : 1 
PATIENT_PATIENT : 1 
THIS_DOCUMENTATION : 1 
MEDICATION_BP : 1 
YRS_PTSD : 1 
EITHER_FOR : 1 
JUST_SITTING : 1 
THIS_IS : 1 
TO_LOOSEN : 1 
MANAGEMENT_INFORMED : 1 
ACTIVITY_PATIENT : 1 
ON_HE : 1 
AN_WHEN : 1 
NO_KNOW : 1 
TABLETS_MOUTH : 1 
THAT_AN : 1 
RECONCILIATION_NOTE : 1 
UP_INTO : 1 
INTO_VA : 1 
PTSD_SVC : 1 
AND_INFORMED : 1 
PATIENT_NKA : 1 
OR_TREATMENT : 1 
LEARNING_ASSESSMENT : 1 
PT_HIS : 1 
SHE_NON : 1 
NOT_FORMOTEROL : 1 
OUTPATIENT_MEDICATIONS : 2 
HE_CAN : 1 
TAB_TWO : 1 
OR_PLEASE : 1 
WHEN_COME : 1 
SINCE_BY : 1 
TOPIC_LIVING : 1 
SUICIDAL_HOMCIDAL : 1 
NOT_DOSE : 1 
ORAL_INHL : 1 
ASSESSMENT_PLAN : 1 
WATER_PLEASE : 1 
DONT_KNOW : 1 
ALSO_REPORTS : 1 
LIST_INFORMATION : 1 
NONE_MEDICATION : 1 
ONE_WHO : 1 
VALVE_HAS : 1 
ABOUT_VACCINE : 1 
PATIENT_ANSWERED : 1 
SEE_PCP : 1 
VETERAN_HE : 1 
TAB_TAKE : 2 
PAIN_ON : 1 
ONE_TABLET : 1 
ALLERGY_HAS : 1 
HAD_PAIN : 1 
SPECIAL_NONE : 1 
LIST_REVIEWED : 1 
VISIT_TO : 1 
DAILY_TAKING : 1 
COMES_WITH : 1 
MONITOR_HIS : 1 
PROBLEM_ARM : 1 
BEEN_WAS : 1 
MENTAL_PT : 1 
NOTE_PATIENT : 1 
PAIN_PAMPHLET : 1 
PATIENT_HEALTHY : 1 
BEEN_RECOMMENDED : 1 
SVC_OR : 1 
LEVEL_OF : 2 
AT_THE : 1 
TIME_EACH : 1 
ON_FOODS : 1 
IMPROVES_HIS : 1 
LIST_ANSWERED : 1 
IT_THANKS : 1 
PROVIDER_SIGNS : 1 
ATIVAN_SHE : 1 
OF_TEMPERATURE : 1 
IN_LEGS : 1 
IN_IS : 2 
ASSESSMENT_TO : 1 
PT_IN : 2 
WILL_CALL : 1 
NEEDED_TO : 1 
TO_VA : 2 
PAIN_CLINICAL : 1 
JUST_WANT : 1 
COMPLETE_TEST : 1 
MAY_MEDICINE : 1 
CONTINUES_CHEST : 1 
PAIN_LEFT : 1 
PM_DOSE : 1 
IN_WHILE : 1 
LB_IN : 1 
GOOD_PC : 1 
DOCUMENTATION_TO : 1 
PLAN_REVIEWED : 1 
PSYCHIATRY_RE : 1 
CALL_TO : 1 
CHEST_IS : 1 
HAS_ECHO : 1 
ANTICOAGULATION_AND : 1 
COUMADIN_BEEN : 1 
MISSED_AS : 1 
EDUCATION_PATIENT : 1 
FOLLOWUP_PRNPATIENT : 1 
AS_HAS : 1 
WITH_DOSE : 1 
IS_METH : 1 
ONLY_ONE : 1 
NORMAL_ADDENDUM : 1 
TAB_DAILY : 1 
GOOD_SCREEN : 1 
THE_VACCINE : 1 
NOTE_ACTIVITY : 1 
SO_ANY : 1 
LEGS_HE : 1 
WITH_SL : 1 
PHYSICIAN_ANY : 1 
TAKE_TABLETS : 1 
HEALTH_LEARNING : 1 
PATIENT_HERE : 1 
TAKE_SOON : 1 
PT_REPORTS : 2 
RESIGNATION_HE : 1 
PAIN_NOT : 1 
TAKE_PILL : 1 
MG_ONEHALF : 1 
MED_PTSD : 1 
SUCH_AS : 1 
OR_MAY : 1 
WHEN_HE : 1 
INHALATION_FOR : 1 
HOMCIDAL_CALL : 1 
INR_HAS : 1 
FURTHER_CAN : 1 
BEFORE_THEY : 1 
YOU_ARE : 1 
MY_COME : 1 
SIGNS_OR : 1 
HE_NON : 1 
DIAGNOSIS_SITE : 1 
WHO_CAN : 1 
LEARNING_ED : 1 
WORKING_NOT : 1 
BEEN_AWARE : 1 
HIM_ISSUE : 1 
SOON_DO : 1 
ANY_OF : 2 
AND_PAIN : 1 
CHEST_ALSO : 1 
MG_TWO : 1 
BP_ALBUTEROL : 1 
HYDROCHLOROTHIAZIDE_MG : 1 
STATES_IS : 1 
THE_SO : 1 
HAS_ANSWERED : 1 
TAKING_FOR : 1 
CAME_HOME : 1 
OR_APPTS : 1 
MEDICATIONS_STATUS : 1 
PATIENT_ALLERGY : 1 
WHEN_HIS : 1 
STATUS_PAIN : 1 
ITSELF_NOT : 1 
FOR_AZITHROMYCIN : 1 
MENTAL_PSYCHIATRY : 1 
TWO_BY : 1 
JAW_HE : 1 
FOR_ORAL : 1 
COUCH_USED : 1 
ORAL_INHALATION : 2 
NORMAL_PATIENT : 1 
EVERY_OR : 1 
IS_NOT : 3 
BUT_KNOWS : 1 
HIM_OF : 1 
EVERY_THEN : 1 
RECOMMENDATION_IF : 1 
THEM_JUST : 1 
TOBACCO_OF : 1 
SHOT_OF : 1 
CM_LOCATION : 1 
PER_ANTICOAGULATION : 1 
ALONG_THE : 1 
UNCHANGED_HIS : 1 
MEDICATION_RECONCILIATION : 1 
NOTE_AND : 1 
OUTPATIENT_LEARNING : 1 
KNEE_STATUS : 1 
PAIN_CONTROLLED : 1 
SEE_LIST : 1 
LEARNING_TO : 1 
EACH_IF : 1 
DOSE_REGARDING : 1 
IN_BLOOD : 1 
PT_HISTORIAN : 1 
PATIENT_TOBACCO : 1 
THE_DOCTOR : 1 
HIS_HOME : 1 
PLAN_MANAGEMENT : 1 
OF_WANT : 1 
THIS_PROBLEM : 1 
TO_PCP : 1 
REVIEWED_PATIENT : 2 
CLINICAL_OUTPATIENT : 1 
COMES_HOME : 1 
PAIN_PHYSICIAN : 1 
HIS_PATIENT : 1 
ADDICT_NOW : 1 
NO_PAIN : 1 
EDUCATION_OF : 1 
TO_THIS : 1 
HEIGHT_IN : 1 
SOMETIMES_PAIN : 1 
NOTE_INFORMED : 1 
AN_ATIVAN : 1 
HIM_INR : 1 
NEW_ADR : 1 
HE_BEEN : 1 
SITTING_ON : 1 
DELTOID_NUMBER : 1 
DO_HELP : 1 
PATIENT_ED : 1 
HAS_CONSTANT : 1 
TO_INJURY : 1 
TO_WILL : 1 
TABLET_FOR : 2 
PAIN_MANAGEMENT : 1 
NUMBER_NOVARTIS : 1 
TOBACCO_IS : 1 
PLEASE_CALL : 1 
THIS_AND : 1 
THAT_IS : 1 
ED_HEALTHY : 1 
HAS_REFILLED : 1 
MEDICATION_AND : 1 
TEST_IT : 1 
OF_OIS : 1 
ONE_EVERY : 1 
HAS_CURRENT : 1 
HEART_PATIENT : 1 
ON_DIET : 1 
INFORMATION_PENICILLIN : 1 
CONTINUE_WITH : 2 
CONSTANT_SINCE : 1 
IS_IMPROVED : 1 
TEASPOONFUL_MOUTH : 1 
TABLET_MOUTH : 1 
YOUR_PAMPHLET : 1 
EVERY_INFECTION : 1 
HE_HAS : 2 
TO_CAROTID : 1 
CHEST_PAIN : 4 
THE_USED : 1 
SUPPLIES_ACTIVE : 1 
ALREADY_YOUR : 1 
ALLERGY_REPORTED : 1 
AND_HE : 3 
GOOD_DISCUSSED : 1 
ALLERGY_REVIEWED : 1 
THEN_TAKE : 1 
CALLED_PATIENT : 1 
CAN_TO : 1 
USER_OF : 1 
BLOOD_PATIENT : 1 
SL_PT : 1 
WHEN_COMES : 1 
AS_TO : 1 
HIM_THIS : 1 
BEEN_CONSTANT : 1 
ARE_ONLY : 1 
RELATED_VISIT : 1 
PILL_THIS : 1 
VACCINE_PRIMARY : 1 
RELATED_TO : 1 
WHEN_WIFE : 1 
PCP_PATIENT : 1 
PATIENT_MANAGING : 1 
NOT_SYMPTOMATIC : 1 
FURTHER_PTSD : 1 
CALLED_RE : 1 
WANT_LEFT : 1 
MEDICATION_TREATMENT : 1 
HEALTH_PT : 1 
INHALATION_EVERY : 1 
BP_CFCF : 1 
VERIFIED_CURRENT : 1 
FORGET_ME : 1 
HE_AN : 2 
APPOINTMENT_TO : 1 
BABY_HER : 1 
PLEASE_THIS : 1 
NOTE_DT : 1 
DOSE_MG : 1 
TWICE_ORAL : 1 
OR_WITH : 1 
COMES_AND : 1 
CONTROL_AND : 1 
VIAGRA_PT : 1 
ACTIVITY_HEALTH : 1 
FL_MENTAL : 1 
KNOW_FURTHER : 1 
FOR_PLEASE : 1 
TO_APPOINTMENT : 1 
PREVENTION_OF : 1 
BE_LEFT : 1 
NOTE_HIM : 1 
SINCE_UNCHANGED : 1 
WISHES_FURTHER : 1 
PROBLEM_PAIN : 1 
YOUR_CLINICAL : 1 
CHRONIC_WITH : 1 
DIRECTED_NOT : 1 
HAS_NKA : 1 
HAD_FOR : 1 
VACCINE_INFORMATION : 1 
OUTCOME_OF : 1 
SERVICES_RECONCILIATION : 1 
OF_OPT : 1 
TAB_ONEHALF : 1 
MOUTH_HOURS : 1 
TO_PAIN : 2 
PAIN_ALSO : 1 
WIFE_HOME : 1 
PAIN_MONTH : 1 
HE_SERVICES : 1 
PATIENT_TO : 1 
PC_MANAGEMENT : 1 
FOR_FIB : 1 
TO_BE : 1 
INFORMATION_INFORMATION : 1 
MG_PT : 1 
VALVE_PATIENT : 1 
PACT_PATIENT : 1 
THE_FRONT : 1 
PREVENTING_PATIENT : 1 
PAIN_OF : 1 
DONT_ANY : 1 
IN_KNOWS : 1 
ADR_LB : 1 
BEEN_HE : 1 
GETS_IN : 1 
MOUTH_FOR : 1 
RUBBING_HIS : 1 
THE_PILL : 1 
BUT_TO : 1 
WITH_AND : 1 
NOW_KNOWS : 1 
BUT_HAVENT : 1 
OR_PTSD : 1 
WILL_ORDER : 1 
CHAMBER_ORAL : 1 
REPORTS_HAVENT : 1 
HERE_PCP : 1 
HOURS_FOR : 1 
PATIENT_ALREADY : 1 
LEFT_NURS : 1 
IS_TAKE : 2 
BEING_PTSD : 1 
ALLERGY_LIST : 2 
REHAB_PT : 1 
THE_HE : 1 
HIS_HAS : 2 
CONTROLLED_WITH : 1 
THE_HEALTH : 1 
PACT_RISK : 1 
LEGS_MY : 1 
THE_FL : 1 
NOT_DOUBLE : 1 
APPTS_HAD : 1 
ORAL_INHALE : 1 
DTR_AND : 1 
ECHO_SOME : 1 
HAD_ANY : 1 
TAKE_MOUTH : 1 
SYMPTOMATIC_IT : 1 
AS_SOON : 1 
OF_OR : 1 
PATIENT_ADDENDUM : 1 
NOT_DONE : 1 
HAS_OVER : 1 
INR_PATIENT : 1 
ME_YOU : 1 
THAT_PAIN : 1 
OF_WITH : 1 
DISCUSSED_TOBACCO : 1 
PER_MANAGEMENT : 1 
INFORMATION_YOUR : 1 
HAS_RECOMMENDED : 1 
TAKE_DOSE : 1 
IS_TO : 3 
PAIN_PAIN : 3 
WILLING_TO : 1 
OR_CALL : 1 
ORAL_SPECIAL : 1 
HAS_MITRAL : 1 
ONEHALF_TABLET : 1 
NECK_PAIN : 1 
OUTPATIENT_SUPPLIES : 1 
THIS_FOR : 1 
PAIN_OFTEN : 1 
TELL_ME : 1 
AS_USED : 1 
SITE_LEFT : 1 
USING_SPECIAL : 1 
MED_OR : 1 
SCHEDULE_MONTHLY : 1 
THEY_TELL : 1 
MEDICATIONS_PLUS : 1 
ECHOCARDIOGRAM_TO : 1 
ARM_HE : 1 
SPINE_RISK : 1 
MEDICATIONS_INCLUDING : 1 
INFORMATION_STATEMENT : 1 
PLAN_CAROTID : 1 
EFFECTIVE_IN : 1 
FOR_MONTHLY : 1 
ADDENDUM_CHRONIC : 1 
ILLNESS_CAROTID : 1 
PATIENT_NOT : 1 
THE_PTSD : 1 
NOT_ANY : 1 
THE_EACH : 1 
HIS_NEVER : 1 
CONTINUE_DOSE : 1 
CALL_HE : 1 
IF_HE : 2 
COMPLETE_UAL : 1 
INHALATION_USING : 1 
ACCESS_VA : 1 
WHEN_HOME : 1 
PATIENT_RECEIVED : 2 
RECOMMENDED_THAT : 1 
IN_CM : 1 
HAS_BEEN : 4 
THE_SAME : 1 
NOT_WITH : 2 
RISK_PACT : 1 
CURRENT_DOSE : 2 
BY_BEFORE : 1 
INHALE_ONE : 2 
CONTAIN_AS : 1 
KNOW_DONT : 1 
HAS_REGURGITATION : 1 
INFECTION_MG : 1 
THAT_VITAMIN : 1 
COUCH_HE : 1 
BEING_NOT : 1 
THE_PAIN : 1 
ANTICOAGULATION_NOTE : 1 
PT_TAKING : 1 
HELP_PROBLEM : 1 
TO_PROBLEM : 1 
GETS_HIS : 1 
TESTS_CAN : 1 
SITE_INJECTION : 1 
ALL_OPT : 1 
WITH_ACTIVITY : 1 
CONTACT_PATIENT : 1 
IT_RECOMMENDED : 1 
OF_EDUCATION : 1 
VA_AS : 1 
ALL_PHY : 1 
REGARDING_OF : 1 
MG_TAB : 3 
VACCINE_PER : 1 
IN_THE : 1 
INSTRUCTIONS_NONE : 1 
NOT_SUICIDAL : 1 
PT_PAIN : 2 
RISK_VETERAN : 1 
THEN_TABLET : 1 
BY_DOING : 1 
IN_BUT : 1 
MAY_THE : 1 
TOBACCO_PATIENT : 1 
DO_DOUBLE : 1 
THAT_CONTAIN : 1 
ACCESS_HAS : 1 
EVERY_TAKE : 1 
SUICIDAL_OR : 1 
AND_JAW : 1 
HIS_CABG : 1 
OF_TESTS : 1 
PLEASE_COUMADIN : 1 
ON_JUST : 1 
HIS_IF : 1 
BUT_HOW : 1 
ORAL_EVERY : 1 
PAIN_STATUS : 1 
PATIENT_IS : 1 
TIME_IF : 1 
ONE_INHALATION : 2 
BEEN_UP : 1 
OR_WILL : 1 
HIS_LEGS : 2 
TAKE_TWO : 1 
KNOW_OF : 1 
AND_HAS : 2 
FORGET_THEY : 1 
PAIN_WHEN : 1 
GIVE_ME : 1 
TABLETS_BY : 1 
INJURY_ILLNESS : 1 
HEALTH_PSYCHIATRY : 1 
AS_OR : 1 
IS_RUBBING : 1 
IF_WALKS : 1 
PATIENT_NO : 1 
BUT_REPORTS : 1 
DOING_NO : 1 
THE_MEDICINE : 1 
WILL_THANKS : 1 
ARE_ONE : 1 
PSYCHIATRY_CALLED : 1 
ALONG_OF : 1 
RECEIVED_VACCINE : 2 
INHALE_ACTIVE : 1 
CABBAGE_OR : 1 
PLAN_EDUCATION : 1 
LOT_PATIENT : 1 
LOT_RECEIVED : 1 
REPORTED_WEIGHT : 1 
VIS_ABOUT : 1 
CURRENT_MANAGEMENT : 1 
OF_CONTINUE : 1 
HE_IS : 3 
VERIFIED_OF : 1 
EITHER_OR : 1 
DOSE_COUMADIN : 2 
TO_HYDROCHLOROTHIAZIDE : 1 
PATIENT_THAT : 1 
USE_CHAMBER : 1 
PATIENT_TOPIC : 1 
NOT_TO : 1 
OF_UNDERSTANDING : 2 
MANAGING_YOUR : 1 
PRIMARY_DIAGNOSIS : 1 
NOTE_ALBUTEROL : 1 
HE_HAD : 1 
OF_INJURY : 1 
PUFF_ORAL : 1 
HE_TO : 5 
HAD_IT : 1 
HIS_TAKE : 1 
HIS_PAIN : 2 
MY_WHEN : 1 
AWARE_THAT : 1 
TO_EVERY : 1 
HEALTH_SCREEN : 1 
SO_DONT : 1 
YOUR_INFORMATION : 2 
YOUR_ALLERGY : 2 
IS_NOW : 1 
BARRIERS_ED : 1 
HE_UAL : 1 
SERVICES_MEDICATION : 1 
TELEPHONE_CALLED : 1 
JUST_BE : 1 
PAIN_EDUCATION : 1 
JUST_ON : 1 
PLEASE_BEEN : 1 
DESCRIPTION_OF : 1 
BY_BARRIER : 1 
FOR_SOME : 1 
CURRENT_PLAN : 1 
RESULTS_CURRENT : 1 
TEST_ORDER : 1 
NURS_CONTACT : 1 
NO_ALLERGY : 1 
OFTEN_BY : 1 
NEW_ALLERGY : 1 
ANSWERED_CURRENT : 1 
ORDER_PRIMARY : 1 
FOR_THEN : 1 
DENI_ADDENDUM : 1 
WHEN_FURTHER : 1 
IN_MONTH : 1 
HAVE_WHEN : 1 
PRNPATIENT_CALL : 1 
HAVENT_IN : 1 
INTERESTED_NOW : 1 
AND_RECOMMENDATION : 1 
NOT_IT : 1 
THE_EFFECTIVE : 1 
PLAN_PAIN : 1 
BUT_BY : 1 
ONE_ORAL : 1 
TO_COUMADIN : 1 
ALSO_HAD : 1 
PT_INR : 1 
INSTRUCTIONS_REVIEW : 1 
LIST_FOR : 1 
MANAGEMENT_AND : 1 
COME_DOCTOR : 1 
DISCUSSED_PATIENT : 1 
CURRENT_OF : 2 
TANGENTIAL_PAIN : 1 
COUMADIN_SCHEDULE : 1 
PROVIDER_ANY : 1 
PATIENT_OUTPATIENT : 1 
ANY_JUST : 1 
NOT_WORSE : 1 
WAS_HIS : 1 
PTSD_DTR : 1 
LOCATION_STATUS : 1 
TELEPHONE_PATIENT : 1 
THE_ONE : 1 
DOCUMENTATION_IS : 1 
HIS_CAME : 1 
HAS_USED : 1 
FOR_INHALATION : 1 
WITH_ACTIVE : 1 
ADR_REPORTED : 1 
YOUR_PAIN : 1 
DT_TO : 1 
PTSD_MEDICATION : 1 
ILLNESS_HYPERCHO : 1 
ACTIVE_NOT : 1 
BY_WORSE : 1 
AS_WATER : 1 
REVIEWED_NO : 1 
THE_ONLY : 1 
HIS_HEART : 1 
MANAGING_PAIN : 1 
TIME_PLEASE : 1 
HEIGHT_CM : 1 
ADDENDUM_HAS : 1 
COMES_HAS : 1 
SAME_PM : 1 
SOON_AS : 1 
NOTE_MCG : 1 
ASSESSMENT_CAROTID : 1 
TO_INTO : 1 
WITH_PAIN : 2 
TREATMENT_CURRENT : 1 
THE_PEE : 1 
IS_MISSED : 1 
REFILLED_PATIENT : 1 
ALBUTEROL_ORAL : 1 
MOUTH_AS : 2 
NUMBER_MANUFACTURER : 1 
LIVING_OUTCOME : 1 
DONE_SOME : 1 
TAKE_DOUBLE : 1 
REHAB_NOT : 1 
AZITHROMYCIN_TAKE : 1 
COMPLETE_AN : 1 
IT_WHILE : 1 
ECHO_FOR : 1 
OF_OVERDOSE : 1 
PRIMARY_OF : 1 
SERVICES_THE : 1 
JUST_TO : 1 
CM_PAIN : 2 
WITH_PLAN : 1 
CARDIOLOGY_NOTE : 1 
REMEMBERED_DO : 1 
THAT_COMPLETE : 1 
HE_TOO : 1 
CENTERS_FOR : 1 
AND_CONTINUES : 1 
THE_TIME : 1 
WIFE_NOW : 1 
OF_PRODUCTS : 1 
ALLERGY_INFORMATION : 1 
INFORMED_HIM : 1 
DO_NOT : 1 
HIS_IS : 1 
COUMADIN_FOR : 1 
ASSESSMENT_PREFERS : 1 
TABLETS_EVERY : 1 
INCLUDING_OUTPATIENT : 1 
OVER_THE : 2 
SECRETIONS_MG : 1 
TAB_PT : 1 
HOURS_TO : 1 
TEASPOONFUL_EVERY : 1 
ANTICOAGULATION_MANAGEMENT : 1 
ML_PER : 1 
THIS_RELATED : 1 
NOTE_PAIN : 1 
BENEFITS_THE : 1 
IT_PT : 1 
TANGENTIAL_IS : 1 
HAS_UP : 1 
FOR_PTSD : 1 
ABOUT_THE : 1 
PC_ANTICOAGULATION : 1 
IN_ARM : 1 
MANAGEMENT_NOTE : 1 
NO_PATIENT : 1 
UAL_TO : 1 
RECEIVED_ML : 1 
IS_WITH : 2 
WHY_THE : 1 
INTAKE_NOTE : 1 
NOT_WORKING : 1 
INTO_FOR : 1 
TAKE_ONE : 1 
ACTIVITY_CHEST : 1 
THIS_RECOMMENDATION : 1 
MY_RESIGNATION : 1 
ANY_TESTS : 1 
MG_ALCF : 1 
ONEHALF_MOUTH : 1 
PAIN_LEGS : 1 
OF_SPINE : 1 
AS_SPINACH : 1 
THOUGH_NOT : 1 
PAIN_COPD : 1 
WANT_TO : 1 
ACTIVITY_OUTPATIENT : 1 
CAN_VIAGRA : 1 
LOCATION_PAIN : 1 
FOR_USING : 1 
NOT_NOW : 1 
UNCHANGED_BY : 1 
NOT_TAKE : 1 
LEGS_TAKE : 1 
KEEP_FOR : 1 
AN_SHE : 1 
DIET_PAIN : 1 
CAROTID_REVIEWED : 1 
CONTACT_PER : 1 
ASSESSMENT_STATES : 1 
TO_HEART : 1 
TEST_WILL : 1 
PT_MY : 1 
CALLED_PC : 1 
BY_AS : 2 
SVC_NOT : 1 
CALLED_TERM : 1 
TAB_TABLET : 1 
CALL_FOR : 1 
ANY_SIGNS : 1 
THE_WHO : 1 
IS_IMPROVES : 1 
LIST_PATIENT : 2 
LIVING_BROCHURE : 1 
EXP_PATIENT : 1 
RISK_ASSESSMENT : 1 
RUBBING_CHEST : 1 
INCLUDING_ACTIVE : 1 
ORDER_SITE : 1 
PILLS_TO : 1 
PLAN_DOPPLER : 1 
OUTPATIENT_REMINDERS : 1 
RECOMMENDED_TO : 1 
PHYSICIAN_KNOW : 1 
PATIENT_EDUCATED : 1 
ACTIVE_INCLUDING : 1 
TOO_THE : 1 
IS_HISTORIAN : 1 
MONTH_PAIN : 1 
GOOD_TEMPERATURE : 1 
HIS_WIFE : 1 
HE_DO : 1 
ACTIVE_INHALATION : 1 
KEEP_LIST : 1 
HEART_HAS : 1 
DOSE_OF : 2 
DOPPLER_WITH : 1 
COMES_ON : 1 
LIVER_THE : 1 
OR_DTR : 1 
COMPLETE_ORDER : 1 
EVERY_WHEN : 1 
INHALATION_ORAL : 2 
FL_HEALTH : 1 
HERE_SEE : 1 
STATES_SHE : 1 
IS_VISIT : 1 
ORAL_FOR : 1 
FOR_TIME : 1 
OF_DELTOID : 1 
EVERY_FOR : 4 
FOR_BREATHING : 1 
GIVE_PT : 1 
NO_ADR : 1 
COME_TO : 1 
DENI_HAS : 1 
THE_AT : 1 
SHE_IS : 1 
TESTS_DO : 1 
TAKES_WHEN : 1 
PRODUCTS_INSTRUCTIONS : 1 
TO_OF : 2 
ALREADY_HAS : 1 
TO_FOR : 1 
ORDER_IT : 1 
OVERDOSE_PATIENT : 1 
OF_ANY : 1 
TO_THE : 2 
SHE_AND : 1 
MORE_ITSELF : 1 
THE_OF : 1 
HE_WISHES : 1 
BY_MOUTH : 3 
NOT_OR : 1 
ONE_PUFF : 1 
CONTINUES_HAVE : 1 
CALL_HIM : 1 
ONE_CAPSULE : 1 
CALL_WISHES : 1 
PAIN_WITH : 3 
PATIENT_MEDICATIONS : 1 
HAS_PHYSICIAN : 1 
WITH_RUBBING : 1 
REGARDING_SIGNS : 1 
MEDICATION_PLAN : 1 
TO_MONITOR : 1 
CHEST_BEEN : 1 
HE_USED : 1 
ADR_WEIGHT : 1 
TABLET_EVERY : 2 
NOTE_PT : 1 
COUMADIN_MG : 1 
THE_YRS : 1 
PAIN_IMPROVED : 1 
THAT_HE : 2 
HIS_LEFT : 1 
INFLUENZA_PATIENT : 1 
CONTROL_PAIN : 1 
AS_LETTUCE : 1 
MEDICATIONS_AEROCHAMBER : 1 
REVIEW_ASSESSMENT : 1 
TAKE_MY : 1 
MANAGEMENT_PATIENT : 1 
NEEDED_SECRETIONS : 1 
TAKE_TABLET : 2 
FAR_THE : 1 
HOME_TAKES : 1 
THAT_SUCH : 1 
BY_ITSELF : 1 
CAULIFLOWER_MAY : 1 
INR_PLEASE : 1 
ILLNESS_ATHERSCLEROSIS : 1 
TOBACCO_RISK : 1 
MEDICATION_OR : 1 
OR_PATIENT : 1 
NOT_ACTIVITY : 1 
FOR_AND : 1 
NKA_LIST : 1 
DISCUSS_AND : 1 
PAIN_CHEST : 1 
SCHEDULE_INR : 1 
UNDERSTANDING_GOOD : 2 
OF_RISK : 1 
PTSD_RECONCILIATION : 1 
WILL_HE : 1 
PLEASE_HAS : 1 
STATUS_USE : 1 
WHILE_PT : 1 
NO_BARRIERS : 1 
ONE_ACTIVE : 1 
THE_THE : 1 
THEN_ONE : 1 
OR_PILL : 1 
HAVE_PAIN : 2 
SUPPLIES_MEDICATIONS : 1 
YOUNGSTOWN_NOTE : 1 
LEFT_AND : 1 
BARRIER_NO : 1 
TAKE_TEASPOONFUL : 1 
CAN_ME : 1 
OF_PATIENT : 1 
FOR_DISEASE : 1 
PAIN_RECOMMENDED : 1 
INFORMED_OF : 1 
WISHES_PTSD : 1 
OF_PACT : 1 
BUT_MORE : 1 
RECEIVED_STATEMENT : 1 
ISSUE_IF : 1 
AN_TO : 1 
FOR_INFECTION : 2 
EVERY_HOURS : 2 
EACH_DOSE : 1 
WITH_OF : 1 
AND_HIM : 1 
ACCESS_AS : 1 
LEVEL_UNDERSTANDING : 2 
AZITHROMYCIN_TAB : 1 
ANY_PAIN : 1 
WILL_WHEN : 1 
PATIENT_HAS : 4 
THIS_ISSUE : 1 
MEDICATIONS_ACTIVE : 1 
SVC_SUICIDAL : 1 
USED_PAIN : 1 
RECOMMENDED_FOLLOWUP : 1 
NOT_REFILLABLE : 1 
OUTPATIENT_AEROCHAMBER : 1 
ANY_OVER : 1 
ARE_THE : 1 
ORDER_THANKS : 1 
VACCINE_PATIENT : 1 
NTG_PT : 1 
CURRENT_PAIN : 1 
CURRENT_LIST : 1 
EDUCATION_LEVEL : 1 
THE_KNOW : 1 
OUTPATIENT_NOTE : 1 
HE_WALKS : 1 
BROCHURE_EDUCATION : 1 
DTR_HAD : 1 
HAS_NO : 1 
ARM_AND : 1 
DAILY_COUMADIN : 1 
PC_LPN : 1 
OF_LEFT : 1 
ON_THAT : 1 
NO_NEW : 1 
OF_ILLNESS : 1 
TEMP_PC : 1 
LEGS_IF : 1 
TERM_HE : 1 
WHO_ME : 1 
ANY_FURTHER : 1 
ME_REPORTS : 1 
MITRAL_NOT : 1 
ADDICT_IN : 1 
REPORTS_CHEST : 1 
FURTHER_MEDICATION : 1 
PAIN_JUST : 1 
WHEN_TO : 1 
NURS_CALLED : 1 
VERBALIZED_ALL : 1 
AN_UAL : 1 
YOUR_PENICILLIN : 1 
DOUBLE_DOSE : 1 
AUTO_THIS : 1 
WHILE_IS : 1 
TO_SCHEDULE : 1 
IN_REHAB : 1 
THIS_LIST : 1 
ACTIVE_STATUS : 1 
YRS_BEING : 1 
CALL_DISCUSS : 1 
USE_ORAL : 1 
PLEASE_HIM : 1 
HOW_VA : 1 
TAKE_OF : 1 
KNOW_TAKE : 1 
NOTE_CLINICAL : 1 
AEROCHAMBER_USE : 1 
BABY_AND : 1 
PAIN_IS : 2 
NOT_INTERESTED : 2 
HAS_ANY : 1 
SCHEDULE_SPINE : 1 
ACTIVITY_PAIN : 1 
HOME_HAS : 1 
IS_TANGENTIAL : 1 
AS_DIURETIC : 1 
REPORTED_LB : 1 
DO_TO : 1 
ONLY_WHO : 1 
THE_INFLUENZA : 1 
MONITOR_HEART : 1 
HOME_AND : 1 
OR_HOMCIDAL : 1 
COMPLETE_ECHOCARDIOGRAM : 1 
SEE_ALLERGY : 1 
HIS_VALVE : 1 
HIS_BEFORE : 1 
OF_INR : 1 
COUMADIN_DAILY : 1 
DT_HERE : 1 
HE_FAR : 1 
STATUS_CONTROLLED : 1 
CODEINE_PT : 1 
MEDICATION_NOTE : 1 
NO_LEARNING : 1 
OF_LEGS : 1 
IF_MISSED : 1 
PAIN_MORE : 1 
DOPPLER_REVIEWED : 1 
HE_SHE : 1 
COUMADIN_AT : 1 
REVIEW_CAROTID : 1 
PATIENT_HE : 1 
DISCUSSED_SCREEN : 1 
IS_NON : 1 
PATIENT_OF : 1 
ACTIVE_MEDICATIONS : 2 
WEIGHT_LB : 1 
INFLUENZA_PER : 1 
ON_COUCH : 1 
TESTS_HE : 1 
HAD_IN : 2 
HER_IS : 1 
MISSED_SOON : 1 
PTSD_HAD : 1 
HE_ATIVAN : 1 
DOSE_PROVIDER : 1 
IS_PAIN : 1 
IN_PREVENTING : 1 
ONLY_CAN : 1 
HAVE_BUT : 1 
PT_IS : 2 
SMOKING_VETERAN : 1 
TAKING_FIB : 1 
LB_KG : 1 
BLOOD_CLOTS : 1 
CURRENT_REVIEWED : 1 
AND_RESIGNATION : 1 
BY_EVERY : 3 
TAKE_ONEHALF : 1 
ALLERGY_WITH : 1 
LPN_NOTE : 1 
UNDERSTANDING_OF : 1 
DIAGNOSIS_OF : 1 
YOU_ONLY : 1 
CHEST_BUT : 2 
SITE_OF : 1 
INFORMATION_CARDIOLOGY : 1 
CAN_DO : 1 
NOT_SL : 1 
MONTH_THE : 1 
THEY_ME : 1 
PREFERS_TO : 1 
CONTINUE_PLAN : 1 
SINCE_WAS : 1 
KEEP_THIS : 1 
KNOW_ANY : 1 
VITAMIN_AS : 1 
SHE_USER : 1 
KNEE_PAIN : 1 
RECOMMENDATION_IS : 1 
ME_ARE : 1 
CURRENT_ALLERGY : 1 
INHL_ONE : 2 
PLEASE_LIST : 1 
OF_TO : 1 
SPECIAL_INSTRUCTIONS : 1 
ME_VIAGRA : 1 
OR_EDUCATED : 1 
NKA_CURRENT : 1 
DONT_OF : 1 
HOURS_AZITHROMYCIN : 1 
CHEST_HE : 1 
WITH_MEDICATION : 1 
DIET_THAT : 1 
MEDICINE_IN : 1 
NOTIFY_REGARDING : 1 
NOT_IMPROVED : 1 
LEFT_CONTACT : 1 
TAKE_PEE : 1 
PATIENT_DIET : 1 
OF_OF : 1 
AS_NOT : 1 
WEIGHT_HEIGHT : 1 
COMES_CHEST : 1 
SO_TAKE : 1 
AS_SERVICES : 1 
DOPPLER_PATIENT : 1 
VERIFIED_DOSE : 1 
TELEPHONE_CONTACT : 1 
IN_LEFT : 1 
CONTROL_LEVEL : 1 
AZITHROMYCIN_MG : 1 
MG_ML : 1 
BUT_ALSO : 1 
HOURS_AS : 1 
OR_LIVER : 1 
REVIEW_PLAN : 1 
BP_MCG : 1 
MOUTH_THEN : 1 
RECOMMENDED_HE : 1 
TAKING_COUMADIN : 1 
PER_PC : 1 
MENTAL_HEALTH : 1 
CARDIOLOGY_PT : 1 
HAS_YOUR : 1 
RECONCILIATION_BP : 1 
ITSELF_WITH : 1 
CFCF_ORAL : 1 
VACCINE_ORDER : 1 
TOBACCO_INSTRUCTIONS : 1 
FURTHER_SERVICES : 1 
PATIENT_NEW : 1 
BY_HOURS : 1 
WEIGHT_KG : 1 
INHALATION_AS : 1 
IF_DOSE : 1 
LIST_HAS : 1 
ASSESSMENT_DOPPLER : 1 
SUPPLIES_OUTPATIENT : 1 
AS_DO : 1 
SOME_TIME : 1 
NOTE_REPORTS : 1 
ACTIVE_SUPPLY : 1 
STATUS_CHRONIC : 1 
DOSE_TAKE : 1 
APPOINTMENT_SCHEDULE : 1 
BARRIERS_PATIENT : 1 
BY_NO : 1 
ALLERGY_WEIGHT : 1 
LEFT_TELEPHONE : 1 
VETERAN_STATES : 1 
OR_WATER : 1 
TAKE_EVERY : 1 
ANY_OVERDOSE : 1 
EFFECTIVE_BLOOD : 1 
BY_ORAL : 1 
KNOWS_TO : 1 
SCHEDULE_PT : 1 
MEDICATIONS_SUPPLIES : 1 
HOME_NO : 1 
OF_INJECTION : 1 
NONE_REVIEW : 1 
WHEN_THE : 1 
HE_CONTINUES : 1 
TAKE_COUMADIN : 1 
OUTPATIENT_SCREEN : 1 
TIME_PM : 1 
HIS_HE : 2 
COMES_PAIN : 1 
INTERESTED_IN : 1 
NO_PHYSICIAN : 1 
DING_PATIENT : 1 
FOR_APPOINTMENT : 1 
RUBBING_HE : 1 
PATIENT_VACCINE : 1 
PAIN_REMINDER : 1 
FOR_INFORMATION : 1 
SPECIAL_MEDICATION : 1 
PTSD_SUICIDAL : 1 
WAS_UNCHANGED : 1 
HOMCIDAL_WILL : 1 
BUT_OFTEN : 1 
HAS_SERVICES : 1 
PATIENT_CHRONIC : 1 
AND_PREVENTION : 1 
NOTE_REMINDERS : 1 
AND_HER : 1 
THE_COMES : 1 
DAILY_PT : 1 
IT_IN : 1 
FOR_SCHEDULE : 2 
TO_CHEST : 1 
OF_SMOKING : 1 
PATIENT_ON : 1 
XYZZY_NOTE : 1 
PT_TANGENTIAL : 1 
HOURS_NEEDED : 1 
COUMADIN_HAS : 1 
AND_OR : 1 
HEART_VALVE : 1 
PRNPATIENT_FOR : 1 
INTRAMUSCULARLY_NUMBER : 1 
IS_OF : 1 
SIGNS_OF : 1 
THE_LESS : 1 
IS_NONUSER : 1 
HAS_SINCE : 1 
COMES_JUST : 1 
YOUR_YOUR : 1 
VISIT_DESCRIPTION : 1 
SCREEN_ASSESSMENT : 1 
MG_DAILY : 1 
ME_THE : 1 
TREATMENT_CONTINUE : 1 
REPORTS_PAIN : 1 
NOW_HE : 1 
KNOW_WHY : 1 
DOWN_ON : 1 
NOT_ECHO : 1 
DOUBLE_PROVIDER : 1 
TO_COMPLETE : 1 
KG_CM : 1 
AS_REMEMBERED : 2 
THE_DATED : 1 
CONTINUE_CURRENT : 2 
HEALTH_ASSESSMENT : 1
MUCH : 1 
VISION : 3 
TINT : 1 
DISTANCE : 2 
DECREASE : 2 
CATEGORY : 1 
INJECTIONS : 1 
MANIFEST : 1 
PERTINENT : 1 
THE : 1 
DARK : 1 
HAVE : 1 
VERY : 2 
PHYSICIAN : 2 
RIGHT : 3 
OUT : 1 
SCARRING : 1 
LP : 1 
OF : 1 
WEARING : 1 
OD : 2 
ASSOCIATED : 1 
LEFT : 4 
LIST : 1 
SYSTEMIC : 1 
NEAR : 1 
FOR : 1 
NONNEOVASCULAR : 1 
MEDS : 2 
SPECS : 1 
MACULAR : 4 
NO : 1 
AGERELATED : 3 
SYMPTOMS : 1 
INDOOR : 1 
GLASSES : 2 
RATION : 3 
CATARACT : 1 
TOMORROW : 1 
USE : 1 
CATARACTS : 1 
CLINIC : 1 
PH : 1 
CC : 2 
NI : 1 
IS : 1 
NOT : 2 
NEOVASCULAR : 1 
TINTED : 1 
OUTDOOR : 1 
DVA : 1 
OS : 1 
AMD : 1 
GOING : 1 
GOOD : 1 
TO : 3 
TOO : 1 
RETINOPATHY : 1 
EYE : 1 
AND : 2 
DIABETIC : 1 
NEW : 1 
BOTH : 2 
PROBLEM : 1 
CULAR : 1 
OU : 3 
COUMADIN : 1 
GLARE : 1 
DE : 3 
NONE : 1 
NOTE : 1 
WITH : 5 
ARE : 1 
LUCENTIS : 2 
RIGHT_LEFT : 5 
DECREASE_NOT : 1 
AND_ARE : 1 
PHYSICIAN_MEDS : 1 
OF_THE : 1 
USE_TO : 1 
DISTANCE_AND : 1 
GOING_HAVE : 1 
DE_OD : 1 
TO_LUCENTIS : 1 
WITH_SYMPTOMS : 1 
DISTANCE_RIGHT : 2 
NOT_GOOD : 1 
NO_OU : 1 
TOO_FOR : 1 
NOTE_NO : 1 
CC_NOT : 1 
OD_CC : 1 
RIGHT_RIGHT : 1 
GOOD_OUT : 1 
LEFT_BOTH : 2 
GOING_TO : 1 
OUT_THE : 1 
WITH_DECREASE : 1 
OS_WITH : 1 
GOOD_THE : 1 
LIST_RETINOPATHY : 1 
VERY_GOOD : 1 
GOOD_OF : 1 
BOTH_INDOOR : 1 
NEAR_LEFT : 1 
OD_NOT : 1 
BOTH_SPECS : 1 
EYE_PROBLEM : 1 
TO_AMD : 1 
VERY_OF : 1 
MACULAR_WITH : 1 
FOR_BOTH : 1 
WITH_GLARE : 1 
LP_LEFT : 1 
LEFT_LEFT : 1 
TOMORROW_PHYSICIAN : 1 
NEW_GLASSES : 1 
NEAR_RIGHT : 2 
EYE_CLINIC : 1 
TO_MACULAR : 1 
WITH_NEOVASCULAR : 1 
WITH_ASSOCIATED : 1 
NO_DIABETIC : 1 
CULAR_NONE : 1 
NOT_CC : 1 
TINT_LEFT : 1 
PHYSICIAN_NONE : 1 
FOR_AND : 1 
OD_LUCENTIS : 1 
NONE_PERTINENT : 1 
NOT_OUT : 1 
CATARACT_OD : 1 
TO_CATARACT : 1 
SYMPTOMS_TO : 1 
EYE_NOTE : 1 
NONE_MEDS : 1 
AMD_OD : 1 
RIGHT_PH : 1 
LIST_NO : 1 
GLARE_SYMPTOMS : 1 
MEDS_DVA : 1 
IS_TO : 1 
ARE_TINTED : 1 
THE_DISTANCE : 1 
TO_HAVE : 1 
TOO_BOTH : 1 
AND_OUTDOOR : 1 
FOR_INDOOR : 1 
THE_GLASSES : 1 
WITH_NONNEOVASCULAR : 1 
PHYSICIAN_WITH : 1 
IS_GOING : 1 
SYSTEMIC_MEDS : 1 
INJECTIONS_WITH : 1 
MACULAR_OD : 1 
GLASSES_ARE : 2 
TO_NOT : 1 
TO_OU : 1 
MEDS_NONE : 1 
OU_TO : 1 
LUCENTIS_PHYSICIAN : 2 
WITH_CULAR : 1 
OUTDOOR_USE : 1 
GLASSES_AND : 1 
DECREASE_WITH : 1 
MUCH_FOR : 1 
LEFT_SPECS : 2 
PERTINENT_MEDS : 1 
NOTE_LIST : 1 
LIST_DIABETIC : 1 
PHYSICIAN_CULAR : 1 
CC_RIGHT : 1 
MEDS_PERTINENT : 1 
WITH_TO : 1 
LEFT_VERY : 1 
DVA_RIGHT : 1 
VISION_WITH : 1 
SYMPTOMS_SCARRING : 1 
NOT_CATARACT : 1 
ARE_MUCH : 1 
LEFT_WEARING : 1 
RIGHT_LP : 1 
NOT_OD : 1 
SYMPTOMS_MACULAR : 1 
VISION_TO : 1 
VISION_GOOD : 1 
NO_RETINOPATHY : 1 
CULAR_MEDS : 1 
DECREASE_TO : 1 
NEW_DISTANCE : 1 
ARE_TOO : 1 
RIGHT_BOTH : 1 
LEFT_NI : 1 
LEFT_PH : 1 
THANKS_CLINIC : 1 
WITH_MACULAR : 2 
INDOOR_AND : 1 
CLINIC_LIST : 1 
INDOOR_USE : 1 
BOTH_AND : 1 
AND_GLASSES : 1 
ORDER_EYE : 1 
USE_IS : 1 
NOT_VERY : 1 
OF_NEW : 1 
OS_SYMPTOMS : 1 
GLARE_TO : 1 
TOMORROW_WITH : 1 
USE_GOING : 1 
PHYSICIAN_ASSOCIATED : 1 
OUT_NEW : 1 
OF_DISTANCE : 1 
HAVE_WITH : 1 
BOTH_VERY : 1 
DARK_LEFT : 1 
MANIFEST_LEFT : 1 
THANKS_NOTE : 1 
DE_WITH : 2 
AND_IS : 1 
MEDS_CC : 1 
RATION_OD : 1 
BOTH_DARK : 1 
WITH_AGERELATED : 2 
AND_TINTED : 1 
IS_HAVE : 1 
NOTE_PROBLEM : 1 
NEW_AND : 1 
LUCENTIS_WITH : 2 
MEDS_COUMADIN : 1 
THE_NEW : 1 
PROBLEM_LIST : 1 
INJECTIONS_PHYSICIAN : 1 
AND_USE : 1 
CLINIC_PROBLEM : 1 
RATION_WITH : 2 
IT_EYE : 1 
TINTED_FOR : 1 
BOTH_OUTDOOR : 1 
PROBLEM_NO : 1 
OUT_OF : 1 
PHYSICIAN_VISION : 1 
HAVE_LUCENTIS : 1 
VISION_NOT : 1 
NONE_SYSTEMIC : 1 
WEARING_RIGHT : 1 
IT_CLINIC : 1 
MEDS_SYSTEMIC : 1 
ASSOCIATED_WITH : 1 
OD_VISION : 1 
MUCH_BOTH : 1 
THANKS_EYE : 1 
TO_TOMORROW : 1 
WITH_MEDS : 1 
COUMADIN_RIGHT : 1 
HAVE_TOMORROW : 1 
PROBLEM_DIABETIC : 1 
OD_INJECTIONS : 1 
OD_PHYSICIAN : 1 
CLINIC_NOTE : 1 
CC_LEFT : 1 
OUTDOOR_IS : 1 
AMD_NOT : 1 
WITH_VISION : 1 
WITH_PHYSICIAN : 1 
TO_SCARRING : 1 
VERY_OUT : 1
