# Supplementary material for: Predicting the Risk of Suicide by Analyzing the Text of Clinical Notes
Source: PLoS One. 2014 Jan 28;9(1):e85733. doi: 10.1371/journal.pone.0085733 (PMC3904866; doi:10.1371/journal.pone.0085733)
Supplement: Appendix S3 — Machine Learning Libraries and Methods: This section is provided to enclose the open source (Apache License) classifier used for the building of the statistical models, specifically for the purposes of study reproducibility. A detailed account of these tools is intended for another publication. (ZIP) [file pone.0085733.s003.zip › Appendix3/ML_libs/Models/va12_FINAL.mod]

<ensemble>
group->1.4964028777
1 and(or(and($TRIAGE_t1.6690647482 !$WANTS_KNOW_t0.1079136691 $WHO_t2.7985611511) and($VITALS_PULSE_t0.3597122302 !$VITALS_RESP_t0.1007194245) $CHEMOTHERAPY_t0.0791366906 $TABLET_ONCE_t0.1366906475 $TN_t0.0791366906 $TYPE_SCHEDULING_t0.0287769784 $UCINATIONS_DENIES_t0.0503597122 $VACCINE_PNEUMOCOCCAL_t0.0359712230 $VA_OTC_t0.0359712230 $VIEW_t0.6762589928 $VITALS_HT_t0.0719424460 $WEARS_t0.1294964029 $WENT_OUT_t0.0791366906 $WHOLE_t0.0719424460 $WIHT_t0.0215827338 $WITH_INSPIRATION_t0.0287769784 $WORK_RELEASE_t0.0287769784 $WORTHLESSNESS_t0.0647482014) !$MG_TAK_t0.0287769784 !$PRODUCTS_IT_t0.0503597122) 
1 or(and(or(and($TRIAGE_t1.6690647482 !$WANTS_KNOW_t0.1079136691 $WHO_t2.7985611511) and($VITALS_PULSE_t0.3597122302 !$VITALS_RESP_t0.1007194245) $CHEMOTHERAPY_t0.0791366906 $TN_t0.0791366906 $TYPE_SCHEDULING_t0.0287769784 $UCINATIONS_DENIES_t0.0503597122 $VACCINE_PNEUMOCOCCAL_t0.0359712230 $VA_OTC_t0.0359712230 $VIEW_t0.6762589928 $VITALS_HT_t0.0719424460 $WEARS_t0.1294964029 $WENT_OUT_t0.0791366906 $WHOLE_t0.0719424460 $WIHT_t0.0215827338 $WITH_INSPIRATION_t0.0287769784 $WORK_RELEASE_t0.0287769784 $WORTHLESSNESS_t0.0647482014) !$MG_TAK_t0.0287769784 !$PRODUCTS_IT_t0.0503597122) $TABLET_ONCE_t0.1366906475) 
1 and(or(and(or(and($TRIAGE_t1.6690647482 !$WANTS_KNOW_t0.1079136691 $WHO_t2.7985611511) and($VITALS_PULSE_t0.3597122302 !$VITALS_RESP_t0.1007194245) $CHEMOTHERAPY_t0.0791366906 $TN_t0.0791366906 $TYPE_SCHEDULING_t0.0287769784 $UCINATIONS_DENIES_t0.0503597122 $VACCINE_PNEUMOCOCCAL_t0.0359712230 $VA_OTC_t0.0359712230 $VIEW_t0.6762589928 $VITALS_HT_t0.0719424460 $WEARS_t0.1294964029 $WENT_OUT_t0.0791366906 $WHOLE_t0.0719424460 $WIHT_t0.0215827338 $WITH_INSPIRATION_t0.0287769784 $WORK_RELEASE_t0.0287769784) !$PRODUCTS_IT_t0.0503597122) $TABLET_ONCE_t0.1366906475 $WORTHLESSNESS_t0.0647482014) !$MG_TAK_t0.0287769784) 
1 and(or(and(or(and($TRIAGE_t1.6690647482 !$WANTS_KNOW_t0.1079136691 $WHO_t2.7985611511) and($VITALS_PULSE_t0.3597122302 !$VITALS_RESP_t0.1007194245) $CHEMOTHERAPY_t0.0791366906 $TN_t0.0791366906 $TYPE_SCHEDULING_t0.0287769784 $UCINATIONS_DENIES_t0.0503597122 $VACCINE_PNEUMOCOCCAL_t0.0359712230 $VA_OTC_t0.0359712230 $VIEW_t0.6762589928 $VITALS_HT_t0.0719424460 $WEARS_t0.1294964029 $WENT_OUT_t0.0791366906 $WHOLE_t0.0719424460 $WIHT_t0.0215827338 $WITH_INSPIRATION_t0.0287769784 $WORK_RELEASE_t0.0287769784 $WORTHLESSNESS_t0.0647482014) !$PRODUCTS_IT_t0.0503597122) $TABLET_ONCE_t0.1366906475) !$MG_TAK_t0.0287769784) 
1 and(or(and(or(and($TRIAGE_t1.6690647482 !$WANTS_KNOW_t0.1079136691 $WHO_t2.7985611511) and($VITALS_PULSE_t0.3597122302 !$VITALS_RESP_t0.1007194245) $CHEMOTHERAPY_t0.0791366906 $TN_t0.0791366906 $TYPE_SCHEDULING_t0.0287769784 $UCINATIONS_DENIES_t0.0503597122 $VACCINE_PNEUMOCOCCAL_t0.0359712230 $VA_OTC_t0.0359712230 $VIEW_t0.6762589928 $VITALS_HT_t0.0719424460 $WEARS_t0.1294964029 $WENT_OUT_t0.0791366906 $WHOLE_t0.0719424460 $WIHT_t0.0215827338 $WITH_INSPIRATION_t0.0287769784 $WORTHLESSNESS_t0.0647482014) !$PRODUCTS_IT_t0.0503597122) $TABLET_ONCE_t0.1366906475 $WORK_RELEASE_t0.0287769784) !$MG_TAK_t0.0287769784) 
1 and(or(and(or(and($TRIAGE_t1.6690647482 !$WANTS_KNOW_t0.1079136691 $WHO_t2.7985611511) and($VITALS_PULSE_t0.3597122302 !$VITALS_RESP_t0.1007194245) $CHEMOTHERAPY_t0.0791366906 $TN_t0.0791366906 $TYPE_SCHEDULING_t0.0287769784 $UCINATIONS_DENIES_t0.0503597122 $VACCINE_PNEUMOCOCCAL_t0.0359712230 $VA_OTC_t0.0359712230 $VIEW_t0.6762589928 $VITALS_HT_t0.0719424460 $WEARS_t0.1294964029 $WENT_OUT_t0.0791366906 $WHOLE_t0.0719424460 $WIHT_t0.0215827338 $WORK_RELEASE_t0.0287769784 $WORTHLESSNESS_t0.0647482014) !$PRODUCTS_IT_t0.0503597122) $TABLET_ONCE_t0.1366906475 $WITH_INSPIRATION_t0.0287769784) !$MG_TAK_t0.0287769784) 
1 and(or(and(or(and($TRIAGE_t1.6690647482 !$WANTS_KNOW_t0.1079136691 $WHO_t2.7985611511) and($VITALS_PULSE_t0.3597122302 !$VITALS_RESP_t0.1007194245) $CHEMOTHERAPY_t0.0791366906 $TN_t0.0791366906 $TYPE_SCHEDULING_t0.0287769784 $UCINATIONS_DENIES_t0.0503597122 $VACCINE_PNEUMOCOCCAL_t0.0359712230 $VA_OTC_t0.0359712230 $VIEW_t0.6762589928 $VITALS_HT_t0.0719424460 $WEARS_t0.1294964029 $WENT_OUT_t0.0791366906 $WHOLE_t0.0719424460 $WITH_INSPIRATION_t0.0287769784 $WORK_RELEASE_t0.0287769784 $WORTHLESSNESS_t0.0647482014) !$PRODUCTS_IT_t0.0503597122) $TABLET_ONCE_t0.1366906475 $WIHT_t0.0215827338) !$MG_TAK_t0.0287769784) 
1 and(or(and(or(and($TRIAGE_t1.6690647482 !$WANTS_KNOW_t0.1079136691 $WHO_t2.7985611511) and($VITALS_PULSE_t0.3597122302 !$VITALS_RESP_t0.1007194245) $CHEMOTHERAPY_t0.0791366906 $TN_t0.0791366906 $TYPE_SCHEDULING_t0.0287769784 $UCINATIONS_DENIES_t0.0503597122 $VACCINE_PNEUMOCOCCAL_t0.0359712230 $VA_OTC_t0.0359712230 $VIEW_t0.6762589928 $VITALS_HT_t0.0719424460 $WEARS_t0.1294964029 $WHOLE_t0.0719424460 $WIHT_t0.0215827338 $WITH_INSPIRATION_t0.0287769784 $WORK_RELEASE_t0.0287769784 $WORTHLESSNESS_t0.0647482014) !$PRODUCTS_IT_t0.0503597122) $TABLET_ONCE_t0.1366906475 $WENT_OUT_t0.0791366906) !$MG_TAK_t0.0287769784) 
1 and(or(and(or(and($TRIAGE_t1.6690647482 !$WANTS_KNOW_t0.1079136691 $WHO_t2.7985611511) and($VITALS_PULSE_t0.3597122302 !$VITALS_RESP_t0.1007194245) $CHEMOTHERAPY_t0.0791366906 $TN_t0.0791366906 $TYPE_SCHEDULING_t0.0287769784 $UCINATIONS_DENIES_t0.0503597122 $VACCINE_PNEUMOCOCCAL_t0.0359712230 $VA_OTC_t0.0359712230 $VIEW_t0.6762589928 $WEARS_t0.1294964029 $WENT_OUT_t0.0791366906 $WHOLE_t0.0719424460 $WIHT_t0.0215827338 $WITH_INSPIRATION_t0.0287769784 $WORK_RELEASE_t0.0287769784 $WORTHLESSNESS_t0.0647482014) !$PRODUCTS_IT_t0.0503597122) $TABLET_ONCE_t0.1366906475 $VITALS_HT_t0.0719424460) !$MG_TAK_t0.0287769784) 
1 and(or(and(or(and($TRIAGE_t1.6690647482 !$WANTS_KNOW_t0.1079136691 $WHO_t2.7985611511) and($VITALS_PULSE_t0.3597122302 !$VITALS_RESP_t0.1007194245) $CHEMOTHERAPY_t0.0791366906 $TN_t0.0791366906 $TYPE_SCHEDULING_t0.0287769784 $UCINATIONS_DENIES_t0.0503597122 $VACCINE_PNEUMOCOCCAL_t0.0359712230 $VA_OTC_t0.0359712230 $VIEW_t0.6762589928 $WEARS_t0.1294964029 $WENT_OUT_t0.0791366906 $WHOLE_t0.0719424460 $WIHT_t0.0215827338 $WORK_RELEASE_t0.0287769784 $WORTHLESSNESS_t0.0647482014) !$PRODUCTS_IT_t0.0503597122) $TABLET_ONCE_t0.1366906475 $VITALS_HT_t0.0719424460 $WITH_INSPIRATION_t0.0287769784) !$MG_TAK_t0.0287769784) 
1 and(or(and(or(and(or(!$GLAUCOMA_t0.3309352518 !$WAL_FOLLOWING_t0.1654676259) !$BRAIN_t0.2589928058 !$MADE_t1.2733812950) and($AFTER_t3.8992805755 $NOTE_t20.6474820144)) or($STEP_t0.3237410072 $TURNING_t0.0575539568 $TYPE_SCHEDULING_t0.0287769784 $VACCINE_PNEUMOCOCCAL_t0.0359712230 $VITALS_HT_t0.0719424460 $VITALS_PULSE_t0.3597122302 $WEARS_t0.1294964029 $WEEK_NOTICE_t0.0575539568 $WENT_OUT_t0.0791366906 $WHOLE_t0.0719424460 $WHO_t2.7985611511 $WITH_INSPIRATION_t0.0287769784 $WRONG_t0.1223021583)) and($VIEW_t0.6762589928 $WANTS_t0.9280575540) $NAPROXEN_MG_t0.1726618705 $PASSED_OUT_t0.0719424460 $TN_t0.0791366906 $VARDENAFIL_HCL_t0.0863309353 $YARD_t0.0359712230 $YELLING_t0.0287769784) !$HEALING_WELL_t0.0431654676 !$NUMBER_NOVARTIS_t0.0359712230 !$PERFUSION_t0.0935251799) 
1 and(or(and(or(and(or(!$GLAUCOMA_t0.3309352518 !$WAL_FOLLOWING_t0.1654676259) !$BRAIN_t0.2589928058 !$MADE_t1.2733812950) and($AFTER_t3.8992805755 $NOTE_t20.6474820144)) or($STEP_t0.3237410072 $TURNING_t0.0575539568 $TYPE_SCHEDULING_t0.0287769784 $VACCINE_PNEUMOCOCCAL_t0.0359712230 $VITALS_HT_t0.0719424460 $VITALS_PULSE_t0.3597122302 $WEARS_t0.1294964029 $WEEK_NOTICE_t0.0575539568 $WENT_OUT_t0.0791366906 $WHOLE_t0.0719424460 $WHO_t2.7985611511 $WITH_INSPIRATION_t0.0287769784 $WRONG_t0.1223021583) !$NUMBER_NOVARTIS_t0.0359712230) and($VIEW_t0.6762589928 $WANTS_t0.9280575540) $NAPROXEN_MG_t0.1726618705 $PASSED_OUT_t0.0719424460 $TN_t0.0791366906 $VARDENAFIL_HCL_t0.0863309353 $YARD_t0.0359712230 $YELLING_t0.0287769784) !$HEALING_WELL_t0.0431654676 !$PERFUSION_t0.0935251799) 
1 and(or(and(or(and(or(and(or(!$GLAUCOMA_t0.3309352518 !$WAL_FOLLOWING_t0.1654676259) !$BRAIN_t0.2589928058 !$MADE_t1.2733812950) and($AFTER_t3.8992805755 $NOTE_t20.6474820144)) or($STEP_t0.3237410072 $TURNING_t0.0575539568 $TYPE_SCHEDULING_t0.0287769784 $VACCINE_PNEUMOCOCCAL_t0.0359712230 $VITALS_HT_t0.0719424460 $VITALS_PULSE_t0.3597122302 $WEARS_t0.1294964029 $WEEK_NOTICE_t0.0575539568 $WENT_OUT_t0.0791366906 $WHOLE_t0.0719424460 $WHO_t2.7985611511 $WITH_INSPIRATION_t0.0287769784 $WRONG_t0.1223021583)) and($VIEW_t0.6762589928 $WANTS_t0.9280575540) $TN_t0.0791366906 $VARDENAFIL_HCL_t0.0863309353 $YARD_t0.0359712230 $YELLING_t0.0287769784) !$NUMBER_NOVARTIS_t0.0359712230 !$PERFUSION_t0.0935251799) $NAPROXEN_MG_t0.1726618705 $PASSED_OUT_t0.0719424460) !$HEALING_WELL_t0.0431654676) 
1 and(or(and(or(and(or(and(or(!$GLAUCOMA_t0.3309352518 !$WAL_FOLLOWING_t0.1654676259) !$BRAIN_t0.2589928058 !$MADE_t1.2733812950) and($AFTER_t3.8992805755 $NOTE_t20.6474820144)) or($STEP_t0.3237410072 $TURNING_t0.0575539568 $TYPE_SCHEDULING_t0.0287769784 $VACCINE_PNEUMOCOCCAL_t0.0359712230 $VITALS_HT_t0.0719424460 $VITALS_PULSE_t0.3597122302 $WEARS_t0.1294964029 $WEEK_NOTICE_t0.0575539568 $WENT_OUT_t0.0791366906 $WHOLE_t0.0719424460 $WHO_t2.7985611511 $WITH_INSPIRATION_t0.0287769784 $WRONG_t0.1223021583)) and($VIEW_t0.6762589928 $WANTS_t0.9280575540) $TN_t0.0791366906 $VARDENAFIL_HCL_t0.0863309353 $YARD_t0.0359712230 $YELLING_t0.0287769784) !$PERFUSION_t0.0935251799) $NAPROXEN_MG_t0.1726618705 $PASSED_OUT_t0.0719424460) !$HEALING_WELL_t0.0431654676 !$NUMBER_NOVARTIS_t0.0359712230) 
1 and(or(and(or(and(or(and(or(!$GLAUCOMA_t0.3309352518 !$WAL_FOLLOWING_t0.1654676259) !$BRAIN_t0.2589928058 !$MADE_t1.2733812950) and($AFTER_t3.8992805755 $NOTE_t20.6474820144)) or($STEP_t0.3237410072 $TURNING_t0.0575539568 $TYPE_SCHEDULING_t0.0287769784 $VACCINE_PNEUMOCOCCAL_t0.0359712230 $VITALS_HT_t0.0719424460 $VITALS_PULSE_t0.3597122302 $WEARS_t0.1294964029 $WEEK_NOTICE_t0.0575539568 $WENT_OUT_t0.0791366906 $WHOLE_t0.0719424460 $WHO_t2.7985611511 $WITH_INSPIRATION_t0.0287769784 $WRONG_t0.1223021583)) and($VIEW_t0.6762589928 $WANTS_t0.9280575540) $VARDENAFIL_HCL_t0.0863309353 $YARD_t0.0359712230 $YELLING_t0.0287769784) !$NUMBER_NOVARTIS_t0.0359712230 !$PERFUSION_t0.0935251799) $NAPROXEN_MG_t0.1726618705 $PASSED_OUT_t0.0719424460 $TN_t0.0791366906) !$HEALING_WELL_t0.0431654676) 
1 and(or(and(or(and(or(and(or(!$GLAUCOMA_t0.3309352518 !$WAL_FOLLOWING_t0.1654676259) !$BRAIN_t0.2589928058 !$MADE_t1.2733812950) and($AFTER_t3.8992805755 $NOTE_t20.6474820144)) or($STEP_t0.3237410072 $TURNING_t0.0575539568 $TYPE_SCHEDULING_t0.0287769784 $VACCINE_PNEUMOCOCCAL_t0.0359712230 $VITALS_HT_t0.0719424460 $VITALS_PULSE_t0.3597122302 $WEARS_t0.1294964029 $WEEK_NOTICE_t0.0575539568 $WENT_OUT_t0.0791366906 $WHOLE_t0.0719424460 $WHO_t2.7985611511 $WITH_INSPIRATION_t0.0287769784 $WRONG_t0.1223021583)) and($VIEW_t0.6762589928 $WANTS_t0.9280575540) $VARDENAFIL_HCL_t0.0863309353 $YARD_t0.0359712230 $YELLING_t0.0287769784) !$PERFUSION_t0.0935251799) $NAPROXEN_MG_t0.1726618705 $PASSED_OUT_t0.0719424460 $TN_t0.0791366906) !$HEALING_WELL_t0.0431654676 !$NUMBER_NOVARTIS_t0.0359712230) 
1 and(or(and(or(and(or(and(or(!$GLAUCOMA_t0.3309352518 !$WAL_FOLLOWING_t0.1654676259) !$BRAIN_t0.2589928058 !$MADE_t1.2733812950) and($AFTER_t3.8992805755 $NOTE_t20.6474820144)) or($STEP_t0.3237410072 $TURNING_t0.0575539568 $TYPE_SCHEDULING_t0.0287769784 $VACCINE_PNEUMOCOCCAL_t0.0359712230 $VITALS_HT_t0.0719424460 $VITALS_PULSE_t0.3597122302 $WEARS_t0.1294964029 $WEEK_NOTICE_t0.0575539568 $WENT_OUT_t0.0791366906 $WHOLE_t0.0719424460 $WHO_t2.7985611511 $WITH_INSPIRATION_t0.0287769784 $WRONG_t0.1223021583) !$NUMBER_NOVARTIS_t0.0359712230) and($VIEW_t0.6762589928 $WANTS_t0.9280575540) $TN_t0.0791366906 $VARDENAFIL_HCL_t0.0863309353 $YARD_t0.0359712230 $YELLING_t0.0287769784) !$PERFUSION_t0.0935251799) $NAPROXEN_MG_t0.1726618705 $PASSED_OUT_t0.0719424460) !$HEALING_WELL_t0.0431654676) 
1 and(or(and(or(and(or(and(or(!$GLAUCOMA_t0.3309352518 !$WAL_FOLLOWING_t0.1654676259) !$BRAIN_t0.2589928058 !$MADE_t1.2733812950) and($AFTER_t3.8992805755 $NOTE_t20.6474820144)) or($STEP_t0.3237410072 $TURNING_t0.0575539568 $TYPE_SCHEDULING_t0.0287769784 $VACCINE_PNEUMOCOCCAL_t0.0359712230 $VITALS_HT_t0.0719424460 $VITALS_PULSE_t0.3597122302 $WEARS_t0.1294964029 $WEEK_NOTICE_t0.0575539568 $WENT_OUT_t0.0791366906 $WHOLE_t0.0719424460 $WHO_t2.7985611511 $WITH_INSPIRATION_t0.0287769784 $WRONG_t0.1223021583) !$NUMBER_NOVARTIS_t0.0359712230) and($VIEW_t0.6762589928 $WANTS_t0.9280575540) $TN_t0.0791366906 $YARD_t0.0359712230 $YELLING_t0.0287769784) !$PERFUSION_t0.0935251799) $NAPROXEN_MG_t0.1726618705 $PASSED_OUT_t0.0719424460 $VARDENAFIL_HCL_t0.0863309353) !$HEALING_WELL_t0.0431654676) 
1 and(or(and(or(and(or(and(or(!$GLAUCOMA_t0.3309352518 !$WAL_FOLLOWING_t0.1654676259) !$BRAIN_t0.2589928058 !$MADE_t1.2733812950) and($AFTER_t3.8992805755 $NOTE_t20.6474820144)) or($STEP_t0.3237410072 $TURNING_t0.0575539568 $TYPE_SCHEDULING_t0.0287769784 $VACCINE_PNEUMOCOCCAL_t0.0359712230 $VITALS_HT_t0.0719424460 $VITALS_PULSE_t0.3597122302 $WEARS_t0.1294964029 $WEEK_NOTICE_t0.0575539568 $WENT_OUT_t0.0791366906 $WHOLE_t0.0719424460 $WHO_t2.7985611511 $WITH_INSPIRATION_t0.0287769784 $WRONG_t0.1223021583) !$NUMBER_NOVARTIS_t0.0359712230) and($VIEW_t0.6762589928 $WANTS_t0.9280575540) $VARDENAFIL_HCL_t0.0863309353 $YARD_t0.0359712230 $YELLING_t0.0287769784) !$PERFUSION_t0.0935251799) $NAPROXEN_MG_t0.1726618705 $PASSED_OUT_t0.0719424460 $TN_t0.0791366906) !$HEALING_WELL_t0.0431654676) 
1 or(and(or(and(or(and(or(and(or(!$GLAUCOMA_t0.3309352518 !$WAL_FOLLOWING_t0.1654676259) !$BRAIN_t0.2589928058 !$MADE_t1.2733812950) and($AFTER_t3.8992805755 $NOTE_t20.6474820144)) or($STEP_t0.3237410072 $TURNING_t0.0575539568 $TYPE_SCHEDULING_t0.0287769784 $VACCINE_PNEUMOCOCCAL_t0.0359712230 $VITALS_HT_t0.0719424460 $VITALS_PULSE_t0.3597122302 $WEARS_t0.1294964029 $WEEK_NOTICE_t0.0575539568 $WENT_OUT_t0.0791366906 $WHOLE_t0.0719424460 $WHO_t2.7985611511 $WITH_INSPIRATION_t0.0287769784 $WRONG_t0.1223021583)) and($VIEW_t0.6762589928 $WANTS_t0.9280575540) $TN_t0.0791366906 $VARDENAFIL_HCL_t0.0863309353 $YARD_t0.0359712230 $YELLING_t0.0287769784) !$NUMBER_NOVARTIS_t0.0359712230 !$PERFUSION_t0.0935251799) $PASSED_OUT_t0.0719424460) !$HEALING_WELL_t0.0431654676) $NAPROXEN_MG_t0.1726618705) 
1 and(or(and(!$DURING_t2.2446043165 $RESCHEDULED_t0.3309352518) and(!$UNTIL_t0.9496402878 $VERBALIZED_t1.1510791367) $ABUSE_SCREEN_t0.0791366906 $STEP_t0.3237410072 $TN_t0.0791366906 $TYPE_SCHEDULING_t0.0287769784 $UNSTEADY_t0.0575539568 $UPPER_CHEST_t0.1726618705 $VACCINE_PNEUMOCOCCAL_t0.0359712230 $VETERAN_t8.3453237410 $VIEW_t0.6762589928 $VITALS_HT_t0.0719424460 $VITALS_PULSE_t0.3597122302 $WAS_SCREENED_t0.1151079137 $WEAPONS_t0.0503597122 $WITHIN_LAST_t0.4748201439 $WITH_INSPIRATION_t0.0287769784 $WORTHLESSNESS_t0.0647482014 $YELLING_t0.0287769784) !$TREATMENT_OBTAINING_t0.0431654676 !$VACCINE_LOT_t0.0431654676) 
1 and(or(and(or($ABUSE_SCREEN_t0.0791366906 $RESCHEDULED_t0.3309352518) !$DURING_t2.2446043165) and(!$UNTIL_t0.9496402878 $VERBALIZED_t1.1510791367) $STEP_t0.3237410072 $TN_t0.0791366906 $TYPE_SCHEDULING_t0.0287769784 $UNSTEADY_t0.0575539568 $UPPER_CHEST_t0.1726618705 $VACCINE_PNEUMOCOCCAL_t0.0359712230 $VETERAN_t8.3453237410 $VIEW_t0.6762589928 $VITALS_HT_t0.0719424460 $VITALS_PULSE_t0.3597122302 $WAS_SCREENED_t0.1151079137 $WEAPONS_t0.0503597122 $WITHIN_LAST_t0.4748201439 $WITH_INSPIRATION_t0.0287769784 $WORTHLESSNESS_t0.0647482014 $YELLING_t0.0287769784) !$TREATMENT_OBTAINING_t0.0431654676 !$VACCINE_LOT_t0.0431654676) 
1 or(and(or(and(!$DURING_t2.2446043165 $RESCHEDULED_t0.3309352518) and(!$UNTIL_t0.9496402878 $VERBALIZED_t1.1510791367) $STEP_t0.3237410072 $TN_t0.0791366906 $TYPE_SCHEDULING_t0.0287769784 $UNSTEADY_t0.0575539568 $UPPER_CHEST_t0.1726618705 $VACCINE_PNEUMOCOCCAL_t0.0359712230 $VETERAN_t8.3453237410 $VIEW_t0.6762589928 $VITALS_HT_t0.0719424460 $VITALS_PULSE_t0.3597122302 $WAS_SCREENED_t0.1151079137 $WEAPONS_t0.0503597122 $WITHIN_LAST_t0.4748201439 $WITH_INSPIRATION_t0.0287769784 $WORTHLESSNESS_t0.0647482014 $YELLING_t0.0287769784) !$TREATMENT_OBTAINING_t0.0431654676 !$VACCINE_LOT_t0.0431654676) $ABUSE_SCREEN_t0.0791366906) 
1 and(or(and(!$DURING_t2.2446043165 $RESCHEDULED_t0.3309352518) and(!$DURING_t2.2446043165 !$UNTIL_t0.9496402878 $VERBALIZED_t1.1510791367) $ABUSE_SCREEN_t0.0791366906 $STEP_t0.3237410072 $TN_t0.0791366906 $TYPE_SCHEDULING_t0.0287769784 $UNSTEADY_t0.0575539568 $UPPER_CHEST_t0.1726618705 $VACCINE_PNEUMOCOCCAL_t0.0359712230 $VETERAN_t8.3453237410 $VIEW_t0.6762589928 $VITALS_HT_t0.0719424460 $VITALS_PULSE_t0.3597122302 $WAS_SCREENED_t0.1151079137 $WEAPONS_t0.0503597122 $WITHIN_LAST_t0.4748201439 $WITH_INSPIRATION_t0.0287769784 $WORTHLESSNESS_t0.0647482014 $YELLING_t0.0287769784) !$TREATMENT_OBTAINING_t0.0431654676 !$VACCINE_LOT_t0.0431654676) 
1 and(or(and(!$DURING_t2.2446043165 $RESCHEDULED_t0.3309352518) and(!$RESCHEDULED_t0.3309352518 !$UNTIL_t0.9496402878 $VERBALIZED_t1.1510791367) $ABUSE_SCREEN_t0.0791366906 $STEP_t0.3237410072 $TN_t0.0791366906 $TYPE_SCHEDULING_t0.0287769784 $UNSTEADY_t0.0575539568 $UPPER_CHEST_t0.1726618705 $VACCINE_PNEUMOCOCCAL_t0.0359712230 $VETERAN_t8.3453237410 $VIEW_t0.6762589928 $VITALS_HT_t0.0719424460 $VITALS_PULSE_t0.3597122302 $WAS_SCREENED_t0.1151079137 $WEAPONS_t0.0503597122 $WITHIN_LAST_t0.4748201439 $WITH_INSPIRATION_t0.0287769784 $WORTHLESSNESS_t0.0647482014 $YELLING_t0.0287769784) !$TREATMENT_OBTAINING_t0.0431654676 !$VACCINE_LOT_t0.0431654676) 
1 and(or(and(!$DURING_t2.2446043165 $RESCHEDULED_t0.3309352518) and(!$TOT_t0.0287769784 !$UNTIL_t0.9496402878 $VERBALIZED_t1.1510791367) $ABUSE_SCREEN_t0.0791366906 $STEP_t0.3237410072 $TN_t0.0791366906 $TYPE_SCHEDULING_t0.0287769784 $UNSTEADY_t0.0575539568 $UPPER_CHEST_t0.1726618705 $VACCINE_PNEUMOCOCCAL_t0.0359712230 $VETERAN_t8.3453237410 $VIEW_t0.6762589928 $VITALS_HT_t0.0719424460 $VITALS_PULSE_t0.3597122302 $WAS_SCREENED_t0.1151079137 $WEAPONS_t0.0503597122 $WITHIN_LAST_t0.4748201439 $WITH_INSPIRATION_t0.0287769784 $WORTHLESSNESS_t0.0647482014 $YELLING_t0.0287769784) !$TREATMENT_OBTAINING_t0.0431654676 !$VACCINE_LOT_t0.0431654676) 
1 and(or(and(!$DURING_t2.2446043165 $RESCHEDULED_t0.3309352518) and(!$TOUR_t0.2230215827 !$UNTIL_t0.9496402878 $VERBALIZED_t1.1510791367) $ABUSE_SCREEN_t0.0791366906 $STEP_t0.3237410072 $TN_t0.0791366906 $TYPE_SCHEDULING_t0.0287769784 $UNSTEADY_t0.0575539568 $UPPER_CHEST_t0.1726618705 $VACCINE_PNEUMOCOCCAL_t0.0359712230 $VETERAN_t8.3453237410 $VIEW_t0.6762589928 $VITALS_HT_t0.0719424460 $VITALS_PULSE_t0.3597122302 $WAS_SCREENED_t0.1151079137 $WEAPONS_t0.0503597122 $WITHIN_LAST_t0.4748201439 $WITH_INSPIRATION_t0.0287769784 $WORTHLESSNESS_t0.0647482014 $YELLING_t0.0287769784) !$TREATMENT_OBTAINING_t0.0431654676 !$VACCINE_LOT_t0.0431654676) 
1 and(or(and(!$DURING_t2.2446043165 $RESCHEDULED_t0.3309352518) and(!$TRACHEA_t0.0287769784 !$UNTIL_t0.9496402878 $VERBALIZED_t1.1510791367) $ABUSE_SCREEN_t0.0791366906 $STEP_t0.3237410072 $TN_t0.0791366906 $TYPE_SCHEDULING_t0.0287769784 $UNSTEADY_t0.0575539568 $UPPER_CHEST_t0.1726618705 $VACCINE_PNEUMOCOCCAL_t0.0359712230 $VETERAN_t8.3453237410 $VIEW_t0.6762589928 $VITALS_HT_t0.0719424460 $VITALS_PULSE_t0.3597122302 $WAS_SCREENED_t0.1151079137 $WEAPONS_t0.0503597122 $WITHIN_LAST_t0.4748201439 $WITH_INSPIRATION_t0.0287769784 $WORTHLESSNESS_t0.0647482014 $YELLING_t0.0287769784) !$TREATMENT_OBTAINING_t0.0431654676 !$VACCINE_LOT_t0.0431654676) 
1 and(or(and(!$DURING_t2.2446043165 $RESCHEDULED_t0.3309352518) and(!$TRAITS_t0.0863309353 !$UNTIL_t0.9496402878 $VERBALIZED_t1.1510791367) $ABUSE_SCREEN_t0.0791366906 $STEP_t0.3237410072 $TN_t0.0791366906 $TYPE_SCHEDULING_t0.0287769784 $UNSTEADY_t0.0575539568 $UPPER_CHEST_t0.1726618705 $VACCINE_PNEUMOCOCCAL_t0.0359712230 $VETERAN_t8.3453237410 $VIEW_t0.6762589928 $VITALS_HT_t0.0719424460 $VITALS_PULSE_t0.3597122302 $WAS_SCREENED_t0.1151079137 $WEAPONS_t0.0503597122 $WITHIN_LAST_t0.4748201439 $WITH_INSPIRATION_t0.0287769784 $WORTHLESSNESS_t0.0647482014 $YELLING_t0.0287769784) !$TREATMENT_OBTAINING_t0.0431654676 !$VACCINE_LOT_t0.0431654676) 
1 and(or(and(!$DURING_t2.2446043165 $RESCHEDULED_t0.3309352518) and(!$TRANQUIL_AS_t0.0359712230 !$UNTIL_t0.9496402878 $VERBALIZED_t1.1510791367) $ABUSE_SCREEN_t0.0791366906 $STEP_t0.3237410072 $TN_t0.0791366906 $TYPE_SCHEDULING_t0.0287769784 $UNSTEADY_t0.0575539568 $UPPER_CHEST_t0.1726618705 $VACCINE_PNEUMOCOCCAL_t0.0359712230 $VETERAN_t8.3453237410 $VIEW_t0.6762589928 $VITALS_HT_t0.0719424460 $VITALS_PULSE_t0.3597122302 $WAS_SCREENED_t0.1151079137 $WEAPONS_t0.0503597122 $WITHIN_LAST_t0.4748201439 $WITH_INSPIRATION_t0.0287769784 $WORTHLESSNESS_t0.0647482014 $YELLING_t0.0287769784) !$TREATMENT_OBTAINING_t0.0431654676 !$VACCINE_LOT_t0.0431654676) 
1 and(or(and(!$INDICATED_t0.8129496403 $RESCHEDULED_t0.3309352518) and(!$UNTIL_t0.9496402878 $VERBALIZED_t1.1510791367) $NAPROXEN_TAB_t0.1654676259 $STEP_t0.3237410072 $TN_t0.0791366906 $UNSTEADY_t0.0575539568 $UPPER_CHEST_t0.1726618705 $VACCINE_PNEUMOCOCCAL_t0.0359712230 $VARDENAFIL_MG_t0.1007194245 $VENLAFAXINE_HCL_t0.0359712230 $VETERAN_t8.3453237410 $VIEW_t0.6762589928 $VITALS_HT_t0.0719424460 $VITALS_PULSE_t0.3597122302 $VITALS_WT_t0.0503597122 $WEAPONS_t0.0503597122 $WITHIN_LAST_t0.4748201439 $WITH_INSPIRATION_t0.0287769784) !$TREATMENT_OBTAINING_t0.0431654676 !$VACCINE_LOT_t0.0431654676) 
1 and(or(and($RESCHEDULED_t0.3309352518 !$WORKED_t0.2661870504) and(!$UNTIL_t0.9496402878 $VERBALIZED_t1.1510791367) $NAPROXEN_TAB_t0.1654676259 $STEP_t0.3237410072 $TN_t0.0791366906 $UNSTEADY_t0.0575539568 $UPPER_CHEST_t0.1726618705 $VACCINE_PNEUMOCOCCAL_t0.0359712230 $VARDENAFIL_MG_t0.1007194245 $VENLAFAXINE_HCL_t0.0359712230 $VETERAN_t8.3453237410 $VIEW_t0.6762589928 $VITALS_HT_t0.0719424460 $VITALS_PULSE_t0.3597122302 $VITALS_WT_t0.0503597122 $WEAPONS_t0.0503597122 $WITHIN_LAST_t0.4748201439 $WITH_INSPIRATION_t0.0287769784) !$TREATMENT_OBTAINING_t0.0431654676 !$VACCINE_LOT_t0.0431654676) 
1 or(and(or(and($RESCHEDULED_t0.3309352518 !$WORKED_t0.2661870504) and(!$UNTIL_t0.9496402878 $VERBALIZED_t1.1510791367) $STEP_t0.3237410072 $TN_t0.0791366906 $UNSTEADY_t0.0575539568 $UPPER_CHEST_t0.1726618705 $VACCINE_PNEUMOCOCCAL_t0.0359712230 $VARDENAFIL_MG_t0.1007194245 $VENLAFAXINE_HCL_t0.0359712230 $VETERAN_t8.3453237410 $VIEW_t0.6762589928 $VITALS_HT_t0.0719424460 $VITALS_PULSE_t0.3597122302 $VITALS_WT_t0.0503597122 $WEAPONS_t0.0503597122 $WITHIN_LAST_t0.4748201439 $WITH_INSPIRATION_t0.0287769784) !$TREATMENT_OBTAINING_t0.0431654676 !$VACCINE_LOT_t0.0431654676) $NAPROXEN_TAB_t0.1654676259) 
1 and(or(and(!$INDICATED_t0.8129496403 !$LIVING_t1.8129496403 $RESCHEDULED_t0.3309352518) and(!$UNTIL_t0.9496402878 $VERBALIZED_t1.1510791367) $NAPROXEN_TAB_t0.1654676259 $STEP_t0.3237410072 $TN_t0.0791366906 $UNSTEADY_t0.0575539568 $UPPER_CHEST_t0.1726618705 $VACCINE_PNEUMOCOCCAL_t0.0359712230 $VARDENAFIL_MG_t0.1007194245 $VENLAFAXINE_HCL_t0.0359712230 $VETERAN_t8.3453237410 $VIEW_t0.6762589928 $VITALS_HT_t0.0719424460 $VITALS_PULSE_t0.3597122302 $VITALS_WT_t0.0503597122 $WEAPONS_t0.0503597122 $WITHIN_LAST_t0.4748201439 $WITH_INSPIRATION_t0.0287769784) !$TREATMENT_OBTAINING_t0.0431654676 !$VACCINE_LOT_t0.0431654676) 
1 and(or(and(!$INDICATED_t0.8129496403 $RESCHEDULED_t0.3309352518) and(!$INDICATED_t0.8129496403 !$UNTIL_t0.9496402878 $VERBALIZED_t1.1510791367) $NAPROXEN_TAB_t0.1654676259 $STEP_t0.3237410072 $TN_t0.0791366906 $UNSTEADY_t0.0575539568 $UPPER_CHEST_t0.1726618705 $VACCINE_PNEUMOCOCCAL_t0.0359712230 $VARDENAFIL_MG_t0.1007194245 $VENLAFAXINE_HCL_t0.0359712230 $VETERAN_t8.3453237410 $VIEW_t0.6762589928 $VITALS_HT_t0.0719424460 $VITALS_PULSE_t0.3597122302 $VITALS_WT_t0.0503597122 $WEAPONS_t0.0503597122 $WITHIN_LAST_t0.4748201439 $WITH_INSPIRATION_t0.0287769784) !$TREATMENT_OBTAINING_t0.0431654676 !$VACCINE_LOT_t0.0431654676) 
1 and(or(and(!$INDICATED_t0.8129496403 $RESCHEDULED_t0.3309352518) and(!$RESCHEDULED_t0.3309352518 !$UNTIL_t0.9496402878 $VERBALIZED_t1.1510791367) $NAPROXEN_TAB_t0.1654676259 $STEP_t0.3237410072 $TN_t0.0791366906 $UNSTEADY_t0.0575539568 $UPPER_CHEST_t0.1726618705 $VACCINE_PNEUMOCOCCAL_t0.0359712230 $VARDENAFIL_MG_t0.1007194245 $VENLAFAXINE_HCL_t0.0359712230 $VETERAN_t8.3453237410 $VIEW_t0.6762589928 $VITALS_HT_t0.0719424460 $VITALS_PULSE_t0.3597122302 $VITALS_WT_t0.0503597122 $WEAPONS_t0.0503597122 $WITHIN_LAST_t0.4748201439 $WITH_INSPIRATION_t0.0287769784) !$TREATMENT_OBTAINING_t0.0431654676 !$VACCINE_LOT_t0.0431654676) 
1 and(or(and(!$INDICATED_t0.8129496403 $RESCHEDULED_t0.3309352518) and(!$TOUR_t0.2230215827 !$UNTIL_t0.9496402878 $VERBALIZED_t1.1510791367) $NAPROXEN_TAB_t0.1654676259 $STEP_t0.3237410072 $TN_t0.0791366906 $UNSTEADY_t0.0575539568 $UPPER_CHEST_t0.1726618705 $VACCINE_PNEUMOCOCCAL_t0.0359712230 $VARDENAFIL_MG_t0.1007194245 $VENLAFAXINE_HCL_t0.0359712230 $VETERAN_t8.3453237410 $VIEW_t0.6762589928 $VITALS_HT_t0.0719424460 $VITALS_PULSE_t0.3597122302 $VITALS_WT_t0.0503597122 $WEAPONS_t0.0503597122 $WITHIN_LAST_t0.4748201439 $WITH_INSPIRATION_t0.0287769784) !$TREATMENT_OBTAINING_t0.0431654676 !$VACCINE_LOT_t0.0431654676) 
1 and(or(and(!$INDICATED_t0.8129496403 $RESCHEDULED_t0.3309352518) and(!$TRACHEA_t0.0287769784 !$UNTIL_t0.9496402878 $VERBALIZED_t1.1510791367) $NAPROXEN_TAB_t0.1654676259 $STEP_t0.3237410072 $TN_t0.0791366906 $UNSTEADY_t0.0575539568 $UPPER_CHEST_t0.1726618705 $VACCINE_PNEUMOCOCCAL_t0.0359712230 $VARDENAFIL_MG_t0.1007194245 $VENLAFAXINE_HCL_t0.0359712230 $VETERAN_t8.3453237410 $VIEW_t0.6762589928 $VITALS_HT_t0.0719424460 $VITALS_PULSE_t0.3597122302 $VITALS_WT_t0.0503597122 $WEAPONS_t0.0503597122 $WITHIN_LAST_t0.4748201439 $WITH_INSPIRATION_t0.0287769784) !$TREATMENT_OBTAINING_t0.0431654676 !$VACCINE_LOT_t0.0431654676) 
1 and(or(and(!$INDICATED_t0.8129496403 $RESCHEDULED_t0.3309352518) and(!$TRAITS_t0.0863309353 !$UNTIL_t0.9496402878 $VERBALIZED_t1.1510791367) $NAPROXEN_TAB_t0.1654676259 $STEP_t0.3237410072 $TN_t0.0791366906 $UNSTEADY_t0.0575539568 $UPPER_CHEST_t0.1726618705 $VACCINE_PNEUMOCOCCAL_t0.0359712230 $VARDENAFIL_MG_t0.1007194245 $VENLAFAXINE_HCL_t0.0359712230 $VETERAN_t8.3453237410 $VIEW_t0.6762589928 $VITALS_HT_t0.0719424460 $VITALS_PULSE_t0.3597122302 $VITALS_WT_t0.0503597122 $WEAPONS_t0.0503597122 $WITHIN_LAST_t0.4748201439 $WITH_INSPIRATION_t0.0287769784) !$TREATMENT_OBTAINING_t0.0431654676 !$VACCINE_LOT_t0.0431654676) 
1 and(or(and(!$INDICATED_t0.8129496403 $RESCHEDULED_t0.3309352518) and(!$TRANQUIL_AS_t0.0359712230 !$UNTIL_t0.9496402878 $VERBALIZED_t1.1510791367) $NAPROXEN_TAB_t0.1654676259 $STEP_t0.3237410072 $TN_t0.0791366906 $UNSTEADY_t0.0575539568 $UPPER_CHEST_t0.1726618705 $VACCINE_PNEUMOCOCCAL_t0.0359712230 $VARDENAFIL_MG_t0.1007194245 $VENLAFAXINE_HCL_t0.0359712230 $VETERAN_t8.3453237410 $VIEW_t0.6762589928 $VITALS_HT_t0.0719424460 $VITALS_PULSE_t0.3597122302 $VITALS_WT_t0.0503597122 $WEAPONS_t0.0503597122 $WITHIN_LAST_t0.4748201439 $WITH_INSPIRATION_t0.0287769784) !$TREATMENT_OBTAINING_t0.0431654676 !$VACCINE_LOT_t0.0431654676) 
1 or(and(or(and(or(and(!$NOTIFIED_t0.6258992806 $RESCHEDULED_t0.3309352518) $VERBALIZED_t1.1510791367) !$YET_t0.3884892086) $ABUSE_AUDITC_t0.0359712230 $PHARYNX_t0.0503597122 $STEP_t0.3237410072 $TN_t0.0791366906 $TYPE_SCHEDULING_t0.0287769784 $UPPER_CHEST_t0.1726618705 $VACCINE_PNEUMOCOCCAL_t0.0359712230 $VARDENAFIL_HCL_t0.0863309353 $VENLAFAXINE_MG_t0.0431654676 $VETERAN_t8.3453237410 $VITALS_HT_t0.0719424460 $VITALS_PULSE_t0.3597122302 $VITALS_WT_t0.0503597122 $WEAPONS_t0.0503597122 $WITHIN_LAST_t0.4748201439) or(!$PRESENTS_t1.3453237410 !$SHORT_t0.4820143885 $URGENT_t0.4748201439) !$TREATMENT_OBTAINING_t0.0431654676 !$VACCINE_LOT_t0.0431654676) $LIVED_t0.0359712230 $UNSTEADY_t0.0575539568) 
1 or(and(or(and(or(and(!$NOTIFIED_t0.6258992806 $RESCHEDULED_t0.3309352518) $VERBALIZED_t1.1510791367) !$YET_t0.3884892086) $PHARYNX_t0.0503597122 $STEP_t0.3237410072 $TN_t0.0791366906 $TYPE_SCHEDULING_t0.0287769784 $UPPER_CHEST_t0.1726618705 $VACCINE_PNEUMOCOCCAL_t0.0359712230 $VARDENAFIL_HCL_t0.0863309353 $VENLAFAXINE_MG_t0.0431654676 $VETERAN_t8.3453237410 $VITALS_HT_t0.0719424460 $VITALS_PULSE_t0.3597122302 $VITALS_WT_t0.0503597122 $WEAPONS_t0.0503597122 $WITHIN_LAST_t0.4748201439) or(!$PRESENTS_t1.3453237410 !$SHORT_t0.4820143885 $URGENT_t0.4748201439) !$TREATMENT_OBTAINING_t0.0431654676 !$VACCINE_LOT_t0.0431654676) $ABUSE_AUDITC_t0.0359712230 $LIVED_t0.0359712230 $UNSTEADY_t0.0575539568) 
1 or(and(or(and(or(and(!$NOTIFIED_t0.6258992806 $RESCHEDULED_t0.3309352518) $VERBALIZED_t1.1510791367 $WITHDRAWAL_t0.3093525180) !$YET_t0.3884892086) $ABUSE_AUDITC_t0.0359712230 $PHARYNX_t0.0503597122 $STEP_t0.3237410072 $TN_t0.0791366906 $TYPE_SCHEDULING_t0.0287769784 $UPPER_CHEST_t0.1726618705 $VACCINE_PNEUMOCOCCAL_t0.0359712230 $VARDENAFIL_HCL_t0.0863309353 $VETERAN_t8.3453237410 $VITALS_HT_t0.0719424460 $VITALS_PULSE_t0.3597122302 $VITALS_WT_t0.0503597122 $WEAPONS_t0.0503597122 $WITHIN_LAST_t0.4748201439) or(!$PRESENTS_t1.3453237410 !$SHORT_t0.4820143885 $URGENT_t0.4748201439) !$TREATMENT_OBTAINING_t0.0431654676 !$VACCINE_LOT_t0.0431654676) $LIVED_t0.0359712230 $UNSTEADY_t0.0575539568) 
1 and(or(and(or(and(or(and(!$NOTIFIED_t0.6258992806 $RESCHEDULED_t0.3309352518) $VERBALIZED_t1.1510791367) !$YET_t0.3884892086) $ABUSE_AUDITC_t0.0359712230 $PHARYNX_t0.0503597122 $STEP_t0.3237410072 $TN_t0.0791366906 $TYPE_SCHEDULING_t0.0287769784 $UPPER_CHEST_t0.1726618705 $VACCINE_PNEUMOCOCCAL_t0.0359712230 $VARDENAFIL_HCL_t0.0863309353 $VENLAFAXINE_MG_t0.0431654676 $VETERAN_t8.3453237410 $VITALS_HT_t0.0719424460 $VITALS_PULSE_t0.3597122302 $VITALS_WT_t0.0503597122 $WEAPONS_t0.0503597122 $WITHIN_LAST_t0.4748201439) or(!$PRESENTS_t1.3453237410 !$SHORT_t0.4820143885 $URGENT_t0.4748201439)) $LIVED_t0.0359712230 $UNSTEADY_t0.0575539568) !$TREATMENT_OBTAINING_t0.0431654676 !$VACCINE_LOT_t0.0431654676) 
1 and(or(and(or(and(or(and(!$NOTIFIED_t0.6258992806 $RESCHEDULED_t0.3309352518) $VERBALIZED_t1.1510791367) !$YET_t0.3884892086) $ABUSE_AUDITC_t0.0359712230 $PHARYNX_t0.0503597122 $STEP_t0.3237410072 $TN_t0.0791366906 $TYPE_SCHEDULING_t0.0287769784 $UPPER_CHEST_t0.1726618705 $VACCINE_PNEUMOCOCCAL_t0.0359712230 $VARDENAFIL_HCL_t0.0863309353 $VENLAFAXINE_MG_t0.0431654676 $VETERAN_t8.3453237410 $VITALS_HT_t0.0719424460 $VITALS_PULSE_t0.3597122302 $VITALS_WT_t0.0503597122 $WEAPONS_t0.0503597122 $WITHIN_LAST_t0.4748201439) or(!$PRESENTS_t1.3453237410 !$SHORT_t0.4820143885 $URGENT_t0.4748201439) !$TREATMENT_OBTAINING_t0.0431654676) $LIVED_t0.0359712230 $UNSTEADY_t0.0575539568) !$VACCINE_LOT_t0.0431654676) 
1 and(or(and(or(and(or(and(!$NOTIFIED_t0.6258992806 $RESCHEDULED_t0.3309352518) $VERBALIZED_t1.1510791367) !$YET_t0.3884892086) $ABUSE_AUDITC_t0.0359712230 $PHARYNX_t0.0503597122 $STEP_t0.3237410072 $TN_t0.0791366906 $TYPE_SCHEDULING_t0.0287769784 $UPPER_CHEST_t0.1726618705 $VACCINE_PNEUMOCOCCAL_t0.0359712230 $VARDENAFIL_HCL_t0.0863309353 $VENLAFAXINE_MG_t0.0431654676 $VETERAN_t8.3453237410 $VITALS_HT_t0.0719424460 $VITALS_PULSE_t0.3597122302 $VITALS_WT_t0.0503597122 $WEAPONS_t0.0503597122 $WITHIN_LAST_t0.4748201439) or(!$PRESENTS_t1.3453237410 !$SHORT_t0.4820143885 $URGENT_t0.4748201439) !$VACCINE_LOT_t0.0431654676) $LIVED_t0.0359712230 $UNSTEADY_t0.0575539568) !$TREATMENT_OBTAINING_t0.0431654676) 
1 and(or(and(or(and(or(and(!$NOTIFIED_t0.6258992806 $RESCHEDULED_t0.3309352518) $VERBALIZED_t1.1510791367 $WITHDRAWAL_t0.3093525180) !$YET_t0.3884892086) $ABUSE_AUDITC_t0.0359712230 $PHARYNX_t0.0503597122 $STEP_t0.3237410072 $TN_t0.0791366906 $TYPE_SCHEDULING_t0.0287769784 $UPPER_CHEST_t0.1726618705 $VACCINE_PNEUMOCOCCAL_t0.0359712230 $VARDENAFIL_HCL_t0.0863309353 $VETERAN_t8.3453237410 $VITALS_HT_t0.0719424460 $VITALS_PULSE_t0.3597122302 $VITALS_WT_t0.0503597122 $WEAPONS_t0.0503597122 $WITHIN_LAST_t0.4748201439) or(!$PRESENTS_t1.3453237410 !$SHORT_t0.4820143885 $URGENT_t0.4748201439) !$TREATMENT_OBTAINING_t0.0431654676) $LIVED_t0.0359712230 $UNSTEADY_t0.0575539568) !$VACCINE_LOT_t0.0431654676) 
1 or(and(or(and(or(and(or(and(!$NOTIFIED_t0.6258992806 $RESCHEDULED_t0.3309352518) $VERBALIZED_t1.1510791367) !$YET_t0.3884892086) $ABUSE_AUDITC_t0.0359712230 $PHARYNX_t0.0503597122 $STEP_t0.3237410072 $TN_t0.0791366906 $TYPE_SCHEDULING_t0.0287769784 $UPPER_CHEST_t0.1726618705 $VACCINE_PNEUMOCOCCAL_t0.0359712230 $VARDENAFIL_HCL_t0.0863309353 $VENLAFAXINE_MG_t0.0431654676 $VETERAN_t8.3453237410 $VITALS_HT_t0.0719424460 $VITALS_PULSE_t0.3597122302 $VITALS_WT_t0.0503597122 $WEAPONS_t0.0503597122 $WITHIN_LAST_t0.4748201439) or(!$PRESENTS_t1.3453237410 !$SHORT_t0.4820143885 $URGENT_t0.4748201439) !$VACCINE_LOT_t0.0431654676) $LIVED_t0.0359712230) !$TREATMENT_OBTAINING_t0.0431654676) $UNSTEADY_t0.0575539568) 
1 or(and(or(and(or(and(or(and(!$NOTIFIED_t0.6258992806 $RESCHEDULED_t0.3309352518) $VERBALIZED_t1.1510791367) !$YET_t0.3884892086) $ABUSE_AUDITC_t0.0359712230 $PHARYNX_t0.0503597122 $STEP_t0.3237410072 $TN_t0.0791366906 $TYPE_SCHEDULING_t0.0287769784 $UPPER_CHEST_t0.1726618705 $VACCINE_PNEUMOCOCCAL_t0.0359712230 $VARDENAFIL_HCL_t0.0863309353 $VENLAFAXINE_MG_t0.0431654676 $VETERAN_t8.3453237410 $VITALS_HT_t0.0719424460 $VITALS_PULSE_t0.3597122302 $VITALS_WT_t0.0503597122 $WEAPONS_t0.0503597122 $WITHIN_LAST_t0.4748201439) or(!$PRESENTS_t1.3453237410 !$SHORT_t0.4820143885 $URGENT_t0.4748201439) !$VACCINE_LOT_t0.0431654676) $UNSTEADY_t0.0575539568) !$TREATMENT_OBTAINING_t0.0431654676) $LIVED_t0.0359712230) 
1 or(and(or(and(or(and(or(and(!$NOTIFIED_t0.6258992806 $RESCHEDULED_t0.3309352518) $VERBALIZED_t1.1510791367) !$YET_t0.3884892086) $PHARYNX_t0.0503597122 $STEP_t0.3237410072 $TN_t0.0791366906 $TYPE_SCHEDULING_t0.0287769784 $UPPER_CHEST_t0.1726618705 $VACCINE_PNEUMOCOCCAL_t0.0359712230 $VARDENAFIL_HCL_t0.0863309353 $VENLAFAXINE_MG_t0.0431654676 $VETERAN_t8.3453237410 $VITALS_HT_t0.0719424460 $VITALS_PULSE_t0.3597122302 $VITALS_WT_t0.0503597122 $WEAPONS_t0.0503597122 $WITHIN_LAST_t0.4748201439) or(!$PRESENTS_t1.3453237410 !$SHORT_t0.4820143885 $URGENT_t0.4748201439) !$VACCINE_LOT_t0.0431654676) $LIVED_t0.0359712230 $UNSTEADY_t0.0575539568) !$TREATMENT_OBTAINING_t0.0431654676) $ABUSE_AUDITC_t0.0359712230) 
1 and(or(and(or($RESCHEDULED_t0.3309352518 $VERBALIZED_t1.1510791367) !$MOUTH_BEDTIME_t0.7553956835) $ABUSE_AUDITC_t0.0359712230 $STEP_t0.3237410072 $TN_t0.0791366906 $TYPE_SCHEDULING_t0.0287769784 $UNSTEADY_t0.0575539568 $UPPER_CHEST_t0.1726618705 $VACCINE_PNEUMOCOCCAL_t0.0359712230 $VARDENAFIL_MG_t0.1007194245 $VETERAN_t8.3453237410 $VIEW_t0.6762589928 $VITALS_HT_t0.0719424460 $VITALS_PULSE_t0.3597122302 $VITALS_WT_t0.0503597122 $WEAPONS_t0.0503597122 $WHEN_BEGAN_t0.0215827338 $WITHIN_LAST_t0.4748201439) or(and(!$OR_MILK_t0.0575539568 !$URGENT_t0.4748201439 !$VIEW_ALERT_t0.1438848921) $UNTIL_t0.9496402878) or($DID_NOT_t1.8992805755 !$FOUR_TIMES_t0.5611510791 !$REQUIRED_t1.6330935252) !$NUM_PAIN_t0.0503597122 !$TREATMENT_OBTAINING_t0.0431654676) 
1 and(or(and(or($RESCHEDULED_t0.3309352518 $VERBALIZED_t1.1510791367) !$MOUTH_BEDTIME_t0.7553956835) $ABUSE_AUDITC_t0.0359712230 $STEP_t0.3237410072 $TN_t0.0791366906 $TYPE_SCHEDULING_t0.0287769784 $UNSTEADY_t0.0575539568 $UPPER_CHEST_t0.1726618705 $VACCINE_PNEUMOCOCCAL_t0.0359712230 $VARDENAFIL_MG_t0.1007194245 $VETERAN_t8.3453237410 $VIEW_t0.6762589928 $VITALS_HT_t0.0719424460 $VITALS_PULSE_t0.3597122302 $VITALS_WT_t0.0503597122 $WEAPONS_t0.0503597122 $WHEN_BEGAN_t0.0215827338 $WITHIN_LAST_t0.4748201439) or(and(!$URGENT_t0.4748201439 !$VIEW_ALERT_t0.1438848921) $UNTIL_t0.9496402878) or($DID_NOT_t1.8992805755 !$FOUR_TIMES_t0.5611510791 !$REQUIRED_t1.6330935252) !$NUM_PAIN_t0.0503597122 !$OR_MILK_t0.0575539568 !$TREATMENT_OBTAINING_t0.0431654676) 
1 or(and(or(and(or($RESCHEDULED_t0.3309352518 $VERBALIZED_t1.1510791367) !$MOUTH_BEDTIME_t0.7553956835) $STEP_t0.3237410072 $TN_t0.0791366906 $TYPE_SCHEDULING_t0.0287769784 $UNSTEADY_t0.0575539568 $UPPER_CHEST_t0.1726618705 $VACCINE_PNEUMOCOCCAL_t0.0359712230 $VARDENAFIL_MG_t0.1007194245 $VETERAN_t8.3453237410 $VIEW_t0.6762589928 $VITALS_HT_t0.0719424460 $VITALS_PULSE_t0.3597122302 $VITALS_WT_t0.0503597122 $WEAPONS_t0.0503597122 $WHEN_BEGAN_t0.0215827338 $WITHIN_LAST_t0.4748201439) or(and(!$OR_MILK_t0.0575539568 !$URGENT_t0.4748201439 !$VIEW_ALERT_t0.1438848921) $UNTIL_t0.9496402878) or($DID_NOT_t1.8992805755 !$FOUR_TIMES_t0.5611510791 !$REQUIRED_t1.6330935252) !$NUM_PAIN_t0.0503597122 !$TREATMENT_OBTAINING_t0.0431654676) $ABUSE_AUDITC_t0.0359712230) 
1 or(and(or(and(or($RESCHEDULED_t0.3309352518 $VERBALIZED_t1.1510791367) !$MOUTH_BEDTIME_t0.7553956835) $STEP_t0.3237410072 $TN_t0.0791366906 $TYPE_SCHEDULING_t0.0287769784 $UNSTEADY_t0.0575539568 $UPPER_CHEST_t0.1726618705 $VACCINE_PNEUMOCOCCAL_t0.0359712230 $VARDENAFIL_MG_t0.1007194245 $VETERAN_t8.3453237410 $VIEW_t0.6762589928 $VITALS_HT_t0.0719424460 $VITALS_PULSE_t0.3597122302 $VITALS_WT_t0.0503597122 $WEAPONS_t0.0503597122 $WHEN_BEGAN_t0.0215827338 $WITHIN_LAST_t0.4748201439) or(and(!$URGENT_t0.4748201439 !$VIEW_ALERT_t0.1438848921) $UNTIL_t0.9496402878) or($DID_NOT_t1.8992805755 !$FOUR_TIMES_t0.5611510791 !$REQUIRED_t1.6330935252) !$NUM_PAIN_t0.0503597122 !$OR_MILK_t0.0575539568 !$TREATMENT_OBTAINING_t0.0431654676) $ABUSE_AUDITC_t0.0359712230) 
1 and(or(and(or($ABUSE_AUDITC_t0.0359712230 $RESCHEDULED_t0.3309352518 $VERBALIZED_t1.1510791367) !$MOUTH_BEDTIME_t0.7553956835) $ABUSE_AUDITC_t0.0359712230 $STEP_t0.3237410072 $TN_t0.0791366906 $TYPE_SCHEDULING_t0.0287769784 $UNSTEADY_t0.0575539568 $UPPER_CHEST_t0.1726618705 $VACCINE_PNEUMOCOCCAL_t0.0359712230 $VARDENAFIL_MG_t0.1007194245 $VETERAN_t8.3453237410 $VIEW_t0.6762589928 $VITALS_HT_t0.0719424460 $VITALS_PULSE_t0.3597122302 $VITALS_WT_t0.0503597122 $WEAPONS_t0.0503597122 $WHEN_BEGAN_t0.0215827338 $WITHIN_LAST_t0.4748201439) or(and(!$OR_MILK_t0.0575539568 !$URGENT_t0.4748201439 !$VIEW_ALERT_t0.1438848921) $UNTIL_t0.9496402878) or($DID_NOT_t1.8992805755 !$FOUR_TIMES_t0.5611510791 !$REQUIRED_t1.6330935252) !$NUM_PAIN_t0.0503597122 !$TREATMENT_OBTAINING_t0.0431654676) 
1 and(or(and(or($RESCHEDULED_t0.3309352518 $STEP_t0.3237410072 $VERBALIZED_t1.1510791367) !$MOUTH_BEDTIME_t0.7553956835) $ABUSE_AUDITC_t0.0359712230 $STEP_t0.3237410072 $TN_t0.0791366906 $TYPE_SCHEDULING_t0.0287769784 $UNSTEADY_t0.0575539568 $UPPER_CHEST_t0.1726618705 $VACCINE_PNEUMOCOCCAL_t0.0359712230 $VARDENAFIL_MG_t0.1007194245 $VETERAN_t8.3453237410 $VIEW_t0.6762589928 $VITALS_HT_t0.0719424460 $VITALS_PULSE_t0.3597122302 $VITALS_WT_t0.0503597122 $WEAPONS_t0.0503597122 $WHEN_BEGAN_t0.0215827338 $WITHIN_LAST_t0.4748201439) or(and(!$OR_MILK_t0.0575539568 !$URGENT_t0.4748201439 !$VIEW_ALERT_t0.1438848921) $UNTIL_t0.9496402878) or($DID_NOT_t1.8992805755 !$FOUR_TIMES_t0.5611510791 !$REQUIRED_t1.6330935252) !$NUM_PAIN_t0.0503597122 !$TREATMENT_OBTAINING_t0.0431654676) 
1 and(or(and(or($RESCHEDULED_t0.3309352518 $TOUR_t0.2230215827 $VERBALIZED_t1.1510791367) !$MOUTH_BEDTIME_t0.7553956835) $ABUSE_AUDITC_t0.0359712230 $STEP_t0.3237410072 $TN_t0.0791366906 $TYPE_SCHEDULING_t0.0287769784 $UNSTEADY_t0.0575539568 $UPPER_CHEST_t0.1726618705 $VACCINE_PNEUMOCOCCAL_t0.0359712230 $VARDENAFIL_MG_t0.1007194245 $VETERAN_t8.3453237410 $VIEW_t0.6762589928 $VITALS_HT_t0.0719424460 $VITALS_PULSE_t0.3597122302 $VITALS_WT_t0.0503597122 $WEAPONS_t0.0503597122 $WHEN_BEGAN_t0.0215827338 $WITHIN_LAST_t0.4748201439) or(and(!$OR_MILK_t0.0575539568 !$URGENT_t0.4748201439 !$VIEW_ALERT_t0.1438848921) $UNTIL_t0.9496402878) or($DID_NOT_t1.8992805755 !$FOUR_TIMES_t0.5611510791 !$REQUIRED_t1.6330935252) !$NUM_PAIN_t0.0503597122 !$TREATMENT_OBTAINING_t0.0431654676) 
1 and(or(and(or($RESCHEDULED_t0.3309352518 $TRACHEA_t0.0287769784 $VERBALIZED_t1.1510791367) !$MOUTH_BEDTIME_t0.7553956835) $ABUSE_AUDITC_t0.0359712230 $STEP_t0.3237410072 $TN_t0.0791366906 $TYPE_SCHEDULING_t0.0287769784 $UNSTEADY_t0.0575539568 $UPPER_CHEST_t0.1726618705 $VACCINE_PNEUMOCOCCAL_t0.0359712230 $VARDENAFIL_MG_t0.1007194245 $VETERAN_t8.3453237410 $VIEW_t0.6762589928 $VITALS_HT_t0.0719424460 $VITALS_PULSE_t0.3597122302 $VITALS_WT_t0.0503597122 $WEAPONS_t0.0503597122 $WHEN_BEGAN_t0.0215827338 $WITHIN_LAST_t0.4748201439) or(and(!$OR_MILK_t0.0575539568 !$URGENT_t0.4748201439 !$VIEW_ALERT_t0.1438848921) $UNTIL_t0.9496402878) or($DID_NOT_t1.8992805755 !$FOUR_TIMES_t0.5611510791 !$REQUIRED_t1.6330935252) !$NUM_PAIN_t0.0503597122 !$TREATMENT_OBTAINING_t0.0431654676) 
1 and(or(and(or($RESCHEDULED_t0.3309352518 $TRAITS_t0.0863309353 $VERBALIZED_t1.1510791367) !$MOUTH_BEDTIME_t0.7553956835) $ABUSE_AUDITC_t0.0359712230 $STEP_t0.3237410072 $TN_t0.0791366906 $TYPE_SCHEDULING_t0.0287769784 $UNSTEADY_t0.0575539568 $UPPER_CHEST_t0.1726618705 $VACCINE_PNEUMOCOCCAL_t0.0359712230 $VARDENAFIL_MG_t0.1007194245 $VETERAN_t8.3453237410 $VIEW_t0.6762589928 $VITALS_HT_t0.0719424460 $VITALS_PULSE_t0.3597122302 $VITALS_WT_t0.0503597122 $WEAPONS_t0.0503597122 $WHEN_BEGAN_t0.0215827338 $WITHIN_LAST_t0.4748201439) or(and(!$OR_MILK_t0.0575539568 !$URGENT_t0.4748201439 !$VIEW_ALERT_t0.1438848921) $UNTIL_t0.9496402878) or($DID_NOT_t1.8992805755 !$FOUR_TIMES_t0.5611510791 !$REQUIRED_t1.6330935252) !$NUM_PAIN_t0.0503597122 !$TREATMENT_OBTAINING_t0.0431654676) 
1 and(or(and(or($RESCHEDULED_t0.3309352518 $TRANQUIL_RESPONSE_t0.0359712230 $VERBALIZED_t1.1510791367) !$MOUTH_BEDTIME_t0.7553956835) $ABUSE_AUDITC_t0.0359712230 $STEP_t0.3237410072 $TN_t0.0791366906 $TYPE_SCHEDULING_t0.0287769784 $UNSTEADY_t0.0575539568 $UPPER_CHEST_t0.1726618705 $VACCINE_PNEUMOCOCCAL_t0.0359712230 $VARDENAFIL_MG_t0.1007194245 $VETERAN_t8.3453237410 $VIEW_t0.6762589928 $VITALS_HT_t0.0719424460 $VITALS_PULSE_t0.3597122302 $VITALS_WT_t0.0503597122 $WEAPONS_t0.0503597122 $WHEN_BEGAN_t0.0215827338 $WITHIN_LAST_t0.4748201439) or(and(!$OR_MILK_t0.0575539568 !$URGENT_t0.4748201439 !$VIEW_ALERT_t0.1438848921) $UNTIL_t0.9496402878) or($DID_NOT_t1.8992805755 !$FOUR_TIMES_t0.5611510791 !$REQUIRED_t1.6330935252) !$NUM_PAIN_t0.0503597122 !$TREATMENT_OBTAINING_t0.0431654676) 
1 and(or(and(or(and($RESCHEDULED_t0.3309352518 !$WEAKNESS_t0.6043165468) $COUGHING_t0.2805755396 $STEP_t0.3237410072 $WHO_t2.7985611511 $WITH_INSPIRATION_t0.0287769784) !$INFLUENZA_t2.0287769784 !$WAL_FOLLOWING_t0.1654676259) and(!$PLAN_t6.7625899281 $VIEW_t0.6762589928 $YESTER_t0.9712230216) $ABUSE_SCREEN_t0.0791366906 $TN_t0.0791366906 $TYPE_SCHEDULING_t0.0287769784 $VARDENAFIL_HCL_t0.0863309353 $VITALS_HT_t0.0719424460 $VITALS_PULSE_t0.3597122302 $WALS_t0.1007194245 $WEARS_t0.1294964029 $WEIGH_DAILY_t0.0503597122 $WENT_OUT_t0.0791366906 $WRONG_t0.1223021583 $YARD_t0.0359712230) !$HEALING_WELL_t0.0431654676 !$LIST_BELOW_t0.1294964029 !$PRODUCTS_IT_t0.0503597122 !$SOME_NUMBNESS_t0.0287769784) 
1 and(or(and(or(and($RESCHEDULED_t0.3309352518 !$WEAKNESS_t0.6043165468) $COUGHING_t0.2805755396 $STEP_t0.3237410072 $WHO_t2.7985611511 $WITH_INSPIRATION_t0.0287769784) !$INFLUENZA_t2.0287769784 !$WAL_FOLLOWING_t0.1654676259) and(!$TV_t0.4676258993 $VIEW_t0.6762589928 $YESTER_t0.9712230216) $ABUSE_SCREEN_t0.0791366906 $TN_t0.0791366906 $TYPE_SCHEDULING_t0.0287769784 $VARDENAFIL_HCL_t0.0863309353 $VITALS_HT_t0.0719424460 $VITALS_PULSE_t0.3597122302 $WALS_t0.1007194245 $WEARS_t0.1294964029 $WEIGH_DAILY_t0.0503597122 $WENT_OUT_t0.0791366906 $WRONG_t0.1223021583 $YARD_t0.0359712230) !$HEALING_WELL_t0.0431654676 !$LIST_BELOW_t0.1294964029 !$PRODUCTS_IT_t0.0503597122 !$SOME_NUMBNESS_t0.0287769784) 
1 or(and(or(and(or(and($RESCHEDULED_t0.3309352518 !$WEAKNESS_t0.6043165468) $COUGHING_t0.2805755396 $STEP_t0.3237410072 $WHO_t2.7985611511 $WITH_INSPIRATION_t0.0287769784) !$INFLUENZA_t2.0287769784 !$WAL_FOLLOWING_t0.1654676259) and(!$PLAN_t6.7625899281 $VIEW_t0.6762589928 $YESTER_t0.9712230216) $TN_t0.0791366906 $TYPE_SCHEDULING_t0.0287769784 $VARDENAFIL_HCL_t0.0863309353 $VITALS_HT_t0.0719424460 $VITALS_PULSE_t0.3597122302 $WALS_t0.1007194245 $WEARS_t0.1294964029 $WEIGH_DAILY_t0.0503597122 $WENT_OUT_t0.0791366906 $WRONG_t0.1223021583 $YARD_t0.0359712230) !$HEALING_WELL_t0.0431654676 !$LIST_BELOW_t0.1294964029 !$PRODUCTS_IT_t0.0503597122 !$SOME_NUMBNESS_t0.0287769784) $ABUSE_SCREEN_t0.0791366906) 
1 or(and(or(and(or(and($RESCHEDULED_t0.3309352518 !$WEAKNESS_t0.6043165468) $COUGHING_t0.2805755396 $STEP_t0.3237410072 $WHO_t2.7985611511 $WITH_INSPIRATION_t0.0287769784) !$INFLUENZA_t2.0287769784 !$WAL_FOLLOWING_t0.1654676259) and(!$TV_t0.4676258993 $VIEW_t0.6762589928 $YESTER_t0.9712230216) $TN_t0.0791366906 $TYPE_SCHEDULING_t0.0287769784 $VARDENAFIL_HCL_t0.0863309353 $VITALS_HT_t0.0719424460 $VITALS_PULSE_t0.3597122302 $WALS_t0.1007194245 $WEARS_t0.1294964029 $WEIGH_DAILY_t0.0503597122 $WENT_OUT_t0.0791366906 $WRONG_t0.1223021583 $YARD_t0.0359712230) !$HEALING_WELL_t0.0431654676 !$LIST_BELOW_t0.1294964029 !$PRODUCTS_IT_t0.0503597122 !$SOME_NUMBNESS_t0.0287769784) $ABUSE_SCREEN_t0.0791366906) 
1 and(or(and(or(and(!$ANSWER_t1.0359712230 $RESCHEDULED_t0.3309352518 !$WEAKNESS_t0.6043165468) $COUGHING_t0.2805755396 $STEP_t0.3237410072 $WHO_t2.7985611511 $WITH_INSPIRATION_t0.0287769784) !$INFLUENZA_t2.0287769784 !$WAL_FOLLOWING_t0.1654676259) and(!$PLAN_t6.7625899281 $VIEW_t0.6762589928 $YESTER_t0.9712230216) $ABUSE_SCREEN_t0.0791366906 $TN_t0.0791366906 $TYPE_SCHEDULING_t0.0287769784 $VARDENAFIL_HCL_t0.0863309353 $VITALS_HT_t0.0719424460 $VITALS_PULSE_t0.3597122302 $WALS_t0.1007194245 $WEARS_t0.1294964029 $WEIGH_DAILY_t0.0503597122 $WENT_OUT_t0.0791366906 $WRONG_t0.1223021583 $YARD_t0.0359712230) !$HEALING_WELL_t0.0431654676 !$LIST_BELOW_t0.1294964029 !$PRODUCTS_IT_t0.0503597122 !$SOME_NUMBNESS_t0.0287769784) 
1 and(or(and(or(and($CHART_t0.9280575540 $RESCHEDULED_t0.3309352518 !$WEAKNESS_t0.6043165468) $COUGHING_t0.2805755396 $STEP_t0.3237410072 $WHO_t2.7985611511 $WITH_INSPIRATION_t0.0287769784) !$INFLUENZA_t2.0287769784 !$WAL_FOLLOWING_t0.1654676259) and(!$PLAN_t6.7625899281 $VIEW_t0.6762589928 $YESTER_t0.9712230216) $ABUSE_SCREEN_t0.0791366906 $TN_t0.0791366906 $TYPE_SCHEDULING_t0.0287769784 $VARDENAFIL_HCL_t0.0863309353 $VITALS_HT_t0.0719424460 $VITALS_PULSE_t0.3597122302 $WALS_t0.1007194245 $WEARS_t0.1294964029 $WEIGH_DAILY_t0.0503597122 $WENT_OUT_t0.0791366906 $WRONG_t0.1223021583 $YARD_t0.0359712230) !$HEALING_WELL_t0.0431654676 !$LIST_BELOW_t0.1294964029 !$PRODUCTS_IT_t0.0503597122 !$SOME_NUMBNESS_t0.0287769784) 
1 and(or(and(or(and(!$EACH_t1.4028776978 $RESCHEDULED_t0.3309352518 !$WEAKNESS_t0.6043165468) $COUGHING_t0.2805755396 $STEP_t0.3237410072 $WHO_t2.7985611511 $WITH_INSPIRATION_t0.0287769784) !$INFLUENZA_t2.0287769784 !$WAL_FOLLOWING_t0.1654676259) and(!$PLAN_t6.7625899281 $VIEW_t0.6762589928 $YESTER_t0.9712230216) $ABUSE_SCREEN_t0.0791366906 $TN_t0.0791366906 $TYPE_SCHEDULING_t0.0287769784 $VARDENAFIL_HCL_t0.0863309353 $VITALS_HT_t0.0719424460 $VITALS_PULSE_t0.3597122302 $WALS_t0.1007194245 $WEARS_t0.1294964029 $WEIGH_DAILY_t0.0503597122 $WENT_OUT_t0.0791366906 $WRONG_t0.1223021583 $YARD_t0.0359712230) !$HEALING_WELL_t0.0431654676 !$LIST_BELOW_t0.1294964029 !$PRODUCTS_IT_t0.0503597122 !$SOME_NUMBNESS_t0.0287769784) 
1 and(or(and(or(and(!$EVENTS_t0.4748201439 $RESCHEDULED_t0.3309352518 !$WEAKNESS_t0.6043165468) $COUGHING_t0.2805755396 $STEP_t0.3237410072 $WHO_t2.7985611511 $WITH_INSPIRATION_t0.0287769784) !$INFLUENZA_t2.0287769784 !$WAL_FOLLOWING_t0.1654676259) and(!$PLAN_t6.7625899281 $VIEW_t0.6762589928 $YESTER_t0.9712230216) $ABUSE_SCREEN_t0.0791366906 $TN_t0.0791366906 $TYPE_SCHEDULING_t0.0287769784 $VARDENAFIL_HCL_t0.0863309353 $VITALS_HT_t0.0719424460 $VITALS_PULSE_t0.3597122302 $WALS_t0.1007194245 $WEARS_t0.1294964029 $WEIGH_DAILY_t0.0503597122 $WENT_OUT_t0.0791366906 $WRONG_t0.1223021583 $YARD_t0.0359712230) !$HEALING_WELL_t0.0431654676 !$LIST_BELOW_t0.1294964029 !$PRODUCTS_IT_t0.0503597122 !$SOME_NUMBNESS_t0.0287769784) 
1 and(or(and(or(and(!$JUN_t0.8129496403 $RESCHEDULED_t0.3309352518 !$WEAKNESS_t0.6043165468) $COUGHING_t0.2805755396 $STEP_t0.3237410072 $WHO_t2.7985611511 $WITH_INSPIRATION_t0.0287769784) !$INFLUENZA_t2.0287769784 !$WAL_FOLLOWING_t0.1654676259) and(!$PLAN_t6.7625899281 $VIEW_t0.6762589928 $YESTER_t0.9712230216) $ABUSE_SCREEN_t0.0791366906 $TN_t0.0791366906 $TYPE_SCHEDULING_t0.0287769784 $VARDENAFIL_HCL_t0.0863309353 $VITALS_HT_t0.0719424460 $VITALS_PULSE_t0.3597122302 $WALS_t0.1007194245 $WEARS_t0.1294964029 $WEIGH_DAILY_t0.0503597122 $WENT_OUT_t0.0791366906 $WRONG_t0.1223021583 $YARD_t0.0359712230) !$HEALING_WELL_t0.0431654676 !$LIST_BELOW_t0.1294964029 !$PRODUCTS_IT_t0.0503597122 !$SOME_NUMBNESS_t0.0287769784) 
1 and(or(and(or(and(!$PLAN_t6.7625899281 $RESCHEDULED_t0.3309352518 !$WEAKNESS_t0.6043165468) $COUGHING_t0.2805755396 $STEP_t0.3237410072 $WHO_t2.7985611511 $WITH_INSPIRATION_t0.0287769784) !$INFLUENZA_t2.0287769784 !$WAL_FOLLOWING_t0.1654676259) and(!$PLAN_t6.7625899281 $VIEW_t0.6762589928 $YESTER_t0.9712230216) $ABUSE_SCREEN_t0.0791366906 $TN_t0.0791366906 $TYPE_SCHEDULING_t0.0287769784 $VARDENAFIL_HCL_t0.0863309353 $VITALS_HT_t0.0719424460 $VITALS_PULSE_t0.3597122302 $WALS_t0.1007194245 $WEARS_t0.1294964029 $WEIGH_DAILY_t0.0503597122 $WENT_OUT_t0.0791366906 $WRONG_t0.1223021583 $YARD_t0.0359712230) !$HEALING_WELL_t0.0431654676 !$LIST_BELOW_t0.1294964029 !$PRODUCTS_IT_t0.0503597122 !$SOME_NUMBNESS_t0.0287769784) 
1 and(or(and(or($RESCHEDULED_t0.3309352518 $STEP_t0.3237410072) !$PROVIDER_t4.9064748201) and(!$WERE_t4.3021582734 $WOULD_t3.4172661871) $NAPROXEN_TAB_t0.1654676259 $PSYCH_t0.5611510791 $TN_t0.0791366906 $TYPE_SCHEDULING_t0.0287769784 $UNDER_SKIN_t0.0647482014 $VACCINE_PNEUMOCOCCAL_t0.0359712230 $VIEW_t0.6762589928 $VITALS_HT_t0.0719424460 $VITALS_PULSE_t0.3597122302 $WEARS_t0.1294964029 $WERE_CONSTANTLY_t0.0647482014 $WITHIN_LAST_t0.4748201439 $WITH_INSPIRATION_t0.0287769784 $WORK_RELEASE_t0.0287769784) !$MG_TAK_t0.0287769784 !$PRODUCTS_IT_t0.0503597122) 
1 and(or(and(or(and(or($RESCHEDULED_t0.3309352518 $STEP_t0.3237410072) !$PROVIDER_t4.9064748201) and(!$WERE_t4.3021582734 $WOULD_t3.4172661871) $PSYCH_t0.5611510791 $TN_t0.0791366906 $TYPE_SCHEDULING_t0.0287769784 $UNDER_SKIN_t0.0647482014 $VACCINE_PNEUMOCOCCAL_t0.0359712230 $VIEW_t0.6762589928 $VITALS_HT_t0.0719424460 $VITALS_PULSE_t0.3597122302 $WEARS_t0.1294964029 $WERE_CONSTANTLY_t0.0647482014 $WITHIN_LAST_t0.4748201439 $WITH_INSPIRATION_t0.0287769784 $WORK_RELEASE_t0.0287769784) !$PRODUCTS_IT_t0.0503597122) $NAPROXEN_TAB_t0.1654676259) !$MG_TAK_t0.0287769784) 
1 and(or(and(or(and(!$WERE_t4.3021582734 $WOULD_t3.4172661871) $TN_t0.0791366906 $TYPE_SCHEDULING_t0.0287769784 $UNDER_SKIN_t0.0647482014 $VACCINE_PNEUMOCOCCAL_t0.0359712230 $VIEW_t0.6762589928 $VITALS_HT_t0.0719424460 $VITALS_PULSE_t0.3597122302 $WEARS_t0.1294964029 $WERE_CONSTANTLY_t0.0647482014 $WITHIN_LAST_t0.4748201439) !$MG_TAK_t0.0287769784) and(or($RESCHEDULED_t0.3309352518 $STEP_t0.3237410072) !$PROVIDER_t4.9064748201) $NAPROXEN_TAB_t0.1654676259 $PSYCH_t0.5611510791 $WITH_INSPIRATION_t0.0287769784 $WORK_RELEASE_t0.0287769784) !$PRODUCTS_IT_t0.0503597122) 
1 and(or(and(or(and(!$WERE_t4.3021582734 $WOULD_t3.4172661871) $TN_t0.0791366906 $TYPE_SCHEDULING_t0.0287769784 $UNDER_SKIN_t0.0647482014 $VACCINE_PNEUMOCOCCAL_t0.0359712230 $VIEW_t0.6762589928 $VITALS_HT_t0.0719424460 $VITALS_PULSE_t0.3597122302 $WEARS_t0.1294964029 $WERE_CONSTANTLY_t0.0647482014 $WITHIN_LAST_t0.4748201439 $WORK_RELEASE_t0.0287769784) !$MG_TAK_t0.0287769784) and(or($RESCHEDULED_t0.3309352518 $STEP_t0.3237410072) !$PROVIDER_t4.9064748201) $NAPROXEN_TAB_t0.1654676259 $PSYCH_t0.5611510791 $WITH_INSPIRATION_t0.0287769784) !$PRODUCTS_IT_t0.0503597122) 
1 and(or(and(or(and(!$WERE_t4.3021582734 $WOULD_t3.4172661871) $TN_t0.0791366906 $TYPE_SCHEDULING_t0.0287769784 $UNDER_SKIN_t0.0647482014 $VACCINE_PNEUMOCOCCAL_t0.0359712230 $VIEW_t0.6762589928 $VITALS_HT_t0.0719424460 $WEARS_t0.1294964029 $WERE_CONSTANTLY_t0.0647482014 $WITHIN_LAST_t0.4748201439 $WORK_RELEASE_t0.0287769784) !$MG_TAK_t0.0287769784) and(or($RESCHEDULED_t0.3309352518 $STEP_t0.3237410072) !$PROVIDER_t4.9064748201) $NAPROXEN_TAB_t0.1654676259 $PSYCH_t0.5611510791 $VITALS_PULSE_t0.3597122302 $WITH_INSPIRATION_t0.0287769784) !$PRODUCTS_IT_t0.0503597122) 
1 and(or(and(or(and(!$WERE_t4.3021582734 $WOULD_t3.4172661871) $TN_t0.0791366906 $TYPE_SCHEDULING_t0.0287769784 $UNDER_SKIN_t0.0647482014 $VACCINE_PNEUMOCOCCAL_t0.0359712230 $VIEW_t0.6762589928 $VITALS_PULSE_t0.3597122302 $WEARS_t0.1294964029 $WERE_CONSTANTLY_t0.0647482014 $WITHIN_LAST_t0.4748201439 $WORK_RELEASE_t0.0287769784) !$MG_TAK_t0.0287769784) and(or($RESCHEDULED_t0.3309352518 $STEP_t0.3237410072) !$PROVIDER_t4.9064748201) $NAPROXEN_TAB_t0.1654676259 $PSYCH_t0.5611510791 $VITALS_HT_t0.0719424460 $WITH_INSPIRATION_t0.0287769784) !$PRODUCTS_IT_t0.0503597122) 
1 and(or(and(or(and(!$WERE_t4.3021582734 $WOULD_t3.4172661871) $TN_t0.0791366906 $TYPE_SCHEDULING_t0.0287769784 $UNDER_SKIN_t0.0647482014 $VIEW_t0.6762589928 $VITALS_HT_t0.0719424460 $VITALS_PULSE_t0.3597122302 $WEARS_t0.1294964029 $WERE_CONSTANTLY_t0.0647482014 $WITHIN_LAST_t0.4748201439 $WORK_RELEASE_t0.0287769784) !$MG_TAK_t0.0287769784) and(or($RESCHEDULED_t0.3309352518 $STEP_t0.3237410072) !$PROVIDER_t4.9064748201) $NAPROXEN_TAB_t0.1654676259 $PSYCH_t0.5611510791 $VACCINE_PNEUMOCOCCAL_t0.0359712230 $WITH_INSPIRATION_t0.0287769784) !$PRODUCTS_IT_t0.0503597122) 
1 and(or(and(or(and(!$WERE_t4.3021582734 $WOULD_t3.4172661871) $TN_t0.0791366906 $TYPE_SCHEDULING_t0.0287769784 $VACCINE_PNEUMOCOCCAL_t0.0359712230 $VIEW_t0.6762589928 $VITALS_HT_t0.0719424460 $VITALS_PULSE_t0.3597122302 $WEARS_t0.1294964029 $WERE_CONSTANTLY_t0.0647482014 $WITHIN_LAST_t0.4748201439 $WORK_RELEASE_t0.0287769784) !$MG_TAK_t0.0287769784) and(or($RESCHEDULED_t0.3309352518 $STEP_t0.3237410072) !$PROVIDER_t4.9064748201) $NAPROXEN_TAB_t0.1654676259 $PSYCH_t0.5611510791 $UNDER_SKIN_t0.0647482014 $WITH_INSPIRATION_t0.0287769784) !$PRODUCTS_IT_t0.0503597122) 
1 and(or(and(or(and(!$WERE_t4.3021582734 $WOULD_t3.4172661871) $TN_t0.0791366906 $UNDER_SKIN_t0.0647482014 $VACCINE_PNEUMOCOCCAL_t0.0359712230 $VIEW_t0.6762589928 $VITALS_HT_t0.0719424460 $VITALS_PULSE_t0.3597122302 $WEARS_t0.1294964029 $WERE_CONSTANTLY_t0.0647482014 $WITHIN_LAST_t0.4748201439 $WORK_RELEASE_t0.0287769784) !$MG_TAK_t0.0287769784) and(or($RESCHEDULED_t0.3309352518 $STEP_t0.3237410072) !$PROVIDER_t4.9064748201) $NAPROXEN_TAB_t0.1654676259 $PSYCH_t0.5611510791 $TYPE_SCHEDULING_t0.0287769784 $WITH_INSPIRATION_t0.0287769784) !$PRODUCTS_IT_t0.0503597122) 
1 and(or(and(or(and(!$WERE_t4.3021582734 $WOULD_t3.4172661871) $TN_t0.0791366906 $UNDER_SKIN_t0.0647482014 $VACCINE_PNEUMOCOCCAL_t0.0359712230 $VIEW_t0.6762589928 $VITALS_HT_t0.0719424460 $WEARS_t0.1294964029 $WERE_CONSTANTLY_t0.0647482014 $WITHIN_LAST_t0.4748201439 $WORK_RELEASE_t0.0287769784) !$MG_TAK_t0.0287769784) and(or($RESCHEDULED_t0.3309352518 $STEP_t0.3237410072) !$PROVIDER_t4.9064748201) $NAPROXEN_TAB_t0.1654676259 $PSYCH_t0.5611510791 $TYPE_SCHEDULING_t0.0287769784 $VITALS_PULSE_t0.3597122302 $WITH_INSPIRATION_t0.0287769784) !$PRODUCTS_IT_t0.0503597122) 
1 and(or(and(!$FAX_t0.2949640288 $VIEW_t0.6762589928 !$WT_KG_t0.9856115108) $NAPROXEN_MG_t0.1726618705 $STEP_t0.3237410072 $SWELLING_NOTED_t0.0575539568 $TN_t0.0791366906 $TYPE_SCHEDULING_t0.0287769784 $UCINATIONS_DENIES_t0.0503597122 $VACCINE_PNEUMOCOCCAL_t0.0359712230 $VARDENAFIL_HCL_t0.0863309353 $VITALS_HT_t0.0719424460 $VITALS_PULSE_t0.3597122302 $WANT_GO_t0.0287769784 $WEARS_t0.1294964029 $WENT_OUT_t0.0791366906 $WHOLE_t0.0719424460 $WITH_INSPIRATION_t0.0287769784 $WORK_RELEASE_t0.0287769784) !$HEALING_WELL_t0.0431654676 !$LIST_BELOW_t0.1294964029 !$PRODUCTS_IT_t0.0503597122) 
1 or(and(or(and(!$FAX_t0.2949640288 $VIEW_t0.6762589928 !$WT_KG_t0.9856115108) $STEP_t0.3237410072 $SWELLING_NOTED_t0.0575539568 $TN_t0.0791366906 $TYPE_SCHEDULING_t0.0287769784 $UCINATIONS_DENIES_t0.0503597122 $VACCINE_PNEUMOCOCCAL_t0.0359712230 $VARDENAFIL_HCL_t0.0863309353 $VITALS_HT_t0.0719424460 $VITALS_PULSE_t0.3597122302 $WANT_GO_t0.0287769784 $WEARS_t0.1294964029 $WENT_OUT_t0.0791366906 $WHOLE_t0.0719424460 $WITH_INSPIRATION_t0.0287769784 $WORK_RELEASE_t0.0287769784) !$HEALING_WELL_t0.0431654676 !$LIST_BELOW_t0.1294964029 !$PRODUCTS_IT_t0.0503597122) $NAPROXEN_MG_t0.1726618705) 
1 and(or(and(or(and(!$FAX_t0.2949640288 $VIEW_t0.6762589928 !$WT_KG_t0.9856115108) $STEP_t0.3237410072 $SWELLING_NOTED_t0.0575539568 $TN_t0.0791366906 $TYPE_SCHEDULING_t0.0287769784 $UCINATIONS_DENIES_t0.0503597122 $VACCINE_PNEUMOCOCCAL_t0.0359712230 $VARDENAFIL_HCL_t0.0863309353 $VITALS_HT_t0.0719424460 $VITALS_PULSE_t0.3597122302 $WANT_GO_t0.0287769784 $WEARS_t0.1294964029 $WENT_OUT_t0.0791366906 $WHOLE_t0.0719424460 $WITH_INSPIRATION_t0.0287769784 $WORK_RELEASE_t0.0287769784) !$HEALING_WELL_t0.0431654676 !$LIST_BELOW_t0.1294964029) $NAPROXEN_MG_t0.1726618705) !$PRODUCTS_IT_t0.0503597122) 
1 and(or(and(or(and(!$FAX_t0.2949640288 $VIEW_t0.6762589928 !$WT_KG_t0.9856115108) $STEP_t0.3237410072 $SWELLING_NOTED_t0.0575539568 $TN_t0.0791366906 $TYPE_SCHEDULING_t0.0287769784 $UCINATIONS_DENIES_t0.0503597122 $VACCINE_PNEUMOCOCCAL_t0.0359712230 $VARDENAFIL_HCL_t0.0863309353 $VITALS_HT_t0.0719424460 $VITALS_PULSE_t0.3597122302 $WANT_GO_t0.0287769784 $WEARS_t0.1294964029 $WENT_OUT_t0.0791366906 $WHOLE_t0.0719424460 $WITH_INSPIRATION_t0.0287769784 $WORK_RELEASE_t0.0287769784) !$HEALING_WELL_t0.0431654676 !$PRODUCTS_IT_t0.0503597122) $NAPROXEN_MG_t0.1726618705) !$LIST_BELOW_t0.1294964029) 
1 and(or(and(!$ANSWER_t1.0359712230 !$FAX_t0.2949640288 $VIEW_t0.6762589928 !$WT_KG_t0.9856115108) $NAPROXEN_MG_t0.1726618705 $STEP_t0.3237410072 $SWELLING_NOTED_t0.0575539568 $TN_t0.0791366906 $TYPE_SCHEDULING_t0.0287769784 $UCINATIONS_DENIES_t0.0503597122 $VACCINE_PNEUMOCOCCAL_t0.0359712230 $VARDENAFIL_HCL_t0.0863309353 $VITALS_HT_t0.0719424460 $VITALS_PULSE_t0.3597122302 $WANT_GO_t0.0287769784 $WEARS_t0.1294964029 $WENT_OUT_t0.0791366906 $WHOLE_t0.0719424460 $WITH_INSPIRATION_t0.0287769784 $WORK_RELEASE_t0.0287769784) !$HEALING_WELL_t0.0431654676 !$LIST_BELOW_t0.1294964029 !$PRODUCTS_IT_t0.0503597122) 
1 and(or(and(!$BRAIN_t0.2589928058 !$FAX_t0.2949640288 $VIEW_t0.6762589928 !$WT_KG_t0.9856115108) $NAPROXEN_MG_t0.1726618705 $STEP_t0.3237410072 $SWELLING_NOTED_t0.0575539568 $TN_t0.0791366906 $TYPE_SCHEDULING_t0.0287769784 $UCINATIONS_DENIES_t0.0503597122 $VACCINE_PNEUMOCOCCAL_t0.0359712230 $VARDENAFIL_HCL_t0.0863309353 $VITALS_HT_t0.0719424460 $VITALS_PULSE_t0.3597122302 $WANT_GO_t0.0287769784 $WEARS_t0.1294964029 $WENT_OUT_t0.0791366906 $WHOLE_t0.0719424460 $WITH_INSPIRATION_t0.0287769784 $WORK_RELEASE_t0.0287769784) !$HEALING_WELL_t0.0431654676 !$LIST_BELOW_t0.1294964029 !$PRODUCTS_IT_t0.0503597122) 
1 and(or(and(!$COPING_t0.4532374101 !$FAX_t0.2949640288 $VIEW_t0.6762589928 !$WT_KG_t0.9856115108) $NAPROXEN_MG_t0.1726618705 $STEP_t0.3237410072 $SWELLING_NOTED_t0.0575539568 $TN_t0.0791366906 $TYPE_SCHEDULING_t0.0287769784 $UCINATIONS_DENIES_t0.0503597122 $VACCINE_PNEUMOCOCCAL_t0.0359712230 $VARDENAFIL_HCL_t0.0863309353 $VITALS_HT_t0.0719424460 $VITALS_PULSE_t0.3597122302 $WANT_GO_t0.0287769784 $WEARS_t0.1294964029 $WENT_OUT_t0.0791366906 $WHOLE_t0.0719424460 $WITH_INSPIRATION_t0.0287769784 $WORK_RELEASE_t0.0287769784) !$HEALING_WELL_t0.0431654676 !$LIST_BELOW_t0.1294964029 !$PRODUCTS_IT_t0.0503597122) 
1 and(or(and(!$EVENTS_t0.4748201439 !$FAX_t0.2949640288 $VIEW_t0.6762589928 !$WT_KG_t0.9856115108) $NAPROXEN_MG_t0.1726618705 $STEP_t0.3237410072 $SWELLING_NOTED_t0.0575539568 $TN_t0.0791366906 $TYPE_SCHEDULING_t0.0287769784 $UCINATIONS_DENIES_t0.0503597122 $VACCINE_PNEUMOCOCCAL_t0.0359712230 $VARDENAFIL_HCL_t0.0863309353 $VITALS_HT_t0.0719424460 $VITALS_PULSE_t0.3597122302 $WANT_GO_t0.0287769784 $WEARS_t0.1294964029 $WENT_OUT_t0.0791366906 $WHOLE_t0.0719424460 $WITH_INSPIRATION_t0.0287769784 $WORK_RELEASE_t0.0287769784) !$HEALING_WELL_t0.0431654676 !$LIST_BELOW_t0.1294964029 !$PRODUCTS_IT_t0.0503597122) 
1 and(or(and(!$FAX_t0.2949640288 !$OXIMETRY_t0.6978417266 $VIEW_t0.6762589928 !$WT_KG_t0.9856115108) $NAPROXEN_MG_t0.1726618705 $STEP_t0.3237410072 $SWELLING_NOTED_t0.0575539568 $TN_t0.0791366906 $TYPE_SCHEDULING_t0.0287769784 $UCINATIONS_DENIES_t0.0503597122 $VACCINE_PNEUMOCOCCAL_t0.0359712230 $VARDENAFIL_HCL_t0.0863309353 $VITALS_HT_t0.0719424460 $VITALS_PULSE_t0.3597122302 $WANT_GO_t0.0287769784 $WEARS_t0.1294964029 $WENT_OUT_t0.0791366906 $WHOLE_t0.0719424460 $WITH_INSPIRATION_t0.0287769784 $WORK_RELEASE_t0.0287769784) !$HEALING_WELL_t0.0431654676 !$LIST_BELOW_t0.1294964029 !$PRODUCTS_IT_t0.0503597122) 
1 and(or(and(!$FAX_t0.2949640288 !$PULSE_OXIMETRY_t0.8201438849 $VIEW_t0.6762589928 !$WT_KG_t0.9856115108) $NAPROXEN_MG_t0.1726618705 $STEP_t0.3237410072 $SWELLING_NOTED_t0.0575539568 $TN_t0.0791366906 $TYPE_SCHEDULING_t0.0287769784 $UCINATIONS_DENIES_t0.0503597122 $VACCINE_PNEUMOCOCCAL_t0.0359712230 $VARDENAFIL_HCL_t0.0863309353 $VITALS_HT_t0.0719424460 $VITALS_PULSE_t0.3597122302 $WANT_GO_t0.0287769784 $WEARS_t0.1294964029 $WENT_OUT_t0.0791366906 $WHOLE_t0.0719424460 $WITH_INSPIRATION_t0.0287769784 $WORK_RELEASE_t0.0287769784) !$HEALING_WELL_t0.0431654676 !$LIST_BELOW_t0.1294964029 !$PRODUCTS_IT_t0.0503597122) 
1 and(or(and(or(and(or(!$BRAIN_t0.2589928058 $WHAT_t2.2733812950) !$DISORDER_t2.0791366906 !$TAB_TAK_t0.0287769784 !$THERAPIST_t0.3021582734) $UNTIL_t0.9496402878) or(and(or($CHECKED_t0.4244604317 $STEP_t0.3237410072 $VARDENAFIL_MG_t0.1007194245 $VIEW_t0.6762589928) !$PICK_t0.3093525180) and($UNTIL_t0.9496402878 $WHO_t2.7985611511) $VACCINE_PNEUMOCOCCAL_t0.0359712230 $VITALS_PULSE_t0.3597122302 $VOICES_t0.2158273381 $WANT_GO_t0.0287769784 $WEARS_t0.1294964029 $WENT_OUT_t0.0791366906 $WHOLE_t0.0719424460 $WITH_INSPIRATION_t0.0287769784 $WORK_RELEASE_t0.0287769784 $WORSENING_t0.2877697842)) $PURCHASED_t0.0359712230 $TN_t0.0791366906 $VITALS_HT_t0.0719424460) !$HEALING_WELL_t0.0431654676 !$INPATIENT_REMOTE_t0.1294964029 !$PROCEDURE_PRACTITIONER_t0.0503597122) 
1 and(or(and(or(and(or(!$BRAIN_t0.2589928058 $WHAT_t2.2733812950) !$DISORDER_t2.0791366906 !$TAB_TAK_t0.0287769784 !$THERAPIST_t0.3021582734) $UNTIL_t0.9496402878) or(and(or($CHECKED_t0.4244604317 $STEP_t0.3237410072 $VARDENAFIL_MG_t0.1007194245 $VIEW_t0.6762589928) !$PICK_t0.3093525180) and($UNTIL_t0.9496402878 $WHO_t2.7985611511) $VACCINE_PNEUMOCOCCAL_t0.0359712230 $VITALS_PULSE_t0.3597122302 $VOICES_t0.2158273381 $WANT_GO_t0.0287769784 $WEARS_t0.1294964029 $WENT_OUT_t0.0791366906 $WHOLE_t0.0719424460 $WITH_INSPIRATION_t0.0287769784 $WORSENING_t0.2877697842)) $PURCHASED_t0.0359712230 $TN_t0.0791366906 $VITALS_HT_t0.0719424460 $WORK_RELEASE_t0.0287769784) !$HEALING_WELL_t0.0431654676 !$INPATIENT_REMOTE_t0.1294964029 !$PROCEDURE_PRACTITIONER_t0.0503597122) 
1 and(or(and(or(and(or(!$BRAIN_t0.2589928058 $WHAT_t2.2733812950) !$DISORDER_t2.0791366906 !$TAB_TAK_t0.0287769784 !$THERAPIST_t0.3021582734) $UNTIL_t0.9496402878) or(and(or($CHECKED_t0.4244604317 $STEP_t0.3237410072 $VARDENAFIL_MG_t0.1007194245 $VIEW_t0.6762589928) !$PICK_t0.3093525180) and($UNTIL_t0.9496402878 $WHO_t2.7985611511) $VACCINE_PNEUMOCOCCAL_t0.0359712230 $VITALS_PULSE_t0.3597122302 $VOICES_t0.2158273381 $WANT_GO_t0.0287769784 $WEARS_t0.1294964029 $WENT_OUT_t0.0791366906 $WHOLE_t0.0719424460 $WORK_RELEASE_t0.0287769784 $WORSENING_t0.2877697842)) $PURCHASED_t0.0359712230 $TN_t0.0791366906 $VITALS_HT_t0.0719424460 $WITH_INSPIRATION_t0.0287769784) !$HEALING_WELL_t0.0431654676 !$INPATIENT_REMOTE_t0.1294964029 !$PROCEDURE_PRACTITIONER_t0.0503597122) 
1 and(or(and(or(and(or(!$BRAIN_t0.2589928058 $WHAT_t2.2733812950) !$DISORDER_t2.0791366906 !$TAB_TAK_t0.0287769784 !$THERAPIST_t0.3021582734) $UNTIL_t0.9496402878) or(and(or($CHECKED_t0.4244604317 $STEP_t0.3237410072 $VARDENAFIL_MG_t0.1007194245 $VIEW_t0.6762589928) !$PICK_t0.3093525180) and($UNTIL_t0.9496402878 $WHO_t2.7985611511) $VACCINE_PNEUMOCOCCAL_t0.0359712230 $VITALS_PULSE_t0.3597122302 $VOICES_t0.2158273381 $WANT_GO_t0.0287769784 $WEARS_t0.1294964029 $WENT_OUT_t0.0791366906 $WHOLE_t0.0719424460 $WORSENING_t0.2877697842)) $PURCHASED_t0.0359712230 $TN_t0.0791366906 $VITALS_HT_t0.0719424460 $WITH_INSPIRATION_t0.0287769784 $WORK_RELEASE_t0.0287769784) !$HEALING_WELL_t0.0431654676 !$INPATIENT_REMOTE_t0.1294964029 !$PROCEDURE_PRACTITIONER_t0.0503597122) 
1 and(or(and(or(and(or(!$BRAIN_t0.2589928058 $WHAT_t2.2733812950) !$DISORDER_t2.0791366906 !$TAB_TAK_t0.0287769784 !$THERAPIST_t0.3021582734) $UNTIL_t0.9496402878) or(and(or($CHECKED_t0.4244604317 $STEP_t0.3237410072 $VARDENAFIL_MG_t0.1007194245 $VIEW_t0.6762589928) !$PICK_t0.3093525180) and($UNTIL_t0.9496402878 $WHO_t2.7985611511) $VACCINE_PNEUMOCOCCAL_t0.0359712230 $VITALS_PULSE_t0.3597122302 $VOICES_t0.2158273381 $WANT_GO_t0.0287769784 $WEARS_t0.1294964029 $WENT_OUT_t0.0791366906 $WITH_INSPIRATION_t0.0287769784 $WORK_RELEASE_t0.0287769784 $WORSENING_t0.2877697842)) $PURCHASED_t0.0359712230 $TN_t0.0791366906 $VITALS_HT_t0.0719424460 $WHOLE_t0.0719424460) !$HEALING_WELL_t0.0431654676 !$INPATIENT_REMOTE_t0.1294964029 !$PROCEDURE_PRACTITIONER_t0.0503597122) 
1 and(or(and(or(and(or(!$BRAIN_t0.2589928058 $WHAT_t2.2733812950) !$DISORDER_t2.0791366906 !$TAB_TAK_t0.0287769784 !$THERAPIST_t0.3021582734) $UNTIL_t0.9496402878) or(and(or($CHECKED_t0.4244604317 $STEP_t0.3237410072 $VARDENAFIL_MG_t0.1007194245 $VIEW_t0.6762589928) !$PICK_t0.3093525180) and($UNTIL_t0.9496402878 $WHO_t2.7985611511) $VACCINE_PNEUMOCOCCAL_t0.0359712230 $VITALS_PULSE_t0.3597122302 $VOICES_t0.2158273381 $WANT_GO_t0.0287769784 $WEARS_t0.1294964029 $WENT_OUT_t0.0791366906 $WITH_INSPIRATION_t0.0287769784 $WORSENING_t0.2877697842)) $PURCHASED_t0.0359712230 $TN_t0.0791366906 $VITALS_HT_t0.0719424460 $WHOLE_t0.0719424460 $WORK_RELEASE_t0.0287769784) !$HEALING_WELL_t0.0431654676 !$INPATIENT_REMOTE_t0.1294964029 !$PROCEDURE_PRACTITIONER_t0.0503597122) 
1 and(or(and(or(and(or(!$BRAIN_t0.2589928058 $WHAT_t2.2733812950) !$DISORDER_t2.0791366906 !$TAB_TAK_t0.0287769784 !$THERAPIST_t0.3021582734) $UNTIL_t0.9496402878) or(and(or($CHECKED_t0.4244604317 $STEP_t0.3237410072 $VARDENAFIL_MG_t0.1007194245 $VIEW_t0.6762589928) !$PICK_t0.3093525180) and($UNTIL_t0.9496402878 $WHO_t2.7985611511) $VACCINE_PNEUMOCOCCAL_t0.0359712230 $VITALS_PULSE_t0.3597122302 $VOICES_t0.2158273381 $WEARS_t0.1294964029 $WENT_OUT_t0.0791366906 $WHOLE_t0.0719424460 $WITH_INSPIRATION_t0.0287769784 $WORK_RELEASE_t0.0287769784 $WORSENING_t0.2877697842)) $PURCHASED_t0.0359712230 $TN_t0.0791366906 $VITALS_HT_t0.0719424460 $WANT_GO_t0.0287769784) !$HEALING_WELL_t0.0431654676 !$INPATIENT_REMOTE_t0.1294964029 !$PROCEDURE_PRACTITIONER_t0.0503597122) 
1 and(or(and(or(and(or(!$BRAIN_t0.2589928058 $WHAT_t2.2733812950) !$DISORDER_t2.0791366906 !$TAB_TAK_t0.0287769784 !$THERAPIST_t0.3021582734) $UNTIL_t0.9496402878) or(and(or($CHECKED_t0.4244604317 $STEP_t0.3237410072 $VARDENAFIL_MG_t0.1007194245 $VIEW_t0.6762589928) !$PICK_t0.3093525180) and($UNTIL_t0.9496402878 $WHO_t2.7985611511) $VITALS_PULSE_t0.3597122302 $VOICES_t0.2158273381 $WANT_GO_t0.0287769784 $WEARS_t0.1294964029 $WENT_OUT_t0.0791366906 $WHOLE_t0.0719424460 $WITH_INSPIRATION_t0.0287769784 $WORK_RELEASE_t0.0287769784 $WORSENING_t0.2877697842)) $PURCHASED_t0.0359712230 $TN_t0.0791366906 $VACCINE_PNEUMOCOCCAL_t0.0359712230 $VITALS_HT_t0.0719424460) !$HEALING_WELL_t0.0431654676 !$INPATIENT_REMOTE_t0.1294964029 !$PROCEDURE_PRACTITIONER_t0.0503597122) 
1 and(or(and(or(and(or(!$BRAIN_t0.2589928058 $WHAT_t2.2733812950) !$DISORDER_t2.0791366906 !$TAB_TAK_t0.0287769784 !$THERAPIST_t0.3021582734) $UNTIL_t0.9496402878) or(and(or($CHECKED_t0.4244604317 $STEP_t0.3237410072 $VARDENAFIL_MG_t0.1007194245 $VIEW_t0.6762589928) !$PICK_t0.3093525180) and($UNTIL_t0.9496402878 $WHO_t2.7985611511) $VITALS_PULSE_t0.3597122302 $VOICES_t0.2158273381 $WANT_GO_t0.0287769784 $WEARS_t0.1294964029 $WENT_OUT_t0.0791366906 $WHOLE_t0.0719424460 $WITH_INSPIRATION_t0.0287769784 $WORSENING_t0.2877697842)) $PURCHASED_t0.0359712230 $TN_t0.0791366906 $VACCINE_PNEUMOCOCCAL_t0.0359712230 $VITALS_HT_t0.0719424460 $WORK_RELEASE_t0.0287769784) !$HEALING_WELL_t0.0431654676 !$INPATIENT_REMOTE_t0.1294964029 !$PROCEDURE_PRACTITIONER_t0.0503597122) 
1 and(or(and(or(and(or(!$BRAIN_t0.2589928058 $WHAT_t2.2733812950) !$DISORDER_t2.0791366906 !$TAB_TAK_t0.0287769784 !$THERAPIST_t0.3021582734) $UNTIL_t0.9496402878) or(and(or($CHECKED_t0.4244604317 $STEP_t0.3237410072 $VIEW_t0.6762589928) !$PICK_t0.3093525180) and($UNTIL_t0.9496402878 $WHO_t2.7985611511) $VACCINE_PNEUMOCOCCAL_t0.0359712230 $VARDENAFIL_MG_t0.1007194245 $VITALS_PULSE_t0.3597122302 $VOICES_t0.2158273381 $WANT_GO_t0.0287769784 $WEARS_t0.1294964029 $WENT_OUT_t0.0791366906 $WHOLE_t0.0719424460 $WITH_INSPIRATION_t0.0287769784 $WORK_RELEASE_t0.0287769784 $WORSENING_t0.2877697842)) $PURCHASED_t0.0359712230 $TN_t0.0791366906 $VITALS_HT_t0.0719424460) !$HEALING_WELL_t0.0431654676 !$INPATIENT_REMOTE_t0.1294964029 !$PROCEDURE_PRACTITIONER_t0.0503597122) 
1 and(or(and(!$HAS_BEEN_t6.3525179856 $STEP_t0.3237410072) and($UNTIL_t0.9496402878 !$VACCINE_IMMUNIZATION_t0.0431654676 !$VOICE_t0.5107913669 $WHO_t2.7985611511) and(!$URGENT_t0.4748201439 $WENT_OUT_t0.0791366906) $INTERVIEWED_t0.0863309353 $MOUTH_ONCE_t0.1726618705 $TN_t0.0791366906 $TYPE_SCHEDULING_t0.0287769784 $UCINATIONS_DENIES_t0.0503597122 $UNSTEADY_t0.0575539568 $VACCINE_PNEUMOCOCCAL_t0.0359712230 $VARDENAFIL_HCL_t0.0863309353 $VIEW_t0.6762589928 $VITALS_HT_t0.0719424460 $VITALS_PULSE_t0.3597122302 $VITALS_WT_t0.0503597122 $WANT_GO_t0.0287769784 $WHOLE_t0.0719424460 $WITH_INSPIRATION_t0.0287769784 $WORK_RELEASE_t0.0287769784) !$PRODUCTS_IT_t0.0503597122) 
1 and(or(and(!$HAS_BEEN_t6.3525179856 $STEP_t0.3237410072) and($UNTIL_t0.9496402878 !$VACCINE_IMMUNIZATION_t0.0431654676 !$VOICE_t0.5107913669 $WHO_t2.7985611511) and($WENT_OUT_t0.0791366906 !$YES_t8.2446043165) $INTERVIEWED_t0.0863309353 $MOUTH_ONCE_t0.1726618705 $TN_t0.0791366906 $TYPE_SCHEDULING_t0.0287769784 $UCINATIONS_DENIES_t0.0503597122 $UNSTEADY_t0.0575539568 $VACCINE_PNEUMOCOCCAL_t0.0359712230 $VARDENAFIL_HCL_t0.0863309353 $VIEW_t0.6762589928 $VITALS_HT_t0.0719424460 $VITALS_PULSE_t0.3597122302 $VITALS_WT_t0.0503597122 $WANT_GO_t0.0287769784 $WHOLE_t0.0719424460 $WITH_INSPIRATION_t0.0287769784 $WORK_RELEASE_t0.0287769784) !$PRODUCTS_IT_t0.0503597122) 
1 or(and(or(and(!$HAS_BEEN_t6.3525179856 $STEP_t0.3237410072) and($UNTIL_t0.9496402878 !$VACCINE_IMMUNIZATION_t0.0431654676 !$VOICE_t0.5107913669 $WHO_t2.7985611511) and(!$URGENT_t0.4748201439 $WENT_OUT_t0.0791366906) $INTERVIEWED_t0.0863309353 $MOUTH_ONCE_t0.1726618705 $TN_t0.0791366906 $UCINATIONS_DENIES_t0.0503597122 $UNSTEADY_t0.0575539568 $VACCINE_PNEUMOCOCCAL_t0.0359712230 $VARDENAFIL_HCL_t0.0863309353 $VIEW_t0.6762589928 $VITALS_HT_t0.0719424460 $VITALS_PULSE_t0.3597122302 $VITALS_WT_t0.0503597122 $WANT_GO_t0.0287769784 $WHOLE_t0.0719424460) !$PRODUCTS_IT_t0.0503597122) $TYPE_SCHEDULING_t0.0287769784 $WITH_INSPIRATION_t0.0287769784 $WORK_RELEASE_t0.0287769784) 
1 or(and(or(and(!$HAS_BEEN_t6.3525179856 $STEP_t0.3237410072) and($UNTIL_t0.9496402878 !$VACCINE_IMMUNIZATION_t0.0431654676 !$VOICE_t0.5107913669 $WHO_t2.7985611511) and(!$URGENT_t0.4748201439 $WENT_OUT_t0.0791366906) $INTERVIEWED_t0.0863309353 $MOUTH_ONCE_t0.1726618705 $TN_t0.0791366906 $UCINATIONS_DENIES_t0.0503597122 $UNSTEADY_t0.0575539568 $VACCINE_PNEUMOCOCCAL_t0.0359712230 $VARDENAFIL_HCL_t0.0863309353 $VIEW_t0.6762589928 $VITALS_HT_t0.0719424460 $VITALS_PULSE_t0.3597122302 $VITALS_WT_t0.0503597122 $WANT_GO_t0.0287769784 $WHOLE_t0.0719424460 $WITH_INSPIRATION_t0.0287769784) !$PRODUCTS_IT_t0.0503597122) $TYPE_SCHEDULING_t0.0287769784 $WORK_RELEASE_t0.0287769784) 
1 or(and(or(and(!$HAS_BEEN_t6.3525179856 $STEP_t0.3237410072) and($UNTIL_t0.9496402878 !$VACCINE_IMMUNIZATION_t0.0431654676 !$VOICE_t0.5107913669 $WHO_t2.7985611511) and(!$URGENT_t0.4748201439 $WENT_OUT_t0.0791366906) $INTERVIEWED_t0.0863309353 $MOUTH_ONCE_t0.1726618705 $TN_t0.0791366906 $UCINATIONS_DENIES_t0.0503597122 $UNSTEADY_t0.0575539568 $VACCINE_PNEUMOCOCCAL_t0.0359712230 $VARDENAFIL_HCL_t0.0863309353 $VIEW_t0.6762589928 $VITALS_HT_t0.0719424460 $VITALS_PULSE_t0.3597122302 $VITALS_WT_t0.0503597122 $WANT_GO_t0.0287769784 $WHOLE_t0.0719424460 $WITH_INSPIRATION_t0.0287769784 $WORK_RELEASE_t0.0287769784) !$PRODUCTS_IT_t0.0503597122) $TYPE_SCHEDULING_t0.0287769784) 
1 or(and(or(and(!$HAS_BEEN_t6.3525179856 $STEP_t0.3237410072) and($UNTIL_t0.9496402878 !$VACCINE_IMMUNIZATION_t0.0431654676 !$VOICE_t0.5107913669 $WHO_t2.7985611511) and(!$URGENT_t0.4748201439 $WENT_OUT_t0.0791366906) $INTERVIEWED_t0.0863309353 $MOUTH_ONCE_t0.1726618705 $TN_t0.0791366906 $UCINATIONS_DENIES_t0.0503597122 $UNSTEADY_t0.0575539568 $VACCINE_PNEUMOCOCCAL_t0.0359712230 $VARDENAFIL_HCL_t0.0863309353 $VIEW_t0.6762589928 $VITALS_HT_t0.0719424460 $VITALS_PULSE_t0.3597122302 $VITALS_WT_t0.0503597122 $WANT_GO_t0.0287769784 $WHOLE_t0.0719424460 $WORK_RELEASE_t0.0287769784) !$PRODUCTS_IT_t0.0503597122) $TYPE_SCHEDULING_t0.0287769784 $WITH_INSPIRATION_t0.0287769784) 
1 or(and(or(and(!$HAS_BEEN_t6.3525179856 $STEP_t0.3237410072) and($UNTIL_t0.9496402878 !$VACCINE_IMMUNIZATION_t0.0431654676 !$VOICE_t0.5107913669 $WHO_t2.7985611511) and(!$URGENT_t0.4748201439 $WENT_OUT_t0.0791366906) $INTERVIEWED_t0.0863309353 $MOUTH_ONCE_t0.1726618705 $TN_t0.0791366906 $UCINATIONS_DENIES_t0.0503597122 $UNSTEADY_t0.0575539568 $VACCINE_PNEUMOCOCCAL_t0.0359712230 $VARDENAFIL_HCL_t0.0863309353 $VIEW_t0.6762589928 $VITALS_HT_t0.0719424460 $VITALS_PULSE_t0.3597122302 $VITALS_WT_t0.0503597122 $WHOLE_t0.0719424460 $WITH_INSPIRATION_t0.0287769784) !$PRODUCTS_IT_t0.0503597122) $TYPE_SCHEDULING_t0.0287769784 $WANT_GO_t0.0287769784 $WORK_RELEASE_t0.0287769784) 
1 or(and(or(and(!$HAS_BEEN_t6.3525179856 $STEP_t0.3237410072) and($UNTIL_t0.9496402878 !$VACCINE_IMMUNIZATION_t0.0431654676 !$VOICE_t0.5107913669 $WHO_t2.7985611511) and(!$URGENT_t0.4748201439 $WENT_OUT_t0.0791366906) $INTERVIEWED_t0.0863309353 $MOUTH_ONCE_t0.1726618705 $TN_t0.0791366906 $UCINATIONS_DENIES_t0.0503597122 $UNSTEADY_t0.0575539568 $VACCINE_PNEUMOCOCCAL_t0.0359712230 $VARDENAFIL_HCL_t0.0863309353 $VIEW_t0.6762589928 $VITALS_HT_t0.0719424460 $VITALS_PULSE_t0.3597122302 $VITALS_WT_t0.0503597122 $WHOLE_t0.0719424460 $WITH_INSPIRATION_t0.0287769784 $WORK_RELEASE_t0.0287769784) !$PRODUCTS_IT_t0.0503597122) $TYPE_SCHEDULING_t0.0287769784 $WANT_GO_t0.0287769784) 
1 or(and(or(and(!$HAS_BEEN_t6.3525179856 $STEP_t0.3237410072) and($UNTIL_t0.9496402878 !$VACCINE_IMMUNIZATION_t0.0431654676 !$VOICE_t0.5107913669 $WHO_t2.7985611511) and(!$URGENT_t0.4748201439 $WENT_OUT_t0.0791366906) $INTERVIEWED_t0.0863309353 $MOUTH_ONCE_t0.1726618705 $TN_t0.0791366906 $UCINATIONS_DENIES_t0.0503597122 $UNSTEADY_t0.0575539568 $VACCINE_PNEUMOCOCCAL_t0.0359712230 $VARDENAFIL_HCL_t0.0863309353 $VIEW_t0.6762589928 $VITALS_HT_t0.0719424460 $VITALS_PULSE_t0.3597122302 $WANT_GO_t0.0287769784 $WHOLE_t0.0719424460 $WITH_INSPIRATION_t0.0287769784) !$PRODUCTS_IT_t0.0503597122) $TYPE_SCHEDULING_t0.0287769784 $VITALS_WT_t0.0503597122 $WORK_RELEASE_t0.0287769784) 
1 or(and(or(and(!$HAS_BEEN_t6.3525179856 $STEP_t0.3237410072) and($UNTIL_t0.9496402878 !$VACCINE_IMMUNIZATION_t0.0431654676 !$VOICE_t0.5107913669 $WHO_t2.7985611511) and(!$URGENT_t0.4748201439 $WENT_OUT_t0.0791366906) $INTERVIEWED_t0.0863309353 $MOUTH_ONCE_t0.1726618705 $TN_t0.0791366906 $UCINATIONS_DENIES_t0.0503597122 $UNSTEADY_t0.0575539568 $VACCINE_PNEUMOCOCCAL_t0.0359712230 $VARDENAFIL_HCL_t0.0863309353 $VIEW_t0.6762589928 $VITALS_HT_t0.0719424460 $VITALS_PULSE_t0.3597122302 $WANT_GO_t0.0287769784 $WHOLE_t0.0719424460 $WITH_INSPIRATION_t0.0287769784 $WORK_RELEASE_t0.0287769784) !$PRODUCTS_IT_t0.0503597122) $TYPE_SCHEDULING_t0.0287769784 $VITALS_WT_t0.0503597122) 
1 or(and(or(and($VIEW_t0.6762589928 $YESTER_t0.9712230216) $TABLET_ONCE_t0.1366906475 $TN_t0.0791366906 $TRIAGE_CHIEF_t0.1079136691 $TURNING_t0.0575539568 $TYPE_SCHEDULING_t0.0287769784 $UCINATIONS_DENIES_t0.0503597122 $UNDER_SKIN_t0.0647482014 $VACCINE_PNEUMOCOCCAL_t0.0359712230 $VA_OTC_t0.0359712230 $VITALS_HT_t0.0719424460 $VITALS_PULSE_t0.3597122302 $WEARS_t0.1294964029 $WEEK_NOTICE_t0.0575539568 $WENT_OUT_t0.0791366906 $WHOLE_t0.0719424460 $WITH_INSPIRATION_t0.0287769784 $WORK_RELEASE_t0.0287769784 $WORTHLESSNESS_t0.0647482014 $ZONE_t0.0359712230) !$AUDIT_t0.0431654676 !$HEALING_WELL_t0.0431654676 !$PERFUSION_t0.0935251799 !$PRODUCTS_IT_t0.0503597122) $PURCHASED_t0.0359712230) 
1 or(and(or(and($VIEW_t0.6762589928 $YESTER_t0.9712230216) $TN_t0.0791366906 $TRIAGE_CHIEF_t0.1079136691 $TURNING_t0.0575539568 $TYPE_SCHEDULING_t0.0287769784 $UCINATIONS_DENIES_t0.0503597122 $UNDER_SKIN_t0.0647482014 $VACCINE_PNEUMOCOCCAL_t0.0359712230 $VA_OTC_t0.0359712230 $VITALS_HT_t0.0719424460 $VITALS_PULSE_t0.3597122302 $WEARS_t0.1294964029 $WEEK_NOTICE_t0.0575539568 $WENT_OUT_t0.0791366906 $WHOLE_t0.0719424460 $WITH_INSPIRATION_t0.0287769784 $WORK_RELEASE_t0.0287769784 $WORTHLESSNESS_t0.0647482014 $ZONE_t0.0359712230) !$AUDIT_t0.0431654676 !$HEALING_WELL_t0.0431654676 !$PERFUSION_t0.0935251799 !$PRODUCTS_IT_t0.0503597122) $PURCHASED_t0.0359712230 $TABLET_ONCE_t0.1366906475) 
1 and(or(and(or(and($VIEW_t0.6762589928 $YESTER_t0.9712230216) $TABLET_ONCE_t0.1366906475 $TN_t0.0791366906 $TRIAGE_CHIEF_t0.1079136691 $TURNING_t0.0575539568 $TYPE_SCHEDULING_t0.0287769784 $UCINATIONS_DENIES_t0.0503597122 $UNDER_SKIN_t0.0647482014 $VACCINE_PNEUMOCOCCAL_t0.0359712230 $VA_OTC_t0.0359712230 $VITALS_HT_t0.0719424460 $VITALS_PULSE_t0.3597122302 $WEARS_t0.1294964029 $WEEK_NOTICE_t0.0575539568 $WENT_OUT_t0.0791366906 $WHOLE_t0.0719424460 $WITH_INSPIRATION_t0.0287769784 $WORK_RELEASE_t0.0287769784 $WORTHLESSNESS_t0.0647482014 $ZONE_t0.0359712230) !$AUDIT_t0.0431654676) $PURCHASED_t0.0359712230) !$HEALING_WELL_t0.0431654676 !$PERFUSION_t0.0935251799 !$PRODUCTS_IT_t0.0503597122) 
1 and(or(and(or(and($VIEW_t0.6762589928 $YESTER_t0.9712230216) $TABLET_ONCE_t0.1366906475 $TN_t0.0791366906 $TRIAGE_CHIEF_t0.1079136691 $TURNING_t0.0575539568 $TYPE_SCHEDULING_t0.0287769784 $UCINATIONS_DENIES_t0.0503597122 $UNDER_SKIN_t0.0647482014 $VACCINE_PNEUMOCOCCAL_t0.0359712230 $VA_OTC_t0.0359712230 $VITALS_HT_t0.0719424460 $VITALS_PULSE_t0.3597122302 $WEARS_t0.1294964029 $WEEK_NOTICE_t0.0575539568 $WENT_OUT_t0.0791366906 $WHOLE_t0.0719424460 $WITH_INSPIRATION_t0.0287769784 $WORK_RELEASE_t0.0287769784 $WORTHLESSNESS_t0.0647482014 $ZONE_t0.0359712230) !$AUDIT_t0.0431654676 !$HEALING_WELL_t0.0431654676) $PURCHASED_t0.0359712230) !$PERFUSION_t0.0935251799 !$PRODUCTS_IT_t0.0503597122) 
1 and(or(and(or(and($VIEW_t0.6762589928 $YESTER_t0.9712230216) $TABLET_ONCE_t0.1366906475 $TN_t0.0791366906 $TRIAGE_CHIEF_t0.1079136691 $TURNING_t0.0575539568 $TYPE_SCHEDULING_t0.0287769784 $UCINATIONS_DENIES_t0.0503597122 $UNDER_SKIN_t0.0647482014 $VACCINE_PNEUMOCOCCAL_t0.0359712230 $VA_OTC_t0.0359712230 $VITALS_HT_t0.0719424460 $VITALS_PULSE_t0.3597122302 $WEARS_t0.1294964029 $WEEK_NOTICE_t0.0575539568 $WENT_OUT_t0.0791366906 $WHOLE_t0.0719424460 $WITH_INSPIRATION_t0.0287769784 $WORK_RELEASE_t0.0287769784 $WORTHLESSNESS_t0.0647482014 $ZONE_t0.0359712230) !$AUDIT_t0.0431654676 !$HEALING_WELL_t0.0431654676 !$PERFUSION_t0.0935251799) $PURCHASED_t0.0359712230) !$PRODUCTS_IT_t0.0503597122) 
1 and(or(and(or(and($VIEW_t0.6762589928 $YESTER_t0.9712230216) $TABLET_ONCE_t0.1366906475 $TN_t0.0791366906 $TRIAGE_CHIEF_t0.1079136691 $TURNING_t0.0575539568 $TYPE_SCHEDULING_t0.0287769784 $UCINATIONS_DENIES_t0.0503597122 $UNDER_SKIN_t0.0647482014 $VACCINE_PNEUMOCOCCAL_t0.0359712230 $VA_OTC_t0.0359712230 $VITALS_HT_t0.0719424460 $VITALS_PULSE_t0.3597122302 $WEARS_t0.1294964029 $WEEK_NOTICE_t0.0575539568 $WENT_OUT_t0.0791366906 $WHOLE_t0.0719424460 $WITH_INSPIRATION_t0.0287769784 $WORK_RELEASE_t0.0287769784 $WORTHLESSNESS_t0.0647482014 $ZONE_t0.0359712230) !$AUDIT_t0.0431654676 !$HEALING_WELL_t0.0431654676 !$PRODUCTS_IT_t0.0503597122) $PURCHASED_t0.0359712230) !$PERFUSION_t0.0935251799) 
1 and(or(and(or(and($VIEW_t0.6762589928 $YESTER_t0.9712230216) $TABLET_ONCE_t0.1366906475 $TN_t0.0791366906 $TRIAGE_CHIEF_t0.1079136691 $TURNING_t0.0575539568 $TYPE_SCHEDULING_t0.0287769784 $UCINATIONS_DENIES_t0.0503597122 $UNDER_SKIN_t0.0647482014 $VACCINE_PNEUMOCOCCAL_t0.0359712230 $VA_OTC_t0.0359712230 $VITALS_HT_t0.0719424460 $VITALS_PULSE_t0.3597122302 $WEARS_t0.1294964029 $WEEK_NOTICE_t0.0575539568 $WENT_OUT_t0.0791366906 $WHOLE_t0.0719424460 $WITH_INSPIRATION_t0.0287769784 $WORK_RELEASE_t0.0287769784 $WORTHLESSNESS_t0.0647482014 $ZONE_t0.0359712230) !$AUDIT_t0.0431654676 !$PERFUSION_t0.0935251799 !$PRODUCTS_IT_t0.0503597122) $PURCHASED_t0.0359712230) !$HEALING_WELL_t0.0431654676) 
1 and(or(and(or(and($VIEW_t0.6762589928 $YESTER_t0.9712230216) $TABLET_ONCE_t0.1366906475 $TN_t0.0791366906 $TRIAGE_CHIEF_t0.1079136691 $TURNING_t0.0575539568 $TYPE_SCHEDULING_t0.0287769784 $UCINATIONS_DENIES_t0.0503597122 $UNDER_SKIN_t0.0647482014 $VACCINE_PNEUMOCOCCAL_t0.0359712230 $VA_OTC_t0.0359712230 $VITALS_HT_t0.0719424460 $VITALS_PULSE_t0.3597122302 $WEARS_t0.1294964029 $WEEK_NOTICE_t0.0575539568 $WENT_OUT_t0.0791366906 $WHOLE_t0.0719424460 $WITH_INSPIRATION_t0.0287769784 $WORK_RELEASE_t0.0287769784 $WORTHLESSNESS_t0.0647482014 $ZONE_t0.0359712230) !$AUDIT_t0.0431654676 !$PRODUCTS_IT_t0.0503597122) $PURCHASED_t0.0359712230) !$HEALING_WELL_t0.0431654676 !$PERFUSION_t0.0935251799) 
1 and(or(and(or(and($VIEW_t0.6762589928 $YESTER_t0.9712230216) $TABLET_ONCE_t0.1366906475 $TN_t0.0791366906 $TRIAGE_CHIEF_t0.1079136691 $TURNING_t0.0575539568 $TYPE_SCHEDULING_t0.0287769784 $UCINATIONS_DENIES_t0.0503597122 $UNDER_SKIN_t0.0647482014 $VACCINE_PNEUMOCOCCAL_t0.0359712230 $VA_OTC_t0.0359712230 $VITALS_HT_t0.0719424460 $VITALS_PULSE_t0.3597122302 $WEARS_t0.1294964029 $WEEK_NOTICE_t0.0575539568 $WENT_OUT_t0.0791366906 $WHOLE_t0.0719424460 $WITH_INSPIRATION_t0.0287769784 $WORK_RELEASE_t0.0287769784 $WORTHLESSNESS_t0.0647482014 $ZONE_t0.0359712230) !$HEALING_WELL_t0.0431654676 !$PERFUSION_t0.0935251799 !$PRODUCTS_IT_t0.0503597122) $PURCHASED_t0.0359712230) !$AUDIT_t0.0431654676) 
1 and(or(and(or(and($VIEW_t0.6762589928 $YESTER_t0.9712230216) $TABLET_ONCE_t0.1366906475 $TN_t0.0791366906 $TRIAGE_CHIEF_t0.1079136691 $TURNING_t0.0575539568 $TYPE_SCHEDULING_t0.0287769784 $UCINATIONS_DENIES_t0.0503597122 $UNDER_SKIN_t0.0647482014 $VACCINE_PNEUMOCOCCAL_t0.0359712230 $VA_OTC_t0.0359712230 $VITALS_HT_t0.0719424460 $VITALS_PULSE_t0.3597122302 $WEARS_t0.1294964029 $WEEK_NOTICE_t0.0575539568 $WENT_OUT_t0.0791366906 $WHOLE_t0.0719424460 $WITH_INSPIRATION_t0.0287769784 $WORK_RELEASE_t0.0287769784 $WORTHLESSNESS_t0.0647482014 $ZONE_t0.0359712230) !$HEALING_WELL_t0.0431654676 !$PRODUCTS_IT_t0.0503597122) $PURCHASED_t0.0359712230) !$AUDIT_t0.0431654676 !$PERFUSION_t0.0935251799) 
1 or(and(or(and($MALE_WHO_t0.4964028777 $VIEW_t0.6762589928) and($WAL_t0.9568345324 $WOULD_BE_t0.8992805755) $NAPROXEN_TAB_t0.1654676259 $TN_t0.0791366906 $TRIAGE_CHIEF_t0.1079136691 $TYPE_SCHEDULING_t0.0287769784 $VACCINE_PNEUMOCOCCAL_t0.0359712230 $VITALS_HT_t0.0719424460 $VITALS_PULSE_t0.3597122302 $WALS_t0.1007194245 $WEARS_t0.1294964029 $WEEK_NOTICE_t0.0575539568 $WENT_OUT_t0.0791366906 $WITH_INSPIRATION_t0.0287769784 $WORK_RELEASE_t0.0287769784 $WORRY_t0.0503597122 $YARD_t0.0359712230) !$HEALING_WELL_t0.0431654676 !$PERFUSION_t0.0935251799 !$PROCEDURE_PRACTITIONER_t0.0503597122 !$TAB_TAK_t0.0287769784) and(!$REQUESTING_t1.5107913669 $STEP_t0.3237410072) $SWELLING_NOTED_t0.0575539568) 
1 or(and(or(and($MALE_WHO_t0.4964028777 $VIEW_t0.6762589928) and($WAL_t0.9568345324 $WOULD_BE_t0.8992805755) $NAPROXEN_TAB_t0.1654676259 $TN_t0.0791366906 $TRIAGE_CHIEF_t0.1079136691 $TYPE_SCHEDULING_t0.0287769784 $VACCINE_PNEUMOCOCCAL_t0.0359712230 $VITALS_HT_t0.0719424460 $VITALS_PULSE_t0.3597122302 $WEARS_t0.1294964029 $WEEK_NOTICE_t0.0575539568 $WENT_OUT_t0.0791366906 $WITH_INSPIRATION_t0.0287769784 $WORK_RELEASE_t0.0287769784 $WORRY_t0.0503597122 $YARD_t0.0359712230) !$HEALING_WELL_t0.0431654676 !$PERFUSION_t0.0935251799 !$PROCEDURE_PRACTITIONER_t0.0503597122 !$TAB_TAK_t0.0287769784) and(!$REQUESTING_t1.5107913669 $STEP_t0.3237410072) $SWELLING_NOTED_t0.0575539568 $WALS_t0.1007194245) 
1 and(or(and(or(and($MALE_WHO_t0.4964028777 $VIEW_t0.6762589928) and($WAL_t0.9568345324 $WOULD_BE_t0.8992805755) $NAPROXEN_TAB_t0.1654676259 $TN_t0.0791366906 $TRIAGE_CHIEF_t0.1079136691 $TYPE_SCHEDULING_t0.0287769784 $VACCINE_PNEUMOCOCCAL_t0.0359712230 $VITALS_HT_t0.0719424460 $VITALS_PULSE_t0.3597122302 $WALS_t0.1007194245 $WEARS_t0.1294964029 $WEEK_NOTICE_t0.0575539568 $WENT_OUT_t0.0791366906 $WITH_INSPIRATION_t0.0287769784 $WORK_RELEASE_t0.0287769784 $WORRY_t0.0503597122 $YARD_t0.0359712230) !$HEALING_WELL_t0.0431654676 !$PERFUSION_t0.0935251799 !$PROCEDURE_PRACTITIONER_t0.0503597122) and(!$REQUESTING_t1.5107913669 $STEP_t0.3237410072) $SWELLING_NOTED_t0.0575539568) !$TAB_TAK_t0.0287769784) 
1 and(or(and(or(and($MALE_WHO_t0.4964028777 $VIEW_t0.6762589928) and($WAL_t0.9568345324 $WOULD_BE_t0.8992805755) $NAPROXEN_TAB_t0.1654676259 $TN_t0.0791366906 $TRIAGE_CHIEF_t0.1079136691 $TYPE_SCHEDULING_t0.0287769784 $VACCINE_PNEUMOCOCCAL_t0.0359712230 $VITALS_HT_t0.0719424460 $VITALS_PULSE_t0.3597122302 $WALS_t0.1007194245 $WEARS_t0.1294964029 $WEEK_NOTICE_t0.0575539568 $WENT_OUT_t0.0791366906 $WITH_INSPIRATION_t0.0287769784 $WORK_RELEASE_t0.0287769784 $WORRY_t0.0503597122 $YARD_t0.0359712230) !$PERFUSION_t0.0935251799 !$PROCEDURE_PRACTITIONER_t0.0503597122) and(!$REQUESTING_t1.5107913669 $STEP_t0.3237410072) $SWELLING_NOTED_t0.0575539568) !$HEALING_WELL_t0.0431654676 !$TAB_TAK_t0.0287769784) 
1 and(or(and(or(and($MALE_WHO_t0.4964028777 $VIEW_t0.6762589928) and($WAL_t0.9568345324 $WOULD_BE_t0.8992805755) $NAPROXEN_TAB_t0.1654676259 $TN_t0.0791366906 $TRIAGE_CHIEF_t0.1079136691 $TYPE_SCHEDULING_t0.0287769784 $VACCINE_PNEUMOCOCCAL_t0.0359712230 $VITALS_HT_t0.0719424460 $VITALS_PULSE_t0.3597122302 $WALS_t0.1007194245 $WEARS_t0.1294964029 $WEEK_NOTICE_t0.0575539568 $WENT_OUT_t0.0791366906 $WITH_INSPIRATION_t0.0287769784 $WORK_RELEASE_t0.0287769784 $WORRY_t0.0503597122 $YARD_t0.0359712230) !$PERFUSION_t0.0935251799 !$PROCEDURE_PRACTITIONER_t0.0503597122 !$TAB_TAK_t0.0287769784) and(!$REQUESTING_t1.5107913669 $STEP_t0.3237410072) $SWELLING_NOTED_t0.0575539568) !$HEALING_WELL_t0.0431654676) 
1 and(or(and(or(and($MALE_WHO_t0.4964028777 $VIEW_t0.6762589928) and($WAL_t0.9568345324 $WOULD_BE_t0.8992805755) $NAPROXEN_TAB_t0.1654676259 $TN_t0.0791366906 $TRIAGE_CHIEF_t0.1079136691 $TYPE_SCHEDULING_t0.0287769784 $VACCINE_PNEUMOCOCCAL_t0.0359712230 $VITALS_HT_t0.0719424460 $VITALS_PULSE_t0.3597122302 $WEARS_t0.1294964029 $WEEK_NOTICE_t0.0575539568 $WENT_OUT_t0.0791366906 $WITH_INSPIRATION_t0.0287769784 $WORK_RELEASE_t0.0287769784 $WORRY_t0.0503597122 $YARD_t0.0359712230) !$HEALING_WELL_t0.0431654676 !$PERFUSION_t0.0935251799 !$PROCEDURE_PRACTITIONER_t0.0503597122) and(!$REQUESTING_t1.5107913669 $STEP_t0.3237410072) $SWELLING_NOTED_t0.0575539568 $WALS_t0.1007194245) !$TAB_TAK_t0.0287769784) 
1 and(or(and(or(and($MALE_WHO_t0.4964028777 $VIEW_t0.6762589928) and($WAL_t0.9568345324 $WOULD_BE_t0.8992805755) $TN_t0.0791366906 $TRIAGE_CHIEF_t0.1079136691 $TYPE_SCHEDULING_t0.0287769784 $VACCINE_PNEUMOCOCCAL_t0.0359712230 $VITALS_HT_t0.0719424460 $VITALS_PULSE_t0.3597122302 $WALS_t0.1007194245 $WEARS_t0.1294964029 $WEEK_NOTICE_t0.0575539568 $WENT_OUT_t0.0791366906 $WITH_INSPIRATION_t0.0287769784 $WORK_RELEASE_t0.0287769784 $WORRY_t0.0503597122 $YARD_t0.0359712230) !$PERFUSION_t0.0935251799 !$PROCEDURE_PRACTITIONER_t0.0503597122 !$TAB_TAK_t0.0287769784) and(!$REQUESTING_t1.5107913669 $STEP_t0.3237410072) $NAPROXEN_TAB_t0.1654676259 $SWELLING_NOTED_t0.0575539568) !$HEALING_WELL_t0.0431654676) 
1 or(and(or(and(or($WALS_t0.1007194245 $WAL_t0.9568345324) $WOULD_BE_t0.8992805755) and($MALE_WHO_t0.4964028777 $VIEW_t0.6762589928) $NAPROXEN_TAB_t0.1654676259 $TN_t0.0791366906 $TRIAGE_CHIEF_t0.1079136691 $TYPE_SCHEDULING_t0.0287769784 $VACCINE_PNEUMOCOCCAL_t0.0359712230 $VITALS_HT_t0.0719424460 $VITALS_PULSE_t0.3597122302 $WEARS_t0.1294964029 $WEEK_NOTICE_t0.0575539568 $WENT_OUT_t0.0791366906 $WITH_INSPIRATION_t0.0287769784 $WORK_RELEASE_t0.0287769784 $WORRY_t0.0503597122 $YARD_t0.0359712230) !$HEALING_WELL_t0.0431654676 !$PERFUSION_t0.0935251799 !$PROCEDURE_PRACTITIONER_t0.0503597122 !$TAB_TAK_t0.0287769784) and(!$REQUESTING_t1.5107913669 $STEP_t0.3237410072) $SWELLING_NOTED_t0.0575539568) 
1 or(and(or(and(or($WALS_t0.1007194245 $WAL_t0.9568345324) $WOULD_BE_t0.8992805755) and($MALE_WHO_t0.4964028777 $VIEW_t0.6762589928) $TN_t0.0791366906 $TRIAGE_CHIEF_t0.1079136691 $TYPE_SCHEDULING_t0.0287769784 $VACCINE_PNEUMOCOCCAL_t0.0359712230 $VITALS_HT_t0.0719424460 $VITALS_PULSE_t0.3597122302 $WEARS_t0.1294964029 $WEEK_NOTICE_t0.0575539568 $WENT_OUT_t0.0791366906 $WITH_INSPIRATION_t0.0287769784 $WORK_RELEASE_t0.0287769784 $WORRY_t0.0503597122 $YARD_t0.0359712230) !$HEALING_WELL_t0.0431654676 !$PERFUSION_t0.0935251799 !$PROCEDURE_PRACTITIONER_t0.0503597122 !$TAB_TAK_t0.0287769784) and(!$REQUESTING_t1.5107913669 $STEP_t0.3237410072) $NAPROXEN_TAB_t0.1654676259 $SWELLING_NOTED_t0.0575539568) 
1 and(or(and(or(and(or($WALS_t0.1007194245 $WAL_t0.9568345324) $WOULD_BE_t0.8992805755) and($MALE_WHO_t0.4964028777 $VIEW_t0.6762589928) $NAPROXEN_TAB_t0.1654676259 $TN_t0.0791366906 $TRIAGE_CHIEF_t0.1079136691 $TYPE_SCHEDULING_t0.0287769784 $VACCINE_PNEUMOCOCCAL_t0.0359712230 $VITALS_HT_t0.0719424460 $VITALS_PULSE_t0.3597122302 $WEARS_t0.1294964029 $WEEK_NOTICE_t0.0575539568 $WENT_OUT_t0.0791366906 $WITH_INSPIRATION_t0.0287769784 $WORK_RELEASE_t0.0287769784 $WORRY_t0.0503597122 $YARD_t0.0359712230) !$HEALING_WELL_t0.0431654676 !$PERFUSION_t0.0935251799) and(!$REQUESTING_t1.5107913669 $STEP_t0.3237410072) $SWELLING_NOTED_t0.0575539568) !$PROCEDURE_PRACTITIONER_t0.0503597122 !$TAB_TAK_t0.0287769784) 
1 and(or(and(or($RESCHEDULED_t0.3309352518 $STEP_t0.3237410072 $TN_t0.0791366906 $VERBALIZED_t1.1510791367) !$INDICATED_t0.8129496403 !$YET_t0.3884892086) and($WERE_t4.3021582734 $WHO_t2.7985611511) $HAPPENS_t0.0575539568 $INFLUENZA_SEP_t0.0359712230 $UNSTEADY_t0.0575539568 $UPPER_CHEST_t0.1726618705 $VARDENAFIL_HCL_t0.0863309353 $VETERAN_t8.3453237410 $VITALS_HT_t0.0719424460 $VITALS_PULSE_t0.3597122302 $VITALS_WT_t0.0503597122 $WALS_t0.1007194245 $WEAPONS_t0.0503597122 $WEIGH_DAILY_t0.0503597122 $WITH_INSPIRATION_t0.0287769784 $WORSENING_t0.2877697842) or($UNTIL_t0.9496402878 !$WE_TALKED_t0.1366906475) !$TREATMENT_OBTAINING_t0.0431654676 !$VACCINE_LOT_t0.0431654676) 
1 or(and(or(and(or($RESCHEDULED_t0.3309352518 $STEP_t0.3237410072 $TN_t0.0791366906 $VERBALIZED_t1.1510791367) !$INDICATED_t0.8129496403 !$YET_t0.3884892086) and($WERE_t4.3021582734 $WHO_t2.7985611511) $INFLUENZA_SEP_t0.0359712230 $UNSTEADY_t0.0575539568 $UPPER_CHEST_t0.1726618705 $VARDENAFIL_HCL_t0.0863309353 $VETERAN_t8.3453237410 $VITALS_HT_t0.0719424460 $VITALS_PULSE_t0.3597122302 $VITALS_WT_t0.0503597122 $WALS_t0.1007194245 $WEAPONS_t0.0503597122 $WEIGH_DAILY_t0.0503597122 $WITH_INSPIRATION_t0.0287769784 $WORSENING_t0.2877697842) or($UNTIL_t0.9496402878 !$WE_TALKED_t0.1366906475) !$TREATMENT_OBTAINING_t0.0431654676 !$VACCINE_LOT_t0.0431654676) $HAPPENS_t0.0575539568) 
1 and(or(and(or($HAPPENS_t0.0575539568 $RESCHEDULED_t0.3309352518 $STEP_t0.3237410072 $TN_t0.0791366906 $VERBALIZED_t1.1510791367) !$INDICATED_t0.8129496403 !$YET_t0.3884892086) and($WERE_t4.3021582734 $WHO_t2.7985611511) $HAPPENS_t0.0575539568 $INFLUENZA_SEP_t0.0359712230 $UNSTEADY_t0.0575539568 $UPPER_CHEST_t0.1726618705 $VARDENAFIL_HCL_t0.0863309353 $VETERAN_t8.3453237410 $VITALS_HT_t0.0719424460 $VITALS_PULSE_t0.3597122302 $VITALS_WT_t0.0503597122 $WALS_t0.1007194245 $WEAPONS_t0.0503597122 $WEIGH_DAILY_t0.0503597122 $WITH_INSPIRATION_t0.0287769784 $WORSENING_t0.2877697842) or($UNTIL_t0.9496402878 !$WE_TALKED_t0.1366906475) !$TREATMENT_OBTAINING_t0.0431654676 !$VACCINE_LOT_t0.0431654676) 
1 and(or(and(or($RESCHEDULED_t0.3309352518 $STEP_t0.3237410072 $TN_t0.0791366906 $TOTAL_TRANSFERRED_t0.0359712230 $VERBALIZED_t1.1510791367) !$INDICATED_t0.8129496403 !$YET_t0.3884892086) and($WERE_t4.3021582734 $WHO_t2.7985611511) $HAPPENS_t0.0575539568 $INFLUENZA_SEP_t0.0359712230 $UNSTEADY_t0.0575539568 $UPPER_CHEST_t0.1726618705 $VARDENAFIL_HCL_t0.0863309353 $VETERAN_t8.3453237410 $VITALS_HT_t0.0719424460 $VITALS_PULSE_t0.3597122302 $VITALS_WT_t0.0503597122 $WALS_t0.1007194245 $WEAPONS_t0.0503597122 $WEIGH_DAILY_t0.0503597122 $WITH_INSPIRATION_t0.0287769784 $WORSENING_t0.2877697842) or($UNTIL_t0.9496402878 !$WE_TALKED_t0.1366906475) !$TREATMENT_OBTAINING_t0.0431654676 !$VACCINE_LOT_t0.0431654676) 
1 and(or(and(or($RESCHEDULED_t0.3309352518 $STEP_t0.3237410072 $TN_t0.0791366906 $TOTAL_XXXXXXXXXXXXXXXXXXXXXXXXXXXXXXXXXXXXXXXXXXXXXXXXXXXXXXXXXXXXXXXXXXXXXXXXXX_t0.0359712230 $VERBALIZED_t1.1510791367) !$INDICATED_t0.8129496403 !$YET_t0.3884892086) and($WERE_t4.3021582734 $WHO_t2.7985611511) $HAPPENS_t0.0575539568 $INFLUENZA_SEP_t0.0359712230 $UNSTEADY_t0.0575539568 $UPPER_CHEST_t0.1726618705 $VARDENAFIL_HCL_t0.0863309353 $VETERAN_t8.3453237410 $VITALS_HT_t0.0719424460 $VITALS_PULSE_t0.3597122302 $VITALS_WT_t0.0503597122 $WALS_t0.1007194245 $WEAPONS_t0.0503597122 $WEIGH_DAILY_t0.0503597122 $WITH_INSPIRATION_t0.0287769784 $WORSENING_t0.2877697842) or($UNTIL_t0.9496402878 !$WE_TALKED_t0.1366906475) !$TREATMENT_OBTAINING_t0.0431654676 !$VACCINE_LOT_t0.0431654676) 
1 and(or(and(or($RESCHEDULED_t0.3309352518 $STEP_t0.3237410072 $TN_t0.0791366906 $TOT_t0.0287769784 $VERBALIZED_t1.1510791367) !$INDICATED_t0.8129496403 !$YET_t0.3884892086) and($WERE_t4.3021582734 $WHO_t2.7985611511) $HAPPENS_t0.0575539568 $INFLUENZA_SEP_t0.0359712230 $UNSTEADY_t0.0575539568 $UPPER_CHEST_t0.1726618705 $VARDENAFIL_HCL_t0.0863309353 $VETERAN_t8.3453237410 $VITALS_HT_t0.0719424460 $VITALS_PULSE_t0.3597122302 $VITALS_WT_t0.0503597122 $WALS_t0.1007194245 $WEAPONS_t0.0503597122 $WEIGH_DAILY_t0.0503597122 $WITH_INSPIRATION_t0.0287769784 $WORSENING_t0.2877697842) or($UNTIL_t0.9496402878 !$WE_TALKED_t0.1366906475) !$TREATMENT_OBTAINING_t0.0431654676 !$VACCINE_LOT_t0.0431654676) 
1 and(or(and(or($RESCHEDULED_t0.3309352518 $STEP_t0.3237410072 $TN_t0.0791366906 $TOUR_t0.2230215827 $VERBALIZED_t1.1510791367) !$INDICATED_t0.8129496403 !$YET_t0.3884892086) and($WERE_t4.3021582734 $WHO_t2.7985611511) $HAPPENS_t0.0575539568 $INFLUENZA_SEP_t0.0359712230 $UNSTEADY_t0.0575539568 $UPPER_CHEST_t0.1726618705 $VARDENAFIL_HCL_t0.0863309353 $VETERAN_t8.3453237410 $VITALS_HT_t0.0719424460 $VITALS_PULSE_t0.3597122302 $VITALS_WT_t0.0503597122 $WALS_t0.1007194245 $WEAPONS_t0.0503597122 $WEIGH_DAILY_t0.0503597122 $WITH_INSPIRATION_t0.0287769784 $WORSENING_t0.2877697842) or($UNTIL_t0.9496402878 !$WE_TALKED_t0.1366906475) !$TREATMENT_OBTAINING_t0.0431654676 !$VACCINE_LOT_t0.0431654676) 
1 and(or(and(or($RESCHEDULED_t0.3309352518 $STEP_t0.3237410072 $TN_t0.0791366906 $TRACHEA_t0.0287769784 $VERBALIZED_t1.1510791367) !$INDICATED_t0.8129496403 !$YET_t0.3884892086) and($WERE_t4.3021582734 $WHO_t2.7985611511) $HAPPENS_t0.0575539568 $INFLUENZA_SEP_t0.0359712230 $UNSTEADY_t0.0575539568 $UPPER_CHEST_t0.1726618705 $VARDENAFIL_HCL_t0.0863309353 $VETERAN_t8.3453237410 $VITALS_HT_t0.0719424460 $VITALS_PULSE_t0.3597122302 $VITALS_WT_t0.0503597122 $WALS_t0.1007194245 $WEAPONS_t0.0503597122 $WEIGH_DAILY_t0.0503597122 $WITH_INSPIRATION_t0.0287769784 $WORSENING_t0.2877697842) or($UNTIL_t0.9496402878 !$WE_TALKED_t0.1366906475) !$TREATMENT_OBTAINING_t0.0431654676 !$VACCINE_LOT_t0.0431654676) 
1 and(or(and(or($RESCHEDULED_t0.3309352518 $STEP_t0.3237410072 $TN_t0.0791366906 $TRAITS_t0.0863309353 $VERBALIZED_t1.1510791367) !$INDICATED_t0.8129496403 !$YET_t0.3884892086) and($WERE_t4.3021582734 $WHO_t2.7985611511) $HAPPENS_t0.0575539568 $INFLUENZA_SEP_t0.0359712230 $UNSTEADY_t0.0575539568 $UPPER_CHEST_t0.1726618705 $VARDENAFIL_HCL_t0.0863309353 $VETERAN_t8.3453237410 $VITALS_HT_t0.0719424460 $VITALS_PULSE_t0.3597122302 $VITALS_WT_t0.0503597122 $WALS_t0.1007194245 $WEAPONS_t0.0503597122 $WEIGH_DAILY_t0.0503597122 $WITH_INSPIRATION_t0.0287769784 $WORSENING_t0.2877697842) or($UNTIL_t0.9496402878 !$WE_TALKED_t0.1366906475) !$TREATMENT_OBTAINING_t0.0431654676 !$VACCINE_LOT_t0.0431654676) 
1 and(or(and(or($RESCHEDULED_t0.3309352518 $STEP_t0.3237410072 $TN_t0.0791366906 $TRANQUIL_RESPONSE_t0.0359712230 $VERBALIZED_t1.1510791367) !$INDICATED_t0.8129496403 !$YET_t0.3884892086) and($WERE_t4.3021582734 $WHO_t2.7985611511) $HAPPENS_t0.0575539568 $INFLUENZA_SEP_t0.0359712230 $UNSTEADY_t0.0575539568 $UPPER_CHEST_t0.1726618705 $VARDENAFIL_HCL_t0.0863309353 $VETERAN_t8.3453237410 $VITALS_HT_t0.0719424460 $VITALS_PULSE_t0.3597122302 $VITALS_WT_t0.0503597122 $WALS_t0.1007194245 $WEAPONS_t0.0503597122 $WEIGH_DAILY_t0.0503597122 $WITH_INSPIRATION_t0.0287769784 $WORSENING_t0.2877697842) or($UNTIL_t0.9496402878 !$WE_TALKED_t0.1366906475) !$TREATMENT_OBTAINING_t0.0431654676 !$VACCINE_LOT_t0.0431654676) 
1 and(or(and(or(and(!$UNTIL_t0.9496402878 $VERBALIZED_t1.1510791367) $PAIR_t0.0431654676 $PSYCH_t0.5611510791 $TRIAGE_CHIEF_t0.1079136691 $TYPE_SCHEDULING_t0.0287769784 $UDS_t0.2446043165 $VACCINE_PNEUMOCOCCAL_t0.0359712230 $VARDENAFIL_TAB_t0.1007194245 $VIEW_t0.6762589928 $VITALS_HT_t0.0719424460 $VITALS_PULSE_t0.3597122302 $WAS_SCREENED_t0.1151079137 $WEAPONS_t0.0503597122 $WHOLE_t0.0719424460 $WITH_INSPIRATION_t0.0287769784) or(!$IMPROVE_t0.3021582734 !$SUPPORTIVE_t0.3525179856 !$WANTS_t0.9280575540) !$HEALING_WELL_t0.0431654676 !$NW_t0.0647482014 !$PRODUCTS_IT_t0.0503597122) and(!$READ_t0.8705035971 $STEP_t0.3237410072) $NAPROXEN_TAB_t0.1654676259 $OPERATIVE_ED_t0.0359712230 $TN_t0.0791366906 $UNSTEADY_t0.0575539568) !$MG_TAK_t0.0287769784) 
1 and(or(and(or(and(!$UNTIL_t0.9496402878 $VERBALIZED_t1.1510791367) $PAIR_t0.0431654676 $PSYCH_t0.5611510791 $TRIAGE_CHIEF_t0.1079136691 $TYPE_SCHEDULING_t0.0287769784 $UDS_t0.2446043165 $VACCINE_PNEUMOCOCCAL_t0.0359712230 $VARDENAFIL_TAB_t0.1007194245 $VIEW_t0.6762589928 $VITALS_HT_t0.0719424460 $VITALS_PULSE_t0.3597122302 $WAS_SCREENED_t0.1151079137 $WEAPONS_t0.0503597122 $WHOLE_t0.0719424460 $WITH_INSPIRATION_t0.0287769784) or(!$IMPROVE_t0.3021582734 !$SUPPORTIVE_t0.3525179856 !$WANTS_t0.9280575540) !$NW_t0.0647482014) and(!$READ_t0.8705035971 $STEP_t0.3237410072) $NAPROXEN_TAB_t0.1654676259 $OPERATIVE_ED_t0.0359712230 $TN_t0.0791366906 $UNSTEADY_t0.0575539568) !$HEALING_WELL_t0.0431654676 !$MG_TAK_t0.0287769784 !$PRODUCTS_IT_t0.0503597122) 
1 and(or(and(or(and(!$UNTIL_t0.9496402878 $VERBALIZED_t1.1510791367) $PAIR_t0.0431654676 $PSYCH_t0.5611510791 $TRIAGE_CHIEF_t0.1079136691 $TYPE_SCHEDULING_t0.0287769784 $UDS_t0.2446043165 $VACCINE_PNEUMOCOCCAL_t0.0359712230 $VARDENAFIL_TAB_t0.1007194245 $VIEW_t0.6762589928 $VITALS_HT_t0.0719424460 $VITALS_PULSE_t0.3597122302 $WAS_SCREENED_t0.1151079137 $WEAPONS_t0.0503597122 $WHOLE_t0.0719424460 $WITH_INSPIRATION_t0.0287769784) or(!$IMPROVE_t0.3021582734 !$SUPPORTIVE_t0.3525179856 !$WANTS_t0.9280575540) !$NW_t0.0647482014 !$PRODUCTS_IT_t0.0503597122) and(!$READ_t0.8705035971 $STEP_t0.3237410072) $NAPROXEN_TAB_t0.1654676259 $OPERATIVE_ED_t0.0359712230 $TN_t0.0791366906 $UNSTEADY_t0.0575539568) !$HEALING_WELL_t0.0431654676 !$MG_TAK_t0.0287769784) 
1 and(or(and(or(and(!$UNTIL_t0.9496402878 $VERBALIZED_t1.1510791367) $PAIR_t0.0431654676 $PSYCH_t0.5611510791 $TRIAGE_CHIEF_t0.1079136691 $TYPE_SCHEDULING_t0.0287769784 $UDS_t0.2446043165 $VACCINE_PNEUMOCOCCAL_t0.0359712230 $VARDENAFIL_TAB_t0.1007194245 $VIEW_t0.6762589928 $VITALS_HT_t0.0719424460 $VITALS_PULSE_t0.3597122302 $WAS_SCREENED_t0.1151079137 $WEAPONS_t0.0503597122 $WHOLE_t0.0719424460 $WITH_INSPIRATION_t0.0287769784) or(!$IMPROVE_t0.3021582734 !$SUPPORTIVE_t0.3525179856 !$WANTS_t0.9280575540) !$PRODUCTS_IT_t0.0503597122) and(!$READ_t0.8705035971 $STEP_t0.3237410072) $NAPROXEN_TAB_t0.1654676259 $OPERATIVE_ED_t0.0359712230 $TN_t0.0791366906 $UNSTEADY_t0.0575539568) !$HEALING_WELL_t0.0431654676 !$MG_TAK_t0.0287769784 !$NW_t0.0647482014) 
1 and(or(and(or(and(!$UNTIL_t0.9496402878 $VERBALIZED_t1.1510791367) $PSYCH_t0.5611510791 $TRIAGE_CHIEF_t0.1079136691 $TYPE_SCHEDULING_t0.0287769784 $UDS_t0.2446043165 $VACCINE_PNEUMOCOCCAL_t0.0359712230 $VARDENAFIL_TAB_t0.1007194245 $VIEW_t0.6762589928 $VITALS_HT_t0.0719424460 $VITALS_PULSE_t0.3597122302 $WAS_SCREENED_t0.1151079137 $WEAPONS_t0.0503597122 $WHOLE_t0.0719424460 $WITH_INSPIRATION_t0.0287769784) or(!$IMPROVE_t0.3021582734 !$SUPPORTIVE_t0.3525179856 !$WANTS_t0.9280575540) !$NW_t0.0647482014 !$PRODUCTS_IT_t0.0503597122) and(!$READ_t0.8705035971 $STEP_t0.3237410072) $NAPROXEN_TAB_t0.1654676259 $OPERATIVE_ED_t0.0359712230 $PAIR_t0.0431654676 $TN_t0.0791366906 $UNSTEADY_t0.0575539568) !$HEALING_WELL_t0.0431654676 !$MG_TAK_t0.0287769784) 
1 or(and(or(and(or(and(!$UNTIL_t0.9496402878 $VERBALIZED_t1.1510791367) $PAIR_t0.0431654676 $PSYCH_t0.5611510791 $TRIAGE_CHIEF_t0.1079136691 $TYPE_SCHEDULING_t0.0287769784 $UDS_t0.2446043165 $VACCINE_PNEUMOCOCCAL_t0.0359712230 $VARDENAFIL_TAB_t0.1007194245 $VIEW_t0.6762589928 $VITALS_HT_t0.0719424460 $VITALS_PULSE_t0.3597122302 $WAS_SCREENED_t0.1151079137 $WEAPONS_t0.0503597122 $WHOLE_t0.0719424460 $WITH_INSPIRATION_t0.0287769784) or(!$IMPROVE_t0.3021582734 !$SUPPORTIVE_t0.3525179856 !$WANTS_t0.9280575540) !$NW_t0.0647482014) and(!$READ_t0.8705035971 $STEP_t0.3237410072) $OPERATIVE_ED_t0.0359712230 $TN_t0.0791366906 $UNSTEADY_t0.0575539568) !$HEALING_WELL_t0.0431654676 !$MG_TAK_t0.0287769784 !$PRODUCTS_IT_t0.0503597122) $NAPROXEN_TAB_t0.1654676259) 
1 or(and(or(and(or(and(!$UNTIL_t0.9496402878 $VERBALIZED_t1.1510791367) $PAIR_t0.0431654676 $PSYCH_t0.5611510791 $TRIAGE_CHIEF_t0.1079136691 $TYPE_SCHEDULING_t0.0287769784 $UDS_t0.2446043165 $VACCINE_PNEUMOCOCCAL_t0.0359712230 $VARDENAFIL_TAB_t0.1007194245 $VIEW_t0.6762589928 $VITALS_HT_t0.0719424460 $VITALS_PULSE_t0.3597122302 $WAS_SCREENED_t0.1151079137 $WEAPONS_t0.0503597122 $WHOLE_t0.0719424460 $WITH_INSPIRATION_t0.0287769784) or(!$IMPROVE_t0.3021582734 !$SUPPORTIVE_t0.3525179856 !$WANTS_t0.9280575540) !$NW_t0.0647482014 !$PRODUCTS_IT_t0.0503597122) and(!$READ_t0.8705035971 $STEP_t0.3237410072) $OPERATIVE_ED_t0.0359712230 $TN_t0.0791366906 $UNSTEADY_t0.0575539568) !$HEALING_WELL_t0.0431654676 !$MG_TAK_t0.0287769784) $NAPROXEN_TAB_t0.1654676259) 
1 or(and(or(and(or(and(!$UNTIL_t0.9496402878 $VERBALIZED_t1.1510791367) $PSYCH_t0.5611510791 $TRIAGE_CHIEF_t0.1079136691 $TYPE_SCHEDULING_t0.0287769784 $UDS_t0.2446043165 $VACCINE_PNEUMOCOCCAL_t0.0359712230 $VARDENAFIL_TAB_t0.1007194245 $VIEW_t0.6762589928 $VITALS_HT_t0.0719424460 $VITALS_PULSE_t0.3597122302 $WAS_SCREENED_t0.1151079137 $WEAPONS_t0.0503597122 $WHOLE_t0.0719424460 $WITH_INSPIRATION_t0.0287769784) or(!$IMPROVE_t0.3021582734 !$SUPPORTIVE_t0.3525179856 !$WANTS_t0.9280575540) !$NW_t0.0647482014 !$PRODUCTS_IT_t0.0503597122) and(!$READ_t0.8705035971 $STEP_t0.3237410072) $NAPROXEN_TAB_t0.1654676259 $OPERATIVE_ED_t0.0359712230 $TN_t0.0791366906 $UNSTEADY_t0.0575539568) !$HEALING_WELL_t0.0431654676 !$MG_TAK_t0.0287769784) $PAIR_t0.0431654676) 
1 and(or(and(or(and(!$ANSWER_t1.0359712230 !$UNTIL_t0.9496402878 $VERBALIZED_t1.1510791367) $PAIR_t0.0431654676 $PSYCH_t0.5611510791 $TRIAGE_CHIEF_t0.1079136691 $TYPE_SCHEDULING_t0.0287769784 $UDS_t0.2446043165 $VACCINE_PNEUMOCOCCAL_t0.0359712230 $VARDENAFIL_TAB_t0.1007194245 $VIEW_t0.6762589928 $VITALS_HT_t0.0719424460 $VITALS_PULSE_t0.3597122302 $WAS_SCREENED_t0.1151079137 $WEAPONS_t0.0503597122 $WHOLE_t0.0719424460 $WITH_INSPIRATION_t0.0287769784) or(!$IMPROVE_t0.3021582734 !$SUPPORTIVE_t0.3525179856 !$WANTS_t0.9280575540) !$NW_t0.0647482014 !$PRODUCTS_IT_t0.0503597122) and(!$READ_t0.8705035971 $STEP_t0.3237410072) $NAPROXEN_TAB_t0.1654676259 $OPERATIVE_ED_t0.0359712230 $TN_t0.0791366906 $UNSTEADY_t0.0575539568) !$HEALING_WELL_t0.0431654676 !$MG_TAK_t0.0287769784) 
1 and(or(and(or(and(!$BRAIN_t0.2589928058 !$UNTIL_t0.9496402878 $VERBALIZED_t1.1510791367) $PAIR_t0.0431654676 $PSYCH_t0.5611510791 $TRIAGE_CHIEF_t0.1079136691 $TYPE_SCHEDULING_t0.0287769784 $UDS_t0.2446043165 $VACCINE_PNEUMOCOCCAL_t0.0359712230 $VARDENAFIL_TAB_t0.1007194245 $VIEW_t0.6762589928 $VITALS_HT_t0.0719424460 $VITALS_PULSE_t0.3597122302 $WAS_SCREENED_t0.1151079137 $WEAPONS_t0.0503597122 $WHOLE_t0.0719424460 $WITH_INSPIRATION_t0.0287769784) or(!$IMPROVE_t0.3021582734 !$SUPPORTIVE_t0.3525179856 !$WANTS_t0.9280575540) !$NW_t0.0647482014) and(!$READ_t0.8705035971 $STEP_t0.3237410072) $NAPROXEN_TAB_t0.1654676259 $OPERATIVE_ED_t0.0359712230 $TN_t0.0791366906 $UNSTEADY_t0.0575539568) !$HEALING_WELL_t0.0431654676 !$MG_TAK_t0.0287769784 !$PRODUCTS_IT_t0.0503597122) 
1 and(or(and(or($UNSTEADY_t0.0575539568 $VIEW_t0.6762589928 $VITALS_PULSE_t0.3597122302 $WAS_SCREENED_t0.1151079137 $WITHIN_LAST_t0.4748201439 $WITH_INSPIRATION_t0.0287769784 $WORK_t2.9496402878 $WORSENING_t0.2877697842) !$PICK_UP_t0.3021582734 !$VARIOUS_t0.1510791367 !$VITALS_RESP_t0.1007194245 !$YES_t8.2446043165) and(!$VITALS_TEMP_t0.2086330935 $WHO_PRESENTS_t0.2517985612) $STEP_t0.3237410072 $TABLET_ONCE_t0.1366906475 $TN_t0.0791366906 $UCINATIONS_DENIES_t0.0503597122 $VACCINE_PNEUMOCOCCAL_t0.0359712230 $VA_OTC_t0.0359712230 $VITALS_HT_t0.0719424460 $WEIGH_DAILY_t0.0503597122 $WERE_CONSTANTLY_t0.0647482014 $WOULD_t3.4172661871) !$CALCULATION_t0.0287769784 !$DFE_t0.0647482014 !$OR_MILK_t0.0575539568 !$TAB_TAK_t0.0287769784) 
1 or(and(or(and(or($UNSTEADY_t0.0575539568 $VIEW_t0.6762589928 $VITALS_PULSE_t0.3597122302 $WAS_SCREENED_t0.1151079137 $WITHIN_LAST_t0.4748201439 $WITH_INSPIRATION_t0.0287769784 $WORK_t2.9496402878 $WORSENING_t0.2877697842) !$PICK_UP_t0.3021582734 !$VARIOUS_t0.1510791367 !$VITALS_RESP_t0.1007194245 !$YES_t8.2446043165) and(!$VITALS_TEMP_t0.2086330935 $WHO_PRESENTS_t0.2517985612) $STEP_t0.3237410072 $TN_t0.0791366906 $UCINATIONS_DENIES_t0.0503597122 $VACCINE_PNEUMOCOCCAL_t0.0359712230 $VA_OTC_t0.0359712230 $VITALS_HT_t0.0719424460 $WEIGH_DAILY_t0.0503597122 $WERE_CONSTANTLY_t0.0647482014 $WOULD_t3.4172661871) !$CALCULATION_t0.0287769784 !$DFE_t0.0647482014 !$OR_MILK_t0.0575539568 !$TAB_TAK_t0.0287769784) $TABLET_ONCE_t0.1366906475) 
1 and(or(and(or(and(or($UNSTEADY_t0.0575539568 $VIEW_t0.6762589928 $VITALS_PULSE_t0.3597122302 $WAS_SCREENED_t0.1151079137 $WITHIN_LAST_t0.4748201439 $WITH_INSPIRATION_t0.0287769784 $WORK_t2.9496402878 $WORSENING_t0.2877697842) !$PICK_UP_t0.3021582734 !$VARIOUS_t0.1510791367 !$VITALS_RESP_t0.1007194245 !$YES_t8.2446043165) and(!$VITALS_TEMP_t0.2086330935 $WHO_PRESENTS_t0.2517985612) $STEP_t0.3237410072 $TN_t0.0791366906 $UCINATIONS_DENIES_t0.0503597122 $VACCINE_PNEUMOCOCCAL_t0.0359712230 $VA_OTC_t0.0359712230 $VITALS_HT_t0.0719424460 $WEIGH_DAILY_t0.0503597122 $WERE_CONSTANTLY_t0.0647482014 $WOULD_t3.4172661871) !$DFE_t0.0647482014) $TABLET_ONCE_t0.1366906475) !$CALCULATION_t0.0287769784 !$OR_MILK_t0.0575539568 !$TAB_TAK_t0.0287769784) 
1 and(or(and(or(and(or($UNSTEADY_t0.0575539568 $VIEW_t0.6762589928 $VITALS_PULSE_t0.3597122302 $WAS_SCREENED_t0.1151079137 $WITHIN_LAST_t0.4748201439 $WITH_INSPIRATION_t0.0287769784 $WORK_t2.9496402878 $WORSENING_t0.2877697842) !$PICK_UP_t0.3021582734 !$VARIOUS_t0.1510791367 !$VITALS_RESP_t0.1007194245 !$YES_t8.2446043165) and(!$VITALS_TEMP_t0.2086330935 $WHO_PRESENTS_t0.2517985612) $STEP_t0.3237410072 $TN_t0.0791366906 $UCINATIONS_DENIES_t0.0503597122 $VACCINE_PNEUMOCOCCAL_t0.0359712230 $VA_OTC_t0.0359712230 $VITALS_HT_t0.0719424460 $WEIGH_DAILY_t0.0503597122 $WERE_CONSTANTLY_t0.0647482014 $WOULD_t3.4172661871) !$DFE_t0.0647482014 !$OR_MILK_t0.0575539568) $TABLET_ONCE_t0.1366906475) !$CALCULATION_t0.0287769784 !$TAB_TAK_t0.0287769784) 
1 and(or(and(or(and(or($UNSTEADY_t0.0575539568 $VIEW_t0.6762589928 $VITALS_PULSE_t0.3597122302 $WAS_SCREENED_t0.1151079137 $WITHIN_LAST_t0.4748201439 $WITH_INSPIRATION_t0.0287769784 $WORK_t2.9496402878 $WORSENING_t0.2877697842) !$PICK_UP_t0.3021582734 !$VARIOUS_t0.1510791367 !$VITALS_RESP_t0.1007194245 !$YES_t8.2446043165) and(!$VITALS_TEMP_t0.2086330935 $WHO_PRESENTS_t0.2517985612) $STEP_t0.3237410072 $TN_t0.0791366906 $UCINATIONS_DENIES_t0.0503597122 $VACCINE_PNEUMOCOCCAL_t0.0359712230 $VA_OTC_t0.0359712230 $VITALS_HT_t0.0719424460 $WEIGH_DAILY_t0.0503597122 $WERE_CONSTANTLY_t0.0647482014 $WOULD_t3.4172661871) !$DFE_t0.0647482014 !$OR_MILK_t0.0575539568 !$TAB_TAK_t0.0287769784) $TABLET_ONCE_t0.1366906475) !$CALCULATION_t0.0287769784) 
1 and(or(and(or(and(or($UNSTEADY_t0.0575539568 $VIEW_t0.6762589928 $VITALS_PULSE_t0.3597122302 $WAS_SCREENED_t0.1151079137 $WITHIN_LAST_t0.4748201439 $WITH_INSPIRATION_t0.0287769784 $WORK_t2.9496402878 $WORSENING_t0.2877697842) !$PICK_UP_t0.3021582734 !$VARIOUS_t0.1510791367 !$VITALS_RESP_t0.1007194245 !$YES_t8.2446043165) and(!$VITALS_TEMP_t0.2086330935 $WHO_PRESENTS_t0.2517985612) $STEP_t0.3237410072 $TN_t0.0791366906 $UCINATIONS_DENIES_t0.0503597122 $VACCINE_PNEUMOCOCCAL_t0.0359712230 $VA_OTC_t0.0359712230 $VITALS_HT_t0.0719424460 $WEIGH_DAILY_t0.0503597122 $WERE_CONSTANTLY_t0.0647482014 $WOULD_t3.4172661871) !$DFE_t0.0647482014 !$TAB_TAK_t0.0287769784) $TABLET_ONCE_t0.1366906475) !$CALCULATION_t0.0287769784 !$OR_MILK_t0.0575539568) 
1 and(or(and(or(and(or($UNSTEADY_t0.0575539568 $VIEW_t0.6762589928 $VITALS_PULSE_t0.3597122302 $WAS_SCREENED_t0.1151079137 $WITHIN_LAST_t0.4748201439 $WITH_INSPIRATION_t0.0287769784 $WORK_t2.9496402878 $WORSENING_t0.2877697842) !$PICK_UP_t0.3021582734 !$VARIOUS_t0.1510791367 !$VITALS_RESP_t0.1007194245 !$YES_t8.2446043165) and(!$VITALS_TEMP_t0.2086330935 $WHO_PRESENTS_t0.2517985612) $STEP_t0.3237410072 $TN_t0.0791366906 $UCINATIONS_DENIES_t0.0503597122 $VACCINE_PNEUMOCOCCAL_t0.0359712230 $VA_OTC_t0.0359712230 $VITALS_HT_t0.0719424460 $WEIGH_DAILY_t0.0503597122 $WERE_CONSTANTLY_t0.0647482014 $WOULD_t3.4172661871) !$OR_MILK_t0.0575539568) $TABLET_ONCE_t0.1366906475) !$CALCULATION_t0.0287769784 !$DFE_t0.0647482014 !$TAB_TAK_t0.0287769784) 
1 and(or(and(or(and(or($UNSTEADY_t0.0575539568 $VIEW_t0.6762589928 $VITALS_PULSE_t0.3597122302 $WAS_SCREENED_t0.1151079137 $WITHIN_LAST_t0.4748201439 $WITH_INSPIRATION_t0.0287769784 $WORK_t2.9496402878 $WORSENING_t0.2877697842) !$PICK_UP_t0.3021582734 !$VARIOUS_t0.1510791367 !$VITALS_RESP_t0.1007194245 !$YES_t8.2446043165) and(!$VITALS_TEMP_t0.2086330935 $WHO_PRESENTS_t0.2517985612) $STEP_t0.3237410072 $TN_t0.0791366906 $UCINATIONS_DENIES_t0.0503597122 $VACCINE_PNEUMOCOCCAL_t0.0359712230 $VA_OTC_t0.0359712230 $VITALS_HT_t0.0719424460 $WEIGH_DAILY_t0.0503597122 $WERE_CONSTANTLY_t0.0647482014 $WOULD_t3.4172661871) !$OR_MILK_t0.0575539568 !$TAB_TAK_t0.0287769784) $TABLET_ONCE_t0.1366906475) !$CALCULATION_t0.0287769784 !$DFE_t0.0647482014) 
1 and(or(and(or(and(or($UNSTEADY_t0.0575539568 $VIEW_t0.6762589928 $VITALS_PULSE_t0.3597122302 $WAS_SCREENED_t0.1151079137 $WITHIN_LAST_t0.4748201439 $WITH_INSPIRATION_t0.0287769784 $WORK_t2.9496402878 $WORSENING_t0.2877697842) !$PICK_UP_t0.3021582734 !$VARIOUS_t0.1510791367 !$VITALS_RESP_t0.1007194245 !$YES_t8.2446043165) and(!$VITALS_TEMP_t0.2086330935 $WHO_PRESENTS_t0.2517985612) $STEP_t0.3237410072 $TN_t0.0791366906 $UCINATIONS_DENIES_t0.0503597122 $VACCINE_PNEUMOCOCCAL_t0.0359712230 $VA_OTC_t0.0359712230 $VITALS_HT_t0.0719424460 $WEIGH_DAILY_t0.0503597122 $WERE_CONSTANTLY_t0.0647482014 $WOULD_t3.4172661871) !$TAB_TAK_t0.0287769784) $TABLET_ONCE_t0.1366906475) !$CALCULATION_t0.0287769784 !$DFE_t0.0647482014 !$OR_MILK_t0.0575539568) 
1 and(or(and(or(and(or($UNSTEADY_t0.0575539568 $VIEW_t0.6762589928 $VITALS_PULSE_t0.3597122302 $WAS_SCREENED_t0.1151079137 $WITHIN_LAST_t0.4748201439 $WITH_INSPIRATION_t0.0287769784 $WORK_t2.9496402878 $WORSENING_t0.2877697842) !$PICK_UP_t0.3021582734 !$VARIOUS_t0.1510791367 !$VITALS_RESP_t0.1007194245 !$YES_t8.2446043165) and(!$VITALS_TEMP_t0.2086330935 $WHO_PRESENTS_t0.2517985612) $STEP_t0.3237410072 $TN_t0.0791366906 $UCINATIONS_DENIES_t0.0503597122 $VACCINE_PNEUMOCOCCAL_t0.0359712230 $VITALS_HT_t0.0719424460 $WEIGH_DAILY_t0.0503597122 $WERE_CONSTANTLY_t0.0647482014 $WOULD_t3.4172661871) !$TAB_TAK_t0.0287769784) $TABLET_ONCE_t0.1366906475 $VA_OTC_t0.0359712230) !$CALCULATION_t0.0287769784 !$DFE_t0.0647482014 !$OR_MILK_t0.0575539568) 
1 and(or(and($UNTIL_t0.9496402878 $WHO_t2.7985611511) and($VIEW_t0.6762589928 $WANTS_t0.9280575540) $NAPROXEN_MG_t0.1726618705 $PULSES_NEURO_t0.0431654676 $STEP_t0.3237410072 $SYST_t0.1223021583 $TN_t0.0791366906 $TV_t0.4676258993 $TYPE_SCHEDULING_t0.0287769784 $VACCINE_PNEUMOCOCCAL_t0.0359712230 $VARDENAFIL_HCL_t0.0863309353 $VITALS_HT_t0.0719424460 $VITALS_PULSE_t0.3597122302 $WANT_GO_t0.0287769784 $WEARS_t0.1294964029 $WEEK_NOTICE_t0.0575539568 $WENT_OUT_t0.0791366906 $WHOLE_t0.0719424460 $WITH_INSPIRATION_t0.0287769784 $WORK_RELEASE_t0.0287769784) !$AUDIT_t0.0431654676 !$HEALING_WELL_t0.0431654676 !$INPATIENT_REMOTE_t0.1294964029 !$TREATMENT_OBTAINING_t0.0431654676) 
1 or(and(or(and($UNTIL_t0.9496402878 $WHO_t2.7985611511) and($VIEW_t0.6762589928 $WANTS_t0.9280575540) $NAPROXEN_MG_t0.1726618705 $PULSES_NEURO_t0.0431654676 $STEP_t0.3237410072 $SYST_t0.1223021583 $TV_t0.4676258993 $TYPE_SCHEDULING_t0.0287769784 $VACCINE_PNEUMOCOCCAL_t0.0359712230 $VARDENAFIL_HCL_t0.0863309353 $VITALS_HT_t0.0719424460 $VITALS_PULSE_t0.3597122302 $WANT_GO_t0.0287769784 $WEARS_t0.1294964029 $WEEK_NOTICE_t0.0575539568 $WENT_OUT_t0.0791366906 $WHOLE_t0.0719424460 $WITH_INSPIRATION_t0.0287769784 $WORK_RELEASE_t0.0287769784) !$AUDIT_t0.0431654676 !$HEALING_WELL_t0.0431654676 !$INPATIENT_REMOTE_t0.1294964029 !$TREATMENT_OBTAINING_t0.0431654676) $TN_t0.0791366906) 
1 or(and(or(and($UNTIL_t0.9496402878 $WHO_t2.7985611511) and($VIEW_t0.6762589928 $WANTS_t0.9280575540) $NAPROXEN_MG_t0.1726618705 $STEP_t0.3237410072 $SYST_t0.1223021583 $TV_t0.4676258993 $TYPE_SCHEDULING_t0.0287769784 $VACCINE_PNEUMOCOCCAL_t0.0359712230 $VARDENAFIL_HCL_t0.0863309353 $VITALS_HT_t0.0719424460 $VITALS_PULSE_t0.3597122302 $WANT_GO_t0.0287769784 $WEARS_t0.1294964029 $WEEK_NOTICE_t0.0575539568 $WENT_OUT_t0.0791366906 $WHOLE_t0.0719424460 $WITH_INSPIRATION_t0.0287769784 $WORK_RELEASE_t0.0287769784) !$AUDIT_t0.0431654676 !$HEALING_WELL_t0.0431654676 !$INPATIENT_REMOTE_t0.1294964029 !$TREATMENT_OBTAINING_t0.0431654676) $PULSES_NEURO_t0.0431654676 $TN_t0.0791366906) 
1 or(and(or(and($UNTIL_t0.9496402878 $WHO_t2.7985611511) and($VIEW_t0.6762589928 $WANTS_t0.9280575540) $PULSES_NEURO_t0.0431654676 $STEP_t0.3237410072 $SYST_t0.1223021583 $TV_t0.4676258993 $TYPE_SCHEDULING_t0.0287769784 $VACCINE_PNEUMOCOCCAL_t0.0359712230 $VARDENAFIL_HCL_t0.0863309353 $VITALS_HT_t0.0719424460 $VITALS_PULSE_t0.3597122302 $WANT_GO_t0.0287769784 $WEARS_t0.1294964029 $WEEK_NOTICE_t0.0575539568 $WENT_OUT_t0.0791366906 $WHOLE_t0.0719424460 $WITH_INSPIRATION_t0.0287769784 $WORK_RELEASE_t0.0287769784) !$AUDIT_t0.0431654676 !$HEALING_WELL_t0.0431654676 !$INPATIENT_REMOTE_t0.1294964029 !$TREATMENT_OBTAINING_t0.0431654676) $NAPROXEN_MG_t0.1726618705 $TN_t0.0791366906) 
1 and(or(and(or(and($UNTIL_t0.9496402878 $WHO_t2.7985611511) and($VIEW_t0.6762589928 $WANTS_t0.9280575540) $NAPROXEN_MG_t0.1726618705 $PULSES_NEURO_t0.0431654676 $STEP_t0.3237410072 $SYST_t0.1223021583 $TV_t0.4676258993 $TYPE_SCHEDULING_t0.0287769784 $VACCINE_PNEUMOCOCCAL_t0.0359712230 $VARDENAFIL_HCL_t0.0863309353 $VITALS_HT_t0.0719424460 $VITALS_PULSE_t0.3597122302 $WANT_GO_t0.0287769784 $WEARS_t0.1294964029 $WEEK_NOTICE_t0.0575539568 $WENT_OUT_t0.0791366906 $WHOLE_t0.0719424460 $WITH_INSPIRATION_t0.0287769784 $WORK_RELEASE_t0.0287769784) !$AUDIT_t0.0431654676 !$HEALING_WELL_t0.0431654676) $TN_t0.0791366906) !$INPATIENT_REMOTE_t0.1294964029 !$TREATMENT_OBTAINING_t0.0431654676) 
1 and(or(and(or(and($UNTIL_t0.9496402878 $WHO_t2.7985611511) and($VIEW_t0.6762589928 $WANTS_t0.9280575540) $NAPROXEN_MG_t0.1726618705 $PULSES_NEURO_t0.0431654676 $STEP_t0.3237410072 $SYST_t0.1223021583 $TV_t0.4676258993 $TYPE_SCHEDULING_t0.0287769784 $VACCINE_PNEUMOCOCCAL_t0.0359712230 $VARDENAFIL_HCL_t0.0863309353 $VITALS_HT_t0.0719424460 $VITALS_PULSE_t0.3597122302 $WANT_GO_t0.0287769784 $WEARS_t0.1294964029 $WEEK_NOTICE_t0.0575539568 $WENT_OUT_t0.0791366906 $WHOLE_t0.0719424460 $WITH_INSPIRATION_t0.0287769784 $WORK_RELEASE_t0.0287769784) !$AUDIT_t0.0431654676 !$HEALING_WELL_t0.0431654676 !$INPATIENT_REMOTE_t0.1294964029) $TN_t0.0791366906) !$TREATMENT_OBTAINING_t0.0431654676) 
1 and(or(and(or(and($UNTIL_t0.9496402878 $WHO_t2.7985611511) and($VIEW_t0.6762589928 $WANTS_t0.9280575540) $NAPROXEN_MG_t0.1726618705 $PULSES_NEURO_t0.0431654676 $STEP_t0.3237410072 $SYST_t0.1223021583 $TV_t0.4676258993 $TYPE_SCHEDULING_t0.0287769784 $VACCINE_PNEUMOCOCCAL_t0.0359712230 $VARDENAFIL_HCL_t0.0863309353 $VITALS_HT_t0.0719424460 $VITALS_PULSE_t0.3597122302 $WANT_GO_t0.0287769784 $WEARS_t0.1294964029 $WEEK_NOTICE_t0.0575539568 $WENT_OUT_t0.0791366906 $WHOLE_t0.0719424460 $WITH_INSPIRATION_t0.0287769784 $WORK_RELEASE_t0.0287769784) !$AUDIT_t0.0431654676 !$HEALING_WELL_t0.0431654676 !$TREATMENT_OBTAINING_t0.0431654676) $TN_t0.0791366906) !$INPATIENT_REMOTE_t0.1294964029) 
1 and(or(and(or(and($UNTIL_t0.9496402878 $WHO_t2.7985611511) and($VIEW_t0.6762589928 $WANTS_t0.9280575540) $NAPROXEN_MG_t0.1726618705 $PULSES_NEURO_t0.0431654676 $STEP_t0.3237410072 $SYST_t0.1223021583 $TV_t0.4676258993 $TYPE_SCHEDULING_t0.0287769784 $VACCINE_PNEUMOCOCCAL_t0.0359712230 $VARDENAFIL_HCL_t0.0863309353 $VITALS_HT_t0.0719424460 $VITALS_PULSE_t0.3597122302 $WANT_GO_t0.0287769784 $WEARS_t0.1294964029 $WEEK_NOTICE_t0.0575539568 $WENT_OUT_t0.0791366906 $WHOLE_t0.0719424460 $WITH_INSPIRATION_t0.0287769784 $WORK_RELEASE_t0.0287769784) !$AUDIT_t0.0431654676 !$INPATIENT_REMOTE_t0.1294964029) $TN_t0.0791366906) !$HEALING_WELL_t0.0431654676 !$TREATMENT_OBTAINING_t0.0431654676) 
1 and(or(and(or(and($UNTIL_t0.9496402878 $WHO_t2.7985611511) and($VIEW_t0.6762589928 $WANTS_t0.9280575540) $NAPROXEN_MG_t0.1726618705 $PULSES_NEURO_t0.0431654676 $STEP_t0.3237410072 $SYST_t0.1223021583 $TV_t0.4676258993 $TYPE_SCHEDULING_t0.0287769784 $VACCINE_PNEUMOCOCCAL_t0.0359712230 $VARDENAFIL_HCL_t0.0863309353 $VITALS_HT_t0.0719424460 $VITALS_PULSE_t0.3597122302 $WANT_GO_t0.0287769784 $WEARS_t0.1294964029 $WEEK_NOTICE_t0.0575539568 $WENT_OUT_t0.0791366906 $WHOLE_t0.0719424460 $WITH_INSPIRATION_t0.0287769784 $WORK_RELEASE_t0.0287769784) !$AUDIT_t0.0431654676 !$INPATIENT_REMOTE_t0.1294964029 !$TREATMENT_OBTAINING_t0.0431654676) $TN_t0.0791366906) !$HEALING_WELL_t0.0431654676) 
1 and(or(and(or(and($UNTIL_t0.9496402878 $WHO_t2.7985611511) and($VIEW_t0.6762589928 $WANTS_t0.9280575540) $NAPROXEN_MG_t0.1726618705 $PULSES_NEURO_t0.0431654676 $STEP_t0.3237410072 $SYST_t0.1223021583 $TV_t0.4676258993 $TYPE_SCHEDULING_t0.0287769784 $VACCINE_PNEUMOCOCCAL_t0.0359712230 $VARDENAFIL_HCL_t0.0863309353 $VITALS_HT_t0.0719424460 $VITALS_PULSE_t0.3597122302 $WANT_GO_t0.0287769784 $WEARS_t0.1294964029 $WEEK_NOTICE_t0.0575539568 $WENT_OUT_t0.0791366906 $WHOLE_t0.0719424460 $WITH_INSPIRATION_t0.0287769784 $WORK_RELEASE_t0.0287769784) !$AUDIT_t0.0431654676 !$TREATMENT_OBTAINING_t0.0431654676) $TN_t0.0791366906) !$HEALING_WELL_t0.0431654676 !$INPATIENT_REMOTE_t0.1294964029) 
1 and(or(and(or($PURCHASED_t0.0359712230 $STEP_t0.3237410072 $TN_t0.0791366906 $WENT_OUT_t0.0791366906) !$WERE_t4.3021582734) and($UNTIL_t0.9496402878 !$VACCINE_GIVEN_t0.2517985612 $WHO_t2.7985611511) $TABLET_ONCE_t0.1366906475 $TYPE_SCHEDULING_t0.0287769784 $UNSTEADY_t0.0575539568 $VACCINE_PNEUMOCOCCAL_t0.0359712230 $VIEW_t0.6762589928 $VITALS_HT_t0.0719424460 $VITALS_PULSE_t0.3597122302 $VITALS_WT_t0.0503597122 $VOICES_t0.2158273381 $WANT_GO_t0.0287769784 $WHOLE_t0.0719424460 $WITHOUT_COMPLICATIONS_t0.0359712230 $WITH_INSPIRATION_t0.0287769784 $WORK_RELEASE_t0.0287769784 $WORTHLESSNESS_t0.0647482014) !$PRODUCTS_IT_t0.0503597122) 
1 and(or(and(or($PURCHASED_t0.0359712230 $STEP_t0.3237410072 $WENT_OUT_t0.0791366906) !$WERE_t4.3021582734) and($UNTIL_t0.9496402878 !$VACCINE_GIVEN_t0.2517985612 $WHO_t2.7985611511) $TABLET_ONCE_t0.1366906475 $TN_t0.0791366906 $TYPE_SCHEDULING_t0.0287769784 $UNSTEADY_t0.0575539568 $VACCINE_PNEUMOCOCCAL_t0.0359712230 $VIEW_t0.6762589928 $VITALS_HT_t0.0719424460 $VITALS_PULSE_t0.3597122302 $VITALS_WT_t0.0503597122 $VOICES_t0.2158273381 $WANT_GO_t0.0287769784 $WHOLE_t0.0719424460 $WITHOUT_COMPLICATIONS_t0.0359712230 $WITH_INSPIRATION_t0.0287769784 $WORK_RELEASE_t0.0287769784 $WORTHLESSNESS_t0.0647482014) !$PRODUCTS_IT_t0.0503597122) 
1 and(or(and(or($STEP_t0.3237410072 $TN_t0.0791366906 $WENT_OUT_t0.0791366906) !$WERE_t4.3021582734) and($UNTIL_t0.9496402878 !$VACCINE_GIVEN_t0.2517985612 $WHO_t2.7985611511) $PURCHASED_t0.0359712230 $TABLET_ONCE_t0.1366906475 $TYPE_SCHEDULING_t0.0287769784 $UNSTEADY_t0.0575539568 $VACCINE_PNEUMOCOCCAL_t0.0359712230 $VIEW_t0.6762589928 $VITALS_HT_t0.0719424460 $VITALS_PULSE_t0.3597122302 $VITALS_WT_t0.0503597122 $VOICES_t0.2158273381 $WANT_GO_t0.0287769784 $WHOLE_t0.0719424460 $WITHOUT_COMPLICATIONS_t0.0359712230 $WITH_INSPIRATION_t0.0287769784 $WORK_RELEASE_t0.0287769784 $WORTHLESSNESS_t0.0647482014) !$PRODUCTS_IT_t0.0503597122) 
1 and(or(and(or($STEP_t0.3237410072 $WENT_OUT_t0.0791366906) !$WERE_t4.3021582734) and($UNTIL_t0.9496402878 !$VACCINE_GIVEN_t0.2517985612 $WHO_t2.7985611511) $PURCHASED_t0.0359712230 $TABLET_ONCE_t0.1366906475 $TN_t0.0791366906 $TYPE_SCHEDULING_t0.0287769784 $UNSTEADY_t0.0575539568 $VACCINE_PNEUMOCOCCAL_t0.0359712230 $VIEW_t0.6762589928 $VITALS_HT_t0.0719424460 $VITALS_PULSE_t0.3597122302 $VITALS_WT_t0.0503597122 $VOICES_t0.2158273381 $WANT_GO_t0.0287769784 $WHOLE_t0.0719424460 $WITHOUT_COMPLICATIONS_t0.0359712230 $WITH_INSPIRATION_t0.0287769784 $WORK_RELEASE_t0.0287769784 $WORTHLESSNESS_t0.0647482014) !$PRODUCTS_IT_t0.0503597122) 
1 or(and(or(and(or($PURCHASED_t0.0359712230 $STEP_t0.3237410072 $TN_t0.0791366906 $WENT_OUT_t0.0791366906) !$WERE_t4.3021582734) and($UNTIL_t0.9496402878 !$VACCINE_GIVEN_t0.2517985612 $WHO_t2.7985611511) $TABLET_ONCE_t0.1366906475 $TYPE_SCHEDULING_t0.0287769784 $UNSTEADY_t0.0575539568 $VACCINE_PNEUMOCOCCAL_t0.0359712230 $VIEW_t0.6762589928 $VITALS_HT_t0.0719424460 $VITALS_PULSE_t0.3597122302 $VITALS_WT_t0.0503597122 $VOICES_t0.2158273381 $WANT_GO_t0.0287769784 $WHOLE_t0.0719424460 $WITHOUT_COMPLICATIONS_t0.0359712230 $WITH_INSPIRATION_t0.0287769784 $WORK_RELEASE_t0.0287769784) !$PRODUCTS_IT_t0.0503597122) $WORTHLESSNESS_t0.0647482014) 
1 or(and(or(and(or($PURCHASED_t0.0359712230 $STEP_t0.3237410072 $TN_t0.0791366906 $WENT_OUT_t0.0791366906) !$WERE_t4.3021582734) and($UNTIL_t0.9496402878 !$VACCINE_GIVEN_t0.2517985612 $WHO_t2.7985611511) $TABLET_ONCE_t0.1366906475 $TYPE_SCHEDULING_t0.0287769784 $UNSTEADY_t0.0575539568 $VACCINE_PNEUMOCOCCAL_t0.0359712230 $VIEW_t0.6762589928 $VITALS_HT_t0.0719424460 $VITALS_PULSE_t0.3597122302 $VITALS_WT_t0.0503597122 $WANT_GO_t0.0287769784 $WHOLE_t0.0719424460 $WITHOUT_COMPLICATIONS_t0.0359712230 $WITH_INSPIRATION_t0.0287769784 $WORK_RELEASE_t0.0287769784 $WORTHLESSNESS_t0.0647482014) !$PRODUCTS_IT_t0.0503597122) $VOICES_t0.2158273381) 
1 or(and(or(and(or($PURCHASED_t0.0359712230 $STEP_t0.3237410072 $TN_t0.0791366906 $WENT_OUT_t0.0791366906) !$WERE_t4.3021582734) and($UNTIL_t0.9496402878 !$VACCINE_GIVEN_t0.2517985612 $WHO_t2.7985611511) $TABLET_ONCE_t0.1366906475 $TYPE_SCHEDULING_t0.0287769784 $UNSTEADY_t0.0575539568 $VACCINE_PNEUMOCOCCAL_t0.0359712230 $VIEW_t0.6762589928 $VITALS_PULSE_t0.3597122302 $VITALS_WT_t0.0503597122 $VOICES_t0.2158273381 $WANT_GO_t0.0287769784 $WHOLE_t0.0719424460 $WITHOUT_COMPLICATIONS_t0.0359712230 $WITH_INSPIRATION_t0.0287769784 $WORK_RELEASE_t0.0287769784) !$PRODUCTS_IT_t0.0503597122) $VITALS_HT_t0.0719424460 $WORTHLESSNESS_t0.0647482014) 
1 or(and(or(and(or($PURCHASED_t0.0359712230 $STEP_t0.3237410072 $TN_t0.0791366906 $WENT_OUT_t0.0791366906) !$WERE_t4.3021582734) and($UNTIL_t0.9496402878 !$VACCINE_GIVEN_t0.2517985612 $WHO_t2.7985611511) $TABLET_ONCE_t0.1366906475 $TYPE_SCHEDULING_t0.0287769784 $UNSTEADY_t0.0575539568 $VACCINE_PNEUMOCOCCAL_t0.0359712230 $VIEW_t0.6762589928 $VITALS_PULSE_t0.3597122302 $VITALS_WT_t0.0503597122 $VOICES_t0.2158273381 $WANT_GO_t0.0287769784 $WHOLE_t0.0719424460 $WITHOUT_COMPLICATIONS_t0.0359712230 $WITH_INSPIRATION_t0.0287769784 $WORK_RELEASE_t0.0287769784 $WORTHLESSNESS_t0.0647482014) !$PRODUCTS_IT_t0.0503597122) $VITALS_HT_t0.0719424460) 
1 or(and(or(and(or($PURCHASED_t0.0359712230 $STEP_t0.3237410072 $TN_t0.0791366906 $WENT_OUT_t0.0791366906) !$WERE_t4.3021582734) and($UNTIL_t0.9496402878 !$VACCINE_GIVEN_t0.2517985612 $WHO_t2.7985611511) $TABLET_ONCE_t0.1366906475 $TYPE_SCHEDULING_t0.0287769784 $UNSTEADY_t0.0575539568 $VACCINE_PNEUMOCOCCAL_t0.0359712230 $VIEW_t0.6762589928 $VITALS_PULSE_t0.3597122302 $VITALS_WT_t0.0503597122 $VOICES_t0.2158273381 $WANT_GO_t0.0287769784 $WHOLE_t0.0719424460 $WITHOUT_COMPLICATIONS_t0.0359712230 $WITH_INSPIRATION_t0.0287769784 $WORTHLESSNESS_t0.0647482014) !$PRODUCTS_IT_t0.0503597122) $VITALS_HT_t0.0719424460 $WORK_RELEASE_t0.0287769784) 
1 or(and(or(and(or($PURCHASED_t0.0359712230 $STEP_t0.3237410072 $TN_t0.0791366906 $WENT_OUT_t0.0791366906) !$WERE_t4.3021582734) and($UNTIL_t0.9496402878 !$VACCINE_GIVEN_t0.2517985612 $WHO_t2.7985611511) $TABLET_ONCE_t0.1366906475 $TYPE_SCHEDULING_t0.0287769784 $UNSTEADY_t0.0575539568 $VACCINE_PNEUMOCOCCAL_t0.0359712230 $VIEW_t0.6762589928 $VITALS_PULSE_t0.3597122302 $VITALS_WT_t0.0503597122 $VOICES_t0.2158273381 $WANT_GO_t0.0287769784 $WHOLE_t0.0719424460 $WITHOUT_COMPLICATIONS_t0.0359712230 $WORK_RELEASE_t0.0287769784 $WORTHLESSNESS_t0.0647482014) !$PRODUCTS_IT_t0.0503597122) $VITALS_HT_t0.0719424460 $WITH_INSPIRATION_t0.0287769784) 
1 and(or(and($GETS_t0.5035971223 $SITUATIONS_YOU_t0.0719424460) and(!$UNTIL_t0.9496402878 $VERBALIZED_t1.1510791367) and($VIEW_t0.6762589928 $WELL_t3.5899280576) $HELPING_HIM_t0.0287769784 $NAPROXEN_MG_t0.1726618705 $PLANS_t0.6618705036 $PSYCHIATRIC_HISTORY_t0.1223021583 $STEP_t0.3237410072 $TN_t0.0791366906 $UNSTEADY_t0.0575539568 $VACCINE_PNEUMOCOCCAL_t0.0359712230 $VITALS_HT_t0.0719424460 $VITALS_PULSE_t0.3597122302 $WAS_SCREENED_t0.1151079137 $WEAPONS_t0.0503597122 $WISH_t0.2014388489 $WITHIN_LAST_t0.4748201439 $WITH_INSPIRATION_t0.0287769784 $WORN_t0.0215827338 $WORRY_t0.0503597122 $YELLING_t0.0287769784) or(!$AGAIN_t1.0791366906 $SO_t1.9208633094) !$INPATIENT_REMOTE_t0.1294964029) 
1 and(or(and(or(and($GETS_t0.5035971223 $SITUATIONS_YOU_t0.0719424460) and(!$UNTIL_t0.9496402878 $VERBALIZED_t1.1510791367) and($VIEW_t0.6762589928 $WELL_t3.5899280576) $HELPING_HIM_t0.0287769784 $PLANS_t0.6618705036 $PSYCHIATRIC_HISTORY_t0.1223021583 $STEP_t0.3237410072 $TN_t0.0791366906 $UNSTEADY_t0.0575539568 $VACCINE_PNEUMOCOCCAL_t0.0359712230 $VITALS_HT_t0.0719424460 $VITALS_PULSE_t0.3597122302 $WAS_SCREENED_t0.1151079137 $WEAPONS_t0.0503597122 $WISH_t0.2014388489 $WITHIN_LAST_t0.4748201439 $WITH_INSPIRATION_t0.0287769784 $WORN_t0.0215827338) !$INPATIENT_REMOTE_t0.1294964029) $NAPROXEN_MG_t0.1726618705 $WORRY_t0.0503597122 $YELLING_t0.0287769784) or(!$AGAIN_t1.0791366906 $SO_t1.9208633094)) 
1 and(or(and(or(and($GETS_t0.5035971223 $SITUATIONS_YOU_t0.0719424460) and(!$UNTIL_t0.9496402878 $VERBALIZED_t1.1510791367) and($VIEW_t0.6762589928 $WELL_t3.5899280576) $HELPING_HIM_t0.0287769784 $PLANS_t0.6618705036 $PSYCHIATRIC_HISTORY_t0.1223021583 $STEP_t0.3237410072 $TN_t0.0791366906 $UNSTEADY_t0.0575539568 $VACCINE_PNEUMOCOCCAL_t0.0359712230 $VITALS_HT_t0.0719424460 $WAS_SCREENED_t0.1151079137 $WEAPONS_t0.0503597122 $WISH_t0.2014388489 $WITHIN_LAST_t0.4748201439 $WITH_INSPIRATION_t0.0287769784 $WORN_t0.0215827338) !$INPATIENT_REMOTE_t0.1294964029) $NAPROXEN_MG_t0.1726618705 $VITALS_PULSE_t0.3597122302 $WORRY_t0.0503597122 $YELLING_t0.0287769784) or(!$AGAIN_t1.0791366906 $SO_t1.9208633094)) 
1 and(or(and(or(and($GETS_t0.5035971223 $SITUATIONS_YOU_t0.0719424460) and(!$UNTIL_t0.9496402878 $VERBALIZED_t1.1510791367) and($VIEW_t0.6762589928 $WELL_t3.5899280576) $HELPING_HIM_t0.0287769784 $PLANS_t0.6618705036 $PSYCHIATRIC_HISTORY_t0.1223021583 $STEP_t0.3237410072 $TN_t0.0791366906 $UNSTEADY_t0.0575539568 $VACCINE_PNEUMOCOCCAL_t0.0359712230 $VITALS_PULSE_t0.3597122302 $WAS_SCREENED_t0.1151079137 $WEAPONS_t0.0503597122 $WISH_t0.2014388489 $WITHIN_LAST_t0.4748201439 $WITH_INSPIRATION_t0.0287769784 $WORN_t0.0215827338) !$INPATIENT_REMOTE_t0.1294964029) $NAPROXEN_MG_t0.1726618705 $VITALS_HT_t0.0719424460 $WORRY_t0.0503597122 $YELLING_t0.0287769784) or(!$AGAIN_t1.0791366906 $SO_t1.9208633094)) 
1 and(or(and(or(and($GETS_t0.5035971223 $SITUATIONS_YOU_t0.0719424460) and(!$UNTIL_t0.9496402878 $VERBALIZED_t1.1510791367) and($VIEW_t0.6762589928 $WELL_t3.5899280576) $HELPING_HIM_t0.0287769784 $PLANS_t0.6618705036 $PSYCHIATRIC_HISTORY_t0.1223021583 $STEP_t0.3237410072 $TN_t0.0791366906 $VACCINE_PNEUMOCOCCAL_t0.0359712230 $VITALS_HT_t0.0719424460 $VITALS_PULSE_t0.3597122302 $WAS_SCREENED_t0.1151079137 $WEAPONS_t0.0503597122 $WISH_t0.2014388489 $WITHIN_LAST_t0.4748201439 $WITH_INSPIRATION_t0.0287769784 $WORN_t0.0215827338) !$INPATIENT_REMOTE_t0.1294964029) $NAPROXEN_MG_t0.1726618705 $UNSTEADY_t0.0575539568 $WORRY_t0.0503597122 $YELLING_t0.0287769784) or(!$AGAIN_t1.0791366906 $SO_t1.9208633094)) 
1 and(or(and(or(and($GETS_t0.5035971223 $SITUATIONS_YOU_t0.0719424460) and(!$UNTIL_t0.9496402878 $VERBALIZED_t1.1510791367) and($VIEW_t0.6762589928 $WELL_t3.5899280576) $HELPING_HIM_t0.0287769784 $PLANS_t0.6618705036 $PSYCHIATRIC_HISTORY_t0.1223021583 $STEP_t0.3237410072 $UNSTEADY_t0.0575539568 $VACCINE_PNEUMOCOCCAL_t0.0359712230 $VITALS_HT_t0.0719424460 $VITALS_PULSE_t0.3597122302 $WAS_SCREENED_t0.1151079137 $WEAPONS_t0.0503597122 $WISH_t0.2014388489 $WITHIN_LAST_t0.4748201439 $WITH_INSPIRATION_t0.0287769784 $WORN_t0.0215827338) !$INPATIENT_REMOTE_t0.1294964029) $NAPROXEN_MG_t0.1726618705 $TN_t0.0791366906 $WORRY_t0.0503597122 $YELLING_t0.0287769784) or(!$AGAIN_t1.0791366906 $SO_t1.9208633094)) 
1 and(or(and(or(and($GETS_t0.5035971223 $SITUATIONS_YOU_t0.0719424460) and(!$UNTIL_t0.9496402878 $VERBALIZED_t1.1510791367) and($VIEW_t0.6762589928 $WELL_t3.5899280576) $PLANS_t0.6618705036 $PSYCHIATRIC_HISTORY_t0.1223021583 $STEP_t0.3237410072 $TN_t0.0791366906 $UNSTEADY_t0.0575539568 $VACCINE_PNEUMOCOCCAL_t0.0359712230 $VITALS_HT_t0.0719424460 $VITALS_PULSE_t0.3597122302 $WAS_SCREENED_t0.1151079137 $WEAPONS_t0.0503597122 $WISH_t0.2014388489 $WITHIN_LAST_t0.4748201439 $WITH_INSPIRATION_t0.0287769784 $WORN_t0.0215827338) !$INPATIENT_REMOTE_t0.1294964029) $HELPING_HIM_t0.0287769784 $NAPROXEN_MG_t0.1726618705 $WORRY_t0.0503597122 $YELLING_t0.0287769784) or(!$AGAIN_t1.0791366906 $SO_t1.9208633094)) 
1 and(or(and(or(and(!$ABLE_t2.2517985612 $GETS_t0.5035971223 $SITUATIONS_YOU_t0.0719424460) and(!$UNTIL_t0.9496402878 $VERBALIZED_t1.1510791367) and($VIEW_t0.6762589928 $WELL_t3.5899280576) $HELPING_HIM_t0.0287769784 $PLANS_t0.6618705036 $PSYCHIATRIC_HISTORY_t0.1223021583 $STEP_t0.3237410072 $TN_t0.0791366906 $UNSTEADY_t0.0575539568 $VACCINE_PNEUMOCOCCAL_t0.0359712230 $VITALS_HT_t0.0719424460 $VITALS_PULSE_t0.3597122302 $WAS_SCREENED_t0.1151079137 $WEAPONS_t0.0503597122 $WISH_t0.2014388489 $WITHIN_LAST_t0.4748201439 $WITH_INSPIRATION_t0.0287769784 $WORN_t0.0215827338) !$INPATIENT_REMOTE_t0.1294964029) $NAPROXEN_MG_t0.1726618705 $WORRY_t0.0503597122 $YELLING_t0.0287769784) or(!$AGAIN_t1.0791366906 $SO_t1.9208633094)) 
1 and(or(and(or(and(!$ABLE_t2.2517985612 !$UNTIL_t0.9496402878 $VERBALIZED_t1.1510791367) and($GETS_t0.5035971223 $SITUATIONS_YOU_t0.0719424460) and($VIEW_t0.6762589928 $WELL_t3.5899280576) $HELPING_HIM_t0.0287769784 $PLANS_t0.6618705036 $PSYCHIATRIC_HISTORY_t0.1223021583 $STEP_t0.3237410072 $TN_t0.0791366906 $UNSTEADY_t0.0575539568 $VACCINE_PNEUMOCOCCAL_t0.0359712230 $VITALS_HT_t0.0719424460 $VITALS_PULSE_t0.3597122302 $WAS_SCREENED_t0.1151079137 $WEAPONS_t0.0503597122 $WISH_t0.2014388489 $WITHIN_LAST_t0.4748201439 $WITH_INSPIRATION_t0.0287769784 $WORN_t0.0215827338) !$INPATIENT_REMOTE_t0.1294964029) $NAPROXEN_MG_t0.1726618705 $WORRY_t0.0503597122 $YELLING_t0.0287769784) or(!$AGAIN_t1.0791366906 $SO_t1.9208633094)) 
1 and(or(and(or(and(!$ACCESS_t0.5467625899 !$UNTIL_t0.9496402878 $VERBALIZED_t1.1510791367) and($GETS_t0.5035971223 $SITUATIONS_YOU_t0.0719424460) and($VIEW_t0.6762589928 $WELL_t3.5899280576) $HELPING_HIM_t0.0287769784 $PLANS_t0.6618705036 $PSYCHIATRIC_HISTORY_t0.1223021583 $STEP_t0.3237410072 $TN_t0.0791366906 $UNSTEADY_t0.0575539568 $VACCINE_PNEUMOCOCCAL_t0.0359712230 $VITALS_HT_t0.0719424460 $VITALS_PULSE_t0.3597122302 $WAS_SCREENED_t0.1151079137 $WEAPONS_t0.0503597122 $WISH_t0.2014388489 $WITHIN_LAST_t0.4748201439 $WITH_INSPIRATION_t0.0287769784 $WORN_t0.0215827338) !$INPATIENT_REMOTE_t0.1294964029) $NAPROXEN_MG_t0.1726618705 $WORRY_t0.0503597122 $YELLING_t0.0287769784) or(!$AGAIN_t1.0791366906 $SO_t1.9208633094)) 
1 and(or(and(!$UNIT_t1.8992805755 $VIEW_t0.6762589928 $WANTS_t0.9280575540) and($UNTIL_t0.9496402878 $WHO_t2.7985611511 !$YES_t8.2446043165) $CREST_t0.1007194245 $HAPPENS_t0.0575539568 $NAPROXEN_MG_t0.1726618705 $TN_t0.0791366906 $TYPE_SCHEDULING_t0.0287769784 $UCINATIONS_DENIES_t0.0503597122 $VACCINE_PNEUMOCOCCAL_t0.0359712230 $VARDENAFIL_HCL_t0.0863309353 $VITALS_HT_t0.0719424460 $VITALS_PULSE_t0.3597122302 $WANT_GO_t0.0287769784 $WEARS_t0.1294964029 $WEEK_NOTICE_t0.0575539568 $WENT_OUT_t0.0791366906 $WHOLE_t0.0719424460 $WITH_INSPIRATION_t0.0287769784 $WORK_RELEASE_t0.0287769784) !$HEALING_WELL_t0.0431654676 !$PROCEDURE_PRACTITIONER_t0.0503597122 !$TAB_TAK_t0.0287769784) 
1 or(and(or(and(!$UNIT_t1.8992805755 $VIEW_t0.6762589928 $WANTS_t0.9280575540) and($UNTIL_t0.9496402878 $WHO_t2.7985611511 !$YES_t8.2446043165) $HAPPENS_t0.0575539568 $NAPROXEN_MG_t0.1726618705 $TN_t0.0791366906 $TYPE_SCHEDULING_t0.0287769784 $UCINATIONS_DENIES_t0.0503597122 $VACCINE_PNEUMOCOCCAL_t0.0359712230 $VARDENAFIL_HCL_t0.0863309353 $VITALS_HT_t0.0719424460 $VITALS_PULSE_t0.3597122302 $WANT_GO_t0.0287769784 $WEARS_t0.1294964029 $WEEK_NOTICE_t0.0575539568 $WENT_OUT_t0.0791366906 $WHOLE_t0.0719424460 $WITH_INSPIRATION_t0.0287769784 $WORK_RELEASE_t0.0287769784) !$HEALING_WELL_t0.0431654676 !$PROCEDURE_PRACTITIONER_t0.0503597122 !$TAB_TAK_t0.0287769784) $CREST_t0.1007194245) 
1 or(and(or(and(!$UNIT_t1.8992805755 $VIEW_t0.6762589928 $WANTS_t0.9280575540) and($UNTIL_t0.9496402878 $WHO_t2.7985611511 !$YES_t8.2446043165) $HAPPENS_t0.0575539568 $NAPROXEN_MG_t0.1726618705 $TN_t0.0791366906 $TYPE_SCHEDULING_t0.0287769784 $UCINATIONS_DENIES_t0.0503597122 $VACCINE_PNEUMOCOCCAL_t0.0359712230 $VARDENAFIL_HCL_t0.0863309353 $VITALS_HT_t0.0719424460 $VITALS_PULSE_t0.3597122302 $WANT_GO_t0.0287769784 $WEARS_t0.1294964029 $WEEK_NOTICE_t0.0575539568 $WENT_OUT_t0.0791366906 $WHOLE_t0.0719424460 $WITH_INSPIRATION_t0.0287769784 $WORK_RELEASE_t0.0287769784) !$HEALING_WELL_t0.0431654676 !$PROCEDURE_PRACTITIONER_t0.0503597122 !$TAB_TAK_t0.0287769784) $PTC_t0.0575539568) 
1 and(or(and(or(and(!$UNIT_t1.8992805755 $VIEW_t0.6762589928 $WANTS_t0.9280575540) and($UNTIL_t0.9496402878 $WHO_t2.7985611511 !$YES_t8.2446043165) $HAPPENS_t0.0575539568 $NAPROXEN_MG_t0.1726618705 $TN_t0.0791366906 $TYPE_SCHEDULING_t0.0287769784 $UCINATIONS_DENIES_t0.0503597122 $VACCINE_PNEUMOCOCCAL_t0.0359712230 $VARDENAFIL_HCL_t0.0863309353 $VITALS_HT_t0.0719424460 $VITALS_PULSE_t0.3597122302 $WANT_GO_t0.0287769784 $WEARS_t0.1294964029 $WEEK_NOTICE_t0.0575539568 $WENT_OUT_t0.0791366906 $WHOLE_t0.0719424460 $WITH_INSPIRATION_t0.0287769784 $WORK_RELEASE_t0.0287769784) !$HEALING_WELL_t0.0431654676 !$PROCEDURE_PRACTITIONER_t0.0503597122) $CREST_t0.1007194245) !$TAB_TAK_t0.0287769784) 
1 and(or(and(or(and(!$UNIT_t1.8992805755 $VIEW_t0.6762589928 $WANTS_t0.9280575540) and($UNTIL_t0.9496402878 $WHO_t2.7985611511 !$YES_t8.2446043165) $HAPPENS_t0.0575539568 $NAPROXEN_MG_t0.1726618705 $TN_t0.0791366906 $TYPE_SCHEDULING_t0.0287769784 $UCINATIONS_DENIES_t0.0503597122 $VACCINE_PNEUMOCOCCAL_t0.0359712230 $VARDENAFIL_HCL_t0.0863309353 $VITALS_HT_t0.0719424460 $VITALS_PULSE_t0.3597122302 $WANT_GO_t0.0287769784 $WEARS_t0.1294964029 $WEEK_NOTICE_t0.0575539568 $WENT_OUT_t0.0791366906 $WHOLE_t0.0719424460 $WITH_INSPIRATION_t0.0287769784 $WORK_RELEASE_t0.0287769784) !$HEALING_WELL_t0.0431654676 !$TAB_TAK_t0.0287769784) $CREST_t0.1007194245) !$PROCEDURE_PRACTITIONER_t0.0503597122) 
1 and(or(and(or(and(!$UNIT_t1.8992805755 $VIEW_t0.6762589928 $WANTS_t0.9280575540) and($UNTIL_t0.9496402878 $WHO_t2.7985611511 !$YES_t8.2446043165) $HAPPENS_t0.0575539568 $NAPROXEN_MG_t0.1726618705 $TN_t0.0791366906 $TYPE_SCHEDULING_t0.0287769784 $UCINATIONS_DENIES_t0.0503597122 $VACCINE_PNEUMOCOCCAL_t0.0359712230 $VARDENAFIL_HCL_t0.0863309353 $VITALS_HT_t0.0719424460 $VITALS_PULSE_t0.3597122302 $WANT_GO_t0.0287769784 $WEARS_t0.1294964029 $WEEK_NOTICE_t0.0575539568 $WENT_OUT_t0.0791366906 $WHOLE_t0.0719424460 $WITH_INSPIRATION_t0.0287769784 $WORK_RELEASE_t0.0287769784) !$PROCEDURE_PRACTITIONER_t0.0503597122 !$TAB_TAK_t0.0287769784) $CREST_t0.1007194245) !$HEALING_WELL_t0.0431654676) 
1 and(or(and(!$ACTIVE_MORNING_t0.4172661871 !$UNIT_t1.8992805755 $VIEW_t0.6762589928 $WANTS_t0.9280575540) and($UNTIL_t0.9496402878 $WHO_t2.7985611511 !$YES_t8.2446043165) $CREST_t0.1007194245 $HAPPENS_t0.0575539568 $NAPROXEN_MG_t0.1726618705 $TN_t0.0791366906 $TYPE_SCHEDULING_t0.0287769784 $UCINATIONS_DENIES_t0.0503597122 $VACCINE_PNEUMOCOCCAL_t0.0359712230 $VARDENAFIL_HCL_t0.0863309353 $VITALS_HT_t0.0719424460 $VITALS_PULSE_t0.3597122302 $WANT_GO_t0.0287769784 $WEARS_t0.1294964029 $WEEK_NOTICE_t0.0575539568 $WENT_OUT_t0.0791366906 $WHOLE_t0.0719424460 $WITH_INSPIRATION_t0.0287769784 $WORK_RELEASE_t0.0287769784) !$HEALING_WELL_t0.0431654676 !$PROCEDURE_PRACTITIONER_t0.0503597122 !$TAB_TAK_t0.0287769784) 
1 and(or(and(!$ACTIVE_MORNING_t0.4172661871 $UNTIL_t0.9496402878 $WHO_t2.7985611511 !$YES_t8.2446043165) and(!$UNIT_t1.8992805755 $VIEW_t0.6762589928 $WANTS_t0.9280575540) $CREST_t0.1007194245 $HAPPENS_t0.0575539568 $NAPROXEN_MG_t0.1726618705 $TN_t0.0791366906 $TYPE_SCHEDULING_t0.0287769784 $UCINATIONS_DENIES_t0.0503597122 $VACCINE_PNEUMOCOCCAL_t0.0359712230 $VARDENAFIL_HCL_t0.0863309353 $VITALS_HT_t0.0719424460 $VITALS_PULSE_t0.3597122302 $WANT_GO_t0.0287769784 $WEARS_t0.1294964029 $WEEK_NOTICE_t0.0575539568 $WENT_OUT_t0.0791366906 $WHOLE_t0.0719424460 $WITH_INSPIRATION_t0.0287769784 $WORK_RELEASE_t0.0287769784) !$HEALING_WELL_t0.0431654676 !$PROCEDURE_PRACTITIONER_t0.0503597122 !$TAB_TAK_t0.0287769784) 
1 and(or(and(!$BRAIN_t0.2589928058 !$UNIT_t1.8992805755 $VIEW_t0.6762589928 $WANTS_t0.9280575540) and($UNTIL_t0.9496402878 $WHO_t2.7985611511 !$YES_t8.2446043165) $CREST_t0.1007194245 $HAPPENS_t0.0575539568 $NAPROXEN_MG_t0.1726618705 $TN_t0.0791366906 $TYPE_SCHEDULING_t0.0287769784 $UCINATIONS_DENIES_t0.0503597122 $VACCINE_PNEUMOCOCCAL_t0.0359712230 $VARDENAFIL_HCL_t0.0863309353 $VITALS_HT_t0.0719424460 $VITALS_PULSE_t0.3597122302 $WANT_GO_t0.0287769784 $WEARS_t0.1294964029 $WEEK_NOTICE_t0.0575539568 $WENT_OUT_t0.0791366906 $WHOLE_t0.0719424460 $WITH_INSPIRATION_t0.0287769784 $WORK_RELEASE_t0.0287769784) !$HEALING_WELL_t0.0431654676 !$PROCEDURE_PRACTITIONER_t0.0503597122 !$TAB_TAK_t0.0287769784) 
1 and(or(and(!$BRAIN_t0.2589928058 $UNTIL_t0.9496402878 $WHO_t2.7985611511 !$YES_t8.2446043165) and(!$UNIT_t1.8992805755 $VIEW_t0.6762589928 $WANTS_t0.9280575540) $CREST_t0.1007194245 $HAPPENS_t0.0575539568 $NAPROXEN_MG_t0.1726618705 $TN_t0.0791366906 $TYPE_SCHEDULING_t0.0287769784 $UCINATIONS_DENIES_t0.0503597122 $VACCINE_PNEUMOCOCCAL_t0.0359712230 $VARDENAFIL_HCL_t0.0863309353 $VITALS_HT_t0.0719424460 $VITALS_PULSE_t0.3597122302 $WANT_GO_t0.0287769784 $WEARS_t0.1294964029 $WEEK_NOTICE_t0.0575539568 $WENT_OUT_t0.0791366906 $WHOLE_t0.0719424460 $WITH_INSPIRATION_t0.0287769784 $WORK_RELEASE_t0.0287769784) !$HEALING_WELL_t0.0431654676 !$PROCEDURE_PRACTITIONER_t0.0503597122 !$TAB_TAK_t0.0287769784) 
1 or(and(or(and(!$AN_t5.7410071942 !$HE_t41.0791366906) $SO_t1.9208633094) or(and($VERBALIZED_t1.1510791367 !$YET_t0.3884892086) and($WERE_t4.3021582734 $WHO_t2.7985611511) $ABUSE_AUDITC_t0.0359712230 $NAPROXEN_MG_t0.1726618705 $RESCHEDULED_t0.3309352518 $STEP_t0.3237410072 $TN_t0.0791366906 $UNSTEADY_t0.0575539568 $VARDENAFIL_HCL_t0.0863309353 $VETERAN_t8.3453237410 $VIEW_t0.6762589928 $VITALS_HT_t0.0719424460 $VITALS_PULSE_t0.3597122302 $VITALS_WT_t0.0503597122 $WALS_t0.1007194245 $WITHIN_LAST_t0.4748201439) or(!$COMPUTERIZED_t0.5179856115 $PTSD_RELATED_t0.0647482014 $SUPPLIES_OUTPATIENT_t1.6618705036)) $COIN_t0.0647482014 $HALDOL_MG_t0.0215827338) 
1 or(and(or(and(!$AN_t5.7410071942 !$HE_t41.0791366906) $SO_t1.9208633094) or(and($VERBALIZED_t1.1510791367 !$YET_t0.3884892086) and($WERE_t4.3021582734 $WHO_t2.7985611511) $NAPROXEN_MG_t0.1726618705 $RESCHEDULED_t0.3309352518 $STEP_t0.3237410072 $TN_t0.0791366906 $UNSTEADY_t0.0575539568 $VARDENAFIL_HCL_t0.0863309353 $VETERAN_t8.3453237410 $VIEW_t0.6762589928 $VITALS_HT_t0.0719424460 $VITALS_PULSE_t0.3597122302 $VITALS_WT_t0.0503597122 $WALS_t0.1007194245 $WITHIN_LAST_t0.4748201439) or(!$COMPUTERIZED_t0.5179856115 $PTSD_RELATED_t0.0647482014 $SUPPLIES_OUTPATIENT_t1.6618705036)) $ABUSE_AUDITC_t0.0359712230 $COIN_t0.0647482014 $HALDOL_MG_t0.0215827338) 
1 or(and(or(and(or($NAPROXEN_MG_t0.1726618705 $STEP_t0.3237410072 $VERBALIZED_t1.1510791367) !$YET_t0.3884892086) and($WERE_t4.3021582734 $WHO_t2.7985611511) $ABUSE_AUDITC_t0.0359712230 $RESCHEDULED_t0.3309352518 $TN_t0.0791366906 $UNSTEADY_t0.0575539568 $VARDENAFIL_HCL_t0.0863309353 $VETERAN_t8.3453237410 $VIEW_t0.6762589928 $VITALS_HT_t0.0719424460 $VITALS_PULSE_t0.3597122302 $VITALS_WT_t0.0503597122 $WALS_t0.1007194245 $WITHIN_LAST_t0.4748201439) or(and(!$AN_t5.7410071942 !$HE_t41.0791366906) $SO_t1.9208633094) or(!$COMPUTERIZED_t0.5179856115 $PTSD_RELATED_t0.0647482014 $SUPPLIES_OUTPATIENT_t1.6618705036)) $COIN_t0.0647482014 $HALDOL_MG_t0.0215827338) 
1 or(and(or(and(or($NAPROXEN_MG_t0.1726618705 $STEP_t0.3237410072 $VERBALIZED_t1.1510791367) !$YET_t0.3884892086) and($WERE_t4.3021582734 $WHO_t2.7985611511) $ABUSE_AUDITC_t0.0359712230 $RESCHEDULED_t0.3309352518 $TN_t0.0791366906 $UNSTEADY_t0.0575539568 $VARDENAFIL_HCL_t0.0863309353 $VETERAN_t8.3453237410 $VIEW_t0.6762589928 $VITALS_HT_t0.0719424460 $VITALS_PULSE_t0.3597122302 $VITALS_WT_t0.0503597122 $WALS_t0.1007194245 $WITHIN_LAST_t0.4748201439) or(and(!$AN_t5.7410071942 !$HE_t41.0791366906) $SO_t1.9208633094) or(!$COMPUTERIZED_t0.5179856115 $PTSD_RELATED_t0.0647482014 $SUPPLIES_OUTPATIENT_t1.6618705036)) $HALDOL_MG_t0.0215827338 $MAJORITY_OF_t0.0359712230) 
1 or(and(or(and(or($STEP_t0.3237410072 $VERBALIZED_t1.1510791367) !$YET_t0.3884892086) and($WERE_t4.3021582734 $WHO_t2.7985611511) $ABUSE_AUDITC_t0.0359712230 $NAPROXEN_MG_t0.1726618705 $RESCHEDULED_t0.3309352518 $TN_t0.0791366906 $UNSTEADY_t0.0575539568 $VARDENAFIL_HCL_t0.0863309353 $VETERAN_t8.3453237410 $VIEW_t0.6762589928 $VITALS_HT_t0.0719424460 $VITALS_PULSE_t0.3597122302 $VITALS_WT_t0.0503597122 $WALS_t0.1007194245 $WITHIN_LAST_t0.4748201439) or(and(!$AN_t5.7410071942 !$HE_t41.0791366906) $SO_t1.9208633094) or(!$COMPUTERIZED_t0.5179856115 $PTSD_RELATED_t0.0647482014 $SUPPLIES_OUTPATIENT_t1.6618705036)) $COIN_t0.0647482014 $HALDOL_MG_t0.0215827338) 
1 or(and(or(and(or($STEP_t0.3237410072 $VERBALIZED_t1.1510791367) !$YET_t0.3884892086) and($WERE_t4.3021582734 $WHO_t2.7985611511) $ABUSE_AUDITC_t0.0359712230 $RESCHEDULED_t0.3309352518 $TN_t0.0791366906 $UNSTEADY_t0.0575539568 $VARDENAFIL_HCL_t0.0863309353 $VETERAN_t8.3453237410 $VIEW_t0.6762589928 $VITALS_HT_t0.0719424460 $VITALS_PULSE_t0.3597122302 $VITALS_WT_t0.0503597122 $WALS_t0.1007194245 $WITHIN_LAST_t0.4748201439) or(and(!$AN_t5.7410071942 !$HE_t41.0791366906) $SO_t1.9208633094) or(!$COMPUTERIZED_t0.5179856115 $PTSD_RELATED_t0.0647482014 $SUPPLIES_OUTPATIENT_t1.6618705036)) $COIN_t0.0647482014 $HALDOL_MG_t0.0215827338 $NAPROXEN_MG_t0.1726618705) 
1 or(and(or(and(!$AN_t5.7410071942 !$HALDOL_MG_t0.0215827338 !$HE_t41.0791366906) $SO_t1.9208633094) or(and($VERBALIZED_t1.1510791367 !$YET_t0.3884892086) and($WERE_t4.3021582734 $WHO_t2.7985611511) $ABUSE_AUDITC_t0.0359712230 $NAPROXEN_MG_t0.1726618705 $RESCHEDULED_t0.3309352518 $STEP_t0.3237410072 $TN_t0.0791366906 $UNSTEADY_t0.0575539568 $VARDENAFIL_HCL_t0.0863309353 $VETERAN_t8.3453237410 $VIEW_t0.6762589928 $VITALS_HT_t0.0719424460 $VITALS_PULSE_t0.3597122302 $VITALS_WT_t0.0503597122 $WALS_t0.1007194245 $WITHIN_LAST_t0.4748201439) or(!$COMPUTERIZED_t0.5179856115 $PTSD_RELATED_t0.0647482014 $SUPPLIES_OUTPATIENT_t1.6618705036)) $COIN_t0.0647482014 $HALDOL_MG_t0.0215827338) 
1 or(and(or(and(!$AN_t5.7410071942 !$HE_t41.0791366906) $ABUSE_AUDITC_t0.0359712230 $SO_t1.9208633094) or(and($VERBALIZED_t1.1510791367 !$YET_t0.3884892086) and($WERE_t4.3021582734 $WHO_t2.7985611511) $ABUSE_AUDITC_t0.0359712230 $NAPROXEN_MG_t0.1726618705 $RESCHEDULED_t0.3309352518 $STEP_t0.3237410072 $TN_t0.0791366906 $UNSTEADY_t0.0575539568 $VARDENAFIL_HCL_t0.0863309353 $VETERAN_t8.3453237410 $VIEW_t0.6762589928 $VITALS_HT_t0.0719424460 $VITALS_PULSE_t0.3597122302 $VITALS_WT_t0.0503597122 $WALS_t0.1007194245 $WITHIN_LAST_t0.4748201439) or(!$COMPUTERIZED_t0.5179856115 $PTSD_RELATED_t0.0647482014 $SUPPLIES_OUTPATIENT_t1.6618705036)) $COIN_t0.0647482014 $HALDOL_MG_t0.0215827338) 
1 or(and(or(and(!$AN_t5.7410071942 !$HE_t41.0791366906) $COIN_t0.0647482014 $SO_t1.9208633094) or(and($VERBALIZED_t1.1510791367 !$YET_t0.3884892086) and($WERE_t4.3021582734 $WHO_t2.7985611511) $ABUSE_AUDITC_t0.0359712230 $NAPROXEN_MG_t0.1726618705 $RESCHEDULED_t0.3309352518 $STEP_t0.3237410072 $TN_t0.0791366906 $UNSTEADY_t0.0575539568 $VARDENAFIL_HCL_t0.0863309353 $VETERAN_t8.3453237410 $VIEW_t0.6762589928 $VITALS_HT_t0.0719424460 $VITALS_PULSE_t0.3597122302 $VITALS_WT_t0.0503597122 $WALS_t0.1007194245 $WITHIN_LAST_t0.4748201439) or(!$COMPUTERIZED_t0.5179856115 $PTSD_RELATED_t0.0647482014 $SUPPLIES_OUTPATIENT_t1.6618705036)) $COIN_t0.0647482014 $HALDOL_MG_t0.0215827338) 
1 or(and(or(and(!$AN_t5.7410071942 !$HE_t41.0791366906) $HALDOL_MG_t0.0215827338 $SO_t1.9208633094) or(and($VERBALIZED_t1.1510791367 !$YET_t0.3884892086) and($WERE_t4.3021582734 $WHO_t2.7985611511) $ABUSE_AUDITC_t0.0359712230 $NAPROXEN_MG_t0.1726618705 $RESCHEDULED_t0.3309352518 $STEP_t0.3237410072 $TN_t0.0791366906 $UNSTEADY_t0.0575539568 $VARDENAFIL_HCL_t0.0863309353 $VETERAN_t8.3453237410 $VIEW_t0.6762589928 $VITALS_HT_t0.0719424460 $VITALS_PULSE_t0.3597122302 $VITALS_WT_t0.0503597122 $WALS_t0.1007194245 $WITHIN_LAST_t0.4748201439) or(!$COMPUTERIZED_t0.5179856115 $PTSD_RELATED_t0.0647482014 $SUPPLIES_OUTPATIENT_t1.6618705036)) $COIN_t0.0647482014 $HALDOL_MG_t0.0215827338) 
1 and(or(and($UNTIL_t0.9496402878 $WHO_t2.7985611511) and($VIEW_t0.6762589928 $WANTS_t0.9280575540) $OLD_PMH_t0.0215827338 $PASSED_OUT_t0.0719424460 $STEP_t0.3237410072 $TABLET_ONCE_t0.1366906475 $TN_t0.0791366906 $TV_t0.4676258993 $TYPE_SCHEDULING_t0.0287769784 $VACCINE_PNEUMOCOCCAL_t0.0359712230 $VITALS_HT_t0.0719424460 $VITALS_PULSE_t0.3597122302 $WANT_GO_t0.0287769784 $WEARS_t0.1294964029 $WEIGH_DAILY_t0.0503597122 $WENT_OUT_t0.0791366906 $WHOLE_t0.0719424460 $WITH_INSPIRATION_t0.0287769784 $WORK_RELEASE_t0.0287769784 $WORTHLESSNESS_t0.0647482014) !$HEALING_WELL_t0.0431654676 !$INPATIENT_REMOTE_t0.1294964029 !$PRODUCTS_IT_t0.0503597122 !$TAB_TAK_t0.0287769784) 
1 and(or(and(or(and($UNTIL_t0.9496402878 $WHO_t2.7985611511) and($VIEW_t0.6762589928 $WANTS_t0.9280575540) $OLD_PMH_t0.0215827338 $STEP_t0.3237410072 $TV_t0.4676258993 $TYPE_SCHEDULING_t0.0287769784 $VACCINE_PNEUMOCOCCAL_t0.0359712230 $VITALS_HT_t0.0719424460 $VITALS_PULSE_t0.3597122302 $WANT_GO_t0.0287769784 $WEARS_t0.1294964029 $WEIGH_DAILY_t0.0503597122 $WENT_OUT_t0.0791366906 $WHOLE_t0.0719424460 $WITH_INSPIRATION_t0.0287769784 $WORK_RELEASE_t0.0287769784) !$TAB_TAK_t0.0287769784) $PASSED_OUT_t0.0719424460 $TABLET_ONCE_t0.1366906475 $TN_t0.0791366906 $WORTHLESSNESS_t0.0647482014) !$HEALING_WELL_t0.0431654676 !$INPATIENT_REMOTE_t0.1294964029 !$PRODUCTS_IT_t0.0503597122) 
1 and(or(and(or(and($UNTIL_t0.9496402878 $WHO_t2.7985611511) and($VIEW_t0.6762589928 $WANTS_t0.9280575540) $OLD_PMH_t0.0215827338 $STEP_t0.3237410072 $TV_t0.4676258993 $TYPE_SCHEDULING_t0.0287769784 $VACCINE_PNEUMOCOCCAL_t0.0359712230 $VITALS_HT_t0.0719424460 $VITALS_PULSE_t0.3597122302 $WANT_GO_t0.0287769784 $WEARS_t0.1294964029 $WEIGH_DAILY_t0.0503597122 $WENT_OUT_t0.0791366906 $WHOLE_t0.0719424460 $WITH_INSPIRATION_t0.0287769784 $WORK_RELEASE_t0.0287769784 $WORTHLESSNESS_t0.0647482014) !$PRODUCTS_IT_t0.0503597122) $PASSED_OUT_t0.0719424460 $TABLET_ONCE_t0.1366906475 $TN_t0.0791366906) !$HEALING_WELL_t0.0431654676 !$INPATIENT_REMOTE_t0.1294964029 !$TAB_TAK_t0.0287769784) 
1 and(or(and(or(and($UNTIL_t0.9496402878 $WHO_t2.7985611511) and($VIEW_t0.6762589928 $WANTS_t0.9280575540) $OLD_PMH_t0.0215827338 $STEP_t0.3237410072 $TV_t0.4676258993 $TYPE_SCHEDULING_t0.0287769784 $VACCINE_PNEUMOCOCCAL_t0.0359712230 $VITALS_HT_t0.0719424460 $VITALS_PULSE_t0.3597122302 $WANT_GO_t0.0287769784 $WEARS_t0.1294964029 $WEIGH_DAILY_t0.0503597122 $WENT_OUT_t0.0791366906 $WHOLE_t0.0719424460 $WITH_INSPIRATION_t0.0287769784 $WORK_RELEASE_t0.0287769784 $WORTHLESSNESS_t0.0647482014) !$PRODUCTS_IT_t0.0503597122 !$TAB_TAK_t0.0287769784) $PASSED_OUT_t0.0719424460 $TABLET_ONCE_t0.1366906475 $TN_t0.0791366906) !$HEALING_WELL_t0.0431654676 !$INPATIENT_REMOTE_t0.1294964029) 
1 and(or(and(or(and($UNTIL_t0.9496402878 $WHO_t2.7985611511) and($VIEW_t0.6762589928 $WANTS_t0.9280575540) $OLD_PMH_t0.0215827338 $STEP_t0.3237410072 $TV_t0.4676258993 $TYPE_SCHEDULING_t0.0287769784 $VACCINE_PNEUMOCOCCAL_t0.0359712230 $VITALS_HT_t0.0719424460 $VITALS_PULSE_t0.3597122302 $WANT_GO_t0.0287769784 $WEARS_t0.1294964029 $WEIGH_DAILY_t0.0503597122 $WENT_OUT_t0.0791366906 $WHOLE_t0.0719424460 $WITH_INSPIRATION_t0.0287769784 $WORK_RELEASE_t0.0287769784 $WORTHLESSNESS_t0.0647482014) !$TAB_TAK_t0.0287769784) $PASSED_OUT_t0.0719424460 $TABLET_ONCE_t0.1366906475 $TN_t0.0791366906) !$HEALING_WELL_t0.0431654676 !$INPATIENT_REMOTE_t0.1294964029 !$PRODUCTS_IT_t0.0503597122) 
1 and(or(and(or(and($UNTIL_t0.9496402878 $WHO_t2.7985611511) and($VIEW_t0.6762589928 $WANTS_t0.9280575540) $OLD_PMH_t0.0215827338 $STEP_t0.3237410072 $TV_t0.4676258993 $TYPE_SCHEDULING_t0.0287769784 $VACCINE_PNEUMOCOCCAL_t0.0359712230 $VITALS_HT_t0.0719424460 $VITALS_PULSE_t0.3597122302 $WANT_GO_t0.0287769784 $WEARS_t0.1294964029 $WEIGH_DAILY_t0.0503597122 $WENT_OUT_t0.0791366906 $WHOLE_t0.0719424460 $WITH_INSPIRATION_t0.0287769784 $WORTHLESSNESS_t0.0647482014) !$TAB_TAK_t0.0287769784) $PASSED_OUT_t0.0719424460 $TABLET_ONCE_t0.1366906475 $TN_t0.0791366906 $WORK_RELEASE_t0.0287769784) !$HEALING_WELL_t0.0431654676 !$INPATIENT_REMOTE_t0.1294964029 !$PRODUCTS_IT_t0.0503597122) 
1 and(or(and(or(and($UNTIL_t0.9496402878 $WHO_t2.7985611511) and($VIEW_t0.6762589928 $WANTS_t0.9280575540) $OLD_PMH_t0.0215827338 $STEP_t0.3237410072 $TV_t0.4676258993 $TYPE_SCHEDULING_t0.0287769784 $VACCINE_PNEUMOCOCCAL_t0.0359712230 $VITALS_HT_t0.0719424460 $VITALS_PULSE_t0.3597122302 $WANT_GO_t0.0287769784 $WEARS_t0.1294964029 $WENT_OUT_t0.0791366906 $WHOLE_t0.0719424460 $WITH_INSPIRATION_t0.0287769784 $WORK_RELEASE_t0.0287769784 $WORTHLESSNESS_t0.0647482014) !$TAB_TAK_t0.0287769784) $PASSED_OUT_t0.0719424460 $TABLET_ONCE_t0.1366906475 $TN_t0.0791366906 $WEIGH_DAILY_t0.0503597122) !$HEALING_WELL_t0.0431654676 !$INPATIENT_REMOTE_t0.1294964029 !$PRODUCTS_IT_t0.0503597122) 
1 and(or(and(or(and($UNTIL_t0.9496402878 $WHO_t2.7985611511) and($VIEW_t0.6762589928 $WANTS_t0.9280575540) $OLD_PMH_t0.0215827338 $STEP_t0.3237410072 $TV_t0.4676258993 $TYPE_SCHEDULING_t0.0287769784 $VACCINE_PNEUMOCOCCAL_t0.0359712230 $VITALS_HT_t0.0719424460 $VITALS_PULSE_t0.3597122302 $WEARS_t0.1294964029 $WEIGH_DAILY_t0.0503597122 $WENT_OUT_t0.0791366906 $WHOLE_t0.0719424460 $WITH_INSPIRATION_t0.0287769784 $WORK_RELEASE_t0.0287769784 $WORTHLESSNESS_t0.0647482014) !$TAB_TAK_t0.0287769784) $PASSED_OUT_t0.0719424460 $TABLET_ONCE_t0.1366906475 $TN_t0.0791366906 $WANT_GO_t0.0287769784) !$HEALING_WELL_t0.0431654676 !$INPATIENT_REMOTE_t0.1294964029 !$PRODUCTS_IT_t0.0503597122) 
1 and(or(and(or(and($UNTIL_t0.9496402878 $WHO_t2.7985611511) and($VIEW_t0.6762589928 $WANTS_t0.9280575540) $OLD_PMH_t0.0215827338 $STEP_t0.3237410072 $TYPE_SCHEDULING_t0.0287769784 $VACCINE_PNEUMOCOCCAL_t0.0359712230 $VITALS_HT_t0.0719424460 $VITALS_PULSE_t0.3597122302 $WANT_GO_t0.0287769784 $WEARS_t0.1294964029 $WEIGH_DAILY_t0.0503597122 $WENT_OUT_t0.0791366906 $WHOLE_t0.0719424460 $WITH_INSPIRATION_t0.0287769784 $WORK_RELEASE_t0.0287769784 $WORTHLESSNESS_t0.0647482014) !$TAB_TAK_t0.0287769784) $PASSED_OUT_t0.0719424460 $TABLET_ONCE_t0.1366906475 $TN_t0.0791366906 $TV_t0.4676258993) !$HEALING_WELL_t0.0431654676 !$INPATIENT_REMOTE_t0.1294964029 !$PRODUCTS_IT_t0.0503597122) 
1 and(or(and(or(and($UNTIL_t0.9496402878 $WHO_t2.7985611511) and($VIEW_t0.6762589928 $WANTS_t0.9280575540) $OLD_PMH_t0.0215827338 $TV_t0.4676258993 $TYPE_SCHEDULING_t0.0287769784 $VACCINE_PNEUMOCOCCAL_t0.0359712230 $VITALS_HT_t0.0719424460 $VITALS_PULSE_t0.3597122302 $WANT_GO_t0.0287769784 $WEARS_t0.1294964029 $WEIGH_DAILY_t0.0503597122 $WENT_OUT_t0.0791366906 $WHOLE_t0.0719424460 $WITH_INSPIRATION_t0.0287769784 $WORK_RELEASE_t0.0287769784 $WORTHLESSNESS_t0.0647482014) !$TAB_TAK_t0.0287769784) $PASSED_OUT_t0.0719424460 $STEP_t0.3237410072 $TABLET_ONCE_t0.1366906475 $TN_t0.0791366906) !$HEALING_WELL_t0.0431654676 !$INPATIENT_REMOTE_t0.1294964029 !$PRODUCTS_IT_t0.0503597122) 
1 and(or(and(or($STEP_t0.3237410072 $VIEW_t0.6762589928) !$FAX_t0.2949640288 !$WT_KG_t0.9856115108) and($UNTIL_t0.9496402878 !$VOICE_t0.5107913669 $WHO_t2.7985611511) $INFLUENZA_SEP_t0.0359712230 $INTERVIEWED_t0.0863309353 $TN_t0.0791366906 $TYPE_SCHEDULING_t0.0287769784 $UCINATIONS_DENIES_t0.0503597122 $VACCINE_PNEUMOCOCCAL_t0.0359712230 $VITALS_HT_t0.0719424460 $VITALS_PULSE_t0.3597122302 $WANT_GO_t0.0287769784 $WEARS_t0.1294964029 $WENT_OUT_t0.0791366906 $WHOLE_t0.0719424460 $WITH_INSPIRATION_t0.0287769784 $WORK_RELEASE_t0.0287769784 $WORRY_t0.0503597122) !$HEALING_WELL_t0.0431654676 !$MG_TAK_t0.0287769784 !$PROCEDURE_PRACTITIONER_t0.0503597122) 
1 or(and(or(and(or($STEP_t0.3237410072 $VIEW_t0.6762589928) !$FAX_t0.2949640288 !$WT_KG_t0.9856115108) and($UNTIL_t0.9496402878 !$VOICE_t0.5107913669 $WHO_t2.7985611511) $INFLUENZA_SEP_t0.0359712230 $TN_t0.0791366906 $TYPE_SCHEDULING_t0.0287769784 $UCINATIONS_DENIES_t0.0503597122 $VACCINE_PNEUMOCOCCAL_t0.0359712230 $VITALS_HT_t0.0719424460 $VITALS_PULSE_t0.3597122302 $WANT_GO_t0.0287769784 $WEARS_t0.1294964029 $WENT_OUT_t0.0791366906 $WHOLE_t0.0719424460 $WITH_INSPIRATION_t0.0287769784 $WORK_RELEASE_t0.0287769784 $WORRY_t0.0503597122) !$HEALING_WELL_t0.0431654676 !$MG_TAK_t0.0287769784 !$PROCEDURE_PRACTITIONER_t0.0503597122) $INTERVIEWED_t0.0863309353) 
1 or(and(or(and(or($STEP_t0.3237410072 $VIEW_t0.6762589928) !$FAX_t0.2949640288 !$WT_KG_t0.9856115108) and($UNTIL_t0.9496402878 !$VOICE_t0.5107913669 $WHO_t2.7985611511) $INTERVIEWED_t0.0863309353 $TN_t0.0791366906 $TYPE_SCHEDULING_t0.0287769784 $UCINATIONS_DENIES_t0.0503597122 $VACCINE_PNEUMOCOCCAL_t0.0359712230 $VITALS_HT_t0.0719424460 $VITALS_PULSE_t0.3597122302 $WANT_GO_t0.0287769784 $WEARS_t0.1294964029 $WENT_OUT_t0.0791366906 $WHOLE_t0.0719424460 $WITH_INSPIRATION_t0.0287769784 $WORK_RELEASE_t0.0287769784 $WORRY_t0.0503597122) !$HEALING_WELL_t0.0431654676 !$MG_TAK_t0.0287769784 !$PROCEDURE_PRACTITIONER_t0.0503597122) $INFLUENZA_SEP_t0.0359712230) 
1 and(or(and(or(and(or($STEP_t0.3237410072 $VIEW_t0.6762589928) !$FAX_t0.2949640288 !$WT_KG_t0.9856115108) and($UNTIL_t0.9496402878 !$VOICE_t0.5107913669 $WHO_t2.7985611511) $INTERVIEWED_t0.0863309353 $TN_t0.0791366906 $TYPE_SCHEDULING_t0.0287769784 $UCINATIONS_DENIES_t0.0503597122 $VACCINE_PNEUMOCOCCAL_t0.0359712230 $VITALS_HT_t0.0719424460 $VITALS_PULSE_t0.3597122302 $WANT_GO_t0.0287769784 $WEARS_t0.1294964029 $WENT_OUT_t0.0791366906 $WHOLE_t0.0719424460 $WITH_INSPIRATION_t0.0287769784 $WORK_RELEASE_t0.0287769784 $WORRY_t0.0503597122) !$HEALING_WELL_t0.0431654676 !$MG_TAK_t0.0287769784) $INFLUENZA_SEP_t0.0359712230) !$PROCEDURE_PRACTITIONER_t0.0503597122) 
1 and(or(and(or(and(or($STEP_t0.3237410072 $VIEW_t0.6762589928) !$FAX_t0.2949640288 !$WT_KG_t0.9856115108) and($UNTIL_t0.9496402878 !$VOICE_t0.5107913669 $WHO_t2.7985611511) $INTERVIEWED_t0.0863309353 $TN_t0.0791366906 $TYPE_SCHEDULING_t0.0287769784 $UCINATIONS_DENIES_t0.0503597122 $VACCINE_PNEUMOCOCCAL_t0.0359712230 $VITALS_HT_t0.0719424460 $VITALS_PULSE_t0.3597122302 $WANT_GO_t0.0287769784 $WEARS_t0.1294964029 $WENT_OUT_t0.0791366906 $WHOLE_t0.0719424460 $WITH_INSPIRATION_t0.0287769784 $WORK_RELEASE_t0.0287769784 $WORRY_t0.0503597122) !$HEALING_WELL_t0.0431654676 !$PROCEDURE_PRACTITIONER_t0.0503597122) $INFLUENZA_SEP_t0.0359712230) !$MG_TAK_t0.0287769784) 
1 and(or(and(or(and(or($STEP_t0.3237410072 $VIEW_t0.6762589928) !$FAX_t0.2949640288 !$WT_KG_t0.9856115108) and($UNTIL_t0.9496402878 !$VOICE_t0.5107913669 $WHO_t2.7985611511) $INTERVIEWED_t0.0863309353 $TN_t0.0791366906 $TYPE_SCHEDULING_t0.0287769784 $UCINATIONS_DENIES_t0.0503597122 $VACCINE_PNEUMOCOCCAL_t0.0359712230 $VITALS_HT_t0.0719424460 $VITALS_PULSE_t0.3597122302 $WANT_GO_t0.0287769784 $WEARS_t0.1294964029 $WENT_OUT_t0.0791366906 $WHOLE_t0.0719424460 $WITH_INSPIRATION_t0.0287769784 $WORK_RELEASE_t0.0287769784 $WORRY_t0.0503597122) !$MG_TAK_t0.0287769784) $INFLUENZA_SEP_t0.0359712230) !$HEALING_WELL_t0.0431654676 !$PROCEDURE_PRACTITIONER_t0.0503597122) 
1 and(or(and(or(and(or($STEP_t0.3237410072 $VIEW_t0.6762589928) !$FAX_t0.2949640288 !$WT_KG_t0.9856115108) and($UNTIL_t0.9496402878 !$VOICE_t0.5107913669 $WHO_t2.7985611511) $INTERVIEWED_t0.0863309353 $TN_t0.0791366906 $TYPE_SCHEDULING_t0.0287769784 $UCINATIONS_DENIES_t0.0503597122 $VACCINE_PNEUMOCOCCAL_t0.0359712230 $VITALS_HT_t0.0719424460 $VITALS_PULSE_t0.3597122302 $WANT_GO_t0.0287769784 $WEARS_t0.1294964029 $WENT_OUT_t0.0791366906 $WHOLE_t0.0719424460 $WITH_INSPIRATION_t0.0287769784 $WORK_RELEASE_t0.0287769784 $WORRY_t0.0503597122) !$MG_TAK_t0.0287769784 !$PROCEDURE_PRACTITIONER_t0.0503597122) $INFLUENZA_SEP_t0.0359712230) !$HEALING_WELL_t0.0431654676) 
1 or(and(or(and(or(and(or($STEP_t0.3237410072 $VIEW_t0.6762589928) !$FAX_t0.2949640288 !$WT_KG_t0.9856115108) and($UNTIL_t0.9496402878 !$VOICE_t0.5107913669 $WHO_t2.7985611511) $TN_t0.0791366906 $TYPE_SCHEDULING_t0.0287769784 $UCINATIONS_DENIES_t0.0503597122 $VACCINE_PNEUMOCOCCAL_t0.0359712230 $VITALS_HT_t0.0719424460 $VITALS_PULSE_t0.3597122302 $WANT_GO_t0.0287769784 $WEARS_t0.1294964029 $WENT_OUT_t0.0791366906 $WHOLE_t0.0719424460 $WITH_INSPIRATION_t0.0287769784 $WORK_RELEASE_t0.0287769784 $WORRY_t0.0503597122) !$MG_TAK_t0.0287769784 !$PROCEDURE_PRACTITIONER_t0.0503597122) $INFLUENZA_SEP_t0.0359712230) !$HEALING_WELL_t0.0431654676) $INTERVIEWED_t0.0863309353) 
1 and(or(and(or($BRAIN_t0.2589928058 $STEP_t0.3237410072 $VIEW_t0.6762589928) !$FAX_t0.2949640288 !$WT_KG_t0.9856115108) and($UNTIL_t0.9496402878 !$VOICE_t0.5107913669 $WHO_t2.7985611511) $INFLUENZA_SEP_t0.0359712230 $INTERVIEWED_t0.0863309353 $TN_t0.0791366906 $TYPE_SCHEDULING_t0.0287769784 $UCINATIONS_DENIES_t0.0503597122 $VACCINE_PNEUMOCOCCAL_t0.0359712230 $VITALS_HT_t0.0719424460 $VITALS_PULSE_t0.3597122302 $WANT_GO_t0.0287769784 $WEARS_t0.1294964029 $WENT_OUT_t0.0791366906 $WHOLE_t0.0719424460 $WITH_INSPIRATION_t0.0287769784 $WORK_RELEASE_t0.0287769784 $WORRY_t0.0503597122) !$HEALING_WELL_t0.0431654676 !$MG_TAK_t0.0287769784 !$PROCEDURE_PRACTITIONER_t0.0503597122) 
1 and(or(and(or($DATE_JUN_t0.2877697842 $STEP_t0.3237410072 $VIEW_t0.6762589928) !$FAX_t0.2949640288 !$WT_KG_t0.9856115108) and($UNTIL_t0.9496402878 !$VOICE_t0.5107913669 $WHO_t2.7985611511) $INFLUENZA_SEP_t0.0359712230 $INTERVIEWED_t0.0863309353 $TN_t0.0791366906 $TYPE_SCHEDULING_t0.0287769784 $UCINATIONS_DENIES_t0.0503597122 $VACCINE_PNEUMOCOCCAL_t0.0359712230 $VITALS_HT_t0.0719424460 $VITALS_PULSE_t0.3597122302 $WANT_GO_t0.0287769784 $WEARS_t0.1294964029 $WENT_OUT_t0.0791366906 $WHOLE_t0.0719424460 $WITH_INSPIRATION_t0.0287769784 $WORK_RELEASE_t0.0287769784 $WORRY_t0.0503597122) !$HEALING_WELL_t0.0431654676 !$MG_TAK_t0.0287769784 !$PROCEDURE_PRACTITIONER_t0.0503597122) 
1 or(and(or(and(or($RESCHEDULED_t0.3309352518 $VETS_t0.6402877698) !$WELL_t3.5899280576) and($VIEW_t0.6762589928 $WOULD_t3.4172661871) $STEP_t0.3237410072 $SWELLING_NOTED_t0.0575539568 $TYPE_SCHEDULING_t0.0287769784 $UPPER_CHEST_t0.1726618705 $VACCINE_PNEUMOCOCCAL_t0.0359712230 $VITALS_HT_t0.0719424460 $VITALS_PULSE_t0.3597122302 $WEARS_t0.1294964029 $WEEK_NOTICE_t0.0575539568 $WENT_OUT_t0.0791366906 $WHOLE_t0.0719424460 $WITH_INSPIRATION_t0.0287769784 $WORK_RELEASE_t0.0287769784 $WRITERS_t0.0359712230 $YARD_t0.0359712230 $ZONE_t0.0359712230) !$HEALING_WELL_t0.0431654676 !$INPATIENT_REMOTE_t0.1294964029 !$MG_TAK_t0.0287769784 !$TREATMENT_OBTAINING_t0.0431654676) $TABLET_ONCE_t0.1366906475 $TN_t0.0791366906) 
1 and(or(and(or(and(or($RESCHEDULED_t0.3309352518 $VETS_t0.6402877698) !$WELL_t3.5899280576) and($VIEW_t0.6762589928 $WOULD_t3.4172661871) $STEP_t0.3237410072 $SWELLING_NOTED_t0.0575539568 $TYPE_SCHEDULING_t0.0287769784 $UPPER_CHEST_t0.1726618705 $VACCINE_PNEUMOCOCCAL_t0.0359712230 $VITALS_HT_t0.0719424460 $VITALS_PULSE_t0.3597122302 $WEARS_t0.1294964029 $WEEK_NOTICE_t0.0575539568 $WENT_OUT_t0.0791366906 $WHOLE_t0.0719424460 $WITH_INSPIRATION_t0.0287769784 $WORK_RELEASE_t0.0287769784 $WRITERS_t0.0359712230 $YARD_t0.0359712230 $ZONE_t0.0359712230) !$HEALING_WELL_t0.0431654676 !$INPATIENT_REMOTE_t0.1294964029 !$MG_TAK_t0.0287769784) $TABLET_ONCE_t0.1366906475 $TN_t0.0791366906) !$TREATMENT_OBTAINING_t0.0431654676) 
1 and(or(and(or(and(or($RESCHEDULED_t0.3309352518 $VETS_t0.6402877698) !$WELL_t3.5899280576) and($VIEW_t0.6762589928 $WOULD_t3.4172661871) $STEP_t0.3237410072 $SWELLING_NOTED_t0.0575539568 $TYPE_SCHEDULING_t0.0287769784 $UPPER_CHEST_t0.1726618705 $VACCINE_PNEUMOCOCCAL_t0.0359712230 $VITALS_HT_t0.0719424460 $VITALS_PULSE_t0.3597122302 $WEARS_t0.1294964029 $WEEK_NOTICE_t0.0575539568 $WENT_OUT_t0.0791366906 $WHOLE_t0.0719424460 $WITH_INSPIRATION_t0.0287769784 $WORK_RELEASE_t0.0287769784 $WRITERS_t0.0359712230 $YARD_t0.0359712230 $ZONE_t0.0359712230) !$HEALING_WELL_t0.0431654676 !$INPATIENT_REMOTE_t0.1294964029 !$TREATMENT_OBTAINING_t0.0431654676) $TABLET_ONCE_t0.1366906475 $TN_t0.0791366906) !$MG_TAK_t0.0287769784) 
1 and(or(and(or(and(or($RESCHEDULED_t0.3309352518 $VETS_t0.6402877698) !$WELL_t3.5899280576) and($VIEW_t0.6762589928 $WOULD_t3.4172661871) $STEP_t0.3237410072 $SWELLING_NOTED_t0.0575539568 $TYPE_SCHEDULING_t0.0287769784 $UPPER_CHEST_t0.1726618705 $VACCINE_PNEUMOCOCCAL_t0.0359712230 $VITALS_HT_t0.0719424460 $VITALS_PULSE_t0.3597122302 $WEARS_t0.1294964029 $WEEK_NOTICE_t0.0575539568 $WENT_OUT_t0.0791366906 $WHOLE_t0.0719424460 $WITH_INSPIRATION_t0.0287769784 $WORK_RELEASE_t0.0287769784 $WRITERS_t0.0359712230 $YARD_t0.0359712230 $ZONE_t0.0359712230) !$HEALING_WELL_t0.0431654676 !$MG_TAK_t0.0287769784) $TABLET_ONCE_t0.1366906475 $TN_t0.0791366906) !$INPATIENT_REMOTE_t0.1294964029 !$TREATMENT_OBTAINING_t0.0431654676) 
1 and(or(and(or(and(or($RESCHEDULED_t0.3309352518 $VETS_t0.6402877698) !$WELL_t3.5899280576) and($VIEW_t0.6762589928 $WOULD_t3.4172661871) $STEP_t0.3237410072 $SWELLING_NOTED_t0.0575539568 $TYPE_SCHEDULING_t0.0287769784 $UPPER_CHEST_t0.1726618705 $VACCINE_PNEUMOCOCCAL_t0.0359712230 $VITALS_HT_t0.0719424460 $VITALS_PULSE_t0.3597122302 $WEARS_t0.1294964029 $WEEK_NOTICE_t0.0575539568 $WENT_OUT_t0.0791366906 $WHOLE_t0.0719424460 $WITH_INSPIRATION_t0.0287769784 $WORK_RELEASE_t0.0287769784 $WRITERS_t0.0359712230 $YARD_t0.0359712230 $ZONE_t0.0359712230) !$HEALING_WELL_t0.0431654676 !$MG_TAK_t0.0287769784 !$TREATMENT_OBTAINING_t0.0431654676) $TABLET_ONCE_t0.1366906475 $TN_t0.0791366906) !$INPATIENT_REMOTE_t0.1294964029) 
1 and(or(and(or(and(or($RESCHEDULED_t0.3309352518 $VETS_t0.6402877698) !$WELL_t3.5899280576) and($VIEW_t0.6762589928 $WOULD_t3.4172661871) $STEP_t0.3237410072 $SWELLING_NOTED_t0.0575539568 $TYPE_SCHEDULING_t0.0287769784 $UPPER_CHEST_t0.1726618705 $VACCINE_PNEUMOCOCCAL_t0.0359712230 $VITALS_HT_t0.0719424460 $VITALS_PULSE_t0.3597122302 $WEARS_t0.1294964029 $WEEK_NOTICE_t0.0575539568 $WENT_OUT_t0.0791366906 $WHOLE_t0.0719424460 $WITH_INSPIRATION_t0.0287769784 $WORK_RELEASE_t0.0287769784 $WRITERS_t0.0359712230 $YARD_t0.0359712230 $ZONE_t0.0359712230) !$INPATIENT_REMOTE_t0.1294964029 !$MG_TAK_t0.0287769784 !$TREATMENT_OBTAINING_t0.0431654676) $TABLET_ONCE_t0.1366906475 $TN_t0.0791366906) !$HEALING_WELL_t0.0431654676) 
1 or(and(or(and(or(and(or($RESCHEDULED_t0.3309352518 $VETS_t0.6402877698) !$WELL_t3.5899280576) and($VIEW_t0.6762589928 $WOULD_t3.4172661871) $STEP_t0.3237410072 $SWELLING_NOTED_t0.0575539568 $TYPE_SCHEDULING_t0.0287769784 $UPPER_CHEST_t0.1726618705 $VACCINE_PNEUMOCOCCAL_t0.0359712230 $VITALS_HT_t0.0719424460 $VITALS_PULSE_t0.3597122302 $WEARS_t0.1294964029 $WEEK_NOTICE_t0.0575539568 $WENT_OUT_t0.0791366906 $WHOLE_t0.0719424460 $WITH_INSPIRATION_t0.0287769784 $WORK_RELEASE_t0.0287769784 $WRITERS_t0.0359712230 $YARD_t0.0359712230 $ZONE_t0.0359712230) !$HEALING_WELL_t0.0431654676 !$MG_TAK_t0.0287769784) $TN_t0.0791366906) !$INPATIENT_REMOTE_t0.1294964029 !$TREATMENT_OBTAINING_t0.0431654676) $TABLET_ONCE_t0.1366906475) 
1 or(and(or(and(or(and(or($RESCHEDULED_t0.3309352518 $VETS_t0.6402877698) !$WELL_t3.5899280576) and($VIEW_t0.6762589928 $WOULD_t3.4172661871) $STEP_t0.3237410072 $SWELLING_NOTED_t0.0575539568 $TYPE_SCHEDULING_t0.0287769784 $UPPER_CHEST_t0.1726618705 $VACCINE_PNEUMOCOCCAL_t0.0359712230 $VITALS_HT_t0.0719424460 $VITALS_PULSE_t0.3597122302 $WEARS_t0.1294964029 $WEEK_NOTICE_t0.0575539568 $WENT_OUT_t0.0791366906 $WHOLE_t0.0719424460 $WITH_INSPIRATION_t0.0287769784 $WORK_RELEASE_t0.0287769784 $WRITERS_t0.0359712230 $YARD_t0.0359712230 $ZONE_t0.0359712230) !$HEALING_WELL_t0.0431654676 !$MG_TAK_t0.0287769784 !$TREATMENT_OBTAINING_t0.0431654676) $TN_t0.0791366906) !$INPATIENT_REMOTE_t0.1294964029) $TABLET_ONCE_t0.1366906475) 
1 or(and(or(and(or(and(or($RESCHEDULED_t0.3309352518 $VETS_t0.6402877698) !$WELL_t3.5899280576) and($VIEW_t0.6762589928 $WOULD_t3.4172661871) $STEP_t0.3237410072 $SWELLING_NOTED_t0.0575539568 $TYPE_SCHEDULING_t0.0287769784 $UPPER_CHEST_t0.1726618705 $VACCINE_PNEUMOCOCCAL_t0.0359712230 $VITALS_HT_t0.0719424460 $VITALS_PULSE_t0.3597122302 $WEARS_t0.1294964029 $WEEK_NOTICE_t0.0575539568 $WENT_OUT_t0.0791366906 $WHOLE_t0.0719424460 $WITH_INSPIRATION_t0.0287769784 $WORK_RELEASE_t0.0287769784 $WRITERS_t0.0359712230 $YARD_t0.0359712230 $ZONE_t0.0359712230) !$MG_TAK_t0.0287769784 !$TREATMENT_OBTAINING_t0.0431654676) $TN_t0.0791366906) !$HEALING_WELL_t0.0431654676 !$INPATIENT_REMOTE_t0.1294964029) $TABLET_ONCE_t0.1366906475) 
1 and(or(and(or(and(or(and(or($RESCHEDULED_t0.3309352518 $VETS_t0.6402877698) !$WELL_t3.5899280576) and($VIEW_t0.6762589928 $WOULD_t3.4172661871) $STEP_t0.3237410072 $SWELLING_NOTED_t0.0575539568 $TYPE_SCHEDULING_t0.0287769784 $UPPER_CHEST_t0.1726618705 $VACCINE_PNEUMOCOCCAL_t0.0359712230 $VITALS_HT_t0.0719424460 $VITALS_PULSE_t0.3597122302 $WEARS_t0.1294964029 $WEEK_NOTICE_t0.0575539568 $WENT_OUT_t0.0791366906 $WHOLE_t0.0719424460 $WITH_INSPIRATION_t0.0287769784 $WORK_RELEASE_t0.0287769784 $WRITERS_t0.0359712230 $YARD_t0.0359712230 $ZONE_t0.0359712230) !$HEALING_WELL_t0.0431654676 !$MG_TAK_t0.0287769784) $TN_t0.0791366906) !$INPATIENT_REMOTE_t0.1294964029) $TABLET_ONCE_t0.1366906475) !$TREATMENT_OBTAINING_t0.0431654676) 
1 or(and(or(and(!$HELP_t1.3812949640 !$MEETING_t0.4964028777 !$TALK_t0.5035971223) $ASKED_IF_t0.2949640288 $SO_t1.9208633094) or(and($WHO_t2.7985611511 $WOULD_BE_t0.8992805755) $PURCHASED_t0.0359712230 $RESCHEDULED_t0.3309352518 $STEP_t0.3237410072 $UCINATIONS_DENIES_t0.0503597122 $UNSTEADY_t0.0575539568 $USAGE_t0.0935251799 $VITALS_PULSE_t0.3597122302 $WAS_SCREENED_t0.1151079137 $WEAPONS_t0.0503597122 $WEIGH_DAILY_t0.0503597122 $WHEN_START_t0.2446043165 $WHO_PRESENTS_t0.2517985612 $WITH_INSPIRATION_t0.0287769784 $WORK_t2.9496402878 $WORRY_t0.0503597122 $WORSENING_t0.2877697842) !$OR_MILK_t0.0575539568 !$OTHER_OCULAR_t0.0431654676 !$TREATMENT_OBTAINING_t0.0431654676) $MOUTH_ONCE_t0.1726618705 $TN_t0.0791366906 $VITALS_HT_t0.0719424460) 
1 or(and(or(and(!$HELP_t1.3812949640 !$MEETING_t0.4964028777 !$TALK_t0.5035971223) $ASKED_IF_t0.2949640288 $SO_t1.9208633094) or(and($WHO_t2.7985611511 $WOULD_BE_t0.8992805755) $RESCHEDULED_t0.3309352518 $STEP_t0.3237410072 $UCINATIONS_DENIES_t0.0503597122 $UNSTEADY_t0.0575539568 $USAGE_t0.0935251799 $VITALS_PULSE_t0.3597122302 $WAS_SCREENED_t0.1151079137 $WEAPONS_t0.0503597122 $WEIGH_DAILY_t0.0503597122 $WHEN_START_t0.2446043165 $WHO_PRESENTS_t0.2517985612 $WITH_INSPIRATION_t0.0287769784 $WORK_t2.9496402878 $WORRY_t0.0503597122 $WORSENING_t0.2877697842) !$OR_MILK_t0.0575539568 !$OTHER_OCULAR_t0.0431654676 !$TREATMENT_OBTAINING_t0.0431654676) $MOUTH_ONCE_t0.1726618705 $PURCHASED_t0.0359712230 $TN_t0.0791366906 $VITALS_HT_t0.0719424460) 
1 and(or(and(or(and(!$HELP_t1.3812949640 !$MEETING_t0.4964028777 !$TALK_t0.5035971223) $ASKED_IF_t0.2949640288 $SO_t1.9208633094) or(and($WHO_t2.7985611511 $WOULD_BE_t0.8992805755) $PURCHASED_t0.0359712230 $RESCHEDULED_t0.3309352518 $STEP_t0.3237410072 $UCINATIONS_DENIES_t0.0503597122 $UNSTEADY_t0.0575539568 $USAGE_t0.0935251799 $VITALS_PULSE_t0.3597122302 $WAS_SCREENED_t0.1151079137 $WEAPONS_t0.0503597122 $WEIGH_DAILY_t0.0503597122 $WHEN_START_t0.2446043165 $WHO_PRESENTS_t0.2517985612 $WITH_INSPIRATION_t0.0287769784 $WORK_t2.9496402878 $WORRY_t0.0503597122 $WORSENING_t0.2877697842) !$OR_MILK_t0.0575539568 !$OTHER_OCULAR_t0.0431654676) $MOUTH_ONCE_t0.1726618705 $TN_t0.0791366906 $VITALS_HT_t0.0719424460) !$TREATMENT_OBTAINING_t0.0431654676) 
1 and(or(and(or(and(!$HELP_t1.3812949640 !$MEETING_t0.4964028777 !$TALK_t0.5035971223) $ASKED_IF_t0.2949640288 $SO_t1.9208633094) or(and($WHO_t2.7985611511 $WOULD_BE_t0.8992805755) $PURCHASED_t0.0359712230 $RESCHEDULED_t0.3309352518 $STEP_t0.3237410072 $UCINATIONS_DENIES_t0.0503597122 $UNSTEADY_t0.0575539568 $USAGE_t0.0935251799 $VITALS_PULSE_t0.3597122302 $WAS_SCREENED_t0.1151079137 $WEAPONS_t0.0503597122 $WEIGH_DAILY_t0.0503597122 $WHEN_START_t0.2446043165 $WHO_PRESENTS_t0.2517985612 $WITH_INSPIRATION_t0.0287769784 $WORK_t2.9496402878 $WORRY_t0.0503597122 $WORSENING_t0.2877697842) !$OR_MILK_t0.0575539568 !$TREATMENT_OBTAINING_t0.0431654676) $MOUTH_ONCE_t0.1726618705 $TN_t0.0791366906 $VITALS_HT_t0.0719424460) !$OTHER_OCULAR_t0.0431654676) 
1 and(or(and(or(and(!$HELP_t1.3812949640 !$MEETING_t0.4964028777 !$TALK_t0.5035971223) $ASKED_IF_t0.2949640288 $SO_t1.9208633094) or(and($WHO_t2.7985611511 $WOULD_BE_t0.8992805755) $RESCHEDULED_t0.3309352518 $STEP_t0.3237410072 $UCINATIONS_DENIES_t0.0503597122 $UNSTEADY_t0.0575539568 $USAGE_t0.0935251799 $VITALS_PULSE_t0.3597122302 $WAS_SCREENED_t0.1151079137 $WEAPONS_t0.0503597122 $WEIGH_DAILY_t0.0503597122 $WHEN_START_t0.2446043165 $WHO_PRESENTS_t0.2517985612 $WITH_INSPIRATION_t0.0287769784 $WORK_t2.9496402878 $WORRY_t0.0503597122 $WORSENING_t0.2877697842) !$OR_MILK_t0.0575539568) $MOUTH_ONCE_t0.1726618705 $PURCHASED_t0.0359712230 $TN_t0.0791366906 $VITALS_HT_t0.0719424460) !$OTHER_OCULAR_t0.0431654676 !$TREATMENT_OBTAINING_t0.0431654676) 
1 and(or(and(or(and(!$HELP_t1.3812949640 !$MEETING_t0.4964028777 !$TALK_t0.5035971223) $ASKED_IF_t0.2949640288 $SO_t1.9208633094) or(and($WHO_t2.7985611511 $WOULD_BE_t0.8992805755) $RESCHEDULED_t0.3309352518 $STEP_t0.3237410072 $UCINATIONS_DENIES_t0.0503597122 $UNSTEADY_t0.0575539568 $USAGE_t0.0935251799 $VITALS_PULSE_t0.3597122302 $WAS_SCREENED_t0.1151079137 $WEAPONS_t0.0503597122 $WEIGH_DAILY_t0.0503597122 $WHEN_START_t0.2446043165 $WHO_PRESENTS_t0.2517985612 $WITH_INSPIRATION_t0.0287769784 $WORK_t2.9496402878 $WORRY_t0.0503597122 $WORSENING_t0.2877697842) !$OR_MILK_t0.0575539568 !$OTHER_OCULAR_t0.0431654676) $MOUTH_ONCE_t0.1726618705 $PURCHASED_t0.0359712230 $TN_t0.0791366906 $VITALS_HT_t0.0719424460) !$TREATMENT_OBTAINING_t0.0431654676) 
1 and(or(and(or(and(!$HELP_t1.3812949640 !$MEETING_t0.4964028777 !$TALK_t0.5035971223) $ASKED_IF_t0.2949640288 $SO_t1.9208633094) or(and($WHO_t2.7985611511 $WOULD_BE_t0.8992805755) $RESCHEDULED_t0.3309352518 $STEP_t0.3237410072 $UCINATIONS_DENIES_t0.0503597122 $UNSTEADY_t0.0575539568 $USAGE_t0.0935251799 $VITALS_PULSE_t0.3597122302 $WAS_SCREENED_t0.1151079137 $WEAPONS_t0.0503597122 $WEIGH_DAILY_t0.0503597122 $WHEN_START_t0.2446043165 $WHO_PRESENTS_t0.2517985612 $WITH_INSPIRATION_t0.0287769784 $WORK_t2.9496402878 $WORRY_t0.0503597122 $WORSENING_t0.2877697842) !$OR_MILK_t0.0575539568 !$TREATMENT_OBTAINING_t0.0431654676) $MOUTH_ONCE_t0.1726618705 $PURCHASED_t0.0359712230 $TN_t0.0791366906 $VITALS_HT_t0.0719424460) !$OTHER_OCULAR_t0.0431654676) 
1 and(or(and(or(and(!$HELP_t1.3812949640 !$MEETING_t0.4964028777 !$TALK_t0.5035971223) $ASKED_IF_t0.2949640288 $SO_t1.9208633094) or(and($WHO_t2.7985611511 $WOULD_BE_t0.8992805755) $RESCHEDULED_t0.3309352518 $STEP_t0.3237410072 $UCINATIONS_DENIES_t0.0503597122 $UNSTEADY_t0.0575539568 $USAGE_t0.0935251799 $VITALS_PULSE_t0.3597122302 $WAS_SCREENED_t0.1151079137 $WEAPONS_t0.0503597122 $WEIGH_DAILY_t0.0503597122 $WHEN_START_t0.2446043165 $WHO_PRESENTS_t0.2517985612 $WITH_INSPIRATION_t0.0287769784 $WORK_t2.9496402878 $WORRY_t0.0503597122 $WORSENING_t0.2877697842) !$OTHER_OCULAR_t0.0431654676 !$TREATMENT_OBTAINING_t0.0431654676) $MOUTH_ONCE_t0.1726618705 $PURCHASED_t0.0359712230 $TN_t0.0791366906 $VITALS_HT_t0.0719424460) !$OR_MILK_t0.0575539568) 
1 or(and(or(and(or(and(!$HELP_t1.3812949640 !$MEETING_t0.4964028777 !$TALK_t0.5035971223) $ASKED_IF_t0.2949640288 $SO_t1.9208633094) or(and($WHO_t2.7985611511 $WOULD_BE_t0.8992805755) $RESCHEDULED_t0.3309352518 $STEP_t0.3237410072 $UCINATIONS_DENIES_t0.0503597122 $UNSTEADY_t0.0575539568 $USAGE_t0.0935251799 $VITALS_PULSE_t0.3597122302 $WAS_SCREENED_t0.1151079137 $WEAPONS_t0.0503597122 $WEIGH_DAILY_t0.0503597122 $WHEN_START_t0.2446043165 $WHO_PRESENTS_t0.2517985612 $WITH_INSPIRATION_t0.0287769784 $WORK_t2.9496402878 $WORRY_t0.0503597122 $WORSENING_t0.2877697842) !$OR_MILK_t0.0575539568 !$TREATMENT_OBTAINING_t0.0431654676) $MOUTH_ONCE_t0.1726618705 $PURCHASED_t0.0359712230 $VITALS_HT_t0.0719424460) !$OTHER_OCULAR_t0.0431654676) $TN_t0.0791366906) 
1 or(and(or(and(!$ACTION_t0.6402877698 $WHO_t2.7985611511 $WOULD_BE_t0.8992805755) $PURCHASED_t0.0359712230 $RESCHEDULED_t0.3309352518 $STEP_t0.3237410072 $UCINATIONS_DENIES_t0.0503597122 $UNSTEADY_t0.0575539568 $USAGE_t0.0935251799 $VITALS_PULSE_t0.3597122302 $WAS_SCREENED_t0.1151079137 $WEAPONS_t0.0503597122 $WEIGH_DAILY_t0.0503597122 $WHEN_START_t0.2446043165 $WHO_PRESENTS_t0.2517985612 $WITH_INSPIRATION_t0.0287769784 $WORK_t2.9496402878 $WORRY_t0.0503597122 $WORSENING_t0.2877697842) or(and(!$HELP_t1.3812949640 !$MEETING_t0.4964028777 !$TALK_t0.5035971223) $ASKED_IF_t0.2949640288 $SO_t1.9208633094) !$OR_MILK_t0.0575539568 !$OTHER_OCULAR_t0.0431654676 !$TREATMENT_OBTAINING_t0.0431654676) $MOUTH_ONCE_t0.1726618705 $TN_t0.0791366906 $VITALS_HT_t0.0719424460) 
1 or(and(or(and(or($STEP_t0.3237410072 $VERBALIZED_t1.1510791367) !$UNTIL_t0.9496402878) and($TRIAGE_t1.6690647482 !$WANTS_KNOW_t0.1079136691 $WHO_t2.7985611511) $MOUTH_FOUR_t0.3597122302 $NAPROXEN_MG_t0.1726618705 $OPERATIVE_ED_t0.0359712230 $TYPE_SCHEDULING_t0.0287769784 $VACCINE_PNEUMOCOCCAL_t0.0359712230 $VIEW_t0.6762589928 $VITALS_HT_t0.0719424460 $VITALS_PULSE_t0.3597122302 $WAS_SCREENED_t0.1151079137 $WEARS_t0.1294964029 $WEEKENDS_t0.0575539568 $WERE_GUARD_t0.0647482014 $WHOLE_t0.0719424460 $WITH_INSPIRATION_t0.0287769784) !$EXPECTED_BLOOD_t0.0503597122 !$MG_TAK_t0.0287769784) $TN_t0.0791366906) 
1 or(and(or(and(or($STEP_t0.3237410072 $VERBALIZED_t1.1510791367) !$UNTIL_t0.9496402878) and($TRIAGE_t1.6690647482 !$WANTS_KNOW_t0.1079136691 $WHO_t2.7985611511) $MOUTH_FOUR_t0.3597122302 $NAPROXEN_MG_t0.1726618705 $TYPE_SCHEDULING_t0.0287769784 $VACCINE_PNEUMOCOCCAL_t0.0359712230 $VIEW_t0.6762589928 $VITALS_HT_t0.0719424460 $VITALS_PULSE_t0.3597122302 $WAS_SCREENED_t0.1151079137 $WEARS_t0.1294964029 $WEEKENDS_t0.0575539568 $WERE_GUARD_t0.0647482014 $WHOLE_t0.0719424460 $WITH_INSPIRATION_t0.0287769784) !$EXPECTED_BLOOD_t0.0503597122 !$MG_TAK_t0.0287769784) $OPERATIVE_ED_t0.0359712230 $TN_t0.0791366906) 
1 or(and(or(and(or($STEP_t0.3237410072 $VERBALIZED_t1.1510791367) !$UNTIL_t0.9496402878) and($TRIAGE_t1.6690647482 !$WANTS_KNOW_t0.1079136691 $WHO_t2.7985611511) $NAPROXEN_MG_t0.1726618705 $TYPE_SCHEDULING_t0.0287769784 $VACCINE_PNEUMOCOCCAL_t0.0359712230 $VARDENAFIL_TAB_t0.1007194245 $VIEW_t0.6762589928 $VITALS_HT_t0.0719424460 $VITALS_PULSE_t0.3597122302 $WAS_SCREENED_t0.1151079137 $WEARS_t0.1294964029 $WEEKENDS_t0.0575539568 $WERE_GUARD_t0.0647482014 $WHOLE_t0.0719424460 $WITH_INSPIRATION_t0.0287769784) !$EXPECTED_BLOOD_t0.0503597122 !$MG_TAK_t0.0287769784) $OPERATIVE_ED_t0.0359712230 $TN_t0.0791366906) 
1 or(and(or(and(or($STEP_t0.3237410072 $VERBALIZED_t1.1510791367) !$UNTIL_t0.9496402878) and($TRIAGE_t1.6690647482 !$WANTS_KNOW_t0.1079136691 $WHO_t2.7985611511) $NAPROXEN_MG_t0.1726618705 $TYPE_SCHEDULING_t0.0287769784 $VACCINE_PNEUMOCOCCAL_t0.0359712230 $VIEW_t0.6762589928 $VITALS_HT_t0.0719424460 $VITALS_PULSE_t0.3597122302 $WAS_SCREENED_t0.1151079137 $WEARS_t0.1294964029 $WEEKENDS_t0.0575539568 $WERE_GUARD_t0.0647482014 $WHOLE_t0.0719424460 $WITH_INSPIRATION_t0.0287769784) !$EXPECTED_BLOOD_t0.0503597122 !$MG_TAK_t0.0287769784) $MOUTH_FOUR_t0.3597122302 $OPERATIVE_ED_t0.0359712230 $TN_t0.0791366906) 
1 or(and(or(and(or($STEP_t0.3237410072 $VERBALIZED_t1.1510791367) !$UNTIL_t0.9496402878) and($TRIAGE_t1.6690647482 !$WANTS_KNOW_t0.1079136691 $WHO_t2.7985611511) $TYPE_SCHEDULING_t0.0287769784 $VACCINE_PNEUMOCOCCAL_t0.0359712230 $VARDENAFIL_TAB_t0.1007194245 $VIEW_t0.6762589928 $VITALS_HT_t0.0719424460 $VITALS_PULSE_t0.3597122302 $WAS_SCREENED_t0.1151079137 $WEARS_t0.1294964029 $WEEKENDS_t0.0575539568 $WERE_GUARD_t0.0647482014 $WHOLE_t0.0719424460 $WITH_INSPIRATION_t0.0287769784) !$EXPECTED_BLOOD_t0.0503597122 !$MG_TAK_t0.0287769784) $NAPROXEN_MG_t0.1726618705 $OPERATIVE_ED_t0.0359712230 $TN_t0.0791366906) 
1 and(or(and(or(and(or($STEP_t0.3237410072 $VERBALIZED_t1.1510791367) !$UNTIL_t0.9496402878) and($TRIAGE_t1.6690647482 !$WANTS_KNOW_t0.1079136691 $WHO_t2.7985611511) $MOUTH_FOUR_t0.3597122302 $NAPROXEN_MG_t0.1726618705 $OPERATIVE_ED_t0.0359712230 $TYPE_SCHEDULING_t0.0287769784 $VACCINE_PNEUMOCOCCAL_t0.0359712230 $VIEW_t0.6762589928 $VITALS_HT_t0.0719424460 $VITALS_PULSE_t0.3597122302 $WAS_SCREENED_t0.1151079137 $WEARS_t0.1294964029 $WEEKENDS_t0.0575539568 $WERE_GUARD_t0.0647482014 $WHOLE_t0.0719424460 $WITH_INSPIRATION_t0.0287769784) !$EXPECTED_BLOOD_t0.0503597122) $TN_t0.0791366906) !$MG_TAK_t0.0287769784) 
1 and(or(and(or(and(or($STEP_t0.3237410072 $VERBALIZED_t1.1510791367) !$UNTIL_t0.9496402878) and($TRIAGE_t1.6690647482 !$WANTS_KNOW_t0.1079136691 $WHO_t2.7985611511) $MOUTH_FOUR_t0.3597122302 $NAPROXEN_MG_t0.1726618705 $OPERATIVE_ED_t0.0359712230 $TYPE_SCHEDULING_t0.0287769784 $VACCINE_PNEUMOCOCCAL_t0.0359712230 $VIEW_t0.6762589928 $VITALS_HT_t0.0719424460 $VITALS_PULSE_t0.3597122302 $WAS_SCREENED_t0.1151079137 $WEARS_t0.1294964029 $WEEKENDS_t0.0575539568 $WERE_GUARD_t0.0647482014 $WHOLE_t0.0719424460 $WITH_INSPIRATION_t0.0287769784) !$MG_TAK_t0.0287769784) $TN_t0.0791366906) !$EXPECTED_BLOOD_t0.0503597122) 
1 and(or(and(or(and(or($STEP_t0.3237410072 $VERBALIZED_t1.1510791367) !$UNTIL_t0.9496402878) and($TRIAGE_t1.6690647482 !$WANTS_KNOW_t0.1079136691 $WHO_t2.7985611511) $MOUTH_FOUR_t0.3597122302 $NAPROXEN_MG_t0.1726618705 $TYPE_SCHEDULING_t0.0287769784 $VACCINE_PNEUMOCOCCAL_t0.0359712230 $VIEW_t0.6762589928 $VITALS_HT_t0.0719424460 $VITALS_PULSE_t0.3597122302 $WAS_SCREENED_t0.1151079137 $WEARS_t0.1294964029 $WEEKENDS_t0.0575539568 $WERE_GUARD_t0.0647482014 $WHOLE_t0.0719424460 $WITH_INSPIRATION_t0.0287769784) !$EXPECTED_BLOOD_t0.0503597122) $OPERATIVE_ED_t0.0359712230 $TN_t0.0791366906) !$MG_TAK_t0.0287769784) 
1 and(or(and(or(and(or($STEP_t0.3237410072 $VERBALIZED_t1.1510791367) !$UNTIL_t0.9496402878) and($TRIAGE_t1.6690647482 !$WANTS_KNOW_t0.1079136691 $WHO_t2.7985611511) $MOUTH_FOUR_t0.3597122302 $NAPROXEN_MG_t0.1726618705 $TYPE_SCHEDULING_t0.0287769784 $VACCINE_PNEUMOCOCCAL_t0.0359712230 $VIEW_t0.6762589928 $VITALS_HT_t0.0719424460 $VITALS_PULSE_t0.3597122302 $WAS_SCREENED_t0.1151079137 $WEARS_t0.1294964029 $WEEKENDS_t0.0575539568 $WERE_GUARD_t0.0647482014 $WHOLE_t0.0719424460 $WITH_INSPIRATION_t0.0287769784) !$MG_TAK_t0.0287769784) $OPERATIVE_ED_t0.0359712230 $TN_t0.0791366906) !$EXPECTED_BLOOD_t0.0503597122) 
1 and(or(and(or(and(or($STEP_t0.3237410072 $VERBALIZED_t1.1510791367) !$UNTIL_t0.9496402878) and($TRIAGE_t1.6690647482 !$WANTS_KNOW_t0.1079136691 $WHO_t2.7985611511) $NAPROXEN_MG_t0.1726618705 $TYPE_SCHEDULING_t0.0287769784 $VACCINE_PNEUMOCOCCAL_t0.0359712230 $VARDENAFIL_TAB_t0.1007194245 $VIEW_t0.6762589928 $VITALS_HT_t0.0719424460 $VITALS_PULSE_t0.3597122302 $WAS_SCREENED_t0.1151079137 $WEARS_t0.1294964029 $WEEKENDS_t0.0575539568 $WERE_GUARD_t0.0647482014 $WHOLE_t0.0719424460 $WITH_INSPIRATION_t0.0287769784) !$EXPECTED_BLOOD_t0.0503597122) $OPERATIVE_ED_t0.0359712230 $TN_t0.0791366906) !$MG_TAK_t0.0287769784) 
1 or(and(or(and(or($COMPLAINT_t3.6906474820 $TX_t0.7194244604) or($VERBALIZED_t1.1510791367 $WEIGHT_LOSS_t0.4388489209) !$WANTS_KNOW_t0.1079136691) and($STEP_t0.3237410072 !$THERE_t2.3812949640) $MOUTH_ONCE_t0.1726618705 $TN_t0.0791366906 $TYPE_SCHEDULING_t0.0287769784 $UNDER_SKIN_t0.0647482014 $UPPER_CHEST_t0.1726618705 $VACCINE_PNEUMOCOCCAL_t0.0359712230 $VIEW_t0.6762589928 $VITALS_HT_t0.0719424460 $VITALS_PULSE_t0.3597122302 $VOICES_t0.2158273381 $WEARS_t0.1294964029 $WENT_OUT_t0.0791366906 $WHOLE_t0.0719424460 $WITH_INSPIRATION_t0.0287769784 $WORRY_t0.0503597122) !$CONSENT_PRODUCTS_t0.0503597122 !$MG_TAK_t0.0287769784) $PASSED_OUT_t0.0719424460) 
1 or(and(or(and(or($COMPLAINT_t3.6906474820 $TX_t0.7194244604) or($VERBALIZED_t1.1510791367 $WEIGHT_LOSS_t0.4388489209) !$WANTS_KNOW_t0.1079136691) and($STEP_t0.3237410072 !$THERE_t2.3812949640) $TN_t0.0791366906 $TYPE_SCHEDULING_t0.0287769784 $UNDER_SKIN_t0.0647482014 $UPPER_CHEST_t0.1726618705 $VACCINE_PNEUMOCOCCAL_t0.0359712230 $VIEW_t0.6762589928 $VITALS_HT_t0.0719424460 $VITALS_PULSE_t0.3597122302 $VOICES_t0.2158273381 $WEARS_t0.1294964029 $WENT_OUT_t0.0791366906 $WHOLE_t0.0719424460 $WITH_INSPIRATION_t0.0287769784 $WORRY_t0.0503597122) !$CONSENT_PRODUCTS_t0.0503597122 !$MG_TAK_t0.0287769784) $MOUTH_ONCE_t0.1726618705 $PASSED_OUT_t0.0719424460) 
1 or(and(or(and(or($COMPLAINT_t3.6906474820 $TX_t0.7194244604) or($VERBALIZED_t1.1510791367 $WEIGHT_LOSS_t0.4388489209) !$WANTS_KNOW_t0.1079136691) and(or($MOUTH_ONCE_t0.1726618705 $STEP_t0.3237410072) !$THERE_t2.3812949640) $TN_t0.0791366906 $TYPE_SCHEDULING_t0.0287769784 $UNDER_SKIN_t0.0647482014 $UPPER_CHEST_t0.1726618705 $VACCINE_PNEUMOCOCCAL_t0.0359712230 $VIEW_t0.6762589928 $VITALS_HT_t0.0719424460 $VITALS_PULSE_t0.3597122302 $VOICES_t0.2158273381 $WEARS_t0.1294964029 $WENT_OUT_t0.0791366906 $WHOLE_t0.0719424460 $WITH_INSPIRATION_t0.0287769784 $WORRY_t0.0503597122) !$CONSENT_PRODUCTS_t0.0503597122 !$MG_TAK_t0.0287769784) $PASSED_OUT_t0.0719424460) 
1 or(and(or(and(or($COMPLAINT_t3.6906474820 $TX_t0.7194244604) or($VERBALIZED_t1.1510791367 $WEIGHT_LOSS_t0.4388489209) !$WANTS_KNOW_t0.1079136691) and(or($MOUTH_ONCE_t0.1726618705 $STEP_t0.3237410072) !$THERE_t2.3812949640) $TYPE_SCHEDULING_t0.0287769784 $UNDER_SKIN_t0.0647482014 $UPPER_CHEST_t0.1726618705 $VACCINE_PNEUMOCOCCAL_t0.0359712230 $VIEW_t0.6762589928 $VITALS_HT_t0.0719424460 $VITALS_PULSE_t0.3597122302 $VOICES_t0.2158273381 $WEARS_t0.1294964029 $WENT_OUT_t0.0791366906 $WHOLE_t0.0719424460 $WITH_INSPIRATION_t0.0287769784 $WORRY_t0.0503597122) !$CONSENT_PRODUCTS_t0.0503597122 !$MG_TAK_t0.0287769784) $PASSED_OUT_t0.0719424460 $TN_t0.0791366906) 
1 and(or(and(or(and(or($COMPLAINT_t3.6906474820 $TX_t0.7194244604) or($VERBALIZED_t1.1510791367 $WEIGHT_LOSS_t0.4388489209) !$WANTS_KNOW_t0.1079136691) and(or($MOUTH_ONCE_t0.1726618705 $STEP_t0.3237410072) !$THERE_t2.3812949640) $TN_t0.0791366906 $TYPE_SCHEDULING_t0.0287769784 $UNDER_SKIN_t0.0647482014 $UPPER_CHEST_t0.1726618705 $VACCINE_PNEUMOCOCCAL_t0.0359712230 $VIEW_t0.6762589928 $VITALS_HT_t0.0719424460 $VITALS_PULSE_t0.3597122302 $VOICES_t0.2158273381 $WEARS_t0.1294964029 $WENT_OUT_t0.0791366906 $WHOLE_t0.0719424460 $WITH_INSPIRATION_t0.0287769784 $WORRY_t0.0503597122) !$CONSENT_PRODUCTS_t0.0503597122) $PASSED_OUT_t0.0719424460) !$MG_TAK_t0.0287769784) 
1 and(or(and(or(and(or($COMPLAINT_t3.6906474820 $TX_t0.7194244604) or($VERBALIZED_t1.1510791367 $WEIGHT_LOSS_t0.4388489209) !$WANTS_KNOW_t0.1079136691) and(or($MOUTH_ONCE_t0.1726618705 $STEP_t0.3237410072) !$THERE_t2.3812949640) $TN_t0.0791366906 $TYPE_SCHEDULING_t0.0287769784 $UNDER_SKIN_t0.0647482014 $UPPER_CHEST_t0.1726618705 $VACCINE_PNEUMOCOCCAL_t0.0359712230 $VIEW_t0.6762589928 $VITALS_HT_t0.0719424460 $VITALS_PULSE_t0.3597122302 $VOICES_t0.2158273381 $WEARS_t0.1294964029 $WENT_OUT_t0.0791366906 $WHOLE_t0.0719424460 $WITH_INSPIRATION_t0.0287769784 $WORRY_t0.0503597122) !$MG_TAK_t0.0287769784) $PASSED_OUT_t0.0719424460) !$CONSENT_PRODUCTS_t0.0503597122) 
1 or(and(or(and(or($COMPLAINT_t3.6906474820 $TX_t0.7194244604) or($VERBALIZED_t1.1510791367 $WEIGHT_LOSS_t0.4388489209) !$ENTRY_t0.3597122302 !$WANTS_KNOW_t0.1079136691) and($STEP_t0.3237410072 !$THERE_t2.3812949640) $TN_t0.0791366906 $TYPE_SCHEDULING_t0.0287769784 $UNDER_SKIN_t0.0647482014 $UPPER_CHEST_t0.1726618705 $VACCINE_PNEUMOCOCCAL_t0.0359712230 $VIEW_t0.6762589928 $VITALS_HT_t0.0719424460 $VITALS_PULSE_t0.3597122302 $VOICES_t0.2158273381 $WEARS_t0.1294964029 $WENT_OUT_t0.0791366906 $WHOLE_t0.0719424460 $WITH_INSPIRATION_t0.0287769784 $WORRY_t0.0503597122) !$CONSENT_PRODUCTS_t0.0503597122 !$MG_TAK_t0.0287769784) $MOUTH_ONCE_t0.1726618705 $PASSED_OUT_t0.0719424460) 
1 or(and(or(and(or(and($PRESENTS_t1.3453237410 $TX_t0.7194244604) $COMPLAINT_t3.6906474820) or($VERBALIZED_t1.1510791367 $WEIGHT_LOSS_t0.4388489209) !$WANTS_KNOW_t0.1079136691) and($STEP_t0.3237410072 !$THERE_t2.3812949640) $TN_t0.0791366906 $TYPE_SCHEDULING_t0.0287769784 $UNDER_SKIN_t0.0647482014 $UPPER_CHEST_t0.1726618705 $VACCINE_PNEUMOCOCCAL_t0.0359712230 $VIEW_t0.6762589928 $VITALS_HT_t0.0719424460 $VITALS_PULSE_t0.3597122302 $VOICES_t0.2158273381 $WEARS_t0.1294964029 $WENT_OUT_t0.0791366906 $WHOLE_t0.0719424460 $WITH_INSPIRATION_t0.0287769784 $WORRY_t0.0503597122) !$CONSENT_PRODUCTS_t0.0503597122 !$MG_TAK_t0.0287769784) $MOUTH_ONCE_t0.1726618705 $PASSED_OUT_t0.0719424460) 
1 or(and(or(and(or(and(!$RESCHEDULED_t0.3309352518 $VERBALIZED_t1.1510791367) $WEIGHT_LOSS_t0.4388489209) or($COMPLAINT_t3.6906474820 $TX_t0.7194244604) !$WANTS_KNOW_t0.1079136691) and($STEP_t0.3237410072 !$THERE_t2.3812949640) $MOUTH_ONCE_t0.1726618705 $TN_t0.0791366906 $TYPE_SCHEDULING_t0.0287769784 $UNDER_SKIN_t0.0647482014 $UPPER_CHEST_t0.1726618705 $VACCINE_PNEUMOCOCCAL_t0.0359712230 $VIEW_t0.6762589928 $VITALS_HT_t0.0719424460 $VITALS_PULSE_t0.3597122302 $VOICES_t0.2158273381 $WEARS_t0.1294964029 $WENT_OUT_t0.0791366906 $WHOLE_t0.0719424460 $WITH_INSPIRATION_t0.0287769784 $WORRY_t0.0503597122) !$CONSENT_PRODUCTS_t0.0503597122 !$MG_TAK_t0.0287769784) $PASSED_OUT_t0.0719424460) 
1 or(and(or(and(or($ABLE_t2.2517985612 $COMPLAINT_t3.6906474820 $TX_t0.7194244604) or($VERBALIZED_t1.1510791367 $WEIGHT_LOSS_t0.4388489209) !$WANTS_KNOW_t0.1079136691) and(or($MOUTH_ONCE_t0.1726618705 $STEP_t0.3237410072) !$THERE_t2.3812949640) $TN_t0.0791366906 $TYPE_SCHEDULING_t0.0287769784 $UNDER_SKIN_t0.0647482014 $UPPER_CHEST_t0.1726618705 $VACCINE_PNEUMOCOCCAL_t0.0359712230 $VIEW_t0.6762589928 $VITALS_HT_t0.0719424460 $VITALS_PULSE_t0.3597122302 $VOICES_t0.2158273381 $WEARS_t0.1294964029 $WENT_OUT_t0.0791366906 $WHOLE_t0.0719424460 $WITH_INSPIRATION_t0.0287769784 $WORRY_t0.0503597122) !$CONSENT_PRODUCTS_t0.0503597122 !$MG_TAK_t0.0287769784) $PASSED_OUT_t0.0719424460) 
1 or(and(or(and($VERBALIZED_t1.1510791367 $WELL_t3.5899280576) and($VITALS_PULSE_t0.3597122302 !$VITALS_RESP_t0.1007194245 !$WELL_t3.5899280576) $COUGHING_t0.2805755396 $STEP_t0.3237410072 $TN_t0.0791366906 $TYPE_SCHEDULING_t0.0287769784 $VACCINE_PNEUMOCOCCAL_t0.0359712230 $VARDENAFIL_TAB_t0.1007194245 $VITALS_HT_t0.0719424460 $WEARS_t0.1294964029 $WEEK_NOTICE_t0.0575539568 $WENT_OUT_t0.0791366906 $WHOLE_t0.0719424460 $WHO_t2.7985611511 $WITH_INSPIRATION_t0.0287769784 $WORSENING_t0.2877697842 $WRONG_t0.1223021583) !$LIST_BELOW_t0.1294964029 !$NUMBER_NOVARTIS_t0.0359712230 !$NW_t0.0647482014 !$PERFUSION_t0.0935251799 !$SOME_NUMBNESS_t0.0287769784 !$TREATMENT_OBTAINING_t0.0431654676) and($RESCHEDULED_t0.3309352518 !$THOUGHT_t0.9568345324) $TABLET_ONCE_t0.1366906475) 
1 and(or(and(or(and($VERBALIZED_t1.1510791367 $WELL_t3.5899280576) and($VITALS_PULSE_t0.3597122302 !$VITALS_RESP_t0.1007194245 !$WELL_t3.5899280576) $COUGHING_t0.2805755396 $STEP_t0.3237410072 $TN_t0.0791366906 $TYPE_SCHEDULING_t0.0287769784 $VACCINE_PNEUMOCOCCAL_t0.0359712230 $VARDENAFIL_TAB_t0.1007194245 $VITALS_HT_t0.0719424460 $WEARS_t0.1294964029 $WEEK_NOTICE_t0.0575539568 $WENT_OUT_t0.0791366906 $WHOLE_t0.0719424460 $WHO_t2.7985611511 $WITH_INSPIRATION_t0.0287769784 $WORSENING_t0.2877697842 $WRONG_t0.1223021583) !$NUMBER_NOVARTIS_t0.0359712230 !$NW_t0.0647482014 !$PERFUSION_t0.0935251799 !$SOME_NUMBNESS_t0.0287769784 !$TREATMENT_OBTAINING_t0.0431654676) and($RESCHEDULED_t0.3309352518 !$THOUGHT_t0.9568345324) $TABLET_ONCE_t0.1366906475) !$LIST_BELOW_t0.1294964029) 
1 and(or(and(or(and($VERBALIZED_t1.1510791367 $WELL_t3.5899280576) and($VITALS_PULSE_t0.3597122302 !$VITALS_RESP_t0.1007194245 !$WELL_t3.5899280576) $COUGHING_t0.2805755396 $STEP_t0.3237410072 $TN_t0.0791366906 $TYPE_SCHEDULING_t0.0287769784 $VACCINE_PNEUMOCOCCAL_t0.0359712230 $VARDENAFIL_TAB_t0.1007194245 $VITALS_HT_t0.0719424460 $WEARS_t0.1294964029 $WEEK_NOTICE_t0.0575539568 $WENT_OUT_t0.0791366906 $WHOLE_t0.0719424460 $WHO_t2.7985611511 $WITH_INSPIRATION_t0.0287769784 $WORSENING_t0.2877697842 $WRONG_t0.1223021583) !$NUMBER_NOVARTIS_t0.0359712230 !$NW_t0.0647482014 !$SOME_NUMBNESS_t0.0287769784 !$TREATMENT_OBTAINING_t0.0431654676) and($RESCHEDULED_t0.3309352518 !$THOUGHT_t0.9568345324) $TABLET_ONCE_t0.1366906475) !$LIST_BELOW_t0.1294964029 !$PERFUSION_t0.0935251799) 
1 and(or(and(or(and($VERBALIZED_t1.1510791367 $WELL_t3.5899280576) and($VITALS_PULSE_t0.3597122302 !$VITALS_RESP_t0.1007194245 !$WELL_t3.5899280576) $COUGHING_t0.2805755396 $STEP_t0.3237410072 $TN_t0.0791366906 $TYPE_SCHEDULING_t0.0287769784 $VACCINE_PNEUMOCOCCAL_t0.0359712230 $VARDENAFIL_TAB_t0.1007194245 $VITALS_HT_t0.0719424460 $WEARS_t0.1294964029 $WEEK_NOTICE_t0.0575539568 $WENT_OUT_t0.0791366906 $WHOLE_t0.0719424460 $WHO_t2.7985611511 $WITH_INSPIRATION_t0.0287769784 $WORSENING_t0.2877697842 $WRONG_t0.1223021583) !$NW_t0.0647482014 !$SOME_NUMBNESS_t0.0287769784 !$TREATMENT_OBTAINING_t0.0431654676) and($RESCHEDULED_t0.3309352518 !$THOUGHT_t0.9568345324) $TABLET_ONCE_t0.1366906475) !$LIST_BELOW_t0.1294964029 !$NUMBER_NOVARTIS_t0.0359712230 !$PERFUSION_t0.0935251799) 
1 or(and(or(and(or(and($VERBALIZED_t1.1510791367 $WELL_t3.5899280576) and($VITALS_PULSE_t0.3597122302 !$VITALS_RESP_t0.1007194245 !$WELL_t3.5899280576) $COUGHING_t0.2805755396 $STEP_t0.3237410072 $TN_t0.0791366906 $TYPE_SCHEDULING_t0.0287769784 $VACCINE_PNEUMOCOCCAL_t0.0359712230 $VARDENAFIL_TAB_t0.1007194245 $VITALS_HT_t0.0719424460 $WEARS_t0.1294964029 $WEEK_NOTICE_t0.0575539568 $WENT_OUT_t0.0791366906 $WHOLE_t0.0719424460 $WHO_t2.7985611511 $WITH_INSPIRATION_t0.0287769784 $WORSENING_t0.2877697842 $WRONG_t0.1223021583) !$NUMBER_NOVARTIS_t0.0359712230 !$NW_t0.0647482014) $TABLET_ONCE_t0.1366906475) !$LIST_BELOW_t0.1294964029 !$PERFUSION_t0.0935251799 !$SOME_NUMBNESS_t0.0287769784 !$TREATMENT_OBTAINING_t0.0431654676) and($RESCHEDULED_t0.3309352518 !$THOUGHT_t0.9568345324)) 
1 or(and(or(and(or(and($VERBALIZED_t1.1510791367 $WELL_t3.5899280576) and($VITALS_PULSE_t0.3597122302 !$VITALS_RESP_t0.1007194245 !$WELL_t3.5899280576) $COUGHING_t0.2805755396 $STEP_t0.3237410072 $TN_t0.0791366906 $TYPE_SCHEDULING_t0.0287769784 $VACCINE_PNEUMOCOCCAL_t0.0359712230 $VARDENAFIL_TAB_t0.1007194245 $VITALS_HT_t0.0719424460 $WEARS_t0.1294964029 $WEEK_NOTICE_t0.0575539568 $WENT_OUT_t0.0791366906 $WHOLE_t0.0719424460 $WHO_t2.7985611511 $WITH_INSPIRATION_t0.0287769784 $WORSENING_t0.2877697842 $WRONG_t0.1223021583) !$NUMBER_NOVARTIS_t0.0359712230 !$NW_t0.0647482014 !$PERFUSION_t0.0935251799 !$SOME_NUMBNESS_t0.0287769784) $TABLET_ONCE_t0.1366906475) !$LIST_BELOW_t0.1294964029 !$TREATMENT_OBTAINING_t0.0431654676) and($RESCHEDULED_t0.3309352518 !$THOUGHT_t0.9568345324)) 
1 or(and(or(and(or(and($VERBALIZED_t1.1510791367 $WELL_t3.5899280576) and($VITALS_PULSE_t0.3597122302 !$VITALS_RESP_t0.1007194245 !$WELL_t3.5899280576) $COUGHING_t0.2805755396 $STEP_t0.3237410072 $TN_t0.0791366906 $TYPE_SCHEDULING_t0.0287769784 $VACCINE_PNEUMOCOCCAL_t0.0359712230 $VARDENAFIL_TAB_t0.1007194245 $VITALS_HT_t0.0719424460 $WEARS_t0.1294964029 $WEEK_NOTICE_t0.0575539568 $WENT_OUT_t0.0791366906 $WHOLE_t0.0719424460 $WHO_t2.7985611511 $WITH_INSPIRATION_t0.0287769784 $WORSENING_t0.2877697842 $WRONG_t0.1223021583) !$NUMBER_NOVARTIS_t0.0359712230 !$NW_t0.0647482014 !$PERFUSION_t0.0935251799 !$SOME_NUMBNESS_t0.0287769784 !$TREATMENT_OBTAINING_t0.0431654676) $TABLET_ONCE_t0.1366906475) !$LIST_BELOW_t0.1294964029) and($RESCHEDULED_t0.3309352518 !$THOUGHT_t0.9568345324)) 
1 or(and(or(and(or(and($VERBALIZED_t1.1510791367 $WELL_t3.5899280576) and($VITALS_PULSE_t0.3597122302 !$VITALS_RESP_t0.1007194245 !$WELL_t3.5899280576) $COUGHING_t0.2805755396 $STEP_t0.3237410072 $TN_t0.0791366906 $TYPE_SCHEDULING_t0.0287769784 $VACCINE_PNEUMOCOCCAL_t0.0359712230 $VARDENAFIL_TAB_t0.1007194245 $VITALS_HT_t0.0719424460 $WEARS_t0.1294964029 $WEEK_NOTICE_t0.0575539568 $WENT_OUT_t0.0791366906 $WHOLE_t0.0719424460 $WHO_t2.7985611511 $WITH_INSPIRATION_t0.0287769784 $WORSENING_t0.2877697842 $WRONG_t0.1223021583) !$NUMBER_NOVARTIS_t0.0359712230 !$NW_t0.0647482014 !$PERFUSION_t0.0935251799 !$TREATMENT_OBTAINING_t0.0431654676) $TABLET_ONCE_t0.1366906475) !$LIST_BELOW_t0.1294964029 !$SOME_NUMBNESS_t0.0287769784) and($RESCHEDULED_t0.3309352518 !$THOUGHT_t0.9568345324)) 
1 or(and(or(and(or(and($VERBALIZED_t1.1510791367 $WELL_t3.5899280576) and($VITALS_PULSE_t0.3597122302 !$VITALS_RESP_t0.1007194245 !$WELL_t3.5899280576) $COUGHING_t0.2805755396 $STEP_t0.3237410072 $TN_t0.0791366906 $TYPE_SCHEDULING_t0.0287769784 $VACCINE_PNEUMOCOCCAL_t0.0359712230 $VARDENAFIL_TAB_t0.1007194245 $VITALS_HT_t0.0719424460 $WEARS_t0.1294964029 $WEEK_NOTICE_t0.0575539568 $WENT_OUT_t0.0791366906 $WHOLE_t0.0719424460 $WHO_t2.7985611511 $WITH_INSPIRATION_t0.0287769784 $WORSENING_t0.2877697842 $WRONG_t0.1223021583) !$NUMBER_NOVARTIS_t0.0359712230 !$NW_t0.0647482014 !$SOME_NUMBNESS_t0.0287769784) $TABLET_ONCE_t0.1366906475) !$LIST_BELOW_t0.1294964029 !$PERFUSION_t0.0935251799 !$TREATMENT_OBTAINING_t0.0431654676) and($RESCHEDULED_t0.3309352518 !$THOUGHT_t0.9568345324)) 
1 or(and(or(and(or(and($VERBALIZED_t1.1510791367 $WELL_t3.5899280576) and($VITALS_PULSE_t0.3597122302 !$VITALS_RESP_t0.1007194245 !$WELL_t3.5899280576) $COUGHING_t0.2805755396 $STEP_t0.3237410072 $TN_t0.0791366906 $TYPE_SCHEDULING_t0.0287769784 $VACCINE_PNEUMOCOCCAL_t0.0359712230 $VARDENAFIL_TAB_t0.1007194245 $VITALS_HT_t0.0719424460 $WEARS_t0.1294964029 $WEEK_NOTICE_t0.0575539568 $WENT_OUT_t0.0791366906 $WHOLE_t0.0719424460 $WHO_t2.7985611511 $WITH_INSPIRATION_t0.0287769784 $WORSENING_t0.2877697842 $WRONG_t0.1223021583) !$NUMBER_NOVARTIS_t0.0359712230 !$NW_t0.0647482014 !$SOME_NUMBNESS_t0.0287769784 !$TREATMENT_OBTAINING_t0.0431654676) $TABLET_ONCE_t0.1366906475) !$LIST_BELOW_t0.1294964029 !$PERFUSION_t0.0935251799) and($RESCHEDULED_t0.3309352518 !$THOUGHT_t0.9568345324)) 
1 and(or(and(or($RESCHEDULED_t0.3309352518 $STEP_t0.3237410072 $TN_t0.0791366906 $VERBALIZED_t1.1510791367) !$VETERAN_t8.3453237410 !$YET_t0.3884892086) $SYST_t0.1223021583 $TABLET_ONCE_t0.1366906475 $TYPE_SCHEDULING_t0.0287769784 $UPPER_CHEST_t0.1726618705 $VACCINE_PNEUMOCOCCAL_t0.0359712230 $VARDENAFIL_HCL_t0.0863309353 $VIEW_t0.6762589928 $VITALS_HT_t0.0719424460 $VITALS_PULSE_t0.3597122302 $WEARS_t0.1294964029 $WEEKEND_t0.3165467626 $WERE_GUARD_t0.0647482014 $WHOLE_t0.0719424460 $WITH_INSPIRATION_t0.0287769784 $YE_t0.0503597122) !$MG_TAK_t0.0287769784 !$PRODUCTS_IT_t0.0503597122) 
1 and(or(and(or($MG_TAK_t0.0287769784 $RESCHEDULED_t0.3309352518 $STEP_t0.3237410072 $TN_t0.0791366906 $VERBALIZED_t1.1510791367) !$VETERAN_t8.3453237410 !$YET_t0.3884892086) $SYST_t0.1223021583 $TABLET_ONCE_t0.1366906475 $TYPE_SCHEDULING_t0.0287769784 $UPPER_CHEST_t0.1726618705 $VACCINE_PNEUMOCOCCAL_t0.0359712230 $VARDENAFIL_HCL_t0.0863309353 $VIEW_t0.6762589928 $VITALS_HT_t0.0719424460 $VITALS_PULSE_t0.3597122302 $WEARS_t0.1294964029 $WEEKEND_t0.3165467626 $WERE_GUARD_t0.0647482014 $WHOLE_t0.0719424460 $WITH_INSPIRATION_t0.0287769784 $YE_t0.0503597122) !$MG_TAK_t0.0287769784 !$PRODUCTS_IT_t0.0503597122) 
1 and(or(and(or($PRODUCTS_IT_t0.0503597122 $RESCHEDULED_t0.3309352518 $STEP_t0.3237410072 $TN_t0.0791366906 $VERBALIZED_t1.1510791367) !$VETERAN_t8.3453237410 !$YET_t0.3884892086) $SYST_t0.1223021583 $TABLET_ONCE_t0.1366906475 $TYPE_SCHEDULING_t0.0287769784 $UPPER_CHEST_t0.1726618705 $VACCINE_PNEUMOCOCCAL_t0.0359712230 $VARDENAFIL_HCL_t0.0863309353 $VIEW_t0.6762589928 $VITALS_HT_t0.0719424460 $VITALS_PULSE_t0.3597122302 $WEARS_t0.1294964029 $WEEKEND_t0.3165467626 $WERE_GUARD_t0.0647482014 $WHOLE_t0.0719424460 $WITH_INSPIRATION_t0.0287769784 $YE_t0.0503597122) !$MG_TAK_t0.0287769784 !$PRODUCTS_IT_t0.0503597122) 
1 and(or(and(or($RESCHEDULED_t0.3309352518 $STEP_t0.3237410072 $SYST_t0.1223021583 $TN_t0.0791366906 $VERBALIZED_t1.1510791367) !$VETERAN_t8.3453237410 !$YET_t0.3884892086) $SYST_t0.1223021583 $TABLET_ONCE_t0.1366906475 $TYPE_SCHEDULING_t0.0287769784 $UPPER_CHEST_t0.1726618705 $VACCINE_PNEUMOCOCCAL_t0.0359712230 $VARDENAFIL_HCL_t0.0863309353 $VIEW_t0.6762589928 $VITALS_HT_t0.0719424460 $VITALS_PULSE_t0.3597122302 $WEARS_t0.1294964029 $WEEKEND_t0.3165467626 $WERE_GUARD_t0.0647482014 $WHOLE_t0.0719424460 $WITH_INSPIRATION_t0.0287769784 $YE_t0.0503597122) !$MG_TAK_t0.0287769784 !$PRODUCTS_IT_t0.0503597122) 
1 and(or(and(or($RESCHEDULED_t0.3309352518 $STEP_t0.3237410072 $TABLET_ONCE_t0.1366906475 $TN_t0.0791366906 $VERBALIZED_t1.1510791367) !$VETERAN_t8.3453237410 !$YET_t0.3884892086) $SYST_t0.1223021583 $TABLET_ONCE_t0.1366906475 $TYPE_SCHEDULING_t0.0287769784 $UPPER_CHEST_t0.1726618705 $VACCINE_PNEUMOCOCCAL_t0.0359712230 $VARDENAFIL_HCL_t0.0863309353 $VIEW_t0.6762589928 $VITALS_HT_t0.0719424460 $VITALS_PULSE_t0.3597122302 $WEARS_t0.1294964029 $WEEKEND_t0.3165467626 $WERE_GUARD_t0.0647482014 $WHOLE_t0.0719424460 $WITH_INSPIRATION_t0.0287769784 $YE_t0.0503597122) !$MG_TAK_t0.0287769784 !$PRODUCTS_IT_t0.0503597122) 
1 and(or(and(or($RESCHEDULED_t0.3309352518 $STEP_t0.3237410072 $TN_t0.0791366906 $TOT_t0.0287769784 $VERBALIZED_t1.1510791367) !$VETERAN_t8.3453237410 !$YET_t0.3884892086) $SYST_t0.1223021583 $TABLET_ONCE_t0.1366906475 $TYPE_SCHEDULING_t0.0287769784 $UPPER_CHEST_t0.1726618705 $VACCINE_PNEUMOCOCCAL_t0.0359712230 $VARDENAFIL_HCL_t0.0863309353 $VIEW_t0.6762589928 $VITALS_HT_t0.0719424460 $VITALS_PULSE_t0.3597122302 $WEARS_t0.1294964029 $WEEKEND_t0.3165467626 $WERE_GUARD_t0.0647482014 $WHOLE_t0.0719424460 $WITH_INSPIRATION_t0.0287769784 $YE_t0.0503597122) !$MG_TAK_t0.0287769784 !$PRODUCTS_IT_t0.0503597122) 
1 and(or(and(or($RESCHEDULED_t0.3309352518 $STEP_t0.3237410072 $TN_t0.0791366906 $TOUR_t0.2230215827 $VERBALIZED_t1.1510791367) !$VETERAN_t8.3453237410 !$YET_t0.3884892086) $SYST_t0.1223021583 $TABLET_ONCE_t0.1366906475 $TYPE_SCHEDULING_t0.0287769784 $UPPER_CHEST_t0.1726618705 $VACCINE_PNEUMOCOCCAL_t0.0359712230 $VARDENAFIL_HCL_t0.0863309353 $VIEW_t0.6762589928 $VITALS_HT_t0.0719424460 $VITALS_PULSE_t0.3597122302 $WEARS_t0.1294964029 $WEEKEND_t0.3165467626 $WERE_GUARD_t0.0647482014 $WHOLE_t0.0719424460 $WITH_INSPIRATION_t0.0287769784 $YE_t0.0503597122) !$MG_TAK_t0.0287769784 !$PRODUCTS_IT_t0.0503597122) 
1 and(or(and(or($RESCHEDULED_t0.3309352518 $STEP_t0.3237410072 $TN_t0.0791366906 $TRACHEA_t0.0287769784 $VERBALIZED_t1.1510791367) !$VETERAN_t8.3453237410 !$YET_t0.3884892086) $SYST_t0.1223021583 $TABLET_ONCE_t0.1366906475 $TYPE_SCHEDULING_t0.0287769784 $UPPER_CHEST_t0.1726618705 $VACCINE_PNEUMOCOCCAL_t0.0359712230 $VARDENAFIL_HCL_t0.0863309353 $VIEW_t0.6762589928 $VITALS_HT_t0.0719424460 $VITALS_PULSE_t0.3597122302 $WEARS_t0.1294964029 $WEEKEND_t0.3165467626 $WERE_GUARD_t0.0647482014 $WHOLE_t0.0719424460 $WITH_INSPIRATION_t0.0287769784 $YE_t0.0503597122) !$MG_TAK_t0.0287769784 !$PRODUCTS_IT_t0.0503597122) 
1 and(or(and(or($RESCHEDULED_t0.3309352518 $STEP_t0.3237410072 $TN_t0.0791366906 $TRAITS_t0.0863309353 $VERBALIZED_t1.1510791367) !$VETERAN_t8.3453237410 !$YET_t0.3884892086) $SYST_t0.1223021583 $TABLET_ONCE_t0.1366906475 $TYPE_SCHEDULING_t0.0287769784 $UPPER_CHEST_t0.1726618705 $VACCINE_PNEUMOCOCCAL_t0.0359712230 $VARDENAFIL_HCL_t0.0863309353 $VIEW_t0.6762589928 $VITALS_HT_t0.0719424460 $VITALS_PULSE_t0.3597122302 $WEARS_t0.1294964029 $WEEKEND_t0.3165467626 $WERE_GUARD_t0.0647482014 $WHOLE_t0.0719424460 $WITH_INSPIRATION_t0.0287769784 $YE_t0.0503597122) !$MG_TAK_t0.0287769784 !$PRODUCTS_IT_t0.0503597122) 
1 and(or(and(or($RESCHEDULED_t0.3309352518 $STEP_t0.3237410072 $TN_t0.0791366906 $TRANQUIL_AS_t0.0359712230 $VERBALIZED_t1.1510791367) !$VETERAN_t8.3453237410 !$YET_t0.3884892086) $SYST_t0.1223021583 $TABLET_ONCE_t0.1366906475 $TYPE_SCHEDULING_t0.0287769784 $UPPER_CHEST_t0.1726618705 $VACCINE_PNEUMOCOCCAL_t0.0359712230 $VARDENAFIL_HCL_t0.0863309353 $VIEW_t0.6762589928 $VITALS_HT_t0.0719424460 $VITALS_PULSE_t0.3597122302 $WEARS_t0.1294964029 $WEEKEND_t0.3165467626 $WERE_GUARD_t0.0647482014 $WHOLE_t0.0719424460 $WITH_INSPIRATION_t0.0287769784 $YE_t0.0503597122) !$MG_TAK_t0.0287769784 !$PRODUCTS_IT_t0.0503597122) 
1 and(or(and($VIEW_t0.6762589928 $WANTS_t0.9280575540) $SWELLING_NOTED_t0.0575539568 $TABLET_ONCE_t0.1366906475 $TN_t0.0791366906 $TRIAGE_CHIEF_t0.1079136691 $TURNING_t0.0575539568 $TYPE_SCHEDULING_t0.0287769784 $UCINATIONS_DENIES_t0.0503597122 $UDS_t0.2446043165 $VACCINE_PNEUMOCOCCAL_t0.0359712230 $VA_OTC_t0.0359712230 $VITALS_HT_t0.0719424460 $VITALS_PULSE_t0.3597122302 $WEARS_t0.1294964029 $WEIGH_DAILY_t0.0503597122 $WENT_OUT_t0.0791366906 $WHOLE_t0.0719424460 $WITH_INSPIRATION_t0.0287769784 $WORK_RELEASE_t0.0287769784 $WORRY_t0.0503597122) !$HEALING_WELL_t0.0431654676 !$MG_TAK_t0.0287769784 !$PERFUSION_t0.0935251799 !$PROCEDURE_PRACTITIONER_t0.0503597122) 
1 or(and(or(and($VIEW_t0.6762589928 $WANTS_t0.9280575540) $SWELLING_NOTED_t0.0575539568 $TABLET_ONCE_t0.1366906475 $TN_t0.0791366906 $TRIAGE_CHIEF_t0.1079136691 $TURNING_t0.0575539568 $TYPE_SCHEDULING_t0.0287769784 $UDS_t0.2446043165 $VACCINE_PNEUMOCOCCAL_t0.0359712230 $VA_OTC_t0.0359712230 $VITALS_HT_t0.0719424460 $VITALS_PULSE_t0.3597122302 $WEARS_t0.1294964029 $WEIGH_DAILY_t0.0503597122 $WENT_OUT_t0.0791366906 $WHOLE_t0.0719424460 $WITH_INSPIRATION_t0.0287769784 $WORK_RELEASE_t0.0287769784 $WORRY_t0.0503597122) !$HEALING_WELL_t0.0431654676 !$MG_TAK_t0.0287769784 !$PERFUSION_t0.0935251799 !$PROCEDURE_PRACTITIONER_t0.0503597122) $UCINATIONS_DENIES_t0.0503597122) 
1 or(and(or(and($VIEW_t0.6762589928 $WANTS_t0.9280575540) $SWELLING_NOTED_t0.0575539568 $TN_t0.0791366906 $TRIAGE_CHIEF_t0.1079136691 $TURNING_t0.0575539568 $TYPE_SCHEDULING_t0.0287769784 $UCINATIONS_DENIES_t0.0503597122 $UDS_t0.2446043165 $VACCINE_PNEUMOCOCCAL_t0.0359712230 $VA_OTC_t0.0359712230 $VITALS_HT_t0.0719424460 $VITALS_PULSE_t0.3597122302 $WEARS_t0.1294964029 $WEIGH_DAILY_t0.0503597122 $WENT_OUT_t0.0791366906 $WHOLE_t0.0719424460 $WITH_INSPIRATION_t0.0287769784 $WORK_RELEASE_t0.0287769784 $WORRY_t0.0503597122) !$HEALING_WELL_t0.0431654676 !$MG_TAK_t0.0287769784 !$PERFUSION_t0.0935251799 !$PROCEDURE_PRACTITIONER_t0.0503597122) $TABLET_ONCE_t0.1366906475) 
1 or(and(or(and($VIEW_t0.6762589928 $WANTS_t0.9280575540) $TABLET_ONCE_t0.1366906475 $TN_t0.0791366906 $TRIAGE_CHIEF_t0.1079136691 $TURNING_t0.0575539568 $TYPE_SCHEDULING_t0.0287769784 $UCINATIONS_DENIES_t0.0503597122 $UDS_t0.2446043165 $VACCINE_PNEUMOCOCCAL_t0.0359712230 $VA_OTC_t0.0359712230 $VITALS_HT_t0.0719424460 $VITALS_PULSE_t0.3597122302 $WEARS_t0.1294964029 $WEIGH_DAILY_t0.0503597122 $WENT_OUT_t0.0791366906 $WHOLE_t0.0719424460 $WITH_INSPIRATION_t0.0287769784 $WORK_RELEASE_t0.0287769784 $WORRY_t0.0503597122) !$HEALING_WELL_t0.0431654676 !$MG_TAK_t0.0287769784 !$PERFUSION_t0.0935251799 !$PROCEDURE_PRACTITIONER_t0.0503597122) $SWELLING_NOTED_t0.0575539568) 
1 and(or(and(or(and($VIEW_t0.6762589928 $WANTS_t0.9280575540) $SWELLING_NOTED_t0.0575539568 $TABLET_ONCE_t0.1366906475 $TN_t0.0791366906 $TRIAGE_CHIEF_t0.1079136691 $TURNING_t0.0575539568 $TYPE_SCHEDULING_t0.0287769784 $UDS_t0.2446043165 $VACCINE_PNEUMOCOCCAL_t0.0359712230 $VA_OTC_t0.0359712230 $VITALS_HT_t0.0719424460 $VITALS_PULSE_t0.3597122302 $WEARS_t0.1294964029 $WEIGH_DAILY_t0.0503597122 $WENT_OUT_t0.0791366906 $WHOLE_t0.0719424460 $WITH_INSPIRATION_t0.0287769784 $WORK_RELEASE_t0.0287769784 $WORRY_t0.0503597122) !$HEALING_WELL_t0.0431654676 !$MG_TAK_t0.0287769784 !$PERFUSION_t0.0935251799) $UCINATIONS_DENIES_t0.0503597122) !$PROCEDURE_PRACTITIONER_t0.0503597122) 
1 and(or(and(or(and($VIEW_t0.6762589928 $WANTS_t0.9280575540) $SWELLING_NOTED_t0.0575539568 $TABLET_ONCE_t0.1366906475 $TN_t0.0791366906 $TRIAGE_CHIEF_t0.1079136691 $TURNING_t0.0575539568 $TYPE_SCHEDULING_t0.0287769784 $UDS_t0.2446043165 $VACCINE_PNEUMOCOCCAL_t0.0359712230 $VA_OTC_t0.0359712230 $VITALS_HT_t0.0719424460 $VITALS_PULSE_t0.3597122302 $WEARS_t0.1294964029 $WEIGH_DAILY_t0.0503597122 $WENT_OUT_t0.0791366906 $WHOLE_t0.0719424460 $WITH_INSPIRATION_t0.0287769784 $WORK_RELEASE_t0.0287769784 $WORRY_t0.0503597122) !$HEALING_WELL_t0.0431654676 !$MG_TAK_t0.0287769784 !$PROCEDURE_PRACTITIONER_t0.0503597122) $UCINATIONS_DENIES_t0.0503597122) !$PERFUSION_t0.0935251799) 
1 and(or(and(or(and($VIEW_t0.6762589928 $WANTS_t0.9280575540) $TABLET_ONCE_t0.1366906475 $TN_t0.0791366906 $TRIAGE_CHIEF_t0.1079136691 $TURNING_t0.0575539568 $TYPE_SCHEDULING_t0.0287769784 $UCINATIONS_DENIES_t0.0503597122 $UDS_t0.2446043165 $VACCINE_PNEUMOCOCCAL_t0.0359712230 $VA_OTC_t0.0359712230 $VITALS_HT_t0.0719424460 $VITALS_PULSE_t0.3597122302 $WEARS_t0.1294964029 $WEIGH_DAILY_t0.0503597122 $WENT_OUT_t0.0791366906 $WHOLE_t0.0719424460 $WITH_INSPIRATION_t0.0287769784 $WORK_RELEASE_t0.0287769784 $WORRY_t0.0503597122) !$HEALING_WELL_t0.0431654676 !$MG_TAK_t0.0287769784 !$PERFUSION_t0.0935251799) $SWELLING_NOTED_t0.0575539568) !$PROCEDURE_PRACTITIONER_t0.0503597122) 
1 and(or(and(or(and($VIEW_t0.6762589928 $WANTS_t0.9280575540) $TABLET_ONCE_t0.1366906475 $TN_t0.0791366906 $TRIAGE_CHIEF_t0.1079136691 $TURNING_t0.0575539568 $TYPE_SCHEDULING_t0.0287769784 $UCINATIONS_DENIES_t0.0503597122 $UDS_t0.2446043165 $VACCINE_PNEUMOCOCCAL_t0.0359712230 $VA_OTC_t0.0359712230 $VITALS_HT_t0.0719424460 $VITALS_PULSE_t0.3597122302 $WEARS_t0.1294964029 $WEIGH_DAILY_t0.0503597122 $WENT_OUT_t0.0791366906 $WHOLE_t0.0719424460 $WITH_INSPIRATION_t0.0287769784 $WORK_RELEASE_t0.0287769784 $WORRY_t0.0503597122) !$HEALING_WELL_t0.0431654676 !$MG_TAK_t0.0287769784 !$PROCEDURE_PRACTITIONER_t0.0503597122) $SWELLING_NOTED_t0.0575539568) !$PERFUSION_t0.0935251799) 
1 and(or(and(or(and($VIEW_t0.6762589928 $WANTS_t0.9280575540) $TABLET_ONCE_t0.1366906475 $TN_t0.0791366906 $TRIAGE_CHIEF_t0.1079136691 $TURNING_t0.0575539568 $TYPE_SCHEDULING_t0.0287769784 $UCINATIONS_DENIES_t0.0503597122 $UDS_t0.2446043165 $VACCINE_PNEUMOCOCCAL_t0.0359712230 $VA_OTC_t0.0359712230 $VITALS_HT_t0.0719424460 $VITALS_PULSE_t0.3597122302 $WEARS_t0.1294964029 $WEIGH_DAILY_t0.0503597122 $WENT_OUT_t0.0791366906 $WHOLE_t0.0719424460 $WITH_INSPIRATION_t0.0287769784 $WORK_RELEASE_t0.0287769784 $WORRY_t0.0503597122) !$MG_TAK_t0.0287769784 !$PERFUSION_t0.0935251799 !$PROCEDURE_PRACTITIONER_t0.0503597122) $SWELLING_NOTED_t0.0575539568) !$HEALING_WELL_t0.0431654676) 
1 and(or(and(!$ANSWER_t1.0359712230 $VIEW_t0.6762589928 $WANTS_t0.9280575540) $SWELLING_NOTED_t0.0575539568 $TABLET_ONCE_t0.1366906475 $TN_t0.0791366906 $TRIAGE_CHIEF_t0.1079136691 $TURNING_t0.0575539568 $TYPE_SCHEDULING_t0.0287769784 $UCINATIONS_DENIES_t0.0503597122 $UDS_t0.2446043165 $VACCINE_PNEUMOCOCCAL_t0.0359712230 $VA_OTC_t0.0359712230 $VITALS_HT_t0.0719424460 $VITALS_PULSE_t0.3597122302 $WEARS_t0.1294964029 $WEIGH_DAILY_t0.0503597122 $WENT_OUT_t0.0791366906 $WHOLE_t0.0719424460 $WITH_INSPIRATION_t0.0287769784 $WORK_RELEASE_t0.0287769784 $WORRY_t0.0503597122) !$HEALING_WELL_t0.0431654676 !$MG_TAK_t0.0287769784 !$PERFUSION_t0.0935251799 !$PROCEDURE_PRACTITIONER_t0.0503597122) 
1 or(and(or(and($VERBALIZED_t1.1510791367 !$YET_t0.3884892086) $RESCHEDULED_t0.3309352518 $STEP_t0.3237410072 $TYPE_SCHEDULING_t0.0287769784 $UNSTEADY_t0.0575539568 $VACCINE_PNEUMOCOCCAL_t0.0359712230 $VARDENAFIL_HCL_t0.0863309353 $VETERAN_t8.3453237410 $VIEW_t0.6762589928 $VITALS_HT_t0.0719424460 $VITALS_PULSE_t0.3597122302 $WAS_SCREENED_t0.1151079137 $WITHIN_LAST_t0.4748201439) or(!$COMPUTERIZED_t0.5179856115 $SUICIDE_RISK_t0.3884892086) or($CURRENTLY_t1.7482014388 !$RISK_t5.6762589928)) $ABUSE_SCREEN_t0.0791366906 $TN_t0.0791366906 $UPPER_CHEST_t0.1726618705 $WEAPONS_t0.0503597122 $WITH_INSPIRATION_t0.0287769784) 
1 or(and(or(and($VERBALIZED_t1.1510791367 !$YET_t0.3884892086) $RESCHEDULED_t0.3309352518 $STEP_t0.3237410072 $UNSTEADY_t0.0575539568 $VACCINE_PNEUMOCOCCAL_t0.0359712230 $VARDENAFIL_HCL_t0.0863309353 $VETERAN_t8.3453237410 $VIEW_t0.6762589928 $VITALS_HT_t0.0719424460 $VITALS_PULSE_t0.3597122302 $WAS_SCREENED_t0.1151079137 $WITHIN_LAST_t0.4748201439) or(!$COMPUTERIZED_t0.5179856115 $SUICIDE_RISK_t0.3884892086) or($CURRENTLY_t1.7482014388 !$RISK_t5.6762589928)) $ABUSE_SCREEN_t0.0791366906 $TN_t0.0791366906 $TYPE_SCHEDULING_t0.0287769784 $UPPER_CHEST_t0.1726618705 $WEAPONS_t0.0503597122 $WITH_INSPIRATION_t0.0287769784) 
1 or(and(or(and(or($RESCHEDULED_t0.3309352518 $VERBALIZED_t1.1510791367) !$YET_t0.3884892086) $STEP_t0.3237410072 $TYPE_SCHEDULING_t0.0287769784 $UNSTEADY_t0.0575539568 $VACCINE_PNEUMOCOCCAL_t0.0359712230 $VARDENAFIL_HCL_t0.0863309353 $VETERAN_t8.3453237410 $VIEW_t0.6762589928 $VITALS_HT_t0.0719424460 $VITALS_PULSE_t0.3597122302 $WAS_SCREENED_t0.1151079137 $WITHIN_LAST_t0.4748201439) or(!$COMPUTERIZED_t0.5179856115 $SUICIDE_RISK_t0.3884892086) or($CURRENTLY_t1.7482014388 !$RISK_t5.6762589928)) $ABUSE_SCREEN_t0.0791366906 $TN_t0.0791366906 $UPPER_CHEST_t0.1726618705 $WEAPONS_t0.0503597122 $WITH_INSPIRATION_t0.0287769784) 
1 or(and(or(and(or($RESCHEDULED_t0.3309352518 $VERBALIZED_t1.1510791367) !$YET_t0.3884892086) $STEP_t0.3237410072 $UNSTEADY_t0.0575539568 $VACCINE_PNEUMOCOCCAL_t0.0359712230 $VARDENAFIL_HCL_t0.0863309353 $VETERAN_t8.3453237410 $VIEW_t0.6762589928 $VITALS_HT_t0.0719424460 $VITALS_PULSE_t0.3597122302 $WAS_SCREENED_t0.1151079137 $WITHIN_LAST_t0.4748201439) or(!$COMPUTERIZED_t0.5179856115 $SUICIDE_RISK_t0.3884892086) or($CURRENTLY_t1.7482014388 !$RISK_t5.6762589928)) $ABUSE_SCREEN_t0.0791366906 $TN_t0.0791366906 $TYPE_SCHEDULING_t0.0287769784 $UPPER_CHEST_t0.1726618705 $WEAPONS_t0.0503597122 $WITH_INSPIRATION_t0.0287769784) 
1 or(and(or(and($VERBALIZED_t1.1510791367 !$WHEELED_t0.0791366906 !$YET_t0.3884892086) $RESCHEDULED_t0.3309352518 $STEP_t0.3237410072 $TYPE_SCHEDULING_t0.0287769784 $UNSTEADY_t0.0575539568 $VACCINE_PNEUMOCOCCAL_t0.0359712230 $VARDENAFIL_HCL_t0.0863309353 $VETERAN_t8.3453237410 $VIEW_t0.6762589928 $VITALS_HT_t0.0719424460 $VITALS_PULSE_t0.3597122302 $WAS_SCREENED_t0.1151079137 $WITHIN_LAST_t0.4748201439) or(!$COMPUTERIZED_t0.5179856115 $SUICIDE_RISK_t0.3884892086) or($CURRENTLY_t1.7482014388 !$RISK_t5.6762589928)) $ABUSE_SCREEN_t0.0791366906 $TN_t0.0791366906 $UPPER_CHEST_t0.1726618705 $WEAPONS_t0.0503597122 $WITH_INSPIRATION_t0.0287769784) 
1 or(and(or(and($VERBALIZED_t1.1510791367 !$YET_t0.3884892086) $RESCHEDULED_t0.3309352518 $STEP_t0.3237410072 $TYPE_SCHEDULING_t0.0287769784 $UNSTEADY_t0.0575539568 $VACCINE_PNEUMOCOCCAL_t0.0359712230 $VARDENAFIL_HCL_t0.0863309353 $VETERAN_t8.3453237410 $VIEW_t0.6762589928 $VITALS_HT_t0.0719424460 $VITALS_PULSE_t0.3597122302 $WAS_SCREENED_t0.1151079137 $WITHIN_LAST_t0.4748201439) or(!$COMPUTERIZED_t0.5179856115 $SUICIDE_RISK_t0.3884892086) or($CURRENTLY_t1.7482014388 !$RISK_t5.6762589928) !$TREATMENT_DECISIONS_t0.0503597122) $ABUSE_SCREEN_t0.0791366906 $TN_t0.0791366906 $UPPER_CHEST_t0.1726618705 $WEAPONS_t0.0503597122 $WITH_INSPIRATION_t0.0287769784) 
1 or(and(or(and(or($ABUSE_SCREEN_t0.0791366906 $RESCHEDULED_t0.3309352518 $VERBALIZED_t1.1510791367) !$YET_t0.3884892086) $STEP_t0.3237410072 $TYPE_SCHEDULING_t0.0287769784 $UNSTEADY_t0.0575539568 $VACCINE_PNEUMOCOCCAL_t0.0359712230 $VARDENAFIL_HCL_t0.0863309353 $VETERAN_t8.3453237410 $VIEW_t0.6762589928 $VITALS_HT_t0.0719424460 $VITALS_PULSE_t0.3597122302 $WAS_SCREENED_t0.1151079137 $WITHIN_LAST_t0.4748201439) or(!$COMPUTERIZED_t0.5179856115 $SUICIDE_RISK_t0.3884892086) or($CURRENTLY_t1.7482014388 !$RISK_t5.6762589928)) $ABUSE_SCREEN_t0.0791366906 $TN_t0.0791366906 $UPPER_CHEST_t0.1726618705 $WEAPONS_t0.0503597122 $WITH_INSPIRATION_t0.0287769784) 
1 or(and(or(and(or($COMPUTERIZED_t0.5179856115 $RESCHEDULED_t0.3309352518 $VERBALIZED_t1.1510791367) !$YET_t0.3884892086) $STEP_t0.3237410072 $TYPE_SCHEDULING_t0.0287769784 $UNSTEADY_t0.0575539568 $VACCINE_PNEUMOCOCCAL_t0.0359712230 $VARDENAFIL_HCL_t0.0863309353 $VETERAN_t8.3453237410 $VIEW_t0.6762589928 $VITALS_HT_t0.0719424460 $VITALS_PULSE_t0.3597122302 $WAS_SCREENED_t0.1151079137 $WITHIN_LAST_t0.4748201439) or(!$COMPUTERIZED_t0.5179856115 $SUICIDE_RISK_t0.3884892086) or($CURRENTLY_t1.7482014388 !$RISK_t5.6762589928)) $ABUSE_SCREEN_t0.0791366906 $TN_t0.0791366906 $UPPER_CHEST_t0.1726618705 $WEAPONS_t0.0503597122 $WITH_INSPIRATION_t0.0287769784) 
1 or(and(or(and(or($COMPUTERIZED_t0.5179856115 $RESCHEDULED_t0.3309352518 $VERBALIZED_t1.1510791367) !$YET_t0.3884892086) $STEP_t0.3237410072 $UNSTEADY_t0.0575539568 $VACCINE_PNEUMOCOCCAL_t0.0359712230 $VARDENAFIL_HCL_t0.0863309353 $VETERAN_t8.3453237410 $VIEW_t0.6762589928 $VITALS_HT_t0.0719424460 $VITALS_PULSE_t0.3597122302 $WAS_SCREENED_t0.1151079137 $WITHIN_LAST_t0.4748201439) or(!$COMPUTERIZED_t0.5179856115 $SUICIDE_RISK_t0.3884892086) or($CURRENTLY_t1.7482014388 !$RISK_t5.6762589928)) $ABUSE_SCREEN_t0.0791366906 $TN_t0.0791366906 $TYPE_SCHEDULING_t0.0287769784 $UPPER_CHEST_t0.1726618705 $WEAPONS_t0.0503597122 $WITH_INSPIRATION_t0.0287769784) 
1 or(and(or(and(or($RESCHEDULED_t0.3309352518 $RISK_t5.6762589928 $VERBALIZED_t1.1510791367) !$YET_t0.3884892086) $STEP_t0.3237410072 $TYPE_SCHEDULING_t0.0287769784 $UNSTEADY_t0.0575539568 $VACCINE_PNEUMOCOCCAL_t0.0359712230 $VARDENAFIL_HCL_t0.0863309353 $VETERAN_t8.3453237410 $VIEW_t0.6762589928 $VITALS_HT_t0.0719424460 $VITALS_PULSE_t0.3597122302 $WAS_SCREENED_t0.1151079137 $WITHIN_LAST_t0.4748201439) or(!$COMPUTERIZED_t0.5179856115 $SUICIDE_RISK_t0.3884892086) or($CURRENTLY_t1.7482014388 !$RISK_t5.6762589928)) $ABUSE_SCREEN_t0.0791366906 $TN_t0.0791366906 $UPPER_CHEST_t0.1726618705 $WEAPONS_t0.0503597122 $WITH_INSPIRATION_t0.0287769784) 
1 or(and(or(and(or(!$DURING_t2.2446043165 $MAKE_t1.2230215827) !$COMPUTERIZED_t0.5179856115) !$PREVIOUSLY_t0.6474820144 $SIGNIFICANT_OTHER_t0.7482014388) or(and($WHO_t2.7985611511 $WOULD_BE_t0.8992805755) $INFLUENZA_SEP_t0.0359712230 $NUMBERS_t0.2589928058 $STEP_t0.3237410072 $TYPE_SCHEDULING_t0.0287769784 $UCINATIONS_DENIES_t0.0503597122 $VACCINE_PNEUMOCOCCAL_t0.0359712230 $VARDENAFIL_MG_t0.1007194245 $VETERAN_t8.3453237410 $VIEW_t0.6762589928 $VITALS_HT_t0.0719424460 $VITALS_WT_t0.0503597122 $WITHIN_LAST_t0.4748201439 $WITH_INSPIRATION_t0.0287769784 $WORK_t2.9496402878)) $TN_t0.0791366906 $UNDER_SKIN_t0.0647482014 $UNSTEADY_t0.0575539568 $WEAPONS_t0.0503597122 $YELLING_t0.0287769784) 
1 or(and(or(and(or(!$DURING_t2.2446043165 $MAKE_t1.2230215827) !$COMPUTERIZED_t0.5179856115) !$PREVIOUSLY_t0.6474820144 $SIGNIFICANT_OTHER_t0.7482014388) or(and($WHO_t2.7985611511 $WOULD_BE_t0.8992805755) $INFLUENZA_SEP_t0.0359712230 $NUMBERS_t0.2589928058 $STEP_t0.3237410072 $TYPE_SCHEDULING_t0.0287769784 $UCINATIONS_DENIES_t0.0503597122 $VACCINE_PNEUMOCOCCAL_t0.0359712230 $VARDENAFIL_MG_t0.1007194245 $VETERAN_t8.3453237410 $VIEW_t0.6762589928 $VITALS_HT_t0.0719424460 $VITALS_WT_t0.0503597122 $WITHIN_LAST_t0.4748201439 $WITH_INSPIRATION_t0.0287769784 $WORK_t2.9496402878 $YELLING_t0.0287769784)) $TN_t0.0791366906 $UNDER_SKIN_t0.0647482014 $UNSTEADY_t0.0575539568 $WEAPONS_t0.0503597122) 
1 or(and(or(and(or(!$DURING_t2.2446043165 $MAKE_t1.2230215827) !$COMPUTERIZED_t0.5179856115) !$PREVIOUSLY_t0.6474820144 $SIGNIFICANT_OTHER_t0.7482014388) or(and($WHO_t2.7985611511 $WOULD_BE_t0.8992805755) $INFLUENZA_SEP_t0.0359712230 $NUMBERS_t0.2589928058 $STEP_t0.3237410072 $TYPE_SCHEDULING_t0.0287769784 $UCINATIONS_DENIES_t0.0503597122 $VACCINE_PNEUMOCOCCAL_t0.0359712230 $VARDENAFIL_MG_t0.1007194245 $VETERAN_t8.3453237410 $VIEW_t0.6762589928 $VITALS_HT_t0.0719424460 $VITALS_WT_t0.0503597122 $WITHIN_LAST_t0.4748201439 $WORK_t2.9496402878 $YELLING_t0.0287769784)) $TN_t0.0791366906 $UNDER_SKIN_t0.0647482014 $UNSTEADY_t0.0575539568 $WEAPONS_t0.0503597122 $WITH_INSPIRATION_t0.0287769784) 
1 or(and(or(and(or(!$DURING_t2.2446043165 $MAKE_t1.2230215827) !$COMPUTERIZED_t0.5179856115) !$PREVIOUSLY_t0.6474820144 $SIGNIFICANT_OTHER_t0.7482014388) or(and($WHO_t2.7985611511 $WOULD_BE_t0.8992805755) $INFLUENZA_SEP_t0.0359712230 $NUMBERS_t0.2589928058 $STEP_t0.3237410072 $TYPE_SCHEDULING_t0.0287769784 $UCINATIONS_DENIES_t0.0503597122 $VACCINE_PNEUMOCOCCAL_t0.0359712230 $VARDENAFIL_MG_t0.1007194245 $VETERAN_t8.3453237410 $VIEW_t0.6762589928 $VITALS_HT_t0.0719424460 $WITHIN_LAST_t0.4748201439 $WITH_INSPIRATION_t0.0287769784 $WORK_t2.9496402878 $YELLING_t0.0287769784)) $TN_t0.0791366906 $UNDER_SKIN_t0.0647482014 $UNSTEADY_t0.0575539568 $VITALS_WT_t0.0503597122 $WEAPONS_t0.0503597122) 
1 or(and(or(and(or(!$DURING_t2.2446043165 $MAKE_t1.2230215827) !$COMPUTERIZED_t0.5179856115) !$PREVIOUSLY_t0.6474820144 $SIGNIFICANT_OTHER_t0.7482014388) or(and($WHO_t2.7985611511 $WOULD_BE_t0.8992805755) $INFLUENZA_SEP_t0.0359712230 $NUMBERS_t0.2589928058 $STEP_t0.3237410072 $TYPE_SCHEDULING_t0.0287769784 $UCINATIONS_DENIES_t0.0503597122 $VACCINE_PNEUMOCOCCAL_t0.0359712230 $VARDENAFIL_MG_t0.1007194245 $VETERAN_t8.3453237410 $VIEW_t0.6762589928 $VITALS_WT_t0.0503597122 $WITHIN_LAST_t0.4748201439 $WITH_INSPIRATION_t0.0287769784 $WORK_t2.9496402878 $YELLING_t0.0287769784)) $TN_t0.0791366906 $UNDER_SKIN_t0.0647482014 $UNSTEADY_t0.0575539568 $VITALS_HT_t0.0719424460 $WEAPONS_t0.0503597122) 
1 or(and(or(and(or(!$DURING_t2.2446043165 $MAKE_t1.2230215827) !$COMPUTERIZED_t0.5179856115) !$PREVIOUSLY_t0.6474820144 $SIGNIFICANT_OTHER_t0.7482014388) or(and($WHO_t2.7985611511 $WOULD_BE_t0.8992805755) $INFLUENZA_SEP_t0.0359712230 $NUMBERS_t0.2589928058 $STEP_t0.3237410072 $TYPE_SCHEDULING_t0.0287769784 $UCINATIONS_DENIES_t0.0503597122 $VARDENAFIL_MG_t0.1007194245 $VETERAN_t8.3453237410 $VIEW_t0.6762589928 $VITALS_HT_t0.0719424460 $VITALS_WT_t0.0503597122 $WITHIN_LAST_t0.4748201439 $WITH_INSPIRATION_t0.0287769784 $WORK_t2.9496402878 $YELLING_t0.0287769784)) $TN_t0.0791366906 $UNDER_SKIN_t0.0647482014 $UNSTEADY_t0.0575539568 $VACCINE_PNEUMOCOCCAL_t0.0359712230 $WEAPONS_t0.0503597122) 
1 or(and(or(and(or(!$DURING_t2.2446043165 $MAKE_t1.2230215827) !$COMPUTERIZED_t0.5179856115) !$PREVIOUSLY_t0.6474820144 $SIGNIFICANT_OTHER_t0.7482014388) or(and($WHO_t2.7985611511 $WOULD_BE_t0.8992805755) $INFLUENZA_SEP_t0.0359712230 $NUMBERS_t0.2589928058 $STEP_t0.3237410072 $TYPE_SCHEDULING_t0.0287769784 $VACCINE_PNEUMOCOCCAL_t0.0359712230 $VARDENAFIL_MG_t0.1007194245 $VETERAN_t8.3453237410 $VIEW_t0.6762589928 $VITALS_HT_t0.0719424460 $VITALS_WT_t0.0503597122 $WITHIN_LAST_t0.4748201439 $WITH_INSPIRATION_t0.0287769784 $WORK_t2.9496402878 $YELLING_t0.0287769784)) $TN_t0.0791366906 $UCINATIONS_DENIES_t0.0503597122 $UNDER_SKIN_t0.0647482014 $UNSTEADY_t0.0575539568 $WEAPONS_t0.0503597122) 
1 or(and(or(and(or(!$DURING_t2.2446043165 $MAKE_t1.2230215827) !$COMPUTERIZED_t0.5179856115) !$PREVIOUSLY_t0.6474820144 $SIGNIFICANT_OTHER_t0.7482014388) or(and($WHO_t2.7985611511 $WOULD_BE_t0.8992805755) $INFLUENZA_SEP_t0.0359712230 $NUMBERS_t0.2589928058 $STEP_t0.3237410072 $UCINATIONS_DENIES_t0.0503597122 $VACCINE_PNEUMOCOCCAL_t0.0359712230 $VARDENAFIL_MG_t0.1007194245 $VETERAN_t8.3453237410 $VIEW_t0.6762589928 $VITALS_HT_t0.0719424460 $VITALS_WT_t0.0503597122 $WITHIN_LAST_t0.4748201439 $WITH_INSPIRATION_t0.0287769784 $WORK_t2.9496402878 $YELLING_t0.0287769784)) $TN_t0.0791366906 $TYPE_SCHEDULING_t0.0287769784 $UNDER_SKIN_t0.0647482014 $UNSTEADY_t0.0575539568 $WEAPONS_t0.0503597122) 
1 or(and(or(and(or(!$DURING_t2.2446043165 $MAKE_t1.2230215827) !$COMPUTERIZED_t0.5179856115) !$PREVIOUSLY_t0.6474820144 $SIGNIFICANT_OTHER_t0.7482014388) or(and($WHO_t2.7985611511 $WOULD_BE_t0.8992805755) $INFLUENZA_SEP_t0.0359712230 $NUMBERS_t0.2589928058 $STEP_t0.3237410072 $UCINATIONS_DENIES_t0.0503597122 $VACCINE_PNEUMOCOCCAL_t0.0359712230 $VARDENAFIL_MG_t0.1007194245 $VETERAN_t8.3453237410 $VIEW_t0.6762589928 $VITALS_HT_t0.0719424460 $VITALS_WT_t0.0503597122 $WITHIN_LAST_t0.4748201439 $WORK_t2.9496402878 $YELLING_t0.0287769784)) $TN_t0.0791366906 $TYPE_SCHEDULING_t0.0287769784 $UNDER_SKIN_t0.0647482014 $UNSTEADY_t0.0575539568 $WEAPONS_t0.0503597122 $WITH_INSPIRATION_t0.0287769784) 
1 or(and(or(and(or(!$DURING_t2.2446043165 $MAKE_t1.2230215827) !$COMPUTERIZED_t0.5179856115) !$PREVIOUSLY_t0.6474820144 $SIGNIFICANT_OTHER_t0.7482014388) or(and($WHO_t2.7985611511 $WOULD_BE_t0.8992805755) $NUMBERS_t0.2589928058 $STEP_t0.3237410072 $TYPE_SCHEDULING_t0.0287769784 $UCINATIONS_DENIES_t0.0503597122 $VACCINE_PNEUMOCOCCAL_t0.0359712230 $VARDENAFIL_MG_t0.1007194245 $VETERAN_t8.3453237410 $VIEW_t0.6762589928 $VITALS_HT_t0.0719424460 $VITALS_WT_t0.0503597122 $WITHIN_LAST_t0.4748201439 $WITH_INSPIRATION_t0.0287769784 $WORK_t2.9496402878 $YELLING_t0.0287769784)) $INFLUENZA_SEP_t0.0359712230 $TN_t0.0791366906 $UNDER_SKIN_t0.0647482014 $UNSTEADY_t0.0575539568 $WEAPONS_t0.0503597122) 
1 and(or(and(or($COPY_t0.8201438849 !$SO_t1.9208633094) or($PAGER_t0.0935251799 $STEP_t0.3237410072 $VITALS_PULSE_t0.3597122302) !$WANTS_t0.9280575540) and($TRIAGE_t1.6690647482 $WHO_t2.7985611511 !$YES_t8.2446043165) $NAPROXEN_MG_t0.1726618705 $SWELLING_NOTED_t0.0575539568 $TN_t0.0791366906 $TYPE_SCHEDULING_t0.0287769784 $UCINATIONS_DENIES_t0.0503597122 $VACCINE_PNEUMOCOCCAL_t0.0359712230 $VARDENAFIL_HCL_t0.0863309353 $VITALS_HT_t0.0719424460 $WEARS_t0.1294964029 $WEDNES_t0.1223021583 $WEEKENDS_t0.0575539568 $WEEK_NOTICE_t0.0575539568 $WENT_OUT_t0.0791366906 $WHOLE_t0.0719424460 $WITH_INSPIRATION_t0.0287769784 $WORK_RELEASE_t0.0287769784 $YOUNG_t0.0503597122) !$LIST_BELOW_t0.1294964029 !$OR_MILK_t0.0575539568) 
1 or(and(or(and(or($COPY_t0.8201438849 !$SO_t1.9208633094) or($PAGER_t0.0935251799 $STEP_t0.3237410072 $VITALS_PULSE_t0.3597122302) !$WANTS_t0.9280575540) and($TRIAGE_t1.6690647482 $WHO_t2.7985611511 !$YES_t8.2446043165) $SWELLING_NOTED_t0.0575539568 $TN_t0.0791366906 $TYPE_SCHEDULING_t0.0287769784 $UCINATIONS_DENIES_t0.0503597122 $VACCINE_PNEUMOCOCCAL_t0.0359712230 $VARDENAFIL_HCL_t0.0863309353 $VITALS_HT_t0.0719424460 $WEARS_t0.1294964029 $WEDNES_t0.1223021583 $WEEKENDS_t0.0575539568 $WEEK_NOTICE_t0.0575539568 $WENT_OUT_t0.0791366906 $WHOLE_t0.0719424460 $WITH_INSPIRATION_t0.0287769784 $WORK_RELEASE_t0.0287769784 $YOUNG_t0.0503597122) !$LIST_BELOW_t0.1294964029 !$OR_MILK_t0.0575539568) $NAPROXEN_MG_t0.1726618705) 
1 or(and(or(and(or($COPY_t0.8201438849 !$SO_t1.9208633094) or($PAGER_t0.0935251799 $STEP_t0.3237410072 $VITALS_PULSE_t0.3597122302) !$WANTS_t0.9280575540) and($TRIAGE_t1.6690647482 $WHO_t2.7985611511 !$YES_t8.2446043165) $TYPE_SCHEDULING_t0.0287769784 $UCINATIONS_DENIES_t0.0503597122 $VACCINE_PNEUMOCOCCAL_t0.0359712230 $VARDENAFIL_HCL_t0.0863309353 $VITALS_HT_t0.0719424460 $WEARS_t0.1294964029 $WEDNES_t0.1223021583 $WEEKENDS_t0.0575539568 $WEEK_NOTICE_t0.0575539568 $WENT_OUT_t0.0791366906 $WHOLE_t0.0719424460 $WITH_INSPIRATION_t0.0287769784 $WORK_RELEASE_t0.0287769784 $YOUNG_t0.0503597122) !$LIST_BELOW_t0.1294964029 !$OR_MILK_t0.0575539568) $NAPROXEN_MG_t0.1726618705 $SWELLING_NOTED_t0.0575539568 $TN_t0.0791366906) 
1 or(and(or(and(or($COPY_t0.8201438849 !$SO_t1.9208633094) or($PAGER_t0.0935251799 $STEP_t0.3237410072 $VITALS_PULSE_t0.3597122302) !$WANTS_t0.9280575540) and($TRIAGE_t1.6690647482 $WHO_t2.7985611511 !$YES_t8.2446043165) $TYPE_SCHEDULING_t0.0287769784 $UCINATIONS_DENIES_t0.0503597122 $VACCINE_PNEUMOCOCCAL_t0.0359712230 $VARDENAFIL_HCL_t0.0863309353 $WEARS_t0.1294964029 $WEDNES_t0.1223021583 $WEEKENDS_t0.0575539568 $WEEK_NOTICE_t0.0575539568 $WENT_OUT_t0.0791366906 $WHOLE_t0.0719424460 $WITH_INSPIRATION_t0.0287769784 $WORK_RELEASE_t0.0287769784 $YOUNG_t0.0503597122) !$LIST_BELOW_t0.1294964029 !$OR_MILK_t0.0575539568) $NAPROXEN_MG_t0.1726618705 $SWELLING_NOTED_t0.0575539568 $TN_t0.0791366906 $VITALS_HT_t0.0719424460) 
1 or(and(or(and(or($COPY_t0.8201438849 !$SO_t1.9208633094) or($PAGER_t0.0935251799 $STEP_t0.3237410072 $VITALS_PULSE_t0.3597122302) !$WANTS_t0.9280575540) and($TRIAGE_t1.6690647482 $WHO_t2.7985611511 !$YES_t8.2446043165) $UCINATIONS_DENIES_t0.0503597122 $VACCINE_PNEUMOCOCCAL_t0.0359712230 $VARDENAFIL_HCL_t0.0863309353 $VITALS_HT_t0.0719424460 $WEARS_t0.1294964029 $WEDNES_t0.1223021583 $WEEKENDS_t0.0575539568 $WEEK_NOTICE_t0.0575539568 $WENT_OUT_t0.0791366906 $WHOLE_t0.0719424460 $WITH_INSPIRATION_t0.0287769784 $WORK_RELEASE_t0.0287769784 $YOUNG_t0.0503597122) !$LIST_BELOW_t0.1294964029 !$OR_MILK_t0.0575539568) $NAPROXEN_MG_t0.1726618705 $SWELLING_NOTED_t0.0575539568 $TN_t0.0791366906 $TYPE_SCHEDULING_t0.0287769784) 
1 or(and(or(and(or($COPY_t0.8201438849 !$SO_t1.9208633094) or($PAGER_t0.0935251799 $STEP_t0.3237410072 $VITALS_PULSE_t0.3597122302) !$WANTS_t0.9280575540) and($TRIAGE_t1.6690647482 $WHO_t2.7985611511 !$YES_t8.2446043165) $UCINATIONS_DENIES_t0.0503597122 $VACCINE_PNEUMOCOCCAL_t0.0359712230 $VARDENAFIL_HCL_t0.0863309353 $WEARS_t0.1294964029 $WEDNES_t0.1223021583 $WEEKENDS_t0.0575539568 $WEEK_NOTICE_t0.0575539568 $WENT_OUT_t0.0791366906 $WHOLE_t0.0719424460 $WITH_INSPIRATION_t0.0287769784 $WORK_RELEASE_t0.0287769784 $YOUNG_t0.0503597122) !$LIST_BELOW_t0.1294964029 !$OR_MILK_t0.0575539568) $NAPROXEN_MG_t0.1726618705 $SWELLING_NOTED_t0.0575539568 $TN_t0.0791366906 $TYPE_SCHEDULING_t0.0287769784 $VITALS_HT_t0.0719424460) 
1 or(and(or(and(or($COPY_t0.8201438849 !$SO_t1.9208633094) or($PAGER_t0.0935251799 $VITALS_PULSE_t0.3597122302) !$WANTS_t0.9280575540) and($TRIAGE_t1.6690647482 $WHO_t2.7985611511 !$YES_t8.2446043165) $STEP_t0.3237410072 $TYPE_SCHEDULING_t0.0287769784 $UCINATIONS_DENIES_t0.0503597122 $VACCINE_PNEUMOCOCCAL_t0.0359712230 $VARDENAFIL_HCL_t0.0863309353 $VITALS_HT_t0.0719424460 $WEARS_t0.1294964029 $WEDNES_t0.1223021583 $WEEKENDS_t0.0575539568 $WEEK_NOTICE_t0.0575539568 $WENT_OUT_t0.0791366906 $WHOLE_t0.0719424460 $WITH_INSPIRATION_t0.0287769784 $WORK_RELEASE_t0.0287769784 $YOUNG_t0.0503597122) !$LIST_BELOW_t0.1294964029 !$OR_MILK_t0.0575539568) $NAPROXEN_MG_t0.1726618705 $SWELLING_NOTED_t0.0575539568 $TN_t0.0791366906) 
1 and(or(and(or(and(or($COPY_t0.8201438849 !$SO_t1.9208633094) or($PAGER_t0.0935251799 $STEP_t0.3237410072 $VITALS_PULSE_t0.3597122302) !$WANTS_t0.9280575540) and($TRIAGE_t1.6690647482 $WHO_t2.7985611511 !$YES_t8.2446043165) $TYPE_SCHEDULING_t0.0287769784 $UCINATIONS_DENIES_t0.0503597122 $VACCINE_PNEUMOCOCCAL_t0.0359712230 $VARDENAFIL_HCL_t0.0863309353 $VITALS_HT_t0.0719424460 $WEARS_t0.1294964029 $WEDNES_t0.1223021583 $WEEKENDS_t0.0575539568 $WEEK_NOTICE_t0.0575539568 $WENT_OUT_t0.0791366906 $WHOLE_t0.0719424460 $WITH_INSPIRATION_t0.0287769784 $WORK_RELEASE_t0.0287769784 $YOUNG_t0.0503597122) !$LIST_BELOW_t0.1294964029) $NAPROXEN_MG_t0.1726618705 $SWELLING_NOTED_t0.0575539568 $TN_t0.0791366906) !$OR_MILK_t0.0575539568) 
1 and(or(and(or(and(or($COPY_t0.8201438849 !$SO_t1.9208633094) or($PAGER_t0.0935251799 $STEP_t0.3237410072 $VITALS_PULSE_t0.3597122302) !$WANTS_t0.9280575540) and($TRIAGE_t1.6690647482 $WHO_t2.7985611511 !$YES_t8.2446043165) $TYPE_SCHEDULING_t0.0287769784 $UCINATIONS_DENIES_t0.0503597122 $VACCINE_PNEUMOCOCCAL_t0.0359712230 $VARDENAFIL_HCL_t0.0863309353 $VITALS_HT_t0.0719424460 $WEARS_t0.1294964029 $WEDNES_t0.1223021583 $WEEKENDS_t0.0575539568 $WEEK_NOTICE_t0.0575539568 $WENT_OUT_t0.0791366906 $WHOLE_t0.0719424460 $WITH_INSPIRATION_t0.0287769784 $WORK_RELEASE_t0.0287769784 $YOUNG_t0.0503597122) !$OR_MILK_t0.0575539568) $NAPROXEN_MG_t0.1726618705 $SWELLING_NOTED_t0.0575539568 $TN_t0.0791366906) !$LIST_BELOW_t0.1294964029) 
1 and(or(and(or(and(or($COPY_t0.8201438849 !$SO_t1.9208633094) or($PAGER_t0.0935251799 $STEP_t0.3237410072 $VITALS_PULSE_t0.3597122302) !$WANTS_t0.9280575540) and($TRIAGE_t1.6690647482 $WHO_t2.7985611511 !$YES_t8.2446043165) $TYPE_SCHEDULING_t0.0287769784 $UCINATIONS_DENIES_t0.0503597122 $VACCINE_PNEUMOCOCCAL_t0.0359712230 $VARDENAFIL_HCL_t0.0863309353 $VITALS_HT_t0.0719424460 $WEARS_t0.1294964029 $WEDNES_t0.1223021583 $WEEKENDS_t0.0575539568 $WENT_OUT_t0.0791366906 $WHOLE_t0.0719424460 $WITH_INSPIRATION_t0.0287769784 $WORK_RELEASE_t0.0287769784) !$OR_MILK_t0.0575539568) $NAPROXEN_MG_t0.1726618705 $SWELLING_NOTED_t0.0575539568 $TN_t0.0791366906 $WEEK_NOTICE_t0.0575539568 $YOUNG_t0.0503597122) !$LIST_BELOW_t0.1294964029) 
1 and(or(and(or(and(or(and($RESCHEDULED_t0.3309352518 !$TAB_TABLET_t3.5107913669) $CHEMOTHERAPY_t0.0791366906 $TABLET_ONCE_t0.1366906475 $VITALS_PULSE_t0.3597122302) !$VITALS_RESP_t0.1007194245) and(or($UNTIL_t0.9496402878 $VS_t0.4388489209) $WHO_t2.7985611511) $TN_t0.0791366906 $TYPE_SCHEDULING_t0.0287769784 $VACCINE_PNEUMOCOCCAL_t0.0359712230 $VARDENAFIL_MG_t0.1007194245 $VIEW_t0.6762589928 $VITALS_HT_t0.0719424460 $WEARS_t0.1294964029 $WENT_OUT_t0.0791366906 $WHOLE_t0.0719424460 $WITH_INSPIRATION_t0.0287769784 $WORK_RELEASE_t0.0287769784 $YARD_t0.0359712230) or(!$TREATMENT_TEAM_t0.3165467626 !$VERBALIZED_t1.1510791367) !$PROCEDURE_PRACTITIONER_t0.0503597122 !$TAB_TAK_t0.0287769784) $STEP_t0.3237410072) !$VACCINE_IMMUNIZATION_t0.0431654676 !$VACCINE_LOT_t0.0431654676) 
1 and(or(and(or(and(or(and($RESCHEDULED_t0.3309352518 !$TAB_TABLET_t3.5107913669) $CHEMOTHERAPY_t0.0791366906 $TABLET_ONCE_t0.1366906475 $VITALS_PULSE_t0.3597122302) !$VITALS_RESP_t0.1007194245) and(or($UNTIL_t0.9496402878 $VS_t0.4388489209) $WHO_t2.7985611511) $TN_t0.0791366906 $TYPE_SCHEDULING_t0.0287769784 $VACCINE_PNEUMOCOCCAL_t0.0359712230 $VARDENAFIL_MG_t0.1007194245 $VIEW_t0.6762589928 $VITALS_HT_t0.0719424460 $WEARS_t0.1294964029 $WENT_OUT_t0.0791366906 $WHOLE_t0.0719424460 $WITH_INSPIRATION_t0.0287769784 $WORK_RELEASE_t0.0287769784 $YARD_t0.0359712230) !$PROCEDURE_PRACTITIONER_t0.0503597122) $STEP_t0.3237410072) !$TAB_TAK_t0.0287769784 !$VACCINE_IMMUNIZATION_t0.0431654676 !$VACCINE_LOT_t0.0431654676) 
1 and(or(and(or(and(or(and($RESCHEDULED_t0.3309352518 !$TAB_TABLET_t3.5107913669) $CHEMOTHERAPY_t0.0791366906 $TABLET_ONCE_t0.1366906475 $VITALS_PULSE_t0.3597122302) !$VITALS_RESP_t0.1007194245) and(or($UNTIL_t0.9496402878 $VS_t0.4388489209) $WHO_t2.7985611511) $TN_t0.0791366906 $TYPE_SCHEDULING_t0.0287769784 $VACCINE_PNEUMOCOCCAL_t0.0359712230 $VARDENAFIL_MG_t0.1007194245 $VIEW_t0.6762589928 $VITALS_HT_t0.0719424460 $WEARS_t0.1294964029 $WENT_OUT_t0.0791366906 $WHOLE_t0.0719424460 $WITH_INSPIRATION_t0.0287769784 $WORK_RELEASE_t0.0287769784 $YARD_t0.0359712230) !$PROCEDURE_PRACTITIONER_t0.0503597122 !$TAB_TAK_t0.0287769784) $STEP_t0.3237410072) !$VACCINE_IMMUNIZATION_t0.0431654676 !$VACCINE_LOT_t0.0431654676) 
1 and(or(and(or(and(or(and($RESCHEDULED_t0.3309352518 !$TAB_TABLET_t3.5107913669) $CHEMOTHERAPY_t0.0791366906 $TABLET_ONCE_t0.1366906475 $VITALS_PULSE_t0.3597122302) !$VITALS_RESP_t0.1007194245) and(or($UNTIL_t0.9496402878 $VS_t0.4388489209) $WHO_t2.7985611511) $TN_t0.0791366906 $TYPE_SCHEDULING_t0.0287769784 $VACCINE_PNEUMOCOCCAL_t0.0359712230 $VARDENAFIL_MG_t0.1007194245 $VIEW_t0.6762589928 $VITALS_HT_t0.0719424460 $WEARS_t0.1294964029 $WENT_OUT_t0.0791366906 $WHOLE_t0.0719424460 $WITH_INSPIRATION_t0.0287769784 $WORK_RELEASE_t0.0287769784 $YARD_t0.0359712230) !$TAB_TAK_t0.0287769784) $STEP_t0.3237410072) !$PROCEDURE_PRACTITIONER_t0.0503597122 !$VACCINE_IMMUNIZATION_t0.0431654676 !$VACCINE_LOT_t0.0431654676) 
1 and(or(and(or(and(or(and($RESCHEDULED_t0.3309352518 !$TAB_TABLET_t3.5107913669) $CHEMOTHERAPY_t0.0791366906 $VITALS_PULSE_t0.3597122302) !$VITALS_RESP_t0.1007194245) and(or($UNTIL_t0.9496402878 $VS_t0.4388489209) $WHO_t2.7985611511) $TABLET_ONCE_t0.1366906475 $TN_t0.0791366906 $TYPE_SCHEDULING_t0.0287769784 $VACCINE_PNEUMOCOCCAL_t0.0359712230 $VARDENAFIL_MG_t0.1007194245 $VIEW_t0.6762589928 $VITALS_HT_t0.0719424460 $WEARS_t0.1294964029 $WENT_OUT_t0.0791366906 $WHOLE_t0.0719424460 $WITH_INSPIRATION_t0.0287769784 $WORK_RELEASE_t0.0287769784 $YARD_t0.0359712230) !$PROCEDURE_PRACTITIONER_t0.0503597122 !$TAB_TAK_t0.0287769784) $STEP_t0.3237410072) !$VACCINE_IMMUNIZATION_t0.0431654676 !$VACCINE_LOT_t0.0431654676) 
1 and(or(and(or(and(or(and($RESCHEDULED_t0.3309352518 !$TAB_TABLET_t3.5107913669) $CHEMOTHERAPY_t0.0791366906 $VITALS_PULSE_t0.3597122302) !$VITALS_RESP_t0.1007194245) and(or($UNTIL_t0.9496402878 $VS_t0.4388489209) $WHO_t2.7985611511) $TN_t0.0791366906 $TYPE_SCHEDULING_t0.0287769784 $VACCINE_PNEUMOCOCCAL_t0.0359712230 $VARDENAFIL_MG_t0.1007194245 $VIEW_t0.6762589928 $VITALS_HT_t0.0719424460 $WEARS_t0.1294964029 $WENT_OUT_t0.0791366906 $WHOLE_t0.0719424460 $WITH_INSPIRATION_t0.0287769784 $WORK_RELEASE_t0.0287769784 $YARD_t0.0359712230) !$PROCEDURE_PRACTITIONER_t0.0503597122 !$TAB_TAK_t0.0287769784) $STEP_t0.3237410072 $TABLET_ONCE_t0.1366906475) !$VACCINE_IMMUNIZATION_t0.0431654676 !$VACCINE_LOT_t0.0431654676) 
1 and(or(and(or(and(or(and($RESCHEDULED_t0.3309352518 !$TAB_TABLET_t3.5107913669) $TABLET_ONCE_t0.1366906475 $VITALS_PULSE_t0.3597122302) !$VITALS_RESP_t0.1007194245) and(or($UNTIL_t0.9496402878 $VS_t0.4388489209) $WHO_t2.7985611511) $CHEMOTHERAPY_t0.0791366906 $TN_t0.0791366906 $TYPE_SCHEDULING_t0.0287769784 $VACCINE_PNEUMOCOCCAL_t0.0359712230 $VARDENAFIL_MG_t0.1007194245 $VIEW_t0.6762589928 $VITALS_HT_t0.0719424460 $WEARS_t0.1294964029 $WENT_OUT_t0.0791366906 $WHOLE_t0.0719424460 $WITH_INSPIRATION_t0.0287769784 $WORK_RELEASE_t0.0287769784 $YARD_t0.0359712230) !$PROCEDURE_PRACTITIONER_t0.0503597122 !$TAB_TAK_t0.0287769784) $STEP_t0.3237410072) !$VACCINE_IMMUNIZATION_t0.0431654676 !$VACCINE_LOT_t0.0431654676) 
1 or(and(or(and(or(and(or(and($RESCHEDULED_t0.3309352518 !$TAB_TABLET_t3.5107913669) $CHEMOTHERAPY_t0.0791366906 $TABLET_ONCE_t0.1366906475 $VITALS_PULSE_t0.3597122302) !$VITALS_RESP_t0.1007194245) and(or($UNTIL_t0.9496402878 $VS_t0.4388489209) $WHO_t2.7985611511) $TYPE_SCHEDULING_t0.0287769784 $VACCINE_PNEUMOCOCCAL_t0.0359712230 $VARDENAFIL_MG_t0.1007194245 $VIEW_t0.6762589928 $VITALS_HT_t0.0719424460 $WEARS_t0.1294964029 $WENT_OUT_t0.0791366906 $WHOLE_t0.0719424460 $WITH_INSPIRATION_t0.0287769784 $WORK_RELEASE_t0.0287769784 $YARD_t0.0359712230) !$PROCEDURE_PRACTITIONER_t0.0503597122 !$TAB_TAK_t0.0287769784) $STEP_t0.3237410072) !$VACCINE_IMMUNIZATION_t0.0431654676 !$VACCINE_LOT_t0.0431654676) $TN_t0.0791366906) 
1 or(and(or(and(or(and(or(and($RESCHEDULED_t0.3309352518 !$TAB_TABLET_t3.5107913669) $TABLET_ONCE_t0.1366906475 $VITALS_PULSE_t0.3597122302) !$VITALS_RESP_t0.1007194245) and(or($UNTIL_t0.9496402878 $VS_t0.4388489209) $WHO_t2.7985611511) $TN_t0.0791366906 $TYPE_SCHEDULING_t0.0287769784 $VACCINE_PNEUMOCOCCAL_t0.0359712230 $VARDENAFIL_MG_t0.1007194245 $VIEW_t0.6762589928 $VITALS_HT_t0.0719424460 $WEARS_t0.1294964029 $WENT_OUT_t0.0791366906 $WHOLE_t0.0719424460 $WITH_INSPIRATION_t0.0287769784 $WORK_RELEASE_t0.0287769784 $YARD_t0.0359712230) !$PROCEDURE_PRACTITIONER_t0.0503597122 !$TAB_TAK_t0.0287769784) $STEP_t0.3237410072) !$VACCINE_IMMUNIZATION_t0.0431654676 !$VACCINE_LOT_t0.0431654676) $CHEMOTHERAPY_t0.0791366906) 
1 and(or(and(or(and($RESCHEDULED_t0.3309352518 !$TAB_TABLET_t3.5107913669) $CHEMOTHERAPY_t0.0791366906 $TABLET_ONCE_t0.1366906475 $VITALS_PULSE_t0.3597122302) !$UDS_t0.2446043165 !$VITALS_RESP_t0.1007194245) and(or($UNTIL_t0.9496402878 $VS_t0.4388489209) $WHO_t2.7985611511) $STEP_t0.3237410072 $TN_t0.0791366906 $TYPE_SCHEDULING_t0.0287769784 $VACCINE_PNEUMOCOCCAL_t0.0359712230 $VARDENAFIL_MG_t0.1007194245 $VIEW_t0.6762589928 $VITALS_HT_t0.0719424460 $WEARS_t0.1294964029 $WENT_OUT_t0.0791366906 $WHOLE_t0.0719424460 $WITH_INSPIRATION_t0.0287769784 $WORK_RELEASE_t0.0287769784 $YARD_t0.0359712230) !$PROCEDURE_PRACTITIONER_t0.0503597122 !$TAB_TAK_t0.0287769784 !$VACCINE_IMMUNIZATION_t0.0431654676 !$VACCINE_LOT_t0.0431654676) 
1 and(or(and(or(and(!$FAX_t0.2949640288 $VIEW_t0.6762589928 !$WT_KG_t0.9856115108) and($UNTIL_t0.9496402878 $WHO_t2.7985611511 !$YES_t8.2446043165) $HAPPENS_t0.0575539568 $MOUTH_ONCE_t0.1726618705 $STEP_t0.3237410072 $TN_t0.0791366906 $UCINATIONS_DENIES_t0.0503597122 $VACCINE_PNEUMOCOCCAL_t0.0359712230 $VITALS_HT_t0.0719424460 $VITALS_PULSE_t0.3597122302 $WANT_GO_t0.0287769784 $WEARS_t0.1294964029 $WENT_OUT_t0.0791366906 $WHOLE_t0.0719424460 $WITH_INSPIRATION_t0.0287769784 $WORK_RELEASE_t0.0287769784 $WORRY_t0.0503597122) or(!$VITALS_RESP_t0.1007194245 $WOULD_BE_t0.8992805755) !$CONSENT_PRODUCTS_t0.0503597122) $TYPE_SCHEDULING_t0.0287769784) !$HEALING_WELL_t0.0431654676 !$LIST_BELOW_t0.1294964029) 
1 and(or(and(or(and(!$FAX_t0.2949640288 $VIEW_t0.6762589928 !$WT_KG_t0.9856115108) and($UNTIL_t0.9496402878 $WHO_t2.7985611511 !$YES_t8.2446043165) $HAPPENS_t0.0575539568 $MOUTH_ONCE_t0.1726618705 $STEP_t0.3237410072 $TN_t0.0791366906 $UCINATIONS_DENIES_t0.0503597122 $VACCINE_PNEUMOCOCCAL_t0.0359712230 $VITALS_HT_t0.0719424460 $VITALS_PULSE_t0.3597122302 $WANT_GO_t0.0287769784 $WEARS_t0.1294964029 $WENT_OUT_t0.0791366906 $WHOLE_t0.0719424460 $WITH_INSPIRATION_t0.0287769784 $WORK_RELEASE_t0.0287769784 $WORRY_t0.0503597122) or(!$VITALS_RESP_t0.1007194245 $WOULD_BE_t0.8992805755) !$CONSENT_PRODUCTS_t0.0503597122 !$HEALING_WELL_t0.0431654676) $TYPE_SCHEDULING_t0.0287769784) !$LIST_BELOW_t0.1294964029) 
1 and(or(and(or(and(!$FAX_t0.2949640288 $VIEW_t0.6762589928 !$WT_KG_t0.9856115108) and($UNTIL_t0.9496402878 $WHO_t2.7985611511 !$YES_t8.2446043165) $HAPPENS_t0.0575539568 $MOUTH_ONCE_t0.1726618705 $STEP_t0.3237410072 $TN_t0.0791366906 $UCINATIONS_DENIES_t0.0503597122 $VACCINE_PNEUMOCOCCAL_t0.0359712230 $VITALS_HT_t0.0719424460 $VITALS_PULSE_t0.3597122302 $WANT_GO_t0.0287769784 $WEARS_t0.1294964029 $WENT_OUT_t0.0791366906 $WHOLE_t0.0719424460 $WITH_INSPIRATION_t0.0287769784 $WORK_RELEASE_t0.0287769784 $WORRY_t0.0503597122) or(!$VITALS_RESP_t0.1007194245 $WOULD_BE_t0.8992805755) !$HEALING_WELL_t0.0431654676) $TYPE_SCHEDULING_t0.0287769784) !$CONSENT_PRODUCTS_t0.0503597122 !$LIST_BELOW_t0.1294964029) 
1 and(or(and(or(and(!$FAX_t0.2949640288 $VIEW_t0.6762589928 !$WT_KG_t0.9856115108) and($UNTIL_t0.9496402878 $WHO_t2.7985611511 !$YES_t8.2446043165) $HAPPENS_t0.0575539568 $MOUTH_ONCE_t0.1726618705 $TN_t0.0791366906 $UCINATIONS_DENIES_t0.0503597122 $VACCINE_PNEUMOCOCCAL_t0.0359712230 $VITALS_HT_t0.0719424460 $VITALS_PULSE_t0.3597122302 $WANT_GO_t0.0287769784 $WEARS_t0.1294964029 $WENT_OUT_t0.0791366906 $WHOLE_t0.0719424460 $WITH_INSPIRATION_t0.0287769784 $WORK_RELEASE_t0.0287769784 $WORRY_t0.0503597122) or(!$VITALS_RESP_t0.1007194245 $WOULD_BE_t0.8992805755) !$CONSENT_PRODUCTS_t0.0503597122) $STEP_t0.3237410072 $TYPE_SCHEDULING_t0.0287769784) !$HEALING_WELL_t0.0431654676 !$LIST_BELOW_t0.1294964029) 
1 and(or(and(or(and(!$FAX_t0.2949640288 $VIEW_t0.6762589928 !$WT_KG_t0.9856115108) and($UNTIL_t0.9496402878 $WHO_t2.7985611511 !$YES_t8.2446043165) $HAPPENS_t0.0575539568 $MOUTH_ONCE_t0.1726618705 $TN_t0.0791366906 $UCINATIONS_DENIES_t0.0503597122 $VACCINE_PNEUMOCOCCAL_t0.0359712230 $VITALS_HT_t0.0719424460 $VITALS_PULSE_t0.3597122302 $WANT_GO_t0.0287769784 $WEARS_t0.1294964029 $WENT_OUT_t0.0791366906 $WHOLE_t0.0719424460 $WITH_INSPIRATION_t0.0287769784 $WORK_RELEASE_t0.0287769784 $WORRY_t0.0503597122) or(!$VITALS_RESP_t0.1007194245 $WOULD_BE_t0.8992805755) !$CONSENT_PRODUCTS_t0.0503597122 !$HEALING_WELL_t0.0431654676) $STEP_t0.3237410072 $TYPE_SCHEDULING_t0.0287769784) !$LIST_BELOW_t0.1294964029) 
1 and(or(and(or(and(!$FAX_t0.2949640288 $VIEW_t0.6762589928 !$WT_KG_t0.9856115108) and($UNTIL_t0.9496402878 $WHO_t2.7985611511 !$YES_t8.2446043165) $HAPPENS_t0.0575539568 $MOUTH_ONCE_t0.1726618705 $TN_t0.0791366906 $UCINATIONS_DENIES_t0.0503597122 $VACCINE_PNEUMOCOCCAL_t0.0359712230 $VITALS_HT_t0.0719424460 $VITALS_PULSE_t0.3597122302 $WANT_GO_t0.0287769784 $WEARS_t0.1294964029 $WENT_OUT_t0.0791366906 $WHOLE_t0.0719424460 $WITH_INSPIRATION_t0.0287769784 $WORK_RELEASE_t0.0287769784 $WORRY_t0.0503597122) or(!$VITALS_RESP_t0.1007194245 $WOULD_BE_t0.8992805755) !$HEALING_WELL_t0.0431654676) $STEP_t0.3237410072 $TYPE_SCHEDULING_t0.0287769784) !$CONSENT_PRODUCTS_t0.0503597122 !$LIST_BELOW_t0.1294964029) 
1 and(or(and(or(and(!$FAX_t0.2949640288 $VIEW_t0.6762589928 !$WT_KG_t0.9856115108) and($UNTIL_t0.9496402878 $WHO_t2.7985611511 !$YES_t8.2446043165) $MOUTH_ONCE_t0.1726618705 $STEP_t0.3237410072 $TN_t0.0791366906 $UCINATIONS_DENIES_t0.0503597122 $VACCINE_PNEUMOCOCCAL_t0.0359712230 $VITALS_HT_t0.0719424460 $VITALS_PULSE_t0.3597122302 $WANT_GO_t0.0287769784 $WEARS_t0.1294964029 $WENT_OUT_t0.0791366906 $WHOLE_t0.0719424460 $WITH_INSPIRATION_t0.0287769784 $WORK_RELEASE_t0.0287769784 $WORRY_t0.0503597122) or(!$VITALS_RESP_t0.1007194245 $WOULD_BE_t0.8992805755) !$CONSENT_PRODUCTS_t0.0503597122 !$HEALING_WELL_t0.0431654676) $HAPPENS_t0.0575539568 $TYPE_SCHEDULING_t0.0287769784) !$LIST_BELOW_t0.1294964029) 
1 and(or(and(or(and(!$FAX_t0.2949640288 $VIEW_t0.6762589928 !$WT_KG_t0.9856115108) and($UNTIL_t0.9496402878 $WHO_t2.7985611511 !$YES_t8.2446043165) $MOUTH_ONCE_t0.1726618705 $TN_t0.0791366906 $UCINATIONS_DENIES_t0.0503597122 $VACCINE_PNEUMOCOCCAL_t0.0359712230 $VITALS_HT_t0.0719424460 $VITALS_PULSE_t0.3597122302 $WANT_GO_t0.0287769784 $WEARS_t0.1294964029 $WENT_OUT_t0.0791366906 $WHOLE_t0.0719424460 $WITH_INSPIRATION_t0.0287769784 $WORK_RELEASE_t0.0287769784 $WORRY_t0.0503597122) or(!$VITALS_RESP_t0.1007194245 $WOULD_BE_t0.8992805755) !$CONSENT_PRODUCTS_t0.0503597122 !$HEALING_WELL_t0.0431654676) $HAPPENS_t0.0575539568 $STEP_t0.3237410072 $TYPE_SCHEDULING_t0.0287769784) !$LIST_BELOW_t0.1294964029) 
1 or(and(or(and(or(and(!$FAX_t0.2949640288 $VIEW_t0.6762589928 !$WT_KG_t0.9856115108) and($UNTIL_t0.9496402878 $WHO_t2.7985611511 !$YES_t8.2446043165) $HAPPENS_t0.0575539568 $MOUTH_ONCE_t0.1726618705 $TN_t0.0791366906 $UCINATIONS_DENIES_t0.0503597122 $VACCINE_PNEUMOCOCCAL_t0.0359712230 $VITALS_HT_t0.0719424460 $VITALS_PULSE_t0.3597122302 $WANT_GO_t0.0287769784 $WEARS_t0.1294964029 $WENT_OUT_t0.0791366906 $WHOLE_t0.0719424460 $WITH_INSPIRATION_t0.0287769784 $WORK_RELEASE_t0.0287769784 $WORRY_t0.0503597122) or(!$VITALS_RESP_t0.1007194245 $WOULD_BE_t0.8992805755) !$CONSENT_PRODUCTS_t0.0503597122) $STEP_t0.3237410072) !$HEALING_WELL_t0.0431654676 !$LIST_BELOW_t0.1294964029) $TYPE_SCHEDULING_t0.0287769784) 
1 or(and(or(and(or(and(!$FAX_t0.2949640288 $VIEW_t0.6762589928 !$WT_KG_t0.9856115108) and($UNTIL_t0.9496402878 $WHO_t2.7985611511 !$YES_t8.2446043165) $HAPPENS_t0.0575539568 $MOUTH_ONCE_t0.1726618705 $TN_t0.0791366906 $UCINATIONS_DENIES_t0.0503597122 $VACCINE_PNEUMOCOCCAL_t0.0359712230 $VITALS_HT_t0.0719424460 $VITALS_PULSE_t0.3597122302 $WANT_GO_t0.0287769784 $WEARS_t0.1294964029 $WENT_OUT_t0.0791366906 $WHOLE_t0.0719424460 $WITH_INSPIRATION_t0.0287769784 $WORK_RELEASE_t0.0287769784 $WORRY_t0.0503597122) or(!$VITALS_RESP_t0.1007194245 $WOULD_BE_t0.8992805755) !$CONSENT_PRODUCTS_t0.0503597122 !$HEALING_WELL_t0.0431654676) $STEP_t0.3237410072) !$LIST_BELOW_t0.1294964029) $TYPE_SCHEDULING_t0.0287769784) 
1 or(and(or(and(or(!$PICK_UP_t0.3021582734 $TALK_t0.5035971223) !$VITALS_RESP_t0.1007194245) $ONE_TABLET_t2.9928057554 $WE_t2.3453237410) or(and(!$PT_t26.0503597122 $STEP_t0.3237410072) and($UNTIL_t0.9496402878 $WHO_t2.7985611511 !$YES_t8.2446043165) $SYST_t0.1223021583 $TN_t0.0791366906 $TYPE_SCHEDULING_t0.0287769784 $UCINATIONS_DENIES_t0.0503597122 $VACCINE_PNEUMOCOCCAL_t0.0359712230 $VIEW_t0.6762589928 $VITALS_HT_t0.0719424460 $VITALS_PULSE_t0.3597122302 $WANT_GO_t0.0287769784 $WEARS_t0.1294964029 $WENT_OUT_t0.0791366906 $WHOLE_t0.0719424460 $WITH_INSPIRATION_t0.0287769784 $WORK_RELEASE_t0.0287769784 $WORRY_t0.0503597122) !$CONSENT_PRODUCTS_t0.0503597122 !$TAB_TAK_t0.0287769784) $TABLET_ONCE_t0.1366906475) 
1 and(or(and(or(and(or(!$PICK_UP_t0.3021582734 $TALK_t0.5035971223) !$VITALS_RESP_t0.1007194245) $MOUTH_FOUR_t0.3597122302 $WE_t2.3453237410) or(and(!$PT_t26.0503597122 $STEP_t0.3237410072) and($UNTIL_t0.9496402878 $WHO_t2.7985611511 !$YES_t8.2446043165) $SYST_t0.1223021583 $TN_t0.0791366906 $TYPE_SCHEDULING_t0.0287769784 $UCINATIONS_DENIES_t0.0503597122 $VACCINE_PNEUMOCOCCAL_t0.0359712230 $VIEW_t0.6762589928 $VITALS_HT_t0.0719424460 $VITALS_PULSE_t0.3597122302 $WANT_GO_t0.0287769784 $WEARS_t0.1294964029 $WENT_OUT_t0.0791366906 $WHOLE_t0.0719424460 $WITH_INSPIRATION_t0.0287769784 $WORK_RELEASE_t0.0287769784 $WORRY_t0.0503597122) !$CONSENT_PRODUCTS_t0.0503597122) $TABLET_ONCE_t0.1366906475) !$TAB_TAK_t0.0287769784) 
1 and(or(and(or(and(or(!$PICK_UP_t0.3021582734 $TALK_t0.5035971223) !$VITALS_RESP_t0.1007194245) $MOUTH_TIMES_t0.7985611511 $WE_t2.3453237410) or(and(!$PT_t26.0503597122 $STEP_t0.3237410072) and($UNTIL_t0.9496402878 $WHO_t2.7985611511 !$YES_t8.2446043165) $SYST_t0.1223021583 $TN_t0.0791366906 $TYPE_SCHEDULING_t0.0287769784 $UCINATIONS_DENIES_t0.0503597122 $VACCINE_PNEUMOCOCCAL_t0.0359712230 $VIEW_t0.6762589928 $VITALS_HT_t0.0719424460 $VITALS_PULSE_t0.3597122302 $WANT_GO_t0.0287769784 $WEARS_t0.1294964029 $WENT_OUT_t0.0791366906 $WHOLE_t0.0719424460 $WITH_INSPIRATION_t0.0287769784 $WORK_RELEASE_t0.0287769784 $WORRY_t0.0503597122) !$CONSENT_PRODUCTS_t0.0503597122) $TABLET_ONCE_t0.1366906475) !$TAB_TAK_t0.0287769784) 
1 and(or(and(or(and(or(!$PICK_UP_t0.3021582734 $TALK_t0.5035971223) !$VITALS_RESP_t0.1007194245) $ONE_TABLET_t2.9928057554 $WE_t2.3453237410) or(and(!$PT_t26.0503597122 $STEP_t0.3237410072) and($UNTIL_t0.9496402878 $WHO_t2.7985611511 !$YES_t8.2446043165) $SYST_t0.1223021583 $TN_t0.0791366906 $TYPE_SCHEDULING_t0.0287769784 $UCINATIONS_DENIES_t0.0503597122 $VACCINE_PNEUMOCOCCAL_t0.0359712230 $VIEW_t0.6762589928 $VITALS_HT_t0.0719424460 $VITALS_PULSE_t0.3597122302 $WANT_GO_t0.0287769784 $WEARS_t0.1294964029 $WENT_OUT_t0.0791366906 $WHOLE_t0.0719424460 $WITH_INSPIRATION_t0.0287769784 $WORK_RELEASE_t0.0287769784 $WORRY_t0.0503597122) !$CONSENT_PRODUCTS_t0.0503597122) $TABLET_ONCE_t0.1366906475) !$TAB_TAK_t0.0287769784) 
1 and(or(and(or(and(or(!$PICK_UP_t0.3021582734 $TALK_t0.5035971223) !$VITALS_RESP_t0.1007194245) $PRIMARY_PROVIDER_t0.8776978417 $WE_t2.3453237410) or(and(!$PT_t26.0503597122 $STEP_t0.3237410072) and($UNTIL_t0.9496402878 $WHO_t2.7985611511 !$YES_t8.2446043165) $SYST_t0.1223021583 $TN_t0.0791366906 $TYPE_SCHEDULING_t0.0287769784 $UCINATIONS_DENIES_t0.0503597122 $VACCINE_PNEUMOCOCCAL_t0.0359712230 $VIEW_t0.6762589928 $VITALS_HT_t0.0719424460 $VITALS_PULSE_t0.3597122302 $WANT_GO_t0.0287769784 $WEARS_t0.1294964029 $WENT_OUT_t0.0791366906 $WHOLE_t0.0719424460 $WITH_INSPIRATION_t0.0287769784 $WORK_RELEASE_t0.0287769784 $WORRY_t0.0503597122) !$CONSENT_PRODUCTS_t0.0503597122) $TABLET_ONCE_t0.1366906475) !$TAB_TAK_t0.0287769784) 
1 and(or(and(or(and(or(!$PICK_UP_t0.3021582734 $TALK_t0.5035971223) !$VITALS_RESP_t0.1007194245) $QUESTION_t0.4028776978 $WE_t2.3453237410) or(and(!$PT_t26.0503597122 $STEP_t0.3237410072) and($UNTIL_t0.9496402878 $WHO_t2.7985611511 !$YES_t8.2446043165) $SYST_t0.1223021583 $TN_t0.0791366906 $TYPE_SCHEDULING_t0.0287769784 $UCINATIONS_DENIES_t0.0503597122 $VACCINE_PNEUMOCOCCAL_t0.0359712230 $VIEW_t0.6762589928 $VITALS_HT_t0.0719424460 $VITALS_PULSE_t0.3597122302 $WANT_GO_t0.0287769784 $WEARS_t0.1294964029 $WENT_OUT_t0.0791366906 $WHOLE_t0.0719424460 $WITH_INSPIRATION_t0.0287769784 $WORK_RELEASE_t0.0287769784 $WORRY_t0.0503597122) !$CONSENT_PRODUCTS_t0.0503597122) $TABLET_ONCE_t0.1366906475) !$TAB_TAK_t0.0287769784) 
1 and(or(and(or(and(or(!$PICK_UP_t0.3021582734 $TALK_t0.5035971223) !$VITALS_RESP_t0.1007194245) $TAB_ONE_t2.6474820144 $WE_t2.3453237410) or(and(!$PT_t26.0503597122 $STEP_t0.3237410072) and($UNTIL_t0.9496402878 $WHO_t2.7985611511 !$YES_t8.2446043165) $SYST_t0.1223021583 $TN_t0.0791366906 $TYPE_SCHEDULING_t0.0287769784 $UCINATIONS_DENIES_t0.0503597122 $VACCINE_PNEUMOCOCCAL_t0.0359712230 $VIEW_t0.6762589928 $VITALS_HT_t0.0719424460 $VITALS_PULSE_t0.3597122302 $WANT_GO_t0.0287769784 $WEARS_t0.1294964029 $WENT_OUT_t0.0791366906 $WHOLE_t0.0719424460 $WITH_INSPIRATION_t0.0287769784 $WORK_RELEASE_t0.0287769784 $WORRY_t0.0503597122) !$CONSENT_PRODUCTS_t0.0503597122) $TABLET_ONCE_t0.1366906475) !$TAB_TAK_t0.0287769784) 
1 and(or(and(or(and(or(!$PICK_UP_t0.3021582734 $TALK_t0.5035971223) !$VITALS_RESP_t0.1007194245) $THEY_t3.0143884892 $WE_t2.3453237410) or(and(!$PT_t26.0503597122 $STEP_t0.3237410072) and($UNTIL_t0.9496402878 $WHO_t2.7985611511 !$YES_t8.2446043165) $SYST_t0.1223021583 $TN_t0.0791366906 $TYPE_SCHEDULING_t0.0287769784 $UCINATIONS_DENIES_t0.0503597122 $VACCINE_PNEUMOCOCCAL_t0.0359712230 $VIEW_t0.6762589928 $VITALS_HT_t0.0719424460 $VITALS_PULSE_t0.3597122302 $WANT_GO_t0.0287769784 $WEARS_t0.1294964029 $WENT_OUT_t0.0791366906 $WHOLE_t0.0719424460 $WITH_INSPIRATION_t0.0287769784 $WORK_RELEASE_t0.0287769784 $WORRY_t0.0503597122) !$CONSENT_PRODUCTS_t0.0503597122) $TABLET_ONCE_t0.1366906475) !$TAB_TAK_t0.0287769784) 
1 and(or(and(or(and(or(!$PICK_UP_t0.3021582734 $TALK_t0.5035971223) !$VITALS_RESP_t0.1007194245) $TOBACCO_t2.7050359712 $WE_t2.3453237410) or(and(!$PT_t26.0503597122 $STEP_t0.3237410072) and($UNTIL_t0.9496402878 $WHO_t2.7985611511 !$YES_t8.2446043165) $SYST_t0.1223021583 $TN_t0.0791366906 $TYPE_SCHEDULING_t0.0287769784 $UCINATIONS_DENIES_t0.0503597122 $VACCINE_PNEUMOCOCCAL_t0.0359712230 $VIEW_t0.6762589928 $VITALS_HT_t0.0719424460 $VITALS_PULSE_t0.3597122302 $WANT_GO_t0.0287769784 $WEARS_t0.1294964029 $WENT_OUT_t0.0791366906 $WHOLE_t0.0719424460 $WITH_INSPIRATION_t0.0287769784 $WORK_RELEASE_t0.0287769784 $WORRY_t0.0503597122) !$CONSENT_PRODUCTS_t0.0503597122) $TABLET_ONCE_t0.1366906475) !$TAB_TAK_t0.0287769784) 
1 and(or(and(or(and(or(!$PICK_UP_t0.3021582734 $TALK_t0.5035971223) !$VITALS_RESP_t0.1007194245) $TOO_t0.4532374101 $WE_t2.3453237410) or(and(!$PT_t26.0503597122 $STEP_t0.3237410072) and($UNTIL_t0.9496402878 $WHO_t2.7985611511 !$YES_t8.2446043165) $SYST_t0.1223021583 $TN_t0.0791366906 $TYPE_SCHEDULING_t0.0287769784 $UCINATIONS_DENIES_t0.0503597122 $VACCINE_PNEUMOCOCCAL_t0.0359712230 $VIEW_t0.6762589928 $VITALS_HT_t0.0719424460 $VITALS_PULSE_t0.3597122302 $WANT_GO_t0.0287769784 $WEARS_t0.1294964029 $WENT_OUT_t0.0791366906 $WHOLE_t0.0719424460 $WITH_INSPIRATION_t0.0287769784 $WORK_RELEASE_t0.0287769784 $WORRY_t0.0503597122) !$CONSENT_PRODUCTS_t0.0503597122) $TABLET_ONCE_t0.1366906475) !$TAB_TAK_t0.0287769784) 
1 and(or(and(or(and(or(!$BEEN_t9.0359712230 $RESTARTED_ON_t0.0719424460) !$COMPLETION_t0.2086330935 !$EVENTS_t0.4748201439 !$NUTRITION_t1.5971223022 !$PICK_t0.3093525180) $SAYS_t1.1798561151) or(and($VERBALIZED_t1.1510791367 !$YET_t0.3884892086) $MOUTH_ONCE_t0.1726618705 $TN_t0.0791366906 $UNSTEADY_t0.0575539568 $VARDENAFIL_HCL_t0.0863309353 $VETERAN_t8.3453237410 $VIEW_t0.6762589928 $VITALS_HT_t0.0719424460 $VITALS_PULSE_t0.3597122302 $VITALS_WT_t0.0503597122 $WALS_t0.1007194245 $WIHT_t0.0215827338 $WITHIN_LAST_t0.4748201439 $WITH_INSPIRATION_t0.0287769784 $WORSENING_t0.2877697842)) $STEP_t0.3237410072 $UPPER_CHEST_t0.1726618705 $VENLAFAXINE_HCL_t0.0359712230 $WEAPONS_t0.0503597122) !$CP_EXAM_t0.0863309353 !$HEALING_WELL_t0.0431654676 !$INPATIENT_REMOTE_t0.1294964029 !$TREATMENT_OBTAINING_t0.0431654676) 
1 and(or(and(or(and(or(!$BEEN_t9.0359712230 $RESTARTED_ON_t0.0719424460) !$COMPLETION_t0.2086330935 !$EVENTS_t0.4748201439 !$NUTRITION_t1.5971223022 !$PICK_t0.3093525180) $SAYS_t1.1798561151) or(and($VERBALIZED_t1.1510791367 !$YET_t0.3884892086) $MOUTH_ONCE_t0.1726618705 $TN_t0.0791366906 $UNSTEADY_t0.0575539568 $VARDENAFIL_HCL_t0.0863309353 $VETERAN_t8.3453237410 $VIEW_t0.6762589928 $VITALS_HT_t0.0719424460 $VITALS_PULSE_t0.3597122302 $VITALS_WT_t0.0503597122 $WALS_t0.1007194245 $WIHT_t0.0215827338 $WITHIN_LAST_t0.4748201439 $WITH_INSPIRATION_t0.0287769784 $WORSENING_t0.2877697842) !$CP_EXAM_t0.0863309353) $STEP_t0.3237410072 $UPPER_CHEST_t0.1726618705 $VENLAFAXINE_HCL_t0.0359712230 $WEAPONS_t0.0503597122) !$HEALING_WELL_t0.0431654676 !$INPATIENT_REMOTE_t0.1294964029 !$TREATMENT_OBTAINING_t0.0431654676) 
1 and(or(and(or(and(or(and(!$BEEN_t9.0359712230 !$COPING_t0.4532374101) $RESTARTED_ON_t0.0719424460) !$COMPLETION_t0.2086330935 !$CP_EXAM_t0.0863309353 !$NUTRITION_t1.5971223022 !$PICK_t0.3093525180) $SAYS_t1.1798561151) or(and($VERBALIZED_t1.1510791367 !$YET_t0.3884892086) $MOUTH_ONCE_t0.1726618705 $TN_t0.0791366906 $UNSTEADY_t0.0575539568 $VARDENAFIL_HCL_t0.0863309353 $VETERAN_t8.3453237410 $VIEW_t0.6762589928 $VITALS_HT_t0.0719424460 $VITALS_PULSE_t0.3597122302 $VITALS_WT_t0.0503597122 $WALS_t0.1007194245 $WIHT_t0.0215827338 $WITHIN_LAST_t0.4748201439 $WITH_INSPIRATION_t0.0287769784 $WORSENING_t0.2877697842)) $STEP_t0.3237410072 $UPPER_CHEST_t0.1726618705 $VENLAFAXINE_HCL_t0.0359712230 $WEAPONS_t0.0503597122) !$HEALING_WELL_t0.0431654676 !$INPATIENT_REMOTE_t0.1294964029 !$TREATMENT_OBTAINING_t0.0431654676) 
1 and(or(and(or(and(or(and(!$BEEN_t9.0359712230 !$COPING_t0.4532374101) $RESTARTED_ON_t0.0719424460) !$COMPLETION_t0.2086330935 !$NUTRITION_t1.5971223022 !$PICK_t0.3093525180) $SAYS_t1.1798561151) or(and($VERBALIZED_t1.1510791367 !$YET_t0.3884892086) $MOUTH_ONCE_t0.1726618705 $TN_t0.0791366906 $UNSTEADY_t0.0575539568 $VARDENAFIL_HCL_t0.0863309353 $VETERAN_t8.3453237410 $VIEW_t0.6762589928 $VITALS_HT_t0.0719424460 $VITALS_PULSE_t0.3597122302 $VITALS_WT_t0.0503597122 $WALS_t0.1007194245 $WIHT_t0.0215827338 $WITHIN_LAST_t0.4748201439 $WITH_INSPIRATION_t0.0287769784 $WORSENING_t0.2877697842)) $STEP_t0.3237410072 $UPPER_CHEST_t0.1726618705 $VENLAFAXINE_HCL_t0.0359712230 $WEAPONS_t0.0503597122) !$CP_EXAM_t0.0863309353 !$HEALING_WELL_t0.0431654676 !$INPATIENT_REMOTE_t0.1294964029 !$TREATMENT_OBTAINING_t0.0431654676) 
1 and(or(and(or(and(or(and(!$BEEN_t9.0359712230 !$COPING_t0.4532374101) $RESTARTED_ON_t0.0719424460) !$COMPLETION_t0.2086330935 !$NUTRITION_t1.5971223022 !$PICK_t0.3093525180) $SAYS_t1.1798561151) or(and($VERBALIZED_t1.1510791367 !$YET_t0.3884892086) $MOUTH_ONCE_t0.1726618705 $TN_t0.0791366906 $UNSTEADY_t0.0575539568 $VARDENAFIL_HCL_t0.0863309353 $VETERAN_t8.3453237410 $VIEW_t0.6762589928 $VITALS_HT_t0.0719424460 $VITALS_PULSE_t0.3597122302 $VITALS_WT_t0.0503597122 $WALS_t0.1007194245 $WIHT_t0.0215827338 $WITHIN_LAST_t0.4748201439 $WITH_INSPIRATION_t0.0287769784 $WORSENING_t0.2877697842) !$CP_EXAM_t0.0863309353) $STEP_t0.3237410072 $UPPER_CHEST_t0.1726618705 $VENLAFAXINE_HCL_t0.0359712230 $WEAPONS_t0.0503597122) !$HEALING_WELL_t0.0431654676 !$INPATIENT_REMOTE_t0.1294964029 !$TREATMENT_OBTAINING_t0.0431654676) 
1 and(or(and(or(and(or($ADMITTED_HOSPITAL_t0.1726618705 !$BEEN_t9.0359712230 $RESTARTED_ON_t0.0719424460) !$COMPLETION_t0.2086330935 !$EVENTS_t0.4748201439 !$NUTRITION_t1.5971223022 !$PICK_t0.3093525180) $SAYS_t1.1798561151) or(and($VERBALIZED_t1.1510791367 !$YET_t0.3884892086) $MOUTH_ONCE_t0.1726618705 $TN_t0.0791366906 $UNSTEADY_t0.0575539568 $VARDENAFIL_HCL_t0.0863309353 $VETERAN_t8.3453237410 $VIEW_t0.6762589928 $VITALS_HT_t0.0719424460 $VITALS_PULSE_t0.3597122302 $VITALS_WT_t0.0503597122 $WALS_t0.1007194245 $WIHT_t0.0215827338 $WITHIN_LAST_t0.4748201439 $WITH_INSPIRATION_t0.0287769784 $WORSENING_t0.2877697842) !$CP_EXAM_t0.0863309353) $STEP_t0.3237410072 $UPPER_CHEST_t0.1726618705 $VENLAFAXINE_HCL_t0.0359712230 $WEAPONS_t0.0503597122) !$HEALING_WELL_t0.0431654676 !$INPATIENT_REMOTE_t0.1294964029 !$TREATMENT_OBTAINING_t0.0431654676) 
1 and(or(and(or(and(or(!$AGO_t1.9136690647 !$BEEN_t9.0359712230 $RESTARTED_ON_t0.0719424460) !$COMPLETION_t0.2086330935 !$EVENTS_t0.4748201439 !$NUTRITION_t1.5971223022 !$PICK_t0.3093525180) $SAYS_t1.1798561151) or(and($VERBALIZED_t1.1510791367 !$YET_t0.3884892086) $MOUTH_ONCE_t0.1726618705 $TN_t0.0791366906 $UNSTEADY_t0.0575539568 $VARDENAFIL_HCL_t0.0863309353 $VETERAN_t8.3453237410 $VIEW_t0.6762589928 $VITALS_HT_t0.0719424460 $VITALS_PULSE_t0.3597122302 $VITALS_WT_t0.0503597122 $WALS_t0.1007194245 $WIHT_t0.0215827338 $WITHIN_LAST_t0.4748201439 $WITH_INSPIRATION_t0.0287769784 $WORSENING_t0.2877697842) !$CP_EXAM_t0.0863309353) $STEP_t0.3237410072 $UPPER_CHEST_t0.1726618705 $VENLAFAXINE_HCL_t0.0359712230 $WEAPONS_t0.0503597122) !$HEALING_WELL_t0.0431654676 !$INPATIENT_REMOTE_t0.1294964029 !$TREATMENT_OBTAINING_t0.0431654676) 
1 and(or(and(or(and(or(!$BEEN_t9.0359712230 $CONTROLLED_t0.6043165468 $RESTARTED_ON_t0.0719424460) !$COMPLETION_t0.2086330935 !$EVENTS_t0.4748201439 !$NUTRITION_t1.5971223022 !$PICK_t0.3093525180) $SAYS_t1.1798561151) or(and($VERBALIZED_t1.1510791367 !$YET_t0.3884892086) $MOUTH_ONCE_t0.1726618705 $TN_t0.0791366906 $UNSTEADY_t0.0575539568 $VARDENAFIL_HCL_t0.0863309353 $VETERAN_t8.3453237410 $VIEW_t0.6762589928 $VITALS_HT_t0.0719424460 $VITALS_PULSE_t0.3597122302 $VITALS_WT_t0.0503597122 $WALS_t0.1007194245 $WIHT_t0.0215827338 $WITHIN_LAST_t0.4748201439 $WITH_INSPIRATION_t0.0287769784 $WORSENING_t0.2877697842) !$CP_EXAM_t0.0863309353) $STEP_t0.3237410072 $UPPER_CHEST_t0.1726618705 $VENLAFAXINE_HCL_t0.0359712230 $WEAPONS_t0.0503597122) !$HEALING_WELL_t0.0431654676 !$INPATIENT_REMOTE_t0.1294964029 !$TREATMENT_OBTAINING_t0.0431654676) 
1 and(or(and(or(and(or(!$BEEN_t9.0359712230 $FAX_t0.2949640288 $RESTARTED_ON_t0.0719424460) !$COMPLETION_t0.2086330935 !$EVENTS_t0.4748201439 !$NUTRITION_t1.5971223022 !$PICK_t0.3093525180) $SAYS_t1.1798561151) or(and($VERBALIZED_t1.1510791367 !$YET_t0.3884892086) $MOUTH_ONCE_t0.1726618705 $TN_t0.0791366906 $UNSTEADY_t0.0575539568 $VARDENAFIL_HCL_t0.0863309353 $VETERAN_t8.3453237410 $VIEW_t0.6762589928 $VITALS_HT_t0.0719424460 $VITALS_PULSE_t0.3597122302 $VITALS_WT_t0.0503597122 $WALS_t0.1007194245 $WIHT_t0.0215827338 $WITHIN_LAST_t0.4748201439 $WITH_INSPIRATION_t0.0287769784 $WORSENING_t0.2877697842) !$CP_EXAM_t0.0863309353) $STEP_t0.3237410072 $UPPER_CHEST_t0.1726618705 $VENLAFAXINE_HCL_t0.0359712230 $WEAPONS_t0.0503597122) !$HEALING_WELL_t0.0431654676 !$INPATIENT_REMOTE_t0.1294964029 !$TREATMENT_OBTAINING_t0.0431654676) 
1 and(or(and(or(and(or(!$BEEN_t9.0359712230 $LB_BMI_t0.4748201439 $RESTARTED_ON_t0.0719424460) !$COMPLETION_t0.2086330935 !$EVENTS_t0.4748201439 !$NUTRITION_t1.5971223022 !$PICK_t0.3093525180) $SAYS_t1.1798561151) or(and($VERBALIZED_t1.1510791367 !$YET_t0.3884892086) $MOUTH_ONCE_t0.1726618705 $TN_t0.0791366906 $UNSTEADY_t0.0575539568 $VARDENAFIL_HCL_t0.0863309353 $VETERAN_t8.3453237410 $VIEW_t0.6762589928 $VITALS_HT_t0.0719424460 $VITALS_PULSE_t0.3597122302 $VITALS_WT_t0.0503597122 $WALS_t0.1007194245 $WIHT_t0.0215827338 $WITHIN_LAST_t0.4748201439 $WITH_INSPIRATION_t0.0287769784 $WORSENING_t0.2877697842) !$CP_EXAM_t0.0863309353) $STEP_t0.3237410072 $UPPER_CHEST_t0.1726618705 $VENLAFAXINE_HCL_t0.0359712230 $WEAPONS_t0.0503597122) !$HEALING_WELL_t0.0431654676 !$INPATIENT_REMOTE_t0.1294964029 !$TREATMENT_OBTAINING_t0.0431654676) 
1 or(and(or(and($UNTIL_t0.9496402878 $WHO_t2.7985611511 !$YES_t8.2446043165) and(!$USUALLY_t0.2877697842 $VIEW_t0.6762589928 $WANTS_t0.9280575540) $HAPPENS_t0.0575539568 $MOUTH_ONCE_t0.1726618705 $TYPE_SCHEDULING_t0.0287769784 $UCINATIONS_DENIES_t0.0503597122 $VACCINE_PNEUMOCOCCAL_t0.0359712230 $VARDENAFIL_HCL_t0.0863309353 $VITALS_HT_t0.0719424460 $VITALS_PULSE_t0.3597122302 $WANT_GO_t0.0287769784 $WEARS_t0.1294964029 $WEEK_NOTICE_t0.0575539568 $WENT_OUT_t0.0791366906 $WHOLE_t0.0719424460 $WITH_INSPIRATION_t0.0287769784 $WORK_RELEASE_t0.0287769784) !$EXPECTED_BLOOD_t0.0503597122 !$HEALING_WELL_t0.0431654676 !$TAB_TAK_t0.0287769784) $HAPPY_t0.0647482014 $TN_t0.0791366906) 
1 or(and(or(and($UNTIL_t0.9496402878 $WHO_t2.7985611511 !$YES_t8.2446043165) and(!$USUALLY_t0.2877697842 $VIEW_t0.6762589928 $WANTS_t0.9280575540) $MOUTH_ONCE_t0.1726618705 $TYPE_SCHEDULING_t0.0287769784 $UCINATIONS_DENIES_t0.0503597122 $VACCINE_PNEUMOCOCCAL_t0.0359712230 $VARDENAFIL_HCL_t0.0863309353 $VITALS_HT_t0.0719424460 $VITALS_PULSE_t0.3597122302 $WANT_GO_t0.0287769784 $WEARS_t0.1294964029 $WEEK_NOTICE_t0.0575539568 $WENT_OUT_t0.0791366906 $WHOLE_t0.0719424460 $WITH_INSPIRATION_t0.0287769784 $WORK_RELEASE_t0.0287769784) !$EXPECTED_BLOOD_t0.0503597122 !$HEALING_WELL_t0.0431654676 !$TAB_TAK_t0.0287769784) $HAPPENS_t0.0575539568 $HAPPY_t0.0647482014 $TN_t0.0791366906) 
1 or(and(or(and($UNTIL_t0.9496402878 $WHO_t2.7985611511 !$YES_t8.2446043165) and(!$USUALLY_t0.2877697842 $VIEW_t0.6762589928 $WANTS_t0.9280575540) $MOUTH_ONCE_t0.1726618705 $TYPE_SCHEDULING_t0.0287769784 $UCINATIONS_DENIES_t0.0503597122 $VACCINE_PNEUMOCOCCAL_t0.0359712230 $VARDENAFIL_HCL_t0.0863309353 $VITALS_HT_t0.0719424460 $VITALS_PULSE_t0.3597122302 $WANT_GO_t0.0287769784 $WEARS_t0.1294964029 $WEEK_NOTICE_t0.0575539568 $WENT_OUT_t0.0791366906 $WHOLE_t0.0719424460 $WITH_INSPIRATION_t0.0287769784 $WORK_RELEASE_t0.0287769784) !$EXPECTED_BLOOD_t0.0503597122 !$HEALING_WELL_t0.0431654676 !$TAB_TAK_t0.0287769784) $HAPPY_t0.0647482014 $SWELLING_NOTED_t0.0575539568 $TN_t0.0791366906) 
1 or(and(or(and($UNTIL_t0.9496402878 $WHO_t2.7985611511 !$YES_t8.2446043165) and(!$USUALLY_t0.2877697842 $VIEW_t0.6762589928 $WANTS_t0.9280575540) $MOUTH_ONCE_t0.1726618705 $TYPE_SCHEDULING_t0.0287769784 $VACCINE_PNEUMOCOCCAL_t0.0359712230 $VARDENAFIL_HCL_t0.0863309353 $VITALS_HT_t0.0719424460 $VITALS_PULSE_t0.3597122302 $WANT_GO_t0.0287769784 $WEARS_t0.1294964029 $WEEK_NOTICE_t0.0575539568 $WENT_OUT_t0.0791366906 $WHOLE_t0.0719424460 $WITH_INSPIRATION_t0.0287769784 $WORK_RELEASE_t0.0287769784) !$EXPECTED_BLOOD_t0.0503597122 !$HEALING_WELL_t0.0431654676 !$TAB_TAK_t0.0287769784) $HAPPY_t0.0647482014 $SWELLING_NOTED_t0.0575539568 $TN_t0.0791366906 $UCINATIONS_DENIES_t0.0503597122) 
1 or(and(or(and($UNTIL_t0.9496402878 $WHO_t2.7985611511 !$YES_t8.2446043165) and(!$USUALLY_t0.2877697842 $VIEW_t0.6762589928 $WANTS_t0.9280575540) $TYPE_SCHEDULING_t0.0287769784 $UCINATIONS_DENIES_t0.0503597122 $VACCINE_PNEUMOCOCCAL_t0.0359712230 $VARDENAFIL_HCL_t0.0863309353 $VITALS_HT_t0.0719424460 $VITALS_PULSE_t0.3597122302 $WANT_GO_t0.0287769784 $WEARS_t0.1294964029 $WEEK_NOTICE_t0.0575539568 $WENT_OUT_t0.0791366906 $WHOLE_t0.0719424460 $WITH_INSPIRATION_t0.0287769784 $WORK_RELEASE_t0.0287769784) !$EXPECTED_BLOOD_t0.0503597122 !$HEALING_WELL_t0.0431654676 !$TAB_TAK_t0.0287769784) $HAPPY_t0.0647482014 $MOUTH_ONCE_t0.1726618705 $SWELLING_NOTED_t0.0575539568 $TN_t0.0791366906) 
1 and(or(and(or(and($UNTIL_t0.9496402878 $WHO_t2.7985611511 !$YES_t8.2446043165) and(!$USUALLY_t0.2877697842 $VIEW_t0.6762589928 $WANTS_t0.9280575540) $MOUTH_ONCE_t0.1726618705 $TYPE_SCHEDULING_t0.0287769784 $UCINATIONS_DENIES_t0.0503597122 $VACCINE_PNEUMOCOCCAL_t0.0359712230 $VARDENAFIL_HCL_t0.0863309353 $VITALS_HT_t0.0719424460 $VITALS_PULSE_t0.3597122302 $WANT_GO_t0.0287769784 $WEARS_t0.1294964029 $WEEK_NOTICE_t0.0575539568 $WENT_OUT_t0.0791366906 $WHOLE_t0.0719424460 $WITH_INSPIRATION_t0.0287769784 $WORK_RELEASE_t0.0287769784) !$EXPECTED_BLOOD_t0.0503597122) $HAPPY_t0.0647482014 $SWELLING_NOTED_t0.0575539568 $TN_t0.0791366906) !$HEALING_WELL_t0.0431654676 !$TAB_TAK_t0.0287769784) 
1 and(or(and(or(and($UNTIL_t0.9496402878 $WHO_t2.7985611511 !$YES_t8.2446043165) and(!$USUALLY_t0.2877697842 $VIEW_t0.6762589928 $WANTS_t0.9280575540) $MOUTH_ONCE_t0.1726618705 $TYPE_SCHEDULING_t0.0287769784 $UCINATIONS_DENIES_t0.0503597122 $VACCINE_PNEUMOCOCCAL_t0.0359712230 $VARDENAFIL_HCL_t0.0863309353 $VITALS_HT_t0.0719424460 $VITALS_PULSE_t0.3597122302 $WANT_GO_t0.0287769784 $WEARS_t0.1294964029 $WEEK_NOTICE_t0.0575539568 $WENT_OUT_t0.0791366906 $WHOLE_t0.0719424460 $WITH_INSPIRATION_t0.0287769784 $WORK_RELEASE_t0.0287769784) !$EXPECTED_BLOOD_t0.0503597122 !$HEALING_WELL_t0.0431654676) $HAPPENS_t0.0575539568 $HAPPY_t0.0647482014 $TN_t0.0791366906) !$TAB_TAK_t0.0287769784) 
1 and(or(and(or(and($UNTIL_t0.9496402878 $WHO_t2.7985611511 !$YES_t8.2446043165) and(!$USUALLY_t0.2877697842 $VIEW_t0.6762589928 $WANTS_t0.9280575540) $MOUTH_ONCE_t0.1726618705 $TYPE_SCHEDULING_t0.0287769784 $UCINATIONS_DENIES_t0.0503597122 $VACCINE_PNEUMOCOCCAL_t0.0359712230 $VARDENAFIL_HCL_t0.0863309353 $VITALS_HT_t0.0719424460 $VITALS_PULSE_t0.3597122302 $WANT_GO_t0.0287769784 $WEARS_t0.1294964029 $WEEK_NOTICE_t0.0575539568 $WENT_OUT_t0.0791366906 $WHOLE_t0.0719424460 $WITH_INSPIRATION_t0.0287769784 $WORK_RELEASE_t0.0287769784) !$EXPECTED_BLOOD_t0.0503597122 !$HEALING_WELL_t0.0431654676) $HAPPY_t0.0647482014 $SWELLING_NOTED_t0.0575539568 $TN_t0.0791366906) !$TAB_TAK_t0.0287769784) 
1 and(or(and(or(and($UNTIL_t0.9496402878 $WHO_t2.7985611511 !$YES_t8.2446043165) and(!$USUALLY_t0.2877697842 $VIEW_t0.6762589928 $WANTS_t0.9280575540) $MOUTH_ONCE_t0.1726618705 $TYPE_SCHEDULING_t0.0287769784 $UCINATIONS_DENIES_t0.0503597122 $VACCINE_PNEUMOCOCCAL_t0.0359712230 $VARDENAFIL_HCL_t0.0863309353 $VITALS_HT_t0.0719424460 $VITALS_PULSE_t0.3597122302 $WANT_GO_t0.0287769784 $WEARS_t0.1294964029 $WEEK_NOTICE_t0.0575539568 $WENT_OUT_t0.0791366906 $WHOLE_t0.0719424460 $WITH_INSPIRATION_t0.0287769784 $WORK_RELEASE_t0.0287769784) !$EXPECTED_BLOOD_t0.0503597122 !$TAB_TAK_t0.0287769784) $HAPPENS_t0.0575539568 $HAPPY_t0.0647482014 $TN_t0.0791366906) !$HEALING_WELL_t0.0431654676) 
1 and(or(and(or(and($UNTIL_t0.9496402878 $WHO_t2.7985611511 !$YES_t8.2446043165) and(!$USUALLY_t0.2877697842 $VIEW_t0.6762589928 $WANTS_t0.9280575540) $MOUTH_ONCE_t0.1726618705 $TYPE_SCHEDULING_t0.0287769784 $UCINATIONS_DENIES_t0.0503597122 $VACCINE_PNEUMOCOCCAL_t0.0359712230 $VARDENAFIL_HCL_t0.0863309353 $VITALS_HT_t0.0719424460 $VITALS_PULSE_t0.3597122302 $WANT_GO_t0.0287769784 $WEARS_t0.1294964029 $WEEK_NOTICE_t0.0575539568 $WENT_OUT_t0.0791366906 $WHOLE_t0.0719424460 $WITH_INSPIRATION_t0.0287769784 $WORK_RELEASE_t0.0287769784) !$EXPECTED_BLOOD_t0.0503597122 !$TAB_TAK_t0.0287769784) $HAPPY_t0.0647482014 $SWELLING_NOTED_t0.0575539568 $TN_t0.0791366906) !$HEALING_WELL_t0.0431654676) 
1 and(or(and(or($RESCHEDULED_t0.3309352518 $STEP_t0.3237410072 $TN_t0.0791366906 $VIEW_t0.6762589928) !$MOUTH_BEDTIME_t0.7553956835 !$VITALS_TEMP_t0.2086330935) $ABUSE_AUDITC_t0.0359712230 $TYPE_SCHEDULING_t0.0287769784 $UNSTEADY_t0.0575539568 $UPPER_CHEST_t0.1726618705 $VACCINE_PNEUMOCOCCAL_t0.0359712230 $VERBALIZED_t1.1510791367 $VETERAN_t8.3453237410 $VITALS_HT_t0.0719424460 $VITALS_PULSE_t0.3597122302 $VITALS_WT_t0.0503597122 $WAS_RESTARTED_t0.0503597122 $WEAPONS_t0.0503597122 $WITHIN_LAST_t0.4748201439 $WORTHLESSNESS_t0.0647482014) !$TREATMENT_OBTAINING_t0.0431654676 !$VACCINE_LOT_t0.0431654676) 
1 or(and(or(and(or($RESCHEDULED_t0.3309352518 $STEP_t0.3237410072 $TN_t0.0791366906 $VIEW_t0.6762589928) !$MOUTH_BEDTIME_t0.7553956835 !$VITALS_TEMP_t0.2086330935) $TYPE_SCHEDULING_t0.0287769784 $UNSTEADY_t0.0575539568 $UPPER_CHEST_t0.1726618705 $VACCINE_PNEUMOCOCCAL_t0.0359712230 $VERBALIZED_t1.1510791367 $VETERAN_t8.3453237410 $VITALS_HT_t0.0719424460 $VITALS_PULSE_t0.3597122302 $VITALS_WT_t0.0503597122 $WAS_RESTARTED_t0.0503597122 $WEAPONS_t0.0503597122 $WITHIN_LAST_t0.4748201439 $WORTHLESSNESS_t0.0647482014) !$TREATMENT_OBTAINING_t0.0431654676 !$VACCINE_LOT_t0.0431654676) $ABUSE_AUDITC_t0.0359712230) 
1 or(and(or(and(or($RESCHEDULED_t0.3309352518 $STEP_t0.3237410072 $TN_t0.0791366906 $VIEW_t0.6762589928) !$MOUTH_BEDTIME_t0.7553956835 !$VITALS_TEMP_t0.2086330935) $UNSTEADY_t0.0575539568 $UPPER_CHEST_t0.1726618705 $VACCINE_PNEUMOCOCCAL_t0.0359712230 $VERBALIZED_t1.1510791367 $VETERAN_t8.3453237410 $VITALS_HT_t0.0719424460 $VITALS_PULSE_t0.3597122302 $VITALS_WT_t0.0503597122 $WAS_RESTARTED_t0.0503597122 $WEAPONS_t0.0503597122 $WITHIN_LAST_t0.4748201439 $WORTHLESSNESS_t0.0647482014) !$TREATMENT_OBTAINING_t0.0431654676 !$VACCINE_LOT_t0.0431654676) $ABUSE_AUDITC_t0.0359712230 $TYPE_SCHEDULING_t0.0287769784) 
1 and(or(and(or(and(or($RESCHEDULED_t0.3309352518 $STEP_t0.3237410072 $TN_t0.0791366906 $VIEW_t0.6762589928) !$MOUTH_BEDTIME_t0.7553956835 !$VITALS_TEMP_t0.2086330935) $TYPE_SCHEDULING_t0.0287769784 $UNSTEADY_t0.0575539568 $UPPER_CHEST_t0.1726618705 $VACCINE_PNEUMOCOCCAL_t0.0359712230 $VERBALIZED_t1.1510791367 $VETERAN_t8.3453237410 $VITALS_HT_t0.0719424460 $VITALS_PULSE_t0.3597122302 $VITALS_WT_t0.0503597122 $WAS_RESTARTED_t0.0503597122 $WEAPONS_t0.0503597122 $WITHIN_LAST_t0.4748201439 $WORTHLESSNESS_t0.0647482014) !$TREATMENT_OBTAINING_t0.0431654676) $ABUSE_AUDITC_t0.0359712230) !$VACCINE_LOT_t0.0431654676) 
1 and(or(and(or(and(or($RESCHEDULED_t0.3309352518 $STEP_t0.3237410072 $TN_t0.0791366906 $VIEW_t0.6762589928) !$MOUTH_BEDTIME_t0.7553956835 !$VITALS_TEMP_t0.2086330935) $TYPE_SCHEDULING_t0.0287769784 $UNSTEADY_t0.0575539568 $UPPER_CHEST_t0.1726618705 $VACCINE_PNEUMOCOCCAL_t0.0359712230 $VERBALIZED_t1.1510791367 $VETERAN_t8.3453237410 $VITALS_HT_t0.0719424460 $VITALS_PULSE_t0.3597122302 $VITALS_WT_t0.0503597122 $WAS_RESTARTED_t0.0503597122 $WEAPONS_t0.0503597122 $WITHIN_LAST_t0.4748201439 $WORTHLESSNESS_t0.0647482014) !$VACCINE_LOT_t0.0431654676) $ABUSE_AUDITC_t0.0359712230) !$TREATMENT_OBTAINING_t0.0431654676) 
1 and(or(and(or($ABUSE_AUDITC_t0.0359712230 $RESCHEDULED_t0.3309352518 $STEP_t0.3237410072 $TN_t0.0791366906 $VIEW_t0.6762589928) !$MOUTH_BEDTIME_t0.7553956835 !$VITALS_TEMP_t0.2086330935) $ABUSE_AUDITC_t0.0359712230 $TYPE_SCHEDULING_t0.0287769784 $UNSTEADY_t0.0575539568 $UPPER_CHEST_t0.1726618705 $VACCINE_PNEUMOCOCCAL_t0.0359712230 $VERBALIZED_t1.1510791367 $VETERAN_t8.3453237410 $VITALS_HT_t0.0719424460 $VITALS_PULSE_t0.3597122302 $VITALS_WT_t0.0503597122 $WAS_RESTARTED_t0.0503597122 $WEAPONS_t0.0503597122 $WITHIN_LAST_t0.4748201439 $WORTHLESSNESS_t0.0647482014) !$TREATMENT_OBTAINING_t0.0431654676 !$VACCINE_LOT_t0.0431654676) 
1 and(or(and(or($RESCHEDULED_t0.3309352518 $STEP_t0.3237410072 $TN_t0.0791366906 $TOUR_t0.2230215827 $VIEW_t0.6762589928) !$MOUTH_BEDTIME_t0.7553956835 !$VITALS_TEMP_t0.2086330935) $ABUSE_AUDITC_t0.0359712230 $TYPE_SCHEDULING_t0.0287769784 $UNSTEADY_t0.0575539568 $UPPER_CHEST_t0.1726618705 $VACCINE_PNEUMOCOCCAL_t0.0359712230 $VERBALIZED_t1.1510791367 $VETERAN_t8.3453237410 $VITALS_HT_t0.0719424460 $VITALS_PULSE_t0.3597122302 $VITALS_WT_t0.0503597122 $WAS_RESTARTED_t0.0503597122 $WEAPONS_t0.0503597122 $WITHIN_LAST_t0.4748201439 $WORTHLESSNESS_t0.0647482014) !$TREATMENT_OBTAINING_t0.0431654676 !$VACCINE_LOT_t0.0431654676) 
1 and(or(and(or($RESCHEDULED_t0.3309352518 $STEP_t0.3237410072 $TN_t0.0791366906 $TRACHEA_t0.0287769784 $VIEW_t0.6762589928) !$MOUTH_BEDTIME_t0.7553956835 !$VITALS_TEMP_t0.2086330935) $ABUSE_AUDITC_t0.0359712230 $TYPE_SCHEDULING_t0.0287769784 $UNSTEADY_t0.0575539568 $UPPER_CHEST_t0.1726618705 $VACCINE_PNEUMOCOCCAL_t0.0359712230 $VERBALIZED_t1.1510791367 $VETERAN_t8.3453237410 $VITALS_HT_t0.0719424460 $VITALS_PULSE_t0.3597122302 $VITALS_WT_t0.0503597122 $WAS_RESTARTED_t0.0503597122 $WEAPONS_t0.0503597122 $WITHIN_LAST_t0.4748201439 $WORTHLESSNESS_t0.0647482014) !$TREATMENT_OBTAINING_t0.0431654676 !$VACCINE_LOT_t0.0431654676) 
1 and(or(and(or($RESCHEDULED_t0.3309352518 $STEP_t0.3237410072 $TN_t0.0791366906 $TRAITS_t0.0863309353 $VIEW_t0.6762589928) !$MOUTH_BEDTIME_t0.7553956835 !$VITALS_TEMP_t0.2086330935) $ABUSE_AUDITC_t0.0359712230 $TYPE_SCHEDULING_t0.0287769784 $UNSTEADY_t0.0575539568 $UPPER_CHEST_t0.1726618705 $VACCINE_PNEUMOCOCCAL_t0.0359712230 $VERBALIZED_t1.1510791367 $VETERAN_t8.3453237410 $VITALS_HT_t0.0719424460 $VITALS_PULSE_t0.3597122302 $VITALS_WT_t0.0503597122 $WAS_RESTARTED_t0.0503597122 $WEAPONS_t0.0503597122 $WITHIN_LAST_t0.4748201439 $WORTHLESSNESS_t0.0647482014) !$TREATMENT_OBTAINING_t0.0431654676 !$VACCINE_LOT_t0.0431654676) 
1 and(or(and(or($RESCHEDULED_t0.3309352518 $STEP_t0.3237410072 $TN_t0.0791366906 $TRANQUIL_AS_t0.0359712230 $VIEW_t0.6762589928) !$MOUTH_BEDTIME_t0.7553956835 !$VITALS_TEMP_t0.2086330935) $ABUSE_AUDITC_t0.0359712230 $TYPE_SCHEDULING_t0.0287769784 $UNSTEADY_t0.0575539568 $UPPER_CHEST_t0.1726618705 $VACCINE_PNEUMOCOCCAL_t0.0359712230 $VERBALIZED_t1.1510791367 $VETERAN_t8.3453237410 $VITALS_HT_t0.0719424460 $VITALS_PULSE_t0.3597122302 $VITALS_WT_t0.0503597122 $WAS_RESTARTED_t0.0503597122 $WEAPONS_t0.0503597122 $WITHIN_LAST_t0.4748201439 $WORTHLESSNESS_t0.0647482014) !$TREATMENT_OBTAINING_t0.0431654676 !$VACCINE_LOT_t0.0431654676) 
1 or(and(or(and(!$WHO_PRESENTS_t0.2517985612 $WOULD_t3.4172661871) $WEARS_t0.1294964029) or(!$WILL_PROVIDE_t0.1798561151 $WT_KG_t0.9856115108) !$WARRANTED_t0.0719424460) and(or($NAPROXEN_TAB_t0.1654676259 $RESCHEDULED_t0.3309352518 $STEP_t0.3237410072 $TV_t0.4676258993 $VIEW_t0.6762589928 $VITALS_HT_t0.0719424460 $VITALS_PULSE_t0.3597122302 $WHEN_BEGAN_t0.0215827338 $WORK_t2.9496402878) !$SAID_THAT_t0.2877697842 !$VARIOUS_t0.1510791367 !$VITALS_RESP_t0.1007194245 !$WHAT_t2.2733812950) $TN_t0.0791366906 $UPPER_CHEST_t0.1726618705 $VACCINE_PNEUMOCOCCAL_t0.0359712230 $WEEKENDS_t0.0575539568 $WENT_OUT_t0.0791366906 $WITHIN_LAST_t0.4748201439 $WITH_INSPIRATION_t0.0287769784) 
1 or(and(or(and(!$WHO_PRESENTS_t0.2517985612 $WOULD_t3.4172661871) $WEARS_t0.1294964029) or(!$WILL_PROVIDE_t0.1798561151 $WT_KG_t0.9856115108) !$WARRANTED_t0.0719424460) and(or($RESCHEDULED_t0.3309352518 $STEP_t0.3237410072 $TV_t0.4676258993 $VIEW_t0.6762589928 $VITALS_HT_t0.0719424460 $VITALS_PULSE_t0.3597122302 $WHEN_BEGAN_t0.0215827338 $WORK_t2.9496402878) !$SAID_THAT_t0.2877697842 !$VARIOUS_t0.1510791367 !$VITALS_RESP_t0.1007194245 !$WHAT_t2.2733812950) $NAPROXEN_TAB_t0.1654676259 $TN_t0.0791366906 $UPPER_CHEST_t0.1726618705 $VACCINE_PNEUMOCOCCAL_t0.0359712230 $WEEKENDS_t0.0575539568 $WENT_OUT_t0.0791366906 $WITHIN_LAST_t0.4748201439 $WITH_INSPIRATION_t0.0287769784) 
1 or(and(or(and(!$BS_t0.7482014388 !$WHO_PRESENTS_t0.2517985612 $WOULD_t3.4172661871) $WEARS_t0.1294964029) or(!$WILL_PROVIDE_t0.1798561151 $WT_KG_t0.9856115108) !$WARRANTED_t0.0719424460) and(or($NAPROXEN_TAB_t0.1654676259 $RESCHEDULED_t0.3309352518 $STEP_t0.3237410072 $TV_t0.4676258993 $VIEW_t0.6762589928 $VITALS_HT_t0.0719424460 $VITALS_PULSE_t0.3597122302 $WHEN_BEGAN_t0.0215827338 $WORK_t2.9496402878) !$SAID_THAT_t0.2877697842 !$VARIOUS_t0.1510791367 !$VITALS_RESP_t0.1007194245 !$WHAT_t2.2733812950) $TN_t0.0791366906 $UPPER_CHEST_t0.1726618705 $VACCINE_PNEUMOCOCCAL_t0.0359712230 $WEEKENDS_t0.0575539568 $WENT_OUT_t0.0791366906 $WITHIN_LAST_t0.4748201439 $WITH_INSPIRATION_t0.0287769784) 
1 or(and(or(and(!$NAPROXEN_TAB_t0.1654676259 !$WHO_PRESENTS_t0.2517985612 $WOULD_t3.4172661871) $WEARS_t0.1294964029) or(!$WILL_PROVIDE_t0.1798561151 $WT_KG_t0.9856115108) !$WARRANTED_t0.0719424460) and(or($NAPROXEN_TAB_t0.1654676259 $RESCHEDULED_t0.3309352518 $STEP_t0.3237410072 $TV_t0.4676258993 $VIEW_t0.6762589928 $VITALS_HT_t0.0719424460 $VITALS_PULSE_t0.3597122302 $WHEN_BEGAN_t0.0215827338 $WORK_t2.9496402878) !$SAID_THAT_t0.2877697842 !$VARIOUS_t0.1510791367 !$VITALS_RESP_t0.1007194245 !$WHAT_t2.2733812950) $TN_t0.0791366906 $UPPER_CHEST_t0.1726618705 $VACCINE_PNEUMOCOCCAL_t0.0359712230 $WEEKENDS_t0.0575539568 $WENT_OUT_t0.0791366906 $WITHIN_LAST_t0.4748201439 $WITH_INSPIRATION_t0.0287769784) 
1 or(and(or(and(!$TOTAL_TRANSFERRED_t0.0359712230 !$WHO_PRESENTS_t0.2517985612 $WOULD_t3.4172661871) $WEARS_t0.1294964029) or(!$WILL_PROVIDE_t0.1798561151 $WT_KG_t0.9856115108) !$WARRANTED_t0.0719424460) and(or($NAPROXEN_TAB_t0.1654676259 $RESCHEDULED_t0.3309352518 $STEP_t0.3237410072 $TV_t0.4676258993 $VIEW_t0.6762589928 $VITALS_HT_t0.0719424460 $VITALS_PULSE_t0.3597122302 $WHEN_BEGAN_t0.0215827338 $WORK_t2.9496402878) !$SAID_THAT_t0.2877697842 !$VARIOUS_t0.1510791367 !$VITALS_RESP_t0.1007194245 !$WHAT_t2.2733812950) $TN_t0.0791366906 $UPPER_CHEST_t0.1726618705 $VACCINE_PNEUMOCOCCAL_t0.0359712230 $WEEKENDS_t0.0575539568 $WENT_OUT_t0.0791366906 $WITHIN_LAST_t0.4748201439 $WITH_INSPIRATION_t0.0287769784) 
1 or(and(or(and(!$TOTAL_XXXXXXXXXXXXXXXXXXXXXXXXXXXXXXXXXXXXXXXXXXXXXXXXXXXXXXXXXXXXXXXXXXXXXXXXXX_t0.0359712230 !$WHO_PRESENTS_t0.2517985612 $WOULD_t3.4172661871) $WEARS_t0.1294964029) or(!$WILL_PROVIDE_t0.1798561151 $WT_KG_t0.9856115108) !$WARRANTED_t0.0719424460) and(or($NAPROXEN_TAB_t0.1654676259 $RESCHEDULED_t0.3309352518 $STEP_t0.3237410072 $TV_t0.4676258993 $VIEW_t0.6762589928 $VITALS_HT_t0.0719424460 $VITALS_PULSE_t0.3597122302 $WHEN_BEGAN_t0.0215827338 $WORK_t2.9496402878) !$SAID_THAT_t0.2877697842 !$VARIOUS_t0.1510791367 !$VITALS_RESP_t0.1007194245 !$WHAT_t2.2733812950) $TN_t0.0791366906 $UPPER_CHEST_t0.1726618705 $VACCINE_PNEUMOCOCCAL_t0.0359712230 $WEEKENDS_t0.0575539568 $WENT_OUT_t0.0791366906 $WITHIN_LAST_t0.4748201439 $WITH_INSPIRATION_t0.0287769784) 
1 or(and(or(and(!$TRACHEA_t0.0287769784 !$WHO_PRESENTS_t0.2517985612 $WOULD_t3.4172661871) $WEARS_t0.1294964029) or(!$WILL_PROVIDE_t0.1798561151 $WT_KG_t0.9856115108) !$WARRANTED_t0.0719424460) and(or($NAPROXEN_TAB_t0.1654676259 $RESCHEDULED_t0.3309352518 $STEP_t0.3237410072 $TV_t0.4676258993 $VIEW_t0.6762589928 $VITALS_HT_t0.0719424460 $VITALS_PULSE_t0.3597122302 $WHEN_BEGAN_t0.0215827338 $WORK_t2.9496402878) !$SAID_THAT_t0.2877697842 !$VARIOUS_t0.1510791367 !$VITALS_RESP_t0.1007194245 !$WHAT_t2.2733812950) $TN_t0.0791366906 $UPPER_CHEST_t0.1726618705 $VACCINE_PNEUMOCOCCAL_t0.0359712230 $WEEKENDS_t0.0575539568 $WENT_OUT_t0.0791366906 $WITHIN_LAST_t0.4748201439 $WITH_INSPIRATION_t0.0287769784) 
1 or(and(or(and(!$TRANQUIL_AS_t0.0359712230 !$WHO_PRESENTS_t0.2517985612 $WOULD_t3.4172661871) $WEARS_t0.1294964029) or(!$WILL_PROVIDE_t0.1798561151 $WT_KG_t0.9856115108) !$WARRANTED_t0.0719424460) and(or($NAPROXEN_TAB_t0.1654676259 $RESCHEDULED_t0.3309352518 $STEP_t0.3237410072 $TV_t0.4676258993 $VIEW_t0.6762589928 $VITALS_HT_t0.0719424460 $VITALS_PULSE_t0.3597122302 $WHEN_BEGAN_t0.0215827338 $WORK_t2.9496402878) !$SAID_THAT_t0.2877697842 !$VARIOUS_t0.1510791367 !$VITALS_RESP_t0.1007194245 !$WHAT_t2.2733812950) $TN_t0.0791366906 $UPPER_CHEST_t0.1726618705 $VACCINE_PNEUMOCOCCAL_t0.0359712230 $WEEKENDS_t0.0575539568 $WENT_OUT_t0.0791366906 $WITHIN_LAST_t0.4748201439 $WITH_INSPIRATION_t0.0287769784) 
1 or(and(or(and(!$TRANQUIL_RESPONSE_t0.0359712230 !$WHO_PRESENTS_t0.2517985612 $WOULD_t3.4172661871) $WEARS_t0.1294964029) or(!$WILL_PROVIDE_t0.1798561151 $WT_KG_t0.9856115108) !$WARRANTED_t0.0719424460) and(or($NAPROXEN_TAB_t0.1654676259 $RESCHEDULED_t0.3309352518 $STEP_t0.3237410072 $TV_t0.4676258993 $VIEW_t0.6762589928 $VITALS_HT_t0.0719424460 $VITALS_PULSE_t0.3597122302 $WHEN_BEGAN_t0.0215827338 $WORK_t2.9496402878) !$SAID_THAT_t0.2877697842 !$VARIOUS_t0.1510791367 !$VITALS_RESP_t0.1007194245 !$WHAT_t2.2733812950) $TN_t0.0791366906 $UPPER_CHEST_t0.1726618705 $VACCINE_PNEUMOCOCCAL_t0.0359712230 $WEEKENDS_t0.0575539568 $WENT_OUT_t0.0791366906 $WITHIN_LAST_t0.4748201439 $WITH_INSPIRATION_t0.0287769784) 
1 or(and(or(and(!$TRANQUIL_t0.0359712230 !$WHO_PRESENTS_t0.2517985612 $WOULD_t3.4172661871) $WEARS_t0.1294964029) or(!$WILL_PROVIDE_t0.1798561151 $WT_KG_t0.9856115108) !$WARRANTED_t0.0719424460) and(or($NAPROXEN_TAB_t0.1654676259 $RESCHEDULED_t0.3309352518 $STEP_t0.3237410072 $TV_t0.4676258993 $VIEW_t0.6762589928 $VITALS_HT_t0.0719424460 $VITALS_PULSE_t0.3597122302 $WHEN_BEGAN_t0.0215827338 $WORK_t2.9496402878) !$SAID_THAT_t0.2877697842 !$VARIOUS_t0.1510791367 !$VITALS_RESP_t0.1007194245 !$WHAT_t2.2733812950) $TN_t0.0791366906 $UPPER_CHEST_t0.1726618705 $VACCINE_PNEUMOCOCCAL_t0.0359712230 $WEEKENDS_t0.0575539568 $WENT_OUT_t0.0791366906 $WITHIN_LAST_t0.4748201439 $WITH_INSPIRATION_t0.0287769784) 
1 and(or(and(!$HARD_t0.5035971223 $STEP_t0.3237410072) and($TRIAGE_t1.6690647482 !$WARRANTED_t0.0719424460 $WHO_t2.7985611511) and($VITALS_PULSE_t0.3597122302 !$VITALS_RESP_t0.1007194245) $TABLET_ONCE_t0.1366906475 $TN_t0.0791366906 $TYPE_SCHEDULING_t0.0287769784 $UNDER_SKIN_t0.0647482014 $VACCINE_PNEUMOCOCCAL_t0.0359712230 $VARDENAFIL_TAB_t0.1007194245 $VA_OTC_t0.0359712230 $VIEW_t0.6762589928 $VITALS_HT_t0.0719424460 $VOICES_t0.2158273381 $WEARS_t0.1294964029 $WENT_OUT_t0.0791366906 $WITHIN_LAST_t0.4748201439 $WITH_INSPIRATION_t0.0287769784 $WORK_RELEASE_t0.0287769784 $YELLING_t0.0287769784) !$PROCEDURE_PRACTITIONER_t0.0503597122 !$TAB_TAK_t0.0287769784) 
1 or(and(or(and($TRIAGE_t1.6690647482 !$WARRANTED_t0.0719424460 $WHO_t2.7985611511) and($VITALS_PULSE_t0.3597122302 !$VITALS_RESP_t0.1007194245) $TABLET_ONCE_t0.1366906475 $TN_t0.0791366906 $TYPE_SCHEDULING_t0.0287769784 $UNDER_SKIN_t0.0647482014 $VACCINE_PNEUMOCOCCAL_t0.0359712230 $VARDENAFIL_TAB_t0.1007194245 $VA_OTC_t0.0359712230 $VIEW_t0.6762589928 $VITALS_HT_t0.0719424460 $VOICES_t0.2158273381 $WEARS_t0.1294964029 $WENT_OUT_t0.0791366906 $WITHIN_LAST_t0.4748201439 $WITH_INSPIRATION_t0.0287769784 $WORK_RELEASE_t0.0287769784 $YELLING_t0.0287769784) !$PROCEDURE_PRACTITIONER_t0.0503597122 !$TAB_TAK_t0.0287769784) and(!$HARD_t0.5035971223 $STEP_t0.3237410072)) 
1 or(and(or(and($TRIAGE_t1.6690647482 !$WARRANTED_t0.0719424460 $WHO_t2.7985611511) and($VITALS_PULSE_t0.3597122302 !$VITALS_RESP_t0.1007194245) $TN_t0.0791366906 $TYPE_SCHEDULING_t0.0287769784 $UNDER_SKIN_t0.0647482014 $VACCINE_PNEUMOCOCCAL_t0.0359712230 $VARDENAFIL_TAB_t0.1007194245 $VA_OTC_t0.0359712230 $VIEW_t0.6762589928 $VITALS_HT_t0.0719424460 $VOICES_t0.2158273381 $WEARS_t0.1294964029 $WENT_OUT_t0.0791366906 $WITHIN_LAST_t0.4748201439 $WITH_INSPIRATION_t0.0287769784 $WORK_RELEASE_t0.0287769784 $YELLING_t0.0287769784) !$PROCEDURE_PRACTITIONER_t0.0503597122 !$TAB_TAK_t0.0287769784) and(!$HARD_t0.5035971223 $STEP_t0.3237410072) $TABLET_ONCE_t0.1366906475) 
1 or(and(or(and($TRIAGE_t1.6690647482 !$WARRANTED_t0.0719424460 $WHO_t2.7985611511) and($VITALS_PULSE_t0.3597122302 !$VITALS_RESP_t0.1007194245) $TYPE_SCHEDULING_t0.0287769784 $UNDER_SKIN_t0.0647482014 $VACCINE_PNEUMOCOCCAL_t0.0359712230 $VARDENAFIL_TAB_t0.1007194245 $VA_OTC_t0.0359712230 $VIEW_t0.6762589928 $VITALS_HT_t0.0719424460 $VOICES_t0.2158273381 $WEARS_t0.1294964029 $WENT_OUT_t0.0791366906 $WITHIN_LAST_t0.4748201439 $WITH_INSPIRATION_t0.0287769784 $WORK_RELEASE_t0.0287769784 $YELLING_t0.0287769784) !$PROCEDURE_PRACTITIONER_t0.0503597122 !$TAB_TAK_t0.0287769784) and(!$HARD_t0.5035971223 $STEP_t0.3237410072) $TABLET_ONCE_t0.1366906475 $TN_t0.0791366906) 
1 or(and(or(and($TRIAGE_t1.6690647482 !$WARRANTED_t0.0719424460 $WHO_t2.7985611511) and($VITALS_PULSE_t0.3597122302 !$VITALS_RESP_t0.1007194245) $UNDER_SKIN_t0.0647482014 $VACCINE_PNEUMOCOCCAL_t0.0359712230 $VARDENAFIL_TAB_t0.1007194245 $VA_OTC_t0.0359712230 $VIEW_t0.6762589928 $VITALS_HT_t0.0719424460 $VOICES_t0.2158273381 $WEARS_t0.1294964029 $WENT_OUT_t0.0791366906 $WITHIN_LAST_t0.4748201439 $WITH_INSPIRATION_t0.0287769784 $WORK_RELEASE_t0.0287769784 $YELLING_t0.0287769784) !$PROCEDURE_PRACTITIONER_t0.0503597122 !$TAB_TAK_t0.0287769784) and(!$HARD_t0.5035971223 $STEP_t0.3237410072) $TABLET_ONCE_t0.1366906475 $TN_t0.0791366906 $TYPE_SCHEDULING_t0.0287769784) 
1 and(or(and(or(and($TRIAGE_t1.6690647482 !$WARRANTED_t0.0719424460 $WHO_t2.7985611511) and($VITALS_PULSE_t0.3597122302 !$VITALS_RESP_t0.1007194245) $TABLET_ONCE_t0.1366906475 $TN_t0.0791366906 $TYPE_SCHEDULING_t0.0287769784 $UNDER_SKIN_t0.0647482014 $VACCINE_PNEUMOCOCCAL_t0.0359712230 $VARDENAFIL_TAB_t0.1007194245 $VA_OTC_t0.0359712230 $VIEW_t0.6762589928 $VITALS_HT_t0.0719424460 $VOICES_t0.2158273381 $WEARS_t0.1294964029 $WENT_OUT_t0.0791366906 $WITHIN_LAST_t0.4748201439 $WITH_INSPIRATION_t0.0287769784 $WORK_RELEASE_t0.0287769784 $YELLING_t0.0287769784) !$TAB_TAK_t0.0287769784) and(!$HARD_t0.5035971223 $STEP_t0.3237410072)) !$PROCEDURE_PRACTITIONER_t0.0503597122) 
1 and(or(and(or(and($TRIAGE_t1.6690647482 !$WARRANTED_t0.0719424460 $WHO_t2.7985611511) and($VITALS_PULSE_t0.3597122302 !$VITALS_RESP_t0.1007194245) $TABLET_ONCE_t0.1366906475 $TN_t0.0791366906 $TYPE_SCHEDULING_t0.0287769784 $UNDER_SKIN_t0.0647482014 $VARDENAFIL_TAB_t0.1007194245 $VA_OTC_t0.0359712230 $VIEW_t0.6762589928 $VITALS_HT_t0.0719424460 $VOICES_t0.2158273381 $WEARS_t0.1294964029 $WENT_OUT_t0.0791366906 $WITHIN_LAST_t0.4748201439 $WITH_INSPIRATION_t0.0287769784) !$PROCEDURE_PRACTITIONER_t0.0503597122) and(!$HARD_t0.5035971223 $STEP_t0.3237410072) $VACCINE_PNEUMOCOCCAL_t0.0359712230 $WORK_RELEASE_t0.0287769784 $YELLING_t0.0287769784) !$TAB_TAK_t0.0287769784) 
1 and(or(and(or(and($TRIAGE_t1.6690647482 !$WARRANTED_t0.0719424460 $WHO_t2.7985611511) and($VITALS_PULSE_t0.3597122302 !$VITALS_RESP_t0.1007194245) $TN_t0.0791366906 $TYPE_SCHEDULING_t0.0287769784 $UNDER_SKIN_t0.0647482014 $VARDENAFIL_TAB_t0.1007194245 $VA_OTC_t0.0359712230 $VIEW_t0.6762589928 $VITALS_HT_t0.0719424460 $VOICES_t0.2158273381 $WEARS_t0.1294964029 $WENT_OUT_t0.0791366906 $WITHIN_LAST_t0.4748201439 $WITH_INSPIRATION_t0.0287769784) !$PROCEDURE_PRACTITIONER_t0.0503597122) and(!$HARD_t0.5035971223 $STEP_t0.3237410072) $TABLET_ONCE_t0.1366906475 $VACCINE_PNEUMOCOCCAL_t0.0359712230 $WORK_RELEASE_t0.0287769784 $YELLING_t0.0287769784) !$TAB_TAK_t0.0287769784) 
1 and(or(and(or(and($TRIAGE_t1.6690647482 !$WARRANTED_t0.0719424460 $WHO_t2.7985611511) and($VITALS_PULSE_t0.3597122302 !$VITALS_RESP_t0.1007194245) $TN_t0.0791366906 $TYPE_SCHEDULING_t0.0287769784 $UNDER_SKIN_t0.0647482014 $VARDENAFIL_TAB_t0.1007194245 $VA_OTC_t0.0359712230 $VIEW_t0.6762589928 $VITALS_HT_t0.0719424460 $VOICES_t0.2158273381 $WEARS_t0.1294964029 $WENT_OUT_t0.0791366906 $WITH_INSPIRATION_t0.0287769784) !$PROCEDURE_PRACTITIONER_t0.0503597122) and(!$HARD_t0.5035971223 $STEP_t0.3237410072) $TABLET_ONCE_t0.1366906475 $VACCINE_PNEUMOCOCCAL_t0.0359712230 $WITHIN_LAST_t0.4748201439 $WORK_RELEASE_t0.0287769784 $YELLING_t0.0287769784) !$TAB_TAK_t0.0287769784) 
1 and(or(and(or(and($TRIAGE_t1.6690647482 !$WARRANTED_t0.0719424460 $WHO_t2.7985611511) and($VITALS_PULSE_t0.3597122302 !$VITALS_RESP_t0.1007194245) $TN_t0.0791366906 $TYPE_SCHEDULING_t0.0287769784 $UNDER_SKIN_t0.0647482014 $VARDENAFIL_TAB_t0.1007194245 $VA_OTC_t0.0359712230 $VIEW_t0.6762589928 $VITALS_HT_t0.0719424460 $VOICES_t0.2158273381 $WEARS_t0.1294964029 $WITHIN_LAST_t0.4748201439 $WITH_INSPIRATION_t0.0287769784) !$PROCEDURE_PRACTITIONER_t0.0503597122) and(!$HARD_t0.5035971223 $STEP_t0.3237410072) $TABLET_ONCE_t0.1366906475 $VACCINE_PNEUMOCOCCAL_t0.0359712230 $WENT_OUT_t0.0791366906 $WORK_RELEASE_t0.0287769784 $YELLING_t0.0287769784) !$TAB_TAK_t0.0287769784) 
1 or(and(or(and(!$UNTIL_t0.9496402878 $VERBALIZED_t1.1510791367 !$VETERAN_t8.3453237410) and($WHO_t2.7985611511 $WITHDRAWAL_t0.3093525180) $PSYCH_t0.5611510791 $STOCKINGS_t0.0935251799 $TN_t0.0791366906 $TRIAGE_CHIEF_t0.1079136691 $TYPE_SCHEDULING_t0.0287769784 $UDS_t0.2446043165 $UNSTEADY_t0.0575539568 $UPPER_CHEST_t0.1726618705 $VARDENAFIL_TAB_t0.1007194245 $VIEW_t0.6762589928 $VITALS_HT_t0.0719424460 $VITALS_WT_t0.0503597122 $WEAPONS_t0.0503597122 $WHOLE_t0.0719424460) or(!$COMMENTS_t3.2230215827 $UNTIL_t0.9496402878) !$EXPECTED_BLOOD_t0.0503597122) $OPERATIVE_ED_t0.0359712230 $TABLET_ONCE_t0.1366906475 $TYPE_SCHEDULING_t0.0287769784 $VACCINE_PNEUMOCOCCAL_t0.0359712230 $VITALS_TEMPERATURE_t0.1654676259 $WITH_INSPIRATION_t0.0287769784) 
1 or(and(or(and(!$UNTIL_t0.9496402878 $VERBALIZED_t1.1510791367 !$VETERAN_t8.3453237410) and($WHO_t2.7985611511 $WITHDRAWAL_t0.3093525180) $PSYCH_t0.5611510791 $STOCKINGS_t0.0935251799 $TN_t0.0791366906 $TRIAGE_CHIEF_t0.1079136691 $TYPE_SCHEDULING_t0.0287769784 $UDS_t0.2446043165 $UNSTEADY_t0.0575539568 $UPPER_CHEST_t0.1726618705 $VARDENAFIL_TAB_t0.1007194245 $VIEW_t0.6762589928 $VITALS_HT_t0.0719424460 $VITALS_WT_t0.0503597122 $WEAPONS_t0.0503597122 $WHOLE_t0.0719424460) or(!$COMMENTS_t3.2230215827 $UNTIL_t0.9496402878) !$EXPECTED_BLOOD_t0.0503597122) $OPERATIVE_ED_t0.0359712230 $TABLET_ONCE_t0.1366906475 $VACCINE_PNEUMOCOCCAL_t0.0359712230 $VITALS_TEMPERATURE_t0.1654676259 $WITH_INSPIRATION_t0.0287769784) 
1 or(and(or(and(!$ABLE_t2.2517985612 $WHO_t2.7985611511 $WITHDRAWAL_t0.3093525180) and(!$UNTIL_t0.9496402878 $VERBALIZED_t1.1510791367 !$VETERAN_t8.3453237410) $PSYCH_t0.5611510791 $STOCKINGS_t0.0935251799 $TN_t0.0791366906 $TRIAGE_CHIEF_t0.1079136691 $TYPE_SCHEDULING_t0.0287769784 $UDS_t0.2446043165 $UNSTEADY_t0.0575539568 $UPPER_CHEST_t0.1726618705 $VARDENAFIL_TAB_t0.1007194245 $VIEW_t0.6762589928 $VITALS_HT_t0.0719424460 $VITALS_WT_t0.0503597122 $WEAPONS_t0.0503597122 $WHOLE_t0.0719424460) or(!$COMMENTS_t3.2230215827 $UNTIL_t0.9496402878) !$EXPECTED_BLOOD_t0.0503597122) $OPERATIVE_ED_t0.0359712230 $TABLET_ONCE_t0.1366906475 $VACCINE_PNEUMOCOCCAL_t0.0359712230 $VITALS_TEMPERATURE_t0.1654676259 $WITH_INSPIRATION_t0.0287769784) 
1 or(and(or(and(!$ACTIONS_t0.1510791367 !$UNTIL_t0.9496402878 $VERBALIZED_t1.1510791367 !$VETERAN_t8.3453237410) and($WHO_t2.7985611511 $WITHDRAWAL_t0.3093525180) $PSYCH_t0.5611510791 $STOCKINGS_t0.0935251799 $TN_t0.0791366906 $TRIAGE_CHIEF_t0.1079136691 $TYPE_SCHEDULING_t0.0287769784 $UDS_t0.2446043165 $UNSTEADY_t0.0575539568 $UPPER_CHEST_t0.1726618705 $VARDENAFIL_TAB_t0.1007194245 $VIEW_t0.6762589928 $VITALS_HT_t0.0719424460 $VITALS_WT_t0.0503597122 $WEAPONS_t0.0503597122 $WHOLE_t0.0719424460) or(!$COMMENTS_t3.2230215827 $UNTIL_t0.9496402878) !$EXPECTED_BLOOD_t0.0503597122) $OPERATIVE_ED_t0.0359712230 $TABLET_ONCE_t0.1366906475 $VACCINE_PNEUMOCOCCAL_t0.0359712230 $VITALS_TEMPERATURE_t0.1654676259 $WITH_INSPIRATION_t0.0287769784) 
1 or(and(or(and(!$ACTIVE_MORNING_t0.4172661871 !$UNTIL_t0.9496402878 $VERBALIZED_t1.1510791367 !$VETERAN_t8.3453237410) and($WHO_t2.7985611511 $WITHDRAWAL_t0.3093525180) $PSYCH_t0.5611510791 $STOCKINGS_t0.0935251799 $TN_t0.0791366906 $TRIAGE_CHIEF_t0.1079136691 $TYPE_SCHEDULING_t0.0287769784 $UDS_t0.2446043165 $UNSTEADY_t0.0575539568 $UPPER_CHEST_t0.1726618705 $VARDENAFIL_TAB_t0.1007194245 $VIEW_t0.6762589928 $VITALS_HT_t0.0719424460 $VITALS_WT_t0.0503597122 $WEAPONS_t0.0503597122 $WHOLE_t0.0719424460) or(!$COMMENTS_t3.2230215827 $UNTIL_t0.9496402878) !$EXPECTED_BLOOD_t0.0503597122) $OPERATIVE_ED_t0.0359712230 $TABLET_ONCE_t0.1366906475 $VACCINE_PNEUMOCOCCAL_t0.0359712230 $VITALS_TEMPERATURE_t0.1654676259 $WITH_INSPIRATION_t0.0287769784) 
1 or(and(or(and(!$ACTIVE_MORNING_t0.4172661871 $WHO_t2.7985611511 $WITHDRAWAL_t0.3093525180) and(!$UNTIL_t0.9496402878 $VERBALIZED_t1.1510791367 !$VETERAN_t8.3453237410) $PSYCH_t0.5611510791 $STOCKINGS_t0.0935251799 $TN_t0.0791366906 $TRIAGE_CHIEF_t0.1079136691 $TYPE_SCHEDULING_t0.0287769784 $UDS_t0.2446043165 $UNSTEADY_t0.0575539568 $UPPER_CHEST_t0.1726618705 $VARDENAFIL_TAB_t0.1007194245 $VIEW_t0.6762589928 $VITALS_HT_t0.0719424460 $VITALS_WT_t0.0503597122 $WEAPONS_t0.0503597122 $WHOLE_t0.0719424460) or(!$COMMENTS_t3.2230215827 $UNTIL_t0.9496402878) !$EXPECTED_BLOOD_t0.0503597122) $OPERATIVE_ED_t0.0359712230 $TABLET_ONCE_t0.1366906475 $VACCINE_PNEUMOCOCCAL_t0.0359712230 $VITALS_TEMPERATURE_t0.1654676259 $WITH_INSPIRATION_t0.0287769784) 
1 or(and(or(and(!$ADDENDUM_t9.3093525180 $WHO_t2.7985611511 $WITHDRAWAL_t0.3093525180) and(!$UNTIL_t0.9496402878 $VERBALIZED_t1.1510791367 !$VETERAN_t8.3453237410) $PSYCH_t0.5611510791 $STOCKINGS_t0.0935251799 $TN_t0.0791366906 $TRIAGE_CHIEF_t0.1079136691 $TYPE_SCHEDULING_t0.0287769784 $UDS_t0.2446043165 $UNSTEADY_t0.0575539568 $UPPER_CHEST_t0.1726618705 $VARDENAFIL_TAB_t0.1007194245 $VIEW_t0.6762589928 $VITALS_HT_t0.0719424460 $VITALS_WT_t0.0503597122 $WEAPONS_t0.0503597122 $WHOLE_t0.0719424460) or(!$COMMENTS_t3.2230215827 $UNTIL_t0.9496402878) !$EXPECTED_BLOOD_t0.0503597122) $OPERATIVE_ED_t0.0359712230 $TABLET_ONCE_t0.1366906475 $VACCINE_PNEUMOCOCCAL_t0.0359712230 $VITALS_TEMPERATURE_t0.1654676259 $WITH_INSPIRATION_t0.0287769784) 
1 or(and(or(and(!$ADDITIONAL_t1.2589928058 $WHO_t2.7985611511 $WITHDRAWAL_t0.3093525180) and(!$UNTIL_t0.9496402878 $VERBALIZED_t1.1510791367 !$VETERAN_t8.3453237410) $PSYCH_t0.5611510791 $STOCKINGS_t0.0935251799 $TN_t0.0791366906 $TRIAGE_CHIEF_t0.1079136691 $TYPE_SCHEDULING_t0.0287769784 $UDS_t0.2446043165 $UNSTEADY_t0.0575539568 $UPPER_CHEST_t0.1726618705 $VARDENAFIL_TAB_t0.1007194245 $VIEW_t0.6762589928 $VITALS_HT_t0.0719424460 $VITALS_WT_t0.0503597122 $WEAPONS_t0.0503597122 $WHOLE_t0.0719424460) or(!$COMMENTS_t3.2230215827 $UNTIL_t0.9496402878) !$EXPECTED_BLOOD_t0.0503597122) $OPERATIVE_ED_t0.0359712230 $TABLET_ONCE_t0.1366906475 $VACCINE_PNEUMOCOCCAL_t0.0359712230 $VITALS_TEMPERATURE_t0.1654676259 $WITH_INSPIRATION_t0.0287769784) 
1 or(and(or(and(!$AFTER_t3.8992805755 !$UNTIL_t0.9496402878 $VERBALIZED_t1.1510791367 !$VETERAN_t8.3453237410) and($WHO_t2.7985611511 $WITHDRAWAL_t0.3093525180) $PSYCH_t0.5611510791 $STOCKINGS_t0.0935251799 $TN_t0.0791366906 $TRIAGE_CHIEF_t0.1079136691 $TYPE_SCHEDULING_t0.0287769784 $UDS_t0.2446043165 $UNSTEADY_t0.0575539568 $UPPER_CHEST_t0.1726618705 $VARDENAFIL_TAB_t0.1007194245 $VIEW_t0.6762589928 $VITALS_HT_t0.0719424460 $VITALS_WT_t0.0503597122 $WEAPONS_t0.0503597122 $WHOLE_t0.0719424460) or(!$COMMENTS_t3.2230215827 $UNTIL_t0.9496402878) !$EXPECTED_BLOOD_t0.0503597122) $OPERATIVE_ED_t0.0359712230 $TABLET_ONCE_t0.1366906475 $VACCINE_PNEUMOCOCCAL_t0.0359712230 $VITALS_TEMPERATURE_t0.1654676259 $WITH_INSPIRATION_t0.0287769784) 
1 or(and(or(and(!$AGAIN_t1.0791366906 !$UNTIL_t0.9496402878 $VERBALIZED_t1.1510791367 !$VETERAN_t8.3453237410) and($WHO_t2.7985611511 $WITHDRAWAL_t0.3093525180) $PSYCH_t0.5611510791 $STOCKINGS_t0.0935251799 $TN_t0.0791366906 $TRIAGE_CHIEF_t0.1079136691 $TYPE_SCHEDULING_t0.0287769784 $UDS_t0.2446043165 $UNSTEADY_t0.0575539568 $UPPER_CHEST_t0.1726618705 $VARDENAFIL_TAB_t0.1007194245 $VIEW_t0.6762589928 $VITALS_HT_t0.0719424460 $VITALS_WT_t0.0503597122 $WEAPONS_t0.0503597122 $WHOLE_t0.0719424460) or(!$COMMENTS_t3.2230215827 $UNTIL_t0.9496402878) !$EXPECTED_BLOOD_t0.0503597122) $OPERATIVE_ED_t0.0359712230 $TABLET_ONCE_t0.1366906475 $VACCINE_PNEUMOCOCCAL_t0.0359712230 $VITALS_TEMPERATURE_t0.1654676259 $WITH_INSPIRATION_t0.0287769784) 
1 and(or(and(or(and($RESCHEDULED_t0.3309352518 !$YESTER_t0.9712230216) $STEP_t0.3237410072 $SYST_t0.1223021583 $VITALS_HT_t0.0719424460 $WORK_t2.9496402878) !$VARIOUS_t0.1510791367 !$WE_t2.3453237410) and(!$USUALLY_t0.2877697842 $WHO_t2.7985611511 $WOULD_t3.4172661871) $TABLET_ONCE_t0.1366906475 $TN_t0.0791366906 $TYPE_SCHEDULING_t0.0287769784 $UL_t0.0215827338 $VACCINE_PNEUMOCOCCAL_t0.0359712230 $VA_OTC_t0.0359712230 $VIEW_t0.6762589928 $VITALS_PULSE_t0.3597122302 $WAS_RESTARTED_t0.0503597122 $WEARS_t0.1294964029 $WENT_OUT_t0.0791366906 $WITH_INSPIRATION_t0.0287769784 $WORTHLESSNESS_t0.0647482014 $YARD_t0.0359712230 $YELLING_t0.0287769784) !$MG_TAK_t0.0287769784 !$PROCEDURE_PRACTITIONER_t0.0503597122) 
1 or(and(or(and(or($RESCHEDULED_t0.3309352518 $STEP_t0.3237410072 $SYST_t0.1223021583 $VITALS_HT_t0.0719424460 $WORK_t2.9496402878) !$EACH_t1.4028776978 !$VARIOUS_t0.1510791367 !$WE_t2.3453237410) and(!$USUALLY_t0.2877697842 $WHO_t2.7985611511 $WOULD_t3.4172661871) $TN_t0.0791366906 $TYPE_SCHEDULING_t0.0287769784 $UL_t0.0215827338 $VACCINE_PNEUMOCOCCAL_t0.0359712230 $VA_OTC_t0.0359712230 $VIEW_t0.6762589928 $VITALS_PULSE_t0.3597122302 $WAS_RESTARTED_t0.0503597122 $WEARS_t0.1294964029 $WENT_OUT_t0.0791366906 $WITH_INSPIRATION_t0.0287769784 $WORTHLESSNESS_t0.0647482014 $YARD_t0.0359712230 $YELLING_t0.0287769784) !$MG_TAK_t0.0287769784 !$PROCEDURE_PRACTITIONER_t0.0503597122) $TABLET_ONCE_t0.1366906475) 
1 or(and(or(and(or($RESCHEDULED_t0.3309352518 $STEP_t0.3237410072 $SYST_t0.1223021583 $VITALS_HT_t0.0719424460 $WORK_t2.9496402878) !$EACH_t1.4028776978 !$VARIOUS_t0.1510791367 !$WE_t2.3453237410) and(!$USUALLY_t0.2877697842 $WHO_t2.7985611511 $WOULD_t3.4172661871) $TYPE_SCHEDULING_t0.0287769784 $UL_t0.0215827338 $VACCINE_PNEUMOCOCCAL_t0.0359712230 $VA_OTC_t0.0359712230 $VIEW_t0.6762589928 $VITALS_PULSE_t0.3597122302 $WAS_RESTARTED_t0.0503597122 $WEARS_t0.1294964029 $WENT_OUT_t0.0791366906 $WITH_INSPIRATION_t0.0287769784 $WORTHLESSNESS_t0.0647482014 $YARD_t0.0359712230 $YELLING_t0.0287769784) !$MG_TAK_t0.0287769784 !$PROCEDURE_PRACTITIONER_t0.0503597122) $TABLET_ONCE_t0.1366906475 $TN_t0.0791366906) 
1 and(or(and(or(and(or($RESCHEDULED_t0.3309352518 $STEP_t0.3237410072 $SYST_t0.1223021583 $VITALS_HT_t0.0719424460 $WORK_t2.9496402878) !$EACH_t1.4028776978 !$VARIOUS_t0.1510791367 !$WE_t2.3453237410) and(!$USUALLY_t0.2877697842 $WHO_t2.7985611511 $WOULD_t3.4172661871) $TN_t0.0791366906 $TYPE_SCHEDULING_t0.0287769784 $UL_t0.0215827338 $VACCINE_PNEUMOCOCCAL_t0.0359712230 $VA_OTC_t0.0359712230 $VIEW_t0.6762589928 $VITALS_PULSE_t0.3597122302 $WAS_RESTARTED_t0.0503597122 $WEARS_t0.1294964029 $WENT_OUT_t0.0791366906 $WITH_INSPIRATION_t0.0287769784 $WORTHLESSNESS_t0.0647482014 $YARD_t0.0359712230 $YELLING_t0.0287769784) !$MG_TAK_t0.0287769784) $TABLET_ONCE_t0.1366906475) !$PROCEDURE_PRACTITIONER_t0.0503597122) 
1 and(or(and(or(and(or($RESCHEDULED_t0.3309352518 $STEP_t0.3237410072 $SYST_t0.1223021583 $VITALS_HT_t0.0719424460 $WORK_t2.9496402878) !$VARIOUS_t0.1510791367 !$WE_t2.3453237410 !$YESTER_t0.9712230216) and(!$USUALLY_t0.2877697842 $WHO_t2.7985611511 $WOULD_t3.4172661871) $TN_t0.0791366906 $TYPE_SCHEDULING_t0.0287769784 $UL_t0.0215827338 $VACCINE_PNEUMOCOCCAL_t0.0359712230 $VA_OTC_t0.0359712230 $VIEW_t0.6762589928 $VITALS_PULSE_t0.3597122302 $WAS_RESTARTED_t0.0503597122 $WEARS_t0.1294964029 $WENT_OUT_t0.0791366906 $WITH_INSPIRATION_t0.0287769784 $WORTHLESSNESS_t0.0647482014 $YARD_t0.0359712230 $YELLING_t0.0287769784) !$PROCEDURE_PRACTITIONER_t0.0503597122) $TABLET_ONCE_t0.1366906475) !$MG_TAK_t0.0287769784) 
1 and(or(and(or(and(or($RESCHEDULED_t0.3309352518 $STEP_t0.3237410072 $SYST_t0.1223021583 $VITALS_HT_t0.0719424460 $WORK_t2.9496402878) !$VARIOUS_t0.1510791367 !$WE_t2.3453237410 !$YESTER_t0.9712230216) and(!$USUALLY_t0.2877697842 $WHO_t2.7985611511 $WOULD_t3.4172661871) $TN_t0.0791366906 $TYPE_SCHEDULING_t0.0287769784 $UL_t0.0215827338 $VACCINE_PNEUMOCOCCAL_t0.0359712230 $VA_OTC_t0.0359712230 $VIEW_t0.6762589928 $VITALS_PULSE_t0.3597122302 $WAS_RESTARTED_t0.0503597122 $WEARS_t0.1294964029 $WITH_INSPIRATION_t0.0287769784 $WORTHLESSNESS_t0.0647482014 $YARD_t0.0359712230 $YELLING_t0.0287769784) !$PROCEDURE_PRACTITIONER_t0.0503597122) $TABLET_ONCE_t0.1366906475 $WENT_OUT_t0.0791366906) !$MG_TAK_t0.0287769784) 
1 and(or(and(or(and(or($RESCHEDULED_t0.3309352518 $STEP_t0.3237410072 $SYST_t0.1223021583 $VITALS_HT_t0.0719424460 $WORK_t2.9496402878) !$VARIOUS_t0.1510791367 !$WE_t2.3453237410 !$YESTER_t0.9712230216) and(!$USUALLY_t0.2877697842 $WHO_t2.7985611511 $WOULD_t3.4172661871) $TN_t0.0791366906 $TYPE_SCHEDULING_t0.0287769784 $VACCINE_PNEUMOCOCCAL_t0.0359712230 $VA_OTC_t0.0359712230 $VIEW_t0.6762589928 $VITALS_PULSE_t0.3597122302 $WAS_RESTARTED_t0.0503597122 $WEARS_t0.1294964029 $WITH_INSPIRATION_t0.0287769784 $WORTHLESSNESS_t0.0647482014 $YARD_t0.0359712230 $YELLING_t0.0287769784) !$PROCEDURE_PRACTITIONER_t0.0503597122) $TABLET_ONCE_t0.1366906475 $UL_t0.0215827338 $WENT_OUT_t0.0791366906) !$MG_TAK_t0.0287769784) 
1 or(and(or(and(or(and($RESCHEDULED_t0.3309352518 !$YESTER_t0.9712230216) $STEP_t0.3237410072 $SYST_t0.1223021583 $VITALS_HT_t0.0719424460 $WORK_t2.9496402878) !$VARIOUS_t0.1510791367 !$WE_t2.3453237410) and(!$USUALLY_t0.2877697842 $WHO_t2.7985611511 $WOULD_t3.4172661871) $TN_t0.0791366906 $TYPE_SCHEDULING_t0.0287769784 $UL_t0.0215827338 $VACCINE_PNEUMOCOCCAL_t0.0359712230 $VA_OTC_t0.0359712230 $VIEW_t0.6762589928 $VITALS_PULSE_t0.3597122302 $WAS_RESTARTED_t0.0503597122 $WEARS_t0.1294964029 $WENT_OUT_t0.0791366906 $WITH_INSPIRATION_t0.0287769784 $WORTHLESSNESS_t0.0647482014 $YARD_t0.0359712230 $YELLING_t0.0287769784) !$MG_TAK_t0.0287769784 !$PROCEDURE_PRACTITIONER_t0.0503597122) $TABLET_ONCE_t0.1366906475) 
1 and(or(and(or(and(or(and($RESCHEDULED_t0.3309352518 !$YESTER_t0.9712230216) $STEP_t0.3237410072 $SYST_t0.1223021583 $VITALS_HT_t0.0719424460 $WORK_t2.9496402878) !$VARIOUS_t0.1510791367 !$WE_t2.3453237410) and(!$USUALLY_t0.2877697842 $WHO_t2.7985611511 $WOULD_t3.4172661871) $TN_t0.0791366906 $TYPE_SCHEDULING_t0.0287769784 $UL_t0.0215827338 $VACCINE_PNEUMOCOCCAL_t0.0359712230 $VA_OTC_t0.0359712230 $VIEW_t0.6762589928 $VITALS_PULSE_t0.3597122302 $WAS_RESTARTED_t0.0503597122 $WEARS_t0.1294964029 $WENT_OUT_t0.0791366906 $WITH_INSPIRATION_t0.0287769784 $WORTHLESSNESS_t0.0647482014 $YARD_t0.0359712230 $YELLING_t0.0287769784) !$PROCEDURE_PRACTITIONER_t0.0503597122) $TABLET_ONCE_t0.1366906475) !$MG_TAK_t0.0287769784) 
1 and(or(and(or(and(or(and($RESCHEDULED_t0.3309352518 !$YESTER_t0.9712230216) $STEP_t0.3237410072 $SYST_t0.1223021583 $VITALS_HT_t0.0719424460 $WORK_t2.9496402878) !$VARIOUS_t0.1510791367 !$WE_t2.3453237410) and(!$USUALLY_t0.2877697842 $WHO_t2.7985611511 $WOULD_t3.4172661871) $TN_t0.0791366906 $TYPE_SCHEDULING_t0.0287769784 $UL_t0.0215827338 $VACCINE_PNEUMOCOCCAL_t0.0359712230 $VA_OTC_t0.0359712230 $VIEW_t0.6762589928 $VITALS_PULSE_t0.3597122302 $WAS_RESTARTED_t0.0503597122 $WEARS_t0.1294964029 $WITH_INSPIRATION_t0.0287769784 $WORTHLESSNESS_t0.0647482014 $YARD_t0.0359712230) !$PROCEDURE_PRACTITIONER_t0.0503597122) $TABLET_ONCE_t0.1366906475 $WENT_OUT_t0.0791366906 $YELLING_t0.0287769784) !$MG_TAK_t0.0287769784) 
1 or(and(or(and($VERBALIZED_t1.1510791367 !$YET_t0.3884892086) $INFLUENZA_SEP_t0.0359712230 $RESCHEDULED_t0.3309352518 $STEP_t0.3237410072 $TN_t0.0791366906 $UNSTEADY_t0.0575539568 $VARDENAFIL_HCL_t0.0863309353 $VETERAN_t8.3453237410 $VIEW_t0.6762589928 $VITALS_HT_t0.0719424460 $VITALS_PULSE_t0.3597122302 $WALS_t0.1007194245 $WAS_SCREENED_t0.1151079137 $WITHIN_LAST_t0.4748201439 $WORSENING_t0.2877697842) or(!$AM_t3.9136690647 $CHIEF_COMPLAINT_t3.1294964029 !$PULSE_t4.8848920863) or(!$COMPUTERIZED_t0.5179856115 !$MAKE_t1.2230215827 $PULSE_t4.8848920863)) $UPPER_CHEST_t0.1726618705 $WEAPONS_t0.0503597122 $WITH_INSPIRATION_t0.0287769784) 
1 or(and(or(and($VERBALIZED_t1.1510791367 !$YET_t0.3884892086) $RESCHEDULED_t0.3309352518 $STEP_t0.3237410072 $TN_t0.0791366906 $UNSTEADY_t0.0575539568 $VARDENAFIL_HCL_t0.0863309353 $VETERAN_t8.3453237410 $VIEW_t0.6762589928 $VITALS_HT_t0.0719424460 $VITALS_PULSE_t0.3597122302 $WALS_t0.1007194245 $WAS_SCREENED_t0.1151079137 $WITHIN_LAST_t0.4748201439 $WORSENING_t0.2877697842) or(!$AM_t3.9136690647 $CHIEF_COMPLAINT_t3.1294964029 !$PULSE_t4.8848920863) or(!$COMPUTERIZED_t0.5179856115 !$MAKE_t1.2230215827 $PULSE_t4.8848920863)) $INFLUENZA_SEP_t0.0359712230 $UPPER_CHEST_t0.1726618705 $WEAPONS_t0.0503597122 $WITH_INSPIRATION_t0.0287769784) 
1 or(and(or(and(!$PULSE_t4.8848920863 $VERBALIZED_t1.1510791367 !$YET_t0.3884892086) $INFLUENZA_SEP_t0.0359712230 $RESCHEDULED_t0.3309352518 $STEP_t0.3237410072 $TN_t0.0791366906 $UNSTEADY_t0.0575539568 $VARDENAFIL_HCL_t0.0863309353 $VETERAN_t8.3453237410 $VIEW_t0.6762589928 $VITALS_HT_t0.0719424460 $VITALS_PULSE_t0.3597122302 $WALS_t0.1007194245 $WAS_SCREENED_t0.1151079137 $WITHIN_LAST_t0.4748201439 $WORSENING_t0.2877697842) or(!$AM_t3.9136690647 $CHIEF_COMPLAINT_t3.1294964029 !$PULSE_t4.8848920863) or(!$COMPUTERIZED_t0.5179856115 !$MAKE_t1.2230215827 $PULSE_t4.8848920863)) $UPPER_CHEST_t0.1726618705 $WEAPONS_t0.0503597122 $WITH_INSPIRATION_t0.0287769784) 
1 or(and(or(and(!$SUICIDAL_t1.7841726619 $VERBALIZED_t1.1510791367 !$YET_t0.3884892086) $INFLUENZA_SEP_t0.0359712230 $RESCHEDULED_t0.3309352518 $STEP_t0.3237410072 $TN_t0.0791366906 $UNSTEADY_t0.0575539568 $VARDENAFIL_HCL_t0.0863309353 $VETERAN_t8.3453237410 $VIEW_t0.6762589928 $VITALS_HT_t0.0719424460 $VITALS_PULSE_t0.3597122302 $WALS_t0.1007194245 $WAS_SCREENED_t0.1151079137 $WITHIN_LAST_t0.4748201439 $WORSENING_t0.2877697842) or(!$AM_t3.9136690647 $CHIEF_COMPLAINT_t3.1294964029 !$PULSE_t4.8848920863) or(!$COMPUTERIZED_t0.5179856115 !$MAKE_t1.2230215827 $PULSE_t4.8848920863)) $UPPER_CHEST_t0.1726618705 $WEAPONS_t0.0503597122 $WITH_INSPIRATION_t0.0287769784) 
1 or(and(or(and(!$TOTAL_TRANSFERRED_t0.0359712230 $VERBALIZED_t1.1510791367 !$YET_t0.3884892086) $INFLUENZA_SEP_t0.0359712230 $RESCHEDULED_t0.3309352518 $STEP_t0.3237410072 $TN_t0.0791366906 $UNSTEADY_t0.0575539568 $VARDENAFIL_HCL_t0.0863309353 $VETERAN_t8.3453237410 $VIEW_t0.6762589928 $VITALS_HT_t0.0719424460 $VITALS_PULSE_t0.3597122302 $WALS_t0.1007194245 $WAS_SCREENED_t0.1151079137 $WITHIN_LAST_t0.4748201439 $WORSENING_t0.2877697842) or(!$AM_t3.9136690647 $CHIEF_COMPLAINT_t3.1294964029 !$PULSE_t4.8848920863) or(!$COMPUTERIZED_t0.5179856115 !$MAKE_t1.2230215827 $PULSE_t4.8848920863)) $UPPER_CHEST_t0.1726618705 $WEAPONS_t0.0503597122 $WITH_INSPIRATION_t0.0287769784) 
1 or(and(or(and(!$TOTAL_XXXXXXXXXXXXXXXXXXXXXXXXXXXXXXXXXXXXXXXXXXXXXXXXXXXXXXXXXXXXXXXXXXXXXXXXXX_t0.0359712230 $VERBALIZED_t1.1510791367 !$YET_t0.3884892086) $INFLUENZA_SEP_t0.0359712230 $RESCHEDULED_t0.3309352518 $STEP_t0.3237410072 $TN_t0.0791366906 $UNSTEADY_t0.0575539568 $VARDENAFIL_HCL_t0.0863309353 $VETERAN_t8.3453237410 $VIEW_t0.6762589928 $VITALS_HT_t0.0719424460 $VITALS_PULSE_t0.3597122302 $WALS_t0.1007194245 $WAS_SCREENED_t0.1151079137 $WITHIN_LAST_t0.4748201439 $WORSENING_t0.2877697842) or(!$AM_t3.9136690647 $CHIEF_COMPLAINT_t3.1294964029 !$PULSE_t4.8848920863) or(!$COMPUTERIZED_t0.5179856115 !$MAKE_t1.2230215827 $PULSE_t4.8848920863)) $UPPER_CHEST_t0.1726618705 $WEAPONS_t0.0503597122 $WITH_INSPIRATION_t0.0287769784) 
1 or(and(or(and(!$TOT_t0.0287769784 $VERBALIZED_t1.1510791367 !$YET_t0.3884892086) $INFLUENZA_SEP_t0.0359712230 $RESCHEDULED_t0.3309352518 $STEP_t0.3237410072 $TN_t0.0791366906 $UNSTEADY_t0.0575539568 $VARDENAFIL_HCL_t0.0863309353 $VETERAN_t8.3453237410 $VIEW_t0.6762589928 $VITALS_HT_t0.0719424460 $VITALS_PULSE_t0.3597122302 $WALS_t0.1007194245 $WAS_SCREENED_t0.1151079137 $WITHIN_LAST_t0.4748201439 $WORSENING_t0.2877697842) or(!$AM_t3.9136690647 $CHIEF_COMPLAINT_t3.1294964029 !$PULSE_t4.8848920863) or(!$COMPUTERIZED_t0.5179856115 !$MAKE_t1.2230215827 $PULSE_t4.8848920863)) $UPPER_CHEST_t0.1726618705 $WEAPONS_t0.0503597122 $WITH_INSPIRATION_t0.0287769784) 
1 or(and(or(and(!$TOUR_t0.2230215827 $VERBALIZED_t1.1510791367 !$YET_t0.3884892086) $INFLUENZA_SEP_t0.0359712230 $RESCHEDULED_t0.3309352518 $STEP_t0.3237410072 $TN_t0.0791366906 $UNSTEADY_t0.0575539568 $VARDENAFIL_HCL_t0.0863309353 $VETERAN_t8.3453237410 $VIEW_t0.6762589928 $VITALS_HT_t0.0719424460 $VITALS_PULSE_t0.3597122302 $WALS_t0.1007194245 $WAS_SCREENED_t0.1151079137 $WITHIN_LAST_t0.4748201439 $WORSENING_t0.2877697842) or(!$AM_t3.9136690647 $CHIEF_COMPLAINT_t3.1294964029 !$PULSE_t4.8848920863) or(!$COMPUTERIZED_t0.5179856115 !$MAKE_t1.2230215827 $PULSE_t4.8848920863)) $UPPER_CHEST_t0.1726618705 $WEAPONS_t0.0503597122 $WITH_INSPIRATION_t0.0287769784) 
1 or(and(or(and(!$TO_t97.0791366906 $VERBALIZED_t1.1510791367 !$YET_t0.3884892086) $INFLUENZA_SEP_t0.0359712230 $RESCHEDULED_t0.3309352518 $STEP_t0.3237410072 $TN_t0.0791366906 $UNSTEADY_t0.0575539568 $VARDENAFIL_HCL_t0.0863309353 $VETERAN_t8.3453237410 $VIEW_t0.6762589928 $VITALS_HT_t0.0719424460 $VITALS_PULSE_t0.3597122302 $WALS_t0.1007194245 $WAS_SCREENED_t0.1151079137 $WITHIN_LAST_t0.4748201439 $WORSENING_t0.2877697842) or(!$AM_t3.9136690647 $CHIEF_COMPLAINT_t3.1294964029 !$PULSE_t4.8848920863) or(!$COMPUTERIZED_t0.5179856115 !$MAKE_t1.2230215827 $PULSE_t4.8848920863)) $UPPER_CHEST_t0.1726618705 $WEAPONS_t0.0503597122 $WITH_INSPIRATION_t0.0287769784) 
1 or(and(or(and(!$TRACHEA_t0.0287769784 $VERBALIZED_t1.1510791367 !$YET_t0.3884892086) $INFLUENZA_SEP_t0.0359712230 $RESCHEDULED_t0.3309352518 $STEP_t0.3237410072 $TN_t0.0791366906 $UNSTEADY_t0.0575539568 $VARDENAFIL_HCL_t0.0863309353 $VETERAN_t8.3453237410 $VIEW_t0.6762589928 $VITALS_HT_t0.0719424460 $VITALS_PULSE_t0.3597122302 $WALS_t0.1007194245 $WAS_SCREENED_t0.1151079137 $WITHIN_LAST_t0.4748201439 $WORSENING_t0.2877697842) or(!$AM_t3.9136690647 $CHIEF_COMPLAINT_t3.1294964029 !$PULSE_t4.8848920863) or(!$COMPUTERIZED_t0.5179856115 !$MAKE_t1.2230215827 $PULSE_t4.8848920863)) $UPPER_CHEST_t0.1726618705 $WEAPONS_t0.0503597122 $WITH_INSPIRATION_t0.0287769784) 
1 or(and(or(and(!$HOUR_t0.9280575540 $WAS_t25.8992805755 $WHO_t2.7985611511) and($STEP_t0.3237410072 !$WEAKNESS_t0.6043165468) $SYST_t0.1223021583 $UCINATIONS_DENIES_t0.0503597122 $UPPER_CHEST_t0.1726618705 $VACCINE_PNEUMOCOCCAL_t0.0359712230 $VIEW_t0.6762589928 $VITALS_HT_t0.0719424460 $VITALS_PULSE_t0.3597122302 $WANT_GO_t0.0287769784 $WEARS_t0.1294964029 $WENT_OUT_t0.0791366906 $WHOLE_t0.0719424460 $WITH_INSPIRATION_t0.0287769784 $WORK_RELEASE_t0.0287769784 $WORTHLESSNESS_t0.0647482014) !$CONSENT_PRODUCTS_t0.0503597122 !$TAB_TAK_t0.0287769784) $TABLET_ONCE_t0.1366906475 $TN_t0.0791366906 $TYPE_SCHEDULING_t0.0287769784) 
1 or(and(or(and($STEP_t0.3237410072 !$WEAKNESS_t0.6043165468) and(!$USUALLY_t0.2877697842 $WAS_t25.8992805755 $WHO_t2.7985611511) $SYST_t0.1223021583 $UCINATIONS_DENIES_t0.0503597122 $UPPER_CHEST_t0.1726618705 $VACCINE_PNEUMOCOCCAL_t0.0359712230 $VIEW_t0.6762589928 $VITALS_HT_t0.0719424460 $VITALS_PULSE_t0.3597122302 $WANT_GO_t0.0287769784 $WEARS_t0.1294964029 $WENT_OUT_t0.0791366906 $WHOLE_t0.0719424460 $WITH_INSPIRATION_t0.0287769784 $WORK_RELEASE_t0.0287769784 $WORTHLESSNESS_t0.0647482014) !$CONSENT_PRODUCTS_t0.0503597122 !$TAB_TAK_t0.0287769784) $TABLET_ONCE_t0.1366906475 $TN_t0.0791366906 $TYPE_SCHEDULING_t0.0287769784) 
1 or(and(or(and($STEP_t0.3237410072 !$WEAKNESS_t0.6043165468) $SYST_t0.1223021583 $UCINATIONS_DENIES_t0.0503597122 $UPPER_CHEST_t0.1726618705 $VACCINE_PNEUMOCOCCAL_t0.0359712230 $VIEW_t0.6762589928 $VITALS_HT_t0.0719424460 $VITALS_PULSE_t0.3597122302 $WANT_GO_t0.0287769784 $WEARS_t0.1294964029 $WENT_OUT_t0.0791366906 $WHOLE_t0.0719424460 $WITH_INSPIRATION_t0.0287769784 $WORK_RELEASE_t0.0287769784 $WORTHLESSNESS_t0.0647482014) !$CONSENT_PRODUCTS_t0.0503597122 !$TAB_TAK_t0.0287769784) $TABLET_ONCE_t0.1366906475 $TN_t0.0791366906 $TYPE_SCHEDULING_t0.0287769784) 
1 or(and(or(and(!$ABLE_t2.2517985612 $STEP_t0.3237410072 !$WEAKNESS_t0.6043165468) and(!$USUALLY_t0.2877697842 $WAS_t25.8992805755 $WHO_t2.7985611511) $SYST_t0.1223021583 $UCINATIONS_DENIES_t0.0503597122 $UPPER_CHEST_t0.1726618705 $VACCINE_PNEUMOCOCCAL_t0.0359712230 $VIEW_t0.6762589928 $VITALS_HT_t0.0719424460 $VITALS_PULSE_t0.3597122302 $WANT_GO_t0.0287769784 $WEARS_t0.1294964029 $WENT_OUT_t0.0791366906 $WHOLE_t0.0719424460 $WITH_INSPIRATION_t0.0287769784 $WORK_RELEASE_t0.0287769784 $WORTHLESSNESS_t0.0647482014) !$CONSENT_PRODUCTS_t0.0503597122 !$TAB_TAK_t0.0287769784) $TABLET_ONCE_t0.1366906475 $TN_t0.0791366906 $TYPE_SCHEDULING_t0.0287769784) 
1 or(and(or(and(!$ABLE_t2.2517985612 !$USUALLY_t0.2877697842 $WAS_t25.8992805755 $WHO_t2.7985611511) and($STEP_t0.3237410072 !$WEAKNESS_t0.6043165468) $SYST_t0.1223021583 $UCINATIONS_DENIES_t0.0503597122 $UPPER_CHEST_t0.1726618705 $VACCINE_PNEUMOCOCCAL_t0.0359712230 $VIEW_t0.6762589928 $VITALS_HT_t0.0719424460 $VITALS_PULSE_t0.3597122302 $WANT_GO_t0.0287769784 $WEARS_t0.1294964029 $WENT_OUT_t0.0791366906 $WHOLE_t0.0719424460 $WITH_INSPIRATION_t0.0287769784 $WORK_RELEASE_t0.0287769784 $WORTHLESSNESS_t0.0647482014) !$CONSENT_PRODUCTS_t0.0503597122 !$TAB_TAK_t0.0287769784) $TABLET_ONCE_t0.1366906475 $TN_t0.0791366906 $TYPE_SCHEDULING_t0.0287769784) 
1 or(and(or(and(!$ACTION_t0.6402877698 $STEP_t0.3237410072 !$WEAKNESS_t0.6043165468) and(!$USUALLY_t0.2877697842 $WAS_t25.8992805755 $WHO_t2.7985611511) $SYST_t0.1223021583 $UCINATIONS_DENIES_t0.0503597122 $UPPER_CHEST_t0.1726618705 $VACCINE_PNEUMOCOCCAL_t0.0359712230 $VIEW_t0.6762589928 $VITALS_HT_t0.0719424460 $VITALS_PULSE_t0.3597122302 $WANT_GO_t0.0287769784 $WEARS_t0.1294964029 $WENT_OUT_t0.0791366906 $WHOLE_t0.0719424460 $WITH_INSPIRATION_t0.0287769784 $WORK_RELEASE_t0.0287769784 $WORTHLESSNESS_t0.0647482014) !$CONSENT_PRODUCTS_t0.0503597122 !$TAB_TAK_t0.0287769784) $TABLET_ONCE_t0.1366906475 $TN_t0.0791366906 $TYPE_SCHEDULING_t0.0287769784) 
1 or(and(or(and(!$ACTION_t0.6402877698 !$USUALLY_t0.2877697842 $WAS_t25.8992805755 $WHO_t2.7985611511) and($STEP_t0.3237410072 !$WEAKNESS_t0.6043165468) $SYST_t0.1223021583 $UCINATIONS_DENIES_t0.0503597122 $UPPER_CHEST_t0.1726618705 $VACCINE_PNEUMOCOCCAL_t0.0359712230 $VIEW_t0.6762589928 $VITALS_HT_t0.0719424460 $VITALS_PULSE_t0.3597122302 $WANT_GO_t0.0287769784 $WEARS_t0.1294964029 $WENT_OUT_t0.0791366906 $WHOLE_t0.0719424460 $WITH_INSPIRATION_t0.0287769784 $WORK_RELEASE_t0.0287769784 $WORTHLESSNESS_t0.0647482014) !$CONSENT_PRODUCTS_t0.0503597122 !$TAB_TAK_t0.0287769784) $TABLET_ONCE_t0.1366906475 $TN_t0.0791366906 $TYPE_SCHEDULING_t0.0287769784) 
1 or(and(or(and(!$ACTIVE_EVERY_t1.2805755396 $STEP_t0.3237410072 !$WEAKNESS_t0.6043165468) and(!$USUALLY_t0.2877697842 $WAS_t25.8992805755 $WHO_t2.7985611511) $SYST_t0.1223021583 $UCINATIONS_DENIES_t0.0503597122 $UPPER_CHEST_t0.1726618705 $VACCINE_PNEUMOCOCCAL_t0.0359712230 $VIEW_t0.6762589928 $VITALS_HT_t0.0719424460 $VITALS_PULSE_t0.3597122302 $WANT_GO_t0.0287769784 $WEARS_t0.1294964029 $WENT_OUT_t0.0791366906 $WHOLE_t0.0719424460 $WITH_INSPIRATION_t0.0287769784 $WORK_RELEASE_t0.0287769784 $WORTHLESSNESS_t0.0647482014) !$CONSENT_PRODUCTS_t0.0503597122 !$TAB_TAK_t0.0287769784) $TABLET_ONCE_t0.1366906475 $TN_t0.0791366906 $TYPE_SCHEDULING_t0.0287769784) 
1 or(and(or(and($ACTIVE_EVERY_t1.2805755396 !$USUALLY_t0.2877697842 $WAS_t25.8992805755 $WHO_t2.7985611511) and($STEP_t0.3237410072 !$WEAKNESS_t0.6043165468) $SYST_t0.1223021583 $UCINATIONS_DENIES_t0.0503597122 $UPPER_CHEST_t0.1726618705 $VACCINE_PNEUMOCOCCAL_t0.0359712230 $VIEW_t0.6762589928 $VITALS_HT_t0.0719424460 $VITALS_PULSE_t0.3597122302 $WANT_GO_t0.0287769784 $WEARS_t0.1294964029 $WENT_OUT_t0.0791366906 $WHOLE_t0.0719424460 $WITH_INSPIRATION_t0.0287769784 $WORK_RELEASE_t0.0287769784 $WORTHLESSNESS_t0.0647482014) !$CONSENT_PRODUCTS_t0.0503597122 !$TAB_TAK_t0.0287769784) $TABLET_ONCE_t0.1366906475 $TN_t0.0791366906 $TYPE_SCHEDULING_t0.0287769784) 
1 or(and(or(and(!$ACTIVE_MORNING_t0.4172661871 $STEP_t0.3237410072 !$WEAKNESS_t0.6043165468) and(!$USUALLY_t0.2877697842 $WAS_t25.8992805755 $WHO_t2.7985611511) $SYST_t0.1223021583 $UCINATIONS_DENIES_t0.0503597122 $UPPER_CHEST_t0.1726618705 $VACCINE_PNEUMOCOCCAL_t0.0359712230 $VIEW_t0.6762589928 $VITALS_HT_t0.0719424460 $VITALS_PULSE_t0.3597122302 $WANT_GO_t0.0287769784 $WEARS_t0.1294964029 $WENT_OUT_t0.0791366906 $WHOLE_t0.0719424460 $WITH_INSPIRATION_t0.0287769784 $WORK_RELEASE_t0.0287769784 $WORTHLESSNESS_t0.0647482014) !$CONSENT_PRODUCTS_t0.0503597122 !$TAB_TAK_t0.0287769784) $TABLET_ONCE_t0.1366906475 $TN_t0.0791366906 $TYPE_SCHEDULING_t0.0287769784) 
1 or(and(or(and(or($VERY_t1.5971223022 $YESTER_t0.9712230216) $VIEW_t0.6762589928 !$WAYS_t0.2877697842) and($UNTIL_t0.9496402878 $WHO_t2.7985611511) $STEP_t0.3237410072 $TN_t0.0791366906 $TRIAGE_CHIEF_t0.1079136691 $TYPE_SCHEDULING_t0.0287769784 $VACCINE_PNEUMOCOCCAL_t0.0359712230 $VITALS_HT_t0.0719424460 $VITALS_PULSE_t0.3597122302 $WEARS_t0.1294964029 $WEIGH_DAILY_t0.0503597122 $WENT_OUT_t0.0791366906 $WHOLE_t0.0719424460 $WILL_PROBABLY_t0.0215827338 $WITH_INSPIRATION_t0.0287769784 $WORK_RELEASE_t0.0287769784 $WORRY_t0.0503597122 $YARD_t0.0359712230) !$HEALING_WELL_t0.0431654676 !$INPATIENT_REMOTE_t0.1294964029 !$LIST_BELOW_t0.1294964029 !$PRODUCTS_IT_t0.0503597122) $HAPPENS_t0.0575539568 $INFLUENZA_SEP_t0.0359712230) 
1 or(and(or(and(or($VERY_t1.5971223022 $YESTER_t0.9712230216) $VIEW_t0.6762589928 !$WAYS_t0.2877697842) and($UNTIL_t0.9496402878 $WHO_t2.7985611511) $STEP_t0.3237410072 $TRIAGE_CHIEF_t0.1079136691 $TYPE_SCHEDULING_t0.0287769784 $VACCINE_PNEUMOCOCCAL_t0.0359712230 $VITALS_HT_t0.0719424460 $VITALS_PULSE_t0.3597122302 $WEARS_t0.1294964029 $WEIGH_DAILY_t0.0503597122 $WENT_OUT_t0.0791366906 $WHOLE_t0.0719424460 $WILL_PROBABLY_t0.0215827338 $WITH_INSPIRATION_t0.0287769784 $WORK_RELEASE_t0.0287769784 $WORRY_t0.0503597122 $YARD_t0.0359712230) !$HEALING_WELL_t0.0431654676 !$INPATIENT_REMOTE_t0.1294964029 !$LIST_BELOW_t0.1294964029 !$PRODUCTS_IT_t0.0503597122) $HAPPENS_t0.0575539568 $INFLUENZA_SEP_t0.0359712230 $TN_t0.0791366906) 
1 and(or(and(or(and(or($VERY_t1.5971223022 $YESTER_t0.9712230216) $VIEW_t0.6762589928 !$WAYS_t0.2877697842) and($UNTIL_t0.9496402878 $WHO_t2.7985611511) $STEP_t0.3237410072 $TN_t0.0791366906 $TRIAGE_CHIEF_t0.1079136691 $TYPE_SCHEDULING_t0.0287769784 $VACCINE_PNEUMOCOCCAL_t0.0359712230 $VITALS_HT_t0.0719424460 $VITALS_PULSE_t0.3597122302 $WEARS_t0.1294964029 $WEIGH_DAILY_t0.0503597122 $WENT_OUT_t0.0791366906 $WHOLE_t0.0719424460 $WILL_PROBABLY_t0.0215827338 $WITH_INSPIRATION_t0.0287769784 $WORK_RELEASE_t0.0287769784 $WORRY_t0.0503597122 $YARD_t0.0359712230) !$HEALING_WELL_t0.0431654676 !$INPATIENT_REMOTE_t0.1294964029 !$LIST_BELOW_t0.1294964029) $HAPPENS_t0.0575539568 $INFLUENZA_SEP_t0.0359712230) !$PRODUCTS_IT_t0.0503597122) 
1 and(or(and(or(and(or($VERY_t1.5971223022 $YESTER_t0.9712230216) $VIEW_t0.6762589928 !$WAYS_t0.2877697842) and($UNTIL_t0.9496402878 $WHO_t2.7985611511) $STEP_t0.3237410072 $TN_t0.0791366906 $TRIAGE_CHIEF_t0.1079136691 $TYPE_SCHEDULING_t0.0287769784 $VACCINE_PNEUMOCOCCAL_t0.0359712230 $VITALS_HT_t0.0719424460 $VITALS_PULSE_t0.3597122302 $WEARS_t0.1294964029 $WEIGH_DAILY_t0.0503597122 $WENT_OUT_t0.0791366906 $WHOLE_t0.0719424460 $WILL_PROBABLY_t0.0215827338 $WITH_INSPIRATION_t0.0287769784 $WORK_RELEASE_t0.0287769784 $WORRY_t0.0503597122 $YARD_t0.0359712230) !$HEALING_WELL_t0.0431654676 !$INPATIENT_REMOTE_t0.1294964029 !$PRODUCTS_IT_t0.0503597122) $HAPPENS_t0.0575539568 $INFLUENZA_SEP_t0.0359712230) !$LIST_BELOW_t0.1294964029) 
1 and(or(and(or(and(or($VERY_t1.5971223022 $YESTER_t0.9712230216) $VIEW_t0.6762589928 !$WAYS_t0.2877697842) and($UNTIL_t0.9496402878 $WHO_t2.7985611511) $STEP_t0.3237410072 $TN_t0.0791366906 $TRIAGE_CHIEF_t0.1079136691 $TYPE_SCHEDULING_t0.0287769784 $VACCINE_PNEUMOCOCCAL_t0.0359712230 $VITALS_HT_t0.0719424460 $VITALS_PULSE_t0.3597122302 $WEARS_t0.1294964029 $WEIGH_DAILY_t0.0503597122 $WENT_OUT_t0.0791366906 $WHOLE_t0.0719424460 $WILL_PROBABLY_t0.0215827338 $WITH_INSPIRATION_t0.0287769784 $WORK_RELEASE_t0.0287769784 $WORRY_t0.0503597122 $YARD_t0.0359712230) !$HEALING_WELL_t0.0431654676 !$PRODUCTS_IT_t0.0503597122) $HAPPENS_t0.0575539568 $INFLUENZA_SEP_t0.0359712230) !$INPATIENT_REMOTE_t0.1294964029 !$LIST_BELOW_t0.1294964029) 
1 and(or(and(or(and(or($VERY_t1.5971223022 $YESTER_t0.9712230216) $VIEW_t0.6762589928 !$WAYS_t0.2877697842) and($UNTIL_t0.9496402878 $WHO_t2.7985611511) $STEP_t0.3237410072 $TN_t0.0791366906 $TRIAGE_CHIEF_t0.1079136691 $TYPE_SCHEDULING_t0.0287769784 $VACCINE_PNEUMOCOCCAL_t0.0359712230 $VITALS_HT_t0.0719424460 $VITALS_PULSE_t0.3597122302 $WEARS_t0.1294964029 $WEIGH_DAILY_t0.0503597122 $WENT_OUT_t0.0791366906 $WHOLE_t0.0719424460 $WILL_PROBABLY_t0.0215827338 $WITH_INSPIRATION_t0.0287769784 $WORK_RELEASE_t0.0287769784 $WORRY_t0.0503597122 $YARD_t0.0359712230) !$INPATIENT_REMOTE_t0.1294964029 !$PRODUCTS_IT_t0.0503597122) $HAPPENS_t0.0575539568 $INFLUENZA_SEP_t0.0359712230) !$HEALING_WELL_t0.0431654676 !$LIST_BELOW_t0.1294964029) 
1 and(or(and(or(and(or($VERY_t1.5971223022 $YESTER_t0.9712230216) $VIEW_t0.6762589928 !$WAYS_t0.2877697842) and($UNTIL_t0.9496402878 $WHO_t2.7985611511) $TN_t0.0791366906 $TRIAGE_CHIEF_t0.1079136691 $TYPE_SCHEDULING_t0.0287769784 $VACCINE_PNEUMOCOCCAL_t0.0359712230 $VITALS_HT_t0.0719424460 $VITALS_PULSE_t0.3597122302 $WEARS_t0.1294964029 $WEIGH_DAILY_t0.0503597122 $WENT_OUT_t0.0791366906 $WHOLE_t0.0719424460 $WILL_PROBABLY_t0.0215827338 $WITH_INSPIRATION_t0.0287769784 $WORK_RELEASE_t0.0287769784 $WORRY_t0.0503597122 $YARD_t0.0359712230) !$HEALING_WELL_t0.0431654676 !$INPATIENT_REMOTE_t0.1294964029 !$PRODUCTS_IT_t0.0503597122) $HAPPENS_t0.0575539568 $INFLUENZA_SEP_t0.0359712230 $STEP_t0.3237410072) !$LIST_BELOW_t0.1294964029) 
1 and(or(and(or(and(or($VERY_t1.5971223022 $YESTER_t0.9712230216) $VIEW_t0.6762589928 !$WAYS_t0.2877697842) and($UNTIL_t0.9496402878 $WHO_t2.7985611511) $TN_t0.0791366906 $TRIAGE_CHIEF_t0.1079136691 $TYPE_SCHEDULING_t0.0287769784 $VACCINE_PNEUMOCOCCAL_t0.0359712230 $VITALS_HT_t0.0719424460 $VITALS_PULSE_t0.3597122302 $WEARS_t0.1294964029 $WEIGH_DAILY_t0.0503597122 $WENT_OUT_t0.0791366906 $WHOLE_t0.0719424460 $WILL_PROBABLY_t0.0215827338 $WITH_INSPIRATION_t0.0287769784 $WORK_RELEASE_t0.0287769784 $WORRY_t0.0503597122 $YARD_t0.0359712230) !$INPATIENT_REMOTE_t0.1294964029 !$PRODUCTS_IT_t0.0503597122) $HAPPENS_t0.0575539568 $INFLUENZA_SEP_t0.0359712230 $STEP_t0.3237410072) !$HEALING_WELL_t0.0431654676 !$LIST_BELOW_t0.1294964029) 
1 or(and(or(and(or(and(or($VERY_t1.5971223022 $YESTER_t0.9712230216) $VIEW_t0.6762589928 !$WAYS_t0.2877697842) and($UNTIL_t0.9496402878 $WHO_t2.7985611511) $STEP_t0.3237410072 $TN_t0.0791366906 $TRIAGE_CHIEF_t0.1079136691 $TYPE_SCHEDULING_t0.0287769784 $VACCINE_PNEUMOCOCCAL_t0.0359712230 $VITALS_HT_t0.0719424460 $VITALS_PULSE_t0.3597122302 $WEARS_t0.1294964029 $WEIGH_DAILY_t0.0503597122 $WENT_OUT_t0.0791366906 $WHOLE_t0.0719424460 $WILL_PROBABLY_t0.0215827338 $WITH_INSPIRATION_t0.0287769784 $WORK_RELEASE_t0.0287769784 $WORRY_t0.0503597122 $YARD_t0.0359712230) !$HEALING_WELL_t0.0431654676 !$INPATIENT_REMOTE_t0.1294964029 !$PRODUCTS_IT_t0.0503597122) $HAPPENS_t0.0575539568) !$LIST_BELOW_t0.1294964029) $INFLUENZA_SEP_t0.0359712230) 
1 or(and(or(and(or(and(or($VERY_t1.5971223022 $YESTER_t0.9712230216) $VIEW_t0.6762589928 !$WAYS_t0.2877697842) and($UNTIL_t0.9496402878 $WHO_t2.7985611511) $STEP_t0.3237410072 $TN_t0.0791366906 $TRIAGE_CHIEF_t0.1079136691 $TYPE_SCHEDULING_t0.0287769784 $VACCINE_PNEUMOCOCCAL_t0.0359712230 $VITALS_HT_t0.0719424460 $VITALS_PULSE_t0.3597122302 $WEARS_t0.1294964029 $WEIGH_DAILY_t0.0503597122 $WENT_OUT_t0.0791366906 $WHOLE_t0.0719424460 $WILL_PROBABLY_t0.0215827338 $WITH_INSPIRATION_t0.0287769784 $WORK_RELEASE_t0.0287769784 $WORRY_t0.0503597122 $YARD_t0.0359712230) !$HEALING_WELL_t0.0431654676 !$INPATIENT_REMOTE_t0.1294964029 !$PRODUCTS_IT_t0.0503597122) $INFLUENZA_SEP_t0.0359712230) !$LIST_BELOW_t0.1294964029) $HAPPENS_t0.0575539568) 
1 and(or(and(or($VITALS_PULSE_t0.3597122302 $WERE_CONSTANTLY_t0.0647482014) !$VITALS_RESP_t0.1007194245 !$YES_t8.2446043165) and(!$FAX_t0.2949640288 $VIEW_t0.6762589928 !$WEEKEND_t0.3165467626 !$WITHIN_LAST_t0.4748201439) $TV_t0.4676258993 $TYPE_SCHEDULING_t0.0287769784 $UDS_t0.2446043165 $UNDER_SKIN_t0.0647482014 $UNSTEADY_t0.0575539568 $UPPER_CHEST_t0.1726618705 $VACCINE_PNEUMOCOCCAL_t0.0359712230 $VITALS_HT_t0.0719424460 $WAS_SCREENED_t0.1151079137 $WEAPONS_t0.0503597122 $WEEKENDS_t0.0575539568 $WHOLE_t0.0719424460 $WITH_INSPIRATION_t0.0287769784 $WORK_RELEASE_t0.0287769784 $WORRY_t0.0503597122) !$NUM_PAIN_t0.0503597122 !$PERFUSION_t0.0935251799) 
1 and(or(and(or($VITALS_PULSE_t0.3597122302 $WERE_GUARD_t0.0647482014) !$VITALS_RESP_t0.1007194245 !$YES_t8.2446043165) and(!$FAX_t0.2949640288 $VIEW_t0.6762589928 !$WEEKEND_t0.3165467626 !$WITHIN_LAST_t0.4748201439) $TV_t0.4676258993 $TYPE_SCHEDULING_t0.0287769784 $UDS_t0.2446043165 $UNDER_SKIN_t0.0647482014 $UNSTEADY_t0.0575539568 $UPPER_CHEST_t0.1726618705 $VACCINE_PNEUMOCOCCAL_t0.0359712230 $VITALS_HT_t0.0719424460 $WAS_SCREENED_t0.1151079137 $WEAPONS_t0.0503597122 $WEEKENDS_t0.0575539568 $WHOLE_t0.0719424460 $WITH_INSPIRATION_t0.0287769784 $WORK_RELEASE_t0.0287769784 $WORRY_t0.0503597122) !$NUM_PAIN_t0.0503597122 !$PERFUSION_t0.0935251799) 
1 and(or(and(or($NUM_PAIN_t0.0503597122 $VITALS_PULSE_t0.3597122302 $WERE_CONSTANTLY_t0.0647482014) !$VITALS_RESP_t0.1007194245 !$YES_t8.2446043165) and(!$FAX_t0.2949640288 $VIEW_t0.6762589928 !$WEEKEND_t0.3165467626 !$WITHIN_LAST_t0.4748201439) $TV_t0.4676258993 $TYPE_SCHEDULING_t0.0287769784 $UDS_t0.2446043165 $UNDER_SKIN_t0.0647482014 $UNSTEADY_t0.0575539568 $UPPER_CHEST_t0.1726618705 $VACCINE_PNEUMOCOCCAL_t0.0359712230 $VITALS_HT_t0.0719424460 $WAS_SCREENED_t0.1151079137 $WEAPONS_t0.0503597122 $WEEKENDS_t0.0575539568 $WHOLE_t0.0719424460 $WITH_INSPIRATION_t0.0287769784 $WORK_RELEASE_t0.0287769784 $WORRY_t0.0503597122) !$NUM_PAIN_t0.0503597122 !$PERFUSION_t0.0935251799) 
1 and(or(and(or($PERFUSION_t0.0935251799 $VITALS_PULSE_t0.3597122302 $WERE_CONSTANTLY_t0.0647482014) !$VITALS_RESP_t0.1007194245 !$YES_t8.2446043165) and(!$FAX_t0.2949640288 $VIEW_t0.6762589928 !$WEEKEND_t0.3165467626 !$WITHIN_LAST_t0.4748201439) $TV_t0.4676258993 $TYPE_SCHEDULING_t0.0287769784 $UDS_t0.2446043165 $UNDER_SKIN_t0.0647482014 $UNSTEADY_t0.0575539568 $UPPER_CHEST_t0.1726618705 $VACCINE_PNEUMOCOCCAL_t0.0359712230 $VITALS_HT_t0.0719424460 $WAS_SCREENED_t0.1151079137 $WEAPONS_t0.0503597122 $WEEKENDS_t0.0575539568 $WHOLE_t0.0719424460 $WITH_INSPIRATION_t0.0287769784 $WORK_RELEASE_t0.0287769784 $WORRY_t0.0503597122) !$NUM_PAIN_t0.0503597122 !$PERFUSION_t0.0935251799) 
1 and(or(and(or($TOTAL_XXXXXXXXXXXXXXXXXXXXXXXXXXXXXXXXXXXXXXXXXXXXXXXXXXXXXXXXXXXXXXXXXXXXXXXXXX_t0.0359712230 $VITALS_PULSE_t0.3597122302 $WERE_CONSTANTLY_t0.0647482014) !$VITALS_RESP_t0.1007194245 !$YES_t8.2446043165) and(!$FAX_t0.2949640288 $VIEW_t0.6762589928 !$WEEKEND_t0.3165467626 !$WITHIN_LAST_t0.4748201439) $TV_t0.4676258993 $TYPE_SCHEDULING_t0.0287769784 $UDS_t0.2446043165 $UNDER_SKIN_t0.0647482014 $UNSTEADY_t0.0575539568 $UPPER_CHEST_t0.1726618705 $VACCINE_PNEUMOCOCCAL_t0.0359712230 $VITALS_HT_t0.0719424460 $WAS_SCREENED_t0.1151079137 $WEAPONS_t0.0503597122 $WEEKENDS_t0.0575539568 $WHOLE_t0.0719424460 $WITH_INSPIRATION_t0.0287769784 $WORK_RELEASE_t0.0287769784 $WORRY_t0.0503597122) !$NUM_PAIN_t0.0503597122 !$PERFUSION_t0.0935251799) 
1 and(or(and(or($TOT_t0.0287769784 $VITALS_PULSE_t0.3597122302 $WERE_CONSTANTLY_t0.0647482014) !$VITALS_RESP_t0.1007194245 !$YES_t8.2446043165) and(!$FAX_t0.2949640288 $VIEW_t0.6762589928 !$WEEKEND_t0.3165467626 !$WITHIN_LAST_t0.4748201439) $TV_t0.4676258993 $TYPE_SCHEDULING_t0.0287769784 $UDS_t0.2446043165 $UNDER_SKIN_t0.0647482014 $UNSTEADY_t0.0575539568 $UPPER_CHEST_t0.1726618705 $VACCINE_PNEUMOCOCCAL_t0.0359712230 $VITALS_HT_t0.0719424460 $WAS_SCREENED_t0.1151079137 $WEAPONS_t0.0503597122 $WEEKENDS_t0.0575539568 $WHOLE_t0.0719424460 $WITH_INSPIRATION_t0.0287769784 $WORK_RELEASE_t0.0287769784 $WORRY_t0.0503597122) !$NUM_PAIN_t0.0503597122 !$PERFUSION_t0.0935251799) 
1 and(or(and(or($TOUR_t0.2230215827 $VITALS_PULSE_t0.3597122302 $WERE_CONSTANTLY_t0.0647482014) !$VITALS_RESP_t0.1007194245 !$YES_t8.2446043165) and(!$FAX_t0.2949640288 $VIEW_t0.6762589928 !$WEEKEND_t0.3165467626 !$WITHIN_LAST_t0.4748201439) $TV_t0.4676258993 $TYPE_SCHEDULING_t0.0287769784 $UDS_t0.2446043165 $UNDER_SKIN_t0.0647482014 $UNSTEADY_t0.0575539568 $UPPER_CHEST_t0.1726618705 $VACCINE_PNEUMOCOCCAL_t0.0359712230 $VITALS_HT_t0.0719424460 $WAS_SCREENED_t0.1151079137 $WEAPONS_t0.0503597122 $WEEKENDS_t0.0575539568 $WHOLE_t0.0719424460 $WITH_INSPIRATION_t0.0287769784 $WORK_RELEASE_t0.0287769784 $WORRY_t0.0503597122) !$NUM_PAIN_t0.0503597122 !$PERFUSION_t0.0935251799) 
1 and(or(and(or($TRACHEA_t0.0287769784 $VITALS_PULSE_t0.3597122302 $WERE_CONSTANTLY_t0.0647482014) !$VITALS_RESP_t0.1007194245 !$YES_t8.2446043165) and(!$FAX_t0.2949640288 $VIEW_t0.6762589928 !$WEEKEND_t0.3165467626 !$WITHIN_LAST_t0.4748201439) $TV_t0.4676258993 $TYPE_SCHEDULING_t0.0287769784 $UDS_t0.2446043165 $UNDER_SKIN_t0.0647482014 $UNSTEADY_t0.0575539568 $UPPER_CHEST_t0.1726618705 $VACCINE_PNEUMOCOCCAL_t0.0359712230 $VITALS_HT_t0.0719424460 $WAS_SCREENED_t0.1151079137 $WEAPONS_t0.0503597122 $WEEKENDS_t0.0575539568 $WHOLE_t0.0719424460 $WITH_INSPIRATION_t0.0287769784 $WORK_RELEASE_t0.0287769784 $WORRY_t0.0503597122) !$NUM_PAIN_t0.0503597122 !$PERFUSION_t0.0935251799) 
1 and(or(and(or($TRAITS_t0.0863309353 $VITALS_PULSE_t0.3597122302 $WERE_CONSTANTLY_t0.0647482014) !$VITALS_RESP_t0.1007194245 !$YES_t8.2446043165) and(!$FAX_t0.2949640288 $VIEW_t0.6762589928 !$WEEKEND_t0.3165467626 !$WITHIN_LAST_t0.4748201439) $TV_t0.4676258993 $TYPE_SCHEDULING_t0.0287769784 $UDS_t0.2446043165 $UNDER_SKIN_t0.0647482014 $UNSTEADY_t0.0575539568 $UPPER_CHEST_t0.1726618705 $VACCINE_PNEUMOCOCCAL_t0.0359712230 $VITALS_HT_t0.0719424460 $WAS_SCREENED_t0.1151079137 $WEAPONS_t0.0503597122 $WEEKENDS_t0.0575539568 $WHOLE_t0.0719424460 $WITH_INSPIRATION_t0.0287769784 $WORK_RELEASE_t0.0287769784 $WORRY_t0.0503597122) !$NUM_PAIN_t0.0503597122 !$PERFUSION_t0.0935251799) 
1 and(or(and(or($TRANQUIL_AS_t0.0359712230 $VITALS_PULSE_t0.3597122302 $WERE_CONSTANTLY_t0.0647482014) !$VITALS_RESP_t0.1007194245 !$YES_t8.2446043165) and(!$FAX_t0.2949640288 $VIEW_t0.6762589928 !$WEEKEND_t0.3165467626 !$WITHIN_LAST_t0.4748201439) $TV_t0.4676258993 $TYPE_SCHEDULING_t0.0287769784 $UDS_t0.2446043165 $UNDER_SKIN_t0.0647482014 $UNSTEADY_t0.0575539568 $UPPER_CHEST_t0.1726618705 $VACCINE_PNEUMOCOCCAL_t0.0359712230 $VITALS_HT_t0.0719424460 $WAS_SCREENED_t0.1151079137 $WEAPONS_t0.0503597122 $WEEKENDS_t0.0575539568 $WHOLE_t0.0719424460 $WITH_INSPIRATION_t0.0287769784 $WORK_RELEASE_t0.0287769784 $WORRY_t0.0503597122) !$NUM_PAIN_t0.0503597122 !$PERFUSION_t0.0935251799) 
1 and(or(and(or($RESCHEDULED_t0.3309352518 $STEP_t0.3237410072 $TN_t0.0791366906 $VIEW_t0.6762589928) !$PICK_UP_t0.3021582734) and(!$ND_t0.4892086331 $UNTIL_t0.9496402878 $WHO_t2.7985611511) $ABUSE_AUDITC_t0.0359712230 $TYPE_SCHEDULING_t0.0287769784 $VACCINE_PNEUMOCOCCAL_t0.0359712230 $VARDENAFIL_HCL_t0.0863309353 $VITALS_HT_t0.0719424460 $VITALS_PULSE_t0.3597122302 $WANT_GO_t0.0287769784 $WEARS_t0.1294964029 $WENT_OUT_t0.0791366906 $WHOLE_t0.0719424460 $WITHIN_LAST_t0.4748201439 $WORK_RELEASE_t0.0287769784 $YARD_t0.0359712230) !$CALCULATION_t0.0287769784 !$HEALING_WELL_t0.0431654676 !$NW_t0.0647482014 !$PRODUCTS_IT_t0.0503597122 !$TAB_TAK_t0.0287769784) 
1 and(or(and(or($RESCHEDULED_t0.3309352518 $STEP_t0.3237410072 $TN_t0.0791366906 $VIEW_t0.6762589928 $YARD_t0.0359712230) !$PICK_UP_t0.3021582734) and(!$ND_t0.4892086331 $UNTIL_t0.9496402878 $WHO_t2.7985611511) $ABUSE_AUDITC_t0.0359712230 $TYPE_SCHEDULING_t0.0287769784 $VACCINE_PNEUMOCOCCAL_t0.0359712230 $VARDENAFIL_HCL_t0.0863309353 $VITALS_HT_t0.0719424460 $VITALS_PULSE_t0.3597122302 $WANT_GO_t0.0287769784 $WEARS_t0.1294964029 $WENT_OUT_t0.0791366906 $WHOLE_t0.0719424460 $WITHIN_LAST_t0.4748201439 $WORK_RELEASE_t0.0287769784) !$CALCULATION_t0.0287769784 !$HEALING_WELL_t0.0431654676 !$NW_t0.0647482014 !$PRODUCTS_IT_t0.0503597122 !$TAB_TAK_t0.0287769784) 
1 or(and(or(and(or($RESCHEDULED_t0.3309352518 $STEP_t0.3237410072 $TN_t0.0791366906 $VIEW_t0.6762589928) !$PICK_UP_t0.3021582734) and(!$ND_t0.4892086331 $UNTIL_t0.9496402878 $WHO_t2.7985611511) $TYPE_SCHEDULING_t0.0287769784 $VACCINE_PNEUMOCOCCAL_t0.0359712230 $VARDENAFIL_HCL_t0.0863309353 $VITALS_HT_t0.0719424460 $VITALS_PULSE_t0.3597122302 $WANT_GO_t0.0287769784 $WEARS_t0.1294964029 $WENT_OUT_t0.0791366906 $WHOLE_t0.0719424460 $WITHIN_LAST_t0.4748201439 $WORK_RELEASE_t0.0287769784 $YARD_t0.0359712230) !$CALCULATION_t0.0287769784 !$HEALING_WELL_t0.0431654676 !$NW_t0.0647482014 !$PRODUCTS_IT_t0.0503597122 !$TAB_TAK_t0.0287769784) $ABUSE_AUDITC_t0.0359712230) 
1 or(and(or(and(or($RESCHEDULED_t0.3309352518 $STEP_t0.3237410072 $TN_t0.0791366906 $VIEW_t0.6762589928 $YARD_t0.0359712230) !$PICK_UP_t0.3021582734) and(!$ND_t0.4892086331 $UNTIL_t0.9496402878 $WHO_t2.7985611511) $ABUSE_AUDITC_t0.0359712230 $VACCINE_PNEUMOCOCCAL_t0.0359712230 $VARDENAFIL_HCL_t0.0863309353 $VITALS_HT_t0.0719424460 $VITALS_PULSE_t0.3597122302 $WANT_GO_t0.0287769784 $WEARS_t0.1294964029 $WENT_OUT_t0.0791366906 $WHOLE_t0.0719424460 $WITHIN_LAST_t0.4748201439 $WORK_RELEASE_t0.0287769784) !$CALCULATION_t0.0287769784 !$HEALING_WELL_t0.0431654676 !$NW_t0.0647482014 !$PRODUCTS_IT_t0.0503597122 !$TAB_TAK_t0.0287769784) $TYPE_SCHEDULING_t0.0287769784) 
1 or(and(or(and(or($RESCHEDULED_t0.3309352518 $STEP_t0.3237410072 $TN_t0.0791366906 $VIEW_t0.6762589928 $YARD_t0.0359712230) !$PICK_UP_t0.3021582734) and(!$ND_t0.4892086331 $UNTIL_t0.9496402878 $WHO_t2.7985611511) $TYPE_SCHEDULING_t0.0287769784 $VACCINE_PNEUMOCOCCAL_t0.0359712230 $VARDENAFIL_HCL_t0.0863309353 $VITALS_HT_t0.0719424460 $VITALS_PULSE_t0.3597122302 $WANT_GO_t0.0287769784 $WEARS_t0.1294964029 $WENT_OUT_t0.0791366906 $WHOLE_t0.0719424460 $WITHIN_LAST_t0.4748201439 $WORK_RELEASE_t0.0287769784) !$CALCULATION_t0.0287769784 !$HEALING_WELL_t0.0431654676 !$NW_t0.0647482014 !$PRODUCTS_IT_t0.0503597122 !$TAB_TAK_t0.0287769784) $ABUSE_AUDITC_t0.0359712230) 
1 or(and(or(and(or($RESCHEDULED_t0.3309352518 $STEP_t0.3237410072 $VIEW_t0.6762589928 $YARD_t0.0359712230) !$PICK_UP_t0.3021582734) and(!$ND_t0.4892086331 $UNTIL_t0.9496402878 $WHO_t2.7985611511) $TN_t0.0791366906 $TYPE_SCHEDULING_t0.0287769784 $VACCINE_PNEUMOCOCCAL_t0.0359712230 $VARDENAFIL_HCL_t0.0863309353 $VITALS_HT_t0.0719424460 $VITALS_PULSE_t0.3597122302 $WANT_GO_t0.0287769784 $WEARS_t0.1294964029 $WENT_OUT_t0.0791366906 $WHOLE_t0.0719424460 $WITHIN_LAST_t0.4748201439 $WORK_RELEASE_t0.0287769784) !$CALCULATION_t0.0287769784 !$HEALING_WELL_t0.0431654676 !$NW_t0.0647482014 !$PRODUCTS_IT_t0.0503597122 !$TAB_TAK_t0.0287769784) $ABUSE_AUDITC_t0.0359712230) 
1 and(or(and(or(and(or($RESCHEDULED_t0.3309352518 $STEP_t0.3237410072 $TN_t0.0791366906 $VIEW_t0.6762589928) !$PICK_UP_t0.3021582734) and(!$ND_t0.4892086331 $UNTIL_t0.9496402878 $WHO_t2.7985611511) $TYPE_SCHEDULING_t0.0287769784 $VACCINE_PNEUMOCOCCAL_t0.0359712230 $VARDENAFIL_HCL_t0.0863309353 $VITALS_HT_t0.0719424460 $VITALS_PULSE_t0.3597122302 $WANT_GO_t0.0287769784 $WEARS_t0.1294964029 $WENT_OUT_t0.0791366906 $WHOLE_t0.0719424460 $WITHIN_LAST_t0.4748201439 $WORK_RELEASE_t0.0287769784 $YARD_t0.0359712230) !$CALCULATION_t0.0287769784 !$HEALING_WELL_t0.0431654676 !$NW_t0.0647482014 !$PRODUCTS_IT_t0.0503597122) $ABUSE_AUDITC_t0.0359712230) !$TAB_TAK_t0.0287769784) 
1 and(or(and(or(and(or($RESCHEDULED_t0.3309352518 $STEP_t0.3237410072 $TN_t0.0791366906 $VIEW_t0.6762589928 $YARD_t0.0359712230) !$PICK_UP_t0.3021582734) and(!$ND_t0.4892086331 $UNTIL_t0.9496402878 $WHO_t2.7985611511) $TYPE_SCHEDULING_t0.0287769784 $VACCINE_PNEUMOCOCCAL_t0.0359712230 $VARDENAFIL_HCL_t0.0863309353 $VITALS_HT_t0.0719424460 $VITALS_PULSE_t0.3597122302 $WANT_GO_t0.0287769784 $WEARS_t0.1294964029 $WENT_OUT_t0.0791366906 $WHOLE_t0.0719424460 $WITHIN_LAST_t0.4748201439 $WORK_RELEASE_t0.0287769784) !$CALCULATION_t0.0287769784 !$HEALING_WELL_t0.0431654676) $ABUSE_AUDITC_t0.0359712230) !$NW_t0.0647482014 !$PRODUCTS_IT_t0.0503597122 !$TAB_TAK_t0.0287769784) 
1 and(or(and(or(and(or($RESCHEDULED_t0.3309352518 $STEP_t0.3237410072 $TN_t0.0791366906 $VIEW_t0.6762589928 $YARD_t0.0359712230) !$PICK_UP_t0.3021582734) and(!$ND_t0.4892086331 $UNTIL_t0.9496402878 $WHO_t2.7985611511) $TYPE_SCHEDULING_t0.0287769784 $VACCINE_PNEUMOCOCCAL_t0.0359712230 $VARDENAFIL_HCL_t0.0863309353 $VITALS_HT_t0.0719424460 $VITALS_PULSE_t0.3597122302 $WANT_GO_t0.0287769784 $WEARS_t0.1294964029 $WENT_OUT_t0.0791366906 $WHOLE_t0.0719424460 $WITHIN_LAST_t0.4748201439 $WORK_RELEASE_t0.0287769784) !$CALCULATION_t0.0287769784 !$HEALING_WELL_t0.0431654676 !$NW_t0.0647482014) $ABUSE_AUDITC_t0.0359712230) !$PRODUCTS_IT_t0.0503597122 !$TAB_TAK_t0.0287769784) 
1 and(or(and(or(and(or($RESCHEDULED_t0.3309352518 $STEP_t0.3237410072 $TN_t0.0791366906 $VIEW_t0.6762589928 $YARD_t0.0359712230) !$PICK_UP_t0.3021582734) and(!$ND_t0.4892086331 $UNTIL_t0.9496402878 $WHO_t2.7985611511) $TYPE_SCHEDULING_t0.0287769784 $VACCINE_PNEUMOCOCCAL_t0.0359712230 $VARDENAFIL_HCL_t0.0863309353 $VITALS_HT_t0.0719424460 $VITALS_PULSE_t0.3597122302 $WANT_GO_t0.0287769784 $WEARS_t0.1294964029 $WENT_OUT_t0.0791366906 $WHOLE_t0.0719424460 $WITHIN_LAST_t0.4748201439 $WORK_RELEASE_t0.0287769784) !$CALCULATION_t0.0287769784 !$HEALING_WELL_t0.0431654676 !$NW_t0.0647482014 !$PRODUCTS_IT_t0.0503597122) $ABUSE_AUDITC_t0.0359712230) !$TAB_TAK_t0.0287769784) 
1 and(or(and(or($PERIODICALLY_t0.0575539568 $STEP_t0.3237410072 $UNDER_SKIN_t0.0647482014 $VIEW_t0.6762589928) !$PICK_UP_t0.3021582734 !$VACCINE_GIVEN_t0.2517985612 !$WT_KG_t0.9856115108) and(!$USUALLY_t0.2877697842 $WHO_t2.7985611511 $WOULD_t3.4172661871) $NAPROXEN_TAB_t0.1654676259 $TN_t0.0791366906 $TYPE_SCHEDULING_t0.0287769784 $UCINATIONS_DENIES_t0.0503597122 $VACCINE_PNEUMOCOCCAL_t0.0359712230 $VITALS_HT_t0.0719424460 $VITALS_PULSE_t0.3597122302 $WEARS_t0.1294964029 $WERE_CONSTANTLY_t0.0647482014 $WHOLE_t0.0719424460 $WIHT_t0.0215827338 $WITH_INSPIRATION_t0.0287769784 $WORK_RELEASE_t0.0287769784 $WORTHLESSNESS_t0.0647482014) !$EXPECTED_BLOOD_t0.0503597122 !$HEALING_WELL_t0.0431654676 !$LIST_BELOW_t0.1294964029) 
1 and(or(and(or($PERIODICALLY_t0.0575539568 $STEP_t0.3237410072 $UNDER_SKIN_t0.0647482014 $VIEW_t0.6762589928) !$PICK_UP_t0.3021582734 !$VACCINE_GIVEN_t0.2517985612 !$WT_KG_t0.9856115108) and(!$USUALLY_t0.2877697842 $WHO_t2.7985611511 $WOULD_t3.4172661871) $NAPROXEN_TAB_t0.1654676259 $TN_t0.0791366906 $TYPE_SCHEDULING_t0.0287769784 $UCINATIONS_DENIES_t0.0503597122 $VACCINE_PNEUMOCOCCAL_t0.0359712230 $VITALS_HT_t0.0719424460 $VITALS_PULSE_t0.3597122302 $WEARS_t0.1294964029 $WERE_GUARD_t0.0647482014 $WHOLE_t0.0719424460 $WIHT_t0.0215827338 $WITH_INSPIRATION_t0.0287769784 $WORK_RELEASE_t0.0287769784 $WORTHLESSNESS_t0.0647482014) !$EXPECTED_BLOOD_t0.0503597122 !$HEALING_WELL_t0.0431654676 !$LIST_BELOW_t0.1294964029) 
1 and(or(and(or($PERIODICALLY_t0.0575539568 $STEP_t0.3237410072 $UNDER_SKIN_t0.0647482014 $VIEW_t0.6762589928) !$PICK_UP_t0.3021582734 !$VACCINE_GIVEN_t0.2517985612 !$WT_KG_t0.9856115108) and(!$USUALLY_t0.2877697842 $WHO_t2.7985611511 $WOULD_t3.4172661871) $NAPROXEN_TAB_t0.1654676259 $TN_t0.0791366906 $TYPE_SCHEDULING_t0.0287769784 $UCINATIONS_DENIES_t0.0503597122 $VACCINE_PNEUMOCOCCAL_t0.0359712230 $VITALS_HT_t0.0719424460 $VITALS_PULSE_t0.3597122302 $WEARS_t0.1294964029 $WERE_GUARD_t0.0647482014 $WHOLE_t0.0719424460 $WIHT_t0.0215827338 $WITH_INSPIRATION_t0.0287769784 $WORK_RELEASE_t0.0287769784 $WORTHLESSNESS_t0.0647482014) !$EXPECTED_BLOOD_t0.0503597122 !$HEALING_WELL_t0.0431654676 !$TAB_TAK_t0.0287769784) 
1 or(and(or(and(or($PERIODICALLY_t0.0575539568 $STEP_t0.3237410072 $UNDER_SKIN_t0.0647482014 $VIEW_t0.6762589928) !$PICK_UP_t0.3021582734 !$VACCINE_GIVEN_t0.2517985612 !$WT_KG_t0.9856115108) and(!$USUALLY_t0.2877697842 $WHO_t2.7985611511 $WOULD_t3.4172661871) $NAPROXEN_TAB_t0.1654676259 $TYPE_SCHEDULING_t0.0287769784 $UCINATIONS_DENIES_t0.0503597122 $VACCINE_PNEUMOCOCCAL_t0.0359712230 $VITALS_HT_t0.0719424460 $VITALS_PULSE_t0.3597122302 $WEARS_t0.1294964029 $WERE_GUARD_t0.0647482014 $WHOLE_t0.0719424460 $WIHT_t0.0215827338 $WITH_INSPIRATION_t0.0287769784 $WORK_RELEASE_t0.0287769784 $WORTHLESSNESS_t0.0647482014) !$EXPECTED_BLOOD_t0.0503597122 !$HEALING_WELL_t0.0431654676 !$LIST_BELOW_t0.1294964029) $TN_t0.0791366906) 
1 or(and(or(and(or($PERIODICALLY_t0.0575539568 $STEP_t0.3237410072 $UNDER_SKIN_t0.0647482014 $VIEW_t0.6762589928) !$PICK_UP_t0.3021582734 !$VACCINE_GIVEN_t0.2517985612 !$WT_KG_t0.9856115108) and(!$USUALLY_t0.2877697842 $WHO_t2.7985611511 $WOULD_t3.4172661871) $TN_t0.0791366906 $TYPE_SCHEDULING_t0.0287769784 $UCINATIONS_DENIES_t0.0503597122 $VACCINE_PNEUMOCOCCAL_t0.0359712230 $VITALS_HT_t0.0719424460 $VITALS_PULSE_t0.3597122302 $WEARS_t0.1294964029 $WERE_GUARD_t0.0647482014 $WHOLE_t0.0719424460 $WIHT_t0.0215827338 $WITH_INSPIRATION_t0.0287769784 $WORK_RELEASE_t0.0287769784 $WORTHLESSNESS_t0.0647482014) !$EXPECTED_BLOOD_t0.0503597122 !$HEALING_WELL_t0.0431654676 !$LIST_BELOW_t0.1294964029) $NAPROXEN_TAB_t0.1654676259) 
1 and(or(and(or(and(or($PERIODICALLY_t0.0575539568 $STEP_t0.3237410072 $UNDER_SKIN_t0.0647482014 $VIEW_t0.6762589928) !$PICK_UP_t0.3021582734 !$VACCINE_GIVEN_t0.2517985612 !$WT_KG_t0.9856115108) and(!$USUALLY_t0.2877697842 $WHO_t2.7985611511 $WOULD_t3.4172661871) $NAPROXEN_TAB_t0.1654676259 $TYPE_SCHEDULING_t0.0287769784 $UCINATIONS_DENIES_t0.0503597122 $VACCINE_PNEUMOCOCCAL_t0.0359712230 $VITALS_HT_t0.0719424460 $VITALS_PULSE_t0.3597122302 $WEARS_t0.1294964029 $WERE_GUARD_t0.0647482014 $WHOLE_t0.0719424460 $WIHT_t0.0215827338 $WITH_INSPIRATION_t0.0287769784 $WORK_RELEASE_t0.0287769784 $WORTHLESSNESS_t0.0647482014) !$EXPECTED_BLOOD_t0.0503597122 !$HEALING_WELL_t0.0431654676) $TN_t0.0791366906) !$LIST_BELOW_t0.1294964029) 
1 and(or(and(or(and(or($PERIODICALLY_t0.0575539568 $STEP_t0.3237410072 $UNDER_SKIN_t0.0647482014 $VIEW_t0.6762589928) !$PICK_UP_t0.3021582734 !$VACCINE_GIVEN_t0.2517985612 !$WT_KG_t0.9856115108) and(!$USUALLY_t0.2877697842 $WHO_t2.7985611511 $WOULD_t3.4172661871) $NAPROXEN_TAB_t0.1654676259 $TYPE_SCHEDULING_t0.0287769784 $UCINATIONS_DENIES_t0.0503597122 $VACCINE_PNEUMOCOCCAL_t0.0359712230 $VITALS_HT_t0.0719424460 $VITALS_PULSE_t0.3597122302 $WEARS_t0.1294964029 $WERE_GUARD_t0.0647482014 $WHOLE_t0.0719424460 $WIHT_t0.0215827338 $WITH_INSPIRATION_t0.0287769784 $WORK_RELEASE_t0.0287769784 $WORTHLESSNESS_t0.0647482014) !$EXPECTED_BLOOD_t0.0503597122 !$LIST_BELOW_t0.1294964029) $TN_t0.0791366906) !$HEALING_WELL_t0.0431654676) 
1 and(or(and(or(and(or($PERIODICALLY_t0.0575539568 $STEP_t0.3237410072 $UNDER_SKIN_t0.0647482014 $VIEW_t0.6762589928) !$PICK_UP_t0.3021582734 !$VACCINE_GIVEN_t0.2517985612 !$WT_KG_t0.9856115108) and(!$USUALLY_t0.2877697842 $WHO_t2.7985611511 $WOULD_t3.4172661871) $NAPROXEN_TAB_t0.1654676259 $TYPE_SCHEDULING_t0.0287769784 $UCINATIONS_DENIES_t0.0503597122 $VACCINE_PNEUMOCOCCAL_t0.0359712230 $VITALS_HT_t0.0719424460 $VITALS_PULSE_t0.3597122302 $WEARS_t0.1294964029 $WERE_GUARD_t0.0647482014 $WHOLE_t0.0719424460 $WIHT_t0.0215827338 $WITH_INSPIRATION_t0.0287769784 $WORK_RELEASE_t0.0287769784 $WORTHLESSNESS_t0.0647482014) !$HEALING_WELL_t0.0431654676 !$LIST_BELOW_t0.1294964029) $TN_t0.0791366906) !$EXPECTED_BLOOD_t0.0503597122) 
1 and(or(and(or($APPT_MADE_t0.0791366906 $PERIODICALLY_t0.0575539568 $STEP_t0.3237410072 $UNDER_SKIN_t0.0647482014 $VIEW_t0.6762589928) !$PICK_UP_t0.3021582734 !$VACCINE_GIVEN_t0.2517985612 !$WT_KG_t0.9856115108) and(!$USUALLY_t0.2877697842 $WHO_t2.7985611511 $WOULD_t3.4172661871) $NAPROXEN_TAB_t0.1654676259 $TN_t0.0791366906 $TYPE_SCHEDULING_t0.0287769784 $UCINATIONS_DENIES_t0.0503597122 $VACCINE_PNEUMOCOCCAL_t0.0359712230 $VITALS_HT_t0.0719424460 $VITALS_PULSE_t0.3597122302 $WEARS_t0.1294964029 $WERE_GUARD_t0.0647482014 $WHOLE_t0.0719424460 $WIHT_t0.0215827338 $WITH_INSPIRATION_t0.0287769784 $WORK_RELEASE_t0.0287769784 $WORTHLESSNESS_t0.0647482014) !$EXPECTED_BLOOD_t0.0503597122 !$HEALING_WELL_t0.0431654676 !$LIST_BELOW_t0.1294964029) 
1 and(or(and(or($BP_t3.8705035971 $PERIODICALLY_t0.0575539568 $STEP_t0.3237410072 $UNDER_SKIN_t0.0647482014 $VIEW_t0.6762589928) !$PICK_UP_t0.3021582734 !$VACCINE_GIVEN_t0.2517985612 !$WT_KG_t0.9856115108) and(!$USUALLY_t0.2877697842 $WHO_t2.7985611511 $WOULD_t3.4172661871) $NAPROXEN_TAB_t0.1654676259 $TN_t0.0791366906 $TYPE_SCHEDULING_t0.0287769784 $UCINATIONS_DENIES_t0.0503597122 $VACCINE_PNEUMOCOCCAL_t0.0359712230 $VITALS_HT_t0.0719424460 $VITALS_PULSE_t0.3597122302 $WEARS_t0.1294964029 $WERE_GUARD_t0.0647482014 $WHOLE_t0.0719424460 $WIHT_t0.0215827338 $WITH_INSPIRATION_t0.0287769784 $WORK_RELEASE_t0.0287769784 $WORTHLESSNESS_t0.0647482014) !$EXPECTED_BLOOD_t0.0503597122 !$HEALING_WELL_t0.0431654676 !$LIST_BELOW_t0.1294964029) 
1 and(or(and(or(!$BRAIN_t0.2589928058 $WISH_t0.2014388489) or($TURNING_t0.0575539568 $TYPE_SCHEDULING_t0.0287769784 $USUALLY_t0.2877697842 $VACCINE_PNEUMOCOCCAL_t0.0359712230 $VITALS_HT_t0.0719424460 $VITALS_PULSE_t0.3597122302 $WEARS_t0.1294964029 $WENT_OUT_t0.0791366906 $WHOLE_t0.0719424460 $WHO_t2.7985611511) !$LEFT_DELTOID_t0.2086330935 !$TREATMENT_OBTAINING_t0.0431654676) and($VIEW_t0.6762589928 !$VISIT_INTO_t0.0215827338 $YESTER_t0.9712230216) $NAPROXEN_TAB_t0.1654676259 $STEP_t0.3237410072 $SWELLING_NOTED_t0.0575539568 $TN_t0.0791366906 $VARDENAFIL_HCL_t0.0863309353 $WEIGH_DAILY_t0.0503597122 $WITH_INSPIRATION_t0.0287769784 $WRONG_t0.1223021583 $YELLING_t0.0287769784) !$DFE_t0.0647482014 !$HEALING_WELL_t0.0431654676 !$OR_MILK_t0.0575539568) 
1 or(and(or(and(or(!$BRAIN_t0.2589928058 $WISH_t0.2014388489) or($TURNING_t0.0575539568 $TYPE_SCHEDULING_t0.0287769784 $USUALLY_t0.2877697842 $VACCINE_PNEUMOCOCCAL_t0.0359712230 $VITALS_HT_t0.0719424460 $VITALS_PULSE_t0.3597122302 $WEARS_t0.1294964029 $WENT_OUT_t0.0791366906 $WHOLE_t0.0719424460 $WHO_t2.7985611511) !$LEFT_DELTOID_t0.2086330935 !$TREATMENT_OBTAINING_t0.0431654676) and($VIEW_t0.6762589928 !$VISIT_INTO_t0.0215827338 $YESTER_t0.9712230216) $STEP_t0.3237410072 $SWELLING_NOTED_t0.0575539568 $TN_t0.0791366906 $VARDENAFIL_HCL_t0.0863309353 $WEIGH_DAILY_t0.0503597122 $WITH_INSPIRATION_t0.0287769784 $WRONG_t0.1223021583 $YELLING_t0.0287769784) !$DFE_t0.0647482014 !$HEALING_WELL_t0.0431654676 !$OR_MILK_t0.0575539568) $NAPROXEN_TAB_t0.1654676259) 
1 or(and(or(and(or(!$BRAIN_t0.2589928058 $WISH_t0.2014388489) or($TURNING_t0.0575539568 $TYPE_SCHEDULING_t0.0287769784 $USUALLY_t0.2877697842 $VACCINE_PNEUMOCOCCAL_t0.0359712230 $VITALS_HT_t0.0719424460 $VITALS_PULSE_t0.3597122302 $WEARS_t0.1294964029 $WENT_OUT_t0.0791366906 $WHOLE_t0.0719424460 $WHO_t2.7985611511) !$LEFT_DELTOID_t0.2086330935 !$TREATMENT_OBTAINING_t0.0431654676 !$WILL_PROVIDE_t0.1798561151) and($VIEW_t0.6762589928 $YESTER_t0.9712230216) $STEP_t0.3237410072 $SWELLING_NOTED_t0.0575539568 $TN_t0.0791366906 $VARDENAFIL_HCL_t0.0863309353 $WEIGH_DAILY_t0.0503597122 $WITH_INSPIRATION_t0.0287769784 $WRONG_t0.1223021583 $YELLING_t0.0287769784) !$DFE_t0.0647482014 !$HEALING_WELL_t0.0431654676 !$OR_MILK_t0.0575539568) $NAPROXEN_TAB_t0.1654676259) 
1 and(or(and(or(and(or(!$BRAIN_t0.2589928058 $WISH_t0.2014388489) or($TURNING_t0.0575539568 $TYPE_SCHEDULING_t0.0287769784 $USUALLY_t0.2877697842 $VACCINE_PNEUMOCOCCAL_t0.0359712230 $VITALS_HT_t0.0719424460 $VITALS_PULSE_t0.3597122302 $WEARS_t0.1294964029 $WENT_OUT_t0.0791366906 $WHOLE_t0.0719424460 $WHO_t2.7985611511) !$LEFT_DELTOID_t0.2086330935) and($VIEW_t0.6762589928 !$VISIT_INTO_t0.0215827338 $YESTER_t0.9712230216) $STEP_t0.3237410072 $SWELLING_NOTED_t0.0575539568 $TN_t0.0791366906 $VARDENAFIL_HCL_t0.0863309353 $WEIGH_DAILY_t0.0503597122 $WITH_INSPIRATION_t0.0287769784 $WRONG_t0.1223021583 $YELLING_t0.0287769784) !$DFE_t0.0647482014 !$OR_MILK_t0.0575539568) $NAPROXEN_TAB_t0.1654676259) !$HEALING_WELL_t0.0431654676 !$TREATMENT_OBTAINING_t0.0431654676) 
1 and(or(and(or(and(or(!$BRAIN_t0.2589928058 $WISH_t0.2014388489) or($TURNING_t0.0575539568 $TYPE_SCHEDULING_t0.0287769784 $USUALLY_t0.2877697842 $VACCINE_PNEUMOCOCCAL_t0.0359712230 $VITALS_HT_t0.0719424460 $VITALS_PULSE_t0.3597122302 $WEARS_t0.1294964029 $WENT_OUT_t0.0791366906 $WHOLE_t0.0719424460 $WHO_t2.7985611511) !$LEFT_DELTOID_t0.2086330935) and($VIEW_t0.6762589928 !$VISIT_INTO_t0.0215827338 $YESTER_t0.9712230216) $STEP_t0.3237410072 $SWELLING_NOTED_t0.0575539568 $TN_t0.0791366906 $VARDENAFIL_HCL_t0.0863309353 $WEIGH_DAILY_t0.0503597122 $WITH_INSPIRATION_t0.0287769784 $WRONG_t0.1223021583 $YELLING_t0.0287769784) !$OR_MILK_t0.0575539568 !$TREATMENT_OBTAINING_t0.0431654676) $NAPROXEN_TAB_t0.1654676259) !$DFE_t0.0647482014 !$HEALING_WELL_t0.0431654676) 
1 and(or(and(or(and(or(!$BRAIN_t0.2589928058 $WISH_t0.2014388489) or($TURNING_t0.0575539568 $TYPE_SCHEDULING_t0.0287769784 $USUALLY_t0.2877697842 $VACCINE_PNEUMOCOCCAL_t0.0359712230 $VITALS_HT_t0.0719424460 $VITALS_PULSE_t0.3597122302 $WEARS_t0.1294964029 $WENT_OUT_t0.0791366906 $WHOLE_t0.0719424460 $WHO_t2.7985611511) !$LEFT_DELTOID_t0.2086330935) and($VIEW_t0.6762589928 $YESTER_t0.9712230216) $STEP_t0.3237410072 $SWELLING_NOTED_t0.0575539568 $TN_t0.0791366906 $VARDENAFIL_HCL_t0.0863309353 $WEIGH_DAILY_t0.0503597122 $WITH_INSPIRATION_t0.0287769784 $WRONG_t0.1223021583 $YELLING_t0.0287769784) !$DFE_t0.0647482014 !$OR_MILK_t0.0575539568) $NAPROXEN_TAB_t0.1654676259 $VISIT_INTO_t0.0215827338) !$HEALING_WELL_t0.0431654676 !$TREATMENT_OBTAINING_t0.0431654676) 
1 and(or(and(or(and(or(!$BRAIN_t0.2589928058 $WISH_t0.2014388489) or($TURNING_t0.0575539568 $TYPE_SCHEDULING_t0.0287769784 $USUALLY_t0.2877697842 $VACCINE_PNEUMOCOCCAL_t0.0359712230 $VITALS_HT_t0.0719424460 $VITALS_PULSE_t0.3597122302 $WEARS_t0.1294964029 $WENT_OUT_t0.0791366906 $WHOLE_t0.0719424460 $WHO_t2.7985611511) !$LEFT_DELTOID_t0.2086330935 !$TREATMENT_OBTAINING_t0.0431654676) and($VIEW_t0.6762589928 !$VISIT_INTO_t0.0215827338 $YESTER_t0.9712230216) $STEP_t0.3237410072 $SWELLING_NOTED_t0.0575539568 $TN_t0.0791366906 $VARDENAFIL_HCL_t0.0863309353 $WEIGH_DAILY_t0.0503597122 $WITH_INSPIRATION_t0.0287769784 $WRONG_t0.1223021583 $YELLING_t0.0287769784) !$DFE_t0.0647482014) $NAPROXEN_TAB_t0.1654676259) !$HEALING_WELL_t0.0431654676 !$OR_MILK_t0.0575539568) 
1 and(or(and(or(and(or(!$BRAIN_t0.2589928058 $WISH_t0.2014388489) or($TURNING_t0.0575539568 $TYPE_SCHEDULING_t0.0287769784 $USUALLY_t0.2877697842 $VACCINE_PNEUMOCOCCAL_t0.0359712230 $VITALS_HT_t0.0719424460 $VITALS_PULSE_t0.3597122302 $WEARS_t0.1294964029 $WENT_OUT_t0.0791366906 $WHOLE_t0.0719424460 $WHO_t2.7985611511) !$LEFT_DELTOID_t0.2086330935 !$TREATMENT_OBTAINING_t0.0431654676) and($VIEW_t0.6762589928 !$VISIT_INTO_t0.0215827338 $YESTER_t0.9712230216) $STEP_t0.3237410072 $SWELLING_NOTED_t0.0575539568 $TN_t0.0791366906 $VARDENAFIL_HCL_t0.0863309353 $WEIGH_DAILY_t0.0503597122 $WITH_INSPIRATION_t0.0287769784 $WRONG_t0.1223021583 $YELLING_t0.0287769784) !$DFE_t0.0647482014 !$HEALING_WELL_t0.0431654676) $NAPROXEN_TAB_t0.1654676259) !$OR_MILK_t0.0575539568) 
1 and(or(and(or(and(or(!$BRAIN_t0.2589928058 $WISH_t0.2014388489) or($TURNING_t0.0575539568 $TYPE_SCHEDULING_t0.0287769784 $USUALLY_t0.2877697842 $VACCINE_PNEUMOCOCCAL_t0.0359712230 $VITALS_HT_t0.0719424460 $VITALS_PULSE_t0.3597122302 $WEARS_t0.1294964029 $WENT_OUT_t0.0791366906 $WHOLE_t0.0719424460 $WHO_t2.7985611511) !$LEFT_DELTOID_t0.2086330935 !$TREATMENT_OBTAINING_t0.0431654676) and($VIEW_t0.6762589928 !$VISIT_INTO_t0.0215827338 $YESTER_t0.9712230216) $STEP_t0.3237410072 $SWELLING_NOTED_t0.0575539568 $TN_t0.0791366906 $VARDENAFIL_HCL_t0.0863309353 $WEIGH_DAILY_t0.0503597122 $WITH_INSPIRATION_t0.0287769784 $WRONG_t0.1223021583 $YELLING_t0.0287769784) !$DFE_t0.0647482014 !$OR_MILK_t0.0575539568) $NAPROXEN_TAB_t0.1654676259) !$HEALING_WELL_t0.0431654676) 
1 and(or(and(or(and(or(!$BRAIN_t0.2589928058 $WISH_t0.2014388489) or($TURNING_t0.0575539568 $TYPE_SCHEDULING_t0.0287769784 $USUALLY_t0.2877697842 $VACCINE_PNEUMOCOCCAL_t0.0359712230 $VITALS_HT_t0.0719424460 $VITALS_PULSE_t0.3597122302 $WEARS_t0.1294964029 $WENT_OUT_t0.0791366906 $WHOLE_t0.0719424460 $WHO_t2.7985611511) !$LEFT_DELTOID_t0.2086330935 !$TREATMENT_OBTAINING_t0.0431654676) and($VIEW_t0.6762589928 !$VISIT_INTO_t0.0215827338 $YESTER_t0.9712230216) $STEP_t0.3237410072 $SWELLING_NOTED_t0.0575539568 $TN_t0.0791366906 $VARDENAFIL_HCL_t0.0863309353 $WEIGH_DAILY_t0.0503597122 $WITH_INSPIRATION_t0.0287769784 $WRONG_t0.1223021583 $YELLING_t0.0287769784) !$HEALING_WELL_t0.0431654676 !$OR_MILK_t0.0575539568) $NAPROXEN_TAB_t0.1654676259) !$DFE_t0.0647482014) 
</ensemble>
<levels>
(ilevels
TargetLevels
p0
(dp1
S'maxval'
p2
F2.0
sS'labels'
p3
(lp4
S'1.24820143885'
p5
aS'1.74820143885'
p6
asS'minval'
p7
F1.0
sS'thresholds'
p8
(lp9
F1.4964028776978417
asS'numberOfLevels'
p10
I2
sS'targetIsEnum'
p11
I00
sS'__intervals__'
p12
(lp13
(F1.0
F1.4964028776978417
tp14
a(F1.4964028776978417
F2.0
tp15
asb.
