# Supplementary material for: Predicting the Risk of Suicide by Analyzing the Text of Clinical Notes
Source: PLoS One. 2014 Jan 28;9(1):e85733. doi: 10.1371/journal.pone.0085733 (PMC3904866; doi:10.1371/journal.pone.0085733)
Supplement: Appendix S3 — Machine Learning Libraries and Methods: This section is provided to enclose the open source (Apache License) classifier used for the building of the statistical models, specifically for the purposes of study reproducibility. A detailed account of these tools is intended for another publication. (ZIP) [file pone.0085733.s003.zip › Appendix3/ML_libs/Models/va32_FINAL.mod]

<ensemble>
group->0.992805755396
1 and(or(and(or(!$VOLUNTEER_OR_t0.0719424460 $WERE_REVIEWED_t0.4820143885) !$RESP_OX_t0.1007194245 !$UNSP_t0.2302158273 !$UPPER_RIGHT_t0.0503597122 !$VERIFIED_t1.3525179856 !$VOLUME_MOOD_t0.0647482014 !$WALKIN_t0.5539568345 !$WARRANT_t0.0503597122 !$WBC_BLOOD_t0.2661870504 !$WHAT_QUESTIONS_t0.4676258993 !$WILL_CONSIDER_t0.0647482014 !$WILL_EXPLORE_t0.0215827338 !$WITHIN_NONPHARMACOLOGICAL_t0.0791366906 !$YOU_FEEL_t0.3741007194) $ABLE_FUNCTION_t0.0791366906 $NURS_NOTE_t0.0503597122 $UPSETTING_IN_t0.1294964029 $VISIT_BIL_t0.0359712230 $WATCHES_t0.0575539568 $WEEK_NOTICE_t0.0575539568 $WILL_PICKED_t0.0935251799 $YEAR_COUNSELED_t0.0431654676 $YOUR_BOTTLES_t0.0215827338) !$ALZHEIMERS_DISEASE_t0.0431654676 !$HOURS_BREATHING_t0.0359712230) 
1 and(or(and(or(!$VOLUNTEER_OR_t0.0719424460 $WERE_REVIEWED_t0.4820143885) !$RESP_OX_t0.1007194245 !$UNSP_t0.2302158273 !$UPPER_RIGHT_t0.0503597122 !$VERIFIED_t1.3525179856 !$VOLUME_MOOD_t0.0647482014 !$WALKIN_t0.5539568345 !$WARRANT_t0.0503597122 !$WBC_BLOOD_t0.2661870504 !$WHAT_QUESTIONS_t0.4676258993 !$WILL_CONSIDER_t0.0647482014 !$WILL_EXPLORE_t0.0215827338 !$WITHIN_NONPHARMACOLOGICAL_t0.0791366906 !$YOU_FEEL_t0.3741007194) $LIPITOR_t0.0503597122 $POSTSURGICAL_STATUS_t0.0647482014 $UPSETTING_IN_t0.1294964029 $VISIT_BIL_t0.0359712230 $WATCHES_t0.0575539568 $WEEK_NOTICE_t0.0575539568 $WILL_PICKED_t0.0935251799 $YEAR_COUNSELED_t0.0431654676 $YOUR_BOTTLES_t0.0215827338) !$ALZHEIMERS_DISEASE_t0.0431654676 !$HOURS_BREATHING_t0.0359712230) 
1 and(or(and(or(!$VOLUNTEER_OR_t0.0719424460 $WERE_REVIEWED_t0.4820143885) !$RESP_OX_t0.1007194245 !$UNSP_t0.2302158273 !$UPPER_RIGHT_t0.0503597122 !$VERIFIED_t1.3525179856 !$VOLUME_MOOD_t0.0647482014 !$WALKIN_t0.5539568345 !$WARRANT_t0.0503597122 !$WBC_BLOOD_t0.2661870504 !$WHAT_QUESTIONS_t0.4676258993 !$WILL_CONSIDER_t0.0647482014 !$WILL_EXPLORE_t0.0215827338 !$YOU_FEEL_t0.3741007194) $ABLE_FUNCTION_t0.0791366906 $NURS_NOTE_t0.0503597122 $UPSETTING_IN_t0.1294964029 $VISIT_BIL_t0.0359712230 $WATCHES_t0.0575539568 $WEEK_NOTICE_t0.0575539568 $WILL_PICKED_t0.0935251799 $YEAR_COUNSELED_t0.0431654676 $YOUR_BOTTLES_t0.0215827338) !$ALZHEIMERS_DISEASE_t0.0431654676 !$HOURS_BREATHING_t0.0359712230 !$WITHIN_NONPHARMACOLOGICAL_t0.0791366906) 
1 and(or(and(or(!$VOLUNTEER_OR_t0.0719424460 $WERE_REVIEWED_t0.4820143885) !$RESP_OX_t0.1007194245 !$UNSP_t0.2302158273 !$UPPER_RIGHT_t0.0503597122 !$VERIFIED_t1.3525179856 !$VOLUME_MOOD_t0.0647482014 !$WALKIN_t0.5539568345 !$WARRANT_t0.0503597122 !$WBC_BLOOD_t0.2661870504 !$WHAT_QUESTIONS_t0.4676258993 !$WILL_CONSIDER_t0.0647482014 !$WITHIN_NONPHARMACOLOGICAL_t0.0791366906 !$YOU_FEEL_t0.3741007194) $ABLE_FUNCTION_t0.0791366906 $NURS_NOTE_t0.0503597122 $UPSETTING_IN_t0.1294964029 $VISIT_BIL_t0.0359712230 $WATCHES_t0.0575539568 $WEEK_NOTICE_t0.0575539568 $WILL_PICKED_t0.0935251799 $YEAR_COUNSELED_t0.0431654676 $YOUR_BOTTLES_t0.0215827338) !$ALZHEIMERS_DISEASE_t0.0431654676 !$HOURS_BREATHING_t0.0359712230 !$WILL_EXPLORE_t0.0215827338) 
1 and(or(and(or(!$VOLUNTEER_OR_t0.0719424460 $WERE_REVIEWED_t0.4820143885) !$RESP_OX_t0.1007194245 !$UNSP_t0.2302158273 !$UPPER_RIGHT_t0.0503597122 !$VERIFIED_t1.3525179856 !$VOLUME_MOOD_t0.0647482014 !$WALKIN_t0.5539568345 !$WARRANT_t0.0503597122 !$WHAT_QUESTIONS_t0.4676258993 !$WILL_CONSIDER_t0.0647482014 !$WILL_EXPLORE_t0.0215827338 !$WITHIN_NONPHARMACOLOGICAL_t0.0791366906 !$YOU_FEEL_t0.3741007194) $ABLE_FUNCTION_t0.0791366906 $NURS_NOTE_t0.0503597122 $UPSETTING_IN_t0.1294964029 $VISIT_BIL_t0.0359712230 $WATCHES_t0.0575539568 $WEEK_NOTICE_t0.0575539568 $WILL_PICKED_t0.0935251799 $YEAR_COUNSELED_t0.0431654676 $YOUR_BOTTLES_t0.0215827338) !$ALZHEIMERS_DISEASE_t0.0431654676 !$HOURS_BREATHING_t0.0359712230 !$WBC_BLOOD_t0.2661870504) 
1 and(or(and(or(!$VOLUNTEER_OR_t0.0719424460 $WERE_REVIEWED_t0.4820143885) !$RESP_OX_t0.1007194245 !$UNSP_t0.2302158273 !$UPPER_RIGHT_t0.0503597122 !$VERIFIED_t1.3525179856 !$VOLUME_MOOD_t0.0647482014 !$WALKIN_t0.5539568345 !$WARRANT_t0.0503597122 !$WHAT_QUESTIONS_t0.4676258993 !$WILL_CONSIDER_t0.0647482014 !$WILL_EXPLORE_t0.0215827338 !$YOU_FEEL_t0.3741007194) $ABLE_FUNCTION_t0.0791366906 $NURS_NOTE_t0.0503597122 $UPSETTING_IN_t0.1294964029 $VISIT_BIL_t0.0359712230 $WATCHES_t0.0575539568 $WEEK_NOTICE_t0.0575539568 $WILL_PICKED_t0.0935251799 $YEAR_COUNSELED_t0.0431654676 $YOUR_BOTTLES_t0.0215827338) !$ALZHEIMERS_DISEASE_t0.0431654676 !$HOURS_BREATHING_t0.0359712230 !$WBC_BLOOD_t0.2661870504 !$WITHIN_NONPHARMACOLOGICAL_t0.0791366906) 
1 and(or(and(or(!$VOLUNTEER_OR_t0.0719424460 $WERE_REVIEWED_t0.4820143885) !$RESP_OX_t0.1007194245 !$UNSP_t0.2302158273 !$UPPER_RIGHT_t0.0503597122 !$VERIFIED_t1.3525179856 !$VOLUME_MOOD_t0.0647482014 !$WALKIN_t0.5539568345 !$WARRANT_t0.0503597122 !$WHAT_QUESTIONS_t0.4676258993 !$WILL_CONSIDER_t0.0647482014 !$WITHIN_NONPHARMACOLOGICAL_t0.0791366906 !$YOU_FEEL_t0.3741007194) $ABLE_FUNCTION_t0.0791366906 $NURS_NOTE_t0.0503597122 $UPSETTING_IN_t0.1294964029 $VISIT_BIL_t0.0359712230 $WATCHES_t0.0575539568 $WEEK_NOTICE_t0.0575539568 $WILL_PICKED_t0.0935251799 $YEAR_COUNSELED_t0.0431654676 $YOUR_BOTTLES_t0.0215827338) !$ALZHEIMERS_DISEASE_t0.0431654676 !$HOURS_BREATHING_t0.0359712230 !$WBC_BLOOD_t0.2661870504 !$WILL_EXPLORE_t0.0215827338) 
1 and(or(and(or(!$VOLUNTEER_OR_t0.0719424460 $WERE_REVIEWED_t0.4820143885) !$RESP_OX_t0.1007194245 !$UNSP_t0.2302158273 !$UPPER_RIGHT_t0.0503597122 !$VERIFIED_t1.3525179856 !$VOLUME_MOOD_t0.0647482014 !$WALKIN_t0.5539568345 !$WBC_BLOOD_t0.2661870504 !$WHAT_QUESTIONS_t0.4676258993 !$WILL_CONSIDER_t0.0647482014 !$WILL_EXPLORE_t0.0215827338 !$WITHIN_NONPHARMACOLOGICAL_t0.0791366906 !$YOU_FEEL_t0.3741007194) $ABLE_FUNCTION_t0.0791366906 $NURS_NOTE_t0.0503597122 $UPSETTING_IN_t0.1294964029 $VISIT_BIL_t0.0359712230 $WATCHES_t0.0575539568 $WEEK_NOTICE_t0.0575539568 $WILL_PICKED_t0.0935251799 $YEAR_COUNSELED_t0.0431654676 $YOUR_BOTTLES_t0.0215827338) !$ALZHEIMERS_DISEASE_t0.0431654676 !$HOURS_BREATHING_t0.0359712230 !$WARRANT_t0.0503597122) 
1 and(or(and(or(!$VOLUNTEER_OR_t0.0719424460 $WERE_REVIEWED_t0.4820143885) !$RESP_OX_t0.1007194245 !$UNSP_t0.2302158273 !$UPPER_RIGHT_t0.0503597122 !$VERIFIED_t1.3525179856 !$VOLUME_MOOD_t0.0647482014 !$WALKIN_t0.5539568345 !$WHAT_QUESTIONS_t0.4676258993 !$WILL_CONSIDER_t0.0647482014 !$WILL_EXPLORE_t0.0215827338 !$WITHIN_NONPHARMACOLOGICAL_t0.0791366906 !$YOU_FEEL_t0.3741007194) $ABLE_FUNCTION_t0.0791366906 $NURS_NOTE_t0.0503597122 $UPSETTING_IN_t0.1294964029 $VISIT_BIL_t0.0359712230 $WATCHES_t0.0575539568 $WEEK_NOTICE_t0.0575539568 $WILL_PICKED_t0.0935251799 $YEAR_COUNSELED_t0.0431654676 $YOUR_BOTTLES_t0.0215827338) !$ALZHEIMERS_DISEASE_t0.0431654676 !$HOURS_BREATHING_t0.0359712230 !$WARRANT_t0.0503597122 !$WBC_BLOOD_t0.2661870504) 
1 and(or(and(or(!$VOLUNTEER_OR_t0.0719424460 $WERE_REVIEWED_t0.4820143885) !$RESP_OX_t0.1007194245 !$UNSP_t0.2302158273 !$UPPER_RIGHT_t0.0503597122 !$VERIFIED_t1.3525179856 !$WALKIN_t0.5539568345 !$WARRANT_t0.0503597122 !$WBC_BLOOD_t0.2661870504 !$WHAT_QUESTIONS_t0.4676258993 !$WILL_CONSIDER_t0.0647482014 !$WILL_EXPLORE_t0.0215827338 !$WITHIN_NONPHARMACOLOGICAL_t0.0791366906 !$YOU_FEEL_t0.3741007194) $ABLE_FUNCTION_t0.0791366906 $NURS_NOTE_t0.0503597122 $UPSETTING_IN_t0.1294964029 $VISIT_BIL_t0.0359712230 $WATCHES_t0.0575539568 $WEEK_NOTICE_t0.0575539568 $WILL_PICKED_t0.0935251799 $YEAR_COUNSELED_t0.0431654676 $YOUR_BOTTLES_t0.0215827338) !$ALZHEIMERS_DISEASE_t0.0431654676 !$HOURS_BREATHING_t0.0359712230 !$VOLUME_MOOD_t0.0647482014) 
1 and(or(and(!$EXAMINATION_COMPLETED_t0.0935251799 !$MATE_t0.0359712230 !$OBESITY_WERE_t0.0935251799 !$UNSP_t0.2302158273 !$USED_VERBAL_t0.0935251799 !$VERIFIED_CORRECT_t0.1438848921 !$VERIFIED_t1.3525179856 !$VOICEMAIL_LEFT_t0.0503597122 !$VOLUME_t0.5395683453 !$WARRANT_t0.0503597122 !$WERE_ATTENDANCE_t0.0647482014 !$WHO_t5.1582733813 !$WILLING_t0.4388489209 !$WILL_EXPLORE_t0.0215827338 !$YEARS_MORSE_t0.0431654676 !$YEARS_OLD_t0.2158273381 !$YOU_FEEL_t0.3741007194) $LIPITOR_t0.0503597122 $VISIT_BIL_t0.0359712230 $VITAMINS_OR_t0.0503597122 $WAIT_MINUTES_t0.0215827338 $WAR_SERVICE_t0.0431654676 $WAS_HORRIBLE_t0.1294964029 $WEAK_MENTAL_t0.1726618705 $WEIGH_DAILY_t0.0503597122 $WILL_PICKED_t0.0935251799 $XXXXXXXXXXXXXXXXXXXXXXXXXXXXXXXXXXXXXXXXXXXXXXXXXXXXXXXXXXXXXXXXXXXXXXXXXX_DISCHARGE_t0.0359712230 $YOU_FIND_t0.0863309353 $ZER_t0.0575539568) !$PREOCCUPIED_t0.0431654676) 
1 and(or(and(!$EXAMINATION_COMPLETED_t0.0935251799 !$OBESITY_WERE_t0.0935251799 !$UNSP_t0.2302158273 !$USED_VERBAL_t0.0935251799 !$VERIFIED_CORRECT_t0.1438848921 !$VERIFIED_t1.3525179856 !$VOICEMAIL_LEFT_t0.0503597122 !$VOLUME_t0.5395683453 !$WARRANT_t0.0503597122 !$WERE_ATTENDANCE_t0.0647482014 !$WHO_t5.1582733813 !$WILLING_t0.4388489209 !$WILL_EXPLORE_t0.0215827338 !$YEARS_MORSE_t0.0431654676 !$YEARS_OLD_t0.2158273381 !$YOU_FEEL_t0.3741007194) $LIPITOR_t0.0503597122 $VISIT_BIL_t0.0359712230 $VITAMINS_OR_t0.0503597122 $WAIT_MINUTES_t0.0215827338 $WAR_SERVICE_t0.0431654676 $WAS_HORRIBLE_t0.1294964029 $WEAK_MENTAL_t0.1726618705 $WEIGH_DAILY_t0.0503597122 $WILL_PICKED_t0.0935251799 $XXXXXXXXXXXXXXXXXXXXXXXXXXXXXXXXXXXXXXXXXXXXXXXXXXXXXXXXXXXXXXXXXXXXXXXXXX_DISCHARGE_t0.0359712230 $YOU_FIND_t0.0863309353 $ZER_t0.0575539568) !$MATE_t0.0359712230 !$PREOCCUPIED_t0.0431654676) 
1 or(and(!$EXAMINATION_COMPLETED_t0.0935251799 !$MATE_t0.0359712230 !$OBESITY_WERE_t0.0935251799 !$PREOCCUPIED_t0.0431654676 !$UNSP_t0.2302158273 !$USED_VERBAL_t0.0935251799 !$VERIFIED_CORRECT_t0.1438848921 !$VERIFIED_t1.3525179856 !$VOICEMAIL_LEFT_t0.0503597122 !$VOLUME_t0.5395683453 !$WARRANT_t0.0503597122 !$WERE_ATTENDANCE_t0.0647482014 !$WHO_t5.1582733813 !$WILLING_t0.4388489209 !$WILL_EXPLORE_t0.0215827338 !$YEARS_MORSE_t0.0431654676 !$YEARS_OLD_t0.2158273381 !$YOU_FEEL_t0.3741007194) $VISIT_BIL_t0.0359712230 $VITAMINS_OR_t0.0503597122 $WAIT_MINUTES_t0.0215827338 $WAR_SERVICE_t0.0431654676 $WAS_HORRIBLE_t0.1294964029 $WEAK_MENTAL_t0.1726618705 $WEIGH_DAILY_t0.0503597122 $WILL_PICKED_t0.0935251799 $XXXXXXXXXXXXXXXXXXXXXXXXXXXXXXXXXXXXXXXXXXXXXXXXXXXXXXXXXXXXXXXXXXXXXXXXXX_DISCHARGE_t0.0359712230 $YOU_FIND_t0.0863309353 $ZER_t0.0575539568) 
1 or(and(!$EXAMINATION_COMPLETED_t0.0935251799 !$MATE_t0.0359712230 !$OBESITY_WERE_t0.0935251799 !$UNSP_t0.2302158273 !$USED_VERBAL_t0.0935251799 !$VERIFIED_CORRECT_t0.1438848921 !$VERIFIED_t1.3525179856 !$VOICEMAIL_LEFT_t0.0503597122 !$VOLUME_t0.5395683453 !$WARRANT_t0.0503597122 !$WERE_ATTENDANCE_t0.0647482014 !$WHO_t5.1582733813 !$WILLING_t0.4388489209 !$WILL_EXPLORE_t0.0215827338 !$YEARS_MORSE_t0.0431654676 !$YEARS_OLD_t0.2158273381 !$YOU_FEEL_t0.3741007194) $ABLE_FUNCTION_t0.0791366906 $VISIT_BIL_t0.0359712230 $VITAMINS_OR_t0.0503597122 $WAIT_MINUTES_t0.0215827338 $WAR_SERVICE_t0.0431654676 $WAS_HORRIBLE_t0.1294964029 $WEAK_MENTAL_t0.1726618705 $WEIGH_DAILY_t0.0503597122 $WILL_PICKED_t0.0935251799 $XXXXXXXXXXXXXXXXXXXXXXXXXXXXXXXXXXXXXXXXXXXXXXXXXXXXXXXXXXXXXXXXXXXXXXXXXX_DISCHARGE_t0.0359712230 $YOU_FIND_t0.0863309353 $ZER_t0.0575539568) 
1 or(and(!$EXAMINATION_COMPLETED_t0.0935251799 !$MATE_t0.0359712230 !$OBESITY_WERE_t0.0935251799 !$UNSP_t0.2302158273 !$USED_VERBAL_t0.0935251799 !$VERIFIED_CORRECT_t0.1438848921 !$VERIFIED_t1.3525179856 !$VOICEMAIL_LEFT_t0.0503597122 !$VOLUME_t0.5395683453 !$WARRANT_t0.0503597122 !$WERE_ATTENDANCE_t0.0647482014 !$WHO_t5.1582733813 !$WILLING_t0.4388489209 !$WILL_EXPLORE_t0.0215827338 !$YEARS_MORSE_t0.0431654676 !$YEARS_OLD_t0.2158273381 !$YOU_FEEL_t0.3741007194) $LIPITOR_t0.0503597122 $VISIT_BIL_t0.0359712230 $VITAMINS_OR_t0.0503597122 $WAIT_MINUTES_t0.0215827338 $WAR_SERVICE_t0.0431654676 $WAS_HORRIBLE_t0.1294964029 $WEAK_MENTAL_t0.1726618705 $WEIGH_DAILY_t0.0503597122 $WILL_PICKED_t0.0935251799 $XXXXXXXXXXXXXXXXXXXXXXXXXXXXXXXXXXXXXXXXXXXXXXXXXXXXXXXXXXXXXXXXXXXXXXXXXX_DISCHARGE_t0.0359712230 $YOU_FIND_t0.0863309353 $ZER_t0.0575539568) 
1 or(and(!$EXAMINATION_COMPLETED_t0.0935251799 !$OBESITY_WERE_t0.0935251799 !$PREOCCUPIED_t0.0431654676 !$UNSP_t0.2302158273 !$USED_VERBAL_t0.0935251799 !$VERIFIED_CORRECT_t0.1438848921 !$VERIFIED_t1.3525179856 !$VOICEMAIL_LEFT_t0.0503597122 !$VOLUME_t0.5395683453 !$WARRANT_t0.0503597122 !$WERE_ATTENDANCE_t0.0647482014 !$WHO_t5.1582733813 !$WILLING_t0.4388489209 !$WILL_EXPLORE_t0.0215827338 !$YEARS_MORSE_t0.0431654676 !$YEARS_OLD_t0.2158273381 !$YOU_FEEL_t0.3741007194) $ABLE_FUNCTION_t0.0791366906 $VISIT_BIL_t0.0359712230 $VITAMINS_OR_t0.0503597122 $WAIT_MINUTES_t0.0215827338 $WAR_SERVICE_t0.0431654676 $WAS_HORRIBLE_t0.1294964029 $WEAK_MENTAL_t0.1726618705 $WEIGH_DAILY_t0.0503597122 $WILL_PICKED_t0.0935251799 $XXXXXXXXXXXXXXXXXXXXXXXXXXXXXXXXXXXXXXXXXXXXXXXXXXXXXXXXXXXXXXXXXXXXXXXXXX_DISCHARGE_t0.0359712230 $YOU_FIND_t0.0863309353 $ZER_t0.0575539568) 
1 or(and(!$EXAMINATION_COMPLETED_t0.0935251799 !$OBESITY_WERE_t0.0935251799 !$PREOCCUPIED_t0.0431654676 !$UNSP_t0.2302158273 !$USED_VERBAL_t0.0935251799 !$VERIFIED_CORRECT_t0.1438848921 !$VERIFIED_t1.3525179856 !$VOICEMAIL_LEFT_t0.0503597122 !$VOLUME_t0.5395683453 !$WARRANT_t0.0503597122 !$WERE_ATTENDANCE_t0.0647482014 !$WHO_t5.1582733813 !$WILLING_t0.4388489209 !$WILL_EXPLORE_t0.0215827338 !$YEARS_MORSE_t0.0431654676 !$YEARS_OLD_t0.2158273381 !$YOU_FEEL_t0.3741007194) $LIPITOR_t0.0503597122 $VISIT_BIL_t0.0359712230 $VITAMINS_OR_t0.0503597122 $WAIT_MINUTES_t0.0215827338 $WAR_SERVICE_t0.0431654676 $WAS_HORRIBLE_t0.1294964029 $WEAK_MENTAL_t0.1726618705 $WEIGH_DAILY_t0.0503597122 $WILL_PICKED_t0.0935251799 $XXXXXXXXXXXXXXXXXXXXXXXXXXXXXXXXXXXXXXXXXXXXXXXXXXXXXXXXXXXXXXXXXXXXXXXXXX_DISCHARGE_t0.0359712230 $YOU_FIND_t0.0863309353 $ZER_t0.0575539568) 
1 and(or(and(!$EXAMINATION_COMPLETED_t0.0935251799 !$MATE_t0.0359712230 !$OBESITY_WERE_t0.0935251799 !$UNSP_t0.2302158273 !$USED_VERBAL_t0.0935251799 !$VERIFIED_CORRECT_t0.1438848921 !$VERIFIED_t1.3525179856 !$VOICEMAIL_LEFT_t0.0503597122 !$VOLUME_t0.5395683453 !$WARRANT_t0.0503597122 !$WERE_ATTENDANCE_t0.0647482014 !$WHO_t5.1582733813 !$WILLING_t0.4388489209 !$WILL_EXPLORE_t0.0215827338 !$YEARS_MORSE_t0.0431654676 !$YEARS_OLD_t0.2158273381 !$YOU_FEEL_t0.3741007194) $VISIT_BIL_t0.0359712230 $VITAMINS_OR_t0.0503597122 $WAIT_MINUTES_t0.0215827338 $WAR_SERVICE_t0.0431654676 $WAS_HORRIBLE_t0.1294964029 $WEAK_MENTAL_t0.1726618705 $WEIGH_DAILY_t0.0503597122 $WILL_PICKED_t0.0935251799 $XXXXXXXXXXXXXXXXXXXXXXXXXXXXXXXXXXXXXXXXXXXXXXXXXXXXXXXXXXXXXXXXXXXXXXXXXX_DISCHARGE_t0.0359712230 $YOU_FIND_t0.0863309353 $ZER_t0.0575539568) !$PREOCCUPIED_WITH_t0.0287769784) 
1 and(or(and(!$EXAMINATION_COMPLETED_t0.0935251799 !$MATE_t0.0359712230 !$OBESITY_WERE_t0.0935251799 !$UNSP_t0.2302158273 !$USED_VERBAL_t0.0935251799 !$VERIFIED_CORRECT_t0.1438848921 !$VERIFIED_t1.3525179856 !$VOICEMAIL_LEFT_t0.0503597122 !$VOLUME_t0.5395683453 !$WARRANT_t0.0503597122 !$WERE_ATTENDANCE_t0.0647482014 !$WHO_t5.1582733813 !$WILLING_t0.4388489209 !$WILL_EXPLORE_t0.0215827338 !$YEARS_MORSE_t0.0431654676 !$YEARS_OLD_t0.2158273381 !$YOU_FEEL_t0.3741007194) $VISIT_BIL_t0.0359712230 $VITAMINS_OR_t0.0503597122 $WAIT_MINUTES_t0.0215827338 $WAR_SERVICE_t0.0431654676 $WAS_HORRIBLE_t0.1294964029 $WEAK_MENTAL_t0.1726618705 $WEIGH_DAILY_t0.0503597122 $WILL_PICKED_t0.0935251799 $XXXXXXXXXXXXXXXXXXXXXXXXXXXXXXXXXXXXXXXXXXXXXXXXXXXXXXXXXXXXXXXXXXXXXXXXXX_DISCHARGE_t0.0359712230 $YOU_FIND_t0.0863309353 $ZER_t0.0575539568) !$PREOCCUPIED_t0.0431654676) 
1 and(or(and(!$EXAMINATION_COMPLETED_t0.0935251799 !$OBESITY_WERE_t0.0935251799 !$PREOCCUPIED_t0.0431654676 !$UNSP_t0.2302158273 !$USED_VERBAL_t0.0935251799 !$VERIFIED_CORRECT_t0.1438848921 !$VERIFIED_t1.3525179856 !$VOICEMAIL_LEFT_t0.0503597122 !$VOLUME_t0.5395683453 !$WARRANT_t0.0503597122 !$WERE_ATTENDANCE_t0.0647482014 !$WHO_t5.1582733813 !$WILLING_t0.4388489209 !$WILL_EXPLORE_t0.0215827338 !$YEARS_MORSE_t0.0431654676 !$YEARS_OLD_t0.2158273381 !$YOU_FEEL_t0.3741007194) $VISIT_BIL_t0.0359712230 $VITAMINS_OR_t0.0503597122 $WAIT_MINUTES_t0.0215827338 $WAR_SERVICE_t0.0431654676 $WAS_HORRIBLE_t0.1294964029 $WEAK_MENTAL_t0.1726618705 $WEIGH_DAILY_t0.0503597122 $WILL_PICKED_t0.0935251799 $XXXXXXXXXXXXXXXXXXXXXXXXXXXXXXXXXXXXXXXXXXXXXXXXXXXXXXXXXXXXXXXXXXXXXXXXXX_DISCHARGE_t0.0359712230 $YOU_FIND_t0.0863309353 $ZER_t0.0575539568) !$EASIER_t0.0575539568) 
1 and(or(and($BROTHER_t0.3237410072 !$STRAIN_t0.1870503597 !$STUDENT_t0.6043165468) and(!$RESIDENTIAL_t0.1079136691 !$SOFTENER_TAB_t0.0431654676 !$UNSP_t0.2302158273 !$VERIFIED_t1.3525179856 !$VISTA_ED_t0.5035971223 !$VOICEMAIL_LEFT_t0.0503597122 !$VOIDING_t0.5395683453 !$WITHIN_NORMAL_t0.5611510791 !$WORKS_t0.3597122302 !$YEAR_t4.5323741007) $TAB_ISSU_t0.0503597122 $URGENT_SERVICES_t0.0575539568 $URINAL_WITHIN_t0.2589928058 $VA_CONTRACT_t0.0431654676 $VISIT_BIL_t0.0359712230 $VITAMINS_OR_t0.0503597122 $WAS_FRIGHTENING_t0.1294964029 $WELL_ENOUGH_t0.0359712230 $YOUNGER_t0.0431654676) !$PREOCCUPIED_WITH_t0.0287769784 !$PSYCHIATRICALLY_STABLE_t0.0359712230 !$RELIEVING_PAIN_t0.0359712230 !$UPDATES_t0.0431654676 !$UPDATE_YOUR_t0.1079136691) 
1 or(and(or(and($BROTHER_t0.3237410072 !$STRAIN_t0.1870503597 !$STUDENT_t0.6043165468) and(!$RESIDENTIAL_t0.1079136691 !$SOFTENER_TAB_t0.0431654676 !$UNSP_t0.2302158273 !$VERIFIED_t1.3525179856 !$VISTA_ED_t0.5035971223 !$VOICEMAIL_LEFT_t0.0503597122 !$VOIDING_t0.5395683453 !$WITHIN_NORMAL_t0.5611510791 !$WORKS_t0.3597122302 !$YEAR_t4.5323741007) $TAB_ISSU_t0.0503597122 $URGENT_SERVICES_t0.0575539568 $URINAL_WITHIN_t0.2589928058 $VA_CONTRACT_t0.0431654676 $VISIT_BIL_t0.0359712230 $VITAMINS_OR_t0.0503597122 $WELL_ENOUGH_t0.0359712230 $YOUNGER_t0.0431654676) !$PREOCCUPIED_WITH_t0.0287769784 !$PSYCHIATRICALLY_STABLE_t0.0359712230 !$RELIEVING_PAIN_t0.0359712230 !$UPDATES_t0.0431654676 !$UPDATE_YOUR_t0.1079136691) $WAS_FRIGHTENING_t0.1294964029) 
1 and(or(and(or(and($BROTHER_t0.3237410072 !$STUDENT_t0.6043165468) $WAS_FRIGHTENING_t0.1294964029) !$STRAIN_t0.1870503597) and(!$RESIDENTIAL_t0.1079136691 !$SOFTENER_TAB_t0.0431654676 !$UNSP_t0.2302158273 !$VERIFIED_t1.3525179856 !$VISTA_ED_t0.5035971223 !$VOICEMAIL_LEFT_t0.0503597122 !$VOIDING_t0.5395683453 !$WITHIN_NORMAL_t0.5611510791 !$WORKS_t0.3597122302 !$YEAR_t4.5323741007) $TAB_ISSU_t0.0503597122 $URGENT_SERVICES_t0.0575539568 $URINAL_WITHIN_t0.2589928058 $VA_CONTRACT_t0.0431654676 $VISIT_BIL_t0.0359712230 $VITAMINS_OR_t0.0503597122 $WELL_ENOUGH_t0.0359712230 $YOUNGER_t0.0431654676) !$PREOCCUPIED_WITH_t0.0287769784 !$PSYCHIATRICALLY_STABLE_t0.0359712230 !$RELIEVING_PAIN_t0.0359712230 !$UPDATES_t0.0431654676 !$UPDATE_YOUR_t0.1079136691) 
1 and(or(and($BROTHER_t0.3237410072 !$STRAIN_t0.1870503597 !$STUDENT_t0.6043165468) and(!$RESIDENTIAL_t0.1079136691 !$SOFTENER_TAB_t0.0431654676 !$UNSP_t0.2302158273 !$VERIFIED_t1.3525179856 !$VISTA_ED_t0.5035971223 !$VOICEMAIL_LEFT_t0.0503597122 !$VOIDING_t0.5395683453 !$WITHIN_NORMAL_t0.5611510791 !$WORKS_t0.3597122302 !$YEAR_t4.5323741007) $TAB_ISSU_t0.0503597122 $URGENT_SERVICES_t0.0575539568 $URINAL_WITHIN_t0.2589928058 $VA_CONTRACT_t0.0431654676 $VISIT_BIL_t0.0359712230 $VITAMINS_OR_t0.0503597122 $WAS_FRIGHTENING_t0.1294964029 $WILL_CONSTITUTE_t0.0719424460 $YEAR_UNKNOWN_t0.0287769784 $YOUNGER_t0.0431654676) !$PREOCCUPIED_WITH_t0.0287769784 !$PSYCHIATRICALLY_STABLE_t0.0359712230 !$RELIEVING_PAIN_t0.0359712230 !$UPDATES_t0.0431654676 !$UPDATE_YOUR_t0.1079136691) 
1 and(or(and(or(and($BROTHER_t0.3237410072 !$SOFTENER_TAB_t0.0431654676 !$STUDENT_t0.6043165468) $WAS_FRIGHTENING_t0.1294964029) !$STRAIN_t0.1870503597) and(!$RESIDENTIAL_t0.1079136691 !$SOFTENER_TAB_t0.0431654676 !$UNSP_t0.2302158273 !$VERIFIED_t1.3525179856 !$VISTA_ED_t0.5035971223 !$VOICEMAIL_LEFT_t0.0503597122 !$VOIDING_t0.5395683453 !$WITHIN_NORMAL_t0.5611510791 !$WORKS_t0.3597122302 !$YEAR_t4.5323741007) $TAB_ISSU_t0.0503597122 $URGENT_SERVICES_t0.0575539568 $URINAL_WITHIN_t0.2589928058 $VA_CONTRACT_t0.0431654676 $VISIT_BIL_t0.0359712230 $VITAMINS_OR_t0.0503597122 $WELL_ENOUGH_t0.0359712230 $YOUNGER_t0.0431654676) !$PREOCCUPIED_WITH_t0.0287769784 !$PSYCHIATRICALLY_STABLE_t0.0359712230 !$RELIEVING_PAIN_t0.0359712230 !$UPDATES_t0.0431654676 !$UPDATE_YOUR_t0.1079136691) 
1 and(or(and(or(and($BROTHER_t0.3237410072 !$STUDENT_t0.6043165468) $PREOCCUPIED_WITH_t0.0287769784 $WAS_FRIGHTENING_t0.1294964029) !$STRAIN_t0.1870503597) and(!$RESIDENTIAL_t0.1079136691 !$SOFTENER_TAB_t0.0431654676 !$UNSP_t0.2302158273 !$VERIFIED_t1.3525179856 !$VISTA_ED_t0.5035971223 !$VOICEMAIL_LEFT_t0.0503597122 !$VOIDING_t0.5395683453 !$WITHIN_NORMAL_t0.5611510791 !$WORKS_t0.3597122302 !$YEAR_t4.5323741007) $TAB_ISSU_t0.0503597122 $URGENT_SERVICES_t0.0575539568 $URINAL_WITHIN_t0.2589928058 $VA_CONTRACT_t0.0431654676 $VISIT_BIL_t0.0359712230 $VITAMINS_OR_t0.0503597122 $WELL_ENOUGH_t0.0359712230 $YOUNGER_t0.0431654676) !$PREOCCUPIED_WITH_t0.0287769784 !$PSYCHIATRICALLY_STABLE_t0.0359712230 !$RELIEVING_PAIN_t0.0359712230 !$UPDATES_t0.0431654676 !$UPDATE_YOUR_t0.1079136691) 
1 and(or(and(or(and($BROTHER_t0.3237410072 !$STUDENT_t0.6043165468) $RELIEVING_PAIN_t0.0359712230 $WAS_FRIGHTENING_t0.1294964029) !$STRAIN_t0.1870503597) and(!$RESIDENTIAL_t0.1079136691 !$SOFTENER_TAB_t0.0431654676 !$UNSP_t0.2302158273 !$VERIFIED_t1.3525179856 !$VISTA_ED_t0.5035971223 !$VOICEMAIL_LEFT_t0.0503597122 !$VOIDING_t0.5395683453 !$WITHIN_NORMAL_t0.5611510791 !$WORKS_t0.3597122302 !$YEAR_t4.5323741007) $TAB_ISSU_t0.0503597122 $URGENT_SERVICES_t0.0575539568 $URINAL_WITHIN_t0.2589928058 $VA_CONTRACT_t0.0431654676 $VISIT_BIL_t0.0359712230 $VITAMINS_OR_t0.0503597122 $WELL_ENOUGH_t0.0359712230 $YOUNGER_t0.0431654676) !$PREOCCUPIED_WITH_t0.0287769784 !$PSYCHIATRICALLY_STABLE_t0.0359712230 !$RELIEVING_PAIN_t0.0359712230 !$UPDATES_t0.0431654676 !$UPDATE_YOUR_t0.1079136691) 
1 and(or(and(or(and($BROTHER_t0.3237410072 !$STUDENT_t0.6043165468) $UBW_t0.0503597122 $WAS_FRIGHTENING_t0.1294964029) !$STRAIN_t0.1870503597) and(!$RESIDENTIAL_t0.1079136691 !$SOFTENER_TAB_t0.0431654676 !$UNSP_t0.2302158273 !$VERIFIED_t1.3525179856 !$VISTA_ED_t0.5035971223 !$VOICEMAIL_LEFT_t0.0503597122 !$VOIDING_t0.5395683453 !$WITHIN_NORMAL_t0.5611510791 !$WORKS_t0.3597122302 !$YEAR_t4.5323741007) $TAB_ISSU_t0.0503597122 $URGENT_SERVICES_t0.0575539568 $URINAL_WITHIN_t0.2589928058 $VA_CONTRACT_t0.0431654676 $VISIT_BIL_t0.0359712230 $VITAMINS_OR_t0.0503597122 $WELL_ENOUGH_t0.0359712230 $YOUNGER_t0.0431654676) !$PREOCCUPIED_WITH_t0.0287769784 !$PSYCHIATRICALLY_STABLE_t0.0359712230 !$RELIEVING_PAIN_t0.0359712230 !$UPDATES_t0.0431654676 !$UPDATE_YOUR_t0.1079136691) 
1 and(or(and(or(and($BROTHER_t0.3237410072 !$STUDENT_t0.6043165468) $UNAVAILA_t0.0503597122 $WAS_FRIGHTENING_t0.1294964029) !$STRAIN_t0.1870503597) and(!$RESIDENTIAL_t0.1079136691 !$SOFTENER_TAB_t0.0431654676 !$UNSP_t0.2302158273 !$VERIFIED_t1.3525179856 !$VISTA_ED_t0.5035971223 !$VOICEMAIL_LEFT_t0.0503597122 !$VOIDING_t0.5395683453 !$WITHIN_NORMAL_t0.5611510791 !$WORKS_t0.3597122302 !$YEAR_t4.5323741007) $TAB_ISSU_t0.0503597122 $URGENT_SERVICES_t0.0575539568 $URINAL_WITHIN_t0.2589928058 $VA_CONTRACT_t0.0431654676 $VISIT_BIL_t0.0359712230 $VITAMINS_OR_t0.0503597122 $WELL_ENOUGH_t0.0359712230 $YOUNGER_t0.0431654676) !$PREOCCUPIED_WITH_t0.0287769784 !$PSYCHIATRICALLY_STABLE_t0.0359712230 !$RELIEVING_PAIN_t0.0359712230 !$UPDATES_t0.0431654676 !$UPDATE_YOUR_t0.1079136691) 
1 and(or(and(or(and($BROTHER_t0.3237410072 !$STUDENT_t0.6043165468) $UNCOOPERATIVE_t0.0647482014 $WAS_FRIGHTENING_t0.1294964029) !$STRAIN_t0.1870503597) and(!$RESIDENTIAL_t0.1079136691 !$SOFTENER_TAB_t0.0431654676 !$UNSP_t0.2302158273 !$VERIFIED_t1.3525179856 !$VISTA_ED_t0.5035971223 !$VOICEMAIL_LEFT_t0.0503597122 !$VOIDING_t0.5395683453 !$WITHIN_NORMAL_t0.5611510791 !$WORKS_t0.3597122302 !$YEAR_t4.5323741007) $TAB_ISSU_t0.0503597122 $URGENT_SERVICES_t0.0575539568 $URINAL_WITHIN_t0.2589928058 $VA_CONTRACT_t0.0431654676 $VISIT_BIL_t0.0359712230 $VITAMINS_OR_t0.0503597122 $WELL_ENOUGH_t0.0359712230 $YOUNGER_t0.0431654676) !$PREOCCUPIED_WITH_t0.0287769784 !$PSYCHIATRICALLY_STABLE_t0.0359712230 !$RELIEVING_PAIN_t0.0359712230 !$UPDATES_t0.0431654676 !$UPDATE_YOUR_t0.1079136691) 
1 and(or(and(!$PSYCHIATRY_NOTE_t0.8273381295 !$UNSP_t0.2302158273 !$UPDATES_t0.0431654676 !$USED_VERBAL_t0.0935251799 !$VERIFIED_t1.3525179856 !$VISIT_DENTAL_t0.3309352518 !$VISTA_ED_t0.5035971223 !$VOICEMAIL_LEFT_t0.0503597122 !$VOLUME_MOOD_t0.0647482014 !$WELL_ENOUGH_t0.0359712230 !$WERE_DISCUSSED_t0.4172661871 !$YEAR_t4.5323741007 !$YR_t0.4892086331) $ABLE_FUNCTION_t0.0791366906 $AVERAGE_RISK_t0.0431654676 $DISEASE_CABG_t0.0287769784 $MALE_CA_t0.0863309353 $UPSETTING_THAT_t0.1294964029 $URGENT_APPT_t0.0431654676 $WAR_SERVICE_t0.0431654676 $WEIGH_DAILY_t0.0503597122 $WE_COULD_t0.1438848921 $WILL_PICKED_t0.0935251799 $WILL_RESTART_t0.0215827338 $WTIH_t0.0431654676 $YE_t0.0503597122 $ZER_t0.0575539568) !$EASIER_t0.0575539568 !$NOISES_t0.0359712230) 
1 and(or(and(!$PSYCHIATRY_NOTE_t0.8273381295 !$UNSP_t0.2302158273 !$UPDATES_t0.0431654676 !$USED_VERBAL_t0.0935251799 !$VERIFIED_t1.3525179856 !$VISIT_DENTAL_t0.3309352518 !$VISTA_ED_t0.5035971223 !$VOICEMAIL_LEFT_t0.0503597122 !$VOLUME_MOOD_t0.0647482014 !$WELL_ENOUGH_t0.0359712230 !$WERE_DISCUSSED_t0.4172661871 !$YEAR_t4.5323741007 !$YR_t0.4892086331) $ABLE_FUNCTION_t0.0791366906 $CONSENT_COLON_t0.0431654676 $DISEASE_CABG_t0.0287769784 $MALE_CA_t0.0863309353 $UPSETTING_THAT_t0.1294964029 $URGENT_APPT_t0.0431654676 $WAR_SERVICE_t0.0431654676 $WEIGH_DAILY_t0.0503597122 $WE_COULD_t0.1438848921 $WILL_PICKED_t0.0935251799 $WILL_RESTART_t0.0215827338 $WTIH_t0.0431654676 $YE_t0.0503597122 $ZER_t0.0575539568) !$EASIER_t0.0575539568 !$NOISES_t0.0359712230) 
1 and(or(and(!$PSYCHIATRY_NOTE_t0.8273381295 !$UNSP_t0.2302158273 !$UPDATES_t0.0431654676 !$USED_VERBAL_t0.0935251799 !$VERIFIED_t1.3525179856 !$VISIT_DENTAL_t0.3309352518 !$VISTA_ED_t0.5035971223 !$VOICEMAIL_LEFT_t0.0503597122 !$VOLUME_MOOD_t0.0647482014 !$WELL_ENOUGH_t0.0359712230 !$WERE_DISCUSSED_t0.4172661871 !$YEAR_t4.5323741007 !$YR_t0.4892086331) $CONSENT_COLON_t0.0431654676 $DISEASE_CABG_t0.0287769784 $LIPITOR_t0.0503597122 $MALE_CA_t0.0863309353 $UPSETTING_THAT_t0.1294964029 $URGENT_APPT_t0.0431654676 $WAR_SERVICE_t0.0431654676 $WEIGH_DAILY_t0.0503597122 $WE_COULD_t0.1438848921 $WILL_PICKED_t0.0935251799 $WILL_RESTART_t0.0215827338 $WTIH_t0.0431654676 $YE_t0.0503597122 $ZER_t0.0575539568) !$EASIER_t0.0575539568 !$NOISES_t0.0359712230) 
1 and(or(and(!$PSYCHIATRY_NOTE_t0.8273381295 !$UNSP_t0.2302158273 !$UPDATES_t0.0431654676 !$USED_VERBAL_t0.0935251799 !$VERIFIED_t1.3525179856 !$VISIT_DENTAL_t0.3309352518 !$VISTA_ED_t0.5035971223 !$VOICEMAIL_LEFT_t0.0503597122 !$VOLUME_MOOD_t0.0647482014 !$WELL_ENOUGH_t0.0359712230 !$WERE_DISCUSSED_t0.4172661871 !$YEAR_t4.5323741007 !$YR_t0.4892086331) $ABLE_FUNCTION_t0.0791366906 $CONSENT_COLON_t0.0431654676 $DISEASE_CABG_t0.0287769784 $LIPITOR_t0.0503597122 $MALE_CA_t0.0863309353 $UPSETTING_THAT_t0.1294964029 $URGENT_APPT_t0.0431654676 $WAR_SERVICE_t0.0431654676 $WEIGH_DAILY_t0.0503597122 $WE_COULD_t0.1438848921 $WILL_PICKED_t0.0935251799 $WILL_RESTART_t0.0215827338 $WTIH_t0.0431654676 $YE_t0.0503597122 $ZER_t0.0575539568) !$EASIER_t0.0575539568 !$NOISES_t0.0359712230) 
1 and(or(and(!$PSYCHIATRY_NOTE_t0.8273381295 !$UNSP_t0.2302158273 !$UPDATES_t0.0431654676 !$USED_VERBAL_t0.0935251799 !$VERIFIED_t1.3525179856 !$VISIT_DENTAL_t0.3309352518 !$VISTA_ED_t0.5035971223 !$VOICEMAIL_LEFT_t0.0503597122 !$VOLUME_MOOD_t0.0647482014 !$WELL_ENOUGH_t0.0359712230 !$WERE_DISCUSSED_t0.4172661871 !$YEAR_t4.5323741007 !$YR_t0.4892086331) $CONSENT_COLON_t0.0431654676 $DISEASE_CABG_t0.0287769784 $GENTLE_t0.0215827338 $LIPITOR_t0.0503597122 $MALE_CA_t0.0863309353 $UPSETTING_THAT_t0.1294964029 $URGENT_APPT_t0.0431654676 $WAR_SERVICE_t0.0431654676 $WEIGH_DAILY_t0.0503597122 $WE_COULD_t0.1438848921 $WILL_PICKED_t0.0935251799 $WILL_RESTART_t0.0215827338 $WTIH_t0.0431654676 $YE_t0.0503597122 $ZER_t0.0575539568) !$EASIER_t0.0575539568 !$NOISES_t0.0359712230) 
1 and(or(and(!$PSYCHIATRY_NOTE_t0.8273381295 !$UNSP_t0.2302158273 !$UPDATES_t0.0431654676 !$USED_VERBAL_t0.0935251799 !$VERIFIED_t1.3525179856 !$VISIT_DENTAL_t0.3309352518 !$VISTA_ED_t0.5035971223 !$VOICEMAIL_LEFT_t0.0503597122 !$VOLUME_MOOD_t0.0647482014 !$WELL_ENOUGH_t0.0359712230 !$WERE_DISCUSSED_t0.4172661871 !$YEAR_t4.5323741007 !$YR_t0.4892086331) $CARDIOLOGIST_t0.1007194245 $CONSENT_COLON_t0.0431654676 $DISCHARGE_ALDRETE_t0.0359712230 $DISEASE_CABG_t0.0287769784 $LIPITOR_t0.0503597122 $MALE_CA_t0.0863309353 $UPSETTING_THAT_t0.1294964029 $URGENT_APPT_t0.0431654676 $WAR_SERVICE_t0.0431654676 $WEIGH_DAILY_t0.0503597122 $WE_COULD_t0.1438848921 $WILL_PICKED_t0.0935251799 $WILL_RESTART_t0.0215827338 $WTIH_t0.0431654676 $YE_t0.0503597122 $ZER_t0.0575539568) !$EASIER_t0.0575539568 !$NOISES_t0.0359712230) 
1 and(or(and($ABLE_FUNCTION_t0.0791366906 $GENTLE_t0.0215827338) and(!$PSYCHIATRY_NOTE_t0.8273381295 !$UNSP_t0.2302158273 !$UPDATES_t0.0431654676 !$USED_VERBAL_t0.0935251799 !$VERIFIED_t1.3525179856 !$VISIT_DENTAL_t0.3309352518 !$VISTA_ED_t0.5035971223 !$VOICEMAIL_LEFT_t0.0503597122 !$VOLUME_MOOD_t0.0647482014 !$WELL_ENOUGH_t0.0359712230 !$WERE_DISCUSSED_t0.4172661871 !$YEAR_t4.5323741007 !$YR_t0.4892086331) $CONSENT_COLON_t0.0431654676 $DISEASE_CABG_t0.0287769784 $LIPITOR_t0.0503597122 $MALE_CA_t0.0863309353 $UPSETTING_THAT_t0.1294964029 $URGENT_APPT_t0.0431654676 $WAR_SERVICE_t0.0431654676 $WEIGH_DAILY_t0.0503597122 $WE_COULD_t0.1438848921 $WILL_PICKED_t0.0935251799 $WILL_RESTART_t0.0215827338 $WTIH_t0.0431654676 $YE_t0.0503597122 $ZER_t0.0575539568) !$EASIER_t0.0575539568 !$NOISES_t0.0359712230) 
1 and(or(and($CARDIOLOGIST_t0.1007194245 $GENTLE_t0.0215827338) and(!$PSYCHIATRY_NOTE_t0.8273381295 !$UNSP_t0.2302158273 !$UPDATES_t0.0431654676 !$USED_VERBAL_t0.0935251799 !$VERIFIED_t1.3525179856 !$VISIT_DENTAL_t0.3309352518 !$VISTA_ED_t0.5035971223 !$VOICEMAIL_LEFT_t0.0503597122 !$VOLUME_MOOD_t0.0647482014 !$WELL_ENOUGH_t0.0359712230 !$WERE_DISCUSSED_t0.4172661871 !$YEAR_t4.5323741007 !$YR_t0.4892086331) $DISCHARGE_ALDRETE_t0.0359712230 $DISEASE_CABG_t0.0287769784 $LIPITOR_t0.0503597122 $MALE_CA_t0.0863309353 $UPSETTING_THAT_t0.1294964029 $URGENT_APPT_t0.0431654676 $WAR_SERVICE_t0.0431654676 $WEIGH_DAILY_t0.0503597122 $WE_COULD_t0.1438848921 $WILL_PICKED_t0.0935251799 $WILL_RESTART_t0.0215827338 $WTIH_t0.0431654676 $YE_t0.0503597122 $ZER_t0.0575539568) !$EASIER_t0.0575539568 !$NOISES_t0.0359712230) 
1 and(or(and(!$PSYCHIATRY_NOTE_t0.8273381295 !$UNSP_t0.2302158273 !$UPDATES_t0.0431654676 !$USED_VERBAL_t0.0935251799 !$VERIFIED_t1.3525179856 !$VISIT_DENTAL_t0.3309352518 !$VISTA_ED_t0.5035971223 !$VOICEMAIL_LEFT_t0.0503597122 !$VOLUME_MOOD_t0.0647482014 !$WELL_ENOUGH_t0.0359712230 !$WERE_DISCUSSED_t0.4172661871 !$YEAR_t4.5323741007 !$YR_t0.4892086331) $ABLE_FUNCTION_t0.0791366906 $ACETATE_t0.0575539568 $AVERAGE_RISK_t0.0431654676 $UPSETTING_THAT_t0.1294964029 $URGENT_APPT_t0.0431654676 $WAR_SERVICE_t0.0431654676 $WEIGH_DAILY_t0.0503597122 $WE_COULD_t0.1438848921 $WILL_PICKED_t0.0935251799 $WILL_RESTART_t0.0215827338 $WTIH_t0.0431654676 $YE_t0.0503597122 $ZER_t0.0575539568) !$EASIER_t0.0575539568 !$NOISES_t0.0359712230) 
1 and(or(and(!$PSYCHIATRY_NOTE_t0.8273381295 !$UNSP_t0.2302158273 !$UPDATES_t0.0431654676 !$USED_VERBAL_t0.0935251799 !$VERIFIED_t1.3525179856 !$VISIT_DENTAL_t0.3309352518 !$VISTA_ED_t0.5035971223 !$VOICEMAIL_LEFT_t0.0503597122 !$VOLUME_MOOD_t0.0647482014 !$WELL_ENOUGH_t0.0359712230 !$WERE_DISCUSSED_t0.4172661871 !$YEAR_t4.5323741007 !$YR_t0.4892086331) $ABLE_FUNCTION_t0.0791366906 $AVERAGE_RISK_t0.0431654676 $BE_REFILLED_t0.0863309353 $UPSETTING_THAT_t0.1294964029 $URGENT_APPT_t0.0431654676 $WAR_SERVICE_t0.0431654676 $WEIGH_DAILY_t0.0503597122 $WE_COULD_t0.1438848921 $WILL_PICKED_t0.0935251799 $WILL_RESTART_t0.0215827338 $WTIH_t0.0431654676 $YE_t0.0503597122 $ZER_t0.0575539568) !$EASIER_t0.0575539568 !$NOISES_t0.0359712230) 
1 and(or(and(or($DISEASE_CABG_t0.0287769784 $INFORMED_COLON_t0.0431654676 $URINAL_WITHIN_t0.2589928058 $WE_COULD_t0.1438848921) !$WET_t0.1151079137) and(or(!$VERIFIED_t1.3525179856 $YEARS_t2.6546762590) !$MH_PSYCHIATRY_t0.3669064748 !$UNSP_t0.2302158273 !$UPDATES_t0.0431654676 !$VISIT_DENTAL_t0.3309352518 !$VISTA_ED_t0.5035971223 !$VOICEMAIL_LEFT_t0.0503597122 !$VOLUME_MOOD_t0.0647482014 !$WERE_DISCUSSED_t0.4172661871 !$WHICH_MAKES_t0.0287769784 !$YEAR_t4.5323741007 !$YOUR_SEES_t0.0359712230 !$YR_t0.4892086331) $ACETATE_t0.0575539568 $URGENT_APPT_t0.0431654676 $VA_CONTRACT_t0.0431654676 $WAR_SERVICE_t0.0431654676 $WAS_FRIGHTENING_t0.1294964029 $WILL_PICKED_t0.0935251799 $WILL_RESTART_t0.0215827338 $WTIH_t0.0431654676 $YE_t0.0503597122) !$EASIER_t0.0575539568) 
1 and(or(and(or($DISEASE_CABG_t0.0287769784 $INFORMED_COLON_t0.0431654676 $URINAL_WITHIN_t0.2589928058 $WE_COULD_t0.1438848921) !$WET_t0.1151079137) and(or(!$VERIFIED_t1.3525179856 $YEARS_t2.6546762590) !$MH_PSYCHIATRY_t0.3669064748 !$UNSP_t0.2302158273 !$UPDATES_t0.0431654676 !$VISIT_DENTAL_t0.3309352518 !$VISTA_ED_t0.5035971223 !$VOICEMAIL_LEFT_t0.0503597122 !$VOLUME_MOOD_t0.0647482014 !$WERE_DISCUSSED_t0.4172661871 !$WHICH_MAKES_t0.0287769784 !$YEAR_t4.5323741007 !$YOUR_SEES_t0.0359712230 !$YR_t0.4892086331) $URGENT_APPT_t0.0431654676 $VA_CONTRACT_t0.0431654676 $WAR_SERVICE_t0.0431654676 $WAS_FRIGHTENING_t0.1294964029 $WILL_PICKED_t0.0935251799 $WILL_RESTART_t0.0215827338 $WTIH_t0.0431654676 $YE_t0.0503597122) !$EASIER_t0.0575539568) 
1 and(or(and(or($DISEASE_CABG_t0.0287769784 $RECTAL_EXAM_t0.0503597122 $URINAL_WITHIN_t0.2589928058 $WE_COULD_t0.1438848921) !$WET_t0.1151079137) and(or(!$VERIFIED_t1.3525179856 $YEARS_t2.6546762590) !$MH_PSYCHIATRY_t0.3669064748 !$UNSP_t0.2302158273 !$UPDATES_t0.0431654676 !$VISIT_DENTAL_t0.3309352518 !$VISTA_ED_t0.5035971223 !$VOICEMAIL_LEFT_t0.0503597122 !$VOLUME_MOOD_t0.0647482014 !$WERE_DISCUSSED_t0.4172661871 !$WHICH_MAKES_t0.0287769784 !$YEAR_t4.5323741007 !$YOUR_SEES_t0.0359712230 !$YR_t0.4892086331) $URGENT_APPT_t0.0431654676 $VA_CONTRACT_t0.0431654676 $WAR_SERVICE_t0.0431654676 $WAS_FRIGHTENING_t0.1294964029 $WILL_PICKED_t0.0935251799 $WILL_RESTART_t0.0215827338 $WTIH_t0.0431654676 $YE_t0.0503597122) !$EASIER_t0.0575539568) 
1 and(or(and(or($DISEASE_CABG_t0.0287769784 $URINAL_WITHIN_t0.2589928058 $WE_COULD_t0.1438848921) !$WET_t0.1151079137) and(or(!$VERIFIED_t1.3525179856 $YEARS_t2.6546762590) !$MH_PSYCHIATRY_t0.3669064748 !$UNSP_t0.2302158273 !$UPDATES_t0.0431654676 !$VISIT_DENTAL_t0.3309352518 !$VISTA_ED_t0.5035971223 !$VOICEMAIL_LEFT_t0.0503597122 !$VOLUME_MOOD_t0.0647482014 !$WERE_DISCUSSED_t0.4172661871 !$WHICH_MAKES_t0.0287769784 !$YEAR_t4.5323741007 !$YOUR_SEES_t0.0359712230 !$YR_t0.4892086331) $ACETATE_t0.0575539568 $URGENT_APPT_t0.0431654676 $VA_CONTRACT_t0.0431654676 $WAR_SERVICE_t0.0431654676 $WAS_FRIGHTENING_t0.1294964029 $WILL_PICKED_t0.0935251799 $WILL_RESTART_t0.0215827338 $WTIH_t0.0431654676 $YE_t0.0503597122) !$EASIER_t0.0575539568) 
1 and(or(and(or($INFORMED_COLON_t0.0431654676 $URINAL_WITHIN_t0.2589928058 $WE_COULD_t0.1438848921) !$WET_t0.1151079137) and(or(!$VERIFIED_t1.3525179856 $YEARS_t2.6546762590) !$MH_PSYCHIATRY_t0.3669064748 !$UNSP_t0.2302158273 !$UPDATES_t0.0431654676 !$VISIT_DENTAL_t0.3309352518 !$VISTA_ED_t0.5035971223 !$VOICEMAIL_LEFT_t0.0503597122 !$VOLUME_MOOD_t0.0647482014 !$WERE_DISCUSSED_t0.4172661871 !$WHICH_MAKES_t0.0287769784 !$YEAR_t4.5323741007 !$YOUR_SEES_t0.0359712230 !$YR_t0.4892086331) $ACETATE_t0.0575539568 $URGENT_APPT_t0.0431654676 $VA_CONTRACT_t0.0431654676 $WAR_SERVICE_t0.0431654676 $WAS_FRIGHTENING_t0.1294964029 $WILL_PICKED_t0.0935251799 $WILL_RESTART_t0.0215827338 $WTIH_t0.0431654676 $YE_t0.0503597122) !$EASIER_t0.0575539568) 
1 and(or(and(or($INFORMED_COLON_t0.0431654676 $URINAL_WITHIN_t0.2589928058 $WE_COULD_t0.1438848921) !$WET_t0.1151079137) and(or(!$VERIFIED_t1.3525179856 $YEARS_t2.6546762590) !$MH_PSYCHIATRY_t0.3669064748 !$UNSP_t0.2302158273 !$VISIT_DENTAL_t0.3309352518 !$VISTA_ED_t0.5035971223 !$VOICEMAIL_LEFT_t0.0503597122 !$VOLUME_MOOD_t0.0647482014 !$WERE_DISCUSSED_t0.4172661871 !$WHICH_MAKES_t0.0287769784 !$YEAR_t4.5323741007 !$YOUR_SEES_t0.0359712230 !$YR_t0.4892086331) $ACETATE_t0.0575539568 $URGENT_APPT_t0.0431654676 $VA_CONTRACT_t0.0431654676 $WAR_SERVICE_t0.0431654676 $WAS_FRIGHTENING_t0.1294964029 $WILL_PICKED_t0.0935251799 $WILL_RESTART_t0.0215827338 $WTIH_t0.0431654676 $YE_t0.0503597122) !$EASIER_t0.0575539568 !$UPDATES_t0.0431654676) 
1 and(or(and(or($RECTAL_EXAM_t0.0503597122 $URINAL_WITHIN_t0.2589928058 $WE_COULD_t0.1438848921) !$WET_t0.1151079137) and(or(!$VERIFIED_t1.3525179856 $YEARS_t2.6546762590) !$MH_PSYCHIATRY_t0.3669064748 !$UNSP_t0.2302158273 !$UPDATES_t0.0431654676 !$VISIT_DENTAL_t0.3309352518 !$VISTA_ED_t0.5035971223 !$VOICEMAIL_LEFT_t0.0503597122 !$VOLUME_MOOD_t0.0647482014 !$WERE_DISCUSSED_t0.4172661871 !$WHICH_MAKES_t0.0287769784 !$YEAR_t4.5323741007 !$YOUR_SEES_t0.0359712230 !$YR_t0.4892086331) $ACETATE_t0.0575539568 $URGENT_APPT_t0.0431654676 $VA_CONTRACT_t0.0431654676 $WAR_SERVICE_t0.0431654676 $WAS_FRIGHTENING_t0.1294964029 $WILL_PICKED_t0.0935251799 $WILL_RESTART_t0.0215827338 $WTIH_t0.0431654676 $YE_t0.0503597122) !$EASIER_t0.0575539568) 
1 and(or(and(or($AVERAGE_RISK_t0.0431654676 $INFORMED_COLON_t0.0431654676 $URINAL_WITHIN_t0.2589928058 $WE_COULD_t0.1438848921) !$WET_t0.1151079137) and(or(!$VERIFIED_t1.3525179856 $YEARS_t2.6546762590) !$MH_PSYCHIATRY_t0.3669064748 !$UNSP_t0.2302158273 !$UPDATES_t0.0431654676 !$VISIT_DENTAL_t0.3309352518 !$VISTA_ED_t0.5035971223 !$VOICEMAIL_LEFT_t0.0503597122 !$VOLUME_MOOD_t0.0647482014 !$WERE_DISCUSSED_t0.4172661871 !$WHICH_MAKES_t0.0287769784 !$YEAR_t4.5323741007 !$YOUR_SEES_t0.0359712230 !$YR_t0.4892086331) $ACETATE_t0.0575539568 $URGENT_APPT_t0.0431654676 $VA_CONTRACT_t0.0431654676 $WAR_SERVICE_t0.0431654676 $WAS_FRIGHTENING_t0.1294964029 $WILL_PICKED_t0.0935251799 $WILL_RESTART_t0.0215827338 $WTIH_t0.0431654676 $YE_t0.0503597122) !$EASIER_t0.0575539568) 
1 and(or(and(or($AVERAGE_RISK_t0.0431654676 $URINAL_WITHIN_t0.2589928058 $WE_COULD_t0.1438848921) !$WET_t0.1151079137) and(or(!$VERIFIED_t1.3525179856 $YEARS_t2.6546762590) !$MH_PSYCHIATRY_t0.3669064748 !$UNSP_t0.2302158273 !$UPDATES_t0.0431654676 !$VISIT_DENTAL_t0.3309352518 !$VISTA_ED_t0.5035971223 !$VOICEMAIL_LEFT_t0.0503597122 !$VOLUME_MOOD_t0.0647482014 !$WERE_DISCUSSED_t0.4172661871 !$WHICH_MAKES_t0.0287769784 !$YEAR_t4.5323741007 !$YOUR_SEES_t0.0359712230 !$YR_t0.4892086331) $URGENT_APPT_t0.0431654676 $VA_CONTRACT_t0.0431654676 $WAR_SERVICE_t0.0431654676 $WAS_FRIGHTENING_t0.1294964029 $WILL_PICKED_t0.0935251799 $WILL_RESTART_t0.0215827338 $WTIH_t0.0431654676 $YE_t0.0503597122) !$EASIER_t0.0575539568) 
1 and(or(and(or($DISEASE_CABG_t0.0287769784 $URINAL_WITHIN_t0.2589928058 $WE_COULD_t0.1438848921) !$WET_t0.1151079137) and(or(!$VERIFIED_t1.3525179856 $YEARS_t2.6546762590) !$MH_PSYCHIATRY_t0.3669064748 !$UNSP_t0.2302158273 !$UPDATES_t0.0431654676 !$VISIT_DENTAL_t0.3309352518 !$VISTA_ED_t0.5035971223 !$VOICEMAIL_LEFT_t0.0503597122 !$VOLUME_MOOD_t0.0647482014 !$WERE_DISCUSSED_t0.4172661871 !$WHICH_MAKES_t0.0287769784 !$YEAR_t4.5323741007 !$YOUR_SEES_t0.0359712230 !$YR_t0.4892086331) $URGENT_APPT_t0.0431654676 $VA_CONTRACT_t0.0431654676 $WAR_SERVICE_t0.0431654676 $WAS_FRIGHTENING_t0.1294964029 $WILL_PICKED_t0.0935251799 $WILL_RESTART_t0.0215827338 $WTIH_t0.0431654676 $YE_t0.0503597122) !$EASIER_t0.0575539568) 
1 and(or(and(!$MH_PSYCHIATRY_t0.3669064748 !$UNSP_t0.2302158273 !$UROLOGY_CLINIC_t0.2661870504 !$VERIFIED_t1.3525179856 !$VISIT_HOLD_t0.0863309353 !$VOICEMAIL_LEFT_t0.0503597122 !$VOLUNTEER_OR_t0.0719424460 !$WHAT_QUESTIONS_t0.4676258993 !$YEAR_t4.5323741007 !$YOUR_RECENT_t0.1726618705) and(!$VERIFIED_t1.3525179856 !$VF_t0.0719424460 !$VISIT_PROCESSES_t0.0647482014 $VISIT_t9.2661870504 !$VOICEMAIL_t0.2949640288 !$WORST_PAIN_t0.7194244604 !$YEAR_HOW_t0.1870503597) $ABLE_FUNCTION_t0.0791366906 $DISEASE_CABG_t0.0287769784 $GENTLE_t0.0215827338 $UPSETTING_IN_t0.1294964029 $URGENT_APPT_t0.0431654676 $VA_CONTRACT_t0.0431654676 $WAR_SERVICE_t0.0431654676 $WAS_FRIGHTENING_t0.1294964029 $WATCHES_t0.0575539568 $WM_ADMITTED_t0.0359712230 $WORTHLESSNESS_t0.0791366906 $YEAR_UNKNOWN_t0.0287769784 $YE_t0.0503597122) !$ALZHEIMERS_DISEASE_t0.0431654676 !$CALCIUM_MG_t0.1510791367 !$WARRANT_t0.0503597122) 
1 and(or(and(!$MH_PSYCHIATRY_t0.3669064748 !$UNSP_t0.2302158273 !$UROLOGY_CLINIC_t0.2661870504 !$VERIFIED_t1.3525179856 !$VISIT_HOLD_t0.0863309353 !$VOICEMAIL_LEFT_t0.0503597122 !$VOLUNTEER_OR_t0.0719424460 !$WHAT_QUESTIONS_t0.4676258993 !$YEAR_t4.5323741007 !$YOUR_RECENT_t0.1726618705) and(!$VERIFIED_t1.3525179856 !$VF_t0.0719424460 !$VISIT_PROCESSES_t0.0647482014 $VISIT_t9.2661870504 !$VOICEMAIL_t0.2949640288 !$WORST_PAIN_t0.7194244604 !$YEAR_HOW_t0.1870503597) $DISEASE_CABG_t0.0287769784 $GENTLE_t0.0215827338 $UPSETTING_IN_t0.1294964029 $URGENT_APPT_t0.0431654676 $VA_CONTRACT_t0.0431654676 $WAR_SERVICE_t0.0431654676 $WATCHES_t0.0575539568 $WM_ADMITTED_t0.0359712230 $WORTHLESSNESS_t0.0791366906 $YEAR_UNKNOWN_t0.0287769784 $YE_t0.0503597122) !$ALZHEIMERS_DISEASE_t0.0431654676 !$CALCIUM_MG_t0.1510791367 !$WARRANT_t0.0503597122) 
1 and(or(and(!$MH_PSYCHIATRY_t0.3669064748 !$UNSP_t0.2302158273 !$UROLOGY_CLINIC_t0.2661870504 !$VERIFIED_t1.3525179856 !$VISIT_HOLD_t0.0863309353 !$VOICEMAIL_LEFT_t0.0503597122 !$VOLUNTEER_OR_t0.0719424460 !$WHAT_QUESTIONS_t0.4676258993 !$YEAR_t4.5323741007 !$YOUR_RECENT_t0.1726618705) and(!$VERIFIED_t1.3525179856 !$VF_t0.0719424460 !$VISIT_PROCESSES_t0.0647482014 $VISIT_t9.2661870504 !$VOICEMAIL_t0.2949640288 !$WORST_PAIN_t0.7194244604 !$YEAR_HOW_t0.1870503597) $DISEASE_CABG_t0.0287769784 $GENTLE_t0.0215827338 $URGENT_APPT_t0.0431654676 $VA_CONTRACT_t0.0431654676 $WAR_SERVICE_t0.0431654676 $WAS_FRIGHTENING_t0.1294964029 $WATCHES_t0.0575539568 $WM_ADMITTED_t0.0359712230 $WORTHLESSNESS_t0.0791366906 $YEAR_UNKNOWN_t0.0287769784 $YE_t0.0503597122) !$ALZHEIMERS_DISEASE_t0.0431654676 !$CALCIUM_MG_t0.1510791367 !$WARRANT_t0.0503597122) 
1 and(or(and(!$MH_PSYCHIATRY_t0.3669064748 !$UNSP_t0.2302158273 !$UROLOGY_CLINIC_t0.2661870504 !$VERIFIED_t1.3525179856 !$VISIT_HOLD_t0.0863309353 !$VOICEMAIL_LEFT_t0.0503597122 !$VOLUNTEER_OR_t0.0719424460 !$WHAT_QUESTIONS_t0.4676258993 !$YEAR_t4.5323741007 !$YOUR_RECENT_t0.1726618705) and(!$VERIFIED_t1.3525179856 !$VF_t0.0719424460 !$VISIT_PROCESSES_t0.0647482014 $VISIT_t9.2661870504 !$VOICEMAIL_t0.2949640288 !$YEAR_HOW_t0.1870503597) $DISEASE_CABG_t0.0287769784 $GENTLE_t0.0215827338 $UPSETTING_IN_t0.1294964029 $URGENT_APPT_t0.0431654676 $VA_CONTRACT_t0.0431654676 $WAR_SERVICE_t0.0431654676 $WAS_FRIGHTENING_t0.1294964029 $WATCHES_t0.0575539568 $WM_ADMITTED_t0.0359712230 $WORTHLESSNESS_t0.0791366906 $YEAR_UNKNOWN_t0.0287769784 $YE_t0.0503597122) !$ALZHEIMERS_DISEASE_t0.0431654676 !$CALCIUM_MG_t0.1510791367 !$WARRANT_t0.0503597122) 
1 and(or(and(!$MH_PSYCHIATRY_t0.3669064748 !$UNSP_t0.2302158273 !$UROLOGY_CLINIC_t0.2661870504 !$VERIFIED_t1.3525179856 !$VISIT_HOLD_t0.0863309353 !$VOICEMAIL_LEFT_t0.0503597122 !$VOLUNTEER_OR_t0.0719424460 !$WHAT_QUESTIONS_t0.4676258993 !$YEAR_t4.5323741007 !$YOUR_RECENT_t0.1726618705) and(!$VERIFIED_t1.3525179856 !$VF_t0.0719424460 !$VISIT_PROCESSES_t0.0647482014 $VISIT_t9.2661870504 !$VOICEMAIL_t0.2949640288 !$WORST_PAIN_t0.7194244604 !$YEAR_HOW_t0.1870503597) $BE_REFILLED_t0.0863309353 $GENTLE_t0.0215827338 $UPSETTING_IN_t0.1294964029 $URGENT_APPT_t0.0431654676 $VA_CONTRACT_t0.0431654676 $WAR_SERVICE_t0.0431654676 $WAS_FRIGHTENING_t0.1294964029 $WATCHES_t0.0575539568 $WM_ADMITTED_t0.0359712230 $WORTHLESSNESS_t0.0791366906 $YEAR_UNKNOWN_t0.0287769784 $YE_t0.0503597122) !$ALZHEIMERS_DISEASE_t0.0431654676 !$CALCIUM_MG_t0.1510791367 !$ROOMMATE_WAS_t0.0431654676) 
1 and(or(and(!$MH_PSYCHIATRY_t0.3669064748 !$UNSP_t0.2302158273 !$UROLOGY_CLINIC_t0.2661870504 !$VERIFIED_t1.3525179856 !$VISIT_HOLD_t0.0863309353 !$VOICEMAIL_LEFT_t0.0503597122 !$VOLUNTEER_OR_t0.0719424460 !$WHAT_QUESTIONS_t0.4676258993 !$YEAR_t4.5323741007 !$YOUR_RECENT_t0.1726618705) and(!$VERIFIED_t1.3525179856 !$VF_t0.0719424460 !$VISIT_PROCESSES_t0.0647482014 $VISIT_t9.2661870504 !$VOICEMAIL_t0.2949640288 !$WORST_PAIN_t0.7194244604 !$YEAR_HOW_t0.1870503597) $BE_REFILLED_t0.0863309353 $GENTLE_t0.0215827338 $UPSETTING_IN_t0.1294964029 $URGENT_APPT_t0.0431654676 $VA_CONTRACT_t0.0431654676 $WAR_SERVICE_t0.0431654676 $WAS_FRIGHTENING_t0.1294964029 $WATCHES_t0.0575539568 $WM_ADMITTED_t0.0359712230 $WORTHLESSNESS_t0.0791366906 $YEAR_UNKNOWN_t0.0287769784 $YE_t0.0503597122) !$ALZHEIMERS_DISEASE_t0.0431654676 !$CALCIUM_MG_t0.1510791367 !$SUPERVISING_ATTENDING_t0.0359712230) 
1 and(or(and(!$MH_PSYCHIATRY_t0.3669064748 !$UNSP_t0.2302158273 !$UROLOGY_CLINIC_t0.2661870504 !$VERIFIED_t1.3525179856 !$VISIT_HOLD_t0.0863309353 !$VOICEMAIL_LEFT_t0.0503597122 !$VOLUNTEER_OR_t0.0719424460 !$WHAT_QUESTIONS_t0.4676258993 !$YEAR_t4.5323741007 !$YOUR_RECENT_t0.1726618705) and(!$VERIFIED_t1.3525179856 !$VF_t0.0719424460 !$VISIT_PROCESSES_t0.0647482014 $VISIT_t9.2661870504 !$VOICEMAIL_t0.2949640288 !$WORST_PAIN_t0.7194244604 !$YEAR_HOW_t0.1870503597) $BE_REFILLED_t0.0863309353 $GENTLE_t0.0215827338 $UPSETTING_IN_t0.1294964029 $URGENT_APPT_t0.0431654676 $VA_CONTRACT_t0.0431654676 $WAR_SERVICE_t0.0431654676 $WAS_FRIGHTENING_t0.1294964029 $WATCHES_t0.0575539568 $WM_ADMITTED_t0.0359712230 $WORTHLESSNESS_t0.0791366906 $YEAR_UNKNOWN_t0.0287769784 $YE_t0.0503597122) !$ALZHEIMERS_DISEASE_t0.0431654676 !$CALCIUM_MG_t0.1510791367 !$UNIT_MONITORED_t0.0359712230) 
1 and(or(and(!$MH_PSYCHIATRY_t0.3669064748 !$UNSP_t0.2302158273 !$UROLOGY_CLINIC_t0.2661870504 !$VERIFIED_t1.3525179856 !$VISIT_HOLD_t0.0863309353 !$VOICEMAIL_LEFT_t0.0503597122 !$VOLUNTEER_OR_t0.0719424460 !$WHAT_QUESTIONS_t0.4676258993 !$YEAR_t4.5323741007 !$YOUR_RECENT_t0.1726618705) and(!$VERIFIED_t1.3525179856 !$VF_t0.0719424460 !$VISIT_PROCESSES_t0.0647482014 $VISIT_t9.2661870504 !$VOICEMAIL_t0.2949640288 !$WORST_PAIN_t0.7194244604 !$YEAR_HOW_t0.1870503597) $BE_REFILLED_t0.0863309353 $GENTLE_t0.0215827338 $UPSETTING_IN_t0.1294964029 $URGENT_APPT_t0.0431654676 $VA_CONTRACT_t0.0431654676 $WAR_SERVICE_t0.0431654676 $WAS_FRIGHTENING_t0.1294964029 $WATCHES_t0.0575539568 $WM_ADMITTED_t0.0359712230 $WORTHLESSNESS_t0.0791366906 $YEAR_UNKNOWN_t0.0287769784 $YE_t0.0503597122) !$ALZHEIMERS_DISEASE_t0.0431654676 !$CALCIUM_MG_t0.1510791367 !$WARRANT_t0.0503597122) 
1 and(or(and(!$MH_PSYCHIATRY_t0.3669064748 !$UNSP_t0.2302158273 !$UROLOGY_CLINIC_t0.2661870504 !$VERIFIED_t1.3525179856 !$VISIT_HOLD_t0.0863309353 !$VOICEMAIL_LEFT_t0.0503597122 !$VOLUNTEER_OR_t0.0719424460 !$WHAT_QUESTIONS_t0.4676258993 !$YEAR_t4.5323741007 !$YOUR_RECENT_t0.1726618705) and(!$VERIFIED_t1.3525179856 !$VF_t0.0719424460 !$VISIT_PROCESSES_t0.0647482014 $VISIT_t9.2661870504 !$VOICEMAIL_t0.2949640288 !$WORST_PAIN_t0.7194244604 !$YEAR_HOW_t0.1870503597) $DISEASE_CABG_t0.0287769784 $GENTLE_t0.0215827338 $UPSETTING_IN_t0.1294964029 $URGENT_APPT_t0.0431654676 $VA_CONTRACT_t0.0431654676 $WAR_SERVICE_t0.0431654676 $WAS_FRIGHTENING_t0.1294964029 $WATCHES_t0.0575539568 $WM_ADMITTED_t0.0359712230 $WORTHLESSNESS_t0.0791366906 $YEAR_UNKNOWN_t0.0287769784 $YE_t0.0503597122) !$ALZHEIMERS_DISEASE_t0.0431654676 !$CALCIUM_MG_t0.1510791367 !$ROOMMATE_WAS_t0.0431654676) 
1 and(or(and(!$MH_PSYCHIATRY_t0.3669064748 !$UNSP_t0.2302158273 !$UROLOGY_CLINIC_t0.2661870504 !$VERIFIED_t1.3525179856 !$VISIT_HOLD_t0.0863309353 !$VOICEMAIL_LEFT_t0.0503597122 !$VOLUNTEER_OR_t0.0719424460 !$WHAT_QUESTIONS_t0.4676258993 !$YEAR_t4.5323741007 !$YOUR_RECENT_t0.1726618705) and(!$VERIFIED_t1.3525179856 !$VF_t0.0719424460 !$VISIT_PROCESSES_t0.0647482014 $VISIT_t9.2661870504 !$VOICEMAIL_t0.2949640288 !$WORST_PAIN_t0.7194244604 !$YEAR_HOW_t0.1870503597) $DISEASE_CABG_t0.0287769784 $GENTLE_t0.0215827338 $UPSETTING_IN_t0.1294964029 $URGENT_APPT_t0.0431654676 $VA_CONTRACT_t0.0431654676 $WAR_SERVICE_t0.0431654676 $WAS_FRIGHTENING_t0.1294964029 $WATCHES_t0.0575539568 $WM_ADMITTED_t0.0359712230 $WORTHLESSNESS_t0.0791366906 $YEAR_UNKNOWN_t0.0287769784 $YE_t0.0503597122) !$ALZHEIMERS_DISEASE_t0.0431654676 !$CALCIUM_MG_t0.1510791367 !$SUPERVISING_ATTENDING_t0.0359712230) 
1 and(or(and(!$BY_TWICE_t1.5323741007 $CONSULT_APPROVED_t0.1079136691) and(!$MH_PSYCHIATRY_t0.3669064748 !$OFF_t1.8848920863 !$UNSP_t0.2302158273 !$UPDATES_t0.0431654676 !$VERIFIED_t1.3525179856 !$VISIT_DENTAL_t0.3309352518 !$VISTA_ED_t0.5035971223 !$VOICEMAIL_LEFT_t0.0503597122 !$VOLUME_MOOD_t0.0647482014 !$WERE_DISCUSSED_t0.4172661871 !$WH_t0.0791366906 !$YEAR_t4.5323741007 !$YR_t0.4892086331) and(!$VINFLUENZA_PATIENT_t0.0647482014 $YOUNGER_t0.0431654676) $ABLE_FUNCTION_t0.0791366906 $LUMBAGO_t0.0359712230 $UPSETTING_IN_t0.1294964029 $URINAL_WITHIN_t0.2589928058 $VA_CONTRACT_t0.0431654676 $WAR_SERVICE_t0.0431654676 $WE_COULD_t0.1438848921 $WILL_PICKED_t0.0935251799 $WILL_RESTART_t0.0215827338 $WTIH_t0.0431654676 $YE_t0.0503597122) !$COMPARISON_t0.0503597122) 
1 and(or(and(!$BY_TWICE_t1.5323741007 $CONSULT_APPROVED_t0.1079136691) and(!$MH_PSYCHIATRY_t0.3669064748 !$OFF_t1.8848920863 !$UPDATES_t0.0431654676 !$VERIFIED_t1.3525179856 !$VISIT_DENTAL_t0.3309352518 !$VISTA_ED_t0.5035971223 !$VOICEMAIL_LEFT_t0.0503597122 !$VOLUME_MOOD_t0.0647482014 !$WERE_DISCUSSED_t0.4172661871 !$WH_t0.0791366906 !$YEAR_t4.5323741007 !$YR_t0.4892086331) and(!$VINFLUENZA_PATIENT_t0.0647482014 $YOUNGER_t0.0431654676) $LUMBAGO_t0.0359712230 $UPSETTING_IN_t0.1294964029 $URINAL_WITHIN_t0.2589928058 $VA_CONTRACT_t0.0431654676 $WAR_SERVICE_t0.0431654676 $WE_COULD_t0.1438848921 $WILL_PICKED_t0.0935251799 $WILL_RESTART_t0.0215827338 $WTIH_t0.0431654676 $YE_t0.0503597122) !$COMPARISON_t0.0503597122) 
1 and(or(and(!$MH_PSYCHIATRY_t0.3669064748 !$OFF_t1.8848920863 !$UNSP_t0.2302158273 !$UPDATES_t0.0431654676 !$VERIFIED_t1.3525179856 !$VISIT_DENTAL_t0.3309352518 !$VISTA_ED_t0.5035971223 !$VOICEMAIL_LEFT_t0.0503597122 !$VOLUME_MOOD_t0.0647482014 !$WERE_DISCUSSED_t0.4172661871 !$WH_t0.0791366906 !$YEAR_t4.5323741007 !$YR_t0.4892086331) and(!$VINFLUENZA_PATIENT_t0.0647482014 $YOUNGER_t0.0431654676) $CONSULT_APPROVED_t0.1079136691 $DISCHARGE_ALDRETE_t0.0359712230 $UPSETTING_IN_t0.1294964029 $URINAL_WITHIN_t0.2589928058 $VA_CONTRACT_t0.0431654676 $WAR_SERVICE_t0.0431654676 $WE_COULD_t0.1438848921 $WILL_PICKED_t0.0935251799 $WILL_RESTART_t0.0215827338 $WTIH_t0.0431654676 $YE_t0.0503597122) !$COMPARISON_t0.0503597122 !$UCINATIONS_SI_t0.0359712230) 
1 and(or(and(!$BY_TWICE_t1.5323741007 $CONSULT_APPROVED_t0.1079136691) and(!$MH_PSYCHIATRY_t0.3669064748 !$OFF_t1.8848920863 !$UNSP_t0.2302158273 !$UPDATES_t0.0431654676 !$VERIFIED_t1.3525179856 !$VISIT_DENTAL_t0.3309352518 !$VISTA_ED_t0.5035971223 !$VOICEMAIL_LEFT_t0.0503597122 !$VOLUME_MOOD_t0.0647482014 !$WERE_DISCUSSED_t0.4172661871 !$WH_t0.0791366906 !$YEAR_t4.5323741007 !$YR_t0.4892086331) and(!$VINFLUENZA_PATIENT_t0.0647482014 $YOUNGER_t0.0431654676) $DISCHARGE_ALDRETE_t0.0359712230 $UPSETTING_IN_t0.1294964029 $URINAL_WITHIN_t0.2589928058 $VA_CONTRACT_t0.0431654676 $WAR_SERVICE_t0.0431654676 $WE_COULD_t0.1438848921 $WILL_PICKED_t0.0935251799 $WILL_RESTART_t0.0215827338 $WTIH_t0.0431654676 $YE_t0.0503597122) !$COMPARISON_t0.0503597122) 
1 and(or(and(!$BY_TWICE_t1.5323741007 $CONSULT_APPROVED_t0.1079136691) and(!$MH_PSYCHIATRY_t0.3669064748 !$OFF_t1.8848920863 !$UNSP_t0.2302158273 !$UPDATES_t0.0431654676 !$VERIFIED_t1.3525179856 !$VISIT_DENTAL_t0.3309352518 !$VISTA_ED_t0.5035971223 !$VOICEMAIL_LEFT_t0.0503597122 !$VOLUME_MOOD_t0.0647482014 !$WERE_DISCUSSED_t0.4172661871 !$WH_t0.0791366906 !$YEAR_t4.5323741007 !$YR_t0.4892086331) and(!$VINFLUENZA_PATIENT_t0.0647482014 $YOUNGER_t0.0431654676) $ENDOSCOPE_t0.0431654676 $UPSETTING_IN_t0.1294964029 $URINAL_WITHIN_t0.2589928058 $VA_CONTRACT_t0.0431654676 $WAR_SERVICE_t0.0431654676 $WE_COULD_t0.1438848921 $WILL_PICKED_t0.0935251799 $WILL_RESTART_t0.0215827338 $WTIH_t0.0431654676 $YE_t0.0503597122) !$COMPARISON_t0.0503597122) 
1 and(or(and(!$BY_TWICE_t1.5323741007 $CONSULT_APPROVED_t0.1079136691) and(!$MH_PSYCHIATRY_t0.3669064748 !$OFF_t1.8848920863 !$UNSP_t0.2302158273 !$UPDATES_t0.0431654676 !$VERIFIED_t1.3525179856 !$VISIT_DENTAL_t0.3309352518 !$VISTA_ED_t0.5035971223 !$VOICEMAIL_LEFT_t0.0503597122 !$VOLUME_MOOD_t0.0647482014 !$WERE_DISCUSSED_t0.4172661871 !$WH_t0.0791366906 !$YEAR_t4.5323741007 !$YR_t0.4892086331) and(!$VINFLUENZA_PATIENT_t0.0647482014 $YOUNGER_t0.0431654676) $GASTROENTEROLOGY_NAME_t0.0647482014 $UPSETTING_IN_t0.1294964029 $URINAL_WITHIN_t0.2589928058 $VA_CONTRACT_t0.0431654676 $WAR_SERVICE_t0.0431654676 $WE_COULD_t0.1438848921 $WILL_PICKED_t0.0935251799 $WILL_RESTART_t0.0215827338 $WTIH_t0.0431654676 $YE_t0.0503597122) !$COMPARISON_t0.0503597122) 
1 and(or(and(!$BY_TWICE_t1.5323741007 $CONSULT_APPROVED_t0.1079136691) and(!$MH_PSYCHIATRY_t0.3669064748 !$OFF_t1.8848920863 !$UNSP_t0.2302158273 !$UPDATES_t0.0431654676 !$VERIFIED_t1.3525179856 !$VISIT_DENTAL_t0.3309352518 !$VISTA_ED_t0.5035971223 !$VOICEMAIL_LEFT_t0.0503597122 !$VOLUME_MOOD_t0.0647482014 !$WERE_DISCUSSED_t0.4172661871 !$WH_t0.0791366906 !$YEAR_t4.5323741007 !$YR_t0.4892086331) and(!$VINFLUENZA_PATIENT_t0.0647482014 $YOUNGER_t0.0431654676) $INFORMED_COLON_t0.0431654676 $UPSETTING_IN_t0.1294964029 $URINAL_WITHIN_t0.2589928058 $VA_CONTRACT_t0.0431654676 $WAR_SERVICE_t0.0431654676 $WE_COULD_t0.1438848921 $WILL_PICKED_t0.0935251799 $WILL_RESTART_t0.0215827338 $WTIH_t0.0431654676 $YE_t0.0503597122) !$COMPARISON_t0.0503597122) 
1 and(or(and(!$BY_TWICE_t1.5323741007 $CONSULT_APPROVED_t0.1079136691) and(!$MH_PSYCHIATRY_t0.3669064748 !$OFF_t1.8848920863 !$UNSP_t0.2302158273 !$UPDATES_t0.0431654676 !$VERIFIED_t1.3525179856 !$VISIT_DENTAL_t0.3309352518 !$VISTA_ED_t0.5035971223 !$VOICEMAIL_LEFT_t0.0503597122 !$VOLUME_MOOD_t0.0647482014 !$WERE_DISCUSSED_t0.4172661871 !$WH_t0.0791366906 !$YEAR_t4.5323741007 !$YR_t0.4892086331) and(!$VINFLUENZA_PATIENT_t0.0647482014 $YOUNGER_t0.0431654676) $LUMBAGO_t0.0359712230 $UPSETTING_IN_t0.1294964029 $URINAL_WITHIN_t0.2589928058 $VA_CONTRACT_t0.0431654676 $WAR_SERVICE_t0.0431654676 $WE_COULD_t0.1438848921 $WILL_PICKED_t0.0935251799 $WILL_RESTART_t0.0215827338 $WTIH_t0.0431654676 $YE_t0.0503597122) !$COMPARISON_t0.0503597122) 
1 and(or(and(!$BY_TWICE_t1.5323741007 $CONSULT_APPROVED_t0.1079136691) and(!$MH_PSYCHIATRY_t0.3669064748 !$OFF_t1.8848920863 !$UNSP_t0.2302158273 !$UPDATES_t0.0431654676 !$VERIFIED_t1.3525179856 !$VISIT_DENTAL_t0.3309352518 !$VISTA_ED_t0.5035971223 !$VOICEMAIL_LEFT_t0.0503597122 !$VOLUME_MOOD_t0.0647482014 !$WERE_DISCUSSED_t0.4172661871 !$WH_t0.0791366906 !$YEAR_t4.5323741007 !$YR_t0.4892086331) and(!$VINFLUENZA_PATIENT_t0.0647482014 $YOUNGER_t0.0431654676) $PREPROCEDURE_DATE_t0.0791366906 $UPSETTING_IN_t0.1294964029 $URINAL_WITHIN_t0.2589928058 $VA_CONTRACT_t0.0431654676 $WAR_SERVICE_t0.0431654676 $WE_COULD_t0.1438848921 $WILL_PICKED_t0.0935251799 $WILL_RESTART_t0.0215827338 $WTIH_t0.0431654676 $YE_t0.0503597122) !$COMPARISON_t0.0503597122) 
1 and(or(and(!$BY_TWICE_t1.5323741007 $CONSULT_APPROVED_t0.1079136691) and(!$MH_PSYCHIATRY_t0.3669064748 !$OFF_t1.8848920863 !$UNSP_t0.2302158273 !$UPDATES_t0.0431654676 !$VERIFIED_t1.3525179856 !$VISIT_DENTAL_t0.3309352518 !$VISTA_ED_t0.5035971223 !$VOICEMAIL_LEFT_t0.0503597122 !$VOLUME_MOOD_t0.0647482014 !$WERE_DISCUSSED_t0.4172661871 !$WH_t0.0791366906 !$YEAR_t4.5323741007 !$YR_t0.4892086331) and(!$VINFLUENZA_PATIENT_t0.0647482014 $YOUNGER_t0.0431654676) $RECTAL_EXAM_t0.0503597122 $UPSETTING_IN_t0.1294964029 $URINAL_WITHIN_t0.2589928058 $VA_CONTRACT_t0.0431654676 $WAR_SERVICE_t0.0431654676 $WE_COULD_t0.1438848921 $WILL_PICKED_t0.0935251799 $WILL_RESTART_t0.0215827338 $WTIH_t0.0431654676 $YE_t0.0503597122) !$COMPARISON_t0.0503597122) 
1 and(or(and(or($CONSULT_APPROVED_t0.1079136691 $UPSETTING_THAT_t0.1294964029 $WATCHES_t0.0575539568) !$YR_OLD_t0.2158273381) and(!$MORE_THAN_t0.8705035971 !$UNT_TAB_t0.0791366906 !$UROLOGY_CLINIC_t0.2661870504 !$VERIFIED_t1.3525179856 !$VISIT_DENTAL_t0.3309352518 !$VOICEMAIL_LEFT_t0.0503597122 !$WHO_t5.1582733813 !$YEARS_OLD_t0.2158273381 !$YEAR_t4.5323741007 !$YR_t0.4892086331) $OBSERVATION_ALERT_t0.0575539568 $VISIT_BIL_t0.0359712230 $WAIT_MINUTES_t0.0215827338 $WAR_SERVICE_t0.0431654676 $WILL_RESTART_t0.0215827338 $WITHIN_SECONDARY_t0.3381294964 $YOUNGER_t0.0431654676 $ZER_t0.0575539568) !$MATE_t0.0359712230 !$NOTE_DTN_t0.0791366906 !$OP_PSYCHIATRY_t0.1079136691) 
1 and(or(and(or($CONSULT_APPROVED_t0.1079136691 $UPSETTING_THAT_t0.1294964029 $WATCHES_t0.0575539568) !$YR_OLD_t0.2158273381) and(!$MORE_THAN_t0.8705035971 !$UROLOGY_CLINIC_t0.2661870504 !$VERIFIED_t1.3525179856 !$VISIT_DENTAL_t0.3309352518 !$VOICEMAIL_LEFT_t0.0503597122 !$WHO_t5.1582733813 !$YEARS_OLD_t0.2158273381 !$YEAR_t4.5323741007 !$YR_t0.4892086331) $OBSERVATION_ALERT_t0.0575539568 $VISIT_BIL_t0.0359712230 $WAIT_MINUTES_t0.0215827338 $WAR_SERVICE_t0.0431654676 $WILL_RESTART_t0.0215827338 $WITHIN_SECONDARY_t0.3381294964 $YOUNGER_t0.0431654676 $ZER_t0.0575539568) !$MATE_t0.0359712230 !$NOTE_DTN_t0.0791366906 !$OP_PSYCHIATRY_t0.1079136691 !$UNT_TAB_t0.0791366906) 
1 and(or(and(or($CONSULT_APPROVED_t0.1079136691 $WATCHES_t0.0575539568) !$YR_OLD_t0.2158273381) and(!$MORE_THAN_t0.8705035971 !$UNT_TAB_t0.0791366906 !$UROLOGY_CLINIC_t0.2661870504 !$VERIFIED_t1.3525179856 !$VISIT_DENTAL_t0.3309352518 !$VOICEMAIL_LEFT_t0.0503597122 !$WHO_t5.1582733813 !$YEARS_OLD_t0.2158273381 !$YEAR_t4.5323741007 !$YR_t0.4892086331) $OBSERVATION_ALERT_t0.0575539568 $UPSETTING_THAT_t0.1294964029 $VISIT_BIL_t0.0359712230 $WAIT_MINUTES_t0.0215827338 $WAR_SERVICE_t0.0431654676 $WILL_RESTART_t0.0215827338 $WITHIN_SECONDARY_t0.3381294964 $YOUNGER_t0.0431654676 $ZER_t0.0575539568) !$MATE_t0.0359712230 !$NOTE_DTN_t0.0791366906 !$OP_PSYCHIATRY_t0.1079136691) 
1 and(or(and(or($CONSULT_APPROVED_t0.1079136691 $WATCHES_t0.0575539568) !$YR_OLD_t0.2158273381) and(!$MORE_THAN_t0.8705035971 !$UROLOGY_CLINIC_t0.2661870504 !$VERIFIED_t1.3525179856 !$VISIT_DENTAL_t0.3309352518 !$VOICEMAIL_LEFT_t0.0503597122 !$WHO_t5.1582733813 !$YEARS_OLD_t0.2158273381 !$YEAR_t4.5323741007 !$YR_t0.4892086331) $OBSERVATION_ALERT_t0.0575539568 $UPSETTING_THAT_t0.1294964029 $VISIT_BIL_t0.0359712230 $WAIT_MINUTES_t0.0215827338 $WAR_SERVICE_t0.0431654676 $WILL_RESTART_t0.0215827338 $WITHIN_SECONDARY_t0.3381294964 $YOUNGER_t0.0431654676 $ZER_t0.0575539568) !$MATE_t0.0359712230 !$NOTE_DTN_t0.0791366906 !$OP_PSYCHIATRY_t0.1079136691 !$UNT_TAB_t0.0791366906) 
1 or(and(or(and(or($CONSULT_APPROVED_t0.1079136691 $UPSETTING_THAT_t0.1294964029 $WATCHES_t0.0575539568) !$YR_OLD_t0.2158273381) and(!$MORE_THAN_t0.8705035971 !$UROLOGY_CLINIC_t0.2661870504 !$VERIFIED_t1.3525179856 !$VISIT_DENTAL_t0.3309352518 !$VOICEMAIL_LEFT_t0.0503597122 !$WHO_t5.1582733813 !$YEARS_OLD_t0.2158273381 !$YEAR_t4.5323741007 !$YR_t0.4892086331) $VISIT_BIL_t0.0359712230 $WAIT_MINUTES_t0.0215827338 $WAR_SERVICE_t0.0431654676 $WILL_RESTART_t0.0215827338 $WITHIN_SECONDARY_t0.3381294964 $YOUNGER_t0.0431654676 $ZER_t0.0575539568) !$MATE_t0.0359712230 !$NOTE_DTN_t0.0791366906 !$OP_PSYCHIATRY_t0.1079136691 !$UNT_TAB_t0.0791366906) $OBSERVATION_ALERT_t0.0575539568) 
1 or(and(or(and(or($CONSULT_APPROVED_t0.1079136691 $UPSETTING_THAT_t0.1294964029 $WATCHES_t0.0575539568) !$YR_OLD_t0.2158273381) and(!$MORE_THAN_t0.8705035971 !$VERIFIED_t1.3525179856 !$VISIT_DENTAL_t0.3309352518 !$VOICEMAIL_LEFT_t0.0503597122 !$WHO_t5.1582733813 !$YEARS_OLD_t0.2158273381 !$YEAR_t4.5323741007 !$YR_t0.4892086331) $VISIT_BIL_t0.0359712230 $WAIT_MINUTES_t0.0215827338 $WAR_SERVICE_t0.0431654676 $WILL_RESTART_t0.0215827338 $WITHIN_SECONDARY_t0.3381294964 $YOUNGER_t0.0431654676 $ZER_t0.0575539568) !$MATE_t0.0359712230 !$NOTE_DTN_t0.0791366906 !$OP_PSYCHIATRY_t0.1079136691 !$UNT_TAB_t0.0791366906 !$UROLOGY_CLINIC_t0.2661870504) $OBSERVATION_ALERT_t0.0575539568) 
1 or(and(or(and(or($CONSULT_APPROVED_t0.1079136691 $WATCHES_t0.0575539568) !$YR_OLD_t0.2158273381) and(!$MORE_THAN_t0.8705035971 !$UROLOGY_CLINIC_t0.2661870504 !$VERIFIED_t1.3525179856 !$VISIT_DENTAL_t0.3309352518 !$VOICEMAIL_LEFT_t0.0503597122 !$WHO_t5.1582733813 !$YEARS_OLD_t0.2158273381 !$YEAR_t4.5323741007 !$YR_t0.4892086331) $OBSERVATION_ALERT_t0.0575539568 $VISIT_BIL_t0.0359712230 $WAIT_MINUTES_t0.0215827338 $WAR_SERVICE_t0.0431654676 $WILL_RESTART_t0.0215827338 $WITHIN_SECONDARY_t0.3381294964 $YOUNGER_t0.0431654676 $ZER_t0.0575539568) !$MATE_t0.0359712230 !$NOTE_DTN_t0.0791366906 !$OP_PSYCHIATRY_t0.1079136691 !$UNT_TAB_t0.0791366906) $UPSETTING_THAT_t0.1294964029) 
1 and(or(and(or(and(or($CONSULT_APPROVED_t0.1079136691 $UPSETTING_THAT_t0.1294964029 $WATCHES_t0.0575539568) !$YR_OLD_t0.2158273381) and(!$MORE_THAN_t0.8705035971 !$UROLOGY_CLINIC_t0.2661870504 !$VERIFIED_t1.3525179856 !$VISIT_DENTAL_t0.3309352518 !$VOICEMAIL_LEFT_t0.0503597122 !$WHO_t5.1582733813 !$YEARS_OLD_t0.2158273381 !$YEAR_t4.5323741007 !$YR_t0.4892086331) $VISIT_BIL_t0.0359712230 $WAIT_MINUTES_t0.0215827338 $WAR_SERVICE_t0.0431654676 $WILL_RESTART_t0.0215827338 $WITHIN_SECONDARY_t0.3381294964 $YOUNGER_t0.0431654676 $ZER_t0.0575539568) !$MATE_t0.0359712230 !$NOTE_DTN_t0.0791366906 !$OP_PSYCHIATRY_t0.1079136691) $OBSERVATION_ALERT_t0.0575539568) !$UNT_TAB_t0.0791366906) 
1 and(or(and(or(and(or($CONSULT_APPROVED_t0.1079136691 $UPSETTING_THAT_t0.1294964029 $WATCHES_t0.0575539568) !$YR_OLD_t0.2158273381) and(!$MORE_THAN_t0.8705035971 !$UROLOGY_CLINIC_t0.2661870504 !$VERIFIED_t1.3525179856 !$VISIT_DENTAL_t0.3309352518 !$VOICEMAIL_LEFT_t0.0503597122 !$WHO_t5.1582733813 !$YEARS_OLD_t0.2158273381 !$YEAR_t4.5323741007 !$YR_t0.4892086331) $VISIT_BIL_t0.0359712230 $WAIT_MINUTES_t0.0215827338 $WAR_SERVICE_t0.0431654676 $WILL_RESTART_t0.0215827338 $WITHIN_SECONDARY_t0.3381294964 $YOUNGER_t0.0431654676 $ZER_t0.0575539568) !$MATE_t0.0359712230 !$NOTE_DTN_t0.0791366906 !$UNT_TAB_t0.0791366906) $OBSERVATION_ALERT_t0.0575539568) !$OP_PSYCHIATRY_t0.1079136691) 
1 and(or(and(or(and(or($CONSULT_APPROVED_t0.1079136691 $UPSETTING_THAT_t0.1294964029 $WATCHES_t0.0575539568) !$YR_OLD_t0.2158273381) and(!$MORE_THAN_t0.8705035971 !$UROLOGY_CLINIC_t0.2661870504 !$VERIFIED_t1.3525179856 !$VISIT_DENTAL_t0.3309352518 !$VOICEMAIL_LEFT_t0.0503597122 !$WHO_t5.1582733813 !$YEARS_OLD_t0.2158273381 !$YEAR_t4.5323741007 !$YR_t0.4892086331) $VISIT_BIL_t0.0359712230 $WAIT_MINUTES_t0.0215827338 $WAR_SERVICE_t0.0431654676 $WILL_RESTART_t0.0215827338 $WITHIN_SECONDARY_t0.3381294964 $YOUNGER_t0.0431654676 $ZER_t0.0575539568) !$NOTE_DTN_t0.0791366906 !$OP_PSYCHIATRY_t0.1079136691 !$UNT_TAB_t0.0791366906) $OBSERVATION_ALERT_t0.0575539568) !$MATE_t0.0359712230) 
1 and(or(and(!$MH_PSYCHIATRY_t0.3669064748 !$UNSP_t0.2302158273 !$UPDATES_t0.0431654676 !$UROLOGY_CLINIC_t0.2661870504 !$VERIFIED_t1.3525179856 !$VISIT_DENTAL_t0.3309352518 !$VISTA_ED_t0.5035971223 !$VOICEMAIL_LEFT_t0.0503597122 !$VOLUME_MOOD_t0.0647482014 !$WERE_DISCUSSED_t0.4172661871 !$YEAR_t4.5323741007 !$YR_t0.4892086331) $ACETATE_t0.0575539568 $CARDIOLOGIST_t0.1007194245 $GENTLE_t0.0215827338 $LIPITOR_t0.0503597122 $UPSETTING_THAT_t0.1294964029 $URGENT_APPT_t0.0431654676 $URINAL_WITHIN_t0.2589928058 $VISIT_BIL_t0.0359712230 $WAR_SERVICE_t0.0431654676 $WE_COULD_t0.1438848921 $WILL_PICKED_t0.0935251799 $WILL_RESTART_t0.0215827338 $WTIH_t0.0431654676 $ZER_t0.0575539568) !$EASIER_t0.0575539568 !$NOISES_t0.0359712230) 
1 and(or(and(!$MH_PSYCHIATRY_t0.3669064748 !$UNSP_t0.2302158273 !$UPDATES_t0.0431654676 !$UROLOGY_CLINIC_t0.2661870504 !$VERIFIED_t1.3525179856 !$VISIT_DENTAL_t0.3309352518 !$VISTA_ED_t0.5035971223 !$VOICEMAIL_LEFT_t0.0503597122 !$VOLUME_MOOD_t0.0647482014 !$WERE_DISCUSSED_t0.4172661871 !$YEAR_t4.5323741007 !$YR_t0.4892086331) $ACETATE_t0.0575539568 $DISEASE_CABG_t0.0287769784 $GENTLE_t0.0215827338 $LIPITOR_t0.0503597122 $UPSETTING_THAT_t0.1294964029 $URGENT_APPT_t0.0431654676 $URINAL_WITHIN_t0.2589928058 $VISIT_BIL_t0.0359712230 $WAR_SERVICE_t0.0431654676 $WE_COULD_t0.1438848921 $WILL_PICKED_t0.0935251799 $WILL_RESTART_t0.0215827338 $WTIH_t0.0431654676 $ZER_t0.0575539568) !$EASIER_t0.0575539568 !$NOISES_t0.0359712230) 
1 and(or(and(!$MH_PSYCHIATRY_t0.3669064748 !$UNSP_t0.2302158273 !$UPDATES_t0.0431654676 !$UROLOGY_CLINIC_t0.2661870504 !$VERIFIED_t1.3525179856 !$VISIT_DENTAL_t0.3309352518 !$VISTA_ED_t0.5035971223 !$VOICEMAIL_LEFT_t0.0503597122 !$VOLUME_MOOD_t0.0647482014 !$WERE_DISCUSSED_t0.4172661871 !$YEAR_t4.5323741007 !$YR_t0.4892086331) $ACETATE_t0.0575539568 $CARDIOLOGIST_t0.1007194245 $CONSENT_COLON_t0.0431654676 $GENTLE_t0.0215827338 $LIPITOR_t0.0503597122 $UPSETTING_THAT_t0.1294964029 $URGENT_APPT_t0.0431654676 $URINAL_WITHIN_t0.2589928058 $VISIT_BIL_t0.0359712230 $WAR_SERVICE_t0.0431654676 $WE_COULD_t0.1438848921 $WILL_PICKED_t0.0935251799 $WILL_RESTART_t0.0215827338 $WTIH_t0.0431654676 $ZER_t0.0575539568) !$EASIER_t0.0575539568 !$NOISES_t0.0359712230) 
1 and(or(and(!$MH_PSYCHIATRY_t0.3669064748 !$UNSP_t0.2302158273 !$UPDATES_t0.0431654676 !$UROLOGY_CLINIC_t0.2661870504 !$VERIFIED_t1.3525179856 !$VISIT_DENTAL_t0.3309352518 !$VISTA_ED_t0.5035971223 !$VOICEMAIL_LEFT_t0.0503597122 !$VOLUME_MOOD_t0.0647482014 !$WERE_DISCUSSED_t0.4172661871 !$YEAR_t4.5323741007 !$YR_t0.4892086331) $ACETATE_t0.0575539568 $CARDIOLOGIST_t0.1007194245 $DISCHARGE_ALDRETE_t0.0359712230 $GENTLE_t0.0215827338 $LIPITOR_t0.0503597122 $UPSETTING_THAT_t0.1294964029 $URGENT_APPT_t0.0431654676 $URINAL_WITHIN_t0.2589928058 $VISIT_BIL_t0.0359712230 $WAR_SERVICE_t0.0431654676 $WE_COULD_t0.1438848921 $WILL_PICKED_t0.0935251799 $WILL_RESTART_t0.0215827338 $WTIH_t0.0431654676 $ZER_t0.0575539568) !$EASIER_t0.0575539568 !$NOISES_t0.0359712230) 
1 and(or(and(!$MH_PSYCHIATRY_t0.3669064748 !$UNSP_t0.2302158273 !$UPDATES_t0.0431654676 !$UROLOGY_CLINIC_t0.2661870504 !$VERIFIED_t1.3525179856 !$VISIT_DENTAL_t0.3309352518 !$VISTA_ED_t0.5035971223 !$VOICEMAIL_LEFT_t0.0503597122 !$VOLUME_MOOD_t0.0647482014 !$WERE_DISCUSSED_t0.4172661871 !$YEAR_t4.5323741007 !$YR_t0.4892086331) $ACETATE_t0.0575539568 $CARDIOLOGIST_t0.1007194245 $DISEASE_CABG_t0.0287769784 $GENTLE_t0.0215827338 $LIPITOR_t0.0503597122 $UPSETTING_THAT_t0.1294964029 $URGENT_APPT_t0.0431654676 $URINAL_WITHIN_t0.2589928058 $VISIT_BIL_t0.0359712230 $WAR_SERVICE_t0.0431654676 $WE_COULD_t0.1438848921 $WILL_PICKED_t0.0935251799 $WILL_RESTART_t0.0215827338 $WTIH_t0.0431654676 $ZER_t0.0575539568) !$EASIER_t0.0575539568 !$NOISES_t0.0359712230) 
1 and(or(and(!$MH_PSYCHIATRY_t0.3669064748 !$UNSP_t0.2302158273 !$UPDATES_t0.0431654676 !$UROLOGY_CLINIC_t0.2661870504 !$VERIFIED_t1.3525179856 !$VISIT_DENTAL_t0.3309352518 !$VISTA_ED_t0.5035971223 !$VOICEMAIL_LEFT_t0.0503597122 !$VOLUME_MOOD_t0.0647482014 !$WERE_DISCUSSED_t0.4172661871 !$YEAR_t4.5323741007 !$YR_t0.4892086331) $ACETATE_t0.0575539568 $CONSENT_COLON_t0.0431654676 $DISEASE_CABG_t0.0287769784 $LIPITOR_t0.0503597122 $MALE_CA_t0.0863309353 $UPSETTING_THAT_t0.1294964029 $URGENT_APPT_t0.0431654676 $URINAL_WITHIN_t0.2589928058 $VISIT_BIL_t0.0359712230 $WAR_SERVICE_t0.0431654676 $WE_COULD_t0.1438848921 $WILL_PICKED_t0.0935251799 $WILL_RESTART_t0.0215827338 $WTIH_t0.0431654676 $ZER_t0.0575539568) !$EASIER_t0.0575539568 !$NOISES_t0.0359712230) 
1 and(or(and(!$MH_PSYCHIATRY_t0.3669064748 !$UNSP_t0.2302158273 !$UPDATES_t0.0431654676 !$UROLOGY_CLINIC_t0.2661870504 !$VERIFIED_t1.3525179856 !$VISIT_DENTAL_t0.3309352518 !$VISTA_ED_t0.5035971223 !$VOICEMAIL_LEFT_t0.0503597122 !$VOLUME_MOOD_t0.0647482014 !$WERE_DISCUSSED_t0.4172661871 !$YEAR_t4.5323741007 !$YR_t0.4892086331) $CARDIOLOGIST_t0.1007194245 $CONSENT_COLON_t0.0431654676 $DISEASE_CABG_t0.0287769784 $LIPITOR_t0.0503597122 $MALE_CA_t0.0863309353 $UPSETTING_THAT_t0.1294964029 $URGENT_APPT_t0.0431654676 $URINAL_WITHIN_t0.2589928058 $VISIT_BIL_t0.0359712230 $WAR_SERVICE_t0.0431654676 $WE_COULD_t0.1438848921 $WILL_PICKED_t0.0935251799 $WILL_RESTART_t0.0215827338 $WTIH_t0.0431654676 $ZER_t0.0575539568) !$EASIER_t0.0575539568 !$NOISES_t0.0359712230) 
1 and(or(and(!$MH_PSYCHIATRY_t0.3669064748 !$UNSP_t0.2302158273 !$UPDATES_t0.0431654676 !$UROLOGY_CLINIC_t0.2661870504 !$VERIFIED_t1.3525179856 !$VISIT_DENTAL_t0.3309352518 !$VISTA_ED_t0.5035971223 !$VOICEMAIL_LEFT_t0.0503597122 !$VOLUME_MOOD_t0.0647482014 !$WERE_DISCUSSED_t0.4172661871 !$YEAR_t4.5323741007 !$YR_t0.4892086331) $CIRCULATION_LEVEL_t0.0431654676 $CONSENT_COLON_t0.0431654676 $DISEASE_CABG_t0.0287769784 $LIPITOR_t0.0503597122 $MALE_CA_t0.0863309353 $UPSETTING_THAT_t0.1294964029 $URGENT_APPT_t0.0431654676 $URINAL_WITHIN_t0.2589928058 $VISIT_BIL_t0.0359712230 $WAR_SERVICE_t0.0431654676 $WE_COULD_t0.1438848921 $WILL_PICKED_t0.0935251799 $WILL_RESTART_t0.0215827338 $WTIH_t0.0431654676 $ZER_t0.0575539568) !$EASIER_t0.0575539568 !$NOISES_t0.0359712230) 
1 and(or(and(!$MH_PSYCHIATRY_t0.3669064748 !$UNSP_t0.2302158273 !$UPDATES_t0.0431654676 !$UROLOGY_CLINIC_t0.2661870504 !$VERIFIED_t1.3525179856 !$VISIT_DENTAL_t0.3309352518 !$VISTA_ED_t0.5035971223 !$VOICEMAIL_LEFT_t0.0503597122 !$VOLUME_MOOD_t0.0647482014 !$WERE_DISCUSSED_t0.4172661871 !$YEAR_t4.5323741007 !$YR_t0.4892086331) $CONSENT_COLON_t0.0431654676 $DISCHARGE_ALDRETE_t0.0359712230 $DISEASE_CABG_t0.0287769784 $LIPITOR_t0.0503597122 $MALE_CA_t0.0863309353 $UPSETTING_THAT_t0.1294964029 $URGENT_APPT_t0.0431654676 $URINAL_WITHIN_t0.2589928058 $VISIT_BIL_t0.0359712230 $WAR_SERVICE_t0.0431654676 $WE_COULD_t0.1438848921 $WILL_PICKED_t0.0935251799 $WILL_RESTART_t0.0215827338 $WTIH_t0.0431654676 $ZER_t0.0575539568) !$EASIER_t0.0575539568 !$NOISES_t0.0359712230) 
1 and(or(and($CIRCULATION_LEVEL_t0.0431654676 $DISCHARGE_ALDRETE_t0.0359712230) and(!$MH_PSYCHIATRY_t0.3669064748 !$UNSP_t0.2302158273 !$UPDATES_t0.0431654676 !$UROLOGY_CLINIC_t0.2661870504 !$VERIFIED_t1.3525179856 !$VISIT_DENTAL_t0.3309352518 !$VISTA_ED_t0.5035971223 !$VOICEMAIL_LEFT_t0.0503597122 !$VOLUME_MOOD_t0.0647482014 !$WERE_DISCUSSED_t0.4172661871 !$YEAR_t4.5323741007 !$YR_t0.4892086331) $DISEASE_CABG_t0.0287769784 $LIPITOR_t0.0503597122 $MALE_CA_t0.0863309353 $UPSETTING_THAT_t0.1294964029 $URGENT_APPT_t0.0431654676 $URINAL_WITHIN_t0.2589928058 $VISIT_BIL_t0.0359712230 $WAR_SERVICE_t0.0431654676 $WE_COULD_t0.1438848921 $WILL_PICKED_t0.0935251799 $WILL_RESTART_t0.0215827338 $WTIH_t0.0431654676 $ZER_t0.0575539568) !$EASIER_t0.0575539568 !$NOISES_t0.0359712230) 
1 and(or(and(!$NA_MG_t0.4604316547 !$PSYCHIATRY_NOTE_t0.8273381295 !$UNSP_t0.2302158273 !$UPDATE_YOUR_t0.1079136691 !$USED_VERBAL_t0.0935251799 !$USING_THERAPEUTIC_t0.0647482014 !$VERIFIED_t1.3525179856 !$VOLUME_MOOD_t0.0647482014 !$VOLUNTEER_OR_t0.0719424460 !$WHAT_QUESTIONS_t0.4676258993 !$WILL_CONSIDER_t0.0647482014 !$YEAR_t4.5323741007) $ABLE_FUNCTION_t0.0791366906 $BE_REFILLED_t0.0863309353 $LUMBAGO_t0.0359712230 $UPSETTING_IN_t0.1294964029 $URGENT_APPT_t0.0431654676 $VA_CONTRACT_t0.0431654676 $WATCHES_t0.0575539568 $WILL_PICKED_t0.0935251799 $WILL_RESTART_t0.0215827338 $WITHHOLDING_t0.0359712230 $WM_ADMITTED_t0.0359712230 $WORTHLESSNESS_t0.0791366906 $YE_t0.0503597122 $ZER_t0.0575539568) !$ALZHEIMERS_DISEASE_t0.0431654676 !$ROOMMATE_WAS_t0.0431654676) 
1 and(or(and(!$NA_MG_t0.4604316547 !$PSYCHIATRY_NOTE_t0.8273381295 !$UNSP_t0.2302158273 !$UPDATE_YOUR_t0.1079136691 !$USED_VERBAL_t0.0935251799 !$USING_THERAPEUTIC_t0.0647482014 !$VERIFIED_t1.3525179856 !$VOLUME_MOOD_t0.0647482014 !$VOLUNTEER_OR_t0.0719424460 !$WHAT_QUESTIONS_t0.4676258993 !$WILL_CONSIDER_t0.0647482014 !$YEAR_t4.5323741007) $ABLE_FUNCTION_t0.0791366906 $BE_REFILLED_t0.0863309353 $LUMBAGO_t0.0359712230 $UPSETTING_IN_t0.1294964029 $URGENT_APPT_t0.0431654676 $VA_CONTRACT_t0.0431654676 $WATCHES_t0.0575539568 $WILL_PICKED_t0.0935251799 $WILL_RESTART_t0.0215827338 $WITHHOLDING_t0.0359712230 $WM_ADMITTED_t0.0359712230 $WORTHLESSNESS_t0.0791366906 $YE_t0.0503597122 $ZER_t0.0575539568) !$ALZHEIMERS_DISEASE_t0.0431654676 !$WARRANT_t0.0503597122) 
1 and(or(and(!$NA_MG_t0.4604316547 !$PSYCHIATRY_NOTE_t0.8273381295 !$UNSP_t0.2302158273 !$UPDATE_YOUR_t0.1079136691 !$USED_VERBAL_t0.0935251799 !$USING_THERAPEUTIC_t0.0647482014 !$VERIFIED_t1.3525179856 !$VOLUME_MOOD_t0.0647482014 !$VOLUNTEER_OR_t0.0719424460 !$WHAT_QUESTIONS_t0.4676258993 !$WILL_CONSIDER_t0.0647482014 !$YEAR_t4.5323741007) $BE_REFILLED_t0.0863309353 $LIPITOR_t0.0503597122 $LUMBAGO_t0.0359712230 $UPSETTING_IN_t0.1294964029 $URGENT_APPT_t0.0431654676 $VA_CONTRACT_t0.0431654676 $WATCHES_t0.0575539568 $WILL_PICKED_t0.0935251799 $WILL_RESTART_t0.0215827338 $WITHHOLDING_t0.0359712230 $WM_ADMITTED_t0.0359712230 $WORTHLESSNESS_t0.0791366906 $YE_t0.0503597122 $ZER_t0.0575539568) !$ALZHEIMERS_DISEASE_t0.0431654676 !$PERMITTED_t0.1079136691) 
1 and(or(and(!$NA_MG_t0.4604316547 !$PSYCHIATRY_NOTE_t0.8273381295 !$UNSP_t0.2302158273 !$UPDATE_YOUR_t0.1079136691 !$USED_VERBAL_t0.0935251799 !$USING_THERAPEUTIC_t0.0647482014 !$VERIFIED_t1.3525179856 !$VOLUME_MOOD_t0.0647482014 !$VOLUNTEER_OR_t0.0719424460 !$WHAT_QUESTIONS_t0.4676258993 !$WILL_CONSIDER_t0.0647482014 !$YEAR_t4.5323741007) $BE_REFILLED_t0.0863309353 $LIPITOR_t0.0503597122 $LUMBAGO_t0.0359712230 $UPSETTING_IN_t0.1294964029 $URGENT_APPT_t0.0431654676 $VA_CONTRACT_t0.0431654676 $WATCHES_t0.0575539568 $WILL_PICKED_t0.0935251799 $WILL_RESTART_t0.0215827338 $WITHHOLDING_t0.0359712230 $WM_ADMITTED_t0.0359712230 $WORTHLESSNESS_t0.0791366906 $YE_t0.0503597122 $ZER_t0.0575539568) !$ALZHEIMERS_DISEASE_t0.0431654676 !$ROOMMATE_WAS_t0.0431654676) 
1 and(or(and(!$NA_MG_t0.4604316547 !$PSYCHIATRY_NOTE_t0.8273381295 !$UNSP_t0.2302158273 !$UPDATE_YOUR_t0.1079136691 !$USED_VERBAL_t0.0935251799 !$USING_THERAPEUTIC_t0.0647482014 !$VERIFIED_t1.3525179856 !$VOLUME_MOOD_t0.0647482014 !$VOLUNTEER_OR_t0.0719424460 !$WHAT_QUESTIONS_t0.4676258993 !$WILL_CONSIDER_t0.0647482014 !$YEAR_t4.5323741007) $BE_REFILLED_t0.0863309353 $LIPITOR_t0.0503597122 $LUMBAGO_t0.0359712230 $UPSETTING_IN_t0.1294964029 $URGENT_APPT_t0.0431654676 $VA_CONTRACT_t0.0431654676 $WATCHES_t0.0575539568 $WILL_PICKED_t0.0935251799 $WILL_RESTART_t0.0215827338 $WITHHOLDING_t0.0359712230 $WM_ADMITTED_t0.0359712230 $WORTHLESSNESS_t0.0791366906 $YE_t0.0503597122 $ZER_t0.0575539568) !$ALZHEIMERS_DISEASE_t0.0431654676 !$WARRANT_t0.0503597122) 
1 and(or(and(!$NA_MG_t0.4604316547 !$NA_TAB_t0.3237410072 !$PSYCHIATRY_NOTE_t0.8273381295 !$UNSP_t0.2302158273 !$UPDATE_YOUR_t0.1079136691 !$USED_VERBAL_t0.0935251799 !$USING_THERAPEUTIC_t0.0647482014 !$VERIFIED_t1.3525179856 !$VOLUME_MOOD_t0.0647482014 !$VOLUNTEER_OR_t0.0719424460 !$WHAT_QUESTIONS_t0.4676258993 !$WILL_CONSIDER_t0.0647482014 !$YEAR_t4.5323741007) $ABLE_FUNCTION_t0.0791366906 $BE_REFILLED_t0.0863309353 $LUMBAGO_t0.0359712230 $UPSETTING_IN_t0.1294964029 $URGENT_APPT_t0.0431654676 $VA_CONTRACT_t0.0431654676 $WATCHES_t0.0575539568 $WILL_PICKED_t0.0935251799 $WILL_RESTART_t0.0215827338 $WITHHOLDING_t0.0359712230 $WM_ADMITTED_t0.0359712230 $WORTHLESSNESS_t0.0791366906 $YE_t0.0503597122 $ZER_t0.0575539568) !$ALZHEIMERS_DISEASE_t0.0431654676 !$WARRANT_t0.0503597122) 
1 and(or(and(!$NA_MG_t0.4604316547 !$NA_TAB_t0.3237410072 !$PSYCHIATRY_NOTE_t0.8273381295 !$UNSP_t0.2302158273 !$UPDATE_YOUR_t0.1079136691 !$USED_VERBAL_t0.0935251799 !$USING_THERAPEUTIC_t0.0647482014 !$VERIFIED_t1.3525179856 !$VOLUME_MOOD_t0.0647482014 !$VOLUNTEER_OR_t0.0719424460 !$WHAT_QUESTIONS_t0.4676258993 !$WILL_CONSIDER_t0.0647482014 !$YEAR_t4.5323741007) $BE_REFILLED_t0.0863309353 $LIPITOR_t0.0503597122 $LUMBAGO_t0.0359712230 $UPSETTING_IN_t0.1294964029 $URGENT_APPT_t0.0431654676 $VA_CONTRACT_t0.0431654676 $WATCHES_t0.0575539568 $WILL_PICKED_t0.0935251799 $WILL_RESTART_t0.0215827338 $WITHHOLDING_t0.0359712230 $WM_ADMITTED_t0.0359712230 $WORTHLESSNESS_t0.0791366906 $YE_t0.0503597122 $ZER_t0.0575539568) !$ALZHEIMERS_DISEASE_t0.0431654676 !$WARRANT_t0.0503597122) 
1 and(or(and(!$NA_MG_t0.4604316547 !$PSYCHIATRY_NOTE_t0.8273381295 !$UNSP_t0.2302158273 !$UPDATE_YOUR_t0.1079136691 !$USED_VERBAL_t0.0935251799 !$USING_THERAPEUTIC_t0.0647482014 !$VERIFIED_t1.3525179856 !$VOLUME_MOOD_t0.0647482014 !$VOLUNTEER_OR_t0.0719424460 !$WHAT_QUESTIONS_t0.4676258993 !$WILL_CONSIDER_t0.0647482014 !$YEAR_t4.5323741007) $ABLE_FUNCTION_t0.0791366906 $BE_REFILLED_t0.0863309353 $DISEASE_CABG_t0.0287769784 $LUMBAGO_t0.0359712230 $UPSETTING_IN_t0.1294964029 $URGENT_APPT_t0.0431654676 $VA_CONTRACT_t0.0431654676 $WATCHES_t0.0575539568 $WILL_PICKED_t0.0935251799 $WILL_RESTART_t0.0215827338 $WITHHOLDING_t0.0359712230 $WM_ADMITTED_t0.0359712230 $WORTHLESSNESS_t0.0791366906 $YE_t0.0503597122 $ZER_t0.0575539568) !$ALZHEIMERS_DISEASE_t0.0431654676 !$ROOMMATE_WAS_t0.0431654676) 
1 and(or(and(!$NA_MG_t0.4604316547 !$PSYCHIATRY_NOTE_t0.8273381295 !$UNSP_t0.2302158273 !$UPDATE_YOUR_t0.1079136691 !$USED_VERBAL_t0.0935251799 !$USING_THERAPEUTIC_t0.0647482014 !$VERIFIED_t1.3525179856 !$VOLUME_MOOD_t0.0647482014 !$VOLUNTEER_OR_t0.0719424460 !$WHAT_QUESTIONS_t0.4676258993 !$WILL_CONSIDER_t0.0647482014 !$YEAR_t4.5323741007) $ABLE_FUNCTION_t0.0791366906 $BE_REFILLED_t0.0863309353 $DISEASE_CABG_t0.0287769784 $LUMBAGO_t0.0359712230 $UPSETTING_IN_t0.1294964029 $URGENT_APPT_t0.0431654676 $VA_CONTRACT_t0.0431654676 $WATCHES_t0.0575539568 $WILL_PICKED_t0.0935251799 $WILL_RESTART_t0.0215827338 $WITHHOLDING_t0.0359712230 $WM_ADMITTED_t0.0359712230 $WORTHLESSNESS_t0.0791366906 $YE_t0.0503597122 $ZER_t0.0575539568) !$ALZHEIMERS_DISEASE_t0.0431654676 !$WARRANT_t0.0503597122) 
1 and(or(and(!$NA_MG_t0.4604316547 !$PSYCHIATRY_NOTE_t0.8273381295 !$UNSP_t0.2302158273 !$UPDATE_YOUR_t0.1079136691 !$USED_VERBAL_t0.0935251799 !$USING_THERAPEUTIC_t0.0647482014 !$VERIFIED_t1.3525179856 !$VOLUME_MOOD_t0.0647482014 !$VOLUNTEER_OR_t0.0719424460 !$WHAT_QUESTIONS_t0.4676258993 !$WILL_CONSIDER_t0.0647482014 !$YEAR_t4.5323741007) $ABLE_FUNCTION_t0.0791366906 $BE_REFILLED_t0.0863309353 $LUMBAGO_t0.0359712230 $UPSETTING_IN_t0.1294964029 $URGENT_APPT_t0.0431654676 $VA_CONTRACT_t0.0431654676 $WATCHES_t0.0575539568 $WILL_PICKED_t0.0935251799 $WILL_RESTART_t0.0215827338 $WITHHOLDING_t0.0359712230 $WM_ADMITTED_t0.0359712230 $WORTHLESSNESS_t0.0791366906 $YE_t0.0503597122 $ZER_t0.0575539568) !$ALZHEIMERS_DISEASE_t0.0431654676 !$ROOMMATE_WAS_t0.0431654676 !$WARRANT_t0.0503597122) 
1 and(or(and(or(!$VERIFIED_t1.3525179856 !$WED_t0.6330935252) !$FEAR_t0.2446043165 !$UNSP_t0.2302158273 !$VISIT_PROCESSES_t0.0647482014 !$VISTA_ED_t0.5035971223 !$VOICEMAIL_LEFT_t0.0503597122 !$VOIDING_t0.5395683453 !$VOLUME_MOOD_t0.0647482014 !$VOLUNTEER_OR_t0.0719424460 !$WALKIN_t0.5539568345 !$WERE_DISCUSSED_t0.4172661871 !$WERE_t7.6330935252 !$WHAT_QUESTIONS_t0.4676258993 !$YEAR_t4.5323741007) $DISEASE_CABG_t0.0287769784 $LUMBAGO_t0.0359712230 $URGENT_APPT_t0.0431654676 $URGENT_SERVICES_t0.0575539568 $WAS_COMPLICATED_t0.0215827338 $WAS_HORRIBLE_t0.1294964029 $WE_COULD_t0.1438848921 $WILL_PICKED_t0.0935251799 $WILL_RESTART_t0.0215827338 $WTIH_t0.0431654676 $YE_t0.0503597122 $YOUR_BOTTLES_t0.0215827338 $ZER_t0.0575539568) !$EASIER_t0.0575539568 !$RETRAINING_t0.0503597122) 
1 and(or(and(or(!$VERIFIED_t1.3525179856 !$WED_t0.6330935252) !$PSYCHIATRY_NOTE_t0.8273381295 !$UNSP_t0.2302158273 !$VISIT_PROCESSES_t0.0647482014 !$VISTA_ED_t0.5035971223 !$VOICEMAIL_LEFT_t0.0503597122 !$VOIDING_t0.5395683453 !$VOLUME_MOOD_t0.0647482014 !$VOLUNTEER_OR_t0.0719424460 !$WALKIN_t0.5539568345 !$WERE_DISCUSSED_t0.4172661871 !$WERE_t7.6330935252 !$WHAT_QUESTIONS_t0.4676258993 !$YEAR_t4.5323741007) $DISEASE_CABG_t0.0287769784 $LUMBAGO_t0.0359712230 $URGENT_APPT_t0.0431654676 $URGENT_SERVICES_t0.0575539568 $WAS_COMPLICATED_t0.0215827338 $WAS_HORRIBLE_t0.1294964029 $WE_COULD_t0.1438848921 $WILL_PICKED_t0.0935251799 $WILL_RESTART_t0.0215827338 $WTIH_t0.0431654676 $YE_t0.0503597122 $YOUR_BOTTLES_t0.0215827338 $ZER_t0.0575539568) !$EASIER_t0.0575539568 !$RETRAINING_t0.0503597122) 
1 and(or(and(or(!$VERIFIED_t1.3525179856 !$WED_t0.6330935252) !$FEAR_t0.2446043165 !$UNSP_t0.2302158273 !$VISIT_PROCESSES_t0.0647482014 !$VISTA_ED_t0.5035971223 !$VOICEMAIL_LEFT_t0.0503597122 !$VOIDING_t0.5395683453 !$VOLUME_MOOD_t0.0647482014 !$VOLUNTEER_OR_t0.0719424460 !$WALKIN_t0.5539568345 !$WERE_DISCUSSED_t0.4172661871 !$WERE_t7.6330935252 !$WHAT_QUESTIONS_t0.4676258993 !$YEAR_t4.5323741007) and(!$VOIDING_t0.5395683453 $YE_t0.0503597122) $DISEASE_CABG_t0.0287769784 $LUMBAGO_t0.0359712230 $URGENT_APPT_t0.0431654676 $URGENT_SERVICES_t0.0575539568 $WAS_COMPLICATED_t0.0215827338 $WAS_HORRIBLE_t0.1294964029 $WE_COULD_t0.1438848921 $WILL_PICKED_t0.0935251799 $WILL_RESTART_t0.0215827338 $WTIH_t0.0431654676 $YOUR_BOTTLES_t0.0215827338 $ZER_t0.0575539568) !$EASIER_t0.0575539568 !$RETRAINING_t0.0503597122) 
1 and(or(and(or(!$VERIFIED_t1.3525179856 !$WED_t0.6330935252) !$PSYCHIATRY_NOTE_t0.8273381295 !$UNSP_t0.2302158273 !$VISIT_PROCESSES_t0.0647482014 !$VISTA_ED_t0.5035971223 !$VOICEMAIL_LEFT_t0.0503597122 !$VOIDING_t0.5395683453 !$VOLUME_MOOD_t0.0647482014 !$VOLUNTEER_OR_t0.0719424460 !$WALKIN_t0.5539568345 !$WERE_DISCUSSED_t0.4172661871 !$WERE_t7.6330935252 !$WHAT_QUESTIONS_t0.4676258993 !$YEAR_t4.5323741007) and(!$VOIDING_t0.5395683453 $YE_t0.0503597122) $DISEASE_CABG_t0.0287769784 $LUMBAGO_t0.0359712230 $URGENT_APPT_t0.0431654676 $URGENT_SERVICES_t0.0575539568 $WAS_COMPLICATED_t0.0215827338 $WAS_HORRIBLE_t0.1294964029 $WE_COULD_t0.1438848921 $WILL_PICKED_t0.0935251799 $WILL_RESTART_t0.0215827338 $WTIH_t0.0431654676 $YOUR_BOTTLES_t0.0215827338 $ZER_t0.0575539568) !$EASIER_t0.0575539568 !$RETRAINING_t0.0503597122) 
1 and(or(and(or(!$VERIFIED_t1.3525179856 !$WED_t0.6330935252) !$FEAR_t0.2446043165 !$PSYCHIATRY_NOTE_t0.8273381295 !$UNSP_t0.2302158273 !$VISIT_PROCESSES_t0.0647482014 !$VISTA_ED_t0.5035971223 !$VOICEMAIL_LEFT_t0.0503597122 !$VOIDING_t0.5395683453 !$VOLUME_MOOD_t0.0647482014 !$VOLUNTEER_OR_t0.0719424460 !$WALKIN_t0.5539568345 !$WERE_DISCUSSED_t0.4172661871 !$WERE_t7.6330935252 !$WHAT_QUESTIONS_t0.4676258993 !$YEAR_t4.5323741007) and(!$VOIDING_t0.5395683453 $YE_t0.0503597122) $DISEASE_CABG_t0.0287769784 $LUMBAGO_t0.0359712230 $URGENT_APPT_t0.0431654676 $URGENT_SERVICES_t0.0575539568 $WAS_COMPLICATED_t0.0215827338 $WAS_HORRIBLE_t0.1294964029 $WE_COULD_t0.1438848921 $WILL_PICKED_t0.0935251799 $WILL_RESTART_t0.0215827338 $WTIH_t0.0431654676 $YOUR_BOTTLES_t0.0215827338 $ZER_t0.0575539568) !$EASIER_t0.0575539568 !$RETRAINING_t0.0503597122) 
1 and(or(and(or(!$VERIFIED_t1.3525179856 !$WED_t0.6330935252) !$FEAR_t0.2446043165 !$UNSP_t0.2302158273 !$VISIT_PROCESSES_t0.0647482014 !$VISTA_ED_t0.5035971223 !$VOICEMAIL_LEFT_t0.0503597122 !$VOIDING_t0.5395683453 !$VOLUME_MOOD_t0.0647482014 !$VOLUNTEER_OR_t0.0719424460 !$WALKIN_t0.5539568345 !$WERE_DISCUSSED_t0.4172661871 !$WERE_t7.6330935252 !$WHAT_QUESTIONS_t0.4676258993 !$YEAR_t4.5323741007) $LUMBAGO_t0.0359712230 $URGENT_APPT_t0.0431654676 $URGENT_SERVICES_t0.0575539568 $WAS_COMPLICATED_t0.0215827338 $WAS_HORRIBLE_t0.1294964029 $WE_COULD_t0.1438848921 $WILL_PICKED_t0.0935251799 $WILL_RESTART_t0.0215827338 $WTIH_t0.0431654676 $YE_t0.0503597122 $YOUR_BOTTLES_t0.0215827338 $ZER_t0.0575539568) !$EASIER_t0.0575539568 !$RETRAINING_t0.0503597122) 
1 and(or(and(or(!$VERIFIED_t1.3525179856 !$WED_t0.6330935252) !$PSYCHIATRY_NOTE_t0.8273381295 !$UNSP_t0.2302158273 !$VISIT_PROCESSES_t0.0647482014 !$VISTA_ED_t0.5035971223 !$VOICEMAIL_LEFT_t0.0503597122 !$VOIDING_t0.5395683453 !$VOLUME_MOOD_t0.0647482014 !$VOLUNTEER_OR_t0.0719424460 !$WALKIN_t0.5539568345 !$WERE_DISCUSSED_t0.4172661871 !$WERE_t7.6330935252 !$WHAT_QUESTIONS_t0.4676258993 !$YEAR_t4.5323741007) $LUMBAGO_t0.0359712230 $URGENT_APPT_t0.0431654676 $URGENT_SERVICES_t0.0575539568 $WAS_COMPLICATED_t0.0215827338 $WAS_HORRIBLE_t0.1294964029 $WE_COULD_t0.1438848921 $WILL_PICKED_t0.0935251799 $WILL_RESTART_t0.0215827338 $WTIH_t0.0431654676 $YE_t0.0503597122 $YOUR_BOTTLES_t0.0215827338 $ZER_t0.0575539568) !$EASIER_t0.0575539568 !$RETRAINING_t0.0503597122) 
1 and(or(and(or(!$VERIFIED_t1.3525179856 !$WED_t0.6330935252) !$UNSP_t0.2302158273 !$VISIT_PROCESSES_t0.0647482014 !$VISTA_ED_t0.5035971223 !$VOICEMAIL_LEFT_t0.0503597122 !$VOIDING_t0.5395683453 !$VOLUME_MOOD_t0.0647482014 !$VOLUNTEER_OR_t0.0719424460 !$WALKIN_t0.5539568345 !$WERE_DISCUSSED_t0.4172661871 !$WERE_t7.6330935252 !$WHAT_QUESTIONS_t0.4676258993 !$YEAR_t4.5323741007) $DISEASE_CABG_t0.0287769784 $LUMBAGO_t0.0359712230 $URGENT_APPT_t0.0431654676 $URGENT_SERVICES_t0.0575539568 $WAS_COMPLICATED_t0.0215827338 $WAS_HORRIBLE_t0.1294964029 $WE_COULD_t0.1438848921 $WILL_PICKED_t0.0935251799 $WILL_RESTART_t0.0215827338 $WTIH_t0.0431654676 $YE_t0.0503597122 $YOUR_BOTTLES_t0.0215827338 $ZER_t0.0575539568) !$EASIER_t0.0575539568 !$RETRAINING_t0.0503597122) 
1 and(or(and(or(!$VERIFIED_t1.3525179856 !$WED_t0.6330935252) !$FEAR_t0.2446043165 !$PSYCHIATRY_NOTE_t0.8273381295 !$UNSP_t0.2302158273 !$VISIT_PROCESSES_t0.0647482014 !$VISTA_ED_t0.5035971223 !$VOICEMAIL_LEFT_t0.0503597122 !$VOIDING_t0.5395683453 !$VOLUME_MOOD_t0.0647482014 !$VOLUNTEER_OR_t0.0719424460 !$WALKIN_t0.5539568345 !$WERE_DISCUSSED_t0.4172661871 !$WERE_t7.6330935252 !$WHAT_QUESTIONS_t0.4676258993 !$YEAR_t4.5323741007) $LUMBAGO_t0.0359712230 $URGENT_APPT_t0.0431654676 $URGENT_SERVICES_t0.0575539568 $WAS_COMPLICATED_t0.0215827338 $WAS_HORRIBLE_t0.1294964029 $WE_COULD_t0.1438848921 $WILL_PICKED_t0.0935251799 $WILL_RESTART_t0.0215827338 $WTIH_t0.0431654676 $YE_t0.0503597122 $YOUR_BOTTLES_t0.0215827338 $ZER_t0.0575539568) !$EASIER_t0.0575539568 !$RETRAINING_t0.0503597122) 
1 and(or(and(or(!$VERIFIED_t1.3525179856 !$WED_t0.6330935252) !$FEAR_t0.2446043165 !$UNSP_t0.2302158273 !$VISIT_PROCESSES_t0.0647482014 !$VISTA_ED_t0.5035971223 !$VOICEMAIL_LEFT_t0.0503597122 !$VOIDING_t0.5395683453 !$VOLUME_MOOD_t0.0647482014 !$VOLUNTEER_OR_t0.0719424460 !$WALKIN_t0.5539568345 !$WERE_DISCUSSED_t0.4172661871 !$WERE_t7.6330935252 !$WHAT_QUESTIONS_t0.4676258993 !$YEAR_t4.5323741007) and(!$VOIDING_t0.5395683453 $YE_t0.0503597122) $LUMBAGO_t0.0359712230 $URGENT_APPT_t0.0431654676 $URGENT_SERVICES_t0.0575539568 $WAS_COMPLICATED_t0.0215827338 $WAS_HORRIBLE_t0.1294964029 $WE_COULD_t0.1438848921 $WILL_PICKED_t0.0935251799 $WILL_RESTART_t0.0215827338 $WTIH_t0.0431654676 $YOUR_BOTTLES_t0.0215827338 $ZER_t0.0575539568) !$COMPARISON_t0.0503597122 !$EASIER_t0.0575539568) 
1 and(or(and(or(!$VERIFIED_t1.3525179856 !$YEAROLD_t0.9208633094) !$EASIER_t0.0575539568 !$MH_PSYCHIATRY_t0.3669064748 !$UNSP_t0.2302158273 !$UNT_t0.2517985612 !$VISIT_DENTAL_t0.3309352518 !$VISTA_ED_t0.5035971223 !$VOICEMAIL_LEFT_t0.0503597122 !$VOLUME_MOOD_t0.0647482014 !$WALKIN_t0.5539568345 !$YEAR_t4.5323741007 !$YR_t0.4892086331) $CONSULT_APPROVED_t0.1079136691 $UPDATED_PLEASE_t0.0215827338 $UPSETTING_THAT_t0.1294964029 $URGENT_APPT_t0.0431654676 $URINAL_WITHIN_t0.2589928058 $WAR_SERVICE_t0.0431654676 $WE_COULD_t0.1438848921 $WILL_RESTART_t0.0215827338 $WTIH_t0.0431654676 $YEAR_COUNSELED_t0.0431654676 $YE_t0.0503597122) or(!$STRUGGLES_t0.0287769784 !$YOU_FEEL_t0.3741007194) !$UCINATIONS_SI_t0.0359712230) 
1 and(or(and(or(!$VERIFIED_t1.3525179856 !$YEAROLD_t0.9208633094) !$EASIER_t0.0575539568 !$MH_PSYCHIATRY_t0.3669064748 !$UNSP_t0.2302158273 !$UNT_t0.2517985612 !$VISIT_DENTAL_t0.3309352518 !$VISTA_ED_t0.5035971223 !$VOICEMAIL_LEFT_t0.0503597122 !$VOLUME_MOOD_t0.0647482014 !$WALKIN_t0.5539568345 !$YEAR_t4.5323741007 !$YR_t0.4892086331) $CONSULT_APPROVED_t0.1079136691 $UPDATED_PLEASE_t0.0215827338 $UPSETTING_THAT_t0.1294964029 $URGENT_APPT_t0.0431654676 $URINAL_WITHIN_t0.2589928058 $WAR_SERVICE_t0.0431654676 $WE_COULD_t0.1438848921 $WILL_RESTART_t0.0215827338 $WTIH_t0.0431654676 $YEAR_COUNSELED_t0.0431654676 $YE_t0.0503597122) or(!$STRUGGLES_t0.0287769784 !$YOU_FEEL_t0.3741007194) !$WAL_REQUESTING_t0.0719424460) 
1 and(or(and(or(!$VERIFIED_t1.3525179856 !$YEAROLD_t0.9208633094) !$EASIER_t0.0575539568 !$MH_PSYCHIATRY_t0.3669064748 !$UNSP_t0.2302158273 !$UNT_t0.2517985612 !$VISIT_DENTAL_t0.3309352518 !$VISTA_ED_t0.5035971223 !$VOICEMAIL_LEFT_t0.0503597122 !$VOLUME_MOOD_t0.0647482014 !$WALKIN_t0.5539568345 !$YEAR_t4.5323741007 !$YR_t0.4892086331) $CONSULT_APPROVED_t0.1079136691 $UPDATED_PLEASE_t0.0215827338 $UPSETTING_THAT_t0.1294964029 $URGENT_APPT_t0.0431654676 $URINAL_WITHIN_t0.2589928058 $WAR_SERVICE_t0.0431654676 $WE_COULD_t0.1438848921 $WILL_RESTART_t0.0215827338 $WTIH_t0.0431654676 $YEAR_COUNSELED_t0.0431654676 $YE_t0.0503597122) or(!$STRUGGLES_t0.0287769784 !$YOU_FEEL_t0.3741007194) !$WE_GIVE_t0.0431654676) 
1 and(or(and(or(!$VERIFIED_t1.3525179856 !$YEAROLD_t0.9208633094) !$EASIER_t0.0575539568 !$MH_PSYCHIATRY_t0.3669064748 !$UNSP_t0.2302158273 !$UNT_t0.2517985612 !$VISIT_DENTAL_t0.3309352518 !$VISTA_ED_t0.5035971223 !$VOICEMAIL_LEFT_t0.0503597122 !$VOLUME_MOOD_t0.0647482014 !$WALKIN_t0.5539568345 !$YEAR_t4.5323741007 !$YR_t0.4892086331) and($CONSULT_APPROVED_t0.1079136691 !$UCINATIONS_SI_t0.0359712230) $UPDATED_PLEASE_t0.0215827338 $UPSETTING_THAT_t0.1294964029 $URGENT_APPT_t0.0431654676 $URINAL_WITHIN_t0.2589928058 $WAR_SERVICE_t0.0431654676 $WE_COULD_t0.1438848921 $WILL_RESTART_t0.0215827338 $WTIH_t0.0431654676 $YEAR_COUNSELED_t0.0431654676 $YE_t0.0503597122) or(!$STRUGGLES_t0.0287769784 !$YOU_FEEL_t0.3741007194)) 
1 and(or(and(or(!$VERIFIED_t1.3525179856 !$YEAROLD_t0.9208633094) !$EASIER_t0.0575539568 !$MH_PSYCHIATRY_t0.3669064748 !$UNSP_t0.2302158273 !$UNT_t0.2517985612 !$VISIT_DENTAL_t0.3309352518 !$VISTA_ED_t0.5035971223 !$VOICEMAIL_LEFT_t0.0503597122 !$VOLUME_MOOD_t0.0647482014 !$WALKIN_t0.5539568345 !$YEAR_t4.5323741007 !$YR_t0.4892086331) and($CONSULT_APPROVED_t0.1079136691 !$UPDATE_t0.5827338129) $UPDATED_PLEASE_t0.0215827338 $UPSETTING_THAT_t0.1294964029 $URGENT_APPT_t0.0431654676 $URINAL_WITHIN_t0.2589928058 $WAR_SERVICE_t0.0431654676 $WE_COULD_t0.1438848921 $WILL_RESTART_t0.0215827338 $WTIH_t0.0431654676 $YEAR_COUNSELED_t0.0431654676 $YE_t0.0503597122) or(!$STRUGGLES_t0.0287769784 !$YOU_FEEL_t0.3741007194)) 
1 and(or(and(or(!$VERIFIED_t1.3525179856 !$YEAROLD_t0.9208633094) !$EASIER_t0.0575539568 !$MH_PSYCHIATRY_t0.3669064748 !$UNSP_t0.2302158273 !$UNT_t0.2517985612 !$VISIT_DENTAL_t0.3309352518 !$VISTA_ED_t0.5035971223 !$VOICEMAIL_LEFT_t0.0503597122 !$VOLUME_MOOD_t0.0647482014 !$WALKIN_t0.5539568345 !$YEAR_t4.5323741007 !$YR_t0.4892086331) and($CONSULT_APPROVED_t0.1079136691 !$VERIFIED_t1.3525179856) $UPDATED_PLEASE_t0.0215827338 $UPSETTING_THAT_t0.1294964029 $URGENT_APPT_t0.0431654676 $URINAL_WITHIN_t0.2589928058 $WAR_SERVICE_t0.0431654676 $WE_COULD_t0.1438848921 $WILL_RESTART_t0.0215827338 $WTIH_t0.0431654676 $YEAR_COUNSELED_t0.0431654676 $YE_t0.0503597122) or(!$STRUGGLES_t0.0287769784 !$YOU_FEEL_t0.3741007194)) 
1 and(or(and(or(!$VERIFIED_t1.3525179856 !$YEAROLD_t0.9208633094) !$EASIER_t0.0575539568 !$MH_PSYCHIATRY_t0.3669064748 !$UNSP_t0.2302158273 !$UNT_t0.2517985612 !$VISIT_DENTAL_t0.3309352518 !$VISTA_ED_t0.5035971223 !$VOICEMAIL_LEFT_t0.0503597122 !$VOLUME_MOOD_t0.0647482014 !$WALKIN_t0.5539568345 !$YEAR_t4.5323741007 !$YR_t0.4892086331) and($CONSULT_APPROVED_t0.1079136691 !$VISTA_ED_t0.5035971223) $UPDATED_PLEASE_t0.0215827338 $UPSETTING_THAT_t0.1294964029 $URGENT_APPT_t0.0431654676 $URINAL_WITHIN_t0.2589928058 $WAR_SERVICE_t0.0431654676 $WE_COULD_t0.1438848921 $WILL_RESTART_t0.0215827338 $WTIH_t0.0431654676 $YEAR_COUNSELED_t0.0431654676 $YE_t0.0503597122) or(!$STRUGGLES_t0.0287769784 !$YOU_FEEL_t0.3741007194)) 
1 and(or(and(or(!$VERIFIED_t1.3525179856 !$YEAROLD_t0.9208633094) !$EASIER_t0.0575539568 !$MH_PSYCHIATRY_t0.3669064748 !$UNSP_t0.2302158273 !$UNT_t0.2517985612 !$VISIT_DENTAL_t0.3309352518 !$VISTA_ED_t0.5035971223 !$VOICEMAIL_LEFT_t0.0503597122 !$VOLUME_MOOD_t0.0647482014 !$WALKIN_t0.5539568345 !$YEAR_t4.5323741007 !$YR_t0.4892086331) and($CONSULT_APPROVED_t0.1079136691 !$VISTA_SC_t0.6474820144) $UPDATED_PLEASE_t0.0215827338 $UPSETTING_THAT_t0.1294964029 $URGENT_APPT_t0.0431654676 $URINAL_WITHIN_t0.2589928058 $WAR_SERVICE_t0.0431654676 $WE_COULD_t0.1438848921 $WILL_RESTART_t0.0215827338 $WTIH_t0.0431654676 $YEAR_COUNSELED_t0.0431654676 $YE_t0.0503597122) or(!$STRUGGLES_t0.0287769784 !$YOU_FEEL_t0.3741007194)) 
1 and(or(and(or(!$VERIFIED_t1.3525179856 !$YEAROLD_t0.9208633094) !$EASIER_t0.0575539568 !$MH_PSYCHIATRY_t0.3669064748 !$UNSP_t0.2302158273 !$UNT_t0.2517985612 !$VISIT_DENTAL_t0.3309352518 !$VISTA_ED_t0.5035971223 !$VOICEMAIL_LEFT_t0.0503597122 !$VOLUME_MOOD_t0.0647482014 !$WALKIN_t0.5539568345 !$YEAR_t4.5323741007 !$YR_t0.4892086331) and($CONSULT_APPROVED_t0.1079136691 !$VITAMIN_t0.6618705036) $UPDATED_PLEASE_t0.0215827338 $UPSETTING_THAT_t0.1294964029 $URGENT_APPT_t0.0431654676 $URINAL_WITHIN_t0.2589928058 $WAR_SERVICE_t0.0431654676 $WE_COULD_t0.1438848921 $WILL_RESTART_t0.0215827338 $WTIH_t0.0431654676 $YEAR_COUNSELED_t0.0431654676 $YE_t0.0503597122) or(!$STRUGGLES_t0.0287769784 !$YOU_FEEL_t0.3741007194)) 
1 and(or(and(or(!$VERIFIED_t1.3525179856 !$YEAROLD_t0.9208633094) !$EASIER_t0.0575539568 !$MH_PSYCHIATRY_t0.3669064748 !$UNSP_t0.2302158273 !$UNT_t0.2517985612 !$VISIT_DENTAL_t0.3309352518 !$VISTA_ED_t0.5035971223 !$VOICEMAIL_LEFT_t0.0503597122 !$VOLUME_MOOD_t0.0647482014 !$WALKIN_t0.5539568345 !$YEAR_t4.5323741007 !$YR_t0.4892086331) and($CONSULT_APPROVED_t0.1079136691 !$WAL_REQUESTING_t0.0719424460) $UPDATED_PLEASE_t0.0215827338 $UPSETTING_THAT_t0.1294964029 $URGENT_APPT_t0.0431654676 $URINAL_WITHIN_t0.2589928058 $WAR_SERVICE_t0.0431654676 $WE_COULD_t0.1438848921 $WILL_RESTART_t0.0215827338 $WTIH_t0.0431654676 $YEAR_COUNSELED_t0.0431654676 $YE_t0.0503597122) or(!$STRUGGLES_t0.0287769784 !$YOU_FEEL_t0.3741007194)) 
1 and(or(and(or(!$PAIN_INFLAMMATION_t0.1438848921 $PSYCHIATRICALLY_t0.0647482014) or($VISTA_IMAGING_t1.9784172662 $WERE_t7.6330935252 !$YEAR_t4.5323741007 $YOUNGER_t0.0431654676) !$MH_PSYCHIATRY_t0.3669064748 !$UNSP_t0.2302158273 !$VERIFIED_CORRECT_t0.1438848921 !$VERIFIED_t1.3525179856 !$VOLUME_MOOD_t0.0647482014 !$VOLUNTEER_OR_t0.0719424460 !$WARM_PHYSICIAN_t0.0935251799 !$WERE_DISCUSSED_t0.4172661871 !$WHICH_INCLUDES_t0.0431654676 !$WH_t0.0791366906 !$WILL_CONSIDER_t0.0647482014) $CONSENT_COLON_t0.0431654676 $LIPITOR_t0.0503597122 $WAS_FRIGHTENING_t0.1294964029 $WAS_HORRIBLE_t0.1294964029 $WATCHES_t0.0575539568 $WILL_PICKED_t0.0935251799 $WORTHLESSNESS_t0.0791366906 $YEAR_UNKNOWN_t0.0287769784 $YE_t0.0503597122 $ZER_t0.0575539568) !$ALZHEIMERS_DISEASE_t0.0431654676 !$UNIT_MONITORED_t0.0359712230) 
1 and(or(and(or($VISTA_IMAGING_t1.9784172662 $WERE_t7.6330935252 !$YEAR_t4.5323741007 $YOUNGER_t0.0431654676) !$MH_PSYCHIATRY_t0.3669064748 !$UNSP_t0.2302158273 !$VERIFIED_CORRECT_t0.1438848921 !$VERIFIED_t1.3525179856 !$VOLUME_MOOD_t0.0647482014 !$VOLUNTEER_OR_t0.0719424460 !$WARM_PHYSICIAN_t0.0935251799 !$WERE_DISCUSSED_t0.4172661871 !$WHICH_INCLUDES_t0.0431654676 !$WH_t0.0791366906) $CONSENT_COLON_t0.0431654676 $LIPITOR_t0.0503597122 $WAS_FRIGHTENING_t0.1294964029 $WAS_HORRIBLE_t0.1294964029 $WATCHES_t0.0575539568 $WILL_PICKED_t0.0935251799 $WORTHLESSNESS_t0.0791366906 $YEAR_UNKNOWN_t0.0287769784 $YE_t0.0503597122 $ZER_t0.0575539568) !$ALZHEIMERS_DISEASE_t0.0431654676 !$UNIT_MONITORED_t0.0359712230) 
1 and(or(and(or($VISTA_IMAGING_t1.9784172662 $WERE_t7.6330935252 !$YEAR_t4.5323741007 $YOUNGER_t0.0431654676) !$MH_PSYCHIATRY_t0.3669064748 !$UNSP_t0.2302158273 !$VERIFIED_CORRECT_t0.1438848921 !$VERIFIED_t1.3525179856 !$VOLUME_MOOD_t0.0647482014 !$VOLUNTEER_OR_t0.0719424460 !$WARM_PHYSICIAN_t0.0935251799 !$WERE_DISCUSSED_t0.4172661871 !$WHICH_INCLUDES_t0.0431654676 !$WH_t0.0791366906 !$WILL_CONSIDER_t0.0647482014) $CONSENT_COLON_t0.0431654676 $LIPITOR_t0.0503597122 $WAS_FRIGHTENING_t0.1294964029 $WATCHES_t0.0575539568 $WILL_PICKED_t0.0935251799 $WORTHLESSNESS_t0.0791366906 $YEAR_UNKNOWN_t0.0287769784 $YE_t0.0503597122 $ZER_t0.0575539568) !$ALZHEIMERS_DISEASE_t0.0431654676 !$UNIT_MONITORED_t0.0359712230) 
1 and(or(and(or($VISTA_IMAGING_t1.9784172662 $WERE_t7.6330935252 !$YEAR_t4.5323741007 $YOUNGER_t0.0431654676) !$MH_PSYCHIATRY_t0.3669064748 !$UNSP_t0.2302158273 !$VERIFIED_CORRECT_t0.1438848921 !$VERIFIED_t1.3525179856 !$VOLUME_MOOD_t0.0647482014 !$VOLUNTEER_OR_t0.0719424460 !$WARM_PHYSICIAN_t0.0935251799 !$WERE_DISCUSSED_t0.4172661871 !$WHICH_INCLUDES_t0.0431654676 !$WH_t0.0791366906 !$WILL_CONSIDER_t0.0647482014) $CONSENT_COLON_t0.0431654676 $LIPITOR_t0.0503597122 $WAS_HORRIBLE_t0.1294964029 $WATCHES_t0.0575539568 $WILL_PICKED_t0.0935251799 $WORTHLESSNESS_t0.0791366906 $YEAR_UNKNOWN_t0.0287769784 $YE_t0.0503597122 $ZER_t0.0575539568) !$ALZHEIMERS_DISEASE_t0.0431654676 !$UNIT_MONITORED_t0.0359712230) 
1 and(or(and(or($VISTA_IMAGING_t1.9784172662 $WERE_t7.6330935252 !$YEAR_t4.5323741007 $YOUNGER_t0.0431654676) !$MH_PSYCHIATRY_t0.3669064748 !$UNSP_t0.2302158273 !$VERIFIED_CORRECT_t0.1438848921 !$VERIFIED_t1.3525179856 !$VOLUME_MOOD_t0.0647482014 !$VOLUNTEER_OR_t0.0719424460 !$WARM_PHYSICIAN_t0.0935251799 !$WERE_DISCUSSED_t0.4172661871 !$WH_t0.0791366906 !$WILL_CONSIDER_t0.0647482014) $CONSENT_COLON_t0.0431654676 $LIPITOR_t0.0503597122 $WAS_FRIGHTENING_t0.1294964029 $WAS_HORRIBLE_t0.1294964029 $WATCHES_t0.0575539568 $WILL_PICKED_t0.0935251799 $WORTHLESSNESS_t0.0791366906 $YEAR_UNKNOWN_t0.0287769784 $YE_t0.0503597122 $ZER_t0.0575539568) !$ALZHEIMERS_DISEASE_t0.0431654676 !$UNIT_MONITORED_t0.0359712230) 
1 and(or(and(or($VISTA_IMAGING_t1.9784172662 $WERE_t7.6330935252 !$YEAR_t4.5323741007 $YOUNGER_t0.0431654676) !$MH_PSYCHIATRY_t0.3669064748 !$UNSP_t0.2302158273 !$VERIFIED_CORRECT_t0.1438848921 !$VERIFIED_t1.3525179856 !$VOLUME_MOOD_t0.0647482014 !$VOLUNTEER_OR_t0.0719424460 !$WERE_DISCUSSED_t0.4172661871 !$WHICH_INCLUDES_t0.0431654676 !$WH_t0.0791366906 !$WILL_CONSIDER_t0.0647482014) $CONSENT_COLON_t0.0431654676 $LIPITOR_t0.0503597122 $WAS_FRIGHTENING_t0.1294964029 $WAS_HORRIBLE_t0.1294964029 $WATCHES_t0.0575539568 $WILL_PICKED_t0.0935251799 $WORTHLESSNESS_t0.0791366906 $YEAR_UNKNOWN_t0.0287769784 $YE_t0.0503597122 $ZER_t0.0575539568) !$ALZHEIMERS_DISEASE_t0.0431654676 !$UNIT_MONITORED_t0.0359712230) 
1 and(or(and(or($VISTA_IMAGING_t1.9784172662 $WERE_t7.6330935252 !$YEAR_t4.5323741007 $YOUNGER_t0.0431654676) !$MH_PSYCHIATRY_t0.3669064748 !$UNSP_t0.2302158273 !$VERIFIED_CORRECT_t0.1438848921 !$VERIFIED_t1.3525179856 !$VOLUME_MOOD_t0.0647482014 !$VOLUNTEER_OR_t0.0719424460 !$WARM_PHYSICIAN_t0.0935251799 !$WERE_DISCUSSED_t0.4172661871 !$WHICH_INCLUDES_t0.0431654676 !$WH_t0.0791366906 !$WILL_CONSIDER_t0.0647482014) $BREATH_FREELY_t0.0431654676 $LIPITOR_t0.0503597122 $WAS_FRIGHTENING_t0.1294964029 $WAS_HORRIBLE_t0.1294964029 $WATCHES_t0.0575539568 $WILL_PICKED_t0.0935251799 $WORTHLESSNESS_t0.0791366906 $YEAR_UNKNOWN_t0.0287769784 $YE_t0.0503597122 $ZER_t0.0575539568) !$ALZHEIMERS_DISEASE_t0.0431654676 !$SUPERVISING_ATTENDING_t0.0359712230) 
1 and(or(and(or($VISTA_IMAGING_t1.9784172662 $WERE_t7.6330935252 !$YEAR_t4.5323741007 $YOUNGER_t0.0431654676) !$MH_PSYCHIATRY_t0.3669064748 !$UNSP_t0.2302158273 !$VERIFIED_CORRECT_t0.1438848921 !$VERIFIED_t1.3525179856 !$VOLUME_MOOD_t0.0647482014 !$VOLUNTEER_OR_t0.0719424460 !$WARM_PHYSICIAN_t0.0935251799 !$WERE_DISCUSSED_t0.4172661871 !$WHICH_INCLUDES_t0.0431654676 !$WH_t0.0791366906 !$WILL_CONSIDER_t0.0647482014) $BREATH_FREELY_t0.0431654676 $LIPITOR_t0.0503597122 $WAS_FRIGHTENING_t0.1294964029 $WAS_HORRIBLE_t0.1294964029 $WATCHES_t0.0575539568 $WILL_PICKED_t0.0935251799 $WORTHLESSNESS_t0.0791366906 $YEAR_UNKNOWN_t0.0287769784 $YE_t0.0503597122 $ZER_t0.0575539568) !$ALZHEIMERS_DISEASE_t0.0431654676 !$UNIT_MONITORED_t0.0359712230) 
1 and(or(and(or($VISTA_IMAGING_t1.9784172662 $WERE_t7.6330935252 !$YEAR_t4.5323741007 $YOUNGER_t0.0431654676) !$MH_PSYCHIATRY_t0.3669064748 !$UNSP_t0.2302158273 !$VERIFIED_CORRECT_t0.1438848921 !$VERIFIED_t1.3525179856 !$VOLUME_MOOD_t0.0647482014 !$VOLUNTEER_OR_t0.0719424460 !$WARM_PHYSICIAN_t0.0935251799 !$WERE_DISCUSSED_t0.4172661871 !$WHICH_INCLUDES_t0.0431654676 !$WH_t0.0791366906 !$WILL_CONSIDER_t0.0647482014) $BREATH_FREELY_t0.0431654676 $LIPITOR_t0.0503597122 $WAS_FRIGHTENING_t0.1294964029 $WAS_HORRIBLE_t0.1294964029 $WATCHES_t0.0575539568 $WILL_PICKED_t0.0935251799 $WORTHLESSNESS_t0.0791366906 $YEAR_UNKNOWN_t0.0287769784 $YE_t0.0503597122 $ZER_t0.0575539568) !$ALZHEIMERS_DISEASE_t0.0431654676 !$WARRANT_t0.0503597122) 
1 and(or(and(or($VISTA_IMAGING_t1.9784172662 $WERE_t7.6330935252 !$YEAR_t4.5323741007 $YOUNGER_t0.0431654676) !$MH_PSYCHIATRY_t0.3669064748 !$UNSP_t0.2302158273 !$VERIFIED_CORRECT_t0.1438848921 !$VERIFIED_t1.3525179856 !$VOLUME_MOOD_t0.0647482014 !$VOLUNTEER_OR_t0.0719424460 !$WARM_PHYSICIAN_t0.0935251799 !$WERE_DISCUSSED_t0.4172661871 !$WHICH_INCLUDES_t0.0431654676 !$WH_t0.0791366906 !$WILL_CONSIDER_t0.0647482014) $CONSENT_COLON_t0.0431654676 $LIPITOR_t0.0503597122 $WAS_FRIGHTENING_t0.1294964029 $WAS_HORRIBLE_t0.1294964029 $WATCHES_t0.0575539568 $WILL_PICKED_t0.0935251799 $WORTHLESSNESS_t0.0791366906 $YEAR_UNKNOWN_t0.0287769784 $YE_t0.0503597122 $ZER_t0.0575539568) !$ALZHEIMERS_DISEASE_t0.0431654676 !$SUPERVISING_ATTENDING_t0.0359712230) 
1 and(or(and(or($BE_REFILLED_t0.0863309353 $LIPITOR_t0.0503597122 $WAS_FRIGHTENING_t0.1294964029 $ZER_t0.0575539568) !$UNT_t0.2517985612) and(!$EASIER_t0.0575539568 !$NOT_APPLICABLE_t1.5683453237 !$PSYCHIATRY_NOTE_t0.8273381295 !$UNSP_t0.2302158273 !$UROLOGY_CLINIC_t0.2661870504 !$USE_INTERACTING_t0.0647482014 !$VERIFIED_t1.3525179856 !$VOIDING_t0.5395683453 !$VOLUME_MOOD_t0.0647482014 !$VOLUNTEER_OR_t0.0719424460 !$WERE_DISCUSSED_t0.4172661871 !$WHAT_QUESTIONS_t0.4676258993 !$YEARS_OLD_t0.2158273381 !$YEAR_t4.5323741007) and(!$VINFLUENZA_IS_t0.0503597122 $YOUNGER_t0.0431654676) $SATURATION_ROOM_t0.1007194245 $URINAL_WITHIN_t0.2589928058 $WE_COULD_t0.1438848921 $WTIH_t0.0431654676 $YEAR_UNKNOWN_t0.0287769784 $YE_t0.0503597122) !$COMPARISON_t0.0503597122) 
1 and(or(and(or($BE_REFILLED_t0.0863309353 $LIPITOR_t0.0503597122 $WAS_FRIGHTENING_t0.1294964029) !$UNT_t0.2517985612) and(!$EASIER_t0.0575539568 !$PSYCHIATRY_NOTE_t0.8273381295 !$UNSP_t0.2302158273 !$UROLOGY_CLINIC_t0.2661870504 !$USE_INTERACTING_t0.0647482014 !$VERIFIED_t1.3525179856 !$VOIDING_t0.5395683453 !$VOLUME_MOOD_t0.0647482014 !$VOLUNTEER_OR_t0.0719424460 !$WERE_DISCUSSED_t0.4172661871 !$WHAT_QUESTIONS_t0.4676258993 !$YEARS_OLD_t0.2158273381 !$YEAR_t4.5323741007) and(!$VINFLUENZA_IS_t0.0503597122 $YOUNGER_t0.0431654676) $SATURATION_ROOM_t0.1007194245 $URINAL_WITHIN_t0.2589928058 $WE_COULD_t0.1438848921 $WTIH_t0.0431654676 $YEAR_UNKNOWN_t0.0287769784 $YE_t0.0503597122 $ZER_t0.0575539568) !$COMPARISON_t0.0503597122) 
1 and(or(and(or($BE_REFILLED_t0.0863309353 $LIPITOR_t0.0503597122 $WAS_FRIGHTENING_t0.1294964029 $ZER_t0.0575539568) !$UNT_t0.2517985612) and(!$EASIER_t0.0575539568 !$PSYCHIATRY_NOTE_t0.8273381295 !$UNSP_t0.2302158273 !$UROLOGY_CLINIC_t0.2661870504 !$USE_INTERACTING_t0.0647482014 !$VERIFIED_t1.3525179856 !$VOIDING_t0.5395683453 !$VOLUME_MOOD_t0.0647482014 !$VOLUNTEER_OR_t0.0719424460 !$WERE_DISCUSSED_t0.4172661871 !$WHAT_QUESTIONS_t0.4676258993 !$YEARS_OLD_t0.2158273381 !$YEAR_t4.5323741007) and(!$VINFLUENZA_IS_t0.0503597122 $YOUNGER_t0.0431654676) $RESPIRATION_BREATH_t0.0431654676 $URINAL_WITHIN_t0.2589928058 $WE_COULD_t0.1438848921 $WTIH_t0.0431654676 $YEAR_UNKNOWN_t0.0287769784 $YE_t0.0503597122) !$COMPARISON_t0.0503597122) 
1 and(or(and(or($BE_REFILLED_t0.0863309353 $LIPITOR_t0.0503597122 $WAS_FRIGHTENING_t0.1294964029 $ZER_t0.0575539568) !$UNT_t0.2517985612) and(!$EASIER_t0.0575539568 !$PSYCHIATRY_NOTE_t0.8273381295 !$UNSP_t0.2302158273 !$UROLOGY_CLINIC_t0.2661870504 !$USE_INTERACTING_t0.0647482014 !$VERIFIED_t1.3525179856 !$VOIDING_t0.5395683453 !$VOLUME_MOOD_t0.0647482014 !$VOLUNTEER_OR_t0.0719424460 !$WERE_DISCUSSED_t0.4172661871 !$WHAT_QUESTIONS_t0.4676258993 !$YEARS_OLD_t0.2158273381 !$YEAR_t4.5323741007) and(!$VINFLUENZA_IS_t0.0503597122 $YOUNGER_t0.0431654676) $SATURATION_ROOM_t0.1007194245 $URINAL_WITHIN_t0.2589928058 $WE_COULD_t0.1438848921 $WTIH_t0.0431654676 $YEAR_UNKNOWN_t0.0287769784 $YE_t0.0503597122) !$COMPARISON_t0.0503597122) 
1 and(or(and(or($BE_REFILLED_t0.0863309353 $LIPITOR_t0.0503597122 $ZER_t0.0575539568) !$UNT_t0.2517985612) and(!$EASIER_t0.0575539568 !$PSYCHIATRY_NOTE_t0.8273381295 !$UNSP_t0.2302158273 !$UROLOGY_CLINIC_t0.2661870504 !$USE_INTERACTING_t0.0647482014 !$VERIFIED_t1.3525179856 !$VOIDING_t0.5395683453 !$VOLUME_MOOD_t0.0647482014 !$VOLUNTEER_OR_t0.0719424460 !$WERE_DISCUSSED_t0.4172661871 !$WHAT_QUESTIONS_t0.4676258993 !$YEARS_OLD_t0.2158273381 !$YEAR_t4.5323741007) and(!$VINFLUENZA_IS_t0.0503597122 $YOUNGER_t0.0431654676) $SATURATION_ROOM_t0.1007194245 $URINAL_WITHIN_t0.2589928058 $WAS_FRIGHTENING_t0.1294964029 $WE_COULD_t0.1438848921 $WTIH_t0.0431654676 $YEAR_UNKNOWN_t0.0287769784 $YE_t0.0503597122) !$COMPARISON_t0.0503597122) 
1 and(or(and(or($LIPITOR_t0.0503597122 $WAS_FRIGHTENING_t0.1294964029 $ZER_t0.0575539568) !$UNT_t0.2517985612) and(!$EASIER_t0.0575539568 !$PSYCHIATRY_NOTE_t0.8273381295 !$UNSP_t0.2302158273 !$UROLOGY_CLINIC_t0.2661870504 !$USE_INTERACTING_t0.0647482014 !$VERIFIED_t1.3525179856 !$VOIDING_t0.5395683453 !$VOLUME_MOOD_t0.0647482014 !$VOLUNTEER_OR_t0.0719424460 !$WERE_DISCUSSED_t0.4172661871 !$WHAT_QUESTIONS_t0.4676258993 !$YEARS_OLD_t0.2158273381 !$YEAR_t4.5323741007) and(!$VINFLUENZA_IS_t0.0503597122 $YOUNGER_t0.0431654676) $BE_REFILLED_t0.0863309353 $SATURATION_ROOM_t0.1007194245 $URINAL_WITHIN_t0.2589928058 $WE_COULD_t0.1438848921 $WTIH_t0.0431654676 $YEAR_UNKNOWN_t0.0287769784 $YE_t0.0503597122) !$COMPARISON_t0.0503597122) 
1 and(or(and(or($BE_REFILLED_t0.0863309353 $BREATH_FREELY_t0.0431654676 $LIPITOR_t0.0503597122 $WAS_FRIGHTENING_t0.1294964029 $ZER_t0.0575539568) !$UNT_t0.2517985612) and(!$EASIER_t0.0575539568 !$PSYCHIATRY_NOTE_t0.8273381295 !$UNSP_t0.2302158273 !$UROLOGY_CLINIC_t0.2661870504 !$USE_INTERACTING_t0.0647482014 !$VERIFIED_t1.3525179856 !$VOIDING_t0.5395683453 !$VOLUME_MOOD_t0.0647482014 !$VOLUNTEER_OR_t0.0719424460 !$WERE_DISCUSSED_t0.4172661871 !$WHAT_QUESTIONS_t0.4676258993 !$YEARS_OLD_t0.2158273381 !$YEAR_t4.5323741007) and(!$VINFLUENZA_IS_t0.0503597122 $YOUNGER_t0.0431654676) $SATURATION_ROOM_t0.1007194245 $URINAL_WITHIN_t0.2589928058 $WE_COULD_t0.1438848921 $WTIH_t0.0431654676 $YEAR_UNKNOWN_t0.0287769784 $YE_t0.0503597122) !$COMPARISON_t0.0503597122) 
1 and(or(and(or($BE_REFILLED_t0.0863309353 $GASTROENTEROLOGY_NAME_t0.0647482014 $LIPITOR_t0.0503597122 $WAS_FRIGHTENING_t0.1294964029 $ZER_t0.0575539568) !$UNT_t0.2517985612) and(!$EASIER_t0.0575539568 !$PSYCHIATRY_NOTE_t0.8273381295 !$UNSP_t0.2302158273 !$UROLOGY_CLINIC_t0.2661870504 !$USE_INTERACTING_t0.0647482014 !$VERIFIED_t1.3525179856 !$VOIDING_t0.5395683453 !$VOLUME_MOOD_t0.0647482014 !$VOLUNTEER_OR_t0.0719424460 !$WERE_DISCUSSED_t0.4172661871 !$WHAT_QUESTIONS_t0.4676258993 !$YEARS_OLD_t0.2158273381 !$YEAR_t4.5323741007) and(!$VINFLUENZA_IS_t0.0503597122 $YOUNGER_t0.0431654676) $SATURATION_ROOM_t0.1007194245 $URINAL_WITHIN_t0.2589928058 $WE_COULD_t0.1438848921 $WTIH_t0.0431654676 $YEAR_UNKNOWN_t0.0287769784 $YE_t0.0503597122) !$COMPARISON_t0.0503597122) 
1 and(or(and(or($BE_REFILLED_t0.0863309353 $GENTLE_t0.0215827338 $LIPITOR_t0.0503597122 $WAS_FRIGHTENING_t0.1294964029 $ZER_t0.0575539568) !$UNT_t0.2517985612) and(!$EASIER_t0.0575539568 !$PSYCHIATRY_NOTE_t0.8273381295 !$UNSP_t0.2302158273 !$UROLOGY_CLINIC_t0.2661870504 !$USE_INTERACTING_t0.0647482014 !$VERIFIED_t1.3525179856 !$VOIDING_t0.5395683453 !$VOLUME_MOOD_t0.0647482014 !$VOLUNTEER_OR_t0.0719424460 !$WERE_DISCUSSED_t0.4172661871 !$WHAT_QUESTIONS_t0.4676258993 !$YEARS_OLD_t0.2158273381 !$YEAR_t4.5323741007) and(!$VINFLUENZA_IS_t0.0503597122 $YOUNGER_t0.0431654676) $SATURATION_ROOM_t0.1007194245 $URINAL_WITHIN_t0.2589928058 $WE_COULD_t0.1438848921 $WTIH_t0.0431654676 $YEAR_UNKNOWN_t0.0287769784 $YE_t0.0503597122) !$COMPARISON_t0.0503597122) 
1 and(or(and(or($BE_REFILLED_t0.0863309353 $LIPITOR_t0.0503597122 $LUMBAGO_t0.0359712230 $WAS_FRIGHTENING_t0.1294964029 $ZER_t0.0575539568) !$UNT_t0.2517985612) and(!$EASIER_t0.0575539568 !$PSYCHIATRY_NOTE_t0.8273381295 !$UNSP_t0.2302158273 !$UROLOGY_CLINIC_t0.2661870504 !$USE_INTERACTING_t0.0647482014 !$VERIFIED_t1.3525179856 !$VOIDING_t0.5395683453 !$VOLUME_MOOD_t0.0647482014 !$VOLUNTEER_OR_t0.0719424460 !$WERE_DISCUSSED_t0.4172661871 !$WHAT_QUESTIONS_t0.4676258993 !$YEARS_OLD_t0.2158273381 !$YEAR_t4.5323741007) and(!$VINFLUENZA_IS_t0.0503597122 $YOUNGER_t0.0431654676) $SATURATION_ROOM_t0.1007194245 $URINAL_WITHIN_t0.2589928058 $WE_COULD_t0.1438848921 $WTIH_t0.0431654676 $YEAR_UNKNOWN_t0.0287769784 $YE_t0.0503597122) !$COMPARISON_t0.0503597122) 
1 and(or(and(!$MH_PSYCHIATRY_t0.3669064748 !$UNSP_t0.2302158273 !$VERIFIED_t1.3525179856 !$VISIT_DENTAL_t0.3309352518 !$VOICEMAIL_LEFT_t0.0503597122 !$VOLUME_MOOD_t0.0647482014 !$WERE_DISCUSSED_t0.4172661871 !$WHICH_MAKES_t0.0287769784 !$YEARS_OLD_t0.2158273381 !$YEAR_t4.5323741007 !$YR_t0.4892086331) and(!$VOICEMAIL_t0.2949640288 $WE_COULD_t0.1438848921) $CONSULT_APPROVED_t0.1079136691 $RESPIRATION_BREATH_t0.0431654676 $URGENT_APPT_t0.0431654676 $URGENT_SERVICES_t0.0575539568 $URINAL_WITHIN_t0.2589928058 $WAS_HORRIBLE_t0.1294964029 $WILL_PICKED_t0.0935251799 $WILL_RESTART_t0.0215827338 $WTIH_t0.0431654676 $YEAR_COUNSELED_t0.0431654676 $YE_t0.0503597122) !$EASIER_t0.0575539568 !$STRAINING_t0.0503597122) 
1 and(or(and(!$MH_PSYCHIATRY_t0.3669064748 !$UNSP_t0.2302158273 !$VERIFIED_t1.3525179856 !$VISIT_DENTAL_t0.3309352518 !$VOICEMAIL_LEFT_t0.0503597122 !$VOLUME_MOOD_t0.0647482014 !$WERE_DISCUSSED_t0.4172661871 !$WHICH_MAKES_t0.0287769784 !$YEARS_OLD_t0.2158273381 !$YEAR_t4.5323741007 !$YR_t0.4892086331) and(!$VOICEMAIL_t0.2949640288 $WE_COULD_t0.1438848921) $CONSULT_APPROVED_t0.1079136691 $SATURATION_ROOM_t0.1007194245 $URGENT_APPT_t0.0431654676 $URGENT_SERVICES_t0.0575539568 $URINAL_WITHIN_t0.2589928058 $WAS_HORRIBLE_t0.1294964029 $WILL_PICKED_t0.0935251799 $WILL_RESTART_t0.0215827338 $WTIH_t0.0431654676 $YEAR_COUNSELED_t0.0431654676 $YE_t0.0503597122) !$EASIER_t0.0575539568 !$STRAINING_t0.0503597122) 
1 and(or(and(!$MH_PSYCHIATRY_t0.3669064748 !$UNSP_t0.2302158273 !$VERIFIED_t1.3525179856 !$VISIT_DENTAL_t0.3309352518 !$VOICEMAIL_LEFT_t0.0503597122 !$VOLUME_MOOD_t0.0647482014 !$WERE_DISCUSSED_t0.4172661871 !$YEARS_OLD_t0.2158273381 !$YEAR_t4.5323741007 !$YR_t0.4892086331) and(!$VOICEMAIL_t0.2949640288 $WE_COULD_t0.1438848921) $CONSULT_APPROVED_t0.1079136691 $SATURATION_ROOM_t0.1007194245 $URGENT_APPT_t0.0431654676 $URGENT_SERVICES_t0.0575539568 $URINAL_WITHIN_t0.2589928058 $WAS_HORRIBLE_t0.1294964029 $WILL_PICKED_t0.0935251799 $WILL_RESTART_t0.0215827338 $WTIH_t0.0431654676 $YEAR_COUNSELED_t0.0431654676 $YE_t0.0503597122) !$EASIER_t0.0575539568 !$STRAINING_t0.0503597122 !$WHICH_MAKES_t0.0287769784) 
1 and(or(and(!$MH_PSYCHIATRY_t0.3669064748 !$UNSP_t0.2302158273 !$VERIFIED_t1.3525179856 !$VISIT_DENTAL_t0.3309352518 !$VOICEMAIL_LEFT_t0.0503597122 !$WERE_DISCUSSED_t0.4172661871 !$WHICH_MAKES_t0.0287769784 !$YEARS_OLD_t0.2158273381 !$YEAR_t4.5323741007 !$YR_t0.4892086331) and(!$VOICEMAIL_t0.2949640288 $WE_COULD_t0.1438848921) $CONSULT_APPROVED_t0.1079136691 $SATURATION_ROOM_t0.1007194245 $URGENT_APPT_t0.0431654676 $URGENT_SERVICES_t0.0575539568 $URINAL_WITHIN_t0.2589928058 $WAS_HORRIBLE_t0.1294964029 $WILL_PICKED_t0.0935251799 $WILL_RESTART_t0.0215827338 $WTIH_t0.0431654676 $YEAR_COUNSELED_t0.0431654676 $YE_t0.0503597122) !$EASIER_t0.0575539568 !$STRAINING_t0.0503597122 !$VOLUME_MOOD_t0.0647482014) 
1 or(and(or(and(!$MH_PSYCHIATRY_t0.3669064748 !$UNSP_t0.2302158273 !$VERIFIED_t1.3525179856 !$VISIT_DENTAL_t0.3309352518 !$VOICEMAIL_LEFT_t0.0503597122 !$VOLUME_MOOD_t0.0647482014 !$WERE_DISCUSSED_t0.4172661871 !$WHICH_MAKES_t0.0287769784 !$YEARS_OLD_t0.2158273381 !$YEAR_t4.5323741007 !$YR_t0.4892086331) and(!$VOICEMAIL_t0.2949640288 $WE_COULD_t0.1438848921) $CONSULT_APPROVED_t0.1079136691 $SATURATION_ROOM_t0.1007194245 $URGENT_SERVICES_t0.0575539568 $URINAL_WITHIN_t0.2589928058 $WAS_HORRIBLE_t0.1294964029 $WILL_PICKED_t0.0935251799 $WILL_RESTART_t0.0215827338 $WTIH_t0.0431654676 $YEAR_COUNSELED_t0.0431654676 $YE_t0.0503597122) !$EASIER_t0.0575539568 !$STRAINING_t0.0503597122) $URGENT_APPT_t0.0431654676) 
1 or(and(or(and(!$MH_PSYCHIATRY_t0.3669064748 !$UNSP_t0.2302158273 !$VERIFIED_t1.3525179856 !$VISIT_DENTAL_t0.3309352518 !$VOICEMAIL_LEFT_t0.0503597122 !$VOLUME_MOOD_t0.0647482014 !$WERE_DISCUSSED_t0.4172661871 !$YEARS_OLD_t0.2158273381 !$YEAR_t4.5323741007 !$YR_t0.4892086331) and(!$VOICEMAIL_t0.2949640288 $WE_COULD_t0.1438848921) $CONSULT_APPROVED_t0.1079136691 $SATURATION_ROOM_t0.1007194245 $URGENT_SERVICES_t0.0575539568 $URINAL_WITHIN_t0.2589928058 $WAS_HORRIBLE_t0.1294964029 $WILL_PICKED_t0.0935251799 $WILL_RESTART_t0.0215827338 $WTIH_t0.0431654676 $YEAR_COUNSELED_t0.0431654676 $YE_t0.0503597122) !$EASIER_t0.0575539568 !$STRAINING_t0.0503597122 !$WHICH_MAKES_t0.0287769784) $URGENT_APPT_t0.0431654676) 
1 and(or(and(or(and(!$MH_PSYCHIATRY_t0.3669064748 !$UNSP_t0.2302158273 !$VERIFIED_t1.3525179856 !$VISIT_DENTAL_t0.3309352518 !$VOICEMAIL_LEFT_t0.0503597122 !$VOLUME_MOOD_t0.0647482014 !$WERE_DISCUSSED_t0.4172661871 !$WHICH_MAKES_t0.0287769784 !$YEARS_OLD_t0.2158273381 !$YEAR_t4.5323741007 !$YR_t0.4892086331) and(!$VOICEMAIL_t0.2949640288 $WE_COULD_t0.1438848921) $CONSULT_APPROVED_t0.1079136691 $SATURATION_ROOM_t0.1007194245 $URGENT_SERVICES_t0.0575539568 $URINAL_WITHIN_t0.2589928058 $WAS_HORRIBLE_t0.1294964029 $WILL_PICKED_t0.0935251799 $WILL_RESTART_t0.0215827338 $WTIH_t0.0431654676 $YEAR_COUNSELED_t0.0431654676 $YE_t0.0503597122) !$EASIER_t0.0575539568) $URGENT_APPT_t0.0431654676) !$STRAINING_t0.0503597122) 
1 and(or(and(or(and(!$MH_PSYCHIATRY_t0.3669064748 !$UNSP_t0.2302158273 !$VERIFIED_t1.3525179856 !$VISIT_DENTAL_t0.3309352518 !$VOICEMAIL_LEFT_t0.0503597122 !$VOLUME_MOOD_t0.0647482014 !$WERE_DISCUSSED_t0.4172661871 !$YEARS_OLD_t0.2158273381 !$YEAR_t4.5323741007 !$YR_t0.4892086331) and(!$VOICEMAIL_t0.2949640288 $WE_COULD_t0.1438848921) $CONSULT_APPROVED_t0.1079136691 $SATURATION_ROOM_t0.1007194245 $URGENT_SERVICES_t0.0575539568 $URINAL_WITHIN_t0.2589928058 $WAS_HORRIBLE_t0.1294964029 $WILL_PICKED_t0.0935251799 $WILL_RESTART_t0.0215827338 $WTIH_t0.0431654676 $YEAR_COUNSELED_t0.0431654676 $YE_t0.0503597122) !$EASIER_t0.0575539568 !$STRAINING_t0.0503597122) $URGENT_APPT_t0.0431654676) !$WHICH_MAKES_t0.0287769784) 
1 and(or(and(or(and(!$MH_PSYCHIATRY_t0.3669064748 !$UNSP_t0.2302158273 !$VERIFIED_t1.3525179856 !$VISIT_DENTAL_t0.3309352518 !$VOICEMAIL_LEFT_t0.0503597122 !$WERE_DISCUSSED_t0.4172661871 !$WHICH_MAKES_t0.0287769784 !$YEARS_OLD_t0.2158273381 !$YEAR_t4.5323741007 !$YR_t0.4892086331) and(!$VOICEMAIL_t0.2949640288 $WE_COULD_t0.1438848921) $CONSULT_APPROVED_t0.1079136691 $SATURATION_ROOM_t0.1007194245 $URGENT_SERVICES_t0.0575539568 $URINAL_WITHIN_t0.2589928058 $WAS_HORRIBLE_t0.1294964029 $WILL_PICKED_t0.0935251799 $WILL_RESTART_t0.0215827338 $WTIH_t0.0431654676 $YEAR_COUNSELED_t0.0431654676 $YE_t0.0503597122) !$EASIER_t0.0575539568 !$STRAINING_t0.0503597122) $URGENT_APPT_t0.0431654676) !$VOLUME_MOOD_t0.0647482014) 
1 and(or(and(or(and(!$MH_PSYCHIATRY_t0.3669064748 !$UNSP_t0.2302158273 !$VERIFIED_t1.3525179856 !$VISIT_DENTAL_t0.3309352518 !$VOICEMAIL_LEFT_t0.0503597122 !$WERE_DISCUSSED_t0.4172661871 !$YEARS_OLD_t0.2158273381 !$YEAR_t4.5323741007 !$YR_t0.4892086331) and(!$VOICEMAIL_t0.2949640288 $WE_COULD_t0.1438848921) $CONSULT_APPROVED_t0.1079136691 $SATURATION_ROOM_t0.1007194245 $URGENT_SERVICES_t0.0575539568 $URINAL_WITHIN_t0.2589928058 $WAS_HORRIBLE_t0.1294964029 $WILL_PICKED_t0.0935251799 $WILL_RESTART_t0.0215827338 $WTIH_t0.0431654676 $YEAR_COUNSELED_t0.0431654676 $YE_t0.0503597122) !$EASIER_t0.0575539568 !$STRAINING_t0.0503597122) $URGENT_APPT_t0.0431654676) !$VOLUME_MOOD_t0.0647482014 !$WHICH_MAKES_t0.0287769784) 
1 and(or(and(!$MH_PSYCHIATRY_t0.3669064748 !$NA_MG_t0.4604316547 !$UNSP_t0.2302158273 !$USED_DETECT_t0.0647482014 !$USED_VERBAL_t0.0935251799 !$VERIFIED_CORRECT_t0.1438848921 !$VERIFIED_t1.3525179856 !$VOLUME_MOOD_t0.0647482014 !$WERE_DISCUSSED_t0.4172661871 !$YEAR_t4.5323741007) $ABLE_FUNCTION_t0.0791366906 $DISEASE_CABG_t0.0287769784 $VETERAN_PSYCHOEDUCATIONAL_t0.0647482014 $WAS_HORRIBLE_t0.1294964029 $WATCHES_t0.0575539568 $WILL_PICKED_t0.0935251799 $WILL_RESTART_t0.0215827338 $WORTHLESSNESS_t0.0791366906 $YE_t0.0503597122 $YOUNGER_t0.0431654676 $ZER_t0.0575539568) !$ALZHEIMERS_DISEASE_t0.0431654676 !$VOLUNTEER_OR_t0.0719424460 !$WARRANT_t0.0503597122) 
1 and(or(and(!$MH_PSYCHIATRY_t0.3669064748 !$NA_MG_t0.4604316547 !$UNSP_t0.2302158273 !$USED_DETECT_t0.0647482014 !$USED_VERBAL_t0.0935251799 !$VERIFIED_CORRECT_t0.1438848921 !$VERIFIED_t1.3525179856 !$WERE_DISCUSSED_t0.4172661871 !$YEAR_t4.5323741007) $ABLE_FUNCTION_t0.0791366906 $DISEASE_CABG_t0.0287769784 $VETERAN_PSYCHOEDUCATIONAL_t0.0647482014 $WAS_HORRIBLE_t0.1294964029 $WATCHES_t0.0575539568 $WILL_PICKED_t0.0935251799 $WILL_RESTART_t0.0215827338 $WORTHLESSNESS_t0.0791366906 $YE_t0.0503597122 $YOUNGER_t0.0431654676 $ZER_t0.0575539568) !$ALZHEIMERS_DISEASE_t0.0431654676 !$VOLUME_MOOD_t0.0647482014 !$VOLUNTEER_OR_t0.0719424460 !$WARRANT_t0.0503597122) 
1 and(or(and(!$MH_PSYCHIATRY_t0.3669064748 !$NA_MG_t0.4604316547 !$UNSP_t0.2302158273 !$USED_DETECT_t0.0647482014 !$VERIFIED_CORRECT_t0.1438848921 !$VERIFIED_t1.3525179856 !$VOLUME_MOOD_t0.0647482014 !$WERE_DISCUSSED_t0.4172661871 !$YEAR_t4.5323741007) $ABLE_FUNCTION_t0.0791366906 $DISEASE_CABG_t0.0287769784 $VETERAN_PSYCHOEDUCATIONAL_t0.0647482014 $WAS_HORRIBLE_t0.1294964029 $WATCHES_t0.0575539568 $WILL_PICKED_t0.0935251799 $WILL_RESTART_t0.0215827338 $WORTHLESSNESS_t0.0791366906 $YE_t0.0503597122 $YOUNGER_t0.0431654676 $ZER_t0.0575539568) !$ALZHEIMERS_DISEASE_t0.0431654676 !$USED_VERBAL_t0.0935251799 !$VOLUNTEER_OR_t0.0719424460 !$WARRANT_t0.0503597122) 
1 and(or(and(!$MH_PSYCHIATRY_t0.3669064748 !$NA_MG_t0.4604316547 !$UNSP_t0.2302158273 !$USED_DETECT_t0.0647482014 !$VERIFIED_CORRECT_t0.1438848921 !$VERIFIED_t1.3525179856 !$WERE_DISCUSSED_t0.4172661871 !$YEAR_t4.5323741007) $ABLE_FUNCTION_t0.0791366906 $DISEASE_CABG_t0.0287769784 $VETERAN_PSYCHOEDUCATIONAL_t0.0647482014 $WAS_HORRIBLE_t0.1294964029 $WATCHES_t0.0575539568 $WILL_PICKED_t0.0935251799 $WILL_RESTART_t0.0215827338 $WORTHLESSNESS_t0.0791366906 $YE_t0.0503597122 $YOUNGER_t0.0431654676 $ZER_t0.0575539568) !$ALZHEIMERS_DISEASE_t0.0431654676 !$USED_VERBAL_t0.0935251799 !$VOLUME_MOOD_t0.0647482014 !$VOLUNTEER_OR_t0.0719424460 !$WARRANT_t0.0503597122) 
1 and(or(and(!$MH_PSYCHIATRY_t0.3669064748 !$NA_MG_t0.4604316547 !$UNSP_t0.2302158273 !$USED_VERBAL_t0.0935251799 !$VERIFIED_CORRECT_t0.1438848921 !$VERIFIED_t1.3525179856 !$VOLUME_MOOD_t0.0647482014 !$WERE_DISCUSSED_t0.4172661871 !$YEAR_t4.5323741007) $ABLE_FUNCTION_t0.0791366906 $DISEASE_CABG_t0.0287769784 $VETERAN_PSYCHOEDUCATIONAL_t0.0647482014 $WAS_HORRIBLE_t0.1294964029 $WATCHES_t0.0575539568 $WILL_PICKED_t0.0935251799 $WILL_RESTART_t0.0215827338 $WORTHLESSNESS_t0.0791366906 $YE_t0.0503597122 $YOUNGER_t0.0431654676 $ZER_t0.0575539568) !$ALZHEIMERS_DISEASE_t0.0431654676 !$USED_DETECT_t0.0647482014 !$VOLUNTEER_OR_t0.0719424460 !$WARRANT_t0.0503597122) 
1 and(or(and(!$MH_PSYCHIATRY_t0.3669064748 !$NA_MG_t0.4604316547 !$UNSP_t0.2302158273 !$VERIFIED_CORRECT_t0.1438848921 !$VERIFIED_t1.3525179856 !$VOLUME_MOOD_t0.0647482014 !$WERE_DISCUSSED_t0.4172661871 !$YEAR_t4.5323741007) $ABLE_FUNCTION_t0.0791366906 $DISEASE_CABG_t0.0287769784 $VETERAN_PSYCHOEDUCATIONAL_t0.0647482014 $WAS_HORRIBLE_t0.1294964029 $WATCHES_t0.0575539568 $WILL_PICKED_t0.0935251799 $WILL_RESTART_t0.0215827338 $WORTHLESSNESS_t0.0791366906 $YE_t0.0503597122 $YOUNGER_t0.0431654676 $ZER_t0.0575539568) !$ALZHEIMERS_DISEASE_t0.0431654676 !$USED_DETECT_t0.0647482014 !$USED_VERBAL_t0.0935251799 !$VOLUNTEER_OR_t0.0719424460 !$WARRANT_t0.0503597122) 
1 or(and(or(and(!$MH_PSYCHIATRY_t0.3669064748 !$NA_MG_t0.4604316547 !$UNSP_t0.2302158273 !$USED_DETECT_t0.0647482014 !$USED_VERBAL_t0.0935251799 !$VERIFIED_CORRECT_t0.1438848921 !$VERIFIED_t1.3525179856 !$VOLUME_MOOD_t0.0647482014 !$WERE_DISCUSSED_t0.4172661871 !$YEAR_t4.5323741007) $ABLE_FUNCTION_t0.0791366906 $VETERAN_PSYCHOEDUCATIONAL_t0.0647482014 $WAS_HORRIBLE_t0.1294964029 $WATCHES_t0.0575539568 $WILL_PICKED_t0.0935251799 $WILL_RESTART_t0.0215827338 $WORTHLESSNESS_t0.0791366906 $YE_t0.0503597122 $YOUNGER_t0.0431654676 $ZER_t0.0575539568) !$ALZHEIMERS_DISEASE_t0.0431654676 !$VOLUNTEER_OR_t0.0719424460 !$WARRANT_t0.0503597122) $DISEASE_CABG_t0.0287769784) 
1 or(and(or(and(!$MH_PSYCHIATRY_t0.3669064748 !$NA_MG_t0.4604316547 !$UNSP_t0.2302158273 !$USED_DETECT_t0.0647482014 !$USED_VERBAL_t0.0935251799 !$VERIFIED_CORRECT_t0.1438848921 !$VERIFIED_t1.3525179856 !$VOLUME_MOOD_t0.0647482014 !$WERE_DISCUSSED_t0.4172661871 !$YEAR_t4.5323741007) $DISEASE_CABG_t0.0287769784 $VETERAN_PSYCHOEDUCATIONAL_t0.0647482014 $WAS_HORRIBLE_t0.1294964029 $WATCHES_t0.0575539568 $WILL_PICKED_t0.0935251799 $WILL_RESTART_t0.0215827338 $WORTHLESSNESS_t0.0791366906 $YE_t0.0503597122 $YOUNGER_t0.0431654676 $ZER_t0.0575539568) !$ALZHEIMERS_DISEASE_t0.0431654676 !$VOLUNTEER_OR_t0.0719424460 !$WARRANT_t0.0503597122) $ABLE_FUNCTION_t0.0791366906) 
1 or(and(or(and(!$MH_PSYCHIATRY_t0.3669064748 !$NA_MG_t0.4604316547 !$UNSP_t0.2302158273 !$USED_DETECT_t0.0647482014 !$USED_VERBAL_t0.0935251799 !$VERIFIED_CORRECT_t0.1438848921 !$VERIFIED_t1.3525179856 !$WERE_DISCUSSED_t0.4172661871 !$YEAR_t4.5323741007) $DISEASE_CABG_t0.0287769784 $VETERAN_PSYCHOEDUCATIONAL_t0.0647482014 $WAS_HORRIBLE_t0.1294964029 $WATCHES_t0.0575539568 $WILL_PICKED_t0.0935251799 $WILL_RESTART_t0.0215827338 $WORTHLESSNESS_t0.0791366906 $YE_t0.0503597122 $YOUNGER_t0.0431654676 $ZER_t0.0575539568) !$ALZHEIMERS_DISEASE_t0.0431654676 !$VOLUME_MOOD_t0.0647482014 !$VOLUNTEER_OR_t0.0719424460 !$WARRANT_t0.0503597122) $ABLE_FUNCTION_t0.0791366906) 
1 or(and(or(and(!$MH_PSYCHIATRY_t0.3669064748 !$NA_MG_t0.4604316547 !$UNSP_t0.2302158273 !$USED_DETECT_t0.0647482014 !$VERIFIED_CORRECT_t0.1438848921 !$VERIFIED_t1.3525179856 !$VOLUME_MOOD_t0.0647482014 !$WERE_DISCUSSED_t0.4172661871 !$YEAR_t4.5323741007) $DISEASE_CABG_t0.0287769784 $VETERAN_PSYCHOEDUCATIONAL_t0.0647482014 $WAS_HORRIBLE_t0.1294964029 $WATCHES_t0.0575539568 $WILL_PICKED_t0.0935251799 $WILL_RESTART_t0.0215827338 $WORTHLESSNESS_t0.0791366906 $YE_t0.0503597122 $YOUNGER_t0.0431654676 $ZER_t0.0575539568) !$ALZHEIMERS_DISEASE_t0.0431654676 !$USED_VERBAL_t0.0935251799 !$VOLUNTEER_OR_t0.0719424460 !$WARRANT_t0.0503597122) $ABLE_FUNCTION_t0.0791366906) 
1 and(or(and(!$MH_PSYCHIATRY_t0.3669064748 !$NOT_APPLICABLE_t1.5683453237 !$UNSP_t0.2302158273 !$VERIFIED_CORRECT_t0.1438848921 !$VERIFIED_t1.3525179856 !$VISIT_HOLD_t0.0863309353 !$VISTA_ED_t0.5035971223 !$VOLUME_MOOD_t0.0647482014 !$VOLUNTEER_OR_t0.0719424460 !$WALKIN_t0.5539568345 !$WARRANT_t0.0503597122 !$WERE_DISCUSSED_t0.4172661871 !$WILLING_t0.4388489209 !$WILL_CONSIDER_t0.0647482014 !$YEAR_t4.5323741007) $AVERAGE_RISK_t0.0431654676 $BE_REFILLED_t0.0863309353 $LIPITOR_t0.0503597122 $URGENT_APPT_t0.0431654676 $VOIDS_URINE_t0.0719424460 $WAS_HORRIBLE_t0.1294964029 $WE_COULD_t0.1438848921 $WILL_PICKED_t0.0935251799 $WILL_RESTART_t0.0215827338 $WTIH_t0.0431654676 $YEAR_COUNSELED_t0.0431654676 $YE_t0.0503597122 $YOUR_BOTTLES_t0.0215827338) !$EASIER_t0.0575539568 !$RETRAINING_t0.0503597122) 
1 and(or(and(!$MH_PSYCHIATRY_t0.3669064748 !$NOT_APPLICABLE_t1.5683453237 !$UNSP_t0.2302158273 !$VERIFIED_CORRECT_t0.1438848921 !$VERIFIED_t1.3525179856 !$VISIT_HOLD_t0.0863309353 !$VISTA_ED_t0.5035971223 !$VOLUME_MOOD_t0.0647482014 !$VOLUNTEER_OR_t0.0719424460 !$WALKIN_t0.5539568345 !$WARRANT_t0.0503597122 !$WERE_DISCUSSED_t0.4172661871 !$WILLING_t0.4388489209 !$WILL_CONSIDER_t0.0647482014 !$YEAR_t4.5323741007) $BE_REFILLED_t0.0863309353 $DISCHARGE_ALDRETE_t0.0359712230 $LIPITOR_t0.0503597122 $URGENT_APPT_t0.0431654676 $VOIDS_URINE_t0.0719424460 $WAS_HORRIBLE_t0.1294964029 $WE_COULD_t0.1438848921 $WILL_PICKED_t0.0935251799 $WILL_RESTART_t0.0215827338 $WTIH_t0.0431654676 $YEAR_COUNSELED_t0.0431654676 $YE_t0.0503597122 $YOUR_BOTTLES_t0.0215827338) !$EASIER_t0.0575539568 !$RETRAINING_t0.0503597122) 
1 and(or(and(!$MH_PSYCHIATRY_t0.3669064748 !$NOT_APPLICABLE_t1.5683453237 !$UNSP_t0.2302158273 !$VERIFIED_CORRECT_t0.1438848921 !$VERIFIED_t1.3525179856 !$VISIT_HOLD_t0.0863309353 !$VISTA_ED_t0.5035971223 !$VOLUME_MOOD_t0.0647482014 !$VOLUNTEER_OR_t0.0719424460 !$WALKIN_t0.5539568345 !$WARRANT_t0.0503597122 !$WERE_DISCUSSED_t0.4172661871 !$WILLING_t0.4388489209 !$WILL_CONSIDER_t0.0647482014 !$YEAR_t4.5323741007) $BE_REFILLED_t0.0863309353 $INFORMED_COLON_t0.0431654676 $LIPITOR_t0.0503597122 $URGENT_APPT_t0.0431654676 $VOIDS_URINE_t0.0719424460 $WAS_HORRIBLE_t0.1294964029 $WE_COULD_t0.1438848921 $WILL_PICKED_t0.0935251799 $WILL_RESTART_t0.0215827338 $WTIH_t0.0431654676 $YEAR_COUNSELED_t0.0431654676 $YE_t0.0503597122 $YOUR_BOTTLES_t0.0215827338) !$EASIER_t0.0575539568 !$RETRAINING_t0.0503597122) 
1 and(or(and(!$MH_PSYCHIATRY_t0.3669064748 !$NOT_APPLICABLE_t1.5683453237 !$UNSP_t0.2302158273 !$VERIFIED_CORRECT_t0.1438848921 !$VERIFIED_t1.3525179856 !$VISIT_HOLD_t0.0863309353 !$VISTA_ED_t0.5035971223 !$VOLUME_MOOD_t0.0647482014 !$VOLUNTEER_OR_t0.0719424460 !$WALKIN_t0.5539568345 !$WARRANT_t0.0503597122 !$WERE_DISCUSSED_t0.4172661871 !$WILLING_t0.4388489209 !$WILL_CONSIDER_t0.0647482014 !$YEAR_t4.5323741007) $BE_REFILLED_t0.0863309353 $LIPITOR_t0.0503597122 $LUMBAGO_t0.0359712230 $URGENT_APPT_t0.0431654676 $VOIDS_URINE_t0.0719424460 $WAS_HORRIBLE_t0.1294964029 $WE_COULD_t0.1438848921 $WILL_PICKED_t0.0935251799 $WILL_RESTART_t0.0215827338 $WTIH_t0.0431654676 $YEAR_COUNSELED_t0.0431654676 $YE_t0.0503597122 $YOUR_BOTTLES_t0.0215827338) !$EASIER_t0.0575539568 !$RETRAINING_t0.0503597122) 
1 and(or(and(!$MH_PSYCHIATRY_t0.3669064748 !$NOT_APPLICABLE_t1.5683453237 !$UNSP_t0.2302158273 !$VERIFIED_CORRECT_t0.1438848921 !$VERIFIED_t1.3525179856 !$VISIT_HOLD_t0.0863309353 !$VISTA_ED_t0.5035971223 !$VOLUME_MOOD_t0.0647482014 !$VOLUNTEER_OR_t0.0719424460 !$WALKIN_t0.5539568345 !$WARRANT_t0.0503597122 !$WERE_DISCUSSED_t0.4172661871 !$WILLING_t0.4388489209 !$WILL_CONSIDER_t0.0647482014 !$YEAR_t4.5323741007) $BE_REFILLED_t0.0863309353 $LIPITOR_t0.0503597122 $TEST_ALLOWS_t0.0359712230 $URGENT_APPT_t0.0431654676 $VOIDS_URINE_t0.0719424460 $WAS_HORRIBLE_t0.1294964029 $WE_COULD_t0.1438848921 $WILL_PICKED_t0.0935251799 $WILL_RESTART_t0.0215827338 $WTIH_t0.0431654676 $YEAR_COUNSELED_t0.0431654676 $YE_t0.0503597122 $YOUR_BOTTLES_t0.0215827338) !$EASIER_t0.0575539568 !$RETRAINING_t0.0503597122) 
1 and(or(and(!$MH_PSYCHIATRY_t0.3669064748 !$NOT_APPLICABLE_t1.5683453237 !$UNSP_t0.2302158273 !$VERIFIED_CORRECT_t0.1438848921 !$VERIFIED_t1.3525179856 !$VISIT_HOLD_t0.0863309353 !$VISTA_ED_t0.5035971223 !$VOLUME_MOOD_t0.0647482014 !$VOLUNTEER_OR_t0.0719424460 !$WALKIN_t0.5539568345 !$WARRANT_t0.0503597122 !$WERE_DISCUSSED_t0.4172661871 !$WILLING_t0.4388489209 !$WILL_CONSIDER_t0.0647482014 !$YEAR_t4.5323741007) $DISEASE_CABG_t0.0287769784 $LIPITOR_t0.0503597122 $LUMBAGO_t0.0359712230 $URGENT_APPT_t0.0431654676 $VOIDS_URINE_t0.0719424460 $WAS_HORRIBLE_t0.1294964029 $WE_COULD_t0.1438848921 $WILL_PICKED_t0.0935251799 $WILL_RESTART_t0.0215827338 $WTIH_t0.0431654676 $YEAR_COUNSELED_t0.0431654676 $YE_t0.0503597122 $YOUR_BOTTLES_t0.0215827338) !$EASIER_t0.0575539568 !$RETRAINING_t0.0503597122) 
1 and(or(and(!$MH_PSYCHIATRY_t0.3669064748 !$NOT_APPLICABLE_t1.5683453237 !$UNSP_t0.2302158273 !$VERIFIED_CORRECT_t0.1438848921 !$VERIFIED_t1.3525179856 !$VISIT_HOLD_t0.0863309353 !$VISTA_ED_t0.5035971223 !$VOLUME_MOOD_t0.0647482014 !$VOLUNTEER_OR_t0.0719424460 !$WALKIN_t0.5539568345 !$WARRANT_t0.0503597122 !$WERE_DISCUSSED_t0.4172661871 !$WILLING_t0.4388489209 !$WILL_CONSIDER_t0.0647482014 !$YEAR_t4.5323741007) $LIPITOR_t0.0503597122 $LUMBAGO_t0.0359712230 $URGENT_APPT_t0.0431654676 $VOIDS_URINE_t0.0719424460 $WAS_HORRIBLE_t0.1294964029 $WE_COULD_t0.1438848921 $WILL_PICKED_t0.0935251799 $WILL_RESTART_t0.0215827338 $WTIH_t0.0431654676 $YEAR_COUNSELED_t0.0431654676 $YE_t0.0503597122 $YOUR_BOTTLES_t0.0215827338) !$EASIER_t0.0575539568 !$RETRAINING_t0.0503597122) 
1 and(or(and(!$FEAR_t0.2446043165 !$MH_PSYCHIATRY_t0.3669064748 !$NOT_APPLICABLE_t1.5683453237 !$UNSP_t0.2302158273 !$VERIFIED_CORRECT_t0.1438848921 !$VERIFIED_t1.3525179856 !$VISIT_HOLD_t0.0863309353 !$VISTA_ED_t0.5035971223 !$VOLUME_MOOD_t0.0647482014 !$VOLUNTEER_OR_t0.0719424460 !$WALKIN_t0.5539568345 !$WARRANT_t0.0503597122 !$WERE_DISCUSSED_t0.4172661871 !$WILLING_t0.4388489209 !$WILL_CONSIDER_t0.0647482014 !$YEAR_t4.5323741007) $LIPITOR_t0.0503597122 $LUMBAGO_t0.0359712230 $URGENT_APPT_t0.0431654676 $VOIDS_URINE_t0.0719424460 $WAS_HORRIBLE_t0.1294964029 $WE_COULD_t0.1438848921 $WILL_PICKED_t0.0935251799 $WILL_RESTART_t0.0215827338 $WTIH_t0.0431654676 $YEAR_COUNSELED_t0.0431654676 $YE_t0.0503597122 $YOUR_BOTTLES_t0.0215827338) !$EASIER_t0.0575539568 !$RETRAINING_t0.0503597122) 
1 and(or(and(!$MH_PSYCHIATRY_t0.3669064748 !$NOT_APPLICABLE_t1.5683453237 !$PSYCHIATRY_NOTE_t0.8273381295 !$UNSP_t0.2302158273 !$VERIFIED_CORRECT_t0.1438848921 !$VERIFIED_t1.3525179856 !$VISIT_HOLD_t0.0863309353 !$VISTA_ED_t0.5035971223 !$VOLUME_MOOD_t0.0647482014 !$VOLUNTEER_OR_t0.0719424460 !$WALKIN_t0.5539568345 !$WARRANT_t0.0503597122 !$WERE_DISCUSSED_t0.4172661871 !$WILLING_t0.4388489209 !$WILL_CONSIDER_t0.0647482014 !$YEAR_t4.5323741007) $LIPITOR_t0.0503597122 $LUMBAGO_t0.0359712230 $URGENT_APPT_t0.0431654676 $VOIDS_URINE_t0.0719424460 $WAS_HORRIBLE_t0.1294964029 $WE_COULD_t0.1438848921 $WILL_PICKED_t0.0935251799 $WILL_RESTART_t0.0215827338 $WTIH_t0.0431654676 $YEAR_COUNSELED_t0.0431654676 $YE_t0.0503597122 $YOUR_BOTTLES_t0.0215827338) !$EASIER_t0.0575539568 !$RETRAINING_t0.0503597122) 
1 and(or(and(!$MH_PSYCHIATRY_t0.3669064748 !$NOT_APPLICABLE_t1.5683453237 !$UNSP_t0.2302158273 !$VERIFIED_CORRECT_t0.1438848921 !$VERIFIED_t1.3525179856 !$VISIT_HOLD_t0.0863309353 !$VISTA_ED_t0.5035971223 !$VOLUME_MOOD_t0.0647482014 !$VOLUNTEER_OR_t0.0719424460 !$WALKIN_t0.5539568345 !$WARRANT_t0.0503597122 !$WERE_DISCUSSED_t0.4172661871 !$WILLING_t0.4388489209 !$WILL_CONSIDER_t0.0647482014 !$YEAR_t4.5323741007) $AVERAGE_RISK_t0.0431654676 $BREATH_FREELY_t0.0431654676 $LIPITOR_t0.0503597122 $URGENT_APPT_t0.0431654676 $VOIDS_URINE_t0.0719424460 $WAS_HORRIBLE_t0.1294964029 $WE_COULD_t0.1438848921 $WILL_PICKED_t0.0935251799 $WILL_RESTART_t0.0215827338 $WTIH_t0.0431654676 $YEAR_COUNSELED_t0.0431654676 $YE_t0.0503597122 $YOUR_BOTTLES_t0.0215827338) !$EASIER_t0.0575539568 !$RETRAINING_t0.0503597122) 
1 and(or(and(!$UNSP_t0.2302158273 !$VERBAL_RESPONSE_t0.0791366906 !$VERIFIED_t1.3525179856 !$VOICEMAIL_LEFT_t0.0503597122 !$VOIDING_t0.5395683453 !$VOLUME_MOOD_t0.0647482014 !$VOLUNTEER_OR_t0.0719424460 !$WERE_DISCUSSED_t0.4172661871 !$YEARS_OLD_t0.2158273381 !$YEAR_t4.5323741007 !$YOUR_t7.0935251799) $BE_REFILLED_t0.0863309353 $INFORMED_COLON_t0.0431654676 $LIPITOR_t0.0503597122 $URGENT_APPT_t0.0431654676 $URGENT_SERVICES_t0.0575539568 $WAS_HORRIBLE_t0.1294964029 $WEIGH_DAILY_t0.0503597122 $WE_COULD_t0.1438848921 $WILL_PICKED_t0.0935251799 $WTIH_t0.0431654676 $YEAR_UNKNOWN_t0.0287769784 $YE_t0.0503597122 $ZER_t0.0575539568) or(!$EASIER_t0.0575539568 $UNIT_UPON_t0.1079136691) or(!$MH_PSYCHIATRY_t0.3669064748 $UPDATE_t0.5827338129)) 
1 and(or(and(!$UNSP_t0.2302158273 !$VERBAL_RESPONSE_t0.0791366906 !$VERIFIED_t1.3525179856 !$VOICEMAIL_LEFT_t0.0503597122 !$VOIDING_t0.5395683453 !$VOLUME_MOOD_t0.0647482014 !$VOLUNTEER_OR_t0.0719424460 !$WERE_DISCUSSED_t0.4172661871 !$YEARS_OLD_t0.2158273381 !$YEAR_t4.5323741007 !$YOUR_t7.0935251799) $BE_REFILLED_t0.0863309353 $INFORMED_COLON_t0.0431654676 $LIPITOR_t0.0503597122 $URGENT_APPT_t0.0431654676 $URGENT_SERVICES_t0.0575539568 $WAS_HORRIBLE_t0.1294964029 $WEIGH_DAILY_t0.0503597122 $WE_COULD_t0.1438848921 $WILL_PICKED_t0.0935251799 $WTIH_t0.0431654676 $YEAR_UNKNOWN_t0.0287769784 $YE_t0.0503597122 $ZER_t0.0575539568) or(!$EASIER_t0.0575539568 $UNIT_UPON_t0.1079136691) or(!$MH_PSYCHIATRY_t0.3669064748 $URINARY_SYMPTOMS_t0.0863309353)) 
1 and(or(and(!$UNSP_t0.2302158273 !$VERBAL_RESPONSE_t0.0791366906 !$VERIFIED_t1.3525179856 !$VOICEMAIL_LEFT_t0.0503597122 !$VOIDING_t0.5395683453 !$VOLUME_MOOD_t0.0647482014 !$VOLUNTEER_OR_t0.0719424460 !$WERE_DISCUSSED_t0.4172661871 !$YEARS_OLD_t0.2158273381 !$YEAR_t4.5323741007 !$YOUR_t7.0935251799) $BE_REFILLED_t0.0863309353 $INFORMED_COLON_t0.0431654676 $LIPITOR_t0.0503597122 $URGENT_APPT_t0.0431654676 $URGENT_SERVICES_t0.0575539568 $WAS_HORRIBLE_t0.1294964029 $WEIGH_DAILY_t0.0503597122 $WE_COULD_t0.1438848921 $WILL_PICKED_t0.0935251799 $WTIH_t0.0431654676 $YEAR_UNKNOWN_t0.0287769784 $YE_t0.0503597122 $ZER_t0.0575539568) or(!$EASIER_t0.0575539568 $UNIT_UPON_t0.1079136691) or(!$MH_PSYCHIATRY_t0.3669064748 $VISTA_IMAGING_t1.9784172662)) 
1 and(or(and(!$UNSP_t0.2302158273 !$VERBAL_RESPONSE_t0.0791366906 !$VERIFIED_t1.3525179856 !$VOICEMAIL_LEFT_t0.0503597122 !$VOIDING_t0.5395683453 !$VOLUME_MOOD_t0.0647482014 !$VOLUNTEER_OR_t0.0719424460 !$WERE_DISCUSSED_t0.4172661871 !$YEARS_OLD_t0.2158273381 !$YEAR_t4.5323741007 !$YOUR_t7.0935251799) $BE_REFILLED_t0.0863309353 $INFORMED_COLON_t0.0431654676 $LIPITOR_t0.0503597122 $URGENT_APPT_t0.0431654676 $URGENT_SERVICES_t0.0575539568 $WAS_HORRIBLE_t0.1294964029 $WEIGH_DAILY_t0.0503597122 $WE_COULD_t0.1438848921 $WILL_PICKED_t0.0935251799 $WTIH_t0.0431654676 $YEAR_UNKNOWN_t0.0287769784 $YE_t0.0503597122 $ZER_t0.0575539568) or(!$EASIER_t0.0575539568 $UNIT_UPON_t0.1079136691) or(!$MH_PSYCHIATRY_t0.3669064748 $WERE_DISCUSSED_t0.4172661871)) 
1 and(or(and(!$UNSP_t0.2302158273 !$VERBAL_RESPONSE_t0.0791366906 !$VERIFIED_t1.3525179856 !$VOICEMAIL_LEFT_t0.0503597122 !$VOIDING_t0.5395683453 !$VOLUME_MOOD_t0.0647482014 !$VOLUNTEER_OR_t0.0719424460 !$WERE_DISCUSSED_t0.4172661871 !$YEARS_OLD_t0.2158273381 !$YEAR_t4.5323741007 !$YOUR_t7.0935251799) $BE_REFILLED_t0.0863309353 $INFORMED_COLON_t0.0431654676 $LIPITOR_t0.0503597122 $URGENT_APPT_t0.0431654676 $URGENT_SERVICES_t0.0575539568 $WAS_HORRIBLE_t0.1294964029 $WEIGH_DAILY_t0.0503597122 $WE_COULD_t0.1438848921 $WILL_PICKED_t0.0935251799 $WTIH_t0.0431654676 $YEAR_UNKNOWN_t0.0287769784 $YE_t0.0503597122 $ZER_t0.0575539568) or(!$EASIER_t0.0575539568 $UNIT_UPON_t0.1079136691) or(!$MH_PSYCHIATRY_t0.3669064748 $YEAR_t4.5323741007)) 
1 and(or(and(!$UNSP_t0.2302158273 !$VERBAL_RESPONSE_t0.0791366906 !$VERIFIED_t1.3525179856 !$VOICEMAIL_LEFT_t0.0503597122 !$VOIDING_t0.5395683453 !$VOLUME_MOOD_t0.0647482014 !$VOLUNTEER_OR_t0.0719424460 !$WERE_DISCUSSED_t0.4172661871 !$YEARS_OLD_t0.2158273381 !$YEAR_t4.5323741007 !$YOUR_t7.0935251799) $BE_REFILLED_t0.0863309353 $INFORMED_COLON_t0.0431654676 $LIPITOR_t0.0503597122 $URGENT_APPT_t0.0431654676 $URGENT_SERVICES_t0.0575539568 $WAS_HORRIBLE_t0.1294964029 $WEIGH_DAILY_t0.0503597122 $WE_COULD_t0.1438848921 $WILL_PICKED_t0.0935251799 $WTIH_t0.0431654676 $YEAR_UNKNOWN_t0.0287769784 $YE_t0.0503597122 $ZER_t0.0575539568) !$EASIER_t0.0575539568 !$MH_PSYCHIATRY_t0.3669064748) 
1 and(or(and(!$UNSP_t0.2302158273 !$VERBAL_RESPONSE_t0.0791366906 !$VERIFIED_t1.3525179856 !$VOICEMAIL_LEFT_t0.0503597122 !$VOIDING_t0.5395683453 !$VOLUNTEER_OR_t0.0719424460 !$WERE_DISCUSSED_t0.4172661871 !$YEARS_OLD_t0.2158273381 !$YEAR_t4.5323741007 !$YOUR_t7.0935251799) $BE_REFILLED_t0.0863309353 $INFORMED_COLON_t0.0431654676 $LIPITOR_t0.0503597122 $URGENT_APPT_t0.0431654676 $URGENT_SERVICES_t0.0575539568 $WAS_HORRIBLE_t0.1294964029 $WEIGH_DAILY_t0.0503597122 $WE_COULD_t0.1438848921 $WILL_PICKED_t0.0935251799 $WTIH_t0.0431654676 $YEAR_UNKNOWN_t0.0287769784 $YE_t0.0503597122 $ZER_t0.0575539568) !$EASIER_t0.0575539568 !$MH_PSYCHIATRY_t0.3669064748 !$VOLUME_MOOD_t0.0647482014) 
1 and(or(and(!$ABLE_FUNCTION_t0.0791366906 !$UNSP_t0.2302158273 !$VERBAL_RESPONSE_t0.0791366906 !$VERIFIED_t1.3525179856 !$VOICEMAIL_LEFT_t0.0503597122 !$VOIDING_t0.5395683453 !$VOLUME_MOOD_t0.0647482014 !$VOLUNTEER_OR_t0.0719424460 !$WERE_DISCUSSED_t0.4172661871 !$YEARS_OLD_t0.2158273381 !$YEAR_t4.5323741007 !$YOUR_t7.0935251799) $BE_REFILLED_t0.0863309353 $INFORMED_COLON_t0.0431654676 $LIPITOR_t0.0503597122 $URGENT_APPT_t0.0431654676 $URGENT_SERVICES_t0.0575539568 $WAS_HORRIBLE_t0.1294964029 $WEIGH_DAILY_t0.0503597122 $WE_COULD_t0.1438848921 $WILL_PICKED_t0.0935251799 $WTIH_t0.0431654676 $YEAR_UNKNOWN_t0.0287769784 $YE_t0.0503597122 $ZER_t0.0575539568) !$EASIER_t0.0575539568 !$MH_PSYCHIATRY_t0.3669064748) 
1 and(or(and(!$ACHING_t0.1654676259 !$UNSP_t0.2302158273 !$VERBAL_RESPONSE_t0.0791366906 !$VERIFIED_t1.3525179856 !$VOICEMAIL_LEFT_t0.0503597122 !$VOIDING_t0.5395683453 !$VOLUME_MOOD_t0.0647482014 !$VOLUNTEER_OR_t0.0719424460 !$WERE_DISCUSSED_t0.4172661871 !$YEARS_OLD_t0.2158273381 !$YEAR_t4.5323741007 !$YOUR_t7.0935251799) $BE_REFILLED_t0.0863309353 $INFORMED_COLON_t0.0431654676 $LIPITOR_t0.0503597122 $URGENT_APPT_t0.0431654676 $URGENT_SERVICES_t0.0575539568 $WAS_HORRIBLE_t0.1294964029 $WEIGH_DAILY_t0.0503597122 $WE_COULD_t0.1438848921 $WILL_PICKED_t0.0935251799 $WTIH_t0.0431654676 $YEAR_UNKNOWN_t0.0287769784 $YE_t0.0503597122 $ZER_t0.0575539568) !$EASIER_t0.0575539568 !$MH_PSYCHIATRY_t0.3669064748) 
1 and(or(and(!$ACTIV_t0.0287769784 !$UNSP_t0.2302158273 !$VERBAL_RESPONSE_t0.0791366906 !$VERIFIED_t1.3525179856 !$VOICEMAIL_LEFT_t0.0503597122 !$VOIDING_t0.5395683453 !$VOLUME_MOOD_t0.0647482014 !$VOLUNTEER_OR_t0.0719424460 !$WERE_DISCUSSED_t0.4172661871 !$YEARS_OLD_t0.2158273381 !$YEAR_t4.5323741007 !$YOUR_t7.0935251799) $BE_REFILLED_t0.0863309353 $INFORMED_COLON_t0.0431654676 $LIPITOR_t0.0503597122 $URGENT_APPT_t0.0431654676 $URGENT_SERVICES_t0.0575539568 $WAS_HORRIBLE_t0.1294964029 $WEIGH_DAILY_t0.0503597122 $WE_COULD_t0.1438848921 $WILL_PICKED_t0.0935251799 $WTIH_t0.0431654676 $YEAR_UNKNOWN_t0.0287769784 $YE_t0.0503597122 $ZER_t0.0575539568) !$EASIER_t0.0575539568 !$MH_PSYCHIATRY_t0.3669064748) 
1 and(or(and(!$MH_PSYCHIATRY_t0.3669064748 !$NOT_APPLICABLE_t1.5683453237 !$UNSP_t0.2302158273 !$USED_DETECT_t0.0647482014 !$VERIFIED_CORRECT_t0.1438848921 !$VOICE_t0.7338129496 !$VOLUNTEER_OR_t0.0719424460 !$WALKIN_t0.5539568345 !$WERE_DISCUSSED_t0.4172661871 !$WILLING_t0.4388489209 !$WILL_CONSIDER_t0.0647482014 !$YEAR_t4.5323741007) $BE_REFILLED_t0.0863309353 $INFORMED_COLON_t0.0431654676 $URGENT_APPT_t0.0431654676 $WAS_FRIGHTENING_t0.1294964029 $WATCHES_t0.0575539568 $WE_COULD_t0.1438848921 $WILL_RESTART_t0.0215827338 $WTIH_t0.0431654676 $YEAR_COUNSELED_t0.0431654676 $YE_t0.0503597122 $YOUR_PILL_t0.0215827338) or(!$HIPS_t0.1007194245 $PAINFUL_t0.4172661871) !$EASIER_t0.0575539568 !$STRUGGLES_t0.0287769784) 
1 and(or(and(!$MH_PSYCHIATRY_t0.3669064748 !$NOT_APPLICABLE_t1.5683453237 !$UNSP_t0.2302158273 !$USED_DETECT_t0.0647482014 !$VERIFIED_CORRECT_t0.1438848921 !$VOICE_t0.7338129496 !$VOLUNTEER_OR_t0.0719424460 !$WALKIN_t0.5539568345 !$WERE_DISCUSSED_t0.4172661871 !$WILLING_t0.4388489209 !$WILL_CONSIDER_t0.0647482014 !$YEAR_t4.5323741007) $HISTORICAL_t0.1294964029 $INFORMED_COLON_t0.0431654676 $URGENT_APPT_t0.0431654676 $WAS_FRIGHTENING_t0.1294964029 $WATCHES_t0.0575539568 $WE_COULD_t0.1438848921 $WILL_RESTART_t0.0215827338 $WTIH_t0.0431654676 $YEAR_COUNSELED_t0.0431654676 $YE_t0.0503597122 $YOUR_PILL_t0.0215827338) or(!$HIPS_t0.1007194245 $PAINFUL_t0.4172661871) !$EASIER_t0.0575539568 !$STRUGGLES_t0.0287769784) 
1 and(or(and(!$NOT_APPLICABLE_t1.5683453237 !$PSYCHIATRY_NOTE_t0.8273381295 !$UNSP_t0.2302158273 !$USED_DETECT_t0.0647482014 !$VERIFIED_CORRECT_t0.1438848921 !$VOICE_t0.7338129496 !$VOLUNTEER_OR_t0.0719424460 !$WALKIN_t0.5539568345 !$WERE_DISCUSSED_t0.4172661871 !$WILLING_t0.4388489209 !$WILL_CONSIDER_t0.0647482014 !$YEAR_t4.5323741007) $BE_REFILLED_t0.0863309353 $INFORMED_COLON_t0.0431654676 $URGENT_APPT_t0.0431654676 $WAS_FRIGHTENING_t0.1294964029 $WATCHES_t0.0575539568 $WE_COULD_t0.1438848921 $WILL_RESTART_t0.0215827338 $WTIH_t0.0431654676 $YEAR_COUNSELED_t0.0431654676 $YE_t0.0503597122 $YOUR_PILL_t0.0215827338) or(!$HIPS_t0.1007194245 $PAINFUL_t0.4172661871) !$EASIER_t0.0575539568 !$STRUGGLES_t0.0287769784) 
1 and(or(and(!$NOT_APPLICABLE_t1.5683453237 !$PSYCHIATRY_NOTE_t0.8273381295 !$UNSP_t0.2302158273 !$USED_DETECT_t0.0647482014 !$VERIFIED_CORRECT_t0.1438848921 !$VOICE_t0.7338129496 !$VOLUNTEER_OR_t0.0719424460 !$WALKIN_t0.5539568345 !$WERE_DISCUSSED_t0.4172661871 !$WILLING_t0.4388489209 !$WILL_CONSIDER_t0.0647482014 !$YEAR_t4.5323741007) $HISTORICAL_t0.1294964029 $INFORMED_COLON_t0.0431654676 $URGENT_APPT_t0.0431654676 $WAS_FRIGHTENING_t0.1294964029 $WATCHES_t0.0575539568 $WE_COULD_t0.1438848921 $WILL_RESTART_t0.0215827338 $WTIH_t0.0431654676 $YEAR_COUNSELED_t0.0431654676 $YE_t0.0503597122 $YOUR_PILL_t0.0215827338) or(!$HIPS_t0.1007194245 $PAINFUL_t0.4172661871) !$EASIER_t0.0575539568 !$STRUGGLES_t0.0287769784) 
1 and(or(and(!$FEAR_t0.2446043165 !$NA_MG_t0.4604316547 !$UNSP_t0.2302158273 !$USED_DETECT_t0.0647482014 !$VERIFIED_CORRECT_t0.1438848921 !$VOICE_t0.7338129496 !$VOLUNTEER_OR_t0.0719424460 !$WALKIN_t0.5539568345 !$WERE_DISCUSSED_t0.4172661871 !$WILLING_t0.4388489209 !$WILL_CONSIDER_t0.0647482014 !$YEAR_t4.5323741007) $INFORMED_COLON_t0.0431654676 $URGENT_APPT_t0.0431654676 $WAS_FRIGHTENING_t0.1294964029 $WATCHES_t0.0575539568 $WE_COULD_t0.1438848921 $WILL_RESTART_t0.0215827338 $WTIH_t0.0431654676 $YEAR_COUNSELED_t0.0431654676 $YE_t0.0503597122 $YOUR_PILL_t0.0215827338) or(!$HIPS_t0.1007194245 $PAINFUL_t0.4172661871) !$EASIER_t0.0575539568 !$STRUGGLES_t0.0287769784) 
1 and(or(and(!$FEAR_t0.2446043165 !$NA_TAB_t0.3237410072 !$UNSP_t0.2302158273 !$USED_DETECT_t0.0647482014 !$VERIFIED_CORRECT_t0.1438848921 !$VOICE_t0.7338129496 !$VOLUNTEER_OR_t0.0719424460 !$WALKIN_t0.5539568345 !$WERE_DISCUSSED_t0.4172661871 !$WILLING_t0.4388489209 !$WILL_CONSIDER_t0.0647482014 !$YEAR_t4.5323741007) $INFORMED_COLON_t0.0431654676 $URGENT_APPT_t0.0431654676 $WAS_FRIGHTENING_t0.1294964029 $WATCHES_t0.0575539568 $WE_COULD_t0.1438848921 $WILL_RESTART_t0.0215827338 $WTIH_t0.0431654676 $YEAR_COUNSELED_t0.0431654676 $YE_t0.0503597122 $YOUR_PILL_t0.0215827338) or(!$HIPS_t0.1007194245 $PAINFUL_t0.4172661871) !$EASIER_t0.0575539568 !$STRUGGLES_t0.0287769784) 
1 and(or(and(!$FEAR_t0.2446043165 !$NOT_APPLICABLE_t1.5683453237 !$UNSP_t0.2302158273 !$USED_DETECT_t0.0647482014 !$VERIFIED_CORRECT_t0.1438848921 !$VOICE_t0.7338129496 !$VOLUNTEER_OR_t0.0719424460 !$WALKIN_t0.5539568345 !$WERE_DISCUSSED_t0.4172661871 !$WILLING_t0.4388489209 !$WILL_CONSIDER_t0.0647482014 !$YEAR_t4.5323741007) $INFORMED_COLON_t0.0431654676 $URGENT_APPT_t0.0431654676 $WAS_FRIGHTENING_t0.1294964029 $WATCHES_t0.0575539568 $WE_COULD_t0.1438848921 $WILL_RESTART_t0.0215827338 $WTIH_t0.0431654676 $YEAR_COUNSELED_t0.0431654676 $YE_t0.0503597122 $YOUR_PILL_t0.0215827338) or(!$HIPS_t0.1007194245 $PAINFUL_t0.4172661871) !$EASIER_t0.0575539568 !$STRUGGLES_t0.0287769784) 
1 and(or(and(!$FEAR_t0.2446043165 !$UNSP_t0.2302158273 !$USED_DETECT_t0.0647482014 !$VERIFIED_CORRECT_t0.1438848921 !$VOICE_t0.7338129496 !$VOLUNTEER_OR_t0.0719424460 !$WALKIN_t0.5539568345 !$WERE_DISCUSSED_t0.4172661871 !$WILLING_t0.4388489209 !$WILL_CONSIDER_t0.0647482014 !$YEAR_t4.5323741007) $BE_REFILLED_t0.0863309353 $INFORMED_COLON_t0.0431654676 $URGENT_APPT_t0.0431654676 $WAS_FRIGHTENING_t0.1294964029 $WATCHES_t0.0575539568 $WE_COULD_t0.1438848921 $WILL_RESTART_t0.0215827338 $WTIH_t0.0431654676 $YEAR_COUNSELED_t0.0431654676 $YE_t0.0503597122 $YOUR_PILL_t0.0215827338) or(!$HIPS_t0.1007194245 $PAINFUL_t0.4172661871) !$EASIER_t0.0575539568 !$STRUGGLES_t0.0287769784) 
1 and(or(and(!$MH_PSYCHIATRY_t0.3669064748 !$NA_MG_t0.4604316547 !$UNSP_t0.2302158273 !$USED_DETECT_t0.0647482014 !$VERIFIED_CORRECT_t0.1438848921 !$VOICE_t0.7338129496 !$VOLUNTEER_OR_t0.0719424460 !$WALKIN_t0.5539568345 !$WERE_DISCUSSED_t0.4172661871 !$WILLING_t0.4388489209 !$WILL_CONSIDER_t0.0647482014 !$YEAR_t4.5323741007) $INFORMED_COLON_t0.0431654676 $URGENT_APPT_t0.0431654676 $WAS_FRIGHTENING_t0.1294964029 $WATCHES_t0.0575539568 $WE_COULD_t0.1438848921 $WILL_RESTART_t0.0215827338 $WTIH_t0.0431654676 $YEAR_COUNSELED_t0.0431654676 $YE_t0.0503597122 $YOUR_PILL_t0.0215827338) or(!$HIPS_t0.1007194245 $PAINFUL_t0.4172661871) !$EASIER_t0.0575539568 !$STRUGGLES_t0.0287769784) 
1 and(or(and(!$NA_MG_t0.4604316547 !$PSYCHIATRY_NOTE_t0.8273381295 !$UNSP_t0.2302158273 !$USED_DETECT_t0.0647482014 !$VERIFIED_CORRECT_t0.1438848921 !$VOICE_t0.7338129496 !$VOLUNTEER_OR_t0.0719424460 !$WALKIN_t0.5539568345 !$WERE_DISCUSSED_t0.4172661871 !$WILLING_t0.4388489209 !$WILL_CONSIDER_t0.0647482014 !$YEAR_t4.5323741007) $INFORMED_COLON_t0.0431654676 $URGENT_APPT_t0.0431654676 $WAS_FRIGHTENING_t0.1294964029 $WATCHES_t0.0575539568 $WE_COULD_t0.1438848921 $WILL_RESTART_t0.0215827338 $WTIH_t0.0431654676 $YEAR_COUNSELED_t0.0431654676 $YE_t0.0503597122 $YOUR_PILL_t0.0215827338) or(!$HIPS_t0.1007194245 $PAINFUL_t0.4172661871) !$EASIER_t0.0575539568 !$STRUGGLES_t0.0287769784) 
1 and(or(and(or($VALLEY_t0.0647482014 !$YEAR_t4.5323741007 $YOUNGER_t0.0431654676) !$EASIER_t0.0575539568 !$PSYCHIATRY_NOTE_t0.8273381295 !$UNSP_t0.2302158273 !$USED_VERBAL_t0.0935251799 !$VERIFIED_t1.3525179856 !$VISIT_DENTAL_t0.3309352518 !$VISTA_ED_t0.5035971223 !$VOICEMAIL_LEFT_t0.0503597122 !$VOLUME_MOOD_t0.0647482014 !$WERE_DISCUSSED_t0.4172661871 !$YR_t0.4892086331) $ABLE_FUNCTION_t0.0791366906 $ACETATE_t0.0575539568 $LUMBAGO_t0.0359712230 $UPSETTING_THAT_t0.1294964029 $URINAL_WITHIN_t0.2589928058 $WAR_SERVICE_t0.0431654676 $WE_COULD_t0.1438848921 $WILL_PICKED_t0.0935251799 $WTIH_t0.0431654676 $YEAR_COUNSELED_t0.0431654676 $YEAR_UNKNOWN_t0.0287769784 $YE_t0.0503597122) !$GRATITUDE_t0.0359712230) 
1 and(or(and(or($VALLEY_t0.0647482014 !$YEAR_t4.5323741007 $YOUNGER_t0.0431654676) !$EASIER_t0.0575539568 !$PSYCHIATRY_NOTE_t0.8273381295 !$UNSP_t0.2302158273 !$USED_VERBAL_t0.0935251799 !$VERIFIED_t1.3525179856 !$VISIT_DENTAL_t0.3309352518 !$VISTA_ED_t0.5035971223 !$VOICEMAIL_LEFT_t0.0503597122 !$VOLUME_MOOD_t0.0647482014 !$WERE_DISCUSSED_t0.4172661871 !$YR_t0.4892086331) $ABLE_FUNCTION_t0.0791366906 $LUMBAGO_t0.0359712230 $MALE_CA_t0.0863309353 $UPSETTING_THAT_t0.1294964029 $URINAL_WITHIN_t0.2589928058 $WAR_SERVICE_t0.0431654676 $WE_COULD_t0.1438848921 $WILL_PICKED_t0.0935251799 $WTIH_t0.0431654676 $YEAR_COUNSELED_t0.0431654676 $YEAR_UNKNOWN_t0.0287769784 $YE_t0.0503597122) !$GRATITUDE_t0.0359712230) 
1 and(or(and(or($VALLEY_t0.0647482014 !$YEAR_t4.5323741007 $YOUNGER_t0.0431654676) !$EASIER_t0.0575539568 !$PSYCHIATRY_NOTE_t0.8273381295 !$UNSP_t0.2302158273 !$UPDATES_t0.0431654676 !$USED_VERBAL_t0.0935251799 !$VERIFIED_t1.3525179856 !$VISIT_DENTAL_t0.3309352518 !$VISTA_ED_t0.5035971223 !$VOICEMAIL_LEFT_t0.0503597122 !$VOLUME_MOOD_t0.0647482014 !$WERE_DISCUSSED_t0.4172661871 !$YR_t0.4892086331) $ABLE_FUNCTION_t0.0791366906 $ACETATE_t0.0575539568 $LUMBAGO_t0.0359712230 $UPSETTING_THAT_t0.1294964029 $URINAL_WITHIN_t0.2589928058 $WAR_SERVICE_t0.0431654676 $WE_COULD_t0.1438848921 $WILL_PICKED_t0.0935251799 $WTIH_t0.0431654676 $YEAR_COUNSELED_t0.0431654676 $YEAR_UNKNOWN_t0.0287769784 $YE_t0.0503597122) !$GRATITUDE_t0.0359712230) 
1 and(or(and(or($VALLEY_t0.0647482014 !$YEAR_t4.5323741007 $YOUNGER_t0.0431654676) !$EASIER_t0.0575539568 !$PSYCHIATRY_NOTE_t0.8273381295 !$UNSP_t0.2302158273 !$UPDATES_t0.0431654676 !$USED_VERBAL_t0.0935251799 !$VERIFIED_t1.3525179856 !$VISIT_DENTAL_t0.3309352518 !$VISTA_ED_t0.5035971223 !$VOICEMAIL_LEFT_t0.0503597122 !$VOLUME_MOOD_t0.0647482014 !$WERE_DISCUSSED_t0.4172661871 !$YR_t0.4892086331) $ABLE_FUNCTION_t0.0791366906 $LUMBAGO_t0.0359712230 $MALE_CA_t0.0863309353 $UPSETTING_THAT_t0.1294964029 $URINAL_WITHIN_t0.2589928058 $WAR_SERVICE_t0.0431654676 $WE_COULD_t0.1438848921 $WILL_PICKED_t0.0935251799 $WTIH_t0.0431654676 $YEAR_COUNSELED_t0.0431654676 $YEAR_UNKNOWN_t0.0287769784 $YE_t0.0503597122) !$GRATITUDE_t0.0359712230) 
1 and(or(and(or($VALLEY_t0.0647482014 !$YEAR_t4.5323741007 $YOUNGER_t0.0431654676) !$EASIER_t0.0575539568 !$PSYCHIATRY_NOTE_t0.8273381295 !$UNSP_t0.2302158273 !$UPDATES_t0.0431654676 !$USED_VERBAL_t0.0935251799 !$VERIFIED_t1.3525179856 !$VISIT_DENTAL_t0.3309352518 !$VISTA_ED_t0.5035971223 !$VOICEMAIL_LEFT_t0.0503597122 !$VOLUME_MOOD_t0.0647482014 !$WERE_DISCUSSED_t0.4172661871 !$YR_t0.4892086331) $ABLE_FUNCTION_t0.0791366906 $ACETATE_t0.0575539568 $LUMBAGO_t0.0359712230 $MALE_CA_t0.0863309353 $UPSETTING_THAT_t0.1294964029 $URINAL_WITHIN_t0.2589928058 $WAR_SERVICE_t0.0431654676 $WE_COULD_t0.1438848921 $WILL_PICKED_t0.0935251799 $WTIH_t0.0431654676 $YEAR_COUNSELED_t0.0431654676 $YEAR_UNKNOWN_t0.0287769784 $YE_t0.0503597122) !$GRATITUDE_t0.0359712230) 
1 and(or(and(or($VALLEY_t0.0647482014 !$YEAR_t4.5323741007 $YOUNGER_t0.0431654676) !$EASIER_t0.0575539568 !$PSYCHIATRY_NOTE_t0.8273381295 !$UNSP_t0.2302158273 !$UPDATES_t0.0431654676 !$USED_VERBAL_t0.0935251799 !$VERIFIED_t1.3525179856 !$VISIT_DENTAL_t0.3309352518 !$VISTA_ED_t0.5035971223 !$VOICEMAIL_LEFT_t0.0503597122 !$VOLUME_MOOD_t0.0647482014 !$WERE_DISCUSSED_t0.4172661871 !$YR_t0.4892086331) and($ACETATE_t0.0575539568 $MALE_CA_t0.0863309353) $ABLE_FUNCTION_t0.0791366906 $LUMBAGO_t0.0359712230 $UPSETTING_THAT_t0.1294964029 $URINAL_WITHIN_t0.2589928058 $WAR_SERVICE_t0.0431654676 $WE_COULD_t0.1438848921 $WILL_PICKED_t0.0935251799 $WTIH_t0.0431654676 $YEAR_COUNSELED_t0.0431654676 $YEAR_UNKNOWN_t0.0287769784 $YE_t0.0503597122) !$GRATITUDE_t0.0359712230) 
1 and(or(and(or($VALLEY_t0.0647482014 !$YEAR_t4.5323741007 $YOUNGER_t0.0431654676) !$EASIER_t0.0575539568 !$PSYCHIATRY_NOTE_t0.8273381295 !$UNSP_t0.2302158273 !$USED_VERBAL_t0.0935251799 !$VERIFIED_t1.3525179856 !$VISIT_DENTAL_t0.3309352518 !$VISTA_ED_t0.5035971223 !$VOICEMAIL_LEFT_t0.0503597122 !$VOLUME_MOOD_t0.0647482014 !$WERE_DISCUSSED_t0.4172661871 !$YR_t0.4892086331) $ABLE_FUNCTION_t0.0791366906 $LUMBAGO_t0.0359712230 $UPSETTING_THAT_t0.1294964029 $URINAL_WITHIN_t0.2589928058 $WAR_SERVICE_t0.0431654676 $WE_COULD_t0.1438848921 $WILL_PICKED_t0.0935251799 $WTIH_t0.0431654676 $YEAR_COUNSELED_t0.0431654676 $YEAR_UNKNOWN_t0.0287769784 $YE_t0.0503597122) !$GRATITUDE_t0.0359712230) 
1 and(or(and(or($VALLEY_t0.0647482014 !$YEAR_t4.5323741007 $YOUNGER_t0.0431654676) !$EASIER_t0.0575539568 !$PSYCHIATRY_NOTE_t0.8273381295 !$UNSP_t0.2302158273 !$USED_VERBAL_t0.0935251799 !$VERIFIED_t1.3525179856 !$VISIT_DENTAL_t0.3309352518 !$VISTA_ED_t0.5035971223 !$VOICEMAIL_LEFT_t0.0503597122 !$VOLUME_MOOD_t0.0647482014 !$WERE_DISCUSSED_t0.4172661871 !$YR_t0.4892086331) $ACETATE_t0.0575539568 $LUMBAGO_t0.0359712230 $UPSETTING_THAT_t0.1294964029 $URINAL_WITHIN_t0.2589928058 $WAR_SERVICE_t0.0431654676 $WE_COULD_t0.1438848921 $WILL_PICKED_t0.0935251799 $WTIH_t0.0431654676 $YEAR_COUNSELED_t0.0431654676 $YEAR_UNKNOWN_t0.0287769784 $YE_t0.0503597122) !$GRATITUDE_t0.0359712230) 
1 and(or(and(or($VALLEY_t0.0647482014 !$YEAR_t4.5323741007 $YOUNGER_t0.0431654676) !$EASIER_t0.0575539568 !$PSYCHIATRY_NOTE_t0.8273381295 !$UNSP_t0.2302158273 !$USED_VERBAL_t0.0935251799 !$VERIFIED_t1.3525179856 !$VISIT_DENTAL_t0.3309352518 !$VISTA_ED_t0.5035971223 !$VOICEMAIL_LEFT_t0.0503597122 !$VOLUME_MOOD_t0.0647482014 !$WERE_DISCUSSED_t0.4172661871 !$YR_t0.4892086331) $LUMBAGO_t0.0359712230 $MALE_CA_t0.0863309353 $UPSETTING_THAT_t0.1294964029 $URINAL_WITHIN_t0.2589928058 $WAR_SERVICE_t0.0431654676 $WE_COULD_t0.1438848921 $WILL_PICKED_t0.0935251799 $WTIH_t0.0431654676 $YEAR_COUNSELED_t0.0431654676 $YEAR_UNKNOWN_t0.0287769784 $YE_t0.0503597122) !$GRATITUDE_t0.0359712230) 
1 and(or(and(or($VALLEY_t0.0647482014 !$YEAR_t4.5323741007 $YOUNGER_t0.0431654676) !$EASIER_t0.0575539568 !$PSYCHIATRY_NOTE_t0.8273381295 !$UNSP_t0.2302158273 !$UPDATES_t0.0431654676 !$USED_VERBAL_t0.0935251799 !$VERIFIED_t1.3525179856 !$VISIT_DENTAL_t0.3309352518 !$VISTA_ED_t0.5035971223 !$VOICEMAIL_LEFT_t0.0503597122 !$VOLUME_MOOD_t0.0647482014 !$WERE_DISCUSSED_t0.4172661871 !$YR_t0.4892086331) $ABLE_FUNCTION_t0.0791366906 $LUMBAGO_t0.0359712230 $UPSETTING_THAT_t0.1294964029 $URINAL_WITHIN_t0.2589928058 $WAR_SERVICE_t0.0431654676 $WE_COULD_t0.1438848921 $WILL_PICKED_t0.0935251799 $WTIH_t0.0431654676 $YEAR_COUNSELED_t0.0431654676 $YEAR_UNKNOWN_t0.0287769784 $YE_t0.0503597122) !$GRATITUDE_t0.0359712230) 
1 and(or(and(or($VINFLUENZA_PATIENT_t0.0647482014 !$WERE_DISCUSSED_t0.4172661871 $WFL_t0.0719424460) !$EASIER_t0.0575539568 !$FEAR_t0.2446043165 !$NOT_APPLICABLE_t1.5683453237 !$UNSP_t0.2302158273 !$USED_POLYPHARMACY_t0.0647482014 !$VISIT_DENTAL_t0.3309352518 !$VOIDING_t0.5395683453 !$VOLUME_MOOD_t0.0647482014 !$WALKIN_t0.5539568345 !$WHAT_QUESTIONS_t0.4676258993 !$WILL_CONSIDER_t0.0647482014 !$YEARS_OLD_t0.2158273381 !$YEAR_t4.5323741007) and($VERIFIED_t1.3525179856 $WATCHES_t0.0575539568) $BE_REFILLED_t0.0863309353 $LIPITOR_t0.0503597122 $MALE_CA_t0.0863309353 $UPDATED_PLEASE_t0.0215827338 $URGENT_APPT_t0.0431654676 $VISIT_BIL_t0.0359712230 $WAS_HORRIBLE_t0.1294964029 $WE_COULD_t0.1438848921 $WILL_RESTART_t0.0215827338 $WTIH_t0.0431654676 $YEAR_COUNSELED_t0.0431654676) !$STRUGGLES_WITH_t0.0359712230) 
1 and(or(and(or($VINFLUENZA_PATIENT_t0.0647482014 !$WERE_DISCUSSED_t0.4172661871) !$EASIER_t0.0575539568 !$FEAR_t0.2446043165 !$UNSP_t0.2302158273 !$USED_POLYPHARMACY_t0.0647482014 !$VISIT_DENTAL_t0.3309352518 !$VOIDING_t0.5395683453 !$VOLUME_MOOD_t0.0647482014 !$WALKIN_t0.5539568345 !$WHAT_QUESTIONS_t0.4676258993 !$WILL_CONSIDER_t0.0647482014 !$YEARS_OLD_t0.2158273381 !$YEAR_t4.5323741007) and($VERIFIED_t1.3525179856 $WATCHES_t0.0575539568) $BE_REFILLED_t0.0863309353 $LIPITOR_t0.0503597122 $MALE_CA_t0.0863309353 $UPDATED_PLEASE_t0.0215827338 $URGENT_APPT_t0.0431654676 $VISIT_BIL_t0.0359712230 $WAS_HORRIBLE_t0.1294964029 $WE_COULD_t0.1438848921 $WILL_RESTART_t0.0215827338 $WTIH_t0.0431654676 $YEAR_COUNSELED_t0.0431654676) !$STRUGGLES_WITH_t0.0359712230) 
1 and(or(and(or($VINFLUENZA_PATIENT_t0.0647482014 !$WERE_DISCUSSED_t0.4172661871 $WFL_t0.0719424460) !$EASIER_t0.0575539568 !$FEAR_t0.2446043165 !$UNSP_t0.2302158273 !$USED_POLYPHARMACY_t0.0647482014 !$VISIT_DENTAL_t0.3309352518 !$VOIDING_t0.5395683453 !$VOLUME_MOOD_t0.0647482014 !$WALKIN_t0.5539568345 !$WHAT_QUESTIONS_t0.4676258993 !$WILL_CONSIDER_t0.0647482014 !$YEARS_OLD_t0.2158273381 !$YEAR_t4.5323741007) and($VERIFIED_t1.3525179856 $WATCHES_t0.0575539568) $BE_REFILLED_t0.0863309353 $LIPITOR_t0.0503597122 $MALE_CA_t0.0863309353 $UPDATED_PLEASE_t0.0215827338 $URGENT_APPT_t0.0431654676 $VISIT_BIL_t0.0359712230 $WAS_HORRIBLE_t0.1294964029 $WE_COULD_t0.1438848921 $WILL_RESTART_t0.0215827338 $WTIH_t0.0431654676 $YEAR_COUNSELED_t0.0431654676) !$STRUGGLES_WITH_t0.0359712230) 
1 and(or(and(or($VINFLUENZA_PATIENT_t0.0647482014 !$WERE_DISCUSSED_t0.4172661871 $WFL_t0.0719424460) !$EASIER_t0.0575539568 !$FEAR_t0.2446043165 !$UNSP_t0.2302158273 !$VISIT_DENTAL_t0.3309352518 !$VOIDING_t0.5395683453 !$VOLUME_MOOD_t0.0647482014 !$WALKIN_t0.5539568345 !$WHAT_QUESTIONS_t0.4676258993 !$WILL_CONSIDER_t0.0647482014 !$YEARS_OLD_t0.2158273381 !$YEAR_t4.5323741007) and($VERIFIED_t1.3525179856 $WATCHES_t0.0575539568) $BE_REFILLED_t0.0863309353 $LIPITOR_t0.0503597122 $MALE_CA_t0.0863309353 $UPDATED_PLEASE_t0.0215827338 $URGENT_APPT_t0.0431654676 $VISIT_BIL_t0.0359712230 $WAS_HORRIBLE_t0.1294964029 $WE_COULD_t0.1438848921 $WILL_RESTART_t0.0215827338 $WTIH_t0.0431654676 $YEAR_COUNSELED_t0.0431654676) !$STRUGGLES_WITH_t0.0359712230 !$USED_POLYPHARMACY_t0.0647482014) 
1 and(or(and(or($ABLE_FUNCTION_t0.0791366906 $VINFLUENZA_PATIENT_t0.0647482014 !$WERE_DISCUSSED_t0.4172661871 $WFL_t0.0719424460) !$EASIER_t0.0575539568 !$FEAR_t0.2446043165 !$UNSP_t0.2302158273 !$USED_POLYPHARMACY_t0.0647482014 !$VISIT_DENTAL_t0.3309352518 !$VOIDING_t0.5395683453 !$VOLUME_MOOD_t0.0647482014 !$WALKIN_t0.5539568345 !$WHAT_QUESTIONS_t0.4676258993 !$WILL_CONSIDER_t0.0647482014 !$YEARS_OLD_t0.2158273381 !$YEAR_t4.5323741007) and($VERIFIED_t1.3525179856 $WATCHES_t0.0575539568) $BE_REFILLED_t0.0863309353 $LIPITOR_t0.0503597122 $MALE_CA_t0.0863309353 $UPDATED_PLEASE_t0.0215827338 $URGENT_APPT_t0.0431654676 $VISIT_BIL_t0.0359712230 $WAS_HORRIBLE_t0.1294964029 $WE_COULD_t0.1438848921 $WILL_RESTART_t0.0215827338 $WTIH_t0.0431654676 $YEAR_COUNSELED_t0.0431654676) !$STRUGGLES_WITH_t0.0359712230) 
1 and(or(and(or($ACETATE_t0.0575539568 $VINFLUENZA_PATIENT_t0.0647482014 !$WERE_DISCUSSED_t0.4172661871 $WFL_t0.0719424460) !$EASIER_t0.0575539568 !$FEAR_t0.2446043165 !$UNSP_t0.2302158273 !$USED_POLYPHARMACY_t0.0647482014 !$VISIT_DENTAL_t0.3309352518 !$VOIDING_t0.5395683453 !$VOLUME_MOOD_t0.0647482014 !$WALKIN_t0.5539568345 !$WHAT_QUESTIONS_t0.4676258993 !$WILL_CONSIDER_t0.0647482014 !$YEARS_OLD_t0.2158273381 !$YEAR_t4.5323741007) and($VERIFIED_t1.3525179856 $WATCHES_t0.0575539568) $BE_REFILLED_t0.0863309353 $LIPITOR_t0.0503597122 $MALE_CA_t0.0863309353 $UPDATED_PLEASE_t0.0215827338 $URGENT_APPT_t0.0431654676 $VISIT_BIL_t0.0359712230 $WAS_HORRIBLE_t0.1294964029 $WE_COULD_t0.1438848921 $WILL_RESTART_t0.0215827338 $WTIH_t0.0431654676 $YEAR_COUNSELED_t0.0431654676) !$STRUGGLES_WITH_t0.0359712230) 
1 and(or(and(or($ACHING_t0.1654676259 $VINFLUENZA_PATIENT_t0.0647482014 !$WERE_DISCUSSED_t0.4172661871 $WFL_t0.0719424460) !$EASIER_t0.0575539568 !$FEAR_t0.2446043165 !$UNSP_t0.2302158273 !$USED_POLYPHARMACY_t0.0647482014 !$VISIT_DENTAL_t0.3309352518 !$VOIDING_t0.5395683453 !$VOLUME_MOOD_t0.0647482014 !$WALKIN_t0.5539568345 !$WHAT_QUESTIONS_t0.4676258993 !$WILL_CONSIDER_t0.0647482014 !$YEARS_OLD_t0.2158273381 !$YEAR_t4.5323741007) and($VERIFIED_t1.3525179856 $WATCHES_t0.0575539568) $BE_REFILLED_t0.0863309353 $LIPITOR_t0.0503597122 $MALE_CA_t0.0863309353 $UPDATED_PLEASE_t0.0215827338 $URGENT_APPT_t0.0431654676 $VISIT_BIL_t0.0359712230 $WAS_HORRIBLE_t0.1294964029 $WE_COULD_t0.1438848921 $WILL_RESTART_t0.0215827338 $WTIH_t0.0431654676 $YEAR_COUNSELED_t0.0431654676) !$STRUGGLES_WITH_t0.0359712230) 
1 and(or(and(or($AGE_DENTAL_t0.3237410072 $VINFLUENZA_PATIENT_t0.0647482014 !$WERE_DISCUSSED_t0.4172661871 $WFL_t0.0719424460) !$EASIER_t0.0575539568 !$FEAR_t0.2446043165 !$UNSP_t0.2302158273 !$USED_POLYPHARMACY_t0.0647482014 !$VISIT_DENTAL_t0.3309352518 !$VOIDING_t0.5395683453 !$VOLUME_MOOD_t0.0647482014 !$WALKIN_t0.5539568345 !$WHAT_QUESTIONS_t0.4676258993 !$WILL_CONSIDER_t0.0647482014 !$YEARS_OLD_t0.2158273381 !$YEAR_t4.5323741007) and($VERIFIED_t1.3525179856 $WATCHES_t0.0575539568) $BE_REFILLED_t0.0863309353 $LIPITOR_t0.0503597122 $MALE_CA_t0.0863309353 $UPDATED_PLEASE_t0.0215827338 $URGENT_APPT_t0.0431654676 $VISIT_BIL_t0.0359712230 $WAS_HORRIBLE_t0.1294964029 $WE_COULD_t0.1438848921 $WILL_RESTART_t0.0215827338 $WTIH_t0.0431654676 $YEAR_COUNSELED_t0.0431654676) !$STRUGGLES_WITH_t0.0359712230) 
1 and(or(and(or($AN_APPOINTMENT_t0.6618705036 $VINFLUENZA_PATIENT_t0.0647482014 !$WERE_DISCUSSED_t0.4172661871 $WFL_t0.0719424460) !$EASIER_t0.0575539568 !$FEAR_t0.2446043165 !$UNSP_t0.2302158273 !$USED_POLYPHARMACY_t0.0647482014 !$VISIT_DENTAL_t0.3309352518 !$VOIDING_t0.5395683453 !$VOLUME_MOOD_t0.0647482014 !$WALKIN_t0.5539568345 !$WHAT_QUESTIONS_t0.4676258993 !$WILL_CONSIDER_t0.0647482014 !$YEARS_OLD_t0.2158273381 !$YEAR_t4.5323741007) and($VERIFIED_t1.3525179856 $WATCHES_t0.0575539568) $BE_REFILLED_t0.0863309353 $LIPITOR_t0.0503597122 $MALE_CA_t0.0863309353 $UPDATED_PLEASE_t0.0215827338 $URGENT_APPT_t0.0431654676 $VISIT_BIL_t0.0359712230 $WAS_HORRIBLE_t0.1294964029 $WE_COULD_t0.1438848921 $WILL_RESTART_t0.0215827338 $WTIH_t0.0431654676 $YEAR_COUNSELED_t0.0431654676) !$STRUGGLES_WITH_t0.0359712230) 
1 and(or(and(or($APPOINTMENT_t7.2661870504 $VINFLUENZA_PATIENT_t0.0647482014 !$WERE_DISCUSSED_t0.4172661871 $WFL_t0.0719424460) !$EASIER_t0.0575539568 !$FEAR_t0.2446043165 !$UNSP_t0.2302158273 !$USED_POLYPHARMACY_t0.0647482014 !$VISIT_DENTAL_t0.3309352518 !$VOIDING_t0.5395683453 !$VOLUME_MOOD_t0.0647482014 !$WALKIN_t0.5539568345 !$WHAT_QUESTIONS_t0.4676258993 !$WILL_CONSIDER_t0.0647482014 !$YEARS_OLD_t0.2158273381 !$YEAR_t4.5323741007) and($VERIFIED_t1.3525179856 $WATCHES_t0.0575539568) $BE_REFILLED_t0.0863309353 $LIPITOR_t0.0503597122 $MALE_CA_t0.0863309353 $UPDATED_PLEASE_t0.0215827338 $URGENT_APPT_t0.0431654676 $VISIT_BIL_t0.0359712230 $WAS_HORRIBLE_t0.1294964029 $WE_COULD_t0.1438848921 $WILL_RESTART_t0.0215827338 $WTIH_t0.0431654676 $YEAR_COUNSELED_t0.0431654676) !$STRUGGLES_WITH_t0.0359712230) 
1 or(and(or($GASTROENTEROLOGY_NAME_t0.0647482014 $WE_COULD_t0.1438848921 $WTIH_t0.0431654676 $YOUNGER_t0.0431654676 $ZER_t0.0575539568) !$YOU_FEEL_t0.3741007194) and(!$ALZHEIMERS_DISEASE_t0.0431654676 !$AZITHROMYCIN_MG_t0.0503597122 !$PREOCCUPIED_WITH_t0.0287769784 !$UNSP_t0.2302158273 !$VERBAL_RESPONSE_t0.0791366906 !$VISIT_PROCESSES_t0.0647482014 !$VISTA_ED_t0.5035971223 !$VOLUME_MOOD_t0.0647482014 !$VOLUNTEER_OR_t0.0719424460 !$WALKIN_t0.5539568345 !$WAL_REQUESTING_t0.0719424460 !$WARRANT_t0.0503597122 !$WERE_DISCUSSED_t0.4172661871 !$WILLING_t0.4388489209 !$WILL_CONSIDER_t0.0647482014 !$YEAR_t4.5323741007) $DISEASE_CABG_t0.0287769784 $URINAL_WITHIN_t0.2589928058 $WAS_HORRIBLE_t0.1294964029 $WILL_PICKED_t0.0935251799 $YEAR_UNKNOWN_t0.0287769784 $YE_t0.0503597122 $YOUR_BOTTLES_t0.0215827338) 
1 and(or(and(or($GASTROENTEROLOGY_NAME_t0.0647482014 $WE_COULD_t0.1438848921 $WTIH_t0.0431654676 $YOUNGER_t0.0431654676 $ZER_t0.0575539568) !$YOU_FEEL_t0.3741007194) and(!$ALZHEIMERS_DISEASE_t0.0431654676 !$PREOCCUPIED_WITH_t0.0287769784 !$UNSP_t0.2302158273 !$VERBAL_RESPONSE_t0.0791366906 !$VISIT_PROCESSES_t0.0647482014 !$VISTA_ED_t0.5035971223 !$VOLUME_MOOD_t0.0647482014 !$VOLUNTEER_OR_t0.0719424460 !$WALKIN_t0.5539568345 !$WAL_REQUESTING_t0.0719424460 !$WARRANT_t0.0503597122 !$WERE_DISCUSSED_t0.4172661871 !$WILLING_t0.4388489209 !$WILL_CONSIDER_t0.0647482014 !$YEAR_t4.5323741007) $DISEASE_CABG_t0.0287769784 $URINAL_WITHIN_t0.2589928058 $WAS_HORRIBLE_t0.1294964029 $WILL_PICKED_t0.0935251799 $YEAR_UNKNOWN_t0.0287769784 $YE_t0.0503597122 $YOUR_BOTTLES_t0.0215827338) !$AZITHROMYCIN_t0.1510791367) 
1 and(or(and(or($GASTROENTEROLOGY_NAME_t0.0647482014 $WE_COULD_t0.1438848921 $WTIH_t0.0431654676 $YOUNGER_t0.0431654676 $ZER_t0.0575539568) !$YOU_FEEL_t0.3741007194) and(!$ALZHEIMERS_DISEASE_t0.0431654676 !$PSYCHIATRY_NOTE_t0.8273381295 !$UNSP_t0.2302158273 !$VERBAL_RESPONSE_t0.0791366906 !$VISIT_PROCESSES_t0.0647482014 !$VISTA_ED_t0.5035971223 !$VOLUME_MOOD_t0.0647482014 !$VOLUNTEER_OR_t0.0719424460 !$WALKIN_t0.5539568345 !$WAL_REQUESTING_t0.0719424460 !$WARRANT_t0.0503597122 !$WERE_DISCUSSED_t0.4172661871 !$WILLING_t0.4388489209 !$WILL_CONSIDER_t0.0647482014 !$YEAR_t4.5323741007) $BE_REFILLED_t0.0863309353 $URINAL_WITHIN_t0.2589928058 $WAS_HORRIBLE_t0.1294964029 $WILL_PICKED_t0.0935251799 $YEAR_UNKNOWN_t0.0287769784 $YE_t0.0503597122 $YOUR_BOTTLES_t0.0215827338) !$AZITHROMYCIN_t0.1510791367) 
1 or(and(or($GASTROENTEROLOGY_NAME_t0.0647482014 $WE_COULD_t0.1438848921 $WTIH_t0.0431654676 $YOUNGER_t0.0431654676 $ZER_t0.0575539568) !$YOU_FEEL_t0.3741007194) and(!$ALZHEIMERS_DISEASE_t0.0431654676 !$AZITHROMYCIN_MG_t0.0503597122 !$PREOCCUPIED_WITH_t0.0287769784 !$UNSP_t0.2302158273 !$VERBAL_RESPONSE_t0.0791366906 !$VISIT_PROCESSES_t0.0647482014 !$VISTA_ED_t0.5035971223 !$VOLUME_MOOD_t0.0647482014 !$VOLUNTEER_OR_t0.0719424460 !$WALKIN_t0.5539568345 !$WAL_REQUESTING_t0.0719424460 !$WARRANT_t0.0503597122 !$WERE_DISCUSSED_t0.4172661871 !$WILLING_t0.4388489209 !$WILL_CONSIDER_t0.0647482014 !$YEAR_t4.5323741007) $DISEASE_CABG_t0.0287769784 $ENDOSCOPE_t0.0431654676 $URINAL_WITHIN_t0.2589928058 $WAS_HORRIBLE_t0.1294964029 $WILL_PICKED_t0.0935251799 $YEAR_UNKNOWN_t0.0287769784 $YE_t0.0503597122 $YOUR_BOTTLES_t0.0215827338) 
1 and(or(and(or($GASTROENTEROLOGY_NAME_t0.0647482014 $WE_COULD_t0.1438848921 $WTIH_t0.0431654676 $YOUNGER_t0.0431654676 $ZER_t0.0575539568) !$YOU_FEEL_t0.3741007194) and(!$ALZHEIMERS_DISEASE_t0.0431654676 !$AZITHROMYCIN_MG_t0.0503597122 !$PREOCCUPIED_WITH_t0.0287769784 !$UNSP_t0.2302158273 !$VERBAL_RESPONSE_t0.0791366906 !$VISIT_PROCESSES_t0.0647482014 !$VISTA_ED_t0.5035971223 !$VOLUME_MOOD_t0.0647482014 !$VOLUNTEER_OR_t0.0719424460 !$WALKIN_t0.5539568345 !$WAL_REQUESTING_t0.0719424460 !$WARRANT_t0.0503597122 !$WERE_DISCUSSED_t0.4172661871 !$WILLING_t0.4388489209 !$WILL_CONSIDER_t0.0647482014 !$YEAR_t4.5323741007) $BE_REFILLED_t0.0863309353 $URINAL_WITHIN_t0.2589928058 $WAS_HORRIBLE_t0.1294964029 $WILL_PICKED_t0.0935251799 $YEAR_UNKNOWN_t0.0287769784 $YE_t0.0503597122 $YOUR_BOTTLES_t0.0215827338) !$AZITHROMYCIN_t0.1510791367) 
1 and(or(and(or($GASTROENTEROLOGY_NAME_t0.0647482014 $WE_COULD_t0.1438848921 $WTIH_t0.0431654676 $YOUNGER_t0.0431654676 $ZER_t0.0575539568) !$YOU_FEEL_t0.3741007194) and(!$ALZHEIMERS_DISEASE_t0.0431654676 !$AZITHROMYCIN_MG_t0.0503597122 !$PSYCHIATRY_NOTE_t0.8273381295 !$UNSP_t0.2302158273 !$VERBAL_RESPONSE_t0.0791366906 !$VISIT_PROCESSES_t0.0647482014 !$VISTA_ED_t0.5035971223 !$VOLUME_MOOD_t0.0647482014 !$VOLUNTEER_OR_t0.0719424460 !$WALKIN_t0.5539568345 !$WAL_REQUESTING_t0.0719424460 !$WARRANT_t0.0503597122 !$WERE_DISCUSSED_t0.4172661871 !$WILLING_t0.4388489209 !$WILL_CONSIDER_t0.0647482014 !$YEAR_t4.5323741007) $BE_REFILLED_t0.0863309353 $URINAL_WITHIN_t0.2589928058 $WAS_HORRIBLE_t0.1294964029 $WILL_PICKED_t0.0935251799 $YEAR_UNKNOWN_t0.0287769784 $YE_t0.0503597122 $YOUR_BOTTLES_t0.0215827338) !$AZITHROMYCIN_t0.1510791367) 
1 and(or(and(or($GASTROENTEROLOGY_NAME_t0.0647482014 $WE_COULD_t0.1438848921 $WTIH_t0.0431654676 $YOUNGER_t0.0431654676 $ZER_t0.0575539568) !$YOU_FEEL_t0.3741007194) and(!$ALZHEIMERS_DISEASE_t0.0431654676 !$PREOCCUPIED_WITH_t0.0287769784 !$UNSP_t0.2302158273 !$VERBAL_RESPONSE_t0.0791366906 !$VISIT_PROCESSES_t0.0647482014 !$VISTA_ED_t0.5035971223 !$VOLUME_MOOD_t0.0647482014 !$VOLUNTEER_OR_t0.0719424460 !$WALKIN_t0.5539568345 !$WAL_REQUESTING_t0.0719424460 !$WARRANT_t0.0503597122 !$WERE_DISCUSSED_t0.4172661871 !$WILLING_t0.4388489209 !$WILL_CONSIDER_t0.0647482014 !$YEAR_t4.5323741007) $BE_REFILLED_t0.0863309353 $DISEASE_CABG_t0.0287769784 $URINAL_WITHIN_t0.2589928058 $WAS_HORRIBLE_t0.1294964029 $WILL_PICKED_t0.0935251799 $YEAR_UNKNOWN_t0.0287769784 $YE_t0.0503597122 $YOUR_BOTTLES_t0.0215827338) !$AZITHROMYCIN_t0.1510791367) 
1 and(or(and(or($GASTROENTEROLOGY_NAME_t0.0647482014 $WE_COULD_t0.1438848921 $WTIH_t0.0431654676 $YOUNGER_t0.0431654676 $ZER_t0.0575539568) !$YOU_FEEL_t0.3741007194) and(!$ALZHEIMERS_DISEASE_t0.0431654676 !$PREOCCUPIED_WITH_t0.0287769784 !$UNSP_t0.2302158273 !$VERBAL_RESPONSE_t0.0791366906 !$VISIT_PROCESSES_t0.0647482014 !$VISTA_ED_t0.5035971223 !$VOLUME_MOOD_t0.0647482014 !$VOLUNTEER_OR_t0.0719424460 !$WALKIN_t0.5539568345 !$WAL_REQUESTING_t0.0719424460 !$WARRANT_t0.0503597122 !$WERE_DISCUSSED_t0.4172661871 !$WILLING_t0.4388489209 !$WILL_CONSIDER_t0.0647482014 !$YEAR_t4.5323741007) $BE_REFILLED_t0.0863309353 $ENDOSCOPE_t0.0431654676 $URINAL_WITHIN_t0.2589928058 $WAS_HORRIBLE_t0.1294964029 $WILL_PICKED_t0.0935251799 $YEAR_UNKNOWN_t0.0287769784 $YE_t0.0503597122 $YOUR_BOTTLES_t0.0215827338) !$AZITHROMYCIN_t0.1510791367) 
1 and(or(and(or($GASTROENTEROLOGY_NAME_t0.0647482014 $WE_COULD_t0.1438848921 $WTIH_t0.0431654676 $YOUNGER_t0.0431654676 $ZER_t0.0575539568) !$YOU_FEEL_t0.3741007194) and(!$ALZHEIMERS_DISEASE_t0.0431654676 !$PREOCCUPIED_WITH_t0.0287769784 !$UNSP_t0.2302158273 !$VERBAL_RESPONSE_t0.0791366906 !$VISIT_PROCESSES_t0.0647482014 !$VISTA_ED_t0.5035971223 !$VOLUME_MOOD_t0.0647482014 !$VOLUNTEER_OR_t0.0719424460 !$WALKIN_t0.5539568345 !$WAL_REQUESTING_t0.0719424460 !$WARRANT_t0.0503597122 !$WERE_DISCUSSED_t0.4172661871 !$WILLING_t0.4388489209 !$WILL_CONSIDER_t0.0647482014 !$YEAR_t4.5323741007) $BE_REFILLED_t0.0863309353 $PREPROCEDURE_DATE_t0.0791366906 $URINAL_WITHIN_t0.2589928058 $WAS_HORRIBLE_t0.1294964029 $WILL_PICKED_t0.0935251799 $YEAR_UNKNOWN_t0.0287769784 $YE_t0.0503597122 $YOUR_BOTTLES_t0.0215827338) !$AZITHROMYCIN_t0.1510791367) 
1 and(or(and(or($GASTROENTEROLOGY_NAME_t0.0647482014 $WE_COULD_t0.1438848921 $WTIH_t0.0431654676 $YOUNGER_t0.0431654676 $ZER_t0.0575539568) !$YOU_FEEL_t0.3741007194) and(!$ALZHEIMERS_DISEASE_t0.0431654676 !$PREOCCUPIED_WITH_t0.0287769784 !$UNSP_t0.2302158273 !$VERBAL_RESPONSE_t0.0791366906 !$VISIT_PROCESSES_t0.0647482014 !$VISTA_ED_t0.5035971223 !$VOLUME_MOOD_t0.0647482014 !$VOLUNTEER_OR_t0.0719424460 !$WALKIN_t0.5539568345 !$WAL_REQUESTING_t0.0719424460 !$WARRANT_t0.0503597122 !$WERE_DISCUSSED_t0.4172661871 !$WILLING_t0.4388489209 !$WILL_CONSIDER_t0.0647482014 !$YEAR_t4.5323741007) $DISEASE_CABG_t0.0287769784 $PREPROCEDURE_DATE_t0.0791366906 $URINAL_WITHIN_t0.2589928058 $WAS_HORRIBLE_t0.1294964029 $WILL_PICKED_t0.0935251799 $YEAR_UNKNOWN_t0.0287769784 $YE_t0.0503597122 $YOUR_BOTTLES_t0.0215827338) !$AZITHROMYCIN_t0.1510791367) 
1 and(or(and(!$PSYCHIATRY_NOTE_t0.8273381295 !$UNSP_t0.2302158273 !$UPDATES_t0.0431654676 !$USED_VERBAL_t0.0935251799 !$VERIFIED_t1.3525179856 !$VISIT_DENTAL_t0.3309352518 !$VISTA_ED_t0.5035971223 !$VOICEMAIL_LEFT_t0.0503597122 !$VOLUME_MOOD_t0.0647482014 !$WERE_DISCUSSED_t0.4172661871 !$YEAR_t4.5323741007 !$YOUR_CHOOSE_t0.0431654676 !$YR_t0.4892086331) $ABLE_FUNCTION_t0.0791366906 $ACETATE_t0.0575539568 $AVERAGE_RISK_t0.0431654676 $BE_REFILLED_t0.0863309353 $URGENT_APPT_t0.0431654676 $URGENT_SERVICES_t0.0575539568 $WAS_COMPLICATED_t0.0215827338 $WAS_HORRIBLE_t0.1294964029 $WE_COULD_t0.1438848921 $WILL_PICKED_t0.0935251799 $WTIH_t0.0431654676 $YEAR_UNKNOWN_t0.0287769784 $YE_t0.0503597122 $ZER_t0.0575539568) !$EASIER_t0.0575539568 !$NEXT_SESSION_t0.1366906475) 
1 and(or(and(!$PSYCHIATRY_NOTE_t0.8273381295 !$UNSP_t0.2302158273 !$UPDATES_t0.0431654676 !$USED_VERBAL_t0.0935251799 !$VERIFIED_t1.3525179856 !$VISIT_DENTAL_t0.3309352518 !$VISTA_ED_t0.5035971223 !$VOICEMAIL_LEFT_t0.0503597122 !$VOLUME_MOOD_t0.0647482014 !$WERE_DISCUSSED_t0.4172661871 !$YEAR_t4.5323741007 !$YOUR_CHOOSE_t0.0431654676 !$YR_t0.4892086331) $ABLE_FUNCTION_t0.0791366906 $ACETATE_t0.0575539568 $AVERAGE_RISK_t0.0431654676 $DISEASE_CABG_t0.0287769784 $URGENT_APPT_t0.0431654676 $URGENT_SERVICES_t0.0575539568 $WAS_COMPLICATED_t0.0215827338 $WAS_HORRIBLE_t0.1294964029 $WE_COULD_t0.1438848921 $WILL_PICKED_t0.0935251799 $WTIH_t0.0431654676 $YEAR_UNKNOWN_t0.0287769784 $YE_t0.0503597122 $ZER_t0.0575539568) !$EASIER_t0.0575539568 !$NEXT_SESSION_t0.1366906475) 
1 and(or(and(!$PSYCHIATRY_NOTE_t0.8273381295 !$UNSP_t0.2302158273 !$UPDATES_t0.0431654676 !$USED_VERBAL_t0.0935251799 !$VERIFIED_t1.3525179856 !$VISIT_DENTAL_t0.3309352518 !$VISTA_ED_t0.5035971223 !$VOICEMAIL_LEFT_t0.0503597122 !$VOLUME_MOOD_t0.0647482014 !$WERE_DISCUSSED_t0.4172661871 !$YEAR_t4.5323741007 !$YOUR_CHOOSE_t0.0431654676 !$YR_t0.4892086331) $ABLE_FUNCTION_t0.0791366906 $AVERAGE_RISK_t0.0431654676 $BE_REFILLED_t0.0863309353 $MALE_CA_t0.0863309353 $URGENT_APPT_t0.0431654676 $URGENT_SERVICES_t0.0575539568 $WAS_COMPLICATED_t0.0215827338 $WAS_HORRIBLE_t0.1294964029 $WE_COULD_t0.1438848921 $WILL_PICKED_t0.0935251799 $WTIH_t0.0431654676 $YEAR_UNKNOWN_t0.0287769784 $YE_t0.0503597122 $ZER_t0.0575539568) !$EASIER_t0.0575539568 !$NEXT_SESSION_t0.1366906475) 
1 and(or(and(!$PSYCHIATRY_NOTE_t0.8273381295 !$UNSP_t0.2302158273 !$UPDATES_t0.0431654676 !$USED_VERBAL_t0.0935251799 !$VERIFIED_t1.3525179856 !$VISIT_DENTAL_t0.3309352518 !$VISTA_ED_t0.5035971223 !$VOICEMAIL_LEFT_t0.0503597122 !$VOLUME_MOOD_t0.0647482014 !$WERE_DISCUSSED_t0.4172661871 !$YEAR_t4.5323741007 !$YOUR_CHOOSE_t0.0431654676 !$YR_t0.4892086331) $ABLE_FUNCTION_t0.0791366906 $AVERAGE_RISK_t0.0431654676 $DISEASE_CABG_t0.0287769784 $MALE_CA_t0.0863309353 $URGENT_APPT_t0.0431654676 $URGENT_SERVICES_t0.0575539568 $WAS_COMPLICATED_t0.0215827338 $WAS_HORRIBLE_t0.1294964029 $WE_COULD_t0.1438848921 $WILL_PICKED_t0.0935251799 $WTIH_t0.0431654676 $YEAR_UNKNOWN_t0.0287769784 $YE_t0.0503597122 $ZER_t0.0575539568) !$EASIER_t0.0575539568 !$NEXT_SESSION_t0.1366906475) 
1 and(or(and(!$PSYCHIATRY_NOTE_t0.8273381295 !$UNSP_t0.2302158273 !$UPDATES_t0.0431654676 !$USED_VERBAL_t0.0935251799 !$VERIFIED_t1.3525179856 !$VISIT_DENTAL_t0.3309352518 !$VISTA_ED_t0.5035971223 !$VOICEMAIL_LEFT_t0.0503597122 !$VOLUME_MOOD_t0.0647482014 !$WERE_DISCUSSED_t0.4172661871 !$YEAR_t4.5323741007 !$YOUR_CHOOSE_t0.0431654676 !$YR_t0.4892086331) $ABLE_FUNCTION_t0.0791366906 $ACETATE_t0.0575539568 $AVERAGE_RISK_t0.0431654676 $BE_REFILLED_t0.0863309353 $DISEASE_CABG_t0.0287769784 $URGENT_APPT_t0.0431654676 $URGENT_SERVICES_t0.0575539568 $WAS_COMPLICATED_t0.0215827338 $WAS_HORRIBLE_t0.1294964029 $WE_COULD_t0.1438848921 $WILL_PICKED_t0.0935251799 $WTIH_t0.0431654676 $YEAR_UNKNOWN_t0.0287769784 $YE_t0.0503597122 $ZER_t0.0575539568) !$EASIER_t0.0575539568 !$NEXT_SESSION_t0.1366906475) 
1 and(or(and(!$PSYCHIATRY_NOTE_t0.8273381295 !$UNSP_t0.2302158273 !$UPDATES_t0.0431654676 !$USED_VERBAL_t0.0935251799 !$VERIFIED_t1.3525179856 !$VISIT_DENTAL_t0.3309352518 !$VISTA_ED_t0.5035971223 !$VOICEMAIL_LEFT_t0.0503597122 !$VOLUME_MOOD_t0.0647482014 !$WERE_DISCUSSED_t0.4172661871 !$YEAR_t4.5323741007 !$YOUR_CHOOSE_t0.0431654676 !$YR_t0.4892086331) $ABLE_FUNCTION_t0.0791366906 $ACETATE_t0.0575539568 $AVERAGE_RISK_t0.0431654676 $BE_REFILLED_t0.0863309353 $ENDOSCOPE_t0.0431654676 $URGENT_APPT_t0.0431654676 $URGENT_SERVICES_t0.0575539568 $WAS_COMPLICATED_t0.0215827338 $WAS_HORRIBLE_t0.1294964029 $WE_COULD_t0.1438848921 $WILL_PICKED_t0.0935251799 $WTIH_t0.0431654676 $YEAR_UNKNOWN_t0.0287769784 $YE_t0.0503597122 $ZER_t0.0575539568) !$EASIER_t0.0575539568 !$NEXT_SESSION_t0.1366906475) 
1 and(or(and(!$PSYCHIATRY_NOTE_t0.8273381295 !$UNSP_t0.2302158273 !$UPDATES_t0.0431654676 !$USED_VERBAL_t0.0935251799 !$VERIFIED_t1.3525179856 !$VISIT_DENTAL_t0.3309352518 !$VISTA_ED_t0.5035971223 !$VOICEMAIL_LEFT_t0.0503597122 !$VOLUME_MOOD_t0.0647482014 !$WERE_DISCUSSED_t0.4172661871 !$YEAR_t4.5323741007 !$YOUR_CHOOSE_t0.0431654676 !$YR_t0.4892086331) $ABLE_FUNCTION_t0.0791366906 $ACETATE_t0.0575539568 $AVERAGE_RISK_t0.0431654676 $BE_REFILLED_t0.0863309353 $MALE_CA_t0.0863309353 $URGENT_APPT_t0.0431654676 $URGENT_SERVICES_t0.0575539568 $WAS_COMPLICATED_t0.0215827338 $WAS_HORRIBLE_t0.1294964029 $WE_COULD_t0.1438848921 $WILL_PICKED_t0.0935251799 $WTIH_t0.0431654676 $YEAR_UNKNOWN_t0.0287769784 $YE_t0.0503597122 $ZER_t0.0575539568) !$EASIER_t0.0575539568 !$NEXT_SESSION_t0.1366906475) 
1 and(or(and(!$PSYCHIATRY_NOTE_t0.8273381295 !$UNSP_t0.2302158273 !$UPDATES_t0.0431654676 !$USED_VERBAL_t0.0935251799 !$VERIFIED_t1.3525179856 !$VISIT_DENTAL_t0.3309352518 !$VISTA_ED_t0.5035971223 !$VOICEMAIL_LEFT_t0.0503597122 !$VOLUME_MOOD_t0.0647482014 !$WERE_DISCUSSED_t0.4172661871 !$YEAR_t4.5323741007 !$YOUR_CHOOSE_t0.0431654676 !$YR_t0.4892086331) $ABLE_FUNCTION_t0.0791366906 $ACETATE_t0.0575539568 $AVERAGE_RISK_t0.0431654676 $BE_REFILLED_t0.0863309353 $RECTAL_EXAM_t0.0503597122 $URGENT_APPT_t0.0431654676 $URGENT_SERVICES_t0.0575539568 $WAS_COMPLICATED_t0.0215827338 $WAS_HORRIBLE_t0.1294964029 $WE_COULD_t0.1438848921 $WILL_PICKED_t0.0935251799 $WTIH_t0.0431654676 $YEAR_UNKNOWN_t0.0287769784 $YE_t0.0503597122 $ZER_t0.0575539568) !$EASIER_t0.0575539568 !$NEXT_SESSION_t0.1366906475) 
1 and(or(and(!$PSYCHIATRY_NOTE_t0.8273381295 !$UNSP_t0.2302158273 !$UPDATES_t0.0431654676 !$USED_VERBAL_t0.0935251799 !$VERIFIED_t1.3525179856 !$VISIT_DENTAL_t0.3309352518 !$VISTA_ED_t0.5035971223 !$VOICEMAIL_LEFT_t0.0503597122 !$VOLUME_MOOD_t0.0647482014 !$WERE_DISCUSSED_t0.4172661871 !$YEAR_t4.5323741007 !$YOUR_CHOOSE_t0.0431654676 !$YR_t0.4892086331) $ABLE_FUNCTION_t0.0791366906 $ACETATE_t0.0575539568 $AVERAGE_RISK_t0.0431654676 $DISEASE_CABG_t0.0287769784 $MALE_CA_t0.0863309353 $URGENT_APPT_t0.0431654676 $URGENT_SERVICES_t0.0575539568 $WAS_COMPLICATED_t0.0215827338 $WAS_HORRIBLE_t0.1294964029 $WE_COULD_t0.1438848921 $WILL_PICKED_t0.0935251799 $WTIH_t0.0431654676 $YEAR_UNKNOWN_t0.0287769784 $YE_t0.0503597122 $ZER_t0.0575539568) !$EASIER_t0.0575539568 !$NEXT_SESSION_t0.1366906475) 
1 and(or(and(!$PSYCHIATRY_NOTE_t0.8273381295 !$UNSP_t0.2302158273 !$UPDATES_t0.0431654676 !$USED_VERBAL_t0.0935251799 !$VERIFIED_t1.3525179856 !$VISIT_DENTAL_t0.3309352518 !$VISTA_ED_t0.5035971223 !$VOICEMAIL_LEFT_t0.0503597122 !$VOLUME_MOOD_t0.0647482014 !$WERE_DISCUSSED_t0.4172661871 !$YEAR_t4.5323741007 !$YOUR_CHOOSE_t0.0431654676 !$YR_t0.4892086331) $ABLE_FUNCTION_t0.0791366906 $AVERAGE_RISK_t0.0431654676 $BE_REFILLED_t0.0863309353 $DISEASE_CABG_t0.0287769784 $MALE_CA_t0.0863309353 $URGENT_APPT_t0.0431654676 $URGENT_SERVICES_t0.0575539568 $WAS_COMPLICATED_t0.0215827338 $WAS_HORRIBLE_t0.1294964029 $WE_COULD_t0.1438848921 $WILL_PICKED_t0.0935251799 $WTIH_t0.0431654676 $YEAR_UNKNOWN_t0.0287769784 $YE_t0.0503597122 $ZER_t0.0575539568) !$EASIER_t0.0575539568 !$NEXT_SESSION_t0.1366906475) 
1 and(or(and(or(and(!$MH_PSYCHIATRY_t0.3669064748 !$NA_MG_t0.4604316547 !$WERE_DISCUSSED_t0.4172661871) $YEAR_OLD_t2.2949640288) !$UNSP_t0.2302158273 !$USING_THERAPEUTIC_t0.0647482014 !$VERIFIED_t1.3525179856 !$VETERAN_CALLERS_t0.0359712230 !$VISTA_SC_t0.6474820144 !$VOLUME_MOOD_t0.0647482014 !$VOLUNTARILY_OR_t0.0359712230 !$VOLUNTEER_OR_t0.0719424460 !$WALKIN_t0.5539568345 !$WBC_BLOOD_t0.2661870504 !$WHAT_QUESTIONS_t0.4676258993 !$WILL_CONSIDER_t0.0647482014 !$WILL_EXPLORE_t0.0215827338 !$YEAR_FEMALE_t0.0431654676) $ABLE_FUNCTION_t0.0791366906 $DISCHARGE_ALDRETE_t0.0359712230 $QUALITIES_t0.0359712230 $WAS_COMPLICATED_t0.0215827338 $WAS_HORRIBLE_t0.1294964029 $WILL_PICKED_t0.0935251799 $WM_ADMITTED_t0.0359712230 $WORTHLESSNESS_t0.0791366906 $YE_t0.0503597122 $YOUR_BOTTLES_t0.0215827338 $ZER_t0.0575539568) !$MATE_t0.0359712230 !$MEDICATIONS_ATENOLOL_t0.0287769784 !$SUPERVISING_ATTENDING_t0.0359712230) 
1 and(or(and(or(and(!$MH_PSYCHIATRY_t0.3669064748 !$NA_MG_t0.4604316547 !$WERE_DISCUSSED_t0.4172661871) $YEAR_OLD_t2.2949640288) !$UNSP_t0.2302158273 !$USING_THERAPEUTIC_t0.0647482014 !$VERIFIED_t1.3525179856 !$VETERAN_CALLERS_t0.0359712230 !$VISTA_SC_t0.6474820144 !$VOLUME_MOOD_t0.0647482014 !$VOLUNTARILY_OR_t0.0359712230 !$VOLUNTEER_OR_t0.0719424460 !$WALKIN_t0.5539568345 !$WBC_BLOOD_t0.2661870504 !$WHAT_QUESTIONS_t0.4676258993 !$WILL_CONSIDER_t0.0647482014 !$WILL_EXPLORE_t0.0215827338 !$YEAR_FEMALE_t0.0431654676) $DISCHARGE_ALDRETE_t0.0359712230 $LIPITOR_t0.0503597122 $QUALITIES_t0.0359712230 $WAS_COMPLICATED_t0.0215827338 $WAS_HORRIBLE_t0.1294964029 $WILL_PICKED_t0.0935251799 $WM_ADMITTED_t0.0359712230 $WORTHLESSNESS_t0.0791366906 $YE_t0.0503597122 $YOUR_BOTTLES_t0.0215827338 $ZER_t0.0575539568) !$MATE_t0.0359712230 !$MEDICATIONS_ATENOLOL_t0.0287769784 !$SUPERVISING_ATTENDING_t0.0359712230) 
1 and(or(and(or(and(!$MH_PSYCHIATRY_t0.3669064748 !$NA_MG_t0.4604316547 !$WERE_DISCUSSED_t0.4172661871) $YEAR_OLD_t2.2949640288) !$UNSP_t0.2302158273 !$USING_THERAPEUTIC_t0.0647482014 !$VERIFIED_t1.3525179856 !$VETERAN_CALLERS_t0.0359712230 !$VISTA_SC_t0.6474820144 !$VOLUME_MOOD_t0.0647482014 !$VOLUNTEER_OR_t0.0719424460 !$WALKIN_t0.5539568345 !$WBC_BLOOD_t0.2661870504 !$WHAT_QUESTIONS_t0.4676258993 !$WILL_CONSIDER_t0.0647482014 !$WILL_EXPLORE_t0.0215827338 !$YEAR_FEMALE_t0.0431654676) $DISCHARGE_ALDRETE_t0.0359712230 $QUALITIES_t0.0359712230 $WAS_COMPLICATED_t0.0215827338 $WAS_HORRIBLE_t0.1294964029 $WILL_PICKED_t0.0935251799 $WM_ADMITTED_t0.0359712230 $WORTHLESSNESS_t0.0791366906 $YE_t0.0503597122 $YOUR_BOTTLES_t0.0215827338 $ZER_t0.0575539568) !$MATE_t0.0359712230 !$MEDICATIONS_ATENOLOL_t0.0287769784 !$SUPERVISING_ATTENDING_t0.0359712230) 
1 and(or(and(or(and(!$MH_PSYCHIATRY_t0.3669064748 !$NA_MG_t0.4604316547 !$WERE_DISCUSSED_t0.4172661871) $YEAR_OLD_t2.2949640288) !$UNSP_t0.2302158273 !$USING_THERAPEUTIC_t0.0647482014 !$VERIFIED_t1.3525179856 !$VISTA_SC_t0.6474820144 !$VOLUME_MOOD_t0.0647482014 !$VOLUNTARILY_OR_t0.0359712230 !$VOLUNTEER_OR_t0.0719424460 !$WALKIN_t0.5539568345 !$WBC_BLOOD_t0.2661870504 !$WHAT_QUESTIONS_t0.4676258993 !$WILL_CONSIDER_t0.0647482014 !$WILL_EXPLORE_t0.0215827338 !$YEAR_FEMALE_t0.0431654676) $DISCHARGE_ALDRETE_t0.0359712230 $QUALITIES_t0.0359712230 $WAS_COMPLICATED_t0.0215827338 $WAS_HORRIBLE_t0.1294964029 $WILL_PICKED_t0.0935251799 $WM_ADMITTED_t0.0359712230 $WORTHLESSNESS_t0.0791366906 $YE_t0.0503597122 $YOUR_BOTTLES_t0.0215827338 $ZER_t0.0575539568) !$MATE_t0.0359712230 !$MEDICATIONS_ATENOLOL_t0.0287769784 !$SUPERVISING_ATTENDING_t0.0359712230) 
1 and(or(and(or(and(!$MH_PSYCHIATRY_t0.3669064748 !$NA_MG_t0.4604316547 !$WERE_DISCUSSED_t0.4172661871) $YEAR_OLD_t2.2949640288) !$USING_THERAPEUTIC_t0.0647482014 !$VERIFIED_t1.3525179856 !$VETERAN_CALLERS_t0.0359712230 !$VISTA_SC_t0.6474820144 !$VOLUME_MOOD_t0.0647482014 !$VOLUNTARILY_OR_t0.0359712230 !$VOLUNTEER_OR_t0.0719424460 !$WALKIN_t0.5539568345 !$WBC_BLOOD_t0.2661870504 !$WHAT_QUESTIONS_t0.4676258993 !$WILL_CONSIDER_t0.0647482014 !$WILL_EXPLORE_t0.0215827338 !$YEAR_FEMALE_t0.0431654676) $DISCHARGE_ALDRETE_t0.0359712230 $QUALITIES_t0.0359712230 $WAS_COMPLICATED_t0.0215827338 $WAS_HORRIBLE_t0.1294964029 $WILL_PICKED_t0.0935251799 $WM_ADMITTED_t0.0359712230 $WORTHLESSNESS_t0.0791366906 $YE_t0.0503597122 $YOUR_BOTTLES_t0.0215827338 $ZER_t0.0575539568) !$MATE_t0.0359712230 !$MEDICATIONS_ATENOLOL_t0.0287769784 !$SUPERVISING_ATTENDING_t0.0359712230) 
1 and(or(and(or(and(!$MH_PSYCHIATRY_t0.3669064748 !$NA_MG_t0.4604316547 !$WERE_DISCUSSED_t0.4172661871) $YEAR_OLD_t2.2949640288) !$UNSP_t0.2302158273 !$USING_THERAPEUTIC_t0.0647482014 !$VERIFIED_t1.3525179856 !$VETERAN_CALLERS_t0.0359712230 !$VISTA_SC_t0.6474820144 !$VOLUME_MOOD_t0.0647482014 !$VOLUNTARILY_OR_t0.0359712230 !$VOLUNTEER_OR_t0.0719424460 !$WALKIN_t0.5539568345 !$WBC_BLOOD_t0.2661870504 !$WHAT_QUESTIONS_t0.4676258993 !$WILL_CONSIDER_t0.0647482014 !$WILL_EXPLORE_t0.0215827338 !$YEAR_FEMALE_t0.0431654676) $DISCHARGE_ALDRETE_t0.0359712230 $QUALITIES_t0.0359712230 $WAS_COMPLICATED_t0.0215827338 $WAS_HORRIBLE_t0.1294964029 $WILL_PICKED_t0.0935251799 $WM_ADMITTED_t0.0359712230 $WORTHLESSNESS_t0.0791366906 $YE_t0.0503597122 $YOUR_BOTTLES_t0.0215827338 $ZER_t0.0575539568) !$MATE_t0.0359712230 !$MEDICATIONS_ATENOLOL_t0.0287769784 !$SUPERVISING_ATTENDING_t0.0359712230) 
1 and(or(and(or(and(!$MH_PSYCHIATRY_t0.3669064748 !$NA_MG_t0.4604316547 !$WERE_DISCUSSED_t0.4172661871) $YEAR_OLD_t2.2949640288) !$UNSP_t0.2302158273 !$USING_THERAPEUTIC_t0.0647482014 !$VERIFIED_t1.3525179856 !$VETERAN_CALLERS_t0.0359712230 !$VISTA_SC_t0.6474820144 !$VOLUME_MOOD_t0.0647482014 !$VOLUNTARILY_OR_t0.0359712230 !$VOLUNTEER_OR_t0.0719424460 !$WALKIN_t0.5539568345 !$WBC_BLOOD_t0.2661870504 !$WHAT_QUESTIONS_t0.4676258993 !$WILL_CONSIDER_t0.0647482014 !$YEAR_FEMALE_t0.0431654676) $DISCHARGE_ALDRETE_t0.0359712230 $QUALITIES_t0.0359712230 $WAS_COMPLICATED_t0.0215827338 $WAS_HORRIBLE_t0.1294964029 $WILL_PICKED_t0.0935251799 $WM_ADMITTED_t0.0359712230 $WORTHLESSNESS_t0.0791366906 $YE_t0.0503597122 $YOUR_BOTTLES_t0.0215827338 $ZER_t0.0575539568) !$MATE_t0.0359712230 !$MEDICATIONS_ATENOLOL_t0.0287769784 !$SUPERVISING_ATTENDING_t0.0359712230 !$WILL_EXPLORE_t0.0215827338) 
1 and(or(and(or(and(!$MH_PSYCHIATRY_t0.3669064748 !$NA_MG_t0.4604316547 !$WERE_DISCUSSED_t0.4172661871) $YEAR_OLD_t2.2949640288) !$UNSP_t0.2302158273 !$USING_THERAPEUTIC_t0.0647482014 !$VERIFIED_t1.3525179856 !$VETERAN_CALLERS_t0.0359712230 !$VISTA_SC_t0.6474820144 !$VOLUME_MOOD_t0.0647482014 !$VOLUNTARILY_OR_t0.0359712230 !$VOLUNTEER_OR_t0.0719424460 !$WALKIN_t0.5539568345 !$WHAT_QUESTIONS_t0.4676258993 !$WILL_CONSIDER_t0.0647482014 !$WILL_EXPLORE_t0.0215827338 !$YEAR_FEMALE_t0.0431654676) $DISCHARGE_ALDRETE_t0.0359712230 $QUALITIES_t0.0359712230 $WAS_COMPLICATED_t0.0215827338 $WAS_HORRIBLE_t0.1294964029 $WILL_PICKED_t0.0935251799 $WM_ADMITTED_t0.0359712230 $WORTHLESSNESS_t0.0791366906 $YE_t0.0503597122 $YOUR_BOTTLES_t0.0215827338 $ZER_t0.0575539568) !$MATE_t0.0359712230 !$MEDICATIONS_ATENOLOL_t0.0287769784 !$SUPERVISING_ATTENDING_t0.0359712230 !$WBC_BLOOD_t0.2661870504) 
1 and(or(and(or(and(!$MH_PSYCHIATRY_t0.3669064748 !$NA_MG_t0.4604316547 !$WERE_DISCUSSED_t0.4172661871) $YEAR_OLD_t2.2949640288) !$UNSP_t0.2302158273 !$USING_THERAPEUTIC_t0.0647482014 !$VERIFIED_t1.3525179856 !$VETERAN_CALLERS_t0.0359712230 !$VISTA_SC_t0.6474820144 !$VOLUME_MOOD_t0.0647482014 !$VOLUNTEER_OR_t0.0719424460 !$WALKIN_t0.5539568345 !$WBC_BLOOD_t0.2661870504 !$WHAT_QUESTIONS_t0.4676258993 !$WILL_CONSIDER_t0.0647482014 !$WILL_EXPLORE_t0.0215827338 !$YEAR_FEMALE_t0.0431654676) $DISCHARGE_ALDRETE_t0.0359712230 $QUALITIES_t0.0359712230 $VOLUNTARILY_OR_t0.0359712230 $WAS_COMPLICATED_t0.0215827338 $WAS_HORRIBLE_t0.1294964029 $WILL_PICKED_t0.0935251799 $WM_ADMITTED_t0.0359712230 $WORTHLESSNESS_t0.0791366906 $YE_t0.0503597122 $YOUR_BOTTLES_t0.0215827338 $ZER_t0.0575539568) !$MATE_t0.0359712230 !$MEDICATIONS_ATENOLOL_t0.0287769784 !$SUPERVISING_ATTENDING_t0.0359712230) 
1 and(or(and(or(and(!$MH_PSYCHIATRY_t0.3669064748 !$NA_MG_t0.4604316547 !$WERE_DISCUSSED_t0.4172661871) $YEAR_OLD_t2.2949640288) !$UNSP_t0.2302158273 !$VERIFIED_t1.3525179856 !$VETERAN_CALLERS_t0.0359712230 !$VISTA_SC_t0.6474820144 !$VOLUME_MOOD_t0.0647482014 !$VOLUNTARILY_OR_t0.0359712230 !$VOLUNTEER_OR_t0.0719424460 !$WALKIN_t0.5539568345 !$WBC_BLOOD_t0.2661870504 !$WHAT_QUESTIONS_t0.4676258993 !$WILL_CONSIDER_t0.0647482014 !$WILL_EXPLORE_t0.0215827338 !$YEAR_FEMALE_t0.0431654676) $DISCHARGE_ALDRETE_t0.0359712230 $QUALITIES_t0.0359712230 $WAS_COMPLICATED_t0.0215827338 $WAS_HORRIBLE_t0.1294964029 $WILL_PICKED_t0.0935251799 $WM_ADMITTED_t0.0359712230 $WORTHLESSNESS_t0.0791366906 $YE_t0.0503597122 $YOUR_BOTTLES_t0.0215827338 $ZER_t0.0575539568) !$MATE_t0.0359712230 !$MEDICATIONS_ATENOLOL_t0.0287769784 !$SUPERVISING_ATTENDING_t0.0359712230 !$USING_THERAPEUTIC_t0.0647482014) 
1 or(and(or(and(or($OD_t1.1079136691 !$VOICE_t0.7338129496) !$ALCOH_t0.2589928058 !$MH_PSYCHIATRY_t0.3669064748 !$URINARY_SYMPTOMS_t0.0863309353 !$VOICEMAIL_t0.2949640288 !$VOLUNTEER_OR_t0.0719424460 !$WERE_DISCUSSED_t0.4172661871 !$WHEN_COUGHING_t0.0431654676 !$YEARS_t2.6546762590 !$YEAR_FEMALE_t0.0431654676 !$YOUR_SEES_t0.0359712230) $BEEN_PRESCRIBED_t0.3597122302 $CONSENT_COLON_t0.0431654676 $NURS_t0.1366906475 $UPDATED_PLEASE_t0.0215827338 $UPSETTING_IN_t0.1294964029 $URINAL_WITHIN_t0.2589928058 $VETERAN_PSYCHOEDUCATIONAL_t0.0647482014 $WAR_SERVICE_t0.0431654676 $WATCHES_t0.0575539568 $WELL_ENOUGH_t0.0359712230 $WILL_RESTART_t0.0215827338 $WTIH_t0.0431654676) !$ARMD_t0.1223021583 !$INSERTION_t0.0431654676) $LIPITOR_t0.0503597122) 
1 or(and(or(and(or($OD_t1.1079136691 !$VOICE_t0.7338129496) !$ALCOH_t0.2589928058 !$MH_PSYCHIATRY_t0.3669064748 !$URINARY_SYMPTOMS_t0.0863309353 !$VOICEMAIL_t0.2949640288 !$VOLUNTEER_OR_t0.0719424460 !$WERE_DISCUSSED_t0.4172661871 !$WHEN_COUGHING_t0.0431654676 !$YEARS_t2.6546762590 !$YEAR_FEMALE_t0.0431654676 !$YOUR_SEES_t0.0359712230) and(!$ALTERNATIVE_t0.1582733813 $BEEN_PRESCRIBED_t0.3597122302) $CONSENT_COLON_t0.0431654676 $NURS_t0.1366906475 $UPDATED_PLEASE_t0.0215827338 $UPSETTING_IN_t0.1294964029 $URINAL_WITHIN_t0.2589928058 $VETERAN_PSYCHOEDUCATIONAL_t0.0647482014 $WAR_SERVICE_t0.0431654676 $WATCHES_t0.0575539568 $WELL_ENOUGH_t0.0359712230 $WILL_RESTART_t0.0215827338 $WTIH_t0.0431654676) !$ARMD_t0.1223021583 !$INSERTION_t0.0431654676) $LIPITOR_t0.0503597122) 
1 or(and(or(and(or($OD_t1.1079136691 !$VOICE_t0.7338129496) !$ALCOH_t0.2589928058 !$MH_PSYCHIATRY_t0.3669064748 !$URINARY_SYMPTOMS_t0.0863309353 !$VOICEMAIL_t0.2949640288 !$VOLUNTEER_OR_t0.0719424460 !$WERE_DISCUSSED_t0.4172661871 !$WHEN_COUGHING_t0.0431654676 !$YEARS_t2.6546762590 !$YEAR_FEMALE_t0.0431654676 !$YOUR_SEES_t0.0359712230) and($BEEN_PRESCRIBED_t0.3597122302 !$CURRENTLY_t2.3812949640) $CONSENT_COLON_t0.0431654676 $NURS_t0.1366906475 $UPDATED_PLEASE_t0.0215827338 $UPSETTING_IN_t0.1294964029 $URINAL_WITHIN_t0.2589928058 $VETERAN_PSYCHOEDUCATIONAL_t0.0647482014 $WAR_SERVICE_t0.0431654676 $WATCHES_t0.0575539568 $WELL_ENOUGH_t0.0359712230 $WILL_RESTART_t0.0215827338 $WTIH_t0.0431654676) !$ARMD_t0.1223021583 !$INSERTION_t0.0431654676) $LIPITOR_t0.0503597122) 
1 or(and(or(and(or($OD_t1.1079136691 !$VOICE_t0.7338129496) !$ALCOH_t0.2589928058 !$MH_PSYCHIATRY_t0.3669064748 !$URINARY_SYMPTOMS_t0.0863309353 !$VOICEMAIL_t0.2949640288 !$VOLUNTEER_OR_t0.0719424460 !$WERE_DISCUSSED_t0.4172661871 !$WHEN_COUGHING_t0.0431654676 !$YEARS_t2.6546762590 !$YEAR_FEMALE_t0.0431654676 !$YOUR_SEES_t0.0359712230) and($BEEN_PRESCRIBED_t0.3597122302 !$DRIVING_t0.3597122302) $CONSENT_COLON_t0.0431654676 $NURS_t0.1366906475 $UPDATED_PLEASE_t0.0215827338 $UPSETTING_IN_t0.1294964029 $URINAL_WITHIN_t0.2589928058 $VETERAN_PSYCHOEDUCATIONAL_t0.0647482014 $WAR_SERVICE_t0.0431654676 $WATCHES_t0.0575539568 $WELL_ENOUGH_t0.0359712230 $WILL_RESTART_t0.0215827338 $WTIH_t0.0431654676) !$ARMD_t0.1223021583 !$INSERTION_t0.0431654676) $LIPITOR_t0.0503597122) 
1 or(and(or(and(or($OD_t1.1079136691 !$VOICE_t0.7338129496) !$ALCOH_t0.2589928058 !$MH_PSYCHIATRY_t0.3669064748 !$URINARY_SYMPTOMS_t0.0863309353 !$VOICEMAIL_t0.2949640288 !$VOLUNTEER_OR_t0.0719424460 !$WERE_DISCUSSED_t0.4172661871 !$WHEN_COUGHING_t0.0431654676 !$YEARS_t2.6546762590 !$YEAR_FEMALE_t0.0431654676 !$YOUR_SEES_t0.0359712230) and($BEEN_PRESCRIBED_t0.3597122302 !$HOW_t4.6258992806) $CONSENT_COLON_t0.0431654676 $NURS_t0.1366906475 $UPDATED_PLEASE_t0.0215827338 $UPSETTING_IN_t0.1294964029 $URINAL_WITHIN_t0.2589928058 $VETERAN_PSYCHOEDUCATIONAL_t0.0647482014 $WAR_SERVICE_t0.0431654676 $WATCHES_t0.0575539568 $WELL_ENOUGH_t0.0359712230 $WILL_RESTART_t0.0215827338 $WTIH_t0.0431654676) !$ARMD_t0.1223021583 !$INSERTION_t0.0431654676) $LIPITOR_t0.0503597122) 
1 or(and(or(and(or($OD_t1.1079136691 !$VOICE_t0.7338129496) !$ALCOH_t0.2589928058 !$MH_PSYCHIATRY_t0.3669064748 !$URINARY_SYMPTOMS_t0.0863309353 !$VOICEMAIL_t0.2949640288 !$VOLUNTEER_OR_t0.0719424460 !$WERE_DISCUSSED_t0.4172661871 !$WHEN_COUGHING_t0.0431654676 !$YEARS_t2.6546762590 !$YEAR_FEMALE_t0.0431654676 !$YOUR_SEES_t0.0359712230) and($BEEN_PRESCRIBED_t0.3597122302 !$CALL_MIN_t0.6115107914 !$SPECIFIC_t0.6115107914) $CONSENT_COLON_t0.0431654676 $NURS_t0.1366906475 $UPDATED_PLEASE_t0.0215827338 $UPSETTING_IN_t0.1294964029 $URINAL_WITHIN_t0.2589928058 $VETERAN_PSYCHOEDUCATIONAL_t0.0647482014 $WAR_SERVICE_t0.0431654676 $WATCHES_t0.0575539568 $WELL_ENOUGH_t0.0359712230 $WILL_RESTART_t0.0215827338 $WTIH_t0.0431654676) !$ARMD_t0.1223021583 !$INSERTION_t0.0431654676) $LIPITOR_t0.0503597122) 
1 and(or(and(or($OD_t1.1079136691 !$VOICE_t0.7338129496) !$ALCOH_t0.2589928058 !$MH_PSYCHIATRY_t0.3669064748 !$URINARY_SYMPTOMS_t0.0863309353 !$VOICEMAIL_t0.2949640288 !$VOLUNTEER_OR_t0.0719424460 !$WERE_DISCUSSED_t0.4172661871 !$WHEN_COUGHING_t0.0431654676 !$YEARS_t2.6546762590 !$YEAR_FEMALE_t0.0431654676 !$YOUR_SEES_t0.0359712230) $BEEN_PRESCRIBED_t0.3597122302 $CONSENT_COLON_t0.0431654676 $NURS_t0.1366906475 $UPDATED_PLEASE_t0.0215827338 $UPSETTING_IN_t0.1294964029 $URINAL_WITHIN_t0.2589928058 $VETERAN_PSYCHOEDUCATIONAL_t0.0647482014 $WAR_SERVICE_t0.0431654676 $WATCHES_t0.0575539568 $WELL_ENOUGH_t0.0359712230 $WILL_RESTART_t0.0215827338 $WTIH_t0.0431654676) !$ARMD_t0.1223021583 !$INSERTION_t0.0431654676) 
1 or(and(or(and(or($OD_t1.1079136691 !$VOICE_t0.7338129496) !$ALCOH_t0.2589928058 !$MH_PSYCHIATRY_t0.3669064748 !$URINARY_SYMPTOMS_t0.0863309353 !$VOICEMAIL_t0.2949640288 !$VOLUNTEER_OR_t0.0719424460 !$WERE_DISCUSSED_t0.4172661871 !$WHEN_COUGHING_t0.0431654676 !$YEARS_t2.6546762590 !$YEAR_FEMALE_t0.0431654676 !$YOUR_SEES_t0.0359712230) $BEEN_PRESCRIBED_t0.3597122302 $CONSENT_COLON_t0.0431654676 $UPDATED_PLEASE_t0.0215827338 $UPSETTING_IN_t0.1294964029 $URINAL_WITHIN_t0.2589928058 $VETERAN_PSYCHOEDUCATIONAL_t0.0647482014 $WAR_SERVICE_t0.0431654676 $WATCHES_t0.0575539568 $WELL_ENOUGH_t0.0359712230 $WILL_RESTART_t0.0215827338 $WTIH_t0.0431654676) !$ARMD_t0.1223021583 !$INSERTION_t0.0431654676) $LIPITOR_t0.0503597122) 
1 and(or(and(or($OD_t1.1079136691 !$VOICE_t0.7338129496) !$ALCOH_t0.2589928058 !$MH_PSYCHIATRY_t0.3669064748 !$URINARY_SYMPTOMS_t0.0863309353 !$VOICEMAIL_t0.2949640288 !$VOLUNTEER_OR_t0.0719424460 !$WERE_DISCUSSED_t0.4172661871 !$WHEN_COUGHING_t0.0431654676 !$YEARS_t2.6546762590 !$YEAR_FEMALE_t0.0431654676 !$YOUR_SEES_t0.0359712230) $BEEN_PRESCRIBED_t0.3597122302 $CONSENT_COLON_t0.0431654676 $NURS_t0.1366906475 $UPDATED_PLEASE_t0.0215827338 $UPSETTING_IN_t0.1294964029 $URINAL_WITHIN_t0.2589928058 $VETERAN_PSYCHOEDUCATIONAL_t0.0647482014 $WAR_SERVICE_t0.0431654676 $WATCHES_t0.0575539568 $WELL_ENOUGH_t0.0359712230 $WILL_RESTART_t0.0215827338 $WTIH_t0.0431654676) !$ARMD_t0.1223021583 !$BOSTON_t0.0575539568 !$INSERTION_t0.0431654676) 
1 and(or(and(or($OD_t1.1079136691 !$VOICE_t0.7338129496) !$ALCOH_t0.2589928058 !$MH_PSYCHIATRY_t0.3669064748 !$URINARY_SYMPTOMS_t0.0863309353 !$VOICEMAIL_t0.2949640288 !$VOLUNTEER_OR_t0.0719424460 !$WERE_DISCUSSED_t0.4172661871 !$WHEN_COUGHING_t0.0431654676 !$YEARS_t2.6546762590 !$YEAR_FEMALE_t0.0431654676 !$YOUR_SEES_t0.0359712230) $BEEN_PRESCRIBED_t0.3597122302 $CONSENT_COLON_t0.0431654676 $NURS_t0.1366906475 $UPDATED_PLEASE_t0.0215827338 $UPSETTING_IN_t0.1294964029 $URINAL_WITHIN_t0.2589928058 $VETERAN_PSYCHOEDUCATIONAL_t0.0647482014 $WAR_SERVICE_t0.0431654676 $WATCHES_t0.0575539568 $WELL_ENOUGH_t0.0359712230 $WILL_RESTART_t0.0215827338 $WTIH_t0.0431654676) !$ARMD_t0.1223021583 !$INSERTION_t0.0431654676 !$LEFT_VM_t0.0791366906) 
1 and(or(and(or(!$WERE_DISCUSSED_t0.4172661871 !$YOU_HAVE_t2.9856115108) !$FEAR_t0.2446043165 !$UNSCHEDULED_ASSESSMENT_t0.1294964029 !$UNSP_t0.2302158273 !$USE_INTERACTING_t0.0647482014 !$VERBAL_RESPONSE_t0.0791366906 !$VERIFIED_t1.3525179856 !$VISIT_DENTAL_t0.3309352518 !$VOICEMAIL_LEFT_t0.0503597122 !$VOIDING_t0.5395683453 !$VOLUME_MOOD_t0.0647482014 !$WALKIN_t0.5539568345 !$YEARS_OLD_t0.2158273381 !$YEAR_t4.5323741007) $ABLE_FUNCTION_t0.0791366906 $ACETATE_t0.0575539568 $BE_REFILLED_t0.0863309353 $URGENT_APPT_t0.0431654676 $URGENT_SERVICES_t0.0575539568 $WAS_HORRIBLE_t0.1294964029 $WATCHES_t0.0575539568 $WE_COULD_t0.1438848921 $WILL_RESTART_t0.0215827338 $WTIH_t0.0431654676 $YEAR_COUNSELED_t0.0431654676 $YE_t0.0503597122 $YOUR_PILL_t0.0215827338) !$ALZHEIMERS_DISEASE_t0.0431654676 !$STRUGGLES_WITH_t0.0359712230) 
1 and(or(and(or(!$WERE_DISCUSSED_t0.4172661871 !$YOU_HAVE_t2.9856115108) !$FEAR_t0.2446043165 !$UNSCHEDULED_ASSESSMENT_t0.1294964029 !$UNSP_t0.2302158273 !$USE_INTERACTING_t0.0647482014 !$VERBAL_RESPONSE_t0.0791366906 !$VERIFIED_t1.3525179856 !$VISIT_DENTAL_t0.3309352518 !$VOICEMAIL_LEFT_t0.0503597122 !$VOIDING_t0.5395683453 !$VOLUME_MOOD_t0.0647482014 !$WALKIN_t0.5539568345 !$YEARS_OLD_t0.2158273381 !$YEAR_t4.5323741007) $ABLE_FUNCTION_t0.0791366906 $ACETATE_t0.0575539568 $DISEASE_CABG_t0.0287769784 $URGENT_APPT_t0.0431654676 $URGENT_SERVICES_t0.0575539568 $WAS_HORRIBLE_t0.1294964029 $WATCHES_t0.0575539568 $WE_COULD_t0.1438848921 $WILL_RESTART_t0.0215827338 $WTIH_t0.0431654676 $YEAR_COUNSELED_t0.0431654676 $YE_t0.0503597122 $YOUR_PILL_t0.0215827338) !$ALZHEIMERS_DISEASE_t0.0431654676 !$STRUGGLES_WITH_t0.0359712230) 
1 and(or(and(or(!$WERE_DISCUSSED_t0.4172661871 !$YOU_HAVE_t2.9856115108) !$FEAR_t0.2446043165 !$UNSP_t0.2302158273 !$USE_INTERACTING_t0.0647482014 !$VERBAL_RESPONSE_t0.0791366906 !$VERIFIED_t1.3525179856 !$VISIT_DENTAL_t0.3309352518 !$VOICEMAIL_LEFT_t0.0503597122 !$VOIDING_t0.5395683453 !$VOLUME_MOOD_t0.0647482014 !$WALKIN_t0.5539568345 !$YEARS_OLD_t0.2158273381 !$YEAR_t4.5323741007) $ABLE_FUNCTION_t0.0791366906 $ACETATE_t0.0575539568 $URGENT_APPT_t0.0431654676 $URGENT_SERVICES_t0.0575539568 $WAS_HORRIBLE_t0.1294964029 $WATCHES_t0.0575539568 $WE_COULD_t0.1438848921 $WILL_RESTART_t0.0215827338 $WTIH_t0.0431654676 $YEAR_COUNSELED_t0.0431654676 $YE_t0.0503597122 $YOUR_PILL_t0.0215827338) !$ALZHEIMERS_DISEASE_t0.0431654676 !$STRUGGLES_WITH_t0.0359712230) 
1 and(or(and(or(!$WERE_DISCUSSED_t0.4172661871 !$YOU_HAVE_t2.9856115108) !$FEAR_t0.2446043165 !$UNSCHEDULED_ASSESSMENT_t0.1294964029 !$UNSP_t0.2302158273 !$USE_INTERACTING_t0.0647482014 !$VERBAL_RESPONSE_t0.0791366906 !$VERIFIED_t1.3525179856 !$VISIT_DENTAL_t0.3309352518 !$VOICEMAIL_LEFT_t0.0503597122 !$VOIDING_t0.5395683453 !$VOLUME_MOOD_t0.0647482014 !$WALKIN_t0.5539568345 !$YEARS_OLD_t0.2158273381 !$YEAR_t4.5323741007) $ABLE_FUNCTION_t0.0791366906 $ACETATE_t0.0575539568 $URGENT_APPT_t0.0431654676 $URGENT_SERVICES_t0.0575539568 $WAS_HORRIBLE_t0.1294964029 $WATCHES_t0.0575539568 $WE_COULD_t0.1438848921 $WILL_RESTART_t0.0215827338 $WTIH_t0.0431654676 $YEAR_COUNSELED_t0.0431654676 $YE_t0.0503597122 $YOUR_PILL_t0.0215827338) !$ALZHEIMERS_DISEASE_t0.0431654676 !$STRUGGLES_WITH_t0.0359712230) 
1 and(or(and(or(!$WERE_DISCUSSED_t0.4172661871 !$YOU_HAVE_t2.9856115108) !$FEAR_t0.2446043165 !$UNSP_t0.2302158273 !$USE_INTERACTING_t0.0647482014 !$VERBAL_RESPONSE_t0.0791366906 !$VERIFIED_t1.3525179856 !$VISIT_DENTAL_t0.3309352518 !$VOICEMAIL_LEFT_t0.0503597122 !$VOIDING_t0.5395683453 !$VOLUME_MOOD_t0.0647482014 !$WALKIN_t0.5539568345 !$YEARS_OLD_t0.2158273381 !$YEAR_t4.5323741007) $ABLE_FUNCTION_t0.0791366906 $ACETATE_t0.0575539568 $UNSCHEDULED_ASSESSMENT_t0.1294964029 $URGENT_APPT_t0.0431654676 $URGENT_SERVICES_t0.0575539568 $WAS_HORRIBLE_t0.1294964029 $WATCHES_t0.0575539568 $WE_COULD_t0.1438848921 $WILL_RESTART_t0.0215827338 $WTIH_t0.0431654676 $YEAR_COUNSELED_t0.0431654676 $YE_t0.0503597122 $YOUR_PILL_t0.0215827338) !$ALZHEIMERS_DISEASE_t0.0431654676 !$STRUGGLES_WITH_t0.0359712230) 
1 and(or(and(or($ABLE_FUNCTION_t0.0791366906 !$WERE_DISCUSSED_t0.4172661871 !$YOU_HAVE_t2.9856115108) !$FEAR_t0.2446043165 !$UNSCHEDULED_ASSESSMENT_t0.1294964029 !$UNSP_t0.2302158273 !$USE_INTERACTING_t0.0647482014 !$VERBAL_RESPONSE_t0.0791366906 !$VERIFIED_t1.3525179856 !$VISIT_DENTAL_t0.3309352518 !$VOICEMAIL_LEFT_t0.0503597122 !$VOIDING_t0.5395683453 !$VOLUME_MOOD_t0.0647482014 !$WALKIN_t0.5539568345 !$YEARS_OLD_t0.2158273381 !$YEAR_t4.5323741007) $ABLE_FUNCTION_t0.0791366906 $ACETATE_t0.0575539568 $URGENT_APPT_t0.0431654676 $URGENT_SERVICES_t0.0575539568 $WAS_HORRIBLE_t0.1294964029 $WATCHES_t0.0575539568 $WE_COULD_t0.1438848921 $WILL_RESTART_t0.0215827338 $WTIH_t0.0431654676 $YEAR_COUNSELED_t0.0431654676 $YE_t0.0503597122 $YOUR_PILL_t0.0215827338) !$ALZHEIMERS_DISEASE_t0.0431654676 !$STRUGGLES_WITH_t0.0359712230) 
1 and(or(and(or($ABNORMAL_t0.7410071942 !$WERE_DISCUSSED_t0.4172661871 !$YOU_HAVE_t2.9856115108) !$FEAR_t0.2446043165 !$UNSCHEDULED_ASSESSMENT_t0.1294964029 !$UNSP_t0.2302158273 !$USE_INTERACTING_t0.0647482014 !$VERBAL_RESPONSE_t0.0791366906 !$VERIFIED_t1.3525179856 !$VISIT_DENTAL_t0.3309352518 !$VOICEMAIL_LEFT_t0.0503597122 !$VOIDING_t0.5395683453 !$VOLUME_MOOD_t0.0647482014 !$WALKIN_t0.5539568345 !$YEARS_OLD_t0.2158273381 !$YEAR_t4.5323741007) $ABLE_FUNCTION_t0.0791366906 $ACETATE_t0.0575539568 $URGENT_APPT_t0.0431654676 $URGENT_SERVICES_t0.0575539568 $WAS_HORRIBLE_t0.1294964029 $WATCHES_t0.0575539568 $WE_COULD_t0.1438848921 $WILL_RESTART_t0.0215827338 $WTIH_t0.0431654676 $YEAR_COUNSELED_t0.0431654676 $YE_t0.0503597122 $YOUR_PILL_t0.0215827338) !$ALZHEIMERS_DISEASE_t0.0431654676 !$STRUGGLES_WITH_t0.0359712230) 
1 and(or(and(or($ACETATE_t0.0575539568 !$WERE_DISCUSSED_t0.4172661871 !$YOU_HAVE_t2.9856115108) !$FEAR_t0.2446043165 !$UNSCHEDULED_ASSESSMENT_t0.1294964029 !$UNSP_t0.2302158273 !$USE_INTERACTING_t0.0647482014 !$VERBAL_RESPONSE_t0.0791366906 !$VERIFIED_t1.3525179856 !$VISIT_DENTAL_t0.3309352518 !$VOICEMAIL_LEFT_t0.0503597122 !$VOIDING_t0.5395683453 !$VOLUME_MOOD_t0.0647482014 !$WALKIN_t0.5539568345 !$YEARS_OLD_t0.2158273381 !$YEAR_t4.5323741007) $ABLE_FUNCTION_t0.0791366906 $ACETATE_t0.0575539568 $URGENT_APPT_t0.0431654676 $URGENT_SERVICES_t0.0575539568 $WAS_HORRIBLE_t0.1294964029 $WATCHES_t0.0575539568 $WE_COULD_t0.1438848921 $WILL_RESTART_t0.0215827338 $WTIH_t0.0431654676 $YEAR_COUNSELED_t0.0431654676 $YE_t0.0503597122 $YOUR_PILL_t0.0215827338) !$ALZHEIMERS_DISEASE_t0.0431654676 !$STRUGGLES_WITH_t0.0359712230) 
1 and(or(and(or($ACHING_t0.1654676259 !$WERE_DISCUSSED_t0.4172661871 !$YOU_HAVE_t2.9856115108) !$FEAR_t0.2446043165 !$UNSCHEDULED_ASSESSMENT_t0.1294964029 !$UNSP_t0.2302158273 !$USE_INTERACTING_t0.0647482014 !$VERBAL_RESPONSE_t0.0791366906 !$VERIFIED_t1.3525179856 !$VISIT_DENTAL_t0.3309352518 !$VOICEMAIL_LEFT_t0.0503597122 !$VOIDING_t0.5395683453 !$VOLUME_MOOD_t0.0647482014 !$WALKIN_t0.5539568345 !$YEARS_OLD_t0.2158273381 !$YEAR_t4.5323741007) $ABLE_FUNCTION_t0.0791366906 $ACETATE_t0.0575539568 $URGENT_APPT_t0.0431654676 $URGENT_SERVICES_t0.0575539568 $WAS_HORRIBLE_t0.1294964029 $WATCHES_t0.0575539568 $WE_COULD_t0.1438848921 $WILL_RESTART_t0.0215827338 $WTIH_t0.0431654676 $YEAR_COUNSELED_t0.0431654676 $YE_t0.0503597122 $YOUR_PILL_t0.0215827338) !$ALZHEIMERS_DISEASE_t0.0431654676 !$STRUGGLES_WITH_t0.0359712230) 
1 and(or(and(or($ADULT_t0.3956834532 !$WERE_DISCUSSED_t0.4172661871 !$YOU_HAVE_t2.9856115108) !$FEAR_t0.2446043165 !$UNSCHEDULED_ASSESSMENT_t0.1294964029 !$UNSP_t0.2302158273 !$USE_INTERACTING_t0.0647482014 !$VERBAL_RESPONSE_t0.0791366906 !$VERIFIED_t1.3525179856 !$VISIT_DENTAL_t0.3309352518 !$VOICEMAIL_LEFT_t0.0503597122 !$VOIDING_t0.5395683453 !$VOLUME_MOOD_t0.0647482014 !$WALKIN_t0.5539568345 !$YEARS_OLD_t0.2158273381 !$YEAR_t4.5323741007) $ABLE_FUNCTION_t0.0791366906 $ACETATE_t0.0575539568 $URGENT_APPT_t0.0431654676 $URGENT_SERVICES_t0.0575539568 $WAS_HORRIBLE_t0.1294964029 $WATCHES_t0.0575539568 $WE_COULD_t0.1438848921 $WILL_RESTART_t0.0215827338 $WTIH_t0.0431654676 $YEAR_COUNSELED_t0.0431654676 $YE_t0.0503597122 $YOUR_PILL_t0.0215827338) !$ALZHEIMERS_DISEASE_t0.0431654676 !$STRUGGLES_WITH_t0.0359712230) 
1 and(or(and(or($VINFLUENZA_PATIENT_t0.0647482014 !$WERE_DISCUSSED_t0.4172661871) !$MH_PSYCHIATRY_t0.3669064748 !$NA_MG_t0.4604316547 !$UNSP_t0.2302158273 !$VERBAL_RESPONSE_t0.0791366906 !$VERIFIED_t1.3525179856 !$VISIT_PROCESSES_t0.0647482014 !$VOLUME_MOOD_t0.0647482014 !$WARRANT_t0.0503597122 !$WERE_t7.6330935252 !$WILL_CONSIDER_t0.0647482014 !$WITH_COLONOSCOPE_t0.0863309353 !$YEARS_OLD_t0.2158273381 !$YEAR_t4.5323741007) and($UPSETTING_IN_t0.1294964029 !$VISIT_UAL_t0.0287769784) $ABLE_FUNCTION_t0.0791366906 $BE_REFILLED_t0.0863309353 $URGENT_APPT_t0.0431654676 $URINAL_WITHIN_t0.2589928058 $WE_COULD_t0.1438848921 $WILL_PICKED_t0.0935251799 $WILL_RESTART_t0.0215827338 $WTIH_t0.0431654676 $YEAR_COUNSELED_t0.0431654676 $YE_t0.0503597122) !$EASIER_t0.0575539568 !$GRATITUDE_t0.0359712230) 
1 and(or(and(or($VINFLUENZA_PATIENT_t0.0647482014 !$WERE_DISCUSSED_t0.4172661871) !$MH_PSYCHIATRY_t0.3669064748 !$NA_MG_t0.4604316547 !$UNSP_t0.2302158273 !$VERBAL_RESPONSE_t0.0791366906 !$VERIFIED_t1.3525179856 !$VISIT_PROCESSES_t0.0647482014 !$VOLUME_MOOD_t0.0647482014 !$WARRANT_t0.0503597122 !$WERE_t7.6330935252 !$WILL_CONSIDER_t0.0647482014 !$WITH_COLONOSCOPE_t0.0863309353 !$YEARS_OLD_t0.2158273381 !$YEAR_t4.5323741007) and($UPSETTING_IN_t0.1294964029 !$VISIT_UAL_t0.0287769784) $ABLE_FUNCTION_t0.0791366906 $BE_REFILLED_t0.0863309353 $URGENT_APPT_t0.0431654676 $URINAL_WITHIN_t0.2589928058 $WE_COULD_t0.1438848921 $WILL_PICKED_t0.0935251799 $WILL_RESTART_t0.0215827338 $WTIH_t0.0431654676 $YEAR_COUNSELED_t0.0431654676 $YE_t0.0503597122) !$EASIER_t0.0575539568 !$SCHEDULE_NEXT_t0.0647482014) 
1 and(or(and(or($VINFLUENZA_PATIENT_t0.0647482014 !$WERE_DISCUSSED_t0.4172661871) !$MH_PSYCHIATRY_t0.3669064748 !$NA_MG_t0.4604316547 !$UNSP_t0.2302158273 !$VERBAL_RESPONSE_t0.0791366906 !$VERIFIED_t1.3525179856 !$VISIT_PROCESSES_t0.0647482014 !$VOLUME_MOOD_t0.0647482014 !$WARRANT_t0.0503597122 !$WERE_t7.6330935252 !$WILL_CONSIDER_t0.0647482014 !$WITH_COLONOSCOPE_t0.0863309353 !$YEARS_OLD_t0.2158273381 !$YEAR_t4.5323741007) and($UPSETTING_IN_t0.1294964029 !$VISIT_UAL_t0.0287769784) $ABLE_FUNCTION_t0.0791366906 $BE_REFILLED_t0.0863309353 $URGENT_APPT_t0.0431654676 $URINAL_WITHIN_t0.2589928058 $WE_COULD_t0.1438848921 $WILL_PICKED_t0.0935251799 $WILL_RESTART_t0.0215827338 $WTIH_t0.0431654676 $YEAR_COUNSELED_t0.0431654676 $YE_t0.0503597122) !$EASIER_t0.0575539568 !$STRUGGLES_t0.0287769784) 
1 and(or(and(or($VINFLUENZA_PATIENT_t0.0647482014 !$WERE_DISCUSSED_t0.4172661871) !$MH_PSYCHIATRY_t0.3669064748 !$NA_MG_t0.4604316547 !$UNSP_t0.2302158273 !$VERBAL_RESPONSE_t0.0791366906 !$VERIFIED_t1.3525179856 !$VISIT_PROCESSES_t0.0647482014 !$VOLUME_MOOD_t0.0647482014 !$WARRANT_t0.0503597122 !$WERE_t7.6330935252 !$WILL_CONSIDER_t0.0647482014 !$WITH_COLONOSCOPE_t0.0863309353 !$YEARS_OLD_t0.2158273381 !$YEAR_t4.5323741007) and($UPSETTING_IN_t0.1294964029 !$VISIT_UAL_t0.0287769784) $ABLE_FUNCTION_t0.0791366906 $DISEASE_CABG_t0.0287769784 $URGENT_APPT_t0.0431654676 $URINAL_WITHIN_t0.2589928058 $WE_COULD_t0.1438848921 $WILL_PICKED_t0.0935251799 $WILL_RESTART_t0.0215827338 $WTIH_t0.0431654676 $YEAR_COUNSELED_t0.0431654676 $YE_t0.0503597122) !$EASIER_t0.0575539568 !$GRATITUDE_t0.0359712230) 
1 and(or(and(or($VINFLUENZA_PATIENT_t0.0647482014 !$WERE_DISCUSSED_t0.4172661871) !$MH_PSYCHIATRY_t0.3669064748 !$NA_MG_t0.4604316547 !$UNSP_t0.2302158273 !$VERBAL_RESPONSE_t0.0791366906 !$VERIFIED_t1.3525179856 !$VISIT_PROCESSES_t0.0647482014 !$VOLUME_MOOD_t0.0647482014 !$WARRANT_t0.0503597122 !$WERE_t7.6330935252 !$WILL_CONSIDER_t0.0647482014 !$WITH_COLONOSCOPE_t0.0863309353 !$YEARS_OLD_t0.2158273381 !$YEAR_t4.5323741007) and($UPSETTING_IN_t0.1294964029 !$VISIT_UAL_t0.0287769784) $ABLE_FUNCTION_t0.0791366906 $DISEASE_CABG_t0.0287769784 $URGENT_APPT_t0.0431654676 $URINAL_WITHIN_t0.2589928058 $WE_COULD_t0.1438848921 $WILL_PICKED_t0.0935251799 $WILL_RESTART_t0.0215827338 $WTIH_t0.0431654676 $YEAR_COUNSELED_t0.0431654676 $YE_t0.0503597122) !$EASIER_t0.0575539568 !$INDIVIDUAL_MINUTES_t0.1151079137) 
1 and(or(and(or($VINFLUENZA_PATIENT_t0.0647482014 !$WERE_DISCUSSED_t0.4172661871) !$MH_PSYCHIATRY_t0.3669064748 !$NA_MG_t0.4604316547 !$UNSP_t0.2302158273 !$VERBAL_RESPONSE_t0.0791366906 !$VERIFIED_t1.3525179856 !$VISIT_PROCESSES_t0.0647482014 !$VOLUME_MOOD_t0.0647482014 !$WARRANT_t0.0503597122 !$WERE_t7.6330935252 !$WILL_CONSIDER_t0.0647482014 !$WITH_COLONOSCOPE_t0.0863309353 !$YEARS_OLD_t0.2158273381 !$YEAR_t4.5323741007) and($UPSETTING_IN_t0.1294964029 !$VISIT_UAL_t0.0287769784) $ABLE_FUNCTION_t0.0791366906 $DISEASE_CABG_t0.0287769784 $URGENT_APPT_t0.0431654676 $URINAL_WITHIN_t0.2589928058 $WE_COULD_t0.1438848921 $WILL_PICKED_t0.0935251799 $WILL_RESTART_t0.0215827338 $WTIH_t0.0431654676 $YEAR_COUNSELED_t0.0431654676 $YE_t0.0503597122) !$EASIER_t0.0575539568 !$SCHEDULE_NEXT_t0.0647482014) 
1 and(or(and(or($VINFLUENZA_PATIENT_t0.0647482014 !$WERE_DISCUSSED_t0.4172661871) !$MH_PSYCHIATRY_t0.3669064748 !$NA_MG_t0.4604316547 !$UNSP_t0.2302158273 !$VERBAL_RESPONSE_t0.0791366906 !$VERIFIED_t1.3525179856 !$VISIT_PROCESSES_t0.0647482014 !$VOLUME_MOOD_t0.0647482014 !$WARRANT_t0.0503597122 !$WERE_t7.6330935252 !$WILL_CONSIDER_t0.0647482014 !$WITH_COLONOSCOPE_t0.0863309353 !$YEARS_OLD_t0.2158273381 !$YEAR_t4.5323741007) and($UPSETTING_IN_t0.1294964029 !$VISIT_UAL_t0.0287769784) $ABLE_FUNCTION_t0.0791366906 $DISEASE_CABG_t0.0287769784 $URGENT_APPT_t0.0431654676 $URINAL_WITHIN_t0.2589928058 $WE_COULD_t0.1438848921 $WILL_PICKED_t0.0935251799 $WILL_RESTART_t0.0215827338 $WTIH_t0.0431654676 $YEAR_COUNSELED_t0.0431654676 $YE_t0.0503597122) !$EASIER_t0.0575539568 !$STRUGGLES_t0.0287769784) 
1 and(or(and(or($BE_REFILLED_t0.0863309353 $UPSETTING_IN_t0.1294964029) !$VISIT_UAL_t0.0287769784) and(or($VINFLUENZA_PATIENT_t0.0647482014 !$WERE_DISCUSSED_t0.4172661871) !$MH_PSYCHIATRY_t0.3669064748 !$NA_MG_t0.4604316547 !$UNSP_t0.2302158273 !$VERBAL_RESPONSE_t0.0791366906 !$VERIFIED_t1.3525179856 !$VISIT_PROCESSES_t0.0647482014 !$VOLUME_MOOD_t0.0647482014 !$WARRANT_t0.0503597122 !$WERE_t7.6330935252 !$WILL_CONSIDER_t0.0647482014 !$WITH_COLONOSCOPE_t0.0863309353 !$YEARS_OLD_t0.2158273381 !$YEAR_t4.5323741007) $ABLE_FUNCTION_t0.0791366906 $URGENT_APPT_t0.0431654676 $URINAL_WITHIN_t0.2589928058 $WE_COULD_t0.1438848921 $WILL_PICKED_t0.0935251799 $WILL_RESTART_t0.0215827338 $WTIH_t0.0431654676 $YEAR_COUNSELED_t0.0431654676 $YE_t0.0503597122) !$EASIER_t0.0575539568 !$GRATITUDE_t0.0359712230) 
1 and(or(and(or($BE_REFILLED_t0.0863309353 $UPSETTING_IN_t0.1294964029) !$VISIT_UAL_t0.0287769784) and(or($VINFLUENZA_PATIENT_t0.0647482014 !$WERE_DISCUSSED_t0.4172661871) !$MH_PSYCHIATRY_t0.3669064748 !$NA_MG_t0.4604316547 !$UNSP_t0.2302158273 !$VERBAL_RESPONSE_t0.0791366906 !$VERIFIED_t1.3525179856 !$VISIT_PROCESSES_t0.0647482014 !$VOLUME_MOOD_t0.0647482014 !$WARRANT_t0.0503597122 !$WERE_t7.6330935252 !$WILL_CONSIDER_t0.0647482014 !$WITH_COLONOSCOPE_t0.0863309353 !$YEARS_OLD_t0.2158273381 !$YEAR_t4.5323741007) $ABLE_FUNCTION_t0.0791366906 $URGENT_APPT_t0.0431654676 $URINAL_WITHIN_t0.2589928058 $WE_COULD_t0.1438848921 $WILL_PICKED_t0.0935251799 $WILL_RESTART_t0.0215827338 $WTIH_t0.0431654676 $YEAR_COUNSELED_t0.0431654676 $YE_t0.0503597122) !$EASIER_t0.0575539568 !$SCHEDULE_NEXT_t0.0647482014) 
1 and(or(and(or($BE_REFILLED_t0.0863309353 $UPSETTING_IN_t0.1294964029) !$VISIT_UAL_t0.0287769784) and(or($VINFLUENZA_PATIENT_t0.0647482014 !$WERE_DISCUSSED_t0.4172661871) !$MH_PSYCHIATRY_t0.3669064748 !$NA_MG_t0.4604316547 !$UNSP_t0.2302158273 !$VERBAL_RESPONSE_t0.0791366906 !$VERIFIED_t1.3525179856 !$VISIT_PROCESSES_t0.0647482014 !$VOLUME_MOOD_t0.0647482014 !$WARRANT_t0.0503597122 !$WERE_t7.6330935252 !$WILL_CONSIDER_t0.0647482014 !$WITH_COLONOSCOPE_t0.0863309353 !$YEARS_OLD_t0.2158273381 !$YEAR_t4.5323741007) $ABLE_FUNCTION_t0.0791366906 $URGENT_APPT_t0.0431654676 $URINAL_WITHIN_t0.2589928058 $WE_COULD_t0.1438848921 $WILL_PICKED_t0.0935251799 $WILL_RESTART_t0.0215827338 $WTIH_t0.0431654676 $YEAR_COUNSELED_t0.0431654676 $YE_t0.0503597122) !$EASIER_t0.0575539568 !$STRUGGLES_t0.0287769784) 
1 and(or(and(!$MH_PSYCHIATRY_t0.3669064748 !$NOT_APPLICABLE_t1.5683453237 !$PSYCHIATRY_NOTE_t0.8273381295 !$UNSP_t0.2302158273 !$UNT_TABLET_t0.0647482014 !$VA_OD_t0.1294964029 !$VERBAL_RESPONSE_t0.0791366906 !$VERIFIED_t1.3525179856 !$VISIT_DENTAL_t0.3309352518 !$VOIDING_t0.5395683453 !$VOLUME_MOOD_t0.0647482014 !$WALKIN_t0.5539568345 !$WILL_CONSIDER_t0.0647482014 !$YEARS_OLD_t0.2158273381 !$YEAR_t4.5323741007 !$YOUR_NEXT_t0.3597122302) $ABLE_FUNCTION_t0.0791366906 $ACETATE_t0.0575539568 $BE_REFILLED_t0.0863309353 $URGENT_APPT_t0.0431654676 $URINAL_WITHIN_t0.2589928058 $WAS_FRIGHTENING_t0.1294964029 $WE_COULD_t0.1438848921 $WILL_PICKED_t0.0935251799 $WILL_RESTART_t0.0215827338 $WTIH_t0.0431654676 $YEAR_COUNSELED_t0.0431654676 $YE_t0.0503597122 $YOUR_BOTTLES_t0.0215827338) !$EASIER_t0.0575539568 !$GRATITUDE_t0.0359712230) 
1 and(or(and(!$MH_PSYCHIATRY_t0.3669064748 !$NOT_APPLICABLE_t1.5683453237 !$PSYCHIATRY_NOTE_t0.8273381295 !$UNSP_t0.2302158273 !$UNT_TABLET_t0.0647482014 !$VA_OD_t0.1294964029 !$VERBAL_RESPONSE_t0.0791366906 !$VERIFIED_t1.3525179856 !$VISIT_DENTAL_t0.3309352518 !$VOIDING_t0.5395683453 !$VOLUME_MOOD_t0.0647482014 !$WALKIN_t0.5539568345 !$WILL_CONSIDER_t0.0647482014 !$YEARS_OLD_t0.2158273381 !$YEAR_t4.5323741007 !$YOUR_NEXT_t0.3597122302) $ABLE_FUNCTION_t0.0791366906 $ACETATE_t0.0575539568 $DISEASE_CABG_t0.0287769784 $URGENT_APPT_t0.0431654676 $URINAL_WITHIN_t0.2589928058 $WAS_FRIGHTENING_t0.1294964029 $WE_COULD_t0.1438848921 $WILL_PICKED_t0.0935251799 $WILL_RESTART_t0.0215827338 $WTIH_t0.0431654676 $YEAR_COUNSELED_t0.0431654676 $YE_t0.0503597122 $YOUR_BOTTLES_t0.0215827338) !$EASIER_t0.0575539568 !$GRATITUDE_t0.0359712230) 
1 and(or(and(!$FEAR_t0.2446043165 !$MH_PSYCHIATRY_t0.3669064748 !$NOT_APPLICABLE_t1.5683453237 !$PSYCHIATRY_NOTE_t0.8273381295 !$UNSP_t0.2302158273 !$UNT_TABLET_t0.0647482014 !$VA_OD_t0.1294964029 !$VERBAL_RESPONSE_t0.0791366906 !$VERIFIED_t1.3525179856 !$VISIT_DENTAL_t0.3309352518 !$VOIDING_t0.5395683453 !$VOLUME_MOOD_t0.0647482014 !$WALKIN_t0.5539568345 !$WILL_CONSIDER_t0.0647482014 !$YEARS_OLD_t0.2158273381 !$YEAR_t4.5323741007 !$YOUR_NEXT_t0.3597122302) $ABLE_FUNCTION_t0.0791366906 $ACETATE_t0.0575539568 $BE_REFILLED_t0.0863309353 $URGENT_APPT_t0.0431654676 $URINAL_WITHIN_t0.2589928058 $WAS_FRIGHTENING_t0.1294964029 $WE_COULD_t0.1438848921 $WILL_PICKED_t0.0935251799 $WILL_RESTART_t0.0215827338 $WTIH_t0.0431654676 $YEAR_COUNSELED_t0.0431654676 $YE_t0.0503597122 $YOUR_BOTTLES_t0.0215827338) !$EASIER_t0.0575539568 !$GRATITUDE_t0.0359712230) 
1 and(or(and(!$FEAR_t0.2446043165 !$MH_PSYCHIATRY_t0.3669064748 !$NOT_APPLICABLE_t1.5683453237 !$PSYCHIATRY_NOTE_t0.8273381295 !$UNSP_t0.2302158273 !$UNT_TABLET_t0.0647482014 !$VA_OD_t0.1294964029 !$VERBAL_RESPONSE_t0.0791366906 !$VERIFIED_t1.3525179856 !$VISIT_DENTAL_t0.3309352518 !$VOIDING_t0.5395683453 !$VOLUME_MOOD_t0.0647482014 !$WALKIN_t0.5539568345 !$WILL_CONSIDER_t0.0647482014 !$YEARS_OLD_t0.2158273381 !$YEAR_t4.5323741007 !$YOUR_NEXT_t0.3597122302) $ABLE_FUNCTION_t0.0791366906 $ACETATE_t0.0575539568 $DISEASE_CABG_t0.0287769784 $URGENT_APPT_t0.0431654676 $URINAL_WITHIN_t0.2589928058 $WAS_FRIGHTENING_t0.1294964029 $WE_COULD_t0.1438848921 $WILL_PICKED_t0.0935251799 $WILL_RESTART_t0.0215827338 $WTIH_t0.0431654676 $YEAR_COUNSELED_t0.0431654676 $YE_t0.0503597122 $YOUR_BOTTLES_t0.0215827338) !$EASIER_t0.0575539568 !$GRATITUDE_t0.0359712230) 
1 and(or(and(!$MH_PSYCHIATRY_t0.3669064748 !$NOT_APPLICABLE_t1.5683453237 !$PSYCHIATRY_NOTE_t0.8273381295 !$UNSP_t0.2302158273 !$UNT_TABLET_t0.0647482014 !$VA_OD_t0.1294964029 !$VERBAL_RESPONSE_t0.0791366906 !$VERIFIED_t1.3525179856 !$VISIT_DENTAL_t0.3309352518 !$VOIDING_t0.5395683453 !$VOLUME_MOOD_t0.0647482014 !$WALKIN_t0.5539568345 !$WILL_CONSIDER_t0.0647482014 !$YEARS_OLD_t0.2158273381 !$YEAR_t4.5323741007 !$YOUR_NEXT_t0.3597122302) $ABLE_FUNCTION_t0.0791366906 $ACETATE_t0.0575539568 $BE_REFILLED_t0.0863309353 $DISEASE_CABG_t0.0287769784 $URGENT_APPT_t0.0431654676 $URINAL_WITHIN_t0.2589928058 $WAS_FRIGHTENING_t0.1294964029 $WE_COULD_t0.1438848921 $WILL_PICKED_t0.0935251799 $WILL_RESTART_t0.0215827338 $WTIH_t0.0431654676 $YEAR_COUNSELED_t0.0431654676 $YE_t0.0503597122 $YOUR_BOTTLES_t0.0215827338) !$EASIER_t0.0575539568 !$GRATITUDE_t0.0359712230) 
1 and(or(and($ABLE_FUNCTION_t0.0791366906 $LIPITOR_t0.0503597122) and(!$MH_PSYCHIATRY_t0.3669064748 !$NOT_APPLICABLE_t1.5683453237 !$PSYCHIATRY_NOTE_t0.8273381295 !$UNSP_t0.2302158273 !$UNT_TABLET_t0.0647482014 !$VA_OD_t0.1294964029 !$VERBAL_RESPONSE_t0.0791366906 !$VERIFIED_t1.3525179856 !$VISIT_DENTAL_t0.3309352518 !$VOIDING_t0.5395683453 !$VOLUME_MOOD_t0.0647482014 !$WALKIN_t0.5539568345 !$WILL_CONSIDER_t0.0647482014 !$YEARS_OLD_t0.2158273381 !$YEAR_t4.5323741007 !$YOUR_NEXT_t0.3597122302) $ACETATE_t0.0575539568 $BE_REFILLED_t0.0863309353 $URGENT_APPT_t0.0431654676 $URINAL_WITHIN_t0.2589928058 $WAS_FRIGHTENING_t0.1294964029 $WE_COULD_t0.1438848921 $WILL_PICKED_t0.0935251799 $WILL_RESTART_t0.0215827338 $WTIH_t0.0431654676 $YEAR_COUNSELED_t0.0431654676 $YE_t0.0503597122 $YOUR_BOTTLES_t0.0215827338) !$EASIER_t0.0575539568 !$GRATITUDE_t0.0359712230) 
1 and(or(and(!$FEAR_t0.2446043165 !$UNSP_t0.2302158273 !$UNT_TABLET_t0.0647482014 !$VA_OD_t0.1294964029 !$VERBAL_RESPONSE_t0.0791366906 !$VERIFIED_t1.3525179856 !$VISIT_DENTAL_t0.3309352518 !$VOIDING_t0.5395683453 !$VOLUME_MOOD_t0.0647482014 !$WALKIN_t0.5539568345 !$WILL_CONSIDER_t0.0647482014 !$YEARS_OLD_t0.2158273381 !$YEAR_t4.5323741007 !$YOUR_NEXT_t0.3597122302) $ABLE_FUNCTION_t0.0791366906 $ACETATE_t0.0575539568 $BE_REFILLED_t0.0863309353 $URGENT_APPT_t0.0431654676 $URINAL_WITHIN_t0.2589928058 $WAS_FRIGHTENING_t0.1294964029 $WE_COULD_t0.1438848921 $WILL_PICKED_t0.0935251799 $WILL_RESTART_t0.0215827338 $WTIH_t0.0431654676 $YEAR_COUNSELED_t0.0431654676 $YE_t0.0503597122 $YOUR_BOTTLES_t0.0215827338) !$EASIER_t0.0575539568 !$GRATITUDE_t0.0359712230) 
1 and(or(and(!$FEAR_t0.2446043165 !$UNSP_t0.2302158273 !$UNT_TABLET_t0.0647482014 !$VA_OD_t0.1294964029 !$VERBAL_RESPONSE_t0.0791366906 !$VERIFIED_t1.3525179856 !$VISIT_DENTAL_t0.3309352518 !$VOIDING_t0.5395683453 !$VOLUME_MOOD_t0.0647482014 !$WALKIN_t0.5539568345 !$WILL_CONSIDER_t0.0647482014 !$YEARS_OLD_t0.2158273381 !$YEAR_t4.5323741007 !$YOUR_NEXT_t0.3597122302) $ABLE_FUNCTION_t0.0791366906 $BE_REFILLED_t0.0863309353 $MALE_CA_t0.0863309353 $URGENT_APPT_t0.0431654676 $URINAL_WITHIN_t0.2589928058 $WAS_FRIGHTENING_t0.1294964029 $WE_COULD_t0.1438848921 $WILL_PICKED_t0.0935251799 $WILL_RESTART_t0.0215827338 $WTIH_t0.0431654676 $YEAR_COUNSELED_t0.0431654676 $YE_t0.0503597122 $YOUR_BOTTLES_t0.0215827338) !$EASIER_t0.0575539568 !$GRATITUDE_t0.0359712230) 
1 and(or(and(!$PSYCHIATRY_NOTE_t0.8273381295 !$UNSP_t0.2302158273 !$UNT_TABLET_t0.0647482014 !$VA_OD_t0.1294964029 !$VERBAL_RESPONSE_t0.0791366906 !$VERIFIED_t1.3525179856 !$VISIT_DENTAL_t0.3309352518 !$VOIDING_t0.5395683453 !$VOLUME_MOOD_t0.0647482014 !$WALKIN_t0.5539568345 !$WILL_CONSIDER_t0.0647482014 !$YEARS_OLD_t0.2158273381 !$YEAR_t4.5323741007 !$YOUR_NEXT_t0.3597122302) $ABLE_FUNCTION_t0.0791366906 $ACETATE_t0.0575539568 $BE_REFILLED_t0.0863309353 $URGENT_APPT_t0.0431654676 $URINAL_WITHIN_t0.2589928058 $WAS_FRIGHTENING_t0.1294964029 $WE_COULD_t0.1438848921 $WILL_PICKED_t0.0935251799 $WILL_RESTART_t0.0215827338 $WTIH_t0.0431654676 $YEAR_COUNSELED_t0.0431654676 $YE_t0.0503597122 $YOUR_BOTTLES_t0.0215827338) !$EASIER_t0.0575539568 !$GRATITUDE_t0.0359712230) 
1 and(or(and(!$PSYCHIATRY_NOTE_t0.8273381295 !$UNSP_t0.2302158273 !$UNT_TABLET_t0.0647482014 !$VA_OD_t0.1294964029 !$VERBAL_RESPONSE_t0.0791366906 !$VERIFIED_t1.3525179856 !$VISIT_DENTAL_t0.3309352518 !$VOIDING_t0.5395683453 !$VOLUME_MOOD_t0.0647482014 !$WALKIN_t0.5539568345 !$WILL_CONSIDER_t0.0647482014 !$YEARS_OLD_t0.2158273381 !$YEAR_t4.5323741007 !$YOUR_NEXT_t0.3597122302) $ABLE_FUNCTION_t0.0791366906 $BE_REFILLED_t0.0863309353 $MALE_CA_t0.0863309353 $URGENT_APPT_t0.0431654676 $URINAL_WITHIN_t0.2589928058 $WAS_FRIGHTENING_t0.1294964029 $WE_COULD_t0.1438848921 $WILL_PICKED_t0.0935251799 $WILL_RESTART_t0.0215827338 $WTIH_t0.0431654676 $YEAR_COUNSELED_t0.0431654676 $YE_t0.0503597122 $YOUR_BOTTLES_t0.0215827338) !$EASIER_t0.0575539568 !$GRATITUDE_t0.0359712230) 
1 and(or(and(!$FEAR_t0.2446043165 !$NOT_APPLICABLE_t1.5683453237 !$UNSP_t0.2302158273 !$VERIFIED_t1.3525179856 !$VETERAN_CALLERS_t0.0359712230 !$VOIDING_t0.5395683453 !$VOLUME_MOOD_t0.0647482014 !$VOLUNTEER_OR_t0.0719424460 !$WALKIN_t0.5539568345 !$WERE_DISCUSSED_t0.4172661871 !$WHAT_QUESTIONS_t0.4676258993 !$WILL_CONSIDER_t0.0647482014 !$WITHIN_NONPHARMACOLOGICAL_t0.0791366906 !$YEARS_OLD_t0.2158273381 !$YEAR_t4.5323741007) $DISCHARGE_ALDRETE_t0.0359712230 $DISEASE_CABG_t0.0287769784 $LIPITOR_t0.0503597122 $UPDATED_PLEASE_t0.0215827338 $URGENT_APPT_t0.0431654676 $WAS_COMPLICATED_t0.0215827338 $WAS_HORRIBLE_t0.1294964029 $WE_COULD_t0.1438848921 $WILL_PICKED_t0.0935251799 $WILL_RESTART_t0.0215827338 $WTIH_t0.0431654676 $YEAR_COUNSELED_t0.0431654676 $YE_t0.0503597122) !$EASIER_t0.0575539568 !$RETRAINING_t0.0503597122) 
1 and(or(and(!$MH_PSYCHIATRY_t0.3669064748 !$NOT_APPLICABLE_t1.5683453237 !$UNSP_t0.2302158273 !$VERIFIED_t1.3525179856 !$VETERAN_CALLERS_t0.0359712230 !$VOIDING_t0.5395683453 !$VOLUME_MOOD_t0.0647482014 !$VOLUNTEER_OR_t0.0719424460 !$WALKIN_t0.5539568345 !$WERE_DISCUSSED_t0.4172661871 !$WHAT_QUESTIONS_t0.4676258993 !$WILL_CONSIDER_t0.0647482014 !$WITHIN_NONPHARMACOLOGICAL_t0.0791366906 !$YEARS_OLD_t0.2158273381 !$YEAR_t4.5323741007) $DISCHARGE_ALDRETE_t0.0359712230 $DISEASE_CABG_t0.0287769784 $LIPITOR_t0.0503597122 $UPDATED_PLEASE_t0.0215827338 $URGENT_APPT_t0.0431654676 $WAS_COMPLICATED_t0.0215827338 $WAS_HORRIBLE_t0.1294964029 $WE_COULD_t0.1438848921 $WILL_PICKED_t0.0935251799 $WILL_RESTART_t0.0215827338 $WTIH_t0.0431654676 $YEAR_COUNSELED_t0.0431654676 $YE_t0.0503597122) !$EASIER_t0.0575539568 !$RETRAINING_t0.0503597122) 
1 and(or(and(!$MH_PSYCHIATRY_t0.3669064748 !$NOT_APPLICABLE_t1.5683453237 !$UNSP_t0.2302158273 !$VERIFIED_t1.3525179856 !$VETERAN_CALLERS_t0.0359712230 !$VOIDING_t0.5395683453 !$VOLUME_MOOD_t0.0647482014 !$VOLUNTEER_OR_t0.0719424460 !$WALKIN_t0.5539568345 !$WERE_DISCUSSED_t0.4172661871 !$WHAT_QUESTIONS_t0.4676258993 !$WILL_CONSIDER_t0.0647482014 !$WITHIN_NONPHARMACOLOGICAL_t0.0791366906 !$YEARS_OLD_t0.2158273381 !$YEAR_t4.5323741007) $AVERAGE_RISK_t0.0431654676 $DISCHARGE_ALDRETE_t0.0359712230 $DISEASE_CABG_t0.0287769784 $LIPITOR_t0.0503597122 $UPDATED_PLEASE_t0.0215827338 $URGENT_APPT_t0.0431654676 $WAS_COMPLICATED_t0.0215827338 $WAS_HORRIBLE_t0.1294964029 $WE_COULD_t0.1438848921 $WILL_PICKED_t0.0935251799 $WILL_RESTART_t0.0215827338 $WTIH_t0.0431654676 $YEAR_COUNSELED_t0.0431654676 $YE_t0.0503597122) !$EASIER_t0.0575539568 !$RETRAINING_t0.0503597122) 
1 and(or(and(!$FEAR_t0.2446043165 !$NOT_APPLICABLE_t1.5683453237 !$UNSP_t0.2302158273 !$VERIFIED_t1.3525179856 !$VETERAN_CALLERS_t0.0359712230 !$VOIDING_t0.5395683453 !$VOLUME_MOOD_t0.0647482014 !$VOLUNTEER_OR_t0.0719424460 !$WALKIN_t0.5539568345 !$WERE_DISCUSSED_t0.4172661871 !$WHAT_QUESTIONS_t0.4676258993 !$WILL_CONSIDER_t0.0647482014 !$WITHIN_NONPHARMACOLOGICAL_t0.0791366906 !$YEARS_OLD_t0.2158273381 !$YEAR_t4.5323741007) $DISCHARGE_ALDRETE_t0.0359712230 $DISEASE_CABG_t0.0287769784 $UPDATED_PLEASE_t0.0215827338 $URGENT_APPT_t0.0431654676 $WAS_COMPLICATED_t0.0215827338 $WAS_HORRIBLE_t0.1294964029 $WE_COULD_t0.1438848921 $WILL_PICKED_t0.0935251799 $WILL_RESTART_t0.0215827338 $WTIH_t0.0431654676 $YEAR_COUNSELED_t0.0431654676 $YE_t0.0503597122) !$EASIER_t0.0575539568 !$RETRAINING_t0.0503597122) 
1 and(or(and(!$FEAR_t0.2446043165 !$UNSP_t0.2302158273 !$VERIFIED_t1.3525179856 !$VETERAN_CALLERS_t0.0359712230 !$VOIDING_t0.5395683453 !$VOLUME_MOOD_t0.0647482014 !$VOLUNTEER_OR_t0.0719424460 !$WALKIN_t0.5539568345 !$WERE_DISCUSSED_t0.4172661871 !$WHAT_QUESTIONS_t0.4676258993 !$WILL_CONSIDER_t0.0647482014 !$WITHIN_NONPHARMACOLOGICAL_t0.0791366906 !$YEARS_OLD_t0.2158273381 !$YEAR_t4.5323741007) $DISCHARGE_ALDRETE_t0.0359712230 $DISEASE_CABG_t0.0287769784 $LIPITOR_t0.0503597122 $UPDATED_PLEASE_t0.0215827338 $URGENT_APPT_t0.0431654676 $WAS_COMPLICATED_t0.0215827338 $WAS_HORRIBLE_t0.1294964029 $WE_COULD_t0.1438848921 $WILL_PICKED_t0.0935251799 $WILL_RESTART_t0.0215827338 $WTIH_t0.0431654676 $YEAR_COUNSELED_t0.0431654676 $YE_t0.0503597122) !$EASIER_t0.0575539568 !$RETRAINING_t0.0503597122) 
1 and(or(and(!$MH_PSYCHIATRY_t0.3669064748 !$NOT_APPLICABLE_t1.5683453237 !$UNSP_t0.2302158273 !$VERIFIED_t1.3525179856 !$VETERAN_CALLERS_t0.0359712230 !$VOIDING_t0.5395683453 !$VOLUME_MOOD_t0.0647482014 !$VOLUNTEER_OR_t0.0719424460 !$WALKIN_t0.5539568345 !$WERE_DISCUSSED_t0.4172661871 !$WHAT_QUESTIONS_t0.4676258993 !$WILL_CONSIDER_t0.0647482014 !$WITHIN_NONPHARMACOLOGICAL_t0.0791366906 !$YEARS_OLD_t0.2158273381 !$YEAR_t4.5323741007) $AVERAGE_RISK_t0.0431654676 $DISEASE_CABG_t0.0287769784 $UPDATED_PLEASE_t0.0215827338 $URGENT_APPT_t0.0431654676 $WAS_COMPLICATED_t0.0215827338 $WAS_HORRIBLE_t0.1294964029 $WE_COULD_t0.1438848921 $WILL_PICKED_t0.0935251799 $WILL_RESTART_t0.0215827338 $WTIH_t0.0431654676 $YEAR_COUNSELED_t0.0431654676 $YE_t0.0503597122) !$EASIER_t0.0575539568 !$RETRAINING_t0.0503597122) 
1 and(or(and(!$MH_PSYCHIATRY_t0.3669064748 !$NOT_APPLICABLE_t1.5683453237 !$UNSP_t0.2302158273 !$VERIFIED_t1.3525179856 !$VETERAN_CALLERS_t0.0359712230 !$VOIDING_t0.5395683453 !$VOLUME_MOOD_t0.0647482014 !$VOLUNTEER_OR_t0.0719424460 !$WALKIN_t0.5539568345 !$WERE_DISCUSSED_t0.4172661871 !$WHAT_QUESTIONS_t0.4676258993 !$WILL_CONSIDER_t0.0647482014 !$WITHIN_NONPHARMACOLOGICAL_t0.0791366906 !$YEARS_OLD_t0.2158273381 !$YEAR_t4.5323741007) $BE_REFILLED_t0.0863309353 $DISCHARGE_ALDRETE_t0.0359712230 $UPDATED_PLEASE_t0.0215827338 $URGENT_APPT_t0.0431654676 $WAS_COMPLICATED_t0.0215827338 $WAS_HORRIBLE_t0.1294964029 $WE_COULD_t0.1438848921 $WILL_PICKED_t0.0935251799 $WILL_RESTART_t0.0215827338 $WTIH_t0.0431654676 $YEAR_COUNSELED_t0.0431654676 $YE_t0.0503597122) !$EASIER_t0.0575539568 !$RETRAINING_t0.0503597122) 
1 and(or(and(!$MH_PSYCHIATRY_t0.3669064748 !$NOT_APPLICABLE_t1.5683453237 !$UNSP_t0.2302158273 !$VERIFIED_t1.3525179856 !$VETERAN_CALLERS_t0.0359712230 !$VOIDING_t0.5395683453 !$VOLUME_MOOD_t0.0647482014 !$VOLUNTEER_OR_t0.0719424460 !$WALKIN_t0.5539568345 !$WERE_DISCUSSED_t0.4172661871 !$WHAT_QUESTIONS_t0.4676258993 !$WILL_CONSIDER_t0.0647482014 !$WITHIN_NONPHARMACOLOGICAL_t0.0791366906 !$YEARS_OLD_t0.2158273381 !$YEAR_t4.5323741007) $DISCHARGE_ALDRETE_t0.0359712230 $DISEASE_CABG_t0.0287769784 $UPDATED_PLEASE_t0.0215827338 $URGENT_APPT_t0.0431654676 $WAS_COMPLICATED_t0.0215827338 $WAS_HORRIBLE_t0.1294964029 $WE_COULD_t0.1438848921 $WILL_PICKED_t0.0935251799 $WILL_RESTART_t0.0215827338 $WTIH_t0.0431654676 $YEAR_COUNSELED_t0.0431654676 $YE_t0.0503597122) !$EASIER_t0.0575539568 !$RETRAINING_t0.0503597122) 
1 and(or(and(!$MH_PSYCHIATRY_t0.3669064748 !$UNSP_t0.2302158273 !$VERIFIED_t1.3525179856 !$VETERAN_CALLERS_t0.0359712230 !$VOIDING_t0.5395683453 !$VOLUME_MOOD_t0.0647482014 !$VOLUNTEER_OR_t0.0719424460 !$WALKIN_t0.5539568345 !$WERE_DISCUSSED_t0.4172661871 !$WHAT_QUESTIONS_t0.4676258993 !$WILL_CONSIDER_t0.0647482014 !$WITHIN_NONPHARMACOLOGICAL_t0.0791366906 !$YEARS_OLD_t0.2158273381 !$YEAR_t4.5323741007) $DISCHARGE_ALDRETE_t0.0359712230 $DISEASE_CABG_t0.0287769784 $LIPITOR_t0.0503597122 $UPDATED_PLEASE_t0.0215827338 $URGENT_APPT_t0.0431654676 $WAS_COMPLICATED_t0.0215827338 $WAS_HORRIBLE_t0.1294964029 $WE_COULD_t0.1438848921 $WILL_PICKED_t0.0935251799 $WILL_RESTART_t0.0215827338 $WTIH_t0.0431654676 $YEAR_COUNSELED_t0.0431654676 $YE_t0.0503597122) !$EASIER_t0.0575539568 !$RETRAINING_t0.0503597122) 
1 and(or(and(!$NOT_APPLICABLE_t1.5683453237 !$PSYCHIATRY_NOTE_t0.8273381295 !$UNSP_t0.2302158273 !$VERIFIED_t1.3525179856 !$VETERAN_CALLERS_t0.0359712230 !$VOIDING_t0.5395683453 !$VOLUME_MOOD_t0.0647482014 !$VOLUNTEER_OR_t0.0719424460 !$WALKIN_t0.5539568345 !$WERE_DISCUSSED_t0.4172661871 !$WHAT_QUESTIONS_t0.4676258993 !$WILL_CONSIDER_t0.0647482014 !$WITHIN_NONPHARMACOLOGICAL_t0.0791366906 !$YEARS_OLD_t0.2158273381 !$YEAR_t4.5323741007) $BE_REFILLED_t0.0863309353 $DISCHARGE_ALDRETE_t0.0359712230 $UPDATED_PLEASE_t0.0215827338 $URGENT_APPT_t0.0431654676 $WAS_COMPLICATED_t0.0215827338 $WAS_HORRIBLE_t0.1294964029 $WE_COULD_t0.1438848921 $WILL_PICKED_t0.0935251799 $WILL_RESTART_t0.0215827338 $WTIH_t0.0431654676 $YEAR_COUNSELED_t0.0431654676 $YE_t0.0503597122) !$EASIER_t0.0575539568 !$RETRAINING_t0.0503597122) 
1 and(or(and(or(!$VERIFIED_t1.3525179856 $YEARS_OLD_t0.2158273381) or($VINFLUENZA_IS_t0.0503597122 !$WERE_DISCUSSED_t0.4172661871) !$VISIT_DENTAL_t0.3309352518 !$VISTA_SC_t0.6474820144 !$VOICEMAIL_LEFT_t0.0503597122 !$VOLUME_MOOD_t0.0647482014 !$YEAR_t4.5323741007 !$YOUR_COLON_t0.0863309353 !$YR_t0.4892086331) and(!$WET_t0.1151079137 $WE_COULD_t0.1438848921) $CONSULT_APPROVED_t0.1079136691 $NOBODY_t0.0359712230 $URINAL_WITHIN_t0.2589928058 $WAR_SERVICE_t0.0431654676 $WAS_FRIGHTENING_t0.1294964029 $WILL_PICKED_t0.0935251799 $YEAR_COUNSELED_t0.0431654676 $YE_t0.0503597122 $YOUNGER_t0.0431654676) !$MATE_t0.0359712230 !$PREOCCUPIED_WITH_t0.0287769784 !$STRETCH_t0.0935251799 !$UCINATIONS_SI_t0.0359712230) 
1 and(or(and(or($VINFLUENZA_IS_t0.0503597122 !$WERE_DISCUSSED_t0.4172661871) !$VERIFIED_t1.3525179856 !$VISIT_DENTAL_t0.3309352518 !$VISTA_SC_t0.6474820144 !$VOICEMAIL_LEFT_t0.0503597122 !$VOLUME_MOOD_t0.0647482014 !$YEAR_t4.5323741007 !$YOUR_COLON_t0.0863309353 !$YR_t0.4892086331) and(!$WET_t0.1151079137 $WE_COULD_t0.1438848921) $CONSULT_APPROVED_t0.1079136691 $NOBODY_t0.0359712230 $URINAL_WITHIN_t0.2589928058 $WAR_SERVICE_t0.0431654676 $WAS_FRIGHTENING_t0.1294964029 $WILL_PICKED_t0.0935251799 $YEAR_COUNSELED_t0.0431654676 $YE_t0.0503597122 $YOUNGER_t0.0431654676) !$MATE_t0.0359712230 !$PREOCCUPIED_WITH_t0.0287769784 !$STRETCH_t0.0935251799 !$UCINATIONS_SI_t0.0359712230) 
1 and(or(and(or($VINFLUENZA_IS_t0.0503597122 !$WERE_DISCUSSED_t0.4172661871) !$VERIFIED_t1.3525179856 !$VISIT_DENTAL_t0.3309352518 !$VISTA_SC_t0.6474820144 !$VOICEMAIL_LEFT_t0.0503597122 !$VOLUME_MOOD_t0.0647482014 !$YEAR_t4.5323741007 !$YR_t0.4892086331) and(!$WET_t0.1151079137 $WE_COULD_t0.1438848921) $CONSULT_APPROVED_t0.1079136691 $NOBODY_t0.0359712230 $URINAL_WITHIN_t0.2589928058 $WAR_SERVICE_t0.0431654676 $WAS_FRIGHTENING_t0.1294964029 $WILL_PICKED_t0.0935251799 $YEAR_COUNSELED_t0.0431654676 $YE_t0.0503597122 $YOUNGER_t0.0431654676) !$MATE_t0.0359712230 !$PREOCCUPIED_WITH_t0.0287769784 !$STRETCH_t0.0935251799 !$UCINATIONS_SI_t0.0359712230 !$YOUR_COLON_t0.0863309353) 
1 and(or(and(or($VINFLUENZA_IS_t0.0503597122 !$WERE_DISCUSSED_t0.4172661871) !$VERIFIED_t1.3525179856 !$VISIT_DENTAL_t0.3309352518 !$VOICEMAIL_LEFT_t0.0503597122 !$VOLUME_MOOD_t0.0647482014 !$YEARS_OLD_t0.2158273381 !$YEAR_t4.5323741007 !$YOUR_COLON_t0.0863309353 !$YR_t0.4892086331) and(!$WET_t0.1151079137 $WE_COULD_t0.1438848921) $CONSULT_APPROVED_t0.1079136691 $NOBODY_t0.0359712230 $URINAL_WITHIN_t0.2589928058 $WAR_SERVICE_t0.0431654676 $WAS_FRIGHTENING_t0.1294964029 $WILL_PICKED_t0.0935251799 $YEAR_COUNSELED_t0.0431654676 $YE_t0.0503597122 $YOUNGER_t0.0431654676) !$MATE_t0.0359712230 !$PREOCCUPIED_WITH_t0.0287769784 !$STRETCH_t0.0935251799 !$UCINATIONS_SI_t0.0359712230) 
1 and(or(and(or($VINFLUENZA_IS_t0.0503597122 !$WERE_DISCUSSED_t0.4172661871) !$VERIFIED_t1.3525179856 !$VISIT_DENTAL_t0.3309352518 !$VOICEMAIL_LEFT_t0.0503597122 !$VOLUME_MOOD_t0.0647482014 !$YEARS_OLD_t0.2158273381 !$YEAR_t4.5323741007 !$YR_t0.4892086331) and(!$WET_t0.1151079137 $WE_COULD_t0.1438848921) $CONSULT_APPROVED_t0.1079136691 $NOBODY_t0.0359712230 $URINAL_WITHIN_t0.2589928058 $WAR_SERVICE_t0.0431654676 $WAS_FRIGHTENING_t0.1294964029 $WILL_PICKED_t0.0935251799 $YEAR_COUNSELED_t0.0431654676 $YE_t0.0503597122 $YOUNGER_t0.0431654676) !$MATE_t0.0359712230 !$PREOCCUPIED_WITH_t0.0287769784 !$STRETCH_t0.0935251799 !$UCINATIONS_SI_t0.0359712230 !$YOUR_COLON_t0.0863309353) 
1 and(or(and(or($VINFLUENZA_IS_t0.0503597122 !$WERE_DISCUSSED_t0.4172661871) !$VERIFIED_t1.3525179856 !$VISIT_DENTAL_t0.3309352518 !$VOICEMAIL_LEFT_t0.0503597122 !$YEARS_OLD_t0.2158273381 !$YEAR_t4.5323741007 !$YOUR_COLON_t0.0863309353 !$YR_t0.4892086331) and(!$WET_t0.1151079137 $WE_COULD_t0.1438848921) $CONSULT_APPROVED_t0.1079136691 $NOBODY_t0.0359712230 $URINAL_WITHIN_t0.2589928058 $WAR_SERVICE_t0.0431654676 $WAS_FRIGHTENING_t0.1294964029 $WILL_PICKED_t0.0935251799 $YEAR_COUNSELED_t0.0431654676 $YE_t0.0503597122 $YOUNGER_t0.0431654676) !$MATE_t0.0359712230 !$PREOCCUPIED_WITH_t0.0287769784 !$STRETCH_t0.0935251799 !$UCINATIONS_SI_t0.0359712230 !$VOLUME_MOOD_t0.0647482014) 
1 and(or(and(or($VINFLUENZA_IS_t0.0503597122 !$WERE_DISCUSSED_t0.4172661871) !$VERIFIED_t1.3525179856 !$VISIT_DENTAL_t0.3309352518 !$VOICEMAIL_LEFT_t0.0503597122 !$YEARS_OLD_t0.2158273381 !$YEAR_t4.5323741007 !$YR_t0.4892086331) and(!$WET_t0.1151079137 $WE_COULD_t0.1438848921) $CONSULT_APPROVED_t0.1079136691 $NOBODY_t0.0359712230 $URINAL_WITHIN_t0.2589928058 $WAR_SERVICE_t0.0431654676 $WAS_FRIGHTENING_t0.1294964029 $WILL_PICKED_t0.0935251799 $YEAR_COUNSELED_t0.0431654676 $YE_t0.0503597122 $YOUNGER_t0.0431654676) !$MATE_t0.0359712230 !$PREOCCUPIED_WITH_t0.0287769784 !$STRETCH_t0.0935251799 !$UCINATIONS_SI_t0.0359712230 !$VOLUME_MOOD_t0.0647482014 !$YOUR_COLON_t0.0863309353) 
1 and(or(and(or($CONSULT_APPROVED_t0.1079136691 $VINFLUENZA_IS_t0.0503597122 !$WERE_DISCUSSED_t0.4172661871) !$VERIFIED_t1.3525179856 !$VISIT_DENTAL_t0.3309352518 !$VOICEMAIL_LEFT_t0.0503597122 !$VOLUME_MOOD_t0.0647482014 !$YEARS_OLD_t0.2158273381 !$YEAR_t4.5323741007 !$YOUR_COLON_t0.0863309353 !$YR_t0.4892086331) and(!$WET_t0.1151079137 $WE_COULD_t0.1438848921) $CONSULT_APPROVED_t0.1079136691 $NOBODY_t0.0359712230 $URINAL_WITHIN_t0.2589928058 $WAR_SERVICE_t0.0431654676 $WAS_FRIGHTENING_t0.1294964029 $WILL_PICKED_t0.0935251799 $YEAR_COUNSELED_t0.0431654676 $YE_t0.0503597122 $YOUNGER_t0.0431654676) !$MATE_t0.0359712230 !$PREOCCUPIED_WITH_t0.0287769784 !$STRETCH_t0.0935251799 !$UCINATIONS_SI_t0.0359712230) 
1 and(or(and(or($CONSULT_APPROVED_t0.1079136691 $VINFLUENZA_IS_t0.0503597122 !$WERE_DISCUSSED_t0.4172661871) !$VERIFIED_t1.3525179856 !$VISIT_DENTAL_t0.3309352518 !$VOICEMAIL_LEFT_t0.0503597122 !$YEARS_OLD_t0.2158273381 !$YEAR_t4.5323741007 !$YOUR_COLON_t0.0863309353 !$YR_t0.4892086331) and(!$WET_t0.1151079137 $WE_COULD_t0.1438848921) $CONSULT_APPROVED_t0.1079136691 $NOBODY_t0.0359712230 $URINAL_WITHIN_t0.2589928058 $WAR_SERVICE_t0.0431654676 $WAS_FRIGHTENING_t0.1294964029 $WILL_PICKED_t0.0935251799 $YEAR_COUNSELED_t0.0431654676 $YE_t0.0503597122 $YOUNGER_t0.0431654676) !$MATE_t0.0359712230 !$PREOCCUPIED_WITH_t0.0287769784 !$STRETCH_t0.0935251799 !$UCINATIONS_SI_t0.0359712230 !$VOLUME_MOOD_t0.0647482014) 
1 and(or(and(or($MATE_t0.0359712230 $VINFLUENZA_IS_t0.0503597122 !$WERE_DISCUSSED_t0.4172661871) !$VERIFIED_t1.3525179856 !$VISIT_DENTAL_t0.3309352518 !$VOICEMAIL_LEFT_t0.0503597122 !$VOLUME_MOOD_t0.0647482014 !$YEARS_OLD_t0.2158273381 !$YEAR_t4.5323741007 !$YOUR_COLON_t0.0863309353 !$YR_t0.4892086331) and(!$WET_t0.1151079137 $WE_COULD_t0.1438848921) $CONSULT_APPROVED_t0.1079136691 $NOBODY_t0.0359712230 $URINAL_WITHIN_t0.2589928058 $WAR_SERVICE_t0.0431654676 $WAS_FRIGHTENING_t0.1294964029 $WILL_PICKED_t0.0935251799 $YEAR_COUNSELED_t0.0431654676 $YE_t0.0503597122 $YOUNGER_t0.0431654676) !$MATE_t0.0359712230 !$PREOCCUPIED_WITH_t0.0287769784 !$STRETCH_t0.0935251799 !$UCINATIONS_SI_t0.0359712230) 
1 and(or(and(or($DISEASE_CABG_t0.0287769784 $WE_COULD_t0.1438848921 $YEAR_COUNSELED_t0.0431654676 $YOUNGER_t0.0431654676) !$VOICEMAIL_t0.2949640288) and(!$MH_PSYCHIATRY_t0.3669064748 !$UNSP_t0.2302158273 !$VERBAL_RESPONSE_t0.0791366906 !$VISTA_ED_t0.5035971223 !$VOICEMAIL_LEFT_t0.0503597122 !$VOLUME_MOOD_t0.0647482014 !$VOLUNTEER_OR_t0.0719424460 !$WALKIN_t0.5539568345 !$WAL_REQUESTING_t0.0719424460 !$WERE_DISCUSSED_t0.4172661871 !$WILLING_t0.4388489209 !$YEAR_t4.5323741007 !$YR_OLD_t0.2158273381) $INFORMED_COLON_t0.0431654676 $PREPROCEDURE_DATE_t0.0791366906 $UPDATED_PLEASE_t0.0215827338 $UPSETTING_IN_t0.1294964029 $URGENT_SERVICES_t0.0575539568 $URINAL_WITHIN_t0.2589928058 $WILL_PICKED_t0.0935251799 $WORTHLESSNESS_t0.0791366906 $YEAR_UNKNOWN_t0.0287769784 $YE_t0.0503597122) !$ALZHEIMERS_DISEASE_t0.0431654676 !$SUPERVISING_ATTENDING_t0.0359712230) 
1 and(or(and(or($DISEASE_CABG_t0.0287769784 $WE_COULD_t0.1438848921 $YEAR_COUNSELED_t0.0431654676 $YOUNGER_t0.0431654676) !$VOICEMAIL_t0.2949640288) and(!$MH_PSYCHIATRY_t0.3669064748 !$UNSP_t0.2302158273 !$VERBAL_RESPONSE_t0.0791366906 !$VISTA_ED_t0.5035971223 !$VOICEMAIL_LEFT_t0.0503597122 !$VOLUME_MOOD_t0.0647482014 !$VOLUNTEER_OR_t0.0719424460 !$WALKIN_t0.5539568345 !$WAL_REQUESTING_t0.0719424460 !$WERE_DISCUSSED_t0.4172661871 !$WILLING_t0.4388489209 !$YEAR_t4.5323741007 !$YR_OLD_t0.2158273381) $INFORMED_COLON_t0.0431654676 $PREPROCEDURE_DATE_t0.0791366906 $UPDATED_PLEASE_t0.0215827338 $UPSETTING_IN_t0.1294964029 $URGENT_SERVICES_t0.0575539568 $URINAL_WITHIN_t0.2589928058 $WILL_PICKED_t0.0935251799 $WORTHLESSNESS_t0.0791366906 $YEAR_UNKNOWN_t0.0287769784 $YE_t0.0503597122) !$EASIER_t0.0575539568 !$SUPERVISING_ATTENDING_t0.0359712230) 
1 and(or(and(or($DISEASE_CABG_t0.0287769784 $WE_COULD_t0.1438848921 $YEAR_COUNSELED_t0.0431654676 $YOUNGER_t0.0431654676) !$VOICEMAIL_t0.2949640288) and(!$MH_PSYCHIATRY_t0.3669064748 !$UNSP_t0.2302158273 !$VERBAL_RESPONSE_t0.0791366906 !$VISTA_ED_t0.5035971223 !$VOICEMAIL_LEFT_t0.0503597122 !$VOLUME_MOOD_t0.0647482014 !$VOLUNTEER_OR_t0.0719424460 !$WALKIN_t0.5539568345 !$WAL_REQUESTING_t0.0719424460 !$WERE_DISCUSSED_t0.4172661871 !$WILLING_t0.4388489209 !$YEAR_t4.5323741007 !$YR_OLD_t0.2158273381) $INFORMED_COLON_t0.0431654676 $PREPROCEDURE_DATE_t0.0791366906 $UPDATED_PLEASE_t0.0215827338 $UPSETTING_IN_t0.1294964029 $URGENT_SERVICES_t0.0575539568 $URINAL_WITHIN_t0.2589928058 $WILL_PICKED_t0.0935251799 $WORTHLESSNESS_t0.0791366906 $YEAR_UNKNOWN_t0.0287769784 $YE_t0.0503597122) !$NO_UNINTENTIONAL_t0.0431654676 !$SUPERVISING_ATTENDING_t0.0359712230) 
1 and(or(and(or($DISEASE_CABG_t0.0287769784 $WE_COULD_t0.1438848921 $YEAR_COUNSELED_t0.0431654676 $YOUNGER_t0.0431654676) !$VOICEMAIL_t0.2949640288) and(!$MH_PSYCHIATRY_t0.3669064748 !$UNSP_t0.2302158273 !$VERBAL_RESPONSE_t0.0791366906 !$VISTA_ED_t0.5035971223 !$VOICEMAIL_LEFT_t0.0503597122 !$VOLUME_MOOD_t0.0647482014 !$VOLUNTEER_OR_t0.0719424460 !$WALKIN_t0.5539568345 !$WAL_REQUESTING_t0.0719424460 !$WERE_DISCUSSED_t0.4172661871 !$WILLING_t0.4388489209 !$YEAR_t4.5323741007 !$YR_OLD_t0.2158273381) $INFORMED_COLON_t0.0431654676 $PREPROCEDURE_DATE_t0.0791366906 $UPDATED_PLEASE_t0.0215827338 $UPSETTING_IN_t0.1294964029 $URGENT_SERVICES_t0.0575539568 $URINAL_WITHIN_t0.2589928058 $WILL_PICKED_t0.0935251799 $WORTHLESSNESS_t0.0791366906 $YEAR_UNKNOWN_t0.0287769784 $YE_t0.0503597122) !$ALZHEIMERS_DISEASE_t0.0431654676 !$NO_UNINTENTIONAL_t0.0431654676 !$SUPERVISING_ATTENDING_t0.0359712230) 
1 and(or(and(or($DISEASE_CABG_t0.0287769784 $WE_COULD_t0.1438848921 $YEAR_COUNSELED_t0.0431654676 $YOUNGER_t0.0431654676) !$VOICEMAIL_t0.2949640288) and(!$MH_PSYCHIATRY_t0.3669064748 !$UNSP_t0.2302158273 !$VERBAL_RESPONSE_t0.0791366906 !$VISTA_ED_t0.5035971223 !$VOICEMAIL_LEFT_t0.0503597122 !$VOLUME_MOOD_t0.0647482014 !$VOLUNTEER_OR_t0.0719424460 !$WALKIN_t0.5539568345 !$WAL_REQUESTING_t0.0719424460 !$WERE_DISCUSSED_t0.4172661871 !$WILLING_t0.4388489209 !$YEAR_t4.5323741007 !$YR_OLD_t0.2158273381) $INFORMED_COLON_t0.0431654676 $PREPROCEDURE_DATE_t0.0791366906 $UPDATED_PLEASE_t0.0215827338 $UPSETTING_IN_t0.1294964029 $URGENT_SERVICES_t0.0575539568 $URINAL_WITHIN_t0.2589928058 $WILL_PICKED_t0.0935251799 $WORTHLESSNESS_t0.0791366906 $YEAR_UNKNOWN_t0.0287769784 $YE_t0.0503597122) !$EASIER_t0.0575539568 !$NO_UNINTENTIONAL_t0.0431654676 !$SUPERVISING_ATTENDING_t0.0359712230) 
1 and(or(and(or($DISEASE_CABG_t0.0287769784 $WE_COULD_t0.1438848921 $YEAR_COUNSELED_t0.0431654676 $YOUNGER_t0.0431654676) !$VOICEMAIL_t0.2949640288) and(!$MH_PSYCHIATRY_t0.3669064748 !$UNSP_t0.2302158273 !$VERBAL_RESPONSE_t0.0791366906 !$VISTA_ED_t0.5035971223 !$VOICEMAIL_LEFT_t0.0503597122 !$VOLUME_MOOD_t0.0647482014 !$VOLUNTEER_OR_t0.0719424460 !$WALKIN_t0.5539568345 !$WAL_REQUESTING_t0.0719424460 !$WERE_DISCUSSED_t0.4172661871 !$WILLING_t0.4388489209 !$YEAR_t4.5323741007 !$YR_OLD_t0.2158273381) $INFORMED_COLON_t0.0431654676 $PREPROCEDURE_DATE_t0.0791366906 $UPDATED_PLEASE_t0.0215827338 $UPSETTING_IN_t0.1294964029 $URGENT_SERVICES_t0.0575539568 $URINAL_WITHIN_t0.2589928058 $WILL_PICKED_t0.0935251799 $WORTHLESSNESS_t0.0791366906 $YEAR_UNKNOWN_t0.0287769784 $YE_t0.0503597122) or(!$ALZHEIMERS_DISEASE_t0.0431654676 !$EASIER_t0.0575539568) !$SUPERVISING_ATTENDING_t0.0359712230) 
1 and(or(and(or($DISEASE_CABG_t0.0287769784 $WE_COULD_t0.1438848921 $YEAR_COUNSELED_t0.0431654676 $YOUNGER_t0.0431654676) !$VOICEMAIL_t0.2949640288) and(!$ALZHEIMERS_DISEASE_t0.0431654676 !$UNSP_t0.2302158273 !$VERBAL_RESPONSE_t0.0791366906 !$VISTA_ED_t0.5035971223 !$VOICEMAIL_LEFT_t0.0503597122 !$VOLUME_MOOD_t0.0647482014 !$VOLUNTEER_OR_t0.0719424460 !$WALKIN_t0.5539568345 !$WAL_REQUESTING_t0.0719424460 !$WERE_DISCUSSED_t0.4172661871 !$WILLING_t0.4388489209 !$YEAR_t4.5323741007 !$YR_OLD_t0.2158273381) $INFORMED_COLON_t0.0431654676 $PREPROCEDURE_DATE_t0.0791366906 $UPDATED_PLEASE_t0.0215827338 $UPSETTING_IN_t0.1294964029 $URGENT_SERVICES_t0.0575539568 $URINAL_WITHIN_t0.2589928058 $WILL_PICKED_t0.0935251799 $WORTHLESSNESS_t0.0791366906 $YEAR_UNKNOWN_t0.0287769784 $YE_t0.0503597122) !$SUPERVISING_ATTENDING_t0.0359712230) 
1 and(or(and(or($DISEASE_CABG_t0.0287769784 $WE_COULD_t0.1438848921 $YEAR_COUNSELED_t0.0431654676 $YOUNGER_t0.0431654676) !$VOICEMAIL_t0.2949640288) and(!$EASIER_t0.0575539568 !$UNSP_t0.2302158273 !$VERBAL_RESPONSE_t0.0791366906 !$VISTA_ED_t0.5035971223 !$VOICEMAIL_LEFT_t0.0503597122 !$VOLUME_MOOD_t0.0647482014 !$VOLUNTEER_OR_t0.0719424460 !$WALKIN_t0.5539568345 !$WAL_REQUESTING_t0.0719424460 !$WERE_DISCUSSED_t0.4172661871 !$WILLING_t0.4388489209 !$YEAR_t4.5323741007 !$YR_OLD_t0.2158273381) $AVERAGE_RISK_t0.0431654676 $INFORMED_COLON_t0.0431654676 $UPDATED_PLEASE_t0.0215827338 $UPSETTING_IN_t0.1294964029 $URGENT_SERVICES_t0.0575539568 $URINAL_WITHIN_t0.2589928058 $WILL_PICKED_t0.0935251799 $WORTHLESSNESS_t0.0791366906 $YEAR_UNKNOWN_t0.0287769784 $YE_t0.0503597122) !$SUPERVISING_ATTENDING_t0.0359712230) 
1 and(or(and(or($DISEASE_CABG_t0.0287769784 $WE_COULD_t0.1438848921 $YEAR_COUNSELED_t0.0431654676 $YOUNGER_t0.0431654676) !$VOICEMAIL_t0.2949640288) and(!$EASIER_t0.0575539568 !$UNSP_t0.2302158273 !$VERBAL_RESPONSE_t0.0791366906 !$VISTA_ED_t0.5035971223 !$VOICEMAIL_LEFT_t0.0503597122 !$VOLUME_MOOD_t0.0647482014 !$VOLUNTEER_OR_t0.0719424460 !$WALKIN_t0.5539568345 !$WAL_REQUESTING_t0.0719424460 !$WERE_DISCUSSED_t0.4172661871 !$WILLING_t0.4388489209 !$YEAR_t4.5323741007 !$YR_OLD_t0.2158273381) $GENTLE_t0.0215827338 $INFORMED_COLON_t0.0431654676 $UPDATED_PLEASE_t0.0215827338 $UPSETTING_IN_t0.1294964029 $URGENT_SERVICES_t0.0575539568 $URINAL_WITHIN_t0.2589928058 $WILL_PICKED_t0.0935251799 $WORTHLESSNESS_t0.0791366906 $YEAR_UNKNOWN_t0.0287769784 $YE_t0.0503597122) !$SUPERVISING_ATTENDING_t0.0359712230) 
1 and(or(and(or($DISEASE_CABG_t0.0287769784 $WE_COULD_t0.1438848921 $YEAR_COUNSELED_t0.0431654676 $YOUNGER_t0.0431654676) !$VOICEMAIL_t0.2949640288) and(!$EASIER_t0.0575539568 !$UNSP_t0.2302158273 !$VERBAL_RESPONSE_t0.0791366906 !$VISTA_ED_t0.5035971223 !$VOICEMAIL_LEFT_t0.0503597122 !$VOLUME_MOOD_t0.0647482014 !$VOLUNTEER_OR_t0.0719424460 !$WALKIN_t0.5539568345 !$WAL_REQUESTING_t0.0719424460 !$WERE_DISCUSSED_t0.4172661871 !$WILLING_t0.4388489209 !$YEAR_t4.5323741007 !$YR_OLD_t0.2158273381) $INFORMED_COLON_t0.0431654676 $PREPROCEDURE_DATE_t0.0791366906 $UPDATED_PLEASE_t0.0215827338 $UPSETTING_IN_t0.1294964029 $URGENT_SERVICES_t0.0575539568 $URINAL_WITHIN_t0.2589928058 $WILL_PICKED_t0.0935251799 $WORTHLESSNESS_t0.0791366906 $YEAR_UNKNOWN_t0.0287769784 $YE_t0.0503597122) !$SUPERVISING_ATTENDING_t0.0359712230) 
1 or(and(or(and(or($ABLE_FUNCTION_t0.0791366906 $CASE_SUMMARY_t0.0647482014 $WE_COULD_t0.1438848921 $YE_t0.0503597122) !$VISTA_ED_t0.5035971223) and(!$FEAR_t0.2446043165 !$NA_TAB_t0.3237410072 !$UNSP_t0.2302158273 !$USING_THERAPEUTIC_t0.0647482014 !$VERIFIED_t1.3525179856 !$VOLUME_MOOD_t0.0647482014 !$WALKIN_t0.5539568345 !$WARRANT_t0.0503597122 !$WERE_DISCUSSED_t0.4172661871 !$WHAT_QUESTIONS_t0.4676258993 !$WILL_CONSIDER_t0.0647482014 !$YEAR_t4.5323741007) $DISEASE_CABG_t0.0287769784 $UPSETTING_THAT_t0.1294964029 $WATCHES_t0.0575539568 $WILL_RESTART_t0.0215827338 $YEAR_COUNSELED_t0.0431654676 $YOUNGER_t0.0431654676 $YOUR_BOTTLES_t0.0215827338) !$ALZHEIMERS_DISEASE_t0.0431654676 !$VOLUNTEER_OR_t0.0719424460) $DISCHARGE_ALDRETE_t0.0359712230) 
1 or(and(or(and(or($ABLE_FUNCTION_t0.0791366906 $CASE_SUMMARY_t0.0647482014 $WE_COULD_t0.1438848921 $YE_t0.0503597122) !$VISTA_ED_t0.5035971223) and(!$FEAR_t0.2446043165 !$NA_TAB_t0.3237410072 !$UNSP_t0.2302158273 !$USING_THERAPEUTIC_t0.0647482014 !$VERIFIED_t1.3525179856 !$VOLUME_MOOD_t0.0647482014 !$WALKIN_t0.5539568345 !$WARRANT_t0.0503597122 !$WERE_DISCUSSED_t0.4172661871 !$WHAT_QUESTIONS_t0.4676258993 !$WILL_CONSIDER_t0.0647482014 !$YEAR_t4.5323741007) $DISEASE_CABG_t0.0287769784 $UPSETTING_THAT_t0.1294964029 $WATCHES_t0.0575539568 $WILL_RESTART_t0.0215827338 $YEAR_COUNSELED_t0.0431654676 $YOUNGER_t0.0431654676 $YOUR_BOTTLES_t0.0215827338) !$ALZHEIMERS_DISEASE_t0.0431654676 !$VOLUNTEER_OR_t0.0719424460) $GASTROENTEROLOGY_NAME_t0.0647482014) 
1 or(and(or(and(or($ABLE_FUNCTION_t0.0791366906 $CASE_SUMMARY_t0.0647482014 $WE_COULD_t0.1438848921 $YE_t0.0503597122) !$VISTA_ED_t0.5035971223) and(!$FEAR_t0.2446043165 !$NA_TAB_t0.3237410072 !$UNSP_t0.2302158273 !$USING_THERAPEUTIC_t0.0647482014 !$VERIFIED_t1.3525179856 !$VOLUME_MOOD_t0.0647482014 !$WALKIN_t0.5539568345 !$WARRANT_t0.0503597122 !$WERE_DISCUSSED_t0.4172661871 !$WHAT_QUESTIONS_t0.4676258993 !$WILL_CONSIDER_t0.0647482014 !$YEAR_t4.5323741007) $DISEASE_CABG_t0.0287769784 $UPSETTING_THAT_t0.1294964029 $WATCHES_t0.0575539568 $WILL_RESTART_t0.0215827338 $YEAR_COUNSELED_t0.0431654676 $YOUNGER_t0.0431654676 $YOUR_BOTTLES_t0.0215827338) !$ALZHEIMERS_DISEASE_t0.0431654676 !$VOLUNTEER_OR_t0.0719424460) $INFORMED_COLON_t0.0431654676) 
1 or(and(or(and(or($ABLE_FUNCTION_t0.0791366906 $CASE_SUMMARY_t0.0647482014 $WE_COULD_t0.1438848921 $YE_t0.0503597122) !$VISTA_ED_t0.5035971223) and(!$FEAR_t0.2446043165 !$NA_TAB_t0.3237410072 !$UNSP_t0.2302158273 !$USING_THERAPEUTIC_t0.0647482014 !$VERIFIED_t1.3525179856 !$VOLUME_MOOD_t0.0647482014 !$WALKIN_t0.5539568345 !$WARRANT_t0.0503597122 !$WERE_DISCUSSED_t0.4172661871 !$WHAT_QUESTIONS_t0.4676258993 !$WILL_CONSIDER_t0.0647482014 !$YEAR_t4.5323741007) $DISEASE_CABG_t0.0287769784 $UPSETTING_THAT_t0.1294964029 $WATCHES_t0.0575539568 $WILL_RESTART_t0.0215827338 $YEAR_COUNSELED_t0.0431654676 $YOUNGER_t0.0431654676 $YOUR_BOTTLES_t0.0215827338) !$ALZHEIMERS_DISEASE_t0.0431654676 !$VOLUNTEER_OR_t0.0719424460) $RECTAL_EXAM_t0.0503597122) 
1 or(and(or(and(or($ABLE_FUNCTION_t0.0791366906 $CASE_SUMMARY_t0.0647482014 $WE_COULD_t0.1438848921 $YE_t0.0503597122) !$VISTA_ED_t0.5035971223) and(!$FEAR_t0.2446043165 !$NA_TAB_t0.3237410072 !$UNSP_t0.2302158273 !$USING_THERAPEUTIC_t0.0647482014 !$VERIFIED_t1.3525179856 !$VOLUME_MOOD_t0.0647482014 !$WALKIN_t0.5539568345 !$WARRANT_t0.0503597122 !$WERE_DISCUSSED_t0.4172661871 !$WHAT_QUESTIONS_t0.4676258993 !$WILL_CONSIDER_t0.0647482014 !$YEAR_t4.5323741007) $DISEASE_CABG_t0.0287769784 $UPSETTING_THAT_t0.1294964029 $WATCHES_t0.0575539568 $WILL_RESTART_t0.0215827338 $YEAR_COUNSELED_t0.0431654676 $YOUNGER_t0.0431654676 $YOUR_BOTTLES_t0.0215827338) !$ALZHEIMERS_DISEASE_t0.0431654676 !$VOLUNTEER_OR_t0.0719424460) $TEST_ALLOWS_t0.0359712230) 
1 or(and(or(and(or($ABLE_FUNCTION_t0.0791366906 $CASE_SUMMARY_t0.0647482014 $WE_COULD_t0.1438848921 $YE_t0.0503597122) !$VISTA_ED_t0.5035971223) and(!$MH_PSYCHIATRY_t0.3669064748 !$NA_TAB_t0.3237410072 !$UNSP_t0.2302158273 !$USING_THERAPEUTIC_t0.0647482014 !$VERIFIED_t1.3525179856 !$VOLUME_MOOD_t0.0647482014 !$WALKIN_t0.5539568345 !$WARRANT_t0.0503597122 !$WERE_DISCUSSED_t0.4172661871 !$WHAT_QUESTIONS_t0.4676258993 !$WILL_CONSIDER_t0.0647482014 !$YEAR_t4.5323741007) $DISEASE_CABG_t0.0287769784 $UPSETTING_THAT_t0.1294964029 $WATCHES_t0.0575539568 $WILL_RESTART_t0.0215827338 $YEAR_COUNSELED_t0.0431654676 $YOUNGER_t0.0431654676 $YOUR_BOTTLES_t0.0215827338) !$ALZHEIMERS_DISEASE_t0.0431654676 !$VOLUNTEER_OR_t0.0719424460) $GASTROENTEROLOGY_NAME_t0.0647482014) 
1 or(and(or(and(or($ABLE_FUNCTION_t0.0791366906 $CASE_SUMMARY_t0.0647482014 $WE_COULD_t0.1438848921 $YE_t0.0503597122) !$VISTA_ED_t0.5035971223) and(!$NA_TAB_t0.3237410072 !$PREOCCUPIED_WITH_t0.0287769784 !$UNSP_t0.2302158273 !$USING_THERAPEUTIC_t0.0647482014 !$VERIFIED_t1.3525179856 !$VOLUME_MOOD_t0.0647482014 !$WALKIN_t0.5539568345 !$WARRANT_t0.0503597122 !$WERE_DISCUSSED_t0.4172661871 !$WHAT_QUESTIONS_t0.4676258993 !$WILL_CONSIDER_t0.0647482014 !$YEAR_t4.5323741007) $DISEASE_CABG_t0.0287769784 $UPSETTING_THAT_t0.1294964029 $WATCHES_t0.0575539568 $WILL_RESTART_t0.0215827338 $YEAR_COUNSELED_t0.0431654676 $YOUNGER_t0.0431654676 $YOUR_BOTTLES_t0.0215827338) !$ALZHEIMERS_DISEASE_t0.0431654676 !$VOLUNTEER_OR_t0.0719424460) $DISCHARGE_ALDRETE_t0.0359712230) 
1 or(and(or(and(or($ABLE_FUNCTION_t0.0791366906 $CASE_SUMMARY_t0.0647482014 $WE_COULD_t0.1438848921 $YE_t0.0503597122) !$VISTA_ED_t0.5035971223) and(!$NA_TAB_t0.3237410072 !$PREOCCUPIED_WITH_t0.0287769784 !$UNSP_t0.2302158273 !$USING_THERAPEUTIC_t0.0647482014 !$VERIFIED_t1.3525179856 !$VOLUME_MOOD_t0.0647482014 !$WALKIN_t0.5539568345 !$WARRANT_t0.0503597122 !$WERE_DISCUSSED_t0.4172661871 !$WHAT_QUESTIONS_t0.4676258993 !$WILL_CONSIDER_t0.0647482014 !$YEAR_t4.5323741007) $DISEASE_CABG_t0.0287769784 $UPSETTING_THAT_t0.1294964029 $WATCHES_t0.0575539568 $WILL_RESTART_t0.0215827338 $YEAR_COUNSELED_t0.0431654676 $YOUNGER_t0.0431654676 $YOUR_BOTTLES_t0.0215827338) !$ALZHEIMERS_DISEASE_t0.0431654676 !$VOLUNTEER_OR_t0.0719424460) $GASTROENTEROLOGY_NAME_t0.0647482014) 
1 or(and(or(and(or($ABLE_FUNCTION_t0.0791366906 $CASE_SUMMARY_t0.0647482014 $WE_COULD_t0.1438848921 $YE_t0.0503597122) !$VISTA_ED_t0.5035971223) and(!$NA_TAB_t0.3237410072 !$PREOCCUPIED_WITH_t0.0287769784 !$UNSP_t0.2302158273 !$USING_THERAPEUTIC_t0.0647482014 !$VERIFIED_t1.3525179856 !$VOLUME_MOOD_t0.0647482014 !$WALKIN_t0.5539568345 !$WARRANT_t0.0503597122 !$WERE_DISCUSSED_t0.4172661871 !$WHAT_QUESTIONS_t0.4676258993 !$WILL_CONSIDER_t0.0647482014 !$YEAR_t4.5323741007) $DISEASE_CABG_t0.0287769784 $UPSETTING_THAT_t0.1294964029 $WATCHES_t0.0575539568 $WILL_RESTART_t0.0215827338 $YEAR_COUNSELED_t0.0431654676 $YOUNGER_t0.0431654676 $YOUR_BOTTLES_t0.0215827338) !$ALZHEIMERS_DISEASE_t0.0431654676 !$VOLUNTEER_OR_t0.0719424460) $INFORMED_COLON_t0.0431654676) 
1 or(and(or(and(or($ABLE_FUNCTION_t0.0791366906 $CASE_SUMMARY_t0.0647482014 $WE_COULD_t0.1438848921 $YE_t0.0503597122) !$VISTA_ED_t0.5035971223) and(!$NA_TAB_t0.3237410072 !$PREOCCUPIED_WITH_t0.0287769784 !$UNSP_t0.2302158273 !$USING_THERAPEUTIC_t0.0647482014 !$VERIFIED_t1.3525179856 !$VOLUME_MOOD_t0.0647482014 !$WALKIN_t0.5539568345 !$WARRANT_t0.0503597122 !$WERE_DISCUSSED_t0.4172661871 !$WHAT_QUESTIONS_t0.4676258993 !$WILL_CONSIDER_t0.0647482014 !$YEAR_t4.5323741007) $DISEASE_CABG_t0.0287769784 $UPSETTING_THAT_t0.1294964029 $WATCHES_t0.0575539568 $WILL_RESTART_t0.0215827338 $YEAR_COUNSELED_t0.0431654676 $YOUNGER_t0.0431654676 $YOUR_BOTTLES_t0.0215827338) !$ALZHEIMERS_DISEASE_t0.0431654676 !$VOLUNTEER_OR_t0.0719424460) $RECTAL_EXAM_t0.0503597122) 
1 and(or(and(or(!$VERIFIED_t1.3525179856 !$VS_t0.9424460432) !$MH_PSYCHIATRY_t0.3669064748 !$OFF_t1.8848920863 !$UNSP_t0.2302158273 !$USE_INTERACTING_t0.0647482014 !$VERIFIED_CORRECT_t0.1438848921 !$VISTA_ED_t0.5035971223 !$VOICEMAIL_LEFT_t0.0503597122 !$VOLUME_MOOD_t0.0647482014 !$VOLUNTEER_OR_t0.0719424460 !$WALKIN_t0.5539568345 !$WARRANT_t0.0503597122 !$WERE_DISCUSSED_t0.4172661871 !$WILLING_t0.4388489209 !$YEAR_OLD_t2.2949640288 !$YEAR_t4.5323741007) $AVERAGE_RISK_t0.0431654676 $DISEASE_CABG_t0.0287769784 $UPDATED_PLEASE_t0.0215827338 $URGENT_APPT_t0.0431654676 $URGENT_SERVICES_t0.0575539568 $URINAL_WITHIN_t0.2589928058 $VA_CONTRACT_t0.0431654676 $WAS_FRIGHTENING_t0.1294964029 $WE_COULD_t0.1438848921 $WILL_PICKED_t0.0935251799 $WILL_RESTART_t0.0215827338 $WTIH_t0.0431654676 $YE_t0.0503597122) !$NEXT_SESSION_t0.1366906475) 
1 and(or(and(or(!$VERIFIED_t1.3525179856 !$VS_t0.9424460432) !$MH_PSYCHIATRY_t0.3669064748 !$OFF_t1.8848920863 !$UNSP_t0.2302158273 !$USE_INTERACTING_t0.0647482014 !$VERIFIED_CORRECT_t0.1438848921 !$VISTA_ED_t0.5035971223 !$VOICEMAIL_LEFT_t0.0503597122 !$VOLUME_MOOD_t0.0647482014 !$VOLUNTEER_OR_t0.0719424460 !$WALKIN_t0.5539568345 !$WARRANT_t0.0503597122 !$WERE_DISCUSSED_t0.4172661871 !$WILLING_t0.4388489209 !$YEAR_OLD_t2.2949640288 !$YEAR_t4.5323741007) $DISCHARGE_ALDRETE_t0.0359712230 $DISEASE_CABG_t0.0287769784 $UPDATED_PLEASE_t0.0215827338 $URGENT_APPT_t0.0431654676 $URGENT_SERVICES_t0.0575539568 $URINAL_WITHIN_t0.2589928058 $VA_CONTRACT_t0.0431654676 $WAS_FRIGHTENING_t0.1294964029 $WE_COULD_t0.1438848921 $WILL_PICKED_t0.0935251799 $WILL_RESTART_t0.0215827338 $WTIH_t0.0431654676 $YE_t0.0503597122) !$NEXT_SESSION_t0.1366906475) 
1 and(or(and(or(!$VERIFIED_t1.3525179856 !$VS_t0.9424460432) !$MH_PSYCHIATRY_t0.3669064748 !$OFF_t1.8848920863 !$UNSP_t0.2302158273 !$USE_INTERACTING_t0.0647482014 !$VERIFIED_CORRECT_t0.1438848921 !$VISTA_ED_t0.5035971223 !$VOICEMAIL_LEFT_t0.0503597122 !$VOLUME_MOOD_t0.0647482014 !$VOLUNTEER_OR_t0.0719424460 !$WALKIN_t0.5539568345 !$WARRANT_t0.0503597122 !$WERE_DISCUSSED_t0.4172661871 !$WILLING_t0.4388489209 !$YEAR_OLD_t2.2949640288 !$YEAR_t4.5323741007) $DISEASE_CABG_t0.0287769784 $RECTAL_EXAM_t0.0503597122 $UPDATED_PLEASE_t0.0215827338 $URGENT_APPT_t0.0431654676 $URGENT_SERVICES_t0.0575539568 $URINAL_WITHIN_t0.2589928058 $VA_CONTRACT_t0.0431654676 $WAS_FRIGHTENING_t0.1294964029 $WE_COULD_t0.1438848921 $WILL_PICKED_t0.0935251799 $WILL_RESTART_t0.0215827338 $WTIH_t0.0431654676 $YE_t0.0503597122) !$NEXT_SESSION_t0.1366906475) 
1 and(or(and(or(!$VERIFIED_t1.3525179856 !$VS_t0.9424460432) !$MH_PSYCHIATRY_t0.3669064748 !$OFF_t1.8848920863 !$UNSP_t0.2302158273 !$USE_INTERACTING_t0.0647482014 !$VERIFIED_CORRECT_t0.1438848921 !$VISTA_ED_t0.5035971223 !$VOICEMAIL_LEFT_t0.0503597122 !$VOLUME_MOOD_t0.0647482014 !$VOLUNTEER_OR_t0.0719424460 !$WALKIN_t0.5539568345 !$WARRANT_t0.0503597122 !$WERE_DISCUSSED_t0.4172661871 !$WILLING_t0.4388489209 !$YEAR_OLD_t2.2949640288 !$YEAR_t4.5323741007) $AVERAGE_RISK_t0.0431654676 $DISCHARGE_ALDRETE_t0.0359712230 $DISEASE_CABG_t0.0287769784 $UPDATED_PLEASE_t0.0215827338 $URGENT_APPT_t0.0431654676 $URGENT_SERVICES_t0.0575539568 $URINAL_WITHIN_t0.2589928058 $VA_CONTRACT_t0.0431654676 $WAS_FRIGHTENING_t0.1294964029 $WE_COULD_t0.1438848921 $WILL_PICKED_t0.0935251799 $WILL_RESTART_t0.0215827338 $WTIH_t0.0431654676 $YE_t0.0503597122) !$NEXT_SESSION_t0.1366906475) 
1 and(or(and(or(!$VERIFIED_t1.3525179856 !$VS_t0.9424460432) !$MH_PSYCHIATRY_t0.3669064748 !$OFF_t1.8848920863 !$UNSP_t0.2302158273 !$USE_INTERACTING_t0.0647482014 !$VERIFIED_CORRECT_t0.1438848921 !$VISTA_ED_t0.5035971223 !$VOICEMAIL_LEFT_t0.0503597122 !$VOLUME_MOOD_t0.0647482014 !$VOLUNTEER_OR_t0.0719424460 !$WALKIN_t0.5539568345 !$WARRANT_t0.0503597122 !$WERE_DISCUSSED_t0.4172661871 !$WILLING_t0.4388489209 !$YEAR_OLD_t2.2949640288 !$YEAR_t4.5323741007) $DISCHARGE_ALDRETE_t0.0359712230 $DISEASE_CABG_t0.0287769784 $RECTAL_EXAM_t0.0503597122 $UPDATED_PLEASE_t0.0215827338 $URGENT_APPT_t0.0431654676 $URGENT_SERVICES_t0.0575539568 $URINAL_WITHIN_t0.2589928058 $VA_CONTRACT_t0.0431654676 $WAS_FRIGHTENING_t0.1294964029 $WE_COULD_t0.1438848921 $WILL_PICKED_t0.0935251799 $WILL_RESTART_t0.0215827338 $WTIH_t0.0431654676 $YE_t0.0503597122) !$NEXT_SESSION_t0.1366906475) 
1 and(or(and(or(!$VERIFIED_t1.3525179856 !$VS_t0.9424460432) !$MH_PSYCHIATRY_t0.3669064748 !$OFF_t1.8848920863 !$UNSP_t0.2302158273 !$USE_INTERACTING_t0.0647482014 !$VERIFIED_CORRECT_t0.1438848921 !$VISTA_ED_t0.5035971223 !$VOICEMAIL_LEFT_t0.0503597122 !$VOLUME_MOOD_t0.0647482014 !$VOLUNTEER_OR_t0.0719424460 !$WALKIN_t0.5539568345 !$WARRANT_t0.0503597122 !$WERE_DISCUSSED_t0.4172661871 !$WILLING_t0.4388489209 !$YEAR_OLD_t2.2949640288 !$YEAR_t4.5323741007) and($AVERAGE_RISK_t0.0431654676 $DISCHARGE_ALDRETE_t0.0359712230) $DISEASE_CABG_t0.0287769784 $UPDATED_PLEASE_t0.0215827338 $URGENT_APPT_t0.0431654676 $URGENT_SERVICES_t0.0575539568 $URINAL_WITHIN_t0.2589928058 $VA_CONTRACT_t0.0431654676 $WAS_FRIGHTENING_t0.1294964029 $WE_COULD_t0.1438848921 $WILL_PICKED_t0.0935251799 $WILL_RESTART_t0.0215827338 $WTIH_t0.0431654676 $YE_t0.0503597122) !$NEXT_SESSION_t0.1366906475) 
1 and(or(and(or(!$VERIFIED_t1.3525179856 !$VS_t0.9424460432) !$MH_PSYCHIATRY_t0.3669064748 !$OFF_t1.8848920863 !$UNSP_t0.2302158273 !$USE_INTERACTING_t0.0647482014 !$VERIFIED_CORRECT_t0.1438848921 !$VISTA_ED_t0.5035971223 !$VOICEMAIL_LEFT_t0.0503597122 !$VOLUME_MOOD_t0.0647482014 !$VOLUNTEER_OR_t0.0719424460 !$WALKIN_t0.5539568345 !$WARRANT_t0.0503597122 !$WERE_DISCUSSED_t0.4172661871 !$WILLING_t0.4388489209 !$YEAR_OLD_t2.2949640288 !$YEAR_t4.5323741007) and($AVERAGE_RISK_t0.0431654676 $LUMBAGO_t0.0359712230) $DISEASE_CABG_t0.0287769784 $UPDATED_PLEASE_t0.0215827338 $URGENT_APPT_t0.0431654676 $URGENT_SERVICES_t0.0575539568 $URINAL_WITHIN_t0.2589928058 $VA_CONTRACT_t0.0431654676 $WAS_FRIGHTENING_t0.1294964029 $WE_COULD_t0.1438848921 $WILL_PICKED_t0.0935251799 $WILL_RESTART_t0.0215827338 $WTIH_t0.0431654676 $YE_t0.0503597122) !$NEXT_SESSION_t0.1366906475) 
1 and(or(and(or(!$VERIFIED_t1.3525179856 !$VS_t0.9424460432) !$MH_PSYCHIATRY_t0.3669064748 !$OFF_t1.8848920863 !$UNSP_t0.2302158273 !$USE_INTERACTING_t0.0647482014 !$VERIFIED_CORRECT_t0.1438848921 !$VISTA_ED_t0.5035971223 !$VOICEMAIL_LEFT_t0.0503597122 !$VOLUME_MOOD_t0.0647482014 !$VOLUNTEER_OR_t0.0719424460 !$WALKIN_t0.5539568345 !$WARRANT_t0.0503597122 !$WERE_DISCUSSED_t0.4172661871 !$WILLING_t0.4388489209 !$YEAR_OLD_t2.2949640288 !$YEAR_t4.5323741007) and($AVERAGE_RISK_t0.0431654676 $RECTAL_EXAM_t0.0503597122) $DISEASE_CABG_t0.0287769784 $UPDATED_PLEASE_t0.0215827338 $URGENT_APPT_t0.0431654676 $URGENT_SERVICES_t0.0575539568 $URINAL_WITHIN_t0.2589928058 $VA_CONTRACT_t0.0431654676 $WAS_FRIGHTENING_t0.1294964029 $WE_COULD_t0.1438848921 $WILL_PICKED_t0.0935251799 $WILL_RESTART_t0.0215827338 $WTIH_t0.0431654676 $YE_t0.0503597122) !$NEXT_SESSION_t0.1366906475) 
1 and(or(and(or(!$VERIFIED_t1.3525179856 !$VS_t0.9424460432) !$MH_PSYCHIATRY_t0.3669064748 !$OFF_t1.8848920863 !$UNSP_t0.2302158273 !$USE_INTERACTING_t0.0647482014 !$VERIFIED_CORRECT_t0.1438848921 !$VISTA_ED_t0.5035971223 !$VOICEMAIL_LEFT_t0.0503597122 !$VOLUME_MOOD_t0.0647482014 !$VOLUNTEER_OR_t0.0719424460 !$WALKIN_t0.5539568345 !$WARRANT_t0.0503597122 !$WERE_DISCUSSED_t0.4172661871 !$WILLING_t0.4388489209 !$YEAR_OLD_t2.2949640288 !$YEAR_t4.5323741007) and($DISCHARGE_ALDRETE_t0.0359712230 $RECTAL_EXAM_t0.0503597122) $DISEASE_CABG_t0.0287769784 $UPDATED_PLEASE_t0.0215827338 $URGENT_APPT_t0.0431654676 $URGENT_SERVICES_t0.0575539568 $URINAL_WITHIN_t0.2589928058 $VA_CONTRACT_t0.0431654676 $WAS_FRIGHTENING_t0.1294964029 $WE_COULD_t0.1438848921 $WILL_PICKED_t0.0935251799 $WILL_RESTART_t0.0215827338 $WTIH_t0.0431654676 $YE_t0.0503597122) !$NEXT_SESSION_t0.1366906475) 
1 and(or(and(or(!$VERIFIED_t1.3525179856 !$VS_t0.9424460432) !$MH_PSYCHIATRY_t0.3669064748 !$OFF_t1.8848920863 !$UNSP_t0.2302158273 !$USE_INTERACTING_t0.0647482014 !$VERIFIED_CORRECT_t0.1438848921 !$VISTA_ED_t0.5035971223 !$VOICEMAIL_LEFT_t0.0503597122 !$VOLUME_MOOD_t0.0647482014 !$VOLUNTEER_OR_t0.0719424460 !$WALKIN_t0.5539568345 !$WARRANT_t0.0503597122 !$WERE_DISCUSSED_t0.4172661871 !$WILLING_t0.4388489209 !$YEAR_OLD_t2.2949640288 !$YEAR_t4.5323741007) and($AVERAGE_RISK_t0.0431654676 $DISCHARGE_ALDRETE_t0.0359712230 $RECTAL_EXAM_t0.0503597122) $DISEASE_CABG_t0.0287769784 $UPDATED_PLEASE_t0.0215827338 $URGENT_APPT_t0.0431654676 $URGENT_SERVICES_t0.0575539568 $URINAL_WITHIN_t0.2589928058 $VA_CONTRACT_t0.0431654676 $WAS_FRIGHTENING_t0.1294964029 $WE_COULD_t0.1438848921 $WILL_PICKED_t0.0935251799 $WILL_RESTART_t0.0215827338 $WTIH_t0.0431654676 $YE_t0.0503597122) !$NEXT_SESSION_t0.1366906475) 
1 and(or(and(or(and(!$MH_PSYCHIATRY_t0.3669064748 !$VERIFIED_t1.3525179856) $YEARS_t2.6546762590) !$RESIDENTIAL_t0.1079136691 !$UNSP_t0.2302158273 !$UPDATES_t0.0431654676 !$VISIT_DENTAL_t0.3309352518 !$VISTA_ED_t0.5035971223 !$VOICEMAIL_LEFT_t0.0503597122 !$VOLUME_MOOD_t0.0647482014 !$WERE_DISCUSSED_t0.4172661871 !$YEAR_t4.5323741007 !$YOUR_COLON_t0.0863309353 !$YR_t0.4892086331) $BE_REFILLED_t0.0863309353 $MALE_CA_t0.0863309353 $SATURATION_ROOM_t0.1007194245 $URGENT_APPT_t0.0431654676 $WAR_SERVICE_t0.0431654676 $WAS_HORRIBLE_t0.1294964029 $WEIGH_DAILY_t0.0503597122 $WE_COULD_t0.1438848921 $WILL_PICKED_t0.0935251799 $WILL_RESTART_t0.0215827338 $WTIH_t0.0431654676 $YEAR_COUNSELED_t0.0431654676 $YE_t0.0503597122) !$STRUGGLES_WITH_t0.0359712230) 
1 and(or(and(or(and(!$PSYCHIATRY_NOTE_t0.8273381295 !$VERIFIED_t1.3525179856) $YEARS_t2.6546762590) !$RESIDENTIAL_t0.1079136691 !$UNSP_t0.2302158273 !$UPDATES_t0.0431654676 !$VISIT_DENTAL_t0.3309352518 !$VISTA_ED_t0.5035971223 !$VOICEMAIL_LEFT_t0.0503597122 !$VOLUME_MOOD_t0.0647482014 !$WERE_DISCUSSED_t0.4172661871 !$YEAR_t4.5323741007 !$YOUR_COLON_t0.0863309353 !$YR_t0.4892086331) $BE_REFILLED_t0.0863309353 $MALE_CA_t0.0863309353 $SATURATION_ROOM_t0.1007194245 $URGENT_APPT_t0.0431654676 $WAR_SERVICE_t0.0431654676 $WAS_HORRIBLE_t0.1294964029 $WEIGH_DAILY_t0.0503597122 $WE_COULD_t0.1438848921 $WILL_PICKED_t0.0935251799 $WILL_RESTART_t0.0215827338 $WTIH_t0.0431654676 $YEAR_COUNSELED_t0.0431654676 $YE_t0.0503597122) !$KATHERINE_t0.0359712230) 
1 and(or(and(or(and(!$MH_PSYCHIATRY_t0.3669064748 !$VERIFIED_t1.3525179856) $YEARS_t2.6546762590) !$RESIDENTIAL_t0.1079136691 !$UNSP_t0.2302158273 !$UPDATES_t0.0431654676 !$VISIT_DENTAL_t0.3309352518 !$VISTA_ED_t0.5035971223 !$VOICEMAIL_LEFT_t0.0503597122 !$VOLUME_MOOD_t0.0647482014 !$WERE_DISCUSSED_t0.4172661871 !$YEAR_t4.5323741007 !$YOUR_COLON_t0.0863309353 !$YR_t0.4892086331) $BE_REFILLED_t0.0863309353 $CIRCULATION_LEVEL_t0.0431654676 $URGENT_APPT_t0.0431654676 $WAR_SERVICE_t0.0431654676 $WAS_HORRIBLE_t0.1294964029 $WEIGH_DAILY_t0.0503597122 $WE_COULD_t0.1438848921 $WILL_PICKED_t0.0935251799 $WILL_RESTART_t0.0215827338 $WTIH_t0.0431654676 $YEAR_COUNSELED_t0.0431654676 $YE_t0.0503597122) !$RETRAINING_t0.0503597122) 
1 and(or(and(or(and(!$MH_PSYCHIATRY_t0.3669064748 !$VERIFIED_t1.3525179856) $YEARS_t2.6546762590) !$RESIDENTIAL_t0.1079136691 !$UNSP_t0.2302158273 !$UPDATES_t0.0431654676 !$VISIT_DENTAL_t0.3309352518 !$VISTA_ED_t0.5035971223 !$VOICEMAIL_LEFT_t0.0503597122 !$VOLUME_MOOD_t0.0647482014 !$WERE_DISCUSSED_t0.4172661871 !$YEAR_t4.5323741007 !$YOUR_COLON_t0.0863309353 !$YR_t0.4892086331) $BE_REFILLED_t0.0863309353 $SATURATION_ROOM_t0.1007194245 $URGENT_APPT_t0.0431654676 $WAR_SERVICE_t0.0431654676 $WAS_HORRIBLE_t0.1294964029 $WEIGH_DAILY_t0.0503597122 $WE_COULD_t0.1438848921 $WILL_PICKED_t0.0935251799 $WILL_RESTART_t0.0215827338 $WTIH_t0.0431654676 $YEAR_COUNSELED_t0.0431654676 $YE_t0.0503597122) !$KATHERINE_t0.0359712230) 
1 and(or(and(or(and(!$MH_PSYCHIATRY_t0.3669064748 !$VERIFIED_t1.3525179856) $YEARS_t2.6546762590) !$RESIDENTIAL_t0.1079136691 !$UNSP_t0.2302158273 !$UPDATES_t0.0431654676 !$VISIT_DENTAL_t0.3309352518 !$VISTA_ED_t0.5035971223 !$VOICEMAIL_LEFT_t0.0503597122 !$VOLUME_MOOD_t0.0647482014 !$WERE_DISCUSSED_t0.4172661871 !$YEAR_t4.5323741007 !$YOUR_COLON_t0.0863309353 !$YR_t0.4892086331) $BE_REFILLED_t0.0863309353 $SATURATION_ROOM_t0.1007194245 $URGENT_APPT_t0.0431654676 $WAR_SERVICE_t0.0431654676 $WAS_HORRIBLE_t0.1294964029 $WEIGH_DAILY_t0.0503597122 $WE_COULD_t0.1438848921 $WILL_PICKED_t0.0935251799 $WILL_RESTART_t0.0215827338 $WTIH_t0.0431654676 $YEAR_COUNSELED_t0.0431654676 $YE_t0.0503597122) !$NOISES_t0.0359712230) 
1 and(or(and(or(and(!$MH_PSYCHIATRY_t0.3669064748 !$VERIFIED_t1.3525179856) $YEARS_t2.6546762590) !$RESIDENTIAL_t0.1079136691 !$UNSP_t0.2302158273 !$UPDATES_t0.0431654676 !$VISIT_DENTAL_t0.3309352518 !$VISTA_ED_t0.5035971223 !$VOICEMAIL_LEFT_t0.0503597122 !$VOLUME_MOOD_t0.0647482014 !$WERE_DISCUSSED_t0.4172661871 !$YEAR_t4.5323741007 !$YOUR_COLON_t0.0863309353 !$YR_t0.4892086331) $BE_REFILLED_t0.0863309353 $SATURATION_ROOM_t0.1007194245 $URGENT_APPT_t0.0431654676 $WAR_SERVICE_t0.0431654676 $WAS_HORRIBLE_t0.1294964029 $WEIGH_DAILY_t0.0503597122 $WE_COULD_t0.1438848921 $WILL_PICKED_t0.0935251799 $WILL_RESTART_t0.0215827338 $WTIH_t0.0431654676 $YEAR_COUNSELED_t0.0431654676 $YE_t0.0503597122) !$RETRAINING_t0.0503597122) 
1 and(or(and(or(and(!$MH_PSYCHIATRY_t0.3669064748 !$VERIFIED_t1.3525179856) $YEARS_t2.6546762590) !$RESIDENTIAL_t0.1079136691 !$UNSP_t0.2302158273 !$UPDATES_t0.0431654676 !$VISIT_DENTAL_t0.3309352518 !$VISTA_ED_t0.5035971223 !$VOICEMAIL_LEFT_t0.0503597122 !$VOLUME_MOOD_t0.0647482014 !$WERE_DISCUSSED_t0.4172661871 !$YEAR_t4.5323741007 !$YOUR_COLON_t0.0863309353 !$YR_t0.4892086331) $BE_REFILLED_t0.0863309353 $SATURATION_ROOM_t0.1007194245 $URGENT_APPT_t0.0431654676 $WAR_SERVICE_t0.0431654676 $WAS_HORRIBLE_t0.1294964029 $WEIGH_DAILY_t0.0503597122 $WE_COULD_t0.1438848921 $WILL_PICKED_t0.0935251799 $WILL_RESTART_t0.0215827338 $WTIH_t0.0431654676 $YEAR_COUNSELED_t0.0431654676 $YE_t0.0503597122) !$STRUGGLES_WITH_t0.0359712230) 
1 and(or(and(or(and(!$MH_PSYCHIATRY_t0.3669064748 !$VERIFIED_t1.3525179856) $YEARS_t2.6546762590) !$RESIDENTIAL_t0.1079136691 !$UNSP_t0.2302158273 !$UPDATES_t0.0431654676 !$VISIT_DENTAL_t0.3309352518 !$VISTA_ED_t0.5035971223 !$VOICEMAIL_LEFT_t0.0503597122 !$VOLUME_MOOD_t0.0647482014 !$WERE_DISCUSSED_t0.4172661871 !$YEAR_t4.5323741007 !$YOUR_COLON_t0.0863309353 !$YR_t0.4892086331) $CONSULT_APPROVED_t0.1079136691 $SATURATION_ROOM_t0.1007194245 $URGENT_APPT_t0.0431654676 $WAR_SERVICE_t0.0431654676 $WAS_HORRIBLE_t0.1294964029 $WEIGH_DAILY_t0.0503597122 $WE_COULD_t0.1438848921 $WILL_PICKED_t0.0935251799 $WILL_RESTART_t0.0215827338 $WTIH_t0.0431654676 $YEAR_COUNSELED_t0.0431654676 $YE_t0.0503597122) !$RETRAINING_t0.0503597122) 
1 and(or(and(or(and(!$MH_PSYCHIATRY_t0.3669064748 !$VERIFIED_t1.3525179856) $YEARS_t2.6546762590) !$RESIDENTIAL_t0.1079136691 !$UNSP_t0.2302158273 !$UPDATES_t0.0431654676 !$VISIT_DENTAL_t0.3309352518 !$VISTA_ED_t0.5035971223 !$VOICEMAIL_LEFT_t0.0503597122 !$VOLUME_MOOD_t0.0647482014 !$WERE_DISCUSSED_t0.4172661871 !$YEAR_t4.5323741007 !$YOUR_COLON_t0.0863309353 !$YR_t0.4892086331) $MALE_CA_t0.0863309353 $SATURATION_ROOM_t0.1007194245 $URGENT_APPT_t0.0431654676 $WAR_SERVICE_t0.0431654676 $WAS_HORRIBLE_t0.1294964029 $WEIGH_DAILY_t0.0503597122 $WE_COULD_t0.1438848921 $WILL_PICKED_t0.0935251799 $WILL_RESTART_t0.0215827338 $WTIH_t0.0431654676 $YEAR_COUNSELED_t0.0431654676 $YE_t0.0503597122) !$RETRAINING_t0.0503597122) 
1 and(or(and(or(and(!$PSYCHIATRY_NOTE_t0.8273381295 !$VERIFIED_t1.3525179856) $YEARS_t2.6546762590) !$RESIDENTIAL_t0.1079136691 !$UNSP_t0.2302158273 !$UPDATES_t0.0431654676 !$VISIT_DENTAL_t0.3309352518 !$VISTA_ED_t0.5035971223 !$VOICEMAIL_LEFT_t0.0503597122 !$VOLUME_MOOD_t0.0647482014 !$WERE_DISCUSSED_t0.4172661871 !$YEAR_t4.5323741007 !$YOUR_COLON_t0.0863309353 !$YR_t0.4892086331) $BE_REFILLED_t0.0863309353 $CIRCULATION_LEVEL_t0.0431654676 $URGENT_APPT_t0.0431654676 $WAR_SERVICE_t0.0431654676 $WAS_HORRIBLE_t0.1294964029 $WEIGH_DAILY_t0.0503597122 $WE_COULD_t0.1438848921 $WILL_PICKED_t0.0935251799 $WILL_RESTART_t0.0215827338 $WTIH_t0.0431654676 $YEAR_COUNSELED_t0.0431654676 $YE_t0.0503597122) !$RETRAINING_t0.0503597122) 
1 and(or(and(!$MH_PSYCHIATRY_t0.3669064748 !$UNSP_t0.2302158273 !$UPDATES_t0.0431654676 !$USED_VERBAL_t0.0935251799 !$VERIFIED_t1.3525179856 !$VISIT_DENTAL_t0.3309352518 !$VISTA_ED_t0.5035971223 !$VOICEMAIL_LEFT_t0.0503597122 !$VOLUME_MOOD_t0.0647482014 !$WERE_DISCUSSED_t0.4172661871 !$YEAR_t4.5323741007 !$YR_t0.4892086331) $CONSULT_APPROVED_t0.1079136691 $LIPITOR_t0.0503597122 $RECTAL_EXAM_t0.0503597122 $UPSETTING_THAT_t0.1294964029 $URGENT_APPT_t0.0431654676 $URGENT_SERVICES_t0.0575539568 $WAS_COMPLICATED_t0.0215827338 $WE_COULD_t0.1438848921 $WILL_PICKED_t0.0935251799 $WILL_RESTART_t0.0215827338 $WTIH_t0.0431654676 $YEAR_COUNSELED_t0.0431654676 $YE_t0.0503597122) !$EASIER_t0.0575539568 !$RETRAINING_t0.0503597122 !$UCINATIONS_SI_t0.0359712230) 
1 and(or(and(!$MH_PSYCHIATRY_t0.3669064748 !$UNSP_t0.2302158273 !$USED_VERBAL_t0.0935251799 !$VERIFIED_t1.3525179856 !$VISIT_DENTAL_t0.3309352518 !$VISTA_ED_t0.5035971223 !$VOICEMAIL_LEFT_t0.0503597122 !$VOLUME_MOOD_t0.0647482014 !$WERE_DISCUSSED_t0.4172661871 !$YEAR_t4.5323741007 !$YR_t0.4892086331) $CONSULT_APPROVED_t0.1079136691 $LIPITOR_t0.0503597122 $RECTAL_EXAM_t0.0503597122 $UPSETTING_THAT_t0.1294964029 $URGENT_APPT_t0.0431654676 $URGENT_SERVICES_t0.0575539568 $WAS_COMPLICATED_t0.0215827338 $WE_COULD_t0.1438848921 $WILL_PICKED_t0.0935251799 $WILL_RESTART_t0.0215827338 $WTIH_t0.0431654676 $YEAR_COUNSELED_t0.0431654676 $YE_t0.0503597122) !$EASIER_t0.0575539568 !$RETRAINING_t0.0503597122) 
1 and(or(and(!$MH_PSYCHIATRY_t0.3669064748 !$UNSP_t0.2302158273 !$UPDATES_t0.0431654676 !$USED_VERBAL_t0.0935251799 !$VERIFIED_t1.3525179856 !$VISIT_DENTAL_t0.3309352518 !$VISTA_ED_t0.5035971223 !$VOICEMAIL_LEFT_t0.0503597122 !$VOLUME_MOOD_t0.0647482014 !$WERE_DISCUSSED_t0.4172661871 !$YEAR_t4.5323741007 !$YR_t0.4892086331) $ACETATE_t0.0575539568 $BE_REFILLED_t0.0863309353 $DISCHARGE_ALDRETE_t0.0359712230 $UPSETTING_THAT_t0.1294964029 $URGENT_APPT_t0.0431654676 $URGENT_SERVICES_t0.0575539568 $WAS_COMPLICATED_t0.0215827338 $WE_COULD_t0.1438848921 $WILL_PICKED_t0.0935251799 $WILL_RESTART_t0.0215827338 $WTIH_t0.0431654676 $YEAR_COUNSELED_t0.0431654676 $YE_t0.0503597122) !$EASIER_t0.0575539568 !$RETRAINING_t0.0503597122) 
1 and(or(and(!$MH_PSYCHIATRY_t0.3669064748 !$UNSP_t0.2302158273 !$UPDATES_t0.0431654676 !$USED_VERBAL_t0.0935251799 !$VERIFIED_t1.3525179856 !$VISIT_DENTAL_t0.3309352518 !$VISTA_ED_t0.5035971223 !$VOICEMAIL_LEFT_t0.0503597122 !$VOLUME_MOOD_t0.0647482014 !$WERE_DISCUSSED_t0.4172661871 !$YEAR_t4.5323741007 !$YR_t0.4892086331) $ACETATE_t0.0575539568 $DISCHARGE_ALDRETE_t0.0359712230 $DISEASE_CABG_t0.0287769784 $UPSETTING_THAT_t0.1294964029 $URGENT_APPT_t0.0431654676 $URGENT_SERVICES_t0.0575539568 $WAS_COMPLICATED_t0.0215827338 $WE_COULD_t0.1438848921 $WILL_PICKED_t0.0935251799 $WILL_RESTART_t0.0215827338 $WTIH_t0.0431654676 $YEAR_COUNSELED_t0.0431654676 $YE_t0.0503597122) !$EASIER_t0.0575539568 !$RETRAINING_t0.0503597122) 
1 and(or(and(!$MH_PSYCHIATRY_t0.3669064748 !$UNSP_t0.2302158273 !$UPDATES_t0.0431654676 !$USED_VERBAL_t0.0935251799 !$VERIFIED_t1.3525179856 !$VISIT_DENTAL_t0.3309352518 !$VISTA_ED_t0.5035971223 !$VOICEMAIL_LEFT_t0.0503597122 !$VOLUME_MOOD_t0.0647482014 !$WERE_DISCUSSED_t0.4172661871 !$YEAR_t4.5323741007 !$YR_t0.4892086331) $AVERAGE_RISK_t0.0431654676 $CONSULT_APPROVED_t0.1079136691 $LIPITOR_t0.0503597122 $UPSETTING_THAT_t0.1294964029 $URGENT_APPT_t0.0431654676 $URGENT_SERVICES_t0.0575539568 $WAS_COMPLICATED_t0.0215827338 $WE_COULD_t0.1438848921 $WILL_PICKED_t0.0935251799 $WILL_RESTART_t0.0215827338 $WTIH_t0.0431654676 $YEAR_COUNSELED_t0.0431654676 $YE_t0.0503597122) !$EASIER_t0.0575539568 !$RETRAINING_t0.0503597122) 
1 and(or(and(!$MH_PSYCHIATRY_t0.3669064748 !$UNSP_t0.2302158273 !$UPDATES_t0.0431654676 !$USED_VERBAL_t0.0935251799 !$VERIFIED_t1.3525179856 !$VISIT_DENTAL_t0.3309352518 !$VISTA_ED_t0.5035971223 !$VOICEMAIL_LEFT_t0.0503597122 !$VOLUME_MOOD_t0.0647482014 !$WERE_DISCUSSED_t0.4172661871 !$YEAR_t4.5323741007 !$YR_t0.4892086331) $CIRCULATION_LEVEL_t0.0431654676 $CONSULT_APPROVED_t0.1079136691 $LIPITOR_t0.0503597122 $UPSETTING_THAT_t0.1294964029 $URGENT_APPT_t0.0431654676 $URGENT_SERVICES_t0.0575539568 $WAS_COMPLICATED_t0.0215827338 $WE_COULD_t0.1438848921 $WILL_PICKED_t0.0935251799 $WILL_RESTART_t0.0215827338 $WTIH_t0.0431654676 $YEAR_COUNSELED_t0.0431654676 $YE_t0.0503597122) !$EASIER_t0.0575539568 !$RETRAINING_t0.0503597122) 
1 and(or(and(!$MH_PSYCHIATRY_t0.3669064748 !$UNSP_t0.2302158273 !$UPDATES_t0.0431654676 !$USED_VERBAL_t0.0935251799 !$VERIFIED_t1.3525179856 !$VISIT_DENTAL_t0.3309352518 !$VISTA_ED_t0.5035971223 !$VOICEMAIL_LEFT_t0.0503597122 !$VOLUME_MOOD_t0.0647482014 !$WERE_DISCUSSED_t0.4172661871 !$YEAR_t4.5323741007 !$YR_t0.4892086331) $CONSULT_APPROVED_t0.1079136691 $INFORMED_COLON_t0.0431654676 $LIPITOR_t0.0503597122 $UPSETTING_THAT_t0.1294964029 $URGENT_APPT_t0.0431654676 $URGENT_SERVICES_t0.0575539568 $WAS_COMPLICATED_t0.0215827338 $WE_COULD_t0.1438848921 $WILL_PICKED_t0.0935251799 $WILL_RESTART_t0.0215827338 $WTIH_t0.0431654676 $YEAR_COUNSELED_t0.0431654676 $YE_t0.0503597122) !$EASIER_t0.0575539568 !$RETRAINING_t0.0503597122) 
1 and(or(and(!$MH_PSYCHIATRY_t0.3669064748 !$UNSP_t0.2302158273 !$UPDATES_t0.0431654676 !$USED_VERBAL_t0.0935251799 !$VERIFIED_t1.3525179856 !$VISIT_DENTAL_t0.3309352518 !$VISTA_ED_t0.5035971223 !$VOICEMAIL_LEFT_t0.0503597122 !$VOLUME_MOOD_t0.0647482014 !$WERE_DISCUSSED_t0.4172661871 !$YEAR_t4.5323741007 !$YR_t0.4892086331) $CONSULT_APPROVED_t0.1079136691 $LIPITOR_t0.0503597122 $PREPROCEDURE_DATE_t0.0791366906 $UPSETTING_THAT_t0.1294964029 $URGENT_APPT_t0.0431654676 $URGENT_SERVICES_t0.0575539568 $WAS_COMPLICATED_t0.0215827338 $WE_COULD_t0.1438848921 $WILL_PICKED_t0.0935251799 $WILL_RESTART_t0.0215827338 $WTIH_t0.0431654676 $YEAR_COUNSELED_t0.0431654676 $YE_t0.0503597122) !$EASIER_t0.0575539568 !$RETRAINING_t0.0503597122) 
1 and(or(and(!$MH_PSYCHIATRY_t0.3669064748 !$UNSP_t0.2302158273 !$UPDATES_t0.0431654676 !$USED_VERBAL_t0.0935251799 !$VERIFIED_t1.3525179856 !$VISIT_DENTAL_t0.3309352518 !$VISTA_ED_t0.5035971223 !$VOICEMAIL_LEFT_t0.0503597122 !$VOLUME_MOOD_t0.0647482014 !$WERE_DISCUSSED_t0.4172661871 !$YEAR_t4.5323741007 !$YR_t0.4892086331) $CONSULT_APPROVED_t0.1079136691 $LIPITOR_t0.0503597122 $RECTAL_EXAM_t0.0503597122 $UPSETTING_THAT_t0.1294964029 $URGENT_APPT_t0.0431654676 $URGENT_SERVICES_t0.0575539568 $WAS_COMPLICATED_t0.0215827338 $WE_COULD_t0.1438848921 $WILL_PICKED_t0.0935251799 $WILL_RESTART_t0.0215827338 $WTIH_t0.0431654676 $YEAR_COUNSELED_t0.0431654676 $YE_t0.0503597122) !$EASIER_t0.0575539568 !$RETRAINING_t0.0503597122) 
1 and(or(and(!$MH_PSYCHIATRY_t0.3669064748 !$UNSP_t0.2302158273 !$UPDATES_t0.0431654676 !$USED_VERBAL_t0.0935251799 !$VERIFIED_t1.3525179856 !$VISIT_DENTAL_t0.3309352518 !$VISTA_ED_t0.5035971223 !$VOICEMAIL_LEFT_t0.0503597122 !$VOLUME_MOOD_t0.0647482014 !$WERE_DISCUSSED_t0.4172661871 !$YEAR_t4.5323741007 !$YR_t0.4892086331) $CONSULT_APPROVED_t0.1079136691 $LIPITOR_t0.0503597122 $SATURATION_ROOM_t0.1007194245 $UPSETTING_THAT_t0.1294964029 $URGENT_APPT_t0.0431654676 $URGENT_SERVICES_t0.0575539568 $WAS_COMPLICATED_t0.0215827338 $WE_COULD_t0.1438848921 $WILL_PICKED_t0.0935251799 $WILL_RESTART_t0.0215827338 $WTIH_t0.0431654676 $YEAR_COUNSELED_t0.0431654676 $YE_t0.0503597122) !$EASIER_t0.0575539568 !$RETRAINING_t0.0503597122) 
1 and(or(and(!$PSYCHIATRY_NOTE_t0.8273381295 !$RESIDENTIAL_t0.1079136691 !$UNSP_t0.2302158273 !$UPDATE_YOUR_t0.1079136691 !$UROLOGY_CLINIC_t0.2661870504 !$USED_DETECT_t0.0647482014 !$VERIFIED_t1.3525179856 !$VOIDING_t0.5395683453 !$VOLUME_t0.5395683453 !$WERE_t7.6330935252 !$WHAT_QUESTIONS_t0.4676258993 !$WILL_CONSIDER_t0.0647482014 !$YEARS_OLD_t0.2158273381 !$YEAR_t4.5323741007) $ABLE_FUNCTION_t0.0791366906 $BE_REFILLED_t0.0863309353 $URGENT_APPT_t0.0431654676 $VS_CHARTED_t0.0359712230 $WAS_COMPLICATED_t0.0215827338 $WAS_FRIGHTENING_t0.1294964029 $WE_COULD_t0.1438848921 $WITHIN_DESCRIBE_t0.0503597122 $WTIH_t0.0431654676 $YEAR_COUNSELED_t0.0431654676 $YEAR_UNKNOWN_t0.0287769784 $YE_t0.0503597122) !$EVERY_NA_t0.1079136691 !$NEXT_SESSION_t0.1366906475) 
1 and(or(and(!$PSYCHIATRY_NOTE_t0.8273381295 !$RESIDENTIAL_t0.1079136691 !$UNSP_t0.2302158273 !$UPDATE_YOUR_t0.1079136691 !$UROLOGY_CLINIC_t0.2661870504 !$USED_DETECT_t0.0647482014 !$VERIFIED_t1.3525179856 !$VOIDING_t0.5395683453 !$VOLUME_t0.5395683453 !$WERE_t7.6330935252 !$WHAT_QUESTIONS_t0.4676258993 !$WILL_CONSIDER_t0.0647482014 !$YEARS_OLD_t0.2158273381 !$YEAR_t4.5323741007) $ABLE_FUNCTION_t0.0791366906 $DISEASE_CABG_t0.0287769784 $URGENT_APPT_t0.0431654676 $VS_CHARTED_t0.0359712230 $WAS_COMPLICATED_t0.0215827338 $WAS_FRIGHTENING_t0.1294964029 $WE_COULD_t0.1438848921 $WITHIN_DESCRIBE_t0.0503597122 $WTIH_t0.0431654676 $YEAR_COUNSELED_t0.0431654676 $YEAR_UNKNOWN_t0.0287769784 $YE_t0.0503597122) !$EVERY_NA_t0.1079136691 !$NEXT_SESSION_t0.1366906475) 
1 and(or(and(!$PSYCHIATRY_NOTE_t0.8273381295 !$RESIDENTIAL_t0.1079136691 !$UNSP_t0.2302158273 !$UPDATE_YOUR_t0.1079136691 !$UROLOGY_CLINIC_t0.2661870504 !$USED_DETECT_t0.0647482014 !$VERIFIED_t1.3525179856 !$VOIDING_t0.5395683453 !$VOLUME_t0.5395683453 !$WERE_t7.6330935252 !$WHAT_QUESTIONS_t0.4676258993 !$WILL_CONSIDER_t0.0647482014 !$YEARS_OLD_t0.2158273381 !$YEAR_t4.5323741007) $BE_REFILLED_t0.0863309353 $LIPITOR_t0.0503597122 $URGENT_APPT_t0.0431654676 $VS_CHARTED_t0.0359712230 $WAS_COMPLICATED_t0.0215827338 $WAS_FRIGHTENING_t0.1294964029 $WE_COULD_t0.1438848921 $WITHIN_DESCRIBE_t0.0503597122 $WTIH_t0.0431654676 $YEAR_COUNSELED_t0.0431654676 $YEAR_UNKNOWN_t0.0287769784 $YE_t0.0503597122) !$EVERY_NA_t0.1079136691 !$NEXT_SESSION_t0.1366906475) 
1 and(or(and(!$PSYCHIATRY_NOTE_t0.8273381295 !$RESIDENTIAL_t0.1079136691 !$UNSP_t0.2302158273 !$UPDATE_YOUR_t0.1079136691 !$UROLOGY_CLINIC_t0.2661870504 !$USED_DETECT_t0.0647482014 !$VERIFIED_t1.3525179856 !$VOIDING_t0.5395683453 !$VOLUME_t0.5395683453 !$WERE_t7.6330935252 !$WHAT_QUESTIONS_t0.4676258993 !$WILL_CONSIDER_t0.0647482014 !$YEARS_OLD_t0.2158273381 !$YEAR_t4.5323741007) $DISEASE_CABG_t0.0287769784 $LIPITOR_t0.0503597122 $URGENT_APPT_t0.0431654676 $VS_CHARTED_t0.0359712230 $WAS_COMPLICATED_t0.0215827338 $WAS_FRIGHTENING_t0.1294964029 $WE_COULD_t0.1438848921 $WITHIN_DESCRIBE_t0.0503597122 $WTIH_t0.0431654676 $YEAR_COUNSELED_t0.0431654676 $YEAR_UNKNOWN_t0.0287769784 $YE_t0.0503597122) !$EVERY_NA_t0.1079136691 !$NEXT_SESSION_t0.1366906475) 
1 and(or(and(!$EASIER_t0.0575539568 !$PSYCHIATRY_NOTE_t0.8273381295 !$UNSP_t0.2302158273 !$UPDATE_YOUR_t0.1079136691 !$UROLOGY_CLINIC_t0.2661870504 !$USED_DETECT_t0.0647482014 !$VERIFIED_t1.3525179856 !$VOIDING_t0.5395683453 !$VOLUME_t0.5395683453 !$WERE_t7.6330935252 !$WHAT_QUESTIONS_t0.4676258993 !$WILL_CONSIDER_t0.0647482014 !$YEARS_OLD_t0.2158273381 !$YEAR_t4.5323741007) $ABLE_FUNCTION_t0.0791366906 $URGENT_APPT_t0.0431654676 $VS_CHARTED_t0.0359712230 $WAS_COMPLICATED_t0.0215827338 $WAS_FRIGHTENING_t0.1294964029 $WE_COULD_t0.1438848921 $WITHIN_DESCRIBE_t0.0503597122 $WTIH_t0.0431654676 $YEAR_COUNSELED_t0.0431654676 $YEAR_UNKNOWN_t0.0287769784 $YE_t0.0503597122) !$EVERY_NA_t0.1079136691 !$NEXT_SESSION_t0.1366906475) 
1 and(or(and(!$EASIER_t0.0575539568 !$PSYCHIATRY_NOTE_t0.8273381295 !$UNSP_t0.2302158273 !$UPDATE_YOUR_t0.1079136691 !$UROLOGY_CLINIC_t0.2661870504 !$USED_DETECT_t0.0647482014 !$VERIFIED_t1.3525179856 !$VOIDING_t0.5395683453 !$VOLUME_t0.5395683453 !$WERE_t7.6330935252 !$WHAT_QUESTIONS_t0.4676258993 !$WILL_CONSIDER_t0.0647482014 !$YEARS_OLD_t0.2158273381 !$YEAR_t4.5323741007) $BE_REFILLED_t0.0863309353 $URGENT_APPT_t0.0431654676 $VS_CHARTED_t0.0359712230 $WAS_COMPLICATED_t0.0215827338 $WAS_FRIGHTENING_t0.1294964029 $WE_COULD_t0.1438848921 $WITHIN_DESCRIBE_t0.0503597122 $WTIH_t0.0431654676 $YEAR_COUNSELED_t0.0431654676 $YEAR_UNKNOWN_t0.0287769784 $YE_t0.0503597122) !$EVERY_NA_t0.1079136691 !$NEXT_SESSION_t0.1366906475) 
1 and(or(and(!$EASIER_t0.0575539568 !$PSYCHIATRY_NOTE_t0.8273381295 !$UNSP_t0.2302158273 !$UPDATE_YOUR_t0.1079136691 !$UROLOGY_CLINIC_t0.2661870504 !$USED_DETECT_t0.0647482014 !$VERIFIED_t1.3525179856 !$VOIDING_t0.5395683453 !$VOLUME_t0.5395683453 !$WERE_t7.6330935252 !$WHAT_QUESTIONS_t0.4676258993 !$WILL_CONSIDER_t0.0647482014 !$YEARS_OLD_t0.2158273381 !$YEAR_t4.5323741007) $DISEASE_CABG_t0.0287769784 $URGENT_APPT_t0.0431654676 $VS_CHARTED_t0.0359712230 $WAS_COMPLICATED_t0.0215827338 $WAS_FRIGHTENING_t0.1294964029 $WE_COULD_t0.1438848921 $WITHIN_DESCRIBE_t0.0503597122 $WTIH_t0.0431654676 $YEAR_COUNSELED_t0.0431654676 $YEAR_UNKNOWN_t0.0287769784 $YE_t0.0503597122) !$EVERY_NA_t0.1079136691 !$NEXT_SESSION_t0.1366906475) 
1 and(or(and(!$EASIER_t0.0575539568 !$PSYCHIATRY_NOTE_t0.8273381295 !$UNSP_t0.2302158273 !$UPDATE_YOUR_t0.1079136691 !$UROLOGY_CLINIC_t0.2661870504 !$USED_DETECT_t0.0647482014 !$VERIFIED_t1.3525179856 !$VOIDING_t0.5395683453 !$VOLUME_t0.5395683453 !$WERE_t7.6330935252 !$WHAT_QUESTIONS_t0.4676258993 !$WILL_CONSIDER_t0.0647482014 !$YEARS_OLD_t0.2158273381 !$YEAR_t4.5323741007) $LIPITOR_t0.0503597122 $URGENT_APPT_t0.0431654676 $VS_CHARTED_t0.0359712230 $WAS_COMPLICATED_t0.0215827338 $WAS_FRIGHTENING_t0.1294964029 $WE_COULD_t0.1438848921 $WITHIN_DESCRIBE_t0.0503597122 $WTIH_t0.0431654676 $YEAR_COUNSELED_t0.0431654676 $YEAR_UNKNOWN_t0.0287769784 $YE_t0.0503597122) !$EVERY_NA_t0.1079136691 !$NEXT_SESSION_t0.1366906475) 
1 and(or(and(!$PSYCHIATRY_NOTE_t0.8273381295 !$RESIDENTIAL_t0.1079136691 !$UNSP_t0.2302158273 !$UPDATE_YOUR_t0.1079136691 !$UROLOGY_CLINIC_t0.2661870504 !$USED_DETECT_t0.0647482014 !$VERIFIED_t1.3525179856 !$VOIDING_t0.5395683453 !$VOLUME_t0.5395683453 !$WERE_t7.6330935252 !$WHAT_QUESTIONS_t0.4676258993 !$WILL_CONSIDER_t0.0647482014 !$YEARS_OLD_t0.2158273381 !$YEAR_t4.5323741007) $ABLE_FUNCTION_t0.0791366906 $URGENT_APPT_t0.0431654676 $VS_CHARTED_t0.0359712230 $WAS_COMPLICATED_t0.0215827338 $WAS_FRIGHTENING_t0.1294964029 $WE_COULD_t0.1438848921 $WITHIN_DESCRIBE_t0.0503597122 $WTIH_t0.0431654676 $YEAR_COUNSELED_t0.0431654676 $YEAR_UNKNOWN_t0.0287769784 $YE_t0.0503597122) !$EVERY_NA_t0.1079136691 !$NEXT_SESSION_t0.1366906475) 
1 and(or(and(!$PSYCHIATRY_NOTE_t0.8273381295 !$RESIDENTIAL_t0.1079136691 !$UNSP_t0.2302158273 !$UPDATE_YOUR_t0.1079136691 !$UROLOGY_CLINIC_t0.2661870504 !$USED_DETECT_t0.0647482014 !$VERIFIED_t1.3525179856 !$VOIDING_t0.5395683453 !$VOLUME_t0.5395683453 !$WERE_t7.6330935252 !$WHAT_QUESTIONS_t0.4676258993 !$WILL_CONSIDER_t0.0647482014 !$YEARS_OLD_t0.2158273381 !$YEAR_t4.5323741007) $BE_REFILLED_t0.0863309353 $URGENT_APPT_t0.0431654676 $VS_CHARTED_t0.0359712230 $WAS_COMPLICATED_t0.0215827338 $WAS_FRIGHTENING_t0.1294964029 $WE_COULD_t0.1438848921 $WITHIN_DESCRIBE_t0.0503597122 $WTIH_t0.0431654676 $YEAR_COUNSELED_t0.0431654676 $YEAR_UNKNOWN_t0.0287769784 $YE_t0.0503597122) !$EVERY_NA_t0.1079136691 !$NEXT_SESSION_t0.1366906475) 
1 and(or(and(!$PSYCHIATRY_NOTE_t0.8273381295 !$UNSP_t0.2302158273 !$URETHRAL_t0.1151079137 !$VERBAL_RESPONSE_t0.0791366906 !$VERIFIED_t1.3525179856 !$VISIT_PROCESSES_t0.0647482014 !$VISTA_ED_t0.5035971223 !$VOLUME_MOOD_t0.0647482014 !$VOLUNTEER_OR_t0.0719424460 !$WERE_DISCUSSED_t0.4172661871 !$WH_t0.0791366906 !$WILL_CONSIDER_t0.0647482014 !$YEAR_t4.5323741007) $ABLE_FUNCTION_t0.0791366906 $DISEASE_CABG_t0.0287769784 $ENDOSCOPE_t0.0431654676 $URGENT_APPT_t0.0431654676 $VA_CONTRACT_t0.0431654676 $VITAMINS_OR_t0.0503597122 $VOIDS_URINE_t0.0719424460 $WAS_FRIGHTENING_t0.1294964029 $WEAK_ORIENTED_t0.1582733813 $WILL_PICKED_t0.0935251799 $WILL_RESTART_t0.0215827338 $WM_ADMITTED_t0.0359712230 $WORTHLESSNESS_t0.0791366906 $YE_t0.0503597122) !$HOURS_BREATHING_t0.0359712230 !$NO_UNINTENTIONAL_t0.0431654676 !$PERMITTED_t0.1079136691) 
1 and(or(and(!$PSYCHIATRY_NOTE_t0.8273381295 !$UNSP_t0.2302158273 !$URETHRAL_t0.1151079137 !$VERBAL_RESPONSE_t0.0791366906 !$VERIFIED_t1.3525179856 !$VISIT_PROCESSES_t0.0647482014 !$VISTA_ED_t0.5035971223 !$VOLUME_MOOD_t0.0647482014 !$VOLUNTEER_OR_t0.0719424460 !$WERE_DISCUSSED_t0.4172661871 !$WH_t0.0791366906 !$WILL_CONSIDER_t0.0647482014 !$YEAR_t4.5323741007) $ABLE_FUNCTION_t0.0791366906 $DISEASE_CABG_t0.0287769784 $ENDOSCOPE_t0.0431654676 $URGENT_APPT_t0.0431654676 $VA_CONTRACT_t0.0431654676 $VITAMINS_OR_t0.0503597122 $VOIDS_URINE_t0.0719424460 $WAS_FRIGHTENING_t0.1294964029 $WEAK_ORIENTED_t0.1582733813 $WILL_PICKED_t0.0935251799 $WILL_RESTART_t0.0215827338 $WM_ADMITTED_t0.0359712230 $WORTHLESSNESS_t0.0791366906 $YE_t0.0503597122) !$HOURS_BREATHING_t0.0359712230 !$PERMITTED_t0.1079136691) 
1 and(or(and(!$PSYCHIATRY_NOTE_t0.8273381295 !$UNSP_t0.2302158273 !$URETHRAL_t0.1151079137 !$VERBAL_RESPONSE_t0.0791366906 !$VERIFIED_t1.3525179856 !$VISIT_PROCESSES_t0.0647482014 !$VISTA_ED_t0.5035971223 !$VOLUME_MOOD_t0.0647482014 !$VOLUNTEER_OR_t0.0719424460 !$WERE_DISCUSSED_t0.4172661871 !$WH_t0.0791366906 !$WILL_CONSIDER_t0.0647482014 !$YEAR_t4.5323741007) $ABLE_FUNCTION_t0.0791366906 $ENDOSCOPE_t0.0431654676 $URGENT_APPT_t0.0431654676 $VA_CONTRACT_t0.0431654676 $VITAMINS_OR_t0.0503597122 $VOIDS_URINE_t0.0719424460 $WAS_FRIGHTENING_t0.1294964029 $WEAK_ORIENTED_t0.1582733813 $WILL_PICKED_t0.0935251799 $WILL_RESTART_t0.0215827338 $WM_ADMITTED_t0.0359712230 $WORTHLESSNESS_t0.0791366906 $YE_t0.0503597122) !$HOURS_BREATHING_t0.0359712230 !$MATE_t0.0359712230 !$PERMITTED_t0.1079136691) 
1 and(or(and(!$PSYCHIATRY_NOTE_t0.8273381295 !$UNSP_t0.2302158273 !$URETHRAL_t0.1151079137 !$VERBAL_RESPONSE_t0.0791366906 !$VERIFIED_t1.3525179856 !$VISIT_PROCESSES_t0.0647482014 !$VISTA_ED_t0.5035971223 !$VOLUME_MOOD_t0.0647482014 !$VOLUNTEER_OR_t0.0719424460 !$WERE_DISCUSSED_t0.4172661871 !$WH_t0.0791366906 !$WILL_CONSIDER_t0.0647482014 !$YEAR_t4.5323741007) $ABLE_FUNCTION_t0.0791366906 $ENDOSCOPE_t0.0431654676 $URGENT_APPT_t0.0431654676 $VA_CONTRACT_t0.0431654676 $VITAMINS_OR_t0.0503597122 $VOIDS_URINE_t0.0719424460 $WAS_FRIGHTENING_t0.1294964029 $WEAK_ORIENTED_t0.1582733813 $WILL_PICKED_t0.0935251799 $WILL_RESTART_t0.0215827338 $WM_ADMITTED_t0.0359712230 $WORTHLESSNESS_t0.0791366906 $YE_t0.0503597122) !$HOURS_BREATHING_t0.0359712230 !$NO_UNINTENTIONAL_t0.0431654676 !$PERMITTED_t0.1079136691) 
1 and(or(and(!$PSYCHIATRY_NOTE_t0.8273381295 !$UNSP_t0.2302158273 !$URETHRAL_t0.1151079137 !$VERBAL_RESPONSE_t0.0791366906 !$VERIFIED_t1.3525179856 !$VISIT_PROCESSES_t0.0647482014 !$VISTA_ED_t0.5035971223 !$VOLUME_MOOD_t0.0647482014 !$VOLUNTEER_OR_t0.0719424460 !$WERE_DISCUSSED_t0.4172661871 !$WH_t0.0791366906 !$WILL_CONSIDER_t0.0647482014 !$YEAR_t4.5323741007) $BE_REFILLED_t0.0863309353 $ENDOSCOPE_t0.0431654676 $URGENT_APPT_t0.0431654676 $VA_CONTRACT_t0.0431654676 $VITAMINS_OR_t0.0503597122 $VOIDS_URINE_t0.0719424460 $WAS_FRIGHTENING_t0.1294964029 $WEAK_ORIENTED_t0.1582733813 $WILL_PICKED_t0.0935251799 $WILL_RESTART_t0.0215827338 $WM_ADMITTED_t0.0359712230 $WORTHLESSNESS_t0.0791366906 $YE_t0.0503597122) !$HOURS_BREATHING_t0.0359712230 !$MATE_t0.0359712230 !$PERMITTED_t0.1079136691) 
1 and(or(and(!$PSYCHIATRY_NOTE_t0.8273381295 !$UNSP_t0.2302158273 !$URETHRAL_t0.1151079137 !$VERBAL_RESPONSE_t0.0791366906 !$VERIFIED_t1.3525179856 !$VISIT_PROCESSES_t0.0647482014 !$VISTA_ED_t0.5035971223 !$VOLUME_MOOD_t0.0647482014 !$VOLUNTEER_OR_t0.0719424460 !$WERE_DISCUSSED_t0.4172661871 !$WH_t0.0791366906 !$WILL_CONSIDER_t0.0647482014 !$YEAR_t4.5323741007) $BE_REFILLED_t0.0863309353 $ENDOSCOPE_t0.0431654676 $URGENT_APPT_t0.0431654676 $VA_CONTRACT_t0.0431654676 $VITAMINS_OR_t0.0503597122 $VOIDS_URINE_t0.0719424460 $WAS_FRIGHTENING_t0.1294964029 $WEAK_ORIENTED_t0.1582733813 $WILL_PICKED_t0.0935251799 $WILL_RESTART_t0.0215827338 $WM_ADMITTED_t0.0359712230 $WORTHLESSNESS_t0.0791366906 $YE_t0.0503597122) !$HOURS_BREATHING_t0.0359712230 !$NO_UNINTENTIONAL_t0.0431654676 !$PERMITTED_t0.1079136691) 
1 and(or(and(!$PSYCHIATRY_NOTE_t0.8273381295 !$UNSP_t0.2302158273 !$URETHRAL_t0.1151079137 !$VERBAL_RESPONSE_t0.0791366906 !$VERIFIED_t1.3525179856 !$VISIT_PROCESSES_t0.0647482014 !$VISTA_ED_t0.5035971223 !$VOLUME_MOOD_t0.0647482014 !$VOLUNTEER_OR_t0.0719424460 !$WERE_DISCUSSED_t0.4172661871 !$WH_t0.0791366906 !$WILL_CONSIDER_t0.0647482014 !$YEAR_t4.5323741007) $DISEASE_CABG_t0.0287769784 $ENDOSCOPE_t0.0431654676 $URGENT_APPT_t0.0431654676 $VA_CONTRACT_t0.0431654676 $VITAMINS_OR_t0.0503597122 $VOIDS_URINE_t0.0719424460 $WAS_FRIGHTENING_t0.1294964029 $WEAK_ORIENTED_t0.1582733813 $WILL_PICKED_t0.0935251799 $WILL_RESTART_t0.0215827338 $WM_ADMITTED_t0.0359712230 $WORTHLESSNESS_t0.0791366906 $YE_t0.0503597122) !$HOURS_BREATHING_t0.0359712230 !$MATE_t0.0359712230 !$PERMITTED_t0.1079136691) 
1 and(or(and(!$PSYCHIATRY_NOTE_t0.8273381295 !$UNSP_t0.2302158273 !$URETHRAL_t0.1151079137 !$VERBAL_RESPONSE_t0.0791366906 !$VERIFIED_t1.3525179856 !$VISIT_PROCESSES_t0.0647482014 !$VISTA_ED_t0.5035971223 !$VOLUME_MOOD_t0.0647482014 !$VOLUNTEER_OR_t0.0719424460 !$WERE_DISCUSSED_t0.4172661871 !$WH_t0.0791366906 !$WILL_CONSIDER_t0.0647482014 !$YEAR_t4.5323741007) $DISEASE_CABG_t0.0287769784 $ENDOSCOPE_t0.0431654676 $URGENT_APPT_t0.0431654676 $VA_CONTRACT_t0.0431654676 $VITAMINS_OR_t0.0503597122 $VOIDS_URINE_t0.0719424460 $WAS_FRIGHTENING_t0.1294964029 $WEAK_ORIENTED_t0.1582733813 $WILL_PICKED_t0.0935251799 $WILL_RESTART_t0.0215827338 $WM_ADMITTED_t0.0359712230 $WORTHLESSNESS_t0.0791366906 $YE_t0.0503597122) !$HOURS_BREATHING_t0.0359712230 !$NO_UNINTENTIONAL_t0.0431654676 !$PERMITTED_t0.1079136691) 
1 and(or(and(!$MH_PSYCHIATRY_t0.3669064748 !$UNSP_t0.2302158273 !$URETHRAL_t0.1151079137 !$VERBAL_RESPONSE_t0.0791366906 !$VERIFIED_t1.3525179856 !$VISIT_PROCESSES_t0.0647482014 !$VISTA_ED_t0.5035971223 !$VOLUME_MOOD_t0.0647482014 !$VOLUNTEER_OR_t0.0719424460 !$WERE_DISCUSSED_t0.4172661871 !$WH_t0.0791366906 !$WILL_CONSIDER_t0.0647482014 !$YEAR_t4.5323741007) $BE_REFILLED_t0.0863309353 $ENDOSCOPE_t0.0431654676 $URGENT_APPT_t0.0431654676 $VA_CONTRACT_t0.0431654676 $VITAMINS_OR_t0.0503597122 $VOIDS_URINE_t0.0719424460 $WAS_FRIGHTENING_t0.1294964029 $WEAK_ORIENTED_t0.1582733813 $WILL_PICKED_t0.0935251799 $WILL_RESTART_t0.0215827338 $WM_ADMITTED_t0.0359712230 $WORTHLESSNESS_t0.0791366906 $YE_t0.0503597122) !$HOURS_BREATHING_t0.0359712230 !$LUTS_t0.0359712230 !$NO_UNINTENTIONAL_t0.0431654676 !$PERMITTED_t0.1079136691) 
1 and(or(and(!$MH_PSYCHIATRY_t0.3669064748 !$UNSP_t0.2302158273 !$URETHRAL_t0.1151079137 !$VERBAL_RESPONSE_t0.0791366906 !$VERIFIED_t1.3525179856 !$VISIT_PROCESSES_t0.0647482014 !$VISTA_ED_t0.5035971223 !$VOLUME_MOOD_t0.0647482014 !$VOLUNTEER_OR_t0.0719424460 !$WERE_DISCUSSED_t0.4172661871 !$WH_t0.0791366906 !$WILL_CONSIDER_t0.0647482014 !$YEAR_t4.5323741007) $DISEASE_CABG_t0.0287769784 $ENDOSCOPE_t0.0431654676 $URGENT_APPT_t0.0431654676 $VA_CONTRACT_t0.0431654676 $VITAMINS_OR_t0.0503597122 $VOIDS_URINE_t0.0719424460 $WAS_FRIGHTENING_t0.1294964029 $WEAK_ORIENTED_t0.1582733813 $WILL_PICKED_t0.0935251799 $WILL_RESTART_t0.0215827338 $WM_ADMITTED_t0.0359712230 $WORTHLESSNESS_t0.0791366906 $YE_t0.0503597122) !$HOURS_BREATHING_t0.0359712230 !$LUTS_t0.0359712230 !$NO_UNINTENTIONAL_t0.0431654676 !$PERMITTED_t0.1079136691) 
1 and(or(and(or($ATTEMPTS_CONTACT_t0.0503597122 !$YEAR_t4.5323741007 $ZER_t0.0575539568) !$EASIER_t0.0575539568 !$PSYCHIATRY_NOTE_t0.8273381295 !$UNSP_t0.2302158273 !$USED_POLYPHARMACY_t0.0647482014 !$VERIFIED_CORRECT_t0.1438848921 !$VERIFIED_t1.3525179856 !$VETERAN_CALLERS_t0.0359712230 !$VIRGINIA_t0.0575539568 !$VISTA_ED_t0.5035971223 !$VOLUME_MOOD_t0.0647482014 !$VOLUNTEER_OR_t0.0719424460 !$WERE_DISCUSSED_t0.4172661871 !$WILL_CONSIDER_t0.0647482014 !$WITH_COLONOSCOPE_t0.0863309353) $AVERAGE_RISK_t0.0431654676 $LIPITOR_t0.0503597122 $URGENT_APPT_t0.0431654676 $URINAL_WITHIN_t0.2589928058 $VA_CONTRACT_t0.0431654676 $VETERAN_PSYCHOEDUCATIONAL_t0.0647482014 $WAS_HORRIBLE_t0.1294964029 $WILL_PICKED_t0.0935251799 $WM_ADMITTED_t0.0359712230 $WORTHLESSNESS_t0.0791366906 $YEAR_UNKNOWN_t0.0287769784 $YE_t0.0503597122) !$CHEN_t0.1726618705 !$DICLOFENAC_t0.0431654676) 
1 and(or(and(or($ATTEMPTS_CONTACT_t0.0503597122 !$YEAR_t4.5323741007 $ZER_t0.0575539568) !$EASIER_t0.0575539568 !$PSYCHIATRY_NOTE_t0.8273381295 !$UNSP_t0.2302158273 !$USED_POLYPHARMACY_t0.0647482014 !$VERIFIED_CORRECT_t0.1438848921 !$VERIFIED_t1.3525179856 !$VETERAN_CALLERS_t0.0359712230 !$VIRGINIA_t0.0575539568 !$VISTA_ED_t0.5035971223 !$VOLUME_MOOD_t0.0647482014 !$VOLUNTEER_OR_t0.0719424460 !$WERE_DISCUSSED_t0.4172661871 !$WILL_CONSIDER_t0.0647482014 !$WITH_COLONOSCOPE_t0.0863309353) $BREATH_FREELY_t0.0431654676 $LIPITOR_t0.0503597122 $URGENT_APPT_t0.0431654676 $URINAL_WITHIN_t0.2589928058 $VA_CONTRACT_t0.0431654676 $VETERAN_PSYCHOEDUCATIONAL_t0.0647482014 $WAS_HORRIBLE_t0.1294964029 $WILL_PICKED_t0.0935251799 $WM_ADMITTED_t0.0359712230 $WORTHLESSNESS_t0.0791366906 $YEAR_UNKNOWN_t0.0287769784 $YE_t0.0503597122) !$CHEN_t0.1726618705 !$DICLOFENAC_t0.0431654676) 
1 and(or(and(or($ATTEMPTS_CONTACT_t0.0503597122 !$YEAR_t4.5323741007 $ZER_t0.0575539568) !$EASIER_t0.0575539568 !$PSYCHIATRY_NOTE_t0.8273381295 !$UNSP_t0.2302158273 !$USED_POLYPHARMACY_t0.0647482014 !$VERIFIED_CORRECT_t0.1438848921 !$VERIFIED_t1.3525179856 !$VETERAN_CALLERS_t0.0359712230 !$VIRGINIA_t0.0575539568 !$VISTA_ED_t0.5035971223 !$VOLUME_MOOD_t0.0647482014 !$VOLUNTEER_OR_t0.0719424460 !$WERE_DISCUSSED_t0.4172661871 !$WILL_CONSIDER_t0.0647482014 !$WITH_COLONOSCOPE_t0.0863309353) $DISCHARGE_ALDRETE_t0.0359712230 $LIPITOR_t0.0503597122 $URGENT_APPT_t0.0431654676 $URINAL_WITHIN_t0.2589928058 $VA_CONTRACT_t0.0431654676 $VETERAN_PSYCHOEDUCATIONAL_t0.0647482014 $WAS_HORRIBLE_t0.1294964029 $WILL_PICKED_t0.0935251799 $WM_ADMITTED_t0.0359712230 $WORTHLESSNESS_t0.0791366906 $YEAR_UNKNOWN_t0.0287769784 $YE_t0.0503597122) !$CHEN_t0.1726618705 !$DICLOFENAC_t0.0431654676) 
1 and(or(and(or($ATTEMPTS_CONTACT_t0.0503597122 !$YEAR_t4.5323741007 $ZER_t0.0575539568) !$EASIER_t0.0575539568 !$PSYCHIATRY_NOTE_t0.8273381295 !$UNSP_t0.2302158273 !$USED_POLYPHARMACY_t0.0647482014 !$VERIFIED_CORRECT_t0.1438848921 !$VERIFIED_t1.3525179856 !$VETERAN_CALLERS_t0.0359712230 !$VIRGINIA_t0.0575539568 !$VISTA_ED_t0.5035971223 !$VOLUME_MOOD_t0.0647482014 !$VOLUNTEER_OR_t0.0719424460 !$WERE_DISCUSSED_t0.4172661871 !$WILL_CONSIDER_t0.0647482014 !$WITH_COLONOSCOPE_t0.0863309353) $INFORMED_COLON_t0.0431654676 $LIPITOR_t0.0503597122 $URGENT_APPT_t0.0431654676 $URINAL_WITHIN_t0.2589928058 $VA_CONTRACT_t0.0431654676 $VETERAN_PSYCHOEDUCATIONAL_t0.0647482014 $WAS_HORRIBLE_t0.1294964029 $WILL_PICKED_t0.0935251799 $WM_ADMITTED_t0.0359712230 $WORTHLESSNESS_t0.0791366906 $YEAR_UNKNOWN_t0.0287769784 $YE_t0.0503597122) !$CHEN_t0.1726618705 !$DICLOFENAC_t0.0431654676) 
1 and(or(and(or($ATTEMPTS_CONTACT_t0.0503597122 !$YEAR_t4.5323741007 $ZER_t0.0575539568) !$EASIER_t0.0575539568 !$PSYCHIATRY_NOTE_t0.8273381295 !$UNSP_t0.2302158273 !$USED_POLYPHARMACY_t0.0647482014 !$VERIFIED_CORRECT_t0.1438848921 !$VERIFIED_t1.3525179856 !$VETERAN_CALLERS_t0.0359712230 !$VIRGINIA_t0.0575539568 !$VISTA_ED_t0.5035971223 !$VOLUME_MOOD_t0.0647482014 !$VOLUNTEER_OR_t0.0719424460 !$WERE_DISCUSSED_t0.4172661871 !$WILL_CONSIDER_t0.0647482014 !$WITH_COLONOSCOPE_t0.0863309353) $LIPITOR_t0.0503597122 $PREPROCEDURE_DATE_t0.0791366906 $URGENT_APPT_t0.0431654676 $URINAL_WITHIN_t0.2589928058 $VA_CONTRACT_t0.0431654676 $VETERAN_PSYCHOEDUCATIONAL_t0.0647482014 $WAS_HORRIBLE_t0.1294964029 $WILL_PICKED_t0.0935251799 $WM_ADMITTED_t0.0359712230 $WORTHLESSNESS_t0.0791366906 $YEAR_UNKNOWN_t0.0287769784 $YE_t0.0503597122) !$CHEN_t0.1726618705 !$DICLOFENAC_t0.0431654676) 
1 and(or(and(or($ATTEMPTS_CONTACT_t0.0503597122 !$YEAR_t4.5323741007 $ZER_t0.0575539568) !$EASIER_t0.0575539568 !$PSYCHIATRY_NOTE_t0.8273381295 !$UNSP_t0.2302158273 !$USED_POLYPHARMACY_t0.0647482014 !$VERIFIED_CORRECT_t0.1438848921 !$VERIFIED_t1.3525179856 !$VETERAN_CALLERS_t0.0359712230 !$VIRGINIA_t0.0575539568 !$VISTA_ED_t0.5035971223 !$VOLUME_MOOD_t0.0647482014 !$VOLUNTEER_OR_t0.0719424460 !$WERE_DISCUSSED_t0.4172661871 !$WILL_CONSIDER_t0.0647482014 !$WITH_COLONOSCOPE_t0.0863309353) $LIPITOR_t0.0503597122 $TEST_ALLOWS_t0.0359712230 $URGENT_APPT_t0.0431654676 $URINAL_WITHIN_t0.2589928058 $VA_CONTRACT_t0.0431654676 $VETERAN_PSYCHOEDUCATIONAL_t0.0647482014 $WAS_HORRIBLE_t0.1294964029 $WILL_PICKED_t0.0935251799 $WM_ADMITTED_t0.0359712230 $WORTHLESSNESS_t0.0791366906 $YEAR_UNKNOWN_t0.0287769784 $YE_t0.0503597122) !$CHEN_t0.1726618705 !$DICLOFENAC_t0.0431654676) 
1 and(or(and(or($ATTEMPTS_CONTACT_t0.0503597122 !$YEAR_t4.5323741007 $ZER_t0.0575539568) !$NO_UNINTENTIONAL_t0.0431654676 !$PSYCHIATRY_NOTE_t0.8273381295 !$UNSP_t0.2302158273 !$USED_POLYPHARMACY_t0.0647482014 !$VERIFIED_CORRECT_t0.1438848921 !$VERIFIED_t1.3525179856 !$VETERAN_CALLERS_t0.0359712230 !$VIRGINIA_t0.0575539568 !$VISTA_ED_t0.5035971223 !$VOLUME_MOOD_t0.0647482014 !$VOLUNTEER_OR_t0.0719424460 !$WERE_DISCUSSED_t0.4172661871 !$WILL_CONSIDER_t0.0647482014 !$WITH_COLONOSCOPE_t0.0863309353) $BREATH_FREELY_t0.0431654676 $LIPITOR_t0.0503597122 $URGENT_APPT_t0.0431654676 $URINAL_WITHIN_t0.2589928058 $VA_CONTRACT_t0.0431654676 $VETERAN_PSYCHOEDUCATIONAL_t0.0647482014 $WAS_HORRIBLE_t0.1294964029 $WILL_PICKED_t0.0935251799 $WM_ADMITTED_t0.0359712230 $WORTHLESSNESS_t0.0791366906 $YEAR_UNKNOWN_t0.0287769784 $YE_t0.0503597122) !$CHEN_t0.1726618705 !$DICLOFENAC_t0.0431654676) 
1 and(or(and(or($ATTEMPTS_CONTACT_t0.0503597122 !$YEAR_t4.5323741007 $ZER_t0.0575539568) !$NO_UNINTENTIONAL_t0.0431654676 !$PSYCHIATRY_NOTE_t0.8273381295 !$UNSP_t0.2302158273 !$USED_POLYPHARMACY_t0.0647482014 !$VERIFIED_CORRECT_t0.1438848921 !$VERIFIED_t1.3525179856 !$VETERAN_CALLERS_t0.0359712230 !$VIRGINIA_t0.0575539568 !$VISTA_ED_t0.5035971223 !$VOLUME_MOOD_t0.0647482014 !$VOLUNTEER_OR_t0.0719424460 !$WERE_DISCUSSED_t0.4172661871 !$WILL_CONSIDER_t0.0647482014 !$WITH_COLONOSCOPE_t0.0863309353) $LIPITOR_t0.0503597122 $PREPROCEDURE_DATE_t0.0791366906 $URGENT_APPT_t0.0431654676 $URINAL_WITHIN_t0.2589928058 $VA_CONTRACT_t0.0431654676 $VETERAN_PSYCHOEDUCATIONAL_t0.0647482014 $WAS_HORRIBLE_t0.1294964029 $WILL_PICKED_t0.0935251799 $WM_ADMITTED_t0.0359712230 $WORTHLESSNESS_t0.0791366906 $YEAR_UNKNOWN_t0.0287769784 $YE_t0.0503597122) !$CHEN_t0.1726618705 !$DICLOFENAC_t0.0431654676) 
1 and(or(and(or(and(!$MATE_t0.0359712230 !$YEAR_t4.5323741007) $ATTEMPTS_CONTACT_t0.0503597122 $ZER_t0.0575539568) !$PSYCHIATRY_NOTE_t0.8273381295 !$UNSP_t0.2302158273 !$USED_POLYPHARMACY_t0.0647482014 !$VERIFIED_CORRECT_t0.1438848921 !$VERIFIED_t1.3525179856 !$VETERAN_CALLERS_t0.0359712230 !$VIRGINIA_t0.0575539568 !$VISTA_ED_t0.5035971223 !$VOLUME_MOOD_t0.0647482014 !$VOLUNTEER_OR_t0.0719424460 !$WERE_DISCUSSED_t0.4172661871 !$WILL_CONSIDER_t0.0647482014 !$WITH_COLONOSCOPE_t0.0863309353) $LIPITOR_t0.0503597122 $PREPROCEDURE_DATE_t0.0791366906 $URGENT_APPT_t0.0431654676 $URINAL_WITHIN_t0.2589928058 $VA_CONTRACT_t0.0431654676 $VETERAN_PSYCHOEDUCATIONAL_t0.0647482014 $WAS_HORRIBLE_t0.1294964029 $WILL_PICKED_t0.0935251799 $WM_ADMITTED_t0.0359712230 $WORTHLESSNESS_t0.0791366906 $YEAR_UNKNOWN_t0.0287769784 $YE_t0.0503597122) !$CHEN_t0.1726618705 !$DICLOFENAC_t0.0431654676) 
1 and(or(and(or(and(!$NOCTURIA_t0.1366906475 !$YEAR_t4.5323741007) $ATTEMPTS_CONTACT_t0.0503597122 $ZER_t0.0575539568) !$PSYCHIATRY_NOTE_t0.8273381295 !$UNSP_t0.2302158273 !$USED_POLYPHARMACY_t0.0647482014 !$VERIFIED_CORRECT_t0.1438848921 !$VERIFIED_t1.3525179856 !$VETERAN_CALLERS_t0.0359712230 !$VIRGINIA_t0.0575539568 !$VISTA_ED_t0.5035971223 !$VOLUME_MOOD_t0.0647482014 !$VOLUNTEER_OR_t0.0719424460 !$WERE_DISCUSSED_t0.4172661871 !$WILL_CONSIDER_t0.0647482014 !$WITH_COLONOSCOPE_t0.0863309353) $AVERAGE_RISK_t0.0431654676 $LIPITOR_t0.0503597122 $URGENT_APPT_t0.0431654676 $URINAL_WITHIN_t0.2589928058 $VA_CONTRACT_t0.0431654676 $VETERAN_PSYCHOEDUCATIONAL_t0.0647482014 $WAS_HORRIBLE_t0.1294964029 $WILL_PICKED_t0.0935251799 $WM_ADMITTED_t0.0359712230 $WORTHLESSNESS_t0.0791366906 $YEAR_UNKNOWN_t0.0287769784 $YE_t0.0503597122) !$CHEN_t0.1726618705 !$DICLOFENAC_t0.0431654676) 
1 and(or(and(or(!$WERE_DISCUSSED_t0.4172661871 !$YOU_HAVE_t2.9856115108) !$MH_PSYCHIATRY_t0.3669064748 !$UNSP_t0.2302158273 !$VERIFIED_t1.3525179856 !$VISIT_DENTAL_t0.3309352518 !$VOICEMAIL_LEFT_t0.0503597122 !$VOLUME_MOOD_t0.0647482014 !$WALKIN_t0.5539568345 !$YEARS_OLD_t0.2158273381 !$YEAR_t4.5323741007 !$YR_t0.4892086331) $ABLE_FUNCTION_t0.0791366906 $ACETATE_t0.0575539568 $DISEASE_CABG_t0.0287769784 $URGENT_APPT_t0.0431654676 $URGENT_SERVICES_t0.0575539568 $WAS_HORRIBLE_t0.1294964029 $WATCHES_t0.0575539568 $WE_COULD_t0.1438848921 $WILL_RESTART_t0.0215827338 $WTIH_t0.0431654676 $YEAR_COUNSELED_t0.0431654676 $YE_t0.0503597122 $YOUR_PILL_t0.0215827338) !$ALZHEIMERS_DISEASE_t0.0431654676 !$HELP_HIMSELF_t0.0359712230) 
1 and(or(and(or(!$WERE_DISCUSSED_t0.4172661871 !$YOU_HAVE_t2.9856115108) !$MH_PSYCHIATRY_t0.3669064748 !$UNSP_t0.2302158273 !$VERIFIED_t1.3525179856 !$VISIT_DENTAL_t0.3309352518 !$VOICEMAIL_LEFT_t0.0503597122 !$VOLUME_MOOD_t0.0647482014 !$WALKIN_t0.5539568345 !$YEARS_OLD_t0.2158273381 !$YEAR_t4.5323741007 !$YR_t0.4892086331) $ABLE_FUNCTION_t0.0791366906 $DISEASE_CABG_t0.0287769784 $MALE_CA_t0.0863309353 $URGENT_APPT_t0.0431654676 $URGENT_SERVICES_t0.0575539568 $WAS_HORRIBLE_t0.1294964029 $WATCHES_t0.0575539568 $WE_COULD_t0.1438848921 $WILL_RESTART_t0.0215827338 $WTIH_t0.0431654676 $YEAR_COUNSELED_t0.0431654676 $YE_t0.0503597122 $YOUR_PILL_t0.0215827338) !$ALZHEIMERS_DISEASE_t0.0431654676 !$HELP_HIMSELF_t0.0359712230) 
1 and(or(and(or(!$WERE_DISCUSSED_t0.4172661871 !$YOU_HAVE_t2.9856115108) !$PSYCHIATRY_NOTE_t0.8273381295 !$UNSP_t0.2302158273 !$VERIFIED_t1.3525179856 !$VISIT_DENTAL_t0.3309352518 !$VOICEMAIL_LEFT_t0.0503597122 !$VOLUME_MOOD_t0.0647482014 !$WALKIN_t0.5539568345 !$YEARS_OLD_t0.2158273381 !$YEAR_t4.5323741007 !$YR_t0.4892086331) $ABLE_FUNCTION_t0.0791366906 $ACETATE_t0.0575539568 $DISEASE_CABG_t0.0287769784 $URGENT_APPT_t0.0431654676 $URGENT_SERVICES_t0.0575539568 $WAS_HORRIBLE_t0.1294964029 $WATCHES_t0.0575539568 $WE_COULD_t0.1438848921 $WILL_RESTART_t0.0215827338 $WTIH_t0.0431654676 $YEAR_COUNSELED_t0.0431654676 $YE_t0.0503597122 $YOUR_PILL_t0.0215827338) !$ALZHEIMERS_DISEASE_t0.0431654676 !$HELP_HIMSELF_t0.0359712230) 
1 and(or(and(or(!$WERE_DISCUSSED_t0.4172661871 !$YOU_HAVE_t2.9856115108) !$PSYCHIATRY_NOTE_t0.8273381295 !$UNSP_t0.2302158273 !$VERIFIED_t1.3525179856 !$VISIT_DENTAL_t0.3309352518 !$VOICEMAIL_LEFT_t0.0503597122 !$VOLUME_MOOD_t0.0647482014 !$WALKIN_t0.5539568345 !$YEARS_OLD_t0.2158273381 !$YEAR_t4.5323741007 !$YR_t0.4892086331) $ABLE_FUNCTION_t0.0791366906 $DISEASE_CABG_t0.0287769784 $MALE_CA_t0.0863309353 $URGENT_APPT_t0.0431654676 $URGENT_SERVICES_t0.0575539568 $WAS_HORRIBLE_t0.1294964029 $WATCHES_t0.0575539568 $WE_COULD_t0.1438848921 $WILL_RESTART_t0.0215827338 $WTIH_t0.0431654676 $YEAR_COUNSELED_t0.0431654676 $YE_t0.0503597122 $YOUR_PILL_t0.0215827338) !$ALZHEIMERS_DISEASE_t0.0431654676 !$HELP_HIMSELF_t0.0359712230) 
1 and(or(and(or(!$WERE_DISCUSSED_t0.4172661871 !$YOU_HAVE_t2.9856115108) !$MH_PSYCHIATRY_t0.3669064748 !$PSYCHIATRY_NOTE_t0.8273381295 !$UNSP_t0.2302158273 !$VERIFIED_t1.3525179856 !$VISIT_DENTAL_t0.3309352518 !$VOICEMAIL_LEFT_t0.0503597122 !$VOLUME_MOOD_t0.0647482014 !$WALKIN_t0.5539568345 !$YEARS_OLD_t0.2158273381 !$YEAR_t4.5323741007 !$YR_t0.4892086331) $ABLE_FUNCTION_t0.0791366906 $ACETATE_t0.0575539568 $DISEASE_CABG_t0.0287769784 $URGENT_APPT_t0.0431654676 $URGENT_SERVICES_t0.0575539568 $WAS_HORRIBLE_t0.1294964029 $WATCHES_t0.0575539568 $WE_COULD_t0.1438848921 $WILL_RESTART_t0.0215827338 $WTIH_t0.0431654676 $YEAR_COUNSELED_t0.0431654676 $YE_t0.0503597122 $YOUR_PILL_t0.0215827338) !$ALZHEIMERS_DISEASE_t0.0431654676 !$HELP_HIMSELF_t0.0359712230) 
1 and(or(and(or(!$WERE_DISCUSSED_t0.4172661871 !$YOU_HAVE_t2.9856115108) !$MH_PSYCHIATRY_t0.3669064748 !$PSYCHIATRY_NOTE_t0.8273381295 !$UNSP_t0.2302158273 !$VERIFIED_t1.3525179856 !$VISIT_DENTAL_t0.3309352518 !$VOICEMAIL_LEFT_t0.0503597122 !$VOLUME_MOOD_t0.0647482014 !$WALKIN_t0.5539568345 !$YEARS_OLD_t0.2158273381 !$YEAR_t4.5323741007 !$YR_t0.4892086331) $ABLE_FUNCTION_t0.0791366906 $DISEASE_CABG_t0.0287769784 $MALE_CA_t0.0863309353 $URGENT_APPT_t0.0431654676 $URGENT_SERVICES_t0.0575539568 $WAS_HORRIBLE_t0.1294964029 $WATCHES_t0.0575539568 $WE_COULD_t0.1438848921 $WILL_RESTART_t0.0215827338 $WTIH_t0.0431654676 $YEAR_COUNSELED_t0.0431654676 $YE_t0.0503597122 $YOUR_PILL_t0.0215827338) !$ALZHEIMERS_DISEASE_t0.0431654676 !$HELP_HIMSELF_t0.0359712230) 
1 and(or(and(or(!$WERE_DISCUSSED_t0.4172661871 !$YOU_HAVE_t2.9856115108) !$MH_PSYCHIATRY_t0.3669064748 !$UNSP_t0.2302158273 !$VERIFIED_t1.3525179856 !$VISIT_DENTAL_t0.3309352518 !$VOICEMAIL_LEFT_t0.0503597122 !$VOLUME_MOOD_t0.0647482014 !$WALKIN_t0.5539568345 !$YEARS_OLD_t0.2158273381 !$YEAR_t4.5323741007 !$YR_t0.4892086331) $ABLE_FUNCTION_t0.0791366906 $ACETATE_t0.0575539568 $DISEASE_CABG_t0.0287769784 $MALE_CA_t0.0863309353 $URGENT_APPT_t0.0431654676 $URGENT_SERVICES_t0.0575539568 $WAS_HORRIBLE_t0.1294964029 $WATCHES_t0.0575539568 $WE_COULD_t0.1438848921 $WILL_RESTART_t0.0215827338 $WTIH_t0.0431654676 $YEAR_COUNSELED_t0.0431654676 $YE_t0.0503597122 $YOUR_PILL_t0.0215827338) !$ALZHEIMERS_DISEASE_t0.0431654676 !$HELP_HIMSELF_t0.0359712230) 
1 and(or(and(or(!$WERE_DISCUSSED_t0.4172661871 !$YOU_HAVE_t2.9856115108) !$PSYCHIATRY_NOTE_t0.8273381295 !$UNSP_t0.2302158273 !$VERIFIED_t1.3525179856 !$VISIT_DENTAL_t0.3309352518 !$VOICEMAIL_LEFT_t0.0503597122 !$VOLUME_MOOD_t0.0647482014 !$WALKIN_t0.5539568345 !$YEARS_OLD_t0.2158273381 !$YEAR_t4.5323741007 !$YR_t0.4892086331) $ABLE_FUNCTION_t0.0791366906 $ACETATE_t0.0575539568 $DISEASE_CABG_t0.0287769784 $MALE_CA_t0.0863309353 $URGENT_APPT_t0.0431654676 $URGENT_SERVICES_t0.0575539568 $WAS_HORRIBLE_t0.1294964029 $WATCHES_t0.0575539568 $WE_COULD_t0.1438848921 $WILL_RESTART_t0.0215827338 $WTIH_t0.0431654676 $YEAR_COUNSELED_t0.0431654676 $YE_t0.0503597122 $YOUR_PILL_t0.0215827338) !$ALZHEIMERS_DISEASE_t0.0431654676 !$HELP_HIMSELF_t0.0359712230) 
1 and(or(and(or(!$MH_PSYCHIATRY_t0.3669064748 !$PSYCHIATRY_NOTE_t0.8273381295) or(!$WERE_DISCUSSED_t0.4172661871 !$YOU_HAVE_t2.9856115108) !$UNSP_t0.2302158273 !$VERIFIED_t1.3525179856 !$VISIT_DENTAL_t0.3309352518 !$VOICEMAIL_LEFT_t0.0503597122 !$VOLUME_MOOD_t0.0647482014 !$WALKIN_t0.5539568345 !$YEARS_OLD_t0.2158273381 !$YEAR_t4.5323741007 !$YR_t0.4892086331) $ABLE_FUNCTION_t0.0791366906 $ACETATE_t0.0575539568 $DISEASE_CABG_t0.0287769784 $URGENT_APPT_t0.0431654676 $URGENT_SERVICES_t0.0575539568 $WAS_HORRIBLE_t0.1294964029 $WATCHES_t0.0575539568 $WE_COULD_t0.1438848921 $WILL_RESTART_t0.0215827338 $WTIH_t0.0431654676 $YEAR_COUNSELED_t0.0431654676 $YE_t0.0503597122 $YOUR_PILL_t0.0215827338) !$ALZHEIMERS_DISEASE_t0.0431654676 !$HELP_HIMSELF_t0.0359712230) 
1 and(or(and(or(!$MH_PSYCHIATRY_t0.3669064748 !$PSYCHIATRY_NOTE_t0.8273381295) or(!$WERE_DISCUSSED_t0.4172661871 !$YOU_HAVE_t2.9856115108) !$UNSP_t0.2302158273 !$VERIFIED_t1.3525179856 !$VISIT_DENTAL_t0.3309352518 !$VOICEMAIL_LEFT_t0.0503597122 !$VOLUME_MOOD_t0.0647482014 !$WALKIN_t0.5539568345 !$YEARS_OLD_t0.2158273381 !$YEAR_t4.5323741007 !$YR_t0.4892086331) $ABLE_FUNCTION_t0.0791366906 $DISEASE_CABG_t0.0287769784 $MALE_CA_t0.0863309353 $URGENT_APPT_t0.0431654676 $URGENT_SERVICES_t0.0575539568 $WAS_HORRIBLE_t0.1294964029 $WATCHES_t0.0575539568 $WE_COULD_t0.1438848921 $WILL_RESTART_t0.0215827338 $WTIH_t0.0431654676 $YEAR_COUNSELED_t0.0431654676 $YE_t0.0503597122 $YOUR_PILL_t0.0215827338) !$ALZHEIMERS_DISEASE_t0.0431654676 !$HELP_HIMSELF_t0.0359712230) 
1 and(or(and(!$RESIDENTIAL_t0.1079136691 !$UNSP_t0.2302158273 !$UPDATE_YOUR_t0.1079136691 !$UROLOGY_CLINIC_t0.2661870504 !$VESSEL_t0.0287769784 !$VISIT_DENTAL_t0.3309352518 !$VISTA_ED_t0.5035971223 !$VOICEMAIL_LEFT_t0.0503597122 !$VOLUME_MOOD_t0.0647482014 !$WAL_REQUESTING_t0.0719424460 !$WEEK_THEN_t0.1151079137 !$WILLING_t0.4388489209 !$YEAR_t4.5323741007 !$YR_t0.4892086331) $CONSULT_APPROVED_t0.1079136691 $KIMBERLY_t0.0287769784 $URGENT_SERVICES_t0.0575539568 $WAS_HORRIBLE_t0.1294964029 $WEIGH_DAILY_t0.0503597122 $WILL_PICKED_t0.0935251799 $YEAR_UNKNOWN_t0.0287769784 $YES_SEC_t0.2374100719 $YE_t0.0503597122 $YOUNGER_t0.0431654676 $ZER_t0.0575539568) !$RADIATING_PAIN_t0.0863309353 !$UCINATIONS_SI_t0.0359712230) 
1 and(or(and(!$RESIDENTIAL_t0.1079136691 !$UNSP_t0.2302158273 !$UPDATE_YOUR_t0.1079136691 !$UROLOGY_CLINIC_t0.2661870504 !$VESSEL_t0.0287769784 !$VISIT_DENTAL_t0.3309352518 !$VISTA_ED_t0.5035971223 !$VOICEMAIL_LEFT_t0.0503597122 !$VOLUME_MOOD_t0.0647482014 !$WEEK_THEN_t0.1151079137 !$WILLING_t0.4388489209 !$YEAR_t4.5323741007 !$YR_t0.4892086331) $CONSULT_APPROVED_t0.1079136691 $KIMBERLY_t0.0287769784 $URGENT_SERVICES_t0.0575539568 $WAS_HORRIBLE_t0.1294964029 $WEIGH_DAILY_t0.0503597122 $WILL_PICKED_t0.0935251799 $YEAR_UNKNOWN_t0.0287769784 $YES_SEC_t0.2374100719 $YE_t0.0503597122 $YOUNGER_t0.0431654676 $ZER_t0.0575539568) !$RADIATING_PAIN_t0.0863309353 !$UCINATIONS_SI_t0.0359712230 !$WAL_REQUESTING_t0.0719424460) 
1 and(or(and(!$RESIDENTIAL_t0.1079136691 !$UNSP_t0.2302158273 !$UPDATE_YOUR_t0.1079136691 !$UROLOGY_CLINIC_t0.2661870504 !$VESSEL_t0.0287769784 !$VISIT_DENTAL_t0.3309352518 !$VISTA_ED_t0.5035971223 !$VOICEMAIL_LEFT_t0.0503597122 !$WAL_REQUESTING_t0.0719424460 !$WEEK_THEN_t0.1151079137 !$WILLING_t0.4388489209 !$YEAR_t4.5323741007 !$YR_t0.4892086331) $CONSULT_APPROVED_t0.1079136691 $KIMBERLY_t0.0287769784 $URGENT_SERVICES_t0.0575539568 $WAS_HORRIBLE_t0.1294964029 $WEIGH_DAILY_t0.0503597122 $WILL_PICKED_t0.0935251799 $YEAR_UNKNOWN_t0.0287769784 $YES_SEC_t0.2374100719 $YE_t0.0503597122 $YOUNGER_t0.0431654676 $ZER_t0.0575539568) !$RADIATING_PAIN_t0.0863309353 !$UCINATIONS_SI_t0.0359712230 !$VOLUME_MOOD_t0.0647482014) 
1 and(or(and(!$RESIDENTIAL_t0.1079136691 !$UNSP_t0.2302158273 !$UPDATE_YOUR_t0.1079136691 !$UROLOGY_CLINIC_t0.2661870504 !$VESSEL_t0.0287769784 !$VISIT_DENTAL_t0.3309352518 !$VISTA_ED_t0.5035971223 !$VOICEMAIL_LEFT_t0.0503597122 !$WEEK_THEN_t0.1151079137 !$WILLING_t0.4388489209 !$YEAR_t4.5323741007 !$YR_t0.4892086331) $CONSULT_APPROVED_t0.1079136691 $KIMBERLY_t0.0287769784 $URGENT_SERVICES_t0.0575539568 $WAS_HORRIBLE_t0.1294964029 $WEIGH_DAILY_t0.0503597122 $WILL_PICKED_t0.0935251799 $YEAR_UNKNOWN_t0.0287769784 $YES_SEC_t0.2374100719 $YE_t0.0503597122 $YOUNGER_t0.0431654676 $ZER_t0.0575539568) !$RADIATING_PAIN_t0.0863309353 !$UCINATIONS_SI_t0.0359712230 !$VOLUME_MOOD_t0.0647482014 !$WAL_REQUESTING_t0.0719424460) 
1 and(or(and(!$RESIDENTIAL_t0.1079136691 !$UNSP_t0.2302158273 !$UPDATE_YOUR_t0.1079136691 !$UROLOGY_CLINIC_t0.2661870504 !$VISIT_DENTAL_t0.3309352518 !$VISTA_ED_t0.5035971223 !$VOICEMAIL_LEFT_t0.0503597122 !$VOLUME_MOOD_t0.0647482014 !$WAL_REQUESTING_t0.0719424460 !$WEEK_THEN_t0.1151079137 !$WILLING_t0.4388489209 !$YEAR_t4.5323741007 !$YR_t0.4892086331) $CONSULT_APPROVED_t0.1079136691 $KIMBERLY_t0.0287769784 $URGENT_SERVICES_t0.0575539568 $WAS_HORRIBLE_t0.1294964029 $WEIGH_DAILY_t0.0503597122 $WILL_PICKED_t0.0935251799 $YEAR_UNKNOWN_t0.0287769784 $YES_SEC_t0.2374100719 $YE_t0.0503597122 $YOUNGER_t0.0431654676 $ZER_t0.0575539568) !$RADIATING_PAIN_t0.0863309353 !$UCINATIONS_SI_t0.0359712230 !$VESSEL_t0.0287769784) 
1 and(or(and(!$RESIDENTIAL_t0.1079136691 !$UNSP_t0.2302158273 !$UROLOGY_CLINIC_t0.2661870504 !$VESSEL_t0.0287769784 !$VISIT_DENTAL_t0.3309352518 !$VISTA_ED_t0.5035971223 !$VOICEMAIL_LEFT_t0.0503597122 !$VOLUME_MOOD_t0.0647482014 !$WAL_REQUESTING_t0.0719424460 !$WEEK_THEN_t0.1151079137 !$WILLING_t0.4388489209 !$YEAR_t4.5323741007 !$YR_t0.4892086331) $CONSULT_APPROVED_t0.1079136691 $KIMBERLY_t0.0287769784 $URGENT_SERVICES_t0.0575539568 $WAS_HORRIBLE_t0.1294964029 $WEIGH_DAILY_t0.0503597122 $WILL_PICKED_t0.0935251799 $YEAR_UNKNOWN_t0.0287769784 $YES_SEC_t0.2374100719 $YE_t0.0503597122 $YOUNGER_t0.0431654676 $ZER_t0.0575539568) !$RADIATING_PAIN_t0.0863309353 !$UCINATIONS_SI_t0.0359712230 !$UPDATE_YOUR_t0.1079136691) 
1 or(and(or(and(!$RESIDENTIAL_t0.1079136691 !$UNSP_t0.2302158273 !$UPDATE_YOUR_t0.1079136691 !$UROLOGY_CLINIC_t0.2661870504 !$VESSEL_t0.0287769784 !$VISIT_DENTAL_t0.3309352518 !$VISTA_ED_t0.5035971223 !$VOICEMAIL_LEFT_t0.0503597122 !$VOLUME_MOOD_t0.0647482014 !$WAL_REQUESTING_t0.0719424460 !$WEEK_THEN_t0.1151079137 !$WILLING_t0.4388489209 !$YEAR_t4.5323741007 !$YR_t0.4892086331) $CONSULT_APPROVED_t0.1079136691 $KIMBERLY_t0.0287769784 $WAS_HORRIBLE_t0.1294964029 $WEIGH_DAILY_t0.0503597122 $WILL_PICKED_t0.0935251799 $YEAR_UNKNOWN_t0.0287769784 $YES_SEC_t0.2374100719 $YE_t0.0503597122 $YOUNGER_t0.0431654676 $ZER_t0.0575539568) !$RADIATING_PAIN_t0.0863309353 !$UCINATIONS_SI_t0.0359712230) $URGENT_SERVICES_t0.0575539568) 
1 or(and(or(and(!$RESIDENTIAL_t0.1079136691 !$UNSP_t0.2302158273 !$UPDATE_YOUR_t0.1079136691 !$UROLOGY_CLINIC_t0.2661870504 !$VESSEL_t0.0287769784 !$VISIT_DENTAL_t0.3309352518 !$VISTA_ED_t0.5035971223 !$VOICEMAIL_LEFT_t0.0503597122 !$VOLUME_MOOD_t0.0647482014 !$WAL_REQUESTING_t0.0719424460 !$WEEK_THEN_t0.1151079137 !$WILLING_t0.4388489209 !$YEAR_t4.5323741007 !$YR_t0.4892086331) $CONSULT_APPROVED_t0.1079136691 $URGENT_SERVICES_t0.0575539568 $WAS_HORRIBLE_t0.1294964029 $WEIGH_DAILY_t0.0503597122 $WILL_PICKED_t0.0935251799 $YEAR_UNKNOWN_t0.0287769784 $YES_SEC_t0.2374100719 $YE_t0.0503597122 $YOUNGER_t0.0431654676 $ZER_t0.0575539568) !$RADIATING_PAIN_t0.0863309353 !$UCINATIONS_SI_t0.0359712230) $KIMBERLY_t0.0287769784) 
1 or(and(or(and(!$RESIDENTIAL_t0.1079136691 !$UNSP_t0.2302158273 !$UPDATE_YOUR_t0.1079136691 !$UROLOGY_CLINIC_t0.2661870504 !$VESSEL_t0.0287769784 !$VISIT_DENTAL_t0.3309352518 !$VISTA_ED_t0.5035971223 !$VOICEMAIL_LEFT_t0.0503597122 !$VOLUME_MOOD_t0.0647482014 !$WEEK_THEN_t0.1151079137 !$WILLING_t0.4388489209 !$YEAR_t4.5323741007 !$YR_t0.4892086331) $CONSULT_APPROVED_t0.1079136691 $URGENT_SERVICES_t0.0575539568 $WAS_HORRIBLE_t0.1294964029 $WEIGH_DAILY_t0.0503597122 $WILL_PICKED_t0.0935251799 $YEAR_UNKNOWN_t0.0287769784 $YES_SEC_t0.2374100719 $YE_t0.0503597122 $YOUNGER_t0.0431654676 $ZER_t0.0575539568) !$RADIATING_PAIN_t0.0863309353 !$UCINATIONS_SI_t0.0359712230 !$WAL_REQUESTING_t0.0719424460) $KIMBERLY_t0.0287769784) 
1 or(and(or(and(!$RESIDENTIAL_t0.1079136691 !$UNSP_t0.2302158273 !$UPDATE_YOUR_t0.1079136691 !$UROLOGY_CLINIC_t0.2661870504 !$VESSEL_t0.0287769784 !$VISIT_DENTAL_t0.3309352518 !$VISTA_ED_t0.5035971223 !$VOICEMAIL_LEFT_t0.0503597122 !$WAL_REQUESTING_t0.0719424460 !$WEEK_THEN_t0.1151079137 !$WILLING_t0.4388489209 !$YEAR_t4.5323741007 !$YR_t0.4892086331) $CONSULT_APPROVED_t0.1079136691 $URGENT_SERVICES_t0.0575539568 $WAS_HORRIBLE_t0.1294964029 $WEIGH_DAILY_t0.0503597122 $WILL_PICKED_t0.0935251799 $YEAR_UNKNOWN_t0.0287769784 $YES_SEC_t0.2374100719 $YE_t0.0503597122 $YOUNGER_t0.0431654676 $ZER_t0.0575539568) !$RADIATING_PAIN_t0.0863309353 !$UCINATIONS_SI_t0.0359712230 !$VOLUME_MOOD_t0.0647482014) $KIMBERLY_t0.0287769784) 
1 and(or(and(!$ASKING_t0.7841726619 !$FEAR_t0.2446043165 !$NA_TAB_t0.3237410072 !$UNSP_t0.2302158273 !$USED_DETECT_t0.0647482014 !$VERIFIED_CORRECT_t0.1438848921 !$VISTA_ED_t0.5035971223 !$VOLUME_MOOD_t0.0647482014 !$VOLUNTEER_OR_t0.0719424460 !$WALKIN_t0.5539568345 !$WAL_REQUESTING_t0.0719424460 !$WERE_DISCUSSED_t0.4172661871 !$WILLING_t0.4388489209 !$WILL_CONSIDER_t0.0647482014 !$YEAR_t4.5323741007) $AVERAGE_RISK_t0.0431654676 $URGENT_APPT_t0.0431654676 $VALLEY_t0.0647482014 $WAS_FRIGHTENING_t0.1294964029 $WEAK_STATUS_t0.1726618705 $WEIGH_DAILY_t0.0503597122 $WILL_PICKED_t0.0935251799 $WM_ADMITTED_t0.0359712230 $WORTHLESSNESS_t0.0791366906 $YEAR_UNKNOWN_t0.0287769784 $YE_t0.0503597122 $YOUR_PILL_t0.0215827338 $ZER_t0.0575539568) !$LIKELY_DUE_t0.0431654676) 
1 and(or(and(!$ASKING_t0.7841726619 !$FEAR_t0.2446043165 !$PAIN_INFLAMMATION_t0.1438848921 !$UNSP_t0.2302158273 !$USED_DETECT_t0.0647482014 !$VERIFIED_CORRECT_t0.1438848921 !$VISTA_ED_t0.5035971223 !$VOLUME_MOOD_t0.0647482014 !$VOLUNTEER_OR_t0.0719424460 !$WALKIN_t0.5539568345 !$WAL_REQUESTING_t0.0719424460 !$WERE_DISCUSSED_t0.4172661871 !$WILLING_t0.4388489209 !$WILL_CONSIDER_t0.0647482014 !$YEAR_t4.5323741007) $AVERAGE_RISK_t0.0431654676 $URGENT_APPT_t0.0431654676 $VALLEY_t0.0647482014 $WAS_FRIGHTENING_t0.1294964029 $WEAK_STATUS_t0.1726618705 $WEIGH_DAILY_t0.0503597122 $WILL_PICKED_t0.0935251799 $WM_ADMITTED_t0.0359712230 $WORTHLESSNESS_t0.0791366906 $YEAR_UNKNOWN_t0.0287769784 $YE_t0.0503597122 $YOUR_PILL_t0.0215827338 $ZER_t0.0575539568) !$LIKELY_DUE_t0.0431654676) 
1 and(or(and(!$ASKING_t0.7841726619 !$MH_PSYCHIATRY_t0.3669064748 !$NA_TAB_t0.3237410072 !$UNSP_t0.2302158273 !$USED_DETECT_t0.0647482014 !$VERIFIED_CORRECT_t0.1438848921 !$VISTA_ED_t0.5035971223 !$VOLUME_MOOD_t0.0647482014 !$VOLUNTEER_OR_t0.0719424460 !$WALKIN_t0.5539568345 !$WAL_REQUESTING_t0.0719424460 !$WERE_DISCUSSED_t0.4172661871 !$WILLING_t0.4388489209 !$WILL_CONSIDER_t0.0647482014 !$YEAR_t4.5323741007) $AVERAGE_RISK_t0.0431654676 $URGENT_APPT_t0.0431654676 $VALLEY_t0.0647482014 $WAS_FRIGHTENING_t0.1294964029 $WEAK_STATUS_t0.1726618705 $WEIGH_DAILY_t0.0503597122 $WILL_PICKED_t0.0935251799 $WM_ADMITTED_t0.0359712230 $WORTHLESSNESS_t0.0791366906 $YEAR_UNKNOWN_t0.0287769784 $YE_t0.0503597122 $YOUR_PILL_t0.0215827338 $ZER_t0.0575539568) !$LIKELY_DUE_t0.0431654676) 
1 and(or(and(!$ASKING_t0.7841726619 !$MH_PSYCHIATRY_t0.3669064748 !$PAIN_INFLAMMATION_t0.1438848921 !$UNSP_t0.2302158273 !$USED_DETECT_t0.0647482014 !$VERIFIED_CORRECT_t0.1438848921 !$VISTA_ED_t0.5035971223 !$VOLUME_MOOD_t0.0647482014 !$VOLUNTEER_OR_t0.0719424460 !$WALKIN_t0.5539568345 !$WAL_REQUESTING_t0.0719424460 !$WERE_DISCUSSED_t0.4172661871 !$WILLING_t0.4388489209 !$WILL_CONSIDER_t0.0647482014 !$YEAR_t4.5323741007) $AVERAGE_RISK_t0.0431654676 $URGENT_APPT_t0.0431654676 $VALLEY_t0.0647482014 $WAS_FRIGHTENING_t0.1294964029 $WEAK_STATUS_t0.1726618705 $WEIGH_DAILY_t0.0503597122 $WILL_PICKED_t0.0935251799 $WM_ADMITTED_t0.0359712230 $WORTHLESSNESS_t0.0791366906 $YEAR_UNKNOWN_t0.0287769784 $YE_t0.0503597122 $YOUR_PILL_t0.0215827338 $ZER_t0.0575539568) !$LIKELY_DUE_t0.0431654676) 
1 and(or(and(!$FEAR_t0.2446043165 !$NA_TAB_t0.3237410072 !$RANGE_t1.2517985612 !$UNSP_t0.2302158273 !$USED_DETECT_t0.0647482014 !$VERIFIED_CORRECT_t0.1438848921 !$VISTA_ED_t0.5035971223 !$VOLUME_MOOD_t0.0647482014 !$VOLUNTEER_OR_t0.0719424460 !$WALKIN_t0.5539568345 !$WAL_REQUESTING_t0.0719424460 !$WERE_DISCUSSED_t0.4172661871 !$WILLING_t0.4388489209 !$WILL_CONSIDER_t0.0647482014 !$YEAR_t4.5323741007) $AVERAGE_RISK_t0.0431654676 $URGENT_APPT_t0.0431654676 $VALLEY_t0.0647482014 $WAS_FRIGHTENING_t0.1294964029 $WEAK_STATUS_t0.1726618705 $WEIGH_DAILY_t0.0503597122 $WILL_PICKED_t0.0935251799 $WM_ADMITTED_t0.0359712230 $WORTHLESSNESS_t0.0791366906 $YEAR_UNKNOWN_t0.0287769784 $YE_t0.0503597122 $YOUR_PILL_t0.0215827338 $ZER_t0.0575539568) !$LIKELY_DUE_t0.0431654676) 
1 and(or(and(!$FEAR_t0.2446043165 !$PAIN_INFLAMMATION_t0.1438848921 !$RANGE_t1.2517985612 !$UNSP_t0.2302158273 !$USED_DETECT_t0.0647482014 !$VERIFIED_CORRECT_t0.1438848921 !$VISTA_ED_t0.5035971223 !$VOLUME_MOOD_t0.0647482014 !$VOLUNTEER_OR_t0.0719424460 !$WALKIN_t0.5539568345 !$WAL_REQUESTING_t0.0719424460 !$WERE_DISCUSSED_t0.4172661871 !$WILLING_t0.4388489209 !$WILL_CONSIDER_t0.0647482014 !$YEAR_t4.5323741007) $AVERAGE_RISK_t0.0431654676 $URGENT_APPT_t0.0431654676 $VALLEY_t0.0647482014 $WAS_FRIGHTENING_t0.1294964029 $WEAK_STATUS_t0.1726618705 $WEIGH_DAILY_t0.0503597122 $WILL_PICKED_t0.0935251799 $WM_ADMITTED_t0.0359712230 $WORTHLESSNESS_t0.0791366906 $YEAR_UNKNOWN_t0.0287769784 $YE_t0.0503597122 $YOUR_PILL_t0.0215827338 $ZER_t0.0575539568) !$LIKELY_DUE_t0.0431654676) 
1 and(or(and(!$MH_PSYCHIATRY_t0.3669064748 !$NA_TAB_t0.3237410072 !$RANGE_t1.2517985612 !$UNSP_t0.2302158273 !$USED_DETECT_t0.0647482014 !$VERIFIED_CORRECT_t0.1438848921 !$VISTA_ED_t0.5035971223 !$VOLUME_MOOD_t0.0647482014 !$VOLUNTEER_OR_t0.0719424460 !$WALKIN_t0.5539568345 !$WAL_REQUESTING_t0.0719424460 !$WERE_DISCUSSED_t0.4172661871 !$WILLING_t0.4388489209 !$WILL_CONSIDER_t0.0647482014 !$YEAR_t4.5323741007) $AVERAGE_RISK_t0.0431654676 $URGENT_APPT_t0.0431654676 $VALLEY_t0.0647482014 $WAS_FRIGHTENING_t0.1294964029 $WEAK_STATUS_t0.1726618705 $WEIGH_DAILY_t0.0503597122 $WILL_PICKED_t0.0935251799 $WM_ADMITTED_t0.0359712230 $WORTHLESSNESS_t0.0791366906 $YEAR_UNKNOWN_t0.0287769784 $YE_t0.0503597122 $YOUR_PILL_t0.0215827338 $ZER_t0.0575539568) !$LIKELY_DUE_t0.0431654676) 
1 and(or(and(!$MH_PSYCHIATRY_t0.3669064748 !$PAIN_INFLAMMATION_t0.1438848921 !$RANGE_t1.2517985612 !$UNSP_t0.2302158273 !$USED_DETECT_t0.0647482014 !$VERIFIED_CORRECT_t0.1438848921 !$VISTA_ED_t0.5035971223 !$VOLUME_MOOD_t0.0647482014 !$VOLUNTEER_OR_t0.0719424460 !$WALKIN_t0.5539568345 !$WAL_REQUESTING_t0.0719424460 !$WERE_DISCUSSED_t0.4172661871 !$WILLING_t0.4388489209 !$WILL_CONSIDER_t0.0647482014 !$YEAR_t4.5323741007) $AVERAGE_RISK_t0.0431654676 $URGENT_APPT_t0.0431654676 $VALLEY_t0.0647482014 $WAS_FRIGHTENING_t0.1294964029 $WEAK_STATUS_t0.1726618705 $WEIGH_DAILY_t0.0503597122 $WILL_PICKED_t0.0935251799 $WM_ADMITTED_t0.0359712230 $WORTHLESSNESS_t0.0791366906 $YEAR_UNKNOWN_t0.0287769784 $YE_t0.0503597122 $YOUR_PILL_t0.0215827338 $ZER_t0.0575539568) !$LIKELY_DUE_t0.0431654676) 
1 and(or(and(!$ASKING_t0.7841726619 !$FEAR_t0.2446043165 !$UNSP_t0.2302158273 !$USED_DETECT_t0.0647482014 !$VERIFIED_CORRECT_t0.1438848921 !$VISTA_ED_t0.5035971223 !$VOLUME_MOOD_t0.0647482014 !$VOLUNTEER_OR_t0.0719424460 !$WALKIN_t0.5539568345 !$WAL_REQUESTING_t0.0719424460 !$WERE_DISCUSSED_t0.4172661871 !$WILLING_t0.4388489209 !$WILL_CONSIDER_t0.0647482014 !$YEAR_t4.5323741007) $AVERAGE_RISK_t0.0431654676 $URGENT_APPT_t0.0431654676 $VALLEY_t0.0647482014 $WAS_FRIGHTENING_t0.1294964029 $WEAK_STATUS_t0.1726618705 $WEIGH_DAILY_t0.0503597122 $WILL_PICKED_t0.0935251799 $WM_ADMITTED_t0.0359712230 $WORTHLESSNESS_t0.0791366906 $YEAR_UNKNOWN_t0.0287769784 $YE_t0.0503597122 $YOUR_PILL_t0.0215827338 $ZER_t0.0575539568) !$LIKELY_DUE_t0.0431654676) 
1 and(or(and(!$ASKING_t0.7841726619 !$MH_PSYCHIATRY_t0.3669064748 !$UNSP_t0.2302158273 !$USED_DETECT_t0.0647482014 !$VERIFIED_CORRECT_t0.1438848921 !$VISTA_ED_t0.5035971223 !$VOLUME_MOOD_t0.0647482014 !$VOLUNTEER_OR_t0.0719424460 !$WALKIN_t0.5539568345 !$WAL_REQUESTING_t0.0719424460 !$WERE_DISCUSSED_t0.4172661871 !$WILLING_t0.4388489209 !$WILL_CONSIDER_t0.0647482014 !$YEAR_t4.5323741007) $AVERAGE_RISK_t0.0431654676 $URGENT_APPT_t0.0431654676 $VALLEY_t0.0647482014 $WAS_FRIGHTENING_t0.1294964029 $WEAK_STATUS_t0.1726618705 $WEIGH_DAILY_t0.0503597122 $WILL_PICKED_t0.0935251799 $WM_ADMITTED_t0.0359712230 $WORTHLESSNESS_t0.0791366906 $YEAR_UNKNOWN_t0.0287769784 $YE_t0.0503597122 $YOUR_PILL_t0.0215827338 $ZER_t0.0575539568) !$LIKELY_DUE_t0.0431654676) 
1 and(or(and(!$PSYCHIATRY_NOTE_t0.8273381295 !$UNSP_t0.2302158273 !$USED_DETECT_t0.0647482014 !$VERIFIED_t1.3525179856 !$VETERAN_CALLERS_t0.0359712230 !$VIRGINIA_t0.0575539568 !$VISTA_ED_t0.5035971223 !$VOICEMAIL_LEFT_t0.0503597122 !$VOLUME_MOOD_t0.0647482014 !$VOLUNTEER_OR_t0.0719424460 !$WALKIN_t0.5539568345 !$WBC_BLOOD_t0.2661870504 !$WERE_DISCUSSED_t0.4172661871 !$WHAT_QUESTIONS_t0.4676258993 !$WILL_EXPLORE_t0.0215827338 !$YEAR_FEMALE_t0.0431654676) $GASTROENTEROLOGY_NAME_t0.0647482014 $LIPITOR_t0.0503597122 $TP_t0.1726618705 $UPSETTING_THAT_t0.1294964029 $URGENT_SERVICES_t0.0575539568 $URINAL_WITHIN_t0.2589928058 $WILL_PICKED_t0.0935251799 $WM_ADMITTED_t0.0359712230 $WORTHLESSNESS_t0.0791366906 $YEAR_UNKNOWN_t0.0287769784 $YE_t0.0503597122 $YOUR_BOTTLES_t0.0215827338 $ZER_t0.0575539568) !$LIKELY_DUE_t0.0431654676 !$MATE_t0.0359712230) 
1 and(or(and(!$PSYCHIATRY_NOTE_t0.8273381295 !$UNSP_t0.2302158273 !$USED_DETECT_t0.0647482014 !$VERIFIED_t1.3525179856 !$VIRGINIA_t0.0575539568 !$VISTA_ED_t0.5035971223 !$VOICEMAIL_LEFT_t0.0503597122 !$VOLUME_MOOD_t0.0647482014 !$VOLUNTEER_OR_t0.0719424460 !$WALKIN_t0.5539568345 !$WBC_BLOOD_t0.2661870504 !$WERE_DISCUSSED_t0.4172661871 !$WHAT_QUESTIONS_t0.4676258993 !$WILL_EXPLORE_t0.0215827338 !$YEAR_FEMALE_t0.0431654676) $GASTROENTEROLOGY_NAME_t0.0647482014 $TP_t0.1726618705 $UPSETTING_THAT_t0.1294964029 $URGENT_SERVICES_t0.0575539568 $URINAL_WITHIN_t0.2589928058 $WILL_PICKED_t0.0935251799 $WM_ADMITTED_t0.0359712230 $WORTHLESSNESS_t0.0791366906 $YEAR_UNKNOWN_t0.0287769784 $YE_t0.0503597122 $YOUR_BOTTLES_t0.0215827338 $ZER_t0.0575539568) !$LIKELY_DUE_t0.0431654676 !$MATE_t0.0359712230) 
1 and(or(and(!$PSYCHIATRY_NOTE_t0.8273381295 !$USED_DETECT_t0.0647482014 !$VERIFIED_t1.3525179856 !$VETERAN_CALLERS_t0.0359712230 !$VIRGINIA_t0.0575539568 !$VISTA_ED_t0.5035971223 !$VOICEMAIL_LEFT_t0.0503597122 !$VOLUME_MOOD_t0.0647482014 !$VOLUNTEER_OR_t0.0719424460 !$WALKIN_t0.5539568345 !$WBC_BLOOD_t0.2661870504 !$WERE_DISCUSSED_t0.4172661871 !$WHAT_QUESTIONS_t0.4676258993 !$WILL_EXPLORE_t0.0215827338 !$YEAR_FEMALE_t0.0431654676) $GASTROENTEROLOGY_NAME_t0.0647482014 $TP_t0.1726618705 $UPSETTING_THAT_t0.1294964029 $URGENT_SERVICES_t0.0575539568 $URINAL_WITHIN_t0.2589928058 $WILL_PICKED_t0.0935251799 $WM_ADMITTED_t0.0359712230 $WORTHLESSNESS_t0.0791366906 $YEAR_UNKNOWN_t0.0287769784 $YE_t0.0503597122 $YOUR_BOTTLES_t0.0215827338 $ZER_t0.0575539568) !$LIKELY_DUE_t0.0431654676 !$MATE_t0.0359712230) 
1 and(or(and(!$PSYCHIATRY_NOTE_t0.8273381295 !$UNSP_t0.2302158273 !$USED_DETECT_t0.0647482014 !$VERIFIED_t1.3525179856 !$VETERAN_CALLERS_t0.0359712230 !$VIRGINIA_t0.0575539568 !$VISTA_ED_t0.5035971223 !$VOICEMAIL_LEFT_t0.0503597122 !$VOLUME_MOOD_t0.0647482014 !$VOLUNTEER_OR_t0.0719424460 !$WALKIN_t0.5539568345 !$WBC_BLOOD_t0.2661870504 !$WERE_DISCUSSED_t0.4172661871 !$WHAT_QUESTIONS_t0.4676258993 !$WILL_EXPLORE_t0.0215827338) $GASTROENTEROLOGY_NAME_t0.0647482014 $TP_t0.1726618705 $UPSETTING_THAT_t0.1294964029 $URGENT_SERVICES_t0.0575539568 $URINAL_WITHIN_t0.2589928058 $WILL_PICKED_t0.0935251799 $WM_ADMITTED_t0.0359712230 $WORTHLESSNESS_t0.0791366906 $YEAR_UNKNOWN_t0.0287769784 $YE_t0.0503597122 $YOUR_BOTTLES_t0.0215827338 $ZER_t0.0575539568) !$LIKELY_DUE_t0.0431654676 !$MATE_t0.0359712230 !$YEAR_FEMALE_t0.0431654676) 
1 and(or(and(!$PSYCHIATRY_NOTE_t0.8273381295 !$UNSP_t0.2302158273 !$USED_DETECT_t0.0647482014 !$VERIFIED_t1.3525179856 !$VETERAN_CALLERS_t0.0359712230 !$VIRGINIA_t0.0575539568 !$VISTA_ED_t0.5035971223 !$VOICEMAIL_LEFT_t0.0503597122 !$VOLUME_MOOD_t0.0647482014 !$VOLUNTEER_OR_t0.0719424460 !$WALKIN_t0.5539568345 !$WBC_BLOOD_t0.2661870504 !$WERE_DISCUSSED_t0.4172661871 !$WHAT_QUESTIONS_t0.4676258993 !$WILL_EXPLORE_t0.0215827338 !$YEAR_FEMALE_t0.0431654676) $DISCHARGE_ALDRETE_t0.0359712230 $TP_t0.1726618705 $UPSETTING_THAT_t0.1294964029 $URGENT_SERVICES_t0.0575539568 $URINAL_WITHIN_t0.2589928058 $WILL_PICKED_t0.0935251799 $WM_ADMITTED_t0.0359712230 $WORTHLESSNESS_t0.0791366906 $YEAR_UNKNOWN_t0.0287769784 $YE_t0.0503597122 $YOUR_BOTTLES_t0.0215827338 $ZER_t0.0575539568) !$LIKELY_DUE_t0.0431654676 !$MATE_t0.0359712230) 
1 and(or(and(!$PSYCHIATRY_NOTE_t0.8273381295 !$UNSP_t0.2302158273 !$USED_DETECT_t0.0647482014 !$VERIFIED_t1.3525179856 !$VETERAN_CALLERS_t0.0359712230 !$VIRGINIA_t0.0575539568 !$VISTA_ED_t0.5035971223 !$VOICEMAIL_LEFT_t0.0503597122 !$VOLUME_MOOD_t0.0647482014 !$VOLUNTEER_OR_t0.0719424460 !$WALKIN_t0.5539568345 !$WBC_BLOOD_t0.2661870504 !$WERE_DISCUSSED_t0.4172661871 !$WHAT_QUESTIONS_t0.4676258993 !$WILL_EXPLORE_t0.0215827338 !$YEAR_FEMALE_t0.0431654676) $GASTROENTEROLOGY_NAME_t0.0647482014 $TP_t0.1726618705 $UPSETTING_THAT_t0.1294964029 $URGENT_SERVICES_t0.0575539568 $URINAL_WITHIN_t0.2589928058 $WILL_PICKED_t0.0935251799 $WM_ADMITTED_t0.0359712230 $WORTHLESSNESS_t0.0791366906 $YEAR_UNKNOWN_t0.0287769784 $YE_t0.0503597122 $YOUR_BOTTLES_t0.0215827338 $ZER_t0.0575539568) !$LIKELY_DUE_t0.0431654676 !$MATE_t0.0359712230) 
1 and(or(and(!$PSYCHIATRY_NOTE_t0.8273381295 !$UNSP_t0.2302158273 !$USED_DETECT_t0.0647482014 !$VERIFIED_t1.3525179856 !$VETERAN_CALLERS_t0.0359712230 !$VIRGINIA_t0.0575539568 !$VISTA_ED_t0.5035971223 !$VOICEMAIL_LEFT_t0.0503597122 !$VOLUME_MOOD_t0.0647482014 !$VOLUNTEER_OR_t0.0719424460 !$WALKIN_t0.5539568345 !$WBC_BLOOD_t0.2661870504 !$WERE_DISCUSSED_t0.4172661871 !$WHAT_QUESTIONS_t0.4676258993 !$WILL_EXPLORE_t0.0215827338 !$YEAR_FEMALE_t0.0431654676) $GASTROENTEROLOGY_NAME_t0.0647482014 $TP_t0.1726618705 $UPSETTING_THAT_t0.1294964029 $URGENT_SERVICES_t0.0575539568 $URINAL_WITHIN_t0.2589928058 $WILL_PICKED_t0.0935251799 $WM_ADMITTED_t0.0359712230 $WORTHLESSNESS_t0.0791366906 $YEAR_UNKNOWN_t0.0287769784 $YE_t0.0503597122 $YOUR_BOTTLES_t0.0215827338 $ZER_t0.0575539568) !$LUTS_t0.0359712230 !$MATE_t0.0359712230) 
1 and(or(and(!$PSYCHIATRY_NOTE_t0.8273381295 !$UNSP_t0.2302158273 !$USED_DETECT_t0.0647482014 !$VERIFIED_t1.3525179856 !$VETERAN_CALLERS_t0.0359712230 !$VIRGINIA_t0.0575539568 !$VISTA_ED_t0.5035971223 !$VOICEMAIL_LEFT_t0.0503597122 !$VOLUME_MOOD_t0.0647482014 !$VOLUNTEER_OR_t0.0719424460 !$WALKIN_t0.5539568345 !$WBC_BLOOD_t0.2661870504 !$WERE_DISCUSSED_t0.4172661871 !$WHAT_QUESTIONS_t0.4676258993 !$YEAR_FEMALE_t0.0431654676) $GASTROENTEROLOGY_NAME_t0.0647482014 $TP_t0.1726618705 $UPSETTING_THAT_t0.1294964029 $URGENT_SERVICES_t0.0575539568 $URINAL_WITHIN_t0.2589928058 $WILL_PICKED_t0.0935251799 $WM_ADMITTED_t0.0359712230 $WORTHLESSNESS_t0.0791366906 $YEAR_UNKNOWN_t0.0287769784 $YE_t0.0503597122 $YOUR_BOTTLES_t0.0215827338 $ZER_t0.0575539568) !$LIKELY_DUE_t0.0431654676 !$MATE_t0.0359712230 !$WILL_EXPLORE_t0.0215827338) 
1 and(or(and(!$PSYCHIATRY_NOTE_t0.8273381295 !$UNSP_t0.2302158273 !$USED_DETECT_t0.0647482014 !$VERIFIED_t1.3525179856 !$VETERAN_CALLERS_t0.0359712230 !$VIRGINIA_t0.0575539568 !$VISTA_ED_t0.5035971223 !$VOICEMAIL_LEFT_t0.0503597122 !$VOLUME_MOOD_t0.0647482014 !$VOLUNTEER_OR_t0.0719424460 !$WALKIN_t0.5539568345 !$WERE_DISCUSSED_t0.4172661871 !$WHAT_QUESTIONS_t0.4676258993 !$WILL_EXPLORE_t0.0215827338 !$YEAR_FEMALE_t0.0431654676) $GASTROENTEROLOGY_NAME_t0.0647482014 $TP_t0.1726618705 $UPSETTING_THAT_t0.1294964029 $URGENT_SERVICES_t0.0575539568 $URINAL_WITHIN_t0.2589928058 $WILL_PICKED_t0.0935251799 $WM_ADMITTED_t0.0359712230 $WORTHLESSNESS_t0.0791366906 $YEAR_UNKNOWN_t0.0287769784 $YE_t0.0503597122 $YOUR_BOTTLES_t0.0215827338 $ZER_t0.0575539568) !$LIKELY_DUE_t0.0431654676 !$MATE_t0.0359712230 !$WBC_BLOOD_t0.2661870504) 
1 and(or(and(!$PSYCHIATRY_NOTE_t0.8273381295 !$UNSP_t0.2302158273 !$VERIFIED_t1.3525179856 !$VETERAN_CALLERS_t0.0359712230 !$VIRGINIA_t0.0575539568 !$VISTA_ED_t0.5035971223 !$VOICEMAIL_LEFT_t0.0503597122 !$VOLUME_MOOD_t0.0647482014 !$VOLUNTEER_OR_t0.0719424460 !$WALKIN_t0.5539568345 !$WBC_BLOOD_t0.2661870504 !$WERE_DISCUSSED_t0.4172661871 !$WHAT_QUESTIONS_t0.4676258993 !$WILL_EXPLORE_t0.0215827338 !$YEAR_FEMALE_t0.0431654676) $GASTROENTEROLOGY_NAME_t0.0647482014 $TP_t0.1726618705 $UPSETTING_THAT_t0.1294964029 $URGENT_SERVICES_t0.0575539568 $URINAL_WITHIN_t0.2589928058 $WILL_PICKED_t0.0935251799 $WM_ADMITTED_t0.0359712230 $WORTHLESSNESS_t0.0791366906 $YEAR_UNKNOWN_t0.0287769784 $YE_t0.0503597122 $YOUR_BOTTLES_t0.0215827338 $ZER_t0.0575539568) !$LIKELY_DUE_t0.0431654676 !$MATE_t0.0359712230 !$USED_DETECT_t0.0647482014) 
1 and(or(and(!$MH_PSYCHIATRY_t0.3669064748 !$UNSP_t0.2302158273 !$UPDATE_YOUR_t0.1079136691 !$USED_DETECT_t0.0647482014 !$USED_VERBAL_t0.0935251799 !$VERIFIED_t1.3525179856 !$VOICEMAIL_LEFT_t0.0503597122 !$VOLUME_MOOD_t0.0647482014 !$VOLUNTEER_OR_t0.0719424460 !$WERE_DISCUSSED_t0.4172661871 !$YEAR_OLD_t2.2949640288 !$YEAR_t4.5323741007 !$YR_OLD_t0.2158273381) $ABLE_FUNCTION_t0.0791366906 $BE_REFILLED_t0.0863309353 $LUMBAGO_t0.0359712230 $UPSETTING_THAT_t0.1294964029 $URGENT_APPT_t0.0431654676 $VISIT_BIL_t0.0359712230 $WAR_SERVICE_t0.0431654676 $WATCHES_t0.0575539568 $WILL_PICKED_t0.0935251799 $WILL_RESTART_t0.0215827338 $WITHIN_SECONDARY_t0.3381294964 $WM_ADMITTED_t0.0359712230 $WORTHLESSNESS_t0.0791366906 $ZER_t0.0575539568) !$ALZHEIMERS_DISEASE_t0.0431654676 !$PERMITTED_t0.1079136691) 
1 and(or(and(!$MH_PSYCHIATRY_t0.3669064748 !$UNSP_t0.2302158273 !$UPDATE_YOUR_t0.1079136691 !$USED_DETECT_t0.0647482014 !$USED_VERBAL_t0.0935251799 !$VERIFIED_t1.3525179856 !$VOICEMAIL_LEFT_t0.0503597122 !$VOLUME_MOOD_t0.0647482014 !$VOLUNTEER_OR_t0.0719424460 !$WERE_DISCUSSED_t0.4172661871 !$YEAR_OLD_t2.2949640288 !$YEAR_t4.5323741007 !$YR_OLD_t0.2158273381) $ABLE_FUNCTION_t0.0791366906 $BE_REFILLED_t0.0863309353 $LUMBAGO_t0.0359712230 $UPSETTING_THAT_t0.1294964029 $URGENT_APPT_t0.0431654676 $VISIT_BIL_t0.0359712230 $WAR_SERVICE_t0.0431654676 $WATCHES_t0.0575539568 $WILL_PICKED_t0.0935251799 $WILL_RESTART_t0.0215827338 $WITHIN_SECONDARY_t0.3381294964 $WM_ADMITTED_t0.0359712230 $WORTHLESSNESS_t0.0791366906 $ZER_t0.0575539568) !$ALZHEIMERS_DISEASE_t0.0431654676 !$ROOMMATE_WAS_t0.0431654676) 
1 and(or(and(!$MH_PSYCHIATRY_t0.3669064748 !$UNSP_t0.2302158273 !$UPDATE_YOUR_t0.1079136691 !$USED_DETECT_t0.0647482014 !$USED_VERBAL_t0.0935251799 !$VERIFIED_t1.3525179856 !$VOICEMAIL_LEFT_t0.0503597122 !$VOLUME_MOOD_t0.0647482014 !$VOLUNTEER_OR_t0.0719424460 !$WERE_DISCUSSED_t0.4172661871 !$YEAR_OLD_t2.2949640288 !$YEAR_t4.5323741007 !$YR_OLD_t0.2158273381) $ABLE_FUNCTION_t0.0791366906 $BE_REFILLED_t0.0863309353 $LUMBAGO_t0.0359712230 $UPSETTING_THAT_t0.1294964029 $URGENT_APPT_t0.0431654676 $VISIT_BIL_t0.0359712230 $WAR_SERVICE_t0.0431654676 $WATCHES_t0.0575539568 $WILL_PICKED_t0.0935251799 $WILL_RESTART_t0.0215827338 $WITHIN_SECONDARY_t0.3381294964 $WM_ADMITTED_t0.0359712230 $WORTHLESSNESS_t0.0791366906 $ZER_t0.0575539568) !$ALZHEIMERS_DISEASE_t0.0431654676 !$SUPERVISING_ATTENDING_t0.0359712230) 
1 and(or(and(!$MH_PSYCHIATRY_t0.3669064748 !$UNSP_t0.2302158273 !$UPDATE_YOUR_t0.1079136691 !$USED_DETECT_t0.0647482014 !$USED_VERBAL_t0.0935251799 !$VERIFIED_t1.3525179856 !$VOICEMAIL_LEFT_t0.0503597122 !$VOLUME_MOOD_t0.0647482014 !$VOLUNTEER_OR_t0.0719424460 !$WERE_DISCUSSED_t0.4172661871 !$YEAR_OLD_t2.2949640288 !$YEAR_t4.5323741007 !$YR_OLD_t0.2158273381) $ABLE_FUNCTION_t0.0791366906 $BE_REFILLED_t0.0863309353 $LUMBAGO_t0.0359712230 $UPSETTING_THAT_t0.1294964029 $URGENT_APPT_t0.0431654676 $VISIT_BIL_t0.0359712230 $WAR_SERVICE_t0.0431654676 $WATCHES_t0.0575539568 $WILL_PICKED_t0.0935251799 $WILL_RESTART_t0.0215827338 $WITHIN_SECONDARY_t0.3381294964 $WM_ADMITTED_t0.0359712230 $WORTHLESSNESS_t0.0791366906 $ZER_t0.0575539568) !$ALZHEIMERS_DISEASE_t0.0431654676 !$UNIT_MONITORED_t0.0359712230) 
1 and(or(and(!$MH_PSYCHIATRY_t0.3669064748 !$UNSP_t0.2302158273 !$UPDATE_YOUR_t0.1079136691 !$USED_DETECT_t0.0647482014 !$USED_VERBAL_t0.0935251799 !$VERIFIED_t1.3525179856 !$VOICEMAIL_LEFT_t0.0503597122 !$VOLUME_MOOD_t0.0647482014 !$VOLUNTEER_OR_t0.0719424460 !$WERE_DISCUSSED_t0.4172661871 !$YEAR_OLD_t2.2949640288 !$YEAR_t4.5323741007 !$YR_OLD_t0.2158273381) $ABLE_FUNCTION_t0.0791366906 $BE_REFILLED_t0.0863309353 $LUMBAGO_t0.0359712230 $UPSETTING_THAT_t0.1294964029 $URGENT_APPT_t0.0431654676 $VISIT_BIL_t0.0359712230 $WAR_SERVICE_t0.0431654676 $WATCHES_t0.0575539568 $WILL_PICKED_t0.0935251799 $WILL_RESTART_t0.0215827338 $WITHIN_SECONDARY_t0.3381294964 $WM_ADMITTED_t0.0359712230 $WORTHLESSNESS_t0.0791366906 $ZER_t0.0575539568) !$ALZHEIMERS_DISEASE_t0.0431654676 !$WARRANT_t0.0503597122) 
1 and(or(and(!$MH_PSYCHIATRY_t0.3669064748 !$UNSP_t0.2302158273 !$UPDATE_YOUR_t0.1079136691 !$USED_DETECT_t0.0647482014 !$USED_VERBAL_t0.0935251799 !$VERIFIED_t1.3525179856 !$VOICEMAIL_LEFT_t0.0503597122 !$VOLUME_MOOD_t0.0647482014 !$VOLUNTEER_OR_t0.0719424460 !$WERE_DISCUSSED_t0.4172661871 !$YEAR_OLD_t2.2949640288 !$YEAR_t4.5323741007 !$YR_OLD_t0.2158273381) $BE_REFILLED_t0.0863309353 $LIPITOR_t0.0503597122 $LUMBAGO_t0.0359712230 $UPSETTING_THAT_t0.1294964029 $URGENT_APPT_t0.0431654676 $VISIT_BIL_t0.0359712230 $WAR_SERVICE_t0.0431654676 $WATCHES_t0.0575539568 $WILL_PICKED_t0.0935251799 $WILL_RESTART_t0.0215827338 $WITHIN_SECONDARY_t0.3381294964 $WM_ADMITTED_t0.0359712230 $WORTHLESSNESS_t0.0791366906 $ZER_t0.0575539568) !$ALZHEIMERS_DISEASE_t0.0431654676 !$PERMITTED_t0.1079136691) 
1 and(or(and(!$MH_PSYCHIATRY_t0.3669064748 !$UNSP_t0.2302158273 !$UPDATE_YOUR_t0.1079136691 !$USED_DETECT_t0.0647482014 !$USED_VERBAL_t0.0935251799 !$VERIFIED_t1.3525179856 !$VOICEMAIL_LEFT_t0.0503597122 !$VOLUME_MOOD_t0.0647482014 !$VOLUNTEER_OR_t0.0719424460 !$WERE_DISCUSSED_t0.4172661871 !$YEAR_OLD_t2.2949640288 !$YEAR_t4.5323741007 !$YR_OLD_t0.2158273381) $BE_REFILLED_t0.0863309353 $LIPITOR_t0.0503597122 $LUMBAGO_t0.0359712230 $UPSETTING_THAT_t0.1294964029 $URGENT_APPT_t0.0431654676 $VISIT_BIL_t0.0359712230 $WAR_SERVICE_t0.0431654676 $WATCHES_t0.0575539568 $WILL_PICKED_t0.0935251799 $WILL_RESTART_t0.0215827338 $WITHIN_SECONDARY_t0.3381294964 $WM_ADMITTED_t0.0359712230 $WORTHLESSNESS_t0.0791366906 $ZER_t0.0575539568) !$ALZHEIMERS_DISEASE_t0.0431654676 !$ROOMMATE_WAS_t0.0431654676) 
1 and(or(and(!$MH_PSYCHIATRY_t0.3669064748 !$UNSP_t0.2302158273 !$UPDATE_YOUR_t0.1079136691 !$USED_DETECT_t0.0647482014 !$USED_VERBAL_t0.0935251799 !$VERIFIED_t1.3525179856 !$VOICEMAIL_LEFT_t0.0503597122 !$VOLUME_MOOD_t0.0647482014 !$VOLUNTEER_OR_t0.0719424460 !$WERE_DISCUSSED_t0.4172661871 !$YEAR_OLD_t2.2949640288 !$YEAR_t4.5323741007 !$YR_OLD_t0.2158273381) $BE_REFILLED_t0.0863309353 $LIPITOR_t0.0503597122 $LUMBAGO_t0.0359712230 $UPSETTING_THAT_t0.1294964029 $URGENT_APPT_t0.0431654676 $VISIT_BIL_t0.0359712230 $WAR_SERVICE_t0.0431654676 $WATCHES_t0.0575539568 $WILL_PICKED_t0.0935251799 $WILL_RESTART_t0.0215827338 $WITHIN_SECONDARY_t0.3381294964 $WM_ADMITTED_t0.0359712230 $WORTHLESSNESS_t0.0791366906 $ZER_t0.0575539568) !$ALZHEIMERS_DISEASE_t0.0431654676 !$SUPERVISING_ATTENDING_t0.0359712230) 
1 and(or(and(!$MH_PSYCHIATRY_t0.3669064748 !$UNSP_t0.2302158273 !$UPDATE_YOUR_t0.1079136691 !$USED_DETECT_t0.0647482014 !$USED_VERBAL_t0.0935251799 !$VERIFIED_t1.3525179856 !$VOICEMAIL_LEFT_t0.0503597122 !$VOLUME_MOOD_t0.0647482014 !$VOLUNTEER_OR_t0.0719424460 !$WERE_DISCUSSED_t0.4172661871 !$YEAR_OLD_t2.2949640288 !$YEAR_t4.5323741007 !$YR_OLD_t0.2158273381) $BE_REFILLED_t0.0863309353 $LIPITOR_t0.0503597122 $LUMBAGO_t0.0359712230 $UPSETTING_THAT_t0.1294964029 $URGENT_APPT_t0.0431654676 $VISIT_BIL_t0.0359712230 $WAR_SERVICE_t0.0431654676 $WATCHES_t0.0575539568 $WILL_PICKED_t0.0935251799 $WILL_RESTART_t0.0215827338 $WITHIN_SECONDARY_t0.3381294964 $WM_ADMITTED_t0.0359712230 $WORTHLESSNESS_t0.0791366906 $ZER_t0.0575539568) !$ALZHEIMERS_DISEASE_t0.0431654676 !$UNIT_MONITORED_t0.0359712230) 
1 and(or(and(!$MH_PSYCHIATRY_t0.3669064748 !$UNSP_t0.2302158273 !$UPDATE_YOUR_t0.1079136691 !$USED_DETECT_t0.0647482014 !$USED_VERBAL_t0.0935251799 !$VERIFIED_t1.3525179856 !$VOICEMAIL_LEFT_t0.0503597122 !$VOLUME_MOOD_t0.0647482014 !$VOLUNTEER_OR_t0.0719424460 !$WERE_DISCUSSED_t0.4172661871 !$YEAR_OLD_t2.2949640288 !$YEAR_t4.5323741007 !$YR_OLD_t0.2158273381) $BE_REFILLED_t0.0863309353 $LIPITOR_t0.0503597122 $LUMBAGO_t0.0359712230 $UPSETTING_THAT_t0.1294964029 $URGENT_APPT_t0.0431654676 $VISIT_BIL_t0.0359712230 $WAR_SERVICE_t0.0431654676 $WATCHES_t0.0575539568 $WILL_PICKED_t0.0935251799 $WILL_RESTART_t0.0215827338 $WITHIN_SECONDARY_t0.3381294964 $WM_ADMITTED_t0.0359712230 $WORTHLESSNESS_t0.0791366906 $ZER_t0.0575539568) !$ALZHEIMERS_DISEASE_t0.0431654676 !$WARRANT_t0.0503597122) 
1 and(or(and(!$NOT_APPLICABLE_t1.5683453237 !$PSYCHIATRY_NOTE_t0.8273381295 !$UNSP_t0.2302158273 !$UPBEAT_t0.0575539568 !$USE_INTERACTING_t0.0647482014 !$VERIFIED_CORRECT_t0.1438848921 !$VISTA_ED_t0.5035971223 !$VOLUME_MOOD_t0.0647482014 !$VOLUNTEER_OR_t0.0719424460 !$WALKIN_t0.5539568345 !$WARRANT_t0.0503597122 !$WERE_DISCUSSED_t0.4172661871 !$WILLING_t0.4388489209 !$WILL_CONSIDER_t0.0647482014 !$YEAR_t4.5323741007) $CIRCULATION_LEVEL_t0.0431654676 $DISEASE_CABG_t0.0287769784 $URGENT_APPT_t0.0431654676 $VOIDS_URINE_t0.0719424460 $WAS_HORRIBLE_t0.1294964029 $WE_COULD_t0.1438848921 $WILL_PICKED_t0.0935251799 $WILL_RESTART_t0.0215827338 $WTIH_t0.0431654676 $YEAR_COUNSELED_t0.0431654676 $YE_t0.0503597122 $YOUR_BOTTLES_t0.0215827338) !$EASIER_t0.0575539568 !$RETRAINING_t0.0503597122) 
1 and(or(and(!$NOT_APPLICABLE_t1.5683453237 !$PSYCHIATRY_NOTE_t0.8273381295 !$UNSP_t0.2302158273 !$UPBEAT_t0.0575539568 !$USE_INTERACTING_t0.0647482014 !$VERIFIED_CORRECT_t0.1438848921 !$VISTA_ED_t0.5035971223 !$VOLUME_MOOD_t0.0647482014 !$VOLUNTEER_OR_t0.0719424460 !$WALKIN_t0.5539568345 !$WARRANT_t0.0503597122 !$WERE_DISCUSSED_t0.4172661871 !$WILLING_t0.4388489209 !$WILL_CONSIDER_t0.0647482014 !$YEAR_t4.5323741007) $CONSENT_COLON_t0.0431654676 $DISEASE_CABG_t0.0287769784 $URGENT_APPT_t0.0431654676 $VOIDS_URINE_t0.0719424460 $WAS_HORRIBLE_t0.1294964029 $WE_COULD_t0.1438848921 $WILL_PICKED_t0.0935251799 $WILL_RESTART_t0.0215827338 $WTIH_t0.0431654676 $YEAR_COUNSELED_t0.0431654676 $YE_t0.0503597122 $YOUR_BOTTLES_t0.0215827338) !$EASIER_t0.0575539568 !$RETRAINING_t0.0503597122) 
1 and(or(and(!$NOT_APPLICABLE_t1.5683453237 !$PSYCHIATRY_NOTE_t0.8273381295 !$UNSP_t0.2302158273 !$UPBEAT_t0.0575539568 !$USE_INTERACTING_t0.0647482014 !$VERIFIED_CORRECT_t0.1438848921 !$VISTA_ED_t0.5035971223 !$VOLUME_MOOD_t0.0647482014 !$VOLUNTEER_OR_t0.0719424460 !$WALKIN_t0.5539568345 !$WARRANT_t0.0503597122 !$WERE_DISCUSSED_t0.4172661871 !$WILLING_t0.4388489209 !$WILL_CONSIDER_t0.0647482014 !$YEAR_t4.5323741007) $DISCHARGE_ALDRETE_t0.0359712230 $DISEASE_CABG_t0.0287769784 $URGENT_APPT_t0.0431654676 $VOIDS_URINE_t0.0719424460 $WAS_HORRIBLE_t0.1294964029 $WE_COULD_t0.1438848921 $WILL_PICKED_t0.0935251799 $WILL_RESTART_t0.0215827338 $WTIH_t0.0431654676 $YEAR_COUNSELED_t0.0431654676 $YE_t0.0503597122 $YOUR_BOTTLES_t0.0215827338) !$EASIER_t0.0575539568 !$RETRAINING_t0.0503597122) 
1 and(or(and(!$NOT_APPLICABLE_t1.5683453237 !$PSYCHIATRY_NOTE_t0.8273381295 !$UNSP_t0.2302158273 !$UPBEAT_t0.0575539568 !$USE_INTERACTING_t0.0647482014 !$VERIFIED_CORRECT_t0.1438848921 !$VISTA_ED_t0.5035971223 !$VOLUME_MOOD_t0.0647482014 !$VOLUNTEER_OR_t0.0719424460 !$WALKIN_t0.5539568345 !$WARRANT_t0.0503597122 !$WERE_DISCUSSED_t0.4172661871 !$WILLING_t0.4388489209 !$WILL_CONSIDER_t0.0647482014 !$YEAR_t4.5323741007) $DISEASE_CABG_t0.0287769784 $RESPIRATION_BREATH_t0.0431654676 $URGENT_APPT_t0.0431654676 $VOIDS_URINE_t0.0719424460 $WAS_HORRIBLE_t0.1294964029 $WE_COULD_t0.1438848921 $WILL_PICKED_t0.0935251799 $WILL_RESTART_t0.0215827338 $WTIH_t0.0431654676 $YEAR_COUNSELED_t0.0431654676 $YE_t0.0503597122 $YOUR_BOTTLES_t0.0215827338) !$EASIER_t0.0575539568 !$RETRAINING_t0.0503597122) 
1 and(or(and(!$FEAR_t0.2446043165 !$NOT_APPLICABLE_t1.5683453237 !$UNSP_t0.2302158273 !$UPBEAT_t0.0575539568 !$USE_INTERACTING_t0.0647482014 !$VERIFIED_CORRECT_t0.1438848921 !$VISTA_ED_t0.5035971223 !$VOLUME_MOOD_t0.0647482014 !$VOLUNTEER_OR_t0.0719424460 !$WALKIN_t0.5539568345 !$WARRANT_t0.0503597122 !$WERE_DISCUSSED_t0.4172661871 !$WILLING_t0.4388489209 !$WILL_CONSIDER_t0.0647482014 !$YEAR_t4.5323741007) $CONSENT_COLON_t0.0431654676 $DISEASE_CABG_t0.0287769784 $INFORMED_COLON_t0.0431654676 $URGENT_APPT_t0.0431654676 $VOIDS_URINE_t0.0719424460 $WAS_HORRIBLE_t0.1294964029 $WE_COULD_t0.1438848921 $WILL_PICKED_t0.0935251799 $WILL_RESTART_t0.0215827338 $WTIH_t0.0431654676 $YEAR_COUNSELED_t0.0431654676 $YE_t0.0503597122 $YOUR_BOTTLES_t0.0215827338) !$EASIER_t0.0575539568 !$RETRAINING_t0.0503597122) 
1 and(or(and(!$MH_PSYCHIATRY_t0.3669064748 !$NOT_APPLICABLE_t1.5683453237 !$UNSP_t0.2302158273 !$UPBEAT_t0.0575539568 !$USE_INTERACTING_t0.0647482014 !$VERIFIED_CORRECT_t0.1438848921 !$VISTA_ED_t0.5035971223 !$VOLUME_MOOD_t0.0647482014 !$VOLUNTEER_OR_t0.0719424460 !$WALKIN_t0.5539568345 !$WARRANT_t0.0503597122 !$WERE_DISCUSSED_t0.4172661871 !$WILLING_t0.4388489209 !$WILL_CONSIDER_t0.0647482014 !$YEAR_t4.5323741007) $CONSENT_COLON_t0.0431654676 $DISEASE_CABG_t0.0287769784 $INFORMED_COLON_t0.0431654676 $URGENT_APPT_t0.0431654676 $VOIDS_URINE_t0.0719424460 $WAS_HORRIBLE_t0.1294964029 $WE_COULD_t0.1438848921 $WILL_PICKED_t0.0935251799 $WILL_RESTART_t0.0215827338 $WTIH_t0.0431654676 $YEAR_COUNSELED_t0.0431654676 $YE_t0.0503597122 $YOUR_BOTTLES_t0.0215827338) !$EASIER_t0.0575539568 !$RETRAINING_t0.0503597122) 
1 and(or(and(!$NOT_APPLICABLE_t1.5683453237 !$PSYCHIATRY_NOTE_t0.8273381295 !$UNSP_t0.2302158273 !$UPBEAT_t0.0575539568 !$USE_INTERACTING_t0.0647482014 !$VERIFIED_CORRECT_t0.1438848921 !$VISTA_ED_t0.5035971223 !$VOLUME_MOOD_t0.0647482014 !$VOLUNTEER_OR_t0.0719424460 !$WALKIN_t0.5539568345 !$WARRANT_t0.0503597122 !$WERE_DISCUSSED_t0.4172661871 !$WILLING_t0.4388489209 !$WILL_CONSIDER_t0.0647482014 !$YEAR_t4.5323741007) $CIRCULATION_LEVEL_t0.0431654676 $DISCHARGE_ALDRETE_t0.0359712230 $DISEASE_CABG_t0.0287769784 $URGENT_APPT_t0.0431654676 $VOIDS_URINE_t0.0719424460 $WAS_HORRIBLE_t0.1294964029 $WE_COULD_t0.1438848921 $WILL_PICKED_t0.0935251799 $WILL_RESTART_t0.0215827338 $WTIH_t0.0431654676 $YEAR_COUNSELED_t0.0431654676 $YE_t0.0503597122 $YOUR_BOTTLES_t0.0215827338) !$EASIER_t0.0575539568 !$RETRAINING_t0.0503597122) 
1 and(or(and(!$NOT_APPLICABLE_t1.5683453237 !$PSYCHIATRY_NOTE_t0.8273381295 !$UNSP_t0.2302158273 !$UPBEAT_t0.0575539568 !$USE_INTERACTING_t0.0647482014 !$VERIFIED_CORRECT_t0.1438848921 !$VISTA_ED_t0.5035971223 !$VOLUME_MOOD_t0.0647482014 !$VOLUNTEER_OR_t0.0719424460 !$WALKIN_t0.5539568345 !$WARRANT_t0.0503597122 !$WERE_DISCUSSED_t0.4172661871 !$WILLING_t0.4388489209 !$WILL_CONSIDER_t0.0647482014 !$YEAR_t4.5323741007) $CONSENT_COLON_t0.0431654676 $DISCHARGE_ALDRETE_t0.0359712230 $DISEASE_CABG_t0.0287769784 $URGENT_APPT_t0.0431654676 $VOIDS_URINE_t0.0719424460 $WAS_HORRIBLE_t0.1294964029 $WE_COULD_t0.1438848921 $WILL_PICKED_t0.0935251799 $WILL_RESTART_t0.0215827338 $WTIH_t0.0431654676 $YEAR_COUNSELED_t0.0431654676 $YE_t0.0503597122 $YOUR_BOTTLES_t0.0215827338) !$EASIER_t0.0575539568 !$RETRAINING_t0.0503597122) 
1 and(or(and(!$NOT_APPLICABLE_t1.5683453237 !$PSYCHIATRY_NOTE_t0.8273381295 !$UNSP_t0.2302158273 !$UPBEAT_t0.0575539568 !$USE_INTERACTING_t0.0647482014 !$VERIFIED_CORRECT_t0.1438848921 !$VISTA_ED_t0.5035971223 !$VOLUME_MOOD_t0.0647482014 !$VOLUNTEER_OR_t0.0719424460 !$WALKIN_t0.5539568345 !$WARRANT_t0.0503597122 !$WERE_DISCUSSED_t0.4172661871 !$WILLING_t0.4388489209 !$WILL_CONSIDER_t0.0647482014 !$YEAR_t4.5323741007) $CONSENT_COLON_t0.0431654676 $DISEASE_CABG_t0.0287769784 $INFORMED_COLON_t0.0431654676 $URGENT_APPT_t0.0431654676 $VOIDS_URINE_t0.0719424460 $WAS_HORRIBLE_t0.1294964029 $WE_COULD_t0.1438848921 $WILL_PICKED_t0.0935251799 $WILL_RESTART_t0.0215827338 $WTIH_t0.0431654676 $YEAR_COUNSELED_t0.0431654676 $YE_t0.0503597122 $YOUR_BOTTLES_t0.0215827338) !$EASIER_t0.0575539568 !$RETRAINING_t0.0503597122) 
1 and(or(and(!$NOT_APPLICABLE_t1.5683453237 !$PSYCHIATRY_NOTE_t0.8273381295 !$UNSP_t0.2302158273 !$UPBEAT_t0.0575539568 !$USE_INTERACTING_t0.0647482014 !$VERIFIED_CORRECT_t0.1438848921 !$VISTA_ED_t0.5035971223 !$VOLUME_MOOD_t0.0647482014 !$VOLUNTEER_OR_t0.0719424460 !$WALKIN_t0.5539568345 !$WARRANT_t0.0503597122 !$WERE_DISCUSSED_t0.4172661871 !$WILLING_t0.4388489209 !$WILL_CONSIDER_t0.0647482014 !$YEAR_t4.5323741007) $DISCHARGE_ALDRETE_t0.0359712230 $DISEASE_CABG_t0.0287769784 $RESPIRATION_BREATH_t0.0431654676 $URGENT_APPT_t0.0431654676 $VOIDS_URINE_t0.0719424460 $WAS_HORRIBLE_t0.1294964029 $WE_COULD_t0.1438848921 $WILL_PICKED_t0.0935251799 $WILL_RESTART_t0.0215827338 $WTIH_t0.0431654676 $YEAR_COUNSELED_t0.0431654676 $YE_t0.0503597122 $YOUR_BOTTLES_t0.0215827338) !$EASIER_t0.0575539568 !$RETRAINING_t0.0503597122) 
1 and(or(and(!$FEAR_t0.2446043165 !$NOT_APPLICABLE_t1.5683453237 !$UNSP_t0.2302158273 !$UPBEAT_t0.0575539568 !$VERIFIED_CORRECT_t0.1438848921 !$VETERAN_PSYCHOEDUCATIONAL_t0.0647482014 !$VISIT_PROCESSES_t0.0647482014 !$VISTA_ED_t0.5035971223 !$VOLUME_MOOD_t0.0647482014 !$VOLUNTEER_OR_t0.0719424460 !$WALKIN_t0.5539568345 !$WARRANT_t0.0503597122 !$WERE_DISCUSSED_t0.4172661871 !$WILLING_t0.4388489209 !$WILL_CONSIDER_t0.0647482014 !$YEAR_t4.5323741007) $BE_REFILLED_t0.0863309353 $DISCHARGE_ALDRETE_t0.0359712230 $URGENT_APPT_t0.0431654676 $VA_CONTRACT_t0.0431654676 $WAS_COMPLICATED_t0.0215827338 $WAS_HORRIBLE_t0.1294964029 $WE_COULD_t0.1438848921 $WILL_PICKED_t0.0935251799 $WILL_RESTART_t0.0215827338 $WTIH_t0.0431654676 $YE_t0.0503597122 $YOUR_BOTTLES_t0.0215827338) !$EASIER_t0.0575539568 !$SCHEDULE_NEXT_t0.0647482014) 
1 and(or(and(!$FEAR_t0.2446043165 !$NOT_APPLICABLE_t1.5683453237 !$UNSP_t0.2302158273 !$UPBEAT_t0.0575539568 !$VERIFIED_CORRECT_t0.1438848921 !$VETERAN_PSYCHOEDUCATIONAL_t0.0647482014 !$VISIT_PROCESSES_t0.0647482014 !$VISTA_ED_t0.5035971223 !$VOLUME_MOOD_t0.0647482014 !$VOLUNTEER_OR_t0.0719424460 !$WALKIN_t0.5539568345 !$WARRANT_t0.0503597122 !$WERE_DISCUSSED_t0.4172661871 !$WILLING_t0.4388489209 !$WILL_CONSIDER_t0.0647482014 !$YEAR_t4.5323741007) $BE_REFILLED_t0.0863309353 $LUMBAGO_t0.0359712230 $URGENT_APPT_t0.0431654676 $VA_CONTRACT_t0.0431654676 $WAS_COMPLICATED_t0.0215827338 $WAS_HORRIBLE_t0.1294964029 $WE_COULD_t0.1438848921 $WILL_PICKED_t0.0935251799 $WILL_RESTART_t0.0215827338 $WTIH_t0.0431654676 $YE_t0.0503597122 $YOUR_BOTTLES_t0.0215827338) !$EASIER_t0.0575539568 !$SCHEDULE_NEXT_t0.0647482014) 
1 and(or(and(!$FEAR_t0.2446043165 !$NOT_APPLICABLE_t1.5683453237 !$UNSP_t0.2302158273 !$UPBEAT_t0.0575539568 !$VERIFIED_CORRECT_t0.1438848921 !$VETERAN_PSYCHOEDUCATIONAL_t0.0647482014 !$VISIT_PROCESSES_t0.0647482014 !$VISTA_ED_t0.5035971223 !$VOLUME_MOOD_t0.0647482014 !$VOLUNTEER_OR_t0.0719424460 !$WALKIN_t0.5539568345 !$WARRANT_t0.0503597122 !$WERE_DISCUSSED_t0.4172661871 !$WILLING_t0.4388489209 !$WILL_CONSIDER_t0.0647482014 !$YEAR_t4.5323741007) $BE_REFILLED_t0.0863309353 $TEST_ALLOWS_t0.0359712230 $URGENT_APPT_t0.0431654676 $VA_CONTRACT_t0.0431654676 $WAS_COMPLICATED_t0.0215827338 $WAS_HORRIBLE_t0.1294964029 $WE_COULD_t0.1438848921 $WILL_PICKED_t0.0935251799 $WILL_RESTART_t0.0215827338 $WTIH_t0.0431654676 $YE_t0.0503597122 $YOUR_BOTTLES_t0.0215827338) !$EASIER_t0.0575539568 !$SCHEDULE_NEXT_t0.0647482014) 
1 and(or(and(!$MH_PSYCHIATRY_t0.3669064748 !$NOT_APPLICABLE_t1.5683453237 !$UNSP_t0.2302158273 !$UPBEAT_t0.0575539568 !$VERIFIED_CORRECT_t0.1438848921 !$VETERAN_PSYCHOEDUCATIONAL_t0.0647482014 !$VISIT_PROCESSES_t0.0647482014 !$VISTA_ED_t0.5035971223 !$VOLUME_MOOD_t0.0647482014 !$VOLUNTEER_OR_t0.0719424460 !$WALKIN_t0.5539568345 !$WARRANT_t0.0503597122 !$WERE_DISCUSSED_t0.4172661871 !$WILLING_t0.4388489209 !$WILL_CONSIDER_t0.0647482014 !$YEAR_t4.5323741007) $BE_REFILLED_t0.0863309353 $DISCHARGE_ALDRETE_t0.0359712230 $URGENT_APPT_t0.0431654676 $VA_CONTRACT_t0.0431654676 $WAS_COMPLICATED_t0.0215827338 $WAS_HORRIBLE_t0.1294964029 $WE_COULD_t0.1438848921 $WILL_PICKED_t0.0935251799 $WILL_RESTART_t0.0215827338 $WTIH_t0.0431654676 $YE_t0.0503597122 $YOUR_BOTTLES_t0.0215827338) !$EASIER_t0.0575539568 !$SCHEDULE_NEXT_t0.0647482014) 
1 and(or(and(!$MH_PSYCHIATRY_t0.3669064748 !$NOT_APPLICABLE_t1.5683453237 !$UNSP_t0.2302158273 !$UPBEAT_t0.0575539568 !$VERIFIED_CORRECT_t0.1438848921 !$VETERAN_PSYCHOEDUCATIONAL_t0.0647482014 !$VISIT_PROCESSES_t0.0647482014 !$VISTA_ED_t0.5035971223 !$VOLUME_MOOD_t0.0647482014 !$VOLUNTEER_OR_t0.0719424460 !$WALKIN_t0.5539568345 !$WARRANT_t0.0503597122 !$WERE_DISCUSSED_t0.4172661871 !$WILLING_t0.4388489209 !$WILL_CONSIDER_t0.0647482014 !$YEAR_t4.5323741007) $BE_REFILLED_t0.0863309353 $LUMBAGO_t0.0359712230 $URGENT_APPT_t0.0431654676 $VA_CONTRACT_t0.0431654676 $WAS_COMPLICATED_t0.0215827338 $WAS_HORRIBLE_t0.1294964029 $WE_COULD_t0.1438848921 $WILL_PICKED_t0.0935251799 $WILL_RESTART_t0.0215827338 $WTIH_t0.0431654676 $YE_t0.0503597122 $YOUR_BOTTLES_t0.0215827338) !$EASIER_t0.0575539568 !$SCHEDULE_NEXT_t0.0647482014) 
1 and(or(and(!$MH_PSYCHIATRY_t0.3669064748 !$NOT_APPLICABLE_t1.5683453237 !$UNSP_t0.2302158273 !$UPBEAT_t0.0575539568 !$VERIFIED_CORRECT_t0.1438848921 !$VETERAN_PSYCHOEDUCATIONAL_t0.0647482014 !$VISIT_PROCESSES_t0.0647482014 !$VISTA_ED_t0.5035971223 !$VOLUME_MOOD_t0.0647482014 !$VOLUNTEER_OR_t0.0719424460 !$WALKIN_t0.5539568345 !$WARRANT_t0.0503597122 !$WERE_DISCUSSED_t0.4172661871 !$WILLING_t0.4388489209 !$WILL_CONSIDER_t0.0647482014 !$YEAR_t4.5323741007) $BE_REFILLED_t0.0863309353 $TEST_ALLOWS_t0.0359712230 $URGENT_APPT_t0.0431654676 $VA_CONTRACT_t0.0431654676 $WAS_COMPLICATED_t0.0215827338 $WAS_HORRIBLE_t0.1294964029 $WE_COULD_t0.1438848921 $WILL_PICKED_t0.0935251799 $WILL_RESTART_t0.0215827338 $WTIH_t0.0431654676 $YE_t0.0503597122 $YOUR_BOTTLES_t0.0215827338) !$EASIER_t0.0575539568 !$SCHEDULE_NEXT_t0.0647482014) 
1 and(or(and(!$NOT_APPLICABLE_t1.5683453237 !$PSYCHIATRY_NOTE_t0.8273381295 !$UNSP_t0.2302158273 !$UPBEAT_t0.0575539568 !$VERIFIED_CORRECT_t0.1438848921 !$VETERAN_PSYCHOEDUCATIONAL_t0.0647482014 !$VISIT_PROCESSES_t0.0647482014 !$VISTA_ED_t0.5035971223 !$VOLUME_MOOD_t0.0647482014 !$VOLUNTEER_OR_t0.0719424460 !$WALKIN_t0.5539568345 !$WARRANT_t0.0503597122 !$WERE_DISCUSSED_t0.4172661871 !$WILLING_t0.4388489209 !$WILL_CONSIDER_t0.0647482014 !$YEAR_t4.5323741007) $BE_REFILLED_t0.0863309353 $DISCHARGE_ALDRETE_t0.0359712230 $URGENT_APPT_t0.0431654676 $VA_CONTRACT_t0.0431654676 $WAS_COMPLICATED_t0.0215827338 $WAS_HORRIBLE_t0.1294964029 $WE_COULD_t0.1438848921 $WILL_PICKED_t0.0935251799 $WILL_RESTART_t0.0215827338 $WTIH_t0.0431654676 $YE_t0.0503597122 $YOUR_BOTTLES_t0.0215827338) !$EASIER_t0.0575539568 !$SCHEDULE_NEXT_t0.0647482014) 
1 and(or(and(!$NOT_APPLICABLE_t1.5683453237 !$PSYCHIATRY_NOTE_t0.8273381295 !$UNSP_t0.2302158273 !$UPBEAT_t0.0575539568 !$VERIFIED_CORRECT_t0.1438848921 !$VETERAN_PSYCHOEDUCATIONAL_t0.0647482014 !$VISIT_PROCESSES_t0.0647482014 !$VISTA_ED_t0.5035971223 !$VOLUME_MOOD_t0.0647482014 !$VOLUNTEER_OR_t0.0719424460 !$WALKIN_t0.5539568345 !$WARRANT_t0.0503597122 !$WERE_DISCUSSED_t0.4172661871 !$WILLING_t0.4388489209 !$WILL_CONSIDER_t0.0647482014 !$YEAR_t4.5323741007) $BE_REFILLED_t0.0863309353 $LUMBAGO_t0.0359712230 $URGENT_APPT_t0.0431654676 $VA_CONTRACT_t0.0431654676 $WAS_COMPLICATED_t0.0215827338 $WAS_HORRIBLE_t0.1294964029 $WE_COULD_t0.1438848921 $WILL_PICKED_t0.0935251799 $WILL_RESTART_t0.0215827338 $WTIH_t0.0431654676 $YE_t0.0503597122 $YOUR_BOTTLES_t0.0215827338) !$EASIER_t0.0575539568 !$SCHEDULE_NEXT_t0.0647482014) 
1 and(or(and(!$NOT_APPLICABLE_t1.5683453237 !$PSYCHIATRY_NOTE_t0.8273381295 !$UNSP_t0.2302158273 !$UPBEAT_t0.0575539568 !$VERIFIED_CORRECT_t0.1438848921 !$VETERAN_PSYCHOEDUCATIONAL_t0.0647482014 !$VISIT_PROCESSES_t0.0647482014 !$VISTA_ED_t0.5035971223 !$VOLUME_MOOD_t0.0647482014 !$VOLUNTEER_OR_t0.0719424460 !$WALKIN_t0.5539568345 !$WARRANT_t0.0503597122 !$WERE_DISCUSSED_t0.4172661871 !$WILLING_t0.4388489209 !$WILL_CONSIDER_t0.0647482014 !$YEAR_t4.5323741007) $BE_REFILLED_t0.0863309353 $TEST_ALLOWS_t0.0359712230 $URGENT_APPT_t0.0431654676 $VA_CONTRACT_t0.0431654676 $WAS_COMPLICATED_t0.0215827338 $WAS_HORRIBLE_t0.1294964029 $WE_COULD_t0.1438848921 $WILL_PICKED_t0.0935251799 $WILL_RESTART_t0.0215827338 $WTIH_t0.0431654676 $YE_t0.0503597122 $YOUR_BOTTLES_t0.0215827338) !$EASIER_t0.0575539568 !$SCHEDULE_NEXT_t0.0647482014) 
1 and(or(and(!$FEAR_t0.2446043165 !$NOT_APPLICABLE_t1.5683453237 !$UNSP_t0.2302158273 !$UPBEAT_t0.0575539568 !$VERIFIED_CORRECT_t0.1438848921 !$VETERAN_PSYCHOEDUCATIONAL_t0.0647482014 !$VISIT_PROCESSES_t0.0647482014 !$VISTA_ED_t0.5035971223 !$VOLUME_MOOD_t0.0647482014 !$VOLUNTEER_OR_t0.0719424460 !$WALKIN_t0.5539568345 !$WARRANT_t0.0503597122 !$WERE_DISCUSSED_t0.4172661871 !$WILLING_t0.4388489209 !$WILL_CONSIDER_t0.0647482014 !$YEAR_t4.5323741007) $BE_REFILLED_t0.0863309353 $DISCHARGE_ALDRETE_t0.0359712230 $LUMBAGO_t0.0359712230 $URGENT_APPT_t0.0431654676 $VA_CONTRACT_t0.0431654676 $WAS_COMPLICATED_t0.0215827338 $WAS_HORRIBLE_t0.1294964029 $WE_COULD_t0.1438848921 $WILL_PICKED_t0.0935251799 $WILL_RESTART_t0.0215827338 $WTIH_t0.0431654676 $YE_t0.0503597122 $YOUR_BOTTLES_t0.0215827338) !$EASIER_t0.0575539568 !$SCHEDULE_NEXT_t0.0647482014) 
1 and(or(and(or(and(or($VISTA_IMAGING_t1.9784172662 $WE_COULD_t0.1438848921 !$YEAR_t4.5323741007 $YOUNGER_t0.0431654676) !$MATE_t0.0359712230 !$VERIFIED_t1.3525179856 !$VINFLUENZA_PATIENT_t0.0647482014 !$VISIT_DENTAL_t0.3309352518 !$VOICEMAIL_LEFT_t0.0503597122 !$WERE_DISCUSSED_t0.4172661871 !$WITH_COLONOSCOPE_t0.0863309353 !$YR_OLD_t0.2158273381) $LIPITOR_t0.0503597122 $MALE_CA_t0.0863309353 $RESPIRATION_BREATH_t0.0431654676 $URGENT_SERVICES_t0.0575539568 $URINAL_WITHIN_t0.2589928058 $VA_CONTRACT_t0.0431654676 $WILL_PICKED_t0.0935251799 $YEAR_UNKNOWN_t0.0287769784 $YE_t0.0503597122) !$MH_PSYCHIATRY_t0.3669064748) $WAS_HORRIBLE_t0.1294964029 $WORTHLESSNESS_t0.0791366906) !$VOLUME_MOOD_t0.0647482014 !$WARRANT_t0.0503597122) 
1 and(or(and(or($VISTA_IMAGING_t1.9784172662 $WERE_t7.6330935252 !$YEAR_t4.5323741007 $YOUNGER_t0.0431654676) !$MATE_t0.0359712230 !$VERIFIED_t1.3525179856 !$VINFLUENZA_PATIENT_t0.0647482014 !$VISIT_DENTAL_t0.3309352518 !$VOICEMAIL_LEFT_t0.0503597122 !$VOLUME_MOOD_t0.0647482014 !$WARRANT_t0.0503597122 !$WERE_DISCUSSED_t0.4172661871 !$WITH_COLONOSCOPE_t0.0863309353 !$YR_OLD_t0.2158273381) $LIPITOR_t0.0503597122 $MALE_CA_t0.0863309353 $RESPIRATION_BREATH_t0.0431654676 $URGENT_SERVICES_t0.0575539568 $URINAL_WITHIN_t0.2589928058 $VA_CONTRACT_t0.0431654676 $WAS_HORRIBLE_t0.1294964029 $WILL_PICKED_t0.0935251799 $YEAR_UNKNOWN_t0.0287769784 $YE_t0.0503597122) !$MH_PSYCHIATRY_t0.3669064748) 
1 and(or(and(or($VISTA_IMAGING_t1.9784172662 $WE_COULD_t0.1438848921 !$YEAR_t4.5323741007 $YOUNGER_t0.0431654676) !$MATE_t0.0359712230 !$VERIFIED_t1.3525179856 !$VINFLUENZA_PATIENT_t0.0647482014 !$VISIT_DENTAL_t0.3309352518 !$VOICEMAIL_LEFT_t0.0503597122 !$VOLUME_MOOD_t0.0647482014 !$WARRANT_t0.0503597122 !$WERE_DISCUSSED_t0.4172661871 !$WITH_COLONOSCOPE_t0.0863309353 !$YR_OLD_t0.2158273381) $LIPITOR_t0.0503597122 $MALE_CA_t0.0863309353 $RESPIRATION_BREATH_t0.0431654676 $URGENT_SERVICES_t0.0575539568 $URINAL_WITHIN_t0.2589928058 $VA_CONTRACT_t0.0431654676 $WAS_HORRIBLE_t0.1294964029 $WILL_PICKED_t0.0935251799 $YEAR_UNKNOWN_t0.0287769784 $YE_t0.0503597122) !$MH_PSYCHIATRY_t0.3669064748) 
1 and(or(and(or($VISTA_IMAGING_t1.9784172662 $WE_COULD_t0.1438848921 !$YEAR_t4.5323741007 $YOUNGER_t0.0431654676) !$MATE_t0.0359712230 !$VERIFIED_t1.3525179856 !$VINFLUENZA_PATIENT_t0.0647482014 !$VISIT_DENTAL_t0.3309352518 !$VOICEMAIL_LEFT_t0.0503597122 !$VOLUME_MOOD_t0.0647482014 !$WARRANT_t0.0503597122 !$WERE_DISCUSSED_t0.4172661871 !$YR_OLD_t0.2158273381) $LIPITOR_t0.0503597122 $MALE_CA_t0.0863309353 $RESPIRATION_BREATH_t0.0431654676 $URGENT_SERVICES_t0.0575539568 $URINAL_WITHIN_t0.2589928058 $VA_CONTRACT_t0.0431654676 $WAS_HORRIBLE_t0.1294964029 $WILL_PICKED_t0.0935251799 $YEAR_UNKNOWN_t0.0287769784 $YE_t0.0503597122) !$MH_PSYCHIATRY_t0.3669064748 !$WITH_COLONOSCOPE_t0.0863309353) 
1 and(or(and(or($VISTA_IMAGING_t1.9784172662 $WE_COULD_t0.1438848921 !$YEAR_t4.5323741007 $YOUNGER_t0.0431654676) !$MATE_t0.0359712230 !$VERIFIED_t1.3525179856 !$VINFLUENZA_PATIENT_t0.0647482014 !$VISIT_DENTAL_t0.3309352518 !$VOICEMAIL_LEFT_t0.0503597122 !$WARRANT_t0.0503597122 !$WERE_DISCUSSED_t0.4172661871 !$WITH_COLONOSCOPE_t0.0863309353 !$YR_OLD_t0.2158273381) $LIPITOR_t0.0503597122 $MALE_CA_t0.0863309353 $RESPIRATION_BREATH_t0.0431654676 $URGENT_SERVICES_t0.0575539568 $URINAL_WITHIN_t0.2589928058 $VA_CONTRACT_t0.0431654676 $WAS_HORRIBLE_t0.1294964029 $WILL_PICKED_t0.0935251799 $YEAR_UNKNOWN_t0.0287769784 $YE_t0.0503597122) !$MH_PSYCHIATRY_t0.3669064748 !$VOLUME_MOOD_t0.0647482014) 
1 and(or(and(or($VISTA_IMAGING_t1.9784172662 $WE_COULD_t0.1438848921 !$YEAR_t4.5323741007 $YOUNGER_t0.0431654676) !$VERIFIED_t1.3525179856 !$VINFLUENZA_PATIENT_t0.0647482014 !$VISIT_DENTAL_t0.3309352518 !$VOICEMAIL_LEFT_t0.0503597122 !$VOLUME_MOOD_t0.0647482014 !$WARRANT_t0.0503597122 !$WERE_DISCUSSED_t0.4172661871 !$WITH_COLONOSCOPE_t0.0863309353 !$YR_OLD_t0.2158273381) $LIPITOR_t0.0503597122 $MALE_CA_t0.0863309353 $RESPIRATION_BREATH_t0.0431654676 $URGENT_SERVICES_t0.0575539568 $URINAL_WITHIN_t0.2589928058 $VA_CONTRACT_t0.0431654676 $WAS_HORRIBLE_t0.1294964029 $WILL_PICKED_t0.0935251799 $YEAR_UNKNOWN_t0.0287769784 $YE_t0.0503597122) !$MATE_t0.0359712230 !$MH_PSYCHIATRY_t0.3669064748) 
1 or(and(or(and(or($VISTA_IMAGING_t1.9784172662 $WE_COULD_t0.1438848921 !$YEAR_t4.5323741007 $YOUNGER_t0.0431654676) !$MATE_t0.0359712230 !$VERIFIED_t1.3525179856 !$VINFLUENZA_PATIENT_t0.0647482014 !$VISIT_DENTAL_t0.3309352518 !$VOICEMAIL_LEFT_t0.0503597122 !$VOLUME_MOOD_t0.0647482014 !$WARRANT_t0.0503597122 !$WERE_DISCUSSED_t0.4172661871 !$WITH_COLONOSCOPE_t0.0863309353 !$YR_OLD_t0.2158273381) $LIPITOR_t0.0503597122 $MALE_CA_t0.0863309353 $RESPIRATION_BREATH_t0.0431654676 $URGENT_SERVICES_t0.0575539568 $URINAL_WITHIN_t0.2589928058 $VA_CONTRACT_t0.0431654676 $WAS_HORRIBLE_t0.1294964029 $WILL_PICKED_t0.0935251799 $YEAR_UNKNOWN_t0.0287769784) !$MH_PSYCHIATRY_t0.3669064748) $YE_t0.0503597122) 
1 or(and(or(and(or($VISTA_IMAGING_t1.9784172662 $WE_COULD_t0.1438848921 !$YEAR_t4.5323741007 $YOUNGER_t0.0431654676) !$MATE_t0.0359712230 !$VERIFIED_t1.3525179856 !$VINFLUENZA_PATIENT_t0.0647482014 !$VISIT_DENTAL_t0.3309352518 !$VOICEMAIL_LEFT_t0.0503597122 !$VOLUME_MOOD_t0.0647482014 !$WARRANT_t0.0503597122 !$WERE_DISCUSSED_t0.4172661871 !$WITH_COLONOSCOPE_t0.0863309353 !$YR_OLD_t0.2158273381) $LIPITOR_t0.0503597122 $MALE_CA_t0.0863309353 $RESPIRATION_BREATH_t0.0431654676 $URGENT_SERVICES_t0.0575539568 $URINAL_WITHIN_t0.2589928058 $VA_CONTRACT_t0.0431654676 $WAS_HORRIBLE_t0.1294964029 $WILL_PICKED_t0.0935251799 $YE_t0.0503597122) !$MH_PSYCHIATRY_t0.3669064748) $YEAR_UNKNOWN_t0.0287769784) 
1 or(and(or(and(or($VISTA_IMAGING_t1.9784172662 $WE_COULD_t0.1438848921 !$YEAR_t4.5323741007 $YOUNGER_t0.0431654676) !$MATE_t0.0359712230 !$VERIFIED_t1.3525179856 !$VINFLUENZA_PATIENT_t0.0647482014 !$VISIT_DENTAL_t0.3309352518 !$VOICEMAIL_LEFT_t0.0503597122 !$VOLUME_MOOD_t0.0647482014 !$WARRANT_t0.0503597122 !$WERE_DISCUSSED_t0.4172661871 !$WITH_COLONOSCOPE_t0.0863309353 !$YR_OLD_t0.2158273381) $LIPITOR_t0.0503597122 $MALE_CA_t0.0863309353 $RESPIRATION_BREATH_t0.0431654676 $URGENT_SERVICES_t0.0575539568 $URINAL_WITHIN_t0.2589928058 $VA_CONTRACT_t0.0431654676 $WILL_PICKED_t0.0935251799) !$MH_PSYCHIATRY_t0.3669064748) $WAS_HORRIBLE_t0.1294964029 $YEAR_UNKNOWN_t0.0287769784 $YE_t0.0503597122) 
1 or(and(or(and(or($VISTA_IMAGING_t1.9784172662 $WE_COULD_t0.1438848921 !$YEAR_t4.5323741007 $YOUNGER_t0.0431654676) !$MATE_t0.0359712230 !$VERIFIED_t1.3525179856 !$VINFLUENZA_PATIENT_t0.0647482014 !$VISIT_DENTAL_t0.3309352518 !$VOICEMAIL_LEFT_t0.0503597122 !$VOLUME_MOOD_t0.0647482014 !$WARRANT_t0.0503597122 !$WERE_DISCUSSED_t0.4172661871 !$WITH_COLONOSCOPE_t0.0863309353 !$YR_OLD_t0.2158273381) $LIPITOR_t0.0503597122 $MALE_CA_t0.0863309353 $RESPIRATION_BREATH_t0.0431654676 $URGENT_SERVICES_t0.0575539568 $URINAL_WITHIN_t0.2589928058 $VA_CONTRACT_t0.0431654676 $WILL_PICKED_t0.0935251799 $YEAR_UNKNOWN_t0.0287769784) !$MH_PSYCHIATRY_t0.3669064748) $WAS_HORRIBLE_t0.1294964029 $YE_t0.0503597122) 
1 and(or(and(or($CONSENT_COLON_t0.0431654676 $DISEASE_CABG_t0.0287769784 $VA_CONTRACT_t0.0431654676 $WAS_FRIGHTENING_t0.1294964029 $WE_COULD_t0.1438848921 $WILL_PICKED_t0.0935251799 $WTIH_t0.0431654676 $YEAR_UNKNOWN_t0.0287769784 $YE_t0.0503597122 $YOUR_BOTTLES_t0.0215827338) !$VOICEMAIL_t0.2949640288) and(!$MATE_t0.0359712230 !$NA_MG_t0.4604316547 !$UNSP_t0.2302158273 !$URETHRAL_t0.1151079137 !$VERIFIED_t1.3525179856 !$VISTA_ED_t0.5035971223 !$VOLUME_t0.5395683453 !$VOLUNTEER_OR_t0.0719424460 !$WALKIN_t0.5539568345 !$WARRANT_t0.0503597122 !$WERE_DISCUSSED_t0.4172661871 !$WHAT_QUESTIONS_t0.4676258993 !$WILL_CONSIDER_t0.0647482014 !$WITHIN_NONPHARMACOLOGICAL_t0.0791366906 !$YEAR_t4.5323741007) $ABLE_FUNCTION_t0.0791366906 $URGENT_APPT_t0.0431654676 $URINAL_WITHIN_t0.2589928058) !$PREOCCUPIED_WITH_t0.0287769784) 
1 and(or(and(or($DISEASE_CABG_t0.0287769784 $RESPIRATION_BREATH_t0.0431654676 $VA_CONTRACT_t0.0431654676 $WAS_FRIGHTENING_t0.1294964029 $WE_COULD_t0.1438848921 $WILL_PICKED_t0.0935251799 $WTIH_t0.0431654676 $YEAR_UNKNOWN_t0.0287769784 $YE_t0.0503597122 $YOUR_BOTTLES_t0.0215827338) !$VOICEMAIL_t0.2949640288) and(!$MATE_t0.0359712230 !$NA_MG_t0.4604316547 !$UNSP_t0.2302158273 !$URETHRAL_t0.1151079137 !$VERIFIED_t1.3525179856 !$VISTA_ED_t0.5035971223 !$VOLUME_t0.5395683453 !$VOLUNTEER_OR_t0.0719424460 !$WALKIN_t0.5539568345 !$WARRANT_t0.0503597122 !$WERE_DISCUSSED_t0.4172661871 !$WHAT_QUESTIONS_t0.4676258993 !$WILL_CONSIDER_t0.0647482014 !$WITHIN_NONPHARMACOLOGICAL_t0.0791366906 !$YEAR_t4.5323741007) $ABLE_FUNCTION_t0.0791366906 $URGENT_APPT_t0.0431654676 $URINAL_WITHIN_t0.2589928058) !$PREOCCUPIED_WITH_t0.0287769784) 
1 and(or(and(or($DISEASE_CABG_t0.0287769784 $VA_CONTRACT_t0.0431654676 $WAS_FRIGHTENING_t0.1294964029 $WE_COULD_t0.1438848921 $WILL_PICKED_t0.0935251799 $WTIH_t0.0431654676 $YEAR_UNKNOWN_t0.0287769784 $YE_t0.0503597122 $YOUR_BOTTLES_t0.0215827338) !$VOICEMAIL_t0.2949640288) and(!$MATE_t0.0359712230 !$NA_MG_t0.4604316547 !$UNSP_t0.2302158273 !$URETHRAL_t0.1151079137 !$VERIFIED_t1.3525179856 !$VISTA_ED_t0.5035971223 !$VOLUME_t0.5395683453 !$VOLUNTEER_OR_t0.0719424460 !$WALKIN_t0.5539568345 !$WARRANT_t0.0503597122 !$WERE_DISCUSSED_t0.4172661871 !$WHAT_QUESTIONS_t0.4676258993 !$WILL_CONSIDER_t0.0647482014 !$WITHIN_NONPHARMACOLOGICAL_t0.0791366906 !$YEAR_t4.5323741007) $ABLE_FUNCTION_t0.0791366906 $BREATH_FREELY_t0.0431654676 $URGENT_APPT_t0.0431654676 $URINAL_WITHIN_t0.2589928058) !$PREOCCUPIED_WITH_t0.0287769784) 
1 and(or(and(or($DISEASE_CABG_t0.0287769784 $VA_CONTRACT_t0.0431654676 $WAS_FRIGHTENING_t0.1294964029 $WE_COULD_t0.1438848921 $WILL_PICKED_t0.0935251799 $WTIH_t0.0431654676 $YEAR_UNKNOWN_t0.0287769784 $YE_t0.0503597122 $YOUR_BOTTLES_t0.0215827338) !$VOICEMAIL_t0.2949640288) and(!$MATE_t0.0359712230 !$NA_MG_t0.4604316547 !$UNSP_t0.2302158273 !$URETHRAL_t0.1151079137 !$VERIFIED_t1.3525179856 !$VISTA_ED_t0.5035971223 !$VOLUME_t0.5395683453 !$VOLUNTEER_OR_t0.0719424460 !$WALKIN_t0.5539568345 !$WARRANT_t0.0503597122 !$WERE_DISCUSSED_t0.4172661871 !$WHAT_QUESTIONS_t0.4676258993 !$WILL_CONSIDER_t0.0647482014 !$WITHIN_NONPHARMACOLOGICAL_t0.0791366906 !$YEAR_t4.5323741007) $ABLE_FUNCTION_t0.0791366906 $CIRCULATION_LEVEL_t0.0431654676 $URGENT_APPT_t0.0431654676 $URINAL_WITHIN_t0.2589928058) !$PREOCCUPIED_WITH_t0.0287769784) 
1 and(or(and(or($DISEASE_CABG_t0.0287769784 $VA_CONTRACT_t0.0431654676 $WAS_FRIGHTENING_t0.1294964029 $WE_COULD_t0.1438848921 $WILL_PICKED_t0.0935251799 $WTIH_t0.0431654676 $YEAR_UNKNOWN_t0.0287769784 $YE_t0.0503597122 $YOUR_BOTTLES_t0.0215827338) !$VOICEMAIL_t0.2949640288) and(!$MATE_t0.0359712230 !$NA_MG_t0.4604316547 !$UNSP_t0.2302158273 !$URETHRAL_t0.1151079137 !$VERIFIED_t1.3525179856 !$VISTA_ED_t0.5035971223 !$VOLUME_t0.5395683453 !$VOLUNTEER_OR_t0.0719424460 !$WALKIN_t0.5539568345 !$WARRANT_t0.0503597122 !$WERE_DISCUSSED_t0.4172661871 !$WHAT_QUESTIONS_t0.4676258993 !$WILL_CONSIDER_t0.0647482014 !$WITHIN_NONPHARMACOLOGICAL_t0.0791366906 !$YEAR_t4.5323741007) $ABLE_FUNCTION_t0.0791366906 $LUMBAGO_t0.0359712230 $URGENT_APPT_t0.0431654676 $URINAL_WITHIN_t0.2589928058) !$PREOCCUPIED_WITH_t0.0287769784) 
1 and(or(and(or($DISEASE_CABG_t0.0287769784 $VA_CONTRACT_t0.0431654676 $WAS_FRIGHTENING_t0.1294964029 $WE_COULD_t0.1438848921 $WILL_PICKED_t0.0935251799 $WTIH_t0.0431654676 $YEAR_UNKNOWN_t0.0287769784 $YE_t0.0503597122 $YOUR_BOTTLES_t0.0215827338) !$VOICEMAIL_t0.2949640288) and(!$MATE_t0.0359712230 !$NA_MG_t0.4604316547 !$UNSP_t0.2302158273 !$URETHRAL_t0.1151079137 !$VERIFIED_t1.3525179856 !$VISTA_ED_t0.5035971223 !$VOLUME_t0.5395683453 !$VOLUNTEER_OR_t0.0719424460 !$WALKIN_t0.5539568345 !$WARRANT_t0.0503597122 !$WERE_DISCUSSED_t0.4172661871 !$WHAT_QUESTIONS_t0.4676258993 !$WILL_CONSIDER_t0.0647482014 !$WITHIN_NONPHARMACOLOGICAL_t0.0791366906 !$YEAR_t4.5323741007) $ABLE_FUNCTION_t0.0791366906 $PREPROCEDURE_DATE_t0.0791366906 $URGENT_APPT_t0.0431654676 $URINAL_WITHIN_t0.2589928058) !$PREOCCUPIED_WITH_t0.0287769784) 
1 and(or(and(or($DISEASE_CABG_t0.0287769784 $VA_CONTRACT_t0.0431654676 $WAS_FRIGHTENING_t0.1294964029 $WE_COULD_t0.1438848921 $WILL_PICKED_t0.0935251799 $WTIH_t0.0431654676 $YEAR_UNKNOWN_t0.0287769784 $YE_t0.0503597122 $YOUR_BOTTLES_t0.0215827338) !$VOICEMAIL_t0.2949640288) and(!$MATE_t0.0359712230 !$NA_MG_t0.4604316547 !$UNSP_t0.2302158273 !$URETHRAL_t0.1151079137 !$VERIFIED_t1.3525179856 !$VISTA_ED_t0.5035971223 !$VOLUME_t0.5395683453 !$VOLUNTEER_OR_t0.0719424460 !$WALKIN_t0.5539568345 !$WARRANT_t0.0503597122 !$WERE_DISCUSSED_t0.4172661871 !$WHAT_QUESTIONS_t0.4676258993 !$WILL_CONSIDER_t0.0647482014 !$WITHIN_NONPHARMACOLOGICAL_t0.0791366906 !$YEAR_t4.5323741007) $ABLE_FUNCTION_t0.0791366906 $TEST_ALLOWS_t0.0359712230 $URGENT_APPT_t0.0431654676 $URINAL_WITHIN_t0.2589928058) !$PREOCCUPIED_WITH_t0.0287769784) 
1 and(or(and(or($CONSENT_COLON_t0.0431654676 $DISEASE_CABG_t0.0287769784 $VA_CONTRACT_t0.0431654676 $WAS_FRIGHTENING_t0.1294964029 $WE_COULD_t0.1438848921 $WILL_PICKED_t0.0935251799 $WTIH_t0.0431654676 $YEAR_UNKNOWN_t0.0287769784 $YE_t0.0503597122 $YOUR_BOTTLES_t0.0215827338) !$VOICEMAIL_t0.2949640288) and(!$MATE_t0.0359712230 !$NA_MG_t0.4604316547 !$UNSP_t0.2302158273 !$URETHRAL_t0.1151079137 !$VERIFIED_t1.3525179856 !$VISTA_ED_t0.5035971223 !$VOLUME_t0.5395683453 !$VOLUNTEER_OR_t0.0719424460 !$WALKIN_t0.5539568345 !$WARRANT_t0.0503597122 !$WERE_DISCUSSED_t0.4172661871 !$WHAT_QUESTIONS_t0.4676258993 !$WILL_CONSIDER_t0.0647482014 !$WITHIN_NONPHARMACOLOGICAL_t0.0791366906 !$YEAR_t4.5323741007) $ABLE_FUNCTION_t0.0791366906 $CIRCULATION_LEVEL_t0.0431654676 $URGENT_APPT_t0.0431654676 $URINAL_WITHIN_t0.2589928058) !$PREOCCUPIED_WITH_t0.0287769784) 
1 and(or(and(or($CONSENT_COLON_t0.0431654676 $DISEASE_CABG_t0.0287769784 $VA_CONTRACT_t0.0431654676 $WAS_FRIGHTENING_t0.1294964029 $WE_COULD_t0.1438848921 $WILL_PICKED_t0.0935251799 $WTIH_t0.0431654676 $YEAR_UNKNOWN_t0.0287769784 $YE_t0.0503597122 $YOUR_BOTTLES_t0.0215827338) !$VOICEMAIL_t0.2949640288) and(!$MATE_t0.0359712230 !$NA_MG_t0.4604316547 !$UNSP_t0.2302158273 !$URETHRAL_t0.1151079137 !$VERIFIED_t1.3525179856 !$VISTA_ED_t0.5035971223 !$VOLUME_t0.5395683453 !$VOLUNTEER_OR_t0.0719424460 !$WALKIN_t0.5539568345 !$WARRANT_t0.0503597122 !$WERE_DISCUSSED_t0.4172661871 !$WHAT_QUESTIONS_t0.4676258993 !$WILL_CONSIDER_t0.0647482014 !$WITHIN_NONPHARMACOLOGICAL_t0.0791366906 !$YEAR_t4.5323741007) $ABLE_FUNCTION_t0.0791366906 $LUMBAGO_t0.0359712230 $URGENT_APPT_t0.0431654676 $URINAL_WITHIN_t0.2589928058) !$PREOCCUPIED_WITH_t0.0287769784) 
1 and(or(and(or($CONSENT_COLON_t0.0431654676 $DISEASE_CABG_t0.0287769784 $VA_CONTRACT_t0.0431654676 $WAS_FRIGHTENING_t0.1294964029 $WE_COULD_t0.1438848921 $WILL_PICKED_t0.0935251799 $WTIH_t0.0431654676 $YEAR_UNKNOWN_t0.0287769784 $YE_t0.0503597122 $YOUR_BOTTLES_t0.0215827338) !$VOICEMAIL_t0.2949640288) and(!$MATE_t0.0359712230 !$NA_MG_t0.4604316547 !$UNSP_t0.2302158273 !$URETHRAL_t0.1151079137 !$VERIFIED_t1.3525179856 !$VISTA_ED_t0.5035971223 !$VOLUME_t0.5395683453 !$VOLUNTEER_OR_t0.0719424460 !$WALKIN_t0.5539568345 !$WARRANT_t0.0503597122 !$WERE_DISCUSSED_t0.4172661871 !$WHAT_QUESTIONS_t0.4676258993 !$WILL_CONSIDER_t0.0647482014 !$WITHIN_NONPHARMACOLOGICAL_t0.0791366906 !$YEAR_t4.5323741007) $ABLE_FUNCTION_t0.0791366906 $PREPROCEDURE_DATE_t0.0791366906 $URGENT_APPT_t0.0431654676 $URINAL_WITHIN_t0.2589928058) !$PREOCCUPIED_WITH_t0.0287769784) 
1 and(or(and(!$PSYCHIATRY_NOTE_t0.8273381295 !$UNSP_t0.2302158273 !$UPDATES_t0.0431654676 !$USED_VERBAL_t0.0935251799 !$VERIFIED_t1.3525179856 !$VISIT_DENTAL_t0.3309352518 !$VISTA_ED_t0.5035971223 !$VOICEMAIL_LEFT_t0.0503597122 !$VOLUME_MOOD_t0.0647482014 !$WERE_DISCUSSED_t0.4172661871 !$YEAR_t4.5323741007 !$YR_t0.4892086331) $ABLE_FUNCTION_t0.0791366906 $ACETATE_t0.0575539568 $AVERAGE_RISK_t0.0431654676 $BE_REFILLED_t0.0863309353 $URGENT_APPT_t0.0431654676 $VA_CONTRACT_t0.0431654676 $VOIDS_URINE_t0.0719424460 $WAR_SERVICE_t0.0431654676 $WAS_FRIGHTENING_t0.1294964029 $WELL_ENOUGH_t0.0359712230 $WE_COULD_t0.1438848921 $WILL_PICKED_t0.0935251799 $WTIH_t0.0431654676 $YEAR_UNKNOWN_t0.0287769784 $YE_t0.0503597122) !$EASIER_t0.0575539568 !$GRATITUDE_t0.0359712230) 
1 and(or(and(!$PSYCHIATRY_NOTE_t0.8273381295 !$UNSP_t0.2302158273 !$UPDATES_t0.0431654676 !$USED_VERBAL_t0.0935251799 !$VERIFIED_t1.3525179856 !$VISIT_DENTAL_t0.3309352518 !$VISTA_ED_t0.5035971223 !$VOICEMAIL_LEFT_t0.0503597122 !$VOLUME_MOOD_t0.0647482014 !$WERE_DISCUSSED_t0.4172661871 !$YEAR_t4.5323741007 !$YR_t0.4892086331) $ABLE_FUNCTION_t0.0791366906 $ACETATE_t0.0575539568 $AVERAGE_RISK_t0.0431654676 $DISEASE_CABG_t0.0287769784 $URGENT_APPT_t0.0431654676 $VA_CONTRACT_t0.0431654676 $VOIDS_URINE_t0.0719424460 $WAR_SERVICE_t0.0431654676 $WAS_FRIGHTENING_t0.1294964029 $WELL_ENOUGH_t0.0359712230 $WE_COULD_t0.1438848921 $WILL_PICKED_t0.0935251799 $WTIH_t0.0431654676 $YEAR_UNKNOWN_t0.0287769784 $YE_t0.0503597122) !$EASIER_t0.0575539568 !$GRATITUDE_t0.0359712230) 
1 and(or(and(!$PSYCHIATRY_NOTE_t0.8273381295 !$UNSP_t0.2302158273 !$UPDATES_t0.0431654676 !$USED_VERBAL_t0.0935251799 !$VERIFIED_t1.3525179856 !$VISIT_DENTAL_t0.3309352518 !$VISTA_ED_t0.5035971223 !$VOICEMAIL_LEFT_t0.0503597122 !$VOLUME_MOOD_t0.0647482014 !$WERE_DISCUSSED_t0.4172661871 !$YEAR_t4.5323741007 !$YR_t0.4892086331) $ABLE_FUNCTION_t0.0791366906 $AVERAGE_RISK_t0.0431654676 $BE_REFILLED_t0.0863309353 $MALE_CA_t0.0863309353 $URGENT_APPT_t0.0431654676 $VA_CONTRACT_t0.0431654676 $VOIDS_URINE_t0.0719424460 $WAR_SERVICE_t0.0431654676 $WAS_FRIGHTENING_t0.1294964029 $WELL_ENOUGH_t0.0359712230 $WE_COULD_t0.1438848921 $WILL_PICKED_t0.0935251799 $WTIH_t0.0431654676 $YEAR_UNKNOWN_t0.0287769784 $YE_t0.0503597122) !$EASIER_t0.0575539568 !$GRATITUDE_t0.0359712230) 
1 and(or(and(!$PSYCHIATRY_NOTE_t0.8273381295 !$UNSP_t0.2302158273 !$UPDATES_t0.0431654676 !$USED_VERBAL_t0.0935251799 !$VERIFIED_t1.3525179856 !$VISIT_DENTAL_t0.3309352518 !$VISTA_ED_t0.5035971223 !$VOICEMAIL_LEFT_t0.0503597122 !$VOLUME_MOOD_t0.0647482014 !$WERE_DISCUSSED_t0.4172661871 !$YEAR_t4.5323741007 !$YR_t0.4892086331) $ABLE_FUNCTION_t0.0791366906 $AVERAGE_RISK_t0.0431654676 $DISEASE_CABG_t0.0287769784 $MALE_CA_t0.0863309353 $URGENT_APPT_t0.0431654676 $VA_CONTRACT_t0.0431654676 $VOIDS_URINE_t0.0719424460 $WAR_SERVICE_t0.0431654676 $WAS_FRIGHTENING_t0.1294964029 $WELL_ENOUGH_t0.0359712230 $WE_COULD_t0.1438848921 $WILL_PICKED_t0.0935251799 $WTIH_t0.0431654676 $YEAR_UNKNOWN_t0.0287769784 $YE_t0.0503597122) !$EASIER_t0.0575539568 !$GRATITUDE_t0.0359712230) 
1 and(or(and(!$PSYCHIATRY_NOTE_t0.8273381295 !$UNSP_t0.2302158273 !$UPDATES_t0.0431654676 !$USED_VERBAL_t0.0935251799 !$VERIFIED_t1.3525179856 !$VISIT_DENTAL_t0.3309352518 !$VISTA_ED_t0.5035971223 !$VOICEMAIL_LEFT_t0.0503597122 !$VOLUME_MOOD_t0.0647482014 !$WERE_DISCUSSED_t0.4172661871 !$YEAR_t4.5323741007 !$YR_t0.4892086331) $ABLE_FUNCTION_t0.0791366906 $ACETATE_t0.0575539568 $AVERAGE_RISK_t0.0431654676 $BE_REFILLED_t0.0863309353 $DISEASE_CABG_t0.0287769784 $URGENT_APPT_t0.0431654676 $VA_CONTRACT_t0.0431654676 $VOIDS_URINE_t0.0719424460 $WAR_SERVICE_t0.0431654676 $WAS_FRIGHTENING_t0.1294964029 $WELL_ENOUGH_t0.0359712230 $WE_COULD_t0.1438848921 $WILL_PICKED_t0.0935251799 $WTIH_t0.0431654676 $YEAR_UNKNOWN_t0.0287769784 $YE_t0.0503597122) !$EASIER_t0.0575539568 !$GRATITUDE_t0.0359712230) 
1 and(or(and(!$PSYCHIATRY_NOTE_t0.8273381295 !$UNSP_t0.2302158273 !$UPDATES_t0.0431654676 !$USED_VERBAL_t0.0935251799 !$VERIFIED_t1.3525179856 !$VISIT_DENTAL_t0.3309352518 !$VISTA_ED_t0.5035971223 !$VOICEMAIL_LEFT_t0.0503597122 !$VOLUME_MOOD_t0.0647482014 !$WERE_DISCUSSED_t0.4172661871 !$YEAR_t4.5323741007 !$YR_t0.4892086331) $ABLE_FUNCTION_t0.0791366906 $ACETATE_t0.0575539568 $AVERAGE_RISK_t0.0431654676 $BE_REFILLED_t0.0863309353 $ENDOSCOPE_t0.0431654676 $URGENT_APPT_t0.0431654676 $VA_CONTRACT_t0.0431654676 $VOIDS_URINE_t0.0719424460 $WAR_SERVICE_t0.0431654676 $WAS_FRIGHTENING_t0.1294964029 $WELL_ENOUGH_t0.0359712230 $WE_COULD_t0.1438848921 $WILL_PICKED_t0.0935251799 $WTIH_t0.0431654676 $YEAR_UNKNOWN_t0.0287769784 $YE_t0.0503597122) !$EASIER_t0.0575539568 !$GRATITUDE_t0.0359712230) 
1 and(or(and(!$PSYCHIATRY_NOTE_t0.8273381295 !$UNSP_t0.2302158273 !$UPDATES_t0.0431654676 !$USED_VERBAL_t0.0935251799 !$VERIFIED_t1.3525179856 !$VISIT_DENTAL_t0.3309352518 !$VISTA_ED_t0.5035971223 !$VOICEMAIL_LEFT_t0.0503597122 !$VOLUME_MOOD_t0.0647482014 !$WERE_DISCUSSED_t0.4172661871 !$YEAR_t4.5323741007 !$YR_t0.4892086331) $ABLE_FUNCTION_t0.0791366906 $ACETATE_t0.0575539568 $AVERAGE_RISK_t0.0431654676 $BE_REFILLED_t0.0863309353 $MALE_CA_t0.0863309353 $URGENT_APPT_t0.0431654676 $VA_CONTRACT_t0.0431654676 $VOIDS_URINE_t0.0719424460 $WAR_SERVICE_t0.0431654676 $WAS_FRIGHTENING_t0.1294964029 $WELL_ENOUGH_t0.0359712230 $WE_COULD_t0.1438848921 $WILL_PICKED_t0.0935251799 $WTIH_t0.0431654676 $YEAR_UNKNOWN_t0.0287769784 $YE_t0.0503597122) !$EASIER_t0.0575539568 !$GRATITUDE_t0.0359712230) 
1 and(or(and(!$PSYCHIATRY_NOTE_t0.8273381295 !$UNSP_t0.2302158273 !$UPDATES_t0.0431654676 !$USED_VERBAL_t0.0935251799 !$VERIFIED_t1.3525179856 !$VISIT_DENTAL_t0.3309352518 !$VISTA_ED_t0.5035971223 !$VOICEMAIL_LEFT_t0.0503597122 !$VOLUME_MOOD_t0.0647482014 !$WERE_DISCUSSED_t0.4172661871 !$YEAR_t4.5323741007 !$YR_t0.4892086331) $ABLE_FUNCTION_t0.0791366906 $ACETATE_t0.0575539568 $AVERAGE_RISK_t0.0431654676 $BE_REFILLED_t0.0863309353 $RECTAL_EXAM_t0.0503597122 $URGENT_APPT_t0.0431654676 $VA_CONTRACT_t0.0431654676 $VOIDS_URINE_t0.0719424460 $WAR_SERVICE_t0.0431654676 $WAS_FRIGHTENING_t0.1294964029 $WELL_ENOUGH_t0.0359712230 $WE_COULD_t0.1438848921 $WILL_PICKED_t0.0935251799 $WTIH_t0.0431654676 $YEAR_UNKNOWN_t0.0287769784 $YE_t0.0503597122) !$EASIER_t0.0575539568 !$GRATITUDE_t0.0359712230) 
1 and(or(and(!$PSYCHIATRY_NOTE_t0.8273381295 !$UNSP_t0.2302158273 !$UPDATES_t0.0431654676 !$USED_VERBAL_t0.0935251799 !$VERIFIED_t1.3525179856 !$VISIT_DENTAL_t0.3309352518 !$VISTA_ED_t0.5035971223 !$VOICEMAIL_LEFT_t0.0503597122 !$VOLUME_MOOD_t0.0647482014 !$WERE_DISCUSSED_t0.4172661871 !$YEAR_t4.5323741007 !$YR_t0.4892086331) $ABLE_FUNCTION_t0.0791366906 $ACETATE_t0.0575539568 $AVERAGE_RISK_t0.0431654676 $DISEASE_CABG_t0.0287769784 $MALE_CA_t0.0863309353 $URGENT_APPT_t0.0431654676 $VA_CONTRACT_t0.0431654676 $VOIDS_URINE_t0.0719424460 $WAR_SERVICE_t0.0431654676 $WAS_FRIGHTENING_t0.1294964029 $WELL_ENOUGH_t0.0359712230 $WE_COULD_t0.1438848921 $WILL_PICKED_t0.0935251799 $WTIH_t0.0431654676 $YEAR_UNKNOWN_t0.0287769784 $YE_t0.0503597122) !$EASIER_t0.0575539568 !$GRATITUDE_t0.0359712230) 
1 and(or(and(!$PSYCHIATRY_NOTE_t0.8273381295 !$UNSP_t0.2302158273 !$UPDATES_t0.0431654676 !$USED_VERBAL_t0.0935251799 !$VERIFIED_t1.3525179856 !$VISIT_DENTAL_t0.3309352518 !$VISTA_ED_t0.5035971223 !$VOICEMAIL_LEFT_t0.0503597122 !$VOLUME_MOOD_t0.0647482014 !$WERE_DISCUSSED_t0.4172661871 !$YEAR_t4.5323741007 !$YR_t0.4892086331) $ABLE_FUNCTION_t0.0791366906 $AVERAGE_RISK_t0.0431654676 $BE_REFILLED_t0.0863309353 $DISEASE_CABG_t0.0287769784 $MALE_CA_t0.0863309353 $URGENT_APPT_t0.0431654676 $VA_CONTRACT_t0.0431654676 $VOIDS_URINE_t0.0719424460 $WAR_SERVICE_t0.0431654676 $WAS_FRIGHTENING_t0.1294964029 $WELL_ENOUGH_t0.0359712230 $WE_COULD_t0.1438848921 $WILL_PICKED_t0.0935251799 $WTIH_t0.0431654676 $YEAR_UNKNOWN_t0.0287769784 $YE_t0.0503597122) !$EASIER_t0.0575539568 !$GRATITUDE_t0.0359712230) 
1 and(or(and(!$DICLOFENAC_t0.0431654676 !$EASIER_t0.0575539568 !$MH_PSYCHIATRY_t0.3669064748 !$UNSP_t0.2302158273 !$UROLOGY_CLINIC_t0.2661870504 !$USED_DETECT_t0.0647482014 !$VERIFIED_t1.3525179856 !$VISTA_ED_t0.5035971223 !$VOLUME_MOOD_t0.0647482014 !$VOLUNTEER_OR_t0.0719424460 !$WERE_DISCUSSED_t0.4172661871 !$WHAT_QUESTIONS_t0.4676258993 !$WILLING_t0.4388489209 !$YEAR_t4.5323741007) and(!$VETERANS_CHART_t0.1798561151 $WILL_PICKED_t0.0935251799) $ABLE_FUNCTION_t0.0791366906 $DISEASE_CABG_t0.0287769784 $PREPROCEDURE_DATE_t0.0791366906 $URGENT_APPT_t0.0431654676 $URINAL_WITHIN_t0.2589928058 $WAS_HORRIBLE_t0.1294964029 $WEIGHT_HEALTHY_t0.0359712230 $WILL_RESTART_t0.0215827338 $WM_ADMITTED_t0.0359712230 $WORTHLESSNESS_t0.0791366906 $YEARS_MORSE_t0.0431654676 $YE_t0.0503597122 $ZER_t0.0575539568) !$DECLINING_t0.0503597122) 
1 and(or(and(!$DICLOFENAC_t0.0431654676 !$EASIER_t0.0575539568 !$MH_PSYCHIATRY_t0.3669064748 !$UNSP_t0.2302158273 !$UROLOGY_CLINIC_t0.2661870504 !$USED_DETECT_t0.0647482014 !$VERIFIED_t1.3525179856 !$VISTA_ED_t0.5035971223 !$VOLUME_MOOD_t0.0647482014 !$VOLUNTEER_OR_t0.0719424460 !$WERE_DISCUSSED_t0.4172661871 !$WHAT_QUESTIONS_t0.4676258993 !$WILLING_t0.4388489209 !$YEAR_t4.5323741007) and(!$VETERANS_CHART_t0.1798561151 $WILL_PICKED_t0.0935251799) $DISEASE_CABG_t0.0287769784 $LIPITOR_t0.0503597122 $PREPROCEDURE_DATE_t0.0791366906 $URGENT_APPT_t0.0431654676 $URINAL_WITHIN_t0.2589928058 $WAS_HORRIBLE_t0.1294964029 $WEIGHT_HEALTHY_t0.0359712230 $WILL_RESTART_t0.0215827338 $WM_ADMITTED_t0.0359712230 $WORTHLESSNESS_t0.0791366906 $YEARS_MORSE_t0.0431654676 $YE_t0.0503597122 $ZER_t0.0575539568) !$DECLINING_t0.0503597122) 
1 and(or(and(!$DICLOFENAC_t0.0431654676 !$EASIER_t0.0575539568 !$MH_PSYCHIATRY_t0.3669064748 !$UNSP_t0.2302158273 !$UROLOGY_CLINIC_t0.2661870504 !$USED_DETECT_t0.0647482014 !$VERIFIED_t1.3525179856 !$VISTA_ED_t0.5035971223 !$VOLUME_MOOD_t0.0647482014 !$VOLUNTEER_OR_t0.0719424460 !$WERE_DISCUSSED_t0.4172661871 !$WHAT_QUESTIONS_t0.4676258993 !$WILLING_t0.4388489209 !$WILL_CONSIDER_t0.0647482014 !$YEAR_t4.5323741007) and(!$VETERANS_CHART_t0.1798561151 $WILL_PICKED_t0.0935251799) $ABLE_FUNCTION_t0.0791366906 $DISEASE_CABG_t0.0287769784 $PREPROCEDURE_DATE_t0.0791366906 $URGENT_APPT_t0.0431654676 $URINAL_WITHIN_t0.2589928058 $WAS_HORRIBLE_t0.1294964029 $WEIGHT_HEALTHY_t0.0359712230 $WILL_RESTART_t0.0215827338 $WM_ADMITTED_t0.0359712230 $WORTHLESSNESS_t0.0791366906 $YEARS_MORSE_t0.0431654676 $YE_t0.0503597122 $ZER_t0.0575539568) !$DECLINING_t0.0503597122) 
1 and(or(and(!$DICLOFENAC_t0.0431654676 !$EASIER_t0.0575539568 !$MH_PSYCHIATRY_t0.3669064748 !$UNSP_t0.2302158273 !$UROLOGY_CLINIC_t0.2661870504 !$USED_DETECT_t0.0647482014 !$VERIFIED_t1.3525179856 !$VISTA_ED_t0.5035971223 !$VOLUME_MOOD_t0.0647482014 !$VOLUNTEER_OR_t0.0719424460 !$WERE_DISCUSSED_t0.4172661871 !$WHAT_QUESTIONS_t0.4676258993 !$WILLING_t0.4388489209 !$WILL_CONSIDER_t0.0647482014 !$YEAR_t4.5323741007) and(!$VETERANS_CHART_t0.1798561151 $WILL_PICKED_t0.0935251799) $DISEASE_CABG_t0.0287769784 $LIPITOR_t0.0503597122 $PREPROCEDURE_DATE_t0.0791366906 $URGENT_APPT_t0.0431654676 $URINAL_WITHIN_t0.2589928058 $WAS_HORRIBLE_t0.1294964029 $WEIGHT_HEALTHY_t0.0359712230 $WILL_RESTART_t0.0215827338 $WM_ADMITTED_t0.0359712230 $WORTHLESSNESS_t0.0791366906 $YEARS_MORSE_t0.0431654676 $YE_t0.0503597122 $ZER_t0.0575539568) !$DECLINING_t0.0503597122) 
1 and(or(and($ABLE_FUNCTION_t0.0791366906 !$RETURNS_t0.4172661871) and(!$DICLOFENAC_t0.0431654676 !$EASIER_t0.0575539568 !$MH_PSYCHIATRY_t0.3669064748 !$UNSP_t0.2302158273 !$UROLOGY_CLINIC_t0.2661870504 !$USED_DETECT_t0.0647482014 !$VERIFIED_t1.3525179856 !$VISTA_ED_t0.5035971223 !$VOLUME_MOOD_t0.0647482014 !$VOLUNTEER_OR_t0.0719424460 !$WERE_DISCUSSED_t0.4172661871 !$WHAT_QUESTIONS_t0.4676258993 !$WILLING_t0.4388489209 !$YEAR_t4.5323741007) and(!$VETERANS_CHART_t0.1798561151 $WILL_PICKED_t0.0935251799) $DISEASE_CABG_t0.0287769784 $PREPROCEDURE_DATE_t0.0791366906 $URGENT_APPT_t0.0431654676 $URINAL_WITHIN_t0.2589928058 $WAS_HORRIBLE_t0.1294964029 $WEIGHT_HEALTHY_t0.0359712230 $WILL_RESTART_t0.0215827338 $WM_ADMITTED_t0.0359712230 $WORTHLESSNESS_t0.0791366906 $YEARS_MORSE_t0.0431654676 $YE_t0.0503597122 $ZER_t0.0575539568) !$DECLINING_t0.0503597122) 
1 or(and(or(and(!$DICLOFENAC_t0.0431654676 !$EASIER_t0.0575539568 !$MH_PSYCHIATRY_t0.3669064748 !$UNSP_t0.2302158273 !$UROLOGY_CLINIC_t0.2661870504 !$USED_DETECT_t0.0647482014 !$VERIFIED_t1.3525179856 !$VISTA_ED_t0.5035971223 !$VOLUME_MOOD_t0.0647482014 !$VOLUNTEER_OR_t0.0719424460 !$WERE_DISCUSSED_t0.4172661871 !$WHAT_QUESTIONS_t0.4676258993 !$WILLING_t0.4388489209 !$WILL_CONSIDER_t0.0647482014 !$YEAR_t4.5323741007) and(!$VETERANS_CHART_t0.1798561151 $WILL_PICKED_t0.0935251799) $ABLE_FUNCTION_t0.0791366906 $DISEASE_CABG_t0.0287769784 $PREPROCEDURE_DATE_t0.0791366906 $URGENT_APPT_t0.0431654676 $URINAL_WITHIN_t0.2589928058 $WAS_HORRIBLE_t0.1294964029 $WEIGHT_HEALTHY_t0.0359712230 $WILL_RESTART_t0.0215827338 $WM_ADMITTED_t0.0359712230 $WORTHLESSNESS_t0.0791366906 $YE_t0.0503597122 $ZER_t0.0575539568) !$DECLINING_t0.0503597122) $YEARS_MORSE_t0.0431654676) 
1 or(and(or(and(!$DICLOFENAC_t0.0431654676 !$EASIER_t0.0575539568 !$MH_PSYCHIATRY_t0.3669064748 !$UNSP_t0.2302158273 !$UROLOGY_CLINIC_t0.2661870504 !$USED_DETECT_t0.0647482014 !$VERIFIED_t1.3525179856 !$VISTA_ED_t0.5035971223 !$VOLUME_MOOD_t0.0647482014 !$VOLUNTEER_OR_t0.0719424460 !$WERE_DISCUSSED_t0.4172661871 !$WHAT_QUESTIONS_t0.4676258993 !$WILLING_t0.4388489209 !$WILL_CONSIDER_t0.0647482014 !$YEAR_t4.5323741007) and(!$VETERANS_CHART_t0.1798561151 $WILL_PICKED_t0.0935251799) $DISEASE_CABG_t0.0287769784 $LIPITOR_t0.0503597122 $PREPROCEDURE_DATE_t0.0791366906 $URGENT_APPT_t0.0431654676 $URINAL_WITHIN_t0.2589928058 $WAS_HORRIBLE_t0.1294964029 $WEIGHT_HEALTHY_t0.0359712230 $WILL_RESTART_t0.0215827338 $WM_ADMITTED_t0.0359712230 $WORTHLESSNESS_t0.0791366906 $YE_t0.0503597122 $ZER_t0.0575539568) !$DECLINING_t0.0503597122) $YEARS_MORSE_t0.0431654676) 
1 and(or(and($ABLE_FUNCTION_t0.0791366906 $LIPITOR_t0.0503597122) and(!$DICLOFENAC_t0.0431654676 !$EASIER_t0.0575539568 !$MH_PSYCHIATRY_t0.3669064748 !$UNSP_t0.2302158273 !$UROLOGY_CLINIC_t0.2661870504 !$USED_DETECT_t0.0647482014 !$VERIFIED_t1.3525179856 !$VISTA_ED_t0.5035971223 !$VOLUME_MOOD_t0.0647482014 !$VOLUNTEER_OR_t0.0719424460 !$WERE_DISCUSSED_t0.4172661871 !$WHAT_QUESTIONS_t0.4676258993 !$WILLING_t0.4388489209 !$WILL_CONSIDER_t0.0647482014 !$YEAR_t4.5323741007) and(!$VETERANS_CHART_t0.1798561151 $WILL_PICKED_t0.0935251799) $DISEASE_CABG_t0.0287769784 $PREPROCEDURE_DATE_t0.0791366906 $URGENT_APPT_t0.0431654676 $URINAL_WITHIN_t0.2589928058 $WAS_HORRIBLE_t0.1294964029 $WEIGHT_HEALTHY_t0.0359712230 $WILL_RESTART_t0.0215827338 $WM_ADMITTED_t0.0359712230 $WORTHLESSNESS_t0.0791366906 $YEARS_MORSE_t0.0431654676 $YE_t0.0503597122 $ZER_t0.0575539568) !$DECLINING_t0.0503597122) 
1 and(or(and($ABLE_FUNCTION_t0.0791366906 !$RETURNS_t0.4172661871) and(!$DICLOFENAC_t0.0431654676 !$EASIER_t0.0575539568 !$MH_PSYCHIATRY_t0.3669064748 !$UNSP_t0.2302158273 !$UROLOGY_CLINIC_t0.2661870504 !$USED_DETECT_t0.0647482014 !$VERIFIED_t1.3525179856 !$VISTA_ED_t0.5035971223 !$VOLUME_MOOD_t0.0647482014 !$VOLUNTEER_OR_t0.0719424460 !$WERE_DISCUSSED_t0.4172661871 !$WHAT_QUESTIONS_t0.4676258993 !$WILLING_t0.4388489209 !$WILL_CONSIDER_t0.0647482014 !$YEAR_t4.5323741007) and(!$VETERANS_CHART_t0.1798561151 $WILL_PICKED_t0.0935251799) $DISEASE_CABG_t0.0287769784 $PREPROCEDURE_DATE_t0.0791366906 $URGENT_APPT_t0.0431654676 $URINAL_WITHIN_t0.2589928058 $WAS_HORRIBLE_t0.1294964029 $WEIGHT_HEALTHY_t0.0359712230 $WILL_RESTART_t0.0215827338 $WM_ADMITTED_t0.0359712230 $WORTHLESSNESS_t0.0791366906 $YEARS_MORSE_t0.0431654676 $YE_t0.0503597122 $ZER_t0.0575539568) !$DECLINING_t0.0503597122) 
1 or(and(or(and($ABLE_FUNCTION_t0.0791366906 !$RETURNS_t0.4172661871) and(!$DICLOFENAC_t0.0431654676 !$EASIER_t0.0575539568 !$MH_PSYCHIATRY_t0.3669064748 !$UNSP_t0.2302158273 !$UROLOGY_CLINIC_t0.2661870504 !$USED_DETECT_t0.0647482014 !$VERIFIED_t1.3525179856 !$VISTA_ED_t0.5035971223 !$VOLUME_MOOD_t0.0647482014 !$VOLUNTEER_OR_t0.0719424460 !$WERE_DISCUSSED_t0.4172661871 !$WHAT_QUESTIONS_t0.4676258993 !$WILLING_t0.4388489209 !$WILL_CONSIDER_t0.0647482014 !$YEAR_t4.5323741007) and(!$VETERANS_CHART_t0.1798561151 $WILL_PICKED_t0.0935251799) $DISEASE_CABG_t0.0287769784 $PREPROCEDURE_DATE_t0.0791366906 $URGENT_APPT_t0.0431654676 $URINAL_WITHIN_t0.2589928058 $WAS_HORRIBLE_t0.1294964029 $WEIGHT_HEALTHY_t0.0359712230 $WILL_RESTART_t0.0215827338 $WM_ADMITTED_t0.0359712230 $WORTHLESSNESS_t0.0791366906 $YE_t0.0503597122 $ZER_t0.0575539568) !$DECLINING_t0.0503597122) $YEARS_MORSE_t0.0431654676) 
1 and(or(and(!$PSYCHIATRY_NOTE_t0.8273381295 !$UNSP_t0.2302158273 !$VERIFIED_t1.3525179856 !$VISIT_DENTAL_t0.3309352518 !$VISTA_ED_t0.5035971223 !$VOICEMAIL_LEFT_t0.0503597122 !$VOLUME_MOOD_t0.0647482014 !$WERE_DISCUSSED_t0.4172661871 !$YEAR_t4.5323741007 !$YOUR_COLON_t0.0863309353 !$YR_t0.4892086331) $CONSULT_APPROVED_t0.1079136691 $TEST_ALLOWS_t0.0359712230 $URGENT_APPT_t0.0431654676 $URGENT_SERVICES_t0.0575539568 $VA_CONTRACT_t0.0431654676 $WAS_FRIGHTENING_t0.1294964029 $WILL_PICKED_t0.0935251799 $WILL_RESTART_t0.0215827338 $WTIH_t0.0431654676 $YE_t0.0503597122 $ZER_t0.0575539568) !$EASIER_t0.0575539568 !$STRAINING_t0.0503597122) 
1 and(or(and(!$PSYCHIATRY_NOTE_t0.8273381295 !$UNSP_t0.2302158273 !$VERIFIED_t1.3525179856 !$VISIT_DENTAL_t0.3309352518 !$VISTA_ED_t0.5035971223 !$VOICEMAIL_LEFT_t0.0503597122 !$VOLUME_MOOD_t0.0647482014 !$WERE_DISCUSSED_t0.4172661871 !$YEAR_t4.5323741007 !$YOUR_COLON_t0.0863309353 !$YR_t0.4892086331) $CONSULT_APPROVED_t0.1079136691 $TEST_ALLOWS_t0.0359712230 $URGENT_APPT_t0.0431654676 $URGENT_SERVICES_t0.0575539568 $VA_CONTRACT_t0.0431654676 $WAS_FRIGHTENING_t0.1294964029 $WILL_PICKED_t0.0935251799 $WILL_RESTART_t0.0215827338 $WTIH_t0.0431654676 $YE_t0.0503597122 $ZER_t0.0575539568) !$EASIER_t0.0575539568 !$UCINATIONS_SI_t0.0359712230) 
1 and(or(and(!$PSYCHIATRY_NOTE_t0.8273381295 !$UNSP_t0.2302158273 !$VERIFIED_t1.3525179856 !$VISIT_DENTAL_t0.3309352518 !$VISTA_ED_t0.5035971223 !$VOICEMAIL_LEFT_t0.0503597122 !$VOLUME_MOOD_t0.0647482014 !$WERE_DISCUSSED_t0.4172661871 !$YEAR_t4.5323741007 !$YR_t0.4892086331) $CONSULT_APPROVED_t0.1079136691 $TEST_ALLOWS_t0.0359712230 $URGENT_APPT_t0.0431654676 $URGENT_SERVICES_t0.0575539568 $VA_CONTRACT_t0.0431654676 $WAS_FRIGHTENING_t0.1294964029 $WILL_PICKED_t0.0935251799 $WILL_RESTART_t0.0215827338 $WTIH_t0.0431654676 $YE_t0.0503597122 $ZER_t0.0575539568) !$EASIER_t0.0575539568 !$UCINATIONS_SI_t0.0359712230 !$YOUR_COLON_t0.0863309353) 
1 and(or(and(!$PSYCHIATRY_NOTE_t0.8273381295 !$UNSP_t0.2302158273 !$VERIFIED_t1.3525179856 !$VISIT_DENTAL_t0.3309352518 !$VISTA_ED_t0.5035971223 !$VOICEMAIL_LEFT_t0.0503597122 !$WERE_DISCUSSED_t0.4172661871 !$YEAR_t4.5323741007 !$YOUR_COLON_t0.0863309353 !$YR_t0.4892086331) $CONSULT_APPROVED_t0.1079136691 $TEST_ALLOWS_t0.0359712230 $URGENT_APPT_t0.0431654676 $URGENT_SERVICES_t0.0575539568 $VA_CONTRACT_t0.0431654676 $WAS_FRIGHTENING_t0.1294964029 $WILL_PICKED_t0.0935251799 $WILL_RESTART_t0.0215827338 $WTIH_t0.0431654676 $YE_t0.0503597122 $ZER_t0.0575539568) !$EASIER_t0.0575539568 !$UCINATIONS_SI_t0.0359712230 !$VOLUME_MOOD_t0.0647482014) 
1 and(or(and(!$PSYCHIATRY_NOTE_t0.8273381295 !$UNSP_t0.2302158273 !$VERIFIED_t1.3525179856 !$VISIT_DENTAL_t0.3309352518 !$VISTA_ED_t0.5035971223 !$VOICEMAIL_LEFT_t0.0503597122 !$WERE_DISCUSSED_t0.4172661871 !$YEAR_t4.5323741007 !$YR_t0.4892086331) $CONSULT_APPROVED_t0.1079136691 $TEST_ALLOWS_t0.0359712230 $URGENT_APPT_t0.0431654676 $URGENT_SERVICES_t0.0575539568 $VA_CONTRACT_t0.0431654676 $WAS_FRIGHTENING_t0.1294964029 $WILL_PICKED_t0.0935251799 $WILL_RESTART_t0.0215827338 $WTIH_t0.0431654676 $YE_t0.0503597122 $ZER_t0.0575539568) !$EASIER_t0.0575539568 !$UCINATIONS_SI_t0.0359712230 !$VOLUME_MOOD_t0.0647482014 !$YOUR_COLON_t0.0863309353) 
1 and(or(and(!$AFFECT_EUTHYMIC_t0.1151079137 !$PSYCHIATRY_NOTE_t0.8273381295 !$UNSP_t0.2302158273 !$VERIFIED_t1.3525179856 !$VISIT_DENTAL_t0.3309352518 !$VISTA_ED_t0.5035971223 !$VOICEMAIL_LEFT_t0.0503597122 !$VOLUME_MOOD_t0.0647482014 !$WERE_DISCUSSED_t0.4172661871 !$YEAR_t4.5323741007 !$YOUR_COLON_t0.0863309353 !$YR_t0.4892086331) $CONSULT_APPROVED_t0.1079136691 $TEST_ALLOWS_t0.0359712230 $URGENT_APPT_t0.0431654676 $URGENT_SERVICES_t0.0575539568 $VA_CONTRACT_t0.0431654676 $WAS_FRIGHTENING_t0.1294964029 $WILL_PICKED_t0.0935251799 $WILL_RESTART_t0.0215827338 $WTIH_t0.0431654676 $YE_t0.0503597122 $ZER_t0.0575539568) !$EASIER_t0.0575539568 !$UCINATIONS_SI_t0.0359712230) 
1 and(or(and(!$ASKING_t0.7841726619 !$PSYCHIATRY_NOTE_t0.8273381295 !$UNSP_t0.2302158273 !$VERIFIED_t1.3525179856 !$VISIT_DENTAL_t0.3309352518 !$VISTA_ED_t0.5035971223 !$VOICEMAIL_LEFT_t0.0503597122 !$VOLUME_MOOD_t0.0647482014 !$WERE_DISCUSSED_t0.4172661871 !$YEAR_t4.5323741007 !$YOUR_COLON_t0.0863309353 !$YR_t0.4892086331) $CONSULT_APPROVED_t0.1079136691 $TEST_ALLOWS_t0.0359712230 $URGENT_APPT_t0.0431654676 $URGENT_SERVICES_t0.0575539568 $VA_CONTRACT_t0.0431654676 $WAS_FRIGHTENING_t0.1294964029 $WILL_PICKED_t0.0935251799 $WILL_RESTART_t0.0215827338 $WTIH_t0.0431654676 $YE_t0.0503597122 $ZER_t0.0575539568) !$EASIER_t0.0575539568 !$UCINATIONS_SI_t0.0359712230) 
1 and(or(and(!$FEAR_t0.2446043165 !$PSYCHIATRY_NOTE_t0.8273381295 !$UNSP_t0.2302158273 !$VERIFIED_t1.3525179856 !$VISIT_DENTAL_t0.3309352518 !$VISTA_ED_t0.5035971223 !$VOICEMAIL_LEFT_t0.0503597122 !$VOLUME_MOOD_t0.0647482014 !$WERE_DISCUSSED_t0.4172661871 !$YEAR_t4.5323741007 !$YOUR_COLON_t0.0863309353 !$YR_t0.4892086331) $CONSULT_APPROVED_t0.1079136691 $TEST_ALLOWS_t0.0359712230 $URGENT_APPT_t0.0431654676 $URGENT_SERVICES_t0.0575539568 $VA_CONTRACT_t0.0431654676 $WAS_FRIGHTENING_t0.1294964029 $WILL_PICKED_t0.0935251799 $WILL_RESTART_t0.0215827338 $WTIH_t0.0431654676 $YE_t0.0503597122 $ZER_t0.0575539568) !$EASIER_t0.0575539568 !$UCINATIONS_SI_t0.0359712230) 
1 and(or(and(!$MAY_INCREASE_t0.1510791367 !$PSYCHIATRY_NOTE_t0.8273381295 !$UNSP_t0.2302158273 !$VERIFIED_t1.3525179856 !$VISIT_DENTAL_t0.3309352518 !$VISTA_ED_t0.5035971223 !$VOICEMAIL_LEFT_t0.0503597122 !$VOLUME_MOOD_t0.0647482014 !$WERE_DISCUSSED_t0.4172661871 !$YEAR_t4.5323741007 !$YOUR_COLON_t0.0863309353 !$YR_t0.4892086331) $CONSULT_APPROVED_t0.1079136691 $TEST_ALLOWS_t0.0359712230 $URGENT_APPT_t0.0431654676 $URGENT_SERVICES_t0.0575539568 $VA_CONTRACT_t0.0431654676 $WAS_FRIGHTENING_t0.1294964029 $WILL_PICKED_t0.0935251799 $WILL_RESTART_t0.0215827338 $WTIH_t0.0431654676 $YE_t0.0503597122 $ZER_t0.0575539568) !$EASIER_t0.0575539568 !$UCINATIONS_SI_t0.0359712230) 
1 and(or(and(!$MENTAL_ALERT_t0.6474820144 !$PSYCHIATRY_NOTE_t0.8273381295 !$UNSP_t0.2302158273 !$VERIFIED_t1.3525179856 !$VISIT_DENTAL_t0.3309352518 !$VISTA_ED_t0.5035971223 !$VOICEMAIL_LEFT_t0.0503597122 !$VOLUME_MOOD_t0.0647482014 !$WERE_DISCUSSED_t0.4172661871 !$YEAR_t4.5323741007 !$YOUR_COLON_t0.0863309353 !$YR_t0.4892086331) $CONSULT_APPROVED_t0.1079136691 $TEST_ALLOWS_t0.0359712230 $URGENT_APPT_t0.0431654676 $URGENT_SERVICES_t0.0575539568 $VA_CONTRACT_t0.0431654676 $WAS_FRIGHTENING_t0.1294964029 $WILL_PICKED_t0.0935251799 $WILL_RESTART_t0.0215827338 $WTIH_t0.0431654676 $YE_t0.0503597122 $ZER_t0.0575539568) !$EASIER_t0.0575539568 !$UCINATIONS_SI_t0.0359712230) 
</ensemble>
<levels>
(ilevels
TargetLevels
p0
(dp1
S'maxval'
p2
F2.0
sS'labels'
p3
(lp4
S'0.496402877698'
p5
aS'1.4964028777'
p6
asS'minval'
p7
F0.0
sS'thresholds'
p8
(lp9
F0.9928057553956835
asS'numberOfLevels'
p10
I2
sS'targetIsEnum'
p11
I00
sS'__intervals__'
p12
(lp13
(F0.0
F0.9928057553956835
tp14
a(F0.9928057553956835
F2.0
tp15
asb.
