# Supplementary material for: Predicting the Risk of Suicide by Analyzing the Text of Clinical Notes
Source: PLoS One. 2014 Jan 28;9(1):e85733. doi: 10.1371/journal.pone.0085733 (PMC3904866; doi:10.1371/journal.pone.0085733)
Supplement: Appendix S3 — Machine Learning Libraries and Methods: This section is provided to enclose the open source (Apache License) classifier used for the building of the statistical models, specifically for the purposes of study reproducibility. A detailed account of these tools is intended for another publication. (ZIP) [file pone.0085733.s003.zip › Appendix3/ML_libs/Poses_README.txt]

                        Poses README
								============
                   Version: Feb 2013


0. Summary
==========
Poulin-Moses (PM) is machine learning system derived from the MOSES
genetic programming system.  It is used to make predictions based on
textual input.


1. Installation & Prerequisites
===============================
PM is available in source and binary forms.  The binary is packaged as
poulin-moses-1.r__REVNO__-1.x86_64.rpm and may be installed on most
64-bit RHEL4/CentOS5 systems as:

    rpm -ivh  poulin-moses-1.r__REVNO__-1.x86_64.rpm

The 'pm' binary is installed as '/usr/bin/pm'; there is a man page,
viewable by issuing 'man pm' at the command prompt, and also a tutorial
in the '/usr/share/doc/poulin-moses-1.r__REVNO__/example-bank' directory.

The MOSES system is a prerequisite, and must be installed before
installing PM.  The current MOSES version is available as:

    moses-3.2.1-1.x86_64.rpm

PM should work with any revision of version 3 of MOSES.


1.1. Windows
------------
WARNING: PM is no longer supported on Windows.

There does exist an earlier win32 binary version of MOSES with all
dlls required to run it. Download the following:

    http://dl.dropbox.com/u/2987665/moses-win32-package.zip

Unpack it under the root directory of the Poulin-moses package. It
should create a directory named "moses-package" with the binary
"moses-exec.exe" and required dlls inside.

Under Windows, you might need to call 'pm.py' explicitly with
python, such as

    C:\Python27\python.exec pm.py


2. Overview
===========
The main program is 'pm', which can be run in different modes to
perform training, model validation, variable importance assessment and
inference.  The training phase creates a model of an input table of
data; the model can then be used to perform inference, that is, to
predict the value of a target variable, given new, previously unseen
inputs.  Depending on the data, it is presumed that the training phase
may take hours or days to perform, and thus is done infrequently; by
contrast, once a model has been learned, inference can be done in
fractions of a second.

Variable importance assessment provides a simple peek into the model:
it simply indicates which variables play the most important role in
predicting the output.  Model validation, or accuracy assessment, is
used to determine how accurate the learned models are in performing
inference.   This is done by partitioning the input dataset into two
parts; one part (called the 'training dataset') is used to train a
model, while the other part (called the 'test dataset') is used to
assess the accuracy of the model.  Because the test dataset was not
used in training, it can provide an objective, independent assessment.
Note that accuracy assessment takes longer than model training; this is
because several models are trained during assessment.  Thus, typically,
model assessment may take hours or days.

PM training works by taking a table of continuous (floating-point)
values, and discretizing them into ranges.  The discretization is
performed automatically, but can be controlled with various options.
It is driven by the distribution of the values: relative to the standard
deviation for input values, and the min to max range of the output.
Each input is referred to as a 'feature';  a single continuous-valued
feature may be discretized onto one or more boolean-valued features.
After discretization, a 'feature-selection' step is optionally
performed.  Feature selection is used to cut down the number of input
features to a more manageable size: thus input datasets may have many
hundreds or a thousand features; after discretization, this may be
multiplied several times over.  The actual learning is performed by
MOSES, which works most rapidly and efficiently when presented with
no more than hundreds of features.  Thus, feature selection is important
for managing overall training time; it can also help with avoiding
over-fitting.

The resulting discretized data is passed to MOSES, which is run in its
boolean-logic mode.  That is, MOSES will learn a set of boolean
expressions, consisting of 'and', 'or' and 'not' elements, that combine
the discretized inputs to predict that the output will be in a certain
range.  These expressions, together with the discretization thresholds,
constitute the 'model' that is learned by PM.   Given such a model,
inference can be performed very rapidly, because it is easy to evaluate
input variables with respect to thresholds, and then to evaluate a
boolean-logic expression.


3. Usage
========
This section provides a general review of the command line and
parameters for uses PM.  A detailed man page is available by issuing
'man pm' at the command line.  A worked example can be found in the
example-bank directory.


3.1. pm
-------
The 'pm' program has one mandatory argument, the command (or mode), and
a set of options. The usage, as well as all available options, can be
displayed with --help:

    $ pm --help | less
    Usage: pm command [options]
    Where command=accuracy|moses|inference|voivar

Each command-mode (accuracy, moses, inference or voivar) is explained
in the following sections.


3.2. The moses Command
----------------------
This command is used to learn a model, given training data. A typical
use of the moses command would be as follows:

    $ pm moses -d TRAINING_FILE -m MODEL_FILE -p TARGET_VAR \
      -e NUMBER_OF_FITNESS_EVALS \
      -s NUMBER_OF_INPUT_LEVELS  -n NUMBER_OF_OUT_LEVELS \
      -F FEATURE_SELECTION_OPTIONS -M MOSES_OPTIONS

where:

TRAINING_FILE is the training data file in DSV format.  This is a
    table of comma-separated or tab-separated values.  Column titles
    must appear in the first non-comment line; comment lines are
    delimited by # ! and ; characters.  Column values are taken as
    floating-point numbers.
    [default: synthetic.dat]

MODEL_FILE is the file where to write the learned model.
    [default: test.model]

TARGET_VAR is the target attribute, that is, the name of the column
    in the dataset that is the dependent variable.  The training process
    attempts to learn this value, based on the input data.
    [default: SP_Change]

NUMBER_OF_FITNESS_EVALS is the maximum number of evaluations that
    MOSES will perform during learning.  Recommended values are in the
    range of ten-thousand to a million; these may take dozens of minutes
    or many hours to run.  As a general rule, the more evaluations, the
    more accurate the learned model; in practice, a plateau is often
    reached in the 100K to 1 million range.  Settings as low as 10 or
    100 are possible; in such cases, the learned model will be very poor.
    [default: 100]

NUMBER_OF_INPUT_LEVELS is the number of levels into which each input
    feature should be discretized.  Recommended ranges are 2 to 20.
    In general, more finely discretized inputs lead to more accurate
    results; models can be learned more accurately with fewer training
    evaluations required. Likewise, for a fixed number of training
    evaluations, a more accurate model can be produced.  On the other
    hand, the CPU time per evaluation can dramatically increase as this
    number is raised.   If the number of resulting features approaches
    or exceeds the number rows in the training dataset, over-fitting
    will occur, resulting in a great fit to the training dataset, but
    poor accuracy on actual data.  Over-fitting can be detrimental to
    accuracy!

    The spacing between input levels is one standard deviation
    by default; thus, the -D flag is needed to obtain more than a
    half-dozen levels.  See the man page 'man pm' for details.
    [default: 2]

NUMBER_OF_OUTPUT_LEVELS is the number of levels into which the output
    (the target variable) should be discretized. Recommended values
    are in the range 2 to 10.  In general, a larger number of output
    levels do not improve the accuracy of the model; rather, they simply
    provide a more fine-grained prediction; so, for example 3 output
    levels are sufficient to provide a low-medium-high indicator.
    [default: 3]

FEATURE_SELECTION_OPTIONS contains extra options which are passed
    directly to the feature-selection stage.  feature-selection is a
    part of the moses package; see 'man feature-selection' for more
    information. These must be grouped together using double quotes
    (see example below).
    [default: feature selection is not done]

MOSES_OPTIONS contains extra options which are passed directly to
    moses. These must be grouped together using double quotes (see
    example below).  See 'man moses' for more information.

PM also has a number of additional useful flags.  See 'man pm' for
details.


3.2.1. Example usage
--------------------
Here is an example using the file synthetic.dat (included in the
release package) as training data:

    $ pm moses -d synthetic.dat -m test.model -p SP_Change -e 100 \
       -l0.2 -u0.2 -F "-ainc -C20 -j4" \
      -M "-Z1 --hc-max-nn-evals=5000 -j4"

In this example, all option values, except for -F and -M, correspond
to their defaults.  So, this is equivalent to

    $ pm moses -F "-ainc -C20 -j4" -M "-Z1 --hc-max-nn-evals=5000 -j4"

The feature selection options used are:

-ainc  Set the feature selection algorithm to incremental.  This is the
    fastest but least accurate.

-C20   Indicate that a total of twenty features should be selected from
    the input dataset.  Recommended values are 10 to 200.  Moses
    can learn more accurate models with more features; however, learning
    speed can dramatically slow once there are more than 200 features.

-j4  Spreads the computation over 4 threads.

The MOSES options used:

-Z1  Enables genetic cross-over during learning.  By default, it is
     disabled; however, for this class of models, learning speed can be
     improved dramatically by using this.

--hc-max-nn-evals=5000   Places a cap on the total number of
     nearest-neighbor evaluations performed.  Recommended values are
     1000 to 20000.  Using a cap can improve learning speed without
     sacrificing accuracy; a default cap of 20000 is used.  See 'man
     moses' for details.

-j4 spreads the computation over 4 threads

None of the MOSES options demonstrated here are mandatory; they are
simply used to speed the search.

After the command finishes, there will be a file, 'test.model', encoding
the binary models generated by the training. Below, the first few
lines of 'test.model' previously generated:

    $ head test.model
    <ensemble>
    SP_Change->40.0093261342
    1 #s_t3.58
    1 or(!#sizzling_t1.73 #s_t3.58)
    1 or(#arabic_t1.53 #bottom_t1.45)
    1 or(#super_t1.58 !#blind_t1.38)
    1 or(#arabic_t1.53 !#sizzling_t1.73)
    1 #restart_t1.56
    1 #bottom_t1.45
    1 or(!#restart_t1.56 #s_t3.58)

The number at the right of the target variable SP_Change is the
threshold considered for bisecting the output domain.  That is, the
model predicts whether the output will be above or below this value.
This is followed by sequence of boolean expressions.  The number in
front of each expression (here, 1 for all of them) is the weight of
each expression.  It is used by the voting process during inference.
The value appended to each variable is the threshold used to bisect
that variable; so, for example, the variable #s_t3.58 is true when
s >= 3.58, false otherwise.


3.3. The inference Command
--------------------------
The inference command is used to calculate the value of the target
attribute, given a previously-learned model, and some inputs. The
typical syntax is as follows:

    $ pm inference -m MODEL_FILE -p TARGET_VAR -c TEST_CASE_FILE

MODEL_FILE is the file that was generated by running the moses command,
    above.  It contains a model for predicting the TARGET_VAR from the
    input data.

TARGET_VAR is the name of the variable to predict. It must be identical
    to the TARGET_VAR specified during the learning phase.

TEST_CASE_FILE contains the input data, in .hcs file format.  The .hcs
    format is a list of words, together with their frequencies.


3.3.1. Example usage
--------------------
Given the model previously learned, a single number is output:

    $ pm inference -m test.model -p SP_Change -c testcase1.hcs
    50.0116576677

The output is the centroid of the interval corresponding to the output
level.  That is, given the input data, this is the model's best guess
for what the resulting output value would take.


3.4. The voivar Command
-----------------------
The VOI (Variables Of Interest) command extracts the variables used
in the learned model, and, given an input dataset, computes their
mutual information, relative to the target variable.  VOI is useful for
understanding which input variables contribute the most to the model.

The VOI command has the syntax

    $ pm voivar -d DATA_FILE -m MODEL_FILE -p TARGET_VAR \
      -o OUTPUT_VOI_FILE

DATA_FILE is the DSV-format table of input data, for which the VOI will
    be computed.

MODEL_FILE is the file that was generated by running the moses command,
    above.  It contains a model for predicting the TARGET_VAR from the
    input data.

TARGET_VAR is the name of the variable to predict. It must be identical
    to the TARGET_VAR specified during the learning phase, and it must
    appear as a column in the DATA_FILE.

OUTPUT_VOI_FILE is where the results will be written.


3.4.1. Example usage
--------------------
For example:

    $ pm voivar -d synthetic.dat -m test.model -p SP_Change -o test.voi

Since the above specifies the defaults, it is equivalent to

    $ pm voivar

due to the option defaults.  The first few lines of the output file are:

    $ head test.voi
    voi(s=3.55075423357)
    voi(bottom=0.491783813556)
    voi(restart=0.292982046181)
    voi(intl=0.239908989857)
    voi(to=0.228104259854)
    voi(rescuers=0.210447349113)
    voi(story=0.199467268069)
    voi(chicago=0.197081297657)
    voi(the=0.18242683608)
    voi(allawi=0.177387393118)
    voi(ruling=0.145564025392)


The file contains the VOI for all variables used by the model, listed
in decreasing order of VOI.


3.5. The accuracy Command
-------------------------
The accuracy command evaluates the quality of the classification learned
for a given dataset.  To perform this evaluation, it re-learns the model
on a fraction of the dataset, and then uses the remaining fraction to
test it's accuracy.   Note that evaluating the accuracy will take longer
than learning the model!  Thus, if several CPU-days were used to learn
the original model, evaluating the accuracy will take at least that
long, and possibly much longer, depending on the number of folds selected.

The syntax should be identical to that used for the 'pm moses' command,
except that 'accuracy' not 'moses' is specified, and the -f option is
used to specify the number of folds:

    $ pm accuracy -f NUMBER_OF_FOLDS  ...

NUMBER_OF_FOLDS specifies how the input dataset is carved up.  So, for
    N folds (NUMBER_OF_FOLDS=N) the dataset is carved up into N parts
    (by taking every Nth row).  Training is performed using N-1 of
    these parts, with the accuracy evaluated on the remaining part.
    This process is then repeated N times, so that accuracy on each
    part is evaluated.  The total accuracy is the average of these
    individual N runs.


3.5.1. Example usage
--------------------
Here is an example of the cross-validation; the arguments used are
identical to those for the moses command example, above.

    $ pm accuracy -f5 -F "-ainc -C20 -j4" -M "-Z1 --hc-max-nn-evals=5000 -j4"

    Train matrix:
    Classifier results in columns, expected results in rows.
    113    28      3
     10    84      6
      1    52    103
    Accuracy: 0.75 (300 correct out of 400 total)
    ----
    Test matrix:
    Classifier results in columns, expected results in rows.
    19    15    2
    10    14    1
     3    27    9
    Accuracy: 0.42 (42 correct out of 100 total)
    ----

The outputs show the confusion matrix and the average accuracy over
all folds, for both the training and the test subsets.  A confusion
matrix with a perfect accuracy would have entries only along the
diagonals.  The train matrix shows how well the learned model did, when
scored on the training dataset itself; the test matrix shows how well
the model did on the part of the dataset that was held back, and not
used for training.  Here, a 3x3 matrix is printed, because the output
was split into 3 levels (the default value for the -n option).

Usually, a much poorer score on the test data, as compared to the
training data, indicates over-fitting.  That is not quite the case
above; simply, the training run was so short, that the model learned was
rather poor.   Contributing to this is that the example dataset is very
small:  it has 100 rows and 884 features; typically, one wants far more
rows than features!  Over-fitting can be avoided by using fewer features
than rows, while increasing the training time. So:

    $ pm accuracy -f5  -F "-ainc -C30 -j12" -M "-Z1 --hc-max-nn-evals=5000 -j12" -e40000

    Train matrix:
    Classifier results in columns, expected results in rows.
    144     0      0
      2    95      3
      0     0    156
    Accuracy: 0.9875 (395 correct out of 400 total)
    ----
    Test matrix:
    Classifier results in columns, expected results in rows.
    27     9     0
     7     9     9
     0    10    29
    Accuracy: 0.65 (65 correct out of 100 total)
    ----

This offers a better result for this dataset; however, it may be a
practical limit, given the size and the artificial nature of this
example dataset.


4. Time Series
==============
Poulin-Moses supports a time-series analysis mode.  For this case, the
data are assumed to be sorted chronologically, with the first columns in
the data file corresponding to earlier instants and the last columns
corresponding to later instants.


4.1. The moses Command
----------------------
A typical command line would be

    $ pm moses -d TRAINING_FILE -m MODEL_FILE -p TARGET_VAR \
     -e NUMBER_OF_FITNESS -l LOWER_NEUTRAL -u UPPER_NEUTRAL \
     -w WINDOW_SIZE -M MOSES_OPTIONS

This command illustrates the use of the -l and -u options, as the
classifier we want to learn will have 3 levels.  For this case, the
lower threshold is defined as mean*(1-LOWER_NEUTRAL) and the upper
threshold as mean*(1+UPPER_NEUTRAL), where 'mean' is the mean value
of the target variable.

Option -w WINDOW_SIZE specifies the number of instants taken into
account for forecasting the variation of the target variable on
instant WINDOW_SIZE+1.

4.1.1. Example usage
--------------------
Here is an example:

    $ pm moses -d synthetic.dat -m test.model -p SP_Change -e 100 \
       -l 0.2 -u 0.2 -w 2 -F "-ainc -C10" -M "-Z1"

This is going to take a long time, because in Time Series mode all
inputs are multiplied by the window size.  Once it's done, this command
will create a model file test.model containing the time series model
of synthetic.dat.

Let's have a look at the test.model

    $ head test.model
    <model>
    SP_Change->0.808872926264
    1 or(!#SP_Change_w0_t51.9690776754 #adrift_w0_t1.44329896907)
    1 or(!#alert_w1_t1.43298969072 #powers_w1_t1.47422680412)
    1 or(!#system_w0_t1.37113402062 #powers_w1_t1.47422680412)
    1 !#prepared_w1_t1.47422680412
    1 or(!#goals_w0_t1.48453608247 #powers_w1_t1.47422680412)
    1 or(!#super_w0_t1.59793814433 #success_w0_t1.43298969072)
    1 !#against_w0_t1.47422680412
    1 !#alert_w1_t1.43298969072

The wINT appended to the variable name represent the look-back of the
variable. The tFLOAT appended to the rest is like in the non-time
series case, the bisection threshold.


4.2. The inference Command
--------------------------
The typical usage of inference for time series is as follows

    $ pm inference -m MODEL_FILE -p TARGET_VAR -w WINDOW_SIZE \
      -c TEST_CASE_FILE1 -c TEST_CASE_FILE2 ...

The only difference here as compared to Section 3.3. is the multiple
use of option -c. One must use -c as many times as the window size
to provide a test case for each instant of the past window.

4.2.1. Example usage
--------------------
Let's try with

    $ pm inference -m test.model -p SP_Change -w 2 \
      -c testcase1.hcs -c testcase2.hcs
    65.5343576779

Just as in the non-time series case, it returns the centroid of the
output interval.


4.3. The voivar Command
-----------------------
The VOI variables has the typical syntax

    $ pm voivar -d DATA_FILE -m MODEL_FILE -p TARGET_VAR \
      -o OUTPUT_VOI_FILE -w WINDOW_SIZE


4.3.1. Example usage
--------------------
Let's illustrate its use in the context of time series:

    $ pm voivar -d synthetic.dat -m test.model -p SP_Change -o test.voi -w 2

Here are the first few lines of the output file thus generated:

    $ head test.voi
    voi(SP_Change_w0=0.324821007517)
    voi(super_w0=0.0760000917848)
    voi(goals_w0=0.0746688725638)
    voi(prepared_w1=0.0495186222138)
    voi(arrests_w1=0.0467362186667)
    voi(saturday_w0=0.044202069846)
    voi(allawi_w0=0.0404580469773)
    voi(success_w0=0.0386806867723)
    voi(begins_w0=0.0373194050126)
    voi(against_w0=0.0369550098449)


4.4. The accuracy Command
-------------------------
Usage here is as in Section 3, nearly identical to the 'moses' command,
except for an additional fold parameter.  It returns the confusion
matrices for training and testing sets.

The typical use (when using 3 levels)

    $ pm accuracy -d TRAINING_FILE -p TARGET_VAR \
      -e NUMBER_OF_FITNESS_EVALS -l LOWER_NEUTRAL -u UPPER_NEUTRAL \
      -w WINDOW_SIZE -F FEATURE_SELECTION_OPTIONS -M MOSES_OPTIONS


4.4.1. Example usage
--------------------
For instance (the computation takes a while)

    $ pm accuracy -d synthetic.dat -p SP_Change -f 3 -e 1000 -l 0.2 -u 0.2 -w 2 -F "-ainc -C10 -j4" -M "-Z1 -j4"
    71     5     4
     7    21     2
     3     9    72
    Accuracy: 0.845360824742
    Test matrix:
    21    13     6
    10     3     2
    10    11    21
    Accuracy: 0.463917525773


5. File Format
==============
Some brief notes regarding the model file format.

<ensemble>
-- First line, containing an arrow ->
   is a feature->weight aka "target->threshold"
-- Each combo prog, preceded by a number, is a "model"; the number in front
   of the combo program the confidence weight of the model.
-- Each variable in the combo program is a variable name, followed by a
   threshold.
</ensemble>
<levels>
python pickle data.  A serialized python object containing: .. stuff.


6. Sources
==========
PM is also available in source form, as a set of python scripts.
These require both Python and SciPy installed on the system.
Specifically:

   - Python 2.7 or above
   - SciPy 0.8 or above


6.1  The raw bank customer satisfaction dataset
-----------------------------------------------
The PM sources come with a banking customer satisfaction dataset, and a
program to generate .dat files given an XLSX file containing message and
target attributes.

Copyright Dilshod Temirkhodjaev (https://github.com/dilshod/xlsx2csv)

It identifies the attribute with the messages and counts the occurrences
of words.  Then identifies the target attribute and produces a data file
relating word counts and the target attribute.

The script assumes the following:
1) the data are on the third sheet of the XLSX file
2) the target attribute is "Q3" at index 14 of that sheet
3) the messages are under the attribute "Q4" at index 15 of that sheet.

Generalizing this program for any attribute might be useful when
dealing with other data files following the same pattern but with
different attribute names.

6.1.1. Prerequisites
--------------------
The perl runtime, and the Spreadsheet::XLSX per module must be
installed.

6.1.2. Usage
------------
Here is an example of how to use this script.

    $ ./xlsx2dat.sh XLSXFILE > DATAFILE


7. Version History
==================
Version 193 -- June  2012 -- improved documentation, tutorial,
                             minor bug-fixes, RPM packaging
Version 118 -- March 2012 -- general reorganization
Version 105 -- March 2012 -- mutual information updates


8. Authors
==========
Chris Poulin
Lucio Coelho
Nil Geisweiller
Linas Vepstas


9. Funding Attibution
==========

Supported by the Intelligence Advanced Research Projects Activity (IARPA) 
via the Department of Interior National Business Center contract number N10PC20221. 
The U.S. Government is authorized to reproduce and distribute reprints for Government purposes 
notwithstanding any copyright annotation thereon. Disclaimer: The views and conclusions expressed herein 
are those of the authors and should not be interpreted as necessarily representing the official policies or endorsements, 
either expressed or implied, of IARPA, DoI/NBC, or the U.S. Government.
