# Supplementary material for: Predicting the Risk of Suicide by Analyzing the Text of Clinical Notes
Source: PLoS One. 2014 Jan 28;9(1):e85733. doi: 10.1371/journal.pone.0085733 (PMC3904866; doi:10.1371/journal.pone.0085733)
Supplement: Appendix S3 — Machine Learning Libraries and Methods: This section is provided to enclose the open source (Apache License) classifier used for the building of the statistical models, specifically for the purposes of study reproducibility. A detailed account of these tools is intended for another publication. (ZIP) [file pone.0085733.s003.zip › Appendix3/ML_libs/Regression_testing/conv.py]

#!/usr/bin/python

import os
import re

def conv(filename):
  fin = open(filename, "r")
  data = fin.read()
  expr = re.compile("<notes>(.*?)</notes>", re.DOTALL|re.MULTILINE|re.IGNORECASE)  
  text = expr.findall(data)[0]
  print filename
  fout = open (filename + ".txt", "w")
  fout.write(text)
  fout.close()


for dirpath, dnames, fnames in os.walk("./"):
  for f in fnames:
    if f.endswith(".xml"):
      filename = os.path.join(dirpath, f)
      conv(filename)
