# Supplementary material for: Predicting the Risk of Suicide by Analyzing the Text of Clinical Notes
Source: PLoS One. 2014 Jan 28;9(1):e85733. doi: 10.1371/journal.pone.0085733 (PMC3904866; doi:10.1371/journal.pone.0085733)
Supplement: Appendix S3 — Machine Learning Libraries and Methods: This section is provided to enclose the open source (Apache License) classifier used for the building of the statistical models, specifically for the purposes of study reproducibility. A detailed account of these tools is intended for another publication. (ZIP) [file pone.0085733.s003.zip › Appendix3/ML_libs/Regression_testing/group1/grp1-pt-1001.xml.txt]

Patient received Vaccine Information Statement (VIS) about the
INFLUENZA IMMUNIZATION
Plan:
Primary Care Nursing Interview
Other:  Patient seen with Throat infection and sinus infection. May Returned to
.  Bilateral knee pains
PROCEDURE NOTE:  Using the sterile technique, I gave him an
C-FILE:  Reviewed
PATIENT&quot;S CHIEF COMPLAINT:
CONFRONTATION VISUAL FIELD: Pt unable
SURG OPHTHALMOLOGY EXAM (LINKSF-AUTOPRINT-COSIGN PARAM)
AS NEEDED FOR PAIN
)   DOCUSATE NA MG CAP TAKE ONE TO TWO CAPSULE(S) BY    ACTIVE
Admission Date: Not Applicable
Pre-op instructions:
MEASURED HEIGHT:          in [. cm] (// :)
OPERATION/PROCEDURE PERFORMED: right eye Phacoemulsification with
A surgical implant was implanted during this procedure.  An electronic
prosthetic consult was processed.
=======================================================================
PC ADMINISTRATIVE NOTE
Patient Name:   ,  M
I have attempted to contact you via the following phone number () -
DOG  RD
December ,
Patient Name:   ,
PRESENT PROBLEMS/CHIEF COMPLAINT:  Red legs
Diabetic Retinopathy Surveillance Consult follow-up note
breathing difficulties, PVD, obesity, DDD, diabetic neuropathy, coronary heart
. Anatomical Location: iliolumbar area neck and rhomboide b/l
TENDERNESS ON PALPATION.AROM AT L/S DECREASED % DUE TO PAIN AND THICH ADIPOSE
. PAD
LOCATION: Knee
No cc&quot;s
phone. Will inform his primary physician that patient has not returned his FOBT
Sentara Bayside Hospital Emergency Department
If (yes) pregnant, how many  :
have helped but he thought he has to take the medicine  only after he run out.
He takes Tylenol PM for s p. He is requesting for medication that can relax
distribution, or copying of this communication is prohibited.
YOUR NEXT PRIMARY CARE APPOINTMENT, YOU MAY CONTACT THE TELECARE NURSES AT
Stated:
PULMONARY-CONSULT NOTE
. Osteoarthritis *
Active Outpatient Medications (excluding Supplies):
BEDTIME NEUROPATHY
NIDDM x , oral meds
// :       H
REASON FOR VISIT
Any possibility of being pregnant? [ ] Yes   [ ] No
UBW:&quot;s
// :  SERUM      CHO OL                mg/dL          -
Please make appointment within the next
Patient has undergone a colonoscopy previously.
The following identifiers were used to verify this patient:  SSN.
Heart disease
Denies overuse. denies standing too long or climbing ladders.
Anion Gap                     . - .            .
ADDENDUM
- no retinopathyper last exam
OU Cataract
ALREADY RECEIVED THE MED IN THE MAIL AND SHE WILL INFORM HER HUSBAND OF THE LAB
g INT started in pt&quot;s left AC. Flushes without difficulty, substantial blood
His headache is almost the same and relieved per tylenol. The neck stiffiness
no cough,no SOB,no hemoptysis
)  DEPRESSIVE DISORDER NEC
Gait: normal
PHYSICAL EXAM:
&gt;&gt;&gt; Verbal, Written
Other substance        : n
Doctor&quot;s orders verified: //
Anterior glenoid labrum de rative changes.
Anterior glenoid labrum de rative changes.
pt verbalizes undersatnding.
to surgery?  Yes
Wound Classification: CLEAN
Pain Scale:
=
b/l ambulators. No open skin lesions, wounds or maceration noted b/l.  physician xerosis noted on b/l plantar feet.  Pedal pulses palpable /, DP and PT b/l.
AMOUNT TO THE SKIN EVERY   FOR SKIN CONDITION
Pain assess/reassess/observations:
Report:
left IF p fx s/p foreign body removal
Subscapularis tendonopathy with question of a tiny undersurface partial
Objective: Hot pack to the left hand and the right shoulder
Decreased ROM of the left IF
Occupational Therapy Progress Note
Occupational Therapy Progress Note
screening this visit. Risk and benefits of prostate cancer screening
Prognosis
intra-articular fracture of the middle ph x associated with
t
thickness tear.
posterior heel hyperkerotosises.  Pt. states that the lesions are extremely
left IF p fx s/p foreign body removal
on right.   ons canal involvment on left.
TRAMADOL  MG TAB   Sig: TAKE TWO TABLETS BY MOUTH THREE TIMES A   AS NEEDED
Collection DT      Spec  HIV AB  W. BLOT  HBsAg   aHBc    aHCV
Hepatitis B - negative
Last pain score:   (// :)
Active Outpatient Medications (including Supplies):
Neuro: Protective threshold is decreased due to EtOH induced peripheral
Patient blood pressure recorded.
Diagnosis
fish oil but he does not want to start any cho ol lowering
Primary Care Provider has advised patient about benefits of
Status       Last Fill
Active Outpatient Medications             Refills      Expiration
especially in the springtime.
HEARING AID:t; both
CONS DERMATOLOGY
HISTORY OF PRESENT ILLNESS:  A -year-old man, patient of
PATIENT EDUCATION RADIOLOGY CARDIAC CATH TEACHING
LUNGS   Good effort, (-)W/R/R, (-)Cough
HEART:  RRR
some state
/.  Initial INR on /=..  Pt denied missed doses therefore retested on
)   OMEPRAZOLE MG EC CAP TAKE ONE CAPSULE BY MOUTH       ACTIVE
LIPID Coll. date       LDL     TRIGLYCEHDL,DIM CHOLESTE
Pt to continue taking coumadin mg daily except .mg on M,F
Current INR is .
// :
w/procedure.    recent dose increase of warfarin led to significant increase in
Click on Anticoag Flowsheet.
complaints of dizziness and lightheadedness  and passing out on the job.
prescription(s), by mail or from the pharmacy window, be sure to follow the
(-)Negative for (Patient denies symptoms of):
TOBACCO? E
NSTEMI
Cardiac  ers: positive troponin: ./././.
NURSING SHIFT NOTE                  Feb ,@:
Behavior observation: Appropriate? Yes
NURSING MEDSURG SHIFT NOTE
called to see him. Denies other medical problems except for his DM,HBP and
Abdomen: Soft
Character: CLEAR, EVEN, UNLABORED
I.V. #
Neuro: Alert/Oriented X , PERRLA
CARDIO:
Radial pulse:
ESTIMATED DURATION OF SERVICES:
Wound Care (other than pressure ulcer):  Yes
required help or supervision with the following activities?
On physical exam his temperature is .�F.  Saturation was %.  Blood pressure
SUBJECTIVE:  ,    is a  year old  , MALE who came in as a new
potential side effects and potential drug interactions of medications
RX#    MEDICATION                    CNSL/RTE  FILL DATE    PHARMACIS
ST:
states that he has filed a claim with RO in Phoenix but is not certain if it is
electrical work yester . He took a cab vs walking to his medical appointment
Influenza not received this flu season;
scheduled for Sept.
NO
Dizziness (ICD--CM .)              Hyperlipidemia (ICD--CM .)
- - - - - - - - - - - - - - - - - - - - - - - - - - - - - - - - - - - - - - -
Conversation with  ,    has a chief complaint of: &lt;not
Mode of travel: Amb.
Temperature:       (//  :)
The supervising practitioner of record for this patient care encounter is
. New Labs/X- s: (x) NO () YES
)
ultrasound scheduled, which was done yester .  He has a
service September th, .
Current rated disabilities:  De rative arthritis of the
Comment: Verbal consent.  Denies egg/latex allergy.
MEDS: reviwed
I will call them to explain not nutrition issue; primarily an issue with
strategies.Promote healthy lifestyle: weight reduction to relieve stress on
=====================================================================
since been residing at Glen Elston Rehab facility. Still no PEG tube, as pt is
BLsome state                      SSN: -- PATIENT PHONE
Judgement:FAIR
KNOW HOW TO HAVE A POSITIVE RELATIONSHIP.  WANTS TO GO TO WORK AT A BETTER JOB
GIRL FROM HIS PAST. DISCUSSED THAT HIS BEHAVIOR MAY BE MISCONSTRUED TO BE
TO FILL HIS LIFE THAT DO NOT INCLUDE A WOMAN AND ALLOW HIMSELF TO HEAL FROM THE
SOCIAL WORK
O/E  GEN-obese,comfortable ,aox,
The patient was given FECAL OCCULT BLOOD TEST CARDS at this encounter.
. Anatomical Location: RIGHT TROCHENT  BURSA
// after  years of marriage. He grew  depressed after the death of his
y/o WM with h/o NMSC and melanoma per report, last - y/a (MM) removed by
does not cry
Active Outpatient Medications                          Status
resistance. Notes that he has improved his eating habits -- less fast food and
Fall Risk Screen:
PC CBOC NP F/U NOTE
See // pharmacy note for complete anticoagulation assessment from
Comment: review
Change in Diet/Alcohol:no
//  INR             .      H
Mailing Address: P.O. Box
Recent medication changes:no
//  INR             .      H
ADDENDUM
PC OUTPT LPN INTAKE NOTE [T/DT]
Computerized
the back of throat.
ATTENDING PHYSICIAN: gaskins
Note dated: Now: FEB ,  :
YES
Do you take ASA on a regular basis?      yes
SKIN W/D COLOR   CAO X NAD
Left main (LM):       -% distal tapering
Level of consciousness:
Past medical history per patient:
to the examination.
It is not expected that blood products will be used in this
Prior to beginning of procedure patient identification and
PMH:  Lives with other(s)
Screening ( - ):
Active Outpatient Medications (including Supplies):
MOUTH EVERY MORNING
other for any new, deleted, changed and non-VA medications including
mention of hyperactivity
ACTIVE MEDICATIONS NOTE (595-DT-257,REV 10/4/07)
Refill/ wal: ritalin
Patient reports that overall, his family situation is about the same.  He
o
information you provide with the medication list in your medical record
HANDEDED.
VITALS (most recent, as listed in the electronic record):
Evaluation/Management Code: HC PRO PHONE CALL - MIN ().
)   BRIMONIDINE TARTRATE .% OPH SOLN INSTILL  DROP IN   ACTIVE
SLIT LAMP EXAM:
LEFT RETINAL IMAGES:
SUPERIOR WI
Diet Review: breakfast : Cheerios and milk
mg s/p starting pioglitizone.
Diabetic Nephropathy: No
O Sat:  (// :)
nurses.  The data can be entered in you chart for your doctor to review.
Pt has seen Metab c service several times since the --
assistance with self-management.
// : PM      /
range responses.
Medical Director
the comments sections at the end of the report. The date and time of the
Medications:
Diagnosis:  diabetes-hypertension
Possible side effects were described to patient, and patient instructed to
follow-up is necessary.
,  JR, --
FEV/FVC
RV/TLC
DIFFUSION CAPACITY
IMAGING (MPI))
Pl ed Procedure:  Pharmacological Stress Test: Persantine, with T ium
=========================================================================
SUBJECTIVE
HYPERTENSION NOS
and ankle
Respiratory Effort: WNL
Get support from family, friends, and co-workers
SW Archer Road
P:  (// :)
Left:  Reactive
YES, patient states they do have Advance Directives/Living Will.
Uretheral stricture                     CHEST PAIN NEC
== == == == == == == == == == == == == ==
With Whom:  WIFE
Vitals:
Voice change after s owing:
SKIN PROBLEMS
// :
Moisture:   physician  Turgor
No wounds, pressure ulcers or other skin problems.
ROOM AIR ( x )
Friction:           = No Apparent Problem
The pressure ulcer prevention protocol was not needed - patient is not
Skin Moisture
The pressure ulcer prevention protocol was not needed - patient is not
Full
HX ESSENTIAL HTN, DYSLIPIDEMIA
HOUR INPUT =
HOUR OUTPUT =
Future Appointments -
-  S A WEEK FOR TWO  , THEN AS FOUR TIMES A
"        "     BP                /
INTERVENTIONS
Cough or any throat clearing after s owing:
Perrla
SKIN ASSESSMENT:
UNITS SQ TWICE A   DO NOT SEND PT HAS SUPPLY
degree of involvement:
ADDENDUM
at risk.
Right pulses:
CBI Urine =  ml (Total CBI output - CBI irrigant)
Dorsal Pedis: Palpable
Dorsal Pedis: Palpable
IN NO DISTRESS. CALL BELL IN REACH.
Per  physician  note:  review of ECG from  uary shows wide complex
ADDENDUM
Information given to Amanda  , PA. VEteran was instructed to continue the
Now double click on the TIU Title to view the document.
***************************************
Phenylephrine .%  drop  Both eyes
=========================================================================
"        "     BP                /
,    JUL ,
Vitals stable
"        "     Pain
telemetry patches
MRP -  MEDICATION RECONCILIATION
REMOVING
Pacemaker
GASTROINTESTINAL
Score:
TOTAL SHIFT INTAKE =  ml **
Braden Scale - For Predicting Pressure Sore Risk
Will discharge to home to  with amiodarone mg bid for one month and then he
Type of Discharge: Regular.
complaints.
If retired:
or
Hypertension
Place:                 Consultant&quot;s choice
OS - . + . x
TYPE:      PROGRESSIVE
Dementia Screen:
Status       Last Fill
BP / (// :)
)   INSULIN SYRINGE .ML G .IN USE SYRINGE    AS      ACTIVE
Patient given Influenza Vaccination . cc I.M. during this visit.
INSULIN NOV N / (NPH/REG) INJ NOVO INJECT  UNITS    ACTIVE
consideration.
Information on Patient Inquiry Screen current:
FOLLOW-UP APPOINTMENT:Plastic Surgery (Gold) ON   ,@:
PHYSICAL ACTIVITY LIMITATIONS: NO nose blowing for   .  Keep head of bed
WI-APN/FOLLOW-UP
. Over the past two  , how o
Allergies:  Patient has answered NKA
Pain History - OPT ():
Patient agreement: Yes
Chief Complaint: No chief complaint
place but instructed vet to use ice and naproxen and
sertraline  mg, BuSpar  mg and aripiprazole  mg.  She was willing
appointment(s).
( ) Phone number in system has been disconnected.
( ) Unable to contact veteran at listed phone number. No anwser, busy, etc..
( ) Currently in-patient at non-V.A. facility.
Starting at: // @ :: PM
Other: ()-.
Facility Appointed PCP: F ,BERYL (ATHENS)
Most recent height:  in [. cm] (// :)
. Please read each item carefully and select the correct answer for
Facility Appointed PCP: F ,BERYL (ATHENS)
Gender:  y/o female
// :  PLASMA     CREATININE            .    mg/dL      . - .
( ) Appointment information confirmed with sponsor or Group Home.
COLUMBUS VAMC                           SULFA DRUGS
PT HERE TO SEE DR JALBUENA FOR URINARY INCONTINENCE WITH COUGHING, LAUGHING,
veteran&quot;s guardian would have to request a competancy hearing. This worker has
VA Facility:
OPT ARIPIP
Ending at: // @ :: PM
+ headache, moderate to severe
Legend: OPT = VA issued outpatient prescription, INP = VA issued inpatient order
Bill as her financial guardian. She had numerous vague complaints but was unable
Other
yr old female vet here to see provider in clinic for the following:
. F [. C] (// :) (// :) (// :)
// @       PULSE OXIMETRY:
Vaccine was given in patient&quot;s Left Deltoid
( ) Appointment verified with Veteran.
Medications listed have been reconciled and reviewed with the patient.
*Prostate Counseling:
HEART:Regular Rate Rhythm, Normal S/S, Negative BRUITS, Negative MURMUR
[ ] Appointment information confirmed with family member.
PATIENT&quot;S MEDICATION LIST
)   ATENOLOL MG TAB TAKE ONE-HALF TABLET BY MOUTH EVERY  ACTIVE
IOP  OU; pre-treatment IOP  OU
(REFRESH) INTO BOTH EYES FOUR TIMES A   FOR DRY
APPLICATION. APPLY TO HEELS AS INSTRUCTED
Rx Expiration Date: //
( ) Patient does not want to be seen.
Vaccine details are: LOT NUMBER: A
Right foot palpable
)   OMEPRAZOLE MG EC CAP TAKE ONE CAPSULE BY MOUTH       ACTIVE
Patient received influenza immunization elsewhere
screen for depression.
Patient Phone Number: -- HOME
Protocol(s) used: &lt;Not identified&gt;.
Reviewed the chart and there is a note dated /.  The clerk accidentally
Medications:
Patient Phone Number: -- HOME
Facility Appointed PCP: PLA,  A MD (PC WPB TEAM )
regular clinic since he has not had an ophthalmology examination in a year.
Anemia
Hepatitis C
Heart:(Required)RRR NO MURMURS
Depression
OPERATION REPORT
All personal property kept by patient:
)   ACETAMINOPHEN TAB  MG PO QH PRN for eye pain; do   ACTIVE
Other
MEDICATION RECONCILIATION
Fall Risk assessment at discharge:
vision OD, denies any other ocular complaints OD.  Reports poor vision OS.
UNABLE TO CONTACT  VET TO ASSESS  IF VET IS CONTINUING THE  USE OF  TOBACCO AND
OPERATIVE FINDINGS:
Operation Disposition: PACU (RECOVERY ROOM)
second time. Patient BP  low ranging from / down to /.
by: IMED SYSTEM
to bilateral lower extremities.
Alarm parameters to unit settings:N/A
Pulse:  (// :)
Type of Advance Directive:
reviewed with the patient and/or caretaker when applicable.
MENTAL STATUS: Veteran&quot;s mental status: alert, oriented
. The radiologist will review this test and results are sent to your
INDICATION FOR EXERCISE STRESS TEST: Pre-op for aorto-fem-fem bypass.
Maximum Heart Rate:   bpm
pulse:   (// :)
MEDICATION INSTRUCTIONS
=========================================================================
ADDENDUM
MEDICATION REVIEW for MEDICATION RECONCILIATION:
PFTs done in this
Correction: veteran coming to CLC tomorrow, //.
SPEECH PATHOLOGY ASSESSMENT
from his delirium and possible cardiac rehabilitation after clearing from
COMMUNITY LIVING CENTER   SHIFT ASSESSMENT:
At  : AM on  uary ,  , the patient (and/or surrogate)
picture." Difficulties may manifest in the performance of instrumental ADLs
Resident returned from pass at . No problems or concerns voiced. Had a good
COMMUNITY LIVING CENTER   SHIFT ASSESSMENT:
following CABG per MPLS VA.  Extensive documentation of complicated pos-op
=========================================================================
***TRIALED TRAVATAN RESULTING IN UVEITIS***
)   ASPIRIN MG CHEW TAB CHE
LIVER FUNCTION:
Thanks again, have a great summer
. Lumbar Radiculopathy (ICD--CM .)
UGI wnl /, see notes / re: colonoscopy
Cardiol =  physician
L-spines //:
. Hypertrophy (Benign) of Prostate with Urinary
L-spines //:
ADDENDUM
Psychology:   minutes of supportive individual therapy
___Erythema
___Onychocryptosis
will attempt to have contact weekly.
so that people will not be in his business.  He said that his upcoming
months. He reports remaining clean and sober and attending follow-up in CBH. He
management progress and pt satisfaction survey this date. Pt states that he
)   MIRTAZAPINE MG TAB TAKE ONE TABLET BY MOUTH AT       ACTIVE
SCREEN FOR ALCOHOL (AUDIT-C)
Suicide Screen:
better
letter from the Pittsburgh VA re his recent colonoscopy, and the letter
Long yellow thick crumbly
offered that he has NO intention of harming himself.  Mr.   also
Temp: . F (. C)
PRIMARY CARE NURSING INTAKE NOTE (T)
CHARACTERISTIC
I will call labs and ask to  see him in m with  cbcd and Ferritin
ACTIVE PROBLEMS:
Do you understand the plan of care the provider has shared with you concerning
albuterol, atrovent,  mometasone..this med was new last summer, prilosec prn
ACUTE NEW PAIN (LESS THAN  MONTHS)
PHYSICAL THERAPY CONSULT
ROM of trunk
O:      Pain /
    
