# Supplementary material for: Predicting the Risk of Suicide by Analyzing the Text of Clinical Notes
Source: PLoS One. 2014 Jan 28;9(1):e85733. doi: 10.1371/journal.pone.0085733 (PMC3904866; doi:10.1371/journal.pone.0085733)
Supplement: Appendix S3 — Machine Learning Libraries and Methods: This section is provided to enclose the open source (Apache License) classifier used for the building of the statistical models, specifically for the purposes of study reproducibility. A detailed account of these tools is intended for another publication. (ZIP) [file pone.0085733.s003.zip › Appendix3/ML_libs/Regression_testing/group1/grp1-pt-1016.xml]

<?xml version="1.0" encoding="ISO-8859-1" ?>
<records>
  <record>
    <group>1</group>
    <study_id>1016</study_id>
    <notes>
Clinical Reminders Activity
PRIMARY CARE NURSING INTAKE NOTE (T)
to stop (has nicotine chewing gum). Dad had MI in his s. Still on EFV
tetanus-diphtheria immunization. The patient was given
to stop (has nicotine chewing gum). Still on EFV monotherapy - wants to continue
VERBAL PAIN ASSESSMENT
PC ESTABLISHED PATIENT NOTE
labs reviewed-
Time Needed for Procedure:    min
Frozen Section Tests:        No
,  ED
NURSE INTRAOPERATIVE REPORT
ANESTHESIA: Retrobulbar Block, Managed Anesthesia Care
ATTENDING STAFF VERIFICATION: Bobbitt
DISCHARGE DATE: Apr ,
SURG ORTHO NOTE (COSIGN)
Facility Appointed PCP:  ,KAREN (PRIMARY CARE TEAM  LIN)
.    Prostate, Hyperplasia of, without Urinary Obs
Provider Plan Reviewed with Patient to speak w SW
Lab drug:
DELIVERY OPTIONS: FED-EX
ADDRESS:
Qty:  for   s
Exp:   ,      Prov: HOOVER,TINA N
DOG  RD
Patient telephone number confirmed with patient.
)   AMLODIPINE   MG TAB ***  MG TABLET MOUTH DAILY
Patient is a TOBACCO LIFETIME NON-USER of tobacco.
Stated:
Medication Reconciliation was done with information from the following sources:
Stated:
. HTN
Level of Consciousness:
Person(s) Taught: Patient
Date:   ? Exact date is unknown
Attending Physician:
REVIEW OF SYSTEMS
)  Chest Pain * (ICD--CM .)
Other:TA  OD   OS
ADDENDUM
ANA     NEGATIVE
Comment: Pt states pain unacceptable.
Went for consult. Due to go fri .
PAST MEDICAL HISTORY:
no arthralgia,no neck pain,no back pain,no radiculopathy
H EHAS HX OF PUD  DO NOT TAKE NSAIDS
)   CAPSAICIN .% CREAM  GM APPLY   AMOUNT TO     ACTIVE
====================================
Anterior glenoid labrum de rative changes.
pt verbalizes undersatnding.
Yes
WNL
Received by: F. Padilla, RN    Via: Stretcher
that he has been compliant with wearing ambulators. Pt. admits to staying off
AMOUNT TO THE SKIN EVERY   FOR SKIN CONDITION
Last pain score:   (// :)
Subscapularis tendonopathy with question of a tiny undersurface partial
Impression:
intra-articular fracture of the middle ph x associated with
PROM of the left IF
thickness tear.
yo male, now  month after right index finger foreign body removal.  Now
finger middle
Musculoskeletal: Index finger swollen, primarily  at PIP, no redness, wound
Referral Diagnosis: RTC tendinopathy
Subscapularis tendonopathy with question of a tiny undersurface partial
Report:
Objective: Paraffin to the left hand and hot pack to the right shoulder
Retrograde massage to IF to reduce edema
OCCUPATIONAL THERAPY EVALUATION
NURSING OUTPATIENT NOTE
Occupational Therapy Progress Note
Supraspinatus tendonopathy.
Chief Complaint: c/o pain in the right shoulder
Anterior glenoid labrum de rative changes.
Vasc: DP/PT palpable /, CFT &lt;sec
Pain assessment/observation elements:
Neuro: Protective and epicritic sensations diminished b/l due to EtOH
TEMP: . F [. C] (// :)
Screening Colonoscopy ordered
R:  (// :)
Pain:  (// :)
PATIENT EDUCATION RADIOLOGY CARDIAC CATH TEACHING
LEFT VENTRICLE:  The left ventricle shows very mild proximal inferior
SIMVASTATIN MG TAB TAKE ONE-HALF TABLET BY MOUTH AT
PR:.
FT.  ON, MT
Your recent lab tests show the following results:
PHARMACY ANTICOAGULATION CLINIC INTERIM
a baseball bad and fracture the right facial area.  No surgery done.
)   LISINOPRIL MG TAB TAKE ONE-HALF TABLET BY MOUTH      ACTIVE
PHARMACY ANTICOAGULATION CLINIC INTERIM
Indication for Anticoagulation: DVT
/..Vet reports   cut which required pressure to stop b ding.  Dental
Indication for Anticoagulation: DVT
HT:   in [. cm] (// :)  WT:  . lb [. kg] (//
Patient/guardian gave verbal consent to influenza vaccination.
Lungs- Nl breath sound, No rales or rhonchi.
, Vasovagal epis  - resolved
GI- NO N/V/ABD PAIN/CHANGE IN BM
- # to call if problems arise and use of memory on meter and coding error
NURSING NOTE
MEAN:  SD: . Range: - mg/dl
HISTORY (Past History, Family History and/or Social History):
Sensory Deficit: Hard of hearing
Face to Face:  Received report from previous shift nurse
Pulses palpable: Yes
Respiration
#  Anxiety, #  Alteration in comfort/pain, # Potential for physical
G.I.
Fluid Retention: No
VS taken BP/ HR- RR- Temp of .  O sats of % on RA.
Pedal pulse:
Yellow
I.V. #
#  Decreased tissue perfusion   )
Bowel sounds: Normoactive X  quadrants.
Turgor:  Within normal limits
No wounds, pressure ulcers or other skin problems.
He has not had any new medications nor has he had any recent trouble or
.      Losartan  mg one tab po each  .
Community skilled home health care
ESTIMATED DURATION OF SERVICES:
UNIT
SUBJECTIVE:  Patient is identified by his name and birthdate
This SW spoke with Marilyn McPherson at travel and she will contact vet to get
Copies of completed advanced directives were sent to the file room for
disability twice. Treated with epidual injections by  physician  help with
. How often did you have six or more drinks on one occasion in the
Active Non-VA Medications                              Status
ADDENDUM
following problems ?
Pt to lab appt to , states ibuprofen is not working at all. Alot of pain in
ADDENDUM
PULSE:             (//  :)
LEARNER ABILITIES
" It feel like something crawling on my skin. I never see this before. I want
RADIATION THERAPY TREATMENT NOTE
INFECTIOUS DISEASE NOTE
physician Barradas, Maria C.
TO SEE PCP TO
mentions recently he has been having problems with dizziness and
by  physician ry  months for benign prostatic hypertrophy.
carrying twi buckets of coal and when he was walking, land caved-in and his rt leg
Patient had advance directive screening at this visit or admission.
HTN
Device:  unit
Please see the attached document from the VISN  Home Respiratory
Pulse:   (// :)
S:CLIENT CAME FOR  MINUTE SESSION.  HE BEGAN BY STATING THAT HE HAD MADE
NEVER BEEN FAITHFUL TO ANOTHER PERSON.  CLIENT MAY HAVE A OCD WHICH DOES NOT
A: Oriented X
Judgement:FAIR
S:CLIENT CAME FOR  MINUTE SESSION.  HE CONTINUES TO RUMINATE OVER HIS
CLIENT DID NOT COME TO APPT. THIS PM.  ATTEMPTED TO CALL BUT THE CALL WAS NOT
P:RTC IN
O:MDD
Active Outpatient Medications                          Status
Dear Patient: The following is your updated Medication List. Please bring
NONE
inted at:
Patient has answered NKA
* PRECAUTIONS: Allergy to eggs, having a fever or had GBS in the past.
.  The purpose of the test and correct collection procedures were
only this special envelope immediately after finishing the test.
prosthesis is not visible on the current examination.
issues with walking -- and can walk all through SuperWalmart without pain. Rides
RECALL FOLLOW-UP:  ARRHYTHMIA/MEDS TUES  MAR ,   MANDATORY
because he had maintained N .  He reports he was only off warfarin for a "very
.  INR in Therapeutic Range
FALL RISK SCREEN
EP OUTPT RESIDENT F/U NOTE [T]
Falls/Trauma:no
MOUTH EVERY MOR
------------------------------------------------------------------------
Called pt.  Says when she called  ier, was on her way here.  Is in the ED
. Ischemic cardioomyopathy, cad,  ef %, pulmona
CARDIOVASCULAR HX: Patient came for a regular visit. Denies any chest pain,
MEDICATIONS: pt req these meds to be refilled
Factors increasing motivation to learn include:
in /. He is on Sinemet / PO TID. The pt appears stable. He is able to
when/if possible)                                        YES
PROVIDER: SULTANA
=========================================================================
)   Non-VA FERROUS SO MG TAB UD MG BY MOUTH EVERY   ACTIVE
TELEPHONE LIAISON CARE-GENERAL NOTE (595-DT-86,REV 08/13/10)
LABORATORY TESTS:  Valproic acid level less than  on February , .
medications that you might be allergic to and to avoid any harmful
Refill/ wal:  METHYLPHENIDATE MG HR   CAP            Qty:  for   s
REVIEW OF SYSTEMS
Length:  minutes.
Weight:   lb [. kg] (// :)
Pulse:   (// :)
The required document (Vaccine Information Sheet) was provided to the
Pupils dilated for imaging
DIABETIC SURVEILLANCE ASSESSMENT:
Blood Pressure:  / (// :)
and Glyburide mg PO BID and pioglitazone  mg PO Daily.
Pulse:            (// :)
I suspect you are doing all you can to help get this under control.
-    AM      PM
-
PATIENT CONTACT NOTE
Medical Director
Weight:          . lb [. kg] (// :)
Medications:
IC/PRIMARY CARE NURSING/PATIENT EDUCATION (T)
Patient educated on Advanced Clinic Access Scheduling and given ACA hand-out.
-no obstruction or significant +BDR
Patient verbalized understanding (PVU) of all instruction provided.
Respiratory Effort: WNL
ACETAMINOPHEN**
ADDENDUM
information. As per  physician u are not experiencing black, tarry stools.
Right: Radial
Constitutional Reports
Alcohol Use Screen (AUDIT-C):
Weight:  lb [. kg] (// :)
)   mv liquid
// :  Temp F (C)        . (.)
REASON FOR VISIT TO :  pt is here for labs and meds to be reviewed by pcp. pt
JUST STARTED HAVING THIS PROBLEM THIS AM
NO CALF TENDERNESS
DATE/TIME OF DISCHARGE: NOV ,  :
future appointments as imported from the medical record.
Friction:           = No Apparent Problem
CONTRAST
AUSC:        LUNGS SOUND CLEAR.
Soft
Skin Temperature
SKIN PROBLEMS
Lungs - clear with no wheezing / rhonchi.
Patient needs assistance with oral hygiene:
== == == == == == == == == == == == == ==
ASSISTIVE DEVICES:
Dysp a
Intake and Output  -
Liters: L
INTAKE AND OUTPUT NOTE
CBI Urine =  ml (Total CBI output - CBI irrigant)
NEUROLOGICAL
Vitals taken to :
.  Azithromycin  mg daily until gone.
.  How satisfied are you with this follow-up call?
hospitalization for bronchitis. Feeling much better. No recurrent edema.
// :  Temp F (C)        . (.)
future appointments as imported from the medical record.
HISTORY:  YEAR OLD MALE WITH H/O OSA, ADMITTED TO  WITH SUDDEN ONSET SOB
INPATIENT ADMISSION DATA BASE
No
CURRENT SKIN ASSESSMENT
CODE
Post Tibial: Palpable
Medical Power of Attorney and Living Will
Perrla
Equipment: Nasal C ula
OUTPUT
"        "     Pulse
"        "     Pain
Click on Tools, click on Vista Imaging Display and then minimize.
*** SC ED DOCUMENT ***
by: Kelly MCGOWAN
REASON FOR VISIT TO : Here to  per nursing clinic visit -- for history
but when layed  down felt short of breath. unsure if from anxiety
Decreased Orientation:
Vital signs:
Alphabetized list of outpatient Rx&quot;s, inpatient orders, remote and Non-VA
Dorsal Pedis: Palpable
KNEE CONDITION  %  SC
TOTAL SHIFT OUTPUT =  ml **
-Correction to Adendom Gave report to Tabitha RN.
"        "     Respir
"        "     Pain
"        "     Respir
Click for Normal
sitting on side of bed watching tv, alert and oriented, no distress observed
Telemetry
Braden Scale - For Predicting Pressure Sore Risk
"        "     Pain
Date of Discharge: Sep ,
V4-POST DISCHARGE FOLLOW-UP CONTACT
sustained vt noted, started on amiodaroine, seen now for further eval.
IMPRESSION: Nonischemic cardiomyopathy, with mild CAD
Sinusitis
turp
(X)SUPPLY FRAME (X)SUPPLY LENSES ()FRAME ENCLOSED
Injection site: Left Deltoid
BP:/ (// :)
his/her knowledge and knows of no reason he/she should not
CC: visual field problems
for viewing and for passing   surgical tools into organs and
cavities) to assist with elevating the skin and muscles off of the
WOUND CARE OR DRESSING INSTRUCTIONS: Ice to face to decrease s
Left message on answering machine, Unable to reach patient
Were constantly on guard, watchful, or easily startled?
I was supervised by  physician O.D.
Writer received order from PCP to contact NOK re: guardianship. Writer reviewed
for pain).
he spends most of his  s sitting around.  He has noticed increasing
PC NUR CLINICAL REMINDERS NOTE
)   Non-VA LISINOPRIL MG TAB .MG MOUTH EVERY   AT     ACTIVE
)   Non-VA METOPROLOL TAB MG AM     MG  PM MOUTH       ACTIVE
// GLUCOSE            .H
RESULTS
+ wheezing, new or worsening
When in room, vet states she seen chiropractor this
Discussed the concept of altering spending to conform to budget requirements,
( ) Appointment cancelled at patients request.
MOUTH
triage nurse on // due to left leg feeling numb and tingling. Denies any pain
Saw chiropractor yeater , better to  unless lays on lt side watching TV.
)   ARIPIPRAZOLE MG TAB TAKE TWO AND ONE-HALF TABLETS    ACTIVE
Medications listed have been reconciled and reviewed with the patient.
TEL TRIAGE AFTER HOURS CALL CENTER NOTE
if she can take naproxen with this, informed that she could
FACILITY                                ALLERGY/ADR
left a message with Mr. Hood asking a)is the above (guardian asking for hearing)
and her father has had to be up with her every night
BADR - Brief Adv React/All
RART -  REMOTE ALLERGY/ADR DATA
Facility Appointed PCP: F ,BERYL (ATHENS)
Recommended Follow-up location: Emergency room, VA
System Concern: Influenza
Patient agreement: No
( ) Appointment information confirmed with family member.
( ) Appointment information confirmed with family member.
Please take medications as listed below.  Please check each of your medications
ADDENDUM
attend any more classes as she has school and other obligations coming up.
No questions about condition/treatment.
Allergies/Adv:Patient has answered NKA
( ) Currently in-patient within a non-V.A. Medical Center or Nursing Home
Capillary filling time, toes:
, Sickening, Stabbing
( ) Phone number listed for veteran has been disconnected.
[ ] Currently in-patient within a V.A. facility.
NURSING NOTE
( ) Unable to contact veteran at listed phone number. No answer, busy, etc..
( ) Appointment cancelled at patients request.
Rx Expiration Date: //
Active Outpatient Medications                          Status
. Hypertension *
Reason for visit: Mycotic toenails
Pedal Pulses:
=========================================================================
Medications:
*********************************************************************
MAS TELEPHONE CONTACT
Evaluation/Management Code: UNLISTED EVALUATION AND MANAGEMENT SERVICE ().
This patient has been clinically assessed according to the
BP       /  MAR , @:
at low speeed. he wasn&quot;t wearing a helmet. Pt did not loose consciuousness and
Felt numb or detached from others, activities, or your surroundings?    NO
PREVENTIVE HEALTH AND PATIENT EDUCATION
DATE:  ,
Height:  in [. cm] (// :)
effects?
SERVICE ELIGIBILITY:
Have you ever had a suicide attempt?
EVERY MORNING --APPLY TO FACE FOR  ACNE
present pedal/radial
Activity:           = Walks Frequently
Anesthesia sheets, Correct Site, PreOp Assessment, Procedure Consents,
INSTRUCTED HER TO HAVE VETERAN CONTACT VA CLINIC FOR MESSAGE CONCERNING LABS.
Pain:             (// :)
B/P:            / (// :)
Temperature:
times and will begin to "give out underneath me". This has significantly
DP
.
. Informed consent was obtained at : AM on October , . The
. Treatment/procedure: access arteries in both groins, use dye to
treatment/procedure.
.  Two renal arteries were identified bilaterally with no significant
Primary: Aortogram and Run Off
BROSIUS (X- )
angiogram. He is resting comfortable, complains  of mild pain
angiogram
PATIENT ALLERGIES: Patient has answered NKA
Dorsalis pedis: Dopple
/ but he stated that it is fine and does not need any pain medication.   B/P:
OCT ,
Scan Time::AM
Work Level METs:     .
LEVEL OF CONSCIOUSNESS: Orientated X
EVERY   FOR   S FOR INFECTION
Complains once great while o.d. hurts, to  related to head cold. Here for
the PFAs.
His Stress test showed a   area of irreversible ischemia. and % EF
CARDIOLOGY CONSULT
Please note that clinical response to bronchodilators can still occur in the
Correction: veteran coming to CLC tomorrow, //.
confused delirious at this point.
delirium.  The patient received multiple units of fresh frozen plasma, packed
Lips: WNL
Occupation:STEEL WORKER
I - Independent
COMMUNITY LIVING CENTER PM/NIGHT SHIFT ASSESSMENT:
Toileting: LEVEL OF ASSISTANCE = Independent
Number of staff needed:
ACTIVITIES OF DAILY LIVING MEASUREMENT DEFINITION
CLC NURSING DAY SHIFT NOTE
SAFETY: Is resident a fall risk:No Call light within reach, Instructed
ADL Task:
Equipment needed:
Tub/shower: LEVEL OF ASSISTANCE = Independent
Pt walkin for f/u lipid lab since on simvastatin.  ordered.
(patient was also instructed to tell them):
Other problems listed below.
future and to be prepared for a visit. Contact info was given to this vet if he
quite protective of his privacy, but he is cl y less suspicious and
NO
patient to .
Patient was provided education about a fecal occult blood test.
WT:   lb [. kg] (// :)
)   HYDROCHLOROTHIAZIDE .MG CAP TAKE ONE CAPSULE BY     ACTIVE (S)
MOUTH EVERY
they are still quite effective in helping with his s p pattern and
overall level of irritability and anxiety.  He continues to do well in
year?
O: This is a  year old male who follows with  physician BH. He is being
This writer agreed to meet the pt at DRC // at :. Pt also said he just
O:  ,    is a  year old MALE.
Dorsalis pedis
[ ] Administered local steroid injection
A &amp; O x /Mood Appropriate
MEDR - MED REC NEW
Active Problems:
HTN
)   CALCIUM MG/VITAMIN D  UNT TAB TAKE  TABLET BY   ACTIVE
Due to Injury: NO
HIGH BLOOD PRESSURE
Do you understand your medical condition, your test and lab reports,
YES
agreement with his/her Primary Care Provider/physician.
Have you had any nightmares about it or thought about it when you did not want
Pt stated that he was here to be seen by his doctor TO , NOW.  Advised pt that
    </notes>
  </record>
</records>
