# Supplementary material for: Predicting the Risk of Suicide by Analyzing the Text of Clinical Notes
Source: PLoS One. 2014 Jan 28;9(1):e85733. doi: 10.1371/journal.pone.0085733 (PMC3904866; doi:10.1371/journal.pone.0085733)
Supplement: Appendix S3 — Machine Learning Libraries and Methods: This section is provided to enclose the open source (Apache License) classifier used for the building of the statistical models, specifically for the purposes of study reproducibility. A detailed account of these tools is intended for another publication. (ZIP) [file pone.0085733.s003.zip › Appendix3/ML_libs/Regression_testing/group1/grp1-pt-1036.xml.txt]

Pt needs fobt issued at imm cl visit //.
NAME:  ,  ED  ESTABLISHED PATIENT
There are no changes.
OPERATION REPORT
WITHOUT SPECTACLE OR CONTACT LENS CORRECTION: /-
K-+ CENTRAL STRIAE
and received : verbal instruction (and written if
PRESENT PROBLEMS/CHIEF COMPLAINT: mid-low back pain, several bumps to back of
Patient is a  male with a h/o CAD - s/p CABG x , PVD - w/  stents in Left
Temp: ., BP: /, /, Pulse: , Resp: , Wt:  lbs, Pain: /
Lisinopril mg daily
chronic
think the reader failed to consider the fact that when
PHONE: ()-
Qty:  for   s
DOG  RD
. How often did you have six or more drinks on one occasion in the
Lachydrin
Signature Informed Consent for
C :
changes-pt agreed reluctantly.is aware of appt -.
. Neuropathy
EVERY
This transmission is intended for the use of the person to whom it is addressed
Patient seen for  minutes for medication management and supportive
Weigh yourself every morning upon rising and record. Call your
[ X ]  Routine Health Maintenance
[ x ]  Follow-up Appointment
[ ] Forgetful
WEIGHT Actual: . lb [. kg] (// :)
This transmission is intended for the use of the person to whom it is addressed
Stated:
// :  SERUM      CHO OL                mg/dL          -
CALL CENTER NOTE
Evaluation/Management Code: UNLISTED EVALUATION AND MANAGEMENT SERVICE ().
Conversation with  ,      has a chief complaint of: &lt;not
LDL: .
SGOT (AST)                     -
A/P:
ucination,no delusion
ADDENDUM
return noted.
Stated pain is:
Insidious onset. No known inciting event.
)  Restless Legs * (ICD--CM .)
Active Outpatient Medications                          Status
Preoperative/Pre-Procedure Checklist
While in the hospital you were treated for Left index finger foreign body.
CYCLOBENZAPRINE  MG TAB
Blood/blood Products Administered:  NONE
POST ANESTHESIA ASSESSMENT
Attending Anesthesiologist   :
POST ANESTHESIA SCORE (Aldrete)
=
TELEPHONE CONTACT NOTE
Anterior glenoid labrum de rative changes.
)   G  NON-LATEX MEDIUM NONSTERILE /BX USE GL
Occupational Therapy Progress Note
X-  of the L IF on //
Impression:
Anterior glenoid labrum de rative changes.
Assessment: Continue physio, to keep pain journal at to when his finger hurts
Decreased ROM of the left IF
This examination of the left index finger reveals a comminuted
)   AMMONIUM LACTATE LOTION  %  ML APPLY          ACTIVE
thickness tear.
t
AC joint de rative changes.)
thickness tear.
Occupational Therapy Progress Note
This examination of the left index finger reveals a comminuted
. Practitioner obtaining informed consent for HIV test:   San Miguel,
SIGNATURE NOT REQUIRED
. Porokeratosis L plantar foot
swelling.
NURSING OUTPATIENT NOTE
VETERAN HAS THESE MEDICAL ISSUES:
IC - PNEUMONIA
___ Other response (describe)
P:  (// :)
An alcohol screening test (AUDIT-C) was negative (score=).
TREATMENT:  Liquid nitrogen and have patient come for  followup check in
PATIENT NAME:   ,             AGE:
was flown by air ambulance to Missoula.  Shortly before arrival in
DATE OF PROCEDURE:  December , .
HEART/BLOOD PRESSURE
FOR HEART/BLOOD PRESSURE
NURSING REASSESSMENT
Is pain control adequate?  Yes
ECTOPY:occ pvc
ALLERGIES:  MORPHINE, ASPIRIN
Current INR is .
for elevated INR.  Decrease dose to mg daily except .mg Mon &amp; Fri.  F/u
low end of range.  P:  increase warfarin to mg daily.  f/u    at PCP appt.
Comment: States will for  copy to clinic for records.
effects.  The patient/guardian had the opportunity to ask questions and
GI- NO N/V/ABD PAIN/CHANGE IN BM
* GEN APPEARANCE - PLEASANT , BMI
following problems: difficulty breathing, hoarseness, wheezing, hives,
NURSING MEDSURG SHIFT NOTE
injury
Urine color/appearance: Yellow / Clear
V/S: T-., P-, R-, Bp-/, o sat-% on RA, Pain level-/
Neuro: Alert/Oriented X, Arousable, Other:
Taking Fluids: Good
Face to Face:  Received report from Marina,LPN w/ walking  .
Cap refill: &lt;  sec
. Do you p ? Not really
confirmed received.
Face to Face: Received report from outgoing shift nurse with walking
Received pt as p but arousable. In no distress.
WOUND/INCISION
.      Losartan  mg one tab po each  .
Oxygen:  No
- - - - - - - - - - - - - - - - - - - - - - - - - - - - - -
Veteran states that through this process he has lost his home (a mobile home
to contact the social worker identified on the written material if
. How often did you have six or more drinks on one occasion in the
PHARMACY GENERAL COUNSELING
required since this patient had a recent pain score of  (//
ordered that and have encouraged pt to stop to have it drawn before leaving the
MARITAL STATUS: Single- lives alone
glu , needs Ac
An alcohol screening test (AUDIT-C) was negative (score=).
Left Apex
- - - - - - - - - - - - - - - - - - - - - - - - - - - - - - - - - - - - - - - -
Lodging Needs:
Alert/speaking
physician ando R.
WEEKLY PROGRESS NOTE
WEEKLY PROGRESS NOTE
)
alcohol screening test (AUDIT-C) was negative (score=)
followup appointment on // to get the results.  In the
vet his pain in right knee improved in    but his lower back was giving pain
Please dilate both eyes. Thanks!
,   , --
Mr.   is a  year old man who presents to urgent care for evaluation of a
MEDS: none
Memory:INTACT
O:STRESS, MDD
RELATIONSHIPS.  HE IS VERY POSSESSIVE AND IF HIS PARTNER HAS OTHER INTERESTS
CLIENT DID NOT COME TO APPT. THIS PM.  ATTEMPTED TO CALL BUT THE CALL WAS NOT
TO FILL HIS LIFE THAT DO NOT INCLUDE A WOMAN AND ALLOW HIMSELF TO HEAL FROM THE
CLIENT DID NOT COME TO APPT. TO .  HE DOES NOT HAVE A PHONE LISTED. WILL SEND
HAVE TO CHANGE. DR.SHAW CAME INTO SESSION TO TALK ABOUT MEDS.   AGREED TO
)   IBUPROFEN TAB MG TAKE ONE TABLET BY MOUTH THREE     ACTIVE
Affect:APPROPRIATE
MEMORIAL BLVD  VILLE, TX
minimal extent, he denied hitting or breaking things. He said that he does
A/P:
BMI:             *
.  No signs/s
MAPLEVIEW LANE
. No signs/symptoms of warfarin toxicity or thrombosis
Date: JUN ,
//  INR             .      H
PC OUTPT STAFF F/U NOTE
HP:office worker, no sob, cp, edema
accurate
Other Medication Instructions:
PATIENT AND PROCEDURE VERIFICATION/"TIME OUT" PROCEDURE
pamphlet sent to the patient detailing the procedure.
patient was given a copy of the medication
PREVENTIVE HEALTH SCREENING NOTE
Patient denies blood in their stool.
Allergies Reviewed: Patient has answered NKA
D EYE CLINIC NURSING PROGRESS NOTE
HISTORY:
In the past    have you been:
=
Non-VA ISONIAZID MG TAB  MG MOUTH EVERY             ACTIVE
No changes in medications per Veteran.
Education:
Patient
Active Outpatient Medications (including Supplies):
Active Outpatient Medications (including Supplies):
follow-up is necessary.
=========================================================================
. Condition or diagnosis:   Cad Eval
Tel. No. of Person Contacted (include area code):
R:  (// :)
Uretheral stricture
Vet to be picked up by Malloy Transport at approximately :pm.
MEDICATIONS:
HOMELESS: no
dose of  nox (further dosing subject to results).
Social Living Situation: lives at home with significant other
Needle:
No
GENITOURINARY
MUSCULOSKELETAL
Friction:           = No Apparent Problem
Destination: RETURN HOME WHEN DISCHARGE
CXR to my view - no infiltrates seen.   Official reports pending.
B/P: /
The patient does not have any patches on the skin.
TOTAL SHIFT OUTPUT =  ml **
RESP THERAPY NOTE (T)
RX TYPE(S):  aerosol
Behavior:
Extremity: Equal Bilaterally
-   No Risk
Post Tibial: Palpable
Yes
Intake and Output  -
DIETS:
"        "     BP                /
--
No
Right pulses:
NURSING SHIFT ASSESSMENT
Bowel Sounds
Equipment: Nasal C ula
REPORT TO ONCOMING SHIFT. VSS. NO COMPLAINTS VOICED. MONITORED QHRS &amp; PRN.
Cooperative
== == == == == == == == == == == == == ==
Breath Sounds:
MEDICAL PROCEDURES:  None.
Left:  /-       /
Tropicamide %    drop  Both eyes
causing severe pain, quit taking it Sun .
Active Outpatient Medications                          Status
Does the patient report pain&gt; when asked for pain score?
HISTORY: Medical History as recorded in the patient problem list in
ok but when layed down felt short of breath. unsure if from anxiety. c/o usually
Assess telemetry, document any changes in rhythm.
HOUR OUTPUT =
Score:
Right Upper: Normal
()L/M
Level of Consciousness: Alert
"        "     Pain
Perrla
TOTAL SHIFT INTAKE =  ml **
Moisture:           = Rarely Moist
Color:  Normal for ethnic group
DISCHARGE ORDERS
WOULD BE LIMITED BECAUSE HIS DEPTH PERCEPTION IS POOR DUE TO THE POOR VISION IN
PSURHX:
. Hypertension *
. Hyperlipidemia *
(X)SUPPLY FRAME (X)SUPPLY LENSES ()FRAME ENCLOSED
rent Pat. Status:   Outpatient
sc ed document: EXTERNAL PROCEDURE NOTE
WT. lb [. kg] (// :)
Diabetes Mellitus without mention of Complication, type II or unspecified type,
NEW MEDICATIONS:
MEDICAL CERTIFICATE
DISCHARGED TO HOME AFTER TORADOL MG IM AND RX FOR FLEXARIL
PRE-THERAPY SKIN ASSESSMENT:
IV Fluids:
upper blepharoplasty.
Post-op edema of forehead and periorbita.
s/p endobrow and upper blepharoplasty
Report will be communicated via CPRS Notification to the requesting
=========================================================================
UNITS SUBCUTANEOUSLY BEFORE BREAKFAST AND INJECT
Date and location of eye exam:
medications: Antihypertensives, Antidepressants, Antipsychotics,
Does patient have pain?
and the community.  Veteran is currently living in adult foster care provided by
Pt&quot;s initial BP-/,P-. Had pt sit quietly and vs were rechecked: BP-
Temperature: . F [. C] (// :)
Patient has answered NKA
Electronically Filed: //
Tonometry Readings:
RESULTS
Negative Responses
Score obtained by patient verbalization of num al scale
(X) Left voicemail message in regards to upcoming appts.
( ) Appointment information left with family member.
RESULTS
ADMINISTRATIVE NOTE
pt advised to moniotr s/s dc, rash, bumps or lumps. Pt given self breast exam
She states the pain is a throbbing pain.
hours
wants to know if PA will write a note to excuse her from
NURSE COMMENTS
vet states she does not need x- s but needs MRI
medications, herbal products or supplements that you may be taking over the
TWICE A   FOR ANXIETY. AVOID GRAPEFRUIT AND
(x) PRE-REGISTRATION COMPLETED.
Identified problem: OTHER UNSPECIFIED COUNSELING.
Hospital  phsome state
Phone: --
Chief Complaint: Leg Cramps (Unilateral)
Caller Response: APPT SAME  .
( ) PATIENT DID NOT WANT TO PRE-REGISTER.
lipid
urgent appointment. She explained that she is very dissatisfied with her brother
Informed MAA staff and have asked that they look/find it to show provider.
Nurse Recommendation: - hours
...Individual
Patient provided with contact numbers.
Prevention&quot;s Inactivated Influenza Vaccine - Vaccine Information
Objective:
effects to report.
Left knee-   cm laceration noted on medial aspect left knee. sl erythema
Allergies/Adv:Patient has answered NKA
. Lo
TAKE ONE-HALF TABLET BY MOUTH EVERY
)   ISOSORBIDE MONO
Alphabetized list of outpatient Rx&quot;s, inpatient orders, remote and Non-VA meds
( ) PATIENT DID NOT WANT TO PRE-REGISTER.
NURSING NOTE
Hypertension
following problems? Feeling down, depressed, or hopeless: Not at all
Evaluation/Management Code: UNLISTED EVALUATION AND MANAGEMENT SERVICE ().
Starting at: // @ :: AM
Caller Response: ***PHARMACY ISSUE.
MISSING PATIENT RISK ASSESSMENT
TRIAGE STATUS:
ESOPHAGEAL REFLUX
BP       /  MAR , @:
ADDITIONAL COMMENTS/INFORMATION:
Identified problem: OTHER UNSPECIFIED COUNSELING.
Identified problem: OTHER UNSPECIFIED COUNSELING.
Pt needs to call and make an appt with  physician gn a narcotic contract
Rx is due on /, and I advised him to come before that time.
[  ]YES
PE:HEENT: L lower lip with  mm ulcer/sore.
Height:  in [. cm] (// :)
reviewed/reordered-copy to pt.Will need renal panel prior to CT scan.
following-up on a positive CRC screening, including the need to
OPS UNIT WITH YOU THE MORNING OF SURGERY.  YOUR DRIVER MUST BE AVAILABLE
Call light, Room/Bathroom,  , Smoking P cy, Side rails, Leaving
spot floating around".
. Chronic Obstructive Pulmonary Disease              //  SOLUM,
than /.
s  Sig: TAKE ONE TABLET BY MOUTH  Refills:    Last:--
AREA EVERY   FOR SKIN CLEANSING                    Expr:--
L: PCIOL centered OD with clear central axis, but PCO capsule encroaching on
.  Side/laterality: Bilateral
s p and he will have to stand and/or walk around at times for relief. He is
History and Physical are still accurate: Yes
Ordered By:  ,  D         Admin By:  ,  D
**If symptoms worsen
date and time: Oct ,@: Patient and/or family was given a copy of
Mr.   was seen this AM on  .
please call the nurse line at ---, option .
. Patient name:   ,
PRELIMINARY REPORT
anxiety noted, able to carry on a  conversation with no problems
Rehab Referral per nursing admission assessment.
on call light Side rails: up X
Veteran was administered an orientation checklist.  He scored % on orientation
Personal Hygiene: LEVEL OF ASSISTANCE = Independent
Bathing: LEVEL OF ASSISTANCE = Independent Shower
Immediate Memory                Percentile Rank =     Severe Impairment
Orientation to Environment      Percentile Rank =      ed Impairment
Bathing: LEVEL OF ASSISTANCE = Independent
L - Limited Assist - Contact Guard Assist, light touch, no lifting
X               Awa ss of dangerous household situation
both OT and ST to increase cognitive awa ss.  This is his main reason for
into bed, pushing wheel chair, putting on socks.)
ADDENDUM
---, option  between hours of :am - :pm.
TWICE A   FOR DEPRESSIO
the time of admission.  He says "I have been busted, shot by a   in the
COMMUNICATION: verbally communicates needs accurately
Veteran is independent with hygiene and activities of daily living.
Active and Recently Expired Outpatient Medications (including Supplies):
POV: then Walking  to ED
. Heart valve replacement status (prosthetic or
Reason for visit: Follow up pain.
Quality of pain is:aching, constant
redone   St Jude Regent valve (mechanical)
___Erythema
Reaction: None
O:  ,    is a  year old MALE.
Psychology:   minutes of individual supportive therapy
Past Medical History:
Subjective: Patient&quot;s chief complaint FOLLOW UP CHO OL
Refer to RN note for other assessment and history.
__x_Lesion:  site_____________
History (current illness, medical):
the behaviors of other people.  He indicated he was taking his
shared that he has been spending more time alone in his apartment.
PSYCHOLOGY
Ocular Hypertension
ST FOOD, DRINK, OR OTHER DRUGS; STAY UPRIGHT
Immunization: INFLUENZA
)HYPERCHO OLEMIA
PROBLEM:                )HYPERTENSION
incorrect; he will change at registration.
SEE MEDICATION PROFILE FOR UPDATE.
PULSE:   (// :)
Mood: pleasant
    
