# Supplementary material for: Predicting the Risk of Suicide by Analyzing the Text of Clinical Notes
Source: PLoS One. 2014 Jan 28;9(1):e85733. doi: 10.1371/journal.pone.0085733 (PMC3904866; doi:10.1371/journal.pone.0085733)
Supplement: Appendix S3 — Machine Learning Libraries and Methods: This section is provided to enclose the open source (Apache License) classifier used for the building of the statistical models, specifically for the purposes of study reproducibility. A detailed account of these tools is intended for another publication. (ZIP) [file pone.0085733.s003.zip › Appendix3/ML_libs/Regression_testing/group1/grp1-pt-1037.xml.txt]

influenza vaccine, dated // Centers for Disease Control and
loss program at this time.
ADDENDUM
Active Inpatient and Outpatient Medications (excluding Supplies):
under a single drug class.
Doing well, retrired, lives alone. No longer has neck pain that is uncontrolled.
meds:
Section : The veteran experienced the following events during OIF/OEF
. Please read each item carefully and select the correct answer for
ASSESSMENT: Bilateral knee de rative joint disease.
REASON FOR CALL:  PC appt with fasting labs.
=========================================================================
PC ANNUAL (H&amp;P) EXAM NOTE
sensation. Pt still drives, got license  wed /.
LEFT EYE:
EYE DROPS ADMINISTERED: Alcaine, Mydriacyl (%), Phenylephrine (.%) Mar
. Treatment/procedure: The surgeon will remove the cloudy lens from
PROSTHESIS
PHYSICAL ACTIVITY LIMITATION:
AT PRN
nev bid til out
TELEPHONE CONTACT
This SW contacted vet&quot;s daughter to complete SW consult requested by  physician  This SW spoke with vet&quot;s daughter, Shirley Alexander, by phone.
followed by blood. Pt. states the bumps then fill up within a few  s. Pt. is
Allergies: PCN
ADDRESS and PHONE verification is mandatory.
PC TEAM: CASA GRANDE CBOC
METHADONE    MG  TAB     RX #:
. Neck Pain
Pharmacy has evaluated the following prescriptions for accuracy and
allergy profile, lab values and documented guidelines.
FLOREsome state
(DUPLICATE REQUSET MED ON SUSP FOR //)
TLC PHARM CONTROLLED RX
PREVENTATIVE &amp; HEALTH MAINTENANCE
Priority of exam: NSC
BACK AND LE&quot;S. PATIENT SAID TO  THAT HE IS OFF OF METHADONE AND  FEELS  MUCH
. Consent to Blood Products (if applicable):
. Practitioner obtaining consent:  Bal os,Julian (PHYSICIAN)
// :  PC YELLOW HESS NP
. cataracts OU
OCULAR HISTORY: (-)glaucoma, (-) cataracts, (-) surgery, (-) injury, (-)
worked up with carotid doppler studies  ier this year with no significant
pt called and infomred md reviewed documentation for bayside er visit and
Patient Interview
)   METOCLOPRAMIDE HCL MG TAB TAKE ONE TABLET BY MOUTH   ACTIVE
infusion of ml isovue  thru g R ac angiocath inserted by EKC was
YOUR NEXT PRIMARY CARE APPOINTMENT, YOU MAY CONTACT THE TELECARE NURSES AT
CHIEF COMPLAINT: lung nodules
ENT: Hearing - decreased esp in the left side; Sinus problems - neg;
PRIMARY CARE-PROVIDER FOLLOW/UP NOTE (D)
. Pulmonary Neoplasm  Ct /, rpt  months
.  year history of thyrotoxicosis - now defined as Grave&quot;s by both / RAI
--------------------------------------------------------------------------
NPDR OS (Ac &lt;%, oral meds) (/)
FOR FOLLOW UP PATIENT
. He has  nodules in the left lobe, but they are warm, making thyroid cancer
remains current as of AUG ,
[ x ]  Other (SPECIFY):  Endocrine clinic
Heart disease
K: clear
ADDENDUM
ADDENDUM
BIFOCALS
States ran out of duloxitine.
Calcium, serum                . - .            .
need to try pravachol as ldl above goal
no abd pain,no heart burn,no nausea,no diarrhea,no constipation,no melena
) Gerd
)  Hypokalemia * (ICD--CM .)
Allergies and Adverse Reactions in Vista:
Pre-Albumin: N/A
AC joint de rative changes.)
Wt:   . lb (. kg)
Complications/Usual Events/Transfusion Reaction/Medications Reaction:
The following actions/teaching methods were initiated as a result of the
=BP &gt; +/- % pre-anesthesia level
----------------------------------
GH jt mobilization
Objective: Pt. ambulates to clinic unassisted, with a non-antalgic gait wearing
Subscapularis tendonopathy with question of a tiny undersurface partial
Objective: Hot pack to the right shoulder
PM&amp;RS OCCUPATIONAL THERAPY PROGRESS NOTE
Decreased ROM of the left IF
(MRI of right shoulder done on //
Decreased ROM of the left IF
Anterior glenoid labrum de rative changes.
physician he/she agrees with my a
PM&amp;RS OCCUPATIONAL THERAPY PROGRESS NOTE
intra-articular fracture of the middle ph x associated with
FOR VITAMIN SUPPLEMENT
AUGUST -CHEST XRY- NO MASSES
Review of Systems -
Skin        :
This examination of the left index finger reveals a comminuted
Object
(MRI of right shoulder done on //
PODIATRY OUTPATIENT NOTE
of left if pip after injury with saw in .
R. Vara, M.D.
CASE WAS REVIEWD WITH RESIDENT STAFF.
RESPIRATION -     (// :)
SCOPE SERIAL #
Colorectal Screen is indicated
DIRECTIONS:  Fill in all spaces that apply. Leave spaces blank that do not
apply. Identify and document learning factors for each person to be taught.
(L/MIN)(%)
)   ASPIRIN MG CHEW TAB  Qty:  for     ACTIVE       Issu:--
s  Sig: CHEW ONE TABLET BY MOUTH     Refills:    Last:--
Left Area: Ambulatory
An alcohol screening test (AUDIT-C) was negative (score=).
Never
His last -month note was reviewed with him.  The eyedrop he did not know
at age .  He has had  colonoscopies, all negative.  His mother died at
AMB-AMBULATORY/OUTPATIENT CARE NOTE
PHARMACY ANTICOAGULATION CLINIC
QT:.
:)
Active Outpatient Medications                          Status
// @        PULSE OXIMETRY:
INR Target Range: .-.
MOUTH EVERY   TO PREVENT BLOOD CLOTS
PATIENT PHONE - --
PAIN INTENSITY:
Never
OBJECTIVE:
CARDIO:
Right: Strong
.Recent EKG showed left anterior hemiblock and chest X  was negative as
Ot
Voiding without difficulty: Yes
Radial pulse:
Skin
Moisture:           = Rarely Moist
W Phone: NONE
This SW spoke with Marilyn McPherson at travel and she will contact vet to get
. How often did you have six or more drinks on one occasion in the
Depression, sickle cell trait, various joint/muscle aches.
Financial stress brought on by unemployment and subsequent lack of
issues - has been able to keep property and have his motel room paid for in
mobile home. Mood remains hopeful and euthymic. Continues to maintain contact
OSU
An alcohol screening test (AUDIT-C) was negative (score=).
UROLOGY SURGERY CONSULT
He is without c/o to .
Labs:
C. PROSTATE BIOPSY RIGHT APEX
APPOINTMENT REMINDER
Pt notified of pending appointment with radiotherapy.
Ending at: // @ :: PM
AGE:   DOB:SEP ,
. HIV + since ,on therapy,Viral Load , CD , CD/CD .
Vital Signs:
.Overall Condition:
Activity:           = Walks Frequently
adapter.
When contacting the cousin to discuss where we are at in this processs, she also
refusing. He is adjusting to the idea of living in a long-term care facility,
PROSTHETICS HOME RESPIRATORY CARE NOTE
Thought:CLEAR
DISCUSSED WHETHER THIS WAS THE PROBLEM THE FEELING OF REJECTION.  ADMITS HE HAS
INFLAMMATION. TAKE WITH FOOD OR MILK.
AGE:  SEX:MALE   WEIGHT: lb [. kg] (// :)
drinks    at least   a   pack a  week
CURRENT NON VA PRESCRIPTION MEDICATIONS:
// TRIGLYCERIDE         .
BY MOUTH DAILY FOR DEPRESSION
BY MOUTH DAILY FOR DEPRESSION
. Hyperlipidemia, NOS
,  E --
Telephone call to pt per RN request to discuss warfarin and re-enrolling in
Thank y
=========================================================================
=========================================================================
If you are taking your warfarin differently than what is listed above,
Assessment, plan and decision making:
Per patient&quot;s warfarin questionnaire from yester :
Caller Response: *APPT SAME  .
MEDS:
LAYER IN AFFECTED EYE(S) AT BEDTIME FOR EYE
amount of time spent "active" in Telecare Record Manager.)
A&amp;OX. Pt is afebrile. Nonproductive cough. No   patches noted  in
Influenza .cc IM given in left deltoid
Temperature   :  . F [. C] (// :)
IMPRESSION:
Wound Care:
Chief complaint: post bx scalp( basal cell ), bx left arm
document can be accessed through Vista Imaging.
) Antibi
Phone Number:
Pt.was advised that no records have come to VA.Then pt.said that she needs to
TWICE A   WITH FOOD
HE RERPORT SHE IS DOING WELL ON MED REGIMEN AND WANTS TO CONTINUE WITH
HIS  YO SON   IS ATTENDING PSU  BUEG
P: RTC  months
The patient&quot;s Braden Scale Score is . The patient is considered
He has had some problems with a deceased partner&quot;s surviving spouse who has
Pulse: (// :)
(Fall Risk Screen)
medications that you might be allergic to and to avoid any harmful
information sheet regarding cbc, bmp, lft, psa, lipid panel, ts, and ua results
SPLITTING TABLETS
Comments: Calls for  wal/mail of doxazosin.
Date:   ? Exact date is unknown
CC:  MALE referred for initialevaluation of .
Hypoglycemia Review: non within the last  months
me.
[ ] Pain Management
might like a copy for your records.
LANCET,TECHLITE G USE  LANCET    AS DIRECTED *DISPOSE    ACTIVE
PULMONARY FUNCTIONS REPORT CONSULT
_HEART - MYOCARDIAL PERFUSION IMAGING (MPI) (MYOCARDIAL PERFUSION
HT:  in [. cm] (// :)
BP: / (// :)
noseb ds                (-)
noseb ds                (-)
medication changes
alcohol (x)
ACETAMINOPHEN MG/HYDROCODONE MG TAB
concerns w
P:  (// :)
M
PC GENERAL GFIRM 1
Was involved in an MVA in  uary.  Had a c neck fracture.  Is now at Park
Future Appointments -
// :
it tonight and it didnt help.  He denies fever, c s, wheezing, cough, PND,
,@:  DPC-LAB
Active Outpatient Medications                          Status
ON ARRIVAL PATIENT WAS: ambulatory
disease.
Yes
== == == == == == == == == == == == == ==
Abdomen
N/A
INTERVENTIONS
Date              Vital             Measurement      Qualifiers
MRSA COLLECTED: Yes.
Score:
Moisture:           = Rarely Moist
B/P: /
PSYCH/SOCIAL:
.  Who at the VA will you call if you have questions?
Very Satisfied
***********************************************************
AS DIRECTED TO TEST BLOOD SUGAR FOUR TIMES A
Information source: Patient
PART
: Medicated pt as per orders written.  EKG was performed with no distress.
Skin Temperature
Gave pt snack and caffeine-free soda. Pt then placed C-pap on face for the
== == == =
MEDICAL COMPLICATIONS: None.
Spi try and diffusion capacity are normal.
PCN, NIACIN
===============================================
APR ,@:  BLUE/
ADDENDUM
Reports overall is following a low cholestrol/low triglyeride diet. Blood sugars
Active Outpatient Medications                          Status
)   ACCU-CHEK COMFORT CV(GLUCOSE) TEST STRIP USE  STRIP   ACTIVE
"        "     Pulse
Future Appointments -
JUN ,@:  PACEMAKER ST JUDE
verbalized understanding and agreeab
Stimulation Thresholds Minimum Paced:
AS DIRECTED TO TEST BLOOD SUGAR FOUR TIMES A
Date              Vital             Measurement      Qualifiers
// :  Temp F (C)        . (.)
not working on Satur . To  worked for extended hours. c/o "I feel great"
ADDENDUM
How long:  YRS
Skin Moisture
Eyes:
Internal Defibrillator
Radial: Palpable
Date              Vital             Measurement      Qualifiers
wife.
OBJECTIVE
TOTAL SHIFT INTAKE =  ml **
OUTPUT --------------------
Femoral: Palpable
HOUR INPUT =
Left Upper: Normal
Moisture:           = Rarely Moist
Urine Output =  ml
Moisture:   physician  Turgor
Extremity: Equal Bilaterally
Extremities: Edema:__  Pulses:_+_   Other:
turp
)   Non-VA CLOPIDOGREL   MG TAB MG MOUTH EVERY       ACTIVE
Learning preferences:
physician d: clopidogrel
TRIGLYCERIDE (V), SERUM, //@                 mg/dl     (Ref:
Outpatient Medications                                 Status
. PTSD SCREEN
medication list was reviewed with, printed
Active Outpatient Medications (including Supplies):
H  some state
Pain Screening:
pain in his low back, hips, and knees when he tries to get up and move
around.  His family members state that he is not overly active at home.
No allergies per patient
A.  Mental status:  Alert
Vitals:
CHIEF COMPLAINT:
Veteran Name:   J
and was given antibiotics. states that she is wheezing, throat scratchy,
papillomavirus (types ,,,) recombinant vaccine given IM in left deltoid,
Length of Session:
Vet in clinic to  and states she has a rib out of
bit.  She is getting better at budgeting and is looking for  to
appointment(s).
( ) Appointment information left with family member.
( ) Unable to contact veteran at listed phone number. No anwser, busy, etc..
( ) Currently in-patient.
Identified problem: OTHER UNSPECIFIED COUNSELING.
( ) Appointment information confirmed with family member or sponsor.
After discussing the health risks of obesity and offering a
System Recommendation: - hours
Nurse Recommendation: - hours
. Please read each item carefully and select the correct answer for
DOCTOR&quot;S NOTE - PSYCHIATRY
Nurse name: FRAZIER, ICE L
Positive Responses
Duration of Complaint:
reports that it is  hours away. The Veteran also reports that she has a
Patient Phone Number: ()-
NURSING NOTE
NURSE COMMENTS
H. PA
NURSING NOTE
Suicidality - None
lethality, no psychosis, insight and judgement-intact
DIAGNOSIS: Same as Above.
Alphabetized list of outpatient Rx&quot;s, inpatient orders, remote and Non-VA meds
HEART:Regular Rate Rhythm, Normal S/S, Negative BRUITS, Negative MURMUR
)   ISOSORBIDE MONO
patient should be seen back in podiatry in three months or as
States need for foot exam/care due to long thick toenails and left great toenail
Please take medications as listed below.  Please check each of your medications
Allergies/Adv:Patient has answered NKA
Last Released: //                        s Supply:
Outpatient Medications                                 Status
Length:  minutes.
Ending at: // @ :: PM
,  J is assigned to Caller Area *WEST PALM BEACH.
No Associate Provider Identified
identified&gt;.
Medications:
Were you consistantly on guard, watchful, or easily startled?    NO
Starting at: // @ :: AM
Starting at: // @ :: AM
contract, and we can obtain a urine sample at that time.
=========================================================================
months or prn.
has not heard from Dorn since.
J
[X] CALCIUM CH EL BLOCKER -Felodipine, Verapamil, Diltiazam, Amlodipine
SLE
Procedure:PHACO/IOL RIGHT(OD) EYE CATARACT
The full consent
PULMONARY:
Other:
not exceed mg of APAP per  hours
van.
CHAPLAINCY GENERAL NOTE
A/P:
patient was seen with dr neff
IF YOU RECEIVE A MEDICATION THAT IS NOT ON THIS LIST PLEASE CALL YOUR
TIMES PER   FOR PAIN,TAKE WITH TRAMADOL
visit,pt states he is doing fine
Hem/Lymph:  Denies bruising or b ding
ABI R . toe index   L .
disease.  Temp F.
// :
EVERY  HOURS FOR   , THEN TAKE ONE TABLET
or  (not )
DLCO (uncorrected) is moderately reduced.
use of equipment as needed
Veteran has been scheduled to be seen on // at  a.m.
Patient refused ADL&quot;s this shift
Tub/shower: LEVEL OF ASSISTANCE =
Occupation:STEEL WORKER
NSC VETERAN
I - Independent
physician EL OF ASSISTANCE = Independent
Leisure: napping, drinking coffee
on call light Siderails: x  Veteran has a wanderguard on his left
suffering from delirium. He has been admitted to the CLC for further recovery
Leisure:
Bathing: LEVEL OF ASSISTANCE =
impairments in working memory and executive function processes, performance
ACTIVITIES OF DAILY LIVING MEASUREMENT DEFINITION
visits to be sure they are correct
COMMUNITY LIVING CENTER   SHIFT ASSESSMENT:
why he was shot and how he went to Minneap s.  Most of the information
breath.  No dyspepsia, constipation or diarrhea. No nocturia or dysuria.
OCCUPATIONAL THERAPY CONSULT
*** SC ED DOCUMENT ***
uary.  VEt reports has returned to work and feels less short of breath even
cells: . (// :) which is Normal.
Allergies:
Incessant/paroxysmal junctional tachycardia
BPH - retention, nocturia, slow urination,
No history of falls. Reassess at future appointments.
___Excision of nail fold, toe:  site____________
// at :. Will continue case services.
SMOKES  CIGARETTES/ .
ADDENDUM
Positive Fecal Occult Blood Test Results
his sister, and she is offering to help him get through the medical
Specify:
BE SPLIT***
(+) physician ter
PMHx:   (-)DM,COPD
)   HCTZ /LISINOPRIL MG TAB  Qty:  for  ACTIVE       Issu:--
B.P.:   / (// :)
need:
)   CLOTRIMAZOLE % TOP CREAM- APPLY A THIN FILM TO      ACTIVE
)HYPERCHOLESYTEROLEMIA
PRIMARY CARE
ACUTE NEW PAIN (LESS THAN  MONTHS)
pelvic tilts hold  sec  rep
prone press ups  reps
Past Medical Hx (surgeries, injuries, illnesses): none recent
    
