# Supplementary material for: Predicting the Risk of Suicide by Analyzing the Text of Clinical Notes
Source: PLoS One. 2014 Jan 28;9(1):e85733. doi: 10.1371/journal.pone.0085733 (PMC3904866; doi:10.1371/journal.pone.0085733)
Supplement: Appendix S3 — Machine Learning Libraries and Methods: This section is provided to enclose the open source (Apache License) classifier used for the building of the statistical models, specifically for the purposes of study reproducibility. A detailed account of these tools is intended for another publication. (ZIP) [file pone.0085733.s003.zip › Appendix3/ML_libs/Regression_testing/group1/grp1-pt-1047.xml.txt]

A PHQ- screen was performed. The score was  which is a negative
EFAVIRENZ MG TAB TAKE ON
cerumen removal pt states hearing loss resolved, instructed to f/u with
of both knees.  The patient tolerated the procedure well.
HISTORY: The patient is here for follow up of his bilateral
ASSESSMENT: Bilateral knee de rative joint disease.
BLOOD PRESSURE:            / (// :)
Reason for visit:  UAL APPT.
Surgery:
SURG OPTOMETRY TEXT NOTE (AUTOPRINT)
REASON FOR EXAMINATION:
PINHOLE:                                      /
Patient requests surgery in an attempt to improve or preserve vision.
ALLERGIES:    PENICILLIN
ST LOCATION:
Ne
EMERGENCY CONTACT:  CALL:  () - (Ask for Ophthalmology Resident on
Status       Last Fill
PC NURSING EXIT INTERVIEW NOTE (LINKED SHARED FILE)
Status       Last Fill
Colorectal Cancer Screen:
radiates to front of chest. Pain is not reproducible or regular in nature.
since last vs. Pt. continues to have financial difficulty and due numerous
Sig: TAKE / TABLET BY MOUTH THREE TIMES A   FOR PAIN
)   ACCU-CHEK *COMFORT CURVE* TEST STRIP EA. USE  STRIP
PHARMACY GENERAL COUNSELING
Exam result:
FUTURE APPOINTMENTS:
[  ]  Other (SPECIFY):
If (yes) pregnant, how many  :
CIRCUMFERENCE/GIRTH - NONE FOUND - Y
Active Outpatient Medications                          Status
. Depression *
DX:DM, Dietary Surveillance, counseling
Labs:
unlikely.
[  ]  Follow-up Appointment
This transmission is intended for the use of the person to whom it is addressed
DURATION OF SYMPTOMS:
. Continues improved but continues clinically thyrotoxic on  mg MMI daily.
Please call --- ext.  and you will also need  ual lab work
year.
his medication. There was some confusion as his list does not match what we have
)  Screening for Malignant Neoplasms of colon
Fall Risk Screen Outpatient:
having muscle cramps, esp to trunk.
no fever,no c s,no wt loss
)  Carpal Tunnel Synd  * (ICD--CM .)
VistA Image Display under "Tools"
SGPT (ALT)                     -                   L
Protein, Total, serum         . - .             .
IR AND ER HURSTS
ETT
affected part of the finger.  Any dead or dying tissue will be cut
s:  Oct ,
MOVING ALL FOUIR EXTREMETIES.
Type of Anesthesia           :   regional
Assistance:  Assisted to lounge chair, Siderails up, Call bell in reach
=Able to move  extremities voluntarily or on command
UBE X  minutes
Pain assess/reassess/observations:
Objective: Hot pack to the left hand and the right shoulder
Decreased ROM of the left IF
OCCUPATIONAL THERAPY EVALUATION
-COPD.
Comment: METAB C/DJD
Follow Up Care
AC joint de rative changes.)
X-  of the L IF on //
Supraspinatus tendonopathy.
upon debridement
left.  grossly neuro intact.
Assessment/Plan
S:  year old MALE RTC for f/u HKT lesions on plantar L foot. Pt states that
Teaching Topic(s):
on how you like to be cared for (ex. Die
(x) Has had an opportunity to have questions answered.
*Tobacco Use Screen FY:
papule which I feel is incomplete removal and therefore the lesion was
treated again with liquid nitrogen and I will check him p.r.n.
Location of Test: Steele Memorial
SAO:  %  liter
ID band on:  Yes
Rhythm: SB/
Did well through night without incident.  S/P cardiac cath // did
Personal belongings sent with patient:  ALL BELONGINGS WITH PT
mg daily.  F/U at Steele Memorial.
:)
B/P:  / (// :)
/..Unable to reach patient.  In  ier discussion, Vet denied s/s b ding.
Pulse Ox:  // @        PULSE OXIMETRY:
pt transported to ER via wheelchair by lab tech, lab tech informed that pt
. f/u with PCP
instructions on the prescription label.  If you have any question about your
CBC                      NOV ,    NOV ,    NOV , @:
WEIGHT:  . lb [. kg] (// :)
Tobacco Use Screen:
his outside family physician, DR.Demanian, urologist  as well as cardiologist,
usually begin soon after the shot and may last -  s.
Voiding without difficulty: Yes
Activity
Other: Voiding per urinal and in bathroom.
Respiration
Face to Face: night nurse
-
Patient is on a modified diet (specify):
SUPPLIES NEEDED:
PAGES:
GENERAL SOCIAL WORK NOTE
)   Non-VA CELE IB   MG CAP MG MOUTH EVERY   AS  ACTIVE
ADDENDUM
ADDENDUM
ADVISED THAT HE HAS UPCOMING APPT FOR XRT AND THEY WILL ADVISE WHAT HE MAY NEED.
DIAGNOSIS: Gleason + adenocarcinoma of prostate
BLOOD PRESSURE:  /  (//  :)
increased  lbs.
OUTSIDE MEDICAL RECORD (OTHER)
S:  y/o man with bulbar ALS presents to pulmonary clinic for follow up. Now
H/o L retinal detachment?
Weight:   lb [. kg] (// :)
S:CLIENT CAME FOR  MINUTE SESSION.  HE CONTINUES TO RUMINATE OVER HIS
S:CLIENT CAME FOR  MINUTE SESSION.  HE CONTINUES TO LAMENT OVER THE LOSS OF
P:RTC IN    FOR CBT
P:RTC IN
CLIENT DID NOT COME TO APPT. TONIGHT.  HE WAS CONFUSED ON THE DATE OF APPT. HE
CLIENT DID NOT COME TO APPT. TO .  HE DOES NOT HAVE A PHONE LISTED. WILL SEND
lb [. kg] (// :)  / (// :)   (//
WORKING. STATES HE WILL CONTINUE TO TRY TO MAKE AMENDS AND WILL NOT COMMIT TO
,    is a  y/o MALE Veteran  new to the primary care clinic.
HE HAS POPPED SOME OF THEM AND PUT A RAZOR TO THEM, USED ALCOHOL AN DUSED A LICE
viral  culture   was  done
BP: / (// :)
Suicide Risk Screening:
lb [. kg] (// :). in [. cm] (// :)BMI:
Have you ever had a suicide attempt?
on warfarin, monitors privately
was given instructions on collection of stool samples to test for
blood.
Mr./Ms.  ,    is a  YO   MALE
) h/o melanoma, NMSC: NER.  Sun protection and skin ca warning signs discussed.
TWICE A   FOR HEART/ BLOOD PRESSURE
Osteopenia DEXA /, .% increase in bone mass on hip and .% on lumabr area
Flu Vaccine:
Site:  Left Deltoid
Goal INR:-
------------------------------------------------------------------------
FALL RISK SCREEN
SIGNATURE NOT REQUIRED
Current PAIN LEVEL (-):
enclosed for your information. If you have any further questions or
concerns, please call the clinic at --  or you may discuss them
The recommended INR range for your anticoagulation is: -. Currently,
The results of your lipid profile are as follows:
B/P: /
Had a fever or night sweats:  No
Dietary: No Restrictions
oriented to: Person, Place, Time
. Hip pain: x  showed OA,  on ibuprofen, stable.
)   HYDROCHLOROTHIAZIDE MG TAB  Qty:      ACTIVE       Issu:--
. Please read each item carefully and select the correct answer
HISTORY OF PRESENT ILLNESS: The patient returned for follow up. Last visit was
time?yes
. Practitioner obtaining consent:  Cocke,  M Jr (PHYSICIAN
___  Unable to contact
Signature Informed Consent for
(PHE) Veteran instructed that information will be relayed to psychiatry.
accomplishment.  He will continue to work to  these goals, and we will
P: RTC  months
Medications reviewed and discussed with patient/caregiver/significant
Outpatient Medications                                 Status
medication.  This process will also help to prevent you from taking any
Weight:  . lb [. kg] (// :)
PT. STATES HIS RING FINGER ON HIS LEFT HAND WILL GET STUCK AND NOT WANT TO SOME
Patient has answered NKA
CAPSULES BY MOUTH AT BEDTIME
rating purposes only as requested by the   VA Regional Office.
Date of birth: OCT ,
RIGHT RETINAL IMAGES:
Medication requested: pioglitazone
Blood Pressure:  / (// :)
I suspect you are doing all you can to help get this under control.
Recommendation : patient will need to follow up with his PCP for DM , improved
Hemoccult cards provided
Vital Signs:
Appointment Rescheduled: No
Patient is actively enrolled in the care coordination/ home telehealth program
PRE BRONCHODILATOR    POST BRONCHODILATOR
VC           .    .
Reaction: None
NO SHOW
bruising                     none
have been unable to reach you, and have left several messages with our contact
Active Problems:
Breath Sounds:
recent neck surgery for C Fx after MVA.  No spinal cord injury from
Fevers, c s, weakness, night sweats and weight change
EACH   FOR GOUT
S/O: Called by ED nursing staff to address travel need for this vet to return to
Vet to be picked up by Malloy Transport at approximately :pm.
PREVENTIVE HEALTH AND PATIENT EDUCATION
Was involved in an MVA in  uary.  Had a c neck fracture.  Is now at Park
stable.
Discharge instuctions given to patient: (YES)
Other:HAS NO DME
Wt:  . lb (. kg) (ACTUAL, BED)
Yes
Score:
Intake and Output -
PULSE: B=         A=
GASTROINTESTINAL
PE obese NAD
Moisture:   physician  Turgor
HOUR OUTPUT =
The pressure ulcer prevention protocol was not needed - patient is not
Speech:
Presumed acute bronchitis
No
PHYSICIAN ASSISTANT NOTE
NURSING TRIAGE NOTE
Future Appointments -
,@:  DPC-LAB
Patient has difficulty s owing:
INTERDISCIPLINARY TREATMENT/DISCHARGE PLAN
Bronchial hygiene/bronchodilators as ordered
Goals/Expected Outcomes
CURRENT SKIN ASSESSMENT
ADDENDUM
Mobility:           = No Limitation
Nutrition:          = Excellent
CARDIOVASCULAR
SKIN PROBLEMS
TOTAL SHIFT OUTPUT =  ml **
TUBES/LINES REMOVED:
***********************************************************
PRIMARY CARE VISIT
verbalized understanding and agreeab
)   ACCU-CHEK COMFORT CV(GLUCOSE) TEST STRIP USE  STRIP   ACTIVE
"        "     BP                /
Standard Title: EMERGENCY DEPT TRIAGE NOTE
Determine most effective teaching method.
Friction:           = No Apparent Problem
-Report recieved from C. Blake, RN
Skin Temperature
Clear to Auscultation:
No complaints.  VSS.
Turgor:  Within normal limits
ADDENDUM
CBI Urine =  ml (Total CBI output - CBI irrigant)
The pressure ulcer prevention protocol was not needed - patient is not
Skin Temperature
OCT ,   FLU, YRS
Follow Up With: cardiology in one month for amiodarone refill
Nurse-Influenza Immunization (r):
. How often did you have a drink containing alcohol in the past
. Hyperlipidemia *
Order Information
Order Information
Reason For Request:
BARRIERS affecting the readiness to learn:
an appeal request to your local Pharmacy Manager to be taken up at the
HR  (// :)
PROBLEM LIST:
HPI:  yo wm with c/o of upper and lateral visual field obstruction nd excess
Wednes  //
HPI/OTHER: see problem list below.
Labs: CBC unre able.
Medication Reconciliation
this time.
schedule
Hyperlipidemia NEC/NOS
Eyes: s/p cataract extractions and lens implants
Nephew states he and Veteran&quot;s sister have called around AM and Veteran was
He recently had surgery in privage sector of cyst of back. IT is healing well.
Active Outpatient Medi
PM
Call Type: *SYMPTOM (DTN).
+ wheezing, new or worsening
- diaphoresis, with dyspnea
drugs.  She is having no psychotic experiences.
MRP -  Medication Reconciliation
+ pain or swelling, hip
Vet called states " I talked to the telenurse last night and I need to be seen
you. How often did you have six or more drinks o
TEL TRIAGE AFTER HOURS CALL CENTER NOTE
Associate: IRONS, ICE
PHYSICIAN ASSISTANT - MEDICAL
( ) Appointment information confirmed with sponsor or Group Home.
( ) Currently in-patient within a non-V.A. Medical Center or Nursing Home.
.  Simvastatin  mg one-half tablet daily.
Please assist her with an appointment for a C&amp;P exam at C i, or provide her
At that time the VA Regional  Field Examiner   Hood had indicated that the
Identified problem: OTHER UNSPECIFIED COUNSELING.
Associate: IRONS, ICE
Duration of Complaint:
Associate: IRONS, ICE
order was still pending
identified&gt;.
Returned call to vet via written message and left message on answering machine.
NURSING NOTE
Duration of Complaint:  Hours
( ) NEW INSURANCE INFORMATION AVA
( ) Left message on machine/voice mail in regards to upcoming appointments.
MRP -  Medication Reconciliation
)   ETODOLAC MG
Date: //
Please refer to this provider&quot;s notes May - Decembe
CONSULT NUTRITION
management class and the regular session @ am in Athens on -- when she has
identified&gt;.
Facility Appointed PCP: CALDWELL,  G (ATHENS)
Veteran Name:   J
Vet called clinic and states that the PT states she needs
Good
ONSET OF PRIMARY PAIN:
Patient provided with contact numbers.
Pain Reassessment/OUTPATIENT:
Suicidality - None
...Doing
(Years/months):
reports good compliance, last drop last night OU. Needs refill to . No other
. Blepharochalasis OU
)   ATENOLOL MG TAB TAKE ONE-HALF TABLET BY MOUTH EVERY  ACTIVE
Allergies/Adv:Patient has answered NKA
( ) Currently in-patient within a non-V.A. Medical Center or Nursing Home.
( ) PATIENT DID NOT WANT TO PRE-REGISTER.
PODIATRY FOLLOW UP CARE
)   GABAPENTIN MG CAP TAKE ONE CAPSULE BY MOUTH DAILY   ACTIVE
NURSING NOTE
Neuro: Decreased sensation bilat; paresthesias; taking gabapentin
Patient Phone Number: -- HOME
MAS TELEPHONE CONTACT
Patient Phone Number: -- HOME
Identified problem: OTHER UNSPECIFIED COUNSELING.
Author:  ,KIMYANA
identified&gt;.
No Associate Provider Identified
and neck pain.   Multiple herniated disks neck and back.  Arthritis in
no chest pain, no SOB, no DOE, no cough, no abd pain, no heartburn, no
Evaluation/Management Code: UNLISTED EVALUATION AND MANAGEMENT SERVICE ().
Conversation with  ,  J has a chief complaint of: &lt;not
ALLERGIES: Patient has answered NKA
)   Non-VA EZETIMIBE/SIMVASTATIN TAB
AFLLAAA
PE:HEENT: L lower lip with  mm ulcer/sore.
Patient counseled on the risks of tobacco use and benefits of
quitting tobacco. Patient advised to quit. Discussed strategies to
OPHTHALMOLOGY HEALTH TECH NOTE-TL
Age:
History from: Patient- AND CHART
FUROSEMIDE MG TAB   Sig: TAKE ONE TABLET BY MO
ESTIMATED BLOOD LOSS:  None.
Orientation was completed on all items noted:
PO intake:  cc
Number/Other:
Shield qhs. No strenuous activity.
Site without redness or swelling.  Covered with a dressing.
=========================================================================
PATIENT:   E
of tests?None.
state.
Rights and responsibilities for pain management.
appropriate for stents will place them.
SURGEON:     , MD, PGY
Major Operations Performed:
ADMISSION:
Call --- between hours of :pm - :am.
Active Outpatient Medications (including Supplies):
. This procedure involves the administration of a radioactive isotope
year old MALE veteran in for re-evaluation of Bilateral femoral artery
received the following iMedConsent document:
/
Patient accepted for TCU on (anticipated date):   ,
Vital Signs:
Transferring service: VAMC, Minneap s
L - Limited Assist - Contact Guard Assist, light touch, no lifting
delirium.  The patient received multiple units of fresh frozen plasma, packed
[x] Stays up late at night (after  pm)
ACTIVITIES OF DAILY LIVING MEASUREMENT DEFINITION
E - Extensive Assist - Any physical weight bearing. (i.e. lifting legs
into bed, pushing wheel chair, putting on socks.)
Mr.   is a  yo male admitted to the CLC on // from the Minneap s
At  : AM on  uary ,  , the patient (and/or surrogate)
IMED EDUCATION
Palliative Care Coordinator:  Jody Holman
DISCHARGE SUMMARY
=========================================================================
Patient Name:   ,     SSN:  --
Previous Pachymetry:
ACTIVE OUTPATIENT MEDICATIONS:
Social HX: Elderly  vet living with sig other independenlty in Enderlin
CABG  x
,
Urine test normal as well.  We&quot;ll see you this fall for the fasting blood work.
Facility: Heart Clinics Northwest, Spokane WA
ADDENDUM
worse for the last  months.
LBP
PSYCHOLOGY
went away about a week later and he did not seek medical help.  He has
Preventative Medicine
EVERY   FOR BLOOD PRESSURE ***CAUTION-TABLET MUST
ADDENDUM
[ ] Removal of nail bed
He was on time for his appointment.  His grooming and hygiene were
. I eat few fruits or vegetables, or milk products. () No
[ ] Dexamethasone
to meet with J. Moncello, CNS to  w his medications and we agreed we
under a single drug class.
CC: Here for ocular HTN f/u &amp; HVF no new problems.
Patient name:  ,
INFLUENZA MAR ,
)   FINASTERIDE MG TAB TAKE ONE TABLET BY MOUTH EVERY     ACTIVE
units (.ml) tuberculin, purified protein derviative administered
ADMINISTRATIVE NOTE
.  The strict maintenance of confidentiality of test results within
SEE MEDICATION PROFILE FOR UPDATE.
PT STATES NEEDS ALBUTEROL TO
ENABLE
VITALS (last observed) --
doing his exercises at home - per his report.
We have not received your cards.  If you lost them please call so I may mail you
OPTOMETRY
    
