# Supplementary material for: Predicting the Risk of Suicide by Analyzing the Text of Clinical Notes
Source: PLoS One. 2014 Jan 28;9(1):e85733. doi: 10.1371/journal.pone.0085733 (PMC3904866; doi:10.1371/journal.pone.0085733)
Supplement: Appendix S3 — Machine Learning Libraries and Methods: This section is provided to enclose the open source (Apache License) classifier used for the building of the statistical models, specifically for the purposes of study reproducibility. A detailed account of these tools is intended for another publication. (ZIP) [file pone.0085733.s003.zip › Appendix3/ML_libs/Regression_testing/group1/grp1-pt-1061.xml.txt]

instructions.  Vet may be reached at -- or --
BY MOUT
AUDIO
WWII which resulted in his hospitalization.  Veteran reports he noticed a roaring
SURG AUDIOLOGY C&amp;P EXAM NOTE
DOB:  JUL ,   AGE:    SEX: MALE
Admission Date: Not Applicable
Patient in Hold: APR ,   :    Patient in OR:  APR ,   :
Start Using Eye  physician w after you are seen in clinic
VISION:
.    ATRIAL FIBRILLATION
Series:
S:     Vet here for f/u DM,CAD,HTN,hyperlipidemia,PVD,neuropathy. Pt. BS avg
:).
Signature Informed Consent for
treatment/procedure.
,
Cardiology recommends echo  ually
. Hyperthyroidism *
)   ATENOLOL MG TAB TAKE ONE TABLET BY MOUTH EVERY     ACTIVE
[  ] Counseled on daily weight monitoring:
he was given prescription and was told to see his own PCP. He has been
[ X ]  Initial Appointment
HEIGHT Actual:  in [. cm] (// :)
comfortable sending him for I therapy, which both Mr   and I have agreed
Patient eligible for glasses, explained to patient what they are
BODY MASS INDEX - AUG , @::   .
is the appropriate long term treatment, since medical remission is cl y not
during the same appointment.  You have not been seen since November  and to
note have been reviewed by the patient&quot;s provider.
Prednisolone acetate % OD Every
OS: /
Anion Gap                     . - .            .
SPECIAL MEDICATION REQUEST CONSULT
ADDENDUM
SEEN.
ADDENDUM
S: Pt is  yo male hx of ischemic stroke with residul expressive aphasia, HLD,
yo MALE who presents for a spine injection evaluation. Chronic history of
Sodium, serum                  -
no HA,no visual changes,no limb weakness,no limb numbness
&gt;&gt;&gt; Disease specific handout:post op care
Teaching method used:
reviewed all of the pertinent studies. I agree with the plan of care as outlined
Impression:
Identification Band present: YES
PM&amp;RS OT LEDWANI   Nov , @:
Type of anesthesia:  MAC, Nerve block
)   CAPSAICIN .% CREAM  GM APPLY   AMOUNT TO     ACTIVE
OBJECTIVE:  (L) Hand.
Occupational Therapy Initial Evaluation
thickness tear.
This examination of the left index finger reveals a comminuted
AC joint de rative changes.)
metallic debris within the regional soft tissues.
a fiber glass saw. Irrigation, repair at the ER. Intraarticular MP fx
ADDENDUM
SUBJECTIVE (CC)      :  year old MALE RTC for b/l plantar posterior heel
ADDENDUM
OCCUPATIONAL THERAPY EVALUATION
This examination of the left index finger reveals a comminuted
(MRI of right shoulder done on //
Impression:
This examination of the left index finger reveals a comminuted
Chief Complaint: c/o pain in the right shoulder
please contact the Special Care Program at ---. We are
PAIN (-)       (// :)
PATIENT HEIGHT -  in [. cm] (// :)
Patient was provided opportunity to ask questions: YES
Would your family background, beliefs or religious needs have any effect
recommened a cholestrol lowering statin. the patient,however, does not want to
Creatinine was .. In March of last year, his hemoglobin and
Diet and exercise modifications are indicated.  If these are already in place,
at this encounter.
BP /  OCT ,@::
I = Issued earmold              F = Mic filter change
both ears clear and both membranes visualized and intact.
Indication for Warfarin:    Goal INR
RESULTS: INR .
. DESCRIBE IV FLUIDS STARTED AND WHY
SYMPTOMS OF CHEST PAIN, JAW PAIN
HEMOTMA TO THE SITE.  PT DENIES PAIN TO THE AREA AND DENIES ANY CHEST
on finger delayed clotting but no other b ding.  Hold  doses then decrease to
CAD
Nasal draiange that is pretty copious and  oying, ever since he was hit with
Active Outpatient Medications                          Status
CONSULT PFT
HGB AC - NONE FOUND
Your recent lab tests show the following results:
Injection Site:
medication, please call your provider or your pharmacist.
DICLOFENAC
IS NO LONGER NUMB.
cecal polyp.
anusol ordered
on going
REASON FOR VISIT/CHIEF COMPLAINT:   Chronic problem(s)
SOURCE(S) OF HISTORY: Patient
Review of Systems
Fevers, c s, weakness, nights sweats and weight change
(-)Negative for (Patient denies symptoms of):
Cap refill: &lt;  sec
Telemetry: Yes
Character: Clear, Unlabored
Cardiac  ers: positive troponin: ./././.
Rate: Regular
Continent: Yes
Denies pain.
Activity
Neuro: Alert/Oriented X, Arousable, Other:
Telemetry: Yes, Tele # intact--no c/o chest pain.
Nursing care plan problem:
Telemetry: Yes
Nursing care plan problem:
VS taken BP/ HR- RR- Temp of .  O sats of % on RA.
Bilateral: Strong
Activity:           = Walks Occasionally
No wounds, pressure ulcers or other skin problems.
Dialysis (center based):  No
ASSESSMENT: Status post recent off-pump heart surgery consisting of left
junction relieves the pain. I explained to hims that in doing this he is
opening Vista Imaging.
PLACE: Desert Reflections Imaging Center
A: lumbar pain/ bil knee pain, cervical pain improving
months ago (PCP counseling required).
GENERAL MENTAL HEALTH NOTE
will come through shortly. His ultimate goal is to live on his property in a
Error, pt did not show for to &quot;s appt
SCREEN FOR ALCOHOL (AUDIT-C)
Active Outpatient Medications (including Supplies):
PSA
Laboratory:   VAMC                               Accession No. SP
Left Apex
PAIN: ral Information: The patient and family were given  ral
S: Pt is a  y/o BLACK OR AFRICAN AM AN male, who presents to me for primary
ADDENDUM
MD:OM
STATES HE IS COMPLIANT WITH PAIN MEDICATION
PER REQUEST OF DR KATIE RADIGAN
a/o x accompanied by cousin.  Here for GI consult
[X] Other: To see MD
Readiness to learn: Ready to learn
GAIT TRAINING :  minutes
I think you have had an injury of the ligament and possibly the cartilage on the
ucinations:NO
WE COULD NOT EXPLORE IT BUT WILL FOCUS ON IT NEXT WEEK.
SOCIAL WORK
WITH HIS HEART AND HE NEEDS TO PROTECT HIMSELF.  DISCUSSED WHAT HE WANTED AND HE
ucinations:NO
Affect:APPROPRIATE
KD URGENT CARE 1010M NURSING RECORD (T)
SI or HI NO
SOCIAL WORK
ALLERGIES:  Patient has answered NKA
CURRENT OTC, HERBAL &amp; VITAMINS TAKING:
VOIDING PROBLEMS, DENIES PENILE DISCHARGE AND DYSURIA.
M/A/, GALLBLADDER SURGERY
AND NOT EVIDENCE OF STD. PT AGAIN ADVISED TO PRACTICE SAFE SEX.
[ ] Has had education previously, declined further education at
// HDL                  .
BY MOUTH DAILY FOR DEPRESSION
PE:
This pt. was referred by his PCP for a mh evaluation. The pt. had recently
)   CALCITONIN UN D NASAL INH -FORTICAL INSTILL      ACTIVE
)   CALCIUM MG/VITAMIN D  UNT TAB TAKE  TABLET BY   ACTIVE
Outpatient Medication Reconciliation
Influenza Immunization Administered:
PAIN:
PC OUTPT RELEASE OF INFORMATION NOTE [DT]
COMPUTER ASSISTANT
//  SGPT           .       {-}   LIVER TEST
,  E
information/instructions.
to reach pt by phone to  - is constant busy signal. Pt has no concerns noted
//  INR             .      H
Cleveland, WI
Subjective:
dose to .mg MWFSa, mg SuTR. Gave pt message over phone, he repeated
Cleveland, WI
SUN:    MG
Antiplatelet therapy:none
(Template approved /)
Positive Responses
MEDS:
LUNGS;cta
ton and Goose Creek Clinics: () -
METOPROLOL SUCCINATE MG SA TAB
AMBULATORY CARE PATIENT/FAMILY EDUCATION
Desire to maintain self care.
Level of consciousness:
PCC-NURSING
Excision of lesion:
MEDICATIN REQUEST
PREVENTIVE HEALTH SCREENING NOTE
Patient request that prescription be mailed.
and complete his back taxes.  Little progress has been made in these areas.  His
PRIMARY CARE-OUTPATIENT NOTE
problem in buildings that he owns.
University  burg.
Pain: (// :)
Patient request that prescription be mailed.
.  Valproic acid  mg in the morning,  mg in the p.m.
The patient declines information about current medications.
Primary Care visit
Active Outpatient Medications                          Status
)   DOXAZOSIN MESYLATE MG TAB TAKE ONE-HALF TABLET BY     ACTIVE
D AMB/OUTPATIENT CARE NOTE
Pain level is scored by the following method:   Mankowski scale
Chief of Staff for Beckley VAMC in
Dear Mr.  :
Pulse:            (// :)
Education:
PATIENT CONTACT NOTE
Patient contact
and has been monitored for the past month with an in-house messaging device.
tests and the value of your tests are included.  If no results are noted
week,
Date      : : : : : : : : : :  : :
LOW CHO OL DIET:
IC/PRIMARY CARE NURSING/PATIENT EDUCATION (T)
Notification by letter.
Lot: -P
I: REFFERED TO PHYSICIAN
FEV         .    .          .
Vital signs:
Ht:  in [. cm] (// :)
Side effects/b ding complications:
Ht:  in [. cm] (// :)
Review past quit attempts helped, what led to relapse
Left:  Reactive
If Yes list:
Heme Positive Stool                     Arthritis,de rn.
year?
RAL:  Alert, oriented, and pleasant   male in no acute
Check out at admissions desk
ADDENDUM
// :  Temp F (C)         (.)
Left Upper: Normal
Sufficient amount
No wounds, pressure ulcers or other skin problems.
Destination: RETURN HOME WHEN DISCHARGE
Patient uses own teeth/and or dentures or partial for chewing:
PART
Friction:           = No Apparent Problem
Moisture:           = Rarely Moist
Temp:  Warm
Level of Consciousness: Alert
== == == == == == == == == == == == == ==
// :
HOUR INPUT =
Urine Output =  ml
INTERVENTIONS
Post Tibial: Palpable
AAOx, well built/developed yo, in NAD.
Dyspnea, improved. Ruled out for Pulmonary emb sm
No
Active and Recently Expired Outpatient Medications (including Supplies):
Active and Recently Expired Outpatient Medications (including Supplies):
Yes
Oxygen Use:
Level of Consciousness: Alert
No wounds, pressure ulcers or other skin problems.
He denies any chest pain or pressure.  He had noticed some mild fluid retention
no edema in legs.
pt denies any numbness or tingling; follows commands
svt
-   No Risk
INITIAL IMPRESSION: S
APR ,@:  BLUE/
-  S A WEEK FOR TWO  , THEN AS FOUR TIM
//  CHO OL          . L
Now double click on the TIU Title to view the document.
Date              Vital             Measurement      Qualifiers
// :
"        "     Respir
-Telemetry shows SVT rate &quot;s, Pt s ping on his right side, awoke
maneuvers attempted and unsuccessful. Rate broke after one minute without
interventions.  physician ied of event. Pt completely asymptomatic with
INTAKE --------------------
Behavior:
physician == == == == == == == == == == == ==
Left Upper: Normal
Speech:
Extremity: Equal Bilaterally
Placed pt on cpap of  fio RA no distress noted.
labs reviewed
Radial: Palpable
OUTPUT
Activity:           = Walks Frequently
wife.
Behavior:
Speech:
Right pulses:
Skin Color:
== == == == == == == == == == == == == ==
INTERVENTIONS
ALLERGIES/ADR:
DATE OF DISCHARGE:  //
presents to the emergency department on / after
Sinusitis
. How often did you have six or more drinks on one occasion in the
Within the past  months, has the patient had any falls?
physician  Radiation Oncologist, for prostate cancer-sees pt every  months
y/o MALE
BP:/ (// :)
)   INSULIN SYRINGE .ML G .IN USE SYRINGE    AS      ACTIVE
"carbuncle" at that time. Would like for someone from his team to call him.
Date of Review:   ,
Wt: . lbs.(Actual) Ht: &quot;" B/P: /
. Anatomical Location: bilateral upper eyelids and bilateral
Last HGBAc value and time done:
)   LISINOPRIL MG TAB TAKE ONE-HALF
Alcohol Screen (AUDIT-C):
Neck: supple, no bruits or thy galy
the clinic to  for an  ual examination; however, he is now residing in
CLINIC TEAM COMMUNICATION NOTE
Patient is here for treatment and evaluation of Diabetes Mellitus, Hypertension,
Date of last prescription change for glasses/contacts:
+ dyspnea, new or worsening
. Special Screening Examination, Human Papillomavirus (HPV)
Attempted to return vet&quot;s call. No success.
physician rdasil
NURSING NOTE
informed this message would be given to the physician
budget. Overall she spent $ more than her budget allowed in November.
has no manic symptoms or depressive symptoms.  She has no suicidal
Facility Appointed PCP: F ,BERYL (ATHENS)
LMP: //
program.  Treatment options have been provided.
NURSING NOTE
An understanding of this review is confirmed.
Pain level:
CONSULTS
Comments: Pt states was given antibiotic to .  Directions state not to
Duration of Complaint:  Months
PRE-REGISTRATION
PSYCHOLOGY INDIVIDUAL TREATMENT
identified&gt;.
PAIN HISTORY
pain):
NURSING NOTE
NURSING NOTE:  " yr old female vet here to see provider in clinic for the
to that time frame.
PATIENT IS HERE FOR a  ADD ON APPT. IS ALERT AND ORIENTED X  SPHERES. AMBULATES
States had recent laminectomy of C// fusion about    ago at Adena.
( ) Left message on answering machine/voice mail in regards to upcoming appts.
exam/care due to long thick toenails and right great toenail ingrown. Reports
Placed call to veterans phone number to remind him/her of next   appointment.
is walking with a cane and able to care for himself. States strength is back at
...Understands how to reach Health Care Provider if pain management is
reports good compliance, last drop last night OU. Needs refill to . No other
F. Pachs // OU:  OD,  OS
AMBULATES WITH A CANE WITH SLOW STEADY GAIT.
=========================================================================
AFFECTED AREA THREE TIMES A   . WASH HANDS AFTER
. Anxiety State Unspecified                         //  MEENACH,LEIA
NURSING NOTE
TEMPERATURE at that time was: . F [. C] (// :)
Hypertension
Influenza Immunization- POST SEASON:
jar or medication bottle. Denies any neck pain.
Ending at: // @ :: PM
Conversation with  ,  J has a chief complaint of: &lt;not
ADDITIONAL COMMENTS/INFORMATION:
Not at all ()
to?   NO
sebaceous cyst below the LLL
AREA EVERY   FOR SKIN CLEANSING                    Expr:--
Temp: . F [. C] (// :)
BETA BLOCKERS: NO ACTIVE BETA BLOCKERS/RELATED MEDS FOUND
OPHTHALMOLOGY BRIEF HISTORY/PHYSICAL-TL
(CATARACT PHACOEMULSIFICATION WITH INSERTION OF INTRAOCULAR LENS)
. Patient name:   ,
Other:   ANTERIOR VITRECTOMY
epinuclear lens material to vitreous cavity.
Disabled
NURSING ADL KARDEX-TL
Cough,  p breathe
L: PCIOL centered
Temp:  Warm
Discharge Instructions:
)   BENZOYL PEROXIDE % BAR,  GM  Qty:    ACTIVE       Issu:--
Total S/C %:
. Anemia                                             //  SOLUM,
)   C MYCIN PHOSPHATE % TOP SOLN  Qty:   ACTIVE       Issu:--
IOP:  OU
.  Special equipment needs: Angio table
Patient&quot;s last weight: . lb [. kg] (// :)
SURGICAL HISTORY &amp; PHYSICAL UPDATE: (* indicates a required field.)
OPERATION REPORT
*** SC ED DOCUMENT ***
Temperature:  F [. C] (// :)
Durable power of attorney
ADDENDUM
I called veteran,he says is not getting nitrates from anywhere else.
Minimum BP:          / mmHg
=========================================================================
R and L and then do R Fem-pop bypass.  If wire will
absence of spi tric improvement.
Respiration:
Veteran has been scheduled to be seen on // at  a.m.
delirium.  The patient received multiple units of fresh frozen plasma, packed
)   COLCHICINE .MG PO BID PRN-Changed from prn to scheduled
invited her to the CLC Interdisciplinary Care Plan meeting on // and she
// at the Minneap s VAMC.  His postoperative course was complicated by
ACTIVITY:
X               Awa ss of dangerous household situation
X               Obtain and maintain source of income
This document was selected from specialty:  Patient Signature Forms .
Eating: LEVEL OF ASSISTANCE = Independent
on call light Siderails: x
)   ASPIRIN MG CHEW TAB CHEW ONE TABLET BY MOUTH EVERY   ACTIVE
better now."  Here for  month follow up Bilateral non-granulomatous
OD:   OS:   @a perkins
PRIMARY CARE CLINICIAN NOTE
breath.  No dyspepsia, constipation or diarrhea. No nocturia or dysuria.
This visit is a scheduled visit.
. Hypertrophy (Benign) of Prostate with Urinary
LATE ENTRY:
Medication summary has been reviewed with patient/caregiver.
Refused to accept vaccination for influenza.
CABGx /
patient&quot;s coumadin tx for AVR.
.Denies wt loss, abd pain, melena, or other problems.
CXR //:
some people so as not be drawn into problem behaviors.  We talked about
s p patterns are good and his appetite is good.  He added that he can
. Alcohol Dependency                                 //  WILBERT,
Advance Directives:
new medication, and medication dose change made by the VA provider.  The list
a letter from the   Domestic Relations Court (DRC) for child support arears
This has led to some rumination about family members he has lost,
SEPTEMBER ,
the clinic appointment:
YOUNGSTOWN PRIMARY CARE PROGRESS NOTE (T)
ALLERGIES/ADVERSE REACTIONS: ASPIRIN
PROBLEM:                )HYPERTENSION
units (.ml) tuberculin, purified protein derviative administered
in [. cm] (// :)
HAS NOT BEEN FILLING ATROVENT OR MOMETASONE
PRIMARY CARE W/VITALS &amp; ALLERGIES
PRIMARY CARE PAIN ASSESSMENT:
ADDENDUM
the   before the back pain started, he had been moving furniture.
DX:     Back pain for
    
