# Supplementary material for: Predicting the Risk of Suicide by Analyzing the Text of Clinical Notes
Source: PLoS One. 2014 Jan 28;9(1):e85733. doi: 10.1371/journal.pone.0085733 (PMC3904866; doi:10.1371/journal.pone.0085733)
Supplement: Appendix S3 — Machine Learning Libraries and Methods: This section is provided to enclose the open source (Apache License) classifier used for the building of the statistical models, specifically for the purposes of study reproducibility. A detailed account of these tools is intended for another publication. (ZIP) [file pone.0085733.s003.zip › Appendix3/ML_libs/Regression_testing/group1/grp1-pt-1064.xml.txt]

correction to the above note---left knee pain.
Active Inpatient and Outpatient Medications (excluding Supplies):
,    is a  yo   veteran,  HIV+ dx&quot;d .
year? Never
Clinic location: Amarillo
PROVIDERS OUTSIDE THIS VA MEDICAL CENTER: NONE
construction, self employed, truck driver
ADDENDUM
EYE DROPS ADMINISTERED: Alcaine, Mydriacyl (%), Phenylephrine (.%)
ADDENDUM
I have reviewed the history and physical for  ,  ED that was per-
FOLLOW-UP: Apr ,@:
WITHOUT SPECTACLE OR CONTACT LENS CORRECTION: /
P:      Will not order med to  but will discuss with him at
Pt. has noticed several bumps to top right of head for the last three months.
I have reviewed and reconciled the patient&quot;s VA pharmacy profile with all the
Allergies: PCN
Location of current pain:
PC PROVIDER: HOOVER,TINA N
P:       wed Methadone mg tab  po tid # RF
Social Security Number: --
C-file: Not available.
MEDICATIONS
Site:  Left Deltoid
Outpatient Health Screen:
PAST MEDICAL HISTORY:
EYE-DIABETIC FOLLOW-UP (T)
c/o: none - uses reading glasses.  Need to update reading glasses but did not
worked up with carotid doppler studies  ier this year with no significant
. Hyperthyroidism *
Level of Consciousness:
HEIGHT Actual:  in [. cm] (// :)
CV: chest pain - neg
surgery on ---pt asking for refill of dicyclomine-stated last written by dr.
REASON FOR VISIT
BEDTIME NEUROPATHY
)   CLONAZEPAM MG TAB TAKE ONE TABLET BY MOUTH AT         ACTIVE (S)
[  ]  Initial Appointment
HgbAc for past  yrs:  HEMOGLOBIN AC             // :    . .
ensure safe and effective health care you need to be seen at least one time per
Subjective:
Identified problem: OTHER UNSPECIFIED COUNSELING.
SGOT (AST)                     -
no answer
PRIMARY CARE (CBOC)
no depression,no anxiety,no suicidal ideation,no memory problems,no
SPECIAL MEDICATION REQUEST CONSULT
The request for a non-formulary medication is Approved by the MUC.
)  Impotence of organic origin (ICD--CM .)
ADDENDUM
.  Over the past   , how often have you been bothered by any
Patient has chronic pain of  or greater.
)  Carpal Tunnel Synd  * (ICD--CM .)
no CP,no PNDs,no orthopnea,no dizziness
ucination,no delusion
HE HAS PAIN QD.
Neuro: Reflexes: / b/l UE
MSK:
&gt;&gt;&gt; Disease specific handout:post op care
Impression:
activities that require you to be awake and alert.
TELEPHONE CONTACT NOTE
to overcompensation.
thickness tear.
Overhead pulleys
(MRI of right shoulder done on //
Chief Complaint: c/o pain in the right shoulder
Referral Diagnosis: RTC tendinopathy
PROM of the left IF
b/l extradepth shoes with plastizote inserts. No open skin lesions, wounds or
left IF p fx s/p foreign body removal
Occupational Therapy Progress Note
AC joint de rative changes.)
Neuro: Sensation intact
VARDENAFIL  MG TAB   Sig: TAKE ONE-HALF TABLET BY MOUTH WEEKLY AS NEEDED ONE
SIGNATURE NOT REQUIRED
_X__ asks questions     ___ eager to learn
/. HEENT examination is noncontributory. Cardiovascular reveals
most recent LDL is .
MED-GENERAL NOTE
His last -month note was reviewed with him.  The eyedrop he did not know
MED-GENERAL NOTE
He goes to a community doctor for that.  He denies any melena.  He denies
I = Issued earmold              F = Mic filter change
SSN:  --             :  OUTPATIENT
Tran:       Job Number:
Resp:  Clear and equal bilaterally.
OMEPRAZOLE MG EC CAP TAKE ONE CAPSULE BY MOUTH EVERY
ADDENDUM
Patient received stent placement:
PULSE:   (// :)
Pain is acute
any discomfort. He is not having any pain in groin area. SL to right FA. He has
Current INR is .
B/P:  / (// :)
ALLERGIES:  MORPHINE, ASPIRIN
TEMP:   . F [. C] (// :)
PAIN:   (// :)
Pt to continue taking coumadin mg daily to get next PT in Id.
Presents fasting for routine follow-up.  Reports "my normal pain" at "" on -
ALLERGIES:  MORPHINE, ASPIRIN
NURSING OUTPATIENT
Patient continues to be followed in the Missoula VA Anticoagulation Clinic.
woke up a couple of   ago with neck pain and couldn&quot;t move well".  States
p Vein Thrombos
Active Outpatient Medications (including Supplies):
was encourage to wait  minutes in the hospital setting and report
CBC                      NOV ,    NOV ,    NOV , @:
: Ativan mg x  tabs dispensed to  physician or patient.
PAIN INTENSITY:
Date: October ,
SOURCE(S) OF HISTORY: Patient
Duration of Current Episode:
Patient states, "I am not a current tobacco user." Patient reports
Chest pain, HTN, PND, DOE, Palpitations
Voiding
Pneumonia vaccine given during this admission.
. Was the Medication Reconciliation comple
Cough: Non-productive
Feels: Warm,  physician  Norm
Cough: Non-productive
G.U.
Urine color/appearance: Yellow / Clear
Telemetry: Yes
Character: CLEAR, EVEN, UNLABORED
Heart rate/rhythm regular: Yes
Doppler: No
V/S: T-, P-, R-, Bp-/, o sat-% on RA, Pain level-/
Cough: Non-productive
.  Hypertension.
.  Diabetes mellitus.
Mobility:           = No Limitation
Name:  ,     Gender: MALE
NURS/SOAPE (TP)
Back and neck has been bothering him since that time.
Patient Name:   ,
ALLERGIES/ADR: Patient has answered NKA
S: Pnt reports he has increased R knee pain to  after helping a friend do
has an effect on the knee pain. Pnt reports less lumbar &amp; knee pain after
First aware he had hepatitis of some sort was in  when he develooped "yellow
FAMILY/SOCIAL HISTORY:
glu , needs Ac
PATHOLOGY REPORT
Specimen (Received Mar ,  :):
T:      (//  :)
Lodging Needs:
PATIENT ASSESSMENT OF READINESS TO LEARN
--Expressed williness to learn
LEARNER LIMITATIONS/BARRIERS
his right knee and developed pain in right knee and lower back as per vet and as per
Entered active service March th, ; released from active
mentioned he may need a new mask.  I have paged  physician nquire about this
ADDENDUM
Stenosis
Care/HME vendor.
this list and all of your pill bottles with you to every clinic visit.
A: Oriented X
RELATIONSHIPS THAT DO NOT INCLUDE SEX FOR A PERIOD OF TIME.  HE IS UNSURE IF
Urine collected and taken to lab for ua and c&amp;s. Pt denies urinary sx.  physician ere and will evaluate.
SHE HAS MADE NO CONTACT AND DID NOT RESPOND TO VALENTINE LETTER.  HE HAS DECIDED
CONSESQUENCES OF HIS BEHAVIOR AND CLIENT SHOULD ALLOW HIM TO ACCEPT THE
:)   (// :)  . F [. C] (// :)
Active Outpatient Medications (including Supplies):
[]
PLEASE CALL THE PT AND TELL HIM THAT ALL OF HIS SPECIAL LAB TESTS WERE NEGATIVE.
Do you have thoughts of hurting yourself?
No
Veteran can write.
O/E  GEN-obese,comfortable ,aox,
you had a pleasant and productive visit.
TWICE A   FOR HEART/ BLOOD PRESSURE
patient c/o of some right groin pain with walking. pateint states he received
to her, he replied "I only said that because that woman was w/ me (his
Iliac Aneurysm (ICD--CM .)
stationary bike  daily. He has moderate
HISTORY OF PRESENT ILLNESS:
Patient Education: INFLUENZA VACCINE
Allergies/ADR:  PENICILLIN
Time of dosing:pm
. How often did you have a drink containing alcohol in the past
Chest pain or SOB:no
to reach pt by phone to  - is constant busy signal. Pt has no concerns noted
that you have been, which according to our records is:
. No signs/symptoms of warfarin toxicity or thrombosis
If you are taking your warfarin differently than what is listed above,
Past Appointments (last / months)
rn to review high k diet
splenectomy
Patient indicated NO to questions of any barriers to education or
The following learning needs/barriers were assessed:
. CAD * (ICD--CM .)
() PCP
ADDENDUM
Influenza Vaccine :
VPA  MG BID
Primary Care Provider: SEARIGHT,JODY A
HIS  YO SON   IS ATTENDING PSU  BUEG
IS ALERT OX
visit.
Patient request that prescription be mailed.
Patient reports that overall, his family situation is about the same.  He
Allergies Reviewed: Patient has answered NKA
other for any new, deleted, changed and non-VA medications including
Resp: (// :)
Acute pharyngitis * (ICD--CM .)               //  LONG,BEULAH A
appointments.
)   BRIMONIDINE TARTRATE .% OPH SOLN INSTILL  DROP IN   ACTIVE
to   , fasting the week before   , before supper on last week
Name of Veteran:  ,  E
ADDENDUM
Data is sent from home to program staff and is reviewed regularly for out-of-
// : PM      /
range responses.
Reaction: None
unpl ed ER/provider visits none
VIS with Date -- provided to patient:
Pt denies any abnormal b ding or bruising. Pt has not missed any doses of
Ht:  in [. cm] (// :)
Active Outpatient Medications (including Supplies):
Allergies:Patient has answered NKA
Patient indicated influenza was received this flu season either here
PATIENT INSTRUCTIONS:
SIGNED COPY IN CHART
EMERGENCY DEPARTMENT COVER NOTE 1010M (T)
Vitals taken to :
Date              Vital             Measurement      Qualifiers
CODE
Within Normal Limits
*************************************************
No
SKIN ASSESSMENT/INITIAL
RESP THERAPY: PULSE OXIMETER (T)
Friction:           = No Apparent Problem
CURRENT SKIN ASSESSMENT
Cough:   physician o expectorate:  NO
Bowel Sounds
ROOM AIR ( x )
Intake and Output  -
AAOx, well built/developed yo, in NAD.
"Impression:
.  Do you have any questions about future appointments, tests or
,    DEC ,
,@:  BLUE/
,@:  BLUE/
HEENT NEG.
// :  Temp F (C)        . (.)
Skin Color:
Voice change after s owing:
Hemodynamically stable
Provide assistance with ADLs
Skin Color:
Breath Sounds:
With Whom: Patsy, wife.
Destination:Home
A&amp;A or HB:
Document(s) previously completed
Cough:   physician ion:
INTAKE AND OUTPUT NOTE
Moisture:           = Rarely Moist
Temp:  Warm
ADDENDUM
Extremity: Equal Bilaterally
( ) Tcm RBC
dyslipidemia, obstructive s p apnea.
Active Outpatient Medications                          Status
No data available
)   ACCU-CHEK COMFORT CV(GLUCOSE) TEST STRIP USE  STRIP   ACTIVE
***********************************************************
-  S A WEEK FOR TWO  , THEN AS FOUR TIMES A
VS REVIEWED. WT INCREASED  Lb/  S.
No
KNOWLEDGE DEFICIT:
Moisture:           = Rarely Moist
Skin Color:
INPATIENT ADMISSION DATA BASE
-Pt again in SVT via Telemetry. Rate &quot;s. Adenosine  mg rapid IV and
== == == == == == == == == == == == == ==
SC Conditions: SERVICE CONNECTED % -
Mobility:           = No Limitation
Vitals taken to :
Clear
He has h/o V-tach in the past and he was admitted for observation but he had
CBI Urine =  ml (Total CBI output - CBI irrigant)
Clear
// :  Temp F (C)        . (.)
ADDENDUM
Moisture:   physician  Turgor
Eyes:
Radial: Doppler
Skin Temperature
The pressure ulcer prevention protocol was not needed - patient is not
Clear
Will discharge to home to  with amiodarone mg bid for one month and then he
V4-POST DISCHARGE FOLLOW-UP CONTACT
Influenza Given:
s/p dual chamber aicd ST JUDE
ADDENDUM
(+) CAT SURGERY/PCIOL //-OD //-OS)
From Service:          - NW EYE GLASS ADJ ORDER
patient.
clopidogrel use such as peripheral arterial disease or cerebrovascular disease.
Active Outpatient Medications                          Status
WI-10-10M NURSE-TRIAGE (BP,O)
WT: lb [. kg] (// :)
removal of underlying fat) of the eye.  (Blepharoplasty)
endobrow, upper blephs and levator repair //
Other Persons in OR: N/A
benefits of the procedure including recurrence, b ding,
As per  physician  patient doing well, RTC in - mos.
horrible, or upsetting that, IN THE PAST MONTH, you
PROGRESS NOTE:INFLUENZA IMMUNIZATION (BP)
encounter,from a multi-dose vial.  The patient was also provided a copy
Genitalia: normal, recent surgery left grin/leg for cyst removal
PHQ-
Weight:       lb [. kg] (// :)
Active Non-VA Medications                              Status
Nurse Recommendation: - hours
+ dyspnea, within past  hour
+ wheezing, new or worsening
expenses since last session (//). This material was reviewed and organized.
Prior to administration of the influenza vaccine, the Vaccine
- Minutes
APPEARANCE:  physician ance, and hygiene were: Appropriate
( ) Currently in-patient.
Identified problem: OTHER UNSPECIFIED COUNSELING.
GYNECOLOGY
FEMALE veteran who served for less than one year in the Army.   Per
B/P record from home:
)   ARIPIPRAZOLE MG TAB TAKE TWO AND ONE-HALF TABLETS    ACTIVE
)   ASPIRIN MG EC TAB TAKE  TABLET(S) BY MOUTH EVERY    ACTIVE
// :  PLASMA     CREATININE            .    mg/dL      . - .
more pain than last week.  Asked if the orders were placed for x s to hips,
NURSING NOTE
last year and in April of  veteran as requesting that she be her own payee.
MEDICATION RECONCILIATION
--------                                -----------
Call Type: DTN CLINICAL INFORMATION .
bilateral knee pain and trhe left ankle.
Hip Bursitis
( ) Appointment cancelled at patients request.
interested in pursuing getting her guardianship to herself and getting
FACILITY                                ALLERGY/ADR
)   ARIPIPRAZOLE MG TAB TAKE TWO AND ONE-HALF TABLETS    ACTIVE (S)
...Can state why pain control is important.
QUALITY OF PRIMARY PAIN:
(Years/months):  months ago
SUBJECTIVE
year? Never
Leg
Prevention&quot;s Inactivated Influenza Vaccine - Vaccine Information
OPT ATENOLOL MG TAB (Status = ACTIVE)
Placed a call to veterans phone number to remind him/her of their upcoming
ATTEMPT: Scheduled
Reason for visit: Mycotic toenails
counter or from other providers**
. Onychomycosis/Dermatophytosis Nail                //  IRWIN,
You will receive a letter with instructions to call your clinic    prior
ACTIVE PROBLEMS
SERUM     /     /     /     /     /           Reference
The VA Desert Pacific Healthcare Network has customized the medical
,  J is assigned to Caller Area *WEST PALM BEACH.
PENICILLIN
Medications:
Patient Phone Number: -- HOME
Medications:
PREVENTIVE HEALTH AND PATIENT EDUCATION
PC FOLLOW-UP
potentially fatal reactions exists.  However, flu vaccine has been
L: Dense mature cataract OU
=========================================================================
Chronic Obstructive Pulmonary Disease
Procedure Physician:  /PAKALNIS
The  Ophthalmology History &amp; Physical dated / has been
Patient re-examined and there are no changes.
Pain status:
for   s  Sig: APPLY         Refills:    Last:--
--Add Cosopt BID for IOP control.
Vital Signs:  Temperature :    . F [. C] (// :)
by: DONNIE E ROBERSON
The following non-formulary drug has been requested:
Respiratory:  Denies shortness of breath
state.
Comment: S p, Physical Activity, Decreased functions
to ambulate to toilet. B/P: / (// :)
(L/MIN)(%)
Post tibial: Doppler
Medications and allergies documented in CPRS (Outpatient/Non-VA,
EVERY   FOR   S FOR INFECTION
not pass via R CFA, do AFF
Active Inpatient and Outpatient Medications (including Supplies):
Patient will be admitted to the following treating specialty in TCU:
PATIENT ADDRESS:
N/A (from a private facility)
Vital signs taken in clinic:
was accepted for.
Patient/Caregiver given Vaccination Information Statement //.
Bathing: LEVEL OF ASSISTANCE = Independent
plans to attend.
resides in Enderlin, ND with fianc�&quot; Shelly.
NA - Did not occur
Number of staff needed:
*** SC ED DOCUMENT ***
Electronically Filed: //
S - Supervision - Set up/Cueing, Stand by Assist
aware of discharge plan.  Veteran went on weekend pass home from / to /
Vital signs taken in clinic:
Electronically Filed: //
NURSING- OUTPATIENT
Arrived via:
// :
No history of falls. Reassess at future appointments.
noted /  nl B/folate, low iron sat
Volume remaining after patient voided: cc
s p patterns have responded to the medications started here.  His
PSYCHOLOGY
Past Medical History:
seen to  for medication management (previously seen by  physician
report that he didn&quot;t s p well last night because he was worried about this
[ ] Other(specify):
MEDICATION LIST REVIEW REPORT
Written (in native language)
WEIGHT:  lb [. kg] (// :)
Participant(s):
. How often did you have six or more drinks on one occasion in
pls contact pcp    to discuss -
Have you ever had any experience that was so frightening, horrible, or upsetting
.  The patient&quot;s right to refuse testing and the availability of
Patient&quot;s Home Telephone:  --
PHQ- Score of  &amp; is a NEGATIVE screen for depression.
PULSE:   (// :)
pelvic tilts hold  sec  rep
    
