# Supplementary material for: Predicting the Risk of Suicide by Analyzing the Text of Clinical Notes
Source: PLoS One. 2014 Jan 28;9(1):e85733. doi: 10.1371/journal.pone.0085733 (PMC3904866; doi:10.1371/journal.pone.0085733)
Supplement: Appendix S3 — Machine Learning Libraries and Methods: This section is provided to enclose the open source (Apache License) classifier used for the building of the statistical models, specifically for the purposes of study reproducibility. A detailed account of these tools is intended for another publication. (ZIP) [file pone.0085733.s003.zip › Appendix3/ML_libs/Regression_testing/group1/grp1-pt-1069.xml]

<?xml version="1.0" encoding="ISO-8859-1" ?>
<records>
  <record>
    <group>1</group>
    <study_id>1069</study_id>
    <notes>
Clinical Reminders Activity
Status       Last Fill
TIMES A   TO RELAX MUSCLES
therefore, the patient was given Influenza vaccine .ml IM to .
Reaction: None
s  Sig: TAKE ONE TO TWO CAPSULE(S)   Refills:    Last:--
DOB:  JUL ,   AGE:    SEX: MALE
COGNITIVE STATUS: Oriented
PINHOLE:                                      /no increase
EXCEED  CAPSULES EVERY   MAXIMUM
Astigmatism is blurred vision caused by an irregularly shaped cornea.
Does the pain go anywhere else?
Attending:   M. Bobbitt
DIAGNOSIS/PROCEDURE:
S-DAUGHTER SAYS V.IRRITABLE LAST NIGHT
PINHOLE:                                      /-
SOFTENER) DO NOT EXCEED  CAPSULES
Patient Name:   ,  M
no diarrhea or constipation
rt hip
ral: no fever,
Patient ethnicity: NOT HISPANIC OR LATINO
--------------------------------------------------------------------------
you have a unilateral carotid occlusion, the velocities increase on the
DELIVERY OPTIONS: Requesting meds to be mailed
disease,
TENDERNESS ON PALPATION.AROM AT L/S DECREASED % DUE TO PAIN AND THICK ADIPOSE
INFORMED CONSENT FORM
points.
Patient&quot;s Influenza Adminstration History was REVIEWED.
Clinical Reminder Activity
HEMOGLOBIN AC:  .  %     (// :)
labarynthitis, had nl H/H, Chem.  Was given Rx for Ativan and Antivert.   Pt
. Osteoarthritis *
Last Menstrual Period:
Name, dosage, frequency and drug interactions reviewed with patient.
PRIMARY CARE-NURSE TELEPHONE NOTE
Stated:
CV: chest pain - neg
Elevated cho ol:
Allergies/Adverse reactions:Patient has answered NKA
Any possibility of being pregnant? [ ] Yes   [ ] No
satiety, and weight loss (all better but not resolved) probably directly related
Recommend:
Recommend:
Level of Consciousness:
Weight:. lb [. kg] (// :)
// :      H
This transmission is intended for the use of the person to whom it is addressed
. Unable to control thyroid hormone concentrations with maximum MMI: sending
)   AMLODIPINE BESYLATE MG TAB TAKE ONE-HALF TABLET BY   ACTIVE
MARITAL STATUS - MARRIED
SOCIAL HISTORY:
ucination,no delusion
ALREADY RECEIVED THE MED IN THE MAIL AND SHE WILL INFORM HER HUSBAND OF THE LAB
NURSING PROGRESS
SPOKE WITH PT CONCERNING X S AFTER DR. HUFANA REVIEWED. TOLD PT OF ARTHRITIC
ADDENDUM
SUBJECTIVE:Mr. ,  E is a  MALE who is here f/u on X &quot;s at VA and
no abd pain,no heart burn,no nausea,no diarrhea,no constipation,no melena
) Initiate Standard Outpatient Fall Precautions.
) Hyperlipidemia
of procedures, anatomic location, etc.
no cough,no SOB,no hemoptysis
no dysurea,no hematuria,no prostatism
)  DEPRESSIVE DISORDER NEC
MOTOR + NO SENSORY DEFICITS NO CLONUS NO ATROPHY NO EDEMA NO TREMORS
Pain education:
CAD          : n
Chief Complaint: Pain in the right shoulder. Pt. also c/o pain in the L sh due
Patient had the following needs/barriers identified:
Gender               : MALE
AC joint de rative changes.)
Pt was a no show for therapy to
Anterior glenoid labrum de rative changes.
states that he has been compliant with wearing ambulators. Pt. admits to staying
oriented X. Complaint of pain denied.
Occupational Therapy Progress Note
metallic debris within the regional soft tissues.
FOR VITAMIN SUPPLEMENT
BLOOD PRESSURE - / (// :)
BM OK AND APETITE UP WITH HELP.
(MRI of right shoulder done on //
some state
.) Multiple porokeratosis plantar Left foot
Weight: . lb [. kg] (// :)
TIME OF ARRIVAL: :.
)   METOPROLOL TARTRATE MG TAB  Qty:      ACTIVE       Issu:--
P: (// :)
CLINICAL REMINDERS RESOLUTION NOTE
skin tags, some of which were taken out about a year ago.  Now, he has some
PATIENT NAME:    D.
. Pain control: monitor  pain and medicate as ordered
Location:  right groin
Bed low/call bell within reach/brakes on:  Yes
// :
LDL (bad cho ol)  Best if below  or if you have diabetes or
be seen locally on fee basis, he will have to contact Boise VA.
coronary artery disease
Patient continues to be followed in the Missoula VA Anticoagulation Clinic.
FOR HEART/BLOOD PRESSURE
CBC                      NOV ,    NOV ,    NOV , @:
Given Pain Management Education Handout.
Patient denies history of latex allergy.
Medication: Influenza vaccine Dose: . cc intramuscular
Left deltoid.
Paresthesias: NONE
PAIN:
Character of Pain:
Activity
Rate: Regular
STATUS: COMPLETED
Telemetry: Yes
Nursing care plan problem:
Rate: Regular
G.I.
NURSING REASSESSMENT NOTE
Heart rate/rhythm regular: Yes
Feels: Warm,  physician  Norm
G.I.
Temp:  Warm
He has not had any new medications nor has he had any recent trouble or
SKILLED CARE:
Consult, demographics and coversheet faxed to Harmony Home Health #-.
was requested for VA payment of ER- done to . SW called vet at home, he had
(D) Adjunctive procedure.  DX: (.).
been disabled since / due to neck and back pain.  He last saw  physician
FT. PIERCE LAB
MOVE SCREENING
// :     .
. It is not expected that an anesthesia practitioner will be
C. PROSTATE BIOPSY RIGHT APEX
O:Labs:
Stage:Tc        Pathology:GL +=
T:      (//  :)
The supervising practitioner of record for this patient care encounter is
physician ando R.
(/ cores, Left apex/mid), undergoing definitive radiation with adjuvant short
.Patient Complaints/Problems:
thigh x  week/swelling has decreased but still draining serous drainage by
SEP ,@:  PC AHMED, YASSAR F
PATIENT DISPOSITION:Referred to Post Triage RN Coordinator
Ambulatory Aid: None;Bedrest;Wheelchair;Nurse
Seatbelt and Accident Screen:
PMHx:
PROSTHETICS HOME RESPIRATORY CARE - CLIENT ASSESSMENT/AGREEMENT
Amount:
Act
No learning barriers.
SUBJECTIVE: Patient seen in the clinic this AM and requested for assistive
Please dilate both eyes. Thanks!
along with increased pain, again of the inside of the left knee.
Active Inpatient and Outpatient Medications (including Supplies):
STVHCS Medication Reconciliation Outpatient Note
Thought:CLEAR
TUES  TO TALK TO JILL GODSEY,NP ABOUT MED TRIAL.
Affect:APPRIPRIATE
ucinations:NO
THIS IS THE RESPONSE AND THAT HE NEEDS TO MOVE ON. CONTINUES TO HAVE ONE NIGHT
,       SEP ,  RACE UNKNOWN  The OBJECT PATIENT  was NOT
Eval: NORMAL VALUE IS NON-REACTIVE
Patient indicated influenza vaccine was received previously.
Compliant with medications .active ,no toxic habits .
.a.   Did your provider talk to you about any new medications he/she
Influenza vaccine not available.
no cp/palpitation, denies sob ,dizziness/headache.
// LDL-CHOL CALCULATION .
patient&quot;s needs.
PATIENT EDUCATION: FECAL OCCULT BLOOD TEST PROCEDURES
)   METOPROLOL TARTRATE MG TAB TAKE ONE TABLET BY MOUTH  ACTIVE
CC:f/u visit
Respiration:       (//  :)
. Hyperlipidemia, NOS
Site:  Left Deltoid
coumadin orders.
The document was selected from the specialty:       Primary Care
//   .
Comment: "Time is Life" handout provided/reviewed
Assessment, plan and decision making:
ADDENDUM
WEIGHT:  lb (. kg)
time spent "active" in Telecare Record Manager.)
/.
Pending Outpatient Medications                         Status
VAMC phone # = () - or  Toll free --- then follow
You should continue your current medications unless you were told otherwise.
patient.
Cover with dry dressing daily
_x__  Reinforcement of contact number
PHONE NUMBER:  -
. The patient HAS decision-making capacity.
epinephrine used for local anesthetic.  Skin lesion excised and
RENOVATE
IS ALERT O X
PT SEEN FOR F/ U
Patient was screened for pain at this visit and reports pain rating is
appointments.
Patient has answered NKA
BOTH EYES THREE TIMES A
and VF
)   SPLIT TABLETS PT IS CAPABLE OF SPLITTING TABLETS AS    ACTIVE
PATIENT DEMOGRAPHICS:
Exam Result: Abnormal
I thought you might like a copy for your records.
Pt to continue other diabetic medications as directed, pt to take pioglitazone
Vital Signs:
Vital Signs:
DM II W/O COMPLICATION                  HYPERTENSION
In the last   s, have any of the following been evident?
phone that he would like to cancel appointment with  physician .  He
Summary of Episode Progress Note (Non-video monthly monitoring):
and has been monitored for the past month with an in-house messaging device.
LDL CALCULATION       PLASMA  (// :)
Weight:          . lb [. kg] (// :)
Diagnosis:  diabetes-hypertension
)   ASPIRIN  TAB  MG CHEWABLE CHEW ONE TABLET BY MOUTH   ACTIVE
at rest and the s
Pneumovax
Lot: X
PHARMACOTHERAPY
Mr.   is an  y/o AAM seen in clinic to  for anticoagulation f/u.
Long Term (current) use of AnticoagulantOpen wound of knee, leg (except thigh),
before appointment.
CHEST PAIN NEC
other:                       denies
information in certified mail.
Warfarin rx in CPRS has been placed on "HOLD" until patient is seen in the
Left:  Radial
(-)Negative for:
Uretheral stricture                     CHEST PAIN NEC
LUNGS:  Clear to auscultation.
HERAT-REG
Patient stable upon discharge
SOURCE OF INFORMATION:veteran
Occupation: retired, previous manufacturing manager at   plant, currently
Vitals taken to :
"        "     Pulse
Has normal respiratory rate/breathing pattern
Patient voices complaints of oral pain:
Information source: Patient
MEDS:        unit dose duoneb
OXYGEN   ( x )  . lpm nc
MUSCULOSKELETAL
== == == == == == == == == == == == == ==
EDUCATION
Skin Moisture
NEUROLOGICAL
Urine Output =  ml
Post Tibial: Palpable
physician
MEDS:        DUONEB UD
COMMENTS:  PT TOL TX WELL/NO ADVERSE REACTION/NPC
RESP THERAPY: PULSE OXIMETER (T)
// :  Temp F (C)        . (.)
loss with furosemide.
-.  He stated that he tries to stay with a low sodium diabetic diet and
discharge summary dictated
Nurse-Influenza Immunization (r):
PRIMARY CARE VISIT
O:
"        "     Pulse
Triage:
SKIN ASSESSMENT/INITIAL
PART II
No
-Report off to oncoming shift.
Moisture:           = Rarely Moist
OPT ACCU-CHEK COMFORT CURVE HI/LO CONTL SOLN (Status = ACTIVE)
ADDENDUM
REPORT TO ONCOMING SHIFT. VSS. NO COMPLAINTS VOICED. MONITORED QHRS &amp; PRN.
Behavior:
Telemetry
Skin Temperature
O:  afeb, VSS
DISCHARGE DIAGNOSES:
LUNGS: Clear.
by:   S. WAY
Claims Assistant
=========================================================================
Vitals taken to :
verbalized understanding and agreeab
Active Outpatient Medications                          Status
-  S A WEEK FOR TWO  , THEN A
CURRENT EMERGENCY DEPT TRIAGE NOTE
- physician e patient.
Tele shows Paced &quot;s, no arrhythmia&quot;s noted at this time.
IV Intake =  ml
Skin Temperature
Screened for Advance Directives.  Educated patient on the MEDICAL POWER OF
CBI Urine =  ml (Total CBI output - CBI irrigant)
OBJECTIVE
"        "     BP                /
Clear
Radial: Palpable
-FS , no coverage needed. PM medications given as ordered. Pt placed on
SUBJECTIVE
Skin Color:
Intake and Output  -
Braden Scale - For Predicting Pressure Sore Risk
Skin Temperature
Diagnosis: V-tach
DISCHARGE SUMMARY
.  Do you have questions regarding your medications?
Not applicable
Usual occupation: US Postal worker.
physician  Radiation Oncologist, for prostate cancer-sees pt every  months
From Service:          - NW EYE GLASS ADJ ORDER
Asked to review patient record to determine need for Plavix.
Please contact the patient to discuss provision of one of the alternative
Note: If you are not in agreement with the disapproval, you may for
An alcohol screening test (AUDIT-C) was negative (score=).
UNITS SUBCUTANEOUSLY BEFORE BREAKFAST AND INJECT
Reason for appointment
Vet advised that note will be for ed to PC team. States he will be in
Tues  //
Denies problems
Primary: BILATERAL ENDOSCOPIC BROWLIFT, BILATERAL BLEPHAROPLASTY
FOLLOW-UP APPOINTMENT:Plastic Surgery (Gold) ON   ,@:
Reason for appointment
Date and location of eye exam:
concerns about how much alcohol this patient drinks and that he defines
PC NUR CLINICAL REMINDERS NOTE
Caregiver Assessment: Veteran presents to GEM clinic to  for follow up visit.
accompanied by his nephew for follow up of memory loss concerns.  Nephew
Date of last prescription change for glasses/contacts:
ral:
loss,cough,dysphagia,diarrhea/constipation, dysuria, chest
NURSING NOTE
hgnac
Notes that she had upper respiratory infection with coughing for a full month.
x- .   Return,  months.
really well.  She has been stable on the medications.  She takes
congestion.
( ) Currently in-patient at non-V.A. facility.
Advised that she could go to the local ER but payment of the bill is not
+ dyspnea
( ) Left message on machine/voice mail in regards to upcoming appointments.
Active problems - Computerized Problem List is the source for the following:
This review is based on the medication list below and patient interview.
MEDICATION LIST
**REMEMBER to always inform all your health care providers of any other
Alphabetized list of outpatient Rx&quot;s, inpatient orders, remote and Non-VA meds
Positive Responses
Veteran states she has no way to get the emergency room. She wants the
INSURANCE
TEL TRIAGE AFTER HOURS CALL CENTER NOTE
There is no indication for an MRI.
Call Type: DTN SYMPTOM .
her heart
Placed a call to veteran&quot;s phone number to remind him/her of their upcoming
FACILITY                                ALLERGY/ADR
Caller Response: OTHER.
Chief Complaint: Hip Pain (Unilateral)
TEL TRIAGE AFTER HOURS CALL CENTER NOTE
Client reports that she vomited twice since coming home from the
( ) Unable to contact veteran at listed phone number. No answer, busy, etc..
( ) Currently in-patient within a V.A. facility.
// : ATHENS LAB appointment(s).
Date: //
also asked her cousin   to meet with this provider; this individual offered
Taught by Anita  ,RD
Call Type: DTN SYMPTOM .
...Visual
. POAG OU due to ONH appearance and VF loss OU; Currently taking Travatan qhs
. Chorioretinal scar inf temp OD
STROKE OR HEART ATTACK. DO NOT CRUSH OR CHEW TABS.
Patient presents in clinic for F/U. Is alert and oriented X spheres. Verified
Patient Education Assessment:
...WHEN &amp; HOW TO OBTAIN FURTHER CARE: Urgent/primary care hours
NURSING NOTE
( ) Appointment information confirmed with family member.
This review is based on the medication list below and patient interview.
against this list to verify whether the dosage is the same or has been changed.
( ) Patient does not want to be seen.
Patient indicated Influenza Vaccine was received previously.
on prevention, home treatment, and when to call a health professional.
without any assistance. Has been eating w
ACTIVE:LORAZEPAM MG TAB (*C)
SIGNIFICANT OTHER ATTENDED CLASS AND PARTICIPATED:  No
Conversation with  ,  J has a chief complaint of: &lt;not
Vaccine Information:
Imp;)Herpes labialis )Hep. C
********************** Medication Reconcilation:**********************
LAST B/P: / (// :)
Computer is the source for the following medication list:
be taken on   of surgery.
implantation, right eye.
The attending,  physician  was present and assisted during the entire
Resident Surgeon: G.S.
Breath Sounds:
Moisture:           = Rarely Moist
)   KETOROLAC T THAMINE SOLN,OPH   DROP OD QID         ACTIVE
--O/W cont acular, and  d/c vigamox QID OD after two additional  s.
ADDENDUM
. Hiatal hernia                                      //  SOLUM,
in stopping was evaluated and discussed.  Evaluate brand and quantity of
.  Patient disposition: Observation Bed
Man
treatment/procedure.
Operation Disposition: PACU (RECOVERY ROOM)
Route: INFILTRATE                 Dosage:  ML
Admission medications documented in CPRS were reviewed.
active chart.  Mr.   was advised he can change this document at any time,
When to call MD
Score:
Blue Arae Triage RN is called and alerted to the PCP&quot;s concern.
. Patient name:   ,
Total Exercise Time: : minutes
EYE TWICE A   FOR GLAUCOMA
Patient had myocardial perfusion study on November th, .  This showed a
BY MOUTH EVERY  HOURS FOR BREATHING
was unsuccessful).  If able to access aorta, plan is to repair right iliacs and
angiogram/stent attempt. CST showed LVEF %, normal LV size and syst c
TELEPHONE CONTACT NOTE
CLC SCREENING CONSULT
Vital Signs:
Pain:
CLC PM/NIGHT SHIFT NOTE
)   BUPROPION MG PO BID-Continued on transfer
Date of birth:MAR ,
CLC NURSING DAY SHIFT NOTE
ACTIVITIES OF DAILY LIVING MEASUREMENT DEFINITION
liquids.  Communication skills WNL.  Suspect significant cogn
COMMUNITY LIVING CENTER PM/NIGHT SHIFT ASSESSMENT:
physician EL OF ASSISTANCE = Independent
X               Mobility within community
This document was selected from category:  Education - Easy Reading
As per social work patient was living with his fianc�&quot; prior to this
Susan  , NP
Dose and route of administration
.  Extensive coronary artery disease, coronary artery bypass grafting
OPERATIONS/PROCEDURES:
)   ALBUTEROL MCG (CFC-F) D ORAL INHL INHALE  PUFFS  ACTIVE
exam to Cosopt BID o.u. and Alphagan BID o.d. for Glaucoma, with secondary optic
Target Pressures:
lb (. kg)
TH ST some state
The above veteran has had a cognitive and coordination evaluation with no
defecit in his driving ability.
Pan-bruit:
ADDENDUM
(ICD--CM V.)
Ortho =  physician NW Orthopedics Spokane
BPH - retention, nocturia, slow urination,
CC: I have a weak stream... I was good for a while but my urination has slowed..
// : BLOOD  .
___PVD
___Candidiasis of nails
Ulcer:  ___right   ___left foot
T:   F [. C] (// :)
P:   (// :)
ral
new problem now, as he just got notice that he has to appear in the
Posterior tibial
SERVICE CONNECTED % - NONE FOUND
MOUTH EVERY
* * * * * * *  ACTIVE OUTPATIENT MEDICATIONS * * * * * * *
Active Outpatient Medications                          Status
Alcohol Use Screening (AUDIT-C)
YES
g)   Immunity declines during the year
Over the last two  , how often have you been bothered by any of the
. Little interest or pleasure in doing things.
Not at all ()
CURRENT COMPLAINTS.PT WAS GETTING FU HERE TILL .WENT TO PRIVATE CARE.
OTHER EXAMINATION:FH OF COLON CA.LAST COLONOSCOPY IN
PT STATES NEEDS ALBUTEROL TO
Issue Date
PRIMARY CARE W/VITALS &amp; ALLERGIES
Pt stated that he was here to be seen by his doctor TO , NOW.  Advised pt that
PRIMARY CARE W/VITALS &amp; ALLERGIES
    </notes>
  </record>
</records>
