# Supplementary material for: Predicting the Risk of Suicide by Analyzing the Text of Clinical Notes
Source: PLoS One. 2014 Jan 28;9(1):e85733. doi: 10.1371/journal.pone.0085733 (PMC3904866; doi:10.1371/journal.pone.0085733)
Supplement: Appendix S3 — Machine Learning Libraries and Methods: This section is provided to enclose the open source (Apache License) classifier used for the building of the statistical models, specifically for the purposes of study reproducibility. A detailed account of these tools is intended for another publication. (ZIP) [file pone.0085733.s003.zip › Appendix3/ML_libs/Regression_testing/group1/grp1-pt-1080.xml]

<?xml version="1.0" encoding="ISO-8859-1" ?>
<records>
  <record>
    <group>1</group>
    <study_id>1080</study_id>
    <notes>
EKG done per order, results given to  physician eview.
. How often did you have a drink containing alcohol in the past
months at which time we will repeat his injections if
=======================================================================
REASON FOR CALL:  PC appt with fasting labs.
CONFRONTATION VISUAL FIELD: Pt unable
ADD: .
NO RESTRICTIONS
BRIEF OCULAR HISTORY:
"Have you f  in the past  months?"
Pain agree:
Info to PCP
possible.  Please contact me at the Casa Grande VA Clinic at your  iest
OBJECTIVE:
CALLER: PT
MEDS:   / insulin  units bid
. Hypercho olemia *
// :   BLOOD  . H
Exp: FEB ,      Prov: HOOVER,TINA
Address confirmed with patient for mailing purposes.
INSULIN NOV N / (NPH/REG) INJ NOVO  UNITS  BID DEC ,
medication into a muscle for therapeutic intervention.  This
AGE:
treatment/procedure.
valve. Patient has not had echo done for some time. Please call him, discuss
No suicidal or homicidal ideation. He deny drinking alcohol or use of illicit
MEDICATION RECONCILIATION (D)
pt claled and notiifed of plan
None
Recommend:
[x ] Alert
o Effects of drops explained to patient, and disposable post-mydriatic
// :       H
REASON FOR VISIT
[  ]  Other (SPECIFY):
Starting at: // @ :: PM
ADDITIONAL COMMENTS/INFORMATION:Pls mail
Influenza Immunization:
Comments: Patient requests MMR for school admission.  Instructed that test
Identified problem: OTHER UNSPECIFIED COUNSELING.
CLONAZEPAM
thought is may have been potassium level. states methocarbamol helps some.
)  TRIGGER FINGER, ACQUIRED
I: flat, no NVI
NEAR ADD: OD:+.    OS:+.
)  Impotence of organic origin (ICD--CM .)
AND NUMBNESS. INFORMED TO MAKE APPT WITH DR. HUFANA IF NEEDED.
)  Restless Legs * (ICD--CM .)
.  Over the past   , how often have you been bothered by any
Recently his back pain is getting worse and also sc osis of spine made him
house w/ son. No DME.
)  Restless Legs * (ICD--CM .)
SUBJECTIVE:Mr. ,  E is a  MALE who is here for f/u from spinal tap
Barriers to learning identified:
P T / P T T: //
Yes
Sequential Compression Device Used Intraoperatively: No
.  Patient Reactions:
Attending Surgeon/Practitioner:  OWENS,
Primary Anesthesia Provider  :  Reddy
Chart reviewed and pt reevaluated prior to surgery. Agree with H &amp; P. ASA .
Vital Signs:
Objective: Pt. ambulates to clinic unassisted, with a non-antalgic gait wearing
metallic debris within the regional soft tissues.
Subjective: Pt. stated that the edema of the IF had decreased slightly.
The treatment time to  was utilized in making a dynamic
intra-articular fracture of the middle ph x associated with
Decreased ROM of the left IF
SIMVASTATIN  MG TAB   Sig: TAKE ONE-HALF TABLET BY MOUTH AT BEDTIME FOR
TEMPERATURE -    . F [. C] (// :)
Jr
Medications
PATIENT WEIGHT - . lb [. kg] (// :)
Would your family background, beliefs or religious needs have any effect
___ Physical  ___ Cognitive  ___ Emotional        ___ Psycho-Social
AMB-AMBULATORY/OUTPATIENT CARE NOTE
SSN:  --             :  OUTPATIENT
been presented for several months.  They were treated with liquid nitrogen
papule which I feel is incomplete removal and therefore the lesion was
SURGERY HISTORY &amp; PHYSICAL
. EXPLAIN NEED FOR INCREASED ORAL INTAKE AFTER PROCEDURE
SUN, TUES, THUR, AND SAT AND TAKE ONE AND ONE-HALF TABLETS MON, WED AND FRI TO
TIME IN:            TIME OUT:
VA MEDICAL CENTER
FT.  ON, MT
Current INR is .
needs dental work--teeth removed and dentures made.
Active Outpatient Medications (including Supplies):
VA MONTANA
PMH:
=========================================================================
EVERY   TO REDUCE STOMACH ACID
D
RESP:   (// :)
SUBJECTIVE:
GLUCOSE RANGE
Neuro: decreased sensation by monofilament
incontinence
(-)Negative for:
EKG ORDERED, EKG DONE AND SHOWN TO DR. ELLIS FOR REVIEW
#  Anxiety, #  Alteration in comfort/pain, # Potential for physical
On Room Air
Appetite: Good
Urine color/appearance: Yellow / Clear
Cardio:
bathroom. Cardiac Enzymes drawn @ : pm. Tele- /SB-
CARDIO:
Patient is fully weight bearing.
DOB: //  Age:
coronary.  Patient is free of
numbness or tingling. He denies any saddle anesthesia. He denies any bowel or
has past dx of low back pain and he fell off of a ladder in  y  uary .
about one week ago.  he has not lost the land (been foreclosed on) yet but
FOBT test kit given to patient to return; verbal a
ed with a "Y" in the counseling "CNSL" field. Counseling regarding
appropriateness; based on the patient&quot;s age, current disease state(s),
NO INJURY
A: Cervical disc de ration.  Pnt has limited transportation to Casa Grande &amp;
A: lumbar DJD/cervical DJD
Patient states that he has a spot on his left wrist that is hurting him and his
ADDENDUM
LEARNER ABILITY
as it was yester . If I feel worst I will still come in."
supervisor about that at that time and he
rogressive dysarthria and dysphagia in  with prog bulbar
PMHx:
GEN: NAD, noncachectic.  Non verbal
=====================================================================
Care/HME vendor.
Name:   ,   ,      SS#:  --
Height:   in [. cm] (// :)
Memory:INTACT
STATES THAT IS WHAT HE MISSES MORE THAN THE RELATIONSHIP.  DISCUSSED NEED FOR
TO WANT TO MAKE AMENDS WITH OLD GIRLFRIEND. HE ATTEMPTED TO MAKE CONTACT AGAIN
- ()-
Active Outpatient Medications                          Status
averages /.
b/p normal
physician carefully identifies the location(s) requiring injection,
the pt interviews. The pt initially minimized symptoms of outbursts, but when
.  The patient was told to page the nurse    after m
He still goes to Baptist   on a regular basis and he enjouys the sermons
Derm Outpatient Medication Reconciliation
He denied feeling hopeless, helpless and worthless. He denied anhedonia, he
PMH:
. Cardiac Dy hythmia, NOS
. Hip replacement (ICD--CM V.)
Influenza Immunization Administered:
prescribed by his non-VA doctor.  He now would like to come back here for
Currently using brand or  ric:brand Coumadin
//  GLUCOSE        .       {-}  DIABETES TEST
(Template approved /)
PC OUTPT NP URGENT CARE NOTE [T]
for   s  Sig: TAKE ONE TABLET BY
------------------------------------------------------------------------
HP:office worker, no sob, cp, edema
W. National Avenue
PE:/ (// :),
Please refer to the sc ed document attached.  This can be accessed in
Ori l call started at: FEB ,  @ : (Call was suspended)
. HTN, on stable , will stop norvasc, add hctz, cont bb, lisinopril, reffer to
CARDIOVASCULAR HX: Patient came for a regular visit. Denies any chest pain,
Patient has had at least  drink in the last year.
Heart Disease
Exam:
. Practitioner(s) performing or supervising treatmen
) Confirmed correct patient position:                      YES
O represents no pain;  represents worst ima ble pain
PHONE UNIT-POD 2
PERTINENT MEDICATION: cprs
Temp:. F [. C] (// :)
LAB VPA LEVEL ON -- WAS &lt;
Recent Vital Signs
tolerated at the current dose regimen.
PSYCHOLOGY-GENERAL NOTE
considering.  He is pleased with his current level of functioning and is
information you provide with the medication list in your medical record
Yes
MOUTH AT BEDTIME FOR PROS
HISTORY:
Starting at: // @ :: AM
No sign of trauma.
No changes in medications per Veteran.
Superior, Wi                         Nov ,
and Glyburide mg PO BID and pioglitazone  mg PO Daily.
Outpatient Medications                                 Status
monitor and Accuchek Aviva
Display c  for Aviva meter
. hours of education time spent with this veteran at
Veteran not seen for scheduled appointment due to:
tests and the value of your tests are included.  If no results are noted
Influenza Immunization:
"So You&quot;re Not Ready Yet" given to patient.
CELL # --
Ht:  in [. cm] (// :)
Arthritis,de rn.
SUBJECTIVE:
Left:  CLEAR
Alcohol Use Screen (AUDIT-C):
. How many drinks containing alcohol did you have on a typical
Below is a summary of the patient information from your visit to .
Uretheral stricture                     CHEST PAIN NEC
PATIENT NAME:   ,
HOMELESS: no
--
future appointments as imported from the medical record.
troponin, d-dimer, and bnp.
"        "     Pain
Activity:           = Walks Occasionally
// :  Temp F (C)        . (.)
BP taken Left Arm
MEDS:        unit dose duoneb
HOUR TOTALS --------------------
COMMENTS:   pt tolerated tx well with no adverse reaction noted.npc
Skin Color:
Says he avoid excessive salty food, does not use salt shaker &amp; wife tries to
pelvis.
Immunization record:
PO Intake =  ml
.  Azithromycin  mg daily until gone.
Appetite: been consuming % of meals since admission
Nutrition:          = Adequate
PART II
No signs of respiratory distress
Friction:           = No Apparent Problem
Rx Expiration Date: //                  Refil
Route , Box C
MONITOR.
: Pt s ping with no distress.  Will continue to monitor.
== == == == == == == == == == == == == ==
The pressure ulcer prevention protocol was not needed - patient is not
. tx direction pending mps
Breath Sounds:
Radiopharmaceutical:
-To nuc med for st resting images.
No
Date              Vital             Measurement      Qualifiers
// :  Temp F (C)        . (.)
***********************************************************
"        "     Wt lbs (kg)[BMI]   (.)[*]Actual
Lungs: ctab
MAY ,@:  DERM
AUG ,@:     (VA WILL CALL)
Right Ventricular R-waves @  milli volts.
AUG ,@:  LUMP &amp; BUMP
// :  Temp F (C)        . (.)
lb [. kg] (// :)
ADDENDUM
correct the error at this time. She advised me to go ahead and give the dose of
Speech:
Left Upper: Normal
physician o see patient  ier this am.
monitor.
INTAKE AND OUTPUT NOTE
TOTAL SHIFT OUTPUT =  ml **
Activity:           = Walks Occasionally
== == == == == == == == == == == == == ==
Extremity: Equal Bilaterally
Pacemaker
Mobility:           = No Limitation
NEUROLOGICAL
NEUROLOGICAL
Right pulses:
pt eating at bedside, ambulatory all morning in  , no complaints voiced,
CURRENT SKIN ASSESSMENT
DOing normal activity.
Hemorrhoids
)   MULTIVITAMIN CAP/TAB *** NON-VA MED ***
Results: normal
will need preop appt
SCD ASSESSMENT
DO NOT drive while taking pain medication.
KC-PLASTIC SURGERY
UNITS SUBCUTANEOUSLY BEFORE BREAKFAST AND INJECT
Please   ONE of the following:
Reason for appointment: DM eye exam
FOR TESTING    AS DIRECTED
No new functional deficiency identified at this time.
veteran.  He presents to  to reestablish care in GEM Clinic.
Medications reviewed and reconciled as below.
MEDICATION RECONCILIATION NOTE
)   Non-VA LISINOPRIL MG TAB .MG MOUTH EVERY   AT     ACTIVE
System Recommendation: Urgent
. Special Screening Examination, Human Papillomavirus (HPV)
coughing   mucus
Call Type: DTN CLINICAL INFORMATION .
Gender:  y/o female
and health risks of continuing this pattern of spending. Engaged in problems
Vaccine was given in patient&quot;s Right Deltoid
Patient indicates: Not allergic to eggs
keep weekly record sheet that she updates with every spending event.
Veteran Name:   J
+ PMH: rheumatoid arthritis
. Special Screening Examination, Human Papillomavirus (HPV)
Gender:  y/o female
ADDITIONAL INFORMATION
SOCIAL WORK NOTE
SOCIAL WORK NOTE
Client voiced understanding but still asked that I add her plea to the note.
Vet states she thought that the physician was going to get her
Conversation with  ,  J has a chief complaint of: &lt;not
take with antacids or milk.  Pt advised not to ingest these things from
+ leg pain, within past  hours
( ) Appointment information confirmed with family member.
( ) No phone number listed for veteran, or number has been disconnected.
--------------------------------------------------------------------------------
Veteran SSN:
NURSING NOTE
...Understands the medications being used to control pain and side
...Verbal Discussion
Legend: OPT = VA issued outpatient prescription, INP = VA issued inpatient order
ADMINISTRATIVE NOTE
( ) Phone was busy X. No other number listed
[ ] Currently in-patient at a non-V.A. Medical Center or Nursing Home.
counter or from other providers**
mycotic bilaterally times ; ingrowing nail left  ux; painful to
APPLICATION. APPLY TO HEELS AS INSTRUCTED
TAKE ONE-HALF TABLET BY MOUTH EVERY
medications, herbal products or supplements that you may be taking over the
)   CAPSAICIN .% CREAM APPLY MODERATE AMOUNT TO        ACTIVE
MEDICATION RECONCILIATION
Capillary filling time, toes:
Caller Response: *****OTHER.
,  J is assigned to Caller Area *WEST PALM BEACH.
PENICILLIN
HT             JUL , @:
Conversation with  ,  J has a chief complaint of: &lt;not
Identified problem: OTHER UNSPECIFIED COUNSELING.
Facility Appointed PCP: PLA,  A MD (PC WPB TEAM )
n/v/d/c, no bloody or black stools, no nocturia, no urgency, no frequency, no
Per Narcotic Contract signed to , patient understands that narcotic
PREVENTIVE HEALTH AND PATIENT EDUCATION
[  ]NO EXPLAIN:
Problem list from computer record:
s.  Some people will also have fever, c s, headache, or muscle
J
. Hiatal hernia                                      //  SOLUM,
=========================================================================
nurse: -- ext  or  or .
The attending was present and assisted during the entire procedure.
Amt:$
AC: formed; -+ cell/flare
rrr
Lab list:
L: PCIOL centered
Respiration:      (// :)
Your blood pressure is / (// :).  Your goal is less
( REPLACES FELODIPINE)
Musculoskeletal:  Denies bone pain or arthralgia.
. What questions do you have about caring for yourself when you are at
IF VET IS USING THE
Comment: Dull, Burning,  , Tender, Aching, Throbbing, Numbing,
HISTORY OF PRESENT ILLNESS: This is a  year old smoking, non-diabetic MALE
by: IMED SYSTEM
incison area. Patient voiced understanding.
ranging from -. Pulses to both legs were with doppler. Left
This document was selected from category: Education - Easy Reading.
Medications discussed with the patient.
HISTORY: The patient states that over the past  to  years he has had
Veteran is independent with hygiene and activities of daily living.
Active Outpatient Medications (including Supplies):
Active Outpatient Medications                          Status
Pre Op Surgery Conference
Patient is not to   surgical site.
Thoracic Society criterion, no significant improvement was observed in
Is on pain control medications/treatments?: No
E - Extensive Assist - Any physical weight bearing. (i.e. lifting legs
postoperative b ding and delirium.  He was admitted to the Fargo VAMC on
driving and both he and his fiance did the  ing and cleaning. Veteran plans
delirium.
L - Limited Assist - Contact Guard Assist, light touch, no lifting
postoperative b ding and delirium, was seen for cognitive assessment this p.m.
Equipment needed:
I - Independent
X       Use of banking forms
received the following iMedConsent document:
Minneap s has been admitted to CLC on -- as a transfer from Minneap s
needed. Shelly reported the he has been on the bupropion for depression and also
with approval from cardiology.  Pt. away on leave.  Please page us when patient
into bed, pushing wheel chair, putting on socks.)
IOP range:
This document was selected from specialty:  Ophthalmology .
*** SC ED DOCUMENT ***
by: IMED SYSTEM
Do you get relief from pain measures taken?
sensitive patient identification information.
out and work on gentle exercises, gradually increasing them as you
Retook BP after letting vet sit for approx  mins due to high reading on the
Quality of pain is:aching, constant
managed by PMD, off RX for this post CABG/AVR
Pets -  poodles for  yrs.
Pittsburgh at this point.  He still feels that if he were back in
Social Work
Psychology:   minutes of supportive individual therapy
PSYCHOLOGY
Never
A: Sobriety
O:  ,    is a  year old MALE.
[ ] Imaging procedures ordered
depressed in the past, and he has re
Allergy/Reaction: LESCOL CAPSULE, SIMVASTATIN, PRAVASTATIN,
======  physician NTIHYPERTENSIVE COMBIN
PFSHx:  (-)smoker
SMOKING/TOBACCO USE:, Never used tobacco in any form
Height:  in [. cm] (// :)
Pain:    (// :)
Participant(s):
EVERY   AVOID GRAPEFRUIT JUICE , FOR HEART OR FOR
)   CLOTRIMAZOLE % TOP CREAM- APPLY A THIN FILM TO      ACTIVE
lantana fl
CURRENT COMPLAINTS.PT WAS GETTING FU HERE TILL .WENT TO PRIVATE CARE.
USES NEBULIZER AS NEEDED
WNL
.
VITALS (last observed) --
BP:  / (// :)
PHYSICAL THERAPY
ADMINISTRATIVE NOTE
    </notes>
  </record>
</records>
