# Supplementary material for: Predicting the Risk of Suicide by Analyzing the Text of Clinical Notes
Source: PLoS One. 2014 Jan 28;9(1):e85733. doi: 10.1371/journal.pone.0085733 (PMC3904866; doi:10.1371/journal.pone.0085733)
Supplement: Appendix S3 — Machine Learning Libraries and Methods: This section is provided to enclose the open source (Apache License) classifier used for the building of the statistical models, specifically for the purposes of study reproducibility. A detailed account of these tools is intended for another publication. (ZIP) [file pone.0085733.s003.zip › Appendix3/ML_libs/Regression_testing/group1/grp1-pt-1099.xml.txt]

Medication  wal Request
TRAUMATIC BRAIN INJURY SCREENING
screen for depression.
. Please read each item carefully and select the correct a
PROVIDERS OUTSIDE THIS VA MEDICAL CENTER: None
months at which time we will repeat his injections if
SOCIAL HX: widowed, lives alone, no alcohol, quit tobacco ~, retired from
EXTRA-OCULAR MOTILITY: Exophoria ROM- full
PINHOLE:                                      /no increase
MR: -. sph
REVIEW OF SYSTEMS: as above
activity at home
I agree with all findings and plan as outlined by above provider.
ASA Class: -SEVERE DISTURB.
VISION:
Conversation with  ,  ED has a chief complaint of: &lt;not identified&gt;.
Number: unsure, is better now with cane
Patient telephone number confirmed with patient.
There was also documentation that pt had carotid bruits, this has already been
,  W a  year old MALE with the following active
Allergies/Adverse reactions:Patient has answered NKA
Stated:
[  ] Counseled on daily weight monitoring:
ALBUMIN                    // :     .
// @       CIRCUMFERENCE/GIRTH: .
just can&quot;t stick to it."
Identified problem: OTHER UNSPECIFIED COUNSELING.
No
HAS informed for further scheduling.
Carbon Dioxide                  -               .
SUBJECTIVE:Mr. ,  E is a  MALE who is here R hand swollen r/t dog
Creatinine, serum             . - .              .
no arthralgia,no neck pain,no back pain,no radiculopathy
)  Osteoarthrosis involving the knee (ICD--CM .)
)  Restless Legs * (ICD--CM .)
c/o having bilateral knee pain, states wants to see arthritis doctor.
COS APPROVAL CONSULT
Electronically Filed: //
PHYSICAL EXAM
Scheduled for: --@:am
Lower Dentures removed: YES
History and Physical completed?
OR Support Personnel:
Post-Procedure Diagnosis:  LEFT INDEX FINGER FOREIGN BODY
I have discussed this note with my supervising attending  physician Dictation: .
Admission V.S. -
Assistance:  Assisted to lounge chair, Siderails up, Call bell in reach
)   CYPROHEPTADINE  MG TAB TAKE ONE TABLET BY MOUTH       ACTIVE
RESPIRATION -     (// :)
Referral Diagnosis: RTC tendinopathy
Subscapularis tendonopathy with question of a tiny undersurface partial
of therapy.
Decreased ROM of the left IF
Subjective: Pt. stated that the edema of the IF had decreased slightly.
metallic debris within the regional soft tissues.
Supraspinatus tendonopathy.
Review of Systems -
Patient blood pressure recorded.
there was minimal increase in ROM of the left IF since using the splint.
(MRI of right shoulder done on //
(MRI of right shoulder done on //
Impression:
and March , . Procedure: DIAGNOSTIC COLONOSCOPY (), Date:
by: USER IMED
We appreciate your patience and understanding. There is no co-payment
Burning/Hot,
agree with conservative care as outlined for neuropathy and hyperkeratotic foot
SPECIAL CARE CHART REVIEW
PATIENT HEIGHT -  in [. cm] (// :)
hematocrit were . and .. He is married, has no biological
in [. cm)
BP /  OCT ,@::
% LAD according to notes.  Will be in for follow up.
good.
TIME IN:            TIME OUT:
PULSE:   (// :)
ACCOMPANIED BY FAMILY.
scale.
Glycohemoglobin level (for diabetics)
MEDICINE OUTPATIENT
PAIN:   (// :)
/..Vet reports   cut which required pressure to stop b ding.  Dental
//
please advise.
An alcohol screening test (AUDIT-C) was negative (score=).
hematuria, urinary frequency, urgency, dysuria, weakness of
messages
.  Is able to demonstrate how to perform a fingerstick.
spoke with pt via phone. pt confirmed full name and full social. informed of
verbalizes undersanding of instructions
Neuro: decreased sensation by monofilament
Palliative Factors (Includes OTC and RX meds):
Pneumonia vaccine given during this admission.
Nursing care plan problem:
Neuro: Alert/Oriented X, PERRLA
Respiration
Abdomen: Soft
Condition: WNL
I.V. Sites:
I.V. #
Right: Strong
Fluid Retention: No
I.V. Sites:
me
HOME CARE SERVICE FUNDING:
Service Connected %:
home cervical traction halter fitting correctly -&gt; instructed to pring in next
S: Pnt reports that he feels the lumbar traction is working, as he can get up at
O: IPT @ #s to  x  mins.
AUDIT-C positive; F/U brief counseling required.
Influenza not received this flu season;
/
nieces/nephews and former supervisor w/last job at "Northern Electric."
PC PATIENT SCREENING
given Nexium for this.  He states that it is working very well for him.
ADDENDUM
Patient was asked if interested in the "MOVE Program"
WEIGHT:           lb [. kg] (// :)
The supervising practitioner of record for this patient care encounter is
family with the following discrepancies:
DIAGNOSIS:
term ADT (Zoladex # //)
SEP ,@:  PC AHMED, YASSAR F
. How often did you have a drink containing alcohol in
Patient had seat belt use screening at this visit or admission.
Lot number:
Communicates per gestures/writing. SOB with exertion.
RECTAL:defer
MEMORIAL BLVD  VILLE, TX
Test name                Result    units      Ref.   range   Site Code
=========================================================================
ucinations:NO
Thought:CLEAR
Thought:CLEAR
S:CLIENT CAME FOR  MINUTE SESSION.  HE CONTINUES TO LAMENT ABOUT LOST
O:MDD
Affect:APPRIPRIATE
SI or HI NO
ucinations:NO
. Bursitis, Prepatellar
Are you feeling hopeless about the present or future?
Patient arrived via:
injection technique according to the land s. The area was prepped with
stated that he has been prone lately to angry outbursts. His wife died on
Bursitis (ICD--CM .)
The patient&quot;s medication profile at time of the clinic visit was:
physician os Fares.
. Cardiac Dy hythmia, NOS
PRESCRIPTION MEDICATION RENEWAL NOTE (MIW) [T]
year?
. Erectile Dysfunction, Non-Organic or Unspecified
//  CREAT           .
Current warfarin dose:.mg Mon/Wed/Fri, mg rest of week
//  INR             .      H
. CBC hemolyzed - will repeat in Milw in Oct.
HCTZ MG
Request for ed to __  for electronic  wal
//  HDL            .
MEDICATIONS:
Resting (B/P) - Intake Staff ONLY:
. PARKINSONISM
PT HAS NO NEW C/O-BUT IS ALMOST OUT OF MEDICATION&quot;
. Please read each item carefully and select the correct answer
. Please read each item carefully and select the correct answer
before yester  , fell back word about one to  feet above the ground, got hurt
Outpatient
Exam completed.
. Anatomical Location: post. scalp, left arm
. Treatment/procedure: The surgeon will cut the lesion out from the
Screening ( - ):
PMH:  Smoke, Lives with other(s)
Chief complaint: post bx post. scalp
documentation into VistA Imaging.
=========================================================================
Medication Reconciliation:
Resp: (// :)
Active Problems
Blood Pressure:  / (// :)
=========================================================================
Dilating agent used:  Phenylephrine .%, Tropicamide %
Ant. Chamber: OD: Cells   OS: Cells
DIAGNOSIS
PATIENT DEMOGRAPHICS:
Patient ethnicity: NOT HISPANIC OR LATINO
*of screening for diabetic retinopathy, but c ot substitute for *
Height:           in [. cm] (// :)
EAST RD ST
Type of Contact: Telephone
Temperature:     . F [. C] (// :)
TPOPC PROGRESS NOTE
Erectile Dysfunction (ICD--CM .)  Peyronie&quot;s Disease
patient is checking his Bg Xper week, his l readings in Dec were ranging -
no hypoglycemia .
I am writing to inform you of the results of the tests you had done
Type of Visit: Nurse Clinic
CARE COORDINATION HOME TELEHEALTH SCREENING CONSULT
TRAZODONE HCL MG TAB T
PATIENT CONTACT NOTE
// : PM      /
Rx: lortab  mg
b ding                     none
hematuria                 (-)
Active Outpatient Medications                          Status
Please send pt an appointment letter, along with no-show letter, in same
Patient no showed // PTx appointment.
Mr Schuler can be reached at this number  -.
min after laying down this evening.  Although he was on BIPAP at the time, he
FOLLOW-UP-ACTIVITY LIMITATIONS:
at risk.
Does patient take Metformin or Glucophage?
Breath Sounds:
Provided patient with informational  let.
Social Work Treatment/Discharge Plan (to be completed within  hours of
No
MAJOR RISK FACTORS / SPECIAL POPULATIONS
The patient does not have any spinal cord injury, paralysis or neurologic
Date              Vital             Measurement      Qualifiers
TOTAL SHIFT OUTPUT =  ml **
Skin Color:
Abdomen
WITH WIFE
previous immunization two   ago.
hospitalization for bronchitis. Feeling much better. No recurrent edema.
APPT LIST/MED LIST
AS DIRECTED TO TEST BLOOD SUGAR FOUR TIMES A
Mode of transportation: Stretcher
Speech:
HISTORY AND PHYSICAL (D)
CBI Urine =  ml (Total CBI output - CBI irrigant)
Skin Moisture
CBI Urine =  ml (Total CBI output - CBI irrigant)
PULMONARY
( ) Muga Scan
tightness.  There is a long-standing history of this, usually with
Yes
States that he has a cold x  week. C/o sinus congestion and cough. Was seen
"        "     Pulse
No Left Ventricular R-waves
NURSING CLINIC NOTE (T)
"        "     Pulse
tramadol makes myalgia better while on pravastatin.
Yes
-   No Risk
Admitted to room  from ETUC. No signs of distress noted.
Radial: Palpable
Gave report to Karen RN.
Vitals taken to :
INTAKE --------------------
Skin Temperature
Call bell in reach. Will con&quot;t to monitor.
Behavior:
Right pulses:
SKIN REASSESSMENT
Diagnosis:  nonischemic cardiomyopathy with recurrent V-tach
Internal Defibrillator
ADDENDUM
TOTAL SHIFT OUTPUT =  ml **
\
== == == == == == == == == == == == == ==
REGULAR DISCHARGE
Hemorrhoids
Did the patient experience an injury from this fall?
asthma, COPD, pneumonia, stroke, migraine,  arthritis.
)   Non-VA DOCUSATE SOD.  MG CAP MG MOUTH TWICE A    ACTIVE
A-C:     .      (// :)
R: (// :)
Call Type: *CLINICAL FU REQUIRED.
,DARLENE M WIFE    R TRL  DERBY, KS    -
Signature Informed Consent for
dermatochalasis.
Anesthesia Technique:  RAL
recently started going to a recreational facility and needs a letter stating it
PCP Appointment
HPI/OTHER: see problem list below.
...Patient denies latex allergy.
WI-GENERAL/PRIMARY CARE
SUBJECTIVE:  He was started on Zocor.  There is a great improvement in
Acute Bronchitis
S p Patterns: Veteran goes to bed at :PM and is often in bed past :AM.
PAST MEDICAL HISTORY:
ALLERGIES: NKA
Active Outpatient Medications                          Status
)
Do you have or have you had any of the following?:  Yes
Reason for Contact:
Facility Appointed PCP: F ,BERYL (ATHENS)
RART -  REMOTE ALLERGY/ADR DATA
MRP -  Medication Reconciliation
( ) Appointment information left with Sponsor.
Caller Response: APPT WITHIN  HRS.
// : GYN-PA appointment(s).
Has urology consult for stress incontinence
NURSE COMMENTS
BY MOUTH DAILY AT BEDTIME FOR MOOD.
)   BUSPIRONE HCL MG TAB TAKE TWO TABLETS BY MOUTH       ACTIVE
.  Morbid obesity.
Caller says she was prescribed this med and wanted more information on it.
TAKE ONE TABLET BY MOUTH THREE TIMES A   FOR MUSCLE RELAXANT
System Recommendation: - hours
ADDENDUM
I reviewed psychology notes and psychiatry notes, and this worker does not see a
Duration of Complaint:
,  J is assigned to Caller Area ATHENS-C ICOTHE.
ADDITIONAL INFORMATION
( ) Appointment information confirmed with family member.
Comments: Discussed weekly as part of plan
Ending at: // @ :: PM
appointment given for the provider
Prior to administration of the influenza vaccine, a copy of the
[ ] Appointment cancelled at patients request.
[ ] Appointment rescheduled at patients request.
G. GDx / - NFI /, WNL OU
A
ADMINISTRATIVE NOTE
Specify Quality CRAMPS.
Has medication been reviewed?Yes
EVERY   FOR BLOOD PRESSURE CONTROL
self-care   "HEALTHWISE FOR LIFE". This   contains information
common health probl
***************************************************************************
Call Type: *MEDICATION REFILL/ WAL.
ADDITIONAL COMMENTS/INFORMATION:
Facility Appointed PCP: PLA,  A MD (PC WPB TEAM )
Identified problem: OTHER UNSPECIFIED COUNSELING.
HYDROMORPHONE HCL MG TAB
Starting at: // @ :: AM
TEMAZEPAM MG CAP
Patient agrees to abide by conditions of contract.
.a.   Did your provider talk to you about any new medications he/she
Alcohol Dependence
Depression
DOXYCYCLINE HYCLATE MG CAP   Sig: TAKE ONE CAPSULE BY MOUTH TWICE A   FOR
(// :)
Tobacco Use
Operating Room:  OR                    Surgical Priority: ELECTIVE
Patient is NOT interested in vocational assistance.
Hypertrophy (Benign) of Prostate with Urinary obstruction
INSTRUCTED HER TO HAVE VETERAN CONTACT VA CLINIC FOR MESSAGE CONCERNING LABS.
PCC (AOPC) NURSING NOTE TL
*** SC ED DOCUMENT ***
Pain:  (// :)
smoking cessation MCM.
Toe Index
*        POP
ABI R . toe index   L .
Preop shower/bath/shampoo and brush teeth before arrival
.  Two renal arteries were identified bilaterally with no significant
(L/MIN)(%)
DISCHARGE SUMMARY
Complains once great while o.d. hurts, to  related to head cold. Here for
cutdown and attempt to pass wire--if able to pass
He has quit smoking since his angio.
in [. cm)
with regular liquids. Dysphagia evaluation performed at MPLS VA on / and the
ADL Task:
VERIFIED
Personal Hygiene: LEVEL OF ASSISTANCE = Independent
Number of staff needed:
requesting a meeting with his providers.  She does not have any particular
P:  Will attend CLC meeting on /.
SIGNATURE NOT REQUIRED
by: IMED SYSTEM
This document was selected from category:  Education - Easy Reading
) Patietn reports that he has no pain.
Vital signs taken in clinic:
OD:     OS:     Time:
Allergies:
noon for official x-  report. If the shoulder is broken, we will refer
coumadin
fair
Aortic valve replacement
associates, with possible negative consequences.  He is gradually
good eye contact and calm. He has been residing in public housing for over
The list of medications below has been provided to the patient for
RIC AC                                MG/DL   . -
[ ] Imaging procedures ordered
SEE REMOTE DATA.
He shared that he was doing &quot;ok&quot;.  He explained that he had received a
Toenails: (specify): - b/l
B. Review the statements below with the patient.
session.  He shared that he was upset by a series of phone calls and
Psychology:   minutes of supportive individual therapy
Intensity:
Status       Last Fill
FLU, YRS MAR ,
)   FINASTERIDE MG TAB TAKE ONE TABLET BY MOUTH EVERY     ACTIVE
Tolerated well without difficulty
Felt numb or detached from others, activities, or your surroundings?    NO
WILL SEE PHARMACY CONSULTANT FOR INSTRUCTIONS ON USE OF MOMETASONE
Patient is here to  as a walk-in, patient states he has severe back pain, can
PHYSICAL THERAPY CONSULT
sensation grossly intact to light touch
PROVIDER:   Bendure, O.D.
    
