# Supplementary material for: Predicting the Risk of Suicide by Analyzing the Text of Clinical Notes
Source: PLoS One. 2014 Jan 28;9(1):e85733. doi: 10.1371/journal.pone.0085733 (PMC3904866; doi:10.1371/journal.pone.0085733)
Supplement: Appendix S3 — Machine Learning Libraries and Methods: This section is provided to enclose the open source (Apache License) classifier used for the building of the statistical models, specifically for the purposes of study reproducibility. A detailed account of these tools is intended for another publication. (ZIP) [file pone.0085733.s003.zip › Appendix3/ML_libs/Regression_testing/group1/processed/grp1-pt-1001.dat]

!  Done reading
! Total word count = 2394
! Total unique words = 1120
! Total pair count = 4784
! Total unique pairs = 4404
OCULAR : 1
SORE : 1
AT : 15
WM : 1
ONLY : 1
WORK : 3
PREOP : 2
OPEN : 1
LOWER : 1
REMOVAL : 2
MONTH : 1
ULCER : 3
REFILLS : 1
WEIGHT : 1
BEEN : 3
REMOVING : 1
BID : 1
RELIEVE : 1
WITHIN : 1
REFILL : 1
DECEMBER : 1
OVERUSE : 1
OUTPATIENT : 6
WEEKLY : 1
INSTRUCTED : 4
INTAKE : 3
CRUMBLY : 1
SPEECH : 1
INPATIENT : 2
CATARACT : 1
TOMORROW : 1
COUNSELING : 1
USE : 3
REVIWED : 1
PASS : 1
SECTIONS : 1
CC : 1
OPERATIVE : 1
SUPPLIES : 3
COMPETANCY : 1
TWICE : 1
ASA : 1
CHEW : 1
VETERANS : 2
LEVEL : 1
ALCOHOL : 2
CHANGES : 3
TOO : 1
RADIAL : 1
PERSONAL : 1
MPLS : 1
MILK : 1
RETIRED : 1
SHOULDER : 1
HIS : 16
CHARACTERISTIC : 1
ARIPIPRAZOLE : 1
MARRIAGE : 1
NOVO : 1
LABRUM : 2
REMOVED : 1
APPROPRIATE : 1
NEURO : 2
DIRECTIVE : 1
TINY : 1
PVD : 1
ONS : 1
TARTRATE : 1
FISH : 1
DISORDER : 1
MEDICINE : 1
TEST : 4
NOTE : 16
PROMOTE : 1
LDL : 1
THRESHOLD : 1
DO : 6
DOES : 3
PROHIBITED : 1
HTN : 1
BLOOD : 5
LATEX : 1
SAME : 2
WORKER : 1
HAVE : 8
BUSINESS : 1
SCHEDULED : 2
ASK : 1
MEASURED : 1
DRUG : 1
OF : 40
INCLUDE : 1
URETHERAL : 1
BPM : 1
TAB : 5
CAO : 1
STABLE : 1
REQUIRED : 2
BLOT : 1
TRAVATAN : 1
HAS : 16
FOR : 26
PHARMACOLOGICAL : 1
CONDITION : 1
NUTRITION : 1
SAID : 1
FEV : 1
NUMBER : 6
CLC : 1
UNDERSTAND : 1
RETESTED : 1
TRIGLYCEHDL : 1
MORNING : 1
HANDEDED : 1
INR : 4
AMB : 1
AID : 1
KNEE : 2
BEGINNING : 1
ULCERS : 1
MELANOMA : 1
EC : 2
RANGING : 1
OUTPT : 1
SATURATION : 1
FOREIGN : 2
COLONOSCOPY : 3
THEM : 1
SUBSTANCE : 1
REV : 1
ASSESSMENT : 6
RESPIRATORY : 1
ROM : 2
SERUM : 1
DOG : 1
BUSY : 1
ACTIVITY : 1
FERRITIN : 1
SHOWS : 1
DISTRIBUTION : 1
SENTARA : 1
STARTING : 2
FRIENDS : 1
RETINOPATHYPER : 1
PREVIOUSLY : 1
INFORMATION : 6
INITIAL : 1
CENTER : 2
EXAM : 5
INFECTION : 2
FLOWSHEET : 1
SUICIDE : 1
THE : 60
INFORM : 2
NURSES : 2
FILED : 1
GROUP : 1
DURATION : 1
PULSES : 2
GO : 1
SIGNIFICANT : 1
WIDE : 1
COLOR : 1
SUPERIOR : 1
CHARACTER : 1
BP : 4
OPT : 3
MEDS : 2
INDICATION : 1
PULMONARYCONSULT : 1
PREVENTION : 2
DEPRESSION : 2
SEPTEMBER : 1
RADIOLOGIST : 1
RED : 1
BYPASS : 1
CM : 2
PSYCHOLOGY : 1
ELECTRONIC : 2
AGREEMENT : 1
AGAIN : 1
GAIT : 1
ADIPOSE : 1
DISPOSITION : 1
BLOWING : 1
CAP : 3
DIET : 2
SQ : 1
STATED : 1
HEARING : 2
RITALIN : 1
HEAL : 1
FAST : 1
GET : 1
PARTIAL : 1
ALBUTEROL : 1
BENEFITS : 2
STARTED : 1
ASSISTANCE : 1
MAXIMUM : 1
DIABETIC : 3
SELFMANAGEMENT : 1
OR : 12
SHIFT : 5
BOTH : 3
TEMP : 1
YEAR : 2
PRESCRIPTION : 2
ALREADY : 1
CONCERNS : 1
POSSIBILITY : 1
COUMADIN : 1
AIR : 1
DE : 3
PARAMETERS : 1
SEEN : 3
FOOD : 1
INSTRUMENTAL : 1
SURVEY : 1
VAGUE : 1
ANKLE : 1
TAKE : 8
INTERVIEW : 1
INCREASE : 2
CORONARY : 1
ANY : 5
DISCHARGE : 3
CAB : 1
AMBULATORS : 1
CONSIDERATION : 1
MOISTURE : 2
QH : 1
OD : 2
SW : 1
INJECT : 1
REACTIVE : 1
FACILITY : 6
UNIT : 1
EXPIRATION : 2
EFFECTS : 2
MD : 1
RELATIONSHIP : 1
RESISTANCE : 1
NAME : 2
CARE : 7
SURROGATE : 1
SAT : 1
EVERY : 3
SKIN : 8
RATED : 1
YESTER : 2
TIMES : 4
IS : 18
DL : 2
DOSES : 1
NOT : 19
ANWSER : 1
OCCULT : 1
CARETAKER : 1
START : 1
FRACTURE : 1
IF : 7
THERE : 1
RETINOPATHY : 1
EXPECTED : 1
RESIDING : 1
WALKING : 1
PERRLA : 2
BELL : 1
HERE : 2
SEPT : 1
PIOGLITIZONE : 1
BOX : 1
EATING : 1
POSITIVE : 2
PRETREATMENT : 1
CLEAN : 2
OXIMETRY : 1
UNITS : 2
ONEHALF : 1
CARDS : 1
FEB : 2
EVALUATION : 1
INT : 1
PROGRESS : 3
KEEP : 1
RHYTHM : 1
REHAB : 1
SERTRALINE : 1
HBSAG : 1
ASSESS : 2
SUMMER : 2
VISION : 2
VET : 4
CBCD : 1
UPCOMING : 1
PASSING : 1
BURSA : 1
DP : 1
DROP : 2
PREGNANT : 2
ASSOCIATED : 1
ESSENTIAL : 1
BACK : 1
ANTICOAG : 1
CBH : 1
HEIGHT : 2
FX : 2
MALE : 1
ADDENDUM : 6
FULL : 1
BY : 10
PMH : 1
STERILE : 1
NO : 22
REDUCTION : 1
AMANDA : 1
CONSCIOUSNESS : 1
CHIEF : 5
CHANGED : 1
LUNGS : 1
TH : 1
BENIGN : 1
RRR : 2
CLINIC : 2
CONVERSATION : 1
RISK : 5
PERFORMED : 1
TENDERNESS : 1
TO : 51
PRN : 2
HEEL : 1
DEGREE : 1
GOLD : 1
ADVANCE : 2
RV : 1
MURMUR : 1
NIDDM : 1
ADMINISTRATIVE : 1
PROCEDURE : 6
PEG : 1
REQUESTING : 1
WILL : 10
CAPACITY : 1
BUT : 5
TAPERING : 1
MPI : 1
TYPE : 3
TIU : 1
PRIMARILY : 1
SEE : 6
PLASMA : 1
COLL : 1
INP : 1
HUSBAND : 1
HEALTHY : 1
PLEASE : 2
ANEMIA : 1
STATUS : 5
LOWERING : 1
PACK : 1
NAD : 1
TROPONIN : 1
CONSULT : 3
TECHNIQUE : 1
FLUSHES : 1
OUT : 2
FRICTION : 1
SUPPORT : 1
GASTROINTESTINAL : 1
WANTS : 1
SURE : 1
SCREEN : 6
FINDINGS : 1
REHABILITATION : 1
FUNCTION : 1
REVIEW : 6
THANKS : 1
MENTAL : 2
HIMSELF : 2
NEEDED : 4
LIVER : 1
WERE : 2
VIEW : 1
CLIMBING : 1
MAN : 1
FILL : 4
RESIDENT : 1
INSTRUCTIONS : 2
ERYTHEMA : 1
LABS : 2
VA : 5
JOB : 2
REASSESS : 1
SUBSCAPULARIS : 1
CONFRONTATION : 1
RADICULOPATHY : 1
POSSIBLE : 2
HOT : 1
INDUCED : 1
DOCTORS : 1
IRRIGANT : 1
CONTINUING : 1
OWING : 2
FAMILY : 3
PAIN : 11
DISEASE : 1
WHEN : 1
AS : 9
BEING : 1
UNDERSATNDING : 1
CREATININE : 1
PEDIS : 2
AMOUNT : 1
WAS : 12
PM : 4
WITH : 24
PHENYLEPHRINE : 1
CATH : 1
OFFERED : 1
THEREFORE : 1
AC : 1
TEMPERATURE : 2
COMMUNICATION : 1
HIV : 1
SIG : 1
SYRINGE : 2
BASIS : 1
UNDERSURFACE : 1
NOW : 2
INCLUDING : 3
NA : 1
FOBT : 1
CONFIRMED : 2
USED : 3
TENDONOPATHY : 1
IT : 2
BEDTIME : 1
LIST : 2
NECESSARY : 1
IMMUNIZATION : 2
SLIT : 1
DISCUSSED : 1
EXERCISE : 1
SUPPLY : 1
NUMEROUS : 1
TIME : 2
CODE : 1
UVEITIS : 1
NMSC : 1
LM : 1
ORIENTED : 2
DIM : 1
CURRENTLY : 1
ATTEMPT : 1
NECK : 2
PRILOSEC : 1
SIDE : 2
BREAKFAST : 1
IMAGES : 1
THICKNESS : 1
DOCTOR : 1
ALLERGY : 1
DISTAL : 1
CALL : 4
MOST : 2
HX : 1
OPERATION : 3
ROAD : 1
IMAGING : 1
SITUATION : 1
ADDRESS : 1
BUSPAR : 1
SOB : 1
IOP : 2
INTRAARTICULAR : 1
REPORTS : 3
SUBJECTIVE : 2
STRICTURE : 1
OPHTHALMOLOGY : 2
HELP : 1
PER : 5
TABLETS : 1
PACU : 1
COMING : 1
YES : 10
ETC : 1
CONSENT : 1
AORTOFEMFEM : 1
RO : 1
WHOM : 1
YOUR : 4
RETURNED : 3
GIVEN : 4
VACCINATION : 1
AHBC : 1
WHO : 1
ED : 1
SURG : 1
ARIPIP : 1
VERBALIZES : 1
DELETED : 1
PHYSICIAN : 6
DELIRIUM : 1
ATENOLOL : 1
CURRENT : 3
10 : 1
HIM : 3
ACCIDENTALLY : 1
INTERACTIONS : 1
PULSE : 4
HE : 19
PROSTHETIC : 1
NEXT : 2
RX : 2
SOBER : 1
THEY : 1
OBESITY : 1
RATE : 2
JALBUENA : 1
TYLENOL : 2
NEUROPATHY : 2
MEMBER : 1
EXTENSIVE : 1
ALARM : 1
OBSERVATION : 1
ML : 3
PHONE : 8
PREDICTING : 1
CLEAR : 1
EXTREMELY : 1
BERYL : 2
RESPONSES : 1
PRIMARY : 5
FAIR : 1
HEMOPTYSIS : 1
WI : 1
DRY : 1
HAD : 3
FIELD : 1
DEPARTMENT : 1
PATIENTS : 3
SULFA : 1
RTE : 1
NEGATIVE : 4
TWO : 4
WRITTEN : 1
ARCHER : 1
CFILE : 1
LOT : 1
LAB : 1
DECREASED : 3
LESIONS : 2
TRAVEL : 1
RD : 1
DIRECTIVES : 1
COMPLAINTS : 4
CONTACT : 5
INPUT : 1
HABITS : 1
HER : 2
WIAPN : 1
PROBLEMS : 6
URINE : 1
YELLOW : 1
BAYSIDE : 1
CHE : 1
ERS : 1
PHARMACIS : 1
CAN : 2
CLERK : 1
THERAPY : 4
LIVING : 3
PLACE : 2
SEND : 1
NONVA : 1
WHICH : 1
SYMPTOMS : 1
PROGRESSIVE : 1
IMPLANT : 1
COMFORTABLE : 1
RANGE : 1
NOTES : 2
TURGOR : 1
OVER : 1
MG : 17
ON : 16
COMPLETE : 1
PRESSURE : 7
GIRL : 1
VERIFY : 1
VIA : 1
HEADACHE : 2
LIGHTHEADEDNESS : 1
GOOD : 2
TRUNK : 1
DORSAL : 2
REG : 1
CCS : 1
MED : 2
CLAIM : 1
DRUGS : 1
07 : 1
INTO : 1
NEPHROPATHY : 1
HEELS : 1
HYPERTROPHY : 1
PROVIDER : 3
OIL : 1
SHE : 3
PO : 1
GENDER : 1
THEN : 2
LOCATION : 3
APPOINTED : 3
ALERT : 2
SHARED : 1
PHOENIX : 1
PRIOR : 1
VERBAL : 2
IMED : 1
DATE : 6
COMMENT : 2
DAILY : 1
THREE : 1
PA : 1
COLLECTION : 1
CHOLESTE : 1
LONG : 2
FEMALE : 2
APPOINTMENT : 8
RADIOLOGY : 1
WOULD : 1
FOLLOW : 1
FROM : 11
LEFT : 10
DIRECTOR : 1
MEDICAL : 5
HEAD : 1
ALSO : 1
SYSTEM : 2
ACTIVITIES : 1
ORDERS : 1
LIPID : 1
AN : 4
UNLABORED : 1
HEART : 6
COMPLAINT : 5
ORDER : 1
TAKES : 1
EXCEPT : 2
USING : 1
HAND : 1
FOUR : 2
INFLUENZA : 4
APPARENT : 1
DENIED : 1
EYE : 2
ULTRASOUND : 1
IMPLANTED : 1
GAVE : 1
LIFESTYLE : 1
ESTIMATED : 1
NEW : 5
MOUTH : 6
YEAROLD : 1
ATTENDING : 2
CHEST : 1
HEPATITIS : 2
HBP : 1
PRESENT : 2
DOCUMENTATION : 1
SOME : 1
MOMETASONE : 1
DT : 2
FVC : 1
MISCONSTRUED : 1
WPB : 1
EXPLAIN : 1
OPH : 1
HC : 1
ARE : 3
ANSWERED : 1
HYPERTENSION : 2
CORRECT : 1
CANAL : 1
APPLY : 1
RECEIVED : 4
ALMOST : 1
SURGERY : 2
INCONTINENCE : 1
FECAL : 1
RECOVERY : 1
ASPIRIN : 1
DIFFUSION : 1
BODY : 2
DOCUSATE : 1
YEARS : 1
HARMING : 1
BE : 7
YR : 1
RUN : 1
CANCER : 1
OL : 2
DUE : 2
LEGEND : 1
LED : 1
OMEPRAZOLE : 2
PH : 1
SEVERE : 1
STIFFINESS : 1
RECONCILED : 1
ALLOW : 1
REVIEWED : 4
MIRTAZAPINE : 1
DM : 1
ISSUE : 2
CHEERIOS : 1
OTHER : 11
ALL : 1
END : 1
LIFE : 1
SECOND : 1
BED : 1
NURSING : 4
PERIPHERAL : 1
FOLLOWING : 5
IDENTIFIED : 1
ENDING : 1
PATIENT : 36
ALLERGIES : 1
WITHOUT : 1
DIAGNOSIS : 2
JUL : 1
SENT : 1
INVOLVEMENT : 1
VERIFIED : 2
CARDIOL : 1
ABDOMEN : 1
BRUITS : 1
ECG : 1
NOS : 1
THAN : 2
ACUTE : 1
PHACOEMULSIFICATION : 1
VOICE : 1
UARY : 2
ARTHRITIS : 1
AUDITC : 1
LADDERS : 1
PROTOCOL : 3
COPYING : 1
PITTSBURGH : 1
JUDGEMENT : 1
CBI : 3
ROOM : 2
PATCHES : 1
IMPROVED : 1
FEET : 1
CAME : 1
VISIT : 3
THAT : 13
PAINS : 1
INSTILL : 1
CHART : 2
NORMAL : 2
WIFE : 1
DEPRESSED : 1
SERVICE : 2
RIGHT : 6
PC : 4
BREATHING : 1
VITALS : 3
PLA : 1
THROAT : 3
CERTAIN : 1
ABOUT : 3
ILIOLUMBAR : 1
PEDAL : 1
ATROVENT : 1
ONE : 5
GENOBESE : 1
POTENTIAL : 2
ANATOMICAL : 2
PTS : 1
NKA : 1
SPEC : 1
WINDOW : 1
THOUGHT : 1
HYPERLIPIDEMIA : 1
TABLET : 2
DURING : 2
YOU : 7
XEROSIS : 1
MURMURS : 1
SEVERAL : 1
LISTED : 3
SCREENING : 3
EGG : 1
VOICED : 1
WOMAN : 1
REACH : 1
ISSUED : 2
PAST : 3
DOCUMENT : 1
OS : 2
REASON : 1
PLANTAR : 1
POSTERIOR : 1
ESPECIALLY : 1
DISABILITIES : 1
ELSTON : 1
SCORE : 2
TOBACCO : 2
PAD : 1
HOME : 4
APPLICATION : 1
NOTED : 2
INDIVIDUAL : 1
DR : 1
SOCIAL : 1
HOSPITAL : 1
CAREFULLY : 1
MAIN : 1
MODERATE : 1
RESULTING : 1
UBW : 1
MEDSURG : 1
INJ : 1
SO : 1
MIN : 1
REGULAR : 4
POOR : 1
IDENTIFIERS : 1
SETTINGS : 1
RECONCILIATION : 3
DIABETESHYPERTENSION : 1
PROTECTIVE : 1
NEC : 2
COMPUTERIZED : 1
MODE : 1
MINUTES : 1
STRESS : 3
GREAT : 1
FOLLOWUP : 5
JR : 1
RHOMBOIDE : 1
DELTOID : 1
GAP : 1
MAKE : 1
RECORDED : 1
WEEK : 1
TEAM : 1
CBOC : 1
FALL : 2
UNDERGONE : 1
CONS : 1
DATA : 1
AM : 1
SUBSTANTIAL : 1
HELPED : 1
DISTRESS : 1
PRACTITIONER : 1
ENTERED : 1
PERSANTINE : 1
DYSLIPIDEMIA : 1
LIVES : 1
REPORT : 4
PEOPLE : 1
LETTER : 2
DEMENTIA : 1
HOW : 3
CALLED : 1
PRODUCTS : 1
TOOK : 1
PROPERTY : 1
SUPERVISION : 1
SPRINGTIME : 1
NSTEMI : 1
MANY : 1
SINCE : 3
FLU : 1
DESCRIBED : 1
COUGH : 3
CHANGE : 2
SOLN : 1
TEACHING : 1
CARDIAC : 3
INQUIRY : 1
ADVISED : 1
DOSE : 1
ENCOUNTER : 2
MONTHS : 2
OBJECTIVE : 1
TRIALED : 1
DEATH : 1
CRY : 1
PALPATION : 1
SSN : 2
ELSEWHERE : 1
BRADEN : 1
LSPINES : 2
BRIMONIDINE : 1
DATED : 2
RELIEVED : 1
TRAMADOL : 1
CHOICE : 1
MANIFEST : 1
MEDICATION : 10
SURVEILLANCE : 1
VISUAL : 1
595DT257 : 1
WANT : 2
THICK : 1
COMMENTS : 1
ATTEMPTED : 1
ACETAMINOPHEN : 1
SUPPORTIVE : 1
THICH : 1
CONTINUE : 2
ORAL : 1
GREW : 1
TOTAL : 2
READ : 1
SERVICES : 1
AHCV : 1
AB : 1
SINUS : 1
SURGICAL : 1
EXAMINATION : 2
ST : 1
HISTORY : 3
CLICK : 2
PROVIDE : 1
MAIL : 2
COLUMBUS : 1
LEGS : 1
NAPROXEN : 1
TUBE : 1
AMIODARONE : 1
PROGNOSIS : 1
RATIVE : 3
UGI : 1
PFTS : 1
GASKINS : 1
NOSE : 1
NOV : 1
WOUND : 2
DDD : 1
AROM : 1
MENTION : 1
HYPERKEROTOSISES : 1
PROSTATE : 3
EXCLUDING : 1
OVERALL : 1
IUM : 1
EFFORT : 2
STANDING : 1
INTERVENTIONS : 1
VS : 1
WAL : 1
TELECARE : 1
WILLING : 1
INSULIN : 2
PROBLEM : 1
EYES : 2
BILL : 1
RECORD : 3
CLASSIFICATION : 1
APPLICABLE : 2
CABG : 1
DIZZINESS : 2
REQUEST : 1
UNABLE : 4
XYZZY : 2
CORRECTION : 1
ADLS : 1
WARFARIN : 1
REFRESH : 1
OUTPUT : 2
METAB : 1
OSTEOARTHRITIS : 1
ANTICOAGULATION : 1
TELEMETRY : 1
AFTER : 6
INTENTION : 1
ADMISSION : 1
COMPLEX : 1
STILL : 1
GUARDIAN : 2
DIFFICULTIES : 2
CONCERNING : 1
SCALE : 2
LESS : 2
POSOP : 1
LUMBAR : 1
COUGHING : 1
MAILING : 1
ATHENS : 2
PCP : 3
ICE : 1
NONV : 1
FUTURE : 1
APPOINTMENTS : 1
WOUNDS : 2
OBSERVATIONS : 1
EACH : 1
RE : 2
ELECTRICAL : 1
TITLE : 1
WNL : 2
DENIES : 6
PHARMACY : 2
OLD : 2
PROCESSED : 1
MRP : 1
CNSL : 1
FOOT : 1
STATEMENT : 1
VETERAN : 4
CAPSULE : 3
PT : 12
ANION : 1
BLSOME : 1
DOUBLE : 1
REMAINING : 1
NP : 1
AREA : 1
PL : 1
CONSULTANTS : 1
VIS : 1
RETINAL : 1
MISSED : 1
STRATEGIES : 1
MM : 1
ILLNESS : 1
MEDICATIONS : 11
MR : 1
TROCHENT : 1
AND : 40
BILATERAL : 2
PACEMAKER : 1
HOUR : 2
NPH : 1
SELECT : 1
PARAM : 1
URINARY : 2
VACCINE : 3
BETTER : 2
COMMUNITY : 2
DEPRESSIVE : 1
RESULTS : 1
EMERGENCY : 1
ANSWER : 1
PERFORMANCE : 1
RECENT : 5
CHO : 2
IN : 27
LOW : 1
CARDIO : 1
MAY : 4
MANAGEMENT : 2
STATE : 2
DISCONNECTED : 1
PLAN : 2
ONYCHOCRYPTOSIS : 1
ANTERIOR : 2
ITEM : 1
DERMATOLOGY : 1
PRO : 1
TAKING : 1
HYPERACTIVITY : 1
PATHOLOGY : 1
RELAX : 1
SATISFACTION : 1
DONE : 2
PALPABLE : 4
PHYSICAL : 4
TEAR : 1
ACTIVE : 16
SPONSOR : 1
KNOW : 1
IDENTIFICATION : 1
BEHAVIOR : 2
INVOLVMENT : 1
MIDDLE : 1
SEASON : 1
THIS : 14
SUPERVISING : 1
EVEN : 1
DIFFICULTY : 1
LPN : 1
PLASTIC : 1
LIMITATIONS : 1
GLENOID : 2
SOFT : 1
VAMC : 1
KEPT : 1
LINKSFAUTOPRINTCOSIGN : 1
LAST : 6
AOX : 1
TLC : 1
COMPLICATED : 1
CLEARING : 2
GLEN : 1
COWORKERS : 1
EDUCATION : 1
FINANCIAL : 1
EXTREMITIES : 1
LAMP : 1
PICTURE : 1
STATES : 4
OCCUPATIONAL : 2
OU : 3
DETAILS : 1
QUESTION : 1
MACERATION : 1
ICDCM : 3
LAUGHING : 1
ETOH : 1
DOWN : 1
MED_NEW : 1
ELECTRONIC_PROSTHETIC : 1
TO_PT : 1
OCCUPATIONAL_PROGRESS : 2
REG_INJ : 1
OPHTHALMOLOGY_EXAM : 1
ASSISTANCE_SELFMANAGEMENT : 1
BENEFITS_OF : 2
ILLNESS_YEAROLD : 1
MRP_RECONCILIATION : 1
RISK_PULSES : 1
RESULTING_UVEITIS : 1
MEDICATION_ADDENDUM : 1
CHEW_CHE : 1
ADVISED_PATIENT : 1
MANY_HELPED : 1
VISION_OD : 1
RECEIVED_IMMUNIZATION : 1
BUT_IS : 1
PRETREATMENT_IOP : 1
ADDENDUM_OUTPT : 1
DECREASED_TO : 2
IN_YEAR : 1
INTO_EYES : 1
THERE_IS : 1
HIS_SENTARA : 1
TOO_LONG : 1
POSSIBLE_CARDIAC : 1
OF_DISCHARGE : 1
ARCHER_ROAD : 1
RECONCILIATION_DONE : 1
OTHER_PROBLEMS : 2
DAILY_MG : 1
HOSPITAL_EMERGENCY : 1
REPORTS_POOR : 1
SURVEILLANCE_CONSULT : 1
PERFORMANCE_INSTRUMENTAL : 1
ILIOLUMBAR_AREA : 1
RELIEVE_ON : 1
YES_MEDSURG : 1
IS_PROCEDURE : 1
PATIENT_INFLUENZA : 2
TAB_SIG : 1
CONTINUE_THE : 1
BLOOD_RECORDED : 1
START_ANY : 1
COMPLAINTS_OD : 1
ML_BRADEN : 1
FOLLOWING_CABG : 1
PLASTIC_GOLD : 1
NO_CCS : 1
CARE_APPOINTMENT : 1
TO_HIS : 2
SEEN_THROAT : 1
BILL_AS : 1
TWO_AS : 1
FRIENDS_AND : 1
OF_HIS : 1
INFECTION_MAY : 1
PROCEDURE_PERFORMED : 1
THE_PATIENT : 5
SECOND_TIME : 1
COWORKERS_SW : 1
HIS_PRIMARY : 1
STRESS_ON : 1
DIM_CHOLESTE : 1
AT_THIS : 1
OTHER_SEEN : 1
ERS_TROPONIN : 1
NORMAL_NEGATIVE : 1
NEURO_PROTECTIVE : 1
CALL_IN : 1
AS_IS : 1
NO_DEPRESSIVE : 1
NOT_ACTIVE : 1
THIS_CARE : 1
LAST_MM : 1
COMPLETE_ANTICOAGULATION : 1
BOTH_EYES : 2
FACILITY_AT : 1
LONG_CLIMBING : 1
NOT_MODE : 1
FROM_PITTSBURGH : 1
AND_SERTRALINE : 1
THEM_TO : 1
URETHERAL_STRICTURE : 1
APPOINTMENT_INFLUENZA : 1
PATIENT_DENIES : 1
CURRENT_DISABILITIES : 1
CHOICE_TYPE : 1
FAMILY_IS : 1
THOUGHT_HE : 1
OUTPATIENT_EXCLUDING : 1
MORNING_FOR : 1
REPORTS_THAT : 1
THAT_CAN : 1
VIS_THE : 1
OSTEOARTHRITIS_OUTPATIENT : 1
ORDER_BILL : 1
TO_FILL : 1
CONSULT_WAS : 1
SAME_HE : 1
FEMALE_HERE : 1
RISK_SCREEN : 1
PLA_PC : 1
OUTPATIENT_STATUS : 1
RETINOPATHY_SURVEILLANCE : 1
LOWERING_PRIMARY : 1
NEGATIVE_LAST : 1
HE_INFORMATION : 1
ERYTHEMA_ONYCHOCRYPTOSIS : 1
TITLE_TO : 1
NORMAL_EXAM : 1
PHARMACY_FOR : 1
VET_CONTINUING : 1
DL_PLEASE : 1
WANTS_TO : 1
PACK_THE : 1
BENEFITS_PROSTATE : 1
PROGRESSIVE_SCREEN : 1
MONTH_THEN : 1
FROM_PASS : 1
10_07 : 1
SELFMANAGEMENT_PM : 1
COLLECTION_SPEC : 1
DATED_NOW : 1
FOR_HIS : 1
ON_PLANTAR : 1
RELATIONSHIP_WANTS : 1
NOT_APPLICABLE : 1
FOR_NO : 1
VETERAN_TO : 1
NO_UBW : 1
VA_EXTENSIVE : 1
RRR_NO : 1
COMPLAINT_CHIEF : 1
PROTOCOL_USED : 1
EXAM_LINKSFAUTOPRINTCOSIGN : 1
PM_FOR : 1
COLONOSCOPY_THE : 2
BODY_SUBSCAPULARIS : 1
CONSULT_FOLLOWUP : 1
OR_OTHER : 1
PERIPHERAL_BLOOD : 1
RECOVERY_ROOM : 1
FISH_OIL : 1
CBI_CBI : 1
PERSONAL_PROPERTY : 1
WITH_OR : 1
VITALS_RECENT : 1
IF_IS : 2
PIOGLITIZONE_NEPHROPATHY : 1
PATIENT_YES : 1
HE_YOU : 1
CERTAIN_IF : 1
WPB_TEAM : 1
DIRECTIVE_REVIEWED : 1
PRESSURE_OR : 1
NEEDED_PATIENT : 2
SEE_PROVIDER : 1
CAPSULE_MOUTH : 2
AREA_AND : 1
THE_LAB : 1
PROSTATE_URINARY : 1
NOW_FEB : 1
AND_BENEFITS : 1
OUT_HE : 1
CAP_ONE : 3
OLD_WHO : 1
THE_SKIN : 1
LETTER_YELLOW : 1
ACTIVE_OTHER : 1
UGI_WNL : 1
HOME_WITH : 1
RESULTING_IN : 1
USING_STERILE : 1
IS_LABS : 1
TOMORROW_PATHOLOGY : 1
BURSA_AFTER : 1
BEEN_AND : 1
THICH_PAD : 1
WILL_THIS : 1
PATIENT_TAB : 1
REFRESH_BOTH : 1
PALPABLE_AND : 1
POSITIVE_RELATIONSHIP : 1
FILL_OUTPATIENT : 1
IN_MEDICAL : 1
NOTE_FOR : 1
CORONARY_HEART : 1
DOSES_THEREFORE : 1
SUPPLIES_EVERY : 1
REVIWED_CALL : 1
IN_PERFORMANCE : 1
PMH_LIVES : 1
DISPOSITION_RECOVERY : 1
AT_RIGHT : 1
ON_PHYSICAL : 2
MEDS_REVIWED : 1
BUT_DOES : 1
PHYSICIAN_LSPINES : 1
INSTRUCTED_CONTINUE : 1
WRITTEN_SUBSTANCE : 1
LESIONS_WOUNDS : 1
PCP_ATHENS : 2
PHARMACOLOGICAL_TEST : 1
ISSUE_STRATEGIES : 1
HEART_DENIES : 1
MACERATION_PHYSICIAN : 1
FOR_HEAD : 1
EXAM_CATARACT : 1
SENT_TO : 1
PATCHES_MEDICATION : 1
LAMP_LEFT : 1
ON_ACTIVITY : 1
TO_CONTACT : 4
DO_ACTIVE : 1
OF_REPORT : 1
PLEASE_APPOINTMENT : 1
OF_ACTIVE : 1
IN_ACTIVE : 1
LIPID_COLL : 1
STANDING_LONG : 1
THOUGHT_HAS : 1
UNITS_SQ : 1
PRESENT_ILLNESS : 1
ST_STATES : 1
OF_TRAVEL : 1
WITH_STRATEGIES : 1
URINE_TOTAL : 1
MILK_MG : 1
PICTURE_MAY : 1
OTHER_OCULAR : 1
HAS_SEPTEMBER : 1
WIDE_COMPLEX : 1
VACCINE_WAS : 1
PREOP_FOR : 1
YOU_VIA : 1
IF_THERAPY : 1
RECENT_LISTED : 1
FOR_ONE : 1
PRIOR_BEGINNING : 1
PRESENT_PROBLEMS : 1
HIV_AB : 1
ECG_FROM : 1
NONVA_MEDICATIONS : 1
FOR_APPOINTED : 1
HE_MIRTAZAPINE : 1
DATE_LDL : 1
MEDICAL_DIRECTOR : 1
PHYSICAL_EXAM : 2
COMPLICATED_POSOP : 1
MAIN_LM : 1
THIS_COMMUNICATION : 1
MG_SHE : 1
OF_MIDDLE : 1
POSOP_TRAVATAN : 1
IN_NO : 1
DECEMBER_NAME : 1
INDICATION_FOR : 1
IT_ELECTRICAL : 1
ARE_TO : 1
WERE_DESCRIBED : 1
MG_MG : 1
PHONE_FAIR : 1
SERVICES_WOUND : 1
URINE_ML : 1
KNOW_HOW : 1
STILL_NO : 1
MED_THE : 1
CBCD_AND : 1
AN_REVIEWED : 1
KEPT_PATIENT : 1
YEAR_MALE : 1
IS_SATURATION : 1
MOUTH_ACTIVE : 4
FOR_RECONCILIATION : 1
PAD_KNEE : 1
TEAM_REGULAR : 1
ULCER_REQUIRED : 1
ABDOMEN_CHARACTER : 1
WITH_MEDICATIONS : 1
PROBLEMS_MOISTURE : 1
ED_PHARMACOLOGICAL : 1
TRAVATAN_IN : 1
ACTIVE_COLL : 1
AFTER_HE : 1
ENDING_PM : 1
LAMP_EXAM : 1
SERVICE_TH : 1
NO_YES : 1
PHYSICAL_ACTIVITY : 1
TYPE_ADVANCE : 1
ANEMIA_HEART : 1
THE_CLERK : 1
RIGHT_PULSES : 1
ORDERS_ANTERIOR : 1
RESISTANCE_NOTES : 1
MOST_RECENT : 2
SUBSTANTIAL_BLOOD : 1
ILIOLUMBAR_NECK : 1
TO_TO : 3
BERYL_ATHENS : 2
DROP_EYES : 1
NEW_CHANGED : 1
FOR_PATIENT : 3
COMPLAINTS_IF : 1
THERAPY_ROM : 1
MAN_OF : 1
ADDRESS_BOX : 1
WM_WITH : 1
SOME_STATE : 1
INFORM_HIS : 1
HE_TAKES : 1
REQUESTING_FOR : 1
AT_DECREASED : 1
HEMOPTYSIS_DEPRESSIVE : 1
OPH_INSTILL : 1
IN_PHOENIX : 1
INR_PROCEDURE : 1
NUMBER_RD : 1
SPONSOR_OR : 1
OIL_HE : 1
CHART_FOR : 1
MIDDLE_ASSOCIATED : 1
IN_CBCD : 1
PATIENT_WITH : 1
REMOVING_GASTROINTESTINAL : 1
THE_PHARMACY : 1
BUSY_ETC : 1
OF_PRESENT : 1
TO_HIM : 2
SHIFT_FOLLOWING : 1
FOLLOWUP_OVER : 1
AT_END : 1
INPUT_HOUR : 1
THICKNESS_POSTERIOR : 1
REGULAR_CLINIC : 1
SINCE_HE : 1
POTENTIAL_DRUG : 1
WEIGHT_REDUCTION : 1
OF_HYPERACTIVITY : 1
SEEN_SERVICE : 1
STIFFINESS_COUGH : 1
LIGHTHEADEDNESS_PASSING : 1
MANAGEMENT_PROGRESS : 1
EATING_LESS : 1
FACILITY_STILL : 1
THE_PRACTITIONER : 1
INFORMATION_VIS : 1
CORRECT_ANSWER : 1
CM_READ : 1
APPLY_HEELS : 1
OXIMETRY_WAS : 1
USED_TO : 1
AND_PASSING : 1
PA_VETERAN : 1
HER_FINANCIAL : 1
PCP_PLA : 1
FILL_DATE : 1
WNL_SUPPORT : 1
RESIDING_AT : 1
THAT_RELAX : 1
CARDIAC_POSITIVE : 1
HAS_VA : 1
NEC_WITH : 1
ANY_OCULAR : 1
PATIENT_PROSTATE : 1
PATIENT_INSTRUCTED : 1
AND_WITH : 1
OF_REGULAR : 1
PAIN_SCORE : 1
WM_NMSC : 1
DISCUSSED_HIS : 1
NSTEMI_ERS : 1
HEAD_BED : 1
NOT_PATIENT : 2
THE_HAS : 1
SEPT_DIZZINESS : 1
MEDICATIONS_EXPIRATION : 1
SCREEN_STATUS : 1
YES_CHIEF : 1
INFORM_HER : 1
CARDIOL_PHYSICIAN : 1
NO_DIZZINESS : 1
CHART_AND : 1
YR_FEMALE : 1
MG_EC : 2
PM_HE : 1
AT_PM : 2
LAST_ACTIVE : 1
PATIENTS_CHIEF : 1
PC_OUTPT : 1
NECK_RHOMBOIDE : 1
YOU_ALBUTEROL : 1
YOU_TAKE : 1
HE_IMPROVED : 1
IF_OR : 1
INT_IN : 1
THAT_DO : 1
EDUCATION_RADIOLOGY : 1
AN_ISSUE : 1
MANIFEST_IN : 1
TO_HAVE : 2
NUMBER_FACILITY : 1
PHONE_NO : 1
MEDICATIONS_NOTE : 1
PHOENIX_IS : 1
IN_THIS : 2
RATE_BPM : 1
VA_DOCUMENTATION : 1
INDICATION_EXERCISE : 1
HOME_TO : 1
ONLY_AFTER : 1
IN_SPRINGTIME : 1
NECESSARY_FEV : 1
HARMING_HIMSELF : 1
MG_SIG : 1
DM_AND : 1
HAS_CLAIM : 1
HE_NOT : 2
COMPLAINTS_DIZZINESS : 1
OF_UNDERSURFACE : 1
LONG_YELLOW : 1
FOR_APPLICATION : 1
IMAGES_WI : 1
OVERALL_HIS : 1
EXAM_VERBAL : 1
AND_ABDOMEN : 1
MIN_TARTRATE : 1
NOT_EXPECTED : 1
INSTRUCTED_EXPIRATION : 1
CHIEF_NO : 1
NEEDED_DT : 1
MOUTH_TIMES : 1
RECONCILIATION_RISK : 1
ANWSER_BUSY : 1
OF_DIZZINESS : 1
NMSC_MELANOMA : 1
TO_STRESS : 1
JALBUENA_FOR : 1
SCREENING_PROGNOSIS : 1
WANT_BE : 1
MOISTURE_THE : 1
THE_IMMUNIZATION : 1
SCREENING_THIS : 1
WAS_PROCESSED : 1
DATE_NOT : 1
TO_TAKE : 1
OR_LADDERS : 1
THAT_BLOOD : 1
NOT_HX : 1
OR_VOICED : 1
OF_HARMING : 1
TOTAL_SHIFT : 1
CHANGED_NONVA : 1
URINARY_WITH : 1
NO_MAILING : 1
PRIMARY_PHYSICIAN : 1
THAT_HAS : 4
CONSULT_ROM : 1
MONTHS_THERAPY : 1
PRO_PHONE : 1
WITH_IN : 1
OF_TOBACCO : 2
FAST_AND : 1
GIVEN_IN : 1
SHE_WILL : 1
EFFECTS_WERE : 1
TO_SEE : 4
THE_END : 1
PLEASE_MAKE : 1
BUSPAR_AND : 1
SCALE_AMBULATORS : 1
RADIOLOGY_CARDIAC : 1
ADDENDUM_INFORMATION : 1
MEDICATIONS_EXCLUDING : 1
LOT_RIGHT : 1
PATIENT_CARE : 1
UNIT_SETTINGS : 1
BED_FOLLOWUP : 1
MONTHS_PHYSICAL : 1
SKIN_PAIN : 1
SECTIONS_AT : 1
HAVE_GREAT : 1
AT_RISK : 1
UNDERSATNDING_SURGERY : 1
PM_RESPONSES : 1
LEFT_FX : 2
DEPRESSION_OPERATION : 1
WORK_AT : 1
RATIVE_PT : 1
MAY_BE : 1
CONS_HISTORY : 1
PRILOSEC_PRN : 1
SEVERE_LEGEND : 1
OR_SURROGATE : 1
SERTRALINE_MG : 1
SHOULDER_ROM : 1
STATEMENT_ABOUT : 1
GENDER_PLASMA : 1
INR_IS : 1
STATUS_FILL : 2
ACTIVE_OUTPATIENT : 5
USED_VERIFY : 1
VET_USE : 1
TO_VET : 1
THAT_HIS : 3
DURING_VISIT : 1
AND_SELECT : 1
GUARDIAN_WOULD : 1
TO_IS : 1
INFORMATION_TO : 1
RX_MEDICATION : 1
LOWER_EXTREMITIES : 1
ONS_INVOLVMENT : 1
DATED_THE : 1
RECORDED_DIAGNOSIS : 1
YOU_CHART : 1
YEAR_HEPATITIS : 1
NEGATIVE_BRUITS : 1
CARE_THAN : 1
SYSTEM_HAS : 1
HEAL_FROM : 1
LIPID_DATE : 1
EVEN_NEURO : 1
FEMALE_PLASMA : 1
CHANGE_DIET : 1
THAT_WILL : 1
HABITS_FAST : 1
TO_FOLLOW : 1
DDD_DIABETIC : 1
END_OF : 1
CONTACT_YOU : 1
LISTED_PHONE : 1
TO_WORK : 1
OUTPATIENT_PRESCRIPTION : 1
THE_WORK : 1
THE_PHENYLEPHRINE : 1
ENCOUNTER_ANATOMICAL : 1
RELIEVE_STRESS : 1
ATENOLOL_MG : 1
MODE_TRAVEL : 1
RADIOLOGY_CATH : 1
NOS_AND : 1
INDUCED_PATIENT : 1
NEW_POTENTIAL : 1
AND_SHE : 1
AREA_NECK : 1
FOR_YOUR : 1
SURE_TO : 1
DIABETIC_RETINOPATHY : 1
PROPERTY_KEPT : 1
NOTE_DATED : 2
DORSAL_PALPABLE : 2
TO_HOME : 1
HARMING_MR : 1
TEAM_CLINIC : 1
TO_RELIEVE : 1
CHARACTER_CLEAR : 1
TYPE_DEMENTIA : 1
THROAT_AND : 1
AND_POSSIBLE : 1
DATED_FEB : 1
DOUBLE_ON : 1
DT_SPEC : 1
LM_DISTAL : 1
TO_MEDICAL : 1
REDUCTION_TO : 1
YESTER_TOOK : 1
EXPLAIN_NUTRITION : 1
OF_MODE : 1
RED_LEGS : 1
DOCUMENT_DROP : 1
AFTER_OWING : 2
WILL_URETHERAL : 1
NOS_ANKLE : 1
CARDIO_PULSE : 1
WITH_COUGHING : 1
SUBJECTIVE_NOS : 1
SIDE_WERE : 1
DENIES_OF : 1
STATUS_VETERANS : 1
AND_ARE : 1
MEDICATION_INSTRUCTIONS : 1
CLEAN_SCALE : 1
ABOUT_INFLUENZA : 1
LEVEL_CONSCIOUSNESS : 1
CRY_ACTIVE : 1
PT_THAT : 2
DOES_WANT : 2
CATARACT_ALREADY : 1
OF_ECG : 1
TIMES_SINCE : 1
AND_OUT : 1
TIMES_NEEDED : 1
APPLY_TO : 1
WITH_LSPINES : 1
RECONCILIATION_PFTS : 1
HEARING_WORKER : 1
HE_RUN : 1
ACUTE_NEW : 1
PREGNANT_NO : 1
QUESTION_TINY : 1
TOO_OR : 1
PT_VERBALIZES : 1
INVOLVMENT_ON : 1
AC_WITHOUT : 1
HANDEDED_MOST : 1
CURRENTLY_INPATIENT : 1
WHO_CAME : 1
BUSINESS_SAID : 1
DROP_ACTIVE : 1
WAS_TO : 1
INR_PT : 1
AGAIN_GREAT : 1
BETTER_GIRL : 1
RE_RECENT : 1
SKIN_PROBLEMS : 2
CONSULT_OF : 1
MG_TAKE : 3
BY_AT : 1
IS_STATE : 1
RISK_WILL : 1
LAST_FILL : 2
VIA_THE : 1
PROHIBITED_NEXT : 1
WALKING_TO : 1
HIS_PAST : 1
MOUTH_PATIENT : 1
PATIENT_DOES : 1
RATE_NORMAL : 1
CAPSULE_ACTIVE : 1
THE_MIDDLE : 1
CAME_AS : 1
LONG_OR : 1
DISTRIBUTION_OR : 1
POSITIVE_WANTS : 1
OMEPRAZOLE_MG : 2
NOTE_TO : 1
USING_THE : 1
REHABILITATION_AFTER : 1
HIS_AND : 1
RV_DIFFUSION : 1
SHIFT_CALLED : 1
NOTES_HE : 1
CONSULT_PROCESSED : 1
HIS_LIFE : 1
TOBACCO_OPERATIVE : 1
RISK_DISCHARGE : 1
RO_PHOENIX : 1
TO_REQUEST : 1
OF_PROCEDURE : 1
THE_FOLLOWING : 4
NOW_CLICK : 1
ALCOHOL_SUICIDE : 1
TRIGLYCEHDL_DIM : 1
HYPERKEROTOSISES_STATES : 1
FLOWSHEET_OF : 1
XEROSIS_ON : 1
APPROPRIATE_NURSING : 1
SHE_WILLING : 1
PH_ASSOCIATED : 1
PARAM_NEEDED : 1
NUMBER_ANWSER : 1
SERVICE_TIMES : 1
COMPLAINTS_WAS : 1
595DT257_10 : 1
PC_NOTE : 1
FINDINGS_OPERATION : 1
NEW_PAIN : 1
PACU_RECOVERY : 1
COLOR_CAO : 1
PCP_MD : 1
AS_FOR : 1
RADICULOPATHY_UGI : 1
NOV_NPH : 1
YES_PATIENT : 1
RESPONSES_MEDICAL : 1
AT_LISTED : 1
TRAVEL_AMB : 1
CALL_MIN : 1
TAB_PO : 1
LESS_THAN : 1
INTERACTIONS_MEDICATIONS : 1
TUBE_PT : 1
DOCTOR_TO : 1
ANATOMICAL_LOCATION : 2
CONCERNING_ATROVENT : 1
LIVING_CENTER : 2
DO_TAKE : 1
NEGATIVE_PATIENT : 1
ASPIRIN_MG : 1
TO_SEVERE : 1
OR_GROUP : 1
ATHENS_FEMALE : 1
PALPABLE_NO : 1
NEGATIVE_FOR : 1
OTHER_THAN : 1
COMMUNITY_CENTER : 2
GIVEN_INFLUENZA : 1
YOUR_NEXT : 1
HIS_DM : 1
BETTER_FROM : 1
FOR_FOLLOWING : 1
NOTE_595DT257 : 1
WITH_NMSC : 1
PRESCRIPTION_BY : 1
IN_ANEMIA : 1
MAIN_DISTAL : 1
WORK_YESTER : 1
MARRIAGE_GREW : 1
ARTHRITIS_OF : 1
REMOVAL_TENDONOPATHY : 1
COLONOSCOPY_CARDIOL : 1
THIS_PROCEDURE : 1
YOU_THE : 2
ATHENS_MOST : 1
RESPIRATORY_EFFORT : 1
ARE_LEFT : 1
PRODUCTS_BE : 1
LEFT_MAIN : 1
NAME_PROBLEMS : 1
IS_OLD : 1
CAN_RELAX : 1
HE_MANAGEMENT : 1
ASK_SEE : 1
THE_STERILE : 1
BUT_HE : 2
SHOWS_COMPLEX : 1
FOR_THE : 1
DATE_DOES : 1
AND_SOFT : 1
ISSUE_WITH : 1
FOR_AUDITC : 1
RATIVE_ANTERIOR : 1
DATE_PATIENT : 1
WITH_PROMOTE : 1
TO_ASSESS : 1
PATHOLOGY_ASSESSMENT : 1
NEGATIVE_APPOINTMENT : 1
WAS_DONE : 1
SURGERY_WOUND : 1
TIMES_THE : 1
THE_BACK : 1
PRETREATMENT_OU : 1
OMEPRAZOLE_EC : 2
INSTRUCTIONS_MEDICATION : 1
CANAL_INVOLVMENT : 1
NPH_REG : 1
OVERUSE_STANDING : 1
FILL_LIFE : 1
CLEAN_AND : 1
THE_CAN : 1
WILL_TO : 2
HIS_EATING : 1
NOTE_BEHAVIOR : 1
MIN_BRIMONIDINE : 1
NO_ADDENDUM : 1
OU_CATARACT : 1
PRESSURE_YES : 1
ON_TIU : 1
RECONCILIATION_REMOVING : 1
PROVIDE_WITH : 1
TO_BY : 1
PAD_LOCATION : 1
VOICE_CHANGE : 1
BEDTIME_NIDDM : 1
INSULIN_ML : 1
ALREADY_THE : 1
CONFIRMED_SPONSOR : 1
NEUROPATHY_ORAL : 1
NOT_REVIEWED : 1
LSPINES_ADDENDUM : 1
HISTORY_PER : 1
ACCIDENTALLY_PATIENT : 1
DISCONNECTED_TO : 1
PAST_THAT : 1
OF_SUPPORTIVE : 1
CONTINUING_USE : 1
RHYTHM_NEGATIVE : 1
DRUGS_PT : 1
WILL_BE : 2
CAO_LEFT : 1
INTERVENTIONS_OR : 1
CARDIAC_REHABILITATION : 1
STATUS_LAST : 2
CM_PROCEDURE : 1
NO_COMPLAINT : 1
AS_NEW : 1
PHONE_CALL : 1
JOB_BY : 1
SEE_DENIES : 1
BPM_MEDICATION : 1
FOR_SKIN : 1
CONSULTANTS_OS : 1
BLOWING_FOR : 1
HIM_OTHER : 1
OTHER_COMPLAINTS : 1
TUBE_AS : 1
CONCERNS_HAD : 1
VETERANS_MENTAL : 1
NAME_HAVE : 1
TRAMADOL_TAB : 1
MEDICATIONS_HAVE : 1
WITH_SURGICAL : 1
NOVO_UNITS : 1
OS_TYPE : 1
FOR_PAIN : 2
THE_TWO : 1
THE_WILL : 1
HIMSELF_ALSO : 1
SAID_HIS : 1
TABLETS_MOUTH : 1
AOX_PATIENT : 1
NO_RETINOPATHYPER : 1
SCORE_OUTPATIENT : 1
PROSTATE_SCREENING : 1
SUPPLIES_PROTECTIVE : 1
FACILITY_OPT : 1
EXTENSIVE_DOCUMENTATION : 1
SEPTEMBER_CURRENT : 1
SCREEN_PC : 1
FROM_TO : 1
RECENT_IN : 1
VITALS_VOICE : 1
BLSOME_STATE : 1
LEGS_DIABETIC : 1
LIVING_SHIFT : 2
YES_COMPLAINT : 1
MAY_MANIFEST : 1
CAB_VS : 1
METAB_SERVICE : 1
THIS_ENCOUNTER : 1
AND_NONVA : 1
ASSESSMENT_UNITS : 1
NONV_FACILITY : 1
WEEK_FOR : 1
EXPIRATION_ESPECIALLY : 1
PRESSURE_SORE : 1
SLIT_EXAM : 1
VERBAL_DENIES : 1
THE_EXAMINATION : 1
LM_TAPERING : 1
ULTRASOUND_SCHEDULED : 1
WALKING_HIS : 1
ABOUT_SAME : 1
ELECTRICAL_YESTER : 1
VETERAN_WAS : 1
UNDERSURFACE_OBJECTIVE : 1
FVC_TLC : 1
OF_AMB : 1
PLAN_OF : 1
GIVEN_AMANDA : 1
LEVEL_OF : 1
AT_THE : 1
MEDICATIONS_MEDICATION : 1
DIFFUSION_CAPACITY : 1
SOME_INITIAL : 1
TO_TWO : 1
ETC_CURRENTLY : 1
RRR_MURMURS : 1
XYZZY_PATIENT : 2
LINKSFAUTOPRINTCOSIGN_AS : 1
DROP_IN : 1
CAB_WALKING : 1
WILL_CALL : 2
TO_LOWER : 1
WITH_THROAT : 1
HIM_IN : 1
PROCEDURE_STRESS : 1
ONE_TO : 1
SHE_WAS : 1
NOTE_COMPUTERIZED : 1
MEDICATION_FOR : 1
LADDERS_ANION : 1
TOTAL_INTAKE : 1
DELETED_AND : 1
DENIES_TOO : 1
PT_HERE : 1
DECREASED_ROM : 1
REMOVAL_SUBSCAPULARIS : 1
BLSOME_SSN : 1
NOTE_CHARACTERISTIC : 1
DOCUMENTATION_OF : 1
SKIN_MOISTURE : 2
DENIES_SYMPTOMS : 1
STATUS_MENTAL : 1
NOT_OF : 1
IN_CLICK : 1
SENTARA_BAYSIDE : 1
HEARING_AID : 1
THRESHOLD_IS : 1
STRESS_SINCE : 1
NURSING_MEDSURG : 1
MPLS_EXTENSIVE : 1
VISION_OS : 1
PATIENT_SYMPTOMS : 1
OF_THROAT : 1
BENEFITS_STATUS : 1
NECK_STIFFINESS : 1
THIS_SSN : 1
BELL_IN : 1
WPB_REGULAR : 1
THE_USE : 1
ARCHER_LEFT : 1
SOB_HEMOPTYSIS : 1
ALCOHOL_INR : 1
REMAINING_CLEAN : 1
MEDICATION_RTE : 1
MINUTES_SUPPORTIVE : 1
REMOVING_PACEMAKER : 1
THICK_CRUMBLY : 1
DYSLIPIDEMIA_HOUR : 1
BE_VACCINE : 1
ACTIVE_OU : 1
FEV_RV : 1
NOTE_REV : 1
AMB_THE : 1
LAB_STARTED : 1
THE_SUPERVISING : 1
AB_HBSAG : 1
DETAILS_LOT : 1
TH_CURRENT : 1
LUMBAR_RADICULOPATHY : 1
ANY_OF : 1
BLOOD_HIS : 1
MENTION_OF : 1
LIMITATIONS_NO : 1
MANAGEMENT_CODE : 1
THE_REPORT : 1
PERRLA_SKIN : 1
PARAM_AS : 1
WNL_SEE : 1
STATUS_ALERT : 1
CHO_OL : 2
CONVERSATION_HAS : 1
GAP_NO : 1
RADIOLOGIST_WILL : 1
PRESSURE_ULCERS : 1
RECONCILED_AND : 1
RELAX_DISTRIBUTION : 1
OF_LAB : 1
NO_MURMURS : 1
FOLLOW_NEGATIVE : 1
BETTER_LETTER : 1
LESS_FOOD : 1
DYSLIPIDEMIA_INPUT : 1
PROMOTE_HEALTHY : 1
THE_WITH : 1
SINUS_INFECTION : 1
SEE_DR : 1
CONFRONTATION_VISUAL : 1
DP_PT : 1
PRN_NEW : 1
OXIMETRY_VACCINE : 1
VAGUE_BUT : 1
STATE_INR : 1
TO_NOT : 1
WITH_MG : 1
LISTED_NUMBER : 1
FILL_BP : 1
THE_AND : 6
MEDICATIONS_595DT257 : 1
PRESCRIPTION_MAIL : 1
SYSTEM_TO : 1
ON_BASIS : 1
WITHOUT_DIFFICULTY : 1
OF_PREGNANT : 1
INTRAARTICULAR_OF : 1
MEDICATION_RECONCILIATION : 3
COMMENTS_SECTIONS : 1
PROVIDE_THE : 1
PERFORMANCE_OF : 1
FECAL_BLOOD : 1
OF_ATTENDING : 1
IN_ON : 1
NUMBER_RIGHT : 1
STABLE_PAIN : 1
RHOMBOIDE_TENDERNESS : 1
MEDICATION_REMOVING : 1
CONTINUE_COUMADIN : 1
DEPRESSIVE_NEC : 1
CBI_URINE : 1
MENTION_HYPERACTIVITY : 1
RED_DIABETIC : 1
COMMENT_CONSENT : 1
STATES_THE : 1
HIM_DENIES : 1
FOLLOWING_ACTIVITIES : 1
WILL_DISCHARGE : 1
DERMATOLOGY_HISTORY : 1
THANKS_HAVE : 1
HIS_THAT : 1
HEIGHT_IN : 2
EFFORT_GET : 1
THE_DOCUMENT : 1
DATE_PHARMACIS : 1
HIS_TEMPERATURE : 1
VA_ISSUED : 2
OR_PLACE : 1
PULMONARYCONSULT_OSTEOARTHRITIS : 1
AT_AM : 1
ST_THAT : 1
MG_CURRENT : 1
ESPECIALLY_THE : 1
OUT_TAKES : 1
EXPIRATION_IN : 1
BP_JUL : 1
DOSE_INCREASE : 1
THANKS_AGAIN : 1
NOTED_ON : 1
ALREADY_RECEIVED : 1
FLU_SEASON : 1
HAND_AND : 1
NOTE_CALLED : 1
THE_IDENTIFIERS : 1
NEXT_HAS : 1
ATTENDING_FOLLOWUP : 1
GLEN_REHAB : 1
ALL_PROPERTY : 1
THIS_AND : 1
INR_ADDENDUM : 1
NOT_HIS : 1
THE_SECTIONS : 1
RECEIVED_THIS : 1
CATH_TEACHING : 1
AMOUNT_TO : 1
LEGEND_VA : 1
NOW_YES : 1
PROSTATE_CANCER : 1
SCALE_PREDICTING : 1
07_WAL : 1
WOUNDS_OR : 1
AND_CARETAKER : 1
SAT_THE : 1
REGULAR_YES : 1
AND_ANKLE : 1
REV_10 : 1
TWO_CAPSULE : 1
SOFT_CHARACTER : 1
NOT_SEND : 1
RADIAL_PULSE : 1
NEC_NORMAL : 1
VETERAN_COMING : 1
CHEST_PAIN : 1
EYE_DO : 1
FOLLOWING_PULSE : 1
AND_HE : 1
OBESITY_DDD : 1
TOOK_CAB : 1
LEFT_APPOINTMENT : 1
AND_RESPIRATORY : 1
PSYCHOLOGY_OF : 1
TO_AMIODARONE : 1
FOLLOWUP_IS : 1
EXCLUDING_SUPPLIES : 1
DO_UNDERSTAND : 1
IF_OCCUPATIONAL : 1
THE_ACCIDENTALLY : 1
ANTICOAG_COMPLAINTS : 1
FOR_DRY : 1
TYPE_PROGRESSIVE : 1
HEART_LOCATION : 1
INCLUDING_MENTION : 1
DEPARTMENT_YES : 1
DISORDER_NEC : 1
PASSING_OUT : 1
POOR_VISION : 1
INTO_BOTH : 1
REPORT_ALL : 1
APPOINTMENT_INFORMATION : 2
PROVIDER_HAS : 2
IN_CBH : 1
PHYSICIAN_NO : 1
GREW_DEPRESSED : 1
RECENT_CHANGES : 1
BRUITS_NEGATIVE : 1
NP_SEE : 1
SEE_IN : 2
BEHAVIOR_MAY : 1
TO_PROVIDER : 1
CHEST_NEC : 1
BILATERAL_LOWER : 1
NOT_RETURNED : 1
PATIENTS_DELTOID : 1
NOTE_DT : 1
DDD_NEUROPATHY : 1
EXAM_HIS : 1
FACILITY_NO : 1
TAB_CHE : 1
NA_MG : 1
CARE_INTERVIEW : 1
INTERVIEW_PATIENT : 1
POSTERIOR_HYPERKEROTOSISES : 1
PATHOLOGY_FROM : 1
ENCOUNTER_IS : 1
LIVER_FUNCTION : 1
MG_ON : 1
FRACTURE_OF : 1
AT_PROBLEMS : 1
ML_CBI : 1
NO_NO : 2
STILL_PEG : 1
HOUR_FUTURE : 1
HANDEDED_VITALS : 1
HBP_AND : 1
ACTIVITIES_PHYSICAL : 1
SCREEN_CBOC : 1
PEOPLE_WILL : 1
RESISTANCE_THAT : 1
HAS_NKA : 1
CC_THIS : 1
HIS_UPCOMING : 1
DECEMBER_PATIENT : 1
OF_WARFARIN : 1
APPOINTED_PLA : 1
OU_PRETREATMENT : 1
AMANDA_VETERAN : 1
PATIENT_TO : 2
INFORMATION_PROVIDE : 1
DOCUSATE_MG : 1
PRODUCTS_WILL : 1
THEN_AS : 1
TO_BE : 2
NAME_ATTEMPTED : 1
DECREASED_OF : 1
BE_FILL : 1
GREAT_SUMMER : 1
CAO_NAD : 1
ONLY_HE : 1
THE_ARE : 1
SATISFACTION_THIS : 1
BERYL_GENDER : 1
SKIN_EVERY : 1
ANSWER_FACILITY : 1
EYES_BP : 1
HUSBAND_THE : 1
SCHEDULED_WAS : 1
HE_REQUESTING : 1
RATIVE_OF : 1
SO_THAT : 1
HAS_SERVICE : 1
SCREEN_DEPRESSION : 1
ANATOMICAL_ILIOLUMBAR : 1
COUNSELING_REGULAR : 1
IMMUNIZATION_SCREEN : 1
WITH_AND : 2
ASPIRIN_CHEW : 1
WNL_GET : 1
DISORDER_GAIT : 1
LEFT_TRAMADOL : 1
REVIEW_BREAKFAST : 1
AND_MG : 3
HYPERTENSION_NOS : 1
LAST_SCORE : 1
REQUIRED_NO : 1
HAS_SEEN : 1
ON_SINCE : 1
BASIS_SKIN : 1
IMPLANTED_THIS : 1
CLIMBING_ANION : 1
YES_PREGNANT : 1
THE_HE : 1
TO_WITH : 1
WITH_THE : 4
IS_DATED : 1
PER_PHYSICIAN : 1
SPRINGTIME_HEARING : 1
PROGRESS_OCCUPATIONAL : 1
AN_PROSTHETIC : 1
RITALIN_REPORTS : 1
REPORT_LEFT : 1
ASSESSMENT_AM : 1
CLERK_MEDICATIONS : 1
MEDICATIONS_PATIENT : 1
MEDSURG_SHIFT : 1
PRACTITIONER_RECORD : 1
YES_CLASSIFICATION : 1
LESS_MONTHS : 1
OIL_BUT : 1
ECG_UARY : 1
OF_RX : 1
DESCRIBED_PATIENT : 1
OF_WITH : 1
NURSING_INTERVIEW : 1
DISTAL_TAPERING : 1
ALLERGY_REVIWED : 1
OF_PROSTATE : 2
BYPASS_HEART : 1
YES_ULTRASOUND : 1
HYPERTENSION_AND : 1
HE_TYPE : 1
PHENYLEPHRINE_DROP : 1
SCALE_NO : 1
FOLLOWUP_CBH : 1
INSTRUCTED_VET : 1
GOOD_EFFORT : 1
CLEARING_FROM : 1
LEFT_FLUSHES : 1
TO_ANY : 1
REGULAR_SINCE : 1
DEPRESSION_PHONE : 1
PATIENT_SCREEN : 1
REQUIRED_HELP : 1
MEASURED_IN : 1
ONEHALF_TABLET : 1
COLOR_NAD : 1
FOR_EXERCISE : 1
CLICK_ANTICOAG : 1
CHOICE_OS : 1
AND_AMOUNT : 1
DISCHARGE_OD : 1
PROBLEMS_CHIEF : 1
THIS_WORKER : 1
OWING_PROBLEMS : 1
QUESTION_OF : 1
THE_MEDICATION : 1
FOR_AORTOFEMFEM : 1
AGREEMENT_YES : 1
REMOVED_BY : 1
DIFFICULTIES_PVD : 1
CONS_DERMATOLOGY : 1
AND_COWORKERS : 1
INFORMATION_STATEMENT : 1
FOUR_FOR : 1
OF_COMMUNICATION : 1
OF_STATUS : 1
THE_LEFT : 2
PATIENT_NOT : 4
GIVEN_PATIENTS : 1
DOCUMENT_PHENYLEPHRINE : 1
HOW_ALLERGIES : 1
AND_PMH : 1
CALL_BRIMONIDINE : 1
SEPT_NO : 1
SW_ARCHER : 1
THEREFORE_RETESTED : 1
WAS_BLOOD : 1
FOR_DOCTOR : 1
HTN_DYSLIPIDEMIA : 1
WITH_AMIODARONE : 1
AND_RIGHT : 1
HAS_BEEN : 1
ALARM_TO : 1
THE_SAME : 2
HIS_COLONOSCOPY : 1
ISSUED_INPATIENT : 1
NO_PROBLEMS : 1
COLONOSCOPY_PHYSICIAN : 1
QH_PRN : 1
INTENTION_HARMING : 1
FOBT_BAYSIDE : 1
CALL_AND : 1
LIFE_DO : 1
AS_PATIENT : 1
JUL_VITALS : 1
MAILING_ADDRESS : 1
PHYSICIAN_HYPERTROPHY : 1
OS_UNABLE : 1
SKIN_COLOR : 1
DEPRESSED_THE : 1
ISSUED_OUTPATIENT : 1
DIRECTIVES_LIVING : 1
NO_PEG : 1
PLAN_PRIMARY : 1
OF_EDUCATION : 1
FOR_IS : 1
RETESTED_ON : 1
WITH_OTHER : 1
VETERANS_GUARDIAN : 1
HAS_RETURNED : 1
LETTER_FROM : 1
NO_HEMOPTYSIS : 1
ARIPIP_AT : 1
CC_DURING : 1
UGI_SEE : 1
SSN_PHONE : 1
MOISTURE_PHYSICIAN : 1
EXERCISE_TEST : 1
LUMBAR_ICDCM : 1
DENIES_ANY : 1
WITH_FAMILY : 1
OCCULT_BLOOD : 1
HTN_HOUR : 1
PARAMETERS_TO : 1
IN_BUT : 1
COMING_TO : 1
SENT_YOUR : 1
MAY_THE : 1
MG_CAP : 3
THE_MAIL : 1
OTHER_PRESSURE : 1
REPORTS_OVERALL : 1
VERBALIZES_TO : 1
HYPERACTIVITY_MEDICATIONS : 1
IN_PATIENTS : 1
COMMENTS_AT : 1
DIAGNOSIS_DIABETESHYPERTENSION : 1
HYPERLIPIDEMIA_ICDCM : 1
OF_NOT : 1
PATIENT_UNDERGONE : 1
PATIENT_IS : 2
NEW_LESS : 1
OUTPATIENT_INP : 1
MONTH_AND : 1
TO_REVIEW : 1
WILL_HIS : 1
BODY_REMOVAL : 2
ON_REGULAR : 1
OVERUSE_DENIES : 1
TAKE_TWO : 1
THERAPY_NOTE : 2
PROCEDURE_PHARMACOLOGICAL : 1
PRESSURE_SUBJECTIVE : 1
PT_SURG : 1
PT_AMOUNT : 1
ADVANCE_DIRECTIVES : 1
MACERATION_NOTED : 1
TELEMETRY_PATCHES : 1
NOTE_SEE : 1
IS_CERTAIN : 1
THE_MEDICINE : 1
OUTPUT_IRRIGANT : 1
ANY_CHO : 1
PC_TEAM : 1
LISTED_IN : 1
SIG_TWO : 1
BUSY_CURRENTLY : 1
DENIES_OTHER : 2
RECEIVED_VACCINE : 1
FOLLOWUP_BREATHING : 1
PROSTATE_HEART : 1
SSN_DISEASE : 1
MG_BUSPAR : 1
SSN_PATIENT : 1
SINCE_RESIDING : 1
FOLLOWING_WERE : 1
NOTE_DIFFICULTIES : 1
THICKNESS_TEAR : 1
ALLOW_HIMSELF : 1
SOCIAL_WORK : 1
GIVEN_TO : 1
LOCATION_NO : 1
NOT_AN : 1
AND_THE : 3
THIS_ANATOMICAL : 1
WITHOUT_SUBSTANTIAL : 1
PREDICTING_PRESSURE : 1
PROGRESS_NOTE : 2
AN_EXAMINATION : 1
DO_ADVANCE : 1
HE_IS : 1
PHYSICAL_HIS : 1
LAUGHING_VETERANS : 1
TIMES_FOR : 1
NOT_INCLUDE : 1
IMED_SYSTEM : 1
SEEN_WITH : 1
EFFORT_HEART : 1
DISABILITIES_DE : 1
PITTSBURGH_RE : 1
PATIENT_THAT : 1
TOBACCO_CARDIAC : 1
WEIGHT_TO : 1
TO_SEEN : 1
AND_FOLLOWUP : 1
AT_PULMONARYCONSULT : 1
FOLLOWUP_THE : 1
SCREEN_FOLLOWUP : 1
SKIN_ASSESSMENT : 1
LEFT_HAND : 1
MIRTAZAPINE_TAB : 1
LEGS_RETINOPATHY : 1
LIFESTYLE_WEIGHT : 1
RHYTHM_NORMAL : 1
TO_AND : 2
RECEIVED_FLU : 1
INSTRUCTIONS_ADDENDUM : 1
SIDE_EFFECTS : 2
LEFT_YES : 1
ONE_TWO : 1
WAS_NEW : 1
YOUR_INDICATION : 1
BLOOD_WILL : 1
HE_TO : 1
TO_HEAL : 1
VETERAN_MEDICATIONS : 1
ADMINISTRATIVE_NOTE : 1
PRIMARILY_AN : 1
BENIGN_PROSTATE : 1
THIS_CORRECTION : 1
OTHER_FACILITY : 1
NOT_IF : 1
DIABETESHYPERTENSION_POSSIBLE : 1
NUTRITION_PRIMARILY : 1
NO_NURSES : 1
THE_LIST : 1
ALLERGY_MEDS : 1
AN_OPHTHALMOLOGY : 1
POTENTIAL_INTERACTIONS : 1
AS_LISTED : 1
TROPONIN_SHIFT : 1
HIS_FAMILY : 1
HYPERACTIVITY_ACTIVE : 1
ON_PT : 1
AID_BOTH : 1
UNLABORED_ALERT : 1
CBOC_NOTE : 1
CORRECTION_VETERAN : 1
SORE_RISK : 1
ON_INQUIRY : 1
NUMEROUS_COMPLAINTS : 1
VACCINE_DETAILS : 1
TWO_TABLETS : 1
FOR_THEN : 1
SKIN_LESIONS : 1
CHANGES_INR : 1
ACTIVITY_LIMITATIONS : 1
HE_TOOK : 1
PERSONAL_KEPT : 1
ATTEMPTED_CONTACT : 1
MPLS_VA : 1
INITIAL_INR : 1
FOLLOWING_NUMBER : 1
SURGICAL_WAS : 1
RRR_STATE : 1
FILL_PHARMACIS : 1
HAS_WITH : 1
RESPIRATORY_WNL : 1
MANAGEMENT_AND : 1
MOUTH_THREE : 1
HAD_OPHTHALMOLOGY : 1
AN_CFILE : 1
DOES_NOT : 3
FAIR_KNOW : 1
THE_COMMENT : 1
THIS_TEST : 1
FOR_KEEP : 1
FILL_ACTIVE : 1
DELTOID_VERIFIED : 1
BOTH_CONS : 1
VA_OUTPATIENT : 1
COWORKERS_ARCHER : 1
NEURO_ALERT : 1
HAD_NUMEROUS : 1
VS_TO : 1
DISCONNECTED_UNABLE : 1
RANGE_MEDICAL : 1
VOICE_AFTER : 1
NO_NOSE : 1
PATIENT_LOW : 1
OR_FROM : 1
MG_CHEW : 1
COMING_CLC : 1
DENIES_STANDING : 1
CALL_BELL : 1
THE_SOCIAL : 1
INCLUDING_MOUTH : 1
THIS_PT : 1
OBSERVATIONS_REPORT : 1
COMMUNITY_LIVING : 2
AS_IN : 1
WI_DIET : 1
NOT_WANT : 2
NAME_PRESENT : 1
WOUND_CARE : 1
PM_HEADACHE : 1
TYLENOL_PM : 1
IN_CLINIC : 1
NO_APPARENT : 1
LPN_INTAKE : 1
HEIGHT_CM : 2
AB_BLOT : 1
THE_HAND : 1
IN_UVEITIS : 1
NORMAL_PHYSICAL : 1
YOU_WITH : 1
SPEECH_PATHOLOGY : 1
HEARING_THIS : 1
WITH_RO : 1
RELAX_OR : 1
CONFRONTATION_FIELD : 1
DE_ARTHRITIS : 1
VS_WALKING : 1
HEAD_OF : 1
THAT_OVERALL : 1
PLANTAR_FEET : 1
CANAL_ON : 1
AND_SW : 1
WITH_YOU : 1
TO_INCREASE : 1
THERAPY_ONYCHOCRYPTOSIS : 1
PATIENTS_LEFT : 1
CORONARY_ANATOMICAL : 1
STANDING_TOO : 1
PROBLEMS_FOR : 1
PRN_FOR : 1
RD_DECEMBER : 1
DOCUSATE_NA : 1
ELSTON_REHAB : 1
LESIONS_ARE : 1
HAS_TO : 1
THE_DATE : 1
ON_OMEPRAZOLE : 1
TO_INDUCED : 1
MENTAL_ALERT : 1
POSOP_TRIALED : 1
EMERGENCY_DEPARTMENT : 1
FOR_PREDICTING : 1
DO_NOT : 2
THE_PLAN : 1
OTHER_OLD : 1
LAB_INT : 1
HIS_IS : 2
INPATIENT_NONV : 1
EFFORT_COUGH : 1
VISIT_INSULIN : 1
AND_MILK : 1
THE_PH : 1
AND_MEDICATIONS : 1
SHOULDER_DECREASED : 1
LUNGS_GOOD : 1
WITH_THICKNESS : 1
ICDCM_CONVERSATION : 1
CONCERNS_VOICED : 1
FAMILY_PATIENTS : 1
RISK_RIGHT : 1
BLOOD_PRODUCTS : 1
FALL_RISK : 2
RADIOLOGIST_REVIEW : 1
INFECTION_SINUS : 1
DR_JALBUENA : 1
OVER_PAST : 1
HAVE_CONTACT : 1
NEEDED_COLLECTION : 1
NEXT_PRIMARY : 1
VOICED_GOOD : 1
ABOUT_THE : 2
OF_BEING : 1
BOTH_BP : 1
PREOP_AORTOFEMFEM : 1
ML_IN : 1
PULSE_TYPE : 1
INTAKE_NOTE : 2
SKIN_CAO : 1
ORIENTED_PERRLA : 1
XYZZY_RECEIVED : 1
RECORD_EVALUATION : 1
STATE_INITIAL : 1
PARAMETERS_UNIT : 1
COMPUTERIZED_THE : 1
APPOINTMENT_NOT : 1
UNABLE_OTHER : 1
HIS_HABITS : 1
07_REFILL : 1
PREVIOUSLY_FOLLOWING : 1
IS_EXPECTED : 1
VAMC_DRUGS : 1
MEDICATION_ATENOLOL : 1
AND_TENDERNESS : 1
EXTREMELY_LEFT : 1
GENOBESE_COMFORTABLE : 1
WITH_SUBJECTIVE : 1
LAST_EXAM : 1
PER_LAST : 1
PROBLEMS_DO : 1
TENDONOPATHY_QUESTION : 1
HOW_MANY : 1
BACK_THROAT : 1
PER_PATIENT : 1
IF_VET : 1
BE_ENTERED : 1
MM_BY : 1
THE_MED : 1
REGULAR_RATE : 1
DELETED_CHANGED : 1
POSSIBILITY_BEING : 1
EFFORT_WNL : 1
EACH_CAREFULLY : 1
DIET_ALCOHOL : 1
REHAB_FACILITY : 1
VA_RE : 1
YOUR_FOR : 1
HIS_MAY : 1
CHIEF_RED : 1
YOUR_PRIMARY : 1
STRESS_PREOP : 1
MPI_ED : 1
HE_HE : 1
CLEAN_SOBER : 1
LAUGHING_GUARDIAN : 1
10_REFILL : 1
DIFFICULTIES_MAY : 1
EXPIRATION_PATIENT : 1
OF_RECORD : 1
OR_THE : 1
UVEITIS_ASPIRIN : 1
TEST_WITH : 1
RV_TLC : 1
HISTORY_OPT : 1
MOISTURE_PRESSURE : 1
BEGINNING_OF : 1
GASTROINTESTINAL_TOTAL : 1
DATE_APPLICABLE : 1
OF_TRUNK : 1
THE_RIGHT : 1
CFILE_REVIEWED : 1
STATUS_RESISTANCE : 1
CONTACT_TO : 1
REGULAR_COMPLAINTS : 1
OBESITY_DIABETIC : 1
IN_OPERATION : 1
DOSE_OF : 1
AS_COLLECTION : 1
CBOC_NP : 1
SAME_AND : 1
VACCINATION_DURING : 1
DENIES_DENIES : 1
GOOD_LIVING : 1
THERAPY_PROGRESS : 2
REVIEW_MEDICATION : 1
ADDENDUM_PSYCHOLOGY : 1
ACTIVITIES_ON : 1
PC_NP : 1
HERE_SEE : 2
THE_DEATH : 1
EXAMINATION_YEAR : 1
ROM_TRUNK : 1
EXCEPT_FOR : 1
AND_LETTER : 1
LSPINES_PSYCHOLOGY : 1
NUMBER_IN : 1
MAKE_WITHIN : 1
FOLLOWING_OXIMETRY : 1
SEVERAL_TIMES : 1
HEADACHE_TO : 1
THAN_PHYSICAL : 1
OF_MARRIAGE : 1
LEFT_LM : 1
ON_MG : 1
AT_NO : 1
ADDENDUM_PC : 1
WILL_INFORM : 2
FEB_OBSERVATION : 1
LIVES_OTHER : 1
EATING_HABITS : 1
ABDOMEN_SOFT : 1
NSTEMI_CARDIAC : 1
TO_THE : 7
TURGOR_WOUNDS : 1
BLOOD_PRESSURE : 2
PAINS_NOTE : 1
ANY_OL : 1
SCREEN_LETTER : 1
THIS_INSULIN : 1
NOT_SKIN : 1
THE_MEDICATIONS : 1
ORDERS_VERIFIED : 1
HOME_VAMC : 1
COMPLAINTS_BUT : 1
THE_OF : 6
TEACHING_LUNGS : 1
ANY_CLEARING : 1
BY_MOUTH : 5
PATIENT_EDUCATION : 1
CARE_INTAKE : 1
TECHNIQUE_HIM : 1
SURROGATE_DIFFICULTIES : 1
ONE_CAPSULE : 2
PAIN_WITH : 1
PRIMARY_APPOINTMENT : 1
PM_OTHER : 1
PT_CONTINUE : 1
DRY_APPLY : 1
ADDENDUM_MEDICATION : 1
BACK_OF : 1
HE_THOUGHT : 1
REHAB_STILL : 1
NECESSARY_JR : 1
BETTER_JOB : 1
PT_HAS : 2
CHIEF_COMPLAINT : 5
SELECT_CORRECT : 1
LESIONS_OR : 1
IN_NEW : 1
WANTS_GO : 1
AND_THEN : 1
OF_WM : 1
THAT_HE : 4
WAS_IMPLANTED : 1
THE_SPRINGTIME : 1
MEDSURG_NOTE : 1
ASSESSMENT_FROM : 2
LAST_PRILOSEC : 1
PROPERTY_BY : 1
SUBJECTIVE_YEAR : 1
RECORD_VITALS : 1
REASON_FOR : 1
PALPABLE_IN : 1
FOOT_OMEPRAZOLE : 1
NUMBER_FOOT : 1
REGULAR_IF : 1
TAKE_TABLET : 2
HAS_FILED : 1
THE_FOR : 1
UARY_PATIENT : 1
NOT_THAT : 1
OTHER_SCREENING : 1
VACCINE_STATEMENT : 1
AND_SOBER : 1
CONTINUE_TAKING : 1
DO_YOU : 2
CURRENT_RATED : 1
MR_ALSO : 1
SINCE_THE : 1
ADDENDUM_NO : 1
AHBC_AHCV : 1
BREAKFAST_CHEERIOS : 1
SEND_HAS : 1
SERUM_CHO : 1
THE_VERBAL : 1
ML_TOTAL : 1
HEADACHE_IS : 1
NORMAL_BRUITS : 1
FLOWSHEET_COMPLAINTS : 1
PALPABLE_MG : 1
STARTING_AT : 1
ANKLE_EFFORT : 1
GOLD_ON : 1
ONE_BY : 3
THE_THE : 1
MANAGEMENT_HC : 1
APPARENT_PROBLEM : 1
PAIN_SCALE : 1
SCORE_TOTAL : 1
NONVA_INCLUDING : 1
DERMATOLOGY_OF : 1
CARE_NURSING : 2
DIABETIC_SURVEILLANCE : 1
YES_SKIN : 1
BEHAVIOR_OBSERVATION : 1
OF_PATIENT : 2
INSTILL_DROP : 1
THE_LESIONS : 1
THE_EVERY : 1
PALPABLE_DP : 1
MAY_CONTACT : 1
FRICTION_NO : 1
NOT_CERTAIN : 1
EXAMINATION_IS : 1
SULFA_DRUGS : 1
SUPPLIES_NEURO : 1
OF_FROM : 1
DISCUSSED_THAT : 1
SKIN_THE : 1
PROSTATE_COUNSELING : 1
OBJECTIVE_PACK : 1
SAID_THAT : 1
BRUITS_MURMUR : 1
WITH_OF : 1
IRRIGANT_DORSAL : 1
OTHER_SKIN : 1
PFTS_IN : 1
DL_INFORMATION : 1
PREGNANT_YES : 1
INFORM_HUSBAND : 1
NEW_LABS : 1
IN_PER : 1
SURE_FOLLOW : 1
SOBER_ATTENDING : 1
ORIENTED_RADIOLOGIST : 1
PATIENT_THEY : 1
DELIRIUM_AND : 1
DOWN_BY : 1
MOST_AS : 1
TEST_FOR : 1
MEASURED_HEIGHT : 1
CARE_THE : 1
MG_AND : 1
REVIEW_TEST : 1
EACH_ITEM : 1
FROM_PHARMACY : 1
PAIN_NA : 1
CENTER_SHIFT : 2
OF_WOUND : 1
YES_STATES : 1
WANT_START : 1
THE_ASSISTANCE : 1
HAS_ADVISED : 1
PHYSICAL_LIMITATIONS : 1
ACTIVE_SCREEN : 1
PREVIOUSLY_THE : 1
COUGH_RRR : 1
WILLING_PHONE : 1
WILL_HER : 1
ARTHRITIS_THE : 1
CABG_MPLS : 1
SUICIDE_BETTER : 1
DIET_NO : 1
NEC_GAIT : 1
NUMBER_SYSTEM : 1
RECORD_HANDEDED : 1
ATTEMPT_TO : 1
THROAT_INFECTION : 1
ASSESSMENT_AT : 2
OF_ILLNESS : 1
WI_REVIEW : 1
PACEMAKER_SCORE : 1
MEDICAL_APPOINTMENT : 1
OF_HIMSELF : 1
FROM_COMMENT : 1
RECONCILIATION_PACEMAKER : 1
HAVE_ADVANCE : 1
PT_UNDERSATNDING : 1
NP_NOTE : 1
INVOLVEMENT_ADDENDUM : 1
OF_ADVANCE : 1
MEDS_REASON : 1
ASSESSMENT_HIS : 1
CRUMBLY_THAT : 1
INPUT_OUTPUT : 1
AMBULATORS_NO : 1
INSTRUMENTAL_ADLS : 1
PATIENTS_LIST : 1
ARIPIP_ENDING : 1
PAST_TWO : 1
STATED_NOTE : 1
PROCESSED_PC : 1
WHO_IN : 1
EGG_LATEX : 1
NUMEROUS_VAGUE : 1
MG_PLEASE : 1
WILL_THEM : 1
APPOINTMENT_WITH : 1
PAIN_REASSESS : 1
RESIDING_GLEN : 1
FRICTION_APPARENT : 1
ORDER_AS : 1
ESSENTIAL_HTN : 1
RX_DATE : 1
TRIALED_RESULTING : 1
PT_SURVEY : 1
COMPLAINT_PLACE : 1
PERSANTINE_WITH : 1
ADDENDUM_RISK : 1
RIGHT_PALPABLE : 1
REVIEW_PT : 1
HE_TYLENOL : 1
ESPECIALLY_IN : 1
HE_GREW : 1
LIST_MG : 1
LABRUM_DE : 2
TO_SKIN : 1
THE_RADIOLOGIST : 1
MD_PC : 1
COUMADIN_DAILY : 1
MG_PIOGLITIZONE : 1
WIFE_VOICE : 1
PAST_HISTORY : 1
FOBT_SENTARA : 1
INVOLVEMENT_AT : 1
VIEW_THE : 1
DIZZINESS_AND : 1
ALLERGIES_PATIENT : 1
RETURNED_TO : 1
IN_HAS : 1
RATE_PULSE : 1
PAIN_THICH : 1
CONTACT_THE : 1
FUTURE_WEEK : 1
BP_VITALS : 1
RETINOPATHYPER_EXAM : 1
DATA_BE : 1
BAYSIDE_EMERGENCY : 1
INT_STARTED : 1
MG_BID : 1
MM_REMOVED : 1
DELIRIUM_POSSIBLE : 1
WEEK_TWO : 1
PATCHES_MRP : 1
SUBSCAPULARIS_TENDONOPATHY : 1
AFTER_DEATH : 1
YELLOW_THICK : 1
HEEL_HYPERKEROTOSISES : 1
DL_MAKE : 1
DEMENTIA_SCREEN : 1
ASSOCIATED_THICKNESS : 1
ML_USE : 1
KEEP_HEAD : 1
UNDERSTAND_PLAN : 1
YOU_FOR : 1
INR_ON : 1
ULCER_PROTOCOL : 2
TIU_TITLE : 1
WAS_OTHER : 1
AS_FINANCIAL : 1
HIS_HEADACHE : 1
SHIFT_AT : 1
MED_IN : 1
RELIEVED_PER : 1
SCREEN_ALCOHOL : 1
VITALS_PAIN : 1
INTAKE_ML : 1
BY_EVERY : 1
THE_NECK : 1
LOCATION_ILIOLUMBAR : 1
YELLOW_CRUMBLY : 1
LETTER_LONG : 1
CANCER_SCREENING : 1
APPARENT_THE : 1
THE_ACTIVITIES : 1
COMPETANCY_THIS : 1
PATIENT_STATES : 1
NOTE_ACTIVE : 1
RTE_DATE : 1
EFFECTS_POTENTIAL : 1
CALL_LABS : 1
DISCHARGE_REGULAR : 1
PROBLEMS_EXCEPT : 1
ADVANCE_DIRECTIVE : 1
CARDS_THIS : 1
OPERATIVE_FINDINGS : 1
ITEM_AND : 1
TO_KNEE : 1
PREGNANT_HOW : 1
WITH_FOLLOWING : 1
TWO_ALLERGIES : 1
OLD_MALE : 1
BEEN_AT : 1
INJECT_UNITS : 1
COMPUTERIZED_BACK : 1
DEGREE_OF : 1
REPORTS_VISION : 1
FOLLOWUP_PLASTIC : 1
INDUCED_PERIPHERAL : 1
COMPETANCY_HEARING : 1
NOTED_PLANTAR : 1
GIRL_HIS : 1
DISTAL_LEVEL : 1
ANTERIOR_GLENOID : 2
OF_PAST : 1
ICDCM_WNL : 1
DIZZINESS_LIGHTHEADEDNESS : 1
TIMES_DRY : 1
FOR_PRESSURE : 1
BLOOD_CARDS : 1
STATED_PULMONARYCONSULT : 1
ALERT_THE : 1
ANTERIOR_LABRUM : 2
IN_SLIT : 1
FOR_TWO : 1
WITH_MEDICATION : 1
SSN_HEART : 1
BLOWING_KEEP : 1
TO_GO : 1
ACTIVE_IOP : 1
BE_SEEN : 1
PROBLEM_PRESSURE : 1
TO_IF : 1
VET_HERE : 1
FEET_PULSES : 1
VISIT_AND : 1
FAMILY_SITUATION : 1
LAST_OU : 1
UNABLE_CONTACT : 2
ACTIVE_DO : 1
ON_RIGHT : 1
LOWER_ALARM : 1
REQUIRED_RRR : 1
CHANGES_GLENOID : 1
MISSED_DOSES : 1
ON_FEET : 1
REPORT_LAST : 1
PALPABLE_DORSAL : 1
IN_YOUR : 1
OCULAR_COMPLAINTS : 1
DIM_PT : 1
PERRLA_CARDIO : 1
WAS_LAST : 1
NA_CAP : 1
GUARDIAN_HAVE : 1
IMMUNIZATION_ELSEWHERE : 1
CFILE_PATIENTS : 1
INTAKE_CHARACTERISTIC : 1
LSPINES_BENIGN : 1
FEB_YES : 1
CARE_OTHER : 1
INSTILL_IN : 1
SUMMER_PRN : 1
EXCLUDING_BEDTIME : 1
NURSES_AT : 1
PULSE_ESTIMATED : 1
DIZZINESS_ICDCM : 1
PRESCRIPTION_INP : 1
RISK_BENEFITS : 1
ACTIVE_PATIENT : 2
WITHIN_NEXT : 1
TO_SURGERY : 1
PATIENT_PHONE : 3
MOST_HEIGHT : 1
ASSESSMENT_DISCHARGE : 1
AND_SATISFACTION : 1
TEST_AND : 1
ANATOMICAL_RIGHT : 1
GREAT_LUMBAR : 1
VET_ASSESS : 1
CCS_PHONE : 1
NOTE_REVIEW : 1
KNEE_PAINS : 1
IOP_OU : 2
FILED_CLAIM : 1
GENDER_FEMALE : 1
THAT_UPCOMING : 1
DENIES_OVERUSE : 1
DIFFUSION_IMAGING : 1
YEAR_OLD : 1
LISTED_HAVE : 1
IN_CHART : 1
THIS_PATIENT : 2
ROOM_TIME : 1
MEDICAL_EXCEPT : 1
PROTECTIVE_IS : 1
NOT_NUTRITION : 1
AND_CARDIAC : 1
HBP_ABDOMEN : 1
WERE_USED : 1
AC_FLUSHES : 1
DISTRESS_CALL : 1
RECENT_AS : 1
SEVERAL_SINCE : 1
PAIN_LESS : 1
SECTIONS_THE : 1
IMPLANT_IMPLANTED : 1
IS_FOR : 1
NURSES_THE : 1
COMPLAINT_CONFRONTATION : 1
HEADACHE_ALMOST : 1
FRACTURE_THE : 1
ANEMIA_HEPATITIS : 1
FILED_WITH : 1
BUT_INSTRUCTED : 1
ELECTRICAL_WORK : 1
GIRL_FROM : 1
NURSING_SHIFT : 2
ALSO_TEMP : 1
ADMISSION_DATE : 1
SURG_OPHTHALMOLOGY : 1
AND_OPERATIVE : 1
YR_OLD : 1
LINKSFAUTOPRINTCOSIGN_PARAM : 1
ANY_POSSIBILITY : 1
POTENTIAL_SIDE : 1
PALPABLE_OMEPRAZOLE : 1
WITH_SELFMANAGEMENT : 1
AT_JOB : 1
ATTENDING_GASKINS : 1
WITHIN_THE : 1
VOICED_HAD : 1
DIFFICULTIES_MANIFEST : 1
WITH_WIFE : 1
OPERATION_REPORT : 1
IN_ASPIRIN : 1
COMPLEX_INFORMATION : 1
CATARACT_RECEIVED : 1
NO_PRESSURE : 1
THE_DIAGNOSIS : 1
REMOVAL_RIGHT : 1
AMIODARONE_BID : 1
ON_PATIENT : 1
AND_LIVES : 1
APPOINTMENTS_FOR : 1
FOREIGN_BODY : 2
FOOD_AND : 1
HE_MG : 1
COLUMBUS_VAMC : 1
AFTER_RUN : 1
REG_NOVO : 1
PULSE_INSTRUCTIONS : 1
ENDING_AT : 1
DATE_TIME : 1
NOTED_PHYSICIAN : 1
HE_SERVICE : 1
RE_HIS : 1
NAD_LEFT : 1
MILK_STARTING : 1
HAS_SHARED : 1
DIABETIC_NEPHROPATHY : 1
INSTRUCTIONS_HEIGHT : 1
PATIENT_VACCINE : 1
HAD_VAGUE : 1
PULSES_DP : 1
IS_BLSOME : 1
RECONCILIATION_FALL : 1
MED_WAS : 1
INTAKE_BRADEN : 1
PHYSICIAN_NOTE : 2
SOCIAL_GENOBESE : 1
TOTAL_OUTPUT : 1
THE_PERFORMANCE : 1
WAS_PRESSURE : 1
AFTER_CLEARING : 1
RANGE_RESPONSES : 1
ADIPOSE_PAD : 1
PAINS_PROCEDURE : 1
CARETAKER_APPLICABLE : 1
TYLENOL_THE : 1
INR_PC : 1
TRUNK_PAIN : 1
THIS_MED : 1
FOR_THIS : 1
AND_OR : 2
GREW_AFTER : 1
DIRECTIVES_WILL : 1
SUPERVISION_WITH : 1
VETERAN_LISTED : 2
ALBUTEROL_MOMETASONE : 1
HIS_RECENT : 1
NECK_NO : 1
REVIWED_WILL : 1
PHYSICIAN_THAT : 1
THAT_LESIONS : 1
MEDICATION_CAN : 1
MURMUR_INFORMATION : 1
SCREENING_OUTPATIENT : 1
OF_HE : 1
REVIEW_CHEERIOS : 1
OPT_VA : 1
MARRIAGE_HE : 1
PROBLEM_THE : 1
FOR_DM : 1
PROTOCOL_NOT : 3
DT_COMPUTERIZED : 1
CONTACT_SO : 1
HOW_PATIENT : 1
ON_INR : 1
LAST_REMOVED : 1
ADDENDUM_AT : 1
VERBAL_CONSENT : 1
BLOOD_HEADACHE : 1
LIVING_URETHERAL : 1
CRUMBLY_OFFERED : 1
OS_TO : 1
YES_HELP : 1
WOUNDS_ULCERS : 1
INJ_INJECT : 1
EYES_TIMES : 1
LEFT_RETINAL : 1
DOG_RD : 1
NIDDM_ORAL : 1
TO_INDICATION : 1
MOMETASONE_THIS : 1
HAS_INTENTION : 1
FLUSHES_DIFFICULTY : 1
ARIPIPRAZOLE_SHE : 1
THE_PROVIDER : 1
RECENT_INCREASE : 1
NO_BLOWING : 1
AFTER_OF : 1
TROCHENT_AFTER : 1
OL_DL : 1
AMIODARONE_MG : 1
MANY_HAVE : 1
CATH_LUNGS : 1
PL_PROCEDURE : 1
INPATIENT_AT : 1
TABLET_BY : 2
ATTENDING_IN : 1
THEY_HAVE : 1
OR_SKIN : 1
NEW_SIDE : 1
FOR_ANY : 2
CLIMBING_LADDERS : 1
LIMITATIONS_NOSE : 1
PATIENT_SEEN : 1
HE_DEPRESSED : 1
FEMALE_CREATININE : 1
TAKE_THE : 1
ELSEWHERE_FOR : 1
EXPLAIN_NOT : 1
DRUGS_HERE : 1
HEART_RATE : 2
DIET_BREAKFAST : 1
MEDICATIONS_PHONE : 1
OPERATION_ALL : 1
ORIENTED_CARDIO : 1
IMMUNIZATION_PRIMARY : 1
INFLUENZA_PLAN : 1
APPOINTMENT_MAY : 1
AMANDA_PA : 1
OPERATION_PACU : 1
SOBER_AND : 1
PHYSICIAN_XEROSIS : 1
FUNCTION_AGAIN : 1
GIVEN_VACCINATION : 1
PHARMACY_NOTE : 1
CONTACT_WEEKLY : 1
AS_PT : 1
LEFT_DELTOID : 1
DIABETIC_CORONARY : 1
INCLUDING_SUPPLIES : 2
MOUTH_EVERY : 2
DISCHARGE_COMPLAINTS : 1
CORRECT_FOR : 1
LSPINES_HYPERTROPHY : 1
DATE_STATES : 1
INTAKE_DT : 1
HYPERLIPIDEMIA_CONVERSATION : 1
APPOINTMENT_SURGERY : 1
NOTES_COLONOSCOPY : 1
ASA_ON : 1
CLICK_THE : 1
THE_TIU : 1
CHIEF_OF : 1
BEEN_RECONCILED : 1
CBH_MANAGEMENT : 1
RETINAL_IMAGES : 1
SIGNIFICANT_IN : 1
IUM_SUBJECTIVE : 1
SORE_WILL : 1
PRACTITIONER_OF : 1
TINY_PARTIAL : 1
CARE_IS : 1
RETINAL_SUPERIOR : 1
SATISFACTION_SURVEY : 1
BEHAVIOR_APPROPRIATE : 1
IN_FOR : 1
IN_WITH : 1
LISTED_BEEN : 1
WOULD_TO : 1
ON_ONS : 1
PAST_MEDICAL : 1
DATA_CAN : 1
APPLICABLE_INSTRUCTIONS : 1
TLC_CAPACITY : 1
RISK_AND : 1
SHOWS_WIDE : 1
STATES_THAT : 3
FROM_UARY : 1
IN_BUSINESS : 1
FISH_BUT : 1
OR_NOTED : 1
NOSE_FOR : 1
ONEHALF_BY : 1
PROTECTIVE_THRESHOLD : 1
OR_CLIMBING : 1
TO_TAKING : 1
RESIDENT_RETURNED : 1
BY_PATIENT : 1
RETURNED_BILATERAL : 1
OPEN_SKIN : 1
SEE_NOTES : 1
ADMINISTRATIVE_PATIENT : 1
HER_OF : 1
CALL_THEM : 1
WITH_PATIENT : 2
POSSIBLE_EFFECTS : 1
MOUTH_LIPID : 1
EYES_FOUR : 1
BILATERAL_EXTREMITIES : 1
WERE_TO : 2
PATIENT_REPORTS : 1
TAB_ONE : 1
TARTRATE_OPH : 1
ONE_MONTH : 1
FINANCIAL_GUARDIAN : 1
PHONE_WILL : 1
STERILE_GAVE : 1
REGULAR_RHYTHM : 1
INTERVENTIONS_COUGH : 1
WITH_SCREENING : 1
PO_QH : 1
EXAM_RETINAL : 1
IN_HE : 1
BE_SURE : 1
SLIT_LAMP : 1
SEEN_VACCINE : 1
NOTE_BREATHING : 1
NOT_PREOP : 1
SCREENING_VISIT : 1
YOU_PROVIDE : 1
USE_OF : 1
PREVENTION_WAS : 2
FOREIGN_REMOVAL : 2
PROBLEMS_PHYSICIAN : 1
STRICTURE_CHEST : 1
HIS_WITH : 1
VA_FACILITY : 1
EYE_PAIN : 1
ETOH_PERIPHERAL : 1
WITH_CONCERNING : 1
ON_AROM : 1
PEG_TUBE : 1
CARDS_AT : 1
PULSES_CBI : 1
THEY_DO : 1
CHANGES_VERBALIZES : 1
PLEASE_EACH : 1
JUDGEMENT_KNOW : 1
ATTEMPTED_TO : 1
CBI_ML : 1
JUDGEMENT_FAIR : 1
MODERATE_SEVERE : 1
TARTRATE_SOLN : 1
OLD_VET : 1
PULSE_DURATION : 1
OF_THIS : 1
HIS_BEHAVIOR : 1
USED_IN : 1
NO_INR : 2
AORTOFEMFEM_MAXIMUM : 1
INITIAL_ON : 1
FOR_ANTICOAGULATION : 1
RE_CARDIOL : 1
HEAL_THE : 1
SHE_NUMEROUS : 1
BUSPAR_MG : 1
MEDICATIONS_DIAGNOSIS : 1
REVIEWED_CHART : 1
AFTER_FROM : 1
LIST_ATENOLOL : 1
NOT_THIS : 1
OUTPUT_APPOINTMENTS : 1
PHYSICIAN_GASKINS : 1
TIMES_INTERVENTIONS : 1
OR_CARETAKER : 1
RECEIVED_THE : 1
REDUCTION_RELIEVE : 1
AUDITC_SCREEN : 1
PERRLA_RADIAL : 1
ONS_CANAL : 1
NO_BUSY : 1
OBJECTIVE_HOT : 1
HE_REPORTS : 1
INFLUENZA_CC : 1
LED_SIGNIFICANT : 1
OUTPT_INTAKE : 1
PROCEDURE_PATIENT : 1
IS_THE : 3
SPEECH_ASSESSMENT : 1
CONCERNING_ALBUTEROL : 1
WAS_FECAL : 1
THERAPY_ERYTHEMA : 1
SIG_TAKE : 1
FVC_RV : 1
IMED_TO : 1
FAIR_HOW : 1
ACETAMINOPHEN_MG : 1
NAPROXEN_AND : 1
COMPLEX_ADDENDUM : 1
PERIPHERAL_PATIENT : 1
LEGEND_OPT : 1
PROCEDURE_AN : 1
ADLS_RESIDENT : 1
IF_YES : 1
ANY_THROAT : 1
NOT_PT : 1
BOX_MEDICATION : 1
TEMPERATURE_IS : 1
INTRAARTICULAR_FRACTURE : 1
FOOT_PALPABLE : 1
UNDERSTAND_THE : 1
AND_TIME : 1
YEAROLD_MAN : 1
INFORMATION_CONFIRMED : 2
HYPERTROPHY_OF : 1
IMAGING_MPI : 1
BELL_REACH : 1
ONE_AND : 1
DURING_THIS : 2
COUGH_SOB : 1
WILL_ATTEMPT : 1
SURGICAL_IMPLANT : 1
MISSED_THEREFORE : 1
FOR_VISIT : 1
NO_INTENTION : 1
TEST_PREOP : 1
FOR_MONTH : 1
GUARDIAN_SHE : 1
INCLUDE_AND : 1
MG_ARIPIPRAZOLE : 1
HEADACHE_MODERATE : 1
SEE_PHARMACY : 1
PAST_HOW : 1
MEDICATION_THAT : 1
NO_PROBLEM : 1
CHART_YOUR : 1
VA_OPT : 1
OPHTHALMOLOGY_EXAMINATION : 1
BY_ADMISSION : 1
BP_RANGING : 1
DONE_THIS : 1
PATIENT_RADIOLOGY : 1
CLASSIFICATION_PAIN : 1
LOCATION_RIGHT : 1
NO_SERUM : 1
SAT_NURSES : 1
DIAGNOSIS_FISH : 1
HOUR_INPUT : 1
HOW_HAVE : 2
THE_TITLE : 1
PSYCHOLOGY_MINUTES : 1
CCS_WILL : 1
FOR_CONDITION : 1
PREOP_MEASURED : 1
IS_PROHIBITED : 1
HIS_DISCUSSED : 1
AS_NEEDED : 2
ADDENDUM_RETINOPATHYPER : 1
DISCHARGE_VISION : 1
YES_WOUND : 1
THREE_TIMES : 1
THIS_RISK : 1
RIGHT_CANAL : 1
DIZZINESS_HYPERLIPIDEMIA : 1
OF_INSTRUMENTAL : 1
OL_MG : 1
GO_TO : 1
IDENTIFICATION_AND : 1
CONTINUE_NOW : 1
HE_SAID : 1
COLUMBUS_SULFA : 1
DOWN_TO : 1
GAP_ADDENDUM : 1
AND_RELIEVED : 1
QH_FOR : 1
EVERY_MORNING : 1
SHIFT_FEB : 1
SERTRALINE_BUSPAR : 1
HAVE_ATTEMPTED : 1
SAME_INFORMATION : 1
RECORD_MANAGEMENT : 1
OR_HYPERTENSION : 1
OR_COPYING : 1
FEMALE_VET : 1
THE_INT : 1
SYSTEM_BEEN : 1
FOLLOWING_PER : 1
HAVE_WEEKLY : 1
OTHER_RECONCILIATION : 1
HERE_TO : 2
PARTIAL_OBJECTIVE : 1
HEART_RRR : 2
UNABLE_OPHTHALMOLOGY : 1
IF_IT : 1
AMB_TEMPERATURE : 1
MG_STARTING : 1
THE_COMMENTS : 1
IMPROVED_HIS : 1
IT_NOT : 1
CM_OPERATION : 1
CLEARING_AFTER : 1
FOR_ALCOHOL : 1
LOT_NUMBER : 1
AS_ACTIVE : 1
SURGERY_YES : 1
PHYSICIAN_NOTED : 1
NOTE_OSTEOARTHRITIS : 1
COLLECTION_DT : 1
GROUP_COLUMBUS : 1
PROBLEMS_COMPLAINT : 1
GLENOID_DE : 2
BPM_PULSE : 1
ANTICOAGULATION_FROM : 1
NOVO_INJECT : 1
SEE_HIM : 2
COMMUNICATION_IS : 1
ACTIVE_NOTE : 1
PRESSURE_IS : 1
GIVEN_FECAL : 1
YOUR_TO : 1
BEEN_DISCONNECTED : 1
RETURNED_PASS : 1
PATIENT_NUMBER : 2
PROCEDURE_RIGHT : 1
REPORT_DATE : 1
PER_REPORT : 1
PHACOEMULSIFICATION_WITH : 1
BP_INTERVENTIONS : 1
EYE_WITH : 1
PERFORMED_RIGHT : 1
SITUATION_IS : 1
PATIENT_ACETAMINOPHEN : 1
FOR_URINARY : 1
SUICIDE_SCREEN : 1
PACEMAKER_GASTROINTESTINAL : 1
REFILL_RITALIN : 1
SUPPORT_FAMILY : 1
SUPPLY_DEGREE : 1
VISUAL_FIELD : 1
CHANGE_IN : 1
WITH_CBCD : 1
RECENT_MEDICATION : 1
ARE_SENT : 1
WAS_APPOINTMENT : 1
CHEERIOS_AND : 1
CARDIAC_CATH : 1
SUPERIOR_WI : 1
WITH_QUESTION : 1
SINCE_BEEN : 1
PLACE_CHOICE : 1
UNITS_ACTIVE : 1
AND_NAPROXEN : 1
CLEAR_UNLABORED : 1
STRESS_PERSANTINE : 1
SUPPLIES_BEDTIME : 1
ALCOHOL_NO : 1
AT_NONV : 1
MEDICINE_AFTER : 1
REPORT_PERSONAL : 1
PO_PRN : 1
PERRLA_ASSESSMENT : 1
PC_CBOC : 1
NO_ANWSER : 1
VERBALIZES_UNDERSATNDING : 1
AT_DUE : 1
HEART_REGULAR : 1
MEDICATIONS_RESISTANCE : 1
NOT_HAD : 1
IS_JR : 1
DRUG_INTERACTIONS : 1
SERVICE_SEVERAL : 1
HAVE_SUMMER : 1
SUBSTANCE_DOCTORS : 1
REVIEW_IN : 1
THE_NOW : 1
ASSESS_REASSESS : 1
LABS_NO : 1
NO_OPEN : 1
IS_ABOUT : 1
ADLS_RETURNED : 1
RHOMBOIDE_ON : 1
DE_RATIVE : 3
COMFORTABLE_AOX : 1
TWICE_DO : 1
THEM_EXPLAIN : 1
GASKINS_DATED : 1
PACU_ROOM : 1
FOLLOWING_ON : 1
FOR_FACILITY : 1
CARETAKER_WHEN : 1
REASSESS_OBSERVATIONS : 1
NO_WOUNDS : 1
OCULAR_OD : 1
YEARS_OF : 1
AND_ATTENDING : 1
ANY_OTHER : 1
CARE_PROVIDER : 2
DATED_CLERK : 1
HIM_CFILE : 1
OTHER_APPOINTED : 1
FOR_STRESS : 1
HOW_TO : 1
ETOH_INDUCED : 1
PTS_LEFT : 1
HOT_PACK : 1
NEUROPATHY_HEART : 1
MENTAL_STATUS : 2
THE_JOB : 1
ICE_AND : 1
IF_FOREIGN : 2
ANTICOAG_FLOWSHEET : 1
SIGNIFICANT_INCREASE : 1
MEDICATION_IN : 1
REFILLS_ESPECIALLY : 1
AND_OF : 2
OTHER_DOCTORS : 1
WILL_NOT : 1
MAILING_BOX : 1
KEEP_OF : 1
IS_DUE : 1
ROAD_LEFT : 1
HISTORY_PATIENT : 2
ALSO_PRIMARY : 1
UBW_SERUM : 1
STIFFINESS_NO : 1
INFLUENZA_RECEIVED : 1
EXPECTED_BLOOD : 1
RESULTS_SENT : 1
EXCEPT_ON : 1
NOTE_OCCUPATIONAL : 1
PLEASE_READ : 1
APPOINTMENT_VERIFIED : 1
THE_HEARING : 1
MEDICATION_REVIEW : 1
SHIFT_INTAKE : 1
THAN_ULCER : 1
CBH_HE : 1
INDIVIDUAL_ERYTHEMA : 1
OUTPATIENT_INCLUDING : 2
LABS_YES : 1
FALL_ASSESSMENT : 1
IN_HIS : 1
SUPERVISION_THE : 1
ON_BEEN : 1
TELEMETRY_MRP : 1
HAS_COMPLAINT : 1
FEV_FVC : 1
CONSIDERATION_INFORMATION : 1
AT_BETTER : 1
REVIEWED_WITH : 2
CLAIM_WITH : 1
CHANGES_ANTERIOR : 1
NO_TUBE : 1
STATE_PATIENT : 1
KNEE_CCS : 1
THE_PRESCRIPTION : 1
BEDTIME_NEUROPATHY : 1
NURSING_OTHER : 1
FOR_COMPLETE : 1
RECEIVED_INFLUENZA : 1
PITTSBURGH_VA : 1
TO_LEFT : 1
NOT_CRY : 1
BUT_WAS : 1
STATES_THEY : 1
MEDS_WILL : 1
SOB_NO : 1
IN_AS : 1
EXPIRATION_DATE : 1
NURSES_STATED : 1
OPT_ARIPIP : 1
ACTIVE_LIPID : 1
MAIL_SHE : 1
JOB_FROM : 1
OPHTHALMOLOGY_LINKSFAUTOPRINTCOSIGN : 1
UNIT_PULSE : 1
MURMURS_DEPRESSION : 1
JR_FVC : 1
CAP_TAKE : 3
MISCONSTRUED_TO : 1
UNITS_TWICE : 1
YOU_CONCERNING : 1
CBI_DORSAL : 1
IS_DECREASED : 1
IS_WORK : 1
THEN_FOUR : 1
BUT_VET : 1
DT_THE : 1
HER_HUSBAND : 1
PACK_TO : 1
WITH_IUM : 1
THIS_FLU : 1
ASSESS_IF : 1
NEW_LAST : 1
BUT_NOT : 1
OPT_ISSUED : 1
PM_RANGE : 1
DENIED_MISSED : 1
THE_SHOULDER : 1
IN_REACH : 1
VA_INPATIENT : 1
VIEW_DOCUMENT : 1
PATIENT_HAVE : 1
EVERY_ACTIVE : 1
SCORE_SHIFT : 1
GOOD_COMMUNITY : 1
THICH_ADIPOSE : 1
TO_AS : 1
REASON_VISIT : 1
DT_HIV : 1
TWICE_NOT : 1
INQUIRY_CURRENT : 1
THROAT_ATTENDING : 1
UARY_THE : 1
RADICULOPATHY_ICDCM : 1
MEDICATIONS_LISTED : 1
SIDE_AND : 1
PHONE_JUDGEMENT : 1
ACTIVE_MEDICATION : 1
THE_LONG : 1
HAS_HAD : 1
BY_MAIL : 1
LIST_YOUR : 1
ON_THE : 3
TO_COMPETANCY : 1
DESCRIBED_TO : 1
WILL_REVIEW : 1
OUT_ON : 1
OU_REFRESH : 1
INFORMATION_ON : 1
TAKE_MEDICINE : 1
OF_THE : 7
VISUAL_PT : 1
FROM_FRIENDS : 1
INCREASE_IN : 1
NUTRITION_ISSUE : 1
RESIDENT_FROM : 1
AND_FINDINGS : 1
WOUNDS_PRESSURE : 1
VETERAN_AT : 1
HOT_TO : 1
IDENTIFIED_THE : 1
HAS_NOT : 2
TO_PA : 1
EXAM_WRITTEN : 1
HAS_CHIEF : 1
PROCESSED_ADMINISTRATIVE : 1
STATES_HE : 2
REPORTS_REMAINING : 1
VET_TO : 3
AND_REVIEWED : 1
ATROVENT_MOMETASONE : 1
YES_YOU : 1
FOLLOWUP_NOTE : 1
TOBACCO_NSTEMI : 1
PROCEDURE_DOSE : 1
LADDERS_GAP : 1
COMPLAINT_NO : 1
TIME_BP : 1
OF_MEDICATIONS : 2
ANSWER_FOR : 1
BY_SYSTEM : 1
CONDITION_ASSESS : 1
PROCEDURE_RECENT : 1
YOUR_MEDICAL : 1
OF_INDIVIDUAL : 1
IS_REQUESTING : 1
SKIN_ROOM : 1
CALLED_SEE : 1
HEART_SOME : 1
CARDIO_RADIAL : 1
PROCEDURE_IDENTIFICATION : 1
URINARY_LSPINES : 1
BOX_RECENT : 1
CLINIC_FOR : 1
EDUCATION_CARDIAC : 1
REMOVAL_ON : 1
ED_PROCEDURE : 1
DIRECTIVE_WITH : 1
NOTED_XEROSIS : 1
SATURATION_WAS : 1
JUL_STABLE : 1
MPI_PL : 1
WIAPN_OVER : 1
VISIT_POSSIBILITY : 1
PHACOEMULSIFICATION_SURGICAL : 1
AND_ASK : 1
HIS_HBP : 1
MEDICATION_PFTS : 1
RECEIVED_MED : 1
WAS_DURING : 1
PCP_BERYL : 2
HOUR_HOUR : 1
SPONSOR_GROUP : 1
ENCOUNTER_LOCATION : 1
CHARACTERISTIC_CALL : 1
POSTERIOR_HEEL : 1
ENTERED_IN : 1
ROOM_FRICTION : 1
HE_OF : 1
FROM_PAST : 1
HAD_COMMUNITY : 1
POSITIVE_NURSING : 1
MG_FOR : 1
FRIENDS_COWORKERS : 1
ELSTON_FACILITY : 1
SEASON_FOR : 1
RD_PATIENT : 1
DIFFICULTY_BLOOD : 1
PER_TYLENOL : 1
DECREASED_DUE : 2
SHARED_WITH : 1
SULFA_PT : 1
WINDOW_BE : 1
CHOLESTE_PT : 1
SCREEN_CURRENT : 1
CLAIM_RO : 1
SUBSCAPULARIS_WITH : 1
NO_ULTRASOUND : 1
WARFARIN_LED : 1
THE_NURSES : 1
GET_SUPPORT : 1
VISION_DENIES : 1
CANCER_PROGNOSIS : 1
VAGUE_COMPLAINTS : 1
DEPRESSED_AFTER : 1
VERIFIED_WITH : 1
PROSTHETIC_WAS : 1
ENCOUNTER_NEW : 1
TEST_CARDS : 1
ASSESSMENT_SQ : 1
HE_REMAINING : 1
AFTER_YEARS : 1
ASSESSMENT_CABG : 1
AND_THICH : 1
CLEAR_EVEN : 1
ATTENDING_PHYSICIAN : 1
CNSL_FILL : 1
RELIEVED_TYLENOL : 1
AT_ELSTON : 1
ATHENS_RECENT : 1
PER_VA : 1
NOTE_OF : 1
PALPATION_AROM : 1
ON_DENIED : 1
HEART_REQUIRED : 1
LETTER_THE : 1
YOU_MAY : 1
JOB_PRESCRIPTION : 1
FROM_LIVING : 1
BUSINESS_HE : 1
NUMBER_HOME : 2
HOME_FACILITY : 1
TO_LEGEND : 1
CAREFULLY_SELECT : 1
AND_ACTIVE : 1
SETTINGS_TYPE : 1
APPOINTMENT_YOU : 1
SKIN_WOUNDS : 1
WHOM_VITALS : 1
DURATION_SERVICES : 1
HAS_HIS : 1
NOV_REG : 1
RECEIVED_INFORMATION : 1
THE_NEGATIVE : 1
DROP_BOTH : 1
REVIEW_FOR : 1
TOBACCO_AND : 1
ARIPIPRAZOLE_MG : 1
REACTIVE_PATIENT : 1
TO_START : 1
NOT_IN : 1
ACTIVE_FOR : 1
ACTIVE_CONSIDERATION : 1
AT_PHONE : 1
EXCEPT_HIS : 1
IN_CORRECTION : 1
DIRECTOR_THE : 1
WAL_RITALIN : 1
ADVANCE_REVIEWED : 1
SINUS_MAY : 1
OWING_SKIN : 2
PROBLEMS_AIR : 1
THE_PRESSURE : 2
AND_ADIPOSE : 1
RECORD_FOR : 1
TYPE_OF : 2
INCLUDE_WOMAN : 1
REPORT_THE : 1
AT_FACILITY : 1
TO_POSITIVE : 1
PEG_AS : 1
UBW_CHO : 1
INCREASE_OF : 1
THE_NEXT : 1
HIS_WM : 1
PULSE_OF : 1
PATIENT_OR : 2
SEASON_SCHEDULED : 1
HAS_DISCONNECTED : 1
ROAD_REACTIVE : 1
CONSCIOUSNESS_MEDICAL : 1
TO_VETERAN : 1
SERVICES_CARE : 1
WILL_STRICTURE : 1
PROSTATE_WITH : 1
TO_VIEW : 1
YES_NO : 1
PEDAL_PULSES : 1
BY_NOT : 1
PHYSICAL_THERAPY : 1
OVERALL_FAMILY : 1
PASS_AT : 1
PRIMARY_THAT : 1
DIAGNOSIS_OIL : 1
HC_PRO : 1
READ_ITEM : 1
FX_FOREIGN : 2
WITH_HAS : 1
THIS_WAS : 1
PAIN_DOCUSATE : 1
WOUND_CLEAN : 1
HEELS_AS : 1
DAILY_EXCEPT : 1
ELECTRONIC_RECORD : 1
LEFT_AC : 1
HEMOPTYSIS_DISORDER : 1
AROM_AT : 1
CHANGED_AND : 1
THE_STIFFINESS : 1
VET_IS : 1
CHO_MG : 1
THERE_NOTE : 1
THE_RECORD : 1
ASSESS_OBSERVATIONS : 1
USE_AS : 1
REHABILITATION_CLEARING : 1
HAS_PATIENT : 1
CONTINUING_THE : 1
UNITS_CONSIDERATION : 1
IMPLANTED_DURING : 1
REFRESH_INTO : 1
HAS_FACILITY : 1
FOR_EYE : 1
PULSES_PALPABLE : 1
VERIFIED_VETERAN : 1
THE_ULCER : 2
APPOINTMENT_THE : 1
BE_MISCONSTRUED : 1
PATIENTS_COMPLAINT : 1
SUPPLIES_NEUROPATHY : 1
TO_DR : 1
VETERANS_STATUS : 1
ICE_NAPROXEN : 1
WAL_PATIENT : 1
DATE_ST : 1
PATIENT_WAS : 1
BUT_UNABLE : 1
STATUS_ORIENTED : 1
AND_IS : 1
DONE_IN : 1
PATIENT_PATIENT : 2
PC_ADMINISTRATIVE : 1
AND_POTENTIAL : 1
COMPLETE_ASSESSMENT : 1
SUPPLIES_MOUTH : 1
TO_SIGNIFICANT : 1
THIS_IS : 1
PROCEDURE_ELECTRONIC : 1
CLERK_ACCIDENTALLY : 1
APPLICABLE_PREOP : 1
NOTE_COMPLETE : 1
THROAT_CLEARING : 1
RTE_FILL : 1
MEDICAL_RECORD : 1
EXTENSIVE_OF : 1
PHARMACIS_ST : 1
DE_CHANGES : 2
VISIT_RISK : 1
HEARING_BOTH : 1
PATIENT_GIVEN : 2
MURMURS_OPERATION : 1
HYPERTROPHY_BENIGN : 1
PHYSICAL_CONSULT : 1
OFFERED_HE : 1
PRESENT_YEAROLD : 1
WHEN_MENTAL : 1
EVERY_OTHER : 1
TO_ICE : 1
OUTPATIENT_MEDICATIONS : 5
APPLICATION_APPLY : 1
OU_ALREADY : 1
ESSENTIAL_DYSLIPIDEMIA : 1
PER_MPLS : 1
LABRUM_RATIVE : 2
FINDINGS_DISPOSITION : 1
OF_BED : 1
SECOND_PATIENT : 1
PROBLEMS_OR : 1
RISK_AT : 1
SUPERVISING_OF : 1
RATE_RHYTHM : 1
NEEDED_FOR : 1
BILATERAL_PAINS : 1
UNABLE_SURG : 1
AM_UARY : 1
ACTIVE_LAMP : 1
CHANGES_PT : 1
PATIENT_THE : 1
PT_SUPPLY : 1
AND_SURROGATE : 1
COMMUNICATION_PROHIBITED : 1
NOT_WOMAN : 1
DO_INCLUDE : 1
OR_MACERATION : 1
LAST_PAIN : 1
SCORE_ACTIVE : 1
INSULIN_NPH : 1
THAT_THE : 1
PATIENT_ANSWERED : 1
SCREENING_INTRAARTICULAR : 1
TAB_TAKE : 3
FULL_HX : 1
OTHER_MEDICATION : 1
AM_ON : 1
ONE_TABLET : 1
HE_CAB : 1
COMPLAINT_RED : 1
COMMENT_REVIEW : 1
USED_THIS : 1
APPROPRIATE_YES : 1
PL_ED : 1
PHYSICAL_VERBAL : 1
VITALS_CHANGE : 1
THAT_NOT : 1
CONFIRMED_WITH : 2
THE_VA : 1
VISIT_ANY : 1
NOTE_PATIENT : 1
MEDICAL_HANDEDED : 1
AHCV_HEPATITIS : 1
SETTINGS_PULSE : 1
HEALTHY_WEIGHT : 1
ADVISED_ABOUT : 1
CLEAN_PAIN : 1
BEHAVIOR_BE : 1
YOU_ASA : 1
BRIMONIDINE_OPH : 1
TECHNIQUE_GAVE : 1
CRY_OUTPATIENT : 1
RETESTED_OMEPRAZOLE : 1
TEMPERATURE_SUPERVISING : 1
PM_MODERATE : 1
THE_CORRECT : 1
REPORT_IF : 1
TO_FOLLOWUP : 1
RIGHT_ONS : 1
CODE_PRO : 1
CONTACT_VET : 1
VERIFY_THIS : 1
IF_FX : 2
BEING_PREGNANT : 1
PAIN_ASSESS : 1
FOR_HE : 1
CLC_TOMORROW : 1
REPORTS_CLEAN : 1
CALL_TO : 1
AND_DRUG : 1
RIGHT_PHACOEMULSIFICATION : 1
DOCTORS_VERIFIED : 1
SEEN_DETAILS : 1
PT_SATISFACTION : 1
APPOINTMENT_PLASTIC : 1
BRIMONIDINE_TARTRATE : 1
INCONTINENCE_WITH : 1
HC_PHONE : 1
STARTING_PIOGLITIZONE : 1
BY_ACETAMINOPHEN : 1
MEDICATIONS_MENTION : 1
SYSTEM_BILATERAL : 1
PRO_CALL : 1
TEST_RESULTS : 1
ON_TRAMADOL : 1
PAIN_HISTORY : 1
CM_PLEASE : 1
OPERATIVE_OPERATION : 1
TO_EXAMINATION : 1
COLL_DATE : 1
AIR_NO : 1
ELECTRONIC_EVALUATION : 1
AND_INFECTION : 1
TAKE_TABLETS : 1
INSTRUCTED_RX : 1
OTHER_PATIENT : 1
WIFE_VITALS : 1
OF_SERVICES : 1
EXAM_OU : 1
MG_WAS : 1
CLINIC_SINCE : 1
ORIENTED_THE : 1
OF_NSTEMI : 1
DONE_YESTER : 1
LED_TO : 1
SYRINGE_ACTIVE : 1
VETERANS_WOULD : 1
TLC_DIFFUSION : 1
FACILITY_STARTING : 1
IS_WAS : 1
THIS_VISIT : 2
TEMPERATURE_THE : 1
MAN_PATIENT : 1
HE_NO : 1
SYMPTOMS_OF : 1
TO_YOUR : 1
HIMSELF_TO : 1
IS_FULL : 1
OF_CARE : 1
EXTREMITIES_ALARM : 1
BLOOD_SUBJECTIVE : 1
YESTER_HAS : 1
NUMBER_NO : 1
OU_INTO : 1
FOLLOWUP_IN : 1
READ_EACH : 1
TOOK_VS : 1
VERIFY_PATIENT : 1
LEFT_IF : 3
WORK_HE : 1
595DT257_REV : 1
INFLUENZA_NOT : 1
COPYING_OF : 1
SEPTEMBER_TH : 1
RIGHT_DECREASED : 1
PEDIS_PALPABLE : 2
HAS_ANSWERED : 1
FOOD_FALL : 1
THREE_AS : 1
UNDERSATNDING_TO : 1
TOTAL_CBI : 1
MEDICATIONS_STATUS : 1
DONE_HE : 1
ANY_DELETED : 1
WOULD_HAVE : 1
EXAMINATION_IT : 1
GAIT_PHYSICAL : 1
INFORM_PRIMARY : 1
USE_SYRINGE : 1
MIRTAZAPINE_MG : 1
ASSESSMENT_COMMENT : 1
PRESSURE_PREVENTION : 2
AND_THERE : 1
TWO_BY : 2
TAB_LIVER : 1
COUGH_HEART : 1
MEDICATION_NO : 1
FOLLOWUP_APPOINTMENT : 1
ESTIMATED_DURATION : 1
CONSIDERATION_ON : 1
OD_DENIES : 1
TO_IMED : 1
IS_NOT : 4
FROM_SHOWS : 1
RELATIONSHIP_TO : 1
SUMMER_LUMBAR : 1
PEDAL_PALPABLE : 1
TIMES_BP : 1
PAIN_PATCHES : 1
COUGHING_LAUGHING : 1
FROM_HIS : 2
OWING_PERRLA : 1
PATIENT_PRESENT : 1
ULTRASOUND_WHICH : 1
OF_PAIN : 1
BLOT_AHBC : 1
LEFT_IMAGES : 1
OD_POOR : 1
HAND_THE : 1
HABITS_LESS : 1
BP_SYRINGE : 1
NO_SAT : 1
ENTERED_YOU : 1
YOUR_RECORD : 1
PAIN_NEC : 1
PATIENT_PRESSURE : 1
CHEERIOS_MILK : 1
HOME_PROTOCOL : 1
CARE_YOU : 1
RECENT_HEIGHT : 1
YEAR_ANEMIA : 1
ON_PALPATION : 1
HOSPITAL_DEPARTMENT : 1
HAVE_DIRECTIVES : 1
AHBC_HEPATITIS : 1
ATTEMPT_HAVE : 1
ROOM_SECOND : 1
HIS_FOBT : 1
CHARACTER_EVEN : 1
OPERATION_PERFORMED : 1
MEDICAL_THE : 1
UVEITIS_MG : 1
FROM_THE : 3
GIVEN_OCCULT : 1
FOR_DEPRESSION : 1
HEEL_PT : 1
TO_THIS : 1
TRAVATAN_RESULTING : 1
SUMMER_RADICULOPATHY : 1
BERYL_MOST : 1
GO_WORK : 1
ANION_ADDENDUM : 1
IRRIGANT_PEDIS : 1
OF_WIAPN : 1
TO_ETOH : 1
ACTIVE_GIVEN : 1
COUGHING_VETERANS : 1
REGULAR_BASIS : 1
PER_TO : 1
ADMISSION_NOT : 1
SENTARA_HOSPITAL : 1
WILL_USED : 1
OF_CANCER : 1
KNEE_PROCEDURE : 1
INPATIENT_BILL : 1
DOG_DECEMBER : 1
SURGERY_ON : 1
PROGRESS_AND : 1
FIELD_UNABLE : 1
INFLUENZA_IMMUNIZATION : 2
JOB_GIRL : 1
SUPERVISING_PRACTITIONER : 1
OR_CONCERNS : 1
SUPPORTIVE_THERAPY : 1
UNLABORED_NEURO : 1
BRADEN_SCALE : 1
BP_INSULIN : 1
TO_AT : 1
AND_RHOMBOIDE : 1
ULCER_YES : 1
OPH_SOLN : 1
HIS_APPOINTMENT : 1
TIU_TO : 1
ALCOHOL_AUDITC : 1
EXCEPT_MG : 1
PEOPLE_NOT : 1
RECORDED_FISH : 1
MR_TEMP : 1
END_THE : 1
LIVER_THANKS : 1
PMH_WITH : 1
CONTACT_AT : 1
FROM_DOWN : 1
EXERCISE_STRESS : 1
CAME_IN : 1
PROMOTE_LIFESTYLE : 1
TURGOR_NO : 1
REMAINING_AND : 1
AND_PT : 2
FOR_DOCUSATE : 1
START_CHO : 1
TABLET_MOUTH : 2
RECOVERY_SECOND : 1
COMPLAINTS_REPORTS : 1
APPLICABLE_MENTAL : 1
HE_HAS : 6
VERIFIED_ANTERIOR : 1
STATEMENT_VIS : 1
INTERACTIONS_OF : 1
BRADEN_FOR : 1
POSITIVE_TROPONIN : 1
STABLE_TELEMETRY : 1
HAVE_HELPED : 1
BID_FOR : 1
TEAR_POSTERIOR : 1
COUGH_ANY : 1
COLONOSCOPY_AND : 1
PERFORMED_EYE : 1
OR_THROAT : 1
NOT_FULL : 1
THE_WINDOW : 1
RX_EXPIRATION : 1
GENOBESE_AOX : 1
WORKER_VA : 1
ON_LEFT : 1
SUMMER_PRILOSEC : 1
TROPONIN_NURSING : 1
BILATERAL_KNEE : 1
FOR_DENIES : 1
EXAM_LEFT : 1
HEPATITIS_REQUIRED : 1
RATIVE_ARTHRITIS : 1
SPEC_HIV : 1
FROM_FAMILY : 1
GET_FROM : 1
PULSE_VACCINE : 1
OF_INVOLVEMENT : 1
DETAILS_ARE : 1
PAST_DISCUSSED : 1
HIV_BLOT : 1
ARE_NUMBER : 1
SOLN_DROP : 1
EXTREMELY_IF : 1
FOLLOW_THE : 1
WITH_WHOM : 1
TO_AMANDA : 1
HBSAG_AHBC : 1
MANIFEST_THE : 1
REVIEWED_CHIEF : 1
AND_INSTRUCTED : 1
TIME_PATIENT : 1
TO_CLC : 1
PREVENTION_PROTOCOL : 2
EXPECTED_THAT : 1
WAS_PC : 1
HAS_UNDERGONE : 1
LABS_ASK : 1
PROGRESSIVE_DEMENTIA : 1
CHART_THERE : 1
EVEN_UNLABORED : 1
OR_WITH : 1
HIM_WITH : 1
NOTE_NAME : 1
ANSWERED_PAIN : 1
OF_AND : 2
YES_DO : 1
OU_IOP : 1
RE_COLONOSCOPY : 1
NO_OR : 1
TH_RATED : 1
YES_COLOR : 1
NEURO_ORIENTED : 1
BLOOD_TEST : 1
BED_WIAPN : 1
SEVERE_OPT : 1
EC_TAKE : 2
ACTIVE_ADMISSION : 1
PATIENT_SSN : 1
COLL_LDL : 1
OL_PRIMARY : 1
MAIL_AND : 1
HEART_ANATOMICAL : 1
HEART_BPM : 1
ERS_POSITIVE : 1
SURVEY_THIS : 1
VACCINE_INFORMATION : 1
TAB_ONEHALF : 1
TO_PAIN : 1
THE_PHONE : 1
TRIALED_TRAVATAN : 1
PROBLEMS_ROOM : 1
DISCHARGE_TO : 1
ABOUT_OF : 1
DEGREE_INVOLVEMENT : 1
RESPONSES_DIRECTOR : 1
COMMENT_VERBAL : 1
FOR_NEW : 1
FOR_THAT : 1
MODE_OF : 1
MEDICAL_PROBLEMS : 1
BODY_ON : 1
OR_OF : 1
OF_COMMENT : 1
FACILITY_PCP : 3
AHCV_NEGATIVE : 1
COUGH_NO : 1
OTHER_FOR : 1
LATEX_MEDS : 1
MAIL_OR : 1
NURSING_INTAKE : 1
NOTE_USING : 1
LEFT_REACTIVE : 1
IOP_PRETREATMENT : 1
IN_DIET : 1
SUPPLY_OF : 1
SUPPORTIVE_INDIVIDUAL : 1
THAN_MONTHS : 1
BREAKFAST_AND : 1
NAPROXEN_SERTRALINE : 1
IS_NECESSARY : 1
IN_PRIOR : 1
CONVERSATION_WITH : 1
CURRENT_FOLLOWUP : 1
PROCEDURE_USING : 1
IMPROVED_EATING : 1
ACCIDENTALLY_MEDICATIONS : 1
VISIT_NOV : 1
DIFFICULTIES_OBESITY : 1
RANGING_FROM : 1
ATHENS_GENDER : 1
FLU_SCHEDULED : 1
USED_NOT : 1
LESIONS_EXTREMELY : 1
RETIRED_OR : 1
AROM_DECREASED : 1
NOT_RECEIVED : 1
PRESCRIPTION_VA : 1
PRIMARILY_ISSUE : 1
IS_NEW : 1
NEXT_CARE : 1
REQUESTING_MEDICATION : 1
THEREFORE_ON : 1
IDENTIFIERS_USED : 1
AS_TIMES : 1
DATE_TRIGLYCEHDL : 1
PEDIS_IN : 1
OPERATION_PROCEDURE : 1
ONYCHOCRYPTOSIS_WILL : 1
OR_HOME : 1
IS_YEAR : 1
EYE_PHACOEMULSIFICATION : 1
WRITTEN_OTHER : 1
TEACHING_GOOD : 1
PROSTHETIC_CONSULT : 1
ALLERGIES_HAS : 1
AND_TO : 1
LAST_BP : 1
COMMENT_CHANGE : 1
PROGRESS_SCREENING : 1
SURVEILLANCE_FOLLOWUP : 1
MEDICINE_ONLY : 1
INPATIENT_ORDER : 1
IF_PREGNANT : 1
CURRENT_IS : 1
IT_IS : 2
HYPERKEROTOSISES_PT : 1
YOUR_DOCTOR : 1
CURRENT_INR : 1
PATIENT_ABOUT : 1
MIDDLE_PH : 1
OL_LOWERING : 1
OF_LAST : 1
INVOLVMENT_LEFT : 1
AS_HER : 1
MINUTES_OF : 1
PREOP_INSTRUCTIONS : 1
RX_CNSL : 1
VITALS_STABLE : 1
UNABLE_TO : 2
ULCER_PREVENTION : 2
PROTOCOL_WAS : 2
TO_USE : 1
AOX_THE : 1
AT_OTHER : 1
SKIN_CONDITION : 1
BOTH_DERMATOLOGY : 1
DENIES_MEDICAL : 1
RIGHT_FOOT : 1
THE_LETTER : 1
ERYTHEMA_WILL : 1
NEW_NO : 1
MELANOMA_PER : 1
MEDICATIONS_INCLUDING : 3
RIGHT_EYE : 1
CHEW_TAB : 1
CBCD_FERRITIN : 1
FIELD_PT : 1
THE_DATA : 1
REASSESS_REPORT : 1
HAD_GOOD : 1
HAVE_REQUEST : 1
PARTIAL_HOT : 1
REVIEW_OF : 1
APPOINTMENT_PHONE : 1
SUBJECTIVE_IS : 1
TIME_OF : 1
WHOM_WIFE : 1
STRATEGIES_PROMOTE : 1
AND_WILL : 1
PLACE_CONSULTANTS : 1
SW_ROAD : 1
SYRINGE_ML : 1
PHONE_MIN : 1
HE_THAT : 1
INFORMATION_GIVEN : 1
PA_WAS : 1
PATIENT_RECEIVED : 2
MD_WPB : 1
IN_CM : 2
HIS_BUSINESS : 1
UNDERGONE_PREVIOUSLY : 1
PHARMACIS_STATES : 1
SATURATION_BLOOD : 1
DRUG_OF : 1
DATE_PT : 1
ACTIVE_RECEIVED : 1
BY_ACTIVE : 3
HEALTHY_LIFESTYLE : 1
FOR_BYPASS : 1
PATIENT_ENCOUNTER : 1
COMPLAINT_NOT : 1
PATIENT_AND : 4
ADDENDUM_REVIEW : 1
RECONCILED_REVIEWED : 1
SERUM_OL : 1
WAS_UNABLE : 1
YEAROLD_PATIENT : 1
METAB_SEVERAL : 1
SHIFT_NOTE : 2
WILLING_APPOINTMENT : 1
DISEASE_DENIES : 1
NEC_WHOM : 1
TITLE_VIEW : 1
CHANGE_OWING : 1
AT_ON : 1
LONG_THICK : 1
PHONE_DOG : 1
EMERGENCY_IF : 1
OF_TINY : 1
MG_TAB : 4
IN_THE : 4
HAS_IMPROVED : 1
MURMUR_APPOINTMENT : 1
APPOINTED_PCP : 3
HIMSELF_MR : 1
AMBULATORS_OPEN : 1
PAIN_AND : 1
SYRINGE_IN : 1
AFTER_SKIN : 1
AND_ALLOW : 1
VIA_FOLLOWING : 1
THROAT_PHYSICIAN : 1
COMFORTABLE_THE : 1
IS_SKIN : 1
PROVIDER_ADVISED : 1
COLONOSCOPY_PREVIOUSLY : 1
PHONE_NUMBER : 5
FULL_ESSENTIAL : 1
DISTRESS_BELL : 1
WHEN_APPLICABLE : 1
NONV_STARTING : 1
YESTER_HE : 2
OF_ADLS : 1
APPOINTMENT_CONFIRMED : 2
MEDICATION_CNSL : 1
NOTE_FEB : 1
IN_PTS : 1
CARDIAC_TEACHING : 1
RATED_DISABILITIES : 1
AND_LIGHTHEADEDNESS : 1
HAS_DEGREE : 1
TABLETS_BY : 1
ANION_GAP : 1
RIGHT_CBI : 1
SCREEN_BETTER : 1
NKA_HISTORY : 1
SYMPTOMS_TOBACCO : 1
PASS_NO : 1
FAST_FOOD : 1
FILL_HIS : 1
PROBLEMS_YOU : 1
FAMILY_FRIENDS : 1
SURG_EXAM : 1
ICDCM_ICDCM : 1
APPOINTED_BERYL : 2
DUE_ETOH : 1
ULCERS_OTHER : 1
ML_SCALE : 1
ACTIVE_INFORMATION : 1
CENTER_ASSESSMENT : 2
FROM_DELIRIUM : 1
ASK_TO : 1
ONYCHOCRYPTOSIS_ATTEMPT : 1
NURSES_DATA : 1
TAKE_CAPSULE : 2
NEPHROPATHY_SAT : 1
THE_PULSE : 1
TENDONOPATHY_WITH : 1
THAT_PEOPLE : 1
RATED_DE : 1
ATENOLOL_TAB : 1
IN_ELECTRONIC : 1
NEGATIVE_NEGATIVE : 1
LDL_DIM : 1
PAIN_ACTIVE : 2
WIAPN_FOLLOWUP : 1
INCLUDING_OF : 1
HIS_DELIRIUM : 1
AS_RX : 1
SPEC_AB : 1
BE_TO : 3
CURRENTLY_AT : 1
PM_FACILITY : 1
ON_FLOWSHEET : 1
VIS_ABOUT : 1
CHO_LOWERING : 1
OBSERVATION_APPROPRIATE : 1
CARDIOL_LSPINES : 1
NOT_IDENTIFIED : 1
WAS_IN : 1
LISTED_THE : 1
SUBSTANCE_ORDERS : 1
PHONE_INFORM : 1
REQUEST_COMPETANCY : 1
MAIL_FROM : 1
HEPATITIS_NEGATIVE : 1
SEE_NOTE : 1
PVD_OBESITY : 1
SUPERIOR_DIET : 1
THICK_OFFERED : 1
REVIEW_CHANGE : 1
PAIN_AMBULATORS : 1
IN_PLEASE : 1
VACCINE_GIVEN : 1
NOT_TO : 2
TRIGLYCEHDL_CHOLESTE : 1
NEUROPATHY_NIDDM : 1
OF_LED : 1
REVIEW_ECG : 1
MEDICAL_INFLUENZA : 1
NEURO_THRESHOLD : 1
HE_OUT : 1
MG_APPOINTMENT : 1
APPLICABLE_STATUS : 1
FERRITIN_ACTIVE : 1
CARDIAC_ERS : 1
HAD_AN : 1
MG_DL : 2
PULMONARYCONSULT_NOTE : 1
SELECT_THE : 1
CLINIC_THE : 1
TENDERNESS_PALPATION : 1
LATEX_ALLERGY : 1
IMAGING_PL : 1
TAKE_ON : 1
THIS_VETERAN : 1
WORK_BETTER : 1
WITH_PM : 1
STATES_DO : 1
THE_TELECARE : 1
OCCULT_TEST : 1
AT_ENCOUNTER : 1
EVALUATION_CODE : 1
INSULIN_NOV : 1
LIST_IN : 1
AND_SINUS : 1
OUTPUT_CBI : 1
USE_ICE : 1
LOCATION_KNEE : 1
PULSES_URINE : 1
PER_THE : 1
IN_MAIL : 1
IUM_HYPERTENSION : 1
COMPLAINTS_OF : 1
NOTE_THERAPY : 1
NOTE_WILL : 1
AT_VISION : 1
EVALUATION_MANAGEMENT : 1
PHOENIX_BUT : 1
FACILITY_ARIPIP : 1
REFILLS_EXPIRATION : 1
NEPHROPATHY_NO : 1
ELECTRONIC_CONSULT : 1
WAS_NEEDED : 2
NOTE_THIS : 1
CAPSULE_BY : 3
TO_YOU : 1
NOT_BE : 1
DO_HAVE : 1
RETURNED_FOBT : 1
FOR_INCONTINENCE : 1
IS_YOUR : 1
LOW_FROM : 1
NURSING_NOTE : 2
THAT_MIRTAZAPINE : 1
DISABILITIES_RATIVE : 1
INFORMATION_WITH : 2
THIS_DATE : 1
VACCINATION_CC : 1
HBSAG_AHCV : 1
AND_PATIENT : 1
ELSEWHERE_SCREEN : 1
NECK_AND : 1
ANWSER_ETC : 1
AND_RESULTS : 1
PATIENT_COUNSELING : 1
SCREENING_ACTIVE : 1
SHE_HAD : 1
SHIFT_ASSESSMENT : 2
PRESSURE_DIAGNOSIS : 1
HX_HTN : 1
COMPLAINT_LEGS : 1
HE_FILED : 1
PICTURE_DIFFICULTIES : 1
ADDRESS_RECENT : 1
SUBSTANTIAL_HIS : 1
COMPLAINTS_RETIRED : 1
NUMBER_DOG : 1
WAS_YESTER : 1
MRP_MEDICATION : 1
SURVEY_DATE : 1
DOSES_RETESTED : 1
INTENTION_OF : 1
EVERY_SKIN : 1
GAVE_HIM : 1
OPERATION_DISPOSITION : 1
INP_ISSUED : 1
TO_FROM : 1
NO_OF : 1
THE_ELECTRONIC : 1
NO_CHIEF : 1
IN_SYSTEM : 1
LOCATION_TROCHENT : 1
DEPRESSION_PATIENT : 1
ICDCM_WITH : 1
TAKE_TO : 1
CREATININE_MG : 1
FILL_INSULIN : 1
GOOD_COUGH : 1
LEFT_OCCUPATIONAL : 1
EYES_JUL : 1
INFORMATION_PATIENT : 1
DUE_TO : 2
JALBUENA_URINARY : 1
DATE_AND : 1
CERTAIN_IT : 1
THE_ONLY : 1
SQ_DO : 1
THIS_AN : 1
PROCEDURE_NOTE : 1
MEDICATION_FALL : 1
MISCONSTRUED_BE : 1
RATIVE_CHANGES : 2
COUGH_OR : 1
REACTIVE_YES : 1
OPT_ENDING : 1
MAY_MISCONSTRUED : 1
LUNGS_EFFORT : 1
BAYSIDE_HOSPITAL : 1
SUBJECTIVE_HYPERTENSION : 1
RIGHT_TROCHENT : 1
THE_DOUBLE : 1
SHIFT_ML : 1
APPOINTMENT_NUMBER : 1
ADIPOSE_LOCATION : 1
FEET_PEDAL : 1
TYPE_DISCHARGE : 1
DENIES_LATEX : 1
SCHEDULED_WHICH : 1
KEPT_BY : 1
TEMP_PRIMARY : 1
TOMORROW_SPEECH : 1
DO_OTHER : 1
OPEN_LESIONS : 1
RITALIN_PATIENT : 1
CODE_HC : 1
OBSERVATIONS_LEFT : 1
LAST_SUMMER : 1
EXAMINATION_IN : 1
AGAIN_HAVE : 1
CONSCIOUSNESS_PAST : 1
SQ_TWICE : 1
ORAL_MEDS : 1
THE_IN : 1
APPOINTMENTS_WEEK : 1
FUTURE_APPOINTMENTS : 1
OCCUPATIONAL_THERAPY : 2
ALL_PERSONAL : 1
SOFT_CLEAR : 1
WHICH_DONE : 1
CAREFULLY_AND : 1
PT_UNABLE : 1
RISK_PC : 1
FOUR_BP : 1
AORTOFEMFEM_BYPASS : 1
MOMETASONE_MED : 1
DP_AND : 1
BENIGN_OF : 1
SAME_RELIEVED : 1
TROCHENT_BURSA : 1
THE_PROSTATE : 1
CHE_FUNCTION : 1
TENDERNESS_ON : 1
PTS_AC : 1
OVER_THE : 1
TAB_MG : 1
CHIEF_CONFRONTATION : 1
THAT_BEHAVIOR : 1
INSTRUMENTAL_RESIDENT : 1
RUN_OUT : 1
YOU_CONTACT : 1
GUARDIAN_HAD : 1
EXAM_TEMPERATURE : 1
PRIMARY_NURSING : 2
HE_DOES : 1
INSULIN_SYRINGE : 1
SKIN_UNITS : 1
COPYING_THIS : 1
CARDIAC_AFTER : 1
RIGHT_SHOULDER : 1
AFTER_PERRLA : 1
COMPLICATED_TRIALED : 1
RETURNED_FROM : 1
DISPOSITION_PACU : 1
PATIENT_JUDGEMENT : 1
PATIENT_AGREEMENT : 1
NO_COUGH : 1
DIABETIC_NO : 1
THEN_HE : 1
TAKE_ONE : 4
PROVIDER_SHARED : 1
HIS_PHYSICIAN : 1
ALERT_PERRLA : 1
NOW_DOUBLE : 1
OTHER_YR : 1
FACILITY_APPOINTED : 3
USE_TOBACCO : 1
AT_ACTIVE : 1
AN_ELECTRONIC : 1
PLAN_CARE : 2
CLEARING_COMMUNITY : 1
NMSC_AND : 1
POSSIBLE_SIDE : 1
PH_WITH : 1
STARTED_PTS : 1
FUNCTION_THANKS : 1
STRATEGIES_HEALTHY : 1
HIS_MEDICAL : 1
HAS_METAB : 1
REQUIRED_OR : 1
RETINOPATHYPER_LAST : 1
HIM_AN : 1
BE_IN : 3
KNOW_TO : 1
OR_ANY : 1
DISTRIBUTION_COPYING : 1
WANT_TO : 2
CORRECTION_COMING : 1
PT_DENIED : 1
VACCINE_ARE : 1
MONTHS_REPORTS : 1
HISTORY_OF : 1
VERIFIED_GLENOID : 1
DIABETESHYPERTENSION_SIDE : 1
PRESSURE_RECORDED : 1
ACETAMINOPHEN_TAB : 1
FROM_AT : 1
NEGATIVE_PAIN : 1
RANGING_DOWN : 1
ORAL_REASON : 1
AT_HEADACHE : 1
CONTACT_TELECARE : 1
PHARMACOLOGICAL_STRESS : 1
PLANTAR_PEDAL : 1
APPOINTMENT_WITHIN : 1
AT_GLEN : 1
TO_SETTINGS : 1
ASSESS_VET : 1
LDL_TRIGLYCEHDL : 1
WOUNDS_MACERATION : 1
MEDICATION_CHANGES : 1
RUN_HE : 1
IN_ALCOHOL : 1
ISSUE_AN : 1
MENTAL_VETERANS : 1
AIR_FRICTION : 1
PRESSURE_RISK : 1
NOTE_SCREENING : 1
PHENYLEPHRINE_BOTH : 1
RISK_ASSESSMENT : 1
WOUND_OTHER : 1
DEMENTIA_STATUS : 1
CONFIRMED_FAMILY : 1
CURRENT_APPOINTMENT : 1
CARE_ENCOUNTER : 1
THRESHOLD_DECREASED : 1
IS_ELECTRICAL : 1
ALERT_ORIENTED : 2
URINARY_INCONTINENCE : 1
TO_TOMORROW : 1
ASSISTANCE_WITH : 1
PRESENT_CHIEF : 1
IDENTIFICATION_PMH : 1
PT_STATES : 2
YES_NURSING : 1
PALPATION_AT : 1
HX_ESSENTIAL : 1
WAS_GIVEN : 2
OTHER_SUBSTANCE : 1
IMMUNIZATION_PLAN : 1
HYPERTENSION_CONSULTANTS : 1
PRESSURE_ULCER : 3
AS_FOUR : 1
PALPABLE_PEDIS : 1
MEDS_FOR : 1
ANSWERED_NKA : 1
DOCUMENTATION_COMPLICATED : 1
MG_QH : 1
PLACE_INSTRUCTED : 1
IN_USE : 1
HUSBAND_OF : 1
TO_CONTINUE : 2
TO_CAPSULE : 1
HER_GUARDIAN : 1
IN_SYRINGE : 1
DOCTOR_REVIEW : 1
CONSULT_NOTE : 1
REV_07 : 1
SHE_INFORM : 1
EVERY_FOR : 1
DORSAL_PEDIS : 2
YEARS_MARRIAGE : 1
TAKE_ASA : 1
PATIENT_BP : 1
RRR_SOME : 1
SUPPORT_FROM : 1
APPLICATION_TO : 1
TO_OF : 1
DIAGNOSIS_POSSIBLE : 1
NEEDED_IS : 2
PHYSICIAN_TURGOR : 1
ALMOST_THE : 1
REACH_PER : 1
UNABLE_YR : 1
ISSUE_PRIMARILY : 1
DENIES_EGG : 1
NEXT_PATIENT : 1
OUT_THE : 1
LABS_AND : 1
OS_PROGRESSIVE : 1
PHYSICIAN_REVIEW : 1
PHONE_HOME : 2
VAMC_SULFA : 1
CBI_OUTPUT : 1
EGG_ALLERGY : 1
TYLENOL_NECK : 1
HAS_COLONOSCOPY : 1
AT_SCREEN : 1
BEGINNING_PROCEDURE : 1
ON_ANTICOAG : 1
FALL_SCREEN : 1
LIVING_WILL : 1
FINANCIAL_SHE : 1
RECENT_COLONOSCOPY : 1
LIFE_THAT : 1
KNEE_NO : 1
IS_NOTE : 1
PATIENT_NAME : 2
INCLUDING_NEURO : 1
BP_COUGH : 1
WEEKLY_SO : 1
THE_WAS : 1
MEDICATIONS_RX : 1
OTHER_MEDICAL : 1
AS_POTENTIAL : 1
HAS_SUPPLY : 1
TO_EXPLAIN : 1
REVIEW_HAS : 1
AMOUNT_THE : 1
BE_HIS : 1
COUMADIN_MG : 1
TEST_AT : 1
INFLUENZA_ELSEWHERE : 1
NOTE_PHARMACY : 1
NO_SKIN : 1
TEAR_HEEL : 1
IS_CONTINUING : 1
CABG_PER : 1
MEMBER_PATIENTS : 1
REVIEW_THIS : 1
OF_ADDENDUM : 1
WITH_INFECTION : 1
LIFESTYLE_REDUCTION : 1
FAMILY_MEMBER : 1
POOR_OS : 1
EXAM_PARAM : 1
LIVES_WITH : 1
HOME_COLUMBUS : 1
WHICH_WAS : 1
MALE_CAME : 1
OUTPATIENT_REFILLS : 1
PLASMA_CREATININE : 1
HEPATITIS_LAST : 1
INCREASE_CLICK : 1
IS_RECENT : 1
WAS_NOT : 2
RETIRED_HYPERTENSION : 1
DIFFICULTY_SUBSTANTIAL : 1
SCREEN_LAST : 1
OPHTHALMOLOGY_IN : 1
WITH_MEMBER : 1
UNDERSURFACE_PARTIAL : 1
DRY_APPLICATION : 1
OFFERED_THAT : 1
CHANGE_AFTER : 1
GAVE_AN : 1
BE_USED : 1
URETHERAL_CHEST : 1
HAVE_POSITIVE : 1
HELPED_HE : 1
CLC_SPEECH : 1
PATIENT_IDENTIFICATION : 1
EXTREMITIES_PARAMETERS : 1
TAKES_PM : 1
REVIEWED_PATIENTS : 1
LESS_FAST : 1
ARE_EXTREMELY : 1
HIMSELF_HEAL : 1
NIDDM_MEDS : 1
GOLD_PHYSICAL : 1
MAKE_APPOINTMENT : 1
NEEDED_PAIN : 1
NOTES_THAT : 1
THE_PAST : 1
HIS_SITUATION : 1
OLD_FEMALE : 1
PATIENT_BENEFITS : 1
PATIENT_INQUIRY : 1
CONSENT_DENIES : 1
CONSENT_EGG : 1
FEB_BEHAVIOR : 1
REACH_PHYSICIAN : 1
THE_PITTSBURGH : 1
WOMAN_ALLOW : 1
THE_TECHNIQUE : 1
LEFT_AND : 1
FEB_DO : 1
TEMP_CARE : 1
BREATHING_PVD : 1
ANTICOAGULATION_ASSESSMENT : 1
PATIENT_HEART : 1
UPCOMING_HE : 1
NOT_MOISTURE : 1
EVERY_IOP : 1
COMPLAINT_OF : 1
NEUROPATHY_CORONARY : 1
REMOVED_DOES : 1
FOLLOWING_PHONE : 1
RO_IN : 1
HAVE_RECONCILED : 1
TO_BILATERAL : 2
INR_MAILING : 1
SCREEN_FOR : 2
GASTROINTESTINAL_SCORE : 1
HELP_OR : 1
PROVIDER_IN : 1
DISEASE_OVERUSE : 1
URINARY_ADDENDUM : 1
PATIENT_HAS : 3
PIOGLITIZONE_DIABETIC : 1
HYPERTENSION_PLACE : 1
SINCE_ASSISTANCE : 1
DEPRESSIVE_DISORDER : 1
SITUATION_ABOUT : 1
OPT_PATIENT : 1
ADDENDUM_MINUTES : 1
DURING_PROCEDURE : 1
AND_PER : 2
FX_BODY : 2
IOP_REFRESH : 1
EFFECTS_DESCRIBED : 1
OF_FOR : 1
WITH_TEAR : 1
OD_ANY : 1
UNDERGONE_COLONOSCOPY : 1
PATIENT_BLOOD : 1
THAT_PRODUCTS : 1
COMPLAINT_VISUAL : 1
FOR_SEPT : 1
OR_WHEN : 1
PT_MISSED : 1
IF_RETIRED : 1
ALBUTEROL_ATROVENT : 1
HAS_NO : 1
SERVICE_SEPTEMBER : 1
AND_ARIPIPRAZOLE : 1
HELPED_BUT : 1
CHE_LIVER : 1
THAN_PRESSURE : 1
MAY_RETURNED : 1
PC_LPN : 1
OF_LEFT : 1
PAIN_THAN : 1
TIME_THE : 1
HAVE_TO : 2
PHONE_IN : 1
BEING_YES : 1
MEDICATIONS_DIABETESHYPERTENSION : 1
FOUR_TIMES : 2
AN_WITH : 1
WORK_COMFORTABLE : 1
THE_IF : 1
STRICTURE_PAIN : 1
DUE_PAIN : 1
PROHIBITED_YOUR : 1
BID_ONE : 1
WNL_NOTES : 1
DIET_REVIEW : 1
HAS_TAKE : 1
ACTIVE_DATE : 1
GLEN_ELSTON : 1
PROGNOSIS_INTRAARTICULAR : 1
INSTRUCTIONS_MEASURED : 1
BYPASS_MAXIMUM : 1
PT_TO : 3
MAXIMUM_RATE : 1
PRIMARY_PROVIDER : 1
PROGRESS_PT : 1
IN_DISTRESS : 1
CLASSIFICATION_CLEAN : 1
BY_OR : 1
NPH_INJ : 1
DELTOID_APPOINTMENT : 1
CONSULTANTS_CHOICE : 1
ARE_LOT : 1
WAS_WILLING : 1
PLA_MD : 1
SKIN_FOR : 1
TELECARE_AT : 1
STARTING_DIABETIC : 1
USE_AND : 1
CAN_DISTRIBUTION : 1
PLASTIC_SURGERY : 1
TAPERING_OF : 1
THE_IT : 1
MAY_IN : 1
PROBLEMS_CONCERNS : 1
HE_PROGRESS : 1
PER_NOTE : 1
OR_PICTURE : 1
HOME_USED : 1
BASIS_YES : 1
THE_INFLUENZA : 1
NO_LAST : 1
AND_MELANOMA : 1
WORKER_HAS : 1
OF_CONSCIOUSNESS : 1
PAIN_TELEMETRY : 1
IN_YOU : 1
HOME_APPOINTED : 1
RIGHT_BURSA : 1
PVD_DDD : 1
ACUTE_PAIN : 1
PRIMARY_CARE : 4
BY_THREE : 1
HOUR_OUTPUT : 1
FERRITIN_PROBLEMS : 1
TEMPERATURE_SATURATION : 1
HEELS_INSTRUCTED : 1
TWO_HOW : 1
PAIN_DO : 1
VETERAN_INSTRUCTED : 1
AND_HIMSELF : 1
MG_EXCEPT : 1
INFECTION_RETURNED : 1
MOISTURE_TURGOR : 1
INP_VA : 1
DOUBLE_CLICK : 1
PAIN_OPT : 1
POSSIBLE_REHABILITATION : 1
AID_CONS : 1
ULCERS_OR : 1
ALMOST_SAME : 1
CONDITION_PAIN : 1
VA_HIS : 1
RECORD_THIS : 1
FROM_REVIEW : 1
UARY_SHOWS : 1
SURGERY_GOLD : 1
ON_UARY : 1
PATIENT_OF : 1
FOR_MEDICATION : 2
DO_SEND : 1
ACTIVE_MEDICATIONS : 6
USED_IDENTIFIED : 1
CALLED_TO : 1
COMPLAINT_BUT : 1
JR_FEV : 1
SYRINGE_AS : 1
ON_CURRENT : 1
LIGHTHEADEDNESS_AND : 1
BEEN_RESIDING : 1
TRAMADOL_MG : 1
CHIEF_PLACE : 1
CREATININE_DL : 1
BOTH_FOUR : 1
CAN_ENTERED : 1
SELFMANAGEMENT_RANGE : 1
ISSUED_PRESCRIPTION : 1
STATE_SSN : 1
STARTED_IN : 1
PC_WPB : 1
PRIOR_TO : 1
PT_BLSOME : 1
BUT_THOUGHT : 1
FOLLOWING_IDENTIFIERS : 1
INJECT_ACTIVE : 1
DEATH_HIS : 1
TELECARE_NURSES : 1
DENIED_DOSES : 1
YES_HOW : 1
FAMILY_AND : 1
SEE_JALBUENA : 1
HAVE_BUT : 1
STATUS_NOTES : 1
INJ_NOVO : 1
YOU_UNDERSTAND : 1
PT_IS : 1
AND_FERRITIN : 1
LEFT_MG : 1
PROGNOSIS_FRACTURE : 1
REPORT_MM : 1
ATROVENT_THIS : 1
INR_ADDRESS : 1
PROVIDER_CLINIC : 1
TINY_UNDERSURFACE : 1
NOTE_NOW : 1
TAKE_ONEHALF : 1
LPN_NOTE : 1
WARFARIN_TO : 1
INTERVIEW_OTHER : 1
FROM_COMMUNITY : 1
THROAT_AFTER : 1
UARY_WIDE : 1
OTHER_ACTIVE : 1
SO_PEOPLE : 1
YES_SCHEDULED : 1
MALE_WHO : 1
TIMES_AS : 1
NKA_PAIN : 1
VERBAL_WRITTEN : 1
CONTACT_VIA : 1
STERILE_TECHNIQUE : 1
CBI_IRRIGANT : 1
BY_IMED : 1
LOWERING_CARE : 1
MELANOMA_REPORT : 1
NAD_MAIN : 1
WEEKLY_THAT : 1
TAPERING_LEVEL : 1
ICDCM_UGI : 1
INFLUENZA_VACCINATION : 1
MOUTH_AT : 1
PFTS_DONE : 1
NO_PHONE : 1
ACTIVE_PROBLEMS : 1
PLACE_BUT : 1
FROM_SOCIAL : 1
OF_COMPLICATED : 1
ON_EXAM : 1
HISTORY_PRESENT : 1
PHARMACY_WINDOW : 1
TO_UNIT : 1
RESULTS_ARE : 1
PASSING_ON : 1
OBSERVATION_YES : 1
TAKING_MG : 1
SCHEDULED_FOR : 1
GLENOID_LABRUM : 2
TO_PATIENT : 1
OF_POSOP : 1
PULSE_MEDICATION : 1
WOUND_CLASSIFICATION : 1
MG_PO : 1
RECENT_AND : 1
EFFECTS_AND : 1
AT_STATED : 1
THAT_PATIENT : 1
NOTES_RE : 1
AND_RISK : 1
WITH_VETERAN : 1
OSTEOARTHRITIS_ACTIVE : 1
VITALS_MOST : 1
NEGATIVE_MURMUR : 1
SPRINGTIME_AID : 1
VISION_UNABLE : 1
BREATHING_DIFFICULTIES : 1
IDENTIFIERS_WERE : 1
NO_SOB : 1
NO_DISTRESS : 1
LOCATION_AREA : 1
AUDITC_SUICIDE : 1
STARTING_PM : 1
PERSANTINE_IUM : 1
THIS_PRIOR : 1
CAPACITY_MPI : 1
DEPRESSION_REPORT : 1
GAIT_NORMAL : 1
NO_DEPRESSION : 1
AND_FALL : 1
CLICK_ON : 2
WITH_SPONSOR : 1
XEROSIS_NOTED : 1
RETURNED_HIS : 1
NOT_NEEDED : 2
IN_LEFT : 2
PEDIS_DORSAL : 1
OD_REPORTS : 1
RECENT_DOSE : 1
MODERATE_TO : 1
PATIENTS_MEDICATION : 1
INDIVIDUAL_THERAPY : 1
GASKINS_NOTE : 1
ACTIVE_SLIT : 1
DIABETIC_NEUROPATHY : 1
SINCE_HAS : 1
TRAVEL_TEMPERATURE : 1
OUTPT_LPN : 1
INQUIRY_SCREEN : 1
WIDE_ADDENDUM : 1
ANY_NEW : 1
WAS_INSTRUCTED : 1
TAKING_COUMADIN : 1
ANKLE_RESPIRATORY : 1
INSTRUCTED_FOLLOWUP : 1
ACTIVITY_NO : 1
DEATH_OF : 1
CAN_BE : 1
INCREASE_WARFARIN : 1
COUNSELING_HEART : 1
OF_DIRECTIVE : 1
SURROGATE_PICTURE : 1
THIS_HAS : 1
CAPACITY_IMAGING : 1
CLEARING_OWING : 1
WORK_GENOBESE : 1
PLASMA_MG : 1
PT_SEEN : 1
PHARMACY_BE : 1
MEDICAL_PER : 1
AT_DISCHARGE : 1
NO_ICDCM : 1
AND_AND : 3
MEMBER_MEDICATION : 1
MONTHS_HE : 1
MAY_TO : 1
PRN_ACUTE : 1
ETC_INPATIENT : 1
ON_JOB : 1
DISCHARGE_HOME : 1
BLOT_HBSAG : 1
BILL_HER : 1
SEE_RE : 1
SCALE_FOR : 1
SHARED_YOU : 1
ASA_REGULAR : 1
HEPATITIS_HEART : 1
WINDOW_SURE : 1
DR_FOR : 1
MOUTH_MORNING : 1
ALLOW_TO : 1
ABOUT_BENEFITS : 1
INSTRUCTED_TO : 3
VERBAL_OTHER : 1
UPCOMING_MONTHS : 1
ISSUED_ORDER : 1
YES_UBW : 1
IMAGES_SUPERIOR : 1
RETINOPATHY_CONSULT : 1
THE_ANSWER : 1
ITEM_CAREFULLY : 1
NO_CALL : 1
PRILOSEC_ACUTE : 1
HELP_SUPERVISION : 1
WILL_LABS : 1
PRN_EYE : 1
MEDICATIONS_SUPPLIES : 3
WOMAN_AND : 1
WITH_URINARY : 1
OTHER_ANY : 1
SCHEDULED_SEPT : 1
TO_VERIFY : 1
EC_CAP : 2
THIS_TO : 1
DL_APPOINTMENT : 1
NOTE_THE : 2
CNSL_RTE : 1
TO_HEELS : 1
FECAL_OCCULT : 1
GROUP_HOME : 1
HIS_HE : 1
DOCTORS_ORDERS : 1
AS_INSTRUCTED : 1
YES_REQUIRED : 1
DM_HBP : 1
HAVE_BEEN : 1
PREGNANT_MANY : 1
REQUEST_HEARING : 1
CHARACTERISTIC_WILL : 1
NEW_DELETED : 1
RADIAL_ESTIMATED : 1
OUTPUT_FUTURE : 1
INFECTION_AND : 1
MEDICATIONS_REFILLS : 1
DIRECTOR_COMMENTS : 1
FLUSHES_WITHOUT : 1
MORNING_OTHER : 1
THIS_SEASON : 1
MAXIMUM_HEART : 1
WITH_LAUGHING : 1
ADVANCE_LIVING : 1
IS_ALMOST : 1
DOES_CRY : 1
FOLLOWUP_NECESSARY : 1
LOW_RANGING : 1
PREDICTING_SORE : 1
ESTIMATED_OF : 1
ALARM_PARAMETERS : 1
POTENTIAL_EFFECTS : 1
CHANGES_NO : 1
NUMBER_PROTOCOL : 1
HEART_DISEASE : 1
THE_CHART : 1
NEW_SUMMER : 1
REVIEWED_THE : 3
CONTACT_VETERAN : 1
AFTER_THE : 1
BURSA_YEARS : 1
CHOLESTE_TO : 1
ROOM_AIR : 1
ADDENDUM_GIVEN : 1
REFILL_WAL : 1
BP_LOW : 1
ICDCM_HYPERLIPIDEMIA : 1
IMPLANT_WAS : 1
CLINIC_HE : 1
BY_DOES : 1
ASSESSMENT_FOLLOWING : 1
TYLENOL_FOR : 1
DURATION_OF : 1
TO_BEGINNING : 1
SEND_PT : 1
IDENTIFIED_REVIEWED : 1
STRESS_TEST : 2
TWO_THEN : 1
AGREEMENT_CHIEF : 1
MEDICATION_LIST : 2
MG_DAILY : 1
DEPARTMENT_IF : 1
PHYSICIAN_PATIENT : 1
ROM_OF : 2
NOSE_BLOWING : 1
ASSOCIATED_WITH : 1
SEEN_METAB : 1
TEST_PERSANTINE : 1
PULSE_OXIMETRY : 1
HAVE_RELATIONSHIP : 1
WITH_CHIEF : 1
TO_YES : 1
MEDICAL_HISTORY : 1
HIS_MONTHS : 1
BEEN_UNABLE : 1
THEN_TYPE : 1
OPT_AGREEMENT : 1
INFORMATION_YOU : 1
NOT_ISSUE : 1
THERAPY_CONSULT : 1
CARE_HAS : 1
ROM_THE : 1
ILLNESS_MAN : 1
SOLN_INSTILL : 1
TAKES_TYLENOL : 1
INCONTINENCE_COUGHING : 1
WITH_IMPLANT : 1
OR_SUPERVISION : 1
POSSIBILITY_OF : 1
! Stats words=1120  pairs=4404
