# Supplementary material for: Predicting the Risk of Suicide by Analyzing the Text of Clinical Notes
Source: PLoS One. 2014 Jan 28;9(1):e85733. doi: 10.1371/journal.pone.0085733 (PMC3904866; doi:10.1371/journal.pone.0085733)
Supplement: Appendix S3 — Machine Learning Libraries and Methods: This section is provided to enclose the open source (Apache License) classifier used for the building of the statistical models, specifically for the purposes of study reproducibility. A detailed account of these tools is intended for another publication. (ZIP) [file pone.0085733.s003.zip › Appendix3/ML_libs/Regression_testing/group1/processed/grp1-pt-1016.dat]

!  Done reading
! Total word count = 2403
! Total unique words = 1081
! Total pair count = 4802
! Total unique pairs = 4371
SORE : 1
AT : 15
ADL : 1
ONLY : 2
ANSWERING : 1
WORK : 1
PREOP : 1
SURROUNDINGS : 1
LISINOPRIL : 2
FINGER : 3
REFILLED : 1
REMOVAL : 1
MONTH : 1
LAND : 1
INFO : 1
WEIGHT : 3
LITERS : 1
BEEN : 6
BID : 1
BASE : 1
WITHIN : 4
QUADRANTS : 1
REFILL : 1
ACCORDING : 1
CAREGENERAL : 1
ASSISTIVE : 1
MILD : 3
MINUTE : 2
OUTPATIENT : 4
INSTRUCTED : 3
INTAKE : 3
ANGIOGRAM : 2
INPATIENT : 4
TOMORROW : 1
MAS : 1
FT : 1
RELATED : 1
USE : 3
ARTHRALGIA : 1
IMMEDIATELY : 1
CC : 1
RR : 1
TWICE : 1
ERROR : 1
COLD : 1
SCHEDULING : 1
LEVEL : 7
ALCOHOL : 1
CHANGES : 2
RADIAL : 2
TWI : 1
ISCHEMIA : 1
TRAUMA : 1
SHOULDER : 2
MACHINE : 1
HIS : 11
BRING : 1
ARIPIPRAZOLE : 1
SOURCES : 1
LABRUM : 2
GM : 1
APPROPRIATE : 1
NEURO : 1
DIRECTIVE : 1
CONCEPT : 1
TINY : 2
ACID : 1
REQ : 1
ATTORNEY : 1
WELL : 1
FEDEX : 1
SHOWED : 1
TEST : 5
SWOLLEN : 1
NOTE : 17
INCREASING : 2
HARD : 1
DO : 3
DOES : 2
NIGHTMARES : 1
TESTS : 3
TENDINOPATHY : 1
TREATMENT : 4
HTN : 3
BLOOD : 3
WORKER : 1
ACCESS : 2
ASSIST : 1
HAVE : 6
SAW : 1
CAVEDIN : 1
OF : 41
DRUG : 1
INCLUDE : 1
TAB : 9
STABLE : 1
REQUIRED : 2
HAS : 15
FOR : 36
LENSES : 1
CONDITION : 4
SAID : 1
08 : 1
TIBIAL : 1
NUMBER : 4
CLC : 2
UNDERSTAND : 1
MORNING : 1
CALCIUM : 1
INR : 1
ASSESSED : 1
KNEE : 1
ULCERS : 1
SC : 2
OUTPT : 1
MY : 1
INSTRUCTION : 1
MESSAGE : 3
FOREIGN : 1
COLONOSCOPY : 1
THEM : 1
REV : 1
CARRYING : 1
ASSESSMENT : 6
RESPIRATORY : 2
DOG : 1
BUSY : 1
ACTIVITY : 2
ENVELOPE : 1
SHOWS : 1
ATTACHED : 1
HELMET : 1
BILATERALLY : 1
BM : 1
DEVICES : 1
INFORMATION : 5
PATTERN : 1
DOPPLE : 1
CENTER : 3
INFECTION : 1
VENTRICLE : 2
RECENTLY : 1
VISIBLE : 1
SUICIDE : 1
PVU : 1
ABILITIES : 1
THE : 39
JUST : 2
GBS : 1
CONSENTS : 1
GROINS : 1
EXP : 1
VASOVAGAL : 1
DURATION : 1
ADVANCED : 2
APPEARS : 1
OCT : 1
DIMINISHED : 1
PULSES : 2
GO : 1
SIGNIFICANT : 2
BOWEL : 1
WATCHFUL : 1
UD : 1
SHEETS : 1
TOES : 1
SEC : 1
LEG : 2
BP : 3
MEDS : 3
INDICATION : 2
POST : 1
CM : 2
HARMFUL : 1
RECALL : 1
EPICRITIC : 1
AGREEMENT : 2
TID : 1
OCCUPATION : 1
CAP : 2
EVER : 1
STATED : 4
CAPILLARY : 1
ADENDOM : 1
EFV : 2
HEARING : 2
ATTEND : 1
GET : 2
RA : 1
WT : 2
REMOTE : 2
PARTIAL : 2
STARTED : 2
HANDOUT : 1
SUSTAINED : 1
ASSISTANCE : 3
AMIODAROINE : 1
DIABETIC : 1
CARDIOVASCULAR : 1
DELIRIOUS : 1
OR : 15
THERAPEUTIC : 1
BOTH : 1
SHIFT : 4
YEAR : 4
TEMP : 4
EPIDUAL : 1
CREAM : 1
LB : 5
MCGOWAN : 1
LAYS : 1
DE : 2
MV : 1
LIKE : 1
GI : 1
SEEN : 3
RT : 1
FEBRUARY : 1
NURSE : 3
OBLIGATIONS : 1
UNKNOWN : 1
MUCH : 1
LABORATORY : 1
MONOTHERAPY : 1
TAKE : 8
INJECTIONS : 1
SENSORY : 1
SECTION : 1
ANY : 8
WALKIN : 1
DISCHARGE : 4
AMBULATORS : 1
RIDES : 1
SYSTEMS : 2
OD : 1
ALOT : 1
SW : 2
ADMITS : 1
FACILITY : 4
DEFICIT : 1
EXPIRATION : 1
UNIT : 2
EFFECTS : 1
IBUPROFEN : 1
NAME : 1
MENTIONS : 1
CARE : 7
SUPRASPINATUS : 1
PROXIMAL : 1
EVERY : 8
COMPLIANT : 1
SKIN : 8
TIMES : 1
IS : 18
SCHOOL : 1
DL : 1
NOT : 12
OCCULT : 1
MINIMIZE : 1
FRACTURE : 2
GUARD : 1
IF : 7
NOK : 1
NOR : 1
WALKING : 2
CANCELLED : 2
ONCE : 1
ELEMENTS : 1
PERRLA : 1
HERE : 5
UNITS : 1
ONEHALF : 3
EVALUATION : 3
BIRTHDATE : 1
PROGRESS : 1
V4POST : 1
RECURRENT : 1
THESE : 1
CHEWING : 2
RALES : 1
CONFORM : 1
VET : 4
LEARNER : 1
CLASSES : 1
ALPHABETIZED : 1
PASSING : 1
PR : 1
DP : 2
EXPERIENCING : 1
EDUCATED : 1
ASSOCIATED : 1
BACK : 1
REQUIREMENTS : 1
DILATED : 1
TUES : 1
HEIGHT : 1
MALE : 4
ADDENDUM : 5
DEFINITION : 1
BY : 14
COMPLAINS : 2
NO : 28
CLINICAL : 3
CONSCIOUSNESS : 2
KNOWS : 1
CHIEF : 1
DYE : 1
RETENTION : 1
LUNGS : 3
BENIGN : 1
MEET : 1
GUARDIANSHIP : 1
RISK : 3
CLINIC : 5
LAYED : 1
TOENAILS : 1
TARRY : 1
EF : 2
TENDERNESS : 1
TO : 72
POINT : 1
COULD : 1
FEEL : 1
DVT : 2
RHONCHI : 2
TASK : 1
ADVANCE : 1
ARISE : 1
TOOLS : 2
PROCEDURE : 4
EHAS : 1
WILL : 3
OFTEN : 1
BUT : 4
BEGAN : 1
CONSCIUOUSNESS : 1
TV : 2
LIQUID : 1
PRIMARILY : 1
SEE : 3
PLASMA : 1
ALTERING : 1
PLEASE : 5
STATUS : 3
TA : 1
CFT : 1
PACK : 1
DRINKS : 1
EFFECTIVE : 1
CONSULT : 2
KELLY : 1
OUT : 1
CARDIOMYOPATHY : 1
COMFORT : 1
HR : 2
FRICTION : 1
SINEMET : 1
ACA : 1
WANTS : 1
STRETCHER : 1
SCREEN : 2
BADR : 1
REVIEW : 2
MAINTAINED : 1
NEEDED : 3
MARILYN : 1
INJECTION : 2
WERE : 4
FACTORS : 1
SHEET : 1
AUSC : 1
RESIDENT : 2
PARAFFIN : 1
WALKS : 1
INSTRUCTIONS : 1
LABS : 3
VA : 2
TAKEN : 2
SUBSCAPULARIS : 2
RADICULOPATHY : 1
TURP : 1
POSSIBLE : 1
AGREED : 1
HOT : 1
TRIAGE : 2
IRRIGANT : 1
HELPING : 1
FAMILY : 3
BAD : 1
PAIN : 22
DISEASE : 1
ORIENTATION : 1
WHEN : 6
AS : 5
BEING : 1
VISTA : 1
FALLS : 1
SINUSITIS : 1
UNDERSATNDING : 1
PEDIS : 3
OBSTRUCTION : 1
ABOVE : 1
AMOUNT : 2
LT : 1
WAS : 13
DYSP : 1
INTERIM : 2
PM : 4
WITH : 29
TINA : 1
TUB : 1
CATH : 1
TEMPERATURE : 2
REDNESS : 1
595DT86 : 1
GONE : 1
INDEX : 2
UNDERSURFACE : 2
NOW : 4
ABD : 1
EXACT : 1
MEDR : 1
MUSCULOSKELETAL : 1
BOBBITT : 1
CONFIRMED : 3
ONSET : 1
TENDONOPATHY : 3
IT : 4
BROSIUS : 1
BELOW : 2
LIST : 2
TROUBLE : 1
CLINICALLY : 1
COPIES : 1
IMMUNIZATION : 1
DISCUSSED : 1
CONSTITUTIONAL : 1
SIGNIFICANTLY : 1
SUPPLY : 2
EQUIPMENT : 2
SHOWER : 1
TIME : 4
LIPS : 1
PURPOSE : 1
CODE : 2
RETROBULBAR : 1
METER : 1
DEVICE : 1
ORIENTED : 2
HYGIENE : 1
CURRENTLY : 2
ATTEMPT : 1
SICKENING : 1
NECK : 1
WALK : 1
SAFETY : 1
SIDE : 2
SIMVASTATIN : 2
THICKNESS : 1
DOCTOR : 1
ALLERGY : 3
SPEAK : 1
CALL : 6
DID : 4
MOST : 1
ESTABLISHED : 1
SHOW : 1
ORIENTATED : 1
HX : 2
ACNE : 1
IMAGING : 2
TELEPHONE : 3
ADDRESS : 1
SOB : 1
VERIFICATION : 1
INTRAARTICULAR : 1
MOTIVATION : 1
REPORTS : 4
SUBJECTIVE : 1
LIFETIME : 1
HELP : 2
FRI : 1
OPTIONS : 1
TABLETS : 1
PER : 2
COMING : 2
YES : 4
CONTINUES : 2
FURTHER : 1
PUD : 1
UNT : 1
ETC : 1
NOTICED : 1
CONSENT : 2
FACE : 4
YOUR : 6
PRECAUTIONS : 1
DOING : 1
CAPSAICIN : 1
GIVEN : 3
UNSURE : 1
VACCINATION : 1
QUITE : 2
WHO : 1
HT : 1
MEAN : 1
ED : 3
SOUND : 2
ANA : 1
SURG : 1
RART : 1
RESPIR : 2
VERBALIZES : 1
PHYSICIAN : 8
DELIRIUM : 1
CURRENT : 2
CONTROL : 1
SUSPICIOUS : 1
10 : 1
PULSE : 6
HE : 25
RX : 1
THEY : 1
NEEDS : 1
TREATED : 1
BLOCK : 1
FELT : 2
MEMBER : 2
VT : 1
TABITHA : 1
OBSERVATION : 1
COAL : 1
PHONE : 2
ML : 2
VISN : 1
PREDICTING : 1
CLEAR : 2
AORTOGRAM : 1
BERYL : 1
PRIMARY : 5
FAIR : 1
MOR : 1
UNTIL : 1
HAD : 10
SIGNS : 1
FINISHING : 1
FIELD : 1
SPECIAL : 1
PATIENTS : 2
GUM : 2
FATHER : 1
PROVIDED : 3
YO : 1
NEGATIVE : 1
DENTAL : 1
13 : 1
TWO : 2
NONE : 1
PERFUSION : 1
LAB : 5
DECREASED : 2
IMPORTED : 2
RD : 1
TRAVEL : 1
DIRECTIVES : 1
CONTACT : 8
VASC : 1
NORMOACTIVE : 1
HER : 6
ORDERED : 2
FEELING : 2
SHOULD : 1
UNDERNEATH : 1
QUESTIONS : 1
VIEWING : 1
PROBLEMS : 8
URINE : 1
YELLOW : 1
NASAL : 1
RTC : 2
NEUROLOGICAL : 1
STAYING : 1
GIVE : 1
CAN : 4
THERAPY : 3
LIVING : 3
MANDATORY : 1
NONVA : 5
WHICH : 2
IER : 1
RANGE : 2
EP : 1
COMFORTABLE : 1
TURGOR : 1
OVER : 1
CODING : 1
MG : 19
ON : 22
CARDIOOMYOPATHY : 1
PRESSURE : 5
RY : 1
SUDDEN : 1
TEL : 1
CALF : 1
FACIAL : 1
RUMINATE : 1
VIA : 1
PFAS : 1
MARIA : 1
DORSAL : 1
MED : 1
FRAME : 2
INTO : 1
CONSTANTLY : 1
EDEMA : 2
HYPERTROPHY : 1
PROVIDER : 3
PO : 4
SHE : 7
UP : 2
THEN : 1
MULTIPLE : 1
DEAR : 1
LOCATION : 1
TELL : 1
APPOINTED : 2
ALERT : 1
WORSENING : 1
FEVER : 1
ELEVATING : 1
VERBAL : 2
OFF : 4
UNDER : 1
SEP : 1
CONFUSED : 1
DATE : 7
DETACHED : 1
COMMENT : 1
DAILY : 4
COLLECTION : 1
RADIOLOGY : 1
APPOINTMENT : 4
FROM : 8
LEFT : 8
METS : 1
DIRECTOR : 1
WHEEZING : 2
MEDICAL : 7
HEAD : 1
CONTRAST : 1
ALSO : 2
SPOKE : 1
ENCLOSED : 1
SYSTEM : 1
LOSARTAN : 1
ACTIVITIES : 2
LIPID : 1
ORDERS : 1
WORKING : 1
MUSCLES : 1
COMPLAINT : 1
DISABILITY : 1
BLACK : 1
ORDER : 1
NL : 1
SENSATIONS : 1
EASILY : 1
HAND : 1
INFLUENZA : 2
APPARENT : 1
GAVE : 2
PACKED : 1
ESTIMATED : 1
NEW : 3
REACT : 1
MOUTH : 9
ATTENDING : 2
CHEST : 2
PRESENT : 1
HAVING : 3
SPEEED : 1
SPENDING : 1
ANESTHESIA : 3
FROZEN : 2
ARE : 4
ANSWERED : 3
NONUSER : 1
HYPERTENSION : 1
NEED : 1
INDEPENDENT : 3
CORRECT : 2
FILE : 1
PERSON : 2
APPLY : 2
RECEIVED : 4
HYDROCHLOROTHIAZIDE : 1
SURGERY : 1
FECAL : 1
KAREN : 1
IRRITABILITY : 1
BODY : 1
STEEL : 1
PREVENTIVE : 1
OSA : 1
CAD : 2
BE : 6
RESOLVED : 1
BECAUSE : 1
TETANUSDIPHTHERIA : 1
RUN : 1
DUE : 4
ADV : 2
STARTLED : 1
PROM : 1
TAUGHT : 1
BDR : 1
PH : 1
ISSUES : 1
RECONCILED : 1
SOUNDS : 1
REVIEWED : 5
BEFORE : 1
OTHER : 4
ALL : 5
DRESSING : 1
ME : 1
BED : 1
NURSING : 8
RXS : 1
FOLLOWING : 4
IDENTIFIED : 2
PATIENT : 31
ALLERGIES : 2
DIAGNOSIS : 1
WITHOUT : 2
BUCKETS : 1
PROV : 1
DING : 1
SPENDS : 1
SENT : 1
EVAL : 1
MI : 1
ANXIETY : 3
METOPROLOL : 1
THAN : 1
MEMORY : 1
AUDITC : 1
SUSPECT : 1
DECREASE : 1
FAITHFUL : 1
COME : 1
CRAWLING : 1
JUDGEMENT : 1
HOSPITALIZATION : 1
CBI : 3
ROOM : 3
CAME : 3
THAT : 8
VISIT : 7
MYCOTIC : 1
NORMAL : 2
OCCUR : 1
STAFF : 2
SERVICE : 2
RIGHT : 5
PC : 2
VITALS : 1
MCPHERSON : 1
ABOUT : 4
PEDAL : 3
ONE : 3
UNACCEPTABLE : 1
PREPARED : 1
POTENTIAL : 1
NKA : 3
NSAIDS : 1
BRIEF : 1
THOUGHT : 1
TABLET : 4
ANOTHER : 1
WRITER : 3
REC : 1
YOU : 9
CL : 1
LISTED : 5
SCREENING : 2
CARDIOLOGY : 1
INFORMED : 2
REACH : 2
PAST : 3
OS : 1
DOCUMENT : 3
REASON : 4
NUMB : 2
SCORE : 1
TOBACCO : 2
HURTS : 1
ORTHO : 1
EPIS : 1
MDD : 1
HOME : 3
NEVER : 2
SIX : 1
POWER : 1
NOTED : 1
SOCIAL : 1
WATCHING : 2
COSIGN : 1
VITAL : 1
SO : 1
BRONCHITIS : 1
MIN : 1
REGULAR : 1
RECONCILIATION : 1
PROTECTIVE : 2
PROSTHESIS : 1
MINUTES : 1
MT : 1
TINGLING : 1
STRESS : 1
GREAT : 1
FOLLOWUP : 4
DELTOID : 1
MASSAGE : 1
ALTERATION : 1
VITAMIN : 1
TEAM : 1
CHECK : 1
FINE : 1
SCAN : 1
FALL : 2
OCD : 1
SULTANA : 1
IC : 1
DAY : 1
DATA : 2
AM : 5
NUR : 1
DISTRESS : 1
EGGS : 1
OCCASION : 1
MOOD : 1
REPORT : 4
HOW : 2
CALLED : 2
MIGHT : 1
PIOGLITAZONE : 1
SINCE : 1
OBS : 1
CHANGE : 1
ALLERGIC : 1
SITTING : 2
GLYBURIDE : 1
LEARN : 1
IRREVERSIBLE : 1
STABBING : 1
MADE : 1
TEACHING : 1
CARDIAC : 1
FILLING : 1
INFECTIOUS : 1
ADVISED : 1
OBTAINED : 1
VERBALIZED : 1
RETROGRADE : 1
MONTHS : 1
OBJECTIVE : 1
YEATER : 1
FOLLOWS : 1
UNLISTED : 1
MEASUREMENT : 1
AVOID : 1
BRADEN : 1
CONCERN : 1
LOOSE : 1
FRESH : 1
ASKING : 2
PIP : 1
NONISCHEMIC : 1
MEDICATION : 3
STOP : 3
RESTING : 1
SURVEILLANCE : 1
VISUAL : 1
WANT : 2
ATTEMPTED : 1
ACETAMINOPHEN : 1
CONTINUE : 1
HYPERPLASIA : 1
ISCHEMIC : 1
ORAL : 1
TOTAL : 2
LIGHT : 1
SERVICES : 1
SURGICAL : 1
EXAMINATION : 1
HISTORY : 7
UPDATED : 1
CLICK : 3
RESPIRATION : 1
HOURS : 1
HEALTH : 2
NAPROXEN : 1
RATIVE : 2
STOOLS : 1
REDUCE : 1
NOV : 1
WOUND : 2
PROSTATE : 1
PREVIOUS : 1
SITE : 2
OVERALL : 1
SD : 1
HOOD : 1
VALPROIC : 1
EFFORT : 1
DORSALIS : 2
REFERRAL : 1
MAR : 2
STATING : 1
PROSTATIC : 1
AZITHROMYCIN : 1
KG : 5
MORE : 2
VS : 1
WAL : 1
DRC : 1
WENT : 1
PROBLEM : 2
OCTOBER : 1
LIN : 1
RECORD : 2
DIZZINESS : 1
REQUEST : 2
AMLODIPINE : 1
RN : 2
UNABLE : 2
XYZZY : 2
CORRECTION : 2
THROUGH : 1
WARFARIN : 1
OUTPUT : 5
STEROID : 1
ELIGIBILITY : 1
ANTICOAGULATION : 4
TELEMETRY : 1
AFTER : 3
PULMONA : 1
ADMISSION : 2
GUARDIAN : 2
STILL : 4
HOOVER : 1
METHYLPHENIDATE : 1
SCALE : 1
SUPERVISED : 1
CONCERNING : 1
LESS : 2
FLUID : 1
NICOTINE : 2
ATHENS : 1
PCP : 5
ULA : 1
ICE : 1
NONV : 1
SAYS : 1
FUTURE : 3
APPOINTMENTS : 2
WOUNDS : 1
WAY : 1
TOILETING : 1
EACH : 2
RE : 1
CLIENT : 4
WNL : 3
DENIES : 2
PHARMACY : 2
OLD : 3
OTHERS : 1
BARRADAS : 1
FREQUENTLY : 1
SATISFIED : 1
DISPLAY : 1
VETERAN : 4
QTY : 2
CAPSULE : 1
GLUCOSE : 1
PT : 16
INJURY : 1
RADIATION : 1
AREA : 2
APR : 1
PROCEDURES : 1
MANAGED : 1
SKILLED : 1
PRIVACY : 1
INTED : 1
CHIROPRACTOR : 2
UNDERSTANDING : 1
AROUND : 1
MEDICATIONS : 11
MR : 1
AND : 45
DELIVERY : 1
TISSUE : 1
URINARY : 1
DAD : 1
VACCINE : 1
RECOMMENDED : 1
BETTER : 2
RESPONSE : 1
COMMUNITY : 2
RESULTS : 2
EMERGENCY : 1
CAVITIES : 1
ANSWER : 1
BREATH : 2
ABLE : 1
RECENT : 2
BH : 1
ARTERIES : 2
IN : 18
KNOWLEDGE : 1
ADMINISTERED : 1
CUT : 1
LOW : 1
MAY : 1
MANAGEMENT : 2
DISCONNECTED : 1
PLAN : 1
ANTERIOR : 2
LENGTH : 1
APPT : 2
UNLESS : 1
ADMITTED : 1
OBSERVED : 1
SATS : 1
VERY : 2
DONE : 2
PALPABLE : 4
PHYSICAL : 1
WEARING : 2
TEAR : 1
NIGHT : 2
ACTIVE : 12
INFERIOR : 1
INTRAOPERATIVE : 1
BEGIN : 1
ORGANS : 1
BASEBALL : 1
BRONCHODILATORS : 1
MIDDLE : 2
COMPLETED : 1
IMPRESSION : 2
ARRHYTHMIA : 1
THIS : 17
HIGH : 1
BUDGET : 1
REMINDERS : 2
GLENOID : 2
SOFT : 1
LAST : 1
PUPILS : 1
EDUCATION : 4
ADR : 2
SESSION : 2
STATES : 3
OCCUPATIONAL : 2
RENAL : 1
LIAISON : 1
PADILLA : 1
LOCAL : 1
WHILE : 1
QUESTION : 2
SHORT : 1
SOMETHING : 1
LIMITS : 1
WASNT : 1
ICDCM : 1
SUPERWALMART : 1
FERROUS : 1
ETOH : 1
DOWN : 1
MED_NEW : 1
IS_THIS : 1
CONTACT_SUSTAINED : 1
TO_PT : 1
OCCUPATIONAL_PROGRESS : 1
NOW_ADVISED : 1
MOST_HIS : 1
COMING_UP : 1
THIS_DISCUSSED : 1
SENT_THE : 1
NO_EHAS : 1
REPORT_TABITHA : 1
TIBIAL_PALPABLE : 1
YES_PROVIDER : 1
BUT_IS : 1
DRINKS_ON : 1
AND_SOCIAL : 1
SEEN_HIS : 1
THE_TREATMENT : 1
ASSISTIVE_DYSP : 1
HISTORY_ARTHRALGIA : 1
PULMONA_HX : 1
CLINICAL_NOTE : 1
ATTEMPT_EVERY : 1
IN_YEAR : 1
CATH_LEFT : 1
OF_DISCHARGE : 2
RECONCILIATION_DONE : 1
OTHER_PROBLEMS : 2
UNACCEPTABLE_WENT : 1
TO_OVER : 1
CAVITIES_ASSIST : 1
IRREVERSIBLE_ISCHEMIA : 1
TAUGHT_DATE : 1
OUTPUT_ML : 1
BEEN_TO : 1
WATCHING_TV : 2
DECREASED_VITAL : 1
UNIT_SEE : 1
THE_ACTIVE : 1
AND_ERROR : 1
FOR_FOR : 1
ON_TO : 1
STATED_LEVEL : 1
UNIT_PLEASE : 1
HE_MAINTAINED : 1
XYZZY_CLINICAL : 2
OF_ORIENTATED : 1
WITHIN_FACILITY : 1
SC_ED : 1
PATIENT_HAD : 1
PAIN_BACK : 1
DEFINITION_NURSING : 1
AND_ORIENTED : 1
OBLIGATIONS_UP : 1
WHEN_POSSIBLE : 1
CALL_PROBLEMS : 1
OF_HIS : 2
HELP_THIS : 1
BELOW_AND : 1
INPATIENT_ORDERS : 1
NOV_APPOINTMENTS : 1
THE_PATIENT : 3
HIS_PRIMARY : 1
PATIENT_VERBALIZED : 1
AT_THIS : 2
PT_NOT : 1
BEEN_CLINICALLY : 1
NEURO_PROTECTIVE : 1
MEMBER_PLEASE : 1
REFERRAL_DIAGNOSIS : 1
PER_ARE : 1
THIS_WANT : 1
REMOTE_ALLERGY : 1
TEMPERATURE_PROBLEMS : 1
INJECTIONS_BY : 1
HE_WAS : 3
WITH_MCPHERSON : 1
COMPLIANT_WITH : 1
WNL_BY : 1
RESPIRATORY_CLIENT : 1
MG_PM : 1
NO_HE : 1
AT_VISIT : 1
RECENT_TESTS : 1
FROM_ACTIVITIES : 1
WITHOUT_OBS : 1
NOTICED_INCREASING : 1
KG_MEDICATIONS : 1
VERBAL_TO : 1
BEEN_ASSESSED : 1
WALK_THROUGH : 1
RADICULOPATHY_HX : 1
ASSESSMENT_POST : 1
ABOUT_CONDITION : 1
GO_FRI : 1
PULSES_MEDICATIONS : 1
DP_PALPABLE : 1
MOR_PT : 1
RISK_SCREEN : 1
PAIN_RECALL : 1
OUTPATIENT_STATUS : 2
NAME_BIRTHDATE : 1
BY_PCP : 1
YOU_NOT : 1
YOUR_LAB : 1
MG_UNT : 1
LISTED_PLEASE : 1
PACK_THE : 1
WANTS_TO : 1
EFFECTS_ELIGIBILITY : 1
THIS_ATTEMPTED : 1
AND_DOES : 1
ADVANCE_SCREENING : 1
PHYSICIAN_WITH : 1
PADILLA_VIA : 1
FREQUENTLY_ANESTHESIA : 1
ADR_DATA : 1
OBTAINED_AM : 1
HAVING_FEVER : 1
HISTORY_NO : 1
CONTACT_WAS : 1
VETERAN_TO : 1
PFAS_STRESS : 1
PAIN_PT : 1
DRUG_DELIVERY : 1
TA_OS : 1
PAIN_ICDCM : 1
NOT_AT : 1
HERE_BE : 1
WITH_ORAL : 1
OR_OTHER : 1
DEFICIT_OF : 1
SCREENING_AT : 1
CBI_CBI : 1
RESULTS_PHARMACY : 1
DILATED_FOR : 1
BUT_THE : 1
ANA_NEGATIVE : 1
HERE_LABS : 1
LIVING_PERRLA : 1
THIS_CALL : 1
AGREEMENT_WITH : 1
CLINICAL_TO : 1
TO_COPIES : 1
THIS_ENVELOPE : 1
PRESSURE_OR : 1
CLIENT_FOR : 2
SCAN_TIME : 1
MEDICAL_OR : 1
CAP_ONE : 1
NOT_COME : 1
MORE_DRINKS : 1
WITH_FROM : 1
OLD_WHO : 1
THE_SKIN : 2
SEEN_NOW : 1
SIGNIFICANTLY_DP : 1
MAS_TELEPHONE : 1
CALLED_PT : 1
FROM_OTHERS : 1
PRESSURE_AND : 1
ACTIVE_DUE : 1
OR_INSTRUCTIONS : 1
CAN_HELP : 1
TIMES_AND : 1
WITH_HOW : 1
ROOM_VA : 1
CODE_UNLISTED : 1
BEEN_AND : 1
APPT_PM : 1
RART_ALLERGY : 1
PREVENTIVE_AND : 1
PACKED_WNL : 1
MARIA_SEE : 1
REPORTS_WAS : 1
EASILY_WAS : 1
LEVEL_ASSISTANCE : 2
PCP_ATHENS : 1
KNEE_CONDITION : 1
PREVENTIVE_HEALTH : 1
FOR_REGULAR : 1
ELEVATING_SKIN : 1
SENT_TO : 1
NURSE_PULSES : 1
STATING_HE : 1
NL_SOUND : 1
WAS_HER : 1
FRACTURE_RIGHT : 1
ON_MACHINE : 1
NOTED_STARTED : 1
SOCIAL_SENSORY : 1
TO_CONTACT : 2
VET_CUT : 1
THOUGHT_ABOUT : 1
ENVELOPE_AFTER : 1
EFFORT_ACETAMINOPHEN : 1
WORSENING_IN : 1
FURTHER_EVAL : 1
DISTRESS_OBSERVED : 1
SKIN_AND : 1
IBUPROFEN_NOT : 1
IN_ACTIVE : 2
HAND_HOT : 1
LIST_OUTPATIENT : 1
WORK_LEVEL : 1
THIS_FOLLOWUP : 1
SHE_CALLED : 1
MEET_PT : 1
PULSES_MAS : 1
RR_OF : 1
ARE_EXPERIENCING : 1
ATTEMPT_MORNING : 1
OR_MORE : 1
OVER_CLIENT : 1
URINE_TOTAL : 1
ELEVATING_THE : 1
PROBLEMS_WITH : 1
COMPLETED_ADVANCED : 1
LEARNER_ABILITIES : 1
AND_ONEHALF : 1
RN_RESPIR : 1
NONVA_MEDICATIONS : 1
NKA_PRECAUTIONS : 1
DENIES_PAIN : 1
DOCUMENT_THE : 1
FOLLOWUP_EMERGENCY : 1
MEDICAL_DIRECTOR : 1
NOT_ON : 1
PROBLEMS_CLEAR : 1
HE_ABLE : 1
ACA_HANDOUT : 1
OFTEN_YOU : 1
RY_FOR : 1
FACIAL_NO : 1
NOT_BLACK : 1
OF_MIDDLE : 1
VISIT_CONTACT : 1
COLD_HERE : 1
YOUR_RECENT : 1
VITALS_TAKEN : 1
AMLODIPINE_TAB : 1
SUPERVISED_PHYSICIAN : 1
WITH_AMLODIPINE : 1
INDICATION_FOR : 2
DORSALIS_ADMINISTERED : 1
NOR_HE : 1
OF_ATTORNEY : 1
RIDES_RECALL : 1
WNL_ADDENDUM : 1
IMAGING_SURVEILLANCE : 1
MG_MG : 3
URINE_ML : 1
TELEMETRY_SCALE : 1
IS_RESTING : 1
HOURS_CENTER : 1
UNKNOWN_PHYSICIAN : 1
REQUIRED_DOCUMENT : 1
YEAR_MALE : 3
OF_LENGTH : 1
CARE_PATIENT : 1
PRIMARY_AORTOGRAM : 1
MOUTH_ACTIVE : 3
EVALUATION_AND : 1
OFF_THE : 1
OCCUPATION_WORKER : 1
MILD_PAIN : 1
SEC_PAIN : 1
REACH_WERE : 1
FRAME_LENSES : 1
TID_PT : 1
SHE_CONTACT : 1
TEL_AFTER : 1
NEW_ACTIVE : 1
BH_HE : 1
VETERAN_HAS : 1
PULSE_YOU : 1
ROOM_VET : 1
VS_TAKEN : 1
UNT_TAKE : 1
CONSENT_INFLUENZA : 1
TO_TO : 6
CONCERNING_PAIN : 1
BERYL_ATHENS : 1
OR_STARTLED : 1
OFF_TO : 1
ARTHRALGIA_NECK : 1
BE_REVIEWED : 1
PROBLEMS_DIZZINESS : 1
FOR_DISABILITY : 1
SUBJECTIVE_PATIENT : 1
MEDICATIONS_HAS : 1
IS_TOBACCO : 1
FOR_TO : 2
THE_HIS : 1
OBSERVED_BRADEN : 1
TEMP_REASON : 1
IS_UNKNOWN : 1
NO_APPOINTMENT : 1
SHE_FACILITY : 1
BY_HIS : 2
TO_FACE : 3
YELLOW_TISSUE : 1
PRIMARY_AND : 1
DID_LOOSE : 1
DUE_INJURY : 1
INFORMATION_AS : 1
NO_WHEEZING : 1
YOU_MIGHT : 1
HAS_NOTICED : 1
SUSPECT_ARE : 1
ON_CLICK : 1
AT_ALL : 1
OF_FACE : 1
STEEL_WORKER : 1
CONTACT_CLINIC : 1
MIDDLE_ASSOCIATED : 1
WITH_INJECTIONS : 1
ADVANCED_WERE : 1
BUSY_ETC : 1
AM_NO : 1
PAIN_CHIROPRACTOR : 1
CAN_STILL : 1
PAIN_FOR : 1
OUTPT_NOTE : 1
METER_AND : 1
NO_HEALTH : 1
VENTRICLE_VERY : 1
ATTENDING_VERIFICATION : 1
HAVE_HAD : 1
MONTH_RIGHT : 1
TAUGHT_PATIENT : 1
FOR_SITTING : 1
SKIN_NEVER : 1
EXP_PROV : 1
SYSTEMS_MINUTES : 1
FOR_PROV : 1
PT_WHEN : 1
TO_VACCINATION : 1
MINUTES_LB : 1
SEE_THIS : 1
AND_OTHER : 1
BUT_LAYED : 1
DOCUMENT_FROM : 1
TWI_OF : 1
FAITHFUL_ANOTHER : 1
FREQUENTLY_SHEETS : 1
MUCH_BETTER : 1
PM_CONTACT : 1
ANY_HARMFUL : 1
MALE_FOLLOWS : 1
PCP_TO : 2
PO_THE : 1
INR_THERAPEUTIC : 1
AND_PASSING : 1
ON_CLINIC : 1
LIST_BRING : 1
AMBULATORS_PT : 1
DVT_HT : 1
ARISE_AND : 1
CURRENT_EXAMINATION : 1
HIS_AROUND : 1
ADV_ALL : 1
RECEIVED_FROM : 2
AND_WITH : 1
PAIN_SCORE : 1
RECENT_LAB : 1
TOBACCO_NONUSER : 1
CAPILLARY_TIME : 1
BRING_INTED : 1
COMFORTABLE_COMPLAINS : 1
CARE_PHYSICIAN : 1
NOW_AFTER : 1
FOLLOWING_YOUR : 1
PERSON_MAY : 1
WRITER_REVIEWED : 1
MESSAGE_CONCERNING : 1
LIPS_WNL : 1
ALTERATION_IN : 1
EDUCATION_RADIOLOGY : 1
TO_HAVE : 1
PHONE_NO : 1
FALLS_TRAUMA : 1
IN_THIS : 1
NOT_EXPERIENCING : 1
THE_VISN : 1
BP_RR : 1
INJECTION_MOOD : 1
HE_NOT : 1
STABLE_IS : 1
TAKE_BY : 1
FINGER_BODY : 1
OF_UNDERSURFACE : 2
DIABETIC_ASSESSMENT : 1
AND_ACA : 1
AND_GLYBURIDE : 1
AROUND_HE : 1
PHYSICIAN_MARIA : 1
NASAL_ULA : 1
SKIN_MUSCLES : 1
YOU_BE : 1
HAD_MI : 1
SERVICE_THIS : 1
WORSENING_WHEN : 1
LIPID_LAB : 1
ALSO_HE : 1
MG_AM : 1
RECOMMENDED_LOCATION : 1
VITAL_ALPHABETIZED : 1
INJECTION_LEFT : 1
WAS_LAND : 1
AFTER_RIGHT : 1
SCREENING_THIS : 1
WHICH_PRESSURE : 1
ADMINISTERED_LOCAL : 1
IN_RIGHT : 1
BP_HIS : 1
REMOTE_AND : 1
TO_TREATMENT : 1
EVAL_NONISCHEMIC : 1
MT_RECENT : 1
ARE_NOT : 1
FEEL_LIKE : 1
THIS_AGREED : 1
TOTAL_SHIFT : 1
CLINIC_VISIT : 1
INTED_AT : 1
PULSE_ABILITIES : 1
CLICK_NORMAL : 1
PT_FOR : 1
THAT_HAS : 1
BARRADAS_MARIA : 1
APPOINTMENTS_IMPORTED : 2
OF_TOBACCO : 1
HE_CL : 1
RESPIR_RESPIR : 1
NEUROLOGICAL_VITALS : 1
ANXIETY_CONTINUES : 1
TO_CAN : 1
MEDICATIONS_DEAR : 1
DISTRESS_TELEMETRY : 1
THE_CURRENT : 1
SHE_WILL : 1
LEG_FEELING : 1
TO_SEE : 1
NONVA_MG : 1
DID_YOU : 1
LIQUID_REASON : 1
SHE_COULD : 1
RADIOLOGY_CARDIAC : 1
ADDENDUM_INFORMATION : 1
OFF_WARFARIN : 1
TEST_AREA : 1
CONSENT_WAS : 1
PHYSICIAN_HE : 1
SD_RANGE : 1
TRIAGE_AFTER : 1
ADDENDUM_LEARNER : 1
WAS_OFF : 1
TOBACCO_STATED : 1
NOW_PT : 1
PROCEDURE_ACCESS : 1
HAD_NIGHTMARES : 1
RATIVE_PT : 1
OF_ALTERING : 1
CAD_EF : 1
THEN_MINIMIZE : 1
WHEN_ROOM : 1
ROOM_DISABILITY : 1
ACTIVE_OUTPATIENT : 2
REV_08 : 1
OUTPUT_PULSE : 1
FEELING_NUMB : 1
ABLE_TO : 1
TO_VET : 1
TUES_MAR : 1
PT_THESE : 1
HER_AND : 1
TO_IS : 1
WENT_FOR : 1
SEEN_THIS : 1
THIS_THIS : 1
NEVER_THIS : 1
REMOVAL_FINGER : 1
ON_RA : 1
RECENTLY_HAS : 1
DISCUSSED_CONCEPT : 1
MEASUREMENT_CLC : 1
NO_MOUTH : 1
LISTED_PHONE : 1
MEDICATIONS_IC : 1
IS_LIFETIME : 1
DISCONNECTED_CURRENTLY : 1
VIEWING_FOR : 1
ADV_PATIENT : 1
RADIOLOGY_CATH : 1
FOR_DVT : 2
STILL_OCCUR : 1
TO_EGGS : 1
TUB_LEVEL : 1
AND_SHE : 1
INFORMED_SHE : 1
ANXIETY_DECREASED : 1
YEAR_IS : 1
OR_RHONCHI : 1
LAB_APPT : 1
WRITER_ORDER : 1
DISCHARGE_V4POST : 1
FRESH_FROZEN : 1
GM_APPLY : 1
RISK_CALL : 1
INSTRUCTIONS_TO : 1
TWICE_WITH : 1
PATIENT_UNDERSTANDING : 1
OF_ADVANCED : 1
PATIENT_LABS : 1
HR_RR : 1
TENDINOPATHY_TENDONOPATHY : 1
HAS_CHEWING : 2
DORSAL_PALPABLE : 1
ANSWERED_CURRENTLY : 1
DISABILITY_TWICE : 1
ACTIVE_GLENOID : 1
DELIRIOUS_THIS : 1
NURSING_DAY : 1
INTERIM_INDICATION : 1
KG_GUARDIAN : 1
BY_KELLY : 1
TO_HERE : 1
INSTRUCTED_ADL : 1
ACTIVITY_PRIMARY : 1
REGULAR_DENIES : 1
TOMORROW_CONFUSED : 1
THE_ISCHEMIC : 1
PO_TID : 1
WASNT_WEARING : 1
HOME_CAPILLARY : 1
INTO_AND : 1
TELEPHONE_CAREGENERAL : 1
ACTIVE_LISTED : 1
THE_FILE : 1
DISCONNECTED_INPATIENT : 1
NO_OBSERVED : 1
ORDER_PCP : 1
ASSESSMENT_LEVEL : 1
HER_NIGHT : 1
BRONCHITIS_FEELING : 1
KNOWLEDGE_AND : 1
VET_GET : 1
MEMBER_APPOINTMENT : 1
ATTENDING_REVIEW : 1
LEVEL_CONSCIOUSNESS : 2
PT_THAT : 2
ACID_LEVEL : 1
HEALTH_ESTIMATED : 1
ASSESSMENT_PRESSURE : 1
EACH_YOUR : 1
DATA_APPOINTED : 1
PHYSICAL_FLUID : 1
CONSTANTLY_ON : 1
APPLY_TO : 2
VISIT_INFO : 1
OS_ADDENDUM : 1
REACT_RART : 1
HE_PROTECTIVE : 1
OUTPUT_LITERS : 1
OFF_FOR : 1
WHO_WITH : 1
QUESTION_TINY : 2
FINGER_SWOLLEN : 1
PT_VERBALIZES : 1
HE_BEGAN : 1
CURRENTLY_INPATIENT : 2
HIS_PATTERN : 1
WAS_TO : 4
INJECTION_SITE : 1
SUDDEN_ONSET : 1
SPEAK_SW : 1
SKIN_PROBLEMS : 2
MG_TAKE : 4
CARE_OR : 1
BY_AT : 1
NURSING_MEAN : 1
ERROR_NOTE : 1
VISIT_DENIES : 1
INFORMATION_THE : 1
MOUTH_PATIENT : 1
AND_CODING : 1
CAPSULE_ACTIVE : 1
THE_MIDDLE : 1
OCCASION_THE : 1
AT_AND : 1
PAIN_RADICULOPATHY : 1
SKIN_LUNGS : 1
INSTRUCTED_TELL : 1
NOTE_TO : 2
HIS_AND : 2
ABD_PAIN : 1
PATIENT_IDENTIFIED : 1
SYSTEM_CONCERN : 1
SERVICES_SUBJECTIVE : 1
CHIROPRACTOR_YEATER : 1
AMIODAROINE_SEEN : 1
TAKE_AS : 1
TO_RIGHT : 1
SHOW_THE : 1
BEEN_FAITHFUL : 1
BILATERALLY_WITH : 1
DID_HAVE : 1
THE_FOLLOWING : 3
LIKE_SOMETHING : 1
SATS_OF : 1
MIDDLE_MUSCULOSKELETAL : 1
ONLY_THIS : 1
ETOH_TEMP : 1
PH_ASSOCIATED : 1
HER_FATHER : 1
MOUTH_DAILY : 1
EDEMA_FUTURE : 1
ON_PO : 1
FOR_PFAS : 1
INFECTIOUS_NOTE : 1
MEDICATIONS_PT : 1
AT_LISTED : 1
LT_WATCHING : 1
OR_HAD : 1
RHONCHI_EPIS : 1
TAB_PO : 1
LESS_THAN : 1
LIGHT_REACH : 1
NEW_PROBLEMS : 1
DOCTOR_TO : 1
LIVING_CENTER : 1
SAYS_WHEN : 1
DO_TAKE : 1
PAIN_ANGIOGRAM : 1
VALPROIC_ACID : 1
AND_LEVEL : 1
UP_NO : 1
BY_RY : 1
WANT_PT : 1
SAFETY_RESIDENT : 1
COMMUNITY_CENTER : 1
TO_FRI : 1
FOLLOWING_PHARMACY : 1
TWI_BUCKETS : 1
MANDATORY_BECAUSE : 1
RE_WRITER : 1
REDNESS_REFERRAL : 1
WATCHING_ARIPIPRAZOLE : 1
TRAUMA_MOUTH : 1
AND_NO : 2
WOUND_REFERRAL : 1
HOSPITALIZATION_FOR : 1
OF_SPENDING : 1
LEFT_SHOWS : 1
DATE_IS : 1
RESPIRATORY_EFFORT : 1
PROVIDER_PLAN : 1
IRRITABILITY_ANXIETY : 1
IS_OLD : 2
TOENAILS_PEDAL : 1
IN_PAIN : 1
SURG_ORTHO : 1
BUT_HE : 2
INJURY_NO : 1
TURGOR_WITHIN : 1
FOR_THE : 1
VERIFICATION_DISCHARGE : 1
PHYSICIAN_HELP : 1
TELL_OTHER : 1
ON_SKIN : 1
TEMP_OF : 1
IN_TO : 1
DELIRIOUS_AT : 1
NO_CURRENT : 1
FOR_VETERAN : 1
ADENDOM_REPORT : 1
WAS_DONE : 1
VACCINATION_LUNGS : 1
INTRAOPERATIVE_REPORT : 1
THE_PROCEDURE : 1
CORRECT_SITE : 1
SURROUNDINGS_NO : 1
ABOUT_IT : 2
ACTIVITIES_OF : 1
PHONE_LISTED : 1
MG_TABLET : 1
TIME_AM : 1
IF_TEAR : 1
WILL_TO : 1
SEE_BEFORE : 1
CALL_LIGHT : 1
PREOP_PROCEDURE : 1
MASSAGE_IF : 1
SEE_THE : 1
FILE_FOR : 1
WHEN_SHE : 1
NOR_HAS : 1
YES_AGREEMENT : 1
ORIENTED_JUDGEMENT : 1
STILL_EFFECTIVE : 1
DAILY_PATIENT : 1
COAL_AND : 1
WAS_ALSO : 1
CURRENT_ISSUES : 1
TO_SW : 1
LAND_AND : 1
DATE_OF : 2
WALKIN_LIPID : 1
TAKEN_BP : 1
COMPLAINS_ONCE : 1
AND_REPORTS : 1
INDEX_SWOLLEN : 1
NO_NURSE : 1
ALLERGIES_ADV : 1
ACCESS_IN : 1
FOR_SKIN : 1
PCP_PRIMARY : 1
ADENDOM_GAVE : 1
EDUCATION_EDUCATED : 1
THAT_CLINICAL : 1
ALL_PROVIDED : 1
NKA_CURRENTLY : 1
AND_KNOWS : 1
ANY_REFILL : 1
PAIN_POTENTIAL : 1
BUSY_APPOINTMENT : 1
OTHER_OBLIGATIONS : 1
NUMB_AND : 1
MEDICATIONS_HAVE : 1
MDD_OUTPATIENT : 1
MILD_INFERIOR : 1
GUARDIAN_FOR : 1
WITH_HER : 2
TO_PROCEDURE : 1
SENSATIONS_DIMINISHED : 1
DL_HISTORY : 1
RANGE_RISK : 1
TELEMETRY_BRADEN : 1
FOR_PAIN : 1
FACTORS_INCREASING : 1
FALL_NO : 1
NIGHT_SHIFT : 1
TAB_AM : 1
ED_ISCHEMIC : 1
SATS_ON : 1
LIMITS_WOUNDS : 1
ABD_CHANGE : 1
BUT_WHEN : 1
RESULTS_ANTICOAGULATION : 1
DATA_FACILITY : 1
ANESTHESIA_CORRECT : 1
DATE_EXACT : 1
PAIN_TIMES : 1
CONTACT_NOTE : 1
CFT_PAIN : 1
SYSTEM_INFLUENZA : 1
METER_CODING : 1
ATTENDING_STAFF : 1
MAR_LOW : 1
CONTROL_AM : 1
PROV_TINA : 1
FROM_TO : 1
CLINICALLY_ACCORDING : 1
ON_SINEMET : 1
PROCEDURE_INSTRUCTED : 1
EXAMINATION_WITH : 1
TO_TABITHA : 1
IS_LESS : 1
ANY_MEDICATION : 1
OF_STAFF : 1
DAY_NOTE : 1
TIME_TOES : 1
AND_NONVA : 1
APPT_TO : 1
IDENTIFIED_BILATERALLY : 1
CALL_CENTER : 1
ULA_PULSE : 1
JUST_HAVING : 1
PRESSURE_SORE : 1
LITERS_INTAKE : 1
TOOLS_INTO : 1
THE_EXAMINATION : 1
ERROR_NURSING : 1
PAIN_ON : 1
PATIENT_FOR : 1
SOFT_TEMPERATURE : 1
CONFIRMED_PATIENT : 1
PRIMARILY_PIP : 1
VISIT_TO : 2
WAS_WALKING : 1
NEEDED_PROCEDURE : 1
PATIENT_GAVE : 1
HER_PRIMARY : 1
VISN_HOME : 1
NUMBER_STAFF : 1
LEVEL_OF : 5
OF_PUD : 1
PROCEDURE_TWO : 1
REQ_THESE : 1
13_LABORATORY : 1
YOUR_NO : 1
ROOM_SYSTEM : 1
NOTE_MEAN : 1
PO_DAILY : 1
VISIBLE_ON : 1
ARTERIES_WERE : 1
CM_SERVICE : 1
PROTECTIVE_EPICRITIC : 1
RN_STRETCHER : 1
ON_ONE : 1
HTN_MG : 1
IN_IS : 1
PAIN_MEDICATIONS : 1
NO_ABOUT : 1
BM_CALL : 1
INCLUDE_HE : 1
UNDERSATNDING_YES : 1
ADR_FACILITY : 1
NSAIDS_CREAM : 1
DONE_MG : 1
HE_HERE : 1
PATIENT_PROVIDED : 1
PT_HERE : 1
NAME_AND : 1
HOOD_ASKING : 1
DECREASED_ORIENTATION : 1
VISTA_IMAGING : 1
V4POST_FOLLOWUP : 1
ON_WATCHFUL : 1
HAD_BE : 1
THOUGHT_IT : 1
MALE_DORSALIS : 1
HE_NOTICED : 1
HYPERTROPHY_TWI : 1
TOOLS_CLICK : 1
HAD_HE : 1
INDEX_FOREIGN : 1
DATE_HEIGHT : 1
YOUR_TEST : 1
IF_SHE : 1
EVERY_THEY : 1
MEDICAL_YOUR : 1
AMBULATORS_ADMITS : 1
PERSON_TAUGHT : 1
SHE_HAS : 1
SKIN_SKIN : 1
ICE_TO : 1
AUSC_SOUND : 1
TO_MENTIONS : 1
NO_BACK : 1
LOOSE_AND : 1
GUARDIAN_ASKING : 1
THE_CORRECTION : 1
FT_ON : 1
WHEN_HE : 1
TELEPHONE_NUMBER : 1
ANY_TROUBLE : 1
THEN_SC : 1
NOTE_STOP : 1
MARIA_TO : 1
CALL_HOSPITALIZATION : 1
VERY_IN : 1
ANY_CLASSES : 1
SHEETS_CORRECT : 1
COMPLIANT_WEARING : 1
MONTHS_BENIGN : 1
TO_DO : 1
RECEIVED_ORDER : 1
FEEL_SOMETHING : 1
ACCORDING_THE : 1
YOU_ARE : 1
NOTE_REV : 1
ON_MONOTHERAPY : 1
BH_IS : 1
RADIAL_ACTIVITY : 1
NONVA_METOPROLOL : 1
TV_MG : 1
NEVER_SEE : 1
MANAGEMENT_CODE : 1
SHEET_PROVIDED : 1
NO_SIGNIFICANT : 1
FOR_DIABETIC : 1
MAY_OCD : 1
MESSAGE_ANSWERING : 1
TO_RN : 1
AND_CAN : 1
SORE_PAIN : 1
UNITS_OF : 1
SPEAK_LAB : 1
WITH_EPIDUAL : 1
RETROGRADE_TO : 1
SUDDEN_SOB : 1
PULSE_CAME : 1
TAB_MOUTH : 1
POWER_ATTORNEY : 1
DYE_TO : 1
FOR_PRESENT : 1
PRESSURE_ULCERS : 1
RECONCILED_AND : 1
PROM_THE : 1
PEDAL_PULSE : 1
DAY_SHIFT : 1
SHOULD_CC : 1
UNITS_FRESH : 1
NOTE_INFECTIOUS : 1
YOUR_CONDITION : 1
PLEASE_NONE : 1
BENIGN_PROSTATIC : 1
STEROID_MOOD : 1
FACTORS_MOTIVATION : 1
STATES_SEEN : 1
BREATH_SOUND : 1
DP_PT : 1
ASKING_THE : 1
HIS_HER : 2
NO_RADICULOPATHY : 1
BRING_NONE : 1
VA_CONCERN : 1
UNIT_SUBJECTIVE : 1
STATED_MEDICATION : 1
NOTE_THAT : 1
STATUS_PATIENT : 1
LISTED_NUMBER : 1
AND_GIVEN : 1
SUPPLY_LENSES : 1
THE_AND : 2
ONE_IN : 1
GLYBURIDE_MG : 1
CENTER_NIGHT : 1
IRREVERSIBLE_AND : 1
DYSP_INTAKE : 1
VISUAL_PROBLEMS : 1
REC_ACTIVE : 1
OBLIGATIONS_COMING : 1
INTRAARTICULAR_OF : 1
ONSET_SOB : 1
MEDICATION_RECONCILIATION : 1
STARTED_AMIODAROINE : 1
INTO_ORGANS : 1
BEFORE_WANT : 1
FECAL_BLOOD : 1
APPOINTMENTS_AS : 2
LEFT_BP : 1
ADVISED_THAT : 1
TASK_NEEDED : 1
COMMENT_STATES : 1
WITH_TO : 1
CONTACT_INFO : 1
FOLLOWING_RESULTS : 1
ORIENTATED_FOR : 1
RUN_BROSIUS : 1
PATIENT_TOBACCO : 1
PAIN_THE : 1
CBI_URINE : 1
WAL_METHYLPHENIDATE : 1
WITH_BH : 1
THIS_PROBLEM : 1
REVIEWED_PATIENT : 1
SHIFT_OUTPUT : 1
FACE_ACNE : 1
ASSESSMENT_OBSERVATION : 1
HAVING_WITH : 1
NOTE_REVIEWED : 1
ASSISTANCE_PT : 1
FOR_REVIEW : 1
GET_OF : 1
NOTE_NONVA : 1
NORMAL_ON : 1
MEDICAL_CONDITION : 1
VACCINE_SHEET : 1
HEIGHT_IN : 1
TO_NOK : 1
THE_DOCUMENT : 2
SHOULDER_MASSAGE : 1
VA_CLINIC : 1
AT_AM : 1
CLINICAL_REMINDERS : 2
PT_SAID : 1
VET_HE : 1
MI_IN : 1
THE_TEST : 2
CONSCIOUSNESS_TAUGHT : 1
HE_BEEN : 2
MONTH_AFTER : 1
TENDINOPATHY_SUBSCAPULARIS : 1
FOLLOWUP_CONTACT : 1
HER_KNOWLEDGE : 1
NOTED_ON : 1
SERVICE_HAVE : 1
SIX_OR : 1
HAND_AND : 1
LIST_OF : 1
CONTACT_MANAGEMENT : 1
LESS_SUSPICIOUS : 1
PROBLEMS_LUNGS : 1
TREATMENT_PROCEDURE : 2
PC_NUR : 1
CODE_POST : 1
TAKE_NSAIDS : 1
THAT_IS : 1
OUTPATIENT_OCCUPATIONAL : 1
TO_COLD : 1
ADDENDUM_PROBLEMS : 1
CATH_TEACHING : 1
ONLY_WARFARIN : 1
AMOUNT_TO : 2
THIS_VET : 1
MED_REC : 1
REVIEWED_TIME : 1
SCALE_PREDICTING : 1
AND_NUMB : 1
CREAM_APPLY : 1
VET_STATES : 1
DVT_IN : 1
SAW_YEATER : 1
DISABILITY_TREATED : 1
SKIN_SEE : 1
OF_MEMORY : 1
ARRHYTHMIA_TUES : 1
ED_BY : 1
TRIAGE_ON : 1
OF_DO : 1
KG_PULSE : 1
FELT_OR : 1
VETERAN_COMING : 1
RHONCHI_PATIENT : 1
ARTERIES_IDENTIFIED : 1
OTHERS_ACTIVITIES : 1
CHEST_PAIN : 2
ORIENTATION_VITAL : 1
SUPRASPINATUS_TENDONOPATHY : 1
FERROUS_MG : 1
OF_ISCHEMIA : 1
ASSOCIATED_PROM : 1
AND_HE : 2
SIGNIFICANT_BDR : 1
DIMINISHED_DUE : 1
HIS_PRIVACY : 1
RIGHT_AREA : 1
WHEEZING_NEW : 1
PVU_OF : 1
OR_ADMISSION : 1
BEGIN_GIVE : 1
INFERIOR_SIMVASTATIN : 1
DO_UNDERSTAND : 1
CAN_TO : 1
COMFORTABLE_OF : 1
TEMPERATURE_TIMES : 1
THE_CARE : 1
PROBLEM_AUSC : 1
POTENTIAL_PHYSICAL : 1
ALL_REMOTE : 1
BILATERALLY_NO : 1
COULD_ALLERGY : 1
APPOINTED_KAREN : 1
CLIENT_CAME : 2
APPOINTMENT_INFORMATION : 2
RELATED_TO : 1
TEAM_LIN : 1
GIVEN_ACA : 1
CONDITION_ALLERGIES : 1
FOR_IMAGING : 1
MEDICATIONS_PRIMARY : 1
WATCHFUL_OR : 1
WAS_ONLY : 1
SITE_PREOP : 1
MEDICATIONS_ATTEND : 1
NONVA_DORSAL : 1
REACT_ALL : 1
LEFT_VENTRICLE : 2
TEST_SHOWED : 1
ACTIVE_ANTERIOR : 1
LEFT_FEELING : 1
FEBRUARY_MEDICATIONS : 1
METHYLPHENIDATE_HR : 1
EFFECTIVE_HELPING : 1
SHOULD_NOT : 1
FRACTURE_OF : 1
BUT_STATED : 1
USE_SCREEN : 1
ML_CBI : 1
EFFECTS_SERVICE : 1
NO_NO : 1
EVERY_BADR : 1
MEDICAL_NO : 1
BRONCHODILATORS_CAN : 1
SIX_MORE : 1
COMFORT_POTENTIAL : 1
VERBALIZED_UNDERSTANDING : 1
HAS_NKA : 3
EMERGENCY_ROOM : 1
BOBBITT_DISCHARGE : 1
ON_EFV : 2
CLC_DAY : 1
NEED_ANY : 1
STARTLED_SUPERVISED : 1
PROCEDURES_WERE : 1
STATED_IT : 1
REPORT_OBJECTIVE : 1
STABLE_HE : 1
MV_LIQUID : 1
PATIENT_TO : 2
PATIENT_CONTACT : 1
PROTECTIVE_OF : 1
YEATER_TO : 1
ANESTHESIA_CARE : 1
OUT_ME : 1
TO_BE : 5
ACTIVE_EVERY : 1
THAN_ON : 1
ASSESSMENT_PC : 1
NURSING_EDUCATION : 1
THE_RESULTS : 1
ANXIETY_ORIENTATION : 1
HAD_GBS : 1
REPORT_PREVIOUS : 1
MOUTH_GLUCOSE : 1
WEARING_PT : 2
SKIN_EVERY : 1
GROINS_USE : 1
SHE_NOT : 1
PAIN_OF : 1
AND_MINIMIZE : 1
AND_MUSCLES : 1
TO_NURSING : 1
DRUG_OPTIONS : 1
ANSWERING_MACHINE : 1
EVAL_IMPRESSION : 1
AM_LEVEL : 1
INPATIENT_FACILITY : 1
WITH_AND : 2
PERRLA_NASAL : 1
IN_THERAPEUTIC : 1
REFILLED_INCREASING : 1
AND_MG : 2
PAST_PURPOSE : 1
LAST_SCORE : 1
THE_VETERAN : 1
TO_STAYING : 1
AFTER_CALL : 1
DATA_BASE : 1
GIVEN_HANDOUT : 1
BIRTHDATE_SW : 1
TO_WITH : 2
WITH_THE : 2
LABORATORY_TESTS : 1
PER_PHYSICIAN : 1
BASE_NO : 1
ATTEND_MORE : 1
PAIN_ADDENDUM : 1
ADVISED_PT : 1
BEFORE_RADIATION : 1
FEBRUARY_THAT : 1
BY_DUE : 1
AS_FROM : 2
HYPERTROPHY_CARRYING : 1
HEALTH_CARE : 1
FOLLOWING_PROBLEMS : 1
TO_IBUPROFEN : 1
FOR_ACNE : 1
AREA_NO : 1
NONVA_STATUS : 1
SHOWER_LEVEL : 1
EPIDUAL_INJECTIONS : 1
RECENT_TROUBLE : 1
IMAGING_DISPLAY : 1
WANT_THERAPY : 1
PACKED_LIPS : 1
PT_ALSO : 1
ACTIVE_NONVA : 2
PREVIOUS_SHIFT : 1
VENTRICLE_THE : 1
TO_ANY : 1
IS_TO : 1
RECONCILIATION_WAS : 1
BETTER_TO : 1
DONE_WITH : 1
ANTICOAGULATION_CLINIC : 2
CONTACT_MEDICAL : 1
STRETCHER_HE : 1
DRC_PT : 1
ONEHALF_TABLET : 2
ANTICOAGULATION_VET : 1
NECK_PAIN : 1
APR_ORTHO : 1
CAN_ALL : 1
PREPARED_FOR : 1
HOOVER_DOG : 1
DAILY_MEASUREMENT : 1
TO_ADENDOM : 1
DENTAL_INDICATION : 1
BOTH_USE : 1
SITE_LEFT : 1
INFLUENZA_AGREEMENT : 1
ALLERGY_EGGS : 1
COAL_WHEN : 1
IMPRESSION_CARDIOMYOPATHY : 1
AMOUNT_ACTIVE : 1
QUESTION_OF : 2
ADDENDUM_ANY : 1
HIS_TO : 1
AZITHROMYCIN_DAILY : 1
ALL_CAN : 1
INPATIENT_REMOTE : 1
FOR_CONTACT : 1
THIS_CONTROL : 1
EFFECTIVE_IN : 1
WORKING_AT : 1
PEDIS_KNEE : 1
THE_LEFT : 3
SPEEED_WASNT : 1
LOW_SPEEED : 1
NOT_ANY : 2
TOBACCO_MEDICATION : 1
CBI_NEUROLOGICAL : 1
IF_HE : 1
ONLY_OFF : 1
RATIVE_VASC : 1
OR_THOUGHT : 1
PROVIDED_TO : 1
COLD_FOR : 1
BOBBITT_DATE : 1
FINGER_MUSCULOSKELETAL : 1
NO_EVERY : 1
ED_INTRAOPERATIVE : 1
HAS_BEEN : 4
AND_CORRECT : 1
MOUTH_THEY : 1
STATED_THAT : 2
UNLISTED_EVALUATION : 1
VISIT_HISTORY : 1
UNDER_CONTROL : 1
DIRECTIVES_SENT : 1
LIN_PROSTATE : 1
NURSE_PALPABLE : 1
KELLY_REASON : 1
ANGIOGRAM_IS : 1
INFO_GIVEN : 1
DID_WANT : 1
BLOOD_DO : 1
TISSUE_BOWEL : 1
DAILY_LIVING : 1
MALE_MONTH : 1
HAVE_SIX : 1
NEVER_FAITHFUL : 1
PROVIDED_ABOUT : 1
LAB_SINCE : 1
STATUS_DEAR : 1
LUNGS_WITH : 1
ED_NURSE : 1
DENIES_ANY : 2
OCCULT_BLOOD : 1
WITH_FAMILY : 2
AT_POINT : 1
COMING_TO : 1
IF_CAN : 1
VITAMIN_TAB : 1
MG_CAP : 2
SITE_DELTOID : 1
NKA_DORSALIS : 1
SCREENING_ORDERED : 1
RISK_NO : 1
EXPIRATION_ACTIVE : 1
FRI_MEDICAL : 1
LEVEL_METS : 1
EQUIPMENT_NASAL : 1
REQUEST_EXPIRATION : 1
AND_FELT : 1
QTY_EXP : 1
OFF_AMOUNT : 1
PROSTATE_OF : 1
HIS_DID : 1
PATIENT_IS : 2
BUT_CALL : 1
BODY_REMOVAL : 1
ISSUES_WITH : 1
ADDENDUM_ATTEND : 1
TAKE_TWO : 1
IS_COMFORTABLE : 1
THERAPY_NOTE : 2
CONFUSED_AT : 1
OVERALL_OF : 1
CAN_OCCUR : 1
WITHIN_NORMAL : 1
INPATIENT_ADMISSION : 1
GET_COPIES : 1
PATIENT_NO : 1
TASK_EQUIPMENT : 1
LB_PATIENT : 1
OUTPUT_IRRIGANT : 1
PRIVACY_BUT : 1
MEMORY_ON : 1
RESIDENT_FALL : 1
PAIN_RESPIR : 1
PROVIDER_SULTANA : 1
KG_MG : 1
PROCEDURE_CONSENTS : 1
OTHER_OD : 1
RA_PEDAL : 1
FATHER_HAD : 1
WILL_VET : 1
TO_REVIEWED : 1
MEDICAL_FRICTION : 1
INFORMATION_FROM : 1
THICKNESS_TEAR : 1
IN_COMFORT : 1
GIVEN_TO : 2
FEVER_OR : 1
NEED_PAIN : 1
EVERY_ARE : 1
STOP_HAS : 2
HE_STATED : 1
AND_THE : 1
HE_ANY : 1
CONSCIOUSNESS_EVERY : 1
NO_INFORMATION : 1
NO_VS : 1
DATE_IN : 1
PREDICTING_PRESSURE : 1
PROGRESS_NOTE : 1
FOLLOWUP_LOCATION : 1
HIS_KNOWLEDGE : 1
HE_IS : 6
PO_EACH : 1
WITHIN_LIMITS : 1
ALLERGY_LEFT : 1
OR_ABOUT : 1
MIN_SECTION : 1
TO_SEEN : 1
WITHIN_NURSING : 1
IS_CL : 1
SKIN_ASSESSMENT : 1
LEFT_HAND : 1
THIS_IF : 1
ICDCM_TA : 1
PT_STABLE : 1
CRAWLING_MY : 1
TO_AND : 1
MANAGEMENT_SERVICE : 1
MY_SKIN : 1
INTAKE_OUTPUT : 2
TABITHA_RN : 1
THAT_IT : 1
INTERIM_FOR : 1
HE_TO : 2
INCREASING_MOTIVATION : 1
CHIROPRACTOR_DISCUSSED : 1
LISTED_BELOW : 2
CONSULT_PLEASE : 1
HELPING_WITH : 1
DATE_ACTIVE : 1
AS_LISTED : 1
TO_RECEIVED : 1
PAIN_EDUCATION : 1
AM_PM : 2
AORTOGRAM_AND : 1
IMMEDIATELY_FINISHING : 1
DEAR_THE : 1
DOING_ALL : 1
ON_OF : 1
VERY_PROXIMAL : 1
CORRECTION_VETERAN : 1
SORE_RISK : 1
ULA_OUTPUT : 1
BEEN_COMPLIANT : 1
STAFF_NEEDED : 1
CLC_CONFUSED : 1
TO_GET : 2
IN_RANGE : 1
CALCIUM_VITAMIN : 1
SYSTEMS_LENGTH : 1
IF_THICKNESS : 1
FELT_NUMB : 1
REMINDERS_NOTE : 1
URINARY_PROVIDER : 1
AND_LAB : 1
ON_AMIODAROINE : 1
UP_HER : 1
GM_AMOUNT : 1
BLOCK_ANESTHESIA : 1
GUM_STILL : 1
LIVING_PM : 1
PLEASE_THE : 1
RESPIRATORY_WNL : 1
AVOID_HARMFUL : 1
BY_PT : 1
LEFT_THE : 1
WILL_PERRLA : 1
DOES_NOT : 2
MOST_OF : 1
HR_TEMP : 1
ON_DUE : 1
BUDGET_REQUIREMENTS : 1
PATIENT_ASSISTANCE : 1
REVIEW_SYSTEMS : 2
OR_FROM : 1
COMING_CLC : 1
HERE_IN : 1
HISTORY_WHEN : 1
OUTPUT_NOTE : 1
CLICK_TOOLS : 1
OPTIONS_FEDEX : 1
RISK_DATE : 1
COMMUNITY_LIVING : 1
CALLED_SAYS : 1
OSA_TO : 1
KG_THE : 1
NOT_WANT : 1
NUMBER_OF : 1
WOUND_CARE : 1
NIGHT_BRIEF : 1
VERBAL_PAIN : 1
THE_ATTACHED : 1
HEIGHT_CM : 1
NO_APPARENT : 1
THE_HAND : 1
METHYLPHENIDATE_MG : 1
TELL_THEM : 1
YOU_WITH : 1
TELEPHONE_LIAISON : 1
MENTIONS_RECENTLY : 1
CONTACT_VA : 1
ASKING_HEARING : 1
MEDR_MED : 1
WITH_MR : 1
SAID_JUST : 1
CORRECT_PREOP : 1
ON_METER : 1
MINUTES_WEIGHT : 1
GUM_HAD : 1
PROBLEMS_FOR : 1
CALL_IF : 1
HERE_FOR : 2
SEEN_CHIROPRACTOR : 1
BM_TO : 1
HAS_TO : 1
SC_SHIFT : 1
BE_REFILLED : 1
PEDAL_MEDICATIONS : 1
STATED_HE : 1
IN_EFFECTS : 1
EHAS_HX : 1
LIST_PLEASE : 1
FOR_PREDICTING : 1
DO_NOT : 1
INPATIENT_NONV : 1
STATED_HTN : 1
AFTER_FINISHING : 1
THIS_OR : 1
THE_PH : 1
LIAISON_NOTE : 1
IMAGING_DIABETIC : 1
GAVE_REPORT : 1
NOT_JUDGEMENT : 1
HAS_HE : 1
IS_HERE : 1
DATA_NO : 1
WHEN_LAYED : 1
ANGIOGRAM_HE : 1
FALL_RISK : 2
SEEN_BY : 1
HAVE_CONTACT : 1
EDEMA_TEMP : 1
ADDRESS_FOR : 1
MOUTH_TRIAGE : 1
RESPONSE_BRONCHODILATORS : 1
DIRECTIVES_WERE : 1
OFTEN_DID : 1
ANSWERED_DORSALIS : 1
PATIENT_NOTE : 2
OFF_OF : 1
ON_TETANUSDIPHTHERIA : 1
NO_PATIENT : 1
MALE_WITH : 1
WALKING_CAVEDIN : 1
AND_OUTPUT : 2
INTAKE_NOTE : 1
BETTER_RECURRENT : 1
TO_ANTERIOR : 1
CUT_WHICH : 1
CLEAR_WITH : 1
REQUEST_RX : 1
SOUND_RALES : 1
SEE_ATTACHED : 1
SUPERWALMART_WITHOUT : 1
FOR_LIPID : 1
WITH_WALKING : 1
EDUCATION_FECAL : 1
PHARMACY_ANTICOAGULATION : 2
THEY_ARE : 1
APPARENT_CONTRAST : 1
THE_ROOM : 1
DID_COME : 1
ME_HAS : 1
BASEBALL_BAD : 1
CURRENT_ASSESSMENT : 1
LOCAL_INJECTION : 1
GUARDIANSHIP_REVIEWED : 1
HAD_DIRECTIVE : 1
THESE_MEDS : 1
LAB_SHOW : 1
DISCHARGE_APR : 1
ADMITTED_TO : 1
INDEPENDENT_WALKIN : 1
TENDONOPATHY_QUESTION : 2
NO_PRIMARY : 1
MANDATORY_HE : 1
VERY_MILD : 1
ATHENS_FOLLOWUP : 1
HARMFUL_REFILL : 1
REGULAR_VISIT : 1
FEVER_HAD : 1
VASC_PT : 1
PROBLEMS_PT : 1
PATIENTS_REQUEST : 2
NOT_TAKE : 1
RESIDENT_FALLS : 1
YOU_ANY : 1
RHONCHI_NEEDS : 1
AM_CALF : 1
STARTED_THIS : 1
EFFORT_WNL : 1
ASSESSMENT_ESTABLISHED : 1
LOSARTAN_MG : 1
YOUR_UPDATED : 1
ANGIOGRAM_PATIENT : 1
ALCOHOL_USE : 1
EXPERIENCING_TARRY : 1
SCREENING_COLONOSCOPY : 1
FROZEN_SECTION : 1
TAB_TABLET : 2
TENDERNESS_TIME : 1
TURP_FRAME : 1
MACHINE_UNABLE : 1
HE_HE : 1
ADR_LEFT : 1
IF_FROM : 1
PRESENT_RADIAL : 1
TIME_WORK : 1
EDEMA_OCCUPATIONAL : 1
PATIENT_TEL : 1
HYPERTENSION_REASON : 1
FOR_PASSING : 1
MEDICATION_PLEASE : 1
TV_AND : 1
YOU_HAD : 2
INFORMED_CONSENT : 1
EASILY_STARTLED : 1
STOOLS_RIGHT : 1
THE_RIGHT : 3
DVT_REPORTS : 1
CODING_NURSING : 1
VITAMIN_UNT : 1
CONTACT_TO : 1
TEMP_SATS : 1
ANXIETY_HE : 1
DISEASE_PHYSICIAN : 1
QUADRANTS_TURGOR : 1
EPIDUAL_BY : 1
ARE_STILL : 1
MINUTE_SESSION : 2
THERAPY_PROGRESS : 1
NOTE_SAFETY : 1
REQUIRED_VACCINE : 1
NOTE_SUPRASPINATUS : 1
AND_OBLIGATIONS : 1
SCHEDULING_GIVEN : 1
VALPROIC_LEVEL : 1
QUESTIONS_CONDITION : 1
ONSET_INPATIENT : 1
OF_IN : 1
WALK_ALL : 1
ONLY_SPECIAL : 1
LEFT_MESSAGE : 2
ALERT_AND : 1
PARAFFIN_TO : 1
SPECIAL_ENVELOPE : 1
AM_WORK : 1
AND_PACK : 1
PATIENT_DATE : 2
SOUNDS_QUADRANTS : 1
THE_AT : 1
DELTOID_HIS : 1
CHECK_EACH : 1
AND_COLLECTION : 1
NO_BLOOD : 1
FALLS_NO : 1
STATUS_HYPERTENSION : 1
OBS_PLAN : 1
NOTE_BARRADAS : 1
OTHER_COMING : 1
XYZZY_REMINDERS : 1
ALL_RART : 1
THE_MEDICAL : 2
TO_FOR : 1
OF_HEARING : 1
HAD_MAINTAINED : 1
TISSUE_PERFUSION : 1
EQUIPMENT_TUB : 1
AT_NO : 1
PULSE_CLIENT : 1
ON_ANSWERING : 1
PUPILS_FOR : 1
TO_THE : 7
ELIGIBILITY_YOU : 1
BLOOD_PRESSURE : 2
CL_LESS : 1
HAS_NICOTINE : 2
CC_FIELD : 1
INPATIENT_DATA : 1
TEST_LAB : 1
ACCESS_ARTERIES : 1
DOG_PATIENT : 1
SERVICE_PATIENT : 1
NICOTINE_CHEWING : 2
THE_OF : 2
PAIN_ASSESSMENT : 2
AUSC_LUNGS : 1
PHARMACY_CLINIC : 2
BY_MOUTH : 4
PATIENT_EDUCATION : 3
CARE_INTAKE : 1
ONE_CAPSULE : 1
INTAKE_TO : 1
UNACCEPTABLE_FOR : 1
TREATMENT_INFECTIOUS : 1
THE_CALL : 1
SWOLLEN_PRIMARILY : 1
APPROPRIATE_MEDR : 1
SHOULDER_GLENOID : 1
CHIEF_COMPLAINT : 1
NOK_RE : 1
OBJECTIVE_TO : 1
ADMISSION_HTN : 1
WELL_YEAR : 1
HER_HAS : 1
AND_THEN : 1
NOTE_SHE : 1
THAT_HE : 3
AT_PATIENTS : 2
EDUCATION_HEIGHT : 1
OF_NOV : 1
INFLUENZA_PATIENT : 1
HERE_THE : 1
THE_CONCEPT : 1
HELMET_DID : 1
KELLY_MCGOWAN : 1
THE_PURPOSE : 1
AND_DORSAL : 1
TWICE_TREATED : 1
MG_HR : 1
REMINDERS_NONVA : 1
NO_REASON : 1
TO_OFF : 1
SENSORY_HARD : 1
REASON_FOR : 3
PATIENT_EXACT : 1
CONCEPT_ALTERING : 1
SPENDS_OF : 1
TAKE_TABLET : 3
TO_WHEN : 1
BLACK_TARRY : 1
PULSE_DECREASED : 1
THIS_THE : 1
HOME_PULSE : 1
UNDERSURFACE_IMPRESSION : 1
DO_YOU : 1
MIDDLE_INDEX : 1
CENTER_NOTE : 1
ANSWER_BUSY : 1
WITH_EVERY : 1
ORAL_HYGIENE : 1
ML_TOTAL : 1
MILD_ANGIOGRAM : 1
SEEN_FOR : 1
BRONCHITIS_MUCH : 1
OCT_TIME : 1
FOR_PHYSICAL : 1
BODY_NOW : 1
AND_MANAGEMENT : 1
FOLLOWING_SOURCES : 1
ONE_BY : 1
THE_THE : 1
APPARENT_PROBLEM : 1
EACH_SKILLED : 1
LESS_AND : 1
CARE_TEAM : 1
CLICK_FOR : 1
EPICRITIC_DIMINISHED : 1
THAT_WAS : 1
CARE_NURSING : 2
DIABETIC_SURVEILLANCE : 1
PC_CLINICAL : 1
THERAPEUTIC_FALL : 1
SERVICE_ELIGIBILITY : 1
ORIENTED_FAIR : 1
OCCUPATIONAL_EVALUATION : 1
THE_EVERY : 1
FRICTION_NO : 1
DIAGNOSIS_RTC : 1
IT_WHEN : 1
NOTE_CBI : 1
OF_OUTPATIENT : 1
TO_BP : 1
YES_SULTANA : 1
AND_FOR : 1
GAVE_VERBAL : 1
RECEIVED_PADILLA : 1
RESTING_COMPLAINS : 1
RXS_INPATIENT : 1
WITH_OF : 3
STOP_DENTAL : 1
THIS_AM : 1
WITH_THIS : 2
NOW_MIDDLE : 1
THE_PT : 2
AND_RUN : 1
TEMP_APPOINTMENTS : 1
HEARING_FACE : 1
OTHER_SKIN : 1
POINT_DELIRIUM : 1
CARE_LIN : 1
INDEPENDENT_PT : 1
PULSES_YES : 1
PEDAL_YELLOW : 1
CENTER_IF : 1
PHYSICIAN_ARE : 1
SAID_HE : 1
PROCEDURE_RENAL : 1
REPORTS_WHICH : 1
MENTIONS_HE : 1
NURSE_REPORT : 1
ASSESSED_TO : 1
REQUIREMENTS_CANCELLED : 1
STATED_RECONCILIATION : 1
RECOMMENDED_FOLLOWUP : 1
ON_PEDAL : 1
TOMORROW_DELIRIOUS : 1
BP_HR : 1
ANSWER_ETC : 1
OF_STATED : 1
WNL_ACETAMINOPHEN : 1
CL_SUSPICIOUS : 1
AND_NOT : 1
WAS_HERE : 1
DOING_YOU : 1
SHE_IER : 1
HE_QUITE : 1
OCCASION_IN : 1
OF_WOUND : 1
OVER_HIS : 1
BELOW_PLEASE : 1
OR_HTN : 1
CLIENT_DID : 1
YOU_DID : 1
HISTORY_DEFICIT : 1
SURGERY_LISINOPRIL : 1
HEAD_HERE : 1
RIGHT_CONSTITUTIONAL : 1
ADL_TASK : 1
MADE_NEVER : 1
INSTRUCTED_HER : 1
GIVEN_STOP : 1
QUITE_EFFECTIVE : 1
INTERIM_BAD : 1
OF_UNIT : 1
ADDENDUM_FOLLOWING : 1
YOU_YOUR : 1
LEARN_IN : 1
NUMBER_CONFIRMED : 1
LAYS_ON : 1
LEVEL_LESS : 1
RETENTION_NO : 1
REVIEWED_PAIN : 1
PT_UNDERSATNDING : 1
DATE_OUTPATIENT : 1
UNABLE_REACH : 1
NO_HIGH : 1
COMPLAINT_PAIN : 1
TO_NO : 1
DOCUMENT_BY : 1
SPEEED_HE : 1
AS_BELOW : 1
PROBLEMS_TO : 1
PCP_PT : 1
SIMVASTATIN_MG : 1
OUTPUT_PAIN : 1
CHANGE_BM : 1
FAMILY_PLEASE : 1
COMPLAINS_OF : 1
LB_MV : 1
TRAVEL_AND : 1
FOLLOWING_IS : 1
YES_RESPIRATION : 1
LAYED_FELT : 1
SOMETHING_CRAWLING : 1
NOTE_CLINICAL : 1
ELEMENTS_NEURO : 1
SOUNDS_NORMOACTIVE : 1
VETERAN_CONTACT : 1
OR_YOUR : 1
COLLECTION_PROCEDURES : 1
IDENTIFIED_HIS : 1
FIELD_PROBLEMS : 1
FRICTION_APPARENT : 1
RX_DATE : 1
COLONOSCOPY_ORDERED : 1
NURSING_OUTPATIENT : 1
WHEN_IN : 1
IN_ROOM : 1
RESPIR_FOR : 1
OF_UNSURE : 1
LABRUM_DE : 2
ACTIVITY_CARE : 1
TO_SKIN : 1
LEG_NUMB : 1
REFILLED_FACTORS : 1
COPIES_COMPLETED : 1
WITH_HYGIENE : 1
PAST_HISTORY : 2
SC_TOTAL : 1
ADVANCED_CLINIC : 1
SESSION_BEGAN : 1
IF_REDUCE : 1
DIZZINESS_AND : 1
ICE_FACE : 1
ALLERGIES_PATIENT : 2
RADIATION_THERAPY : 1
ON_SIMVASTATIN : 1
HAD_RECENT : 1
REVIEWED_PCP : 1
TAKEN_AZITHROMYCIN : 1
IMPORTED_FROM : 2
VA_SYSTEM : 1
TEAR_YO : 1
WITH_HOOD : 1
NONVA_TAB : 1
BACK_NO : 1
MG_BID : 1
LIFETIME_NONUSER : 1
10_LABORATORY : 1
SUBSCAPULARIS_TENDONOPATHY : 2
NORMAL_LIMITS : 1
DEAR_PATIENT : 1
ARRHYTHMIA_MEDS : 1
AND_PHYSICIAN : 1
SPENDING_TO : 1
PRIMARILY_AT : 1
HOW_OFTEN : 1
FOR_PROSTATIC : 1
TV_ALERT : 1
POINT_THE : 1
SOURCES_HTN : 1
THE_NONVA : 1
CONSENT_TO : 1
DATE_DATE : 1
COLLECTION_WERE : 1
BELOW_CHECK : 1
GET_THIS : 1
OF_RXS : 1
BECAUSE_HAD : 1
MEAN_RANGE : 1
TWO_ARTERIES : 1
LB_KG : 5
ANY_RECENT : 1
TESTS_ACID : 1
MG_VITAMIN : 1
HAD_NEW : 1
COLONOSCOPY_PAIN : 1
NOTE_FALLS : 1
BY_EVERY : 1
DONE_INFORMATION : 1
UNDERSTANDING_OF : 1
WITH_ONSET : 1
PATIENT_BEEN : 1
FILLING_TOES : 1
FOR_HEARING : 1
ON_GUARD : 1
TAB_EACH : 1
BE_BY : 2
FINE_DOES : 1
LEFT_ON : 1
CORRECTION_ADENDOM : 1
HE_WALKING : 1
TUB_SHOWER : 1
COULD_FACILITY : 1
AND_OFF : 2
OF_WITHOUT : 1
PEDIS_BUT : 1
ADVANCE_DIRECTIVE : 1
BEING_THIS : 1
RADICULOPATHY_EHAS : 1
DELIRIUM_THE : 1
RECENTLY_HE : 1
MEDS_BE : 2
ALTERING_TO : 1
MEDICAL_WEIGHT : 1
DAILY_UNTIL : 1
PALPABLE_RESPIRATION : 1
OLD_MALE : 3
FOR_LABS : 1
IN_PAST : 1
PO_PULSE : 1
ONCE_WHILE : 1
UNT_TAB : 1
OF_IRREVERSIBLE : 1
INFORMATION_PER : 1
FAITHFUL_TO : 1
AT_REQUEST : 2
ANTERIOR_GLENOID : 2
HE_SPENDS : 1
FOR_PRESSURE : 1
CARDIOLOGY_CONSULT : 1
OR_SURROUNDINGS : 1
ANTERIOR_LABRUM : 2
THIS_POINT : 1
RELATED_HEAD : 1
INTERIM_BASEBALL : 1
ACTIVE_RESULTS : 1
THERAPY_TREATMENT : 1
UD_MG : 1
HYPERTENSION_FOR : 1
NUR_CLINICAL : 1
SPECIAL_IMMEDIATELY : 1
WAY_HERE : 1
MADE_BEEN : 1
TO_GO : 1
REASON_HE : 1
V4POST_DISCHARGE : 1
YOU_HAVE : 1
BE_SEEN : 1
NEW_OR : 1
ACTIVITY_WALKS : 1
TO_IF : 3
EVERY_AT : 1
UNABLE_CONTACT : 1
NOT_NSAIDS : 1
NO_ANSWER : 1
HISTORY_YEAR : 1
UPDATED_MEDICATION : 1
NOT_VISIBLE : 1
DO_IN : 1
CLICK_VISTA : 1
IC_PRIMARY : 1
EVALUATION_OUTPATIENT : 1
TELEPHONE_CONTACT : 1
NEURO_AND : 1
TO_GAVE : 1
BY_PADILLA : 1
AND_WALK : 1
TO_MG : 1
AZITHROMYCIN_MG : 1
PRECAUTIONS_ALLERGY : 1
EXP_HOOVER : 1
REMINDERS_ACTIVITY : 1
STOP_NICOTINE : 2
CONCERNING_LABS : 1
CODE_EVALUATION : 1
CONSULT_DUE : 1
HAVE_OCD : 1
DISCHARGE_FOLLOWUP : 1
TEST_CORRECT : 1
OF_FRESH : 1
DISPLAY_THEN : 1
WITH_WHEEZING : 1
VITALS_TO : 1
OF_TEST : 1
MILD_PROXIMAL : 1
ON_LT : 1
EF_CARDIOVASCULAR : 1
QUITE_PROTECTIVE : 1
ADDRESS_QTY : 1
ICDCM_OTHER : 1
IMMUNIZATION_PATIENT : 1
SCREEN_AUDITC : 1
NOTE_FACILITY : 1
VISIT_ADMISSION : 1
PIP_NO : 1
TEST_AND : 2
THE_PUPILS : 1
SCORE_TENDONOPATHY : 1
HELPING_HIS : 1
WEIGHT_KG : 3
AM_MG : 1
TO_HEAD : 1
GLUCOSE_WHEEZING : 1
SEC_ASSESSMENT : 1
WELL_IN : 1
LISTED_FOR : 1
PATTERN_OVERALL : 1
YEAR_OLD : 3
THIS_PATIENT : 1
LISTED_HAVE : 1
BEEN_HAVING : 1
EFV_WANTS : 1
RISK_EP : 1
AT_AT : 1
ABOUT_OR : 1
IS_FOR : 1
REFERRAL_RTC : 1
SULTANA_NONVA : 1
IS_BEING : 1
WITH_CAD : 1
NOW_FURTHER : 1
FRACTURE_THE : 2
SIDE_OF : 1
NURSING_SHIFT : 1
SHORT_OF : 1
WITHIN_NONV : 1
BID_AND : 1
AS_SHE : 1
NONISCHEMIC_CARDIOMYOPATHY : 1
EVERY_APPLY : 1
SURGERY_DONE : 1
RE_GUARDIANSHIP : 1
ISCHEMIC_CAD : 1
RANGE_DL : 1
MONTHS_FOR : 1
SHOWER_OF : 1
GUM_ON : 1
BROSIUS_HE : 1
VERY_INR : 1
ASSIST_ELEVATING : 1
OF_BREATH : 1
HT_IN : 1
HE_CONTINUES : 2
ONE_OCCASION : 1
NO_PRESSURE : 1
OR_VASOVAGAL : 1
TO_TELL : 1
THAT_YOU : 1
ABOVE_GUARDIAN : 1
INCREASING_PC : 1
LIQUID_TEMP : 1
TRIAGE_NURSE : 1
FOREIGN_BODY : 1
TIMES_WILL : 1
MAINTAINED_REPORTS : 1
DATE_TIME : 1
TO_CONFORM : 1
POTENTIAL_FOR : 1
VIEWING_AND : 1
TOOLS_ON : 1
08_10 : 1
CONSENT_OBTAINED : 1
MR_HOOD : 1
CALLED_IER : 1
UNSURE_FROM : 1
RIDES_FOLLOWUP : 1
MEDICAL_OF : 1
INFORMATION_SHEET : 1
VASC_DP : 1
HOOD_IS : 1
REVIEWED_NEEDED : 1
ADMITS_TO : 1
THEM_PROBLEMS : 1
WATCHING_ALERT : 1
SITTING_SIDE : 1
MOUTH_PR : 1
NEVER_BEEN : 1
NOTE_DIRECTOR : 1
ARE_DOING : 1
EACH_OF : 1
FACE_RECEIVED : 1
UNTIL_GONE : 1
TEST_IS : 1
IT_OR : 1
TOTAL_OUTPUT : 2
IN_STILL : 1
STEEL_INDEPENDENT : 1
DIRECTOR_LB : 1
FOR_MYCOTIC : 1
MEDICATIONS_AS : 1
OF_SYSTEMS : 2
LEARNER_IT : 1
NASAL_OUTPUT : 1
TO_WELL : 1
YO_MALE : 1
AND_OR : 1
RESPIRATION_ALTERATION : 1
FROZEN_PLASMA : 1
NIGHTMARES_IT : 1
PM_ATTEMPTED : 1
VETERAN_LISTED : 1
ALL_YOU : 1
PT_LAB : 1
CARE_DRESSING : 1
NECK_NO : 1
ARTERIES_IN : 1
PEDAL_RADIAL : 1
NO_RHONCHI : 1
ED_CARDIOOMYOPATHY : 1
KG_IC : 1
NURSE_INTRAOPERATIVE : 1
RETENTION_VS : 1
NOTICED_PC : 1
THIS_SPECIAL : 1
FURTHER_IMPRESSION : 1
IDENTIFIED_WITH : 1
NEEDS_WITH : 1
PLASMA_PACKED : 1
ALL_THROUGH : 1
PARTIAL_IMPRESSION : 1
CONDITION_YOUR : 1
PHYSICAL_RETENTION : 1
OUTPUT_INTAKE : 1
MINIMIZE_SC : 1
BE_PREPARED : 1
HE_WEARING : 1
VERBAL_CONSENT : 1
FACILITY_NURSING : 1
RXS_ORDERS : 1
SC_DOCUMENT : 1
AND_RT : 1
BE_FOR : 1
USE_MEMORY : 1
WOUNDS_ULCERS : 1
TAB_UD : 1
DOG_RD : 1
ALL_SUPERWALMART : 1
GROINS_DYE : 1
PT_STARTED : 1
EGGS_HAVING : 1
IDENTIFIED_BY : 1
PROSTATE_HYPERPLASIA : 1
HAS_COMPLIANT : 1
NOT_CONSCIUOUSNESS : 1
MG_UD : 1
SHIFT_NURSE : 1
REPORTS_ALCOHOL : 1
SHEETS_SITE : 1
FELT_OF : 1
INCREASING_NUR : 1
NOTE_PHYSICIAN : 1
SHORT_BREATH : 1
TABLET_BY : 3
CAD_PULMONA : 1
REMOTE_ADR : 1
ADDENDUM_AS : 1
OR_SKIN : 1
HURTS_RELATED : 1
PROCEDURE_MIN : 1
IT_LIKE : 1
HIS_STRESS : 1
AT_ALOT : 1
SUICIDE_EVERY : 1
ARE_ALL : 1
ON_ADVANCED : 1
MEDR_REC : 1
ON_TOOLS : 1
BRIEF_ADV : 1
SHIFT_PULSES : 1
FINISHING_THE : 1
HAS_SIGNIFICANTLY : 1
TO_ACTIVE : 1
TINGLING_ANY : 1
CARDIOVASCULAR_HX : 1
INFORMATION_WAS : 1
LEFT_DELTOID : 1
MOUTH_EVERY : 4
FACIAL_AREA : 1
FROM_MEDICAL : 2
WRITER_AGREED : 1
RALES_OR : 1
TO_AVOID : 1
DOES_NEED : 1
SURROUNDINGS_PREVENTIVE : 1
EP_RESIDENT : 1
RECEIVED_UNITS : 1
TEACHING_VENTRICLE : 1
PALPABLE_MEDICAL : 1
MEET_THE : 1
RESPIR_CLICK : 1
OR_LOSARTAN : 1
SO_MG : 1
LEVEL_THAN : 1
IT_FINE : 1
HIS_LEG : 1
LIPID_SINCE : 1
HYPERPLASIA_OF : 1
BEEN_RECONCILED : 1
TO_PREPARED : 1
TINA_RD : 1
MORE_ON : 1
EDUCATED_ON : 1
NO_TAKEN : 1
MEDICATION_SCAN : 1
TRAVEL_SHE : 1
RESTING_COMFORTABLE : 1
EDUCATED_ADVANCED : 1
DISEASE_NOTE : 1
REPORTS_YES : 1
PT_CFT : 1
TINY_PARTIAL : 2
TOBACCO_LIFETIME : 1
TIME_NEEDED : 1
MEMBER_TAKE : 1
PAIN_PATIENT : 2
OF_REASON : 1
PROSTATIC_CARRYING : 1
FOR_TWICE : 1
IN_WITH : 1
PROBLEMS_HE : 1
TABLETS_MEDICATIONS : 1
CARDIOMYOPATHY_WITH : 1
LISTED_BEEN : 1
SURGICAL_INTO : 1
FOR_OF : 1
ANTICOAGULATION_HT : 1
FRAME_ENCLOSED : 1
MV_TEMP : 1
HE_WASNT : 1
MASSAGE_TO : 1
LISINOPRIL_MG : 2
PAST_MEDICAL : 1
ON_IMAGING : 1
SITTING_AROUND : 1
INSTRUCTION_RESPIRATORY : 1
CALF_DATE : 1
CLASSES_SHE : 1
CLIENT_NOT : 1
ONEHALF_BY : 2
PERRLA_EQUIPMENT : 1
TELEPHONE_EVALUATION : 1
MIN_FROZEN : 1
DP_CONSENT : 1
IN_PULSE : 1
BAD_AND : 1
MUSCULOSKELETAL_INDEX : 1
HIS_NAME : 1
SUSPICIOUS_NO : 1
MEDICAL_POWER : 1
WITH_PATIENT : 3
BUCKETS_COAL : 1
NONE_AT : 1
DECREASE_MESSAGE : 1
DORSALIS_PEDIS : 2
WERE_TO : 1
DIRECTIVE_AT : 1
MULTIPLE_UNITS : 1
SITTING_HE : 1
TO_TEMP : 1
OF_PRIVACY : 1
THE_RECEIVED : 1
OVERALL_LEVEL : 1
CONDITION_TEST : 1
TREATMENT_ALLERGIES : 1
RUN_OFF : 1
THIS_SIGNIFICANTLY : 1
SUPPLY_SUPPLY : 1
THEM_OTHER : 1
YES_WITH : 1
CLINIC_INDICATION : 1
BLACK_STOOLS : 1
595DT86_08 : 1
WAS_OBTAINED : 1
IN_HE : 1
SOUND_CLEAR : 1
FACE_FOR : 1
MARILYN_AT : 1
USE_OF : 1
WHO_FOLLOWS : 1
FINE_AND : 1
FOREIGN_REMOVAL : 1
CAP_FOR : 1
PUD_NOT : 1
RIGHT_RADIAL : 1
ALSO_TO : 1
TWO_AND : 1
WALKS_ANESTHESIA : 1
REDNESS_WOUND : 1
MINIMIZE_ED : 1
ALOT_PAIN : 1
REPORT_TO : 1
WHEEZING_RHONCHI : 1
CHANGES_VERBALIZES : 1
CONSENTS_HER : 1
FOR_EXP : 1
TO_ASSIST : 1
PLEASE_EACH : 1
DRINKS_ONE : 1
ATTEMPTED_TO : 1
CBI_ML : 1
JUDGEMENT_FAIR : 1
PATIENT_MULTIPLE : 1
SEP_DISCHARGE : 1
INDEX_FINGER : 2
OR_WORSENING : 1
THROUGH_WITHOUT : 1
BEEN_PROBLEMS : 1
NO_RALES : 1
QTY_REVIEW : 1
FOR_ANTICOAGULATION : 2
LUNGS_BREATH : 1
THIS_PM : 1
ADDENDUM_NEGATIVE : 1
HELP_WITH : 1
WITH_NO : 2
AS_PER : 1
NO_ABD : 1
RESIDENT_NOTE : 1
AND_CARDIOLOGY : 1
WITHIN_REACH : 1
WHEEZING_OR : 1
TAKE_MEDICATIONS : 1
CONSULT_TO : 1
WORKER_COMMUNITY : 1
GONE_SATISFIED : 1
ATTORNEY_LIVING : 1
COMMENT_PT : 1
HER_EVERY : 1
NO_BUSY : 1
IN_ADDENDUM : 1
HE_REPORTS : 1
PAIN_HE : 1
IS_THE : 2
SEP_V4POST : 1
RADIATION_TREATMENT : 1
GUARDIAN_GAVE : 1
PROBLEMS_HTN : 1
HISTORY_OR : 1
MAY_HAVE : 1
THERAPY_EVALUATION : 1
ATTEND_ANY : 1
WAS_BY : 1
CLINICAL_ACTIVITY : 1
IF_YES : 1
GET_UNDER : 1
TESTS_NO : 1
OF_LIVING : 1
SURVEILLANCE_BLOOD : 1
NOT_PT : 1
LIVING_MEASUREMENT : 1
WITH_AMBULATORS : 1
REV_13 : 1
INTRAARTICULAR_FRACTURE : 1
TOOLS_ORGANS : 1
CARDIOOMYOPATHY_EF : 1
CONCERN_PATIENT : 1
TO_PER : 1
INFORMATION_CONFIRMED : 2
LENSES_FRAME : 1
TO_ADVISED : 1
PROBLEM_AM : 1
PATIENT_CONSTANTLY : 1
APR_SURG : 1
INJECTIONS_PHYSICIAN : 1
CONTINUE_PAIN : 1
OR_MG : 1
TUES_MANDATORY : 1
FOR_VISIT : 5
INR_IN : 1
REPORT_FROM : 1
UD_BY : 1
ACTIVE_LIAISON : 1
PT_DID : 1
OF_DAILY : 1
HR_CAP : 1
EDUCATION_DATE : 1
DATE_APR : 1
HAVING_OR : 1
OD_OS : 1
ETOH_SCREENING : 1
WAL_MG : 1
AND_BIRTHDATE : 1
NO_PROBLEM : 1
BUDGET_APPOINTMENT : 1
GLYBURIDE_PO : 1
RADIAL_CONSTITUTIONAL : 1
NURSING_CAPILLARY : 1
TEACHING_LEFT : 1
ORTHO_NOTE : 1
FAMILY_HISTORY : 1
LITERS_AND : 1
SIMVASTATIN_PATIENT : 1
PATIENT_RADIOLOGY : 1
PROTECTIVE_AND : 1
TREATMENT_ADV : 1
PROSTHESIS_IS : 1
PROBLEM_THIS : 1
DILATED_IMAGING : 1
PHYSICIAN_NOT : 1
WRITER_TO : 1
THIS_BEFORE : 1
FOR_CONDITION : 1
NUMB_DETACHED : 1
OCT_SCAN : 1
PAIN_CHANGE : 1
BAD_FRACTURE : 1
OBJECTIVE_PARAFFIN : 1
THE_DILATED : 1
ACCESS_AND : 1
ACNE_PEDAL : 1
TO_NOW : 1
EVERY_MORNING : 1
HAVE_OR : 1
NAPROXEN_THIS : 1
USE_TO : 1
LOSARTAN_ONE : 1
TOES_SICKENING : 1
NORMOACTIVE_QUADRANTS : 1
INDEPENDENT_OF : 1
NURSING_VISIT : 1
THE_GUARDIAN : 1
VITAL_SIGNS : 1
UNSURE_IF : 1
STATING_THAT : 1
MEASUREMENT_DEFINITION : 1
HERE_TO : 2
METOPROLOL_TAB : 1
PARTIAL_OBJECTIVE : 1
ISSUES_WALKING : 1
CODING_ERROR : 1
PROVIDER_PHYSICIAN : 1
EPICRITIC_SENSATIONS : 1
FUTURE_AS : 2
WHEN_DOWN : 1
EXACT_IS : 1
DISCHARGE_FUTURE : 1
REPORTS_AGREEMENT : 1
CALCIUM_MG : 1
SIGNS_ALPHABETIZED : 1
FOLLOWS_PHYSICIAN : 1
PURPOSE_OF : 1
HIS_DOCTOR : 1
PULSE_REQUIRED : 1
CONSTITUTIONAL_ALCOHOL : 1
ALPHABETIZED_LIST : 1
IS_FALL : 1
TO_LEARN : 1
DETACHED_FROM : 1
ON_YOUR : 1
INFECTIOUS_DISEASE : 1
595DT86_REV : 1
PT_WALKIN : 1
POST_PALPABLE : 1
PAIN_OBSERVATION : 1
RECURRENT_TEMP : 1
FROM_PREVIOUS : 1
TENDONOPATHY_COMPLAINT : 1
ABOVE_ASKING : 1
VISIT_FOR : 1
GLENOID_DE : 2
KNOWS_OF : 1
PRESSURE_GLYBURIDE : 1
BEEN_DISCONNECTED : 1
ACTIVITIES_OR : 1
HEALTH_AND : 1
PATIENT_NUMBER : 1
PM_NIGHT : 1
HEARING_TO : 1
QUADRANTS_WITHIN : 1
FOR_LAB : 1
AT_TRAVEL : 1
IF_ARISE : 1
AMIODAROINE_NOW : 1
ENVELOPE_IMMEDIATELY : 1
AND_FATHER : 1
SIDE_TV : 1
SINUSITIS_SUPPLY : 1
CHIROPRACTOR_BETTER : 1
CAPSAICIN_GM : 1
SIGNIFICANT_PRIMARY : 1
NONUSER_TOBACCO : 1
GUM_DAD : 1
IS_WORKING : 1
CHANGE_IN : 1
VISUAL_FIELD : 1
PROBLEMS_CALCIUM : 1
HARMFUL_WAL : 1
GAVE_TO : 1
FOR_COMPLAINS : 1
ON_AND : 1
AT_LOW : 1
CARDIAC_CATH : 1
PATIENT_GUARDIAN : 1
COMPLAINS_GREAT : 1
NEEDED_OF : 1
WITH_QUESTION : 2
PAIN_SUBSCAPULARIS : 1
AND_DENIES : 1
SKILLED_HEALTH : 1
CLEAR_SKIN : 1
HANDOUT_NO : 1
PULSE_YELLOW : 1
TROUBLE_LOSARTAN : 1
ALOT_OF : 1
TREATMENT_NOTE : 1
VERBALIZES_UNDERSATNDING : 1
IC_CARE : 1
RALES_RHONCHI : 1
NOT_HAD : 1
MEMORY_METER : 1
NUMBER_WITH : 1
AND_HOT : 1
RESULTS_WHEEZING : 1
STABBING_NUMBER : 1
WOUND_OR : 1
CENTER_NURSING : 1
DE_RATIVE : 2
PROVIDED_RESPIRATORY : 1
EVER_SUICIDE : 1
CHEWING_STILL : 1
THE_HOME : 1
AND_NOTE : 1
WITH_SIGNIFICANT : 1
TO_APPT : 2
DRESSING_INSTRUCTIONS : 1
FILLING_TIME : 1
AT_DRC : 1
CONCERN_INFLUENZA : 1
TO_RECENTLY : 1
WAS_RTC : 1
COMPLAINT_IN : 1
ORIENTED_DISTRESS : 1
NO_WOUNDS : 1
SHIFT_SAFETY : 1
HIGH_BLOOD : 1
NO_WOUND : 1
HIS_SITTING : 1
CARE_PROVIDER : 1
MAS_CONTACT : 1
ORDER_FROM : 1
NUMB_TINGLING : 1
ADVANCED_DIRECTIVES : 1
MI_HIS : 1
CHEST_MEDICATIONS : 1
BP_AT : 1
HOT_PACK : 1
STATES_UNACCEPTABLE : 1
APPLY_AMOUNT : 1
APPEARS_STABLE : 1
MALE_OSA : 1
FOR_INR : 1
SUSPECT_YOU : 1
OR_EASILY : 1
MAINTAINED_HE : 1
TO_STOP : 3
WAS_SUPERVISED : 1
NO_QUESTIONS : 1
AND_OF : 2
CARE_STAFF : 1
TARRY_RIGHT : 1
DATE_UNKNOWN : 1
TESTS_SHOW : 1
CHANGES_DP : 1
NOTE_OCCUPATIONAL : 1
OF_SATS : 1
SESSION_HE : 2
ON_SIDE : 2
COMMUNITY_HOME : 1
PHYSICIAN_OF : 1
IS_VISIBLE : 1
HER_HERE : 1
LB_PULSE : 1
REVIEWED_BY : 1
IN_HIS : 1
PROM_OF : 1
WT_LB : 2
ANSWERED_PRECAUTIONS : 1
TEMP_SCREENING : 1
ADVANCED_ACCESS : 1
NO_EDEMA : 1
REVIEWED_WITH : 2
MOTIVATION_LEARN : 1
LAB_REPORTS : 1
STEROID_INJECTION : 1
CFT_SEC : 1
BETTER_NO : 1
DEVICE_PLEASE : 1
TARRY_STOOLS : 1
TO_GIVE : 1
IS_ON : 1
WITH_MILD : 1
STAYING_OFF : 1
TO_LEFT : 3
WERE_SENT : 1
CALL_NOT : 1
HISTORY_OLD : 1
BUCKETS_OF : 1
ACTIVE_GLUCOSE : 1
VA_FOR : 1
WAS_PROVIDED : 2
MUSCLES_OF : 1
EXPIRATION_DATE : 1
SEE_TO : 1
REPORT_RETROBULBAR : 1
NUR_REMINDERS : 1
RESULTS_NEW : 1
PREVIOUS_NURSE : 1
FOR_DUE : 1
PROSTATIC_HYPERTROPHY : 1
MG_UNTIL : 1
UP_WITH : 1
HAS_HAVING : 1
EDUCATION_ABOUT : 1
FROM_FOLLOWING : 1
PATIENT_MG : 1
DYSP_AND : 1
HAS_CLINICALLY : 1
CHIEF_PAIN : 1
CAP_TAKE : 1
UNKNOWN_ATTENDING : 1
ANY_CHEST : 1
RUMINATE_OVER : 1
WHICH_NOT : 1
NKA_ALLERGY : 1
STILL_QUITE : 1
ED_DOCUMENT : 1
PROGRESS_SUPRASPINATUS : 1
NO_ARTHRALGIA : 1
HIS_CLIENT : 1
IER_WAS : 1
OBSTRUCTION_SIGNIFICANT : 1
INFO_WAS : 1
WAY_IS : 1
PACK_TO : 1
IRRIGANT_NEUROLOGICAL : 1
NO_TENDERNESS : 1
TEMP_FUTURE : 1
LIPS_OCCUPATION : 1
ORTHO_COSIGN : 1
DOCTOR_NOW : 1
PRECAUTIONS_TO : 1
TO_DECREASE : 1
CENTER_OR : 1
PROBLEMS_ARISE : 1
THE_SHOULDER : 2
TA_OD : 1
RECEIVED_MULTIPLE : 1
FOLLOWUP_CALL : 1
STRESS_SHOWED : 1
OF_URINARY : 1
BY_WRITER : 1
EVERY_ACTIVE : 2
INJECTION_APPROPRIATE : 1
RESIDENT_RISK : 1
VIA_THAT : 1
BOWEL_SOUNDS : 1
PATIENT_FOLLOWING : 1
EMERGENCY_VA : 1
OR_SOCIAL : 1
SOB_ADMISSION : 1
UNIT_PATIENT : 1
REASON_VISIT : 3
PC_PATIENT : 1
TO_HAVING : 1
FEDEX_QTY : 1
NOTE_MEDICAL : 1
GREAT_WHILE : 1
EVALUATION_NURSING : 1
MESSAGE_MR : 1
IT_THOUGHT : 1
ADDENDUM_ANA : 1
APPLY_FACE : 1
TOILETING_OF : 1
PEDIS_ADMINISTERED : 1
INTED_PATIENT : 1
MEDICATIONS_LISTED : 2
MUSCULOSKELETAL_FINGER : 1
CRAWLING_ON : 1
HAS_HAD : 3
CONTINUES_TO : 2
NOT_LOOSE : 1
LIFETIME_OF : 1
PULSE_SUSPECT : 1
ON_THE : 2
KAREN_PRIMARY : 1
CARDIOOMYOPATHY_CAD : 1
FOLLOWING_PT : 1
APPROPRIATE_MED : 1
VISIT_PT : 1
ONEHALF_TABLETS : 1
NKA_INPATIENT : 1
RECORD_YEAR : 1
DYE_TREATMENT : 1
AND_TINGLING : 1
ANESTHESIA_SHEETS : 1
REFILL_METHYLPHENIDATE : 1
ADV_REACT : 1
MT_YOUR : 1
BECAUSE_HE : 1
TO_HELP : 1
OF_THE : 4
ASSESSMENT_PROCEDURE : 1
RECEIVED_REPORT : 1
NONVA_SO : 1
PURPOSE_THE : 1
MAR_AT : 1
GAVE_CONSENT : 1
YES_ANXIETY : 1
YELLOW_DECREASED : 1
COMING_NO : 1
IT_YOU : 1
PALPABLE_CFT : 1
DOWN_SHORT : 1
TAKE_NAPROXEN : 1
WOUNDS_PRESSURE : 1
GIVE_UNDERNEATH : 1
VETERAN_AT : 1
HOT_TO : 1
HAS_NOT : 1
STARTED_ON : 1
YEATER_BETTER : 1
TEAR_MALE : 1
OCTOBER_TREATMENT : 1
WANT_RADIATION : 1
ORGANS_AND : 1
REQUIRED_PRESSURE : 1
VET_TO : 1
AND_REVIEWED : 1
MORE_AS : 1
NONVA_FERROUS : 1
CARDIOVASCULAR_PATIENT : 1
EVERY_TELEPHONE : 1
HERE_PER : 1
NO_TO : 1
WITHOUT_PAIN : 1
PROXIMAL_INFERIOR : 1
IS_IN : 1
OF_MEDICATIONS : 1
THE_APPEARS : 1
WITH_OSA : 1
PUD_DO : 1
PULSE_CLICK : 1
SAFETY_IS : 1
WITH_HIS : 2
INSTRUCTED_TASK : 1
YOUR_MEDICAL : 1
ANY_NIGHTMARES : 1
DONE_LISINOPRIL : 1
ORIENTED_NO : 1
SKIN_HE : 1
CLINIC_FOR : 2
CHEWING_DAD : 1
EDUCATION_CARDIAC : 1
MIGHT_BE : 1
HAD_TO : 1
ISCHEMIA_AND : 1
CLIENT_MAY : 1
STILL_ON : 2
TABITHA_RESPIR : 1
LABS_MEDS : 1
PCP_BERYL : 1
QUITE_OF : 1
LOCAL_STEROID : 1
SHE_CAN : 1
GO_PAST : 1
ACNE_PRESENT : 1
SPENDING_CONFORM : 1
MEDICATIONS_THAT : 1
CC_VISUAL : 1
RD_PATIENT : 1
OF_INDEPENDENT : 2
OF_ALL : 1
OUTPT_RESIDENT : 1
SUBSCAPULARIS_WITH : 2
BLOCK_MANAGED : 1
TOES_STABBING : 1
ACTIVE_ANTICOAGULATION : 1
PEDIS_DOPPLE : 1
PROV_HOOVER : 1
NOT_CC : 1
HR_QTY : 1
TO_INFLUENZA : 1
SUSTAINED_VT : 1
ATTENDING_PHYSICIAN : 1
TO_PUPILS : 1
SHOWED_AREA : 1
RTC_TENDINOPATHY : 1
TESTS_ED : 1
PATIENT_CAME : 1
IBUPROFEN_IS : 1
ADV_HAS : 1
OF_RA : 1
HOME_HEALTH : 1
THAT_COULD : 1
CANCELLED_AT : 2
NONUSER_OF : 1
DURATION_SERVICES : 1
OTHER_LISTED : 1
CONTACT_EVALUATION : 1
FROZEN_PACKED : 1
ARE_YOU : 1
HTN_OF : 1
SICKENING_STABBING : 1
IS_ABOVE : 1
INJURY_HIGH : 1
FROZEN_TESTS : 1
FEELING_AND : 1
FILE_ROOM : 1
ARIPIPRAZOLE_MG : 1
LIN_HYPERPLASIA : 1
QTY_FOR : 2
COSIGN_APPOINTED : 1
NOT_IN : 1
WITH_INFORMED : 1
OCTOBER_THE : 1
IS_IDENTIFIED : 1
AT_PHONE : 1
PAIN_IN : 3
IN_CORRECTION : 1
CONFUSED_DELIRIOUS : 1
FOR_SESSION : 2
TAKE_CAPSAICIN : 1
PER_NURSING : 1
OUT_UNDERNEATH : 1
CAN_WALK : 1
CAP_QTY : 1
BREATH_NO : 1
PROVIDED_EDUCATION : 1
ACTIVE_PHARMACY : 1
HAS_DISCONNECTED : 1
SENSORY_DEFICIT : 1
CUT_REQUIRED : 1
TO_VETERAN : 2
RIGHT_FINGER : 1
CARDIOLOGY_PLEASE : 1
REACH_PATIENT : 1
GBS_IN : 1
DRESSING_ICE : 1
INTRAOPERATIVE_ANESTHESIA : 1
OR_DRINKS : 1
NIGHT_ASSESSMENT : 1
MOUTH_PHARMACY : 1
PRESSURE_STOP : 1
WITH_ELEVATING : 1
PEDAL_PULSES : 1
THERAPEUTIC_RANGE : 1
SW_SPOKE : 1
ASSESSMENT_BLOOD : 1
ARIPIPRAZOLE_TAB : 1
VISIBLE_THE : 1
FOR_BRONCHITIS : 1
FINGER_FOREIGN : 1
13_10 : 1
HER_WAY : 1
PIOGLITAZONE_MG : 1
IN_WT : 1
CARRYING_TWI : 1
OD_ADDENDUM : 1
CLINICALLY_ASSESSED : 1
DEVICE_UNIT : 1
TEAM_PROSTATE : 1
MOUTH_NURSE : 1
HOSPITALIZATION_BRONCHITIS : 1
SYSTEMS_CHEST : 1
INFECTION_COMPLAINS : 1
SIMVASTATIN_TAB : 1
QUITE_IN : 1
CLINIC_SCHEDULING : 1
ATHENS_RECOMMENDED : 1
THE_RECORD : 2
PARAFFIN_THE : 1
FOLLOWING_STATED : 1
CAREGENERAL_NOTE : 1
NONE_INTED : 1
IN_HELPING : 1
NEEDED_SHOWER : 1
TABLET_DAILY : 1
PM_PATIENT : 1
SHOW_FOLLOWING : 1
HIS_STILL : 1
HE_MADE : 1
PULSES_PALPABLE : 1
FRAME_SUPPLY : 1
AS_PHYSICIAN : 1
IS_AND : 1
ROOM_STATES : 1
SHE_SHOULD : 1
EXACT_DATE : 1
ON_FEBRUARY : 1
TO_VERBAL : 1
SYSTEMS_PAIN : 1
HISTORY_PAST : 1
TURGOR_NORMAL : 1
ORIENTATED_EVERY : 1
PT_PALPABLE : 1
HE_ONLY : 1
NORMAL_SITTING : 1
WHILE_TO : 1
PASSING_TOOLS : 1
MG_HISTORY : 1
PATIENT_WAS : 3
HE_ON : 1
ORDERED_WAS : 1
TO_CALL : 2
SCREEN_EP : 1
PATIENT_PATIENT : 3
STABBING_PHONE : 1
CONTACT_VT : 1
REVIEWED_FOR : 1
THIS_IS : 1
PROBLEMS_VIEWING : 1
HAVING_PROBLEMS : 1
PEDAL_ACTIVITY : 1
WITH_MARILYN : 1
OF_INSTRUCTION : 1
NO_LIGHT : 1
MEDICAL_RECORD : 2
AND_USE : 1
IF_PROBLEMS : 1
DE_CHANGES : 2
BEGAN_BY : 1
PATIENT_GIVEN : 1
PFAS_HIS : 1
FAIR_CAME : 1
WERE_THIS : 1
VETERAN_VA : 1
INFORMED_THAT : 1
BASEBALL_AND : 1
VACCINATION_NL : 1
NOTE_IS : 1
WITHIN_INSTRUCTED : 1
OCD_WHICH : 1
LISTED_VETERAN : 1
RESPIRATION_ANXIETY : 1
OUTPATIENT_MEDICATIONS : 2
TAB_TWO : 1
HE_MOST : 1
NICOTINE_GUM : 2
LABRUM_RATIVE : 2
ABILITIES_IT : 1
RUMINATE_HIS : 1
PM_TO : 1
OF_BED : 1
WASNT_HELMET : 1
NO_REDNESS : 1
HER_CARE : 1
NEEDED_FOR : 1
PERFUSION_BOWEL : 1
TREATED_EPIDUAL : 1
WAS_ON : 1
CHANGES_PT : 1
PATIENT_THE : 1
LENGTH_MINUTES : 1
NOW_MONTH : 1
FRESH_PLASMA : 1
OBS_PROVIDER : 1
TEST_PROSTHESIS : 1
CONTINUES_RUMINATE : 1
NOT_ORIENTED : 1
LAST_PAIN : 1
FERROUS_SO : 1
MILD_SINUSITIS : 1
NORMAL_NO : 1
PATIENT_ANSWERED : 3
SEE_PCP : 1
BY_STATING : 1
TAB_TAKE : 4
AM_ON : 1
EHAS_OF : 1
WARFARIN_VERY : 1
ARE_QUITE : 1
INFLUENZA_LUNGS : 1
REPORTS_HE : 1
CONFIRMED_WITH : 3
NIGHT_BADR : 1
YES_RECEIVED : 1
PLEASE_BRING : 1
HE_SHOULD : 1
APPEARS_HE : 1
WITH_PHYSICIAN : 1
VISIT_ANY : 1
NOTE_595DT86 : 1
OBSTRUCTION_OR : 1
MCPHERSON_AT : 1
HE_BY : 1
CAVITIES_TO : 1
HIS_TEST : 1
CANCELLED_PATIENTS : 2
IS_ABLE : 1
HEARING_HER : 1
AND_FRACTURE : 1
VENTRICLE_LEFT : 1
WNL_RECEIVED : 1
INTAKE_AND : 2
INFECTION_ONCE : 1
ABOUT_FECAL : 1
IS_UPDATED : 1
ALLERGY_ADR : 2
SW_LAB : 1
THE_MAR : 1
NO_ED : 1
ME_THIS : 1
CONTACT_VET : 1
TESTS_VALPROIC : 1
ATTORNEY_AND : 1
LAYED_DOWN : 1
FIELD_FOR : 1
TO_EDEMA : 1
PROCEDURE_FROZEN : 1
BRIEF_REACT : 1
TIME_DISCHARGE : 1
REMOTE_NONVA : 1
AS_IMPORTED : 2
OS_ANA : 1
ML_TO : 1
FOR_HE : 1
CLC_TOMORROW : 1
RTC_IN : 1
PLAN_REVIEWED : 1
ON_MEDICATIONS : 1
CURRENT_SKIN : 1
SOCIAL_HISTORY : 1
PULSE_PAIN : 1
EDUCATION_PATIENT : 1
LEG_HAD : 1
AS_HAS : 1
BARRADAS_TO : 1
UNLISTED_AND : 1
HAVE_VETERAN : 1
ESTABLISHED_PATIENT : 1
ALLERGY_TO : 1
MEMBER_INFORMATION : 1
CAD_TURP : 1
AREA_IRREVERSIBLE : 1
SW_DRUG : 1
EVER_HAD : 1
PHYSICIAN_BARRADAS : 1
UNDERNEATH_THIS : 1
OF_SERVICES : 1
TO_WAS : 1
DENIES_CHEST : 1
IRRITABILITY_AND : 1
IMPRESSION_NONISCHEMIC : 1
MACHINE_TO : 1
TO_SUDDEN : 1
CAME_FOR : 3
MEDICATION_OCT : 1
ADMITS_STAYING : 1
MANAGEMENT_THIS : 1
NSAIDS_CAPSAICIN : 1
THIS_VISIT : 1
AT_PR : 1
RN_PAIN : 1
AND_ANXIETY : 1
RECALL_ARRHYTHMIA : 1
OF_NO : 1
FOR_MINUTE : 2
FOR_NORMAL : 1
LT_SIDE : 1
THAT_MIGHT : 1
RIGHT_FACIAL : 1
AUDITC_LB : 1
DELTOID_BP : 1
NUMBER_NO : 1
HISTORY_HISTORY : 2
RY_MONTHS : 1
FROM_VISN : 1
TEL_TRIAGE : 1
OR_GBS : 1
WERE_IDENTIFIED : 1
MILD_CAD : 1
LEFT_IF : 1
METS_LEVEL : 1
CHIROPRACTOR_THIS : 1
SUSTAINED_NOTED : 1
HTN_LEVEL : 1
AM_PATIENT : 1
CLC_NURSING : 1
THICKNESS_YO : 1
FOR_MIN : 1
HYDROCHLOROTHIAZIDE_MG : 1
STATES_IS : 1
TABLET_ACTIVE : 1
STAFF_BOBBITT : 1
PEDIS_PALPABLE : 1
HAS_ANSWERED : 3
ACETAMINOPHEN_ADDENDUM : 1
CAPILLARY_FILLING : 1
ASSESSMENT_TOILETING : 1
BED_TV : 1
LB_HYDROCHLOROTHIAZIDE : 1
NO_RECURRENT : 1
HARD_HEARING : 1
TOTAL_CBI : 1
MEDICATIONS_STATUS : 3
PLEASE_MEDICATIONS : 1
SIMVASTATIN_ORDERED : 1
AFTER_HOURS : 1
DELIRIUM_PATIENT : 1
MG_BY : 1
ANA_COMMENT : 1
STILL_IN : 1
PHYSICIAN_BH : 1
ANGIOGRAM_ALLERGIES : 1
TIBIAL_MEDICAL : 1
WEARING_AMBULATORS : 1
MEDS_TUES : 1
HX_OF : 1
FATHER_HAS : 1
TELEPHONE_CONFIRMED : 1
ANOTHER_CLIENT : 1
FOR_HAS : 1
ESTIMATED_DURATION : 1
ATTACHED_DOCUMENT : 1
PATTERN_AND : 1
RANGE_FALL : 1
CODE_TIBIAL : 1
SKIN_CODE : 1
POWER_OF : 1
REPORTS_USE : 1
IS_NOT : 2
HISTORY_BUT : 1
BREATH_IF : 1
YOU_SIX : 1
HAS_DP : 1
DIZZINESS_BY : 1
ASSISTANCE_ORAL : 1
BE_WITH : 1
REACH_ADL : 1
WENT_CONSULT : 1
WHICH_DOES : 1
OF_PAIN : 2
MY_NEVER : 1
REQUEST_MOUTH : 1
OF_ASSISTANCE : 2
RETROGRADE_MASSAGE : 1
TREATMENT_TWO : 1
OLD_DORSALIS : 1
SULTANA_FERROUS : 1
PT_SAYS : 1
CALF_TENDERNESS : 1
IMMUNIZATION_THE : 1
CALL_THE : 1
HOW_DID : 1
STAFF_VERIFICATION : 1
HTN_UNIT : 1
FLUID_NO : 1
VISN_RESPIRATORY : 1
SHOWS_MILD : 1
ATTACHED_FROM : 1
PCP_JUST : 1
OCCUR_IN : 1
LESS_ON : 1
AFTER_INDEX : 1
LAB_TO : 1
ASSESSMENT_CODE : 1
DENTAL_FOR : 1
WERE_ONLY : 1
RECURRENT_EDEMA : 1
LOCATION_ROOM : 1
TO_PCP : 1
PIOGLITAZONE_PO : 1
TO_MEET : 1
MONOTHERAPY_TO : 1
LOW_HE : 1
AND_MEDS : 1
BE_UP : 1
EFV_TETANUSDIPHTHERIA : 1
WITH_PATTERN : 1
NO_PAIN : 3
ALL_OF : 1
FROM_THE : 4
TO_REFILLED : 1
OTHERS_OR : 1
TO_THIS : 2
PM_SHIFT : 1
BERYL_RECOMMENDED : 1
PROVIDER_REVIEWED : 1
INSTRUCTION_PROVIDED : 1
HAD_SUICIDE : 1
PREOP_ASSESSMENT : 1
TO_ETOH : 1
SINEMET_PO : 1
ASSISTANCE_NUMBER : 1
TO_LAYS : 1
IN_BOTH : 1
BOTH_GROINS : 1
KG_PATIENT : 1
BADR_ADV : 1
HIS_RT : 1
THIS_SPOKE : 1
SITTING_ON : 1
LAB_DRUG : 1
PROCEDURES_ONLY : 1
BY_MCGOWAN : 1
RESPONSE_TO : 1
ORGANS_CAVITIES : 1
WARFARIN_FOR : 1
TO_INJURY : 1
PALPABLE_YES : 1
APPT_THIS : 1
MORE_CLASSES : 1
LUNGS_SOUND : 1
PRIMARY_TEAM : 1
BRADEN_SCALE : 1
AND_LITERS : 1
BE_FACTORS : 1
AM_OCTOBER : 1
SUSPICIOUS_AND : 1
SCREEN_WEIGHT : 1
WITH_DIZZINESS : 1
SAW_CHIROPRACTOR : 1
GI_ABD : 1
YEAR_THIS : 1
CONFORM_TO : 1
FACE_DECREASE : 1
PRESSURE_TO : 1
AROUND_HAS : 1
NAPROXEN_WITH : 1
CONTACT_AT : 1
DAD_MI : 1
ISCHEMIA_EF : 1
TABLET_MOUTH : 3
ANXIETY_ALTERATION : 1
ASKING_IS : 1
CHANGES_VASC : 1
HE_HAS : 4
NONV_CENTER : 1
MG_MOUTH : 4
BRADEN_FOR : 1
HAD_ADVANCE : 1
SAYS_SHE : 1
TO_DING : 1
OCCUR_THE : 1
VERBALIZES_YES : 1
INDEPENDENT_COMMUNITY : 1
UNDERSTAND_MEDICAL : 1
GUARD_OR : 1
YOUR_AND : 1
ALL_INSTRUCTION : 1
PATIENT_ADVANCE : 1
RX_EXPIRATION : 1
SUPPLY_FRAME : 2
PAIN_TEMPERATURE : 1
PLEASE_TAKE : 1
FOR_BUT : 1
PROCEDURE_ARTERIES : 1
CAPSAICIN_CREAM : 1
RISK_PAIN : 1
HOW_ARE : 1
LABS_PAIN : 1
SUPRASPINATUS_CHIEF : 1
PROBLEMS_HAS : 1
BRONCHODILATORS_STILL : 1
HOME_CARE : 1
DECREASED_TISSUE : 1
ADMISSION_DATA : 1
MESSAGE_WITH : 1
ON_OCCASION : 1
CARE_ESTIMATED : 1
THE_TEL : 1
CONTACT_NOK : 1
LISTED_FUTURE : 1
ONE_TAB : 1
LEFT_LEG : 1
TO_CLC : 1
ADMINISTERED_STEROID : 1
METOPROLOL_MG : 1
OF_NEEDED : 1
OR_DRESSING : 1
NONVA_LISINOPRIL : 1
MALE_PEDIS : 1
TIME_FOR : 1
VS_BP : 1
PR_ON : 1
TETANUSDIPHTHERIA_THE : 1
WRITER_RECEIVED : 1
HTN_DEVICE : 1
CONSENTS_INSTRUCTED : 1
CLINIC_INTERIM : 2
BLOOD_WT : 1
OF_AND : 3
LAND_CAVEDIN : 1
KNOWS_NO : 1
NO_OR : 2
AND_LIVING : 1
AND_AVOID : 1
PATIENTS_RX : 1
OF_PERSON : 1
UNTIL_HOW : 1
AND_EDUCATION : 1
NEGATIVE_COMMENT : 1
IN_GROINS : 1
BLOOD_TEST : 1
THAN_FEBRUARY : 1
BLOOD_AND : 1
WILL_BEGIN : 1
TO_PERSON : 1
WILL_EQUIPMENT : 1
PLEASE_NOTE : 1
WHEN_YOU : 1
EQUIPMENT_ULA : 1
CONSTANTLY_GUARD : 1
NURSE_ON : 1
ON_MY : 1
VACCINE_INFORMATION : 1
TAB_ONEHALF : 2
ENCLOSED_INJECTION : 1
PT_STATED : 1
WHEN_DID : 1
HANDOUT_OBSTRUCTION : 1
CORRECT_PROCEDURES : 1
SINCE_SIMVASTATIN : 1
MEDICATIONS_YOU : 1
LENSES_ENCLOSED : 1
OBTAINED_AT : 1
BACK_PAIN : 1
CALL_WITHIN : 1
NOTE_TRAUMA : 1
BDR_PATIENT : 1
CONSCIOUSNESS_ORIENTATED : 1
TENDONOPATHY_CHIEF : 1
LEVEL_IRRITABILITY : 1
OBSERVED_TELEMETRY : 1
FACILITY_PCP : 2
PERFUSION_SOUNDS : 1
ASSISTIVE_DEVICES : 1
FOR_SURGICAL : 1
NURSING_INTAKE : 1
ACTIVE_TELEPHONE : 1
YOUR_ADDENDUM : 1
HURTS_TO : 1
AT_NONVA : 1
NOTE_DISEASE : 1
WANT_STATED : 1
HELMET_PT : 1
TV_ARIPIPRAZOLE : 1
SIGNIFICANTLY_INFORMED : 1
NONVA_PEDIS : 1
CONDITION_TOTAL : 1
MUCH_NO : 1
TETANUSDIPHTHERIA_IMMUNIZATION : 1
SATISFIED_YOU : 1
OLD_WITH : 1
NURSING_UNABLE : 1
STARTED_HAVING : 1
APPT_STATES : 1
ORDERED_PATIENT : 2
FOR_MESSAGE : 1
RESOLVED_GI : 1
NOV_FUTURE : 1
FOR_FEELING : 1
HAD_ANY : 3
AGREED_TO : 1
VERBALIZED_PVU : 1
CONDITION_LAST : 1
SOURCES_STATED : 1
BY_DOCTOR : 1
OR_HOME : 1
IS_YEAR : 2
WALKS_FREQUENTLY : 1
WITHOUT_RIDES : 1
ALLERGIES_HAS : 1
AND_TO : 4
RECENT_OR : 1
EPIS_GI : 1
OFF_BROSIUS : 1
NURSE_DUE : 1
PAIN_MEDICATION : 1
REACH_INSTRUCTED : 1
PLAN_WITH : 1
IT_IS : 1
ANY_ABOUT : 1
FINGER_PRIMARILY : 1
MIDDLE_PH : 1
MG_EVERY : 1
TESTS_THE : 1
MOOD_APPROPRIATE : 1
OF_MILD : 1
CONTINUES_DO : 1
UNABLE_TO : 2
FACILITY_NOTE : 1
CONTINUE_VERBAL : 1
INDEPENDENT_NUMBER : 1
SKIN_CONDITION : 1
TOILETING_LEVEL : 1
RA_PULSE : 1
REASON_SHE : 1
DRC_AT : 1
TAKEN_TO : 1
CM_EFFECTS : 1
ARISE_USE : 1
PATIENT_ALLERGIES : 1
DUE_GO : 1
THE_BP : 1
CORRECT_COLLECTION : 1
UNDERSTAND_YOUR : 1
RT_PATIENT : 1
REVIEW_OF : 2
COMMUNITY_SKILLED : 1
WT_KG : 2
SUBJECTIVE_IS : 1
TIME_OF : 1
MOR_CALLED : 1
ASSESSMENT_ELEMENTS : 1
AND_WILL : 3
WHILE_HURTS : 1
USE_DYE : 1
PASSING_SURGICAL : 1
CARRYING_BUCKETS : 1
POST_TIBIAL : 1
TWO_RENAL : 1
HE_THAT : 1
BP_HER : 1
BROSIUS_ANGIOGRAM : 1
RESPIRATORY_PULSE : 1
WALKIN_FOR : 1
HIGH_PRESSURE : 1
PATIENT_RECEIVED : 1
IMPRESSION_FRACTURE : 1
IN_CM : 2
ALCOHOL_SCREEN : 1
ALPHABETIZED_OF : 1
VET_IF : 1
STATUS_ADDENDUM : 1
URINARY_OBS : 1
GIVE_OUT : 1
INDEPENDENT_LIVING : 1
OBSERVATION_ELEMENTS : 1
WITH_WEARING : 1
MANAGEMENT_UNLISTED : 1
BY_ACTIVE : 3
DECREASED_PERFUSION : 1
TIME_SICKENING : 1
COMFORT_PAIN : 1
TO_REACH : 1
RECONCILED_REVIEWED : 1
CONTRAST_AUSC : 1
NEEDS_ASSISTANCE : 1
VISIT_MYCOTIC : 1
IF_POSSIBLE : 1
TO_BUDGET : 1
SHIFT_NOTE : 1
LEG_PATIENT : 1
BOWEL_NORMOACTIVE : 1
AT_ON : 1
IN_ED : 1
WHEEZING_PATIENT : 1
TO_ANOTHER : 1
CAREGENERAL_595DT86 : 1
PHYSICIAN_MONTHS : 1
OF_TINY : 2
MG_TAB : 7
IN_THE : 5
DIMINISHED_TO : 1
NOTE_LISINOPRIL : 1
THERAPY_NURSING : 1
APPOINTED_PCP : 2
PT_PAIN : 1
PALPABLE_SEC : 1
HOW_SATISFIED : 1
CENTER_PM : 1
DISCHARGE_CONTACT : 1
MEDICATIONS_TELEPHONE : 1
FOR_VERY : 1
ANXIETY_IN : 1
ORDERED_PAIN : 1
10_TESTS : 1
WAS_WITH : 1
HAVING_PROBLEM : 1
WERE_CONSTANTLY : 1
FLUID_RETENTION : 1
MESSAGE_LABS : 1
NEUROLOGICAL_TAKEN : 1
SHE_SEEN : 1
PAIN_OCT : 1
PRIVACY_HE : 1
SW_WITH : 1
DAD_HAD : 1
NEW_WORSENING : 1
PHONE_NUMBER : 2
AND_CAVITIES : 1
OUTPATIENT_INPATIENT : 1
WAS_EDUCATION : 1
IF_ANXIETY : 1
TEMP_FOR : 1
NOTE_IF : 1
FOR_EVAL : 1
RESOLVED_NO : 1
APPOINTMENT_CONFIRMED : 2
APPOINTMENT_AT : 2
CARDIAC_TEACHING : 1
IS_RESIDENT : 1
BDR_VERBALIZED : 1
SHE_CHIROPRACTOR : 1
CONSCIUOUSNESS_AND : 1
NOT_VISUAL : 1
SCAN_AM : 1
SHOULDER_RETROGRADE : 1
MORNING_TO : 1
SATISFIED_ARE : 1
FOR_HISTORY : 1
APPOINTED_BERYL : 1
DUE_ETOH : 1
NKA_PEDIS : 1
ULCERS_OTHER : 1
FOR_FURTHER : 1
DING_INDICATION : 1
LABS_TIME : 1
DISCHARGE_SEP : 1
NEGATIVE_PT : 1
SINCE_ON : 1
SHOULDER_ANTERIOR : 1
HEALTH_PATIENT : 1
BETTER_UNLESS : 1
TAKE_CAPSULE : 1
MESSAGE_ON : 1
PHYSICIAN_RECEIVED : 1
TENDONOPATHY_WITH : 2
ANSWERING_UNABLE : 1
SUICIDE_ATTEMPT : 1
NOTE_TENDONOPATHY : 1
LIVING_DEFINITION : 1
BE_TO : 1
RIGHT_RETROGRADE : 1
FINISHING_TEST : 1
HISTORY_SENSORY : 1
LEARN_INCLUDE : 1
PAIN_CLICK : 2
WEARING_HELMET : 1
CARE_ATTENDING : 1
MEDS_TO : 2
VETERAN_BEEN : 1
JUDGEMENT_CLIENT : 1
THIS_WRITER : 1
NOT_TO : 1
INSTRUCTIONS_ICE : 1
PLEASE_SEE : 1
ADDENDUM_PULSE : 1
PLASMA_LIPS : 1
WHICH_REQUIRED : 1
FACILITY_ADR : 1
AREA_OF : 1
HE_HAD : 3
PT_AT : 1
MG_DL : 1
ARTHRALGIA_NO : 1
MIGHT_ALLERGIC : 1
AORTOGRAM_RUN : 1
UNLESS_ON : 1
WORKER_INDEPENDENT : 1
DIAGNOSIS_TENDINOPATHY : 1
OCCULT_TEST : 1
RADIAL_WALKS : 1
EVALUATION_CODE : 1
LENGTH_WEIGHT : 1
HE_JUST : 1
OUTPUT_CBI : 2
NONV_MEDICAL : 1
IS_SINEMET : 1
KG_LIQUID : 1
ON_OCTOBER : 1
NOTE_THERAPY : 1
EVERY_CALLED : 1
OR_HISTORY : 1
ASSISTANCE_INDEPENDENT : 2
PATIENT_ALSO : 1
TEMP_COLONOSCOPY : 1
SCREEN_OUTPT : 1
MR_ASKING : 1
NOTE_SD : 1
PATIENT_TELEPHONE : 1
AT_HAS : 1
AND_EPICRITIC : 1
AND_TABLETS : 1
HAS_INCREASING : 1
EVALUATION_MANAGEMENT : 2
CAPSULE_BY : 1
REQUIRED_TO : 1
SICKENING_PHONE : 1
DIRECTOR_WEIGHT : 1
IS_YOUR : 1
DOCUMENT_VACCINE : 1
NURSING_NOTE : 4
TRAUMA_NO : 1
FOR_CONCERNING : 1
INFORMATION_WITH : 2
YOU_EVER : 1
LEVEL_LEVEL : 1
PROBLEMS_BELOW : 1
PCP_KAREN : 1
AND_PATIENT : 2
PLEASE_THAT : 1
CALLED_WAS : 1
SHIFT_ASSESSMENT : 1
PO_AND : 1
TOENAILS_PULSES : 1
HYPERPLASIA_WITHOUT : 1
FUTURE_AND : 1
EP_OUTPT : 1
TABLETS_ACTIVE : 1
RECORD_HISTORY : 1
LOCATION_EMERGENCY : 1
FOLLOWUP_HOSPITALIZATION : 1
AT_PATIENT : 1
TREATMENT_ACCESS : 1
DAILY_SUSPECT : 1
UP_QUESTIONS : 1
HYDROCHLOROTHIAZIDE_CAP : 1
SOUND_NO : 1
YOU_TO : 1
HX_CAME : 1
FOR_PROCEDURE : 1
PAIN_RIDES : 1
RT_LEG : 1
WITH_PROM : 1
LEFT_WITH : 1
UPDATED_LIST : 1
OR_BDR : 1
EVERY_SKIN : 1
MEDICAL_CENTER : 1
AVOID_ANY : 1
ABILITIES_FEEL : 1
THAT_SHE : 1
HIS_BUT : 1
BENIGN_HYPERTROPHY : 1
VERBAL_ASSESSMENT : 1
BE_ALLERGIC : 1
PATIENTS_MOUTH : 1
DUE_TO : 4
ORDERS_AND : 1
CLASSES_AS : 1
AUDITC_WEIGHT : 1
SCHEDULING_AND : 1
PROVIDED_EFFORT : 1
OF_YOUR : 1
DP_INFORMED : 1
MDD_ACTIVE : 1
DUE_LEFT : 1
RATIVE_CHANGES : 2
ACID_LESS : 1
ARE_WITH : 1
SPENDS_MOST : 1
PALPABLE_KNEE : 1
HER_HAVE : 1
SHIFT_ML : 1
HX_PATIENT : 1
PAIN_PC : 1
YO_NOW : 1
TO_UP : 1
REDUCE_OCCUPATIONAL : 1
NOW_FINGER : 1
STOOLS_RADIAL : 1
YES_WNL : 1
WITHIN_MEDICAL : 1
INFORMED_WAS : 1
ACCESS_SCHEDULING : 1
DISPLAY_AND : 1
PROTECTIVE_HIS : 1
OTHER_TA : 1
THIS_THAT : 1
PT_REQ : 1
AND_PIOGLITAZONE : 1
DOWN_FELT : 1
VET_REPORTS : 1
PROVIDER_HAVE : 1
HOME_RESPIRATORY : 1
OF_IRRITABILITY : 1
MEDS_MAR : 1
OCD_DOES : 1
RIGHT_ANTERIOR : 1
PERSON_PATIENT : 1
FUTURE_APPOINTMENTS : 2
PRESSURE_YOU : 1
OCCUPATIONAL_THERAPY : 2
THE_IS : 1
DEVICES_INTAKE : 1
PADILLA_RN : 1
OF_COMPLETED : 1
ASSIST_WITH : 1
EQUIPMENT_NEEDED : 1
AND_WHEN : 1
MORNING_APPLY : 1
SIGNIFICANT_PATIENT : 1
HOME_FILLING : 1
LABORATORY_VALPROIC : 1
BED_WATCHING : 1
RTC_MDD : 1
IMMEDIATELY_AFTER : 1
NEW_NOR : 1
VT_NOTED : 1
PAIN_SPENDS : 1
PATIENT_WERE : 1
REPORT_ANESTHESIA : 1
TINA_DOG : 1
DATE_DISCHARGE : 1
EFV_MONOTHERAPY : 1
CONTROL_PM : 1
APPOINTMENT_CANCELLED : 2
BY_NAME : 1
OPTIONS_ADDRESS : 1
TAB_MG : 4
GUARD_WATCHFUL : 1
RENAL_ARTERIES : 1
PEDIS_LOCAL : 1
HX_PUD : 1
TEMPERATURE_AND : 1
THE_FACIAL : 1
PRIMARY_NURSING : 2
HELP_GET : 1
DING_DENTAL : 1
PULMONA_CARDIOVASCULAR : 1
EACH_COMMUNITY : 1
RIGHT_SHOULDER : 2
NIGHTMARES_ABOUT : 1
SPOKE_WITH : 1
PATIENT_AGREEMENT : 1
PC_ESTABLISHED : 1
HE_BEING : 1
OF_SEP : 1
NOT_WORKING : 1
TAKE_ONE : 1
FACILITY_APPOINTED : 2
FOR_FLUID : 1
PROBLEM_CONTRAST : 1
AT_ACTIVE : 1
AGREEMENT_APPOINTMENT : 1
WILL_CONTACT : 1
PH_WITH : 1
SKIN_TEMPERATURE : 1
ADMISSION_DEVICE : 1
RIGHT_INDEX : 1
ACETAMINOPHEN_INFORMATION : 1
OUTPATIENT_RXS : 1
PROBLEMS_LISTED : 1
THEY_STILL : 1
FACE_REPORT : 1
YOU_DOING : 1
RR_TEMP : 1
WANTS_CONTINUE : 1
CORRECTION_COMING : 1
HE_RESTING : 1
SESSION_CONTINUES : 1
IF_TO : 1
ORAL_ASSISTIVE : 1
MEDICATIONS_HYPERTENSION : 1
POSSIBLE_YES : 1
FOLLOWUP_MEDS : 1
EGGS_FEVER : 1
THAT_HAD : 1
VISTA_DISPLAY : 1
AT_SPEEED : 1
ACA_NO : 1
TROUBLE_OR : 1
SECTION_NO : 1
YOUR_MEDICATIONS : 1
TO_LEG : 1
CHEWING_GUM : 2
CALL_FOR : 1
ACTIVITY_FREQUENTLY : 1
COSIGN_FACILITY : 1
LAB_ON : 1
NOW_FOR : 1
INCLUDE_IN : 1
SCORE_SUBSCAPULARIS : 1
PRESSURE_RISK : 1
MAR_MANDATORY : 1
CALL_BUT : 1
PR_FT : 1
PROBLEMS_AND : 1
CONFIRMED_FAMILY : 2
PATIENT_AMLODIPINE : 1
PAIN_DATE : 1
ALSO_SAID : 1
UNLESS_LAYS : 1
PAIN_WENT : 1
OUTPUT_CORRECTION : 1
ALERT_ORIENTED : 1
DETACHED_OTHERS : 1
TO_TOMORROW : 1
PAIN_NO : 2
PATIENT_EDUCATED : 1
ASSISTANCE_WITH : 1
AND_BY : 1
PALPABLE_CONDITION : 1
THE_PFAS : 1
TEST_LB : 1
SWOLLEN_AT : 1
PT_STATES : 1
EVERY_NIGHT : 1
AND_BE : 1
THE_ABOVE : 1
PROSTHESIS_NOT : 1
ABOUT_TREATMENT : 1
TO_RELATED : 1
WAS_GIVEN : 2
EFV_IMMUNIZATION : 1
SHIFT_TOILETING : 1
HT_CM : 1
STATES_PAIN : 1
VERIFICATION_BOBBITT : 1
LABS_TEMPERATURE : 1
UNDERSTANDING_PVU : 1
PLEASE_CHECK : 1
SENSATIONS_DUE : 1
GUARDIAN_VERBAL : 1
ELEMENTS_PROTECTIVE : 1
SKIN_LAST : 1
ROOM_FOR : 1
DATE_SURG : 1
ANSWERED_NKA : 3
WITH_OFTEN : 1
FOLLOWS_WITH : 1
OF_ON : 2
PHYSICIAN_WRITER : 1
TO_CONTINUE : 1
USE_AUDITC : 1
ACCORDING_TO : 1
BREATH_UNSURE : 1
STATES_SHE : 1
ETC_APPOINTMENT : 1
RETROBULBAR_MANAGED : 1
CONSULT_NOTE : 1
DELIVERY_OPTIONS : 1
EVERY_FOR : 3
FELT_SHORT : 1
DORSAL_PEDIS : 1
AGREEMENT_HIS : 1
WHEN_CALLED : 1
FEELING_BETTER : 1
HAVING_THIS : 1
OF_CHEST : 1
IRRIGANT_VITALS : 1
COME_TO : 1
WALKING_AND : 1
MALE_NOW : 1
MCGOWAN_REASON : 1
PM_ACTIVE : 1
TO_SPEAK : 1
STRETCHER_THAT : 1
IMAGING_AND : 1
MYCOTIC_PEDAL : 1
AND_SENSATIONS : 1
BID_PIOGLITAZONE : 1
FAMILY_APPOINTMENT : 1
NOTE_URINE : 1
LABS_AND : 1
NEW_MEDICATIONS : 1
RESPIR_PAIN : 1
PHYSICIAN_REVIEW : 1
TO_FILE : 1
ACTIVE_TO : 1
FINGER_MIDDLE : 1
CBI_OUTPUT : 1
DISCUSSED_THE : 1
NEEDED_TUB : 1
PRESSURE_DO : 1
ACTIVE_METOPROLOL : 1
HAD_ATTEMPT : 1
ASSESSMENT_CONSENTS : 1
CAVEDIN_AND : 1
FALL_SCREEN : 1
LIVING_WILL : 1
NO_DONE : 1
IS_ATTENDING : 1
TRIAGE_HOURS : 1
REDUCE_EDEMA : 1
NO_CALF : 1
THE_WAS : 2
PATIENT_NEEDS : 1
YOU_THIS : 1
GREAT_HURTS : 1
HEARING_AND : 1
ADR_MESSAGE : 1
AMOUNT_THE : 1
DL_PAST : 1
DID_NOT : 3
HELP_HOW : 1
TO_THEM : 1
TINGLING_DENIES : 1
SURVEILLANCE_ASSESSMENT : 1
CONTRAST_LUNGS : 1
NO_SKIN : 1
TO_UNLESS : 1
IS_FINE : 1
NORMOACTIVE_TURGOR : 1
FAMILY_MEMBER : 2
DO_WELL : 1
THROUGH_SUPERWALMART : 1
BY_THAT : 1
CAN_TAKE : 1
MUSCLES_OFF : 1
METS_OF : 1
MANAGED_CARE : 1
REPORT_PARAFFIN : 1
OF_WATCHING : 1
REQ_MEDS : 1
STOP_DING : 1
VISIT_OR : 1
WAS_NOT : 1
GONE_HOW : 1
SHOWED_OF : 1
NL_BREATH : 1
PM_MOUTH : 1
PAIN_OTHER : 1
COMPLAINS_MILD : 1
PIP_REDNESS : 1
REQUIREMENTS_APPOINTMENT : 1
SHEET_WAS : 1
WITH_MEMBER : 2
UNDERSURFACE_PARTIAL : 2
CAVEDIN_HIS : 1
FOR_AND : 3
MCPHERSON_TRAVEL : 1
BELOW_FUTURE : 1
TO_LAB : 1
THIS_UNDER : 1
MAR_BECAUSE : 1
TEMPERATURE_SKIN : 1
FEELING_MUCH : 1
BEGIN_TO : 1
STILL_EFV : 2
STARTLED_WAS : 1
REMINDERS_PRIMARY : 1
THE_PAST : 1
THE_WOUND : 1
PCP_MENTIONS : 1
SCHOOL_OTHER : 1
CONSCIOUSNESS_PERSON : 1
NO_PREVENTIVE : 1
HAS_SCHOOL : 1
PO_BID : 1
LEFT_AND : 1
SIDE_WATCHING : 1
PAST_THE : 1
WALKING_CAN : 1
STATUS_REASON : 1
GUARDIANSHIP_WRITER : 1
PREPARED_VISIT : 1
SOUND_SOFT : 1
THAT_RESPONSE : 1
ATTEMPTED_CALL : 1
AT_FT : 1
HAVE_RECONCILED : 1
MOTIVATION_TO : 1
FOR_INFECTION : 2
LAB_YES : 1
FROM_ANXIETY : 1
ONEHALF_ACTIVE : 1
ON_HER : 1
YOU_CAN : 1
VET_SHE : 1
IMPORTED_THE : 2
CALL_NOTE : 1
PERSON_CLIENT : 1
NOK_GUARDIANSHIP : 1
FOR_VIEWING : 1
HAD_NEVER : 1
ALLERGIC_TO : 1
ESTABLISHED_NOTE : 1
THE_PROSTHESIS : 1
ANY_PAIN : 3
VASOVAGAL_EPIS : 1
PATIENT_HAS : 4
STATES_IBUPROFEN : 1
PT_JUST : 1
TO_BRONCHODILATORS : 1
NOT_NEED : 1
MCGOWAN_FOR : 1
ASSESSED_ACCORDING : 1
SHOWS_VERY : 1
WITH_INFORMATION : 1
THIS_NO : 1
FOR_CONSULT : 1
NURSING_PATIENT : 1
OUTPATIENT_NOTE : 1
OR_WHEN : 1
TID_THE : 1
MEDICATIONS_NOR : 1
ANESTHESIA_RETROBULBAR : 1
CLINIC_BASEBALL : 1
JUST_STARTED : 1
AND_EF : 1
SD_MG : 1
WORKING_ALL : 1
ON_SEEN : 1
OF_LEFT : 1
STAYING_AMOUNT : 1
FACE_FACE : 1
ON_VISTA : 1
MEDICATIONS_ADDENDUM : 2
OF_COAL : 1
OF_SITTING : 1
IMPRESSION_INTRAARTICULAR : 1
CLEAR_NO : 1
TO_AZITHROMYCIN : 1
THE_IF : 1
NO_OBSTRUCTION : 1
INCREASING_TO : 1
SERVICES_UNIT : 1
FRI_PAST : 1
SURGICAL_TOOLS : 1
SUPERWALMART_PAIN : 1
SIGNIFICANT_AORTOGRAM : 1
NUMBER_ANSWER : 1
CONDITION_SC : 1
STAFF_ACTIVITIES : 1
THESE_TO : 1
PCP_CONTACT : 1
PT_TO : 2
PRIMARY_PROVIDER : 1
PROXIMAL_SIMVASTATIN : 1
RADIAL_REPORTS : 1
DECREASE_LEFT : 1
THE_VENTRICLE : 1
CLEAR_SOFT : 1
OR_DETACHED : 1
LIGHT_WITHIN : 1
WOUND_DIAGNOSIS : 1
CONTACT_RE : 1
HISTORY_AND : 1
AT_PT : 1
ACTIVE_MOUTH : 1
HAS_AND : 1
LAYS_LT : 1
CORRECTION_TO : 1
VT_STARTED : 1
GLUCOSE_RESULTS : 1
ABLE_WHEN : 1
DELIVERY_FEDEX : 1
SKIN_FOR : 1
SHE_TAKE : 1
IN_MDD : 1
HYGIENE_ASSISTIVE : 1
ALL_ALOT : 1
CONSTITUTIONAL_REPORTS : 1
ONE_PO : 1
SECTION_TESTS : 1
MARILYN_MCPHERSON : 1
KG_MV : 1
SCHOOL_AND : 1
PARTIAL_REPORT : 1
OF_CONSCIOUSNESS : 2
TO_REDUCE : 1
DISCHARGE_DATE : 1
ML_CORRECTION : 1
MYCOTIC_TOENAILS : 1
JUST_YEAR : 1
OR_SIGNIFICANT : 1
CLINIC_MESSAGE : 1
PRIMARY_CARE : 4
TAKE_WITH : 1
WAS_AT : 1
CHECK_OF : 1
SOFT_SKIN : 1
SUPERVISED_BY : 1
HOURS_CALL : 1
ON_WAY : 1
AND_BEGIN : 1
PROVIDER_NONVA : 1
TO_BUT : 1
PARTIAL_INTRAARTICULAR : 1
AND_SERVICE : 1
BEING_WRITER : 1
ALTERING_SPENDING : 1
FEDEX_ADDRESS : 1
LAB_TESTS : 1
AGREEMENT_NO : 1
IS_BY : 1
IT_FEEL : 1
NOTE_UNABLE : 1
UNDERSURFACE_REPORT : 1
SIGNS_LIST : 1
HE_SHE : 1
NO_NECK : 1
VIA_STRETCHER : 1
ULCERS_OR : 1
CONDITION_PAIN : 1
LOOSE_CONSCIUOUSNESS : 1
ABOUT_WHEN : 1
BY_PHYSICIAN : 3
PVU_ALL : 1
CAME_REGULAR : 1
TO_STATES : 1
ACTIVE_MEDICATIONS : 4
WEIGHT_LB : 3
LUNGS_CLEAR : 2
ANY_MORE : 1
RENAL_WERE : 1
ADL_EQUIPMENT : 1
RN_VIA : 1
ON_CURRENT : 1
TO_RUMINATE : 1
HAD_IN : 2
COPIES_OF : 1
ANTICOAGULATION_DVT : 2
HAVE_EVER : 1
MG_ONE : 1
SO_TAB : 1
PUPILS_DILATED : 1
MANAGED_ANESTHESIA : 1
OSA_ADMITTED : 1
CLINICAL_RESPONSE : 1
ACTIVITIES_YOUR : 1
KG_HYDROCHLOROTHIAZIDE : 1
OFF_ANGIOGRAM : 1
SITE_ASSESSMENT : 1
ABOUT_OCCULT : 1
MEDICATIONS_MAS : 1
SPOKE_MARILYN : 1
PALPABLE_POWER : 1
AT_PIP : 1
FAMILY_AND : 1
AND_HIS : 1
THIS_SW : 1
YOU_UNDERSTAND : 1
PT_IS : 1
THIS_DELIRIUM : 1
BP_MAR : 1
TINY_UNDERSURFACE : 2
TAKE_ONEHALF : 2
FRAME_INJECTION : 1
SINUSITIS_TURP : 1
TURP_SUPPLY : 1
PAIN_UNACCEPTABLE : 1
ORDERS_REMOTE : 1
DISCHARGE_NOV : 1
CM_WT : 1
WITH_SUDDEN : 1
FOR_BENIGN : 1
REC_NEW : 1
ANY_MEDICATIONS : 1
IER_ON : 1
TREATED_WITH : 1
ALTERATION_COMFORT : 1
MULTIPLE_OF : 1
MALE_WHO : 1
COMPLETED_DIRECTIVES : 1
DEVICES_DYSP : 1
PROVIDED_THE : 1
LISINOPRIL_TAB : 2
HARD_OF : 1
DAILY_IS : 1
EPIS_RESOLVED : 1
CBI_IRRIGANT : 1
ON_ORDERED : 1
DVT_VET : 1
DAILY_PULSE : 1
PATIENT_TRIAGE : 1
WNL_STEEL : 1
CAD_SINUSITIS : 1
CONSCIUOUSNESS_FELT : 1
LB_MEDICATIONS : 1
SOMETHING_ON : 1
INFLUENZA_VACCINATION : 1
MOUTH_AT : 2
ADMISSION_BASE : 1
ACTIVE_PROBLEMS : 1
08_13 : 1
RECEIVED_BY : 1
GBS_THE : 1
PATIENT_SPEAK : 1
RECORD_FRICTION : 1
COME_APPT : 1
GLENOID_LABRUM : 2
NOTE_COSIGN : 1
WATCHFUL_EASILY : 1
WNL_OCCUPATION : 1
CARDIOMYOPATHY_MILD : 1
TO_PATIENT : 2
NEEDED_ACTIVITIES : 1
MG_PO : 2
ENCLOSED_SITE : 1
DOPPLE_BUT : 1
ANESTHESIA_ATTENDING : 1
REMOVAL_NOW : 1
FROM_SHIFT : 1
FROM_PCP : 1
HISTORY_FAMILY : 1
YOUR_SURROUNDINGS : 1
UNDERNEATH_ME : 1
BEEN_CURRENTLY : 1
IF_QUITE : 1
BEEN_WITH : 1
CLINIC_ACCESS : 1
BIRTHDATE_THIS : 1
WITH_FOLLOWUP : 1
NO_DISTRESS : 1
ELIGIBILITY_HAVE : 1
LIAISON_CAREGENERAL : 1
JUST_IS : 1
NUMBER_LISTED : 1
PAIN_SAW : 1
OF_OF : 1
PULSE_THE : 1
NURSING_HOME : 1
ADMITTED_WITH : 1
VASOVAGAL_RESOLVED : 1
AMLODIPINE_MG : 1
ASKING_FOR : 1
WHEN_IF : 1
HER_TO : 1
HEAD_COLD : 1
ANESTHESIA_BLOCK : 1
ACTIVE_HTN : 1
LIKE_CRAWLING : 1
CLICK_ON : 2
FACE_TO : 2
MEDICATIONS_REQ : 1
ACTIVITIES_DAILY : 1
IN_BM : 1
TAKE_AND : 1
SURG_NOTE : 1
THE_SOURCES : 1
RHONCHI_VASOVAGAL : 1
STATUS_FOLLOWING : 1
ORIENTATION_SIGNS : 1
PHYSICIAN_RY : 1
POSSIBLE_PROVIDER : 1
MONOTHERAPY_WANTS : 1
GIVEN_THIS : 1
PRESENT_PEDAL : 1
PULSE_LEARNER : 1
ANY_NEW : 1
RTC_SUBSCAPULARIS : 1
DORSALIS_DOPPLE : 1
NUMB_OR : 1
WAS_INSTRUCTED : 1
CONDITION_TREATMENT : 1
TO_HAS : 2
AND_THIS : 1
CONFORM_BUDGET : 1
AND_OVERALL : 1
THIS_HAS : 2
HTN_CALCIUM : 1
VISIT_TOENAILS : 1
REQUEST_TRIAGE : 1
HAD_MADE : 1
RD_TELEPHONE : 1
REPORTS_CUT : 1
ON_MT : 1
HYGIENE_DEVICES : 1
ANY_SAW : 1
LUNGS_NL : 1
THE_ED : 1
PHYSICIAN_YOU : 1
PT_DRC : 1
GI_NO : 1
EF_CARDIOLOGY : 1
FOLLOWUP_SUSTAINED : 1
MEAN_SD : 1
SCALE_FOR : 1
LEFT_THICKNESS : 1
INDICATION_ANTICOAGULATION : 2
BY_RN : 1
AREA_SURGERY : 1
INSTRUCTED_TO : 2
UNDER_AM : 1
NURSING_CLINIC : 1
BY_HELP : 1
VENTRICLE_SHOWS : 1
DOCUMENT_KELLY : 1
NO_CALL : 1
ARTERIES_BOTH : 1
EXAMINATION_ISSUES : 1
IN_VET : 1
FACILITY_ALLERGY : 1
FT_MT : 1
OR_NURSING : 1
OCCUPATION_STEEL : 1
WALKING_LAND : 1
HIS_ON : 1
WERE_ON : 1
HERE_IS : 1
CAME_MINUTE : 2
THIS_YEAR : 1
PT_ADMITS : 1
FROM_DECREASED : 1
DOCUMENT_INFORMATION : 1
CHEST_ICDCM : 1
SHE_SCHOOL : 1
FECAL_OCCULT : 1
CONCEPT_OF : 1
OF_FROZEN : 1
FOLLOWUP_ARRHYTHMIA : 1
CLIENT_HAVE : 1
TENDERNESS_DATE : 1
BASE_CURRENT : 1
ONCE_GREAT : 1
AT_ALSO : 1
TAKEN_HR : 1
HAVE_BEEN : 1
WERE_BILATERALLY : 1
UNDERSATNDING_WNL : 1
EF_PULMONA : 1
SOB_INPATIENT : 1
RECALL_FOLLOWUP : 1
PAST_FAMILY : 1
FAIR_CLIENT : 1
EDEMA_THERAPY : 1
TO_OUT : 1
KNOWLEDGE_KNOWS : 1
SKILLED_HOME : 1
MOUTH_MOR : 1
ALLERGY_DATA : 1
NOT_RTC : 1
SIDE_BED : 1
PREDICTING_SORE : 1
MINUTE_HE : 2
THE_REQUIRED : 1
ESTIMATED_OF : 1
WHEN_WAS : 1
FUTURE_TO : 1
NOTE_LABS : 1
CAN_NAPROXEN : 1
TEST_WT : 1
TWO_ONEHALF : 1
AND_HER : 1
QUESTIONS_ABOUT : 1
NO_SURGERY : 1
VISIT_HERE : 1
CARE_DURATION : 1
NONISCHEMIC_WITH : 1
REVIEWED_THE : 1
PT_APPEARS : 1
RETROBULBAR_BLOCK : 1
CONTACT_VETERAN : 1
PHYSICIAN_HAVE : 1
AFTER_THE : 1
AGREED_MEET : 1
KAREN_CARE : 1
CURRENTLY_WITHIN : 2
PATIENT_ON : 1
ANOTHER_PERSON : 1
REFILL_WAL : 1
ETC_CANCELLED : 1
HAVE_YOU : 2
WITH_ADMITTED : 1
WRITER_FOR : 1
OBSERVATION_NEURO : 1
DOES_ORIENTED : 1
NUMBER_FOR : 1
DURATION_OF : 1
CALL_WAS : 1
STRESS_TEST : 1
MEDICATION_WAS : 1
MEDICATION_LIST : 1
DAILY_GONE : 1
ALSO_INSTRUCTED : 1
MG_DAILY : 2
SINEMET_TID : 1
DEFICIT_HARD : 1
BEGAN_STATING : 1
INPATIENT_WITHIN : 2
ALLERGIC_AND : 1
PO_COMMUNITY : 1
RANGE_MG : 1
ASSOCIATED_WITH : 1
TO_INCLUDE : 1
ANTICOAGULATION_INTERIM : 2
RART_REMOTE : 1
ISCHEMIC_CARDIOOMYOPATHY : 1
LAB_DELIVERY : 1
CM_LB : 1
LABS_REVIEWED : 1
MEDICAL_HISTORY : 2
YOUR_MEDICATION : 1
DOPPLE_HE : 1
EF_CONSULT : 1
DEFINITION_CLC : 1
HOOVER_TINA : 1
PER_CLINIC : 1
BADR_BRIEF : 1
HAVE_WHICH : 1
DIRECTIVE_SCREENING : 1
INFERIOR_MG : 1
KNEE_SC : 1
THIS_INFORMED : 1
WORK_METS : 1
TO_REQUIREMENTS : 1
LIMITS_NO : 1
EVERY_MOR : 1
MOOD_MEDR : 1
CREAM_GM : 1
WITHOUT_URINARY : 1
RECORD_NO : 1
EXPERIENCING_BLACK : 1
! Stats words=1081  pairs=4371
