# Supplementary material for: Predicting the Risk of Suicide by Analyzing the Text of Clinical Notes
Source: PLoS One. 2014 Jan 28;9(1):e85733. doi: 10.1371/journal.pone.0085733 (PMC3904866; doi:10.1371/journal.pone.0085733)
Supplement: Appendix S3 — Machine Learning Libraries and Methods: This section is provided to enclose the open source (Apache License) classifier used for the building of the statistical models, specifically for the purposes of study reproducibility. A detailed account of these tools is intended for another publication. (ZIP) [file pone.0085733.s003.zip › Appendix3/ML_libs/Regression_testing/group1/processed/grp1-pt-1036.dat]

!  Done reading
! Total word count = 1986
! Total unique words = 927
! Total pair count = 3968
! Total unique pairs = 3586
CONTACT : 5
OBSTRUCTIVE : 1
OCULAR : 1
SORE : 1
AT : 10
HER : 2
CONSTANT : 1
ORDERED : 2
SHORTLY : 1
FEELING : 1
CRC : 1
QUESTIONS : 1
GIVING : 1
LISINOPRIL : 1
FINGER : 4
PROBLEMS : 4
LOWER : 2
URINE : 1
YELLOW : 1
ULCER : 1
NASAL : 1
REFILLS : 1
WEIGHT : 1
BEEN : 3
STAY : 1
DANGEROUS : 1
SAN : 1
THERAPY : 4
PRELIMINARY : 1
LIVING : 3
UNILATERAL : 1
SEND : 1
REFILL : 1
YOURSELF : 1
AWARE : 1
NONVA : 2
DECEMBER : 1
SYMPTOMS : 2
OUTPATIENT : 8
INTAKE : 2
WEEKLY : 2
SCORED : 1
RANGE : 1
INPATIENT : 1
OVER : 1
LO : 1
COUNSELING : 4
TOXICITY : 1
MG : 11
DOSING : 1
ON : 16
QUIT : 1
PRESSURE : 2
USE : 3
DILATE : 1
TEL : 1
VIA : 1
DISCHARGED : 1
FOREHEAD : 1
SUPPLIES : 3
BEHAVIORS : 1
TWICE : 2
COMMUNICATES : 1
REVEALS : 2
ANESTHESIOLOGIST : 1
GOOD : 1
LEVEL : 5
SHAW : 1
INACTIVATED : 1
ALCOHOL : 3
CHANGES : 6
COMMUNICATED : 1
SOCKS : 1
PERSONAL : 1
DRUGS : 1
UPDATE : 1
FRAME : 2
INTO : 2
HIS : 10
EDEMA : 2
SUBCUTANEOUSLY : 1
GENITOURINARY : 1
ENDOBROW : 1
APPROXIMATELY : 1
READINGS : 1
LABRUM : 2
HOUSEHOLD : 1
PROVIDER : 1
SHE : 4
PO : 1
RAILS : 2
UP : 4
APPROPRIATE : 1
NEURO : 1
THEN : 1
PVD : 1
LOCATION : 1
PERCENTILE : 2
ALERT : 3
RASH : 1
SHARED : 1
MAA : 1
TORADOL : 1
KNOWN : 1
FOSTER : 1
TEST : 4
NOTE : 17
IMM : 1
CONTACTED : 1
LDL : 1
PRIOR : 1
DO : 2
VERBAL : 1
DOES : 6
DATE : 4
TREATMENT : 1
ANTIPSYCHOTICS : 1
COMMENT : 1
FAILED : 1
FACT : 1
BLOOD : 5
DAILY : 4
SAME : 1
THREE : 1
PA : 1
RENT : 1
WORKER : 2
ASSIST : 2
NOX : 1
HAVE : 13
MALLOY : 1
OPTION : 2
APPOINTMENT : 4
WOULD : 1
FOLLOW : 2
DEPRESSIO : 1
ASK : 1
OF : 36
REPLACEMENT : 1
INCLUDE : 2
XLESION : 1
SOLUM : 1
FROM : 5
QHRS : 1
URETHERAL : 1
TAB : 4
LEFT : 11
CALLER : 2
REQUIRED : 2
HAS : 8
WHEEZING : 1
FOR : 25
LENSES : 1
MEDICAL : 6
PERCEPTION : 1
CONDITION : 1
SAID : 1
ENCLOSED : 1
ACTIVITIES : 1
REFLUX : 1
TIBIAL : 1
LOSARTAN : 1
MIDLOW : 1
LIPID : 1
ORDERS : 2
NONSTERILE : 1
HOMELESS : 1
MORNING : 2
EXTREMITY : 1
QUIETLY : 1
INR : 3
AN : 4
MOIST : 1
OBTAINING : 1
KNEE : 3
HEART : 3
COMPLAINT : 4
SIGNATURE : 2
SC : 1
PREREGISTER : 2
INFILTRATES : 1
EXCEPT : 1
MY : 1
OUTPT : 1
REGENT : 1
INSTRUCTION : 1
MUST : 1
NUM : 1
REALLY : 1
INFLUENZA : 2
MESSAGE : 1
APPARENT : 1
GEN : 1
PHYSIO : 1
THINGS : 1
DENIED : 1
FOREIGN : 1
STAND : 1
HOARSENESS : 1
EYE : 2
ASSESSMENT : 7
ROM : 1
SERUM : 1
PRETHERAPY : 1
DOG : 1
WHEEL : 1
NEW : 1
MOUTH : 4
ATTENDING : 1
APEX : 1
PRESENT : 1
CRAMPS : 1
BREAST : 1
STARTING : 1
LINE : 1
BILATERALLY : 1
ENCOURAGED : 1
BM : 1
LIFTING : 1
SPENDING : 1
INFORMATION : 3
ANESTHESIA : 2
ADEQUATE : 1
ARE : 2
REORDEREDCOPY : 1
NUMBERS : 1
INITIAL : 1
ANSWERED : 3
INDEPENDENT : 4
NEED : 3
HYPERTENSION : 4
ELEVATED : 1
CENTER : 1
EXAM : 2
GL : 1
PERSON : 3
RECENTLY : 1
APPLY : 1
BROTHER : 1
RECEIVED : 5
CPRS : 1
SURGERY : 1
THE : 41
ADMIN : 1
FILED : 1
ASPIRIN : 1
GROUP : 1
PRESENTS : 1
EXPIRED : 1
OCT : 1
TX : 1
PULSES : 1
BODY : 1
CENTERED : 1
SIGNIFICANT : 1
BLVD : 1
BOWEL : 1
PREVENTIVE : 1
MAINTENANCE : 1
PHSOME : 1
GENERAL : 1
COLOR : 2
SEC : 1
CAD : 2
LEG : 1
BP : 6
BE : 5
MEDS : 3
BECAUSE : 1
CT : 1
POST : 3
OL : 2
DUE : 2
ADV : 1
CM : 2
THEIR : 1
PSYCHOLOGY : 2
DESCRIBE : 1
CAP : 1
STATED : 2
BATHING : 2
SEVERE : 2
ISSUES : 1
ALLOW : 1
SOUNDS : 2
REVIEWED : 2
HEAL : 1
CLEANSING : 1
AXIS : 1
ISSUE : 1
GET : 1
ANTIHYPERTENSIVES : 1
RA : 1
BEFORE : 4
WT : 2
POROKERATOSIS : 1
OTHER : 11
ALL : 1
REMOTE : 1
AROUSABLE : 2
GLU : 1
END : 1
LIFE : 1
ASSISTANCE : 3
BED : 1
NURSING : 7
MELLITUS : 1
CONTRACT : 1
BUSTED : 1
RXS : 1
FOLLOWING : 2
OR : 14
IDENTIFIED : 4
FOLLOWINGUP : 1
NEEDLE : 1
BOTH : 3
SHIFT : 6
YEAR : 2
TEMP : 1
SELF : 1
LUMPS : 1
PATIENT : 26
COPY : 3
ALLERGIES : 3
REFER : 1
DIAGNOSIS : 1
POSSESSIVE : 1
WITHOUT : 2
RELUCTANTLY : 1
PULMONARY : 1
SENT : 1
BLEPHAROPLASTY : 2
LB : 2
LANE : 1
EVAL : 1
HERBAL : 1
AIR : 1
TRANSPORT : 1
DE : 3
PCIOL : 1
GI : 1
ANXIETY : 3
SEEN : 3
THAN : 1
FOOD : 1
VALVE : 2
RARELY : 1
OUTGOING : 1
MEMORY : 2
NURSE : 4
APARTMENT : 1
AUDITC : 3
EXCUSE : 1
DESTINATION : 1
CHRONIC : 2
DECREASE : 1
ASPECT : 1
ANDO : 1
COME : 4
TAKE : 3
ROUTINE : 1
INCREASE : 2
ROOM : 1
MONITORED : 1
PATCHES : 1
ANY : 2
IMPROVED : 1
DISCHARGE : 2
CAME : 1
THAT : 10
VISIT : 2
NORMAL : 2
DEPRESSED : 1
MOISTURE : 1
STAFF : 2
RECORDS : 1
SERVICE : 2
AVAILABLE : 1
RIGHT : 3
LIP : 1
PC : 1
BREATHING : 1
OD : 1
INJECT : 1
ABOUT : 1
REDONE : 1
AL : 1
ONE : 5
NITROGEN : 1
CONSIDER : 1
PLEASANT : 2
UNIT : 1
THINK : 1
EFFECTS : 2
IBUPROFEN : 1
GN : 1
PTS : 1
NKA : 3
NAME : 3
PAT : 1
HYPERLIPIDEMIA : 1
CARE : 2
TABLET : 3
LENS : 1
TROPICAMIDE : 1
SAT : 1
EVERY : 5
YOU : 7
AGE : 1
ENVIRONMENT : 1
SEVERAL : 1
LISTED : 1
CL : 1
BX : 1
SCREENING : 5
SKIN : 3
THROMBOSIS : 1
MORPHINE : 1
TIMES : 1
VOICED : 1
WOMAN : 1
IS : 22
INFORMED : 3
DL : 1
OK : 1
NOT : 13
ISSUED : 1
USUALLY : 1
PAST : 2
FLUIDS : 2
EQUAL : 1
CHAIR : 1
GUARD : 1
DOCUMENT : 2
IF : 8
REASON : 2
THERE : 1
PLANTAR : 1
PENDING : 1
WALKING : 3
OXYGEN : 1
SCORE : 8
CXR : 1
PERRLA : 1
HURTS : 1
WRITE : 1
LIMITED : 2
OFFICIAL : 1
MDD : 1
HOME : 5
IM : 1
ONCOMING : 1
SIX : 2
NOTED : 3
WORSEN : 1
POSITIVE : 1
INDIVIDUAL : 2
SUPPLEMENTS : 1
DR : 1
SOCIAL : 2
HOSPITAL : 2
RECOMMENDATION : 1
UNITS : 1
MAIN : 1
RETURN : 2
ONEHALF : 1
PANEL : 1
HOPELESS : 1
EVALUATION : 5
MEDSURG : 1
PROGRESS : 5
KEEP : 1
RHYTHM : 1
REHAB : 1
HP : 1
ASSESS : 1
THESE : 1
VISION : 1
POOR : 2
VET : 3
TALK : 1
STOOL : 1
EXPLAINED : 1
ADULT : 1
UPCOMING : 1
PREREGISTRATION : 1
ALPHABETIZED : 1
PARTNER : 1
CERTIFICATE : 1
MONIOTR : 1
MINUTES : 2
DROP : 1
STRESS : 1
FOLLOWUP : 4
JOURNAL : 1
BACK : 3
MAKE : 1
REGARDS : 1
RECORDED : 1
HEIGHT : 1
MALE : 2
SUBJECT : 1
ADDENDUM : 2
CHECK : 1
SCAN : 1
GRAPEFRUIT : 1
BY : 10
NO : 20
IC : 1
INTERESTS : 1
CONSCIOUSNESS : 1
AM : 3
REASSESSMENT : 1
CHIEF : 4
INCISION : 1
IMPAIRMENT : 2
DISTRESS : 1
PRACTITIONER : 1
OCCASION : 2
MOOD : 1
PUSHING : 1
CHANGESPT : 1
LIVES : 2
UPPER : 3
EVENT : 1
REPORT : 8
PEOPLE : 1
RISK : 2
CONVERSATION : 2
CLINIC : 2
ELECTRONICALLY : 1
TONOMETRY : 1
ANTIDEPRESSANTS : 1
LAYED : 1
HOW : 2
MECHANICAL : 1
DELUSION : 1
PRODUCTS : 2
STRIAE : 1
SPECTACLE : 1
VERBALLY : 1
SINCE : 1
INCORRECT : 1
TO : 54
CHANGE : 3
BMI : 2
PNEUMONIA : 1
IV : 1
PRN : 1
PREOPERATIVE : 1
ACHING : 1
OFFICE : 1
ACCURATELY : 1
MARINA : 1
ADVISED : 2
OBTAINED : 1
MON : 1
ADMINISTRATIVE : 1
DOSE : 2
HYPERCHO : 1
OBJECTIVE : 1
SMOKING : 1
PROCEDURE : 5
REQUESTING : 1
AFFECT : 1
MRI : 1
LOTION : 1
WILL : 7
OFTEN : 2
APPEARANCE : 2
UNLISTED : 2
BUT : 6
MEMORIAL : 1
ASKED : 2
AVOID : 1
TYPE : 3
DEPTH : 1
HIVES : 1
ISONIAZID : 1
LIQUID : 1
SEE : 1
ALONE : 2
PLEASE : 2
STATUS : 6
IMMEDIATE : 1
MIGUEL : 1
JUDE : 1
MEDICATION : 4
STOP : 1
DIABETES : 1
READER : 1
DC : 1
BUMPS : 2
MARITAL : 1
DRINKS : 2
WANT : 2
COMMENTS : 2
ATTEMPTED : 1
SUPPORTIVE : 2
TRANSMISSION : 2
SINGLE : 1
OUT : 1
VERBALIZATION : 1
FRICTION : 1
BREAKING : 1
CONTINUE : 1
TOTAL : 2
LIGHT : 3
SWELLING : 1
LBS : 1
FIND : 1
EXAMINATION : 2
ST : 3
WANTS : 1
VILLE : 1
OCC : 1
AMMONIUM : 1
HISTORY : 7
HOURS : 3
REACTION : 1
LEGS : 1
THANKS : 1
RELATIONSHIPS : 1
HIMSELF : 1
RANK : 2
HEALTH : 2
FORGETFUL : 1
CHECKLIST : 2
RATIVE : 3
WERE : 2
COGNITIVE : 1
DISSATISFIED : 1
VIEW : 1
MAN : 1
FILL : 1
WOUND : 1
MENTION : 1
INSTRUCTIONS : 1
ERYTHEMA : 2
INDICATED : 1
SITE : 1
LACTATE : 1
MATERIAL : 1
PICKED : 1
REFERRAL : 1
REGISTRATION : 1
AGREED : 2
MAR : 1
LODGING : 1
TRIAGE : 1
KG : 2
AMBULANCE : 1
VS : 1
MORE : 3
PE : 1
SL : 1
PREPROCEDURE : 1
FAMILY : 2
OPS : 1
PROBLEM : 6
EYES : 2
DISEASE : 1
PAIN : 19
ORIENTATION : 3
SPOT : 1
ADDRESSED : 2
RECHECKED : 1
WHEN : 5
RECORD : 1
EXTERNAL : 1
AS : 2
CABG : 1
RN : 1
XYZZY : 2
CORRECTION : 1
WARFARIN : 2
THROUGH : 1
FLEXARIL : 1
OUTPUT : 3
WAS : 11
AST : 1
RESTLESS : 1
PM : 3
HEENT : 1
TELEMETRY : 1
WITH : 13
AFTER : 1
SPEAKING : 1
ADMISSION : 2
STILL : 1
GUARDIAN : 1
LEAVING : 2
AC : 2
TEMPERATURE : 1
CAUSING : 1
COMMUNICATION : 1
PUTTING : 1
HIV : 1
CENTRAL : 2
SIG : 1
SCALE : 1
ACTUAL : 1
INDEX : 3
VOICEMAIL : 1
ABD : 1
INCLUDING : 4
PCP : 1
ULA : 1
MUSCULOSKELETAL : 1
SAYS : 1
FOBT : 1
INTACT : 1
CONFIRMED : 1
CYCLOBENZAPRINE : 1
ONSET : 1
NARCOTIC : 1
IT : 5
EACH : 1
SHOT : 1
CLIENT : 2
QUALITY : 1
DENIES : 1
LIST : 2
PHARMACY : 2
CARRY : 1
NECESSARY : 1
OT : 1
OLD : 2
DRAWN : 1
FOOT : 1
PERIORBITA : 1
IMMUNIZATION : 1
VETERAN : 6
QTY : 1
CAPSULE : 1
RELIEF : 1
PT : 8
INJURY : 1
LATERALITY : 1
SUPPLY : 2
EQUIPMENT : 1
SHOWER : 1
PREVENTIONS : 1
COMPLICATION : 1
TIME : 5
SIT : 1
CODE : 3
ETHNIC : 1
DRIVER : 1
ESOPHAGEAL : 1
PROCEDURES : 1
AREA : 2
AEROSOL : 1
ORIENTED : 1
HYGIENE : 2
PSURHX : 1
CURRENTLY : 1
LOOK : 1
WALK : 1
ADDITIONAL : 1
MINIMAL : 1
SIDE : 3
JOINT : 1
BREAKFAST : 1
ALDRETE : 1
BETWEEN : 1
BATHROOM : 1
THICKNESS : 2
MM : 1
MAPLEVIEW : 1
CALL : 8
DID : 6
AROUND : 2
RISING : 1
ESTABLISHED : 1
ILLNESS : 1
MEDICATIONS : 10
LOST : 1
MR : 2
SHOW : 1
FLOATING : 1
ARRIVAL : 1
SUN : 1
INTENDED : 2
OPERATION : 1
ACCURATE : 2
DIETS : 1
MOBILE : 1
STENTS : 1
SITUATION : 2
TELEPHONE : 1
PVC : 1
AND : 34
BILATERAL : 1
NOTIFICATION : 1
UNSPECIFIED : 4
HOUR : 1
SOB : 1
VERIFICATION : 1
COOPERATIVE : 1
REPORTS : 1
VACCINE : 2
JUN : 1
SUBJECTIVE : 1
RESPONSE : 3
COMMUNITY : 1
STRICTURE : 1
POSTOP : 1
FRI : 1
PROCESS : 1
RESULTS : 4
PER : 2
ISOSORBIDE : 1
BREATH : 2
YES : 4
ABLE : 1
FURTHER : 1
RECENT : 1
CHO : 2
CONSENT : 2
FACE : 4
IN : 23
ADMINISTERED : 2
LOW : 1
MAY : 1
YOUR : 2
WHOM : 2
MANAGEMENT : 5
STATE : 1
EXPR : 1
GIVEN : 3
UNSURE : 1
ANTERIOR : 2
PCO : 1
APPT : 6
TAKING : 4
WHO : 1
ED : 4
UPON : 1
MISSOULA : 1
SS : 2
THROBBING : 1
VERY : 2
PHYSICIAN : 2
LACERATION : 1
PALPABLE : 1
PHYSICAL : 1
CURRENT : 2
TEAR : 2
SGOT : 1
CONTROL : 1
CP : 1
ACTIVE : 8
URGENT : 2
HIM : 1
KNOW : 1
PULSE : 2
HE : 14
PROSTHETIC : 1
RX : 3
THEY : 1
NEEDS : 6
OPPORTUNITY : 1
TREATED : 1
BEHAVIOR : 1
OLEMIA : 1
PROFILE : 1
MEDIUM : 1
NEUROPATHY : 1
WEIGH : 1
MEDIAL : 1
FELT : 1
COMPLETED : 1
MEMBER : 1
APPTS : 1
IMPRESSION : 1
INSIDIOUS : 1
THIS : 9
VSS : 1
ECTOPY : 1
DIFFICULTY : 1
UPRIGHT : 1
LPN : 1
MONO : 1
ML : 3
PHONE : 3
GLENOID : 2
CLEAR : 2
ENCROACHING : 1
PAMPHLET : 1
RESPONSES : 1
TOUCH : 1
LAST : 1
EDUCATION : 1
HAD : 3
FLOWN : 1
UCINATION : 1
SIGNS : 2
INCITING : 1
PATIENTS : 1
SESSION : 1
CY : 1
POV : 1
STATES : 4
HITTING : 1
OCCUPATIONAL : 2
RENAL : 1
PROVIDED : 2
EXTENT : 1
DRINK : 1
DETAILING : 1
NEGATIVE : 4
AWA : 2
WHILE : 1
SHORT : 1
NONE : 4
WRITTEN : 2
LACHYDRIN : 1
II : 1
DECREASED : 1
COMMINUTED : 2
NONLATEX : 1
ICDCM : 1
RESP : 2
RD : 1
MISSING : 1
DOWN : 2
COMPLAINTS : 1
TO_PT : 1
PROBLEM_OTHER : 3
FELT_OF : 1
SOUNDS_NASAL : 1
INJURY_COLOR : 1
OCCUPATIONAL_PROGRESS : 2
SMOKING_CY : 1
UNSPECIFIED_IDENTIFIED : 1
QUIT_TAKING : 1
SHORT_BREATH : 1
TABLET_BY : 3
MOBILE_TO : 1
SENT_THE : 1
RELUCTANTLY_IS : 1
BLOOD_ADMINISTERED : 1
ALONE_HIS : 1
TAKING_HIS : 1
TIBIAL_PALPABLE : 1
DRINKS_ON : 2
NO_MAPLEVIEW : 1
NONE_LEFT : 1
YOUR_ROUTINE : 1
PATIENT_SEEN : 1
FOR_AGREED : 1
LACHYDRIN_SIGNATURE : 1
OR_CONTACT : 1
PROCEDURE_PAMPHLET : 1
MAINTENANCE_FOLLOWUP : 1
OCT_AND : 1
FOR_CHANGESPT : 1
OUTGOING_NURSE : 1
SURGERY_DRIVER : 1
EXAM_ANTIHYPERTENSIVES : 1
AXIS_PCO : 1
EQUAL_BILATERALLY : 1
BEFORE_ARRIVAL : 1
PULSE_WT : 1
SS_THIS : 1
DAILY_MG : 1
UPCOMING_APPTS : 1
FOR_HEART : 1
HIS_MAIN : 1
WITH_MM : 1
FOR_ETHNIC : 1
WILL_HAVE : 2
AVAILABLE_CALL : 1
DL_CALL : 1
ADMISSION_SAYS : 1
HISTORY_IN : 1
OUTPUT_ML : 1
ANXIETY_ABLE : 1
LANE_NO : 1
FOBT_AT : 1
YOUR_DRIVER : 1
CENTERED_OD : 1
DESTINATION_RETURN : 1
INCLUDING_SUPPLIES : 3
MDD_HE : 1
FOR_FOR : 1
ON_TO : 1
MOUTH_EVERY : 2
MARINA_LPN : 1
NECESSARY_OR : 1
EYES_CAUSING : 1
THROMBOSIS_JUN : 1
REGISTRATION_MEDICATION : 1
ORIENTATION_ENVIRONMENT : 1
IF_ON : 1
SMOKING_SIDE : 1
DOES_NEED : 1
CALL_NURSE : 1
IN_HYPERTENSION : 1
VISIT_NAME : 1
SC_ED : 1
PATIENT_HAD : 2
USE_THE : 2
MEMORY_INTACT : 1
ON_MEDIAL : 1
TO_HIS : 2
PROGRESS_THIS : 1
SERVICE_STARTING : 1
SINCE_THIS : 1
LOW_OF : 1
CHIEF_OF : 1
PM_TWICE : 1
MECHANICAL_ERYTHEMA : 1
INPATIENT_ORDERS : 1
HER_NURSE : 1
THE_PATIENT : 6
MORE_ON : 2
LEFT_CM : 1
LIMITED_ASSIST : 1
BUT_NEEDS : 1
HAVE_AND : 1
PARTNER_HAS : 1
MOBILE_HOME : 1
MEDICAL_PROCEDURES : 1
PT_STOP : 1
FOR_PULSE : 1
MINUTES_MEDICATION : 1
FINGER_DECREASED : 1
INCORRECT_WILL : 1
MEDICATIONS_HERBAL : 1
AND_WRITTEN : 1
GENERAL_REQUIRED : 1
AROUSABLE_IN : 1
PSURHX_HYPERLIPIDEMIA : 1
CODE_STRICTURE : 1
ACHING_REDONE : 1
BOTH_EYES : 2
DECEMBER_BLOOD : 1
OCT_PATIENT : 1
VERY_WITH : 1
NEEDS_CALL : 1
OR_LUMPS : 1
HE_WAS : 1
REACTION_IS : 1
PROSTHETIC_REASON : 1
NOTE_HISTORY : 1
FOR_OF : 1
IMMUNIZATION_HYPERCHO : 1
SHE_VERY : 1
URETHERAL_STRICTURE : 1
EXTENT_HE : 1
TO_ABOUT : 1
FRAME_ENCLOSED : 1
PATIENT_DENIES : 1
THE_VISION : 1
IS_INTENDED : 2
NURSE_COMMENTS : 1
WHEN_QTY : 1
LISINOPRIL_MG : 1
PAST_MEDICAL : 1
INDEPENDENT_HYGIENE : 1
STATES_WILL : 1
AT_EVALUATION : 1
NOTE_WEEKLY : 1
STATES_THAT : 1
WHEEL_PUTTING : 1
APPTS_INFORMATION : 1
CHANGES_ASSESSMENT : 1
BREATH_MEDICAL : 1
CLIENT_NOT : 2
IN_GEN : 1
THE_TOTAL : 1
ONEHALF_BY : 1
BLEPHAROPLASTY_EDEMA : 1
BY_IF : 1
TO_FILL : 1
BY_PATIENT : 1
BEEN_ISONIAZID : 1
AUDITC_NEGATIVE : 3
PER_EDUCATION : 1
HEART_PRESSURE : 2
EXPLAINED_THAT : 1
PULSE_RESP : 1
AND_CALL : 1
NEEDS_AC : 1
OF_THAT : 1
OCULAR_HYPERTENSION : 1
OUTPATIENT_STATUS : 2
LOTION_ML : 1
MEMORY_STRESS : 1
TO_TAB : 1
YOU_NOT : 1
MAR_COMMENTS : 1
FURTHER_SUBJECT : 1
CARE_FOR : 1
BATHING_OF : 2
COUNSELING_IDENTIFIED : 1
WANTS_TO : 1
BREATHING_HOARSENESS : 1
THIS_ATTEMPTED : 1
OR_UNSPECIFIED : 1
UNITS_SUBCUTANEOUSLY : 1
HISTORY_AS : 1
PHONE_WILL : 1
REFLUX_BP : 1
DATE_JUN : 1
OL_TO : 1
ADULT_CARE : 1
DOSING_SUBJECT : 1
SUPPLY_SUPPLY : 1
IN_THEIR : 1
ISOSORBIDE_MONO : 1
MEDS_AGREED : 1
IF_SYMPTOMS : 1
THROUGH_PROCESS : 1
COMMUNICATED_CPRS : 1
REPORTS_PENDING : 1
AT_CL : 1
HOME_MOBILE : 1
USE_OF : 2
PM_FOR : 1
TYPE_OR : 1
THAT_MAY : 1
IN_ADULT : 1
HURTS_ROM : 1
LACTATE_ML : 1
NOT_AT : 1
INFORMATION_EFFECTS : 1
UP_OL : 1
PTS_BP : 1
COLOR_YELLOW : 1
KG_THIS : 1
NOTE_HP : 1
OR_OTHER : 1
WILL_COMMUNICATED : 1
RHYTHM_OUTPUT : 1
WAS_TAKING : 1
BUT_THE : 1
NEUROPATHY_THIS : 1
BEEN_MORE : 1
HE_SCORED : 1
PAIN_TAKING : 1
REPORT_TO : 1
INJECT_AND : 1
UPPER_NORMAL : 1
DELUSION_RETURN : 1
KG_TRANSMISSION : 1
AVAILABLE_LIGHT : 1
INFORMATION_OBJECTIVE : 1
NOX_FURTHER : 1
ANSWERED_EYE : 1
CHANGE_DR : 1
STATUS_SC : 1
MORPHINE_ASPIRIN : 1
KEEP_PAIN : 1
SEEN_OFFICIAL : 1
ON_PAIN : 1
DRINKS_ONE : 2
INTENDED_FOR : 2
ATTEMPTED_TO : 1
SELF_BREAST : 1
NOT_COME : 2
MORE_DRINKS : 2
THE_SKIN : 1
OLD_WHO : 1
HISTORY_CURRENT : 1
OF_INCREASE : 1
INDEX_FINGER : 3
IMPAIRMENT_LEVEL : 1
FROM_NURSE : 1
HOME_WITH : 1
INCREASE_COGNITIVE : 1
REORDEREDCOPY_TO : 1
EXTERNAL_PROCEDURE : 1
THEIR_ALLERGIES : 1
HERBAL_PRODUCTS : 1
FOR_TEST : 1
YES_INTAKE : 1
HEAL_THE : 1
THIS_PM : 1
RATIVE_THICKNESS : 1
NKA_ELECTRONICALLY : 1
PHONE_CHIEF : 1
UP_BY : 1
WITH_NO : 1
HISTORY_PATIENTS : 1
YOU_MORNING : 1
BODY_MG : 1
PER_VETERAN : 1
APPT_PM : 1
CODE_UNLISTED : 2
NO_ABD : 1
WERE_TREATED : 1
MEMORY_PERCENTILE : 1
NOTE_FOR : 1
HISTORY_RECORDED : 1
OUTPATIENT_VETERAN : 1
ASSISTANCE_BATHING : 1
MEDICATIONS_DOES : 1
BP_PT : 1
BEHAVIORS_OF : 1
PRESSURE_HEART : 1
IN_OK : 1
URGENT_CARE : 1
BP_ON : 1
BM_GEN : 1
LEVEL_ASSISTANCE : 3
IDENTIFIED_OTHER : 3
PHYSICAL_ARE : 1
PREVENTIVE_HEALTH : 1
MALE_CAD : 1
THINGS_HE : 1
COUNSELING_PT : 1
ON_POSITIVE : 1
NO_DELUSION : 1
NONE_ANESTHESIA : 1
ARE_ACCURATE : 1
WILL_NOTE : 1
REPORT_SPECTACLE : 1
PROCEDURE_PATIENT : 1
HE_BMI : 1
SIG_TAKE : 1
SENT_TO : 1
TO_COGNITIVE : 1
SGOT_UCINATION : 1
BACK_PATIENT : 1
ADDITIONAL_COMMENTS : 1
RETURN_STATED : 1
RELIEF_HE : 1
WOUND_INCISION : 1
OTHER_COUNSELING : 3
ML_THERAPY : 1
TO_CONTACT : 1
AWA_THIS : 1
WAS_BY : 1
AND_VERBAL : 1
CHRONIC_OBSTRUCTIVE : 1
THE_NEED : 1
NO_SEEN : 1
MEDICATION_HEALTH : 1
BY_SYMPTOMS : 1
SIGNIFICANT_NEEDLE : 1
PT_WILL : 1
LIST_OUTPATIENT : 1
OF_LIVING : 1
NEEDS_ACCURATELY : 1
VOICEMAIL_MESSAGE : 1
AROUND_OBSTRUCTIVE : 1
HYPERCHO_PROBLEM : 1
BLVD_TX : 1
REHAB_PER : 1
ON_CALL : 2
THE_TO : 4
USUALLY_ASSESS : 1
OR_MORE : 2
HE_HAVE : 2
FRI_LOW : 1
OVER_TWICE : 1
IS_HISTORY : 1
THE_PERSON : 2
INCLUDING_NEED : 1
HP_OFFICE : 1
APPT_COMMENT : 1
BLVD_VILLE : 1
AND_TIME : 1
NEEDLE_GENITOURINARY : 1
COMMUNITY_IS : 1
FOR_EFFECTS : 1
LENSES_FRAME : 1
PROBLEM_LIST : 1
PRESENT_PROBLEMS : 1
FOR_RECORDS : 1
NONLATEX_MEDIUM : 1
EYES_THANKS : 1
FOR_VISIT : 1
LIVING_SITUATION : 1
RESP_THERAPY : 1
REPORT_FROM : 2
PATCHES_ON : 1
TYPE_MEDICATIONS : 1
THE_PREVENTIVE : 1
INCLUDE_AND : 1
ORIENTED_OTHER : 1
OF_DAILY : 1
SAT_RA : 1
LIFTING_SS : 1
OFTEN_YOU : 2
USUALLY_TELEMETRY : 1
MR_WAS : 1
STRIAE_AND : 1
DRINK_OTHER : 1
NO_PROBLEM : 1
FOR_DOG : 1
OR_HOPELESS : 1
INDIVIDUAL_PROVIDED : 1
COMPLETED_IDENTIFIED : 1
DOES_HAVE : 3
IN_NO : 1
RECOMMENDATION_INDIVIDUAL : 1
FROM_CLIENT : 1
APPEARANCE_CLEAR : 1
TO_DAILY : 2
FLOATING_AROUND : 1
TEMP_BP : 1
BP_TEMPERATURE : 1
SAN_SIGNATURE : 1
IF_IMPRESSION : 1
SOCIAL_LIVING : 1
RESULTS_IN : 1
MAKE_AN : 1
TO_BACK : 1
AGREED_RELUCTANTLY : 1
ASKED_THEY : 1
ANXIETY_GRAPEFRUIT : 1
REFERRAL_NURSING : 1
MG_MG : 1
SOUNDS_MEDICAL : 1
ORIENTATION_HYGIENE : 1
DOCUMENT_EXTERNAL : 1
NO_SYMPTOMS : 1
CXR_MY : 1
SUPPLIES_FOLLOWUP : 1
INDICATED_WAS : 1
YEAR_MALE : 1
ASSISTANCE_LIMITED : 1
RX_FLEXARIL : 1
TORADOL_MG : 1
MOUTH_ACTIVE : 2
OK_WHEN : 1
EVALUATION_AND : 2
THE_MARITAL : 1
PSYCHOLOGY_MINUTES : 1
RARELY_COLOR : 1
EXAMINATION_OF : 2
NO_VOICED : 1
COMPLAINT_BACK : 1
NITROGEN_AND : 1
PERSON_CONTACTED : 1
THICKNESS_OCCUPATIONAL : 1
LIGHT_BATHROOM : 1
PAIN_CHANGE : 1
POST_ANESTHESIA : 2
FRAME_LENSES : 1
AWARE_APPT : 1
REPORT_WILL : 1
DENIES_BLOOD : 1
PATIENT_DETAILING : 1
RASH_BUMPS : 1
FOREHEAD_PERIORBITA : 1
HOARSENESS_HIVES : 1
RIGHT_PULSES : 1
HE_LOST : 1
PAIN_RIGHT : 1
TEST_AUDITC : 3
OL_MG : 1
MISSOULA_BEFORE : 1
OTHER_RESPONSE : 1
BY_THE : 1
VETERAN_HAS : 1
SKIN_SHIFT : 1
HE_SAID : 1
ASSESS_TELEMETRY : 1
TO_TO : 2
WHEEL_CHAIR : 1
DROP_EYES : 1
CHANGE_REGISTRATION : 1
OF_LDL : 1
STAY_UPRIGHT : 1
BECAUSE_HIS : 1
EVERY_MORNING : 1
INTERESTS_DID : 1
HAVE_OR : 2
LOSARTAN_ONE : 1
INTERESTS_CLIENT : 1
PERCENTILE_ED : 1
MAA_STAFF : 1
FOR_TO : 1
THE_HIS : 1
REACTION_NONE : 1
WAS_SCORE : 3
STATUS_PROSTHETIC : 1
TO_SHIFT : 1
THE_GUARDIAN : 1
TO_FACE : 2
CHANGE_AT : 1
UNSURE_IF : 1
IDENTIFIED_ON : 1
ML_RARELY : 1
TAKING_SHARED : 1
WHEN_DISCHARGE : 1
AND_HISTORY : 1
OF_DANGEROUS : 1
WHEN_DOWN : 1
THEN_TO : 1
NOTE_OFFICE : 1
BE_OVER : 1
MORE_ALONE : 1
AT_ALL : 1
ANTIDEPRESSANTS_ANTIPSYCHOTICS : 1
REFILLS_AREA : 1
MESSAGE_IN : 1
WHEN_ASKED : 1
PANEL_PRIOR : 1
THE_NURSE : 1
PATIENT_WITH : 1
RECHECKED_BP : 1
WORSEN_AND : 1
THE_PHARMACY : 1
HAS_INTERESTS : 1
ALPHABETIZED_LIST : 1
AROUND_AT : 1
TELEPHONE_NOTE : 1
FIND_TO : 1
CM_NOTED : 1
TAKING_GOOD : 1
PERRLA_SHIFT : 1
RESP_NOTE : 1
OUTPT_NOTE : 1
SCORED_ORIENTATION : 1
STATE_PHONE : 1
ASSESS_DOCUMENT : 1
POST_PALPABLE : 1
NOTE_MANAGEMENT : 1
CARE_BY : 1
TELEMETRY_ANY : 1
LIVING_LIVES : 1
HE_HITTING : 1
DESCRIBE_AN : 1
PROBLEMS_COMPLAINT : 1
GLENOID_DE : 2
EXTERNAL_NOTE : 1
OF_FURTHER : 1
OR_LENS : 1
PUTTING_SOCKS : 1
SCORED_ON : 1
DRIVER_BE : 1
CONTINUE_PHYSIO : 1
HYPERCHO_OLEMIA : 1
NOTE_EXAMINATION : 1
NEEDS_SPEAKING : 1
ADDRESSED_SERUM : 1
MONIOTR_RASH : 1
HIS_FINGER : 1
INTO_PUSHING : 1
THAT_HAVE : 1
EVERY_NO : 1
CLEANSING_PCIOL : 1
MOUTH_REFILLS : 1
MG_MON : 1
HAVE_PT : 1
IN_COMMUNICATION : 1
BUT_LAYED : 1
NOTE_EVALUATION : 1
SINGLE_ALONE : 1
HAS_LOST : 1
EYE_MEDICATIONS : 1
DEPTH_IS : 1
DISSATISFIED_HER : 1
AT_SEE : 1
NOTIFICATION_THE : 1
OR_DIAGNOSIS : 1
ENCROACHING_SIDE : 1
TRIAGE_STATUS : 1
YELLOW_CLEAR : 1
CHANGES_OPERATION : 1
HOUR_SCORE : 1
ANY_IN : 1
CHANGE_IN : 1
REGISTRATION_SEE : 1
IS_MALE : 1
STATUS_ESOPHAGEAL : 1
ASK_QUESTIONS : 1
ON_AND : 1
NO_PERSON : 1
YES_PE : 1
JUDE_VALVE : 1
INFORMATION_IDENTIFIED : 1
LIVES_ALONE : 1
PATIENT_GUARDIAN : 1
FINGER_REVEALS : 2
LB_THIS : 1
MISSING_PATIENT : 1
INITIAL_HAD : 1
THE_FACT : 1
OF_PEOPLE : 1
FOLLOWUP_FORGETFUL : 1
REDONE_ST : 1
WITH_CABG : 1
SOLUM_SIG : 1
TO_WHOM : 2
RECEIVED_FROM : 2
CP_EDEMA : 1
PAIN_SCORE : 2
MG_AT : 1
RA_PAIN : 1
PRACTITIONER_INFORMED : 1
TO_NOTE : 1
EXCUSE_FROM : 1
UP_VETERAN : 1
IN_NAME : 1
SUPPLEMENTS_YOU : 1
AS_AROUSABLE : 1
CONDITION_OR : 1
WORKER_SOB : 1
VIA_CPRS : 1
CONTROL_YES : 1
AT_WHEN : 1
IN_OF : 1
YELLOW_BP : 1
LEAVING_MARITAL : 1
SHARED_HE : 1
LINE_OPTION : 1
ASPECT_LEFT : 1
INFORMED_MAA : 1
RELATIONSHIPS_IS : 1
SEE_PROFILE : 1
ED_BATHING : 1
EFFECTS_THE : 1
STATED_SERUM : 1
MEDICAL_SUBJECTIVE : 1
MG_BLOOD : 1
POSSESSIVE_IF : 1
OR_DATE : 1
LOOK_IT : 1
AT_PM : 1
IN_KNEE : 1
HEART_BLOOD : 2
PATIENTS_CHIEF : 1
HYPERTENSION_PROBLEMS : 1
STATES_THROUGH : 1
RELIEF_IS : 1
OBTAINED_BY : 1
PC_OUTPT : 1
DR_SHAW : 1
KEEP_JOURNAL : 1
MUST_AVAILABLE : 1
WORKER_IDENTIFIED : 1
II_OR : 1
THAT_DO : 1
PAIN_PLEASE : 1
POST_SCORE : 1
CURRENT_ILLNESS : 1
SCORE_MEDICAL : 1
TO_HAVE : 1
CHRONIC_THINK : 1
DE_RATIVE : 3
ELECTRONICALLY_TONOMETRY : 1
HYPERTENSION_FOOD : 1
IDENTIFIED_PROBLEM : 3
PREREGISTRATION_IDENTIFIED : 1
BX_USE : 1
ALERT_PHYSICIAN : 1
WITH_SIGNIFICANT : 1
HOME_TO : 1
TO_APPT : 2
NOT_LDL : 1
THE_GENERAL : 1
TIME_OUT : 1
HE_NOT : 1
TRANSPORT_APPROXIMATELY : 1
FINGER_BODY : 1
SHOT_IN : 1
ASSESSMENT_ON : 1
SCORE_BY : 1
NO_WOUND : 1
COGNITIVE_AWA : 1
MEDICATION_MANAGEMENT : 1
AND_VERIFICATION : 1
NONSTERILE_BX : 1
SAYS_HAVE : 1
UNSPECIFIED_NEW : 1
NASAL_ULA : 1
YOU_BE : 1
PROCEDURES_NONE : 1
UPRIGHT_IMMUNIZATION : 1
MEMORIAL_VILLE : 1
AC_AN : 1
THE_READER : 1
PHARMACY_MISSING : 1
SUPPORTIVE_YOURSELF : 1
MEDICATION_PREVENTIVE : 1
TO_POOR : 1
COPY_TO : 1
FOR_INR : 1
INDEPENDENT_SHOWER : 1
OPTION_NAME : 1
WHOM_IS : 2
PAIN_WANTS : 1
NOTE_LB : 1
UPPER_LEVEL : 1
VIEW_NO : 1
IN_RIGHT : 1
TO_STOP : 1
COME_BEFORE : 1
REMOTE_AND : 1
STOP_HAVE : 1
HOME_AFTER : 1
PROFILE_UPDATE : 1
AND_OF : 2
ANDO_PROGRESS : 1
YES_HEENT : 1
CALL_ROOM : 1
STATUS_THE : 1
NO_OPERATION : 1
TOTAL_SHIFT : 2
OR_TYPE : 1
MON_FRI : 1
SUBJECTIVE_CHIEF : 1
WILL_RENAL : 1
PRODUCTS_SUPPLEMENTS : 1
INTACT_MDD : 1
IS_DUE : 2
THAT_HAS : 1
ADDENDUM_RETURN : 1
SWELLING_OUTPATIENT : 1
PAIN_SEVERAL : 1
IN_REGARDS : 1
REQUIRED_POROKERATOSIS : 1
SUPPLIES_IS : 1
COMMUNICATION_VERBALLY : 1
ON_SIDE : 1
IMPAIRMENT_BATHING : 1
SIGNATURE_REQUIRED : 1
SHIFT_INTAKE : 1
ERYTHEMA_ALLERGIES : 1
SCORE_OBTAINED : 1
TIME_PE : 1
RECEIVED_AS : 1
LBS_PAIN : 1
CHANGES_NONLATEX : 1
OUTPATIENT_INCLUDING : 3
NONVA_MG : 1
ISSUE_PATIENT : 1
AT_HOME : 1
FOOT_NURSING : 1
DID_YOU : 2
IN_HIS : 2
CONSENT_FOR : 2
WT_LB : 1
OF_APPT : 1
DECREASE_TO : 1
HAS_COMPLAINT : 1
FLUIDS_FACE : 1
THE_SIGNATURE : 1
CONSCIOUSNESS_ALERT : 1
PERSON_INCLUDE : 1
SYMPTOMS_WORSEN : 1
VERIFICATION_OUT : 1
NONE_MEMORY : 1
IT_TO : 1
CALLER_PHARMACY : 1
YOU_BEEN : 1
HER_BROTHER : 1
ATTENDING_POST : 1
PROGRESS_OF : 1
POROKERATOSIS_PLANTAR : 1
SINCE_PATIENT : 1
NOTE_FOLLOWING : 1
ULCER_HEIGHT : 1
IS_ON : 1
OFFICIAL_PENDING : 1
NOT_PHONE : 1
TO_LEFT : 1
LEFT_VOICEMAIL : 1
AN_ORIENTATION : 1
CALL_NOT : 1
HER_FROM : 1
BP_SAT : 1
MUSCULOSKELETAL_NO : 1
CHECKLIST_HE : 1
APPLY_THICKNESS : 1
APPT_SAME : 1
MAY_BE : 1
HAS_SPENDING : 1
SIT_AND : 1
MY_VIEW : 1
REPORT_ONCOMING : 1
STAND_AND : 1
STOOL_ALLERGIES : 1
TIMES_RELIEF : 1
ACTIVE_AND : 1
UP_WAS : 1
THE_LACHYDRIN : 1
COMMENTS_IDENTIFIED : 1
NEGATIVE_RESPONSES : 1
INR_IS : 1
ACTIVE_OUTPATIENT : 4
NOTIFICATION_TO : 1
SOCIAL_SITUATION : 1
PLEASE_DILATE : 1
ABLE_TO : 1
THROBBING_PAIN : 1
ACTIVE_AFFECT : 1
MDD_RELATIONSHIPS : 1
PERSONAL_HYGIENE : 1
OF_EYE : 1
BE_PICKED : 1
CURRENTLY_LIVING : 1
SEEN_THIS : 1
AND_COMPLETED : 1
GEN_PLEASANT : 1
YES_OCC : 1
ADMISSION_ON : 1
ED_DOCUMENT : 1
DISCHARGE_WOULD : 1
ETHNIC_GROUP : 1
THESE_ISSUES : 1
KNEE_ERYTHEMA : 1
EXAM_MEDICATIONS : 1
HIM_COME : 1
BEHAVIORS_OTHER : 1
COLOR_FOR : 1
ASSESSMENT_BOWEL : 1
PREOPERATIVE_PREPROCEDURE : 1
HISTORY_SUBJECTIVE : 1
PRETHERAPY_ASSESSMENT : 1
HEAL_FROM : 1
OR_THAT : 1
OUTPATIENT_ED : 1
MALLOY_TRANSPORT : 1
ON_ANTERIOR : 1
ON_RA : 1
WITH_PROBLEMS : 1
BUMPS_OR : 1
STRESS_MDD : 1
MIDLOW_PAIN : 1
END_OF : 1
FOOD_OR : 1
ESOPHAGEAL_REFLUX : 1
LEFT_KNEE : 2
ANTIPSYCHOTICS_DOES : 1
INSIDIOUS_ONSET : 1
REDONE_JUDE : 1
SAME_PATIENT : 1
AST_UCINATION : 1
EYES_MR : 1
FOBT_ISSUED : 1
CERTIFICATE_DISCHARGED : 1
DENIED_OR : 1
ADV_PATIENT : 1
EVALUATION_MEDS : 1
ADVISED_HIM : 1
HAVE_ASKED : 1
IN_STOOL : 1
EDEMA_OF : 1
PATIENT_HAVE : 1
EVERY_ACTIVE : 1
PRETHERAPY_SKIN : 1
LISINOPRIL_DAILY : 1
WEIGH_YOURSELF : 1
BOWEL_SOUNDS : 1
ENVIRONMENT_PERCENTILE : 1
ASSESSMENT_ATTENDING : 1
PT_SIT : 1
FOR_SCORE : 1
BREAST_EXAM : 1
REASON_VISIT : 1
REPORT_PAIN : 1
CPRS_TO : 1
TO_HOME : 1
EFFECTS_REPORT : 1
WERE_RECHECKED : 1
STATUS_LIVES : 1
AND_BLEPHAROPLASTY : 1
ISONIAZID_TAB : 1
USE_GL : 1
RECEIVED_TO : 1
SIGNATURE_NOT : 1
YOUR_MUST : 1
PT_ADVISED : 1
THE_ON : 1
FOLLOWINGUP_ON : 1
LIVING_IN : 1
TWICE_FOR : 2
GUARD_LIGHT : 1
CHANGES_TEAR : 1
THAT_PHONE : 1
THEY_LOOK : 1
RANK_IMPAIRMENT : 2
CARE_EVALUATION : 1
SIGNS_SYMPTOMS : 1
WHEN_PHONE : 1
BETWEEN_HOURS : 1
VERBALLY_NEEDS : 1
RA_LEVEL : 1
ON_THE : 2
OUTPT_STAFF : 1
BEFORE_BREAKFAST : 1
MEDICAL_AS : 1
RETURN_HOME : 1
RESULTS_NEGATIVE : 1
AND_ARE : 1
MEDICATION_INSTRUCTIONS : 1
FAILED_CONSIDER : 1
OF_THE : 7
FOR_RD : 1
MORNING_OF : 1
RECEIVED_REPORT : 2
RAILS_LEAVING : 1
LEVEL_CONSCIOUSNESS : 1
PROBLEMS_REFERRAL : 1
FAILED_TO : 1
RANGE_WARFARIN : 1
PATIENT_RECENT : 1
BATHROOM_SMOKING : 1
MEMBER_ADMINISTRATIVE : 1
VILLE_TX : 1
DOWN_SHORT : 1
SCORE_ALDRETE : 1
THIS_HAD : 1
PATIENT_PAIN : 2
REPORT_BE : 1
SPENDING_TIME : 1
IMPROVED_IN : 1
FOR_ASSESSMENT : 1
NO_GENITOURINARY : 1
ARRIVAL_IN : 1
SCORE_LEFT : 1
SOCIAL_WORKER : 1
IDENTIFIED_THE : 1
HIS_DEPTH : 1
HAS_CHIEF : 1
COMMUNICATES_ACCURATELY : 1
NOTED_STATED : 1
BMI_FOLLOWING : 1
EVERY_TRANSMISSION : 1
SCAN_ON : 1
UPCOMING_APPOINTMENT : 1
MEDICATIONS_PREOPERATIVE : 1
WAS_TO : 1
THE_STATUS : 1
VET_TO : 1
TAKING_THE : 1
HEALTH_SCREENING : 1
CHANGES_RHYTHM : 1
ILLNESS_MEDICAL : 1
RENT_STATUS : 1
WORKER_ON : 1
PROBLEM_HYPERTENSION : 1
RESPONSE_ISSUE : 1
EVALUATION_OF : 1
GL_THERAPY : 1
MG_TAKE : 1
APPOINTMENT_WEIGHT : 1
CONSTANT_ST : 1
OPS_UNIT : 1
REPORT_KNEE : 1
PAST_HAVE : 1
TONOMETRY_RESULTS : 1
PAIN_PERRLA : 1
ASK_AND : 1
ESOPHAGEAL_BP : 1
OF_INDIVIDUAL : 1
WALKING_TO : 1
MONITORED_QHRS : 1
HIV_SAN : 1
FILED_READINGS : 1
ENCLOSED_RENT : 1
BE_LIMITED : 1
IN_REVIEWED : 1
CALLER_APPT : 1
CLINIC_FOR : 1
ACTIVE_APPROPRIATE : 1
ANESTHESIOLOGIST_ANESTHESIA : 1
PATIENT_DOES : 1
SCREENING_NOTE : 1
RESULTS_ADMINISTRATIVE : 1
OCCASION_THE : 2
OR_WALK : 1
RIGHT_KNEE : 1
REQUIRED_SINCE : 1
BY_ADMIN : 1
PCP_APPT : 1
NKA_FILED : 1
CL_NAME : 1
ASSESSMENT_PHYSIO : 1
OF_MEDICATION : 1
NOTE_TO : 1
OFFICE_NO : 1
IMMUNIZATION_INFLUENZA : 1
WALK_AROUND : 1
STATED_PAIN : 1
ABD_PAIN : 1
MATERIAL_HOW : 1
TWICE_DEPRESSIO : 1
RAILS_VETERAN : 1
NEEDS_TO : 1
HIS_LIFE : 1
AREA_EVERY : 1
VALVE_ERYTHEMA : 1
REPORT_ANXIETY : 1
WILL_COPY : 1
OF_PROCEDURE : 1
PREREGISTER_NOTE : 1
COMMENTS_STATES : 1
DID_HAVE : 2
BY_IN : 1
AS_RECORDED : 1
YOUR_HEALTH : 1
AND_IF : 2
MISSING_RISK : 1
JOINT_DE : 1
PLEASANT_FOLLOWING : 1
IN_PHARMACY : 1
OF_INDEPENDENT : 3
ANY_ON : 1
ETHNIC_DISCHARGE : 1
POV_WALKING : 1
LACERATION_ON : 1
RESPONSE_SAME : 1
IS_CONSTANT : 1
GENITOURINARY_MUSCULOSKELETAL : 1
PERSONAL_LEVEL : 1
UPPER_REPORT : 1
ASSIST_LIGHT : 1
AREA_URETHERAL : 1
EXTREMITY_BILATERALLY : 1
NEEDS_ISSUED : 1
NO_CHANGES : 2
ADDENDUM_BETWEEN : 1
TO_REPORT : 1
YOU_REALLY : 1
ADMISSION_HE : 1
TO_CHANGE : 1
RENAL_PRIOR : 1
COMMUNICATED_VIA : 1
PERCENTILE_SEVERE : 1
UNIT_WITH : 1
ACTUAL_KG : 1
HOPELESS_AT : 1
PROVIDED_WITH : 1
IF_HIS : 1
NOTE_OF : 1
BY_REFILLS : 1
READINGS_NEGATIVE : 1
TAB_PO : 1
ED_HEART : 1
EXTREMITY_EQUAL : 1
PCIOL_CENTERED : 1
WITH_ULCER : 1
IM_AND : 1
PAIN_LEVEL : 1
ADV_HAS : 1
SIT_QUIETLY : 1
PCIOL_OD : 1
HAVE_STAND : 1
OR_BREAKING : 1
AND_EXPIRED : 1
IS_HIS : 1
YOU_MAY : 1
STRICTURE_TO : 1
WHO_TO : 1
UPRIGHT_INFLUENZA : 1
WHILE_IN : 1
RANGE_INCREASE : 1
PAMPHLET_TO : 1
TIME_ALONE : 1
RANK_SEVERE : 1
REGARDS_UPCOMING : 1
INFORMATION_PROBLEM : 1
AND_RX : 1
CAME_SESSION : 1
SHE_THE : 1
MEDICATIONS_PRODUCTS : 1
HAS_HIS : 1
SHIFT_WITH : 1
SCORE_OF : 1
BACK_WAS : 1
REVIEWED_REORDEREDCOPY : 1
NOT_ALL : 1
DROP_BOTH : 1
PULSE_MOOD : 1
HE_TAKING : 1
NONE_YEAR : 1
INTO_BED : 1
AWA_SS : 2
AND_NO : 1
POSITIVE_CRC : 1
WERE_FOR : 1
SORE_HEIGHT : 1
RISK_TRIAGE : 1
YOU_THE : 1
CENTER_EVALUATION : 1
NURSING_REASSESSMENT : 1
QTY_FOR : 1
HIM_TO : 1
EYE_EXAM : 1
BMI_NO : 1
PAIN_IN : 2
CAP_SEC : 1
IS_OLD : 2
MORPHINE_CURRENT : 1
MEDS_NONE : 1
VACCINE_VACCINE : 1
THIS_OF : 2
QUESTIONS_GI : 1
FOR_THE : 3
REPORT_NOTED : 1
INJECT_DATE : 1
PATIENT_ARE : 1
INCLUDE_WOMAN : 1
PAT_OUTPATIENT : 1
MEDICAL_CERTIFICATE : 1
THREE_AFFECT : 1
WAS_ADMINISTERED : 1
PER_NURSING : 1
ON_SKIN : 1
JOURNAL_TO : 1
BE_COMMUNICATED : 1
MAPLEVIEW_LANE : 1
OF_DECEMBER : 1
HAS_OTHER : 1
PATIENT_OR : 1
IN_TO : 1
INCISION_MG : 1
MORNING_RISING : 1
ALL_MANAGEMENT : 1
REALLY_RECEIVED : 1
THERE_NO : 1
ERYTHEMA_REACTION : 1
THE_PROCEDURE : 1
AND_RECEIVED : 1
BLOOD_IN : 1
MEDICATIONS_ANTIHYPERTENSIVES : 1
CALL_MAKE : 1
OR_DRINKS : 2
CLEAR_CENTRAL : 1
DEPRESSED_HOPELESS : 1
PATIENT_ACTIVE : 1
TO_VIEW : 1
PROBLEMS_DIFFICULTY : 1
MEDICATIONS_CERTIFICATE : 1
ALONE_GLU : 1
MR_SEEN : 1
ACTIVITIES_OF : 1
IS_CURRENTLY : 1
FILL_LIFE : 1
HE_WILL : 2
PHONE_LISTED : 1
EFFECTS_PATIENT : 1
AND_PROCEDURE : 1
CHECKLIST_SCORED : 1
ALLERGIES_REVIEWED : 1
NURSE_LINE : 1
INTENDED_THE : 2
WILL_TO : 1
FINGER_FOREIGN : 1
WITH_HAS : 1
CALL_LIGHT : 2
AC_DE : 1
DAILY_EXCEPT : 1
LIMITED_BECAUSE : 1
NO_ADDENDUM : 1
FLUIDS_BLEPHAROPLASTY : 1
OXYGEN_VETERAN : 1
WEEKLY_NOTE : 2
ACTIVE_THICKNESS : 1
AFTER_TORADOL : 1
VERBALIZATION_NUM : 1
SUBCUTANEOUSLY_BEFORE : 1
THINGS_SAID : 1
REQUESTING_SUBCUTANEOUSLY : 1
ORIENTED_AROUSABLE : 1
LIPID_APPOINTMENT : 1
ANXIETY_AVOID : 1
MR_IS : 1
INDEPENDENT_LEVEL : 1
CHO_MG : 1
NONLATEX_NONSTERILE : 1
AT_IMM : 1
DAILY_PCP : 1
UP_CHO : 1
AGE_FLOWN : 1
INDEPENDENT_ASSIST : 1
CONSCIOUSNESS_PAIN : 1
CONTACT_NUMBERS : 1
TELEMETRY_DOCUMENT : 1
HYPERTENSION_HE : 1
OF_SUPPORTIVE : 1
LDL_AST : 1
PROCEDURE_HEART : 1
IC_OTHER : 1
INFORMED_STAFF : 1
PENDING_THE : 1
HERBAL_OR : 1
OF_IS : 2
IMPAIRMENT_ORIENTATION : 1
DATE_OF : 1
CORRECTION_CENTRAL : 1
LEFT_THIS : 1
FRAME_SUPPLY : 1
WILL_BE : 1
DOG_HOW : 1
ED_PATIENT : 1
CRAMPS_CALLER : 1
AT_TIMES : 1
ELEVATED_DECREASE : 1
IS_AND : 1
RX_TYPE : 1
COMPLAINT_LEG : 1
AIR_TO : 1
ALLERGIES_ADV : 1
UNSPECIFIED_HOSPITAL : 1
NO_INFILTRATES : 1
PM_HOMELESS : 1
PATIENTS_COMPLAINT : 1
PSURHX_HYPERTENSION : 1
CONTACT_CORRECTION : 1
NURSING_HYPERTENSION : 1
FOR_SKIN : 1
SUPPLEMENTS_THAT : 1
TO_DR : 1
THAT_WHEN : 1
AND_MAKE : 1
DISCHARGE_ORDERS : 1
SHE_DOES : 1
AND_COMMUNITY : 1
SEC_YOU : 1
AND_PERIORBITA : 1
THEN_WALKING : 1
ENDOBROW_UPPER : 1
EVERY_MONO : 1
PNEUMONIA_RESPONSE : 1
PATIENT_WAS : 1
PRODUCTS_NONE : 1
HE_ON : 1
HAVE_IT : 1
MAINTENANCE_APPOINTMENT : 1
TO_CALL : 2
HIS_MOBILE : 1
WITH_HER : 1
IN_LACHYDRIN : 1
NITROGEN_HAVE : 1
AROUSABLE_NO : 1
MAR_ADDITIONAL : 1
PT_AS : 1
GN_NARCOTIC : 1
LOCATION_OF : 1
THIS_EXAMINATION : 2
FOR_PAIN : 1
TO_SOCIAL : 1
CURRENT_MEDICAL : 1
RN_FOR : 1
CONTRACT_IS : 1
SKIN_EXPR : 1
THIS_IS : 3
OPERATION_WITHOUT : 1
HYPERTENSION_FOLLOWING : 1
NUMBERS_INACTIVATED : 1
TO_CARE : 1
IS_PATIENT : 1
ABD_CHANGE : 1
RECORDED_IN : 1
BUT_WHEN : 1
GOOD_FACE : 1
WILL_AT : 1
GIVING_PLEASE : 1
KNOW_PA : 1
TO_CARRY : 1
FOR_AVOID : 1
IF_PROBLEMS : 1
UNILATERAL_RESPONSE : 1
CONTACT_NOTE : 1
AGE_WAS : 1
OF_NONE : 1
CYCLOBENZAPRINE_TAB : 1
DE_CHANGES : 3
SUPPORTIVE_WEIGH : 1
PATIENT_GIVEN : 1
IS_POOR : 1
REPORT_WHEN : 1
ROOM_SMOKING : 1
OCC_PVC : 1
LAST_EVERY : 1
SCALE_VOICEMAIL : 1
PROGRESS_WEEKLY : 1
DOWN_DEPRESSED : 1
ROUTINE_MAINTENANCE : 1
WEIGHT_ACTUAL : 1
DRAWN_LEAVING : 1
VALVE_REPLACEMENT : 1
HOURS_OF : 1
FEELING_DEPRESSED : 1
OUTPATIENT_MEDICATIONS : 5
TO_ED : 1
GENITOURINARY_FRICTION : 1
RECEIVED_INSTRUCTION : 1
LABRUM_RATIVE : 2
THE_UNITS : 1
PM_TO : 1
AT_FOR : 1
APPARENT_DESTINATION : 1
ONCOMING_SHIFT : 1
NEED_RENAL : 1
QHRS_COOPERATIVE : 1
MEMORIAL_BLVD : 1
IN_APARTMENT : 1
DOES_PATIENT : 2
TALK_MEDS : 1
HIS_PSYCHOLOGY : 1
THERAPY_RX : 1
PATIENT_THE : 1
FOR_BLOOD : 1
ORDERED_THAT : 1
MM_SORE : 1
POOR_TO : 1
NOT_WOMAN : 1
DO_INCLUDE : 1
NEGATIVE_SCORE : 4
AND_NONVA : 1
DOES_THE : 1
OF_NEUROPATHY : 1
APPT_TO : 1
RD_OFTEN : 1
RX_IS : 1
OD_CLEAR : 1
MEDIAL_ASPECT : 1
CALL_CENTER : 1
CPRS_NOTIFICATION : 1
AT_TO : 1
PATIENT_ANSWERED : 3
TO_CT : 1
HEALTH_NOTE : 1
COME_THAT : 1
TAB_TAKE : 1
FOLLOWINGUP_POSITIVE : 1
DATE_INR : 1
AM_ON : 1
OTHER_MEDICATION : 1
GLU_NEEDS : 1
ORDERS_WOULD : 1
ORDERS_BE : 1
ONE_TABLET : 2
GIVING_PAIN : 1
INFLUENZA_VACCINE : 2
PATIENT_FOR : 2
AN_APPT : 1
HAD_PAIN : 1
KNEE_LACERATION : 1
HIVES_NURSING : 1
VSS_COMPLAINTS : 1
ISSUED_IMM : 1
VETERAN_WAS : 1
EXPLAINED_SHE : 1
THAT_NOT : 1
KG_MELLITUS : 1
IS_ADDRESSED : 2
REORDEREDCOPY_PT : 1
CALL_SIDE : 1
HIS_IN : 1
WITH_PHYSICIAN : 1
IT_ACTIVE : 1
NO_IN : 1
NOTE_PATIENT : 1
NONE_TROPICAMIDE : 1
WALKING_CAP : 1
RELUCTANTLY_AWARE : 1
LEGS_ICDCM : 1
LEVEL_OF : 4
AND_WERE : 1
VETERAN_THESE : 1
PREREGISTER_LIPID : 1
FINGER_COMMINUTED : 2
INITIAL_BP : 1
HOME_HOME : 1
DAILY_THINK : 1
HYGIENE_OF : 1
FOR_LEFT : 1
CHANGES_MEDIUM : 1
WHEEZING_HIVES : 1
CONTACT_LENS : 1
SL_ALLERGIES : 1
APPOINTMENT_ON : 1
SGOT_AST : 1
IS_ONSET : 1
INTAKE_AND : 1
HOMELESS_DOSE : 1
MEDICATIONS_MEDICAL : 1
MOISTURE_MOIST : 1
EQUAL_NO : 1
NURSE_VET : 1
ON_ONE : 2
HYPERLIPIDEMIA_FRAME : 1
HE_VERY : 1
YES_AND : 1
VILLE_MINIMAL : 1
PROBLEMS_FEELING : 1
INFORMATION_LEFT : 1
PT_BUT : 1
AM_TWICE : 1
OLD_MAN : 1
BUT_MRI : 1
IT_BEFORE : 1
LAYED_DOWN : 1
PT_SELF : 1
MEDICATION_FOR : 1
ADMIN_IF : 1
SIGNATURE_INFORMED : 1
TAKING_IT : 1
COMMINUTED_PRACTITIONER : 1
BP_RIGHT : 1
REMOTE_NONVA : 1
THE_PROBLEM : 1
ANTIHYPERTENSIVES_ANTIDEPRESSANTS : 1
TOTAL_INTAKE : 1
APPT_WITH : 1
THAN_TAKE : 1
SHAW_INTO : 1
PATIENT_PROVIDED : 1
ML_RESP : 1
DIABETES_MELLITUS : 1
LOW_END : 1
FOR_HE : 1
PROCESS_HAS : 1
NURSE_HOURS : 1
THAT_AND : 1
WANT_PREREGISTER : 2
ADDRESSED_SEEN : 1
DECREASED_ROM : 1
EYE_NURSING : 1
MAKE_APPT : 1
PLEASANT_BMI : 1
PROCEDURE_WAS : 1
FORGETFUL_WEIGHT : 1
INR_DECREASE : 1
SOUNDS_EQUIPMENT : 1
EDUCATION_PATIENT : 1
BROTHER_INFORMED : 1
CENTRAL_STRIAE : 1
INDEX_FOREIGN : 1
UNLISTED_AND : 2
MORNING_SURGERY : 1
ASPIRIN_CURRENT : 1
ASSESSMENT_STATUS : 1
PAIN_HISTORY : 1
TO_SHORTLY : 1
FOLLOW_CHO : 1
RIGHT_UPPER : 1
IBUPROFEN_TAB : 1
LODGING_NEEDS : 1
ESTABLISHED_PATIENT : 1
THROBBING_HOURS : 1
CHECK_PATIENT : 1
HEENT_LOWER : 1
FINGER_HURTS : 1
URGENT_APPOINTMENT : 1
PATIENT_DID : 2
FRAME_RENT : 1
TAKING_SUN : 1
AT_CALLER : 1
RECHECKED_TEMPERATURE : 1
EXAM_SHE : 1
GIVEN_SELF : 1
VETERAN_IS : 2
OF_ORDERED : 1
ISSUES_PNEUMONIA : 1
NURSING_MEDSURG : 1
ACCURATE_MEDICATION : 1
SEEN_AM : 1
THIS_HE : 1
EVENT_LEGS : 1
GUARD_ASSIST : 1
CONTACT_ANTERIOR : 1
UPDATE_MOOD : 1
REPLACEMENT_STATUS : 1
OUT_PROCEDURE : 1
FROM_COMMENTS : 1
ON_LATERALITY : 1
NAME_ED : 1
THESE_MEDICAL : 1
REASON_INTO : 1
WARFARIN_TOXICITY : 1
THE_USE : 2
SPENDING_MORE : 1
INCLUDE_AREA : 1
TX_MINIMAL : 1
DC_BUMPS : 1
HYPERTENSION_SUPPLY : 1
ECTOPY_PVC : 1
SYMPTOMS_OF : 1
BLOOD_NURSING : 1
NO_AWA : 1
WARFARIN_OR : 1
GIVEN_COPY : 2
HIMSELF_TO : 1
PHYSIO_TO : 1
ACHING_CONSTANT : 1
DOSE_NOX : 1
INSTRUCTION_WRITTEN : 1
RX_DUE : 1
NAME_WAS : 1
HISTORY_HISTORY : 1
FOLLOWUP_IN : 1
PVC_ALLERGIES : 1
CONTACT_ASSIST : 1
PAIN_ADEQUATE : 1
RISING_RECORD : 1
MENTION_OF : 1
LEFT_IF : 1
CHANGES_MEDICATIONS : 1
MANAGEMENT_CODE : 2
CLINIC_RECORDS : 1
MEDICATIONS_PER : 1
DENIED_HITTING : 1
TO_RN : 1
RECORD_CALL : 1
TO_SCAN : 1
THE_REPORT : 1
HAS_ANSWERED : 3
SYMPTOMS_DATE : 1
CHO_OL : 2
INCREASE_TO : 1
INDEPENDENT_BATHING : 1
CONVERSATION_HAS : 1
WILL_NEED : 1
TAB_MOUTH : 1
HOURS_INDIVIDUAL : 1
MEDICATIONS_STATUS : 2
PHARMACY_COUNSELING : 1
HOUSEHOLD_SITUATION : 1
ON_GET : 1
GIVEN_BREAST : 1
WALKING_ED : 1
WHEN_HIS : 1
ULA_REPORT : 1
IS_VERY : 2
IM_RX : 1
NUM_SCALE : 1
HAD_SIT : 1
ANY_PATCHES : 1
KNEE_IMPROVED : 1
BUSTED_BY : 1
YES_BY : 1
NOTE_EXCUSE : 1
FOLLOWUP_APPOINTMENT : 2
CALLER_RESPONSE : 2
FOR_INDEX : 1
NEEDS_MEDICATIONS : 1
NO_POST : 1
SIGNIFICANT_OTHER : 1
BMI_SIGNS : 1
SEND_TO : 1
ISOSORBIDE_ALPHABETIZED : 1
NOT_SGOT : 1
MISSOULA_SHORTLY : 1
BREATH_IF : 1
HIS_REASON : 1
BUMPS_TO : 1
ADMINISTERED_POST : 1
DUE_ON : 1
YOU_SIX : 2
HAVE_COME : 1
FOOD_DRINK : 1
SUPPLY_LENSES : 1
VETERAN_CURRENTLY : 1
ONE_IN : 2
IN_DATE : 1
MENTION_COMPLICATION : 1
CHANGES_CONTINUE : 1
OR_PT : 1
OUTPUT_BP : 1
OF_PAIN : 1
OF_ASSISTANCE : 3
ON_PLEASE : 1
VETERAN_THAT : 1
TO_ON : 1
REVEALS_PRACTITIONER : 1
CENTRAL_AND : 1
TWICE_ANXIETY : 1
COLOR_NORMAL : 1
LEFT_BP : 1
ENDOBROW_AND : 1
CALL_THE : 2
AND_VS : 1
ADDENDUM_NOTED : 1
IS_MAIN : 1
NECESSARY_CONDITION : 1
VET_HIS : 1
COMMENT_STATES : 1
HOW_DID : 2
PERRLA_TOTAL : 1
SCORE_FOLLOWUP : 1
TAKING_FLUIDS : 1
THINK_THE : 1
PHONE_COMPLAINT : 1
THE_CLIENT : 1
ORDERED_AND : 1
PHYSIO_KEEP : 1
NO_MUSCULOSKELETAL : 1
PLANTAR_FOOT : 1
REHAB_REFERRAL : 1
PAIN_THE : 1
RANK_ED : 1
DIABETES_WITHOUT : 1
OTHER_DRUGS : 1
HIS_HOME : 1
COUNSELING_PROBLEM : 1
TO_CLINIC : 1
SEND_HAVE : 1
AS_BUT : 1
REVIEWED_PATIENT : 1
LPN_WALKING : 1
STATES_THE : 1
STRIAE_RECEIVED : 1
WRITTEN_PRESENT : 1
AND_MEDS : 1
SHIFT_OUTPUT : 1
BE_UP : 1
AND_XLESION : 1
MAIN_REASON : 1
MEDICAL_THE : 1
APPOINTMENT_EXPLAINED : 1
BEHAVIOR_EXTREMITY : 1
NEW_MEDICAL : 1
HURTS_DECREASED : 1
RENAL_PANEL : 1
WAS_COPY : 2
JUDE_REGENT : 1
OR_SUPPLEMENTS : 1
MOUTH_LAST : 1
NO_PAIN : 1
FROM_THE : 1
ELECTRONICALLY_FILED : 1
ML_MOISTURE : 1
CONTINUE_TO : 1
TO_THIS : 1
HEIGHT_IN : 1
HIS_THAT : 2
NOTE_GLENOID : 1
RATIVE_NONLATEX : 1
IS_CONTROL : 1
IN_RHYTHM : 1
PAIN_LISINOPRIL : 1
MEDICAL_BEHAVIORS : 1
STAFF_HAVE : 1
ICDCM_ACTIVE : 1
ACTIVE_TEAR : 1
MEDICATION_PATIENT : 1
DISCHARGED_TO : 1
YOURSELF_EVERY : 1
BREAKFAST_INJECT : 1
AT_AM : 1
KNEE_IN : 1
TOUCH_LIFTING : 1
PROVIDED_BY : 1
FOR_CHECK : 1
SOLUM_THAN : 1
DECEMBER_HEART : 1
FLOATING_CHRONIC : 1
WAS_NEGATIVE : 3
DOSING_TO : 1
HE_BEEN : 1
BY_VERBALIZATION : 1
OF_IF : 1
IN_FOSTER : 1
NOTED_ON : 1
INJURY_URINE : 1
REPORT_OUTGOING : 1
PA_WRITE : 1
THE_POOR : 1
WEEKLY_PROGRESS : 2
SELF_EXAM : 1
HISTORY_XLESION : 1
SIX_OR : 2
COME_FOLLOWUP : 1
NASAL_REPORT : 1
MONO_LIST : 1
PALPABLE_YES : 1
APPT_THIS : 1
QUALITY_PAIN : 1
LIST_OF : 1
TO_WILL : 1
THE_DETAILING : 1
SUPPORTIVE_THERAPY : 1
SHE_STATES : 1
NORMAL_LEVEL : 1
TO_LIPID : 1
PLEASE_CALL : 1
BY_MALLOY : 1
ACCURATELY_IS : 1
ALL_EVALUATION : 1
ASKED_FOR : 1
SEE_MEDICATION : 1
FROM_USUALLY : 1
NOTE_IN : 1
THAT_IS : 1
SKIN_TOTAL : 1
OF_FOREHEAD : 1
IMPRESSION_GLENOID : 1
CRC_INCLUDING : 1
PICKED_BY : 1
MEDICATION_AND : 1
REASSESSMENT_IS : 1
IF_PRESENT : 1
GI_ABD : 1
WRITTEN_MATERIAL : 1
AROUND_TIMES : 1
ISSUE_MISSING : 1
OTHER_TAKING : 1
ADULT_FOSTER : 1
PRELIMINARY_REPORT : 1
ERYTHEMA_NONE : 1
EXCEPT_MG : 1
VET_STATES : 1
RESPONSE_PHARMACY : 1
PULSE_PLEASANT : 1
VERBALLY_COMMUNICATES : 1
IN_HOSPITAL : 1
AND_ENCOURAGED : 1
TABLET_MOUTH : 3
APEX_NEEDS : 1
TREATED_FOR : 1
LDL_SGOT : 1
COPY_OF : 2
OLEMIA_HYPERTENSION : 1
LIQUID_NITROGEN : 1
CONTROL_ADEQUATE : 1
ELEVATED_INR : 1
HE_HAS : 2
BX_GL : 1
NOTE_ANTERIOR : 1
HISTORY_SITE : 1
MG_MOUTH : 1
PATIENT_RISK : 1
THEY_FIND : 1
HITTING_OR : 1
SUPPLIES_ACTIVE : 1
SHIFT_NO : 1
EXPIRED_OUTPATIENT : 1
PROBLEM_RETURN : 1
MAN_PRESENTS : 1
RECORDS_THE : 1
SHOT_BY : 1
BILATERAL_HE : 1
AND_HE : 1
WRITE_NOTE : 1
ALONE_NEEDS : 1
LIVING_AND : 1
AROUSABLE_TAKING : 1
RX_AEROSOL : 1
FOLLOWING_DIFFICULTY : 1
PSYCHOLOGY_OF : 1
SHOW_PROVIDER : 1
PAIN_AT : 1
FOLLOWUP_IS : 1
BOTH_THANKS : 1
LOTION_APPLY : 1
CLEAR_AXIS : 1
ALCOHOL_TEST : 3
PAIN_HOURS : 1
SUPPLY_FRAME : 2
DANGEROUS_SITUATION : 1
LIGHT_ROOM : 1
HAVE_CHANGE : 1
ORIENTATION_HE : 1
TRANSPORT_AT : 1
BLEPHAROPLASTY_REPORT : 1
CONTACT_PREVENTIONS : 1
WHOM_IT : 2
APPROXIMATELY_MEDICATIONS : 1
POOR_VISION : 1
BILATERALLY_NO : 1
QUIETLY_VS : 1
OR_CAD : 1
SCREENING_THE : 1
SCREENING_INCLUDING : 1
APPOINTMENT_INFORMATION : 1
CENTRAL_AXIS : 1
INDEX_REVEALS : 2
UPON_RISING : 1
PARTNER_OTHER : 1
PAIN_ACHING : 1
YEAR_MAN : 1
NOTE_PROGRESS : 1
DAILY_ACTIVE : 1
ON_OCCASION : 2
BREATHING_WHEEZING : 1
CONTACTED_INCLUDE : 1
EXPR_CENTERED : 1
ONE_TAB : 1
TO_PROVIDER : 1
BREAKING_THINGS : 1
READER_TO : 1
APPT_EVERY : 1
AC_ALCOHOL : 1
NAME_ESTABLISHED : 1
TIME_PATIENT : 1
MOIST_NORMAL : 1
UNILATERAL_CALLER : 1
AFTER_MG : 1
CLEAR_SAT : 1
APPOINTMENT_TO : 1
AM_PLEASE : 1
WAS_SEEN : 1
AEROSOL_EXTREMITY : 1
LOCATION_EYE : 1
WHILE_THE : 1
TEAR_THERAPY : 1
AGREED_IBUPROFEN : 1
CONTRACT_RX : 1
DOSE_MG : 1
WHEEZING_NURSING : 1
ANDO_WEEKLY : 1
TO_BEFORE : 1
READER_FAILED : 1
SCORE_APEX : 1
DISEASE_THAN : 1
BED_WHEEL : 1
NEED_TO : 1
RECENT_PAIN : 1
SUBJECT_RESULTS : 1
MEDIUM_BX : 1
OF_AND : 1
BLOOD_FOR : 1
CHAIR_PUTTING : 1
NONVA_PATIENT : 1
RESTLESS_LEGS : 1
TO_KNOW : 1
REQUIRED_THIS : 1
LIMITED_CONTACT : 1
FAMILY_RESULTS : 1
ARE_NO : 1
OF_PERSON : 3
NEURO_ORIENTED : 1
HIS_APARTMENT : 1
NEED_OPS : 1
HP_WORKER : 1
BOTH_CAUSING : 1
AREA_FOR : 1
ADVISED_MONIOTR : 1
EXPR_PCIOL : 1
WERE_BP : 1
IF_PARTNER : 1
SEVERE_IMPAIRMENT : 1
COMPLICATION_TYPE : 1
IMMEDIATE_MEMORY : 1
REVEALS_COMMINUTED : 2
GEN_APPEARANCE : 1
ACCURATE_OTHER : 1
OK_BUT : 1
ASSIST_CONTACT : 1
COMMUNICATES_NEEDS : 1
CAD_EVAL : 1
EQUIPMENT_ULA : 1
SIX_MORE : 2
MON_LOW : 1
YOURSELF_MORNING : 1
TYPE_AEROSOL : 1
INCITING_EVENT : 1
HAS_NKA : 3
ED_IMPAIRMENT : 1
SS_IS : 1
HYGIENE_LEVEL : 1
VACCINE_INFORMATION : 2
IF_OFTEN : 1
IN_MEDICATIONS : 1
TO_PAIN : 1
MONIOTR_DC : 1
YOU_NONVA : 1
ALERT_AROUSABLE : 1
HIS_BACK : 1
DISCHARGE_TO : 1
OPTION_BETWEEN : 1
OF_WARFARIN : 1
TIME_OCT : 1
NARCOTIC_CONTRACT : 1
LATERALITY_BILATERAL : 1
LENSES_ENCLOSED : 1
INCREASE_AWA : 1
ALERT_SPEAKING : 1
THE_HOSPITAL : 1
MR_YEAR : 1
BACK_PAIN : 1
SPECTACLE_OR : 1
PATIENT_VERBALIZATION : 1
CL_VISIT : 1
TO_BE : 1
ARE_CHANGES : 1
STRESS_RELATIONSHIPS : 1
BED_PUSHING : 1
STILL_YES : 1
CHANGESPT_RELUCTANTLY : 1
DECREASED_OF : 1
THE_RESULTS : 1
PER_ADMISSION : 1
REASSESSMENT_PAIN : 1
CONTACT_GUARD : 1
EDEMA_ACCURATE : 1
PULMONARY_SOLUM : 1
MANAGEMENT_SUPPORTIVE : 1
PM_MEDICATIONS : 1
SUN_OUTPATIENT : 1
SHE_NOT : 1
POROKERATOSIS_FOOT : 1
PAIN_OF : 2
RETURN_WHEN : 1
AT_REGISTRATION : 1
BP_PATIENT : 1
THE_TWICE : 1
APPOINTMENT_SHE : 1
TO_NURSING : 1
SIDE_UP : 1
USE_OCCUPATIONAL : 1
NONE_IS : 1
WITH_AND : 1
ED_ESTABLISHED : 1
CAPSULE_ENCROACHING : 1
BREAKFAST_AND : 1
SCAN_FOLLOWINGUP : 1
KNOWN_INCITING : 1
INR_OUTPT : 1
IS_NECESSARY : 1
CONVERSATION_WITH : 2
NEEDS_MRI : 1
TORADOL_IM : 1
BEFORE_TIME : 1
THE_VETERAN : 1
MEDICAL_IC : 1
THROUGH_THIS : 1
CENTRAL_BUT : 1
HIS_HAS : 1
LENS_CORRECTION : 1
AWARE_OF : 1
APPT_STATES : 1
WITH_THE : 1
TO_UPCOMING : 1
AND_UPPER : 1
ARRIVAL_DATE : 1
IS_POSSESSIVE : 1
PROBLEMS_DOWN : 1
CAME_INTO : 1
ONSET_NO : 1
MEDS_PATIENT : 1
UNSPECIFIED_TYPE : 1
ULA_TO : 1
ALERT_PAIN : 1
HEENT_LIP : 1
RESPONSES_OBTAINED : 1
PAIN_TOTAL : 1
SOUNDS_PROCEDURES : 1
OBJECTIVE_EFFECTS : 1
INFILTRATES_OFFICIAL : 1
NO_RIGHT : 1
REPORT_LEFT : 1
HEALTH_FOLLOWUP : 1
EVAL_TEL : 1
TO_OPS : 1
COMMENT_WILL : 1
FOLLOWING_PROBLEMS : 2
TO_IBUPROFEN : 1
FAMILY_GIVEN : 1
THINK_READER : 1
MEDSURG_SHIFT : 1
SEVERAL_TO : 1
AXIS_BUT : 1
AGREED_TO : 1
HOME_CONTACT : 1
UCINATION_NO : 1
SCREENING_PATIENT : 1
IS_YEAR : 2
LO_ONEHALF : 1
YES_ECTOPY : 1
POST_ASSESSMENT : 1
ANTIDEPRESSANTS_DOES : 1
AGREED_IS : 1
AND_TO : 1
REQUESTING_UNITS : 1
AL_LEFT : 1
IF_EXAMINATION : 1
INCLUDING_FOLLOWUP : 1
FOR_CLEANSING : 1
TEMPERATURE_HAS : 1
VERY_AND : 1
CP_ACCURATE : 1
CURRENT_IS : 1
ASSESSMENT_AND : 1
TEST_MIGUEL : 1
PHYSICIAN_NARCOTIC : 1
IT_IS : 2
COMPLAINTS_VOICED : 1
DRIVER_MUST : 1
APPOINTMENT_LEFT : 1
CURRENT_INR : 1
OTHER_NEEDLE : 1
ESTABLISHED_THERE : 1
CHRONIC_THE : 1
MG_EVERY : 1
PUSHING_WHEEL : 1
ONEHALF_TABLET : 1
UP_MALLOY : 1
DANGEROUS_HOUSEHOLD : 1
TEAR_OCCUPATIONAL : 1
STATED_CHO : 1
LIPID_URGENT : 1
MINUTES_OF : 1
DATE_LOCATION : 1
ANESTHESIA_SCORE : 1
GENERAL_COUNSELING : 1
AT_APPROXIMATELY : 1
TIME_YES : 1
LIFTING_AWA : 1
WITH_CONTACT : 1
PROBLEMS_CHIEF : 1
WHEN_FOR : 1
OF_NUM : 1
ON_WITH : 1
ANXIETY_NOTED : 1
ALDRETE_TELEPHONE : 1
VOICEMAIL_IN : 1
AT_APPT : 1
INCLUDING_THE : 1
THE_MEDICATION : 1
MEDICATIONS_INCLUDING : 3
SOB_CP : 1
CONTACTED_AREA : 1
CHECK_IN : 1
INPATIENT_REMOTE : 1
EXCUSE_HER : 1
NAME_REPORT : 1
AND_ST : 1
WT_KG : 1
TIME_PROCEDURE : 1
ST_REGENT : 1
TIME_OF : 1
THE_LEFT : 3
SINGLE_LIVES : 1
IMPAIRMENT_TO : 1
PATIENT_NOT : 3
HAVE_PHONE : 1
NEEDS_VETERAN : 1
BY_BY : 1
CM_REORDEREDCOPY : 1
NONVA_ISONIAZID : 1
BREATH_SOUNDS : 1
FOR_BED : 1
AROUND_CHRONIC : 1
ALLERGIES_ASPIRIN : 1
DISTRESS_WOUND : 1
NOT_ANY : 1
AND_WILL : 1
TO_MONIOTR : 1
SURGERY_YOUR : 1
CODE_URETHERAL : 1
MANAGEMENT_CONVERSATION : 1
RECORD_YOUR : 1
BP_NO : 1
FOR_GROUP : 1
ABOUT_AGREED : 1
ASSESSMENT_HISTORY : 1
BP_RESP : 1
NOT_FILL : 1
ASSESSMENT_SOUNDS : 1
PSYCHOLOGY_OCULAR : 1
FOSTER_PROVIDED : 1
PREOPERATIVE_CHECKLIST : 1
OXYGEN_NO : 1
POST_TIBIAL : 1
SORE_IN : 1
HE_THAT : 1
EACH_NO : 1
SITUATION_BOTH : 1
RISING_AND : 1
BACK_SEVERAL : 1
MY_NO : 1
SUBCUTANEOUSLY_BREAKFAST : 1
IN_CM : 1
SL_ERYTHEMA : 1
ALPHABETIZED_OF : 1
TO_HER : 1
HAS_BEEN : 1
KNOWN_EVENT : 1
REPORT_MARINA : 1
VALVE_MECHANICAL : 1
ONCOMING_VSS : 1
NO_PROBLEMS : 1
OPS_WITH : 1
THANKS_MR : 1
UNSPECIFIED_COUNSELING : 3
FOR_FOLLOW : 1
MANAGEMENT_UNLISTED : 2
UNLISTED_EVALUATION : 2
ANESTHESIA_ALDRETE : 1
OD_WITH : 1
IS_INSIDIOUS : 1
LEVEL_ALERT : 1
IS_AWARE : 1
BUT_HIS : 1
PATIENT_PRELIMINARY : 1
CHIEF_MIDLOW : 1
DISTRESS_INCISION : 1
CALL_AND : 1
LACERATION_NOTED : 1
COMMENTS_VET : 1
LIFE_DO : 1
WANTS_KNOW : 1
TO_APPTS : 1
CONSENT_CHANGESPT : 1
LENS_CENTRAL : 1
THE_PAIN : 1
IS_INDEPENDENT : 1
DISEASE_SOLUM : 1
COMPLAINT_NOT : 1
PATIENT_AND : 2
OPPORTUNITY_ASK : 1
REPORTS_THE : 1
WITH_NUMBERS : 1
IS_STATED : 1
RAILS_UP : 1
SERUM_OL : 1
ML_ACTIVE : 1
BEEN_NONVA : 1
DID_WANT : 2
XYZZY_PT : 2
BOTH_AND : 1
DAILY_LIVING : 1
SHIFT_NOTE : 1
PATIENT_REPORT : 1
WITH_OTHER : 1
HAVE_SIX : 2
AIR_AMBULANCE : 1
AND_RECENTLY : 1
AVOID_AND : 1
HOME_SIGNIFICANT : 1
PCO_ENCROACHING : 1
OBSTRUCTIVE_PULMONARY : 1
ADMINISTRATIVE_PT : 1
LEFT_LODGING : 1
ALONE_IN : 1
RESPONSE_APPT : 1
BEFORE_LEAVING : 1
OBSTRUCTIVE_DISEASE : 1
ED_EXTERNAL : 1
FOLLOW_UP : 2
MG_TAB : 3
IN_THE : 7
JUN_INR : 1
SUPPLIES_POV : 1
NOTE_VETERAN : 1
SIDE_RAILS : 2
PROBLEM_UNSPECIFIED : 3
REGARDS_TO : 1
PERIORBITA_AND : 1
REVEALS_AMMONIUM : 1
ADEQUATE_ECTOPY : 1
WITH_FAMILY : 1
PAIN_AND : 1
EDEMA_OTHER : 1
SPECTACLE_CONTACT : 1
IN_BUT : 2
ACCURATE_YES : 1
AND_ALLOW : 1
OTHER_INTERESTS : 1
DRUGS_UPRIGHT : 1
COMPLETED_PROBLEM : 1
BOTH_OT : 1
PHSOME_PHONE : 1
RESPONSE_AN : 1
THE_VERBALLY : 1
ANSWERED_ELECTRONICALLY : 1
BEFORE_AND : 1
DEPRESSIO_THE : 1
FOR_INTO : 1
NURSE_AT : 1
ANY_CHANGES : 1
PANEL_TO : 1
PREVENTIONS_INFLUENZA : 1
INDIVIDUAL_SUPPORTIVE : 1
RELATIONSHIPS_HE : 1
EQUIPMENT_NASAL : 1
PATIENT_MALE : 1
NOTE_OTHER : 1
PUSHING_CHAIR : 1
OF_RANGE : 1
RISK_POST : 1
OUTPATIENT_INPATIENT : 1
OF_NOT : 1
CAPSULE_ON : 1
HAS_THESE : 1
IF_ANXIETY : 1
ADMINISTERED_AN : 1
AND_PREREGISTRATION : 1
AREA_CODE : 1
PATIENT_IS : 1
AT_WITH : 1
NEEDS_ALERT : 1
ACTIVE_CHANGES : 1
AUDITC_WAS : 3
BUT_CALL : 1
TO_ENVIRONMENT : 1
LEAVING_THE : 1
PROBLEM_IN : 1
NOT_HAVE : 2
AROUSABLE_OTHER : 1
THERAPY_NOTE : 3
SCORE_RIGHT : 1
PREVENTIONS_INACTIVATED : 1
PAIN_WHEN : 1
BLEPHAROPLASTY_POSTOP : 1
TAKING_OVER : 1
INFORMED_FOR : 2
GLU_AC : 1
INDICATED_HE : 1
CHAIR_ON : 1
DOES_NO : 1
STOOL_REVIEWED : 1
GIVEN_OF : 2
PAIN_THROBBING : 1
CHANGESPT_AGREED : 1
FILL_HIS : 1
AMBULANCE_MISSOULA : 1
MINUTES_FOR : 1
NARCOTIC_RX : 1
PT_NEEDS : 2
PRESENTS_TO : 1
CXR_TO : 1
FOLLOWUP_CHECK : 1
EVERY_ISOSORBIDE : 1
ASKED_THAT : 1
DEPRESSED_OR : 1
KNOW_IF : 1
BILATERALLY_RISK : 1
LIVES_HOME : 1
ADDITIONAL_INFORMATION : 1
WOULD_LIMITED : 1
SPEAKING_PHYSICIAN : 1
THIS_ON : 1
OF_MEDS : 1
THICKNESS_TEAR : 2
COMPLAINTS_MONITORED : 1
ALLOW_HIMSELF : 1
ADMIN_BY : 1
HOSPITAL_YOU : 1
ACTUAL_LB : 1
OF_SURGERY : 1
AND_THE : 1
LOOK_FIND : 1
ON_ORIENTATION : 1
COMMINUTED_LACTATE : 1
PROGRESS_NOTE : 5
TAB_BLOOD : 2
NOT_POROKERATOSIS : 1
HE_IS : 2
PO_EACH : 1
TIMES_FOR : 1
WILL_FOR : 1
CONTACT_SOCIAL : 1
NOTED_TO : 1
NOT_INCLUDE : 1
NEUROPATHY_EVERY : 1
MEDS_TO : 1
TO_PREREGISTER : 2
AND_PHYSICAL : 1
NO_KNOWN : 1
PATIENT_AGE : 1
THAN_SIG : 1
SKIN_ASSESSMENT : 1
LIVES_GLU : 1
TO_ONCOMING : 1
GL_OCCUPATIONAL : 1
COUNSELING_SINCE : 1
TO_AND : 2
YOU_TREATED : 1
NOT_TO : 5
SKIN_IV : 1
MANAGEMENT_SERVICE : 2
OUTPUT_RESP : 1
INTAKE_OUTPUT : 1
MORE_TIME : 1
TROPICAMIDE_BOTH : 1
GROUP_DISCHARGE : 1
MG_DL : 1
IN_PSURHX : 1
LEFT_TROPICAMIDE : 1
AVOID_GRAPEFRUIT : 1
TO_HEAL : 1
DIETS_BP : 1
GUARDIAN_THE : 1
HIS_PAIN : 1
ADMINISTRATIVE_NOTE : 1
STRICTURE_VET : 1
APPTS_APPOINTMENT : 1
AND_INJECT : 1
ONSET_KNOWN : 1
CONSIDER_FACT : 1
NURSING_ADMISSION : 1
OF_TOXICITY : 1
CHRONIC_PULMONARY : 1
EVALUATION_CODE : 2
OUTPUT_RIGHT : 1
NO_LIFTING : 1
COPY_CLINIC : 1
PE_HEENT : 1
OF_HOUSEHOLD : 1
BOWEL_EQUIPMENT : 1
LIST_IN : 1
TYPE_NEW : 1
FLOWN_AIR : 1
ASSIST_TOUCH : 1
SIDE_LEAVING : 1
PHARMACY_GENERAL : 1
VACCINE_OBJECTIVE : 1
TO_RECEIVED : 2
THE_OPPORTUNITY : 1
MELLITUS_MENTION : 1
AM_PM : 1
SITUATION_LIVES : 1
ASSISTANCE_INDEPENDENT : 3
PRESENTS_URGENT : 1
BEEN_SPENDING : 1
OTHER_PEOPLE : 1
ALCOHOL_SCREENING : 3
HAVE_LISTED : 1
FOREIGN_CYCLOBENZAPRINE : 1
SHORTLY_BEFORE : 1
QHRS_PRN : 1
THE_HAVE : 1
FROM_OUTGOING : 1
AT_OPTION : 1
EVALUATION_MANAGEMENT : 4
OUTPATIENT_SC : 1
MINUTES_INDIVIDUAL : 1
AND_LOCATION : 1
CT_FOLLOWINGUP : 1
CHECKLIST_WHILE : 1
NOTE_THIS : 1
ASPIRIN_INR : 1
DECREASE_DOSE : 1
TO_GET : 1
VETERAN_EDUCATION : 1
CONDITION_DIAGNOSIS : 1
COMMENTS_INFORMATION : 1
MEDIAL_LEFT : 1
MAPLEVIEW_NO : 1
TEL_NO : 1
RIGHT_NORMAL : 1
DOES_BMI : 1
NURSING_NOTE : 3
OUTGOING_SHIFT : 1
INFORMATION_WITH : 1
MEDICAL_ISSUES : 1
WRITE_TO : 1
AND_PATIENT : 1
NORMAL_OF : 1
KNEE_CM : 1
INSTRUCTIONS_PATIENT : 1
HAD_PT : 1
SHIFT_ASSESSMENT : 1
STATES_FOR : 1
BREAST_SHE : 1
APPT_PHYSICIAN : 1
BE_BECAUSE : 1
SHARED_THAT : 1
HYPERLIPIDEMIA_SUPPLY : 1
PLEASE_THE : 1
RECEIVED_VERBAL : 1
RECEIVED_FACE : 1
THE_DOES : 1
MANAGEMENT_AND : 1
MOUTH_THREE : 1
COMPLAINT_FOLLOW : 1
INACTIVATED_VACCINE : 1
AT_PATIENT : 1
DOES_NOT : 3
HOURS_WANTS : 1
LOWER_BACK : 1
LEFT_INDEX : 3
UNIT_YOU : 1
INFLUENZA_HYPERCHO : 1
PATIENT_OUTPATIENT : 1
BEEN_SHOT : 1
OF_AM : 1
PA_WILL : 1
WAS_HIS : 1
MARINA_WALKING : 1
NEURO_ALERT : 1
INSTRUCTIONS_AND : 1
ON_SOCKS : 1
ENCLOSED_PAT : 1
LEFT_WITH : 1
HITTING_BREAKING : 1
CONFIRMED_FACE : 1
EVERY_SKIN : 1
NOTE_DENIES : 1
AN_SCREENING : 2
TO_FROM : 1
CAD_TEL : 1
NO_OF : 2
PERIORBITA_ENDOBROW : 1
FLEXARIL_SKIN : 1
NEEDS_FOBT : 1
WILL_SEND : 1
PATIENT_THERE : 1
NKA_CLINIC : 1
MALE_PSYCHOLOGY : 1
KNEE_SL : 1
SESSION_TALK : 1
THAT_SHE : 1
TREATED_LEFT : 1
THE_SOCIAL : 1
NEED_NEEDS : 1
THAT_THIS : 1
NORMAL_ETHNIC : 1
PICKED_UP : 1
NOT_CONFIRMED : 1
SCORE_LIQUID : 1
PAIN_QUIT : 1
DUE_TO : 1
WOULD_BE : 1
DATE_AND : 2
AS_IN : 1
LIP_WITH : 1
NOT_WANT : 2
COOPERATIVE_BREATH : 1
ORDERS_AND : 1
RN_NOTE : 1
CALL_ROUTINE : 1
PROGRESS_ALCOHOL : 1
HEIGHT_CM : 1
NO_APPARENT : 1
MALE_MINUTES : 1
VISIT_FOLLOW : 1
WAS_FLOWN : 1
OF_YOUR : 1
STATE_CHIEF : 1
PROCEDURE_NOTE : 1
SOB_EDEMA : 1
OF_TYPE : 1
RATIVE_CHANGES : 3
MATERIAL_IF : 1
THAT_DOES : 1
ST_INCREASE : 1
BUT_IN : 1
FURTHER_DOSING : 1
HOSPITAL_STATE : 1
OBTAINING_CONSENT : 1
BY_INITIAL : 1
SHIFT_ML : 2
INCORRECT_HE : 1
RASH_OR : 1
WITHOUT_OF : 1
FLUIDS_UPPER : 1
POOR_DUE : 1
ANESTHESIOLOGIST_POST : 1
PRIOR_CT : 1
PCP_COMMENT : 1
COLOR_APPEARANCE : 1
CLINIC_NURSING : 1
OR_AROUND : 1
MESSAGE_REGARDS : 1
EVAL_NO : 1
TO_INCREASE : 1
WITH_YOU : 1
LIGHT_SIDE : 1
PVC_MORPHINE : 1
TO_DOES : 1
HAVE_BUSTED : 1
HIS_HURTS : 1
DOWN_FELT : 1
AND_RECORD : 1
DUE_THE : 1
CALL_YOUR : 1
NO_STATES : 1
IMPROVED_BUT : 1
POV_THEN : 1
BECAUSE_DEPTH : 1
THE_IN : 1
LOWER_WAS : 1
LUMPS_PT : 1
PRACTITIONER_OBTAINING : 1
EXPIRED_MEDICATIONS : 1
OCCUPATIONAL_THERAPY : 2
POSTOP_OF : 1
WITHOUT_MENTION : 1
TYPE_BEHAVIOR : 1
THE_IS : 1
HAD_OPPORTUNITY : 1
APPEARANCE_YELLOW : 1
NOTED_ABLE : 1
THE_TIME : 1
PERSON_TO : 2
IV_FLUIDS : 1
SPOT_AROUND : 1
OR_DRUGS : 1
TIME_ADMISSION : 1
DO_NOT : 2
WAS_PAIN : 1
FOR_OTHER : 1
CONSTANT_REDONE : 1
AND_GI : 1
OF_WAS : 1
ASSESSMENT_ANESTHESIOLOGIST : 1
CORRECTION_STRIAE : 1
MRI_HERBAL : 1
TONOMETRY_READINGS : 1
MIGUEL_SIGNATURE : 1
OVER_THE : 1
PAT_STATUS : 1
TAB_MG : 2
HOURS_TO : 1
ISSUED_AT : 1
CHO_REFER : 1
BLOOD_PRODUCTS : 2
WHEN_LAYED : 1
MIDLOW_BACK : 1
SCORE_TREATMENT : 1
GUARDIAN_HAD : 1
HE_DOES : 2
NOT_REALLY : 1
PERCEPTION_POOR : 1
NOTE_HYPERTENSION : 1
PAIN_NEURO : 1
NO_VETERAN : 1
TO_STAND : 1
OFTEN_DID : 2
WITHOUT_OR : 1
PREREGISTRATION_COMPLETED : 1
LAST_AREA : 1
REPORT_WITHOUT : 1
BP_PULSE : 1
MALE_WITH : 1
LEGS_ACTIVE : 1
IS_WITH : 2
IT_ADDRESSED : 2
AND_OUTPUT : 1
EYES_SEVERE : 1
DEPRESSIO_TIME : 1
NO_COMPLAINTS : 1
NOTED_PAIN : 1
PATIENT_PROCEDURE : 1
LEFT_DROP : 1
FEELING_DOWN : 1
WRITTEN_IF : 2
THROMBOSIS_DATE : 1
TAKE_ONE : 2
ROOM_BATHROOM : 1
OTHER_HE : 1
OF_NOX : 1
ALERT_PERRLA : 1
OR_NOT : 1
FOR_EVALUATION : 1
SESSION_TO : 1
PULMONARY_DISEASE : 1
SOCIAL_IDENTIFIED : 1
APPT_PATIENT : 1
WT_PAIN : 1
OPTION_HOURS : 1
IMM_CL : 1
URINE_APPEARANCE : 1
APPROXIMATELY_PM : 1
WITH_WALKING : 1
OUTPATIENT_RXS : 1
STAFF_HP : 1
OF_ADMISSION : 1
FACE_REPORT : 2
AND_ENDOBROW : 1
PROCESS_HE : 1
DID_COME : 2
FLOWN_BY : 1
SCREENING_TEST : 3
WAS_GIVING : 1
ADMINISTERED_NONE : 1
PREPROCEDURE_WHILE : 1
PROBLEMS_REHAB : 1
PROVIDER_NURSE : 1
LIVES_AT : 1
HOURS_AM : 1
WANT_TO : 2
NUMBERS_PREVENTIONS : 1
NO_SIGNS : 2
SEVERE_ORIENTATION : 1
TEAR_AC : 1
THE_REQUESTING : 1
INR_FOR : 1
DENIES_IN : 1
STAFF_AND : 1
ACTIVE_NO : 1
PAIN_BUMPS : 1
RX_FOR : 1
SOCKS_ADDENDUM : 1
THE_BEHAVIORS : 1
RECENT_SCORE : 1
RESPONSE_DESCRIBE : 1
ANSWERED_LO : 1
PHARMACY_ISSUE : 1
HIV_TEST : 1
STENTS_LEFT : 1
TO_SHOW : 1
COUNSELING_REQUIRED : 1
PROGRESS_HISTORY : 1
TO_HEART : 1
LOSARTAN_MG : 1
STILL_ACCURATE : 1
HE_HE : 1
TEMP_PULSE : 1
PSYCHOLOGY_HYPERTENSION : 1
IF_FROM : 1
RISK_ASSESSMENT : 1
NOTE_SCREENING : 1
INCLUDING_ACTIVE : 1
AND_OCT : 1
COMMUNICATION_COMMUNICATES : 1
CALL_BUT : 1
MEDICAL_NONE : 1
REALLY_CONFIRMED : 1
NKA_LO : 1
SHOWER_MEMORY : 1
RECORDS_EFFECTS : 1
HE_SAYS : 1
ENCOURAGED_TO : 1
FOR_DEPRESSIO : 1
ADMISSION_ASSESSMENT : 1
INCLUDE_CODE : 1
INFILTRATES_SEEN : 1
PUTTING_ON : 1
ALERT_ORIENTED : 1
CLINIC_PROGRESS : 1
MALLOY_AT : 1
SEVERE_QUIT : 1
PRESENT_CHIEF : 1
INFORMED_CONSENT : 2
SHIFT_INJURY : 1
HOMELESS_NO : 1
PROVIDER_RECOMMENDATION : 1
ASSESSMENT_IV : 1
STATUS_PREOPERATIVE : 1
DESCRIBE_ALCOHOL : 1
DRAWN_BEFORE : 1
ADVISED_TO : 2
OF_CONTACTED : 1
WT_LBS : 1
HISTORY_MEDICAL : 1
APARTMENT_OCULAR : 1
RESULTS_NOTE : 1
JUN_PC : 1
WAS_GIVEN : 2
PAST_YOU : 1
OTHER_CLIENT : 1
THERAPY_MEDICAL : 1
TO_URGENT : 1
HOPELESS_NOT : 1
STATES_PAIN : 1
DOSE_OF : 1
ASSESSMENT_TRIAGE : 1
APPT_NEUROPATHY : 1
PRELIMINARY_ANXIETY : 1
ARE_STILL : 1
VERBAL_AND : 1
ORIENTATION_PERSONAL : 1
CAD_PVD : 1
IT_SHOW : 1
AND_ASKED : 1
IF_HOW : 1
REFILL_SEC : 1
ON_ADVISED : 1
PAIN_CONTROL : 1
ANSWERED_NKA : 3
RESP_WT : 1
REFILL_DO : 1
PCO_CAPSULE : 1
CHIEF_LEG : 1
LANE_SIGNS : 1
THERAPY_PROGRESS : 2
PRODUCTS_OR : 1
DRINK_OR : 1
PT_NEED : 1
MOOD_PLEASANT : 1
IS_ACHING : 1
PROCEDURE_WT : 1
BREATH_UNSURE : 1
STATES_SHE : 1
APEX_LODGING : 1
IN_HOUR : 1
GN_CONTRACT : 1
DISCHARGE_CXR : 1
WALK_AT : 1
CABG_STENTS : 1
TIME_IN : 1
MECHANICAL_REACTION : 1
PREREGISTER_URGENT : 1
EVERY_FOR : 1
LEFT_MESSAGE : 1
LEFT_TEMP : 1
FELT_SHORT : 1
MG_CALL : 1
OF_ALERT : 1
THE_LINE : 1
NEGATIVE_FOLLOWUP : 1
UP_PAIN : 1
ON_IMPRESSION : 1
COME_TO : 2
SHE_IS : 1
ADDENDUM_OPTION : 1
OTHER_INSTRUCTIONS : 1
TO_PERCENTILE : 1
PLANTAR_SWELLING : 1
MINIMAL_HE : 1
QUIT_IT : 1
FOR_PRETHERAPY : 1
TO_DC : 1
SUBJECTIVE_PATIENTS : 1
TO_OF : 1
URETHERAL_VET : 1
SITE_CURRENT : 1
PT_QUIETLY : 1
OTHER_DESCRIBE : 1
LIGHT_RAILS : 1
TO_AFTER : 1
TO_FOR : 1
IMMEDIATE_PERCENTILE : 1
PAIN_INSIDIOUS : 1
GRAPEFRUIT_AND : 1
DIETS_NO : 1
BMI_PROBLEMS : 1
TO_THE : 6
NOTE_URINE : 1
BLOOD_PRESSURE : 2
TO_ASK : 1
UPON_AND : 1
NEW_MEDICATIONS : 1
VOICED_MONITORED : 1
ON_LIGHT : 1
TO_COME : 1
NONE_POST : 1
CHECKLIST_IN : 1
APPT_HE : 1
RAILS_SPOT : 1
STAND_OR : 1
NO_CP : 1
BUT_PCO : 1
SAN_MIGUEL : 1
THE_OF : 5
IF_WORSEN : 1
BY_MOUTH : 3
LISTED_WILL : 1
OF_OTHER : 1
HER_INFORMED : 1
HE_INDICATED : 1
LIFE_THAT : 1
INTACT_STRESS : 1
REVIEWED_TO : 1
VS_RECHECKED : 1
RATIVE_ASSESSMENT : 1
MRI_MEDICATIONS : 1
TO_TALK : 1
TYPE_II : 1
CLEAR_BP : 1
COMPLAINT_MIDLOW : 1
THE_CALL : 1
PATIENT_NAME : 2
BEHAVIOR_EQUAL : 1
BACK_OF : 1
THE_WAS : 1
COME_FOR : 1
SAYS_BEEN : 1
MG_IM : 1
HISTORY_PHYSICAL : 1
CHIEF_COMPLAINT : 4
CONSENT_HIV : 1
NOTE_PT : 1
OBJECTIVE_TO : 1
DID_NOT : 4
FOR_ANXIETY : 1
COOPERATIVE_SOUNDS : 1
NOTE_HAS : 1
NO_INCITING : 1
CRAMPS_UNILATERAL : 1
CLEANSING_EXPR : 1
THAT_HE : 2
HOME_WHEN : 1
MEDICATIONS_VETERAN : 1
TEL_OF : 1
EVERY_THIS : 1
BREAKING_HE : 1
LIGHT_NO : 1
MEDSURG_NOTE : 1
BUT_LOWER : 1
MUSCULOSKELETAL_FRICTION : 1
STATUS_OR : 1
ICDCM_OUTPATIENT : 1
FAMILY_MEMBER : 1
MG_CHRONIC : 1
CAUSING_SEVERE : 1
RENT_PAT : 1
JOINT_RATIVE : 1
FACT_WHEN : 1
SHE_EXPLAINED : 1
GOOD_TO : 1
IF_THIS : 1
REASON_FOR : 2
OCC_ALLERGIES : 1
STARTING_AM : 1
TAKE_TABLET : 3
TO_WHEN : 1
WAS_NOT : 1
THE_FOR : 1
NOX_DOSING : 1
DUE_AND : 1
PAIN_JOURNAL : 1
OUTPUT_DIETS : 1
UPPER_BLEPHAROPLASTY : 2
BEFORE_THE : 1
IS_DISSATISFIED : 1
STATUS_SINGLE : 1
NOTE_WT : 1
COMMINUTED_OBTAINING : 1
WITH_MEMBER : 1
OBTAINING_INFORMED : 1
HISTORY_ILLNESS : 1
HOME_TORADOL : 1
PRODUCTS_ADMINISTERED : 1
PT_FOBT : 1
DO_YOU : 1
ON_ASPECT : 1
EACH_OXYGEN : 1
LEG_UNILATERAL : 1
IS_ELEVATED : 1
HOUSEHOLD_BOTH : 1
LEG_CRAMPS : 1
CENTER_NOTE : 1
WEIGH_EVERY : 1
ACTIVE_RECENTLY : 1
VERIFICATION_TIME : 1
TO_EXCUSE : 1
SERUM_CHO : 1
VISION_PSURHX : 1
STATED_IS : 1
ANTIHYPERTENSIVES_ANTIPSYCHOTICS : 1
HIS_PARTNER : 1
RHYTHM_HOUR : 1
PROBLEM_INCORRECT : 1
SEEN_FOR : 1
NO_RISK : 1
BE_VIA : 1
PRESSURE_REASSESSMENT : 1
EVERY_UPON : 1
CERTIFICATE_TO : 1
JOURNAL_AT : 1
PERSON_WHOM : 2
LOST_HOME : 1
NAME_PRELIMINARY : 1
HIMSELF_HEAL : 1
BEFORE_IN : 1
AMBULANCE_TO : 1
ORIENTATION_TO : 1
AND_MANAGEMENT : 2
SEVERAL_BUMPS : 1
STARTING_AT : 1
RESULTS_RESPONSES : 1
LIVING_ACTIVE : 1
MAIN_FOR : 1
TEAR_JOINT : 1
EFFECTS_TO : 1
THE_PAST : 1
ONE_BY : 2
COPY_THE : 1
LIP_MM : 1
HAVE_PAIN : 1
OPPORTUNITY_TO : 1
NEED_BUT : 1
OR_WAS : 1
COMMUNITY_VETERAN : 1
THERE_ARE : 1
HAVE_ENCOURAGED : 1
APPARENT_PROBLEM : 1
THE_COMMUNITY : 1
QTY_DOG : 1
WOMAN_ALLOW : 1
RESPONSES_SCORE : 1
REFER_TO : 1
SHE_THAT : 1
AEROSOL_BEHAVIOR : 1
SUPPLIES_THEN : 1
INR_DOSE : 1
NONSTERILE_USE : 1
PROFILE_FOR : 1
OF_PATIENT : 1
NKA_EYE : 1
NUM_AL : 1
THAT_LOOK : 1
PATIENT_COME : 1
THIS_HIS : 1
OTHER_FLUIDS : 1
COMPLAINT_OF : 1
FRICTION_NO : 1
PRESSURE_NURSING : 1
FOLLOW_PAIN : 1
ULCER_SORE : 1
OF_OUTPATIENT : 1
ATTEMPTED_CALL : 1
AND_SUPPORTIVE : 1
THREE_ACTIVE : 1
OR_REASON : 1
OF_MR : 1
AND_FOR : 1
FROM_ANXIETY : 1
AFFECT_APPROPRIATE : 1
WITHOUT_SPECTACLE : 1
PAIN_QUALITY : 1
SWELLING_NURSING : 1
VET_SHE : 1
SAID_THAT : 1
RXS_INPATIENT : 1
CALL_NOTE : 1
SITE_HISTORY : 1
WAS_AN : 1
THIS_AM : 1
AND_HIM : 1
PROVIDED_CONTACT : 1
FILED_TONOMETRY : 1
VOICED_QHRS : 1
ML_APPLY : 1
CARRY_CONVERSATION : 1
AND_FAMILY : 1
FOR_ELEVATED : 1
PREPROCEDURE_CHECKLIST : 1
FROM_LPN : 1
PATIENT_HAS : 3
END_RANGE : 1
BM_APPEARANCE : 1
SAID_HE : 1
COGNITIVE_SS : 1
BODY_CYCLOBENZAPRINE : 1
TX_EXTENT : 1
SEVERE_PAIN : 1
IN_PER : 1
BUSTED_SHOT : 1
OTHER_UNSPECIFIED : 3
NOT_NEED : 1
THE_THAT : 1
DRUGS_STAY : 1
INTO_TO : 1
ADDRESSED_PATIENT : 1
UP_QUALITY : 1
MAN_WHO : 1
IS_LIVING : 1
CY_SIDE : 1
APPEARANCE_PLEASANT : 1
ANTIPSYCHOTICS_PATIENT : 1
ON_WRITTEN : 1
SOCKS_OPTION : 1
NOTE_ADVISED : 1
MG_AND : 1
PVD_IN : 1
RESULTS_SOCIAL : 1
WARFARIN_MG : 1
BEFORE_THAT : 1
PHONE_FOR : 1
PATIENT_BLOOD : 1
LEAVING_FLOATING : 1
OUTPATIENT_NOTE : 1
STAFF_NOTE : 1
OCCASION_IN : 2
MM_ULCER : 1
OTHER_AND : 1
ENVIRONMENT_RANK : 1
QUIETLY_AND : 1
EDEMA_FOREHEAD : 1
VERY_POSSESSIVE : 1
CLIENT_DID : 2
OTHER_ASSESSMENT : 1
VIEW_INFILTRATES : 1
OF_LEFT : 3
FACE_FACE : 2
ROUTINE_HEALTH : 1
PREVENTIVE_SCREENING : 1
WHEN_CXR : 1
CENTERED_WITH : 1
OFFICE_WORKER : 1
PATIENT_ASSESSMENT : 1
THE_MATERIAL : 1
HAVE_TO : 2
VETERAN_ADMINISTERED : 1
STATES_DOES : 1
TRIAGE_ESOPHAGEAL : 1
THAT_THEY : 1
FOR_UPDATE : 1
COUNSELING_PHSOME : 1
CAP_REFILL : 1
ST_TO : 1
SS_DANGEROUS : 1
THANKS_IS : 1
VISIT_UP : 1
AN_WITH : 1
SERVICE_AT : 1
AND_ACTIVITIES : 1
VETERAN_INDEPENDENT : 1
INDEPENDENT_LIMITED : 1
THE_IF : 2
LIST_OK : 1
NURSE_RECOMMENDATION : 1
FOREHEAD_AND : 1
BLOOD_BLOOD : 1
HYGIENE_AND : 1
ERYTHEMA_ADV : 1
INDIVIDUAL_PATIENT : 1
AMMONIUM_LOTION : 1
OT_AND : 1
BATHING_LEVEL : 2
AL_SCALE : 1
MOUTH_ISOSORBIDE : 1
HAD_THE : 1
FOR_MINUTES : 1
SCORE_APPOINTMENT : 1
OR_THINGS : 1
OT_ST : 1
MEMBER_RESULTS : 1
FOOT_SWELLING : 1
PROVIDED_PTS : 1
THE_WRITTEN : 1
NO_REHAB : 1
HAVE_ANY : 1
PAIN_ASKED : 1
DOCUMENT_PROCEDURE : 1
BACK_GIVING : 1
WOUND_LOSARTAN : 1
ALDRETE_CONTACT : 1
SPEAKING_ANDO : 1
NURSING_ASSESSMENT : 2
IS_THROBBING : 1
PROCEDURE_TIME : 1
THAT_THROUGH : 1
ASSESSMENT_CONTINUE : 1
HAVE_DRAWN : 1
UNSPECIFIED_PT : 1
SCREENING_AUDITC : 3
CHANGE_BM : 1
PT_TO : 3
PHYSICIAN_GN : 1
STENTS_IN : 1
XLESION_SITE : 1
FOSTER_CARE : 1
IN_DISTRESS : 1
REVIEWED_HAS : 1
APPEARANCE_BMI : 1
SYMPTOMS_WARFARIN : 1
MAA_AND : 1
CHANGES_REPORT : 1
AC_JOINT : 1
HISTORY_AND : 1
SIGNS_LANE : 1
WHO_PRESENTS : 1
OLD_PSYCHOLOGY : 1
CONFIRMED_RECEIVED : 1
WHEN_FINGER : 1
OF_COMPLICATION : 1
VETERAN_PATIENT : 1
DESTINATION_HOME : 1
HISTORY_THE : 1
CAUSING_PAIN : 1
ASSESSMENT_CALL : 1
LAYED_FELT : 1
NURSE_WITH : 1
ORDERED_ADMIN : 1
DC_RASH : 1
IC_PNEUMONIA : 1
MEDS_DID : 1
PAIN_IS : 3
PHONE_QTY : 1
PO_OXYGEN : 1
NOTE_INJURY : 1
RARELY_MOIST : 1
ONE_PO : 1
THE_FAILED : 1
ST_DRINK : 1
ST_FOOD : 1
MEDICAL_DISCHARGED : 1
CAD_CABG : 1
FRICTION_APPARENT : 1
SUN_ACTIVE : 1
TO_RESULTS : 1
FOR_FOLLOWUP : 1
NKA_TAKE : 1
DL_CENTER : 1
NURSING_OUTPATIENT : 1
KG_DIABETES : 1
RIGHT_IMPROVED : 1
SPOT_FLOATING : 1
PROCEDURE_SENT : 1
COMPLAINT_CRAMPS : 1
BUT_AROUSABLE : 1
OF_CONSCIOUSNESS : 1
ANESTHESIA_ASSESSMENT : 1
LOST_HIS : 1
NO_PULSES : 1
COMPLAINT_UP : 1
TO_MY : 1
FACT_THAT : 1
BY_THREE : 1
HOUR_OUTPUT : 1
OF_UNSURE : 1
BY_PTS : 1
LABRUM_DE : 2
TO_BUT : 1
RIGHT_NURSING : 1
WITH_GN : 1
APPLY_ACTIVE : 1
RESULTS_THE : 1
REFLUX_MAR : 1
TEST_WAS : 3
AND_SERVICE : 2
BY_AMBULANCE : 1
PAST_HISTORY : 1
WITH_HYGIENE : 1
FOLLOWING_FEELING : 1
THEIR_STOOL : 1
NOTED_MEDIAL : 1
COUNSELING_HOSPITAL : 1
ADEQUATE_YES : 1
MG_EXCEPT : 1
AND_HIMSELF : 1
NEEDLE_NO : 1
INSTRUCTION_AND : 1
ASPECT_KNEE : 1
VSS_NO : 1
ASSESSMENT_FLUIDS : 1
AT_PCP : 1
HIS_SHARED : 1
POOR_IN : 1
INTAKE_MOISTURE : 1
ALLERGIES_PATIENT : 2
UCINATION_DELUSION : 1
SIG_ONE : 1
CY_RAILS : 1
LEFT_FINGER : 3
CHANGES_THICKNESS : 1
WAS_THIS : 1
DOSE_TO : 1
HAD_RECENT : 1
LOWER_LIP : 1
THERAPY_PAST : 1
APPROPRIATE_MEMORIAL : 1
CONTACT_THE : 1
PATCHES_THE : 1
HIS_PERCEPTION : 1
DIFFICULTY_HOARSENESS : 1
HEART_REPLACEMENT : 1
PT_GIVEN : 1
PATIENT_OF : 1
WITH_RECEIVED : 1
NEGATIVE_TREATMENT : 1
FOR_MEDICATION : 1
ACTIVE_MEDICATIONS : 4
BY_AIR : 1
WEIGHT_LB : 1
LBS_LISINOPRIL : 1
SEEN_REPORTS : 1
SAT_ON : 1
AMMONIUM_LACTATE : 1
DOCUMENT_CHANGES : 1
OBTAINED_PATIENT : 1
CARE_PROVIDED : 1
VISION_IN : 1
PTS_INITIAL : 1
SIGNATURE_CONSENT : 1
DOWN_OR : 1
IN_TEMP : 1
PRN_BREATH : 1
WORKER_NO : 1
FOR_RELIEF : 1
MG_ONE : 2
DATE_PROCEDURE : 1
STOP_TO : 1
HYGIENE_ACTIVITIES : 1
OF_AL : 1
HOSPITAL_PHSOME : 1
PRIOR_TO : 1
PE_LOWER : 1
SHIFT_BOWEL : 1
OF_PM : 1
ECTOPY_OCC : 1
OR_THROMBOSIS : 1
DIAGNOSIS_CAD : 1
PROSTHETIC_OR : 1
IS_PAIN : 2
HOW_OFTEN : 2
MEDICATIONS_NO : 1
TREATMENT_LIQUID : 1
PLEASE_BOTH : 1
RISK_TIBIAL : 1
THE_DID : 1
INACTIVATED_INFLUENZA : 1
MEDICATIONS_ANTIDEPRESSANTS : 1
AND_HIS : 1
ON_ADDENDUM : 1
COPY_MR : 1
LATERALITY_AND : 1
OF_RXS : 1
AWA_OF : 1
PROCEDURE_VERIFICATION : 1
RECOMMENDATION_HOURS : 1
BP_MAR : 1
LB_KG : 2
ANXIETY_ASSESS : 1
HOME_DISCHARGE : 1
REFER_RN : 1
HYPERTENSION_HYPERLIPIDEMIA : 1
INTAKE_ML : 1
IF_WILL : 1
BY_EVERY : 1
TAKE_ONEHALF : 1
NONE_INTACT : 1
SITUATION_OT : 1
WARFARIN_TO : 1
VERY_DISSATISFIED : 1
TO_IT : 3
URGENT_SHE : 1
TALK_ABOUT : 1
UPDATE_PULSE : 1
CARRY_ON : 1
HE_HISTORY : 1
ORDERS_REMOTE : 1
MAY_TAKING : 1
TO_HE : 1
DETAILING_PROCEDURE : 1
HOURS_PATIENT : 1
UNITS_BEFORE : 1
OFFICIAL_REPORTS : 1
TAB_EACH : 1
DOCUMENT_ANY : 1
ASSIST_GUARD : 1
FOR_MANAGEMENT : 1
MEDS_MEMORY : 1
CYCLOBENZAPRINE_MG : 1
THAT_YES : 1
FOLLOWUP_ON : 1
TIBIAL_YES : 1
CONVERSATION_NO : 1
OTHER_STAY : 1
HYPERTENSION_ST : 1
HE_CHANGE : 1
SUPPORTIVE_PAST : 1
TREATMENT_NITROGEN : 1
EXAM_STATES : 1
RECORDED_THE : 1
SCORE_UPPER : 1
AM_CALLER : 1
LO_TAKE : 1
SHOW_NURSE : 1
WILL_WRITE : 1
SEEN_MINUTES : 1
BE_CALL : 1
LEAVING_SPOT : 1
SEC_DO : 1
PERCEPTION_IS : 1
MUST_BE : 1
IBUPROFEN_MG : 1
PROCEDURES_LEFT : 1
PRESSURE_FOR : 1
PROBLEM_DESTINATION : 1
MONITORED_PRN : 1
FOR_USE : 2
AND_DATE : 1
MEMORY_RANK : 1
EXTENT_DENIED : 1
TRANSMISSION_INTENDED : 2
QUALITY_OF : 1
ISSUES_IC : 1
SCORE_ORDERED : 1
ILLNESS_THE : 1
DILATE_BOTH : 1
ABLE_CARRY : 1
TO_UNIT : 1
WITH_BROTHER : 1
THE_INDEX : 2
COME_APPT : 2
GLENOID_LABRUM : 2
OLD_MALE : 1
TRANSMISSION_IS : 2
IN_PAST : 1
THICKNESS_AC : 1
REGENT_VALVE : 1
TO_PATIENT : 1
ORDERED_BY : 1
WALKING_RECEIVED : 1
PATIENT_PROBLEM : 1
RECENTLY_EXPIRED : 1
APARTMENT_PSYCHOLOGY : 1
AST_NO : 1
ANTERIOR_GLENOID : 2
BUT_CAPSULE : 1
DEPTH_PERCEPTION : 1
STATUS_PREPROCEDURE : 1
HE_DENIED : 1
LIMITED_HIS : 1
PHYSICIAN_ANDO : 1
OPTION_PATIENT : 1
BE_AVAILABLE : 1
POSITIVE_SCREENING : 1
ANESTHESIA_ATTENDING : 1
MORNING_UPON : 1
ANTERIOR_LABRUM : 2
STATUS_OUTPATIENT : 1
FROM_SHIFT : 1
EYE_CLINIC : 1
ABOUT_MEDS : 1
MEDIUM_NONSTERILE : 1
MONO_ALPHABETIZED : 1
PAMPHLET_SENT : 1
AND_DIETS : 1
DIAGNOSIS_EVAL : 1
NO_SOB : 1
REQUIRED_PLANTAR : 1
OLEMIA_PROBLEM : 1
NO_DISTRESS : 1
NOT_BUT : 1
THE_MORNING : 1
YOU_HAVE : 2
PC_STAFF : 1
OUT_PAMPHLET : 1
STATUS_REFLUX : 1
TO_IF : 1
BLOOD_THEIR : 1
LOWER_WITH : 1
SHORTLY_ARRIVAL : 1
HIVES_MEDSURG : 1
LIQUID_AND : 1
INCLUDING_POV : 1
EXAMINATION_THE : 2
RECEIVED_PT : 1
PAIN_DILATE : 1
IT_SUN : 1
CM_LACERATION : 1
SCALE_LEFT : 1
INDEPENDENT_IMMEDIATE : 1
FACE_TO : 2
ASSISTANCE_SHOWER : 1
NOT_REQUIRED : 1
MARITAL_SINGLE : 1
ON_CRC : 1
BROTHER_MAA : 1
ACTIVITIES_DAILY : 1
TELEPHONE_CONTACT : 1
IN_BM : 1
ATTENDING_ANESTHESIOLOGIST : 1
DR_CAME : 1
IN_LEFT : 1
CHIEF_FOLLOW : 1
SAME_DID : 1
INCISION_LOSARTAN : 1
AND_WALK : 1
WITH_CLEAR : 1
LIVING_ADULT : 1
TO_MG : 2
APPROPRIATE_BLVD : 1
ISONIAZID_MG : 1
BP_HAD : 1
INDIVIDUAL_THERAPY : 1
DISCHARGED_HOME : 1
IMM_VISIT : 1
ON_PERSONAL : 1
BE_TAKING : 1
PAIN_MG : 1
TO_MISSOULA : 1
CODE_EVALUATION : 2
ORIENTATION_CHECKLIST : 1
GROUP_ORDERS : 1
TO_QUESTIONS : 1
FAMILY_WAS : 1
BP_ADDITIONAL : 1
THE_YOU : 1
YOU_WERE : 1
EDUCATION_ACTIVE : 1
FOR_COPY : 1
INCITING_RESTLESS : 1
IN_PATIENT : 2
THE_VET : 1
HOARSENESS_WHEEZING : 1
TROPICAMIDE_DROP : 1
THE_WORKER : 1
INCREASE_WARFARIN : 1
NORMAL_FOR : 1
BETWEEN_OF : 1
IV_UPPER : 1
GET_THE : 1
TEST_SAN : 1
SIDE_LATERALITY : 1
ANXIETY_USUALLY : 1
AND_WEIGH : 1
VIA_NOTIFICATION : 1
PULSES_SHIFT : 1
ST_JUDE : 1
PERCENTILE_RANK : 2
NOTE_ALCOHOL : 1
PVD_STENTS : 1
OUTPUT_SCORE : 1
FRI_END : 1
LACHYDRIN_INFORMED : 1
PENDING_PATIENT : 1
AND_AN : 1
RESTLESS_ICDCM : 1
NOTE_TYPE : 1
PHYSICAL_STILL : 1
URINE_COLOR : 1
SUPPLIES_OUTPATIENT : 1
CONSIDER_THE : 1
YEAR_OLD : 2
GI_NO : 1
THIS_PATIENT : 1
INDEPENDENT_WITH : 1
LEFT_FAMILY : 1
II_UNSPECIFIED : 1
LPN_CAP : 1
POSTOP_EDEMA : 1
FIND_IT : 1
PRN_COOPERATIVE : 1
ALLOW_TO : 1
IS_FOR : 3
EVENT_RESTLESS : 1
ENCOURAGED_PT : 1
RETURN_NOTED : 1
DAILY_AT : 1
CHANGES_IN : 2
BUMPS_LUMPS : 1
WITH_CAD : 1
VETERAN_STATES : 1
NOTE_RX : 1
ACCURATELY_VETERAN : 1
IMPRESSION_ANTERIOR : 1
IS_CONDITION : 1
INFLUENZA_OLEMIA : 1
QUESTIONS_AND : 1
AN_CHECKLIST : 1
BILATERAL_AND : 1
CM_REVIEWED : 1
IN_VET : 1
NURSING_SHIFT : 2
NONVA_MEDS : 1
SHORT_OF : 1
MEDICATIONS_HOMELESS : 1
SCORE_TELEPHONE : 1
MEDICATIONS_SUPPLIES : 3
LACTATE_LOTION : 1
WOMAN_AND : 1
REGENT_MECHANICAL : 1
NURSING_PROGRESS : 1
SERVICE_CONVERSATION : 1
MOISTURE_RARELY : 1
TO_KEEP : 1
PHYSICIAN_WEEKLY : 1
ON_CONVERSATION : 1
NO_DOSE : 1
DISSATISFIED_WITH : 1
SHIFT_VSS : 1
LEFT_SL : 1
MOIST_COLOR : 1
DIFFICULTY_BREATHING : 1
IF_PA : 1
MELLITUS_WITHOUT : 1
ASKED_PAIN : 1
VALVE_STATUS : 1
OPERATION_REPORT : 1
COMPLICATION_II : 1
OF_BREATH : 1
SITUATION_AT : 1
OL_REFER : 1
NOTE_THE : 1
UPPER_POSTOP : 1
ONE_OCCASION : 2
THAT_YOU : 1
DELUSION_ADDENDUM : 1
SUBJECT_TO : 1
OF_EXAM : 1
LB_DIABETES : 1
SERVICE_WITH : 1
FOREIGN_BODY : 1
RECENTLY_OUTPATIENT : 1
MARITAL_STATUS : 1
TOXICITY_THROMBOSIS : 1
FROM_MARINA : 1
HAVE_BEEN : 2
OTHER_NO : 1
DATE_TIME : 1
THIS_TRANSMISSION : 2
HAVE_PATCHES : 1
ACCURATE_ORDERED : 1
READINGS_RESULTS : 1
WITH_CENTRAL : 1
STATUS_DOES : 1
ENCROACHING_ON : 1
FOR_HIV : 1
DILATE_EYES : 1
VERBALIZATION_OF : 1
NURSING_IS : 1
PEOPLE_HE : 1
XLESION_HISTORY : 1
FOR_FLEXARIL : 1
HIS_LOWER : 1
LIGHT_TOUCH : 1
RD_HOW : 1
VERBAL_INSTRUCTION : 1
REPLACEMENT_PROSTHETIC : 1
FLEXARIL_PRETHERAPY : 1
IT_DRAWN : 1
UNSURE_FROM : 1
VET_PAIN : 1
URGENT_FOR : 1
TEMPERATURE_PATIENT : 1
AND_ADVISED : 1
LUMPS_GIVEN : 1
HAVE_THAT : 1
SHOWER_IMMEDIATE : 1
MG_FRI : 1
VET_BE : 1
THE_COMMUNICATION : 1
LEVEL_NEURO : 1
OCULAR_ST : 1
FOLLOWUP_NECESSARY : 1
PATIENT_LIST : 1
WORSEN_DATE : 1
TOXICITY_OR : 1
HAVE_PATIENT : 1
FACE_RECEIVED : 2
NAME_AGE : 1
VISIT_ED : 1
CHANGE_SHAW : 1
LINE_AT : 1
BUMPS_BACK : 1
THIS_PROCESS : 1
TOTAL_OUTPUT : 1
MANAGEMENT_STARTING : 1
AFFECT_MEMORIAL : 1
BY_TRANSPORT : 1
SS_OF : 1
BATHROOM_CY : 1
COMMINUTED_AMMONIUM : 1
DAILY_CHRONIC : 1
ADDRESSED_STATED : 1
RESP_LBS : 1
LISTED_SEND : 1
RESULTS_LIVING : 1
COUNSELING_NEEDS : 1
GET_RESULTS : 1
CT_SCAN : 1
PHSOME_STATE : 1
THAT_TIME : 1
INR_PC : 1
TO_PICKED : 1
SIDE_BILATERAL : 1
AND_OR : 2
SHAW_CAME : 1
HEART_VALVE : 1
HAVE_YOU : 1
SCORE_HISTORY : 1
IS_OF : 1
PM_ATTEMPTED : 1
SKIN_CLEANSING : 1
AM_RESPONSE : 1
WALKING_PT : 1
SIGNS_OF : 1
LEFT_APEX : 1
ADMINISTERED_ORIENTATION : 1
REFILLS_LAST : 1
PULSES_NURSING : 1
CALL_WAS : 1
OF_HE : 1
PREREGISTER_NURSING : 1
EXCEPT_MON : 1
FORGETFUL_ACTUAL : 1
BEEN_BUSTED : 1
MG_DAILY : 3
ALLERGIES_MORPHINE : 1
ROM_OF : 1
INSIDIOUS_NO : 1
OR_FAMILY : 1
BLEPHAROPLASTY_WILL : 1
HEALTH_MAINTENANCE : 1
CABG_PVD : 1
TO_REQUESTING : 1
APPOINTMENT_FORGETFUL : 1
DETAILING_THE : 1
LODGING_ALERT : 1
REFERRAL_PER : 1
WALKING_REFILL : 1
VS_WERE : 1
YES_ORDERED : 1
PEOPLE_INDICATED : 1
GRAPEFRUIT_PREREGISTRATION : 1
PROBLEMS_BREATHING : 1
HAS_MEDICAL : 1
WITH_CHIEF : 1
NEEDS_AN : 1
MIGUEL_NOT : 1
POSSESSIVE_AND : 1
MINIMAL_EXTENT : 1
MEDICAL_HISTORY : 2
ED_VALVE : 1
MEDICATION_PROFILE : 1
CRC_SCREENING : 1
AND_HAVE : 3
RXS_ORDERS : 1
SC_DOCUMENT : 1
FLUIDS_GOOD : 1
HOSPITAL_WERE : 1
SIGNS_MAPLEVIEW : 1
OR_FOR : 1
NEGATIVE_LEFT : 1
CURRENTLY_IN : 1
INTO_SESSION : 1
PALPABLE_INTAKE : 1
STAY_IMMUNIZATION : 1
ROM_THE : 1
DOG_RD : 1
NEED_PANEL : 1
TOUCH_NO : 1
PNEUMONIA_OTHER : 1
AN_ALCOHOL : 2
PROCEDURE_DECEMBER : 1
HYPERTENSION_INCORRECT : 1
WILL_CHANGE : 1
SHIFT_NURSE : 1
XYZZY_NEEDS : 1
OL_DL : 1
NURSE_WALKING : 1
TO_CONSIDER : 1
! Stats words=927  pairs=3586
