# Supplementary material for: Predicting the Risk of Suicide by Analyzing the Text of Clinical Notes
Source: PLoS One. 2014 Jan 28;9(1):e85733. doi: 10.1371/journal.pone.0085733 (PMC3904866; doi:10.1371/journal.pone.0085733)
Supplement: Appendix S3 — Machine Learning Libraries and Methods: This section is provided to enclose the open source (Apache License) classifier used for the building of the statistical models, specifically for the purposes of study reproducibility. A detailed account of these tools is intended for another publication. (ZIP) [file pone.0085733.s003.zip › Appendix3/ML_libs/Regression_testing/group1/processed/grp1-pt-1037.dat]

!  Done reading
! Total word count = 2119
! Total unique words = 1051
! Total pair count = 4234
! Total unique pairs = 3900
OCULAR : 1
LOBE : 1
AT : 22
SICKLE : 1
WORK : 1
LISINOPRIL : 1
FINGER : 1
PRESCRIPTIONS : 1
MONTH : 1
EVENTS : 2
OEF : 1
THANK : 1
REFILLS : 1
DOXAZOSIN : 1
WEIGHT : 1
BEEN : 3
BID : 1
UNCONTROLLED : 1
WITHIN : 2
THRESHOLDS : 1
OUTPATIENT : 10
INTAKE : 1
INPATIENT : 3
CATARACT : 1
COUNSELING : 1
SPLIT : 1
USE : 3
OVERLY : 1
CC : 2
SUPPLIES : 2
TWICE : 1
REGARDING : 1
CHEW : 2
PRESS : 1
LEVEL : 3
ALCOHOL : 3
CHANGES : 3
RADIAL : 2
NEFF : 1
MILK : 1
SHOULDER : 3
HIS : 8
AMBAMBULATORY : 1
COPD : 1
QT : 1
LABRUM : 1
OBJECT : 1
VOIDING : 1
PAROXYSMAL : 1
TINY : 1
WELL : 2
SHOWED : 1
PHARM : 1
PROCESSS : 1
TEST : 6
NOTE : 12
INCESSANT : 1
CONTACTED : 1
LDL : 1
FASTING : 1
DO : 1
TS : 1
MOTEL : 1
TREATMENT : 1
BLOOD : 7
SAME : 2
WORKER : 1
CV : 1
HAVE : 4
ADVERSE : 1
SAW : 1
BPH : 1
SCHEDULED : 1
INFUSION : 1
OF : 39
DRUG : 1
TAB : 6
CALLER : 2
PSYCHIATRY : 1
HAS : 16
FOR : 26
JUNCTIONAL : 1
CONDITION : 1
TRAIT : 1
SAID : 2
NUMBER : 3
CLC : 1
STRIP : 2
ACCUCHEK : 1
INR : 1
CALCIUM : 2
OBTAINING : 1
KNEE : 1
SC : 1
MY : 1
DPCLAB : 1
MYOCARDIAL : 2
ASSESSMENT : 3
RESPIRATORY : 1
ROM : 2
SERUM : 2
BUSY : 1
ACTIVITY : 2
TARGET : 1
INTERNAL : 1
APEX : 1
STARTING : 2
PAPILLOMAVIRUS : 1
LAYER : 1
BILATERALLY : 1
NAUSEA : 1
INFORMATION : 5
TRIGLYCERIDE : 2
CENTER : 1
CAFFEINEFREE : 1
EXAM : 3
QUESTIONNAIRE : 1
SUGAR : 2
NODULES : 2
CD : 3
THE : 35
NURSES : 1
EXTENDED : 1
BAL : 1
NSC : 2
DURATION : 1
IDENTIFY : 1
PULSES : 1
SIGNIFICANT : 1
SPLITTING : 1
WATCHFUL : 1
COLLECTED : 1
THYROID : 1
SEC : 1
BP : 2
MEDS : 4
LIMITATION : 1
HEARD : 1
CT : 1
POST : 1
DEPRESSION : 3
SON : 1
CM : 1
HARMFUL : 1
GAIT : 1
OCCUPATION : 1
DIET : 1
BATHING : 1
HEARING : 1
CLOUDY : 1
GET : 3
WHAT : 1
WT : 1
TOP : 1
REMOTE : 1
PARTIAL : 1
ASSISTANCE : 3
PELVIC : 1
OR : 10
SHIFT : 3
BOTH : 1
TEMP : 2
PRESCRIPTION : 1
SUPPLEMENT : 1
YEAR : 2
CONSIDERED : 1
BEACH : 1
COPY : 1
CREAM : 1
CONCERNS : 1
PULMONARY : 3
LB : 2
NAPPING : 1
JUDGEMENTINTACT : 1
DE : 3
LIKE : 1
RETRIRED : 1
SEEN : 3
FOOD : 2
NURSE : 3
CALLS : 1
UNKNOWN : 1
MUCH : 1
URINATION : 1
NEOPLASM : 1
RPT : 1
INTERVIEW : 1
TAKE : 5
SECTION : 1
ANY : 1
TRY : 2
BIFOCALS : 1
RECORDS : 2
RADIOTHERAPY : 1
MOISTURE : 5
SYSTEMS : 1
OD : 1
SW : 4
ADMITS : 1
MAINTAIN : 1
FACILITY : 1
MD : 1
NAME : 2
CARE : 7
LENS : 1
FUNCTIONS : 1
EVERY : 3
AGE : 3
INVOLVED : 1
FILM : 1
SKIN : 4
TIMES : 3
YESTER : 1
IS : 27
DL : 1
NOT : 8
ANWSER : 1
OCCULT : 1
FRACTURE : 2
GUARD : 1
IF : 7
PENDING : 1
HIPS : 1
IM : 2
POSITIVE : 2
OXIMETRY : 1
NPDR : 1
INFLAMMATION : 1
PROGRESS : 2
KEEP : 1
RHYTHM : 1
REFUSED : 1
ADAPTER : 1
HP : 1
VET : 3
PND : 1
MOTHER : 1
ALPHABETIZED : 1
HESS : 1
VIRAL : 1
ASSOCIATED : 1
BACK : 3
SOURCE : 1
MALE : 2
ACCURACY : 1
ADDENDUM : 6
FULL : 1
DEFINITION : 1
BY : 10
NO : 20
INTENSITY : 1
PRAVACHOL : 1
REF : 1
CHIEF : 3
ENDOCRINE : 1
RETENTION : 1
BMP : 1
INJURIES : 1
UPPER : 1
RELEASED : 1
RISK : 1
CLINIC : 4
PERFORMED : 1
AMBULATES : 1
TOENAILS : 1
DIDNT : 1
SCALP : 1
RAI : 1
BURN : 1
TO : 37
PREALBUMIN : 1
FEEL : 1
PRN : 2
INFOMRED : 1
SLOW : 1
TRANSFUSION : 1
EYEDROP : 1
MURMUR : 1
BIOPSY : 1
PROCEDURE : 2
WILL : 4
FLORESOME : 1
CAPACITY : 1
WARM : 1
OFTEN : 1
BUT : 1
DS : 2
MPI : 1
INSERTED : 1
UNEMPLOYMENT : 1
WHETHER : 1
CIGARETTES : 1
CBC : 1
PLEASE : 5
STATUS : 6
JUDE : 1
BRUISING : 1
ANTIBI : 1
SPENT : 1
BUMPS : 1
PACK : 2
DRINKS : 2
HOPEFUL : 1
CONSULT : 4
REVIEWD : 1
OUT : 3
COMFORT : 1
GRAVES : 1
CONSISTANTLY : 1
WANTS : 1
SURE : 1
SCREEN : 3
EVALUATED : 1
REACTION : 2
FUNCTION : 1
ASSIGNED : 1
REVIEW : 2
NEEDED : 1
DISCUSSING : 1
MENTAL : 1
MARILYN : 1
GERD : 1
WERE : 2
BROUGHT : 1
IMPAIRMENTS : 1
LES : 1
FACTORS : 1
SHEET : 1
FILL : 2
RESIDENT : 1
WALKS : 1
LABS : 2
VA : 3
REASSESS : 1
SUBSCAPULARIS : 1
WED : 1
PREFERENCES : 1
TURP : 1
HOT : 1
DOCTORS : 1
CH : 1
PRIORITY : 1
PART : 1
LOAD : 1
NEV : 1
FAMILY : 3
OFFERING : 2
INITIATED : 1
DILTIAZAM : 1
DISEASE : 5
PAIN : 9
REP : 1
WHEN : 2
AMBULATORY : 2
PACED : 1
AS : 13
FALLS : 1
VISTA : 2
DIFFERENTLY : 1
RECOMBINANT : 1
AMOUNT : 1
ABOVE : 3
WAS : 15
PM : 2
WITH : 23
TUB : 1
FEELS : 2
PHENYLEPHRINE : 1
AC : 3
TEMPERATURE : 2
HIV : 1
SIG : 1
REMAINS : 2
DRINKING : 1
UNDERSURFACE : 1
INDEX : 2
NOW : 2
ABD : 1
EXACT : 1
INCLUDING : 1
PTSD : 1
CONFIRMED : 1
HYDROCODONE : 1
TENDONOPATHY : 1
IT : 3
VARIOUS : 1
SHOT : 1
BELOW : 1
BEDTIME : 1
LIST : 3
IOL : 1
OT : 1
PREANESTHESIA : 1
PARTNERS : 1
DISCUSSED : 1
SUPPLY : 1
EQUIPMENT : 1
SHOWER : 1
TIME : 3
TILTS : 1
REENROLLING : 1
HCL : 1
CURRENTLY : 1
NECK : 3
PAID : 1
ACTIONS : 1
SIDE : 1
JOINT : 3
PROSTHETICS : 1
ALLERGY : 1
VALUES : 1
CALL : 5
DID : 2
MOST : 1
LFT : 1
RESULT : 1
HX : 1
ARRIVAL : 1
IMAGING : 2
MOBILE : 1
ADDRESS : 1
TELEPHONE : 2
UNSPECIFIED : 1
REPS : 1
VERIFICATION : 1
INTRAARTICULAR : 1
REPORTS : 4
SAMPLE : 1
COLONOSCOPIES : 1
SODA : 1
HEM : 1
HELP : 2
TABLETS : 1
PER : 6
VAN : 1
ISOSORBIDE : 1
YES : 3
CONTINUES : 1
COUSIN : 1
FURTHER : 1
TOE : 2
ETC : 1
CONSENT : 3
FACE : 1
YOUR : 5
LEISURE : 2
RETURNED : 1
DOING : 3
GIVEN : 3
MASSES : 1
TACHYCARDIA : 1
HT : 1
WHO : 2
ED : 1
DIARRHEA : 2
QUALIFIERS : 3
PHYSICIAN : 7
DAUGHTER : 2
DELIRIUM : 1
ARM : 1
CURRENT : 2
CONTROL : 1
HIM : 2
SUBSEQUENT : 1
FELODIPINE : 1
PULSE : 4
HE : 17
NEXT : 1
RX : 2
NEEDS : 1
THEY : 2
BIT : 1
OBESITY : 1
RATE : 1
REFERRED : 1
MEMBER : 2
MONO : 1
ACHES : 1
ML : 3
PHONE : 7
ADJUSTING : 1
CLEAR : 2
RAN : 1
RESPONSES : 1
PRIMARY : 3
SNACK : 1
HAD : 3
SIGNS : 1
ANNUAL : 1
PMRS : 2
SERIAL : 1
FRAZIER : 1
LOSS : 1
SISTER : 1
PATIENTS : 2
MRSA : 1
DEFINED : 1
CONSTIPATION : 2
COLORECTAL : 1
PRONE : 1
YO : 1
MELENA : 1
NEGATIVE : 6
WRITTEN : 1
NONE : 4
PERFUSION : 2
DECREASED : 3
LAB : 1
COMMINUTED : 1
TRAVEL : 1
CONTACT : 5
NOTIFIED : 1
INPUT : 1
FEELING : 1
SHOULD : 1
QUESTIONS : 1
PROBLEMS : 2
HEMIBLOCK : 1
URINE : 2
MINIMUM : 1
YELLOW : 1
BAYSIDE : 1
RTC : 1
DUPLICATE : 1
NEG : 1
CAN : 2
KNEES : 1
THERAPY : 4
PSYCH : 1
LIVING : 3
STIMULATION : 1
MANDATORY : 1
VARA : 1
DOPPLER : 1
SLE : 1
NONVA : 2
WHICH : 1
IER : 1
RANGE : 1
TURGOR : 1
ENT : 1
TOENAIL : 1
MG : 10
VISITS : 1
ON : 15
COMPLETE : 1
UROLOGY : 1
REVEALS : 1
DROPS : 1
MED : 2
FOLD : 1
PCN : 2
FEMORAL : 1
WEST : 1
EDEMA : 1
PROVIDER : 1
SHE : 10
UP : 5
PALM : 1
THEN : 4
USUAL : 1
FEW : 1
LONGTERM : 1
ALERT : 1
FEVER : 1
ACCESSED : 1
AWAY : 1
LETHALITY : 1
UNDER : 1
OFF : 1
SEP : 1
DOCUMENTED : 1
EKC : 1
GOT : 1
DATE : 5
DAILY : 3
THREE : 1
PA : 1
PROGRAM : 1
LONG : 2
APPOINTMENT : 6
FOLLOW : 2
EUTHYMIC : 1
PHACO : 1
CELLS : 1
FROM : 4
LEFT : 16
HYPOGLYCEMIA : 1
WHEEZING : 2
MEDICAL : 3
SPOKE : 2
ALSO : 2
SEX : 1
SYSTEM : 1
ACTIVITIES : 1
LIPID : 1
ORDERS : 2
SURGEON : 1
EXTREMITY : 1
WORKING : 2
AN : 3
MOIST : 3
DISPOSE : 1
CATARACTS : 2
HEART : 4
LICENSE : 1
COMPLAINT : 4
MYDRIACYL : 1
EASILY : 1
FOUR : 2
INFLUENZA : 2
TRIGLYERIDE : 1
EXCEED : 1
EYE : 5
GAVE : 1
NEW : 1
MOUTH : 6
ATTENDING : 1
CHEST : 2
REQUSET : 1
DOCUMENTATION : 1
SOME : 2
EXCISION : 1
MUSCLE : 1
ARE : 5
ANSWERED : 1
NEED : 3
INDEPENDENT : 2
CORRECT : 3
PERSON : 1
APPLY : 3
SURGERY : 2
RECOVERY : 1
FECAL : 1
HYPOKALEMIA : 1
ASPIRIN : 1
DIFFUSION : 1
HYPERCHOLESYTEROLEMIA : 1
STEEL : 1
MAINTENANCE : 1
GENERAL : 2
BE : 7
EL : 2
INITIALEVALUATION : 1
ISOVUE : 1
CANCER : 1
LEAVE : 1
DUE : 1
CLASS : 1
REJECTION : 1
ADV : 1
STARTLED : 1
TAUGHT : 1
ABI : 1
NONPRODUCTIVE : 1
PH : 1
ISSUES : 1
REVIEWED : 3
DM : 1
PSYCHOSIS : 1
OTHER : 4
ALL : 2
CAROTID : 1
ME : 1
NURSING : 2
CONTRACT : 1
RXS : 1
FOLLOWING : 4
SATUR : 1
IDENTIFIED : 3
GLAUCOMA : 1
ENDING : 2
PATIENT : 13
ALLERGIES : 5
WITHOUT : 2
DIAGNOSIS : 1
DING : 1
TIL : 1
OBTAIN : 1
CASA : 1
AGREES : 1
ABDOMEN : 1
BRUITS : 1
REDUCED : 1
IDEA : 1
NOS : 1
THAN : 2
PODIATRY : 2
RARELY : 3
DYSURIA : 1
ACUTE : 1
UARY : 2
MEMORY : 1
SENSATION : 1
AUDITC : 2
CAREPROVIDER : 1
WE : 2
CLOPIDOGREL : 2
COME : 1
DECISION : 1
AGREEAB : 1
LOOKING : 1
ROOM : 1
PATCHES : 1
VISIT : 2
THAT : 13
NORMAL : 4
WIFE : 1
STAFF : 1
SIDERAILS : 1
RIGHT : 6
PC : 5
VITALS : 1
MCPHERSON : 1
THROAT : 1
PROCESSES : 1
ONE : 4
ISSU : 2
NKA : 1
THOUGHT : 1
HYPERLIPIDEMIA : 1
TABLET : 3
DURING : 1
YOU : 8
UPS : 1
LISTED : 3
DIRECTED : 3
SCREENING : 3
BX : 2
STUDIES : 1
LYMPH : 1
SMOKES : 1
SPACES : 2
GETTING : 1
NOCTURIA : 2
PAST : 1
REACTIONS : 1
EQUAL : 1
OS : 2
DOCUMENT : 3
PSA : 1
REASON : 1
DULOXITINE : 1
SCORE : 4
COFFEE : 1
ESP : 1
BASAL : 1
DLCO : 1
REMINDER : 1
HOME : 3
GFIRM : 1
NEVER : 2
SIX : 1
UNCORRECTED : 1
NOTED : 1
DR : 1
SOCIAL : 1
MEMBERS : 1
CAREFULLY : 2
RECOMMENDATION : 2
PANEL : 1
VERAPAMIL : 1
METHADONE : 2
VITAL : 4
MIN : 1
CONTACTING : 1
REGULAR : 1
NONANTALGIC : 1
PROSTHESIS : 1
MINUTES : 1
ANTIBIOTICS : 1
STRESS : 1
GREAT : 2
SPECIFY : 2
DIRECTIONS : 1
DELTOID : 2
GRANDE : 1
WEEK : 1
RISKS : 1
VITAMIN : 1
PREVENTATIVE : 1
TEAM : 1
CHECK : 1
CBOC : 1
FINE : 1
FALL : 1
AM : 2
THRU : 1
DISTRESS : 1
PRACTITIONER : 1
OCCASION : 1
DEFIBRILLATOR : 1
EKG : 2
MOOD : 1
WHERE : 1
LIVES : 1
RIB : 1
APAP : 1
REPORT : 1
REFUSING : 1
LEAST : 1
HOW : 3
CALLED : 1
PRODUCTS : 1
PROPERTY : 1
JULIAN : 1
MIGHT : 2
DYSPEPSIA : 1
SINCE : 2
DORN : 1
DISCUSS : 2
COUGH : 2
RERPORT : 1
ALLERGIC : 1
CPAP : 1
TEACHING : 1
YRS : 1
CENTERS : 1
ADVISED : 1
LEARNING : 2
VERBALIZED : 1
PRINTED : 1
OBJECTIVE : 4
MONTHS : 6
MRI : 2
MEASUREMENT : 4
AVOID : 1
BRADEN : 1
ANGIOCATH : 1
STRONG : 1
DATED : 1
ALONE : 1
PIP : 1
ALCAINE : 1
TRAMADOL : 1
INSIGHT : 1
WHY : 1
LUNG : 1
MEDICATION : 3
COMMENTS : 2
THICK : 1
ACETAMINOPHEN : 1
CASE : 2
SINGLE : 1
OSU : 1
ORAL : 1
CONTINUE : 2
TOTAL : 1
READ : 2
MVA : 1
LIGHT : 1
SERVICES : 1
GOAL : 1
SINUS : 1
EXAMINATION : 1
ST : 1
HISTORY : 3
EXECUTIVE : 1
NOSEB : 2
RESPIRATION : 1
PMHX : 1
HOURS : 6
MAIL : 1
HEALTH : 2
DRIVES : 1
RATIVE : 3
PLACED : 1
ALEXANDER : 1
MODERATELY : 1
UA : 1
WOUND : 1
INDICATED : 1
PROSTATE : 1
ILLNESSES : 1
SURVIVING : 1
EXCLUDING : 1
SITE : 1
OVERALL : 2
INTERVENTIONS : 1
MAR : 1
COMPLICATIONS : 2
GH : 1
KG : 2
MORE : 1
WAL : 1
MAKING : 2
TELECARE : 2
AUG : 1
WENT : 1
PROBLEM : 2
EYES : 1
RECEIVE : 1
DECEASED : 1
BLUE : 1
ER : 1
RECORD : 1
APPLICABLE : 1
REQUEST : 1
SUICIDALITY : 1
AMLODIPINE : 1
SUSP : 1
RN : 1
UNABLE : 1
XYZZY : 2
AUGUST : 1
WARFARIN : 3
THROUGH : 2
ADLS : 1
OUTPUT : 2
ANTICOAGULATION : 1
VETS : 2
BLOCKER : 1
AFTER : 2
LONGER : 1
STILL : 1
BUDGETING : 1
SCALE : 1
LESS : 2
NON : 2
REMOVE : 1
ICE : 1
FUTURE : 3
APPOINTMENTS : 3
EACH : 4
DOB : 1
DENIES : 2
ASSOCIATE : 1
PHARMACY : 2
EXPERIENCED : 1
TONIGHT : 1
REQUESTED : 1
FREQUENTLY : 1
FOOT : 1
SATISFIED : 1
VETERAN : 7
QTY : 2
SHIRLEY : 1
GLUCOSE : 1
PT : 14
INJURY : 2
SCRATCHY : 1
MOVE : 1
TRIES : 1
NP : 1
AREA : 2
APR : 1
CLOTRIMAZOLE : 1
SUFFERING : 1
TER : 1
UNDERSTANDING : 1
AROUND : 1
MEDICATIONS : 13
UNASSISTED : 1
PREVENT : 1
AND : 41
PSU : 1
BILATERAL : 1
PACEMAKER : 1
HOUR : 1
SELECT : 2
VACCINE : 2
GUIDELINES : 1
JUN : 1
RESPONSE : 1
BETTER : 1
COMMUNITY : 1
TECHLITE : 1
WORKED : 2
RESULTS : 2
ANSWER : 2
BREATH : 2
ABLE : 1
RECENT : 2
PERFORMANCE : 1
NAIL : 1
METOCLOPRAMIDE : 1
IN : 23
ADMINISTERED : 1
LOW : 3
CARDIO : 1
FOLLOWED : 1
MAY : 1
REGIMEN : 1
MANAGEMENT : 1
STATE : 3
PLAN : 1
ANTERIOR : 2
ITEM : 2
MOBILIZATION : 1
LENGTH : 2
APPT : 2
TAKING : 1
SPOUSE : 1
ADMITTED : 1
SURGERIES : 1
VERY : 1
AFEBRILE : 1
DONE : 2
PALPABLE : 2
PHYSICAL : 1
WEARING : 1
WANDERGUARD : 1
ACTIVE : 14
SPONSOR : 1
KNOW : 1
LACK : 1
MANAGER : 1
LANCET : 2
BUEG : 1
METHODS : 1
SPI : 1
PROFILE : 1
CONTROLLED : 1
MIDDLE : 1
SUGARS : 1
CLOTS : 1
IMPRESSION : 1
THIS : 10
HCTZ : 1
DIFFICULTY : 1
EVEN : 1
NIACIN : 1
GLENOID : 1
BLANK : 1
SCOPE : 1
XRY : 1
LAST : 4
TLC : 1
AOX : 1
MINNEAP : 1
CHAPLAINCY : 1
HOLD : 1
MEDICATED : 1
DIED : 1
FINANCIAL : 1
EXTREMITIES : 1
SESSION : 1
THIN : 1
STATES : 6
OCCUPATIONAL : 3
OU : 1
CHOLESTROL : 1
AFFECTED : 1
PARK : 1
QUESTION : 1
CELL : 2
SHORT : 1
ICDCM : 1
OIF : 1
THYROTOXICOSIS : 1
TYPES : 1
JT : 1
FEELING_REJECTION : 1
OFFERING_RECOMMENDATION : 1
POST_BX : 1
PROBLEM_OTHER : 1
MOIST_PSYCH : 1
TO_PT : 1
CHEW_QTY : 1
OCCUPATIONAL_PROGRESS : 2
HIS_MOTHER : 1
SHORT_BREATH : 1
ABI_INDEX : 1
SCORE_SURGERY : 1
TABLET_BY : 2
FULL_PULMONARY : 1
PER_WRITTEN : 1
INVOLVED_AN : 1
AND_LACK : 1
LEFT_LOBE : 1
BACK_HIPS : 1
DS_CHANGES : 1
REMAINS_HOPEFUL : 1
OVERLY_AT : 1
DRINKS_ON : 1
STATE_PAIN : 1
PT_CALLED : 1
AOX_IS : 1
SICKLE_CELL : 1
PATIENT_SEEN : 1
FEELS_SHORT : 1
TEAM_GRANDE : 1
TABLET_OR : 1
FRACTURE_NOW : 1
CAROTID_STUDIES : 1
APEX_REMINDER : 1
NOTE_NEOPLASM : 1
MEDICATIONS_BY : 1
MEMBER_SPONSOR : 1
CLINIC_DISEASE : 1
TAKING_YOUR : 1
LEFT_LENGTH : 1
SOCIAL_WHO : 1
SAME_MEDS : 1
LESS_SHORT : 1
ABOVE_PLAN : 1
WAS_AS : 1
NEFF_IF : 1
HEART_RATE : 1
CLEAR_ADDENDUM : 2
DAUGHTER_ALEXANDER : 1
QUESTIONS_VERY : 1
EQUAL_BILATERALLY : 1
ADJUSTING_TO : 1
SUFFERING_DELIRIUM : 1
ALL_THAT : 1
WERE_AS : 1
APPLY_THIN : 1
APPOINTMENT_MAY : 1
BEEN_ADMITTED : 1
SLE_PHACO : 1
SW_VETS : 1
SINGLE_DRUG : 1
HIS_ROOM : 1
RESULT_THE : 1
PAIN_PHARMACY : 1
INSIGHT_JUDGEMENTINTACT : 1
OUTPUT_ML : 1
BEEN_TO : 3
TO_ACTIVE : 1
DOCTORS_NOTE : 1
JUDE_VERBALIZED : 1
PULSE_MOISTURE : 1
LEFT_DELTOID : 2
THIS_ADDENDUM : 1
REFUSING_IS : 1
INCLUDING_SUPPLIES : 1
ON_TO : 1
DYSURIA_THERAPY : 1
PAIN_INTENSITY : 1
ADDRESS_PHONE : 1
MOUTH_EVERY : 2
PAPILLOMAVIRUS_RECOMBINANT : 1
PHONE_BY : 1
CORRECT_FOR : 2
TO_AVOID : 1
OBTAINING_BAL : 1
YOU_CONSISTANTLY : 1
SC_ED : 1
TACHYCARDIA_RETENTION : 1
HAS_HEARD : 1
WHY_HE : 1
WITHOUT_YES : 1
IS_PCN : 1
REASSESS_FUTURE : 1
HOW_WENT : 1
LB_DRINKS : 1
MELENA_GERD : 1
FALLS_REASSESS : 1
CARE_APPOINTMENT : 1
NEVER_HIS : 1
PRESS_REPS : 1
NEEDED_VETERAN : 1
MEMBERS_THAT : 1
PATIENT_INTERVIEW : 1
GRANDE_METHADONE : 1
AMBAMBULATORY_OUTPATIENT : 1
APPOINTMENTS_EXCISION : 1
BRUISING_OR : 1
INPATIENT_ORDERS : 1
ACTIONS_TEACHING : 1
MEDICAL_BE : 1
THE_PATIENT : 1
PHENYLEPHRINE_MAR : 1
MORE_ON : 1
NOT_UNCORRECTED : 1
STRESS_ON : 1
STRONG_RECENT : 1
INSERTED_EKC : 1
AT_THIS : 2
WHEN_TRIES : 1
DISEASE_ADDENDUM : 1
TRAVEL_SHE : 1
DISEASE_ABDOMEN : 1
CENTERS_DISEASE : 1
WITH_TRAMADOL : 1
TRAIT_VARIOUS : 1
NORMAL_NEGATIVE : 1
MOBILE_HOME : 1
NOT_HEARD : 1
NOTE_SUICIDALITY : 1
GAIT_SUBSCAPULARIS : 1
NSC_AND : 1
SNACK_AND : 1
IT_HOURS : 1
TINY_PARTIAL : 1
WORKING_AND : 1
NOT_ACTIVE : 1
CHEST_NEGATIVE : 1
JT_MOBILIZATION : 1
EYE_DROPS : 2
SINCE_CALCIUM : 1
TIMES_PER : 1
SIGNIFICANT_CALLED : 1
ACTIVITY_LIMITATION : 1
APPOINTMENTS_IT : 1
MEDS_IN : 1
MEMBER_OR : 1
MEDICATION_IS : 1
OBJECTIVE_TOTAL : 1
REQUEST_DISCUSS : 1
ADDRESS_AND : 1
TABLET_NOT : 1
LEFT_NORMAL : 1
FOR_VITAMIN : 1
NODULES_HEARING : 1
REVIEWD_RESIDENT : 1
MEDICATIONS_THE : 1
AT_AGE : 2
FOLLOWING_ACTIONS : 1
HE_WAS : 1
DORN_CALCIUM : 1
PATIENT_STATUS : 1
IS_HE : 1
SON_IS : 1
WITH_MCPHERSON : 1
FOR_OF : 1
VITALS_COMPLAINT : 1
NECK_PHARMACY : 1
SPENT_IN : 1
REMOVE_CLOUDY : 1
PAIN_HAS : 1
CONDITION_WALKS : 1
NURSE_COMMENTS : 1
OF_HAS : 1
SPI_AND : 1
CONTROLLED_RX : 1
LISINOPRIL_MG : 1
PAST_MEDICAL : 1
WAS_REVIEWED : 2
PROCESSES_ACTIVITIES : 1
MOBILE_MOOD : 1
NOW_DEFINED : 1
OUTPATIENT_OF : 1
STATES_THAT : 1
OUTPATIENT_EXCLUDING : 1
TECHLITE_USE : 1
REPORTS_THAT : 2
IS_UNCONTROLLED : 1
HAS_INFLAMMATION : 1
BE_THEY : 1
SOCIAL_AT : 1
HAS_SOME : 1
ML_FEMORAL : 1
BILATERALLY_EXTREMITIES : 1
MOISTURE_INTERNAL : 1
WITH_DOPPLER : 1
GAVE_SNACK : 1
OF_BP : 1
WENT_MINNEAP : 1
AUDITC_NEGATIVE : 2
WITHIN_PT : 1
REGIMEN_AND : 1
PATCHES_IN : 1
RISK_SCREEN : 1
OUTPATIENT_STATUS : 5
CLOUDY_LENS : 1
THE_PATIENTS : 1
PERFUSION_IN : 1
SAME_LAYER : 1
CAN_ACCESSED : 1
FILL_WITHIN : 1
SW_REQUESTED : 1
PHYSICIAN_TRIGLYCERIDE : 1
DOCUMENT_BE : 1
LISTED_PLEASE : 1
FOR_MEDICAL : 1
QUESTIONS_SATISFIED : 1
BATHING_OF : 1
AWAY_VETERAN : 1
WANTS_TO : 1
PACK_THE : 1
TAB_ONE : 1
ACTIVE_INFUSION : 1
UNEMPLOYMENT_SUBSEQUENT : 1
HOURS_PLEASE : 1
HAS_OUT : 1
YOUR_ALLERGIES : 1
TOE_AT : 1
PARK_FUTURE : 1
DYSURIA_OCCUPATIONAL : 1
CLOPIDOGREL_TRIGLYCERIDE : 1
STRIP_STRIP : 1
REGULAR_RHYTHM : 1
INPUT_UPPER : 1
FACE_THE : 1
ACTIVE_OF : 1
ISOSORBIDE_MONO : 1
PIP_INJURY : 1
USE_ACTIVE : 1
HE_DENIES : 1
MELENA_HYPOKALEMIA : 1
CALCIUM_NEED : 1
BE_SURE : 1
DISTRESS_TEMPERATURE : 1
FACE_FOR : 1
PREVENT_BLOOD : 1
DEPRESSION_BY : 1
MARILYN_AT : 1
PROCEDURE_SURGEON : 1
USE_OF : 1
OTHER_NOT : 1
NOT_AT : 1
LEFT_AMBULATORY : 1
CONSTIPATION_NO : 1
INSIGHT_AND : 1
HOURS_CHAPLAINCY : 1
PTSD_SCREEN : 1
JUDGEMENTINTACT_DIAGNOSIS : 1
PCN_ADDRESS : 1
HAS_RIB : 1
SPI_TRY : 1
ANTIBI_PHONE : 1
NAPPING_COFFEE : 1
FALLS_AT : 1
DISEASE_EVERY : 1
SURGERIES_ILLNESSES : 1
TONIGHT_IT : 1
WITH_OR : 1
REDUCED_OF : 1
PAST_HX : 1
NOCTURIA_DYSURIA : 1
SENSATION_PT : 1
UPPER_NORMAL : 1
EXTREMITIES_EDEMA : 1
DONE_ON : 2
SERVICES_SMOKES : 1
FUTURE_JUN : 1
PRN_HAS : 1
WE_CAN : 1
PLEASE_EACH : 3
ASSESSMENT_KNEE : 1
SHIFT_TUB : 1
DENIES_OR : 1
DRINKS_ONE : 1
PULSE_INR : 1
ADDENDUM_INPATIENT : 1
MORE_DRINKS : 1
BY_DAILY : 2
ROOM_PAID : 1
INDEX_FINGER : 1
BUEG_RTC : 1
ARM_DOCUMENT : 1
CONTINUES_MAINTAIN : 1
SCOPE_SERIAL : 1
FULL_CONSENT : 1
ALCAINE_PHENYLEPHRINE : 1
NOTIFIED_PENDING : 1
IF_PRACTITIONER : 1
EXECUTIVE_PROCESSES : 1
WEARING_TENDONOPATHY : 1
OS_PHYSICIAN : 1
NP_CATARACTS : 1
WITH_NO : 2
STATUS_MINUTES : 1
EYE_THE : 1
AWAY_THE : 1
FOLLOWING_CHOLESTROL : 1
AS_PER : 1
NOT_THIS : 1
WEEK_CURRENT : 1
NO_ABD : 1
BOTH_NPDR : 1
NONE_TRY : 1
NPDR_AC : 1
TAKE_MEDICATIONS : 1
OR_PRN : 1
STATUS_VITALS : 1
LONG_SKIN : 1
UARY_HAD : 1
EVERY_LEARNING : 1
LOBE_BUT : 1
AND_AROUND : 1
OS_JULIAN : 1
LETHALITY_PSYCHOSIS : 1
TAB_FOR : 2
NO_NOCTURIA : 1
LEVEL_ASSISTANCE : 2
IDENTIFIED_OTHER : 1
NO_BUSY : 1
RX_PREVENTATIVE : 1
OBJECTIVE_HOT : 1
THIN_TO : 1
VISTA_AC : 1
PSU_RTC : 1
TEACHING_METHODS : 1
BE_BACK : 1
OR_DLCO : 1
IT_HELP : 1
TOENAIL_PLEASE : 1
CARE_CHIEF : 1
SATISFIED_DIRECTED : 1
IF_APPLICABLE : 1
CLINIC_AND : 1
INFLUENZA_CC : 1
SUBSEQUENT_OF : 1
IS_THE : 1
USE_STRIP : 1
NUMBER_PT : 1
BPH_NOCTURIA : 1
AFEBRILE_COUGH : 1
OTHER_COUNSELING : 1
ACETAMINOPHEN_MG : 1
VAN_GENERAL : 1
TO_CONTACT : 2
MALE_LB : 1
TRY_PRAVACHOL : 1
PHYSICAL_LIMITATION : 1
UNKNOWN_CC : 1
THEN_CPAP : 1
MEDICATIONS_TRIGLYCERIDE : 1
RX_HEALTH : 1
LIST_OUTPATIENT : 1
OF_LIVING : 2
HOURS_NURSE : 1
IN_EYE : 1
ON_SUSP : 1
THERAPY_LOAD : 1
NOT_EXCEED : 1
TYPES_VACCINE : 1
INFORMATION_SOURCE : 1
LIVING_MEASUREMENT : 1
NECK_IS : 1
PAIN_THAT : 1
WAS_DISEASE : 1
IN_HOME : 1
ON_CALL : 1
FROM_SINCE : 1
THE_TO : 1
SMOKES_CIGARETTES : 1
OR_MORE : 1
THIS_TUB : 1
INTRAARTICULAR_FRACTURE : 1
KNEES_WHEN : 1
FEELS_CONSENT : 1
IS_HOURS : 1
REMINDER_PT : 1
PIP_AFTER : 1
DISEASE_AND : 1
VETS_TO : 1
BEEN_SCHEDULED : 1
SERUM_DL : 1
PROBLEMS_WITH : 1
BLUE_REPORTS : 1
LEFT_DOCUMENT : 1
TO_PER : 1
THROAT_PAPILLOMAVIRUS : 1
RECORD_MANAGER : 1
PERSON_BE : 1
CARE_NEW : 1
INFORMATION_CONFIRMED : 1
COFFEE_ON : 1
CAPACITY_ARE : 1
PT_SNACK : 1
YOUR_WARFARIN : 1
CASE_WAS : 1
PRODUCTS_IF : 1
IMAGING_MPI : 1
FOR_RECORDS : 1
BACK_AND : 2
OEF_READ : 1
NEGATIVE_MOTHER : 1
SCRATCHY_PAPILLOMAVIRUS : 1
MEDS_SECTION : 1
DUE_LONG : 1
DATE_VITAL : 3
KG_COMPLICATIONS : 1
CONTINUE_HIS : 1
PAID_FOR : 1
DRUG_DOING : 1
SCORE_UROLOGY : 1
PC_APPT : 1
MOIST_PHONE : 1
PRIMARY_CAREPROVIDER : 1
LOW_HIPS : 1
NOT_ON : 2
TIL_OUT : 1
MEDICATIONS_PULSE : 1
BUT_THEY : 1
YOUR_DIFFERENTLY : 1
OF_DAILY : 1
BID_TIL : 1
DENIES_BRUISING : 1
NOTE_NONE : 1
OFTEN_YOU : 1
PALPABLE_VITAL : 1
FEELS_LESS : 1
RISKS_OF : 1
OF_MIDDLE : 1
MEDICATION_THAT : 1
INPATIENT_OUTPATIENT : 1
COUNSELING_APPOINTMENT : 1
YES_ABDOMEN : 1
GERD_HYPOKALEMIA : 1
DUPLICATE_REQUSET : 1
COMMENTS_CALLS : 1
INFORMATION_BREATH : 1
TOE_INDEX : 1
NO_ASSOCIATE : 1
WHEEZING_THROAT : 1
NEGATIVE_NEVER : 1
INR_RANGE : 1
MG_HYDROCODONE : 1
TAKE_FOOD : 1
WITH_DECEASED : 1
MG_MG : 2
SURGERY_WORKED : 1
VITAL_OVERALL : 1
ON_DECREASED : 1
URINE_ML : 1
SIDERAILS_VETERAN : 1
PROPERTY_HAVE : 1
CAN_OBTAIN : 1
THE_COUSIN : 1
COMFORT_GLUCOSE : 1
ER_AND : 1
ACTIVE_AT : 1
INTENSITY_NEVER : 1
HOUR_INPUT : 1
DENIES_WHEEZING : 1
MOUTH_ACTIVE : 2
TEMPERATURE_GAVE : 1
DEPRESSION_HYPERLIPIDEMIA : 1
EXAMINATION_OF : 1
BP_LEVEL : 1
OCCUPATION_WORKER : 1
YOU_RECEIVE : 1
PATIENTS_SCALE : 1
STILL_GOT : 1
VITAMIN_AUGUST : 1
ENDING_PM : 2
AS_NEEDED : 1
YOU_QUESTIONS : 1
IN_TELECARE : 1
SHE_CONTACT : 1
DRIVES_LICENSE : 1
WITH_FOR : 1
PHYSICAL_ACTIVITY : 1
AT_PARK : 1
IS_AT : 1
THE_ALSO : 1
QUESTIONNAIRE_YESTER : 1
PACEMAKER_ST : 1
PALPABLE_INPUT : 1
WARFARIN_QUESTIONNAIRE : 1
HELP_DENIES : 1
TEST_AUDITC : 2
STATES_OUT : 1
DECREASED_ESP : 1
WAS_NEXT : 1
VETERAN_HAS : 2
APPOINTMENTS_TONIGHT : 1
VITALS_CHIEF : 1
NOCTURIA_OR : 1
TO_TO : 1
OR_STARTLED : 1
AND_CHEST : 1
FASTING_PC : 1
MG_QTY : 1
MOTHER_AT : 1
HAVE_OR : 1
WITH_VITAMIN : 1
PMHX_DM : 1
FOR_TO : 1
PRIMARY_FOLLOW : 1
PATIENT_REFUSED : 1
IS_UNKNOWN : 1
WARFARIN_FROM : 1
INR_TARGET : 1
SHIRLEY_ALEXANDER : 1
JUN_PACEMAKER : 1
WAS_SCORE : 2
LEFT_SUFFERING : 1
CLINIC_TO : 1
REGIMEN_WANTS : 1
SOME_STATE : 1
AGE_HE : 1
LOSS_AT : 1
CHEST_XRY : 1
MAIL_OF : 1
VITAL_SIGNS : 1
SEEN_ON : 1
MEASUREMENT_DEFINITION : 1
OVERALL_CONDITION : 1
SHE_AGREES : 1
LIGHT_VETERAN : 1
PARTIAL_OBJECTIVE : 1
ADVISED_NO : 1
SHE_REFUSING : 1
FEELS_MUCH : 1
RECORD_AOX : 1
OR_SPONSOR : 1
YOU_MIGHT : 1
WITH_NEFF : 1
ON_ROM : 1
LIKE_COPY : 1
BUDGETING_AND : 1
PULSE_SKIN : 1
FURTHER_RECOVERY : 1
ADVERSE_REACTIONS : 1
PULMONARY_REPORT : 1
YES_PULSE : 1
RIGHT_PMRS : 1
OBESITY_AND : 1
EXACT_IS : 1
STEEL_WORKER : 1
SUGARS_OUTPATIENT : 1
NEVER_OBJECTIVE : 1
MIDDLE_ASSOCIATED : 1
NEV_TIL : 1
BUSY_ETC : 1
ALPHABETIZED_LIST : 1
XRY_MASSES : 1
EXAM_BACK : 1
TO_HIM : 1
HOURS_THEN : 1
ADLS_SHIFT : 1
FUTURE_IT : 1
CAFFEINEFREE_SODA : 1
PATIENTS_BRADEN : 1
REVIEW_WITHIN : 1
PRN_NEV : 1
BUDGETING_IS : 1
OXIMETRY_TARGET : 1
THE_SIDE : 1
FEMORAL_PALPABLE : 1
FOOT_EXAM : 1
AT_HE : 1
ANSWER_ASSESSMENT : 1
PODIATRY_THREE : 1
TRIGLYCERIDE_MG : 1
GLENOID_DE : 1
LONGER_NECK : 1
LEFT_SINUS : 1
PREVENTATIVE_HEALTH : 1
BEACH_ASSOCIATE : 1
IN_MONTHS : 1
KG_DRINKS : 1
FROM_PHYSICAL : 1
EQUIPMENT_AS : 1
TURP_NONVA : 1
RADIAL_DATE : 1
ACTIVE_FUNCTIONS : 1
PC_HP : 1
THICK_TOENAILS : 1
AT_LEAST : 1
THE_PREANESTHESIA : 1
UP_FEW : 1
ARE_YOUR : 1
PATIENT_NUMBER : 1
AN_MVA : 1
YOU_ON : 1
REPORTS_IT : 1
TO_TAUGHT : 1
MRSA_COLLECTED : 1
MEDICAL_SPECIFY : 1
ACTIVE_PREFERENCES : 1
OIF_PLEASE : 1
EDEMA_PULSES : 1
PROSTHESIS_PHYSICAL : 1
MOUTH_REFILLS : 1
SPACES_BLANK : 1
SCREEN_MEDICATION : 1
TIME_ADDENDUM : 1
AT_TRAVEL : 1
BLANK_THAT : 1
XYZZY_INFLUENZA : 2
STATUS_PTSD : 1
NEED_TOP : 1
ANY_HARMFUL : 1
AND_MUCH : 1
INFLUENZA_DATED : 1
NUMBER_NURSING : 1
DROPS_ALCAINE : 1
REASSESS_AT : 1
SINCE_CH : 1
CORRECT_ANSWER : 2
ADDENDUM_LONG : 1
RECORDS_TECHLITE : 1
AND_WAS : 2
PROBLEM_FEELING : 1
CHOLESTROL_LOW : 1
OBJECTIVE_RIGHT : 1
SKIN_THIS : 1
AC_MEDS : 1
LAB_VALUES : 1
GREAT_TOENAIL : 1
NOT_APPLY : 1
LIVES_ALONE : 1
FINGER_REVEALS : 1
GOT_WED : 1
METHADONE_FEELS : 1
WITH_QUESTION : 1
CLOTS_PATIENT : 1
HIS_DIED : 1
NO_REVIEW : 1
DONE_DECREASED : 1
HYPERCHOLESYTEROLEMIA_PRIMARY : 1
FOR_TAKE : 2
WHEEZING_COUGH : 1
PRESCRIPTION_MEDICATIONS : 1
SPECIFY_BE : 1
WEARING_SUBSCAPULARIS : 1
INFLAMMATION_WITH : 1
FRACTURE_IS : 1
EVALUATED_FOLLOWING : 1
NO_ANWSER : 1
TO_LONG : 1
AND_REACTIONS : 1
HEART_REGULAR : 1
FREQUENTLY_WHEN : 1
STRIP_ACTIVE : 1
DATED_FOR : 1
BACK_IN : 1
FEVER_WHEEZING : 1
STILL_DRIVES : 1
PM_IS : 1
RIGHT_APPOINTMENT : 1
BEEN_ABLE : 1
SCALE_IS : 1
MONTH_WAS : 1
QUALIFIERS_COLLECTED : 1
DOCUMENT_LEARNING : 1
ACTIVE_NEED : 1
AT_PM : 2
NECK_THAT : 1
OD_EYE : 1
USE_LANCET : 1
OF_METHADONE : 1
DISEASE_CONTROL : 1
PATIENT_BE : 1
LICENSE_LEFT : 1
EKG_PERFORMED : 1
THAT_DO : 1
DE_RATIVE : 3
EVEN_CELLS : 1
PHONE_NO : 1
APEX_APPOINTMENT : 1
IDENTIFIED_PROBLEM : 1
IN_THIS : 1
SERIAL_COLORECTAL : 1
PHYSICIAN_PC : 1
AND_STIMULATION : 1
WITH_SIGNIFICANT : 1
ABLE_KEEP : 1
WITH_NONANTALGIC : 1
INDICATED_FILL : 1
INTERVIEW_METOCLOPRAMIDE : 1
PC_YELLOW : 1
SURGERIES_INJURIES : 1
OR_DYSURIA : 1
HAD_SOME : 1
THANK_YOU : 1
PHYSICIAN_SW : 1
HE_NOT : 2
OF_UNDERSURFACE : 1
MOVE_HIS : 1
SURGERY_HE : 1
TRIGLYCERIDE_BY : 1
QUESTIONNAIRE_FROM : 1
WELL_ON : 1
VA_MEDICATIONS : 1
OR_OCCUPATIONAL : 1
PROCEDURE_IOL : 1
AND_DIFFUSION : 1
AND_VERIFICATION : 1
JOINT_MUSCLE : 1
RAN_OF : 1
EQUAL_EXTREMITIES : 1
OF_REVIEW : 1
DIED_AMBAMBULATORY : 1
HCTZ_LISINOPRIL : 1
THERAPY_SC : 1
YOU_BE : 1
MEDS_FOLLOW : 1
KNEES_HE : 1
DEFINITION_TO : 1
GENERAL_GFIRM : 1
LAYER_IN : 1
ALSO_HE : 1
FILL_UP : 1
IS_NORMAL : 1
SCREENING_IN : 1
ANWSER_BUSY : 1
HOT_PACK : 1
IS_THROAT : 1
HE_DID : 1
APPLY_IDENTIFY : 1
IS_CONSIDERED : 1
AROUND_FAMILY : 1
DULOXITINE_CALCIUM : 1
MENTAL_STATUS : 1
ON_HIS : 1
UP_PATIENT : 1
OR_EASILY : 1
BIOPSY_RIGHT : 1
PHARM_CONTROLLED : 1
HE_WITHOUT : 1
ICE_RESPONSES : 1
OUT_BIT : 1
PACK_WEEK : 1
THIS_PROCESSS : 1
DIFFICULTY_RADIAL : 1
MEDICAL_HX : 1
NO_HAVE : 1
GET_OFTEN : 1
COMMENTS_FOR : 1
LEFT_ARM : 1
MOUTH_INFUSION : 1
MINUTES_AT : 1
REMOTE_AND : 1
CONSTIPATION_MELENA : 1
THEY_CORRECT : 1
CALL_TIMES : 1
DIET_BLOOD : 1
VERY_AS : 1
NECK_FRACTURE : 1
RIGHT_DONE : 2
VARA_CASE : 1
TOTAL_SHIFT : 1
CELLS_WHICH : 1
MEDICATION_ALCOHOL : 1
DATE_UNKNOWN : 1
CHEST_NO : 1
PND_ACTIVE : 1
SUGARS_ACTIVE : 1
THAT_HAS : 1
CARDIO_STRONG : 1
JOINT_ACHES : 1
WITH_IN : 1
PLEASE_READ : 2
PHYSICIAN_OF : 1
GIVEN_IN : 2
HAS_SCHEDULED : 1
PATIENT_AMBULATORY : 1
SCREEN_IS : 1
ISSU_NEED : 1
SHIFT_INTAKE : 1
PATIENT_PART : 1
SHE_WILL : 1
SUFFERING_FROM : 1
QTY_ACTIVE : 2
THROUGH_MEDICAL : 1
CC_REFERRED : 1
PRONE_PRESS : 1
OUTPATIENT_INCLUDING : 1
NONVA_MG : 1
EYE_ADMINISTERED : 1
AT_HOME : 1
DID_YOU : 1
FOR_EACH : 1
IN_HIS : 1
MEDICATIONS_REACTION : 1
FLORESOME_STATE : 1
EXCEED_MG : 1
WT_LB : 1
OF_APPOINTMENT : 1
PERFUSION_IMAGING : 1
LIVING_LONGTERM : 1
PROSTATE_BIOPSY : 1
MEDICATIONS_EXCLUDING : 1
BUMPS_FILL : 1
STATES_HAS : 1
TEST_USE : 1
FILL_ALL : 1
WORKED_EXTENDED : 1
REQUESTED_BY : 1
REVIEWED_WITH : 2
PHYSICIAN_HE : 1
RECEIVE_THAT : 1
LFT_LIPID : 1
MAKING_CANCER : 1
OR_DING : 1
DATE_MEASUREMENT : 3
PAIN_HIS : 1
IS_FOLLOWING : 1
CLEAR_DISCUSSED : 1
IS_ON : 1
MEDICATIONS_ON : 1
WED_LEFT : 1
WHETHER_THIS : 1
PRIORITY_OF : 1
HE_INFLAMMATION : 1
GIVEN_IM : 1
OBJECTIVE_SHIFT : 1
APPT_SAME : 1
AND_LEARNING : 1
SITE_AT : 1
GRAVES_BY : 1
THE_RISKS : 1
RELEASED_SUPPLY : 1
OBESITY_OFFERING : 1
ACTIVE_AND : 1
AS_OT : 1
UNSPECIFIED_APPOINTMENT : 1
COLORECTAL_IS : 1
LONGER_HAS : 1
WIFE_TOTAL : 1
ACTIVE_OUTPATIENT : 4
FACTORS_EACH : 1
ISOVUE_THRU : 1
UP_WITH : 1
FOR_PERSON : 1
NEED_CLOTRIMAZOLE : 1
ABLE_TO : 1
MONTHS_ME : 1
BOTH_RAI : 1
APPLY_SPACES : 1
IS_PC : 1
OF_CALCIUM : 1
PER_REQUEST : 1
AND_SELECT : 2
NURSE_NAME : 1
FOOD_RERPORT : 1
BP_DS : 1
THROUGH_THE : 1
EYE_BEDTIME : 1
REMOVE_THE : 1
PRN_NOT : 1
JULIAN_PC : 1
WARM_THYROID : 1
BLANK_DO : 1
LEARNING_FACTORS : 1
HAS_NODULES : 1
ED_DOCUMENT : 1
SCREEN_MEDICATIONS : 1
BY_BOTH : 1
AND_PHONE : 1
NEGATIVE_BRUITS : 1
SUPPLY_MEDICATIONS : 1
APR_ADDENDUM : 1
VA_YOU : 1
PROCESSS_ALSO : 1
YOUR_PER : 1
ADVERSE_IN : 1
TRY_AS : 1
VERBALIZED_AND : 1
MUCH_TO : 1
HOW_HE : 1
EYE_OF : 1
PACK_TO : 1
CONTACTED_DAUGHTER : 1
TABLETS_COMMENTS : 1
COMMENTS_PA : 1
POSITIVE_RESPONSES : 1
TYPES_RECOMBINANT : 1
RARELY_PSYCH : 1
FAMILY_MEMBERS : 1
THIS_CONTACTED : 1
RECORDS_LANCET : 1
WHO_PULSE : 1
TO_MAINTAIN : 1
MOISTURE_EYES : 1
REACTIONS_IN : 1
REENROLLING_IN : 1
FOOD_OR : 1
LISTED_PHONE : 1
FOR_ER : 1
TO_WORK : 1
THAT_UNCONTROLLED : 1
LES_PATIENT : 1
TREATMENT_THE : 1
ADV_PATIENT : 1
MOUTH_TO : 1
FINE_LYMPH : 1
CONTRACT_WE : 1
THE_SHOULDER : 1
PCN_APR : 1
TUB_LEVEL : 1
LEFT_TEMPERATURE : 1
COMPLAINT_NODULES : 1
AND_SHE : 3
RECENT_SHOWED : 1
ED_UARY : 1
ML_ISOVUE : 1
FOR_YOUR : 1
KNOW_AGE : 1
NORMAL_NIACIN : 1
EVERY_ACTIVE : 1
PROCEDURE_PHACO : 1
MVA_UARY : 1
MAINTAIN_CONTACT : 1
HAS_IN : 1
CALCIUM_EL : 1
MEDICATIONS_ADV : 1
NEGATIVE_AS : 1
TWICE_WITH : 1
JT_OBJECTIVE : 1
NOW_PARK : 1
ADMITTED_THE : 1
LABS_PC : 1
MONTHS_THE : 1
DR_NEFF : 1
HYPOGLYCEMIA_REVIEW : 1
AND_JUDGEMENTINTACT : 1
HAS_THE : 1
MEDICATIONS_LISTED : 1
IF_YOU : 3
PT_ADVISED : 1
NO_DYSPEPSIA : 1
MANAGER_PT : 1
IN_AN : 1
LIVING_IN : 1
SEEN_DR : 1
FOR_AMOUNT : 1
BREATH_EVEN : 1
EXCLUDING_UNDER : 1
LOSS_PROGRAM : 1
HAS_HAD : 2
CONTINUES_TO : 1
HIS_SUFFERING : 1
HIS_YO : 1
ICDCM_ALLERGIES : 1
SPONSOR_AFTER : 1
SCALE_SCORE : 1
AND_STATES : 1
NEED_FOOT : 1
EACH_TO : 1
METOCLOPRAMIDE_MG : 1
VISIT_PT : 1
NOTE_PULMONARY : 1
WHEEZING_PND : 1
DELTOID_IMPRESSION : 1
OR_DIARRHEA : 1
DOPPLER_STUDIES : 1
WAS_THAT : 1
ALL_HIS : 1
OVERALL_IS : 1
TO_HELP : 1
CANCER_CURRENT : 1
STRESS_BROUGHT : 1
VET_GET : 1
OF_THE : 6
DURING_OIF : 1
DM_HCTZ : 1
SIDE_SINUS : 1
PSYCHIATRY_NURSE : 1
PSA_LIPID : 1
PT_THAT : 1
INJURY_UP : 1
INJURIES_NONE : 1
EACH_YOUR : 1
WEST_BEACH : 1
PLACED_CPAP : 1
IS_ASSIGNED : 1
THIS_SHIFT : 1
CONSENT_BAL : 1
PSYCH_SOCIAL : 1
REVIEWED_PRINTED : 1
ON_OUTPATIENT : 1
AT_VA : 1
PATIENT_PAIN : 1
SPACES_THAT : 2
TO_TEST : 2
TS_AND : 1
FOR_ASSESSMENT : 1
VETERAN_AT : 1
ON_THIS : 1
LEFT_BUT : 1
THYROID_CANCER : 1
DIAGNOSIS_SAME : 1
HOT_TO : 1
LEISURE_LEVEL : 1
HAS_NOT : 1
DISCUSSED_THIS : 1
AGREES_WITH : 1
ACUTE_NEW : 1
ON_ARRIVAL : 1
QUESTION_TINY : 1
EXAM_NOTE : 1
PMRS_THERAPY : 2
ON_BY : 1
MAINTAIN_OSU : 1
IER_THIS : 1
OF_ML : 1
LEISURE_BATHING : 1
STATES_HE : 1
CURRENTLY_INPATIENT : 1
FOR_PHARM : 1
COMPLAINT_POST : 1
VET_CLINIC : 1
PERFUSION_MPI : 1
VET_TO : 1
DYSPEPSIA_OR : 1
PULSE_APPOINTMENTS : 1
PAROXYSMAL_TACHYCARDIA : 1
LAST_ME : 1
NODULES_THE : 1
TO_MOST : 1
FOLLOWING_DURING : 1
AS_VOIDING : 1
MG_TAKE : 1
PT_HE : 1
OF_MEDICATIONS : 1
FOR_IN : 1
AND_DOCUMENTED : 1
AND_LES : 1
IF_HAVE : 1
ANSWER_FOR : 2
WILL_YOU : 1
USE_EQUIPMENT : 1
MG_OF : 1
NON_WITHIN : 1
IDEA_OF : 1
NO_MELENA : 1
ASSESSMENT_BILATERAL : 1
WITH_HIS : 1
CLEAR_WHETHER : 1
ANTIBIOTICS_STATES : 1
CASA_CBOC : 1
UROLOGY_CONSULT : 1
MAR_PROCEDURE : 1
SURGEON_WILL : 1
RESULTS_TABLETS : 1
CALLER_APPT : 1
PELVIC_TILTS : 1
HOME_ALLERGIES : 1
FOR_BY : 1
MIGHT_BE : 1
RATE_NORMAL : 1
THE_MIDDLE : 1
OCCASION_THE : 1
RECOMBINANT_VACCINE : 1
NOS_CALL : 1
CONSISTANTLY_ON : 1
AT_AND : 2
NONVA_CLOPIDOGREL : 1
UP_PULMONARY : 1
DELIRIUM_HAS : 1
WITH_FASTING : 1
WILL_CONTINUE : 1
TIMES_DATE : 1
IN_IN : 1
DRINKING_ON : 1
EKC_WAS : 1
HIS_AND : 1
WILL_THE : 1
ABD_PAIN : 1
TRIGLYCERIDE_MOUTH : 1
HCTZ_MG : 1
TWICE_FOOD : 1
PRESCRIPTIONS_ACCURACY : 1
KEEP_AND : 1
NEEDS_TO : 1
PROGRAM_AT : 1
CBOC_METHADONE : 1
MEMBER_TO : 1
DOCUMENTATION_BAYSIDE : 1
TAKE_AS : 1
TO_RIGHT : 1
AND_AGREEAB : 1
APPOINTMENT_RADIOTHERAPY : 1
CELL_LEFT : 1
IS_AFEBRILE : 1
TAUGHT_ASPIRIN : 1
PHONE_PT : 1
CHIEF_LUNG : 1
FUNCTIONS_REPORT : 1
DID_HAVE : 1
THE_FOLLOWING : 3
VA_WILL : 1
DEFINITION_VISITS : 1
AFTER_INJURY : 1
PAIN_MIGHT : 1
MANAGER_AOX : 1
BLOOD_STATES : 1
CAREPROVIDER_UP : 1
JOINT_DE : 1
CARE_NOTE : 2
THIS_PLEASE : 1
MEDICATIONS_THAT : 1
IS_REDUCED : 1
AS_BY : 1
OF_INDEPENDENT : 1
LEISURE_DRINKING : 1
IS_MODERATELY : 1
PH_ASSOCIATED : 1
ABI_TOE : 1
HEALTH_RISKS : 1
DRUG_CLASS : 1
DIFFUSION_ARE : 1
NUMBER_ANWSER : 1
APPLY_LEAVE : 1
CONSULT_BY : 1
RESPONSE_SAME : 1
SUBSCAPULARIS_WITH : 1
NEW_PAIN : 1
MOUTH_DAILY : 2
NO_ALLERGIES : 1
OSU_AN : 1
IDENTIFY_DOCUMENT : 1
FOR_CALL : 1
THE_NURSES : 1
CONTROL_LOSS : 1
EXTREMITY_BILATERALLY : 1
PROGRESS_INTRAARTICULAR : 1
LOOKING_FOR : 1
PART_PT : 1
SUPPLIES_UNDER : 1
BURN_NAUSEA : 1
WITH_GAIT : 1
PROBLEMS_NEG : 1
HOPEFUL_AND : 1
IN_ALL : 1
AT_LISTED : 1
UP_AND : 1
WITH_PRINTED : 1
LABS_ANNUAL : 1
MONTHS_PELVIC : 1
SEEN_BACK : 1
PA_NURSING : 1
NOTE_OF : 1
HAS_PAIN : 1
WHO_HAS : 1
BY_REFILLS : 1
ANGIOCATH_INSERTED : 1
UNCORRECTED_MODERATELY : 1
LESS_THAN : 1
ALEXANDER_BY : 1
EXTREMITY_EQUAL : 1
FUNCTION_PERFORMANCE : 1
SHE_DOING : 1
CD_CD : 3
LIVING_CENTER : 1
ADV_HAS : 1
PT_ALLERGIES : 1
TO_AREA : 1
WAS_PERFORMED : 1
HOURS_VAN : 1
ASPIRIN_MG : 1
PULMONARY_CT : 1
FOR_RECOVERY : 1
YOU_MAY : 1
TEMPERATURE_PT : 1
BY_PHONE : 1
OVERALL_ACTIVITY : 1
COMMUNITY_CENTER : 1
NO_PATCHES : 1
YOUR_NEXT : 1
IS_INDICATED : 1
CAPACITY_NORMAL : 1
WAL_OF : 1
HISTORY_GLAUCOMA : 1
FOLLOW_NOTE : 1
CAREFULLY_SELECT : 2
DLCO_IS : 1
PANEL_TS : 1
APPOINTMENT_YOU : 1
OF_DULOXITINE : 1
THREE_MONTHS : 1
TAB_CONCERNS : 1
IS_WELL : 1
TACHYCARDIA_BPH : 1
MYDRIACYL_PHENYLEPHRINE : 1
LEFT_TOENAIL : 1
ON_LIST : 1
CM_BP : 1
SW_CONTACTED : 1
DELTOID_OF : 1
IS_ABOVE : 1
SEP_SINCE : 1
SAMPLE_AT : 1
EL_OF : 1
TOP_APPLY : 1
IN_IF : 1
CELL_TRAIT : 1
DATE_IS : 1
QTY_FOR : 2
VISTA_PREALBUMIN : 1
AT_PHONE : 1
PAIN_IN : 1
THEY_WARM : 1
AND_MD : 1
REPORT_CONSULT : 1
ALONE_LONGER : 1
DOCUMENTATION_FOR : 1
THIS_OF : 1
HEART_NO : 1
COLONOSCOPIES_NEGATIVE : 1
REP_PRESS : 1
STATE_HE : 1
WAS_AND : 1
DISCUSSING_THE : 1
FOR_THE : 1
PC_GFIRM : 1
MASSES_REVIEW : 1
TURGOR_EXTREMITY : 1
INCESSANT_PAROXYSMAL : 1
BE_MIN : 1
PROPERTY_AND : 1
CHEW_TABLET : 1
ALLERGY_LAB : 1
BREATH_NO : 1
CORRECT_COMMUNITY : 1
MED_AND : 1
SHE_OFFERING : 1
PREALBUMIN_AC : 1
IN_TO : 1
LOW_CHOLESTROL : 1
FOR_CONTROL : 1
MINUTES_ENDING : 1
PHYSICIAN_EL : 1
GET_AND : 1
AT_TIME : 2
AT_FUTURE : 2
SLE_PROCEDURE : 1
TO_VETERAN : 1
THROAT_SCRATCHY : 1
NOSEB_NOSEB : 1
IF_ANTERIOR : 1
VETERAN_WANDERGUARD : 1
NOW_AS : 1
OU_OCULAR : 1
SEP_HIV : 1
WORK_AND : 1
OR_DRINKS : 1
SLOW_URINATION : 1
CONTACT_AN : 1
CONSIDERED_HAS : 1
PER_MENTAL : 1
RELEASED_OUTPATIENT : 1
RERPORT_IS : 1
SIGNS_OVERALL : 1
CONTACT_OSU : 1
RESPONSES_DURATION : 1
ANNUAL_HP : 1
SW_SPOKE : 2
ACTIVITIES_OF : 1
TILTS_HOLD : 1
MAR_TREATMENT : 1
MEMBER_UNABLE : 1
READ_ITEM : 2
CARE_COMPLAINT : 1
SUSP_TLC : 1
LOOKING_TO : 1
TRIES_TO : 1
WEEK_NON : 1
THIS_WAS : 1
FOLLOWED_BY : 1
CLC_FURTHER : 1
SHE_PATIENT : 1
IS_AWAY : 1
THROUGH_VISTA : 1
CALL_LIGHT : 1
QT_OUTPATIENT : 1
RAI_NPDR : 1
ABDOMEN_INTERVENTIONS : 1
ADMITS_HAS : 1
FROM_DORN : 1
AC_DE : 1
VERIFICATION_MANDATORY : 1
MEASUREMENT_WIFE : 1
MRI_RIGHT : 2
UP_NOTE : 1
THYROTOXICOSIS_NOW : 1
AM_CONTRACT : 1
SCHEDULED_TO : 1
NORMAL_RARELY : 1
MONTHS_PATIENTS : 1
DRINKS_AT : 1
YES_RADIAL : 1
PHYSICIAN_YELLOW : 1
MED_REGIMEN : 1
EVALUATED_THE : 1
IT_DIDNT : 1
IMPRESSION_WOUND : 1
ASSOCIATE_IDENTIFIED : 1
EXCISION_OF : 1
COMPLICATIONS_SPI : 1
ARE_MAKING : 1
ALLERGIES_AND : 1
USE_AS : 1
WHY_WAS : 1
STATUS_ARRIVAL : 1
NEVER_CARDIO : 1
AND_DOCUMENT : 1
HAS_PATIENT : 1
HESS_CATARACTS : 1
TO_SW : 1
BURN_NO : 1
NONE_LETHALITY : 1
IN_CARE : 1
THE_BRADEN : 1
RHYTHM_NEGATIVE : 1
LIMITATION_AT : 1
FOR_EYE : 1
OF_SESSION : 1
DOING_FINE : 1
BUEG_MONTHS : 1
EXACT_DATE : 1
ALLERGIES_ADV : 1
PACED_DIRECTED : 1
WHO_AT : 1
STATE_SCREENING : 1
NOW_AT : 1
AND_EUTHYMIC : 1
DOCUMENT_FACTORS : 1
NAIL_TOE : 1
PAROXYSMAL_JUNCTIONAL : 1
GRAVES_BOTH : 1
CASE_SMOKES : 1
FOR_DOCTORS : 1
SHE_WITH : 1
LANCET_USE : 1
MRI_OF : 2
REFERRED_INITIALEVALUATION : 1
PERFORMED_NO : 1
NIACIN_BLUE : 1
YEAR_OF : 1
PROBLEMS_DECEASED : 1
APPLICABLE_PRACTITIONER : 1
WENT_TO : 1
ASSESSMENT_HE : 1
PMHX_COPD : 1
AND_LOSS : 1
REVIEWED_DOCUMENTATION : 1
PATIENT_WAS : 2
IN_CC : 1
VISIT_PATIENT : 1
SYSTEM_HOURS : 1
IN_HAD : 1
LACK_ISSUES : 1
AROUND_HIS : 1
MG_CONCERNS : 1
OF_REPORTS : 1
AND_IS : 2
FOUR_INFORMATION : 1
CONTACTING_THE : 1
AS_DIRECTED : 3
PT_AS : 1
BROUGHT_ON : 1
VA_THEN : 1
HAS_ABLE : 1
THIS_EXAMINATION : 1
FOR_PAIN : 1
REVIEWED_FOR : 1
SPLITTING_COMMENTS : 1
BLOOD_PT : 1
QUALIFIERS_OBJECTIVE : 1
IS_PATIENT : 1
WITH_ENDING : 1
HEARD_FROM : 1
WITH_MARILYN : 1
THE_WILL : 2
ALCOHOL_ACETAMINOPHEN : 1
NURSE_PA : 1
NAME_FRAZIER : 1
DATE_EXACT : 1
TO_WORKED : 1
RERPORT_SHE : 1
DE_CHANGES : 2
TARGET_RANGE : 1
IF_MRI : 1
THREE_OR : 1
FOR_INITIALEVALUATION : 1
OUTPATIENT_MEDICATIONS : 7
BY_FOLLOWED : 1
AND_SUBSEQUENT : 1
IN_VISTA : 1
IN_CASE : 1
LABRUM_RATIVE : 1
AT_FOR : 1
HEARING_ESP : 1
SNACK_CAFFEINEFREE : 1
WORKING_ON : 1
LIVING_SHIFT : 1
RATE_RHYTHM : 1
MYOCARDIAL_HT : 1
NP_OU : 1
SYSTEM_RECOMMENDATION : 1
DIET_SUGARS : 1
CARE_PROSTHETICS : 1
ASSESSMENT_PLAN : 1
THAN_WHAT : 1
HE_AGREES : 1
BY_AND : 1
OF_APAP : 1
CELL_BX : 1
IMPAIRMENTS_IN : 1
LENGTH_MINUTES : 1
NUMBER_NOTE : 1
ADJUSTING_THE : 1
AT_IN : 1
SCORE_HIS : 1
NEGATIVE_SCORE : 2
AND_NONVA : 1
QUALIFIERS_MRSA : 1
AS_DISPOSE : 1
THE_EYEDROP : 1
DELIRIUM_HE : 1
ALSO_REPORTS : 1
RECOMMENDATION_PLEASE : 1
TO_WARFARIN : 1
SOURCE_PART : 1
DEPRESSION_CELL : 1
HIS_MONTH : 1
BUT_ARE : 1
DEFINED_GRAVES : 1
PATIENT_ANSWERED : 1
DATED_CENTERS : 1
WAS_SHOT : 1
STATUS_OXIMETRY : 1
VALUES_AND : 1
SUSP_FOR : 1
TAB_TAKE : 1
DL_OUTPATIENT : 1
VETS_DAUGHTER : 2
BAYSIDE_ER : 1
ASSIGNED_TO : 1
AFFECTED_EYE : 1
FAMILY_OR : 1
ONE_TABLET : 3
WARFARIN_THAN : 1
INFLUENZA_VACCINE : 1
PERFORMANCE_ACTIVITIES : 1
BLOOD_RESULTS : 1
ALLERGIES_ADDRESS : 1
SMOKES_ADDENDUM : 1
LIST_REVIEWED : 1
LAYER_AFFECTED : 1
COLONOSCOPIES_ALL : 1
CONFIRMED_WITH : 1
THAT_NOT : 2
UNDERSURFACE_OBJECTIVE : 1
THE_VA : 1
NOTE_PATIENT : 1
CATARACTS_OU : 1
HOW_YRS : 1
PREVENT_CLOTS : 1
DEPRESSION_NOS : 1
THE_EVENTS : 1
LEVEL_OF : 2
OR_MILK : 1
WITH_STAFF : 1
AT_THE : 1
SUICIDALITY_NONE : 1
ISSUES_HAS : 1
HE_WENT : 1
THE_PRESCRIPTIONS : 1
MCPHERSON_AT : 1
DIFFUSION_CAPACITY : 1
HIM_THE : 1
FINGER_COMMINUTED : 1
OF_AS : 1
ETC_CURRENTLY : 1
AUG_OTHER : 1
FINANCIAL_STRESS : 1
BLOOD_SUGARS : 1
REMAINS_CURRENT : 1
LOW_TRIGLYERIDE : 1
THE_CLOUDY : 1
HAS_WANDERGUARD : 1
BACK_PODIATRY : 1
RX_NECK : 1
APAP_HOURS : 1
EVERY_TO : 1
THE_CORRECT : 2
MOTHER_DIED : 1
MOISTURE_MOIST : 3
ON_ONE : 1
DPCLAB_OUTPATIENT : 1
PT_AFEBRILE : 1
SECTION_VETERAN : 1
STAFF_SCOPE : 1
AT_NEV : 1
CANCER_REMAINS : 1
OF_NAIL : 1
WILL_CALL : 1
INFORMATION_LEFT : 1
TO_VA : 1
RESIDENT_RESPIRATION : 1
WERE_YOU : 1
SOURCE_PATIENT : 1
CONTACT_VET : 1
MOBILIZATION_PT : 1
RN_REQUEST : 1
CV_GLUCOSE : 1
REMOTE_NONVA : 1
THE_PROBLEM : 1
TOTAL_INTAKE : 1
LEARNING_PREFERENCES : 1
CLOPIDOGREL_TAB : 1
PERFORMED_WITH : 1
APPT_WITH : 1
WAL_MAIL : 1
PHONE_THIS : 1
HAS_PHONE : 1
GFIRM_INVOLVED : 1
RATIVE_PHYSICIAN : 1
ON_FACE : 1
SCORE_MOISTURE : 1
MIN_ASPIRIN : 1
NURSE_HOURS : 1
AREA_WEST : 1
VISTA_ANTIBI : 1
LOAD_CD : 2
BREATH_CELLS : 1
CALL_TO : 1
PRAVACHOL_LDL : 1
NAME_AND : 1
DECREASED_ROM : 2
AUGUST_XRY : 1
SKIN_RARELY : 1
PSYCHOSIS_AND : 1
KG_USUAL : 1
AT_CONTRACT : 1
VISTA_IMAGING : 1
UARY_REPORTS : 1
CALL_PC : 1
CHANGES_HE : 1
ON_WATCHFUL : 1
SKIN_MOISTURE : 2
INTERNAL_DEFIBRILLATOR : 1
TIME_OR : 1
TEST_RESULTS : 1
COUGH_PATCHES : 1
AFTER_DISCUSSING : 1
PHYSICIAN_CLOPIDOGREL : 1
ARE_PCN : 1
NEG_CAREPROVIDER : 1
THE_SPECIFY : 1
MRSA_YES : 1
FOLLOWED_BLOOD : 1
DID_KNOW : 1
DILTIAZAM_SLE : 1
CALL_YOU : 1
SIGNIFICANT_PT : 1
NO_RECORDS : 1
UNDERSTANDING_AND : 1
OF_FALLS : 1
VARIOUS_JOINT : 1
XYZZY_VACCINE : 1
CBC_BMP : 1
VIRAL_CD : 1
IS_CC : 1
ACCESSED_VISTA : 1
SHE_HAS : 2
AND_FUNCTION : 1
GIVEN_LEFT : 1
TRIGLYCERIDE_SERUM : 1
HX_INJURIES : 1
WITH_SAW : 1
OF_THYROTOXICOSIS : 1
AMOUNT_OF : 1
REFUSING_HE : 1
THAT_LEAVE : 1
SIGNS_CONDITION : 1
TEACHING_WERE : 1
ARRIVAL_PATIENT : 1
CELL_VARIOUS : 1
TELECARE_RECORD : 1
WHEN_HE : 1
ISSU_CHEW : 1
NOT_KNOW : 1
IDENTIFIED_IDENTIFIED : 1
AMLODIPINE_SLE : 1
CV_TEST : 1
LENS_PROSTHESIS : 1
LENS_FROM : 1
CATARACTS_OCULAR : 1
TAB_QTY : 2
WHAT_IS : 1
LANCET_TECHLITE : 1
YOU_ARE : 1
CLOPIDOGREL_MG : 1
SHE_ALSO : 1
PCN_NIACIN : 1
SPECIFY_ENDOCRINE : 1
THAT_MIGHT : 1
ALSO_REFUSING : 1
THAN_PELVIC : 1
UNCONTROLLED_MEDS : 1
NEFF_YOU : 1
NUMBER_NO : 1
EXAM_CARE : 1
NAME_WAS : 1
READ_EACH : 2
REVIEWED_HIM : 1
CPAP_ON : 1
MEDICATED_PT : 1
CONTROLLED_PREVENTATIVE : 1
THEN_FILL : 1
JOINT_DISEASE : 1
LEFT_IF : 3
GH_JT : 1
NO_SIGNIFICANT : 1
IS_OVERLY : 1
NORMAL_MOISTURE : 1
STATES_IS : 1
MEASUREMENT_QUALIFIERS : 3
ISOVUE_AC : 1
OF_AUG : 1
OU_HISTORY : 1
AND_CAN : 1
NOTE_CLEAR : 1
HAS_ANSWERED : 1
CHANGES_ACETAMINOPHEN : 1
MURMUR_MONO : 1
AND_EXECUTIVE : 1
HAD_COLONOSCOPIES : 1
RECOVERY_LEISURE : 1
OBJECT_OF : 1
AT_REFUSED : 1
STATUS_ALERT : 1
SERIAL_SCREEN : 1
THEN_PT : 1
TAB_MOUTH : 1
ARE_TAKING : 1
SUBSEQUENT_LACK : 1
FOR_MAIL : 1
MEDICATIONS_STATUS : 5
LEARNING_FOR : 1
TIL_TELEPHONE : 1
LEFT_MRI : 1
PLEASE_MEDICATIONS : 1
PHYSICIAN_TER : 1
EXCISION_NAIL : 1
ANSWER_DOCTORS : 1
CAROTID_DOPPLER : 1
KNEE_RATIVE : 1
THYROTOXICOSIS_DEFINED : 1
HIM_GET : 1
WAS_THE : 1
SKIN_EYES : 1
GETTING_BETTER : 1
GLUCOSE_TEST : 1
AM_AT : 1
ON_THERAPY : 1
RATIVE_JOINT : 1
BIOPSY_APEX : 1
IS_OFFERING : 1
CHIEF_VETERAN : 1
PLEASE_YOUR : 1
THOUGHT_CLEAR : 1
UPS_PAST : 1
FOR_FOOT : 1
COUGH_DPCLAB : 1
ALERT_VITALS : 1
SON_ATTENDING : 1
RECOVERY_BATHING : 1
FEEL_ADDENDUM : 1
OUTPUT_PALPABLE : 1
PT_THEN : 1
CALLER_RESPONSE : 1
ARE_IN : 1
MINNEAP_MOST : 1
MIN_MG : 1
SUPPLY_OUTPATIENT : 1
COMMENTS_NURSING : 1
EXTENDED_FEEL : 1
HEARD_DORN : 1
PATCHES_NOTED : 1
DOCUMENTED_GUIDELINES : 1
AND_LEFT : 1
IS_NOT : 2
ME_PAIN : 1
HIS_SISTER : 1
AC_ORAL : 1
TEMP_WORKING : 1
HAVE_COME : 1
YOU_SIX : 1
AT_CONTINUE : 1
IOL_RIGHT : 1
SUPPLIES_STATE : 1
LISTED_NUMBER : 1
AND_GIVEN : 1
AS_GRAVES : 1
LFT_PSA : 1
FUNCTION_PROCESSES : 1
OF_SHOULDER : 2
ABOVE_GOAL : 1
ONE_IN : 1
TO_CALLER : 1
WITH_LABS : 1
INITIATED_RESULT : 1
DE_JOINT : 1
REFUSED_THIS : 1
OF_ASSISTANCE : 3
WITHOUT_DIFFICULTY : 1
TOE_DISEASE : 1
NAPPING_DRINKING : 1
YOUR_TIMES : 1
INTRAARTICULAR_OF : 1
WAS_AMBULATORY : 1
GREAT_PLEASE : 1
WORKED_WITH : 1
WANDERGUARD_ON : 1
PACED_AS : 1
ASSISTANCE_OCCUPATION : 1
NEEDS_TWICE : 1
AND_LESS : 1
UA_SPLITTING : 1
PERFORMANCE_OF : 1
LB_COMPLICATIONS : 1
FECAL_BLOOD : 1
DPCLAB_ACTIVE : 1
BID_OUT : 1
ADVISED_THAT : 1
AS_ALPHABETIZED : 1
CALLS_FOR : 1
HIM_THROUGH : 1
IT_AND : 1
HOW_DID : 1
LYMPH_BRUISING : 1
AND_WE : 1
BX_SCALP : 1
PAIN_TAKE : 1
CARE_YOU : 1
PREANESTHESIA_GH : 1
MURMUR_ISOSORBIDE : 1
IN_WORKING : 1
WHERE_WE : 1
ISSU_CLOTRIMAZOLE : 1
LANCET_AS : 1
HOME_MOOD : 1
DEPRESSION_SICKLE : 1
NURSING_SUICIDALITY : 1
BREATH_DYSPEPSIA : 1
BLOCKER_VERAPAMIL : 1
AGREEAB_STIMULATION : 1
HP_NOTE : 1
ACTIVE_INPATIENT : 1
TIME_MONTHS : 1
TO_CLINIC : 1
LIVES_NO : 1
NEGATIVE_ISOSORBIDE : 1
FAMILY_UNABLE : 1
GOT_LICENSE : 1
ORDERS_WRITTEN : 1
DISCUSSED_WHETHER : 1
STATES_THE : 1
AND_MEDS : 1
THOUGHT_DISCUSSED : 1
RESULTS_HIS : 1
APPOINTMENTS_JUN : 1
CHAPLAINCY_NOTE : 1
STATUS_SCREEN : 1
LABS_BIOPSY : 1
NOTE_REVIEWED : 1
PT_PLACED : 1
MOUTH_LAST : 1
OR_HAS : 1
MAINTENANCE_OF : 1
NO_PAIN : 1
ML_MOISTURE : 1
RESULTS_SPLITTING : 1
OUT_TELEPHONE : 1
COMPLETE_CONSULT : 1
FOR_DEPRESSION : 2
HAS_EVALUATED : 1
XRY_NO : 1
INDEPENDENT_PHYSICIAN : 1
ARE_WARM : 1
AS_ABOVE : 2
INITIATED_AS : 1
BP_PREANESTHESIA : 1
METOCLOPRAMIDE_HCL : 1
WHEEZING_SCRATCHY : 1
BRADEN_SCORE : 1
BILATERALLY_EDEMA : 1
IN_VARA : 1
BY_WAS : 1
LOW_BACK : 1
STIMULATION_THRESHOLDS : 1
ENDOCRINE_HEART : 1
HOURS_READ : 1
NEGATIVE_HIS : 1
HIPS_AND : 1
AT_AM : 2
TEMPERATURE_WOUND : 1
APPLY_AND : 1
VALUES_DOCUMENTED : 1
PER_HOURS : 1
PT_SAID : 1
LACK_OF : 1
CIGARETTES_POSITIVE : 1
WITH_PARTNERS : 1
MANAGEMENT_LIKE : 1
WAS_NEGATIVE : 3
ANY_INFORMATION : 1
HE_BEEN : 1
TO_PROPERTY : 1
THE_EXPERIENCED : 1
LENGTH_ENDING : 1
BIFOCALS_RAN : 1
THIS_SPOKE : 2
AMBULATORY_ALCOHOL : 1
OF_IF : 1
WANDERGUARD_HIS : 1
REPORTS_RETURNED : 1
OFF_METHADONE : 1
MOOD_HOPEFUL : 1
SIX_OR : 1
THRU_AC : 1
FINANCIAL_BROUGHT : 1
LIST_OF : 1
OVERLY_ACTIVE : 1
PAIN_MANAGEMENT : 1
BRADEN_SCALE : 1
INJURY_WITH : 1
LOW_LOW : 1
MOTEL_ROOM : 1
REQUESTED_PHYSICIAN : 1
MOIST_OUTPUT : 1
APPLICABLE_OBTAINING : 1
TREATMENT_PROCEDURE : 1
PLEASE_CALL : 1
VA_PRESCRIPTION : 1
IS_DIRECTIONS : 1
VET_HAS : 1
THAT_IS : 6
JOINT_REASON : 1
INFUSION_OF : 1
HE_ADJUSTING : 1
NONANTALGIC_GAIT : 1
ADDENDUM_HOW : 1
RADIOTHERAPY_AT : 1
REENROLLING_THANK : 1
INITIALEVALUATION_OF : 1
TO_THICK : 1
NAUSEA_DIARRHEA : 1
DLCO_UNCORRECTED : 1
STIMULATION_MINIMUM : 1
AGE_DOB : 1
CREAM_APPLY : 1
INDEPENDENT_EL : 1
CONTINUE_WITH : 1
CONTACTED_VETS : 1
CONTACT_AT : 1
LIST_CALL : 1
OUT_OF : 2
NEEDED_HAS : 1
LAB_AND : 1
TABLET_MOUTH : 2
SAMPLE_THAT : 1
COPD_LISINOPRIL : 1
SOME_WITH : 1
DORN_SINCE : 1
PHYSICIAN_SHE : 1
RADIAL_PULSE : 1
BLOOD_SUGAR : 2
LEVEL_GH : 1
AS_ORDERS : 1
THAN_IS : 1
HE_HAS : 5
OR_NO : 1
EYE_CATARACT : 1
NURSE_FRAZIER : 1
IM_IN : 2
MG_MOUTH : 1
PAID_IN : 1
DISCUSSING_HEALTH : 1
PHONE_FOLLOWED : 1
AND_PROGRAM : 1
WERE_INITIATED : 1
EL_ASSISTANCE : 1
MONTHS_PRN : 1
AND_HE : 1
STATES_BUMPS : 1
GUARD_OR : 1
PRINTED_OUTPATIENT : 1
ML_THRU : 1
INFORMATION_NO : 1
PLACED_ON : 1
GERD_ICDCM : 1
THEN_TAKE : 1
INDEPENDENT_NAPPING : 1
IN_MVA : 1
ADMINISTERED_ALCAINE : 1
NOSEB_DS : 2
EXCLUDING_SUPPLIES : 1
HOURS_FEEL : 1
VETS_SHIRLEY : 1
CLASS_WELL : 1
ON_LEFT : 1
TO_LABS : 1
ALCOHOL_TEST : 2
AND_WANTS : 1
PLEASE_TAKE : 1
RISKS_OBESITY : 1
BLOOD_PATIENT : 1
MYDRIACYL_MAR : 1
BILATERAL_KNEE : 1
SYSTEMS_SKIN : 1
SCALP_BASAL : 1
THE_LENS : 1
MG_REF : 1
RIGHT_APEX : 1
AND_PROFILE : 1
AS_TO : 2
PANEL_AND : 1
YO_SON : 1
PHACO_RIGHT : 1
REPORT_HEART : 1
DIRECTIONS_IN : 1
DISPOSE_ACTIVE : 1
PM_ASSIGNED : 1
VERAPAMIL_AMLODIPINE : 1
APPOINTMENT_INFORMATION : 3
HOPEFUL_EUTHYMIC : 1
INDEX_REVEALS : 1
ARM_CAN : 1
WITHOUT_TO : 1
GUIDELINES_FLORESOME : 1
RESULT_OF : 1
HELP_HE : 1
HOME_CARE : 1
GRANDE_CBOC : 1
TEST_STRIP : 1
AT_AMBAMBULATORY : 1
AND_OUTPATIENT : 1
ON_OCCASION : 1
OS_AC : 1
BRUITS_NEGATIVE : 1
AND_MAKING : 1
ALLERGY_PROFILE : 1
AGREEAB_THRESHOLDS : 1
OR_STATES : 1
RECORDS_HAVE : 1
WATCHFUL_OR : 1
STUDIES_IER : 1
VETERAN_ALSO : 1
PT_AMBULATES : 1
COMPLICATIONS_EVENTS : 1
TO_CLC : 1
NOT_IDENTIFY : 1
WAS_SEEN : 1
YES_SCORE : 1
NO_LONGER : 1
SPECIFY_SPLIT : 1
BLUE_ADDENDUM : 1
RIGHT_OD : 1
SAW_IN : 1
GAVE_PT : 1
THIS_TIME : 1
ON_SATUR : 1
SPONSOR_DISCUSSING : 1
MODERATELY_USE : 1
NEED_TO : 1
SHOT_AND : 1
PHYSICIAN_THIS : 1
CONTROL_AND : 1
OF_AND : 2
FROM_HE : 1
LIST_WAS : 1
EUTHYMIC_CONTINUES : 1
NO_OR : 1
PULSES_TURP : 1
FRACTURE_OF : 1
AND_AVOID : 1
LISTED_ABOVE : 1
ML_PHYSICIAN : 1
NO_NO : 3
BLOOD_TEST : 1
CAREPROVIDER_FOLLOW : 1
TO_APPOINTMENT : 2
PROFILE_LAB : 1
RESPIRATORY_NOTE : 1
MODERATELY_REDUCED : 1
PROSTATE_RIGHT : 1
ALLERGIES_INCESSANT : 1
DYSPEPSIA_CONSTIPATION : 1
ER_VISIT : 1
WARFARIN_AND : 1
REVEALS_COMMINUTED : 1
BPH_RETENTION : 1
SIX_MORE : 1
STARTLED_NO : 1
DEFIBRILLATOR_PALPABLE : 1
HAS_NKA : 1
VERBALIZED_UNDERSTANDING : 1
DEFIBRILLATOR_RADIAL : 1
MALE_REFERRED : 1
OTHER_SPECIFY : 1
RAN_OUT : 1
NO_HEART : 1
HIS_BACK : 1
BEDTIME_EYE : 1
MEDICATIONS_YOU : 2
POSITIVE_DURATION : 1
PATIENT_TO : 1
LABS_PROSTATE : 1
OTHER_ENDOCRINE : 1
POSITIVE_FECAL : 1
TO_BE : 3
IS_GETTING : 1
PMRS_OCCUPATIONAL : 2
FINE_HEM : 1
DECREASED_OF : 2
COUGH_NO : 1
TO_HYPERCHOLESYTEROLEMIA : 1
YOU_TAKING : 1
MVA_IN : 1
REPORTS_HAS : 1
CATARACTS_INJURY : 1
EXCEED_OF : 1
MOUTH_FOR : 2
PULSE_RISK : 1
NOTED_IN : 1
ABOVE_ASSESSMENT : 1
LIKE_FOR : 1
DOXAZOSIN_DATE : 1
LIMITATION_PRN : 1
BX_LEFT : 1
OF_SKIN : 1
HE_FEVER : 1
THAN_MONTHS : 1
OF_IMPAIRMENTS : 1
ASSISTANCE_IMPAIRMENTS : 1
SATISFIED_AS : 1
TIME_ACTIVE : 2
ASPIRIN_CHEW : 1
PRIMARY_ACUTE : 1
OCULAR_HISTORY : 1
CHOLESTROL_TRIGLYERIDE : 1
PATIENT_ADLS : 1
NOTE_PSYCHIATRY : 1
NO_DIARRHEA : 1
NON_PRESCRIPTION : 1
SHE_TO : 1
DULOXITINE_SERUM : 1
FOLD_SITE : 1
SHE_WHEEZING : 1
THE_VETERAN : 2
PRESS_UPS : 1
HOURS_FOR : 1
BIT_IS : 1
MIGHT_COPY : 1
WHAT_LISTED : 1
GET_THROUGH : 1
SEX_WEIGHT : 1
MEDICATIONS_WERE : 1
SEX_MALE : 1
USUAL_EVENTS : 1
OF_FOLD : 1
THE_HE : 1
FEELING_OF : 1
PT_WAS : 1
PRONE_UPS : 1
TO_WITH : 2
THE_HEALTH : 1
TAB_NECK : 1
EKG_SHOWED : 1
APR_BLUE : 1
WITH_THE : 1
YESTER_RESPONSE : 1
HEART_CLEAR : 1
HE_DOING : 1
TO_TRY : 1
THIN_FILM : 1
REMAINS_AS : 1
CONSULT_MYOCARDIAL : 1
PC_WITH : 1
RPT_YEAR : 1
DIARRHEA_NO : 2
NO_PT : 1
FOLLOWING_EVENTS : 1
UP_CAROTID : 1
APPOINTMENT_PT : 1
RECOMBINANT_GIVEN : 1
CLINIC_WITH : 1
INDICATED_DIRECTIONS : 1
STRONG_EKG : 1
CONTRACT_AND : 1
NEXT_CARE : 1
HEMIBLOCK_CHEST : 1
WED_EYE : 1
WELL_LIVES : 1
LESS_MONTHS : 1
STUDIES_THIS : 1
PODIATRY_NOTE : 1
AREA_PALM : 1
SHOWER_LEVEL : 1
TO_BLOOD : 4
SHOT_HOW : 1
IS_LISTED : 1
YES_MOISTURE : 1
WALKS_FREQUENTLY : 1
ON_AT : 1
PM_DOB : 1
TRAMADOL_PT : 1
MANDATORY_PC : 1
MEMBERS_STATE : 1
OF_DATE : 1
ON_VIRAL : 1
AND_TO : 2
VACCINE_IM : 1
NONVA_HEART : 1
JULIAN_PHYSICIAN : 1
YELLOW_NP : 1
AMBAMBULATORY_CARE : 1
OF_PENDING : 1
IS_PSU : 1
NORMAL_INCESSANT : 1
HIV_SINCE : 1
PALM_NO : 1
CONSTIPATION_DIARRHEA : 1
UNDER_DRUG : 1
ISOSORBIDE_PATIENT : 1
NO_AT : 1
TO_ANY : 1
BE_SPLIT : 1
ACCURACY_ALLERGY : 1
AFFECTED_AT : 1
IS_TO : 4
ASSESSMENT_AND : 1
IT_IS : 1
EXTENDED_HOURS : 1
TLC_CONTROLLED : 1
APPOINTMENT_LEFT : 1
SUPPLEMENT_CHEST : 1
DOCUMENT_CAN : 1
PAIN_PAIN : 1
MIDDLE_PH : 1
ANTICOAGULATION_CLINIC : 1
IS_NONPRODUCTIVE : 1
BETTER_AT : 1
NEG_PRIMARY : 1
MG_EVERY : 1
ENDOCRINE_CLINIC : 1
ACHES_FINANCIAL : 1
NECK_PAIN : 2
LEFT_FROM : 1
TAUGHT_MIN : 1
PROCESSS_SHE : 1
MEDS_HEART : 1
THE_BUMPS : 1
HX_SURGERIES : 1
MED_ON : 1
UNABLE_TO : 1
DURATION_COMPLAINT : 1
MOIST_SOCIAL : 1
DAILY_MEASUREMENT : 1
STATES_NEED : 1
DENIES_FEVER : 1
RECENT_EKG : 1
INPATIENT_AND : 1
OF_NOW : 1
SOME_PAIN : 1
PREFERENCES_PHYSICIAN : 1
OFFERING_HELP : 1
GOAL_NO : 1
SERUM_NEED : 1
MALE_FOR : 1
AND_GUIDELINES : 1
OF_TIME : 1
QUESTION_OF : 1
PHONE_VERIFICATION : 1
INPATIENT_PROBLEM : 1
THE_MONTHS : 1
FEMORAL_HOUR : 1
MEDICATIONS_INCLUDING : 1
RIGHT_EYE : 1
MPI_PERFUSION : 1
THE_BP : 1
DR_IF : 1
TURGOR_EQUAL : 1
GLAUCOMA_CATARACTS : 1
CHEW_TAB : 1
MASSES_OF : 1
INPATIENT_REMOTE : 1
PARTIAL_HOT : 1
REVIEW_OF : 1
CURRENT_AS : 1
VERAPAMIL_DILTIAZAM : 1
WT_KG : 1
DRIVES_GOT : 1
THE_LEFT : 5
NO_PER : 1
BIT_SHE : 1
FROM_PROSTHESIS : 1
NIACIN_APR : 1
GET_UP : 1
AND_WILL : 1
DIDNT_HELP : 1
METHADONE_TAB : 1
NO_PSYCHOSIS : 1
NO_GERD : 1
AMBULATES_TO : 1
CLASS_DOING : 1
SHOULD_SEEN : 1
DISPOSE_PULMONARY : 1
TOE_SITE : 1
NOTE_WAS : 2
IN_AFFECTED : 1
SUPPLIES_SINGLE : 1
OSU_ALCOHOL : 1
PATIENT_SAID : 1
IF_AFTER : 1
CONTINUE_SERVICES : 1
THAT_RECORDS : 1
IN_CM : 1
CALL_APPT : 1
ALPHABETIZED_OF : 1
TIMES_VITAL : 1
HAS_BEEN : 3
HIS_LOW : 1
FOR_EXTENDED : 1
UNSPECIFIED_COUNSELING : 1
PA_NOTE : 1
LES_SAID : 1
PM_AGE : 1
FOR_FOLLOW : 1
DOB_SEP : 1
WELL_RETRIRED : 1
CT_MONTHS : 1
INSERTED_BY : 1
NO_NOTED : 1
BY_ACTIVE : 1
ATTENDING_BUEG : 1
DONE_PODIATRY : 1
PART_MEDICATED : 1
CONCERNS_GENERAL : 1
SITE_WILL : 1
FACILITY_PROSTHETICS : 1
MEASUREMENT_MRSA : 1
IN_MEMORY : 1
ASSIGNED_CALLER : 1
LOW_DIET : 1
NSC_INDEPENDENT : 1
WRITTEN_WAS : 1
REDUCED_USE : 1
CHEW_ONE : 1
DIDNT_HE : 1
DIRECTED_ACTIVE : 1
TEST_HIS : 1
AT_OUTPATIENT : 1
MINNEAP_OF : 1
PHENYLEPHRINE_TREATMENT : 1
DAILY_LIVING : 1
GETTING_AT : 1
STATUS_ACCUCHEK : 1
POST_SCALP : 1
PACK_CURRENT : 1
CD_SIGNS : 1
TIMES_INFORMATION : 1
HAVE_SIX : 1
HAS_RETURNED : 1
PERFUSION_HT : 1
LONG_THICK : 1
DISCUSS_WHERE : 1
INJURY_WORKED : 1
UP_WITHIN : 1
LUNG_NODULES : 1
SCORE_RARELY : 1
BY_THIS : 1
OF_TINY : 1
PODIATRY_OUTPATIENT : 1
THE_FEELING : 1
RESPONSE_APPT : 1
THAT_NEEDS : 1
GENERAL_PATIENT : 1
TEMPERATURE_IMPRESSION : 1
MG_TAB : 6
FOLLOW_UP : 2
MOISTURE_PHYSICIAN : 1
IN_THE : 3
PROBLEM_UNSPECIFIED : 1
HYPOKALEMIA_ALLERGIES : 1
CARE_THOUGHT : 1
OCCULT_BLOOD : 1
OCCUPATIONAL_CONSULT : 1
WITH_FAMILY : 2
WAS_ADVISED : 1
EDEMA_OTHER : 1
OEF_PLEASE : 1
RESPIRATORY_CARE : 1
AOX_PT : 1
PHARM_RX : 1
EYE_AT : 1
RISK_MEDICATIONS : 1
IMPAIRMENTS_WORKING : 1
TRY_DIFFUSION : 1
MAY_THE : 1
VACCINE_DATED : 1
STATE_REQUSET : 1
DUPLICATE_MED : 1
DECEASED_PARTNERS : 1
PARTNERS_SPOUSE : 1
SINGLE_CLASS : 1
PRODUCTS_APPLICABLE : 1
GIVEN_STATES : 1
WAS_WITH : 5
OF_INFORMATION : 1
NEED_TRY : 1
AGREES_MY : 1
NPDR_OS : 1
REPORTS_OVERALL : 1
HEM_DENIES : 1
IT_TONIGHT : 1
PRESCRIPTIONS_FOR : 1
OUT_DULOXITINE : 1
CD_VITAL : 2
NOTE_THOUGHT : 1
HYPERCHOLESYTEROLEMIA_CARE : 1
RADIAL_PALPABLE : 1
IS_LOW : 1
AT_BEDTIME : 1
NAME_ICE : 1
UNASSISTED_WITH : 1
FOR_TLC : 1
FACTORS_FOR : 1
SW_WITH : 2
CLINIC_HEART : 1
PHONE_NUMBER : 3
RADIAL_SKIN : 1
REF_OUTPATIENT : 1
SPACES_APPLY : 1
OUTPATIENT_INPATIENT : 1
STRIP_USE : 1
TAB_PC : 1
BY_BLOOD : 1
SHOWED_LEFT : 1
CLOPIDOGREL_SERUM : 1
CONSULT_REQUESTED : 1
CONSULT_IS : 1
PATIENT_IS : 1
NEW_LESS : 1
AUDITC_WAS : 2
SCHEDULED_BE : 1
SHE_NEEDS : 1
PATIENT_CONSIDERED : 1
IMAGING_MYOCARDIAL : 1
AND_MOVE : 1
MEASUREMENT_VISITS : 1
STATUS_ON : 1
NUMBER_WAS : 1
OF_EVEN : 1
BE_THROUGH : 1
VAN_CHAPLAINCY : 1
APPOINTMENT_CONFIRMED : 1
UARY_VET : 1
TRIES_GET : 1
UPPER_MOISTURE : 1
THERAPY_NOTE : 2
AND_DECISION : 1
BEACH_NO : 1
JUDGEMENTINTACT_SAME : 1
THYROID_REMAINS : 1
OCULAR_GLAUCOMA : 1
LEAVE_BLANK : 1
VETERAN_REPORTS : 1
ASSISTANCE_STEEL : 1
EVENTS_DURING : 1
THRU_ANGIOCATH : 1
RECORDS_COME : 1
TER_DM : 1
HEALTH_PRIORITY : 1
PER_RN : 1
CC_IM : 1
INITIALEVALUATION_HYPOGLYCEMIA : 1
PROCEDURE_THE : 1
VISITS_BE : 1
LETHALITY_NO : 1
CHAPLAINCY_GENERAL : 1
DM_COPD : 1
NO_INSIGHT : 1
ML_OUTPUT : 1
NONE_RECENT : 1
ADDENDUM_FECAL : 1
SURE_ARE : 1
PC_TEAM : 1
BUSY_CURRENTLY : 1
NON_THE : 1
WORKER_NSC : 1
EKG_WAS : 1
FOR_FURTHER : 1
SINCE_ON : 1
CENTER_ASSESSMENT : 1
ACTIVE_PULSE : 1
FROM_DELIRIUM : 1
ILLNESSES_NONE : 1
AND_GREAT : 1
MONTHS_PAIN : 1
WILL_VET : 1
ARRIVAL_WAS : 1
HAS_PULSE : 1
DOPPLER_IER : 1
MINIMUM_PACED : 1
PROSTHETICS_HOME : 1
VITAL_MEASUREMENT : 3
THE_INFORMATION : 1
FAMILY_STATE : 1
REGARDING_BMP : 1
TENDONOPATHY_WITH : 1
APPOINTMENT_APPOINTMENT : 1
LEFT_PIP : 1
NEGATIVE_NEGATIVE : 1
ALLERGIES_PAROXYSMAL : 1
WITH_FOOD : 2
AND_THE : 2
OXIMETRY_INR : 1
LIVING_DEFINITION : 1
LONG_YRS : 1
YOUR_LANCET : 1
BE_TO : 1
ACTIVE_TELECARE : 1
OF_REASSESS : 1
RETRIRED_ALONE : 1
PHARMACY_EVALUATED : 1
LAST_NOTE : 1
JUNCTIONAL_BPH : 1
OVERALL_FOLLOWING : 1
PROGRESS_NOTE : 2
OBJECTIVE_CARDIO : 1
RETENTION_SLOW : 1
PSA_PANEL : 1
PRIORITY_EXAM : 1
HE_IS : 5
FOR_ACTIVE : 2
GREAT_HOW : 1
TIMES_FOR : 1
AND_OFFERING : 1
URINE_OUTPUT : 1
MPI_MYOCARDIAL : 1
WAS_IN : 1
SEEN_WITH : 1
ALLERGIES_PCN : 1
LUNG_ENT : 1
TO_SEEN : 1
NOT_FROM : 1
SUPPLEMENT_AUGUST : 1
SOME_PROBLEMS : 1
TAKE_TRAMADOL : 1
RECOMMENDATION_NURSE : 1
YEAR_HISTORY : 1
NSC_BACK : 1
MAKING_THYROID : 1
VETERAN_BEEN : 1
AT_COMPLAINT : 1
VARA_WAS : 1
OF_ISOVUE : 1
VACCINE_GIVEN : 1
CONTINUE_CASE : 1
RHYTHM_NORMAL : 1
TO_AND : 3
GIVEN_ANTIBIOTICS : 1
SCREEN_INDICATED : 1
WHICH_NORMAL : 1
INTAKE_OUTPUT : 1
FOR_WAL : 1
HE_HAD : 2
SEEN_IN : 1
IF_ARE : 1
PHONE_IS : 1
MG_DL : 1
THAT_IT : 1
SELECT_THE : 2
MIGHT_ALLERGIC : 1
HE_TO : 2
IDENTIFIED_MEDICATIONS : 2
DOB_HIV : 1
STATES_RAN : 1
BRUISING_DING : 1
OF_EQUIPMENT : 1
LISTED_BELOW : 1
PAIN_HEART : 1
NO_HAS : 1
DOCUMENT_VET : 1
IS_NOW : 1
SCREEN_LIST : 1
THE_TELECARE : 1
OCCULT_TEST : 1
FOR_PC : 1
FROM_CALLER : 1
MONO_SHOULD : 1
HOURS_THE : 1
TELEPHONE_THIS : 1
CALL_PT : 1
UNCORRECTED_IS : 1
HIM_EYEDROP : 1
NOT_OVERLY : 1
ACTIVE_LEARNING : 1
AND_ALLERGY : 1
REMAINS_AND : 1
METHODS_INITIATED : 1
AS_LISTED : 1
CM_NOSEB : 1
MD_REVIEWED : 1
RANGE_MOUTH : 1
HIS_FAMILY : 1
CONSENT_OS : 1
ASSISTANCE_INDEPENDENT : 1
ALCOHOL_SCREENING : 2
BE_ACCESSED : 1
STATE_THAT : 1
ABDOMEN_DATE : 1
THE_DEPRESSION : 1
AN_IN : 1
INFOMRED_REVIEWED : 1
TO_MINNEAP : 1
FOR_ACCURACY : 1
IMPRESSION_CARE : 1
COMPLAINT_VETERAN : 1
ADLS_THIS : 1
SPLIT_TER : 1
SICKLE_TRAIT : 1
RESPONSES_OF : 1
BE_PHYSICIAN : 1
UNCONTROLLED_SECTION : 1
LEISURE_NAPPING : 1
SHIRLEY_BY : 1
MAKING_PER : 1
MAINTENANCE_PRIORITY : 1
GAIT_WEARING : 1
YRS_SKIN : 1
FOR_THEN : 1
TO_GET : 2
RARELY_PHONE : 1
NOTIFIED_OF : 1
NURSING_NOTE : 2
ALL_NEGATIVE : 1
AND_CAFFEINEFREE : 1
AUG_SPECIFY : 1
INFORMATION_WITH : 2
EXAM_NSC : 1
OF_NSC : 1
AND_PATIENT : 2
AFEBRILE_NONPRODUCTIVE : 1
TER_PMHX : 1
ANWSER_ETC : 1
AND_RESULTS : 1
SURGERY_INJURY : 1
PROFILE_VALUES : 1
SHE_GETTING : 1
UA_RESULTS : 1
BY_UNEMPLOYMENT : 1
SHIFT_ASSESSMENT : 1
FRAZIER_POSITIVE : 1
STATES_FOR : 1
CONCERNS_PC : 1
CURRENT_VA : 1
ACTIVITY_AT : 1
PT_NOTIFIED : 1
REJECTION_ADMITS : 1
SURVIVING_WHO : 1
DISEASE_CLEAR : 1
OR_AFTER : 1
CURRENTLY_IDENTIFIED : 1
EYEDROP_HE : 1
CLOTRIMAZOLE_CREAM : 1
IN_UARY : 1
RANGE_EVERY : 1
AVOID_HARMFUL : 1
MUSCLE_FINANCIAL : 1
BY_PT : 1
CURRENT_OF : 1
MEDS_LAYER : 1
AT_PATIENT : 1
CONTACTING_COUSIN : 1
REPS_MEDICAL : 1
DING_TOE : 1
LEFT_INDEX : 1
SIG_CHEW : 1
SKIN_GAVE : 1
PULMONARY_OTHER : 1
LEFT_GREAT : 1
NAIL_FOLD : 1
HE_SHOT : 1
HAD_ALL : 1
FELODIPINE_DILTIAZAM : 1
INTERVENTIONS_DATE : 1
LIPID_PANEL : 1
REJECTION_HE : 1
AS_VETERAN : 1
LEFT_WITH : 1
HE_TRIES : 1
STATUS_COMFORT : 1
AND_LOOKING : 1
MAIL_DOXAZOSIN : 1
CONSIDERED_HE : 1
MOST_OF : 1
AND_KNEES : 1
AN_SCREENING : 2
NO_OF : 1
SERUM_TO : 1
WITH_ACTIVE : 1
ORDERS_EKG : 1
SURGEON_REMOVE : 1
REVIEW_SYSTEMS : 1
WARFARIN_DIFFERENTLY : 1
COFFEE_CALL : 1
PTSD_MEDICATION : 1
OF_REJECTION : 1
MG_CHEW : 1
PND_DPCLAB : 1
AVOID_ANY : 1
NONPRODUCTIVE_COUGH : 1
FOOT_CARE : 1
THAT_SHE : 3
STRIP_PULSE : 1
AND_UA : 1
ACTIONS_METHODS : 1
HE_NODULES : 1
TRANSFUSION_REACTION : 1
TOP_CREAM : 1
COMMUNITY_LIVING : 1
OF_HYPOGLYCEMIA : 1
OS_ORAL : 1
ACCUCHEK_CV : 1
BE_ALLERGIC : 1
THE_ACTIONS : 1
INFORMATION_PATIENT : 1
YOU_MEDICATION : 1
DUE_TO : 1
ACETAMINOPHEN_HYDROCODONE : 1
HAS_COLONOSCOPIES : 1
OF_PER : 1
ORDERS_AND : 1
WITHIN_LAST : 1
WOUND_CARE : 1
YEAR_NO : 1
IN_CLINIC : 1
AS_RESULT : 1
TO_PRAVACHOL : 1
STATUS_LENGTH : 1
OF_YOUR : 1
PC_GENERAL : 1
SAID_TO : 1
IM_GIVEN : 1
OF_DOXAZOSIN : 1
RATIVE_CHANGES : 2
WE_AT : 1
CREAM_THIN : 1
LEFT_SIDE : 1
NOTE_NURSE : 2
SINUS_PROBLEMS : 1
SCALP_CELL : 1
OBTAINING_CONSENT : 1
SHIFT_ML : 1
SCORE_NEVER : 1
FOUR_DATE : 1
NEVER_LAST : 1
CLOUDY_FROM : 1
NOTE_ROM : 1
VETERAN_PHYSICIAN : 1
TO_UP : 1
ARE_COMMUNITY : 1
AMLODIPINE_PROCEDURE : 1
WITH_DISTRESS : 1
CARE_FACILITY : 1
EL_BLOCKER : 1
WELL_MED : 1
FOR_EXAM : 1
HAS_ADMITTED : 1
TEMP_HOURS : 1
FASTING_LABS : 1
INTERVENTIONS_VITAL : 1
GUIDELINES_STATE : 1
CALLER_AREA : 1
WIFE_OBJECTIVE : 1
CALL_IF : 1
FOLLOWING_TEACHING : 1
REF_MEDICATIONS : 1
EXPERIENCED_FOLLOWING : 1
VET_REPORTS : 1
LENGTH_OF : 1
SCORE_THE : 1
CALL_YOUR : 1
YOUR_RECORDS : 1
BUMPS_THEN : 1
HOME_RESPIRATORY : 1
ORAL_MEDS : 1
YO_IS : 1
HAS_TO : 1
PULMONARY_NEOPLASM : 1
FUTURE_APPOINTMENTS : 3
PRACTITIONER_OBTAINING : 1
HOURS_AWAY : 1
OCCUPATIONAL_THERAPY : 3
CARE_DUE : 1
OF_COMPLAINT : 1
DISTRESS_SKIN : 1
THROUGH_IMAGING : 1
THE_IS : 1
MENTAL_ALERT : 1
HYPOGLYCEMIA_NON : 1
CENTERS_FOR : 1
METHODS_WERE : 1
CH_BLOCKER : 1
LEFT_ANTERIOR : 2
AND_CONTINUES : 1
REQUEST_TO : 1
OFFERING_TO : 1
PROGRESS_DECREASED : 1
CAREFULLY_AND : 2
EQUIPMENT_NEEDED : 1
ENT_HEARING : 1
HEMIBLOCK_AND : 1
PERSON_TO : 1
AND_WHEN : 1
PALM_BEACH : 1
LIST_PLEASE : 1
AT_PRN : 1
LESS_OF : 1
OFFERING_SYSTEM : 1
RTC_THE : 1
TEMP_EVERY : 1
DO_NOT : 1
PAPILLOMAVIRUS_TYPES : 1
REASON_CALL : 1
OF_BIT : 1
LENGTH_SESSION : 1
AND_REENROLLING : 1
SHOULD_BE : 1
TO_THAT : 1
COMPLETE_SW : 1
SPECIFY_CLINIC : 1
PULSE_FALL : 1
THE_PH : 1
SHIFT_SHOWER : 1
WRITTEN_EKG : 1
FOLLOWING_PRESCRIPTIONS : 1
PER_PAIN : 1
AND_MEDICATIONS : 1
SENSATION_STILL : 1
TO_WHERE : 1
BACK_LES : 1
EKC_YOUR : 1
TAB_MG : 1
GUARD_WATCHFUL : 1
COMPLICATIONS_USUAL : 1
ACHES_STRESS : 1
INCLUDING_SOME : 1
TELEPHONE_TO : 1
WITH_DAUGHTER : 1
BLOOD_PRODUCTS : 1
YOU_CONTACT : 1
PT_AND : 2
FALL_RISK : 1
OBJECT_MRI : 1
AT_APPOINTMENTS : 1
CALLED_AND : 1
THE_FULL : 1
CHIEF_POST : 1
SEC_PRONE : 1
NOTE_FRACTURE : 1
HIS_LAST : 1
HELP_GET : 1
THICK_AND : 1
BMP_LFT : 1
IMAGING_PHONE : 1
PRACTITIONER_CONSENT : 1
ESP_THE : 1
NEXT_PRIMARY : 1
MILK_AGE : 1
WHO_THE : 1
CC_MALE : 1
INDEX_TEMP : 1
OFTEN_DID : 1
QUALIFIERS_TEMP : 1
RIGHT_SHOULDER : 3
TELEPHONE_CALL : 1
OFF_OF : 1
MONTHS_HISTORY : 1
LAST_AREA : 1
IS_ADJUSTING : 1
DING_ABI : 1
ALONE_NO : 1
RESPIRATION_SCOPE : 1
WITH_CAROTID : 1
DOING_HEM : 1
CATARACT_THE : 1
SPOKE_WITH : 2
WAS_PROBLEM : 1
PSU_BUEG : 1
AND_DIDNT : 1
SHIFT_WHY : 1
MONTHS_TILTS : 1
NOT_WORKING : 1
TAKE_ONE : 2
ANTIBI_NUMBER : 1
TEST_BLOOD : 2
DIED_AT : 1
OR_NOT : 1
OT_WITHOUT : 1
WE_ARE : 1
RETURNED_WORK : 1
CONSULT_HEART : 1
CALCIUM_SERUM : 1
SKIN_TEMPERATURE : 1
ABD_NO : 1
PH_WITH : 1
WILL_CONTACT : 1
CONSULT_HE : 1
LICENSE_WED : 1
OUTPATIENT_RXS : 1
MY_OCCUPATIONAL : 1
ALL_SPACES : 1
PHARMACY_ANTICOAGULATION : 1
LONGTERM_CARE : 1
WITH_PMRS : 1
THEY_ARE : 2
PSYCHIATRY_NAME : 1
HISTORY_FALLS : 1
AS_LDL : 1
ON_PODIATRY : 1
CLC_FOR : 1
SIDE_PROBLEMS : 1
WANTS_CONTINUE : 1
UP_MOVE : 1
EYES_INTERNAL : 1
REQUSET_MED : 1
SCREENING_TEST : 2
PER_FOR : 1
BAL_OS : 1
ESP_IN : 1
NOT_MG : 1
DIRECTED_TEST : 2
WAS_INVOLVED : 1
VETERAN_THE : 1
HISTORY_OF : 2
ACTIVE_ISSU : 2
OBTAIN_SAMPLE : 1
HAVE_QUESTIONS : 1
NAUSEA_NO : 1
DIARRHEA_CONSTIPATION : 1
BLOOD_FOUR : 2
APPLY_FILM : 1
TOENAILS_AND : 1
DOING_WELL : 2
ADMITTED_TO : 1
OF_SHE : 1
REMINDER_NOTIFIED : 1
COMPLAINT_THAT : 1
HOLD_SEC : 1
TENDONOPATHY_QUESTION : 1
PT_RN : 1
CAFFEINEFREE_PT : 1
MOOD_REMAINS : 1
OBTAIN_URINE : 1
ARE_AT : 1
EVENTS_OIF : 1
NO_PROVIDER : 1
PER_PATIENT : 1
SUPPLIES_SOME : 1
CONTACT_TELECARE : 1
REGULAR_RATE : 1
MUSCLE_ACHES : 1
HYPERLIPIDEMIA_NOS : 1
CALLER_WEST : 1
PROSTHESIS_ACTIVITY : 1
BAL_JULIAN : 1
REACTION_THE : 1
WORKING_SATUR : 1
MEDICATION_CHANGES : 1
EACH_CAREFULLY : 2
IDENTIFIED_WERE : 1
WITH_MY : 1
YOUR_MEDICATIONS : 1
VERIFICATION_IS : 1
MOIST_NONE : 1
DECREASED_IN : 1
MUCH_CONSENT : 1
NO_HISTORY : 1
SEC_REP : 1
ACTIVITY_FREQUENTLY : 1
PSYCH_WHO : 1
HARMFUL_SHEET : 1
YOUR_PRIMARY : 1
RESULTS_SISTER : 1
SUGAR_TIMES : 2
OTHER_NONVA : 1
THRESHOLDS_MINIMUM : 1
HESS_NP : 1
REPORTS_IS : 1
RX_PAIN : 1
PRINTED_ACTIVE : 1
MEDICAL_NONE : 1
REGARDING_CBC : 1
ANTIBIOTICS_THAT : 1
SPLIT_PHYSICIAN : 1
DOCUMENT_UARY : 1
AGE_SEX : 1
LIPID_TS : 1
THERAPY_VIRAL : 1
CONFIRMED_FAMILY : 1
AMBULATES_CLINIC : 1
SPOUSE_HAS : 1
PACEMAKER_JUDE : 1
IN_LONGTERM : 1
ADDENDUM_POSITIVE : 1
THE_CLC : 1
CHANGES_LB : 1
LEFT_AREA : 1
DROPS_ADMINISTERED : 1
PHYSICIAN_PMHX : 1
PAIN_NO : 1
EASILY_STARTLED : 1
BAYSIDE_VISIT : 1
TOENAILS_LEFT : 1
EXTREMITIES_PULSES : 1
PT_STATES : 2
HOW_LONG : 1
THE_RIGHT : 1
PHONE_NONE : 1
SPOUSE_WHO : 1
LAST_MONTH : 1
CONTACT_TO : 1
BLOOD_IF : 1
BASAL_CELL : 1
BP_NOSEB : 1
TRAIT_JOINT : 1
CONSENT_OTHER : 1
WAS_GIVEN : 1
NOS_TELEPHONE : 1
COUNSELING_INFORMATION : 1
IF_OF : 1
MOST_THE : 1
HT_CM : 1
PC_HESS : 1
WARM_MAKING : 1
PLEASE_CHECK : 1
SPENT_ACTIVE : 1
WITH_HE : 1
JUN_ST : 1
SPLITTING_TABLETS : 1
SIDERAILS_HAS : 1
OUT_CONTACT : 1
MEDS_FOR : 1
TRIGLYERIDE_DIET : 1
ROOM_FOR : 1
RECEIVE_MEDICATION : 1
ANSWERED_NKA : 1
LAST_MONTHS : 1
DOCUMENTED_FLORESOME : 1
WORKER_VETERAN : 1
IS_OFF : 1
SPOKE_VETS : 1
AMBULATORY_YES : 1
PROSTHETICS_RESPIRATORY : 1
THERAPY_PROGRESS : 2
AT_THAT : 1
APPOINTMENTS_PACEMAKER : 1
IS_ALLERGIES : 2
SAW_VARA : 1
PRESCRIPTION_TRIGLYCERIDE : 1
LEFT_HEMIBLOCK : 1
TO_CONTINUE : 1
ACCESSED_THROUGH : 1
AT_WILL : 1
SHE_RIB : 1
STATES_SHE : 2
HOUR_LEFT : 1
DO_APPLY : 1
ORAL_FOR : 1
OF_IN : 1
ISSU_SIG : 1
PELVIC_HOLD : 1
EVERY_FOR : 1
MG_APAP : 1
YELLOW_HESS : 1
PER_PATIENTS : 1
STAFF_RESPIRATION : 1
CLINIC_QT : 1
IN_BP : 1
GLAUCOMA_SURGERY : 1
CLINIC_ACTIVE : 1
INTERNAL_RADIAL : 1
GREAT_ADDENDUM : 1
LDL_GOAL : 1
COME_TO : 1
FEEL_GREAT : 1
IN_DEPRESSION : 1
AND_CAPACITY : 1
SHOULDER_DONE : 2
SHE_IS : 4
URINE_AT : 1
AT_CHIEF : 1
ADMINISTERED_MYDRIACYL : 1
CHECK_EACH : 1
IN_LOW : 1
TO_PRODUCTS : 1
ST_VERBALIZED : 1
CALL_SIDERAILS : 1
PHYSICIAN_TURGOR : 1
PER_VAN : 1
THE_MEDICAL : 2
URINATION_HISTORY : 1
TO_FOR : 1
ACCURACY_AND : 1
PULSES_OTHER : 1
DECISION_PER : 1
IF_RECEIVE : 1
AT_NO : 1
THANK_IF : 1
AND_IT : 1
TO_THE : 3
LANCET_DIRECTED : 1
SINCE_THERAPY : 1
BY_RAI : 1
ON_LIGHT : 1
HAD_NECK : 1
SCREEN_THAT : 1
TURP_CLOPIDOGREL : 1
AS_AUG : 1
TRY_AND : 1
ADAPTER_WHEN : 1
CPAP_FACE : 1
THE_BREATH : 1
TO_PREVENT : 1
THE_OF : 2
SAME_ABOVE : 1
NOSEB_MEDICATION : 1
PHARMACY_CLINIC : 1
FALL_SCREEN : 1
BY_MOUTH : 4
COMMINUTED_MRI : 1
CASE_REVIEWD : 1
ADDENDUM_ACTIVE : 1
OT_VOIDING : 1
DAILY_FOR : 2
RN_TO : 1
OF_OTHER : 1
PT_DRIVES : 1
SYSTEMS_THIS : 1
PAIN_WITH : 1
CONDITION_ACTIVITY : 1
UARY_NECK : 1
PRIMARY_APPOINTMENT : 1
WAS_REVIEWD : 1
AND_FEELS : 2
BX_ARM : 1
SINUS_NEG : 1
IS_ATTENDING : 1
NKA_RELEASED : 1
NOT_DLCO : 1
NODULES_ENT : 1
RESPIRATION_SERIAL : 1
PHACO_IOL : 1
IN_MOBILE : 1
EACH_PERSON : 1
HEALTH_OF : 1
PULMONARY_FUNCTIONS : 1
ADAPTER_CONTACTING : 1
CC_GIVEN : 1
CHIEF_COMPLAINT : 3
JUDE_UNDERSTANDING : 1
NOTE_PT : 1
ANTERIOR_AND : 1
NORMAL_PCN : 1
SELECT_CORRECT : 2
PLAN_DECISION : 1
MEDICATIONS_ACCUCHEK : 1
THAT_NO : 1
DIAGNOSIS_AS : 1
NOTE_COMMENTS : 1
DEFINED_AS : 1
DID_NOT : 1
APPOINTMENT_REMINDER : 1
FOLLOWING_LOW : 1
ICDCM_AND : 1
TLC_PHARM : 1
COUGH_PND : 1
RESIDENT_STAFF : 1
MONTHS_AS : 1
AND_INTERVIEW : 1
MALE_WEIGHT : 1
LAST_RELEASED : 1
NO_SKIN : 1
THAT_HE : 2
PT_STILL : 1
NOTE_PHARMACY : 1
DRINKING_COFFEE : 1
IS_FINE : 1
HIS_LEFT : 1
ANTERIOR_HEMIBLOCK : 1
EYE_AMOUNT : 1
NONPRODUCTIVE_NO : 1
FAMILY_MEMBER : 2
WITH_DR : 1
ALERT_CHIEF : 1
SODA_PT : 1
AT_PACK : 1
JOINT_RATIVE : 1
THE_COMPLICATIONS : 1
REASON_FOR : 1
TELECARE_MANAGER : 1
DISEASE_YES : 1
STARTING_AM : 2
HISTORY_THYROTOXICOSIS : 1
TAKE_TABLET : 2
THE_FOR : 1
GENERAL_WAS : 1
REVEALS_OBJECT : 1
INPATIENT_IDENTIFIED : 1
VA_PT : 1
UNDERSTANDING_AGREEAB : 1
FOR_ISSU : 2
THIS_THE : 1
ON_REGIMEN : 1
EXAM_DUE : 1
WITH_MEMBER : 2
OUTPUT_FEMORAL : 1
FRAZIER_ICE : 1
UNDERSURFACE_PARTIAL : 1
UNASSISTED_NONANTALGIC : 1
RETRIRED_LIVES : 1
SODA_THEN : 1
FOR_AND : 1
MCPHERSON_TRAVEL : 1
NOCTURIA_URINATION : 1
DISCUSS_AND : 1
YOU_IF : 1
ON_FOR : 2
RIB_OF : 1
NOTE_INTRAARTICULAR : 1
CLINIC_UNASSISTED : 1
FOOD_HE : 1
PARTNERS_SURVIVING : 1
AC_ANGIOCATH : 1
CAN_URINE : 1
PHONE_INTENSITY : 1
STEEL_NSC : 1
NORMAL_BRUITS : 1
DIFFICULTY_YES : 1
ACTIVE_IN : 1
PRN_BID : 1
DILTIAZAM_AMLODIPINE : 1
MYOCARDIAL_PERFUSION : 2
NOTE_SENSATION : 1
COLLECTED_SCORE : 1
STARTING_AT : 2
NURSING_NURSE : 1
VOIDING_DIFFICULTY : 1
ONE_BY : 2
THEN_ONE : 1
THE_THE : 1
ACTIVE_SIG : 1
EXECUTIVE_FUNCTION : 1
CONSENT_PULMONARY : 1
REACTION_FOLLOWING : 1
EVEN_WHICH : 1
NKA_LAST : 1
PHONE_PAIN : 1
CALLED_INFOMRED : 1
RETENTION_NOCTURIA : 1
NONE_SW : 1
CONSISTANTLY_GUARD : 1
DECEASED_SURVIVING : 1
DS_NOSEB : 1
EKG_LEFT : 1
NO_STARTING : 1
MAY_CONTACT : 1
FOR_DISEASE : 1
NEGATIVE_OT : 1
TAB_RX : 1
ON_MED : 1
ONE_OR : 1
AND_ADVERSE : 1
SISTER_AND : 1
OF_OUTPATIENT : 1
KNEE_DE : 1
DIARRHEA_NOCTURIA : 1
REACTION_REACTION : 1
DIRECTIONS_FILL : 1
SURVIVING_SPOUSE : 1
DL_REF : 1
SHEET_REGARDING : 1
LISTED_ASSESSMENT : 1
MONTHS_YEAR : 1
EVERY_HOURS : 1
NO_NAUSEA : 1
DOCTORS_PSYCHIATRY : 1
OBJECTIVE_PACK : 1
SAID_THAT : 2
BRUITS_MURMUR : 1
RXS_INPATIENT : 1
WITH_OF : 1
BLOCKER_FELODIPINE : 1
URINATION_NO : 1
ALLERGIC_TO : 1
AMBULATORY_DISEASE : 1
ALLERGIES_ADVERSE : 1
FOR_NOTE : 1
PATIENT_HAS : 2
MILK_SEX : 1
YESTER_CALLER : 1
FOR_HOURS : 1
INFORMATION_REGARDING : 1
FACILITY_HOME : 1
SESSION_IN : 1
AND_INFOMRED : 1
DAUGHTER_TO : 1
SERUM_MG : 1
PER_ORDERS : 1
TABLETS_CALLS : 1
FOR_HYPERLIPIDEMIA : 1
WITH_VISIT : 1
WITH_HIM : 1
UPS_REPS : 1
HEM_LYMPH : 1
OTHER_UNSPECIFIED : 1
RATIVE_DISEASE : 1
MONO_PATIENT : 1
VISIT_STATES : 1
WERE_CONSISTANTLY : 1
AMOUNT_TIME : 1
ENT_DECREASED : 1
OBJECTIVE_PT : 1
DIRECTED_DISPOSE : 1
HCL_MG : 1
FILL_IN : 1
WAS_YOUR : 1
TO_IDEA : 1
EACH_ITEM : 2
OUTPATIENT_NOTE : 2
EYEDROP_DID : 1
AREA_AMBULATORY : 1
TONIGHT_AND : 1
SCORE_IS : 1
MANAGEMENT_MIGHT : 1
CENTER_SHIFT : 1
LEARNING_PHYSICIAN : 1
OCCASION_IN : 1
OR_ABI : 1
DISEASE_REASON : 1
INTENSITY_OBJECTIVE : 1
BELOW_PLEASE : 1
EUTHYMIC_TO : 1
OF_LEFT : 4
HIPS_KNEES : 1
PAIN_THAN : 1
MD_DOCUMENTATION : 1
CASE_SERVICES : 1
ADDENDUM_STATES : 1
HAVE_TO : 1
TRANSFUSION_MEDICATIONS : 1
CASA_GRANDE : 1
INJURY_SAW : 1
PT_PER : 2
CARE_ACUTE : 1
FUNCTIONS_CONSULT : 1
SHEET_CBC : 1
IN_INFLUENZA : 1
WILL_REMOVE : 1
VARIOUS_MUSCLE : 1
CORRECT_LIVING : 1
WALKS_ADAPTER : 1
AND_SYSTEM : 1
FOUR_TIMES : 2
STATUS_PULSE : 1
MOTEL_PAID : 1
VETERAN_INDEPENDENT : 1
THE_IF : 2
NURSE_RECOMMENDATION : 1
ASSESSMENT_WHY : 1
ABOVE_ALPHABETIZED : 1
CHANGES_ALCOHOL : 1
INDEX_DISEASE : 1
MEDICATIONS_PTSD : 1
REACTION_MEDICATIONS : 1
DIFFERENTLY_WHAT : 1
HELP_HIM : 1
INPUT_LEFT : 1
HEART_MYOCARDIAL : 1
BATHING_LEVEL : 1
OF_ADMITS : 1
AS_NEED : 1
TRAMADOL_VISIT : 1
CONSTIPATION_OR : 1
PSYCHOSIS_INSIGHT : 1
CONSULT_SC : 1
SESSION_VET : 1
AFTER_WITH : 1
SLOW_NO : 1
HIS_MEMBERS : 1
MEDS_REGULAR : 1
HAS_TAKE : 1
IF_GLENOID : 1
THRESHOLDS_PACED : 1
RPT_MONTHS : 1
WHETHER_WAS : 1
DS_DS : 1
MEDICATIONS_LENGTH : 1
OF_RIGHT : 2
MONTHS_OR : 2
AS_BELOW : 1
YOU_CALL : 1
WITH_VETS : 1
AGE_MALE : 1
ALLERGIES_PER : 1
PROVIDER_IDENTIFIED : 2
CONTACT_SW : 1
SCREENING_AUDITC : 2
AT_IS : 1
IN_THREE : 1
PT_TO : 1
NOTE_DECREASED : 1
FOLLOWING_FOR : 1
SATUR_TO : 1
BMP_PSA : 1
LEAVE_SPACES : 1
TO_HOW : 1
TRAVEL_AND : 1
TO_SURE : 1
THIS_LIST : 1
AC_JOINT : 1
TECHLITE_LANCET : 1
THE_SURGEON : 1
AMBULATORY_AN : 1
ADDENDUM_REPORTS : 1
PATIENT_METOCLOPRAMIDE : 1
REP_PRONE : 1
ASSISTANCE_LEISURE : 1
WEST_PALM : 1
WILL_CASE : 1
MANDATORY_TEAM : 1
VETERAN_EXPERIENCED : 1
LEAST_PACK : 1
INCESSANT_JUNCTIONAL : 1
APPT_FASTING : 1
SEEN_AT : 1
HAD_FRACTURE : 1
CHEST_WAS : 1
PAIN_IS : 1
TELECARE_AT : 1
THIS_WITH : 1
APPOINTMENT_WITH : 1
MIGHT_LIKE : 1
RARELY_MOIST : 3
OTHER_EXCEED : 1
HCL_TAB : 1
OUTPUT_MOISTURE : 1
ASSOCIATED_FOR : 1
COMPLICATIONS_NONE : 1
MARILYN_MCPHERSON : 1
ACTIVE_FUTURE : 1
SHOULDER_OCCUPATIONAL : 1
IDEA_LIVING : 1
OD_CATARACT : 1
HOURS_GREAT : 1
IS_WHEEZING : 1
HOURS_RECOMMENDATION : 1
VETERAN_AND : 1
IS_DOING : 2
COUSIN_DISCUSS : 1
REACTIONS_VISTA : 1
ACUTE_PAIN : 1
PRIMARY_CARE : 2
TAKE_WITH : 2
CHECK_OF : 1
HAS_ON : 1
THEN_UP : 1
LABRUM_DE : 1
AND_DIAGNOSIS : 1
LEFT_UPPER : 1
HAS_FALL : 1
AC_INSERTED : 1
FEW_IS : 1
HYPERLIPIDEMIA_TELEPHONE : 1
PC_CASA : 1
TEST_WAS : 2
VISITS_TO : 1
COMPLAINT_NAME : 1
FOOD_MILK : 1
DS_MEDICATION : 1
AM_AND : 1
IN_PREALBUMIN : 1
NOTED_INFLUENZA : 1
THEN_SAID : 1
MOISTURE_TURGOR : 1
OR_AGE : 1
COMPLAINT_BX : 1
SISTER_SHE : 1
DOXAZOSIN_EXACT : 1
VOIDING_WITHOUT : 1
RETURNED_TO : 1
ALLERGIES_PATIENT : 2
MEDS_THE : 1
HE_SHE : 2
LEFT_FINGER : 1
SIG_ONE : 1
VITAL_QUALIFIERS : 3
CHANGES_WT : 1
UNEMPLOYMENT_AND : 1
OUTPATIENT_CARE : 1
TRIGLYERIDE_BLOOD : 1
CONTACT_THE : 1
PATIENT_HE : 1
HYPOKALEMIA_ICDCM : 1
BY_PHYSICIAN : 1
EL_FELODIPINE : 1
TO_STATES : 1
ACTIVE_MEDICATIONS : 4
AREA_AN : 1
PT_OF : 1
WEIGHT_LB : 1
VITAMIN_SUPPLEMENT : 1
PROGRAM_THIS : 1
OF_VET : 1
FEVER_COUGH : 1
DOING_ON : 1
MOBILIZATION_OBJECTIVE : 1
IS_BETTER : 1
NO_MASSES : 1
EXAM_SENSATION : 1
NEOPLASM_RPT : 1
ACTIVE_HOME : 1
AM_STARTING : 1
SUBSCAPULARIS_TENDONOPATHY : 1
UP_HE : 1
POSITIVE_OCCULT : 1
OR_AS : 1
COPY_YOUR : 1
HEART_BURN : 1
CONTACT_THIS : 1
BIFOCALS_STATES : 1
ADMITS_HE : 1
PT_THE : 1
WORKED_UP : 1
REFERRED_FOR : 1
SW_CONSULT : 1
HOW_OFTEN : 1
WITHOUT_LABS : 1
SPOKE_MARILYN : 1
DISCUSS_WARFARIN : 1
STARTLED_STARTING : 1
HYDROCODONE_MG : 1
WITH_RESIDENT : 1
TELECARE_NURSES : 1
RIB_OUT : 1
FOLD_TOE : 1
CONSENT_TO : 1
EVENTS_TRANSFUSION : 1
LOBE_THEY : 1
AND_HIS : 1
DATE_DATE : 1
THIS_SW : 3
BELOW_CHECK : 1
OF_RXS : 1
PT_IS : 2
RECOMMENDATION_HOURS : 2
TAKING_WARFARIN : 1
HOLD_REP : 1
PARK_APPOINTMENTS : 1
LB_KG : 2
BLOOD_CLOTS : 1
FUTURE_EXCISION : 1
JUNCTIONAL_TACHYCARDIA : 1
TINY_UNDERSURFACE : 1
INTAKE_ML : 1
VACCINE_CENTERS : 1
ALSO_THAT : 1
ANGIOCATH_BY : 1
WARFARIN_REENROLLING : 1
ACTIVE_PRIMARY : 1
ORDERS_REMOTE : 1
TO_HE : 1
BE_TAUGHT : 1
ON_GUARD : 1
INTERVIEW_HCL : 1
WORKING_MEMORY : 1
AT_STARTING : 1
NODULES_IN : 1
INFUSION_ML : 1
METHADONE_MG : 1
REFILLS_LEFT : 1
HEARING_DECREASED : 1
MEDICATIONS_ALLERGIES : 1
VERY_SATISFIED : 1
DISEASE_TEMP : 1
RIGHT_RECENT : 1
PC_ANNUAL : 1
ASSISTANCE_IN : 1
LISINOPRIL_TAB : 1
UNDER_SINGLE : 1
VIRAL_LOAD : 1
SURE_THEY : 1
AND_IN : 1
PCN_AND : 1
PENDING_WITH : 1
TUB_SHOWER : 1
IF_PIP : 1
FELODIPINE_VERAPAMIL : 1
WHERE_ARE : 1
LONGTERM_FACILITY : 1
QUALIFIERS_WIFE : 1
REVIEW_NON : 1
THE_LAST : 1
HEART_PERFUSION : 1
NONANTALGIC_WEARING : 1
ITEM_AND : 2
BROUGHT_BY : 1
IN_PODIATRY : 1
SCOPE_COLORECTAL : 1
OBJECTIVE_AMBULATES : 1
THE_IDEA : 1
GH_MOBILIZATION : 1
THE_INDEX : 1
THE_LOBE : 1
GLENOID_LABRUM : 1
WATCHFUL_EASILY : 1
WOUND_CHIEF : 1
CIGARETTES_ADDENDUM : 1
DAUGHTER_SHIRLEY : 1
MG_RX : 1
COMFORT_CV : 1
PATIENTS_WARFARIN : 1
ANTERIOR_GLENOID : 1
LEVEL_JT : 1
NON_VA : 1
NEED_FOR : 1
COLLECTED_YES : 1
THAT_APPLY : 1
MEDICAL_COMPLICATIONS : 1
HAVE_HIS : 1
NEGATIVE_MURMUR : 1
ANTERIOR_LABRUM : 1
DIRECTED_TO : 2
OF_SPENT : 1
HYDROCODONE_TAB : 1
REQUSET_ON : 1
CARE_PHARMACY : 1
FILM_ACTIVE : 1
YRS_MOISTURE : 1
QUALIFIERS_NOT : 1
DAILY_DEPRESSION : 2
AND_SODA : 1
PER_WARFARIN : 1
DECISION_MAKING : 1
TO_TWICE : 1
BLOOD_ACTIVE : 1
INFOMRED_MD : 1
THE_THEN : 1
MEASUREMENT_TEMP : 1
NONE_SPI : 1
NO_DISTRESS : 1
HE_RERPORT : 1
MINIMUM_AS : 1
ME_MANAGEMENT : 1
YOU_HAVE : 2
URINE_SAMPLE : 1
HE_OFF : 1
RADIOTHERAPY_ENDING : 1
BE_SEEN : 2
PALPABLE_HOUR : 1
FROM_YESTER : 1
MEMORY_EXECUTIVE : 1
ACTIVITY_WALKS : 1
TIME_SPENT : 1
VISIT_AND : 1
NONE_NO : 1
LAST_SUPPLY : 1
UNABLE_CONTACT : 1
HAS_NECK : 1
EXAMINATION_THE : 1
REVIEWD_WITH : 1
INFLAMMATION_TAKE : 1
BEDTIME_FOR : 1
COMPLAINT_LUNG : 1
LEAST_WEEK : 1
CALCIUM_CH : 1
ASSOCIATE_PROVIDER : 1
RATIVE_WT : 1
SAID_SHE : 1
DELTOID_TEMPERATURE : 1
NOTE_ANTICOAGULATION : 1
SCRATCHY_TYPES : 1
ON_UNEMPLOYMENT : 1
ACTIVITIES_DAILY : 1
TELEPHONE_CONTACT : 1
FILM_TO : 1
WITHIN_FEW : 1
IN_LEFT : 4
NEOPLASM_CT : 1
SCREENING_PAIN : 1
FOR_BILATERAL : 1
HP_EXAM : 1
CATARACTS_SURGERY : 1
HOME_REMAINS : 1
WHICH_IS : 1
SERVICES_CIGARETTES : 1
LEFT_EYE : 2
ABOVE_NO : 1
RTC_MONTHS : 1
OIF_OEF : 1
MONTH_NOTE : 1
SURGERY_CONSULT : 1
PULSE_FUTURE : 1
ALEXANDER_PHONE : 1
INJURIES_ILLNESSES : 1
CARDIO_RIGHT : 1
ACTIVE_PULMONARY : 1
COPY_FOR : 1
SECTION_THE : 1
IDENTIFY_AND : 1
PALPABLE_DATE : 1
NURSES_AT : 1
MEDICAL_SURGERIES : 1
THEN_PLACED : 1
QT_ACTIVE : 1
CAN_BE : 1
MY_PMRS : 1
TO_UNASSISTED : 1
APPT_MEDS : 1
GET_THE : 1
CHANGES_PHYSICIAN : 1
BE_ON : 1
PATIENT_PHONE : 2
HIS_MOTEL : 1
THAT_MONTHS : 1
DAUGHTER_COMPLETE : 1
CH_EL : 1
ST_JUDE : 1
ICE_POSITIVE : 1
DELTOID_LENGTH : 1
EXPERIENCED_THE : 1
PHONE_NURSING : 1
MAKING_PATIENTS : 1
KEEP_PROPERTY : 1
PATIENT_MENTAL : 1
WEIGHT_KG : 1
TEMP_NOT : 1
HISTORY_CATARACTS : 1
COUSIN_TO : 1
ETC_INPATIENT : 1
VETERAN_NAME : 1
ILLNESSES_RECENT : 1
PROCESSES_PERFORMANCE : 1
SKIN_EXAMINATION : 1
LEFT_FAMILY : 1
FEW_PT : 1
NEV_BID : 1
AT_BUDGETING : 1
FURTHER_LEISURE : 1
PREALBUMIN_JOINT : 1
NEGATIVE_UROLOGY : 1
TO_THEN : 1
MED_SUSP : 1
HARMFUL_INFORMATION : 1
FOR_SUPPLEMENT : 1
PAIN_LESS : 1
PODIATRY_IN : 1
EVERY_PREVENT : 1
PENDING_APPOINTMENT : 1
IS_FOR : 1
OTHER_TURP : 1
EYES_DEFIBRILLATOR : 1
AUGUST_CHEST : 1
FRACTURE_THE : 1
THE_ANSWER : 2
ITEM_CAREFULLY : 2
WHEN_CONTACTING : 1
USUAL_TRANSFUSION : 1
LDL_ABOVE : 1
MEMORY_AND : 1
PATIENT_MEDICATED : 1
WE_OBTAIN : 1
PHYSICIAN_EXTREMITY : 1
ALCOHOL_MG : 1
METHADONE_AND : 1
IER_YEAR : 1
SHORT_OF : 1
NONVA_MEDS : 1
ARE_CORRECT : 1
OCCUPATION_STEEL : 1
MEDICATIONS_SUPPLIES : 2
INFLUENZA_IM : 1
CBC_LFT : 1
NOTE_LEFT : 1
UROLOGY_SURGERY : 1
ADDENDUM_OVERALL : 1
EVENTS_REACTION : 1
MOISTURE_RARELY : 3
TO_KEEP : 1
HOME_NO : 1
WITHIN_THE : 1
SHOWER_OF : 1
THIS_SHE : 1
IS_LOOKING : 1
COLORECTAL_SCREEN : 1
CURRENT_NON : 1
DISCUSS_WE : 1
THE_CONSENT : 1
OF_BREATH : 1
EASILY_NO : 1
WHEN_THE : 1
AND_HOW : 1
HT_IN : 1
BY_EKC : 1
PAIN_NEVER : 1
CELLS_IS : 1
NSC_VETERAN : 1
THIS_YEAR : 1
ONE_OCCASION : 1
HIS_SON : 1
THAT_YOU : 1
FECAL_OCCULT : 1
ON_PATIENT : 2
FOR_BAYSIDE : 1
OF_EXAM : 1
IMAGING_ANTIBI : 1
BASAL_BX : 1
IOL_OD : 1
DRINKS_LEAST : 1
IN_RECORD : 1
CARE_TO : 1
DEPRESSION_MOUTH : 1
PREFERENCES_CLOPIDOGREL : 1
GOAL_ABD : 1
PHARMACY_HAS : 1
TILTS_SEC : 1
INDEPENDENT_LEISURE : 1
ENDING_AT : 2
TEST_SUGAR : 2
COME_VA : 1
WORKED_FOR : 1
COMMINUTED_OBJECT : 1
FOR_MOBILE : 1
KG_AT : 1
DOING_RETRIRED : 1
FOR_APPOINTMENT : 1
HAVE_VERY : 1
RAI_OS : 1
ANTICOAGULATION_QT : 1
INVOLVED_IN : 1
BX_BASAL : 1
INFORMATION_SHEET : 1
COPD_HCTZ : 1
DIFFERENTLY_THAN : 1
AS_OF : 2
PRAVACHOL_AS : 1
YEAR_WITH : 1
SHOWED_ANTERIOR : 1
ISSUES_BEEN : 1
IN_PROCESSS : 1
DISEASE_FOR : 1
TS_UA : 1
NO_CONSTIPATION : 2
EACH_OF : 1
AS_STATES : 1
OF_OBESITY : 1
ACTIVE_HYPERCHOLESYTEROLEMIA : 1
TIMES_SOURCE : 1
GENERAL_NOTE : 1
MEDICATED_AS : 1
NO_BURN : 1
PROBLEMS_PRIMARY : 1
THE_SICKLE : 1
FLORESOME_DUPLICATE : 1
IS_MEDS : 1
EYE_EYE : 1
IS_WITHOUT : 1
NURSES_CHIEF : 1
IN_DELTOID : 2
NORMAL_ALLERGIES : 1
HEART_DISEASE : 1
TEAM_CASA : 1
MEDICATIONS_AS : 1
OF_SYSTEMS : 1
PULMONARY_NOT : 1
SUGAR_FOUR : 2
CONTACT_VETERAN : 1
AFTER_THE : 1
TARGET_MOUTH : 1
THAT_TIME : 1
FOLLOW_PATIENT : 1
NONE_THIS : 1
SATUR_WORKED : 1
ADDENDUM_BIFOCALS : 2
HAD_PROBLEMS : 1
FOR_UP : 1
IM_LEFT : 1
OF_OCCUPATION : 1
REFUSED_ADLS : 1
IN_SPACES : 1
CLOTRIMAZOLE_TOP : 1
REPORTS_SHE : 1
COMPLAINT_REPORTS : 1
UNKNOWN_MALE : 1
CONSULT_ED : 1
IS_OF : 1
GET_HOW : 1
LIGHT_SIDERAILS : 1
WITH_RADIOTHERAPY : 1
VETERAN_LISTED : 1
BETTER_BUDGETING : 1
MYOCARDIAL_IMAGING : 1
TO_DISCUSS : 2
NOCTURIA_SLOW : 1
PATIENT_SHOULD : 1
KNOW_AT : 1
REPS_PAST : 1
REFILLS_LAST : 1
DURATION_OF : 1
HAVE_MOTEL : 1
HIV_ON : 1
PATIENTS_QUESTIONNAIRE : 1
MEDICATION_WAS : 1
MOIST_URINE : 1
RARELY_URINE : 1
MEDICATION_LIST : 1
ROM_OF : 2
LAST_LEFT : 1
PROBLEM_THE : 1
ANSWERED_LAST : 1
APAP_PER : 1
WAS_ANTIBIOTICS : 1
ALLERGIC_AND : 1
HEALTH_MAINTENANCE : 1
IS_MANDATORY : 1
MOVE_AROUND : 1
ASSOCIATED_WITH : 1
SHOULDER_PMRS : 1
CT_RPT : 1
GFIRM_WAS : 1
SHOULDER_ON : 2
CALLS_WAL : 1
WITH_YO : 1
ADDENDUM_ADDENDUM : 1
ACCUCHEK_COMFORT : 1
PULSE_OXIMETRY : 1
PLAN_AND : 1
OF_ISSUES : 1
TOENAIL_TAKE : 1
ARE_NORMAL : 1
STATE_DUPLICATE : 1
SAME_AS : 1
ATTENDING_PSU : 1
TO_COMPLETE : 1
WORK_FEELS : 1
ABOVE_LIST : 1
SUICIDALITY_LETHALITY : 1
APPOINTMENTS_OF : 1
DURING_OEF : 1
ANNUAL_EXAM : 1
LYMPH_DENIES : 1
AND_HAVE : 1
FREQUENTLY_ADAPTER : 1
RXS_ORDERS : 1
GLUCOSE_STRIP : 1
SC_DOCUMENT : 1
PREVENTATIVE_MAINTENANCE : 1
LONG_TOENAILS : 1
YES_INTERVENTIONS : 1
THERAPY_CONSULT : 1
ROM_THE : 2
AGE_HAS : 1
ALCAINE_MYDRIACYL : 1
TO_PROSTATE : 1
AGE_SEP : 1
CONSENT_BLOOD : 1
RIGHT_STRONG : 1
AN_ALCOHOL : 2
CATARACT_FULL : 1
CBOC_MG : 1
VET_IN : 1
PREANESTHESIA_LEVEL : 1
BILATERAL_DE : 1
IN_THANK : 1
PAIN_SCREENING : 1
CLOTS_PHONE : 1
! Stats words=1051  pairs=3900
