# Supplementary material for: Predicting the Risk of Suicide by Analyzing the Text of Clinical Notes
Source: PLoS One. 2014 Jan 28;9(1):e85733. doi: 10.1371/journal.pone.0085733 (PMC3904866; doi:10.1371/journal.pone.0085733)
Supplement: Appendix S3 — Machine Learning Libraries and Methods: This section is provided to enclose the open source (Apache License) classifier used for the building of the statistical models, specifically for the purposes of study reproducibility. A detailed account of these tools is intended for another publication. (ZIP) [file pone.0085733.s003.zip › Appendix3/ML_libs/Regression_testing/group1/processed/grp1-pt-1047.dat]

!  Done reading
! Total word count = 2242
! Total unique words = 1018
! Total pair count = 4480
! Total unique pairs = 4057
CONTACT : 6
OCULAR : 1
SORE : 1
SCHEDULE : 1
AT : 11
HER : 2
ORDERED : 1
TOPIC : 1
WM : 1
POPPED : 1
ONLY : 1
CERUMEN : 1
ANSWERING : 1
QUESTIONS : 2
PALLIATIVE : 1
WORK : 4
FINGER : 2
PROBLEMS : 3
LOWER : 1
URINE : 2
REMOVAL : 3
MONTH : 1
ULCER : 3
RTC : 4
WEIGHT : 5
CARPAL : 1
BEEN : 1
READINESS : 1
CAN : 1
KNEES : 1
THERAPY : 1
WITHIN : 4
LIVING : 2
PLACE : 2
REFILL : 2
SEND : 1
NONVA : 2
AVA : 1
WHICH : 2
MINUTE : 2
IER : 1
SYMPTOMS : 1
OUTPATIENT : 7
INTAKE : 2
INSTRUCTED : 2
RANGE : 1
NOTES : 1
TURGOR : 2
INPATIENT : 2
SPEECH : 1
OVER : 2
CATARACT : 1
GABAPENTIN : 2
COUNSELING : 4
MAS : 1
MG : 12
ON : 27
TRANSFERRING : 1
QUIT : 1
ADMINISTRATION : 1
DYING : 1
PURIFIED : 1
USE : 6
PRESSURE : 7
TEL : 1
CC : 2
RUMINATE : 1
VIA : 2
SPINAL : 1
SUPPLIES : 2
TWICE : 1
VETERANS : 1
GOOD : 2
DEAD : 1
LEVEL : 1
TRUNK : 1
ACCOMPLISHMENT : 1
ALCOHOL : 2
CHANGES : 1
EZETIMIBE : 1
SOCKS : 1
PERSONAL : 1
DRUGS : 1
UPDATE : 1
MILK : 1
PRESERVE : 1
FEMORAL : 1
APPEAL : 1
DUSED : 1
STRICT : 1
INTO : 1
SHOULDER : 1
MACHINE : 2
HIS : 13
COORDINATOR : 1
COPD : 1
TUBERCULIN : 1
ID : 1
WORSE : 1
APPROXIMATELY : 1
SAO : 1
PINHOLE : 1
PROVIDER : 1
REMOVED : 1
VOIDING : 2
PO : 1
INSURANCE : 1
SHE : 3
EXTREMETIES : 1
APPROPRIATE : 1
NEURO : 2
UP : 11
ENDERLIN : 1
MULTIPLE : 2
FEW : 1
LOCATION : 2
APPOINTED : 1
WORSENING : 1
DETERMINE : 1
WELL : 6
SHOWED : 1
SHARED : 1
MEDICINE : 1
TEST : 6
NOTE : 10
SPOKANE : 1
IRONS : 3
FEVER : 2
FASTING : 1
AWAY : 1
UNDER : 3
DOES : 2
TESTS : 1
TALKED : 1
CONFUSED : 1
IMED : 1
DATE : 4
TREATMENT : 1
FRONT : 1
COMMENT : 1
HTN : 1
GIRTH : 1
DAILY : 5
BLOOD : 8
XRT : 1
UROLOGIST : 1
THREE : 1
CV : 1
ASSIST : 4
HAVE : 13
MALLOY : 1
COLLECTION : 1
PROGRAM : 1
APPOINTMENT : 5
EX : 1
EXTRACTIONS : 1
WHEELCHAIR : 1
FOLLOW : 7
ASK : 1
DRUG : 1
OF : 37
FROM : 5
LEFT : 8
TAB : 6
NOTETL : 1
METHOD : 1
PSYCHIATRY : 1
STABLE : 2
REQUIRED : 1
ASSISTED : 1
HAS : 11
WHEEZING : 1
IMPLANTS : 1
TUNNEL : 1
FOR : 37
MEDICAL : 5
IR : 1
NUTRITION : 2
ENCLOSED : 1
ALSO : 2
ACTIVITIES : 1
NUMBER : 3
LIPID : 1
CLC : 1
SECTOR : 1
STRIP : 4
SURGEON : 1
ACCUCHEK : 2
WORKING : 1
EXCELLENT : 1
INR : 2
AN : 6
OBTAINING : 1
ADENOCARCINOMA : 1
KNEE : 1
HEART : 2
COMPLAINT : 3
SIGNATURE : 2
ORDER : 3
MELANOMA : 1
PREREGISTER : 1
MS : 1
SEEK : 1
DIE : 1
MUST : 1
DPCLAB : 1
HAND : 2
INFLUENZA : 1
MESSAGE : 3
AMENDS : 1
APPARENT : 1
OUTSIDE : 2
DENIED : 1
THEM : 5
GOALS : 2
ASSESSMENT : 3
PACKED : 1
ALS : 1
ROM : 1
SERUM : 1
ESTIMATED : 1
CONTAINING : 1
QUITTING : 1
DISCUSSION : 1
WHEEL : 1
ACTIVITY : 2
NEW : 4
MOUTH : 6
PROVIDERS : 1
HURSTS : 1
CHEST : 2
ND : 1
PRESENT : 1
HAVING : 2
CRAMPS : 1
SOME : 3
LITER : 1
LIFTING : 2
MONITORS : 1
INFORMATION : 6
OA : 1
ANESTHESIA : 1
MUSCLE : 1
LATER : 1
FROZEN : 1
ARE : 2
NUMBERS : 1
ANSWERED : 4
DEBRIDEMENT : 1
NEED : 5
CENTER : 3
CORRECT : 1
FILE : 1
EXAM : 2
PERSON : 2
RECENTLY : 1
BLAKE : 1
CYST : 1
RECEIVED : 3
HYDROCHLOROTHIAZIDE : 1
SURGERY : 4
SUICIDE : 2
SWEATS : 2
THE : 44
VC : 1
INCREASED : 1
GROUP : 1
PRESENTS : 1
DURATION : 3
OCT : 3
BRONCHODILATOR : 2
CIRCUMFERENCE : 1
SIGNIFICANT : 1
MOVING : 1
MAINTENANCE : 1
PREVENTIVE : 1
INTERDISCIPLINARY : 1
GENERAL : 2
UNRE : 1
REPRODUCIBLE : 1
YEARS : 1
BP : 2
COLON : 1
BE : 6
LIMITATION : 1
BELONGINGS : 2
RESOLVED : 1
OX : 1
CANCER : 1
PREVENTION : 2
POST : 1
DEPRESSION : 1
DUE : 1
MATCH : 1
ADV : 1
CLASS : 2
CM : 1
PSYCHOLOGY : 1
LBP : 1
IMAGE : 1
HERNIATED : 1
AGAIN : 1
LESION : 1
CAP : 2
DIET : 1
EVER : 1
ENROLLED : 1
HEARING : 1
LATE : 1
SOUNDS : 1
REVIEWED : 1
NE : 1
DM : 2
GET : 2
WHAT : 2
WT : 2
RESTRICTIONS : 1
OTHER : 10
DRESSING : 1
DIETARY : 2
THYROTOXIC : 1
ALL : 4
AUTHOR : 1
ALBUTEROL : 1
BENEFITS : 1
QHS : 1
ASSISTANCE : 1
BED : 3
TECH : 3
NURSING : 7
CARDIOVASCULAR : 1
DYSPNEA : 1
FOLLOWING : 1
OR : 18
IDENTIFIED : 6
SHIFT : 1
RELAYED : 1
BOTH : 1
PRESCRIPTION : 1
YEAR : 3
PATIENT : 31
ALLERGIES : 3
REFER : 1
DIAGNOSIS : 1
WITHOUT : 3
CONCERNS : 1
PULMONARY : 1
DING : 1
SENT : 1
LB : 6
TRANSPORT : 1
DE : 2
LIKE : 1
EXPERIENCES : 1
PUT : 1
STAYS : 1
SEEN : 1
PRE : 1
DEXAMETHASONE : 1
NOS : 1
PODIATRY : 1
VOICE : 1
ACUTE : 1
UARY : 2
NURSE : 1
SB : 1
ARTHRITIS : 1
SENSATION : 1
OPERATIONS : 1
CORD : 1
SYMPTOM : 1
WE : 5
PROTOCOL : 2
SUSPECT : 1
CLINICS : 1
COME : 2
SYND : 1
INTERVIEW : 1
TAKE : 6
CBI : 3
LINES : 1
INDEPENDENLTY : 1
INCREASE : 1
FOUND : 1
AGREEAB : 1
TRY : 1
IMPROVED : 2
ANY : 5
DISCHARGE : 3
CAME : 2
THAT : 7
VISIT : 3
PGY : 1
CHART : 1
NORMAL : 2
FUROSEMIDE : 1
MOISTURE : 1
STAFF : 1
SIDERAILS : 1
SERVICE : 2
RIGHT : 2
LIP : 1
PC : 1
VITALS : 1
TOLERATED : 1
DEMANIAN : 1
WA : 1
ABOUT : 2
LATERAL : 1
CONFIDENTIALITY : 1
ONE : 4
ISSU : 1
REQUESTS : 1
FACILITY : 2
NITROGEN : 1
MD : 1
IBUPROFEN : 1
NKA : 3
NAME : 3
TUBES : 1
HYPERLIPIDEMIA : 2
CARE : 6
TABLET : 5
SURROGATE : 1
LENS : 1
DEXA : 1
SUPRASPINATUS : 1
AGE : 1
EVERY : 4
YOU : 16
INVOLVED : 1
SEVERAL : 1
LISTED : 1
SCREENING : 2
SKIN : 5
CARDIOLOGY : 1
TIMES : 1
IS : 17
DIAPHORESIS : 1
INFORMED : 2
NOT : 16
REACH : 3
TELENURSE : 1
JODY : 1
PAST : 1
USUALLY : 1
DTN : 1
FRACTURE : 1
GUARD : 1
DOCUMENT : 1
IF : 6
CHAIR : 2
EXIT : 1
REASON : 3
PLANTAR : 1
THERE : 1
PENDING : 1
EXPECTED : 1
SCORE : 2
BAND : 1
TOBACCO : 4
ESP : 1
INVOLVES : 1
DISKS : 1
EXERCISES : 1
OPTOMETRY : 2
AFFECTING : 1
LIMITED : 1
BELL : 1
HERE : 2
HOME : 7
CBT : 1
SIX : 1
LUMABR : 1
PENICILLIN : 1
NOTED : 1
WEAKNESS : 1
DR : 1
RATING : 1
SOCIAL : 2
UNITS : 2
RECOMMENDATION : 1
CAREFULLY : 1
OXIMETRY : 1
RETURN : 1
ONEHALF : 2
CARDS : 2
GROSSLY : 1
DECEMBE : 1
EVALUATION : 3
CAUTIONTABLET : 1
SAMPLES : 1
RHYTHM : 1
DEPT : 1
VITAL : 2
LICE : 1
SO : 1
ARTERY : 1
BRONCHITIS : 1
THESE : 1
ASSESS : 1
NER : 1
VISION : 1
REGULAR : 2
VET : 7
STOOL : 1
RECONCILIATION : 3
UPCOMING : 2
NEC : 1
MINUTES : 1
VIRAL : 1
DROP : 1
PREGNANT : 1
SPECIFY : 2
FOLLOWUP : 1
HKT : 1
MONCELLO : 1
JR : 1
BACK : 2
DELTOID : 1
MAKE : 1
CURVE : 1
REGARDS : 1
FX : 1
WEEK : 1
RISKS : 1
MALE : 5
WARNING : 1
HOLMAN : 1
PREVENTATIVE : 1
CHECK : 1
ADDENDUM : 6
PSYCHOTIC : 1
FALL : 3
DEFINITION : 1
EXAMINER : 1
BY : 10
NO : 27
REASSESSMENT : 1
AM : 4
DOE : 1
CHIEF : 1
AUTOPRINT : 1
UBE : 1
PRACTITIONER : 1
ADVISE : 1
PUSHING : 1
UPPER : 1
REGIONAL : 3
REPORT : 2
EA : 1
MEET : 1
CONVERSATION : 1
CAPSULES : 1
RISK : 3
CLINIC : 4
HEMOCCULT : 1
FOUIR : 1
PERFORMED : 2
HOW : 4
PRODUCTS : 1
CALLED : 4
PHQ : 1
PIOGLITAZONE : 1
TCU : 1
SINCE : 1
MANY : 1
MEDI : 1
FLU : 2
COUGH : 1
CHANGE : 1
TO : 58
DISCUSS : 1
BMI : 1
HEARTBURN : 1
FEEL : 1
LEARN : 1
MESSAGES : 1
OFFICE : 1
TEACHING : 2
CARDIAC : 1
COUNSELED : 1
YRS : 1
ADVISED : 2
ADMINISTRATIVE : 1
VERBALIZED : 1
LABEL : 1
MONTHS : 3
OBJECTIVE : 1
DX : 1
TOOLS : 1
BONE : 1
PROCEDURE : 2
BULBAR : 1
FOLLOWS : 1
WILL : 14
STEELE : 2
OFTEN : 2
UNLISTED : 1
BUT : 1
MEASUREMENT : 1
MEMORIAL : 2
SSN : 1
COORDINATION : 1
TYPE : 2
CAREGIVER : 1
LIQUID : 1
CELE : 1
FRESH : 1
SEE : 3
PLASMA : 1
EAT : 1
PLEASE : 6
CBC : 2
ASSISTANT : 2
STATUS : 4
RING : 1
MEDICATION : 7
ISOTOPE : 1
BRUISING : 1
DRINKS : 1
SURVEILLANCE : 1
PACK : 1
NAD : 1
PAPULE : 1
VISUAL : 1
EFFECTIVE : 1
MO : 1
WANT : 2
CONSULT : 1
TRANSMISSION : 1
MALIGNANT : 1
SINGLE : 1
HR : 1
COMFORT : 2
FRICTION : 1
ITEMS : 1
CONTINUE : 2
TOTAL : 3
LIGHT : 1
SWELLING : 2
MVA : 2
READ : 1
RECIEVED : 1
LBS : 1
GOAL : 1
GASTROINTESTINAL : 1
EXAMINATION : 1
ST : 1
SHIELD : 1
HISTORY : 3
PROVIDE : 1
IMPROVE : 1
RESPIRATION : 1
TEXT : 1
SCREEN : 6
ANTICIPATED : 1
HOURS : 3
MAIL : 2
BARRIERS : 1
REACTION : 1
PAGES : 1
LEGS : 1
NEEDED : 3
HEALTH : 2
GOUT : 1
AMIODARONE : 1
EXT : 1
REEVALUATION : 1
RATIVE : 2
WERE : 1
EFAVIRENZ : 1
PURPOSES : 1
MAN : 1
RESPONSIBILITIES : 1
RAZOR : 1
FILL : 2
NOV : 3
RADIOACTIVE : 1
RESIDENT : 1
BILAT : 1
INSTRUCTIONS : 2
INCOMPLETE : 1
INDICATED : 1
LABS : 2
INCIDENT : 1
EXCESS : 1
VA : 2
TAKEN : 1
PROSTATE : 1
HIP : 3
NEPHEW : 1
REASSESS : 1
PREVIOUS : 1
SITE : 2
HOOD : 1
LAMENT : 1
PICKED : 1
PRESUMED : 1
AGREED : 1
INSTUCTIONS : 1
HOT : 1
MAR : 1
COMMIT : 1
TRIAGE : 3
NATURE : 1
IRRIGANT : 1
KG : 6
MORE : 1
VS : 1
STANDARD : 1
PE : 2
NEOPLASMS : 1
PART : 1
OWING : 1
FAMILY : 1
WENT : 1
EYES : 1
PROBLEM : 5
ACTIVELY : 1
PAIN : 12
DISEASE : 1
ORIENTATION : 1
PACHYMETRY : 1
ADDRESSED : 1
WHEN : 1
MMI : 1
ER : 2
RECORD : 1
AS : 8
CABG : 1
VISTA : 1
REQUEST : 2
SUICIDALITY : 1
RN : 1
UNABLE : 3
XYZZY : 2
CARDIOLOGIST : 1
OBSTRUCTION : 1
THROUGH : 1
WARFARIN : 1
OUTPUT : 4
WAS : 15
METAB : 1
GLEASON : 1
PM : 4
HEENT : 1
ANTICOAGULATION : 1
WITH : 20
AFTER : 4
ADMISSION : 1
CATH : 1
THEREFORE : 1
STILL : 1
RESCHEDULED : 1
AC : 1
TEMPERATURE : 2
PUTTING : 1
REDNESS : 1
SIG : 3
ACTUAL : 1
PARESTHESIAS : 1
HEALING : 1
OBESE : 1
ABD : 1
ATHENS : 2
NOW : 2
PRIVATELY : 1
INCLUDING : 1
PCP : 3
ICE : 3
NONV : 2
INTACT : 1
CULTURE : 1
FUTURE : 2
CONFIRMED : 1
TELEHEALTH : 1
APPOINTMENTS : 3
ONSET : 1
TENDONOPATHY : 1
USED : 1
EACH : 2
OBSERVATIONS : 1
IT : 2
SHOT : 1
TITLE : 1
ELDERLY : 1
CLIENT : 4
ASSOCIATE : 4
BELOW : 1
BEDTIME : 1
IMEDCONSENT : 1
LIST : 3
PHARMACY : 2
MRP : 2
OLD : 2
TONIGHT : 1
REQUESTED : 2
CLINICALLY : 1
MODIFIED : 1
DETACHMENT : 1
FOOT : 1
RADIATES : 1
IMMUNIZATION : 1
DISPLAY : 1
NURSEINFLUENZA : 1
VETERAN : 5
QTY : 1
CAPSULE : 1
WEDNES : 1
GLUCOSE : 1
DISCUSSED : 3
PT : 9
INJURY : 1
CA : 1
FEVERS : 1
MOVE : 1
NUMEROUS : 1
TIME : 5
CODE : 1
NMSC : 1
AREA : 1
ORIENTED : 1
HYGIENE : 2
SOON : 1
AFLLAAA : 1
CURRENTLY : 3
ATTEMPT : 2
NECK : 4
RETINAL : 2
BEARING : 1
SIMVASTATIN : 2
JOINT : 2
STRATEGIES : 1
LINKED : 1
BETWEEN : 1
IMAGES : 1
BATHROOM : 1
MM : 1
CALL : 9
DID : 8
AROUND : 1
MOST : 1
UNDERSTANDING : 1
LOUNGE : 1
LOST : 1
ILLNESS : 1
MEDICATIONS : 6
MR : 2
SHOW : 1
RESULT : 1
HX : 1
BIRTH : 1
INTENDED : 1
SUN : 1
NORTHWEST : 1
MAJOR : 1
PREVENT : 1
STENTS : 1
TELEPHONE : 1
ADDRESS : 1
AND : 40
BILATERAL : 3
ETODOLAC : 1
UNSPECIFIED : 2
HOUR : 1
SOB : 1
SELECT : 1
TISSUE : 1
PROTECTION : 1
REPORTS : 1
VACCINE : 1
RECOMMENDED : 1
URINAL : 1
VOLUNTARILY : 1
OPHTHALMOLOGY : 2
HELP : 3
STRENUOUS : 1
PROCESS : 1
RESULTS : 2
PER : 2
EMERGENCY : 2
ANSWER : 1
BREATH : 1
YES : 6
CONTINUES : 5
ABLE : 2
RECENT : 1
FURTHER : 1
NAIL : 1
VEGETABLES : 1
CONSENT : 2
MOBILITY : 1
FACE : 2
IN : 20
ADMINISTERED : 1
CUT : 1
WHOM : 1
YOUR : 6
MAY : 5
MANAGEMENT : 4
STATE : 1
DOING : 3
RETURNED : 2
GIVEN : 2
ALT : 1
PLAN : 2
ITEM : 1
CONFUSION : 1
FRUITS : 1
HPI : 2
APPT : 5
TAKING : 2
ADMITTED : 1
CALDWELL : 1
ED : 1
UPON : 1
OBSERVED : 1
KIMYANA : 1
SURG : 1
PHYSICIAN : 5
DONE : 1
COMPLIANCE : 1
OSTEOPENIA : 1
PHYSICAL : 1
DELIRIUM : 1
ATENOLOL : 1
CURRENT : 2
DME : 1
DJD : 1
PROTEIN : 2
CARED : 1
CP : 1
CONTROL : 1
NIGHT : 7
GROOMING : 1
AUSCULTATION : 1
ACTIVE : 11
SPONSOR : 1
PRIVAGE : 1
UNLIKELY : 1
HIM : 1
MANAGER : 1
PULSE : 3
HE : 15
FINASTERIDE : 1
COCKE : 1
NEEDS : 3
OPPORTUNITY : 1
FY : 1
THEY : 1
TREATED : 1
PHE : 1
COMMAND : 1
BEGIN : 1
PROFILE : 2
COVERED : 1
BRONCHODILATORS : 1
MASS : 1
ACCEPTED : 1
COMPLETED : 1
EXTENSIVE : 1
SGPT : 1
UAL : 2
THIS : 8
BLEPHAROCHALASIS : 1
STUCK : 1
VSS : 1
DIFFICULTY : 3
HVF : 1
IB : 1
ML : 3
PHONE : 3
BRONCHIAL : 1
CLEAR : 1
VAMC : 1
TOUCH : 1
ETT : 1
PRIMARY : 3
LAST : 10
DERVIATIVE : 1
MINNEAP : 2
EDUCATION : 2
HAD : 6
RIGHTS : 1
SIGNS : 3
FIELD : 2
EXTREMITIES : 1
FINANCIAL : 1
LOSS : 4
SISTER : 1
SESSION : 3
SUMMARY : 1
STATES : 9
OCCUPATIONAL : 1
COLORECTAL : 1
PROVIDED : 2
DRINK : 1
OU : 2
YO : 3
ENABLE : 1
NEGATIVE : 1
OUR : 1
LOCAL : 1
PARK : 1
AFFECTED : 1
QUESTION : 1
WRITTEN : 1
NONE : 6
CNS : 1
OUTCOMES : 1
LIMITS : 1
DECREASED : 2
LAB : 3
ICDCM : 1
LESIONS : 1
TRAVEL : 1
TRANSPORTED : 1
COMPLAINTS : 1
REASON_EXAMINATION : 1
LATE_NIGHT : 1
BILATERAL_ARTERY : 1
AGE_HISTORY : 1
PROBLEM_OTHER : 2
CBT_RTC : 1
AND_PULSE : 1
STOOL_SAMPLES : 1
TABLET_BY : 4
EVERY_BLOOD : 1
IMEDCONSENT_PATIENT : 1
BENEFITS_OF : 1
ANSWERING_NURSING : 1
NOTE_IRONS : 1
MELANOMA_NER : 1
MRP_RECONCILIATION : 2
CURRENTLY_THE : 1
MAY_THEM : 1
BLEPHAROCHALASIS_ATENOLOL : 1
INVOLVED_AN : 1
DOING_MONTHS : 1
VOICE_MAIL : 1
QUESTION_ABOUT : 1
ANESTHESIA_ASSISTANCE : 1
FRACTURE_NOW : 1
CARE_HE : 1
DID_THROUGH : 1
FOLLOWS_FEVER : 1
IRONS_DURATION : 1
SCREEN_TO : 1
NONE_SHOW : 1
BRONCHODILATOR_VC : 1
CALLED_AROUND : 1
VETERANS_HAVE : 1
USE_HIS : 1
HE_AND : 1
ARE_ALL : 1
DOING_YEARS : 1
TO_OVER : 2
NOV_LB : 1
OF_BOTH : 1
FOR_HEART : 1
WITH_MM : 1
SINGLE_DRUG : 1
SECTOR_OF : 1
COMMAND_UBE : 1
OUTPUT_ML : 1
UP_THE : 1
BEEN_TO : 1
LAST_COLORECTAL : 1
IR_ER : 1
WITH_AN : 1
LEFT_DELTOID : 1
GROSSLY_NEURO : 1
CERUMEN_PT : 1
BED_HE : 1
INCLUDING_SUPPLIES : 1
BED_WAS : 1
ICE_ORDER : 1
OFFICE_DATE : 1
PATIENT_INFLUENZA : 1
TAB_SIG : 1
GABAPENTIN_PATIENT : 1
AN_APPOINTMENT : 1
FROM_PATIENT : 1
PATIENT_NEED : 1
MOUTH_EVERY : 3
RESOLVED_INSTRUCTED : 1
NEEDED_PAGES : 1
WERE_FEW : 1
SECTOR_CYST : 1
COMPLAINT_ASSOCIATE : 1
IF_ON : 1
NIGHT_NURSE : 1
SOME_HAS : 1
NIGHT_WITHOUT : 1
EXT_AND : 1
FOLLOWUP_THIS : 1
RECEIVED_UNITS : 1
INSURANCE_INFORMATION : 1
CONTACT_PROBLEMS : 1
USE_THE : 1
CALLED_ED : 1
WITHOUT_YES : 1
WELL_YOU : 1
IB_MG : 1
TO_HIS : 1
INTAKE_CC : 1
ADVISE_WHAT : 1
CHIEF_OF : 1
BLOOD_NONE : 1
MEDICATION_THIS : 2
WAS_BP : 1
OF_HIS : 1
HELP_THIS : 1
TO_PODIATRY : 1
MEET_WITH : 1
IN_BONE : 1
CARE_VISIT : 1
RETINAL_IMAGES : 1
THE_PATIENT : 5
COUNSELED_THE : 1
OBESE_MOISTURE : 1
INFORMATION_AVA : 1
OPTOMETRY_NOTE : 1
LIMITED_ASSIST : 1
ACTIVITY_SITE : 1
ADDENDUM_CBI : 1
CALL_IN : 1
WA_ADDENDUM : 1
IS_ACTIVELY : 1
YES_ACTIVITY : 1
COMPLETED_ALL : 1
QUIT_STRATEGIES : 1
ULCER_PATIENT : 1
OR_IN : 1
STATES_LOSS : 1
NO_DME : 1
PROTECTION_AND : 1
BLAKE_RN : 1
SCREENING_LB : 1
PAIN_PATIENT : 1
THE_HR : 1
REQUIRED_CURRENT : 1
AND_ARTHRITIS : 1
IN_FOR : 2
INFORMATION_REASON : 1
SURGERY_FX : 1
HE_WAS : 2
FOR_OF : 1
STABLE_DISCHARGE : 1
IS_INTENDED : 1
MEDICATION_ETODOLAC : 1
CURRENTLY_RESULTS : 1
DONE_SUICIDE : 1
MESSAGE_MACHINE : 1
STATES_WILL : 1
SINCE_VS : 1
OTHER_HAS : 1
STATES_THAT : 2
OF_SAMPLES : 1
WHEEL_PUTTING : 1
WEEK_AND : 1
LOUNGE_SIDERAILS : 1
YOUR_IS : 1
HAS_SOME : 1
CLIENT_NOT : 2
LEARN_APPEAL : 1
ONE_FOR : 1
INJURY_FROM : 1
SWELLING_COVERED : 1
ONEHALF_BY : 1
LEFT_GOAL : 1
IS_INCOMPLETE : 1
VISIT_VERBALIZED : 1
REACH_ABLE : 1
HEART_PRESSURE : 1
LIST_LABS : 1
FOR_PINHOLE : 1
RECONCILIATION_THIS : 1
RISK_SCREEN : 2
HOME_TELEHEALTH : 1
OUTPATIENT_STATUS : 2
WITH_PATIENT : 3
CONTACT_PHONE : 1
OPERATIONS_PERFORMED : 1
RISKS_TOBACCO : 1
HEMOCCULT_CARDS : 1
URINE_TEST : 1
AFFECTING_READINESS : 1
HOUR_THE : 1
THEM_PLEASE : 1
HOLMAN_SUMMARY : 1
SWEATS_WEIGHT : 1
EFFECTIVE_METHOD : 1
REQUEST_YOUR : 1
YOU_FROM : 1
PURIFIED_PROTEIN : 1
GLEASON_OF : 1
MULTIPLE_UNITS : 1
TAB_ONE : 1
PACK_THE : 1
PSYCHOTIC_MRP : 1
THE_RECEIVED : 1
MONTH_FOR : 1
LEGS_BED : 1
ONE_MONTH : 1
HOLMAN_DISCHARGE : 1
PT_TRANSPORTED : 1
PHONE_WILL : 1
STRIP_STRIP : 1
THEM_THE : 1
CARDIOVASCULAR_SKIN : 1
FINGER_HIS : 1
FOR_HIS : 1
USE_ACTIVE : 1
ON_PLANTAR : 1
ON_WHEN : 1
ENDERLIN_CABG : 1
WEDNES_HPI : 1
VETERAN_TO : 1
SPECIFY_NEEDED : 1
WITH_CAREGIVER : 1
STEELE_MEMORIAL : 2
NAME_PREVIOUS : 1
USE_OF : 1
PREVENTION_WAS : 2
PATIENT_WILL : 1
BIRTH_OCT : 1
TO_LOCAL : 1
HTN_NO : 1
TCU_ON : 1
WAS_STILL : 1
STRIP_BP : 1
ALSO_TO : 1
REGIONAL_ASSISTED : 1
NIGHT_INCIDENT : 1
ESP_TO : 1
ORDER_WAS : 1
CBI_CBI : 1
FOR_PHE : 1
ASSOCIATE_ICE : 3
WT_CARPAL : 1
MALE_ADMITTED : 1
WITH_OR : 1
PAIN_HERNIATED : 1
BP_TITLE : 1
PREVENTATIVE_MEDICINE : 1
REVIEWED_AND : 1
PATIENT_YES : 1
ENDERLIN_URINE : 1
AND_CHECK : 1
NO_ASSISTANT : 1
FOR_OCULAR : 1
VOIDING_PER : 1
CYST_OF : 1
EXAM_OR : 1
FOR_ACCUCHEK : 1
NEEDED_PATIENT : 2
CAPSULE_MOUTH : 1
DR_UROLOGIST : 1
PLEASE_EACH : 1
CLIENT_FOR : 2
ASSESSMENT_KNEE : 1
MEDICAL_OR : 2
UP_CARE : 2
INTENDED_FOR : 1
AND_BENEFITS : 1
CBI_ML : 1
CAP_ONE : 1
FROM_ANY : 1
NOT_COME : 2
MORE_DRINKS : 1
OLD_RTC : 1
PACKED_UP : 1
SHIELD_QHS : 1
PATIENT_MULTIPLE : 1
BY_DAILY : 1
OF_OCT : 1
PREREGISTER_PODIATRY : 1
NOTE_APPOINTMENTS : 1
OR_WORSENING : 1
WAS_COMPLETED : 1
OA_IBUPROFEN : 1
THROUGH_WITHOUT : 1
MAS_TELEPHONE : 1
IN_CHEST : 1
UP_AC : 1
ON_AREA : 1
TUBERCULIN_PROTEIN : 1
OPHTHALMOLOGY_TECH : 1
FOR_ANTICOAGULATION : 1
NKA_EZETIMIBE : 1
YES_INTAKE : 1
ON_DATE : 2
MEDICATIONS_SOCIAL : 1
BILATERAL_ASSESSMENT : 1
PLAN_OLD : 1
FEVERS_WEAKNESS : 1
UP_BY : 1
CAN_HELP : 1
RETINAL_MEDICATION : 1
WILL_STUCK : 1
DOE_NO : 1
STATES_NEEDS : 2
TEACHING_METHOD : 1
SCREEN_HIS : 1
FILL_COLORECTAL : 1
SUPPLIES_PROCEDURE : 1
CODE_UNLISTED : 1
DIETARY_RESTRICTIONS : 1
NO_ABD : 1
COVERED_DRESSING : 1
PREVENTIVE_AND : 1
WHEEZING_OR : 1
MANY_CIRCUMFERENCE : 1
RECEIVED_THE : 1
UARY_HAD : 1
WAS_SOME : 1
CALL_MAY : 1
WE_UNDER : 1
TO_FINANCIAL : 1
SHOW_NONE : 1
PCP_ATHENS : 1
IDENTIFIED_OTHER : 2
OBJECTIVE_HOT : 1
TREATMENT_DISCHARGE : 1
PREVENTIVE_HEALTH : 1
DUSED_VIRAL : 1
ADDRESS_TRAVEL : 1
LEVEL_FOR : 1
WENT_AWAY : 1
CLINIC_AND : 1
IS_THE : 1
CARE_JODY : 1
AND_CA : 1
AT_MEMORIAL : 1
USE_STRIP : 2
SIG_TAKE : 2
EZETIMIBE_TAB : 1
PATIENT_CAREGIVER : 1
THEM_PUT : 1
WITH_ALL : 1
PO_INTAKE : 1
HELP_PREVENT : 1
REMOVED_CARE : 1
HE_CLIENT : 1
ON_MACHINE : 2
OTHER_COUNSELING : 2
THERAPY_EVALUATION : 1
STRIP_PHARMACY : 1
LABS_CBC : 1
TO_CONTACT : 1
ANY_QUESTIONS : 1
NEEDS_GOOD : 1
PM_TYPE : 1
THE_SCORE : 1
NOTE_STRICT : 1
IMAGE_DISPLAY : 1
MULTIPLE_HERNIATED : 1
RECONCILIATION_ETODOLAC : 1
GET_UNDER : 1
PATIENT_RETURNED : 1
IF_YES : 1
VISION_PENICILLIN : 1
ALSO_HELP : 1
CLINIC_AT : 1
LIST_NOT : 1
OF_LIVING : 1
FOR_BARRIERS : 1
CAP_MG : 1
LABEL_IF : 1
PT_CONTINUES : 1
OF_BIRTH : 1
COMPLAINT_HOURS : 1
AS_AS : 1
COUNSELING_ASSOCIATE : 1
PRESENT_ILLNESS : 1
LIVING_MEASUREMENT : 1
NECK_IS : 1
POPPED_OF : 1
HYGIENE_AS : 1
FOLLOW_NOW : 1
THE_TO : 2
ACCUCHEK_CURVE : 1
NER_SUN : 1
OR_MORE : 1
OPTOMETRY_TEXT : 1
OVER_CLIENT : 1
URINE_TOTAL : 1
MASS_ON : 1
CONTACT_INFORMED : 1
WILL_RELAYED : 1
THE_PERSON : 1
CONSENT_COCKE : 1
ISOTOPE_OLD : 1
HAVE_NOT : 1
WORSENING_DIAPHORESIS : 1
INFORMATION_CONFIRMED : 1
FOR_NEOPLASMS : 1
UP_RETINAL : 1
IF_THERAPY : 1
THAT_IDENTIFIED : 1
OTHER_PROBLEM : 1
PROBLEM_LIST : 2
RECOMMENDATION_WILL : 1
BELL_REACH : 1
CARE_MG : 1
THE_SESSION : 1
NONE_ACTIVE : 1
MO_ESTIMATED : 1
MAKE_AND : 1
EXTRACTIONS_AND : 1
PRESENTS_PULMONARY : 1
USUALLY_SOON : 1
OUTSIDE_FAMILY : 1
FOR_VISIT : 1
FILL_PC : 1
QUESTIONS_TOBACCO : 1
DATE_VITAL : 1
TO_CHAIR : 1
INDEPENDENLTY_IN : 1
REPORT_FROM : 1
DIE_HAS : 1
IS_REMOVAL : 1
DR_DEMANIAN : 1
SEEK_MEDICAL : 1
SWELLING_WITH : 1
IN_ONE : 1
PHARMACY_MANAGER : 1
PRE_POST : 1
OF_DAILY : 1
AND_REGULAR : 1
VISIT_UNDERSTANDING : 1
BONE_ON : 1
NEURO_DECREASED : 1
VOLUNTARILY_ON : 1
IS_VETERAN : 1
UPCOMING_FOR : 1
RECOMMENDATION_PATIENT : 1
LAST_DOING : 1
WITHIN_MEDICATION : 1
OFTEN_YOU : 2
RISKS_OF : 1
SHE_GOOD : 1
NO_PROBLEM : 1
OPHTHALMOLOGY_HEALTH : 1
IN_NO : 1
TAKING_WEIGHT : 1
DOES_HAVE : 1
ER_HURSTS : 1
OCULAR_HTN : 1
PLANTAR_PT : 1
BEARING_LIFTING : 1
NO_ASSOCIATE : 1
OR_SWELLING : 2
TAB_AFLLAAA : 1
INR_RANGE : 1
RETINAL_WEIGHT : 1
MEDICATION_THERE : 1
OF_ASSOCIATE : 1
THE_COORDINATION : 1
VS_PT : 1
TYPE_SYMPTOM : 1
ORDER_INFORMATION : 2
NURSEINFLUENZA_HOW : 1
IN_REEVALUATION : 1
FOR_AMIODARONE : 1
MG_MG : 1
APPOINTMENT_HIS : 1
URINE_ML : 1
GABAPENTIN_CAP : 1
HOURS_CENTER : 1
LEFT_GROSSLY : 1
HEARTBURN_EVALUATION : 1
STRICT_OF : 1
FILE_LAST : 1
RECONCILIATION_MG : 1
COMFORT_GLUCOSE : 1
YEAR_MALE : 2
HIS_WE : 1
MOUTH_ACTIVE : 3
STANDARD_EMERGENCY : 1
UPCOMING_APPT : 1
EVALUATION_AND : 1
LABS_UNRE : 1
VISION_ALLERGIES : 1
AND_AGREED : 1
HEALTH_TECH : 1
TRUNK_NO : 1
ON_RHYTHM : 1
IRONS_PHYSICIAN : 1
TOTAL_SERUM : 1
THE_STRICT : 1
NITROGEN_AND : 1
VACCINE_LEFT : 1
SEVERAL_WITH : 1
ACTIVE_UNITS : 1
ACTIVE_MEDI : 1
SITE_REDNESS : 1
CURRENT_LEVEL : 1
FOR_FX : 1
RTC_CLIENT : 1
UPCOMING_MRP : 1
PLAN_YEAR : 1
THREE_TIMES : 1
NOT_ALLERGIES : 1
TEL_AFTER : 1
AT_PARK : 1
IS_AT : 1
VIA_MESSAGE : 1
HIS_PCP : 1
ANSWERED_CAPSULES : 1
WITH_DYSPNEA : 1
SCREEN_PERFORMED : 1
EXCELLENT_SKIN : 1
BY_THE : 1
RADIOACTIVE_YEAR : 1
NECK_FOR : 1
SEND_KG : 1
DM_HEMOCCULT : 1
MEDICATION_PIOGLITAZONE : 1
TO_TO : 5
WHEEL_CHAIR : 1
DETERMINE_EFFECTIVE : 1
LATE_AT : 1
COMPLIANCE_LAST : 1
TO_ACCOMPLISHMENT : 1
HYPERLIPIDEMIA_INFORMATION : 1
MG_QTY : 1
MANAGER_TO : 1
ACTIVE_PLEASE : 1
FOR_PT : 1
HAVE_OR : 1
WITH_CNS : 1
WERE_EAT : 1
FUTURE_OTHER : 1
BILAT_PARESTHESIAS : 1
REACTION_NONE : 1
AND_ER : 1
ATTEMPT_ON : 1
WM_WITH : 1
KG_IN : 1
MONTHS_REVIEWED : 1
VITAL_SIGNS : 2
TO_FACE : 1
GOAL_INR : 1
MEASUREMENT_DEFINITION : 1
ICE_ASSISTANT : 1
VETERAN_NEW : 1
PAIN_ENCLOSED : 1
WITH_PT : 1
PARESTHESIAS_GABAPENTIN : 1
REQUEST_AFFECTING : 1
ON_COLLECTION : 1
OR_HIP : 1
SUSPECT_ARE : 1
ANSWERED_USE : 1
THE_STATES : 1
COCKE_JR : 1
QUESTIONS_CONCERNS : 1
UP_GABAPENTIN : 1
INDEPENDENLTY_ENDERLIN : 1
ILLNESS_PATIENT : 1
ER_VIA : 1
IDENTIFIED_FACILITY : 1
HPI_WM : 1
MALIGNANT_NEOPLASMS : 1
LESIONS_PLANTAR : 1
SPONSOR_OR : 1
THEREFORE_LESION : 1
ACUTE_NO : 1
BRONCHODILATOR_BRONCHODILATOR : 1
FOR_UAL : 1
PATIENT_DIFFICULTY : 1
PATIENT_WITH : 1
WITHOUT_CARDIAC : 1
FOUND_OUTPATIENT : 1
OF_PRESENT : 1
ID_ON : 1
TO_LEARN : 1
AS_ACTIVE : 1
SOCKS_IS : 1
NURSING_SIMVASTATIN : 1
PM_OF : 1
PHYSICIAN_DR : 1
HOW_LIKE : 1
ON_MR : 1
LBS_MEDICAL : 1
EACH_GOUT : 1
EVERY_AS : 1
BY_ED : 1
WAS_INSTRUCTIONS : 1
SERVICE_VAMC : 1
OF_STOOL : 1
ASSIST_HER : 1
TO_EXTREMITIES : 1
OTHER_SEE : 1
ACTIVE_NOTE : 1
OUTPATIENT_MUSCLE : 1
AND_NEED : 1
PUTTING_SOCKS : 1
RECONCILIATION_PAIN : 1
TUBERCULIN_PURIFIED : 1
ELDERLY_LIVING : 1
CRAMPS_ESP : 1
HEALTH_AND : 1
IRRIGANT_PRESSURE : 1
THEM_USED : 1
PATIENT_NUMBER : 2
CBC_ABLE : 1
AN_MVA : 1
ORDER_ORDER : 1
PRESUMED_ACUTE : 1
HIS_FINGER : 1
WE_SCREENING : 1
PER_REPORT : 1
INTO_PUSHING : 1
MALE_NMSC : 1
NEW_TO : 1
NECK_SURGERY : 1
PRESSURE_INCREASED : 1
TEXT_AUTOPRINT : 1
FRONT_OF : 1
SEE_THIS : 1
DISCUSS_THE : 1
NO_CHEST : 1
AT_PROVIDE : 1
EACH_FOR : 1
CARDS_VITAL : 1
ACTIVE_ADDENDUM : 2
AMIODARONE_NURSEINFLUENZA : 1
MUST_ADDENDUM : 1
TONIGHT_HE : 1
COORDINATION_TELEHEALTH : 1
DRINK_CONTAINING : 1
SIG_OTHER : 1
NOTED_INTAKE : 1
THIS_WILL : 1
CORRECT_ANSWER : 1
REMOVAL_THEREFORE : 1
AND_WAS : 1
VISUAL_FIELD : 1
TELEHEALTH_PRE : 1
IS_MALE : 3
PROVIDE_AT : 1
GENERAL_SOCIAL : 1
PRESUMED_BRONCHITIS : 1
NO_CORD : 1
ON_AND : 1
LEFT_SEVERAL : 1
SURGERY_IN : 2
CARDIAC_CATH : 1
PT_MG : 1
SEEK_HELP : 1
PROBLEMS_SHIFT : 1
REMOVAL_AND : 1
TIME_HIP : 1
PAST_HYPERLIPIDEMIA : 1
AUTHOR_KIMYANA : 1
SCREEN_OUTPATIENT : 1
TO_WHOM : 1
OF_SYMPTOMS : 1
WELL_AS : 1
AND_WITH : 1
MG_AT : 1
NOTE_SHARED : 1
FRACTURE_IS : 1
NOT_PATIENT : 3
OR_PRESERVE : 1
ADMINISTRATION_OF : 1
NOTES_DECEMBE : 1
PURPOSES_ONLY : 1
BLAKE_SKIN : 1
AFFECTED_OF : 1
THE_TOLERATED : 1
REPRODUCIBLE_REGULAR : 1
HAD_SURGERY : 1
CONFUSION_HIS : 1
SCREEN_PAPULE : 1
STRIP_ACTIVE : 1
PRESSURE_REASON : 1
YOUR_CARDS : 1
BACK_IN : 1
SEE_PROFILE : 1
HE_VETERANS : 1
ON_WARFARIN : 1
VET_CALLED : 2
ACTIVE_ALLERGIES : 1
AT_PM : 1
OF_RESULTS : 1
UNSPECIFIED_ASSOCIATE : 1
IN_ABLE : 1
HEART_BLOOD : 1
LESIONS_ON : 1
FRUITS_VEGETABLES : 1
ASSESS_REASSESS : 1
RESTRICTIONS_TO : 1
ARE_FOLLOWS : 1
LINES_PRIMARY : 1
EXT_YOU : 1
AFTER_ACTIVITIES : 1
CENTER_NURSING : 2
LAST_VISIT : 1
REASSESSMENT_SUICIDALITY : 1
EVER_SUICIDE : 1
DE_RATIVE : 2
TO_HAVE : 2
REFILL_NURSEINFLUENZA : 1
IDENTIFIED_PROBLEM : 2
GENERAL_EXAM : 1
KG_WORKING : 1
PREVIOUS_ACTIVE : 1
TO_APPT : 2
OR_PROVIDE : 1
FOR_CALLED : 1
BEDTIME_RATING : 1
MG_SIG : 1
STRATEGIES_OPHTHALMOLOGY : 1
CONTROL_PATIENT : 1
INR_FALL : 1
STEELE_UNABLE : 1
LAST_VS : 1
FOR_IMPROVED : 1
TUNNEL_SYND : 1
HE_NOT : 2
ONSET_OF : 1
TRANSPORT_APPROXIMATELY : 1
AM_OUTPATIENT : 1
REASSESS_OBSERVATIONS : 1
VISTA_IMAGE : 1
TAKE_BY : 1
HIS_RING : 1
EXAMINATION_PINHOLE : 1
AVA_LEFT : 1
RESIDENT_ON : 1
CALLED_TALKED : 1
RING_FINGER : 1
MAS_CONTACT : 1
OCT_FLU : 1
FEW_OR : 1
PUT_TO : 1
CHANGES_THE : 1
ON_MMI : 1
MALIGNANT_OF : 1
OR_OR : 1
GASTROINTESTINAL_PE : 1
MOUTH_TIMES : 1
SOME_CONFUSION : 1
HAVE_RECEIVED : 1
YOUR_LIPID : 1
HOT_PACK : 1
PROCEDURE_HISTORY : 1
WHAT_WE : 1
WORKING_STATES : 1
HE_DID : 2
OR_REGULAR : 1
PER_URINAL : 1
ORDER_REASON : 1
ON_HIS : 1
SUSPECT_YOU : 1
WHOM_IS : 1
WE_AGREED : 1
CAPSULES_MOUTH : 1
IMPROVED_HEMOCCULT : 1
THE_RECOMMENDED : 1
ALL_NOTED : 1
TO_PULMONARY : 1
HIP_ON : 1
NECK_FRACTURE : 1
ADMINISTRATIVE_THE : 1
DEFINITION_EXTENSIVE : 1
SKIN_CA : 1
MOVING_FOUIR : 1
NKA_NONVA : 1
TOTAL_IR : 1
PROFILE_UPDATE : 1
AND_OF : 1
WARNING_SIGNS : 1
FIELD_EXAMINER : 1
WILL_NOT : 1
MACHINE_NOTE : 1
TOTAL_SHIFT : 1
THE_PRIMARY : 1
NAIL_BED : 1
PAIN_OUTPATIENT : 1
CBI_THE : 1
CHEST_NO : 1
PCP_ON : 1
OUTPUT_THE : 1
UP_NOW : 1
LIST_BELOW : 1
THAT_HAS : 1
HISTORY_PATIENT : 2
NOT_REPRODUCIBLE : 1
INFORMATION_FOR : 1
FAMILY_PHYSICIAN : 1
PIOGLITAZONE_BLOOD : 1
OF_TOBACCO : 2
IN_REGARDS : 1
WITH_IN : 1
HE_NEED : 1
PLEASE_READ : 1
SESSION_HE : 2
WILL_CHECK : 1
RECORD_MAN : 1
SIGNATURE_REQUIRED : 1
NO_IS : 1
QTY_ACTIVE : 1
PENDING_RETURNED : 1
TO_ENABLE : 1
OUTPATIENT_INCLUDING : 1
AT_HOME : 1
DID_YOU : 2
CP_AT : 1
BE_YOU : 1
CONSENT_FOR : 1
WT_LB : 1
ADMINISTRATION_RADIOACTIVE : 1
STATUS_MEDICATION : 1
TAKING_ANY : 1
STRICT_MAINTENANCE : 1
UNITS_ML : 1
TO_HEALTH : 1
TO_MAKE : 1
NEEDED_GENERAL : 1
OXIMETRY_TRANSPORTED : 1
OF_APPT : 1
ENABLE_LAST : 1
INTACT_PLAN : 1
OLD_VETERAN : 1
HAS_COMPLAINT : 1
TEST_USE : 1
REQUESTED_BY : 1
ASSISTANT_NOTE : 1
ANSWER_HISTORY : 1
LOSS_ORIENTATION : 1
TRIAGE_AFTER : 1
AND_THEREFORE : 1
SIGNS_TRANSFERRING : 1
LINES_REMOVED : 1
ACTIVITY_WITHOUT : 1
NEPHEW_STATES : 1
THE_PRESCRIPTION : 1
ARTERY_RECEIVED : 1
WITH_APPOINTMENT : 1
CARDIOLOGIST_BEGIN : 1
IS_ON : 1
WORK_NOTE : 1
NOT_PHONE : 1
HAS_OWING : 1
TO_LEFT : 1
IDENTIFIED_ASSOCIATE : 1
MAY_DISCUSS : 1
ISSU_PLEASE : 1
HAVE_FURTHER : 1
MEET_MONCELLO : 1
SOB_NO : 1
COORDINATION_HOME : 1
LOCATION_TEST : 1
THE_RISKS : 1
OR_SURROGATE : 1
SHOULDER_ROM : 1
VIRAL_WAS : 1
SCREEN_SIGNATURE : 1
TRANSFERRING_SERVICE : 1
WORSENING_WITH : 1
TEACHING_FRICTION : 1
STATUS_FILL : 2
SUICIDE_SCREENING : 1
USED_ALCOHOL : 1
THE_FINGER : 1
PLAN_BRONCHIAL : 1
TO_PSYCHIATRY : 1
OF_BACK : 1
UP_WITH : 2
ACTIVE_OUTPATIENT : 4
SYMPTOMS_IMPROVED : 1
PATIENT_ALL : 1
OUTPUT_PULSE : 1
WRITTEN_MESSAGE : 1
ABLE_TO : 1
PERFORMED_SCORE : 1
TO_VET : 2
CONTINUES_BUT : 1
CALLED_STATES : 1
AND_SELECT : 1
CAP_TAKE : 1
TO_IS : 1
NO_RESTRICTIONS : 1
ON_REMOVAL : 1
DRESSING_PATIENT : 1
BE_PICKED : 1
RUMINATE_OVER : 1
MELANOMA_NMSC : 1
CALLED_BY : 1
HIS_CLIENT : 1
AND_HURSTS : 1
DROP_LAST : 1
WORK_TO : 1
PULSE_GASTROINTESTINAL : 1
PROVIDERS_NOTES : 1
VISUAL_OBSTRUCTION : 1
SUPRASPINATUS_UPON : 1
DIET_SPECIFY : 1
ABOUT_WEEK : 1
VERBALIZED_AND : 1
SIGNIFICANT_OUTPATIENT : 1
REPORTS_GOOD : 1
PACK_TO : 1
MALLOY_TRANSPORT : 1
APPT_XRT : 1
CLINICALLY_ON : 1
AT_YOU : 1
AND_LUMABR : 1
KNEES_PATIENT : 1
QUITTING_PATIENT : 1
PRIVAGE_OF : 1
ON_STATUS : 1
TO_FOLLOW : 1
THAT_WILL : 1
HAD_INDICATED : 1
AUTHOR_IDENTIFIED : 1
PC_NURSING : 1
HE_UPCOMING : 1
SHOW_BRUISING : 1
RECONCILIATION_OR : 1
TO_WORK : 1
USE_PHARMACY : 1
CENTER_OR : 2
ANY_LB : 1
ADV_PATIENT : 1
ATENOLOL_MG : 1
USUALLY_BEGIN : 1
THE_SHOULDER : 1
WILL_WHAT : 1
NOT_MATCH : 1
RECEIVED_MULTIPLE : 1
IN_REACH : 1
HOW_CIRCUMFERENCE : 1
TO_MEDICATIONS : 1
CONTINUE_WORK : 1
FOR_YOUR : 2
BELONGINGS_PT : 1
IF_LOST : 1
NOT_YOUR : 1
PRESENT_THE : 1
EVERY_ACTIVE : 3
HAVE_AROUND : 1
MVA_UARY : 1
IN_CBT : 1
GROUP_CURRENTLY : 1
ALS_TO : 1
HERE_OCULAR : 1
ANY_QUESTION : 1
LIPID_PROFILE : 1
ST_NE : 1
FRESH_FROZEN : 1
WITH_ALS : 1
FEMORAL_RECEIVED : 1
MEDICATION_PROCESS : 1
REASON_VISIT : 1
REGIONAL_EXAMINER : 1
DIET_SUPPLIES : 1
TEMPERATURE_FLU : 1
NOW_PARK : 1
WHAT_MAY : 1
ADMITTED_THE : 1
ANSWERED_CURRENTLY : 1
IN_ATHENS : 1
RESCHEDULED_PATIENT : 1
SSN_PREVIOUS : 1
YEAR_HIS : 1
FROM_FEVERS : 1
UARY_THE : 1
OTHER_INDEPENDENLTY : 1
SIGNATURE_NOT : 1
COPD_METAB : 1
LABS_UNLIKELY : 1
IF_YOU : 3
PERFORMED_ADMISSION : 1
THE_ON : 2
AGREED_WE : 1
CONTAINING_ALCOHOL : 1
DEAD_DYING : 1
IN_AN : 2
WILL_COMMIT : 1
NO_HEARTBURN : 1
TWICE_FOR : 1
GUARD_LIGHT : 1
WENT_ABOUT : 1
IN_RESPIRATION : 1
HAS_HAD : 1
IS_SPEECH : 1
OF_UPPER : 1
CONTINUES_TO : 3
WHAT_HE : 1
BETWEEN_HOURS : 1
AND_STATES : 1
ON_THE : 5
DISCUSSED_STRATEGIES : 1
NOT_SPEECH : 1
HAND_WILL : 1
REACH_AND : 1
MMI_DAILY : 1
NKA_INPATIENT : 1
ON_LAST : 1
PERSON_PLACE : 1
GIVEN_INSTRUCTIONS : 1
TO_VIA : 2
CONFUSED_THE : 1
REGIONAL_DATE : 1
LAST_VOIDING : 1
HE_RECENTLY : 1
TO_HELP : 1
THE_TELENURSE : 1
OF_THE : 4
KIMYANA_IDENTIFIED : 1
BACK_IS : 1
MEMORIAL_LITER : 1
PC_EXIT : 1
GOOD_ONSET : 1
HER_THAT : 1
NIGHT_AND : 2
AND_THEY : 1
AM_IN : 1
INCREASE_IN : 1
ADDENDUM_ADVISED : 2
AN_FOR : 1
INFORMATION_BE : 1
PT_THAT : 1
OUR_ACTIVE : 1
SOME_AS : 1
REPORT_HAVE : 1
NONVA_CELE : 1
ALL_EXTREMETIES : 1
SOON_AFTER : 1
ON_FOOT : 1
INSTRUCTIONS_ON : 2
HYGIENE_BRONCHODILATORS : 1
ACUTE_BRONCHITIS : 1
GASTROINTESTINAL_OBESE : 1
OF_REGIONAL : 1
NO_SHOW : 1
TO_TEST : 1
NEEDS_ONSET : 1
HER_AT : 1
HE_PREVENTATIVE : 1
SCORE_WAS : 1
HOT_TO : 1
OUTPUT_PRESSURE : 1
TECH_THAT : 1
HURSTS_AFFECTED : 1
WHEELCHAIR_LAB : 1
ML_TUBES : 1
HAS_CHIEF : 1
WEAKNESS_SWEATS : 1
SISTER_CALLED : 1
HYPERLIPIDEMIA_ORDER : 1
TEMPERATURE_TO : 1
SUN_PROTECTION : 1
CURRENTLY_INPATIENT : 2
CONSENT_JR : 1
STATES_HE : 2
MAY_YOU : 1
IN_ENDERLIN : 1
FURTHER_QUESTIONS : 1
KG_TOBACCO : 1
VET_CLINIC : 1
DM_DIETARY : 1
VET_TO : 2
BE_CARED : 1
WILL_HELP : 1
SCORE_WHICH : 1
SKIN_PROBLEMS : 1
MEDICATIONS_AND : 2
TEST_NORMAL : 1
NO_TO : 1
IMPROVED_CARDS : 1
FACE_NURSE : 1
APPOINTMENT_FOR : 1
DISCHARGE_INSTUCTIONS : 1
WELL_NIGHT : 1
MINNEAP_AM : 1
DISCUSS_THEM : 1
COUNSELING_EXAM : 1
MG_TAKE : 4
YOUR_PHARMACY : 1
RETURN_VET : 1
BY_AT : 1
IF_HAVE : 2
AMIODARONE_REFILL : 1
PRESSURE_DEXA : 1
LAST_FILL : 2
IMAGE_UNDER : 1
MODIFIED_SPECIFY : 1
ASSESSMENT_BILATERAL : 1
DURATION_SYMPTOMS : 1
MAIL_YOU : 1
CALL_VET : 1
WITH_HIS : 1
CALL_CLINIC : 1
CARE_COORDINATOR : 1
HERNIATED_DISKS : 1
HIS_HIS : 1
IDENTIFIED_AND : 1
KG_PT : 1
GOALS_EXPECTED : 1
RETINAL_DETACHMENT : 1
CLINIC_FOR : 1
GOOD_OF : 1
REACH_IN : 1
TO_SOME : 1
COPD_COMMENT : 1
ALL_FOUIR : 1
ATHENS_WHEN : 1
MEDICINE_EVERY : 1
ACCEPTED_TCU : 1
ABOUT_LATER : 1
SUPPLIES_NEEDED : 1
USE_BENEFITS : 1
MESSAGES_WITH : 1
WILL_CONTINUE : 2
HIS_AND : 2
ABD_PAIN : 1
FAMILY_DR : 1
APPOINTMENTS_OTHER : 1
DEXAMETHASONE_MEET : 1
NEEDS_TO : 2
FUROSEMIDE_TAB : 1
AND_CHART : 1
SPONSOR_GROUP : 1
CYST_BACK : 1
GROOMING_AND : 1
AND_AGREEAB : 1
CBC_UNRE : 1
POST_VC : 1
ACTIVE_BP : 1
THE_FOLLOWING : 1
DID_HAVE : 2
ISSU_READ : 1
PRESSURE_CAUTIONTABLET : 1
AND_VISUAL : 1
HOME_HIS : 1
APPARENT_REPORT : 1
LAMENT_OVER : 1
MEDI_PM : 1
CM_HAVE : 1
PER_HIS : 1
JOINT_DE : 1
WITH_SIG : 1
ORIENTED_TO : 1
AS_BY : 1
PSYCHIATRY_ACCOMPLISHMENT : 1
CONTACT_ASK : 1
NOTE_DETERMINE : 1
LB_TOBACCO : 1
DRUG_CLASS : 1
OTHER_OU : 1
BACK_ARTHRITIS : 1
NO_SPINAL : 1
PATIENT_COUNSELED : 1
WILL_RTC : 1
BILATERAL_FEMORAL : 1
MOUTH_DAILY : 1
CARE_COORDINATION : 1
STAYS_UP : 1
NEED_THIS : 1
HOURS_INSURANCE : 1
OF_THEM : 1
HR_PROBLEM : 1
AUSCULTATION_NO : 1
SENSATION_PARESTHESIAS : 1
ASSIST_LIGHT : 1
DECREASED_BILAT : 1
ASSISTANT_APPOINTMENT : 1
SGPT_PROTEIN : 1
MAIL_IN : 1
ADVISE_HE : 1
CUT_OCT : 1
DAILY_STEELE : 1
DERVIATIVE_ADMINISTRATIVE : 1
PRIMARY_CLINIC : 1
SURGEON_MD : 1
WAS_AGAIN : 1
GIRTH_NONE : 1
PULSE_OX : 1
PROVIDED_WITH : 1
NOTE_OF : 1
DRINK_ALCOHOL : 1
VA_FIELD : 1
BEDTIME_PURPOSES : 1
COMPLIANCE_DROP : 1
PARK_STABLE : 1
TEMPERATURE_OCT : 1
RESPIRATION_FACE : 1
WITH_ULCER : 1
IBUPROFEN_HYDROCHLOROTHIAZIDE : 1
PAIN_LEVEL : 1
NEW_PROBLEMS : 1
FEW_FRUITS : 1
NO_DELIRIUM : 1
LAST_LAST : 1
ADV_HAS : 1
PODIATRY_FOLLOW : 1
IMPLANTS_NEPHEW : 1
NEW_THE : 1
WAS_PERFORMED : 1
SENT_PATIENT : 1
ANSWER_OF : 1
UNITS_TUBERCULIN : 1
SCREENING_FOR : 1
YOU_MAY : 1
CA_WARNING : 1
TOOLS_SGPT : 1
DING_OX : 1
NIGHT_PM : 1
NUMBER_HOME : 2
OR_GROUP : 1
NOTETL_HISTORY : 1
THE_LOSS : 1
ON_YES : 1
OF_ALLERGIES : 1
REGARDS_UPCOMING : 1
NO_OTHER : 1
TREATMENT_PLAN : 1
CAREFULLY_SELECT : 1
PRESSURE_SUSPECT : 1
PRESCRIPTION_IF : 1
RISK_LB : 1
IS_WELL : 1
FOR_STENTS : 1
THE_READINESS : 1
PLACE_THEM : 1
RELAYED_PSYCHIATRY : 1
FROZEN_PACKED : 1
LIFTING_INTO : 1
IS_YO : 2
INTO_BED : 1
BILAT_TAKING : 1
LOSS_NONE : 1
TOBACCO_AND : 1
SOME_PATIENT : 1
NO_LOSS : 1
LAST_PT : 1
FOR_XRT : 1
THIS_PROCEDURE : 1
OUTSIDE_MEDICAL : 1
LIPID_ARE : 1
AUTOPRINT_REASON : 1
NO_ACTIVITY : 1
TO_USED : 1
PSYCHOLOGY_AWAY : 1
PM_HEALTH : 1
DENIED_DING : 1
MATCH_WE : 1
VOICE_IN : 1
OTHER_IF : 1
THE_FASTING : 1
IER_DISCUSSION : 1
HVF_NEW : 1
COMPLAINT_NEW : 1
YOU_DRINK : 1
TURGOR_WITHIN : 1
BP_RISK : 1
EDUCATION_INVOLVED : 1
FOR_THE : 3
MOVING_ALL : 1
ON_YOU : 1
THE_PRESSURE : 2
CORD_FROM : 1
ENROLLED_IN : 1
TYPE_OF : 1
FOR_SESSION : 2
THREE_FOR : 1
PATIENT_OR : 1
IN_TO : 1
DUE_NUMEROUS : 1
MONCELLO_TO : 1
RIGHTS_AND : 1
DOE_COUGH : 1
GET_AND : 1
FOR_VETERAN : 1
AT_TIME : 1
NOT_CURRENT : 1
CALL_HOURS : 1
WAS_DONE : 1
EVALUATION_COPD : 1
COUNSELING_AUTHOR : 1
EYES_EXTRACTIONS : 1
BE_RELAYED : 1
REACH_PATIENT : 1
DEMANIAN_UROLOGIST : 1
THE_PROCEDURE : 1
CARDS_IF : 1
SPECIFY_YES : 1
ANSWERED_NONVA : 1
DISCHARGE_BRONCHIAL : 1
MMI_PLEASE : 1
PRESSURE_MUST : 1
STILL_PENDING : 1
OR_DRINKS : 1
DUE_SIG : 1
EXAM_FUTURE : 1
IMEDCONSENT_DOCUMENT : 1
FILL_CANCER : 1
APPOINTMENT_CP : 1
CALL_ASK : 1
PROBLEM_BELOW : 1
ACTIVITIES_OF : 1
IS_CURRENTLY : 1
FASTING_WORK : 1
MG_TABLET : 1
HE_WILL : 2
PHONE_LISTED : 1
AN_OPPORTUNITY : 1
HR_LIST : 1
NO_VSS : 1
READ_ITEM : 1
VISIT_UAL : 1
CURVE_TEST : 1
INTENDED_THE : 1
WILL_TO : 3
WITH_HAS : 1
MATCH_WHAT : 1
DISCHARGE_PLAN : 1
CONTROL_RECOMMENDATION : 1
NE_EMERGENCY : 1
HOME_PER : 1
PHYSICIAN_HOUR : 1
UP_VISIT : 1
DIETARY_NO : 1
WAS_TIME : 2
PROSTATE_PRESSURE : 1
AC_DE : 1
MAY_VOIDING : 1
CARDIAC_DID : 1
RETURNED_FOLLOW : 1
ADMINISTERED_ADMINISTRATIVE : 1
REFILL_NO : 1
MEDICATION_PAIN : 1
CARE_GABAPENTIN : 1
NO_PSYCHOTIC : 1
REPRODUCIBLE_OR : 1
IDENTIFIED_NO : 1
QUIT_DISCUSSED : 1
NUMBERS_REASSESSMENT : 1
MOBILITY_NO : 1
SPOKANE_WA : 1
WHEN_SHE : 1
MR_IS : 2
ON_TENDONOPATHY : 1
WITH_DRUGS : 1
SIMVASTATIN_TAB : 1
DAILY_NURSING : 1
ASSOCIATE_IDENTIFIED : 1
CONFIRMED_SPONSOR : 1
WELL_THROUGH : 1
TRIAGE_DETERMINE : 1
ASSESS_OBSERVATIONS : 1
CONTACT_NUMBERS : 1
NO_EVALUATION : 1
HAS_AN : 1
EMERGENCY_DEPT : 1
IN_CARE : 1
HOME_DID : 1
MONTH_AMIODARONE : 1
TECH_NOTETL : 1
TABLET_DAILY : 1
PHYSICIAN_ASSISTANT : 2
AND_VETERAN : 1
DATE_OF : 2
PAGES_GENERAL : 1
HEARING_LOSS : 1
HAS_FACILITY : 1
LOUNGE_CHAIR : 1
WILL_BE : 2
STATUS_LAST : 2
ESTIMATED_LOSS : 1
HAD_THAT : 1
HYDROCHLOROTHIAZIDE_TAB : 1
NURSING_TRIAGE : 1
UNDER_TOOLS : 1
THE_ULCER : 2
CIRCUMFERENCE_GIRTH : 1
THESE_GOALS : 1
ENCLOSED_FOR : 1
ALLERGIES_ADV : 1
DISCHARGE_GIVEN : 1
FOR_FASTING : 1
NOW_AT : 1
FX_AFTER : 1
LUMABR_FLU : 1
NUMBER_OTHER : 1
FROM_TAKING : 1
AT_OR : 2
ELDERLY_VET : 1
TURGOR_NORMAL : 1
AND_YOU : 1
LIFTING_LEGS : 1
FEMORAL_ARTERY : 1
UAL_WORK : 1
BARRIERS_AFFECTING : 1
OF_CYST : 1
PRESERVE_ALLERGIES : 1
SURG_OPTOMETRY : 1
INFORMATION_ORDER : 1
ADDRESS_NEED : 1
NKA_CURRENTLY : 1
PATIENT_WAS : 1
RECOMMENDED_RANGE : 1
PT_SHE : 1
ALL_WITH : 1
HE_ON : 1
MOST_TEACHING : 1
THE_INR : 1
NONE_RIGHTS : 1
STEELE_SAO : 1
IN_HAD : 1
AND_BATHROOM : 1
INTACT_ASSESSMENT : 1
QUITTING_TOBACCO : 1
SKIN_WARNING : 1
INVOLVES_ADMINISTRATION : 1
WE_RTC : 1
ACCOMPLISHMENT_HE : 1
VITAL_APPOINTMENT : 1
PRESSURE_LBS : 1
OF_PRIMARY : 1
LOCATION_OF : 1
IMED_PALLIATIVE : 1
CALLED_CLINIC : 1
YO_WITH : 1
FOR_PAIN : 2
CULTURE_DONE : 1
UNDER_SGPT : 1
DM_IMPROVED : 1
IDENTIFIED_NECK : 1
THIS_IS : 1
PAIN_SHOWED : 1
COMMAND_MINUTES : 1
MEDICAL_RECORD : 1
DISCUSSION_VET : 1
OUTPATIENT_SUICIDALITY : 1
HIP_CALLED : 1
DRESSING_OF : 1
AS_HAD : 1
INTERVIEW_LINKED : 1
AND_DUE : 1
ESP_TRUNK : 1
NO_MANAGEMENT : 1
REFER_THIS : 1
FOLLOW_WITH : 2
OF_NONE : 1
PAIN_HEARTBURN : 1
DE_CHANGES : 1
MAN_BULBAR : 1
BOTH_KNEES : 1
AS_HIS : 1
TOBACCO_SCREEN : 2
NAME_VET : 1
ONLY_AS : 1
INFORMED_THAT : 1
PROTEIN_ADMINISTERED : 1
PULMONARY_FOR : 1
CANCER_RADIATES : 1
NEC_NOS : 1
PACKED_STAYS : 1
SIGNS_DISCUSSED : 1
ICE_WAS : 1
PT_HIS : 1
HOURS_OF : 1
DRUGS_IS : 1
OUTPATIENT_MEDICATIONS : 4
NURSEINFLUENZA_IMMUNIZATION : 1
VISIT_WAS : 1
OR_PLEASE : 1
REEVALUATION_BILATERAL : 1
OBESE_NAD : 1
OF_BED : 1
RUMINATE_HIS : 1
TRANSPORTED_TO : 1
ACTUAL_YES : 1
HIS_GROOMING : 1
WAS_ON : 3
STATES_ALBUTEROL : 1
PRIMARY_PATIENT : 1
AM_UARY : 1
APPOINTMENTS_MEDICATION : 1
MODIFIED_DIET : 1
ASSESSMENT_PLAN : 1
THEM_AND : 1
AND_SURROGATE : 1
FOR_BLOOD : 3
PATIENT_THE : 1
MM_SORE : 1
FRESH_PLASMA : 1
HX_ELDERLY : 1
HAVING_PSYCHOTIC : 1
RETURNED_CALL : 1
THESE_AND : 1
CONTINUES_RUMINATE : 1
BLOOD_MR : 1
BP_SUICIDE : 1
EXPECTED_CURRENT : 1
APPT_TO : 1
PHYSICIAN_DEMANIAN : 1
DECEMBE_CONSULT : 1
CALL_CENTER : 1
UPON_DEBRIDEMENT : 1
THAT_THE : 3
FOR_CP : 1
PATIENT_ANSWERED : 3
DATE_APPT : 1
LAMENT_THE : 1
OTHER_VOIDING : 1
PLACE_SURGEON : 1
IN_DID : 1
UBE_MINUTES : 1
OF_IT : 1
VETERAN_HE : 1
TAB_TAKE : 4
AM_ON : 1
AUTOPRINT_FOR : 1
CATARACT_EXTRACTIONS : 1
ONE_TABLET : 2
WEIGHT_BEARING : 1
HAS_DME : 1
VET_DING : 1
HYPERLIPIDEMIA_NEC : 1
PATIENT_FOR : 2
SURROGATE_EDUCATION : 1
RIGHT_IMAGES : 1
AM_ATHENS : 1
UPCOMING_APPOINTMENTS : 1
PATIENT_IER : 1
VISIT_TIME : 1
OR_DIAPHORESIS : 1
FY_PAPULE : 1
NOTETL_AGE : 1
ORDER_STILL : 1
CONFIRMED_WITH : 1
VETERAN_WAS : 1
DEPT_TRIAGE : 1
IS_ADDRESSED : 1
TOPIC_ON : 1
WHEN_HAS : 1
THE_VA : 2
ASSISTANT_MEDICAL : 1
OR_MILK : 1
AND_WERE : 1
AT_THE : 1
SUICIDALITY_NONE : 1
STATES_TALKED : 1
METHOD_FRICTION : 1
MEDICATIONS_MEDICATION : 1
PATIENT_CHART : 1
MANAGEMENT_APPROPRIATE : 1
ADVISED_QUIT : 1
GIRTH_FOUND : 1
STATUS_THIS : 1
SHARED_FILE : 1
NOT_MEDICAL : 1
NEURO_SENSATION : 1
BP_STANDARD : 1
SCORE_INTAKE : 1
CAPSULES_BY : 1
XRT_AND : 1
NAME_INFLUENZA : 1
OSTEOPENIA_INCREASE : 1
AMENDS_AND : 1
PROVIDERS_MAY : 1
SCREENING_MALIGNANT : 1
NOTE_NURSING : 1
FOR_LESIONS : 1
THE_CORRECT : 1
WAS_TREATED : 1
INTAKE_AND : 1
NOTE_FUTURE : 1
NONE_HAVE : 1
REQUEST_BARRIERS : 1
BRONCHODILATORS_ORDERED : 1
AS_WELL : 3
TAKE_CERUMEN : 1
PRESCRIPTION_LABEL : 1
DAILY_PLEASE : 2
HAS_APPT : 1
OF_NAIL : 1
VET_LIVING : 1
ON_RISKS : 1
INFORMATION_LEFT : 1
CONTINUES_IMPROVED : 1
NOTE_REASON : 1
INCIDENT_CARDIAC : 1
INFORMED_PT : 1
SIGNS_SERVICE : 1
ETODOLAC_MG : 1
LIFTING_THE : 1
NONE_ORIENTATION : 1
ANY_WEIGHT : 2
AND_DISCUSSED : 1
ER_WHEELCHAIR : 1
MEDICATION_FOR : 1
IMPLANTS_STATES : 1
SIGNATURE_INFORMED : 1
TAKING_PATIENT : 1
LINKED_FILE : 1
SERUM_IR : 1
TALKED_THE : 1
HPI_SEE : 1
CV_GLUCOSE : 1
LB_IN : 1
TENDONOPATHY_UPON : 1
THE_PROBLEM : 2
LOSS_RESOLVED : 1
TREATED_AGAIN : 1
BELONGINGS_SENT : 1
PM_CALL : 1
INTERVIEW_NOTE : 1
CUT_MOVING : 1
PATIENT_PROVIDED : 1
PAIN_ASSESS : 1
IF_SUPRASPINATUS : 1
REGULAR_NATURE : 1
THEY_ADVISE : 1
OF_RADIOACTIVE : 1
SWEATS_NO : 1
AN_DUSED : 1
RTC_IN : 2
CAUTIONTABLET_MUST : 1
WANT_PREREGISTER : 1
DID_BELONGINGS : 1
NO_DEXAMETHASONE : 1
CALL_TO : 1
IS_HAVING : 1
STUCK_AND : 1
STATUS_DX : 1
CURRENT_SKIN : 1
ON_IBUPROFEN : 1
DECREASED_ROM : 1
SUMMARY_NAME : 1
CHEST_IS : 1
SPINAL_CORD : 1
AREA_FLU : 1
SKIN_ADDENDUM : 1
FOUIR_EXTREMETIES : 1
RAZOR_THEM : 1
DIFFICULTY_DUE : 1
IS_NEGATIVE : 1
OCT_ALL : 1
RAZOR_TO : 1
IB_CAP : 1
NORTHWEST_WA : 1
NONE_FOUND : 1
TEST_RESULTS : 1
UNLISTED_AND : 1
HAVING_CRAMPS : 1
AND_DID : 1
NORMAL_ADDENDUM : 1
ED_STAFF : 1
PROCESS_WILL : 1
ON_UBE : 1
TRAVEL_NEED : 1
ALCOHOL_IN : 1
INSTRUCTED_THAT : 1
UNDERSTANDING_AND : 1
EZETIMIBE_SIMVASTATIN : 1
HEENT_LOWER : 1
GABAPENTIN_MG : 1
PATIENT_DID : 1
SURGERY_OPTOMETRY : 1
BMI_YOU : 1
IN_SINCE : 1
IMED_EDUCATION : 1
REMOVED_PRIMARY : 1
SHE_HAS : 1
EVER_HAD : 1
INR_RISK : 1
NUMEROUS_SIG : 1
YOU_HOW : 1
PATIENT_HERE : 1
PSYCHOLOGY_WENT : 1
ASSISTANCE_TO : 1
VITAL_TRANSFERRING : 1
LAST_AND : 1
MESSAGES_OUR : 1
GUARD_ASSIST : 1
PAIN_NOT : 1
CONFIDENTIALITY_TEST : 1
PAIN_OR : 1
YRS_FOLLOW : 1
LABS_FOLLOWUP : 1
BELL_IN : 1
MG_ONEHALF : 1
FOR_VET : 1
THE_LESION : 1
CAME_FOR : 2
OR_MAY : 1
FOUIR_TYPE : 1
THE_USE : 1
APPOINTMENT_THIS : 1
OCULAR_HVF : 1
AFFECTED_PART : 1
CARDIOLOGY_IN : 1
CV_TEST : 1
WAS_WHICH : 1
SESSION_AM : 1
TAB_QTY : 1
BULBAR_ALS : 1
TAB_PE : 1
INJURY_FEVERS : 1
TO_YOUR : 1
TABLET_PLEASE : 1
SWEATS_AND : 1
YOU_ARE : 1
FOR_MINUTE : 2
HAND_GET : 1
STATE_AND : 1
SOME_OF : 1
TEL_TRIAGE : 1
CONTACT_ASSIST : 1
BRONCHITIS_PHYSICIAN : 1
READ_EACH : 1
HOME_MG : 1
FINGER_ANY : 1
MEDICAL_HELP : 1
QHS_STRENUOUS : 1
JOINT_DISEASE : 1
LEFT_IF : 1
CLASS_HERE : 1
AND_PAIN : 1
MINNEAP_ASSIST : 1
MANAGEMENT_CODE : 1
DID_PERSONAL : 1
PATIENT_ADVISED : 1
HYDROCHLOROTHIAZIDE_MG : 1
SOCIAL_NOTE : 1
BELONGINGS_WITH : 2
ST_LOCATION : 1
MESSAGE_ANSWERING : 1
RIGHT_DECREASED : 1
HAS_ANSWERED : 3
REACH_TO : 1
ADDENDUM_THAT : 1
UNITS_OF : 1
TO_DISCUSSED : 1
PSYCHOTIC_EXPERIENCES : 1
APPOINTMENT_GROOMING : 1
CONVERSATION_HAS : 1
NUTRITION_EXCELLENT : 1
WILL_NEED : 2
WILL_CUT : 1
COUNSELING_LABS : 1
DTN_WHEEZING : 1
MAY_NEED : 1
HIS_REPORT : 1
HERNIATED_NECK : 1
TOTAL_CBI : 1
HIS_AT : 1
MEDICATIONS_STATUS : 2
PHARMACY_COUNSELING : 1
MONTHS_PSYCHOLOGY : 1
CLASS_THE : 1
KNEE_RATIVE : 1
DATE_SIGNS : 1
MOVE_EXTREMITIES : 1
DX_DIETARY : 1
WAS_THE : 1
DELIRIUM_PATIENT : 1
AFTER_HOURS : 1
GLUCOSE_TEST : 1
WITH_PCP : 2
UNITS_FRESH : 1
PCP_INSTRUCTIONS : 1
VIRAL_CULTURE : 1
RATIVE_JOINT : 1
ARE_AS : 1
LIST_HPI : 1
PRESSURE_PREVENTION : 2
BENEFITS_QUITTING : 1
SKIN_CLEAR : 1
DISCUSSED_TO : 1
FOLLOWUP_APPOINTMENT : 1
QHS_NO : 1
ANY_PHYSICAL : 1
OBSTRUCTION_EXCESS : 1
FASTING_BLOOD : 1
AND_LEFT : 2
POST_BRONCHODILATOR : 1
DIAPHORESIS_WITH : 1
IS_NOT : 3
OPPORTUNITY_HAVE : 1
UNLIKELY_APPOINTMENT : 1
PERSONAL_BELONGINGS : 1
BED_YES : 1
HIM_OF : 1
OTHER_IN : 1
PCP_CALDWELL : 1
YOU_SIX : 1
WITH_MG : 1
FOR_HTN : 1
GIVEN_ON : 1
APPOINTED_CALDWELL : 1
THE_AND : 2
IRONS_ICE : 3
CONTAINING_IN : 1
WHICH_NEGATIVE : 1
INVOLVES_THE : 1
DIAPHORESIS_DYSPNEA : 1
FY_WHICH : 1
EFAVIRENZ_TAB : 1
LAST_WITHOUT : 1
YEARS_MONTHS : 1
ONSET_PRIMARY : 1
USED_AN : 1
DE_JOINT : 1
SUICIDE_ON : 1
OF_PAIN : 2
WITHOUT_DIFFICULTY : 1
INSTUCTIONS_TO : 1
INFORMATION_IF : 1
FLU_SITE : 1
PULSE_PE : 1
IS_ENROLLED : 1
QUESTION_YOUR : 1
VETERAN_THAT : 1
INCREASED_OUTSIDE : 1
MEDICATION_RECONCILIATION : 3
STAFF_TO : 1
FOOT_PT : 1
COORDINATOR_JODY : 1
DIAGNOSIS_ADENOCARCINOMA : 1
DIETARY_COUNSELING : 1
NAME_SSN : 1
HAND_THE : 1
REACH_YOU : 1
BILATERAL_BILATERAL : 1
SAO_ID : 1
PCP_DM : 1
APPOINTMENT_RESCHEDULED : 1
OF_COLON : 1
ORIENTATION_COMPLETED : 1
SEE_LIST : 1
EMERGENCY_TRIAGE : 1
ACTIVE_BREATH : 1
CALL_THE : 1
ADVISED_THAT : 1
ANTICIPATED_DATE : 1
CANCER_SCREEN : 1
HOW_DID : 2
AND_WE : 2
IN_ON : 1
AT_NIGHT : 1
CONFIDENTIALITY_OF : 1
MAY_DIAGNOSIS : 1
TO_FRONT : 1
ALLERGIES_ST : 1
URINAL_IN : 1
CLINIC_FOLLOW : 1
PLANTAR_FOOT : 1
FOLLOW_LAST : 1
PROBLEMS_NAME : 1
MO_BLOOD : 1
CBI_URINE : 1
PLEASE_EXT : 1
TO_CLINIC : 1
FROM_RN : 1
INSTRUCTIONS_THE : 1
TO_MEET : 1
STATES_THE : 1
SHIFT_OUTPUT : 1
BE_UP : 2
NEURO_ASSESSMENT : 1
OPHTHALMOLOGY_RESIDENT : 1
CALL_TYPE : 1
NIGHT_OU : 1
ASSESSMENT_YEAR : 1
AS_CARDIOLOGIST : 1
PHE_VETERAN : 1
NOTE_NONVA : 1
MAINTENANCE_OF : 1
NO_PAIN : 2
FROM_THE : 1
ESTIMATED_BLOOD : 1
TO_ADDRESS : 1
HEART_CLINICS : 1
AT_HR : 1
CONTINUE_TO : 2
METHOD_NO : 1
TO_THIS : 1
OR_YOU : 1
OVER_LOSS : 1
DEXA_IN : 1
ARTHRITIS_IN : 1
EVALUATION_COMMENT : 1
SUMMARY_PATIENT : 1
HAVING_MUSCLE : 1
EXCESS_HPI : 1
MALE_RTC : 1
HAVE_DRINK : 1
EXAMINATION_PATIENT : 1
HAD_SUICIDE : 1
IR_AND : 1
NOS_EYES : 1
PACHYMETRY_ACTIVE : 1
AT_AM : 1
NURSING_DURATION : 1
TOUCH_LIFTING : 1
DEPT_NOTE : 1
HOOD_HAD : 1
FX_MVA : 1
WILL_MONTHS : 1
LIFTING_DELIRIUM : 1
PARESTHESIAS_TAKING : 1
PROTECTION_SKIN : 1
HERE_FOLLOW : 1
PREVENTATIVE_EVERY : 1
DROP_NIGHT : 1
CLINICS_SPOKANE : 1
PCP_FOR : 1
HIS_BILATERAL : 1
SYND_ICDCM : 1
OF_IF : 1
KG_USE : 1
HELP_TO : 1
BEGIN_AFTER : 1
UP_BELL : 1
SIX_OR : 1
TO_IMPROVE : 1
DOING_EXERCISES : 1
ADDENDUM_MOBILITY : 1
CONTINUES_LAMENT : 1
HAND_AND : 1
TO_TAKEN : 1
REGIONAL_OFFICE : 1
PROTEIN_TOTAL : 1
HIS_EXERCISES : 1
BRONCHIAL_BRONCHODILATORS : 1
OR_CONCERNS : 1
UROLOGIST_AS : 1
PAIN_MANAGEMENT : 1
TURGOR_OUTPUT : 1
DOCUMENT_PATIENT : 1
ATHENS_VETERAN : 1
EYES_CATARACT : 1
COLLECTION_OF : 1
DIETARY_SURVEILLANCE : 1
CNS_TO : 1
ACTIVITY_VOIDING : 1
BY_MALLOY : 1
PSYCHIATRY_HE : 1
PLEASE_CALL : 3
COUGH_ABD : 1
SEE_MEDICATION : 1
ML_TUBERCULIN : 1
SKIN_TOTAL : 1
PALLIATIVE_COORDINATOR : 1
FEVER_NO : 2
LEFT_NEURO : 1
HIS_APPOINTMENT : 1
FROM_WEAKNESS : 1
AND_SKIN : 1
PATIENT_BELONGINGS : 1
PICKED_BY : 1
THIS_VET : 1
PROVIDER_AND : 1
TITLE_DEPT : 1
IN_DISCUSSION : 1
PERSONAL_SENT : 1
NECK_BACK : 1
WORSE_THE : 1
PLAN_HYGIENE : 1
NEED_GLEASON : 1
ON_DIET : 1
REGULAR_IN : 1
CALL_EXT : 1
VET_STATES : 1
TO_THESE : 1
TO_TONIGHT : 1
PHQ_SCREEN : 1
PM_ACTIVITIES : 1
MONCELLO_CNS : 1
TUBES_LINES : 1
DATE_BIRTH : 1
TABLET_MOUTH : 3
MALE_MELANOMA : 1
TRAVEL_FOR : 1
PERSON_TIME : 1
HOME_IDENTIFIED : 1
BLEPHAROCHALASIS_OU : 1
MD_MAJOR : 1
LIQUID_NITROGEN : 1
HE_HAS : 3
NONV_CENTER : 2
TONIGHT_WAS : 1
ALL_BELONGINGS : 1
MG_MOUTH : 1
CHEST_PAIN : 2
NEOPLASMS_COLON : 1
SOCKS_MR : 1
NAME_CALLED : 1
EXTREMETIES_TYPE : 1
SUPRASPINATUS_TENDONOPATHY : 1
CONTACT_SIGNATURE : 1
GROOMING_HYGIENE : 1
NO_LIMITATION : 1
AND_WEIGHT : 1
NEOPLASMS_OF : 1
ON_HIP : 1
AND_HE : 1
STATES_RING : 1
THE_CLINIC : 1
PROCEDURE_INVOLVES : 1
WHEEZING_NEW : 1
SWELLING_HIP : 1
RN_SKIN : 1
GOUT_BY : 1
DISCUSSED_WITH : 1
COCKE_PHYSICIAN : 1
IN_MVA : 1
REQUESTED_BLOOD : 1
NURSING_EXIT : 1
AFTER_PM : 1
FOR_AFTER : 1
CAN_TO : 1
PGY_OPERATIONS : 1
ON_LEFT : 1
IN_MASS : 1
THYROTOXIC_ON : 1
IF_OCCUPATIONAL : 1
NOT_SEEK : 1
AUSCULTATION_COMPLAINTS : 1
BILATERAL_KNEE : 1
CLINIC_STATES : 1
TRANSPORT_AT : 1
THERE_WAS : 1
THE_CARE : 2
MANY_GIRTH : 1
WHOM_IT : 1
YEARS_REPORTS : 1
BLOOD_SUSPECT : 1
TISSUE_WILL : 1
INTAKE_NUMBER : 1
VSS_TURGOR : 1
ON_TIME : 1
CLIENT_CAME : 2
APPOINTMENT_INFORMATION : 1
DISCHARGE_PATIENT : 1
METAB_FOLLOW : 1
LIMITS_ADDENDUM : 1
SHOWED_OA : 1
HAS_UPCOMING : 1
REGULAR_AM : 1
THE_ANY : 1
WAS_YES : 1
HELP_HE : 1
TEST_STRIP : 2
REDNESS_SWELLING : 1
DAILY_ACTIVE : 1
AWAY_WEEK : 1
TO_SIGNATURE : 1
CATH_PERSONAL : 1
THAT_PT : 2
BY_ESTIMATED : 1
TO_CLC : 1
FOR_RESIDENT : 1
PROBLEM_REPORT : 1
BLOOD_OSTEOPENIA : 1
OWING_TREATMENT : 1
YES_SCORE : 1
WITH_LIQUID : 1
PREVENTION_PROTOCOL : 2
PULMONARY_CLINIC : 1
LAST_PC : 1
OR_TISSUE : 1
SYND_VISTA : 1
THIS_TIME : 1
OBSERVATIONS_HOT : 1
NKA_BY : 1
TIME_FOR : 1
ALSO_NEED : 1
SENT_WITH : 1
QTY_ISSU : 1
BED_WHEEL : 1
NEED_TO : 2
YES_SB : 1
SCREEN_RADIATES : 1
RESPONSIBILITIES_PAIN : 1
WEIGHT_EACH : 1
SHOT_AND : 1
WANT_SOME : 1
OF_AND : 2
CHAIR_PUTTING : 1
OBSTRUCTION_ND : 1
INCOMPLETE_REMOVAL : 1
WILL_LB : 1
MILK_PRODUCTS : 1
LIMITED_CONTACT : 1
IMMUNIZATION_HOW : 1
DONE_BP : 1
OUR_CONTACT : 1
USE_SCREEN : 2
ML_CBI : 1
THIS_PROVIDERS : 1
AND_EDUCATION : 1
OF_PERSON : 1
PURIFIED_DERVIATIVE : 1
NO_NO : 7
INSURANCE_AVA : 1
APPT_SURG : 1
SIDERAILS_UP : 1
WT_LOSS : 1
INCIDENT_CATH : 1
DELTOID_GOAL : 1
TO_PERSON : 1
TEST_MEMORIAL : 1
MEDICATIONS_HX : 1
SHE_IDENTIFIED : 1
PATIENT_SSN : 1
ASSIST_CONTACT : 1
SORE_COUNSELED : 1
NEW_INFORMATION : 1
CLC_ON : 1
SIX_MORE : 1
LOSS_TUNNEL : 1
HIM_LOCATION : 1
TIME_SCHEDULE : 1
VERBALIZED_UNDERSTANDING : 1
HAS_NKA : 3
OTHER_SPECIFY : 1
APPEAL_REQUEST : 1
TAB_ONEHALF : 1
BY_TECH : 1
HER_AN : 1
WAS_IS : 1
MG_DATE : 1
TO_ER : 1
PINHOLE_PATIENT : 1
MINNEAP_LIMITED : 1
ITEMS_PO : 1
PATIENT_TO : 1
AN_REQUEST : 1
IS_EFAVIRENZ : 1
RHYTHM_DID : 1
NITROGEN_WILL : 1
CARE_VERBALIZED : 1
BELOW_CBC : 1
VIA_BY : 1
NONE_STATE : 1
IS_REPRODUCIBLE : 1
TO_BE : 4
BED_PUSHING : 1
INFORMATION_INFORMATION : 1
DECREASED_OF : 1
THE_RESULTS : 1
TIME_VA : 1
ADVISED_HE : 1
FROM_MINNEAP : 1
FACILITY_PCP : 1
COUGH_NO : 1
AND_LENS : 1
APPOINTMENTS_MRP : 1
WORK_YEAR : 1
CONTACT_GUARD : 1
YOU_TAKING : 1
FOR_REQUEST : 1
BAND_YES : 1
MVA_IN : 1
WHICH_FEEL : 1
PRESSURE_OSTEOPENIA : 1
INCREASE_BONE : 1
RATIVE_OF : 1
SIGNS_APPOINTMENT : 1
ANSWERING_MACHINE : 1
WEIGHT_CHANGE : 1
MALE_TO : 1
CHECK_LOCATION : 1
INFLUENZA_FINASTERIDE : 1
OBSERVATIONS_OBJECTIVE : 1
DETACHMENT_LB : 1
RATING_PURPOSES : 1
CONVERSATION_WITH : 1
ASSISTANCE_ASSISTED : 1
PREVIOUS_PACHYMETRY : 1
WE_WILL : 1
REASON_REQUEST : 1
RECIEVED_BLAKE : 1
ADMISSION_BETWEEN : 1
DJD_UP : 1
SKIN_OCT : 1
YES_OTHER : 2
AFTER_CALL : 1
CELE_MG : 1
YES_PREGNANT : 1
WITH_UPPER : 1
SSN_PACHYMETRY : 1
VETERAN_IN : 1
CONCERNS_CALL : 1
MINNEAP_AT : 1
TO_WITH : 2
IDENTIFIED_CALL : 1
YOU_FALL : 1
TO_UPCOMING : 1
OF_ANESTHESIA : 1
MONITORS_WAS : 1
WAS_HE : 1
ASK_OPHTHALMOLOGY : 1
IN_BATHROOM : 1
TO_TRY : 1
SUICIDALITY_DOING : 1
IMPROVE_OR : 1
WITH_MONCELLO : 1
NOT_RECEIVED : 1
PERFORMED_CALL : 1
HEENT_LIP : 1
FRUITS_OR : 1
BREATH_RECENT : 1
INTERDISCIPLINARY_TREATMENT : 1
NEW_PATIENT : 1
ASSISTED_LOUNGE : 1
SAMPLES_TO : 1
PATIENT_SIGNIFICANT : 1
INTERDISCIPLINARY_DISCHARGE : 1
CBC_NOV : 2
CALDWELL_ATHENS : 1
PHYSICIAN_MEDICAL : 1
OR_HOME : 3
PM_PREVENTIVE : 1
NURSING_INTERVIEW : 1
PHYSICAL_WEIGHT : 1
PATIENT_TESTS : 1
RESULTS_OF : 1
BELOW_LABS : 1
HAVE_QUESTION : 1
MUST_REMOVAL : 1
THE_IMEDCONSENT : 1
TO_AUSCULTATION : 1
OF_PROSTATE : 1
PHYSICIAN_UNABLE : 1
EX_DIE : 1
ALLERGIES_HAS : 1
DISCUSSION_DENIED : 1
BRUISING_NONE : 1
AND_TO : 1
UPPER_LATERAL : 1
APPEAL_TO : 1
LBP_WENT : 1
YOU_OPTOMETRY : 1
IF_PREGNANT : 1
PROBLEMS_PATIENT : 1
ADDRESSED_OF : 1
UNDER_DRUG : 1
LOCAL_MANAGER : 1
IT_IS : 2
CHAIR_SIDERAILS : 1
REMOVAL_OF : 1
BRONCHODILATOR_REACTION : 1
ANY_ABOUT : 1
RADIATES_TO : 1
LAST_DROP : 1
CONTACT_ACTIVE : 1
MG_EVERY : 1
GOUT_CALLED : 1
PUSHING_WHEEL : 1
ABLE_MEDICATION : 1
UBE_PAIN : 1
ONEHALF_TABLET : 2
UP_MALLOY : 1
OUTSIDE_RECORD : 1
NECK_PAIN : 1
SOME_THEM : 1
ABLE_RECONCILIATION : 1
CLINICS_NORTHWEST : 1
PRIMARY_PAIN : 1
SYMPTOM_DTN : 1
RIGHT_RETINAL : 1
UNABLE_TO : 3
DURATION_COMPLAINT : 2
ULCER_PREVENTION : 2
AT_APPROXIMATELY : 1
GENERAL_COUNSELING : 1
THIS_FOR : 1
DAILY_MEASUREMENT : 1
TIME_YES : 1
PROTOCOL_WAS : 2
CONSULT_MANAGEMENT : 1
WITH_CONTACT : 2
HEARING_RESOLVED : 1
HEMOCCULT_PROVIDED : 1
RESULTS_SEE : 1
WE_WE : 1
SITE_LEFT : 1
ORIENTED_PERSON : 1
MALE_FOR : 1
ITEMS_NOTED : 1
MORE_TEL : 1
SERVICE_MINNEAP : 1
CONTINUES_CLINICALLY : 1
THE_MONTHS : 1
BATHROOM_RESPIRATION : 1
MEDICATIONS_INCLUDING : 1
LIKE_BE : 1
THIS_FALL : 1
DTN_NEW : 1
COMPLAINTS_TURGOR : 1
LEARN_AN : 1
SYMPTOMS_CONTINUES : 1
OF_FEMORAL : 1
RESULT_APPOINTMENTS : 1
ALL_CAN : 1
RECEIVED_YOUR : 1
WT_KG : 1
THIS_CONTROL : 1
COUNSELING_RESULT : 1
OBTAINING_COCKE : 1
GET_STUCK : 1
THE_LEFT : 2
PATIENT_NOT : 3
JR_UNABLE : 1
HAVE_PHONE : 1
YO_MELANOMA : 1
BREATH_SOUNDS : 1
OUTPATIENT_SOCIAL : 1
SHOT_MAY : 1
ON_CERUMEN : 1
WITH_DRESSING : 1
AND_WILL : 5
MANAGEMENT_CONVERSATION : 1
TO_AN : 1
FIELD_OBSTRUCTION : 1
RESIDENT_STATUS : 1
SCREEN_WAS : 1
PART_THE : 1
BUT_CLINICALLY : 1
DISPLAY_TOOLS : 1
VAMC_LIMITED : 1
DPCLAB_PATIENT : 1
PATIENT_RECEIVED : 1
PO_CC : 1
BRONCHODILATOR_POST : 1
TAKEN_UP : 1
BE_CUT : 1
OBSERVED_HIS : 1
STRIP_EA : 1
AND_RIGHT : 1
IN_CM : 1
BONE_MASS : 1
FOR_REFILL : 1
OF_CONTINUES : 1
ORDERED_GOALS : 1
PAGES_SOCIAL : 1
CLINIC_HAS : 1
HE_MAY : 1
PAPULE_FEEL : 1
YES_RHYTHM : 1
HOME_PATIENT : 1
OPHTHALMOLOGY_ON : 1
ASK_FOR : 1
PT_WITH : 1
WORK_FACILITY : 1
APPROXIMATELY_PREVENTIVE : 1
NO_PROBLEMS : 1
LOSS_INSTRUCTED : 1
PAIN_COMFORT : 1
UNSPECIFIED_COUNSELING : 2
IN_IER : 1
MANAGEMENT_UNLISTED : 1
FOR_FOLLOW : 3
SIDERAILS_CALL : 1
OTHER_PER : 1
UNLISTED_EVALUATION : 1
IMPROVE_PRESERVE : 1
AND_FUROSEMIDE : 1
UNDER_CONTROL : 1
CALL_AND : 1
MEDICAL_HE : 1
RESULT_FUTURE : 1
PATIENT_AND : 2
COMPLAINT_NOT : 1
WITH_NUMBERS : 1
AT_RATING : 1
OUTPATIENT_HAVING : 1
TO_REACH : 2
PROBLEM_RECIEVED : 1
DIFFICULTY_OWING : 1
DID_WANT : 1
CONTACT_PATIENT : 1
DETERMINE_MOST : 1
HAS_DIFFICULTY : 1
BARRIERS_THE : 1
BRONCHODILATORS_AS : 1
NUMBER_SHIELD : 1
DAILY_LIVING : 1
PROBLEM_HPI : 1
YES_PRACTITIONER : 1
OF_BLOOD : 1
TRIAGE_FUTURE : 1
WITH_OTHER : 1
POPPED_SOME : 1
HAVE_SIX : 1
NOV_NOV : 3
ACTIVE_STANDARD : 1
WAS_CONFUSED : 1
COMFORT_TEST : 1
NO_WT : 3
AT_ON : 1
PAIN_REASSESSMENT : 1
VET_WRITTEN : 1
ACTIVELY_ENROLLED : 1
TO_VITALS : 1
OF_USE : 1
BLOOD_MS : 1
RIGHTS_RESPONSIBILITIES : 1
FOLLOW_UP : 7
MG_TAB : 5
MOISTURE_PHYSICIAN : 1
IN_THE : 2
TECH_TECH : 1
NO_ORIENTED : 1
COMPLETED_ON : 1
APPOINTED_PCP : 1
REGARDS_TO : 1
PROBLEM_UNSPECIFIED : 2
WORK_THESE : 1
CLASS_CC : 1
PAIN_OA : 1
PAIN_APPROPRIATE : 1
TO_OR : 1
DIFFICULTY_ACTIVITY : 1
EXPERIENCES_MEDICATION : 1
WELL_ACTIVE : 1
MG_CAP : 2
SINGLE_CLASS : 1
TOBACCO_PATIENT : 1
IDENTIFIED_RETURNED : 1
SITE_DELTOID : 1
VA_OFFICE : 1
URINE_NORMAL : 1
PREVENT_FROM : 1
LAST_NIGHT : 2
MD_PGY : 1
NONVA_EZETIMIBE : 1
SHOWED_ON : 1
NONVA_SIMVASTATIN : 1
IS_SKIN : 1
AT_BEDTIME : 1
INDICATED_THAT : 1
TIME_HYPERLIPIDEMIA : 1
VET_VIA : 1
NEW_WORSENING : 1
REPORT_RECIEVED : 1
OF_TESTS : 1
PHONE_NUMBER : 2
THIS_NOTES : 1
HKT_ON : 1
LB_WORKING : 1
PUSHING_CHAIR : 1
FOR_MR : 1
CARED_FOR : 1
OF_NOT : 1
STRIP_USE : 2
WELL_CARDIOLOGIST : 1
BRONCHIAL_HYGIENE : 1
NEEDS_REFILL : 1
PATIENT_IS : 5
AND_RAZOR : 1
TELEHEALTH_PROGRAM : 1
SHE_NEEDS : 1
OF_HOURS : 1
NURSING_STAFF : 1
RESULTS_YOUR : 1
CONFUSED_ON : 1
NOW_RETINAL : 1
AT_STABLE : 1
NOT_HAVE : 1
APPOINTMENT_CONFIRMED : 1
IN_ATTEMPT : 1
HOME_PROGRAM : 1
CARDIOLOGY_ONE : 1
REFILL_TO : 1
ANTICIPATED_VITAL : 1
MONITORS_PRIVATELY : 1
UP_CARDIOLOGY : 1
INFORMED_FOR : 1
NONE_DOING : 1
PATIENT_REQUESTS : 1
CHAIR_ON : 1
DRUGS_SHE : 1
CAREGIVER_SIGNIFICANT : 1
PHQ_WAS : 1
WRITTEN_AND : 1
WITHIN_NORMAL : 1
DID_WELL : 1
PRODUCTS_NO : 1
HAVING_NO : 1
REMOVAL_NAIL : 1
FLU_FOLLOW : 1
SURGEON_PGY : 1
ALCOHOL_DUSED : 1
PROCEDURE_THE : 1
APPOINTMENTS_SPECIFY : 1
OUTSIDE_PHYSICIAN : 1
ENROLLED_THE : 1
PT_NEEDS : 1
PRESENTS_TO : 1
OUTPUT_IRRIGANT : 1
BACK_IT : 1
LOST_THEM : 1
CARED_EX : 1
EVERY_ALLERGIES : 1
PHYSICIAN_TO : 1
UP_HIS : 2
ASSIST_PHYSICAL : 1
BRUISING_HAVE : 1
HEALTH_PATIENT : 1
HAD_FEVER : 1
PROFILE_AS : 1
FACILITY_CLINICS : 1
DEFINITION_ASSIST : 1
TAKE_CAPSULE : 1
WAS_CONFUSION : 1
HAS_MEDICINE : 1
MESSAGE_ON : 2
YRS_UP : 1
EVERY_UNITS : 1
PT_HEARING : 1
FUROSEMIDE_MG : 1
LOCATION_NE : 1
GROSSLY_INTACT : 1
SOCIAL_WORK : 1
GIVEN_TO : 1
FEVER_OR : 1
ATENOLOL_TAB : 1
SIG_INDEPENDENLTY : 1
PUT_RAZOR : 1
REEVALUATION_OF : 1
UNLIKELY_FOLLOWUP : 1
NORMAL_AS : 1
CC_NUMBER : 1
AND_THE : 4
SUICIDE_ATTEMPT : 1
LIVING_DEFINITION : 1
ICDCM_VISTA : 1
ASSESSMENT_MOBILITY : 1
BE_TO : 1
HKT_LESIONS : 1
TOOLS_ALT : 1
THERAPY_COPD : 1
THE_RETURNED : 1
ON_PRESCRIPTION : 1
AS_USUALLY : 1
TCU_ANTICIPATED : 1
DECREASED_SENSATION : 1
YOUR_LOCAL : 1
MVA_NO : 1
MG_MMI : 1
TALKED_TO : 1
WITHIN_LIMITS : 1
LIKE_TO : 1
TIMES_FOR : 1
WAS_IN : 1
MAY_DECEMBE : 1
SPOKANE_ADDENDUM : 1
THIS_INVOLVES : 1
TO_SEEN : 1
COMMENT_METAB : 1
TO_PREREGISTER : 1
MANAGEMENT_CLASS : 1
VISIT_APPT : 1
ALS_PRESENTS : 1
EXPERIENCES_MRP : 1
LIMITS_CBI : 1
SKIN_ASSESSMENT : 1
LEFT_HAND : 2
NOTE_MOST : 1
SEND_LB : 1
HOURS_PM : 1
NOTE_LINKED : 1
NOT_TO : 5
MANAGEMENT_SERVICE : 1
UPON_LEFT : 1
INTAKE_OUTPUT : 1
FINANCIAL_AND : 1
LEFT_WILL : 1
HE_HAD : 1
NKA_CAPSULES : 1
HAD_AN : 1
HOOD_INDICATED : 1
SELECT_THE : 1
HE_TO : 2
WAS_PENDING : 1
IMPROVED_CONTINUES : 1
KIMYANA_NO : 1
OUTPATIENT_PM : 1
TAKE_ON : 1
HAS_PREVENTATIVE : 1
ADMINISTRATIVE_NOTE : 1
LOSS_CARPAL : 1
THAT_TEACHING : 1
PENICILLIN_ST : 1
TYPE_DTN : 1
CHECK_HIM : 1
YOUR_INFORMATION : 1
ADDENDUM_URINE : 1
RELAYED_TO : 1
IS_NOW : 1
MEDICAL_OTHER : 1
ON_HOW : 1
EVALUATION_CODE : 1
NO_LIFTING : 1
PE_HEENT : 1
NIGHT_SWEATS : 2
AFLLAAA_PE : 1
OUTPUT_CBI : 1
COLORECTAL_CANCER : 1
WELL_OUTPATIENT : 1
MEDICATIONS_WE : 1
NONV_MEDICAL : 2
ASSIST_TOUCH : 1
DME_WT : 1
PHARMACY_GENERAL : 1
SURROGATE_IMED : 1
FINANCIAL_DIFFICULTY : 1
LOST_PLEASE : 1
MEMORIAL_TO : 1
JODY_DISCHARGE : 1
NEURO_INTACT : 1
YOUR_NOV : 1
HIS_FAMILY : 1
MS_YO : 1
NOTE_ASSOCIATE : 1
RESPONSIBILITIES_FOR : 1
REASSESSMENT_OUTPATIENT : 1
SOON_THE : 1
HAVE_LISTED : 1
RECEIVED_CARDS : 1
THE_HYPERLIPIDEMIA : 1
HPI_OTHER : 1
DOING_ALL : 1
OR_VEGETABLES : 1
PACHYMETRY_OUTPATIENT : 1
ON_OF : 1
AN_IN : 1
UNDER_RECOMMENDATION : 1
EVALUATION_MANAGEMENT : 2
MACHINE_MAIL : 1
TAKEN_AT : 1
ETT_PART : 1
ASSESSMENT_ADDENDUM : 1
WAS_NEEDED : 2
DAILY_CALL : 1
SIG_TABLET : 1
CAPSULE_BY : 1
DOCUMENT_ACCEPTED : 1
DAILY_ASSIST : 1
NECK_MULTIPLE : 1
TO_YOU : 2
PAIN_SOB : 1
ICE_DURATION : 1
ASSOCIATE_IRONS : 3
RECENTLY_SURGERY : 1
ADMINISTERED_NOTE : 1
TO_GET : 1
ONEHALF_DAILY : 1
WEEK_LATER : 1
IN_MONTH : 1
IN_CABG : 1
OR_NIGHT : 1
OCT_RIGHT : 1
NURSING_NOTE : 3
ADMISSION_CALL : 1
COMMIT_IS : 1
TO_OPHTHALMOLOGY : 1
INFORMATION_WITH : 1
YOU_EVER : 1
OF_RTC : 1
AND_PATIENT : 1
OF_KNEES : 1
LUMABR_AREA : 1
NECK_AND : 1
OCT_YRS : 1
CONFUSION_AS : 1
STENTS_WILL : 1
OR_IMED : 1
METAB_DJD : 1
SOCIAL_HX : 1
PLEASE_THE : 1
NEED_UAL : 1
MANAGEMENT_AND : 1
IN_UARY : 1
MOUTH_THREE : 1
LOCATION_EMERGENCY : 1
FLU_YRS : 1
DISCUSSED_PATIENT : 1
TRANSPORTED_ER : 1
SIMVASTATIN_AFLLAAA : 1
GOOD_COMPLIANCE : 1
DOES_NOT : 2
OF_QUITTING : 1
CHAIR_UP : 1
SEE_PROBLEM : 1
COMFORT_CURVE : 1
YOU_TO : 2
OF_AM : 1
MRP_MEDICATION : 2
NEGATIVE_MG : 1
TRY_MAKE : 1
HX_VET : 1
BE_OCT : 1
MONTHS_GOOD : 1
ID_BAND : 1
ON_SOCKS : 1
COUNSELED_ON : 1
LIST_DOES : 1
AS_REQUESTED : 1
MONTHS_LBP : 1
TELEPHONE_PATIENT : 1
ICDCM_IMAGE : 1
EXTENSIVE_ASSIST : 1
MOVE_VOLUNTARILY : 1
LOSS_RTC : 1
HIS_CAME : 1
ACTIVE_ADV : 1
EA_STRIP : 1
MEDICAL_CENTER : 2
EXTENSIVE_ANY : 1
FOR_LAST : 1
YO_ADMITTED : 1
PURPOSES_AS : 1
PINHOLE_REQUESTS : 1
OR_HER : 1
WILL_SEND : 1
MUSCLE_CRAMPS : 1
HVF_NO : 1
CALL_BELL : 1
OUTCOMES_SKIN : 1
PICKED_UP : 1
AFTER_NO : 1
OU_REFILL : 1
ACCUCHEK_CV : 1
LEFT_OCCUPATIONAL : 1
REFILL_IMMUNIZATION : 1
MALE_VETERAN : 2
LIP_WITH : 1
ANTICOAGULATION_IS : 1
NOT_WANT : 2
OUTPUT_GASTROINTESTINAL : 1
HIS_OUTSIDE : 1
MR_MS : 1
NO_APPARENT : 1
PIOGLITAZONE_PRESSURE : 1
OF_YOUR : 1
THE_HAND : 1
PULSE_PT : 1
TO_PROVIDERS : 1
RATIVE_CHANGES : 1
TEACHING_ON : 1
AND_NECK : 1
REMOVAL_STATES : 1
WELL_THE : 1
OBTAINING_CONSENT : 1
ML_PURIFIED : 1
SHIFT_ML : 1
TEST_STEELE : 1
SCHEDULE_NEC : 1
FIELD_ND : 1
UPDATE_STATES : 1
DEXAMETHASONE_TO : 1
HER_WITH : 1
HISTORY_FROM : 1
MOUTH_AS : 1
TO_UP : 1
EXAM_AT : 1
RECENTLY_HAD : 1
FOR_EX : 1
PLACE_TIME : 1
REVIEWED_DISCUSSED : 1
SHE_HAVING : 1
DIFFICULTY_AND : 1
WITHIN_MEDICAL : 2
FOR_EXAM : 1
APPT_SURGERY : 1
SB_DID : 1
PENDING_IDENTIFIED : 1
KG_STATES : 2
SOUNDS_RECENT : 1
MAJOR_PERFORMED : 1
BULBAR_PRESENTS : 1
TO_DOES : 1
DIAGNOSIS_GLEASON : 1
CALL_BETWEEN : 1
EXCELLENT_CARDIOVASCULAR : 1
CHANGE_FOR : 1
PT_PCP : 1
LATERAL_FIELD : 1
LEFT_MESSAGES : 1
AND_IMPLANTS : 1
WELL_HISTORY : 1
RESULTS_WITHIN : 1
REGULAR_SESSION : 1
HERE_FOR : 2
MEMORIAL_UNABLE : 1
IMPROVED_BUT : 1
EXPECTED_OUTCOMES : 1
NUMEROUS_TAKE : 1
RECORD_OTHER : 1
THE_DATE : 1
YOU_AND : 1
FUTURE_APPOINTMENTS : 2
PRACTITIONER_OBTAINING : 1
PRESSURE_YOU : 1
OCCUPATIONAL_THERAPY : 1
HIS_ASSESSMENT : 1
PODIATRY_UP : 1
OF_COMPLAINT : 2
HOME_TELEPHONE : 1
THE_IS : 1
HAD_OPPORTUNITY : 1
REQUEST_TO : 1
MEDICATION_REQUESTED : 1
ASSIST_WITH : 1
CAREFULLY_AND : 1
PERSON_TO : 1
HAVE_FINANCIAL : 1
AROUND_AM : 1
APPOINTMENT_TRANSMISSION : 1
TO_NIGHT : 1
EXIT_NOTE : 1
ACTIVITY_OTHER : 1
INPATIENT_NONV : 2
ACCEPTED_FOR : 1
SWEATS_DIETARY : 1
NUTRITION_CLASS : 1
EDUCATION_WAS : 1
AND_VETERANS : 1
SHOULDER_DECREASED : 1
OVER_THE : 1
THEREFORE_THE : 1
TO_CARED : 1
NOT_PRESUMED : 1
CABG_TEST : 1
IS_HERE : 1
VACCINE_SITE : 1
OXIMETRY_PT : 1
FALL_RISK : 2
THEM_SURGEON : 1
PROVIDED_VITAL : 1
CALLED_AND : 1
STRATEGIES_TO : 1
HE_DOES : 1
MAY_LAST : 1
HELP_GET : 1
GOAL_FALL : 1
PRACTITIONER_CONSENT : 1
DUSED_LICE : 1
FALL_FOR : 1
ON_SUPRASPINATUS : 1
APPROPRIATE_FOR : 1
OFTEN_DID : 2
LIVING_SIG : 1
APPROPRIATE_STENTS : 1
WITHOUT_OR : 1
IT_HEALING : 1
RIGHT_SHOULDER : 1
NOT_COMMIT : 1
FOR_MALIGNANT : 1
AND_NUMEROUS : 1
HYGIENE_WERE : 1
TEMPERATURE_CLEAR : 1
NO_PATIENT : 1
HOME_MAS : 1
DISCUSSED_FOR : 1
AND_OUTPUT : 1
IT_ADDRESSED : 1
NO_COMPLAINTS : 1
AND_ACCUCHEK : 1
WITH_OUR : 1
ADENOCARCINOMA_OF : 1
NO_COUGH : 1
ASSISTANT_NURSING : 1
PREVENT_YOU : 1
NEC_EYES : 1
XYZZY_SCREEN : 1
TAKE_ONE : 3
ON_COMMAND : 1
FOR_REEVALUATION : 1
REPORTS_COMPLIANCE : 1
TEST_BLOOD : 1
TECH_INFORMED : 1
FACILITY_APPOINTED : 1
RANGE_FOR : 1
PE_OBESE : 1
VET_WITH : 1
VS_CONTINUES : 1
HURSTS_ETT : 1
AROUND_AND : 1
SCREEN_OUTSIDE : 1
IS_MODIFIED : 1
TOBACCO_ADVISED : 1
ABD_NO : 1
SKIN_TEMPERATURE : 2
WHAT_HAVE : 1
CA_SIGNS : 1
THE_LABEL : 1
FINASTERIDE_MG : 1
APPROXIMATELY_PM : 1
ON_ALL : 1
STANDARD_TITLE : 1
NEED_DIAGNOSIS : 1
HOME_INPATIENT : 1
EXAMINER_HAD : 1
EXTREMITIES_OR : 1
DELTOID_INR : 1
SPEECH_PRESUMED : 1
YOU_DOING : 1
DID_COME : 2
ETODOLAC_DATE : 1
CURRENT_ASSESSMENT : 1
RISK_SCREENING : 1
YOUR_CBC : 1
RING_ON : 1
AS_FOLLOWS : 1
WANT_TO : 2
MONTHS_REPORTS : 1
WAS_INVOLVED : 1
ACTIVE_ISSU : 1
HISTORY_OF : 1
HAVE_QUESTIONS : 1
PRIVAGE_SECTOR : 1
DISPLAY_UNDER : 1
AT_PER : 1
SESSION_CONTINUES : 2
INR_FOR : 1
PALLIATIVE_CARE : 1
SCREENING_KG : 1
PROBLEMS_SOUNDS : 1
CLEAR_TO : 1
NAME_MAR : 1
SISTER_HAVE : 1
YES_HAS : 1
ADMITTED_TO : 1
MASS_HIP : 1
ANSWERED_TOBACCO : 1
HOW_MANY : 1
NO_PROVIDER : 1
AND_RESPONSIBILITIES : 1
VISTA_DISPLAY : 1
FOR_TCU : 1
IN_CLIENT : 1
WITHOUT_INCIDENT : 1
ANTICOAGULATION_CURRENTLY : 1
USE_FY : 1
NIGHT_NO : 1
CAREGIVER_OUTPATIENT : 1
EAT_FRUITS : 1
EXIT_INTERVIEW : 1
OF_STEELE : 1
MILK_NO : 1
YOU_ANY : 2
HYPERLIPIDEMIA_NOS : 1
STATES_TEACHING : 1
UAL_LAB : 1
TECH_AGE : 1
EACH_CAREFULLY : 1
CALLED_AM : 1
LATERAL_VISUAL : 1
IN_SECTOR : 1
DENIED_PULSE : 1
CLINIC_OR : 1
AND_THAT : 1
WITH_BULBAR : 1
SUN_AND : 1
ALLERGIES_PENICILLIN : 1
THROUGH_NIGHT : 1
PLEASE_SO : 1
NOTE_TRIAGE : 1
EA_USE : 1
COMMIT_TO : 1
THE_BLOOD : 1
NEED_BE : 1
CLINICALLY_THYROTOXIC : 1
SPECIFY_SUPPLIES : 1
CALL_FOR : 1
KG_CLIENT : 1
STUCK_NOT : 1
AM_ACTIVE : 1
HOME_CURRENTLY : 1
PHARMACY_TO : 1
CAP_MOUTH : 1
GOALS_OUTCOMES : 1
WE_HAVE : 2
PLACE_HIP : 1
ICE_OF : 1
HOME_SIMVASTATIN : 1
NAD_PHYSICIAN : 1
IMAGES_MEDICATION : 1
ALCOHOL_AN : 1
ED_NURSING : 1
TOLERATED_PROCEDURE : 1
ATTEMPT_WARFARIN : 1
MEMORIAL_SAO : 1
CALL_SYMPTOM : 1
SURGERY_PRIVAGE : 1
NURSE_PATIENT : 1
FROM_AND : 1
FEVER_NIGHT : 1
THE_CLC : 1
PUTTING_ON : 1
CALDWELL_VETERAN : 1
MALLOY_AT : 1
SHARED_STATUS : 1
WARFARIN_MONITORS : 1
PAIN_NO : 2
NOV_WEIGHT : 2
YOU_HAD : 1
INFORMED_CONSENT : 1
MAINTENANCE_CONFIDENTIALITY : 1
UNSPECIFIED_AUTHOR : 1
HE_CONTINUE : 2
THEM_MD : 1
ADVISED_TO : 1
PT_STATES : 5
TO_AMENDS : 1
ON_SHE : 1
THE_RIGHT : 1
WITH_CARDIOLOGY : 1
ATHENS_NAME : 1
ONLY_REQUESTED : 1
CHART_FUROSEMIDE : 1
OUTCOMES_CURRENT : 1
DISEASE_PRESSURE : 1
MAKE_AMENDS : 1
OF_LIPID : 1
WAS_GIVEN : 1
PRESSURE_ULCER : 2
LAB_YEAR : 1
THEM_RECOMMENDED : 1
NOTES_MAY : 1
HAVE_FOR : 1
PREREGISTER_FOLLOW : 1
AREA_VACCINE : 1
TOBACCO_USE : 3
MINUTE_SESSION : 2
LAST_MONTHS : 1
ANSWERED_NKA : 3
VITALS_LAST : 1
LAST_LBP : 1
NO_NUTRITION : 1
MEDICINE_FOR : 1
ON_LUMABR : 1
HIP_PAIN : 1
AT_THAT : 1
FEEL_IS : 1
AGREEAB_ACCUCHEK : 1
WITH_INSTRUCTIONS : 1
STATES_SHE : 1
THIS_SCHEDULE : 1
XRT_THEY : 1
DME_LB : 1
PROCESS_ALSO : 1
VITALS_OBSERVED : 1
BEGIN_SOON : 1
PER_AND : 1
OF_IN : 1
AND_BACK : 1
EVERY_FOR : 1
LEFT_MESSAGE : 2
NOT_TEMPERATURE : 1
APPOINTMENT_NO : 1
FLU_VACCINE : 1
JR_PHYSICIAN : 1
BLOOD_FACILITY : 1
OF_CHEST : 1
CELE_IB : 1
KG_BED : 1
AFFECTING_THE : 1
COME_TO : 2
TELENURSE_NIGHT : 1
SHE_IS : 1
INCOMPLETE_AND : 1
THE_AT : 2
MACHINE_VOICE : 1
HIS_MEDICATIONS : 1
EXERCISES_HOME : 1
PM_ACTIVE : 1
FOLLOW_OF : 1
ACTIVELY_IN : 1
PE_NAD : 1
NEEDED_IS : 2
TO_OF : 2
TRY_TO : 1
DYSPNEA_SHE : 1
PHYSICIAN_TURGOR : 1
VAMC_MINNEAP : 1
TO_FOR : 1
FOLLOWING_DOCUMENT : 1
PLEASE_REFER : 1
ETT_AFFECTED : 1
ON_MG : 1
TEST_WITHIN : 1
AGE_FROM : 1
ON_ANSWERING : 1
PENICILLIN_LOCATION : 1
SIGNS_TWICE : 1
OTHER_QHS : 1
DIFFICULTY_INTERDISCIPLINARY : 1
AND_WANT : 1
PROVIDE_HER : 1
FUTURE_DPCLAB : 1
TO_THE : 4
BLOOD_PRESSURE : 5
OU_MG : 1
PHONE_HOME : 2
HAD_NECK : 1
FOLLOW_CARE : 2
FOR_CBT : 1
APPT_HE : 3
CBI_OUTPUT : 1
NOT_SKIN : 1
SOCIAL_ELDERLY : 1
REGIONAL_FIELD : 1
SIGNS_RESCHEDULED : 1
SCHEDULE_HYPERLIPIDEMIA : 1
RHYTHM_SB : 1
NIGHT_PATIENT : 1
WE_NOT : 1
SURGERY_SURG : 1
BED_SCORE : 1
FILL_NURSING : 1
XYZZY_PHQ : 2
HAD_ATTEMPT : 1
THE_OF : 6
TO_PREVENT : 1
MOUTH_BEDTIME : 1
MR_YO : 1
ACTIVE_NURSING : 1
REGIONAL_ASSISTANCE : 1
THE_IDENTIFIED : 1
REASSESS_OBJECTIVE : 1
PATIENT_EDUCATION : 1
FALL_SCREEN : 2
BY_MOUTH : 5
LISTED_WILL : 1
CARE_HOME : 1
NOT_OR : 1
CONTINUES_HAVE : 1
LB_CLIENT : 1
NURSING_NEURO : 1
YOUR_ANTICOAGULATION : 1
ONE_CAPSULE : 1
BEARING_LEGS : 1
NEW_INSURANCE : 1
UARY_NECK : 1
PROCEDURE_WELL : 1
SORE_PATIENT : 1
PLEASE_TO : 1
TRIAGE_HOURS : 1
UPPER_AND : 1
FACE_NIGHT : 1
PATIENT_NAME : 2
DATE_PLEASE : 1
THE_WAS : 2
ON_MONITORS : 1
YOU_THIS : 1
DATE_REFER : 1
HAVE_SCREENING : 1
EDUCATION_PALLIATIVE : 1
CHIEF_COMPLAINT : 1
WITH_NITROGEN : 1
ALT_TOTAL : 1
LIVING_WITH : 1
MACHINE_NURSING : 1
LEVEL_ENCLOSED : 1
NEEDS_ALBUTEROL : 1
SELECT_CORRECT : 1
SCREEN_FY : 1
DID_NOT : 4
EMERGENCY_CONTACT : 1
PAIN_SWELLING : 1
OX_OXIMETRY : 1
NO_DOE : 1
EXAM_RESULT : 1
TO_THEM : 1
CORRECT_HISTORY : 1
THAT_HE : 1
MULTIPLE_DISKS : 1
OA_ON : 1
LIGHT_NO : 1
MEDI_CALL : 1
SB_WELL : 1
HIS_LEFT : 1
CARPAL_SYND : 1
BOTH_THE : 1
CARDS_YOU : 1
AS_GOALS : 1
VEGETABLES_OR : 1
TYPE_ANESTHESIA : 1
TIMES_PAIN : 1
YOU_THEM : 1
EXTRACTIONS_LENS : 1
JOINT_RATIVE : 1
AFTER_MVA : 1
UP_OF : 1
TEST_AS : 1
AND_HYGIENE : 1
REASON_FOR : 3
CM_BMI : 1
NER_PROTECTION : 1
AS_LIST : 1
WILL_ALSO : 2
TAKE_TABLET : 4
WAS_NOT : 2
AN_ATTEMPT : 1
THEY_WILL : 1
REMOVAL_PT : 1
VSS_WITHIN : 1
HPI_YO : 1
LOSS_OF : 1
OF_ISOTOPE : 1
THE_MAINTENANCE : 1
UARY_PATIENT : 1
CARE_JOINT : 1
REDNESS_OR : 1
UNDERSTANDING_AGREEAB : 1
MOST_EFFECTIVE : 1
NATURE_SINCE : 1
LATER_HE : 1
ON_FROM : 1
HIS_THERE : 1
CERUMEN_REMOVAL : 1
VET_DENIED : 1
PERFORMED_THE : 1
FOR_AND : 1
ADDENDUM_NO : 1
OR_VISION : 1
FINGER_ON : 1
PULSE_PULSE : 1
CENTER_NOTE : 1
ND_WEDNES : 1
WEDNES_OTHER : 1
SURGERY_AN : 1
SCORE_AND : 1
ADENOCARCINOMA_PROSTATE : 1
ON_FOR : 1
DISKS_AND : 1
NOT_WHAT : 1
THIS_UNDER : 1
ML_TOTAL : 1
APPT_FOR : 1
ARTHRITIS_NO : 1
JOINT_BLOOD : 1
STABLE_MG : 1
PAIN_MULTIPLE : 1
HAVE_SEVERAL : 1
DIFFICULTY_YES : 1
STATES_AND : 1
TO_TRUNK : 1
PERSON_WHOM : 1
CATARACT_AND : 1
STAFF_ADDRESS : 1
ADDENDUM_FOR : 1
AND_MANAGEMENT : 1
ANESTHESIA_REGIONAL : 1
SAMPLES_TEST : 1
QUESTIONS_OR : 1
THE_PAST : 1
CARPAL_TUNNEL : 1
ATTEMPT_IMPROVE : 1
VOIDING_DIFFICULTY : 1
ONE_BY : 3
LIP_MM : 1
SYMPTOM_WHEEZING : 1
DEBRIDEMENT_LEFT : 1
OR_ON : 1
ADDENDUM_OF : 1
OPPORTUNITY_TO : 1
NURSE_IS : 1
OTHER_MAN : 1
BIRTH_RIGHT : 1
INFLUENZA_MAR : 1
APPARENT_PROBLEM : 1
PRIVATELY_GIVEN : 1
HAVE_LEFT : 1
HEALING_WELL : 1
PRE_BRONCHODILATOR : 1
HEARTBURN_NO : 1
PATIENT_TOLERATED : 1
RADIOACTIVE_ISOTOPE : 1
LEFT_AND : 1
REFER_TO : 1
WITHOUT_REDNESS : 1
LB_ACTUAL : 1
OR_DYING : 1
PARK_DISCHARGE : 1
ADDENDUM_WORSE : 1
MAR_MG : 1
AND_SISTER : 1
PROFILE_FOR : 1
OCCUPATIONAL_EVALUATION : 1
BLOOD_LOSS : 1
COMPLAINT_OF : 1
IN_BMI : 1
FRICTION_NO : 1
WELL_WELL : 1
EMERGENCY_CALL : 1
ULCER_SORE : 1
CBT_IN : 1
KNEE_DE : 1
OU_NEEDS : 1
TO_TELENURSE : 1
AND_FOR : 1
AT_STEELE : 1
AN_TO : 2
LABEL_YOU : 1
NOW_DETACHMENT : 1
NO_STRENUOUS : 1
OBJECTIVE_PACK : 1
BLOOD_REASON : 1
YOU_CAN : 1
CALL_NOTE : 1
WITH_OF : 2
BY_NURSING : 1
PROVIDED_CONTACT : 1
THE_PT : 1
NEED_FOLLOW : 1
NIGHT_NEED : 1
PAPULE_WHICH : 1
RECENT_SURGERY : 1
NUTRITION_CARDIOVASCULAR : 1
UNRE_ABLE : 1
PATIENT_HAS : 4
WEIGHT_LIFTING : 1
NAIL_HE : 1
JODY_HOLMAN : 1
PLEASE_HER : 1
HAVE_UNABLE : 1
SESSION_IN : 1
MONTHS_MEDICATIONS : 1
STRENUOUS_SITE : 1
CALL_SO : 1
VETERANS_SISTER : 1
GENERAL_WORK : 1
OTHER_UNSPECIFIED : 2
FEVERS_NIGHT : 1
RATIVE_DISEASE : 1
GLEASON_ADENOCARCINOMA : 1
GOALS_AND : 1
YOU_LIKE : 1
COLON_RISK : 1
CONTINUE_TRY : 1
FINGER_DEAD : 1
CONTINUES_THYROTOXIC : 1
THEM_CALL : 1
TO_TRAVEL : 1
NONE_WAS : 1
ATHENS_ON : 1
TEST_FOR : 1
HIS_FOR : 1
CURRENT_PAIN : 1
FOR_ON : 1
AND_NOT : 2
HYGIENE_EAT : 1
NUTRITION_MANAGEMENT : 1
STATES_TO : 1
NURSING_PATIENT : 1
OUTPATIENT_MEDI : 1
EACH_ITEM : 1
UP_LATE : 1
DEPRESSION_DX : 1
DOING_YOU : 1
RISK_SIGNATURE : 1
STATES_HIS : 1
WELL_SEE : 2
ND_EXCESS : 1
MM_ULCER : 1
NOS_CATARACT : 1
VC_NONE : 1
TO_RETURN : 1
BUT_CONTINUES : 1
HAS_NO : 1
OVER_HIS : 1
HAS_POPPED : 1
TO_PLACE : 1
STATE_RIGHTS : 1
AVA_MESSAGE : 1
CLIENT_DID : 2
THAT_INFORMATION : 1
CULTURE_WAS : 1
DECEMBE_NUTRITION : 1
THYROTOXIC_MG : 1
SENSATION_BILAT : 1
OF_LEFT : 1
EXTREMETIES_OF : 1
MAIL_OPTOMETRY : 1
PATIENT_SURGERY : 1
NOTE_CELE : 1
SIGNIFICANT_MEDICATIONS : 1
TIME_PRACTITIONER : 1
FACE_FACE : 1
TIME_THE : 1
ASSIST_ANY : 1
SIMVASTATIN_ONEHALF : 1
KNEES_THE : 1
PHE_INSTRUCTED : 1
FRONT_CHEST : 1
THE_REGULAR : 1
FOR_UPDATE : 1
COMMENT_DJD : 1
AN_APPEAL : 1
BLOOD_CAUTIONTABLET : 1
TRIAGE_NOTE : 2
WORK_HIS : 1
ATTEMPT_TO : 1
APPT_CLIENT : 1
COLLECTION_STOOL : 1
TIME_PAIN : 1
TECH_LAB : 1
VEGETABLES_MILK : 1
THE_IF : 2
TEXT_NOTE : 1
RESPIRATION_TO : 1
UP_CALL : 1
REQUIRED_PAIN : 1
NO_NEW : 1
ON_MODIFIED : 1
VIA_WRITTEN : 1
OF_ILLNESS : 1
PROSTATE_BLOOD : 1
YEAR_MEDICATION : 1
MEDICAL_APPOINTMENT : 1
SPINAL_INJURY : 1
ANY_FURTHER : 1
CORD_INJURY : 1
INFORMATION_WILL : 1
PROGRAM_BRONCHODILATOR : 1
EFFECTIVE_TEACHING : 1
TAB_ACTIVE : 1
OR_COMMAND : 1
HAVE_ANY : 2
UNABLE_REACH : 2
NUMBER_IDENTIFIED : 1
DYING_WILL : 1
TO_NO : 3
CONSULT_NUTRITION : 1
BLOOD_WORK : 1
RTC_HKT : 1
OCT_MOVING : 1
COUNSELING_KIMYANA : 1
MANAGER_BE : 1
SIMVASTATIN_MG : 1
ISOTOPE_YEAR : 1
PROVIDER_IDENTIFIED : 1
NMSC_NER : 1
PT_TO : 2
TESTS_NONE : 1
DIE_HAD : 1
NOTE_DECREASED : 1
LOCAL_PHARMACY : 1
UAL_SURGERY : 1
WHEELCHAIR_BY : 1
FILE_STATUS : 1
AND_CHANGE : 1
WITHIN_SEE : 1
DERVIATIVE_ADMINISTERED : 1
AS_ADDENDUM : 1
VIA_WHEELCHAIR : 1
EXTREMITIES_VOLUNTARILY : 1
INSTRUCTED_INFORMATION : 1
COMPLAINTS_VSS : 1
BLOOD_INCREASED : 1
PROBLEMS_BREATH : 1
AC_JOINT : 1
CC_OTHER : 1
MESSAGE_AND : 1
THAT_TOPIC : 1
RESOLVED_TO : 1
WEAKNESS_NIGHT : 1
ALT_PROTEIN : 1
DYSPNEA_DRUGS : 1
WAS_RECENTLY : 1
SEEN_HOW : 1
NEED_LAB : 1
HISTORY_THE : 1
RTC_MEDICATIONS : 1
CHANGES_OF : 1
COORDINATOR_HOLMAN : 1
ALBUTEROL_TO : 1
PLEASE_ASSIST : 1
TO_OTHER : 1
MG_PLEASE : 1
TEACHING_TOPIC : 1
OTHER_WITH : 1
DID_SEEK : 1
WILL_THEM : 1
RECIEVED_FROM : 1
HAD_FRACTURE : 1
FINASTERIDE_TAB : 1
CENTER_ASSOCIATE : 1
PAIN_IS : 1
PLASMA_STAYS : 1
MINUTES_PAIN : 1
NONE_BEEN : 1
MEDICATIONS_DEPRESSION : 1
USE_AND : 1
ML_LINES : 1
PAIN_REASSESS : 1
DEPRESSION_DM : 1
INDICATED_THE : 1
NUMBER_MAS : 1
PROTEIN_SERUM : 1
VET_RETURN : 1
PATIENT_ACCEPTED : 1
ALL_ITEMS : 1
CARDIOLOGIST_USUALLY : 1
PROVIDED_SIGNS : 1
STATES_HEARING : 1
FRICTION_APPARENT : 1
EXAMINER_HOOD : 1
FROM_BLAKE : 1
ABOUT_CBC : 1
PART_OF : 1
SOUNDS_NECK : 1
NIGHT_NEEDS : 1
DRINKS_TRIAGE : 1
NO_EXPERIENCES : 1
MEDICATIONS_REVIEWED : 1
CP_EXAM : 1
KG_CAME : 1
AS_ORDERED : 1
RETURN_TO : 1
PRIMARY_CARE : 2
FOR_GOUT : 1
BY_THREE : 1
HOUR_OUTPUT : 1
HOURS_CALL : 1
SITE_WITHOUT : 1
STILL_IDENTIFIED : 1
TOLERATED_THE : 1
ON_ANTICIPATED : 1
BATHROOM_FACE : 1
OBSERVED_DOING : 1
CURVE_STRIP : 1
OSTEOPENIA_DEXA : 1
TO_LAMENT : 1
HAVE_ANSWERED : 1
OTHER_SHIELD : 1
AND_SERVICE : 1
FOR_WILL : 1
VETERAN_INSTRUCTED : 1
AM_AND : 1
ALSO_UAL : 1
SO_MAIL : 1
CLC_FROM : 1
LITER_BAND : 1
UPDATE_PT : 1
AGAIN_LIQUID : 1
MOISTURE_TURGOR : 1
PRESERVE_VISION : 1
THAT_WITH : 1
TITLE_EMERGENCY : 1
OR_SWEATS : 1
OU_ATENOLOL : 1
VOIDING_WITHOUT : 1
ALLERGIES_PATIENT : 2
RETURNED_TO : 1
TISSUE_BE : 1
SGPT_ALT : 1
SIG_ONE : 1
TUBES_REMOVED : 1
CHART_MG : 1
LOWER_LIP : 1
RESTRICTIONS_ORIENTED : 1
THE_MINNEAP : 1
PATIENT_OTHER : 1
INCREASED_LBS : 1
ON_UARY : 1
SPEECH_ACUTE : 1
PATIENT_OF : 1
MS_IS : 1
HOME_PROBLEM : 1
ACTIVE_MEDICATIONS : 3
WEIGHT_LB : 3
FALL_THE : 1
SURVEILLANCE_COUNSELING : 1
TO_GOALS : 1
CC_HERE : 1
COUNSELING_UNLIKELY : 1
HAD_IN : 1
TO_RUMINATE : 1
SIGNATURE_CONSENT : 1
CLEAR_AUSCULTATION : 1
HAVE_EVER : 1
IMMUNIZATION_OFTEN : 1
BY_LAB : 1
NE_CONTACT : 1
NORMAL_LIMITS : 1
NOTE_AUTOPRINT : 1
HAD_OR : 1
AM_VETERAN : 1
YOU_WILL : 1
DOES_MATCH : 1
OR_COVERED : 1
AGREED_UNDER : 1
PE_LOWER : 1
OF_PM : 1
SHIELD_NO : 1
DYING_TISSUE : 1
LAB_WORK : 1
MAY_CONSULT : 1
DRUG_CC : 1
HOW_OFTEN : 2
CHANGE_EACH : 1
CIRCUMFERENCE_NONE : 1
STRIP_GENERAL : 1
YES_HOW : 1
DX_DM : 1
NO_DIETARY : 1
DETACHMENT_WEIGHT : 1
TIME_HIS : 1
AGREEAB_COMFORT : 1
CATH_DID : 1
AND_LAST : 1
CONTACT_PAIN : 1
INSTUCTIONS_GIVEN : 1
DISKS_NECK : 1
NONE_YEARS : 1
CARE_AC : 1
EFAVIRENZ_MG : 1
PAIN_PROVIDED : 1
ALCOHOL_THE : 1
ULCER_PROTOCOL : 2
GET_THIS : 1
AND_LATERAL : 1
MOBILITY_LIMITATION : 1
HIS_DOES : 1
THERE_SOME : 1
REQUESTS_SURGERY : 1
LAST_OBSERVED : 1
LB_KG : 6
MANAGEMENT_FOR : 1
TO_QUIT : 1
BY_MO : 1
VETERAN_VET : 1
TO_APPOINTMENTS : 1
PROBLEMS_TOTAL : 1
TUNNEL_ICDCM : 1
SCREEN_NOT : 1
BY_EVERY : 2
TAKE_ONEHALF : 1
STATUS_DEPRESSION : 1
OUTPUT_TUBES : 1
WILL_HIM : 1
AFTER_SHOT : 1
NMSC_SUN : 1
LB_PT : 1
MEDICAL_INFORMATION : 1
TO_IT : 1
MALE_NEW : 1
REPORT_WE : 1
ON_VOICE : 1
TO_HE : 1
VOIDING_URINAL : 1
BMI_HAVE : 1
ASSIST_GUARD : 1
FOR_MANAGEMENT : 1
TREATED_WITH : 1
HIS_HAND : 1
MULTIPLE_OF : 1
ADDRESSED_DURATION : 1
PRIMARY_VISIT : 1
MAN_WITH : 1
YOUR_IF : 2
ICE_PHYSICIAN : 1
NONVA_IB : 1
HEALING_ACTIVE : 1
FOUND_ACTIVE : 1
UNDER_SINGLE : 1
DEMANIAN_AS : 1
CBI_IRRIGANT : 1
LEFT_ON : 2
AND_IN : 1
SOB_DOE : 1
HIS_MEDICATION : 1
ENCLOSED_YOUR : 1
ALBUTEROL_ENABLE : 1
CARDIOVASCULAR_PROBLEMS : 1
PRESSURE_FOR : 1
PROGRAM_PRE : 1
FOR_USE : 1
MOUTH_AT : 1
THE_LAST : 2
THE_REGIONAL : 2
PM_AM : 1
ITEM_AND : 1
DELIRIUM_THE : 1
RANGE_YOUR : 1
ACTIVE_PROBLEMS : 1
PREGNANT_HOW : 1
TRANSMISSION_INTENDED : 1
WARNING_DISCUSSED : 1
ILLNESS_THE : 1
FOR_EXAMINATION : 1
GIVEN_PATIENT : 1
HISTORY_PRESENT : 1
RECONCILIATION_TIME : 1
MAR_FINASTERIDE : 1
COUNSELING_IRONS : 1
REQUESTED_THE : 1
APPOINTMENTS_PATIENT : 1
COME_APPT : 2
SINCE_LAST : 1
IN_PAST : 1
OLD_MALE : 2
RADIATES_FRONT : 1
TRANSMISSION_IS : 1
AND_MAY : 1
PRODUCTS_DEXAMETHASONE : 1
LITER_ID : 1
FOOT_STATES : 1
TO_PATIENT : 3
UNRE_MEDICATION : 1
SEE_YOU : 1
COMFORT_CV : 1
LICE_CULTURE : 1
BE_TAKEN : 1
EXERCISES_AT : 1
NEED_FOR : 1
LBS_OUTSIDE : 1
CONSENT_PHE : 1
EDUCATION_CARE : 1
DM_SURVEILLANCE : 1
APPT_TONIGHT : 1
FOR_PRESSURE : 1
ACTIVE_ML : 1
MESSAGE_LEFT : 1
TO_MALE : 1
TO_PRIMARY : 1
MINUTES_ASSESS : 1
ARTERY_THE : 1
HOURS_NEW : 1
HAS_IDENTIFIED : 1
SAO_LITER : 1
AFLLAAA_HEENT : 1
WM_OF : 1
NO_SOB : 1
REQUESTS_IN : 1
REQUESTED_PIOGLITAZONE : 1
RISK_OUTPATIENT : 1
ON_STABLE : 1
ORDERED_EXPECTED : 1
CRAMPS_TO : 1
YOU_HAVE : 5
KG_ACTUAL : 1
BE_SEEN : 1
NEW_OR : 1
THE_WELL : 1
TRANSFERRING_VAMC : 1
OF_OF : 2
LOWER_WITH : 1
NURSING_HOME : 2
NONE_NO : 1
WE_SINGLE : 1
RECOMMENDED_INR : 1
GABAPENTIN_PHONE : 1
LIQUID_AND : 1
LAST_OU : 1
UNABLE_CONTACT : 1
IDENTIFIED_APPOINTED : 1
SO_MAY : 1
DEAD_OR : 1
NO_BLEPHAROCHALASIS : 1
WITH_SPONSOR : 1
ASSOCIATE_PROVIDER : 1
FOR_OPHTHALMOLOGY : 1
STABLE_INSTUCTIONS : 1
FACE_TO : 1
DISCUSSED_TWICE : 1
NOT_REQUIRED : 1
HIP_AND : 1
ACTIVITIES_DAILY : 1
TELEPHONE_CONTACT : 1
IS_NO : 1
TO_MOVE : 1
WA_WORSE : 1
NOT_NEEDED : 2
WILL_ADVISE : 1
HE_POPPED : 1
PAST_ORDER : 1
INSTRUCTIONS_COLLECTION : 1
DISCHARGE_SUMMARY : 1
SCREEN_HAVING : 1
DRINKS_TEL : 1
BAND_ON : 1
IS_HEALING : 1
GOALS_WE : 1
HOW_YOU : 1
CAUTIONTABLET_ADDENDUM : 1
WHICH_IS : 2
CODE_EVALUATION : 1
NO_BRUISING : 1
RTC_MONTHS : 1
OPERATIONS_ADMISSION : 1
TO_QUESTIONS : 1
AND_PUT : 1
OF_FRESH : 1
THEM_ALCOHOL : 1
SEEN_YOU : 1
CONTACT_CALL : 1
LICE_VIRAL : 1
ACCOMPLISHMENT_WILL : 1
RESCHEDULED_NO : 1
OF_TEST : 2
YOU_OFTEN : 1
IRRIGANT_THE : 1
FOR_HKT : 1
TENDONOPATHY_DEBRIDEMENT : 1
TAKING_GABAPENTIN : 1
STAYS_LATE : 1
ON_ITEMS : 1
MEASUREMENT_EXTENSIVE : 1
TO_LOUNGE : 1
OF_FINGER : 1
BETWEEN_OF : 1
LESION_WAS : 1
PATIENT_PHONE : 2
LAB_LAB : 1
YO_WM : 1
UP_AT : 2
WORK_HEART : 1
NURSING_TO : 1
TABLET_MO : 1
WILL_GET : 1
NOTE_NEURO : 1
TURGOR_HOUR : 1
URINAL_AND : 1
WEIGHT_KG : 3
BRONCHITIS_NO : 1
NAD_MOISTURE : 1
VETERAN_NAME : 1
UP_LAST : 1
STABLE_HYDROCHLOROTHIAZIDE : 1
PHYSICAL_BEARING : 1
EXCESS_WEDNES : 1
YES_OBTAINING : 1
TELENURSE_LAST : 1
YEAR_OLD : 2
FOR_DIE : 1
TRUNK_FEVER : 1
FACILITY_HEART : 1
LENS_IMPLANTS : 1
IER_VET : 1
EAT_FEW : 1
TESTS_STATE : 1
READINESS_TO : 1
INSTRUCTED_TO : 1
IS_FOR : 2
DAILY_AT : 1
DOING_HIS : 1
COVERED_WITH : 1
LIMITATION_EXCELLENT : 1
HAVE_CONTAINING : 1
YOU_LOST : 1
NORMAL_WELL : 1
THE_ANSWER : 1
IRONS_ORDER : 1
OR_PRODUCTS : 1
EX_HAS : 1
ITEM_CAREFULLY : 1
DPCLAB_HAS : 1
PT_DAILY : 1
NATURE_LAST : 1
TEST_EA : 1
MAJOR_OPERATIONS : 1
OFFICE_OF : 1
IMAGES_REQUESTED : 1
CNS_HIS : 1
OR_NURSING : 2
SWELLING_VET : 1
UROLOGIST_WELL : 1
LAST_WAS : 1
AND_MESSAGE : 1
WITHIN_NONV : 2
MEDICATIONS_SUPPLIES : 1
MUSCLE_ESP : 1
AN_LICE : 1
WORKING_HE : 1
SURVEILLANCE_LABS : 1
SERVICE_CONVERSATION : 1
LEGS_INTO : 1
ANY_DEAD : 1
WORK_NONVA : 1
MAY_MAIL : 1
COLON_FALL : 1
BY_VA : 1
THE_ADMINISTRATION : 1
THIS_TO : 1
VA_REGIONAL : 2
YOUR_PROFILE : 1
OF_CONFIDENTIALITY : 1
COLORECTAL_SCREEN : 1
TOPIC_HOW : 1
AMENDS_WILL : 1
GOOD_LAST : 1
PAIN_ACCUCHEK : 1
CAME_MINUTE : 2
HE_CONTINUES : 2
NOTE_THE : 1
ER_ETT : 1
OF_FROZEN : 1
SERVICE_WITH : 1
LBP_PSYCHOLOGY : 1
FOLLOWING_IMEDCONSENT : 1
ENABLE_VITALS : 1
GROUP_HOME : 1
AGAIN_WITH : 1
NOTED_PO : 1
STOOL_TO : 1
HAVE_BEEN : 1
OTHER_NO : 1
SPECIFY_IF : 1
HAVE_DIFFICULTY : 1
PREGNANT_MANY : 1
FOLLOWS_HAD : 1
THIS_TRANSMISSION : 1
NIGHT_AFTER : 1
LESION_TREATED : 1
NO_PHYSICIAN : 1
HELP_HAS : 1
OX_PULSE : 1
WILL_PLACE : 1
AWAY_ABOUT : 1
FOR_APPOINTMENT : 1
LIGHT_TOUCH : 1
CARE_CLINIC : 1
FOR_INFORMATION : 1
INVOLVED_IN : 1
ANY_OR : 1
VETERAN_FOR : 1
DJD_FOLLOW : 1
IN_NATURE : 1
VET_BE : 1
HTN_HVF : 1
CLASS_AND : 1
NEPHEW_HE : 1
DISEASE_BLOOD : 1
ARE_DOING : 1
REACTION_NO : 1
PHYSICIAN_NOTE : 1
MINUTE_HE : 2
RN_TEMPERATURE : 1
TOTAL_OUTPUT : 2
THIS_PROCESS : 1
BY_TRANSPORT : 1
SURGERY_FOR : 1
OTHER_BLEPHAROCHALASIS : 1
ASSISTED_TO : 1
CC_FOR : 1
LENS_NEPHEW : 1
CONCERNS_PLEASE : 1
QUESTIONS_ANSWERED : 1
HIP_SHOWED : 1
RETURNED_FOR : 1
LISTED_SEND : 1
VC_REACTION : 1
SUPPLIES_THIS : 1
FOR_RTC : 1
AFTER_THE : 1
SUICIDE_RISK : 1
NEGATIVE_EFAVIRENZ : 1
MALE_IN : 1
THAT_TIME : 1
YO_MALE : 2
TO_PICKED : 1
CURRENTLY_WITHIN : 2
PATIENT_IN : 1
PATIENT_ON : 2
TAB_ON : 1
FOR_UP : 3
DEXA_INCREASE : 1
SUPPLIES_PAGES : 1
YOU_DISCUSS : 1
CARDS_PROVIDED : 1
HEALTH_NOTETL : 1
FOR_THIS : 1
AND_OR : 1
NOTE_DURATION : 1
APPOINTMENTS_DPCLAB : 1
SURG_TEXT : 1
COMPLAINT_IRONS : 1
RATING_ONLY : 1
HAVE_YOU : 1
FROZEN_PLASMA : 1
CLINIC_HE : 1
HIS_LIST : 1
MVA_SPINAL : 1
PRIVATELY_WAS : 1
DING_PULSE : 1
ALL_YOU : 1
OUTPATIENT_NONE : 1
DEBRIDEMENT_GROSSLY : 1
OCT_RETINAL : 1
DURATION_OF : 3
OF_HE : 1
MEDICATION_WAS : 1
FURTHER_OR : 1
LIMITATION_NUTRITION : 1
YOU_ALSO : 1
TWICE_HEART : 1
LAB_TECH : 2
MG_DAILY : 2
WARFARIN_PRIVATELY : 1
LINKED_SHARED : 1
ROM_OF : 1
NORTHWEST_SPOKANE : 1
INPATIENT_WITHIN : 2
FOR_DM : 1
PROTOCOL_NOT : 2
CABG_URINE : 1
WITH_BOTH : 1
NUMBERS_PAIN : 1
ABLE_MOVE : 1
SERUM_AND : 1
HE_CONFUSED : 1
AT_AFTER : 1
PLASMA_PACKED : 1
STENTS_PLACE : 1
ADDENDUM_ADDENDUM : 1
PULSE_OXIMETRY : 1
ACCUCHEK_COMFORT : 2
INSTRUCTED_WITH : 1
ADDENDUM_REMOVAL : 1
IBUPROFEN_STABLE : 1
RTC_FOR : 2
WITH_CHIEF : 1
TO_YES : 1
PROTEIN_DERVIATIVE : 1
SEVERAL_MESSAGES : 1
ACTUAL_BED : 1
FEEL_INCOMPLETE : 1
THE_SHOT : 1
BEEN_UNABLE : 1
RECENT_NECK : 1
RECEIVED_FOLLOWING : 1
MEDICATION_PROFILE : 1
LATER_AND : 1
OF_FALL : 1
READINESS_LEARN : 1
AND_HAVE : 1
GLUCOSE_STRIP : 1
KG_CM : 1
INCLUDING_THIS : 1
OF_BILATERAL : 2
AND_ON : 1
INFORMATION_YOU : 1
ORIENTATION_WAS : 1
LAB_INFORMED : 1
BE_FOR : 1
IN_PRIVAGE : 1
OWING_INTERDISCIPLINARY : 1
HEART_NORTHWEST : 1
ROM_THE : 1
WORSE_FOR : 1
MAIL_REGARDS : 1
TOUCH_NO : 1
PROFILE_ARE : 1
PATIENT_ACTIVELY : 1
STRENUOUS_ACTIVITY : 1
HIP_VET : 1
BILATERAL_DE : 1
PGY_MAJOR : 1
UAL_APPT : 1
LIST_YO : 1
IS_DURATION : 1
NO_FEVER : 1
VOLUNTARILY_OR : 1
FIELD_HOOD : 1
HAVE_CALLED : 1
ABOUT_YOUR : 1
! Stats words=1018  pairs=4057
