# Supplementary material for: Predicting the Risk of Suicide by Analyzing the Text of Clinical Notes
Source: PLoS One. 2014 Jan 28;9(1):e85733. doi: 10.1371/journal.pone.0085733 (PMC3904866; doi:10.1371/journal.pone.0085733)
Supplement: Appendix S3 — Machine Learning Libraries and Methods: This section is provided to enclose the open source (Apache License) classifier used for the building of the statistical models, specifically for the purposes of study reproducibility. A detailed account of these tools is intended for another publication. (ZIP) [file pone.0085733.s003.zip › Appendix3/ML_libs/Regression_testing/group1/processed/grp1-pt-1061.dat]

!  Done reading
! Total word count = 2279
! Total unique words = 1082
! Total pair count = 4554
! Total unique pairs = 4180
CAREOUTPATIENT : 1
AT : 14
CONSTANT : 1
SHORTLY : 1
ADL : 1
PERTINENT : 1
AREARS : 1
ANSWERING : 1
STEADY : 1
WORK : 2
LISINOPRIL : 1
FINGER : 4
PHYSICALTL : 1
MONTH : 2
DOXAZOSIN : 1
WEIGHT : 3
AUDIOLOGY : 1
NITRATES : 1
BEEN : 10
READINESS : 1
BID : 1
WITHIN : 2
REFILL : 2
MILD : 1
MINUTE : 1
OUTPATIENT : 7
INTAKE : 1
SCORED : 1
SPEECH : 2
TAXES : 1
CATARACT : 1
COUNSELING : 1
RELATED : 1
PURIFIED : 1
USE : 2
HEME : 1
CC : 1
RR : 1
HGB : 1
SUPPLIES : 3
ERROR : 1
CHEW : 2
VETERANS : 1
LEVEL : 6
ALCOHOL : 3
CHANGES : 2
RADIAL : 1
RAL : 3
EARS : 1
INTACTNO : 1
OM : 1
SHOULDER : 2
MACHINE : 1
HIS : 13
TUBERCULIN : 1
TIM : 1
GM : 2
VOIDING : 1
NEURO : 1
APPROPRIATE : 2
BROKE : 1
PVD : 1
ACID : 1
ATTORNEY : 1
WELL : 1
PERKINS : 1
TEST : 1
NOTE : 16
MIC : 1
LEIA : 1
DO : 1
DOES : 1
TALKED : 1
TESTS : 3
UNDERSTANDS : 1
TREATMENT : 5
HTN : 1
DESERT : 1
ATRIAL : 1
SAME : 1
STROKE : 1
HAVE : 7
ADVERSE : 1
SAW : 1
SCHEDULED : 3
ASK : 1
OF : 46
OYING : 1
EXPRESSIVE : 1
TAB : 6
EARMOLD : 1
REACHED : 1
REQUIRED : 2
HAS : 15
DOMESTIC : 1
FOR : 34
FEV : 1
NUMBER : 1
TIBIAL : 1
CLC : 1
DICLOFENAC : 1
MORNING : 1
CALCIUM : 1
INR : 3
AMB : 1
KNEE : 1
HYPERTHYROIDISM : 1
ULCERS : 3
SC : 1
FIBER : 1
OUTPT : 1
MESSAGE : 3
THY : 1
ASSESSMENT : 2
SERUM : 1
BUSY : 1
ACTIVITY : 4
OWN : 2
EVIDENCE : 1
SHOWS : 1
APEX : 1
HEMOTMA : 1
CONSULTS : 1
PAPILLOMAVIRUS : 1
BILATERALLY : 1
PREVIOUSLY : 1
INFORMATION : 5
PACHS : 1
INITIAL : 3
CENTER : 2
EXAM : 2
RECENTLY : 3
ATTEMPTS : 1
SWEATS : 1
THE : 47
AUDIO : 1
PRESENTS : 3
DURATION : 1
EXPIRED : 2
OCT : 1
ANGIO : 1
PULSES : 1
CENTERED : 1
UN : 1
INTRAOCULAR : 1
COLOR : 1
CHARACTER : 1
SEC : 1
BP : 4
MEDS : 2
INDICATION : 1
NIGHTS : 1
POST : 4
SEPTEMBER : 1
DEPRESSION : 1
BYPASS : 1
ASYMPTOMATIC : 1
CM : 5
PSYCHOLOGY : 1
AGAIN : 1
GAIT : 2
DESCRIBE : 1
TRIC : 1
CAP : 1
STATIN : 1
DIET : 2
EVER : 1
LATE : 1
HANDS : 1
WT : 2
RA : 2
WHAT : 3
TOP : 1
PARTIAL : 1
AROUSABLE : 1
STARTED : 2
HANDOUT : 1
ASSISTANCE : 1
VISUALIZED : 1
ULTIMATE : 1
MELLITUS : 1
OR : 22
EXPLORE : 1
BOTH : 3
TEMP : 5
PRESCRIPTION : 4
YEAR : 3
BREATHE : 1
ALREADY : 1
CREAM : 1
PULMONARY : 1
CONCERNS : 1
AAOX : 1
LB : 1
COUMADIN : 1
HERBAL : 1
DE : 2
LIKE : 1
PCIOL : 1
GI : 1
NONGRANULOMATOUS : 1
SEEN : 4
MAILED : 2
MANEUVERS : 1
RADIGAN : 1
TRAINING : 1
MEDICATIN : 1
LABORATORY : 1
CHRONIC : 2
RELAPSE : 1
CLINICS : 1
TAKE : 4
MONITORED : 1
ANY : 6
DISCHARGE : 4
PRETTY : 1
TISSUES : 1
MOISTURE : 1
SYSTEMS : 1
OD : 3
INVITED : 1
HGBAC : 1
MAINTAIN : 2
FACILITY : 1
EYELIDS : 1
REACTIVE : 1
CARTILAGE : 1
THINK : 1
EFFECTS : 1
MYCIN : 1
MD : 2
NAME : 1
1010M : 1
CARE : 19
LENS : 2
ANUSOL : 1
EVERY : 5
AGE : 1
COMPLIANT : 1
SKIN : 5
TIMES : 1
IS : 22
DOSES : 1
NOT : 13
FLUIDS : 1
RELATIONS : 1
START : 1
IF : 5
DURABLE : 1
MH : 1
WALKING : 1
RESIDING : 1
BAND : 1
HERE : 6
EATING : 1
POSITIVE : 3
UNITS : 2
ONEHALF : 2
LIVE : 1
EVALUATION : 5
PROGRESS : 2
MMHG : 1
YOUNGSTOWN : 1
REFUSED : 1
THESE : 2
CHEWING : 1
VISION : 1
OFFPUMP : 1
VET : 3
STOOL : 1
EXPLAINED : 2
UPCOMING : 1
PREREGISTRATION : 1
MANIC : 1
COMMANDS : 1
BUILDINGS : 1
SEBACEOUS : 1
VALUE : 2
DROP : 1
BACK : 4
COMPUTER : 1
HOWEVER : 2
REGARDS : 1
SOURCE : 2
HEIGHT : 2
FX : 1
MALE : 7
ADDENDUM : 8
BY : 14
NO : 31
CONSCIOUSNESS : 3
HEMOGLOBIN : 1
CHIEF : 4
ACCESSION : 1
JAR : 1
RETENTION : 1
LUNGS : 1
CREEK : 1
MEETING : 1
UPPER : 3
BENIGN : 1
CONVERSATION : 1
RISK : 1
CLINIC : 5
PRACTICE : 1
AMBULATES : 2
TOENAILS : 1
TO : 48
PRN : 1
IV : 1
COULD : 1
SPECIALTY : 1
HEEL : 1
ADVANCE : 1
SLOW : 1
COUNSELED : 1
SAFE : 1
DX : 1
PROCEDURE : 1
WILL : 3
OFTEN : 1
WARM : 2
BUT : 2
CTA : 1
PATTERNS : 1
APPETITE : 1
TYPE : 1
CAREGIVER : 1
TIU : 1
SEE : 3
PLASMA : 1
RESIDUL : 1
PLEASE : 2
INDICATES : 1
ANEMIA : 1
STATUS : 3
HDL : 1
LOWERING : 1
DIABETES : 1
SPENT : 1
DRINKS : 1
NAD : 1
TROPONIN : 1
IMPROVING : 1
CONSULT : 3
DECLINES : 1
OUT : 2
HR : 1
FRICTION : 1
COPIOUS : 1
SUPPORT : 1
LBS : 1
FORMS : 1
SCREEN : 2
REFLECTIONS : 1
REVIEW : 4
MENTAL : 1
HIMSELF : 2
RELIGIOUS : 1
INJECTION : 2
HLD : 1
LIVER : 1
WERE : 1
VIEW : 1
MANKOWSKI : 1
CONTACTS : 1
INSTRUCTIONS : 3
WALKS : 2
LABS : 1
VA : 1
CANCERSEES : 1
TAKEN : 1
AGREED : 1
PART : 1
FAMILY : 4
EPINUCLEAR : 1
DISEASE : 1
PAIN : 26
WHEN : 1
AMBULATORY : 1
AS : 4
FALLS : 1
VISTA : 1
SINUSITIS : 1
REPEATED : 1
CREATININE : 1
INCOME : 1
AMOUNT : 2
WAS : 10
PM : 1
PHOSPHATE : 1
WITH : 14
CARBUNCLE : 1
STD : 1
AC : 2
TEMPERATURE : 2
WANTED : 1
COMMUNICATION : 1
SYRINGE : 2
INDEX : 4
MESSAGING : 1
ABD : 1
NOW : 3
INCLUDING : 3
INTACT : 1
CONFIRMED : 1
DISABLED : 1
USED : 1
MOUT : 1
PROTECT : 1
MONITORING : 1
IT : 2
BELOW : 1
LIST : 2
INCLUDED : 1
OT : 1
VITRECTOMY : 1
IMMUNIZATION : 2
SA : 1
WWII : 1
DISCUSSED : 1
DENTURES : 1
EXERCISE : 1
EQUIPMENT : 1
SUCCINATE : 1
FEVERS : 1
KATIE : 1
TIME : 4
DEVICE : 1
OCCASIONALLY : 1
ORIENTED : 3
NECK : 2
ADDITIONAL : 1
TEETH : 1
SIDE : 2
JOINT : 1
VITREOUS : 1
THICKNESS : 1
REPAIR : 1
GOING : 1
CALL : 5
DID : 2
SHOW : 2
HX : 1
OPERATION : 1
SUN : 1
IMAGING : 2
SITUATION : 1
UNSPECIFIED : 1
NOTIFICATION : 1
IOP : 1
INTRAARTICULAR : 1
REPORTS : 3
SUBJECTIVE : 2
OPHTHALMOLOGY : 1
CONSISTING : 1
LLL : 1
OPTIONS : 1
PER : 1
YES : 8
COUSIN : 1
FURTHER : 1
UNT : 1
CONSENT : 1
NOTICED : 2
YOUR : 5
CAPSAICIN : 1
DOING : 1
GIVEN : 4
VACCINATION : 1
LITTLE : 1
HT : 3
WHO : 2
ED : 1
JAW : 1
DIARRHEA : 1
SURG : 1
RESPIR : 1
MEMBRANES : 1
BASED : 1
QUALIFIERS : 1
BAR : 1
PHYSICIAN : 7
COMPLIANCE : 1
DELIRIUM : 1
ATENOLOL : 1
CURRENT : 2
TON : 1
URGENT : 1
TERM : 1
HIM : 3
PULSE : 1
HE : 19
NEXT : 2
THEY : 1
NEEDS : 4
COLCHICINE : 1
RATE : 3
REFERRED : 1
BLOCK : 1
NEUROPATHY : 1
MASS : 1
APPTS : 1
UAL : 1
ML : 3
PHONE : 3
DECLINED : 1
PRNCHANGED : 1
CLEAR : 2
INGROWN : 1
BERYL : 1
RESPONSES : 1
PRIMARY : 8
WI : 2
DERVIATIVE : 1
BS : 1
HAD : 7
POSSIBLY : 1
SIGNS : 1
FIELD : 1
DEPARTMENT : 1
PMRS : 1
LOSS : 1
SPECIAL : 4
PATIENTS : 3
SUMMARY : 1
HUMAN : 1
CONSTIPATION : 1
PROVIDED : 2
MELENA : 1
YO : 3
NEGATIVE : 1
AWA : 1
SUPPLE : 1
CLOTTING : 1
TWO : 1
LMP : 1
NONE : 2
UNIVERSITY : 1
LOT : 1
LAB : 1
COMMINUTED : 3
DIRECTIVES : 1
CONTACT : 3
INPUT : 1
HER : 3
ORDERED : 1
DEVELOPED : 1
QUESTIONS : 1
COURT : 1
PROBLEMS : 5
URINE : 1
FEMPOP : 1
MINIMUM : 1
MP : 1
NASAL : 2
RTC : 1
ERS : 1
ADENA : 1
DANGEROUS : 1
CAN : 1
THERAPY : 4
HIT : 1
TEMPLATE : 1
PLACE : 2
WHICH : 2
SYMPTOMS : 4
COMFORTABLE : 1
ROARING : 1
OVER : 1
TOENAIL : 1
MG : 12
ON : 18
QUIT : 1
COMPLETE : 1
PRESSURE : 4
BEHAVIORS : 1
REVEALS : 3
GOOD : 3
SUTR : 1
UPDATE : 1
DEPENDENCY : 1
FRAME : 1
CONTINENT : 1
INTO : 1
SODIUM : 1
EMB : 1
EDEMA : 1
HYPERTROPHY : 1
PROVIDER : 5
HOUSEHOLD : 1
MARCH : 1
SHE : 3
PO : 1
UP : 1
THEN : 3
MULTIPLE : 1
USES : 1
DEAR : 1
LOCATION : 1
APPOINTED : 1
BECKLEY : 1
ALERT : 5
WORSENING : 1
REMISSION : 1
DATE : 6
DAILY : 2
THREE : 1
LONG : 2
PROGRAM : 2
FEMALE : 1
APPOINTMENT : 4
WOULD : 3
ELSE : 1
FOLLOW : 1
FROM : 5
SOLUM : 1
GOOSE : 1
LEFT : 9
METHOD : 2
MEDICAL : 1
SEX : 2
EXTREMITY : 1
AN : 5
MOIST : 1
UNLABORED : 1
HEART : 2
SIGNATURE : 2
COMPLAINT : 4
BLACK : 1
USING : 1
CHILD : 1
HAND : 1
FOUR : 1
BOTTLE : 1
INFLUENZA : 3
APPARENT : 1
BETA : 2
OWNS : 1
PHARMACIST : 1
EYE : 1
BURG : 1
GAVE : 1
KD : 1
PACKED : 1
FURNITURE : 1
MESYLATE : 1
AGO : 2
NEW : 2
MOUTH : 3
CHEST : 4
PRESENT : 1
FORTICAL : 1
SOME : 3
MOMETASONE : 1
EXCISION : 1
DT : 1
ANESTHESIA : 1
FROZEN : 1
ARE : 8
ANSWERED : 1
CECAL : 1
RULED : 1
DESIRE : 1
HYPERTENSION : 3
INDEPENDENT : 1
WIRE : 1
APPLY : 1
CYST : 1
RECEIVED : 1
SURGERY : 2
OUTLINED : 1
ASPIRIN : 2
COMPLETELY : 1
TX : 1
BODY : 1
MOVING : 1
ENTRY : 1
PREVENTIVE : 1
GENERAL : 1
INTERDISCIPLINARY : 1
NUMBNESS : 2
CAD : 2
TABLE : 1
BE : 6
YR : 1
OL : 2
GLASSES : 2
DUE : 1
LED : 2
PING : 1
LESION : 1
CANE : 2
REVIEWED : 4
CLEANSING : 1
DM : 1
BEFORE : 1
OTHER : 9
ALL : 2
ME : 1
NURSING : 10
DYSPNEA : 2
FOLLOWING : 2
IDENTIFIED : 1
ENDING : 1
PATIENT : 26
SELF : 1
ACCEPT : 1
ALLERGIES : 4
WITHOUT : 1
LIMB : 2
JUL : 1
DING : 2
ANTIPLATELET : 1
ALLOWED : 1
OBTAIN : 1
WILBERT : 1
ADMISSIONS : 1
BRUITS : 1
BENZOYL : 1
SPINE : 1
ANXIETY : 1
METOPROLOL : 1
REFFERED : 1
THAN : 1
RELIEVES : 1
DYSURIA : 2
RARELY : 1
ACUTE : 1
VOICE : 1
PHACOEMULSIFICATION : 1
ARTHRITIS : 1
HIMS : 1
AUDITC : 2
WE : 3
DESTINATION : 1
DECREASE : 1
COME : 1
CAVITY : 1
HOSPITALIZATION : 1
FOUND : 2
IMPROVED : 1
THAT : 9
VISIT : 4
INSTILL : 1
NORMAL : 2
WIFE : 1
STAFF : 1
SIDERAILS : 1
RIGHT : 5
PC : 1
VITALS : 1
ABOUT : 4
ATROVENT : 1
ONE : 4
ISSU : 2
TELE : 1
UNSUCCESSFUL : 1
PLEASANT : 1
ANATOMICAL : 1
NKA : 1
BRIEF : 1
HYPERLIPIDEMIA : 1
TABLET : 4
FIO : 1
DURING : 1
JUNCTION : 1
YOU : 4
TOLD : 1
CL : 1
SCREENING : 2
STUDIES : 1
CARDIOLOGY : 1
INFORMED : 2
REACH : 2
GETTING : 1
NOCTURIA : 1
ISSUED : 1
REACTIONS : 1
HI : 1
PAST : 3
EQUAL : 1
OS : 3
DOCUMENT : 3
PSA : 1
NOVEMBER : 2
NUMB : 1
REASON : 1
PLANTAR : 1
POSTERIOR : 1
OXYGEN : 1
CXR : 1
ABSENCE : 1
HA : 1
DELAYED : 1
RESULTED : 1
SP : 1
HPV : 1
HOME : 1
SIX : 1
KARDEXTL : 1
POWER : 1
WEAKNESS : 2
NOTED : 3
RUMINATION : 1
DR : 1
INDIVIDUAL : 1
MEMBERS : 1
SOCIAL : 2
RETURN : 2
SUICIDAL : 1
GLASS : 1
SPHERES : 1
EFFECT : 1
MODIFICATIONS : 1
VITAL : 2
SO : 1
CALCITONIN : 1
IMPROVEMENT : 1
REGULAR : 1
GALLBLADDER : 1
RECONCILIATION : 1
SENDING : 1
PEROXIDE : 1
BELIEFS : 1
MINUTES : 1
CLEVELAND : 2
TINGLING : 1
BIL : 1
GREAT : 1
DIRECTIONS : 1
GAP : 1
IRRIGATION : 1
WEEK : 3
VITAMIN : 1
CHECK : 1
TEAM : 2
APPROVED : 1
IC : 1
NERVE : 1
AM : 1
PFT : 1
HELPED : 1
DISTRESS : 1
OCCASION : 1
REGIONAL : 1
SVT : 2
EVENT : 1
REPORT : 1
PEOPLE : 1
LETTER : 2
HOW : 2
CALLED : 1
PROPERTY : 1
DYSPEPSIA : 1
SINCE : 3
CHANGE : 4
COUGH : 1
INHOUSE : 1
LEARN : 2
SOLN : 1
CPAP : 1
ONCOLOGIST : 1
MADE : 2
FUSION : 1
FILLING : 1
CARDIAC : 1
TEACHING : 1
ADVISED : 1
DOSE : 2
APHASIA : 1
ENCOUNTER : 1
MONTHS : 4
OBJECTIVE : 1
AWOKE : 1
AFFECT : 1
FOLLOWS : 1
WASH : 1
MRI : 1
ECHO : 1
MEASUREMENT : 1
POLYP : 1
RELEASE : 1
MAC : 1
STRONG : 1
SOMEONE : 1
FRESH : 1
UCINATIONS : 2
AREAS : 1
ASSISTANT : 1
ANTIBIOTIC : 1
WHY : 1
PENILE : 1
MEDICATION : 8
RECOMMENED : 1
VISUAL : 1
WANT : 1
COMMENTS : 2
THICK : 1
ATTEMPTED : 2
AFRICAN : 1
SUFFICIENT : 1
STRENGTH : 1
ISCHEMIC : 1
TOTAL : 1
LIGHT : 1
GOAL : 2
SURGICAL : 1
EXAMINATION : 5
HISTORY : 5
CLICK : 1
RESPIRATION : 1
OTC : 1
BACKGROUND : 1
MAIL : 1
DESK : 1
LEGS : 1
HEALTH : 3
DEBRIS : 1
SUCCESS : 1
ADD : 1
RATIVE : 1
PLACED : 2
REMIND : 1
POSTOPERATIVE : 1
NOV : 1
CABGX : 1
INDICATED : 1
PROSTATE : 2
SITE : 2
OVERALL : 1
MATERIAL : 1
VALPROIC : 1
INTERVENTIONS : 3
COMPLICATIONS : 1
KG : 1
METALLIC : 1
VS : 1
OP : 1
MORE : 2
PE : 1
ANYWHERE : 1
DRC : 1
AVR : 1
AUG : 1
INSULIN : 1
PROBLEM : 7
BLUE : 1
RECORD : 1
ER : 1
ELIGIBLE : 1
APPLICABLE : 1
REQUEST : 5
IED : 1
RN : 1
XYZZY : 2
THROUGH : 1
WARFARIN : 1
OUTPUT : 2
VETS : 1
TELEMETRY : 4
READY : 1
AFTER : 4
RECOMMENDS : 1
LONGER : 1
ADMISSION : 1
COURSE : 1
SCALE : 1
ACTUAL : 2
BUILT : 1
OPENING : 1
FLUID : 1
LUMBAR : 1
ATHENS : 1
PCP : 4
SAYS : 1
WOUNDS : 3
TITLE : 1
DENIES : 9
DOB : 1
SPECIFIC : 1
ACCOMPANIED : 1
ACETATE : 1
OLD : 2
DRAWN : 1
FREQUENTLY : 1
CLINICIAN : 1
VETERAN : 3
QTY : 2
DIALYSIS : 1
PT : 17
INJURY : 1
BLOCKERS : 2
RADIATION : 1
ANION : 1
DOUBLE : 1
AREA : 3
APR : 3
LAMINECTOMY : 1
SELECTED : 1
CERVICAL : 1
UNDERSTANDING : 1
LOST : 1
MEDICATIONS : 6
MR : 2
PREDNISOLONE : 1
AND : 38
BILATERAL : 4
HOUR : 1
URINARY : 1
INH : 1
BETTER : 1
LEDWANI : 1
DEPRESSIVE : 1
RESULTS : 3
EMERGENCY : 1
BREATH : 1
ABLE : 1
VITAMINS : 1
RECENT : 3
CHO : 2
AVG : 1
IN : 28
ADMINISTERED : 2
LOW : 1
MAY : 1
MANAGEMENT : 1
STATE : 2
EXPR : 1
PLAN : 4
ANTERIOR : 1
MWFSA : 1
APPT : 2
TAKING : 1
AGREE : 1
SS : 1
SERIES : 1
SATS : 1
DONE : 2
PALPABLE : 2
RDASIL : 1
PHYSICAL : 1
PROTEIN : 1
CP : 1
TEAR : 1
NIGHT : 1
ACTIVE : 15
IDENTIFICATION : 1
PCCNURSING : 1
GALY : 1
OPPORTUNITY : 1
FILTER : 1
BEHAVIOR : 2
SPI : 1
SI : 1
SEASON : 1
IMPRESSION : 3
FOCUS : 1
SGPT : 1
THIS : 11
SM : 1
BUDGET : 2
SOFT : 1
SIGNAL : 1
VAMC : 3
ADDED : 1
LAST : 6
MINNEAP : 1
COMPLICATED : 1
UALLY : 1
FIBRILLATION : 1
EDUCATION : 5
HOLD : 2
ADR : 1
INSERTION : 1
MEENACH : 1
STATES : 4
OCCUPATIONAL : 2
DRAIANGE : 1
OU : 3
CHOLESTROL : 1
AFFECTED : 1
LIGAMENT : 1
PATIENT_INFORMATION : 1
TO_PT : 1
TESTS_AND : 1
PAIN_KNEE : 1
PACHS_OU : 1
TX_FOR : 1
OR_GALY : 1
QUESTIONS_WOULD : 1
LEDWANI_TYPE : 1
TIBIAL_PALPABLE : 1
DRINKS_ON : 1
PT_AVG : 1
INFLUENZA_PATIENTS : 1
PRESCRIPTION_BE : 2
CALLED_VETERAN : 1
VOICE_MAIL : 1
HAD_INJURY : 1
CARE_MEETING : 1
NAME_OTHER : 1
OF_DISCHARGE : 1
LUMBAR_PAIN : 1
CONSISTING_LEFT : 1
AND_BILATERAL : 1
OTHER_PROBLEMS : 4
REQUIRED_MENTAL : 1
FAMILY_BELIEFS : 1
ABOUT_AT : 1
SPECIAL_CARE : 1
HEART_SURGERY : 1
NOTED_REVIEWED : 1
CHANGES_METALLIC : 1
REVIEW_WT : 1
DOCUMENT_DURABLE : 1
OUTPUT_ML : 1
BEEN_TO : 1
ELSE_BP : 1
GOAL_TO : 1
SEE_MD : 1
THE_SPECIAL : 1
CAD_DRAIANGE : 1
FROM_PATIENT : 1
BERYL_LMP : 1
MESSAGE_BE : 1
DO_BYPASS : 1
HAS_INITIAL : 1
SC_ED : 1
PATIENT_HAD : 1
CLINIC_APPOINTMENT : 1
AND_ORIENTED : 1
TO_HIS : 1
TWO_AS : 1
REQUEST_CONSULT : 1
NORMAL_SPEECH : 1
GLASSES_CONTACTS : 1
RESULTS_SITE : 1
BEEN_MOVING : 1
THE_PATIENT : 6
HIS_PRIMARY : 1
CENTER_LUMBAR : 1
AT_THIS : 1
ERS_TROPONIN : 1
PROVIDED_OPPORTUNITY : 1
PT_NOT : 1
DT_COMPUTER : 1
RISK_INITIAL : 1
CLINIC_COMMUNICATION : 1
INTERVENTIONS_IED : 1
HIS_POSTOPERATIVE : 1
TO_SEBACEOUS : 1
PM_CONVERSATION : 1
ENTRY_SUMMARY : 1
INTERDISCIPLINARY_CARE : 1
SPINE_INJECTION : 1
THEN_DO : 1
AMBULATES_WITH : 1
GOOD_ADDED : 1
AC_NONE : 1
HE_UNIVERSITY : 1
HE_WAS : 2
DOCUMENT_SELECTED : 1
ORIENTED_AMBULATES : 1
COMPLIANT_WITH : 1
DOSE_CHANGE : 1
PATIENT_DENIES : 1
SUPPLIES_YES : 1
MODIFICATIONS_INDICATED : 1
EYELIDS_BILATERAL : 1
RECENT_TESTS : 1
LED_RELAPSE : 1
ASSISTANCE_ON : 1
FIO_RA : 1
THAT_CAN : 1
WAS_ANTIBIOTIC : 1
FX_SUBJECTIVE : 1
ASSESSMENT_POST : 1
STATES_WAS : 1
SUPPLIES_OXYGEN : 1
CHEWING_PART : 1
NIGHTS_AND : 1
FEMALE_HERE : 1
OUTPATIENT_STATUS : 2
STEADY_AFFECTED : 1
MORNING_MG : 1
SUCCESS_PHYSICIAN : 1
REQUEST_PREVENTIVE : 1
AND_INDICATION : 1
THE_PATIENTS : 1
BY_PCP : 1
TITLE_TO : 1
ON_WEIGHT : 1
OYING_EVER : 1
LUMBAR_BIL : 1
YOUR_LAB : 1
YOU_NOT : 1
MG_UNT : 1
APPETITE_GOOD : 1
WHICH_RESULTED : 1
CARE_FOR : 1
NEXT_IS : 1
ERROR_DID : 1
IS_BACK : 1
INTAKE_BEHAVIOR : 1
PAIN_REQUEST : 1
PATIENTS_PREDNISOLONE : 1
CL_NOT : 1
OF_NEXT : 1
RESULTS_INJECTION : 1
ADDED_HE : 1
NOT_APPLICABLE : 1
NOW_IN : 1
HIMSELF_WHAT : 1
CONSULT_PFT : 1
METALLIC_WITHIN : 1
WITH_CAREGIVER : 1
COMMENTS_PT : 1
RATE_CONTINENT : 1
CARE_AT : 1
SUCCESS_RDASIL : 1
DYSURIA_THIS : 1
HER_THE : 1
NOT_AT : 1
THE_BEFORE : 1
PATIENT_FAMILY : 2
COLOR_INTERVENTIONS : 1
OR_OTHER : 4
WHY_OF : 1
GLASSES_EXPLAINED : 1
DENIES_WT : 1
THE_PHYSICIAN : 1
NOCTURIA_DYSURIA : 1
LENS_TO : 1
APPLICABLE_PATIENT : 1
UPPER_NORMAL : 2
CONSULT_HGB : 1
DONE_ON : 1
FOR_CABGX : 1
BILATERALLY_PLACED : 1
MALE_NO : 1
INCLUDING_PSA : 1
PRESSURE_OR : 3
TO_CONSTANT : 1
PACHS_OD : 1
SEE_PROVIDER : 1
AREA_AND : 1
CARBUNCLE_THAT : 1
NERVE_CAPSAICIN : 1
PROSTATE_URINARY : 1
MORE_DRINKS : 1
OLD_RTC : 1
BY_DAILY : 1
BOTTLE_DENIES : 1
TIME_LISINOPRIL : 1
RAL_THE : 1
SERIES_HERE : 1
FEVERS_WEAKNESS : 1
FX_ADDENDUM : 1
EVALUATION_CHRONIC : 1
BS_SIGNATURE : 1
RECONCILIATION_IMMUNIZATION : 1
SENDING_HIM : 1
NO_FACILITY : 1
HAD_MOVING : 1
BRIEF_PHYSICALTL : 1
NO_NOCTURIA : 1
LEVEL_ASSISTANCE : 1
PCP_ATHENS : 1
TALKED_ABOUT : 1
PREVENTIVE_HEALTH : 1
SIDE_MANEUVERS : 1
MEDICATION_DOSE : 1
OPENING_VISTA : 1
NOTE_HAVE : 1
THE_AREA : 2
THAN_HER : 1
PROBLEM_MOISTURE : 1
ON_MACHINE : 1
ONEHALF_SCREEN : 1
CERVICAL_PAIN : 1
HAND_OCCUPATIONAL : 1
NOTICED_SOME : 1
CHRONIC_OF : 1
THE_VAMC : 1
NOTED_INR : 1
POSSIBLY_CARTILAGE : 1
NOT_DURING : 1
NONGRANULOMATOUS_OS : 1
PAIN_PER : 1
RR_OF : 1
ONCOLOGIST_PROSTATE : 1
OR_MORE : 1
SUN_ANTIPLATELET : 1
HAS_SEPTEMBER : 1
DISEASE_HANDOUT : 1
BEEN_SCHEDULED : 1
TO_RUMINATION : 1
YO_WHO : 1
APHASIA_YO : 1
CHEST_ON : 1
DUE_LONG : 1
DENIES_PAIN : 2
MANKOWSKI_CHIEF : 1
APPOINTMENT_PRIMARY : 1
PLACE_DESERT : 1
POST_JAR : 1
WARFARIN_GOAL : 1
DESIRE_TO : 1
DO_FEMPOP : 1
RESPONSES_LUNGS : 1
MG_ANTIPLATELET : 1
OFTEN_YOU : 1
SIDERAILS_ASPIRIN : 1
ACCOMPANIED_COUSIN : 1
COUNSELING_GENERAL : 1
SIGNATURE_EATING : 1
IN_NO : 1
DOING_THIS : 1
YOUR_RECENT : 1
OTHER_CXR : 1
HAS_LED : 1
INDICATION_FOR : 1
MG_GAVE : 1
OF_ATTORNEY : 1
EQUIPMENT_ANGIO : 1
MG_MG : 1
YOUNGSTOWN_CARE : 1
URINE_ML : 1
NO_SYMPTOMS : 1
APPOINTMENT_ACTUAL : 1
DURING_THE : 1
HAD_CALCITONIN : 1
YEAR_MALE : 1
ATRIAL_FIBRILLATION : 1
BETA_RELATED : 1
CARE_PATIENT : 2
MOUTH_ACTIVE : 2
REQUEST_OF : 1
FOR_HIMSELF : 1
TO_GAIT : 1
CARE_OUTLINED : 1
HIS_GOAL : 1
AND_AGREED : 1
INJURY_OF : 1
KARDEXTL_COUGH : 1
EXAMINATION_OF : 3
WITH_WITH : 1
BOTH_MEMBRANES : 1
GOOD_AND : 1
ENDING_PM : 1
ACTUAL_HT : 1
ANTERIOR_VITRECTOMY : 1
AND_DENTURES : 1
VISIT_COMPLAINT : 1
GETTING_FROM : 1
LOWERING_STATIN : 1
INDEPENDENT_ON : 1
RIGHT_PULSES : 1
TERM_TREATMENT : 1
HE_LOST : 1
MANKOWSKI_SCALE : 1
VETERAN_HAS : 1
BY_THE : 3
RELATIONS_COURT : 1
VS_TAKEN : 1
UNT_TAKE : 1
BASED_ASSESSMENT : 1
SITE_DENIES : 1
BERYL_ATHENS : 1
COMPLAINT_CHRONIC : 1
CREATININE_IN : 1
FOR_PATIENT : 1
SEC_YES : 1
FOR_TO : 2
PATIENT_REFUSED : 1
ORIENTED_PLEASANT : 1
CLINIC_TO : 1
CERVICAL_IMPROVING : 1
HANDOUT_POST : 1
BY_HIS : 1
WHEN_DISCHARGE : 1
KNEE_CERVICAL : 1
POSITIVE_STOOL : 1
PT_PHONE : 1
TEMP_DISCHARGE : 1
OF_DANGEROUS : 1
NOVEMBER_TO : 1
EFFECTS_DING : 1
BEEN_SINCE : 1
AT_ALL : 1
BYPASS_WIRE : 1
FOR_UAL : 1
TO_HIM : 2
NOT_COMMENTS : 1
PAIN_FOR : 1
BACK_STARTED : 1
PAIN_ENDING : 1
THE_UCINATIONS : 1
HELPED_WHAT : 1
MONTH_FOLLOW : 1
CARE_OF : 1
HAVE_HAD : 1
SINCE_HE : 1
PROBLEMS_PENILE : 1
OTHER_SEE : 1
TUBERCULIN_PURIFIED : 1
RECENTLY_UN : 1
PT_PING : 1
VISIT_SCHEDULED : 1
COURSE_COMPLICATED : 1
NO_ACUTE : 1
TO_VACCINATION : 1
SPEECH_EXTREMITY : 1
CALL_SUCCESS : 1
DRC_CHILD : 1
OPHTHALMOLOGY_BRIEF : 1
ACETATE_OD : 1
YOUR_ARE : 1
EVERY_OS : 1
OR_BY : 1
YES_PAIN : 1
UNSUCCESSFUL_RATE : 1
WAS_OPPORTUNITY : 1
IS_MALE : 1
DRAIANGE_THAT : 1
ANYWHERE_ELSE : 1
LOT_TO : 1
NASAL_INH : 1
POSITIVE_RATE : 1
SPEECH_EQUAL : 1
ANUSOL_ON : 1
CARDIAC_POSITIVE : 1
BELOW_THE : 1
BLOCKERS_ACTIVE : 1
POST_OFFPUMP : 1
TO_NOTE : 1
AFTER_ONE : 1
RECENT_LAB : 1
NOT_PATIENT : 1
COMPLICATED_ACTIVITY : 1
REPAIR_THE : 1
CONSCIOUSNESS_NO : 1
IN_OF : 1
COMMINUTED_OF : 1
REQUEST_PRESCRIPTION : 2
OBTAIN_MAINTAIN : 1
AREA_TIMES : 1
YR_FEMALE : 1
HIMSELF_STRENGTH : 1
PROBLEM_TAKEN : 1
AT_PM : 1
CARE_PROGRAM : 1
STATUS_DOXAZOSIN : 1
ACTIVE_BLOCKERS : 1
OF_MONTHS : 1
INCLUDED_IF : 1
PC_OUTPT : 1
STRONG_WALKS : 1
TO_HAVE : 1
ON_AFTER : 1
IN_THIS : 1
TO_MWFSA : 1
MATERIAL_TO : 1
BP_RR : 1
NO_WEAKNESS : 1
ACTIVITY_NEURO : 1
PE_THIS : 1
HAD_SOME : 1
PROBLEM_YES : 1
WITH_OUTPATIENT : 1
TAKE_BY : 1
PE_PT : 1
PRESENTS_THE : 1
INITIAL_IMPRESSION : 1
CONTACT_HAS : 1
OR_HI : 1
JAW_PAIN : 1
EVER_HE : 1
PHACOEMULSIFICATION_INSERTION : 1
TO_ME : 1
BEEN_FILLING : 1
ACTUAL_IN : 1
SPENT_MORE : 1
OR_OR : 1
SYMPTOMS_HAS : 1
NURSING_YR : 1
LENS_MATERIAL : 1
LOW_OL : 1
BENZOYL_BAR : 1
ON_HIS : 2
VITAL_HT : 1
FOR_PRIMARY : 1
SAME_APPOINTMENT : 1
AUDITC_ACTIVE : 1
DATE_NOT : 1
VAMC_HIS : 1
VISUALIZED_INTACT : 1
IN_RIGHT : 1
ALL_TO : 1
PERKINS_CARE : 1
OUTPUT_INTERVENTIONS : 1
STEADY_GAIT : 1
RIGHT_DONE : 1
IDENTIFICATION_BAND : 1
PAIN_MELENA : 1
FROM_SPECIALTY : 1
FOLLOWING_METHOD : 1
CANE_WITH : 1
IN_THESE : 1
SUCCINATE_MG : 1
CONTACT_AND : 1
CLEAR_AND : 1
ON_APPT : 1
PLACED_PT : 1
WE_TALKED : 1
IN_REGARDS : 1
THE_EXPLAINED : 1
MYCIN_PHOSPHATE : 1
HAS_SCHEDULED : 1
TEAM_COMMUNICATION : 1
THROUGH_HIS : 1
MARCH_LAST : 1
QTY_ACTIVE : 2
AND_NEEDS : 1
MEETING_AND : 1
AND_COMPLETE : 1
THESE_ALREADY : 1
LAST_YEAR : 1
TO_SEE : 3
NO_WE : 1
HIMSELF_STATES : 1
DID_YOU : 1
IMPROVEMENT_VETERAN : 1
CONSENT_FOR : 1
MEENACH_NURSING : 1
GIVEN_PT : 1
DEPENDENCY_ADVANCE : 1
LATE_ENTRY : 1
ANXIETY_STATE : 1
DECREASE_TO : 1
PROGRAM_WE : 1
MADE_BY : 1
CONSCIOUSNESS_ALERT : 2
AGO_AT : 1
BELOW_LLL : 1
SVT_NO : 1
DOXAZOSIN_MESYLATE : 1
WITH_INTAKE : 1
DATE_MEASUREMENT : 1
TO_SELF : 1
WANTED_HE : 1
HANDS_ANXIETY : 1
EATING_LEVEL : 1
ADDENDUM_SUBJECTIVE : 1
OUTPT_OF : 1
THIS_REVIEW : 1
OUT_PULMONARY : 1
OF_CAP : 1
FOR_CHEWING : 1
AT_BY : 2
CLEAR_CARDIAC : 1
MAY_BE : 1
AVG_SIGNATURE : 1
ACTIVE_AND : 2
PERTINENT_STUDIES : 1
ACTIVE_OUTPATIENT : 5
SHE_MORE : 1
LLL_AREA : 1
ABLE_TO : 1
CECAL_ANUSOL : 1
OF_SODIUM : 1
PER_REQUEST : 1
TO_IS : 1
INFORMATION_TO : 1
CONCERNS_NOTED : 1
CHEST_NURSING : 1
ACETATE_EVERY : 1
DEPENDENCY_WILBERT : 1
HDL_BY : 1
PROVIDER_IF : 1
TELEMETRY_CHARACTER : 1
VAMC_ACCESSION : 1
DROP_LAST : 1
IS_WALKING : 1
PER_OF : 1
STATUS_POST : 1
VETS_CALL : 1
REPORTS_GOOD : 1
PROGRAM_OPTIONS : 1
HT_LOCATION : 1
EDUCATION_CONTACT : 1
ON_RA : 1
FAMILY_MEMBERS : 1
REACHED_AT : 1
THIS_DOCUMENT : 1
ARE_IF : 2
TAKE_ALCOHOL : 1
ATENOLOL_MG : 1
PATIENTS_LAST : 1
URGENT_1010M : 1
PT_EVERY : 1
BP_AND : 1
AND_SHE : 1
DECLINES_ABOUT : 1
PATTERNS_ARE : 1
WWII_WHICH : 1
FRESH_FROZEN : 1
RELIEVES_PAIN : 1
GM_APPLY : 1
INSTRUCTIONS_TO : 1
MANEUVERS_ATTEMPTED : 1
HR_RR : 1
SURGERY_NOT : 1
TO_STATE : 1
YEAR_HIS : 1
HA_VISUAL : 1
CHARACTER_CLEAR : 1
ADD_ON : 1
DOUBLE_ON : 1
THE_ON : 1
MONTH_AN : 1
AM_MALE : 1
YOUR_DICLOFENAC : 1
IS_REPORTS : 1
SOFT_FIBER : 1
TIME_DONE : 1
INTRAARTICULAR_FX : 1
VETERANS_NUMBER : 1
TERM_SINCE : 1
ANTIBIOTIC_TO : 1
FAMILY_BACKGROUND : 1
DM_HTN : 1
NONE_YOUR : 1
NOTE_BEEN : 1
OR_DIARRHEA : 1
DENIES_OF : 1
BLOCK_CAPSAICIN : 1
OVERALL_SPENT : 1
LEVEL_CONSCIOUSNESS : 3
DOES_WANT : 1
ADVERSE_ASPIRIN : 1
RAL_ORIENTED : 1
APPLY_TO : 1
RECENT_OFFPUMP : 1
INDICATES_FIELD : 1
AVG_INFORMED : 1
HGB_AC : 1
WITH_RESIDUL : 1
SUICIDAL_FACILITY : 1
CARE_CLINICIAN : 1
MD_STATES : 1
EXAM_NOTE : 1
ELSE_MINIMUM : 1
INTRAARTICULAR_MP : 1
WAS_TO : 1
QUESTIONS_YES : 1
INJECTION_SITE : 1
SEBACEOUS_BELOW : 1
SKIN_PROBLEMS : 3
OR_DEPRESSIVE : 1
LOCATION_BILATERAL : 1
MG_TAKE : 3
NOT_ADDITIONAL : 1
RELAPSE_LEFT : 1
BEEN_NURSING : 1
FEV_VITAL : 1
CAREGIVER_REFUSED : 1
INFORMATION_THE : 1
SURGERY_CONSISTING : 1
INDIVIDUAL_IDENTIFIED : 1
ERROR_PT : 1
REMISSION_IS : 1
SM_NO : 1
PATIENT_DOES : 1
REFUSED_TO : 1
SUFFICIENT_AMOUNT : 1
OCCASION_THE : 1
SURGERY_AND : 1
NO_ARE : 1
DICLOFENAC_IS : 1
CHEW_CHEW : 1
HIS_AND : 2
ABD_PAIN : 1
STATIN_PATIENT : 1
NEEDS_TO : 2
INVITED_HER : 1
PROBLEMS_RETURN : 1
OUTPATIENT_RECONCILIATION : 1
SHOW_THE : 1
OS_PRIMARY : 1
TOTAL_SOLUM : 1
DID_HAVE : 1
SPEECH_RIGHT : 1
THE_FOLLOWING : 2
NOW_CLICK : 1
COURT_DRC : 1
CARE_NOTE : 3
SATS_OF : 1
TOENAIL_INGROWN : 1
IN_COMFORTABLE : 1
STOOL_ARTHRITIS : 1
ACTIVE_MG : 1
OTHER_OU : 1
FOLLOWING_INJECTION : 1
IS_CONSTANT : 1
MOUTH_DAILY : 1
METALLIC_DEBRIS : 1
INR_CLEVELAND : 1
APPOINTMENT_YOUNGSTOWN : 1
EVERY_MONTHS : 1
JUL_AGE : 1
INCOME_THIS : 1
PREREGISTRATION_INDIVIDUAL : 1
NO_CHANGES : 1
ECHO_UALLY : 1
DISCHARGE_INSTRUCTIONS : 1
TREATMENT_CARDIOLOGY : 1
REMISSION_CL : 1
COMPLIANCE_DROP : 1
APPROPRIATE_URGENT : 1
EXTREMITY_EQUAL : 1
PCIOL_CENTERED : 1
REQUIRED_OPERATION : 1
PAIN_LEVEL : 2
VITAMINS_VOIDING : 1
ANATOMICAL_LOCATION : 1
NEGATIVE_PATIENT : 1
ASPIRIN_MG : 1
INITIAL_THICKNESS : 1
COUGH_PCIOL : 1
OVERALL_SHE : 1
AND_EXPIRED : 2
VALPROIC_ACID : 1
WHO_TO : 1
SI_OR : 1
NEGATIVE_FOR : 1
GLASSES_TO : 1
EXPRESSIVE_APHASIA : 1
IN_PT : 2
REGARDS_UPCOMING : 1
APPTS_CARE : 1
CARE_AS : 1
WOULD_FAMILY : 1
HIM_HER : 1
NOT_ALL : 1
IS_YO : 1
AWA_SS : 1
INFORMATION_INSTRUCTIONS : 1
WHEN_PATIENT : 1
IN_ERROR : 1
CAP_SEC : 1
HTN_HYPERLIPIDEMIA : 1
OWN_TEETH : 1
PATIENT_NOTIFICATION : 1
THIS_OF : 3
RESPIRATION_VETERAN : 1
FOR_THE : 2
PRN_SCHEDULED : 1
FOR_AUDITC : 1
MR_HAVE : 1
OTHER_HOLD : 1
TEMP_OF : 1
IN_TO : 1
NOW_RESIDING : 1
PCP_HAS : 1
BEEN_BY : 1
APPROPRIATE_KD : 1
AFTER_ANXIETY : 1
INCOME_DOCUMENT : 1
TOTAL_ANEMIA : 1
OL_NOW : 1
THE_BACK : 1
BREATHE_CENTERED : 1
HIS_PROPERTY : 1
COMPLAINT_PROBLEM : 1
LIST_POSITIVE : 1
THE_HOWEVER : 1
REFLECTIONS_CENTER : 1
FALLS_PHYSICIAN : 1
FAMILY_WERE : 1
CALL_LIGHT : 1
DIRECTIVES_MEDICATION : 1
VITRECTOMY_LENS : 1
AC_DE : 1
MP_FX : 1
PATIENT_HEIGHT : 1
DIET_AND : 1
OF_DIABETES : 1
ON_TIU : 1
REQUIRED_FIELD : 1
PAIN_BIL : 1
REFILL_NO : 1
SCHEDULED_TO : 1
DEPARTMENT_AFTER : 1
TREATMENT_PAIN : 1
ORIENTED_AROUSABLE : 1
ONE_MINUTE : 1
PROPERTY_ERROR : 1
ATTORNEY_ADDENDUM : 1
INSULIN_ML : 1
PROVIDER_THE : 1
SPECIALTY_SIGNATURE : 1
UPCOMING_EXAM : 1
DATE_OF : 3
JAW_HEMOTMA : 1
TAKEN_BP : 1
RELEASE_INFORMATION : 1
EDEMA_LEGS : 1
PLACE_AT : 1
SAW_IRRIGATION : 1
THE_PERTINENT : 1
OF_MEDICATIN : 1
CURRENT_HERBAL : 1
DEPRESSIVE_SYMPTOMS : 1
DENIES_DISCHARGE : 1
AT_OR : 1
PLANTAR_POSTERIOR : 1
FOR_SKIN : 1
AND_MEMBRANES : 1
MRI_OF : 1
CARE_PROGRESS : 1
NUMBNESS_TINGLING : 1
SA_AMBULATORY : 1
BY_PATIENTS : 1
SOLN_QTY : 1
QUIT_ATTEMPTS : 1
IN_ACUTE : 1
CHO_DIET : 1
EMB_SM : 1
NO_CONCERNS : 1
THIS_EXAMINATION : 3
SP_LEFT : 1
SATS_ON : 1
TO_CARE : 1
WEEK_WORK : 1
YES_INTACTNO : 1
HISTORY_NURSING : 1
DOCUMENT_TEMPERATURE : 1
SCHEDULED_VISIT : 1
IMPRESSION_APR : 1
HEEL_ADDENDUM : 1
SEE_READINESS : 1
LENS_PATIENT : 1
CONTACT_NOTE : 1
BRIEF_HISTORY : 1
BUDGET_IN : 1
RIGHT_PLEASE : 1
PROTEIN_ADMINISTERED : 1
MAINTAIN_OF : 1
SHOWS_RATE : 1
CAN_ALCOHOL : 1
FROM_TO : 1
IN_APR : 2
CHANGES_DEBRIS : 1
ENCOUNTER_BP : 1
PAIN_JAW : 1
PAIN_CERVICAL : 1
SGPT_TEST : 1
STRENGTH_BACK : 1
WILL_COME : 1
YOUNGSTOWN_PRIMARY : 1
TEAR_THIS : 1
STARTED_HE : 1
EDUCATION_PREVIOUSLY : 1
BUILT_YO : 1
PAST_HAS : 1
OF_STAFF : 1
OF_KATIE : 1
THIS_ENCOUNTER : 1
HOWEVER_HE : 1
EVERY_MALE : 1
PEOPLE_SO : 1
WEEK_FOR : 1
MONTH_WITH : 1
CLINICS_SUCCINATE : 1
AT_TO : 1
VETERAN_HE : 2
PATIENT_SIGNATURE : 1
NUMB_POLYP : 1
INJECTION_CHRONIC : 1
UAL_HOWEVER : 1
BEEN_FOR : 1
PATIENT_FOR : 1
SAW_REPAIR : 1
SUTR_PT : 1
APPROPRIATE_LONG : 1
FOR_THERAPY : 1
PLAN_OF : 1
THE_DEPARTMENT : 1
NO_IN : 1
LEVEL_OF : 4
AND_WERE : 1
AT_THE : 3
DX_PAIN : 1
FINGER_COMMINUTED : 3
ACCEPT_VACCINATION : 1
WITH_BEHAVIOR : 1
NO_SUICIDAL : 1
WANTED_AND : 1
CURRENT_MEDICATIONS : 1
EXERCISE_ARE : 1
ON_BILATERAL : 1
ON_ONE : 1
BREATHE_PCIOL : 1
SP_APEX : 1
DOSES_DECREASE : 1
HPV_TO : 1
AREARS_THIS : 1
ADD_APPT : 1
NOT_EVIDENCE : 1
RELATED_FOUND : 1
ONCOLOGIST_FOR : 1
AMBULATORY_CARE : 1
IT_WILL : 1
SIGNATURE_INFORMED : 1
SCALE_CHIEF : 1
INCLUDED_NO : 1
HE_CLEVELAND : 1
OM_HE : 1
INTERDISCIPLINARY_PLAN : 1
DONE_MG : 1
PATIENT_PROVIDED : 1
DIABETES_MELLITUS : 1
TAXES_PROGRESS : 1
WEAKNESS_NIGHTS : 1
IS_BUSY : 1
CL_DURING : 1
COMMANDS_SVT : 1
PATIENT_USES : 1
INFLUENZA_CABGX : 1
VISTA_IMAGING : 1
EXPLAINED_PATIENT : 1
EXPLAINED_TO : 2
BP_MMHG : 1
GIVEN_THE : 1
RELIGIOUS_HAVE : 1
DENIES_SYMPTOMS : 1
NONE_FOUND : 1
HE_NOTICED : 2
BEFORE_BACK : 1
NOT_OF : 1
ACUTE_OUT : 1
IS_VISTA : 1
SVT_PT : 1
SIGNS_HT : 1
MONITORING_WAS : 1
ADDENDUM_TEMP : 1
SHE_HAS : 1
MOMETASONE_CARE : 1
PATIENT_HERE : 2
MINUTES_YOU : 1
VISION_ATRIAL : 1
TX_AVR : 1
PATIENT_SYMPTOMS : 1
NOT_THE : 1
OU_SPECIAL : 1
INFORMATION_CURRENT : 1
STATES_HAD : 1
RESULTED_HIS : 1
TEMPLATE_APPROVED : 1
MALE_INSULIN : 1
BEEN_MADE : 1
THESE_HIS : 1
YOU_ARE : 1
ARE_ALREADY : 1
NOTE_AN : 1
PO_PRNCHANGED : 1
HERBAL_TAKING : 1
ABOUT_FAMILY : 1
AT_UNDERSTANDS : 1
CONTACTS_DYSPNEA : 1
EARMOLD_FILTER : 1
EXAM_CARE : 1
BUILDINGS_THAT : 1
MAC_NERVE : 1
FOR_PART : 1
FOR_ADD : 1
MEASUREMENT_QUALIFIERS : 1
EDUCATION_NOTIFICATION : 1
COME_THROUGH : 1
OFFPUMP_SURGERY : 1
FOUND_BRIEF : 1
MESSAGE_ANSWERING : 1
APPETITE_IS : 1
UNITS_OF : 1
VITREOUS_DISABLED : 1
CHO_OL : 2
PATIENT_FORMS : 1
CONVERSATION_HAS : 1
THE_ER : 1
SOME_MILD : 1
MEDICATION_INFLUENZA : 1
SYMPTOMS_CAP : 1
POWER_ATTORNEY : 1
VACCINATION_INFLUENZA : 1
PRESSURE_ULCERS : 3
AND_BOTH : 1
PSYCHOLOGY_TREATMENT : 1
HIS_CAREOUTPATIENT : 1
MONTHS_PSYCHOLOGY : 1
YOU_SEEN : 1
ISSUED_EARMOLD : 1
DING_HT : 1
WIRE_ABSENCE : 1
CM_PATIENT : 1
UNITS_FRESH : 1
RULED_OUT : 1
CATARACT_WITH : 1
VACCINATION_FOR : 1
RIGHT_SKIN : 1
NAD_IMPROVED : 1
PFT_AC : 1
BILATERAL_OD : 1
CLINIC_YOUNGSTOWN : 1
THE_AND : 3
FOR_STATES : 1
CENTER_NO : 1
OF_WT : 1
ONE_IN : 1
ML_INTERVENTIONS : 1
NO_COULD : 1
HYPERTENSION_ML : 1
PEOPLE_AS : 1
MEDICATION_RECONCILIATION : 1
TO_ON : 1
AGREE_THE : 1
PLEASE_CONTACT : 1
SERUM_NO : 1
MIC_FILTER : 1
SYMPTOMS_OR : 1
AMBULATORY_PATIENT : 1
PT_OVER : 1
CONSULTS_PT : 1
CARE_LEVEL : 1
LOST_THE : 1
WAS_HIT : 1
RN_YEAR : 1
FOLLOWING_RESULTS : 1
BREATH_DYSPEPSIA : 1
PAIN_THE : 2
REVIEWED_PATIENT : 1
DECLINES_INFORMATION : 1
AGAIN_ADVISED : 1
TINGLING_FOLLOWS : 1
NIGHT_OU : 1
NOTE_UNDERSTANDING : 1
GOING_REASON : 1
AFTER_STATE : 1
THICKNESS_THIS : 1
HEIGHT_IN : 2
OR_PROBLEMS : 1
THE_DOCUMENT : 1
NOTE_OLD : 1
BID_PRNCHANGED : 1
BAR_QTY : 1
NORMAL_SUFFICIENT : 1
WI_SUBJECTIVE : 1
FOR_VAMC : 1
DECLINED_FURTHER : 1
STD_AGAIN : 1
DING_HOLD : 1
HE_BEEN : 2
PCP_FOR : 1
SIX_OR : 1
WAS_REFERRED : 1
PROVIDER_ACETATE : 1
PAIN_MANAGEMENT : 1
TREATMENT_PROCEDURE : 1
NOTE_IN : 1
THAT_IS : 1
CM_COMFORTABLE : 1
AMOUNT_TO : 1
NO_RESULTS : 1
TO_THICK : 1
FEVERS_NIGHTS : 1
REFFERED_PHYSICIAN : 1
SIGNATURE_FORMS : 1
CREAM_APPLY : 1
KG_HISTORY : 1
REGULAR_YES : 1
INITIAL_HEIGHT : 1
SPECIAL_REQUEST : 1
TO_FEV : 1
BY_FOLLOWING : 1
CHEST_PAIN : 3
MEDICAL_REMISSION : 1
WEEK_LOW : 1
DURABLE_POWER : 1
REACTIONS_PROBLEM : 1
AND_HE : 2
PALPABLE_AAOX : 1
TREATMENT_OPTIONS : 1
THAT_IN : 1
PLACED_ON : 1
INGROWN_REPORTS : 1
STRONG_ACTIVITY : 1
MEDICATION_REQUEST : 2
DX_BACK : 1
REPORTS_PLACED : 1
DANGEROUS_SITUATION : 1
JAR_OR : 1
REPEATED_CLEVELAND : 1
PAIN_INFORMATION : 1
THE_CARE : 1
IDENTIFIED_HISTORY : 1
HEMOGLOBIN_AND : 1
AVR_DENIES : 1
CENTER_BASED : 1
ANY_PHYSICIAN : 1
MEDICATIONS_PRIMARY : 1
MEDICATIONS_CARE : 1
MONTHS_BP : 1
USING_PHYSICIAN : 1
SEE_IN : 1
TO_PROVIDER : 1
TAXES_LITTLE : 1
FOR_EXPLAINED : 1
SAYS_NOT : 1
PAIN_PRESSURE : 1
NOTE_DT : 1
DOSE_MG : 1
MORE_THAN : 1
ALLERGIES_PRIMARY : 1
PREDNISOLONE_ACETATE : 1
TREATMENT_SINCE : 1
UPPER_SUFFICIENT : 1
ACTIVE_ON : 1
IT_BUT : 1
COMMUNICATION_PATIENT : 1
LOW_CHO : 1
PROVIDER_OR : 1
INDICATED_IF : 1
SINCE_NOVEMBER : 1
MEMBRANES_VISUALIZED : 1
ENTRY_MEDICATION : 1
ACTIVE_CARBUNCLE : 1
TISSUES_GLASS : 1
PURIFIED_DERVIATIVE : 1
NO_NO : 1
PALPABLE_OUTPUT : 1
AREA_FOR : 1
WT_LOSS : 1
AND_EVIDENCE : 1
DYSPEPSIA_CONSTIPATION : 1
PROCEDURE_CARDIOLOGY : 1
LUNGS_CTA : 1
THAT_FRAME : 1
CC_OLD : 1
OWN_PCP : 1
SIX_MORE : 1
SUBJECTIVE_DOSE : 1
TO_VETS : 1
HAS_NKA : 1
INTERVENTIONS_TIBIAL : 1
QUALIFIERS_TELEMETRY : 1
INSTRUCTIONS_VET : 1
IN_SIDE : 1
REVIEWED_PALPABLE : 1
ALERT_AROUSABLE : 1
HIS_BACK : 1
PART_FRICTION : 1
COMPLICATIONS_IN : 1
DESK_ADDENDUM : 1
SYSTEMS_WEAKNESS : 1
PATIENT_CONTACT : 2
OF_STD : 1
THEN_AS : 1
TEAM_TO : 1
TO_BE : 1
HANDOUT_OP : 1
IS_GETTING : 1
MINNEAP_HIS : 1
AND_POSSIBLY : 1
NURSING_EDUCATION : 1
THE_RESULTS : 1
RATE_PING : 1
AGO_ADENA : 1
ANY_RECOMMENED : 1
TO_REMIND : 1
OF_PRESENTS : 1
SURG_AUDIOLOGY : 1
FOR_POSTERIOR : 1
BAND_YES : 1
HIMS_IN : 1
NEW_MEDICATION : 1
ALERT_WOUNDS : 1
IF_LIST : 1
HANDS_AFTER : 1
MOUTH_FOR : 1
ANSWERING_MACHINE : 1
WEIGHT_CHANGE : 1
HAS_EDUCATION : 1
MANIC_OR : 1
LIKE_FOR : 1
AN_MESSAGING : 1
WITH_AND : 1
ASPIRIN_CHEW : 1
PAST_QUIT : 1
MANIC_SYMPTOMS : 1
PATIENT_ANY : 1
DT_ASSISTANT : 1
AT_ARE : 1
NUMBER_TO : 1
VET_FOR : 1
PLAN_TELEMETRY : 1
SLOW_GAIT : 1
HOW_REACH : 1
DEVELOPED_IN : 1
TO_UPCOMING : 1
WITH_THE : 1
OF_ANESTHESIA : 1
SUPPLIES_PSA : 1
PAIN_ADDENDUM : 1
DIARRHEA_NO : 1
STATIN_THE : 1
ANY_NUMBNESS : 1
LEFT_RELIEVES : 1
HERE_MONTH : 1
COULD_NOT : 1
HEALTH_CARE : 1
BP_ISSUED : 1
CONSCIOUSNESS_PCCNURSING : 1
MEDICATION_PER : 1
OF_WITH : 1
SCREENING_PATIENT : 1
OF_PCCNURSING : 1
OF_PROSTATE : 1
ON_AT : 1
AS_BE : 1
DENIES_NECK : 1
FOR_CLEANSING : 1
PROBLEM_TELEMETRY : 1
CARE_PAIN : 2
ADMINISTERED_PC : 1
APPROPRIATE_TERM : 1
IS_TO : 1
POSITIVE_ARTHRITIS : 1
MG_IN : 2
LAST_DROP : 1
ONEHALF_TABLET : 1
DANGEROUS_HOUSEHOLD : 1
NECK_PAIN : 1
DURATION_COMPLAINT : 1
MALE_FOR : 1
AMOUNT_ACTIVE : 1
IMAGING_PLACE : 1
HIS_TO : 1
WEEK_SOCIAL : 1
PROCEDURE_RECOMMENDS : 1
THE_LEFT : 3
PROGRESS_BEEN : 1
BACK_FOR : 1
BILATERALLY_PT : 1
IN_NAD : 1
INR_WI : 1
TO_AN : 1
TIM_CHO : 1
FROM_PRN : 1
TON_GOOSE : 1
CLINIC_TEAM : 1
PROVIDED_TO : 1
ANTERIOR_EPINUCLEAR : 1
NO_NUMB : 1
AND_RIGHT : 1
VITRECTOMY_EPINUCLEAR : 1
PAIN_NOTE : 1
HAS_BEEN : 6
OUT_ADMISSIONS : 1
THE_SAME : 1
MAY_REACHED : 1
DOCUMENT_DATE : 1
AMB_CARE : 1
SOFT_TISSUES : 1
PRETTY_AND : 1
MONITORED_FOR : 1
SPECIAL_PROGRAM : 1
FOR_FOLLOW : 1
VISUAL_NO : 1
COMMENTS_NOT : 1
MENTAL_NOTE : 1
PRACTICE_SAFE : 1
PT_MESSAGE : 1
HISTORY_UPDATE : 1
TO_APPTS : 1
THE_PAIN : 2
SELECTED_FROM : 1
IS_LONGER : 1
COUSIN_HERE : 1
MEDICATION_CHANGE : 1
RAL_INFORMATION : 1
DENIES_TO : 1
SKIN_COLOR : 1
TO_PROTECT : 1
DEVICE_TESTS : 1
COMPUTER_SGPT : 1
PRIMARY_CAREOUTPATIENT : 1
BY_LOT : 1
PHONE_REPEATED : 1
HAVE_SIX : 1
SODIUM_NO : 1
NO_SUCCESS : 1
LETTER_FROM : 1
TELEMETRY_SVT : 1
IS_SCORED : 1
TELEMETRY_TELE : 1
APPOINTMENT_HAVE : 1
BELIEFS_OR : 1
FROM_ELSE : 1
GALLBLADDER_SURGERY : 1
REGARDS_TO : 1
DENIES_ANY : 4
CM_SENDING : 1
ON_DELIRIUM : 1
TROPONIN_REGULAR : 1
SINCE_AND : 1
VITAMIN_TAB : 1
INITIAL_APR : 1
BRUITS_OR : 1
JUL_SEX : 1
LAST_NIGHT : 1
SPENT_THAN : 1
SPI_TRIC : 1
IN_TEAM : 1
INHOUSE_DEVICE : 1
RELATED_MEDS : 1
CONFIRMED_LEVEL : 1
OF_NOT : 1
NEEDS_REFILL : 1
PATIENT_IS : 2
INTACT_INDICATION : 1
RTC_PLANTAR : 1
NURSING_ADL : 1
OUTPUT_WALKS : 1
PROBLEM_IN : 1
CAD_HYPERLIPIDEMIA : 1
HERE_TREATMENT : 1
AROUSABLE_OTHER : 1
SHORTLY_ULTIMATE : 1
PFT_HGB : 1
HIMS_THAT : 1
SPECIAL_SCREENING : 1
ADR_OF : 1
YO_HX : 1
INFORMED_FOR : 1
GREAT_INGROWN : 1
ADVANCE_DIRECTIVES : 1
VETERAN_REPORTS : 1
PAIN_IMPROVING : 1
SINCE_REMISSION : 1
SVT_RISK : 1
ADMINISTERED_IN : 1
LIMB_DISEASE : 1
YES_TELE : 1
ATTEMPTS_HELPED : 1
SHORTLY_HIS : 1
CONTACT_SPECIAL : 1
BLOCKERS_RELATED : 1
EXPLORE_BUT : 1
INFLUENZA_ADMINISTERED : 1
DYSPNEA_NEW : 1
BEEN_IN : 1
MALE_HX : 1
VISTA_PLACE : 1
SCREEN_NECK : 1
FIELD_OPERATION : 1
HE_HIT : 1
HE_WANTED : 1
REVIEWED_ALL : 1
THICKNESS_TEAR : 1
VITAL_MEASUREMENT : 1
ABOUT_MEMBERS : 1
SOCIAL_WORK : 2
GIVEN_TO : 2
LABS_RADIAL : 1
POSTOPERATIVE_WAS : 1
CONTACTS_NEW : 1
CLINICIAN_BREATH : 1
HE_ANY : 1
AND_THE : 2
FOR_WHICH : 1
BLOCK_CREAM : 1
MANEUVERS_AND : 1
INSTRUCTIONS_REACH : 1
LOSS_ABD : 1
PROGRESS_NOTE : 1
AN_EXAMINATION : 1
HE_IS : 4
PLAN_PROBLEM : 2
IS_LIVE : 1
PATIENTS_PROVIDER : 1
URINE_OUTPUT : 1
GIVEN_AND : 1
RA_DISTRESS : 1
IN_WITHIN : 1
PATIENT_THAT : 2
TO_SEEN : 1
IS_CL : 1
DISABLED_NURSING : 1
IF_THESE : 1
PATIENT_REVIEW : 1
OVER_PHONE : 1
NEUROPATHY_BS : 1
BEHAVIOR_PHYSICIAN : 1
PAIN_ACTIVITY : 1
SIDE_EFFECTS : 1
SEEN_IN : 1
IF_ARE : 1
HE_TO : 1
WILL_THROUGH : 1
SOLUM_MYCIN : 1
BENIGN_PROSTATE : 1
SHOW_FOR : 1
PHYSICIAN_NURSING : 1
MELENA_OR : 1
IS_NOW : 1
MD_READINESS : 1
BOTTLE_ANY : 1
OR_PRESSURE : 1
CTA_AND : 1
THE_LIST : 1
OF_HOUSEHOLD : 1
OL_DOUBLE : 1
VOIDING_DENIES : 1
CANE_SLOW : 1
NURSING_PLAN : 2
EVIDENCE_OF : 1
HAS_CONCERNS : 1
CONTINENT_YES : 1
ON_OF : 1
NO_SEBACEOUS : 1
MACHINE_MAIL : 1
PROBLEM_BUILDINGS : 1
CALL_PROVIDER : 1
WITHOUT_PHYSICIAN : 1
ADDENDUM_THERAPY : 1
PCCNURSING_OF : 1
FOR_THEN : 1
DOMESTIC_RELATIONS : 1
TRAINING_MINUTES : 1
HE_NEEDS : 1
EVALUATION_EXAMINATION : 1
STD_PT : 1
CALCIUM_VITAMIN : 1
OF_YEAR : 1
MAINTAIN_SELF : 1
STAFF_FOR : 1
PHONE_HE : 1
PROGRAM_TREATMENT : 1
GM_AMOUNT : 1
THE_METHOD : 1
MG_MWFSA : 1
INTERVENTIONS_PHYSICIAN : 1
IMAGING_CENTER : 1
POSITIVE_MEDS : 1
ALLERGIES_REACTIONS : 1
PLEASE_THE : 1
MEMBERS_HAS : 1
NURSING_CARE : 2
DOES_NOT : 1
MINUTE_INTERVENTIONS : 1
LEFT_INDEX : 3
SUPPLE_NO : 1
UCINATIONS_AFFECT : 1
NEURO_ALERT : 1
HIMSELF_DISCUSSED : 1
OF_PRESCRIPTION : 1
UPPER_EYELIDS : 1
HR_TEMP : 1
BE_MAILED : 2
THESE_AREAS : 1
NOTE_NOTE : 1
EXAMINATION_HE : 1
REVIEW_SYSTEMS : 1
BEEN_SEEN : 1
VITALS_ALLERGIES : 1
MG_CHEW : 1
ER_INTRAARTICULAR : 1
HOLD_DOSES : 1
PACKED_COLCHICINE : 1
RECENTLY_CALCITONIN : 1
AREA_DENIES : 1
THIS_PT : 1
MASS_AUG : 1
SOCIAL_ALLERGIES : 1
AMBULATES_HAD : 1
BUDGET_OVERALL : 1
WOULD_BE : 1
NOT_WANT : 1
HIS_HEART : 1
SPI_IMPROVEMENT : 1
AFTER_MINUTE : 1
IN_CLINIC : 3
NO_APPARENT : 1
HEIGHT_CM : 1
SHE_NO : 1
WITH_PAIN : 1
ACID_MG : 1
TAB_CHEW : 1
FURTHER_AT : 1
ADDENDUM_CALLED : 1
DISCHARGE_BENZOYL : 1
APPARENT_MOISTURE : 1
CM_SIDE : 1
PAPILLOMAVIRUS_ATTEMPTED : 1
CHANGE_FOR : 2
VALUE_OF : 1
ANY_NECK : 1
MEDICATION_MEDICATION : 1
HERE_FOR : 5
CHARACTER_UNLABORED : 1
BACK_UNDERSTANDS : 1
HAS_TO : 1
THE_DATE : 1
INFORMATION_NOTE : 1
OF_COMPLAINT : 1
ABD_MELENA : 1
WITH_INHOUSE : 1
INITIAL_EVALUATION : 1
SOLUM_PHOSPHATE : 1
PING_ON : 1
EMERGENCY_DEPARTMENT : 1
ALLERGIES_ADR : 1
CAD_NASAL : 1
PATIENT_HOWEVER : 1
AND_INTACT : 1
THE_PLAN : 1
HIS_IS : 1
FOR_EMB : 1
LABORATORY_ACCESSION : 1
FLUIDS_STARTED : 1
INTACT_FOR : 1
NO_LIMB : 2
PHONE_TO : 2
HE_REPEATED : 1
DYSURIA_VISIT : 1
LAMINECTOMY_FUSION : 1
IS_HERE : 2
SPINE_EVALUATION : 1
APR_USING : 1
SKIN_INTERVENTIONS : 1
WALKING_WITH : 1
GETTING_NITRATES : 1
LIGAMENT_POSSIBLY : 1
THICK_AND : 1
DEPRESSIVE_SHE : 1
LEVEL_COMMENTS : 1
WILL_ON : 1
PROSTATE_PT : 1
FOR_CANCERSEES : 1
PAIN_NEURO : 1
SGPT_LIVER : 1
DURABLE_OF : 1
HERE_DM : 1
OFTEN_DID : 1
WOULD_LIKE : 1
OR_SYMPTOMS : 1
CARE_ACTIVE : 1
PATIENT_NOTE : 1
EFFECTS_COMPLICATIONS : 1
ML_IN : 1
IS_WITH : 2
TOENAILS_RIGHT : 1
HAVE_REVIEWED : 1
HISTORY_REVIEW : 1
GENERAL_MENTAL : 1
REPORTS_COMPLIANCE : 1
CONFIRMED_PAIN : 1
ABSENCE_OF : 1
ASYMPTOMATIC_WITH : 1
FOR_EVALUATION : 1
WHY_SYMPTOMS : 1
VITAMINS_TAKING : 1
TO_PRACTICE : 1
VOIDING_PROBLEMS : 1
RESULTS_NOTED : 1
FOR_TREATMENT : 2
TROPONIN_RATE : 1
THEY_ARE : 1
TRIC_RESPIRATION : 1
AUDIO_WHICH : 1
THE_APPROPRIATE : 1
MEDICATION_CONSULT : 1
TOENAILS_AND : 1
LAB_SHOW : 1
PRIMARY_CLINICIAN : 1
HDL_MOUTH : 1
VISIT_OUTPATIENT : 1
INSERTION_INTRAOCULAR : 1
AT_DELIRIUM : 1
REACH_BY : 1
MEDICATIONS_CONSULT : 1
ORDERED_ON : 1
TREATMENT_HAVE : 1
ACTIVE_AMB : 1
COUNSELING_REQUIRED : 1
AUDITC_OUTPATIENT : 1
PT_COMPLETELY : 1
SYSTEMS_FEVERS : 1
COPIOUS_AND : 1
TELEMETRY_NURSING : 1
TAB_TABLET : 1
HE_ALCOHOL : 1
FOR_CONTACTS : 1
STATUS_CONSULT : 1
SIDERAILS_MG : 1
EVALUATION_THICKNESS : 1
MADE_IN : 1
AMBULATES_STATES : 1
INCLUDING_ACTIVE : 1
CLINIC_ATRIAL : 1
CTA_TON : 1
INFORMED_THIS : 1
AN_WHO : 1
ADDENDUM_OM : 1
INTO_BEHAVIORS : 1
OS_PERKINS : 1
BACK_AT : 1
MEDICATION_PLEASE : 1
YOU_HAD : 1
INFORMED_CONSENT : 1
DATE_APPLICABLE : 1
ADDENDUM_VETERAN : 1
THE_RIGHT : 1
DICLOFENAC_NO : 1
OPHTHALMOLOGY_HISTORY : 1
VITAMIN_UNT : 1
SPECIFIC_POST : 1
RECORD_SI : 1
TEMP_SATS : 1
REVIEW_CONFIRMED : 1
LB_SURGICAL : 1
INTACTNO_PAIN : 1
TO_VITREOUS : 1
EYE_AFTER : 1
REFILL_SEC : 1
FOR_AVR : 1
HTN_PVD : 1
XYZZY_VET : 1
DRAWN_INTO : 1
HIT_ACTIVE : 1
POST_SEASON : 1
AT_THAT : 2
TO_RELAPSE : 1
BE_AT : 1
CHEST_FINGER : 1
PAST_WITH : 1
ER_MP : 1
HERE_SEE : 1
SOME_ABOUT : 1
WORK_WITH : 1
LEFT_MESSAGE : 1
OF_ALERT : 2
ALERT_AND : 2
ON_IMPRESSION : 1
HE_OWNS : 1
SHOULDER_DONE : 1
OBJECTIVE_OCCUPATIONAL : 1
IS_PRETTY : 1
TIMES_HANDS : 1
UP_NONGRANULOMATOUS : 1
VAMC_NO : 1
WAS_SELECTED : 1
ANXIETY_UNSPECIFIED : 1
TO_FOR : 3
SEX_ADMISSION : 1
BUT_FOCUS : 1
PRNCHANGED_FROM : 1
OWNS_BURG : 1
ON_ANSWERING : 1
ASSISTANT_LIVER : 1
TO_THE : 6
BEHAVIOR_RIGHT : 1
IS_APPROPRIATE : 1
RADIGAN_ACCOMPANIED : 1
RETURN_VETS : 1
WORSENING_SPECIAL : 1
ADVISED_PRACTICE : 1
WHICH_IN : 1
CHANGE_NEGATIVE : 1
IMPRESSION_EXAMINATION : 1
APPOINTMENT_WALKING : 1
NOT_DRAWN : 1
WE_NOT : 1
HE_ADDED : 1
THE_OF : 2
PAIN_ASSESSMENT : 1
BY_MOUTH : 3
PATIENT_EDUCATION : 2
WAS_COMPLICATED : 1
DAILY_FOR : 1
ABOUT_ARE : 1
WARM_DISCHARGE : 1
HIS_HEMOGLOBIN : 1
BILATERAL_ACTIVITY : 1
PLACED_TO : 1
DATE_REVIEW : 1
UPPER_AND : 1
ARE_INDICATED : 1
PROBLEM_WE : 1
PT_BLACK : 1
NORMAL_EXTREMITY : 1
ACTIVE_BETTER : 1
PT_YO : 1
HISTORY_PHYSICAL : 1
PT_HAS : 1
TOP_QTY : 1
IRRIGATION_REPAIR : 1
CHIEF_COMPLAINT : 3
AND_THEN : 2
SIGNAL_PT : 1
CLEANSING_EXPR : 1
HOME_WHEN : 1
DEVICE_AND : 1
THAT_HE : 2
METHOD_USED : 1
AND_MODIFICATIONS : 1
SUPPORT_THIS : 1
IS_CONFIRMED : 1
SUBJECTIVE_YEAR : 1
JOINT_RATIVE : 1
APEX_PAIN : 1
DESIRE_MAINTAIN : 1
URINARY_ENTRY : 1
REASON_FOR : 1
AND_MEDICATION : 1
TAKE_TABLET : 3
REQUIRED_GENERAL : 1
AND_AT : 1
INFORMED_MESSAGE : 1
BEFORE_THE : 1
MOVING_DX : 1
FORMS_EATING : 1
GOAL_RESULTS : 1
ELIGIBLE_FOR : 1
LESION_MEDICATIN : 1
AND_BEEN : 1
EXAM_DUE : 1
MESSAGE_OVER : 1
WAS_TOLD : 1
WORSENING_SCREENING : 1
MD_OM : 1
AUDITC_NECK : 1
APEX_RAL : 1
REQUEST_THAT : 2
PT_HAD : 1
MINIMUM_MMHG : 1
CONTINENT_DENIES : 1
CONSTANT_BUSY : 1
APPT_FOR : 1
INITIAL_APPOINTMENT : 1
LIMB_NO : 1
COMMINUTED_COMPLAINT : 1
TEETH_OR : 1
ADMINISTERED_CM : 1
ONE_BY : 2
DIRECTIVES_NEW : 1
THE_THE : 3
TO_PHONE : 1
OPPORTUNITY_TO : 1
MEENACH_LEIA : 1
APPARENT_PROBLEM : 1
NUMBNESS_OR : 1
THAT_WAS : 1
PVD_NEUROPATHY : 1
CARE_NURSING : 2
CONSISTING_OF : 1
EARMOLD_MIC : 1
RESULTED_IN : 1
OF_PATIENT : 1
OCCUPATIONAL_EVALUATION : 1
YO_IN : 1
FRICTION_NO : 1
INTERVENTIONS_POST : 1
COMMINUTED_CHIEF : 1
INJECTION_MEDICATION : 1
DIARRHEA_NOCTURIA : 1
OU_NEEDS : 1
VA_THE : 1
STUDIES_AGREE : 1
CHECK_AT : 1
PLEASANT_MALE : 1
NEEDS_TABLE : 1
PCIOL_TEMP : 1
WITH_OF : 1
THE_PT : 2
BEEN_PROVIDED : 1
AT_WE : 1
OTHER_SKIN : 3
LAST_VALUE : 1
PALPABLE_ACTIVITY : 1
TO_HIMS : 1
MALE_OF : 1
AUG_IS : 1
THE_RELATIONS : 1
THE_THAT : 1
PATIENT_THEY : 1
TO_VETERANS : 1
BP_HR : 1
INR_INR : 1
HIS_FOR : 1
AND_NOT : 1
MONITORING_HE : 1
PHYSICIAN_IED : 1
HIS_SIDE : 1
OUTPATIENT_MEDICATION : 1
AND_EVALUATION : 1
OCCASION_IN : 1
TELEMETRY_YES : 3
REFERRED_BY : 1
ASK_YES : 1
TO_RETURN : 1
FOR_GOAL : 1
ISSU_ANEMIA : 1
ROARING_AUDIOLOGY : 1
PLAN_VS : 1
NEEDS_ANGIO : 1
DISEASE_SPECIFIC : 1
MEDICATIONS_DOXAZOSIN : 1
AMBULATES_CANE : 1
DEAR_MR : 1
CAD_HTN : 1
MAILED_AND : 1
LIMB_WEAKNESS : 1
CAP_REFILL : 1
SUPPORT_AREARS : 1
PRESSURE_HE : 1
BEEN_INITIAL : 1
IF_NO : 1
CONSULTS_COMMENTS : 1
PROVIDED_NOTE : 1
READY_LEARN : 1
ANYWHERE_MINIMUM : 1
HOLD_PATIENT : 1
ADVANCE_NEW : 1
ATHENS_LMP : 1
CONSTIPATION_OR : 1
VETERANS_PHONE : 1
TO_EMERGENCY : 1
RETENTION_NO : 1
FOLLOWS_SVT : 1
TIME_WOULD : 1
COMPLAINT_PAIN : 1
WARFARIN_INR : 1
TO_NO : 2
ANSWERING_VOICE : 1
GOING_FOR : 1
INDIVIDUAL_TREATMENT : 1
DOSE_MADE : 1
AND_CHANGE : 1
DERVIATIVE_ADMINISTERED : 1
TEAM_CALL : 1
INPUT_OUTPUT : 1
QUALIFIERS_RESPIR : 1
SINUSITIS_HOW : 1
BEEN_REVIEWED : 2
ARE_MASS : 1
AT_ADENA : 1
AUDIOLOGY_CP : 1
DESTINATION_HOME : 1
OUT_FOR : 1
REMIND_HER : 1
HER_NEXT : 1
SOMEONE_HIS : 1
HAVE_PROVIDED : 1
BODY_MASS : 1
VETERAN_SAYS : 1
TOP_SOLN : 1
SEEN_AT : 1
OR_YOUR : 1
CHANGES_LIMB : 1
PAIN_EXPLAINED : 1
BY_HERE : 1
OF_STROKE : 1
UCINATIONS_WE : 1
FRICTION_APPARENT : 1
AND_EVER : 1
ALERT_INPUT : 1
NIGHT_NEEDS : 1
LEIA_NOTE : 1
ENCOUNTER_OCT : 1
POSTERIOR_ADDENDUM : 1
IS_BLACK : 1
CAVITY_DISABLED : 1
AWOKE_MANEUVERS : 1
LEFT_UPPER : 2
WANT_CREATININE : 1
HGBAC_VALUE : 1
COMPLAINT_PREREGISTRATION : 1
SITE_MEDICATION : 1
HAVE_AGREED : 1
TELEMETRY_SHOWS : 1
SHOULDER_CONTACT : 1
NOTE_LEVEL : 1
WEIGHT_NEGATIVE : 1
STROKE_WITH : 1
BILATERAL_EYELIDS : 1
VIEW_THE : 1
IMPRESSION_THIS : 1
HISTORY_SODIUM : 1
ALLERGIES_PATIENT : 1
ASSESSMENT_THE : 1
IN_HAS : 2
ALLOWED_NOVEMBER : 1
THE_BUDGET : 1
DEBRIS_THE : 1
EDEMA_IN : 1
YES_OT : 1
EXAMINATION_PAPILLOMAVIRUS : 1
GOOSE_CLINICS : 1
HAD_RECENT : 1
ON_IS : 1
CENTERED_WARM : 1
CABGX_PATIENTS : 1
CONTACT_THE : 1
THE_MINNEAP : 1
PATIENT_OTHER : 1
MESSAGING_TESTS : 1
OF_ABOUT : 1
REQUEST_DR : 1
PRESENTS_FOR : 1
MG_BID : 1
THE_DOMESTIC : 1
VAMC_DEAR : 1
SIGNATURE_CONSENT : 1
ADMISSIONS_DESK : 1
PAIN_TO : 3
WEEK_TWO : 1
TIME_WAS : 1
CHILD_SUPPORT : 1
MEDICATION_SUMMARY : 1
ISSU_TOTAL : 1
AND_MALE : 1
UALLY_HYPERTHYROIDISM : 1
SUBJECTIVE_TO : 1
WHICH_MR : 1
PCP_HE : 1
ML_USE : 1
HOW_OFTEN : 1
MESSAGING_DEVICE : 1
NUMBER_REMIND : 1
TO_SITE : 1
MINNEAP_VAMC : 1
WEIGHT_HE : 1
EDUCATION_AT : 1
TIU_TITLE : 1
VALUE_TIME : 1
AWA_OF : 1
HUMAN_HPV : 1
LB_KG : 1
SYMPTOMS_DEPRESSIVE : 1
OU_OD : 1
SCREEN_ALCOHOL : 1
MG_VITAMIN : 1
LEGS_PT : 1
LEIA_NURSING : 1
IF_WILL : 1
BY_EVERY : 2
PRESCRIPTION_MAILED : 2
REPORT_ED : 1
UNDERSTANDING_OF : 1
PHOSPHATE_TOP : 1
NOTIFICATION_BY : 1
TEST_INSTRUCTIONS : 1
SEC_TELEMETRY : 1
VETS_NO : 1
RISK_IMPRESSION : 1
EPINUCLEAR_LENS : 1
LEFT_ON : 1
SINCE_WAS : 1
WITHOUT_INTERVENTIONS : 1
PT_BS : 1
SOME_RUMINATION : 1
NITRATES_FROM : 1
GLASS_IRRIGATION : 1
EVERY_COUNSELED : 1
DELIRIUM_THE : 1
TO_INVITED : 1
PRESENTS_SPINE : 1
OF_INTRAOCULAR : 1
ATTEMPTED_UNSUCCESSFUL : 1
VAMC_IN : 1
IN_DOING : 1
SVT_RATE : 1
APPLICABLE_IN : 1
OLD_MALE : 1
ADDENDUM_BEFORE : 1
OR_NEEDS : 1
APPT_IS : 1
BEHAVIORS_WE : 1
RECENTLY_EXPIRED : 2
UNT_TAB : 1
REACTIVE_IF : 1
DOB_AGE : 1
OF_MELLITUS : 1
EVIDENCE_STD : 1
SAME_YOU : 1
FOR_TWO : 1
WITH_MEDICATION : 1
RELEASE_OF : 1
RESIDUL_EXPRESSIVE : 1
ME_FOR : 1
DELAYED_BUT : 1
NOTE_CONTACT : 1
GAVE_MESSAGE : 1
RELAPSE_REACTIVE : 1
THE_LIGAMENT : 1
PHYSICAL_INDICATES : 1
REFLECTIONS_IMAGING : 1
ACTIVE_IOP : 1
YOU_HAVE : 3
GALLBLADDER_AND : 1
BE_SEEN : 1
NEW_OR : 1
ACTIVITY_WALKS : 2
VET_HERE : 2
LEARN_TO : 1
TABLE_LAST : 1
AS_NOT : 1
LAST_OU : 1
UPDATE_INDICATES : 1
PRESCRIPTION_FOR : 1
EXAMINATION_THE : 3
ON_RIGHT : 1
CAREOUTPATIENT_NOTE : 1
PHYSICALTL_CATARACT : 1
CALL_VETERANS : 1
AFTER_SINUSITIS : 1
SUFFICIENT_NO : 1
IC_PRIMARY : 1
IS_NO : 1
LITTLE_HAS : 1
BYPASS_IF : 1
MELENA_OTHER : 1
NUMB_CECAL : 1
TO_MG : 1
PLEASANT_IN : 1
REPAIR_AT : 1
PROBLEMS_CENTER : 1
NOTE_COME : 1
IOP_SPECIAL : 1
DESERT_REFLECTIONS : 1
RECENT_HEART : 1
ON_CPAP : 1
SEEN_NOVEMBER : 1
FOUND_YOUR : 1
OF_FRESH : 1
MENTAL_HEALTH : 1
THE_MG : 1
NASAL_DRAIANGE : 1
PULSES_COLOR : 1
NOTED_DATE : 1
EDUCATION_DECLINED : 1
PERTINENT_AGREE : 1
JUNCTION_THE : 1
PAIN_RAL : 1
TAKING_PROBLEMS : 1
BE_ON : 1
WILL_FOCUS : 1
AAOX_BUILT : 1
HE_OPENING : 1
TEST_INFORMATION : 1
SCREEN_AUDITC : 1
XYZZY_INSTRUCTIONS : 2
SINCE_MEDICAL : 1
PAIN_STARTED : 1
FOCUS_ON : 1
PATIENTS_TX : 1
LMP_TREATMENT : 1
OUTLINED_IMPRESSION : 1
WEIGHT_KG : 1
IOP_OU : 1
THIS_MESSAGE : 1
AMOUNT_WOUNDS : 1
WILL_ABSENCE : 1
YEAR_OLD : 1
INTRAOCULAR_LENS : 1
AREA_THREE : 1
LAST_PRESCRIPTION : 1
WIFE_SPEECH : 1
CLINIC_VISION : 1
CP_NOTE : 1
ANGIO_TABLE : 1
EARS_CLEAR : 1
DEPARTMENT_ON : 1
HELPED_LED : 1
AN_INJURY : 1
IS_FOR : 2
OF_REFILL : 1
THE_INTERDISCIPLINARY : 1
THIS_LED : 1
TEETH_AND : 1
EVALUATION_DIABETES : 1
WILL_OF : 1
HEMOTMA_TO : 1
NOTE_ALLERGIES : 1
DISTRESS_LABS : 1
INFORMATION_AT : 1
WHAT_TO : 1
ADMISSION_DATE : 1
TO_HIMSELF : 1
YR_OLD : 1
APPOINTMENT_IS : 1
USES_OWN : 1
IN_NOVEMBER : 1
HAD_LAMINECTOMY : 1
WITHIN_THE : 2
SITUATION_OBTAIN : 1
IMMUNIZATION_ADMINISTERED : 1
PING_HIS : 1
OPERATION_REPORT : 1
GOOD_LAST : 1
ONE_WITHOUT : 1
WHAT_LED : 1
HT_IN : 2
ONE_OCCASION : 1
CARE_HIMSELF : 1
NO_PRESSURE : 3
ISSU_IOP : 1
ADMISSIONS_ADDENDUM : 1
AND_DYSURIA : 1
REMIND_HIM : 1
THAT_OWNS : 1
RECENTLY_OUTPATIENT : 2
ENDING_AT : 1
PRESENT_PMRS : 1
FOLLOWING_MANKOWSKI : 1
PHYSICIAN_VITAL : 1
FILTER_CHANGE : 1
NO_PHYSICIAN : 1
FORMS_LEVEL : 1
UNIVERSITY_BURG : 1
YES_HEME : 1
OR_MOMETASONE : 1
OTHER_TELEMETRY : 1
EYELIDS_AND : 1
BENZOYL_PEROXIDE : 1
SPECIAL_MEDICATION : 1
SURGICAL_HISTORY : 1
ANY_OR : 1
RATIVE_METALLIC : 1
STUDIES_WITH : 1
MEDS_LUNGS : 1
NO_CONSTIPATION : 1
PHYSICIAN_UPPER : 1
AFFECT_KD : 1
TO_READY : 1
THE_LLL : 1
TOENAIL_REPORTS : 1
GLASS_SAW : 1
LEARN_READY : 1
DAILY_MONITORING : 1
OF_SYSTEMS : 1
BILATERAL_NONGRANULOMATOUS : 1
PT_CPAP : 1
YO_MALE : 2
RADIGAN_BY : 1
AND_OR : 1
FROZEN_PLASMA : 1
LIGHT_SIDERAILS : 1
NECK_NO : 1
LEFT_APEX : 1
PMRS_LEDWANI : 1
DOCUMENT_WAS : 1
SERIES_VET : 1
MILD_RETENTION : 1
GAIT_AREA : 1
ON_DELAYED : 1
NONE_APPROVED : 1
BETA_BLOCKERS : 2
WOULD_FOR : 1
FOR_DM : 1
AND_EXERCISE : 1
ARE_SEEN : 1
AGREED_PATIENT : 1
LED_SOME : 1
EARS_AND : 1
PLASMA_PACKED : 1
ADDENDUM_ADDENDUM : 1
HIM_THERAPY : 1
1010M_RECORD : 1
RTC_FOR : 1
PROTEIN_DERVIATIVE : 1
CLC_CARE : 1
THE_CARTILAGE : 1
RIGHT_TOENAIL : 1
INDICATION_WARFARIN : 1
BAND_PRESENT : 1
READINESS_LEARN : 1
NO_PACHS : 1
SC_DOCUMENT : 1
REFFERED_TO : 1
HEMOTMA_THE : 1
WOUNDS_ULCERS : 3
STROKE_RESIDUL : 1
OFFPUMP_HEART : 1
WHAT_ARE : 1
LEARN_GAIT : 1
TO_SCHEDULED : 1
AT_DESK : 1
PENILE_AND : 1
THE_PROVIDER : 2
PATIENT_HOLD : 1
GM_QTY : 1
FINGER_DELAYED : 1
AFRICAN_AM : 1
TABLET_BY : 4
ANTIBIOTIC_DIRECTIONS : 1
COMMUNICATION_NOTE : 1
DESCRIBE_FLUIDS : 1
OR_SKIN : 3
CM_WAS : 1
OCCASIONALLY_WOUNDS : 1
SEE_OWN : 1
YOUR_PROVIDER : 1
DIABETES_HYPERTENSION : 1
HE_AND : 1
ASPIRIN_HYPERTENSION : 1
EQUAL_BILATERALLY : 1
AUG_THE : 1
UPCOMING_APPTS : 1
INSTRUCTIONS_MAY : 1
BE_VALPROIC : 1
MESYLATE_TAB : 1
TO_ACTIVE : 1
HLD_MALE : 1
HI_NO : 1
WITH_AN : 1
INCLUDING_SUPPLIES : 3
DESTINATION_RETURN : 1
HIM_FOR : 1
MOUTH_EVERY : 2
YES_DENIES : 1
THERAPY_NONE : 1
MOIST_TEMP : 1
SCORED_BY : 1
SPEECH_PULSES : 1
RECEIVED_UNITS : 1
INR_DESCRIBE : 1
AGREE_WITH : 1
CLICK_THE : 1
MONTHS_AGO : 1
OPERATION_SC : 1
THE_TIU : 1
COPIOUS_OYING : 1
CHIEF_OF : 2
NOTED_LABS : 1
PROTECT_DISCUSSED : 1
CARE_VISIT : 1
WARM_INSTRUCTIONS : 1
MORE_ON : 1
SUMMARY_BEEN : 1
OWNS_UNIVERSITY : 1
WELL_BUILT : 1
CHECK_OUT : 1
APHASIA_HLD : 1
BACK_TAXES : 1
INTO_PROBLEM : 1
NO_AND : 1
VISIT_BENIGN : 1
HAD_NOTICED : 1
THERAPY_THIS : 1
AT_CONVERSATION : 1
PAIN_PATIENT : 2
NEUROPATHY_PT : 1
DYSPNEA_RULED : 1
LEFT_NORMAL : 2
YEAR_RAL : 1
IN_FOR : 1
PROBLEMS_HE : 1
GIVEN_ANTIBIOTIC : 1
ACTIVE_CALCIUM : 1
ALCOHOL_DEPENDENCY : 1
IS_HE : 1
AGREED_ELIGIBLE : 1
SUMMARY_HAS : 1
RAL_PT : 1
WAS_HYPERTENSION : 1
TEAR_EXAMINATION : 1
LISINOPRIL_MG : 1
HIS_VETERAN : 1
FEMPOP_IF : 1
BLUE_FOR : 1
ONEHALF_BY : 1
DISCHARGE_DYSURIA : 1
STOOL_DE : 1
YES_CLEAR : 1
COMPLICATIONS_HT : 1
COLCHICINE_PO : 1
OP_TEACHING : 1
HER_OF : 1
WITH_PATIENT : 1
TAKING_VOIDING : 1
SWEATS_WEIGHT : 1
PURIFIED_PROTEIN : 1
HEMOGLOBIN_DIET : 1
IN_MR : 1
MULTIPLE_UNITS : 1
KD_CARE : 1
TAB_ONE : 2
EMB_NO : 1
CARE_VITALS : 1
RESPONSES_MEDS : 1
THE_RECEIVED : 1
FOR_INJECTION : 1
POSSIBLY_THE : 1
WERE_GIVEN : 1
ANTIPLATELET_THERAPY : 1
AN_MALE : 1
ON_DAILY : 1
OF_FEVERS : 1
NO_ACTIVE : 2
ISSUED_MIC : 1
OR_THY : 1
CLEVELAND_WI : 2
HE_DENIES : 1
CARE_METHOD : 1
VA_PROVIDER : 1
ANESTHESIA_NERVE : 1
PHYSICIAN_RDASIL : 1
OR_THIS : 1
USE_OF : 1
ON_SINUSITIS : 1
CARE_ALLERGIES : 1
LEVEL_SCORED : 1
WITH_INSERTION : 1
IN_MORNING : 1
OTC_VITAMINS : 1
SEX_HAS : 1
FOR_PULMONARY : 1
SOCIAL_WITH : 1
UN_NASAL : 1
SLOW_STEADY : 1
IN_OR : 1
TEMPERATURE_POWER : 1
LOSS_PAIN : 1
COMPLIANT_PAIN : 1
FOR_AN : 1
INDEPENDENT_CALL : 1
MADE_THESE : 1
ARE_PATIENT : 1
SUICIDAL_APPOINTED : 1
DRINKS_ONE : 1
MELLITUS_DATE : 1
ATTEMPTED_TO : 1
OLD_VET : 1
PATIENT_MULTIPLE : 1
SKIN_DIALYSIS : 1
INDEX_FINGER : 3
OR_WORSENING : 1
OF_THIS : 2
MP_ADDENDUM : 1
REVEALS_MRI : 1
DIRECTIONS_NOT : 1
TUBERCULIN_PROTEIN : 1
DESK_TEMP : 1
BE_INTO : 1
OR_TINGLING : 1
NURSING_TEMPERATURE : 1
PHYSICIAN_FEV : 1
AND_UCINATIONS : 1
TEACHING_METHOD : 1
PT_ASYMPTOMATIC : 1
CAVITY_NURSING : 1
MR_EDUCATION : 1
CONSULT_TO : 1
REVIEW_PAST : 1
TAB_AMBULATORY : 1
URGENT_CARE : 1
THAT_WOULD : 1
MEASUREMENT_RESPIR : 1
TO_DIRECTIONS : 1
AND_DIET : 1
NURSING_SI : 1
PAIN_HE : 1
NO_ASSESSMENT : 1
IS_THE : 1
PT_BY : 1
FUSION_ABOUT : 1
RECOMMENED_LOWERING : 1
NEXT_APPOINTMENT : 1
PATIENT_CAREGIVER : 1
MYCIN_TOP : 1
ADDITIONAL_COMMENTS : 1
ALCOHOL_WILBERT : 1
POLYP_ORDERED : 1
THERAPY_EVALUATION : 2
BLUE_WEEK : 1
WAS_BY : 2
HIS_COURSE : 1
FAMILY_DESIRE : 1
HYPERTENSION_OF : 1
BIL_KNEE : 1
PHYSICIAN_LEFT : 1
EXAMINATION_HOWEVER : 1
RAL_IS : 1
LONGER_CECAL : 1
INSTILL_CALCIUM : 1
IF_YES : 1
IS_SCHEDULED : 1
WEAKNESS_NO : 1
HAD_PREVIOUSLY : 1
NOTE_DOB : 1
AND_GALLBLADDER : 1
THE_TO : 2
ON_CALL : 1
RULED_FOR : 1
IT_WEEK : 1
AM_AN : 1
CONSULT_OTHER : 1
DATE_CHO : 1
HAVE_NOT : 1
MINUTES_THINK : 1
AND_TIME : 1
RDASIL_NOTE : 1
FOUND_OPHTHALMOLOGY : 1
HYPERTROPHY_OF : 1
FOR_INFLUENZA : 1
LAMINECTOMY_OF : 1
FOR_VISIT : 1
BETA_NO : 1
PEROXIDE_BAR : 1
DATE_VITAL : 1
FOR_APPT : 1
PROBLEM_OF : 1
THEY_BODY : 1
INDICATED_THESE : 1
MD_TO : 1
DIET_IC : 1
KARDEXTL_BREATHE : 1
PT_DID : 1
FOR_MONTH : 1
ORIENTED_OTHER : 1
DOB_JUL : 1
PROGRESS_ALLERGIES : 1
OD_OS : 3
BEEN_APPOINTMENT : 1
TABLE_PATIENTS : 1
NO_PROBLEM : 1
NOV_TYPE : 1
CLOTTING_NO : 1
LEGS_DENIES : 1
BILATERAL_STRONG : 1
BIL_PAIN : 1
TIME_FRAME : 1
FOLLOWS_COMMANDS : 1
PHYSICALTL_PHACOEMULSIFICATION : 1
EVERY_ANION : 1
ACTIVE_AT : 1
LLL_EVERY : 1
SEEN_SINCE : 1
RECOMMENED_CHOLESTROL : 1
HOUR_INPUT : 1
THE_TITLE : 1
CHRONIC_SOURCE : 1
THE_STUDIES : 1
WIRE_WILL : 1
REFERRED_HIS : 1
THREE_TIMES : 1
IS_AT : 1
HIS_PCP : 2
AREAS_HIS : 1
SPECIAL_EQUIPMENT : 1
THE_NO : 1
FOLLOW_BILATERAL : 1
NOCTURIA_OR : 1
COMPLIANCE_LAST : 1
LABORATORY_VAMC : 1
HAVE_OR : 1
IN_MARCH : 1
FOR_SPINE : 1
IN_BUILDINGS : 1
AUDITC_SUPPLE : 1
IS_COPIOUS : 1
VITAL_SIGNS : 1
ANION_SPECIAL : 1
REVIEWED_RADIAL : 1
FEMALE_VET : 1
GOAL_INR : 1
RETURN_CALL : 1
SEEN_ON : 1
JAR_MEDICATION : 1
HERE_TO : 1
INTERVENTIONS_ALLERGIES : 1
BUILT_DEVELOPED : 1
THEN_TO : 1
UNSUCCESSFUL_BROKE : 1
ADVERSE_REACTIONS : 1
FREQUENTLY_WIFE : 1
LUNGS_TON : 1
CALCIUM_MG : 1
REQUEST_ADDENDUM : 1
DIET_PRIMARY : 1
FOR_ALCOHOL : 1
SPHERES_AMBULATES : 1
IMPROVED_RULED : 1
TO_LEARN : 2
HAS_MONITORED : 1
AS_ACTIVE : 1
CARTILAGE_ON : 1
POST_PALPABLE : 1
LIST_LETTER : 1
OR_DENTURES : 1
NO_INITIAL : 1
DISTRESS_NOTED : 1
SURGERY_OF : 1
PRIMARY_MD : 1
ON_IT : 1
THICK_TOENAILS : 1
PHACOEMULSIFICATION_WITH : 1
BAR_GM : 1
HA_NO : 1
HAS_LOST : 1
HOLD_THEN : 1
POST_CARE : 1
TEMP_BETA : 1
SITUATION_AND : 1
LATE_MEDICATION : 1
CAPSAICIN_GM : 1
APPOINTMENT_HEIGHT : 1
OTHER_YES : 1
TREATMENT_MEDICAL : 1
AND_WAS : 1
EQUAL_PLACED : 1
INTACTNO_CHEST : 1
ASK_QUESTIONS : 1
ADDENDUM_LEFT : 1
ON_AND : 1
LOST_SEPTEMBER : 1
GREAT_TOENAIL : 1
RESIDING_IN : 1
FINGER_REVEALS : 3
ACTIVITY_OCCASIONALLY : 1
ABOUT_MEDICATIONS : 1
ATTORNEY_CALLED : 1
AND_DENIES : 1
RATE_REGULAR : 1
CLEAR_UNLABORED : 1
RESIDUL_APHASIA : 1
HOWEVER_DOES : 1
BECKLEY_IN : 1
HOSPITALIZATION_REPORTS : 1
SUN_MG : 1
ARE_NOTED : 1
TO_LONG : 1
MODIFICATIONS_ARE : 1
IC_CARE : 1
BOTH_EARS : 1
NERVE_BLOCK : 1
MALE_PRESENTS : 2
SEBACEOUS_CYST : 1
INJECTION_EVALUATION : 1
WE_COULD : 1
FOUR_TIM : 1
THE_SOFT : 1
OR_APR : 1
OF_EVENT : 1
BUT_NO : 1
NO_APPROPRIATE : 1
PT_NO : 1
FUSION_AGO : 1
PSYCHOLOGY_INDIVIDUAL : 1
DE_RATIVE : 1
ARE_AND : 1
AND_NOTE : 1
STAFF_BECKLEY : 1
FROM_DOMESTIC : 1
TO_APPT : 1
NOTICED_ROARING : 1
STARTED_WHY : 1
ACTIVE_OBJECTIVE : 1
RADIATION_FOR : 1
WOULD_YOUR : 1
LEARN_TRAINING : 1
OR_DYSURIA : 1
ADDENDUM_THE : 1
MWFSA_SUTR : 1
COMPLAINT_IN : 1
PULSE_EDUCATION : 1
NO_WOUNDS : 3
QUIT_HELPED : 1
CPAP_FIO : 1
RUMINATION_ABOUT : 1
AFFECTED_AREA : 1
RIGHT_SIDE : 1
NOT_DURATION : 1
CARE_PROVIDER : 1
EVALUATION_PT : 1
OF_REVIEW : 2
SUBJECTIVE_CC : 1
DENIES_PENILE : 1
HOW_TO : 1
JUNCTION_RELIEVES : 1
LETTER_REFFERED : 1
NOT_NITRATES : 1
APPLY_AMOUNT : 1
BUT_WILL : 1
REGULAR_CONTINENT : 1
IMPROVING_AGO : 1
NOTE_TEMPERATURE : 1
IS_ALERT : 1
FOR_SUPPORT : 1
BURG_PAIN : 1
THROUGH_SHORTLY : 1
OBTAIN_AND : 1
AND_OF : 1
EXPR_BETA : 1
NO_HA : 1
IF_WIRE : 1
ANATOMICAL_BILATERAL : 1
VISIT_HYPERTROPHY : 1
HISTORY_PATIENT : 1
TESTS_SHOW : 1
ED_TEMPERATURE : 1
ARE_WEEK : 1
OF_SATS : 1
PHYSICIAN_OF : 1
REVIEWED_BY : 1
TIME_HYPERTENSION : 1
OUTPATIENT_INCLUDING : 3
AT_HDL : 1
ACTIVE_TOTAL : 1
IN_HIS : 1
NOVEMBER_AND : 1
OF_APPOINTMENT : 1
ASSISTANT_SGPT : 1
UNITS_ML : 1
TO_HEALTH : 1
IMMUNIZATION_SEASON : 1
REGIONAL_TISSUES : 1
HAS_COMPLAINT : 1
NO_EDEMA : 1
REVIEWED_WITH : 1
NITRATES_ANYWHERE : 1
HIT_WITH : 1
BODY_INDEX : 1
AS_OUTLINED : 1
BUDGET_ALLOWED : 1
COMPLICATED_BY : 1
HAND_THERAPY : 1
BEEN_MONITORED : 1
OXYGEN_USE : 1
BEHAVIORS_TALKED : 1
TO_LEFT : 1
ATTEMPTED_RETURN : 1
PREREGISTRATION_PSYCHOLOGY : 1
VAMC_POSTOPERATIVE : 1
NONE_TEMPLATE : 1
CARDIOLOGY_ECHO : 1
UNDERSTANDS_TO : 1
WAS_PROVIDED : 1
ARTHRITIS_DE : 1
MEMBERS_HE : 1
ANTIPLATELET_NONE : 1
STATE_TO : 1
INTERVENTIONS_ADR : 1
NO_VISUAL : 1
NOTE_AT : 1
BURG_PATIENT : 1
NOVEMBER_NO : 1
MEMBRANES_AND : 1
NOT_SHOW : 1
PT_MONTHS : 1
CHIEF_PAIN : 1
PCCNURSING_EXCISION : 1
ANY_CHEST : 2
MESSAGE_WOULD : 1
WITH_LATE : 1
DESERT_IMAGING : 1
GAP_SPECIAL : 1
HEME_POSITIVE : 1
ED_DOCUMENT : 1
CHANGE_BOTH : 1
RELIGIOUS_NEEDS : 1
CALCITONIN_UN : 1
THEN_FOUR : 1
POSITIVE_RESPONSES : 1
AN_UNDERSTANDING : 1
WT_ACTUAL : 1
YES_PMRS : 1
TO_MAINTAIN : 1
PSA_LABORATORY : 1
ADL_COUGH : 1
EVALUATION_HISTORY : 1
COLCHICINE_MG : 1
WASH_AFTER : 1
ACCOMPANIED_BY : 1
NOT_BEEN : 2
THE_SHOULDER : 1
CALCITONIN_NASAL : 1
RECEIVED_MULTIPLE : 1
MG_THE : 2
HERE_ADD : 1
PROBLEMS_DESTINATION : 1
VIEW_DOCUMENT : 1
FIELD_REPORT : 1
RIGHT_GREAT : 1
EVERY_ACTIVE : 2
CHEST_OR : 1
LIVE_ON : 1
YOUR_PHARMACIST : 1
PROTECT_HIMSELF : 1
ECHO_HYPERTHYROIDISM : 1
BILATERAL_LAST : 1
PLACE_REFLECTIONS : 1
REASON_VISIT : 1
NOTED_WEEK : 1
CABGX_COUMADIN : 1
FIBER_SAW : 1
VISIT_ACTIVE : 1
OF_FIO : 1
MONTHS_THE : 1
BID_FROM : 1
ANUSOL_ORDERED : 1
CARE_TEACHING : 1
HAS_THE : 1
SOLN_ACTIVE : 1
NEEDS_HAVE : 1
PT_ADVISED : 1
DENIES_LOSS : 1
ORDERED_GOING : 1
NO_DYSPEPSIA : 1
SODIUM_SERUM : 1
PHYSICIAN_BUDGET : 1
ACTIVE_MEDICATION : 1
THE_LONG : 1
REPORTS_NOTICED : 1
HAS_HAD : 1
WHAT_HE : 1
ACUTE_CHECK : 1
ADDENDUM_PT : 1
GOOD_HIS : 1
ON_THE : 2
VET_MAY : 1
ARE_INCLUDED : 1
ABSENCE_SPI : 1
SHE_AT : 1
RETURN_HOME : 1
OF_THE : 5
BELIEFS_RELIGIOUS : 1
GOOD_HE : 1
FIO_NO : 1
SCHEDULED_HER : 1
PACKED_MG : 1
WOUNDS_PRESSURE : 3
AND_CREEK : 1
ON_THIS : 1
PULMONARY_EMB : 1
APPROVED_RESPONSES : 1
HAS_NOT : 1
OF_SPI : 1
NOTE_REQUEST : 1
PLASMA_COLCHICINE : 1
WEAKNESS_SWEATS : 1
HAS_CHIEF : 1
NOV_OF : 1
NOTE_YR : 1
SO_AS : 1
STATES_HE : 1
WITHIN_REGIONAL : 1
VET_TO : 1
ATROVENT_MOMETASONE : 1
DYSPEPSIA_OR : 1
HEALTH_SCREENING : 1
PROBLEM_HYPERTENSION : 1
ON_FINGER : 1
EVALUATION_OF : 1
WHAT_WANTED : 1
READY_TO : 1
LIGHT_ASPIRIN : 1
CREEK_CLINICS : 1
WITH_HIS : 1
COURSE_WAS : 1
DONE_LISINOPRIL : 1
BACK_LITTLE : 1
SKIN_HE : 1
CLINIC_FOR : 2
SCREENING_NOTE : 1
OS_GAP : 1
TO_SOME : 1
PRIMARY_PROGRESS : 1
BEEN_FURNITURE : 1
ADDENDUM_IS : 1
OF_HISTORY : 1
RA_STRONG : 1
SPECIAL_NEEDS : 1
YES_CARE : 1
AT_HOW : 1
PHARMACIST_IS : 1
CARE_ASSESSMENT : 1
AND_SPHERES : 1
PROGRAM_AT : 1
ANY_EFFECT : 1
PCP_BERYL : 1
AREA_EVERY : 1
POSTERIOR_HEEL : 1
NO_LEFT : 1
AS_IMPRESSION : 1
COMMENTS_STATES : 1
DECLINED_EDUCATION : 1
YOUR_OR : 1
BUILDINGS_HE : 1
DIALYSIS_BASED : 1
INFORMATION_ABOUT : 1
JOINT_DE : 1
DIET_EXERCISE : 1
DURING_SAME : 1
OF_INDEPENDENT : 1
ANY_ON : 1
PRACTICE_SEX : 1
COURT_FOR : 1
CHANGE_MADE : 1
WI_MG : 1
HGBAC_AND : 1
RN_RAL : 1
MAC_BLOCK : 1
DOMESTIC_COURT : 1
UNIVERSITY_PAIN : 1
EXTREMITY_BILATERALLY : 1
PAIN_HEMOTMA : 1
MAIL_IN : 1
WALKING_CANE : 1
OD_AMBULATES : 1
FIBER_GLASS : 1
APPT_SCREEN : 1
ABOUT_CURRENT : 1
BLOCKERS_MEDS : 1
LAST_LAST : 1
TO_AREA : 1
TO_CAVITY : 1
OF_RA : 2
UNITS_TUBERCULIN : 1
VITREOUS_CAVITY : 1
THERAPY_WHICH : 1
LETTER_THE : 1
BY_PHONE : 1
TOLD_SEE : 1
YEAR_HEMOGLOBIN : 1
PROBLEMS_DIALYSIS : 1
DOCUMENT_VITAL : 1
DING_DOSES : 1
NO_OTHER : 2
CHIEF_STAFF : 1
APPOINTMENT_YOU : 1
FREQUENTLY_BEHAVIOR : 1
BASED_NO : 1
SHE_THE : 1
TEMP_LEFT : 1
FROZEN_PACKED : 1
OU_EQUIPMENT : 1
BY_AMB : 1
BY_AUDIO : 1
IRRIGATION_AT : 1
DIRECTIONS_STATE : 1
PLACED_CALL : 1
PAIN_IN : 1
PROGRESS_HAS : 1
VOICE_IN : 1
PATIENTS_WEIGHT : 1
SCHEDULED_HYPERTROPHY : 1
TYPE_OF : 1
AMOUNT_NO : 1
WITH_CANE : 2
ACTUAL_CM : 1
CHEW_TABLET : 1
BREATH_NO : 1
CHOLESTROL_LOWERING : 1
PATIENT_OR : 1
TREATMENT_EVALUATION : 1
AT_TIME : 2
KATIE_RADIGAN : 1
ATTEMPTED_AND : 1
USED_ALL : 1
BUT_OTHER : 1
OR_DRINKS : 1
WITH_SLOW : 1
THAN_BUDGET : 1
PROSTATE_WITH : 1
TO_VIEW : 1
HE_UCINATIONS : 1
DISABLED_ADL : 1
FILLING_ATROVENT : 1
OR_PHARMACIST : 1
WITH_HAS : 1
THIS_WAS : 2
MEDICATION_BOTTLE : 1
PULSES_SKIN : 1
SIDE_AWOKE : 1
SOMEONE_FROM : 1
MRI_RIGHT : 1
NAD_DYSPNEA : 1
STARTED_HAD : 1
HYPERTENSION_UNITS : 1
PRESENTS_ME : 1
OUTLINED_IDENTIFICATION : 1
TEMPLATE_POSITIVE : 1
EXPLORE_IT : 1
EXPLAINED_HIMS : 1
EXCISION_OF : 1
PAIN_CONSULTS : 1
RECOMMENDS_ECHO : 1
TELE_INTACTNO : 1
USE_AS : 1
OR_MOUT : 1
HAS_PATIENT : 1
COMPLETE_HIS : 1
SITE_PT : 1
SHOW_FOLLOWING : 1
CONSCIOUSNESS_EXCISION : 1
COUGH_BREATHE : 1
INGROWN_PLACED : 1
PHARMACIST_DICLOFENAC : 1
BACKGROUND_OR : 1
LONG_TREATMENT : 1
GAIT_AFFECTED : 1
SIGNS_IN : 1
IS_AND : 1
VALUE_YOUR : 1
CURRENT_PRIMARY : 1
DYSPNEA_IMPROVED : 1
AVR_WT : 1
UNLABORED_CARDIAC : 1
NOT_GETTING : 1
PRESCRIPTION_CHANGE : 1
AFTER_ARE : 1
REACH_PT : 1
IMAGING_LUMBAR : 1
MINUTE_WITHOUT : 1
EVALUATION_THE : 1
RESIDING_CLINIC : 1
FROM_ANYWHERE : 1
PATIENT_WAS : 1
VISUAL_CHANGES : 1
BY_OUTPATIENT : 1
TO_SAFE : 1
TO_CALL : 1
MARCH_OF : 1
WEEK_DATE : 1
NOTE_PROBLEM : 1
HI_SOCIAL : 1
DID_SHOW : 1
HEART_AND : 1
ARE_GOOD : 1
OL_DIET : 1
THIS_IS : 3
SKIN_EXPR : 1
CXR_SOME : 1
WT_ABD : 1
REACH_CARE : 1
PCP_COUNSELING : 1
OF_INCOME : 1
AC_FOUND : 1
DE_CHANGES : 1
AT_MINNEAP : 1
CLOTTING_BUT : 1
HYPERTROPHY_BENIGN : 1
THAT_PRESCRIPTION : 2
IF_RESULTS : 1
NOTE_IS : 1
APR_IN : 1
OUTPATIENT_MEDICATIONS : 5
AND_ANY : 1
PRESENT_YES : 1
AS_TIM : 1
HE_CAN : 1
UNDERSTANDING_THIS : 1
VISIT_IS : 1
FIBRILLATION_SERIES : 1
OF_PERTINENT : 1
PROBLEMS_DENIES : 2
HX_ISCHEMIC : 1
ASPIRIN_PROBLEM : 1
MAILED_ACID : 1
TEMPERATURE_AT : 1
FRESH_PLASMA : 1
VISION_FIBRILLATION : 1
INTAKE_PHYSICIAN : 1
METHOD_SCALE : 1
COMMINUTED_JOINT : 1
PAIN_HEIGHT : 1
PATIENT_ANSWERED : 1
SCALE_OF : 1
OR_PRIMARY : 1
ACCEPT_FOR : 1
HEALTH_NOTE : 2
TAB_TAKE : 4
REPORTS_CALL : 1
ONE_TABLET : 2
ANGIO_PATIENTS : 1
COMPLETELY_ASYMPTOMATIC : 1
REPORTS_HE : 1
OP_CARE : 1
CREATININE_WAS : 1
COMPLAINT_MONTHS : 1
LONG_TERM : 1
ASYMPTOMATIC_INTAKE : 1
THE_VA : 1
HIS_IN : 1
EDUCATION_HDL : 1
NOTE_PATIENT : 3
VALPROIC_MG : 1
START_USING : 1
NOT_SEEN : 1
BLACK_OR : 1
DATE_LAST : 1
OF_AS : 1
COMMINUTED_AC : 1
REVIEW_QUIT : 1
RELATIONS_DRC : 1
PT_REFERRED : 1
ML_POST : 1
PC_RELEASE : 1
PATIENT_OWN : 1
OCT_ISSUED : 1
NOTE_NURSING : 1
SCHEDULED_INVITED : 1
PM_WITH : 1
MOISTURE_MOIST : 1
IN_LEGS : 1
IMPROVED_OUT : 1
LIVE_HIS : 1
HIS_HOSPITALIZATION : 1
IN_DYSPNEA : 1
THE_VALUE : 1
NEXT_WEEK : 1
RADIATION_ONCOLOGIST : 1
IMPROVEMENT_RESPIRATION : 1
HE_NOW : 1
DEAR_PULSE : 1
EFFECT_RECOMMENED : 1
TEMP_LEVEL : 1
IN_HOSPITALIZATION : 1
MONTHS_PREREGISTRATION : 1
AMB_OUTPATIENT : 1
PRETTY_COPIOUS : 1
CALL_TO : 1
DELAYED_CLOTTING : 1
SURG_CP : 1
DISCHARGE_PRESENTS : 1
EDUCATION_PATIENT : 1
WITH_EXPRESSIVE : 1
CENTERED_TEMP : 1
FOR_WARFARIN : 1
COUSIN_FOR : 1
FLUIDS_AND : 1
NOT_FILLING : 1
AND_TOLD : 1
ASSESSMENT_STATUS : 1
IMMUNIZATION_POST : 1
YES_USE : 1
PAIN_HISTORY : 1
IS_OPENING : 1
NO_DING : 1
ANEMIA_SOLUM : 1
NURSING_NURSING : 1
THIS_HE : 1
TO_WAS : 1
DENIES_CHEST : 2
SPECIFIC_HANDOUT : 1
PAIN_OR : 2
PCP_MH : 1
BY_COUSIN : 1
SYMPTOMS_CHEST : 1
LED_TO : 2
HIS_RIGHT : 1
COULD_EXPLORE : 1
AN_OF : 2
SUPPLE_BRUITS : 1
SYRINGE_ACTIVE : 1
PCP_REQUIRED : 1
HAD_BEEN : 1
OCCUPATIONAL_INITIAL : 1
THIS_VISIT : 1
EVERY_BETTER : 1
NURSING_INFORMED : 1
HE_NO : 1
OF_DR : 1
OR_HE : 1
SYMPTOMS_OF : 2
AND_MAINTAIN : 1
ARTHRITIS_RN : 1
SWEATS_AND : 1
OF_CARE : 1
ALCOHOL_ACTIVE : 1
LEFT_IF : 1
WAS_PRESCRIPTION : 1
MADE_THE : 1
FRAME_IS : 1
NASAL_THAT : 1
STATES_IS : 2
TABLET_ACTIVE : 2
FOUND_RECENT : 1
HAS_ANSWERED : 1
NO_SP : 1
LAST_CHANGE : 1
OUTPUT_ACTIVITY : 1
INTRAOCULAR_PATIENT : 1
FOR_CHILD : 1
MEDICATIONS_STATUS : 2
STARTED_AND : 1
HOUSEHOLD_SITUATION : 1
PROVIDER_PREDNISOLONE : 1
OF_PT : 2
NO_AFFECT : 1
LESION_REQUEST : 1
DELIRIUM_PATIENT : 1
IN_VISION : 1
USE_SYRINGE : 1
OCCASIONALLY_NO : 1
PLEASE_YOUR : 1
VITALS_PRIMARY : 1
HX_OF : 1
ALLERGIES_DATE : 1
ARE_IN : 2
SEEN_ADDENDUM : 1
POST_RECENT : 1
CHOLESTROL_STATIN : 1
POWER_OF : 1
IS_NOT : 2
RECENT_OF : 1
WELL_DEVELOPED : 1
WARM_LEVEL : 1
POST_OP : 1
HIM_OF : 2
THE_WITHIN : 1
INPUT_URINE : 1
YOU_SIX : 1
DOSES_THEN : 1
OF_SHOULDER : 1
FROM_HIS : 1
INR_IV : 1
OF_LENS : 1
CM_PAST : 1
ACTIVE_COUNSELED : 1
OF_PAIN : 1
OF_ASSISTANCE : 1
SOME_PEOPLE : 1
STATE_MEENACH : 1
RESPIRATION_HAS : 1
DYSPNEA_OR : 1
CALLED_HE : 1
HISTORY_PHYSICALTL : 1
INR_RESULTS : 1
CHEST_JAW : 1
BP_SYRINGE : 1
MESSAGE_PHONE : 1
LIGAMENT_AND : 1
PT_AGAIN : 1
OF_LESION : 1
ABOUT_PATTERNS : 1
HOW_DID : 1
LEFT_PAIN : 1
MAILED_COMPLETE : 1
HAVE_AN : 1
FLUID_NO : 1
ROARING_SURG : 1
ON_UCINATIONS : 1
OR_BOTTLE : 1
TAB_CARE : 1
RARELY_TEMP : 1
UPPER_SPEECH : 1
RIGHT_AWOKE : 1
ANESTHESIA_MAC : 1
BY_AWA : 1
TO_WHAT : 1
COMMANDS_NO : 1
DYSURIA_SURGERY : 1
THE_MONTH : 1
WEAKNESS_LIMB : 1
ALL_OF : 1
AND_DOSE : 1
FROM_THE : 1
FOR_DEPRESSION : 1
NOTE_ADVERSE : 1
IV_STARTED : 1
MALE_RTC : 1
NOTE_INFORMED : 1
MOMETASONE_PRIMARY : 1
LAST_WEIGHT : 1
BOTH_VISUALIZED : 1
CONCERNS_INR : 1
MAILED_VALPROIC : 1
AND_VALUE : 1
POLYP_ANUSOL : 1
ADMISSION_NOT : 1
RA_NO : 1
DROP_NIGHT : 1
RECONCILIATION_INFLUENZA : 1
ADR_DATE : 1
FOR_PROSTATE : 1
CXR_PEOPLE : 1
OTHER_DING : 1
CLEVELAND_SUN : 1
HERE_GI : 1
ACID_IN : 1
INFLUENZA_IMMUNIZATION : 2
COMPLETELY_WITH : 1
ADDENDUM_CC : 1
CLEANSING_TEMP : 1
TOLD_TO : 1
BP_INSULIN : 1
PLEASE_CALL : 1
DISCUSSED_WHAT : 1
RETENTION_EDEMA : 1
EFFECT_CHOLESTROL : 1
ML_TUBERCULIN : 1
YOUR_TESTS : 1
PROBLEM_BEHAVIORS : 1
TALKED_PATTERNS : 1
MEDICATION_AND : 1
TIU_TO : 1
AND_PLEASANT : 1
ALCOHOL_AUDITC : 2
GAIT_TRAINING : 1
OCT_EARMOLD : 1
THE_INTRAARTICULAR : 1
1010M_NURSING : 1
THE_DECLINES : 1
TISSUES_FIBER : 1
AAOX_WELL : 1
PRESSURE_HAD : 1
TABLET_MOUTH : 2
HYPERLIPIDEMIA_NEUROPATHY : 1
ON_GOING : 1
HE_HAS : 2
WI_SUN : 1
ARE_PAIN : 1
OR_NO : 2
SUPPLIES_ACTIVE : 1
AND_WEIGHT : 1
EXPIRED_OUTPATIENT : 2
POSITIVE_TROPONIN : 1
THESE_ARE : 1
ACTIVITY_ALERT : 1
EDUCATION_DESIRE : 1
THE_CLINIC : 2
MAINTAIN_SOURCE : 1
IN_AT : 1
CARE_1010M : 1
PROBLEM_RARELY : 1
TEAM_NOTE : 1
DEPRESSION_PE : 1
PAIN_AT : 1
MEETING_ON : 1
CHRONIC_HISTORY : 1
FROM_TEAM : 1
AND_ABLE : 1
FILTER_BOTH : 1
COUNSELED_DAILY : 1
EXPR_TEMP : 1
INSTRUCTIONS_PEROXIDE : 1
FOR_DENIES : 2
CAPSAICIN_CREAM : 1
EXCISION_LESION : 1
YES_OXYGEN : 1
INVITED_TO : 1
DRAIANGE_IS : 1
DE_RN : 1
WALKS_WIFE : 1
TRAINING_THINK : 1
ULTIMATE_GOAL : 1
ATTEMPTS_WHAT : 1
UAL_EXAMINATION : 1
AND_SOURCE : 1
PT_DENIES : 2
TO_OBJECTIVE : 1
INDEX_REVEALS : 3
DISCHARGE_PATIENT : 1
STRENGTH_IS : 1
THE_APPOINTMENT : 2
SHOWS_SVT : 1
ON_OCCASION : 1
THIS_WOULD : 1
DATE_LOW : 1
EXAMINATION_HUMAN : 1
UNSPECIFIED_LEIA : 1
TIME_PATIENT : 1
TO_CLC : 1
YES_YOUR : 1
METOPROLOL_MG : 1
NO_LONGER : 1
YES_WOULD : 1
NURSING_RECORD : 1
GAVE_PT : 1
AUDIO_WWII : 1
NORMAL_AMOUNT : 1
CONSCIOUSNESS_HOUR : 1
QTY_ISSU : 2
SAYS_IS : 1
FURNITURE_BACK : 1
VS_BP : 1
FAMILY_HE : 1
NO_OR : 2
PRESCRIPTION_AND : 1
HIM_DATE : 1
NEURO_ORIENTED : 1
DRAWN_PROBLEM : 1
TO_TIME : 1
AND_DO : 1
BP_OCT : 1
CLEAR_BOTH : 1
ACTUAL_ANATOMICAL : 1
STATUS_PFT : 1
REVEALS_COMMINUTED : 3
CONSULT_SEEN : 1
ERS_POSITIVE : 1
TAB_ONEHALF : 2
NURSING_AN : 1
ONEHALF_ALCOHOL : 1
DISCHARGE_TO : 1
BECKLEY_VAMC : 1
BROKE_ONE : 1
ATHENS_PROGRAM : 1
THERAPY_INITIAL : 1
BACK_PAIN : 2
AND_UNSUCCESSFUL : 1
INJURY_THE : 1
FIBRILLATION_VET : 1
TEMP_BLOCKERS : 1
PROBLEMS_SOME : 1
PATIENT_REQUEST : 2
LIST_FROM : 1
IDENTIFICATION_PRESENT : 1
FACILITY_PCP : 1
EVENT_COMPLETELY : 1
OU_OS : 1
AS_CARBUNCLE : 1
RETURN_WHEN : 1
INSTILL_ACTIVE : 1
BY_MOUT : 1
WILBERT_DIRECTIVES : 1
LEFT_REACTIVE : 1
SPECIALTY_PATIENT : 1
CANE_AND : 1
OF_LIGAMENT : 1
DM_CAD : 1
CONVERSATION_WITH : 1
IN_AREAS : 1
PARTIAL_FOR : 1
SCREENING_HUMAN : 1
TREATMENT_AND : 1
BY_ACTIVITY : 1
SEX_MALE : 1
PT_WAS : 2
ALREADY_IN : 1
APR_BLUE : 1
HAS_MANIC : 1
PRN_TO : 1
FOR_BECKLEY : 1
LEDWANI_NOV : 1
THERAPY_BOTH : 1
HAD_ANY : 1
KG_SURGICAL : 1
FAMILY_GIVEN : 1
IS_RESIDING : 1
OS_AMBULATES : 1
SELF_CARE : 1
RDASIL_NURSING : 1
ACTIVE_BETA : 1
WALKS_FREQUENTLY : 1
APR_PATIENT : 1
ALLERGIES_HAS : 1
LONGER_NUMB : 1
AND_TO : 2
MELLITUS_HYPERTENSION : 1
UN_INH : 1
ABLE_CARE : 1
WHICH_BOTH : 1
NOVEMBER_HAS : 1
OR_AM : 1
CC_YEAR : 1
SENDING_FOR : 1
PAIN_MEDICATION : 1
CONSTIPATION_DIARRHEA : 1
LBS_ACTUAL : 1
FOR_GLASSES : 2
PAIN_PAIN : 3
NECK_SUPPLE : 1
TESTS_THE : 2
NUMBNESS_DISEASE : 1
OF_LAST : 2
REVEALS_CHIEF : 1
PRIMARY_PAIN : 1
BE_REACHED : 1
THAT_PRETTY : 1
DISCHARGE_USES : 1
NEEDS_ANY : 1
AND_RATE : 1
LAST_LB : 1
THE_LETTER : 1
CM_EFFECTS : 1
THE_MONTHS : 1
YES_LIST : 1
MEDICATIONS_INCLUDING : 3
PLAN_ON : 1
CHEW_TAB : 1
REVIEW_OF : 1
NUMBNESS_SPECIFIC : 1
REVEALS_AC : 1
SPECIAL_EXAMINATION : 1
RATE_BROKE : 1
IMPRESSION_BLUE : 1
PROVIDED_NURSING : 1
EDUCATION_BY : 1
SYRINGE_ML : 1
AFFECTED_THREE : 1
OF_JUNCTION : 1
TINGLING_COMMANDS : 1
LAST_HIS : 1
SHOULDER_PLEASE : 1
REACTIONS_ASPIRIN : 1
OT_LEDWANI : 1
PROSTATE_CANCERSEES : 1
UNSPECIFIED_MEENACH : 1
ULTIMATE_IS : 1
FEV_SIGNS : 1
POST_TIBIAL : 1
HE_THAT : 1
CECAL_POLYP : 1
TO_PHYSICIAN : 2
PATIENT_RECEIVED : 1
APPTS_EXAM : 1
IN_CM : 5
EQUIPMENT_NEEDS : 1
ALCOHOL_SCREEN : 1
PERKINS_PRIMARY : 1
MONTH_UP : 1
HEIGHT_ACTUAL : 1
NO_NOTED : 2
FOR_FROM : 1
AT_LEFT : 1
ACTIVE_NOW : 1
BY_ACTIVE : 2
PLACE_THIS : 1
PALPABLE_WELL : 1
COMFORTABLE_SENDING : 1
PATIENT_AND : 2
COMPLAINT_NOT : 1
OPPORTUNITY_ASK : 1
IMAGING_DESERT : 1
OT_NOV : 1
CHEW_ONE : 1
EMERGENCY_ON : 1
TO_REACH : 2
BROKE_AFTER : 1
MEDICATION_DENIES : 1
CONTACT_PATIENT : 1
BOTH_AND : 1
PAPILLOMAVIRUS_HPV : 1
SIGNAL_HAS : 1
DECREASE_CAD : 1
TRIC_IMPROVEMENT : 1
AND_RECENTLY : 2
TITLE_VIEW : 1
THINK_HAVE : 1
LONG_THICK : 1
IED_OF : 1
NEXT_SOCIAL : 1
LITTLE_PROGRESS : 1
MG_TAB : 5
FOLLOW_UP : 1
MWFSA_MG : 1
IN_THE : 5
LIVER_INFORMATION : 1
APPOINTED_PCP : 1
PT_PAIN : 1
SUPPLIES_AND : 1
CARTILAGE_THE : 1
GAIT_MINUTES : 1
PAIN_MONTHS : 1
SYRINGE_IN : 1
GI_OTHER : 1
DING_COMPLICATIONS : 1
PATIENT_DECLINES : 1
SOME_SO : 1
WAS_WITH : 1
OF_INFORMATION : 1
WHAT_THEY : 1
WHO_FOR : 1
MINIMUM_BP : 1
HT_ANATOMICAL : 1
WALKS_OCCASIONALLY : 1
NIGHTS_SWEATS : 1
FLUID_RETENTION : 1
PHYSICIAN_OVERALL : 1
RADIAL_PALPABLE : 1
HPV_ATTEMPTED : 1
OXYGEN_LEVEL : 1
NEW_WORSENING : 1
OF_TESTS : 1
PHONE_NUMBER : 1
SITE_PLEASE : 1
MORNING_IN : 1
REFUSED_ACCEPT : 1
SCHEDULED_BE : 1
AND_HAS : 1
REFILL_TO : 1
MEDS_OPHTHALMOLOGY : 1
ANION_GAP : 1
OUTPT_RELEASE : 1
PROBLEM_VS : 1
HAD_EDUCATION : 1
THE_HAD : 2
RECENT_LAMINECTOMY : 1
MG_THERAPY : 1
MALE_DATE : 1
OUT_AT : 1
APPOINTED_BERYL : 1
ME_PRIMARY : 1
PRESENTS_TO : 2
HERBAL_VITAMINS : 1
ULCERS_OTHER : 3
ADENA_LEFT : 1
YEAR_ALERT : 1
MMHG_AND : 2
ADDITIONAL_INFORMATION : 1
ALL_NO : 1
AND_GREAT : 1
MESSAGE_ON : 1
FINGER_CLOTTING : 1
ATRIAL_SERIES : 1
GIVEN_PRESCRIPTION : 1
CHANGE_BY : 1
ATENOLOL_TAB : 1
GIVEN_RAL : 1
THY_THE : 1
WITH_STEADY : 1
BE_TO : 1
CYST_BELOW : 1
INH_INSTILL : 1
WAS_IN : 1
OF_SERUM : 1
TIM_OL : 1
STATUS_RECENT : 1
PATTERNS_GOOD : 1
VETERAN_BEEN : 1
HISTORY_PAIN : 1
RUMINATION_FAMILY : 1
UPDATE_REQUIRED : 1
ORIENTED_AND : 1
NOT_TO : 2
TELE_CHEST : 1
HE_HAD : 2
MOUT_WWII : 1
PHONE_IS : 1
HAD_AN : 1
CARDIAC_ERS : 1
CLINIC_THE : 1
ACCESSION_NO : 1
INDICATES_REQUIRED : 1
GI_CONSULT : 1
AT_ENCOUNTER : 1
FORTICAL_INSTILL : 1
MONTHS_PCP : 1
AFRICAN_AN : 1
OS_WITH : 1
NOTE_WILL : 1
ASSISTANCE_INDEPENDENT : 1
CLINICS_METOPROLOL : 1
GOOSE_CREEK : 1
CHEWING_FRICTION : 1
ACTIVE_HAND : 1
ASSESSMENT_ADDENDUM : 1
HOWEVER_NOT : 1
NOTE_THIS : 1
HOWEVER_IS : 1
NOT_BE : 1
ANSWERED_CURRENT : 1
MILD_FLUID : 1
MH_EVALUATION : 1
TO_LIVE : 1
EVALUATION_THIS : 1
COMMENTS_INFORMATION : 1
RECORD_OR : 1
MR_AND : 1
ACTIVITY_AWA : 1
COMPLETE_BACK : 1
NURSING_NOTE : 5
NO_SOCIAL : 1
USED_REVIEWED : 1
MATERIAL_VITREOUS : 1
MOIST_WARM : 1
NOT_IT : 1
PRIMARY_VITALS : 1
NURSING_KARDEXTL : 1
TO_DURATION : 1
OPENING_IMAGING : 1
OPTIONS_BEEN : 1
BE_DRAWN : 1
SAFE_SEX : 1
GOOD_COMPLIANCE : 1
ACTIVITY_SS : 1
CM_NOT : 1
MANAGEMENT_IS : 1
NO_CHECK : 1
LOCATION_UPPER : 1
REVIEW_IS : 1
FOR_PROCEDURE : 1
NOTIFICATION_LETTER : 1
COUNSELED_ON : 1
WIFE_BEHAVIOR : 1
BEHAVIOR_SPEECH : 1
EVERY_SKIN : 1
NO_NUMBNESS : 1
SEX_HAD : 1
OM_STATES : 1
WITH_ACTIVE : 1
SEASON_JAR : 1
OR_SPECIAL : 1
HUMAN_PAPILLOMAVIRUS : 1
HIS_ULTIMATE : 1
LAST_HGBAC : 1
CLINICIAN_NOTE : 1
AND_GOOSE : 1
BEHAVIOR_LEFT : 1
TIMES_WASH : 1
BE_AND : 1
OU_REFILL : 1
INFORMATION_PATIENT : 1
CLEVELAND_SUBJECTIVE : 1
ADDENDUM_MD : 1
DUE_TO : 1
DIALYSIS_CENTER : 1
MEDICATIN_REQUEST : 1
PATIENT_WHAT : 1
CALL_NO : 1
CHANGE_EARS : 1
PREVIOUSLY_DECLINED : 1
OF_YOUR : 1
CM_HAS : 1
SIDE_DING : 1
STATES_GIVEN : 1
RATIVE_CHANGES : 1
LETTER_LOT : 1
OR_MEDICATION : 1
REACTIVE_YES : 1
MORE_HER : 1
ML_PURIFIED : 1
PAIN_PC : 1
BETTER_NOW : 1
DOXAZOSIN_MG : 1
VISIT_CHIEF : 1
ADDENDUM_OCCUPATIONAL : 1
OWN_AND : 1
AT_ER : 1
IED_EVENT : 1
IN_DEAR : 1
LIST_HEME : 1
AND_WHY : 1
NECK_ENDING : 1
DENIES_NUMBNESS : 1
HEEL_OCCUPATIONAL : 1
OTHER_TO : 1
CALL_YOUR : 1
IT_NEXT : 1
WITH_PLAN : 1
IDENTIFIED_PAIN : 1
DISCHARGE_AND : 1
OCCUPATIONAL_THERAPY : 2
EXPIRED_MEDICATIONS : 2
WAS_INFLUENZA : 1
AWOKE_ATTEMPTED : 1
CARE_DUE : 1
FOR_PLANTAR : 1
ANY_FALLS : 1
OTHER_PACHS : 1
CREEK_METOPROLOL : 1
RESPIR_TELEMETRY : 1
IV_FLUIDS : 1
SUPPLIES_LABORATORY : 1
YES_CHARACTER : 1
INDEX_IS : 1
REGIONAL_SOFT : 1
SCREENING_EXAMINATION : 1
BENIGN_OF : 1
TO_THAT : 2
DATE_DISCHARGE : 1
COUMADIN_FOR : 1
HYPERTHYROIDISM_ATENOLOL : 1
IMMUNIZATION_PAIN : 1
MH_THE : 1
ON_NEXT : 1
DAILY_WEIGHT : 1
PT_ANY : 1
MEDICATIN_PREVENTIVE : 1
NOTE_PAIN : 1
PRIMARY_NURSING : 1
MONTHS_HAS : 1
INSULIN_SYRINGE : 1
GALY_THE : 1
CARE_IF : 1
ALLERGIES_CARE : 1
THY_GALY : 1
BE_GIVEN : 1
COMPUTER_ASSISTANT : 1
INSTRUCTIONS_BENZOYL : 1
RIGHT_SHOULDER : 2
USE_LEVEL : 1
USING_EYE : 1
PLAN_MEETING : 1
OTHER_ANTERIOR : 1
NO_MANIC : 1
LENS_NAME : 1
PRNCHANGED_PRN : 1
DR_KATIE : 1
TAKE_ONE : 1
WITHIN_PAST : 1
NOW_DOUBLE : 1
BILATERAL_HGBAC : 1
LOWERING_THE : 1
WE_ARE : 1
FACILITY_APPOINTED : 1
STATE_UNSPECIFIED : 1
TON_AND : 1
COME_SHORTLY : 1
PLAN_CARE : 1
WERE_RAL : 1
OF_FUSION : 1
AUDIOLOGY_EXAM : 1
PAIN_CARE : 1
AND_SYMPTOMS : 1
RR_TEMP : 1
HER_BUDGET : 1
GLASSES_DYSPNEA : 1
CAREGIVER_TO : 1
WANT_TO : 1
KD_URGENT : 1
HISTORY_OF : 1
DE_YEAR : 1
ACTIVE_ISSU : 2
RELIEVES_THE : 1
CONSULT_ADDENDUM : 1
DERVIATIVE_IN : 1
NO_BETA : 1
NEW_AND : 1
PATIENTS_COUMADIN : 1
FAMILY_EDUCATION : 1
TEACHING_USED : 1
EXERCISE_MODIFICATIONS : 1
FURNITURE_DX : 1
HEART_HE : 1
VISUALIZED_AND : 1
CHIEF_CHRONIC : 1
ALERT_HOUR : 1
FOUR_CHO : 1
NO_BRUITS : 1
FOCUS_IT : 1
ACTIVITY_FREQUENTLY : 1
EVER_SINCE : 1
OTHER_VITRECTOMY : 1
NOW_FOR : 1
SUTR_GAVE : 1
PROVIDER_PAIN : 1
RESULTS_INR : 1
SM_ACTIVE : 1
APR_WEEK : 1
AGE_SEX : 1
HOLD_APR : 1
HE_SAYS : 1
THE_CLC : 1
ALERT_ORIENTED : 3
MONITORED_THE : 1
ABOUT_AGO : 1
ELIGIBLE_GLASSES : 1
OD_PERKINS : 1
NOTE_JUL : 1
ADVISED_TO : 1
PT_STATES : 1
IS_COMPLIANT : 1
ON_SHE : 1
SAFE_HAS : 1
WT_LBS : 1
YES_NURSING : 1
NASAL_FORTICAL : 1
WAS_GIVEN : 2
TREATMENT_IDENTIFIED : 1
HYPERTENSION_IMMUNIZATION : 1
HT_CM : 2
AS_FOUR : 1
UNDERSTANDS_HOW : 1
ANSWERED_NKA : 1
MG_SUTR : 1
OF_ON : 1
NO_STATUS : 1
CONSTANT_SIGNAL : 1
IN_USE : 1
INHOUSE_MESSAGING : 1
EDUCATION_TO : 1
LBS_HT : 1
IN_SYRINGE : 1
IS_VISIT : 1
AREARS_HAS : 1
EVERY_FOR : 1
BS_AVG : 1
OF_CHEST : 1
OD_EVERY : 1
MACHINE_VOICE : 1
TEMP_UPPER : 1
TO_OF : 1
PREVIOUSLY_FURTHER : 1
CALL_SIDERAILS : 1
NOTE_NO : 1
SCORED_THE : 1
PLANTAR_HEEL : 1
OF_NOTE : 1
AGO_COUNSELING : 1
RESULTS_DESCRIBE : 1
IN_HOLD : 1
HOUSEHOLD_OBTAIN : 1
TO_ASK : 1
ON_LIGHT : 1
CARE_PROBLEM : 2
PRESCRIPTION_WAS : 1
PAST_ATTEMPTS : 1
SKIN_DESTINATION : 1
DYSURIA_GALLBLADDER : 1
MEDS_CTA : 1
EATING_OF : 1
REFILL_TELEMETRY : 1
COMMINUTED_MRI : 1
THEN_FEMPOP : 1
MALE_ADMISSION : 1
CANCERSEES_PT : 1
CALL_HIM : 1
STATES_RECENT : 1
SPHERES_STATES : 1
FORTICAL_ACTIVE : 1
NOTE_BREATH : 1
CPAP_OF : 1
PATIENT_NAME : 1
TO_NASAL : 1
OR_RELIGIOUS : 1
SA_TAB : 1
MALE_BP : 1
DID_NOT : 1
FEMPOP_BYPASS : 1
DEPRESSION_THIS : 1
DOING_HE : 1
REQUEST_HEALTH : 1
WORK_ALLERGIES : 1
INFLUENZA_POST : 1
CANE_ABLE : 1
AND_APPETITE : 1
RAL_ALERT : 1
UCINATIONS_NO : 2
OF_ADDENDUM : 1
OTC_HERBAL : 1
TYPE_ANESTHESIA : 1
CONSENT_TREATMENT : 1
MASS_INDEX : 1
PATIENT_ELIGIBLE : 1
DEBRIS_WITHIN : 1
ADL_KARDEXTL : 1
BUSY_PT : 1
WITH_HEART : 1
WALKS_NO : 1
ANEMIA_MYCIN : 1
DISCUSSED_HE : 1
PROPERTY_IN : 1
WORK_PATIENT : 1
MAINTAIN_CARE : 1
PREDNISOLONE_OD : 1
FOR_AND : 1
CARE_PLAN : 3
ACTIVE_RECENTLY : 2
ISCHEMIC_WITH : 1
YO_NAD : 1
NO_RISK : 1
BEEN_ATROVENT : 1
LMP_PROGRAM : 1
THE_PAST : 2
UP_BILATERAL : 1
AGAIN_TO : 1
OLD_FEMALE : 1
PHYSICAL_UPDATE : 1
PO_BID : 1
TEMPERATURE_THAT : 1
CHILD_AREARS : 1
YOUR_FAMILY : 1
PROVIDER_YOUR : 1
APR_START : 1
OWN_HE : 1
AN_INHOUSE : 1
DENIES_ACTIVITY : 1
HYPERTHYROIDISM_MG : 1
COMPLAINT_OF : 1
HE_ROARING : 1
CARE_FAMILY : 1
OL_IC : 1
COMFORTABLE_HIM : 1
MANAGEMENT_REPORTS : 1
SCREEN_FOR : 1
AFFECT_APPROPRIATE : 1
IMPRESSION_IDENTIFICATION : 1
AFTER_YOU : 1
WE_PAIN : 1
AREAS_PRIMARY : 1
PROVIDER_IN : 1
ALLERGIES_ADVERSE : 1
SI_HI : 1
AND_FAMILY : 1
INCLUDING_YES : 1
ANY_PAIN : 2
SINUSITIS_OFTEN : 1
PATIENT_HAS : 1
GOAL_IS : 1
SUCCINATE_SA : 1
UALLY_ATENOLOL : 1
EVENT_PT : 1
ALLOWED_IN : 1
IF_MANAGEMENT : 1
INFORMATION_DT : 1
YOUR_BACKGROUND : 1
GENERAL_HEALTH : 1
OF_FOR : 1
OF_MAC : 1
FOR_ON : 1
THAT_BE : 2
FOR_CONSULT : 1
FOR_PAST : 1
TEMP_WARM : 2
NURSING_PATIENT : 1
OUTPATIENT_NOTE : 1
NEEDS_PROTECT : 1
EVALUATION_TEAR : 1
CM_REVIEW : 1
TO_MD : 1
DRC_FOR : 1
HAS_NO : 3
FOR_PE : 1
FILLING_OR : 1
CATARACT_PHACOEMULSIFICATION : 1
THREE_WASH : 1
OF_LEFT : 4
WARM_OF : 1
POSTOPERATIVE_COURSE : 1
IS_GOOD : 2
PREVENTIVE_SCREENING : 1
THERAPY_TEMPLATE : 1
ADDED_THAT : 1
EYE_PHYSICIAN : 1
SEE_HIS : 1
MOVING_FURNITURE : 1
SS_DANGEROUS : 1
TEMPERATURE_DURABLE : 1
WORK_HIS : 1
HEME_STOOL : 1
PT_ON : 2
UNLABORED_ERS : 1
HOUR_URINE : 1
HEALTH_WILL : 1
MIC_CHANGE : 1
RESPIR_SHOWS : 1
SEPTEMBER_THE : 1
OF_ISCHEMIC : 1
STATES_STRENGTH : 1
FALLS_RADIATION : 1
HAVE_ANY : 1
HYPERTENSION_INFLUENZA : 1
OF_RIGHT : 1
CENTER_PAIN : 1
AGE_MALE : 1
ISSU_OU : 1
AN_UAL : 1
NONGRANULOMATOUS_OD : 1
REPORT_SC : 1
BLACK_AFRICAN : 1
LIMB_NUMBNESS : 1
AC_JOINT : 1
WI_DOSE : 1
BOTH_MR : 1
ORIENTED_SPHERES : 1
WHO_PRESENTS : 2
SELF_LEVEL : 1
THEN_DECREASE : 1
NOTE_COMPUTER : 1
PROBLEM_SOURCE : 1
NOW_HERE : 1
METOPROLOL_SUCCINATE : 1
AGO_PCP : 1
SEEN_PT : 1
HAS_REVIEWED : 1
TO_OTHER : 1
NOTICED_MILD : 1
PAIN_IS : 2
PAIN_OUTPT : 1
ARE_BODY : 1
RARELY_MOIST : 1
DONE_IMPRESSION : 1
HLD_YO : 1
HIS_TEAM : 1
ADMINISTERED_PAIN : 1
WE_ABOUT : 1
EXAM_DOB : 1
CARDIOLOGY_RECOMMENDS : 1
OF_CONSCIOUSNESS : 3
TIME_LIKE : 1
KATIE_ACCOMPANIED : 1
OR_PARTIAL : 1
CURRENT_OTC : 1
CP_EXAM : 1
PRIMARY_CARE : 6
PEROXIDE_GM : 1
HAS_MADE : 1
MEDICATION_HAS : 1
REACH_HEALTH : 1
OF_TRIC : 1
OVER_HE : 1
ADDENDUM_SEEN : 1
NOTED_CLEVELAND : 1
DR_RADIGAN : 1
PULSE_PATIENT : 1
LAB_TESTS : 1
ALERT_NO : 1
PARTIAL_CHEWING : 1
HIS_OWN : 1
IS_BY : 1
DOUBLE_CLICK : 1
CAREOUTPATIENT_PROBLEM : 1
HAS_SUICIDAL : 1
LEFT_FINGER : 3
DOSE_TO : 1
VITAL_QUALIFIERS : 1
HER_ALLOWED : 1
CALL_DATE : 1
ULCERS_OR : 3
OUTPATIENT_CARE : 1
PHOSPHATE_SOLN : 1
PSA_VAMC : 1
FURTHER_EDUCATION : 1
SOURCE_INCOME : 1
PATIENT_OF : 1
ACTIVE_MEDICATIONS : 3
RATE_PT : 1
WEIGHT_LB : 1
IMPROVING_MONTHS : 1
SYRINGE_AS : 1
CYST_THE : 1
MEDICAL_IS : 1
PROBLEMS_CXR : 1
TIBIAL_AAOX : 1
IN_REVIEW : 1
FOR_MH : 1
BACKGROUND_BELIEFS : 1
THIS_BP : 1
OBJECTIVE_HAND : 1
IS_PAIN : 1
BILATERAL_UPPER : 1
AND_LAST : 1
AND_HIS : 2
PROVIDER_LIST : 1
REPEATED_WI : 1
OR_AFRICAN : 1
PT_IS : 2
HYPERTENSION_DATE : 1
REACHED_OR : 1
HOME_DISCHARGE : 1
PROVIDER_CLINIC : 1
TAKE_ONEHALF : 2
PENILE_DISCHARGE : 1
BOTH_CLEAR : 1
ON_PROPERTY : 1
SELECTED_SPECIALTY : 1
MULTIPLE_OF : 1
PRIMARY_VISIT : 1
MALE_WHO : 2
LIKE_SOMEONE : 1
BETTER_HERE : 1
LISINOPRIL_TAB : 1
PT_RECENTLY : 1
AT_ADMISSIONS : 1
PULMONARY_SM : 1
TO_SCREEN : 1
IMPRESSION_BAND : 1
HOSPITALIZATION_VETERAN : 1
HIS_TAXES : 1
HEART_CONSISTING : 1
FOR_ADDENDUM : 1
HAVE_EFFECT : 1
SO_NOT : 1
KNEE_PAIN : 1
THE_REGIONAL : 1
LEFT_JUNCTION : 1
WAS_MARCH : 1
RESULTS_ARE : 1
THE_INDEX : 3
MEDS_FOUND : 1
HYPERLIPIDEMIA_PVD : 1
GM_ACTIVE : 1
DEVELOPED_YO : 1
TO_PATIENT : 1
NKA_CURRENT : 1
MG_PO : 1
OF_ADDITIONAL : 1
RECOMMENDS_UALLY : 1
LEVEL_CONSULTS : 1
PRIMARY_ADDENDUM : 1
TO_CAD : 1
PHYSICIAN_AFTER : 1
MR_PULSE : 1
FRAME_PATIENT : 1
PRIMARY_NOTE : 1
EPINUCLEAR_MATERIAL : 1
NO_WORK : 1
DAILY_DEPRESSION : 1
SEASON_OR : 1
FOR_CAD : 1
OYING_SINCE : 1
BEEN_WITH : 1
NO_DISTRESS : 1
THE_MORNING : 1
OF_OF : 1
REVIEW_LBS : 1
BY_TO : 1
METHOD_REVIEWED : 1
NKA_OTC : 1
HER_TO : 1
STATE_NOT : 1
CLICK_ON : 1
HIS_APPETITE : 1
CAN_DEPENDENCY : 1
USES_TEETH : 1
PHYSICIAN_ONCOLOGIST : 1
GAP_MEDICATION : 1
WWII_RESULTED : 1
TO_QUESTIONS : 1
INSERTION_OF : 1
LOT_REFFERED : 1
AND_DONE : 1
ALREADY_PLACE : 1
IN_PATIENT : 1
HE_GIVEN : 1
THIS_HAS : 1
CHANGE_GLASSES : 1
SHOW_TO : 1
SEEN_CLINIC : 1
SOME_FLUID : 1
THINK_YOU : 1
AND_AND : 2
IF_PAIN : 1
WASH_HANDS : 1
HISTORY_CATARACT : 1
INDEX_AUG : 1
PHYSICIAN_YOU : 1
PAST_MONTHS : 1
RATE_AFTER : 1
MEDICATION_CALL : 1
IN_THAT : 1
CARBUNCLE_AT : 1
OR_START : 1
READINESS_TO : 1
COLOR_ALLERGIES : 1
HEALTH_PROVIDER : 1
TO_CREATININE : 1
REVIEWED_OF : 1
OR_FOLLOWS : 1
RADIAL_OUTPUT : 1
PHYSICIAN_RADIATION : 1
APPROVED_POSITIVE : 1
MEDICATIONS_SUPPLIES : 3
RA_BILATERAL : 1
CHO_NOW : 1
WITH_URINARY : 1
IN_PLACE : 1
AROUSABLE_TELEMETRY : 1
MOISTURE_RARELY : 1
BY_VA : 1
NO_CYST : 1
SEPTEMBER_CLINIC : 1
MESYLATE_MG : 1
AND_OYING : 1
NOTICED_SURG : 1
SOURCE_OF : 2
OF_FROZEN : 1
PROBLEM_UNITS : 1
EXPRESSIVE_HLD : 1
CARE_TO : 1
TAKEN_HR : 1
HAVE_BEEN : 3
ADENA_MESSAGE : 1
HAD_RECENTLY : 1
IS_OR : 1
PMRS_OT : 1
CLC_INTERDISCIPLINARY : 1
BRUITS_THY : 1
CHRONIC_PROBLEM : 1
VET_BE : 1
START_EYE : 1
WEIGHT_MONITORING : 1
HE_COMPLIANT : 1
ON_REASON : 1
HAVE_PATIENT : 1
METHOD_MANKOWSKI : 1
MOUT_AUDIO : 1
BY_LETTER : 1
BUDGET_SHE : 1
WAS_FROM : 1
THAT_DOING : 1
SS_OF : 1
CHANGES_NO : 1
COUMADIN_TX : 1
SYMPTOMS_SHE : 1
NOT_EXPLORE : 1
REVIEWED_THE : 1
PVD_PT : 1
MONTHS_MALE : 1
PART_NO : 1
TESTS_ARE : 1
MALE_IN : 1
THAT_TIME : 3
OPTIONS_HAVE : 1
PATIENT_IN : 3
INH_FORTICAL : 1
NAME_ANTERIOR : 1
SOURCE_HISTORY : 1
HGB_NONE : 1
FOR_GI : 1
ISCHEMIC_STROKE : 1
INFORMATION_NOT : 1
PAIN_NURSING : 2
PAST_MONTH : 1
AFTER_HOW : 1
LIVER_TEST : 1
WOULD_GIVEN : 1
SKIN_CLEANSING : 1
MG_SA : 1
ALL_THE : 1
DURATION_OF : 1
TWO_THEN : 1
NOT_FOR : 1
SHE_SPENT : 1
SHOULDER_ON : 1
DESCRIBE_IV : 1
VALUE_AND : 1
STATUS_MESYLATE : 1
THE_EMERGENCY : 1
THE_SITE : 1
LABS_REVIEWED : 1
WITH_CHIEF : 1
ATROVENT_OR : 1
SURGICAL_PHYSICAL : 1
GALY_CLINIC : 1
LEVEL_IS : 1
TESTS_INCLUDED : 1
HAD_FALLS : 1
FOR_CHIEF : 1
AND_HAVE : 1
DENTURES_OR : 1
LONG_TOENAILS : 1
SERUM_HA : 1
OR_FOR : 1
OS_ANION : 1
MAIL_REGARDS : 1
TO_ACCEPT : 1
CANCERSEES_EVERY : 1
APPT_ALERT : 1
BLOCKERS_NO : 1
FOR_SOMEONE : 1
URINARY_LATE : 1
WILBERT_ADVANCE : 1
CREAM_GM : 1
DENTURES_PARTIAL : 1
BUSY_SIGNAL : 1
ACCESSION_SP : 1
! Stats words=1082  pairs=4180
