# Supplementary material for: Predicting the Risk of Suicide by Analyzing the Text of Clinical Notes
Source: PLoS One. 2014 Jan 28;9(1):e85733. doi: 10.1371/journal.pone.0085733 (PMC3904866; doi:10.1371/journal.pone.0085733)
Supplement: Appendix S3 — Machine Learning Libraries and Methods: This section is provided to enclose the open source (Apache License) classifier used for the building of the statistical models, specifically for the purposes of study reproducibility. A detailed account of these tools is intended for another publication. (ZIP) [file pone.0085733.s003.zip › Appendix3/ML_libs/Regression_testing/group1/processed/grp1-pt-1064.dat]

!  Done reading
! Total word count = 2168
! Total unique words = 992
! Total pair count = 4332
! Total unique pairs = 3977
CONTACT : 5
OBSTRUCTIVE : 2
AT : 6
HER : 4
CONSTANT : 1
DEVELOPED : 2
ONLY : 1
SHOULD : 1
PALPITATIONS : 1
QUESTIONS : 3
STATIONARY : 1
OPEN : 1
PROBLEMS : 2
LOWER : 1
URINE : 3
REMOVAL : 3
YELLOW : 2
MONTH : 3
ULCER : 1
ATIVAN : 1
REFILLS : 1
RTC : 2
WEIGHT : 2
CARPAL : 1
BEEN : 6
READINESS : 1
BID : 3
CAN : 2
NEG : 2
THERAPY : 2
BASE : 1
WITHIN : 2
PRIVATE : 1
REFILL : 1
YOURSELF : 1
ACCORDING : 1
AWARE : 2
DOPPLER : 4
NONVA : 3
AA : 1
WHICH : 1
AMBULATE : 1
SYMPTOMS : 1
IER : 1
OUTPATIENT : 12
GOES : 1
INTAKE : 2
WEEKLY : 1
RANGE : 1
COMFORTABLE : 1
SHORTNESS : 1
TURGOR : 1
UNDERLYING : 1
OVER : 1
INPATIENT : 4
CATARACT : 1
COUNSELING : 2
VISITS : 1
TOXICITY : 1
MG : 14
DOSING : 1
ON : 8
COSOPT : 1
ADMINISTRATION : 1
USE : 2
PRESSURE : 2
SPECIMEN : 1
AVAILABILITY : 1
COVER : 1
PILL : 1
PASS : 2
CC : 1
VIA : 3
EPISODE : 1
SUPPLIES : 5
TWICE : 1
REVEALS : 1
SECURITY : 1
CEREBROVASCULAR : 1
DERMATOPHYTOSIS : 1
VETERANS : 1
PURSUING : 1
READING : 2
CHAMBER : 1
LEVEL : 3
DROPS : 1
INACTIVATED : 1
PAYEE : 1
ALCOHOL : 1
CHANGES : 2
ARMY : 1
RADIAL : 1
MED : 1
UPDATE : 1
PCN : 1
DXD : 1
SHOULDER : 2
WEST : 1
HIS : 8
ARIPIPRAZOLE : 2
OXIMETER : 1
BOTHERING : 1
ID : 1
ENDOBROW : 1
SOAPE : 1
WEEKEND : 1
PROVIDER : 3
MARCH : 1
VOIDING : 1
SHE : 2
PO : 1
PALM : 1
APPROPRIATE : 1
NEURO : 2
UP : 3
ENDERLIN : 1
GENDER : 1
THEN : 2
USES : 1
LOCATION : 2
TELL : 1
ALERT : 2
ONYCHOMYCOSIS : 1
WORSENING : 1
TARTRATE : 1
WELL : 4
OUTOF : 1
WILLINESS : 1
TEST : 1
NOTE : 9
FASTING : 2
MIC : 1
LDL : 1
PRIOR : 2
DO : 5
DOCUMENTED : 1
TESTS : 2
TENDINOPATHY : 1
DATE : 3
FA : 1
COMMENT : 1
HTN : 1
DESERT : 1
BLOOD : 1
DAILY : 2
SAME : 1
CONSTRUCTION : 1
THREE : 1
VALENTINE : 1
REQUIRE : 1
CV : 2
ASSIST : 1
HAVE : 11
FEMALE : 1
PROGRAM : 1
LONG : 1
APPOINTMENT : 2
SCHEDULED : 1
AWAKE : 1
DRUG : 1
OF : 39
INCLUDE : 1
FROM : 8
TAB : 7
LEFT : 5
EARMOLD : 1
CALLER : 1
STABLE : 1
REQUIRED : 1
DEC : 1
HAS : 20
WHEEZING : 1
TUNNEL : 1
FOR : 27
MEDICAL : 4
UE : 1
HEAD : 1
SAID : 1
COUNTER : 1
GYNECOLOGY : 1
ALSO : 1
SEX : 1
TIBIAL : 1
ACTIVITIES : 1
NUMBER : 5
ORDERS : 1
RESPOND : 1
RECURRENCE : 1
STRIP : 2
ACCUCHEK : 1
EXTREMITY : 1
AN : 1
INR : 1
INSERTS : 1
MOIST : 2
ASSESSED : 1
UNLABORED : 1
NONCONTRIBUTORY : 1
KNEE : 7
HEART : 2
HYPERTHYROIDISM : 1
HURTING : 1
SIGNATURE : 1
COMPLAINT : 1
ORGANIC : 1
SC : 2
ORDER : 2
TABS : 1
NL : 1
EC : 2
MY : 1
FIANC : 1
NURS : 1
VPA : 1
IDEATION : 1
MYDRIACYL : 1
FOUR : 1
INFLUENZA : 7
APPARENT : 1
OUTSIDE : 1
FOREIGN : 1
STAND : 1
EYE : 3
ASSESSMENT : 3
RESPIRATORY : 1
SERUM : 1
CONTAINING : 1
ACTIVITY : 1
BUSY : 1
OWN : 1
NEW : 3
AGO : 2
MOUTH : 4
PROVIDERS : 2
ATTENDING : 1
DECIDED : 1
CHEST : 3
HEPATITIS : 1
ND : 1
TCM : 1
VEIN : 1
PRESENT : 1
TP : 1
OVERHEAD : 1
HAVING : 1
SOME : 2
BILATERALLY : 2
PREVIOUSLY : 2
INFORMATION : 3
EXPENSES : 1
OPH : 1
ENCOURAGE : 1
ARE : 2
STENOSIS : 1
REFERENCE : 1
ANSWERED : 3
INITIAL : 2
INDEPENDENT : 1
HYPERTENSION : 1
NEED : 3
CENTER : 1
ERE : 1
INFECTION : 1
WOKE : 1
APPLY : 1
HORRIBLE : 2
CYST : 1
RECEIVED : 4
CPRS : 1
DUAL : 1
SURGERY : 3
THE : 39
INCREASED : 2
FILED : 2
ROBERSON : 1
HERSELF : 1
ASPIRIN : 3
PRESENTS : 1
DURATION : 1
AICD : 1
CUEING : 1
BODY : 1
SIGNIFICANT : 1
PREVENTIVE : 1
BOWEL : 1
COLLECTED : 1
SERVED : 1
COLOR : 4
CHARACTER : 1
SEC : 1
YEARS : 1
CAD : 1
ARRIVED : 1
LEG : 2
HB : 1
BP : 3
OPT : 1
BE : 6
LIMITATION : 2
BECAUSE : 2
NURSETRIAGE : 1
RAPID : 1
OX : 1
DICYCLOMINESTATED : 1
PREVENTION : 1
POST : 2
DEPRESSION : 2
SON : 1
GLASSES : 2
CM : 2
THEIR : 1
PSYCHOLOGY : 1
PROM : 1
DISCOMFORT : 1
AGAIN : 1
TID : 1
NONPRODUCTIVE : 3
CAP : 1
OMEPRAZOLE : 1
DIET : 1
EVER : 1
SEARIGHT : 1
BATHING : 1
RECONCILED : 1
SHOES : 1
ATTEND : 1
ALLOW : 1
SOUNDS : 2
REVIEWED : 7
SORT : 1
GET : 1
ANEURYSM : 1
WT : 2
BEFORE : 2
WHAT : 1
RA : 1
REEXAMINED : 1
OTHER : 6
PLANS : 1
PRODUCTIVE : 1
ALL : 3
TOP : 1
CAROTID : 1
BENEFITS : 1
TRAN : 1
STARTED : 1
GLU : 1
BOTHERED : 1
HANDOUT : 1
ASSISTANCE : 2
ME : 1
PELVIC : 1
NURSING : 3
MELLITUS : 1
CARDIOVASCULAR : 1
PERIPHERAL : 1
DYSPNEA : 1
FOLLOWING : 3
OR : 17
IDENTIFIED : 2
LANGUAGE : 1
PRESCRIPTION : 1
TEMP : 4
YEAR : 5
SELF : 1
PATIENT : 31
BEACH : 1
BLEPHS : 1
COPY : 2
ACCEPT : 1
ALLERGIES : 8
WITHOUT : 1
DIAGNOSIS : 1
PULMONARY : 1
TRHE : 1
DING : 2
CONCERNS : 1
AAOX : 1
SENT : 1
BLEPHAROPLASTY : 1
LB : 4
REGULARLY : 1
COUMADIN : 1
AIR : 1
DE : 1
PCIOL : 1
CS : 1
SEEN : 3
ANXIETY : 1
EXPERIENCE : 1
ANCE : 1
THAN : 3
RARELY : 2
MAILED : 1
VOICE : 1
ACUTE : 2
NURSE : 1
MEMORY : 1
SENSATION : 1
SX : 1
BEULAH : 1
DESTINATION : 1
TOILET : 1
CLOPIDOGREL : 1
CHRONIC : 2
PROTOCOL : 1
SYND : 1
ANKLE : 1
TAKE : 6
AMARILLO : 1
CBI : 3
ROUTINE : 1
ROOM : 1
ANY : 10
DISCHARGE : 3
MYCOTIC : 1
THAT : 15
VISIT : 5
ADENOSINE : 1
INSTILL : 1
CHART : 1
OCCUR : 1
WIFE : 1
NORMAL : 3
MOISTURE : 3
STAFF : 2
RECORDS : 1
SERVICE : 3
AVAILABLE : 2
RIGHT : 8
PC : 2
OD : 1
VITALS : 2
HGBAC : 1
ABOUT : 4
ONE : 7
FACILITY : 2
GENOBESE : 1
LEVATOR : 1
DEFICIT : 1
PLEASANT : 1
NQUIRE : 1
NKA : 3
NAME : 3
NW : 1
PULLEYS : 1
1010M : 1
CARE : 5
TABLET : 3
LENS : 1
UNPL : 1
DURING : 1
SAT : 2
VOLUME : 1
FUNCTIONS : 1
EVERY : 4
YOU : 14
EVALUATE : 1
SEVERAL : 1
LISTED : 1
THROMBOSIS : 1
MORPHINE : 2
SKIN : 7
STUDIES : 1
TIMES : 1
WOMAN : 1
IS : 20
DL : 1
DOSES : 1
REACH : 1
NOT : 14
GETTING : 2
ISSUED : 1
RESPONDED : 1
REACTIONS : 1
JODY : 1
PAST : 9
DTN : 1
EQUAL : 2
OS : 1
DOCUMENT : 2
IF : 5
USER : 1
INTERESTED : 1
REASON : 2
THERE : 1
WALKING : 1
SCORE : 1
BIKE : 1
PNT : 2
CANCELLED : 1
TOBACCO : 1
PATEINT : 1
WRITE : 1
HIPS : 1
HERE : 2
ASKS : 1
UPSETTING : 2
CUSTOMIZED : 1
HOME : 7
NEVER : 2
SIX : 1
PENICILLIN : 2
SHELLY : 1
NOTED : 2
EXTRADEPTH : 1
DR : 1
SOCIAL : 2
HOSPITAL : 1
RECOMMENDATION : 1
ONEHALF : 3
SUICIDAL : 1
GLASS : 1
MODERATE : 1
MENTIONED : 1
PROGRESS : 2
RHYTHM : 1
FATAL : 1
EFFECT : 1
V4POST : 1
EITHER : 1
VITAL : 4
METHADONE : 1
SO : 1
DISPENSED : 1
MIN : 1
REGULAR : 1
VET : 1
RECONCILIATION : 2
LEARNER : 1
UPCOMING : 1
PND : 1
PACIFIC : 1
MINUTES : 2
AFF : 1
DROP : 1
OVERCOMPENSATION : 1
SPECIFY : 1
FOLLOWUP : 5
STENT : 1
HOWEVER : 1
DELTOID : 1
BACK : 2
SOURCE : 1
HEIGHT : 1
FX : 1
WEEK : 4
MALE : 1
VOIDED : 1
VIAL : 1
ADDENDUM : 10
CBOC : 1
BY : 11
APPROVED : 1
PAGED : 1
NO : 29
INTENSITY : 1
CLINICAL : 1
CONSCIOUSNESS : 1
DATA : 3
HEMOGLOBIN : 1
MOS : 1
PLASTIZOTE : 1
AM : 1
DOE : 1
CHIEF : 1
ENSURE : 1
CHANGED : 1
ENTERED : 1
OCCASION : 1
PLACEMENT : 1
DYSLIPIDEMIA : 1
UPPER : 1
SVT : 1
TH : 1
HEALTHCARE : 1
SPLENECTOMY : 1
REPORT : 4
RELEASED : 1
GUARDIANSHIP : 1
CLINIC : 6
SIGNED : 1
LEAST : 1
LETTER : 2
ELECTRONICALLY : 2
REFUSE : 1
CFA : 1
DONNIE : 1
HOW : 3
DELUSION : 1
POTENTIALLY : 1
PHQ : 2
HEMODYNAMICALLY : 1
SUPERVISION : 1
TOENAILS : 1
ARTERIAL : 1
EXPECTORATE : 1
SPECTACLE : 1
TCU : 1
SINCE : 2
DIDNT : 1
FLU : 2
DISCUSS : 2
TO : 52
CHANGE : 2
COUGH : 5
PNEUMONIA : 1
IV : 1
SOLN : 1
LEARN : 3
SPECIALTY : 1
MADE : 1
ION : 1
EYEDROP : 1
YRS : 1
LEARNING : 1
ENCOUNTER : 1
MONTHS : 4
SAFE : 1
PROCEDURE : 2
REQUESTING : 1
CAT : 1
MSK : 1
MRI : 1
WILL : 6
VENDOR : 1
OFTEN : 3
WARM : 2
APPEARANCE : 2
BUT : 3
MEASUREMENT : 1
EXISTS : 1
ASKED : 1
SSN : 1
THOUGHTS : 1
PATTERNS : 1
TYPE : 1
CAREGIVER : 1
ORIGIN : 1
BRIMONIDINE : 1
DATED : 1
PLASMA : 1
ASKING : 1
PNDS : 1
SET : 1
PLEASE : 1
CBC : 1
STATUS : 5
ALCAINE : 1
WHY : 1
JUDE : 1
MEDICATION : 6
BRUISING : 1
DIABETES : 1
BUMPS : 1
DRINKS : 1
NAD : 1
EFFECTIVE : 1
CONSULT : 1
TESTING : 1
BURSITIS : 1
COMFORT : 1
FRICTION : 1
CONTINUE : 1
TOTAL : 1
ABNORMAL : 1
NETWORK : 1
THROMBOS : 1
HME : 1
EXAMINATION : 1
ST : 1
TREATING : 1
SUCH : 1
HISTORY : 8
PROVIDE : 1
MEDGENERAL : 2
FAT : 1
SCREEN : 2
HOURS : 1
REACTION : 1
BARRIERS : 3
ASSIGNED : 1
REVIEW : 2
NEEDED : 3
RELATIONSHIPS : 1
HEALTH : 3
AMIODARONE : 1
ADD : 1
VTACH : 1
RATIVE : 1
WERE : 4
PLACED : 2
NORM : 1
REMIND : 1
COULDNT : 1
UA : 1
NOV : 3
INSTRUCTIONS : 2
NOTELEFT : 1
DEVELOOPED : 1
INDICATED : 2
VA : 4
HIP : 1
JOB : 1
TAKEN : 5
REASSESS : 1
EXCLUDING : 1
SITE : 1
OVERALL : 1
WED : 1
MATERIAL : 1
REFERRAL : 1
CONSESQUENCES : 1
APRIL : 1
MAR : 1
LODGING : 1
IRRIGANT : 1
KG : 3
HELPING : 1
MORE : 2
VS : 1
OP : 1
SL : 1
OWING : 1
MASK : 1
FAMILY : 2
WENT : 1
EYES : 1
PROBLEM : 3
PAIN : 25
DISEASE : 4
OCTOBER : 1
RECEIVE : 1
CLONAZEPAM : 1
REP : 1
WHEN : 1
BLUE : 2
RECORD : 1
ER : 1
AS : 7
FALLS : 1
DIZZINESS : 1
DIFFERENTLY : 1
REQUEST : 4
IMPOTENCE : 1
RN : 1
XYZZY : 2
CREATININE : 1
CORRECTION : 2
ADLS : 1
WARFARIN : 2
OUTPUT : 3
ABOVE : 2
GENITALIA : 1
WAS : 14
AST : 1
PM : 2
GREATER : 1
HEENT : 2
ANTICOAGULATION : 1
WITH : 15
TELEMETRY : 2
TINA : 1
AFTER : 4
FEELS : 1
PHENYLEPHRINE : 1
ADMISSION : 2
WORRIED : 1
PLS : 1
CONDITIONS : 1
AC : 3
PARTICIPANT : 1
HOOVER : 1
BOTTLES : 1
TEMPERATURE : 2
EMPLOYED : 1
HIV : 1
SIG : 2
ACTUAL : 1
COUPLE : 1
LESS : 2
BUILT : 1
EYEDIABETIC : 1
LUMBAR : 1
INCLUDING : 6
PCP : 2
NA : 1
INTACT : 1
FUTURE : 2
APPOINTMENTS : 4
SETTING : 1
WOUNDS : 1
APNEA : 1
CLIENT : 1
QUALITY : 1
SPECIFIC : 1
BEDTIME : 1
DENIES : 5
RF : 1
LIST : 2
PHARMACY : 1
IRWIN : 1
REQUESTED : 1
IMMUNIZATION : 1
STATEMENT : 1
NONFORMULARY : 2
VETERAN : 6
GLUCOSE : 1
CAPSULE : 1
PT : 11
PREVENTIONS : 1
MOVE : 1
ORGANIZED : 1
REPLIED : 1
TIME : 4
EAGER : 1
REMAINING : 1
TILTS : 1
CODE : 1
IRON : 1
RBC : 1
APR : 1
DRIVER : 1
AREA : 2
ORIENTED : 1
HYGIENE : 1
CURRENTLY : 1
ATTEMPT : 1
VIS : 1
NECK : 2
MISSED : 1
JOINT : 1
THICKNESS : 1
ALLERGY : 1
REPAIR : 1
DOCTOR : 1
CALL : 4
DID : 6
MOST : 1
RESIDES : 1
ILLNESS : 1
MEDICATIONS : 14
EXPRESSED : 1
FOLATE : 1
ADDRESS : 1
SITUATION : 1
TELEPHONE : 2
PSU : 1
AND : 40
BILATERAL : 1
HOUR : 1
UNSPECIFIED : 2
PATSY : 1
SOB : 1
URINARY : 1
IOP : 1
REPORTS : 5
VACCINE : 8
QD : 1
SUBJECTIVE : 2
COMMUNITY : 1
OPHTHALMOLOGY : 1
WORKED : 1
TABLETS : 2
PER : 6
EMERGENCY : 1
ANSWER : 1
BREATH : 2
CONTINUES : 1
YES : 2
COMPLE : 1
FRIEND : 1
RECENT : 2
NAIL : 1
NOTICED : 1
MOBILITY : 2
IN : 28
KNOWLEDGE : 1
LOW : 1
ADMINISTERED : 1
WHOM : 1
FOLLOWED : 1
MAY : 1
YOUR : 3
MANAGEMENT : 1
VARDENAFIL : 1
STATE : 2
DOING : 1
GIVEN : 3
PLAN : 1
UNSURE : 1
VACCINATION : 1
GROIN : 2
TAKING : 2
WHO : 1
HT : 1
ADMITTED : 2
ED : 3
MISSOULA : 1
MUC : 1
PERIOD : 1
QUALIFIERS : 1
DELETED : 1
PATHOLOGY : 1
PHYSICIAN : 11
DONE : 1
ATENOLOL : 1
PHYSICAL : 3
CURRENT : 5
PERSONS : 1
NIGHT : 1
CONTROL : 2
WI1010M : 1
TEAR : 1
CP : 1
SGOT : 1
ACTIVE : 18
HIM : 6
KNOW : 1
REFLEXES : 1
PULSE : 3
HE : 23
NEXT : 1
BUEG : 1
NEEDS : 3
FILTER : 1
BEHAVIOR : 1
RATE : 2
PROFILE : 1
NEUROPATHY : 1
ACCEPTED : 1
COMPLETED : 1
SEASON : 1
ILIAC : 1
IMPRESSION : 2
ADJ : 1
FRIGHTENING : 1
IMPORTANT : 1
THIS : 8
OBSERVATION : 1
EVEN : 1
HIGH : 1
LIMITATIONS : 1
ML : 1
PHONE : 3
CLEAR : 6
SIGNAL : 1
NATIVE : 1
RESPONSES : 1
PRIMARY : 3
LAST : 10
AOX : 1
EDUCATION : 3
HOLD : 1
HAD : 4
MULTIDOSE : 1
SIGNS : 4
UCINATION : 1
ORTHOPNEA : 1
MATURE : 1
DEPARTMENT : 1
ADR : 3
SPECIAL : 2
PATIENTS : 4
SESSION : 1
STATES : 3
OCCUPATIONAL : 1
TRUCK : 1
PROVIDED : 2
SUPPER : 1
DRINK : 1
PAKALNIS : 1
OU : 1
YO : 3
MELENA : 1
GRIN : 1
NEGATIVE : 2
OUR : 1
PHARYNGITIS : 1
DENSE : 1
TWO : 3
WRITTEN : 2
NONE : 4
CFILE : 1
LIMITS : 1
DECREASED : 1
CONNECTED : 1
LAB : 2
LESIONS : 1
ICDCM : 5
WAIT : 1
FIRST : 1
RESP : 3
THE_WERE : 1
TO_PT : 2
OCCUPATIONAL_PROGRESS : 1
PROBLEM_OTHER : 2
FLU_HAS : 1
TABLET_BY : 3
TO_HERSELF : 1
BENEFITS_OF : 1
HAVE_PHYSICIAN : 1
RECENT_LEFT : 1
STATE_COMMENT : 1
OR_CARPAL : 1
FOR_ANY : 1
ACUTE_ANY : 1
OFTEN_HAVE : 1
COMPLE_COUGH : 1
DRINKS_ON : 1
THE_MISSOULA : 1
EXTRADEPTH_SHOES : 1
STATE_PAIN : 1
PRESCRIPTION_BE : 1
BEEN_DENSE : 1
HAS_MISSED : 1
PCP_DISCUSS : 1
DOPPLER_AND : 1
MEDICAL_ASSIGNED : 1
OR_CONTACT : 1
CAROTID_STUDIES : 1
DECREASED_TO : 1
TABLETS_CAN : 1
TAKING_YOUR : 1
YOUR_BOTTLES : 1
HAS_DECIDED : 1
OF_DISCHARGE : 1
VACCINATION_INFORMATION : 1
DATA_AVAILABLE : 1
CLEAR_ADDENDUM : 1
LUMBAR_PAIN : 1
HEART_RATE : 1
DOSING_HOW : 1
MEDICATIONS_PHONE : 1
CODE_WITHIN : 1
TO_OVERCOMPENSATION : 1
FACILITY_SIGNS : 1
HE_CBI : 1
EQUAL_BILATERALLY : 2
ENSURE_SAFE : 1
FOR_HEART : 1
IS_CARDIOVASCULAR : 1
NOV_ATIVAN : 2
SUPPER_LAST : 1
GIVEN_VACCINATION : 1
QD_NEURO : 1
SESSION_MATERIAL : 1
THE_ACTIVE : 1
MYDRIACYL_ADDENDUM : 1
THIS_ADDENDUM : 1
LEFT_DELTOID : 1
RESPOND_VALENTINE : 1
INCLUDING_SUPPLIES : 4
FOR_FOR : 1
PATIENT_INFLUENZA : 2
TAB_SIG : 1
PAIN_INTENSITY : 1
MOUTH_EVERY : 2
OUTSIDE_THIS : 1
UP_COUPLE : 1
OCCASION_PLS : 1
MOIST_TEMP : 1
RATIVE_NEURO : 1
ADDENDUM_OVER : 1
SC_ED : 1
MADE_NO : 1
WAS_ABOUT : 1
REASSESS_FUTURE : 1
CAT_SURGERY : 1
ANCE_AND : 1
IRON_VOLUME : 1
FALLS_REASSESS : 1
LEVEL_NONPRODUCTIVE : 1
TO_AWAKE : 1
MONTHS_AGO : 2
PHYSICIAN_ION : 1
STABLE_ASSISTANCE : 1
THE_KNEE : 1
TWO_AS : 1
COMMUNITY_FOR : 1
OF_SPECIAL : 1
REQUEST_CONSULT : 1
OF_HIS : 2
WILL_ADMITTED : 1
DONNIE_ROBERSON : 1
BOTHERED_ANY : 1
YOUR_CLINIC : 1
COUGH_ION : 1
PT_NOTICED : 1
WHO_SERVED : 1
THE_PATIENT : 1
YOU_EVERY : 1
MORE_ON : 1
DENSE_CATARACT : 1
IS_SENT : 1
THROMBOSIS_IF : 1
ASPIRIN_OUTPATIENT : 1
GIVEN_INFORMATION : 1
DISEASE_PROCEDURE : 1
CC_PATTERNS : 1
ICDCM_STATIONARY : 1
LEG_FOR : 1
LAST_SESSION : 1
WELL_BUILT : 1
PT_NOT : 1
DEFICIT_MOISTURE : 1
HAVE_AND : 1
HIV_DXD : 1
REVIEWED_REGULARLY : 1
MAILED_PATIENT : 1
SOAPE_BACK : 1
FOR_PULSE : 1
NO_AND : 1
EYE_DROPS : 1
REFERRAL_DIAGNOSIS : 1
THE_ORDERS : 1
NONFORMULARY_IS : 1
SAT_VOLUME : 1
MEDICATION_IS : 1
KG_ACTIVE : 1
KG_OF : 1
STATIONARY_DAILY : 1
MARCH_TH : 1
HORRIBLE_UPSETTING : 2
HE_WAS : 2
SON_IS : 1
LENS_WILL : 1
ORDERS_WERE : 1
ACUTE_ICDCM : 1
FOR_OF : 2
BARRIERS_HIS : 1
BOTHERED_BY : 1
PATIENT_DENIES : 1
SHOULD_HIM : 1
ERE_WILL : 1
PT_URINARY : 1
PNDS_ORTHOPNEA : 1
CONTACT_GIVEN : 1
NO_HE : 1
UE_MSK : 1
FAMILY_IS : 1
NO_REACH : 1
WAS_REVIEWED : 2
PAST_MEDICAL : 2
AOX_YOU : 1
YELLOW_SOCIAL : 1
RIGHT_REFERRAL : 1
ONE_YEAR : 1
OUTPATIENT_EXCLUDING : 1
LETTER_HAS : 1
REPORTS_THAT : 1
BILATERALLY_MG : 1
HE_DEVELOOPED : 1
NEGATIVE_SCREEN : 1
BEEN_ACCORDING : 1
IMPRESSION_THAT : 1
YOU_PROGRESS : 1
ONEHALF_BY : 1
IMPORTANT_QUALITY : 1
WITH_DOPPLER : 1
TO_TAKING : 1
BY_PATIENT : 1
OPEN_SKIN : 1
HEART_PRESSURE : 1
SAME_HE : 1
JODY_YO : 1
YES_CLEAR : 1
ASSIST_AWARE : 1
VACCINE_HAS : 1
NEEDS_AC : 1
HER_OF : 1
OUTPATIENT_STATUS : 2
HE_RECEIVED : 1
THE_PATIENTS : 2
APPOINTMENTS_TARTRATE : 1
TAKEN_LAB : 1
HE_ADMITTED : 1
OF_ORIGIN : 1
NEEDED_ED : 1
SOUNDS_AIR : 1
CS_PT : 1
FOR_ED : 1
PATIENT_REPORTS : 2
BATHING_OF : 1
SHE_BE : 1
PILL_WITH : 1
PAIN_COUGH : 1
TAB_ONE : 1
TARTRATE_OPH : 1
TO_LETTER : 1
MONTH_THEN : 1
ONE_MONTH : 1
REGULARLY_OUTOF : 1
UA_CS : 1
MAR_NEEDS : 1
INCLUDING_RECURRENCE : 1
CV_CHEST : 1
STATEMENT_BATHING : 1
MIN_TIBIAL : 1
STRIP_STRIP : 1
MONTHS_RN : 1
HEMOGLOBIN_AC : 1
ISSUED_MIC : 1
REFILL_OF : 1
EVERY_PLASMA : 1
VETERAN_REQUESTING : 1
FEMALE_VETERAN : 1
USE_ACTIVE : 1
HE_DENIES : 2
IN_HE : 1
DENSE_MATURE : 1
PAIN_PT : 1
PAIN_SURGERY : 1
NEW_HAVE : 1
ANY_HAS : 1
ENSURE_AND : 1
MELENA_HE : 1
RF_SECURITY : 1
PREVENTION_WAS : 1
KG_PARTICIPANT : 1
PATIENT_WILL : 1
FOREIGN_REMOVAL : 1
AWARE_HE : 1
PROVIDED_GENITALIA : 1
REPORT_IN : 1
SIGNIFICANT_LEVEL : 1
ALLERGIES_LOCATION : 1
HISTORY_TO : 1
APPLY_REFILLS : 1
ORGANIZED_TO : 1
THE_BEFORE : 1
COLOR_YELLOW : 1
OR_OTHER : 1
PRIVATE_FACILITY : 1
FOR_REMOVAL : 1
ROUTINE_REPORTS : 1
TWO_AND : 2
CBI_CBI : 1
AFF_ACTIVE : 1
FALLS_AT : 1
OPHTHALMOLOGY_PHYSICAL : 1
IF_ORDERS : 1
IN_ND : 1
FACILITY_VITAL : 1
IN_OR : 1
OUTPATIENT_HEALTH : 1
DISEASE_OR : 1
REVIEWED_AND : 2
THAT_SO : 1
CARE_IMPRESSION : 1
OU_OBSTRUCTIVE : 1
RECURRENCE_DING : 1
PHQ_OF : 1
DONE_ON : 1
HIM_SINCE : 1
FASTING_WEEK : 1
REQUEST_IN : 1
YEAR_AND : 1
CHART_EMERGENCY : 1
TO_ADMINISTRATION : 1
NEEDED_PATIENT : 1
TO_CONSTANT : 1
MORPHINE_ASPIRIN : 2
TAB_STATUS : 1
MADE_CONTACT : 1
CAPSULE_MOUTH : 1
SEARIGHT_JODY : 1
ON_PAIN : 1
OF_HOME : 1
DRINKS_ONE : 1
CBI_ML : 1
CAP_ONE : 1
MORE_DRINKS : 1
TARTRATE_SOLN : 1
CLONAZEPAM_MG : 1
TELL_HIM : 1
INCREASED_KNEE : 1
OR_WORSENING : 1
HIS_BEHAVIOR : 1
CLINIC_ACCEPTED : 1
ANSWERED_OTHER : 1
HOME_WITH : 1
EITHER_PATIENT : 1
ALCAINE_PHENYLEPHRINE : 1
KNEE_AFTER : 1
SECURITY_CFILE : 1
REPAIR_PERSONS : 1
AICD_JUDE : 1
OBSTRUCTIVE_ACTIVE : 1
FA_HAS : 1
COUNSELING_SGOT : 1
AWARE_HAD : 1
WITH_NO : 1
AND_PRODUCTIVE : 1
AS_PER : 3
RECONCILED_THE : 1
PREVENTIVE_AND : 1
MODERATE_HISTORY : 1
SPECIALTY_IN : 1
INCREASED_NO : 1
MENTIONED_MAY : 1
WHEEZING_OR : 1
RIGHT_OF : 1
FOR_IOP : 1
CORRECTION_THE : 1
TO_VALENTINE : 1
BP_ON : 1
NOTE_YEAR : 1
LESIONS_WOUNDS : 1
LEVEL_ASSISTANCE : 1
IDENTIFIED_OTHER : 2
MG_TABS : 1
RESPIRATORY_SHORTNESS : 1
PROCEDURE_PAKALNIS : 1
PREVENTIVE_HEALTH : 1
SPECIFY_MEDICATION : 1
WENT_ON : 1
WI1010M_BP : 1
NO_ASSESSMENT : 1
NO_DELUSION : 1
OF_BEHAVIOR : 1
DISPENSED_TO : 1
REVIEWED_INCREASED : 1
REPLIED_SAID : 1
AM_CURRENT : 1
DENIES_ABNORMAL : 1
IS_THE : 1
USE_STRIP : 1
SIG_TAKE : 1
PROVIDERS_DERMATOPHYTOSIS : 1
PT_BY : 1
PATIENT_CAREGIVER : 1
WITH_ALL : 1
RANGE_REACTION : 1
HAVE_THOUGHTS : 1
THE_OUTPATIENT : 1
ALERT_OX : 1
OTHER_COUNSELING : 2
ANY_QUESTIONS : 1
TEAR_OVERHEAD : 1
FROM_PRIVATE : 1
DO_ACTIVE : 1
DICYCLOMINESTATED_WRITTEN : 1
ORGANIC_ORIGIN : 1
LIST_REPORT : 1
WORRIED_THIS : 1
CHRONIC_OBSTRUCTIVE : 1
PATIENT_INDICATED : 2
CHRONIC_OF : 1
CAREGIVER_VACCINATION : 1
SUBJECTIVE_NEVER : 1
CYST_REMOVAL : 1
REQUESTING_THAT : 1
IN_ACTIVE : 2
STATES_VEIN : 1
KNOW_MEDGENERAL : 1
THIS_SPECIFY : 1
DING_BRUISING : 1
NQUIRE_THIS : 1
INSTRUCTIONS_SIGNED : 1
BID_PRIMARY : 1
OCTOBER_SOURCE : 1
OR_BENEFITS : 1
PNEUMONIA_VACCINE : 1
PRIOR_ADMINISTRATION : 1
MARCH_RELEASED : 1
TO_WAIT : 1
CLINIC_ORIENTED : 1
PHENYLEPHRINE_ADDENDUM : 1
UNPL_ED : 1
PHQ_WEIGHT : 1
ION_AND : 1
PRESENT_ILLNESS : 1
THE_INCLUDING : 1
APPLY_LAST : 1
LEG_INACTIVATED : 1
OR_MORE : 1
THOUGHTS_OF : 1
WAS_ADMITTED : 1
URINE_TOTAL : 1
REMAINING_AFTER : 1
SVT_VIA : 1
LAST_RN : 1
DISEASE_HANDOUT : 1
INFECTION_PASS : 1
IN_PURSUING : 1
AFTER_FIRST : 1
NUMBER_CLEAR : 1
NL_FOLATE : 1
YOUR_WARFARIN : 1
COUNSELING_AST : 1
FOR_ONE : 1
AND_ONEHALF : 2
BACK_AND : 1
ONE_AND : 1
RAPID_IV : 1
DURING_THIS : 1
NONVA_MEDICATIONS : 2
FOR_VISIT : 2
NEVER_PREVENTIONS : 1
DATE_VITAL : 1
RESP_THERAPY : 1
EYEDIABETIC_FOLLOWUP : 1
THERAPY_PULSE : 1
ED_ER : 1
PER_FROM : 1
RESIDES_IN : 1
FOR_MONTH : 1
YOUR_DIFFERENTLY : 1
USES_READING : 1
PHYSICAL_HAS : 1
THROMBOSIS_YOU : 1
SAT_RA : 1
IS_VETERAN : 1
OFTEN_YOU : 3
THE_CHEST : 1
OD_OS : 1
THE_RECONCILIATION : 1
PAST_HOW : 1
NO_PROBLEM : 1
DOPPLER_BP : 1
INPATIENT_OUTPATIENT : 2
LEFT_EXTRADEPTH : 1
IS_ACUTE : 1
REPORT_WRITTEN : 1
PHYSICIAN_ANCE : 1
PAST_LAST : 1
APPEARANCE_CLEAR : 1
VITALS_TAKEN : 2
PROCEDURE_RECURRENCE : 1
SESSION_THIS : 1
BOTTLES_YOU : 1
FAMILY_HISTORY : 1
IN_TCU : 1
NOTE_AC : 1
IN_GETTING : 1
LIST_AND : 1
PACIFIC_HEALTHCARE : 1
MG_RAPID : 1
NO_UCINATION : 1
ALERT_VISIT : 1
URINE_ML : 1
OF_HURTING : 1
CORRECTION_WILL : 1
HERSELF_AND : 1
NO_SYMPTOMS : 1
PAIN_LAST : 1
CALL_DTN : 1
COMFORT_GLUCOSE : 1
ORIENTED_RELATIONSHIPS : 1
NEED_NEW : 1
INDICATED_WAS : 1
FOLLOWUP_WITHOUT : 1
CURRENT_PC : 1
MOUTH_ACTIVE : 2
HOW_HAVE : 1
WITH_INSERTS : 1
THAT_PER : 1
VETERAN_ADDENDUM : 1
YOU_RECEIVE : 1
HAD_OF : 1
PROVIDER_SEARIGHT : 1
NO_ANXIETY : 1
HIPS_NURSING : 1
AS_NEEDED : 1
HE_WELL : 1
SERVICE_TH : 1
PROBLEMS_SPECIAL : 1
PHYSICAL_ACTIVITY : 1
IS_REVIEWED : 1
HOWEVER_VACCINE : 1
PAIN_RIGHT : 1
THAT_OF : 1
BY_THE : 1
IMPOTENCE_ORGANIC : 1
MOST_RECENT : 1
DELTOID_OUTPATIENT : 1
TO_TO : 2
PAGED_NQUIRE : 1
ON_ALLERGIES : 1
NEW_CHANGED : 1
FOR_PATIENT : 1
OR_DOCUMENT : 1
HAVE_OR : 1
IRON_SAT : 1
HAVING_PAIN : 1
TELEMETRY_ADENOSINE : 1
FOR_TO : 1
REMOVAL_THERAPY : 1
BE_HER : 1
WAS_ENCOURAGE : 1
REACTION_NONE : 1
ID_FASTING : 1
BEEN_BOTHERING : 1
NORMAL_SURGERY : 1
EDUCATION_VACCINE : 1
NEED_MASK : 1
EXTRADEPTH_WITH : 1
TO_DOCTOR : 1
HANDOUT_POST : 1
MONTHS_REVIEWED : 1
PAIN_WALKING : 1
VITAL_SIGNS : 3
PATIENT_DOING : 1
OS_FROM : 1
LESS_LUMBAR : 1
ANEURYSM_ICDCM : 1
UNSURE_IF : 1
USER_REPORTS : 1
OXIMETER_NO : 1
THE_LEARNING : 1
VET_AND : 1
PAKALNIS_THE : 1
WOMAN_ME : 1
EFFECT_ON : 1
EPISODE_PATIENT : 1
OCTOBER_OF : 1
COMMENT_PHYSICAL : 1
VACCINE_BEEN : 1
EXPRESSED_TO : 1
PND_PALPITATIONS : 1
PATSY_DESTINATION : 1
PT_PHONE : 1
HAS_NOTICED : 1
ADDENDUM_MOISTURE : 1
BUILT_DEVELOPED : 1
BEHAVIOR_AND : 1
DONE_CHIEF : 1
MEDICATIONS_HERE : 1
EXCLUDING_IS : 1
NO_VITALS : 1
SHOULD_ALLOW : 1
OPH_INSTILL : 1
ILLNESS_PATIENT : 1
REQUIRE_YOU : 1
SIGNIFICANT_HYPERTHYROIDISM : 1
ON_WEEKEND : 1
NONPRODUCTIVE_FEELS : 1
SOME_GROIN : 1
CHAMBER_ST : 1
COVER_NOTE : 1
BEDTIME_CLONAZEPAM : 1
CARE_CBOC : 1
HISTORY_EYEDIABETIC : 1
APRIL_VETERAN : 1
AND_BILATERALLY : 1
MEDICATIONS_NURSE : 1
ANXIETY_NO : 1
VACCINE_THE : 1
OF_PRESENT : 1
TELEPHONE_NOTE : 1
TO_HIM : 1
TO_LEARN : 3
PAIN_FOR : 1
BP_WT : 1
REMOVAL_WEIGHT : 1
INTENSITY_OCTOBER : 1
QUESTIONS_ANY : 1
HERE_PSYCHOLOGY : 1
VISIT_FOR : 1
NIGHT_HE : 1
ADLS_COLOR : 1
STATUS_WI1010M : 1
THIS_STENOSIS : 1
TAB_TID : 1
BEFORE_BEFORE : 1
ASSESSED_ICDCM : 1
OR_LENS : 1
VARDENAFIL_TAB : 1
VOIDED_PATTERNS : 1
NOT_PASS : 1
THICKNESS_OVERHEAD : 1
AT_LEAST : 1
HEALTH_AND : 1
WHY_CONTROL : 1
HE_INCREASED : 1
ARE_YOUR : 1
PATIENT_NUMBER : 1
RECORDS_IS : 1
AGO_SUBJECTIVE : 1
FROM_SERVICE : 1
SOUNDS_ROOM : 1
THAT_HAVE : 1
PAST_HEMOGLOBIN : 1
SITUATION_IS : 1
LEG_PREVENTIONS : 1
FRIGHTENING_OR : 1
WAS_ME : 1
NEEDED_SIGNATURE : 1
BRUISING_HAS : 1
NORM_COUGH : 1
NONPRODUCTIVE_WARM : 1
POST_CARE : 1
APPARENT_CURRENT : 1
PATIENT_CC : 1
PER_RECORD : 1
DRINK_CONTAINING : 1
PROVIDER_VISITS : 1
DROPS_ALCAINE : 1
REASSESS_AT : 1
VEIN_THROMBOS : 1
PCP_TO : 1
SENSATION_VARDENAFIL : 1
CLINIC_LOCATION : 1
EXPERIENCE_THAT : 1
VIA_DO : 1
YELLOW_CLEAR : 1
AND_WAS : 1
ANY_IN : 1
READING_NEED : 1
GET_PT : 1
VEIN_ACTIVE : 1
MEDGENERAL_NOTE : 2
DECREASED_FUNCTIONS : 1
ID_PRESENTS : 1
SUPERVISION_SET : 1
REQUEST_INTERESTED : 1
IF_SHOES : 1
RATE_REGULAR : 1
CLEAR_UNLABORED : 1
ORIGIN_ICDCM : 1
TINA_METHADONE : 1
PROBLEMS_NO : 1
RA_PAIN : 1
PULSE_PELVIC : 1
COLOR_BREATH : 1
NOT_PATIENT : 1
ADMINISTRATION_OF : 1
SOME_RIGHT : 1
IN_OF : 1
RESP_ACUTE : 1
PC_PROVIDER : 1
HE_MODERATE : 1
HERE_HIS : 1
FOR_CAREGIVER : 1
BARRIERS_EDUCATION : 1
SL_TO : 1
STRIP_ACTIVE : 1
REQUEST_PRESCRIPTION : 1
DATA_PT : 1
NO_DIZZINESS : 1
BID_IOP : 1
VPA_MG : 1
REQUEST_FOR : 1
MG_EC : 2
PRIVATE_VITAL : 1
IOP_VITAL : 1
MONTH_WAS : 1
YELLOW_TELEMETRY : 1
SIGNED_COPY : 1
IN_KNEE : 1
THIS_MEDICAL : 1
HEART_BLOOD : 1
HEPATITIS_OF : 1
ANY_THAT : 1
PATIENT_BE : 1
PT_NO : 1
TEMPERATURE_DONNIE : 1
SIG_REFILLS : 1
THAT_DO : 1
NO_OPEN : 1
IS_ABOUT : 1
TO_HAVE : 1
DE_RATIVE : 1
ONLY_SAID : 1
COMFORTABLE_AOX : 1
NOTELEFT_KNEE : 1
IDENTIFIED_PROBLEM : 2
ED_ELECTRONICALLY : 1
AND_NOTE : 1
HAD_AND : 1
PHYSICIAN_ABOUT : 1
LAST_BECAUSE : 1
HOME_TO : 3
WITH_SIGNIFICANT : 1
LEFT_HIP : 1
THAT_BECAUSE : 1
ASSISTANCE_ADLS : 1
THE_SETTING : 1
MG_SIG : 1
HE_CURRENT : 1
OR_LEFT : 1
EQUAL_OMEPRAZOLE : 1
TUNNEL_SYND : 1
SUPPLIES_YO : 1
FUTURE_TESTS : 1
GIVEN_DURING : 1
HE_NOT : 2
ADDENDUM_THE : 1
HERSELF_GETTING : 1
TAKE_BY : 1
COMPLAINT_IN : 1
NO_MEDICATION : 1
MSK_DISEASE : 1
OVERALL_HIS : 1
HAS_CHRONIC : 1
ONYCHOMYCOSIS_NAIL : 1
KNOWLEDGE_DEFICIT : 1
NA_NOT : 1
TEMP_PAIN : 1
CARE_NEED : 1
REMOVAL_PHQ : 1
MEDICATION_MANAGEMENT : 1
TENDINOPATHY_OF : 1
NA_DID : 1
CARE_PROVIDER : 1
YO_VETERAN : 1
OR_BRUISING : 1
APPOINTMENTS_TESTS : 1
FAT_THE : 1
YOU_BE : 1
BY_ANY : 1
ACTUAL_IN : 1
XYZZY_TO : 1
TEAR_PULLEYS : 1
HISTORY_FOLLOWUP : 1
WIFE_DESTINATION : 1
HE_DID : 1
BUT_WILL : 1
YELLOW_FAMILY : 1
NO_SPECIAL : 1
FOLLOWING_NONFORMULARY : 1
ONE_NOT : 1
IF_FOREIGN : 1
UP_STAND : 1
IN_RIGHT : 2
IS_ALERT : 1
SO_FRIGHTENING : 1
ABOVE_KNEE : 1
PHYSICIAN_DOING : 1
NO_QUESTIONS : 1
PREVIOUSLY_COMPLETED : 1
NO_ORTHOPNEA : 1
VETERAN_SERVED : 1
RIGHT_DONE : 1
FOR_BEDTIME : 1
AND_OF : 1
SHORTNESS_OF : 1
QD_REFLEXES : 1
WILL_NOT : 1
CHANGED_NONVA : 1
CONTACT_AND : 1
URINE_AND : 1
ADDENDUM_INFLUENZA : 1
CLINIC_VISIT : 1
CLEAR_AND : 1
BEEN_PATIENT : 1
CFA_DO : 1
AWAKE_ALERT : 1
CARDIOVASCULAR_REVEALS : 1
HISTORY_PATIENT : 1
PT_FOR : 1
INFLUENZA_RECEIVED : 1
HIP_BURSITIS : 1
HE_NEED : 1
EPISODE_STATES : 1
AND_LOWER : 1
TOENAILS_OR : 1
SUPPLIES_IS : 1
COMMUNITY_DOCTOR : 1
BILATERALLY_TCM : 1
ONE_TIME : 1
SIGNATURE_REQUIRED : 1
MEDICATION_REVIEW : 1
PHYSICIAN_EYES : 1
QUESTIONS_FUTURE : 1
REQUIRE_TO : 1
LAST_YEAR : 1
FOR_THAN : 1
SAME_ALLERGIES : 1
OUTPATIENT_INCLUDING : 4
EYE_ADMINISTERED : 1
DID_YOU : 2
HAS_HISTORY : 1
PROM_OF : 1
CHANGE_OUTPATIENT : 1
WT_LB : 2
ANXIETY_SUICIDAL : 1
AND_GETTING : 1
PAIN_COULDNT : 1
CARE_NO : 1
MEDICATIONS_EXCLUDING : 1
NOTED_YOU : 1
OF_STATE : 1
TEST_USE : 1
OF_UPCOMING : 1
REPORT_HE : 1
REVIEWED_WITH : 1
MATERIAL_REVIEWED : 1
LAST_THIS : 1
NO_CONTACT : 1
KG_NONVA : 1
YOU_BEEN : 2
HER_HE : 1
DATE_MEASUREMENT : 1
PLEASANT_AND : 1
POTENTIALLY_REACTIONS : 1
RF_SOCIAL : 1
MED_TO : 1
LAST_ADD : 1
PM_HOW : 1
INFLUENZA_THE : 1
BEDTIME_NEUROPATHY : 1
RIGHT_AND : 2
YOU_BOTHERED : 1
JODY_HIS : 1
CARE_VENDOR : 1
OCCUR_OF : 1
TO_TOILET : 1
PLASTIZOTE_NO : 1
REFERENCE_THE : 1
MULTIDOSE_THE : 1
PM_RESPONSES : 1
LEFT_FX : 1
IS_SCREEN : 1
ENTERED_ACTIVE : 1
BP_SAT : 1
UNPL_ER : 1
CUEING_BY : 1
SOB_NO : 1
REMAINING_PATIENT : 1
PM_OFTEN : 1
PROBLEM_CURRENT : 1
WAS_PROVIDED : 1
PHQ_SCORE : 1
BUEG_ALERT : 1
OF_AGO : 1
PT_ID : 1
ACTIVE_AND : 2
NO_BP : 1
OVERCOMPENSATION_TEAR : 1
NURSING_LAST : 1
INR_IS : 1
SIG_ONEHALF : 1
BECAUSE_THAT : 1
NOT_ORDER : 1
ACTIVE_OUTPATIENT : 5
UP_WITH : 1
SELF_EMPLOYED : 1
NKA_PNT : 1
AND_CS : 1
THAT_HIS : 1
FOLLOWING_LEARNING : 1
CHIEF_PAIN : 1
OF_EYE : 1
TO_IS : 1
WERE_NEGATIVE : 1
CAP_TAKE : 1
OF_CURRENT : 2
SUICIDAL_IDEATION : 1
NONFORMULARY_HAS : 1
CONCERNS_NOTED : 1
NURS_SOAPE : 1
PRODUCTIVE_TWICE : 1
PAIN_REPORTS : 1
WENT_WEEKEND : 1
ED_DOCUMENT : 1
FOR_NONFORMULARY : 1
UPSETTING_THAT : 1
TELEMETRY_CHARACTER : 1
PHYSICIAN_NORM : 1
NOT_UP : 1
THEN_FOUR : 1
PHARMACY_WITH : 1
PAIN_PNT : 1
PATIENTS_TELEPHONE : 1
OR_THAT : 1
BY_REPORT : 1
ON_RA : 1
TO_HIPS : 1
PLACED_FOR : 1
THIS_FLU : 1
WORSENING_SINCE : 1
AS_ONE : 1
UNLABORED_RATE : 1
VETERAN_HIV : 1
CBOC_DEPRESSION : 1
COMFORTABLE_YOU : 1
SKIN_COUGH : 1
RELEASED_FROM : 1
TO_LEARNER : 1
OF_READINESS : 1
BUT_NOT : 1
EMERGENCY_COVER : 1
NOT_ASKS : 1
TO_EXPRESSED : 1
AMARILLO_PROVIDERS : 1
ER_VISITS : 1
CS_DENIES : 1
ATENOLOL_MG : 1
PM_RANGE : 1
OF_DOSING : 1
HOWEVER_FLU : 1
THE_SHOULDER : 1
DATA_IS : 1
TO_MEDICATIONS : 1
NAD_IMPRESSION : 1
AMBULATE_TOILET : 1
MYCOTIC_COUNTER : 1
EVERY_ACTIVE : 1
CHEST_OR : 1
HAS_IN : 1
HOME_PHQ : 1
BOWEL_SOUNDS : 1
INITIAL_RESP : 1
NAME_MALE : 1
PLAN_WENT : 1
DENIES_URINARY : 1
INSTRUCTIONS_TO : 1
DATED_BEEN : 1
ASKING_REFILL : 1
BEEN_REEXAMINED : 1
THOUGHTS_HURTING : 1
TENDINOPATHY_PROM : 1
REASON_VISIT : 2
TO_HOME : 1
ADMITTED_THE : 1
NEEDS_ASSESSMENT : 1
YEAR_CLINIC : 1
NO_NAME : 1
PAIN_PND : 1
TELEPHONE_PHQ : 1
HAS_THE : 1
INCLUDING_ACUTE : 1
RECEIVED_TO : 1
CHARACTER_CLEAR : 1
ADDENDUM_PATIENT : 1
SIGNATURE_NOT : 1
ND_WITH : 1
IF_YOU : 1
DUAL_CHAMBER : 1
CONTAINING_ALCOHOL : 1
SOME_WAS : 1
BY_DONNIE : 1
VETERAN_WENT : 1
TWICE_FOR : 1
CLOPIDOGREL_USE : 1
AA_OR : 1
CONTINUES_TO : 1
PNEUMONIA_GIVEN : 1
HIS_YO : 1
NORMAL_PAIN : 1
PO_TID : 1
AFTER_OWING : 1
EITHER_HERE : 1
SIGNS_SYMPTOMS : 1
ANSWER_CARE : 1
MOS_HORRIBLE : 1
GLASS_ADJ : 1
RA_LEVEL : 1
VETERANS_NUMBER : 1
FAT_OF : 1
ON_THE : 1
ONEHALF_TABLETS : 2
CLINIC_WAS : 1
DOPPLER_STUDIES : 1
ON_LAST : 1
REFLEXES_MSK : 1
DENIES_OF : 1
NOT_MISSED : 1
WEEK_BEFORE : 2
ALL_HIS : 1
BURSITIS_CANCELLED : 1
BECAUSE_HE : 1
AND_ARE : 1
OF_YOURSELF : 1
REVIEWED_RECONCILED : 1
OF_THE : 4
PAIN_GROIN : 1
LUMBAR_KNEE : 1
LEVEL_CONSCIOUSNESS : 1
NOTE_MOISTURE : 1
REVIEWED_WT : 1
NECK_HAS : 1
VISIT_BEDTIME : 1
RECEIVED_PLACEMENT : 1
YOUR_PILL : 1
NO_HYPERTHYROIDISM : 1
WEST_BEACH : 1
IS_ASSIGNED : 1
DISCUSS_HAVE : 1
VALENTINE_HE : 1
NOTICED_BUMPS : 1
ACTIVE_MENTIONED : 1
ADDENDUM_CARE : 1
RATE_ADENOSINE : 1
PATIENT_PAIN : 1
AT_INITIAL : 1
SHELLY_DID : 1
ALLERGY_ARIPIPRAZOLE : 1
PHYSICAL_DATED : 1
KNOWLEDGE_MOISTURE : 1
HAS_NOT : 1
EYES_RADIAL : 1
EFFECT_THE : 1
CM_CV : 1
AWAKE_AND : 1
HME_THIS : 1
CORRECTION_NOT : 1
TO_NEXT : 1
IER_THIS : 1
CURRENTLY_INPATIENT : 1
STATES_HE : 1
NONFORMULARY_MEDICATION : 1
IN_ENDERLIN : 1
HAS_REQUESTED : 1
DROP_ACTIVE : 1
WAS_TO : 1
IS_QUALITY : 1
REPORT_THAT : 1
AND_REVIEWED : 1
PRIMARY_YEARS : 1
CONNECTED_MOBILITY : 1
RIGHT_HE : 1
MEDICATIONS_AND : 1
NO_TO : 2
APPOINTMENT_FOR : 1
DRUG_HAS : 1
SUPPLIES_WAS : 1
WELL_NIGHT : 1
IN_VIA : 1
MG_TAKE : 3
AND_DOCUMENTED : 1
LOCATION_PROVIDERS : 1
PERIPHERAL_DISEASE : 1
AND_TELL : 1
BY_AT : 1
RELEASED_ACTIVE : 1
BLEPHAROPLASTY_ENDOBROW : 1
DISEASE_OUTPATIENT : 1
WALKING_STATES : 1
MEASUREMENT_CODE : 1
CALL_CLINIC : 1
LEG_CYST : 1
REFLEXES_UE : 1
ENTERED_SERVICE : 1
WITH_FIANC : 1
APPOINTMENTS_BRIMONIDINE : 1
PURSUING_GETTING : 1
HIS_PAST : 1
NEURO_UE : 1
HERE_INSTRUCTIONS : 1
PELVIC_TILTS : 1
BIKE_DAILY : 1
SUPERVISION_UP : 1
COLOR_CHANGE : 1
DELUSION_HAS : 1
BACK_PER : 1
THAT_REQUIRE : 1
ILIAC_ANEURYSM : 1
FOLLOWUP_NONE : 1
TIBIAL_DOPPLER : 1
ADDENDUM_DATA : 1
RIGHT_KNEE : 2
AS_REQUESTING : 1
VETERAN_WHO : 1
THE_AVAILABILITY : 1
THAN_ONE : 1
COLOR_VOICE : 1
NEEDS_BARRIERS : 1
DISCOMFORT_HE : 1
PROVIDED_PATIENT : 1
AREA_SL : 1
ADDENDUM_IS : 1
OMEPRAZOLE_MG : 1
UNDERLYING_OF : 1
OF_HISTORY : 1
NEUROPATHY_MG : 1
PATIENT_CONTINUES : 1
NOTE_TO : 1
MG_TO : 1
BY_AWARE : 1
SHORTNESS_BREATH : 1
WITH_PATSY : 1
HIS_AND : 1
COUGH_HYPERTENSION : 1
LEARNING_BARRIERS : 1
TO_RIGHT : 2
USES_GLASSES : 1
MEDGENERAL_HIS : 1
OF_PROCEDURE : 1
LEARN_EXAMINATION : 1
THE_FOLLOWING : 3
DID_HAVE : 2
LIMITATION_VITALS : 1
ENCOUNTER_FROM : 1
MG_FOR : 1
GETTING_FACILITY : 1
SUPPLIES_ENCOURAGE : 1
JOINT_DE : 1
NONPRODUCTIVE_URINE : 1
CUEING_STAND : 1
OF_INDEPENDENT : 1
OF_EPISODE : 1
BLUE_HEENT : 2
ACTIVE_MG : 1
IS_CONSTANT : 1
LESS_KNEE : 1
REQUESTING_SHE : 1
EAGER_LEARN : 1
FA_HE : 1
FOLLOWED_THE : 1
TRAN_NUMBER : 1
ICDCM_PCP : 1
EYE_GLASS : 1
BUEG_IS : 1
MISSOULA_VA : 1
ORDER_CLOPIDOGREL : 1
EXTREMITY_BILATERALLY : 1
WHICH_ACCORDING : 1
INTACT_MG : 1
NO_CHANGES : 1
NONPRODUCTIVE_HYPERTENSION : 1
LB_PARTICIPANT : 1
DING_PER : 1
LEARN_LIMITATIONS : 1
IN_BENEFITS : 1
CLEAR_EVEN : 1
ORTHOPNEA_DIZZINESS : 1
HEENT_TEMP : 1
VA_PHARMACY : 1
MG_IV : 1
DRINK_ALCOHOL : 1
HAS_PAIN : 2
DOPPLER_NO : 1
DRIVER_ADDENDUM : 1
TAB_PO : 1
LESS_THAN : 1
RTC_TENDINOPATHY : 1
EXTREMITY_EQUAL : 1
AND_VISIT : 1
TID_SOCIAL : 1
PAIN_LEVEL : 1
WARM_PHYSICIAN : 1
MY_NORMAL : 1
TO_AREA : 1
YOURSELF_VETERAN : 1
ASPIRIN_MG : 1
BLEPHS_AND : 1
PCIOL_OD : 1
HISTORY_NEEDS : 1
DIET_SPLENECTOMY : 1
FOLLOWUP_MY : 1
NUMBER_HOME : 1
NEGATIVE_FOR : 1
BY_PHONE : 1
WHEN_DEVELOOPED : 1
ALERT_CONTACT : 1
IS_ANY : 1
TO_TOP : 1
FOLLOWUP_USES : 1
CANCELLED_AT : 1
TINA_WED : 1
GLASSES_TO : 1
VACCINE_MG : 1
STATUS_NURSE : 1
COMPLETED_PHYSICIAN : 1
VA_PROFILE : 1
IS_REGULARLY : 1
JOB_RESP : 1
THREE_MONTHS : 1
SKIN_WOUNDS : 1
KNOW_NOTE : 1
NIGHT_BECAUSE : 1
MYDRIACYL_PHENYLEPHRINE : 1
SCORE_OF : 1
YEAR_LEG : 1
HIM_HER : 1
VTACH_THE : 1
KNEE_DEVELOPED : 1
IS_YO : 1
PARTICIPANT_HOW : 1
COUGH_URINE : 1
WT_INCREASED : 1
IS_ABOVE : 1
INFORMATION_BATHING : 1
WERE_FOR : 1
HAD_URINE : 1
FOR_NOT : 1
ARIPIPRAZOLE_MG : 2
DO_AN : 1
TO_OUR : 1
COUPLE_OF : 1
TELEPHONE_SCORE : 1
CLINICAL_INFORMATION : 1
PLACED_CALL : 1
ACTIVE_FOR : 1
HIM_TO : 1
THE_PER : 1
SKIN_INITIAL : 1
HME_VENDOR : 1
VA_CENTER : 1
WITH_SHELLY : 1
DECIDED_OF : 1
PERIOD_TIME : 1
PAIN_IN : 3
HE_REVIEWED : 1
ON_MORPHINE : 1
DTN_INFORMATION : 1
SERUM_THE : 1
AREA_TO : 1
BUT_HE : 1
ABOUT_APPOINTMENTS : 1
VACCINE_VACCINE : 2
NEEDS_PATHOLOGY : 1
STAFF_SC : 1
YOU_DRINK : 1
WAS_AND : 1
FOR_THE : 1
THE_PRESSURE : 1
SOME_SORT : 1
PATIENT_PC : 1
INDICATED_TO : 1
ACTUAL_CM : 1
SET_UP : 1
HEPATITIS_SOME : 1
NOV_MG : 1
ORIENTED_THAT : 1
PATIENT_DURATION : 1
ANY_HE : 2
ROUTINE_FOLLOWUP : 1
IV_SC : 1
IN_TO : 1
EFFECTIVE_CARE : 1
FOR_CONTROL : 1
SX_ERE : 1
TIME_IS : 1
BEEN_BY : 1
LB_NO : 1
NOT_CURRENT : 1
AT_FUTURE : 1
THERE_NO : 1
THE_PCN : 1
PARTICIPANT_OFTEN : 1
HOME_FROM : 1
AFF_INPATIENT : 1
DATED_HAS : 1
THE_PROCEDURE : 1
DUAL_AICD : 1
OMEPRAZOLE_EC : 1
RTC_PROM : 1
BEEN_REQUESTED : 1
NO_KNOWLEDGE : 1
PERIOD_OF : 1
PLACEMENT_PAIN : 1
ADMINISTRATION_THE : 1
HIS_SPECIAL : 1
OF_ORGANIC : 1
OR_DRINKS : 1
LAST_WRITTEN : 1
ATTEMPT_REASON : 1
HERE_PATIENT : 1
YES_NO : 1
MATURE_CATARACT : 1
OVERALL_FAMILY : 1
BOTHERING_SINCE : 1
DRUG_BEEN : 1
TILTS_HOLD : 1
ALLERGIES_REVIEWED : 1
SETTING_AND : 1
ARIPIPRAZOLE_TAB : 2
IN_ARMY : 1
WILL_TO : 1
RATE_MG : 1
TO_TESTING : 1
STATUS_RECOMMENDATION : 1
FX_FOREIGN : 1
DISCHARGE_PLAN : 1
DECIDED_CONSESQUENCES : 1
THIS_WAS : 2
WARM_EXTREMITY : 1
SEEN_PHYSICIAN : 1
AC_DE : 1
FIRST_HE : 1
MRI_RIGHT : 1
GLASSES_DID : 1
PULMONARY_PROCEDURE : 1
UNSURE_URINE : 1
OF_NEGATIVE : 1
PROVIDE_WITH : 1
REFUSE_AND : 1
FILED_NURSING : 1
TO_AMBULATE : 1
ACTIVE_PLACED : 1
MOBILITY_NO : 2
THIS_MATERIAL : 1
CHANGED_AND : 1
EVER_ANY : 1
HEALTH_YOU : 1
IN_GROIN : 1
REMOVAL_UNDERLYING : 1
VOICE_CHANGE : 1
MAR_LODGING : 1
HIM_ACCEPT : 1
REVIEW_DIET : 1
DL_MORE : 1
REVIEW_REPORT : 1
HE_YELLOW : 1
WAS_ALSO : 1
USE_AS : 1
VETERAN_WRITE : 1
HAS_PATIENT : 1
HAS_VTACH : 1
URINARY_PHYSICIAN : 1
HAS_AN : 1
NKA_REPORTS : 1
HYGIENE_APPROPRIATE : 1
REPORTS_LUMBAR : 1
PRESENTS_FASTING : 1
OF_IS : 1
NETWORK_CUSTOMIZED : 1
BLUE_NEG : 1
CHRONIC_PAIN : 1
WILL_BE : 1
ADDENDUM_HAVE : 1
AS_PHYSICIAN : 1
SIGNS_IN : 2
WITH_SKIN : 1
COLLECTED_AND : 1
THE_ULCER : 1
TO_RESIDES : 1
ANSWERED_PNT : 1
NOT_SEX : 1
PLS_CONTACT : 1
CONTACT_CORRECTION : 1
REACH_PT : 1
NEVER_LOCATION : 1
NEED_UPDATE : 1
SOAPE_TP : 1
PER_IDENTIFIED : 1
BREATH_COMMENT : 1
DEPRESSION_NO : 1
ABOUT_OTHER : 1
MRI_OF : 1
NO_PNDS : 1
CLEAR_EQUAL : 1
EXPENSES_LAST : 1
PAIN_FIRST : 1
CLIENT_SHOULD : 1
APNEA_OUTPATIENT : 1
ENDOBROW_UPPER : 1
THIS_ADMISSION : 1
HE_ONLY : 1
NEG_TEMP : 1
STAFF_IS : 1
PATIENT_WAS : 1
LB_KNOWLEDGE : 1
VISIT_PATIENT : 1
LEARNER_LIMITATIONS : 1
NAIL_IRWIN : 1
SL_RIGHT : 1
LIST_REVIEW : 1
MG_PRIMARY : 1
TO_CALL : 1
MIN_POST : 1
AND_IS : 1
DIET_PATIENT : 1
INFORMATION_ATENOLOL : 1
SECURITY_NUMBER : 1
NO_CONCERNS : 1
OF_PRIMARY : 1
PROVIDER_NONE : 1
HE_V4POST : 1
LOCATION_OF : 1
SUCH_PERIPHERAL : 1
REVIEWED_FOR : 1
RECONCILIATION_CALL : 1
NAME_ADR : 1
DOCTOR_THAT : 1
EYE_ADJ : 1
1010M_TAKEN : 1
FROM_HOME : 2
YOURSELF_NO : 1
CONTACT_NOTE : 1
NOTELEFT_PAIN : 1
DE_CHANGES : 1
NOTE_IMMUNIZATION : 1
CM_ACTIVE : 1
NOTICED_SEVERAL : 1
PATIENT_GIVEN : 1
BID_CARE : 1
THAT_PRESCRIPTION : 1
TESTS_OR : 1
IS_SIGNS : 1
ICDCM_NO : 1
THAN_YEAR : 1
NOTE_VITALS : 1
ON_PASS : 1
OUTPATIENT_MEDICATIONS : 7
TAB_TWO : 2
FROM_TO : 2
SHE_MADE : 1
THE_HISTORY : 2
RATE_RHYTHM : 1
THAN_WHAT : 1
HIS_PSYCHOLOGY : 1
FOR_BLOOD : 1
BUILT_YO : 1
CHEST_NEG : 1
DO_INCLUDE : 1
PT_ASKING : 1
CLEAR_TEMP : 1
OF_STAFF : 1
REEXAMINED_THERE : 1
PAIN_NEG : 1
BY_MUC : 1
PATHOLOGY_REPORT : 1
FATAL_REACTIONS : 1
AND_NONVA : 1
MEDICATION_PREVIOUSLY : 1
REFILL_DICYCLOMINESTATED : 1
THE_EYEDROP : 1
COSOPT_BID : 1
WEEK_FOR : 1
NL_LOW : 1
COUNSELING_GYNECOLOGY : 1
UE_DISEASE : 1
HIS_MONTH : 1
THAT_THE : 1
RECURRENCE_AS : 1
NORMAL_NO : 1
HIM_THAT : 2
INITIAL_HGBAC : 1
VACCINE_ALLERGIES : 1
PATIENT_ANSWERED : 3
LEFT_OUTPATIENT : 1
PROFILE_ALL : 1
VIS_WITH : 1
TAB_TAKE : 5
STATIONARY_BIKE : 1
PHYSICIAN_COUGH : 1
OTHER_MEDICATION : 1
GLU_NEEDS : 1
ASSIGNED_TO : 1
HAD_PLEASANT : 1
SHELLY_NA : 1
ONE_TABLET : 1
HEMOGLOBIN_ENSURE : 1
PAIN_ON : 1
FOR_HIPS : 1
WARFARIN_THAN : 1
INFLUENZA_VACCINE : 5
AND_EVALUATE : 1
REPORTS_HE : 1
OD_FROM : 1
OP_CARE : 1
ABOUT_SAME : 1
LONG_APPOINTMENTS : 1
THAT_NOT : 1
NUMBER_STAFF : 1
DENIES_MELENA : 1
PHYSICIAN_ERE : 1
THE_VA : 3
TIME_DOSING : 1
RESPONSES_REACTION : 1
INCLUDING_WAS : 1
LEVEL_OF : 2
AND_WERE : 1
INFLUENZA_GIVEN : 1
ONLY_THAT : 1
OUTPATIENT_EVERY : 1
PATIENTS_VA : 1
HIM_THE : 1
OF_AS : 1
BRIMONIDINE_OPH : 1
LB_REMOVAL : 1
VIS_DATE : 1
NEURO_SENSATION : 1
NO_SUICIDAL : 1
BY_REASON : 1
CANCELLED_PATIENTS : 1
WOKE_UP : 1
CONTACT_LENS : 1
COLOR_INPATIENT : 1
SGOT_AST : 1
PHYSICIAN_REPORT : 1
INTAKE_AND : 2
DROP_IN : 1
ALLERGY_ADR : 1
WEEK_OF : 1
MOISTURE_MOIST : 2
ON_ONE : 1
CLINIC_FILED : 1
USE_SUCH : 1
TEMPERATURE_PRESSURE : 1
RAPID_AND : 1
AND_APRIL : 1
TO_THICKNESS : 1
NOTE_GOES : 1
PT_IN : 2
THAN_WEEK : 1
AS_ENTERED : 1
COMMENT_ACTIVITY : 1
PERIPHERAL_ARTERIAL : 1
BY_DR : 1
RESIDES_ENDERLIN : 1
ADD_COSOPT : 1
ADENOSINE_RAPID : 1
INFLUENZA_ALLERGIES : 1
TAKEN_CLEAR : 1
IF_FX : 1
PACIFIC_NETWORK : 1
NUMBER_MEDICATIONS : 1
RECONCILIATION_TYPE : 1
CV_GLUCOSE : 1
IMPRESSION_YOU : 1
DELETED_AND : 1
NAME_VETERAN : 1
HB_DOCUMENT : 1
HEAD_FOR : 1
WOKE_COUPLE : 1
DIABETES_MELLITUS : 1
AVAILABLE_MEDICATIONS : 1
FOR_HE : 1
IRWIN_YOU : 1
NURSE_HOURS : 1
BUT_HAD : 1
AREA_WEST : 1
RTC_IN : 1
FOR_UA : 1
VIA_NO : 1
IS_BUSY : 1
CALL_TO : 1
VACCINE_DURING : 1
CURRENT_EPISODE : 1
IS_HAVING : 1
CURRENT_SKIN : 1
WAS_FOR : 2
HE_DECIDED : 1
VISITS_NONE : 1
HAVE_PAGED : 1
IOP_CONTROL : 1
SOCIAL_HISTORY : 1
BRIMONIDINE_TARTRATE : 1
ACTIVE_PLASMA : 1
PULSE_PAIN : 1
CONDITIONS_CONNECTED : 1
IS_NEGATIVE : 1
V4POST_FOLLOWUP : 1
SEX_PERIOD : 1
SURGERY_LEFT : 1
ADDENDUM_VACCINE : 1
BE_FOLLOWED : 1
IN_CV : 1
EFFECTIVE_HEALTH : 1
HEMODYNAMICALLY_STABLE : 1
SINCE_TIME : 1
MONTH_YOU : 1
AND_DID : 1
IN_AREA : 1
FOLATE_IRON : 1
ADDENDUM_STENOSIS : 1
THE_VACCINE : 2
ALCOHOL_IN : 1
LEARN_WILLINESS : 1
DID_KNOW : 1
TO_FOLLOWING : 1
LEARN_LEARNER : 1
LODGING_NEEDS : 1
OF_FALLS : 1
BEEN_WHICH : 1
AIR_AND : 1
SPECIMEN_MAR : 1
INFECTION_NOT : 1
PRESSURE_PATIENT : 1
CONSCIOUSNESS_ACTUAL : 1
EVER_HAD : 1
SHE_HAS : 1
ACUTE_DISCOMFORT : 1
PATIENT_ADDRESS : 1
LAST_AND : 1
IN_APRIL : 1
NOTE_INFLUENZA : 1
ATTEND_RESIDES : 1
DING_AS : 1
PAIN_OR : 2
GREATER_TUNNEL : 1
SPECIFIC_HANDOUT : 1
IF_URINE : 1
BE_OWN : 1
BEULAH_BRIMONIDINE : 1
HIS_RIGHT : 1
DOSING_PM : 1
SUCH_AS : 1
INDICATED_NO : 1
WARFARIN_TOXICITY : 1
WHEN_HE : 1
NOT_KNOW : 1
ALLERGIES_DOCUMENTED : 1
TEMPERATURE_THE : 1
CV_TEST : 1
ASPIRIN_EC : 1
WHAT_IS : 1
SYMPTOMS_OF : 1
TO_YOUR : 1
CFILE_NOT : 1
WARFARIN_OR : 1
FOR_YRS : 1
PROBLEMS_SERUM : 1
YOU_ARE : 1
INCLUDING_PATIENT : 1
REQUIRED_ASKS : 1
GETTING_GUARDIANSHIP : 1
FEELS_WARM : 1
HEENT_NEG : 1
NONE_ED : 1
FRIGHTENING_HORRIBLE : 1
EARMOLD_FILTER : 1
PROCEDURE_INCLUDING : 1
OUR_IS : 1
HOME_MG : 1
TRAN_JOB : 1
RARELY_SKIN : 1
REVIEWED_HIM : 1
ANY_OF : 1
YOU_PLEASANT : 1
LEFT_IF : 2
AND_TRHE : 1
THE_ARMY : 1
AND_PAIN : 1
TELEMETRY_RATE : 1
NO_SIGNIFICANT : 1
TYPE_CLINICAL : 1
FUTURE_NOTED : 1
LIMITS_SKIN : 1
MEASUREMENT_QUALIFIERS : 1
IS_CLEAR : 1
AND_AAOX : 1
ATTEMPT_SCHEDULED : 1
EVERY_PATIENT : 1
HAS_ANSWERED : 3
BILATERALLY_OMEPRAZOLE : 1
NOTED_FOLATE : 1
MISSOULA_ANTICOAGULATION : 1
READING_BUT : 1
ON_CHIEF : 1
FOLLOWUP_INFLUENZA : 1
VALENTINE_LETTER : 1
KG_HOW : 1
BP_LB : 1
COSOPT_FOR : 1
DEPRESSION_PELVIC : 1
ADDENDUM_EQUAL : 1
ARE_TAKING : 1
PREVIOUSLY_BY : 1
MAY_NEED : 1
SIGNS_TEMPERATURE : 1
SHOES_PLASTIZOTE : 1
TOTAL_CBI : 1
MEDICATIONS_STATUS : 3
ANY_DELETED : 1
PROM_THE : 1
RIGHT_TO : 1
PER_ACTIVE : 1
ASPIRIN_NURSING : 1
TCU_ADDRESS : 1
PC_POTENTIALLY : 1
RECEIVED_MAR : 1
CAROTID_DOPPLER : 1
ISSUED_EARMOLD : 1
HEALTH_PAST : 1
WAS_WHEN : 1
WAS_THE : 1
ALLERGIES_IN : 1
GLUCOSE_TEST : 1
IN_CONTACT : 1
IRWIN_WILL : 1
AND_CLIENT : 1
WAS_PER : 1
NONE_SELF : 1
NOTED_NL : 1
ACTIVE_SERVICE : 1
GLASS_ORDER : 1
PRESSURE_PREVENTION : 1
THROMBOS_OUTPATIENT : 1
AND_THERE : 1
DEVELOOPED_FAMILY : 1
NOT_NUMBER : 1
SON_ATTENDING : 1
EDUCATION_PC : 1
THE_ALLERGIES : 1
PER_VET : 1
PT_TELL : 1
ANSWERED_PATIENT : 1
FASTING_ROUTINE : 1
AND_LEFT : 1
IS_NOT : 2
WELL_DEVELOPED : 1
AFTER_HELPING : 1
BUMPS_TO : 1
HIM_OF : 1
POST_OP : 1
DOCUMENT_FILED : 1
CLIENT_ALLOW : 1
OTHER_IN : 1
YOU_SIX : 1
WITH_MG : 1
NETWORK_HAS : 1
AT_ONE : 1
HE_PAIN : 1
DID_WORKED : 1
OF_SHOULDER : 1
HEENT_IS : 1
THE_AND : 3
ONE_IN : 2
OVERHEAD_PULLEYS : 1
CONTAINING_IN : 1
PATIENTS_PHARMACY : 1
WITH_PROVIDED : 1
TO_CALLER : 1
ADLS_SKIN : 1
OR_PT : 1
DAILY_TO : 1
YEARS_MONTHS : 2
GROIN_SL : 1
ADDENDUM_CAT : 1
AND_REPORT : 1
OF_PAIN : 2
OF_ASSISTANCE : 1
WILLINESS_LEARN : 1
ACTIVITY_DECREASED : 1
WALKING_PATEINT : 1
ACTIVE_MARCH : 1
YEAR_IN : 2
MEDICATION_RECONCILIATION : 2
AFTER_PATIENT : 1
ACTIVE_CAN : 1
WORKED_WITH : 1
APR_WITHOUT : 1
NKA_OTHER : 1
GIVEN_DUAL : 1
HER_REPLIED : 1
NO_SAT : 1
MIC_FILTER : 1
WHOM_PATSY : 1
EDUCATION_FOLLOWUP : 1
ANY_BARRIERS : 1
VACCINE_MINUTES : 1
LEARNING_NEEDS : 1
PATIENT_CLOPIDOGREL : 1
PT_AGAIN : 1
CALL_THE : 1
WITH_TO : 2
HOW_DID : 2
WRITTEN_IN : 1
PROGRESS_AC : 1
MODERATE_OF : 1
UA_AND : 1
CARE_YOU : 1
COUGH_NONPRODUCTIVE : 3
PROVIDER_JODY : 1
CBI_CLEAR : 1
WHICH_TO : 1
RARELY_TEMP : 1
PAIN_THE : 1
CONTINUE_COUMADIN : 1
ACUTE_PHARYNGITIS : 1
YEAR_NEVER : 2
NOTE_JOINT : 1
CBI_URINE : 1
NONE_UNPL : 1
SUBJECTIVE_IDENTIFIED : 1
CHAMBER_AICD : 1
ACTIVE_INPATIENT : 2
TO_CLINIC : 1
OTHER_ONYCHOMYCOSIS : 1
DISCUSS_HIM : 1
ANY_DISCOMFORT : 1
VISIT_TWICE : 1
REQUESTED_RESPIRATORY : 1
REVIEWED_PATIENT : 1
CHARACTER_EVEN : 1
WAS_WORRIED : 1
THE_MONTH : 1
CARE_HME : 1
FIRST_AWARE : 1
PREVIOUSLY_SEEN : 1
PATEINT_STATES : 1
RIGHT_FA : 1
CALL_TYPE : 1
OUTPATIENT_VIA : 1
TIME_NAME : 1
NOTE_REVIEWED : 1
WILL_DISCHARGE : 1
NO_PAIN : 1
NO_AVAILABLE : 1
ALL_OF : 2
ELECTRONICALLY_FILED : 2
AVAILABLE_ACCUCHEK : 1
AND_COULDNT : 1
FOR_DEPRESSION : 1
PROVIDER_TINA : 1
EVALUATE_SHE : 1
DOPPLER_SKIN : 1
HEIGHT_IN : 1
NONE_CONSTRUCTION : 1
ASSESSMENT_OF : 1
GOES_COMMUNITY : 1
BP_ENCOUNTER : 1
INFORMATION_KNEE : 1
OF_HEIGHT : 1
SO_HORRIBLE : 1
FLU_EITHER : 1
HAVE_DRINK : 1
NONPRODUCTIVE_COLOR : 1
PNT_REPORTS : 2
LDL_IS : 1
BE_AWAKE : 1
VA_CLINIC : 1
VOIDING_VACCINE : 1
WORRIED_ABOUT : 1
LODGING_PATIENT : 1
REVIEWED_ORGANIZED : 1
WELL_LAST : 1
GENITALIA_NORMAL : 1
PATIENT_USE : 1
REPORTS_LESS : 1
AA_HB : 1
BEEN_RESPIRATORY : 1
SURGERY_ON : 1
FOLLOWUP_CONTACT : 1
FOR_SIG : 1
SYND_ICDCM : 1
CLINIC_ELECTRONICALLY : 1
LETTER_WITH : 1
RIGHT_GROIN : 1
INFLUENZA_IMMUNIZATION : 1
OF_HEAD : 1
SIX_OR : 1
NONE_USES : 1
FLU_SEASON : 1
ILIAC_ICDCM : 1
TOP_OF : 1
REFILLS_ADD : 1
CONSESQUENCES_HIS : 1
TO_WILL : 1
PROBLEMS_REFERENCE : 1
ASSESSMENT_READINESS : 1
IN_MISSOULA : 1
CONTROL_VITAL : 1
CV_PAIN : 1
REVIEW_HIGH : 1
PLEASE_CALL : 1
ABNORMAL_DING : 1
THIS_AND : 1
MORE_PAIN : 1
SOUNDS_WITH : 1
OPH_SOLN : 1
NONVA_EVERY : 1
RECEIVED_THIS : 1
THAT_WOMAN : 1
BEHAVIOR_CLIENT : 1
BOTHERING_HIM : 1
ARTERIAL_OR : 1
PHARMACY_PROFILE : 1
NECK_BEEN : 1
RECENT_IS : 1
WITHIN_HOUR : 1
HAS_CURRENT : 1
THE_NOTELEFT : 1
CARDIOVASCULAR_MOST : 1
LIMITATION_TAKEN : 1
OUTPATIENT_PATIENT : 1
ELECTRONICALLY_NURSING : 1
CONSESQUENCES_OF : 1
WOUNDS_OR : 1
SAID_BECAUSE : 1
ACTIVE_HE : 1
OR_HB : 1
REGULAR_YES : 1
IN_HOSPITAL : 1
SPECIAL_REQUEST : 1
REPORT_SPECIMEN : 1
AND_PT : 1
FOR_ROUTINE : 1
AAOX_WELL : 1
WEEK_IF : 1
TABLET_MOUTH : 3
OF_FAT : 1
THAN_IS : 1
HE_HAS : 6
OR_NO : 1
CHEST_PAIN : 3
DATE_OCTOBER : 1
MED_BUT : 1
NO_LIMITATION : 2
IRRIGANT_CLEAR : 1
CPRS_NONVA : 1
AND_HE : 2
BID_FOR : 2
DO_AFF : 1
VA_DESERT : 1
MONTHS_SUBJECTIVE : 1
INCLUDING_DING : 1
OVERCOMPENSATION_THICKNESS : 1
ADDRESS_PRIVATE : 1
THAT_IN : 1
CENTER_CONSTRUCTION : 1
AGO_YEAR : 1
VETERAN_AS : 1
WHEEZING_NEW : 1
TO_AMIODARONE : 1
PAIN_AT : 1
SAFE_AND : 1
INTACT_VARDENAFIL : 1
ADMINISTERED_ALCAINE : 1
NOT_CLEAR : 1
HELPING_DO : 1
NEURO_REFLEXES : 1
EXCLUDING_SUPPLIES : 1
STATUS_FOR : 1
PCP_INFLUENZA : 1
ADR_PENICILLIN : 1
MEDICATION_REQUEST : 1
GENOBESE_AOX : 1
FOLLOWUP_APR : 1
CONSTRUCTION_EMPLOYED : 1
NOTE_RARELY : 1
BLOOD_PATIENT : 1
FOR_BUT : 1
CLEAR_HAS : 1
BILATERAL_KNEE : 1
ACTIVE_WEEK : 1
YO_SON : 1
ROOM_INTAKE : 1
HAS_MODERATE : 1
CYST_PHQ : 1
MOST_LDL : 1
WORSENING_EXPENSES : 1
BEFORE_ON : 1
PT_DENIES : 2
IS_IF : 1
OWN_MEDICATION : 1
SOLN_DROP : 1
URINARY_SX : 1
SOCIAL_GLU : 1
PHYSICIAN_NO : 1
COVER_1010M : 1
ADMISSION_DATA : 1
WITH_WHOM : 1
CLINIC_PRIOR : 1
TEST_STRIP : 1
IS_APPROVED : 1
AND_OUTPATIENT : 2
ON_OCCASION : 1
ARRIVED_NO : 1
REFERENCE_VA : 1
IN_LANGUAGE : 1
CP_PNDS : 1
UNDERLYING_FAT : 1
DEPRESSION_PULSE : 1
LEFT_LEG : 1
YOU_NEED : 1
STUDIES_IER : 1
TOENAILS_COUNTER : 1
SERVED_FOR : 1
IF_COLLECTED : 1
TIME_PATIENT : 1
YRS_AC : 1
PHENYLEPHRINE_HAVE : 1
OF_NEEDED : 1
STRIP_WEEK : 1
ON_WEEK : 1
PREVENTION_PROTOCOL : 1
YRS_HEMOGLOBIN : 1
WERE_APPROPRIATE : 1
PCP_ADDENDUM : 1
STARTED_HIS : 1
PHYSICIAN_OR : 1
ME_HIS : 1
MORE_THAN : 1
NO_IDEATION : 1
IS_UNSURE : 1
MUC_IMPOTENCE : 1
DURATION_CURRENT : 1
IMMUNIZATION_BP : 1
WELL_RTC : 1
AM_NOT : 1
NO_SOUNDS : 1
NEED_TO : 2
EVEN_UNLABORED : 1
ENCOURAGE_TO : 1
OF_VETERAN : 2
IN_CPRS : 1
GET_NEXT : 1
OR_PAIN : 1
PENICILLIN_TIME : 1
HE_DISCHARGE : 1
OR_BLUE : 1
LISTED_ABOVE : 1
ARE_NO : 1
ORDER_PATIENT : 1
ML_CBI : 1
AND_EDUCATION : 1
SVT_TELEMETRY : 1
NO_NO : 5
AND_AS : 1
DOSES_OF : 1
ENDOBROW_BLEPHS : 1
NORM_NONPRODUCTIVE : 1
PLANS_TO : 1
EC_TAKE : 2
MALE_NURS : 1
DEFICIT_RARELY : 1
POTENTIALLY_FATAL : 1
VOIDING_PNEUMONIA : 1
FUNCTIONS_AMBULATE : 1
TAKEN_DATE : 1
SIX_MORE : 1
LOCATION_AMARILLO : 1
TO_COMMUNITY : 1
THE_DESERT : 1
THREE_HAVE : 1
WAS_FOLLOWUP : 1
HAS_NKA : 3
NEG_SURGERY : 1
OTHER_SPECIFY : 1
VACCINE_INFORMATION : 2
POST_DOPPLER : 1
SIGNS_BY : 1
CONNECTED_NO : 1
PNT_HE : 1
TEMP_MOISTURE : 1
WIFE_HOME : 1
OF_DICYCLOMINESTATED : 1
WITH_PLASTIZOTE : 1
DISCHARGE_TO : 1
VENDOR_THIS : 1
OF_WARFARIN : 1
FOR_NEW : 1
FOR_THAT : 2
PHYSICIAN_NQUIRE : 1
PATIENT_TO : 1
LB_ACTIVE : 1
MSK_SPECIFIC : 1
THE_HOSPITAL : 1
AND_AVAILABILITY : 1
PERSONS_OR : 1
SPECTACLE_OR : 1
PROGRAM_AND : 1
THEN_AS : 1
DOCTOR_FOR : 1
TOBACCO_USER : 1
TO_BE : 3
HANDOUT_OP : 1
FIANC_SHELLY : 1
ARE_CHANGES : 1
PATIENT_REQUEST : 1
OR_OF : 1
CEREBROVASCULAR_DISEASE : 1
RBC_OBSTRUCTIVE : 1
TO_REMIND : 1
OTHER_FOR : 1
CLEAR_WILL : 1
CONTROL_IS : 1
INSERTS_NO : 1
YOU_TAKING : 1
PATIENT_VOIDED : 1
PAIN_OF : 1
SYND_NO : 1
REPORTS_HAS : 1
TO_NURSING : 1
VARDENAFIL_MG : 1
SCREEN_DEPRESSION : 1
SERVICE_NW : 1
NOTE_LAST : 2
ADENOSINE_MG : 1
SUPPLIES_PATIENT : 2
CARE_SEARIGHT : 1
PENICILLIN_MEDICATIONS : 1
LEARN_HEENT : 1
TIMES_REVIEWED : 1
NOTED_THAT : 1
OR_DEC : 1
NONFORMULARY_DRUG : 1
PATIENT_WELL : 1
SORT_WAS : 1
WILL_ORDER : 1
HER_GUARDIANSHIP : 1
HGBAC_FOR : 1
GENDER_NURS : 1
ADDENDUM_DROPS : 1
THE_IMPOTENCE : 1
NOTE_OVERCOMPENSATION : 1
TO_HELPING : 1
NUMBER_TO : 1
WHAT_LISTED : 1
PND_DOE : 1
SERVICE_MOBILITY : 1
DATA_BASE : 1
REEXAMINED_AND : 1
THE_HE : 2
RESP_AND : 1
LENS_CORRECTION : 1
AWARE_OF : 1
TO_WITH : 1
FOUR_VS : 1
FROM_FACILITY : 1
NOT_MEDICATIONS : 1
GROIN_AREA : 1
DEVELOPED_IN : 2
VOLUME_AFTER : 1
WITH_THE : 2
AC_REPORT : 1
PRIMARY_CBOC : 1
PER_PHYSICIAN : 1
STABLE_PROVIDE : 1
AMBULATE_TO : 1
DURING_ADMISSION : 1
OX_PATIENT : 1
TESTS_NEGATIVE : 1
IN_MOS : 1
AND_ALL : 1
DOCUMENTED_IN : 1
TIMES_VS : 1
NEXT_PT : 1
CP_NO : 1
BOTTLES_WITH : 1
HAD_ANY : 1
UP_CAROTID : 1
CONSCIOUSNESS_HEIGHT : 1
PAIN_TRHE : 1
ADDRESS_FROM : 1
MEDICATIONS_PATIENT : 1
HEALTH_CARE : 1
ATTEND_IN : 1
EYE_BLEPHAROPLASTY : 1
OF_OR : 1
STUDIES_THIS : 1
AND_TELEPHONE : 1
WITH_NECK : 1
AS_TIMES : 1
MAILED_REPORTS : 1
SEVERAL_TO : 1
CBC_NOV : 2
AREA_PALM : 1
NONVA_STATUS : 1
DISCHARGE_VETERAN : 1
QUESTIONS_OF : 1
PHYSICAL_DECREASED : 1
UCINATION_NO : 1
FROM_MULTIDOSE : 1
AVAILABLE_COMFORT : 1
INFLUENZA_WAS : 1
ED_WAS : 1
OF_WITH : 1
JOB_NUMBER : 1
IS_LISTED : 1
WAS_FRIGHTENING : 1
UNSPECIFIED_SGOT : 1
ACTIVE_NONVA : 1
ALLERGIES_HAS : 1
INCLUDE_FOR : 1
AND_TO : 1
ACCEPT_ACTIVE : 1
PNT_LESS : 1
GUARDIANSHIP_HERSELF : 1
OF_SOME : 2
IS_PSU : 1
ADR_ARIPIPRAZOLE : 1
VENDOR_LIST : 1
TEMP_SKIN : 1
QUALIFIERS_WITHIN : 1
ADJ_ORDER : 1
CURRENT_IS : 1
FEELS_PHYSICIAN : 1
CLINIC_WOKE : 1
IS_TO : 1
COPY_NORMAL : 1
SETTING_REPORT : 1
ICDCM_CP : 1
HURTING_YOURSELF : 1
REMOVAL_OF : 1
CURRENT_INR : 1
ANY_ABOUT : 1
MOUTH_ADDENDUM : 1
ANTICOAGULATION_CLINIC : 1
SHE_HER : 1
PHYSICIAN_EXPECTORATE : 1
CAD_PCP : 1
NORMAL_RECENT : 1
TO_ABOVE : 1
AND_CONDITIONS : 1
OF_LAST : 1
ONEHALF_TABLET : 1
NECK_PAIN : 1
COMPLE_NONPRODUCTIVE : 1
INCREASED_LB : 1
PRIMARY_PAIN : 1
VISIT_REQUEST : 1
ALSO_COPY : 1
USER_PATIENT : 1
WRITE_COMFORTABLE : 1
ULCER_PREVENTION : 1
DOSES_HT : 1
PROTOCOL_WAS : 1
MOVE_STATES : 1
IRRIGANT_TEMP : 1
PER_FOLLOWUP : 1
INPATIENT_AND : 2
SITE_LEFT : 1
PATEINT_HE : 1
NW_EYE : 1
EXISTS_HOWEVER : 1
PROFILE_WITH : 1
UPSETTING_PATIENTS : 1
OF_TIME : 1
STATEMENT_LEVEL : 1
TAKEN_TO : 3
INPATIENT_PROBLEM : 1
THE_MEDICATION : 1
YOU_THOUGHTS : 1
MEDICATIONS_INCLUDING : 5
PATIENT_ALLERGIES : 1
HOSPITAL_AND : 1
SC_CONDITIONS : 1
ASSESSMENT_RESP : 1
VITAL_TAKEN : 2
TCM_DYSLIPIDEMIA : 1
NEEDED_SC : 1
INFORMATION_STATEMENT : 1
SUICIDAL_NO : 1
HTN_DOE : 1
WT_KG : 1
FILED_OUTPATIENT : 1
THE_LEFT : 1
TIME_OF : 1
WHOM_WIFE : 1
PAST_YRS : 1
WEEKLY_NEEDED : 1
PATIENT_NOT : 1
BREATH_SOUNDS : 1
ALLERGIES_ASPIRIN : 2
CLINIC_UP : 1
RELATIONSHIPS_THAT : 1
IN_ELECTRONICALLY : 1
NOT_ANY : 2
DEVELOOPED_YELLOW : 1
AND_WILL : 1
IN_NAD : 1
FASTING_THE : 1
METHADONE_TAB : 1
ASSESSED_CAD : 1
ADMISSION_THE : 1
MONTHS_TO : 1
ANKLE_BURSITIS : 1
SKIN_BREATH : 1
DESERT_HEALTHCARE : 1
POST_TIBIAL : 1
HEAD_THE : 1
TOILET_MIN : 1
NEGATIVE_DO : 1
TO_PHYSICIAN : 1
ORIGIN_ADDENDUM : 1
PROVIDED_TO : 1
STAND_BY : 1
ST_ADDENDUM : 1
NOTE_WAS : 1
SIG_APPLY : 1
ON_COMPLAINT : 1
PATHOLOGY_SPECIMEN : 1
WITH_AMIODARONE : 1
PATIENT_RECEIVED : 1
RTC_MOS : 1
BREATH_WITH : 1
SERVICE_MARCH : 1
IN_CM : 2
FOR_REFILL : 1
TIME_PER : 1
CAN_GENOBESE : 1
TO_HER : 1
HAS_BEEN : 4
HELPING_FRIEND : 1
HE_MAY : 1
PROVIDERS_THIS : 1
OUTPATIENT_CONTINUES : 1
AFTER_AWARE : 1
THE_SAME : 1
AND_EFFECTIVE : 1
WEEKEND_PASS : 1
NO_PROBLEMS : 1
HOUR_WHEEZING : 1
HEIGHT_ACTUAL : 1
CONTINUES_BE : 1
NOT_TOBACCO : 1
UNSPECIFIED_COUNSELING : 2
VA_PACIFIC : 1
SUPPLIES_PLEASE : 1
MATURE_OU : 1
PHYSICAL_FOR : 1
NO_NOTED : 1
WITH_AT : 1
ATTENDING_BUEG : 1
LANGUAGE_LB : 1
SERUM_REFERENCE : 1
XYZZY_CORRECTION : 2
VETERAN_DXD : 1
PALM_PENICILLIN : 1
ASSIGNED_CALLER : 1
WILL_RECEIVE : 1
PCIOL_OS : 1
MEDICAL_SEEN : 1
ANSWER_PRIMARY : 1
THE_PAIN : 1
PATIENT_AND : 1
WARM_NORM : 1
STATUS_DATA : 1
SKIN_COLOR : 3
TO_REACH : 1
REACTIONS_HOWEVER : 1
PAST_WHEEZING : 1
REFUSE_TESTING : 1
MEDICATIONS_SITE : 1
SPLENECTOMY_INDICATED : 1
SUPPER_ON : 1
HIV_YEAR : 1
VISIT_MYCOTIC : 1
RHYTHM_REGULAR : 1
STATES_AM : 1
INR_ALLERGIES : 1
MEDICATION_COMPLE : 1
THE_REQUEST : 1
APPOINTMENTS_NL : 1
WILL_LETTER : 1
NKA_FOR : 1
HAVE_SIX : 1
BILATERALLY_RBC : 1
SIGNAL_HAS : 1
ADDENDUM_PHYSICIAN : 1
NOV_NOV : 3
CLEAR_TELEMETRY : 1
WHY_PAIN : 1
CONTACT_INFLUENZA : 1
CHANGE_OWING : 1
AT_ON : 1
LESS_ONE : 1
OBSTRUCTIVE_PULMONARY : 1
MEDGENERAL_HE : 1
ABOVE_APPOINTMENTS : 1
SELF_TRUCK : 1
ORDERS_PLACED : 1
HAVE_THE : 1
FOLLOWING_TREATING : 1
OBSTRUCTIVE_DISEASE : 1
MG_TAB : 7
MOISTURE_PHYSICIAN : 1
IN_THE : 7
HAS_EFFECT : 1
MATERIAL_WAS : 1
SURGERY_PCIOL : 1
AC_ENSURE : 1
CC_HAVE : 1
INFLUENZA_VPA : 1
AS_PERIPHERAL : 1
ASSIST_OF : 1
PROBLEM_UNSPECIFIED : 2
DENIES_ANY : 2
VETERAN_CAN : 1
TO_EDUCATION : 1
PAIN_AND : 2
TO_ATTEND : 1
PAIN_MONTHS : 1
DISCHARGE_CONTACT : 1
TO_OR : 2
ANKLE_HIP : 1
NOT_WILL : 1
SPECTACLE_CONTACT : 1
REVIEW_WRITTEN : 1
SHOULDER_REFERRAL : 1
LIMITATIONS_HIS : 1
MG_CAP : 1
DYSPNEA_PAST : 1
CONTACT_PCP : 1
MONTHS_MONTHS : 1
TOBACCO_PATIENT : 1
PER_APR : 1
SURGERY_PT : 1
WAS_WITH : 1
APPOINTMENTS_MONTHS : 1
SITE_DELTOID : 1
AC_PATHOLOGY : 1
WHO_FOR : 1
LAST_NIGHT : 1
REPORTS_OVERALL : 1
TO_MIN : 1
DOCUMENT_COMPLETED : 1
NUMBER_CFILE : 1
PREVENTIONS_INFLUENZA : 1
HIPS_NOTE : 1
NEW_WORSENING : 1
PHONE_NUMBER : 2
HOME_OR : 1
RADIAL_SKIN : 1
BLUE_BLUE : 1
ED_PROVIDER : 1
AT_ALLERGIES : 1
PATIENT_SOME : 1
STRIP_USE : 1
GLASSES_BUT : 1
PAIN_STATUS : 1
PATIENT_IS : 1
OP_IMPRESSION : 1
DATA_SENT : 1
MONTH_AND : 1
TO_REVIEW : 1
AND_MOVE : 1
BODY_REMOVAL : 1
BEEN_MATURE : 1
TAKE_TWO : 2
APPOINTMENT_AT : 1
HOME_PROGRAM : 1
THERAPY_NOTE : 1
AND_HAS : 1
DATE_PROVIDED : 1
HAVING_ANY : 1
PREVENTIONS_INACTIVATED : 1
DISEASE_ACTIVE : 1
JUDE_CAT : 1
ADMITTED_OBSERVATION : 1
SHOULDER_DIAGNOSIS : 1
BLEPHS_LEVATOR : 1
ASKS_EAGER : 1
GLU_AC : 1
WITHIN_NORMAL : 1
INPATIENT_ADMISSION : 1
MEDICATIONS_STARTED : 1
PATIENT_NO : 1
MEDICATIONS_WI1010M : 1
FILTER_SSN : 1
INCLUDING_RESP : 1
PASS_HOME : 1
UPSETTING_IN : 1
PILL_BOTTLES : 1
HER_THEIR : 1
OUTPUT_IRRIGANT : 1
FOR_CYST : 1
MELLITUS_NO : 1
IN_HORRIBLE : 1
HOME_AA : 1
AND_ORGANIZED : 1
VIA_CFA : 1
NO_DEFICIT : 1
TESTING_AND : 1
RECONCILED_PATIENTS : 1
QUESTIONS_EAGER : 1
NEUROPATHY_CLONAZEPAM : 1
OBSERVATION_HE : 1
CHEST_HTN : 1
HEALTH_PATIENT : 1
NOT_MED : 1
TAKE_CAPSULE : 1
CATARACT_OU : 1
AS_ARTERIAL : 1
PHARYNGITIS_ICDCM : 1
ALL_ALLERGIES : 1
FROM_VIAL : 1
MG_DISPENSED : 1
DOPPLER_IER : 1
CONCERNS_THAT : 1
THICKNESS_TEAR : 1
CONDITIONS_SERVICE : 1
HEMODYNAMICALLY_PROVIDE : 1
VITAL_MEASUREMENT : 1
TREATING_IN : 1
FEMALE_WHO : 1
ASPIRIN_PAIN : 1
MELLITUS_MOBILITY : 1
ATENOLOL_TAB : 1
NKA_PATIENT : 1
PULLEYS_OF : 1
AND_THE : 2
HE_ANY : 1
PAIN_ACTIVE : 1
REGULARLY_FOR : 1
HOME_MEDICATIONS : 1
MANAGEMENT_SEEN : 1
OUTSIDE_VA : 1
PALPITATIONS_VOIDING : 1
ND_FIANC : 1
BE_TO : 1
FATAL_EXISTS : 1
OF_REASSESS : 1
LAST_NOTE : 1
PROGRESS_NOTE : 2
TO_CLEAR : 1
FOR_PERIOD : 1
UNSPECIFIED_GYNECOLOGY : 1
NAD_DO : 1
HE_IS : 2
ACTIVE_ASPIRIN : 1
COUGH_PHYSICIAN : 2
WITHIN_LIMITS : 1
HE_GOES : 1
WAS_IN : 1
FUNCTIONS_TO : 1
INFLUENZA_BP : 1
MASK_HAVE : 1
NOT_INCLUDE : 1
HE_REPLIED : 1
PATIENT_THAT : 2
ALLERGIES_PCN : 1
TO_SEEN : 1
PHYSICIAN_AND : 2
OR_CEREBROVASCULAR : 1
CHANGES_SENSATION : 1
LEFT_GRIN : 1
AND_PHYSICAL : 1
WILL_SHE : 1
WEEK_ASKED : 1
SKIN_ASSESSMENT : 2
GYNECOLOGY_VETERAN : 1
NOT_AVAILABLE : 1
VACCINE_GIVEN : 1
TO_AND : 1
NOT_TO : 1
PER_ENTERED : 1
TH_RELEASED : 1
OF_BARRIERS : 1
RECEIVED_FLU : 1
FACILITY_ADR : 1
INTAKE_OUTPUT : 2
SOCIAL_SECURITY : 1
SUPPLIES_WILL : 1
HE_HAD : 2
IF_ARE : 1
SEEN_TO : 1
PHONE_IS : 1
MG_DL : 1
HIS_KNEE : 1
IS_IMPORTANT : 1
HE_TO : 2
OPT_ATENOLOL : 1
ADR_TIME : 1
PROVIDERS_ONYCHOMYCOSIS : 1
NEG_ON : 1
TO_EVERY : 1
APR_SPECTACLE : 1
ALLOW_HIM : 1
HEALTH_SCREEN : 1
TYPE_DTN : 1
OR_SOB : 1
EMPLOYED_DRIVER : 1
DIAGNOSIS_TENDINOPATHY : 1
OWN_PAYEE : 1
OF_TOXICITY : 1
CHRONIC_PULMONARY : 1
MINUTES_APPEARANCE : 1
VIA_TELEMETRY : 1
CENTER_NONE : 1
CALL_PT : 1
OF_PLAN : 1
OUTPUT_CBI : 1
HIM_EYEDROP : 1
BARRIERS_TO : 1
EVALUATE_HAS : 1
BY_ASSIST : 1
TO_FA : 1
PERSONS_IN : 1
HAS_KNEE : 1
CFILE_AVAILABLE : 1
NEURO_INTACT : 1
FROM_ACTIVE : 1
CHANGES_PAIN : 1
HIS_FAMILY : 1
REVIEWED_HISTORY : 1
THEIR_ATTEMPT : 1
IS_NONCONTRIBUTORY : 1
STATES_RECEIVED : 1
ASSISTANCE_INDEPENDENT : 1
PATIENT_ALSO : 1
ON_PT : 1
SGOT_NO : 1
BARRIERS_WERE : 1
BASE_AGAIN : 1
HAS_CONCERNS : 1
DEVELOPED_PAIN : 1
AT_HAS : 1
ALL_YOUR : 1
AND_TABLETS : 2
OR_EXPENSES : 1
ARTERIAL_DISEASE : 1
APNEA_ACTIVE : 1
WAIT_MINUTES : 1
HIS_ILIAC : 1
REACTIONS_EXISTS : 1
PAIN_YEARS : 1
YO_HIV : 1
DISCOMFORT_IS : 1
GROIN_PAIN : 1
ADD_BID : 1
WAS_NEEDED : 1
CAPSULE_BY : 1
AICD_ST : 1
GRIN_LEG : 1
IN_PLS : 1
PULSE_OXIMETER : 1
PAIN_SOB : 1
STAFF_NEEDED : 1
DOPPLER_TEMPERATURE : 1
FOR_THEN : 1
SKIN_LESIONS : 1
TO_GET : 1
FAMILY_SOCIAL : 1
DO_HAVE : 2
TCU_PATIENT : 1
ORTHOPNEA_NO : 1
NURSING_NOTE : 1
THE_MINUTES : 1
ABOVE_PAST : 1
FASTING_FOR : 1
EVERY_CLINIC : 1
THIS_VA : 1
YOU_EVER : 1
PAYEE_MEDICATION : 1
DENIES_SX : 1
BLEPHAROPLASTY_UPPER : 1
FROM_ARIPIPRAZOLE : 1
AND_PATIENT : 1
OR_GREATER : 1
MOIST_WARM : 1
PAYEE_RECONCILIATION : 1
NECK_AND : 1
AND_SC : 1
KNEE_PNT : 1
ORDER_TO : 1
MELENA_DENIES : 1
RIGHT_PAIN : 1
TABLETS_ACTIVE : 2
RESP_CLEAR : 1
CURRENTLY_IDENTIFIED : 1
EYEDROP_HE : 1
PLEASE_THE : 1
ANY_TO : 1
ED_THAT : 1
SENT_FROM : 1
INACTIVATED_VACCINE : 1
MOIST_SKIN : 1
NEXT_IN : 1
APPOINTMENTS_LAST : 1
LOWER_BACK : 1
CODE_NORMAL : 1
NONCONTRIBUTORY_CARDIOVASCULAR : 1
PAIN_QD : 1
YOU_TO : 3
OTHER_PERSONS : 1
HAD_CBI : 1
WAS_HIS : 1
ON_ASKING : 1
SENT_HOME : 1
NKA_INDICATED : 1
VS_WT : 1
JUDE_ADDENDUM : 1
BE_PATIENT : 1
NEEDS_PATIENT : 1
NEEDED_ONE : 1
DAILY_GET : 1
BECAUSE_WOMAN : 1
NO_OF : 1
MEDICAL_CENTER : 1
FOR_LAST : 1
TRUCK_ADDENDUM : 1
VOICE_AFTER : 1
BE_MAILED : 1
IN_OUTPATIENT : 1
OBSERVATION_BUT : 1
AST_ANSWER : 1
WARFARIN_DIFFERENTLY : 1
MINUTES_THE : 1
CLEAR_DISCHARGE : 1
OR_FROM : 1
EMPLOYED_TRUCK : 1
ANCE_HYGIENE : 1
STENOSIS_CARE : 1
THAT_SHE : 1
OUTPUT_NOTE : 1
CREATININE_MG : 1
HE_ALLERGIES : 1
ACCUCHEK_CV : 1
BE_AND : 1
INDICATED_INFLUENZA : 1
COULDNT_MOVE : 1
SET_CUEING : 1
HAS_SEVERAL : 1
FILED_SUPERVISION : 1
OF_HT : 1
VACCINE_VPA : 1
BOWEL_ROOM : 1
REQUEST_THE : 1
REQUESTED_DENIES : 1
NUMBER_OF : 1
UPCOMING_SCHEDULED : 1
PATIENT_AM : 1
YEAR_NO : 1
IN_CLINIC : 2
NO_APPARENT : 1
INCLUDING_ALLERGIES : 1
ATIVAN_TABS : 1
AS_VET : 1
TEMPERATURE_BY : 1
OF_YOUR : 1
PATIENT_PT : 1
NURSETRIAGE_WT : 1
RATIVE_CHANGES : 1
WITH_PAIN : 1
AND_NECK : 1
SUPPLIES_CALL : 1
PAST_AND : 1
THAT_THAT : 1
WERE_PLACED : 1
PAIN_PC : 1
KNEE_LOWER : 1
DOING_RTC : 1
ADMITTED_FOR : 1
HEALTHCARE_HAS : 1
NO_CAN : 1
AVAILABILITY_PATIENTS : 1
COLOR_APPEARANCE : 1
THAT_OVERALL : 1
MOUTH_AS : 1
OUTPUT_WELL : 1
KG_REMOVAL : 1
FROM_MENTIONED : 1
HB_PREVIOUSLY : 1
THE_MUC : 1
TABS_TO : 1
DIABETES_MOBILITY : 1
IMPOTENCE_OF : 1
WITH_YOU : 1
VTACH_IN : 1
OPEN_LESIONS : 1
AFTER_HEMODYNAMICALLY : 1
APPROPRIATE_CURRENTLY : 1
CALLER_AREA : 1
DYSLIPIDEMIA_APNEA : 1
SC_SERVICE : 1
AMARILLO_OUTSIDE : 1
TP_AND : 1
SEEN_LEAST : 1
CAN_WHY : 1
PAST_HOUR : 1
MINUTES_IN : 1
WILL_EVALUATE : 1
IN_IMPRESSION : 1
AND_SHOULD : 1
CALL_YOUR : 1
HER_PAYEE : 1
HIS_ANEURYSM : 1
WERE_CAD : 1
YO_IS : 1
ASSESSMENT_PHYSICIAN : 1
EVERY_ADDENDUM : 1
DESTINATION_AA : 1
FUTURE_APPOINTMENTS : 2
OCCUPATIONAL_THERAPY : 1
RECEIVED_HER : 1
HOSPITAL_SETTING : 1
AWARE_DISCHARGE : 1
DONNIE_THE : 1
HAS_BOTHERING : 1
INDEPENDENT_TO : 1
ENCOURAGE_WAIT : 1
HOME_TELEPHONE : 1
THE_IS : 1
APPEARANCE_YELLOW : 1
COLOR_SOUNDS : 1
CM_CHEST : 1
EMERGENCY_DEPARTMENT : 1
ALLERGIES_ADR : 2
HAS_CUSTOMIZED : 1
LEAST_TIME : 1
PALM_BEACH : 1
REPORTS_NORMAL : 1
SKIN_VOICE : 1
YES_CHARACTER : 1
DO_NOT : 1
SINCE_SESSION : 1
DATE_TO : 1
NAIL_YOU : 1
GYNECOLOGY_FEMALE : 1
ACCEPTED_FOR : 1
PRODUCTIVE_VISIT : 1
URINE_COLLECTED : 1
APPOINTMENT_CANCELLED : 1
MOVE_WELL : 1
AND_MEDICATIONS : 3
IMPRESSION_ACTIVITIES : 1
COUPLE_AGO : 1
AFTER_VOIDED : 1
HE_ISSUED : 1
OVER_THE : 1
PT_ANY : 1
PHONE_TO : 2
COUNSELING_FEMALE : 1
SX_PHYSICIAN : 1
EDUCATION_INFLUENZA : 1
THEN_V4POST : 1
PALPITATIONS_PNEUMONIA : 1
LIST_ALL : 1
REPLIED_ONLY : 1
NQUIRE_ABOUT : 1
PT_AND : 1
SPLENECTOMY_PATIENT : 1
SEEN_BY : 1
AT_APPOINTMENTS : 1
BENEFITS_THE : 1
MEDICATIONS_LEFT : 1
PRESENT_PATIENT : 1
INCLUDE_SEX : 1
OVER_PAST : 1
NAME_OF : 1
HIS_LAST : 1
WOMAN_WAS : 1
HTN_PND : 1
ABOUT_THE : 1
PAIN_NEURO : 1
NO_VETERAN : 1
PHQ_LB : 1
MONTH_PROGRESS : 1
PAST_OFTEN : 1
OFTEN_DID : 2
BUMPS_TOP : 1
WITHOUT_OR : 1
BEEN_BOTHERED : 1
RIGHT_SHOULDER : 2
HYGIENE_WERE : 1
HOUR_NEW : 1
AGAIN_IN : 1
REPORT_NOV : 1
WITH_CAROTID : 1
SURGERY_OD : 1
AND_OUTPUT : 2
UPCOMING_ATTEMPT : 1
HAVE_REVIEWED : 2
WRITTEN_NATIVE : 1
PSU_BUEG : 1
PROVIDERS_OUTSIDE : 1
WELL_STATES : 1
WAS_SO : 1
THE_TREATING : 1
THEN_HE : 1
IN_WAS : 1
TH_FROM : 1
RESPOND_TO : 1
TAKE_ONE : 2
WITHIN_PAST : 1
DISEASE_CEREBROVASCULAR : 1
LONG_BEULAH : 1
DELUSION_HE : 1
PULMONARY_DISEASE : 1
AT_ACTIVE : 1
DEC_BLUE : 2
DYSLIPIDEMIA_OBSTRUCTIVE : 1
REGULAR_DOPPLER : 1
SKIN_TEMPERATURE : 1
ORGANIC_ICDCM : 1
DXD_NEVER : 1
PROVIDER_HOOVER : 1
URINE_APPEARANCE : 1
PRIOR_ACTIVE : 1
WRITTEN_DR : 1
BE_IN : 1
NAME_ALLERGIES : 1
ADR_HAS : 1
WITH_WALKING : 1
MG_STATUS : 1
TRUCK_DRIVER : 1
WITH_DATE : 1
HISTORY_FALLS : 1
ADDENDUM_SURGERY : 1
ACTIVE_INITIAL : 1
TEMP_ADDENDUM : 2
VISITS_VIS : 1
THE_HOW : 1
SURGERY_GRIN : 1
ADJ_PATIENT : 1
AN_ON : 1
APPROPRIATE_INPATIENT : 1
OU_CHRONIC : 1
CURRENT_ASSESSMENT : 1
AVAILABILITY_OF : 1
GENOBESE_COMFORTABLE : 1
THAT_DIDNT : 1
TO_VITAL : 2
TESTING_THE : 1
HISTORY_OF : 2
NO_SIGNS : 1
HAVE_QUESTIONS : 1
MEDICATION_CONSULT : 1
SPECIFY_LIST : 1
STAFF_AND : 1
ORDER_MED : 1
DOING_WELL : 1
ADMITTED_TO : 1
LIMITATION_GENDER : 1
HOLD_SEC : 1
HAS_QD : 1
DOCUMENT_ELECTRONICALLY : 1
APPEARANCE_ANCE : 1
OF_GREATER : 1
NO_PRIMARY : 1
ADDENDUM_EYE : 1
STENT_PLACEMENT : 1
UPDATE_READING : 1
HE_HEPATITIS : 1
PER_PATIENT : 1
DERMATOPHYTOSIS_NAIL : 1
COPY_CHART : 1
FOLLOWING_DRUG : 1
ON_KNEE : 1
REACH_BY : 1
PATIENTS_REQUEST : 1
BACK_NECK : 1
DICYCLOMINESTATED_LAST : 1
YOU_ANY : 1
ACCORDING_OUR : 1
CALLER_WEST : 1
DELETED_CHANGED : 1
PLEASANT_PRODUCTIVE : 1
ANTICOAGULATION_WOKE : 1
GIVEN_CHAMBER : 1
ALLERGIES_PENICILLIN : 1
NEED_BE : 1
HOURS_DYSPNEA : 1
TAB_TABLET : 1
NO_HISTORY : 1
ARMY_RECORD : 1
SEC_REP : 1
REPAIR_OTHER : 1
IDEATION_MEMORY : 1
HISTORY_DATED : 1
COLLECTED_TAKEN : 1
PHARYNGITIS_LONG : 1
NONCONTRIBUTORY_REVEALS : 1
STATUS_PLACED : 1
NOT_HAVING : 1
READING_GLASSES : 2
NEG_SKIN : 1
LAB_UA : 1
AND_REPAIR : 1
MEDICAL_NONE : 1
PAST_HE : 1
CAREGIVER_GIVEN : 1
OR_THE : 2
HE_VTACH : 1
AGO_WITH : 1
PAIN_DATE : 1
GROIN_WITH : 1
INFORMATION_OPT : 1
DROPS_ADMINISTERED : 1
VACCINE_APPEARANCE : 1
STATUS_NO : 1
ASSISTANCE_WITH : 1
DELTOID_HEALTH : 1
YOU_HAD : 2
DATA_ACCUCHEK : 1
PROVIDED_COPY : 1
REVEALS_RECENT : 1
FOLLOWING_NEEDS : 1
THE_RIGHT : 2
OPHTHALMOLOGY_HISTORY : 1
LAST_MONTH : 1
SPECIFIC_POST : 1
CONTACT_TO : 2
IS_MORPHINE : 1
THE_ABOVE : 1
DISEASE_PHYSICIAN : 1
CHANGE_SSN : 1
PAST_YOU : 1
PATTERNS_RESPONDED : 1
MISSED_ANY : 1
INDEPENDENT_PLANS : 1
PRESSURE_ULCER : 1
TESTS_WERE : 1
AS_FOUR : 1
HT_CM : 1
TID_RF : 1
ABOUT_ADDENDUM : 1
OS_SERVICE : 1
HAS_CONSESQUENCES : 1
NOT_OCCUR : 1
ICDCM_OVER : 1
REPORTS_MY : 1
AGAIN_SVT : 1
PAIN_CONTROL : 1
LAST_MONTHS : 2
ANSWERED_NKA : 3
HIGH_SPLENECTOMY : 1
BODY_OCCUPATIONAL : 1
OF_PATIENTS : 1
COUGH_EXPECTORATE : 1
NO_MEMORY : 1
VIAL_THE : 1
ACTIVE_APPOINTMENT : 1
HYPERTENSION_MELLITUS : 1
EYEDIABETIC_NONE : 1
THERAPY_PROGRESS : 1
IN_SVT : 1
OF_PILL : 1
SEX_FOR : 1
CONSTANT_SIGNAL : 1
PLAN_VETERAN : 1
BE_AT : 1
IS_ALLERGIES : 1
FOLLOWUP_POTENTIALLY : 1
SERVED_LESS : 1
TO_CONTINUE : 1
ACCORDING_TO : 1
WITH_INSTRUCTIONS : 1
WAIT_IN : 1
TP_BACK : 1
PER_AND : 1
OF_IN : 1
DISCUSS_WITH : 1
AND_BACK : 1
PELVIC_HOLD : 1
EVERY_FOR : 2
FLU_VACCINE : 1
APPROVED_THE : 1
EDUCATION_THE : 1
PATIENT_INSTRUCTIONS : 1
CLINIC_ACTIVE : 1
SOCIAL_NUMBER : 1
CONTACT_DID : 1
BP_FROM : 1
PRIOR_PROBLEMS : 1
SHOULDER_DONE : 1
GETTING_ALLERGY : 1
ADMINISTERED_MYDRIACYL : 1
THAT_ALL : 1
REMOVAL_OCCUPATIONAL : 1
COULDNT_WELL : 1
ER_PROVIDER : 1
IS_OX : 1
OF_THEIR : 1
NEEDED_IS : 1
TO_OF : 2
PHYSICIAN_TURGOR : 1
THE_MEDICAL : 1
TO_AFTER : 1
TO_FOR : 2
NURS_TP : 1
EXAMINATION_NONCONTRIBUTORY : 1
BIKE_HE : 1
LAST_NAME : 1
LOW_IRON : 1
OF_ANY : 1
TO_THE : 5
BLOOD_PRESSURE : 1
THE_NONFORMULARY : 1
ORGANIZED_PRIOR : 1
PHONE_HOME : 1
ACTIVE_TO : 1
ALSO_PROVIDED : 1
ASSESSMENT_INITIAL : 1
CBI_OUTPUT : 1
INPATIENT_DATA : 1
CHART_DEPARTMENT : 1
NO_CP : 1
PAIN_INPATIENT : 1
THE_MEDICATIONS : 1
ARRIVED_VIA : 1
STATUS_ACTIVE : 1
NURSING_ARRIVED : 1
FOR_APPLY : 1
LEFT_ANKLE : 1
AGO_NECK : 1
THE_OF : 1
OF_SORT : 1
UPSETTING_THE : 1
NO_DATA : 1
NUMBER_NOT : 1
ENDERLIN_WITH : 1
APPEARANCE_PHYSICIAN : 1
SSN_TRAN : 1
BY_MOUTH : 4
PATIENT_EDUCATION : 2
AND_TAKEN : 1
RN_TO : 1
MEMORY_PROBLEMS : 1
BASE_PT : 1
ONE_CAPSULE : 1
LAB_FOR : 1
PAIN_WITH : 1
PLACED_TO : 2
PT_CONTINUE : 1
IS_NOTE : 1
IS_ATTENDING : 1
PROBLEM_SKIN : 1
UPPER_AND : 1
CURRENT_USER : 1
EVEN_HEART : 1
PATIENT_NAME : 1
PAIN_AFTER : 2
THE_WAS : 1
CPRS_OUTPATIENT : 1
DO_HAS : 1
RECEIVE_WITH : 1
YOU_NOTE : 1
PT_HAS : 3
HISTORY_PHYSICAL : 2
CHIEF_COMPLAINT : 1
NATIVE_WEIGHT : 1
PSU_IS : 1
ICDCM_LONG : 1
HEENT_EXAMINATION : 1
ABOVE_NOTELEFT : 1
LESIONS_OR : 1
TO_FOLLOWED : 1
DID_NOT : 4
VISIT_ORIENTED : 1
MULTIDOSE_VIAL : 1
COUMADIN_MG : 1
ABNORMAL_OR : 1
BEACH_PENICILLIN : 1
AND_THEN : 1
SIGNAL_PT : 1
CONTROL_IMPORTANT : 1
THAT_HE : 2
NO_SKIN : 2
AT_PATIENTS : 1
BEEN_HIM : 1
DXD_YEAR : 1
CARPAL_SYND : 1
OF_ADDENDUM : 1
HISTORY_DURATION : 1
SOB_TO : 1
FOLATE_LOW : 1
MY_PAIN : 1
CLINICAL_BILATERAL : 1
SUBJECTIVE_YEAR : 1
JOINT_RATIVE : 1
TO_MINUTES : 1
ENDERLIN_ND : 1
ASSESSMENT_COUGH : 1
FILED_SET : 1
PLASMA_CREATININE : 1
AND_RECONCILED : 1
UP_OF : 1
BUSY_PT : 1
AND_HYGIENE : 1
REASON_FOR : 2
PASS_VIA : 1
NOTE_HE : 1
TAKE_TABLET : 3
PHYSICAL_ED : 1
WAS_NOT : 1
THE_FOR : 1
HIP_APPOINTMENT : 1
MOUTH_WEEKLY : 1
INPATIENT_IDENTIFIED : 1
SAT_REMAINING : 1
DEPARTMENT_COVER : 1
THE_THREE : 1
DENIES_SHORTNESS : 1
CONTINUE_TAKING : 1
OR_PATIENT : 1
DOE_PALPITATIONS : 1
STATUS_SIG : 1
LEARNER_BARRIERS : 1
DO_YOU : 2
TOILET_POST : 1
CHANGE_AFTER : 1
UNLABORED_HEART : 1
FOR_AND : 1
NOTE_HIS : 1
LEAST_ONE : 1
ACTIVITIES_REQUIRE : 1
REQUEST_THAT : 1
CBOC_NO : 1
YO_NAD : 1
WILL_DISCUSS : 1
TO_LAB : 1
PHYSICIAN_PAKALNIS : 1
ML_TOTAL : 1
ANY_PATIENT : 1
CONSTANT_BUSY : 1
CLONAZEPAM_TAB : 1
PATIENT_INTENSITY : 1
PATIENTS_HOME : 1
SEEN_FOR : 1
TO_DATE : 1
INITIAL_APPOINTMENT : 1
LANGUAGE_WEIGHT : 1
HAD_EXPERIENCE : 1
SEVERAL_BUMPS : 1
LAB_WERE : 1
NOT_WORKED : 1
SPECIAL_LAB : 1
TO_STAFF : 1
CARPAL_TUNNEL : 1
THE_PAST : 4
RECOMMENDATION_DYSPNEA : 1
HIS_SITUATION : 1
ONE_BY : 2
TO_PHONE : 1
PATIENT_CHEST : 1
THERAPY_OXIMETER : 1
THERE_ARE : 1
APPARENT_PROBLEM : 1
MINUTES_PHYSICIAN : 1
AND_PRIOR : 1
FOLLOWING_SPECIALTY : 1
EYES_DOPPLER : 1
NONVA_INCLUDING : 1
THAT_WAS : 3
CHANGES_STATUS : 1
AND_EQUAL : 1
THE_STARTED : 1
CEREBROVASCULAR_ACTIVE : 1
OR_FOLLOWING : 1
SEARIGHT_HIS : 1
AND_ALERT : 1
EARMOLD_MIC : 1
PROVIDE_ASSISTANCE : 1
OF_PATIENT : 1
INSTILL_DROP : 1
VA_ANTICOAGULATION : 1
YO_IN : 1
HURTING_NO : 1
ACTIVE_CREATININE : 1
FRICTION_NO : 1
DIAGNOSIS_RTC : 1
PRESSURE_OF : 1
LEARN_EXPRESSED : 1
MG_MORE : 1
CONSTRUCTION_SELF : 1
EXAMINATION_IS : 1
AND_HEALTH : 1
ASSISTANCE_PLANS : 1
AFTER_FRIEND : 1
AND_FOR : 1
FOR_INFECTION : 2
SCREEN_FOR : 1
THIS_OTHER : 1
IF_EXTRADEPTH : 1
NW_GLASS : 1
SKIN_THE : 1
HE_WORRIED : 1
HOME_ARIPIPRAZOLE : 1
WITHOUT_SPECTACLE : 1
ONEHALF_ACTIVE : 2
SAID_THAT : 1
AND_HIM : 1
THE_PT : 1
WI1010M_NURSETRIAGE : 1
ANY_DOSES : 1
REQUIRED_QUESTIONS : 1
DEPRESSION_ANXIETY : 1
RECENT_SURGERY : 1
THEIR_UPCOMING : 1
ANY_PAIN : 1
LAST_COSOPT : 1
ONE_SIGNATURE : 1
EQUAL_TCM : 1
PATIENT_HAS : 4
OUTPATIENT_JOB : 1
KNEE_ACTIVE : 1
PO_RF : 1
FRIEND_DO : 1
RECEIVE_LETTER : 1
MALE_SOAPE : 1
SITUATION_ABOUT : 1
DIDNT_WELL : 1
HOOVER_WED : 1
DOCUMENT_PREVIOUSLY : 1
DAILY_HE : 1
WITH_HIM : 2
DID_OCCUR : 1
OTHER_UNSPECIFIED : 2
TO_VETERANS : 1
AND_PER : 1
ASKED_IF : 1
PHYSICIAN_THE : 1
FX_BODY : 1
NEVER_LEG : 1
BREATH_STATE : 1
HAS_INR : 1
SAFE_EFFECTIVE : 1
OR_DISEASE : 1
MEDICATIONS_PREVENTIVE : 1
OF_FOR : 1
CURRENT_PAIN : 1
RECONCILIATION_COMPLE : 1
REPORT_RECEIVED : 1
THAT_BE : 2
REVEALS_MOST : 1
AND_NOT : 1
TEMP_WARM : 1
FOR_PAST : 1
NURSING_PATIENT : 1
ACCEPTED_PATIENT : 1
EYEDROP_DID : 1
SCORE_IS : 1
OCCASION_IN : 1
STATUS_NURSETRIAGE : 1
PAIN_PROVIDER : 1
TELEMETRY_YES : 1
PNDS_NO : 1
HAS_NO : 2
PROGRESS_INFLUENZA : 1
PLS_PCP : 1
BRUISING_PT : 1
OF_LEFT : 1
PAIN_THAN : 1
TO_PROGRAM : 1
HISTORY_SEEN : 1
DISEASE_SPECIFIC : 1
OCCUR_NUMBER : 1
UP_CUEING : 1
AND_LEVATOR : 1
HGBAC_PAST : 1
HAVE_TO : 1
PATIENT_ASSESSMENT : 1
ICDCM_BIKE : 1
ANEURYSM_STATIONARY : 1
IV_AND : 1
INSTRUCTIONS_CALL : 1
NUMBER_RESP : 1
GOES_TO : 1
IS_FROM : 1
MONTHS_HAVE : 1
SIGNS_TAKEN : 2
OUTPATIENT_TRAN : 1
APPOINTMENTS_NOTED : 1
ATIVAN_MG : 1
THE_EYE : 1
FOUR_TIMES : 1
WRITTEN_BY : 1
DENIES_EARMOLD : 1
HYPERTHYROIDISM_LEVEL : 1
TRHE_LEFT : 1
RECEIVED_LODGING : 1
NEEDS_WERE : 1
MANAGEMENT_PREVIOUSLY : 1
THE_IF : 1
NURSE_RECOMMENDATION : 1
OWING_HEMODYNAMICALLY : 1
PULSE_FRICTION : 1
VOIDED_CC : 1
OF_ILLNESS : 1
OUTOF_PM : 1
DIFFERENTLY_WHAT : 1
TIBIAL_MEDICATIONS : 1
BID_ONE : 1
BATHING_LEVEL : 1
MIC_CHANGE : 1
NONVA_FOR : 1
VETERANS_PHONE : 1
MEDICATIONS_HEALTH : 1
TAB_ACTIVE : 1
REPORTS_CHEST : 1
HAVE_ANY : 1
COMPLAINT_PAIN : 1
RECORDS_NO : 1
OF_RIGHT : 2
VPA_BID : 1
DERMATOPHYTOSIS_IRWIN : 1
PHYSICIAN_INTAKE : 1
DATE_SOURCE : 1
TELL_THAT : 1
PT_TO : 1
LAST_ASKED : 1
PRIMARY_PROVIDER : 1
SHOES_WITH : 1
LIMITATIONS_BARRIERS : 1
OF_INFLUENZA : 1
THAN_LAST : 1
TIME_HE : 1
REVIEWED_HAS : 1
IN_EMERGENCY : 1
OR_IF : 2
SYMPTOMS_WARFARIN : 1
ACTIVE_CALL : 1
RIGHT_HEAD : 1
AC_JOINT : 1
THIS_LIST : 1
HISTORY_AND : 1
NEGATIVE_YOU : 1
AT_PT : 1
EAGER_TO : 1
DOE_VOIDING : 1
PAST_APPOINTMENTS : 1
PSYCHOLOGY_MEDICAL : 1
PATIENT_STENT : 1
GREATER_CARPAL : 1
FOLLOWUP_FATAL : 1
DESTINATION_HOME : 1
IN_PRESENTS : 1
REMIND_HER : 1
CORRECTION_TO : 1
WEST_PALM : 1
NONE_READING : 1
NORMAL_AT : 1
PCN_OF : 1
OPT_MG : 1
SEEN_AT : 1
LETTER_INSTRUCTIONS : 1
THROMBOS_ACTIVE : 1
LIMITATION_NAME : 1
SEASON_HERE : 1
PAIN_IS : 2
TO_HEENT : 1
THIS_WITH : 1
PURSUING_HER : 1
HIM_PT : 1
VS_REVIEWED : 1
RARELY_MOIST : 2
PASS_FROM : 1
IN_ID : 1
DOPPLER_MEDICATIONS : 1
OUTPUT_MOISTURE : 1
FROM_NW : 1
INSTRUCTIONS_COPY : 1
FROM_OTHER : 1
FRICTION_APPARENT : 1
ABOUT_FUTURE : 1
HAVE_RESPONDED : 1
DESERT_PACIFIC : 1
FOR_OBSERVATION : 1
FOR_FOLLOWUP : 1
THE_INFLUENZA : 1
PER_SUBJECTIVE : 1
NURSING_OUTPATIENT : 2
HAS_DENSE : 1
AOX_HAD : 1
OF_CONSCIOUSNESS : 1
MYCOTIC_TOENAILS : 1
PRIMARY_CARE : 2
INCLUDING_PLEASE : 1
HAS_MADE : 1
IS_MEDGENERAL : 1
HOME_PREVENTIVE : 1
ANY_MELENA : 1
TO_BUT : 1
VISIT_NEUROPATHY : 1
ACTIVITY_FUNCTIONS : 1
COUMADIN_DAILY : 1
INITIAL_THERAPY : 1
RECEIVED_STENT : 1
MASK_PAGED : 1
LAB_TESTS : 1
PAST_HISTORY : 2
NURSETRIAGE_BP : 1
BEULAH_APPOINTMENTS : 1
YEAR_THE : 1
HORRIBLE_OR : 2
MOISTURE_TURGOR : 1
DAILY_HAS : 1
OX_VISIT : 1
IS_BY : 1
RESP_PULSE : 1
DEPARTMENT_NOTE : 1
OUTPATIENT_NONVA : 1
FOLLOWED_IN : 1
ALLERGIES_PATIENT : 3
STENOSIS_HME : 1
HIS_LAB : 1
LISTED_PAST : 1
ANY_EXPERIENCE : 1
PATIENT_FROM : 1
UCINATION_DELUSION : 1
WAS_MEDICATION : 1
IMPORTANT_OF : 1
VITAL_QUALIFIERS : 1
WAS_THIS : 1
PASS_CFA : 1
TEMP_PT : 1
NOT_MEDGENERAL : 1
QUESTIONS_TO : 1
ANY_DING : 1
ACTIVE_FASTING : 1
BY_PHYSICIAN : 1
VACCINATION_STATEMENT : 1
MENTIONED_HE : 1
INFORMATION_BILATERAL : 1
FOR_MEDICATION : 2
PATIENT_OF : 3
OR_UPSETTING : 2
ACTIVE_MEDICATIONS : 6
WEIGHT_LB : 2
RBC_DYSLIPIDEMIA : 1
SAT_ON : 1
SUBJECTIVE_PROBLEM : 1
PRESENTS_FOR : 1
FOLLOWUP_REPORTS : 1
RHYTHM_YES : 1
MG_BID : 2
CREATININE_DL : 1
SORT_IN : 1
AND_DEVELOPED : 1
MEDICAL_IS : 1
BUT_DISCUSS : 1
HIM_AT : 1
HAVE_EVER : 1
ADMISSION_WAS : 1
NONPRODUCTIVE_DIABETES : 1
PAIN_TO : 2
WEEK_TWO : 1
PCN_LOCATION : 1
CLEAR_HE : 1
SPECIALTY_TCU : 1
NORMAL_LIMITS : 1
YOU_WILL : 1
HE_DIDNT : 1
QUALIFIERS_CODE : 1
STATES_NOT : 1
MEDICATIONS_RESP : 1
KNEE_TO : 1
PRIOR_TO : 1
TEMP_COLOR : 1
MEMORY_NO : 1
WORKED_UP : 1
OF_PM : 1
WEEKEND_HOME : 1
OR_THROMBOSIS : 1
CATARACT_CHRONIC : 1
STENT_PULSE : 1
HOW_OFTEN : 3
MEDICATIONS_NO : 1
OBSTRUCTIVE_APNEA : 1
TOP_RIGHT : 1
NAME_GENDER : 1
NUMBER_REMIND : 1
INACTIVATED_INFLUENZA : 1
DTN_CLINICAL : 1
APPOINTMENT_HGBAC : 1
BURSITIS_APPOINTMENT : 1
ACTIVE_SERUM : 1
ULCER_PROTOCOL : 1
LAST_WEEK : 2
ALCOHOL_THE : 1
PULLEYS_MRI : 1
MOBILITY_LIMITATION : 2
RECOMMENDATION_HOURS : 1
TESTS_DEC : 1
MUC_OF : 1
TAKING_WARFARIN : 1
HOLD_REP : 1
LB_KG : 3
COPY_IN : 1
DISPENSED_PHYSICIAN : 1
THE_WEEK : 1
TUNNEL_ICDCM : 1
ABOUT_THIS : 2
BY_EVERY : 2
PRESCRIPTION_MAILED : 1
TAKE_ONEHALF : 1
TO_READING : 1
WERE_DO : 1
IN_NATIVE : 1
ADR_PATIENT : 1
SOUNDS_WHOM : 1
ENCOUNTER_MULTIDOSE : 1
TO_HE : 2
FOR_OUTOF : 1
DYSPNEA_WITHIN : 1
PULSE_IS : 1
METHADONE_MG : 1
EXPENSES_SINCE : 1
FOR_MANAGEMENT : 1
STATE_PHYSICAL : 1
MEDICATIONS_ALLERGIES : 1
CFA_AFF : 1
EXPERIENCE_WAS : 1
THE_OPHTHALMOLOGY : 1
RECONCILIATION_COUGH : 1
WOUNDS_LEFT : 1
APPROVED_BY : 1
AND_ALLERGIES : 1
MORPHINE_TEMP : 1
TIME_SUBJECTIVE : 1
RECORD_FROM : 1
RESP_PHARYNGITIS : 1
PAIN_ACUTE : 1
CBI_IRRIGANT : 1
EDUCATION_OR : 1
PSYCHOLOGY_PAST : 1
AND_IN : 1
CUSTOMIZED_MEDICAL : 1
HOURS_WITHIN : 1
PATIENT_STATES : 1
PENICILLIN_OF : 1
COPY_GENITALIA : 1
UPPER_BLEPHS : 1
SEASON_EITHER : 1
MOUTH_AT : 1
ADMISSION_BASE : 1
KNEE_PAIN : 5
THE_LAST : 1
REQUEST_NONFORMULARY : 1
ACTIVE_PROBLEMS : 1
SENSATION_INTACT : 1
QUALITY_OF : 1
APRIL_OF : 1
ANY_ABNORMAL : 1
HISTORY_PRESENT : 1
AIR_INTAKE : 1
DIZZINESS_NO : 1
QUALITY_PRIMARY : 1
HAD_HEPATITIS : 1
OF_TO : 1
PATIENTS_TO : 1
STATE_WHY : 1
OUTOF_RANGE : 1
TAKING_MG : 1
SCHEDULED_FOR : 1
SINCE_LAST : 1
LETTER_HE : 1
IN_PAST : 3
ADR_MG : 1
DEVELOPED_YO : 1
TO_PATIENT : 1
COMFORT_CV : 1
PROGRAM_STAFF : 1
MG_PO : 1
PREVIOUSLY_COUGH : 1
AST_NO : 1
BEACH_MEDICATIONS : 1
AT_REQUEST : 1
TURGOR_RADIAL : 1
THAT_PATIENT : 1
FROM_VITAL : 1
LOW_SAT : 1
TAKEN_CLINIC : 2
TREATING_SPECIALTY : 1
SUPPLIES_ALLERGIES : 1
SERVICE_CONNECTED : 1
CM_OUTPATIENT : 1
FRIEND_HAS : 1
FOR_TWO : 1
RECENT_LDL : 1
BY_WEEKLY : 1
RELATIONSHIPS_DO : 1
CURRENT_PATIENT : 1
GETTING_HER : 1
TO_REFUSE : 1
AVAILABLE_SITE : 1
IMMUNIZATION_ENCOUNTER : 1
IMPRESSION_DO : 1
AND_FACILITY : 1
HIGH_DIET : 1
DOCUMENTED_CPRS : 1
ROBERSON_FOLLOWING : 1
NONE_VIS : 1
WEEK_NAME : 1
IDEATION_NO : 1
V4POST_DISCHARGE : 1
ASPIRIN_TEMP : 1
OUTPUT_AAOX : 1
MORPHINE_NURSING : 1
YOU_HAVE : 5
NEW_OR : 1
BE_SEEN : 1
LAST_BY : 1
STARTED_HERE : 1
FAMILY_SITUATION : 1
INFLUENZA_DUAL : 1
BY_TO : 1
REACTION_UNPL : 1
TABS_DISPENSED : 1
ARMY_PER : 1
ASKING_FOR : 1
NO_ANSWER : 1
NO_DEPRESSION : 1
AN_EFFECT : 1
PAKALNIS_OPHTHALMOLOGY : 1
HER_TO : 1
MISSED_DOSES : 1
CHANGES_NEURO : 1
INCREASED_PAIN : 1
VISIT_RELATIONSHIPS : 1
CALL_VETERANS : 1
STAND_ASSIST : 1
HYPERTENSION_DIABETES : 1
NOT_REQUIRED : 1
BUT_DID : 1
TURGOR_EYES : 1
NONE_WITH : 1
STATES_THROMBOS : 1
WELL_VEIN : 1
NEW_MASK : 1
TELEPHONE_CONTACT : 1
IS_NO : 1
NATIVE_LANGUAGE : 1
TAKE_AND : 2
NOT_NEEDED : 1
CURRENT_TOBACCO : 1
VACCINE_ADR : 1
OXIMETER_FRICTION : 1
PULSE_TILTS : 1
HIM_ALL : 1
WAS_ACCEPTED : 1
LEVATOR_REPAIR : 1
NEVER_CLINIC : 1
PROCEDURE_PHYSICIAN : 1
HEART_RHYTHM : 1
BARRIERS_RIGHT : 1
ICDCM_BEULAH : 1
EXPRESSED_WILLINESS : 1
HYPERTHYROIDISM_OF : 1
GIVEN_THIS : 1
WARM_ADDENDUM : 1
COMPLETED_COUGH : 1
ANY_NEW : 1
MONTH_NOTE : 1
DISCHARGE_FOLLOWUP : 1
INSTILL_IN : 1
TO_QUESTIONS : 1
COUNTER_FROM : 1
VIA_RATE : 1
TAKING_COUMADIN : 1
VITALS_TO : 2
GLASSES_NEED : 1
IN_PATIENT : 1
SCREEN_PAST : 1
GENITALIA_RECENT : 1
VACCINE_OPT : 1
CAN_WRITE : 1
OWING_STABLE : 1
APPOINTMENTS_OR : 1
TABLETS_ASPIRIN : 1
SERVICE_EYE : 1
EXPECTORATE_NO : 1
TCM_RBC : 1
PATIENT_PHONE : 1
AAOX_BUILT : 1
VISIT_TOENAILS : 1
FROM_PROVIDERS : 1
YES_DOPPLER : 1
PLASMA_MG : 1
OF_UNDERLYING : 1
ST_JUDE : 1
DRIVER_EYE : 1
PENICILLIN_PATIENT : 1
PATSY_WIFE : 1
GRIN_FOR : 1
DIZZINESS_UCINATION : 1
BILATERAL_PAIN : 1
MEDICAL_EYEDIABETIC : 1
WEIGHT_KG : 2
VOLUME_REMAINING : 1
PLANS_ATTEND : 1
VIAL_PATIENT : 1
DISCHARGE_HOME : 1
WITH_ADLS : 1
URINE_COLOR : 1
WELL_IN : 1
ROBERSON_THE : 1
LDL_MEDGENERAL : 1
IN_CHART : 1
RADIAL_DOPPLER : 1
TO_SIGNS : 1
MEDICATION_CALL : 1
INSERTS_OPEN : 1
DR_FOR : 1
OUTPATIENT_ARRIVED : 1
PAIN_HTN : 1
READINESS_TO : 1
ALLOW_TO : 1
DENIES_ISSUED : 1
FOR_PM : 1
REFERRAL_RTC : 1
TO_UPDATE : 1
RECORD_HOME : 1
ILLNESS_EDUCATION : 1
WILL_WITH : 1
HAVE_CONTAINING : 1
LEVEL_COUGH : 1
LOWER_AS : 1
OVERHEAD_MRI : 1
PAST_CHEST : 1
IN_WHEN : 1
FACILITY_ALLERGY : 1
VIA_HISTORY : 1
EYE_ENDOBROW : 1
IER_YEAR : 1
TO_HIGH : 1
MEDICATIONS_SUPPLIES : 5
ONE_PER : 1
OTHER_ANY : 1
ADDENDUM_REVIEWED : 1
RN_REVIEW : 1
WEEKLY_AS : 1
BY_ROBERSON : 1
MOISTURE_RARELY : 2
ION_INTAKE : 1
BE_ADMITTED : 1
EC_CAP : 1
PAGED_PHYSICIAN : 1
PATTERNS_HAVE : 1
MOIST_COLOR : 1
ERE_AND : 1
SCREEN_MEDICAL : 1
DISCUSS_YOU : 1
CARE_ACTIVITIES : 1
TO_FASTING : 1
OF_BREATH : 1
COLOR_ADMISSION : 1
HT_IN : 1
CAN_STATE : 1
IF_THE : 1
THIS_YEAR : 1
ONE_OCCASION : 1
WAS_RECEIVED : 1
PC_FOLLOWUP : 1
HIS_SON : 1
ONYCHOMYCOSIS_DERMATOPHYTOSIS : 1
SCHEDULED_REASON : 1
AMIODARONE_BID : 1
OUTPATIENT_SCREEN : 1
SOURCE_OF : 1
THAT_YOU : 2
REMIND_HIM : 1
ADDENDUM_EXTREMITY : 1
PC_HOOVER : 1
CONTROL_SIGNS : 1
EXISTS_FLU : 1
YOUR_PRIOR : 1
FOREIGN_BODY : 1
CLINIC_AMARILLO : 1
TOXICITY_THROMBOSIS : 1
COUGH_FEELS : 1
CLEAR_YES : 1
HAVE_BEEN : 2
TO_MEDICATION : 1
WILLINESS_TO : 1
REPORT_CBC : 1
TILTS_SEC : 1
RIGHT_REFUSE : 1
RESPONDED_THE : 1
MAY_NEW : 1
PAST_PAIN : 1
OTHER_PROVIDERS : 1
NEW_DELETED : 1
1010M_VITALS : 1
FILTER_CHANGE : 1
ASKS_QUESTIONS : 1
INTERESTED_IN : 1
LOCATION_CURRENT : 1
DID_RESPOND : 1
HER_OWN : 1
BEFORE_SUPPER : 2
BACK_AS : 1
ICDCM_ADDENDUM : 2
PATIENTS_RIGHT : 1
SPECIAL_MEDICATION : 1
THIS_SEASON : 1
DIFFERENTLY_THAN : 1
YEAR_WITH : 1
TRHE_ANKLE : 1
GUARDIANSHIP_TO : 1
NOT_RESPOND : 1
BARRIERS_ASSESSED : 1
ACCEPT_THE : 1
SPECIAL_TESTS : 1
VET_AS : 1
TOXICITY_OR : 1
ASKED_THE : 1
SKIN_INPATIENT : 1
LAST_THREE : 1
LEVATOR_OTHER : 1
TOTAL_OUTPUT : 1
CAT_PCIOL : 1
PLACEMENT_PULSE : 1
HISTORY_GLU : 1
PATIENT_CHRONIC : 1
SIGNED_IN : 1
HEALTHCARE_NETWORK : 1
MEDICATION_APPROVED : 1
SPECIMEN_RECEIVED : 1
TWO_ONEHALF : 2
NO_BOWEL : 1
QUESTIONS_ABOUT : 1
OUR_RECORDS : 1
REVIEWED_THE : 1
FOR_MYCOTIC : 1
RANGE_RESPONSES : 1
AC_SAFE : 1
INTENSITY_DATE : 1
FIANC_NA : 1
GENDER_MALE : 1
PATIENT_REEXAMINED : 1
DL_PAIN : 1
THAT_TIME : 1
CAD_ICDCM : 1
ROOM_AIR : 1
AS_THAT : 1
SSN_OUTPATIENT : 1
COUNTER_OR : 1
WED_METHADONE : 1
ALERT_TELEPHONE : 1
SOURCE_HISTORY : 1
ACTIVITIES_THAT : 1
VETERAN_ON : 1
MOS_OR : 1
TO_RECORDS : 1
WERE_ASSESSED : 1
HAVE_YOU : 2
PAST_MONTH : 1
ADDENDUM_RECEIVED : 1
HAS_INCREASED : 1
DIDNT_LAST : 1
ELECTRONICALLY_SUPERVISION : 1
EXPECTORATE_BOWEL : 1
VITAL_TEMPERATURE : 1
THAT_DENIES : 1
TO_DISCUSS : 1
SIGNS_OF : 1
ME_ILIAC : 1
PHYSICIAN_THAT : 1
REFILLS_LAST : 1
ALL_THE : 1
RESPONSES_NONE : 1
DURATION_OF : 1
OF_HE : 1
TWO_THEN : 1
TWICE_HEART : 1
WRITE_GENOBESE : 1
MEDICATION_LIST : 1
MG_DAILY : 1
HAVE_OF : 1
EC_TAB : 1
ALLERGIES_MORPHINE : 2
PHYSICIAN_PATIENT : 2
PATIENTS_INTERESTED : 1
PROTOCOL_NOT : 1
ACTIVE_STATE : 1
VETERAN_DATA : 1
CLOPIDOGREL_SUCH : 1
REPORTS_PAIN : 1
CUSTOMIZED_THE : 1
KNEE_AND : 3
FOR_LESS : 1
SHOULDER_ON : 1
NOTE_1010M : 1
AND_CBC : 1
WED_MG : 1
ACCUCHEK_COMFORT : 1
WERE_CURRENTLY : 1
DING_OR : 1
ATTENDING_PSU : 1
MEDICAL_HISTORY : 2
INTERESTED_PURSUING : 1
WITH_PATEINT : 1
PATIENT_SIGNED : 1
HOOVER_TINA : 1
READINESS_LEARN : 1
EVERY_VISIT : 1
GLUCOSE_STRIP : 1
SC_DOCUMENT : 1
TAKEN_IN : 2
VA_MEDICAL : 1
HAVE_WHICH : 1
HE_UNSURE : 1
CONSULT_REQUEST : 1
ALCAINE_MYDRIACYL : 1
DR_REASON : 1
TO_ACCEPT : 1
LIMITS_NO : 1
CONSULT_THE : 1
PLASTIZOTE_INSERTS : 1
UPDATE_GLASSES : 1
NOT_VIA : 1
THE_BLEPHAROPLASTY : 1
RESPIRATORY_DENIES : 1
SOLN_INSTILL : 1
SINCE_THAT : 1
RESPONDED_TO : 1
BECAUSE_WAS : 1
BUSY_SIGNAL : 1
AMIODARONE_MG : 1
! Stats words=992  pairs=3977
