# Supplementary material for: Predicting the Risk of Suicide by Analyzing the Text of Clinical Notes
Source: PLoS One. 2014 Jan 28;9(1):e85733. doi: 10.1371/journal.pone.0085733 (PMC3904866; doi:10.1371/journal.pone.0085733)
Supplement: Appendix S3 — Machine Learning Libraries and Methods: This section is provided to enclose the open source (Apache License) classifier used for the building of the statistical models, specifically for the purposes of study reproducibility. A detailed account of these tools is intended for another publication. (ZIP) [file pone.0085733.s003.zip › Appendix3/ML_libs/Regression_testing/group1/processed/grp1-pt-1069.dat]

!  Done reading
! Total word count = 2444
! Total unique words = 1100
! Total pair count = 4884
! Total unique pairs = 4465
CONTL : 1
SORE : 1
AT : 11
WORK : 1
VOICES : 1
SH : 1
MONTH : 2
ULCER : 1
ATIVAN : 1
REFILLS : 1
ACCIDENT : 1
WEIGHT : 5
BEEN : 9
STAY : 1
BID : 2
WITHIN : 4
ONH : 1
UNILATERAL : 2
ASSISTIVE : 1
DRAINING : 1
OUTPATIENT : 8
INTAKE : 2
MID : 1
ANGIOGRAM : 1
INPATIENT : 4
LO : 1
SPLIT : 1
ACULAR : 1
FT : 1
COSOPT : 1
RELATED : 1
USE : 3
CC : 3
HEMATURIA : 1
EPISODE : 1
HORMONE : 1
SUPPLIES : 1
TWICE : 2
REGARDING : 1
CHEW : 2
READING : 1
VETERANS : 1
LEVEL : 1
PANBRUIT : 1
ALCOHOL : 3
CHANGES : 2
RADIAL : 2
RAL : 3
CRUSH : 1
RETIRED : 1
SHOULDER : 2
MACHINE : 1
HIS : 4
RECOMMEND : 2
COORDINATOR : 1
SUBCUTANEOUSLY : 1
LABRUM : 1
OBJECT : 1
GRAFTING : 1
PVD : 1
WELL : 2
TARTRATE : 2
SHOWED : 2
DISORDER : 1
TEST : 2
NOTE : 17
SPOKANE : 1
LDL : 2
DO : 3
DOES : 2
CATEGORY : 1
TREATMENT : 2
BLOOD : 4
LATEX : 1
SAME : 1
WORKER : 1
ACCESS : 1
CV : 1
STROKE : 1
HAVE : 8
ADVERSE : 2
SAW : 1
BPH : 1
OF : 44
DRUG : 1
URETHERAL : 1
TAB : 5
BUPROPION : 1
CALLER : 1
ASSISTED : 1
STABLE : 2
TRAVATAN : 1
MONITOR : 1
HAS : 19
FOR : 36
BIDCONTINUED : 1
TIBIAL : 2
NUMBER : 4
CLC : 3
ACCUCHEK : 1
SEROUS : 1
AID : 1
KNEE : 2
TABS : 1
MY : 1
ALERTED : 1
MESSAGE : 1
THINGS : 1
COLONOSCOPY : 1
MYOCARDIAL : 1
ASSESSMENT : 6
RESPIRATORY : 3
VOMITED : 1
US : 1
DEFINITIVE : 1
CONCENTRATIONS : 1
SCAR : 1
BUSY : 1
ACTIVITY : 3
HISPANIC : 1
TARGET : 1
SHOWS : 1
APEX : 2
TAGS : 1
IRRITABLE : 1
IMPLANTATION : 1
BM : 1
NAUSEA : 1
PREVIOUSLY : 2
INFORMATION : 5
PATTERN : 1
SDAUGHTER : 1
INITIAL : 1
CENTER : 3
EXAM : 3
INFECTION : 1
THE : 54
JUST : 1
INFORM : 2
INCREASED : 1
SATIETY : 1
PRESENTS : 2
REST : 1
APPRIPRIATE : 1
GO : 2
SIGNIFICANT : 2
SPLITTING : 1
COLOR : 1
UD : 1
CHARACTER : 1
THYROID : 1
BP : 1
LEG : 1
OPT : 1
MEDS : 4
INDICATION : 1
PREVENTION : 1
POST : 2
HARMONY : 1
BYPASS : 1
DUONEB : 2
FREE : 1
AGREEMENT : 2
AGAIN : 1
ADIPOSE : 1
DISPOSITION : 3
OCCUPATION : 2
DIET : 1
STATED : 3
GET : 1
POROKERATOSIS : 1
REMOTE : 1
ALBUTEROL : 2
BOTHERED : 1
HANDOUT : 2
ASSISTANCE : 2
DIABETIC : 2
MAXIMUM : 2
EVIDENT : 1
OR : 10
SHIFT : 5
BOTH : 2
PRESCRIPTION : 1
TEMP : 3
YEAR : 2
SUPPLEMENT : 1
COPY : 1
ALREADY : 1
CONCERNS : 2
STAGE : 1
BLEPHAROPLASTY : 1
LB : 5
POSSIBILITY : 1
COUMADIN : 1
IMP : 1
STREAM : 1
DE : 2
LIKE : 2
SEEN : 7
RT : 1
VELOCITIES : 1
MAILED : 1
EPINEPHRINE : 1
NURSE : 1
UNKNOWN : 1
MUCH : 1
URINATION : 2
ANDO : 1
INTERVIEW : 2
TAKE : 4
SENSORY : 1
CORONARY : 3
INCREASE : 2
BROWLIFT : 1
MONITORED : 2
ANY : 9
DISCHARGE : 4
POAG : 1
AMBULATORS : 1
PAYMENT : 2
TISSUES : 1
MOISTURE : 3
RECORDS : 1
OD : 3
BESYLATE : 1
SW : 1
INTRAMUSCULAR : 1
ADMITS : 1
INJECT : 1
FACILITY : 3
UNIT : 1
MOTOR : 1
MD : 1
SECONDARY : 1
OCCLUSION : 1
NAME : 4
NW : 2
CARE : 12
EVERY : 4
AGE : 1
EVALUATE : 1
SKIN : 8
COMPLIANT : 2
TIMES : 2
IS : 25
OK : 1
NOT : 14
OCCULT : 1
DTN : 2
TILL : 1
TOLL : 1
IF : 4
ILIACS : 1
NOR : 1
THERE : 1
PENDING : 1
EXPECTED : 1
BELL : 1
HERE : 3
HIATAL : 1
SKILLS : 1
BOISE : 1
IM : 1
EATING : 1
POSITIVE : 1
RATING : 1
UNITS : 1
ONEHALF : 1
EVALUATION : 1
CST : 1
PROGRESS : 3
RHYTHM : 1
ARTERY : 3
VISION : 1
VET : 2
ANITA : 1
UPCOMING : 2
BEST : 1
ORTHOPEDICS : 1
ALPHABETIZED : 1
VALUE : 1
DROP : 1
EDUCATED : 1
PREGNANT : 1
COMPUTER : 1
BACK : 1
CURVE : 1
REGARDS : 1
SOURCE : 4
TUES : 2
DICTATED : 1
MARRIED : 1
MALE : 3
ADDENDUM : 5
FULL : 1
DEFINITION : 1
BY : 11
NO : 37
CLINICAL : 4
CONSCIOUSNESS : 1
HEMOGLOBIN : 1
REASSESSMENT : 1
CHIEF : 3
RETENTION : 1
CHANGED : 1
LUNGS : 2
TH : 2
UPPER : 1
CONVERSATION : 1
MEET : 1
RISK : 1
CLINIC : 5
EXCISED : 1
PROSTATISM : 1
DELUSION : 1
TENDERNESS : 1
BURN : 1
TO : 60
COULD : 1
IV : 1
PRN : 1
SPECIALTY : 1
GOLD : 1
SLOW : 1
ADVANCE : 1
LV : 1
DX : 1
BIOPSY : 1
PROCEDURE : 3
REQUESTING : 1
WILL : 5
OFTEN : 1
APPEARANCE : 1
CAPACITY : 1
WARM : 2
BUT : 4
ASKED : 2
COORDINATION : 1
TYPE : 2
CAREGIVER : 1
WHETHER : 1
PLASMA : 1
HUSBAND : 1
CBC : 1
PLEASE : 2
STATUS : 8
CFCF : 1
DIABETES : 1
SPENT : 1
MARITAL : 1
DRINKS : 1
TOL : 1
DYSUREA : 1
RENOVATE : 1
COGN : 1
CONSULT : 2
DECLINES : 1
OUT : 1
COMFORT : 1
CONT : 1
WANTS : 1
QID : 2
SCREEN : 1
SLOWED : 1
EVALUATED : 1
REACTION : 2
ANATOMIC : 1
BARRIERS : 2
REVIEW : 3
NEEDED : 1
THANKS : 1
HERATREG : 1
WERE : 3
MAN : 1
FILL : 1
RESIDENT : 1
CONTACTS : 1
LABS : 1
VA : 4
CANCERSEES : 1
TAKEN : 4
NEPHEW : 2
STOPPING : 1
TRIAGE : 6
IRRIGANT : 1
INITIATE : 1
PART : 1
FAMILY : 1
BAD : 1
DISEASE : 3
PAIN : 22
WHEN : 3
MMI : 1
AMBULATORY : 1
PACED : 1
AS : 6
BEING : 1
VIGAMOX : 1
ARRHYTHMIAS : 1
ABOVE : 1
AMOUNT : 1
WAS : 20
DRAINAGE : 1
PM : 3
LPM : 1
DISAPPROVAL : 1
PHARMACOTHERAPY : 1
WITH : 21
AHMED : 1
FEELS : 1
OFFERED : 1
FORM : 1
THEREFORE : 1
GODSEY : 1
AC : 2
TEMPERATURE : 3
COMMUNICATION : 1
SIG : 1
BASIS : 1
PARESTHESIAS : 1
MESSAGING : 1
ABD : 1
NOW : 3
DEFINES : 1
INCLUDING : 1
MUSCULOSKELETAL : 1
BOBBITT : 1
CHORIORETINAL : 1
CONFIRMED : 1
DISABLED : 1
USED : 1
MONITORING : 1
IT : 2
BELOW : 3
LIST : 7
SIZE : 1
STUDY : 1
TROUBLE : 1
IMMUNIZATION : 1
VF : 2
NURSEINFLUENZA : 1
DISCUSSED : 1
CA : 1
EXERCISE : 1
COMPLICATION : 1
CHEM : 1
TIME : 6
CLONUS : 1
DEVICE : 1
ORIENTED : 3
PLEASURE : 1
CURRENTLY : 4
ATTEMPT : 1
NECK : 1
ADDITIONAL : 1
JOINT : 1
BREAKFAST : 1
APETITE : 1
PROSTHETICS : 1
DOCTOR : 1
REPAIR : 1
SOFTENER : 1
ALLERGY : 2
CALL : 8
DID : 1
IRREGULARLY : 1
REINFORCEMENT : 1
DYSPHAGIA : 1
RESULT : 1
SHOW : 1
ARRIVAL : 1
BIRTH : 1
OPERATION : 1
PROFESSIONAL : 1
TELEPHONE : 2
SOB : 2
PLANT : 1
JILL : 1
REPORTS : 2
SUBJECTIVE : 3
STRICTURE : 1
ANTIVERT : 1
HELP : 1
OPTIONS : 1
PER : 1
TABLETS : 2
PACU : 1
COMING : 1
YES : 5
CONTINUES : 2
COUSIN : 1
FURTHER : 1
TOXIC : 1
ETC : 2
CONSENT : 1
MOBILITY : 1
YOUR : 5
WHOM : 1
PRECAUTIONS : 1
DOING : 1
GIVEN : 4
SUSAN : 1
LITTLE : 1
LVEF : 1
WHO : 1
ED : 1
UPON : 1
MISSOULA : 1
DIARRHEA : 3
BASED : 2
PHYSICIAN : 10
CURRENT : 4
CONTROL : 2
URGENT : 1
AUSCULTATION : 1
TERM : 1
HIM : 1
ADMINSTRATION : 1
DEMOGRAPHICS : 2
INTERACTIONS : 1
FAXED : 1
PULSE : 3
HE : 19
RX : 2
NEEDS : 4
EASY : 1
RATE : 4
REFERRED : 1
MONTHLY : 1
MEMBER : 1
EXTENSIVE : 1
ADJ : 1
TRANSFER : 1
OBSERVATION : 1
VSS : 2
PHONE : 5
ML : 5
PREDICTING : 1
CLEAR : 4
RESPONSES : 1
CLAIMS : 1
PRIMARY : 7
HEMOPTYSIS : 1
SEATBELT : 1
DRY : 1
UNTIL : 1
HAD : 8
ATTACK : 1
SIGNS : 3
LOSS : 5
PATIENTS : 2
SUMMARY : 3
CONSTIPATION : 3
PROVIDED : 1
MELENA : 1
MANUFACTURING : 1
NEGATIVE : 2
TWO : 4
NONE : 4
PERFUSION : 1
II : 2
CONNECTED : 1
LOT : 1
LAB : 3
DECREASED : 2
WEAK : 1
RD : 1
RECONCILATION : 1
DIRECTIVES : 1
COMPLAINTS : 4
CONTACT : 5
NOTICE : 1
LABIALIS : 1
HABITS : 1
PROBABLY : 1
HER : 4
ORDERED : 2
SHOULD : 1
FH : 1
QUESTIONS : 1
PROBLEMS : 3
URINE : 2
NEUROLOGICAL : 1
MCG : 1
STAYING : 1
NEG : 1
ROUTE : 2
CAN : 1
THERAPY : 3
PRIVATE : 1
CAUSED : 1
ARTHRITIC : 1
LIVING : 3
NONVA : 1
WHICH : 1
NOTES : 1
OVER : 1
APPEAR : 1
MG : 6
ON : 19
ADMINISTRATION : 1
PRESSURE : 3
DILATE : 1
ATTENDED : 1
TEL : 2
COVER : 1
KETOROLAC : 1
VERIFY : 1
NC : 1
HEADACHE : 1
GOOD : 1
MED : 2
EDEMA : 1
SODIUM : 1
OXIMETER : 1
PINHOLE : 2
PROVIDER : 2
SHE : 9
INSURANCE : 1
PO : 1
INF : 1
UP : 3
CERTIFIED : 1
GENDER : 1
MULTIPLE : 1
THEN : 2
USUAL : 1
LOCATION : 3
ALERT : 2
SYST : 1
DIRECTLY : 1
DETERMINE : 1
FEVER : 1
PRIOR : 1
SEP : 2
OFF : 1
DOCUMENTED : 1
GOT : 1
DATE : 5
COMMENT : 1
DAILY : 2
THREE : 1
DOSAGE : 3
LONG : 1
APPOINTMENT : 7
WOULD : 1
ELSE : 1
WHEELCHAIR : 1
FOLLOW : 3
FROM : 4
SOLUM : 1
QHRS : 1
LEFT : 8
NPC : 1
MEDICAL : 1
SPOKE : 1
ALSO : 2
SEX : 1
LORAZEPAM : 1
ACTIVITIES : 1
ORDERS : 2
PCPS : 1
PLAVIX : 1
SURGEON : 1
MUSCLES : 1
AN : 6
MOIST : 2
HEART : 5
COMPLAINT : 4
ORDER : 1
NL : 1
EXCEPT : 1
TAKES : 1
FIANC : 1
ETHNICITY : 1
REALLY : 1
INFLUENZA : 6
DENIED : 1
EXCEED : 2
EYE : 4
AFEB : 1
AGO : 1
NEW : 3
MOUTH : 4
FS : 1
PROVIDERS : 1
ATTENDING : 2
CHEST : 4
PRESENT : 1
OPTIC : 1
COVERSHEET : 1
SOME : 4
CARENURSE : 1
ANESTHETIC : 1
OPH : 1
ANESTHESIA : 1
ADJUVANT : 1
ARE : 1
ANSWERED : 2
THIGH : 2
HYPERTENSION : 1
NEED : 1
INDEPENDENT : 1
ELEVATED : 1
ATROPHY : 1
GL : 1
TRIAL : 1
PERSON : 1
RECEIVED : 3
CPRS : 2
MENSTRUAL : 1
SURGERY : 2
FECAL : 1
RECOVERY : 1
BRAKES : 1
NONVIDEO : 1
FREQUENCY : 1
ASPIRIN : 1
THAMINE : 1
TX : 1
INHL : 1
CAD : 1
COLON : 1
BE : 9
EL : 1
RESOLVED : 1
ENDOSCOPIC : 1
OL : 2
DUE : 4
GLASSES : 1
ADJUNCTIVE : 1
CLASS : 1
THEIR : 1
TAUGHT : 1
ALPHAGAN : 1
LESION : 1
ALONG : 1
SOUNDS : 1
REVIEWED : 5
DM : 1
ISSUE : 1
BEFORE : 2
OTHER : 6
ALL : 3
DRESSING : 1
CAROTID : 1
LIQUIDS : 1
QHS : 1
LIFE : 1
BED : 2
NURSING : 6
INHALE : 1
DYSPNEA : 1
RXS : 1
FOLLOWING : 4
IDENTIFIED : 1
GLAUCOMA : 2
DIAGNOSES : 1
PATIENT : 40
ALLERGIES : 3
DIAGNOSIS : 3
WITHOUT : 1
JUL : 1
OBTAIN : 1
EVAL : 1
VERIFIED : 1
METOPROLOL : 2
NOS : 1
ANTICOAGULANTOPEN : 1
RARELY : 2
DYSURIA : 1
VOICE : 1
MEMORY : 1
OPERATIONS : 1
STVHCS : 1
AUDITC : 2
SYMPTOM : 2
SUSPECT : 1
FEE : 1
DECISION : 1
CBI : 3
FOUND : 1
AGREEAB : 1
ROOM : 2
THAT : 13
VISIT : 4
CHART : 1
NORMAL : 3
FUROSEMIDE : 1
SERVICE : 2
RIGHT : 7
AVAILABLE : 1
PC : 3
YASSAR : 1
BREATHING : 2
VITALS : 4
BRAND : 1
ABOUT : 4
AAM : 1
ONE : 5
ISSU : 1
TELE : 1
UNSUCCESSFUL : 1
FU : 1
NKA : 2
THOUGHT : 2
IMMUNITY : 1
HYPERLIPIDEMIA : 2
TABLET : 3
DURING : 2
YOU : 10
TOLD : 2
DIRECTED : 1
LISTED : 1
SCREENING : 4
VOICED : 1
INFORMED : 1
HUFANA : 1
REACH : 1
GETTING : 1
NOCTURIA : 1
REACTIONS : 1
PAST : 1
HI : 1
DOCUMENT : 3
NOVEMBER : 1
REASON : 2
PLANTAR : 1
POSTERIOR : 1
OXYGEN : 1
SCORE : 2
ACT : 1
REMINDER : 1
ORTHO : 1
HOME : 5
ONCOMING : 2
POWER : 1
NOTED : 1
DR : 1
INDIVIDUAL : 1
AORTA : 1
SOCIAL : 2
RETURN : 1
GLASS : 1
SPHERES : 1
OTHERWISE : 1
DEPT : 1
RESOLUTION : 1
HEP : 1
VITAL : 3
REGULAR : 3
LDLCHOL : 1
MEDICATE : 1
QUANTITY : 1
PIERCE : 1
TALK : 2
RECONCILIATION : 1
DIABETESHYPERTENSION : 1
NEC : 3
PNEUMOVAX : 1
SENDING : 1
COMPUTERIZED : 1
MINUTES : 1
POINTS : 1
SCREENED : 2
FOLLOWUP : 1
STENT : 1
DELTOID : 2
WEEK : 2
VITAMIN : 1
TEAM : 1
FALL : 1
DAY : 1
AM : 1
NUR : 1
PRACTITIONER : 2
CANCEL : 1
REGIONAL : 1
REPORT : 2
PRESSURES : 1
CAPSULES : 2
HOW : 3
CALLED : 2
MIGHT : 1
PIOGLITAZONE : 1
SINCE : 2
COUGH : 2
DISCUSS : 1
CHANGE : 2
INHOUSE : 1
SOLN : 2
ONCOLOGIST : 1
ADVISED : 4
LEARNING : 1
VERBALIZED : 1
DOSE : 3
ENCOUNTER : 1
OBJECTIVE : 1
MONTHS : 2
AFFECT : 1
AGAINST : 1
MRI : 2
PALPATION : 1
MEASUREMENT : 1
BRADEN : 1
CONCERN : 1
UCINATIONS : 1
CONGESTION : 1
ASSISTANT : 1
MEDICATION : 7
VISUAL : 1
CORES : 1
WANT : 1
THICK : 1
COMMENTS : 1
TRANSMISSION : 1
CONTINUE : 2
ORAL : 2
ABNORMAL : 1
TOTAL : 2
SWELLING : 1
EXAMINATION : 1
INSIDE : 1
ST : 1
CALCULATION : 2
HISTORY : 3
RESPIRATION : 1
PMHX : 1
HOURS : 4
MAIL : 3
LATINO : 1
HEALTH : 3
DEBRIS : 1
COVERAGE : 1
HERNIA : 1
RATIVE : 2
VTACH : 1
PLACED : 3
NORM : 1
REMIND : 1
COGNITIVE : 2
NOV : 3
WOUND : 1
ALWAYS : 1
AROM : 1
INDICATED : 2
PROSTATE : 2
HIP : 2
SITE : 1
PREVIOUS : 1
ENTIRE : 1
TREMORS : 1
MAR : 1
LABARYNTHITIS : 1
KG : 5
METALLIC : 1
STANDARD : 1
ANYWHERE : 1
MAKING : 1
RACE : 1
TELECARE : 1
WENT : 1
EYES : 2
PROBLEM : 3
BILL : 1
ADDRESSED : 1
BLUE : 1
RECORD : 3
ER : 2
APPLICABLE : 1
DIZZINESS : 1
AMLODIPINE : 1
HGNAC : 1
NONREACTIVE : 1
RN : 2
UNABLE : 2
XYZZY : 2
WARFARIN : 1
PUFFS : 1
OUTPUT : 3
ANTICOAGULATION : 2
OSTEOARTHRITIS : 1
TELEMETRY : 2
AFTER : 4
ALTERNATIVE : 1
PARTICIPATED : 1
ARAE : 1
ADMISSION : 1
STILL : 1
CONCERNING : 1
SCALE : 1
CORNEA : 1
COUGHING : 1
ATHENS : 1
NONV : 1
SAYS : 1
PROVISION : 1
APPOINTMENTS : 2
WAY : 2
CLIENT : 2
WNL : 1
DENIES : 4
DOB : 1
ACCOMPANIED : 1
REQUESTED : 2
FOOT : 2
CHEWABLE : 1
VETERAN : 5
QTY : 1
CAPSULE : 1
PT : 17
SHAPED : 1
CANDIDIASIS : 1
RADIATION : 2
MOVE : 2
TRIES : 1
NP : 2
PROCEDURES : 3
INTEREST : 1
SKILLED : 1
SELECTED : 2
UNDERSTANDING : 1
MEDICATIONS : 14
LOCALLY : 1
MR : 3
INTENDED : 1
AND : 43
BILATERAL : 2
GEM : 1
DELIVERY : 1
DRIVING : 1
DEFECIT : 1
VACCINE : 6
RESPONSE : 2
BETTER : 1
COMMUNITY : 2
DEPRESSIVE : 1
EMERGENCY : 2
ANSWER : 1
BREATH : 1
ABLE : 1
RECENT : 1
CHO : 2
IN : 21
LOW : 2
FOLLOWED : 1
MAY : 1
MANAGEMENT : 1
STATE : 2
PLAN : 3
ANTERIOR : 1
GROIN : 1
UNLESS : 1
TAKING : 1
PERIOD : 1
PATHOLOGY : 1
RELAX : 1
DONE : 2
PALPABLE : 2
TC : 1
WEARING : 1
NIGHT : 4
CP : 1
ACTIVE : 17
ASTIGMATISM : 1
MANAGER : 2
ABILITY : 1
BEDREST : 1
BEHAVIOR : 1
POSTAL : 1
COMPLETED : 1
SUPERVISING : 1
THIS : 16
DEFICITS : 1
PLASTIC : 1
NAILS : 1
DECISIONMAKING : 1
REMINDERS : 3
CAPABLE : 1
GLENOID : 1
REMEMBER : 1
SOFT : 1
VAMC : 1
LAST : 10
EDUCATION : 6
HOLD : 1
UCINATION : 1
PALPITATION : 1
ADR : 1
BLURRED : 1
STATES : 4
OCCUPATIONAL : 1
HERPES : 1
UNDERGOING : 1
OU : 2
WHILE : 1
LOCAL : 2
SHORT : 1
ICDCM : 1
RESP : 1
INFILTRATE : 1
DENIES_DIZZINESS : 1
OCCUPATIONAL_PROGRESS : 1
DISEASE_TENDERNESS : 1
REVIEWED_PT : 1
FOR_ASSISTIVE : 1
NOW_ADVISED : 1
DEMOGRAPHICS_RESULT : 1
OFTEN_HAVE : 1
DIABETESHYPERTENSION_TAB : 1
RIGHT_ILIACS : 1
TIBIAL_PALPABLE : 1
CHEM_WAS : 1
SEEN_HIS : 1
VOICE_MAIL : 1
GOOD_FOR : 1
BLEPHAROPLASTY_FOLLOWUP : 1
NO_TOXIC : 1
GETTING_HERE : 1
CURRENT_COMPLAINTS : 1
CLINICAL_NOTE : 1
DECREASED_TO : 1
THERE_IS : 1
SUPPLIES_STVHCS : 1
AT_ANY : 1
WELL_NO : 1
PINHOLE_SOFTENER : 1
ATTENDED_AND : 1
OUTPUT_ML : 1
VETERAN_SHE : 1
YES_IMMUNITY : 1
APPOINTMENT_CHEST : 1
OCCUPATION_RETIRED : 1
LOCALLY_FEE : 1
COGNITIVE_STATUS : 1
HOME_HE : 1
PATIENT_INFLUENZA : 2
ON_TO : 1
LAB_MOVE : 1
DIAGNOSIS_PROCEDURE : 1
PHYSICIAN_NW : 1
TAKE_VITAL : 1
XYZZY_CLINICAL : 2
WITHIN_FACILITY : 1
ROUTE_INFILTRATE : 1
PATIENT_HAD : 2
PLASTIC_GOLD : 1
USE_THE : 1
AS_JUST : 1
REMINDERS_CAREGIVER : 1
AND_ORIENTED : 1
APPEARANCE_AND : 1
POSTERIOR_SERVICE : 1
CAPABLE_OF : 1
THE_KNEE : 1
GLASSES_CONTACTS : 1
PATIENT_INTERVIEW : 2
CLEAR_RADIAL : 1
BOTHERED_ANY : 1
MEET_WITH : 1
INPATIENT_ORDERS : 1
BELOW_AND : 2
RAL_COUGH : 1
THE_PATIENT : 4
WERE_REVIEWED : 1
REGARDING_MEDICATIONS : 1
AT_THIS : 2
ABNORMAL_YOU : 1
ASSISTANT_TAKEN : 1
CLINIC_IS : 1
ABOUT_NEW : 1
NO_DEPRESSIVE : 1
THIS_CARE : 1
COORDINATOR_AMBULATORY : 1
IS_DYSPNEA : 1
OR_IN : 1
DRAINING_SEROUS : 1
PAIN_THICK : 1
BOTH_EYES : 2
HE_WAS : 1
MAKING_WEIGHT : 1
MEMORY_LOSS : 1
URETHERAL_STRICTURE : 1
DOCUMENT_SELECTED : 2
TO_ABOUT : 1
COMPLIANT_WITH : 2
SHE_UPPER : 1
PATIENT_DENIES : 1
RESPIRATORY_CLIENT : 1
IS_INTENDED : 1
AT_VISIT : 1
REACTIONS_HAS : 1
NOTE_THERE : 1
MOVE_SCREENING : 1
REPORTS_THAT : 1
UNABLE_CONTROL : 1
DRESSING_DAILY : 1
QUANTITY_OF : 1
PAIN_UNILATERAL : 1
AUDITC_NEGATIVE : 1
AND_DISCHARGE : 1
OUTPATIENT_STATUS : 3
DURING_YEAR : 1
WITH_SECONDARY : 1
HERNIA_IN : 1
CONTACT_PHONE : 1
FROM_UNABLE : 1
FOR_ED : 1
YOU_NOT : 1
PERFUSION_STUDY : 1
COGN_LIVING : 1
OTHER_MEDICATIONS : 1
IS_INDICATION : 1
TWO_ADDITIONAL : 1
OF_KNEE : 1
HEMOGLOBIN_AC : 1
NOT_APPLICABLE : 1
AUSCULTATION_PATIENT : 1
HISTORY_NO : 1
VETERAN_TO : 1
OD_QID : 1
SOURCE_INFORMATION : 1
METALLIC_WITHIN : 1
REALLY_WELL : 1
COMMENTS_PT : 1
DATE_CARE : 1
BY_SEP : 1
TOL_TX : 1
NOT_AT : 1
HERE_BE : 1
CONSTIPATION_NO : 1
PHYSICIAN_TEMP : 1
TO_ANTICOAGULATION : 1
LIST_VERIFY : 1
BYPASS_GRAFTING : 1
MR_AN : 1
MAR_CLC : 1
EXERCISE_MINUTES : 1
BUT_OF : 1
REASON_APPOINTMENT : 2
RECOVERY_ROOM : 1
CBI_CBI : 1
PAIN_MONITOR : 1
THE_PHYSICIAN : 1
COULD_GO : 1
PATIENT_PRIMARY : 1
AGREEMENT_WITH : 1
PATIENT_FECAL : 1
WEAK_STREAM : 1
OTHER_DENIES : 1
DONE_ON : 1
PREVIOUSLY_PREVENTION : 1
IM_TO : 1
STOPPING_WAS : 1
THE_LAB : 1
PROSTATISM_DISORDER : 1
INTENDED_FOR : 1
PROBLEM_IS : 1
CARE_URGENT : 1
HISPANIC_LATINO : 1
BILATERAL_FOLLOWUP : 1
TIMES_AND : 1
THEN_YOU : 1
COUMADIN_THE : 1
DISPOSITION_RECOVERY : 1
NOTE_CAREGIVER : 1
GLAUCOMA_HAD : 1
LEFT_NEGATIVE : 1
OR_TOLL : 1
LIKE_CANCEL : 1
NO_DELUSION : 1
PROVIDER_THIS : 1
NORM_TEMP : 1
THE_LOCAL : 1
TEST_PROCEDURES : 1
OPH_OD : 1
BROWLIFT_BILATERAL : 1
PAIN_PM : 1
THE_LOT : 1
SUPPLIES_MEDICATION : 1
MALE_IS : 1
MAN_PROCEDURE : 1
HOURS_NURSING : 1
ON_MACHINE : 1
EXCEPT_BEFORE : 1
TO_CONTACT : 2
BY_IRREGULARLY : 1
LIST_BE : 1
OD_TWO : 1
BELOW_IF : 1
ARRHYTHMIAS_AT : 1
STATUS_PINHOLE : 1
LIST_OUTPATIENT : 1
QID_OD : 1
CONSULT_AND : 1
OF_BIRTH : 1
VSS_DIAGNOSES : 1
YASSAR_DISPOSITION : 1
NEPHEW_OF : 1
INFORMATION_SOURCE : 1
NOT_EXCEED : 1
VETERAN_HAD : 1
ONCOLOGIST_PROSTATE : 1
DUONEB_OXYGEN : 1
BREATH_MOISTURE : 1
RATE_STATUS : 1
HE_HAVE : 1
URINE_TOTAL : 1
ISSU_REMINDERS : 1
FOLLOWING_REVIEW : 1
VACCINE_WAS : 2
OL_ADVERSE : 1
PROBLEM_LIST : 1
HAVE_ONE : 1
EYES_THANKS : 1
THERAPY_PULSE : 1
ROOM_SHE : 1
WEEK_HAS : 1
SUSAN_DOSE : 1
OFTEN_YOU : 1
MONTHLY_AND : 1
LOW_DIABETIC : 1
MR_WAS : 1
INPATIENT_OUTPATIENT : 1
DUONEB_LPM : 1
CONCENTRATIONS_WITH : 1
VITALS_TAKEN : 2
REACTIONS_PATIENT : 1
INDICATION_FOR : 1
NOR_HE : 1
RESPIRATORY_RATE : 1
BELOW_PATIENT : 2
VACCINE_RECEIVED : 2
TAGS_SOME : 1
HE_SUMMARY : 1
OF_CBI : 1
URINE_ML : 2
MED_THE : 1
HOURS_CENTER : 2
TAGS_OF : 1
DURING_THE : 2
INCREASED_AGAIN : 1
PAIN_LAST : 1
CALL_DTN : 2
MEDICATION_BE : 1
RENOVATE_ALERT : 1
EXTENSIVE_CORONARY : 1
MOUTH_ACTIVE : 3
PRESENT_AND : 1
LOCAL_ANESTHETIC : 1
BETTER_NOT : 1
EXAMINATION_OF : 1
QID_ACTIVE : 1
OSTEOARTHRITIS_MENSTRUAL : 1
LAST_HOW : 1
NO_VOICED : 1
WITH_INCREASED : 1
WITH_MEDICATIONS : 1
THIS_INDIVIDUAL : 1
OXYGEN_NC : 1
YES_DECLINES : 1
VERIFY_THE : 1
IN_TELECARE : 1
WHETHER_THE : 1
VA_CORONARY : 1
THE_PCPS : 1
WITH_FOR : 1
TEL_AFTER : 2
TEST_AUDITC : 1
SH_PATIENT : 1
SUMMARY_NURSEINFLUENZA : 1
VETERAN_HAS : 1
BOISE_CORONARY : 1
TO_TO : 1
OFF_TO : 1
FOR_PATIENT : 3
MG_QTY : 1
HERATREG_PATIENT : 1
PRIVATE_OTHER : 1
SUBJECTIVE_PATIENT : 1
MEDICATIONS_HAS : 1
FOLLOWING_BARRIERS : 1
PAIN_ELEVATED : 1
LV_SIZE : 1
FOR_TO : 2
WAS_SCORE : 1
CLINIC_TO : 2
SOME_STATE : 2
PATIENT_VOICES : 1
NP_ABOUT : 1
BY_HIS : 2
NO_INDICATION : 1
REPAIR_ILIACS : 1
HOME_WAS : 1
PNEUMOVAX_PHARMACOTHERAPY : 1
WITH_PT : 1
RECORDS_PT : 1
MEDS_UD : 1
AT_DECREASED : 1
YOU_MIGHT : 1
CALLED_AT : 1
NIGHT_PINHOLE : 1
KG_TH : 1
MEDICATIONS_NOT : 1
BEEN_SINCE : 1
AT_ALL : 1
MEDS_RESPONSES : 1
VALUE_NONREACTIVE : 1
WARFARIN_RX : 1
NO_REACTION : 1
PRIMARY_TELEPHONE : 1
PATIENT_WITH : 1
DRY_DAILY : 1
BUSY_ETC : 1
AND_ANTIVERT : 1
TELEPHONE_NOTE : 2
TO_HIM : 1
MONITOR_AND : 1
NEW_NOW : 1
CLC_SCREENING : 1
PROSTATISM_DEPRESSIVE : 1
ADJUVANT_PATIENT : 1
ETHNICITY_NOT : 1
AT_HE : 1
CARE_OF : 1
RETIRED_MANUFACTURING : 1
LB_DIAGNOSIS : 1
HABITS_DID : 1
HAVE_UNILATERAL : 1
CAPSULE_LAST : 1
LDL_BAD : 1
REQUESTING_MEDS : 1
COMPLETED_TELEMETRY : 1
FROM_SERVICE : 1
ALLERGY_MEDICATION : 1
FORM_PATIENTS : 1
NOTE_ASSESSMENT : 1
ASKED_REVIEW : 1
SLOW_CC : 1
HE_LIKE : 1
BELOW_OR : 1
THE_PRACTITIONER : 1
CHORIORETINAL_SCAR : 1
TO_ONH : 1
SAME_HAS : 1
NO_OFF : 1
COVERAGE_NEEDED : 1
IS_MALE : 1
WITH_DRY : 1
CALCULATION_PLASMA : 1
CHO_ALLERGIES : 1
AMBULATORS_PT : 1
ANYWHERE_ELSE : 1
NOTICE_HE : 1
THE_ATTENDING : 1
ADIPOSE_INFORMED : 1
BAD_OL : 1
DIABETIC_MEDICATIONS : 1
TO_WHOM : 1
DTN_VISUAL : 1
DOES_PAIN : 1
NEC_NO : 1
ADR_CALLER : 1
RN_COORDINATOR : 1
ALWAYS_ALL : 1
PATIENT_SCREENED : 1
THE_HAS : 1
OBJECTIVE_BP : 1
HYPERTENSION_IN : 1
ADR_RESPONSE : 1
INCREASE_CAPSULES : 1
OF_DISPOSITION : 1
VA_ARTERY : 1
EVALUATE_BRAND : 1
BEEN_ACTIVE : 1
INFORM_HER : 1
FOLLOWING_EVIDENT : 1
SENDING_AMLODIPINE : 1
FOR_VA : 1
OF_WERE : 1
OF_NAILS : 1
MD_SCORE : 1
TO_CONTROL : 1
WHO_IS : 1
BUT_DRAINING : 1
CPRS_WERE : 1
IF_OR : 1
ENDOSCOPIC_BROWLIFT : 1
SOFT_FOR : 1
TO_HAVE : 1
PHONE_NO : 1
MAILED_TENDERNESS : 1
NOTE_DEBRIS : 1
HAD_AND : 1
IS_REPAIR : 1
THAT_CARE : 1
NOTE_NONVIDEO : 1
GEM_CLINIC : 1
HE_NOT : 1
INFORMATION_IMP : 1
APPEARANCE_VF : 1
CONTINUE_YOUR : 1
RIGHT_LABS : 1
WERE_OTHERWISE : 1
NOT_EXPECTED : 1
RESPONSE_OTHER : 1
NOT_CRUSH : 1
EXCISED_AND : 1
OUTPATIENT_PRECAUTIONS : 1
ASKED_COUSIN : 1
DRY_DRESSING : 1
IS_BLURRED : 1
DIZZINESS_LDLCHOL : 1
WANT_BE : 1
NONV_ADVISED : 1
BIOPSY_RIGHT : 1
TO_TAKE : 1
IN_RIGHT : 1
REMOTE_AND : 1
CONSTIPATION_MELENA : 1
DEFINITIVE_WITH : 1
URINATION_HAS : 1
RIGHT_DONE : 1
PALPABLE_MEDS : 1
FROM_SPECIALTY : 1
ARE_NOT : 1
MOISTURE_URINE : 1
BEEN_PATIENT : 1
ALLERGY_INFLUENZA : 1
PAIN_CAD : 1
LIST_BELOW : 2
PT_FOR : 1
THAT_HAS : 2
THAT_VOMITED : 1
IN_REGARDS : 1
YOUR_NOT : 1
TALK_JILL : 1
AND_THICK : 1
SHE_WILL : 1
NOT_NORMAL : 1
RATING_APPOINTMENTS : 1
QTY_ACTIVE : 1
EXAMINATION_FH : 1
ALBUTEROL_MCG : 1
AND_VIGAMOX : 1
PALPABLE_PHYSICIAN : 1
AT_HOME : 1
ROOM_INFILTRATE : 1
SCREENING_YES : 1
SHE_COULD : 1
STATES_HAS : 1
OR_CARE : 1
PATIENT_CARE : 1
DROP_QID : 1
OF_UPCOMING : 1
DATE_PRIMARY : 1
INHL_PUFFS : 1
STATUS_MARRIED : 1
PHYSICIAN_HE : 1
TRIAGE_AFTER : 2
YOU_BEEN : 1
LEFT_ACTIVE : 1
POROKERATOSIS_PLANTAR : 1
FOR_WITH : 1
ADDENDUM_SUBJECTIVE : 1
NOW_PT : 1
THIS_REVIEW : 2
WILL_PROSTATE : 1
RATIVE_PT : 1
LOSS_ALL : 1
CLIENT_AGREEMENT : 1
UNILATERAL_TRIAGE : 1
IS_SOURCE : 2
ATHENS_LAB : 1
SOLUM_STOPPING : 1
ACTIVE_AND : 1
LAST_PINHOLE : 1
STATUS_FILL : 1
ACTIVE_OUTPATIENT : 3
INITIATE_OUTPATIENT : 1
HAVE_DIABETES : 1
SOLN_OPH : 1
ABLE_TO : 1
WORK_WAS : 1
CHORIORETINAL_INF : 1
OF_EYE : 1
SPHERES_VERIFIED : 1
HEART_PLACED : 1
PROCEDURE_DX : 1
NURSING_SPOKE : 1
CHEST_NURSING : 1
THIS_THIS : 1
LEFT_FOOT : 2
VERBALIZED_AND : 1
SEATBELT_AND : 1
BID_GLAUCOMA : 1
TO_FOLLOW : 1
THAT_WILL : 1
FACILITY_ADVISED : 1
RELAX_THEREFORE : 1
THIS_DOCUMENT : 2
OTHER_DIABETIC : 1
LEFT_KNEE : 1
LISTED_PHONE : 1
ALLERGY_CALLER : 1
ACTIVE_DEMOGRAPHICS : 1
HE_SAW : 1
OR_LATINO : 1
PT_EVERY : 1
ABOUT_HOW : 1
DENIES_SOB : 1
AND_SHE : 1
NO_WITH : 1
FOR_YOUR : 1
DISABLED_DUE : 1
LESION_AND : 1
WANTS_INSURANCE : 1
PACED_NO : 1
HAVE_CAROTID : 1
NEGATIVE_UNITS : 1
ADDITIONAL_HIATAL : 1
TO_HOME : 1
THIS_IV : 1
RESPIRATORY_BREATHING : 1
SHE_VACCINE : 1
ALCOHOL_PATIENT : 1
BY_WAY : 1
RT_RAL : 1
TAKEN_VERBALIZED : 1
MEDICATIONS_DOCUMENTED : 1
NURSING_DAY : 1
SCORE_UNITS : 1
IF_YOU : 2
NIGHT_SOFTENER : 1
FULL_RETURN : 1
NEC_DENIES : 1
WITH_SODIUM : 1
MONTH_AN : 1
PRESSURE_NOV : 1
ASKED_TO : 1
NOTE_SKIN : 1
TO_APPEARANCE : 1
VETERANS_NUMBER : 1
WITH_COUGHING : 1
BLEPHAROPLASTY_APPOINTMENT : 1
BEFORE_BREAKFAST : 1
FURTHER_CARE : 1
DENIES_OF : 1
THE_INTEREST : 1
NOT_CAPSULES : 1
TEMPERATURE_VTACH : 1
MONTHS_SERVICE : 1
MOVE_IT : 1
LEVEL_CONSCIOUSNESS : 1
PT_THAT : 2
DOES_WANT : 1
CHARACTER_OF : 1
OPTIONS_REQUESTING : 1
ANDO_CORES : 1
STROKE_HEART : 1
EATING_LORAZEPAM : 1
PATIENT_PAIN : 1
PAIN_LUNGS : 1
NO_SHOW : 1
NOTE_HGNAC : 1
ILIACS_AND : 1
VA_AND : 1
SURGERY_RIGHT : 1
PATIENT_EXAM : 1
PREGNANT_NO : 1
HAD_PROCEDURE : 1
VISIT_HYPERLIPIDEMIA : 1
CLC_CONSULT : 1
GOOD_WHILE : 1
CURRENTLY_INPATIENT : 2
WAS_TO : 1
EVAL_NORMAL : 1
AFTER_DR : 1
MEDICATIONS_TAKES : 1
RAL_LOSS : 1
PUFFS_ACTIVE : 1
MG_TAKE : 2
IF_HAVE : 1
LAST_FILL : 1
INITIATE_STANDARD : 1
SURGEON_BREATH : 1
EXTENSIVE_ARTERY : 1
MONITORED_QHRS : 1
SPOKANE_RETENTION : 1
AGREEMENT_THE : 1
TOLL_THEN : 1
PATIENT_MEDS : 1
HYPERLIPIDEMIA_SITE : 1
PATIENT_DOES : 1
MCG_CFCF : 1
NAME_PAIN : 1
INFORM_ALL : 1
ORDERED_PLACED : 1
WERE_TOLD : 1
AT_AND : 2
ON_SUBJECTIVE : 1
TEMP_LOSS : 1
CAUSED_AN : 1
PATIENT_CONTINUES : 1
EVAL_VALUE : 1
ABD_PAIN : 1
VISUAL_POAG : 1
MAIL_WARFARIN : 1
NEEDS_TO : 2
TO_RIGHT : 1
AND_AGREEAB : 1
RESPIRATORY_INFECTION : 1
NEPHEW_FOLLOW : 1
THE_FOLLOWING : 4
WNL_SIGNIFICANT : 1
SCREENING_IS : 1
OU_DUE : 1
WITH_DISAPPROVAL : 1
WAY_TO : 1
PRESENT_ASSISTED : 1
FOOT_RAL : 1
USE_SCREENING : 1
WITH_OPTIC : 1
OF_EPISODE : 1
ACTIVE_MG : 1
COMPLAINTS_WAS : 1
TO_HARMONY : 1
AN_MRI : 1
METALLIC_DEBRIS : 1
PACU_RECOVERY : 1
HAVE_NIGHT : 1
EVERY_MONTHS : 1
LEG_EXCEPT : 1
LVEF_LV : 1
EYE_GLASS : 1
JUL_AGE : 1
TWICE_SINCE : 1
MISSOULA_VA : 1
RESPONSES_STATES : 1
DETERMINE_NEED : 1
GODSEY_ABOUT : 1
BURN_NAUSEA : 1
INTEREST_PLEASURE : 1
AT_LISTED : 1
COLON_CA : 1
PCPS_PATIENT : 1
AGAINST_LIST : 1
QUESTIONS_YOUR : 1
NPC_THERAPY : 1
WARM_PHYSICIAN : 1
DOCTOR_TO : 1
LIVING_CENTER : 1
AND_ANGIOGRAM : 1
MOVE_CONTINUES : 1
ASPIRIN_MG : 1
INFILTRATE_DOSAGE : 1
PALPABLE_NO : 1
NEGATIVE_FOR : 1
CHANGED_PATIENT : 1
TAUGHT_ANITA : 1
PVD_OF : 1
COMMUNITY_CENTER : 1
GIVEN_INFLUENZA : 1
IN_PT : 1
ON_YES : 1
REGARDS_UPCOMING : 1
CARENURSE_TELEPHONE : 1
YES_LDL : 1
BEEN_ON : 2
FOR_FOLLOWING : 2
MARRIED_HISTORY : 1
ROOM_ROUTE : 1
THE_SPECIALTY : 1
SYMPTOM_VISUAL : 1
EYE_TWICE : 1
HIM_HER : 1
NOT_ALL : 1
STABLE_ON : 1
VISIT_RESPIRATION : 1
AND_NO : 2
NAME_EXERCISE : 1
EL_OF : 1
NURSING_REASSESSMENT : 1
INTRAMUSCULAR_LEFT : 1
BUPROPION_MG : 1
SINCE_COMING : 1
OPTIC_TARGET : 1
ADVANCE_EDUCATED : 1
SKIN_INITIAL : 1
SYMPTOM_HER : 1
CHEWABLE_CHEW : 1
CA_COLONOSCOPY : 1
OU_TO : 1
INCLUDING_STVHCS : 1
HEART_NO : 1
TIME_ARRIVAL : 1
WAS_AND : 2
OL_ALLERGIES : 1
FOR_THE : 4
CP_PALPITATION : 1
HOURS_BREATHING : 1
ON_SKIN : 1
DEFICITS_CLONUS : 1
NUMBER_NUMBER : 1
IN_TO : 2
BEEN_BY : 1
TIME_IS : 1
PROBABLY_RELATED : 1
DONE_TO : 1
OUTPATIENT_FALL : 1
MONTHLY_MONITORING : 1
REQUESTED_FOR : 2
ON_SURGERY : 1
NONVIDEO_MONITORING : 1
OTHER_ALPHABETIZED : 1
ACTIVITIES_OF : 1
DOSE_OXYGEN : 1
HE_WILL : 2
STATUS_COMPLETED : 1
AORTA_PLAN : 1
ACTIVE_MR : 1
AID_NONE : 1
WILL_TO : 1
TRIES_TO : 1
ICDCM_ORTHO : 1
CAROTID_THE : 1
WITH_PROVIDER : 1
AC_DE : 1
POWER_CBI : 1
DIET_AND : 1
CARE_DEMOGRAPHICS : 1
CAPSULES_MAXIMUM : 1
PATIENT_STABLE : 1
HAS_STABLE : 1
STVHCS_MEDICATION : 1
REMINDER_ACTIVITY : 1
MR_IS : 2
NOR_HAS : 1
PRESSURE_CBC : 1
CPRS_REVIEWED : 1
ALREADY_THE : 1
TO_PC : 1
WAY_CLAIMS : 1
GIVEN_VACCINE : 1
PHARMACOTHERAPY_IS : 1
RECORD_DETERMINE : 1
INFILTRATE_ML : 1
CALL_PROFESSIONAL : 1
TO_SW : 1
BURN_NO : 1
SUSPECT_COGN : 1
HOLD_UNTIL : 1
DECISIONMAKING_EPINEPHRINE : 1
DATE_OF : 2
PULSE_TRIAGE : 1
WILL_BE : 3
STATUS_LAST : 1
AND_REPORTS : 1
SIZE_AND : 1
HAS_SLOWED : 1
VISION_BY : 1
STATUS_ALCOHOL : 1
AND_VF : 2
MRI_OF : 1
HAD_RESPIRATORY : 1
YEAR_NOW : 1
WENT_TO : 1
VISIT_ACCOMPANIED : 1
CONSTIPATION_RT : 1
HERATREG_STABLE : 1
CONSTIPATION_HIP : 1
DISCHARGE_OF : 1
IS_VISION : 1
OTHER_FH : 1
TOLD_PATIENT : 1
AS_DIRECTED : 1
COVERSHEET_FAXED : 1
ASSISTANCE_BEEN : 1
LOCATION_OF : 1
PT_CAPABLE : 1
DISEASE_ARTERY : 1
FOR_PAIN : 1
THE_TWO : 1
NIGHT_SHIFT : 2
PT_OSTEOARTHRITIS : 1
VET_ADVISED : 1
LDLCHOL_PATIENTS : 1
TO_CARE : 1
SHE_TAKES : 1
STAY_WITH : 1
ACTIVE_ACULAR : 1
THE_ALTERNATIVE : 1
SWELLING_DECREASED : 1
OUTPATIENT_ACTIVE : 1
CONTACT_NOTE : 1
SOME_WHICH : 1
MENSTRUAL_PERIOD : 1
CARE_PRIMARY : 1
HANDOUT_PATIENT : 1
GIVEN_ORDERED : 1
NO_INITIATE : 1
ASSESSMENT_HOW : 1
CAREGIVER_ASSESSMENT : 1
SCAR_INF : 1
TOL_WELL : 1
PATIENT_RECORD : 1
TX_WELL : 1
BEHAVIOR_SKIN : 1
EXAM_COSOPT : 1
ORAL_INHL : 1
SEROUS_DRAINAGE : 1
CALL_SCORE : 1
DRUG_REVIEWED : 1
PAIN_NEG : 1
DID_PROVIDER : 1
UNILATERAL_OCCLUSION : 1
DAY_NOTE : 1
AN_ANESTHESIA : 1
AND_NONVA : 1
CONTACTS_RAL : 1
COSOPT_BID : 1
STREAM_WAS : 1
NONV_FACILITY : 1
WEEK_FOR : 1
MONTH_WITH : 1
PROCEDURE_SAYS : 1
CALL_CENTER : 2
PRESSURE_SORE : 1
MONITORING_HAS : 1
HAD_NL : 1
FOR_DIRECTIVES : 1
PIOGLITAZONE_SIGNS : 1
REASSESSMENT_HEART : 1
INFLUENZA_VACCINE : 5
ALBUTEROL_ISSUE : 1
BEEN_FOR : 1
BILL_NOT : 1
VSS_COMPLAINTS : 1
CALLED_VET : 1
FOR_THERAPY : 1
NO_IN : 1
CLONUS_NO : 1
LEVEL_OF : 1
TWO_OFTEN : 1
SKIN_SCREENED : 1
SPLIT_TABLETS : 1
SHOWED_BY : 1
AND_SUMMARY : 1
NC_MUSCULOSKELETAL : 1
TO_TWO : 1
ETC_CURRENTLY : 1
TAB_OTHER : 1
ONE_OF : 1
VITAMIN_BLOOD : 1
CAN_THIS : 1
AFFECT_UCINATIONS : 1
PATHOLOGY_GL : 1
CURRENT_MEDICATIONS : 1
KETOROLAC_SOLN : 1
CURRENTLY_TRAVATAN : 1
MONITORING_AND : 1
OF_ALTERNATIVE : 1
ARRHYTHMIAS_NOTED : 1
CONSCIOUSNESS_WEIGHT : 1
AMOUNT_ACT : 1
ONCOLOGIST_FOR : 1
US_WORKER : 1
ONE_TO : 1
TO_PULSE : 1
ACTIVE_LORAZEPAM : 1
PANBRUIT_ICDCM : 1
THYROID_HORMONE : 1
ALL_HEALTH : 1
PC_STATES : 1
HE_HERE : 1
IMMUNITY_DECLINES : 1
YOU_TOLD : 1
WARM_HAS : 1
WITH_SHORT : 1
FACILITY_LAB : 1
YOU_SHOULD : 1
WAS_FOR : 3
EPINEPHRINE_USED : 1
GODSEY_NP : 1
TIME_MINUTES : 1
HAS_DECREASED : 1
BM_AND : 1
WAS_EVALUATED : 1
GOT_NOTICE : 1
BE_FOLLOWED : 1
SKIN_MOISTURE : 1
CONSULT_SIGNS : 1
CONTL_SOLN : 1
THIS_NP : 1
NONE_FOUND : 1
EDEMA_TREMORS : 1
BY_MARITAL : 1
HORMONE_WITH : 1
HARMONY_HOME : 1
SORE_SKIN : 1
PLANT_VITALS : 1
TAKEN_OUT : 1
UNDERSTANDING_AND : 1
ALPHAGAN_BID : 1
EASY_AS : 1
AMBULATORS_ADMITS : 1
SHE_HAS : 2
MMI_SENDING : 1
MUSCULOSKELETAL_EDUCATION : 1
FOR_VET : 1
NAME_TOTAL : 1
TEMP_STROKE : 1
THE_USE : 1
SOB_HEMOPTYSIS : 1
ANY_TROUBLE : 1
ATIVAN_ANTIVERT : 1
APPOINTMENT_PHYSICIAN : 1
HYPERTENSION_THE : 1
DTN_HER : 1
TO_ALWAYS : 1
COUGHING_FULL : 1
RISK_TEMPERATURE : 1
ADJUVANT_SHORT : 1
COMPLIANT_WEARING : 1
INHALE_PUFFS : 1
COSOPT_AND : 1
NIGHT_NOTE : 1
YOU_ARE : 1
DELTOID_PARESTHESIAS : 1
YASSAR_PATIENT : 1
THE_SUPERVISING : 1
SOME_OF : 1
ANTICOAGULATION_FOR : 1
PALPITATION_SOB : 1
BIRTH_MAR : 1
SENSORY_NO : 1
ANY_OF : 3
PATIENT_COVER : 1
PATIENT_MYOCARDIAL : 1
BASED_ON : 2
ALSO_IN : 1
SEEN_THE : 2
HIP_UNILATERAL : 1
BEST_BELOW : 1
NOTE_CLEAR : 1
CHO_OL : 2
APPOINTMENTS_HAS : 1
CONVERSATION_HAS : 1
THE_ER : 1
MEDICATION_INFLUENZA : 1
DECISION_ADDENDUM : 1
OK_AND : 1
NEC_CLEAR : 1
AND_RENOVATE : 1
OF_LAB : 1
DAY_SHIFT : 1
II_NO : 1
BESYLATE_MG : 1
BIOPSY_APEX : 1
GLASS_ORDER : 1
ADVERSE_NPC : 1
DENIED_OCCUPATIONAL : 1
TEST_METOPROLOL : 1
TO_OBTAIN : 1
SHOWS_NO : 1
WAS_IF : 1
FAMILY_THIS : 1
CRUSH_CHEW : 1
SOCIAL_PATIENT : 1
THOUGHT_TUES : 1
LISTED_NUMBER : 1
ML_ADMISSION : 1
THE_AND : 2
ATIVAN_AND : 1
CENTER_NIGHT : 1
LAST_HAVE : 1
PT_ARTHRITIC : 1
AND_PARTICIPATED : 1
OF_VACCINE : 1
AM_REQUESTED : 1
ON_BASIS : 1
INDEPENDENT_WITHIN : 1
OF_PREGNANT : 1
LOSS_COUGH : 1
MEDICATION_RECONCILIATION : 1
TO_ON : 1
PLAN_RATE : 1
PLEASE_CONTACT : 1
TAB_SIGNIFICANT : 1
LAST_PERIOD : 1
FOR_LONG : 1
FECAL_BLOOD : 1
CONCERNING_DR : 1
EMERGENCY_TRIAGE : 1
CLEAR_TUES : 1
ADVISED_THAT : 3
PT_PRIMARY : 1
CORNEA_THE : 1
METOPROLOL_TARTRATE : 2
CONCENTRATIONS_MAXIMUM : 1
ACTIVE_CLINICAL : 1
PAIN_THE : 2
PHONE_OR : 1
PINHOLE_NO : 1
DEPRESSIVE_NEC : 1
CONTACTS_LOSS : 1
CBI_URINE : 1
TO_CLINIC : 1
REVIEWED_PATIENT : 1
GET_EMERGENCY : 1
DOSAGE_ADMISSION : 1
CALL_TYPE : 2
CENTER_CLIENT : 1
CONSULT_DEMOGRAPHICS : 1
BY_ANITA : 1
THE_DOCUMENT : 1
SURGERY_IMPLANTATION : 1
OF_ANTICOAGULANTOPEN : 1
VA_CLINIC : 1
VET_THAT : 1
CLINICAL_REMINDERS : 3
ANGIOGRAM_STENT : 1
SPOKE_PT : 1
DEPT_NOTE : 1
YOUR_CURRENT : 1
WAS_NEGATIVE : 1
MEDICATE_AS : 1
AND_QID : 1
DURING_ENTIRE : 1
HE_BEEN : 1
VF_LOSS : 1
ML_SKIN : 1
RIGHT_GROIN : 1
ALREADY_RECEIVED : 1
DISPOSITION_OBSERVATION : 1
NEW_HE : 1
ANSWERED_ANY : 1
LIST_OF : 1
OR_BE : 1
ARAE_RN : 1
PAIN_MANAGEMENT : 1
THICK_INFORMED : 1
IN_MISSOULA : 1
VAMC_PHONE : 1
COVERAGE_PM : 1
TREATMENT_PROCEDURE : 1
PC_NUR : 1
THIS_AND : 2
FROM_CATEGORY : 1
RADIAL_FOR : 1
SCORE_BLUE : 1
NAUSEA_DIARRHEA : 1
ANY_TIME : 1
COULD_TO : 1
NECK_BACK : 1
DIAGNOSIS_DISCHARGE : 1
SCALE_PREDICTING : 1
CAPACITY_EPINEPHRINE : 1
PC_AHMED : 1
INTERVIEW_MEDICATION : 1
BE_TUES : 1
OF_MEMORY : 1
CORONARY_BYPASS : 1
REGULAR_YES : 1
TWO_CAPSULE : 1
ASSESSMENT_PRESENTS : 1
GOT_THAT : 1
OF_DONE : 1
NORMAL_LV : 1
TABS_PRESENTS : 1
CHEST_PAIN : 3
PANBRUIT_ADDENDUM : 1
BP_CLEAR : 1
AND_HE : 2
AFTER_ADDITIONAL : 1
SENDING_BESYLATE : 1
COMPUTER_IS : 1
PLACED_ON : 2
SAW_FT : 1
BOTH_THANKS : 1
FACILITY_ATHENS : 1
APPOINTMENT_PAIN : 1
ALCOHOL_TEST : 1
BASIS_HE : 1
CERTIFIED_WARFARIN : 1
YOU_CONTINUE : 1
PAIN_INFORMATION : 1
RIGHT_APEX : 1
DISORDER_NEC : 1
APPOINTMENT_DATE : 2
APPOINTMENT_INFORMATION : 1
ANESTHESIA_PRACTITIONER : 1
INHL_INHALE : 1
THAT_DEFINES : 1
INDIVIDUAL_TAUGHT : 1
AND_OUTPATIENT : 1
VOICES_OF : 1
AND_MAKING : 1
ML_IM : 1
PROCEDURE_DISPOSITION : 1
CHEST_NEC : 2
DYSURIA_CHEST : 1
TOLL_FREE : 1
CURRENTLY_VITALS : 1
ONE_NIGHT : 1
EDEMA_NO : 1
DELTOID_NONE : 1
SW_VET : 1
OF_ORAL : 1
PREVENTION_TREATMENT : 1
DEFECIT_IN : 1
COMPUTER_THE : 1
DIABETES_OR : 1
OF_VETERAN : 1
THAMINE_SOLN : 1
LIQUIDS_SKILLS : 1
ENCOUNTER_IS : 1
COLONOSCOPY_IN : 1
NOTE_INFORMATION : 1
PT_TOL : 1
NO_HABITS : 1
ML_CBI : 1
NO_NO : 11
AND_AS : 1
SUMMARY_EPISODE : 1
KG_TIME : 2
DYSPHAGIA_CONSTIPATION : 1
DIRECTED_PT : 1
EXCEED_CAPSULES : 2
BPH_RETENTION : 1
VERBALIZED_UNDERSTANDING : 1
BEHAVIOR_TELEMETRY : 1
HAS_NKA : 2
DEFINITION_LIQUIDS : 1
MOUTH_HOURS : 1
ENTIRE_RESIDENT : 1
EMERGENCY_ROOM : 1
TRIAL_AFFECT : 1
OUTPUT_BRADEN : 1
CLC_DAY : 1
DYSUREA_NO : 1
HIS_DRIVING : 1
IS_RESPONSE : 1
OPT_COMFORT : 1
PATIENT_TO : 3
DUE_ONH : 1
AHMED_YASSAR : 1
ON_CONTINUES : 1
LOW_BELL : 1
PATIENT_COMPLAINTS : 2
TO_BE : 4
THE_TIBIAL : 1
CAPSULE_REFILLS : 1
COMPLICATION_HYPERTENSION : 1
LEFT_RAL : 1
TO_REMIND : 1
WEARING_PT : 1
HUSBAND_THE : 1
AFEB_DISCHARGE : 1
PAIN_OF : 2
IS_AAM : 1
SERVICE_NW : 1
NOV_PAIN : 1
AN_MESSAGING : 1
LIKE_FOR : 1
INPATIENT_FACILITY : 1
TIME_ACTIVE : 1
EPISODE_NOTE : 1
ORAL_INFORMATION : 1
FOUND_MOUTH : 1
NKA_BOTH : 1
THE_VETERAN : 1
DISPOSITION_BED : 1
NUMBER_TO : 1
NOTE_BE : 1
TO_STAYING : 1
COGNITIVE_COORDINATION : 1
AFTER_CALL : 2
SEATBELT_ACCIDENT : 1
TO_WITH : 2
LORAZEPAM_TAB : 1
TO_UPCOMING : 1
WITH_THE : 1
WAS_HE : 1
WELL_ADVERSE : 1
REMINDERS_RESOLUTION : 1
SKIN_EXCISED : 1
ADVISED_PT : 1
ARTERY_CORONARY : 1
DIARRHEA_NO : 1
DIRECTLY_RECOMMEND : 1
DROP_OD : 1
PAIN_RATE : 1
IN_THINGS : 1
NEEDS_MOVE : 1
STVHCS_RECONCILIATION : 1
UNSUCCESSFUL_ABLE : 1
HEALTH_CARE : 1
PRACTITIONER_RECORD : 1
LVEF_NORMAL : 1
AND_TELEPHONE : 1
PATIENT_DEMOGRAPHICS : 1
CARE_HOURS : 1
CONGESTION_INPATIENT : 1
RECENT_TROUBLE : 1
TO_AUSCULTATION : 1
ON_AT : 1
PAIN_AGAIN : 1
PT_ALSO : 1
TO_REACTION : 1
BEDREST_WHEELCHAIR : 1
VACCINE_IM : 1
ADJ_ORDER : 1
FEELS_PHYSICIAN : 1
IS_TO : 1
ASSESSMENT_AND : 1
REALLY_SHE : 1
OTHER_EXAMINATION : 1
COUSIN_MEET : 1
REVIEW_PATIENT : 1
IS_BASED : 2
ANTICOAGULATION_CLINIC : 1
PAIN_DENIED : 1
ONEHALF_TABLET : 1
COLOR_AND : 1
UNDERGOING_RADIATION : 1
THYROID_CONCENTRATIONS : 1
THAMINE_OPH : 1
DAILY_MEASUREMENT : 1
FOLLOWING_THIS : 1
INPATIENT_AND : 1
SITE_LEFT : 1
CHART_MR : 1
NW_EYE : 1
EYES_THREE : 1
OBJECT_PATIENT : 1
INDEPENDENT_MOBILITY : 1
THE_MEDICATION : 3
ALTERNATIVE_NOTE : 1
SUMMARY_YOU : 1
WAS_FU : 1
LOW_SODIUM : 1
CORONARY_ARTERY : 3
HIS_TO : 1
INPATIENT_REMOTE : 1
PROCEDURES_LOCATION : 1
MAIL_RX : 1
PULSE_TEMP : 1
TALK_TO : 2
THE_LEFT : 2
PATIENT_NOT : 3
HOW_MUCH : 1
SERVICE_NONE : 1
NOT_ANY : 1
WORKER_PHYSICIAN : 1
TRIAGE_RN : 2
NP_DOSE : 1
DATE_ASKED : 1
AN_CALL : 1
SHE_BEEN : 1
SCORE_ARAE : 1
IN_SH : 1
SUBCUTANEOUSLY_BREAKFAST : 1
DRAINING_DRAINAGE : 1
JUST_GOT : 1
HAS_BEEN : 6
THIGH_APPOINTMENT : 1
BARRIERS_SUBJECTIVE : 1
THE_SAME : 1
AGO_NOW : 1
OR_CHEW : 1
NOT_DYSPNEA : 1
SOFT_TISSUES : 1
STATED_THAT : 2
MONITORED_FOR : 1
AGAINST_THIS : 1
FOR_FOLLOW : 2
VITAL_PAIN : 1
THE_SH : 1
SCREENING_CONSULT : 1
THE_PAIN : 1
SELECTED_FROM : 2
GEM_TO : 1
AS_PATIENT : 1
WARM_NORM : 1
LEFT_WEIGHT : 1
WAS_GETTING : 1
SKIN_COLOR : 1
ULCER_RIGHT : 1
NAME_DIARRHEA : 1
STATUS_TELEMETRY : 1
MEDS_DUONEB : 1
RHYTHM_REGULAR : 1
DAILY_LIVING : 1
OF_FOLLOWING : 1
FOR_IS : 1
BELL_WITHIN : 1
HAS_CAPACITY : 1
AND_ALPHAGAN : 1
URINATION_CC : 1
NO_HEMOPTYSIS : 1
DIABETIC_AS : 1
REQUESTING_TO : 1
HIP_RAL : 1
EVALUATION_WITH : 1
CHEW_TABS : 1
VERIFIED_PATIENT : 1
REGARDS_TO : 1
WITH_FAMILY : 1
OCCULT_BLOOD : 1
WAS_ADVISED : 1
VISIT_TRIAGE : 1
RESPIRATORY_CARE : 1
DOSAGE_AND : 1
THE_MAIL : 1
UNKNOWN_OBJECT : 1
WITHIN_COMMUNITY : 1
SITE_DELTOID : 1
RESULT_THOUGHT : 1
JUL_SEX : 1
LAST_NIGHT : 1
COGNITIVE_AND : 1
SHE_INFLUENZA : 1
THE_OVER : 1
CLEAR_WAY : 1
DIAGNOSIS_DIABETESHYPERTENSION : 1
CLINIC_HEART : 1
STROKE_OR : 1
INHOUSE_DEVICE : 1
OF_NOT : 1
STATE_MULTIPLE : 1
PATIENT_IS : 1
TO_BOISE : 1
AUDITC_WAS : 1
DRINKS_AND : 1
PAIN_THIS : 1
THIS_PROVIDER : 1
TO_REVIEW : 1
OPERATIONS_ALBUTEROL : 1
NURSE_AND : 1
EXCISED_RENOVATE : 1
THERAPY_NOTE : 1
ON_MEDICAL : 1
PATTERN_VOICES : 1
PHYSICIAN_PIERCE : 1
DIABETESHYPERTENSION_ASPIRIN : 1
ADVANCE_DIRECTIVES : 1
PATIENT_NO : 1
FUROSEMIDE_HE : 1
BEDREST_NURSE : 1
SCREENED_PAIN : 1
OUTPUT_IRRIGANT : 1
CLAIMS_ASSISTANT : 1
PC_TEAM : 1
BUSY_CURRENTLY : 1
HE_BE : 1
DEFECIT_HIS : 1
DEVICE_LDL : 1
PROCEDURES_METOPROLOL : 1
SIGNS_PAIN : 1
INHALE_ACTIVE : 1
ATTENDING_WAS : 1
UP_ACCOMPANIED : 1
PROSTHETICS_HOME : 1
ASSISTIVE_DILATE : 1
ER_PAYMENT : 1
SOCIAL_WORK : 1
ASSISTED_THE : 1
OF_SURGERY : 1
LOCATION_NO : 1
SCAR_TEMP : 1
NAME_NO : 1
KG_SPENT : 1
HE_STATED : 1
AND_THE : 1
HE_ANY : 1
ROUTE_DOSAGE : 1
KG_ST : 1
DID_YOUR : 1
ACTIVE_TELECARE : 1
DM_COMPLICATION : 1
PREDICTING_PRESSURE : 1
PROGRESS_NOTE : 2
SPECIALTY_PRIMARY : 1
RETENTION_SLOW : 1
PLAN_PROBLEM : 1
URINE_OUTPUT : 1
URINATION_HAVE : 1
INFORMATION_IN : 1
AND_ACCIDENT : 1
RESIDENT_BREATH : 1
MUCH_THIS : 1
TO_SEEN : 2
AS_SOCIAL : 1
INFORM_YOUR : 1
SKIN_ASSESSMENT : 1
GLAUCOMA_WITH : 1
TO_ONCOMING : 2
TO_AND : 2
INTAKE_OUTPUT : 1
PAIN_ACTIVITY : 1
BRAND_QUANTITY : 1
CHEWABLE_ONE : 1
IF_ARE : 1
PROCEDURES_ANATOMIC : 1
SEEN_IN : 3
ONE_TWO : 1
STANDARD_OUTPATIENT : 1
HE_TO : 3
REGULAR_STATUS : 1
OF_INSIDE : 1
THE_THIS : 2
VACCINE_AVAILABLE : 1
SOB_DIZZINESS : 1
SHOW_FOR : 1
BY_NEPHEW : 1
PAIN_HEART : 1
AND_INJECT : 1
HISTORY_UCINATION : 1
ANSWERED_BOTH : 1
DELIVERY_REQUESTING : 1
ALERT_PT : 1
THE_LIST : 2
HIS_FIANC : 1
DOING_THINGS : 1
TRIAGE_PHYSICIAN : 1
MARRIED_SOCIAL : 1
PAIN_EDUCATION : 2
SINCE_DUE : 1
NURSING_PLAN : 1
MEDICATIONS_IN : 1
FACILITY_THAT : 1
QHRS_PRN : 1
MOISTURE_NEUROLOGICAL : 1
ON_OF : 1
ALL_YOUR : 1
IN_CERTIFIED : 1
MACHINE_MAIL : 1
SORE_RISK : 1
FOLLOW_YOU : 1
BEEN_COMPLIANT : 1
HISTORY_LATEX : 1
EDUCATION_MOISTURE : 1
PULSE_OXIMETER : 1
BE_LOCALLY : 1
FOR_THEN : 1
LAST_ANY : 1
TO_GET : 1
HE_NEEDS : 1
AMLODIPINE_BESYLATE : 1
SUBJECTIVE_SEEN : 1
MANAGER_AT : 1
REMINDERS_NOTE : 2
CURVE_HI : 1
FEVER_PATIENT : 1
PHONE_HE : 1
LIVING_PM : 1
OL_IF : 1
ALLERGIES_REACTIONS : 1
PLEASE_THE : 1
CURRENT_OF : 1
NURSING_CARE : 1
WAS_UNSUCCESSFUL : 1
DOES_NOT : 1
APETITE_WITH : 1
EPISODE_PROGRESS : 1
OF_PRESCRIPTION : 1
STATUS_PHONE : 1
HE_TRIES : 1
PAIN_ANYWHERE : 1
BE_PATIENT : 1
HIATAL_HERNIA : 1
SELECTED_CATEGORY : 1
NO_WAY : 1
AAM_SEEN : 1
TH_SOME : 1
AN_SCREENING : 1
PROVIDED_ASSESSMENT : 1
BE_MAILED : 1
ER_DONE : 1
TO_IN : 1
VITALS_ALLERGIES : 2
MG_CHEW : 1
IRRIGANT_BP : 1
CALL_BELL : 1
REST_THE : 1
ACTIVE_TOXIC : 1
COMMUNITY_LIVING : 1
SAME_OR : 1
ADDENDUM_WEIGHT : 1
ONH_AND : 1
INDICATED_INFLUENZA : 2
NOT_WANT : 1
APEX_MID : 1
INTERVIEW_THIS : 1
IN_CLINIC : 3
CONNECTED_NONE : 1
SHE_NO : 1
WITH_PAIN : 1
PARTICIPATED_NO : 1
RARELY_OPT : 1
RETURN_MONTHS : 1
OBJECT_WAS : 1
CONTACT_VA : 1
ORTHOPEDICS_BPH : 1
CALLER_OTHER : 1
COMPUTERIZED_LIST : 1
ACTIVE_REST : 1
OBTAIN_FURTHER : 1
THEN_CURRENT : 1
DYSPHAGIA_DIARRHEA : 1
OF_NUMBER : 1
ADMINSTRATION_WAS : 1
THIS_SUSAN : 1
CHANGE_FOR : 1
ABOVE_VETERAN : 1
HAS_TO : 1
ASSESSMENT_PHYSICIAN : 1
DRIVING_PANBRUIT : 1
NOTE_TAGS : 1
HEALTH_WAS : 1
WITH_INHOUSE : 1
HARMONY_HEALTH : 1
NOTE_YOU : 1
STATED_HE : 2
LAST_TIMES : 1
APEX_UNDERGOING : 1
ABLE_ACCESS : 1
BY_PC : 1
FOR_PREDICTING : 1
NAME_FREQUENCY : 1
DO_NOT : 2
TO_NECK : 1
INPATIENT_NONV : 1
DIARRHEA_OR : 1
INTERVIEW_AGAINST : 1
SKIN_INTAKE : 1
HERE_WENT : 1
STENT_CST : 1
AND_MEDICATIONS : 1
PHONE_TO : 1
AND_ROUTE : 1
THEREFORE_THE : 1
OCCLUSION_VELOCITIES : 1
HAS_HE : 1
PLEASURE_IN : 1
BIDCONTINUED_TRANSFER : 1
IS_HERE : 1
APPEAR_THE : 1
SEEN_BY : 1
THOUGHT_MIGHT : 1
CALLED_AND : 1
RESIDENT_SURGEON : 1
SHOWED_MOUTH : 1
ACTIVE_REPORT : 1
HAVE_CONTACT : 1
PULSE_NORMAL : 1
REQUESTED_ASSISTIVE : 1
TALK_YOU : 1
PROSTATE_PT : 1
STOPPING_EVALUATED : 1
FOR_CANCERSEES : 1
PMHX_PROSTHETICS : 1
OF_BEING : 1
COMPLICATION_IN : 1
WOULD_LIKE : 1
BEEN_BOTHERED : 1
SHIFT_BUPROPION : 1
SOLUM_IN : 1
COMPLAINTS_PT : 1
NO_PATIENT : 1
NOW_HAS : 1
AND_OUTPUT : 1
SOFTENER_DO : 1
BLUE_ARAE : 1
OXIMETER_LOSS : 1
PRESENTS_GEM : 1
IN_WAS : 1
OF_ULCER : 1
ADVISED_CAN : 1
ACTIVE_MARITAL : 1
TO_ANTERIOR : 1
WITH_MMI : 1
SH_DUE : 1
TOTAL_EXERCISE : 1
RN_AMBULATORY : 1
PROCEDURES_TARTRATE : 1
VETERAN_PRESENTS : 1
ABD_NO : 1
PLASMA_LB : 1
OF_WEIGHT : 1
BUT_MY : 1
REPORTS_RATING : 1
PRIMARY_HOURS : 1
BESYLATE_TAB : 1
EDUCATION_FECAL : 1
IV_ML : 1
IS_EXPECTED : 1
THE_ROOM : 1
SUMMARY_DICTATED : 1
UPCOMING_ACTIVE : 1
QHRS_BEHAVIOR : 1
DAILY_OF : 1
HAVE_QUESTIONS : 1
PROBABLY_DIRECTLY : 1
TEMPERATURE_FOR : 1
DENIES_IN : 1
WELL_HAS : 1
CAD_COMPLAINT : 1
CLEAR_TO : 2
DISCHARGE_DO : 1
DELUSION_ALREADY : 1
RX_ATIVAN : 1
RX_FOR : 1
CONTROL_MONITOR : 1
OFF_ONCOMING : 1
STATE_ABOVE : 1
ABOUT_MED : 1
TO_MAILED : 1
SIGNS_DM : 1
TEMPERATURE_DIAGNOSIS : 1
CAROTID_OCCLUSION : 1
THE_INSURANCE : 1
CONTACT_CLC : 1
THE_MED : 1
ULCER_LEFT : 1
YOU_ANY : 1
POSSIBILITY_BEING : 1
IRRITABLE_NIGHT : 1
IS_APPOINTMENTS : 1
ONCOMING_MOISTURE : 1
ACT_NO : 1
ALCOHOL_USE : 1
HAVE_WEAK : 1
HAD_ADJUNCTIVE : 1
THIS_SHOWED : 1
TELEMETRY_NURSING : 1
FOR_CONTACTS : 1
POAG_DUE : 1
VACCINE_IMP : 1
ARAE_TRIAGE : 1
BEFORE_APPOINTMENT : 1
VOICES_COMPLAINTS : 1
THE_ENTIRE : 1
OF_RECORD : 1
SECONDARY_TARGET : 1
RESPIRATORY_WITH : 1
BRAKES_YES : 1
WITHOUT_ANY : 1
DECREASED_STILL : 1
CONSTIPATION_DYSURIA : 1
SUPPLEMENT_BLOOD : 1
SPOKANE_BPH : 1
INFORMED_CONSENT : 1
NOTE_METALLIC : 1
TO_SUSAN : 1
FOLLOWING_NEEDS : 1
REQUESTED_VA : 1
TWICE_GLAUCOMA : 1
THE_RIGHT : 1
OF_METOPROLOL : 1
NAME_CONTROL : 1
TIME_TO : 1
GO_THE : 1
HE_ADJUNCTIVE : 1
FOOT_NEW : 1
SYST_TELEPHONE : 1
ADDENDUM_REPORT : 1
TREATMENT_OPERATION : 1
HELP_OF : 1
SPENT_ACTIVE : 1
WITH_HE : 2
BEEN_CHANGED : 1
SPLITTING_TABLETS : 1
OF_ONE : 1
PRECAUTIONS_OF : 1
ACTIVITY_REGULAR : 1
PAIN_CONTROL : 1
PRN_TELEMETRY : 1
NUMBER_THE : 1
THERAPY_PROGRESS : 1
OF_ER : 1
ATROPHY_EDEMA : 1
PAST_WITH : 1
WHICH_TAKEN : 1
THE_GO : 1
RECOMMEND_RECOMMEND : 1
AND_BACK : 1
NONE_BEDREST : 1
RAL_NEW : 1
LEFT_MESSAGE : 1
ALERT_AND : 1
FOR_BREATHING : 1
HERE_AT : 1
ALONG_WITH : 1
UNKNOWN_THE : 1
SHOULDER_DONE : 1
AND_UP : 1
PAYMENT_THE : 1
WAS_SELECTED : 2
OTHER_COMPLAINT : 1
XYZZY_REMINDERS : 1
ATTENDED_CLASS : 1
THE_MEDICAL : 1
FILL_TO : 1
TO_FOR : 2
MUSCLES_THEREFORE : 1
FREE_THEN : 1
CHANGE_DOCUMENT : 1
WILL_INFORM : 1
HAVE_STREAM : 1
PATIENT_DISPOSITION : 2
TO_THE : 3
HUFANA_TOLD : 1
BLOOD_PRESSURE : 2
ML_TEMPERATURE : 1
TO_VERBALIZED : 1
ALL_BUT : 1
OD_AFTER : 1
DISCUSS_OF : 1
NO_CP : 1
THINGS_NOT : 1
THE_MEDICATIONS : 1
STATUS_ACTIVE : 1
PHONE_THE : 1
CURRENT_USE : 1
THERAPY_ANTERIOR : 1
THE_OF : 2
BY_RD : 1
THE_SOURCE : 2
PATIENT_EDUCATION : 2
BY_MOUTH : 3
TO_WHETHER : 1
TX_NO : 1
AN_AAM : 1
PRACTITIONER_WILL : 1
PLACED_TO : 1
BUT_PAYMENT : 1
ABILITY_ADDENDUM : 1
ORDERED_RIGHT : 1
PT_CONTINUE : 1
NO_PROSTATISM : 1
TO_TALK : 1
PT_TAKE : 1
ASSISTANCE_MOBILITY : 1
NURSING_APPOINTMENT : 1
FORM_POINTS : 1
SKILLED_CARE : 1
CHIEF_COMPLAINT : 3
HE_SOME : 1
NEEDS_ALBUTEROL : 1
PLAN_DECISION : 1
TO_FOLLOWED : 1
ANYWHERE_ATTENDING : 1
IS_LIFE : 1
MG_BIDCONTINUED : 1
AND_INTERVIEW : 2
DICTATED_IMMUNIZATION : 1
THAT_HE : 7
MEDICATIONS_UNLESS : 1
PATHOLOGY_THE : 1
THIS_OFFERED : 1
BACK_HE : 1
AGREEAB_ACTIVE : 1
DISEASE_PATIENT : 1
INFORMATION_HERPES : 1
AUDITC_YES : 1
HAS_EATING : 1
JOINT_RATIVE : 1
CONTROL_PAIN : 1
UP_OF : 1
REASON_FOR : 2
TELECARE_MANAGER : 1
CAPABLE_SPLITTING : 1
MANAGEMENT_HANDOUT : 1
TAKE_TABLET : 2
AVAILABLE_CP : 1
THE_FOR : 2
MAR_NURSING : 1
INF_TEMP : 1
MENSTRUAL_NAME : 1
AND_BEEN : 1
UNDERSTANDING_AGREEAB : 1
NOT_THAT : 1
AHMED_PATIENT : 1
REMEMBER_ALWAYS : 1
THIS_THE : 1
ILIACS_ANGIOGRAM : 1
MR_MALE : 1
DO_YOU : 1
TOLD_PT : 1
CENTER_NOTE : 2
TO_INFORM : 1
CONCERNING_AFTER : 1
ACULAR_AND : 1
RD_TYPE : 1
ANSWER_BUSY : 1
PRESENTS_IN : 1
ML_TOTAL : 1
ATTACK_NOT : 1
WHO_HERE : 1
SEEN_FOR : 1
OL_BEST : 1
STATUS_USE : 1
ACTIVE_IN : 1
MYOCARDIAL_PERFUSION : 1
MOTOR_NO : 1
NO_BARRIERS : 1
ADDENDUM_LB : 1
GOLD_ON : 1
ONE_BY : 2
TO_PHONE : 1
VELOCITIES_ON : 1
THAT_WAS : 1
TUES_TO : 1
RETENTION_NOCTURIA : 1
CARE_NURSING : 1
NOTE_CLIENT : 1
PC_CLINICAL : 1
HE_GOT : 1
OF_PATIENT : 1
ASSISTED_DURING : 1
TELEMETRY_SKIN : 1
PATIENT_DECISIONMAKING : 1
DELTOID_COUMADIN : 1
OF_OUTPATIENT : 1
UP_HELP : 1
LOCAL_SKIN : 1
AND_FOR : 1
CLEAR_BY : 1
SOME_MULTIPLE : 1
ACTIVE_CC : 1
EVERY_HOURS : 1
RXS_INPATIENT : 1
THIS_AM : 1
WITH_THIS : 1
FURTHER_URGENT : 1
THEIR_UPCOMING : 1
LAST_MENSTRUAL : 1
MAXIMUM_SENDING : 1
PREGNANT_YES : 1
HEALTH_WITHOUT : 1
INFORM_HUSBAND : 1
MOBILITY_WITHIN : 1
THAT_TRIES : 1
TO_VETERANS : 1
YOU_ABOUT : 1
YOU_LIKE : 1
REGULAR_FEELS : 1
INFLUENZA_ADMINSTRATION : 1
ANSWER_ETC : 1
TEAM_HE : 1
LIST_TAKEN : 1
HIS_FOR : 1
WAS_HERE : 1
PROGRESS_METALLIC : 1
TABLETS_IS : 1
BRAND_AND : 1
NURSE_SEATBELT : 1
AND_EVALUATION : 1
TELEMETRY_YES : 1
OF_WOUND : 1
IN_LAST : 1
ORTHO_PHYSICIAN : 1
WITHOUT_ASSISTANCE : 1
COMPLAINT_HIP : 1
ALPHAGAN_FOR : 1
TIME_INTAKE : 1
MMI_AMLODIPINE : 1
SEEN_INDICATED : 1
MRI_CALL : 1
ONH_APPEARANCE : 1
YES_FEELS : 1
IS_NONREACTIVE : 1
CALL_MD : 1
WILL_HER : 1
RESOLVED_PROBABLY : 1
COMPLAINTS_PROBLEMS : 1
SEROUS_BY : 1
DRESSING_REINFORCEMENT : 1
PATIENT_ASSESSMENT : 1
YOUR_CARE : 1
STILL_DRAINING : 1
AND_SCREEN : 1
NOVEMBER_TH : 1
SOB_HEADACHE : 1
TRIAGE_NOTE : 1
SEP_RACE : 1
ANTIVERT_OSTEOARTHRITIS : 1
RECEIVED_ON : 1
PROVIDER_INDIVIDUAL : 1
ORIENTED_OF : 1
HOLD_PATIENT : 1
VETERANS_PHONE : 1
TIMES_RELAX : 1
BOBBITT_PROCEDURE : 1
COMPLAINT_PAIN : 3
NAILS_ULCER : 1
WHEN_TO : 3
MYOCARDIAL_STUDY : 1
ALSO_HER : 1
RADIATION_WITH : 1
ORIENTED_COMPLAINT : 1
RN_CALLED : 1
THIS_LIST : 1
SDAUGHTER_SAYS : 1
DYSUREA_HEMATURIA : 1
REMIND_HER : 1
FOR_AT : 1
ALBUTEROL_TO : 1
TUES_TALK : 1
WARFARIN_IN : 1
TO_ORIENTED : 1
MELENA_INITIATE : 1
DICTATED_NURSEINFLUENZA : 1
AGAIN_THE : 1
VF_SPLIT : 1
SHOWS_PACED : 1
OR_HEART : 1
RECONCILATION_COMPUTER : 1
APPOINTMENT_WITH : 1
HISTORY_WAS : 1
SODIUM_DIET : 1
AT_CURRENT : 1
WAY_GET : 1
NEED_PLAVIX : 1
TRAVATAN_CHORIORETINAL : 1
FROM_NW : 1
COMMUNITY_DOCUMENT : 1
SHOULDER_PT : 1
LAST_SAW : 1
EDUCATION_OCCULT : 1
DUONEB_UD : 1
WAS_EVAL : 1
RATIVE_STATES : 1
ELEVATED_OL : 1
NONE_TAKE : 1
LABRUM_DE : 1
DIAGNOSES_LUNGS : 1
INSIDE_THE : 1
TEST_WAS : 1
TARGET_LB : 1
MEDS_DOSE : 1
CARENURSE_NOTE : 1
MEDICATION_BELOW : 2
AM_AND : 1
SHE_GO : 1
CURRENT_EMERGENCY : 1
INTEREST_OR : 1
ORDERS_THE : 1
MID_UNDERGOING : 1
HAS_BLOOD : 1
CALL_HEALTH : 1
LOSS_FUROSEMIDE : 1
NO_LEARNING : 1
YEAR_THE : 1
THIS_AT : 1
NEGATIVE_URETHERAL : 1
ATTEMPT_CST : 1
BEEN_PLACED : 1
NORM_WARM : 1
VSS_NO : 1
MEDICATIONS_APPLICABLE : 1
RESP_PULSE : 1
FOLLOWED_IN : 1
DISCUSSED_BRAND : 1
IN_HAS : 1
DEBRIS_THE : 1
SIG_ONE : 1
NOT_VACCINE : 1
HAD_RECENT : 1
SHE_WANTS : 1
CONTACT_THE : 1
SPLITTING_AS : 1
REVIEWED_PLAN : 1
IN_AGREEMENT : 1
PT_CONCERNING : 1
ABNORMAL_THOUGHT : 1
THE_PNEUMOVAX : 1
SKIN_NEUROLOGICAL : 1
VITAMIN_SUPPLEMENT : 1
ADMINISTRATION_EXTENSIVE : 1
TEMP_HE : 1
THE_YEAR : 1
VITAL_VITAL : 1
CLEAR_AUSCULTATION : 1
LIFE_HANDOUT : 1
SWELLING_HAS : 1
WEEK_TWO : 1
NO_REPORT : 1
SIGNS_SIGNS : 1
HIS_ABILITY : 1
WNL_SUSPECT : 1
COPY_YOUR : 1
OF_ADMINISTRATION : 1
THE_NURSING : 1
HOW_OFTEN : 1
TO_APPEAR : 1
MESSAGING_DEVICE : 1
REVIEWED_REMINDER : 1
THE_RESIDENT : 1
PLEASE_BOTH : 1
NUMBER_REMIND : 1
YOU_FOR : 1
OF_RXS : 1
STAYING_COMPLAINT : 1
SENSORY_DEFICITS : 1
RECONCILATION_LAST : 1
LB_KG : 5
MED_IN : 1
PROVIDER_TO : 1
ANY_RECENT : 1
GRAFTING_OPERATIONS : 1
PROVIDED_REVIEWED : 1
HAD_NEW : 1
TRAVATAN_QHS : 1
TO_APPOINTMENTS : 1
INTAKE_ML : 1
REACTION_SIG : 1
BY_EVERY : 1
NKA_EYES : 1
REVIEWED_TOLD : 1
IMMUNITY_DURING : 1
UNITS_BEFORE : 1
PRIMARY_ENDOSCOPIC : 1
YES_BAD : 1
RD_CALL : 1
COLONOSCOPY_PT : 1
BE_BY : 1
STATUS_SOCIAL : 1
DEVICE_CALCULATION : 1
LAST_DOB : 1
IN_STATES : 1
LEFT_ON : 1
CPRS_BEEN : 1
OF_ARRIVAL : 1
OBJECTIVE_CLEAR : 1
IMMUNIZATION_CARE : 1
CONT_ACULAR : 1
LAST_TWO : 1
HISTORY_REVIEWED : 1
ANESTHETIC_SKIN : 1
THE_LAST : 2
TRANSMISSION_INTENDED : 1
TARGET_PRESSURES : 1
MEDS_BE : 1
DILATE_BOTH : 1
REGULAR_COMPLETED : 1
DX_BEEN : 1
AND_QUANTITY : 1
IN_DOING : 1
ROOM_WANTS : 1
FT_PIERCE : 1
TRANSMISSION_IS : 1
AND_ASSISTED : 1
PROBLEM_REGULAR : 1
LAB_SCREENING : 1
STREAM_GOOD : 1
FOLLOWUP_PLASTIC : 1
ANTERIOR_GLENOID : 1
NEED_FOR : 1
DOB_AGE : 1
SERVICE_CONNECTED : 1
NP_AND : 1
FOR_PRESSURE : 1
COMING_FROM : 1
AS_LOCATION : 1
ANTERIOR_LABRUM : 1
DIRECTED_TO : 1
VF_TABLETS : 1
FOR_TWO : 1
NOT_EVAL : 1
DECISION_MAKING : 1
VOMITED_TWICE : 1
NUR_CLINICAL : 1
RX_IN : 1
PAIN_SOURCE : 1
FREQUENCY_AND : 1
HISPANIC_OR : 1
YOU_HAVE : 3
CANDIDIASIS_NAILS : 1
BE_SEEN : 3
TIME_SPENT : 1
LDL_CALCULATION : 1
VISIT_AND : 1
RADIAL_FS : 1
NO_DYSUREA : 1
UNABLE_CONTACT : 1
PRESCRIPTION_FOR : 1
ACTIVITY_AC : 1
NO_ANSWER : 1
CAPSULES_NAME : 1
CALL_VETERANS : 1
TELEPHONE_CONTACT : 1
IS_NO : 1
DEFINES_NUR : 1
TO_THYROID : 1
OUTPATIENT_THOUGHT : 1
NONREACTIVE_PATIENT : 1
SCREENING_IT : 1
DISCHARGE_SUMMARY : 2
REMINDERS_ACTIVITY : 1
NIGHT_RACE : 1
DISABLED_SINCE : 1
BED_LOW : 1
HEADACHE_LDLCHOL : 1
PUFFS_EXAM : 1
HEART_RHYTHM : 1
PHYSICIAN_PRESENT : 1
IF_BELOW : 1
THANKS_ALONG : 1
MEDICATION_VACCINE : 1
CARE_OTHER : 1
MEDICATION_LAST : 1
DETERMINE_FOR : 1
YOU_WERE : 1
VITALS_TO : 2
COPY_FOR : 1
ORTHOPEDICS_SPOKANE : 1
THE_INCREASE : 1
SOURCE_FOR : 2
INFECTION_COUGHING : 1
PATIENT_ETHNICITY : 1
OXYGEN_LPM : 1
ACTIVE_PATIENT : 1
FIANC_TO : 1
SERVICE_EYE : 1
COUGH_DIARRHEA : 1
BE_ON : 1
INTERACTIONS_WITH : 1
VET_HOME : 1
CFCF_ORAL : 1
ATTACK_DO : 1
AT_CURRENTLY : 1
ANY_WHEN : 1
ISSUE_PRIMARY : 1
TO_DETERMINE : 1
RECOMMEND_OF : 1
AGREEAB_OUTPATIENT : 1
HGNAC_THAT : 1
ASKED_HER : 1
LOT_MR : 1
WEIGHT_KG : 4
COUSIN_TO : 1
TEMP_WITH : 1
ATTENDING_DIAGNOSIS : 1
THIS_PATIENT : 2
ANTICOAGULANTOPEN_WOUND : 1
COORDINATOR_AID : 1
LAST_PRESCRIPTION : 1
SEEN_PATIENT : 2
BARRIERS_PATIENT : 1
IS_FOR : 1
TABLETS_PT : 1
ACULAR_VIGAMOX : 1
VETERAN_STATES : 1
TO_GLENOID : 1
TAKING_TRAVATAN : 1
SHOW_THERAPY : 1
NURSING_SHIFT : 1
REFERRED_POST : 1
NONVA_MEDS : 1
INSURANCE_TRIAGE : 1
INTERACTIONS_REVIEWED : 1
BID_AND : 1
LOSS_CONCERNS : 1
POAG_OU : 1
NURSING_PROGRESS : 1
ANY_POSSIBILITY : 1
EYE_ATTENDING : 1
WHETHER_DOSAGE : 1
ABOVE_HAS : 1
WITHIN_THE : 1
AFTER_TWO : 1
SHIFT_VSS : 1
PROCEDURE_BEEN : 1
TIBIAL_CONNECTED : 1
INDICATION_AN : 1
NORMAL_RATE : 1
COUMADIN_ORDERS : 1
ACTIVITY_RATE : 1
QUANTITY_PATIENT : 1
WHEELCHAIR_NURSE : 1
REMIND_HIM : 1
OF_EXAM : 1
COORDINATION_WITH : 1
ON_MEDICATION : 2
PALPITATION_DENIES : 1
ER_TO : 1
LIFE_PROVIDED : 1
POINTS_INFLUENZA : 1
THIS_TRANSMISSION : 1
CHIEF_HIP : 1
LAST_IS : 1
PATTERN_PATIENT : 1
APPLICABLE_OCCUPATION : 1
INFLUENZA_HISTORY : 1
MEDICAL_OF : 1
APPOINTMENT_AND : 1
OFFERED_BY : 1
DOSAGE_IS : 1
NOT_USUAL : 1
ORDERED_LOCATION : 1
ADMITS_TO : 1
ADMISSION_DOCUMENTED : 1
NORMAL_IS : 1
NO_CONSTIPATION : 1
DO_CRUSH : 1
DIABETIC_AND : 1
DIAGNOSIS_ASPIRIN : 1
REFILLS_DOB : 1
REGULAR_REASSESSMENT : 1
PATIENT_CARENURSE : 1
TO_REPAIR : 1
TOTAL_OUTPUT : 1
FOR_DATE : 1
PART_II : 1
NO_ARRHYTHMIAS : 1
MEDICATIONS_AS : 2
DISCHARGE_LUNGS : 1
BED_CALL : 1
APPRIPRIATE_UCINATIONS : 1
PACED_ARRHYTHMIAS : 1
WILL_IN : 1
LOT_PHARMACOTHERAPY : 1
NC_EDUCATION : 1
FOR_THIS : 1
AFEB_VSS : 1
ANTICOAGULANTOPEN_OF : 1
REPORTS_SHE : 1
OF_URINE : 1
HIP_NO : 1
MULTIPLE_PLANTAR : 1
IS_OF : 1
VETERAN_LISTED : 1
LIQUIDS_COMMUNICATION : 1
LEFT_APEX : 1
REFILLS_LAST : 1
INJECT_REASON : 1
DOCUMENT_WAS : 2
WAS_PREVIOUSLY : 2
HAVE_OF : 1
REPORTS_PAIN : 1
WAS_RX : 1
REPAIR_RIGHT : 1
RETIRED_PREVIOUS : 1
APPOINTMENT_ADVISED : 1
FS_NO : 1
VACCINE_DOSE : 1
NOTE_BUPROPION : 1
THE_DELIVERY : 1
STATUS_WEEK : 1
OF_WHICH : 1
TIMES_VF : 1
RXS_ORDERS : 1
ACTIVE_CHART : 1
BE_FOR : 1
EYES_TIMES : 1
PINHOLE_INCREASE : 1
NL_CHEM : 1
HAS_COMPLIANT : 1
NO_FEVER : 1
NOTE_PHYSICIAN : 1
TABLET_BY : 3
INPATIENT_AT : 1
AAM_IN : 1
FS_COVERAGE : 1
TO_PRIVATE : 1
SHOULDER_ALSO : 1
THE_MISSOULA : 1
CORES_APEX : 1
BARRIERS_GENDER : 1
PATIENT_SEEN : 2
SELECTED_THE : 1
GROIN_BED : 1
ARTERY_PATIENT : 1
DIRECTIVES_EDUCATED : 1
HEART_RATE : 1
YOUR_PROVIDER : 1
ANY_ASSISTANCE : 1
MEDICATIONS_OUTPATIENT : 1
AND_BID : 1
HELP_MRI : 1
IMMUNIZATION_PRIMARY : 1
FOR_HEART : 1
OPERATION_PACU : 1
HERE_TILL : 1
WILL_HAVE : 1
ON_HOLD : 1
RESOLVED_DIRECTLY : 1
DEFINES_PC : 1
MEDICATIONS_SHE : 2
FREE_FOLLOW : 1
TO_PCPS : 1
WITH_AN : 1
LEFT_DELTOID : 2
AS_PT : 2
INCLUDING_SUPPLIES : 1
MOUTH_EVERY : 2
TO_HERATREG : 1
CLC_PM : 1
TIME_WHEN : 1
TIME_LIFE : 1
CONSTIPATION_CHEST : 1
APPOINTMENT_SURGERY : 1
WITHIN_THIS : 1
TO_UNDERSTANDING : 1
TC_PATHOLOGY : 1
MOIST_ACCUCHEK : 1
LABARYNTHITIS_HAD : 1
CHIEF_OF : 1
CARE_VISIT : 1
EDUCATED_ON : 1
UNSUCCESSFUL_IF : 1
PRACTITIONER_OF : 1
COMMENT_IS : 1
NO_AND : 1
CARE_IS : 1
PER_WORK : 1
APPRIPRIATE_NO : 1
ADDENDUM_ICDCM : 1
AN_SHAPED : 1
ADMINSTRATION_HISTORY : 1
NEPHEW_FOR : 1
FOR_VITAMIN : 1
KG_OF : 1
IN_FOR : 1
NKA_ANY : 1
IN_WITH : 1
PAIN_CHARACTER : 1
ASSESSMENT_EL : 1
DEMOGRAPHICS_AND : 1
TIME_IV : 1
STABLE_DISCHARGE : 1
IS_CALLED : 1
BOTHERED_BY : 1
DIRECTLY_RELATED : 1
WOULD_TO : 1
SPENT_IN : 1
MESSAGE_MACHINE : 1
WAS_REVIEWED : 1
STATES_WILL : 1
AUDITC_IMMUNITY : 1
STATES_THAT : 1
OR_TABS : 1
SHOWED_LVEF : 1
OCCUPATION_US : 1
HAS_SOME : 1
NO_SATIETY : 1
ONEHALF_BY : 1
HEART_PRESSURE : 1
REACTION_NPC : 1
AND_APETITE : 1
WORKER_RADIATION : 1
MED_AFFECT : 1
HERPES_HEP : 1
MEDICAL_POWER : 1
HER_OF : 2
WITH_PATIENT : 1
CHEM_GIVEN : 1
LAST_JUL : 1
IRRIGANT_OBJECTIVE : 1
PER_SOCIAL : 1
SIGNS_VITAL : 1
WANTS_THE : 1
SHE_VOMITED : 1
EPINEPHRINE_FOR : 1
WAS_GOOD : 1
TAB_ONE : 1
CARE_VITALS : 2
GIVEN_PAIN : 1
ADJUNCTIVE_PROCEDURE : 1
CAN_CHANGE : 1
CV_CHEST : 1
INFLUENZA_ML : 1
LUNGS_BY : 1
UNITS_SUBCUTANEOUSLY : 1
NOTE_RATE : 1
DISEASE_CONTINUES : 1
DENIES_PRIMARY : 1
NAME_DOSAGE : 1
ANY_HAS : 1
USE_OF : 2
TO_ACCESS : 1
CARE_ALLERGIES : 2
ELEVATED_CHO : 1
TO_LOCAL : 1
OU_TAKING : 1
PHONE_TOLL : 1
STRICTURE_CHEST : 1
FEE_HE : 1
KG_THIS : 1
NEC_LUNGS : 1
SCREEN_PMHX : 1
FUROSEMIDE_STATED : 1
LO_SOLN : 1
CURRENTLY_TAKEN : 1
NOT_AGREEMENT : 1
ON_AROM : 1
WITH_CONCERNING : 1
SLOWED_PVD : 1
TH_ST : 1
DELUSION_RECEIVED : 1
COMPLAINTS_THIGH : 1
THE_BILL : 1
REPORT_TO : 2
HEALTH_PROVIDERS : 1
FOR_AN : 2
HEP_RECONCILATION : 1
KG_TRANSMISSION : 1
HE_LAST : 1
CBI_ML : 1
NO_ATROPHY : 1
SCREEN_PROSTHETICS : 1
NOVEMBER_THIS : 1
CHANGES_THAT : 1
REFERRED_TO : 1
JILL_GODSEY : 1
FOR_ANTICOAGULATION : 1
ON_DATE : 1
DOSE_DUONEB : 1
ANATOMIC_ETC : 1
FILL_TIMES : 1
WITH_NO : 1
STATES_NEEDS : 1
EYE_THE : 1
JUST_NOTICE : 1
REVIEWED_CHART : 1
AS_PER : 1
NO_ABD : 1
DIABETES_BE : 1
DRAINAGE_SEP : 1
SCREENED_FOR : 2
WITHIN_REACH : 1
ORIENTED_VERIFIED : 1
TARTRATE_MG : 2
OR_FREE : 1
RECEIVED_THE : 1
REVIEWED_CLINICAL : 1
PHYSICIAN_CORES : 1
AMBULATORY_AID : 1
BILATERAL_BROWLIFT : 1
SHAPED_CORNEA : 1
URGENT_CARE : 1
THAT_WOULD : 1
MANUFACTURING_MANAGER : 1
NO_BUSY : 1
MOIST_OPT : 1
AN_SEEN : 1
FOR_ATIVAN : 1
PAIN_HE : 1
IS_THE : 4
CHEST_NOTE : 1
SIG_TAKE : 1
BPH_NOCTURIA : 1
PATIENTS_PATIENT : 1
CALLED_ALERTED : 1
CLINICAL_ACTIVITY : 2
PATIENT_INDICATED : 2
APPOINTMENTS_ACTIVE : 1
SHIFT_ACTIVITIES : 1
ANY_THE : 2
FH_OF : 1
MONITOR_PAIN : 1
SKIN_AFEB : 1
COLON_LAST : 1
OF_LIVING : 1
DRAINAGE_BY : 1
BASED_THE : 2
MANAGEMENT_EDUCATION : 1
LIVING_MEASUREMENT : 1
WITH_AMBULATORS : 1
THE_TO : 3
ACCUCHEK_CURVE : 1
DISPOSITION_REFERRED : 1
COMPLETED_YES : 1
THE_PERSON : 1
FOR_GLAUCOMA : 2
SOFTENER_NOT : 1
PENDING_MEDICATIONS : 1
CONCERN_PATIENT : 1
TRANSFER_OF : 1
RECORD_MANAGER : 1
INFORMATION_CONFIRMED : 1
TO_ADVISED : 1
BY_OF : 1
CONT_AND : 1
PLAN_IS : 1
BELL_REACH : 1
FOR_RECORDS : 1
MOTOR_SENSORY : 1
COUGH_SOB : 1
RESP_THERAPY : 1
PIOGLITAZONE_VITAL : 1
ARRIVAL_METOPROLOL : 1
DEFINITIVE_RADIATION : 1
FOR_MONTH : 1
OF_DAILY : 1
DOB_JUL : 1
SHIFT_RARELY : 1
WITH_MAXIMUM : 1
YOUR_PT : 1
DO_EXCEED : 1
THREE_AND : 1
HERNIA_SOLUM : 1
OUT_ABOUT : 1
NO_ADVERSE : 1
TYPE_SYMPTOM : 2
OSTEOARTHRITIS_LAST : 1
ON_FEE : 1
PLACED_SUBJECTIVE : 1
COGNITIVE_ORIENTED : 1
LIST_AND : 2
ALWAYS_INFORM : 1
VSS_DISCHARGE : 1
PREVIOUSLY_ON : 1
LOCATION_RIGHT : 1
RESPONSE_AND : 1
VISIT_BY : 1
COMMENT_TIME : 1
ACTIVE_AT : 1
IS_WHO : 1
IV_INTAKE : 1
SHAPED_DOES : 1
SOURCE_MEDS : 1
KNEE_INPATIENT : 1
HOW_HAVE : 1
FOR_URETHERAL : 1
UNDERGOING_DEFINITIVE : 1
UD_COMMENTS : 1
VTACH_SUMMARY : 1
PM_GIVEN : 1
MRI_TYPE : 1
YOU_QUESTIONS : 1
BLURRED_CAUSED : 1
THREE_TIMES : 1
TC_GL : 1
PC_YASSAR : 1
COMMUNITY_THIS : 1
DENIES_INFORMATION : 1
GO_TO : 1
FROM_EDUCATION : 1
USED_LOCAL : 1
RIGHT_LEFT : 1
TO_NOW : 1
PHYSICIAN_MEDS : 1
HAVE_OR : 1
PROVIDERS_OF : 1
REACTION_NONE : 1
VISIT_REPORTS : 1
SYMPTOM_HEART : 1
TO_MUSCLES : 1
BED_TREATMENT : 1
TO_SHIFT : 2
BOBBITT_DIAGNOSIS : 1
VITAL_SIGNS : 3
INCREASE_THE : 1
SEEN_ON : 1
MEASUREMENT_DEFINITION : 1
HERE_TO : 1
DECLINES_DURING : 1
FOLLOWING_MEDICATION : 1
DOSE_CC : 1
HEART_CALL : 1
LIKE_COPY : 1
EXERCISE_TIME : 1
OF_EXTENSIVE : 1
PULSE_SKIN : 1
MEDICATIONS_WEEK : 1
ADVERSE_REACTIONS : 1
IF_ABLE : 1
TRIAGE_SKIN : 1
URINATION_SLOWED : 1
PROCEDURE_OPERATION : 1
RADIAL_NEGATIVE : 1
MEET_THIS : 1
IT_NOT : 1
MEDICATIONS_VAMC : 1
HIS_DOCTOR : 1
SATIETY_AND : 1
PROBLEMS_THIGH : 1
FOR_ALCOHOL : 1
NOTE_NOTES : 1
ALPHABETIZED_LIST : 1
RELAX_MUSCLES : 1
AS_ACTIVE : 1
HAS_MONITORED : 1
CA_LAST : 1
BREATHING_PATIENT : 1
POST_PALPABLE : 1
PO_BIDCONTINUED : 1
AND_REASON : 1
GLENOID_DE : 1
UNIT_DUONEB : 1
OTHER_INFORMATION : 1
ASSESSMENT_WHEN : 1
PROBLEMS_COMPUTERIZED : 1
BY_CLAIMS : 1
ROUTE_ADMINISTRATION : 1
SLOWED_BLOOD : 1
THE_RADIAL : 1
UNLESS_YOU : 1
PM_NIGHT : 2
PT_LAST : 1
AND_BRADEN : 1
RECORDS_TO : 1
ENCOUNTER_PHYSICIAN : 1
VA_NO : 1
ACTIVE_ADDENDUM : 1
AGO_HE : 1
LDL_CHO : 1
LOCATION_ETC : 1
LIVING_HIS : 1
ARTHRITIC_SUBJECTIVE : 1
LOCALLY_ON : 1
OF_ARTHRITIC : 1
THE_DISAPPROVAL : 1
UNLESS_WERE : 1
OPT_ACCUCHEK : 1
LB_THIS : 1
EDUCATION_SKIN : 1
HER_PLACED : 1
HE_WOULD : 1
RATE_REGULAR : 3
AT_NONV : 1
NW_SPOKANE : 1
EMERGENCY_SHE : 1
VACCINE_NOT : 1
DUE_NECK : 1
SOCIAL_UCINATION : 1
COVERSHEET_TO : 1
AT_DUE : 1
NOT_HAD : 1
TAKE_PIOGLITAZONE : 1
INITIAL_PART : 1
DRUG_INTERACTIONS : 1
NOT_NO : 1
NO_PALPITATION : 1
PRIMARY_COMMENT : 1
STAY_LOW : 1
FOLLOW_VISIT : 1
HAS_APPEAR : 1
RIGHT_THE : 1
THE_SOFT : 1
HEART_BLOOD : 1
PT_NO : 1
POST_RN : 1
CLIENT_REPORTS : 1
PRECAUTIONS_HYPERLIPIDEMIA : 1
SKILLED_CONSULT : 1
MEMORY_CONCERNS : 1
DE_RATIVE : 2
DTN_SYMPTOM : 2
TERM_CURRENT : 1
UPON_SOURCE : 1
ADDRESSED_UNABLE : 1
TEMP_OD : 1
INFORMATION_CERTIFIED : 1
RADIATION_FOR : 1
PACU_ROOM : 1
VET_AT : 1
LOW_CALL : 1
COMPLAINT_IN : 1
NOTED_AT : 1
ANY_OTHER : 1
PROVISION_OF : 1
ADVISED_NOTE : 1
UPCOMING_ALLERGY : 1
OTHERWISE_PATIENT : 1
BY_ANY : 1
LB_TIME : 2
HOW_TO : 1
NONE_CHARACTER : 1
AGREEMENT_AMOUNT : 1
IN_DENIES : 1
PERIOD_DOSAGE : 1
WHOM_IS : 1
THE_INSIDE : 1
NONREACTIVE_INDICATED : 1
IS_ALERT : 2
PLANTAR_LEFT : 1
WITH_LOW : 1
DISORDER_MOTOR : 1
AND_OF : 3
MANAGER_PLANT : 1
INF_OD : 1
ATROPHY_NO : 1
THE_PRIMARY : 1
NONVA_POSITIVE : 1
GIVEN_RX : 1
MINUTES_TWICE : 1
FOUND_EVERY : 1
DOSAGE_ML : 1
YOU_UNILATERAL : 1
THERAPY_TO : 1
CLEAR_PALPABLE : 1
PHYSICIAN_OF : 1
SHOWED_NORMAL : 1
INFORMED_FORM : 1
NO_IS : 1
OUTPATIENT_INCLUDING : 1
IN_HIS : 1
TO_HEALTH : 1
PROSTATE_BIOPSY : 1
LPM_MUSCULOSKELETAL : 1
REGIONAL_TISSUES : 1
HAS_COMPLAINT : 1
NO_EDEMA : 1
SUMMARY_DO : 1
REVIEWED_WITH : 1
NONE_PAIN : 1
VACCINE_CC : 1
FOR_ALERT : 1
DENIES_HISTORY : 1
CORNEA_DOES : 1
BEEN_MONITORED : 1
BLOOD_CANDIDIASIS : 1
ML_TIBIAL : 1
IS_ON : 3
LIST_IS : 1
YOU_BOTHERED : 1
RIGHT_AND : 1
CONCERNS_ABOUT : 1
SOB_NO : 1
AND_DURING : 1
REPORT_ONCOMING : 1
ADVISED_SHE : 1
NUR_REMINDERS : 1
MAIL_SHE : 1
WEEK_SWELLING : 1
PROFESSIONAL_ANY : 1
UP_WITH : 1
YOUR_TALK : 1
PLEASE_DILATE : 1
ON_STATE : 1
PT_MONTHS : 1
TAKING_QHS : 1
CHIEF_PAIN : 1
GIVEN_AS : 1
CORES_LEFT : 1
PHYSICIAN_NORM : 1
AID_BEDREST : 1
AND_COVERSHEET : 1
OF_IMPLANTATION : 1
HER_HUSBAND : 1
POSITIVE_RESPONSES : 1
UPCOMING_FACILITY : 1
MEDICATION_OUTPATIENT : 1
DOCTOR_NOW : 1
EDUCATION_ASSESSMENT : 1
BUT_NOT : 1
NAILS_RIGHT : 1
ENDOSCOPIC_BILATERAL : 1
CALCULATION_PATIENTS : 1
ACCOMPANIED_BY : 1
THE_SHOULDER : 1
POINTS_PATIENTS : 1
PNEUMOVAX_LOT : 1
SECONDARY_OPTIC : 1
EVERY_ACTIVE : 1
NOT_LEFT : 1
GIVEN_FOR : 1
WEIGHT_LOSS : 1
IS_AN : 1
TELEMETRY_TEMPERATURE : 1
TRIAL_APPRIPRIATE : 1
RATE_BREATHING : 1
BUPROPION_PO : 1
NOTICE_THAT : 1
SOLN_ACTIVE : 1
OF_TABLETS : 1
DIAGNOSIS_VTACH : 1
HOME_HAD : 1
OF_LOSS : 1
NONE_MOUTH : 1
TABLETS_AS : 1
CURRENT_UNLESS : 1
TWICE_FOR : 1
HAS_HAD : 3
CONTINUES_TO : 2
CONCERN_NAME : 1
GLASS_ADJ : 1
ON_THE : 5
CLONUS_ATROPHY : 1
OF_THE : 8
US_POSTAL : 1
HUFANA_REVIEWED : 1
PLAVIX_CONTACT : 1
AND_STENT : 1
PHONE_THAT : 1
AN_IRREGULARLY : 1
IN_TUES : 1
NOS_LEFT : 1
MED_TRIAL : 1
AT_VA : 1
PATIENT_DISCUSS : 1
VETERAN_AT : 1
PLAN_TO : 1
OD_ACTIVE : 1
HAS_NOT : 1
IS_SEEN : 1
GROIN_LOW : 1
HAS_CHIEF : 1
STATES_HE : 2
WITHIN_REGIONAL : 1
VAMC_OR : 1
LIST_TO : 2
NO_TO : 1
OTHER_LIST : 1
IS_IN : 1
NO_MELENA : 1
INFORMATION_VETERAN : 1
WITH_HIS : 1
WITH_FIANC : 1
ASSESSMENT_VETERAN : 1
REPORT_OFF : 1
REST_AND : 1
NEG_ELEVATED : 1
ORIENTED_NO : 1
CLINIC_FOR : 4
WAY_ASSISTANT : 1
PT_GETTING : 1
NOTE_CV : 1
KG_DIABETESHYPERTENSION : 1
NEEDS_BARRIERS : 1
AND_SPLIT : 1
HE_PC : 1
RESPIRATION_HYPERLIPIDEMIA : 1
YES_CARE : 1
BID_ALPHAGAN : 1
DRIVING_ABILITY : 1
QUESTIONS_REGARDING : 1
CARE_ASSESSMENT : 1
RECEIVED_MED : 1
AND_SPHERES : 1
REVIEWED_ACTIVE : 1
FOR_WHILE : 1
BUT_RESOLVED : 1
LEARNING_BARRIERS : 1
HE_OF : 1
WELL_SHE : 1
YOUR_HEALTH : 1
THEIR_FACILITY : 1
NONE_WHEELCHAIR : 1
ORDERS_DOCUMENT : 1
JOINT_DE : 1
UPON_DISCHARGE : 1
EXAM_CONCERNS : 1
IN_STOPPING : 1
OF_INDEPENDENT : 1
AMBULATORY_NONE : 1
DECREASED_DUE : 1
ACTIVITY_LAST : 1
CATEGORY_EASY : 1
ABOUT_MUCH : 1
EVERY_ASTIGMATISM : 1
PATIENT_MEDICATION : 1
IN_WERE : 1
FOLLOWED_THE : 1
REACTION_RESP : 1
CORONARY_DISEASE : 2
MAIL_IN : 1
HER_COUSIN : 1
ATTENDING_PHYSICIAN : 1
NOTE_OF : 1
PALPATION_AROM : 1
CONTROL_HORMONE : 1
THE_DUE : 1
CATEGORY_EDUCATION : 1
HOME_HEALTH : 1
THAT_COULD : 1
RECOMMEND_LEVEL : 2
YOU_MAY : 1
READING_PER : 1
SCREENED_ADVANCE : 1
DEMOGRAPHICS_COVERSHEET : 1
SCORE_SUBCUTANEOUSLY : 1
FAXED_TO : 1
EDUCATION_EASY : 1
FOR_MRI : 1
AND_ACTIVE : 1
HI_LO : 1
SHE_THE : 1
SUPPLEMENT_PRESSURE : 1
SOME_PATIENT : 1
NEUROLOGICAL_OUTPUT : 1
TOXIC_DID : 1
WHILE_BUT : 1
MANAGER_PENDING : 1
NOT_IN : 1
PLACED_CALL : 1
EYE_EXAM : 1
AT_PHONE : 1
PAIN_IN : 2
NO_DEFICITS : 1
GOLD_REASON : 1
ALTERNATIVE_IF : 1
VOICE_IN : 1
ACTIVE_EXAM : 1
NEUROLOGICAL_URINE : 1
ACT_LEARNING : 1
OUT_YEAR : 1
AND_ADIPOSE : 1
RECORD_FOR : 1
AMOUNT_NO : 1
MANUFACTURING_AT : 1
AT_FACILITY : 1
CHEW_TABLET : 1
LOSS_OU : 1
VF_OU : 1
PHYSICIAN_EL : 1
INITIAL_II : 1
AT_TIME : 2
THERE_NO : 1
TO_VETERAN : 1
HOME_FROM : 1
NOW_AS : 1
PATIENT_TOTAL : 1
SOLN_STATUS : 1
NIGHT_ASSESSMENT : 1
SLOW_URINATION : 1
ABILITY_PANBRUIT : 1
YES_NO : 1
EDUCATION_HANDOUT : 1
NOS_SITE : 1
CC_INTRAMUSCULAR : 1
LABS_STAGE : 1
INTENDED_THE : 1
WITH_HAS : 1
THIS_WAS : 1
GLAUCOMA_PATIENT : 1
UP_VISIT : 1
DIABETIC_DIET : 1
CHARACTER_PAIN : 1
MRI_RIGHT : 1
BLOOD_CBC : 1
TAKES_CURRENTLY : 1
ALONG_INCREASED : 1
SUBCUTANEOUSLY_BEFORE : 1
AROM_AT : 1
THE_UNABLE : 1
RIGHT_PT : 1
PAYMENT_OF : 2
MD_BLUE : 1
SDAUGHTER_IRRITABLE : 1
HAS_PATIENT : 1
EMERGENCY_DEPT : 1
DENIED_THERAPY : 1
FOR_LOCAL : 1
RECORD_PENDING : 1
ADVERSE_PATIENT : 1
SW_CALLED : 1
IS_AND : 2
ATTENDING_BOBBITT : 1
LAB_APPOINTMENT : 1
TERM_USE : 1
PRESCRIPTION_CHANGE : 1
OR_PLEASURE : 1
DIRECTIVES_PATIENT : 1
KNEE_EXCEPT : 1
ALBUTEROL_CFCF : 1
ARRIVAL_TARTRATE : 1
MCG_ORAL : 1
ALERTED_THE : 1
UNTIL_IS : 1
EYE_CONCERNS : 1
AND_LOSS : 2
PATIENT_WAS : 4
MID_DEFINITIVE : 1
STATUS_ORIENTED : 1
TOTAL_TIME : 1
TO_CALL : 2
AND_IS : 1
OVER_LAST : 1
TOXIC_HABITS : 1
APPOINTMENT_ALSO : 1
ASSISTANT_VITALS : 1
MEDICATIONS_HE : 1
PROBLEMS_PROBLEM : 1
ASSESSMENT_PART : 1
PATIENT_LIVING : 1
THIS_IS : 4
IS_PATIENT : 2
EYE_ADJ : 1
LAB_DATE : 1
EVERY_MAXIMUM : 1
HEADACHE_CALCULATION : 1
ORAL_PAIN : 1
DOSAGE_FREQUENCY : 1
THAT_AN : 1
TO_GODSEY : 1
DE_CHANGES : 2
RECONCILIATION_NOTE : 1
PATIENT_GIVEN : 1
WOUND_KNEE : 1
TAB_CHEWABLE : 1
NOTE_IS : 1
RATE_NURSING : 1
MOBILITY_COMMUNITY : 1
IMP_HERPES : 1
OUTPATIENT_MEDICATIONS : 5
REMINDER_HEMOGLOBIN : 1
NURSEINFLUENZA_IMMUNIZATION : 1
HE_CAN : 1
LABRUM_RATIVE : 1
SUBJECTIVE_SKIN : 1
APEX_LABS : 1
PROGRESS_NONVIDEO : 1
EVERY_OUTPATIENT : 1
HAS_BUT : 1
DIARRHEA_DYSURIA : 1
RATE_RHYTHM : 1
SUPERVISING_OF : 1
ONCOMING_SHIFT : 2
HE_DEFINES : 1
THIS_BY : 1
TO_BID : 1
STATES_ALBUTEROL : 1
OR_BEEN : 1
ASSESSMENT_PLAN : 1
HEMOGLOBIN_LABARYNTHITIS : 1
CHANGES_PT : 1
PATIENT_THE : 2
FOR_BLOOD : 1
GLASSES_RAL : 1
CHEST_NEG : 1
PERFUSION_ON : 1
NEGATIVE_SCORE : 1
WHEELCHAIR_SEATBELT : 1
DOES_THE : 1
EDUCATION_CHIEF : 1
VELOCITIES_INCREASE : 1
GENDER_AC : 1
VIGAMOX_OD : 1
PATIENT_ANSWERED : 2
MONTHS_WELL : 1
BIRTH_CLC : 1
TAB_TAKE : 2
PROVIDERS_ANY : 1
SOUNDS_RARELY : 1
ONE_TABLET : 2
MESSAGING_LDL : 1
PROBLEM_NOW : 1
AND_EVALUATE : 1
UPCOMING_APPOINTMENTS : 1
PATIENT_UNIT : 1
OR_SKILLED : 1
MAXIMUM_MMI : 1
DEPT_TRIAGE : 1
CONFIRMED_WITH : 1
IS_ADDRESSED : 1
TREMORS_EDUCATION : 1
LONG_TERM : 1
THE_VA : 1
WITH_PHYSICIAN : 1
THE_OR : 1
NOTE_PATIENT : 1
REACH_ON : 1
CHEW_PATIENT : 1
DATE_LAST : 1
HERE_ON : 1
GL_SUPERVISING : 1
OR_SEEN : 1
CONGESTION_CURRENTLY : 1
TO_CALLED : 1
ML_POST : 1
DM_II : 1
INTAKE_AND : 1
ALLERGY_ADR : 1
TH_SHOWED : 1
MOISTURE_MOIST : 2
PATIENT_OBSERVATION : 1
CHANGES_WAS : 1
SOURCE_PATIENT : 1
RADIATION_ONCOLOGIST : 1
AND_DISCUSSED : 1
NOT_PROBABLY : 1
TWO_CURRENT : 1
REMOTE_NONVA : 1
BEING_PREGNANT : 1
LATINO_HAVE : 1
STATED_CV : 1
FOR_PAYMENT : 1
REACH_BRAKES : 1
ML_TO : 1
NOT_RESOLVED : 1
ON_MEDICATIONS : 1
CALL_TO : 1
AND_DRUG : 1
TO_CANCEL : 1
MONTHS_FROM : 1
PHYSICIAN_WAS : 1
URGENT_PRIMARY : 1
PROFESSIONAL_WITHOUT : 1
SOCIAL_HISTORY : 1
APPOINTMENT_PLASTIC : 1
EDUCATION_PATIENT : 1
EDUCATED_PATIENT : 1
IS_PT : 1
BEEN_DISABLED : 1
SOURCE_THE : 2
MAN_TREATMENT : 1
BRAKES_ON : 1
USUAL_OCCUPATION : 1
PHYSICIAN_FT : 1
PRESSURES_LB : 1
MUSCULOSKELETAL_SKIN : 1
CC_WEAK : 1
MALE_STATUS : 1
MR_ADVISED : 1
LOCATION_GROIN : 1
TO_RELAX : 1
TUES_DENIES : 1
TELECARE_RECORD : 1
TAUGHT_BY : 1
VETERAN_RETIRED : 1
ADMITS_STAYING : 1
MEDICATION_RECONCILATION : 1
THIS_VISIT : 1
ALL_CURRENT : 1
TAB_QTY : 1
OF_ALLERGY : 1
CST_LVEF : 1
OD_STROKE : 1
BLUE_TRIAGE : 1
FAXED_HARMONY : 1
FEELS_WARM : 1
NUMBER_NO : 1
HI_CONTL : 1
TEL_TRIAGE : 2
WITHIN_BRAKES : 1
TROUBLE_SKILLED : 1
VA_PAYMENT : 1
CARE_PULSE : 1
INFLUENZA_NOT : 1
ABOUT_YEAR : 1
AND_PAIN : 2
INTAKE_SKIN : 1
CLC_NIGHT : 1
CLC_NURSING : 1
EVALUATED_DISCUSSED : 1
NOTE_ACTIVITIES : 1
RIGHT_BED : 1
TABLET_ACTIVE : 1
HAS_ANSWERED : 2
COMPLIANT_MEDICATIONS : 1
MISSOULA_ANTICOAGULATION : 1
PATIENT_SHOWS : 1
LAST_CHANGE : 1
PRIVATE_CARE : 1
GL_THE : 1
NEG_CHO : 1
TOTAL_CBI : 1
MEDICATIONS_STATUS : 3
WAS_SCREENED : 1
TO_NONE : 1
CONSENT_FORM : 1
AFTER_HOURS : 2
REGARDING_YOUR : 1
STATE_POROKERATOSIS : 1
HYPERLIPIDEMIA_PROCEDURES : 1
THOUGHT_CLEAR : 1
WEARING_AMBULATORS : 1
DISAPPROVAL_MAY : 1
RADIATION_ADJUVANT : 1
AGREEMENT_ACT : 1
RESULT_ABNORMAL : 1
PLAVIX_PLEASE : 1
FOLLOWUP_APPOINTMENT : 1
TIBIAL_PHYSICIAN : 1
ARE_IN : 1
CALLER_RESPONSE : 1
UCINATIONS_THIS : 1
LITTLE_OR : 1
MOUTH_CC : 1
BILATERAL_BLEPHAROPLASTY : 1
SIGNIFICANT_OTHER : 1
TO_AORTA : 1
IDENTIFIED_GENDER : 1
POWER_OF : 1
MAILED_DISEASE : 1
IS_NOT : 2
ON_HOME : 1
UD_PT : 1
HIM_OF : 1
ADDRESSED_TO : 1
EXAM_ABOUT : 1
OF_SHOULDER : 1
DEMOGRAPHICS_EXAM : 1
LAB_PROGRESS : 1
OF_PAIN : 3
OF_ASSISTANCE : 1
BEEN_STABLE : 1
DECREASED_BUT : 1
AT_PLANT : 1
TH_THIS : 1
OF_COLON : 1
BEEN_PHONE : 1
ADDENDUM_TO : 1
PAIN_NEC : 2
FH_COLON : 1
ON_PALPATION : 1
OF_PROCEDURES : 1
PRIMARY_CARENURSE : 1
PLANTAR_FOOT : 1
ARTERY_BYPASS : 1
LONG_CURRENT : 1
NOT_HISPANIC : 1
PT_TX : 1
AFTER_HUFANA : 1
CARE_TIME : 1
ACTIVE_INPATIENT : 1
WENT_PRIVATE : 1
CAD_CHIEF : 1
COVER_DRY : 1
PAIN_RATING : 1
TO_MEET : 1
FOLLOWING_LIST : 1
THE_MONTH : 1
AND_MEDS : 1
NOTE_MONTHLY : 1
THEREFORE_PATIENT : 1
NIGHT_SEP : 1
HEMOPTYSIS_DYSUREA : 1
PT_PLACED : 1
NO_PAIN : 2
THOUGHT_YOU : 1
OR_HAS : 1
FROM_THE : 2
OR_YOU : 2
II_HYPERTENSION : 1
TO_THIS : 1
NO_CLONUS : 1
PM_SHIFT : 2
NONE_SIG : 1
LOSS_DYSPHAGIA : 1
ETHNICITY_HISPANIC : 1
NP_MED : 1
BREAKFAST_INJECT : 1
IRREGULARLY_CORNEA : 1
NEEDED_MEDICATIONS : 1
NORMAL_SIZE : 1
AND_FAXED : 1
MAY_FOR : 1
READING_AS : 1
NO_NEEDED : 1
FOR_PROSTATE : 1
SURGERY_ON : 1
MY_HAS : 1
CARE_CONSULT : 1
RESPONSE_CHIEF : 1
POROKERATOSIS_LEFT : 1
CONTROL_THYROID : 1
SUPERVISING_PRACTITIONER : 1
BRADEN_SCALE : 1
ST_STATE : 1
CV_PAIN : 1
NEEDS_IDENTIFIED : 1
FOR_ANESTHETIC : 1
APPOINTMENTS_PROBLEMS : 1
BASIS_WILL : 1
DR_REVIEWED : 1
RECORD_TO : 1
LOSS_WITH : 1
OUTPUT_SCALE : 1
CONTACT_AT : 1
AND_PT : 1
CBI_OBJECTIVE : 1
DATE_BIRTH : 1
JILL_NP : 1
TABLET_MOUTH : 2
THE_CONCERN : 1
HE_HAS : 4
BRADEN_FOR : 1
POSTERIOR_TIBIAL : 1
ACCIDENT_SCREEN : 1
UNTIL_PATIENT : 1
CONTACT_BOISE : 1
SHIFT_NO : 1
AND_COORDINATION : 1
AND_WEIGHT : 1
EL_ASSISTANCE : 1
BID_FOR : 1
UNILATERAL_CAROTID : 1
THE_CLINIC : 1
PATIENT_AGAINST : 1
OTHER_CLASS : 1
HOW_OBTAIN : 1
BOISE_VA : 1
PAIN_AT : 1
ASSISTANCE_HAS : 1
SHE_TWICE : 1
MOIST_THAMINE : 1
ALLERGIES_PT : 1
STATUS_FOR : 1
LOSS_NEPHEW : 1
BEFORE_CHEST : 1
INCREASE_EXCEED : 1
FOR_BUT : 1
INDIVIDUAL_OFFERED : 1
PATIENTS_INFLUENZA : 1
CHANGES_STATES : 1
WHOM_IT : 1
CHANGED_DOES : 1
ANITA_RD : 1
LABS_TC : 1
BEEN_EATING : 1
SOLN_DROP : 1
HOME_CARE : 1
FOLLOWING_BEEN : 1
LORAZEPAM_MG : 1
DISEASE_CORONARY : 1
EDUCATION_WHEN : 1
HAD_PERFUSION : 1
LAST_PHYSICIAN : 1
STAGE_PATHOLOGY : 1
THE_TEL : 1
HAS_COGNITIVE : 1
WHILE_MY : 1
LDL_PLASMA : 1
PROBLEMS_WEEK : 1
SIGNIFICANT_COMMUNITY : 1
OBTAIN_CARE : 1
SCREENING_VITAL : 1
DOSE_INTRAMUSCULAR : 1
METOPROLOL_MG : 2
CONTINUE_OTHER : 1
ADDENDUM_ORTHO : 1
LOCATION_EYE : 1
EXPECTED_THAT : 1
FU_HERE : 1
THIS_TIME : 1
PREVIOUSLY_COMPLIANT : 1
QTY_ISSU : 1
OF_ANATOMIC : 1
ORTHO_NW : 1
IN_CPRS : 2
VISIT_PULSE : 1
HGNAC_NOTES : 1
NO_OR : 1
SUBJECTIVE_MR : 1
OF_PERSON : 1
BLOOD_TEST : 1
TO_APPOINTMENT : 1
FOR_PLEASE : 2
INCREASE_ON : 1
PROSTATE_RIGHT : 1
RELATED_RECOMMEND : 2
RT_HIP : 1
SURGEON_SOUNDS : 1
DEFICITS_NO : 1
QHS_SCAR : 1
MAIL_AND : 1
OTHERWISE_COVER : 1
SKIN_DIAGNOSIS : 1
VACCINE_INFORMATION : 1
DATE_ALSO : 1
NO_HEART : 1
TAB_ONEHALF : 1
TO_PAIN : 1
PT_STATED : 1
MEDICATIONS_YOU : 1
DOSAGE_THE : 1
WAS_SHOW : 1
THIS_DRINKS : 1
DYSPNEA_MESSAGE : 1
OR_RT : 1
NO_DEFECIT : 1
BACK_PAIN : 1
CALL_WITHIN : 1
LABARYNTHITIS_NL : 1
TO_ONE : 1
ADVISED_HE : 1
COUGH_NO : 1
COUGHING_FOR : 1
REVIEWED_ASSESSMENT : 1
DUE_HAD : 1
PM_MEDICATIONS : 1
MAXIMUM_ASTIGMATISM : 1
SEP_PC : 1
PULSE_HAS : 1
UP_MEMORY : 1
THIGH_SWELLING : 1
ADDITIONAL_ADDENDUM : 1
AND_REQUESTED : 1
BUT_STILL : 1
BREAKFAST_AND : 1
SINCE_HOME : 1
CONVERSATION_WITH : 1
CAPSULES_EVERY : 1
NO_DIARRHEA : 2
ACTIVE_VISIT : 1
COMPUTERIZED_PROBLEM : 1
PROVIDER_TALK : 1
NOTE_HEART : 1
THAT_ANESTHESIA : 1
HOURS_FOR : 1
TREATMENT_AND : 1
MIGHT_COPY : 1
RECEIVED_COMPLIANT : 1
NO_INCREASE : 1
SEX_MALE : 1
MEDS_UNIT : 1
PT_WAS : 2
NUMBER_PHONE : 1
CHART_WAS : 1
ANTICOAGULATION_LONG : 1
ORAL_INHALE : 1
AROM_DECREASED : 1
DOCUMENTED_IN : 1
HAD_ANY : 2
EVALUATION_NO : 1
HEP_MEDICATION : 1
CONTINUE_DIABETIC : 1
CBC_NOV : 2
BY_DOCTOR : 1
UCINATION_NO : 1
INFLUENZA_WAS : 2
EDUCATION_CAD : 1
DUE_PATIENT : 1
BREATHING_UNSUCCESSFUL : 1
MALE_COGNITIVE : 1
SEX_COGNITIVE : 1
AND_TO : 2
DECLINES_THE : 1
RECENT_OR : 1
OU_CURRENTLY : 1
RESPONSE_THAT : 1
MONTH_RETURN : 1
SOUNDS_MOISTURE : 1
AFFECT_APPRIPRIATE : 1
BY_AN : 1
FOR_PLAVIX : 1
GLAUCOMA_SECONDARY : 1
EXCEED_PATIENT : 1
IT_IS : 2
COMPLAINTS_VOICED : 1
OTHER_ATTENDED : 1
FOR_GLASSES : 1
PALPABLE_FS : 1
EASY_READING : 1
THE_POSTERIOR : 1
VISION_CAUSED : 1
CURRENT_DEPT : 1
OF_LAST : 1
MEMBER_THIS : 1
ON_LDL : 1
AUSCULTATION_HERATREG : 1
NOV_GIVEN : 2
UNABLE_TO : 2
PROVISION_ONE : 1
DATE_LOCATION : 1
MOIST_KETOROLAC : 1
EXCEED_EVERY : 1
ARTERY_DISEASE : 2
RECEIVED_PREVIOUSLY : 2
AS_HE : 1
RIGHT_FOOT : 1
HORMONE_CONCENTRATIONS : 1
TAKEN_TO : 2
MEDICATIONS_INCLUDING : 1
RIGHT_EYE : 1
UNIT_DOSE : 1
PAYMENT_ER : 1
SUBJECTIVE_IS : 1
TIME_OF : 1
BREATH_SOUNDS : 1
CARE_CLIENT : 1
WITH_DRESSING : 1
THE_NEEDS : 1
AND_WILL : 1
IS_ANDO : 1
PATIENT_PROBLEMS : 1
ANTIVERT_PT : 1
PROSTATE_CANCERSEES : 1
ON_TRANSFER : 1
OXIMETER_TEMP : 1
POST_TIBIAL : 1
HE_THAT : 1
SHORT_COMPLAINTS : 1
WERE_ACTIVE : 1
RX_CPRS : 1
NOTED_THIS : 1
RISK_SKIN : 1
ALPHABETIZED_OF : 1
STATUS_ADDENDUM : 1
HOME_TREATMENT : 1
BREATHING_PATTERN : 1
LATEX_MEDICATION : 1
ONCOMING_VSS : 1
RETURN_REALLY : 1
CONTINUES_BE : 1
WITH_WEARING : 1
NO_NOTED : 1
CARE_EXAMINATION : 1
BY_ACTIVE : 3
TO_FURTHER : 1
WERE_OUT : 1
NOTE_MG : 1
LESION_EXCISED : 1
SEP_AHMED : 1
PATIENT_ENCOUNTER : 1
TOLD_OTHERWISE : 1
PATIENT_AND : 1
COMPLAINT_NOT : 1
CHEW_ONE : 1
BETTER_BUT : 1
CONTACT_PATIENT : 1
DYSPNEA_LEFT : 1
SHIFT_NOTE : 2
ED_TO : 1
NOV_NOV : 3
REGULAR_NURSING : 1
SAYS_LAST : 1
ANESTHESIA_WILL : 1
FOOT_WEIGHT : 1
NEEDS_EDUCATION : 1
LAST_COMPUTER : 1
HANDOUT_REVIEWED : 1
PATIENT_TELE : 1
THAT_NEEDS : 1
LEFT_PARESTHESIAS : 1
MG_TAB : 4
DISCHARGE_DICTATED : 1
FOLLOW_UP : 2
IN_THE : 8
CC_HAVE : 1
NO_EXCEED : 1
TO_TRIAGE : 1
PT_PAIN : 1
CENTER_PM : 1
PAIN_AND : 2
EVERY_FROM : 1
VACCINE_ML : 1
LOSS_BETTER : 1
SPLIT_PT : 1
WAS_WITH : 1
OF_INFORMATION : 1
PINHOLE_DO : 1
IN_POSTERIOR : 1
NOTE_THOUGHT : 1
RADIAL_PALPABLE : 1
CANCEL_WITH : 1
BEFORE_AND : 1
PHONE_NUMBER : 3
TISSUES_FOR : 1
TRIES_STAY : 1
OUTPATIENT_INPATIENT : 1
CLINICAL_REMINDER : 1
NOTE_IF : 1
FOR_WAS : 2
ADJ_ASKED : 1
CENTER_THERE : 1
APPOINTMENT_CONFIRMED : 1
AND_HAS : 1
VERIFIED_EDUCATION : 1
DISCHARGE_SOURCE : 1
AND_DECISION : 1
VITAL_DM : 1
SHIFT_MOISTURE : 1
SHORT_PATIENT : 1
EYE_FOR : 1
STENT_ATTEMPT : 1
BUT_URINATION : 1
HIS_PRIOR : 1
VA_OF : 1
PRIOR_THIS : 1
ALLERGIES_STATED : 1
THANKS_WITH : 1
WITH_MRI : 1
REVIEW_BASED : 2
PT_NEEDS : 1
PVD_CANDIDIASIS : 1
IRRITABLE_LAST : 1
ISSU_CLINICAL : 1
PRESENTS_TO : 1
WAS_PRESENT : 1
INDICATED_VACCINE : 2
HER_THEIR : 1
WHICH_WERE : 1
BLURRED_VISION : 1
BARRIERS_IDENTIFIED : 1
ANATOMIC_LOCATION : 1
ANGIOGRAM_ATTEMPT : 1
LIST_THE : 1
HEMATURIA_NO : 1
PARTICIPATED_CONVERSATION : 1
OK_APETITE : 1
LAB_NURSING : 1
OFFERED_TAUGHT : 1
APPOINTMENT_VET : 1
MESSAGE_ON : 1
COMPLAINTS_MONITORED : 1
INJECT_FOR : 1
PHYSICIAN_TELE : 1
MONTH_MONTHS : 1
STABLE_THE : 1
LIVING_DEFINITION : 1
CURRENTLY_AT : 1
ETC_COUGH : 1
ALERT_SEEN : 1
COLOR_INTAKE : 1
LIKE_TO : 1
WILL_FOR : 1
WHEN_HOW : 1
MEDS_TO : 1
EXPECTED_AN : 1
EXAM_TO : 1
UPPER_RESPIRATORY : 1
NOT_AVAILABLE : 1
DIAGNOSES_CLEAR : 1
BE_BIOPSY : 1
NOT_TO : 1
NW_ORTHOPEDICS : 1
LATINO_YOU : 1
FULL_MONTH : 1
FACILITY_ADR : 1
HE_HAD : 2
BOTH_THREE : 1
VALUE_IS : 1
THE_SHE : 1
ETC_NO : 1
TENDERNESS_PALPATION : 1
LATEX_ALLERGY : 1
PHARMACOTHERAPY_MR : 1
TYPE_DTN : 2
TISSUES_VITAMIN : 1
TWO_REFILLS : 1
PROCEDURE_SDAUGHTER : 1
NOT_INFORMATION : 1
DX_DISABLED : 1
BE_PROSTATE : 1
OCCULT_TEST : 1
HE_JUST : 1
OUTPUT_POST : 1
OUTPUT_CBI : 1
RENOVATE_IS : 1
IM_REACTION : 1
LEARNING_SUBJECTIVE : 1
IN_MAIL : 2
RACE_UNKNOWN : 1
COMPLAINTS_OF : 1
NOTE_WILL : 1
OF_CA : 1
ASSISTANCE_INDEPENDENT : 1
ALCOHOL_SCREENING : 2
BIDCONTINUED_ON : 1
THE_HAVE : 1
MAKING_ADDENDUM : 1
ACTIVITY_HEMOGLOBIN : 1
NKA_POSSIBILITY : 1
ACCESS_PLAN : 1
ROUTE_OF : 1
AND_LOCATION : 1
TO_YOU : 1
CONCERNS_HOW : 1
SODIUM_DIABETIC : 1
DO_HAVE : 1
WHEN_CALL : 2
BREATHING_WAS : 1
NURSING_HGNAC : 1
NURSING_NOTE : 3
THINGS_AT : 1
PATIENT_UPON : 1
NO_SENSORY : 1
INFORMATION_WITH : 1
DOSE_AND : 1
AND_PATIENT : 2
NECK_AND : 1
ON_DELIVERY : 1
THAT_NOTE : 1
PRIMARY_VITALS : 2
ACCOMPANIED_HIS : 1
SHE_HAD : 1
ARTHRITIC_ADDENDUM : 1
COMFORT_HI : 1
SHIFT_ASSESSMENT : 1
HYPERLIPIDEMIA_OF : 1
ORDER_TO : 1
MAXIMUM_IS : 1
TABLETS_ACTIVE : 1
TARTRATE_TAB : 2
DECISIONMAKING_CAPACITY : 1
INFECTION_WITH : 1
TWICE_COMING : 1
COMFORT_CURVE : 1
REVIEW_IS : 2
CONSENT_POINTS : 1
NEEDS_PATIENT : 1
TEAM_STATES : 1
POSITIVE_VETERAN : 1
ANESTHETIC_LESION : 1
OF_ACTIVITY : 1
RAL_NO : 1
OPERATION_DISPOSITION : 1
ON_VA : 1
ORIENTED_PINHOLE : 1
TO_GEM : 1
SAYS_IRRITABLE : 1
WITH_ACTIVE : 1
SHOULD_YOUR : 1
BM_OK : 1
ATHENS_APPOINTMENT : 1
IS_CAPABLE : 1
ISSUE_DATE : 1
YES_SATIETY : 1
THAT_SHE : 3
TAKE_TO : 1
HAS_DECISIONMAKING : 1
CHO_BEST : 1
DELTOID_ORDERS : 1
POST_TRIAGE : 1
CC_VISIT : 1
INFORMATION_PATIENT : 1
DUE_TO : 3
DATE_AND : 1
STANDARD_FALL : 1
ORDERS_AND : 1
AND_SYST : 1
CAUSED_BY : 1
LITTLE_INTEREST : 1
RATIVE_CHANGES : 2
HANDOUT_PROVIDED : 1
HEMOPTYSIS_NO : 1
WAS_NO : 1
ANTICOAGULATION_TERM : 1
SKILLS_SUSPECT : 1
RESPIRATION_NOS : 1
ABOUT_TRIAL : 1
WAS_CLINICAL : 1
DONE_SOME : 1
RECOVERY_ROUTE : 1
ALL_BETTER : 1
MALE_AC : 1
WARM_HE : 1
PLANT_CURRENTLY : 1
IMPLANTATION_RIGHT : 1
SUSPECT_SIGNIFICANT : 1
HEART_DO : 1
MINUTES_EYE : 1
YES_WARM : 1
HOURS_NOTE : 1
EYES_ALONG : 1
DAILY_REINFORCEMENT : 1
VERIFY_WHETHER : 1
YOUR_RECORDS : 1
OF_PROGRESS : 1
HOME_RESPIRATORY : 1
ACCESS_AORTA : 1
THE_IN : 1
AC_HAD : 1
OCCUPATIONAL_THERAPY : 1
WAS_INFLUENZA : 1
THE_IS : 2
MEDS_POSITIVE : 1
FREQUENCY_DRUG : 1
TEMPERATURE_SCREENED : 1
PERSON_TO : 1
AND_WHEN : 1
APPEAR_IN : 1
KNEE_LEG : 1
HAS_PLACED : 1
NEW_NOR : 1
REGIONAL_SOFT : 1
SYMPTOM_POAG : 1
OPH_DROP : 1
CONSULT_VITAL : 1
ARTERY_GRAFTING : 1
MANAGER_OUTPATIENT : 1
ACCIDENT_PMHX : 1
ORDER_ASKED : 1
TENDERNESS_ON : 1
TO_PROVISION : 1
OVER_THE : 1
TAB_MG : 1
TAKES_CONGESTION : 1
SIZE_SYST : 1
ALSO_PAIN : 1
STAYING_ORIENTED : 1
TIMES_TO : 1
AT_REST : 1
HAD_CHEM : 1
FOR_ADVANCE : 1
PROCEDURES_MCG : 1
BE_DISEASE : 1
AC_LABARYNTHITIS : 1
RIGHT_SHOULDER : 2
STATED_CHEST : 1
YOU_DIABETES : 1
CLASS_PARTICIPATED : 1
DISPOSITION_PACU : 1
IT_ADDRESSED : 1
II_REPORT : 1
ALSO_ASKED : 1
NO_COMPLAINTS : 1
SPOKE_WITH : 1
NO_COUGH : 1
HAS_WAY : 1
MG_CHEWABLE : 1
AGAIN_OF : 1
AVAILABLE_NO : 1
STILL_SEROUS : 1
TAKE_ONE : 2
HEART_ATTACK : 1
STATE_THE : 1
PHYSICIAN_ORTHOPEDICS : 1
TEMPERATURE_AFEB : 1
ANDO_LEFT : 1
MEDICATION_REMEMBER : 1
RARELY_KETOROLAC : 1
ORDERED_PT : 1
ADDENDUM_MR : 1
SKIN_TEMPERATURE : 3
STATUS_VAMC : 1
WAS_REQUESTED : 1
BE_IN : 2
PHYSICIAN_SUMMARY : 1
MEDICATIONS_DIRECTED : 1
WITH_FUROSEMIDE : 1
OUTPATIENT_RXS : 1
ADDENDUM_HERNIA : 1
VISUAL_OU : 1
CONCERNS_NEPHEW : 1
GETTING_FU : 1
SCREENING_TEST : 1
BEEN_EVIDENT : 1
WANT_TO : 1
MY_URINATION : 1
HISTORY_OF : 1
ACTIVE_ISSU : 1
NAUSEA_NO : 1
DIARRHEA_CONSTIPATION : 3
DISAPPROVAL_YOU : 1
FALL_HYPERLIPIDEMIA : 1
ACTIVE_NO : 1
RESOLUTION_SKIN : 1
IF_TO : 1
TEMPERATURE_VSS : 1
WITH_HELP : 1
ADIPOSE_CONSENT : 1
ATTEMPT_SHOWED : 1
WEAK_WAS : 1
THAT_HAD : 1
AN_PRACTITIONER : 1
SOME_THE : 1
CFCF_INHL : 1
TROUBLE_OR : 1
FALL_PRECAUTIONS : 1
SIGNIFICANT_COGN : 1
HYPERLIPIDEMIA_NOS : 1
YOUR_MEDICATIONS : 2
AND_THAT : 2
SIGNS_II : 1
ELSE_ATTENDING : 1
RECONCILIATION_OUTPATIENT : 1
CLINICAL_RESOLUTION : 1
CP_DENIES : 1
TAKEN_PULSE : 1
PRESSURE_RISK : 1
NOTE_SCREENING : 1
PRIMARY_BILATERAL : 1
AGE_SEX : 1
LEFT_RADIAL : 1
CONFIRMED_FAMILY : 1
THE_LITTLE : 1
CARE_ENCOUNTER : 1
MALE_JOINT : 1
DYSURIA_NURSING : 1
ALERT_ORIENTED : 1
ML_MEDICATIONS : 1
OR_CONSTIPATION : 1
PAIN_NO : 1
ER_BUT : 1
ABOUT_AGO : 1
MONITORED_THE : 1
PT_STATES : 1
YES_NURSING : 1
NO_HEMATURIA : 1
THICK_ADIPOSE : 1
THE_ABOVE : 1
PALPATION_AT : 1
WAS_GIVEN : 2
SEP_UNKNOWN : 1
OPTIC_PRESSURES : 1
PARESTHESIAS_PAIN : 1
WOUND_OF : 1
COMMUNICATION_SKILLS : 1
WEIGHT_ALL : 1
COMING_HOME : 1
ACTIVE_CONT : 1
LAST_COLONOSCOPY : 1
ANSWERED_NKA : 2
PRESSURES_KG : 1
UPPER_INFECTION : 1
PROSTHETICS_RESPIRATORY : 1
HIP_PAIN : 1
QID_CONT : 1
HUSBAND_OF : 1
USE_AUDITC : 1
TO_CONTINUE : 1
TO_CAPSULE : 1
INHOUSE_MESSAGING : 1
STATES_SHE : 1
DELIVERY_OPTIONS : 1
SHE_INFORM : 1
EVERY_FOR : 1
PT_AFTER : 1
YEAR_AGO : 1
KETOROLAC_THAMINE : 1
MACHINE_VOICE : 1
FOLLOW_OF : 1
CALCULATION_NEEDS : 1
OF_THEIR : 1
SATIETY_WEIGHT : 1
EDUCATION_READING : 1
OF_ANY : 1
BED_MAN : 1
COMMUNICATION_WNL : 1
LV_AND : 1
NEW_MEDICATIONS : 2
VOICED_MONITORED : 1
OD_OR : 1
MEDICATE_ORDERED : 1
CARE_PROBLEM : 1
ACTIVE_TO : 1
PREVIOUS_MANUFACTURING : 1
ASSESSMENT_INITIAL : 1
CBI_OUTPUT : 1
BYPASS_OPERATIONS : 1
CANCERSEES_PT : 1
NOT_OR : 2
OF_OTHER : 1
CONTINUES_HAVE : 1
THEN_EMERGENCY : 1
TRIAGE_HOURS : 2
PATIENT_NAME : 3
THE_WAS : 2
FEE_BASIS : 1
OR_ATTACK : 1
LEFT_MID : 1
EATING_ACTIVE : 1
LIVING_WITH : 1
ICDCM_PHYSICIAN : 1
ST_SOME : 1
OF_SPLITTING : 1
EXAM_RESULT : 1
ADVERSE_REACTION : 1
CLIENT_ASSESSMENT : 1
UCINATIONS_NO : 1
OF_ADDENDUM : 1
WITH_ADJUVANT : 1
FAMILY_MEMBER : 1
DEBRIS_WITHIN : 1
CURRENT_PT : 1
INTRAMUSCULAR_DELTOID : 1
EVIDENT_PHONE : 1
LPM_NC : 1
WAS_NOT : 1
PRN_BEHAVIOR : 1
IMPLANTATION_EYE : 1
NUMBER_PATIENT : 1
PAIN_OTHER : 1
FOR_STRICTURE : 1
MOVE_ON : 1
PREVIOUSLY_WITH : 1
WORK_PATIENT : 1
WITH_MEMBER : 1
THIGH_BEFORE : 1
OF_CONTACT : 1
SKIN_SOME : 1
HAD_COGNITIVE : 1
FOR_AND : 1
URETHERAL_CHEST : 1
NORMAL_RESPIRATORY : 1
NOCTURIA_URINATION : 1
CARE_PLAN : 1
FT_LAB : 1
INTERVIEW_LIST : 1
ON_FOR : 1
MEASUREMENT_LIQUIDS : 1
BROWLIFT_BLEPHAROPLASTY : 1
CURVE_LO : 1
TO_DATE : 1
MEMBER_REVIEW : 1
ON_PREVENTION : 1
PERSON_WHOM : 1
OF_DENIED : 1
LEG_THIGH : 1
PROGRESS_WITH : 1
THE_PAST : 1
NOTES_THAT : 1
II_COMPLICATION : 1
NO_COVERAGE : 1
RN_IS : 1
USED_FOR : 1
BEST_IF : 1
THERAPY_OXIMETER : 1
REINFORCEMENT_CONTACT : 1
NEPHEW_DATE : 1
IMP_LABIALIS : 1
SOME_NAME : 1
TIBIAL_SERVICE : 1
CERTIFIED_MAIL : 1
PREVENTION_HOME : 1
TAKEN_ABOUT : 1
VA_ANTICOAGULATION : 1
MELENA_STANDARD : 1
AN_INHOUSE : 1
PATIENT_REFERRED : 1
COMPLAINT_OF : 2
CONTL_STATUS : 1
REINFORCEMENT_OF : 1
LEFT_COUMADIN : 1
NW_GLASS : 1
NO_NAUSEA : 1
INSIDE_OF : 1
CALL_NOTE : 2
TO_STAY : 1
VOICED_QHRS : 1
DONE_SW : 1
ALLERGIES_ADVERSE : 1
PIERCE_MOVE : 1
PATIENT_HAS : 3
PERIOD_NAME : 1
KNEE_ACTIVE : 1
PENDING_OUTPATIENT : 1
THE_OPTIONS : 1
DEPRESSIVE_DISORDER : 1
MEDICATIONS_ACTIVE : 2
PO_ON : 1
DR_HUFANA : 1
LOSS_CURRENTLY : 1
CLINIC_THIS : 1
OF_FOR : 1
THE_RESPONSE : 1
SUSAN_NP : 1
TEMP_WARM : 1
FOR_PAST : 1
PATIENTS_NEEDS : 1
OUTPATIENT_NOTE : 1
TOLD_OF : 1
ED_PC : 1
FOR_FULL : 1
ADMISSION_MEDICATIONS : 1
CLIENT_THAT : 1
ASTIGMATISM_BLURRED : 1
TO_MD : 1
MEDICATIONS_NOR : 1
MG_SIGNIFICANT : 1
HAS_NO : 1
AORTA_IS : 1
THAT_PRIMARY : 1
COMPLAINTS_ORAL : 1
PHYSICIAN_DUONEB : 1
VTACH_DISCHARGE : 1
TUES_PROBLEMS : 1
OF_LEFT : 1
HAVE_TO : 1
BEING_YES : 1
REASSESSMENT_NOTE : 1
NEEDED_PM : 1
HABITS_YOUR : 1
CLINIC_AM : 1
APEX_STAGE : 1
ASPIRIN_TAB : 1
ON_TH : 1
DISPOSITION_TO : 1
PT_ON : 1
STRICTURE_PAIN : 1
DUE_PAIN : 1
HEMATURIA_PROSTATISM : 1
PROBLEMS_BILATERAL : 1
YEAR_OVER : 1
NEC_OTHER : 1
HAD_THE : 1
THE_NOTE : 1
INSURANCE_TEL : 1
TAB_ACTIVE : 1
NUMBER_ANSWER : 1
HAVE_ANY : 1
RATING_IS : 1
NO_THIS : 1
OF_RIGHT : 1
LUNGS_TO : 1
AND_ALERTED : 1
AGE_MALE : 1
HIATAL_SOLUM : 1
SCREENING_AUDITC : 2
PT_TO : 3
PAIN_GO : 1
CONNECTED_FOUND : 1
FIANC_PRIOR : 1
ALCOHOL_THIS : 1
NOTE_APPOINTMENT : 1
TO_PIOGLITAZONE : 1
PROBLEM_RATE : 1
OR_IF : 1
OPTIONS_MEDS : 1
NONVIDEO_MONTHLY : 1
AC_JOINT : 1
ACTIVE_STATUS : 1
UNILATERAL_TEL : 1
ORIENTED_SPHERES : 1
SYST_CONTACT : 1
MEDICATIONS_GIVEN : 1
THE_OBJECT : 1
USUAL_US : 1
NOTE_CLC : 1
RACE_THE : 1
TO_OTHER : 1
COORDINATION_EVALUATION : 1
PAIN_IS : 1
HAS_NORMAL : 1
IN_DRIVING : 1
MIGHT_LIKE : 1
RARELY_MOIST : 2
EVALUATED_AND : 1
PLASTIC_SURGERY : 1
CANDIDIASIS_OF : 1
DRINKS_THAT : 1
PAIN_TEL : 1
OF_BILL : 1
THIGH_WEEK : 1
COMMENTS_TOL : 1
OF_CONSCIOUSNESS : 1
TABS_PATIENT : 1
SKILLS_WNL : 1
HOME_AND : 1
NO_CONVERSATION : 1
PRIMARY_CARE : 5
AS_ORDERED : 2
GRAFTING_PROCEDURES : 1
HOURS_CALL : 2
IS_SAME : 1
TWO_HOW : 1
DISCUSSED_EVALUATE : 1
WITH_PRIMARY : 1
ALL_COMPLAINTS : 1
COVER_WITH : 1
VETERAN_OCCUPATION : 1
HAS_CHANGED : 1
APPLICABLE_USUAL : 1
TRIAGE_ASSESSMENT : 1
HER_HEART : 1
UCINATION_DELUSION : 1
HE_SHE : 1
SHOULD_CONTINUE : 1
OBSERVATION_BED : 1
INFLUENZA_DOSE : 1
ABOUT_ANY : 1
RECORD_THIS : 1
HIS_NEPHEW : 1
CC_LEFT : 1
PAIN_OCCUPATIONAL : 1
TO_TEAM : 1
SURGERY_GOLD : 1
PIERCE_LAB : 1
ACTIVE_MEDICATIONS : 3
WEIGHT_LB : 4
PT_OF : 1
LUNGS_CLEAR : 2
WAS_LIVING : 1
BLOOD_BM : 1
CPRS_HAS : 1
CALCULATION_WEIGHT : 1
RHYTHM_YES : 1
OCCUPATION_POSTAL : 1
DOSE_ROUTE : 1
TO_ISSUE : 1
HEALTH_PROFESSIONAL : 1
AND_ABD : 1
EXAM_ABNORMAL : 1
HEART_BURN : 1
PRIOR_TO : 1
FOLLOW_SHOULD : 1
AND_PNEUMOVAX : 1
PATIENT_PRESENTS : 1
MEDICATIONS_NO : 1
STUDY_ON : 1
LOCAL_BUT : 1
LABIALIS_MEDICATION : 1
VITALS_PT : 1
PT_IS : 1
CC_RESPIRATION : 1
DOCUMENT_AT : 1
VOMITED_SINCE : 1
SIGNS_CLC : 1
CRUSH_OR : 1
MULTIPLE_POROKERATOSIS : 1
TAKE_ONEHALF : 1
TO_IT : 1
TELE_PACED : 1
LB_TH : 1
NORMAL_VALUE : 1
ORDERS_REMOTE : 1
ON_VOICE : 1
ANY_MEDICATIONS : 2
PMHX_HOME : 1
MAY_AN : 1
DOCUMENT_ANY : 1
PREVIOUS_MANAGER : 1
PRIMARY_VISIT : 1
MALE_WHO : 1
LABIALIS_HEP : 1
USE_ANTICOAGULANTOPEN : 1
HE_CHANGE : 1
OBSERVATION_MAN : 1
APETITE_UP : 1
CBI_IRRIGANT : 1
TO_JILL : 1
CONSCIOUSNESS_LB : 1
STUDY_NOVEMBER : 1
ANY_ALPHABETIZED : 1
SUBJECTIVE_COLOR : 1
MONITORED_PRN : 1
CAREGIVER_VETERAN : 1
FOR_USE : 1
MOUTH_AT : 1
THE_REGIONAL : 1
ACTIVE_PROBLEMS : 1
SIGNIFICANT_ATTENDED : 1
HAVE_REGARDING : 1
THE_VELOCITIES : 1
PROGRESS_SPOKE : 1
TO_NEED : 1
APPOINTMENTS_PATIENT : 1
GLENOID_LABRUM : 1
TO_PATIENT : 1
CONTACT_NUMBER : 1
MG_PO : 1
BE_TAKEN : 1
LOCAL_ER : 1
PHYSICIAN_ANDO : 1
ON_SOME : 1
COUGH_DYSPHAGIA : 1
FEVER_ETHNICITY : 1
PRACTITIONER_BE : 1
TAKEN_ON : 1
INFORMATION_OCCUPATION : 1
EVIDENT_THAT : 1
SHIFT_PHYSICIAN : 1
BE_ED : 1
HOW_ALCOHOL : 1
PLACED_HOLD : 1
NO_SOB : 1
BEEN_WITH : 1
DOCUMENTED_CPRS : 1
GO_ANYWHERE : 1
EVALUATE_AND : 1
PLASMA_WEIGHT : 1
ONE_THE : 1
PCPS_CONCERN : 1
OF_OF : 1
TILL_TO : 1
AMLODIPINE_MG : 1
GO_ELSE : 1
QHS_CHORIORETINAL : 1
VIGAMOX_QID : 1
HER_TO : 1
RATE_PATTERN : 1
INCREASED_PAIN : 1
BAD_CHO : 1
THE_DOSAGE : 1
PRESSURE_BM : 1
HANDOUT_DENIES : 1
ACTIVITIES_DAILY : 1
TO_MOVE : 1
CAPACITY_USED : 1
CANCEL_APPOINTMENT : 1
IN_LEFT : 1
IRREGULARLY_SHAPED : 1
REMEMBER_TO : 1
RESPONSES_VETERAN : 1
RAL_PROBLEM : 1
PHYSICIAN_ONCOLOGIST : 1
NEC_MOTOR : 1
ANY_NEW : 2
SKIN_LESION : 1
SKIN_TAGS : 1
THE_YOU : 1
DUONEB_COMMENTS : 1
ASSESSMENT_AMOUNT : 1
SUMMARY_OF : 1
CAPSULES_PATIENT : 1
ELSE_BOBBITT : 1
IS_PHYSICIAN : 1
TO_HAS : 1
TWO_ADDENDUM : 1
GET_THE : 1
ADJUNCTIVE_DX : 1
CHANGE_GLASSES : 1
DENIES_PROBLEMS : 1
PT_SEEN : 1
AND_MEDICATE : 1
TELE_SHOWS : 1
SEEN_CLINIC : 1
LIST_REMEMBER : 1
ETC_INPATIENT : 1
ALERTED_TO : 1
THEN_FOLLOW : 1
REVIEW_RECORD : 1
ASSESSMENT_AGREEMENT : 1
HAD_UPPER : 1
TELEPHONE_STATED : 1
NOTE_STATED : 1
GIVEN_MANAGEMENT : 1
QID_AFTER : 1
OF_LEG : 1
BILATERAL_ENDOSCOPIC : 1
NOTE_REPORTS : 1
SCALE_FOR : 1
MEDICATIONS_ALCOHOL : 1
SHE_CONGESTION : 1
BP_RADIAL : 1
POSTAL_WORKER : 1
FOR_SUPPLEMENT : 1
SAW_PHYSICIAN : 1
ANITA_CALL : 1
CONCERNS_DATE : 1
POSTAL_PHYSICIAN : 1
SEEN_LOCALLY : 1
MONTHS_REALLY : 1
CHANGE_THIS : 1
PATIENT_HISTORY : 1
WERE_TAKEN : 1
HERPES_LABIALIS : 1
TO_COSOPT : 1
TO_POST : 1
PAIN_MEDICATE : 1
IS_UNABLE : 1
PHYSICIAN_RADIATION : 1
NEW_PROBLEM : 1
FACILITY_ALLERGY : 1
SPHERES_PATIENT : 1
OCCLUSION_THE : 1
IS_HANDOUT : 1
BLOOD_PVD : 1
MEDICATIONS_SUPPLIES : 1
TAKEN_OF : 1
ACTIVE_COMPUTERIZED : 1
PLEASURE_DOING : 1
MOISTURE_RARELY : 2
TO_VERIFY : 1
NPC_RESP : 1
THIS_TO : 1
HAS_RESPIRATORY : 1
ONE_SEP : 1
TREATMENT_WHEN : 1
PT_ADMITS : 1
WAS_RECEIVED : 2
SOURCE_OF : 1
BLOOD_PROCEDURES : 1
FECAL_OCCULT : 1
IN_RECORD : 1
LAST_IN : 1
NO_FOR : 2
TRIAGE_IS : 1
MARITAL_STATUS : 1
NO_TREMORS : 1
HAVE_BEEN : 1
EXCEPT_THIGH : 1
NL_WAS : 1
NOTES_SHE : 1
THE_BEEN : 1
DILATE_EYES : 1
PATIENT_DRINKS : 1
ON_NOVEMBER : 1
DIET_DISCHARGE : 1
FOR_APPOINTMENT : 2
KG_DIAGNOSIS : 1
OF_MAR : 1
NO_ALREADY : 1
RESOLUTION_NOTE : 1
ASTIGMATISM_IS : 1
HE_INFLUENZA : 1
SPECIALTY_CARE : 1
ADDENDUM_HIATAL : 1
DISEASE_ON : 1
ON_UNTIL : 1
COGN_COMMUNITY : 1
CLASS_AND : 1
REMINDERS_STATUS : 1
ON_REASON : 1
RAL_FEVER : 1
BILL_IS : 1
FU_TILL : 1
PREDICTING_SORE : 1
PRESENTS_CLINIC : 1
HOME_THE : 1
HAD_MYOCARDIAL : 1
WAS_FROM : 2
NO_BURN : 1
PROBLEMS_PRIMARY : 1
OF_LATEX : 1
THE_POWER : 1
HAD_FOLLOWING : 1
PRESSURE_OK : 1
DISCHARGE_DIAGNOSES : 1
PARESTHESIAS_NONE : 1
STABLE_UPON : 1
TREMORS_PAIN : 1
IDENTIFIED_MALE : 1
CONTACT_VETERAN : 1
PROBLEM_AS : 1
GENDER_MALE : 1
ENTIRE_SURGEON : 1
PART_NO : 1
DOING_NOT : 1
DISCUSS_PROVISION : 1
MUSCLES_THE : 1
PATIENT_IN : 2
CURRENTLY_WITHIN : 1
LDLCHOL_CALCULATION : 1
PATIENT_ON : 1
OTHER_CHIEF : 1
FOR_UP : 2
PROCEDURES_ALBUTEROL : 1
CARE_PROVIDERS : 1
MUCH_ALCOHOL : 1
WITH_DEFECIT : 1
HAVE_YOU : 1
PAST_MONTH : 1
STAGE_TC : 1
PATIENTS_ADMINSTRATION : 1
TRANSFER_DATE : 1
AND_INTERACTIONS : 1
TO_DISCUSS : 1
NOCTURIA_SLOW : 1
ADMINISTRATION_CORONARY : 1
OCCUPATION_PREVIOUS : 1
CURRENTLY_TAKING : 1
HEALTH_REQUESTED : 1
TWO_THEN : 1
OPERATIONS_PROCEDURES : 1
MEDICATION_LIST : 4
PHYSICIAN_PATIENT : 1
INPATIENT_WITHIN : 1
NURSEINFLUENZA_PRIMARY : 1
DIAGNOSIS_SDAUGHTER : 1
TRIAGE_COORDINATOR : 1
LO_CONTL : 1
NOW_HE : 2
SHOULDER_ON : 1
THE_EMERGENCY : 1
WITHIN_ATHENS : 1
PLAN_AND : 1
ACCUCHEK_COMFORT : 1
FOOT_LB : 1
WITH_CHIEF : 1
ASSISTIVE_PLEASE : 1
CST_SHOWED : 1
TIME_EYE : 1
TILL_WENT : 1
SINCE_TO : 1
ACTIVITY_STATUS : 1
CARE_COMMENT : 1
MAIL_REGARDS : 1
CANCERSEES_EVERY : 1
MARITAL_MARRIED : 1
AN_ALCOHOL : 1
CONTINUE_CURRENT : 1
DEFINITION_COMMUNICATION : 1
OF_LITTLE : 1
DIZZINESS_HEADACHE : 1
PAIN_CLC : 1
CLAIMS_VITALS : 1
POSSIBILITY_OF : 1
! Stats words=1100  pairs=4465
