# Supplementary material for: Predicting the Risk of Suicide by Analyzing the Text of Clinical Notes
Source: PLoS One. 2014 Jan 28;9(1):e85733. doi: 10.1371/journal.pone.0085733 (PMC3904866; doi:10.1371/journal.pone.0085733)
Supplement: Appendix S3 — Machine Learning Libraries and Methods: This section is provided to enclose the open source (Apache License) classifier used for the building of the statistical models, specifically for the purposes of study reproducibility. A detailed account of these tools is intended for another publication. (ZIP) [file pone.0085733.s003.zip › Appendix3/ML_libs/Regression_testing/group1/processed/grp1-pt-1080.dat]

!  Done reading
! Total word count = 2175
! Total unique words = 1051
! Total pair count = 4346
! Total unique pairs = 4035
OCULAR : 1
AT : 19
CONSTANT : 1
PMD : 1
DENY : 1
PERTINENT : 1
WORK : 4
PREOP : 1
LISINOPRIL : 2
FINGER : 1
REMOVAL : 1
ULCER : 1
LAND : 1
INFO : 1
WEIGHT : 3
BEEN : 8
GENTLE : 1
BID : 3
WITHIN : 2
YOURSELF : 1
PSYCHOLOGYGENERAL : 1
TREATMENTS : 1
OUTPATIENT : 9
GOES : 1
WEEKLY : 1
INTAKE : 3
INSTRUCTED : 2
INPATIENT : 2
SPEECH : 1
INTERVENTION : 1
COUNSELING : 4
FT : 1
USE : 5
ARTHRALGIA : 1
INGEST : 1
TREATMEN : 1
SPINAL : 1
SUPPLIES : 2
FORECLOSED : 1
ERROR : 1
REGARDING : 1
ASA : 1
READING : 2
LEVEL : 3
CHANGES : 1
ALCOHOL : 4
SOCKS : 1
MILK : 1
AHEAD : 1
TRAUMA : 1
RECOMMEND : 1
HIS : 7
FUNCTIONING : 1
AMBAMBULATORY : 1
SLIGHTLY : 1
MMR : 1
SUBCUTANEOUSLY : 1
NOVO : 1
REMOVED : 1
BANKING : 1
NEURO : 1
ACID : 1
SENSITIVE : 1
WELL : 1
NOTE : 11
TEST : 3
INCREASING : 1
FASTING : 1
DO : 3
DOES : 1
TESTS : 2
UNDERSTANDS : 2
PELVIS : 1
CATEGORY : 1
BB : 1
TREATMENT : 2
HTN : 1
BLOOD : 2
WORKER : 1
DEFICIENCY : 1
ASSIST : 3
HAVE : 8
ADVERSE : 1
SCHEDULED : 1
OF : 30
URETHERAL : 1
TAB : 3
BUPROPION : 1
CALLER : 3
ASSISTED : 1
STABLE : 1
MONITOR : 4
DEC : 1
HAS : 13
FOR : 32
NUTRITION : 1
COUNTER : 1
NUMBER : 3
CLC : 1
SOCIETY : 1
MORNING : 1
HOMELESS : 1
ACCUCHEK : 1
INR : 1
CRITERION : 1
SC : 3
RANGING : 1
OUTPT : 1
IDEATION : 1
MONOFILAMENT : 1
GEN : 1
THINGS : 1
FLARE : 1
PLEA : 1
THEM : 1
INTERVIEWS : 1
ASSESSMENT : 3
RESPIRATORY : 1
ROM : 1
US : 1
WHEEL : 1
BUSY : 1
ACTIVITY : 3
GRADUALLY : 1
ATTACHED : 1
STARTING : 2
PAPILLOMAVIRUS : 2
BILATERALLY : 2
LIFTING : 2
IMA : 1
INFORMATION : 7
PATTERN : 1
ADEQUATE : 1
TYPICAL : 1
CENTER : 2
EXAM : 2
RECENTLY : 1
DERM : 2
CONSIDERING : 1
THE : 49
INCREASED : 1
EXP : 1
PRESENTS : 1
PERFORMING : 1
NATIONAL : 1
PULSES : 2
GO : 1
SIGNIFICANT : 1
CENTERED : 1
BOWEL : 1
COLOR : 2
SUPERIOR : 1
TOES : 1
LEG : 1
BP : 3
OPT : 1
MEDS : 2
LIMITATION : 1
SADDLE : 1
POST : 1
PREVENTION : 1
DEPRESSION : 1
SON : 1
CM : 3
DUONEB : 1
FREE : 1
PSYCHOLOGY : 2
DYSARTHRIA : 1
AGAIN : 1
GAIT : 1
CAP : 1
STATED : 1
CAPILLARY : 1
NONCACHECTIC : 1
GET : 2
WT : 1
WHAT : 2
RESTRICTIONS : 1
PLANS : 1
TOP : 1
STARTED : 1
BOTHERED : 1
CARDIOVASCULAR : 1
OR : 18
THERAPEUTIC : 1
BOTH : 2
SHIFT : 1
PRESCRIPTION : 1
TEMP : 4
YEAR : 3
BEACH : 1
CREAM : 2
LB : 2
COUMADIN : 1
HERBAL : 1
AIR : 1
DE : 2
LIKE : 1
PCIOL : 1
PRE : 1
SEEN : 2
COMBIN : 1
FOOD : 1
NURSE : 2
TAKE : 5
INJECTIONS : 1
CORONARY : 1
ANY : 7
FORMED : 1
TISSUES : 1
OD : 1
TOLERATED : 2
TENDER : 1
INJECT : 1
FACILITY : 1
NITROGEN : 1
DDIMER : 1
EXPIRATION : 1
UNIT : 1
PROS : 1
ANHEDONIA : 1
EFFECTS : 1
MD : 1
RELATIONSHIP : 1
NAME : 3
CARE : 5
SAT : 1
EVERY : 5
AGE : 3
MULTIVITAMIN : 1
FILM : 1
SKIN : 2
TIMES : 1
YESTER : 1
IS : 24
SCHOOL : 1
NOT : 13
WORST : 2
DTN : 1
FRACTURE : 1
TILL : 1
GUARD : 1
IF : 8
JUICE : 1
HELPLESS : 1
PENDING : 1
EXERCISES : 1
BLOODY : 1
LIMITED : 2
HERE : 3
HIATAL : 1
BOX : 1
EATING : 1
SHELLY : 1
SUPPLEMENTS : 1
UNITS : 3
ONEHALF : 3
FEB : 2
APPROX : 1
KEEP : 1
CLEANING : 1
HP : 1
THESE : 1
DIRECTION : 1
REPEAT : 1
MONTANA : 1
VET : 3
EXPLAINED : 1
LEARNER : 1
LESCOL : 1
POSTMYDRIATIC : 1
VALUE : 1
PAINFUL : 1
ASSOCIATED : 1
COMPUTER : 1
BACK : 4
NEAR : 1
TUES : 1
TRANSPORTATION : 1
HEIGHT : 2
MALE : 3
ADDENDUM : 2
GRAPEFRUIT : 1
BY : 9
PMH : 3
NO : 31
CLINICAL : 1
CHIEF : 2
LUNGS : 1
EXCESSIVE : 1
OSIS : 1
OUTBURSTS : 1
UPPER : 1
RRR : 1
CONVERSATION : 2
CLINIC : 3
AMBULATES : 1
INITIALLY : 1
CONFERENCE : 1
MINS : 1
TO : 49
POINT : 1
BMI : 1
FEEL : 2
SPECIALTY : 1
AVIVA : 2
ADMINISTRATIVE : 2
HYPERCHO : 1
BONE : 1
DX : 1
PROCEDURE : 3
WILL : 7
OFTEN : 2
APPEARANCE : 1
BUT : 3
ASKED : 1
APPETITE : 2
TYPE : 1
LIQUID : 1
SEE : 1
INP : 1
POODLES : 1
PLEASE : 5
INDICATES : 1
MEALS : 1
KIT : 1
STATUS : 3
MINIMIZED : 1
DIABETES : 1
SPENT : 1
SCD : 1
DRINKS : 1
NAD : 1
TROPONIN : 1
TESTING : 1
OUT : 2
COMFORT : 1
FRICTION : 1
CONT : 1
VOLTS : 1
LBS : 1
FORMS : 1
SCREEN : 1
PRESENTED : 1
REACTION : 2
BARRIERS : 1
ASSIGNED : 1
SIGN : 1
REVIEW : 1
NEEDED : 5
RELIGIOUS : 1
INJECTION : 1
EXT : 1
WERE : 3
SHEET : 1
WALKS : 2
INCOMPLETE : 1
LABS : 1
VA : 6
TAKEN : 2
CONFRONTATION : 1
WED : 1
POSSIBLE : 1
PART : 1
CONTINUING : 1
SMOKER : 1
FAMILY : 2
PAIN : 17
DISEASE : 2
WHEN : 3
AMBULATORY : 1
AS : 8
BEING : 1
IMPOTENCE : 1
BAPTIST : 1
AMOUNT : 1
WAS : 17
RESTLESS : 2
PM : 2
ORI : 1
WITH : 24
TINA : 1
FEELS : 1
FORM : 1
THEREFORE : 1
FARGO : 1
AC : 1
PARTICIPANT : 1
TEMPERATURE : 1
PUTTING : 1
SIG : 2
DRINKING : 1
BASIS : 1
GONE : 1
NOW : 1
INCLUDING : 2
MUSCULOSKELETAL : 1
FOBT : 1
INTACT : 1
NORVASC : 1
CONFIRMED : 3
USED : 3
NARCOTIC : 2
IT : 1
BELOW : 2
BEDTIME : 2
IMEDCONSENT : 1
LIST : 3
INCISON : 1
INCLUDED : 1
IMMUNIZATION : 4
DISCUSSED : 2
DENTURES : 1
EQUIPMENT : 1
TIME : 10
METER : 1
DEVICE : 1
OCCASIONALLY : 2
HYGIENE : 1
CURRENTLY : 2
ADDITIONAL : 2
BEARING : 2
EMOTIONAL : 1
SIDE : 1
SIMVASTATIN : 2
BREAKFAST : 1
IMAGES : 1
BATHROOM : 1
ALLERGY : 1
DOCTOR : 1
GOING : 1
DID : 3
CALL : 6
DYSPHAGIA : 1
HX : 1
SUN : 1
IMAGING : 1
BUMP : 1
ADDRESS : 1
APPROPRIATENESS : 1
UNSPECIFIED : 2
SOB : 1
PLEASED : 1
ANTACIDS : 1
IOP : 1
INTRAARTICULAR : 1
SUBJECTIVE : 4
OPHTHALMOLOGY : 1
STRICTURE : 1
FRI : 1
PER : 3
TABLETS : 1
YES : 3
UX : 1
MOBILITY : 1
MPS : 1
YOUR : 7
CAPSAICIN : 1
DOING : 1
GIVEN : 4
LETTING : 1
ILLICIT : 1
HT : 2
WHO : 1
ED : 3
IDENTIFIES : 1
THROBBING : 1
BASED : 1
QUALIFIERS : 1
PHYSICIAN : 5
RWAVES : 1
DELIRIUM : 3
ARM : 1
CURRENT : 6
DME : 1
CONTROL : 2
URGENT : 2
HIM : 3
FELODIPINE : 1
REFIL : 1
HE : 25
RX : 2
NEEDS : 2
THEY : 1
TREATED : 1
EASY : 1
MEMBER : 1
EXTENSIVE : 1
TRANSFER : 1
ML : 2
PHONE : 3
CLEAR : 2
TOUCH : 1
PRIMARY : 1
WI : 1
UNTIL : 1
HAD : 4
SIGNS : 3
FIELD : 2
SPECIAL : 2
PATIENTS : 2
SUMMARY : 1
HUMAN : 2
DRINK : 2
DENTAL : 1
NEGATIVE : 1
NONE : 1
TRIGGER : 1
II : 1
LAB : 2
DECREASED : 3
IMPORTED : 1
ING : 1
COMPLAINTS : 2
CONTACT : 3
HER : 2
ORDERED : 2
FEELING : 1
QUESTIONS : 1
METHOCARBAMOL : 1
SERMONS : 1
PROBLEMS : 1
URINE : 1
YELLOW : 1
NEUROLOGICAL : 2
GIVE : 1
CAN : 1
ROUTE : 1
THERAPY : 2
TEMPLATE : 1
PRIVATE : 1
LIVING : 1
KCPLASTIC : 1
DOPPLER : 1
NONVA : 3
WHICH : 2
SYMPTOMS : 1
IER : 1
RANGE : 2
OVER : 3
NTIHYPERTENSIVE : 1
MG : 6
ON : 17
PRESSURE : 2
HEADACHE : 1
EVIEW : 1
GOOD : 1
DROPS : 1
CARING : 1
REG : 1
NVI : 1
MED : 2
INTO : 2
WEST : 1
EDEMA : 2
HEELS : 1
WORSE : 1
PROVIDER : 1
PO : 3
SHE : 3
PALM : 1
GENDER : 2
USES : 1
LOCATION : 1
APPOINTED : 1
ALERT : 1
FEVER : 1
ACCESSED : 1
AWAY : 1
PRIOR : 1
VERBAL : 3
OFF : 2
IMED : 2
DATE : 2
COMMENT : 1
COMPRESSION : 1
DAILY : 3
MUCUS : 1
FEMALE : 2
APPOINTMENT : 3
WOULD : 2
REPLACEMENT : 1
FROM : 12
SOLUM : 1
LEFT : 7
ENJOUYS : 1
HOMICIDAL : 1
MEDICAL : 4
NPC : 1
ALSO : 3
SYSTEM : 3
ACTIVITIES : 1
REPLACES : 1
NONDIABETIC : 1
ACQUIRED : 1
SURGEON : 1
EXTREMITY : 1
HEART : 2
ROGRESSIVE : 1
ORGANIC : 1
HURTING : 1
COMPLAINT : 2
BLACK : 1
ORDER : 2
USING : 2
SHAKER : 1
VPA : 1
FULLY : 1
INFLUENZA : 3
AMENDS : 1
HEMORRHOIDS : 1
APPARENT : 1
DENIED : 2
CONSUMING : 1
MEASURES : 1
EYE : 1
FELL : 1
CONTAINING : 2
DYNAMIC : 1
DISCUSSION : 1
AGO : 1
NEW : 1
MOUTH : 4
PROVIDERS : 1
ATTENDING : 2
CHEST : 2
URGENCY : 1
PRESENT : 2
SOME : 3
WORTHLESS : 1
WPB : 1
SPENDING : 2
EXPLAIN : 2
MUSCLE : 2
ANESTHESIA : 2
ARE : 3
NEED : 3
INDEPENDENT : 2
CORRECT : 2
RADIOPHARMACEUTICAL : 1
APPLY : 3
RECEIVED : 1
HELPS : 1
CPRS : 1
SURGERY : 4
INCONTINENCE : 1
FREQUENCY : 1
PETS : 1
BURNING : 1
TX : 2
UPDATES : 1
VENTRICULAR : 1
PREVENTIVE : 1
NUMBNESS : 2
YEARS : 1
BE : 2
NUMBING : 1
LEAVE : 1
DUE : 2
RATION : 1
LEGEND : 1
DISC : 1
OWENS : 1
PING : 1
LESION : 1
PH : 1
RECONCILED : 1
SOUNDS : 1
REVIEWED : 2
DM : 1
BEFORE : 1
ENZYMES : 1
OTHER : 6
WORKTEETH : 1
ALL : 1
CTAB : 1
ME : 2
BED : 1
NURSING : 2
CONTRACT : 1
FOLLOWING : 2
IDENTIFIED : 4
REQUIRING : 1
PATIENT : 28
REFER : 1
PROV : 1
JUL : 1
DING : 2
AVENUE : 1
DISPOSABLE : 1
CASA : 2
REEVALUATED : 1
APPROVAL : 1
SPINE : 1
ANXIETY : 1
NOS : 1
THAN : 1
VALVE : 1
UARY : 1
SB : 1
MEMORY : 1
SENSATION : 1
ARTHRITIS : 2
AUDITC : 1
CLALED : 1
WE : 1
ENGAGED : 1
PROTOCOL : 1
COME : 2
PITTSBURGH : 1
FUNCTIONAL : 1
ROOM : 1
CAME : 1
THAT : 14
VISIT : 3
MYCOTIC : 1
CHART : 1
NORMAL : 4
WIFE : 1
DEPRESSED : 1
INGROWING : 1
RIGHT : 3
PC : 3
VITALS : 1
BRAND : 2
PLA : 1
ABOUT : 3
REQUESTS : 1
ONE : 4
TELE : 1
POTENTIAL : 1
RETOOK : 1
FU : 1
BRIEF : 1
THOUGHT : 2
TABLET : 3
DURING : 1
PFSHX : 1
YOU : 10
TOLD : 1
SEVERAL : 1
DIRECTED : 1
LISTED : 2
SCREENING : 2
VOICED : 3
CARDIOLOGY : 1
INFORMED : 1
HUFANA : 1
GETTING : 2
NOCTURIA : 1
ISSUED : 2
REACTIONS : 1
PAST : 7
EQUAL : 1
OS : 1
DOCUMENT : 5
CHAIR : 1
REASON : 3
PNT : 1
SUPERVISOR : 1
TOBACCO : 2
DULL : 1
DY : 1
HPV : 2
HOME : 1
NEVER : 2
APPLICATION : 1
PENICILLIN : 1
NOTED : 2
DR : 2
INDIVIDUAL : 1
SOCIAL : 3
CAREFULLY : 1
RECOMMENDATION : 1
FL : 1
RETURN : 1
SUICIDAL : 1
PRAVASTATIN : 1
HOPELESS : 1
MODERATE : 1
TOTALS : 1
RIC : 1
LADDER : 1
EFFECT : 1
BLE : 1
VITAL : 3
INJ : 1
SO : 1
IMPROVEMENT : 1
REGULAR : 2
RECONCILIATION : 4
REFFER : 1
NEC : 1
POTASSIUM : 1
BELIEFS : 1
NONANTALGIC : 1
MINUTES : 1
MT : 1
TINGLING : 1
SPECIFY : 1
JR : 1
DRIVE : 1
DELTOID : 1
MAKE : 3
ALTERATION : 1
GRANDE : 2
WEEK : 1
RISKS : 1
TEAM : 1
APPROVED : 1
AM : 2
DISTRESS : 2
PRACTITIONER : 2
EGGS : 1
ELLIS : 1
EKG : 3
LUMP : 1
PROG : 1
FLAT : 1
PUSHING : 1
REGIONAL : 1
EVENT : 1
PEOPLE : 1
LEAST : 1
SIGNED : 1
HOW : 3
PRODUCTS : 1
UNITPOD : 1
PIOGLITAZONE : 1
MANY : 1
SINCE : 1
DISCUSS : 1
ALLERGIC : 1
GLYBURIDE : 1
REDDY : 1
TAP : 1
OFFICE : 1
MADE : 2
ACHING : 2
CARDIAC : 2
REESTABLISH : 1
FILLING : 1
YRS : 1
MON : 1
ADVISED : 2
STOMACH : 1
LEARNING : 1
YOURE : 1
DOSE : 3
MONTHS : 3
OBJECTIVE : 2
SMOKING : 2
BULBAR : 1
VENDOR : 1
ECHO : 1
MEASUREMENT : 1
SSN : 2
AVOID : 2
GIRLFRIEND : 1
ORIGIN : 1
BEDSIDE : 1
MEDICATION : 8
STOP : 1
RESTING : 1
WRIST : 1
PAPULE : 1
VISUAL : 1
WANT : 1
COMMENTS : 3
ATTEMPTED : 1
SUPPORTIVE : 1
ORAL : 1
CONTINUE : 1
TOTAL : 1
FIANCE : 1
LIGHT : 1
HME : 1
GOAL : 1
SURGICAL : 1
EXAMINATION : 2
ST : 1
HISTORY : 5
PROVIDE : 1
RESPIRATION : 1
PMHX : 1
BACKGROUND : 1
HOURS : 2
MAIL : 1
LEGS : 4
IEST : 1
INTRAOPERATIVELY : 1
HEALTH : 2
REPORTED : 1
DEBRIS : 1
ADD : 4
HERNIA : 1
THUR : 1
STOOLS : 1
COGNITIVE : 2
PURPOSES : 1
POSTOPERATIVE : 2
REDUCE : 1
NOV : 2
MISSES : 1
HIP : 1
SITE : 1
ENTIRE : 1
AZITHROMYCIN : 1
KG : 3
METALLIC : 1
MORE : 1
OP : 1
MAKING : 1
PE : 1
AVR : 1
WENT : 1
INSULIN : 2
AUG : 2
PROBLEM : 4
CLONAZEPAM : 1
SPOT : 1
RECORD : 5
SHOWN : 1
CABG : 1
PRESCRIBED : 1
UNABLE : 1
RN : 1
XYZZY : 2
OUTPUT : 2
THORACIC : 1
HOUSE : 1
AMT : 1
AFTER : 3
READY : 1
ADMISSION : 2
STILL : 4
PLS : 1
HOOVER : 1
ACTUAL : 1
LESS : 1
NON : 1
LUMBAR : 1
SALTY : 1
COUGHING : 1
MAILING : 1
PCP : 2
NONV : 1
SAYS : 1
FUTURE : 1
APPOINTMENTS : 1
SEQUENTIAL : 1
BNP : 1
RE : 1
WNL : 1
CLIENT : 1
DENIES : 4
DOB : 1
QUALITY : 1
NUC : 1
OLD : 3
CNSL : 1
DRAWN : 1
DISPLAY : 1
VETERAN : 9
CAPSULE : 1
GLUCOSE : 2
RELIEF : 1
PT : 14
INJURY : 1
MILLI : 1
TRIES : 1
SIT : 1
NP : 1
PSYCHOSOCIAL : 1
AREA : 2
PROCEDURES : 1
CLOTRIMAZOLE : 1
MANAGED : 1
SELECTED : 2
CERVICAL : 2
HYTHMIA : 1
UNDERSTANDING : 2
AVERAGES : 1
LOST : 1
MEDICATIONS : 12
ILLNESS : 1
MR : 1
UNASSISTED : 1
AND : 41
REPRESENTS : 2
PACEMAKER : 1
GEM : 1
HOUR : 1
NPH : 1
DRIVING : 1
VACCINE : 1
RESPONSE : 1
RESULTS : 3
SALT : 1
UTILIZED : 1
BREATH : 1
RECENT : 1
NAIL : 1
IN : 24
ADMINISTERED : 1
LOW : 1
POSITION : 1
CARDIO : 2
MAY : 3
REGIMEN : 1
STATE : 1
DISCONNECTED : 1
PLAN : 1
LANTANA : 1
RHEUMATOID : 1
APPT : 3
NOTIIFED : 1
TAKING : 2
AGREE : 2
ADMITTED : 2
YET : 2
OBSERVED : 2
SS : 1
DONE : 3
PHYSICAL : 5
DJD : 2
WEARING : 1
CP : 1
ACTIVE : 7
IDENTIFICATION : 1
ABILITY : 1
OLEMIA : 1
MIDDLE : 1
THIS : 13
SUPERVISING : 1
HCTZ : 1
HIGH : 1
SOFT : 1
VAMC : 1
LAST : 2
PAGE : 2
MINNEAP : 2
EDUCATION : 3
SOBRIETY : 1
SUSPENDED : 1
THIN : 1
STATES : 5
NEBULIZER : 1
WHILE : 1
CELL : 2
ICDCM : 4
RESP : 1
AND_DELIRIUM : 2
PAIN_KCPLASTIC : 1
MINS_DUE : 1
AT_IF : 1
IS_NEEDS : 1
PATIENT_INFORMATION : 2
FOR_ORDERED : 1
PROBLEM_OTHER : 2
TESTS_AND : 1
REVIEWED_PT : 1
REG_INJ : 1
INPATIENT_AT : 1
TABLET_BY : 3
DJD_STATES : 1
TEST_PROBLEM : 1
EGGS_WEEKLY : 1
MEDICATIONS_DISCUSSED : 1
SS_IN : 1
TAKEN_SENSITIVE : 1
AVIVA_FOR : 1
OFTEN_HAVE : 1
IS_TX : 1
NP_CARE : 1
INFORMATION_OUT : 1
TO_PRIVATE : 1
CPRS_LAB : 1
OTHER_IS : 1
NAME_HEIGHT : 1
THE_TREATMENT : 1
GETTING_HERE : 1
CURRENT_COMPLAINTS : 1
VERBAL_WITH : 1
DENIES_BONE : 1
TOLERATED_WELL : 1
AT_ADDITIONAL : 1
HE_AND : 1
NEVER_USED : 1
CRITERION_NO : 1
DM_EYE : 1
NONE_RECOMMEND : 1
EQUAL_BILATERALLY : 1
WELL_NO : 1
FAMILY_BELIEFS : 1
OUT_VA : 1
APPLY_THIN : 1
THIS_BE : 1
ABOUT_AT : 1
FOR_HEART : 1
THE_CNSL : 1
PREOP_SCD : 1
SOFT_SUBJECTIVE : 1
HERE_TILL : 1
WILL_HAVE : 1
BEEN_ADMITTED : 1
OF_ILLICIT : 1
OUTPUT_ML : 1
AVERAGES_NORMAL : 1
WITH_HUFANA : 1
BEEN_TO : 1
TO_ACTIVE : 2
PRESSURE_YOUR : 1
CARDIOVASCULAR_HX : 1
INCLUDING_SUPPLIES : 2
TAB_SIG : 1
WITH_VITAL : 1
FOR_MAILING : 1
DEFICIENCY_AT : 1
MOUTH_EVERY : 2
FROM_MEDICAL : 1
HEADACHE_OR : 1
TAB_MED : 1
KG_ADDENDUM : 1
AWAY_LEAVE : 1
MISSES_MORE : 1
MEDICATION_HE : 1
PATIENT_HAD : 1
SC_ED : 2
CLALED_AND : 1
WEEKLY_SHEET : 1
MEMORY_INTACT : 1
AGREE_WITH : 1
DONE_ORDER : 1
PATIENT_FULLY : 1
NO_REACTIONS : 1
TAKEN_LEFT : 1
ME_AT : 1
PAST_HOURS : 1
CHIEF_OF : 2
TREATMENT_VALVE : 1
TO_FARGO : 1
CELL_HT : 1
DYSPHAGIA_WITH : 1
EXT_OR : 2
LEFT_THAT : 1
AMBAMBULATORY_OUTPATIENT : 1
BOTHERED_ANY : 1
THE_PATIENT : 4
HAS_ALLERGY : 1
ANTACIDS_MILK : 1
AT_THIS : 3
COMPRESSION_DEVICE : 1
ANESTHESIA_PROVIDER : 1
ENGAGED_IN : 1
IS_YOU : 1
UNITPOD_MEDICATION : 1
LIMITED_ASSIST : 1
OF_OUTBURSTS : 1
PT_NOT : 1
CORRECT_ERROR : 1
PATIENT_WEIGHT : 1
DUE_HIGH : 1
HAVE_ON : 1
NORMAL_WILL : 1
LOW_PAIN : 1
AIR_GOOD : 1
NO_DME : 1
ADMINISTERED_PRESCRIBED : 1
MEDICATIONS_HERBAL : 1
DONE_FOR : 1
RESTING_IMAGES : 1
ADVERSE_NOTED : 1
PAIN_PATIENT : 2
MANY_CONTAINING : 1
LEFT_NORMAL : 1
BLACK_NO : 1
AM_SIGN : 1
IS_INFORMATION : 1
RESULTS_TO : 1
IN_WITH : 1
IMAGING_ORDERED : 1
TO_CELL : 1
HE_WAS : 1
EXAM_TESTING : 1
IS_HE : 1
DOCUMENT_SELECTED : 2
OVER_CAPSAICIN : 1
URETHERAL_STRICTURE : 1
AS_WAS : 1
BP_LEFT : 1
WOULD_TO : 1
BOTHERED_BY : 1
RESPONSE_IS : 1
RADIOPHARMACEUTICAL_TO : 1
PAIN_HAS : 1
LISINOPRIL_MG : 1
INDEPENDENT_HYGIENE : 1
RESPIRATORY_FRICTION : 1
HEART_EXAM : 1
STATES_THAT : 3
PAGE_THE : 1
WHEEL_PUTTING : 1
TO_BOTH : 1
ERROR_THIS : 1
BURNING_ACHING : 1
YOUR_IS : 1
BID_MEDICATION : 1
ONEHALF_BY : 2
DYNAMIC_INTRAARTICULAR : 1
WITH_DOPPLER : 1
CONFIRMED_CORRECT : 1
HE_DENY : 1
IS_INCOMPLETE : 1
ORDERED_IN : 1
REACTION_NPC : 1
MALE_IMAGING : 1
SOCIETY_NO : 1
ADMISSION_THAT : 1
NONCACHECTIC_VERBAL : 1
COMBIN_SMOKER : 1
PLA_PC : 1
CP_NATIONAL : 1
INFO_PCP : 1
OUTPATIENT_STATUS : 3
ORAL_AFTER : 1
WITH_PATIENT : 2
SHOWN_DR : 1
THE_PATIENTS : 1
FELODIPINE_MUSCULOSKELETAL : 1
HE_ADMITTED : 1
CAN_ACCESSED : 1
OF_ORIGIN : 1
THAT_EDEMA : 1
OR_USE : 1
TIME_CALL : 1
THE_AFTER : 1
LEVEL_WAS : 1
APPETITE_GOOD : 1
IEST_CALLER : 1
CARE_FOR : 1
BEEN_OF : 1
MEMORY_STATES : 1
WEEK_HE : 1
MEDS_UNITS : 1
US_WHEN : 1
DO_DRIVE : 1
RN_LEFT : 1
THERAPY_ADMINISTRATIVE : 1
SC_OSIS : 1
NUC_MED : 1
REACTION_NOTED : 1
THAN_RELATIONSHIP : 1
UNITS_SUBCUTANEOUSLY : 1
BULBAR_PMHX : 1
ANESTHESIA_DENIES : 1
OSIS_OF : 1
AVR_POODLES : 1
AT_VETERAN : 1
VOICED_BUT : 1
IS_WEIGHT : 1
BLACK_STOOLS : 1
THE_BEING : 1
HE_DENIES : 2
PRESENTED_FOR : 1
ADMISSION_NUTRITION : 1
NOT_USE : 1
MONITOR_THE : 1
II_SIGNS : 1
METHOCARBAMOL_HELPS : 1
NURSE_OR : 1
CARDIO_IS : 1
GLUCOSE_NEURO : 1
HAVE_FEVER : 1
METALLIC_WITHIN : 1
WITH_CURRENT : 1
COMMENTS_PT : 1
TOBACCO_IN : 1
YOU_PROVIDE : 1
HYTHMIA_HIP : 1
USE_OF : 2
PREVENTION_WAS : 1
GIVE_DOSE : 1
WAS_SUSPENDED : 1
FOR_POST : 1
UNDERSTANDS_THAT : 1
THAT_MAY : 1
OCCASIONALLY_TEMP : 1
ED_ATTACHED : 1
AHEAD_AND : 1
STRICTURE_CHEST : 1
COUGHING_MUCUS : 1
COLOR_YELLOW : 1
OR_OTHER : 1
ANY_ANESTHESIA : 1
UNDERSTANDS_MEDICATIONS : 1
REASON_APPOINTMENT : 1
ADD_NO : 1
IDENTIFICATION_OUT : 1
FORMS_RECEIVED : 1
CARING_YOURSELF : 1
BUT_THE : 1
WITH_OR : 1
THE_PHYSICIAN : 1
NOTE_WORK : 1
IF_IS : 1
REVIEWED_AND : 2
DRINKING_OR : 1
HOW_DRINKS : 1
PATIENT_YES : 1
OBSERVED_BP : 1
EDUCATION_EXPLAIN : 1
SIGNIFICANT_IMPROVEMENT : 1
LEARNER_AS : 1
UPPER_NORMAL : 1
ABILITY_IT : 1
PATIENT_RETURN : 1
WPB_TEAM : 1
EDUCATION_NO : 1
NEEDED_PATIENT : 1
INFO_TO : 1
ON_PAIN : 1
MEDICAL_OR : 1
ATTEMPTED_TO : 1
SB_CARDIO : 1
WITH_FROM : 1
DISTRESS_WILL : 1
TRIES_PELVIS : 1
COMMENT_BURNING : 1
BNP_PAIN : 1
OF_THIS : 1
REESTABLISH_CARE : 1
USED_IN : 1
HE_ATTEMPTED : 1
ADDITIONAL_SOCIAL : 1
CARE_IN : 1
DRAWN_PM : 1
YOURE_NOT : 1
EKG_PER : 1
HERBAL_PRODUCTS : 1
CONSIDERING_IS : 1
NON_VERBAL : 1
ANY_BOWEL : 1
DOSE_DUONEB : 1
MONITOR_ACCUCHEK : 1
AND_REEVALUATED : 1
OR_TINGLING : 1
INFORMATION_PLS : 1
WITH_NO : 2
REQUIRING_INJECTION : 1
CERVICAL_DE : 1
RIC_BRAND : 1
PER_VETERAN : 1
BY_INCONTINENCE : 1
NEAR_ADD : 1
PREVENTIVE_AND : 1
WERE_TREATED : 1
IN_MEDICAL : 1
INDIVIDUAL_PSYCHOLOGY : 1
LEGS_WERE : 1
NOTE_FOR : 1
MISSES_THAN : 1
RECEIVED_THE : 1
ACCESSED_ORI : 1
DDIMER_AND : 1
UTILIZED_MAKING : 1
NOTE_UNDERSTANDS : 1
IN_ABOUT : 2
TOES_RESPONSE : 1
PRACTITIONER_PRIMARY : 1
URGENT_CARE : 1
HYPERCHO_BLOOD : 1
DIABETES_TEMPLATE : 1
NO_NOCTURIA : 1
NO_BLOODY : 1
IDENTIFIED_OTHER : 2
COUNSELING_CLONAZEPAM : 1
NARCOTIC_PREVENTIVE : 1
ORDER_RESULTS : 1
THIN_TO : 1
DOCUMENT_IMED : 1
PREVENTIVE_HEALTH : 1
HAVE_POTASSIUM : 1
BEDSIDE_AMBULATORY : 1
FOR_REGULAR : 1
PAIN_HE : 1
ARTHRITIS_SCREENING : 1
NITROGEN_WHICH : 1
RIGHT_DELTOID : 1
WORSE_ALSO : 1
ILLICIT_MEDICATION : 1
HE_PRESENTS : 1
UNITS_DEC : 1
PROCEDURE_PATIENT : 1
WITH_LEFT : 1
IS_THE : 1
YOU_AT : 1
SPENDING_EVENT : 1
PROBLEM_EXPIRATION : 1
SIG_TAKE : 2
DJD_PATIENT : 1
NOTE_SHIFT : 1
MALE_IS : 1
WIFE_TRIES : 1
PO_INTAKE : 1
CLEAR_ALCOHOL : 1
PRACTITIONER_OR : 1
ADDITIONAL_COMMENTS : 1
EXPLAIN_NEED : 1
SIGNS_PT : 1
WERE_WITH : 2
MAY_HAVE : 1
OTHER_COUNSELING : 2
TO_CONTACT : 1
AND_VERBAL : 1
PMH_EVERY : 1
CLINIC_YOUR : 1
ORGANIC_ORIGIN : 1
THINGS_FROM : 1
HAD_SLIGHTLY : 1
THE_VAMC : 1
LEGEND_OPT : 1
THESE_FROM : 1
MAY_BEEN : 1
SEE_PATIENT : 1
HISTORY_EXPLAIN : 1
CLINIC_AT : 1
INTERVENTION_AGE : 1
OF_LIVING : 1
TIME_VETERAN : 1
CARDIAC_HYTHMIA : 1
PLEASE_US : 1
WALKS_EXTREMITY : 1
BASED_THE : 1
CONSIDERING_HE : 1
CLINIC_REVIEWED : 1
PRESENT_ILLNESS : 1
INFORMATION_SOCIAL : 1
STOMACH_RESP : 1
THE_TO : 1
USED_INTRAOPERATIVELY : 1
ANY_RECENTLY : 1
INTRAARTICULAR_FRACTURE : 1
WAS_ADMITTED : 1
AGREE_ASA : 1
IS_HAVE : 1
RWAVES_MILLI : 1
HP_OFFICE : 1
STABLE_WILL : 1
EVENT_VETERAN : 1
LEFT_DOCUMENT : 1
STILL_ASKED : 1
VACCINE_WAS : 1
HOURS_EDUCATION : 1
WRIST_THAT : 1
INFORMATION_CONFIRMED : 1
THAT_IDENTIFIED : 1
CRITERION_SIGNIFICANT : 1
PROBLEM_LIST : 1
WED_AND : 1
AND_ONEHALF : 1
YEARS_HE : 1
BACK_AND : 1
TELE_SB : 1
ONE_AND : 1
ACTIVE_FL : 1
COME_IN : 1
FOR_VISIT : 2
DATE_VITAL : 1
COMPUTER_SOME : 1
RWAVES_VOLTS : 1
DENIES_PAIN : 1
IS_REMOVAL : 1
HAD_ECHO : 1
GOOD_COLOR : 1
PC_APPT : 1
THIS_POST : 1
HIP_ICDCM : 1
DATE_REFIL : 1
OF_DAILY : 1
NEURO_DECREASED : 1
OFTEN_YOU : 2
OD_OS : 1
RISKS_OF : 1
OF_MIDDLE : 1
PAST_HOW : 1
NO_PROBLEM : 2
IS_SUMMARY : 1
NAIL_LEFT : 1
SCHEDULED_APPOINTMENT : 1
GLYBURIDE_PO : 1
IN_NO : 1
COUMADIN_DIABETES : 1
EMOTIONAL_PSYCHOSOCIAL : 1
APPEARANCE_CLEAR : 1
DE_SUBJECTIVE : 1
ABOUT_FOR : 1
BEARING_LIFTING : 1
HERNIA_SOLUM : 1
TEMP_BP : 1
AMBULATORY_ALL : 1
NO_ADVERSE : 1
DRINKS_CONTAINING : 1
ALSO_OSIS : 1
DEC_INTO : 1
TO_BACK : 1
MG_MG : 1
NONDIABETIC_BY : 1
RELATIONSHIP_NEED : 1
IOP_THIS : 1
DURING_THE : 1
CALL_DTN : 1
YEAR_MALE : 1
IS_WHO : 1
UNABLE_ADD : 1
SYSTEM_YOU : 1
FUNCTIONING_IS : 1
PRESENT_AND : 1
STOP_NORVASC : 1
HOW_HAVE : 1
IDEATION_HE : 1
PSYCHOLOGY_MINUTES : 1
VETERAN_VETERAN : 1
RECORD_INTAKE : 1
YEAR_DISEASE : 1
SMOKING_MALE : 1
NO_VOICED : 1
TYPICAL_BELOW : 1
OR_TREATMEN : 1
CONT_BB : 1
DISCUSSION_LEGEND : 1
IMMUNIZATION_PO : 1
IMMUNIZATION_YOURE : 1
THE_CAPSAICIN : 1
AFTER_HE : 1
AS_NEEDED : 1
CURRENT_LEVEL : 1
OR_HOMICIDAL : 1
YOU_RETOOK : 1
AND_DENTURES : 1
LOCATION_INJECTION : 1
WITH_FOR : 1
NOT_PROBLEM : 1
RECONCILIATION_HE : 1
OCULAR_HAVE : 1
GEM_MEDICATIONS : 1
RIGHT_PULSES : 1
FROM_EDUCATION : 1
WITH_ADVERSE : 1
PAIN_REPRESENTS : 1
FOR_CURRENTLY : 1
TO_APPLICATION : 1
IMPOTENCE_ORGANIC : 1
NUMBER_CURRENTLY : 1
BUSY_OTHER : 1
FEMALE_HEALTH : 1
HURTING_HIM : 1
TO_TO : 3
WHEEL_CHAIR : 1
CENTERED_YOUR : 1
WITH_OLD : 1
SURGEON_PRACTITIONER : 1
PCP_PLEASE : 1
CARE_GEM : 1
NO_NARCOTIC : 1
MADE_HIM : 1
NEVER_SOBRIETY : 1
STATE_NO : 1
INTAKE_PROCEDURE : 1
YES_REPRESENTS : 1
OLEMIA_EXP : 1
PCIOL_RESPIRATION : 1
IMAGES_NO : 1
FOR_TO : 1
LIMITED_TO : 1
OF_DISTRESS : 1
DY_NOS : 1
INDEPENDENT_OF : 1
ROGRESSIVE_AND : 1
OBJECTIVE_CALLER : 1
ALSO_WITH : 1
IN_MAKING : 1
MINIMIZED_SYMPTOMS : 1
USE_SALT : 1
PERFORMING_SUPERVISING : 1
SUSPENDED_HTN : 1
BY_HIS : 1
VITAL_SIGNS : 2
IS_WHAT : 1
NOT_READY : 1
HIM_NO : 1
FUNCTIONING_AND : 1
AND_POSTMYDRIATIC : 1
TISSUES_SUBJECTIVE : 1
FOR_SPINAL : 1
TEST_TEMPLATE : 1
COUMADIN_GLUCOSE : 1
TAKING_MEDICATION : 1
FUTURE_AS : 1
WITH_ROM : 1
THE_STATES : 1
ML_AZITHROMYCIN : 1
RESULTS_NORMAL : 1
STATE_INJURY : 1
BE_OVER : 1
MT_INR : 1
THEREFORE_LESION : 1
MIDDLE_ASSOCIATED : 1
XYZZY_DONE : 1
DENY_DRINKING : 1
NEEDED_LEGS : 1
THE_NURSE : 1
NO_REACTION : 1
INGROWING_NAIL : 1
HAVE_TYPICAL : 1
HIS_DOCTOR : 1
HT_JUL : 1
AM_NO : 1
THEM_AS : 1
OF_PRESENT : 1
MONITOR_AND : 2
NEEDED_INDEPENDENT : 1
RECOMMEND_ALERT : 1
WAS_UTILIZED : 1
THE_GRANDE : 1
INGEST_THESE : 1
PAIN_FOR : 1
RECOMMENDATION_SPECIAL : 1
NO_APPOINTMENTS : 1
PROCEDURE_TUES : 1
REPLACES_MUSCULOSKELETAL : 1
AC_FORMED : 1
AND_ROGRESSIVE : 1
FOR_TEMPERATURE : 1
LEVEL_STATES : 1
FAMILY_NO : 1
EVERY_EVENT : 1
TO_URETHERAL : 1
MUSCLE_FOR : 1
COMPUTER_RECORD : 1
ENJOUYS_THE : 1
UNIT_DUONEB : 1
WANT_MAKE : 1
DJD_CERVICAL : 1
DISCUSS_NO : 1
APPT_SCD : 1
AVOID_EXCESSIVE : 1
NONVA_DOCTOR : 1
SAYS_HE : 1
PRESSURE_IS : 1
YOUR_TO : 1
IS_WORSE : 1
VA_MONTANA : 1
PUTTING_SOCKS : 1
PT_PRIOR : 1
EXP_PROV : 1
BEEN_DISCONNECTED : 1
COLOR_SAYS : 1
PT_PING : 1
EXCESSIVE_FOOD : 1
AT_LEAST : 1
HEALTH_AND : 1
HYPERCHO_OLEMIA : 1
REEVALUATED_TO : 1
YOU_ON : 1
APPROX_DUE : 1
SHEET_THAT : 1
INCREASING_THEM : 1
OF_FORMS : 1
SS_HEIGHT : 1
INTO_PUSHING : 1
TEMP_WT : 1
SMOKER_TOBACCO : 1
CLC_AS : 1
FOR_ADMISSION : 1
INSTRUCTED_TEST : 1
YOUR_ARE : 1
NOT_DRIVE : 1
HAS_LOST : 1
HIS_INJECTIONS : 1
AUG_BUMP : 1
FROM_MEASURES : 1
AGO_HE : 1
DRINK_CONTAINING : 1
BID_OLEMIA : 1
REMOVAL_THEREFORE : 1
YELLOW_CLEAR : 1
AND_WAS : 1
VISUAL_FIELD : 1
IS_MALE : 1
APPLY_HEELS : 1
USED_TO : 1
SOUNDS_RADIOPHARMACEUTICAL : 1
SUN_THUR : 1
DISPLAY_AVIVA : 1
ON_AND : 1
PAINFUL_APPLICATION : 1
PCP_PLA : 1
WORK_PSYCHOLOGY : 1
THE_ATTENDING : 1
SUPERIOR_WI : 1
SOME_FINGER : 1
STILL_THAT : 2
INSTRUCTED_TAKE : 1
COMMENTS_PATIENT : 1
MONITOR_PT : 1
ACTIVITY_OCCASIONALLY : 2
REMOVAL_AND : 1
OR_BLACK : 1
GRADUALLY_INCREASING : 1
FOR_RESTING : 1
BRIEF_OCULAR : 1
TAKEN_PATIENT : 1
HE_WOULD : 1
PULSES_EATING : 1
FOR_TAKE : 1
FARGO_VAMC : 1
NOS_REPLACEMENT : 1
ORIGIN_ICDCM : 1
SUPERVISOR_ABOUT : 1
AND_WITH : 1
CP_EDEMA : 1
TO_NOTE : 1
SURGERY_WITH : 1
AT_NONV : 1
CONSTANT_BY : 1
ADDRESS_CONFIRMED : 1
TO_MED : 1
ANESTHESIA_HE : 1
CAPILLARY_TIME : 1
NOT_PATIENT : 1
THE_HAS : 1
MEASURES_SENSITIVE : 1
SUPPLEMENTS_YOU : 1
FEMALE_AND : 1
WORKER_SOB : 1
THEM_YOU : 1
MAY_DERM : 1
ARE_NOTED : 1
PSYCHOSOCIAL_OUTPATIENT : 1
DENIED_ANHEDONIA : 1
NOT_HAD : 1
BACK_IN : 1
VETERAN_SSN : 1
READY_YET : 1
IS_USING : 1
TO_IMMUNIZATION : 1
CHART_AND : 1
PRAVASTATIN_NTIHYPERTENSIVE : 1
WHAT_QUESTIONS : 1
YESTER_FEEL : 1
CORRECT_THE : 1
READING_THE : 1
BLE_PAIN : 1
AT_PM : 1
TO_CONTROL : 1
NOT_ALLERGIC : 1
WHO_IS : 1
THE_SOFT : 1
SSN_NOTE : 1
INCLUDED_IF : 1
PC_OUTPT : 1
INCREASED_INTAKE : 1
ALTERATION_IN : 1
CENTER_NURSING : 1
INJURY_DISC : 1
NONVA_MED : 1
OR_MUSCLE : 1
RECORD_TROPONIN : 1
MEALS_ADMISSION : 1
IDENTIFIED_PROBLEM : 2
AND_NOTE : 1
YELLOW_CARDIO : 1
SIGNED_PATIENT : 1
WITH_NONANTALGIC : 1
TO_APPT : 1
NOT_TX : 1
TIME_TIME : 1
FILLING_TIME : 1
SPENT_THIS : 1
MG_SIG : 1
HUFANA_NEEDED : 1
PATIENTS_AGE : 1
TIME_OUT : 1
GEM_CLINIC : 1
NOTED_NPC : 1
MUSCLE_HERNIA : 1
WOULD_YOUR : 1
ADDENDUM_THE : 1
COUNSELING_APPROPRIATENESS : 1
HE_NOT : 1
PHONE_PERTINENT : 1
THERAPY_PSYCHOLOGY : 1
SYSTEM_DO : 1
WHAT_DO : 1
PACEMAKER_MOBILITY : 1
REGULAR_AND : 1
FOR_OR : 2
FOBT_TEST : 1
ADD_CONT : 1
AND_SIDE : 1
AND_GLYBURIDE : 1
MEDICATION_CPRS : 1
MADE_HOUSE : 1
NO_SIGN : 1
ABOUT_CARING : 1
EFFECTS_DROPS : 1
THOUGHT_MAY : 1
RESPONSE_OTHER : 1
CONTAINING_DID : 1
SEQUENTIAL_COMPRESSION : 1
UNDERSTANDING_RANGING : 1
PATIENT_POSITION : 1
YOU_BE : 1
GIRLFRIEND_HE : 1
BY_ANY : 1
OR_OR : 1
POINT_STILL : 1
PMH_RHEUMATOID : 1
DIRECTION_PENDING : 1
AS_NO : 1
DISTRESS_NO : 1
VENTRICULAR_MILLI : 1
PHYSICAL_COGNITIVE : 1
PLANS_DELIRIUM : 1
BRAND_OR : 1
APPLY_AMOUNT : 1
RE_ALLERGY : 1
PLEASE_ONE : 1
APPARENT_RX : 1
AS_IT : 1
ON_HIS : 1
FOR_YOURSELF : 1
INDICATES_ALLERGIC : 1
LUNGS_CTAB : 1
SURGERY_AGREE : 1
RISKS_CONTINUING : 1
IN_RIGHT : 1
HOUSE_NO : 1
SIGNS_RESPIRATORY : 1
IDENTIFIES_THE : 1
THERAPY_NEVER : 1
LEFT_ARM : 1
LEFT_WRIST : 1
CONTRACT_SIGNED : 1
MEDICATION_IN : 1
HE_FELL : 1
LEGS_SUBJECTIVE : 1
SPECIFY_AT : 1
INJECT_PLEASE : 1
AND_OF : 2
FROM_SPECIALTY : 1
TRIGGER_ACQUIRED : 1
INDICATES_NOT : 1
TOTAL_SHIFT : 1
GRAPEFRUIT_FOR : 1
PAIN_EVERY : 1
PRODUCTS_SUPPLEMENTS : 1
PROCEDURE_VALVE : 1
BUPROPION_FOR : 1
HISTORY_PATIENT : 1
THAT_HAS : 1
WHAT_MISSES : 1
DOING_ACTIVITY : 1
APPOINTMENTS_IMPORTED : 1
WITH_IN : 1
THE_CREAM : 1
THIS_PATTERN : 1
GRANDE_DJD : 1
LUMP_BUMP : 1
GIVEN_IN : 1
IMMUNIZATION_RECORD : 1
SKIN_DOING : 1
THE_CURRENT : 1
IF_MG : 1
AGE_TREATMENT : 1
VAMC_ON : 1
NONDIABETIC_MALE : 1
IDENTIFIES_LOCATION : 1
LAST_YEAR : 1
CLEANING_VETERAN : 1
CONFERENCE_PATIENT : 1
NONVA_MG : 1
OUTPATIENT_INCLUDING : 2
TUES_THUR : 1
DID_YOU : 2
APPLY_MODERATE : 1
EXPLAIN_LIST : 1
WITH_GIRLFRIEND : 1
FORECLOSED_YET : 1
RESPIRATION_BLOOD : 1
UX_PAINFUL : 1
TO_MAKE : 3
CLEAR_BATHROOM : 1
CONTACT_ME : 1
TO_CASA : 1
REGIONAL_TISSUES : 1
PATIENT_TOLD : 1
HAS_COMPLAINT : 2
TEST_GIVEN : 1
CONTACT_AGAIN : 1
PURPOSES_INSULIN : 1
PLS_INFLUENZA : 1
EKG_EKG : 1
PELVIS_IMMUNIZATION : 1
ML_MG : 1
AND_THEREFORE : 1
YOU_BEEN : 1
SC_OF : 1
RESULTS_WILL : 1
DATE_MEASUREMENT : 1
MAKE_CONTACT : 1
ADDENDUM_LEARNER : 1
HE_MORE : 1
THUR_SAT : 1
NO_NEAR : 1
IS_ON : 1
PHYSICIAN_HOW : 1
YOU_BOTHERED : 1
WORK_NOTE : 2
CARE_VENDOR : 1
CARDIOLOGY_AWAY : 1
HUFANA_IF : 1
NEUROLOGICAL_NEUROLOGICAL : 1
TO_LEARNING : 1
MAY_BE : 1
HCTZ_CONT : 1
AND_DURING : 1
BY_OFFICE : 1
EXPIRATION_DATE : 1
ARTHRITIS_DE : 1
DECREASED_THE : 1
FEMALE_ADDITIONAL : 1
EXAM_PRACTITIONER : 1
ADEQUATE_II : 1
FLAT_NO : 1
INR_IS : 1
SIG_ONEHALF : 1
PAST_TO : 1
MG_UNTIL : 1
NUTRITION_PART : 1
SUSPENDED_ON : 1
LADDER_IN : 1
OF_BACK : 1
ACTIVE_OUTPATIENT : 4
PATTERN_OF : 1
COGNITIVE_THIS : 1
NO_RESTLESS : 1
NUC_FOR : 1
HEADACHE_MUSCLE : 1
UNITS_HYPERCHO : 1
YOUR_GOAL : 1
ANY_CHEST : 1
NO_RESTRICTIONS : 1
RECORD_SHEET : 1
AND_ENJOUYS : 1
PROVIDER_CHART : 1
OR_NUMBER : 1
ED_DOCUMENT : 2
CALLER_MEDS : 1
LEARNING_YES : 1
COUNSELING_CNSL : 1
FOR_WHEN : 1
RELIGIOUS_NEEDS : 1
ON_RECENT : 1
ALCOHOL_DID : 1
ABOUT_WEEK : 1
READING_MEDICATIONS : 1
OR_THAT : 1
URGENT_SPECIAL : 1
HE_FEELING : 1
FORECLOSED_ON : 1
THEY_TREATED : 1
PLEASE_OF : 1
RECONCILIATION_FILLING : 1
ORIGIN_AND : 1
SENSITIVE_PATIENT : 1
DEPRESSION_ALSO : 1
TOLERATED_AT : 1
CARDIO_BATHROOM : 1
THIS_DOCUMENT : 2
HEMORRHOIDS_CAP : 1
ONEHALF_MON : 1
GIVEN_PHYSICIAN : 1
APPOINTMENT_DUE : 1
DOCTOR_NOW : 1
WEEK_AGO : 1
MEDICATION_KCPLASTIC : 1
OPT_ISSUED : 1
CENTER_OR : 1
ARE_IF : 2
OUTPATIENT_PRESCRIPTION : 1
PARTICIPANT_AVOID : 1
TO_EGGS : 1
OR_ATTENDING : 1
VA_INPATIENT : 1
ADD_OS : 1
PLEASE_PAGE : 1
DEC_MEDICATION : 1
EDEMA_OF : 1
PHYSICIAN_SEE : 1
FORMED_FLARE : 1
MEDICATIONS_USED : 1
EVERY_ACTIVE : 1
PT_INTERVIEWS : 1
ON_DRIVING : 1
IMED_DO : 1
MORNING_NO : 1
ADDRESS_WITH : 1
NEEDED_RESTLESS : 1
TO_AS : 1
PATIENT_UNDERSTANDING : 1
DELTOID_INDICATES : 1
REASON_VISIT : 1
COUNSELING_APPOINTED : 1
AGREE_INFO : 1
OF_BANKING : 1
ADMITTED_THE : 1
LIMITED_TRANSPORTATION : 1
PT_EATING : 1
PT_ADVISED : 1
NEEDS_HAVE : 1
CONTAINING_ALCOHOL : 2
PNT_LIMITED : 1
ACTIVE_MEDICATION : 1
SOME_PLEASE : 1
GUARD_LIGHT : 1
HAS_HAD : 3
ARE_INFLUENZA : 1
GLUCOSE_DIABETES : 1
YOUR_PRESSURE : 1
REGULAR_DENIES : 1
HAS_DX : 1
BY_PMD : 1
WAS_VITAL : 1
ECHO_DONE : 1
WHAT_HE : 1
AND_NUMBNESS : 1
WITH_APPROVAL : 1
VETERAN_DELIRIUM : 1
CHEST_PATIENT : 1
ASSESSMENT_NOT : 1
LIST_YOUR : 1
ON_THE : 3
BEING_USED : 1
ARE_INCLUDED : 1
NEEDS_DENTAL : 1
FAMILY_BACKGROUND : 1
SALTY_DOES : 1
ONEHALF_TABLETS : 1
CTAB_MAY : 1
BEFORE_BREAKFAST : 1
STATES_HELPS : 1
CARDIAC_ENZYMES : 1
CLIENT_VOICED : 1
RECOMMENDATION_URGENT : 1
LEFT_UX : 1
REVIEWED_RECONCILED : 1
COMPLAINTS_CURRENT : 1
VISUAL_PT : 1
OF_THE : 5
CENTER_ON : 1
BACK_IS : 1
BELIEFS_RELIGIOUS : 1
TRIGGER_FINGER : 1
EDEMA_THE : 1
PT_THAT : 1
CARE_NEBULIZER : 1
WEST_BEACH : 1
ADMITTED_CLC : 1
IS_ASSIGNED : 1
APPLY_TO : 1
VET_USING : 1
DERM_VA : 1
AC_CELL : 1
REPORTED_HE : 1
BOX_MONITOR : 1
SHELLY_REPORTED : 1
LISTED_CURRENTLY : 1
OFF_FOR : 1
LIKE_COME : 1
FOR_ASSESSMENT : 1
BEEN_FORECLOSED : 1
VETERAN_AT : 1
PLANS_LIMITED : 1
OF_FUNCTIONING : 1
PT_INITIALLY : 1
VOICED_RANGING : 1
HAS_NOT : 2
FOR_SCHEDULED : 1
HE_DRINKING : 1
OR_BRAND : 1
DYSARTHRIA_AND : 1
ALERT_EFFECTS : 1
HAS_CHIEF : 2
BMI_LUNGS : 1
IER_THIS : 1
PE_REFER : 1
CURRENTLY_INPATIENT : 1
STATES_HE : 1
EXAM_PERFORMING : 1
WAS_TO : 3
WITHIN_REGIONAL : 1
ADD_HER : 1
LADDER_UARY : 1
ALSO_APPROVAL : 1
TAKING_THE : 1
CARDIOVASCULAR_PATIENT : 1
ICDCM_MR : 1
MEDICATIONS_AND : 1
PERFORMING_OR : 1
RELATIONSHIP_DISCUSSED : 1
IF_FEEL : 1
NOT_LOST : 1
ANHEDONIA_PMH : 1
IN_GEM : 1
ENJOUYS_SERMONS : 1
CERVICAL_DISC : 1
TEAM_BLOODY : 1
SO_YOURE : 1
BY_AT : 1
BY_SYSTEM : 2
PING_WITH : 1
NEED_INCREASED : 1
RE_REACTION : 1
USES_NEBULIZER : 1
WITH_HIS : 1
CONSTANT_MANAGED : 1
YOUR_MEDICAL : 1
OF_INDIVIDUAL : 1
WI_NOV : 1
VISIT_DENIES : 1
BB_REFFER : 1
EGGS_KEEP : 1
TAKING_PAIN : 1
ERROR_AT : 1
THE_DERM : 1
ONE_AGO : 1
PSYCHOLOGYGENERAL_NOTE : 1
EXPLAIN_FOR : 1
OLEMIA_BLOOD : 1
PER_CONTRACT : 1
THE_MIDDLE : 1
ATTEMPTED_MAKE : 1
MONITOR_INTAKE : 1
NO_ARE : 1
AT_CALL : 1
PT_GETTING : 1
PETS_POODLES : 1
TEMP_LAB : 1
IN_SUPERVISOR : 1
LOST_LAND : 1
EKG_AND : 1
WITH_FASTING : 1
OF_MEDICATION : 1
MONTHS_THEY : 1
USING_THE : 1
VOICED_CURRENT : 1
WILL_CONTINUE : 1
OFFICE_NO : 1
BEARING_AGE : 1
PENDING_BREATH : 1
INGROWING_LEFT : 1
LEARNING_IDENTIFIED : 1
ADEQUATE_PART : 1
DE_PNT : 1
INJECT_ONE : 1
TEMPERATURE_JR : 1
ANY_EFFECT : 1
ORAL_INTAKE : 1
INTAKE_AZITHROMYCIN : 1
OUTPATIENT_RECONCILIATION : 1
VENDOR_SS : 1
APPROVAL_CARDIOLOGY : 1
THE_FOLLOWING : 2
DID_HAVE : 2
VA_WILL : 1
NOTE_CONSIDERING : 1
EDUCATION_SPENT : 1
BMI_ACTUAL : 1
PRESENT_ASSISTED : 1
FREE_NUMBNESS : 1
INFLUENZA_COMMENTS : 1
PATIENT_INTO : 1
PHYSICAL_EMOTIONAL : 1
AT_VET : 1
CARE_NOTE : 2
SAT_TAKE : 1
CLIENT_UNDERSTANDING : 1
BOWEL_OR : 1
SIGNS_AT : 1
ACTIVE_LANTANA : 1
IEST_OBJECTIVE : 1
TABLETS_WED : 1
HIM_DISCUSS : 1
PH_ASSOCIATED : 1
EVERY_MEDICATIONS : 1
HEALTH_RISKS : 1
YEAR_HEART : 1
CATEGORY_EASY : 1
WITH_SPENDING : 1
COMPLAINTS_WAS : 1
PSYCHOLOGY_SOBRIETY : 1
COMBIN_PFSHX : 1
MED_NORMAL : 1
IS_CONSTANT : 1
METALLIC_DEBRIS : 1
CERVICAL_PATIENT : 1
FOR_CALL : 1
LEFT_SIMVASTATIN : 1
DIABETES_TEST : 1
PROV_HOOVER : 1
ANY_HIS : 1
DISPOSABLE_POSTMYDRIATIC : 1
ASSIST_LIGHT : 1
PCP_MD : 1
EXTREMITY_BILATERALLY : 1
NORMAL_NEED : 1
TO_HX : 1
NO_CHANGES : 1
NOV_NPH : 1
WITH_GAIT : 1
SCHOOL_ADMISSION : 1
IMMUNIZATION_SO : 1
RANGING_PULSES : 1
ON_BUPROPION : 1
WITHIN_HOURS : 1
SPEECH_UPPER : 1
RESPIRATION_YOUR : 1
DRINK_ALCOHOL : 1
IS_GOAL : 1
OR_RIC : 1
PETS_FOR : 1
LETTING_SIT : 1
AND_BNP : 1
IN_ORI : 1
EXTREMITY_EQUAL : 1
PCIOL_CENTERED : 1
INFORMED_MAKE : 1
FOLLOWING_REASON : 1
PATIENT_CAME : 1
SURGERY_HISTORY : 1
THERAPEUTIC_THIS : 1
CATEGORY_EDUCATION : 1
TO_AREA : 1
CENTER_FT : 1
ALL_MORNING : 1
IS_PLEASED : 1
YOU_MAY : 1
CLEAR_USE : 1
HISTORY_STARTING : 1
TO_PAGE : 1
PHYSICIAN_EVIEW : 1
OFF_RX : 1
PATIENT_REACTIONS : 1
CELL_FLARE : 1
NEGATIVE_FOR : 1
RIGHT_RWAVES : 1
EDUCATION_EASY : 1
AGO_HAS : 1
IF_SIMVASTATIN : 1
NO_OTHER : 1
VENDOR_NAME : 1
BEEN_ON : 2
WILL_PREOP : 1
YOU_RELIEF : 1
FARGO_ON : 1
WILL_REPEAT : 1
WOULD_FAMILY : 1
MEDICATIONS_PRODUCTS : 1
OTHER_LISTED : 1
RECORD_THAT : 1
NOV_REG : 1
OTHER_STARTING : 1
NO_NVI : 1
MYCOTIC_TIMES : 1
GIRLFRIEND_ATTEMPTED : 1
INTO_BED : 1
FEB_CALL : 1
NAD_NONCACHECTIC : 1
ORDERED_EKG : 1
TOP_APPLY : 1
OF_SPENDING : 1
FOR_ST : 1
WHEN_PATIENT : 2
YOU_THE : 1
CLINICAL_INFORMATION : 1
ADD_OD : 1
EYE_EXAM : 1
HME_VENDOR : 1
NORVASC_HCTZ : 1
VA_CENTER : 1
SHELLY_THE : 1
IS_OLD : 2
SEVERAL_MONTHS : 1
IN_PAIN : 2
DTN_INFORMATION : 1
THIS_OF : 1
CLINIC_MEDICATIONS : 1
DUONEB_HOUR : 1
YOU_DRINK : 1
SMOKING_NONDIABETIC : 1
WAS_AND : 1
PROCEDURE_SUN : 1
IN_VACCINE : 1
CURRENTLY_USING : 1
THE_PRESSURE : 1
LISINOPRIL_REFFER : 1
EVERY_AVOID : 1
NORMAL_PHYSICIAN : 2
LEVEL_FUNCTIONING : 1
VISIT_SPECIFY : 1
KCPLASTIC_UNITS : 1
USE_ILLICIT : 1
MED_ST : 1
HIM_SON : 1
TO_IDENTIFIED : 1
MANAGED_BY : 1
NAME_RHEUMATOID : 1
APPOINTMENT_DM : 1
WHILE_TAKING : 1
NATIONAL_PE : 1
HAS_DISCONNECTED : 1
AGE_CORONARY : 1
BEEN_BY : 1
TO_AGREE : 1
FOR_VETERAN : 1
MMR_FOR : 1
AT_TIME : 4
HAD_VETERAN : 1
APPOINTMENT_EYE : 1
DAILY_MEDICATIONS : 1
NEUROLOGICAL_PULSES : 1
WORSE_AND : 1
PNT_HAS : 1
RETURN_ED : 1
EVERY_SPENDING : 1
THE_PROCEDURE : 1
SUPPLIES_MONTANA : 1
ACHING_MANAGED : 1
AT_MEDICAL : 1
OF_CONTINUING : 1
OF_ORGANIC : 1
STATUS_OP : 1
PATIENT_LB : 1
IMEDCONSENT_DOCUMENT : 1
NPH_REG : 1
PER_ORDER : 1
MEDICATION_PT : 1
NO_VITAL : 1
YES_NO : 1
SYSTEM_AREA : 1
AND_INFORMATION : 1
ACTIVITIES_OF : 1
PHYSICAL_THERAPY : 1
PHONE_LISTED : 1
LESION_SURGERY : 1
MUSCLE_THERAPEUTIC : 1
WILL_TO : 1
WITH_HAS : 2
SPENDING_IN : 1
THIS_WAS : 2
GO_AHEAD : 1
TRIES_TO : 1
PSYCHOLOGYGENERAL_CONSIDERING : 1
DYSARTHRIA_DYSPHAGIA : 1
HOOVER_ADDRESS : 1
FOR_INCREASED : 1
HEELS_AS : 1
THESE_THINGS : 1
PIOGLITAZONE_MG : 1
SHE_ADVISED : 1
AS_WNL : 1
HIS_WRIST : 1
PATIENTS_CURRENT : 1
PROVIDERS_BILATERALLY : 1
FOBT_KIT : 1
AT_SYSTEM : 1
BLOOD_EXP : 1
YOURSELF_YOU : 1
PROVIDE_WITH : 1
WRIST_IS : 1
SUBCUTANEOUSLY_BEFORE : 1
MAY_AUG : 1
MULTIVITAMIN_TAB : 1
FEELING_HOPELESS : 1
MOBILITY_NO : 1
NO_NUMBER : 2
MR_IS : 1
WE_REPEAT : 1
CALL_RIGHT : 1
VET_IS : 1
RIGHT_PT : 1
SIMVASTATIN_TAB : 1
TINA_ADDRESS : 1
SMOKER_SMOKING : 1
IMED_INCISON : 1
BUMP_TEMP : 1
PAIN_PAST : 1
SOCIAL_PSYCHOLOGY : 1
DM_EXAM : 1
REGARDING_BASED : 1
THE_RECORD : 1
RECORD_YES : 1
FOR_SEVERAL : 1
TABLETS_MON : 1
COGNITIVE_ASSESSMENT : 1
TAB_NONVA : 1
TEMPERATURE_MEDICATIONS : 1
OUTBURSTS_WHEN : 1
NARCOTIC_HEALTH : 1
EVERY_REDUCE : 1
ALLERGY_LESCOL : 1
OF_SUPPORTIVE : 1
REESTABLISH_IN : 1
YOURE_READY : 1
VETERAN_NOT : 1
OF_IS : 1
HERBAL_OR : 1
FEELS_THAT : 1
AND_VETERAN : 1
HAD_DONE : 1
LEFT_THIS : 1
REMOVED_DENTURES : 1
WILL_STOP : 1
BACKGROUND_OR : 1
ON_GENTLE : 1
THE_ULCER : 1
SPOT_HIS : 1
NUMBER_HAS : 1
VALUE_YOUR : 1
VETERAN_PMH : 1
MANAGED_PMD : 1
WORK_ON : 1
POINT_HE : 1
FROM_VISIT : 1
TO_VERBAL : 1
LEVEL_METHOCARBAMOL : 1
PAPILLOMAVIRUS_GENDER : 1
RECENT_VITAL : 1
IF_NEEDED : 1
TOBACCO_NEVER : 1
SUPPLEMENTS_THAT : 1
SHE_WITH : 1
LIFTING_LEGS : 1
TO_DR : 1
LEGS_WITH : 1
PROBLEM_FROM : 1
NUMBNESS_TINGLING : 1
DENY_ALCOHOL : 1
ACCESSED_IN : 1
HIM_HOUSE : 1
WENT_TO : 1
NURSE_EXT : 1
FIELD_REGARDING : 1
GLUCOSE_RANGE : 1
PAIN_POTENTIAL : 1
PATIENT_WAS : 1
NOTE_VET : 1
PAGE_NURSE : 1
DISEASE_NO : 1
COMPRESSION_USED : 1
AWAY_ON : 1
TUES_AND : 1
SUICIDAL_HOMICIDAL : 1
AND_IS : 1
WAS_BUSY : 1
AS_DIRECTED : 1
DRINKING_ALCOHOL : 1
AND_WORTHLESS : 1
CAPSULE_PRAVASTATIN : 1
RIGHT_PATIENT : 1
BAPTIST_ON : 1
HAS_PAST : 1
NOVO_UNITS : 1
PAIN_AGREE : 1
TREATMENT_TIME : 1
SYSTEM_URGENT : 1
PRACTITIONER_OWENS : 1
ASKED_ADD : 1
HER_CONVERSATION : 1
PATIENT_HOMELESS : 1
THIS_IS : 1
PATIENT_CELL : 1
TO_INGEST : 1
IN_SOCIAL : 1
TO_CARE : 2
MEDICAL_RECORD : 2
BUT_WHEN : 1
HE_ROGRESSIVE : 1
SOME_WILL : 1
FROM_RECORD : 1
OF_NONE : 1
MALE_BY : 1
OTHER_MYCOTIC : 1
RECONCILIATION_NOTE : 1
HE_THE : 1
BRIEF_HISTORY : 1
METER_HOURS : 1
AND_INFORMED : 1
DELIRIUM_ASSIST : 1
IF_RESULTS : 1
CNSL_COUNSELING : 1
LISTED_VETERAN : 1
PROV_TINA : 1
HOURS_OF : 1
OUTPATIENT_MEDICATIONS : 5
FROM_TO : 1
APPLICATION_APPLY : 1
THE_HISTORY : 1
PATTERN_SPENDING : 1
NOT_SALT : 1
TX_WELL : 1
ALLERGY_REACTION : 1
AT_FOR : 2
TO_YEARS : 1
RANGE_THIS : 1
VAMC_DRIVING : 1
WILL_COME : 1
SYSTEM_RECOMMENDATION : 1
EXPIRATION_REFIL : 1
APPROPRIATENESS_BASED : 1
ASSOCIATED_DECREASED : 1
IS_LESS : 1
AS_TRANSFER : 1
PATIENT_THE : 1
PHYSICAL_EXPLAIN : 1
HAS_TRANSPORTATION : 1
AND_PLEASE : 1
AT_YOUR : 1
TIME_TOES : 1
NO_URGENCY : 1
DELIRIUM_HE : 1
WITH_PROG : 1
VALVE_HAS : 1
INSULIN_NPH : 1
WORST_WILL : 1
THAT_THE : 3
SKIN_SAYS : 1
VETERAN_HE : 1
COLOR_HE : 1
TAB_TAKE : 1
WORTHLESS_DENIED : 1
ASSIGNED_TO : 1
ONE_TABLET : 1
VERBAL_LEGEND : 1
FELL_OFF : 1
WEIGHT_BEARING : 2
PATIENT_FOR : 2
BEEN_FOR : 1
GET_HER : 1
BATHROOM_ENZYMES : 1
CONFIRMED_PATIENT : 2
NEED_APPT : 1
PATIENT_IER : 1
CONTINUING_THIS : 1
DY_HYTHMIA : 1
ASSESSMENT_DOING : 1
VISIT_TO : 1
CONFIRMED_WITH : 2
THE_LOCATION : 1
INSULIN_UNITS : 1
RRR_LAB : 1
VISIT_ANY : 1
NO_IN : 1
LEGS_ICDCM : 2
OR_MILK : 1
LEVEL_OF : 1
AT_THE : 2
AREA_PATIENT : 1
NOT_SEEN : 1
EDUCATION_TIME : 1
ROGRESSIVE_DYSARTHRIA : 1
DISC_DE : 1
DISEASE_STATE : 1
MINS_TO : 1
COMMENTS_TOLERATED : 1
SIGNS_TOLERATED : 1
UARY_ABOUT : 1
ONE_OF : 1
NEURO_SENSATION : 1
OF_SINCE : 1
DRINKS_ALCOHOL : 1
NO_SUICIDAL : 1
PO_DAILY : 1
ML_ACTIVITY : 1
PE_PLEASE : 1
EVERY_TO : 1
OBSERVED_PHYSICAL : 1
INTAKE_AND : 1
FROM_COMPUTER : 1
SIT_FOR : 1
RETOOK_AFTER : 1
CONTROL_TREATMENTS : 1
IN_IS : 1
TREATMEN_CORRECT : 1
PAIN_MEDICATIONS : 1
PATIENT_VOICED : 1
WILL_CALL : 1
OLD_SMOKING : 1
DOCTOR_HE : 1
BONE_PAIN : 1
AT_IEST : 1
WORKTEETH_AND : 1
OF_EXPLAINED : 1
NAME_SS : 1
THE_VALUE : 1
FRI_TO : 1
MAIL_INFLUENZA : 1
HE_NOW : 1
ANY_WEIGHT : 1
NOT_WHILE : 1
TO_AHEAD : 1
HELPS_TRIGGER : 1
AVOID_SALTY : 1
PATIENT_THIS : 1
IN_PROG : 1
INCLUDED_NO : 1
VPA_LEVEL : 1
IDENTIFIED_SEQUENTIAL : 1
AS_IMPORTED : 1
APPT_WITH : 2
CARE_SSN : 1
DRIVING_AND : 1
USE_SHAKER : 1
DENIES_BOWEL : 1
PATIENT_HT : 1
HOURS_APPOINTMENT : 1
AREA_WEST : 1
THAT_AND : 1
BY_HP : 1
LEAST_IN : 1
CURRENT_SKIN : 1
DECREASED_ROM : 1
BILATERALLY_MOBILITY : 1
DME_RESTLESS : 1
WAS_FOR : 1
WITH_ANTACIDS : 1
PHYSICIAN_WAS : 1
MAKE_APPT : 1
TO_REESTABLISH : 2
AUDITC_HOW : 1
IF_REASON : 1
RHEUMATOID_SPECIAL : 1
GRAPEFRUIT_JUICE : 1
EXPLAINED_PATIENT : 1
CALL_PC : 1
LEFT_ALCOHOL : 1
EXPLAINED_TO : 1
SHE_THOUGHT : 1
TO_PELVIS : 1
ACQUIRED_NO : 1
PATIENT_UNDERSTANDS : 1
RELIGIOUS_HAVE : 1
OUT_MEDICAL : 1
DID_THE : 1
ACHING_THROBBING : 1
WORK_MINUTES : 1
NURSING_UNDERSTANDS : 1
INFORMATION_AND : 1
BEEN_CONSUMING : 1
ALCOHOL_IN : 1
INSTRUCTED_THAT : 1
REDUCE_STOMACH : 1
SUPPLIES_VA : 1
SIGN_TRAUMA : 1
YRS_PITTSBURGH : 1
BATHROOM_CARDIAC : 1
NORMAL_CAREFULLY : 1
VETERAN_IS : 1
QUESTIONS_DO : 1
LEFT_PAINFUL : 1
RELIEF_FROM : 1
BNP_ACTIVITY : 1
THIS_HE : 1
HE_HIS : 1
GUARD_ASSIST : 1
NOT_THE : 1
TO_WAS : 1
MONOFILAMENT_INCONTINENCE : 1
PAIN_OR : 1
DENIES_CHEST : 1
RATION_HAS : 1
THE_LESION : 1
DONE_SHOWN : 1
ADMISSION_ADEQUATE : 1
CAME_FOR : 1
FT_ON : 1
MEDICATIONS_WEIGHT : 1
INITIALLY_SYMPTOMS : 1
HPV_GENDER : 1
OFF_LADDER : 1
INDEPENDENT_USE : 1
LEAVE_PAGE : 1
SEE_IER : 1
KG_CORRECT : 1
IDENTIFIED_YES : 1
MINUTES_SUPPORTIVE : 1
DRAWN_TELE : 1
TEMPLATE_APPROVED : 1
INTERVIEWS_THE : 1
OR_HE : 1
SYMPTOMS_OF : 1
ARTHRITIS_RN : 1
FOR_YRS : 1
LIST_COMPUTER : 1
OF_NO : 1
ALSO_SC : 1
YOU_ARE : 1
TEMP_LB : 1
AVIVA_METER : 1
THE_DISCUSSED : 1
TO_UTILIZED : 1
LIFTING_POSTOPERATIVE : 2
ACHING_CONSTANT : 1
OF_NUMBNESS : 1
NUMBNESS_INFORMED : 1
ON_WAS : 1
MED_FOR : 1
DELIRIUM_WAS : 2
CONTACT_ASSIST : 1
JR_MEDICATIONS : 1
PATIENT_BED : 1
STATED_THE : 1
LEFT_IF : 1
CHANGES_MEDICATIONS : 1
MINNEAP_NEEDED : 1
AND_PAIN : 1
BASED_ON : 1
PSYCHOLOGY_NEVER : 1
FOR_METER : 1
NO_SIGNIFICANT : 1
TYPE_CLINICAL : 1
MEDICATIONS_PER : 1
ME_TO : 1
MEASUREMENT_QUALIFIERS : 1
STATES_IS : 1
SOCIAL_NOTE : 2
IS_HIM : 1
WORK_GENTLE : 1
PATIENT_MAILING : 1
USES_AS : 1
TEMP_TAKEN : 1
PHONE_UNITPOD : 1
CAPILLARY_FILLING : 1
IMMUNIZATION_PRESCRIBED : 1
THAT_AT : 1
NURSING_COUNTER : 1
IER_AM : 1
SOCKS_IOP : 1
OUTPUT_ACTIVITY : 1
ENTIRE_AMT : 1
CONVERSATION_HAS : 2
PRIVATE_CARE : 1
HAVE_HEADACHE : 1
WILL_NEED : 1
CALL_STARTED : 1
GEN_NONCACHECTIC : 1
TAB_MOUTH : 1
WAS_HISTORY : 1
NEVER_IS : 1
NEC_PATIENT : 1
AND_BOTH : 1
MEDICATIONS_STATUS : 3
COGNITIVE_PSYCHOSOCIAL : 1
BELOW_IS : 1
FEEL_WORST : 1
ATTENDING_SURGEON : 1
SHAKER_TRIES : 1
SIGN_OF : 1
OR_STOOLS : 1
CURRENT_REGIMEN : 1
IN_COMPLAINTS : 1
II_NO : 1
GLUCOSE_TEST : 1
JUICE_HEART : 1
VISIT_OTHER : 1
STILL_IN : 1
MEDICATION_SURGERY : 1
NOTED_IMMUNIZATION : 1
SPINAL_TAP : 1
NUMBNESS_TO : 1
MEDS_INSULIN : 1
PRESSURE_PREVENTION : 1
CONFRONTATION_VISUAL : 1
NO_IMPROVEMENT : 1
DISEASE_PRACTITIONER : 1
FULLY_BEARING : 1
FOR_ORAL : 1
INFLUENZA_SO : 1
STATES_THOUGHT : 1
CALLER_RESPONSE : 1
TOTALS_PT : 1
HIS_NONVA : 1
YOUR_BLOOD : 1
REACTIONS_SURGEON : 1
ANY_PHYSICAL : 2
WAS_IF : 1
IS_NOT : 2
VPA_ON : 1
HTN_STABLE : 1
OF_BUT : 1
MYCOTIC_BILATERALLY : 1
MADE_OUTPATIENT : 1
ORDERED_DEPRESSED : 1
VOLTS_AUG : 1
TRANSPORTATION_TO : 1
NEC_NAME : 1
OF_DROPS : 1
COMMENT_DULL : 1
SURGERY_UNITS : 1
IT_YESTER : 1
THE_AND : 2
INJECTIONS_REASON : 1
REDDY_REVIEWED : 1
IMEDCONSENT_MINNEAP : 1
FIANCE_THE : 1
CONTAINING_IN : 1
GLYBURIDE_MG : 1
TO_CALLER : 1
IN_ARTHRITIS : 1
WITH_LABS : 1
WHEN_INTO : 1
BEACH_HT : 1
OR_PT : 1
OF_PAIN : 1
ME_GO : 1
ON_BASIS : 1
SOME_PEOPLE : 1
ON_PLEASE : 1
POSITION_YES : 1
INTRAARTICULAR_OF : 1
TIME_SHE : 1
TO_CARDIOVASCULAR : 1
MEDICATION_RECONCILIATION : 4
TO_ON : 2
IMA_PAIN : 1
PLEASE_CONTACT : 1
SHOWN_TO : 1
STILL_FEELS : 1
HE_DYSARTHRIA : 1
RESPIRATORY_DISTRESS : 1
QUESTIONS_YOU : 1
PROVIDE_THE : 1
THROBBING_NUMBING : 1
APPOINTMENTS_AS : 1
TO_GRANDE : 1
CLEANING_PLANS : 1
YOUR_RECORD : 1
NORMAL_SEE : 1
DME_LEGS : 1
WILL_RIGHT : 1
PAIN_NEC : 1
DRINK_IN : 1
HOW_DID : 1
HURTING_AND : 1
IN_ON : 1
UPDATES_WITH : 1
FELODIPINE_DENIES : 1
OR_PAST : 1
LOST_THE : 1
MONTHS_AT : 1
DENTURES_MADE : 1
PT_TX : 1
MONTANA_PMH : 1
TO_CLINIC : 1
REVIEW_ALTERATION : 1
WENT_PRIVATE : 1
PIOGLITAZONE_PO : 1
TO_PCP : 1
TROPONIN_AND : 1
BOWEL_HAS : 1
BEEN_VETERAN : 1
CARE_HME : 1
SHIFT_OUTPUT : 1
PERTINENT_MEDICATION : 1
CALL_TYPE : 1
INITIALLY_MINIMIZED : 1
SENSATION_BY : 1
WIFE_TO : 1
FOR_REVIEW : 1
OR_SUPPLEMENTS : 1
NOTE_NONVA : 1
NO_PAIN : 1
OR_HAS : 2
NO_BRIEF : 1
FROM_THE : 1
CM_ARTHRITIS : 1
HIS_FIANCE : 1
CONTINUE_TO : 1
SUBJECTIVE_LEFT : 1
FOR_DEPRESSION : 1
HEIGHT_IN : 2
USE_BANKING : 1
KG_YOUR : 1
PROBLEMS_VACCINE : 1
TELE_CARDIO : 1
SUBJECTIVE_RANGE : 1
ASA_SIGNS : 1
VA_ISSUED : 2
HAVE_DRINK : 1
LOW_BACK : 1
VA_CLINIC : 1
DUONEB_TOTALS : 1
NEEDS_WORKTEETH : 1
IDENTIFIED_THIS : 1
BREAKFAST_INJECT : 1
AT_AM : 1
TOUCH_LIFTING : 1
ALSO_FEVER : 1
ACTIVE_RECONCILIATION : 1
AND_VALUE : 1
DOCUMENT_THIS : 1
REGULAR_BASIS : 1
RELIEF_PAIN : 1
ASSESSMENT_THIS : 1
REPLACEMENT_INFLUENZA : 1
ED_WITH : 1
PHYSICAL_ON : 1
DURING_ENTIRE : 1
HE_BEEN : 1
SPENT_WITH : 1
HPV_COUGHING : 1
FOR_SIG : 1
NOTE_SIG : 1
OF_IF : 1
PRESENT_THIS : 1
AT_FEB : 1
AFTER_STILL : 1
CALL_SUSPENDED : 1
FIELD_UNABLE : 1
INCONTINENCE_NEGATIVE : 1
INFLUENZA_IMMUNIZATION : 3
FROM_NEEDED : 1
NO_ASSIST : 1
NO_POSTOPERATIVE : 1
PLAN_NONE : 1
QUALITY_PAIN : 1
CONSUMING_MEALS : 1
ATTENDING_PRESENT : 1
AT_AMBULATORY : 1
PERTINENT_CPRS : 1
SUPPORTIVE_THERAPY : 1
TOLD_TO : 1
ACTIVE_RECOMMENDATION : 1
VERBAL_HME : 1
TREATMENT_PROCEDURE : 1
UARY_ONE : 1
PLEASE_CALL : 1
NUMBING_OF : 1
MINIMIZED_OF : 1
HAS_RE : 1
FROM_CATEGORY : 1
YOUR_TESTS : 1
CONT_LISINOPRIL : 1
HISTORY_YOU : 1
THAT_IS : 2
PSYCHOSOCIAL_AMBAMBULATORY : 1
UPDATES_EVERY : 1
NONANTALGIC_GAIT : 1
AMOUNT_TO : 1
LEGEND_VA : 1
FROM_SPINAL : 1
PAIN_SIDE : 1
SIMVASTATIN_PRAVASTATIN : 1
HE_FEELS : 1
IDENTIFICATION_INFORMATION : 1
HIS_LEARNER : 1
NO_RESULTS : 1
AND_ONE : 1
HIP_REPLACEMENT : 1
DERM_MEDICATION : 1
CARDIO_PATIENT : 1
PROCEDURE_AMT : 1
INJURY_CERVICAL : 1
CREAM_APPLY : 2
AGE_DISEASE : 1
TO_THESE : 1
VET_STATES : 1
SIGNED_TO : 1
NOT_DIRECTION : 1
HAS_SPOT : 1
WITH_DECREASED : 1
CONTACT_AT : 1
TIME_WILL : 1
HAD_LEAST : 1
ED_BY : 1
AND_PT : 1
TABLET_MOUTH : 2
NOTE_OUTPATIENT : 1
ANXIETY_ALTERATION : 1
MORE_THE : 1
OUTPATIENT_PRESENTED : 1
NEBULIZER_AS : 1
LIQUID_NITROGEN : 1
HE_HAS : 5
NONV_CENTER : 1
RECORD_PO : 1
OR_CLOTRIMAZOLE : 1
MG_MOUTH : 1
CHEST_PAIN : 2
INTRAOPERATIVELY_NO : 1
PER_SUPERIOR : 1
SUPPLIES_ACTIVE : 1
HE_BACK : 1
NO_LIMITATION : 1
TO_ELLIS : 1
MT_CURRENT : 1
AND_FIANCE : 1
AND_HE : 7
AFTER_SUN : 1
PHONE_WAS : 1
NOT_INGEST : 1
DISCUSSED_WITH : 1
ENTIRE_PROCEDURE : 1
PSYCHOLOGY_OF : 1
NOT_SURGICAL : 1
HOMICIDAL_HE : 1
CAREFULLY_THE : 1
IDEATION_DENY : 1
SEEN_COGNITIVE : 1
RX_EXPIRATION : 1
VENTRICULAR_RWAVES : 1
WALKS_TEMP : 1
THAT_PHYSICIAN : 1
ON_LEFT : 1
HE_WERE : 1
HAS_VETERAN : 1
BASIS_HE : 1
CORRECT_POSITION : 1
CAPSAICIN_CREAM : 1
GET_FROM : 1
VITAL_TOLERATED : 1
POTENTIAL_PHYSICAL : 1
SURGERY_CONFERENCE : 1
BILATERALLY_PACEMAKER : 1
DE_RN : 1
ORDER_GIVEN : 1
MULTIVITAMIN_CAP : 1
NEW_DEFICIENCY : 1
APPOINTMENT_INFORMATION : 1
THAT_OVER : 1
ACTIVITY_HEMORRHOIDS : 1
SPECIFY_STARTING : 1
ELLIS_FOR : 1
PAIN_ACHING : 1
THE_REASON : 1
TABLET_HP : 1
FINGER_FLAT : 1
FOR_TOP : 1
DAILY_ACTIVE : 1
LEAVE_PLEASE : 1
TENDER_THROBBING : 1
DULL_BURNING : 1
EXAMINATION_HUMAN : 2
YET_FOBT : 1
DOCUMENT_MINNEAP : 1
GOAL_LESS : 1
DX_OF : 1
CHEST_NEC : 1
PT_AMBULATES : 1
REPLACEMENT_ICDCM : 1
TO_CLC : 1
PRESENTED_SEVERAL : 1
DRINK_THE : 1
ROOM_APPETITE : 1
APPT_ASSESSMENT : 1
AND_DYSPHAGIA : 1
APPOINTMENT_TO : 1
FL_CURRENT : 1
WAS_SEEN : 1
WITH_LIQUID : 1
PREVENTION_PROTOCOL : 1
ICDCM_SUBJECTIVE : 1
PATIENTS_DELTOID : 1
WORST_BLE : 1
FU_HERE : 1
THIS_TIME : 2
MORE_THAN : 1
AVR_PETS : 1
HIGH_ON : 1
NUMBER_BEEN : 1
BY_OFF : 1
NONVA_LISINOPRIL : 1
TRANSPORTATION_CASA : 1
PHYSICIAN_CAREFULLY : 1
DERM_AUG : 1
BED_WHEEL : 1
NEED_TO : 1
APPROVED_OUTPT : 1
ON_EXERCISES : 1
NOCTURIA_URGENCY : 1
TIMES_NAIL : 1
CONTROL_AND : 1
HER_PLEA : 1
OF_AND : 1
FROM_OPHTHALMOLOGY : 1
CHAIR_PUTTING : 1
NO_OR : 2
RESTLESS_LEGS : 2
FRACTURE_OF : 1
INCOMPLETE_REMOVAL : 1
LIMITED_CONTACT : 1
UNDERSTANDING_FROM : 1
SUBJECTIVE_MR : 1
USE_SCREEN : 1
AND_EDUCATION : 1
NO_NO : 3
AND_AS : 1
FOR_PROS : 1
ING_CLEANING : 1
AUG_LUMP : 1
TO_TIME : 1
HP_WORKER : 1
LAB_LEVEL : 1
INTACT_THAT : 1
PEOPLE_WILL : 1
IN_PROBLEMS : 1
WHEN_YOU : 1
FOOD_DOES : 1
FEB_HOOVER : 1
ASSIST_CONTACT : 1
ACTIVE_SYSTEM : 1
YES_COMPRESSION : 1
CLC_ON : 1
HOPELESS_HELPLESS : 1
COMFORT_POTENTIAL : 1
AIR_APPETITE : 1
INCREASING_AS : 1
OTHER_SPECIFY : 1
HELPS_SOME : 1
WEEKLY_RECORD : 1
METHOCARBAMOL_SOME : 1
IN_MEDICATIONS : 1
TO_PAIN : 1
PT_STATED : 1
LEVEL_ON : 1
ILLNESS_IS : 1
FROM_YOUR : 1
HIS_BACK : 1
PAGE_US : 1
APPROVAL_FROM : 1
APPOINTED_PLA : 1
MUCUS_TYPE : 1
NARCOTIC_CONTRACT : 1
LUMBAR_DJD : 1
PATIENT_TO : 1
PER_RESULTS : 1
INFORMATION_PROVIDE : 1
BOTH_LEGS : 1
BACK_PAIN : 2
INR_NEEDS : 1
LIST_FROM : 1
IS_GETTING : 1
OR_OF : 1
YOU_IN : 1
PCP_POSSIBLE : 1
WEARING_METALLIC : 1
BED_PUSHING : 1
DECREASED_OF : 1
TIME_VA : 1
FROM_MINNEAP : 1
FACILITY_PCP : 1
BAPTIST_REGULAR : 1
DEVICE_INTRAOPERATIVELY : 1
FORMED_CELL : 1
ML_WALKS : 1
VALVE_PATIENT : 1
BRAND_GLUCOSE : 1
IOP_RANGE : 1
THE_INTERVIEWS : 1
CONTACT_GUARD : 1
LIVING_OUTPATIENT : 1
NOTE_VOICED : 1
SITE_THORACIC : 1
INFORMATION_MAIL : 1
NEEDED_REPORTED : 1
ICDCM_NUMBNESS : 1
WHICH_FEEL : 1
SCHEDULED_DUE : 1
DIRECTION_MPS : 1
ARTHRALGIA_QUESTIONS : 1
CABG_AVR : 1
XYZZY_EKG : 2
SON_NO : 1
ADMISSION_INSTRUCTED : 1
SUPPORTIVE_INDIVIDUAL : 1
BUT_STILL : 1
CARDIAC_DRAWN : 1
OF_RESPIRATORY : 1
WITH_AND : 1
BREAKFAST_AND : 1
INCISON_AREA : 1
OCULAR_HISTORY : 1
NONVA_HE : 1
THE_QUALITY : 1
SUPERVISING_CONFIRMED : 1
CONVERSATION_WITH : 2
WE_WILL : 1
AND_MG : 2
SINCE_NUTRITION : 1
THOUGHT_THAT : 1
SCREENING_HUMAN : 2
REFER_THE : 1
TO_BAPTIST : 1
VET_FOR : 1
RANGING_FROM : 1
ANY_HEIGHT : 1
MEDS_UNIT : 1
THE_HE : 1
TEST_IDENTIFIED : 1
PT_WAS : 1
RESULTS_GIVEN : 1
BULBAR_GEN : 1
WITH_THE : 3
NO_INJURY : 1
REPORTED_THE : 1
THORACIC_CRITERION : 1
PM_COMMENTS : 1
COMMENTS_REQUESTS : 1
THIN_FILM : 1
TX_DIRECTION : 1
FASTING_CONFRONTATION : 1
SPINE_HIM : 1
FEEL_WILL : 1
PC_WITH : 1
AND_DISPOSABLE : 1
READING_DISCUSSED : 1
INCISON_PATIENT : 1
GRANDE_VA : 1
NEUROLOGICAL_RIGHT : 2
PRESCRIPTION_VA : 1
TO_SC : 1
NOTED_SKIN : 1
AS_FROM : 2
CLINIC_WITH : 1
CALL_VENTRICULAR : 1
MEDICATIONS_PATIENT : 1
YET_BUT : 1
TEAM_NO : 1
OF_OR : 1
THAT_PREVENTIVE : 1
MONTHS_AGREE : 1
HERE_FROM : 1
POODLES_YRS : 1
NEEDED_USE : 1
PMH_TO : 1
AREA_PALM : 1
OF_IDENTIFIED : 1
NO_FUNCTIONAL : 1
RANGE_DOCUMENT : 1
OR_HOME : 1
PHYSICAL_WEIGHT : 1
SYSTEM_INCISON : 1
IS_YEAR : 2
WORK_CLIENT : 1
TO_SURGICAL : 1
POSTMYDRIATIC_REASON : 1
FLARE_LAB : 1
THE_IMEDCONSENT : 1
CALLER_PT : 1
OS_IMPOTENCE : 1
URGENT_SCREENING : 1
PRESCRIBED_HIS : 1
LAST_BP : 1
INFORMATION_YOUR : 1
AND_TO : 2
STATUS_PRE : 1
CURRENTLY_BRAND : 1
INPATIENT_ORDER : 1
SEQUENTIAL_DEVICE : 1
YOURSELF_WHEN : 1
AMBAMBULATORY_CARE : 1
FULLY_WEIGHT : 1
SPENDING_ENGAGED : 1
THUR_AND : 1
BACK_SOCIAL : 1
MAIL_IMMUNIZATION : 1
PAIN_MEDICATION : 1
NOVO_BID : 1
CURRENT_IS : 1
GENTLE_EXERCISES : 1
IS_TO : 2
ALLERGIC_EGGS : 1
COMPLAINTS_VOICED : 1
OR_HIATAL : 1
CURRENT_INR : 1
MIDDLE_PH : 1
LESCOL_CAPSULE : 1
EASY_READING : 1
CONTACT_ACTIVE : 1
MG_EVERY : 1
JUICE_FOR : 1
PUSHING_WHEEL : 1
TESTS_THE : 1
HPV_FEMALE : 1
TX_PENDING : 1
ONEHALF_TABLET : 2
BUT_FOBT : 1
PHYSICAL_ROOM : 1
HOPELESS_AND : 1
VETERAN_WI : 1
SCD_ASSESSMENT : 1
WITH_ASA : 1
SSN_NURSING : 1
SERMONS_OUTPATIENT : 1
MINUTES_OF : 1
UNITPOD_PERTINENT : 1
THAT_WHAT : 1
ULCER_PREVENTION : 1
PROTOCOL_WAS : 1
FOR_EKG : 1
REFIL_BOX : 1
MONITOR_PRESSURE : 1
NEEDS_ANY : 1
TEMP_LBS : 1
FOR_AVIVA : 1
IN_COUNSELING : 1
AMOUNT_ACTIVE : 1
DISTRESS_FRICTION : 1
OF_TIME : 1
EFFECT_COGNITIVE : 1
INTACT_STATES : 1
THE_MONTHS : 2
FOR_INTERVENTION : 1
THE_MEDICATION : 1
TROPONIN_DDIMER : 1
OUTPATIENT_BEEN : 1
WAS_FU : 1
HAVE_ABOUT : 1
MEDICATIONS_INCLUDING : 2
US_PATIENT : 1
SOB_CP : 1
DR_IF : 1
FIELD_PT : 1
REPRESENTS_WORST : 1
AZITHROMYCIN_DAILY : 1
SADDLE_ANESTHESIA : 1
UNIT_DOSE : 1
OWENS_ANESTHESIA : 1
NO_FUTURE : 1
WT_KG : 1
AND_CLEANING : 1
SPECIAL_EXAMINATION : 2
SUBJECTIVE_IS : 1
DYSPHAGIA_IN : 1
AVOID_JUICE : 1
THE_LEFT : 1
NO_PER : 1
PATIENT_NOT : 4
BACK_FOR : 1
USED_CONTROL : 1
BREATH_SOUNDS : 1
GIVEN_PATIENTS : 1
DISPLAY_FOR : 1
EDEMA_AVENUE : 1
ON_TRANSFER : 1
IF_HE : 1
ON_BELOW : 1
VA_PMH : 1
AMBULATES_TO : 1
TRANSFER_MINNEAP : 1
GONE_BEEN : 1
DELTOID_PATIENT : 1
FOOD_NOT : 1
TO_PHYSICIAN : 1
REACTION_LESCOL : 1
NOTE_WAS : 1
NATIONAL_AVENUE : 1
AND_MADE : 1
CERVICAL_DJD : 1
MD_WPB : 1
LEAST_DRINK : 1
SUBCUTANEOUSLY_BREAKFAST : 1
IN_CM : 3
PEOPLE_ALSO : 1
CALL_APPT : 1
FLARE_RRR : 1
ALCOHOL_SCREEN : 1
TO_HER : 1
HAS_BEEN : 3
AUDITC_MANY : 1
PAIN_TAKEN : 1
NOT_WITH : 1
PAPULE_FEEL : 1
ISSUED_INPATIENT : 1
PT_WITH : 1
THE_EDEMA : 1
CURRENT_DOSE : 1
PAIN_PARTICIPANT : 1
AM_INTAKE : 1
ENZYMES_DRAWN : 1
WILL_STILL : 1
LIMITATION_NEUROLOGICAL : 2
PT_ADD : 1
ASA_VITAL : 1
SOFT_TISSUES : 1
NTIHYPERTENSIVE_PFSHX : 1
UNSPECIFIED_COUNSELING : 2
STATED_THAT : 1
SUBJECTIVE_GLUCOSE : 1
TREATMENTS_EXTENSIVE : 1
OBSERVED_IS : 1
TIME_CALLER : 1
IF_DECREASED : 1
MAKE_AGAIN : 1
MANY_DRINKS : 1
FOR_FROM : 1
ON_IOP : 1
SOCIETY_CRITERION : 1
BARRIERS_LEARNING : 1
SPINAL_BARRIERS : 1
PMHX_NAD : 1
PALM_PENICILLIN : 1
ROUTE_MONITOR : 1
DENIED_HE : 1
ASSIGNED_CALLER : 1
IN_MEMORY : 1
IS_INDEPENDENT : 1
SELECTED_FROM : 2
VERBAL_CARE : 1
INFORMATION_FEMALE : 1
COMPLAINT_NOT : 2
PATIENT_AND : 1
ABOUT_THAT : 1
LABS_CONFRONTATION : 1
FOR_SCHOOL : 1
WAS_GETTING : 1
DEPRESSED_THE : 1
SKIN_COLOR : 1
COMFORT_PAIN : 1
DOING_NORMAL : 1
DX_LOW : 1
TOLD_PAGE : 1
GENDER_ADDITIONAL : 1
ISSUED_OUTPATIENT : 1
BOTH_AND : 1
THE_SERMONS : 1
DAILY_LIVING : 1
PAPILLOMAVIRUS_HPV : 2
OF_FOLLOWING : 1
OF_EDUCATION : 1
NITROGEN_PAPULE : 1
THE_AGE : 1
AMENDS_WITH : 1
NONE_ALERT : 1
EXERCISES_GRADUALLY : 1
PAST_YEARS : 1
STATES_OVER : 1
REFFER_CARDIOVASCULAR : 1
MG_TAB : 2
IT_WAS : 1
IN_THE : 5
BELIEFS_OR : 1
STILL_TO : 1
NOTE_LISINOPRIL : 1
PULSES_PT : 1
SPEECH_LEFT : 1
NONCACHECTIC_NON : 1
APPOINTED_PCP : 1
PROBLEM_UNSPECIFIED : 2
DENIES_ANY : 3
WITH_FAMILY : 1
INJECTION_THE : 1
PAIN_AND : 2
AT_POINT : 1
AVIVA_HOURS : 1
MOUTH_MEDICATIONS : 1
GENDER_AND : 1
LEFT_CLEAR : 1
ANXIETY_IN : 1
PT_MEDS : 1
INJECTIONS_IF : 1
AS_YOU : 1
INTAKE_AFTER : 1
FOR_WANT : 1
RECONCILED_AS : 1
WALKS_OCCASIONALLY : 2
LEG_WITHIN : 1
TIME_WITH : 1
IN_PATIENTS : 1
AT_BEDTIME : 2
BEFORE_AND : 1
SUICIDAL_OR : 1
UNASSISTED_WITH : 1
MALE_IMED : 1
INPATIENT_ADMINISTRATIVE : 1
HOME_OR : 1
PHONE_NUMBER : 1
OF_TESTS : 1
HERNIA_NURSE : 1
IS_REPLACES : 1
MORNING_IN : 1
PUSHING_CHAIR : 1
OF_NOT : 2
AT_BEDSIDE : 1
HIS_IF : 1
BEEN_POTASSIUM : 1
OF_LOW : 1
BLE_PHONE : 1
HIS_DID : 1
NVI_NEAR : 1
PATIENT_IS : 4
OUTPATIENT_INP : 1
DEFICIENCY_IDENTIFIED : 1
WILL_HIS : 1
YEAR_SMOKING : 1
ON_REGULAR : 1
APPOINTMENT_CONFIRMED : 1
NONVA_RESULTS : 1
THERAPY_NOTE : 1
AND_HAS : 1
ROUTE_BOX : 1
CONTINUING_PATTERN : 1
SPECIAL_SCREENING : 2
PATIENT_ATTENDING : 1
MEDICATIONS_MONITOR : 1
TAKING_OVER : 1
PATIENT_REQUESTS : 1
FINGER_ACQUIRED : 1
DISCUSSED_NEED : 1
CHAIR_ON : 1
EYE_FOR : 1
SOBRIETY_YEAR : 1
THE_HAD : 1
PATIENT_NO : 1
SENSATION_MONOFILAMENT : 1
BP_LETTING : 1
REDUCE_ACID : 1
JUL_CONVERSATION : 1
FOR_HISTORY : 1
WAS_PRESENT : 1
PRESENTS_TO : 2
ADVISED_ME : 1
IMA_BLE : 1
PULSES_BOTH : 1
PC_TEAM : 1
ASKED_THAT : 1
FOR_MONTHS : 1
ASSIST_PHYSICAL : 1
INFLUENZA_ADMINISTERED : 1
ED_IN : 1
HEALTH_PATIENT : 1
ADDITIONAL_INFORMATION : 2
RECENT_SIGNS : 1
YEARS_HAS : 1
TOBACCO_ANY : 1
PHYSICIAN_COMBIN : 1
ATTENDING_WAS : 1
THEY_WERE : 1
MONTHS_PAIN : 1
ARM_MEDS : 1
NOCTURIA_NO : 1
AND_SAT : 1
INFORMATION_FROM : 1
IN_COMFORT : 1
VITAL_MEASUREMENT : 1
TO_LEGS : 1
THE_INFORMATION : 1
SOCIAL_WORK : 3
RADIOPHARMACEUTICAL_NUC : 1
FEVER_OR : 1
GIVEN_TO : 3
ASSISTED_THE : 1
IN_DYNAMIC : 1
ADMINISTRATIVE_PHONE : 1
NAME_NO : 1
NURSE_AFTER : 1
AND_WORK : 1
PAST_AT : 1
AND_THE : 3
HE_ANY : 2
LOCATION_REQUIRING : 1
ENGAGED_PROBLEMS : 1
TINGLING_HE : 1
PRIVATE_USES : 1
FORM_HEIGHT : 1
NTIHYPERTENSIVE_COMBIN : 1
CURRENTLY_AT : 1
AND_GIVE : 1
REPLACES_FELODIPINE : 1
COUNSELING_REGARDING : 1
AVENUE_PE : 1
PT_REEVALUATED : 1
SUBJECTIVE_CLEAR : 1
AND_RISKS : 1
AT_DRINK : 1
HE_IS : 1
DECREASED_SENSATION : 1
OCCASIONALLY_EQUAL : 1
HE_GOES : 1
LIKE_TO : 1
THORACIC_SOCIETY : 1
DULL_TENDER : 1
NOT_IDENTIFIED : 1
HE_PMH : 1
UNSPECIFIED_CLONAZEPAM : 1
WAS_IN : 3
EVERY_HERBAL : 1
IMED_SYSTEM : 2
LISTED_INPATIENT : 1
PATIENT_THAT : 3
WORTHLESS_HE : 1
AT_NOT : 1
OTHER_ASSIGNED : 1
GIVE_THE : 1
LUMP_TEMP : 1
AFTER_PROCEDURE : 1
WNL_LAST : 1
OLD_HE : 1
VETERAN_SUPERIOR : 1
SKIN_ASSESSMENT : 1
NO_DATE : 1
GETTING_AND : 1
VACCINE_GIVEN : 1
NOT_TO : 3
TO_AND : 2
ACTIVITY_MULTIVITAMIN : 1
THOUGHT_THE : 1
RECORD_MOUTH : 1
INTAKE_OUTPUT : 1
NURSE_HE : 1
IN_ANY : 1
HE_HAD : 1
PAIN_ACTIVITY : 1
INCONTINENCE_FOR : 1
PT_AT : 1
OCCASIONALLY_BP : 1
RATION_PNT : 1
CM_DE : 1
AVOID_GRAPEFRUIT : 1
CAPSULE_SIMVASTATIN : 1
LUNGS_MAY : 1
HE_TO : 2
GRANDE_LUMBAR : 1
OR_IDEATION : 1
LANTANA_CURRENT : 1
HIS_PAIN : 1
PRIMARY_ANESTHESIA : 1
NOT_YET : 1
ADMINISTRATIVE_NOTE : 2
THIS_VETERAN : 2
EQUAL_PACEMAKER : 1
DOSE_HOUR : 1
TYPE_DTN : 1
REEVALUATED_PRIOR : 1
DUE_TESTS : 1
IMAGES_DATE : 1
POODLES_FOR : 1
ING_AND : 1
GOING_TO : 1
AND_INJECT : 1
INSULIN_NOV : 1
FOR_PC : 1
STABLE_STOP : 1
NO_LIFTING : 1
OF_PLAN : 1
THE_LIST : 1
LIST_IN : 1
BID_HYPERCHO : 1
BARRIERS_TO : 1
OLD_NONDIABETIC : 1
CENTERED_RESPIRATION : 1
NONV_MEDICAL : 1
ASSIST_TOUCH : 1
NEED_PREOP : 1
NON_CARE : 1
PENICILLIN_JUL : 1
PENDING_MPS : 1
FOR_SOME : 1
TIME_WE : 1
TO_STRICTURE : 1
BE_ACCESSED : 1
OPHTHALMOLOGY_SC : 1
PAIN_ARTHRALGIA : 1
RECONCILED_BELOW : 1
ON_WILL : 1
AND_TABLETS : 1
CONFERENCE_IS : 1
OLD_IMAGING : 1
WAS_NEEDED : 1
GAIT_WEARING : 1
DO_HAVE : 1
TO_GET : 1
HOUR_COMMENTS : 1
COMMENTS_INFORMATION : 1
IS_YOUR : 1
MAILING_PURPOSES : 1
BB_LISINOPRIL : 1
INTERVENTION_THIS : 1
NURSING_NOTE : 1
DENTAL_REMOVED : 1
NOV_GLYBURIDE : 1
AT_WHICH : 1
TRAUMA_NO : 1
PRESCRIBED_BY : 1
FORMS_THE : 1
INFORMATION_WITH : 1
AND_PATIENT : 1
PLAN_RECOMMEND : 1
FOR_MINS : 1
DONE_PER : 1
AND_SC : 1
PO_AND : 1
WAS_OBSERVED : 1
WORST_IMA : 1
PAPILLOMAVIRUS_COUGHING : 1
CLOTRIMAZOLE_CREAM : 1
THIS_TREATMENT : 1
IN_UARY : 1
YOUR_VISIT : 1
CURRENT_OF : 1
DOES_NOT : 1
SYMPTOMS_OUTBURSTS : 1
THE_COMMENT : 1
ON_TYPICAL : 1
LEFT_MEDS : 1
WAS_YESTER : 1
BRAND_RIC : 1
CAREFULLY_IDENTIFIES : 1
HX_CAME : 1
VA_OUTPATIENT : 1
NO_REPRESENTS : 1
TREATMEN_CONFIRMED : 1
NEVER_TOBACCO : 1
ON_SOCKS : 1
POSSIBLE_CONTACT : 1
PROG_PMHX : 1
PT_MINIMIZED : 1
HIATAL_HERNIA : 1
EXTENSIVE_ASSIST : 1
SELECTED_CATEGORY : 1
INP_ISSUED : 1
ON_LEAVE : 1
MADE_ACTIVE : 1
MEDICAL_CENTER : 2
NO_OF : 2
EXTENSIVE_ANY : 1
WHICH_TIME : 1
AHEAD_GIVE : 1
OR_FROM : 1
HUMAN_PAPILLOMAVIRUS : 2
OF_MADE : 1
TO_IN : 1
FREQUENCY_NO : 1
PO_OUTPATIENT : 1
GOING_GET : 1
THAT_SHE : 1
OUTPUT_NOTE : 1
INCLUDING_VA : 1
THERAPEUTIC_INTERVENTION : 1
TOP_CREAM : 1
AGREE_TO : 1
HE_MISSES : 1
SOCKS_RANGE : 1
THAT_UPDATES : 1
OF_LADDER : 1
DUE_TO : 2
KCPLASTIC_SURGERY : 1
FROM_LEG : 1
APPETITE_URINE : 1
PROS_HISTORY : 1
EXAM_FOR : 1
OF_MEALS : 1
IN_CLINIC : 1
DISTRESS_CONTINUE : 1
TIME_PLEASE : 1
NO_APPARENT : 1
HEIGHT_CM : 2
IS_FULLY : 1
OF_YOUR : 1
PACEMAKER_NO : 1
ORDERED_DONE : 1
DONE_AND : 1
SOB_EDEMA : 1
NOTE_STATES : 1
MEDICAL_TROPONIN : 1
POTASSIUM_LEVEL : 1
CREAM_THIN : 1
CLALED_NOTIIFED : 1
PAST_AND : 1
WAS_NO : 1
THAT_THAT : 1
MILLI_VOLTS : 1
YOU_WITH : 1
SHIFT_ML : 1
HX_PATIENT : 1
THE_LAND : 1
TOLERATED_TX : 1
REQUESTS_MMR : 1
CORONARY_IS : 1
THE_REQUIRING : 1
HER_WITH : 1
CONFRONTATION_FIELD : 1
NORVASC_ADD : 1
DO_GET : 1
COLOR_APPEARANCE : 1
ALSO_HAVE : 1
LESS_FELODIPINE : 1
RETURN_VERBAL : 1
EXERCISES_INCREASING : 1
SOUNDS_TO : 1
SADDLE_HE : 1
DE_RATION : 1
WITH_DISTRESS : 1
BURNING_TENDER : 1
CALLER_OTHER : 1
SLIGHTLY_TREATMENT : 1
GET_CONVERSATION : 1
PATIENT_MMR : 1
DONE_SOME : 1
ASSESSMENT_EQUIPMENT : 1
PATIENT_FREE : 1
LAND_BEEN : 1
IMPOTENCE_OF : 1
REPRESENTS_IMA : 1
SCHOOL_INSTRUCTED : 1
HAS_ADMITTED : 1
AMT_FORMED : 1
DEVICE_USED : 1
TYPICAL_IS : 1
FASTING_LABS : 1
AND_SHOWN : 1
MUSCULOSKELETAL_BONE : 1
BLOOD_IS : 1
CALLER_AREA : 1
THAT_HURTING : 1
OD_IMPOTENCE : 1
AND_PIOGLITAZONE : 1
RANGE_DECREASED : 1
KIT_TO : 1
PATIENT_DISPOSABLE : 1
ECHO_FOR : 1
VALUE_OF : 1
AND_NOTIIFED : 1
AT_CASA : 1
HERE_FOR : 2
TEST_APPROVED : 1
CM_PAIN : 1
LESS_REPLACES : 1
PM_SB : 1
INTERVIEWS_PT : 1
FUTURE_APPOINTMENTS : 1
MAILING_INSULIN : 1
THE_RELATIONSHIP : 1
HOMICIDAL_IDEATION : 1
WHICH_WE : 1
IF_WERE : 1
NO_WILL : 1
CORRECT_PATIENT : 1
MAKE_WITH : 2
APPEARANCE_YELLOW : 1
ALCOHOL_OR : 1
CHART_REVIEWED : 1
THE_TIME : 1
NOW_LIKE : 1
EQUIPMENT_NEEDED : 1
NORMAL_HEMORRHOIDS : 1
PT_UNABLE : 1
ON_CONTROL : 1
PALM_BEACH : 1
YES_SEQUENTIAL : 1
YES_AT : 1
DO_NOT : 1
DELIRIUM_LIMITED : 1
REASON_CALL : 1
REGIONAL_SOFT : 1
FOR_OTHER : 1
LAST_HEART : 1
INPATIENT_NONV : 1
SCREENING_EXAMINATION : 2
INFORMED_TO : 1
NPC_SKIN : 1
THE_PH : 1
HERE_WENT : 1
VOICED_SKIN : 1
PAST_DX : 1
SON_DME : 1
DOPPLER_THIS : 1
DENIES_SADDLE : 1
OVER_THE : 3
EXP_FEB : 1
TAB_MG : 1
THEREFORE_THE : 1
MONTHS_WERE : 1
CAPSAICIN_APPLY : 1
ASSESSMENT_NORMAL : 1
IS_HERE : 1
PLEASED_WITH : 1
IMMUNIZATION_COMMENTS : 1
PHYSICIAN_GOING : 1
NEAR_OD : 1
PT_AND : 1
OUTPT_NP : 1
PARTICIPANT_EVERY : 1
BEEN_THE : 1
HE_EXCESSIVE : 1
PROCEDURES_DEPRESSED : 1
TIME_ADVISED : 1
OVER_PAST : 2
MON_AND : 1
APPROX_MINS : 1
ON_YET : 1
SIDE_VERBAL : 1
DENTAL_WORKTEETH : 1
BILATERALLY_INGROWING : 1
YET_GIVEN : 1
THE_COUNSELING : 1
PAST_OFTEN : 1
OFTEN_DID : 1
QUALIFIERS_TEMP : 1
MEDICATIONS_AVERAGES : 1
WOULD_LIKE : 1
BEEN_BOTHERED : 1
HE_ANHEDONIA : 1
DECREASED_SLIGHTLY : 1
OFF_OF : 1
SUPERIOR_NOV : 1
COMPLAINTS_PT : 1
EFFECTS_OF : 1
NO_PATIENT : 1
REQUIRING_THE : 1
DISCUSSED_FOR : 1
IS_WITH : 2
AND_OUTPUT : 1
NO_COMPLAINTS : 1
AND_ACCUCHEK : 1
STATUS_AND : 1
TEMP_VPA : 1
POTASSIUM_STATES : 1
IN_WORK : 1
MONITOR_PING : 1
MINNEAP_BEEN : 1
GETTING_WORSE : 1
INTO_FOR : 1
TAKE_ONE : 2
WITHIN_PAST : 1
AND_ALSO : 2
COUNSELING_THOUGHT : 1
FEVER_HEADACHE : 1
HELPLESS_WORTHLESS : 1
SOBRIETY_IS : 1
FACILITY_APPOINTED : 1
SAYS_AVOID : 1
PRE_OP : 1
TO_STOMACH : 1
AT_ACTIVE : 1
RECOMMEND_EFFECTS : 1
KG_WOULD : 1
TEST_KIT : 1
VETERAN_PRESENTS : 1
FUNCTIONAL_IDENTIFIED : 1
ACQUIRED_FLAT : 1
PH_WITH : 1
SEVERAL_THEY : 1
YET_TO : 1
MEDICATION_CAPILLARY : 1
ORGANIC_ICDCM : 1
CASA_LUMBAR : 1
PAIN_PHONE : 1
SIT_APPROX : 1
BID_DEC : 1
URINE_APPEARANCE : 1
OLD_GIRLFRIEND : 1
BE_IN : 1
RESULTS_NOTED : 1
SINCE_ADMISSION : 1
SURGERY_SUBCUTANEOUSLY : 1
HEART_FOR : 1
ON_AS : 1
PRE_SURGERY : 1
ILLICIT_RECONCILIATION : 1
ORI_CALL : 1
REQUESTS_FOR : 1
OF_SPINE : 1
MILLI_AUG : 1
FREQUENCY_PER : 1
DOSE_SPEECH : 1
ADDENDUM_ABILITY : 1
WAS_HTN : 1
THE_HOW : 1
TAP_TO : 1
GETTING_FU : 1
RECENTLY_HIS : 1
CURRENT_ASSESSMENT : 1
ADD_RESTRICTIONS : 1
AFTER_LETTING : 1
CARDIO_CARDIAC : 1
WANT_TO : 1
ARTHRALGIA_WHAT : 1
HISTORY_OF : 1
NO_SIGNS : 1
AND_AVIVA : 1
SPINE_MADE : 1
IF_RESTLESS : 1
RECORD_PEOPLE : 1
HCTZ_BB : 1
APPLY_FILM : 1
VETERAN_NURSING : 1
ADD_PLEA : 1
PLS_MAIL : 1
THE_INITIALLY : 1
PFSHX_SMOKER : 1
ADMITTED_TO : 2
NUMBING_HISTORY : 1
VETERAN_SEEN : 1
EATING_AT : 1
RX_FOR : 1
DJD_DJD : 1
ARE_AT : 1
OTHER_NUMBER : 1
HOW_MANY : 1
AGE_PROCEDURE : 1
ELLIS_REVIEW : 1
BOTH_HE : 1
REGULAR_VISIT : 1
TOTALS_COMMENTS : 1
FOR_USING : 1
KEEP_RECORD : 1
ARTHRITIS_SPECIAL : 1
FOR_THERAPEUTIC : 1
IF_VET : 1
TREATMENT_TO : 1
ANY_FORM : 1
NOT_TAKE : 1
ALL_IN : 1
PAIN_UNITPOD : 1
PROBLEMS_WAS : 1
TESTING_DIRECTED : 1
APPROVED_PC : 1
CALLER_WEST : 1
BEARING_DOB : 1
HME_NAME : 1
INSTRUCTED_ONEHALF : 1
REFIL_ROUTE : 1
ON_BUT : 1
THE_CASA : 1
ANHEDONIA_HE : 1
ALCOHOL_USE : 2
WITH_BULBAR : 1
MINNEAP_HAS : 1
FL_COMPLAINTS : 1
OUTPT_URGENT : 1
SALTY_FOOD : 1
HIS_ADDENDUM : 1
PER_NARCOTIC : 1
PAIN_GETTING : 1
PROVIDERS_MYCOTIC : 1
SALT_SHAKER : 1
BEDTIME_TEMPERATURE : 1
EFFECT_PHYSICAL : 1
SEEN_SCHEDULED : 1
PLEA_THE : 1
CM_MEMORY : 1
INCLUDING_ACTIVE : 1
READY_GIVEN : 1
MEMBER_NO : 1
FEMALE_INFORMATION : 1
WERE_IN : 1
IF_HAD : 1
FIELD_COUNSELING : 1
URGENT_NOTE : 1
KEEP_WEEKLY : 1
PAST_HE : 1
THE_ENTIRE : 1
OR_THE : 2
CONFIRMED_FAMILY : 1
AMBULATES_CLINIC : 1
SPOT_ON : 1
PHYSICIAN_NTIHYPERTENSIVE : 1
PUTTING_ON : 1
PFSHX_SMOKING : 1
HOMELESS_NO : 1
THAT_HER : 1
PROBLEM_RX : 1
PAIN_INFO : 1
YRS_AT : 1
VETERAN_NUMBER : 1
ADVISED_TO : 2
TO_AMENDS : 1
DOES_USE : 1
WT_LBS : 1
LIST_PCIOL : 1
REPEAT_HIS : 1
PT_AWAY : 1
ACID_SUBJECTIVE : 1
NAME_PMH : 1
MAKE_AMENDS : 1
TIME_TO : 1
EKG_ORDERED : 1
WAS_GIVEN : 1
RESP_GLUCOSE : 1
VOICED_UNDERSTANDING : 2
HAS_AT : 1
SOLUM_NURSE : 1
INTO_MUSCLE : 1
PRESSURE_ULCER : 1
DOSE_OF : 1
HT_CM : 1
VETERAN_OR : 1
NAIL_UX : 1
YOUR_IEST : 1
INSULIN_BID : 1
POST_CABG : 1
ICDCM_OVER : 1
TOBACCO_USE : 1
BP_TAKEN : 1
PAIN_CONTROL : 1
HOMELESS_FUTURE : 1
VITALS_LAST : 1
SMOKING_USE : 1
UX_TO : 1
CELL_IN : 1
TX_WITH : 1
RECONCILIATION_CLALED : 1
HT_CONVERSATION : 1
MEMBER_PHONE : 1
PHYSICAL_NEED : 1
OPHTHALMOLOGY_ED : 1
PRODUCTS_OR : 1
AT_THAT : 1
UNSPECIFIED_FACILITY : 1
LB_WOULD : 1
FEEL_IS : 1
HE_ENJOUYS : 1
BY_NONVA : 1
HAD_DECREASED : 1
FEB_WAS : 1
USE_USED : 1
PC_NP : 1
USE_AUDITC : 1
IS_ACHING : 1
STATES_SHE : 1
AGAIN_ACTIVE : 1
NEBULIZER_NEEDED : 1
VITALS_OBSERVED : 1
CAP_TAB : 1
GAIT_METALLIC : 1
SCREEN_HOW : 1
OF_IN : 1
FOR_TIME : 1
TIME_IN : 1
IF_WORST : 1
SHE_ME : 1
REPEAT_INJECTIONS : 1
NEEDED_VITALS : 1
THE_AT : 1
INCOMPLETE_AND : 1
THROBBING_HISTORY : 1
NOTE_SOCIAL : 1
APPLICATION_TO : 1
ALCOHOL_YOU : 1
ACTUAL_LUNGS : 1
WAS_SELECTED : 2
NEEDED_IS : 1
URGENCY_FREQUENCY : 1
THE_MEDICAL : 1
FOLLOWING_DOCUMENT : 1
CARDIAC_DY : 1
PMD_OFF : 1
BUMP_LB : 1
PLEASE_REFER : 1
FOR_CLOTRIMAZOLE : 1
AT_NO : 1
MMR_SCHOOL : 1
DOSE_REGIMEN : 1
BID_PIOGLITAZONE : 1
EDUCATION_READING : 1
CARING_FOR : 1
SUBJECTIVE_STATED : 1
STATUS_NORMAL : 1
ON_QUALITY : 1
LEG_PAIN : 1
TO_THE : 5
BLOOD_PRESSURE : 1
EATING_BEDSIDE : 1
BELOW_RECONCILIATION : 1
TO_COME : 1
DISCUSSED_THE : 1
NO_CP : 1
THE_MEDICATIONS : 1
MUCUS_CALL : 1
COME_SUPERVISOR : 1
WELL_WITH : 1
MOUTH_BEDTIME : 2
THE_OF : 4
SOLUM_EXT : 1
GRADUALLY_THEM : 1
PATIENT_EDUCATION : 1
BY_MOUTH : 2
REVIEW_ANXIETY : 1
YESTER_IF : 1
PAINFUL_TO : 1
PHONE_BUSY : 1
CALL_HIM : 1
BEARING_LEGS : 1
IN_CALL : 1
EXPLAIN_PROBLEM : 1
GOOD_URINE : 1
WERE_BACK : 1
MEALS_SINCE : 1
PLEASE_TO : 1
PATIENT_NAME : 1
LB_ADDENDUM : 1
THE_WAS : 4
TO_MONITOR : 1
HEALTH_OF : 1
RECONCILIATION_NONVA : 1
BEEN_PRESENTED : 1
OR_RELIGIOUS : 1
HISTORY_PHYSICAL : 1
SOME_TRIGGER : 1
CHIEF_COMPLAINT : 2
WITH_NITROGEN : 1
SB_PATIENT : 1
PRACTITIONER_PERFORMING : 1
PLEA_TO : 1
AM_MONITOR : 1
NORMAL_ACTIVITY : 1
FOR_ANXIETY : 1
ICDCM_AND : 1
PMH_CARDIAC : 1
BEACH_PENICILLIN : 1
PING_NO : 1
TINGLING_DENIES : 1
PULSES_TO : 1
ADVERSE_REACTION : 1
THAT_HE : 2
HAVE_IN : 1
MEDICATIONS_VETERAN : 1
BASIS_AND : 1
LIGHT_NO : 1
DIRECTED_NEW : 1
HIS_LEFT : 1
INJ_UNITS : 1
FAMILY_MEMBER : 1
FUNCTIONAL_DEFICIENCY : 1
WITH_DR : 1
DOSE_PSYCHOLOGYGENERAL : 1
OP_SURGERY : 1
CONTROL_PAIN : 1
UTILIZED_IN : 1
DEBRIS_WITHIN : 1
CURRENT_PT : 1
AND_RECONCILED : 1
OF_TAKE : 1
REASON_FOR : 3
WILL_ALSO : 1
REGIMEN_NOTE : 1
NOTE_HE : 1
STARTING_AM : 1
TAKE_TABLET : 3
WAS_NOT : 1
THE_FOR : 1
OP_CONFERENCE : 1
PAIN_WITHIN : 1
RESTING_NO : 1
COUNSELING_FIELD : 1
WITH_MEMBER : 1
TO_NUC : 1
WAS_TOLD : 1
MR_MALE : 1
UNASSISTED_NONANTALGIC : 1
DO_YOU : 2
MEDICATION_INTO : 1
FOR_AND : 1
UNDERSTANDS_THE : 1
URETHERAL_CHEST : 1
HE_STILL : 2
THE_DULL : 1
PRIOR_SURGERY : 1
LEGS_POSTOPERATIVE : 1
NUTRITION_ADEQUATE : 1
HYTHMIA_NOS : 1
PAST_APPOINTMENT : 1
OS_OF : 1
PATIENT_IDENTIFICATION : 1
CLINIC_UNASSISTED : 1
WITH_EVERY : 1
BP_THERAPY : 1
WHO_HERE : 1
DOCUMENT_ATTACHED : 1
SEEN_FOR : 2
WNL_VITALS : 1
PT_INSULIN : 1
ADD_HCTZ : 1
FOR_PHYSICAL : 1
NOTE_SSN : 1
STARTED_AT : 1
KG_BMI : 1
STARTING_AT : 2
STOOLS_NO : 1
READING_ON : 1
LIVING_ACTIVE : 1
DRIVE_TAKING : 1
THE_PAST : 5
ONE_BY : 1
TENDER_ACHING : 1
BLOODY_OR : 1
SHEET_SHE : 1
APPARENT_PROBLEM : 1
ADDENDUM_CORRECT : 1
MEDICATION_MUSCLE : 1
NUMBNESS_OR : 1
NO_NEUROLOGICAL : 1
METER_OF : 1
HAD_IS : 1
LEARNER_ABILITY : 1
ADMINISTERED_BY : 1
PO_BID : 1
AREA_VOICED : 1
RX_THIS : 1
REFER_TO : 1
SHE_THAT : 1
LBS_BMI : 1
ATTACHED_THIS : 1
ADVISED_NOT : 1
NOTE_CLIENT : 1
ICDCM_IMMUNIZATION : 1
FEELING_HELPLESS : 1
THE_DOSE : 2
YOUR_FAMILY : 1
RN_SUBJECTIVE : 1
ASSISTED_DURING : 1
OF_PATIENT : 1
DYNAMIC_FRACTURE : 1
APPT_DR : 1
COMPLAINT_OF : 2
FRICTION_NO : 1
FEB_PROV : 1
HIS_LEVEL : 1
TESTING_AS : 1
SITE_SOCIETY : 1
INTRAOPERATIVELY_PATIENT : 1
AND_HEALTH : 1
NEEDED_WNL : 1
IN_TIME : 1
PAST_OF : 1
BP_PHYSICAL : 1
VET_SHE : 1
IMPORTED_THE : 1
TIME_AND : 1
ACCUCHEK_DISPLAY : 1
THIS_AM : 1
LAB_PCIOL : 1
STATES_METHOCARBAMOL : 1
WITH_THIS : 1
THE_PT : 2
ALLERGIC_TO : 1
DR_ELLIS : 1
PAPULE_WHICH : 1
TO_WANT : 1
THAN_THE : 1
OUT_WORK : 1
CONTRACT_TO : 1
TEMPLATE_PC : 1
SPECIALTY_SC : 1
ANY_PAIN : 1
SPENDING_VETERAN : 1
RECENTLY_BACK : 1
PATIENT_HAS : 2
WEIGHT_LIFTING : 1
BUSY_NO : 1
GOAL_IS : 1
UNTIL_APPETITE : 1
DDIMER_BNP : 1
WAS_RECENT : 1
LIST_CENTERED : 1
RESTRICTIONS_OCULAR : 1
NP_URGENT : 1
IN_PER : 1
MAKING_DYNAMIC : 1
OTHER_UNSPECIFIED : 2
GO_AND : 1
DR_HUFANA : 1
THIS_EQUIPMENT : 1
YOU_ABOUT : 1
DEPRESSION_AND : 1
YOUR_BACKGROUND : 1
DISEASE_EXAM : 1
MEDICATIONS_BEING : 1
MONOFILAMENT_NEGATIVE : 1
OBJECTIVE_PT : 2
NEW_FUNCTIONAL : 1
FOR_ON : 1
NOW_WOULD : 1
STOP_ADD : 1
UNDERSTANDS_NARCOTIC : 1
SURGERY_PATIENT : 1
OUTPATIENT_NOTE : 1
OUTPATIENT_MEDICATION : 1
AGE_PATIENT : 1
AMENDS_OLD : 1
SURGICAL_SITE : 1
USING_COMMENT : 1
WPB_NO : 1
TO_RETURN : 1
IN_LAST : 1
HEMORRHOIDS_MULTIVITAMIN : 1
SUBJECTIVE_PT : 1
BUT_TEST : 1
AND_ADDENDUM : 1
THE_FARGO : 1
TAKEN_ARM : 1
INCREASED_ORAL : 1
OF_LEFT : 2
OR_SUPERVISING : 1
NEGATIVE_EKG : 1
DISCUSS_SUICIDAL : 1
ENZYMES_PM : 1
OFFICE_WORKER : 1
ASSIST_ANY : 1
VET_SIT : 1
NVI_ADD : 1
EQUIPMENT_INDEPENDENT : 1
CASA_GRANDE : 2
LUMBAR_CERVICAL : 1
THIS_MONITOR : 1
PROS_STARTING : 1
GOES_TO : 1
QUALIFIERS_WT : 1
HAVE_CARING : 1
DISC_RATION : 1
SUPERVISING_TREATMEN : 1
IF_NO : 1
PT_ON : 1
AND_ACTIVITIES : 1
VETERAN_INDEPENDENT : 1
STRICTURE_PAIN : 1
THE_IF : 2
NO_NEW : 1
WHILE_PAIN : 1
DRIVE_WHILE : 1
OF_ILLNESS : 1
LABS_VISUAL : 1
FROM_PULSES : 1
HYGIENE_AND : 1
RECONCILIATION_PT : 1
RIGHT_VENTRICULAR : 1
FOR_COGNITIVE : 1
TO_UNDERSTANDS : 1
CASA_VA : 1
THE_NOTE : 1
EVERY_GRAPEFRUIT : 1
ST_RESTING : 1
REACTIONS_ATTENDING : 1
HAVE_ANY : 1
DOCUMENT_BY : 1
DOCUMENT_HAS : 1
PM_ADDITIONAL : 1
SPECIALTY_OPHTHALMOLOGY : 1
OR_WHAT : 1
AS_BELOW : 1
VOLTS_LUMP : 1
SIMVASTATIN_MG : 1
HIATAL_SOLUM : 1
AND_TAKE : 1
PT_TO : 1
ORDER_ADMINISTRATIVE : 1
HISTORY_HAVE : 1
PRIMARY_PROVIDER : 1
THIS_AGE : 1
FOLLOWING_FOR : 1
ATTACHED_CAN : 1
TIME_HE : 2
SIDE_DISCUSSION : 1
NOTIIFED_PLAN : 1
NPH_INJ : 1
DROPS_TO : 1
DERM_OUTPATIENT : 1
RHEUMATOID_ARTHRITIS : 1
HISTORY_THE : 1
UNDERSTANDING_STILL : 1
BY_MONOFILAMENT : 1
TRANSFER_FROM : 1
WEST_PALM : 1
CALL_DISCUSS : 1
CNSL_FIELD : 1
AUG_VA : 1
AGE_CURRENT : 1
APPETITE_BEEN : 1
REGARDING_APPROPRIATENESS : 1
PLEASE_HIM : 1
THIS_CABG : 1
FOR_APPROX : 1
MUSCLE_HIATAL : 1
PLA_MD : 1
APPT_FASTING : 1
DRIVING_BOTH : 1
VERBAL_DISCUSSION : 1
BELOW_SUMMARY : 1
TREATED_LIQUID : 1
WEIGHT_DOB : 1
CAP_NONVA : 1
PAIN_IS : 2
ACHING_NUMBING : 1
HOURS_INFORMATION : 1
NO_CERVICAL : 1
RECONCILIATION_DENIED : 1
PMD_RX : 1
AT_CURRENT : 1
RETOOK_BP : 1
THE_ING : 1
ASSESSMENT_DO : 1
FROM_OTHER : 1
FRICTION_APPARENT : 1
POST_AVR : 1
ACTUAL_CTAB : 1
PLEASED_HIS : 1
RX_DATE : 1
ON_AIR : 1
MEDICAL_FT : 1
ORDER_NOTE : 1
PRAVASTATIN_PHYSICIAN : 1
WED_FRI : 1
REACTION_CAPSULE : 1
BANKING_FORMS : 1
MEDICATIONS_PRE : 1
FOR_PITTSBURGH : 1
TO_REDUCE : 1
NAME_HOMELESS : 1
HAS_LIMITED : 1
MEDICATIONS_REVIEWED : 1
FRI_TIME : 1
JR_PATIENT : 1
TAKE_WITH : 1
HAS_ON : 2
TOLERATED_THE : 1
HEELS_INSTRUCTED : 1
LEFT_UPPER : 1
MINNEAP_SHELLY : 1
MD_PC : 1
MEDICAL_YES : 1
MEDS_DOSE : 1
IN_OUT : 1
VA_AT : 1
CONTROL_MEDICATIONS : 1
DROPS_EXPLAINED : 1
WITH_HYGIENE : 1
MED_RESULTS : 1
NOTED_INFLUENZA : 1
MEDICATION_NOTE : 1
SUPERVISOR_THAT : 1
INFORMATION_GENDER : 1
PT_CLALED : 1
THIS_AT : 1
HE_PLEASED : 1
INP_VA : 1
NOTE_TOTAL : 1
BRAND_COUMADIN : 1
CM_INTACT : 1
PATIENT_FROM : 1
DEBRIS_THE : 1
SIG_ONE : 1
COGNITIVE_EMOTIONAL : 1
USING_OR : 1
VITAL_QUALIFIERS : 1
NPC_COLOR : 1
EXAMINATION_PAPILLOMAVIRUS : 2
HIM_AND : 1
TRAUMA_CHANGES : 1
OUTPATIENT_CARE : 1
THIS_CAN : 1
AVENUE_PLEASE : 1
LESCOL_SIMVASTATIN : 1
DATE_ROUTE : 1
IMPORTED_FROM : 1
URGENCY_NO : 1
SUN_TUES : 1
ACTIVE_MEDICATIONS : 4
CAME_REGULAR : 1
WEIGHT_LB : 1
BP_AFTER : 1
NOV_AND : 1
CTAB_DERM : 1
GET_RELIEF : 1
THE_YEAR : 1
PITTSBURGH_AT : 1
ON_CURRENT : 1
OF_SPEECH : 1
MG_BID : 1
UNDERSTANDING_BUT : 1
RESTRICTIONS_BRIEF : 1
BOTH_WERE : 1
ICDCM_THE : 1
WORKER_NO : 1
LAND_FORECLOSED : 1
PELVIS_RECORD : 1
TIME_WAS : 1
NAD_NON : 1
BACKGROUND_BELIEFS : 1
HYGIENE_ACTIVITIES : 1
SERMONS_DERM : 1
ISSUED_PRESCRIPTION : 1
RESP_SUBJECTIVE : 1
SURGICAL_THORACIC : 1
PC_WPB : 1
OWENS_PRIMARY : 1
RECONCILIATION_CAPILLARY : 1
PRIOR_TO : 1
HELPLESS_AND : 1
PT_THE : 1
THINGS_LEG : 1
IS_PAIN : 1
HOW_OFTEN : 2
MEDICATIONS_NO : 1
BEDSIDE_ALL : 1
EDEMA_NATIONAL : 1
BELOW_MEDICATION : 1
HE_SPOT : 1
TO_SITE : 1
DTN_CLINICAL : 1
THAT_IF : 1
AND_HIS : 2
SUMMARY_THE : 1
ULCER_PROTOCOL : 1
ALCOHOL_THE : 1
INJ_NOVO : 1
USING_BRAND : 1
ILLNESS_THIS : 1
MOBILITY_LIMITATION : 1
ACID_RESP : 1
BLOOD_FEB : 1
PMH_DY : 1
LAST_OBSERVED : 1
HUMAN_HPV : 2
INJECTION_PT : 1
LB_KG : 2
FOR_AS : 1
AND_FRI : 1
INTAKE_ML : 1
DENIED_HOPELESS : 1
BY_EVERY : 1
TO_READING : 1
TAKE_ONEHALF : 2
BEEN_LEVEL : 1
YOU_BP : 1
THAT_NARCOTIC : 1
ONE_ONEHALF : 1
COME_BACK : 1
VISIT_URETHERAL : 1
TO_HE : 1
MAY_TAKING : 1
FILLING_TOES : 1
UNITS_BEFORE : 1
POSTMYDRIATIC_FOR : 1
SELECTED_SPECIALTY : 1
SHAKER_WIFE : 1
CURRENT_STATE : 1
ASSIST_GUARD : 1
TREATED_WITH : 1
ALTERATION_COMFORT : 1
AS_MEDICATION : 1
BACK_HERE : 1
SURGEON_OWENS : 1
MALE_WHO : 1
OBSERVED_IN : 1
LBS_KG : 1
CELL_RRR : 1
INFORMATION_WORK : 1
TINA_CONFIRMED : 1
LISINOPRIL_TAB : 1
FROM_PT : 1
CLEAR_CARDIO : 1
AND_IN : 1
GEN_NAD : 1
PHYSICAL_ADMINISTRATIVE : 1
SMOKING_TOBACCO : 1
BY_IMED : 2
USED_NO : 1
PATIENT_STATES : 2
PROCEDURES_ORDERED : 1
PATIENT_INDICATES : 1
ACCUCHEK_AVIVA : 1
CABG_PETS : 1
WHEN_ARE : 1
NARCOTIC_SIGNED : 1
CURRENT_DISEASE : 1
STATUS_AVERAGES : 1
WILL_NORVASC : 1
HAVE_EFFECT : 1
AS_RETOOK : 1
MOUTH_AT : 3
SO_NOT : 1
THE_REGIONAL : 1
THE_LAST : 1
NO_PHONE : 1
EMOTIONAL_AMBAMBULATORY : 1
NONANTALGIC_WEARING : 1
MONTANA_EVERY : 1
LEGS_DING : 1
DOB_CORONARY : 1
QUALITY_OF : 1
OBJECTIVE_AMBULATES : 1
HISTORY_PRESENT : 1
GIVEN_PATIENT : 2
RESULTS_ARE : 1
OUTPUT_TOTAL : 1
BILATERALLY_TIMES : 1
OUT_AND : 1
OUTBURSTS_BUT : 1
DAILY_UNTIL : 1
YES_MOUTH : 1
DISCONNECTED_SSN : 1
AVIVA_DISPLAY : 1
OLD_MALE : 1
IN_PAST : 3
AND_ASSISTED : 1
HTN_ON : 1
TO_PATIENT : 4
OR_NEEDS : 1
YOUR_OBJECTIVE : 1
MG_PO : 2
HERE_CURRENTLY : 1
THOUGHT_IS : 1
AVERAGES_PHYSICIAN : 1
NEED_FOR : 2
DOB_AGE : 1
MEDICATION_TEMP : 1
WERE_DOPPLER : 1
HE_DENIED : 2
REDDY_CHART : 1
PT_TOLERATED : 1
WITH_VETERAN : 1
MON_WED : 1
FROM_CARDIOLOGY : 1
THIS_POINT : 1
DOPPLER_LEFT : 1
PO_ML : 1
THAT_TEST : 1
WITH_MEDICATION : 1
DAILY_OUTPATIENT : 1
FILM_ACTIVE : 1
BLOODY_BLACK : 1
WAS_GOING : 1
NO_SOB : 1
TIMES_INGROWING : 1
MEASUREMENT_TEMP : 1
NO_DISTRESS : 1
TO_GO : 1
ON_STABLE : 1
WORK_SOCIAL : 1
ONE_THE : 1
YOU_HAVE : 3
KG_ACTUAL : 1
HE_OFF : 1
ACTIVITY_WALKS : 2
STARTING_PM : 1
TIME_SPENT : 1
NUMBER_LISTED : 2
EVERY_AT : 1
TILL_TO : 1
NURSING_HOME : 1
IN_FORM : 1
ICDCM_INFLUENZA : 1
OF_TRAUMA : 1
PAIN_MEASURES : 1
PM_TELE : 1
COUGHING_CALL : 1
BEDTIME_FOR : 2
HER_TO : 1
KIT_GIVEN : 1
EVIEW_HOW : 1
VETERAN_PLANS : 1
REPRESENTS_NO : 1
IN_YOUR : 1
DELIRIUM_SEEN : 1
SCD_DO : 1
VITAL_OBJECTIVE : 1
ACTIVITIES_DAILY : 1
STOOLS_NOCTURIA : 1
FILM_TO : 1
NOT_NEEDED : 1
TAKE_AND : 1
WEARING_DEBRIS : 1
THE_ERROR : 1
MODERATE_TO : 1
AUG_WILL : 1
IS_HURTING : 1
WORST_STILL : 1
AZITHROMYCIN_MG : 1
INDIVIDUAL_THERAPY : 1
VA_CALL : 1
FOR_PURPOSES : 1
PAGE_WHEN : 1
BE_TAKING : 1
AS_TAKE : 1
ST_IMAGES : 1
HE_AVOID : 1
DECREASED_BY : 1
WHICH_IS : 1
HOME_COUNTER : 1
HIM_HIS : 1
LAB_LIST : 1
DISPOSABLE_REASON : 1
ON_PATIENTS : 1
VERBAL_ED : 1
PLEASE_ME : 1
TEMP_KG : 1
COUNSELING_FACILITY : 1
EKG_DONE : 2
REPRESENTS_PAIN : 1
COUNTER_FROM : 1
EVIEW_OFTEN : 1
OSIS_SPINE : 1
CONSUMING_OF : 1
FIANCE_DID : 1
TAKE_ANTACIDS : 1
ABOUT_ONE : 1
THE_VET : 1
SUMMARY_OF : 1
PRESCRIPTION_INP : 1
GOES_BAPTIST : 1
CARDIOLOGY_PT : 1
ONE_WEEK : 1
POSTOPERATIVE_AND : 2
CAN_BE : 1
ARM_UNIT : 1
TO_UNASSISTED : 1
IMAGING_PROCEDURES : 1
PURPOSES_NOV : 1
POSITION_REPRESENTS : 1
LESION_WAS : 1
FLAT_NVI : 1
DISCUSSION_OPT : 1
FORM_IN : 1
IMPROVEMENT_WAS : 1
TO_SURGERY : 1
IMMUNIZATION_PATIENT : 1
FROM_PROVIDERS : 1
SCREEN_AUDITC : 1
IS_FREE : 1
JUL_WITH : 1
BEDTIME_PROS : 1
NEEDED_SHELLY : 1
FOR_TESTING : 1
RANGE_NEURO : 1
SAT_AND : 1
BONE_OR : 1
AND_AND : 1
BY_RECENTLY : 1
MPS_BREATH : 1
UPPER_PHYSICIAN : 1
ON_MT : 1
WEIGHT_KG : 1
NOS_HIP : 1
RESTLESS_ICDCM : 2
VETERAN_NAME : 1
CARE_USES : 1
PHYSICAL_BEARING : 1
SUPPLIES_OUTPATIENT : 1
URINE_COLOR : 1
LISTED_FOR : 1
GENDER_FEMALE : 2
STOMACH_ACID : 1
TO_EVIEW : 1
THE_ED : 1
OF_ENGAGED : 1
SOME_TIME : 1
YEAR_OLD : 2
BREATH_RADIOPHARMACEUTICAL : 1
INDEPENDENT_WITH : 1
MPS_SOUNDS : 1
PAST_MONTHS : 2
TISSUES_PT : 1
CPRS_TEMP : 1
WI_AND : 1
CLONAZEPAM_IS : 1
MUSCULOSKELETAL_DENIES : 1
PROCEDURE_AC : 1
DR_FOR : 1
IDENTIFIED_AT : 1
GENTLE_GRADUALLY : 1
IS_FOR : 1
ISSUED_ORDER : 1
WAS_SURGERY : 1
PITTSBURGH_THIS : 1
SLIGHTLY_THE : 1
BEING_TO : 1
CHANGES_IN : 1
FRACTURE_THE : 1
FROM_TAP : 1
IF_FOR : 1
PROVIDER_REDDY : 1
HAVE_CONTAINING : 1
PATIENT_HISTORY : 1
CREAM_MODERATE : 1
IS_DENTAL : 1
STATUS_MONITOR : 1
THE_BUPROPION : 1
AGAIN_OUTPATIENT : 1
OR_NURSING : 1
FT_MT : 1
PHYSICIAN_IDENTIFIES : 1
MALE_PROCEDURES : 1
INGEST_THINGS : 1
TO_HIGH : 1
AMT_AC : 1
CLONAZEPAM_THOUGHT : 1
LAB_VPA : 1
MEDICATIONS_SUPPLIES : 2
NO_EXTENSIVE : 1
BID_AND : 1
FREE_OF : 1
STILL_GOES : 1
FOR_JR : 1
TO_KEEP : 1
NOTIIFED_OF : 1
WITHIN_THE : 1
LANTANA_FL : 1
SALT_WIFE : 1
REGIMEN_PSYCHOLOGYGENERAL : 1
YOU_GET : 1
THIS_SHE : 1
IMMUNIZATION_ADMINISTERED : 1
HIS_CURRENT : 1
EVENT_NAME : 1
BOX_PT : 1
WHEN_THE : 1
HT_IN : 1
THIS_YEAR : 1
NOTE_THE : 1
HISTORY_AT : 1
TO_HEELS : 1
MILK_ADVISED : 1
THAT_YOU : 1
LISINOPRIL_TO : 1
FOLLOWING_IMEDCONSENT : 1
COME_HERE : 1
ATTENDING_PRACTITIONER : 1
DIRECTED_NO : 1
IS_MAY : 1
AS_INSTRUCTED : 1
STARTED_FEB : 1
REG_NOVO : 1
HAVE_BEEN : 2
TO_MEDICATION : 1
HIGH_READING : 1
NO_EXPLAIN : 1
PAST_PAIN : 1
BANKING_RECEIVED : 1
OTHER_PROVIDERS : 1
POTENTIAL_FOR : 1
THE_BEEN : 1
CONTINUE_MONITOR : 1
ON_ROOM : 1
SENSITIVE_IDENTIFICATION : 1
FOR_APPOINTMENT : 2
OCCASIONALLY_EXTREMITY : 1
LIGHT_TOUCH : 1
SIMVASTATIN_PHYSICIAN : 1
EASY_MEDICATIONS : 1
PATIENTS_RIGHT : 1
DING_DELIRIUM : 2
ANY_OR : 1
PAIN_WORST : 1
ANESTHESIA_REDDY : 1
ANTACIDS_OR : 1
TAP_BARRIERS : 1
STILL_COME : 1
MEDICATIONS_WITH : 1
FEELS_IF : 1
EXCESSIVE_SALTY : 1
DID_ING : 1
HE_CARDIAC : 1
SURGERY_PHYSICAL : 1
CM_PARTICIPANT : 1
LIFTING_DING : 1
NOTE_PHONE : 1
SIGNS_OBJECTIVE : 1
FU_TILL : 1
UNTIL_GONE : 1
OR_ARTHRALGIA : 1
WAS_FROM : 2
APPROPRIATENESS_ON : 1
DENIED_FEELING : 1
TOTAL_OUTPUT : 1
MONTHS_WHICH : 1
NO_FREQUENCY : 1
PART_II : 1
HEART_DISEASE : 1
RECORD_DDIMER : 1
THAT_ADD : 1
BUT_ASKED : 1
APPETITE_CONSUMING : 1
FROM_PAIN : 2
MAKING_INTRAARTICULAR : 1
REFFER_TO : 1
PROG_BULBAR : 1
USE_NEVER : 1
MODERATE_AMOUNT : 1
PENICILLIN_HT : 1
PART_NO : 1
TESTS_ARE : 1
THAT_TIME : 1
PMHX_GEN : 1
ROOM_AIR : 1
CLINICAL_GENDER : 1
SSN_OUTPATIENT : 1
FELL_OF : 1
COUNTER_OR : 1
FOR_THIS : 1
CLOTRIMAZOLE_TOP : 1
PREOP_APPT : 1
MEASURES_TAKEN : 1
HAVE_YOU : 2
AND_FELL : 1
IS_OF : 2
PMH_ARTHRITIS : 1
TREATMENTS_NO : 1
LEGS_OVER : 1
SIGNS_OF : 1
NUMBER_FOR : 1
HEART_OR : 1
LETTING_VET : 1
HE_RE : 1
CALL_WAS : 1
DOCUMENT_WAS : 2
TO_APPLY : 1
IMPROVEMENT_OBSERVED : 1
DAILY_GONE : 1
MEDICATION_LIST : 1
OPT_VA : 1
MG_DAILY : 2
DING_AND : 2
ME_THE : 1
PHYSICIAN_PATIENT : 1
ROM_OF : 1
FOR_DM : 1
PROTOCOL_NOT : 1
POSTOPERATIVE_DING : 2
NOT_FOR : 1
ASSOCIATED_WITH : 1
POSSIBLE_PLEASE : 1
DEPRESSED_IN : 1
WORKTEETH_REMOVED : 1
THIS_NEEDED : 1
HOUSE_SON : 1
SSN_BEEN : 1
RRR_LIST : 1
AMBULATORY_MORNING : 1
SHE_UPDATES : 1
WITH_CHIEF : 2
LIQUID_PAPULE : 1
THE_SC : 1
MILK_PT : 1
REMOVED_AND : 1
NOT_ECHO : 1
AFTER_VET : 1
UNABLE_NO : 1
MEDICATIONS_TREATMENTS : 1
GRANDE_CLINIC : 1
BUPROPION_DEPRESSION : 1
FEEL_INCOMPLETE : 1
RIC_COUMADIN : 1
RECEIVED_FOLLOWING : 1
TO_POSSIBLE : 1
TESTS_INCLUDED : 1
TO_LANTANA : 1
HOOVER_TINA : 1
SC_DOCUMENT : 2
AND_ON : 1
VA_MEDICAL : 1
UNITS_BID : 2
INFORMATION_YOU : 1
TILL_WENT : 1
OR_FOR : 1
USED_TOBACCO : 1
SIGNIFICANT_WAS : 1
ROM_THE : 1
COMMENTS_PLS : 1
TOUCH_NO : 1
CORONARY_PATIENT : 1
CALL_AT : 1
TO_TESTS : 1
RECORD_SOME : 1
DENTURES_ACTIVE : 1
GONE_APPETITE : 1
ORI_STARTED : 1
PAIN_WALKS : 1
ALERT_OF : 1
DISCONNECTED_VETERAN : 1
HPV_MUCUS : 1
HOUR_TOTALS : 1
HAD_AT : 1
TOES_CALLER : 1
ABILITY_AS : 1
ANY_SADDLE : 1
! Stats words=1051  pairs=4035
