# Supplementary material for: Predicting the Risk of Suicide by Analyzing the Text of Clinical Notes
Source: PLoS One. 2014 Jan 28;9(1):e85733. doi: 10.1371/journal.pone.0085733 (PMC3904866; doi:10.1371/journal.pone.0085733)
Supplement: Appendix S3 — Machine Learning Libraries and Methods: This section is provided to enclose the open source (Apache License) classifier used for the building of the statistical models, specifically for the purposes of study reproducibility. A detailed account of these tools is intended for another publication. (ZIP) [file pone.0085733.s003.zip › Appendix3/ML_libs/Regression_testing/group1/processed/grp1-pt-1099.dat]

!  Done reading
! Total word count = 1936
! Total unique words = 955
! Total pair count = 3868
! Total unique pairs = 3579
CONTACT : 5
CONTAINS : 1
DEMONSTRATE : 1
STICK : 1
CALM : 1
AT : 16
HER : 1
ORDERED : 1
ADL : 1
ONLY : 1
FEELING : 2
WORK : 1
EVENING : 1
PALLIATIVE : 1
PREOP : 1
SURROUNDINGS : 1
FINGER : 1
PROBLEMS : 1
URINE : 2
LOWER : 1
DILATING : 1
LAND : 1
RTC : 1
WEIGHT : 2
BEEN : 5
CAN : 3
THERAPY : 3
WITHIN : 3
REFILL : 1
SEND : 1
WIREIF : 1
ACCORDING : 2
NONVA : 1
WHICH : 2
NOSHOW : 1
MINUTE : 1
OUTPATIENT : 4
GOES : 1
WEEKLY : 1
INTAKE : 2
INSTRUCTED : 2
RANGE : 1
NOTES : 3
OVER : 1
SPEECH : 1
COUNSELING : 3
MG : 14
ON : 11
QUIT : 2
AGENT : 1
DIABETICS : 1
RELATED : 1
PCC : 1
ADMINISTRATION : 1
UROLOGY : 1
USE : 3
PRESSURE : 4
ARTHRALGIA : 1
LONGSTANDING : 1
ETUC : 1
SPH : 1
PASS : 2
EXERTION : 1
VIA : 2
HEMATURIA : 2
POSTPROCEDURE : 1
SPINAL : 1
PARKINSONISM : 1
TWICE : 2
EXOPHORIA : 1
COLD : 2
COMMUNICATES : 1
ASA : 1
SHAMPOO : 1
READING : 1
GOOD : 2
SCHEDULING : 1
CHAMBER : 1
LEVEL : 2
ALCOHOL : 4
RAL : 1
RADIAL : 1
PERSONAL : 1
MPLS : 1
MED : 2
RETIRED : 1
INTO : 1
SHOULDER : 3
HIS : 6
EDEMA : 2
COPD : 1
SLIGHTLY : 1
HYPERTROPHY : 1
READINGS : 1
PINHOLE : 1
REMOVED : 1
PROVIDER : 4
MARCH : 1
SHE : 3
NEURO : 2
UP : 3
MCM : 1
PUBLIC : 1
VOCATIONAL : 1
MIGRAINE : 1
TINY : 1
LOCATION : 1
APPOINTED : 2
ALERT : 1
WELL : 2
SHARED : 2
SHOWED : 1
MEDICINE : 1
TEST : 3
NOTE : 7
SWOLLEN : 1
EAST : 1
NEPHEWS : 1
PRIOR : 1
DO : 1
DOES : 4
SEP : 1
TESTS : 1
NONORGANIC : 1
TENDINOPATHY : 1
GOT : 1
IMED : 2
DETACHED : 1
DATE : 2
CATEGORY : 1
HEALTHWISE : 1
PARALYSIS : 1
TREATMENT : 2
GIRTH : 1
BLOOD : 4
DAILY : 2
LATEX : 1
BROKEN : 1
THREE : 1
SAME : 1
WORKER : 1
BENDURE : 1
RENEWAL : 1
STROKE : 1
HAVE : 7
ADVERSE : 1
PROGRAM : 1
APPOINTMENT : 9
SCHEDULED : 1
FOLLOW : 1
HOUSING : 1
OF : 39
REPLACEMENT : 1
CELLS : 2
FROM : 6
TAB : 5
LEFT : 6
REACHED : 1
BATH : 1
CALLER : 3
PSYCHIATRY : 1
REQUIRED : 4
ASSISTED : 1
HYPOGLYCEMIA : 1
MONITOR : 1
DEC : 1
HAS : 15
FOR : 30
MEDICAL : 2
HEAD : 1
DICTATION : 1
BUSPIRONE : 1
CONDITION : 1
SPOKE : 1
ALSO : 1
SYSTEM : 2
ACTIVITIES : 1
AORTIC : 1
NUMBER : 5
STATEMENTS : 1
CLC : 1
SURGEON : 1
WORKING : 2
INR : 1
AN : 3
KNEE : 2
ADT : 1
SIGNATURE : 2
COMPLAINT : 3
SC : 1
ASTHMA : 1
USING : 1
RANGING : 1
MY : 1
DISCREPANCIES : 1
ETHNICITY : 1
MONOFILAMENT : 1
HAND : 1
FOUR : 1
MESSAGE : 1
HEMORRHOIDS : 1
INFLUENZA : 2
OUTSIDE : 1
FOREIGN : 1
COLONOSCOPY : 1
EYE : 1
FELL : 1
GAVE : 1
ROM : 3
SERUM : 1
CONTAINING : 1
DOG : 1
ACTIVITY : 1
GRADUALLY : 1
AGO : 1
HISPANIC : 1
NEW : 2
MOUTH : 7
PROVIDERS : 2
LET : 1
ATTENDING : 1
INTERNAL : 1
SPLINT : 1
URGENCY : 1
PRESENT : 1
HAVING : 1
TEMAZEPAM : 1
CRAMPS : 1
DOCUMENTATION : 2
STARTING : 1
MOMETASONE : 1
BILATERALLY : 1
WPB : 1
HRS : 1
INFORMATION : 6
MUSCLE : 1
ANESTHESIA : 1
ARE : 1
ANSWERED : 1
INDEPENDENT : 1
ZOCOR : 1
CORRECT : 3
CENTER : 1
EXAM : 2
ERECTILE : 2
RECENTLY : 1
RECEIVED : 2
SUGAR : 1
ALMOST : 1
INCONTINENCE : 1
BIOLOGICAL : 1
THE : 39
INFORM : 1
JUST : 1
OUTLINED : 2
FILED : 1
KAREN : 1
FREQUENCY : 1
DURATION : 1
WRITING : 2
REST : 1
APPRIPRIATE : 1
BURNING : 1
TX : 1
OCT : 2
ANGIO : 1
WIDOWED : 1
PULSES : 1
CIRCUMFERENCE : 1
BODY : 1
ALBUMIN : 1
SIGNIFICANT : 1
VENTRICULAR : 1
BLVD : 1
DOCUSATE : 1
COLOR : 1
ARRIVED : 1
BP : 1
MEDS : 1
BE : 3
XPER : 1
POST : 3
DEPRESSION : 2
FORMER : 1
HYDROMORPHONE : 1
CLASS : 1
CM : 4
PSYCHOLOGY : 2
ELECTRONIC : 1
TRACTION : 2
ABI : 1
LAD : 1
CORRECTLY : 1
LESION : 1
DERMATOCHALASIS : 1
CAP : 3
STATED : 3
CANE : 1
SEVERE : 2
ATTEND : 1
ALONG : 1
SOUNDS : 1
LATELY : 1
REVIEWED : 2
BRUSH : 1
GET : 1
PATIETN : 1
BEFORE : 2
OTHER : 4
ALL : 1
REMOTE : 2
CAROTID : 1
PARTIAL : 1
ASSOCIATES : 1
LIQUIDS : 1
STARTED : 2
LIFE : 1
ME : 1
ASSISTANCE : 3
BED : 2
DIABETIC : 1
NURSING : 3
CONTRACT : 1
FOLLOWING : 3
OR : 12
IDENTIFIED : 4
SHIFT : 2
ENDING : 1
PRESCRIPTION : 1
YEAR : 2
LAYING : 1
TRAZODONE : 1
PATIENT : 26
COPY : 1
ALLERGIES : 3
WITHOUT : 1
REFER : 1
ALREADY : 1
DIAGNOSIS : 5
PULMONARY : 1
DING : 2
LB : 1
COUMADIN : 1
VERIFIED : 1
HYCLATE : 1
OBUT : 1
AGREES : 1
ABDOMEN : 2
BRUITS : 1
APPROVAL : 1
SEEN : 1
EXPERIENCE : 1
NOS : 1
VALVE : 1
DYSURIA : 1
OSTEOARTHROSIS : 1
ACUTE : 1
CALLS : 1
NURSE : 2
IPT : 1
SENSATION : 2
ARTHRITIS : 2
AUDITC : 2
MUCH : 1
CORD : 1
PEYRONIES : 1
WE : 3
TAKE : 6
HOSPITALIZATION : 1
INJECTIONS : 1
CBI : 6
INCREASE : 2
GLUCOPHAGE : 1
ROOM : 2
ANY : 4
WALKIN : 1
DISCHARGE : 3
FEET : 1
SELFCARE : 1
CAME : 1
VISIT : 3
THAT : 10
CHART : 1
WIFE : 3
TISSUES : 1
MOISTURE : 1
STAFF : 2
SYSTEMS : 2
SIDERAILS : 1
SOD : 1
SERVICE : 2
RIGHT : 4
YASSAR : 1
PC : 3
VITALS : 1
OD : 2
TOLERATED : 1
PLA : 1
ABOUT : 4
MUGA : 1
ONE : 5
FACILITY : 3
METFORMIN : 1
TPOPC : 1
MD : 1
FU : 1
ANATOMICAL : 1
NKA : 2
BRIEF : 1
NAME : 2
THOUGHT : 2
CARE : 7
TABLET : 3
LORTAB : 1
TROPICAMIDE : 1
DURING : 1
SUPRASPINATUS : 1
EVERY : 2
YOU : 7
COMMON : 1
DIRECTED : 1
BX : 1
SCREENING : 7
SKIN : 4
HYPERKERATOTIC : 1
TIMES : 2
HURT : 1
YESTER : 1
IS : 19
DL : 1
INFORMED : 3
OK : 1
NOT : 8
REACH : 2
DYSFUNCTION : 2
PAST : 2
USUALLY : 1
HI : 1
REACTIONS : 1
DOCUMENT : 2
OS : 3
IF : 6
CHAIR : 1
USER : 1
INTERESTED : 2
NUMB : 1
REASON : 1
BG : 1
RETINOPATHY : 1
THERE : 5
RESIDING : 1
SCHULER : 1
SUPERVISOR : 1
PNT : 1
SCORE : 1
CANCELLED : 1
TOBACCO : 2
PERSONNEL : 1
ONCE : 1
TL : 1
DY : 1
PERRLA : 1
HURTS : 1
BELL : 2
OFFICIAL : 1
MORBID : 1
HERE : 3
MDD : 1
HOME : 4
ELECTRIC : 1
TRAUMATIC : 1
NOTED : 1
ALTHOUGH : 1
WEAKNESS : 1
INDIVIDUAL : 1
POSITIVE : 1
SOCIAL : 3
RECOMMENDATION : 1
UNITS : 1
CAREFULLY : 3
GROSSLY : 1
EVALUATION : 1
PRAVASTATIN : 1
HOPELESS : 1
RIC : 1
DERBY : 1
PROGRESS : 1
FINGERSTICK : 1
DISTURB : 1
RECURRENT : 2
VITAL : 2
IMPROVEMENT : 1
BRONCHITIS : 2
ANT : 1
UPSET : 1
MIN : 2
REGULAR : 2
REPEAT : 2
VISION : 1
FARES : 1
VET : 1
TALK : 1
EXPLAINED : 1
RECONCILIATION : 2
GDX : 1
NFI : 1
MODE : 1
MINUTES : 1
BELT : 1
STRESS : 1
GREAT : 2
SPECIFY : 2
BACK : 3
RECORDED : 1
TRANSPORTATION : 1
HEIGHT : 2
MARRIED : 1
MALE : 2
WEEK : 3
SUBSTITUTE : 1
TEAM : 1
MAKES : 1
ADDENDUM : 3
SCAN : 1
FALL : 1
FULL : 3
BY : 13
COMPLAINS : 1
PMH : 1
SITES : 2
NO : 24
INTENSITY : 1
CLINICAL : 1
DATA : 2
REF : 1
REASSESSMENT : 1
AM : 4
APPRECIATE : 1
CHIEF : 2
BRAIN : 1
DISTRESS : 1
DIOXIDE : 1
RETENTION : 1
PRACTITIONER : 1
DEFIBRILLATOR : 1
HEMATOCRIT : 1
ELECTIVE : 1
ADVISE : 1
MOOD : 1
MEETING : 2
LIVES : 2
PREPPED : 1
OUTBURSTS : 1
REGIONAL : 1
BENIGN : 1
WIGENERAL : 1
REPORT : 2
RISK : 3
CONVERSATION : 1
CLINIC : 5
LETTER : 3
ELECTRONICALLY : 1
PERFORMED : 1
HOW : 2
CONSEQUENCES : 1
GROUND : 1
MINS : 1
TOENAILS : 1
SINCE : 2
SCALP : 2
RELAXANT : 1
FLU : 2
COUGH : 1
TO : 35
PNEUMONIA : 2
POP : 1
MESSAGES : 1
TASK : 1
CARDIAC : 1
YRS : 1
COUNSELED : 1
INCLUDES : 1
MON : 1
ADMINISTRATIVE : 1
DOSE : 1
ENCOUNTER : 1
MONTHS : 1
SMOKING : 2
PROCEDURE : 2
REQUESTING : 1
ICOTHE : 1
AFFECT : 1
MRI : 2
WILL : 8
OFTEN : 2
BUT : 1
MEASUREMENT : 1
MEMORIAL : 1
PTX : 1
ASKED : 1
PATTERNS : 1
COORDINATION : 1
TYPE : 4
TRL : 1
NOON : 1
SEE : 5
CONSERVATIVE : 1
STRONG : 1
UCINATIONS : 2
ALONE : 1
CONGESTION : 1
PLEASE : 5
CBC : 1
TRAMADOL : 1
STATUS : 3
HDL : 1
PARTICULAR : 1
NONISCHEMIC : 1
MEDICATION : 8
STOP : 1
RESTING : 1
COMMENTS : 3
SUPPORTIVE : 1
CONSULT : 4
TECHNIQUE : 2
BURSITIS : 2
CARDIOMYOPATHY : 1
OUT : 3
CONT : 1
TOTAL : 4
LIGHT : 1
READ : 3
SUPPORT : 1
SURGICAL : 1
SINUS : 1
ST : 1
WANTS : 1
VILLE : 1
KS : 1
HISTORY : 4
PROBL : 1
MILW : 1
STRETCHER : 1
RESPIRATION : 2
SCREEN : 1
FINDINGS : 1
OTC : 1
PREPATELLAR : 1
HOURS : 2
ASSIGNED : 1
REVIEW : 4
LEGS : 1
NEEDED : 1
INFORMATIONAL : 1
LATINO : 1
HEALTH : 1
INJECTION : 1
DEBRIS : 1
VTACH : 1
WERE : 3
FACTORS : 2
DARLENE : 1
GESTURES : 1
FILL : 1
NEUROLOGIC : 1
INSTRUCTIONS : 2
LABS : 1
AOPC : 1
VA : 3
PROSTATE : 1
TAKEN : 2
JOB : 1
PREVIOUS : 1
SUBSCAPULARIS : 1
SITE : 1
WED : 1
RADICULOPATHY : 1
LAMENT : 1
REFERRAL : 1
POSSIBLE : 1
HOT : 1
NORTHERN : 1
MAR : 1
STATING : 1
IRRIGANT : 2
KG : 1
PRIORITY : 1
METALLIC : 1
MORE : 1
WAL : 3
PART : 1
PRING : 1
FAMILY : 3
COPAYMENT : 1
PROBLEM : 4
DISEASE : 1
PAIN : 7
RECORD : 1
AS : 7
VISTA : 1
PRESCRIBED : 1
FOLLOWUPACTIVITY : 1
REQUEST : 4
RN : 1
XYZZY : 2
CREATININE : 1
OBSTRUCTION : 1
WARFARIN : 1
CONSULTANT : 1
OUTPUT : 4
ABOVE : 3
CUTDOWN : 1
WAS : 13
RESTLESS : 1
PM : 3
WITH : 26
AHMED : 1
AFTER : 1
COS : 1
FEELS : 1
PHENYLEPHRINE : 1
ADMISSION : 3
CONDITIONS : 1
RESCHEDULED : 1
AC : 2
WANTED : 1
TEMPERATURE : 2
CONCERNING : 1
SIG : 1
SCALE : 1
CHECKING : 1
UNDERSURFACE : 1
INDEX : 3
FLUID : 1
LUMBAR : 1
ATHENS : 1
NOW : 1
PCP : 3
INTACT : 1
SAYS : 1
FUTURE : 1
TELEHEALTH : 1
CONFIRMED : 3
USED : 1
TENDONOPATHY : 2
IT : 4
MONITORING : 1
EACH : 3
WNL : 2
CLIENT : 1
QUALITY : 1
BEDTIME : 1
DENIES : 1
BELOW : 3
LIST : 4
ACCOMPANIED : 1
PHARMACY : 1
MRP : 1
OT : 1
OLD : 1
OTHERS : 1
FOOT : 1
GLYCOHEMOGLOBIN : 1
IMMUNIZATION : 1
POPULATIONS : 1
VETERAN : 2
CAPSULE : 1
DISCUSSED : 2
PT : 6
NIECES : 1
TIGHTNESS : 1
INJURY : 3
DENTURES : 1
SHOWER : 1
MOTILITY : 1
MOVE : 1
TIME : 6
ABIDE : 1
CODE : 1
PROCEDURES : 1
AREA : 2
ORIENTED : 1
HYGIENE : 1
HCL : 3
PATIENCE : 1
ATTEMPT : 1
NECK : 1
WORD : 1
TEETH : 1
ADDITIONAL : 2
MINIMAL : 1
ZOLADEX : 1
SELECTED : 1
BIPAP : 1
PERFORM : 1
CERVICAL : 1
SEAT : 1
ALLERGY : 2
DOCTOR : 1
HYTHMIA : 1
GOING : 1
CALL : 4
DID : 3
LOUNGE : 1
UNDERSTANDING : 1
LOST : 1
MEDICATIONS : 5
MR : 3
DYSPHAGIA : 1
RESULT : 1
ARRIVAL : 1
HX : 1
OPERATING : 1
MAJOR : 1
IMAGING : 2
TELEPHONE : 2
RECREATIONAL : 1
CANT : 1
AND : 24
BILATERAL : 1
CYPROHEPTADINE : 1
UNSPECIFIED : 3
NEXIUM : 1
SOB : 1
SELECT : 3
URINARY : 2
REPORTS : 3
VACCINE : 2
RESPONSE : 1
SUBJECTIVE : 3
BETTER : 3
MYALGIA : 1
RESULTS : 1
INVOLVING : 1
FRI : 1
TABLETS : 1
PER : 1
ANSWER : 2
BREATH : 1
YES : 5
CONTINUES : 1
ABLE : 2
FURTHER : 1
TOE : 2
ARTERIES : 1
CONSENT : 1
CARBON : 1
IN : 21
CUT : 2
MIW : 1
YOUR : 3
DOING : 1
GIVEN : 3
UNSURE : 1
PLAN : 4
ITEM : 3
ATHENSC : 1
HPI : 1
APPT : 2
SMOKE : 1
FITTING : 1
WHO : 1
AGREE : 2
ADMITTED : 1
ED : 3
SERIES : 1
RART : 1
VERBALIZES : 1
QUALIFIERS : 1
VERY : 1
PHYSICIAN : 2
DONE : 3
DOXYCYCLINE : 1
PALPABLE : 1
RWAVES : 1
FUNDING : 1
ARM : 1
PHYSICAL : 4
CURRENT : 1
DEFER : 1
CREAT : 1
RECTAL : 1
CONTROL : 1
DEPENDENCE : 1
ACTIVE : 8
SPONSOR : 1
TERM : 1
HIM : 1
DEMOGRAPHICS : 1
CESSATION : 1
UNDERSANDING : 1
PULSE : 3
HE : 22
FINASTERIDE : 1
NEXT : 1
RX : 2
NEEDS : 1
OBESITY : 1
BEHAVIOR : 1
EASY : 1
PROFILE : 1
NEUROPATHY : 1
FELT : 1
SI : 1
HEMOLYZED : 1
MEMBER : 1
COMPLETED : 3
SEASON : 1
IMPRESSION : 1
SUPERVISING : 2
THIS : 16
HCTZ : 1
DIFFICULTY : 1
LIMITATIONS : 1
ML : 4
PHONE : 2
HALTER : 1
CLEAR : 2
SOFT : 2
BERYL : 1
TOUCH : 1
PRIMARY : 1
FAIR : 1
LAST : 2
EDUCATION : 1
HAD : 6
DIED : 1
SIGNS : 2
ADR : 1
SPECIAL : 2
PATIENTS : 3
SESSION : 2
SUMMARY : 1
EXTRAOCULAR : 1
STATES : 4
RENAL : 1
PROVIDED : 2
DRINK : 1
OU : 1
PRONE : 1
DENTAL : 1
NEGATIVE : 2
GYNPA : 1
WHILE : 2
TWO : 3
QUESTION : 1
NONE : 2
DECREASED : 3
CONNECTED : 1
LOT : 1
ICDCM : 4
ANGRY : 1
RD : 1
RESP : 1
DIAGNOSTIC : 1
DOWN : 1
ALLERGY_PRIMARY : 1
ABDOMEN_WIFE : 1
POST_BX : 1
FAMILY_GLYCOHEMOGLOBIN : 1
PROBLEM_OTHER : 2
RESTING_INTAKE : 1
CONSULTANT_FOR : 1
ABI_INDEX : 1
TABLET_BY : 3
REMOTE_ADR : 1
HAS_INFORMED : 1
EVERY_BLOOD : 1
INFORMATION_IT : 1
NONE_MONTHS : 1
MRP_RECONCILIATION : 1
MY_SUPERVISING : 1
POSITIVE_COUNSELING : 1
HURTS_RELATED : 1
REQUIRED_INFLUENZA : 1
THAT_FEELS : 1
AND_SOCIAL : 1
CARE_HE : 1
HEALTH_CALL : 1
THERE_IS : 3
ATHENSC_ADDITIONAL : 1
MG_PATIENT : 2
PARTICULAR_WILL : 1
YOUR_PROVIDER : 1
FU_DARLENE : 1
TOLERATED_WELL : 1
BEFORE_ARRIVAL : 1
CLINICAL_REQUIRED : 1
CORRECTLY_TO : 1
NOTES_BE : 1
SPECIAL_CARE : 1
DONE_TYPE : 1
VA_ON : 1
DISCHARGE_COMPLAINS : 1
URINARY_URGENCY : 1
CONDITIONS_OF : 1
WITH_YES : 1
MG_REQUEST : 1
OK_EXPLAINED : 1
MEDICATIONS_SHE : 1
OUTPUT_ML : 2
TOUCH_PROVIDER : 1
BEEN_TO : 1
DARLENE_WIFE : 1
PLAN_BE : 1
MR_REVIEW : 1
APPOINTMENT_GIVEN : 1
HI_NO : 1
EXERTION_DEFER : 1
THE_ACTIVE : 1
ADL_VERIFIED : 1
PM_LORTAB : 1
OS_TIME : 1
OUTLINED_BY : 1
PROBL_CALL : 1
NO_BURNING : 1
AN_APPOINTMENT : 1
MOUTH_EVERY : 1
OUTSIDE_THIS : 1
ROOM_FROM : 1
BLOOD_RECORDED : 1
ONLY_PT : 1
WAS_PULSE : 1
DATE_USER : 1
SC_ED : 1
PATIENT_HAD : 1
PAIN_BACK : 1
HRS_APPOINTMENT : 1
SHOWED_APPOINTMENT : 1
CONSULT_ELECTRONICALLY : 1
IRRIGANT_PULMONARY : 1
ICDCM_PEYRONIES : 1
AGREE_WITH : 2
THE_KNEE : 1
CHIEF_OF : 1
NEXIUM_THIS : 1
REACH_CYPROHEPTADINE : 1
FRI_REST : 1
TO_TOUCH : 1
TIME_NOON : 1
THE_PATIENT : 4
MORE_ON : 1
AGREE_CONSERVATIVE : 1
THIS_CONTAINS : 1
PRESENT_FUTURE : 1
AT_THIS : 2
COMMENTS_BY : 1
NOON_FOR : 1
CLC_MEETING : 1
CONT_MONITOR : 1
EVERY_TOLERATED : 1
REQUESTING_MEETING : 1
SCREENING_NEXIUM : 1
CALL_IN : 2
PLAN_ENDING : 1
STATED_ON : 1
PRACTITIONER_OF : 1
ABOUT_NEW : 1
TINY_PARTIAL : 1
SUMMARY_ONCE : 1
THIS_CARE : 1
RADIAL_GAVE : 1
REFERRAL_DIAGNOSIS : 1
HAS_FOR : 1
CARE_IS : 1
WEIGHT_ALBUMIN : 1
SCREENING_PMH : 1
ALL_AND : 1
REMOTE_ALLERGY : 1
DEC_WERE : 1
NOTE_ERECTILE : 1
NOTE_MIW : 1
IMMUNIZATION_AGO : 1
NOTE_SPECIFY : 1
IN_FOR : 1
IN_WITH : 1
CARDIOMYOPATHY_WITH : 1
IMAGING_ORDERED : 1
TOUCH_BENDURE : 1
HE_WAS : 4
FINDINGS_PLAN : 1
DOCUMENT_SELECTED : 1
LAYING_THIS : 1
TO_ABOUT : 2
PATIENT_DENIES : 1
SHOWED_PTX : 1
NURSE_COMMENTS : 1
AT_VISIT : 1
PAST_MEDICAL : 1
REACTIONS_HAS : 1
PROVIDER_CLASS : 1
STATES_THAT : 2
FROM_ACTIVITIES : 1
REPORTS_THAT : 2
LOUNGE_SIDERAILS : 1
DOG_CREATININE : 1
AGREE_ALL : 1
NO_MAJOR : 1
WITH_STATES : 1
INJURY_FROM : 1
BURSITIS_ICDCM : 1
SMOKE_WITH : 1
CLINIC_CARE : 1
SYSTEMS_PATIENT : 1
AUDITC_NEGATIVE : 1
IDENTIFIED_UNSURE : 1
EXPLAINED_THAT : 1
URGENCY_DYSURIA : 1
INSTRUCTED_PRING : 1
PLA_PC : 1
ED_HAS : 1
OUTPATIENT_STATUS : 2
HOME_TELEHEALTH : 1
HE_RECEIVED : 1
IMED_WE : 1
WITH_PATIENT : 3
THIS_STATES : 1
THE_PATIENTS : 1
NONE_AT : 1
IN_VOCATIONAL : 1
CANE_PATIENT : 1
ON_WEIGHT : 1
THAT_EDEMA : 1
PHARMACY_FOR : 1
FOR_ED : 1
APPROVAL_CONSULT : 1
MCM_TOE : 1
MEDICATION_RENEWAL : 1
EXERTION_RECTAL : 1
TAB_ONE : 2
WANTS_TO : 1
USUALLY_YES : 1
OR_UNSPECIFIED : 1
SOFT_WNL : 1
URINARY_INSTRUCTED : 1
MEDS_PNEUMONIA : 1
COLONOSCOPY_DATE : 1
ON_DAILY : 1
HE_FOLLOWUPACTIVITY : 1
ED_FOR : 1
CALLER_ATHENSC : 1
BEHAVIOR_PULSES : 1
PRONE_LATELY : 1
ADR_DATA : 1
WITH_LETTER : 1
ANSWER_YESTER : 1
VETERAN_TO : 1
CONSULT_FOR : 1
LEFT_TREATMENT : 1
ADMISSION_LOT : 1
LIMITATIONS_AT : 1
PRESSURE_THERE : 1
METALLIC_WITHIN : 1
PROCEDURE_SURGEON : 1
MOMETASONE_PATIENT : 1
AHMED_HOW : 1
USE_OF : 1
ALLERGIES_ACTIVE : 1
SKIN_ABDOMEN : 1
RX_MEDS : 1
HE_UPSET : 1
DOCUMENTATION_PT : 1
OUTPATIENT_VET : 1
WORKING_VERY : 1
THE_SPLINT : 1
REMOTE_HE : 1
PERFORM_SPOKE : 1
NURSING_TL : 1
TRL_DERBY : 1
SCREENING_AT : 1
AUDITC_POSITIVE : 1
PHYSICAL_SCHEDULED : 1
INJURY_SCREEN : 1
MESSAGES_IS : 1
AM_DENTURES : 1
HE_EXPLAINED : 1
HIS_PROVIDERS : 1
TYPE_MEDICATION : 1
CBI_CBI : 2
HAD_BRUITS : 1
PERFORMED_AT : 1
REPORT_TO : 1
ADT_SEP : 1
SCALE_LEVEL : 1
LESION_FROM : 1
PC_SCREENING : 1
HE_SHARED : 2
DONE_ON : 2
ROM_FULL : 1
MEETING_WITH : 1
TOE_POP : 1
WPB_TEAM : 1
TO_ADMINISTRATION : 1
EXAM_SCHEDULED : 1
CAPSULE_MOUTH : 1
WEAKNESS_OF : 1
CLIENT_FOR : 1
PLEASE_EACH : 3
MARRIED_NO : 1
PROSTATE_URINARY : 1
CBI_ML : 2
FEET_THE : 1
BY_DAILY : 1
NO_ALCOHOL : 1
THE_GROUND : 1
PREPPED_STATED : 1
PROGRESS_ERECTILE : 1
HAND_DOG : 1
PAIN_VITAL : 1
INDEX_FINGER : 1
OF_THIS : 1
TRACTION_WORKING : 1
PHYSICAL_COMPLETED : 1
HOME_WITH : 1
COMPLETED_ANATOMICAL : 1
PULSES_REASSESSMENT : 1
DIOXIDE_MR : 1
FROM_OTHERS : 1
IT_ONE : 1
BELOW_BEEN : 1
KS_SIGNATURE : 1
HISPANIC_LATINO : 1
DILATING_AGENT : 1
REGULAR_LIQUIDS : 1
WITH_NO : 1
SMOKING_SINCE : 1
DOCUMENT_SMOKING : 1
NOT_THIS : 1
RART_ALLERGY : 1
WALKIN_PATIENT : 1
PROCEDURE_DIAGNOSTIC : 1
CONGESTION_AND : 1
PMH_LIVES : 1
LOWER_DENTURES : 1
ROOM_OR : 1
DIED_ON : 1
PROBL_TYPE : 1
LESION_OUT : 1
HIS_READINGS : 1
NOTE_YEAR : 1
LEVEL_ASSISTANCE : 1
PCP_ATHENS : 1
IDENTIFIED_OTHER : 2
PARTIAL_THERAPY : 1
ALLERGIES_NOON : 1
TREATMENT_DISCHARGE : 1
FOLLOW_GOOD : 1
VOCATIONAL_ASSISTANCE : 1
SOCIAL_WIDOWED : 1
LEVEL_FOR : 1
MEETING_SIGNATURE : 1
CONTACT_TEMPERATURE : 1
PROVIDER_ASA : 1
THE_AREA : 1
INCREASE_ROM : 1
SIG_TAKE : 1
FOR_OVER : 1
OFTEN_IN : 1
MALE_IS : 1
WITH_ALL : 1
ADDITIONAL_COMMENTS : 1
TRANSPORTATION_SPEECH : 1
RN_TAKEN : 1
HISTORY_NKA : 1
OTHER_COUNSELING : 2
PROVIDER_PRIOR : 1
ON_PRAVASTATIN : 1
BX_POST : 1
WAS_BY : 1
VET_CUT : 1
HAD_SLIGHTLY : 1
SHOULDER_IS : 1
ANY_THE : 1
DL_IMAGING : 1
PATIENT_METFORMIN : 1
PATIENT_EXPERIENCE : 1
OT_SUBSTITUTE : 1
WNL_SITES : 1
CARE_CHART : 1
IN_MILW : 1
OF_BELOW : 1
CAP_MG : 1
CARDIAC_HYTHMIA : 1
NOSHOW_IN : 1
PNEUMONIA_VACCINE : 1
PRIOR_ADMINISTRATION : 1
PHONE_CONFIRMED : 1
INCREASE_SPH : 1
WILL_CONT : 1
HAS_ALREADY : 1
SPECIFY_THE : 1
COMMENTS_FACILITY : 1
BLVD_TX : 1
REGULAR_DISCHARGE : 1
NO_INFORMED : 1
URINE_TOTAL : 2
IS_HISTORY : 1
BLVD_VILLE : 1
AC_CALL : 1
OVER_LIST : 1
USER_IMED : 1
OS_DIAGNOSIS : 1
JUST_CANT : 1
INFORMATION_CONFIRMED : 1
YES_RISK : 1
CIRCUMFERENCE_JUST : 1
ACTIVITY_HOME : 1
BY_OF : 2
PROBLEM_LIST : 1
OTHER_PROBLEM : 1
HYPERTROPHY_OF : 1
RESP_PROBLEMS : 1
NAME_FULL : 1
BELL_REACH : 2
FULL_PINHOLE : 1
THE_SESSION : 1
RISK_SPECIAL : 1
REVIEW_HEIGHT : 1
NONE_ACTIVE : 1
DURING_THIS : 1
IN_HEMATOCRIT : 1
NKA_OUTPATIENT : 1
FOR_RETINOPATHY : 1
INFORMATION_COMMON : 1
DATE_VITAL : 1
TO_CHAIR : 1
AND_MARCH : 1
DATA_MEDICATION : 1
IS_LONGSTANDING : 1
MG_NONE : 1
BETTER_WITH : 1
TO_LIGHT : 1
PHYSICAL_EXAM : 1
TRAUMATIC_BRAIN : 1
NEURO_DECREASED : 1
SHOWER_BATH : 1
PATIENT_SCREENING : 1
IN_BRONCHITIS : 1
ANGIO_IN : 1
OFTEN_YOU : 1
GREAT_IMPROVEMENT : 1
MARCH_DIAGNOSTIC : 1
SEE_PHARMACY : 1
OD_OS : 2
ADDENDUM_WAS : 1
FOR_CUTDOWN : 1
YOU_OR : 1
WORKER_NOT : 1
DEMONSTRATE_HOW : 1
COLD_HERE : 1
DOES_HAVE : 2
CORRECT_OUTSIDE : 1
VISIT_NURSE : 1
TOE_INDEX : 2
VITALS_TAKEN : 1
REACTIONS_PATIENT : 1
BELOW_PATIENT : 1
SEND_AN : 1
MG_MG : 1
URINE_ML : 2
TAKE_METFORMIN : 1
ON_TAKE : 1
EVALUATION_PERFORMED : 1
DEPENDENCE_DOXYCYCLINE : 1
HOT_AGREE : 1
IS_WHO : 1
YEAR_MALE : 1
MONITOR_RIGHT : 1
MOUTH_ACTIVE : 4
THERAPY_STATUS : 1
CARE_OUTLINED : 1
PSYCHOLOGY_MINUTES : 1
NO_ME : 1
OFFICIAL_IF : 1
NUMB_DETACHED : 1
SINCE_USING : 1
HAD_OF : 1
SCREENING_DIABETIC : 1
PM_GIVEN : 1
CLINIC_OD : 1
ENDING_PM : 1
CAP_SIG : 1
THREE_TIMES : 1
WAL_HDL : 1
IF_IN : 1
HEMATOCRIT_AND : 1
CBI_SKIN : 1
PC_YASSAR : 1
IPT_MINS : 1
FACILITY_AND : 1
HERE_AS : 1
RIGHT_PULSES : 1
PASS_ABLE : 1
NO_HYPOGLYCEMIA : 1
TEST_AUDITC : 1
FROM_EDUCATION : 1
MPLS_ON : 1
ED_PAIN : 1
TO_TO : 1
SINUS_AND : 1
ATTEND_MEETING : 1
SPONSOR_RESPONSE : 1
BERYL_ATHENS : 1
ARTHRALGIA_NECK : 1
LORTAB_MG : 1
FORMER_LAST : 1
COUNSELING_HCL : 1
PRAVASTATIN_YES : 1
FOR_PATIENT : 1
ANT_OD : 1
GOOD_CONTACT : 1
MEDICATIONS_HAS : 1
MEDICATIONS_BELOW : 1
HAVE_OR : 1
THERAPY_ROM : 1
THIS_MIN : 1
LUMBAR_IS : 1
DISCHARGE_HEMORRHOIDS : 1
DID_PATIENT : 1
FOR_TO : 1
OF_DISTRESS : 1
DY_NOS : 1
INDEPENDENT_OF : 1
FROM_FALL : 1
BY_PALLIATIVE : 1
WAS_SCORE : 1
LABS_PCC : 1
UNDERSANDING_OF : 1
STROKE_ARTHRITIS : 1
WORKING_WELL : 1
MEDICINE_OUTPATIENT : 1
VITAL_SIGNS : 1
PCC_AOPC : 1
RETINOPATHY_BUT : 1
PCC_NURSING : 1
CYPROHEPTADINE_MG : 1
SIGNIFICANT_MIN : 1
WIFE_ON : 1
WITH_PT : 1
HERE_TO : 1
LOST_AFFECT : 1
PHYSICIAN_FARES : 1
INTAKE_STAFF : 1
BED_PM : 1
CONVERSATION_ED : 1
PT_PHONE : 1
NOSHOW_LETTER : 1
BURSITIS_THE : 1
TRACTION_IS : 1
HAS_CONSULT : 1
ADVERSE_REACTIONS : 1
CONSEQUENCES_IS : 1
PALPABLE_REPORT : 1
COMMUNICATES_PER : 1
TEAM_PROBLEM : 1
FROM_NO : 1
ICOTHE_INFORMATION : 1
CONTACT_CLINIC : 1
GIRTH_CANT : 1
OCT_ACCORDING : 1
PULSE_TRAMADOL : 1
NUMBER_MIN : 1
MG_STARTING : 1
OTC_AND : 1
ARRIVED_INJECTION : 1
IS_HAND : 1
PATIENT_WITH : 1
SOUNDS_PROVIDED : 1
TOE_PREOP : 1
LOT_NUMBER : 1
ED_CHIEF : 1
XPER_WEEK : 1
MONITOR_BEHAVIOR : 1
TOLERATED_WITHOUT : 1
SYSTEMS_ABOVE : 1
DETACHED_FROM : 1
KNEE_STATES : 1
FELL_WORD : 1
WERE_AND : 1
PHONE_CALLS : 1
ETHNICITY_NOT : 1
DIAGNOSIS_INDEX : 1
WITHOUT_FELT : 1
HAVE_HAD : 1
GOING_RECREATIONAL : 1
ZOCOR_THERE : 1
OTHER_SEE : 1
VACCINE_COPY : 1
RD_ST : 1
DEPRESSION_READ : 1
DISTRESS_NOTED : 1
NEW_IS : 1
APPOINTMENT_HAS : 1
ON_IT : 1
ACTIVITIES_OR : 1
SIGNIFICANT_DISCHARGE : 1
BEFORE_FELL : 1
ARTHRITIS_DOCTOR : 1
PATIENT_NUMBER : 1
ON_NOT : 1
ADT_ZOLADEX : 1
SLIGHTLY_METALLIC : 1
INDEX_POP : 1
BEEN_YES : 1
MOOD_BUSPIRONE : 1
IRRIGANT_MOISTURE : 1
VOCATIONAL_HYPERTROPHY : 1
MG_MON : 1
PATIENT_TAKE : 1
TEMPERATURE_CALL : 1
REST_OF : 1
ABDOMEN_CONDITION : 1
HIS_INJECTIONS : 1
NUMBER_IS : 1
MUCH_BETTER : 1
ABOVE_AT : 1
COORDINATION_TELEHEALTH : 1
THE_PRACTITIONER : 1
DRINK_CONTAINING : 1
CORRECT_ANSWER : 2
PLAN_OUTLINED : 1
AND_PSYCHIATRY : 1
IS_WORKING : 2
AND_WAS : 1
IS_MALE : 1
YOU_OF : 1
GAVE_TO : 1
ON_AND : 2
PCP_PLA : 1
RX_MG : 1
VERBALIZES_UNDERSANDING : 1
RESIDING_IN : 1
COMPLAINS_GREAT : 1
LIVES_ALONE : 1
SURGICAL_PRIORITY : 1
WITH_QUESTION : 1
MEDICATIONS_RESTING : 1
HIS_DIED : 1
STATEMENTS_WITH : 1
DOWN_THIS : 1
ARE_FEELING : 1
BELOW_THE : 1
DISCHARGE_DID : 1
WITH_EXERTION : 1
COMMENTS_MOUTH : 1
DOSE_MON : 1
RESPIRATION_ABDOMEN : 1
ARRIVAL_RENAL : 1
SCALP_DOCUMENTATION : 1
ADMINISTRATION_OF : 1
FITTING_INSTRUCTED : 1
BRIEF_REQUIRED : 1
SUBJECTIVE_HE : 1
CM_HEMATOCRIT : 1
IN_OF : 1
ORDERED_REMOTE : 1
ARTHRITIS_COS : 1
SHARED_HE : 2
CONTACT_TELEPHONE : 1
PHYSICAL_OR : 1
ALCOHOL_TOBACCO : 1
TO_ABIDE : 1
ABOVE_ASA : 1
FAMILY_COMMENTS : 1
REQUEST_FOR : 1
PM_IS : 1
SYSTEMS_AS : 1
PLEASE_SEND : 1
YRS_FINASTERIDE : 1
OR_DATE : 1
NUMBER_WITH : 1
AT_PM : 2
ACTIVE_ALLERGIES : 1
THIS_MEDICAL : 1
OF_RESULTS : 1
WHO_IS : 1
TAB_STARTING : 1
THE_SOFT : 1
THE_GOT : 1
PT_NO : 1
MESSAGE_CONCERNING : 1
NOTE_TL : 1
HE_SEVERE : 1
THERAPY_INTENSITY : 1
SPLINT_MRI : 1
TO_HAVE : 1
KAREN_RN : 1
IDENTIFIED_PROBLEM : 2
ANY_PARTICULAR : 1
WITH_SIGNIFICANT : 1
CLEAR_CLEAR : 1
TIME_TIME : 1
MG_SIG : 1
FU_REQUIRED : 1
PULMONARY_SCAN : 1
TIME_OUT : 1
FOR_FACILITY : 1
GIVEN_DURING : 1
OR_NEUROLOGIC : 1
OF_UNDERSURFACE : 1
FINGER_BODY : 1
WAL_MEDICATIONS : 1
VTACH_DEFIBRILLATOR : 1
KAREN_VITALS : 1
RECURRENT_APPT : 1
REASON_CONTACT : 1
HOME_TRACTION : 1
OR_HI : 1
BED_AT : 1
TEST_NAME : 1
REFER_FAIR : 1
INTENSITY_LAST : 1
NOT_DURATION : 1
VERY_FOR : 1
CRAMPS_MEDICATION : 1
FOR_STRESS : 1
NURSE_BY : 1
PROCEDURES_SEE : 1
HOW_TO : 1
MOUTH_TIMES : 1
ANSWER_PLEASE : 1
INJECTION_ACCORDING : 1
MEMORIAL_VILLE : 1
ACTIVE_REFERRAL : 1
HYPERKERATOTIC_FOOT : 1
CORRECT_PROVIDERS : 1
PERFORM_FINGERSTICK : 1
DEPENDENCE_DEPRESSION : 1
NIECES_AND : 1
SCHEDULING_DIOXIDE : 1
PRING_NEXT : 1
PAIN_WANTS : 1
TAB_AT : 1
EVENING_HE : 1
SCREENING_THIS : 1
DYSFUNCTION_OR : 1
WHICH_PRESSURE : 1
FULL_SOCIAL : 1
TO_STOP : 1
XYZZY_WAL : 1
LEFT_ARM : 1
RECORDED_WAS : 1
ATTEMPT_PASS : 1
CLINIC_COORDINATION : 1
RIGHT_DONE : 2
ADMISSION_CARE : 1
MOISTURE_URINE : 1
CONTACT_AND : 1
TOTAL_SHIFT : 2
CLINIC_VISIT : 1
MUSCLE_RELAXANT : 1
MON_FRI : 1
HAS_RESIDING : 1
STARTED_ZOCOR : 1
IS_GREAT : 1
LIST_BELOW : 1
THAT_HAS : 3
INFLUENZA_RECEIVED : 1
FOLLOWING_DISCREPANCIES : 1
ACTIVE_OBESITY : 1
ICDCM_BILATERAL : 1
COMPLETED_HOURS : 1
SESSION_HE : 2
PLEASE_READ : 3
CODE_UCINATIONS : 1
RECTAL_DEFER : 1
DEFIBRILLATOR_TOTAL : 1
REQUEST_ED : 1
SIGNATURE_REQUIRED : 1
IN_ROM : 1
AND_NEEDS : 1
BRUITS_THIS : 1
UNDERSURFACE_OF : 1
TO_SEE : 1
DID_YOU : 1
AT_HOME : 1
TO_FEET : 1
WEAKNESS_MESSAGES : 1
CONSENT_FOR : 1
INVOLVING_THE : 1
OF_APPOINTMENT : 1
WRITING_WITH : 1
COMMON_HEALTH : 1
REGIONAL_TISSUES : 1
CONTROL_HEALTHWISE : 1
STATES_HAS : 1
PATIENT_CARE : 1
HAS_COMPLAINT : 1
SEVERE_BACK : 1
IN_EAST : 1
MODE_TRANSPORTATION : 1
NO_EDEMA : 1
FOLLOWUPACTIVITY_AT : 1
HAS_NEW : 1
STATES_IT : 1
RIGHT_FLUID : 1
BETTER_NO : 1
THOUGHT_THOUGHT : 1
AS_OUTLINED : 2
REVIEWED_YES : 1
DATE_MEASUREMENT : 1
WITH_NEGATIVE : 1
MG_DING : 1
NEUROLOGIC_DATE : 1
MR_SPH : 1
CODE_NO : 1
AT_RISK : 1
NAME_RESULT : 1
LEVEL_DIABETICS : 1
HAS_WEEK : 1
MDD_AFFECT : 1
PARTICULAR_ATTEND : 1
REGULAR_HEMORRHOIDS : 1
BG_WEEK : 1
IMAGING_MEDICATION : 1
VA_FOR : 1
DAILY_BEDTIME : 1
VERY_WELL : 1
COORDINATION_HOME : 1
LATINO_OF : 1
ALCOHOL_DEPRESSION : 1
AND_PSYCHOLOGY : 1
WAS_PREPPED : 1
STATUS_FILL : 1
HEMORRHOIDS_DID : 1
ACTIVE_OUTPATIENT : 2
YOUR_TALK : 1
MAKES_BETTER : 1
HOME_SERVICE : 1
TESTS_HAD : 1
ABLE_TO : 2
LIGHT_PROVIDER : 1
VALVE_ASSOCIATES : 1
AND_SELECT : 3
PERSONAL_HYGIENE : 1
CAP_TAKE : 1
EXAM_ANATOMICAL : 1
INDEX_ABI : 1
DING_PLEASE : 1
FROM_ETUC : 1
PAIN_REPORTS : 1
PRONE_TO : 1
AND_COMPLETED : 1
ED_DOCUMENT : 1
DERBY_SIGNATURE : 1
CAN_UP : 1
NO_ARTHRALGIA : 1
LABS_AOPC : 1
RECTAL_MEMORIAL : 1
DENTURES_REMOVED : 1
COLOR_WITH : 1
NO_THOUGHT : 1
PT_AN : 1
RECONCILIATION_INFORMATION : 1
COMMENTS_WEEKLY : 1
STATING_IT : 1
TAKEN_INTAKE : 1
REACHED_AT : 1
THIS_FLU : 1
HOUSING_FOR : 1
TO_WALKIN : 1
PATTERNS_GOES : 1
SCHEDULING_CARBON : 1
THIS_DOCUMENT : 1
TISSUES_TENDONOPATHY : 1
COLOR_ABDOMEN : 1
SAME_PATIENT : 1
COLONOSCOPY_BY : 1
OUT_MEDICATION : 1
HOME_CERVICAL : 1
POST_DOCUMENTATION : 1
NKA_COUNSELED : 1
TREATMENT_THE : 1
POP_ABI : 1
BE_COMPLETED : 1
OR_LATINO : 1
ACCOMPANIED_BY : 1
THE_SHOULDER : 1
IN_REACH : 2
INFLUENZA_COPY : 1
MEASUREMENT_TOTAL : 1
OF_THERAPY : 1
BY_ABOVE : 1
DIABETIC_RETINOPATHY : 1
EDEMA_OF : 1
CHART_REVIEW : 1
EVERY_ACTIVE : 1
PAIN_CESSATION : 1
GOES_BED : 1
GIVEN_FOR : 2
CAN_PHYSICAL : 1
BED_AM : 1
OF_SCREENING : 1
BRUSH_TEETH : 1
LETTER_IN : 1
UNSURE_IS : 1
TO_AS : 1
ON_THERE : 1
BG_XPER : 1
WIREIF_TO : 1
TENDINOPATHY_TENDONOPATHY : 1
PC_PATIENT : 1
DOCUMENTATION_VISTA : 1
GREAT_WHILE : 1
OUTLINED_FOR : 1
ALCOHOL_PATIENT : 1
TWICE_ACTIVE : 1
LAST_AT : 1
NONVA_SOD : 1
SIGNATURE_NOT : 1
ADDENDUM_PATIENT : 1
REQUEST_GDX : 1
NOTES_AND : 2
DENTURES_YES : 1
CONTAINING_ALCOHOL : 1
NEEDED_MEETING : 1
HOME_SCREENING : 1
WAS_OK : 1
BELOW_WITH : 1
BY_CONDITIONS : 1
RETENTION_SITES : 1
TWICE_FOR : 1
HYPERKERATOTIC_SPECIAL : 1
WEEK_CONGESTION : 1
CONTINUES_TO : 1
PNEUMONIA_GIVEN : 1
PARALYSIS_NEUROLOGIC : 1
ST_OF : 1
TO_ARTHRITIS : 1
RETIRED_FROM : 1
MED_AS : 1
DEC_RANGING : 1
ON_THE : 1
TEETH_BEFORE : 1
CARE_SUBJECTIVE : 1
CELLS_PATIENT : 1
CLINIC_WAS : 1
DEPRESSION_HYCLATE : 1
AOPC_NURSING : 1
FRI_MG : 1
TELEHEALTH_CONSULT : 1
ELECTIVE_IS : 1
INFORMATION_ON : 1
CONNECTED_CERVICAL : 1
TOBACCO_FROM : 1
BRONCHITIS_FEELING : 1
OF_THE : 9
OT_FOR : 1
TO_PASS : 2
THERE_GREAT : 1
PULSE_MAKES : 1
TRAMADOL_MAKES : 1
EDEMA_THE : 1
INCREASE_IN : 1
PT_THAT : 1
COMPLETED_WITHIN : 1
REPLACEMENT_WITH : 1
IS_ASSIGNED : 1
VILLE_TX : 1
HAD_RECEIVED : 1
OFTEN_BED : 1
DENTAL_PLEASE : 1
TWO_HOSPITALIZATION : 1
OBESITY_CALLER : 1
INSTRUCTIONS_ON : 1
AT_VA : 1
ACUTE_BRONCHITIS : 1
TO_TEST : 1
HAD_SEAT : 1
IF_INTERESTED : 1
PLAN_TO : 1
DOCUSATE_SOD : 1
VA_AND : 1
DISCUSSED_THIS : 1
STARTED_ON : 1
QUESTION_TINY : 1
HAS_CHIEF : 1
SELFCARE_HEALTHWISE : 1
OUT_ACCOMPANIED : 1
ETUC_NO : 1
STATES_HE : 2
FILL_YRS : 1
COMPLAINT_POST : 1
REQUIRED_PRESSURE : 1
WNL_RIGHT : 1
WITHIN_REGIONAL : 1
CUTDOWN_AND : 1
MIW_YEAR : 1
BELT_SCREENING : 1
HAVE_DISCUSSED : 1
OF_CLINIC : 1
APPOINTMENT_FOR : 1
NO_BURSITIS : 1
CERVICAL_HALTER : 1
MG_TAKE : 3
OF_MEDICATIONS : 1
IS_IN : 1
FOR_IN : 1
BLOOD_DILATING : 1
MOMETASONE_IS : 1
BY_SYSTEM : 1
SINUS_CONGESTION : 1
SWOLLEN_CREATININE : 1
LAST_FILL : 1
PAIN_SIGNS : 1
MG_OF : 1
WITH_HIS : 1
OF_INDIVIDUAL : 1
ENCOUNTER_FAMILY : 1
AREA_ICOTHE : 1
UROLOGY_CONSULT : 1
SURGEON_WILL : 1
HX_WIDOWED : 1
ON_ZOCOR : 1
CLINIC_FOR : 1
CALLER_APPT : 1
CHECKING_HIS : 1
THERE_MINIMAL : 1
IT_TAKE : 1
AM_MEDICAL : 1
PATIENT_DOES : 1
THE_TASK : 1
YEAR_DYSFUNCTION : 1
OF_TELEPHONE : 1
AT_AND : 1
IN_WILL : 1
PAIN_RADICULOPATHY : 1
ABIDE_CONDITIONS : 1
POPULATIONS_PATIENT : 1
PROVIDED_PATIENT : 1
NFI_WNL : 1
TRAMADOL_MYALGIA : 1
INJURY_THIS : 1
RN_VITALS : 1
OF_MEDICATION : 1
HERE_SWOLLEN : 1
USING_THE : 1
IN_IN : 1
WAL_TRAUMATIC : 1
CONTRACT_DID : 1
CENTER_MONTHS : 1
WILL_THE : 1
NEPHEWS_AND : 1
COPAYMENT_BURNING : 1
OBESITY_SAYS : 1
HCTZ_MG : 1
NO_COPAYMENT : 1
DIABETICS_OUTPATIENT : 1
MOVE_WEIGHT : 1
PCP_BERYL : 1
ALL_FINDINGS : 1
DOG_SERUM : 1
BY_SCALE : 1
NO_LEFT : 1
PHONE_PT : 1
BILATERALLY_WITH : 1
DID_HAVE : 1
THE_FOLLOWING : 3
NOW_CANE : 1
REVIEWED_EVERY : 1
PLEASE_PT : 1
MG_FOR : 1
PHYSICIAN_OS : 1
USE_SCREENING : 1
AS_BY : 1
OF_INDEPENDENT : 1
CONTACT_APPOINTED : 1
ABI_TOE : 1
PNT_THAT : 1
PRESSURE_SELFCARE : 1
CATEGORY_EASY : 1
FROM_SCREENING : 1
VILLE_TEST : 1
IN_WERE : 1
SUBSCAPULARIS_WITH : 1
MOUTH_DAILY : 1
PERSONAL_LEVEL : 1
CARE_COORDINATION : 1
METALLIC_DEBRIS : 1
CONSENT_DERMATOCHALASIS : 1
OR_FUTURE : 1
CARBON_SUBJECTIVE : 1
QUIT_SINCE : 1
PAIN_SMOKING : 1
PCP_MD : 1
AS_FOR : 1
THE_PROGRAM : 1
READING_PATIETN : 1
APPT_HRS : 1
ABDOMEN_WITH : 1
WILL_CLC : 1
MEMBER_COMMENTS : 1
ATTENDING_PHYSICIAN : 1
FOOT_SPECIAL : 1
WITHIN_HOURS : 1
HAS_PAIN : 1
PROVIDED_WITH : 1
DRINK_ALCOHOL : 1
RTC_TENDINOPATHY : 1
THE_LUMBAR : 1
PATIENTS_APPOINTMENT : 1
DIAGNOSIS_LEFT : 1
FOLLOWING_REASON : 1
GIRTH_JUST : 1
THE_TESTS : 1
ANATOMICAL_LOCATION : 1
CATEGORY_EDUCATION : 1
NURSE_CARE : 1
TO_AREA : 1
SCREENING_FOR : 2
IS_HIS : 1
ALBUMIN_CIRCUMFERENCE : 1
HIM_PATIENT : 1
OPERATING_OR : 1
SI_OR : 1
VERBALIZES_OF : 1
PALLIATIVE_FACTORS : 1
CANCELLED_AT : 1
EDUCATION_EASY : 1
MEDICATION_WAL : 2
ON_YES : 1
REASSESSMENT_DIAGNOSIS : 1
INDIVIDUAL_INTENSITY : 1
TREATMENT_PLAN : 1
CAREFULLY_SELECT : 3
AND_RX : 1
SUBSTITUTE_FOR : 1
OU_NOTE : 1
ADDENDUM_SHIFT : 1
CARE_AS : 1
WILL_REPEAT : 2
DICTATION_ADMISSION : 1
LIST_LIST : 1
ARE_YOU : 1
IN_FOLLOW : 1
CM_BP : 1
CALLER_SHE : 1
ELECTRIC_PC : 1
POP_TOE : 1
MINIMAL_IN : 1
WELL_DIFFICULTY : 1
REQUIRED_DARLENE : 1
WANTS_SEE : 1
FOR_DIABETICS : 1
HOSPITALIZATION_FOR : 1
SHE_PRESCRIBED : 1
YOU_THE : 1
ABOUT_PRESENT : 1
NOT_IN : 1
TIMES_OF : 1
HALTER_FITTING : 1
SEE_OF : 1
VA_CENTER : 1
KG_SUPERVISING : 1
OF_NURSE : 1
WORK_TREATMENT : 1
HISTORY_ALLERGIES : 1
YOU_DRINK : 1
FOR_THE : 2
EAST_ST : 1
THE_BELOW : 1
AND_TEETH : 1
OR_LOT : 1
TYPE_OF : 2
RECORD_FOR : 1
REPORT_THE : 1
WITH_CANE : 1
FOR_SESSION : 1
DEMONSTRATE_TO : 1
THREE_FOR : 1
MED_AND : 1
STARTED_GOING : 1
TO_IDENTIFIED : 1
OR_GLUCOPHAGE : 1
FURTHER_SCHEDULING : 1
SEE_REMOTE : 1
NOTE_PULSE : 1
PALLIATIVE_INCLUDES : 1
AT_TIME : 3
THERE_NO : 1
CUT_REQUIRED : 1
TO_VETERAN : 1
POSTPROCEDURE_LEFT : 1
NONORGANIC_OR : 1
MIGRAINE_ARTHRITIS : 1
CALM_HAS : 1
ADMINISTRATION_THE : 1
BURSITIS_ARE : 1
PROSTATE_WITH : 1
SURROUNDINGS_NO : 1
HE_GET : 1
NO_VITAL : 1
YES_NO : 1
PRESSURE_STOP : 1
PROBLEM_BELOW : 1
HURT_EXAM : 1
PHYSICAL_THERAPY : 1
AND_PROCEDURE : 1
PHYSICAL_URINE : 1
SCREENING_TRAZODONE : 1
PROBLEMS_PRESSURE : 1
WIDOWED_LIVES : 1
FOR_BRONCHITIS : 1
READ_ITEM : 3
WILL_TO : 1
FINGER_FOREIGN : 1
NEUROPATHY_HYPERKERATOTIC : 1
WITH_HAS : 1
NO_BIOLOGICAL : 1
INFORM_YOU : 1
THIS_WAS : 1
HYCLATE_CAP : 1
DISCHARGE_PLAN : 1
PULSES_SKIN : 1
BROKEN_WILL : 1
DEFER_MEMORIAL : 1
DEPRESSION_DOXYCYCLINE : 1
FAIR_AORTIC : 1
HYCLATE_MG : 1
WERE_HE : 1
PATIENT_HEIGHT : 1
TIME_ALLERGIES : 1
BEEN_YEAR : 1
MRI_RIGHT : 2
TO_NOTES : 1
GYNPA_APPOINTMENT : 1
RENEWAL_NOTE : 1
DISEASE_IS : 1
INDEX_PREOP : 1
HAS_UROLOGY : 1
PULSE_BY : 1
TO_BY : 1
FEELING_HOPELESS : 1
HOSPITALIZATION_BRONCHITIS : 1
MR_IS : 1
WE_REPEAT : 1
QUALIFIERS_TOTAL : 1
PT_APPOINTMENT : 1
AT_TEMAZEPAM : 1
PM_APPOINTMENT : 1
WAS_ALSO : 1
OF_SUPPORTIVE : 1
INFORMATION_APPOINTED : 1
DATA_MRP : 1
ACUTE_PATTERNS : 1
IN_PNT : 1
SUPPORT_PERSONNEL : 1
OF_IS : 2
HAD_DONE : 1
APPRECIATE_PATIENCE : 1
LOUNGE_CHAIR : 1
COMPLAINS_ONCE : 1
WILL_BE : 1
STATUS_LAST : 1
CAP_AGREES : 1
SINCE_ANGIO : 1
SIGNS_IN : 1
PROFILE_AT : 1
ADVERSE_PATIENT : 1
WELL_HIM : 1
CIRCUMFERENCE_GIRTH : 1
HOURS_ADDENDUM : 1
USUALLY_WITH : 1
LATINO_SCREENING : 1
HCTZ_REQUEST : 1
PSYCHIATRY_AND : 1
PROGRAM_WEIGHT : 1
TO_PRING : 1
LETTER_ALONG : 1
RELAXANT_SYSTEM : 1
RECURRENT_VTACH : 1
APPT_LIST : 1
OS_CELLS : 1
MRI_OF : 2
IS_HAS : 1
SHE_DOES : 1
VISTA_MEDICATION : 1
NO_PREPATELLAR : 1
REVIEW_STATEMENTS : 1
OF_DID : 1
WILL_COUMADIN : 1
OBSTRUCTION_INSTRUCTED : 1
APPOINTMENT_LETTER : 1
TEETH_ARRIVAL : 1
THIS_ADMISSION : 1
BRAIN_INJURY : 1
WHILE_TO : 1
IS_AS : 1
OCT_LAD : 1
LIST_DIRECTED : 1
PATIENT_WAS : 2
HE_ON : 1
HAND_SWOLLEN : 1
USER_WE : 1
SYSTEM_HOURS : 1
IN_HAD : 1
STRONG_FLUID : 1
HAS_QUIT : 1
INCONTINENCE_NURSE : 1
UNITS_REF : 1
REQUEST_NFI : 1
PATIENTS_PROFILE : 1
VIA_PT : 1
IN_ACUTE : 1
AND_IS : 2
MG_TWICE : 1
TX_NAME : 1
INFORM_OF : 1
HEALTHWISE_FOR : 1
AS_DIRECTED : 1
FORMER_SUPERVISOR : 1
PATIENT_PATIENT : 1
WAS_MINIMAL : 1
LEFT_SUBJECTIVE : 1
MEDICATIONS_HE : 1
PCP_APPOINTMENT : 1
SMOKE_LIVES : 1
ANATOMICAL_POST : 1
HE_MARRIED : 1
THE_WILL : 1
UNDERSANDING_INSTRUCTIONS : 1
CONTROL_SELFCARE : 1
DIAGNOSIS_NONISCHEMIC : 1
TABLETS_MOUTH : 1
CONTACT_NOTE : 1
WARFARIN_DOSE : 1
USE_OPERATING : 1
FOR_LIFE : 1
PATIENT_GIVEN : 1
HE_THE : 1
HYPERTROPHY_BENIGN : 1
PHYSICAL_CONSULT : 1
HOUSING_OVER : 1
PATIETN_REPORTS : 1
VETERAN_VA : 1
FOR_AM : 1
VALVE_REPLACEMENT : 1
HOURS_OF : 1
OUTPATIENT_MEDICATIONS : 2
TAB_TWO : 1
VISIT_WAS : 1
HE_CAN : 1
AT_FOR : 1
TEST_RESULT : 1
WEEK_SINUS : 1
NEXT_REPORTS : 1
SUPERVISING_OF : 1
MEMORIAL_BLVD : 1
SYSTEM_RECOMMENDATION : 1
WAS_ON : 2
OUTPUT_SKIN : 1
DOES_PATIENT : 1
FOR_BLOOD : 1
ICOTHE_ADDITIONAL : 1
CONT_TO : 1
QUIT_TOBACCO : 1
REPLACEMENT_ASSOCIATES : 1
OF_STAFF : 1
HAS_MEDICATION : 1
GRADUALLY_EYE : 1
DID_PROVIDER : 1
NEGATIVE_SCORE : 1
IS_CHECKING : 1
PARTIAL_OF : 1
VISION_CONVERSATION : 1
COLD_WEEK : 1
PHENYLEPHRINE_TROPICAMIDE : 1
IDENTIFIED_BILATERALLY : 1
REF_RANGE : 1
THAT_THE : 1
PM_AND : 1
AT_TO : 1
PATIENT_ANSWERED : 1
EYE_CONTACT : 1
TAB_PATIENT : 1
TAB_TAKE : 3
ASSIGNED_TO : 1
FINGERSTICK_SPOKE : 1
ONE_TABLET : 3
UNDERSTANDING_IS : 1
INFLUENZA_VACCINE : 1
PATIENT_FOR : 1
NOTES_THIS : 1
CONFIRMED_PATIENT : 1
AORTIC_VALVE : 1
ML_REGULAR : 1
SEVERE_DISTURB : 1
REPORTS_HE : 2
DY_HYTHMIA : 1
ME_CARE : 1
SPEECH_HISTORY : 1
WAS_INCREASE : 1
CONFIRMED_WITH : 2
CLINIC_OS : 1
NEEDED_REQUESTING : 1
YES_EVERY : 1
NUMBER_STAFF : 1
ANSWER_BEFORE : 1
HIS_IN : 2
SERVICE_SERVICE : 1
OR_CREAT : 1
THE_OR : 1
NO_IN : 1
LEGS_ICDCM : 1
LEVEL_OF : 1
FARES_CARDIAC : 1
AT_THE : 1
OF_WEEK : 1
SOB_WITH : 1
YOUR_NO : 1
OF_VERBALIZES : 1
HYGIENE_OF : 1
OF_AS : 1
FOR_ELECTRONIC : 1
NEURO_SENSATION : 1
CANCELLED_PATIENTS : 1
CLASS_DISTURB : 1
IS_ABLE : 1
ARTERIES_WERE : 1
LET_SOCIAL : 1
TERM_ADT : 1
CLINICAL_FU : 1
THE_CORRECT : 3
REPORT_IF : 1
ALLERGY_ADR : 1
YOU_HOPELESS : 1
CONTACT_FACILITY : 1
GESTURES_SOB : 1
YES_AND : 1
INFORMATION_LEFT : 1
BED_PAST : 1
STATUS_YOU : 1
HERE_HAND : 1
SHE_ALCOHOL : 1
PATTERNS_VETERAN : 1
CAROTID_THIS : 1
INFORMATION_APPOINTMENT : 1
AM_TEMAZEPAM : 1
ONE_TO : 1
CANE_TELEPHONE : 1
PLEASE_AN : 1
SHE_WAS : 1
LOCATION_SCALP : 1
SIGNATURE_INFORMED : 1
INTERESTED_VOCATIONAL : 1
HPI_SEE : 1
IN_NEXT : 1
CAN_GET : 1
HAVE_PARTICULAR : 1
READINGS_IN : 1
UP_IPT : 1
NO_SITES : 1
IT_PCP : 1
WAL_REQUEST : 1
THERAPY_SENSATION : 1
FOR_HE : 1
SESSION_SHARED : 1
DING_NONE : 1
PROGRAM_LB : 1
LAD_TO : 1
VACCINE_DURING : 1
THIS_USUALLY : 1
DECREASED_ROM : 1
NAME_AND : 1
INFORMATIONAL_LET : 1
SPINAL_CORD : 1
TASK_PERSONAL : 1
FLU_MAR : 1
BATH_SHAMPOO : 1
SITES_STRONG : 1
VISTA_IMAGING : 1
ATHENSC_ICOTHE : 1
HYDROMORPHONE_MG : 1
THIS_EVENING : 1
GIVEN_THE : 1
SKIN_MOISTURE : 1
INTERNAL_DEFIBRILLATOR : 1
CELLS_OS : 1
DID_THE : 1
INDEX_FOREIGN : 1
MORBID_OBESITY : 1
THE_VACCINE : 1
ALCOHOL_IN : 1
HAVE_VETERAN : 1
HISTORY_THIS : 1
IMED_THIS : 1
ICDCM_LEGS : 1
MIN_LAYING : 1
ARM_TREATMENT : 1
THIS_ALREADY : 1
WIFE_TRL : 1
THE_VISIT : 1
TAKE_TABLETS : 1
PATIENT_HERE : 1
MOUTH_TWICE : 2
ALTHOUGH_HE : 1
ASSISTANCE_TO : 1
WELL_FOR : 1
IN_DEC : 1
TO_MINS : 1
THIS_HE : 1
NO_BACK : 1
SEE_DURATION : 1
NONE_HEMATURIA : 1
AC_DL : 1
BELL_IN : 2
THE_LESION : 1
CAME_FOR : 1
NO_OSTEOARTHROSIS : 1
WITH_LIQUIDS : 1
INCONTINENCE_COMMENTS : 1
HURT_OUTPATIENT : 1
TELEPHONE_NUMBER : 1
WITH_PROVIDERS : 1
COMMENTS_DISCUSSED : 1
THIS_VISIT : 1
REACH_MG : 1
DILATING_USED : 1
ATHENS_REMOTE : 1
MINUTES_SUPPORTIVE : 1
HE_STARTED : 1
HE_NO : 1
BUSPIRONE_MG : 1
UNDERSTANDING_THERE : 1
OUTPUT_REGULAR : 1
ABLE_PASS : 1
MINS_AUDITC : 1
NOTES_WILL : 1
MY_ATTENDING : 1
OF_NO : 1
ACCORDING_THE : 1
FOR_MINUTE : 1
JOB_AT : 1
PRIORITY_PATIENT : 1
FOLLOWING_DIAGNOSIS : 1
REFER_COUMADIN : 1
AN_LETTER : 1
THE_SUPERVISING : 1
DISCREPANCIES_DIAGNOSIS : 1
QUALITY_CRAMPS : 1
RETINOPATHY_OT : 1
READ_EACH : 3
EXPERIENCE_INJURY : 1
SURGEON_CUT : 1
WERE_IDENTIFIED : 1
ANY_OF : 1
STATED_THE : 1
LEFT_IF : 2
INFLUENZA_NOT : 1
INTAKE_SKIN : 1
COUNSELING_INFLUENZA : 1
EDEMA_LIST : 1
NO_SIGNIFICANT : 1
FACILITY_NEEDS : 1
ALLERGY_WIGENERAL : 1
TYPE_CLINICAL : 1
COUMADIN_FAIR : 1
REVIEWED_NOTES : 1
FOR_DIABETIC : 1
HEMATURIA_OUTPATIENT : 1
FEELS_LUMBAR : 1
MEASUREMENT_QUALIFIERS : 1
SPECIFY_CRAMPS : 1
TO_RN : 1
HAS_ANSWERED : 1
MONITORING_ALBUMIN : 1
CONCERNING_PCC : 1
CBI_PULMONARY : 1
MR_CAN : 1
BEFORE_YESTER : 1
NO_RECURRENT : 1
AND_MORE : 1
WILL_CUT : 1
FULL_NAME : 1
REQUESTING_WITH : 1
SEE_DATA : 1
WNL_ADMINISTRATIVE : 1
TOTAL_CBI : 2
MEDICATIONS_STATUS : 2
ADMISSION_ASSISTANCE : 1
NO_UCINATIONS : 1
NUMBER_UNSURE : 1
MONITORING_CIRCUMFERENCE : 1
XYZZY_MEDICATION : 2
AND_NOTES : 1
IS_VERY : 1
DONE_MRI : 1
TELEPHONE_TEMPERATURE : 1
GLYCOHEMOGLOBIN_FOR : 1
TESTS_YOU : 1
RIGHT_SKIN : 1
THOUGHT_CLEAR : 2
SUPERVISOR_JOB : 1
THIS_DOES : 1
MUGA_SCAN : 1
AND_THERE : 1
NOT_NUMBER : 1
TWO_BY : 1
WEEK_READINGS : 1
CUT_LESION : 1
USED_PHENYLEPHRINE : 1
TELEPHONE_CONFIRMED : 1
SITES_ME : 1
CALLER_RESPONSE : 1
AM_PAST : 1
LIQUIDS_EVALUATION : 1
DYSFUNCTION_PEYRONIES : 1
FROM_MOTILITY : 1
CONFIRMED_FULL : 1
NO_RADICULOPATHY : 1
CLINIC_PULSE : 1
EXOPHORIA_FULL : 1
WAS_IF : 1
HAS_SMOKING : 1
QUIT_SMOKING : 1
IS_NOT : 1
HEMATURIA_FREQUENCY : 1
FOREIGN_HAVE : 1
AND_HYPERKERATOTIC : 1
FULL_NO : 1
NFI_OU : 1
OS_CARDIAC : 1
OF_SHOULDER : 2
FURTHER_CARBON : 1
THE_PRESENT : 1
GREAT_IN : 1
CONTAINING_IN : 1
TO_CALLER : 1
TWO_AGO : 1
WITHOUT_DIFFICULTY : 1
OF_ASSISTANCE : 1
GDX_WNL : 1
CREATININE_SERUM : 1
SOUNDS_PATIENT : 1
HOME_AGREE : 1
MEDICATION_RECONCILIATION : 2
HAS_PRONE : 1
TYPE_VISIT : 1
SCHULER_BE : 1
INFORMATION_FACILITY : 1
ERECTILE_DYSFUNCTION : 2
SERUM_NO : 1
AND_ADL : 1
APPOINTMENT_RESCHEDULED : 1
SEE_LIST : 1
HOW_DID : 1
BX_SCALP : 1
PATIENT_PRESSURE : 1
ABLE_DEMONSTRATE : 1
AT_NUMBER : 1
PAIN_VET : 1
HDL_RESTING : 1
NKA_STATED : 1
SERVICE_FUNDING : 1
FLUID_NO : 1
SUBJECTIVE_WAS : 1
MONTHS_AT : 1
BEEN_OLD : 1
AGENT_PHENYLEPHRINE : 1
PINHOLE_NO : 1
NOT_HISPANIC : 1
CBI_URINE : 2
CONTRACT_YOUR : 1
COPD_PNEUMONIA : 1
SITES_HOME : 1
NO_QUIT : 1
RECURRENT_EDEMA : 1
LIVES_NO : 1
IF_SHOULDER : 1
TECHNIQUE_RECENTLY : 1
SCALP_LEFT : 1
AND_SUPERVISOR : 1
ON_SIGNATURE : 1
FOR_MOOD : 1
AND_MEDS : 1
EDEMA_APPT : 1
SHIFT_OUTPUT : 2
FARES_DY : 1
WORKING_AS : 1
CALL_TYPE : 2
SENSATION_BY : 1
ALCOHOL_QUIT : 1
NO_PAIN : 3
FROM_THE : 1
EXPERIENCE_AN : 1
ELECTRONICALLY_FILED : 1
OTHERS_OR : 1
FOR_DEPRESSION : 1
OR_YOU : 1
AS_ABOVE : 1
OR_SURGICAL : 1
HEIGHT_IN : 2
TEMPERATURE_BELL : 1
NOT_SEE : 1
IN_BED : 1
ZOLADEX_SEP : 1
TOBACCO_RETIRED : 1
PHENYLEPHRINE_ANT : 1
TEMPERATURE_PROGRESS : 1
HAVE_DRINK : 1
PNT_REPORTS : 1
VA_CLINIC : 1
ETHNICITY_HISPANIC : 1
ASSISTANCE_NUMBER : 1
HAS_COLD : 1
AT_AM : 1
FINGERSTICK_WITH : 1
PRESCRIBED_THIS : 1
SPOKE_PT : 1
SCHULER_CAN : 1
STARTED_TO : 1
MOISTURE_CBI : 1
CM_EAST : 1
WAS_NEGATIVE : 1
OU_ADMINISTRATIVE : 1
UP_TIME : 1
IS_IMPROVEMENT : 1
HE_BEEN : 2
TENDINOPATHY_SUBSCAPULARIS : 1
OF_IF : 1
ML_SKIN : 1
LETTER_WITH : 1
UP_BELL : 1
LEFT_SPONSOR : 1
WEEK_CBC : 1
TO_COMPLETED : 1
FLU_SEASON : 1
WAS_BIPAP : 1
CONTINUES_LAMENT : 1
NEW_HE : 1
SUPERVISING_PRACTITIONER : 1
LIST_OF : 1
THE_PROVIDERS : 1
FUNDING_CONNECTED : 1
TO_WILL : 1
SUPPORTIVE_THERAPY : 1
POSTPROCEDURE_DIAGNOSIS : 1
NEXT_PNT : 1
GLUCOPHAGE_BREATH : 1
ABIDE_BY : 1
BIOLOGICAL_CM : 1
TEMAZEPAM_MG : 1
TREATMENT_PROCEDURE : 1
TO_AT : 1
THIS_AND : 1
APPOINTMENT_UROLOGY : 1
SOCIAL_TREATMENT : 1
TIME_FOLLOWUPACTIVITY : 1
SEAT_USE : 1
CALLS_PSYCHOLOGY : 1
FROM_CATEGORY : 1
WIFE_DERBY : 1
THAT_IS : 1
HEMATURIA_URINARY : 1
TO_COLD : 1
CM_RD : 1
RECEIVED_THIS : 1
SAYS_WAS : 1
HRS_GYNPA : 1
COPD_STROKE : 1
MEDICATIONS_DO : 1
HE_FEELS : 1
OF_USUALLY : 1
PRESSURE_TO : 1
FACTORS_SPECIAL : 1
PC_AHMED : 1
ICDCM_RESTLESS : 1
LIFE_CONTAINS : 1
ACTIVE_MORBID : 1
CAROTID_BRUITS : 1
ZOCOR_IS : 1
FOR_MUSCLE : 1
ADMISSION_NUMBER : 1
NORTHERN_ELECTRIC : 1
TIME_WILL : 1
ONE_FEET : 1
PUBLIC_HOUSING : 1
REF_SITE : 1
FOR_RIC : 1
OUT_OF : 1
TABLET_MOUTH : 3
WRITING_SOB : 1
COPY_OF : 1
IMPROVEMENT_ACUTE : 1
FELT_OR : 1
BLOOD_SUGAR : 1
EYE_AND : 1
HE_HAS : 6
OR_NO : 1
YESTER_BACK : 1
OTHERS_ACTIVITIES : 1
ARTERIES_IDENTIFIED : 1
MG_MOUTH : 1
DIAGNOSTIC_DATE : 1
SAYS_SHE : 1
SUPRASPINATUS_TENDONOPATHY : 1
TO_DING : 1
RISK_FACTORS : 1
PNEUMONIA_MIGRAINE : 1
AND_HE : 2
AREA_ATHENSC : 1
STRESS_INCONTINENCE : 1
STATEMENTS_BELOW : 1
THE_CLINIC : 1
ALBUMIN_GIRTH : 1
AREA_PREPPED : 1
YOUR_AND : 1
SHAMPOO_AND : 1
ATHENS_RART : 1
HYPOGLYCEMIA_AM : 1
TO_DEMONSTRATE : 1
SEE_CONSULTANT : 1
PSYCHOLOGY_OF : 1
MEETING_ON : 1
OR_ADMISSION : 1
DIAGNOSIS_PATIENT : 1
CANT_TO : 1
SITES_RIGHT : 1
ATTEND_CLC : 1
VENTRICULAR_RWAVES : 1
MEDICATION_REQUEST : 1
OF_PHONE : 1
ASA_CLASS : 1
ALCOHOL_TEST : 1
COUNSELED_DAILY : 1
WILL_SEE : 1
BILATERAL_KNEE : 1
THERE_WAS : 2
AS_TO : 1
LAND_THE : 1
BILATERALLY_NO : 1
REQUIRED_BY : 1
CLIENT_CAME : 1
AOPC_NOTE : 1
APPOINTMENT_INFORMATION : 2
TL_ED : 1
RIC_MG : 1
RELATED_TO : 1
ALREADY_YEAR : 1
THE_APPOINTMENT : 1
PRESENT_OR : 1
HOME_CARE : 1
ON_MRI : 1
COPAYMENT_HOT : 1
HEMATOCRIT_WERE : 1
SERIES_PHONE : 1
UNSPECIFIED_CURRENT : 1
AT_IPT : 1
CELLS_DIAGNOSIS : 1
THAT_PT : 1
QUIT_RETIRED : 1
BRUSH_BEFORE : 1
PERFORMED_MPLS : 1
OSTEOARTHROSIS_THE : 1
OF_NEEDED : 1
LEFT_VENTRICULAR : 1
WAS_SEEN : 1
ASTHMA_COPD : 1
DOSE_MG : 1
AGREES_ABIDE : 1
PHONE_AND : 1
MESSAGES_ABLE : 1
OF_NOTED : 1
MEMBER_DISCUSSED : 1
SPECIFY_QUALITY : 1
ENCOUNTER_IS : 1
SPECIAL_POPULATIONS : 1
PRESSURE_CONTROL : 1
AND_WORKER : 1
PERRLA_RESPIRATION : 1
RESTLESS_LEGS : 1
FOR_DERMATOCHALASIS : 1
SUBJECTIVE_MR : 1
ML_CBI : 2
TELEPHONE_TPOPC : 1
NEURO_ORIENTED : 1
AND_AS : 1
NO_NO : 2
BP_OCT : 1
WAL_ADDITIONAL : 1
FOR_PLEASE : 1
ASSISTANCE_BENIGN : 1
SIDERAILS_UP : 1
REMOVED_HISTORY : 1
PATIENT_VIA : 1
IN_SAME : 1
CLC_ON : 1
HAS_NKA : 1
SKIN_DIAGNOSIS : 1
HYGIENE_LEVEL : 1
BELOW_HAS : 1
DYSPHAGIA_EVALUATION : 1
ARTHRITIS_NONVA : 1
RESPIRATION_DIAGNOSIS : 1
ANGRY_HIS : 1
MIN_DISCHARGE : 1
PT_STATED : 1
POPULATIONS_THE : 1
PT_CONFIRMED : 1
NO_CLEAR : 1
DISCHARGE_TO : 1
MORBID_CALLER : 1
APPOINTED_PLA : 1
PULSE_LEFT : 1
WAS_PHYSICIAN : 1
PATIENT_TO : 1
PREPATELLAR_ARE : 1
DOCUSATE_MG : 1
STROKE_MIGRAINE : 1
ELECTRIC_PATIENT : 1
PATIENT_CONTACT : 1
ANGIO_CM : 1
MODE_OF : 1
BACK_PAIN : 2
ASSOCIATES_POSSIBLE : 1
AHMED_YASSAR : 1
REACH_CONT : 1
FOR_NEUROPATHY : 1
TO_BE : 1
OR_OF : 1
INFORMATION_INFORMATION : 1
DECREASED_OF : 1
THE_RESULTS : 1
MONOFILAMENT_PALLIATIVE : 1
TPOPC_PROGRESS : 1
FACILITY_PCP : 2
PCP_HPI : 1
LETTER_STATING : 1
BRUITS_HAS : 1
SPECIFY_REVIEW : 1
ANY_CORD : 1
HERE_CUTDOWN : 1
SYSTEM_THIS : 1
PROVIDERS_DOES : 1
PAST_PAST : 1
SHE_NOT : 1
SEP_PC : 1
MIGRAINE_NONVA : 1
WITH_ED : 1
FOUR_MODE : 1
MOUTH_FOR : 1
REQUEST_RESCHEDULED : 1
SCREEN_DEPRESSION : 1
SUPPORTIVE_INDIVIDUAL : 1
HURTS_TO : 1
APPOINTMENT_SCHULER : 1
ATTENDING_DICTATION : 1
AND_FORMER : 1
SCAN_TIGHTNESS : 1
PHYSICIAN_DICTATION : 1
CORRECT_BEFORE : 1
CONDITION_WNL : 1
CONVERSATION_WITH : 1
IMED_APPRECIATE : 1
ASSISTANCE_ASSISTED : 1
WE_WILL : 2
PROVIDER_TALK : 1
YOU_DONE : 1
MUCH_NO : 1
PAIN_CAN : 1
VERIFIED_HYGIENE : 1
NO_INCREASE : 1
INFORMED_FURTHER : 1
OLD_WITH : 1
MOTILITY_ROM : 1
OUTPATIENT_PAIN : 1
THE_HE : 1
ALSO_DOCUMENTATION : 1
KNEE_RESTLESS : 1
WITH_THE : 3
FOR_MESSAGE : 1
SCREENING_SCREEN : 1
CRAMPS_HAS : 1
HE_DOING : 1
FOR_RELAXANT : 1
PATIENT_ASKED : 1
ACTIVE_AC : 1
SEVERE_VISION : 1
DURING_ADMISSION : 1
YES_THAT : 1
URGENCY_WEAKNESS : 1
NOT_RECEIVED : 1
HYDROMORPHONE_HCL : 1
FOR_FEELING : 1
WAS_DOCUMENTATION : 1
WITHIN_OF : 1
HAD_ANY : 1
HAVING_KNEE : 1
ELECTRONICALLY_PHYSICAL : 1
DISCUSSED_WEEKLY : 1
ACTIVE_ADVERSE : 1
TENDONOPATHY_OF : 1
ASTHMA_PNEUMONIA : 1
RESCHEDULED_AT : 1
LETTER_IT : 1
PRACTITIONER_RECORD : 1
TYPE_FU : 1
ASSISTED_LOUNGE : 1
PATIENT_INFORMATIONAL : 1
PATIENT_DEMOGRAPHICS : 1
INFORMATIONAL_SOCIAL : 1
OSTEOARTHROSIS_INVOLVING : 1
ANY_WILL : 1
OF_IDENTIFIED : 1
GET_AT : 1
TO_BLOOD : 1
SCREENING_GIVEN : 1
YESTER_FELL : 1
OF_WITH : 1
AORTIC_REPLACEMENT : 1
RESULTS_OF : 1
OF_PROSTATE : 1
ON_AT : 1
APPRIPRIATE_OR : 1
LOWER_REMOVED : 1
FUNDING_SERVICE : 1
AND_TO : 1
ALMOST_OF : 1
OD_TIME : 1
WIFE_DIED : 1
ABOVE_ACTIVITY : 1
GOT_OUTPATIENT : 1
WITH_CALLER : 1
AFFECT_APPRIPRIATE : 1
PALPABLE_GAVE : 1
CLEAR_CLIENT : 1
NOS_PRESCRIPTION : 1
IS_TO : 3
YASSAR_HOW : 1
OF_CALLS : 1
CHAIR_SIDERAILS : 1
IT_IS : 1
TOBACCO_OPERATING : 1
APPOINTMENT_LEFT : 1
REVIEW_PATIENT : 1
DIED_BURSITIS : 1
DOCTOR_APPROVAL : 1
EASY_READING : 1
MOVE_PROGRAM : 1
BELOW_DENIES : 1
TO_ABOVE : 1
IF_PT : 1
ASA_SEVERE : 1
ORIENTED_RESPIRATION : 1
NECK_PAIN : 1
STRESS_NURSE : 1
MINUTES_OF : 1
MOTILITY_EXOPHORIA : 1
CARDIOMYOPATHY_RECURRENT : 1
YES_HISTORY : 1
DURATION_COMPLAINT : 1
CARE_SERVICE : 1
BE_REACHED : 1
ASKED_INTERESTED : 1
DL_PROCEDURES : 1
INDEPENDENT_NUMBER : 1
THIS_WORKER : 1
RESTING_STAFF : 1
RECONCILIATION_ACTIVE : 1
DEMOGRAPHICS_PATIENT : 1
TX_TEST : 1
AS_HE : 1
CAP_PATIENT : 1
OF_CONTRACT : 1
QUESTION_OF : 1
TAKEN_TO : 1
BODY_HAVE : 1
THE_MEDICATION : 1
EVENING_ALTHOUGH : 1
ANESTHESIA_RAL : 1
ACCOMPANIED_FAMILY : 1
THE_PMH : 1
LIMITATIONS_RISK : 1
SUMMARY_COMPLAINS : 1
THIS_FALL : 1
WHILE_PRAVASTATIN : 1
VITAL_TAKEN : 1
REVIEW_OF : 2
FOR_CONTACT : 1
PREOP_BATH : 1
TALK_TO : 1
FOR_HIM : 1
SUBJECTIVE_IS : 1
DING_HEMATURIA : 1
THE_LEFT : 2
TIME_OF : 1
BIPAP_THE : 1
NOS_MEDICATION : 1
PATIENT_NOT : 3
BREATH_SOUNDS : 1
GET_UP : 1
NOT_ANY : 2
FOR_AC : 1
WHILE_HURTS : 1
ARM_PROCEDURE : 1
PULSE_ACCOMPANIED : 1
USE_MOMETASONE : 1
THIS_NOTE : 1
AT_MPLS : 1
DYSURIA_OF : 1
WAS_UPSET : 1
TWO_RENAL : 1
BROKEN_WE : 1
HE_THAT : 4
SYSTEMS_BLOOD : 1
BP_LAD : 1
PROVIDED_TO : 1
AS_CAN : 1
COLD_FOR : 1
MD_WPB : 1
YASSAR_OFTEN : 1
HOPELESS_ABOUT : 1
VISION_WITH : 1
RANGING_NO : 1
DIFFICULTY_FELT : 1
NUMBER_PER : 1
NONORGANIC_UNSPECIFIED : 1
REST_WEEK : 1
SCALP_ARM : 1
WAS_PRESCRIBED : 1
COUGH_SEEN : 1
IN_CM : 4
RECONCILIATION_RESP : 1
BY_SERIES : 1
HAS_BEEN : 5
PROVIDERS_THIS : 1
SCHEDULED_AM : 1
BRIEF_COUNSELING : 1
INTAKE_TEMPERATURE : 1
THE_EDEMA : 1
CURRENT_DOSE : 1
PASS_HAS : 1
SOFT_TISSUES : 1
GIVEN_NEXIUM : 1
UNSPECIFIED_COUNSELING : 2
STATED_THAT : 2
UNSPECIFIED_HYDROMORPHONE : 1
IF_DECREASED : 1
SIDERAILS_CALL : 1
AND_FOOT : 1
FOR_FOLLOW : 1
PRIMARY_SUBJECTIVE : 1
COUNSELING_NO : 1
INTACT_LIGHT : 1
INCLUDES_AND : 1
ACTIVE_RESPIRATION : 1
CONNECTED_HOME : 1
BY_ACTIVE : 2
URINARY_OBSTRUCTION : 1
VETERAN_GOES : 1
OR_BREATH : 1
BY_FAMILY : 1
BURSITIS_PREPATELLAR : 1
TEAM_IDENTIFIED : 1
PATIENCE_AND : 1
SCREENING_CONSULT : 1
ASSIGNED_CALLER : 1
INR_HEMOLYZED : 1
IMAGING_RECONCILIATION : 1
FAMILY_THE : 1
RANGING_HYPOGLYCEMIA : 1
SELECTED_FROM : 1
PATIENT_ENCOUNTER : 1
SEP_AHMED : 1
COMPLAINT_NOT : 1
AS_PATIENT : 1
INSTRUCTIONS_DECREASED : 1
PAST_AM : 1
SKIN_COLOR : 1
OUT_PULSE : 1
NOTE_TRAMADOL : 1
OF_FOLLOWING : 1
ABOUT_LOST : 1
MG_WED : 1
POST_SCALP : 2
WITH_OTHER : 1
WITH_THERE : 1
ED_TO : 1
EXTRAOCULAR_MOTILITY : 1
TIGHTNESS_THERE : 1
SEEN_PULSE : 1
MARRIED_HAS : 1
HEMORRHOIDS_THE : 1
HDL_MEDICATIONS : 1
RESPONSE_APPT : 1
OF_TINY : 1
SUBSTITUTE_HEIGHT : 1
MG_TAB : 5
FOLLOW_UP : 1
IN_THE : 1
JOB_NORTHERN : 1
APPOINTED_PCP : 2
RECEIVED_SPECIFY : 1
PROBLEM_UNSPECIFIED : 2
WITH_FAMILY : 1
CHECKING_BG : 1
FINDINGS_AND : 1
TECHNIQUE_TO : 1
CAN_REACHED : 1
MG_CAP : 3
CARE_FUNDING : 1
INJECTIONS_IF : 1
WIDOWED_ALONE : 1
WAS_WITH : 1
UNITS_RANGE : 1
BACK_WORD : 1
MESSAGE_LABS : 1
FLUID_RETENTION : 1
RADIAL_PALPABLE : 1
STICK_IT : 1
AT_BEDTIME : 1
SOB_EXERTION : 1
SMOKING_CESSATION : 1
YES_REASON : 1
YOU_FEELING : 1
VTACH_INTERNAL : 1
REACH_WILL : 1
NOTE_DYSFUNCTION : 1
BURNING_HOT : 1
OF_TESTS : 1
CALLER_SAYS : 1
ELECTIVE_PATIENT : 1
READING_REPORTS : 1
OF_NOT : 1
HIS_IF : 1
BUT_OT : 1
PATIENT_IS : 3
AUDITC_WAS : 1
PREVIOUS_IMMUNIZATION : 1
WILL_HIS : 1
NOT_HAVE : 2
APPOINTMENT_CONFIRMED : 1
AND_WANTED : 1
TAKE_TWO : 1
APPOINTMENT_AT : 2
PEYRONIES_PATIENT : 1
HAS_BACK : 1
TABLETS_BY : 1
OUTBURSTS_WIFE : 1
SERUM_ARTHRALGIA : 1
MIN_AFTER : 1
INFORMED_FOR : 2
LAND_AREA : 1
OD_CELLS : 1
RANGE_SITE : 1
RAL_STARTED : 1
THE_HAD : 1
TYPE_CONTACT : 1
YRS_MAR : 1
PATIENT_NO : 1
RAL_RECENTLY : 1
PUBLIC_FOR : 1
SENSATION_MONOFILAMENT : 1
PROCEDURE_THE : 1
ZOLADEX_PC : 1
TO_BED : 1
APPOINTED_BERYL : 1
OUTPUT_IRRIGANT : 2
PC_TEAM : 1
VIA_INJECTION : 1
RETIRED_EXTRAOCULAR : 1
CHART_PATIENT : 1
KS_INFORMED : 1
THERAPY_DECREASED : 1
IS_COPAYMENT : 1
AND_COUGH : 1
FOR_FURTHER : 1
APPRIPRIATE_SI : 1
BEEN_IN : 1
AN_FROM : 1
TIGHTNESS_IS : 1
ADDITIONAL_INFORMATION : 2
TAKE_CAPSULE : 1
IDENTIFIED_NUMBER : 1
ADMISSION_ASSISTED : 1
THIS_ALTHOUGH : 1
UPSET_BY : 1
WIFE_IMMUNIZATION : 1
VITAL_MEASUREMENT : 1
TENDONOPATHY_WITH : 1
GROSSLY_INTACT : 1
SOCIAL_WORK : 1
ORDERED_SEE : 1
IMPRESSION_MARCH : 1
DATA_HE : 1
OF_INSTRUCTIONS : 1
AND_THE : 4
ICDCM_HAVING : 1
TO_BEHAVIOR : 1
OUTSIDE_VA : 1
DID_YOUR : 1
BREATH_PROVIDED : 1
PROGRESS_NOTE : 1
CONSULT_FILED : 1
SOFT_SUPRASPINATUS : 1
SEAT_BELT : 1
POST_POST : 1
HE_IS : 2
PT_FULL : 1
PLAN_PROBLEM : 1
DECREASED_SENSATION : 1
TIMES_FOR : 1
NOT_IDENTIFIED : 1
IMED_SYSTEM : 1
REPEAT_MILW : 1
WANTED_MORE : 1
RESPIRATION_SOFT : 1
WAS_STARTED : 1
LEFT_RWAVES : 1
AND_PHYSICAL : 2
TO_OUTBURSTS : 1
IS_MARRIED : 1
WITH_CONSERVATIVE : 1
SELFCARE_FOR : 1
RECREATIONAL_AND : 1
ICDCM_DISEASE : 1
FAMILY_SCALE : 1
VACCINE_GIVEN : 1
THE_DISCREPANCIES : 1
RECEIVED_FLU : 1
MEDICATIONS_PLEASE : 1
WHICH_REQUIRED : 1
FOR_WAL : 1
HE_HAD : 1
LUMBAR_TRACTION : 1
THE_EXPERIENCE : 1
FOR_BUSPIRONE : 1
MG_DL : 1
ARTHRALGIA_NO : 1
SELECT_THE : 3
SPLINT_OF : 1
THAT_IT : 1
INJECTION_TECHNIQUE : 1
LATEX_ALLERGY : 1
HE_TO : 1
MEDICAL_ALLERGIES : 1
CBC_WILL : 1
CESSATION_TOE : 1
APPT_WITHIN : 1
RECENTLY_GOING : 1
HOURS_REVIEWED : 1
PEYRONIES_DISEASE : 1
ADMINISTRATIVE_NOTE : 1
BENIGN_PROSTATE : 1
TRACTION_HALTER : 1
MEDICATION_READ : 1
DIFFICULTY_NUMB : 1
WNL_OU : 1
NO_HAS : 1
DIAGNOSIS_CARDIOMYOPATHY : 1
EXPLAINED_HE : 1
GOING_TO : 1
IS_NOW : 1
IF_HX : 1
DIAGNOSIS_TENDINOPATHY : 1
BRONCHITIS_VETERAN : 1
BEDTIME_MOOD : 1
CENTER_NONE : 1
THE_LIST : 1
WIREIF_ABLE : 1
MEDICATION_REVIEWED : 1
OF_PLAN : 1
OUTPUT_CBI : 2
WE_APPRECIATE : 1
WELL_WITHOUT : 1
VISIT_CLINIC : 1
WEEK_HIS : 1
BY_USER : 1
TIME_WE : 1
NURSING_PLAN : 1
ASSISTANCE_INDEPENDENT : 1
SPONSOR_CALLER : 1
ALCOHOL_SCREENING : 1
DEFIBRILLATOR_ADDENDUM : 1
PATIENT_TELEPHONE : 1
STATUS_SEND : 1
LIFE_THIS : 1
HPI_OTHER : 1
AT_APPOINTMENT : 1
ON_OF : 2
SOCIAL_OF : 1
RISK_ADMITTED : 1
DYSFUNCTION_NONORGANIC : 1
NO_MR : 1
ARRIVAL_TWO : 1
METFORMIN_GLUCOPHAGE : 1
CAPSULE_BY : 1
REQUIRED_TO : 1
ADVISE_AN : 1
TO_YOU : 2
TWO_TABLETS : 1
TRANSPORTATION_STRETCHER : 1
STAFF_NEEDED : 1
DISTURB_CONVERSATION : 1
SCREENING_SMOKE : 1
SHE_DEPENDENCE : 1
DO_HAVE : 1
COMMENTS_INFORMATION : 1
FOR_INCONTINENCE : 1
THIS_ASTHMA : 1
NOTED_RADIAL : 1
TO_LAND : 1
DENIES_ALLERGY : 1
LIST_MEDICATIONS : 1
NURSING_NOTE : 2
PATIENT_SHOWED : 1
CONTACT_CALM : 1
AT_WHICH : 1
FOR_CONCERNING : 1
THIS_VA : 1
FELT_NUMB : 1
INFORMATION_WITH : 2
MPLS_VA : 1
NO_AM : 1
BERYL_RART : 1
AM_LOWER : 1
IT_WORKING : 1
USE_AT : 1
ON_ICDCM : 1
MAJOR_RISK : 1
NO_SHOWED : 1
ACTIVITY_AT : 1
SHARED_THAT : 2
SOCIAL_HX : 1
WITHIN_HRS : 1
ALLERGIES_REACTIONS : 1
STAFF_PARKINSONISM : 1
THE_DOES : 1
MOUTH_THREE : 1
INTAKE_ONLY : 1
WEEK_INR : 1
FLU_YRS : 1
CM_WITH : 1
NURSING_CARE : 1
SPECIAL_THE : 1
DOES_NOT : 3
HE_GRADUALLY : 1
PATIENTS_GDX : 1
CHAIR_UP : 1
MEDS_VACCINE : 1
AGENT_USED : 1
LEFT_INDEX : 1
SEE_PROBLEM : 1
WILL_PHARMACY : 1
MRP_MEDICATION : 1
SUPRASPINATUS_REVIEW : 1
DIABETICS_MEDICINE : 1
NEURO_ALERT : 1
INFORMATION_HEALTH : 1
COUNSELING_HAS : 1
COUNSELED_ON : 1
CURRENT_WARFARIN : 1
LEFT_WITH : 1
AT_NORTHERN : 1
GOOD_EYE : 1
OUTPATIENT_COMPLETED : 1
SELECTED_CATEGORY : 1
LB_THE : 1
AT_ELECTRIC : 1
AN_SCREENING : 1
TO_FROM : 1
NO_OF : 1
MEDICAL_CENTER : 1
GROSSLY_TO : 1
PATIENT_ARRIVED : 1
RADICULOPATHY_OSTEOARTHROSIS : 1
SOCIAL_INFORMED : 1
REVIEW_SYSTEMS : 2
HAVE_THIS : 1
WHICH_TIME : 1
SEASON_NEPHEWS : 1
PATIENT_THERE : 1
UNSURE_BETTER : 1
NIECES_NEPHEWS : 1
OR_FROM : 1
LIST_MED : 1
TO_IN : 1
LONGSTANDING_OF : 1
FOOT_CARE : 1
LETTER_SAME : 1
CALL_BELL : 2
HAVE_HAVE : 1
PER_GESTURES : 1
TO_ANGRY : 1
LAST_JOB : 1
TASK_VERIFIED : 1
WEEKLY_PART : 1
REVIEWED_PSYCHOLOGY : 1
IPT_TO : 1
NEPHEWS_FORMER : 1
KG_THE : 1
TELEHEALTH_SCREENING : 1
EXAM_FOR : 1
PATIENT_CHECKING : 1
AFTER_LAYING : 1
NUMBER_OF : 1
STICK_TO : 1
IN_CLINIC : 1
HEIGHT_CM : 2
INJURY_SCREENING : 1
WE_YOUR : 1
OK_HE : 1
AND_ATTEMPT : 1
LATEX_WIGENERAL : 1
TO_FACILITY : 1
FOR_PROVIDER : 1
HER_HAVE : 1
REPORT_KAREN : 1
SHIFT_ML : 2
ADMISSION_NURSING : 1
STAFF_ONLY : 1
MG_REST : 1
THE_LAND : 1
WITH_LET : 1
CONTACT_VA : 1
BETTER_NOW : 1
HEALTHWISE_LIFE : 1
MAKES_MYALGIA : 1
TO_ROOM : 1
MOUTH_RESPIRATION : 1
OUTLINED_ABOVE : 1
DENIES_LATEX : 1
AND_OFTEN : 1
NOON_OFFICIAL : 1
CLEAR_THOUGHT : 1
SWOLLEN_DOG : 1
WITH_STATED : 1
THERE_ALSO : 1
CALLER_AREA : 1
SHOWER_SHAMPOO : 1
RWAVES_NURSING : 1
BEFORE_TWO : 1
ADDENDUM_TOTAL : 1
BETTER_ON : 1
PT_VIA : 1
VET_REPORTS : 1
HERE_FOR : 1
COLD_SINUS : 1
JUST_STICK : 1
COMMUNICATES_GESTURES : 1
THE_ADL : 1
ERECTILE_ICDCM : 1
IN_CYPROHEPTADINE : 1
PHARMACY_CONSULTANT : 1
WHICH_WE : 1
OF_COMPLAINT : 1
HEMOLYZED_REPEAT : 1
FITTING_CORRECTLY : 1
NO_WILL : 1
THE_IS : 1
AND_CBI : 1
STATED_HE : 1
UPSET_SERIES : 1
FOR_LOWER : 1
CAREFULLY_AND : 3
THE_TIME : 1
CREATININE_NO : 1
WITH_CARE : 1
SUPERVISING_PHYSICIAN : 1
UNSPECIFIED_CREAT : 1
STRONG_RETENTION : 1
FOR_HEIGHT : 1
RESP_ACTIVE : 1
REGIONAL_SOFT : 1
MEDICATION_AT : 1
TOENAILS_SPECIFY : 1
SURGICAL_ELECTIVE : 1
BENIGN_OF : 1
CLASS_SEVERE : 1
CONSERVATIVE_CARE : 1
THIS_OR : 1
APPOINTMENT_CANCELLED : 1
LEFT_SINCE : 1
NEEDS_STATING : 1
GAVE_REPORT : 1
OVER_THE : 1
DAILY_WEIGHT : 1
WITH_POSSIBLE : 1
VENTRICULAR_NURSING : 1
RENAL_ARTERIES : 1
INTO_IMAGING : 1
PLAN_AT : 1
CONSULTANT_INSTRUCTIONS : 1
IS_HERE : 2
REQUIRED_IMED : 1
BY_PROVIDER : 1
IMPROVEMENT_IN : 1
REQUIRED_NOT : 1
CARE_REVIEW : 1
CHIEF_POST : 1
FILL_FLU : 1
HAVE_CONTACT : 1
OF_ENDING : 1
TALK_YOU : 1
DING_DENTAL : 1
ABOUT_THE : 1
TIMES_MODE : 1
RESPIRATION_REFERRAL : 1
ACTIVE_WELL : 1
OFTEN_DID : 1
RIGHT_SHOULDER : 2
PATIENT_NOTE : 1
PROVIDERS_SHE : 1
DECREASED_SLIGHTLY : 1
PROCEDURE_COLONOSCOPY : 1
DOCUMENT_PAIN : 1
COS_APPROVAL : 1
FUTURE_PATIENT : 1
WHILE_ON : 1
ALONE_NO : 1
MALE_WITH : 1
IS_WITH : 1
SKIN_CALL : 1
SPOKE_WITH : 1
ANESTHESIA_TECHNIQUE : 1
PROVIDERS_OUTSIDE : 1
TROPICAMIDE_CHAMBER : 1
PROVIDER_BENDURE : 1
BURNING_AGREE : 1
DOCTOR_COS : 1
ADMITTED_ROOM : 1
ORIENTED_PERRLA : 1
TAKE_ONE : 4
BETTER_RECURRENT : 1
CUT_WHICH : 1
FEELING_ABOUT : 1
TEST_BLOOD : 1
OTC_RX : 1
ALERT_PERRLA : 1
FACILITY_APPOINTED : 2
IN_PUBLIC : 1
FALL_COPD : 1
COMPLETED_LOCATION : 1
ALREADY_BEEN : 1
HOW_PERFORM : 1
COMPLETED_SUPPORT : 1
NOTE_WITH : 1
ANGRY_OUTBURSTS : 1
CONGESTION_COUGH : 1
CALLS_AND : 1
SKIN_TEMPERATURE : 1
DECREASED_METALLIC : 1
FINASTERIDE_MG : 1
BE_IN : 1
PERRLA_ABDOMEN : 1
DOING_OK : 1
PROFILE_TIME : 1
RESCHEDULED_PATIENTS : 1
TO_RECREATIONAL : 1
GDX_NFI : 1
SCREENING_TEST : 1
HIM_ADDENDUM : 1
PRESSURE_DILATING : 1
WAS_ASKED : 1
CLEAR_CAME : 1
OBUT_ALMOST : 1
NO_SIGNS : 1
HISTORY_OF : 1
DIRECTED_TEST : 1
DISCUSSED_NOTE : 1
NEUROPATHY_AND : 1
CONSEQUENCES_HE : 1
BLOOD_FOUR : 1
SESSION_CONTINUES : 1
INDEX_SHOWER : 1
PRESSURE_RECORDED : 1
ADMITTED_TO : 1
TENDONOPATHY_QUESTION : 1
WORKER_DOES : 1
THAT_HAD : 2
MCM_INDEX : 1
MAJOR_FACTORS : 1
SKIN_CBI : 1
IMPRESSION_AND : 1
CAN_THERAPY : 1
RX_PNEUMONIA : 1
ABOUT_MDD : 1
SEEN_NO : 1
PATIENTS_REQUEST : 2
HAVING_BILATERAL : 1
FOR_TOBACCO : 1
COS_CONSULT : 1
UCINATIONS_BURSITIS : 1
WAS_DOING : 1
VIA_PHONE : 1
YOU_ANY : 2
DYSPHAGIA_PERFORMED : 1
COUNSELING_REQUIRED : 1
EACH_CAREFULLY : 3
WITH_MY : 1
BETTER_WHILE : 1
BACK_CAN : 1
INJURY_OR : 1
OF_VISIT : 1
HE_ALCOHOL : 1
FOLLOWING_ALLERGIES : 1
SUGAR_TIMES : 1
SPECIAL_CHART : 1
ADVISE_ALCOHOL : 1
LIST_PATIENT : 1
CAP_MOUTH : 1
URINARY_FREQUENCY : 1
MEDICATION_RESP : 1
INCREASE_MR : 1
IF_HAD : 1
MEDICAL_NONE : 1
REPEAT_IN : 1
OF_RECORD : 1
CONFIRMED_FAMILY : 1
OR_PERSONNEL : 1
SEE_ARTHRITIS : 1
CARE_ENCOUNTER : 1
HIS_XPER : 1
DETACHED_OTHERS : 1
ALLERGIES_FOR : 1
ALERT_ORIENTED : 1
REQUEST_APPOINTMENT : 1
MEDICATION_PLEASE : 1
PAIN_NO : 2
YOU_HAD : 2
INFORMED_CONSENT : 1
PULSE_NO : 1
FILED_EXAM : 1
OUTPATIENT_EXAM : 1
REPEAT_HIS : 1
NO_MIN : 1
ANSWERED_STATED : 1
TRAUMATIC_INJURY : 1
TO_RELATED : 1
HIS_WIFE : 1
CLINIC_NOTE : 1
SCAN_THERE : 1
DATE_BY : 1
INSTRUCTIONS_USE : 1
RIC_AC : 1
SCORE_URINARY : 1
LIST_AS : 1
NOTES_PSYCHIATRY : 1
MINS_POSITIVE : 1
TOBACCO_USE : 1
MINUTE_SESSION : 1
ANSWERED_NKA : 1
HOPELESS_THE : 1
WIFE_PREVIOUS : 1
IN_OCT : 1
GOOD_IN : 1
ADDENDUM_PSYCHOLOGY : 1
BE_AT : 1
PROBLEMS_BLOOD : 1
HAD_DECREASED : 1
IN_OD : 1
ROOM_SURGICAL : 1
ACCORDING_TO : 2
AND_LETTER : 1
OF_NEURO : 1
TIME_IN : 1
EVERY_FOR : 1
HEALTH_PROBL : 1
FEELING_BETTER : 1
OF_MAJOR : 1
DISCREPANCIES_TERM : 1
AFTER_DOWN : 1
IN_BP : 1
ON_IMPRESSION : 1
REPEAT_INJECTIONS : 1
TROPICAMIDE_ANT : 1
ALONG_WITH : 1
SHOULDER_DONE : 2
BATH_AND : 1
IT_APPOINTMENT : 1
WAS_SELECTED : 1
TO_OF : 1
FULL_INFORMED : 1
TAB_CONTACT : 1
WITH_PREVIOUS : 1
OTHER_COMPLAINT : 1
MG_IMAGING : 1
GLYCOHEMOGLOBIN_LEVEL : 1
ANT_CHAMBER : 1
TO_FOR : 1
GLUCOPHAGE_SOUNDS : 1
CARDIAC_DY : 1
NUMBER_COMMUNICATES : 1
WIGENERAL_PRIMARY : 1
AS_ACTIVITY : 1
ALMOST_OUT : 1
LIVES_OTHER : 1
ABDOMEN_SOFT : 1
EDUCATION_READING : 1
PHYSICAL_CBI : 1
WAL_COMMENTS : 1
SUBJECTIVE_STATED : 1
TO_THE : 2
BLOOD_PRESSURE : 3
OUT_THE : 1
OF_UNDERSANDING : 1
DONE_OF : 1
NEW_MEDICATIONS : 1
ACTIVE_TOLERATED : 1
BEHAVIOR_RIGHT : 1
CARE_PROBLEM : 1
CBI_OUTPUT : 2
ARRIVED_VIA : 1
BIOLOGICAL_IN : 1
TL_SC : 1
TERM_ZOLADEX : 1
HE_LIMITATIONS : 1
THE_OF : 3
REMOTE_DATA : 1
INSTRUCTIONS_NEURO : 1
BY_MOUTH : 6
CARE_HOME : 1
APPOINTMENT_MR : 1
TECHNIQUE_RAL : 1
NOT_OR : 1
ONE_CAPSULE : 1
GROUND_GOT : 1
GOT_HURT : 1
NO_VENTRICULAR : 1
IT_PROBLEM : 1
FOLLOWUPACTIVITY_LIMITATIONS : 1
FROM_EXTRAOCULAR : 1
VACCINE_OF : 1
DIAGNOSTIC_COLONOSCOPY : 1
AT_OF : 1
WAS_OS : 1
IRRIGANT_MUGA : 1
LATELY_ANGRY : 1
PAIN_PHYSICAL : 1
LATELY_TO : 1
COMPLETED_OR : 1
THE_WAS : 1
TO_MONITOR : 1
HISTORY_PHYSICAL : 2
PT_HAS : 1
GREAT_HURTS : 1
CHIEF_COMPLAINT : 2
DIAGNOSIS_ADT : 1
OCT_MG : 1
YOUR_PATIENCE : 1
KNEE_ICDCM : 1
SELECT_CORRECT : 3
SENSATION_GROSSLY : 1
HAD_CAROTID : 1
CALM_HE : 1
DOING_HE : 1
IF_SINCE : 1
THAT_HE : 7
AT_PATIENTS : 2
MILW_IN : 1
SOD_MG : 1
INTERESTED_THE : 1
SITE_UCINATIONS : 1
IS_GRADUALLY : 1
PATIETN_THAT : 1
LIQUIDS_DYSPHAGIA : 1
AND_FULL : 1
UCINATIONS_NO : 2
DISEASE_PATIENT : 1
PRIORITY_ELECTIVE : 1
FAMILY_MEMBER : 1
RECORDED_THERE : 1
WITHIN_GYNPA : 1
OR_HAVE : 1
ASSISTANCE_HYPERTROPHY : 1
RECONCILIATION_APPOINTMENT : 1
LIVES_WITH : 1
CONSULT_TRAZODONE : 1
TO_KAREN : 1
DEBRIS_WITHIN : 1
HEMOLYZED_WILL : 1
BACK_ABOUT : 1
REASON_FOR : 1
STOP_DING : 1
STARTING_AM : 1
TAKE_TABLET : 3
VISIT_OR : 1
IS_OUT : 1
THE_FOR : 1
SUPPORT_POSTPROCEDURE : 1
EASY_PATIETN : 1
COUNSELING_HYDROMORPHONE : 1
NAME_UNITS : 1
WITH_MEMBER : 1
MEDICINE_PAIN : 1
MIW_ERECTILE : 1
MR_MALE : 1
TEMAZEPAM_CAP : 1
UNDERSURFACE_PARTIAL : 1
OR_PATIENT : 1
FACTORS_INCLUDES : 1
AUDITC_BRIEF : 1
DO_YOU : 1
SIGNS_DISTRESS : 1
OF_CONTACT : 1
FOR_AND : 2
AC_MG : 1
SINCE_THE : 1
MEETING_HIS : 1
CARE_PLAN : 1
TO_INFORM : 1
HOT_WITH : 1
PT_HAD : 1
HYTHMIA_NOS : 1
RD_TYPE : 1
WILL_ATTEND : 1
QUALITY_HAS : 1
THIS_NURSING : 1
PATIENT_RIC : 1
ML_TOTAL : 2
WHO_HERE : 1
NO_RISK : 2
ADMINISTRATIVE_SPECIFY : 1
BRONCHITIS_MUCH : 1
HALTER_CORRECTLY : 1
FEELING_MUCH : 1
PART_PLAN : 1
NOT_BY : 1
STARTING_AT : 1
MYALGIA_WHILE : 1
SPEECH_AND : 1
PSYCHOLOGY_AND : 1
HAD_BELT : 1
COPY_THE : 1
ONE_BY : 4
THE_THE : 1
FOLLOWING_YES : 1
PROBLEM_NEURO : 1
USED_TROPICAMIDE : 1
LAYING_DOWN : 1
AS_PART : 1
FREQUENCY_URGENCY : 1
SUPERVISOR_LAST : 1
INJECTIONS_SOCIAL : 1
THAT_WAS : 2
ROM_PINHOLE : 1
PARALYSIS_OR : 1
XPER_HIS : 1
METFORMIN_OR : 1
AND_UNDERSTANDING : 1
MAR_MG : 1
OF_PATIENT : 2
INFORMED_OF : 1
UP_GOOD : 1
HAS_BIOLOGICAL : 1
COMPLAINT_OF : 1
DIAGNOSIS_RTC : 1
STATES_WANTS : 1
THE_ICDCM : 1
ASSOCIATES_WITH : 1
IN_TIME : 1
SCREEN_FOR : 1
REQUIRED_WIFE : 1
IN_MOVE : 1
IS_INTERESTED : 1
RISK_TO : 1
WITH_OF : 1
PSYCHOLOGY_NOTES : 1
STOP_DENTAL : 1
LET_WORK : 1
BEEN_PROVIDED : 1
ALLERGIES_ADVERSE : 1
COMPLAINT_ASSIGNED : 1
SI_HI : 1
WERE_RANGING : 1
PATIENT_HAS : 1
FUTURE_ARRIVED : 1
CREAT_CURRENT : 1
FREQUENCY_DYSURIA : 1
ABOVE_PROVIDER : 1
TRL_KS : 1
INFORMED_VERBALIZES : 1
SEVERE_PAIN : 1
STRETCHER_HISTORY : 1
REPORTS_WHICH : 1
CM_OCT : 1
PTX_MR : 1
NUMBER_AFTER : 1
OTHER_UNSPECIFIED : 2
MEDICATION_REFILL : 1
MED_WANTED : 1
YOU_ABOUT : 1
WITH_VIA : 1
MUGA_TIGHTNESS : 1
CHAMBER_OD : 1
ASKED_IF : 1
TPOPC_NOTE : 1
GRADUALLY_GOOD : 1
MIN_SUMMARY : 1
CONSERVATIVE_AS : 1
NO_OBUT : 1
CONTAINS_COMMON : 1
OF_FOR : 2
HCL_MG : 3
DYSURIA_WEAKNESS : 1
FOR_ON : 1
WARFARIN_MG : 1
STATES_TO : 1
PATIENT_BLOOD : 1
RECREATIONAL_FACILITY : 1
ACCORDING_NOTES : 1
EACH_ITEM : 3
FACTORS_POPULATIONS : 1
WIGENERAL_CARE : 1
YES_STATES : 1
HAS_NO : 3
MINIMAL_INCREASE : 1
SUBJECTIVE_PT : 1
WPB_IDENTIFIED : 1
UROLOGY_FOR : 1
OCT_HCTZ : 1
THE_OUT : 1
OF_LEFT : 2
ABOVE_GROUND : 1
REQUEST_BRAIN : 1
IS_GOOD : 1
BUSPIRONE_HCL : 1
NEGATIVE_CONSEQUENCES : 1
HEAD_HERE : 1
NKA_ACTIVE : 1
TIME_THE : 1
SINCE_HIS : 1
SPH_REVIEW : 1
ON_USE : 1
REACHED_THIS : 1
RENEWAL_MIW : 1
TYPE_REFILL : 1
CALL_MEDICATION : 1
WRITING_INFORM : 1
PATIENT_AGREES : 1
APPOINTMENT_OTHER : 1
FOR_SCHEDULING : 1
PROBLEM_ALERT : 1
GOES_TO : 1
ADL_TASK : 1
SIGNS_TAKEN : 1
NEGATIVE_HEMATURIA : 1
FOUR_TIMES : 1
INSTRUCTED_HER : 1
PSYCHIATRY_NOTES : 1
SYSTEM_DOCUMENT : 1
ATTEMPT_TO : 1
THE_IF : 3
UP_CALL : 1
NO_NEW : 1
NEGATIVE_HE : 1
TEMPERATURE_TPOPC : 1
SPINAL_INJURY : 1
NUMBER_CONFIRMED : 1
SCALP_INTO : 1
CORD_INJURY : 1
IN_HCTZ : 1
SKIN_REASSESSMENT : 1
QUALIFIERS_SHIFT : 1
RETENTION_NO : 1
TRAZODONE_MG : 1
TO_ELECTRONIC : 1
DIABETIC_BUT : 1
AGREES_TO : 1
AREA_WAS : 1
MILW_OCT : 1
LAMENT_ABOUT : 1
HAVE_ANY : 2
OF_RIGHT : 2
FLU_NIECES : 1
WITH_THAT : 1
SCREENING_AUDITC : 1
TO_AUDITC : 1
NEXIUM_FOR : 1
ERECTILE_NONORGANIC : 1
INTACT_TO : 1
SUPERVISING_ATTENDING : 1
ON_BURSITIS : 1
PARKINSONISM_HAS : 1
OF_INFLUENZA : 1
TIME_HE : 1
OR_DETACHED : 1
TO_HOW : 1
ACTIVE_CALL : 1
DISTURB_VISION : 1
IN_ASSISTANCE : 1
BEEN_REVIEWED : 1
WITH_VTACH : 1
HISTORY_AND : 2
MOOD_HCL : 1
REVIEW_THE : 1
RADICULOPATHY_INVOLVING : 1
THE_SURGEON : 1
PRESCRIPTION_RENEWAL : 1
DIAGNOSIS_TERM : 1
PULMONARY_MUGA : 1
LOT_COMMUNICATES : 1
FALL_ASTHMA : 1
REASSESSMENT_NONISCHEMIC : 1
BY_MONOFILAMENT : 1
DOCUMENTATION_INTO : 1
APPOINTMENT_ALONG : 1
INJURY_PARALYSIS : 1
NO_PTX : 1
PREVIOUS_TWO : 1
DERBY_KS : 1
BODY_DISCUSSED : 1
BY_TWICE : 1
FOR_MEDICINE : 1
PLA_MD : 1
SLIGHTLY_DEBRIS : 1
VIA_TECHNIQUE : 1
AT_DOES : 1
FINASTERIDE_TAB : 1
ROOM_ETUC : 1
HYPOGLYCEMIA_WRITING : 1
CONTACT_PM : 1
VETERAN_CONTACT : 1
THIS_WITH : 2
OR_YOUR : 1
FOLLOWING_ACTIVE : 1
DEFER_BLVD : 1
NOT_INTERESTED : 1
ALCOHOL_DEPENDENCE : 1
HAD_TOENAILS : 1
NOTE_PM : 1
DONE_IMPRESSION : 1
HCL_TAB : 3
ALTHOUGH_WAS : 1
IS_BROKEN : 1
COMPLAINT_IS : 1
DATA_SHARED : 1
PER_WRITING : 1
RECOMMENDATION_ADDENDUM : 1
RISK_DOES : 1
MOUTH_MORBID : 1
PART_OF : 1
WED_FRI : 1
OBSTRUCTION_HER : 1
POST_LEFT : 1
WE_REFER : 1
THE_INFLUENZA : 1
CLINIC_MESSAGE : 1
PRIMARY_CARE : 1
BY_THREE : 1
RECEIVED_TOENAILS : 1
CANT_STICK : 1
MUSCLE_SYSTEM : 1
AGO_FOR : 1
TO_SKIN : 1
OF_INR : 1
RESULTS_THE : 1
PTX_APPOINTMENT : 1
MD_PC : 1
TO_LAMENT : 1
TO_PERFORM : 1
OF_DECREASED : 1
HAS_SEVERE : 1
TEST_WAS : 1
IN_OUT : 1
PATIENT_SEAT : 1
HI_UCINATIONS : 1
WERE_NO : 1
APPOINTMENT_HPI : 1
PAST_HISTORY : 1
DICTATION_ASSISTANCE : 1
MEDICATION_NOTE : 1
MED_LIST : 1
FEELS_THE : 1
HIS_SHE : 1
RECENTLY_STARTED : 1
BELT_USE : 1
REQUEST_TRAUMATIC : 1
PRING_IN : 1
COMPLAINT_BX : 1
INVOLVING_KNEE : 1
ON_BIPAP : 1
REGULAR_DYSPHAGIA : 1
SIG_ONE : 1
HE_SHE : 1
DEBRIS_THE : 1
LEFT_FINGER : 1
MYALGIA_BETTER : 1
OF_TRANSPORTATION : 1
APPT_MED : 1
NO_NECK : 1
DOXYCYCLINE_HYCLATE : 1
WAS_THIS : 1
VITAL_QUALIFIERS : 1
OS_FARES : 1
ONLY_PARKINSONISM : 1
PATIENT_HE : 2
ABOUT_ANY : 1
ADDITIONAL_APPOINTMENT : 1
RECORD_THIS : 1
REFILL_ADDITIONAL : 1
PRESCRIPTION_MEDICATION : 1
ACTIVE_MEDICATIONS : 2
WEIGHT_LB : 1
RENAL_WERE : 1
BACK_NO : 1
LEGS_HAVING : 1
STATUS_PLEASE : 1
STRETCHER_SPEECH : 1
USING_SPLINT : 1
PAIN_STATES : 1
PLAN_AS : 1
BEEN_RESIDING : 1
SIGNATURE_CONSENT : 1
LAD_ACCORDING : 1
TO_WIREIF : 1
CALL_CLINICAL : 1
PLEASE_ADVISE : 1
ICDCM_THE : 1
IS_BETTER : 1
MONOFILAMENT_FACTORS : 1
BRAIN_SCREENING : 1
LAST_FLU : 1
OF_PLEASE : 1
SUBSCAPULARIS_TENDONOPATHY : 1
MDD_APPRIPRIATE : 1
PC_WPB : 1
ACTIVITIES_YOUR : 1
PRIOR_TO : 1
PRAVASTATIN_NO : 1
PATIENT_AN : 1
HAD_TYPE : 1
THE_YES : 1
TISSUES_SUPRASPINATUS : 1
HOW_OFTEN : 1
CESSATION_MCM : 1
DERMATOCHALASIS_TECHNIQUE : 1
RECURRENT_INTERNAL : 1
HAS_PROVIDED : 1
MALE_THE : 1
HOURS_NO : 1
CARBON_DIOXIDE : 1
CYPROHEPTADINE_TAB : 1
AS_WALKIN : 1
RECOMMENDATION_HOURS : 1
TWO_ARTERIES : 1
PROVIDER_TO : 2
TWICE_AC : 1
OF_STRETCHER : 1
LB_KG : 1
INR_CBC : 1
TINY_UNDERSURFACE : 1
SEASON_NIECES : 1
OS_ALLERGIES : 1
IRRIGANT_SKIN : 1
BY_EVERY : 1
ALSO_THAT : 1
TO_IT : 1
YEAR_ERECTILE : 1
TO_HE : 1
NOW_WITH : 1
WITH_REGULAR : 1
ANY_MEDICATIONS : 1
EAST_RD : 1
HIS_ANGIO : 1
COUMADIN_AORTIC : 1
MALE_WHO : 1
PROVIDED_THE : 1
IF_USING : 1
CBI_IRRIGANT : 2
PMH_SMOKE : 1
PATIENT_STATES : 1
BY_IMED : 2
BIPAP_AT : 1
ALLERGIES_NKA : 1
PROCEDURES_ORDERED : 1
FOR_ADDENDUM : 1
STAFF_REQUESTING : 1
HYTHMIA_PRESCRIPTION : 1
CONFIRMED_NAME : 1
DOWN_EVENING : 1
FOR_USE : 1
MOUTH_AT : 1
THE_REGIONAL : 1
KNEE_PAIN : 1
ITEM_AND : 3
SENSATION_INTACT : 1
ACTIVE_PROBLEMS : 1
CHAMBER_CELLS : 1
USE_ROOM : 1
STATUS_DO : 1
YES_FOR : 2
WITH_FOLLOWING : 2
TOENAILS_REVIEW : 1
PASS_WIREIF : 1
ME_HOME : 1
MAR_FINASTERIDE : 1
CONSULT_SENSATION : 1
SCHEDULED_FOR : 1
ANY_SPINAL : 1
IN_PAST : 1
OLD_MALE : 1
TO_PATIENT : 1
FELL_BACK : 1
OUT_FROM : 1
ONCE_WHILE : 1
IS_OFTEN : 1
DEPRESSION_PLEASE : 1
HAVE_SPINAL : 1
ABOUT_TO : 1
AT_REQUEST : 2
RX_LORTAB : 1
IN_HOUSING : 1
TAKEN_CLINIC : 1
AT_AGREE : 1
SERVICE_CONNECTED : 1
FOR_PRESSURE : 1
MON_WED : 1
OR_SURROUNDINGS : 1
DOES_SEE : 1
DIRECTED_TO : 1
RELATED_HEAD : 1
SITE_CODE : 1
TECHNIQUE_ACCORDING : 1
YOUR_SURROUNDINGS : 1
MR_SCHULER : 1
DISTRESS_RADIAL : 1
CBC_HEMOLYZED : 1
TRACTION_FITTING : 1
FACTORS_OTC : 1
THOUGHT_CLIENT : 1
NEW_OBUT : 1
WITH_INFORMATIONAL : 1
HISPANIC_OR : 1
YOU_HAVE : 2
HX_LIVES : 1
ACTIVE_BLOOD : 1
IMMUNIZATION_TWO : 1
WRITING_TO : 1
PM_RX : 1
PREPPED_WITH : 1
POSSIBLE_CONSEQUENCES : 1
EVALUATION_AT : 1
BEDTIME_FOR : 1
TRAZODONE_HCL : 1
HEAD_COLD : 1
SMOKING_MCM : 1
HER_TO : 1
LOCATION_POST : 1
WITH_RECTAL : 1
CUT_THE : 1
AM_TO : 1
POSITIVE_BRIEF : 1
WITH_SPONSOR : 1
NOT_REQUIRED : 1
IS_NO : 1
WORD_ONE : 1
INCLUDES_OTC : 1
APPROVAL_ELECTRONICALLY : 1
PATIENTS_MEDICATION : 1
INDIVIDUAL_THERAPY : 1
DISCHARGE_SUMMARY : 1
RESPONSE_WITHIN : 1
VISIT_PHYSICIAN : 1
FOR_ANESTHESIA : 1
APPRECIATE_YOUR : 1
DECREASED_BY : 1
DYSFUNCTION_ICDCM : 1
THE_SCREENING : 1
CONCERNING_LABS : 1
DARLENE_TRL : 1
FEET_ABOVE : 1
GIVEN_THIS : 1
CONTAINS_INFORMATION : 1
SOD_CAP : 1
PERSONNEL_DIAGNOSIS : 1
ANY_NEW : 1
MEDICATION_APPOINTMENT : 1
VERIFIED_PERSONAL : 1
RTC_SUBSCAPULARIS : 1
GROUND_HURT : 1
NUMB_OR : 1
PATIENT_LATEX : 1
AND_PLAN : 1
WORD_ABOUT : 1
SMOKING_HIS : 1
PNEUMONIA_STROKE : 1
ML_DISCHARGE : 1
THE_YOU : 1
VITALS_TO : 1
ALONE_ALCOHOL : 1
THE_CANCELLED : 1
ABOUT_ONE : 1
CONSULT_STRESS : 1
IN_PATIENT : 2
EXAM_COMPLETED : 1
OUTLINED_NEUROPATHY : 1
ANSWER_READ : 1
PATIENT_ETHNICITY : 1
CERVICAL_TRACTION : 1
CAN_BE : 1
FOR_OFFICIAL : 1
TO_LOUNGE : 1
THE_STATEMENTS : 1
IMAGING_PROCEDURES : 1
AND_THIS : 1
RELAXANT_RECOMMENDATION : 1
GESTURES_WRITING : 1
EXOPHORIA_ROM : 1
TO_INTAKE : 1
THIS_HAS : 1
CELLS_CELLS : 1
SCORE_HEMATURIA : 1
THE_MRI : 1
IF_SUBJECTIVE : 1
UP_AT : 1
IS_FAMILY : 1
VISIT_ADMISSION : 1
OBUT_IS : 1
DIAGNOSIS_DEMOGRAPHICS : 1
ST_TYPE : 1
CUTDOWN_ATTEMPT : 1
HE_COLD : 1
REPORTS_CUT : 1
BILATERAL_PAIN : 1
WEIGHT_KG : 1
CONDITIONS_CONTRACT : 1
RESTLESS_ICDCM : 1
MEDICATIONS_INTAKE : 1
AM_MG : 1
TIMES_MUSCLE : 1
HE_STATES : 1
TO_HEAD : 1
PRESSURE_AGENT : 1
YEAR_OLD : 1
THIS_PATIENT : 1
DERMATOCHALASIS_ANESTHESIA : 1
ABOVE_THE : 1
PRESCRIBED_MED : 1
FROM_THIS : 1
DENTAL_ADVISE : 1
BEEN_PRONE : 1
ICDCM_PATIENTS : 1
ML_COLOR : 1
INSTRUCTED_TO : 2
AN_INJURY : 1
NURSING_CLINIC : 1
AND_CALM : 1
REFERRAL_RTC : 1
SHAMPOO_BRUSH : 1
THE_PRIOR : 1
DAILY_AT : 1
DOCUMENTATION_THAT : 1
AC_TYPE : 1
PASS_HE : 1
HAVE_CONTAINING : 1
THE_ANSWER : 2
NOTE_RX : 1
PREOP_SHOWER : 1
ITEM_CAREFULLY : 3
UNSPECIFIED_NO : 1
PATIENCE_UNDERSTANDING : 1
WITH_OBSTRUCTION : 1
OR_SUPPORT : 1
CM_REGULAR : 1
ALONG_NOSHOW : 1
WITH_RECURRENT : 1
WORKING_HE : 1
CONSULT_HCL : 1
WITH_URINARY : 1
INTENSITY_STATUS : 1
ADDENDUM_REVIEWED : 1
WEEKLY_AS : 1
NONISCHEMIC_CARDIOMYOPATHY : 1
DEMOGRAPHICS_ETHNICITY : 1
LOST_MDD : 1
RESULT_UNITS : 1
WITHIN_THE : 1
PHYSICIAN_ADMISSION : 1
ETUC_SIGNS : 1
WILL_REFER : 1
MORE_INFORMATION : 1
MEDICATION_BEEN : 1
AM_WRITING : 1
LORTAB_DING : 1
WITH_WIFE : 1
SHOULDER_BROKEN : 1
BLOOD_CONTROL : 1
RESULT_REF : 1
CAME_MINUTE : 1
HE_CONTINUES : 1
IF_THE : 1
FOR_REPORT : 1
FULL_AND : 1
PERSONNEL_POSTPROCEDURE : 1
SERIES_OF : 1
ONCE_GREAT : 1
FOREIGN_BODY : 1
SEE_DOCTOR : 1
NONVA_DOCUSATE : 1
CORRECTLY_INSTRUCTED : 1
CM_WERE : 1
AND_BRUSH : 1
DOES_TAKE : 1
WERE_BILATERALLY : 1
ENDING_AT : 1
SERVICE_HOME : 1
BRONCHITIS_PATTERNS : 1
TEST_SUGAR : 1
AGO_HOSPITALIZATION : 1
INTERESTED_IN : 2
BEEN_LATELY : 1
PARKINSONISM_PT : 1
TO_FINGERSTICK : 1
READINGS_DEC : 1
LIGHT_TOUCH : 1
LAMENT_LOST : 1
NURSE_CLINIC : 1
LONGSTANDING_HISTORY : 1
THIS_SEASON : 1
NEUROLOGIC_VITAL : 1
AS_OF : 1
GYNPA_HAS : 1
OUTBURSTS_HIS : 1
IS_ALMOST : 1
PLAN_NEURO : 1
STATING_PCP : 1
IT_IDENTIFIED : 1
PATIENT_SESSION : 1
ALLERGY_DATA : 1
SOFT_CONDITION : 1
WEIGHT_MONITORING : 1
PT_CAROTID : 1
FAMILY_WITH : 1
ELECTRONIC_HDL : 1
OF_MESSAGES : 1
THE_TRACTION : 1
WAS_FROM : 1
MINUTE_HE : 1
TOTAL_OUTPUT : 4
NO_ADMITTED : 1
MONTHS_WHICH : 1
ASSISTED_TO : 1
HE_QUIT : 1
DAILY_MONITORING : 1
REMOVED_YES : 1
NOTED_PALPABLE : 1
NONISCHEMIC_WITH : 1
OF_SYSTEMS : 2
SUGAR_FOUR : 1
TIME_PULSE : 1
GOOD_TIME : 1
TWICE_TOBACCO : 1
NOTE_MY : 1
CONDITION_SITES : 1
ADR_MRP : 1
WILL_IN : 2
AFFECT_SI : 1
PATIENT_IN : 1
OTHER_CHIEF : 1
FOR_UP : 1
THIS_MED : 1
FOR_THIS : 3
PREPATELLAR_YOU : 1
IS_WE : 1
OPERATING_ROOM : 1
THERE_LONGSTANDING : 1
SPH_OF : 1
SAME_NO : 1
REFILL_WAL : 1
HIS_BG : 1
HAVE_YOU : 1
AND_MINUTES : 1
INTERNAL_ADDENDUM : 1
BUT_SUBSTITUTE : 1
ELECTRONIC_WAL : 1
INTO_VISTA : 1
FAIR_VALVE : 1
NEEDS_LETTER : 1
SCALE_GLYCOHEMOGLOBIN : 1
BE_WITHIN : 1
FILED_PHYSICAL : 1
SIGNS_OF : 1
STATED_COUNSELED : 1
NECK_NO : 1
WALKIN_STATES : 1
DURATION_OF : 1
THIS_INFORMATION : 1
UCINATIONS_THOUGHT : 1
SEND_PT : 1
DOCUMENT_WAS : 1
OF_MOMETASONE : 1
RISK_PATIENT : 1
THIS_NUMBER : 1
CONSULT_GROSSLY : 1
ROM_OF : 2
WITH_FINDINGS : 1
SURROUNDINGS_WILL : 1
OR_PRIORITY : 1
DISCUSSED_AS : 1
NOTE_SC : 1
COMMON_PROBL : 1
SHOULDER_ON : 2
EXTRAOCULAR_EXOPHORIA : 1
IDENTIFIED_WITH : 1
RART_REMOTE : 1
WED_MG : 1
NO_SEE : 1
TAKE_OR : 1
CORD_PARALYSIS : 1
RWAVES_CLINIC : 1
WITH_CHIEF : 1
MEDICAL_HISTORY : 1
TENDONOPATHY_REVIEW : 1
POSSIBLE_NEGATIVE : 1
RANGE_CODE : 1
MEDICATION_PROFILE : 1
THE_MOVE : 1
HEMATURIA_ACTIVE : 1
DOXYCYCLINE_MG : 1
CREAT_WARFARIN : 1
ARTHRITIS_DOCUSATE : 1
TAKEN_IN : 1
SC_DOCUMENT : 1
MARCH_PROCEDURE : 1
VA_MEDICAL : 1
BE_FOR : 1
OFFICIAL_REPORT : 1
IF_SOCIAL : 1
WITH_NOSHOW : 1
THERAPY_CONSULT : 1
RESIDING_PUBLIC : 1
ROM_THE : 2
DIOXIDE_SUBJECTIVE : 1
CORRECT_PLEASE : 1
WANTED_INFORMATION : 1
PINHOLE_INCREASE : 1
WITH_SUPERVISING : 1
RIGHT_STRONG : 1
AN_ALCOHOL : 1
COUGH_WAS : 1
THE_PROVIDER : 1
WORK_DISCHARGE : 1
NOTE_QUALITY : 1
NORTHERN_PC : 1
FOR_INSTRUCTIONS : 1
! Stats words=955  pairs=3579
