# Supplementary material for: Predicting the Risk of Suicide by Analyzing the Text of Clinical Notes
Source: PLoS One. 2014 Jan 28;9(1):e85733. doi: 10.1371/journal.pone.0085733 (PMC3904866; doi:10.1371/journal.pone.0085733)
Supplement: Appendix S3 — Machine Learning Libraries and Methods: This section is provided to enclose the open source (Apache License) classifier used for the building of the statistical models, specifically for the purposes of study reproducibility. A detailed account of these tools is intended for another publication. (ZIP) [file pone.0085733.s003.zip › Appendix3/ML_libs/Regression_testing/group2/grp2-pt-1003.xml.txt]

fold and place in his car trunk, he still rides the scooter. He did bring up
bursitis.
PLAN OF CARE/SPECIAL INSTRUCTIONS
Coumadin has been refilled
. Have you ever had any experience that was so frightening,
HYPERLIPIDEMIA
POTASSIUM CHLORIDE MEQ/PKT ORAL PWD MIX IN WATER &amp; TAKE   ACTIVE
MOUTH MON-FRI AND TAKE ONE TABLET SAT-SUN (BLOOD
Patient verbalized understanding of all.
Identified problem: OTHER UNSPECIFIED COUNSELING.
Scheduled medical appt
PRIMARY CARE NURSING PROGRESS NOTE (TEXT) PB
He presents to the clinic to  to request an x-  be done of
DOES PATIENT TAKE ASPIRIN?   No
documented in a separate encounter or note.
*
Compliance with medical care regimen.
by patient.
Temp: F [. C] (// :)
during this admission? YES
Denies chest pain/pressure, pain neck/jaw, deformity, swelling,
PRESENTS TO CLINIC FOR REVIEW OF CHRONIC MEDICAL PROBLEMS, pt states he has been
Chart documentation
Our records indicate you missed your scheduled appointment as noted above.
last couple of    with suicidal ideations . i saw him dec st at
suicidal ideation but was able to control it and felt if he s p he
Appe
Diabetes
6A TREATMENT TEAM NOTE
The patient does not have any homicidal thoughts.
Patient&quot;s wanted to watch the Redskins game this afternoon. Game began at . This took place of
retiring  as the relaxation activity.
recovery coordinator, clinical nurse leader, students and nursing.
Alert, oriented to
BOWERMAN, KAREN: PHYSICIAN ASSISTANT
work after discharge and plans to start going to   and socialize more.  He
Participants were asked to discuss previous behaviors and reasons on why the are motivated to make
NURSING NOTE
Participating in unit activities/Interacting w/others
Date of Discharge: Dec ,
Med Reconciliation (Provider):
No Primary Provider Identified
. REASON FOR ADMISSION/PRESENT COMPLAINT:chest discomfort and short
Test                   Result    units         Ref.   range         Date
drainage. No drainage at this time from the meatus.
Pt is alert and oriented x ,  , hand grasp are equal and firm. On bedrest.
WT:    lb [. kg] (// :)
DRAINS: None
PROBLEM #
MEDICATIONS (both Erie VA and Non-VA)
FINAL DIAGNOSIS:  Hematuria possibly from Coumadin.
Date of Admission://
herbals.  Reconciliation performed.
gross hematuria present.  However, a PSA on // was ..
PRE VISIT OPD NURSING NOTE (T)
continued to rise.  On //, it was ..  He had a
his postvoid
history of atrial fibrillation and CVA.  He developed chest pain
which seems to reproduce the pain.  The patient admits that he
Significant medical history:
Patient Phone:--
with his deceased wife.  He is on : precautions and will be further evaluated
GOAL:  Safe discharge to the appropriate level of care.
called to see patient for chest pain-saw patient c/o cp returning worse than
ADDENDUM
No wounds, pressure ulcers or other skin problems.
A. Help patient identify symptoms of anxiety, B. Monitor anxiety
RESPONSE TO NEW MEDICATIONS:
Mitral Valve Insufficiency
Pt. was visited as a response to a consult request by  physician t.&quot;s chart
WBC                       .    tho
care.  Per BH follow-up note of this date, it appears as though pt has
Cardiac monitor shows atrial fibrillation; rate &quot;s to &quot;s.  Occasional PVC&quot;s
junctional beats with BBB, occasional MF PVC&quot;s.
NURSING TELEMETRY
with exertion/ambulation...bil breath sounds are clear but diminished in bil
There is no suicidality but ssome thoughts of death . For example he speaks of a
A: Pt. tolerated treatment well and was able to increase his ambulation distance
Mobility:           = No Limitation
Dx- .- Please refer to complete H&amp;P by PCP .
session. No additional c/o&quot;s noted.
SWS-DISCHARGE PLANNING
NURSING INPATIENT NOTE
Braden Scale - For Predict
ambulation. Patient washed up in the bathroom. Pajamas and linens
It designates his daughter Donna Erdman or Kathryn McC a his true and lawful
Personal History of Surgery
targeted admission, even though he underwent the evaluation.  Regarding risk,
CHEST PAIN EXPRESSED. BBSC RESPIRATIONS REGULAR AND EASY. NO SOB  NOTED.
to edge of bed. Once his feet are on the floor, patient is able to ambulate
PRN
your staff physician re-order pt&quot;s coumadin at that time.
discussion, pt is doing well at the facility.
Primary Care Nursing Exit Note
RECEIVED PROGRESS NOTE FROM DR. CHERRY. PT SEEN // IN F/U ELEVATED PSA,
return call.
NURS/VESTING CLINIC NP
Daily or almost daily
( ) Family member
Time to Triage: Nov ,@:
MH IP NURSING NOTE (S)
Mobility:           = No Limitation
Friction:           = No Apparent Problem
PT was seen before and during team   and his recent stressors and admission
CPT Code:
problematic- reflecting poor judgment. Son describes picture oin which patients
Nursing Diagnosis:  Depression
Objectives:
(  X  ) Enhance positive social behavior.
Pulse:           (// :)
executed therefore and got forms from our nurse to  regarding this.
Blood Pressure R:/ Pulse:
PSYCHIATRY SOCIAL WORK NOTE
____ Will be mailed to the patient
thank you please inform
" I have brought a CD of my MRI&quot;s. I have been taking my medication for the
.Knee osteoarthritis
This call was initiated by: nurse
Electronically Filed: //
Demonstrated skill by completing pain questionnaires
brief answers with elaboration
PHARMACY MEDICATION COUNSELING - Pain Clinic Pharmacist
PAIN SPECIALIST WANTED REFERRAL TO PHYSICAL THERAPY AFTER NERVE CONDUCTION STUDY
This call was initiated by: Patient
[ ] message to KRISHNASWAMY,MALATHI or covering PCP :
Facility Appointed PCP: KRISHNASWAMY,MALATHI (PC CHARLOTTE)
by: SUS A MAURER
PATIENT MISSED APPOINTMENTS (TP)
____ Will be picked up by the patient on ____
. The patient HAS decision-making capacity.
Goal:  The pati
Location: lower back
Condition on Discharge: Satisfactory
Take medications as prescribed.
=========================================================================
=========================================================================
IODINATED CONTRAST: Has patient had iodinated contrast in the past?
,   IARD, --
RIGHT EYE:
Cornea:             OD-PUNCTURE TYPE SCAR
)   SIMVASTATIN MG TAB TAKE ONE-HALF TABLET BY MOUTH AT  ACTIVE
benign p ps, rec to repeat in  years. Deniese any other problem, no CP, SOB,
The following identifiers were used to verify this patient:
Pulse:   (// :)
Exercise - Advised to gradually increase until walks briskly (- minute
Diet - Advised to adopt for use a calorie intake to achieve and maintain
Gender:  y/o male
was given to the patient.
Rec
LOWER ENDOSCOPY PRE-INSTRUCTIONS (GOLYTELY) - MORNING.
---------------------------------------
going to move.  Has a lot of gas. denies hematochezia.
Other drugs: tylenol,fish oil
- - - - - - - - - - - - - - - - - - - - - - - - - - - - - - - - - - - - - - - -
Study Title:  Veteran Impact of Chronic Pruritus (Itch): The
T:  . F [. C] (// :)
yo pt here for removal of cyst on R forehead.  ALso with itching around neck.
DERMATOLOGY CLINIC
MODE OF TRANSPORTATION:
MODE OF TRANSPORTATION:
ALLERGIES: PROZAC MG CAPSULE
Test Results:
This -year-old   male patient of  physician  Goginen in Albany.
Test Results:
DESCRIPTION OF PROCEDURE: Patient was brought to the operating room and
NURSE INTRAOPERATIVE REPORT
RESULTS REPORTING
The patient reports drinking below the recommended limits.
MOUTH EVERY  HOURS IF NEEDED FOR SHORTNESS OF BREATH
any questions or concerns regarding these results please call your
APPOINTMENT GIVEN:___SAME    ___HR  ___   ___ WEEK
How does your family or living situation affect your health?
How does your family or living situation affect your health?
Active Outpatient Medications (including Supplies):
PC - TELEPHONE NOTE
BP: / (// :)
MARRIED BLACK  MALE with past psychiatric history of substance abuse in
WT   =  lb [. kg] (// :)
Patient reports they still use tobacco. Patient counseled that tobacco
wandering or becoming missing from a treatment setting.
IN EACH NOSTRIL TWICE A   AS NEEDED FOR ALLERGIES
ZZPALLIATIVE CARE
life expectancy of around  months. However, a diagnosis of lung cancer has not
Not at all ()
Carcinoma of Lung .
An alcohol screening te
NO
HT  in [. cm] (// :)
go outdoors as tolerated.
PROVIDER: VELARDE,JUDY M
tough it through". When asked how he would do this, he said "I&quot;d use a gun".
Pulse reading was documented at this visit.
Appears ready to learn.
ETOH Hx: denies
Dysphagia: no
Diagnosis
SOMETIMES JUST WITH STANDING; HE NEVER WENT FOR X   SO I COULD MAKE ORTHO
( )PRE-OP ADMISSION ON Oct ,
TYPE ORAL MEDICATION
Returned pt.&quot;s call this am. He requested to move his surgery back due to work.
ADDENDUM
TALKED WITH PATIENT
Is patient alert? Yes
,    JR  --some state    () -
A sc ed external medical record is attached to this note.
/#AFLUABA.(R)deltoid.Reaction:none
Pain Level:  Current -/     Worst  -/
Amputation Status of the Upper Limb Abov
upsetting that, IN THE PAST MONTH, you:
Veteran offers bandages changed daily by wound care nurse.
CC/S:
RT TH distal met head area full thickness that measures  X  cm with ducky
MEDICATIONS:
Patient had prostate screening education with risks and benefits
drainage
SAO:%
Does the patient have pain? No
Diabetic Foot Ulcer
regulary at the wound clinic for multiple non-healing ulcers. Denies any
. Anatomical Location: mediastinum
GASTROENTEROLOGY PROCEDURE
PATHOLOGY REPORT
. Barrett&quot;s Esophagus
PREOPERATIVE DIAGNOSIS:
standard radiotherapy method recommended by the Japanese Society of Therapeutic
Denies injury no bruise noted.
Belongings list done.
CC:   ,  C, age , p/w diarrhea x
HISTORY OF PRESENT ILLNESS:  y/o MALE c PMH of esophegaeal adenocarcinoma p/w
Assess patient&quot;s fall risk upon admission, change in status, after a change
HOME CARE SERVICES
min
improved/fever/c s/night sweats/productive cough with mucus. SOB is improving
treatment; the only thing he was able to tolerate were a lot of fluids.
. Chronic sphenoidal sinusitis
four week history of diarrhea.  He stated his diarrhea started
PHARMACY - PHARMACIST NOTE
MEDICAL RESIDENT NOTE
acute soi.
,  C is a  year old here for chronic f/u and reissue of
What is your acceptable level of pain?
Neuro: Protective sensation absent bil.
reveals % epithelialization.   No erythema or edema noted. Hyperkeratotic
BODY MASS INDEX - . (APR , @::)
PHARMACY - PHARMACIST NOTE
Neuropathic ulcer, Left - resolved
Mental Status: Oriented to own ability ()
BMI: . (APR , @::)
GLUCOSE-FINGER:   H
abd: TTP in epigastric region as well as RLQ and LLQ. nml BS x. non distended.
little better after the enema yester  and would lime to have another one
Gait/Transferring: Normal, bedrest, immobile ()
Dysphagia:     Yes
. Anatomical Location: See description of treatment/procedure.
ADDENDUM
SODIUM:
Anti-Hypertensives/Diuretics: No
-EGD yester  showed a tumor in the esophagus with no sign of obstruction. a
following medication list):
has started feeling suicidal since his discharge last week.
problems.
. CONSTIPATION, unspecified
MHICM SCREEN
every time he eats or drinks. also states he has - bouts of diarrhea daily.
-  No risk
and mobility activities.
correlation to events and life changes.
anything to offer him but if his med/psych team feel that we could be of service
METOPROLOL TAB                   MG            BID ORAL
MUCOUS MEMBRANE ALTERATION:
Having trouble with s p.  Back pain is making it difficult to relax.  Morphine
Assess patient&quot;s fall risk upon admission, change in status, after a change in
ADDENDUM
FALL RISK STANDARD:
PAIN, CHRONIC:
Ambulatory aid:None, bedrest, wheelchair, nurse ()
atient  ,  C  ()
experiencing improved mood and stated, "The more I know, the  better off I am."
MENTAL HEALTH NOTE
He had a little bit of s p last night.  Started on the TID dosing of
wait to see if his medications will help with time.
Neuro: Protective sensation diminished to SWMF.
would not let staff do his FSBS or VS at . This nurse spoke with him about
y/o male with hx of esophageal cancer s/p radiation DM , OSA , bipolar
OSA
LUBIPRO  CAP,ORAL            MCG           BID ORAL
Plan for education on:
LUBIPRO  CAP,ORAL            MCG           BID ORAL
the time of discharge
History of:
DIABETIC TELERETINAL IMAGING CONSULT
GEN: sitting in chair with head resting on desk.  in NAD, but appearing ill
BELONGINGS
Type of pain:
History of falling - immediate or within  months: Yes ()
.  Coronary artery disease with myocardial infarction (MI) times two.
denies any acute complaints at present.
G IV heplock placed right FA: / NS started infusing at cc/hr for cc
: Hep-lock D/C&quot;d after infusion of cc, .% Saline infused.  B/P recheck
-COPD
DEXTROSE % INJ,SOLN            /-AMP        PRN IV PUSH
DRUG                             DOSAGE          SIG
Collaborate with interdisciplinary team, as needed.
ALBUMIN: .
Uncontrolled
.  Diabetic foot ulcer, on outpatient antibiotic therapy.
Patient Name:  ,   C. MRN:
MODIFIED RAMSAY SEDATION SCORE = LOC.
heent: anict  sclera, mmm
to endoscopic resection, seen by surgery who do not want to operate, will
PARALYSIS OF MEDIAN NERVE  %  SC
-Lumosacral and cervical spondylosis
consultants if present).
Last Assessment Info: Patient has been admitted within past   s, and a full
I/O: /
The patient seen in a.m.   with  physician , the MICU attending and the
Gait/Transferring: Normal, bedrest, immobile ()
NSTEMI
Ambulatory aid: None, bedrest, wheelchair, nurse ()
CARDIOLOGY NOTE
Moxifloxacin for RLL infiltrate.
Heart: RRR, no murmur.
Date of Discharge: Jun ,
exchange w/c for a "W version. (states has lost # since last issue). Pt
PARALYSIS OF MEDIAN NERVE  %  SC.
Weight: . lb [. kg] (// :)
ADDENDUM
he has a h/o cad, nstemi,esophageal ca,depression,copd.
Pt returns to clinic to be evaluated for  er W/C. He reports that he has
) DISTAL ESOPHAGUS AT  CM, BIOPSY(X):
Date/ Time:    Age: Sex:MALE
SAO:
alert and oriented, cooperative, fair eye contact, no abnormal
Y/O MALE arrived via Ambulatory
PODIATRY CLINIC NOTE
SOB along with left lower abd pain.  He has had normal BM&quot;s with no nausea or
ADDENDUM
Caller verbalizes understanding and agrees to follow advice given:
II. VITAL SIGNS
. Osteoarthrosis, localized, primary, involving shoulder region
% to %
. Allergic rhinitis *
. Impingment Synd
controlled substance medication.
-reduce callouses
S: persistent insomnia that was worsened by lack of pain medications.  Taking
lasix because he did not follow instruction and have taken more because he
Sensory perception:
ADDENDUM
*  SELECT ALL WHO WERE EDUCATED: Patient
=====================================================================
*  MUTUAL GOAL(S): Patient verbalizes understanding of instructions
DPAHC?                              NO
====================================
Pt. here for evaluation of right side rib discomfort. Pt. rates pain
HISTORY OF PRESENT ILLNESS:Pt. here for evaluation of right side rib discomfort.
Respiration..... (// :)
Issue Date
PATIENT EDUCATION: PAIN
some state
s p apnea consisting mainly of hypoventilation from a study completed
Caller:
Pain Scale:   (// :)
f/u  months. sorry.
[] High fiber diet and Fiber supplement.
report any that occur.
No Associate Provider Assigned.
Pulse:   (// :)
Allergies:Patient has answered NKA
=========================================================================
RIGHT RETINAL IMAGES:
PT REQUESTING "JUST A WEEK&quot;S WORTH" OF HYDROCODONE BECAUSE IT WAS CUT
MEDICATION REQUEST NOTE
on metformin  mg BID for past   s
Veteran Name:   D
Recommended Follow-up location: Physician office
- diast c blood pressure, more than
Contact Phone Number: SAME.
ATYPICAL ANTIPSYCHOTIC METABOLIC MONITORING
Are: Doing, Reading
Facility Appointed PCP: SOORYA,ASHOK T (LANS/PC )
No Primary Provider Identified
AMBULANCE TRANSPORT
****************************************************************
Family or significant other is present during
Medications - sent to pharmacy
exercise.
EDUCATIONAL INFORMATION - provided to patient
*** SUICIDE RISK ASSESSMENT-COMPREHENSIVE Has ADDENDA ***
Power of Attorney for Health Care as indicated below:
Danger to self or others
PATIENT EDUCATION PROVIDED
Patient comprehension of education:
)   TEMAZEPAM CAP,ORAL  MG PO HS PRN                     ACTIVE
Patient description of altered thought process: None
any depression @ this time.Vet has flat affect but good eye contact
movement.
: Number of patients in attendance.
: Minutes spent with patients.
homicidal ideation at this time.
homicidal ideation.
understanding verbalized
ID:  year old   male fsome state.
.     NameJoe Longstreet Phone
Elopement Risk Factors:
ADDENDUM
)   LISINOPRIL MG TAB  Qty:   Sig: TAKE   PENDING
smile, expressing optimism about himself.
DISCHARGE SUMMARY
that were waiting and he would not leave the exam room, he said he woudl wait.
I did contact Mountain Crest Hospital and he was never admitted there from that
taken without any incident for the procedure. He then came back to reality
Clinical Reminder Activity
increased saliva during the   and very dry at night, no sinus problem,
Treatment plan changes at
=========================================================================
======================================================================
Level of Understanding: Good
PURPOSE(S) OR NEED FOR WHICH THE INFORMATION IS TO BE USED BY
also exhibited mood lability and is easily prone to anger since the accident.  He
Immmunization (Flu)
The pressure ulcer prevention protocol was not needed - patient is not
NURSING SHIFT ASSESSMENT [DT] NSA
MRSA SURVEILLANCE
Patient&quot;s Interdisciplinary Plan of Care was reviewed.
-  By self or significant other
,
for recovery/relapse prevention and maintenance.
occurs for - seconds (worsens during this time) each time and happens
c/o R shoudler pai for few months no known injury
PCC-NURSING INTAKE
VITAL SIGNS:
S:here as appt f/u DM ,hyperlipidemia ,HTN ,CAD
(+) Atrial fibrillation, Chronic Ischemic heart disease
PCC-TELEPHONE
BARRIERS TO LEARNING:
PREFERRED LEARNING METHODS: Verbal, Pamphlet
in postion no exersional CP
Expiration date: July
Denies any new allergies
)   ALBUTEROL /IPRATROP MCG D PO INHL INHALE       ACTIVE (S)
ADDENDUM
Physical Activity/ADL Screening :
Tobacco Use Disorder (ICD--CM .)   Schizoaffective Disorder, unspecified
Active Outpatient Medications                          Status
. Lower (legs, knees, ankles, toes) - e.g., lateral knee movement, toe
(None; Normal)
DATE: OCT ,  :
ED MEDICATION ADMINISTRATION NOTE (SECONDARY)
Patient had nutrition screening at this encounter.
Flu Shot FY:
is same as before.  Says hydrocodone caused his left foot to swell and gave bad
acknowledges
System Recommendation: - hours
C/O LEG PAIN IN BOTH LEGS GETTING WORSE OVER PAST WEEK; NO SWELLING NOTED;
Positive Responses
Other:
understand why she couldn&quot;t leave paperwork even though she has an
Documentation is from the CDC&quot;s website "TIPS"
.  Hypertension, controlled.
- - - - - - - - - - - - - - - - - - - - - - - - - - - - - - - - - - - - - - - -
INTERDISCIPLINARY PATIENT HEALTH EDUCATION NOTE    SEP ,
Emotional/psychological factors:      No
Protocol(s) used: &lt;Not identified&gt;.
The following identifiers were used to verify this patient:  SSN.
VS:  BP:/ (// :)
. If No, the patient is counseled to
age  and for patients of any age who are residents of chronic care
This letter is a courtesy reminder of services available to you through
scheduled for your appointment,even fasting lab, PLEASE b
thoracic operation could be scheduled.  Again he is declined operation at this
B.  Should you need to CANCEL your appointment, do you know how?
performed depending on findings.
Phone Number:--
Otherwise no changes to health or medications.
VITALS:
Post operative   #.
[X] Discharge diet instruction sheet provided.
Facility Appointed PCP: KETCHUM,CAREY   ( EMER PRIMARY CARE)
Caller Response: *OTHER.
. Did the hospital staff give you and your family someone close to you, all the
Last PCP appt: NOV           Est. return appt for pain follow: MAY
Is the patient a current tobacco user or has used a tobacco product
.  Tobacco abuse.
Pain Contract located and signed?none     Last UDS://
No Associate Provider Identified
Relationship: SISTER
Patient to see  physician ince provider is off station at this time
Difficulty urinating. Denies pain or burning with urination. Patient
ADVANCE DIRECTIVE INFORMATION
year old MALE
Cell Phones
BREATH SOUNDS
LAB DATA
A.M.
Yellow Tag On Door
CURRENT VITAL SIGNS
of nurse if symptoms occur.
thickness.
HEIGHT:  . in [. cm] (// :)
Blood Pressure:  / (// :)
INPATIENT NURSING REASSESSMENT
Equipment/Devices used:
SKIN WARM AND DRY
I visited with Mr.   in his hospital room to discuss HH services. He
male who presented to the hospital with swelling of
SCHEDULED DATE:-
brushings and biopsies were obtained from the right
GATIFLOXACIN, GUAFENESIN
GATIFLOXACIN, GUAFENESIN MG/ML UD
reduction done.
Bronchoscopy/carcinoma,
Verified correct patient
[] IM Demerol   MG
COMPLICATIONS: None
ENDO TELEPHONE FOLLOW-UP
ADDENDUM
Respirations:  (// :)
endoscopic procedure.
No--Dentures
OCT   INFLUENZA
no symptoms.  No chest pain, no undue dyspnea, no orthopnea or PND,
INTERVENTIONS
Alert
ICU NURSING ASSESSMENT
Left:  Strong
Refer to care plan and MD orders for treatment plan, All unre
ML  TKO@ START AFTER BOLUS-MG/MIN X HRS- THEN
Regular
)   AMIODARONE INJ AMIODARONE  MG in DEXTROSE %     ACTIVE
Posterior tibial: Right: Strong
breakfast, meds. pt to go back ion  hour for nd part of dippy
increase in adenosine, a naturally-occurring substance in the body,
he stands.  He normally walks with the assistance of a cane.
Tongue: Midline
further needs at this time. Will continue to monitor pt. VSS.
Moisture:           = Rarely Moist
drainage or edema to site, dressing intact.  Hand grips equal
SAFETY: Bed in low position, brakes on., Call light within reach, Urinal within
Active Inpatient Medications                           Status
PHYSICAL THERAPY DAILY NOTE
PRESSURE ULCER PROTOCOL NA - NO RISK            //
Comments:
pvc&quot;s
Supper: %
Height:        &quot; " ( cm)
Objective:  Active Inpatient Medications (including Supplies):
AMARILLO TEXAS
SOURCE OF REFERRAL:
.  Episodic wide complex tachycardia.
Treatments:
with PCP here at the VA.
the following problems? Little interest or pleasure in doing
TRIAGE CODE:
PATIENT ARRIVAL:
Pulse:             (//  :)
diarrhea. Lst drink was this pm.
CARDIOVASCULAR:
ambulated slowly on his
CC:dizziness
NURSING ADMISSION SCREENING ASSESSMENT
importance of not drinking EtOH and taking antabuse at the same time.  He
The patient was given FECAL OCCULT BLOOD TEST CARDS at this encounter.
=
physician
on whole wheat bread, chicken, pasta, or fish for dinner. Eats good amount of
Veteran has been educated about advance directives and will contact
Reason for call and discussion with patient:
OR HI,
MHS-BDI PSYCHOLOGY REPORT
[] .  Often
PRIMARY CARE PROVIDER: LOPC Team C
year history.  Unemployed.
She has been upset with her boss who used to be her friend and was talking about
Feliciano Lopez, MA Voc Rehabilitation Specialist.
) Attention Span: Patient has displayed ability to remain task focused
Client requested help with processing service connection disability benefits. I
BARRIERS TO LEARNING:  none
Veteran participated in a psycho-educational class led by Judy McCully, LMSW.
PER PATIENT ADDENDUMS WHERE NECESSARY:
the lives of a ghetto family. The story ends in triumph and recovery for the
Data ( Self - Report, Observations, Interventions, Current
Plan: (Tasks to be completed be
SATT INDIVIDUAL SESSION
woman would about what people thought of them so they go and seek help. The
Mr   was seen to  as a walk-in for  minutes.
focus of to &quot;s session was a review of the  stages of recovery: admission,
means as well as different levels among different countries.
Pain level acceptable to patient:
DATE OF BIRTH:  December , .
T:  // jld
Neuropathy//no
Active and Recently Expired Outpatient Medications (excluding Supplies):
)   CLONIDINE HCL .MG TAB TAKE TWO TABLETS BY MOUTH      ACTIVE
)   HYP LLOSE .% OPH SOLN INSTILL  DROP IN TO EYES   ACTIVE
Veterans Administration
INTERVENTIONS:
UA  negative
Outpatient VA Meds:
bladder spasms
psychotropics on  a regular basis, full benefits of meds will not be gained.
Active Outpatient Medications (excluding Supplies):
CHANGE
)   BUPROPION HCL MG TAB TAKE TWO TABLETS BY MOUTH       ACTIVE
currently working.  He has summer employment with the conservation and
MH ASSESSMENT SCREENING
Origin of Pain:            MIGRAINES
However, he does not have income for deposit. Suggested he work with HUD VASH
Have had any nightmares about it or thought about it when you did
says that two years ago he had a syncopal episode and the etiology was
)   FORMOTEROL FUMARATE MCG INHL CAP INHALE ONE CAPSULE  ACTIVE
dizziness is nonexistant.  I noticed he&quot;s not had a TSH on the lowered thyroid
hypothyroidism and COPD.  Apparently he has been in the hospital in
provider at this encounter.
Location: Hospital
was in the Marine Corp for  years.  Served in Korea and Somalia, in combat
Facility Appointed PCP:  ,    (PUEBLO-RED)
Patti RN psych evaluator at Parkview ED --
--
Patient height: . in [. cm] (// :)
Directive/Organ  Donation.
;MG  .
disease.
Comments:
no observable changes at this time
RTU
Previous Vitals:
room most of the  .  Veteran was out of bed for meals, then returned to his
Total Independent, Not Tube Fed
DRESSING (PUTTING ON CLOTHING, SOCKS, SHOES):
ADL-FLOWSHEET
BED MOBILITY
%-%
nicotine dependence
Dyslipidemia
Severe
ADDENDUM
none
long. Will need a NHCU consult for rehab placed. As of to , he will be number
offered to inquire as to status of possible transfer to VA.
=========================================================================
Active Inpatient Medications              Status       Stop Date
[ ]family/caregiver training
physician erate
Nutrition:          = Adequate
PMR/OT DAILY CONSULT NOTE
CPT code:  Re-eval
fluids up  in Rfoot. The OT assessed Veteran&quot;s measurements in order to
P er/Encouragement/Support
needing minimal assistance to assist his R leg at times during bed mobility.
can fully extend all fingers but the RSF. Conducted parrafing bath-  applications
pt can navigate the steps sitting in the short term.
//
suicidal and homicidal ideation.
One to One Counseling/Education was provided.
belongings including w/c  ier this am. Pt has other belongings he will take
Last Pain Med:
Patient is a  year old MALE.
Height:           in [. cm] (// :)
-) for the mail, for s/p multiple trauma pain.  Next apt.- with dr.
transportation is an issue with this vet, our efforts to arrange transportation
Precautions: External fixator right LE. s/p MVA /. Limited WB status # per
Level of Understanding: Good
VA ADVANCE DIRECTIVE:
Buckeye, AZ
W Verde Ln
P = Patient           V = Verbal            V = Verbalized Understanding
physician YL MG EC TAB                           Dispensed: FEB ,
. S p Apnea
Pain Goal--What pain level is acceptable to patient (-)?
Patient Phone: ()-**VERIFIED**
could be faxed instead.  Please call pt to let him know which way it should be
abnormality.
potential lethality than other meds he has been given. Agree that more oversight
Sun , and requested if VA offers family counseling.  Advised Mrs.   that
CODE - NSC,
W VERDsome state
up," felt more desperate. He says a nurse at Del Webb whose family member had
explanation for his medical conditions, feeling guilty related to the effects
chest with radiation to shoulder.  Had pain before and had cardiac cath  months
Vet attended the group        [x]Yes  [ ]No   [ ]Excused
MORSE FALL SCALE
High fall risk - with medications and pt.&quot;s h
the outpatient Mental Health clinic with complaints of suicidal
Patient counseled on safe and effective medication use at this encounter.
MALE    MARITAL STATUS - MARRIED
. Depression *
Marital Status: Married
SPC. Vet is future oriented.
SOCIAL WORK NOTE
TC FROM VET STATING THAT HE RECEIVED LETTER STATING THAT HE WAS "NOT APPROVED"
DISPOSITION: Call , transport to the nearest Emergency Room
. Depression *
ED Note dated //
Secondary Diagnosis related to cognition or mobility: Yes ()
Race:
*Pt on .mg clonazepam TID and mg clonazepam at HS.  Usual recommended
talked about working with    , Social Worker to write an "Impact
States he may be discharged to . Stat EKG taken bedside in am.
FALL RISK HIGH same, no falls.
No diplopia or vision changes.
medications please ask your nurse for clarification or ask to speak
to your physician prior to discharge. If you find that you have
Veteran is accompanied by his wife  . D. Klein, LMSW, SPC is also present.
twisted her back.  Wife is unable to assist vet at this time.
before.
Operates a Computer Independently__x__
ADDENDUM
Also, vet indicates having problems with hemorrhoids b ding.  Advised that
CRISIS NOTE
AND WAS ABLE TO TALK TO DISPATCH.
AGRESSIV
groups include  s.  Vet also denied deliberately getting in the way of a
pt placed on : with sitter
been discharged during initial contact. Relayed information that pt was not
identify herself on the phone she stated that she was the wife (  ) and
Received call from SPC -- to alert me relatives upset veteran with
State:
The direct care staff (MD, RN, Rehabilitation) thinks the patient IS
states that he has no refills on his Simvastatin &amp; would like that Rx mailed.
SGPT                       U/L                       //
was.  Returned call and left a message on her work voicemail (--/-
tooth pain.  No fever.  Occassional cough.  Resolving.
FYI PCP.
*Influenza Reminder:
but LESS THAN /:
understood and I will call him back in  . . tmk
Patient has answered NKA
Brain: No significant cerebral abnormality.  Specifically, no
Pulse:
Information below provided by hospital.
pt. aware of appt. date.
Military Service: YES
If you are asking to write stimulant meds ,I can,t without/befor seeing him and my
stool.
+ rhinorrhea, yellow or
ADDENDUM
no pain
Assessment:
anxiety attacks.  Says will be his first appt. with this MD.  Call back #-
)   OMEPRAZOLE MG EC CAP TAKE ONE CAPSULE BY MOUTH       ACTIVE
Complaint:  pt feels there is nothing wrong and denies feelings of
Contacted   Compton.  He will contact transfer nurse coordinator at -
() Veteran was counseled of his rights to enact Advance Directives.
Pulse:   (// :)
ACTIVITY:
Pt use the wheelchair went he came out to dinner, he walk out to get his
visit this weekend. This SW phoned the wife and informed her of the phone
after getting now dose of clonidine. At  manual b/p was /. Pt.
EK-NURSING RN MH
makes needs known. Talks about specific situations he has been involved in
)   ALBUTEROL/IPRATROPIUM INHL,ORAL   PUFFS INHL ORAL     ACTIVE
)   LORAZEPAM TAB   MG PO QH PRN FOR ANXIETY             ACTIVE
Pt remains on PRSE and Active Duty LOR status. Pt in bed throughout the night;
)   LORAZEPAM TAB   MG PO QH PRN FOR ANXIETY - NOT TO    ACTIVE
Reviewed medication administration, side effects, diet/medication
PUFFS IN  HOURS
. Secondary Diagnosis:                   No:
Pt was stating that his anxiety was a /. Order received for ativan mg x
questions, then vet tried to gain attention from his peers about his "poor
Short attention span/easily distractible
EK-NURSING NA PC
FOR PAIN - NOT TO EXCEED MG (ACETAMINOPHEN) PER
him and  month old daughter. Several people visited and were able to take care of
this information would be passed on to the appropriate people.  Patient advocate
)   ALBUTEROL/IPRATROPIUM INHL,ORAL   PUFF INHL ORAL QH  ACTIVE
been here before.  Soldier is confused, highly anxious. Denies that
Per patient: "I came in to do a survey and the doctor thought I should be
Assessment Date &amp; Time:  //
provided. Veteran said he would review it and inform this writer should
Compared newly ordered medications and medication changes to active
lbs (MAR , @:)
Appearance clean and neat.   physician roomed.
.  Name  Kristey    Phone  --
States he has been transferred to a WTU (Warrior Transition Unit) and wants to
PRN FOR SHORTNESS OF BREATH
PATCH-ROTATE SITES-DO NOT SMOKE ** nicotine
One to one counseling/education utilized with patient/significant
MEDICATION MANAGEMENT: antipsychotics, antidepressants, mood
EK-NURSING NA MH
PATCH-ROTATE SITES-DO NOT SMOKE ** nicotine
NOT TO EXCEED , MG IN  HOURS FROM ALL SOURCES
PRN FOR SHORTNESS OF BREATH
to help Mr.  . However, she is trying to be supportive and maintain
epis  and how that had put a lot of strain on his marriage. She is aware of
husband or experiences combat Veterans have been through and how that affects
scheduled for tomorrow. He is returning to Ft. Riley where he will resume his
maintain/improve heart health.
Patient Phone:
Psome state
PRIMARY PROVIDER:NONE LISTED
The fluid may be sent for microscopic analysis.  Medication may be
Neck: normal
. Treatment/procedure: This procedure involves removal of fluid from
Patient Education Documentation:
Comment: Given and reviewed current list of medications, reports
fee basis so that  physician an get paid.  Veteran will contact  physician &quot;s office to insure that  physician an perform the evaluation for the
O) Vital Signs:
Weight          . lb [. kg] (// :)
O; Wearing elbow pad right elbow - per orthopedics
stressor).
services (did this to  physician guson&quot;s office in an attempt to get them to
COPD.
ADDENDUM
Patient had safe/effect. use of medication at this encounter.
SAO            % ra rest.
Acute:
BODY MASS INDEX - . (AUG , @::)
Y/O MALE arrived via Ambulatory
Weight: . lb [. kg] (// :)
Patient had safe/effect. use of medication at this encounter.
visit.
accessed by selecting the Tools Menu, then select Imaging Display."
MODERATE SEDATION
PCP: BETTS,  C
denies nausea, no vomiting
Tobacco Use Screen FY:
BODY MASS INDEX - . (OCT , @::)
ADDENDUM
Respiration      (// :)
UNSCHEDULED NURSING ASSESSMENT
(D) Extraction erupted tooth/exr:
time  minutes
from family and friends, anticipating withdrawal symptoms, and/or
removing tobacco products from their environment.  Also discussed
BEDTIME FOR HEART AND BLOOD PRESSURE (DO NOT TAKE
Dental Category: -CLASS IV.  Treatment Status: Active.
(D) Rem imp tooth w mucoper flp. Tooth: .  DX: (.).
AT BEDTIME (DO NOT TAKE WITH GRAPEFRUIT JUICE) FOR
CLINIC FOR WITHIN ONE WEEK.   PATIENT MAY GO THE MENTAL HEALTH WALK
Patient stable AND AMBULATORY
De ration of intervertebral disc (ICDTobacco Use Disorder (ICD--CM .)
JUL ,
DISPOSITION OF SELECTED ITEMS
-accepted by  HS,  physician calling report
Accepted: [ ]Y  [ ]N
Active Outpatient Medications (including Supplies):
    
