# Supplementary material for: Predicting the Risk of Suicide by Analyzing the Text of Clinical Notes
Source: PLoS One. 2014 Jan 28;9(1):e85733. doi: 10.1371/journal.pone.0085733 (PMC3904866; doi:10.1371/journal.pone.0085733)
Supplement: Appendix S3 — Machine Learning Libraries and Methods: This section is provided to enclose the open source (Apache License) classifier used for the building of the statistical models, specifically for the purposes of study reproducibility. A detailed account of these tools is intended for another publication. (ZIP) [file pone.0085733.s003.zip › Appendix3/ML_libs/Regression_testing/group2/grp2-pt-1012.xml.txt]

(NVO)   Right: +.-.x
note that he experiences pain on  p palpation, consistent with trochant
RESULTS:  (  ) within range   ( x ) slightly too low    ( ) too high---inr
Called patient per PC ANTICOAGULATION MANAGEMENT NOTE and informed him of INR
"FOR YOUR HEALTH" BROCHURE GIVEN AND REVIEWED.
PENICILLIN
Sc ed images attached to this note include:
.  Lactose intolerance.
ALLERGIES/ADVERSE REACTIONS: Patient has answered NKA
Is patient
medical history includes anxiety, tobacco dependence, however,
ANOTHER PHYSICIAN?  Yes
by patient.
pt sees pvt mds regularly -new rx -dipyridamole  mgs bid
Pulse  (// :)
Respiration  (// :)
P: Refer to: MD
Tobacco use was assessed
pt needs ot stay on lisinopril for renal protection in diabetes, and BP control
you.
Patient states used tobacco in the past  months?  YES
Patient was counselled about
PRESENTS TO CLINIC FOR REVIEW OF CHRONIC MEDICAL PROBLEMS, pt states he has been
*of screening for diabetic retinopathy, but c ot substitute for *
not able to provide you with appropriate medical care unless you keep
6A TREATMENT TEAM NOTE
LOC:
MOOD:
GI/METAB C:
to he feels he can "help&quot;, other people by doing volunteer work at his local
6A TREATMENT TEAM NOTE
PARTICIPATION:
Normal
discharge. Will increase the Divalproex to  as recent VPA level was ..
BUSPIRONE TAB  MG PO TID(--)                        ACTIVE
Normal,organized
Patient attended Wrap-Up group which consisted of discussion of to &quot;s goal and whether it was
)   BUPROPION TAB  MG PO BID(-NOON)                   ACTIVE
Suicidal Plan:
BRIEF HISTORY:   y o w d m with bipolar dis  mixed has been feeling
LISINOPRIL MG TAB   SIG: TAKE ONE-HALF TABLET BY MOUTH DAILY
His mood is normal, no lethality issues. He admits that taking medication
TEMPERATURE:  Temperature: . F [. C] (// :)
Caller verbalized understanding
Allergies: PAROXETINE, ACIPHEX MG TAB UD, LEXAPRO MG TAB
I informed  physician of above.
Current Meds: Active Outpatient
RESPONSE TO NEW MEDICATIONS:
Not applicable
HR:    (// :)
PE
ESTIMATED BLOOD LOSS: &lt;cc
-------------------------------------
Interdisciplinary Plan of Care Reviewed: Care plan updated
afib, hr controlled, following urology recomendations.
NURSING - INPATIENT
clear, resp easy and unlabored. Abd soft, non tender with BS X  present. IID
NURSING DISCHARGE SUMMARY
UROLOGY-PROVIDER
Instructed to weigh self daily before breakfast and write down the
Means to carry out plan: N/A
approximately  or  months ago due to gross hematuria.  He has
Yes
Appetite: good
PATIENT IS NOT SURE OF WHAT MEDICATIONS HE IS TAKING OUTSIDE OF THE VA. WILL
--------------
Medication route: topically
Hypertrophy (Benign) of Prostate without Urinary obstruction (ICD--CM
RELATIONSHIP: DTR
Pt is a retired tool and die maker from  ral Electric.
RESPONSE TO NEW MEDICATIONS:
NURSING NOTE:
Not applicable
L. Monitor oxygen saturation via ABG&quot;s and/or pulse oximetry as ordered
-Patient&quot;s inpatient medication profile from Intensive Care Unit
voided      cc
HR:-&quot;s
and easy, denies any dyspnea.  O sat %ra.  BBSC.  Abdomen is soft and
continent of large loose bm tonight.  VOided large amount yellow urine in
INTERVENTIONS
Nurses Report:
NURSING INPATIENT NOTE
ADDENDUM
Received a return telephone call from Twinbrook.  Pt has not been accepted for
ADDENDUM
Constipated No, Diarrhea No,
CP or chest pressure but stated he was short of breath following ambulation.
Eating well Yes, Voiding normally Yes, Has Foley No,
NURSING INPATIENT NOTE
to edge of bed. Once his feet are on the floor, patient is able to ambulate
Slept well most of night.
presses on his sternum. Did not complain of cough this am, but states that he
coumadin to . mg on /) Hold coumadin for now - please continue to follow
Community nursing home
Patient has answered NKA
BY MOUTH TWICE A   ON MON S WEDNES S AND
Takes B complex and occ Tylenol-about once every - months
TELEPHONE CONTACT:
Appointments
Sates he is a carpenter.  Last worked in Hawai
records. I was going to interview the veteran for a second assessment, but the
education. Veteran not prepared to complete Advance Directive at this
PHARMACY MEDICATION EDUCATION-PT ED (T)
C/C Pointing to his right groin, patient states "I have a
y/o WM c/o a bulge in his right groin. Denies abd pain, N/V/D, CP, SOB,
LISINOPRIL MG TAB TAKE ONE-HALF TABLET BY MOUTH EVERY     ACTIVE
Pt with depression, vauge SI, no plan after lsoing job /, also c/o
Active Outpatient Medications (including Supplies):
When did you last experience pain:
Verbal Assessment:
Sensory Perception: = No Impairment
MAJOR RISK FACTORS / SPECIAL POPULATIONS
he has gotten both anxious and depressed. He has been feeling hopewfless and
voiced any S/I or intent this tour.   Mood depressed and anxious.  Will continue
Withdrawal Symptoms:   No
adjusting to milieu tolerating the citalopram and not showing signs of
Nursing Diagnosis:  Depression
Affect:  congruent with conversation, interacting
(     ) Provide social /
I
LDL                                          .
AM.  Pt feels like his mood has improved since admission.  Pt tolerating meds
If you have not been assigned a Primary Care Doctor, a follow up
NEUROPSYCHOLOGY CONSULT
DATE OF BIRTH: //
NURSING DISCHARGE TELEPHONE FOLLOW-UP NOTE (S)
Psychiatrist interventions: prescribe and adjust medications, monitor labs
The Medication (s) to be  wed include:
[ ] Nursing Appt. Date:
advised pt to follow the prescribed dose and he confirmed he was taking it mg
Pain Level: Worst /, Least /, Average -/, Right Now /
brief answers with elaboration
synvisc w/ good results for ~  month. Neck pain with exte
in health or welfare.
REMINDERS AS FOLLOWS: Will keep scheduled appts.
Verbalized understanding
[ ] PRMC
Pt identified by name, SS# and/or DOB
[ ] ER  Bay Pines
[ ] CRMC
Click on Tools, click on VISTA IMAGING
Pt identified by name, SS# and/or DOB
O:      Alert, interactive, and tense
SIGNATURE NOT REQUIRED
Pt Identification Completed, SSN Confirmed, Allergy History Confirmed.
SURGERY PROGRESS NOTE
INITIAL NURSING ASSESSMENT: a&amp;o, skin warm and dry,   raised areas noted to
time, no pain only itching has not taken any OTC&quot;s; of note he has also been
Duration of Complaint:  Months
.     Tobacco Use Disorder (ICD--CM .)
pleas contact patient and have him request copy of CT of the lumbar and
PC TELCARE
Facility Appointed PCP: MALATINSZKY,  (ORANGE TEAM)
Provider notified of pain rating.
=========================================================================
MEDICATION RECONCILIATION
BMI (Body Mass Index): Normal range -  to .
Is the patient taking any NEW Over-The-Counter, Non-VA, or Herbal
Alcohol use: Yes
Aldrete Score equal to or greater than : Yes
- - - - - - - - - - - - - - - - - - - - - - - - - - - - - - - - - -
Historical/Outside results available:
which is increased from last year. states milk causes diarrhea.
BLEPHARITIS NOS                         Conjunctivitis (ICD--CM .)
- - - - - - - - - - - - - - - - - - - - - - - - -
GERIATRICS CLINIC
-add HC % lotion
LV / - EIC on forehead removed
-well healed scar R alar groove NER
___ Physical  ___ Cognitive  ___ Emotional        ___ Psycho-Social
EVALUATION:
SURGERY - SCHEDULE COORDINATOR
)   AMLODIPINE BESYLATE MG TAB TAKE ONE TABLET BY MOUTH  ACTIVE
Procedure:COLONOSCOPY
Consult with Primary Care Provider/Team: ___YES  ___ NO  ___N/A
Lab/X :
Weight:  lb [. kg] (// :)
How does your family or living situation affect your health?
VETERAN INSTRUCTED TO:
Active Outpatient Medications             Refills      Expiration
Weight:  lb [. kg] (// :)
Patient called and is requesting  wal of the following prescription:
PMH:De ration of lumbar or lumbosacral inHepatitis B carrier
draw clock correctly.  Ability to manage meds, etc is not an absolute certainty
These two MCA distribution infarcts suggest B ICA emb sm, either because of
ALLERGIES:Patient has answered NKA
NOTED THAT HIS HR WHEN CHECKING IN WAS . PATIENT HAS NOT RECEIVED DENTAL CARE
notifying DCF and intervening for pt safety.
SWS TELEPHONE CONTACT
Regular
soups, crackers only.  Does get typical HB also.  Symptoms seem to be worse
Evaluation/Management Code: HC PRO PHONE CALL - MIN ().
J.  :  "Uh, yes I do."
wandering or becoming missing from a treatment setting.
want to?   NO
WT  lb [. kg] (// :)
)   MOMETASONE FUROATE ORAL INH MCG USE  PUFF BY       ACTIVE (S)
no f/u appt made with PC Ravella. States he will return to clinic as needed, he
COPD
Service: Pulmonary
Alcohol Use Screen (AUDIT-C):
PC CLINICIAN VISIT NOTE
sore throat
(including Supplies):
. F (. C)
Recently Expired Inpatient and Outpatient Medications
Please call vet to find out if he is doing better-as he had diarrhea-for which
. Condition or diagnosis: Blood in stools, or pain, injury,
ORTHOPEDIC CONSULT
BFAST  -
AVERAGE
Lantus           units                am
AGAIN ASKED HIM NOT TO DO THAT
Telephone #:
LUNCH NOON
GLUCOSE
New Prescription - Action, dosage, and side affects
Veteran was not able to be reached: Veteran is Low risk of
HPI:
Amputation Status of the Upper Limb Abov
.% PF Bupivacaine   cc and mg Depomedrol, total    cc,      cc each site
Exm Date: OCT ,
undergoing radiation therapy, on about  of  treatments.
[]    []     T   No evidence of primary tumor
. Pain, Chronic
are getting worse.
the ulcer did not probe or undermine. There was no purulent drainage, no mal-
B/P suboptimal
- Avoid sun exposure or wear sunscreen.
No changes in assessment since pre-procedure evaluation:
SURGICAL ATTENDING NOTE
Hyperlipidemia *
PODIATRY CLINIC NOTE
ALLERGIES:
LT lateral th met head that is full thickness measures . cm x . cm, with
Uncooperative patient:              No
XXXXXXXXXXXXXXXXXXXXXXXXXXXXXXXXXXXXXXXXXXXXXXXXXXXXXXXXXXXXXXXXXXXXXXXXXX
The patient is currently being followed by:NANDA,ANITA N
- - - - - - - - - - - - - - - - - - - - - - - - - - - - - - - - - - - - - - - -
eus lymphnode biopsy was also negative.
. Allergic rhinitis *
ADDENDUM
Belongings list done.
Pain:  (//  : PM)
Current Diet: CLEAR LIQ
-dey dressing applied Lt sub st, th dressed with betadine.
Patient  ,  C  ()
Type of pain: Pressure
Pain intensity (=none - =worst):
except for gas. Patient denies pain.  Patient reports that he is going to be D/C
. Colon Polyp
Fluid Vol Imb ce Better
PHONE NUMBER: --
**Services Referred (type, frequency, date range):
Percocet tid prn TCBP #
SCANNED RADIATION THERAPY REPORT
.. Wound base is granular. No signs of probe to bone, tracking or undermining.
x .cm x mm.  No probe to bone, erythema, drainage, tracking or undermining
Veteran reportedly plans to call   C. Lincoln Hospital fo
S:  y/o male pt rtc for f/u on ulceration on his left foot.  He admits to
GERD *
Diabetic Foot Ulcer
BODY MASS INDEX - . (APR , @::)
O:
He has a h/o
CAD * - has had mi in the past per patient report.
. chronic pain
The patient is a  year old with a PMHX of dm, gerd/barrett&quot;s and esophageal
Place call light, TV controls, bedside table, telephone, and urinal within reach
PE:
Mental Status: Oriented to own ability ()
amp.)---am glargine held.-------instaglucose)--(food)----
POTASSIUM: .
. lb [. kg] (// :)
Mental Status: Oriented to own ability ()
chest: course bs
of the patient.  Offer frequent toileting.
Promote nutritional status: encourage intake of fluids and refer to dietitian.
Heart: ss heard, no murm, regular rhythm
extremties: + pitting edema, distal pulses intact
NONCARDIAC CHEST PAIN Secondary to:
Patient being discharged to: Home
PMHX: DM; Esophageal CA s/p radiation; GERD; CAD; Hyperlipidemia, COPD.
--------------
Psychotropic  physician edative/Anti-Anxiety/Pain Meds: No
Assess pain level, symptoms, and history.
Does patient have pain?:Yes
Encourage patient to verbalize feelings, perceptions and fears.
Educate patient/family regarding adequate nutrition and oral care.
Vet has been using privileges appropriately and interacting with peers on and
nightmares. Complaining of pain level . Received Percocet and then morphine
O: Objective for this group:  y Recovery process
NURSING NOTE
CLINICAL
Observed hourly for safety and s p pattern.AM medications given vital signs
asses:
Observed hourly for safety and s p pattern.No distress noted.Am medications
Assisted by   Carelock, PMS .
Ambulatory aid:None, bedrest, wheelchair, nurse ()
Time-out Clinical Invasive Procedures
Provider(s)/Practitioner(s):
During the implementation of the electronic patient record at VAMC
Gen:  awake, alert, able to touch chin to chest with ease
Mental Status: Oriented to own ability ()
Anti-Histamines: No
ADDENDUM
th metatarsal.) Ancef ok pending cultures.
Patient was admitted to VA Hospital -- for continued nausea vomiting,
) Bactrim x  s
ADDENDUM
family is in chicago and pt has no contact with them, on the other hand, threr
TG
PAIN ASSESSMENT
SULFA MG/TRIMETHOPRIM MG TA TABLET (DS)   QH ORAL
O: y. o MALE,  , MARITAL STATUS - DIVORCED, PERIOD OF SERVICE - VIETNAM
** PHARMACY: DISCHARGE MEDICATION EDUCATION **
.  Physical therapy
PLATINUM CLINIC NOTE
suicidal ideation , nd time he quit taking his insulin. was d/ced yester .
Date and time of notification: May ,@:
events overnight.  Will continue A/P as previously written.  Will consult social
at home despite having a   and he also reports difficulty remembering to
Accucheck was  &amp; scheduled blood glucose was . physician med &amp;
__________________________________________________________________________
CRAX,SALTINES PKG
The following list contains the medications the patient has currently active
Patient Consent:
exacerbated by  p breathing and cough.  / intensity.  No nausea but
-OA
SYMMETRICAL
He also complains of a cough with clear/yellow sputum and a low grade fever. He
Sec. Diag. Comments: weak
pleuritic in nature, worse with cough/ p inspiration.  Came to the ER for
Will continu
MORSE FALL SCALE
Anti-Hypertensives/Diuretics: Yes
=========================================================================
// @       .                /         .
I was notified by home care services that patient was previously enrolled with
DIABETES MELLITUS
to your physician prior to discharge. If you find that you have
Gait/Transferring: Normal, bedrest, immobile ()
Status       Last Fill
indication, dosages, route of administration, frequency and possible
Comment:
emergencies given: Yes
.  Coronary artery disease and congestive heart failure (CHF):
.  Podiatry.
A: Vet states this episode really scared him and he plans to be as compliant
Major Depressive Disorder, Recurrent Episode
// @ : stat chem  drawn and sent to lab: Waiting results
alert and oriented, cooperative, fair eye contact, no abnormal
PREVENTIVE HEALTH MANAGEMENT
on palpation of ant. chest   &lt;ribs&gt;to &lt;similar to his complaint he says&gt;.
w/c in automobile. He would like rack to place w/c on automobile. Consult given
Vital Signs:
ALLERGIES:
ERYTHROMYCIN, CODEINE, PENICILLIN, NIACIN, OMEPRAZOLE, FLUNIS DE, CHICKEN
Chief Complaint: Abdominal Pain
DATE/TIME         TEMP    PULSE   RESP    BP      PAIN    WT (LB) P OX
He has to have repeat of PAP scan at Mayo on // and will have further
PATIENT ED READINESS/GOALS/METHOD:
PATIENT ED TOPIC: Tests/Procedures
cc: consult prior to starting Zometa
Worked at Har s age
The patient was instructed to exercise aerobically for - minutes
rib pain for  week since he fell off his bike
Chief complaint and condition upon arrival:
Pt here for month follow up appt Pt has pain to  pain level  in his
no longer tolerated or within one week following initiation of pain
ALLERGIES
Current physical activity/exercise activities: PHYSICAL ACTIVITY W/WORK
IM at this encounter. The patient was told about possible side effects
Findings:
The full consent
Patient instructed to complete the FOBT cards y y.
report any that occur.
Respiration:   (// :)
Age:  Sex: MALE Race:  , NOT OF HISPANIC ORIGIN
)   ASPIRIN  TAB  MG CHEWABLE CHEW ONE TABLET BY MOUTH   ACTIVE
LIPID PROFILE Coll. dat// :   // :   // :
AMBULATORY CARE/PAISLEY
No Associate Provider Identified
Gender:  y/o male
Duration of Complaint:
Non-VA medication reviewed, no change reported.
Call Type: DTN SYMPTOM .
:psychosis-resolved.
(S):   Chief Complaint/Hx of present illness:
(influenza vaccine is not approved for
Blood Pressure:/ (// :)
Patient Phone Number: --
,  D is assigned to Caller Area LANSING.
Contact Phone Number: SAME.
successive no show (on heels of cancel/reschedule) psychiatric v-tel follow up
Called and left message with   in regards to appointment with  physician r
The primary purpose of the High Risk for Suicide PRF is to communicate to
RESPIRATION: (// :)
Rate your Level of Depression: (with  none to  severe)
The veteran:
for him.  I asked him when he began to feel suicidal before the Respoeridol shot
S: Pt. reports that he has been s ping well and is feeling improvement in
following instructions, socializing,
Describe:
Include frowning, b ing, grimacing of upper face.
. Have you ever tried to kill yourself?                   No
)   MAGNESIUM HYDROXIDE SUSP,ORAL  ML PO DAILY PRN For   ACTIVE
we will continue present medications and give him level  privileges at this
PATIENT EDUCATION PROVIDED
Pt. was quiet and isolative on this shift. Remained in room most of evening.
HEALTH EDUCATION PROVIDED
Patient Education materials provided to patient (specify):
Who Was Instructed: patient
. Have you become drunk or high on drugs more than
VISIT.  I was able to accommodate him.  He wanted to update me on his current
was crying in the exam room about the death of an old friend).  He does have a
___Discharge
arrived.  He agreed to have his medicines mailed to him and agreed that he
Letter to veteran from Mental Health Council advising he should only go to Ft.
and reckless.  He said he does not want to get into more trouble and end up in
denies any side effects from his medications and has been taking them as
about the work release and weekenders that he must do.  I believe this has a lot
=========================================================================
then pt stopped it because he had GI upset at that dose.  Just prior to
Site:  left deltoid
. Inability to relax
MRSA PT DECLINED                                //
change needed.
Heather C  - Fiance&quot;
DISCHARGE SUMMARY
. Current Employment Status: Working full-time
encouraging a call back.
one year before returning to Fort  physician ugust of .  In October of
Providers he has missed appts w/.  Offered to have Veteran seen in CIU which
YES
Pain Scale/Bill of Rights:
O;alert not in distress
(+) Atrial fibrillation, Chronic Ischemic heart disease
Past medical history per patient:
down, depressed, or hopless?       Not at all
Education Methods:
copd.  no cardiac history.
Patient inappropriately identified as a current tobacco user. Patient
Verifier E-Sig:/ES/  L
. Tongue - Rate only increases in movement both in and out of mouth, NOT
tapping, heel dropping, foot squirming and inversion and eversion of foot
Is the patient intubated/apneic/pulseless? No
[ ] Abdominal:
ELIGIBILITY FOR VA INPATIENT CARE: Yes
Thank you.
The caller was instructed:
ADMINISTRATIVE NOTE
NON VA CLINICAL DOCUMENTATION (B)
Yes. If Yes, the patient is counseled to stop
ABUSE/NEGLECT SCREEN:
[]   Provider informed
. Patient was not checked out but transferred to (other than out of
NURSING TELEPHONE TRIAGE NOTE
pleuritic components.  He subsequently had a CXR and then CT which confirmed the
. The patient HAS decision-making capacity.
K. How/when to seek emergency treatment/follow-up
Potential for increased anxiety related to knowledge deficit of procedure.
ASF/OOU  PRE-PROCEDURE  NOTE
On B/P Medication:  Yes
- - - - - - - - - - - - - - - - - - - - - - - - - - - - - - - - - - - - - - - -
- - - - - - - - - - - - - - - - - - - - - - - - - - - - - - - - - - - - - - - -
yet bbs with audible congestion, anterior and posterior.  gi abd nt, bsx. gu no
/              .
Existing knowledge of diseases/problem:
NURSING TELEPHONE TRIAGE NOTE
No Associate Provider Identified
.  When is your next appointment?
.  Who are you to call if you have questions about your care?
Call Type: BHM RX  WAL.
PHE adequately verbalized/demo
CC:routine visit with sob x . wk.
PROCEDURE PERFORMED:
PRE-OP MEDS GIVEN:  [ ] YES [ ] NO [ ] N/A
NURSING O.R. PREOPERATIVE ASSESSMENT
============
ADDENDUM
)   AMLODIPINE BESYLATE MG TAB TAKE ONE TABLET BY MOUTH  ACTIVE
from Bronchoscopy, mediastinoscopy
This information has been reviewed and for ed to PCP:KETCHUM
BRIEF CLINICAL HISTORY:
- - - - - - - - - - - - - - - - - - - - - - - - - - - - - - - - - - - - - - - -
Last PCP appt://      Est. return appt for pain evaluation:/
,  W
IMPRESSIONS:
ADDITIONAL COMMENTS/INFORMATION:
ADDENDUM
of suspicious skin or tissue for diagnostic examination.  The type of
Patient dropped by requesting medication mometasone furoate. Patient also wants
childhood infections, airway hyperactivity, low socioeconomic
Fourth leading cause of death
Medications reviewed with patient. Patient verbalized understanding of
therapy, heat therapy, imagery,  p breathing, &amp; massage.
LAB:NONE
PROVIDER HISTORY/PHYSICAL:
TIME PATIENT LEFT URGENT CARE Sep ,@:
Admitting Diagnosis: CHF
TELEMETRY NOTE
Diminished
Siderails Up
Apical Heart Rate:
Telemetry in place.
rul mass highly suspicious for lung neoplasm. Bronchoscopy is the diagnostic
Date admitted to telemetry:  Sep ,
RESPIRATORY TREATMENT:
Liters
ELIMINATION
Voiding
LRI
approves of this service and requests Encompass HH of Muskogee. Patient plans to
DICTAPHONE JOB NUMBER:  /
[] IV Valium  MG
PATHOLOGY REPORT
Submitted by:                               Date obtained: Sep ,  :
COMMENTS:
:) (// :). F [. C] (// :) Pulse Oximetry
No pallor or jaundice.
COMPLICATIONS: None
- - - - - - - - - - - - - - - - - - - - - - - - - - - - - - - - - - - - - - - -
I WILL SEE HIM BACK AFTER A MONTH.
ADDENDUM
nurse to please notify vet that I have placed a consult for hospice
ATTN: Community Health Nurse Coordinator G
Pain:  (// :) (Scale from -)
RTC IN  MONTHS WITH LABS. TD SHOT GIVEN TO . PODIATRY CONSULT.
Height(inches):  in [. cm] (// :)
No Address Information Enter
Fluids infusing: NS AT CC VIA D/F
PCP ordered EKG and labs to . Cardiology consult ordered as well.  Pt to RTC
no symptoms.  No chest pain, no undue dyspnea, no orthopnea or PND,
Admission Info: Admit to MICU.
EVERY   FOR BLOOD PRESSURE
LTC Co-Pay Status: EXEMPT
Pulse oximeter WNL for pt;oxygen sat &gt;%
TELEMETRY NOTE
Notification to :
Other: HX OF EPIS  OF V-TACH
PAIN ASSESSMENT
Patient&quot;s acceptable level of pain:
Best motor response: Obeys
PHYSICAL THERAPY DAILY NOTE
with plans to be switched to p.o. tomorrow. No EP studies will be done at this
Plan: pt to go to S for a couple  s of therapy then to possible short term
pt resting in bed watching TV, no c/o. will continue to monitor.
Clear
SKIN REASSESSMENT VANOD
)   SIMVASTATIN TAB  MG PO QHS
Post Op Care:
Desire and Motivation: Eager to learn
TELEMETRY NOTE
BM:  Yes   #BMs:     Colostomy: No
Sa:
tour activities and care.
SOCIAL WORK SERVICE-AMARILLO (C)
Community nursing home
PATIENT EDUCATION TOPICS COVERED:          Diabetic Foot Care
BRIEF HISTORY OF PRESENT ILLNESS:  The patient is a -year-old
THREE TIMES A   FOR MUSCLE SPASM
)   LISINOPRIL MG TAB TAKE ONE-HALF TABLET BY MOUTH      ACTIVE
Home Phone number:  -
cold a week ago and, since then, he has felt weak and tired.  He
doing things: N y every
problem. I also give him this tel #-- X, to reschedule his
Depressive Disorder NOS (ICD--CM ./.)
a/) notified at p.....
ADDENDUM
ambulate to restroom only
FALL RISK SCREEN-MORSE PATIENT FALL SCREEN
A previous LEARNER ASSESSMENT COMPLETED: MAY ,  identified the
Briefly, this is a -yr-old vet with EtOH dependence who was admitted for
NURSING REASSESSMENT/FOLLOW UP
% TINNITUS (SERVICE CONNECTED)
CBOC PRIMARY CARE INITIAL EVALUATION
Alcohol Dependence                      PTSD (ICD--CM .)
Heart Health
[ ] Psychosocial assessment
SI/HI. Denied illicit drug/ETOH use. Has  years of sobriety and is
Patient reported that he has been having problems with depression for the past
[x] .  Often
encouraged to complete this same process with their own feeling list and
none.  Children none.
( )  Physical
CTRS
SATT GROUP EDUCATION/LECTURE
y addiction, and how this too can effect one&quot;s reactions. The discussion
The focus of to &quot;s session was Good Decision Making Skills. WE discussed how
Session Date:  --
past.  Then, with the clay, they were asked to create a model which resembled an aspect of that memory.
members in attendance to  in support of their  d one and they added many
provided a handout on the topic and each area of loss was read and thoroughly
SATT INDIVIDUAL SESSION
EVERY EVENING
pterigium SOMETIMES bothersome
Session Date: --
I really want to change? Do I want to thrive instead of just survive? What are
( )  Cultural           ( )  Religious
(X)  Eager to learn
COMPREHENSIVE ABILITY:
Session Subject:  Scrabble
relationship to a mood altering event, experience or thing that has life
Biopsychosocial data form //.
Axis II: none noted
Reason for Contact: ([x])Case management
touch.
LTC Co-Pay Status: NON EXEMPT
SATT INDIVIDUAL SESSION
Outcome: No answer
Jaw: None
time.  The patient reported that he saw Debra Zinken, nurse
Nicotine dependence.
SULFA DRUGS, PENICILLIN
Discussed prioritizing her needs right now, taking care of
situations that remind you of it?
Allergies: SULFA DRUGS, PENICILLIN
)   OMEPRAZOLE MG EC CAP TAKE ONE CAPSULE BY MOUTH
.  Hydroxyzine  mg hs.
ABUSIVE TO HIS WIFE AND ALWAYS PROVIDED FOR THE FAMILY, BUT HE ADMITS HE
and affect was congruent to mood.  Doug was cooperative and p te, answering
Influenza Immunization-V:
However, he does not have income for deposit. Suggested he work with HUD VASH
you. How often did you have a drink containing alcohol in the past
)   FERROUS GLUCONATE MG TAB TAKE ONE TABLET BY MOUTH   ACTIVE
anterior chest while he was lying in bed.  He took two nitroglycerin and
Active Outpatient Medications (including Supplies):
Date: October,
Mr. Bass has a significant history of substance abuse, including cocaine, crack
Mr. Bass was alert, oriented to person, place and time. At times, he appeared
HPI:Has not had any cocaine or other illicit drugs since july, .
part of suicide attempt. He has been in treatment, is now abstinent from cocaine,
MH TREATMENT PLAN (T)
The patient was admitted on Jun ,
Patient pulse:  (// :)
( ) Yes        (X ) No
Eye Color:
ETOH and opiate       ETOH and opiate.            . serax and Clonidine
BRADEN SKIN RISK ASSESSMENT
Skin Moisture
NOTE:
no observable changes at this time
Completely Independent and Continent, No Appliances
no observable changes at this time
Previous Vitals:
Independent
If any of above is not checked, complete ADL Flowsheet
If any of above is not checked, complete ADL Flowsheet
Respiration:  (// :)
Completely Independent
seen by Lisansky -.  Has been over one year since seen by primay. Apt.s set
fasting labs.
second with me at :. I saw him waiting most of the time but by : he was no
longer in the waiting room.
rehab.  Team UNMH is requesting transfer to REHAB here at VA.
VA thought if patient required placement in SNF that he could be transferred
external fixator device.  The veteran completed the scheduled pre-op
physician, and Chief, Stroke and Rehab per Patient Transfer Coordinator.
=========================================================================
[X]Grooming [X] physician ]Other (specify)
UNCOMFORTABLE BED I HAVE EVER SLEPT IN, WILL THEY BE ABLE TO GET ME A BETTER
TB test given in right forearm, .ml. Will check results on //.
=========================================================================
Date treatment initiated: Wednes  July nd
Patient had a motorcycle crash on March  which precipitated many of his
ADDENDUM
site left upper thight clean and dry.     dry raised lesions .
application a couple of times the vesicles ruptured and clear fluid came out.
patient up to wheel chair to ambulate to the restroom and sink to brush teeth
Discipline(s)
therapy the patient reports being independent in wheelchair mobility and only
Watching TV
See Outside Medical Records sc ed documents:  Notes from Health South dated
pt can navigate the steps sitting in the short term.
ONE POINT HE WENT ON DISABILITY AND HAS NOT WORKED SINCE. HE
Pastoral Care/Visitation as Requested
4D INPATIENT NURSING NOTE
PMR/OT DAILY CONSULT NOTE
Give:  MG PO QAM                                   Stop:--
v.
VITAL SIGNS:
with multiple  fractures.  Here now because of low back pain he has a
Last fill date://
Temperature:     . F [. C] (// :)
extremity mangled tib/fib fracture; s/p limited open reduction internal fixation
Allergies:  Patient has answered NKA
Blood Pressure:  / (// :)
asking when his new w/c will arrive.
walking with a  . In addition, he had a standard Guardian Escort
complete
Reason for referral:Physical therapy for ambulation, weight bearing, etc.
BP:            / (// :)
Prostate Screening Education:
S p Apnea - on CPAP
Tetanus vaccine: /
ADDENDUM
NEUROPHYSIOLOGY REPORT/EEG, //:  No epileptiform discharages or focal
Medication dose and side effects discussed as below, pt states understanding.
Aspirin
Performed Mar , . Cardio-pulmonary exam, Rectal exam, Abdominal
II. VITAL SIGNS
Do you receive all of your medications from this VAMC Pharma
pt is being admitted to C
Report called to C, report give to Sharon
Mental Status: Oriented to own ability ()
diast c dyfunction and the neurologic consultation.
Active Inpatient Medications (excluding Supplies):
DISCHARGE INSTRUCTIONS
The supervising practitioner of record for this patient care encounter is  physician mission Date:
. Patient name:   ,
orthostatic hypotension.  Vet will advise if any new symptoms develop.  Will
TELEPHONE CONTACT
ARMY                  JUN ,     JUL ,     HONORABLE
panic d/o.  States that epis  were few and far between, but increased in
physician d he does not consider a neurologic cause for pt&quot;s troubles. An
Vet&quot;s wife   presents to  on vet&quot;s behalf.   becomes tearful shortly
medications he was discharged on from IP psych facility within the private
No further sws needed at this time. Remain available prn.
-Ibuprofen mg tab given PO. Pt. to x  via guerney &amp; O @ L n/c.
WHEN ASKED IF VET NEEDED TO BE INPATIENT, VET STATED HE MAY NEED TO BE INPATIENT
SUICIDE, RISK FOR- denied
NUTRITIONAL RISK STATUS:
Current Diet: LOW CHOL
Does the veteran provide understanding and support to others in his/her
Plan:Observe/documents behavior.Medications.PRN&quot;S LAB&quot;s.Vital signs.Monitor
Date of S p Study:   Epworth S piness Scale: /
Type of Machine: Remstar M
SUICIDE RISK ASSESSMENT
[X]  Written medication information on new prescriptions is provided by the
NOK:  ,                    Relation: SPOUSE
O: y. o MALE,  ,
VET STATED HE WAS LOSING EVERYTHING AND THIS WAS THE LAST STRAW.
PATIENT NAME:  ,              SSN #: --
Patient Name:  ,   J.
AGE:   YRS MALE
CALLER: VETERAN
PAIN SCALE LEVEL (-):
ED NURSING NOTE
Breathing:
SW met w/ veteran at bedside, veteran cooperative, talkative, but agitated over
PRESENTING CHIEF COMPLAINT:DEPRESSION AND SI
anxious.
No diplopia or vision changes.
Veteran is accompanied by his wife  . D. Klein, LMSW, SPC is also present.
Basic Computer Knowledge____
Initiates Response Freely_x___
ISSUES NOT RELATED TO RECTAL B DING.
Has had US done by ER on // which was unre able.  Triglycerides also ^
INFLUENZA
Bordinko. Chris Horner available as resource as well. Pt had been discharged and
Suctioning:  No
urine
SGOT                       U/L                       //
SE RD
surg
SURG PREP - PRE-OP INSTRUCTIONS
VITALS
this visit.
Respiration:
ATRIUM DDRIVE
Phone ( ):
hours National Suicide Hotline: ---TALK ()
offered weight management treatment.
For use by MD, ARNP, or PA
DAILY
stool.
him to draw the specimen.
Patient completed testing //.  Full report to follow.
For use by MD, ARNP, or PA
Strattera and trazodone
Person being educated:
Identified Learning Needs:
X-  Orders: Portable CXR
)   OMEPRAZOLE MG EC CAP TAKE ONE CAPSULE BY MOUTH       ACTIVE
Avoid alcohol-containing beverages
Hospital was that he was previously a patient here however he denied ever having
EK-SW NOTE
Active Inpatient Medications (excluding Supplies):
EK-RESTRAINT/SECLUSION
HISTORY OF CURRENT ILLNESS:
then was prescribed Lexipro along with prednisone for his asthma-like
Resp:    (// :)
DRUG/ETOH WITHDRAWAL:
MEDICATION:
SMOKE
Active Inpatient Medications                           Status
He does become calmer and  more realistic after talking with staff and
Pt remains on PRSE and Active Duty LOR status. Pt in bed throughout the night;
ARM OR CHEST -REMOVE OLD PATCH-ROTATE SITES-DO NOT
Patient was seen on the unit this morning for medication education on two new
STUTTERING, "HYPERSOMNOLENCE" , anxiety.  May
dose per  physician Will continue to monitor.
APPEARANCE: Clean
DIAGNOSIS:
further cares &amp; requesting to go AMA.Denies any SI/HI.
the WAIS conversion norms instead of the WAIS-R as stated above.
warrior transition program, awaiting medical boarding. He came to TOVA from
documents, tax information, a box full of prescriptions etc).  He
STAETS HE IS NOT GOING TO GIVE UP HIS COLA.
Education completed for safe and effective use of medication(s).
)   ALBUTEROL/IPRATROPIUM INHL,ORAL   PUFF INHL ORAL QID  ACTIVE
)   TRAZODONE TAB  MG PO QHS PTSD, Insomnia             ACTIVE
)   NAPROXEN TAB   MG PO BID W/MEALS pain               ACTIVE
Pt PRSE status. Pt attended Individual Testing this morning and has isolated for
)   ACETAMINOPHEN TAB  MG PO QH PRN FOR HEADACHE -     ACTIVE
Patient/significant other verbalizes understanding of instructions
Patient is currently a non-tobacco user.
EXTREMITIES:
Blood Pressure  / (// :)
Temperature     . F [. C] (// :)
RAL:  Well-developed and well-nourished.  Awake, alert, and oriented.
Normal mood, affect, and memory.
PRESSURE
S p: Good
Anxiety: Low
PREVENTIVE HEALTH MANAGEMENT
on his rotator cuff next week. Denies other stressors except for financial.
hospital and wound dressed--he thinks they might have done an x  but he
CURRENT MEDICATIONS:
Concentration: Fair
How often:
Patient Phone: ()-
[ ] Patient stated he/she would make appointment
S) ,    is a  y.o. who presents for to s visit
denies dizziness
Patient is a former tobacco user but has quit.
Respiration      (// :)
RAL:  Well-developed and well-nourished.  Awake, alert, and oriented.
rom of head
Urgent appt -- made with pcp Betts
MEDICATION REQUESTED:
Tobacco Counseling:
(D) Rem imp tooth w mucoper flp. Tooth: .  DX: (.).
(D)
=========================================================================
ER DISCHARGE INSTRUCTIONS
Disposition:d/c to home
DOB (x)
Patient and/or caregiver given education on safety and fall
Admit Date &amp; Time: // @ :   Pt was sent via AMR direct to  .
MOUTH EVERY MORNING AND TAKE ONE TABLET AT BEDTIME
    
