# Supplementary material for: Predicting the Risk of Suicide by Analyzing the Text of Clinical Notes
Source: PLoS One. 2014 Jan 28;9(1):e85733. doi: 10.1371/journal.pone.0085733 (PMC3904866; doi:10.1371/journal.pone.0085733)
Supplement: Appendix S3 — Machine Learning Libraries and Methods: This section is provided to enclose the open source (Apache License) classifier used for the building of the statistical models, specifically for the purposes of study reproducibility. A detailed account of these tools is intended for another publication. (ZIP) [file pone.0085733.s003.zip › Appendix3/ML_libs/Regression_testing/group2/grp2-pt-1017.xml.txt]

Patient is requesting rx refill on Coumadin.
NURS TELEPHONE CONTACT
Called patient per PC ANTICOAGULATION MANAGEMENT NOTE and informed him of INR
ADDENDUM
Patient Phone Number: ()-
DATE OF LAST PNEUMOVAX: &lt; age
Scheduled medical appt
This documentation is related to: .
Does patient have any new allergies to report since last visit?
his cervical spine. The patient was previously seen in clinic
NO
ADDENDUM
.  Tobacco dependence.
elevated cho ol.  Total cho ol was  and his triglycerides were .
Patient and/or significant other was asked if there was anything else we could
daily and took them to
Techniques for self-monitoring drug therapy.
lungs - no rales/ronchi
also says he has stress where he lives,
Select one of the following c  if service provided at this visit:
HAGERSTOWN/TELEPHONE NURSING
Fri  to reschedule your appointment. We look for  to hearing from
you.
ADDENDUM
refused
Insomnia (Icd--cm .)
drugs.
HISTORY - PRESENT ILLNESS
NURSING NOTE
Flat
PARTICIPATION:
"Better than when I came in" "The first thing I notice is insomnia."
IMPULSE CONTROL:
MCBRIDE, GWINN: SOCIAL WORKER
Patient attended and participated in a.m. community meeting preceeded by an exercise session with
ADLs
DEC , @:     Comments: it is now breakfast time
Please note that each of the following criteria must be
CLONIDINE TAB  .MG PO QH-PRN For elevated blood          ACTIVE
Please refer to the cover sheet for vital signs, medication administration, and
Patient  given  Discharge  Appointment  List.
Years.
)   OLANZAPINE MG TAB TAKE ONE-HALF TABLET BY MOUTH      ACTIVE
EVERY MORNING AND TAKE ONE TABLET AT BEDTIME
Length:  min.
I spoke with his daughter, Donna Erdman about pm --.
UROLOGICAL MED TERAZOSIN  MG
INTERVENTIONS:
UREA NITROGEN                mg/dl              -              -Feb-
)   AMLODIPINE BESYLATE TAB  MG PO QAM                    ACTIVE
Bowel regularity/movement
Monitor hydration, skin status
A NOTED HAND WEAKNESS DUE TO OLD CVA. PT GIVEN  BALL AND RUBBER BAND FOR
NURSING NOTE:
// @       PULSE OXIMETRY:
WAY CATHETER IN PLACE IN URETHERA
was anything this writer could do for him, he  replied,"Yes. You can
/hr without redness or swelling noted. Pt rings call bell appropriately,
ON ROOM AIR. BBSC. ABDOMEN SOFT WITH ACTIVE BS IN ALL QUADRANTS. PO
NURSING - INPATIENT
SAT UP IN CHAIR MOST OF SHIFT. INDEPENDENT IN ROOM. VOIDING IN URINAL.
Activity:           = Walks Occasionally
PHYSICAL FINDINGS:  The patient had no physical findings except
Comment: pt teaching on the risks of taking Warfarin and advised pt
Is veteran&quot;s mobility as expected?Yes
Hypertension (ICD--CM .)-well controled
cystoscopy done on //, which just showed a few   clots
gave
S p: s ping better
Risk for Self harm:    low, denies plans               Risk of harm to others:
Weight:         . lb [. kg] (// :)
Chief Complaint: lonely, financial stressors
.  He does complain of some urgency and frequency.  However,
Patient
PHARMACIST MEDICATION RECONCILIATION NOTE
continue to monitor.
SW/IDT
Moisture:           = Rarely Moist
)   AMLODIPINE BESYLATE TAB  MG PO QAM                    ACTIVE
Reviewed pt&quot;s chart and met with Mr.   regarding his desire for long term
pt&quot;s SC disability is related to his admission diagnosis, then pt IS mandatory
Problem #  hypertension
Met:
PT ID:    admitted // :
PR:na
ADDENDUM
Problem #  injury potential
Skin Temperature
No wounds, pressure ulcers or other skin problems.
QRS .
ADDENDUM
long term care this am. The veteran is not eligible for long term care. We note
NURSING - INPATIENT
Interdisciplinary Plan of Care Reviewed: No changes at this time
Activity:           = Walks Occasionally
NURSING NOTE:
W Phone: NONE
Date service is projected to start:
ADDENDUM
Pt. indicates he is agreeable to STR to get stronger.
A: Pt. tolerated treatment well and was able to increase his ambulation distance
ADDENDUM
issue is that there aren&quot;t any male beds on the first floor at Twinbrook.
Dx- .- Please refer to complete H&amp;P by PCP .
Neuro/Sensory: A/O x&quot;s . Able to make needs known.
Level of care completed.Currnetly patient has been seen in the therapy
or wheeled   and toileting. Pt was out in   ambulating with his w/w and
Pt voids clear yellow via his urinal and in the bath room.
Pain: is /. No pain medication required at this time.
*SKIN REASSESSMENT
and told nursing, again nursing states he had no c/o overnight.
DOES PATIENT HAVE AN ADVANCED DIRECTIVE: No
be prepared for pt&quot;s admission tomorrow.
PT IS ALERT AND ORINTED X APICAL IS IRREGULAR NO COMPLAINTS OF
noted, not even with ambulation to br. Pulse ox % on roomair. Abdomen
.  Atrial fibrillation.
Follow-Up:
IV infusions:  No
NO SHOW
OR TINGLING, HA, WEAKNESS, ABD PAIN, N/V, INDIGESTION, CHANGE IN BOWEL
*** SC ED DOCUMENT ***
office note
*** SC ED DOCUMENT ***
past year?
E:   Veteran demonstrated good understanding of
PATIENT&quot;S AGE:
HTN . // BRUZZESE,  D
suicidal x month, no plan. no previous attempts.
Skin Temperature
Moisture:   physician  Turgor
Vitals:
MH MHICM SCREENING NOTE (S)
signs or symptoms of withdrawal.  This AM in treatment, pt acknowledges recent
convenience store.  Pt and his wife had been seperated
his/her life that have made him/her loose his/her temper.
(  X  ) Enhance coping / living skills.
above.
I
Medication                Indication                   Entry Date
Patient is sociable.
NURSING INTAKE NOTE
PORT CHARLOTTE SOAP NOTE (TP)
chronic pain. Some initial insomnia and nightmares of burnt bodies along the
Please review my note dated //-patient recently admitted for seizure
Visn  Patient Health Ed Calendar:
Off the Dilantin since a month now. No problems with Seizures since doing
Seen  physician  physiatrist recently(was his prior pain mgmt specialist)
____ Will be picked up by the patient on ____
Pt identified by name, SS# and/or DOB
says he needs to get this done sooner.
[ ] PCP Appointment  Date:
unable to make
Currently having pain in lower back , left leg,and neck.
R:
orders.
Aggravating Factors: certain positions, standing too long, and walking.
Patient has a lifetime history of smoking  or more cigarettes.
was provided to the patient/guardian.
ADDENDUM
When pt calls back tell him I have discontinued the terazosin. It is not safe to
Recommended Follow-up location: Urgent care, VA
PINHOLE:                                      /
Source:  list, patient
Patient made aware that copies of CT scan from Wilkes facility need to be faxed
Patient Phone Number:
PT IS SCHED TOMORROW AT  WITH TOD DOW------- OR CELL --
Patient/family state(s):  No new allergies
CHIEF COMPLAINT:
=========================================================================
Signature Informed Consent for
Aldrete Score:
BRIEF CLINICAL HISTORY:
CLINICAL REMINDER ACTIVITY/PLAN OF CARE
-LN x  lesions to
Describe location (site) of pain:
DERMATOLOGY CLINIC
med for pain level of a
Call referred to:
EVALUATION:
examine the rectum and colon.  If necessary, the physician will
If Pain Medication Was Prescribed, Was it Helpful?     ___ No  ___ Yes
statements:
Issue Date
Height:  in [. cm] (// :)
at this level as this would correspond to mild dementia if pt had vascular
: PLEASE GET ME A CD OF PATIENT&quot;S BRAIN MRI AND I WILL SEND IT TO DR.
ADDENDUM
)   AMOXICILLIN MG CAP TAKE ONE CAPSULE BY MOUTH THREE  ACTIVE
-Mild elevation of RVSP at  mmHg
however to indicate areas of strengths and deficits and can be a basis for
the victim of elder abuse as he is leaving his home, his money, a safe
No fam able to care                     Family health prblm
PC WALKIN JBLUE
COMPLETION.
Psychiatry MD examination and Baker Act note
receive Risperdal @ hospital; d/c&quot;d the next morning.  Vet was given an outpt rx
PSYCHIATRY INDIVIDUAL MHC
He has more esophageal co
% on RA.  ST no ectopy, skin w/d, NS infusing via LFA @ KVO.
he is coughing up some blood now and would like to bring in another specimen.
Anticancer Res.  Sep-Oct;():-. s
TIMES DAILY BEFORE MEALS FOR STOMACH ACID
ADDENDUM
none
Pain Score Due at OPT Visits:
f)   The possibility of Guillian-Barre synd  (self-limited and
Time Called:  //@:
Outpatient Medication Review
Respiration
Recently Expired Inpatient and Outpatient Medications
Readiness to Learn/Education Topics
Recent Labs:
. Felt numb or detached from others, activities, or you surroundings
/ NEG COLONOSCOPY
Race: RACE UNKNOWN
Occupation: NONE GIVEN
(X) MINIMAL EXERTION
the joint will be cut away and replaced with the prosthesis.  If
knee pain has worsened with walking and going up and down stairs.  He
will discuss with ms berkley and will see
PCC NURSE NOTE
UNITS UNDER THE SKIN EVERY MORNING AND INJECT
)   ACCU-CHEK COMFORT CV(GLUCOSE) TEST STRIP USE  STRIP   ACTIVE
=====================================================================
. Lower (legs, knees, ankles, toes) - e.g., lateral knee movement, toe
. HEAR LOSS SENSORINEUR, ASYMMETRICAL
Your last blood pressure reading on record here was elevated at /.  Your
note pt is asymptomatic
Grade  L and L spondylosis.  Moderate de rative disc
Address:     E  BELLO      some state
"Please refer to the sc ed text document attached. This can be
EMERGENCY DEPT 10-10M
. Diabetes Mellitus Type II or unspecified with Neurological Manifestations
states that he felt sick and had nausea and c s. The patient states that he
Alert and Oriented, Resp Reg Even Unalabored.
[X]  For new or changed medications, explained indication, dose, side effects,
physician E SULF. MG   TAB                     Dispensed: AUG ,
currently taking Coumadin.
FeverChest pain or pressure, Palpitations
II. VITAL SIGNS
GERD *
Computer is the source for the following medication list:
Mayo clinic for ablative txt. Seen there in Nov and they requested eus, ct
Uncooperative patient:              No
Diarrhea: No
Exam Location:
Modified Aldrete
= anxious or restless
Laboratory: PHOENIX VAMC                               Accession No. CY
. CERVICAL SPONDYLOSIS
The above recommendations are based on the following abstracts copied and pasted
Pain at its worst is?
Abuse Screen:
vomiting , last night. I&quot;m  been having diarrhea for the past week my dog was
Rx:  cycles of radiation ( cycles to be completed
- yo male with esophageal CA coming in for f/u. pt has been receiving
Lungs: cta b, no r/r/w
-placed apligraft#GS...A on both ulcerations on left foot, covered with
Abd: soft, sl distended but pt is obese, BS nl, no TTP to light palpation
.  Depression.
. LUMBOSACRAL SPONDYLOSIS
Active Outpatient Medications             Refills      Expiration
-xerosis, flaking and cracking in the interdigital s
Check Pain Level by clicking the appropriate measurement
Healed ulcer noted to the sub th metatarsal head, right.    laceration
PODIATRY CLINIC NOTE
that he is feeling good and has been chaiging his dressing daily with iodosorb.
Mobility: Pt is able to ambulate without difficulty
Date: //     Name:  ,  C      SSN: --
month and finally reported to PCP on Mon  received po Rx and had BM x
of abd (epigastric) pain with nause and vomiting.  Also with dysphagia and
:  Patient complained of pain to his lower back /. Medicated with
APR , @::     : CT      DX: CHEST PAINS                   .
denies CP or shortness of breath.
light housekeeping.
RBC: .
Confirmed ASA by Physician: . Severe systemic disease not incapacitating
GI COMPLAINTS:
. Anatomical Location: See description of treatment/procedure.
Medical/Surgical History:
Place call light, TV controls, bedside table, telephone, and urinal within reach
PRIMARY DIAGNOSIS:  Radiation induced esophagitis.
Auth: /-//
Printed and for ed to  physician review and information
. Major Depressive Disorder, Recurrent Episode
. CERVICAL SPONDYLOSIS
Age:
Who does patient want provider to discuss healthcare with (list n ): (Friend) Venessa Hoyt
This includes an ICD--CM diagnosis of -, and either  or more
Prior to admission, he was receiving HHA x/wk for  months for bathing assist
Psychotropic  physician edative/Anti-Anxiety/Pain Meds: No
Illnesses:diabetes; hyperlipidemia; chronic constipation; esophageal cancer
presents to  with:
taken the new medication Mirtazaping mg.  "I don&quot;t remember s ping, but I
Assess causative and contributing factors and onset of feelings and symptoms in
well.Accu check .Medicated for pain at  with Acetamenophen
positive feedback when patient assumes responsibility for own behavior.
Sec. Diag. Comments:MULTIPLE MEDICAL ISSUES
Mental Status: Oriented to own ability ()
Assess history of s p pattern disturbance and the patient&quot;s view of reason for
Assess history of s p pattern disturbance and the patient&quot;s view of reason
Patient  ,  C  ()
Vet has been using privileges appropriately and interacting with peers on and
_X__  Initiates
Encourage patient to verbalize feelings, perceptions and fears.
Evaluation:
atient  ,  C  ()
Secondary Diagnosis related to cognition or mobility:Yes ()
ARTERIOSCLEROTIC HEART DISEASE  %  SC
___ Exercise
SAC-PREPRIMARY GROUP
disturbance.
Ambulatory aid:None, bedrest, wheelchair, nurse ()
O: y. o MALE,  ,
willing to wear support stockings to mechanically reduce the edema, as well.
Sec. Diag. Comments:multiple medical problems
Ambulatory aid:None, bedrest, wheelchair, nurse ()
and requesting we increase the gabapentin so that he may get more relief.  Mood
called regarding him looking pale and ill.  He had fever and new onset headache.
febrile after tylenol.  Staff concerned because he appears to be getting worse
Frequency of pain: All the time
He has an unfortunate history of esophageal carcinoma which has been under
Past Medical History
Age: Sex:MALE Race:
NURSING REASSESSMENT NOTE
CASE MANAGER:   Yamamoto,RN ph# -- x
Patient was admitted to VA Hospital -- for continued nausea vomiting,
IV/ACCESS DISCONTINUED:
Information obtained by:
,  C is a  year old MALE admitted:
A/P: Per agency p cy, vet will be discharged from home care services since he
MEDICAL INTERN NOTE
EMERGENCY DEPT 10-10M
yo man with PMHx as listed below has been admitted to this service multiple
NURSING REASSESSMENT NOTE
IV/Saline Lock: No, Saline Lock in place, but not attached to IV ()
-  No risk
- blood sugars have been elevated all   covered with sliding scale orders
level
Patient  ,  C  ()
NURSING REASSESSMENT NOTE
Provided the following:
) L
XXXXXXXXXXXXXXXXXXXXXXXXXXXXXXXXXXXXXXXXXXXXXXXXXXXXXXXXXXXXXXXXXXXXXXXXXX
carcinoma esophagus.
penicillin, omeprazole, niacin.
bp / HR  SPO  @  l/m no change in pain. Pt given
NUTRITION RISK SCREEN PART I
EKG COMPLETED
Computer order processed
Date/Time Patient Arrived on Unit://@:
(T) - thromboemb sm proph
Tele:   -ST  to low &quot;s, no ectopy
EDUCATION INSTRUCTIONS:  Discussed CHF medication regimen with patient
(Describe facilitating factors and possible barriers to care, treatment
CALLED TO: Pat
)   ALBUTEROL MCG (CFC-F) D ORAL INHL INHALE  PUFFS  ACTIVE
BY MOUTH THREE TIMES A   AS NEEDED TO CONTROL
Hearing Impairment _____
Y/O MALE arrived via Ambulatory
FISH
Call TLC prn
This  year old MALE presents to clinic to   as a walk in with baseline sob,
continues to smoke  / ppd.
Pain:  (// :)
B/P: / (// :)
ekg done (x) yes ()no
no SI/HI/intent/plan, no AH, VH, IOR, delusions; goal-directed thought
Patient understands and is able to weigh the risks/benefits of giving and/or
Check Pain Level by clicking the appropriate measurement
PMH: CHF, CAD-MIx, DM, DJD, COPD, esophageal cancer, hyperlipidemia,
floor. Asked pt to have a seat so I can put a dsg on his rt forearm. Pt stated
Vomiting stopped this morning-pain LLQ. Vet offered ED due to severity
submet  HPK lesion
HEMATOLOGY/ONCOLOGY CLINIC NOTE
Pt. here for evaluation of right side rib discomfort. Pt. rates pain
Siblings: Noncontributory
Continued to encourage good hand hygiene.  Pt agreed and appreciated phone call.
EXAM:
Pulse:   (// :) Blood Pressure:  / (// :)
regarding this telephone visit, related follow-up
procedure site.
or more years
.
NUR/PREVMED
MORNING AND TAKE ONE TABLET EVERY EVENING FOR
Dictated by:  D. Bontke, MD
Blood pressure remains high at home.
No Associate Provider Identified
identified&gt;.
Author:  S,TONJA S
INVOLVEMENT OF PATIENT&quot;S FAMILY OR REPRESENTATIVE:
() Desires significant other to be involved in tr
Blood Pressure:/ (// :)
(all taken within  hours, pt states no other symptoms)  Pt states it is running
No Associate Provider Identified
I have reviewed the chart and patient may return as necessary.
AGE:
Mobility:           = No Limitation
elicited
Elopement Risk Factors:
PSYCHIATRIST NOTE
Other:
SOCIAL WORK NOTE
MH NURSING NOTE
)   LISINOPRIL TAB  MG PO DAILY                          ACTIVE
point, s ping well. Moods are stable, no racing thoughts, no vivid dreams, so
If yes, when and how?
. Have you ever been diagnosed with depression or
None
PSYCHIATRIST NOTE
contact and is pleasant with staff.Vet still tends to isolate.
TELEPHONE NOTE
FX left clavicle and  ribs.  Is out of pain medication (was discharged from
has just come out of Mountain Crest for the third time in the last few
area. Lot#AA Exp: -- as per L. Perrin Expires : //. Tolerated
was in MountainCrest, they decreased his Risperdal Consta because he was so
. How often did you have a drink containing alcohol in the past
. How often did you have six or more drinks on one occasion in the
Eduction COMPLETED and including; prostate cancer testing
prescribed.
for a patient like mr.   who has a brain injury. i attempted to call/page
Smoking Fire Risk and Interventions reviewed and found effective, no
at risk.
Transfer Protocol reviewed and found appropriate, no change needed.
Section : The veteran experienced the following events during OIF/OEF
worse after s:
MRSA PT DECLINED                                //
MRSA ADM SWABS IN LAST WEEK:  No data available for MRSA SCRN-ADMISSION
took place on or around //, while stationed in New  .  He was driving a
appointments with PT and Audiology on // depending on his actual release
Outpatient Medications                    Status       Expiration
interscapular region
special needs.
dizziness occur with rapid change in
NECK;supple
_
Breathing about the same.  He has stopped the simvastatin on his own and
TABLET AT - P.M. AS NEEDED AS DIRECTED
Mr.     a  Y/O Single   male v
. Jaws - e.g., biting, clenching, chewing, mouth opening, lateral
Pt here on UC appt with c/o mild increase in soa-   .  Mild
An alcohol screening test (AUDIT-C) was negative (score=).
BREATHING (DO NOT USE FOR ACUTE ATTACK)
)   LORAZEPAM MG TAB TAKE  TABLET BY MOUTH EVERY         ACTIVE
MOUTH TWICE A   FOR BREATHING. RINSE MOUTH AFTER
NAME:  ,                SSN: --
Treatment/Medication prior to discharge:
ED MEDICATION ADMINISTRATION NOTE (SECONDARY)
(D) Comprehensve oral evaluation.  DX: (.).
FOR BLOOD PRESSURE/HEART
PRIMARY CARE PRACTICE GROUP
. If No, the patient is counseled to
Desire/Motivation to learn:  Accepting
Comments:  w the following:
ALLERGIES:SEE CPRS
ALLERGIES:  NKA
TIME of LAST MEAL:--
Readiness to learn:  Yes
[X]  Independent
[X]   None
identified&gt;.
PAIN SCORE:
.  RN/LPN will review and provide copy of written instructions.
. Condition or diagnosis: A suspicious-appearing lung lesion
,  W  (--)
Next pcp appt:  //
yes
yo male smoker with two RUL masses with associated right hilar and
PLAN:
ATTENDING SURGEON:    Minnich
N. Safety/self-care (describe): siderails up x, bed in lowest
PHARMACY DISCHARGE INSTRUCTIONS
Active Outpatient Medications (excluding Supplies):
Community Resources Access/Referral needs:None
ADDENDUM
Call Type: BHM PCP MESSAGE.
your pain?
NURSING TELEPHONE TRIAGE NOTE
___ Smoking Cessation Refused
mediastinoscopy on //.  Patient has no new complaints at this time.
PLAN:
concerning his request. Unclear of his request. No answer.
identified&gt;.
FLU LIKE SX LAST MONTH, FEELS BETTER
ESTIMATED BLOOD LOSS:      MIN cc
PRIMARY CARE PAIN ASSESSMENT:
TEMP:   F [. C] (// :)
WEIGHT:  . lb [. kg] (// :)
Patient tolerated well. Report given to Seabolt,RN upon arrival to ER
HEIGHT:         . in [. cm] (// :)
WEIGHT:   lb [. kg] (// :)
-  Have adequate respiratory functions as evidenced by:
Sinus rhythm
Bowel Movements:
Breakfast -  percent
q  minutes for High Fall Risk
.  Normal left atrial volumes.
.  Moderate enlargement of the right atrium ( ml).
USES URINAL
Voiding
Fall Risk Precautions
TELEMETRY NOTE
Iv site infiltrated, removed from right wrist, restarted to left fa with g,
PULSE:   (// :)
Albuterol .cc/.cc Atrovent
Bed pan/urinal within easy reach
Abnormalities:
PLAN:   BRONCH
FOLLOW UP APPOINTMENTS TO BE
SOFT WITH+BS BM TO .DENIES ANY PAIN AT THIS TIME
|     INHALE  PUFFS BY MOUTH FOUR TIMES A   FOR BREATHING (SHAKE WELL  |
biopsy of suspected lung cancer. She requested VAMC supply someone to  ,
After obtaining informed consent, the patient was
BRONCHIAL BRUSHINGS RIGHT UPPER LOBE
Patient&quot;s Home Telephone:  --
Am an Heart Association: "How Can I Make My Lifestyle Healthier?"
TRANSCRIPTIONIST:  COLLINS,
Disposition
- - - - - - - - - - - - - - - - - - - - - - - - - - - - - - - - - - - - - - - -
ONCOLOGY CONSULT
TRANSCRIPTIONIST:  COLLINS,
VA.
Assessment: PARONYCHIA
note dictated
Primary Next of Kin Information
. Condition or diagnosis:   Screening of asymptomatic, proper age,
B/P:/ P: R: SaO: Temp:. Pain:  LOC:
rate., Other: IRREGULAR HEART RATE. PT IN A-SYMPTOMATIC AND IN NO DISTRESS.
Reason: Veteran has compensable SC disability.
IN MANY YEARS WITH THIS.
The patient says that he has f  multiple times previously and
Alert
Turgor: Good
Plan to discharge to: Home Alone
He is % service connected, and has private insurance coverage. His NOK is his
team. Awaiting recomme
.  Dyslipidemia.
inches and weighs  pounds.
increased to  mm.  The mitral valve area is normal.  The aortic
&lt; sec
/ BEAT RUNS NSVT,  BEAT RUN NSVT X
)   METOPROLOL TAB  .MG PO BID                          ACTIVE
WEIGHT          . lb [. kg] (// :)
Cardiac rhythm:   N
PAIN INTENSITY (- scale):
now NPO for dippy test this am. Pt is aware of this &amp; reminded.  Denies needs @
Glasgow Coma Scale:
*************************************************
NEUROLOGIC: Alert, Oriented X
Other:
PHYSICAL THERAPY DAILY NOTE
tour activities and care.
Shave:
Patient Plan of Care
Urinal kept within easy reach of patient.
Moisture:           = Rarely Moist
-   Mild Risk
No change in previous interventions as listed below
S ping soundly. Respirations even, unlabored.
Telemetry: #
)   AMIODARONE TAB  MG PO TID                           ACTIVE
Refer to care plan and MD orders for treatment plan, All unresolved pain will
Subjective: Patient discussed and seen with team on am  . No new
IV SITE STABLE WITHOUT S/S OF INFILTRATION OR INFLAMMATION.
)   METOPROLOL TAB  .MG PO DAILY                        ACTIVE
TELEMETRY NOTE
PLAN*:
SAFETY: Bed in low position, brakes on., Call light within reach, Urinal within
ELIMINATION
HYGIENE:
)   DOCUSATE NA UD LIQUID,ORAL  MG/ML PO BID          ACTIVE
abnormal rhythm, and the patient was admitted for a further
(burning)
Homeless:  No
Chief Complaint:
Health Summary/Cardiology Reports.
RESPIRATION:       (//  :)
PULSE:             (//  :)
withdrawl,depressive disorder, HTN, syncope, and pacemaker
/.  Pt. did not have any signs of withdrawal, no febrile epis , no
soft/non distended
)   MULTIVITAMIN CAP/TAB TAKE  TABLET BY MOUTH DAILY AS   PENDING
Outpatient Medication Reconciliation
Pt seen to  in reference to // Nutrition MOVE consult
Chart check accomplished to followup on PCP consult.
V ALL Colon Cancer Screen:
He noted that he has been able to quit consuming alcohol on a daily
or on guard?
- moderate, - severe
Severe Symptoms:
Length of visit- minutes
COMPREHENSIVE ABILITY:
.  Does anger or resentment block your peace of mind?
( )  Family Member/Other
( )  Physical
DESIRE AND MOTIVATION: adequate
counseling for them both when he returns to Lubbock. She wants to see that he is
Session Date:  --
questionaire.  Upon completion, we discussed his answers.  Additionally, we
Other
aftercare follow-up).  Veteran voiced understanding.  He says that he will think
veterans were angry that their friends had relapse but also stated that they
Problem and Objective of Session:  SHOW HOW ALCO/DRUGS MAKES YOU POWERLESS AND
Issues/Stressors, Functional Impairment, Group Behavior, Motivation,
Patient was attentive and participated in class except as noted.
impress or please others.  The need to please others becomes more important than
attempting to gain power over others,  y trauma).  The class concluded with a
Therapist. The focus of to &quot;s session was resentments and how hurtful to the
eventually straighten out.
Pain Screening:
. Feeling down, depressed, or hopeless
gang .  I have recommended that Deb tell the patient that if he has
Trunk Movements
. Athetoid/Myokymic/
Medication Reconciliation:
UA  negative
Click here to order Fecal Occult Blood test X
specimen collection and return to Lab
Outpatient VA Meds:
. Depression
Name.................. ,
She stated that she gets numb during crisis situations and then falls apart after
Current known Allergies:
Active Outpatient Medications                          Status
PC PROV OUTPATIENT NOTE
I transported this vet to appointments to view apartments for rent in Spearfish
AUD-C:
PROGRAM
. Gynecomastia                                        ACTIVE
ONCE DAILY TO REDUCE STOMACH ACID.
ADDENDUM
and donning and doffing of the stockings. Veteran voiced
Reports having weapons at home and is not wanting to give
narrowing of left L-L foramen, related to   foraminal disc protrusion with
Dear Mr.  :
Patches of s p. Affect is very guarded, tense, and ang
and living off the streets.  He says that he is "content" in this new
VA but they will be
Date VIM given:
ACTIVITY:
Completely Independent
[] Case Manager
We will continue to follow t
He wishes to rescind his "decline to transfer" paperwork.  Patient notified
COMMUNITY HEALTH
MANAGED CARE OFFICE CASE MANAGER NOTE
What makes pain Worse?:moving
How Does Pain Affect Patient&quot;s ADLs/Functioning?
Color:  Normal for ethnic group
oxy/acet given at this time, will monitor effect
No daily mouth care				Yes
Referring diagnosis: V.
Branch of Service:
Hand assessment:
ADDENDUM
total of  hours during the   and evening and stretching x daily. Finally
R hand, hand was wrapped with coban and then submerged again two times more.
tentatively to go home Thurs  /. Informed that this writer would notify
Other-Note  LONG RECOVERY
PLEASE BRING ALL THE MEDICATIONS YOU ARE TAKING TO YOUR NEXT
.  SUGGESTED PLAN FOR FOLLOWUP: keep above appointments. if you need to
CURRENT SKIN ASSESSMENT
PHONE #
Vet&quot;s concern:
Pt given discharge instructions, and to return on Mon  AM for ortho
Weight:          Unavailable (// :)
=========================================================================
[] Case Manager
CLINICAL REMINDERS NOTE
Respirations:   (// :)
ADDENDUM
Carpal Tunnel Repair, Right /
Level of Understanding: Good
Comment: Testing kit provided
Call placed to pt regarding above: states he has enough medication and he will
TELEPHONE CONTACT
Contacted vet regarding recent lab results //.  LDL up at , TG up at
remain hydrated throughout the   to avoid common symptom of muscle aches.  He
. Informed consent was obtained at : AM on March , . The
exam, Mental status exam WNL.
who said " I havwe a  second pause and need pacemaker." Pt said he has
Means of arrival: Wheelchair
Unknown patient could not confirm
bed is not yet ready for pt on C, awaiting for call from C for OK to send pt
presents with a chief complaint of "drowsyness and feeling drunk"
his left side is weak, both ar
Aurora on Satur ,  May and is unsure what to expect. Encouraged her to
Spent much time exploring how veteran&quot;s behavior and thoughts contribute to
Patient called to indicate he is feeling a little less depressed since
TYPE OF CONTACT: TELEPHONE
JUN ,
and he explained it is more for safe feeling or when he needs to rest with
)   CLONAZEPAM .MG TAB TAKE ONE TABLET BY MOUTH TWICE A  ACTIVE
MENTAL HEALTH-PSYCHIATRIC HISTORY AND ASSESSMENT (BP)
that the veteran is neither currently capable of success
Date: //
The veteran demonstrated insight into his/her issues:
back to work with the syncope he has had.  Had to give up CDL.  He tend to stay
If yes, explain how:MORE RELAXED, AFFECT/MOOD BRIGHTER
Date: //
ANXIETY: Slight improvement
You have been given a list of your medications at discharge.
NURSING DISCHARGE NOTE
interim as needed.  Feels that many of his difficulties and possibly
SOCIAL WORK NOTE
MARITAL STATUS - MARRIED, PERIOD OF SERVICE - POST-VIETNAM, PRIMARY ELIGIBILTY
Patient reports for follow-up. EEG has been reported as negative, event monitor
provided job stocking which he says he wears  but they are very warm so he has
WILL FALL WHEN SHE IS NOT AT HOME.
ADDENDUM
provider. Stated that he is frustrated with billing.  Advised veteran that I
He is denying suicidal feelings.  Has been seen by neuro and cards for
MH - INTERDISCIPLINARY TREATMENT PLAN
Gait/Transferring: Normal, bedrest, immobile ()
NUTRITION SCREEN
** Cardiovascular: No an , palpitations, tachycardia, orthopnea, pedal
assesses at the VAMC, he no longer expressed suicidal thoughts. Pt denies having
Pt on Mon . Writer stated a call was made to Prosthetics and was waiting fro a
______________________________________________________________________
appointment time/date.
Patient discharged on // with spouse to provide transportation home. SW
,   ,  year old  , MALE
Verified address and phone number with an additional cell number of --
hemmorrhoid procedure I thought the last time I talked to her. Read Oct  note
he decided to go out to the rec ctr and the p ce stopped him and
required help or supervision with the following activities?
of Fee Basis.
EXAM:
LAB CHECK
marble
. Dementia with Lewy Bodies.  Has been prescribed ar pt from group health
NURSING PROGRESS NOTE
SOAP format only
ADDENDUM
help him. The patient denies using any nasal sp s of an
this visit.
Disabilities:      (NONE RECORDED)
minutes. Between epis , no e
&quot;Y&quot; indicates patient IS taking medication as written;
Ask patient the following questions:
nasal trauma but c ot recall a specific incident, he had some fights when he
.) You must be logged into CPRS.
ADDENDUM
schedule this appointment. Thank you!!
MED NO SHOW
, K=., BUN=, Cr=., Troponin=..  Blood culture negative x  .  NG
MOTIVATION FOR TREATMENT
No barriers to learning identified
scheduled appts
=========================================================================
TOPIC/HANDOUT/COMMENTS:
ADDENDUM
)   Non-VA AMPHETAMINE/DEXTROA
pt called and given MD orders/message
Blood Pressure: / Pulse:  Machine
)   Non-VA AMPHETAMINE/DEXTROAMPHETAMINE TAB  MOUTH DAILY  ACTIVE
Contact (Name/Relationship):
EDUCATION ACTIVITIES: (Enter date, status and code for each entry)
=====================================================================
If No, is this a high risk situation? No
LNC. Pt on auto bp cuff Q  minutes. Pt arrived with LAC #G HL from EMS.
Call PC Provider for f/u within:
Response to Education:Verbalizes Successfully
PATIENT EDUCATION
NURSING INTAKE NOTE
MANATEE HISTORY AND PHYSICAL
ALLAMANDsome state
Do yo
. Intravenous Therapy
. Gait (major cause of fall)
Does the patient want to complete an advance directive? No
Total Score:
() Does not desire an Advance Directive at this time.
PATIENT COMPLAINTS/PRESENTING PROBLEM UPON ADMISSION: This  y.o. active duty
.
PERTINENT HX per H&amp;P: hyperlipidemia, HTN, GI upset intermittently, L
fo . Pt stated his wife is trying to move his property and it isn&quot;t right for
with much nursing staff.
. Ambulatory Aid
likes to help peers; interacts well; but paranoid of staff and persons in
observed resting in bed for rest of night. Will continue to monitor and offer
TO EXCEED  DOSES IN  HRS
ADDENDUM
DATE OF REPORT:         //
Yes
been resting in bed throughout the noc with eyes closed and even nonlabored
Missed morning Community Meeting.
DOES NOT WANT NUTRITION ED AT THIS TIME BUT WILL THINK ABOUT IT WHEN HE IS MORE
other.
. Impro
been med complaint and using his prn he rates his anxiety a /, and depression
)   ARIPIPRAZOLE TAB  MG PO QHS PTSD                      ACTIVE
TO HAIRLESS AREA OF UPPER ARM OR CHEST -REMOVE OLD
)   ALBUTEROL/IPRATROPIUM INHL,ORAL   PUFF INHL ORAL QID  ACTIVE
)   QUETIAPINE TAB  MG PO QH PRN For anxiety            ACTIVE
other.
daughter this weekend.
SELF, BRUSH HIS TEETH, HAND WASHING AFTER EVER MEALS, SELF AND ROOM ARE CLEAN.
that I was available for any questions or concerns she may have regarding her
Exercise Education:
DISPOSITION:
[x]Patient stated he/she would make appointment
somethng like that.
consent obtained.  Time out for right patient, right side.  Right elbow prepped
. Condition or diagnosis:   Fluid collection
PREVENTIVE HEALTH MANAGEMENT
Level of Understanding: Good
Level of Understanding: Good
I: )Applied sterile dressing to right elbow.Patient instructed to keep
Patient had safe/effect. use of medication at this encounter.
the pain pill was but it isn&quot;t working."
O) Vital Signs:
Flashbacks: Denies
Vital Signs:
Temperature: . F [. C] (// :)
REPORT OF CONTACT
Fluoroscopy, a real-time x- , may be used during this procedure.
Exam Location:
Liquid,  , nonbloody.  No fevers, no abdominal pain.  Has "quit eating and
A: CMP, CBC, C. Difficile NEG/normal.
APPROVED
VA Fee schedule and will constitute payment in full.  Copies of all
DEC ,
TYPE OF CONTACT:   PERSONAL[ X]  TELEPHONE[ ]
(D) Extraction erupted tooth/exr:
CLINIC VISIT-MENTAL HEALTH
Delivery Method:    [] Handout    [X] Verbally explained
(D) Rem imp tooth w mucoper flp. Tooth: .  DX: (.).
(D) Rem imp tooth w mucoper flp. Tooth: .  DX: (.).
=========================================================================
Gender:  y/o male
ADDITIONAL INFORMATION
OTHER: (such as family member, caregiver speaking for patient) ( )
hpi; difficulty urination.  cc residual in er. thought might be
Source of information: Telephone,
He asked what medicine he would be give
Admit Date &amp; Time: // @ :   Pt was sent via AMR direct to  .
Per Lisa CM at  H Psych unit pt was discharged to  with the following meds:
not want additional help at this time. He adamantly denies any current suicidal
Patient is receptive to learning.
    
