# Supplementary material for: Predicting the Risk of Suicide by Analyzing the Text of Clinical Notes
Source: PLoS One. 2014 Jan 28;9(1):e85733. doi: 10.1371/journal.pone.0085733 (PMC3904866; doi:10.1371/journal.pone.0085733)
Supplement: Appendix S3 — Machine Learning Libraries and Methods: This section is provided to enclose the open source (Apache License) classifier used for the building of the statistical models, specifically for the purposes of study reproducibility. A detailed account of these tools is intended for another publication. (ZIP) [file pone.0085733.s003.zip › Appendix3/ML_libs/Regression_testing/group2/grp2-pt-1018.xml.txt]

CC:  Vision not very good out of the new distance glasses, and glasses are
Mr.   is a  yrs. old patient that is being seen to  by the Wheelchair
with non-neovascular age-related macular de ration OS
veteran not being given clear instructions when he contacted pharmacy in
PRIMARY CARE NURSING PROGRESS NOTE (TEXT) PB
MODE OF TRANSPORTATION:   Ambulatory
"When you decide to quit, here is what will help you be
rtc -- for labs, recommended rtc in yr.
Dosage form, route of administration and duration of therapy.
___ Individual Psychotherapy (- min)
your appointments.  Depending on your medical condition(s), failure to
Range
RECOMMENDATIONS:
CHIEF COMPLAINT:
person
INSIGHT:
Aware of problem; cooperating w/treatment plan.
No problems noted
Temp:  . F (// :)
also started him on seroquel and states he&quot;s feeling better already and it&quot;s the
PSYCHOSOCIAL:
Patient remembered his goal of working on getting "medicines straightened out" and getting some
Patient is s ping without any discomfort ,respirations regular and unlabored.
Homicidal Ideation:
MENTAL HEALTH EDUCATION GROUP
NURSING 6A GOALS GROUP
pain
MG BY MOUTH QH-PRN For pain
Education handouts from CPRS or brochures given to patient:
Additional information:
noncompliance and intense  ucinations and threatening behavior to  his
logical, goal oriented, No SI, no HI, no AVH.
MSE: Alert, fully oriented, well groomed,  he was wearing dark prescription
Name: SIMETHICONE MG CHEW TAB
Results (if applicable): DECREASE IN PAIN
(CVA )HYPOTHYROIDISM, IRON DEF ANEMIA, COPD CHF , MITRALVALVE ISUFF.
. SUBSTANCE ABUSE:
)   AMLODIPINE BESYLATE TAB  MG PO QAM                    ACTIVE
of course that needs to be determined by professional mental health staff.  I
ADDENDUM
p  r  b/p /
%     ra      %
no coverage ordered. Left unit at  for cystoscopy.
Wound Classification: CLEAN/CONTAMINATED
NURSING - INPATIENT
NURSING INPATIENT NOTE
this staff almost running. Pt sitting in chair at bedside at this time, call
QUADRANTS. PO INTAKE GOOD FOR EVENING MEAL. RPP IID IN THE LEFT FOREARM, WITH
Date of Admission://
ralized Anxiety Disorder (ICD--CM .)-heels well controled on current
Coping strategy: keeping busy
ADDENDUM
) Maintain fluid b ce:
) Patient to notify Provider if
instructions/education.
few   clots noted.  There was also a diverticulum.  The
Chief Complaint:
has been quite depressed for the last several months since the
Personal History of Surgery
SWS-INPATIENT ASSESSMENT
If Patient is DNR - is Blue Band on?
CHEST PAIN/AN
PHYSICIAN INPATIENT NOTE
Comments: meds as ordered, labs as ordered...dietary restrictions as
continent of large loose bm tonight.  VOided large amount yellow urine in
This pt is a DNR.
Rare Trigeminy noted at  with HR at
)   ALBUTEROL/IPRATROPIUM INHL,ORAL   PUFFS INHL ORAL     ACTIVE
Attendence benefit that is accepted at some facilities if income isn&quot;t
Moisture:           = Rarely Moist
Missed toilet and voided large amt urine down legs and onto floor.
The patient lives with:
Bathing (tub bath, shower, or sponge)-NO
easy BBS noted to have expiratory wheezing. Occassional  productive
Sensory Perception: = No Impairment
ori lly a ed % SC for {likely} PTSD. This was downgraded first to % ,
issues at this time.
ambulated  feet with rolling   and SBA. ambulated  feet with
CATEGORY-PHYSICAL
NURSING - INPATIENT
noted. Bilateral PPP. NO IID present. No change in status noted. VSS. Will
would be unable to adequately meet his needs (in terms of mental health) and
Postsurgical Aortocoronary Bypass Status (ICD--CM V.)
pedal edema noted. Bilateral PPP. Needs assistance going from center of bed
Braden Scale - For Predicting Pressure Sore Risk
ADDENDUM
)   CLOPIDOGREL BISUL
REASON FOR ADMISSION:  This is an -year-old   male with
MRSA screen completed prior to patient&quot;s discharge or transfer:   yes
Patient/family/caregiver voiced understanding of discharge instructions.
PHARMACIST DISCHARGE MEDICATION COUNSELING (T)
Private home/apartment
Behavioral Health Clinic
ADDENDUM
REVIEWED LABS.
PLEASE DISCUSS WITH HIM.
Medication Issue:
. EtOH use: - beers/ ; denies any withdrawal symptoms or dependence; no
*********************************************************************
weekend. endorses depressed mood and anxiety almost daily over the last month,
Skin Color:
adjusting to milieu tolerating the citalopram and not showing signs of
Time spent: minutes
started on Fri .  On initial interview, pt unable to voice why he is in the
Number of Participants:
MH SOCIAL WORK NOTE
MH IP PSYCHIATRY RESIDENT NOTE
DATE OF BIRTH: //
Lisinopril / HCTZ he is already taking. He is advised to RTC in / to see PCP.
The expected outcomes will be re-assessed and r ed/up
[ ] message to KRISHNASWAMY,MALATHI or covering PCP
Verbalized understanding
SIGNATURE NOT REQUIRED
Pt has been prescribed Lorazepam by MH specialist and his UDS was + to Benzos
Advised pt that I have tracked hardcopy RX and FM Pharmacy has not yet received
The patient has upcoming appointment(s):
[ ] Nursing Appt. Date:
____ Other
anxiety. My anxiety is getting worse and now I&quot;m having panic attacks. I need
along Kuwait highway, mood swings, tension, panicked and guarded feelings,
verbalizes understanding. pt requesting to pick up hard copy to take to
Primary Care provider: KRISHNASWAMY,MALATHI
Total Encounter Time:[ ] minutes
[ ]Fawcett
to schedule appt r/t seizure
Electronically Filed: //
[ ]Fawcett
SUBJECTIVE: "I am doing much better now."
+ tob &gt; councelled to stop
XYGEN SATURATION: % on ra
Social:  Alcohol: once - mos
Lab test for Hepatitis C Antibody ordered at this encounter.
Written/Verbal Instructions on Obtaining  wals from the Clinic, Primary Care
Spoke w/ pt will go to lab // for recheck of TSH and PSA.
LEFT EYE:
Florida since july until oct. Will give Med recon to have with him for medicines
Pain Intensity: Best it gets
Diet - Advised to adopt for use a calorie intake to achieve and maintain
Avoid nonprescription and non-essential medications.
NUMBNESS IN BILATERAL LEGS. STATES LOW BACK PAIN AND NUMBNESS IN LEGS IS COME
Yes -  A written copy of the patient&quot;s updated medication list
RR:  (// :)
Patient&quot;s next appointment: RECALL DATE //
COLON - COLONOSCOPY WITH MODERATE SEDATION
land s,
appendiceal orifice, cecal strap (crow&quot;s foot) and i cecal valve.  The
Sustains  second head lift, has bilateral hand grasp, lifts knees off bed  Yes
NUTRITION/WEIGHT EDUCATION:
S:  PT  yo cauc male w/ hx of collagenous c tis. PT s/p recent colonoscopy,
Diabetes Mellitus without mention of ComDysphagia (ICD--CM .)
RTC - months
DERMATOLOGY RESIDENT PROGRESS NOTE
time. Routine blood work done on him has shown a hemoglobin of .,
Lab/X :
SURGERY - SCHEDULE COORDINATOR
NURSE INTRAOPERATIVE REPORT
Preop Skin Integ: INTACT                Preop Converse: N/A
Acute Problem:
CH - Chem &amp; Hematology  (max   s)
(x) Knows when to return for follow-up or appointment.
to  or tomorrow.
in the VA system.
Diagnosis: DEMENTIA
and made good eye contact, but was agitated. Patient reported that he was
The Repeatable Battery for the Assessment of Neuropsycholo
VACCINATION/SKIN TESTS (T)
INSOMNIA, unspecified                   Depressive Disorder NOS
notifying DCF and intervening for pt safety.
TO PRIMARY CARE PHYSICIAN ON //.  SPOUSE CONFIRMED THAT SISTER DID TAKE A GUN
deceased parent&quot;s house.
- - - - - - - - - - - - - - - - - - - - - - - - - - - - - - - - - - - - - - - -
states as soon as he got home he noticed some
GERD (ICD--CM .)
Active Outpatient Medications
Identified problem: OTHER UNSPECIFIED COUNSELING.
Large, intensely hypermetab c area in the left lower lobe
FAMILY AND LEGAL AFFAIRS REPRESENTATIVE:  Bill Castle
J.  :  "Uh, yes I do."
as uh,
NOSTRIL TWICE A   FOR BREATHING
ZZPALLIATIVE CARE
- - - - - - - - - - - - - - - - - - - - - - - - - - - - - - - - - - - - - - - -
been active w/ other clinics /pulm and hospice.
)   GUAIFENESIN MG   TAB TAKE ONE TABLET BY MOUTH      ACTIVE
experience  abdominal discomfort. He continues to lose weight. He has been
Pt asked for information about whether he would b eable to move to Reno to be
)   ALBUTEROL *HFA* ORAL INH .GM USE  PUFFS BY MOUTH    ACTIVE
the left inguinal region. The hernia is painful, but resolves when he lies down
Pain Score Due at OPT Visits:
An alcohol screening test (AUDIT-C) was negative (score=).
Pulse reading was documented at this visit.
Pulse reading was documented at this visit.
/
Pain             (// :)
Subjective:
Family Hx:
. Tried hard not to think about it or went out of your way to avoid
Wt:. lb [. kg] (// :)
NORVASC ? MG
PRINCIPAL PREOP DX: OA LT KNEE
REVIEW OF SYSTEMS (Negative unless otherwise indicated):
Neurological Disease Reviewed
Social Security:  --
. Informed consent was obtained at : PM on September , .
/    /---//
Will for  note to Rita Berkley/Roger   for review.
SOLUTION AS DIRECTED WITH EACH NEW BOTTLE OF TEST
Caller: Patient
)   INSULIN,GLARGINE,HUMAN  UNIT/ML INJ INJECT        ACTIVE
S:
)   ACCU-CHEK COMFORT CURVE HI/LO CONTL SOLN USE CONTROL   ACTIVE
=====================================================================
employed ( )
"Impression:
CABG  v
Procedure Note: BILATERAL L-, L-S Lumbar Facet joint injection Under
S:  y/o male RTC for f/u on ulcers b/l foot.  Pt has been comingt o
The patient is currently being followed by:NANDA,ANITA N
Pain:  (// :)
ADDENDUM
[X]  Written medication information on each prescription is provided by the
Accucheck @  was . Pt. was complaining of weakness. Denies taking his
SECTION             GI PROCEDURE RECORD
Medical History reviewed with patient.
ADDENDUM
RESPIRATION:             &gt;Able to  p breath/cough freely
Introducer: N/A
SURGICAL ATTENDING NOTE
At urging of GI service, pt was discussed with  physician t is a poor
PODIATRY CLINIC NOTE
No
candidates.
HPI:  See previous surgery notes for details.  Pt. presents for evaluation of
Exam: Afebrile vss
HEM/ONC PHYSICIAN FOLLOWUP NOTE
following him and have put a consult to Tucson surgery departemnt for their
"Please refer to the sc ed text document attached.  This can be
CALORIE             FEB ,
Ambulatory aid: None, bed rest, wheelchair, nurse ()
NURSING DISCHARGE NOTE
four week history of diarrhea.  He stated his diarrhea started
ADDENDUM
. LUMBOSACRAL SPONDYLOSIS
Veteran discharged to  with visiting nurse to continue wound care to his foot
Percocet tid prn TCBP #
PODIATRY CLINIC NOTE
diameter. The wound base is granular. No probe to bone, drainage, tracking or
reported that the procedure was not suppose to last long. Veteran pl ed to
Healed ulcer noted to the sub th metatarsal head, right.    laceration
daily dressing changes with iodosorb. Patient relates that he has not been
)   ACETAMINOPHEN MG/OXYCODONE MG TAB     ACTIVE       Issu:--
Pt states that the post op shoes with modifications are helping Pt denies any
Vasc: DP &amp; PT pulses palpable bil.
Frequency of pain: Comes and Goes
Anti-Hypertensives/Diuretics: Yes
Anti-His
of abd (epigastric) pain with nause and vomiting.  Also with dysphagia and
Age: Sex:MALE Race:
his stool softers.
ADDENDUM
MEDICAL INTERN NOTE
followed by two arge BM&quot;s yester .
// @
asa
MORSE FALL SCALE
e:    Fallrisk standard--meds
pt able to tolerate clear liquid diet. Pt c/o of difficulty with spicieness of
Encourage activities, as tolerated.
THE MED FORM
O: Received c/s for this yo male for skilled nursing x/wk for  months for
Printed and for ed to  physician review and information
suicidal ideations. vet states he had the same problem last week and was
Current pain level:
condition noted.No s/s of hypo/hyperglycemia noted.Observe for hand washing to
PAIN, CHRONIC still
SODIUM CHLORIDE .% IRRG SOLN                DAILYTX IRRIGATION
History of falling - immediate or within  months:No ()
oncologist about the cancer on Mon .  Pt reports that depending on what the
and then making living arrangements that would be more appropriate for him.  No
Assess pain level, symptoms, and history.
Pain type:Chronic
disturbance.
Anti-Diabetics:No
Secondary Diagnosis related to cognition or mobility:Yes ()
Has patient been newly prescribed any of the following medications within the
Anti-Histamines:No
experiencing improved mood and stated, "The more I know, the  better off I am."
___ Passive
_x__ with Staff only
Pain Goal--What pain level is acceptable to patient (-)?
Encourage patient to verbalize feelings, perceptions and fears.
.  Current prescription medications
on Mon
Ambulatory aid: None,
RESIDENT)
,  C is a  year old MALE admitted:
LORATADINE TAB,ORAL
meningitis in which case it would be likely to resolve on its own anyway.
Psychotropic  physician dative/Anti-Anxiety/Pain Meds: Yes
reach of the patient.  Offer frequent toileting.
for  months for bathing and HM hrs/wk for  months for light housekeeping.
SECONDARY DIAGNOSES:
.  CT-guided lumbar puncture with successful tap.
on the other hand, he would like to talk with oncology .
Diabetic Retinopathy
HEENT: dry mucous membranes, lips.  OP clear
Wt hx:  kg/ (/),  (/)
Ambulatory ai
with all ADL&quot;s, has VNS for housekeeping and states he is going to have nurse
(May ) denied suicidal ideation. He continued to deny suicidal ideation to
suicidal ideation , nd time he quit taking his insulin. was d/ced yester .
Once infused will recheck BP
Diabetic foot sensory exam:
Monofilament test done.
Exam Result: Abnormal
Pt states he was just d/c from VAMC yester
his LUE, particularly in the first three digits.  Says he fell twice at home
. tobacco abuse
Assess causative factors, including nutrition.
Assess the patient&quot;s coordination and b ce before assisting with transfer
Anti-Histamines: No
Collaborate with interdisciplinary team, as needed.
Has patient been newly prescribed any of the following medications within the
DEXTROSE
Anti-Histamines: No
again two  s prior to admission and he thought that he fractured his
currently taking Coumadin.
SECTION       TRANSFER/DISCHARGE INFORMATION:
S/O: States compliance with current controlled substance regimen with no
States he has trouble s ping mainly due to the back &amp; shoulder pain. States
Affect is appropriate with no obvious lethargy.
bx areas showed high grade dysplasia w/ microscopic foci of adenoca.  has been
cv: reg
PARALYSIS OF MEDIAN NERVE  %  SC
Breath Sounds
TG
Current problems, diagnoses, tests, treatments and plans reviewed with team
Patient  ,  C  ()
RESP: -
Admission
Esophageal CA
Has patient been newly prescribed any of the following medications within the
Anti-Hypertensives/Diuretics: Yes
PMH/FMH/SH: See R Note.
Pain Goal--What pain level is acceptable to patient (-)?
History of falling - immediate or within  months: Yes ()
FALL RISK STANDARD
Patient being discharged to: Home
VA Fee schedule and will constitute payment in full.  Copies of all
II. VITAL SIGNS
. CERVICAL SPONDYLOSIS
ARTERIOSCLEROTIC HEART DISEASE  %  SC
Eye History:npdr ou, no sx, no laser, no trauma, cats ou
MH Recreation Therapy Leisure Assessment
Neuro: Loss of protective sensation / SWMF b/l.
What is your pain level now?
Pain at its best is?
understanding of above.
ALLERGIES:
Written medication information on each prescription provided by outpatient
. Barrett&quot;s Esophagus
. Tobacco Use Disorder
throat, increased sob with thick sputum of uncertain color, increaed wheezing,
alert and oriented, cooperative, fair eye contact, no abnormal
sub st met-heads. Pt has home nursing come to his house daily to change his
If YES, are you interested in smoking cessation?   YES[]    NO[+]
. LUMBOSACRAL SPONDYLOSIS
no eoth,no mj for past sev months
-Advised patient to be cautious when changing positions.
Never
(D) Intraoral periapical first f. Tooth: .  DX: (.).
REVIEW OF MEDICAL RECORDS
DATE(S) OF EMPLOYMENT:
=========================================
Epworth S piness Scale was .
Temperature:..... F [. C] (// :)
ALLERGIES:
Callers&quot; Telephone Number PATIENT PHONE -
Weight:  lb [. kg] (// :)  Height:
AMOUNT TO AFFECTED AREA TWI
Callers&quot; Telephone Number PATIENT PHONE -
regarding this telephone visit, related follow-up
--
procedure verbally concurred with the stated patient&quot;s name, procedure, and
Active medication orders and most recent medication reconciliation note
Mfg: ID Biomedical Corp. for Glaxo Kline (multidose vial)
Nursing Telephone Encounter (Medical Problem)
Callers&quot; Telephone Number PATIENT PHONE -
UCC M Initial Note
Evaluation:  Patient to see Patient to see MD
Patient ethnicity: NOT HISPANIC OR LATINO
// :  BLOOD      HEMOGLOBIN AC        . H  %          . -
====================================================================
*a comprehensive eye exam.                                        *
typical   when you were drinking in the past year?  or
the following problems? Littl
Patient received TETANUS DIPTHERIA.
Evaluation/Management Code: UNLISTED EVALUATION AND MANAGEMENT SERVICE ().
No Associate Provider Identified
Pt lives with his daughter now.
Temperature:. F [. C] (// :)
HT= in [. cm] (// :)
===========================
,  D is assigned to Caller Area LANSING.
[]Substance abuse
.
years.Wants to try to d/c Risperdal.Amitriptyline  mg hs for
Thought Process:Logical.
ADDENDUM
increase in meds. pt states he had been using a wrist cuff to take bp and tried
No Associate Provider Identified
Approved by IMFC /
foster care home and SW services at Gaylord (if available) or Sa w O/P SW
ADDENDUM
Attorney to the patient. Issued fsome state.
and subsequently was evaluated at a hospital in Fort Collins,
these topics as a guide to better health!  Share them with your spouse and
Power of Attorney for Health Care as indicated below:
stupid."
SPECIFIC SYMPTOMS: Mood swings: "Mostly highs." S p: "Not very good." He has
and talked with me after class.  He wants very much to get help.  He has
the shot started to wear off and before he got the next shot.  The woulds on his
Per vet&quot;s request and after completion of ROI this SW placed phone call to vet&quot;s
Permission for Alveta  son (pt&quot;s Power of Attorney and Sister) to
Elopement Risk Factors:
Unit  Movie Date: Quantum of Solace (  Bond )
Attended   Services
Altered Mood: Depressed
PART ONE - Traits:
)   SIMVASTATIN TAB  MG PO HS                            ACTIVE
none
none
. Have you become drunk or high on drugs more than
participated in walks,groups and trainings.Vet shows better eye
Step : People and social settings that provide distraction:
Urgent Care Services  AddressPVH Ft. Collins
PATIENT EDUCATION PROVIDED
Date of Discharge:  Jun ,@:
this SW that the personnel who coordinates the services of out of office until
that his statement is reliable.
Veteran self-referred to the chaplain&quot;s office for a visit. He was over-dressed
also been brought to the attention of   Stapert MSW DBC and will be
LCSW with the DBC; a plan for continuity of treatment will have to be designed
well. Phoned his sister ( whom has medical guardianship)after to inform her that
States he is very depressed.  he states he was in prision for stalking his
TELEPHONE NOTE
Treatment plan changes at
be done. Three jobs in the IL area are due to be completed by tomorrow.
MRSA SURVEILLANCE
S: No acute events overnight.  Patient has been reading and playing guitar on
it would be helpful to meet together with his fianc�.  He denies any concerns
MRSA SURVEILLANCE
RESTRAINTS:
Smoking Fire Risk and Interventions reviewed and found effective, no
BEHAVIOR: cooperative, calm, THOUGHT PROCESS: coherent and logical, reality
========== DIET/NUTRITION ============================================
Heather C  - Fiance&quot;
Skin Assessment is DU
wedding, legal issues related to previous medical treatment; Main  medical
Clinical Reminder Activity
IRVING PARK RD #         Phone: ()-
temporary benefit
wherein patients are provided with education, behavioral counseling,
PERSON ASSESSED:
* Wear the same type of clothing when weighing.
-hyperlipidemia on zocor  mg last ldl &gt;
Level of Understanding: Good
ABD;soft ,BS+ not tender
AMLODIPINE BESYLATE MG TAB              Fill Date: JUN ,
Hbac in  months
nurse to call
feeling better in the lat few  s
PCC-NURSING INTAKE
SUBJECTIVE
Patient refused flu vaccine.
Age:   Sex: MALE  POW: NO
PLAN
using it more and more and not getting the same effects
CHIEF COMPLAINT:
Anxiety (ICD--CM ./.)        COPD (ICD--CM .)
Receive Critical Test results by:[X]Telephone  [ ] Fax
The caller will state to the recipient that the results fall under the
An alcohol screening test (AUDIT-C) was negative (score=).
none due to mhc
for  year or more. Patient counseled on the risks and adverse
quit smoking in
[ ] Psychiatry:
Latest Vitals:
Pain Level:
(D) Bridge porcelain base metal:
No retained teeth noted.
+ leg pain, moderate to severe
acknowledged veteran&quot;s efforts to be more physically active. discussed
FOR BLOOD PRESSURE/HEART
SCHEDULED, LEFT MESSAGE ON HER CELL PHONE OF APPT /
[]   Patient reports abuse/neglect
ALLERGIES:  Patient has answered NKA
CT //
Desire/Motivation to learn:  Accepting
PULMONARY Hx:  spot o
Desire/Motivation to learn:  Accepting
however, he is easily arousable.  IVFs infusing at KVO.  IV site shows no
Facility Appointed PCP: KETCHUM,CAREY   ( EMER PRIMARY CARE)
PRE-OP MEDS GIVEN:  [x ] YES [ ] NO [ ] N/A
BP:
ENEMA/DOUCHE:           [ ] YES [ ] NO
SHAVE/P
If Ye
pt has had TTNA, TBBx, and TBNA without definitive diagnosis, will refer to
Additional Comments (If indicated):
Protocol(s) used: &lt;Not identified&gt;.
// :
between to  and your next clinic visit
Bowel Sounds:
Treatment (Wound care, etc.), K. How/when to seek emergency
Pulse:   (// :)
[] Accepting
Yes Pain Score:  - No Pain
.  Vital signs within  hours of discharge:
breath which is progressively increasing.  Of note, the patient was
ADDENDUM
Comments: OXYcodone IR CAP,ORAL  MG
No Associate Provider Identified
Comments:  w TERAZOSIN HCL CAP,ORAL  MG
[ ] With exertion
HEENT PERRLA, TM&quot;S INTACT W/O ERYTHEMIA,
TOTAL:               - Not a Fall Risk
ADMISSION RELEASE OF RESPONSIBILITY
no oral lesions,no thrush
EMERGENCY ROOM DISCHARGE NOTE
TEMP:  . F [. C] (// :)
called regarding sliding scale.  See orders.
SOAP W/VITALS GENERAL NOTE
VITALS (last observed) --
HCT                 .        %            -          -Sep-
Productive of: Medium amount,
VITALS (last observed) --
to radiologic contrast agent(s).The requested examination was
A.M.
PATIENT CHECKED - q Minute
CURRENT VITAL SIGNS
OXYGEN THERAPY:
I N T A K E:
Other Respiratory Treatment: Room air pulse ox was %.  Heart rate was
Visitors, Valuables, Bed, call light, TV/siderails, Smoking , ID band,
CURRENT VITAL SIGNS
Abnormalities:
INTAKE &amp; OUTPUT
Urine Total:cc/ml
TRANSCRIPTIONIST:  COLLINS,
. Treatment/procedure: DIAGNOSTIC FIBER OPTIC BRONCHOSCOPY
PRE BRONCHOSCOPY
Laboratory:   C. MONTGOMERY VAMC                 Accession No. MUSSP
agreeable to repeat bronchoscopy which will be scheduled on an out-patient basis
Kimberly Gatzman,RN
This patient IS NOT receiving Non-VA Care.
Cough, Smoker
.  The case was referred to the Armed Forces
Institute of Pathology, and diagnosis from right upper
mailed to him
CARE.
All Care Hospice agency of Muskogee called with referral (  ), patient
Primary Care Nursing Interview
Scheduling criteria
. Potential for skin impairment related to physical immobilization during
patient home: JIM CHERRY - FRIEND
No one home.
of . He is not complaining any chest pain, shortness of breadth, palpitations
at this time. Says does not drink coffee but does drink a lot of soda/dr pepper.
Dx:  Ventricular tachycardia
Home Phone Number:
Patient Plan of Care
Amiodarone started in  gu, educated to medication and what it is for,
Pupils
Left:  Weak
ICU NURSING ASSESSMENT
ADVANCE DIRECTIVE
PULSE OX        // @       PULSE OXIMETRY:
PAIN INTENSITY (- scale):
Responds to verbal stimuli
PAIN INTENSITY (- scale):
Nursing Narrative: Received report from off going shift. assumed pt care.
Report given to on  coming  shift.
ASSESSMENT:
Pts HR decreasing to -s. Amiodarone  off  at this time.
pt to
pt back to unit resting quietly in lbed. vs chareted.
PROCEDURES:
)   ENOXAPARIN INJ  MG/.ML SC DAILY                    ACTIVE
)   AMIODARONE TAB  MG PO TID                           ACTIVE
No change in previous interventions as listed below
SKIN REASSESSMENT VANOD
rehab placement. Patient has private insurance through ASARCO. Copy made of his
picked up tomorrow by the s p study clinic.Pt reminded that there is an
in case he qualifies for CPAP therapy.
pvc&quot;s/coup
STATUS: Alert; Oriented
Fluids offered qh:
ENCOURAGED PATIENT TO REPORT HIS PAIN LEVEL USING THE
Rhythm: SB/ /ST
previous   IV sites had been established. pt denies pain with sites
reach, Food/water within reach, ID Band on, Siderails up x
Date sited: May ,
. Over the past two  , how often have you been bothered by the
)   LISINOPRIL MG TAB TAKE ONE-HALF TABLET BY MOUTH      ACTIVE
However, no collision on I- up to Washington.
Topics Covered: Plan of Care
Evaluation of Patient/Family Education:Voiced understanding
There is a % drop in FEV with a dose of . which is suggestive of positive
methach ne c enge test
in with recommendation of his private md.Patient reports that his wife left him
NURSING ASSESSMENT: SEE NURSES DOCUMENTATION
sick. He never went through a detox program, he tries at times to
Regular rate and rhythm, SS
for himself and his family. Wife at bedside, supportive. Patient in agreement
Integumentary:
EMERGENCY CONTACT:
WBC                        .     K/cmm      . - .       []
Call Type: OTHER.
admitted to medicine service and at time was in stable condition, no acute
Topic: instructed about fall risk precautions: bed in low and locked
[ ]Impaired (Describe location):
MH TELEPHONE CONTACT NOTE
work.We gave the form to the pt. I also gave him a note stating that pt is
CBOC TELEPHONE NOTE
Telephone Assessment &amp; app&quot; for
of imminent suicidal ideation or intent. The scale does not correct for
TOTAL SCORE:
(x) Continue treatment plan
horrible or upsetting that, IN THE PAST MONTH, you: Felt numb or
( )  Seems uninterested
who are serious about their recovery are really "put off" by those who are
situations where they were offered drugs and/or alcohol.  Many veteran&quot;s stated
Subject:  Alcohol breath test and random drug screening.
S-D.  Patient registered a ..  Patient was subsequently escorted and
Patient provided with information about the availablity of Pastoral Care
MHS-GENERAL NOTE (NON-S.O.A.P.)
health patient from Lubbock therefore he was discussed along with the non-dual
SATT GROUP RECREATION THERAPY
slitting her tires, putting silly string on her car and letting it dry, and
TIME OF CONTACT:  :-:
Quattlebaum, TRS/TXC, CTRS
PATIENT EDUCATION - MNT/SATP NUTRITION CLASS
Subject:  Weekly Rule Reading.
McCord, PhD. The focus of to &quot;s class was on understanding PTSD and it&quot;s
TIME OF CONTACT:  -
certain situations. We talked about immaturity and lack of social skills due
Method of Teaching:
The veteran attended group therapy to  facilitated by   Hays, LCSW and Judy
this point.
TIME OF CONTACT:  : - :
According to the creator of this lesson, spirituality must be redefined as the
discussion in which the patients reported on the reasons for their own
quite a c enge to say the least.  Patients were monitored during their discussion but required no therapist
Session Facilitators:    M. Harrington, TRS/TXC, CTRS and Joe Quattlebaum, TRS/TXC, CTRS
SATT GROUP THERAPY
Marital Status: SEPARATED
RATED DISABILITIES - NONE FOUND
SATT INDIVIDUAL SESSION
--- Abnormal Involuntary Movement Scale ---
MH PROVIDER NOTE
Collection DT       Spec GLUCOSE
MH CARE COORDINATOR NOTE
S/O. Veteran here as appointed for a  minute appt. Writer introduced self as
The veteran was staffed on // and the treatment plan was discussed
Outpatient VA Meds:
Computerized Problem List is the source for the following - from comp and pen
City/State, facility if known: Sierra Vista Regional hospital
Active Outpatient Medications             Refills      Expiration
Status       Last Fill
surroundings?
NURS MOVE Weight Loss Program Offer:
CYCLE.
COMFORTABLE ALONE.  PT STATES THAT SINCE SHE KICKED HIM OUT, HE CAME TO SD TO
CASE MANAGEMENT
stated he has time tomorrow morning.  A time slot was available so we scheduled
payments and utility deposits.  Also, we talked about finances and work
Hearing aid(s) back from repair.
This patient is a -year-old man who follows with a local doctor in El
ADDENDUM
ECH HEPATITIS C RISK ASSESSMENT:
Illicit injected drug use.
GENERAL INFORMATION CBCB
appointment to discuss your options and continue with the current
.  Patient verbalized understanding of Advance Directive.
Active Medications:
Veteran is a yo wm admitted to the unit on // with a diagnosis of
FOCUS - Topic of note, based on change in condition, significant event or
Alert and Oriented
Slept Well
Completely Independent and Continent, No Appliances
EATING
BOWEL CONTINENCE:
Place
Suggested plan for follow-up:STOP DRINKING ALCOHOL, ATTEND ALCOHOL ANONYMOUS
CONDITIONS.
states she does not understand. He left that residence Tues  and went to the
Place
Patient Name:   ,
PC PROVIDER: WANKER,  L
an acute service outside of the VA.  At this time the waiting list for D is
not covered by Medicare. Discussed with Lori VA does not give such referrals and
ADDENDUM
Pulse:                (// :)
Height:               in [. cm] (// :)
Origin of Pain:MVA / with mult. surg
[X]Transfer Device[ ]Bathing Device
O: Veteran was R hand dominant prior to accident. His pain level was reported to
and social activities during his admission.  Will educate pt as to the ADA laws,
Bathing: Moderate
have to stay in hospital for so long.  The patient denies any probelms with
MVA when intoxicated with multiple injuries. Some anxiety present at  mg of
at this time.
goes off   a few times a   via wheelchair.
Unrest with Medical Condition/Process
Pastoral Care/Visitation as Requested
He is min assist for some transfers. He has good car transfers. He has good hand
4D INPATIENT NOTE
P) Continue to assist with dc plans.
Respirations:     (// :)
PSYPC TELEPHONE CONTACT
No Future Appointment
Comment: Testing kit provided
DISCHARGE SUMMARY/B ER GOOD SAM, //: Syncope, likely / hyperventilaton
Contacted vet regarding recent lab results //.  LDL up at , TG up at
Refrral:
ADVANCE DIRECTIVE DISCUSSION
CONSENT SIGNED AND ON CHART?            Yes
PAIN SCALE LEVEL (-): none
ALLERGY ORDERS).
SI, and thinking that life isn&quot;t worth living anymore, secondary to
potential lethality than other meds he has been given. Agree that more oversight
Appointment with me is @. Just phoned Mrs.   and informed her of this.
unclear at this time, but I will update her in the future, should I hear any
MEDS RUN OUT.
CXR - clear
WHEN ASKED IF VET NEEDED TO BE INPATIENT, VET STATED HE MAY NEED TO BE INPATIENT
PATIENT ADDRESS:
Mental Status: Oriented to own ability ()
Total Morse score for Fall Risk:
CLONAZEPAM TAB  MG PO HS for anxiety and depression        ACTIVE
HOW:  Verbal, Written/Pamphlet
IV/Saline Lock: No, Saline Lock in place, but not attached to IV ()
Psychotropic  physician edative/Anti-Anxiety/Pain Meds: No
Evaluation:
Name:  ,                      Date Completed: JUL ,
W VERDsome state
Phone Number: Patient Phone: ()-         Homeless: No
BMI:BODY MASS INDEX - . (JUL , @::)
working as a volunteer, and in turn physiological benefit. Will ask pcrn to
received a bill from the VA for a couple of thousand dollars and now wants
activity, snoring, airflow, body position, oxygen saturation, EKG, rib cage and
discovered.
and SI protocol.
S:
P CE WAS CALLED DUE TO SUICIDAL THOUGHTS. PT APPARENTLY HAD AN ALTERCATION
Participation:
placed &amp; nurse Ellie notified.  Pt checked on again at PM &amp; PM, he stated he
Assess patient&quot;s fall risk upon change in status, after a change in
I:Hourly checks maintained. Encouraged to seek staff as needed. Encouraged to
SOCIAL WORK NOTE
Mode of transportation:
completed consults for couples counseling and rec. therapy. Pharmacy completed
VET MAY DISPLAY MINOR ANGER AND ANXIETY RELATED TO CURRENT FINANCIAL
his being in a victim role again. He verbalized appreciation; is quite proud of
SPC WAS PROCESSING WITH VET.
// @       .                /        .
CC:     "I&quot;m not suicidal and I don&quot;t know why I&quot;m here."
Primary Diagnosis
inquire about pt. Initial conversation
W VERDsome state
TELEPHONE CONTACT
SPC to Follow up as needed.
PATIENT DEMOGRAPHICS
PROGNOSIS:
sounded distraught and anxious stating "I don&quot;t know why they are here but I am
is through non VA  physician ical GRoup Port Orchard.  He also sees a
NURSING PROGRESS NOTE
ADDENDUM
blood pressure with appropriate sized MANUAL cuff.
--
NEUROLOGY - CONSULT
Inhale  Puffs By Mouth Twice A
TLH - CASCADE CSS
PC - NON-VISIT NOTE
op if he has found someone that can give him a ride.  If he can not find a ride
ANES - PREANESTHETIC EVALUATION - SCANNED
Sinuses: Clear
this visit.
Head:
Patient
MDD/ADD
m
CURRENT MEDICATIONS: Active Outpatient Medications (including Supplies):
Wt:  lb [. kg] (// :)
CDI REMINDER DIALOG
/
UNIT L
.
Active Outpatient Medications                          Status
=========================================================================
Strattera and trazodone
[X] Cardiac:
Phone number: --
ALLAMANDsome state
When asked if he was taking meds, he said that
- pt resting.
Verbal patient
Identifying characteristics:
occasional use of inhaler; might be asthma
- Identify reasons for and benefits of quitting
DIET ORDER: EK-REGULAR
Height:  in [. cm] (// :)
Cooperative, Isolative, Appropriately interacts with peers and/or staff,
SELF HARM/HARM OF OTHERS:
Pt in bed most of the evening.
housing, primary support group, social environment, job related problems
psych unit equates to child neglect and that his social worker is stoking the
was noted: Pt exhibited with  ed paranoia. Pt alleges that his jeep has
Vet stated that his vehicle was stolen and he needed to take care of it.
PRN FOR PAIN - NOT TO EXCEED MG (ACETAMINOPHEN)
continued to accuse this nurse and staff of withholding his medications, and
Reviewed reason for medication(s) with patient/significant other.
Mum , PA informed at . Pt. bright and alert, joking and smiling as he
administer BY MOUTH or INTRAMUSCULAR
Mr.   slept good through the night with no problems or complaints at this
PUFFS IN  HOURS
HYDROCODONE /ACETAMINOPHEN MG TAB UD PO QH PRN
)   HYDROCODONE/ACETAMINOPHEN TAB   TABLET / OF       ACTIVE
)   HYDROXYZINE CAP,ORAL  MG PO QHS PRN insomnia. This   ACTIVE
Heiligenthal.  He presented angry, agitated and proceeded to take out all of the
psychiatric unit at this facility. He stated that he would like to be
which pose danger to the individual or others.  Less restrictive
)   TUBERCULIN,PURIFIED PROTEIN DERIVATIVE  .ML ID ONCE  ACTIVE
EK-NUTRITION NOTE
Attending on unit groups.
REPEAT DOSE - MAY BE GIVEN ONE TIME IF FIRST DOSE
TREATMENT PLAN
Axis   Current Medical Conditions:  See Medical History above
effect profile of topimax, abilify and citalopram-  GI upset, loose
PATCH-ROTATE SITES-DO NOT SMOKE ** nicotine
Patient Education :
Active Inpatient Medications                           Status
EK-SW NOTE
)   TOPIRAMATE TAB  MG PO QAM mood, headache             ACTIVE
NOT TO EXCEED , MG IN  HOURS FROM ALL SOURCES
)   ALBUTEROL/IPRATROPIUM INHL,ORAL   PUFF INHL ORAL QID  ACTIVE
seeming to have difficulty knowing what he wants to say.  BP rechecked and was
peers with the exception of time spent in his room on the phone.
meeting, and his goal for to  is "looking for  to seeing my daughter
presently is in the pm group.
Discussed sign and symptoms to report if worsen: pt given Suicide Prevention
PCP: BETTS,  C
Denies cramping
[ ]Message left on machine regarding appointment date &amp; time.
Temperature     . F [. C] (// :)
TYPE OF CONTACT:   PERSONAL[x]  TELEPHONE[ ]
METOPROLOL SUCCINATE XL MG TAB
WAL:[x]
DATE OF CONTACT:JUN ,
Respiration      (// :)
AMLODIPINE BESYLATE MG TAB   Sig: TAKE ONE-HALF TABLET BY MOUTH EVERY   TO
PREVENTIVE HEALTH MANAGEMENT
Intrusive thoughts: Denies
there and buying a house and just putting a travel trailer on significant others
States glucosamine gives him diarrhea, not Doenpezil as he thought perviously.
O) Vital Signs:
PATIENT WORK PHONE - ()-
[ ] No anwer after several attemps to call.
approve but no extensions
Comments:
ADDENDUM
Report given to accepting RN:   M.  .
= as p, sluggish respo
NECK:  Supple.  No masses or bruits. No thy gally.  Carotid pulses
PO Bsome state
Lab is pending.
TELEPHONE TRIAGE REPORT
FOR MENTAL HEA
(D) Extraction erupted tooth/exr:
(D) Diagnostic casts.  DX: (.).
BEDTIME FOR DEPRESSION
provider added as a co-signer.
TOTAL OF CC OUTPUT.
HPI/ROS: y M presents complaining of inability to urinate for  hours and
EMERGENCY DEPARTMENT MD NOTE (BLANK)
) Follow up in Gold Clinic in  to   s.
prostatitis or side effects from mh meds. patient stopped his cogentin. felt
Active Outpatient Medications (including Supplies):
patient and advised to quit.
identifying stress or social triggers/c enges and pl ing ways
Did the patient have access to firearms?  No
Veteran&quot;s name:  S,  O
=========================================================================
    
