# Supplementary material for: Predicting the Risk of Suicide by Analyzing the Text of Clinical Notes
Source: PLoS One. 2014 Jan 28;9(1):e85733. doi: 10.1371/journal.pone.0085733 (PMC3904866; doi:10.1371/journal.pone.0085733)
Supplement: Appendix S3 — Machine Learning Libraries and Methods: This section is provided to enclose the open source (Apache License) classifier used for the building of the statistical models, specifically for the purposes of study reproducibility. A detailed account of these tools is intended for another publication. (ZIP) [file pone.0085733.s003.zip › Appendix3/ML_libs/Regression_testing/group2/grp2-pt-1043.xml]

<?xml version="1.0" encoding="ISO-8859-1" ?>
<records>
  <record>
    <group>2</group>
    <study_id>1043</study_id>
    <notes>
Problem list:
. refractive error
- s/p Lucentis injections x  ( physician              - with associated vision decrease
( ) .-.
Advance Directives:
documents to next appointment.
. Have you ever had any experience that was so frightening,
FOR BREAKTHROUGH PAIN
DATE OF LAST TETANUS:
PAST MEDICAL &amp; SURGICAL HISTORY: TVHS Chart Not available for review due to CPRS
DOES PATIENT TAKE ASPIRIN?   No
being requested that the clinician order diagnostic studies.
If Yes, List meds:hawthorne extract
No known drug allergies.
hypertension.
allergies -NKDA.
lungs - no rales/ronchi
--Informed pt that this writer would call pt once a response is rcvd from PCP.
PRESENTS TO CLINIC FOR REVIEW OF CHRONIC MEDICAL PROBLEMS, pt states he has been
SCL - HEMOGLOBIN AC
___ Individual Psychotherapy (- min)
HPI: pt. returned to clinic schdule for bipolar dis mixed. he state has
Phone:    ()-
state had strange dreams. no drug use. drink alcohol occasionally -last
.  TOBACCO USE WAS ASSESSED DURING THIS ADMISSION?  YES _d__ NO ___
in the group.
Year Old UNKNOWN, MALE
the blood level was high. Will restart it tonight at mg HS
Pt attended and participated in evening wrap-up group. Stated he met his goal of
because he does have a place to live and money to live on.Stated that it puts
recovery.
Homicidal Plan:
QID-PRN for Heartburn
Yes
changes such as  terminating the use of  drugs/alcohol. Patients spoke about obstacles that they
Pt stated that he was able to accomplish his goals to  and feel a little "clearer" to .  Pt was
Active Inpatient Medications (including Supplies):
AFFECT:
recovery coordinator, clinical nurse leader, students and nursing.
stated that his goal for to  was to make sure he gets discharged tomorrow.  He states that he
)   DIVALPROEX TAB,SA,HR (EXTENDED  MG PO            ACTIVE
)   DM /GUAIF MG/ML (ALC/SUGAR FREE)   ML PO       ACTIVE
SUBJECTIVE:
we
SIG: USE  STRIP TO FINGER THREE TIMES A WEEK AS NEEDED
Active Inpatient and Outpatient Medications (including Supplies):
adjustment will be made at time of result evaluation..
and took him off Valproic acid completely. He does not know about any
Smokes cigarettes
Advised to follow up with AOD # provided
On arrival patient was  in a wheelchair (from the welcome desk)
PHARMACIST MEDICATION COUNSELING (T)
Mitral Valve Insufficiency
O:   VIA:   SPO on L nc=%, placed on L nc=%, placed on rm air=%.
___________________________________________________________________
PRN for respiratory distress. use with spacer
Health Consult on Mr.  , due to statements he has made to me and others
ADDENDUM
HE CURRENTLY LIVES ALONE AT HOME IN A SINGLE FAMILY UNIT IN   PARK. VET
HEAD:  ATNC
bury me ft under." C/O gas discomfort. No  other voiced complaints at
. NACL INFUSING AT  CC/HR. RPP, B/L. PT VOIDING LARGE AMOUNTS OF A RED
Treated Diagnoses:  hematuria and  hypothyroid
MEDICAL FOLLOWUP:  Medical followup with PCP in   .
Risk for Self harm:       denies      Risk of harm to others: denies
Pain:            (// :)
S:routine visit-difficulty breathing "I can&quot;t do the things I used to do."
the past year? Never
AT BEDTIME AS NEEDED TO HELP S P
death of his wife.  He does admit to at times feeling somewhat
Hypertrophy (Benign) of Prostate without Urinary obstruction (ICD--CM
CARE. REPORTS PAIN TO LEFT CHEST / WITH PALPATION AND INSPIRATION, STATES IT
Patient Phone:--
Not applicable
NURSING - ICU
Friction:           = No Apparent Problem
while crossing the street from the Seterny club (spelling ?), on //,
ekg : - only sig change from  am is has fli
RESPONSE TO NEW MEDICATIONS:
A. S ps - hours without awakening, B. Reports a decrease in the
Indicates understanding.  Repositions self ad lib.   No difficulty
Reviewed pt&quot;s chart and met with Mr.   regarding his desire for long term
% SC.  Pt is non-mandatory, meaning that he is not eligible for LTC through
BP: / (// :)  Pain Score:  (// :)
. IV:
. Skin: Intact
avoid falls.
TELEMETRY MAINTAINED
tenderness is martkedly improved.  He has concern that he hasn&quot;t had a BM
)   AMLODIPINE BESYLATE TAB  MG PO QAM                    ACTIVE
CS
while patient up to the BR patient is A-Fib and tachy at -.
REASON FOR ADMISSION:
sufficient.  She was unsure if this would be necessary.
at times. No cough noted. Pulse ox % on roomair. Abdomen large, round
Nurses Report:
Fevers/C s No, Nausea/Vomiting No,
Mobil
then to % :He is unsure why.
Patient sputum secretions are yellow   color.
Musculo/Skeletal: independent with positioning, transfers, and ambulation.
O sat % RA, No signs of cyanosis, capillary refill &lt;  sec.
Pt. attends OT in w/c brought by transport,A&amp;Ox.,smiling this session.
Pt is scheduled for GECAC target assessment for to  at : am.
admission decision and proceed appropriately.
--------------------
.  Atrial fibrillation.
NURSING DISCHARGE SUMMARY
I. PATIENT/CAREGIVER COUNSELING ACTIONS:
-----------------------------------
Active Outpatient Medications (excluding Supplies):
RECEIVED PROGRESS NOTE FROM DR. CHERRY&quot;S OFFICE. PT SEEN // IN F/U ELEVATED
ADDENDUM
OR TINGLING, HA, WEAKNESS, ABD PAIN, N/V, INDIGESTION, CHANGE IN BOWEL
)   Non-VA COENZYME Q CAP/TAB ONE TAB  EVERY           ACTIVE
Any limitations on issues your representative may discuss?:  No
CLINIC TEAM COMM FAX 1010 CORRESPONDENCE
Respiratory Rate
year?
Prostate Cancer Screen/Educate:
Patient has not had a decrease in mobility or ability to
Patient Instructions:
,    is  year old MALE.
Result:
Mental Status: Alert, Oriented, Cooperative
Date/Time of Session:  // @ am
[ ]  Other:
Vitals (most recent):
mind and he should have talked to her as this was not a good business decision.
Moisture:           = Rarely Moist
Precautions: nursing observation ( min checks)
Tobacco Use Disorder
The Patient was seen face to face and discussed with the Treatment Team.
__X__ Need to be  wed
Height last read Aug , @::
. A diet low in Sodium (salt)
PORT CHARLOTTE TELEPHONE CONTACT
Setting a quit date, ideally within
Total Encounter Time:[ ] minutes
MORPHINE SULF MG * * TAB
__x__ Need to be  wed
-- Opioid agreement w/PCP
Pt identified by name, SS# and/or DOB
Protocol(s) used: &lt;Not identified&gt;.
Now double click on the TIU Title to View the document
PAIN:  (// :)
SUBJECTIVE: "I am doing much better now."
// :  BLDG - PAIN CON/REC
burning some type of vine for the past   s, denies use of any new
Protocol(s) used: &lt;Not identified&gt;.
Comprehensive Pain Screening Plan
FOLLOW-UP/PLAN OF CARE INSTRUCTIONS:
questions, re: colonoscopy scheduled //; advised to follow directions he
Diagnosis:Family h/o Colon CA
physician or  ed if b ding or drainage is present  Not Applicable
year old male patient presents for an elective outpatient
Comment: DIET: LOW SALTS/SUGARS/FATS
JUN , @::   .
Has patient has a Postive PPD in
BRIEF CLINICAL HISTORY:
Scheduled with provider: ___TO      ____FUTURE      ___N/A
meds.  I pointed out that he just got the alprazolam on the th.  He didn&quot;t
Left Area: Ambulatory
MUCH OF BODY. HAS HX OF HEPATITIS C. CONCERNED "THAT I&quot;M DYING FROM
IF NEEDED F
PLEASE CONTACT VETERAN. VA DECLINED THE LOCAL DERMATOLOGIST CONSULT. WILL NEED
Outpatient:
ALPRAZOLAM MG TAB TAKE ONE TABLET BY MOUTH EVERY  HOURS   ACTIVE
Status       Last Fill
PC - TELEPHONE NOTE
MALE
at this level as this would correspond to mild dementia if pt had vascular
caregiver for wife c Alzheimer&quot;s who c ot be left alone is also assoc. c %
SPOKE WITH MRS. FREEZE IN FEE BASIS OFFICE IN GAINESVILLE.  PLAN IS TO FIND CARE
and made good eye contact, but was agitated. Patient reported that he was
SUBSTANTIATE MR.  S CLAIMS.  THE
ALLERGIES:Patient has answered NKA
PHARMACY NOTE
COMPLETION.
SELLING HIS CLOTHING FOR MONEY.  VETERAN HAS ALSO BEEN PAYING SISTERS UTILITIES
[ ] No answer
MARRIED BLACK  MALE with vascular dementia with multiple delusions of
Pt verbalized understanding of proposed procedure.
Given his prior  yr untrteated course he has done well.
ADDENDUM
Other Dependence on Supplemental oxygen (ICD--CM
EVERY  HOURS FOR SHORTNESS
yrs ago but now larger and ?pleural effusion, has very poor lung function and
J.  :  "Uh, yes I do."
blood since  , this year but to  he coughed up
This patient has been clinically assessed according to the
COPD
management. Pt was advised to come to the ER if the hernia becomes non-reducible
Pt here for urgent visit
Hypoxic, dyspneic, pale
SOAP:
screen for depression.
PHYSICIANS/DICTATION REFERENCE
B: (Background) Onset/Duration/Signs &amp; Symptom(s)/Self-treatment
Allergies/ADR:  Patient has answered NKA
-------------------------------------------------------------------------
Unable to contact pt. for pre-colonoscopy instructions.  Phone disconnects when
PAST MEDICAL HISTORY:
/ NEG COLONOSCOPY
DO YOU HAVE ANY PROSTEHESIS OR IMPLANTABLE DEVICES:   No
PRINCIPAL PROCEDURE  Left total knee arthroplasty
To view the EKG rhythm strip from CPRS, click on TOOLS, then IMAGING DISPLAY.
CALLED TO GET SOME READINGS FROM MR
SUPPER PM
units +ss     noon
see dec  telephone note
Person being educated:
)   ACCU-CHEK COMFORT CV(GLUCOSE) TEST STRIP USE  STRIP   ACTIVE
suicide/homocide ideation - No show letter mailed.
ADDENDUM
Prosthetics dept for an appt to be measured.  Thanks.
Patient has the following contraindication to a beta-blocker:
I have  wed the tamsulosin at his request.
Slot).  Thanks.
Weight:        . lb [. kg] (// :)
Focal (+), pain in right&gt;left hip posterior aspect
CONSENT
UNDERSTANDING MEASURED BY:
Amputation Status of the Upper Limb Abov
Pt tolerated procedure.
visit) for chronic osteomyelitis.  A nurse comes out to his house daily for
Gen: Cam  s to b/l LE. Pt travels in wheelchair.   physician ntact b/l
______________________________________________________________________
meds/dressings  wd as patient desires.
Affect is appropriate with no obvious lethargy.
PREVENTIVE HEALTH MANAGEMENT
Advanced Directives Education:
- Take with lots of water.
Procedures:
Comments:
MODIFIED RAMSAY SEDATION SCORE = LOC.
Also c/o dysphagia with reflux, both liquids and s ds.
Physical Exam.
granular base %, hyperkeratotic wound margins, + undermining . cm
new spots on the bottom of his feet and that he should go to the ED to
Pt previosuly determined to be excessively high risk for surgical intervention
Vital Signs:
// @       PULSE OXIMETRY:
% to %
// @                        /
. CERVICAL SPONDYLOSIS
NURSING ADMISSION ASSESSMENT
NOTE DATED: // :: PM         ADMISSION ASSESSMENT
FEB , @::     : CM      DX: DEHYDRATION                   .
undergoing XRT for esophageal ca and told me that he is to go to the Tucson VAMC
,  C
and breathing better, abdominal pain is decreased. Pt. also complains of left
urinary sxs such as hematuria, dysuria, increased frequency or urgency; no bowel
EVALUATION:  Verbalized understanding
Doctor&quot;s Discharge Instructions given to individual patient
Labs reviewed
CONSULTS:
. Chronic Obstructive Pulmonary Disease
acute soi.
Rx: MS  mg qid FSP control #
= Worst Pain Ima ble  = Pt. unable to respond
Ulceration noted sub left st met measuring . cm in diameter. Wound base is
edema.
Neuro: Protective sensation absent bil via Semmes Weinstein . (g)
Education provided regarding patient responsibilities for valuables/ belongings
month and finally reported to PCP on Mon  received po Rx and had BM x
-maximized cardiac medical management (ACE, ASA, STATIN, BB)
MORSE FALL SCALE
Plan:
: Pt awake stated that he was in pain medications given as ordered. He
HUMAN INSULIN REGULAR INJ         UNITS         TIDAC SUBCUTANEOUS
METOCLOPRAMIDE INJ               MG/ML        QAC&amp;HS INTRAVENOUS
esophgeal ca
s
--
Patient  ,  C  ()
obtained, from patient. Consent was obtained by the physician.
Symptoms:
Heart: ss heard, no m, regular rhythm
LYMPH %: .  L
- clean based antral ulcer w/ prelim H pylori neg
ADDENDUM
Pt. admitted for epigastric pain and N/V. Pt. lives alone in a house. Pt.
demonstrated superficial exudate over esophagus from  cm to  cm,
Inpt Plan of Care, Tx, &amp; Services:
The following risk factor identifies this patient at high nutritional risk.
Psychotropic  physician edative/Anti-Anxiety/Pain Meds: No
discharge pl ing.
and mobility activities.
SUBJECTIVE:
ADDENDUM
below:
s prior this admission.
Has patient been newly prescribed any of the following medications within the
vital signs.
disturbance.
waiting to see SW about housing.  Reports chronic lower back pain persists and
Psychotropic  physician ative/Anti-Anxiety/Pain Meds:No
and has ta
Pt. has monotone voice pitch. He is p te. He is knowledgable about all
Weight Hx: . kg /, . kg /
Evaluation:
DIABETES MELLITUS  %  SC
to address this some and he&quot;s been keeping them elevated.  He&quot;s been ambulatory
ADDENDUM
to by podiatry (minor debridement) and following this he developed some fever,
&amp; draped L - L lumbar area was isolated by palpation &amp; with aid of
the spinal canal is withdrawn and sent for analysis.
HOSPITALIST NOTE
been admitted to med teach team for work up of infection source. Patient
METHOCARBAMOL TAB                MG           QH PRN ORAL
Anti-Diabetics: No
left st metatarsal head measuring cm in length and .cm in width (improved
DIABETIC FOOT ULCER
on the other hand, he would like to talk with oncology .
*of screening for diabetic retinopathy, but c ot substitute for *
Initial Nutrition Assessment
Iron
RESPIRATORY CONSULT
headache. Denies suicidal ideations at this time. When asked why he hasn&quot;t taken
to your physician prior to discharge. If
II. VITAL SIGNS
Active problems - Computerized Problem List is the source for the following:
. Diabetes Mellitus Type II or unspecified with Neurological Manifestations
. will consult social work to assist with placement
events overnight.  Will continue A/P as previously written.  Will consult social
Weight: . lb [. kg] (// :)
intracranial pressure, compartmental synd .
HCT: .
Type of pain: Crushing
Type
EDUCATION NOTE
importance of medication compliance and disease state management. Discussed need
DATE/TIME         TEMP    PULSE   RESP    BP      PAIN    WT (LB) P OX
ID BAND/NAME/SSN CORRECT:               Yes
physician E SULF. MG   TAB                     Dispensed: FEB ,
Current Medications:
Esophageal cancer,
Introducer: N/A
rally pleasant, in NAD.
Affect is appropriate with no obvious lethargy.
PREVENTIVE HEALTH MANAGEMENT
HEENT:  TMs clear
Auscultation: POSTERIOR
type - clear
Pt given  NTG SL per MD order.
Moderately/Severely Compromised Nutritional Status within past six months
Treating copd exacerbation / bronchitis with moxifloxacin and prednisone.
Pain Location #: Chest
Objective
Patient  ,  C  ()
Tele:   -ST  to low &quot;s, no ectopy
. Briefly state what the present condition is of the patient on Transfer:
Plan
Labs, films, echocardiogram reviewed.  An
When did pain start:
HOMEMAKER/HOME HEALTH CONSULT (BP)
Good
THE MED FORM
anxious/agitated).
Concurrent signature by ACOS for Geriatrics and Extended Care indicates approval
FOCUS OF INTRAMUCOSAL ADENOCARCINOMA
. CONSTIPATION,
Patient had CHF weight education at this encounter.  Instructed to
- Shake prior to each use
unchanged.  No side effects
ROS- patient denies
Neuro: Loss of protective sensation / SWMF b/l.
The patient&quot;s eligibilty includes: PRIMARY ELIGIBILTY CODE - SERVICE CONNECTED
Presents to clinic as a walkin with above complaints
If male, age -, PSA education given. [+]
mcg Fentanyl given ivp for c/o of pain rated as a
"No I am leaving." I explained to pt I needed to clean the floor. I got pt to
Patient mental status: Alert Oriented x
ERYTHROMYCIN, CODEINE, PENICILLIN, NIACIN, OMEPRAZOLE, FLUNIS DE, CHICKEN
Vomiting stopped this morning-pain LLQ. Vet offered ED due to severity
ADDENDUM
or
. Little interest or pleasure in doing things
declined to . and pain resolved.
Pharmacist will fully assess the non-formulary request on the
, , , , , , , , .
MEDICAL RECORDS WERE: Reviewed
Was given at past visit.
[]New Patient/Initial Consult        [x]Established Patient/F/U Consult
rib pain for  week since he fell off his bike
[X]  Do not operate a motor vehicle for  week.
I discussed the care of this patient with the resident providing the
Essential Hypertension                  Suicide attempt
Pt here for month follow up appt Pt has pain to  pain level  in his
DOB:  AUG ,           AGE:
without problems. No chest pain, shortness of breath. Can walk and
Pupils dilated for imaging
Digital Pager:
PT WAS A NO SHOW FOR PODIATRY CONSULT APPT. ALERT TO PCP VIA ADDITIONAL SIGNER
procedure site.
FEB ,   INFLUENZA
to include family/significant other in discussions
NUR/PREVMED
Have you used any nicotine and/or nicotine products within the last
)   HYDROCHLOROTHIAZIDE MG TAB TAKE ONE TABLET BY MOUTH  ACTIVE (S)
TELEPHONE TRIAGE (TLCP)
- diast c blood pressure, more than
Blood pressure remains high at home.
Accompanied by daughter, some concern about skin lesion on back.
HEENT: WNL
Ending at: // @ :: AM
Facility Appointed PCP: SOORYA,ASHOK T (LANS/PC )
AO x .
R= (// :)
[x]Intelligence                []Financial Stability
[x]chronic medical conditions
He needs nursing appointment for blood pressure check in one week.
Patient Phone Number: --
NO SHOW
Patient Phone Number:
filled through the VA. Call has been transferred to PSA/Call center to arrange
.  ADVISED patient to quit tobacco.
Tetanus Diphtheria Immunization given at another health care site.
Permision for the  dan VAMC to contact Blue Cross Blue Shield of Michigan
severity of mental illness.
Unit Recreation and Crafts
Altered Mood: Depressed
SUMMARY OF PATIENT EDUCATION:
MH NURSING NOTE
S.  Veteran states that he is feeling less depressed at this time.
Active Inpatient Medications                           Status
constipation
)   QUETIAPINE TAB  MG PO HS                             ACTIVE
Medication reconciliation completed. Medication changes made; see orders.
)   MAGNESIUM HYDROXIDE SUSP,ORAL  ML PO DAILY PRN For   ACTIVE
)   SIMVASTATIN TAB  MG PO HS                            ACTIVE
Reviewed patient&quot;s medications and symptoms. He complains of  time sedation
Treatment Plan:
PATIENT EDUCATION PROVIDED
Date of Admission:  // :
. Were you ever abused as a child either physically,
MSE: Pt present for   prior to D/C to  to return to Fort Collins.  All
Bus travel arranged for transport to Ft. Collins on //. Taxi and bus
POST DISCHARGE TELEPHONE CONTACT NOTE
that his statement is reliable.
FCPD dispatch Donna contacted, they are very familiar with   and officers
SOCIAL WORK - GENERAL PSYCHOSOCIAL NOTE
behaviors.
past trip to Mountain Crest resulted in their prescribing Risperdal Consta as
HTN
COMPLETE PHYSICAL EXAM
Staff assessment: Level of INTENT of this event was: Low
AXIS I:    Bipolar I
denies any side effects from his medications and has been taking them as
called the social work consultant who provided some information on the
plan: will call the tbi social worker on mon , --. i am off work tomorrow.
Smoking Fire Risk and Interventions reviewed and found effective, no
DURATION OF GROUP:  minutes
Nursing Shift Assessment
Unable to assess patient&quot;s pain at this time.
DISCHARGE SUMMARY
accident who was brought in to  by his mother for worsening depressive
A.Yes.Being dazed, confused or seeing stars?
smoke from the air b
POLYTRAUMA TELEPHONE NOTE
ADDENDUM
Writer tried to reach this veteran again before his scheduled appointment with
Fall Risk: normal
Inhaler prescribed
Do you take one aspirin per   at home? YES
READING
LUNGS;occ wheezing no rales o sat % RA
PAIN:  /
AMLODIPINE BESYLATE MG TAB              Fill Date: JUN ,
fluorescent dye into the vein to allow examination of the blood
doctor applies eye drops to dilate (widen) the pupils.  A special
pt t ocall blod glucsoe readings in
Outpatient
oriented to: Person, Place, Time
VITAL SIGNS:
* Wear the same type of clothing when weighing.
YES
down, depressed, or hopless?       Not at all
keep current recall.
no JVD
)   LORAZEPAM MG TAB TAKE  TABLET BY MOUTH EVERY         ACTIVE
EDUCATION ACTIVITIES: (Enter date, status and code for each entry)
D/C from Pulm CLinic
Dose: MG
Route: IV
Education Topics:
kill myself. they know my number; she told me they would only use it if they
appt as patienthas not been to pcp in long period, no recent LPN eval.
she has intractible mood d/o and topax has helped improve mood stability. she is
measures . x . cm on image .
Type(s) of education/instruction provided:
PHE adequately verbalized/demonstrated understanding
SPECIALTY:  PULM
JUL ,
injury, multiple sclerosis, spinal cord injury or amputation that has
INTERVENTIONS:
-
Protocol(s) used: &lt;Not identified&gt;.
mediastinum is the space within the chest between and in front of the
Meds, K. How/when to seek emergency treatment/follow-up
inhaler to his home medications.
How does patient like to learn?  Listening
Desire/Motivation to learn:
[] None
Medications:
[This form is to be used to convey patient instructions and
.  If diabetic, results of the last glucometer/date/time:
PAST SURGICAL HISTORY:  Gun shot wound to right knee status post
The following identifiers were used to verify this patient:  SSN.
___ Smoking Cessation Referral
The Anesthesia Technique(s) subfile was changed as follows:
***PLEASE UP DATE WITH SIGNED CONTRACT***
Caller Response: *OTHER.
Call Type: BHM CLINICAL FOLLOW UP.
NURSING TELEPHONE TRIAGE NOTE
ADDITIONAL COMMENTS/INFORMATION:
Selenium Sulfate
of suspicious skin or tissue for diagnostic examination.  The type of
TEMPERATURE:     . F [. C] (// :)
Air space enlargement and loss of elastic recoil
TAB (ZOCOR) anymore, it is causing him a lot of problems.
Heparin Lock:       -  No
Temperature:     . F [. C] (// :)
PATIENT CHECKED - q Minute
Diminished
OXYGEN
Blood Pressure:  / (// :)
Diminished
RBC                        . L   M/cmm      . to .       []
Abnormalities:
PRIMARY CARE TEAM PROVIDER: N. GRAHAM ARNP
UROLOGY
bring driver for discharge.
physician ied, no redness or swelling noted.
Patient&quot;s Home Telephone:  --
The patient was called and results of the recent bronchoscopy and PET scan were
The telephone number called was --
Kimberly Gatzman,RN
Pt does take medication as prescribed.
Lab is not required at this time.
Alert and oriented.
Unable to contact
TELEPHONE NOTE
MEDICAL RECORD |                   CYTOPATHOLOGY
BRIEF CLINICAL HISTORY:
SEE SC ED IMAGE IN VISTA IMAGING DISPLAY
ALREADY COMPROMISE FROM COPD AND HIGH O REQUREMENT. HE ONLY WANTS SUPPORTIVE
Time IV DCd: May ,@: W/CATH TIP INTACT. NO S/S REDNESS/SWELLING.
rate., Other: IRREGULAR HEART RATE. PT IN A-SYMPTOMATIC AND IN NO DISTRESS.
LTC Co-Pay Status: EXEMPT
yester . Lab and EKG ordered to  by  physician
O Sat: // @        PULSE OXIMETRY:
Proper inhaler use reviewed with patient.  Verbalizes a clear underst
Allergies:
MOUTH EVERY MORNING FOR BLOOD PRESSURE
BEDTIME FOR CHO OL
Status       Last Fill
s  Sig: TAKE ONE TABLET BY MOUTH  Refills:    Last:--
pulse
NURSING NARRATIVE  Received pt from Cardiac clinic, placed in bed, monitor
breath.  He denies any chest pain.
Cardiac rhythm:   N
s ping VSS. breathing  unlabored. No  observed  S/S of distress.,
ML   ml/hr TKO IV
Other: HX OF EPIS  OF V-TACH
Dipyridamole.  Aminophylline  mg given at  slow IVP  minutes post
Resting, HR decreases to &quot;s at rest, SB.
Objective:  Active Inpatient Medications (including Supplies):
time as per Tuscon VA EP specialist. Patient may be ready for discharge from
Score:
arthroscopic surgery x to right knee within last year.  Abd. soft &amp;
Arrhythmia Present: (type, duration, # of significant events)
Nursing Interventions:
Sensory Perception: = No Impairment
)   AMIODARONE TAB  MG PO TID                           ACTIVE
Patient has been working with PT on ambulation and b ce, and has made some
Rate Range: /&quot;S
RT C CPAP/BIPAP NOTE
PRESSURE ULCER PROTOCOL
IV Care: Saline lock flushed per p cy., Site inspected and palpated; clean
DISCHARGE SUMMARY
SEP ,   TETANUS DIPTHERIA (TD-ADULT)
SUBJECTIVE:  This is a  year old male ambulatory to Primary
SPECIALTY CLINIC CARDIOLOGY
configured with the following settings:
EMERGENCY DEPARTMENT NURSING TRIAGE ASSESSMENT NOTE
Pt had a negative exercise stress test with the following interpraetation on May
The patient?s medications were reviewed and clarified based on the patient?s
RESPIRATION:       (//  :)
PMH:
Abdoman - soft distended (Observe and palpate X  quads).
Impaired:  No
MODE: Stretcher
Night Shift ( - )
Weak
assistance before getting out of bed.
ADL:             [x ]Independent     [ ]Total Care
assessment was in s/s, got IVF (L) and transiently placed on dopamine. Pt
Anternate Telephone Number
BMI: .
OR HI,
and limited finances). Currently has care w/ CBOC/PCP. Denied mania, psychosis,
Interpretation: -="no" risk; -=low risk; -=moderate risk
RESULTS OF TESTING
- moderate, - severe
SYMPTOMS  ed as moderate or severe in intensity:
horrible or upsetting that, IN THE PAST MONTH, you: Were
Facilitators:    M. Harrington, TRS/TXC, CTRS and Joe Quattlebaum, TRS/TXC,
SATT GROUP THERAPY
counselors, other staff, sponsors, chaplains, peers, etc. to assist them in the
PAST MEDICAL HISTORY:  He of course has a lengthy history of
TYPE OF CONTACT:  Vocational lecture
( )  Biomedical Ethics
Patients were shown a film entitled "Bradshaw Part ". The focus of to &quot;s
encouraged to develop a sense of awa ss in support of staying present every
to fill out the "thank you" cards, but also they would need to bring their completed project to the
Patients were shown a film entitled "Bradshaw Part ". The focus of to &quot;s
TIME OF CONTACT:  -
he stated that his wife wrote him a letter and states that she wants to try
SATT GROUP EDUCATION/LECTURE
substance abuse problem, is that he lacks sufficient motivation to continually
Session Date:  --
Session Facilitators:    M. Harrington, TRS/TXC, CTRS and Joe Quattlebaum, TRS/TXC, CTRS
Group enthusiasm was moderate.  Participation also moderate.  Most patients appeared to enjoy the diversion
SATT GENERAL NON-SOAP
provide input on ways they are maintaining their own sobriety and share healthy
enabled their peers to relapses. Counselors let the group know that they had
Age /Race RACE UNKNOWN
THY: No
SATT INDIVIDUAL SESSION
make to be pleased with their progress in treatment. They put them in writing,
Veteran participated in the discussion.
Axis  : no medical problems or pain issues.
way.  He stated several reasons for this, yet, he said he felt that things would
service-connected, Caucasian male who is seen to  for  minutes for
QUESTIONED THE PATIENT ABOUT THOUGHTS OF SUICIDE?  Yes
construction. He is concerned about his teeth and says he needs
Fall risk information was obtained from: patient
Cyanocobalamin mcg Tab Take One Tablet by Mouth Every
Age:      Sex: MALE     Race:
Date: August,   ? Exact date is unknown
Active Outpatient Medications             Refills      Expiration
SULFA DRUGS, PENICILLIN
SUMMARY OF THEMES DISCUSSED:
*
Active Outpatient Medications (excluding Supplies):
. Felt numb or detached from others, activities, or your
c/o hand peeling also stomach pain
)   METRONIDAZOLE MG TAB TAKE ONE TABLET BY MOUTH FOUR  ACTIVE
town area.  He would be interested in seeing somebody in Psych for some
month.
D-Depression: Yes
Findings:  This recently separated, Caucasian,  year old male Army veteran
conducting a timely and successful housing search.  After s, Melody, staff
Discussed the patient&quot;s eating pattern.
An alcohol screening test (AUDIT-C) was negative (score=).
. PTSD SCREEN
night, lorazepam one at night, Lasix  three a  , terazosin  mg one
Vet states he has been in  hospitals and  nursing home in the
levothyroxine . mg which has not been refilled for some time.  He,
PCP Appointment
miralax  gm qd mix in  oz water
VET ALSO REQUESTING IF MRI CAN BE DONE AT THE SAME TIME. ALSO WANTS TO KNOW WHEN
disc
States he gets sick on vicodin and percoset, and itches with morphine.
Oxycodone pain works well.
Info to PCP
terrible. Still has nightmares, recurring theme of being overrun, but not being
detox numerous times.  He lived in Mass and returned to Avondale area, he lives
Chief Complaint: patient has sore sensation over the lower spine.
. a. Current medications (VA):
List medications not prescribed
RTU
Completely Independent
If any of above is not checked, complete ADL Flowsheet
Cooperative
Wathches TV/Listens to Radio
NURSING/MEDICAL CONDITION NOTE(T)
Respiration:   (// :)
order of clinical importance, enter if applicable, four () other
Returned call. Left message that I had called.
PLAN: ("X" one)
paperwork/ assessements / op reports and physical tpy/ortho
Medical records reviewed, including operative and imaging reports, and limited
following a motorcycle accident.  Laurie states she has made multiple attempts
patient back to VA.
)   IBUPROFEN TAB                             ACTIVE
Allergies: Patient has answered NKA
EVALUATION NOTE:
Branch of Service:
found  - .x. cm circular, hard to touch with formed edges lesions,. skin
Eating: Minimum
Mr.   demonstrated donning his flexion g  and we discussed whether a
//
Skin Moisture
pin sites located on Right leg-  surrouding knee and  to shin.
enough room "to maneuver my leg and move into my chair."  Medicated for
and Thurs  July th of this week.
Alert and Oriented x
P er/Encouragement/Support
)   ARIPIPRAZOLE TAB                          ACTIVE
when I&quot;m in my wheelchair and my foot is pressing on my foot rest, I just need
D/C instructions given to pt, pt verbalized understanding. Pt will be picked up
Pulse:            (// :)
Gastrointestinal:  wnl
THIS IS YOUR CURRENT LIST OF MEDICATIONS:
Centrum Multivitamin q
W VERDsome state
Street Address:
Work Phone:--
and time that timeout was done: Mar ,@:
Consent to be contacted was given.
CP ENDOSCOPIC COLONOSCOPY
SCANNED OUTSIDE MEDICAL RECORDS
Pain location: across chest
Obtain history and assess degree of activity intolerance.
. treatment plan: medical team
vomiting. He has not have drowsyness spell since admission. He could walk w/o
no treatment for orthostasis from this view point.  Vet will need to avoid BPH
no essential change in pattern.  Per  physician estion have contacted  physician  and have been advised that hr urine for HIAA and
In order to enhance the distinction between the many different
clinic.  She has reviewed test results and discussed possible medications that
SPC TO FOLLOW UP AS NEEDED.
Service Branch    Service #    Entered         Seperated       Discharge
**PLEASE REFER TO THE  A COMPLETED TO  BY THIS WRITER  FOR FURTHER INFO**
not at fault, was not ticketed, and took the rest of the   off of work,
MENTAL HEALTH NOTE
tolerating med OK at this point. No seizures.
household,
Informed  physician t this SWR is the OIF/OEF Marriage and Family counselor.
S:  Patient arrived timely to appointment and was seen X  minutes for
struggling with some depression, anxiety, irritability (longstanding), but has
discussed asking for help/avoiding these, before he experiences fainting, rather
referral from   Klein, LMSW.  Mood is anxious, affect is congruent.  Eye
--------------
Assess patient&quot;s potential for suicide on an ongoing basis, increasing level of
Current Diet: LOW CHOL
Anti-Diabetics: No
I:Brief, supportive contacts made. Encouraged to seek staff as needed. Up at
Does patient have current pain?:Not at this time
-  Low ri
E: anxiety: same
SAC-PREPRIMARY GROUP
occurrences recently. Remains stressed financially, worries about bankruptcy
. RISK FACTORS IDENTIFIED:
Protective Factors)
explained at this encounter.
Patient verbalized understanding of above.
Combat: NO                             POW: NO
s py.
Disucussed with vet the idea that insurance companies do not pay death benefits
W VERDsome state
WIFE STATED THAT VET IS NOT CURRENTLY SI. HOWEVER, SHE STATED HE IS NOT
last yr, bp uncontrolled
ortho:  laying /  p=
TELEPHONE TRIAGE REPORT
. Suicide ideation, threats, or self-harm now or within past   s?
This includes an ICD--CM diagnosis of -, and either  or more
and social information):  Paint a clinical portrait of the patient&quot;s
NURSING REASSESSMENT NOTE
Military History:  Pt stated he has  years with the military including
Patient  ,     ()
Anti-Histamines: No
is improving and that he now sees light at the end of the tunnel. Denies SI and
Ambulatory aid: None, bedrest, wheelchair, nurse ()
a gun in his possession.
schedule and number to contact for Recreation Therapy.
Person__x__
however, he has not been given the okay to work on his table saw since his
pt placed on : with sitter
REPORT OF CONTACT
Received call from SPC -- to alert me relatives upset veteran with
Patient Phone: ()-
VET WAS AGREEABLE TO MHICM INVOLVEMENT.
ID/CC:       is a  year old MALE
really need all strength&quot;s of patches  wed?
(//) nicotine patches? That is the basis of his current request.
years. The patient is a -year-old   male who reports that he
P.O. Box
some state
&quot;N&quot; indicates patient NOT taking medication;
Negative for:scalp lesions, hair changes
Left Message:Asked patient to call BHL
Phone ( ):
COMMENTS:
Active Outpatient Medications                          Status
me  ier than that.  thanks.
Blood pressure cuff was against bare arm
DAILY FOR STOMACH
Avoid alcohol
Avoid smoking or exposure to other peoples smoke
INTERDISCIPLINARY PT/FAM EDUCATION
Chief Complaint:
PSYCHIATRIC EXAM: oriented x  normal
// @       PULSE OXIMETRY:
Barriers to learning:No barriers to learning identified
EMPLOYEE HEALTH NOTE
Reading:
The prescribing provider is responsible for monitoring of
No.
PATIENT SENSES:  Vision
Secondary Diagnosis  = No
Pneumonia vaccine was received at another facility:
has been mistreated, suppressed and harassed at Ft. Riley and that he was headed
Up ad lib-wheelchair
MEDICATION:
)   TUBERCULIN,PURIFIED PROTEIN DERIVATIVE  .ML ID ONCE  ACTIVE
Patient came to this nurse complaining of bilateral leg cramping that started
b. Weak:
dose per  physician Will continue to monitor.
are that they can control their behavior when they are angry.  Many of the group
ACTIVITY LEVEL:
is repeat dose to use if needed.
sprain but no evidence of fracture.
)   HYDROXYZINE CAP,ORAL  MG PO TID PRN PTSD symptoms    ACTIVE
ADDENDUM
rescheduled for another appointment in the afternoon so that he could provide
Reason for admission:
EK-NURSING RN MH
all groups to  with minimal participation.  He has been more visible on the
Pt does not know of anyone close-by that may be able to mow his grass.  Pt said
EK-PHYSICIAN MH
June ,
estimated length of stay at this facility is    from to .
Nursing Review Form.  His written goal for the   was, "Do the best I can for
TREATMENT PLAN
Legal Status: Fully competent
milieu, activities and groups, meds (reviewed the risks, benefits
PATCH-ROTATE SITES-DO NOT SMOKE ** nicotine
history of PTSD and related concerns.  Testing is r
cause uncomfortable emotional or psychiatric symptoms such as anxiety, panic,
Mr.   had an elevated pulse  ier and doctor was notified. No new
had functioned in the society, which, according to her, meant he had a job, was
emotional support.
will be available for Ft. Riley treaters to review upon his return there.  He
as tolerated
SCANNED OUTSIDE MEDICAL RECORDS
P: here for pcp follow up
Issue Date
[ ]
RAL:  Well-developed and well-nourished.  Awake, alert, and oriented.
compression.  Has not worked.
Pulse            (// :)
MENTAL HEALTH NOTE
ASPIRATION AND/OR INJECTION OF JOINT, BURSA, CYST, OR
[ ] No anwer after several attempts to call.
Delusions: Denies
P: as per pcp
ADDENDUM
S) ,    is a  y.o. who presents for to s visit
Weight          . lb [. kg] (// :)
O; Wearing elbow pad right elbow - per orthopedics
Description of pain: Dull Ache,
EXTREMITIES:  Left elbow has steri-stripped laceration with surrounding
FOSAMAX MG TABLET, ULTRAM MG TABLET, IBUPROFEN, METHADONE, FLAGYL, ELAVIL
from referring provider were availible for review.  See note dated     for
PLAN: Pt decided that he will do home care on wound.  Pt instructed to RTC if
ADDENDUM
Weight          . lb [. kg] (// :)
LABS: REVIEWED.
COMMENT:
. Pain in joint involving lower leg
Caries: , , (MBD), (MBD), (MBD), (O), (MODL), (MBL),
WITH GRAPEFRUIT JUICE)
JUN ,  :       Age    Gender: MALE
Pulse:  (// :)
Veteran Name:   O  S
Source of information: Telephone, Patient self-report
Is the patient taking non-VA meds, Over
or killing yourself?
MHC FOLLOW-UP
)   DOXAZOSIN MESYLATE MG TAB TAKE ONE TABLET BY MOUTH    PENDING
    </notes>
  </record>
</records>
