# Supplementary material for: Predicting the Risk of Suicide by Analyzing the Text of Clinical Notes
Source: PLoS One. 2014 Jan 28;9(1):e85733. doi: 10.1371/journal.pone.0085733 (PMC3904866; doi:10.1371/journal.pone.0085733)
Supplement: Appendix S3 — Machine Learning Libraries and Methods: This section is provided to enclose the open source (Apache License) classifier used for the building of the statistical models, specifically for the purposes of study reproducibility. A detailed account of these tools is intended for another publication. (ZIP) [file pone.0085733.s003.zip › Appendix3/ML_libs/Regression_testing/group2/grp2-pt-1049.xml]

<?xml version="1.0" encoding="ISO-8859-1" ?>
<records>
  <record>
    <group>2</group>
    <study_id>1049</study_id>
    <notes>
. refractive error
Left:  -.-.x                   Left:  +.-.x
frequency.
Called patient per PC ANTICOAGULATION MANAGEMENT NOTE and informed him of INR
to? No
horrible or upsetting that, IN THE PAST MONTH, you: Were
pm) if a dose is missed, take as soon as remembered. DO NOT take a double
Advised we haven&quot;t checked his Pt/INR since Sept. He was in the hospital in
ADDENDUM
NON-FORMULARY DRUG REQUEST CONSULT REPORT
ADDENDUM
// and // from above provider are attached to this addendum.
scared.
ALLERGIES/ADVERSE REACTIONS: Patient has answered NKA
EXIT INTERVIEW
Electronically Filed: //
by: Bonnie  , MSW STUDENT
MEANS OF COMMUNICATION:  Speaks English? Yes
Is patient
Blood Pressure Check:
no, patient not interested
Patient ethnicity: NOT HISPANIC OR LATINO
Chart documentation
___ Individual Psychotherapy (- min)
NURSING ACUTE CARE ADMISSION DATA BASE
Resp.     (// :)
=========================================================================
NURSING NOTE
Homicidal Ideation:
Homicidal Plan:
Patient voices no homicidal plan.
Period of Service: VIETNAM ERA (DEC , to SEP ,)
pt. has appeared to be as p, on q minute checks, will continue safety
Active Inpatient Medications                           Status
CARDIOVASCULAR:
Disabled; collects service-connect
Pt attended and participated for one hour with eight Veterns on A discussing addiction,
PARTICIPATION:
was also told about PRRC although he was concerned about the long drive.
Rational
Type of Discharge: regular.
PROCEDURES:
)   CLOTRIMAZOLE % TOP CREAM APPLY MODERATE AMOUNT        ACTIVE
MSE: Alert, fully oriented, well groomed,  he was wearing dark prescription
you. How often did you have six or more drinks on one occasion in
ot chest pain and blood in urine.  I relayed this to his daughter who was very
(CVA )HYPOTHYROIDISM, IRON DEF ANEMIA, COPD CHF , MITRALVALVE ISUFF.
DNR to include no chest compressions, defibrillation, cardioversion,
Dentures    None
. SUBSTANCE ABUSE:
WWII
running again. IID to left wrist  with NS infusing at cc/hour. Pt is
CREATININE                .  mg/dl            . -  .           -Feb-
BLE. Pedal pulses are palpable. Call bell within reach. For bloodwork in
,  is a  y/o MALE who presents for: hematuria, on coumadin for
TID with spacer
ADDENDUM
effects/adverse events, resolve hematuria, therapeutic anticoagulation (INR -
support and spiritual encouragement.
is patent and intact with CBI infusing, draining light cherry to peach colored
Nutrition plan of care:
AND IS A RETIREE OF GE WHERE HE SPENT  YEARS. HE ALSO RETIRED FROM SEVERAL
DISCUSSED WITH DR. BOGGIO PATIENT CLEARED FOR CYSTOSCOPY ,NO ANTIBIOTIC
Will d/c daily pulse oximetry checks per protocol. LPN  a notified
MILEWSKI,  E (FULLY TRAINED)
B. VOID WITHOUT DIFFICULTY
PO
PHYSICIAN INPATIENT NOTE
Nutrition:          = Adequate
)   AMLODIPINE BESYLATE TAB  MG PO QAM                    ACTIVE
Interdisciplinary Plan of Care Reviewed: No changes at this time
consider talking to his non-VA doctor about Coumadin might be a
Self
Chief Complaint: depressed, feeling lonely
Pain:            (// :)
sats % on room air @rest
Hypertrophy (Benign) of Prostate without Urinary obstruction (ICD--CM
INFORMATION ONLY
ADDENDUM
DECREASED CARDIAC OUTPUT related to: ischemia
NURSING NOTE:
signs/symptoms of anxiety
Hypertension (ICD--CM .)
Current Diet:  CALORIE
Monitor hydration, elimination, skin status
Problem #  injury potential
vague historian.  He reports that his chest pain is better, and even his chest
S:
*SKIN REASSESSMENT
She voiced understanding and agreement with current plan for pt to attend STR
*SKIN REASSESSMENT
PATIENT DEMOGRAPHICS
Tubefeeding (any method):  No
BASIC ACTIVITIES OF DAILY LIVING:  In the last   s, has the veteran
Pt c/o
I will amend the GEC form done yester  to reflect this outcome.
O: UBE x  mins. Kinetron x  mins. sit to stand at SBA. SPS at close SBA.
Edema: (-) bilat LE&quot;s.
Other Diagnosis:
)   ALBUTEROL/IPRATROPIUM INHL,ORAL   PUFFS INHL ORAL     ACTIVE
IID is intact to RFA and patent for a flush and free of s/s of
Trace of BLE edema noted, PPP.
Per discussion with Mr.   regarding if pt truly targets, he reported that
CHEST PAIN EXPRESSED. BBSC RESPIRATIONS REGULAR AND EASY. NO SOB  NOTED.
discomfort. VSS. Will continue to monitor patient. No change in status noted.
Pain Scale -:
Mobility:           = No Limitation
LIVING SITUATION
Date: April ,
Click on Tools, click on VistA Imaging Display.
Pain:         (// :)
****************
Correspondence was received:
Patient instructed on injury prevention; the need to wear a seat belt.
ACTIVE PROBLEM
Follow-up activity-limitations: No restrictions
NURSING NOTE - INPATIENT
Activity: up ad lib, reported for meds/vs    Level: Nursing observation
=========================================================================
O:      Alert, interactive, and tense
Diagnosis based on DSM-IV criteria:
,    is a  yo MALE calling to request medication
The patient has upcoming appointment(s):
// :  CHAR MH P CHATHAM NEW REC
blood pressure."
Primary Care provider: KRISHNASWAMY,MALATHI
nursing and pharmacy staff.
____ Need to be refilled
morphine. Sporadic intrusive memories of burnt bodies along Kuwait highway.
// :  BLDG - PAIN CON/REC
[ ] Fawcett
pain clinic telephone number, pre-procedure instructions
Also Pain specialist wanted pt to be placed on LYrica inplace of the Gabapentin.
Comments: Would like a referral to neurology. States he  had another
Pt Identification Completed, SSN Confirmed, Allergy History Confirmed.
l.  Surgery/Procedure: CAUDAL EPIDURAL STEROID INJECTION
.  NO smoking and or alcohol be
finger intermittent numbness and parasthesias.
ER IDN SECONDARY 1010M (PART 3) PROVIDER EXAMINATION(LINKSF)
CC/ welts x   s
Family History:  Mother died at  of ?
Patient Phone Nu
ANATOMICAL SIDE: Right
Facility Appointed PCP: MALATINSZKY,  (ORANGE TEAM)
L Deltoid
Veteran SSN:
Pain is made better by:new onset
to view the large bowel, also called the large intestine.  Moderate
PE:
Patient&quot;s weight: . lb [. kg] (// :)
CLINICAL REMINDER ACTIVITY/PLAN OF CARE
CATEGORY:
PRIMARY LANGUAGE: _x__English  ___Non-English:
DISPOSTITON:
B/P: / (// :)
Measurement DT    POx
*
Pain Score:  (// :)
Are there any physical or behavioral indicators present which support a
(x) Has had an opportunity to have questions answered.
Patient requesting local prescription for Hydrocodone until Oxycodone comes in
PULSE:  (// :)
FOR S P
TAKE ONE-HALF TABLET BY MOUTH EVERY MORNING FOR BLOOD PRESSURE
ADDENDUM
Nutrition counseling/Education
HAS BEEN SIGNIFICANT FACTOR IN HIS HOSTILITY WITH US. HE SEEMS TO HAVE REACHE
: PLEASE GET ME A CD OF PATIENT&quot;S BRAIN MRI AND I WILL SEND IT TO DR.
Interpreting Cardiologist: Hoa N-Pho,MD
Chief Complaint: Vetin for routine follow up appt. Left leg and arm pain, PN ,
No fam able to care                     Family health prblm
knowing why he was admitted to Baptist but later talks of it&quot;s helpfulness in
Specimen (Received Feb ,  :):
middle initial J, last name spelled  .  Mr.  &quot;s date of
Active Outpatient Medications (including Supplies):
Call Type: LWBS F/U CALL.
Active Outpatient Medications                          Status
Hemoptysis .
says he has developed a "hernia in my LEFT groin."  He says it is not operable
following problems ?
agreement with his/her Primary Care Provider/physician.
for you. How many drinks containing alcohol did you have on a
Discussed removing guns from his home. Vet resisted. Agreed to give his wife the
Subjective:
Submitted by: SUN,JACHI                Date obtained: Sep ,
Blood Pressure
Weight
TOTAL "YES" REPSONSES WERE:  - YES
Other Surgeons:
Who provided the information for the assessment ?
What is patient&quot;s tetanus immunization status ?
EDUCATION SCREENING ASSESSMENT
.  Multivitamin.
DATE (M/D/Y): Aug ,
CLINIC HE SAID HE TAKES BETWEEN - UNITS
Primary Care Provider: BOWENS,ARABELLA D
Electronic View alert sent to:
CURRENT MEDICATIONS: Active Outpatient Medications (including Supplies):
Lifestyle modifications including diet/nutritional management of fat
S:
. Upper (arms, wrists, hands, fingers) - Include choreic movements
.
Veteran did not answer call - left message. Will make another attempt
Veteran answered call:
. Dyslipidemia (ICD--CM .)
ORDERS:
- pt&quot;s last GIM visit was / - he is a transfer pt to me.  I have never
Did pt smoke  minutes prior to BP being taken? No
*Patient received the influenza vaccine at this encounter.
*****Sc ed document attached to this note******
Pt tolerated procedure.
XRT/chemo at this time.  Still able to aliment/s ow.  Agree c approach, for
wed as patient requests.
I. CHIEF COMPLAINT:
pt with high grade dysplasia- evaluate staging for barretts/extension
Report given to accepting RN: Marcia   RN
B ding: No
HPI:  y/o male with hx Barrett&quot;s esophagus since .  Had low grade
: DMII
PLAN/Next step of care: ) will print and for  to PCP for evaluation and
ETODOLAC MG
PODIATRY CLINIC NOTE
that connects the throat with the stomach), stomach, and initial
(  s)
MEDICAL RECORD |                   CYTOPATHOLOGY
R/O METASTATIC ADENOCARCINOMA ARISING IN BARRETT&quot;S ESOPHAGUS
SCANNED CONSENT
proximally. + Probes to bone at proximal part of wound. No purulent
drainage. No malodor. Mild periwound erythema and edema.
Air.
malodor, no drainage
Date:FEB ,  Time:       Age: Sex:MALE
. Chronic Obstructive Pulmonary Disease
constipation, and when the diarrhea started, he was still taking them. About one
Assess hydration status and monitor lab values.
/
Secondary Diagnosis related to cognition or mobility: Yes ()
Reason for Admission: Medical
Fall Risk High Same
IV/ACCESS DISCONTINUED:
.  Infectious diarrhea, organism not identified
ADDENDUM
. Diverticulosis
states that he has been changing the dressing every .  Chronic ulcerations on
Height:  in [. cm] (// :)
ADDENDUM
neuropathy and h/o diverticulitis who p/w N+V x  d. He has been constipated for
Frequency of pain: Comes and Goes
holding BB &quot; low BP
Significant wt loss over the past  months during esophageal ca treatment
Inpatient - Current Diet Order: Clear
ICS - INTERDISCIPLINARY TREATMENT PLAN
Age: Sex:MALE Race:
morphine IV push.  Patient also stated that his enama given  ier and had good
-radiation gastritis is of concern given the proximity to his XRT
MEDICAL STUDENT NOTE
POTASSIUM: .  L
Pain type: Acute
Has patient been newly prescribed any of the following medications within the
Psychotropic  physician dative/Anti-Anxiety/Pain Meds: No
:  Ambulating in  way.
NPO Since:Apr ,@:
Communication Barrier: none
MCH: .
// @
LYMPH %: .  L
heent: anict  sclera, mmm
P:Pt. seen by Platinum clinic SWer in / for related problem. This writer
.  Bipolar disorder.
MAY ,@:     GI-PATEL F/U (CD-)
MAY ,@:     DIAB TELERET IMAG (GOLD)
**Services Referred (type, frequency, date range): Skilled nursing x/wk for
with isolation but not on   restriction.Patient is alert with period of
NUTRITION SCREEN
MORSE FALL SCALE
physically and emotionaly.Slept  hour only which he stated he does not s p
please do not hesitate to recontact us.  Thank you.
PAIN ASSESSMENT
in
Pain Location #:LOWER BACK
Plan:
Mood still depressed.  A little more hope now.  Still pl ing on assisted
about ALF, however, after viewing options, especially finances, may end up going
COPING INEFFECTIVE R/T DEPRESSION WITH SUICIDAL IDEATION: no SI expressed.
Pain intensity (=none - =worst):
Movie: "Chalk Talk" by Father    .
Thoughts clear. Denies psychotic sx./SI/HI. Relates his meds are being adjusted
S: "I can understand why."
- cont carafate suspension qid
Consulted to podiatry for new onset ulceration to left sub st MTP discovered
Intervention: Pt. was angry this shift because he had to stay out of his bed and
Tot
Denied any other sx&quot;s such as cp/sob/n/v/d/c. Pt. seen this am and reports sx&quot;s
Patient&quot;s care discussed with team.
Encourage fluid intake, unless contraindicated, and record intake and output.
S: Patient is a  yo male seen resting at bedside to  in NAD. He relates that
**Services Referred (type, frequency, date range): Skilled nursing services
Hyperlipidemia, CAD).  Discussed need for regular monitoring of blood sugar and
.  Podiatry.
.  Attempted lumbar puncture by  physician e on May , .
Mr.   arrived to our   at :, after doctors and this writer finished
PAIN ASSESSMENT
History of falling - immediate or within  months: Yes ()
PAIN ASSESSMENT
to your physician prior to discharge. If
. Chronic sphenoidal sinusitis
PAIN ASSESSMENT
MP  H&amp;P Addendum
Briefly, pt. is a  y/o male with multiple medical problems well known to our
Psychotropic  physician dative/Anti-Anxiety/Pain Meds: No
Weight: . lb [. kg] (// :)
Sec. Diag. Comments: unsteady gait
When did pain start:
CHLORIDE:
NURSING REASSESSMENT NOTE
YES
Patient smokes:  physician us: not currently drinking.
mg ASA PO.
NURSING REASSESSMENT NOTE
Patient  ,  C  ()
Date/Time Patient Arrived on Unit://@:
Secondary Diagnosis related to cognition or mobility: Yes ()
ATTENDING PHYSICIAN - SINGARAJAH,CLEMENT U
Nutrition Assessment
PMH:
.  Patient has decision-making capacity, he or she understands
:Troponin &amp; UFH drawn &amp; sent to lab.Pm care done.Linen changed.
Last Assessment Info: Patient has been admitted within past   s, and a full
LAST HRS:  Pt is a  yo male admitted / for nstemi and copd exacerbation.
ral:NAD, A&amp;O x , seen lying in bed.
NURSING REASSESSMENT NOTE
LUNGS: crackles at bases bilat.
GLUCOSE:   H
SSN: --
Heart:RRR without murmur. +S, no S, rub, click
admission history and physical and daily progress notes. Notes by medical
ALTERNATING WITH ALBUTEROL/IPRATROPIUM
Management reviewed with team.
Anti-Hypertensives/Diuretics: No
FALL RISK STANDARD
or radiation, monitor signs and symptoms associated with pain, such as BP,
CONSULTS:
and that his HHA services may be delayed until that happens. He finally seemed
ED NURSING NOTE
understanding of the expectations and guidelines. Vet has agreed to begin
Pt has put on weight since discharge: he states app
CC/S:
CAD *
BMI:BODY MASS INDEX - . (AUG , @::)
S: feeling miserable physically.  Went to the ER yester  and received a
EMERGENCY DEPT 10-10M
PMH:
have been looking for the pt, they have started w/up on pt: let them know that pt
Explained indication, dose, side effects, and directions. Written medication
E  BELLO
PATIENT NAME:  ,  C
. Pain, Chronic
periwound erythema or edema.  Undermining prior to debridement. No purulence.
does not probe/tunnel/undermine, no acute soi
-Monitor wt. changes.
A/P: Neuropathic ulceration left sub st met head-healed
NURSING EXIT INTERVIEW
Sensory perception:
Active Outpatient Medications (including Supplies):
preventative medicine, travel, advanced directive, safety,
Diet: No Restrictions
Issue Date
MEDICAL RECORD  PROGRESS NOTES
ALLERGIES:
Result:
TWICE A
ADDENDUM
Recommendations:
procedure verbally concurred with the stated patient&quot;s name, procedure, and
JUN ,   PNEUMOCOCCAL
DOB:  DEC ,,              Age:
Temp: . F [. C] (// :)
History of:
to .
EVERY
Accompanied by daughter, some concern about skin lesion on back.
insomnia and Citalopram  mg for depression and anxiety,
synd  within    of getting an
PSYCHI - GENERAL MD NOTE
Speech: Normal.
Hyg/grooming: Fair.
Nurse Recommendation: -  s
Protocol(s) used: &lt;Not identified&gt;.
No Associate Provider Identified
HOSPITAL CARE - NON VA
Date: February,   ? Exact date is unknown
DISCUSS WITH YOUR PRIMARY CARE PROVIDER/NURSE
Total Medications
Usual weight: #  months ago
by % weight loss
Education needs: not interested in more education on healthy eating for heart
the below individual(s) as durable POA for Health Care:
B/P:   / (// :)
PATIENT EDUCATION PROVIDED
Patient receptivity: attentive
: Number of patients in attendance.
ral Focus of Group:
.     Name Phone
Current barriers to learning?
Memory: Able to function independently
on it.
Thiis has been documented elsewhere. Veteran came to the audiology clinic when I
ramble on for a while. I then told him I had to take ear impression for the aid
him.  I did not once have to intervene in his grandiosity as there was none.
Neurological: no syncope, weakness,+ tremors from medicine, coordination
problems, loss of
Did the patient have access to firearms? Unknown
stripped. . He became despondent in reaction to the side effects from
DAILY
he/she is considered to be mentally ill or drug dependent, and meet a
The patient has been referred to the following program(s), and the
Influenza Immunization Administered:
STEP : PEOPLE WHO CAN HELP TO SUPPORT AND DISTRACT ME:
. Place: Fiddleheads
A paper record contingency plan was in place for the medical record
Heather C  - Fiance&quot;
Score:
No data available
Have met with patient and concur with assessment and plan for discharge. Met
records will be reviewed in   s for evidence of continued or resolved
in Huber facility.
encouraging a call back.
Marital Status: SINGLE                             Age:
Thank you,
breathing...ny father smoked and had a heart attack. I don&quot;t want
CONSULT REQUEST DATE: //
PREFERRED LEARNING METHODS: Verbal, Pamphlet
* You notice any signs of increased swelling or fluid  or fluid
Reads in English language.
EDUCATION/INSTRUCTION-PCC
no n/V no rectal b ing
(+) COPD, HTN, HYPERLIPIDEMIA
The   patient was educated prior
Alert
Influenza .cc IM given in left deltoid
Temperature   :  . F [. C] (// :)
Pain          :   (// :)
Moderate hyperinflation. Old granulomatous changes.
ADDENDUM
placed in recall to come fasting for labs
BP: /   P:      R:      WT:      T: .    HT:
ABDOMEN: no organomegaly, no tenderness
CDI REMINDER DIALOG
ED NURSE FOCUSED ASSESSMENT (SECONDARY)
See to &quot;s "ER Note (Initial)" for the Vital Signs.
Recieved call from   CM with update:  stated patient is still in the unit
Mr.   to be d/ced to a sub acute rehab facility. She had questions about
Learning Assessment:
Next Appointment:
% SC bipolar d/o
Detailed request:  Attempted to contact vet. on the phone, per  physician e in to  for labs.  Called her cel. phone, left voicemail to call the
COPC MENTAL HEALTH PSYCHIATRY
MS:  yo obese C F. casual dress appropriate to setting; appearance
Patient is requesting a  wal of the following medication:
inorder to receive metformin, which also needs  wal, she will have
health.
PSYCHOSOCIAL SCREEN:
relapse;
.  Hypertension, controlled.
ADDENDUM
OUTCOME/COMMENTS:Patient verbalize understanding procedure instructions
DESIGNATED DRIVER:  Yes
.  Position for comfortable gas exchange.
Level of Understanding: Good
H&amp;P UPDATED WITHIN LAST  HOURS:  [ ] YES [ ] NO
PRE-OP MEDS GIVEN:  [x ] YES [ ] NO [ ] N/A
ENEMA/DOUCHE:           [ ] YES [ ] NO
Good
.  Position for comfortable gas exchange.
Wt:         lb [. kg] (// :)
Have you f  within the last three months? Yes_____ No__x___
Quantity:
Author: HEARD,SHARON D
status quo except for slightly increased right-sided chest pain and cough over
results of any tests?
R: (// :)
mediastinum is the space within the chest between and in front of the
NEURO:  P  X      Oriented  X       Moves Extremities X
ALLERGIES: Patient has answered NKA
Religious/cultural factors:       No
staging purposes. stayed overnight because of a   wound hematoma post-
ALLERGIES:  Patient has answered NKA
Feeds Self
Discharge medications:Terazosin HCL Cap take  capsules by mouth every night at
ADDENDUM
Length:  minutes.
physician tified and has discussed with patient,no action needed.
$TEXT
Ending at: // @ :: AM
**************************************************************************
S:   year old BLACK OR AFRICAN AM AN MALE status post bronchoscopy and
Caller Response: *OTHER.
Protocol(s) used: &lt;Not identified&gt;.
.  Patient
,  W is assigned to Caller Area  EMER.
EMER,AL
The following has been reviewed and for ed to PCP:Ketchum,C
NURSING TELEPHONE TRIAGE NOTE
SKIN RIGHT SCALP SUPERIOR AURICLE, RAISED VARIGATED, IRREGULAR
RESP:   (// :)
-    be without collaborative complications, i.e. cardiac compromise.
Diminished
Total
Bed Alarm On
OF   SPUTUM. THINKS HE HAD FEVERS AT HOME BUT DID NOT MEASURE TEMP. HAD
CURRENT VITAL SIGNS
lives in Muskogee.
TEMP:  . F [. C] (// :)
Dyspnea with ADL&quot;s
DISCHARGE DIETARY INSTRUCTIONS:
CARE PLAN: CARDIAC OUTPUT, DECREASED
After obtaining informed consent, the patient was
GLUCOSE                     H   mg/dL       to         []
- - - - - - - - - - - - - - - - - - - - - - - - - - - - - - - - - - - - - - - -
LR CYRNG
PREOPERATIVE DIAGNOSIS:
WENT TO MY DOCTOR AND WAS PUT ON SOME  NEW MEDICATIONS-CRESTOR MG TAB
PHONE CONTACT
obesity and offering a referral to MOVE or another weight loss program
WITH OTHER PROCEDURE
YOU MAY TAKE ASPIRIN, NSAIDS (IBUPROFEN, ADVIL, MOTRIN, ALEVE, NAPROSYN) OR
Time IV DCd: May ,@: W/CATH TIP INTACT. NO S/S REDNESS/SWELLING.
OCT ,   INFLUENZA
Inhaler use: No
Left:  Weak
father,    . Patient is followed in OP clinic team . Patient was
PAST MEDICAL HISTORY:
P.E: Current Vitals:
admission,  lead EKG of WCT read by  physician d patient placed on
PERIPHERAL PULSES:
o/e: patient is stable, has no complaints.
Comments: DR DOE TO UNIT, ORDERS GIVEN
S ping  Wakes to voice. Denies pain or discomfort. VSS.
Response rate:Brisk
)   AMIODARONE INJ AMIODARONE  MG in DEXTROSE %     ACTIVE
ASSESSMENT:
ICU NURSING ASSESSMENT
Active Inpatient Medications                           Status
hyperlipidemia. Pt is very pleasant and friendly. Denies any
Sensory Perception: = No Impairment
)   METOPROLOL TAB  .MG PO DAILY-                   ACTIVE
mm in diameter size erythema &amp; induration to left inner forearm
imb ce during ambulation, and  rally debilitated condition but
Post Op Care:
Problem: Fall Potential
SKIN REASSESSMENT VANOD
SAFETY: Bed in low position, brakes on., Call light within reach, Urinal within
Urine: Voids
Method of Teaching:           Verbal
They are not able to accept pt. to , admissions staff is not working to .
feeling well. Did not have any specific complaints. Walking around.
)  SIMVASTATIN TAB  MG PO QHS
)   ASPIRIN TAB,EC  MG PO DAILY                          ACTIVE
reach, Food/water within reach, ID Band on, Siderails up x , Lighting
at this time.
Patient&quot;s present level of pain:
Posterior tibial                        WEAK                    WEAK
PATIENT STATES HE WILL RETURN TO THE NAIL CLINIC IN  MONTHS FOR
Weight:           lb [. kg] (// :)
Vital Signs:
a+o with ETOH in breath
DIAGNOSTIC IMPRES
hospital because of his employment obligations. The pt denied any SI/HI
pre-syncope/hypotension.  Pt was recently dc&quot;d from King  hospital after
GENITOURINARY:
Alert, Oriented
[ ]Requires assistance with:
C
)   F C ACID MG TAB TAKE ONE TABLET BY MOUTH DAILY AS   PENDING
Personal History
)   F C ACID MG TAB TAKE ONE TABLET BY MOUTH DAILY AS   ACTIVE
following positive items:
I: Intervention:
Date/Time:  JUL ,  :
Age:     Sex:  MALE    Race:  RACE UNKNOWN
mom that her son would need to re-establish his eligibility and than make an
SYMPTOMS  ed as moderate or severe in intensity:
Moderate symptoms
quitting (ALL  COMPONENTS ARE REQUIRED):
No
Presented: Ambulatory without assistance
SATT GENERAL NON-SOAP
own war experiences. They discussed many of their experiences from the various
Problem and Objective of Session: TO SHOW HOW ACCEPTANCE IS PROPORTIONAL TO
longer. He is taking Citalopram at this time and gets it from the VA in Lubbock.
Citalopram. He stated during our one to one for the biopsychosocial that his
relatively unre able.  He does have a history of tobacco
DATE OF LECTURE: //
consume these nutrients from foods, in addition to
included the importance of restoring the interpersonal bond with self and ego
Veteran&quot;s discussed child rearing practices to include the difference between
patient was given opportunity to present his project and tell about it.  Participation was better than expected and
a sense of awa ss in daily living.  Veteran&quot;s discussed the benefits of
half of Chapter . Covered were the causes of relapse both in addiction and to
another" in humor can lead to anger and resentment on another&quot;s part. We
IOP group Veteran was administered an alcohol breath test using the Intoxilyzer S-D.  Patient
registered a ..  Patient was subsequently escorted and accompanied for random drug screen
( )  Physical
( )   physician etation
making amends to  d ones and the importance of allowing people to have their
continued watching the HBO presentation from the series, "The Corner". This
HTN:No
plans designed to aid him in becoming intrinsically motivated to develop and
(X)  Verbal
Facilitators:  Joe Quattlebaum TRS/TXC, CTRS &amp;   M. Harrington TRS/TXC, CTRS
SATT GENERAL NON-SOAP
job. Patient is encouraged to look into finishing school as he has
Outcome: No answer
Patient has religious, cultural, or ethnic preferences that impact
Patient had nursing  ual screen at this encounter.
Extremity Movements
MH CLINICAL REMINDERS NOTE
Pain rating at its worst in the last  hours:
Neuropathy//no
things.  The patient denies hopelessness.  Denies any thoughts of hurting
Thrusting Lower Lip:
. Retrocollis/Toricollis:
PLAN OF CARE
bruising, hygiene, decubitus)
Current medications prior to any changes made at this visit as
REL T HISTORICAL DEVELOPMENTS SINCE LAST CONTACT: The following--
*
PRIMARY CARE NP PA SCHEDULED VISIT STL
Pulse: (// :)
Falls Risk Education
him of the appointment. No further action by writer.
STAY WITH HIS MOTHER FOR A WHILE, BUT SHE "GOT ON HIS NERVES", SO HE IS NOW
HE IS VERY STRESSED ABOUT NOT HAVING A JOB HERE, HAVING ONLY $, H
of disputes: Yes
PERFORM OCCUPATIONAL BENDING?  YES__X_   NO___
THREE   SLIP A FEW   AGO.  NOW STAYING WITH HIS MOTHER IN BELLE FOURCHE,
)   ALBUTEROL SO .% INHL ML USE  AMPULE IN          ACTIVE
last   s. States he has appt with PCP at VA on / and will
Patient states he/she is a non-user of tobacco products for last
PRESENTING CHIEF COMPLAINT:  Veteran severed in the US Army, severed in
intrusive memories, anger, avoidance, emotional numbing. Used cocaine for many
.  HOMELESS:            Yes             No
Pulse:   (// :)
Independent
Completely Independent and Continent, No Appliances
NURSING/MEDICAL CONDITION NOTE(T)
======================================================================
Stays to Self
Independent
BOWEL CONTINENCE:
AXIS IV:
check any of the following if true to patient:
Interacts With Others
none
Dosing/ physician ion information for vardenafil (Levitra)
,     --
)   SODIUM CHLORIDE NASAL DROPS/SP ( ML) SP         ACTIVE
very helpful
MCO called   Beaty, MSW (-) Case Manager at HealthSouth.  She is out
ADDENDUM
patient elects to transfer to VA.
PURPOSE OF INFORMATION:  Establish a brief psychosocial history of
VA Fee Authorization.  The veteran is scheduled for readmission
Do you require help with any daily activities? Yes
Turgor:  Within normal limits
Give:   TABLETS PO QH PRN                          Stop:--
Give:  MG/.ML SC DAILY ( NOX)                 Stop:--
Religious Literature
Inflammed, swollen, b ding gums(gingiva)	No
Precautions: NWB on Right Lower Extremity
[X]  INDIVIDUAL - ECS CODE: RC
Bathing: Moderate
//
Total time:  minutes excluding IPC
Met with patient and explained that admission was for    of therapy in
PATIENT AGREED TO VISIT UNDER THE FOLLOWING CONDITIONS:
He is min assist for some transfers. He has good car transfers. He has good hand
PMR/PT DISCHARGE CONSULT NOTE
&gt;PATIENT EDUCATION PERFORMED:
Language barriers   Other:
4D INPATIENT NURSING NOTE
discharged from Health South   s ago and has not been able to s p
Bipolar affective disorder, mixed
A.
Message left with pt.s answering machine to please come in to see dr. Wanker
be an option and he stated "I will just take care of it." Vet seemed some what
patients report.
. Pt no showed for this scheduled appt. I will hold this consult open x
clothes without assistance
ALLERGIES/ADVERSE DRUG REACTIONS:
Pain:           (// :)
Pain:           (// :)
diet for   ", but would like to start medication at this time.  Simvastatin
Communication Barrier:
Exam
. S p Apnea
PAST MEDICAL HISTORY:
OF ADMISSION:  C Telemetry.
a prescriber to  in CSTAT.  Vet validates that he is on no psych/MH
a prescriber to  in CSTAT.  Vet validates that he is on no psych/MH
these on and off for some time but the frequency has intensified. He has been
calling crisis hotline yester .  The veteran noted that he had been having
Patient is a  year old MALE seen in clinic for: f/u on syncopy
vet was given by SPC. She would like this worker to review them a
that this had on the family.  Veteran stated that "you meet the right people
with Tegretol. Was feeling hopeless, inadequate due to unemployment as truck
Informed  physician t this SWR is the OIF/OEF Marriage and Family counselor.
SPC CONTACTED VETS POA AND GAVE POA NUMBER FOR THERAPIST TO ASSIST W/ ASSAULT IN
BUCKEYE, AZ               County: MARICOPA
Occupation: DRIVER
than after.  Does continue to struggle somewhat.  Also, continues to read Why
PATIENT NAME:  ,              SSN #: --
Impulsive and/or aggressive Tendencies
with staff post encouragement. Denies pain s/i h/i avh at this time and contract
Given information of unit structure. Answered questions regarding unit rules.
P.
Ambulatory aid: None, bedrest, wheelchair, nurse ()
TYPE OF CONTACT: TELEPHONE
Marital Status: MARRIED                        Age:
W VERDE LN               Phone: ( -
AGE:   YRS MALE
Date/ Time:Jul ,@:    Age: Sex:MALE
ED NURSING NOTE
Patient is alert and oriented at the time of this interview. Veteran is
WIFE STATED VET HAS F  AND HIT HEAD TWICE (NO LOC) AND SHE IS AFRAID THAT HE
passing out
BMI:BODY MASS INDEX - . (SEP , @::)
neurocardiogenic syncope.  Doesn&quot;t want to be admitted but agrees to with
traffic, denies present SI while speaking to this SW, denied plan or
Sec. Diag. Comments: Syncope D/O
PT IS ALERT AND PLEASANT. SUFFERS OF CARDIOGENIC SYNCOPE WHICH HAS CAUSED HIM TO
-new meds: ASA restarted (has been on oupt OTC), APAP
Interventions
Total Morse score for Fall Risk:
Pulse:  (// :)
due to difficulty paying the mortgage, mounting medical bills, etc. When pt was
LIVES VERY FAR FROM HERE AND HAS DIFFICULTIES TO ACCESS MEDICAL CARE.
appointment time/date.
SUPP,RTL  MG INSERT  SUPPOSITORY RECTALLY TWICE A
Patient Phone: ()-
REPORT OF CONTACT
SPC CONTACTED BUCKEYE P CE ) -
this pt and could not discuss the details of his care other than to state that
ARIZONA
Relationship to patient:
NOT capable of increased independence (in ADL&quot;s, IADL&quot;s, or mobility).
ACTIVE PROBLEMS:
Patient refuses pneumococcal vaccine.
Plan: Will wait for return call.
(//) nicotine patches? That is the basis of his current request.
Second Blood Pressure is GREATER THAN /;
in  ral, we  treat for -   with bupropion for smoking cessation. Is
ADDENDUM
odynophagia, dysphagia, change in voice, shortness of breath, or chest pain.
V suggestive of age indeterminate lateral mi.  NO st/t wave changes of concern.
PC - NON-VISIT NOTE
Tx with lamviudine in , -Hep B S Ab never converted, so thought to
/
see note by Ms. ROth.
POW: NO
TOPIC/HANDOUT/COMMENTS:
Patient did not have a cigarette within  minutes of B/P check
,     --
Did not appear for scheduled appointment.
DAILY FOR STOMACH
Person being educated:
DATE (M/D/Y): Dec ,
Background (brief):
Do not smoke and avoid exposure to secondary smoke
and "government issues of paperwork, conspiracy, protection of his family;  that
Time and Vitals at Discharge: - pt left va with military p ce to return
interventions
Total Score:
- Get support from family, friends and co-workers
=========================================================================
)   LORAZEPAM TAB   MG PO QH PRN FOR ANXIETY OR          ACTIVE
can have conference call with pt and his wife.  He complained of feeling a bit
Treatment Status: Inpatient
Deferred
PRN FOR PAIN - NOT TO EXCEED MG (ACETAMINOPHEN)
)   NICOTINE PATCH  MG/HRS TRANSDERMAL QAM FOR
Mr.   will be scheduled for individual testing with this provider.  Full
Pt was stating that his anxiety was a /. Order received for ativan mg x
members said they are quite confident that they can control their actions when
Cooperative, Appropriately interacts with peers and/or staff, Redirectable,
ACTIVITY:
APPEARANCE: Clean
information that staffing was too reduced to allow for a staff person to sit with
further cares &amp; requesting to go AMA.Denies any SI/HI.
Lock Present (post-ops):            No:
a. Oriented to Own Ability:
front bridgework.  Pharynx normal.
EK-SUICIDE PREVENTION ASSESSMENT INITIAL
Initially veteran struggled to with responding to questions.  Veteran reports
.   I had no appetite.
)   TRAZODONE TAB  MG PO QHS PTSD, Insomnia             ACTIVE
was, "Take each   one step at a time."  Met with team to discuss tx needs,
EK-BH-INTERDISCIPLINARY TX TEAM
anger, frustration, sadness, and negative self-talk. The facilitator normalized
NOT TO EXCEED , MG IN  HOURS FROM ALL SOURCES
cravings, smoking cessation
EK-PHYSICIAN MH
EK-NURSING LPN MH
with staff. Compliant with meds and requests.
family for the h   and being depressed.
during his    long stay: psychosocial assessment; MHICM assessment, AD
Discussed activity per provider orders.
MENTAL HEALTH CONSULT
exercise for - minutes several times per week to
Blood Pressure  / (// :)
On the phone, pt. is wheezing &amp; sounds very SOB. He c ot complete sentences &amp;
[ ]
PATIENT COMMENTS:
Weight          . lb [. kg] (// :)
AMLODIPINE BESYLATE MG T
PATIENT WORK PHONE - --CELL
. It is not expected that an anesthesia practitioner will be
Patient Education Documentation:
Level of Understanding: Good
Patient with
understsands how to order
with c/o
/
ORTHOPEDIC CONSULT
x  with olecranon spurring
Pain:  (// :)
Pain:  (// :)
O:
O:  ALERT/ORIENTED, PLEASANT AND APPROPRIATE.
Patient Education Documentation:
PREDNISONE MG TAB   Sig: TAKE ONE TABLET BY MOUTH EVERY MORNING WITH FOOD
for ESI or nerve stimulator.  He has had ADR to multiple pain meds.
SIG
DATE/TIME         TEMP    PULSE   RESP    BP      PAIN    WT (LB) P OX
Current Medication List provided for patient to review and update
MEDICATIONS:
physician NOPHEN MG TAB                        Di
- - - - - - - - - - - - - - - - - - - - - - - - - - - - - - - - - - - - - - - -
Issue Date
=========================================================================
(D) Dentures complete maxillary: Upper
Pt Ed Teaching Reassessment:
Pt also reports needing up to mg of seroquel at bedtime for s p. Discussed
Other Dental Findings:
PATIENT AMBULATORY TO EXAM ROOM FOR EVAL OF URINARY
CC ADDITIONAL URINE FROM FOLEY.
Ambulatory, thin middle aged male.
Active Outpatient Medications (including Supplies):
HEART AND BLOOD PRESSURE***REPLACES FELODIPINE**
Per Lisa CM pt transferred from BVA ER TO  HS Locked psych unit //. Pt
found to have depressed mood, racing thoughts, anxiety, excessive worry and SI
MHC PSYCHOLOGIST TELEPHONE NOTE
    </notes>
  </record>
</records>
