# Supplementary material for: Predicting the Risk of Suicide by Analyzing the Text of Clinical Notes
Source: PLoS One. 2014 Jan 28;9(1):e85733. doi: 10.1371/journal.pone.0085733 (PMC3904866; doi:10.1371/journal.pone.0085733)
Supplement: Appendix S3 — Machine Learning Libraries and Methods: This section is provided to enclose the open source (Apache License) classifier used for the building of the statistical models, specifically for the purposes of study reproducibility. A detailed account of these tools is intended for another publication. (ZIP) [file pone.0085733.s003.zip › Appendix3/ML_libs/Regression_testing/group2/grp2-pt-1050.xml.txt]

record notes.
note that he experiences pain on  p palpation, consistent with trochant
Schedule monthly PT/INR please
ADMINISTRATIVE NOTE
Sc ed Pain Management Office Visit dated // is attached to this note.
Sc ed images attached to this note include:
Sc ed Pain Management F/U reports (CC: Pain in his lower back and legs) dated
Not required carotid us
Not required
DOES PATIENT TAKE ASPIRIN?   No
:)  BMT: .
advised to call in am if not feeling better
HAGERSTOWN/TELEPHONE NURSING
Protocol(s) used:
Patient was counselled about
R: (// :)
no racy mind. denies any suicidal ideation . denies use of alcohol /
to  he state has been very depressed  lot of lossed, unable to handle
Temp:    . F [. C] (// :)
with the RN on duty. Patient states that he is still depressed and dis not get
MENTAL HEALTH EDUCATION GROUP
Patient voices no homicidal plan.
PARTICIPATION:
Pain:   (// :)
Pt. was up times one requested something for s p, given Vistarik mg. po for
Patient voices no homicidal plan.
No  ucinations
TREATMENT PLAN TYPE: Initial
PATIENT&quot;S STRENGTHS
Pulse:  (// :)
Resp:  (// :)
psychologist, social worker, suicide prevention coordinator,
Veteran will be seen on treatment team  .
recovery coordinator, clinical nurse leader, students and nursing.
Rational
The patient does not have any homicidal thoughts.
understanding)
Patient  given  Discharge  Appointment  List.
noncompliance and intense  ucinations and threatening behavior to  his
/  - best. He s ps from  pm to  am, appetite good, denies anxiety. He
MSE: Alert, fully oriented, well groomed,  he was wearing dark prescription
you. How often did you have six or more drinks on one occasion in
the  past year? Not rated
verbalized understanding.
of stress at the time as the weather was bad and he was passing - trucks.Wife
Personal History of Surgery
colored urine.
ABDOMEN NOT DISTENDED, CATHETER IN PLACE IN URETHERA
determine if another should still be conducted, or if the situation has been
CHAPLAIN-SPIRITUAL ASSESSMENT (T)
Problem #
EYES:  PERRLA, EOMI
BONANTI,MARY C (FULLY TRAINED)        ROSENTHAL,  (ORIENTEE)
COMPLICATIONS: None.
-------------------------------------
Patient is a DNR. Alert and oriented x. Moves all extremities with
DIET:  Low-fat diet.
ralized Anxiety Disorder (ICD--CM .)-heels well controled on current
Postsurgical Aortocoronary Bypass Status /HX CHF(ICD--CM V.)-no evidence
The following TESTS or PROCEDURES were explained, including preps: Other:future
clinic:
Patient is requesting  wal of the following prescriptions:
Patient is requesting  wal of the following prescriptions:
Energy/motivation: good
Explained to him the patient was taking already terazosin and
Mail medications
Hypothyroidism
Prosthetics None
Unit:  Med
prior ekg obtained afib rate  now with t wave inversion-pt given morphine sq
(// :)
. Skin: Intact
midsternal /. pain is reproducable with palpation.  ntg gtt started at
PROBLEMS:
Time frame to complete goals:  HOURS
=================================================================
or slowed. Affect restricted initially but quickly brightened when reminded that
)   CARVEDILOL TAB  .MG PO BID                          ACTIVE
Alteration in Respiratory Status related to: chest pain,debility
redness or edema noted. Voiding via urinal for cc amber. No c/o pain.
Interdisciplinary Plan of Care Reviewed: No changes at this time
She voiced understanding and agreement with current plan for pt to attend STR
Name:  ,   Gender: MALE
Service Connected %:
GOALS OF CARE:
REFERRING TO WHICH PROGRAM:
Per CLC Consult, pt would be considered for short term rehab as long as a plan
Fevers/C s No, Nausea/Vomiting No,
=========================================================================
NURSING NOTE:
-   No Risk
Palpitations No
Pulses: PPP bilaterally
refer to Fairview Manor and GLC-CS to determine if he will be appropriate for
GI/GU: Abdomen soft, round, nontender with palpation.
to do to take "better care" of himself, he indentified trouble with bathing and
that if he felt safe to return home, services, such as H/HHA could be placed to
his wishes.  Signed, witnessed, and notarized document was placed in pt&quot;s chart
pedal edema noted. Bilateral PPP. Needs assistance going from center of bed
English
Ostomy care (not trach):  No
Clin
BEDTIME FOR CHO OL/TRIGLY
Location: Private physicians office
SIMVASTATIN
Pt is a  WM with no sig PMHx who is here for initialy visit. Pt has not seen a
PHARMACY MEDICATION EDUCATION-PT ED (T)
CHF Meds:(please specify if not one of target medications above)
PLAN: Non-acute care  Level
EVERY EVENING FOR BLOOD PRESSURE
Patient is being discharged home.
DEPRESSION:
Chest pressure/chest heaviness: No
PMHx:
Justification for admission: pt wtih significant life stressors and
M (PART ) NURSING TREATMENT
Pulse:  (// :)
Activity: up and about
Respirations:  (// :)
yester  but not much to do on the unit.  Pt denies any depression, denies SI.
Axis IV: lives by himself, going through divorce, unemployed
not have enough income from the store&quot;s business. He said he felt he was
Primary Care provider: KRISHNASWAMY,MALATHI
by: SUS A MAURER
Educational Evaluation: Independent understanding,
mail. He has not. It was mailed on // and he is calling to  for his next
The Medication (s) to be  wed include:
[ ] ER Bay Pines
discussing the health risks of obesity and offering a referral to
other at this encounter.
[ ] Patients preference local hospital
EXPEDITOR
***** Sc ed document attached to this note *****
// :  CHAR MH P CHATHAM NEW REC
***************Subjective****************
NO Allergy to Iodine/Shellfish
// :  FM CP RYAN
ROS:
- cough, -uri
Father died at  of gastric CA
Lot#/Expiration date:
and with cough.   pt descrbe pain as   pain and occasionally preassure. no
Medication reconciliation done:
Patient made aware that copies of CT scan from Wilkes facility need to be faxed
CENTRAL NERVOUS SYSTEM:
No Complaints
,    is assigned to Caller Area OTHER.
PULSE:  (// :)
listed below.
Outpatient Medications                                 Status
PATIENT HEALTH EDUCATION RECORD ((T))
call back TAP. This note for ed to Provider.
Anticoagulation: No
Comments: Abdomen soft
GI EDUCATION PROCEDURE DISCHARGE INSTRUCTIONS NOTE
Patient&quot;s weight: . lb [. kg] (// :)
Anodontia                               Colonic Polyps
GI LABORATORY PATHOLOGY
=============================
He also c/o rash on both arms and the head. Patient has appointment with PCP on
followed up with  physician n for BCC nose and was treated with surgery
OCT , @::   .
Study-related procedures
- - - - - - - - - - - - - - - - - - - - - - - - - - - - - - - - - - - - - - - -
NURSING OUTPT TRIAGE INTAKE NOTE
ADDENDUM
APPOINTMENT GIVEN:___SAME    ___HR  ___   ___ WEEK
CALL INITIATED BY: __X_Veteran  ___Nurse  ___Significant Other ___Agency
Active Outpatient Medications                          Status
Patient in Hold: JUL ,   :    Patient in OR:  JUL ,   :
Diagnosis: screening
Identify caller if not Veteran:
An additional assessment of the patient&quot;s positive screen for
Action: No action indicated
suspicion of abuse, assault, neglect or sexual molestation?
"FIVE KEYS TO QUITTING".
Tobacco:  Yes
*
Sig: TAKE ONE TABLET BY MOUTH EVERY    Refills:    Last:--
HYDROXYZINE HCL (ATARAX) MG TAB TAKE TWO TABLETS BY       ACTIVE
PC - INTAKE NOTE
TAKE ONE CAPSULE BY MOUTH AT BEDTIME AS NEEDED FOR S P
Issue Date
HE NEEDS TO BE RESCHEDULED AS SOON AS WE CAN AFTER GETTING COMPLETE LABS FOR MALE
HEPATITIS B CARRIER WITH NO NORMAL LFT.
FRONTOPARIETAL REGION. SIGNIFICANT EVOLUTIONAL CHANGE.
ADDENDUM
Since the patient c ot see well enough to drive to Gainesville, c ot bring
leaving his wife as she was having an affair with the maintenance man and that
MRI shows B MCA distribution infarcts, neither within one month of the scan
-no show letter to be mailed per VA administrative proceedures
BP Check:
AS HE CARES FOR HIS SISTER BUT THE STRESS IS TOO MUCH.  THE LOUD MUSIC BOTHERS
HEARING THIS MORNING INVOLVING THE ARREST OF VETERAN WHEN HE WAS ATTACKED BY HIS
Call Type: MEDICATION REFILL/ WAL.
Conversation with  ,  J has a chief complaint of: &lt;not
at night, wakes up at night alot, has to belch, pass flatus.  Has lost  lbs
Carcinoma of Lung
Pulse:
coughing up blood - times per  .
Medical problems
DAILY FOR YOUR HEART
)   METOCLOPRAMIDE MG TAB TAKE ONE-HALF T
COPD * (ICD--CM .) .
Have you ever had any experience that was so frightening, horrible, or
Reason for Call:
function.
for you. How often did you have six
PRIMARY CARE NURSING INTAKE NOTE (T)
No Barriers to Learning
Blood Pressure  / (// :)
Height          NO RESULTS FOR TO
persistent abdominal pain associated with watery diarrhea x  months, not
BM pattern change: yes, - watery stools per  , eats all
Vet telephoned in inquiring about pathology reports from his recent scope and
SURGERY DATE: Oct ,@:
Emergency Contact:  ,KRISTEN
ORTHOPEDIC NOTE
Document Sc ing Coordinator
A:
HIM UNDERSTAND HOW THE READINGS CORRELATE.
Electronic View alert sent to:
horrible or upsetting that, IN THE PAST MONTH, you: Were constantly
Physical Activity/ADL Screening :
For use by MD, ARNP, or PA
Note: Author cancelled pt&quot;s Diabetic Retinal Screening appt, scheduled for
and a GIM f/u visit.  Thanks.
GERD
of R forearm crutch x &gt;ft.  Patient demonstrated good safety with new DME.
Exm Date: OCT ,
cancer /. He is seeking a second opinion for treatment plan. He has been
reeval p completion of neoadj therapy.  I don&quot;t see PET, may be useful also.
ADDENDUM
UNSCHEDULED NURSING ASSESSMENT
Accucheck @  was . Pt. was complaining of weakness. Denies taking his
A/P
If male, age -, PSA education given. [+]
erythromycin, CODEINE (swelling, dyspnea, rash), PENICILLIN, ERYTHROMYCIN
have that evaluated.
I. CHIEF COMPLAINT:
// @      .                /
Patient had prostate screening education with risks and benefits
Cough, SOB
RT TH distal met head area full thickness that measures  X  cm with
A:
wearing these boots to facilitate the healing process.
at cm.
On Arrival Patient was:  Wheel Chair
- - - - - - - - - - - - - - - - - - - - - - - - - - - - - - - - - - - - - - - -
SAO:
Sig: TAKE ONE TABLET BY MOUTH EVERY     Refills:    Last:--
esophogeal lesions.
Pt known to surgery clinic.
Y/O MALE arrived via Ambulatory
Neck: no lad, no massess
- cc NS iv started at cc/hr.
Information/Additional Information obtained from: None Listed
assessment and plan; Mr.   is a  yo male with PMHx of esophageal
SUBJECTIVE: Pt doing well.  Pt states no new c/o.
Height:  in [. cm] (// :)
Medical Diagnoses treated during this admission:
// @        PULSE OXIMETRY:
radiation therapy (XRT).
Patient had prostate screening education with risks and benefits
If male, age -, PSA education given. [+]
noted.
Are you a current smoker?  YES[+]    NO[]
. Diverticulosis
Date of birth:   ,     Age:       Sex: MALE
Pain:  (//  : PM  )
HEENT:  mmmoist
Case Manager Summary/Pending Issues prior to discharge:
:  Patient complained of pain to his lower back /. Medicated with
. GI:
vital signs.
HOME CARE SERVICES
Pain Goal--What pain level is acceptable to patient (-)?
Indications
amp.)---am glargine held.-------instaglucose)--(food)----
GLUCOSE-FINGER:   H
MEDICAL STUDENT NOTE
RDW: .  H
- chronic constipation
Anti-Histamines: No
S:Pt. requesting to speak with SWer.
A: Spoke with patient -- via telephone.  He expressed desire to continue
**Services Referred (type, frequency, date range): Skilled nursing x/wk for
DATE/TIME         TEMP    PULSE   RESP    BP      PAIN    WT (LB) P OX
. GERD *
Name/phone of contact(s): (Friend) Venessa Hoyt
Weight: . lb [. kg] (// :)
Has a sitter or required a sitter this  admission or previous admissions: No
) Brief HPI:
Estimated Needs are based upon:  kg
Allergies: ERYTHROMYCIN, CODEINE, PENICILLIN, NIACIN, OMEPRAZOLE, FLUNIS DE
History of falling - immediate or within  months:No ()
Frequency of pain:All the time
Plan: He agreed with trying different agents for the constipation now.  Also
Type of pain:
_X__  Exercise
Ways Alcohol and  physician the body, mind and environment in so many
ADDENDUM
are available for him. Vet no longer endorsing thoughts of self harm. He will be
Evaluation:
reevaluation and refills
None
Pain Location #: Back
RESIDENT)
,  C is a  year old MALE admitted:
ICS - INTERDISCIPLINARY TREATMENT PLAN
However, I would not expect such
lumbar puncture, bacterial meningitis has been ruled out. Blood cultures
ADDENDUM
IV/Saline Lock: No, Saline Lock in place, but not attached to IV ()
ADDENDUM
.  Interventional radiology.
.  An IR-guided lumbar puncture.
presented after he was found by his visiting nurse holding a loaded gun. p ce
TABLET BY MOUTH THREE TIMES A   AS                 Expr:--
Date: May,
Image quality adequate
HOSPITALIST NOTE
.  Coronary artery disease with myocardial infarction (MI) times two.
Pain Goal--What pain level is acceptable to patient (-)?
. will consult social work to assist with placement
and/or referrals by staff. Patient will undergo continued spiritual
. treatment plan: medical team
Assess causative factors, including nutrition.
daily weight, and prescribed medications.
INSULIN REG HUMAN  UNITS/ML NO               TIDAC SUBCUTANEOUS
last   s:
MEDICAL INTERN NOTE
Reason for Admission: Medical
to your physician prior to discharge. If you find that you have
for light housekeeping.
Allergies:
exacerbated by  p breathing and cough.  / intensity.  No nausea but
CV:  Tachy, regular, no murmur
NUTRITIONAL RISK STATUS:
CARDIOLOGY NOTE
Comments:
PULMONARY/CRITICAL CARE NOTE
cc of amber colored urine.Coughing hard,slightly productive.
Patient  ,  C  ()
Meds:  Active Inpatient Medications (excluding Supplies):
Assess the patient&quot;s coordination and b ce before assisting with transfer
Patient  states  that he  has  chronic back pain  /.
HPI: Mr.   is a yo man with a PMH significant for CAD(MI
Active Inpatient Medications                           Status
PAIN ASSESSMENT
Issue Date
.  Chronic pain.
,admmitted to inpt psychiatry
MEDICAL RESIDENT NOTE
Rapid Triage:
Chief Complaint:
CC/S:
. Chronic sphenoidal sinusitis
involuntary movements, speech of RRR, mood- "exhausted", affect- blunted
Active problems - Computerized Problem List is the source for the following:
)   ACCU-CHEK COMFORT CV(GLUCOSE) TEST STRIP USE  STRIP   ACTIVE
the past few years.
emesis and no c/o fevers or c s.  He continues to smoke appx - packs per
copd, cad, dm, diverticulosis.
. Chronic Obstructive Pulmonary Disease
DATE/TIME         TEMP    PULSE   RESP    BP      PAIN    WT (LB) P OX
II: def
yo divorced SC VN combat vet male vet who has above hx according to
vitals
MENTAL HEALTH-AMBULATORY CARE
. Feeling down, depressed, or hopeless
=====================================================================
Vision: Fair
responsible for the patients management.  See residents note for further
IC/POLYSOMNOGRAPHY(SLEEP STUDY) CONSULT
Patient arrived at Sep ,@: and patient triaged at Sep ,@:.
,  A                --
PVU
Pending Outpatient Medications
PRIMARY CARE NURSE MEDICAL WALK-IN VISIT
Active Outpatient Medications (including Supplies):
,  D   --   MALE
Patient does give verbal consent for nurse
ADDENDUM
AGE:, SEX:MALE
Patient has answered NKA
Patient tolerated the procedure [X] well [] fair [] poor.
,  D   --   MALE
EVERY   FOR HEART/ TO THIN BLOOD
Duration of diabetes (years):
Nursing Telephone Encounter (Non Medical / Medication Refill)
EVERY
WITH FOOD - FOR GOUT
breathing complaints, chest pain, cough symptoms, numbness,
affect, interactive, cooperative.
Conversation with  ,  D has a chief complaint of: VETERAN IS
DSHI Disposition Report
- headaches, new or worsening
Pain: (// :)
SI/HI,intent or plan: None.
VETERAN THOUGHT THAT CAREGIVER MAY BE ABLE TO TAKE HIM TO APPOINTMENT.
deal with them
friends.
__________________________________________________________________________
Patient reports no known food or drug allergies.
)   QUETIAPINE TAB  MG PO HS                             PENDING
Patient description of altered thought process:
neck have blood crusted on them and I asked if it was itchy or bothering him?
sister, Alveta  sen ()-. A voice message w/this SW&quot;s contact
: Number of patients in attendance.
twice in the last two years?                            No
SUMMARY OF PATIENT EDUCATION:
Urgent Care Services  AddressPVH Ft. Collins
Type of encounter: group face to face
POST DISCHARGE TELEPHONE CONTACT:
Called   but could not reach him.
)   Non-VA LISINOPRIL MG TAB MG MOUTH EVERY          ACTIVE
Patient presented to  at around am.  He was demanding to be seen.  He was
INTRAMUSCULARLY EVERY TWO
was in MountainCrest, they decreased his Risperdal Consta because he was so
ual Men&quot;s Education:
CNs about packaging his pm Buproprion, Quetiapine, and perhaps Lamotrigen for
together as he might have a seizure.  I told him Lamotrigen is anti-seizure and
during the order entry process.
talk that he had the  previous times he had suicidal gestures.
Past Psychiatric History: Prior attempt to hang self with extension cord
The information to be released includes information regarding the
requires him to travel away from home during the week.  He also worries about
Smoking Fire Risk and Interventions reviewed and found effective, no
Activity:           = Walks Frequently
-   No Risk
that it is a failing company and it is stressful on pt, this is probably
PREFERS TO LEARN BY: Reading
Chief Complaint: dull aching pain lower cervical region with radiation to
YES
Is there anything new that you want your provider to know about to ?
"Pain: The Fifth Vital Sign" Patient Pointer/handout provided
still smoking
OPTOMETRY IMAGE CONSULT
CLERICAL NOTE
wt stable
Alert
smoking- smoking    cigars/ - asks about Chantix.  Was on wellbutrin in
effects of tobacco use and advised to remain tobacco free.
ASSESSMENT:
Caller Name:jim Service:Clinical Laboratory
Patient tobacco free:  &gt; months
Alcohol Use Screening *:
MHC AIMS
EXAM:
[ ]  ral:
CARDIOVASCULAR EXAM: Normal heart rate and rhythm
NEURO EXAM: CN II-XII normal, motor strength normal
ELIGIBILITY FOR VA OUTPATIENT CARE: Yes
Treatment/Medication prior to discharge:
Beth Fisher for update of all meds administered.
Handout.
responsible for providing high quality care and you are responsible
Just reading this view alert, I was on leave, hard copy to pcp.
discouraged.
[]   Chaplain
IMPRESSIONS:
scope visualizes the  er and more peripheral airways, and biopsy
[X] Abnormal CXR
- - - - - - - - - - - - - - - - - - - - - - - - - - - - - - - - - - - - - - - -
[]   Case Manager
Call Type: BHM RX  WAL.
Contact Phone Number: same.
PL ED PROCEDURE:lung biopsy
ATTENDING STAFF NOTE COMPLETED:  [ ] YES [ ] NO
ADDENDUM
//)
Existing knowledge of diseases/problem:
Protocol(s) used: &lt;Not identified&gt;.
PREVENTIVE HEALTH NOTE
PATIENT CHECK OUT NOTE-T
Attending: MINNICH,
.  Who is your primary care provider/ subspecialty physician?
Scheduled return appt:
. Ere
C.  Are you willing to come to your clinic appointment  ier if someone
DIAGNOSIS(ES): RUL nodules; mediastinal adenopathy
.  Cristen Catignani
No
)   AMLODIPINE TAB  MG PO DAILY                          ACTIVE
position
Treatments/special care:None
.  Gastrointestinal: Continent
Ending at: // @ :: AM
Conversation with  ,  W has a chief complaint of: &lt;not identified&gt;.
No Associate Provider Identified
Oxycodone. Oxycodone is not giving him the relief that he needs.
$APHDR
***PLEASE UP DATED WITH SIGNED CONTRACT AND UDS***
THORACIC SURGERY PROGRESS NOTE
Phone: --                      Phone: NOT APPLICABLE
TAKE  TABLETS BY MOUTH EVERY  HOURS AS NEEDED FOR PAIN (OUTDATE //)
Starting at: // @ :: PM
Fourth leading cause of death
TEMP:  . F [. C] (// :)
Patient phoned in, requests  wal SALMETEROL MCG/BLSTR PO INHL DISKUS and
possession.
CURRENT VITAL SIGNS
WBC                 .        K/cmm      . - .       -Sep-
Environment Clear of Hazards
Up With Assistance
Thick, , Yellow secretions.
Up With Assistance
COUGH:
C ula
PRIOR TO LEAVING AND HE STATED UNDERSTANDING.
HYPOALBUMINEMIA
Chest pain, Acute onset of shortness of breath, Elevated temperature, B ding
Encompass of Muskogee called (  )with referral and patient information
ROUTINE DISCHARGE MRSA SWAB OBTAINED.
HAS PATIENT RECIEVED PREP?   No; details:
which our agency does not supply." She reports he lives alone in the community;
NPO Status is
Lung mass
Provisional Diagnosis: hydronephrosis
- - - - - - - - - - - - - - - - - - - - - - - - - - - - - - - - - - - - - - - -
- - - - - - - - - - - - - - - - - - - - - - - - - - - - - - - - - - - - - - - -
Patient&quot;s Home Telephone:  --
Recommentations:  If you were prescribed cho ol lowering medication and you
Discharge instructions given.  Patient&quot;s level of understanding was Good.
Associated Complaints:
Allergies (as currently listed in electronic record):
PATHOLOGY REPORT
PREOPERATIVE DIAGNOSIS:
I encouraged Mr.  to call me if I can be of assistance in the future.  CM
I WILL SEE HIM BACK AFTER A MONTH.
you. How often did you have a drink containing alcohol in the past year?
Service Connected %:
he could present to the Clinic for Nursing Assessment and further disposition.
to come to the clinic ASAP to get evaluated for
Active Outpatient Medications                          Status
Cardiac Output, Decreased (Electrical/Mechanical)
ICU NURSING ASSESSMENT
Cardiology put the patient on  er and then the patient was
Left:  Weak
Sa:
he stands.  He normally walks with the assistance of a cane.
PT EVALUATION , THERAPEUTIC ACTIVITIES EA  MIN X
Rate Range: -&quot;s
Sensory Perception: = No Impairment
Arrhythmia Present: (type, duration, # of significant events)
Score:
ACTIVITY: Bedrest
Side Rails Up if appropriate.
)   METOPROLOL TAB  .MG PO DAILY                        ACTIVE
improved. I would like to get this pt a rollator   with seat, which
Musculo Skeletal:
HYGIENE: Shower, self
Met with pt. this AM to discuss discharge plans. He lives alone here in
Received report, walking   completed, assumed pt cares.  year old
MOBILITY: With Assistance,
Protective Devices:
Nursing Comments: Patient walked half way down to  north at  and back to
PAIN
SKIN PROBLEMS
Comments:
SAFETY: Bed in low position, brakes on., Call light within reach, Urinal within
-   No Risk
this time, denies any needs at this time, denies any pain. Will monitor.
DURATION:  Continuous
be referred to ordering provider
.  Hypertension.
screen for depression.
*******************OBSERVATIONS FOR ABUSE/NEGLECT******************
in Sealy urgent care clinic yester .  Patient was  prescribed lexapro  mg po
NON INVASIVE PROCEDURE CONSULTS
have a medicine that the detox doctor gave me and I am not suppose  to
hospital // for syncope and hypotension requiring dopamine.  Pt. was
IV Line:
Family History
HYPERKALEMIA
Psych:
BMI:  .
- minimal, - mild,
quitting (ALL  COMPONENTS ARE REQUIRED):
needs physical, labs, chest x- , needs meds
Active and Recently Expired Outpatient Medications (including Supplies):
VETERAN HAS ATTENDED AA/NA MEETING, SATT AFTERCARE AND ALL REQUIRED ISOP
[] .  Very Often
year,depression
Veteran agr
so she knows what he is doing.
SOURCE OF INFORMATION:  Interview, and previous patient demonstration.
( )  Moderate
relationship to a mood altering event, experience or thing that has life
SUBJECT:  Alcohol Breath Test
completed weekly to assist Veteran in adjusting to program milieu, increasing chances of successful completion
Veteran attended psycho educational group to , facilitated by   Hays, LCSW.
again. He was encouraged to use relaxation and de-escalation techniques prior to
Level of Participation:  ( ) Active   (X) Moderate   ( ) Minimal   ( )
Left  Eye :  PH Left  Eye :
Session Duration: .  hours
blame their use on a situation that would cause them to be upset so they felt
Veteran participated in the discussion.
att
Axis V:  GAF:
review of the buddy system and how that is working and review of BAC and what it
Health Partners Clinic by psychiatric  physician sniewski in February,
that time, medications were continued as previously prescribed.  It is
Incapacitation due to Abnormal Movements: None, normal
Suicidal thoughts/feelings present?
WHY NOW?  Not feeling suicidal at this moment, but thoughts come and go.
Rohlfs for electrodiagnostic evaluation for upper extremity numbness and
Collection DT       Spec GLUCOSE
ASSESSMENT: DISCUS Item and Score (one score for each item)
The veteran verbalized an understanding and agrees with the treatment plan.
FALL RISK ASSESSMENT OUTCOME:
Prostate Cancer Screening Education:
NURSING NOTE (E)
CLINICAL REMINDER ACTIVITY
(   ) This is the first in the series.  Patient is instructed to
Age...................
PILL -, PAK # TAKE PILL -, PAK
PSYCHIATRY STL
PILL -, PAK # TAKE PILL -, PAK
PC PTSD
Chief Complaint:______year old fe
Name.................. ,
RR:    (// :)
=========================================================================
Patient has religious, cultural, or ethnic preferences that impact
No new functional deficiency identified at this time.
PC PROV OUTPATIENT NOTE
VETERAN IS ABLE TO:
information was gathered. However, Doug appears to be in need of supportive
EVERY   FOR IRON REPLACEMENT.
when you were drinking in the past year?  or
Problem: Battery door
This patient is a -year-old man who follows with a local doctor in El
SOCIAL HISTORY:  He is a nonsmoker since about .  No alcohol or
months and advised to continue with abstinence.
Outpatient Medications                                 Status
and donning and doffing of the stockings. Veteran voiced
Access to firearms.  Details:
O:  BP = / (// :)  P =  (// :)  WT =  lb [.
VET IS ALSO REQUESTING ALL NARCOTICS TO BE STOPPED.  STATES THEY ARE NOT HELPING
with the patient and resolved. New medicines added and current medicines
and is currently s ping.  They have not yet obtained a tox screen or
Non-VA documentation into VistA Imaging.
NURSING/TREATMENT TEAM REVIEW NOTE
Blood Pressure:  / (// :)
ORAL CARE:
Alert and Oriented
Completely Independent and Continent, No Appliances
)   ACETAMINOPHEN TAB  MG PO QH PRN for pain/fever     ACTIVE
at the patient&quot;s own request.
peripheral fractures.  He appears be making some progress in rehab, however
could go to a medical unit for stabilization given hx of psych dx and
Visit Date:  // :
surgery @ UNMH.  PTC offered to transfer patient to Fee Services for answer.
PURPOSE OF INFORMATION:  Establish a brief psychosocial history of
INTERVENTIONS
Pain assessment: Patient had - out of  pain in RLE depending on activity
Vet has h/o bipolar disorder and has not been on meds since
None of the above
Diarrhea: No  Constipation: Yes
dependence
Current Weight: NA
PMR/RT INITIAL ASSESSMENT/TX PLAN CONSULT NOTE
ADDENDUM
4D MDS NURSING WEEKLY SUMMARY NOTE
Patient alert and appears to be in good sprits smiling. Nurse stand by assisted
Other Assessment:
to Ms. McMullen for continud SW intervention/discharge pl ing.
crash with multiple fractures.
Skin Moisture
breakthrough pain  ier in shift. Pt moved to d - and is resting quietly
x w/c seating
CH.SUGGESTED THAT VET MIGHT ENJOY COMING TO THE CHAPEL FOR
having to get him into his house due to fixator and w/c. Patient states he will
A) Patient ready for dc.
(Note for activities on Wednes  July th)
IPC
[]  lace
[] Rx sent to pharmacy.
DIAGNOSIS: external fixation problem
Tobacco Use Screening/Counseling:
preferences at this time.
.  Patient was counsele
Comment: Testing kit provided
BY MOUTH AT PM   BEFORE EXAM. **DRINK  CUP
because he has increase in sx. He is passing out daily and has feeling
The patient is currently being followed by:ZELL,  L
pts wife states that pt has been backing out for a number of months now and this
propranolol in  . for these symptoms.  He has con&quot;t to have syncopal
is notable that per the patient&quot;s wife, he was started in simvastatin last week.
at bedside.
quickly fell as p.  He was well oriented and the neurological
Tetanus vaccine: /
Marital Status: Married
appointment as well.
done prior to scheduling.  pt contacted and will come in before AM tomorrow.
time, thought did note that he was involved in MVA wherein another car ran a
REFERRAL CASE MANAGER NOTE
WIFE STATED THAT VET IS SET TO BE DISCHARGED TOMORROW.
depression is ongoing and that he would like to pursue increase in
Period of Service: POST-VIETNAM
been coping by trying to focus on positives in his life, pace himself, ask for
I. CHIEF COMPLAINT:
informati
TYPE OF CONTACT: TELEPHONE
physician , HIV, and Sickle Cell information may be discussed: Yes
Has key symptoms (pessimism/hopelessness, worthlessness, anger, or
FALL RISK, STANDARD: gait steady no falls
History of falling - immediate or within  months: Yes ()
I:Brief, supportive contacts made. Encouraged to seek staff as needed. Up at
cooperative / compliant with staff. Steady gait, no reported
Hourly safety checks completed.
Admission Date:
High Fall Risk Same
Axis II  deferred
precludes passing CDL physical. Is looking to explore his options for
to s p. He has no c/o AM headaches, but he does c/o  time hypersomnolance.
. Suicide ideation, threats, or self-harm now or within past   s?
turn stool black. no sudden dizziness or weakness. no rectal pain or
. Major Depressive Disorder, Recurrent, Unspecified
Mode of transportation:
Patient had prostate screening education with risks and benefits
Comment: vision loss
in individual session.  The veteran reports that his mood continues to be
Patient Name:  ,   J.
. Major Depressive Disorder, Recurrent, Unspecified (DSM-IV ./ICD--CM
heent:      non-ict  sclera, eomi, perrl, mmm
Patent
On Arrival Patient was:  Stretcher
tasered and reports p ce jumped on his chest and abdomen. Transported from
Carpal Tunnel Repair, Left /
ADDENDUM
MORSE FALL SCALE
ADDENDUM
PT ADMITTED ON - DUE TO SI AND SEVERE DEPRESSION.
High risk - see High Risk Fall Prevention (due to meds)
W VERDsome state
provide a visiting nurse to start the week of //.
A. Physical Information:
PHONE NUMBER: --
CONTACT PHONE: Patient Phone: ()- Verified.
Returned call at :
SPC CONTACTED DISPATCH AGAIN AND THEY STATED VET WAS IN THE DRIVEWAY ADN ACTING
ED NURSING NOTE
Means of arrival: Stretcher with side rails up
W VERDsome state
appointment issues settled.  Will be here on -- to see Ms. Zell as he also
States that taking the Colace TID seems to help a little but still feels that
depressive symptoms.   He is curretnly on celexa mg.  he is also on asa /
NURSING PROGRESS NOTE
MG/HRS, NICOTINE PATCH  MG/HRS, NICOTINE PATCH  MG/HRS
hello
SURGERY PREOP ASSESSMENT DAY SURGERY
Attached to this entry is a sc ed PRE-OP INSTRUCTIONS Nursing note.
,
Orbits/Optic nerves: Normal
evidence of hydrocephalus, neoplasm, infectious/inflammatory
Additional Comments: The vestibular and cochlear apparatus as
Dear      ,
THAT CAUSED A CX OF HIS SURGERY--APPT MADE FOR /--WOULD LIKE TO DISCUSS EKG
question via telephone?
a referral to a smoking cessation program with their provider.
PREVIOUS TREATMENT: Psychiatric/Medical/Substance Abuse:
If yes, when did you have these thoughts?
at this time.  Veteran given following information:
PCC NURSE NOTE
Active Non-VA Medications                              Status
MHC NO SHOW TELEPHONE FOLLOW UP NOTE
this patient.  Call back #--.
In infants and younger children use saline nose drops to clear mucus. You
)   VARDENAFIL HCL MG TAB TAKE ONE-HALF TABLET BY MOUTH  ACTIVE
I informed him that f/u would be with  physician hough I am happy to handle
according to what he told me.
DAILY FOR STOMACH
Chief Complaint: Sinus Congestion
Reading:
Stroke Risk Education:
he decided to seek help at Fort Leavenworth instead.
Mode of transport:Ambulatory
Patient here to be admitted to acute psych related to paranoia with delusions.
)   NAPROXEN TAB  MG PO BID                             ACTIVE
Counseling provided that included advising the patient to:
EK-IPAA PSYCHOSOCIAL ASSESSMENT
EK-HISTORY &amp; PHYSICAL
Observe and document mood/behavior, Continue w/current nursing standards of
APPETITE: Good
rates pain as / in neck and -/ in face. Pt. worried about
prse
report will follow.  Please see group consult for the full report.
situations. He gave critical responses to almost all answers she gave. When he
about military all the way to the chapel. Pt. became upset at lunch
evidence to s many people at Ft. Riley and that everyone is against
GROUP/INDIVIDUAL PSYCHOLOGICAL ASSESSMENT REPORT
GU-GYN:Denies problems
PATIENT SENSES:  Hearing
EK-SW PSYCHOSOCIAL ASSESSMENT UPDATE
Chief complaint-  with  physician
"I just can&quot;t function."
See  physician  admission note of //.  Essentially at that time:
Veteran attended a psychoeducational group in the  room on -C. Eleven veterans attended this
Active Inpatient and Outpatient Medications (including Supplies):
Active Inpatient Medications                           Status
ADDENDUM
structure and expectations. He offered no complaints.
Court hearing on //
EK-NURSING RN MH
TO HAIRLESS AREA OF UPPER ARM OR CHEST -REMOVE OLD
)   NICOTINE PATCH  MG/HR PATCH TRANSDERMAL QAM APPLY  ACTIVE
getting about  hours s p/noc, having difficulty staying as p.
easily returns a smile.  Active duty Ft.Riley soldier. PRSE LOR.
)   NAPROXEN TAB   MG PO BID W/MEALS pain               ACTIVE
of triggers presented to the group was: External events or circumstances that
seeming to have difficulty knowing what he wants to say.  BP rechecked and was
of the individual. This group attempts to empower veterans to begin and or
to Ft. Riley on //.  I have attempted to call  physician idge and Kinzey
Level of Understanding: Good
LABS: REVIEWED.
. Walk in for painless swelling of right elbow for several  s.
EXTREMITIES:  Mod effusion right olecranon bursa.
The needle may be guided using x- , ultrasound, or both techniques.
Barretts esophagitis by history
HEENT:
nature of the eval to be done.  http://www.fda.gov/cdrh/pdf/Pb.pdf for
where is is to have this procedure that he would kill himself.  Pt seen and does
understands how to order
Number of hours - Interupted: No
Patient had safe/effect. use of medication at this encounter.
fee basis so that  physician an get paid.  Veteran will contact  physician &quot;s office to insure that  physician an perform the evaluation for the
the joint , bursa, periarticular structure or cyst with a needle.
ASPIRATION AND/OR INJECTION OF JOINT, BURSA, CYST, OR
Normal mood, affect, and memory.
Pt Name:  ,
of his body. Reports that he gets frustrated as anytime he tries to do anything
Concentration: Fair
Temperature: . F [. C] (// :)
Wound to left shin clean with no s/s of infectino present.  Wound has been
for ESI or nerve stimulator.  He has had ADR to multiple pain meds.
OMEPRAZOLE MG EC CAP
Dysphagia:
- - - - - - - - - - - - - - - - - - - - - - - - - - - - - - - - - - - - - - - -
: ESOPHAGEAL BIOPSIES AT
Patient Education Documentation:
O: Reviewed AAS report and partial lab,.
BODY MASS INDEX - . (NOV , @::)
Patient had safe/effect. use of medication at this encounter.
UNSCHEDULED NURSING ASSESSMENT
wrist.  He has a  cm skin tear on his left wrist.
in quitting tobacco, such as nicotine replacement products
Special Instructions: [X] Full dentures   [] Partial dentures
)   ALPRAZOLAM .MG TAB TAKE ONE TABLET BY MOUTH EVERY   ACTIVE
DISCONTINUE DIPHENHYDRAMINE (BENADRYL).  IF YOUR DEVELOP MOVEMENT
: discharged home with f/u instructions
CC: &quot;inability to urinate&quot;
Pt has not been seen in PC in one year- pt is willing to set up routine appt.
Advance Directive Screening:
anxiety was "eating
hospitalizations and prior suicide attempts. See CPRS for complete
ET:   $none
pulse ox   // @       PULSE OXIMETRY:
Date of birth: OCT ,   Age:
Accepted: [ ]Y  [ ]N
ADDENDUM
HEMATOLOGY
    
