# Supplementary material for: Predicting the Risk of Suicide by Analyzing the Text of Clinical Notes
Source: PLoS One. 2014 Jan 28;9(1):e85733. doi: 10.1371/journal.pone.0085733 (PMC3904866; doi:10.1371/journal.pone.0085733)
Supplement: Appendix S3 — Machine Learning Libraries and Methods: This section is provided to enclose the open source (Apache License) classifier used for the building of the statistical models, specifically for the purposes of study reproducibility. A detailed account of these tools is intended for another publication. (ZIP) [file pone.0085733.s003.zip › Appendix3/ML_libs/Regression_testing/group2/grp2-pt-1081.xml]

<?xml version="1.0" encoding="ISO-8859-1" ?>
<records>
  <record>
    <group>2</group>
    <study_id>1081</study_id>
    <notes>
TELEPHONE CONTACT
( ) change dose to
(x ) .-.
() optic ischemia
( ) change dose to
clots.
NURS NOTE
DATE OF LAST TETANUS:
Endocet /mg  po TID
PRIVATE PROVIDERS
OUTSIDE MEDICAL REC(FEE)-N/F DRUG CONSULT-PHARMACY
HT:   in [. cm] (// :)    WT:   lb [. kg] (//
OIS OPT PHY INSTR AUTO PB
SCARED AND DID NOT COMPLETE STRESS  TEST,  HYPERCHO OLEMIA, ACID
PAST MEDICAL HISTORY:  Includes:
DOES PATIENT TAKE ASPIRIN?   No
Blood Pressure Check:
lisinopril as ordered for better b/p control and for renal protection with
/.
(If yes, send home medical equipment team consult and/or page ).
REASON FOR REQUEST: Diabetic Teleretinal Imaging for Diabetic Retinopathy
Please call us between :am and :pm, Mon  through Fri  to
Patient states used tobacco in the past  months?  NO
Tobacco use:
asphixiating himself. he state wanted to get help. still not s ping
FINANCIAL TROUBLES. FEELING OVERWHELMED, HELPLESS, AND WORTHLESS. HAD PLAN TO
B.P.     / (// :)
No overt s/s distress noted or reported.
Year Old UNKNOWN, MALE
down the tube...financial issues...".
The patient voices no suicidal plan.
a movie, or reading magazines and  s. Snacks and juice were made available.
the blood level was high. Will restart it tonight at mg HS
again."Pt. was given Benadryl mg. po for s p, and Tylenol mg. po for c/o
Please refer to the cover sheet for vital signs, medication administration, and
play g .  Vet participated appropriately.
Disabled; collects service-connect
Suicidal Plan:
Tremors absent.
A: Glipizide schedule is not correct for comment on order.
Active Inpatient Medications (including Supplies):
Residence (A stable residence should be a priority before entering into HIP)
pain
CLONIDINE TAB  .MG PO QH-PRN For elevated blood          ACTIVE
Attended the  relaxation group discussed  s and tv shows to watch later.Interacted well with
=========================================================================
Cooperative
Non-VA Meds Last Documented On: ** Data not found **
Patient  encouraged  to  take  all  medications  as  ordered,  and  to  keep
Patient communicates understanding
Medications
:a.m. for Repeat Fasting Lipids and LFT&quot;s per order of Becky
Name: SIMETHICONE MG CHEW TAB
Hypertrophy (Benign) of Prostate without Urinary obstruction (ICD--CM
. VALUABLES:
PATIENT RANG AT  FOR DRAINAGE FROM PENIS. PATIENT HAS CBI RUNNING AND BLOODY
BLE. Pedal pulses are palpable. Call bell within reach. For bloodwork in
P- CONTINUE TO RUN CBI
HHR, PPP, +edema lower extremities. Capillary refill less than  seconds.
physician
Continue Interventions:
COMPLAINTS OF CHEST PAIN OR PRESSURE. RESPIRATIONS REGULAR AND EASY, NO SOB
BRADEN SKIN RISK ASSESSMENT
not ___ an acceptable level of pain.
Weight:          lb [. kg] (// :)
Instructed to weigh self daily before breakfast and write down the
Yes
This is a  year old male here to  for treatment of Depression and GAD
ADDENDUM
PHYSICAL EXAMINATION:
urologist and was put on finasteride, however, then he was put on
with the following level of intervention(s).
RELATIONSHIP: DTR
ROOM WITH PT. BEHAVIORAL HEALTH CALLED, SPOKE WITH CRIS, REQUESTING IMMEDIATE
Assessment Data provided by: Pt and chart review.
NURSING TRANSFER NOTE (INTRA-FACILITY) (T)
midsternal /. pain is reproducable with palpation.  ntg gtt started at
NURSING NOTE:
PROBLEM #
Monitor weight for stability/healthy loss
If yes, type
pt in icu less than hrs
. Cardiac Monitor: YES
O:  L  VIA: NC  SPO: %
Continue Interventions: a,b,c,d,e
PT ID:    admitted // :
INTERDISCIPLINARY PLAN OF CARE UPDATE
ordered...chemstrips qid.
chemstrip was         no coverage needed..
The pressure ulcer prevention protocol was no
Met with pt on this date.  Discussed that pt will likely be eligible for STR,
P: Continue per plan of care.
regarding the case that pt targets in the PA R and therefore must undergo PA R
ADDENDUM
CP
Pt is A&amp;Ox. Pt is independent for feeding positioning ambulating with a cane
assisted living so that contacts can be made in the event that pt is denied at
Acti
admission decision and proceed appropriately.
Postsurgical Aortocoronary Bypass Status (ICD--CM V.)
Transfer sheets faxed to:
*Medication list to be sent with patient.
Parenteral feeding:  No
Attention To: coggins
HABITS, BLOOD IN STOOL, HEMATURIA, DYSURIA, NOCTURIA x  to  usually.
BPH. PT DOES NOT WANT PROSTATE BX. DRE DONE.
Pt here in LVN Clinic to  for Pneumococcal injection.
education. Veteran not prepared to complete Advance Directive at this
Nutrition Screen:
Medications: none
b.  Provided strong mes
Sent all specimens to lab.
Physician may be reached on pager: x
EMERGENCY DEPT (PART 4) NURSING TREATMENT (S)
Family/significant other adaptation to illness (involvement in patient&quot;s care):
NURSING NOTE - INPATIENT
(     ) Enhance functional performance.
MH SOCIAL WORK NOTE
NURSING REASSESSMENT
Conversation: appropriate
S: PT IS REQUESTING MORE FOOD.
NEUROPSYCHOLOGY CONSULT
The expected outcomes will be re-assessed and r ed/up
change noted.
:Pt called back. Pt states has -  s left of his morphine and he has been
// :  BLDG - PAIN CON/REC
O:      Alert, interactive, and tense
Changes in the following within the last   s:Pt. denies any recent changes
Comment:
Total Encounter Time:[ ] minutes
Nurse&quot;s telephone location:
Ending at: // @ :: AM
SIGNATURE NOT REQUIRED
by: SUS A MAURER
TAKE ONE TABLET BY MOUTH EVERY  HOURS FOR CHRONIC PAIN
PORT CHARLOTTE TELEPHONE CONTACT
hours.
Time: Jun ,@:
Weight:              lb [. kg]
// :  FM CP RYAN
*********************************************************************
IT
Family History:  Mother died at  of ?
Lab test for Hepatitis C Antibody ordered at this encounter.
Pneumococcal Vaccine:
Pneumococcal vaccine ordered.
EDUCATION:  Following issues discussed, reviewed or provided:
Caller Response: *OTHER.
hemostasis, dressing applied
SURGICAL OPHTHALMOLOGY CONSULT(COSIGN PARAM)USE W/SHAREDFILE
)   HYDROCODONE /ACETAMINOPHEN MG TAB TAKE  TABLET   ACTIVE
benign p ps, rec to repeat in  years. Deniese any other problem, no CP, SOB,
he has been doing well,  MRI of neck could not be done due to piece of metal in
will not authorize a repeat exam.  CT of chest was order to evaluate new finding
Phone #
Pain interferes with:new onset
. Surrogate (if applicable):
Aldrete Score:
Episode, Severe, with Psychotic Features (ICD-
Depressive Disorder NOS (ICD--CM ./Other and unspecified hyperlipidemia
Anodontia                               Colonic Polyps
ACCOMPANIED BY:  self
Pt has following recent VA hx:
Pt was to see  physician (--, appt //) in Carolton, GA as
Episode, Severe, with Psychotic Features (ICD-
$APHDR
BITE OR CHEW.
CLINICAL REMINDER ACTIVITY/PLAN OF CARE
NURSING OUTPT TRIAGE INTAKE NOTE
Acute Problem:
SPOKE WITH: _X__Veteran   ___Significant Other    ___Nurse    ___Agency
Call referred to:
LEARNS BEST: _x__ Visual  __x_ Hearing  __x_ Doing
___PT. EDUCATION GIVEN
Scheduled with provider: ___TO      ____FUTURE      ___N/A
___EMERGENT    ___NON-EMERGENT         ____SAME
COLON - COLONOSCOPY (COLONOSCOPY)
Surgeon(s): souza
told him that I would not fill them  y.  He fills the alprazolam each month
RESP:  (// :)
the Provider to . (Condition, Treatment, and/or Medications)
"FIVE KEYS TO QUITTING".
Identify caller if not Veteran:
Height:  in [. cm] (// :)
TEMP: . F [. C] (// :)
AWAITING HIS PAIN MED IN THE MAIL, BUT WANTS TO KNOW IF HE CAN GET A LOCAL
please place  wal order for oxycodone.
TELEPHONE TRIAGE
Do you have diabetes? NO
Age:
Plan:
LAST PC FU VISIT____//______________
phone:()-
AND PISTOL WHIP VETERAN.  SHE REPORTED THAT VETERANS SISTER (ALLEGEDLY) WAS UNDER
TELEPHONE NUMBER (H)()-        TELEPHONE NUMBER (W)
sister had stolen his food and personal belongings. Ms.   states she plans
Pulse:
Family and Legal Affairs Representative for the Department of Veteran
sputum specimen and was told to come to er for
BRIEF CLINICAL HISTORY:
he was last seen by me in april
Patient here for pulmonary visit
TWICE A
oxygen. Dyspnea varies from   to  . He cought us sputum tinged with blood
T  . F [. C] (// :)
Gi Restrepo A- clinic.
I am unfamiliar with this pt.
Hospice.
Pain  (// :)
PC COMMUNICATION
Spi try shows severe obstructive changes
occasions accompanied by fever,  ral malaise, myalgia and headache.
An alcohol screening test (AUDIT-C) was negative (score=).
PROGRESS NOTES Text
IMPRESSION:
: educated vet to trial otc meds such as tylenol, robitussin, mucinex
Patient&quot;s Active Medications were reviewed at this visit.
Pain             (// :)
MEDICATION LIST REVIEW REPORT
REASON FOR CONSULT:
Recent Labs:
fax/answering machine picks up.
Signature Informed Consent for
infection, disease, or cancer of the digestive tract.  This procedure
Pathology:
Patient had Occult Blood (Fecal) Lab test ordered at this
GERD: ON MEDS
Location:
patient and agree with the management plan.
LANTUS PM          RANING FROM  - UNITS
LUNCH NOON
RANGE.
states that due to transportation problems he can only make appt on Mon  or
Pneumovax *:
Vision barrier present.
THINGS EASILY. THUS, MAKING IT HARD FOR HIM TO REMEMBER TO TAKE HIS INSULIN.
Scoring:   -  animals =  points
A:
HE WILL CONTINUE TO CHANGE THIS AND THE LANTUS AS HE WANTS NO MATTER WHAT WE
Verbal
HIMS NON-VA/OUTSIDE RECORDS
patient&quot;s blood pressure, heart rate, and breathing may be monitored
Tolerated well with no adverse effects noted.
Denies fever/c s/nausea/vomiting.
Pulse:  (// :)
BRIEF STATEMENT OF INFORMATION REQUESTED AND GIVEN: recieved consultation from
HT:  in [. cm] (// :) WT: lb [. kg] (// :)
(  s)
document can be accessed through Vista Imaging.
GENERAL SURGERY CONSULT
but says this doesn&quot;t help anymore.  Also takes prilosec and rolaids, which
CODEINE, NIACIN, OMEPRAZOLE, FLUNIS DE
have that evaluated.
spine and of the lumbosacral spine. Vacuum disc phenomena seen at
morbidities.   CT scan w/ no evidence of lymphadenopathy or spread.  His case
P:
CONSENT SIGNED AND ON CHART?            Yes
- - - - - - - - - - - - - - - - - - - - - - - - - - - - - - - - - - - - - - - -
Treatment options therefore include radiation therapy alone or chemoradiation. I
Collect stool spec if poss.
MEDICAL STUDENT NOTE
Problems: (list problem)
approval for Fee Basis.
APPLY   AMOUNT TOPICALLY EVERY    Refills:    Last:--
PARALYSIS OF MEDIAN NERVE  %  SC
Acute and Chronic
Colon Polyp
throughout his abdomen with the worst being in the epigastric region. Pt sts his
followed by two arge BM&quot;s yester .
// @
GLUCOSE-FINGER:
Discussed advanced directives with patient. The patient has the capacity to make
ADDENDUM
GASTROENTEROLOGY NOTE
Indications
Medical/Surgical History:
RDW: .  H
denies N/V/D, CP, SOB. Is aware of d/c plan and is agreeable.
-pt scheduled for d/c to  at :.
Does patient have belongings to inventory: No
Assess pain level, symptoms, and history.
Bed in low position and bolted to floor. Treaded socks.
Intervention:
___ Creative Arts
SOCIAL WORK NOTE
induced damage w/ possible underlying tumor, have discusssed w/ heme/onc and
we need tissue dx to see if tumor has recurred despite xrt in order to procede
no longer feels depressed. Denied SI. FSBG at  was  and pt. admitted
S P PATTERN DISTURBANCE-Slept until
Anti-Hypertensives/Diuretics: No
y/o male with hx of esophageal cancer s/p radiation DM , OSA , bipolar
derided slightly erythematouse at the wound borders surrounded by dry hard skin.
: Neuro checks revealed no abnormalities. Antibiotic has been given, pt is
ADDENDUM
SUBJECTIVE:
HUMAN INSULIN ASPART INJ          UNITS        TIDAC SUBCUTANEOUS
During the implementation of the electronic patient record at VAMC
Place call light, TV controls, bedside table, telephone, and urinal within
Intervention:
PSYLLIUM SUGAR FREE POWDER,ORAL   TABLESPOONFU  BID ORAL
__________________________________________________________________________
medications please ask your nurse for clarification or ask to speak
to your physician prior to discharge. If you find that you have
side effects.  Topics also included potential drug-drug, drug-nutrient,
Problems: (list problem)
DIABETIC TELERETINAL IMAGING CONSULT
IBW: -      %IBW:%
instability on feet with coccyx pain. Denies loss of consciousness, tingling,
Pat
LEARNER:  Patient
DJD *
ABD:  +BS, soft, ND, mild diffuse TTP without G/R
incontinence.  He also reported to housestaff that he has difficulty remembering
.  bipolar d/o
Weight: . lb [. kg] (// :)
Barrett&quot;s esophagus, COPD, depression, PTSD, diverticulosis, tobacco use
Educate patient/family regarding the type of fluid volume imb ce being
Monitor for signs and symptoms of hyperglycemia/hypoglycemia and blood glucose
Pain Goal--What pain level is acceptable to patient (-)?
Please review this list. If you have questions regarding your
Also referred to as conscious sedation, is a drug-induced depression
Patient Consent:
= Worst Pain Ima ble  = Pt. unable to respond
GEN:  NAD
ED NURSING NOTE
Current Diet: NPO
met head, measures . x . cm. Woound base is granular. No drainage noted.
Rel t issues from FASTERCHUGS mnemonic addressed:
and Alice  , Parents who live in Chicago, Ill.
crepts with bilaterall lower extremity edema. The labs reviewed not significant
Ambulatory aid: None, bedrest, wheelchair, nurse ()
SODIUM:   L
SSN: --
fall risk and should not be out of bed without assistance.
BLOOD GLUCOSE MONITORING
-INTESTINAL METAPLASIA WITH LOW GRADE DYSPLASIA AND
. Barrett&quot;s Esophagus
. Impingment Synd
)   ACETAMINOPHEN MG/OXYCODONE MG TAB TAKE  TABLETS   ACTIVE
dependence- in remission
- Activate prior to use.
What is your pain level now?
UNSCHEDULED NURSING ASSESSMENT
edema to both feet.
[] Provided pt with Understanding Your Medications refill system and
. LUMBOSACRAL SPONDYLOSIS
after troponin negative
Date/ Time:Sep ,@:    Age: Sex:MALE
yo divorced SC VN combat vet male vet who has above hx according to
processes, insight/judgment- adequate for medical decision-making ability
Vascular: Pedal pulses are palpable with difficulty b/l. CFT &lt; sec digits -
to lack of attendance for   s or more.  Vet&quot;s last   of attendance was on
*  MUTUAL GOAL(S): Patient verbalizes understanding of instructions
IS THIS EXAMINATION FOR REVIEW OF AN ALREADY SERVICE-CONNECTED MENTAL
operating motorcycle, which he landed on right side.
Active Outpatient Medications                          Status
Muscle sprain
ADDENDUM
Digital Pager:
Patient education assessment has not changed.
Patient does give verbal consent for nurse
advances it through the rectum and to the sigmoid colon.  A
To &quot;s DAte: SEP ,
Patient tolerated the procedure [X] well [] fair [] poor.
Alternate Telephone Number
Primary Care Team:  FTOPC TEAM BLUE
or more years
.
NUR-DM BLOOD PRESSURE &gt;/:
NO
- headaches, new or worsening
HEENT: WNL
TELEPHONE TRIAGE (TLCP)
Pt. took two Diltiazem capsules yester  for BP reading of /. Pt states he
Active and Recently Expired Outpatient Medications (excluding Supplies):
[x]Intelligence                []Financial Stability
// :           H    H    .      L   .
HEMOGLOBIN AC; BLOOD
Time spent exercising per session:
:psychosis-resolved.
-  /,   /
AREA. EXPLAINED THAT HE HAS AN APPOINTMENT IN GAYLORD CLINIC ON MARCH ,
appoint Alveta D.  son to property of the patient.
TELEPHONE CONTACT NOTE
Department of Veterans Affairs Medisome state
MAJOR RISK FACTORS / SPECIAL POPULATIONS
Temp:  Warm
Verbalizes no thoughts of harm to self or others
O. Level of Conciousness: Alert
Patient description of altered thought process:
Who Was Instructed: patient
Describe:
Who Was Instructed: patient
****************************************************************
PATIENT EDUCATION PROVIDED
e.g., movements of forehead, eyebrows, periorbital area, cheeks.
Pulse:
Treatment Team)? Yes
Current barriers to learning?
Patient receptivity: attentive
Resp:   (// :)
Pt. will demonstrate increased cognitive functioning.
Violence Potential:
ideation. Presents with chief complaint of "I got a divorce  years ago."
Plan:  Will update all MHC staff, providers, Lt. Brodine and   Stapert
his stomach hurt.
Information from PVH is very limited and sketchy.
PSYCHIATRY TELEPHONE NOTE
EVERY EVENING
denies any side effects from his medications and has been taking them as
c/o pain of # d/t herniated disc and pinched nerve in cervical area, also PTSD
__________________________________________________________________________
ADDENDUM
warranted.
DC CALL BACK NOTE [DT]
and will need at least a   notice so he can request the   off. Pt
. Patient was wearing a helmet: No
Caucasian male, who served in the Army for  years in military intelligence.
therefore, the history reported in this note is by patient&quot;s report only.
Diagnosis: neck pain
HPI: chronic neck pain since
* You notice any signs of increased swelling or fluid  or fluid
VITAL SIGNS:
LUNGS;occ wheezing no rales o sat % RA
(-) Thyroid, Renal, Cancer, Neuro, GI, Liver
Image order complete.    Please open VistA Imaging to view the images.
PCC-NURSING INTAKE
Blood Pressure:  / (// :)
Temperature   :  . F [. C] (// :)
PCC NOTE
of his functional status-He can walk at the level in his house-mobile home
Patient is:
Dental Category: -CLASS IV.  Treatment Status: Active.
SCHEDULED, LEFT MESSAGE ON HER CELL PHONE OF APPT /
ACTION PLAN:  What would you like to do
none
within the past  months?
------------------------------------------------------------------
Existing knowledge of diseases/problem:
tissue samples in order to diagnose problems in the lungs and airway
performed with a flexible bronchoscope (a tubular, lighted instrument
INTERDISCIPLINARY PT HEALTH ED-T (PHE)
Time to Clinic:                                NA:
[] (  if) With Fluoroscopy
- - - - - - - - - - - - - - - - - - - - - - - - - - - - - - - - - - - - - - - -
presents for lung biopsy alert, orientedx, limited mobility, eom intact. cv
Wt:      lb [. kg] (
- - - - - - - - - - - - - - - - - - - - - - - - - - - - - - - - - - - - - - - -
Patient Phone Number: --
Length:  minutes.
Identified problem: Issue of Repeat Prescriptions.
OXYCODONE  MG SCRIPT# SENT TO PHARMACY FOR REFILL IN PCP&quot;ABSENCE//
use of tobacco product due to its
.  Tobacco abuse.
month.
should cancel their clinic appointment?
Identified problem: Issue of Repeat Prescriptions.
OPERATION REPORT
ATTENDING STAFF NOTE COMPLETED:  [ ] YES [ ] NO
Disposition:  stable to pacu
Anterior Breath Sounds:
Medications reviewed:
[X] Time
-plus years.  Ethanol:  None currently.  However, quit d
B.  Should you need to CANCEL your appointment, do you know how?
Bad Addr:
Quantity:  Refills:
The following identifiers were used to verify this patient:  SSN.
Veteran is in lobby requesting to be seen due to swollen feet.
Thrombolytics?
MEDICATION ADMINISTERED
========================================================
Mode of Arrival:  Private Vehicle
called regarding diet order and neb tx.  see orders.
Weight:           lb [. kg] (// :)
INTAKE &amp; OUTPUT
Abdomen , no organomegaly
Safety  :
Education Provided To Patient
ACTIVITY
.  Aortic root is mildly dilated at  cm.
OXYGEN THERAPY:
Voiding
Yellow Bracelet On
Call Light Within Reach
Bed pan/urinal within easy reach
Blood Pressure:  / (// :)
O U T P U T S:
PULSE:   (// :)
Nurse, Bathroom, Telephone, Patient hand , Sign-out Procedure,
Environment Clear of Hazards
Abnormalities:
)  Severe right lower extremity peripheral vascular
NURSING NOTE W/VITALS
- - - - - - - - - - - - - - - - - - - - - - - - - - - - - - - - - - - - - - - -
- - - - - - - - - - - - - - - - - - - - - - - - - - - - - - - - - - - - - - - -
Influenza Vaccine - Nurse:
Standard Patient Education done to  - Influenza Immunization
bronchoscopy which confirmed the presence of non   cell lung cancer. He was
See VistA Imaging for sc ed document.
PODIATRIC NOTE
COLONOSCOPY EDUCATION NOTE
Pulse Ox: // @
Signature Informed Consent for
B.  RESPIRATORY PROBLEMS
Proper inhaler use reviewed with patient.  Verbalizes a clear underst
abnormal rythn strip showing PVCs. His EKG to  shows several PVCs and a pulse
Primary Next of Kin Information
Patient Plan of Care
I&amp;O
Rhythm:  /ST
Past Medical History: HTN, dyslipidemia
review, impression, and plan.
Pt. seen, examined, and discussed with a team.
PATIENT NAME:   ,
Pupils
Tongue: Midline
)   METOPROLOL TAB  .MG PO BID                          ACTIVE
Tongue: Midline
Oriented to time, person and place
with residual left lower extremity weakness according to the
REHAB DIAGNOSIS:  Debility  INITIAL EVAL DATE: May ,
SKIN PROBLEMS
before returning home. Spoke with the medical team regarding safety concerns if
b ce when standing.  Has "nerve damage" to left leg and has had
Objective:  Active Inpatient Medications (including Supplies):
IV Location: L hand
Christian faith as Methodist faith background. Chaplaincy support, presence,
will be sc ed into CPRS for viewing. Based on results Pt will
They are not able to accept pt. to , admissions staff is not working to .
VERBAL PAIN ASSESSMENT
STATUS: Alert; Oriented
Oral Care: Self
)   METOPROLOL TAB  MG PO DAILY                          ACTIVE
Sensory Perception: = No Impairment
Nursing Narrative:***************************
that he was in the hospital at the VA two   ago for a
The direct care staff (MD, RN, Rehabilitation) thinks the patient IS
Primary Care Nursing Interview
FOR CIRCULATION
)   LISINOPRIL MG TAB TAKE ONE-HALF TABLET BY MOUTH      ACTIVE
===================================================================
. Had EKG done, told to f/u
CURRENT MEDICATIONS:
very intoxicated, dizzy, and then passed out. His son brought him
IV - L hand and AC and intact.
Detox. He was informed that his dad is an in pt. and will wait for further
for Detox bec. he only drink  bottle of liquor before he was admitted and he
Observe pt&quot;s ability to use call light
[ ]Bedfast         [ ]Inappropriate
medications.  This list includes VA. Non-VA and over-the -counter medications.
=========================================================================
NURSING TELEPHONE ENCOUNTER NOTE
AGO, HAD SUICIDAL THOUGH  MO AGO, NOT RECENTLY, NO PLAN, NO CURRENT SI
BP:   / (// :)
HOURS AS NEEDED
Patient has answered NKA
BECK ANXIETY INDEX (BAI)
. Have you ever had any experience that was so frightening,
Patient came to clinic for medical clearance to  and stopped by the mental
( )  Family Member/Other
SATT AFTERCARE
.  How often do you feel guilty over past behaviors?
Mr.   was provided with one  minute phone card.  He expressed
underlying irrational beliefs.  They were encouraged to utilize their
here for his graduatation. I will have Ms. Plaut sign off on his treatment plan
consume these nutrients from foods, in addition to
providing discipline to   children.  Veteran&quot;s shared their experiences in
with Mary Plaut, LCSW at the LOPC. He states the regrets he has now are that he
themselves. Veterans were provided a handout including the  steps to wise
CHAPLAIN GENERAL NOTE
LMSW.  The class focused on a presentation outlining characteristics associated
SATT GROUP THERAPY
Ocular meds:NONE
lifestyle once he leaves IOP.   He has followed instructions on our process (see
TIME OF CONTACT:  -
( )  Demonstration
VETERAN CONTINUES ATTENDING AA/NA MEETINGS, SATT AFTERCARE AND ALL REQUIRED ISOP
TIME OF CONTACT:  -
TYPE OF CONTACT:  Group Therapy
GOAL: PRIMARY ADDICTION COUNSELOR: Cinda Sisneros
Late Entry to visit dated below: No
S: Main Focus of Session: Mr.   reported to the LOPC for substance abuse/
telephone numbers for the "buddy system." Patients are asked to contact their
Patient Name:   ,    was a NO-SHOW for to &quot;s
he should try to get it down with a cold shower, but if this does not
noted that Mr.   did have an appointment scheduled with Renotta
MH NURSING NOTE
s ping. "Last night I had a terrible night." He relates he is not having
// :  (.)[*]
Have you had an EMG before? no
AS NEEDED FOR TOBACCO CESSATION, NO SMOKING OR
things.  The patient denies hopelessness.  Denies any thoughts of hurting
Weight:
Fall risk information was obtained from: patient
Click here to order Fecal Occult Blood test X
with menstrual fluctuations; Anxiety
Sex...................FEMALE
PSYCHIATRY STL
TWO TABLETS BY MOUTH FOUR TIMES A
)   BREVICON TAB, TAKE  TABLET BY MOUTH ONCE A        ACTIVE
MH ASSESSMENT SCREENING
Writer was informed veteran was at work and would not be home until : or
)   NAPROXEN MG TAB TAKE ONE TABLET BY MOUTH EVERY    ACTIVE
========================================================================
please inform
S: "FEELING ALRIGHT AS LONG AS I DON&quot;T MOVE."
Location: Hospital
OXIM
Somalia, Haiti, engaged in  combat, witnessed the casualties of war and
PHARM. MED. REFILL (B)
describes being injured in the military "was shot in the back of my legs."  He
TEL/BRONX/TRIAGE
.  Age:
Patient present weight: . lb [. kg] (// :)
Veteran is a yo wm admitted to the unit on // with a diagnosis of
no
AMBULATORY/OUTPATIENT CARE NOTE
NAME OF CALLER: (If different from Patient):
second with me at :. I saw him waiting most of the time but by : he was no
Active Outpatient Medications (including Supplies):
involvement.
Patient did not report for the following scheduled appointment:
[] No follow up needed
ICD-/Diagnosis:V.
Weight:              . lb [. kg] (// :)
Active Medications:
Problems with mobility?YES* (OT)
Turgor:  Within normal limits
Recommend consult to Dental Service, if symptomatic
Adm. Date:  JUL , :
Reason for referral: Eval for gait, passive/active ROM right ankle (has hybrid
FWW. Presently the patient states that he requires assistance to carry out many
for an hour at a time. Veteran reported an increase in use of his R hand
Received in report from last night that patient slept all night and did not
and social activities during his admission.  Will educate pt as to the ADA laws,
Eating: Minimum
to Ms. McMullen for continud SW intervention/discharge pl ing.
complaints at this time.We will continue to see weekly for management.
complained of immobility and discomfort of R shoulder. Mr.
aspects of a car transfer.
Toileting: Minimum
Pastoral Care/Visitation as Requested
Name: Pin site care on right lower extremity.
Patient appreciative.
History obtained from patient, paramedic.
ALLERGIES:
[] Rx
IV Fluids and Medications in ED:
injuries sustained - (last filled -) for window to .  See note of -.
Temperature:     . F [. C] (// :)
Pain:             (// :)
P) Discuss with PCP  physician n available for vet in case he may nee
P
=========================================================================
Information on healthy eating and access to professional RD given
W VERDsome state
Active problems - Computerized Problem List is the source for the following:
pts overall status or condition unchanged
The supervising practitioner of record for this patient care encounter is  physician mission Date:
MAR , @::     : CT      DX: CHEST PAINS
Patient Phone: ()-**VERIFIED**
PLATINUM CLINIC NOTE
Lab done on //, -HIAA, normal.  CT done on // also normal.  Have
VET IS CURRENTLY SAFE.
stress re medical issues which have impacted on his life in terms of precluding
testing is pl ed. PCP considered a carcinoid synd  but endo tests were
visit this Fri , /.  If pt is transferred to VA for care, will attempt to
TYPE OF CONTACT: TELEPHONE
been coping by trying to focus on positives in his life, pace himself, ask for
cardiology yester  and work up was essentially negative, as they had
Carpal Tunel Repair, Left /
Vet had Called suicide preventions specialist who encouraged vet to come in. Vet
Vet with history of PTSD from Childhood sexual abuse. Vet had seen  physician
MHICM SCREEN
. Severe Functional Impairment: Severe functional impairment is such
Intervention:
Vet states he slept on and off during night which he says is usual for him. Says
PO QH PRN FOR INDIGESTION
Group Name: Health and Wellness
and mobility activities.
NONE
MENTAL HEALTH NOTE
CHIEF COMPLAINT/ASSESSMENT:
yester . no blood clots. sometimes stool black. not taking medication to
Phone Number: Patient Phone: ()-         Homeless: No
II. VITAL SIGNS
he has appealed.  Has hearing upcoming.  Also plans to apply for VA pension
construct a letter indicating vet capable of performing functions of VA volunteer,
issues but doing better. Pt very interested in Volunteering here @ Hosp. No
=========================================================================
Reason Ordered: Syncope and Collapse
SPC GAVE VET ON-CALL NUMBER AND VET WILL BE REVIEWED FOR FLAG.
MONITORING HIS SUGARS AND EATING REGULARLY.
The patient is currently being followed by:ZELL,  L
Does patient have items to inventory: Belongings inventoried by MHT, receipt
Participation:
** Gastrointestinal: No nausea, vomiting, abdominal pain, diarrhea,
Yes.  Describe the ideation/threats/self-harm:
Due to vet&quot;s frequent suicidal ideation, threats and attempts, suicide
the time being. If through case management, we determine vet&quot;s acute fin
O:  A consult was received for this  year old male that was seen by vet&quot;s
for medication management and physical assessment.
in   s. Vet also indicates would like consult for KT as he has seen the
VET THEN D/C&quot;D TC WITH SPC.
SPC STATED I HAD JUST TALKED TO VET AND HE WAS REFUSING TO ANSWER THE DOOR.
DISPATCH STATED IF WE COULD GET HIM TO TALK TO THE P CE THEY WOULD LEAVE.
PATIENT NAME:  ,              SSN #: --
TELEPHONE CONTACT
Address:  W VERDE LN
of this conversation.
Routine follow-up visit in Primary Care.
ENT - CONSULT REQUESTED
Weight:
Blood Pressure: / (// :)
,    is a  year old with a history of deviated septum and
PSHx:
PE
FYI to  physician
CLINICAL REMINDER ACTIVITY
&quot;Y&quot; indicates patient IS taking medication as written;
claims no legal issues as a result of, nor any domestic issues.  He recently
REVIEW OF SYSTEMS:
PREFERRED METHOD OF LEARNING:
Screen is NEGATIVE - suicide risk was not found to be clinically significant
Patient
Verbalizes Successfully
ADDENDUM
MH No Show F/U call - First Attempt
on call from his job. He will call and rescedule his app.
*IF ANY ELEMENT IS POSITIVE, PLACE ON CLOSE OBSERVATION*
BEDTIME
because he has knowledge of the illegal activity and that he&quot;s being followed.
medications he was given yester  at Leavenworth VA. He is cooperative with the
)   NAPROXEN TAB  MG PO BID                             ACTIVE
No objective signs/symptoms of withdrawal observed by staff
Compliant with medications as ordered
ACTIVITY LEVEL:
therapeutic/adv
Wife was very distraught as she feels helpless as to what she can do for
Urgent Care physician called and order for combivent was obtained for pt.
time. Several times does stop conversation due to urgency to urinate. Encouraged
PROGRESS TO S TREATMENT PLAN GOALS BEHAVIORAL HEALTH:
PRN FOR PAIN - NOT TO EXCEED MG (ACETAMINOPHEN)
)   NAPROXEN TAB   MG PO BID WITH FOOD                  ACTIVE
Verbalized understanding of all information.
EK-PHARMACY PATIENT EDUCATION
group exercise. His goal for to  was to "Go Home" attainable was by not taking
speach, and almost immediately began telling wife how to care for child and what
FOR PAIN - NOT TO EXCEED MG (ACETAMINOPHEN) PER
Mr.   slept good through the night with no problems or complaints at this
set up appt. with children ahead of time and he had not done this. He was given
know"
)   ALBUTEROL/IPRATROPIUM INHL,ORAL   PUFF INHL ORAL QH  ACTIVE
TO EXCEED  DOSES IN  HRS
Mr.   arrived for his scheduled neuropsychological evaluation on
physician s consulted.  Soldier is seen and admission orders are
NUTRITIONAL SCREEN:
Group type: -Spirituality/Psych
cats and the fact that his grass is probably high with no one taking care of it.
mood change.  Pt seems somewhat slow to react and answer to things.  Pt appears
Rates his depression at /.  Denies SI.  Affect is brighter to .  Less
ADDENDUM
)   TOPIRAMATE TAB  MG PO QHS mood, headache            ACTIVE
ADDENDUM
)   ARIPIPRAZOLE TAB   MG PO QHS ptsd                    ACTIVE
PCP: BETTS,  C
next visit.  This was reinforced with pt who verbalized understanding.
BODY MASS INDEX - . (APR , @::)
TAKE ONE TABLET BY MOUTH AT BEDTIME
HEENT:
That would cost $ a visit
. The patient HAS decision-making capacity.
injected into the joint, bursa, periarticular structure, or cyst
)Obtained fluid from elbow. Sent to Lab
LISINOPRIL MG TAB   Sig: TAKE ONE TABLET BY MOUTH EVERY   TO CON
Respiration      (// :)
BODY MASS INDEX - . (AUG , @::)
the VA in Phoenix.
Intrusive thoughts: Denies
How often:
A: Alteration in comfort pain in elbow
PERCOCET, SULFA DRUGS, CEFADROXIL, HORSE SERUM PROTEINS, CIPROFLOXACIN,
Patient Phone: ()-
S:  PRESENTS FOR SCHEDULED SLMHC APPOINTMENT.
Local provider will no longer see him, due to such threats.  VA won&quot;t do or pay
"Please refer to the sc ed text document attached. This can be
esophagus, or food pipe, with an endoscope.  An endoscope is a thin
Modified Aldrete
- - - - - - - - - - - - - - - - - - - - - - - - - - - - - - - - - - - - - - - -
Liquid,  , nonbloody.  No fevers, no abdominal pain.  Has "quit eating and
BACK:  Straight and nontender.
ADDENDUM
DEC ,
MEDICATION REQUESTED:
Pt states he is s ping better on the higher dose of seroquel but still
Pt states the klonopin has been beneficial but he is still experiencing
(D) Diagnostic casts.  DX: (.).
)   AMOXICILLIN MG CAP TAKE ONE CAPSULE BY MOUTH THREE  ACTIVE
BEDTIME FOR HEART AND BLOOD PRESSURE (DO NOT TAKE
)   BENZTROPINE MESYLATE MG TAB TAKE ONE TABLET BY MOUTH  ACTIVE
VITAL SIGNS
None.  VETERAN LIVES WITH HIS SON WHO WAS AT WORK AT TIME OF PHONE CALL.
PAJAMAS:
)   AMLODIPINE BESYLATE MG TAB TAKE ONE TABLET BY MOUTH   ACTIVE
PATIENT IDENTIFICATION:
TWICE A   TO TREAT MOVEMENT DISORDER
MHC TELEPHONE NOTE
Active Outpatient Medications (including Supplies):
    </notes>
  </record>
</records>
