# Supplementary material for: Predicting the Risk of Suicide by Analyzing the Text of Clinical Notes
Source: PLoS One. 2014 Jan 28;9(1):e85733. doi: 10.1371/journal.pone.0085733 (PMC3904866; doi:10.1371/journal.pone.0085733)
Supplement: Appendix S3 — Machine Learning Libraries and Methods: This section is provided to enclose the open source (Apache License) classifier used for the building of the statistical models, specifically for the purposes of study reproducibility. A detailed account of these tools is intended for another publication. (ZIP) [file pone.0085733.s003.zip › Appendix3/ML_libs/Regression_testing/group2/grp2-pt-1097.xml]

<?xml version="1.0" encoding="ISO-8859-1" ?>
<records>
  <record>
    <group>2</group>
    <study_id>1097</study_id>
    <notes>
Reports no other medical problems since he was last seen, he did state that he
__X__ATTEMPTED TO CALL PATIENT
Patient aware that he is to take the Coumadin at the same time each   (-
. Have you ever had any experience that was so frightening,
results. ..
NONE
OUTSIDE MEDICAL REC(FEE)-N/F DRUG CONSULT-PHARMACY
There is a sc ed Pain Management Follow-Up Report dated // attached to
MODE OF TRANSPORTATION:   Ambulatory
Other:X-  OF CERVICAL SPINE  AND ABDOMINAL US ORDERED TO BE DONE AT PB
lipids done at a local health club.  The patient is careful about following the
CPC 1 PHYSICIAN PROGRESS NOTE
Sex: MALE
"hate to s the p ce force for what they did to him and his family."  His
dose.  Will increase Quetiapine and shift dosing of Buproprion to encourage
" My meds...there was alot of things going on...it was time to change some
PARTICIPATION:
again."Pt. was given Benadryl mg. po for s p, and Tylenol mg. po for c/o
PSYCHIATRY INPATIENT NOTE
QID-PRN for Heartburn
Veteran attended and actively participated.
Veteran demonstrates difficulty reporting symptoms to health care providers
attentive throughout the group.
Pain:  (// :)
)   ALOH/MGOH/SIMTH XTRA STRE
MENTAL HEALTH EDUCATION GROUP
Homicidal Ideation:
Non-VA Meds Last Documented On: ** Data not found **
Date patient was discharged: December ,
Discharge instructions given to:
Will c
plan.
Staff from west Moreland hospital ER called inquiring about
On arrival patient was  in a wheelchair (from the welcome desk)
BEHAVIORAL HEALTH CONSULT
min. prior to arrival via ambulance. + hematuria with clots.
PHARMACIST MEDICATION RECONCILIATION NOTE
experiences, and then again spoke that he was "ready to die."
OTHER  ER COMPANIES AND WHAT IIS BELIEVE TO BE THE STATE P CE AUXILLARY.
colored urine. Scant amount of bloody drainage seeping around Foley at tip of
SURGEON:  physician ASSISTANT:
Active Inpatient Medications (including Supplies):
night shift "I don&quot;t know wants  wrong...I wish God would call me home."
admitted FEB , : hematuria. This is resolved.
)   F C ACID TAB  MG PO QAM                             ACTIVE
AT BEDTIME AS NEEDED TO HELP S P
still having urinary symptoms just seen by dulabon who placed on finseteride
Abbreviations: BF: boyfriend    DIC: drop in center GF: girlfriend
Clinic of the Erie VA Medical Center.  He was last seen by me on
HS W/HYTRIN WANTS FINESTERIDE THAT WAS ORDERED THRU PCP CHORAZY
the Erie VA Medical Center.  He has a past history of being
Time medication administered:
Glasses     Retained at own risk
Insigh
Interdisciplinary Plan of Care Reviewed: No changes at this time
not
Anxiety related to Life changes due to aging process.
Not applicable
Allergies: PAROXETINE, ACIPHEX MG TAB UD, LEXAPRO MG TAB
POTASSIUM                 .    mmol/l         . -  .           -Dec-
Comments: off one to one observation
(// :)
with exertion/ambulation...bil breath sounds are clear but diminished in bil
Continue: ,
Problem #  hypertension
GOALS:
Met:
Braden Scale - For Predicting Pressure Sore Risk
NURSING
QRS .
A-Fib with occasional UF PVC and Couplet, occasional/frequent aberrant beats.
Patient alertand oriented x. Independent with cares and  ambulation.
good.CS this tour /.
Dysphagia diet:  No
BASIC ACTIVITIES OF DAILY LIVING:  In the last   s, has the veteran
treatment time  mins
Pt AOx,DNR,amd for chest pain,none this tour.Pt for placement.No
Active Inpatient Medications                           Status
A: Pt. used rolling   exclusively to  and did well. Pt. showed increased
Night Sweats No, Abdominal Pain
.  Diabetes.
No caregiver available
Dysphagia diet:  No
CLINIC TEAM COMMUNICATION NOTE
ROS:
( ) Caregiver
)   LISINOPRIL MG TAB TAKE ONE-HALF TABLET BY MOUTH      ACTIVE
- Avoid constipation.
Temp:   . F [
marriage (separated  yrs, got served divorce papers  mo ago)and losing job on
"due to poor decisions", worried about bills, cost of divorce, opportunities to
MEDICATIONS: (OVER-THE-COUNTER, HERBALS, PRESCRIBED OUTSIDE THE VA)
Skin Color:
Pain rating: no pain.
adjusting to milieu tolerating the citalopram and not showing signs of
of this shift.
above.
addressed. When pt explained why he was not paying his landlord rent for the
Respiration:  (// :)
RECENT PRN MEDICATIONS
Result:
LDL                                          .
GLUCOSE                    // :
Axis  : htn
Resp:
Integrated Case Summary:
STRENGTHS: personable
please review notes from / as pt believes he should have a new order
PATIENT AGREEMENT FOR OPIOID CONSENT.
Total Encounter Time:[ ] minutes
FT. MYERS TELEPHONE CONTACT (TP)
[ ] Fawcett
approved for Lyrica as use for radicular pain in his case is not a FDA or VA
verbalizes understanding. pt requesting to pick up hard copy to take to
____ Other
// :  CHAR MH P CHATHAM NEW REC
EXPEDITOR
_x___ Need to be  wed
O: Observation: Pt. exhibits poor cervical posture with flexed positioning.
Injection Site: Right Deltoid.
EDUCATION:  Following issues discussed, reviewed or provided:
ADDENDUM
ADDITIONAL COMMENTS/INFORMATION:
Nurse Recommendation: - hours
. to . = Overweight.  BMI of  or greater: Obese.
BMI: BODY MASS INDEX
pain since  aggravated by activity and twisting motions of the body; ran out
This document was selected from specialty: Gastroenterology.
*Documented Allergies:  Patient has answered NKA
are
NURSING OUTPT TRIAGE INTAKE NOTE
GI LABORATORY PATHOLOGY
Not taking the immodium regularly. states that when he took regularly bid, he
GERIATRICS CLINIC
- Patient does have pain.
PRIM OPEN ANGLE GLAUCOMA                SENILE NUCLEAR CATARACT
Depressive Disorder NOS (ICD--CM ./Other and unspecified hyperlipidemia
T:  . F [. C] (// :)
Consult with Primary Care Provider/Team: ___YES  ___ NO  ___N/A
. The patient HAS decision-making capacity.
Patient:  ,
Identify caller if not Veteran:
Patient screen Positive for Depression.
(x) Knows to call the Telephone Advice Nurse if
CBOC - PRIMARY CARE PA NOTE
MUCH OF BODY. HAS HX OF HEPATITIS C. CONCERNED "THAT I&quot;M DYING FROM
MOUTH EVERY  HOURS IF NEEDED FOR SHORTNESS OF BREATH
No
// :
*************************
SOCIAL WORKER WILL PREPARE LETTER FOR VETERAN TO PICK UP.
Start of Care Date: //
RV Diast c Dimension:            .       (.-. cm)
An alternate scenario is that his elderly Alzheimer&quot;s wife is being sexually
Patient blood pressure recorded.
LAST FILLED______//________
PSYCHIATRY MED ED PHARMACIST OUTPATIENT
man is believed to be gay, wife does not have AD, home is neat and well-
Pt returned from pacu at :am.procedure was cancelled. Support given pt offered
Call Type: MEDICATION REFILL/ WAL.
VITAL SIGNS:
THREE T
Pt to follow up with me on Aug
Encounter for palliative care V.
,  J is assigned to Caller Area *WEST PALM BEACH.
HE would like a truss for this.
gets his main health care per Hospice.
then call me with his decision,
PATIENT&quot;S ACTIVE PROBLEM(s):
==================================================================
Trunk: left lateral chest   with one light tan/ , scaly, stuck on
Cryo
COMPREHENSIVE PSYCHIATRIC EVALUATION
nauseous Fever
Blood Pressure
. Were constantly on guard, watchful, or easily startled ?
Infectious Disease Reviewed
ADMISSION DATE: Oct ,
Age:              Sex:  MALE
.  Aspirin.
PT HISTORICALLY RELUCTANT TO MAKE CHANGES SO WILL DO LITTLE AT A TIME
P:
meter, eat breakfast, and take meds am of fu appt.
periorbital area, cheeks; including frowning, b ing, smiling,
athetoid movements (i.e., slow irregular, complex,serpentine)
(None; Normal)
tapping, heel dropping, foot squirming and inversion and eversion of foot
No
______
______
R shoulder OA s/p shoulder Total arthroplasty @
CORRESPONDENCE TEST RESULTS GIM
Skin Carcinoma
Postsurgical Aortocoronary Bypass Status
patient&quot;s blood pressure, heart rate, and breathing may be monitored
post-
hyperkeratotic border. No signs of infection. Ulceration noted sub right th MPJ
F C ACID TAB  MG
. Osteoarthrosis, localized, primary, involving
feet
TYPE OF CONTACT:
S:  y.o. male pt rtc for f/u on diabetic ulcerations bilateral feet. Pt
d/c and f/u asap if any SE
well to be ordered by dr patel
At urging of GI service, pt was discussed with  physician t is a poor
Means of arrival: Wheelchair
Pain:  (// :)
ETODOLAC MG
. CT of the abdomen and pelvis with contrast with no acute
arteries and of major vessels in this -year-old man are
andenocarcinoma esophagus with mediastinal lymph node metastases
ID BAND/NAME/SSN CORRECT:               Yes
Procedure, Alternatives, Risks and Benefits discussed, consent
MODIFIED RAMSAY SEDATION SCORE = LOC.
accessed by selecting the Tools Menu, then select Imaging Display."
Procedures:
back and was put into the room.He stayed there about min.Vet then just as the
E  BELLO   some state          Verified: Yes
Submitted by: MICHELE A YOUNG               Date obtained:   ,  :
PATIENT:  ,  C
Page  physician pt has blood sugar . MD order to give NPH insulin
MORSE FALL SCALE
experienced, and the appropriate interventions including dietary modifications,
improved/fever/c s/night sweats/productive cough with mucus. SOB is improving
. lbs [. kg](/), . lbs [. kg](/),
Patient  ,  C  ()
IV/Saline Lock: No, Saline Lock in place, but not attached to IV ()
CHRONIC HEART FAILURE MEDICATIONS: none
Primary Diagnosis:
ADDENDUM
-  Does not probe to bone, no drainage or tracking noted
SOB
. Impingement synd
Pain intensity (=none - =worst):
WEIGHT/ANTHROPOMETRICS
:  Ambulating in  way.
VITAL SIGNS:
Abdomen: soft, nd, nabs, mildly tender to  p palp diffusely
CREATININE: .
document can be accessed through Vista Imaging.
,  C is a  year old MALE admitted:
// @       .                /         .
RBC: .  L
LYMPH %: .  L
shins, ambulates with steady gait, lef
-EGD yester  showed a tumor in the esophagus with no sign of obstruction. a
+  , home health care nurse, came in to find pt with loaded gun to his head
Level of Understanding: Good
Plan: Encourage patient to be involved in making treatment plans and decisions.
spoke with oncology to , pt will be seen for evaluation either mon
Sec. Diag. Comments:MULTIPLE MEDICAL ISSUES
Encourage patient to discontinue the use of tobacco products.
Anti-Diabetics:No
oncologist about the cancer on Mon .  Pt reports that depending on what the
facility at discharge.  He states that he does not really   much for himself
Social Interaction:
BIOCHEMICAL/METAB C
do better he would like to possibly dc mon .  Will reeval for that on Sat.
Encourage patient to verbalize feelings, perceptions and fears.
Vet staffed with  physician  SW/Cara   and writer/Care Coordinator. Vet
Has a sitter or required a sitter this  admission or previous admissions:No
insight good
Was going to shoot self on admission    ago,had guns in his home,health
year old MALE
** anaphylactic
bowel movement every other  . Radial pulses are palpable. No edema noted in
: Neuro checks revealed no abnormalities. Antibiotic has been given, pt is
accessed by selecting the Tools Menu, then select Imaging Display."
Plan:
SUBJECTIVE:
Patient has left foot ulcerations. Per podiatry note --: "Pedal pulses
his address.
IMAGE QUALITY ASSESSMENT:
CLINICAL:
Admitting Diagnosis: hyperglycemia
surgeries
Ambulatory ai
Last Pain Scale:  (// :)
Admission Date:
medical diagnoses and medication regimen.
was admitted to psychiatry (voluntary. He was responding and improving becoming
.  Mental health.
Posttraumatic Stress D/O
Diabetic foot sensory exam:
Oscillometry exam done.
Pt seen and examined this am, unchanged from previous visit  ier to .  No
PAIN ASSESSMENT
Admission Date:MAY , :
NON-FORMULARY/RESTRICTED DRUG MED REQUEST
PLAN INTERVENTION/EVALUATION
INSULIN REG HUMAN  UNITS/ML NO               TIDAC SUBCUTANEOUS
PARALYSIS OF MEDIAN NERVE  %  SC
Veteran admitted // with Hyperglycemia.
medication regimen. Instructed patient to f/u with  physician
regarding blood pressure and status of out-patient medications.
PHONE NUMBER: --
)   ACCU-CHEK COMFORT CV(GLUCOSE) TEST STRIP  ACTIVE       Issu:--
ESOPHAGUS - EGD WITH MODERATE SEDATION-ANALGESIA (CONSCIOUS
-OSA
-OA
nd ntg SL given. BP / HR  SPO   l/m pain /
Read back critical value performed? Yes
derm: Pt has + pitting edema on both legs. Extensive hemosiderin deposition of
EKG PROCEDURE NOTE
Psychotropic  physician dative/Anti-Anxiety/Pain Meds: No
Anti-Histamines: No
Last Assessment Info: Patient has been admitted within past   s, and a full
Received IVF overnight for hypotension, which has improved.  Pancultured.
Cardiology
GLUCOSE:   H
hour events:  year old,   male with past medical history of NSTEMI,
P  -
ADDENDUM
)   DEXTROSE % INJ,SOLN  /-AMP IVP PRN I
Anti-Hypertensives/Diuretics: No
at the VA, so if he goes home over the weekend, he will be at the VA from -
treatment because was scheduled during breakfast.
Date of Discharge: Jun ,
Metoprolol Dosing:
Do you have any questions or concerns about your current diagnosis? No
URGENT (PLATINUM)
c/o chest pain since  that radiates to l arm took  nitro pain from
Weakness _____
B. Cognitive Information:
Attention Span:
BODY MASS INDEX - . (AUG , @::)
Y/O MALE arrived via Ambulatory
. Impingment Syndr
feels much better.
per recent cxr&gt;, p ardial effusion. patient agrees to get f/u
ED NURSING NOTE
PCP:NANDA,ANITA N
ED NURSING NOTE
. CERVICAL SPONDYLOSIS
Late entry from :
/ Patient Disposition
EMERGENCY DEPT PHYSICIAN NOTE
PREVENTIVE HEALTH MANAGEMENT
Sitting comfortably in chair. Appears a bit ashen.
PODIATRY CLINIC NOTE
star
record,who lives alone in an apt in Phx
help offload the forefoot.
=====================================================================
-- PCP: noted LBP, MRSA and depression. Nl CBC, UA, glucose,
on -  pain scale at this time.  Pt. reports accident while operating
. Low Back Pain
. Skin Abscess  MRSA
MOUTH EVERY MORNING
Medications and Instructions:
Patient SSN.: --
The patient had no allergies or contraindications to the pneumovax
Exp: //
Age:          Date of Birth: DEC ,
--
. Correct site
Active Outpatient Medications                          Status
FULL NAME " ,  E"
No Associate Provider Identified
Identified problem: OTHER UNSPECIFIED COUNSELING.
Repeat BP:
MSE:
Thought Process:Logical.
Facility Appointed PCP: SOORYA,ASHOK T (LANS/PC )
should assist this veteran.
Called and left message with   in regards to appointment with  physician r
ADDENDUM
suicidal, however did cut throat per self to  at  am, than rode bic
DISCUSS WITH YOUR PRIMARY CARE PROVIDER/NURSE
stren
DRRTP
__________________________________________________________________________
GOAL
As you find out more about your health, you take charge of many
for prior to this date. First thoughts and first attempt happened to .
Nutrition diagnosis: Involuntary weight loss related to depression as evidenced
Violence Potential:
O. Level of Conciousness: Alert
Temp:   F [. C] (// :)
Vet completed activities in work  and participated in discussion.
.     VA Suicide Prevention Re
Pt. will not become impacted with stool.
Topic(s) Discussed: Illness Management- Reducing the Risk of Relapse
Discussion Handout
none
Activity:  return to normal activity
Eating for Energy
Follow-up appointment has been scheduled w/Sones at CVAMC on // at :.
(if No check record to validate)?                       Ye
VISIT.  I was able to accommodate him.  He wanted to update me on his current
MEDICATION RECONCILIATION - OUTPATIENT
his stomach hurt.
well. Phoned his sister ( whom has medical guardianship)after to inform her that
prescribed.
Late Entry For --:
Active and Recently Expired Outpatient Medications (including Supplies):
He/She further agrees that they am not carrying a firearm or
. Read a
at risk.
S p problems
The patient does not have a history of CHF and was not diagnosed with CHF
A yr old MALE with history of TBI and PTSD following an automobile
is currently in lawsuit regarding MVA and his lawyer has his medical records. Pt
records will be reviewed in   s for evidence of continued or resolved
Injury: //
======================================================================
L ear- took all antibiotics as directed,  no lesion noted.  Pt denies any further
PCC-NURSING INTAKE
COPD
* Keep a diary of you weight.
LUNGS;occ wheezing no rales O sat %RA
IMED INFORMED CONSENT EYE HEALTH
Hbac in  months
Yes. The following physical limitations are reported: Vision, Hearing,
pt admi
YES
Patient denies presence of a febrile illness.
Heart Disease
Tobacco Use Cessation:
BUT IS NOT ABLE TO COME TO HOSPITAL TO PICK UP)
CURRENT MEDICATIONS: Active Outpatient Medications (including Supplies):
Select  -  : Not at all [ points]
Abdomen:
Patient tobacco free:  &lt;  year
? rales in rt base.
could not convince him otherwise.
No barriers to learning identified
(None; Normal)
Telephone #:
Mode of arrival: Ambulatory
[ ] Psychiatry:
[ ] Di uptive: Angry; increased anxiety; verbally abusive; combative;
Route: IV
Medication: LABETOLOL
Site: IVP
Latest Vitals:
If no, comments:
dyphoric; affect congruent, reactive sadness.
PHARMACY NOTE
ADDENDUM
None
He is to see Pulmonary on // at : p.m.
$TEXT
- - - - - - - - - - - - - - - - - - - - - - - - - - - - - - - - - - - - - - - -
OPERATIVE FINDINGS:
Patient was given education and a kit containing  FOBT cards with
Yes. If Yes, the patient is counseled to stop
Length:  minutes.
bladder distension.  integ piv patent,left ue g lab specimens sent.  a stable
NURSING ASF POST-PROCEDURE NOTE-T
B/P:    / (// :)
Author: BOWDEN,DEBORAH B
MRC APPROVED: /
Protocol(s) used: &lt;Not identified&gt;.
Pain contract located and intact:NONE NOTED             Last UDS: JUL.&quot;
No Associate Provider Identified
Last pcp appt:    //
use of tobacco product due to its
PLAN:
another veteran.
PATIENT CHECK OUT NOTE
W R  , LPN.
Patient discussed with attending physician, who concurs with findings and plan
Progress Note (if indicated):
PATIENT CHECK OUT NOTE
to  for sampling of the mediastinal lymph n .  Bronchoscopic
Pulse Oximeter reading at admission:
Patient has answered NKA
Feeds Self
Community Resources Access/Referral needs:None
Call Type: BHM RX  WAL.
Length:  minutes.
,  W is assigned to Caller Area  EMER.
ADDITIONAL COMMENTS/INFORMATION:
CHIEF COMPLAINT:RUL NODULES
DENIES FALLS/ MEDICATION CHANGES
Temperature:  . F [. C] (// :)
LAB RESULTS LAST  HRS - NONE FOUND
Anesthesia Technique:  RAL
.  Hypertension, controlled.
.  Probable CA right lung.
.  Otherwise as per previous notes.
HEIGHT:  . in [. cm] (// :)
. It is not expected that an anesthesia practitioner will be
Allergies reviewed with patient. Patient denies any new allergies at this time.
BP:  / (// :)
ADMINISTRATIVE NOTE
(complete all that apply)
RHYTHM:
-    demonstrate adaptive breathing and energy conserving technique.
Admitted From:  Home
Mode of Arrival:  Private Vehicle
Height:          . in [. cm] (// :)
Dyspnea with Walking
OXYGEN
Nasal C ula /liters
NEUROLOGI
Bed Alarm On
Door Open to Room
BLOCKS:
Diminished
Nasal C ula /liters
PHYSICAL ASSESSMENT
Keep door open to patient room
CARDIOVASCULAR
Weight:           lb [. kg] (// :)
WNL:  Alert and oriented to person place and ti
Albuterol .cc/.cc Atrovent
O U T P U T S:
PRIOR TO LEAVING AND HE STATED UNDERSTANDING.
RATE:&quot;s
SW called Muskogee community action at -. Requested meals on wheels be
Pulse:           (// :)
[] IM Demerol  MG
tapers at the ureteropelvic junction.
Nutritional improvement and weight loss/management: caloric
This patient IS NOT receiving Non-VA Care.
six items of informed consent: nature of the procedure, indications
Information Statement (VIS) Inactivated Influenza Vaccine (//)
Unable to contact
. Please read each item carefully and select the correct answer for
Temperature: . F [. C] (// :)
Weight(lbs):  lb [. kg] (// :)
AMBULATORY CARE NOTE
obesity and offering a referral to MOVE or another weight loss program
. No evidence of injury during or immediately post-procedure related to
NOTIFY LIFE SUPPORT @ () - EXT. OR GO TO THE EMERGENCY ROOM
PCP ordered EKG and labs to . Cardiology consult ordered as well.  Pt to RTC
IN MANY YEARS WITH THIS.
Laboratory Data
review, impression, and plan.
.  Hypertension.
Arrhythmia Present: (type, duration, # of significant events)
Comments:
Current Vitals:
BLOOD PRESSURE  / (// :)
CARDIOVASCULAR
muscle).  This could lead to reduced oxygen supply to part of the
SUBJECTIVE:  Patient&quot;s chief complaint is feeling imb ce when
Comments:
: Pt. Physcians by to check on pt. new orders obtained. Pt.
ATTENDING PHYSICIAN NOTE (T)
)   SODIUM CHLORIDE .%  INJ in SODIUM CHLORIDE .%   ACTIVE
physician&quot;s point of view. Patient seen by physical therapist to , and he
consider SNU placement. Spoke with patient at the bedside this AM, prior to PT
I think he will ultimately be able to use for improved safety with gait.
Actions: Assist as needed w/ambulation and transfers;
BM:  No   #BMs:     Colostomy: No
)   OMEPRAZOLE CAP,EC  MG PO QAM-DM                      ACTIVE
insurance through Asarco; he retired from there after  years of employment.
Comments:
PAIN ASSESSMENT
Oral Care: Self
)   AMIODARONE TAB  MG PO TID                           ACTIVE
)   OMEPRAZOLE CAP,EC  MG PO QAM-DM                      ACTIVE
-   No Risk
this time, no s/s of pain or distress.
Regular, unlabored, no abnormal breat
TELEMETRY NOTE
Oral Care: Self
Oral Care:
Accompanied by: Hospital Staff
GOALS OF CARE:
Other insurance
Patient IS homebound
**************************************************
in Sealy urgent care clinic yester .  Patient was  prescribed lexapro  mg po
presents to me for a primary care follow-up visit for the above listed
PFT on //
AIRWAY: PATENT
related that he is close to his adult children now, even though he was not
MH INDIVIDUAL PSYCHOTHERAPY NOTE
he was not suppost to drink with, and that he just drank most of a bottle of
/.  Pt. did not have any signs of withdrawal, no febrile epis , no
Conroe.
Observe pt&quot;s ability to use call light
Vital Signs:
% PERFORATED EAR DRUM (SERVICE CONNECTED)
Patient Education Assessment:
FAMILY HISTORY:  FATHER: COPD, CHF MOTHER: MUSCULAR DYSTROPHY
)   CITALopram TAB MG TAKE ONE-HALF TABLET BY MOUTH      PENDING
Date/Time:  JUL ,  :
Presented: Ambulatory without assistance
.  Over the past   , how often have you been bothered by any of
horrible or upsetting that, IN THE PAST MONTH, you: Were
The veteran attended group therapy to  facilitated by Judy McCully LMSW and
Patient is being followed by VA Mental Health Clinic for depression.
PROBLEMS, GOALS, AND INTERVENTIONS
( )  Refuses counseling
talk to her on his leisure time.
Media:  Leather crafts
Patients were shown a film entitled "Bradshaw Part ". The focus of to &quot;s
VETERAN ATTENDED CLASS ON DENIAL, THE ALCO/DRUG ADDICT, OVER EATER AND THE
PER PATIENT ADDENDUMS WHERE NECESSARY:
LMSW.  The class focused on a presentation outlining characteristics associated
Mr.   stated that that was min he could spend more productively taking
The veteran attended group therapy to  facilitated by Judy McCully, LMSW.
Add:
TIME OF CONTACT:  -
Mr.   continues to show sincere desire to develop a constructive leisure
lifestyle once he leaves IOP.   He has followed instructions on our process (see
) Mr.   will contact me regularly via phone and/or e-mail to report
To &quot;s topic of discussion was attitudes in  ral and then we focused on
a hand-out about how as addicts they sacrifice their own personalities to
intervention as they appeared to be talking about this situation appropriately and healthily.
TYPE OF CONTACT:  Group Therapy
within normal limits.  This also suggests a reduction in severity of anxiety
SATT GROUP THERAPY
He stated that currently, he had NO spare time to spend on leisure activities.
feeling better about things. He is waiting to hear about his full time
program, and contact number for MOVE! Program.
Patient declined NFS referral.
am I aware of it being a common side effect from Bupropion, Clonidine,
WHY NOW?  Not feeling suicidal at this moment, but thoughts come and go.
)   NICOTINE MG GUM CHEW  PIECE IN MOUTH EVERY  HOURS   ACTIVE
depression and Paroxetine  mgs p.o. h.s. for depression, Ziprasidone
. Athetoid/Myokymic
. Ankle Flexion/
TIMES A   FOR ANXIETY AND NERVE PAIN
AS NEEDED FOR TOBACCO CESSATION, NO SMOKING OR
Phone contact attempt log following appointment no-show:
Pain Assessment:
Coronary Artery Disease
ear pain, pressure, or discharge.  One ear infection approx  year ago.  No
exposure reportedly occured in Viet Nam.  Pt denied and significant civilian
City/State, facility if known: Sierra Vista Regional hospital
HIGH RISK FACTORS: None
Narrative comments:
TWO TABLETS BY MOUTH FOUR TIMES A
CYCLE.
.  Zolmitriptan  mg for the onset
OUT OF THEIR HOME AND SERVED HIM WITH DIVORCE PAPERS    AGO.  PT STATES
Purpose:  Veteran was referred to the SUPT clinic by  physician  the purposes
(//)
syncopal episode and he hurt his knee.  He also mentions that he has
)   ALBUTEROL SO .% INHL ML USE  AMPULE IN          ACTIVE
ADDENDUM
MST Screening:
Constitutional: No fever or c s
drug use escalated. Used cocaine, meth?, and alcohol. went through treatment
were injured and sutures.
Patient BMI: BMI: .
)   OXAZEPAM CAP,ORAL  MG PO QH PRN MG FOR S&amp;S OF     ACTIVE
Referral to physician/psychiatrist
Completely Independent
EATING
SAFETY: PSYCHIATRIC SERVICES PRIVILEGE STATUS:
Stays to Self
-LIVE AT HOME.
=========================================================================
herniation of discs L and L with chronic back pain,
call this number -- if tommorrow to call this nmber --.
Pt did not keep his consult appointment and did not reschedule.
(Cialis).  Vardenafil is the formulary agent. Sildenafil and Tadalafil are
transfer to VA:  We will update you when information revieved and reviewed.
surgeon at UNMH.
pain. He participated well in his therapy. They are concerned with him going
physician, and Chief, Stroke and Rehab per Patient Transfer Coordinator.
MONITOR COMFORT - AND WILL REPORT INADEQUATE PAIN MANAGEMENT TO PROVIDER IN A.M.
step: if st step negative repeat on // and read on
Needs assistance with daily mouth care		No
Patient states that he has been in and out of various facilities recovering from
VET WELCOMED P ER. LIKED TO BULD MODEL CARS AND MOTORCYCLES/.
Alert and Responsive
Coping with Medical Condition/Process
ADDENDUM
Comment: Patient verbalized understanding, and also verbalized his
Veteran stated that he wanted to use the paraffin to address his R hand
R hand was then positioned on hot pack and covered for  minutes total.
from under his leg, move the leg rest out of the way and gently lower his leg to
Veteran had two helpers but was very independent and demonstrates good b ce
Eating: NONE
PMR/OT DAILY CONSULT NOTE
b. FUTURE APPOINTMENTS:
P) Continue to assist with dc plans.
=mod assist; =max assist; =total assist)
one can transport. Wife has back problems and unable to assist him. Patient
=========================================================================
,
EMERGENCY DEPARTMENT NURSE TRIAGE DOCUMENTATION
Respirations:     (// :)
with multiple  fractures.  Here now because of low back pain he has a
Cardiovascular: vss
[x] Mail    [] Window
INSTRUCTION TO PATIENT:
O LPM:   None
yo M with RLE ex-fix abutting skin on lateral margin of leg without skin
Pain:             (// :)
Total time: min
BP:             / (// :)
explained at this encounter.
Past Surgeries at this VA:
pt and his wife were in room discussing pts dispo and care
Pt  is  y   male w PMH significant for Bipolar and personality disorder
Has patient been newly prescribed any of the following medications within the
vomiting. He has not have drowsyness spell since admission. He could walk w/o
Patient being discharged to: Home
USE CUTTER AS DIRECTED AS NEEDED        Refills:    Last:--
done.  He can be reached at the above phone number at anytime.
full consent
Hyperventilation is obtained. Photic stimulation induces very strong and well
son.  The veteran reports that he has been attempting to put information
CARDIOLOGY OUTPATIENT NOTE
ADDENDUM
financially and emotionally.
Pt referral from   Klein.  Set up appt on June  at  hours to discuss
Also, vet&quot;s hardship waiver application has been approved and will leave that
. ALLERGIES:
TO BE SAFE.
VET HAS HX OF SUICIDE ATTEMPTS WHEN UNDER PRESSURE.
Surgeries:  Hemorrhoidectomy
Encourage patient to share concerns and feelings.
q shift
Height:  in [. cm] (// :)
ADDENDUM
Date last Assessment was done: //
Is patient on Palliative/ Comfort Care: No
d/o with agoraphobia per // MH note by Lori B. Highberger MD on AXIS I
Observed and documented behaviors.
Comments:
good news that he was able to save his home.
NONE
attempt return to work - c ot return to driving truck, as medication
Oxygen: NA
The patient&quot;s eligibilty includes: PRIMARY ELIGIBILTY CODE - NSC
Patient Disposition
No Agent orange/radiation/combat during Army
Seasonal allergies
ADDENDUM
was presented. A related rationale for treatment was provided, including the use
Active Outpatient Medications (including Supplies):
do not have any knowledge pertaining to billing p cies.  Veteran was
PROCEDURES:
. Unemployment *
arrives by ambulance with SI, taken to room  for comprehensive triage
and persistent mental illness includes, but is not limited to
Assess patient&quot;s fall risk upon change in status, after a change in
Assess the patient&quot;s coordination and b ce before assisting with transfer
EDUCATION NOTE
home care services to provide medication management, physical assessment,
etc
Manual Dexterity:
VET STATED HE WOULD NOT BE COMING BACK TO THE VAMC FOR SERVICES OR TREATMENT AND
CHECKED OUT FOR ESCALATING OF BEHAVIORS AND SI STATEMENTS.
Dysphagia diet:  No
time extensive evaluation and review was taken and it sounded to me that he had
-) who his PCP was.
delusional-like preoccupation with food and food safety.  Wife has replaced
results.
Pulse:
Influenza Dose: . ml
PATIENT ENTERED MEDICATON REVIEW: Oct ,
A/P
PC - RESULTS LETTER
Additional Comments: The vestibular and cochlear apparatus as
Patient is here to  for his initial VA primary care visit/exam.
amphetamine, benzodiazepene and cocaine.  WBC=., H/H=./., plt=.  Na=
consistent with severe hypoxia encephalopathy.  CXR with possible perihilar
PCC NOTE
Patient instructed to remain in area for  minutes after injection.
**********************************************************
PATIENT&quot;S NAME:  ,
*.  MDD
RESPONSE:
Comment: THE PATIENT ALREADY HAS A SET OF CARDS AND WILL WORK ON
The patient was counseled on the risks of overweight or obesity and
ADDENDUM
WITH MHC AND IT IS MORE CONVEINANT FOR HIM.
complete.
MHC MEDICATION MANAGEMENT
Pertinent Past Medical History:  REVIEWED
CONSTITUTIONAL EXAM: Vital signs stable
PCC TELEPHONE NOTE
)Hyperlipidemia
DOSAGE UNITS TO BE DISPENSED:
non-formulary medications.  Documentation of monitoring is
Has / Migraine to , which causes his BP to go up.
very anxious , paranoid, restraining order aganist him
- Set a quit date, ideally within two
EK-HISTORY &amp; PHYSICAL (BP)
Headaches and high blood pressure; percocet tried to no avail; clonidine
Pt use the wheelchair went he came out to dinner, he walk out to get his
ACETAMINOPHEN FROM ALL SOURCES
mistrust he has for Ft. Riley personnel that he has come in contact with.
Site: left forearm
interactions, dosage, storage, special instructions.
Pt on phone this am calling operator &amp; requesting to speak to the surgeon
PRN FOR PAIN - NOT TO EXCEED MG (ACETAMINOPHEN)
MEDICATION:
EK-NO SHOW
changed clothes for several  s.  Veteran has not been eating well.
Inventory sheet completed:  Yes
. Secondary Diagnosis:                   No:
LOR-WR.  Active Duty.  Alert and oriented X .  Appetite is poor-fair.
and family dynamics.  S.W. to meet with patient regarding those concerns.
discussion. Forgiving ones self is a c enge which led to some discussion
)   LORAZEPAM TAB   MG PO TID PRN FOR ANXIETY             ACTIVE
IS REPEAT DOSE - MAY BE GIVEN ONE TIME IF FIRST
closed and even nonlabored respirations. Will continue to monitor patient&quot;s
LOR-PRSE.  Active Duty.  Alert and oriented X .  Appetite is good.
cravings, smoking cessation
Wife told him she has decided to divorce him and asked him to accept this fact.
saving the marriage and she adamantly said "no". She blamed him for shredding
)   TOPIRAMA
LOOK ON HIS FACE WHEN HE CAME OUT TO MEDS, MEALS OR PRN&quot;S, VITALS, SHOWERED
NOT TO EXCEED , MG IN  HOURS FROM ALL SOURCES
participated. He spent the shift in the  room watching tv and socializing with
GOAL; RELAX, SHOWER, SHAVE,GETA HAIR CUT.
.  Posttraumatic stress disorder chronic severe.
Patient had safe/effect. use of medication at this encounter.
PATIENT INFORMATION:
HEART:
Patient Education Documentation:
[x]Patient was called on //with reminder of appointment
Patient Education Documentation:
ASPIRATION AND/OR INJECTION OF JOINT, BURSA, CYST, OR
LISINOPRIL MG TAB   Sig: TAKE ONE TABLET BY MOUTH EVERY   TO CONTROL BLOOD
. The patient HAS decision-making capacity.
infection, swelling, inflammation, or other symptoms.
Sees local private cardiologist -  physician                orthopedic - physician who recently fired pt
SHOW LOW FOLLOW-UP
[x] Message left on machine regarding appointment date &amp; time.
Comment: Med list reviewed with and given to pt post provider visit.
Paranoid
sterri-stripped.
TYPE OF CONTACT:   PERSONAL[ ]  TELEPHONE[ ]
DATE OF CONTACT: OCT ,
worked so good lately.
CONTACT PHONE: Patient Phone: ()- Verified.
rates neck pain / which is constant in nature, does not radiate
Active Outpatient Medications (including Supplies):
(D) Extraction erupted tooth/exr:
)   BENZTROPINE MESYLATE MG TAB TAKE ONE TABLET BY MOUTH  ACTIVE
provider added as a co-signer.
DISCHARGED AMBULATORY, STEADY GAIT TO HOME.
CLINIC FOR WITHIN ONE WEEK.   PATIENT MAY GO THE MENTAL HEALTH WALK
the urinary problem
Meds: Active Outpatient Medicati
-pcxr done
This case is supervised by the cosigning psychologist, who was available during
Active Outpatient Medications (including Supplies):
)   QUETIAPINE FUMARATE MG TAB TAKE ONE TABLET BY       PENDING
    </notes>
  </record>
</records>
