# Supplementary material for: Predicting the Risk of Suicide by Analyzing the Text of Clinical Notes
Source: PLoS One. 2014 Jan 28;9(1):e85733. doi: 10.1371/journal.pone.0085733 (PMC3904866; doi:10.1371/journal.pone.0085733)
Supplement: Appendix S3 — Machine Learning Libraries and Methods: This section is provided to enclose the open source (Apache License) classifier used for the building of the statistical models, specifically for the purposes of study reproducibility. A detailed account of these tools is intended for another publication. (ZIP) [file pone.0085733.s003.zip › Appendix3/ML_libs/Regression_testing/group2/grp2-pt-1099.xml]

<?xml version="1.0" encoding="ISO-8859-1" ?>
<records>
  <record>
    <group>2</group>
    <study_id>1099</study_id>
    <notes>
METHOD: VERBAL VIA TELEPHONE
PT:      .     (// :)
Called patient per PC ANTICOAGULATION MANAGEMENT NOTE and informed him of INR
results. ..
brocc , cabbage, cauliflower, or liver) may make the medicine less effective
clots.
Patient has contacted clinic requesting  wal of the following:
ATRIAL FIBRILLATION ON COUMADIN
Review Positive  physician ollected //
TEMPERATURE:  . F [. C] (// :) BP: / (// :)
Does patient have any new allergies to report since last visit?
LABS:
Patient and/or significant other states adequate information was given at this
April , . At that time he was complaining of left-sided
MEDICATION RECONCILIATION:
X- S:
visit.
Description of To &quot;s Injury/Illness:  Concerned about elevated lipids at
other similar product).
Non-VA prescribed medications:none
Techniques for self-monitoring drug therapy.
smoking - none
no, patient not interested
Pt presents to  for scheduled nsg appt for B/P check/monitor education.  Pt
Select one of the following c  if service provided at this visit:
HPI: pt. returned to clinic as schdule for bipolar dis mixed. has been
Pt remains safely monitored on q minute safety checks.  Resting in his room.
IDENTIFYING INFO:
Hold Depakote tonight
FLOW OF THOUGHTS:
Rational
Period of Service: VIETNAM ERA (DEC , to SEP ,)
NURSING NOTE
SUBJECTIVE:
PSYCHOSOCIAL:
BOWERMAN, KAREN: PHYSICIAN ASSISTANT
Group was educated about trmt options of Family Psychoeducation Program and provided informational
Homicidal Plan:
APPETITE:
Veteran in bed, resting quietly with eyes closed. Respirations even/unlabored.
Active Inpatient Medications (including Supplies):
Suicidal Ideation:
Time: ::
Pt. also loosing weight, he lost  lp since last appointment. He eats once a
ACTIVE MEDICATIONS:
min ago while driving. associated with shortness of breath. Pt. was under a lot
were given. (IF CAREGIVER, note relationship to patient:  )
dc&quot;d from Hamot on / after PE. Pt was seen in ER by Urology.  Apical
running again. IID to left wrist  with NS infusing at cc/hour. Pt is
of course that needs to be determined by professional mental health staff.  I
L. Monitor oxygen saturation via ABG&quot;s and/or pulse oximetry as ordered
WT:    lb [. kg] (// :)
PPP. Voiding punch colored urine with scant    blood clot noted in
Nutrition:          = Adequate
Reviewed written instructions with patient/family/caregiver.
PRE VISIT OPD NURSING NOTE (T)
MED RECONCILIATION(SURGERY):
gross hematuria in the past secondary for a past history of
USES CANE FOR AMBULATION, AT BEDSIDE
INFORMATION ONLY
HIATAL HERNIA  %  SC
HR
If Patient is DNR - is Blue Band on? Yes
Laboratory Data
skin   warm and dry no lower extremity edema with bil pedal pulses
NURSING - INPATIENT
but increase with exertion. BBS clear but diminished. Sats %RA. Abdomen
Braden Scale - For Predicting Pressure Sore Risk
HOMEBOUND STATUS:
The patient DOES NOT HAVE a limited life expectancy (likely to be less
need for short term rehab for "-   for a rehab program of transfers,
now- I could just go to s p
NURSING INPATIENT NOTE
Braden Scale - For Predicting Pressure Sore Ris
Other: Up to bathroom for assisted cares.
S PLESSNESS (DOSE=*MG TAB=MG)
Not applicable
Mobility:           = No Limitation
PRIMARY DIAGNOSES:
Pain level noted on VS template and reported to the provider via
Current Medications, including OTCs and complimentary medications: none
records. I was going to interview the veteran for a second assessment, but the
. Tobacco use: ppd;  no plan to quit
bulge right here."  Denies CP, SOB, N/V/D, H/A, and
"due to poor decisions", worried about bills, cost of divorce, opportunities to
busy working and had his own covenience store for  yrs but now has lost
Group Leader: Mandy  , OTS
modalities, therapeutic containment measures for safety, and environment
CURRENT SKIN ASSESSMENT
Chief complaint: si without plan
Reviewed discharge medications with patient. Patient verbalizes
Actual discharge time: :am
Location: pain in lower back and right knee
Pt states he slipped on  steps and this aggravated his low back pain over the
ALCOHOL. I also want to limit his free water intake-to  glasses daily. Use low
_xx___ Will be picked up by the patient on ____
.Benign hypertension.
__x__ Need to be  wed
wals.
wals.
____ Need to be refilled
encounter.
Handouts Given: printed prescription regimen for assistance in
"For my usual check up."
// :  A-ASU PAIN INTERVENTION
already left when they tried to call him. apologized to paatient for
Spoke with pt concerning pain procedure on __/ at :___. Pt instructed not
rd floor, ASU with a driver. Pt instructed may have heart and blood pressure or
Intensity:
States is able to function on current treatment plan.
Time: Jun ,@:
Weight:              lb [. kg]
R:
Regarding patient,  ,
Trouble s ping at night
GAUGE:
RIGHT EYE: WITHOUT SPECTACLE OR CONTACT LENS CORRECTION: /-
Allergies/Adverse reactions:PENICILLIN, SULFA DRUGS
assessment is complete.
)   HYDROCODONE /ACETAMINOPHEN MG TAB TAKE  TABLET   ACTIVE
Avoid alcohol and tobacco.
BP: / (// :)
[ ] Significant Other:
Anticoagulation: No
TAKE AS DIRECTED FOR COLONOSCOPY
Complications:
Specimen (Received Aug ,  :):
- - - - - - - - - - - - - - - - - - - - - - - - - - - - - - - - - - - - - - - -
Respiration:  (// :)
Is the patient taking any NEW Over-The-Counter, Non-VA, or Herbal medications?
GLUCOSE (last ):
CALL INITIATED BY: _X__Veteran  ___Nurse  ___Significant Other ___Agency
___URGENT      ___ROUTINE              ____PATIENT EDUCATION
CALL INITIATED BY: __X_Veteran  ___Nurse  ___Significant Other ___Agency
relaxed and drowsy feeling.
ACUTE - OBSERVATION FOLLOW UP (TELEPHONE)
MOUTH EVERY  HOURS IF NEEDED FOR SHORTNESS OF BREATH
*
IF NEEDED FOR ANXIETY
// - REQUIRES NEW PRESCRIPTION
PT IS REQUESTING A FEE CONSULT TO GET HIS HEPATITIS SHOT DONE LOCAL. HE STATED
PC - TELEPHONE NOTE
Age:     Sex: MALE
MEDICAL PROVIDER: pearce/fillion
Jax,Laboratory            //@:      Non-count
draw clock correctly.  Ability to manage meds, etc is not an absolute certainty
APPOINTMENT TO  WITH PSYCHAITRIST WILL ALERT HER TO HAVE VETERAN COME TO
History/Clinical Information: Multiple old CVAs
OF APPROACHING THIS PATIENT FROM STANDPOINT OF CC AND STRUCTURED HISTORY I LET
Pain recorded at this visit as
scope done.
Pain recorded at this visit as
He&quot;s had a significant decline in his physical health over the last  months
S:
TELEPHONE TRIAGE
Previous bronchsocopy was unsuccessful, and mass was too close to the aorta for
States that he has arranged to be transported home upon discharge
- - - - - - - - - - - - - - - - - - - - - - - - - - - - - - - - - - - - - - - -
REFERRED BY: self
V.)
GASTROENTEROLOGY CONSULT
Anticancer Res.  Sep-Oct;():-. s
BP / (// :)
Active Problems
Personal History of Tobacco Use (ICD--CM V.) V.
Visit Date: // :
. How often did you have six or more drinks on one occasion in the
F (. C)
Clinical Reminders Activity
biopsy. Vet advised that results are availble in CPRS but this writer would have
Park.
for about a month.  He has a mild weather ache.  He comes in to discuss
Gastrointestinal Disease Reviewed
Depression: NO MEDS
Substance Abuse Reviewed
Do you have family or other support person at home ?
. Treatment/procedure: The purpose of this procedure is to replace
the joint will be cut away and replaced with the prosthesis.  If
The image can be viewed by selecting the TOOLS option in the Menu Bar and
WT .
MOVE! - BMI &gt;:
=====================================================================
units +ss     supper
Advance Directive:
ADDENDUM
SOLUTION AS DIRECTED WITH EACH NEW BOTTLE OF TEST
)   INSULIN,GLARGINE,HUMAN  UNIT/ML INJ INJECT        ACTIVE
periorbital area, cheeks; including frowning, b ing, smiling,
A sc ed external medical record is attached to this note.
PHQ-
screen for depression.
Not at all
Use Vista Imaging via the "Tools" menu to access.
ADDENDUM
Skin Carcinoma
TRK#
LBP facetogenic. Please eval and treat with stretching (esp L-spine and
GENERAL SURGERY CONSULT RESULT
Please call if not  wable. Thanks
BRIEF STATEMENT OF INFORMATION REQUESTED AND GIVEN:  physician would like a
- Avoid sun exposure or wear sunscreen.
HPI:  y/o male with hx Barrett&quot;s esophagus since .  Had low grade
: cervical, lumbar spondylosis
: T&amp;A as child
at cm.
SCANNED RADIATION THERAPY REPORT
. Diverticulosis
- cc NS iv started at cc/hr.
Plan for education on treatment plan, services and procedures
Gen: NAD
Inpatient - Current Diet Order:
Discharge to:Home
S : This  y.o male seen resting at bedsite in NAD c/o diabetic foot
ral: Pt A&amp;O *  with good color resting comfortably in bed.
Plan:
A: Dm ulceration
Patient had prostate screening education with risks and benefits
Neuro: Protective sensation absent bil via Semmes Weinstein . (g)
Computer is the source for the following medication list:
that he is feeling good and has been chaiging his dressing daily with iodosorb.
(//  : PM  )
CLINICAL
SUBJECTIVE: pt feels "fine" this morning, had BM x  (nonbloody), tol clear diet
// @       .                /         .
SODIUM:
Frequency of pain: Comes and Goes
last   s:
Personnel:
Exam performed in Endoscopy Suite. Inpatient-
Pre-Exam Physical:
PAIN ASSESSMENT
exudative process (no candida) with non-obstructing underlying tumor
s. no other new complaints overnight
Anti-Histamines: No
Auth: /-//
SKILLED NURSING HOME CARE CONSULT (BP)
medication management and physical assessment.  Patient was admitted to the
Concurrent signature by ACOS for Ambulatory Care indicates approval for
Reports he is a smoker, has hx of alcohol abuse, but quit "years ago". states he
. LUMBOSACRAL SPONDYLOSIS
Date of birth:   ,     Age:       Sex: MALE
Patient states he/she is bein
while in USMC.
PAIN, CHRONIC still
The following risk factor identifies this patient at high nutritional risk.
Weight: . lb [. kg] (// :)
Has a sitter or required a sitter this  admission or previous admissions: No
presents to  with:
Ways Alcohol and  physician the body, mind and environment in so many
NUTRITION CONSULT
Frequency of pain:All the time
vet with poor s p secondary to back pain/tightness. racing mind about CA. Vet
COPING INEFFECTIVE R/T DEPRESSION WITH SUICIDAL IDEATION:
PAIN ASSESSMENT
The lecture on BIO - PSYCHO - SOC
P: Describe any significant individual issues for this patient:
___ N/A
Social worker met with Veteran, treating inpatient psychiatrist and nursing care
Assess patient&quot;s fall risk upon admission
Has patient been newly prescribed any of the following medications within the
at /. Ate half of dinner and said he did not like the food. Denied any
Complications:
. Anatomical Location: See description of treatment/procedure.
completely res d per his report.
ulceration, there is granular wound base. Ulceration measures  x . cm. Wound
vital signs.
he is feeling better, headaches and neck stiffness resolved. Denies
awake, alert, NAD
) Sucralafate
FAXED TO (FAX NUMBER): --
.  History of myocardial infarction (MI).
Discharge Summary Dictated #
bottom.
consult he was being discharged.
Level of Understanding: Good
. Diverticulosis
NURSING REASSESSMENT NOTE
Frequency of pain: Comes and Goes
Assess the patient&quot;s coordination and b ce before assisting with transfer
GLUCOSE LIQUID,ORAL              GM            PRN ORAL
last   s:
EVALUATION:
Active Outpatient Medications             Refills      Expiration
DATE/TIME         TEMP    PULSE   RESP    BP      PAIN    WT (LB) P OX
(  s)
Report given to accepting RN: LaVerne Clemens RN
Check Pain Level by clicking the appropriate measurement
BODY MASS INDEX - . (JUN , @::)
Pt states he feels much better
- cont nutrional supplementation
-Diabetic foot ulcer
Pt given  mg Plavix PO per MD order.
Pain Goal--What pain level is acceptable to patient (-)?
which the patient was discharged.  H
Treating copd exacerbation / bronchitis with moxifloxacin and prednisone.
Accuchecks range - to
Await echo
LUNGS: crackles at base
Does patient have pain?: Yes
Integrilin mcg/kg/min
(S) - sedation (goals, level, daily awakening trials, methods, etc)
S:  Pt. without complaints.  Denies CP, SOB, abd pain.  No lightheadedness.  No
)   ASPIRIN TAB,EC  MG PO DAILY                          ACTIVE
No longer requires ICU care.
ALTE
See R Accept Note for full details.
CARDIOLOGY NOTE
CARDIOLOGY NOTE
PMHX: DM; Esophageal CA s/p radiation; GERD; CAD; Hyperlipidemia, COPD;
Do you have any questions or concerns about your current diagnosis? No
and that his HHA services may be delayed until that happens. He finally seemed
RADIATION ATYPIA
FOUR TIMES A   AS NEEDED FOR EPIGASTRIC PAIN
Vet was oriented to the Recreation Therapy program. Vet was provided a copy of
Allergic rhinitis
Diabetic Foot Ulcer
Active Outpatient
Pt returns to clinic to be evaluated for  er W/C. He reports that he has
f/up. Pt states he is tired, continues to smoke approx  PPD: educated pt on
Pt to call via TLC if he has any questions.
Will have him evaluated at Mayo clinic for possible endoscopic mucosal resection
Y/O MALE arrived via Ambulatory
To (x)x-  ()CT Scan via () ambulatory, () wheelchair, (x) stretcher
. Impingment Synd
ED NURSING NOTE
points.
physician
PATIENT NAME:  ,  C           SSN #: --
PATIENT ADDRESS:
. Surrogate (if applicable):
Upon f/u here, his PSA was ..  ADT was continued.
SMR&quot;s:
Jun  Atypical CP, EKG-nl.
Raised in Galesburg IL-intact family, older of  children have a
TYPE OF JOB(S):
HISTORY OF PRESENT ILLNESS:Pt. here for evaluation of right side rib discomfort.
=========================================================================
Went to clinic after s and was given pain med (Tramadol) that
EXERCISE EDUCATION:
No problem
Requesting refill(s) for prescriptive medication(s).    HYDROCORDONE
AMOUNT TO AFFECTED AREA TWI
ADDENDUM
ADDENDUM
Caller:
Puls:  (// :)
Either Ophthalmology or Optometry
Anternate Telephone Number
Conversation with  ,  D has a chief complaint of: &lt;not
PSYCHI - GENERAL MD NOTE
CDC Vaccine Information Statements(VIS),dated // was made available
[] Poor social support
MEDICAL - CLINICIAN SOAP NOTE
=========================================================================
Duration: minutes.
ADDENDUM
appt..
Conversation with  ,    has a chief complaint of: &lt;not
vision
Weight observations/appearance: acceptable
Name:
Patient comprehension of education:
...o..Veteran appeared to s p fairly well this night shift...
neck have blood crusted on them and I asked if it was itchy or bothering him?
communicate with the  dan VAMC staff pertaining to admission, diagnosis,
Patient is Level
sister states that she believes he went off of his medications again just over a
Vet refused to keep  et and returned to property.
Pt. will demonstrate the ability to function in a structured setting.
Entered in error.
Patient Education materials provided to patient (specify):
Reason for contact: Crisis note from  fu with Fort Collins, P ce Dept
he had this injection @ -.
taking mg of Lamotrigen and wants to remain on that.  Will observe him
past year?
Review of Systems:   ral: no fever, +fatigue, +change in weight, down
DOB:   , ()
Patient&quot;s stated: Level of INTENT of this event was: Low
Resperidone Consta which is a new medication for him. . *Also, he is confused
during the order entry process.
attempt and recent thoughts of suicide this past December.  The patient
also exhibited mood lability and is easily prone to anger since the accident.  He
feels are unrealistic goals and deadlines from his boss.  The patient is also
TO &quot;S GROUP: Group members were instructed how to complete SUICIDE SAFETY
Nursing Shift Assessment
Electronically Filed: //
TRACH/NECK STOMA: Patient does not have a trach or neck stoma.
( - ):
-  Home
PATIENT RECORD FLAG CATEGORY II - HIGH RISK FOR SUICIDE
C.No.Loss of consciousness less than a minute?
school and receive a teaching degree in Special Ed.  Pt visited WDVA to  to
NO SHOW FOR APPOINTMENT [T]
, he was in a car accident in which he suffered a TBI and was unconscious
OIF/OEF Outreach Team
I enjoyed meeting with you last week.  I am writing in reference to your
Inhaler Education: /
NECK;supple
X-  of shoulder discussed witb pt
pt is doing better on meds
OPTOMETRY CONSULT
oriented to: Person, Place, Time
no n/V breathing about the same
CHIEF COMPLAINT:
c/o DOE walking across  room
)   FLUNIS DE MCG D ORAL INHL INHALE  PUFFS BY    ACTIVE
Increased effexor XR mg a
[ ] Disoriented: Patient is unable to answer questions correctly
Site: IV
CDI REMINDER DIALOG
Patient requests  wal of the following medication(s):
Gender:  y/o female
Call back number: ()--cel.
assessment. N/A
ACTION PLAN:  What would you like to do
Prostate Screening Education:
Ending at: // @ :: AM
REPORT OF FIBEROPTIC BRONCHOSCOPY
TIME of LAST MEAL:t-
Resp:    (// :)
. Informed consent was obtained at : AM on September , .
proced
VITAL SIGNS:
GOALS:
Protocol(s) used: &lt;Not identified&gt;.
Length:  minutes.
Scheduled return appt:
Starting at: // @ :: AM
___ Smoking Cessation Referral
,  W --
Time to Clinic:// @ AM                               NA:
ACTION PLAN:  What would you like to do
Scrubbed                              Circulating
PATIENT OUTCOME:
mediastinoscopy with mediastinal lymph
-Sumpter
Patient does not desire information.
Present
activity may be useful in controlling BP.
Ending at: // @ :: AM
No Associate Provider Identified
Proctofoam
PUNCH BIOPSY BENIGN RIGHT TEMPORAL:"
RESP:   (// :)
Patient phoned in, requests  wal ENALAPRIL MALEATE MG mailed out.
states he is taking stool softner x  daily.
ADDENDUM
PLEASE NOTIFY VET DC SIMVASTATIN, DO NOT TAKE SIMVASTATIN AND PRAVASTATIN
Non Productive Cough
Dyspnea with Walking
Bilateral, Upper, Lower
NURSING NOTE W/VITALS
Diminished
CARDIOVASCULAR
Effort:Moderate
%.  Placed back on Oxymizer c ula LPM.
CURRENT VITAL SIGNS
Respirations:      (// :)
NURSING NOTE W/VITALS
Effort:None
Apical Heart Rate:
BREATH SOUNDS:Rhonchi
patient dc&quot;d
SOCIAL WORK CONSULT
NON VA Care
Chief Complaint/Reason for Procedure:
GATIFLOXACIN, GUAFENESIN MG/ML UD
- - - - - - - - - - - - - - - - - - - - - - - - - - - - - - - - - - - - - - - -
PREOPERATIVE DIAGNOSIS:
PREOPERATIVE DIAGNOSIS:
- - - - - - - - - - - - - - - - - - - - - - - - - - - - - - - - - - - - - - - -
Influenza Vaccine - Nurse:
Patient discharged in the care of:   Friend
Lung mass
Mr   was called this am and informed of the results of recent
onychomycotic toe on his left foot, the great toe.  He does have
nonsmoker.  He denies chest pain, hemoptysis, or blood in his
AMARILLO VAMC COLON/ENDO LAB:  COLONOSCOPY PROCEDURE RESULTS  --
. Potential for injury related to jewelry
endoscopic procedure
No--Dentures
BY:  physician ti
LTC Co-Pay Status: EXEMPT
Discharge Date:
Reason for visit or symptoms:
Friction:           = No Apparent Problem
Skin Color:
Equal
WEIGHT           lb [. kg] (// :)
REPOSITIONS
Pupil size:-mm
INPATIENT MEDICINE PROGRESS NOTE (SOAP)
healing.
TELEMETRY NOTE
Glasgow Coma Scale:
PVC&quot;S
pt to nuclear med for nd part of dippy test, voices no complaints denies
pt back to unit resting quietly in lbed. vs chareted.
PRESSURE ULCER PROTOCOL
stated "I&quot;m a hugger and I&quot;m going home to "
agrees patient will either need rehab placement or continued PT as inpatient
insurance card. Discussed with Teena  , MSW. She will find out if PI covers
REHAB DIAGNOSIS:  Debility  INITIAL EVAL DATE: May ,
Shave:
BM: No    #BMs:     Colostomy: No
via Wheelchair May ,.
Nursing Interventions:
Pt resting quietly.
not safe for d/c home since he lives alone.
Urine Color:
sister inlaw both have one. Pt con&quot;t to state he felt like he was doing fine
ACTIVITIES OF DAILY LIVING
Lunch:
ATTENDING PHYSICIAN NOTE (T)
recurrent or chronic health problem.
Weight:           lb [. kg] (// :)
appointment with your Primary Care Provider., Return to Emergency Department or
CURRENT HX: He states that he has just been real busy as they are trying to
wm with h/o ETOH abuse and PTSD. Comes with his wife because he is
HEENT:
PATIENT ARRIVAL:
No
Speech - Clear
ADDENDUM
Moisture:           = Rarely Moist
and met with  physician assistance in completion of Insurance papers.
)   VARDENAFIL HCL MG TAB TAKE ONE-HALF TABLET BY MOUTH  ACTIVE
Heart Health
Pt seen to  in reference to // Nutrition MOVE consult
Resp:  (// :)
GU:  Abnormal
ALLERGIES:  No Allergy Assessment
(REQUIRED)
~~~~~~~~~~~~~~~~~~~~~~~~~~~~~~~~~~~~~~~~~~~~~~~~~~~~~~~~~~~~~~~
Method of Teaching:
SATT GENERAL NON-SOAP
Session Facilitator:  Joe Quattlebaum TRS/TXC, CTRS
reporting that he has a resentment to  one of his peers. He stated that the
TYPE OF CONTACT:  Group Therapy
aftercare plan with Judy Plaut at the lOPC and doesn&quot;t want to travel back up
(x )  Video, CCTV
( )  Family Member/Other
( )  Cultural
beings need to accomplish in order to reach their gaols in life.  Veterans were
should be avoided and they talked about time out as an effective means of
certain situations. We talked about immaturity and lack of social skills due
( )  Family Member/Other
to stimulate a more long lasting, positive use of his leisure time.
SATT Recreational Therapy Individual Session:
SATT GROUP EDUCATION/LECTURE
seemed to sabotage themselves when things were running smooth for them. Some
felt it was because, for so many years, self-disappointment and their long
Left  Eye:.
Other
focus of to &quot;s session was a  ral one.  Staff brought up a subject matter
more men than women seek treatment for their substance abuse due to a women&quot;s
TYPE OF CONTACT:  Group Therapy
DSM-IV Diagnostic Impression
Persons present: Patient
ago that he was getting a divorce, so he has had some adjustments to make.
S/O. Veteran was contacted by telephone to assess his response to the recent
noticed any difference overall with the dose being increased. He currently rates
medications, Bupropion Sustained Action  mgs p.o. b.i.d. for
. Chewing/Lip Smacking:
UPPER LIMB:
MH PROVIDER NOTE
NO-SHOW CLINIC NOTE
Hgb .
I REVIEWED THE MEDICATIONS THE PATIENT HAS BEEN TAKING AND THE FOLLOWING
PTSD Screening Nurse:
upsetting that, IN THE PAST MONTH, you:
Intake Examination SAVAHCS
would like to recv hearing aids, hearing eval thru VA.
exam. :
Active Outpatient Medications (excluding Supplies):
PSYCHIATRY STL
Visit Date:  // :
Short session with vet to , who had to go to the hospital
future. DIscussed about teratogenic effects of meds. SHe stated that she took
Service Connection....Service Connected: Yes (%)
when you were drinking in the past year?
for ed to  physician review. Per  physician led pt to inform that
COMFORTABLE ALONE.  PT STATES THAT SINCE SHE KICKED HIM OUT, HE CAME TO SD TO
Veteran contacted this office for a follow up to his recent request for CWT
placement. Veteran has been sheduled for a CWT medical clearance on -- at
Medication Reconciliation:
Patient/Caregiver given Vaccination Information Sheet: Pneumococcal
his wife&quot;s lawyer has been contacting him about various issues related to the
EVERY   FOR IRON REPLACEMENT.
WI-DEPRESSION SCREENING PHQ-:
Medicines are lisinopril  one a  , guaifenesin over-the-counter,
simple sugars and amt he eats at supper.
The contractor discovered that the veteran was not using the oxygen as
USAGE - PT ED: APPROPRIATE LEVELS (SETTINGS) BASED ON PRESCRIPTION
not working.
I have reviewed your imaging studies to date and I can not identify
drug use escalated. Used cocaine, meth?, and alcohol. went through treatment
No  Current Advance Directive
ACTION - Past, present or future nursing interventions.
HYGIENE (INCLUDES COMBING HAIR, BRUSHING TEETH, WASHING HANDS AND FACE
Completely Independent
======================================================================
Physiology
Future Appointments:  Date       Time  Clinic
AXIS IV:
that is an option.  If he opts to transfer to the VA, that is also an option as
after having his external fixature changed tomorrow at UNMH.
How Does Pain Affect Patient&quot;s ADLs/Functioning?
physician?
ADDENDUM
feeding-
for bowel regularity on opiates. hold
Give:  MG PO TID-WM                               Stop:--
O:  Current Diet: Regular Diet
PMH
bipolar
his wheelchair.
The patient ambu
4D INPATIENT NURSING NOTE
assumed care of patient. Patient A/O x, lying supine in bed with
" when asked pain level. Patient states " I can wait till my next dose, I think
.      Psychosocial wellbeing; bipolar disorder, hx of substance abuse
OT Frequency and Duration:- x weekly
E: RESPONSE TO CH
JUL ,@:  BHCL MICHALSKE SUD ASSESS PM
Patient is a  year old MALE.
discharged from Health South   s ago and has not been able to s p
PAIN LEVEL:
Weight:          Unavailable (// :)
Active Outpatient Medications (including Supplies):
O:Historical visit. Pt came into the clinic on a walk-in basis. He is
[x] Medication  wal/Refill
Patient does not wish to outline life-sustaining treatment
LISINOPRIL
)   Non-VA MULTIVITAMIN CAP/TAB  TABLET BY MOUTH EVERY    ACTIVE
Given lab #.
Buckeye, AZ
Monitoring:
Gag Reflex: Present
Resp:  (//  : PM)     B/P: / (//  : PM)
MEDICAL HISTORY &amp; PHYSICAL EXAM (BP)
by Cardiology. He has been on propanolol, florinef and tegretol for symptomatic
slurred speech. No focal neurologic complaints. He carbamazepine level was  at
PROCEDURES:  None.
PLATINUM CLINIC NOTE
contrast.
this time.  Veteran stated that he is facing numerous stressors such as
MENTAL HEALTH NOTE
ADDENDUM
Staff assessment: Level of LETHALITY of this event was: High
VET STATED REASON FOR OD WAS FAMILY AND FINICAL PROBLEMS.
KEEP THE MEDS IN TO REDUCE OD RISK.
committed suicide impressed upon him the impact of this on family; he says he
admission.  Does still have panic packet disseminated at previous visit.
W VERDE LN               Phone: ( -
Patient has answered NKA
Plan: Iburprofen mg PO now and tid prn.
contact is good at %.
REPORT OF CONTACT
cardiology yester  and work up was essentially negative, as they had
Name:            ,
** SIGNIFICANT PAST MEDICAL HISTORY: First Phx. VA psych admis.
year old NSC married male vet admitted to  physician on D. Vet presented
Pain:  (//  : PM  )
This includes an ICD--CM diagnosis of -, and either  or more
group? YES
Gait/Transferring: Normal, bedrest, immobile ()
TYPE OF CONTACT: TELEPHONE
DATE OF BIRTH:    ,
II. PAIN ASSESSMENT SCALE
Author:  physician R LSU physician
[X]  Patient is familiar with how to obtain medication refills.
Vet states he is doing "better" than he was during our last visit. He has been
Active Outpatient Medications             Refills      Expiration
feels trapped inside his home because he could pass out at any time. Indicates
Crossed eye correction,
SOCIAL WORK NOTE
were expanded upon here. She stated concerns about the pt being alone for up
ideation.  Main issue is copayments from hospital.  Per chart, appeared to
*Pt on .mg clonazepam TID and mg clonazepam at HS.  Usual recommended
The patient receives prescription medications:
___ Exercise
Encourage patient to identify and use support systems.
EKG PROCEDURE NOTE
Anti-Histamines: No
PRESENTING CHIEF COMPLAINT:DEPRESSION AND SI
.  CURRENT STATUS: VET IS A  Y/O   MALE.
SOCIAL WORK NOTE
behaviours he spoke of to writer.
-Pt calling in again app to speak &amp;/o to see PCP...explanation offered no appt,
colace to mg tid to see if this improves stool passage and subsequently
Marital Status: MARRIED
required help or supervision with the following activities?
CALLED TO:
- Are you having shortness of breath that is different than usual?
upper denture, Hep B, deviated  septum  having septoplasty, COPD, hypothyroid,
Q&quot;s i II,   and AVF suggestive of age indeterminate IMI. Snall Q&quot;s in AVF, V-
schedule this appointment. Thank you!!
What does your pain level need to be for you to experience
Quit date:
broked up with a girlfriend, who also uses alcohol excessively.
FAMILY HISTORY:no prostate or colon cancer , no heart problems.
encounter.
verified on Jun , @::.
DATE (M/D/Y): //
lAMICTAL  MG PO Q  , SEROQUEL MG PO TAKE /- TAB PO Q HS
THE PATIENT HAD A LAB DRAWN TO .CHART CHECKED TO PCP FOR LAB REVIEW.
)   OMEPRAZOLE MG EC CAP TAKE ONE CAPSULE BY MOUTH       ACTIVE
ATRIUM DDRIVE
Associate Provider:
Apply petroleum jelly such as Vaseline to the nostrils to reduce
Select system affected
See to &quot;s "ER Note (Initial)" for the Vital Signs.
Situation:
Recommended Follow-up location: Clinic
+ Temperature is . degrees F
PPD:
, plan is to switch to Crestor  mg daily.
Medication approved - Rx $ ROSUVASTATIN
No chest pain, no dyspnea
)Hyperlipidemia
Received phone contact from     staff member at Irwin Army Hospital
CARDIOVASCULAR: Other:
- Review past quit attempts
COGNITION: Alert, Oriented x
ADDENDUM
background information. This SW told her I could not disclose any  details
NICOTINE CRAVINGS - APPLY TO HAIRLESS AREA OF UPPER
stated he wants a new social worker.
night.  He appeared groggy during interview, but was able to participate in
monitoring his progress though the notes.  At this time will continue to do so
Pt BP was high at pm  nurse was notify.
milieu, activities and groups, psychological testing, neuro eval,
start over, "no sarcasm from either of us", vet was agreeable.
is repeat dose to use if needed.
Heiligenthal.  He presented angry, agitated and proceeded to take out all of the
there.  He did not want the terms "psychotic", "anxious" or "depressed" to be
assigned social worker.  Mr   replied: "you&quot;d think I&quot;d know that since
identified as  physician  Patient was questioned as to why he was asking these
indicating and he showed this writer an AMA form.  Patient asked if his staff
ASSESSMENT PROCEDURES:
last bm   before yester . HAs lost  pounds. Does have lose of
Instructed patient how to report adverse reactions, order refills, and
Anxiety Disorder:  PTSD,chronic
Met with the veteran on the   per nursing request. When I arrived on the unit
/. Vet took his night meds and went to bed.
all groups to  with minimal participation.  He has been more visible on the
.  Name       Phone  --
Clinician Pager or Emergency Contact # --------------------
Will continue to assess his tx progress, support him, and plan for discharge
)   ARIPIPRAZOLE TAB  MG PO QHS ptsd                     ACTIVE
Attending on unit groups.
check . Pt&quot;s affect is flat and depressed. Pt was encouraged to increase his
Active Inpatient Medications                           Status
closed. Respirations even and non-labored. Pleasant and cooperative with staff
INSOMNIA, AGITATION
EK-NURSING NA MH
)   CITALOPRAM TAB   MG PO QHS PTSD                      ACTIVE
EK-SW NOTE
PREVENTIVE HEALTH MANAGEMENT
Comment: Pt states that he doesn&quot;t do much exercise to to aches and
Height           in [. cm] (// :)
CURRENT MEDICATIONS:
SOB; WHEEZING
Temperature      F [. C] (// :)
Respiration      (// :)
[ ] Phone number disconnected
Psome state
PATIENT WORK PHONE - ()-
FEE BASIS CONSULT
-     elbow protector given
S: Veteran is still focused on obtaining an implant nerve stimulator. He is
O) Vital Signs:
fractures.  Large laceration on elbow was steri-stripped.    s later it bled,
Pain is tolerable.  Bled last night, not much.
Pain:  (// :)
FOSAMAX MG TABLET, ULTRAM MG TABLET, IBUPROFEN, METHADONE, FLAGYL, ELAVIL
not improved, having at least - epis  liquid stools daily since then
Quantity:  Refills:
FOSAMAX MG TABLET, ULTRAM MG TABLET, IBUPROFEN, METHADONE, FLAGYL, ELAVIL
ASSESSMENT: Alt. skin integrity--skin tear left wrist.
)   DOXEPIN HCL MG CAP TAKE ONE CAPSULE BY MOUTH AT      ACTIVE
)   BACLOFEN MG TAB TAKE ONE TABLET BY MOUTH EVERY      ACTIVE
PATIENT AMBULATORY TO EXAM ROOM FOR EVAL OF URINARY
having urinary retention after they changed his psych medication.
PMHx/PSHx:Essential Hypertension (ICD--CM .) Keratosis (ICD--CM .)
Chief Complaint: Decreased Urination (Male)
S,  OAddress:  ISLE  ST
Chief Complaint:
Past Psychiatric History:
DISPOSITION OF SELECTED ITEMS
Patient and/or caregiver given education on safety and fall
    </notes>
  </record>
</records>
