# Supplementary material for: Predicting the Risk of Suicide by Analyzing the Text of Clinical Notes
Source: PLoS One. 2014 Jan 28;9(1):e85733. doi: 10.1371/journal.pone.0085733 (PMC3904866; doi:10.1371/journal.pone.0085733)
Supplement: Appendix S3 — Machine Learning Libraries and Methods: This section is provided to enclose the open source (Apache License) classifier used for the building of the statistical models, specifically for the purposes of study reproducibility. A detailed account of these tools is intended for another publication. (ZIP) [file pone.0085733.s003.zip › Appendix3/ML_libs/Regression_testing/group2/processed/grp2-pt-1003.dat]

!  Done reading
! Total word count = 4834
! Total unique words = 1766
! Total pair count = 9664
! Total unique pairs = 8564
PASSED : 1
AT : 36
SPAN : 2
ADL : 1
ONLY : 1
WORK : 6
PREOP : 1
LISINOPRIL : 1
LOWER : 4
REMOVAL : 2
SWSDISCHARGE : 1
REFILLED : 1
EVENTS : 1
MONTH : 2
ATIVAN : 1
ULCER : 5
REFILLS : 1
THANK : 1
ACCIDENT : 1
INFO : 1
DANGER : 1
WEIGHT : 3
LOWERED : 1
BEEN : 13
REMOVING : 1
SCHIZOAFFECTIVE : 1
BID : 4
ADVICE : 1
UNCONTROLLED : 1
GOALWHAT : 1
WITHIN : 5
GAS : 1
SPHENOIDAL : 1
DUCKY : 1
DECEMBER : 1
PLANNING : 1
TREATMENTS : 1
OUTPATIENT : 8
MINUTE : 1
AMBULATE : 1
MILITARY : 1
INTAKE : 2
BOLUSMG : 1
SHORTNESS : 3
INPATIENT : 5
DIURETICS : 1
TOMORROW : 1
COUNSELING : 5
DOSING : 1
ELOPEMENT : 1
FT : 1
CLOSE : 1
PARRAFING : 1
RELATED : 2
USE : 10
YL : 1
OIN : 1
MEANS : 1
CC : 6
DISCHARGED : 2
HEMATURIA : 2
EPISODE : 1
OPERATIVE : 1
SUPPLIES : 5
TWICE : 1
REGARDING : 3
VETERANS : 3
READING : 2
LEVEL : 7
CHANGES : 6
ALCOHOL : 1
STRESSOR : 1
AZ : 1
TRIED : 1
SOCKS : 1
LONGSTREET : 1
PERSONAL : 1
COLLABORATE : 1
IMPORTANCE : 1
SEEMS : 1
DIAST : 1
COMPTON : 1
TRAUMA : 1
SHOULDER : 2
MET : 1
HIS : 30
COORDINATOR : 2
BRING : 1
COPD : 4
AFLUABA : 1
ID : 2
OUTDOORS : 1
RISE : 1
MARRIAGE : 1
SOURCES : 1
APPARENTLY : 1
METABOLIC : 1
NEURO : 2
APPROPRIATE : 2
SUGGESTED : 1
DIRECTIVE : 3
KLEIN : 1
ATTORNEY : 1
FISH : 2
WELL : 4
DISORDER : 3
KNOWN : 2
SHOWED : 1
TEST : 4
NOTE : 27
CONTACTED : 1
REASONS : 1
FASTING : 1
JULY : 1
FSOME : 1
DO : 7
DOES : 6
NIGHTMARES : 1
TALKED : 2
ARRANGE : 1
CATEGORY : 1
MUTUAL : 1
TREATMENT : 9
HTN : 1
ATRIAL : 3
BLOOD : 6
SAME : 5
UNDERWENT : 1
WORKER : 1
ASSIST : 2
ADDENDUMS : 1
HAVE : 11
SAW : 1
SOORYA : 1
SCHEDULED : 6
ASK : 2
STEPS : 1
MF : 1
DRUG : 1
INFUSION : 1
OF : 106
INCLUDE : 1
CRISIS : 1
PUFF : 1
TAB : 8
RETURNING : 2
BUPROPION : 1
CALLER : 3
STABLE : 1
PSYCHIATRY : 1
REISSUE : 1
MONITOR : 3
HAS : 30
DEC : 2
FOR : 56
ANTICIPATING : 1
CAREY : 1
JUNCTIONAL : 1
PERCEPTION : 1
CONDITION : 1
NUTRITION : 2
SAID : 3
REDSKINS : 1
TIBIAL : 1
NUMBER : 4
UNDERSTAND : 1
EXPLANATION : 1
SOCIETY : 1
MORNING : 1
CLONIDINE : 2
MUCOUS : 1
REFLECTING : 1
ASSESSED : 1
AID : 2
TRANSITION : 1
KNEE : 2
ULCERS : 2
SC : 3
FIBER : 2
CEREBRAL : 1
EC : 2
CLOTHING : 1
JLD : 1
MY : 3
INSTRUCTION : 2
NURS : 1
IDEATION : 4
MESSAGE : 2
GEN : 1
MYOCARDIAL : 1
THEM : 2
SUBSTANCE : 3
ASSESSMENT : 8
MEDIAN : 2
PREINSTRUCTIONS : 1
SCAR : 1
ACTIVITY : 4
OWN : 1
GRADUALLY : 1
LET : 2
REPRODUCE : 1
SHOWS : 1
AMBULATION : 3
ND : 1
ATTACHED : 1
CONSERVATION : 1
MENU : 1
BLADDER : 1
NAUSEA : 2
PARTICIPANTS : 1
FRIENDS : 1
DEVICES : 1
INFORMATION : 6
DEFORMITY : 1
ADEQUATE : 1
INITIAL : 1
THO : 1
ILL : 1
DEXTROSE : 2
EXAM : 1
RECENTLY : 1
EDGE : 1
SATSUN : 1
ACHIEVE : 1
CD : 2
PSYCHOLOGICAL : 1
SUICIDE : 1
SWEATS : 1
THE : 97
JUST : 2
CARCINOMA : 2
INFORM : 2
INCREASED : 1
FILED : 1
INSTEAD : 1
PHONED : 1
NSC : 1
GROUP : 1
PRESENTS : 2
IDENTIFY : 2
REST : 1
SECONDS : 1
BRISKLY : 1
APPEARS : 2
EXPIRED : 1
OCT : 4
DIMINISHED : 2
LLOSE : 1
ALBUMIN : 1
GO : 4
SIGNIFICANT : 5
TALKS : 1
GUILTY : 1
WIDE : 1
KRISTEY : 1
MICU : 1
UD : 1
THYROID : 1
TOES : 1
RESIDENTS : 1
LEG : 2
ARRIVED : 2
BP : 2
MEDS : 5
BELONGINGS : 4
LIMITATION : 2
POST : 1
PREVENTION : 2
DEPRESSION : 5
SON : 1
MAURER : 1
CM : 7
ALBANY : 1
PSYCHOLOGY : 1
KOREA : 1
EXERSIONAL : 1
AGAIN : 1
GAIT : 2
ANXIOUS : 1
DISPOSITION : 2
TID : 2
SLOWLY : 1
CAP : 5
DIET : 4
STATED : 3
EVER : 1
TE : 1
SHOES : 1
AMP : 1
SOMETIMES : 1
FLP : 1
GET : 3
ANTIHYPERTENSIVES : 1
RA : 1
WHAT : 2
WT : 2
PLANS : 1
COMPARED : 1
SOLDIER : 1
ALBUTEROL : 3
BENEFITS : 3
STARTED : 4
ASSISTANCE : 2
SPASMS : 1
DIABETIC : 3
CARDIOVASCULAR : 1
APPLICATIONS : 1
REGULARY : 1
OR : 33
THERAPEUTIC : 1
SHIFT : 1
BOTH : 2
NODENTURES : 1
SUPPLEMENT : 1
YEAR : 5
TEMP : 1
CONCERNS : 1
LB : 5
COUMADIN : 3
IMP : 1
TRANSPORT : 2
DE : 1
LIKE : 1
ERIE : 1
STANDS : 1
MEATUS : 1
ITCHING : 1
CALORIE : 1
PUT : 1
EXCUSED : 1
INTERVERTEBRAL : 1
WEBB : 1
SEEN : 5
PRE : 1
RT : 1
EXPERIENCE : 1
ENCOURAGEMENT : 1
ASHOK : 1
OSTEOARTHROSIS : 1
MAILED : 2
NURSE : 12
TRAINING : 1
PS : 1
SURVEY : 1
COUNTRIES : 1
UDS : 1
NAMEJOE : 1
CALLOUSES : 1
CHRONIC : 7
RILEY : 1
RELAPSE : 1
URINATION : 1
TAKE : 13
AMARILLO : 1
SENSORY : 1
EXHIBITED : 1
CORONARY : 1
INCREASE : 3
WITHDRAWAL : 1
ATTACKS : 1
ANY : 12
WALKIN : 1
DISCHARGE : 10
FINAL : 1
MOISTURE : 1
RADIOTHERAPY : 1
RECORDS : 1
RIDES : 1
QH : 3
ALTERED : 1
SW : 1
TOLERATED : 2
ATIENT : 1
ADMITS : 1
EXAMPLE : 1
LATERAL : 1
MAINTAIN : 3
NATURALLYOCCURRING : 1
EXECUTED : 1
METFORMIN : 1
FACILITY : 5
MALATHI : 2
EXPIRATION : 1
UNIT : 2
EFFECTS : 2
LOPC : 1
MD : 3
RELATIONSHIP : 1
SECONDARY : 3
NAME : 3
POSTION : 1
CARE : 17
OFFER : 1
AMBULATED : 1
AGE : 4
EVERY : 2
INVOLVED : 1
PATCHROTATE : 2
INFARCTION : 1
MRIS : 1
SKIN : 2
TAG : 1
TIMES : 2
YESTER : 2
CONDUCTION : 1
IS : 36
HUD : 1
KATHRYN : 1
NOT : 24
BOUTS : 1
WORST : 1
OCCULT : 1
FLUIDS : 2
START : 2
IPRATROP : 1
IF : 10
JUICE : 1
LABILITY : 1
USER : 1
EXIT : 1
MH : 4
THERE : 3
CHLORIDE : 1
PENDING : 1
ONCE : 1
ANICT : 1
MIGRAINES : 1
OPTIMISM : 1
SCLERA : 1
LIMITED : 1
SALIVA : 1
HERE : 7
UPSETTING : 1
IM : 1
COMPREHENSION : 1
CVA : 1
HYP : 1
POSITIVE : 2
BANDAGES : 1
CHARLOTTE : 1
CLEAN : 1
UNITS : 1
CARDS : 1
LOCATED : 1
ANGER : 1
ONEHALF : 1
FEB : 1
EVALUATION : 4
CONDUCTED : 1
APT : 1
PROGRESS : 2
FED : 1
REHAB : 1
UNEMPLOYED : 1
ARTERY : 1
HP : 1
DISPENSED : 1
ASSESS : 2
THESE : 1
SUMMER : 1
ERDMAN : 1
VISION : 1
REPEAT : 1
LUMOSACRAL : 1
VET : 9
STOOL : 1
PSYCHOEDUCATIONAL : 1
PND : 1
ORTHOPEDICS : 1
VERDSOME : 1
CORP : 1
TSH : 1
DROP : 1
MA : 1
REPORTING : 1
EDUCATED : 2
EXPERIENCING : 1
COMPUTER : 1
HOWEVER : 4
BACK : 8
TRYING : 1
SOURCE : 1
TRANSPORTATION : 4
HEIGHT : 4
MARRIED : 3
MALE : 13
CAR : 1
ADDENDUM : 15
PATI : 1
FULL : 3
GRAPEFRUIT : 1
BY : 23
BMS : 1
PMH : 1
NO : 50
REDUCTION : 1
RELAXATION : 1
CLINICAL : 2
PSYCHOTROPICS : 1
REF : 1
REASSESSMENT : 1
PB : 1
CHANGED : 1
SATT : 1
HYPOTHYROIDISM : 1
TH : 1
UPPER : 1
BENIGN : 1
RRR : 1
CLINIC : 10
RISK : 10
PERFORMED : 2
BUCKEYE : 1
TO : 128
BMI : 1
IV : 3
FEEL : 1
COULD : 4
PRN : 7
PREFERRED : 1
ABUSE : 2
ION : 1
TASK : 1
ADVANCE : 4
MURMUR : 1
CREST : 1
COUNSELED : 4
COMPLETING : 1
SAFE : 4
TOOLS : 1
BIOPSY : 1
DX : 2
PROCEDURE : 7
PCCTELEPHONE : 1
REQUESTING : 1
ABNORMALITY : 2
STORY : 1
EDUCATIONAL : 1
WILL : 16
APPEARANCE : 1
OFTEN : 1
WARM : 1
WATCH : 1
CAPACITY : 1
BUT : 8
ANKLES : 1
ASKED : 2
THOUGHTS : 2
BEGAN : 1
STRESSORS : 1
SITESDO : 2
TYPE : 3
CAREGIVER : 1
HH : 1
DESCRIBES : 1
SEE : 4
HUSBAND : 1
PLEASE : 6
INDICATES : 1
MEALS : 1
OCCASSIONAL : 1
STATUS : 13
TOUGH : 1
DIABETES : 1
MARITAL : 2
SPENT : 1
MHICM : 1
DRINKS : 1
NAD : 1
EFFECTIVE : 1
DEL : 1
BBB : 1
IMPROVING : 1
MEQ : 1
CONTINUED : 1
CONSULT : 4
OUT : 3
HR : 2
FRICTION : 1
EFFORTS : 1
SUPPORT : 1
LBS : 1
FIND : 1
PRODUCT : 1
WANTS : 1
PAI : 1
FORMS : 1
DEPENDING : 1
LEVELS : 1
IMPROVE : 1
EVALUATOR : 1
SCREEN : 2
FINDINGS : 1
ENHANCE : 1
PRESENTED : 1
SOMALIA : 1
REHABILITATION : 2
BARRIERS : 2
REACTION : 1
EVALUATED : 2
ASSIGNED : 1
SIGN : 1
REVIEW : 3
HIMSELF : 1
MENTAL : 4
NEEDED : 4
TRIUMPH : 1
LOR : 1
NEAT : 1
CLARIFICATION : 1
THINKS : 1
WERE : 8
BROUGHT : 2
FACTORS : 2
SHEET : 1
COULDNT : 1
RESUME : 1
ENACT : 1
MICROSCOPIC : 1
RESIDENT : 1
INSTRUCTIONS : 2
WALKS : 2
ERYTHEMA : 1
INCE : 1
VA : 6
SYNCOPAL : 1
TAKEN : 3
SPC : 3
POSSIBLE : 1
TRIAGE : 2
NML : 1
ABOV : 1
PART : 1
WORTH : 1
FAMILY : 10
BAD : 1
IMPACT : 2
INITIATED : 2
DISEASE : 3
PAIN : 34
WHEN : 2
AMBULATORY : 5
EXTERNAL : 2
AS : 18
FALLS : 1
SINUSITIS : 1
WASHED : 1
ASSESSMENTCOMPREHENSIVE : 1
HIGHLY : 1
OBSTRUCTION : 1
INCOME : 1
GASTROENTEROLOGY : 1
AMOUNT : 1
ABOVE : 1
WAS : 36
DRAINAGE : 4
FLOOR : 1
PM : 1
WITH : 47
FEELS : 1
CATH : 1
WHOLE : 1
OFFERED : 1
THEREFORE : 1
CONDITIONS : 1
WANTED : 2
REEVAL : 1
PUTTING : 1
SIG : 2
REMAINS : 1
DRINKING : 2
COUPLE : 1
BASIS : 2
INDEX : 3
SWMF : 1
NOW : 1
ABD : 2
INCLUDING : 4
NA : 3
INTACT : 1
SETTING : 1
HYDROCODONE : 2
CHICKEN : 1
USED : 7
LEADER : 1
MONITORING : 1
IT : 11
SHOT : 1
DUTY : 1
BEDTIME : 2
BELOW : 3
LIST : 3
NECESSARY : 1
OT : 2
GOLYTELY : 1
TROUBLE : 1
STUDY : 3
DEMONSTRATED : 1
DISCUSSED : 1
EATS : 2
ETIOLOGY : 1
CA : 1
EXERCISE : 2
EQUIPMENT : 1
VOMITING : 1
TIME : 18
PURPOSE : 1
CODE : 4
GATIFLOXACIN : 2
ESOPHAGEAL : 2
ORIENTED : 5
PLEASURE : 1
HCL : 2
ERATE : 1
PUEBLORED : 1
MUCOPER : 1
EXTEND : 1
CURRENTLY : 1
ATTEMPT : 1
PAID : 1
NECK : 3
WALK : 2
NONEXISTANT : 1
ADDITIONAL : 1
SAFETY : 1
EMOTIONAL : 1
SIDE : 3
SIMVASTATIN : 2
BREAKFAST : 1
RESPIRATIONS : 2
IMAGES : 1
THICKNESS : 2
BATHROOM : 1
DOCTOR : 1
SPEAK : 1
SEDATION : 2
DISTAL : 2
GOING : 2
DID : 6
CALL : 13
MOST : 1
6A : 1
INDEPENDENTLYX : 1
EXPRESSED : 1
PROBLEMATIC : 1
DYSPHAGIA : 2
RESULT : 1
RTU : 1
ARRIVAL : 1
HX : 2
SUN : 1
BIRTH : 1
OPERATION : 2
IMAGING : 2
GOGINEN : 1
TELEPHONE : 2
SITUATION : 2
CPT : 2
SELECTING : 1
UNSPECIFIED : 3
SOB : 4
COOPERATIVE : 1
REPORTS : 4
RATES : 1
JUDGMENT : 1
URINAL : 1
GUAFENESIN : 2
CONSISTING : 1
HELP : 5
TABLETS : 2
PER : 6
URINATING : 1
YES : 7
FRIEND : 1
FURTHER : 2
TOE : 1
DONATION : 1
NONHEALING : 1
NOTICED : 1
STAGES : 1
MOBILITY : 6
YOUR : 13
TTP : 1
PRECAUTIONS : 2
RETURNED : 3
DOING : 3
GIVEN : 6
RESOLVING : 1
TACHYCARDIA : 1
SOCIALIZE : 1
LITTLE : 3
ABSENT : 1
SPECIFICALLY : 1
HES : 1
WHO : 5
HT : 1
REM : 1
UPON : 2
ED : 4
JAW : 1
DIARRHEA : 5
VERBALIZES : 2
ATTENDANCE : 1
PHYSICIAN : 17
RHINITIS : 1
DAUGHTER : 2
COMPLIANCE : 1
CURRENT : 5
CONTROL : 1
TOOTH : 4
DEPENDENCE : 1
INSUFFICIENCY : 1
TERM : 1
HIM : 7
DESPERATE : 1
FAXED : 1
HYPOVENTILATION : 1
PULSE : 8
HE : 60
NS : 1
NEXT : 1
RX : 1
NEEDS : 2
NORMALLY : 1
THEY : 2
STUDENTS : 1
BIT : 1
RATE : 1
EASY : 1
TYLENOL : 1
MANUAL : 1
NEUROPATHY : 1
TARGETED : 1
MASS : 3
FELT : 2
ACCEPTED : 2
SSOME : 1
MEMBER : 2
MIX : 1
LUBIPRO : 2
FRIGHTENING : 1
PREDICT : 1
WATER : 1
TRANSFER : 2
VSS : 1
RELATIVES : 1
ML : 2
PHONE : 9
DECLINED : 1
TALKING : 1
CLEAR : 1
NOSTRIL : 1
IPRATROPIUM : 2
LAWFUL : 1
PAMPHLET : 1
ELBOW : 2
RESPONSES : 1
HERBALS : 1
PRIMARY : 8
FAIR : 1
EGD : 1
DRY : 2
CHERRY : 1
UNTIL : 1
BS : 1
HAD : 16
POSSIBLY : 1
ORTHOPNEA : 1
SIGNS : 4
LANS : 1
THING : 1
SPECIAL : 1
SISTER : 1
JAPANESE : 1
PATIENTS : 8
MRSA : 1
SUMMARY : 1
GLUCOSEFINGER : 1
THROUGHOUT : 1
BRONCHOSCOPY : 1
CONSTIPATION : 1
AMPUTATION : 1
ANALYSIS : 1
PROVIDED : 6
DRINK : 1
BBSC : 1
PRONE : 1
YO : 1
DENTAL : 1
NEGATIVE : 1
OUR : 3
TWO : 4
NONE : 11
APPE : 1
II : 1
LAB : 2
LOT : 3
SALINE : 1
MISSING : 1
DIRECTIVES : 2
COMPLAINTS : 2
CONTACT : 8
MEMBRANE : 1
HER : 5
RETURNS : 1
ORDERED : 1
PAINSAW : 1
DEVELOPED : 1
MARINE : 1
FEELING : 2
SHOULD : 4
LIME : 1
QUESTIONS : 2
PEERS : 1
PROBLEMS : 5
ENDOSCOPY : 1
YELLOW : 2
BOWERMAN : 1
MCG : 4
GIVE : 1
CAN : 3
KNEES : 1
THERAPY : 3
SEEING : 1
PSYCH : 2
DOOR : 1
CAUSED : 1
PLACE : 2
LIVING : 2
AWARE : 2
PROZAC : 1
NONVA : 1
WHICH : 4
IER : 1
SYMPTOMS : 4
RANGE : 1
MONFRI : 1
SPEAKS : 1
OVER : 1
LLQ : 1
MG : 21
WEEKS : 1
ON : 32
CONNECTION : 1
TRANSFERRING : 2
COMPLETE : 1
ADMINISTRATION : 3
BREAD : 1
EST : 1
PRESSURE : 8
SOI : 1
ATTENDED : 1
HEMATOCHEZIA : 1
IMMOBILE : 2
VERIFY : 2
WAITING : 1
EXERTION : 1
VIA : 2
FOREHEAD : 1
SWELL : 1
NAVIGATE : 1
SPECIALIST : 2
BEHAVIORS : 1
ACCEPTABLE : 3
REVEALS : 1
STAT : 1
GOOD : 4
TRUNK : 1
FALLING : 1
MED : 3
DRUGS : 1
FOLD : 1
EDEMA : 2
SODIUM : 1
WORSE : 2
WEEKEND : 1
SAO : 3
PROVIDER : 10
OIL : 1
RETIRING : 1
SHE : 7
PO : 4
UP : 5
GENDER : 1
THEN : 5
MULTIPLE : 2
USUAL : 1
FEW : 1
LOCATION : 5
APPOINTED : 4
ALERT : 6
NEAREST : 1
FEVER : 2
ACCESSED : 1
ZZPALLIATIVE : 1
FINGERS : 1
BOSS : 1
LETHALITY : 1
PRIOR : 1
VERBAL : 2
SEP : 1
OFF : 2
CONFUSED : 1
DOCUMENTED : 2
SHOUDLER : 1
OBJECTIVES : 1
GOT : 1
DATE : 14
LOCALIZED : 1
FA : 1
PARALYSIS : 2
COMMENT : 1
ANTIPSYCHOTICS : 1
DAILY : 6
MUCUS : 1
GRASP : 1
DOSAGE : 1
ICU : 1
LONG : 1
PAPERWORK : 1
APPOINTMENT : 4
POSTVOID : 1
WOULD : 8
EPITHELIALIZATION : 1
WHEELCHAIR : 3
FOLLOW : 3
IODINATED : 2
FROM : 16
ENEMA : 1
LEFT : 5
INTERACTING : 1
INDICATE : 1
METHOD : 1
BATH : 1
REALITY : 1
FSBS : 1
MEDICAL : 7
HOMICIDAL : 4
ANTABUSE : 1
HEAD : 2
ELABORATION : 1
CONTRAST : 2
TASKS : 1
ALSO : 7
SPOKE : 1
ORGAN : 1
SYSTEM : 1
SEX : 1
LORAZEPAM : 2
ACTIVITIES : 2
ORDERS : 1
MRS : 1
WORKING : 2
AN : 8
OPERATE : 1
MOIST : 1
ADENOCARCINOMA : 1
HEART : 4
DISABILITY : 1
COMPLAINT : 2
BLACK : 1
ORDER : 2
EPISODIC : 1
SEEK : 1
OPERATES : 1
FORMOTEROL : 1
EASILY : 2
FULLY : 1
HAND : 2
FOUR : 1
HEMORRHOIDS : 1
VOC : 1
INFLUENZA : 2
UNDERSTOOD : 1
APPARENT : 1
DENIED : 1
PHARMACIST : 3
EXCEED : 2
MEASURES : 1
EYE : 3
UNSCHEDULED : 1
EXTRACTION : 1
GAVE : 1
DONNA : 1
DISTENDED : 1
DIFFERENT : 2
DISCUSSION : 2
STRAIN : 1
AGO : 1
NEW : 2
MOUTH : 6
INQUIRE : 1
FOCUSED : 1
EMER : 1
YEAROLD : 1
ATTENDING : 1
CHEST : 7
NEUROPATHIC : 1
PRESENT : 8
TP : 1
HAVING : 2
TEMAZEPAM : 1
DOCUMENTATION : 3
SOME : 2
PSOME : 1
DT : 1
HRS : 1
OPH : 1
SEPARATE : 1
ARE : 7
GHETTO : 1
ANSWERED : 2
KETCHUM : 1
INDEPENDENT : 1
HYPERTENSION : 1
NEED : 3
CORRECT : 1
ELEVATED : 1
CYST : 1
RECEIVED : 4
ALMOST : 1
SURGERY : 3
PSYCHIATRIC : 1
FECAL : 1
RECOVERY : 4
BARRETTS : 1
HERSELF : 1
BRAKES : 1
KAREN : 1
ASPIRIN : 1
BURNING : 1
MHSBDI : 1
SKILL : 1
INHL : 6
BODY : 4
MAINTENANCE : 1
SATISFACTORY : 1
OSA : 2
INTERDISCIPLINARY : 3
SERVED : 1
UNRE : 1
TRUE : 1
YEARS : 3
CAD : 2
BIOPSIES : 1
WRONG : 1
BE : 22
RESOLVED : 1
BECAUSE : 3
ENDOSCOPIC : 2
CANCER : 2
LEAVE : 2
DUE : 1
RATION : 1
TRANSFERRED : 1
CLASS : 2
REMAIN : 1
KRISHNASWAMY : 2
THEIR : 1
HS : 3
DISC : 1
DISCOMFORT : 3
LED : 1
IARD : 1
OMEPRAZOLE : 1
PHONES : 1
IMPINGMENT : 1
CANE : 1
SEVERE : 1
ALONG : 1
MAINLY : 1
SOUNDS : 2
REVIEWED : 3
DM : 2
OCCURS : 1
ISSUE : 3
AMONG : 1
BEFORE : 5
OTHER : 10
DRESSING : 2
ALL : 7
PRODUCTIVE : 1
FUMARATE : 1
LIFE : 2
ME : 1
NHCU : 1
BED : 6
NURSING : 14
CONTRACT : 1
INHALE : 2
IP : 1
DYSPNEA : 1
FOLLOWING : 4
IDENTIFIED : 5
INSURE : 1
RELAYED : 1
MORSE : 1
WORSENS : 1
SELF : 3
PATIENT : 71
ALLERGIES : 4
WITHOUT : 2
DIAGNOSIS : 7
REFER : 2
JUL : 1
DING : 1
LIMB : 1
SENT : 2
RFOOT : 1
VERIFIED : 2
ATYPICAL : 1
COURTESY : 1
AGREES : 1
CORRELATION : 1
CALLING : 1
MI : 1
EXPERIENCES : 1
UNDUE : 1
MCCULLY : 1
ATTENTION : 3
ANXIETY : 6
METOPROLOL : 1
THAN : 4
RARELY : 1
VALVE : 1
PODIATRY : 1
THOUGH : 3
ACUTE : 3
WHOSE : 1
SENSATION : 2
WE : 1
PARTICIPATING : 1
REORDER : 1
PROTOCOL : 3
DISTANCE : 1
FEE : 1
SYND : 1
VASH : 1
ROOM : 5
IMPROVED : 2
FEET : 1
CAME : 3
VISIT : 4
THAT : 29
INSTILL : 1
ADENOSINE : 1
CHART : 2
WIFE : 5
NORMAL : 5
OCCUR : 2
STAFF : 4
SERVICE : 3
AVAILABLE : 1
RIGHT : 9
FIRM : 1
PC : 4
VITALS : 2
VISITED : 3
ABOUT : 10
ANYTHING : 1
ONE : 9
RECHECK : 1
PMR : 1
POTENTIAL : 1
DESIGNATES : 1
LASIX : 1
EXPRESSING : 1
ANATOMICAL : 2
RLL : 1
PTS : 1
NKA : 2
BRIEF : 1
ADVOCATE : 1
THOUGHT : 4
HYPERLIPIDEMIA : 2
SPONDYLOSIS : 1
PRSE : 1
TABLET : 2
MCC : 1
WRITER : 1
ANOTHER : 1
DURING : 7
REC : 2
GRIPS : 1
YOU : 13
ENVIRONMENT : 1
SEVERAL : 1
LISTED : 1
FELICIANO : 1
SCREENING : 6
HYPERKERATOTIC : 1
MORPHINE : 1
WOMAN : 1
CARDIOLOGY : 1
INFORMED : 1
ERUPTED : 1
REACH : 1
GETTING : 3
ADDENDA : 1
MEDIASTINUM : 1
HI : 1
PAST : 6
EQUAL : 2
OS : 1
CHAIR : 1
PSA : 2
REASON : 2
POSTERIOR : 1
SCORE : 1
LOPEZ : 1
TOBACCO : 8
INVOLVES : 1
SUS : 1
PAD : 1
REMINDER : 3
WRITE : 2
ORTHO : 1
EPIS : 1
MEASUREMENTS : 1
HOME : 1
NEVER : 2
RSF : 1
POWER : 1
NOTED : 6
INDIVIDUAL : 1
DR : 2
SOCIAL : 4
DIPLOPIA : 1
LN : 1
HOSPITAL : 7
RECOMMENDATION : 1
RETURN : 2
SUICIDAL : 5
MODERATE : 1
WOUDL : 1
NSA : 1
WTU : 1
OTHERWISE : 1
EFFECT : 2
INJ : 2
RESECTION : 1
VITAL : 4
PARKVIEW : 1
SO : 4
UPSET : 2
MIN : 2
MRN : 1
BEFOR : 1
POOR : 2
REGULAR : 3
RLQ : 1
TALK : 1
IDENTIFIERS : 2
CDCS : 1
RECONCILIATION : 2
PROTECTIVE : 2
ENDO : 1
POTASSIUM : 1
JUDY : 2
FYI : 1
MODE : 2
DENIESE : 1
MINUTES : 3
GAINED : 1
BIL : 3
FOLLOWUP : 3
JR : 1
RAMSAY : 1
DELTOID : 1
MAKE : 2
ALTERATION : 1
ACKNOWLEDGES : 1
WEEK : 5
RISKS : 1
MAKES : 1
TEAM : 5
FIXATOR : 1
FALL : 6
APPROVED : 1
DATA : 2
DRAINS : 1
NERVE : 3
PKT : 1
AM : 4
PVCS : 3
SITTER : 1
MOVEMENT : 2
BRAIN : 1
HAPPENS : 1
MOUNTAIN : 1
ICDTOBACCO : 1
EKG : 1
CANCEL : 1
DYSLIPIDEMIA : 1
FLAT : 1
ESOPHEGAEAL : 1
MOOD : 3
WHERE : 2
LE : 1
LIVES : 1
RIB : 2
REPORT : 6
PEOPLE : 3
IMMMUNIZATION : 1
SIGNED : 1
LETTER : 2
ELECTRONICALLY : 1
ANTIDEPRESSANTS : 1
HOW : 6
PRODUCTS : 1
CALLED : 1
TOOK : 1
INFUSING : 1
FEELINGS : 1
MOTIVATED : 1
SINCE : 3
NSTEMI : 2
FLU : 2
COVERING : 1
DISCUSS : 2
CHANGE : 5
COUGH : 2
SITTING : 2
ALLERGIC : 1
GAIN : 1
LEARN : 1
ESOPHAGUS : 3
SOLN : 2
PREOPERATIVE : 1
OFFICE : 3
CARDIAC : 2
OBTAINED : 1
ADVISED : 4
LEARNING : 3
VERBALIZED : 3
DOSE : 1
ENCOUNTER : 7
OBJECTIVE : 1
MONTHS : 5
DEATH : 1
AFFECT : 3
ADLFLOWSHEET : 1
SSN : 1
GUSONS : 1
BRADEN : 1
AFFECTS : 1
BRUSHINGS : 1
ORIGIN : 1
STRONG : 2
SOMEONE : 1
BEDSIDE : 1
DATED : 1
SMILE : 1
PROCESSING : 1
ITCH : 1
ASKING : 1
DPAHC : 1
ASSISTANT : 1
PRURITUS : 1
EXPECTANCY : 1
ANTIBIOTIC : 1
WHY : 2
IMMEDIATE : 1
ROOMED : 1
MEDICATION : 15
LUNG : 2
STOP : 1
RESTING : 1
SURVEILLANCE : 1
TONGUE : 1
WANT : 1
COMMENTS : 2
ACETAMINOPHEN : 1
SUPPORTIVE : 1
BURSITIS : 1
ODPUNCTURE : 1
TKO : 1
ITEMS : 1
CONTINUE : 1
ISCHEMIC : 1
ORAL : 12
TOTAL : 1
ABNORMAL : 1
MVA : 1
LIGHT : 1
SWELLING : 3
RHINORRHEA : 1
ANSWERS : 1
DELIBERATELY : 1
OVERSIGHT : 1
SERVICES : 4
SINUS : 1
GOAL : 3
ST : 1
HISTORY : 10
WANDERING : 1
RESPIRATION : 2
TEXT : 1
HOURS : 4
MAIL : 1
TUMOR : 1
DESK : 1
LEGS : 2
HEALTH : 9
TUBE : 1
AMIODARONE : 2
PLACED : 3
UA : 1
SORRY : 1
NOV : 2
REDUCE : 1
DIPPY : 1
WOUND : 2
IDEATIONS : 1
INCIDENT : 1
INDICATED : 1
PROSTATE : 1
NOTHING : 1
EXCLUDING : 2
SITE : 1
PREVIOUS : 2
BIPOLAR : 1
PICKED : 1
VERDE : 1
REFERRAL : 2
INTERVENTIONS : 3
STANDING : 1
PAJAMAS : 1
MAR : 1
GAME : 2
STATING : 3
COMPLICATIONS : 1
KG : 5
AMBULANCE : 1
MORE : 6
AFTERNOON : 1
VS : 2
STANDARD : 2
MAKING : 1
RACE : 1
AUG : 1
WENT : 2
EYES : 1
PROBLEM : 5
QUESTIONNAIRES : 1
TELERETINAL : 1
CLONAZEPAM : 2
DECEASED : 1
NEEDING : 1
RECORD : 1
ER : 2
DIZZINESS : 2
PRESCRIBED : 1
REQUEST : 3
SUICIDALITY : 1
UNABLE : 1
RN : 3
XYZZY : 2
THROUGH : 3
PUFFS : 2
THORACIC : 1
OSTEOARTHRITIS : 1
HEENT : 1
TELEMETRY : 1
WARRIOR : 1
AFTER : 8
READY : 1
PARTICIPATED : 1
COMPLEX : 1
ADMISSION : 10
DIFFICULT : 1
EMPLOYMENT : 1
STILL : 2
ANTIPSYCHOTIC : 1
WORSENED : 1
AGRESSIV : 1
SCALE : 3
CORNEA : 1
LESS : 1
NON : 1
FLUID : 2
NICOTINE : 3
BRUISE : 1
VOICEMAIL : 1
PWD : 1
MMM : 1
GROUPS : 1
LST : 1
WEBSITE : 1
PCP : 10
SAYS : 4
FUTURE : 1
APPOINTMENTS : 1
WAY : 2
WOUNDS : 1
OBSERVABLE : 1
APNEA : 2
OBSERVATIONS : 1
EACH : 2
TITLE : 1
INFUSED : 1
CLIENT : 1
SPECIFIC : 1
TWISTED : 1
DENIES : 11
ASSOCIATE : 2
ACCOMPANIED : 1
PHARMACY : 4
OPD : 1
OLD : 5
OTHERS : 2
REQUESTED : 3
MODIFIED : 1
FOOT : 3
DISPLAY : 1
VETERAN : 11
QTY : 1
CAPSULE : 3
DINNER : 2
PT : 32
INJURY : 2
REGION : 2
BEATS : 1
RADIATION : 2
WBC : 1
MOVE : 2
NP : 1
STATION : 1
AREA : 1
APR : 2
INTEREST : 1
WB : 1
CONSULTANTS : 1
ENDS : 1
RETINAL : 1
MINIMAL : 1
MISSED : 2
BETTS : 1
SELECTED : 1
PERFORM : 1
EXCHANGE : 1
PERSISTENT : 1
CERVICAL : 1
COMBAT : 2
UNDERSTANDING : 7
AROUND : 2
MEDICATIONS : 20
ILLNESS : 2
LOST : 1
MR : 3
DIRECT : 1
OPERATING : 1
OCCASIONAL : 2
AND : 90
HOUR : 1
INSOMNIA : 1
DESCRIPTION : 3
SELECT : 2
RECOMMENDED : 4
JUN : 1
RESPONSE : 3
BETTER : 2
LOC : 1
PROCESS : 1
RESULTS : 4
INVOLVING : 1
EMERGENCY : 1
SCOOTER : 1
UTILIZED : 1
BREATH : 5
ABLE : 6
RECENT : 1
BH : 1
IN : 54
TIPS : 1
POSITION : 1
LOW : 1
CUT : 1
MAY : 5
REGIMEN : 1
MANAGEMENT : 1
LMSW : 2
STATE : 6
GUN : 1
WHEAT : 1
PLAN : 7
DERMATOLOGY : 1
MITRAL : 1
APPT : 6
SMOKE : 2
TAKING : 3
AGREE : 1
ADMITTED : 2
APPEARING : 1
VERY : 1
PATHOLOGY : 1
RELAX : 1
DONE : 3
PHYSICAL : 3
WEARING : 1
TC : 1
CP : 3
NIGHT : 4
ACTIVE : 25
KNOW : 3
ADOPT : 1
LACK : 1
PCCNURSING : 1
VESTING : 1
ABILITY : 2
BEDREST : 5
DISPATCH : 1
FY : 2
DISTRACTIBLE : 1
TEXAS : 1
METHODS : 1
INTRAOPERATIVE : 1
BEHAVIOR : 1
EPIGASTRIC : 1
OFFERS : 2
TOLERATE : 1
NEWLY : 1
CONTROLLED : 2
COMPLETED : 2
SGPT : 1
FOCUS : 1
THIS : 41
TMK : 1
DIFFICULTY : 1
EVEN : 3
HIGH : 3
VELARDE : 1
DECISIONMAKING : 1
STIMULANT : 1
BECOMING : 1
LAST : 8
EXR : 1
GROSS : 1
FIBRILLATION : 3
MOXIFLOXACIN : 1
EDUCATION : 9
RIGHTS : 1
EKNURSING : 3
PATTI : 1
DEPOSIT : 1
PICTURE : 1
SESSION : 3
HEPLOCK : 2
STATES : 6
PUSH : 1
SUPPER : 1
SITUATIONS : 1
MIDLINE : 1
CELL : 1
SHORT : 3
DEMEROL : 1
LIMITS : 1
FIRST : 1
ICDCM : 2
WAIT : 2
COGNITION : 1
INFILTRATE : 1
ETOH : 2
VERSION : 1
DISPLAYED : 1
LINENS : 1
PASTA : 1
TO_PT : 1
AGE_HISTORY : 1
APPOINTED_KRISHNASWAMY : 1
EXPECTANCY_OF : 1
SUPPORT_NEEDING : 1
SAID_WOUDL : 1
PCP_KRISHNASWAMY : 1
FOLLOW_GIVEN : 1
SIGNS_AS : 1
SIGNS_HERE : 1
SCREEN_BODY : 1
SPC_ALERT : 1
SIDE_DIET : 1
PROVIDER_PRIMARY : 1
PAIN_BBSC : 1
INFORM_WRITER : 1
SEVERE_NONE : 1
PC_PAIN : 1
WAS_AS : 1
OF_DISCHARGE : 3
TOLERATED_WELL : 1
OTHER_PROBLEMS : 1
IN_THROUGHOUT : 1
PROCEDURE_THEN : 1
BEEN_ADMITTED : 1
BEEN_TO : 1
UP_THE : 2
MONTHS_YES : 1
APPOINTMENT_GIVEN : 1
FY_BODY : 1
HE_WHO : 1
RESIDENTS_CHRONIC : 1
DONE_CC : 1
ON_TO : 1
PAIN_CURRENT : 1
PHYSICIAN_GOGINEN : 1
AFTER_INFUSION : 1
HOMICIDAL_THOUGHTS : 1
ORIGIN_PAIN : 1
SOCIALIZE_HE : 1
SIGN_OBSTRUCTION : 1
BEFORE_SAYS : 1
DO_THIS : 1
MH_SITESDO : 1
SLOWLY_ON : 1
OF_GOOD : 2
APPOINTED_SOORYA : 1
DISCHARGE_THE : 1
THE_PEOPLE : 1
SC_ED : 1
PATIENT_HAD : 5
USE_THE : 1
LISTED_FLUID : 1
THIS_PHONED : 1
LET_KNOW : 1
AT_USUAL : 1
AND_ORIENTED : 2
THE_KNEE : 1
OF_HIS : 1
TOES_KNEE : 1
WERE_WAITING : 1
HEALTH_HE : 1
THO_CARE : 1
THE_PATIENT : 14
PERSONAL_OF : 1
PATIENT_VERBALIZED : 2
HYDROCODONE_HIS : 1
IMMOBILE_AMBULATORY : 1
MIN_IMPROVED : 1
ANTIPSYCHOTICS_ANTIDEPRESSANTS : 1
TRANSPORT_OR : 1
NOV_MH : 1
FAXED_PLEASE : 1
HE_PARTICIPANTS : 1
EVALUATION_FOR : 1
DISCHARGE_WEEK : 1
OF_THERAPEUTIC : 1
STRESSOR_SERVICES : 1
HE_FLU : 1
HIS_THIS : 1
FROM_MEATUS : 1
AT_VISIT : 1
PATIENT_CURRENT : 1
OUTPATIENT_EXCLUDING : 2
SKIN_HELP : 1
CONTRAST_THE : 1
SODIUM_ANTIHYPERTENSIVES : 1
IMPORTANCE_OF : 1
TIME_SEX : 1
CONTACT_PHONE : 1
CONDUCTED_PARRAFING : 1
PRESENT_IV : 1
BECOMING_MISSING : 1
LAWFUL_PERSONAL : 1
FELT_IF : 1
WANTS_TO : 1
HE_STANDS : 1
CONSULTANTS_PRESENT : 1
IDENTIFIED_TRANSPORT : 1
LEFT_MENTAL : 1
BEGAN_AT : 1
PHYSICAL_ADL : 1
TAKE_DENTAL : 1
II_SIGNS : 1
RRR_NO : 1
PROTOCOL_USED : 1
AUG_ARRIVED : 1
ED_ADMINISTRATION : 1
OCCURS_SECONDS : 1
VERDE_LN : 1
NOT_AT : 2
TO_SWMF : 1
FEEL_THAT : 1
OR_OTHER : 3
SITUATION_YOUR : 2
FOR_REMOVAL : 1
BY_COMPLETING : 1
BUT_THE : 1
WITH_OR : 1
HISTORY_SUBSTANCE : 1
BREATH_PATCHROTATE : 1
NOTED_BODY : 1
FIBRILLATION_ISCHEMIC : 1
PRESSURE_OR : 1
THIS_SAO : 1
CAPSULE_MOUTH : 1
ASSESSMENT_LEFT : 1
LIFE_ANYTHING : 1
COMMENTS_OBSERVABLE : 1
AND_BENEFITS : 1
SITE_DRESSING : 1
FOREHEAD_ALSO : 1
FOOT_SWELL : 1
OF_INCREASE : 1
NURSE_SPOKE : 1
ANXIOUS_THAT : 1
AS_LEVELS : 1
BREATH_LAB : 1
ITCHING_AROUND : 1
MD_ORDERS : 1
DENIES_HEMATOCHEZIA : 1
DISCOMFORT_AND : 1
IS_TRYING : 1
INFORMATION_PROVIDED : 2
NONE_PARTICIPATED : 1
BEEN_AND : 1
NSC_STATE : 1
OTHER_RECOVERY : 1
ASSESSMENT_ATTACKS : 1
TO_ADOPT : 1
IDENTIFIED_OTHER : 1
CAME_OUT : 1
TALKED_ABOUT : 1
COUNSELED_THAT : 1
THROUGH_SCHEDULED : 1
IMAGING_GEN : 1
DATE_DRAINAGE : 1
PROVIDER_THIS : 1
TROUBLE_WITH : 1
RESOLVED_MENTAL : 1
ACTIVITY_COORDINATOR : 1
YOUR_SCHEDULED : 1
DOSING_OF : 1
FIBRILLATION_CVA : 1
OF_TEMAZEPAM : 1
WITH_LEFT : 1
SENT_TO : 1
ADDENDUM_RESPIRATIONS : 1
SAFE_EFFECT : 2
TEAM_THE : 1
AND_WOULD : 2
REPORTS_DRINKING : 1
AFTER_ENEMA : 1
BE_NECK : 1
ALERT_YES : 1
MH_NURSING : 1
THOUGHT_ABOUT : 1
SWELLING_TO : 1
CP_EXPIRATION : 1
SKIN_AND : 1
RECEIVED_NOTE : 1
SEE_PATIENT : 1
MONITOR_SHOWS : 1
LST_WAS : 1
PODIATRY_CLINIC : 1
TIME_VETERAN : 1
COMBAT_APPOINTED : 1
FULL_BENEFITS : 1
ALLERGIC_IMPINGMENT : 1
OF_BIRTH : 1
AS_AS : 2
PRESENT_ILLNESS : 2
DATE_BRUSHINGS : 1
DO_AND : 1
SUPPORTIVE_AND : 1
PROBLEMS_WITH : 1
CATEGORY_IV : 1
DEMONSTRATED_BY : 1
FOCUSED_REQUESTED : 1
ALLERGIES_PROZAC : 1
OTHER_PROBLEM : 1
THIS_PRESSURE : 1
GO_ION : 1
MG_NONE : 1
RTU_VITALS : 1
SHOT_IS : 1
STOOL_RHINORRHEA : 1
ETOH_TAKING : 1
HE_ABLE : 1
CHRONIC_MEDICAL : 1
BEEN_ABOUT : 1
IN_NO : 1
REQUEST_BY : 1
INCREASE_UNTIL : 1
PULSE_INFORMATION : 1
PT_RETURNS : 1
NOTE_AFLUABA : 1
ARE_TO : 2
NURSE_CLARIFICATION : 1
MYOCARDIAL_MI : 1
OF_DEATH : 1
OF_ATTORNEY : 1
DENIES_NAUSEA : 1
EDUCATION_TEMAZEPAM : 1
NO_SYMPTOMS : 1
ANY_PROBLEM : 1
ATRIAL_FIBRILLATION : 3
BED_MEALS : 1
LOR_STATUS : 1
COORDINATOR_CLINICAL : 1
DID_UP : 1
THAT_PER : 1
MAY_IS : 1
WITH_MEDICATIONS : 2
HOW_AFFECTS : 1
PLEASE_THORACIC : 1
DIARRHEA_STATED : 1
KATHRYN_MCC : 1
ANXIETY_PT : 1
VETERAN_HAS : 1
CONSULT_CPT : 1
REFERRAL_TO : 1
IN_THERE : 1
TO_TO : 4
YL_MG : 1
IS_ISSUE : 1
STORY_ENDS : 1
METABOLIC_MONITORING : 1
CARE_CALLER : 1
CONSTIPATION_UNSPECIFIED : 1
CLEAN_NEAT : 1
SOME_STATE : 2
MEDICATIONS_REPORTS : 1
TAKE_LAST : 1
NERVE_CONDUCTION : 1
THE_THOUGHT : 1
ATTACKS_WILL : 1
DIPPY_IN : 1
RISK_MOBILITY : 1
ACTIVITIES_OTHERS : 1
MIX_IN : 1
GIVEN_THAT : 1
VESTING_CLINIC : 1
BEDTIME_HEART : 1
ANSWERED_RIGHT : 1
TAKING_MEDICATION : 1
PHARMACIST_PAIN : 1
REM_TOOTH : 1
ASSESSMENT_ORIGIN : 1
YELLOW_ON : 1
OPH_INSTILL : 1
STAT_TAKEN : 1
AT_ALL : 1
TAKE_ACTIVE : 1
TRAINING_ERATE : 1
PATIENT_WITH : 1
BETTER_THE : 1
ELBOW_PAD : 1
TEXT_HE : 1
ADEQUATE_OT : 1
PAIN_CONTRACT : 1
TELEPHONE_NOTE : 1
HER_WORK : 1
HAVE_ANOTHER : 1
STANDARD_RADIOTHERAPY : 1
ATTENDED_GROUP : 1
TO_HIM : 2
REMAIN_TASK : 1
THICKNESS_MEASURES : 1
WERE_AND : 1
INHL_ACTIVE : 2
MEDICATIONS_ASK : 1
ITCHING_NECK : 1
DISC_ICDTOBACCO : 1
LIST_STARTED : 1
CALLER_VERBALIZES : 1
HELP_IDENTIFY : 1
HAVE_HAD : 1
GUILTY_RELATED : 1
WHEELCHAIR_ATIENT : 1
AND_ASSESSMENT : 1
DEVICES_USED : 1
TRANSFER_NURSE : 1
ID_USE : 1
TO_ENACT : 1
HIS_SIMVASTATIN : 1
INCIDENT_THE : 1
RETURNING_TO : 1
PLACED_OF : 1
SATSUN_PATIENT : 1
HAND_GRIPS : 1
REPORTING_PATIENT : 1
FISH_STUDY : 1
RECORDS_INDICATE : 1
MOIST_OR : 1
FOR_RLL : 1
WEEK_HOW : 1
MOUTH_MONFRI : 1
DOSAGE_COLLABORATE : 1
PLAN_ALL : 1
RECORD_ATTACHED : 1
IPRATROPIUM_INHL : 2
OF_DRINKING : 1
UTILIZED_PATIENT : 1
MEDICATIONS_SENT : 1
TABLET_BLOOD : 1
PT_MG : 1
FOR_MG : 1
PROCEDURE_PROCEDURE : 1
TEAM_AS : 1
CLONIDINE_HCL : 1
FURTHER_GOAL : 1
WERE_LOT : 1
THE_UPPER : 1
FROM_OUR : 1
FULL_OF : 1
IS_DURING : 1
OUTPATIENT_THERAPY : 1
TO_NOTE : 1
RISK_ADMISSION : 2
YO_HERE : 1
STANDS_HE : 1
TO_PLAN : 1
WERE_PATIENT : 1
PATIENT_EXERCISE : 1
BACK_IN : 1
COUGH_RESOLVING : 1
RISK_STANDARD : 1
TAKEN_WITHOUT : 1
ENCOUNTER_NOTE : 1
NEEDED_UNCONTROLLED : 1
PROVIDER_REASON : 1
HOSPITAL_SWELLING : 1
OF_BECAUSE : 1
OSTEOARTHROSIS_PRIMARY : 1
WALK_PATIENT : 1
BUT_ILL : 1
BREAD_CHICKEN : 1
MEASUREMENTS_ORDER : 1
AN_ISSUE : 1
LMSW_IS : 1
IDENTIFIED_PROBLEM : 1
RELAXATION_RECOVERY : 1
FEET_ARE : 1
OSTEOARTHRITIS_CALL : 1
HE_NOT : 4
DIZZINESS_NURSING : 1
PRESENTS_THE : 1
BACK_DUE : 1
GRASP_ARE : 1
OR_HI : 1
REPRODUCE_THE : 1
KOREA_SOMALIA : 1
BIL_IS : 1
HISTORY_PHONE : 1
MEDICATION_MANAGEMENT : 1
NO_SIGN : 1
NO_TOBACCO : 1
TO_GUSONS : 1
DIET_SHEET : 1
TO_ME : 1
DIRECTIVE_DONATION : 1
RECOMMENDED_LOCATION : 1
PERSONAL_HISTORY : 1
ANXIETY_ATTACKS : 1
SECONDS_DURING : 1
DRUGS_TYLENOL : 1
ON_HIS : 3
THROUGH_AND : 1
ROOM_MOST : 1
ANY_ACUTE : 1
SCREENING_THIS : 1
RIB_DISCOMFORT : 2
PROBLEMS_INTEREST : 1
LOW_BRAKES : 1
TO_AGE : 1
MISSING_FROM : 1
AMBULATORY_CLINIC : 1
PREOP_ADMISSION : 1
READING_DOCUMENTED : 1
HAVE_CD : 1
OFTEN_PRIMARY : 1
STATUS_THE : 1
ANTICIPATING_SYMPTOMS : 1
OLD_SEVERAL : 1
MORE_DESPERATE : 1
LIMITED_STATUS : 1
HEMORRHOIDS_DING : 1
GRAPEFRUIT_FOR : 1
THAT_HAS : 2
COUGH_WITH : 1
PT_FOR : 3
COUNSELED_SAFE : 1
SCHEDULED_MEDICAL : 1
THE_LIVES : 1
WITH_IN : 1
THE_CURRENT : 1
ROOM_DISCUSS : 1
AMIODARONE_AMIODARONE : 1
WITH_DING : 1
NUMBER_SAME : 1
HAD_BEFORE : 1
WITH_NEURO : 1
COMPLAINT_CHEST : 1
MARRIED_VET : 1
TO_MAKE : 1
MEDICATIONS_EXCLUDING : 2
STATES_HAS : 4
AMBULANCE_TRANSPORT : 1
WOUDL_WAIT : 1
OR_COMPLIANCE : 1
IS_ACCOMPANIED : 1
SESSION_ADDITIONAL : 1
DISCUSS_PREVIOUS : 1
TO_SELF : 1
UNDERSTANDING_VERBALIZED : 1
THEN_CAME : 1
THAT_SCHEDULED : 1
FROM_ALL : 1
SINUSITIS_FOUR : 1
HAD_NIGHTMARES : 1
LOR_PT : 1
MY_MEDICATION : 1
TO_LEARNING : 2
SUBSTANCE_IN : 2
MAY_BE : 3
TAKEN_BECAUSE : 1
THE_REC : 1
TO_OWN : 1
ACTIVE_AND : 1
WAIT_SEE : 1
EXPECTANCY_AROUND : 1
WARRIOR_UNIT : 1
USED_VERIFY : 2
HER_AND : 1
SUICIDAL_IDEATION : 1
WENT_FOR : 1
SO_MAKE : 1
UNCONTROLLED_FOOT : 1
STABLE_AMBULATORY : 1
IMMOBILE_NSTEMI : 1
PATIENTS_PLAN : 1
CARE_RESPONSE : 1
LEFT_FOOT : 1
BED_THROUGHOUT : 1
NO_OCCASSIONAL : 1
LOWER_KNEES : 1
ACTIVITY_SCREENING : 1
COPD_PT : 1
TO_ALL : 1
TO_FOLLOW : 1
FEELINGS_OF : 1
TO_WALKIN : 1
METHODS_VERBAL : 1
CLONAZEPAM_TID : 1
OR_AT : 1
TAKING_AT : 1
MALE_ALERT : 1
TO_WORK : 1
OF_GOGINEN : 1
REVIEWED_SELF : 1
NOTE_BP : 1
DIAGNOSIS_LUNG : 1
IDEATION_WAS : 1
THIS_YEAROLD : 1
PT_CALL : 1
GASTROENTEROLOGY_PROCEDURE : 1
MEQ_ORAL : 1
DATE_JULY : 1
ALSO_TWISTED : 1
COUNSELING_ADVISED : 1
DOSAGE_SIG : 1
EDEMA_HYPERKERATOTIC : 1
INVOLVED_ALBUTEROL : 1
PAID_WILL : 1
BUCKEYE_AZ : 1
FOR_YOUR : 1
VETERAN_IMPACT : 1
ELOPEMENT_RISK : 1
PATIENT_MRN : 1
RTU_PREVIOUS : 1
FOCUS_TO : 1
MALE_ARRIVED : 2
PATIENT_UNDERSTANDING : 2
AT_IDEATION : 1
COOPERATIVE_EYE : 1
AS_BEFORE : 1
CAREY_PRIMARY : 1
RECOMMENDATION_LEG : 1
RIGHTS_ENACT : 1
CYST_ON : 1
LAST_PCP : 1
MI_TIMES : 1
WHAT_THOUGHT : 1
ASKED_TO : 1
SUICIDAL_HIS : 1
LOWERED_THYROID : 1
TUBE_DRESSING : 1
SPC_ALSO : 1
TO_CLINICAL : 1
DRAINAGE_OR : 1
NEAREST_EMERGENCY : 1
IMPACT_CHRONIC : 1
OCT_INFLUENZA : 1
RESULTS_YEAROLD : 1
THEN_REGULAR : 1
MIDLINE_FURTHER : 1
SCALE_FALL : 1
ALL_WHO : 1
PATIENT_SEE : 1
AND_SIGNED : 1
TO_ALERT : 1
FUMARATE_INHL : 1
ON_WHY : 1
ON_OUTPATIENT : 1
PATIENT_PAIN : 2
DAILY_NOTE : 2
LESS_UNDERSTOOD : 1
RESTING_DESK : 1
VA_AND : 1
ANXIETY_ANXIETY : 1
REALITY_REMINDER : 1
SO_PHYSICIAN : 1
IER_THIS : 1
THROUGH_HOW : 1
WAS_TO : 7
NO_USED : 1
SKIN_PROBLEMS : 1
MEDICATIONS_AND : 2
THOUGHTS_DEATH : 1
CEREBRAL_SPECIFICALLY : 1
MY_FOR : 1
YOUR_SOMEONE : 1
PHYSICIAN_YL : 1
PATIENTS_OF : 1
COMMENT_GIVEN : 1
SOORYA_LANS : 1
GO_MENTAL : 1
GOOD_OF : 1
PATIENT_DOES : 1
TOOK_OF : 1
SEVERAL_VISITED : 1
CAPSULE_ACTIVE : 1
LABILITY_AND : 1
MEDS_BLADDER : 1
SEE_INCE : 1
OT_DAILY : 1
PLAN_FOR : 1
SEEK_THE : 1
GAME_BEGAN : 1
OMEPRAZOLE_MG : 1
AT_CM : 1
UPON_ADMISSION : 2
NOTE_TO : 1
TOOTH_TIME : 1
TERM_AND : 1
ON_DISCHARGE : 1
HIS_AND : 1
WAS_TALKING : 1
ABD_PAIN : 1
WILL_RESUME : 1
WITH_ITCHING : 1
DYSPHAGIA_NO : 1
MEMBER_TO : 1
TAKE_AS : 1
BEFORE_OPERATES : 1
HAS_CAD : 1
OF_PROCEDURE : 2
CLARIFICATION_ASK : 1
OF_STAGES : 1
ASSESSMENT_TIME : 1
GAINED_ACTIVE : 1
PLEASE_PT : 1
BEFORE_SOLDIER : 1
ORAL_MCG : 2
TO_SUPPORTIVE : 1
ALLERGIES_ZZPALLIATIVE : 1
WBC_CARE : 1
TIPS_CONTROLLED : 1
KNOW_WHICH : 1
NO_DIABETIC : 1
WORST_AMPUTATION : 1
HEALTH_OUTPATIENT : 1
AS_FOR : 2
HUSBAND_OR : 1
ADENOSINE_SUBSTANCE : 1
INTEREST_PLEASURE : 1
ASSESSMENT_INFO : 1
OLD_HEIGHT : 1
IF_HIS : 2
WALK_STABLE : 1
RECOMMENDED_MOUTH : 1
TAB_PO : 2
NOTE_NEUROPATHIC : 1
CATH_MONTHS : 1
ON_PRECAUTIONS : 1
PAIN_QUESTIONNAIRES : 1
STRONG_BREAKFAST : 1
PAIN_LEVEL : 3
METHOD_RECOMMENDED : 1
ORTHOPEDICS_SERVICES : 1
SURVEILLANCE_INTERDISCIPLINARY : 1
ADVISED_ADOPT : 1
ADDENDUM_ENDOSCOPIC : 1
AND_EXPIRED : 1
GOOD_PURPOSE : 1
BEFORE_HAD : 1
OF_ALLERGIES : 1
MOBILITY_NICOTINE : 1
VETERAN_OF : 1
CARE_AS : 1
REGION_ALLERGIC : 1
PATIENT_WHERE : 1
WOULD_LET : 1
MORPHINE_ASSESS : 1
KG_REPORTS : 1
SPC_TO : 1
HAS_REFILLS : 1
EACH_AND : 1
FOR_NOT : 2
DENIES_ACUTE : 1
STATUS_REM : 1
IT_FELT : 1
PRODUCT_TOBACCO : 1
NO_BUT : 1
WILL_FURTHER : 1
OF_NURSE : 1
MUCOUS_ALTERATION : 1
IS_OLD : 2
APPROVED_DISPOSITION : 1
AFTER_NERVE : 1
ADMINISTRATION_SECONDARY : 1
PATIENT_BROUGHT : 1
HEART_NO : 1
FOR_THE : 6
NEEDS_TALKS : 1
PAIN_NEXT : 1
FOLLOWUP_OF : 1
ISSUE_WITH : 1
NERVE_WEIGHT : 1
EXTERNAL_RECORD : 1
PATIENT_VERIFIED : 1
DIPLOPIA_VISION : 1
DIRECTIVE_AZ : 1
CHANGE_STATUS : 2
STRESSOR_DID : 1
THE_PROCEDURE : 1
WITH_JUICE : 1
USE_MEDICATION : 2
NOV_EST : 1
TOOTH_AT : 1
HE_WILL : 4
OF_MY : 1
ORAL_ACTIVE : 2
PROTECTIVE_ABSENT : 1
WILL_TO : 1
AID_NONE : 2
PHARMACIST_SPECIALIST : 1
STATUS_AFTER : 2
CHLORIDE_MEQ : 1
BE_SUPPORTIVE : 1
DISCUSSION_PATIENT : 1
ASKING_TO : 1
BE_INDIVIDUAL : 1
ADMISSION_SCREENING : 1
PATIENT_HEIGHT : 1
DIET_AND : 1
PATIENT_STABLE : 1
BRUISE_NOTED : 1
HYPERLIPIDEMIA_HTN : 1
ICDCM_DISORDER : 1
PCP_SESSION : 1
PULSE_ALLERGIES : 1
HER_BOSS : 1
HOW_HAD : 1
EDUCATIONAL_PROVIDED : 1
EXCHANGE_FOR : 1
AND_FIBER : 1
LAB_THORACIC : 1
ST_AT : 1
COMPTON_WILL : 1
HAS_AN : 1
LOCATED_AND : 1
HE_MALE : 1
BRUISE_BELONGINGS : 1
DATE_OF : 4
CAP_ORAL : 3
OF_SESSION : 1
BELOW_PROVIDED : 1
AT_TIMES : 1
WHO_USED : 1
QUESTIONNAIRES_ANSWERS : 1
DURING_CONTACT : 1
MEANS_WELL : 1
OF_ADENOCARCINOMA : 1
BE_ABNORMALITY : 1
PATIENT_MUTUAL : 1
PATIENTS_DIAGNOSIS : 1
CARE_PROGRESS : 1
PREFERRED_LEARNING : 1
FEB_PAIN : 1
DISTAL_AT : 1
OF_FLUID : 1
ARE_READING : 1
WEEKEND_SW : 1
FRIEND_WAS : 1
SYSTEM_HOURS : 1
DISCHARGE_OF : 1
UNITS_REF : 1
THAT_AFFECTS : 1
SUICIDAL_HOMICIDAL : 1
OR_FISH : 1
EPITHELIALIZATION_NO : 1
INFILTRATE_RRR : 1
AND_ADMISSION : 1
FOR_PAIN : 2
HAD_CARDIAC : 1
CAPACITY_THE : 1
USED_ALSO : 1
DOSING_WAIT : 1
NURSE_DEL : 1
DENIED_DELIBERATELY : 1
YESTER_SHOWED : 1
HIS_MED : 1
TABLETS_MOUTH : 2
CERVICAL_CONSULTANTS : 1
THROUGHOUT_NIGHT : 1
MAINLY_OF : 1
CPT_PROBLEMATIC : 1
BY_NURSE : 1
OF_PHYSICIAN : 1
MG_THEN : 1
IPRATROPIUM_ORAL : 2
FROM_TO : 1
SHE_LEAVE : 1
PAIN_JAW : 1
WAIT_CONTACT : 1
SAID_ID : 1
WHO_PRESENTED : 1
SPECIFIC_SITUATIONS : 1
ALLERGIES_MG : 1
INVOLVES_OF : 1
PATIENT_COMPREHENSION : 1
MEDIASTINUM_PROCEDURE : 1
NOTED_LAST : 1
AND_FORMS : 1
MASS_OCT : 1
COMPLIANCE_WITH : 1
EVEN_SHE : 1
ULCER_REGULARY : 1
TRANSFERRED_WTU : 1
EYE_CONTACT : 2
BUT_APPEARING : 1
CPT_REEVAL : 1
FAMILY_OR : 3
MENU_THEN : 1
PAIN_MAY : 1
MARRIED_MALE : 1
BEDSIDE_AM : 1
PHYSICIAN_DIAST : 1
INTERDISCIPLINARY_TEAM : 1
UNSPECIFIED_SCREEN : 1
PT_MOISTURE : 1
AMBULATION_BREATH : 1
VET_FUTURE : 1
THE_LOCATION : 1
HE_WOUDL : 1
ROOM_SAID : 1
MAR_CLEAN : 1
THE_LIMITS : 1
MR_HIS : 1
NOT_APPROVED : 1
MONTHS_DIAGNOSIS : 1
AT_THE : 4
HE_WENT : 1
TO_LET : 1
TIME_EACH : 1
ON_FINDINGS : 1
VSS_RARELY : 1
AND_HAPPENS : 1
FOR_CHEST : 1
MAY_NECK : 1
WITH_SUICIDAL : 1
OF_DIARRHEA : 2
TEXAS_SOURCE : 1
WELL_AT : 1
RELAXATION_ACTIVITY : 1
WITH_HOMICIDAL : 1
FOLLOW_IS : 1
MINUTES_WITH : 1
MCCULLY_LMSW : 1
OR_COVERING : 1
OLD_CELL : 1
PAIN_MEDICATIONS : 1
REC_TO : 1
TEAM_NEEDED : 1
CLINIC_MODE : 1
TO_VA : 1
THE_BODY : 1
IDENTIFIED_FOR : 1
HIM_IN : 1
UA_OUTPATIENT : 1
MR_SHE : 1
ONE_TO : 2
TIME_CONTINUE : 1
EPIGASTRIC_AS : 1
EXECUTED_THEREFORE : 1
HE_LITTLE : 1
MEDICATION_FOR : 1
THOUGH_HAS : 2
APPT_WITH : 1
DISORDER_ACTIVE : 1
CLINIC_WITHIN : 1
THERE_FROM : 1
PT_HERE : 3
USER_OR : 1
ESOPHAGUS_WITH : 1
AND_MONTH : 1
HRS_THEN : 1
GRAPEFRUIT_JUICE : 1
MEATUS_PT : 1
DERMATOLOGY_MODE : 1
OCCUR_HEIGHT : 1
RADIATION_TO : 1
YEAR_UNEMPLOYED : 1
TRUE_LAWFUL : 1
GIVEN_THE : 1
DID_TO : 1
DESK_IN : 1
DID_THE : 1
DISORDER_SCHIZOAFFECTIVE : 1
THROUGH_FOR : 1
UNDERSTANDING_AND : 1
NO_WAS : 1
OBSERVABLE_CHANGES : 1
PRESENTED_THE : 1
ACETAMINOPHEN_HIM : 1
LOCATED_SIGNED : 1
AT_WEBB : 1
NOT_THE : 2
PATIENT_SYMPTOMS : 1
REPORTS_FEE : 1
INITIAL_CONTACT : 1
WARM_DRY : 1
THIS_SSN : 1
CONTACT_PHYSICIAN : 1
TAKING_LASIX : 1
KNEE_OSTEOARTHRITIS : 1
APPT_PAIN : 1
PAI_FOR : 1
LIMITS_EVERY : 1
MONTHS_ATTENDED : 1
ESOPHAGEAL_CANCER : 1
PEOPLE_THOUGHT : 1
PAI_FEW : 1
TO_DO : 1
ADMITS_THAT : 1
MAINTAIN_HEART : 1
YOU_ARE : 1
INJ_AMP : 1
IS_ORIENTED : 1
WAS_INITIATED : 2
TIME_HAPPENS : 1
TOLERATED_TREATMENT : 1
WITH_IS : 1
ON_TID : 1
IMPACT_HE : 1
DEC_RECONCILIATION : 1
PATIENT_ALBUTEROL : 1
APPOINTMENT_EVEN : 1
WAS_FORMOTEROL : 1
NO_SIGNIFICANT : 1
FOR_PART : 1
SOCIAL_NOTE : 2
NOTED_HYPERKERATOTIC : 1
HOURS_ALL : 1
SHORT_ATTENTION : 1
AN_DONE : 1
BRING_UP : 1
SCHEDULED_DATE : 1
TO_TOLERATE : 1
HIS_AT : 1
FOR_PRESENT : 1
TOLERATE_LOT : 1
PRESSURE_ULCERS : 1
PHONES_SOUNDS : 1
UNEMPLOYED_HAS : 1
PUSH_DOSAGE : 1
REGARDING_RESULTS : 1
WRONG_DENIES : 1
STILL_USE : 1
OIN_PATIENTS : 1
HIGH_FIBER : 1
POSSIBLE_TO : 1
WALKIN_MINUTES : 1
ORAL_LORAZEPAM : 1
AT_CARCINOMA : 1
DIRECTIVE_INFORMATION : 1
AMBULATORY_PODIATRY : 1
EKNURSING_PC : 1
PAIN_GOALWHAT : 1
VISIT_APPEARS : 1
NONE_TELEPHONE : 1
FIBER_AND : 1
NOTE_DELTOID : 1
FOR_WORSENS : 1
POSITIVE_OTHER : 1
PCP_PATTI : 1
FOR_STATES : 1
CODE_REEVAL : 1
SIGNIFICANT_MANAGEMENT : 1
ER_HE : 1
VITALS_OPERATIVE : 1
ON_BASIS : 1
PCP_AT : 1
HEALTH_AS : 1
TO_ON : 1
MUTUAL_GOAL : 1
FECAL_BLOOD : 1
NURSING_PARTICIPATING : 1
IT_AND : 2
ED_MEDICAL : 1
ORDERED_AND : 1
SYNCOPAL_EPISODE : 1
LIMITATION_NO : 1
BECAUSE_IT : 1
DRY_NIGHT : 1
GUN_PULSE : 1
THINKS_THE : 1
GAS_DENIES : 1
DIAGNOSIS_PT : 1
LAST_COUPLE : 1
PAIN_LOCATED : 1
DISEASE_MYOCARDIAL : 1
FOR_FEW : 1
SESSION_WOULD : 1
IS_REMINDER : 1
MALE_FSOME : 1
CONTINUE_TO : 1
EMPLOYMENT_WITH : 1
DISABILITY_BARRIERS : 1
DATE_ADMISSION : 1
NEW_MITRAL : 1
AFTER_CONDUCTION : 1
DOING_AT : 1
SCAR_MG : 1
INDEPENDENT_TUBE : 1
TAKING_BECAUSE : 1
FLU_THE : 1
TAKEN_MORE : 1
PATIENT_LOWER : 1
NOTE_COMPLIANCE : 1
DX_AT : 1
VA_DIRECTIVE : 1
LACK_OF : 1
OR_CALLER : 1
ASKED_HOW : 1
ACTIVE_POSTERIOR : 1
HE_BEEN : 5
WAS_CUT : 1
STATE_PRIMARY : 1
LIST_OF : 1
MALE_MARITAL : 1
SUPPORTIVE_MAINTAIN : 1
TREATMENT_PROCEDURE : 2
PLACE_OF : 1
SMOKE_ONE : 1
ALERT_RELATIVES : 1
REACTION_PAIN : 1
THIS_VET : 2
RECOMMENDED_LIMITS : 1
PSYCHIATRIC_HISTORY : 1
AND_ONE : 1
APPOINTED_KETCHUM : 1
SPECIAL_COUMADIN : 1
INTERVENTIONS_ICU : 1
USE_INTAKE : 1
HEART_PATIENT : 1
VET_THIS : 1
DEPRESSION_ENHANCE : 1
WEEK_CONSTIPATION : 1
APPT_DATE : 1
EXHIBITED_LABILITY : 1
MEDICAL_FEELING : 1
ALMOST_FAMILY : 1
DISTENDED_BETTER : 1
ON_PRSE : 1
DISCHARGED_INITIAL : 1
FASTING_PLEASE : 1
BE_INSTEAD : 1
CHEST_PAIN : 4
SPHENOIDAL_FOUR : 1
DISORDER_JUL : 1
RISK_FACTORS : 1
INDEX_PHARMACY : 1
DRAINAGE_DRAINAGE : 1
PULSE_PSYCHIATRY : 1
INSURE_PHYSICIAN : 1
NOTE_SECONDARY : 2
HIS_CONDITIONS : 1
DO_FSBS : 1
AMPUTATION_OF : 1
WITH_MEDICAL : 1
ENDOSCOPY_PREINSTRUCTIONS : 1
TRANSPORTATION_PRECAUTIONS : 1
MEDICATION_REQUEST : 1
THAT_PHYSICIAN : 2
OR_COMBAT : 1
SCOOTER_DID : 1
VETERANS_INTERVENTIONS : 1
STARTED_FEELING : 1
OR_KATHRYN : 1
SIGNIFICANT_MEDICATION : 1
THE_CARE : 1
IS_PRESENT : 2
REPORTING_THE : 1
AFFECTS_FOR : 1
MRN_MODIFIED : 1
PAID_VETERAN : 1
PSYCH_FEEL : 1
ADDENDUM_CALLER : 1
RESUME_MAINTAIN : 1
UNIT_AND : 1
THE_GROUP : 1
ACTIVITIES_TO : 1
SAYS_AT : 1
IDENTIFY_HERSELF : 1
IPRATROP_MCG : 1
GRADUALLY_INCREASE : 1
FOR_ANALYSIS : 1
STATUS_OF : 2
YOU_NEED : 1
LOWER_ENDOSCOPY : 1
CURRENT_SIGNS : 1
OF_RIGHTS : 1
ERDMAN_KATHRYN : 1
DEVELOPED_CHEST : 1
DELTOID_NONE : 1
WAS_SEEN : 2
DISPOSITION_SELECTED : 1
NAME_PHONE : 1
BEEN_DOCUMENTATION : 1
MORE_THAN : 1
SOLDIER_IS : 1
AGREE_THAT : 1
KNEES_TOES : 1
ABOVE_COUPLE : 1
OF_VETERAN : 2
UP_FELT : 1
IN_COMBAT : 1
MRIS_HAVE : 1
TO_INQUIRE : 1
NONE_NORMAL : 1
MCC_HIS : 1
NO_EXCUSED : 1
HER_FRIEND : 1
SSN_VS : 1
NEEDS_AT : 1
NONE_WILL : 1
UNSPECIFIED_SCHEDULED : 1
NICOTINE_DYSLIPIDEMIA : 1
MARRIED_BLACK : 1
INFORMED_HER : 1
VERBALIZED_UNDERSTANDING : 2
MOUTH_HOURS : 1
HIS_BACK : 1
TO_ER : 1
FOR_CC : 1
USE_CALORIE : 1
DRY_VISITED : 1
MORE_HE : 3
HEMATOCHEZIA_DRUGS : 1
PHONE_STATES : 1
DATA_SELF : 1
THE_HOSPITAL : 3
PREDICT_AMBULATION : 1
TRAUMA_PAIN : 1
STARTED_PHARMACIST : 1
HAS_BELONGINGS : 1
OBTAINED_FROM : 1
TO_BE : 5
PHONE_STATE : 1
EPITHELIALIZATION_ERYTHEMA : 1
ASKED_HE : 1
THE_ARE : 1
NEGATIVE_VA : 1
KETCHUM_EMER : 1
WITHIN_URINAL : 1
VERBAL_IN : 1
TO_THROUGH : 1
STATUS_SPC : 1
IT_APPEARS : 1
ADDENDUM_ALL : 1
ORIENTED_GRASP : 1
ACCEPTABLE_OF : 1
VS_AT : 1
ADDENDUM_UNSCHEDULED : 1
ASSESSMENT_ANXIETY : 1
EKNURSING_RN : 1
AND_MG : 1
NOTE_ALONG : 1
FOLLOW_MAY : 1
THE_VETERAN : 1
HEPLOCK_PLACED : 1
NOTE_BE : 1
DIET_TO : 1
OR_PND : 1
SURGERY_TARGETED : 1
THE_HEALTH : 1
LORAZEPAM_TAB : 2
MOUTH_COMPLAINT : 1
WHERE_NECESSARY : 1
NO_INJURY : 1
WITH_THE : 4
MG_PER : 1
WAS_HE : 1
HAD_CATH : 1
PRESSURE_NOT : 1
WITH_SERVICE : 1
DIARRHEA_NO : 1
ANY_THOUGHTS : 1
WEEK_HISTORY : 1
FOLLOWING_PROBLEMS : 1
CONTRACT_AND : 1
HEALTH_CARE : 1
USE_WHEELCHAIR : 1
PHONE_OTHERWISE : 1
THE_SELF : 1
THEN_TRIED : 1
OF_IDENTIFIED : 1
SUICIDAL_PATIENT : 1
PROTECTIVE_SENSATION : 2
PRONE_ANGER : 1
PRURITUS_THE : 1
TALKED_PATIENT : 1
YOU_THAT : 1
PO_HS : 1
WHERE_THE : 1
UNSCHEDULED_ASSESSMENT : 1
FOR_CALORIE : 1
UP_RFOOT : 1
PAINSAW_PATIENT : 1
REMOVAL_OF : 2
MG_IN : 2
ALSO_STATES : 1
APPOINTMENT_DO : 1
CHEST_WHICH : 1
BE_ASSESSMENT : 1
DIFFERENT_PAIN : 1
FOR_DINNER : 1
PLAN_UNRE : 1
PROCESS_ANY : 1
NERVE_LUMOSACRAL : 1
REMOVAL_FLUID : 1
ONEHALF_TABLET : 1
RATION_INTERVERTEBRAL : 1
HIS_POSTVOID : 1
VIA_AMBULATORY : 2
BY_HS : 1
ANY_INCIDENT : 1
INCREASE_AMBULATION : 1
IT_BE : 1
SERVICE_YES : 1
INDICATED_BELOW : 1
EQUAL_SAFETY : 1
HOSPITAL_AND : 1
PWD_IN : 1
BP_BLACK : 1
MONITOR_ANXIETY : 1
BACK_ON : 1
RESPONSES_UNDERSTAND : 1
DONATION_MG : 1
NONE_LONG : 1
DEVICES_SKIN : 1
OUT_TO : 2
BP_NO : 1
AND_SOCIALIZE : 1
TOOTH_PAIN : 1
IF_HE : 2
LEGS_GETTING : 1
TO_PHARMACY : 1
ASSESSMENT_DATE : 1
AMBULATORY_DE : 1
ER_REPORTS : 1
THAT_WANDERING : 1
INVOLVING_SHOULDER : 1
THE_SITTING : 1
NOTE_SOB : 1
RECOVERY_CLINICAL : 1
ERIE_AND : 1
ABOUT_ADVANCE : 1
REPORT_BARRETTS : 1
DYSPNEA_NO : 1
CODE_VERDSOME : 1
MAILED_SGPT : 1
AND_INFORM : 1
ANSWERED_BRAIN : 1
CUT_REQUEST : 1
OFF_MENTAL : 1
HAS_BEEN : 9
INFORM_HAVE : 1
START_BOLUSMG : 1
FULL_THE : 1
ENCOUNTER_FLU : 1
THEY_AND : 1
IN_ALBANY : 1
HEALTH_WALK : 1
PAINSAW_CP : 1
WHEELCHAIR_WENT : 1
UNSPECIFIED_COUNSELING : 1
DE_OF : 1
FOR_FOLLOW : 1
ENDO_FOLLOWUP : 1
BEFOR_HIM : 1
MENTAL_NOTE : 1
INFORM_BROUGHT : 1
CALL_AND : 2
VS_THIS : 1
EC_DISPENSED : 1
BRIEF_WITH : 1
OT_VETERANS : 1
OF_FOLLOWING : 1
PCP_MALATHI : 1
ACTIVE_PT : 2
OF_MEDICAL : 1
COUMADIN_THAT : 1
POSITION_BRAKES : 1
LET_STAFF : 1
PASTA_OR : 1
VERIFIED_PATIENT : 1
DENIES_ANY : 3
PROBLEM_UNSPECIFIED : 1
OCCULT_BLOOD : 1
NORMAL_WITH : 1
ALERT_NURSING : 1
TO_OR : 3
MG_ORAL : 1
TABLET_SATSUN : 1
LEVEL_TO : 1
MEDICATIONS_VITALS : 1
MG_CAP : 1
CHANGES_THIS : 1
TOBACCO_PATIENT : 1
ANY_ANATOMICAL : 1
LBS_APPEARANCE : 1
INJURY_PCCNURSING : 1
MINUTE_ADVISED : 1
IN_DENIESE : 1
BY_SUS : 1
AT_BEDTIME : 1
FIBER_DIET : 1
INDICATE_MISSED : 1
HIS_WOULD : 1
AND_FELT : 1
OF_NOT : 1
ADMISSION_RECONCILIATION : 1
PATIENT_IS : 6
PSYCHOEDUCATIONAL_CLASS : 1
PAST_WEEK : 1
BEDREST_NSTEMI : 1
JAPANESE_SOCIETY : 1
TAKE_TWO : 2
THERAPY_NOTE : 1
LEGS_ANKLES : 1
NO_EXERSIONAL : 1
PSOME_STATE : 1
WHEELCHAIR_HE : 1
OF_RECOVERY : 1
DRINKING_AND : 1
OR_VS : 1
ORAL_TIME : 1
APPARENT_PT : 1
DATE_EDUCATION : 1
MEDICAL_CONDITIONS : 1
UP_BURSITIS : 1
UPSETTING_IN : 1
LB_PATIENT : 2
NORMALLY_WALKS : 1
TOLERATED_VELARDE : 1
RATE_OCCASIONAL : 1
DENIES_OTHER : 1
SERVED_KOREA : 1
FOR_MONTHS : 1
SUICIDALITY_SSOME : 1
IT_THROUGH : 1
BEEN_IN : 2
REFILLED_HAVE : 1
INHALE_ACTIVE : 1
PAPERWORK_THOUGH : 1
TO_REVIEWED : 1
EDGE_OF : 1
OF_MEDS : 1
SHORT_RESULT : 1
BE_OFFERED : 1
BMS_NO : 1
OF_INSTRUCTIONS : 1
ADDENDUM_SODIUM : 1
AS_RESPONSE : 1
ITCH_THE : 1
AND_THE : 6
NAME_KRISTEY : 1
ADDENDUM_FALL : 1
NO_INFORMATION : 1
HELP_HOWEVER : 1
CARE_AND : 1
PROGRESS_NOTE : 2
OUR_NURSE : 1
GIVEN_AND : 1
CM_BLOOD : 1
OR_ABOUT : 1
PATIENT_THAT : 2
THIS_MALE : 2
EFFECTS_DIET : 1
OR_MEDICATIONS : 1
NO_KNOWN : 1
HAS_ABILITY : 1
HEAD_ON : 1
FOR_CARE : 1
SAO_ALERT : 1
ENDOSCOPIC_PROCEDURE : 1
REFILLED_YOU : 1
IF_ARE : 1
RESECTION_SEEN : 1
PUFF_ORAL : 1
THE_JAPANESE : 1
HE_TO : 2
UA_NEGATIVE : 1
OUTPATIENT_MENTAL : 1
IN_STATUS : 2
ORAL_MIX : 1
THOUGH_HE : 1
PSYCHOEDUCATIONAL_LED : 1
FOCUS_OF : 1
GAINED_OUTPATIENT : 1
GOING_TO : 2
HAS_LOT : 1
IN_BODY : 1
AGE_WHO : 1
BARRIERS_TO : 2
AN_PAID : 1
AGRESSIV_GROUPS : 1
ON_SITTER : 1
MORE_OVERSIGHT : 1
DESCRIPTION_OF : 3
STATUS_PT : 1
RISK_ADDENDUM : 1
DATE_AGE : 1
REGION_TO : 1
DISCUSSED_BEDTIME : 1
FOR_MULTIPLE : 2
TWO_TABLETS : 2
HIS_DISTANCE : 1
FOR_THEN : 1
PHYSICIAN_MICU : 1
PUFFS_HOURS : 1
COUNTRIES_LEVEL : 1
VISIT_READY : 1
AREA_FULL : 1
BACK_WIFE : 1
ORAL_MUCOUS : 1
BH_NOTE : 1
LIFE_CHANGES : 1
HAS_TOBACCO : 1
CURRENT_OF : 1
ADMINISTRATION_NOTE : 1
ADMISSION_OCT : 1
LOWER_BACK : 1
HEMATURIA_FROM : 1
AND_NML : 1
EVALUATOR_PARKVIEW : 1
GOOD_EYE : 1
MOST_OF : 1
CARCINOMA_VERIFIED : 1
LOCATION_BACK : 1
KLEIN_SPC : 1
IN_NATURALLYOCCURRING : 1
AS_DIFFERENT : 1
TO_IN : 1
AT_SHOULD : 1
AND_MOBILITY : 1
FALLING_IMMEDIATE : 1
MASS_AUG : 1
CHANGES_LEVEL : 1
SWSDISCHARGE_NURSING : 1
PICKED_UP : 1
WOULD_BE : 1
WAS_PT : 1
COGNITION_OR : 1
NUMBER_OF : 1
WOUND_CARE : 1
CVA_DEVELOPED : 1
HEIGHT_CM : 4
NO_APPARENT : 1
ACTIVITY_INCREASED : 1
ADDENDUM_HAS : 1
PULSE_PT : 1
MEDICATIONS_POST : 1
FURTHER_AT : 1
HAS_DISTAL : 1
CONSTIPATION_MHICM : 1
RISK_WITH : 1
NO_DIAGNOSIS : 1
VERBALIZED_YEAR : 1
ONE_PATIENT : 1
BIPOLAR_LUBIPRO : 1
WITH_MR : 1
IT_AS : 1
NURSING_WITH : 1
NP_DAILY : 1
TONGUE_MIDLINE : 1
HAS_ADMITTED : 1
ORDER_ER : 1
MCG_INHL : 2
ADDENDUMS_WHERE : 1
PRN_FOR : 4
STATUS_PHYSICAL : 1
THIS_IT : 1
HERE_FOR : 4
STATUS_DATE : 1
DRY_AT : 1
BED_HIS : 1
AT_CC : 1
CARDIOLOGY_NOTE : 1
HOMICIDAL_IDEATION : 3
IS_RETURNING : 1
AND_LIME : 1
STRONG_REFER : 1
SWELLING_PRESENTS : 1
BEEN_GIVEN : 1
IN_ELEVATED : 1
FOOT_ON : 1
FAMILY_STORY : 1
THAT_WORSENED : 1
VET_ATTENDED : 1
SHOULD_BE : 2
UNDERSTAND_SHE : 1
DECLINED_AT : 1
NO_DX : 1
THE_MARINE : 1
ATTORNEY_FOR : 1
PLAN_AT : 1
PSA_CALL : 1
ARE_EQUAL : 1
NO_SINUS : 1
SEEN_BY : 1
NORMAL_TREATMENT : 1
ABNORMALITY_SPECIFICALLY : 1
COUNSELING_UTILIZED : 1
SO_COULD : 1
GIVEN_SAME : 1
OVER_PAST : 1
TO_REPRODUCE : 1
THAN_UNDERSTOOD : 1
REC_REPEAT : 1
SOCKS_ADLFLOWSHEET : 1
BEATS_BBB : 1
CM_THE : 1
THIS_HOMICIDAL : 1
OF_WAIT : 1
NO_PATIENT : 1
FOR_TRAUMA : 1
HE_ID : 1
MOUTH_AND : 1
WAS_SO : 1
PREVIOUS_ROOM : 1
PEOPLE_PATIENT : 1
PATIENTS_IN : 1
THOUGHT_PROCESS : 1
SAME_WEEK : 1
FOR_EVALUATION : 2
FOR_PREDICT : 1
ALBUMIN_UNCONTROLLED : 1
SENT_PHARMACY : 1
CURRENTLY_HE : 1
EDUCATION_SOME : 1
AND_BIOPSIES : 1
SOCIAL_BEHAVIOR : 1
POOR_ATTENTION : 1
OIL_STUDY : 1
WHOSE_FAMILY : 1
PAIN_EXPRESSED : 1
MUCUS_IS : 1
DR_IS : 1
THE_APPROPRIATE : 2
MEDICATION_TO : 1
EDEMA_SITE : 1
WAIT_DID : 1
OPERATIVE_DIET : 1
APPT_CARE : 1
DO_SURVEY : 1
GOGINEN_IN : 1
PAIN_BEFORE : 1
MG_ACETAMINOPHEN : 1
NO_PRIMARY : 2
NO_PROVIDER : 4
PER_PATIENT : 2
BURSITIS_OF : 1
YEARS_ANY : 1
START_AFTER : 1
RECOVERY_FOR : 1
WITHOUT_INCIDENT : 1
DELIBERATELY_IN : 1
PROBLEMS_PT : 1
TO_HOSPITAL : 1
MED_PSYCH : 1
STILL_TOBACCO : 1
DEC_AT : 1
PROBLEM_WAS : 1
MUCOPER_TOOTH : 1
HIS_FEET : 1
THE_EVALUATION : 2
CONSERVATION_MH : 1
HE_OR : 1
HE_HE : 3
CARE_LETTER : 1
REPEAT_IN : 1
SOB_IMPROVING : 1
ORAL_RETURNED : 1
APPT_HYPERLIPIDEMIA : 1
HE_UNDERWENT : 1
HYPERKERATOTIC_MASS : 1
DISCHARGE_LAST : 1
OF_CONTACTED : 1
REQUESTED_VA : 1
OF_METOPROLOL : 1
VISITED_MR : 1
HIS_WIFE : 2
THEN_BACK : 1
INCREASED_DURING : 1
MHSBDI_PSYCHOLOGY : 1
EQUAL_FIRM : 1
PATIENT_ADDENDUMS : 1
LEARNING_PREFERRED : 1
TOOTH_FLP : 1
AT_THAT : 1
SHOUDLER_FOR : 1
OF_IN : 1
SIDE_DISCOMFORT : 2
NONE_BEDREST : 2
OF_NEURO : 1
WORK_WITH : 1
SALIVA_DURING : 1
AFTER_NOW : 1
LEFT_MESSAGE : 1
OTHER_UNDERSTAND : 1
PT_CARDIAC : 1
CALL_BACK : 2
ALERT_AND : 2
PATIENT_DATE : 1
HERE_AT : 1
ALONG_WITH : 1
MOUNTAIN_CREST : 1
HIS_MEDICATIONS : 1
STAGES_OF : 1
FALLS_NO : 1
TRANSFER_COORDINATOR : 1
BIL_REVEALS : 1
MD_RN : 1
PATIENT_ASPIRIN : 1
AND_NEAT : 1
AT_NO : 1
HIM_MY : 1
WAIT_TO : 1
PATIENT_MAY : 1
USED_BE : 1
REPORT_ESOPHAGUS : 1
THE_FLOOR : 1
ON_ALSO : 1
COMPLETED_PAIN : 1
BLOOD_PRESSURE : 4
DONE_OF : 1
AN_PERFORM : 1
ALL_BUT : 1
ALBANY_TEST : 1
HAS_AFFECT : 1
NO_CP : 2
OF_HUSBAND : 1
DISCOMFORT_SHORT : 1
WERE_ABLE : 1
POTENTIAL_LETHALITY : 1
THE_OF : 5
PAIN_ASSESSMENT : 1
PATIENT_EDUCATION : 4
BUT_LESS : 1
ION_HOUR : 1
NURSING_CONTINUED : 1
STATION_THIS : 1
ONE_CAPSULE : 2
INTAKE_TO : 1
VERBAL_UNDERSTANDING : 1
IN_AM : 1
FOR_FOCUS : 1
LOCALIZED_INVOLVING : 1
NAUSEA_OR : 1
MAINTAIN_AND : 1
TO_MONITOR : 1
BELOW_TO : 1
DIABETIC_ULCER : 2
EXERCISE_TO : 1
SOUNDS_DATA : 1
PT_HAS : 2
ENCOUNTER_ACCESSED : 1
AFFECT_GOOD : 1
FIBER_REPORT : 1
CHANGES_ACTIVE : 1
FOR_ANXIETY : 2
TOBACCO_PRODUCTS : 1
NURSE_COORDINATOR : 1
AMBULATION_WASHED : 1
TREATMENTS_PCP : 1
THAT_HE : 5
RETURNED_AND : 1
SOB_TO : 1
THIS_MD : 1
IN_FALL : 2
LINENS_IT : 1
PERCEPTION_SELECT : 1
THE_SEEN : 1
BEEN_DURING : 1
THE_FOR : 2
WAS_PRE : 1
THE_PCP : 1
MAINTAIN_MALE : 1
MET_AREA : 1
CODE_PROBLEMATIC : 1
LOPC_TEAM : 1
DO_YOU : 1
DIRECT_STAFF : 1
INFORMATION_PT : 1
VET_DENIED : 1
LMSW_PER : 1
HE_STILL : 1
SINCE_THE : 1
TO_BOWERMAN : 1
TRYING_BE : 1
ON_WHEAT : 1
BOUTS_OF : 1
LEGS_WORSE : 1
QUESTIONS_OR : 1
DISCOMFORT_ISSUE : 1
HYP_LLOSE : 1
CARE_INDICATED : 1
ONE_BY : 1
ONE_ACTIVE : 1
OBJECTIVES_POSITIVE : 1
TEAM_HISTORY : 1
APPARENT_PROBLEM : 1
PAIN_SCALE : 1
OF_WHAT : 1
DIABETES_TREATMENT : 1
CARE_NURSING : 2
CONSISTING_OF : 1
ATTACHED_THIS : 1
MEDICATION_REDUCE : 1
ORIENTED_FAIR : 1
BIRTH_JLD : 1
PUSH_DRUG : 1
INFORMED_OF : 1
LOCATION_HOSPITAL : 1
FRICTION_NO : 1
PATIENT_DECISIONMAKING : 1
PRESSURE_NURSING : 1
IT_WHEN : 2
GROSS_PRESENT : 1
DIABETIC_IMAGING : 1
WHAT_YOUR : 1
VA_THE : 1
EVERY_HOURS : 1
MD_CALL : 1
MAILED_WAS : 1
THIS_AM : 2
WITH_THIS : 2
THE_PT : 2
FOR_REHAB : 1
NO_MALE : 1
OTHER_SKIN : 1
PERCEPTION_ADDENDUM : 1
THE_FACILITY : 1
UNDERSTANDING_AGREES : 1
OF_PATCHROTATE : 1
DOING_FACILITY : 1
PC_TELEPHONE : 1
RISK_PVCS : 1
APPEARING_BELONGINGS : 1
NURSE_REPORT : 1
DOING_CODE : 1
MORE_PARTICIPANTS : 1
DEPRESSION_COPD : 1
CD_OF : 1
HE_NORMALLY : 1
SOLN_PRN : 1
YOU_PLEASE : 1
WIFE_IS : 2
ARE_THE : 1
DAUGHTER_PEOPLE : 1
WRITE_STIMULANT : 1
TO_MALATHI : 1
EVENTS_LIFE : 1
IS_WRONG : 1
ON_WORK : 1
NO_SOMETIMES : 1
NONE_DATE : 1
DEPRESSION_PT : 1
ALSO_VET : 1
HERE_CHRONIC : 1
WATCH_REDSKINS : 1
DATE_OCT : 1
THE_ASSISTANCE : 1
DEMEROL_MG : 1
YOU_DID : 1
BEHAVIORS_REASONS : 1
FIBRILLATION_TO : 1
PATIENTS_ANY : 1
SINCE_HIS : 1
STAFF_DO : 1
NOTE_TC : 1
PO_INHL : 1
RN_THINKS : 1
AND_FEELINGS : 1
FEELS_THERE : 1
NSA_MRSA : 1
EXHIBITED_MOOD : 1
IF_NO : 1
OF_ILLNESS : 2
DEPENDENCE_SEVERE : 1
TELEPHONE_FOLLOWUP : 1
YOU_YOUR : 2
GET_THEM : 1
WHICH_WAY : 1
LATERAL_KNEE : 1
ER_SUPPORT : 1
AND_CERVICAL : 1
FOR_DATA : 1
NON_DISTENDED : 1
NURSING_ASSESSMENT : 3
AS_BELOW : 1
WB_STATUS : 1
RSF_CONDUCTED : 1
FURTHER_EVALUATED : 1
HE_MEDICAL : 1
FOR_EATS : 1
PUFF_INHL : 1
COPD_RETURNS : 1
TIME_HE : 2
RISK_ASSESSMENTCOMPREHENSIVE : 1
POSITIVE_BEHAVIOR : 1
EXCUSED_MORSE : 1
HP_BY : 1
UNDERSTOOD_WILL : 1
HYPERLIPIDEMIA_CAD : 1
OTHERWISE_CHANGES : 1
DESCRIPTION_ALTERED : 1
COMPLETE_HP : 1
ELBOW_RIGHT : 1
CLEAR_BUT : 1
BODY_MASS : 3
TH_MET : 1
ALL_LAST : 1
ERDMAN_OR : 1
VETERAN_CONTACT : 1
AMARILLO_SOURCE : 1
PROVIDED_HOSPITAL : 1
ANXIETY_RESPONSE : 1
LEG_TIMES : 1
THEREFORE_AND : 1
BEEN_DISCHARGED : 1
COMPLEX_TACHYCARDIA : 1
FUTURE_ORIENTED : 1
OSA_OSA : 1
LOCATION_SEE : 1
MOVEMENT_TOE : 1
FAIR_EYE : 1
REMINDER_SERVICES : 1
STATION_AT : 1
INFORMATION_BELOW : 1
CLASS_BY : 1
SPASMS_PSYCHOTROPICS : 1
PAST_HISTORY : 1
INTEREST_OR : 1
RECOVERY_THE : 1
OF_THOUGHT : 1
TO_RESECTION : 1
RIGHT_CORNEA : 1
YELLOW_ADDENDUM : 1
DO_WANT : 1
HERSELF_THE : 1
ANYTHING_OFFER : 1
JULY_ANY : 1
TAG_ON : 1
DUTY_LOR : 1
AND_MAINTENANCE : 1
HISTORY_DIABETIC : 1
RETURNED_TO : 1
ALLERGIES_PATIENT : 1
ABLE_TALK : 1
PCP_DENIES : 1
MANAGEMENT_ANTIDEPRESSANTS : 1
SON_PICTURE : 1
VISIT_WEEKEND : 1
SC_LB : 1
DEPRESSION_MARITAL : 1
TYPE_ORAL : 1
INTERVENTIONS_CURRENT : 1
RLL_INFILTRATE : 1
NKA_BRAIN : 1
LOPC_YEAR : 1
CHART_WBC : 1
DIRECTIVES_PULSE : 1
MG_BID : 2
DIFFERENT_COUNTRIES : 1
DIET_FIBER : 1
SCHEDULED_AS : 1
TO_NOV : 1
DEPOSIT_HE : 1
MOXIFLOXACIN_RLL : 1
THE_YES : 1
GETTING_DOSE : 1
HS_PHYSICIAN : 1
FOR_PLACED : 1
NEXT_WITH : 1
TO_SITE : 1
CONTROL_IT : 1
EXERCISE_INFORMATION : 1
OF_LUNG : 2
EXERTION_BIL : 1
PEOPLE_AND : 1
LETHALITY_THAN : 1
THOUGHT_THEM : 1
WILL_HIM : 1
WAS_BROUGHT : 1
NOTE_PB : 1
UNDERSTANDING_OF : 2
PATIENT_BEEN : 1
BS_DISTENDED : 1
DISPOSITION_OF : 1
FLUIDS_IN : 1
WITH_BACK : 1
ON_DESK : 1
TO_CONSULT : 1
WATER_ACTIVE : 1
INFUSING_AT : 1
PAD_RIGHT : 1
THAT_WITHOUT : 1
LEFT_ON : 1
AND_IN : 2
PATIENT_STATES : 1
COUNSELING_MEDICAL : 1
COMMENTS_SUPPER : 1
FALLING_OR : 1
PATIENT_IODINATED : 1
PUFFS_IN : 1
ON_WT : 1
WITH_TRANSPORTATION : 1
PKT_ORAL : 1
PRESCRIBED_IODINATED : 1
REMINDER_BUT : 1
WOULD_ABOUT : 1
ADVANCE_DIRECTIVE : 2
THE_LAST : 1
DISEASE_BARRIERS : 1
EXPRESSING_ABOUT : 1
AND_CHANGES : 2
NAME_RECOMMENDED : 1
SEE_DESCRIPTION : 1
NO_FALLS : 1
COUNSELING_MRS : 1
DAILY_BY : 1
HE_REVIEW : 1
EFFECTS_CHEST : 1
THE_GATIFLOXACIN : 1
COPD_APPARENTLY : 1
PROVIDED_BELONGINGS : 1
EDUCATIONAL_INFORMATION : 1
PATCHROTATE_SITESDO : 2
PT_TOLERATED : 1
YOUR_EVEN : 1
DINNER_EATS : 1
WAS_HAD : 1
SWELLING_SCHEDULED : 1
NEEDED_ALLERGIES : 1
WHICH_SEEMS : 1
DISEASE_COMMENTS : 1
DISC_USE : 1
KRISTEY_STATES : 1
HE_EATS : 1
ENHANCE_POSITIVE : 1
TIME_DISCUSSION : 1
WAS_ABLE : 4
CP_THE : 1
OF_CALLED : 1
THAT_NSC : 1
WITH_COMPLAINTS : 1
WASHED_UP : 1
SHOULD_YOU : 1
DIARRHEA_DRINK : 1
HAS_UPSET : 1
YEARS_IN : 1
CAUSED_HIS : 1
IMAGES_PT : 1
BE_EVALUATED : 2
LB_WEARING : 1
IS_NO : 1
ANTIDEPRESSANTS_EKNURSING : 1
TREATMENT_STATUS : 1
ABOUT_DISCHARGE : 1
THE_GAME : 1
DISCHARGE_SUMMARY : 1
THE_ENEMA : 1
DID_SAYS : 1
DISCHARGE_DEC : 1
OF_HYDROCODONE : 1
PRODUCT_ABUSE : 1
HEIGHT_OBJECTIVE : 1
NUTRITION_SCREENING : 1
PULSE_EXECUTED : 1
BED_CAN : 1
INSTRUCTIONS_HAS : 1
REGULAR_INJ : 1
INSTILL_IN : 1
RECEIVED_LETTER : 1
NOTE_BRADEN : 1
DID_FOLLOW : 1
WOULD_NOT : 2
MEDICATIONS_PRESCRIBED : 1
RIB_PT : 1
ACTIVE_PATIENT : 1
FLUIDS_UP : 1
ACTIVE_IMP : 1
MALE_STATE : 1
STATUS_LEGS : 1
PAST_VETERAN : 1
YES_LOCATION : 1
CONTACT_CREST : 1
THAN_OTHER : 1
WEIGHT_KG : 3
ALCOHOL_TE : 1
RIGHTS_TO : 1
PATIENTS_INTERDISCIPLINARY : 1
HUSBAND_EXPERIENCES : 1
LIST_HAS : 1
DESIGNATES_DAUGHTER : 1
THIS_PATIENT : 2
CM_DUCKY : 1
AND_CARDIAC : 1
NORMAL_IMMOBILE : 2
PREOP_ON : 1
MEDICATION_THE : 1
AN_THE : 1
BENEFITS_MEDS : 1
PHONE_STATED : 1
STATUS_THERAPY : 1
SPEAK_YOUR : 1
ORAL_MG : 1
PRN_PUSH : 1
WILL_WITH : 1
CAREGIVER_TRAINING : 1
PATIENT_WASHED : 1
LAWFUL_HISTORY : 1
THEY_GO : 1
AND_TEST : 1
WILL_OF : 1
OPERATIVE_DISCHARGE : 1
FOR_COULD : 1
NURSING_SHIFT : 1
OWN_ABILITY : 1
PRESENT_ASSESSMENT : 1
NURSING_PROGRESS : 1
OFTEN_CARE : 1
TO_EKG : 1
EVEN_LAB : 1
BY_EXHIBITED : 1
IMPORTANCE_NOT : 1
MESSAGE_HER : 1
PVCS_BEATS : 1
OBJECTIVE_INPATIENT : 1
OFFICE_BLOOD : 1
OF_BREATH : 3
YOU_MISSED : 1
HT_IN : 1
NO_PRESSURE : 1
STATUS_IN : 1
PATIENT_HI : 1
LUNG_AN : 1
ON_PATIENT : 1
BID_ORAL : 3
THE_THING : 1
SIGNIFICANT_CEREBRAL : 1
YOUR_PRIOR : 1
VERBALIZED_ID : 1
BMS_WITH : 1
CAN_THE : 1
HAS_EDUCATED : 1
SITTER_BEEN : 1
MH_SCREENING : 1
IN_WAY : 1
VERY_DRY : 1
CALORIE_TO : 1
PATIENT_PSOME : 1
WERE_OF : 1
RA_ACUTE : 1
FINGERS_BUT : 1
TEXAS_OF : 1
PATIENT_VERBALIZES : 1
MHICM_EVERY : 1
TREATMENT_ALL : 1
PATIENT_TEMP : 1
TO_OCCASIONAL : 1
MEDICAL_RESIDENT : 1
MEDICATION_ANTIPSYCHOTICS : 1
NEVER_FOR : 1
ME_RELATIVES : 1
MALATHI_CHARLOTTE : 1
HOW_YOUR : 2
IT_OR : 1
APPEARS_READY : 1
APPOINTMENTS_TP : 1
MARRIED_MARITAL : 1
CC_FOR : 1
YOUR_ACTIVE : 1
HES_HAD : 1
MEDICATIONS_AS : 1
WORKING_WITH : 1
INFORMATION_THAT : 1
YELLOW_OR : 1
HE_SUMMER : 1
CONFUSED_ANXIOUS : 1
TOBACCO_WANDERING : 1
EVALUATED_ER : 1
WITH_TIME : 1
RECOVERY_PREVENTION : 1
HIS_RECENT : 1
OF_IMMEDIATE : 1
FROM_STATING : 1
DATE_IT : 1
NEAT_ROOMED : 1
AND_REMOVING : 1
WILL_LAST : 1
SUPPLIES_PC : 1
COUNSELED_AGE : 1
DENTAL_CATEGORY : 1
ABSENT_REVEALS : 1
CHART_THO : 1
INFARCTION_MI : 1
PROTOCOL_NOT : 2
MEDICAL_PRIMARY : 1
TO_TRANSPORTATION : 1
ALSO_MOOD : 1
FIRM_BEDREST : 1
PAIN_STATE : 1
SIGNS_LOCALIZED : 1
FILED_SKILL : 1
SAME_AS : 1
PREVIOUS_BEHAVIORS : 1
ORTHOPNEA_OR : 1
TO_COMPLETE : 1
PROBLEMS_STATES : 1
DURING_INITIAL : 1
SELECTED_ACCEPTED : 1
INCLUDING_THIS : 1
AND_ON : 2
USED_TOBACCO : 1
WOUNDS_ULCERS : 1
TO_LBS : 1
HE_WALK : 1
OBJECTIVE_ACTIVE : 1
IS_COURTESY : 1
WITHIN_ACTIVE : 1
PT_AWARE : 1
ALTERED_THOUGHT : 1
PARTICIPATING_IN : 1
THIS_PHYSICIAN : 2
NO_FEVER : 1
TO_STAT : 1
OIL_TITLE : 1
AMIODARONE_MG : 1
ONE_SATSUN : 1
PROBLEM_OTHER : 1
DIRECTIVES_ACTIVITY : 1
VERBALIZES_AND : 1
AVAILABLE_YOU : 1
HEMATURIA_POSSIBLY : 1
INHL_ORAL : 4
PROBLEM_TREATMENT : 1
POST_OPERATIVE : 1
CALL_OMEPRAZOLE : 1
STIMULANT_MEDS : 1
QH_BEEN : 1
HIS_DONNA : 1
DEATH_EXAMPLE : 1
YES_SOME : 1
CALORIE_INTAKE : 1
NOTE_ON : 1
ANXIOUS_DENIES : 1
FELT_DESPERATE : 1
FIBRILLATION_CHRONIC : 1
FOR_HEART : 1
ANTIDEPRESSANTS_MOOD : 1
WELL_RLQ : 1
CAN_WITHOUT : 1
HEMATURIA_HOWEVER : 1
FEELING_GUILTY : 1
PHARMACY_NOTE : 2
PREDICT_PATIENT : 1
AS_PT : 1
INCLUDING_SUPPLIES : 3
VERBAL_VERBALIZED : 1
QTY_SIG : 1
MOUTH_EVERY : 1
OR_MOBILITY : 1
SCHEDULED_BRUSHINGS : 1
OCCASIONAL_PVCS : 2
THE_LOWERED : 1
ELECTRONICALLY_DEMONSTRATED : 1
WAS_ABOUT : 1
FSOME_NAMEJOE : 1
THOUGH_SHE : 1
THE_REPORTS : 1
BID_MUCOUS : 1
TSH_ON : 1
TO_ARRANGE : 1
BY_TEMP : 1
SENSATION_ABSENT : 1
NO_PROTOCOL : 1
BIT_OF : 1
MEMBER_TIME : 1
TRANSITION_UNIT : 1
THE_OSTEOARTHRITIS : 1
TRYING_TO : 1
RELATIVES_UPSET : 1
DIRECTIVE_BUCKEYE : 1
ARE_ON : 1
IMPACT_OF : 1
BELOW_RECOMMENDED : 1
UPSET_HER : 1
OF_MEDIAN : 2
PAIN_PATIENT : 2
IN_FOR : 1
BREAKFAST_MEDS : 1
TAKE_CARE : 1
PHONE_HIS : 1
AT_PRESENT : 1
SALINE_RECHECK : 1
WAS_REVIEWED : 1
LIST_DONE : 1
LIMITATION_FRICTION : 1
RISK_AND : 1
PRIMARY_SHOULDER : 1
NICOTINE_ONE : 1
VET_THE : 1
BY_PATIENT : 3
AND_PATIENTS : 1
COPD_HE : 1
SPECIALIST_SPAN : 1
HER_OF : 1
HE_RECEIVED : 1
MEDICAL_PT : 1
MARRIAGE_SHE : 1
ATTENTION_SPAN : 2
NEAT_PHYSICIAN : 1
POSTVOID_OF : 1
FOR_MEDICAL : 1
PATIENT_REPORTS : 2
AMOUNT_VETERAN : 1
DEXTROSE_SOLN : 1
OR_EXPERIENCES : 1
APPEARS_THOUGH : 1
SWSDISCHARGE_PLANNING : 1
CD_AFTER : 1
HIS_KLEIN : 1
NO_ACTIVE : 1
EASILY_DISTRACTIBLE : 1
OTHER_THE : 1
AT_VETERAN : 1
MAY_DISCHARGED : 1
PO_QH : 2
COMPLEX_TREATMENTS : 1
TALKS_ABOUT : 1
DIFFICULT_RELAX : 1
REQUESTED_IF : 1
BE_SATT : 1
WORSE_PAST : 1
USE_OF : 2
YES_ARTERY : 1
FRIEND_AND : 1
REGARDING_RISK : 1
REPORT_PRIMARY : 1
PURPOSE_NEED : 1
PROTOCOL_NO : 1
EXPERIENCING_MOOD : 1
TYPE_MEDICATION : 1
DAILY_WOUND : 1
THE_OT : 1
NOTE_DR : 1
OUTPATIENT_HEALTH : 1
SEE_FOR : 1
TOLERATE_WERE : 1
REGIMEN_PATIENT : 1
ADMISSION_EVEN : 1
FIND_YOU : 1
CARDS_AT : 1
ENHANCE_SOCIAL : 1
RISK_SAME : 1
TO_ASSIST : 2
ANY_AGE : 1
PROVIDER_IS : 1
DO_KNOW : 1
OF_THIS : 2
IT_DIFFICULT : 1
PC_CHARLOTTE : 1
ACTIVE_REMAINS : 1
BE_FIRST : 1
TO_TASK : 1
RN_MH : 1
MED_PROVIDER : 1
HEART_HEALTH : 1
TO_NEAREST : 1
MEASURES_WITH : 1
DEPRESSION_OBJECTIVES : 1
WITHIN_REACH : 1
BELONGINGS_DONE : 1
VISIT_NURSING : 1
ADDENDUM_TALKED : 1
BIOPSIES_OBTAINED : 1
TRUNK_STILL : 1
WOMAN_ABOUT : 1
HOW_WOULD : 1
CLASS_TREATMENT : 1
SUBSTANCE_MEDICATION : 1
HEALTH_HOW : 1
ASSIST_HIS : 1
IN_ADDENDUM : 1
FOR_ATIVAN : 1
HE_REPORTS : 1
NO_ASSESSMENT : 1
THE_CONDUCTED : 1
ADDENDA_POWER : 1
IMMMUNIZATION_THE : 1
IS_THE : 2
PARTICIPANTS_ASKED : 1
AND_PERSONAL : 1
SIG_TAKE : 1
BE_GAINED : 1
VALVE_INSUFFICIENCY : 1
ADDENDUM_PAIN : 1
WAS_BY : 4
NOT_NOT : 1
VERBALIZED_PHYSICIAN : 1
CAP_MG : 1
ICDCM_JUL : 1
ND_OF : 1
PATIENT_ADMITS : 1
ON_CALL : 1
CLINIC_DAILY : 1
ASSIST_VET : 1
IN_ADENOSINE : 1
STATUS_STOP : 1
FUMARATE_MCG : 1
TID_MG : 1
BY_OF : 1
MEANS_AS : 1
DURING_THIS : 2
CANE_TONGUE : 1
HAD_EFFECT : 2
SALIVA_THE : 1
THEY_USE : 1
INTERVERTEBRAL_DISC : 1
CONDUCTED_BATH : 1
AGAIN_HE : 1
AND_FIRM : 1
ABOV_THAT : 1
SERVICE_DISABILITY : 1
INTERACTING_DATE : 1
THE_WEBSITE : 1
THE_CHEST : 1
BEDREST_IMMOBILE : 2
TREATMENTS_WITH : 1
THE_ASSESSED : 1
SCHEDULED_APPOINTMENT : 1
CM_BIOPSY : 1
TASKS_TO : 1
NO_ASSOCIATE : 2
NO_DYSPNEA : 1
BROUGHT_THE : 1
WITH_DECEASED : 1
HAVE_IS : 1
LASIX_BECAUSE : 1
OUR_TO : 2
HYPOTHYROIDISM_COPD : 1
THIS_BEFORE : 1
MOBILITY_CAN : 1
OR_SITUATION : 2
WITH_AMBULATION : 1
SUICIDALITY_BUT : 1
MIGRAINES_HOWEVER : 1
GOOD_AMOUNT : 1
PROCEDURE_PATHOLOGY : 1
HIM_WHICH : 1
SITTING_IN : 2
HE_IMMMUNIZATION : 1
AS_APPT : 1
MEDICATIONS_FEE : 1
DENIES_NEW : 1
IS_ACCEPTABLE : 2
AMBULATORY_LB : 1
REPORTS_THEY : 1
LINENS_DESIGNATES : 1
MEDICAL_CARE : 1
BOLUSMG_HRS : 1
THIS_APPEARS : 1
HOSPITAL_PT : 1
SOB_NOTED : 1
WAS_DOCUMENTED : 1
MI_TWO : 1
BUCKEYE_VERDE : 1
REACTION_NONE : 1
TRANSPORTATION_EXTERNAL : 1
FROM_CHERRY : 1
TO_TOTAL : 1
STATING_THAT : 3
OFFERED_TO : 1
METOPROLOL_TAB : 1
HS_ACTIVE : 1
HEART_RRR : 1
ILLNESS_HERE : 1
WAS_STATING : 1
THEN_TO : 1
ANXIETY_WAS : 1
STILL_RIDES : 1
RX_MAILED : 1
IDEATION_BUT : 1
LEARNING_VETERAN : 1
AMP_PRN : 1
ENDOSCOPY_GOLYTELY : 1
REFILLS_ON : 1
ICU_NURSING : 1
AND_ANTABUSE : 1
GIVEN_REVIEWED : 1
GIVEN_AGREE : 1
VESTING_NP : 1
IV_STATUS : 1
DROP_TO : 1
BBSC_RESPIRATIONS : 1
ALSO_BEDTIME : 1
GRIPS_EQUAL : 1
AND_FINAL : 1
DX_PLEASE : 1
IMPROVE_HEALTH : 1
FACTORS_ADDENDUM : 1
THE_CDCS : 1
LIFE_OF : 1
GIVEN_FECAL : 1
PROBLEMS_LITTLE : 1
SCHIZOAFFECTIVE_DISORDER : 1
DANGER_SELF : 1
DONNA_OR : 1
MEDICATION_SIDE : 1
CA_COPD : 1
ICDCM_SCHIZOAFFECTIVE : 1
OTHERWISE_NO : 1
RESPIRATIONS_AND : 1
DIARRHEA_STARTED : 1
NO_CHEST : 1
PATIENT_TAKE : 1
ALSO_DENIED : 1
ENCOUNTER_PHYSICIAN : 1
ACTIVE_ADDENDUM : 1
HAS_LOST : 1
MG_COMMENTS : 1
OF_ATRIAL : 1
THE_MENTAL : 2
DEPRESSION_STATUS : 1
THIS_WILL : 1
EXPERIENCE_THAT : 1
HR_FOR : 1
HIS_ANXIETY : 1
ON_AND : 3
BIL_BREATH : 1
TO_INSURE : 1
CARDIAC_CATH : 1
EXECUTED_AND : 1
WITH_INTERDISCIPLINARY : 1
MONITOR_PT : 1
PATIENT_DURING : 1
NOTE_TEXT : 1
GUAFENESIN_GUAFENESIN : 1
HE_WOULD : 3
CHRONIC_PRURITUS : 1
SO_THEY : 1
OF_TELERETINAL : 1
MG_AT : 1
DYSLIPIDEMIA_ADDENDUM : 1
HOWEVER_DOES : 1
SHOWS_FIBRILLATION : 1
OF_TOLERATED : 1
IMPROVED_NIGHT : 1
TOOTH_DX : 1
PO_PRN : 3
SATISFACTORY_TAKE : 1
ATIENT_EXPERIENCING : 1
IDEATION_AT : 1
BACK_MG : 1
REFILLS_HIS : 1
AND_COOPERATIVE : 1
PT_THIS : 1
LBS_MAR : 1
COUNSELED_TOBACCO : 1
OTHERS_OF : 1
WEEKS_OF : 1
THE_CONSERVATION : 1
SPECIALIST_ATTENTION : 1
SINUS_PROBLEM : 1
TIME_RTU : 1
AMONG_DIFFERENT : 1
SPECIALIST_REFERRAL : 1
REVIEWED_CURRENT : 1
UNDERSTAND_WHY : 1
WE_COULD : 1
BACK_TO : 2
HI_MHSBDI : 1
DISCUSS_SERVICES : 1
MAURER_PATIENT : 1
ANY_THIS : 1
INJURY_BRUISE : 1
AND_SOMALIA : 1
NOT_STAFF : 1
HEART_BLOOD : 1
ANY_THAT : 2
NOTE_SOI : 1
ANOTHER_GAIT : 1
FEW_MONTHS : 1
DEFORMITY_PRESENTS : 1
DID_MOUNTAIN : 1
USE_PATIENT : 1
OFFICE_IN : 1
WITH_SIGNIFICANT : 1
SORRY_FIBER : 1
ADMISSION_MEANS : 1
TIME_TIME : 1
NURSE_ATIENT : 1
REPEAT_YEARS : 1
EXTRACTION_TOOTH : 1
WHO_RESIDENTS : 1
RECHECK_DEXTROSE : 1
HIS_ABOUT : 1
AM_PT : 1
OFFERED_INQUIRE : 1
PATCHROTATE_NOT : 2
RIDES_THE : 1
NHCU_FOR : 1
CARE_PROVIDER : 1
ACTIVITY_RECOVERY : 1
AND_EASILY : 1
CONTRAST_IN : 1
EASILY_PRONE : 1
SIGNS_OSTEOARTHROSIS : 1
ROOM_AND : 1
WITHOUT_BEFOR : 1
TO_PHYSICAL : 1
MENTAL_STATUS : 1
EMER_CARE : 1
EXPRESSED_BBSC : 1
LIFE_EXPECTANCY : 1
DATE_APPEARS : 1
PROVIDER_PULSE : 1
THE_RECOMMENDED : 1
PROVIDED_INCLUDING : 1
REPORT_INTERVENTIONS : 1
FOR_SUGGESTED : 1
AND_OF : 1
SHORTNESS_OF : 3
WILL_NOT : 1
CARE_STAFF : 1
MAKING_DIFFICULT : 1
CHEST_NO : 1
HISTORY_PATIENT : 1
HISTORY_FALLING : 1
OF_SUICIDAL : 2
OPERATES_COMPUTER : 1
REVIEW_AND : 1
HI_PSYCHOLOGY : 1
REVIEWED_BY : 1
STAFF_HIS : 1
HAS_NSTEMI : 1
PRN_YOUR : 1
IN_HIS : 2
SYND_SUBSTANCE : 1
EXCEED_MG : 2
PATIENT_ARRIVAL : 1
AFFECT_BUT : 1
DISTANCE_MOBILITY : 1
ISSUE_PARALYSIS : 1
OF_APPT : 1
GOING_AND : 1
NOSTRIL_TWICE : 1
HE_CONTACT : 1
HAVE_BROUGHT : 1
NONE_PAIN : 1
NECK_DERMATOLOGY : 1
BEDREST_DYSPHAGIA : 1
COMPLETE_BY : 1
PUEBLORED_RN : 1
UNTIL_WALKS : 1
LLQ_NML : 1
REASSESSMENT_EQUIPMENT : 1
HES_NOT : 1
AS_NOTED : 1
IS_ON : 1
MAY_SENT : 1
TO_FT : 1
FOR_KNEE : 1
KRISHNASWAMY_MALATHI : 2
OF_ESOPHAGEAL : 1
BUT_WAS : 1
CHEST_PRESSURE : 1
FIRST_APPT : 1
FT_RILEY : 1
IN_KOREA : 1
AGAIN_IS : 1
PATIENT_PHYSICIAN : 1
TOBACCO_COUNSELED : 1
AND_DURING : 1
EXPIRATION_DATE : 1
NOTE_FROM : 2
CHERRY_SEEN : 1
EXCEED_IN : 1
DIURETICS_EGD : 1
HAD_SCREENING : 2
DIARRHEA_OF : 1
WEEK_SWELLING : 1
DYSPHAGIA_YES : 1
STAFF_RN : 1
AND_FRIENDS : 1
VISION_MEDICATIONS : 1
HAD_SAFE : 2
BEDTIME_NOT : 1
TO_DINNER : 1
TRANSFER_TO : 1
HAS_POWER : 1
HOW_HE : 1
SCLERA_TO : 1
PRESSURE_THAN : 1
HOW_PERFORMED : 1
THIS_FLU : 1
APPROPRIATE_LEVEL : 1
IN_TAKE : 1
KETCHUM_CAREY : 1
AND_TALKING : 1
BY_SESSION : 1
ACCOMPANIED_BY : 1
CARE_BH : 1
ETOH_AND : 1
DENIES_DYSPHAGIA : 1
VA_INPATIENT : 1
PT_RATES : 1
HAS_IN : 1
WHY_SHE : 1
SIG_WITH : 1
DOOR_CURRENT : 1
TO_AS : 2
HIS_DAUGHTER : 1
IS_AN : 1
TOE_NORMAL : 1
MANUAL_WAS : 1
THE_OPERATING : 1
NOTE_MEDICAL : 1
IT_THOUGHT : 1
ADDENDUM_PATIENT : 1
PT_BED : 1
USUAL_RECOMMENDED : 1
YOU_ALL : 1
ADEQUATE_PMR : 1
NONE_ANY : 1
FEW_NO : 1
ACTIVE_MEDICATION : 1
HAD_CONTRAST : 1
MICROSCOPIC_ANALYSIS : 1
SUICIDE_ASSESSMENTCOMPREHENSIVE : 1
PATIENT_SAFE : 2
SERVICE_TAB : 1
NOT_DENTAL : 1
SITTING_THE : 1
ADDENDA_OF : 1
HOSPITAL_PROVIDER : 1
GAVE_ACKNOWLEDGES : 1
DING_ADVISED : 1
ADVISED_CRISIS : 1
INCREASE_IN : 1
CONTROLLED_SUBSTANCE : 1
LOCATION_PHYSICIAN : 1
SPECIFICALLY_NO : 1
SHOWED_IN : 1
IT_YOU : 1
STATED_DIARRHEA : 1
AT_VA : 1
SCALE_MONTHS : 1
WAS_EKNURSING : 1
GHETTO_FAMILY : 1
PLAN_TO : 1
PREVIOUS_VITALS : 1
KG_HAD : 1
WRITER_COMPARED : 1
CHANGED_DAILY : 1
CONSISTING_MAINLY : 1
STATES_HE : 5
OR_VITALS : 1
REPORT_THAT : 1
TEMP_THIS : 1
FOLLOWUP_NOTE : 1
NKA_NO : 1
ACTIVE_VETERANS : 1
NO_TO : 1
MOTIVATED_MAKE : 1
EVALUATION_OF : 2
BOTH_GETTING : 1
WITH_MD : 1
OBSERVABLE_AT : 1
THE_ETIOLOGY : 1
NEVER_THERE : 1
CALLED_SEE : 1
MRN_RAMSAY : 1
CLINIC_FOR : 3
YOUR_DO : 1
STEPS_SITTING : 1
INJ_MG : 1
PCP_APPT : 1
FOUR_WEEK : 1
ABOUT_LOPEZ : 1
OF_MEDICATION : 2
HIS_TRUE : 1
OF_HISTORY : 2
UNDERWENT_THE : 1
SUMMARY_WERE : 1
ACTIVE_LLOSE : 1
PHYSICIAN_NUTRITION : 1
ATRIAL_AND : 1
CC_NURSING : 1
THAT_WE : 1
BEHAVIOR_EXECUTED : 1
APPOINTMENT_AS : 1
ANTIBIOTIC_PATIENT : 1
KRISHNASWAMY_OR : 1
PC_BY : 1
FOR_YEARS : 1
IT_HIS : 1
CORRELATION_EVENTS : 1
MG_FOR : 1
LOCATION_WAS : 1
SCREENING_WITH : 1
VERSION_STATES : 1
BOTH_VA : 1
NONE_WHEELCHAIR : 2
NO_ON : 1
SUPPORT_MINIMAL : 1
AMBULATORY_NONE : 2
HAD_HIS : 1
OF_ALL : 1
BE_SENT : 1
PATIENT_COUNSELED : 3
PATIENT_MEDICATION : 1
FOR_CALL : 1
SELECT_DISPLAY : 1
DISTAL_HEAD : 1
IN_AND : 2
IN_EACH : 1
RECEIVED_CALL : 1
VA_OFFERS : 1
SPECIFICALLY_PULSE : 1
HIM_KNOW : 1
TEST_CARDS : 1
PTS_AT : 1
FAMILY_TRAINING : 1
ABOUT_DIRECTIVES : 1
MR_HOWEVER : 1
MMM_TO : 1
NONE_MEDICATIONS : 1
REQUEST_AN : 1
LOT_OF : 3
PATIENT_CAME : 1
TRANSFERRING_NORMAL : 2
PROBLEMS_HELP : 1
THAT_COULD : 1
CONSULT_REHAB : 1
PHYSICIAN_GUSONS : 1
DATA_TAG : 1
AS_RLQ : 1
POTENTIAL_THAN : 1
THAT_MORE : 1
TREATMENT_PLAN : 2
APPOINTMENT_YOU : 1
SHE_THE : 1
VISITED_WITH : 1
LOWER_CONDITION : 1
NOT_LET : 1
DEATH_FOR : 1
ADMISSION_COMPLAINT : 1
DUCKY_PATIENT : 1
MAKE_ORTHO : 1
APPROPRIATE_OF : 1
TO_START : 1
SPOKE_HIM : 1
MONTHS_HIGH : 1
BRONCHOSCOPY_VERIFIED : 1
FULLY_ALL : 1
SEE_OF : 1
NEED_CANCEL : 1
TIME_TRIAGE : 1
ALSO_DISCUSSED : 1
GOGINEN_ALBANY : 1
INCLUDE_VET : 1
THE_PRESSURE : 1
ELEVATED_PSA : 1
PROBLEM_PLAN : 1
REHABILITATION_THINKS : 1
ARRIVAL_PULSE : 1
PATIENT_OR : 1
NA_MH : 1
FLOOR_IS : 1
ACTIVE_DUTY : 1
CM_ORGAN : 1
AGE_FOR : 1
PRESCRIBED_CONTRAST : 1
WOUDL_DID : 1
ALL_CARCINOMA : 1
AT_TIME : 7
THERE_NO : 1
NEGATIVE_OUTPATIENT : 1
PRSE_AND : 1
AND_RECEIVED : 1
INSTRUCTIONS_NO : 1
MEDICATION_PT : 1
YES_NO : 1
MR_SEEN : 1
GAVE_BAD : 1
EXTERNAL_MEDICAL : 1
HIS_MARRIAGE : 1
WIFE_UNABLE : 1
IMPINGMENT_CONTROLLED : 1
THIS_WAS : 2
RESTING_ON : 1
AND_ORDERS : 1
CONTACT_MOVEMENT : 1
SOCIALIZE_MORE : 1
AT_BENIGN : 1
DAILY_MEMBER : 1
REQUEST_NOTE : 1
PRECAUTIONS_FIXATOR : 1
TO_AMBULATE : 1
USE_ICDCM : 2
EVER_ANY : 1
MICU_ATTENDING : 1
VET_IS : 1
ESOPHAGUS_PREOPERATIVE : 1
ASSOCIATE_IDENTIFIED : 1
DANGER_TO : 1
ANTICIPATING_WITHDRAWAL : 1
FROM_VET : 1
VETERAN_WITH : 1
OR_ALSO : 1
OF_SCHEDULED : 1
SHOT_FY : 1
HAS_PATIENT : 1
THYROID_HYPOTHYROIDISM : 1
OF_IS : 1
VOMITING_TOBACCO : 1
EXAM_ROOM : 1
MULTIPLE_NONHEALING : 1
MONITOR_RESPONSE : 1
CAN_NAVIGATE : 1
SURVEY_THE : 1
THE_ULCER : 1
IF_NEEDED : 1
NONE_THE : 1
VISION_CHANGES : 1
OR_PLEASURE : 1
HIS_OR : 1
UNDERSTANDING_ALL : 1
SOURCES_PRN : 1
THIS_ADMISSION : 1
REISSUE_WHAT : 1
GOLYTELY_GOING : 1
HAS_SUMMER : 1
RECOMMENDED_BY : 1
STATUS_ORIENTED : 1
HE_ON : 1
SAW_DEC : 1
MRSA_SURVEILLANCE : 1
AND_CONTACT : 1
DECEASED_WIFE : 1
AND_IS : 1
ABD_HE : 1
PATIENT_PATIENT : 2
STATED_SHE : 1
ILLNESS_PMH : 1
BOLUSMG_MIN : 1
ACCEPTED_OUTPATIENT : 1
PROVIDER_NONE : 1
CAREY_EMER : 1
EMOTIONAL_FACTORS : 1
VITAL_HERE : 1
SOCKS_SHOES : 1
THIS_IS : 1
AND_PLANS : 1
HAVING_PROBLEMS : 1
GENDER_WAS : 1
AFTERNOON_BEGAN : 1
MEDICAL_RECORD : 1
SO_GO : 1
EDEMA_NOTED : 1
EGD_SHOWED : 1
XYZZY_AND : 1
THAT_CRISIS : 1
NEEDING_MINIMAL : 1
TOBACCO_SCREEN : 1
AND_INFORMED : 1
BMI_APR : 1
NECK_DEFORMITY : 1
UNEMPLOYED_SHE : 1
ON_IN : 1
BROUGHT_CD : 1
HAS_CARDIAC : 1
WEBB_FAMILY : 1
RESPONSE_CONSULT : 1
SHE_COULDNT : 1
OUTPATIENT_MEDICATIONS : 5
TAB_TWO : 2
PCP_NO : 1
OF_BED : 2
COMPLETED_BE : 1
LUNG_HAS : 1
NEEDED_FOR : 2
VISIT_ACCESSED : 1
ENCOUNTER_MARITAL : 1
TO_STATUS : 1
COPD_INJ : 1
NO_UNDUE : 1
HYDROCODONE_BECAUSE : 1
WORSENS_DURING : 1
TRANSPORT_TO : 1
APNEA_PAIN : 1
CAR_HE : 1
SESSION_WOMAN : 1
JUL_DISPOSITION : 1
THAT_THE : 1
OF_CANE : 1
OSTEOARTHROSIS_LOCALIZED : 1
PATIENT_ANSWERED : 2
ADDENDUM_ANTIHYPERTENSIVES : 1
HEALTH_NOTE : 2
OCCASIONAL_MF : 1
TAB_TAKE : 3
CARE_CC : 1
HIS_WILL : 1
PRN_ACTIVE : 1
THE_LEVEL : 1
ONE_TABLET : 1
VASH_HAD : 1
SAO_RA : 1
OBSERVATIONS_CURRENT : 1
GLUCOSEFINGER_ABD : 1
NURSING_DIAGNOSIS : 1
THE_VA : 1
RADIATION_SHOULDER : 1
MCG_CAP : 1
OF_JUN : 1
CREST_HOSPITAL : 1
NOTE_PATIENT : 2
IS_THAT : 1
PREOPERATIVE_STANDARD : 1
RECEIVED_PROGRESS : 1
CLONIDINE_MANUAL : 1
WORKING_HAS : 1
ALONG_LEFT : 1
IN_GO : 1
NEXT_APT : 1
OF_AS : 1
MAILED_THE : 1
TAKING_ANTABUSE : 1
REVIEW_IT : 1
DISCHARGE_IF : 1
NOTED_SWSDISCHARGE : 1
NOT_TUBE : 1
IS_ABLE : 1
IN_SEPARATE : 1
PHYSICIAN_REPORT : 1
WEEK_OF : 1
INDEPENDENTLYX_ADDENDUM : 1
BIOPSIES_WERE : 1
EDUCATED_MUTUAL : 1
DRAINAGE_EDEMA : 1
TELEPHONE_BP : 1
IDENTIFIED_FOLLOWING : 1
IP_NOTE : 1
ANTABUSE_THE : 1
PM_CARDIOVASCULAR : 1
SERVED_IN : 1
DAUGHTER_SEVERAL : 1
ENACT_DIRECTIVES : 1
IN_EYES : 1
LAST_PROBLEMS : 1
UDS_NO : 1
OF_AN : 1
DRINKING_THE : 1
TYPE_SCAR : 1
FOR_HE : 3
TOOK_PLACE : 1
BRISKLY_DIET : 1
DELIBERATELY_GETTING : 1
CALL_TO : 2
SHOWED_TUMOR : 1
HOMICIDAL_UNDERSTANDING : 1
PLACED_RIGHT : 1
DEMEROL_COMPLICATIONS : 1
PROCEDURE_WAS : 1
COUMADIN_BEEN : 1
EDUCATED_PATIENT : 1
PC_NO : 1
DECLINED_OPERATION : 1
TYPE_PAIN : 1
SCREENING_IMPORTANCE : 1
REACH_WITHIN : 1
TEST_RESULTS : 2
GOALWHAT_LEVEL : 1
BRAKES_ON : 1
UNDERWENT_EVALUATION : 1
ULCERS_DENIES : 1
ALLERGIES_IPRATROP : 1
PT_OUTPATIENT : 1
DRAINAGE_THIS : 1
IN_PHYSICIAN : 1
ASSISTANCE_TO : 1
AMOUNT_OF : 1
ED_MEDICATION : 1
OF_SERVICES : 1
PSYCH_TEAM : 1
MALE_STATUS : 1
PAIN_NOT : 1
TO_WAS : 1
PAIN_OR : 1
DENIES_CHEST : 1
ALERT_TO : 1
ORAL_PUFFS : 1
ORTHO_ADMISSION : 1
REGARDING_BLOOD : 1
ABOUT_FELICIANO : 1
EVALUATED_SAFE : 1
BELONGINGS_WILL : 1
CAN_FULLY : 1
TAB_QTY : 1
HE_NO : 1
PARTICIPANTS_WERE : 1
SITUATION_AFFECT : 2
AND_MAINTAIN : 2
IT_SHOULD : 1
SHOES_ADLFLOWSHEET : 1
STAFF_MD : 1
NAME_FOLLOWUP : 1
OF_CARE : 4
ADDENDUM_HE : 1
LAST_STARTED : 1
IF_FIND : 1
SENSATION_TO : 1
ACTIVE_CURRENTLY : 1
NUMBER_NO : 1
DRESSING_PUTTING : 1
INSTEAD_PLEASE : 1
NECESSARY_LIVES : 1
VA_BLADDER : 1
ALSO_EXHIBITED : 1
OR_NOTE : 1
GUILTY_TO : 1
CHANGES_MEDICATIONS : 1
EDUCATION_WITH : 2
MD_FOR : 1
THE_CORP : 1
THE_RSF : 1
MESSAGE_KRISHNASWAMY : 1
NS_INFUSING : 1
SUN_REQUESTED : 1
WATCH_THE : 1
NOV_IP : 1
LEFT_ABD : 1
INFORMATION_WOULD : 1
CONTACT_NO : 1
ASSESSMENT_ERUPTED : 1
PHONE_SHE : 1
UPPER_LIMB : 1
TO_NONE : 1
TOES_LATERAL : 1
TYLENOL_OIL : 1
WAS_THE : 2
PRESSURE_PREVENTION : 1
THE_YESTER : 1
FINAL_HEMATURIA : 1
TWO_BY : 2
NURSE_STUDENTS : 1
IN_POSTION : 1
WOUND_NURSE : 1
CALLER_RESPONSE : 1
FRIGHTENING_HYPERLIPIDEMIA : 1
PHYSICIAN_PTS : 1
LITTLE_OR : 1
TO_SWELL : 1
IN_YEARS : 1
AND_LEFT : 1
SECONDARY_RELATED : 1
HR_WEEK : 1
WHEAT_BREAD : 1
LIVES_GHETTO : 1
ABNORMAL_ARRIVED : 1
FROM_HIS : 1
THAT_CM : 1
EXR_MINUTES : 1
ATTORNEY_HEALTH : 1
TWO_AGO : 1
DURING_SENT : 1
ORDERED_MEDICATIONS : 1
ADENOSINE_NATURALLYOCCURRING : 1
NEVER_WENT : 1
PSYCHOTROPICS_REGULAR : 1
HAVE_MORE : 1
PATIENTS_FALL : 2
PROVIDED_VETERAN : 1
DRESSING_HAND : 1
OPERATES_INDEPENDENTLYX : 1
REGULARY_AT : 1
MONTH_DAUGHTER : 1
DISEASE_PCCTELEPHONE : 1
WAY_IT : 1
IV_PLACED : 1
ABUSE_IN : 1
SUPPLIES_HCL : 1
TOBACCO_TOBACCO : 1
NO_OBSERVABLE : 1
SHOULD_NEED : 1
ADDITIONAL_NOTED : 1
DRUGS_FISH : 1
EQUIPMENT_USED : 1
SAFETY_BED : 1
SUGGESTED_HE : 1
DIRECTIVES_AND : 1
OTHER_DRUGS : 1
ACTIVE_INPATIENT : 3
ALTERATION_TROUBLE : 1
WOULD_THIS : 1
AT_DO : 1
BE_PASSED : 1
REEVAL_UP : 1
NO_PAIN : 2
IM_MG : 1
OR_HAS : 1
GIVEN_OCCULT : 1
LOT_GAS : 1
AS_ABOVE : 1
TO_THIS : 4
SENSATION_DIMINISHED : 1
ARTERY_WITH : 1
ASSESSMENT_OF : 1
TYPE_SIMVASTATIN : 1
DISTRACTIBLE_EKNURSING : 1
MEDICATION_ADMINISTRATION : 2
SIGNS_NURSE : 1
AND_PLACE : 1
TO_ETOH : 1
DISCHARGED_TO : 1
EPISODIC_WIDE : 1
AM_RISK : 1
REGULAR_BASIS : 1
OCCASIONAL_JUNCTIONAL : 1
RISK_COMMENTS : 1
VERBAL_PAMPHLET : 1
KG_PATIENT : 2
MALE_PHONES : 1
VET_TRIED : 1
BE_SERVICE : 1
HISTORY_ATRIAL : 1
THAN_CONTACT : 1
MALE_HEIGHT : 1
RESPONSE_TO : 2
WRITE_IMPACT : 1
HE_PATIENT : 1
TO_COMPLETED : 1
BURNING_WITH : 1
WENT_CAME : 1
OR_CONCERNS : 1
TO_WILL : 2
HR_CC : 1
ABOVE_LAST : 1
TO_PREVIOUS : 1
CAD_ATRIAL : 1
PLACE_HIS : 1
FOR_MEALS : 1
SIGNIFICANT_ABNORMALITY : 1
EVALUATION_RISK : 1
PROVIDED_FACILITY : 1
PRESENT_TWISTED : 1
AND_OLD : 1
IMMMUNIZATION_FLU : 1
FIBRILLATION_AND : 1
PRIMARY_IDENTIFIED : 2
THAT_MEASURES : 1
LONGSTREET_PHONE : 1
INFORMATION_OLD : 1
TIME_WILL : 1
CAME_IN : 1
CODE_NSC : 1
FOLLOW_INSTRUCTION : 1
AND_PT : 1
TABLET_MOUTH : 1
MEASUREMENTS_IN : 1
NOTE_METFORMIN : 1
SAFETY_IN : 1
FOR_PAINSAW : 1
HE_HAS : 11
OR_NO : 1
BRADEN_FOR : 1
POSTERIOR_TIBIAL : 1
CANCER_DM : 1
URINATING_DENIES : 1
MODIFIED_SEDATION : 1
THE_REDSKINS : 1
BID_FOR : 1
ENDS_IN : 1
COMPREHENSION_OF : 1
IN_AT : 1
PATIENT_ADVANCE : 1
SAFE_AND : 1
OCT_MEDICATION : 1
NONEXISTANT_HES : 1
LITTLE_BETTER : 1
PCP_INFLUENZA : 1
EQUIPMENT_DEVICES : 1
OF_PHONE : 1
AND_ABLE : 3
AND_WANTS : 1
HE_WERE : 1
HEPLOCK_CD : 1
SOURCE_REFERRAL : 1
OF_DEC : 1
PLEASE_HAVE : 1
RECONCILIATION_PROVIDER : 1
FSBS_OR : 1
PROVIDER_AMBULANCE : 1
YOU_INFORM : 1
ITEMS_ACCEPTED : 1
GOOD_ADVANCE : 1
THESE_PLEASE : 1
SW_PHONED : 1
AM_MENTAL : 1
TO_GAIN : 1
WITH_SOCIAL : 1
DIZZINESS_NONEXISTANT : 1
NO_DRAINAGE : 1
THAT_PT : 1
HEALTH_OR : 1
THIS_NURSE : 1
UNRE_ML : 1
NSA_SURVEILLANCE : 1
NOW_OF : 1
SELECT_IMAGING : 1
WITH_STATE : 1
ATRIAL_CHRONIC : 1
PREVENTION_PROTOCOL : 1
VA_NONVA : 1
PROVIDED_COMPREHENSION : 1
IN_RFOOT : 1
ASSISTANCE_CANE : 1
RESULTS_THIS : 1
OR_WITH : 1
ANY_OCCUR : 1
SCREENING_NO : 1
YOUR_APPOINTMENT : 4
MMM_ENDOSCOPIC : 1
UNDERSTANDING_ID : 1
ASK_YOUR : 1
REORDER_COUMADIN : 1
NO_OR : 4
OUR_INDICATE : 1
WEEK_PROBLEMS : 1
TREATMENT_WELL : 1
ABOUT_MALE : 1
ONE_EDUCATION : 2
CHICKEN_PASTA : 1
TO_ENCOURAGEMENT : 1
GUAFENESIN_ML : 1
RIGHT_ELBOW : 1
WHEN_YOU : 1
LUBIPRO_CAP : 2
HAD_FOR : 1
THIS_OUR : 1
TAB_ONEHALF : 1
SAME_BEFORE : 1
THE_PHONE : 2
WHEN_DID : 1
JUNCTIONAL_BEATS : 1
TO_SESSION : 1
SEP_PSYCHOLOGICAL : 1
ON_FOREHEAD : 1
OSTEOARTHRITIS_THIS : 1
CALL_INITIATED : 2
RECOVERY_COORDINATOR : 1
AN_IMPACT : 1
MODE_OF : 2
BACK_PAIN : 1
CALL_WITHIN : 1
PAMPHLET_IN : 1
LETHALITY_OTHER : 1
THAN_AND : 1
DOING_TRIAGE : 1
TO_ONE : 2
PARRAFING_APPLICATIONS : 1
LETTER_STATING : 1
HIMSELF_DISCHARGE : 1
FACILITY_PCP : 4
NECESSARY_THE : 1
OTHER_FOR : 1
APR_PHARMACY : 1
OF_SALINE : 1
PAJAMAS_AND : 1
DID_HOSPITAL : 1
EATS_AMOUNT : 1
UNDERSTANDING_PURPOSE : 1
SIGNED_NONE : 1
ASSESSMENT_PATIENT : 1
INCREASE_HIS : 1
WALKS_WITH : 1
NURSING_ORIENTED : 1
BLADDER_SPASMS : 1
APPOINTMENT_FASTING : 1
FAMILY_TIME : 1
YOU_SAYS : 1
TREATMENT_AND : 1
CONTACT_FOR : 1
SEX_MALE : 1
MIN_HRS : 1
VETERAN_IN : 1
PLAN_MD : 1
LLQ_BS : 1
PEERS_HIS : 1
TIBIAL_RIGHT : 1
TREATMENT_ACTIVE : 1
VERSION_HAS : 1
TIMES_DURING : 1
DIFFERENT_AMONG : 1
DURING_ADMISSION : 1
CHRONIC_SINUSITIS : 1
CALLOUSES_INSOMNIA : 1
CONTROLLED_INTERDISCIPLINARY : 1
POSTERIOR_RIGHT : 1
TELERETINAL_CONSULT : 1
TC_VET : 1
HAD_ANY : 2
TAKE_MOUTH : 1
FROM_DATE : 1
JLD_NEUROPATHY : 1
PARRAFING_BATH : 1
IDENTIFIERS_USED : 2
PODIATRY_NOTE : 1
AGRESSIV_INCLUDE : 1
ADDENDUM_ALSO : 1
NONE_PROBLEM : 1
IS_YEAR : 2
WITH_SOB : 1
AGREE_MORE : 1
HAD_LITTLE : 1
LED_JUDY : 1
ALLERGIES_HAS : 1
OF_DATE : 3
AND_TO : 3
SAID_WOULD : 1
SCORE_HEENT : 1
MORSE_FALL : 1
UNABLE_ASSIST : 1
ULCER_NA : 1
REASONS_ON : 1
PHYSICAL_AFTER : 1
VETERAN_ACCOMPANIED : 1
DUE_WORK : 1
CHEST_DISCOMFORT : 1
PCP_BETTS : 1
GOOD_VA : 1
HEALTH_CLINIC : 1
ANY_ABOUT : 1
PAIN_PAIN : 2
ABLE_CONTROL : 1
OF_LAST : 1
ANY_FOR : 1
BETTER_AFTER : 1
IDENTIFIED_REASON : 1
UNABLE_TO : 1
RANGE_DATE : 1
PROTOCOL_WAS : 1
IMAGES_REQUESTING : 1
DRESSING_INTACT : 1
ON_WITH : 1
GUSONS_IN : 1
ARTERY_DISEASE : 1
MEDICATIONS_TO : 1
COMMENT_AND : 1
PAST_PSYCHIATRIC : 1
PATIENT_NUTRITION : 1
NODENTURES_INFLUENZA : 1
MEDICATIONS_INCLUDING : 3
RIGHT_EYE : 1
PLEASE_INFORM : 1
EQUAL_BED : 1
INFILTRATE_HEART : 1
THE_DATA : 1
TRANSPORTATION_ALLERGIES : 1
COUNSELING_WAS : 1
TIME_OF : 1
BREATH_SOUNDS : 2
INITIATED_NURSE : 1
DECEASED_HE : 1
HIS_FSBS : 1
VALVE_PT : 1
WILL_TRANSFER : 1
WANTED_TO : 2
EYES_VETERANS : 1
IN_AFTER : 2
IN_SECONDARY : 1
TO_PHYSICIAN : 3
NOTE_WAS : 1
MALATHI_COVERING : 1
SWEATS_PRODUCTIVE : 1
WITH_PAST : 1
BELONGINGS_LIST : 1
MCC_TRUE : 1
PRESENT_MALE : 1
LEVEL_CARE : 1
FOLD_PLACE : 1
BOSS_USED : 1
NOT_WITH : 1
PLAN_CHANGES : 1
STATUS_PER : 1
STEPS_IN : 1
ERATE_ADEQUATE : 1
DIZZINESS_IS : 1
INHALE_ONE : 1
PROBLEMATIC_REFLECTING : 1
NO_NOTED : 3
INSTRUCTIONS_COUMADIN : 1
BARRIERS_LEARNING : 2
ARRANGE_PRECAUTIONS : 1
BY_ACTIVE : 3
ABOUT_HIMSELF : 1
NOTED_PLANNING : 1
SHORT_TERM : 1
FAMILY_THE : 1
CAME_TO : 3
PROGRESS_TEXT : 1
FALL_HIGH : 2
COMPLAINTS_PRESENT : 1
OCT_ADDENDUM : 1
AS_ALBUMIN : 1
SPAN_PATIENT : 1
MINUTES_FAMILY : 1
CODE_FLUIDS : 1
INFUSION_CC : 1
INDICATES_PROBLEMS : 1
SAYS_THAT : 1
LLOSE_SOLN : 1
BAD_SYSTEM : 1
IF_LAST : 1
THE_TOOLS : 1
DIMINISHED_TO : 1
DING_THAT : 1
ALSO_DELIBERATELY : 1
APPOINTED_PCP : 4
PURPOSE_OR : 1
UP_PLAN : 1
ALL_UNRE : 1
RISK_MEDICATIONS : 1
THERAPY_DAILY : 1
SOCIAL_TO : 1
AMIODARONE_IN : 1
TO_ANGER : 1
OF_INFORMATION : 1
CARDIAC_MONTHS : 1
UNITS_RANGE : 1
EATS_OR : 1
FUTURE_SOCIAL : 1
PSYCHOTROPICS_ON : 1
HOMICIDAL_PATIENTS : 1
ACCEPTABLE_LEVEL : 1
ANKLES_LATERAL : 1
NURSE_AT : 2
NUMBER_PATIENTS : 1
NOT_FOLLOW : 1
PHONE_NUMBER : 2
OFFICE_AN : 1
CLINICAL_REMINDER : 1
SPEAK_TO : 1
FORMOTEROL_FUMARATE : 1
ED_NOTE : 1
PRESSURE_PULSE : 1
IN_ATTEMPT : 1
REDSKINS_GAME : 1
BELONGINGS_OF : 1
TABLETS_BY : 2
BACK_ION : 1
URINAL_WITHIN : 1
FAMILY_FRIENDS : 1
OF_GAS : 1
PER_STRESSOR : 1
HYP_OPH : 1
CONNECTION_DISABILITY : 1
PS_TO : 1
HEALTH_PATIENT : 2
TAKE_CAPSULE : 1
MESSAGE_ON : 1
NOTICED_NOT : 1
OUTPATIENT_VA : 1
THICKNESS_IN : 1
RELAYED_INFORMATION : 1
BAD_ACKNOWLEDGES : 1
GRASP_EQUAL : 1
CHANGE_BUPROPION : 1
ALBUTEROL_IPRATROPIUM : 2
VET_OUR : 1
NOT_IDENTIFIED : 1
WAS_IN : 1
NOTED_TO : 1
WHEN_HOW : 1
NOTE_RESIDENT : 1
LISTED_THE : 1
THIS_INVOLVES : 1
CD_INFUSION : 1
DISPLAY_SEDATION : 1
LB_DRAINS : 1
PEOPLE_OF : 1
NOTE_ACUTE : 1
IN_SHORT : 1
FROM_THAT : 1
THE_TERM : 1
JUN_EXCHANGE : 1
SEEN_TO : 1
THE_SHE : 1
BUT_THAN : 1
MOOD_NA : 1
WITH_ELABORATION : 1
TO_APPROPRIATE : 2
SOB_IS : 1
WITH_VASH : 1
ANGER_SINCE : 1
ZZPALLIATIVE_CARE : 1
LEVEL_PAIN : 1
OCCULT_TEST : 1
CALL_PT : 1
TIMES_DENIES : 1
HS_PRN : 1
AFTER_BOLUSMG : 1
HAS_CHART : 1
IS_STATES : 1
PAIN_APT : 1
SAYS_CAUSED : 1
GAME_AFTERNOON : 1
TRIAGE_PATIENT : 1
NAME_MRN : 1
COMPLAINTS_OF : 1
PHYSICIAN_OFFICE : 3
RILEY_HE : 1
RETURNS_CLINIC : 1
SWELL_GAVE : 1
ALCOHOL_SCREENING : 1
PROTECTIVE_DIMINISHED : 1
CURRENT_PLAN : 1
THE_HAVE : 1
CP_DATE : 1
OUTDOORS_TOLERATED : 1
NOT_INSTRUCTION : 1
CAPSULE_BY : 1
NOTE_THIS : 1
HOWEVER_IS : 1
ROOM_OF : 1
NOT_BE : 1
OUTPATIENT_ANTIBIOTIC : 1
USED_WARM : 1
SPEAKS_OF : 1
GET_HIS : 1
INDIVIDUAL_WOMAN : 1
NURSING_NOTE : 6
THIS_DATE : 1
DISCHARGED_DURING : 1
FOREHEAD_WITH : 1
CC_RT : 1
SHIFT_ASSESSMENT : 1
VISIT_THIS : 1
TO_COUNSELING : 2
EXPRESSING_OPTIMISM : 1
THE_DOES : 1
NONVA_DIAGNOSIS : 1
EXAMPLE_HE : 1
CM_WITH : 1
THOUGHT_BE : 1
HISTORY_SHE : 1
LOWER_LEGS : 1
DIPLOPIA_OR : 1
ON_METFORMIN : 1
LONGSTREET_ELOPEMENT : 1
BEHAVIORS_AND : 1
NOTED_RESPONSES : 1
PAIN_NECK : 1
YOU_TO : 1
MANAGEMENT_ANTIPSYCHOTICS : 1
BLOOD_MORE : 1
FOR_PROCEDURE : 1
PRN_SHORTNESS : 2
COUNSELED_ON : 1
ON_SOCKS : 1
HAS_ADDENDA : 1
CALLER_UNDERSTANDING : 1
DEL_WEBB : 1
TRIUMPH_RECOVERY : 1
HAS_USED : 1
TO_EFFECTS : 1
RFOOT_THE : 1
DIAGNOSIS_SOMETIMES : 1
HIS_SURGERY : 1
WIFE_INFORMED : 1
OUT_GET : 1
TACHYCARDIA_TREATMENTS : 1
HAS_DECISIONMAKING : 1
DRAINAGE_DOES : 1
COMPARED_ORDERED : 1
NO_EGD : 1
BBSC_REGULAR : 1
DUE_TO : 1
THERAPY_PATIENT : 1
DATE_AND : 1
COUGH_MUCUS : 1
BRAIN_SIGNIFICANT : 1
ABILITY_REMAIN : 1
WELL_DIFFERENT : 1
LOC_HEENT : 1
HELP_THE : 1
ADL_TOBACCO : 1
LET_DO : 1
LITTLE_INTEREST : 1
DAILY_ALMOST : 1
FLOOR_PATIENT : 1
FOOT_REGULARY : 1
INDICATES_HAVING : 1
DE_RATION : 1
ANY_ALLERGIES : 1
BY_MAURER : 1
CLINIC_REVIEW : 1
MEDICATIONS_MITRAL : 1
MAIL_FOR : 1
SERVICES_AVAILABLE : 1
UNTIL_BRISKLY : 1
BIOPSY_TIME : 1
ESOPHAGUS_NO : 1
PAIN_FEVER : 1
GASTROENTEROLOGY_PATHOLOGY : 1
SITUATIONS_HE : 1
FORMOTEROL_MCG : 1
PATIENT_REC : 1
CALL_YOUR : 1
ORIENTED_COOPERATIVE : 1
BASIS_SO : 1
THE_IN : 1
DECEMBER_NEUROPATHY : 1
PRIMARY_NONE : 1
PT_GO : 1
OF_TONGUE : 1
CERVICAL_SPONDYLOSIS : 1
WANTED_WATCH : 1
ANXIETY_ORDER : 1
CORRECT_PATIENT : 1
MCCULLY_PER : 1
THE_IS : 3
CARDIOLOGY_MOXIFLOXACIN : 1
THE_TIME : 2
WITH_CARE : 1
VET_FLAT : 1
CHARLOTTE_BY : 1
MANUAL_PT : 1
MEDICATION_AT : 3
CARDIOVASCULAR_AMBULATED : 1
EXIT_NOTE : 1
OF_ESOPHEGAEAL : 1
TEAM_FEEL : 1
TO_THAT : 1
INFO_HAS : 1
DATE_DISCHARGE : 2
SERVICES_IMPROVED : 1
DIMINISHED_SWMF : 1
DYSPNEA_ORTHOPNEA : 1
EPIGASTRIC_REGION : 1
ASSESSMENT_STRONG : 1
QUESTIONS_VET : 1
GAS_HEMATOCHEZIA : 1
TP_BE : 1
PRIMARY_NURSING : 2
CHLORIDE_PKT : 1
ALL_FINGERS : 1
ULCER_OUTPATIENT : 1
NORMALLY_WITH : 1
DIFFICULTY_URINATING : 1
AFTER_HOME : 1
AS_IODINATED : 1
FSOME_STATE : 1
DISCHARGE_MED : 1
DISCUSSED_FOR : 1
BEEN_HERE : 1
HIGHLY_ANXIOUS : 1
SPOKE_WITH : 1
HELP_PATIENT : 1
WITHIN_PAST : 1
AWARE_HUSBAND : 1
HIGH_FALL : 1
PM_AMBULATED : 1
BY_MESSAGE : 1
YOUR_STAFF : 1
DISPATCH_AGRESSIV : 1
USE_TOBACCO : 1
PLAN_CARE : 2
HIS_MEDICAL : 1
JLD_NO : 1
MALE_WAS : 1
WAS_ORDER : 1
GROUPS_VET : 1
THAT_YEARS : 1
NOT_FED : 1
DATE_NO : 1
TO_OFFER : 1
WANT_TO : 1
FRIENDS_ANTICIPATING : 1
TAKEN_BEDSIDE : 1
HISTORY_OF : 8
OF_WILL : 1
OTHER_DID : 1
TIME_PROTECTIVE : 1
RETURN_NURS : 1
BED_NICOTINE : 1
IN_ATTENDANCE : 1
ANATOMICAL_MEDIASTINUM : 1
EVALUATOR_AT : 1
PT_RN : 1
NO_DIPLOPIA : 1
LOPEZ_VOC : 1
THAT_HAD : 1
CREST_AND : 1
IS_NOTHING : 1
QUESTIONNAIRES_BRIEF : 1
RELATED_COGNITION : 1
MOXIFLOXACIN_FOR : 1
LST_DRINK : 1
EXCEED_ACETAMINOPHEN : 1
SCREENING_ASSESSMENT : 1
LANS_PC : 1
ASSESSMENT_IMPORTANCE : 1
MICU_AND : 1
MOOD_EKNURSING : 1
PHYSICIAN_ROOMED : 1
MEDICATION_CHANGES : 1
THERAPY_AFTER : 1
THE_MORE : 1
INITIAL_RELAYED : 1
FLUIDS_CHRONIC : 1
STABLE_AND : 1
SINCE_ISSUE : 1
USER_HAS : 1
HAD_SYNCOPAL : 1
PAST_IARD : 1
AGE_SEX : 1
THE_WENT : 1
RN_PSYCH : 1
TREATMENT_THIS : 1
ADMISSION_ASSESSMENT : 1
PUTTING_ON : 1
IARD_RIGHT : 1
ALERT_ORIENTED : 3
TID_AND : 1
IS_SUICIDALITY : 1
CARE_LIFE : 1
WB_PER : 1
OF_TRANSFER : 1
AND_BE : 1
HELP_TIME : 1
TOMORROW_HE : 1
PAST_YOU : 1
PRESSURE_ULCER : 2
AT_SUICIDAL : 1
HT_CM : 1
CALLING_REPORT : 1
RFOOT_OT : 1
ANSWERED_NKA : 2
UTILIZED_WITH : 1
ML_START : 1
YOUR_GIVEN : 1
FROM_STUDY : 1
TO_RISE : 1
WRONG_AND : 1
BEEN_MY : 1
ORAL_FOR : 1
STUDY_VETERAN : 1
ADVANCE_PULSE : 1
ADDENDUM_LISINOPRIL : 1
PHYSICIAN_WBC : 1
PHYSICIAN_PROVIDER : 1
LANS_NO : 1
IMPACT_STATES : 1
FA_STARTED : 1
ADVANCE_AND : 1
ALTERED_PROCESS : 1
HOSPITAL_IN : 2
ACTIVE_HYP : 1
ASPIRIN_NO : 1
FLP_DX : 1
NECK_NORMAL : 1
NEEDED_IS : 1
NOTE_NO : 1
NURSING_TELEMETRY : 1
WITH_OCCASIONAL : 1
ABUSE_PAIN : 1
CHANGES_HEALTH : 1
AND_IT : 1
ALBANY_RESULTS : 1
WANDERING_OR : 1
NEW_MEDICATIONS : 1
MAKE_NOTE : 1
DIAGNOSIS_JUST : 1
ARRIVED_VIA : 2
SURVEY_AND : 1
PRESSURE_DO : 1
IT_INFORM : 1
DO_HE : 1
UNDUE_DYSPNEA : 1
AND_TAKEN : 1
PSYCHIATRY_SOCIAL : 1
RIDES_SCOOTER : 1
CALL_HIM : 1
RECOMMENDED_THE : 1
IN_PSA : 1
HER_VOICEMAIL : 1
AT_OF : 1
WORSENED_BY : 1
PHYSICIAN_WORK : 1
THAT_MAILED : 1
EVENTS_AND : 1
NIGHT_PRODUCTIVE : 1
PATIENT_NAME : 1
ANOTHER_ONE : 1
FEE_BASIS : 1
ENCOUNTER_OR : 1
REPORTS_BELOW : 1
REQUESTED_TO : 1
HR_HOW : 1
PRESSURE_PSYCHIATRY : 1
COMPLETED_SATT : 1
FOLLOWUP_PHYSICIAN : 1
DID_NOT : 1
BE_HIS : 1
FY_MASS : 1
SEDATION_PCP : 1
PRESENT_HEPLOCK : 1
AND_DUTY : 1
HE_WAIT : 1
HIS_LEFT : 1
EVERY_IF : 1
COMPLAINT_DISCOMFORT : 1
FAMILY_MEMBER : 2
WITH_DR : 1
ID_OLD : 1
ON_FLOOR : 1
COUNSELING_SCHEDULED : 1
ASSESSMENTCOMPREHENSIVE_HAS : 1
BED_IN : 1
EXERSIONAL_CP : 1
EXPERIENCES_COMBAT : 1
PATI_LOCATION : 1
REF_DATE : 1
ALL_PRN : 1
SESSION_REVIEW : 1
PRSE_ACTIVE : 1
KNOWN_TALKS : 1
BEATS_WITH : 1
THE_PAJAMAS : 1
THE_LIMB : 1
WAY_PT : 1
APPEARS_TO : 1
SAYS_NURSE : 1
ENVIRONMENT_ALSO : 1
ON_SAFE : 1
NUTRITION_ADEQUATE : 1
AT_ED : 1
FOR_RELAPSE : 1
BE_POTENTIAL : 1
ACTIVE_WORKING : 1
CHERRY_PT : 1
NO_CEREBRAL : 1
STARTED_SUICIDAL : 1
WORK_HUD : 1
NO_RISK : 2
LEAVE_THE : 1
NAD_BUT : 1
TACHYCARDIA_WITH : 1
NURSING_EQUIPMENT : 1
EXCLUDING_CHANGE : 1
BELONGINGS_TYPE : 1
DONNA_ERDMAN : 1
THE_STORY : 1
INPATIENT_INCLUDING : 1
RAMSAY_SEDATION : 1
ACTIVE_TIBIAL : 1
TWICE_NEEDED : 1
EDUCATED_ADVANCE : 1
ARE_RESIDENTS : 1
RISKS_BENEFITS : 1
METHODS_PAMPHLET : 1
AND_INTRAOPERATIVE : 1
SHE_THAT : 1
CONTACT_ABNORMAL : 1
YOUR_FAMILY : 3
SHOULDER_REGION : 1
DAILY_CONSULT : 1
REFER_COMPLETE : 1
NEWLY_MEDICATIONS : 1
IN_HOURS : 2
WITH_MYOCARDIAL : 1
SURGERY_BACK : 1
NAUSEA_VOMITING : 1
NO_NAUSEA : 1
ON_HER : 1
PRIOR_DISCHARGE : 1
CONSERVATION_AND : 1
OBSERVATIONS_INTERVENTIONS : 1
REASONS_WHY : 1
BENEFITS_DRAINAGE : 1
CLOTHING_SOCKS : 1
PATIENT_HAS : 5
DATE_CAREGIVER : 1
WAS_WIFE : 1
PATIENT_DOCUMENTATION : 1
OTHER_UNSPECIFIED : 1
DT_MRSA : 1
NOTE_HAD : 1
PHYSICIAN_THE : 1
HX_ESOPHAGEAL : 1
TRANSPORT_FAMILY : 1
VETERAN_OUT : 1
PMH_OF : 1
PLEASE_ASK : 1
THERAPEUTIC_DENIES : 1
HCL_MG : 2
OF_FOR : 3
FOR_ON : 1
CHANGED_BY : 1
PULSE_DIARRHEA : 1
FOR_PAST : 1
BBB_MF : 1
THE_KNOW : 1
BELOW_BY : 1
HAS_DISPLAYED : 1
HE_WALKS : 1
PROBLEM_PT : 1
AT_MANUAL : 1
HAS_NO : 1
ANXIETY_TO : 2
READING_FACILITY : 1
THOUGHTS_WANTED : 1
MEDICATION_RETURNED : 1
AND_GAIT : 1
MG_HOURS : 1
NA_FOR : 1
NURSE_ELECTRONICALLY : 1
CONSULT_SITTING : 1
ACTIVE_COMPLAINT : 1
YEARS_DENIESE : 1
TO_GRADUALLY : 1
AN_DOCUMENTATION : 1
YES_EXCUSED : 1
THE_REGARDING : 1
DIARRHEA_DAILY : 1
RETIRING_AS : 1
PAIN_MAKING : 1
SCALE_SORRY : 1
FOR_VITAL : 1
AN_WITH : 1
ASSISTANT_AFTER : 1
RELATED_THE : 1
OF_ITEMS : 1
AFLUABA_DELTOID : 1
GO_SEEK : 1
PVCS_JUNCTIONAL : 1
JUN_FOR : 1
DISCHARGE_YOU : 1
TO_THERAPY : 1
PROCEDURE_REPORT : 1
OFFERS_FAMILY : 1
TO_PVCS : 1
AND_SUPPLEMENT : 1
HAVE_ANY : 2
OF_RIGHT : 2
INSTRUCTION_SHEET : 1
AGE_MALE : 1
PROVIDER_IDENTIFIED : 3
AND_TAKE : 1
ABILITY_TO : 1
PRIMARY_PROVIDER : 4
THYROID_AND : 1
WHO_EDUCATED : 1
WITH_SITTER : 1
VIA_WEIGHT : 1
LIGHT_WITHIN : 1
DONE_DOES : 1
PRODUCTS_THEIR : 1
BUT_IF : 1
BY_OR : 1
DIPPY_INCREASE : 1
ACTIVE_MOUTH : 1
DISTANCE_NO : 1
OF_ANXIETY : 1
SOCIETY_OF : 1
GOT_FORMS : 1
SITESDO_NOT : 2
NSC_VERDSOME : 1
ADVICE_II : 1
ALSO_PRESENT : 1
STARTED_THE : 1
LOWERED_HYPOTHYROIDISM : 1
WOULD_LIME : 1
HAS_NORMAL : 1
STOOL_YELLOW : 1
RARELY_MOIST : 1
ABILITY_BMI : 1
HEALTH_MEDICATIONS : 1
MINIMAL_TO : 1
WAS_BEFORE : 1
PRESENT_MEDICATIONS : 1
DIABETES_6A : 1
BECOMING_FROM : 1
PCP_SOORYA : 1
MAINLY_HYPOVENTILATION : 1
IS_DOING : 1
PATIENT_YEAR : 1
KG_HE : 1
TAKE_WITH : 1
WAS_AT : 1
ABOUT_POOR : 1
IS_SAME : 1
IM_DEMEROL : 1
RESULTS_THE : 1
MAINTAIN_EPIS : 1
WEEKS_WORTH : 1
HTN_CAD : 1
ADMINISTRATION_SIDE : 1
MEDICATION_NOTE : 2
STAFF_REORDER : 1
CALL_SPC : 1
FAMILY_CLOSE : 1
EACH_TIME : 1
AND_ANTICIPATING : 1
STILL_THE : 1
HAD_NORMAL : 1
WAS_MEDICATION : 1
FOLLOWUP_ADDENDUM : 1
THEN_IMAGING : 1
COUMADIN_AT : 1
IDENTIFY_OF : 1
NUMBER_OFFERED : 1
THE_EFFECTS : 1
LEFT_REFER : 1
ABOUT_WHEN : 1
MEDICATIONS_STOP : 1
BY_PHYSICIAN : 2
NOTE_CPT : 1
UNIT_INTERACTING : 1
USED_IDENTIFIED : 1
CLIENT_REQUESTED : 1
CALLED_TO : 1
PT_OF : 2
AS_SAYS : 1
FEVER_COUGH : 1
ON_CURRENT : 1
MEDICAL_IS : 1
HAVE_EVER : 1
FOCUSED_CLIENT : 1
FLU_PRESSURE : 1
ALLERGIES_ALBUTEROL : 1
PRIOR_TO : 1
ADMITS_HE : 1
FOLLOWING_IDENTIFIERS : 2
DIET_PUFFS : 1
OF_AROUND : 1
SEE_PHYSICIAN : 1
TAKE_PENDING : 1
EFFECTIVE_MEDICATION : 1
MULTIPLE_TRAUMA : 1
LIMB_ABOV : 1
SYMPTOMS_THICKNESS : 1
MORE_BECAUSE : 1
RACE_ON : 1
MOBILITY_LIMITATION : 2
PT_IS : 2
AS_WALKIN : 1
RECOMMENDATION_HOURS : 1
OF_CC : 1
AND_LINENS : 1
PRN_STAFF : 1
MEDS_HE : 1
TAKE_ASPIRIN : 1
TO_IT : 1
DENIES_PER : 1
DIAGNOSIS_OF : 1
TO_HE : 2
ATTENTION_PATIENT : 1
YOU_ASKING : 1
FOR_MICROSCOPIC : 1
SURGERY_DO : 1
NUMBER_OTHERWISE : 1
PTS_COUMADIN : 1
DAILY_NO : 1
REDUCE_CALLOUSES : 1
INTRAOPERATIVE_RESULTS : 1
SKILL_BY : 1
CONTACT_REASON : 1
SOI_YEAR : 1
PSYCHOLOGICAL_NO : 1
LOST_SINCE : 1
PROCEDURE_OCT : 1
FAMILY_COUNSELING : 1
MOUTH_AT : 1
REC_LOWER : 1
THAT_WAITING : 1
IN_POSITION : 1
MOOD_STATED : 1
TALKS_SPECIFIC : 1
OF_TO : 4
DISCHARGED_STAT : 1
MIN_THEN : 1
JUDGMENT_SON : 1
SCHEDULED_FOR : 2
COMMENTS_NO : 1
FYI_PCP : 1
RECENT_AND : 1
THAT_PATIENT : 1
TO_SHOULDER : 1
MISSED_SCHEDULED : 1
WHAT_PEOPLE : 1
STAFF_PHYSICIAN : 1
BED_MOBILITY : 2
REQUESTING_JUST : 1
CATH_VET : 1
PATIENT_VERBAL : 1
HIS_HOSPITAL : 1
PMR_DAILY : 1
HIGH_DIET : 1
PRESENT_PT : 1
DIARRHEA_HE : 1
WIFE_LMSW : 1
WELL_AND : 1
THIS_LOCATION : 1
OPERATION_COULD : 1
SEPARATE_OR : 1
GO_OUTDOORS : 1
GAIT_NORMAL : 2
BEDTIME_FOR : 1
STANDS_NORMALLY : 1
SOMETIMES_JUST : 1
TOBACCO_PAIN : 1
HAS_ESOPHAGUS : 1
INFUSED_RECHECK : 1
AMBULATION_MOBILITY : 1
RETURNED_HIS : 1
EFFECT_OF : 2
NOTED_POSITIVE : 1
TO_MOVE : 2
CURRENT_TOBACCO : 1
COORDINATOR_AT : 1
BRISKLY_MINUTE : 1
DONE_BRONCHOSCOPY : 1
SEVERAL_PEOPLE : 1
ONCE_FEET : 1
PRODUCTIVE_WITH : 1
TO_REMAIN : 1
VERDSOME_STATE : 1
BROUGHT_TO : 1
NS_STARTED : 1
REVIEWED_LIST : 1
REQUESTED_HELP : 1
TASK_CLIENT : 1
TOOLS_MENU : 1
AND_GAVE : 1
STORY_IN : 1
WITH_DUCKY : 1
AND_THIS : 1
MG_DISEASE : 1
REPORT_ACCEPTED : 1
WITHOUT_SEEING : 1
STANDARD_PAIN : 1
MOOD_AND : 2
BE_BE : 1
SMILE_OPTIMISM : 1
POSTION_NO : 1
NURS_CLINIC : 1
BENIGN_PS : 1
OF_FAMILY : 1
HOWEVER_ON : 1
NEUROPATHIC_LEFT : 1
INDEX_AUG : 1
FYI_INFLUENZA : 1
TWISTED_BACK : 1
SCALE_FOR : 1
VELARDE_JUDY : 1
MAKES_NEEDS : 1
ASHOK_PC : 1
INJURY_INTAKE : 1
NIGHT_LORAZEPAM : 1
DOING_READING : 1
PAIN_AMBULATORY : 1
IF_FOR : 1
IS_UNABLE : 1
LIMB_UPSETTING : 1
NURSE_NOTE : 1
BASIS_FULL : 1
NONEXISTANT_NOTICED : 1
AND_MESSAGE : 1
MEDICATIONS_SUPPLIES : 5
PLEASURE_DOING : 1
COURTESY_OF : 1
MOISTURE_RARELY : 1
TO_VERIFY : 2
EC_CAP : 1
ERYTHEMA_OR : 1
THIS_TO : 1
RILEY_WHERE : 1
MONTHS_HOWEVER : 1
IMPROVE_HEART : 1
ACTIVE_LBS : 1
AND_HOW : 2
SEEN_ELEVATED : 1
CURRENTLY_WORKING : 1
IF_THE : 1
NOTE_THE : 1
CONTINUED_TO : 1
AFTER_IN : 1
DURING_AND : 2
FECAL_OCCULT : 1
HIM_DEC : 1
MARRIAGE_IS : 1
CARE_TO : 1
CLINIC_PHARMACIST : 1
MARITAL_STATUS : 2
TIME_NEURO : 1
CHANGES_AT : 2
UNSCHEDULED_NURSING : 1
OCCUR_THICKNESS : 1
HOWEVER_PSA : 1
ADDENDUM_RESPIRATION : 1
INTAKE_VITAL : 1
ANXIETY_SAYS : 1
CONTRACT_LOCATED : 1
DATE_DENIES : 1
ADMINISTRATION_INTERVENTIONS : 1
TWO_ANY : 1
INVOLVED_IN : 1
STARTED_INFUSING : 1
PERFORMED_GROSS : 1
PAIN_MIGRAINES : 1
WEEK_NO : 1
MEDIASTINUM_GASTROENTEROLOGY : 1
PHYSICIAN_INCE : 1
UPSET_WITH : 2
IN_PSYCHOEDUCATIONAL : 1
DURING_MEDICATIONS : 1
SOUNDS_ARE : 1
ABLE_TOLERATE : 1
PRESENTS_CLINIC : 1
SURVEILLANCE_PATIENTS : 1
THIS_AFLUABA : 1
TWISTED_HER : 1
RESPONSE_DID : 1
THE_EXAM : 1
NO_MURMUR : 1
DIAGNOSIS_TO : 1
EPISODE_THE : 1
DISPLAY_MODERATE : 1
HIS_FIRST : 1
ABOUT_WHAT : 1
PATIENT_THANK : 1
SUICIDE_RISK : 1
UNDERSTANDING_YL : 1
MALE_IN : 1
INTAKE_SIGNS : 1
PATIENT_IN : 3
DIAGNOSIS_RELATED : 1
DIRECT_CARE : 1
FAMILY_HAD : 1
HOURS_NEEDED : 1
COUMADIN_HAS : 1
TELERETINAL_IMAGING : 1
HAVE_YOU : 1
THE_VERY : 1
SCOOTER_HE : 1
CELL_BREATH : 1
RECOVERY_RELAPSE : 1
START_TO : 1
IN_MARINE : 1
CALL_WAS : 2
TRANSPORTATION_IS : 1
GOAL_PATI : 1
OTHERS_DATE : 1
TP_WILL : 1
PHYSICIAN_ERATE : 1
LEFT_TO : 1
APPEARS_AS : 1
BUT_EYE : 1
STANDING_HE : 1
PATIENT_YOU : 1
GRIPS_SAFETY : 1
ASKING_WRITE : 1
TO_RHINITIS : 1
MEDICAL_HISTORY : 1
SCREENING_OF : 1
UD_DONE : 1
USUAL_TALKED : 1
OCCASSIONAL_COUGH : 1
AND_HAVE : 1
WRITE_MEDS : 1
OR_FOR : 2
WAY_SHOULD : 1
VITALS_POST : 1
WHY_ARE : 1
HIM_MONTH : 1
ADDENDUMS_NECESSARY : 1
ASSESSED_VETERANS : 1
ERUPTED_EXR : 1
WORK_DISCHARGE : 1
BECAUSE_WAS : 1
ID_YEAR : 1
CHAIR_HEAD : 1
FELICIANO_MA : 1
BENEFITS_OF : 1
ARE_OF : 1
PICTURE_WHICH : 1
RHINITIS_SYND : 1
OTHER_IS : 1
MEDS_SPASMS : 1
TO_GOING : 1
VERBALIZED_OF : 1
INPATIENT_NURSING : 1
MINUTE_DIET : 1
HIS_PSYCH : 1
THERE_IS : 2
ORDER_RECEIVED : 1
TAKE_SMILE : 1
POTASSIUM_CHLORIDE : 1
ODPUNCTURE_TYPE : 1
CONTACT_TRANSFER : 1
AND_SHORT : 1
POTASSIUM_MEQ : 1
CALL_FROM : 1
HIS_ROOM : 1
OUT_BED : 1
BEEN_UPSET : 1
SATISFACTORY_MEDICATIONS : 1
INPATIENT_STATUS : 2
TO_COPD : 1
EDEMA_TO : 1
WERE_ASKED : 1
MOTIVATED_TO : 1
CORP_YEARS : 1
HIM_MALE : 1
THE_LORAZEPAM : 1
CD_MY : 1
OF_PLACED : 1
FOR_FOR : 1
RECONCILIATION_GROSS : 1
OR_BURNING : 1
TAB_SIG : 1
THE_SHORT : 1
FROM_PATIENT : 1
KG_ADDENDUM : 1
WANDERING_BECOMING : 1
APPEARANCE_AND : 1
TO_HIS : 5
DESCRIPTION_TREATMENT : 1
OF_SPECIAL : 1
MEDICATION_THIS : 2
PROCEDURE_SODIUM : 1
AT_THIS : 16
ORAL_BID : 2
DESCRIBES_OIN : 1
CLINICAL_NURSE : 1
DM_BIPOLAR : 1
PT_NOT : 1
NEURO_PROTECTIVE : 2
TTP_IN : 1
MILITARY_YES : 1
NOT_ACTIVE : 1
SELF_OTHERS : 1
OR_IN : 1
ADMINISTRATION_EFFECTS : 1
DATE_ED : 1
SOLDIER_CONFUSED : 1
RESPIRATIONS_PROCEDURE : 1
AFTER_CHANGE : 2
THEM_TO : 1
HE_WAS : 3
MF_NURSING : 1
SOMETIMES_WITH : 1
WITH_PATIENTS : 1
ISCHEMIC_DISEASE : 1
ACTIVITY_ADL : 1
NIGHT_TAB : 1
WILL_PARALYSIS : 1
NURSING_DEPRESSION : 1
PSYCHOLOGICAL_FACTORS : 1
REPORTS_THAT : 1
LN_PATIENT : 1
HIS_TOTAL : 1
MH_IP : 1
UNDERSTANDING_INSTRUCTIONS : 1
CM_PRESSURE : 1
WITH_SIGN : 1
THE_SCOOTER : 1
FOR_TOMORROW : 1
SAME_HE : 1
AND_CALL : 2
OUTPATIENT_STATUS : 1
BELOW_DANGER : 1
HERBALS_PERFORMED : 1
BY_PCP : 1
HEAD_AREA : 1
DEXTROSE_POSTERIOR : 1
WITH_AROUND : 1
THE_AFTER : 1
AND_LLQ : 1
DENIES_INJURY : 1
OPD_NOTE : 1
TO_ACHIEVE : 1
STARTED_PHARMACY : 1
PATIENTS_ATTENDANCE : 1
APPROVED_CALL : 1
OR_MCC : 1
ABD_IN : 1
AND_AGREES : 1
LOCATION_LOWER : 1
FOR_HIS : 1
HYPERKERATOTIC_BODY : 1
EKNURSING_MH : 2
TAKE_NO : 1
PERSISTENT_THAT : 1
EASILY_EKNURSING : 1
AMBULATED_SLOWLY : 1
HEENT_SCLERA : 1
DURING_BED : 1
SATT_INDIVIDUAL : 1
HAVE_THROUGH : 1
YOU_VETERAN : 2
HER_THE : 1
PAIN_BOTH : 1
CARDIOVASCULAR_SLOWLY : 1
AND_TEAM : 1
SCREENING_AT : 1
THIS_TOOK : 1
FISH_OIL : 1
PROVIDER_JUDY : 1
BID_THE : 1
HIM_BACK : 1
IMPROVING_TREATMENT : 1
PATIENT_YES : 1
ON_PHONE : 2
THIS_CALL : 3
HYPERTENSION_CONTROLLED : 1
TO_ATTENTION : 1
SOME_SC : 1
COMPLETING_PAIN : 1
THANK_PLEASE : 1
TIME_HOMICIDAL : 1
WITH_RISKS : 1
APR_ABD : 1
NEEDED_PATIENT : 1
RARELY_DRAINAGE : 1
MALE_CELL : 1
HE_TAKE : 1
ENEMA_AND : 1
CAP_ONE : 2
WANTS_PRN : 1
MONFRI_AND : 1
FALLS_DIPLOPIA : 1
IF_OCCUR : 1
SAME_FALLS : 1
INFO_PATIENT : 1
PAIN_SOME : 1
COUNTRIES_PAIN : 1
KOREA_AND : 1
AND_APPARENTLY : 1
PREVENTION_MAINTENANCE : 1
SAO_REST : 1
CHANGES_ANYTHING : 1
OF_SUBSTANCE : 1
NOTE_FOR : 1
STRESSORS_ADMISSION : 1
BY_HOSPITAL : 1
EXAMPLE_SPEAKS : 1
CORRECT_IM : 1
RETURNING_FT : 1
BACK_TMK : 1
WOULD_IT : 1
OFFER_BUT : 1
XYZZY_FOLD : 2
TIBIAL_STRONG : 1
HE_PRESENTS : 1
SPECIALIST_WANTED : 1
INHALE_ADDENDUM : 1
THE_OUTPATIENT : 1
STATING_HE : 2
ATTACKS_SAYS : 1
OTHER_COUNSELING : 1
OFFERS_CHANGED : 1
RISK_CHEST : 1
IN_MINUTES : 1
RETURN_FOR : 1
IN_ACTIVE : 1
DATE_MILITARY : 1
MEDICATION_MAY : 1
REFERRAL_EPISODIC : 1
FULL_THICKNESS : 1
WITHIN_AND : 1
HOMICIDAL_AT : 1
HEALTH_PHONE : 1
IN_CHAIR : 1
USED_PRODUCT : 1
NOT_EXCEED : 2
HAD_TSH : 1
THOUGHTS_OF : 1
WAS_ADMITTED : 1
KLEIN_LMSW : 1
WIDE_COMPLEX : 1
SOMALIA_IN : 1
SUPPLEMENT_ANY : 1
MEDICAL_REGIMEN : 1
FOR_ONE : 1
FOR_CHRONIC : 1
HAVE_ONE : 1
REMINDER_OF : 1
ORDER_FOR : 1
MEDICATIONS_WILL : 1
TAG_DOOR : 1
DENIES_PAIN : 2
HS_USUAL : 1
PROBLEMS_HEMORRHOIDS : 1
ADMINISTRATION_UA : 1
DISCUSS_HH : 1
INCOME_DEPOSIT : 1
AMBULANCE_FAMILY : 1
SPC_VET : 1
PRESENT_HOWEVER : 1
MR_WAS : 1
PERSISTENT_INSOMNIA : 1
NOTE_MOXIFLOXACIN : 1
PATHOLOGY_BARRETTS : 1
ASSIST_LEG : 1
DECISIONMAKING_GOAL : 1
MAURER_MISSED : 1
CURRENT_AMPUTATION : 1
CAD_FIBRILLATION : 1
CURRENT_TASKS : 1
MONTHS_SORRY : 1
ABOV_UPSETTING : 1
THOUGHTS_PATIENTS : 1
BY_ALSO : 1
DONE_CARCINOMA : 1
ED_DATED : 1
INFORM_THIS : 1
KNOW_HOW : 1
CHRONIC_AMBULATORY : 1
DURING_THE : 1
AFTER_GETTING : 1
YEAR_MALE : 3
YOU_FIND : 1
ADDENDUM_VET : 1
MEDICATION_BE : 1
MOUTH_ACTIVE : 4
THAT_RECEIVED : 1
CONTINUED_RISE : 1
BE_ACTIVE : 1
TO_DISPATCH : 1
WAS_RETURNED : 1
IN_TMK : 1
AWARE_APPT : 1
PHYSICAL_ACTIVITY : 1
RESPONSES_OTHER : 1
CAD_NSTEMI : 1
TO_HH : 1
JUICE_CLINIC : 1
HERE_AS : 1
ANTABUSE_AT : 1
BY_THE : 3
HAS_FEELING : 1
WIFE_RECEIVED : 1
THE_DIRECT : 1
WORSENED_LACK : 1
VITALS_ROOM : 1
MG_QTY : 1
APPEARANCE_CLEAN : 1
ARE_BUT : 1
SUS_MAURER : 1
SELECTING_TOOLS : 1
LE_MVA : 1
BE_HER : 1
CLINIC_TO : 3
ALSO_WITH : 1
CANCER_NOT : 1
BY_HIS : 1
CHRONIC_SPHENOIDAL : 1
AMBULATE_PRN : 1
EGD_YESTER : 1
TALKING_ABOUT : 1
PHONE_AFTER : 1
IS_ALSO : 1
BETTER_AM : 1
SOMALIA_COMBAT : 1
KNOWN_PCCNURSING : 1
STAT_EKG : 1
VET_ALSO : 1
CLEAR_DIMINISHED : 1
HE_SYNCOPAL : 1
OCT_ORAL : 1
NO_MORSE : 1
ACHIEVE_AND : 1
MY_MRIS : 1
HS_CALLING : 1
MALE_PMH : 1
OF_PRESENT : 2
CARE_WAS : 1
COMPLAINTS_AT : 1
PCCNURSING_INTAKE : 1
YL_EC : 1
DX_BEDTIME : 1
CC_DIZZINESS : 1
REASON_ADMISSION : 1
ODPUNCTURE_SCAR : 1
OSA_CAP : 1
CHEST_WITH : 1
CARE_BY : 1
CARE_OF : 1
CM_OUTDOORS : 1
SHE_STATED : 1
SERVICES_DID : 1
WOULD_REVIEW : 1
BREATH_SITESDO : 1
DIAGNOSIS_DEPRESSION : 1
PARTICIPATING_UNIT : 1
HE_SPEAKS : 1
TO_WOULD : 1
THAT_RX : 1
TOE_NONE : 1
DENIESE_OTHER : 1
ACTIVE_REVIEWED : 1
PROVIDER_RELATIONSHIP : 1
BEEN_EDUCATED : 1
SLOWLY_HIS : 1
HEMATURIA_PRESENT : 1
REQUESTED_MOVE : 1
SUPPLIES_BUPROPION : 1
WAS_NEVER : 1
LITTLE_AFTER : 1
OCCUR_ASSOCIATE : 1
ADDENDUM_ACTIVITY : 1
USED_TO : 3
OFFERS_BANDAGES : 1
MORSE_SCALE : 1
WORK_TOOTH : 1
PHONED_WIFE : 1
CHRONIC_ITCH : 1
THE_ATTENDING : 1
REM_IMP : 1
AM_FALL : 1
NAD_APPEARING : 1
SEEK_HELP : 1
RESPONSE_NEW : 1
PATIENT_PROSTATE : 1
WELL_AS : 2
RECEIVED_FROM : 1
AND_WITH : 1
WITH_EXERTION : 1
BELOW_THE : 1
BENEFITS_SAO : 1
OS_NOTED : 1
TOBACCO_DISORDER : 1
FOR_ZZPALLIATIVE : 1
NOT_PATIENT : 1
THE_HAS : 1
LABILITY_IS : 1
SAFE_DISCHARGE : 1
ADDENDUM_MG : 1
TO_SOCIALIZE : 1
NOT_INCOME : 1
BIL_SOUNDS : 1
MG_EC : 2
HAVING_TROUBLE : 1
PMH_ESOPHEGAEAL : 1
TREATMENT_SETTING : 1
TO_CONTROL : 1
NOSTRIL_AS : 1
PAST_NO : 1
OF_MONTHS : 1
COGNITION_MOBILITY : 1
INVOLVES_REMOVAL : 1
FALL_UPON : 2
DINNER_HE : 1
TO_HAVE : 1
OF_ONCE : 1
RHINITIS_IMPINGMENT : 1
ATTENDANCE_SPENT : 1
ANXIETY_NOT : 1
SAME_ATYPICAL : 1
NEUROPATHY_NO : 1
GETTING_IN : 1
APPOINTMENT_SAME : 1
HE_NURSE : 1
VETERAN_PARTICIPATED : 1
WITHIN_MONTHS : 1
POST_DISCHARGE : 1
OF_REFERRAL : 1
REGULAR_AND : 1
BID_PLAN : 1
THOUGHT_OF : 1
IF_OFFERS : 1
ATIENT_IMPROVED : 1
WHICH_NURSING : 1
FOR_OR : 1
FSBS_VS : 1
CLINIC_BE : 1
BECAUSE_SENSORY : 1
RESPONSE_OTHER : 1
NEUROPATHIC_ULCER : 1
PULSE_EXERCISE : 1
NSTEMI_CA : 1
PT_EKNURSING : 1
ALSO_HE : 1
VERY_AT : 1
HUD_HAVE : 1
SGPT_RETURNED : 1
BBB_OCCASIONAL : 1
OWN_BMI : 1
TO_TAKE : 1
APPE_6A : 1
BEFORE_HYDROCODONE : 1
MOBILITY_RACE : 1
ACTIVE_TAB : 1
TO_HP : 1
CC_INFUSED : 1
HIS_AMBULATION : 1
APNEA_MAINLY : 1
PRECAUTIONS_AND : 1
STUDENTS_NURSING : 1
SUICIDAL_SAW : 1
AT_DURING : 1
DENIESE_ANY : 1
PVCS_NURSING : 1
DRESSING_ON : 1
AMPUTATION_STATUS : 1
SELECTED_ITEMS : 1
MORE_KNOW : 1
SEX_SAO : 1
TO_SEE : 3
BY_CHART : 1
RETINAL_PT : 1
ALBUTEROL_MCG : 1
ISSUE_PATIENT : 1
REMINDER_LESS : 1
SMOKE_NOT : 1
MOUTH_HYP : 1
MODE_TRANSPORTATION : 2
PHYSICIAN_WHOLE : 1
STATUS_MARRIED : 2
INHL_PUFFS : 1
RIB_RESPIRATION : 1
BEFORE_COMPUTER : 1
AND_BLOOD : 1
PND_INTERVENTIONS : 1
RESULTS_DESCRIPTION : 1
JR_STATE : 1
BIRTH_DECEMBER : 1
SOMEONE_CLOSE : 1
REVEALS_EPITHELIALIZATION : 1
WITH_BBB : 1
COMPARED_NEWLY : 1
THAN_ADDENDUM : 1
TOOTH_EXR : 1
SCHEDULED_APPT : 1
WORK_NOTE : 2
WBC_THO : 1
RN_EVALUATOR : 1
HAPPENS_SHOUDLER : 1
STRONG_TO : 1
MALE_PAST : 1
EVEN_HE : 1
GIVEN_HR : 1
AM_HE : 1
ASKED_DISCUSS : 1
HAD_PROSTATE : 1
PAIN_PROTECTIVE : 1
AND_NONE : 1
ACTIVE_OUTPATIENT : 4
HAD_EPISODE : 1
LIMITED_WB : 1
ABLE_TO : 6
TO_VET : 1
THAT_HIS : 1
CALL_VESTING : 1
INFORMATION_TO : 2
ALL_PROBLEM : 1
COUNSELED_HIS : 1
PRONE_TO : 1
THIS_THIS : 1
ADMISSION_ON : 1
SMOKE_NICOTINE : 2
PROBLEMATIC_POOR : 1
MULTIPLE_ULCERS : 1
NONE_DEPRESSION : 1
DENIES_NO : 3
PER_OF : 1
GUAFENESIN_GATIFLOXACIN : 1
IV_DRUG : 1
LOST_LAST : 1
EXCLUDING_CLONIDINE : 1
KAREN_ASSISTANT : 1
BMI_GLUCOSEFINGER : 1
FOLLOWING_LITTLE : 1
MONTHS_CORONARY : 1
FOR_ER : 1
CALL_APPOINTMENT : 1
RECONCILIATION_NO : 1
ON_CLOTHING : 1
ADMISSION_HERBALS : 1
TREATMENT_THE : 1
AT_HS : 1
BE_COMPLETED : 1
PUFFS_INHL : 1
INFORMATION_IS : 1
UNSPECIFIED_ACTIVE : 1
STATUS_POSSIBLE : 1
TO_MEDICATIONS : 1
JUDGMENT_DESCRIBES : 1
RELAX_ASSESS : 1
RESPIRATION_DATE : 1
FACILITY_PRIMARY : 1
NOTE_DATED : 1
HIM_IF : 1
INDEPENDENTLYX_ALSO : 1
BY_SELECTING : 1
TOUGH_IT : 1
HIS_FOOT : 1
PATIENT_IM : 1
TREATMENT_TEAM : 1
LEARNING_METHODS : 1
NURSING_LEFT : 1
REVIEWED_ADMINISTRATION : 1
IF_YOU : 2
WEEKEND_THIS : 1
LEADER_STUDENTS : 1
THE_ON : 1
BREATH_ANY : 1
FOR_CLINIC : 1
DRAINAGE_SAO : 1
PAIN_BRIEF : 1
GLUCOSEFINGER_TTP : 1
REQUESTING_WEEKS : 1
PO_INHALE : 1
FEELING_RELATED : 1
OF_MODE : 1
CHEST_PATIENT : 1
NML_BS : 1
DPAHC_NO : 1
DM_HTN : 1
PER_ADDENDUMS : 1
VETERANS_MEASUREMENTS : 1
WITH_HEAD : 1
ISSUE_PT : 1
RX_SGPT : 1
DENIES_OF : 1
WITH_HEMORRHOIDS : 1
EVALUATED_FOR : 1
STAFF_YOU : 1
SURGERY_ADMISSION : 1
ON_LOWERED : 1
KRISTEY_PHONE : 1
TKO_AFTER : 1
NURSE_TO : 1
TO_REPEAT : 1
ERATE_NUTRITION : 1
ALL_IDENTIFIED : 1
LEG_IN : 1
ROOM_HE : 1
PHYSICIAN_GET : 1
COUNSELING_CLINIC : 1
PAIN_CHRONIC : 1
TRANSFERRING_BEDREST : 2
SOCIAL_WORKER : 1
NP_OR : 1
FOR_AMBULATION : 1
SHOULDER_HAD : 1
EFFECTS_MEDICATION : 1
RECORD_IS : 1
NOT_NICOTINE : 2
TIPS_HYPERTENSION : 1
RN_MAKES : 1
MG_TAKE : 3
PVCS_TELEMETRY : 1
DRAINAGE_NO : 1
BY_AT : 1
STANDING_NEVER : 1
PROCEDURE_NODENTURES : 1
RETURNED_PT : 1
SUPPLIES_TEXAS : 1
SCLERA_MMM : 1
FINDINGS_PHONE : 1
LLOSE_OPH : 1
DEPENDENCE_DYSLIPIDEMIA : 1
OTHER_MEDS : 1
WAS_FUMARATE : 1
ADDENDUM_WITH : 1
OR_REGARDING : 1
BATH_APPLICATIONS : 1
ADLFLOWSHEET_BED : 1
ATTACHED_TO : 1
NHCU_CONSULT : 1
SOB_THE : 1
RLQ_AND : 1
OF_FALLING : 1
OR_WITHIN : 1
GHETTO_THE : 1
CHRONIC_HEART : 1
TO_REQUEST : 3
YEAR_HERE : 1
OCCUR_NO : 1
THE_NEAREST : 1
WITHDRAWAL_AND : 1
THE_FOLLOWING : 3
AND_BAD : 1
PCP_APPOINTED : 1
TO_COGNITION : 1
SEP_EMOTIONAL : 1
AND_IF : 2
REISSUE_OF : 1
MOVEMENT_NUMBER : 1
SHOULDER_PAIN : 1
NOTED_LIST : 1
GIVEN_II : 1
SENSORY_ADDENDUM : 1
SORRY_HIGH : 1
COMPREHENSION_EDUCATION : 1
GOAL_PATIENT : 1
THIS_SAID : 1
PROBLEM_CP : 1
PC_NOTE : 1
TO_WTU : 1
NO_CHANGES : 2
CALL_TRANSPORT : 1
MEDICATIONS_PT : 1
SAFE_TO : 1
ST_SUICIDAL : 1
POOR_JUDGMENT : 1
ORGAN_DONATION : 1
TRAINING_PHYSICIAN : 1
PHARMACY_PHARMACIST : 2
PHYSICIAN_CALLING : 1
REGARDING_THESE : 1
IN_NOSTRIL : 1
SCHIZOAFFECTIVE_UNSPECIFIED : 1
LESS_THAN : 1
LIGHT_REACH : 1
WITH_WORKER : 1
WORK_ADDENDUM : 1
MG_COMPLICATIONS : 1
ANATOMICAL_LOCATION : 2
PROCEDURE_ADDENDUM : 1
DO_TAKE : 2
NONE_LISTED : 1
SYMPTOMS_NO : 1
STATED_MORE : 1
WHO_TO : 2
DISCHARGE_HISTORY : 1
CVA_HE : 1
AMP_IV : 1
WHICH_THE : 1
HIS_MAINTAIN : 1
WILL_REASON : 1
STATES_LOST : 1
COUGH_FYI : 1
IS_WELL : 1
ABILITY_APR : 1
WANT_OPERATE : 1
NOT_ALL : 1
DRINKING_BELOW : 1
AND_NO : 1
EASILY_TO : 1
UDS_ASSOCIATE : 1
YOU_THE : 1
DATE_FAMILY : 1
THIS_PROCEDURE : 1
INTERDISCIPLINARY_HEALTH : 1
NURSING_REASSESSMENT : 1
BUPROPION_MG : 1
THICKNESS_HEIGHT : 1
TO_USED : 1
THERAPY_NAME : 1
SC_AND : 1
WILL_PICKED : 1
CLINIC_COMPLAINTS : 1
PS_REC : 1
PAIN_CLINIC : 1
TIME_VET : 1
AND_MD : 1
SITESDO_SMOKE : 2
ONCE_HIS : 1
RECEIVED_ATIVAN : 1
YOU_OFFERS : 1
INJURY_NO : 1
FY_IS : 1
FOR_PLAN : 1
FELT_MORE : 1
WHOSE_MEMBER : 1
MARINE_CORP : 1
DATE_PATIENT : 1
HAS_OTHER : 1
IN_TO : 3
PROBLEMS_UNSPECIFIED : 1
METFORMIN_BID : 1
THIS_BLOOD : 1
RT_DISTAL : 1
FOR_VETERAN : 1
RESPIRATION_NURSING : 1
BE_AGAIN : 1
CLINIC_NP : 1
INTRAOPERATIVE_REPORT : 1
OMEPRAZOLE_EC : 1
INDEX_ADDENDUM : 1
ABD_TTP : 1
WHEAT_CHICKEN : 1
POOR_SHORT : 1
INDICATE_YOU : 1
DIARRHEA_PHARMACY : 1
THE_TID : 1
AMIODARONE_INJ : 1
TOOTH_MUCOPER : 1
ABOUT_IT : 2
THEN_AMIODARONE : 1
CLEAN_AND : 1
TIME_EATS : 1
IODINATED_CONTRAST : 2
DISCHARGE_DIET : 1
CALL_LIGHT : 1
ANY_LOCATION : 1
STATE_DIRECT : 1
ANSWERS_WITH : 1
BOWERMAN_PHYSICIAN : 1
MOBILITY_NO : 2
REMINDER_ACTIVITY : 1
ACTIVE_IS : 1
INSTRUCTIONS_DPAHC : 1
BEEN_CHART : 1
CODE_REFLECTING : 1
RETURNING_WORSE : 1
ADMITTED_FROM : 1
NONE_UDS : 1
HIS_PEERS : 1
ACTIVITIES_CORRELATION : 1
BRING_BURSITIS : 1
VERIFIED_CORRECT : 1
PHYSICIAN_ASSISTANT : 1
SCHEDULED_YOUR : 1
WILL_BE : 6
POSSIBLY_FROM : 1
ED_PATIENT : 1
TRANSITION_AND : 1
KNOW_PERFORMED : 1
PSA_RETURN : 1
NEED_WHICH : 1
IS_TREATMENT : 1
NIGHT_ON : 1
II_VITAL : 1
WORK_WILL : 1
SERVICES_MALE : 1
CONTRAST_HAS : 1
RESOLVED_STATUS : 1
IN_DEXTROSE : 1
YES_PT : 1
INFUSING_CC : 1
VSS_MOISTURE : 1
NEEDED_SHORTNESS : 1
HIGHLY_DENIES : 1
WITH_HER : 1
THROUGHOUT_THE : 1
FULL_THAT : 1
STATUS_LOWER : 1
NO_YESTER : 1
COPD_DEXTROSE : 1
BREATH_ARE : 1
MONTHS_VET : 1
ANXIETY_MONITOR : 1
ML_UD : 1
PRN_ANXIETY : 2
TO_CARE : 2
MISSED_YOUR : 1
SUICIDAL_IDEATIONS : 1
AMBULATED_ON : 1
MUCOUS_MEMBRANE : 1
PT_STATING : 1
ROOM_NURSE : 1
THEIR_ALSO : 1
VISIT_OPD : 1
HE_THE : 2
LAST_APPT : 1
PROSTATE_SCREENING : 1
HOURS_LEG : 1
AMBULATION_PATIENT : 1
ON_OCT : 1
INCIDENT_FOR : 1
HAD_EXPLANATION : 1
RATE_TO : 1
GET_PAID : 1
APT_WITH : 1
WAS_VISITED : 1
PHYSICIAN_IN : 1
HX_DENIES : 1
COMPTON_HE : 1
PATIENT_APPOINTMENTS : 1
THING_HE : 1
OPERATION_AT : 1
TRANSPORTATION_MODE : 1
ORAL_INHL : 2
SYSTEM_RECOMMENDATION : 1
DOES_PATIENT : 2
TOOLS_THEN : 1
THE_ESOPHAGUS : 1
CLASS_LED : 1
MAILED_TO : 1
FEET_ON : 1
THIS_ENCOUNTER : 6
RETURNED_CALL : 2
HOWEVER_HE : 1
EFFECTIVE_USE : 1
STANDARD_METHOD : 1
PHARMACIST_NOTE : 2
CALLOUSES_PERSISTENT : 1
WILL_NUMBER : 1
AND_NONVA : 1
HOWEVER_OF : 1
TIME_OPERATES : 1
HIGH_SAME : 1
REF_RANGE : 1
COUPLE_WITH : 1
EVALUATION_RIGHT : 2
WARM_AND : 1
VETERAN_HE : 1
MONITORING_DOING : 1
PATIENT_FOR : 1
RIGHT_IMAGES : 1
ON_MARRIAGE : 1
HEAD_RESTING : 1
CODE_PATIENT : 1
CARE_EXPECTANCY : 1
HIM_BUT : 1
VETERAN_WAS : 2
MARINE_FOR : 1
PLAN_OF : 2
MALATHI_OR : 1
MEDICATIONS_LOWER : 1
NO_IN : 2
DIMINISHED_IN : 1
NKA_RIGHT : 1
LEVEL_OF : 4
HIMSELF_SUMMARY : 1
AND_WERE : 2
BLACK_WITH : 1
NOT_HERSELF : 1
MEDICATIONS_MEDICATION : 1
HER_WIFE : 1
RESIDENT_ACUTE : 1
DUCKY_MEDICATIONS : 1
PAIN_SEEMS : 1
OPERATE_PARALYSIS : 1
OR_MONTHS : 1
DROP_IN : 1
TO_REALITY : 1
WITH_HUD : 1
AS_WELL : 2
MED_IS : 1
APPT_NOV : 1
PT_IN : 2
MINUTES_SPENT : 1
WILL_CALL : 1
OF_DOES : 1
THAT_TWO : 1
SEPARATE_ENCOUNTER : 1
ACTIVE_DIZZINESS : 1
MG_TID : 1
COORDINATOR_VETERAN : 1
ORIENTED_OWN : 1
OPERATION_THIS : 1
SHE_WAS : 1
NICOTINE_TO : 2
OCCASSIONAL_RESOLVING : 1
ACTIVE_LORAZEPAM : 1
BRUSHINGS_BIOPSIES : 1
INCREASE_ADENOSINE : 1
HIS_STARTED : 1
IT_DESIGNATES : 1
WALK_TO : 1
THE_SIGNS : 1
INTERDISCIPLINARY_PLAN : 1
ACCEPTED_HS : 1
PATIENT_PROVIDED : 1
STRAIN_HIS : 1
SCALE_PREDICT : 1
PEERS_ABOUT : 1
MENTAL_ORIENTED : 1
HERSELF_ON : 1
SCORE_LOC : 1
DOSE_CLONIDINE : 1
ICDTOBACCO_DISORDER : 1
TIME_MINUTES : 1
IN_ACTIVITIES : 1
RESULTS_REPORTING : 1
PRESSURE_NECK : 1
ANY_DEPRESSION : 1
HYPOTHYROIDISM_AND : 1
THOUGHT_IT : 1
CAD_ESOPHAGEAL : 1
OF_CLONIDINE : 1
ADVICE_GIVEN : 1
MONTH_YOU : 1
UNSPECIFIED_MHICM : 1
ON_CAP : 1
CONNECTION_BENEFITS : 1
SHOUDLER_PAI : 1
DIARRHEA_LST : 1
REFERRAL_PHYSICAL : 1
IDEATION_UNDERSTANDING : 1
SHE_HAS : 2
THE_PATI : 1
HE_HIS : 2
RADIATION_OSA : 1
FOR_HEALTH : 1
IN_TRIUMPH : 1
AND_STOOL : 1
REPORT_RESULTS : 1
PLACE_RETIRING : 1
TE_NO : 1
AMBULATION_BIL : 1
CARE_INSTRUCTIONS : 1
CARE_CALLED : 1
NKA_RETINAL : 1
WHAT_IS : 1
ADDENDUM_WOUNDS : 1
HEALTH_DOES : 1
ISCHEMIC_HEART : 1
ABSENT_BIL : 1
RETURNING_THAN : 1
ON_WAS : 2
HAPPENS_PAI : 1
BATHROOM_AND : 1
PUT_LOT : 1
DR_TRANSPORTATION : 1
SUBSTANCE_THE : 1
SOORYA_ASHOK : 1
STATED_THE : 1
RELAYED_THAT : 1
MALE_PRESENTED : 1
TOBACCO_OR : 2
SHEET_PROVIDED : 1
LOWER_PAIN : 1
SUICIDAL_SINCE : 1
NONE_VETERAN : 1
AND_MY : 1
REFLECTING_JUDGMENT : 1
BUT_THOUGHTS : 1
VISITED_WERE : 1
SIMVASTATIN_LIKE : 1
RECOVERY_ADMISSION : 1
AND_MORE : 1
WILL_NEED : 1
PARALYSIS_MEDIAN : 2
POWER_ATTORNEY : 1
FOR_MAIL : 1
EDUCATION_COMMENT : 1
SIGN_OF : 1
FAMILY_SIGNIFICANT : 1
TO_ABILITY : 1
APR_GLUCOSEFINGER : 1
MD_REHABILITATION : 1
THE_WITH : 2
IS_BE : 1
HAD_POSTVOID : 1
ASSIGNED_PULSE : 1
RECENT_STRESSORS : 1
AND_SEEK : 1
PB_PRESENTS : 1
IMMEDIATE_OR : 1
BEGAN_THIS : 1
COUNSELING_EDUCATION : 2
HE_RETURNING : 1
TO_OPERATE : 1
TO_EDGE : 1
SCAR_SIMVASTATIN : 1
THE_AND : 4
DISCUSSION_IS : 1
LOCALIZED_PRIMARY : 1
SAO_AND : 1
LEVEL_ACCEPTABLE : 2
HIS_SHORT : 1
ALBUTEROL_INHL : 2
AM_REQUESTED : 1
OR_DAILY : 1
PT_PARALYSIS : 1
PREVENTION_AND : 1
OF_TARGETED : 1
ABOUT_SPECIFIC : 1
JAW_DEFORMITY : 1
AND_LAWFUL : 1
AND_RECENT : 1
MEALS_RETURNED : 1
NOTE_AND : 1
SYMPTOMS_OR : 1
TAB_DISPENSED : 1
NON_LITTLE : 1
ADVISED_THAT : 2
WITH_TO : 1
RLQ_LLQ : 1
ARRIVED_AMBULATORY : 2
AT_NIGHT : 1
JR_SOME : 1
IN_BLOOD : 1
PHYSICIAN_REORDER : 1
RIGHT_GATIFLOXACIN : 1
FOR_VERSION : 1
FAMILY_SOMEONE : 1
TIME_PREVIOUS : 1
WHICH_TO : 1
PAIN_THE : 1
PATIENT_TOBACCO : 1
GET_TO : 1
THE_DOCTOR : 1
TO_CLINIC : 3
PHONE_RISK : 1
THE_WIFE : 2
RIGHT_FA : 1
WHOLE_WHEAT : 1
CORP_FOR : 1
HAVING_WITH : 2
LEG_AT : 1
FOR_REVIEW : 1
ESOPHEGAEAL_ASSESS : 1
SURGERY_WHO : 1
AT_HR : 1
FROM_COUMADIN : 1
HEIGHT_IN : 3
ABOUT_WORKING : 1
IN_BED : 1
SINCE_ACCIDENT : 1
GIVE_YOU : 1
ETIOLOGY_FORMOTEROL : 1
VET_THAT : 1
REPORT_ANY : 1
BE_FAXED : 1
UNRE_TKO : 1
SPENT_WITH : 1
ORDERS_TREATMENT : 1
TALK_DISPATCH : 1
PROCEDURE_THIS : 1
OF_IF : 1
RRR_MURMUR : 1
TO_ALLERGIC : 1
AND_HAD : 1
COULDNT_LEAVE : 1
PLACE_IN : 1
SOI_IS : 1
FISH_FOR : 1
ITEMS_BY : 1
THE_IDENTIFIERS : 2
AND_CVA : 1
DAILY_FAMILY : 1
PHONE_SAME : 1
FURTHER_NEEDS : 1
THE_MR : 1
NOTE_IN : 1
ORIENTED_HAND : 1
INFUSION_OF : 1
HAS_REFILLED : 1
PICKED_BY : 1
REFERRAL_WIDE : 1
IF_PRESENT : 1
PROCESSING_SERVICE : 1
EXTEND_FINGERS : 1
NOT_NURSING : 1
VELARDE_TOUGH : 1
PATIENT_DISPLAYED : 1
UNDERSTANDING_VA : 1
BED_ONCE : 1
POSITION_ON : 1
SAFE_USE : 2
DRINK_THIS : 1
DATA_REPORT : 1
MORE_THE : 1
PATIENT_MISSED : 1
HOW_THAT : 2
AT_WAS : 2
HIS_VISIT : 1
ANICT_MMM : 1
INHL_CAP : 1
VOICEMAIL_PAIN : 1
BREAD_PASTA : 1
WITHIN_WEEK : 1
MOVEMENT_OF : 1
NO_LIMITATION : 2
FOR_SHORTNESS : 3
AND_HE : 3
EXPLANATION_HIS : 1
HE_RESUME : 1
DOCUMENTED_SEPARATE : 1
TRIED_TO : 1
THAT_IN : 1
PLACED_ON : 1
INDEX_MALE : 1
TEST_DESCRIPTION : 1
QUESTIONS_THEN : 1
EXCLUDING_SUPPLIES : 2
CPT_CODE : 2
PEOPLE_ADVOCATE : 1
BLOOD_PATIENT : 1
REHAB_PLACED : 1
AS_TO : 3
DISEASE_WITH : 1
DISCOMFORT_PT : 1
PWD_MIX : 1
MG_QUESTIONS : 1
RELATED_TO : 2
QTY_TAKE : 1
AND_DOCTOR : 1
NODENTURES_OCT : 1
SALINE_INFUSED : 1
INHL_INHALE : 2
MVA_LIMITED : 1
ARRANGE_TRANSPORTATION : 1
NURSING_INPATIENT : 1
KNEE_MOVEMENT : 1
CARCINOMA_CORRECT : 1
REASSESSMENT_DEVICES : 1
ERIE_VA : 1
USE_THIS : 1
TAKING_MY : 1
SELECT_ALL : 1
PAIN_PRESSURE : 1
STRESSORS_AND : 1
MAINTENANCE_FOR : 1
MEDICATION_CALLOUSES : 1
SCREEN_EVERY : 1
IS_PRONE : 1
CAREGIVER_PHYSICIAN : 1
SOB_FOLLOWING : 1
SOUNDS_LAB : 1
CONTROL_AND : 1
SHEET_FACILITY : 1
NONHEALING_ULCERS : 1
HELP_PROCESSING : 1
USE_SCREEN : 1
NO_NO : 2
ULCER_ON : 1
PT_NAVIGATE : 1
NSTEMI_AMBULATORY : 1
TE_HT : 1
HAS_NKA : 2
BY_SELF : 1
HAND_ARE : 1
EMERGENCY_ROOM : 1
STUDY_CALLER : 1
AGE_ARE : 1
THINKS_PATIENT : 1
AROUND_HOWEVER : 1
ML_REDUCTION : 1
KNEE_TOE : 1
KATHRYN_HIS : 1
PATIENT_TO : 2
POOR_SON : 1
BOTH_LEGS : 1
SINUSITIS_WEEK : 1
THIS_LETTER : 1
FOOT_ULCER : 2
CHEST_AND : 1
ANATOMICAL_SEE : 1
WITH_PROCESSING : 1
MORPHINE_PATIENTS : 1
ONLY_HE : 1
PHONE_ELOPEMENT : 1
PROBLEMS_CONSTIPATION : 1
PAIN_OF : 2
TO_NURSING : 1
SO_THAT : 1
OF_MONITOR : 1
PHYSICIAN_AN : 2
EDUCATION_SEP : 1
UNIT_ACTIVITIES : 1
WITH_AND : 2
FEVER_SWEATS : 1
CONSULTANTS_IF : 1
PSA_ON : 1
LETTER_COURTESY : 1
FOR_EXAMPLE : 1
DECEMBER_JLD : 1
TRUNK_HE : 1
NUMBER_TO : 1
VOC_REHABILITATION : 1
THE_HE : 4
IF_VA : 1
LUMOSACRAL_CERVICAL : 1
IN_BATHROOM : 1
DIFFICULT_TO : 1
OF_EPISODIC : 1
DYSLIPIDEMIA_SEVERE : 1
RT_TH : 1
ALLERGIC_RHINITIS : 1
CONTACTED_HE : 1
BENEFITS_TO : 1
NO_PT : 2
IARD_EYE : 1
OCT_ED : 1
BREAKFAST_PT : 1
PROBLEM_BOTH : 1
CLINIC_WITH : 1
TITLE_VETERAN : 1
MEDICATIONS_PATIENT : 1
RACE_PT : 1
OF_OR : 1
VETERAN_COUNSELED : 1
DRY_WITH : 1
EYES_ACTIVE : 1
SHOULD_ASSESSMENT : 1
OF_WITH : 1
IMAGING_DISPLAY : 1
RHINORRHEA_OR : 1
ASSESSMENT_DT : 1
OF_ABUSE : 1
ADDENDUM_PHYSICAL : 1
BEDREST_WHEELCHAIR : 2
CONTACT_MOUNTAIN : 1
NONE_LEVEL : 1
NA_PC : 1
FA_NS : 1
MOIST_DRAINAGE : 1
TEST_UNITS : 1
IS_TO : 8
PRECAUTIONS_EXTERNAL : 1
WTU_WARRIOR : 1
EMER_PRIMARY : 1
JUICE_FOR : 1
WAS_OF : 3
SERVICES_MIN : 1
OLD_HERE : 1
MG_HS : 1
SHE_AWARE : 1
CORNEA_ODPUNCTURE : 1
HEMATOCHEZIA_OTHER : 1
NOTE_SCALE : 1
PER_FOLLOWUP : 1
THE_MEATUS : 1
HRS_REGULAR : 1
ANY_WHO : 1
FIXATOR_LE : 1
YELLOW_TAG : 1
HIS_ARE : 1
HX_DYSPHAGIA : 1
STIMULANT_CAN : 1
CORONARY_ARTERY : 1
ORAL_THE : 1
HIS_TO : 1
DISCUSS_BEHAVIORS : 1
SEEMS_TO : 1
ASSISTANT_WORK : 1
SHOULD_ABNORMALITY : 1
CONDITIONS_GUILTY : 1
BY_WOUND : 1
TALK_TO : 1
TALKING_FELICIANO : 1
PATIENT_NOT : 2
NOT_ANY : 1
IN_NAD : 1
TO_AN : 2
AND_HOMICIDAL : 1
ADVOCATE_IPRATROPIUM : 1
CHEST_EXPRESSED : 1
THAT_PUT : 1
MG_TEST : 1
PLAN_TASKS : 1
MISSING_TREATMENT : 1
SHE_BEEN : 1
OR_THOUGHT : 1
WITHDRAWAL_SYMPTOMS : 1
PROVIDED_TO : 1
OF_HERBALS : 1
CLONIDINE_MG : 1
DIET_INSTRUCTION : 1
AND_CPT : 1
EATS_DRINKS : 1
CALL_LEFT : 1
CONDITIONS_FEELING : 1
THE_SAME : 1
ACTIVE_PHYSICAL : 1
THE_ENDS : 1
SAO_THE : 1
STATED_THAT : 1
DYSPHAGIA_DIAGNOSIS : 1
LMSW_PATIENT : 1
QH_PRN : 2
GOAL_THE : 1
COULDNT_PAPERWORK : 1
HIS_CC : 1
WITH_RADIATION : 1
OF_OBSTRUCTION : 1
HE_PERCEPTION : 1
LIKE_RX : 1
HE_APPE : 2
FROM_CDCS : 1
THE_PAIN : 1
INTACT_GRIPS : 1
SHE_AN : 1
PROVIDER_VELARDE : 1
MCG_PO : 1
TIME_PROVIDED : 1
DISTAL_ESOPHAGUS : 1
USE_DISORDER : 2
BLOOD_DO : 1
REPORTS_STILL : 1
NURSE_RT : 1
OF_EDUCATION : 1
THAN_NO : 1
IMP_MUCOPER : 1
HAS_CAPACITY : 1
PLANS_START : 1
ADMITTED_PAST : 1
NO_SWELLING : 1
CALLER_PAIN : 1
SHE_TRYING : 1
YOUR_ACCEPTABLE : 1
NEVER_ADMITTED : 1
SAME_ANTIPSYCHOTIC : 1
WAS_APPROVED : 1
HE_SIGNIFICANT : 1
ED_EXTERNAL : 1
DISPLAYED_TO : 1
FAXED_INSTEAD : 1
IT_WAS : 2
HE_BOUTS : 1
DID_THAT : 1
HERBALS_RECONCILIATION : 1
WILL_PHYSICIAN : 1
IN_BUT : 1
PAIN_MED : 1
MAY_THE : 2
THE_MAIL : 1
CHRONIC_REISSUE : 1
MEMBER_HAD : 1
LAST_NIGHT : 1
INDICATED_DANGER : 1
PREFERRED_METHODS : 1
MEDICATION_COUNSELING : 1
ASSESS_PATIENTS : 2
NICOTINE_NOT : 1
PAIN_BURNING : 1
INFORMATION_YEAR : 1
EXPERIENCING_IMPROVED : 1
THOUGH_PT : 1
WORK_TALKED : 1
DURING_TEAM : 1
WILL_HIS : 2
ADMISSION_AS : 1
ON_REGULAR : 1
STATE_NAMEJOE : 1
AROUND_DERMATOLOGY : 1
OFFICE_INSURE : 1
MH_NEEDS : 1
DATE_PROVIDED : 1
QH_ACTIVE : 1
VITAL_OSTEOARTHROSIS : 1
PAIN_ANXIETY : 1
WITHIN_INPATIENT : 1
INSURE_THAT : 1
PARKVIEW_PATIENT : 1
SHORT_SPAN : 1
ADVANCE_DIRECTIVES : 2
THEREFORE_GOT : 1
RETURN_APPT : 1
BEDREST_NURSE : 2
PCP_FACILITY : 1
PVCS_SUPPER : 1
JUDY_TOUGH : 1
DEPRESSION_ED : 1
HE_BE : 2
ADMISSION_CODE : 1
WIDE_TACHYCARDIA : 1
UNIT_WANTS : 1
PKT_PWD : 1
BODY_HE : 1
ATTEMPT_GET : 1
MALE_HX : 1
OF_PRURITUS : 1
FOLLOWING_WERE : 2
MEMBRANE_ALTERATION : 1
LOWER_ABD : 1
THE_INFORMATION : 1
OR_EDEMA : 2
ANTIPSYCHOTIC_MONITORING : 1
DAILY_PRESSURE : 1
SOCIAL_WORK : 2
GIVEN_TO : 1
WAS_COUNSELED : 1
OF_SURGERY : 1
AND_DRAINAGE : 1
HE_STATED : 1
FOR_WHICH : 1
AND_ETIOLOGY : 1
ANGER_THE : 1
FIXATOR_RIGHT : 1
MIGRAINES_HE : 1
FOLLOWUP_LOCATION : 1
HE_IS : 3
FOR_ACTIVE : 1
IT_HE : 1
SEEN_WITH : 1
PUT_OF : 1
NO_REFILLS : 1
WALK_OUT : 1
VET_INDICATES : 1
CONCERNS_THESE : 1
TO_AND : 5
NURSE_CC : 1
LEARNING_LEARNING : 1
YES_IF : 1
UP_IN : 2
ADENOCARCINOMA_ASSESS : 1
SEEN_IN : 2
ZZPALLIATIVE_LIFE : 1
HS_RECOMMENDED : 1
SIDE_EFFECTS : 1
ISSUE_THIS : 1
NIGHT_STARTED : 1
PCP_REMINDER : 1
LIVING_AFFECT : 2
TERM_SUICIDAL : 1
MED_RECONCILIATION : 1
AS_PROVIDER : 1
DESK_NAD : 1
NOTE_SEP : 1
LEFT_RESOLVED : 1
NURSING_ADMISSION : 1
FOR_CLARIFICATION : 1
GUN_READING : 1
NIGHT_SWEATS : 1
IN_IPRATROPIUM : 1
PC_FOR : 1
TMK_HAS : 1
EDUCATION_PROVIDED : 2
DISCHARGE_EXCHANGE : 1
LAST_OF : 1
TO_KRISHNASWAMY : 1
MEASURES_CM : 1
BRUSHINGS_AND : 1
REGARDING_CHEST : 1
SUPPLEMENT_REPORT : 1
MOBILITY_DEPENDENCE : 1
NOTHING_WRONG : 1
PASTA_FISH : 1
START_GOING : 1
LIME_TO : 1
EXR_TIME : 1
HEALTH_WITH : 1
PHONE_PSOME : 1
TO_GET : 2
HEAD_FULL : 1
TO_WARRIOR : 1
LUNG_ALCOHOL : 1
ANTIHYPERTENSIVES_NO : 1
WHERE_WILL : 1
USE_AT : 1
PHONE_HE : 1
JUST_WORTH : 1
YEARS_AGO : 1
DOES_YOUR : 2
WAY_OF : 1
ASK_NURSE : 1
MONTHS_NO : 1
TRANSPORTATION_AN : 1
LAB_DATA : 1
PT_DOING : 1
GEN_IN : 1
BY_PT : 1
DISTENDED_LITTLE : 1
DOES_NOT : 2
FOR_NONHEALING : 1
KNOW_BETTER : 1
HP_PCP : 1
SCREENING_EDUCATION : 1
PATIENT_UP : 1
MEDICATIONS_HAD : 1
URINATION_ADVANCE : 1
THEM_THEY : 1
WRITER_SHOULD : 1
DEPOSIT_SUGGESTED : 1
AT_PARKVIEW : 1
REHABILITATION_ATTENTION : 1
GETTING_OVER : 1
CONTACT_INFORMATION : 1
AN_SCREENING : 1
SEE_IF : 1
VA_FAMILY : 1
CHANGES_PLEASE : 1
GIVE_AND : 1
BE_MAILED : 1
PULSE_READING : 1
PCP_CAREY : 1
BEFORE_IS : 1
IS_NURSING : 1
CHRONIC_AID : 1
ACCESSED_SELECTING : 1
TRANSFER_VA : 1
SERVICE_CONNECTION : 1
DIFFICULTY_DENIES : 1
PULSE_BELOW : 1
THIS_PT : 1
JULY_DENIES : 1
FALL_WITH : 1
NOT_WANT : 1
PASSED_TO : 1
WITH_PAIN : 1
DRAINS_NONE : 1
PAST_AND : 1
INFUSED_COPD : 1
PROVIDER_LISTED : 1
SECONDARY_PATIENT : 1
REQUESTED_WITH : 1
6A_TEAM : 1
ERUPTED_TOOTH : 1
DEXTROSE_INJ : 1
DOCUMENTED_AT : 1
BARRETTS_PREOPERATIVE : 1
WORSE_OVER : 1
CALLER_OTHER : 1
HE_THEN : 1
CLIENT_HELP : 1
SELF_OBSERVATIONS : 1
LEAVE_EVEN : 1
TO_INCREASE : 2
ORAL_PWD : 1
PT_OTHER : 1
LONG_WILL : 1
VETERAN_WILL : 1
ABLE_TAKE : 1
WITH_HX : 1
SERVICE_METOPROLOL : 1
AND_OCCURS : 1
BE_NUMBER : 1
LOWER_PREINSTRUCTIONS : 1
BY_LACK : 1
BID_PAST : 1
VA_ADVANCE : 1
CDCS_TIPS : 1
FEELING_SINCE : 1
STANDARD_CHRONIC : 1
OR_YES : 1
DO_NOT : 3
INPATIENT_BRADEN : 1
STAGES_RECOVERY : 1
ONLY_THING : 1
OF_WAS : 1
EDUCATION_WAS : 1
BE_DISCHARGED : 1
FEVER_OCCASSIONAL : 1
ENCOUNTER_ON : 1
NO_FRICTION : 1
ACTIVE_BENIGN : 1
PLEASURE_IN : 1
FALL_RISK : 5
BEEN_THE : 1
REGARDING_THIS : 1
ATTENTION_HIS : 1
ILL_TYPE : 1
WAS_PM : 1
AN_BE : 1
HIS_LAST : 1
ROOM_ED : 1
REMAINS_ON : 1
PAIN_NEURO : 1
REGULAR_FULL : 1
FROM_TREATMENT : 1
SIGNS_LB : 1
RIGHT_BREAKFAST : 1
WOULD_LIKE : 1
COULD_ORTHO : 1
PRESSURE_PROTOCOL : 1
MALE_WITH : 2
APPROPRIATE_PATIENT : 1
TO_ADDENDUM : 2
LACK_PAIN : 1
WHY_THE : 1
FRIGHTENING_POTASSIUM : 1
WORK_VOICEMAIL : 1
WITH_BEEN : 1
DISPOSITION_CALL : 1
CARE_EXIT : 1
MOBILITY_FULLY : 1
OTHER_HE : 2
ASSOCIATE_ASSIGNED : 1
PROVIDER_AT : 1
SUPPLIES_CHANGE : 1
GAIN_ATTENTION : 1
SOCIAL_PULSE : 1
ASSESSMENT_EXTRACTION : 1
RELATIONSHIP_SISTER : 1
FOR_TREATMENT : 1
DOCUMENTATION_FROM : 1
ORDERS_FOR : 1
BEDREST_WT : 1
ALERT_ME : 1
IF_MEDICATIONS : 1
MEDIAN_SC : 2
OF_ADMISSION : 2
MALE_GIVEN : 1
THE_ROOM : 2
SESSION_NO : 1
TWO_DENIES : 1
OF_SO : 1
SEDATION_LOC : 1
PLANNING_INPATIENT : 1
NUTRITION_AT : 1
ICDTOBACCO_USE : 1
PHONE_VERIFIED : 1
6A_TREATMENT : 1
DINNER_WALK : 1
DIZZINESS_ADMISSION : 1
ANALYSIS_MEDICATION : 1
BY_WHO : 1
DAILY_OR : 1
COULD_SCHEDULED : 1
STATE_UP : 1
FOR_SECONDS : 1
COULD_OF : 1
OFF_STATION : 1
ENDOSCOPIC_RESECTION : 1
NIGHT_NO : 1
IMMOBILE_YES : 1
INJ_SOLN : 1
OR_OTHERS : 1
SWELLING_NOTED : 1
NOT_TAKE : 2
ULCER_LEFT : 1
WITH_TEAM : 1
INITIATED_BY : 2
YES_ANATOMICAL : 1
WOMAN_WOULD : 1
THEN_SELECT : 1
SUN_AND : 1
YOUR_FOR : 1
WOULD_WHAT : 1
INTERDISCIPLINARY_AS : 1
WORK_TC : 1
ASSESSED_MEASUREMENTS : 1
PATIENT_MESSAGE : 1
AND_YOUR : 1
TUBE_FED : 1
NO_HT : 1
TO_AGRESSIV : 1
OUR_EFFORTS : 1
COMPLETING_QUESTIONNAIRES : 1
TROUBLE_BACK : 1
SEEMS_REPRODUCE : 1
PAIN_DIABETIC : 1
WITHOUT_ANY : 1
NOT_SMOKE : 2
FROM_AND : 1
YOU_HAD : 1
IV_TREATMENT : 1
THE_RIGHT : 1
GO_THE : 1
RA_REST : 1
TIME_TO : 1
CLINIC_NOTE : 1
MULTIPLE_PAIN : 1
ACTIVE_HERE : 1
ADVISED_MRS : 1
DOSE_OF : 1
WITH_HE : 1
ADLFLOWSHEET_MOBILITY : 1
SWMF_NOT : 1
SISTER_TO : 1
IS_OFF : 1
PHONED_THE : 1
FOR_DEPOSIT : 1
NURSE_LEADER : 1
FULLY_EXTEND : 1
KG_DRAINS : 1
NURSING_SCREENING : 1
AFTERNOON_GAME : 1
PATIENT_DIRECTIVE : 1
RESPIRATIONS_ENDOSCOPIC : 1
NAVIGATE_THE : 1
ANY_HOMICIDAL : 1
COMMENTS_PVCS : 1
POSSIBLY_COUMADIN : 1
RECEIVED_FOR : 1
RADIATION_DM : 1
INPATIENT_REASSESSMENT : 1
FOR_ALLERGIES : 1
SHE_IS : 2
IN_LOW : 1
HOW_DOES : 2
BY_ELECTRONICALLY : 1
TO_FOR : 3
IDEATION_TO : 1
PLEASE_REFER : 1
ON_MG : 2
HAS_INVOLVED : 1
EDUCATION_ON : 1
TO_THE : 11
REPRODUCE_PAIN : 1
DIET_MEDICATION : 1
NO_FOOT : 1
STATUS_ACTIVE : 1
VETERAN_STATE : 1
INTACT_HAND : 1
METHOD_BY : 1
GO_AS : 1
REST_ACUTE : 1
HAD_ON : 1
BY_MOUTH : 4
ABUSE_CONTRACT : 1
CORRELATION_TO : 1
EXPRESSED_RESPIRATIONS : 1
EMPLOYMENT_THE : 1
REPORT_REPORTING : 1
TO_TALK : 1
TWO_YEARS : 1
MEDICATION_USE : 1
PLEASE_TO : 1
EVALUATED_GOAL : 1
DESCRIBES_PICTURE : 1
HAND_EQUAL : 1
PATIENT_GO : 1
COUNSELING_PAIN : 1
HE_RIDES : 1
SPAN_HAS : 1
APR_PHARMACIST : 1
SPECIFIC_HE : 1
BRONCHOSCOPY_CARCINOMA : 1
STATUS_LEVEL : 1
BENEFITS_BARRIERS : 1
HAVE_INCOME : 1
APPARENTLY_HAS : 1
PCCTELEPHONE_BARRIERS : 1
HERE_THE : 1
LETTER_IS : 1
PROZAC_MG : 1
TIME_AGE : 1
SHORT_SUICIDAL : 1
INSUFFICIENCY_PT : 1
TELEPHONE_ADDENDUM : 1
SATT_SESSION : 1
HOSPITAL_ROOM : 1
UPSET_VETERAN : 1
IN_DIRECTIVE : 1
PAJAMAS_LINENS : 1
REASON_FOR : 2
ACTIVE_BEEN : 1
LAB_YELLOW : 1
AND_MEDICATION : 2
NOTE_HE : 1
THORACIC_OPERATION : 1
TAKE_TABLET : 2
LEGS_KNEES : 1
SECONDS_WORSENS : 1
BEEN_TRANSFERRED : 1
PROSTATE_EDUCATION : 1
URINATING_PAIN : 1
WEBB_WHOSE : 1
LOT_STRAIN : 1
FALL_SCALE : 1
OR_PATIENT : 1
NML_NON : 1
CHICKEN_OR : 1
ADDENDUM_NO : 2
AS_THE : 1
WITHIN_YES : 1
PICTURE_OIN : 1
APPT_FOR : 1
PATIENT_RETURNING : 1
HAD_EXPERIENCE : 1
STARTED_AT : 1
HISTORY_SURGERY : 1
PROVIDER_TEAM : 1
BS_NON : 1
OVERSIGHT_SUN : 1
THE_THE : 2
OR_INTERVENTIONS : 1
HAVE_PAIN : 1
STAFF_GIVE : 1
THAT_WAS : 5
MESSAGE_TO : 1
PCP_KETCHUM : 1
REFER_TO : 2
IS_IMPROVING : 1
NOTE_MOBILITY : 1
PULSE_LST : 1
OF_PATIENT : 3
INSTILL_DROP : 1
MISSED_TP : 1
INCLUDING_IER : 1
NEED_CONSULT : 1
PARKVIEW_ED : 1
EPIS_AND : 1
AND_FOR : 2
OF_FROM : 2
MICROSCOPIC_MEDICATION : 1
WITH_OF : 3
REGULAR_EASY : 1
CONDUCTION_THIS : 1
STUDENTS_AND : 1
ATRIAL_RATE : 1
LEVEL_UNDERSTANDING : 2
PB_HE : 1
HEENT_ANICT : 1
FED_DRESSING : 1
SYMPTOMS_AND : 1
PER_BH : 1
MALE_OF : 2
SAID_HE : 2
PATIENT_THEY : 1
PRESSURE_MORE : 1
GO_AND : 1
NA_NO : 1
HE_DEVELOPED : 1
RECOMMENDED_FOLLOWUP : 1
WAS_REVIEW : 1
COORDINATOR_NURSE : 1
CLINIC_SOB : 1
OF_GHETTO : 1
SEEN_SURGERY : 1
MEDICAL_PATIENT : 1
NORMAL_DATE : 1
PHARMACIST_NEUROPATHIC : 1
NOT_SHIFT : 1
PT_FEELS : 1
NOT_TSH : 1
NOT_DRINKING : 1
APPEARING_ILL : 1
PAIN_WHICH : 1
REC_ENDOSCOPY : 1
MCG_BID : 2
THEN_VET : 1
WORSE_THAN : 1
AT_WOUND : 1
HOSPITAL_TO : 1
ATTEMPT_TO : 1
BY_CARE : 1
READY_LEARN : 1
MODIFIED_RAMSAY : 1
IN_TEST : 1
IMAGING_MODERATE : 1
CONSULT_GEN : 1
EQUAL_AND : 1
PAD_ELBOW : 1
SIMVASTATIN_MG : 1
PER_HIM : 1
ERYTHEMA_EDEMA : 1
OF_DIABETIC : 1
ANALYSIS_MAY : 1
REVIEW_THE : 1
EVEN_THOUGH : 2
THE_THYROID : 1
THERE_NOTHING : 1
ANTIPSYCHOTICS_MOOD : 1
NORMAL_OCT : 1
HAD_LOT : 1
SUMMARY_THAT : 1
UNDERSTOOD_AND : 1
IS_ATTACHED : 1
SYNCOPAL_AND : 1
BETTS_NAUSEA : 1
TAKE_CATEGORY : 1
MINUTES_FROM : 1
NURSE_WITH : 1
HAS_MONITOR : 1
AGE_AND : 1
OCT_NO : 1
INHL_PUFF : 1
ARE_MOTIVATED : 1
FOUR_HISTORY : 1
TARGETED_ADMISSION : 1
RADIOTHERAPY_METHOD : 1
SENSORY_PERCEPTION : 1
SINUS_TREATMENT : 1
BLADDER_PSYCHOTROPICS : 1
REGULAR_AMIODARONE : 1
AS_PRESCRIBED : 1
ONE_ONE : 2
NUMBER_ATYPICAL : 1
COMPLAINTS_SUICIDAL : 1
FRICTION_APPARENT : 1
ENCOUNTER_SAO : 1
PAST_RIGHT : 1
SIGNIFICANT_IS : 1
DRUG_DOSAGE : 1
ORAL_PLAN : 1
CARCINOMA_LUNG : 1
VET_EFFORTS : 1
ADDENDUM_RISK : 1
OF_SELECTED : 1
MR_IN : 1
DISPENSED_FEB : 1
THERAPY_NERVE : 1
AND_COPD : 1
OPERATING_AND : 1
OR_CHANGES : 1
NOTED_ABOVE : 1
PCP_PUEBLORED : 1
LEARN_HX : 1
HERE_SOLDIER : 1
FACTORS_PROTOCOL : 1
ICU_ASSESSMENT : 1
CORNEA_TYPE : 1
PAIN_PHARMACIST : 1
INSTRUCTION_AND : 1
WOULD_DO : 1
DEPENDING_ON : 1
ACTIVE_PS : 1
MYOCARDIAL_INFARCTION : 1
ANY_EXPERIENCE : 1
ON_SIMVASTATIN : 1
WAS_THIS : 1
THE_YO : 1
MAINTAIN_GENDER : 1
JUDY_LMSW : 1
COURTESY_REMINDER : 1
ACUTE_MASS : 1
COUMADIN_DATE : 1
PATIENTS_RISK : 2
DIARRHEA_HISTORY : 1
ILLNESS_PT : 1
CC_HR : 1
PAIN_TO : 1
DISCOMFORT_RATES : 1
FLU_SHOT : 1
MRS_THAT : 1
AND_PHYSICIAN : 1
AND_REASONS : 1
EDUCATION_PAIN : 1
MD_BACK : 1
ENCOUNTER_MALE : 1
OF_CHRONIC : 4
STRONG_MEDS : 1
CALL_DISCUSSION : 1
ULCER_PROTOCOL : 2
CELL_PHONES : 1
LB_KG : 5
WITH_BOSS : 1
HIS_DISCHARGE : 1
FISH_DINNER : 1
LIST_CC : 1
BE_BY : 1
INQUIRE_TO : 1
AFTER_AND : 1
YESTER_WOULD : 1
VISITED_RESPONSE : 1
THAT_ANXIETY : 1
CHEST_PAINSAW : 1
INHL_QH : 1
THE_WAY : 1
TONGUE_FURTHER : 1
CARDS_THIS : 1
STATE_SC : 1
ALTERATION_HAVING : 1
BACK_OMEPRAZOLE : 1
ETIOLOGY_WAS : 1
WEARING_ELBOW : 1
NURSE_CARDIOLOGY : 1
IN_DOING : 1
PATIENTS_TO : 1
NO_ERYTHEMA : 1
INTERVERTEBRAL_ICDTOBACCO : 1
FIBRILLATION_RATE : 1
SINCE_LAST : 1
HE_SENSORY : 1
IN_PAST : 2
OLD_MALE : 3
MA_REHABILITATION : 1
HERE_BEFORE : 1
RECENTLY_EXPIRED : 1
MONTH_VETERAN : 1
NUTRITION_PMR : 1
NEED_FOR : 1
THING_WAS : 1
BLOOD_CARDS : 1
FACTORS_LISINOPRIL : 1
BE_FRIEND : 1
ORAL_MEDICATION : 1
OVER_WEEK : 1
SIG_COLLABORATE : 1
WEEK_PATIENT : 1
IV_HEPLOCK : 1
TO_GO : 1
IS_COUNSELED : 1
DEMONSTRATED_SKILL : 1
OUT_DINNER : 1
YOU_HAVE : 1
HAD_BMS : 1
SENSATION_BIL : 1
TO_IF : 2
OF_FLUIDS : 1
ENCOURAGEMENT_SUPPORT : 1
WARRIOR_TRANSITION : 1
CAP_INHALE : 1
THIS_YES : 1
FOR_PATIENTS : 1
COMPLAINT_FEELS : 1
THEIR_ENVIRONMENT : 1
LEARN_ETOH : 1
THERE_THAT : 1
WERE_EDUCATED : 1
TO_MG : 2
DM_HYPERLIPIDEMIA : 1
WOULD_LEAVE : 1
MG_ML : 1
BED_LOW : 1
SPAN_DISTRACTIBLE : 1
COVERING_FACILITY : 1
NO_THE : 1
NECK_CLINIC : 1
RISE_IT : 1
MENTAL_HEALTH : 3
LEFT_LOWER : 1
AGREES_FOLLOW : 1
WTU_TRANSITION : 1
WITH_RESTING : 1
SAYS_BE : 1
DISABILITY_BENEFITS : 1
NOTE_CODE : 1
ENCOUNTER_HOSPITAL : 1
BE_ON : 1
SCREENING_TE : 1
SPC_IS : 2
ARE_ASKING : 1
PATIENT_PHONE : 4
PT_REMAINS : 1
CM_OBJECTIVE : 1
WHICH_IT : 1
PATTI_PSYCH : 1
IN_PROVIDER : 1
HOURS_PAIN : 1
HE_DISTAL : 1
VETERAN_NAME : 1
THIS_SHOULD : 2
ENDOSCOPIC_NODENTURES : 1
AND_AMBULATORY : 1
YEAR_OLD : 4
DISPOSITION_TRANSPORT : 1
KNOW_THE : 1
DISCHARGE_INSTRUCTION : 1
TOUGH_THROUGH : 1
COLLABORATE_INTERDISCIPLINARY : 1
LAB_PLEASE : 1
WERE_USED : 2
VERDE_PATIENT : 1
ATTENTION_EASILY : 1
INFARCTION_TIMES : 1
HOSPITAL_WAS : 1
ABOUT_OR : 1
TO_NEW : 1
STRAIN_ON : 1
PHYSICIAN_PRIOR : 1
NATURALLYOCCURRING_SUBSTANCE : 1
EDUCATION_DOCUMENTATION : 1
BRIEF_ANSWERS : 1
LIME_HAVE : 1
OF_DIPPY : 1
DURING_TIME : 1
ADMISSION_THOUGH : 1
JUL_OF : 1
EMERGENCY_DEPRESSION : 1
FOLD_AND : 1
RESULT_UNITS : 1
INDEX_OCT : 1
INCREASE_WALKS : 1
PVCS_HEIGHT : 1
AT_NURSE : 1
OUTPATIENT_MEDS : 1
WHEELCHAIR_NURSE : 2
THAT_YOU : 1
ON_SATISFACTORY : 1
HAVE_TAKING : 1
SEDATION_SCORE : 1
RECENTLY_OUTPATIENT : 1
FRIENDS_WITHDRAWAL : 1
DATE_TIME : 2
TOBACCO_PRODUCT : 1
FINAL_DIAGNOSIS : 1
MAINTAIN_IMPROVE : 1
CARE_THIS : 2
STOP_DATE : 1
OF_DPAHC : 1
BELONGINGS_HE : 1
ADDENDUM_HAD : 1
ANY_OR : 1
YES_RACE : 1
BUT_RSF : 1
TRIAGE_CODE : 1
PRESENT_HER : 1
ARE_DOING : 1
FEE_SO : 1
NEED_NHCU : 1
RELATIVES_VETERAN : 1
PATIENT_DRINKING : 1
COMPLIANCE_MEDICAL : 1
HOUR_ND : 1
ENCOURAGEMENT_NEEDING : 1
PHONE_COULD : 1
MAKES_KNOWN : 1
PMR_OT : 1
SIGNED_LAST : 1
AFTER_MIN : 1
DENIES_ANATOMICAL : 1
FEELINGS_CONTACTED : 1
RESUME_HIS : 1
MAIL_MULTIPLE : 1
AND_OR : 1
OPERATING_ROOM : 1
NAME_MODIFIED : 1
AT_LEVEL : 1
LED_BY : 1
TO_SINCE : 1
DIRECTIVES_WILL : 1
NIGHTMARES_IT : 1
IS_OF : 1
NIGHT_SINUS : 1
CAP_MCG : 2
STATING_HIS : 1
ACKNOWLEDGES_SYSTEM : 1
OF_HE : 2
PROVIDED_APPOINTED : 1
NURSE_INTRAOPERATIVE : 1
WAITING_HE : 1
CAPSULE_DIZZINESS : 1
BP_IF : 1
APPOINTED_PUEBLORED : 1
DID_THIS : 1
REVEALS_NO : 1
EST_RETURN : 1
AND_SPONDYLOSIS : 1
AND_DISCUSSION : 1
CLINIC_OF : 1
SWELLING_POSITIVE : 1
THE_MENU : 1
DIAST_BLOOD : 1
ROOM_DEPRESSION : 1
OF_STRAIN : 1
PROVIDER_NO : 1
BEEN_INVOLVED : 1
FROM_DR : 1
ACUTE_IS : 1
MUCOPER_FLP : 1
TAKEN_IN : 1
DIET_ADVISED : 1
YES_JR : 1
NOTE_ULCER : 2
BE_FOR : 2
RATES_PAIN : 1
PER_CAME : 1
PERFORMED_HEMATURIA : 1
REDSKINS_THIS : 1
OR_PCP : 1
OTHER_PRESENT : 1
PHONE_GETTING : 1
HE_DECLINED : 1
NURSE_SYMPTOMS : 1
MG_UD : 1
SUICIDAL_COUNSELED : 1
AFTER_OF : 1
CM_GO : 1
WHICH_INFORMATION : 1
DRUG_SIG : 1
ENVIRONMENT_DISCUSSED : 1
BE_FURTHER : 1
ALL_WERE : 1
COPD_PATIENT : 1
TABLET_BY : 1
DENIED_GETTING : 1
OR_SKIN : 1
ADL_SCREENING : 1
ASPIRIN_DOCUMENTED : 1
ADMISSION_IN : 2
PATIENT_SEEN : 1
RHINORRHEA_YELLOW : 1
FAMILY_CAREGIVER : 1
IDEATIONS_SAW : 1
LOT_FLUIDS : 1
WIFE_HE : 1
VETERANS_HAVE : 1
EVALUATION_REGARDING : 1
LEARNING_VERBAL : 1
WEARING_PAD : 1
VA_FOLLOWING : 1
CM_DIRECTIVE : 1
LOCATION_OFFICE : 1
NOTE_PRESSURE : 1
EXTERNAL_FIXATOR : 1
BRAIN_NO : 1
CONTACT_OFFICE : 1
BLOOD_VERBALIZED : 1
HAS_FLAT : 1
TO_ACTIVE : 4
SECONDARY_HAD : 1
SCREEN_TIME : 1
MONFRI_TAKE : 1
PARALYSIS_OF : 2
HE_NEVER : 2
YES_DENIES : 1
WAITING_AND : 1
ELOPEMENT_FACTORS : 1
SUS_PATIENT : 1
BACK_HOUR : 1
VITAL_OF : 1
EKNURSING_NA : 2
RIGHT_NS : 1
SAME_TIME : 1
ELABORATION_PHARMACY : 1
ARRIVAL_DIARRHEA : 1
PLANNING_NURSING : 1
HIS_LEG : 1
WITH_CONSERVATION : 1
PT_CAN : 1
RETINAL_IMAGES : 1
PHARMACY_EDUCATIONAL : 1
RECOMMENDED_ABOUT : 1
HERE_APPT : 1
SSN_BP : 1
MOVE_LOT : 1
IN_DO : 1
BRAKES_CALL : 1
CARE_SERVICES : 1
TEMP_DURING : 1
WHO_DO : 1
NO_AND : 2
EXERSIONAL_EXPIRATION : 1
HIS_CAR : 1
CAPACITY_GOAL : 1
CURRENT_VITAL : 1
IN_WITH : 2
DONE_AGE : 1
SCHEDULED_TOMORROW : 1
ALBUMIN_DIABETIC : 1
FOR_OF : 8
THOUGHT_NONE : 1
FOOT_TO : 1
WOULD_TO : 1
OR_USED : 1
PAIN_HAS : 1
PULSE_ACTIVITY : 1
OF_HAS : 1
MINUTES_FOCUS : 1
LISINOPRIL_MG : 1
THOUGHT_SHOULD : 1
BOSS_WHO : 1
STATES_THAT : 1
REGIMEN_BY : 1
SYND_CONTROLLED : 1
NO_ABNORMAL : 1
OR_NOTED : 1
BIPOLAR_OSA : 1
DID_CONTACT : 1
MEDICATIONS_HELP : 1
ONEHALF_BY : 1
CARE_PER : 1
SELECT_WHO : 1
FOR_SERVED : 1
COLLABORATE_WITH : 1
MEDICATIONS_ERIE : 1
PAIN_FOLLOW : 1
WITH_PATIENT : 4
HAD_IODINATED : 1
DISCHARGE_SATISFACTORY : 1
TO_SUICIDE : 1
IN_ALBUTEROL : 1
VETERAN_SAID : 1
WERE_TO : 4
WITH_URINATION : 1
RADIOTHERAPY_RECOMMENDED : 1
CHANGE_HCL : 1
FEELING_SUICIDAL : 1
AN_GET : 1
CA_DEPRESSION : 1
ADOPT_USE : 1
EVEN_FASTING : 1
ETOH_DENIES : 1
FOR_EDUCATION : 1
PULSE_THEREFORE : 1
CATEGORY_CLASS : 1
ASSESS_FALL : 2
AS_DM : 1
PAIN_ACCEPTABLE : 1
IF_SYMPTOMS : 1
BOUTS_DIARRHEA : 1
AND_GOT : 1
LAST_ASSESSMENT : 1
CONSULT_FOR : 1
REDUCTION_BRONCHOSCOPY : 1
CODE_ARRIVAL : 1
THAT_WERE : 1
ROOMED_NAME : 1
AT_IV : 1
TMK_PATIENT : 1
SIG_PENDING : 1
DEFORMITY_SWELLING : 1
PREVENTION_WAS : 1
INTERVENTIONS_NEGATIVE : 1
FULL_PATIENT : 1
NOTE_RECEIVED : 1
VERDSOME_UP : 1
PATIENT_GOAL : 1
CHANGE_ADDENDUM : 1
ATTENDANCE_MINUTES : 1
REPORT_ACTIVE : 1
DATA_YELLOW : 1
CONTRAST_PATIENT : 1
ACTIVITY_PT : 1
PAIN_TAKING : 1
THAT_SO : 1
OF_DENIES : 2
SEEN_BEFORE : 1
IN_REGION : 1
ASSESSMENT_NSA : 1
DENIES_OR : 1
ADDITIONAL_OS : 1
ANSWERS_ELABORATION : 1
BREATH_HELP : 1
IMMOBILE_DYSPHAGIA : 1
FROM_NURSE : 1
AND_LIFE : 1
THIS_PM : 1
APPOINTMENTS_WILL : 1
VA_ACTIVE : 1
AND_DE : 1
UP_BY : 1
HELP_WITH : 2
WITH_NO : 2
MEDICAL_NOTE : 1
EXCUSED_FALL : 1
CONTACTED_COMPTON : 1
IN_BIL : 1
COMBAT_FACILITY : 1
FLU_FY : 1
RESIDENT_NOTE : 1
BE_OF : 2
TAKE_MEDICATIONS : 1
POSITIVE_SOCIAL : 1
AMBULATORY_AID : 2
PROVIDER_LOPC : 1
BY_PAIN : 1
DIFFERENT_LEVELS : 1
GIVEN_VITAL : 1
NEW_ALBUTEROL : 1
OF_INTERVERTEBRAL : 1
PAIN_HE : 1
PCCTELEPHONE_TO : 1
DISPENSED_APNEA : 1
BASIS_BENEFITS : 1
PROCEDURE_PATIENT : 1
CARE_MIN : 1
WAS_FECAL : 1
ABNORMALITY_POTENTIAL : 1
HAVE_HOMICIDAL : 1
NONE_LAST : 1
MORE_SUN : 1
THAT_OVERSIGHT : 1
SPASMS_ON : 1
HAD_BIT : 1
HE_CHEST : 1
ANY_QUESTIONS : 1
CLINICAL_ACTIVITY : 1
HIS_HISTORY : 1
WEEK_DOES : 1
DENTAL_CLASS : 1
ABOUT_WITH : 2
MHSBDI_REPORT : 1
THROUGH_WHEN : 1
MHICM_SCREEN : 1
COMPLAINT_PT : 1
THE_TO : 1
MRSA_PATIENTS : 1
AMONG_COUNTRIES : 1
NEW_ALLERGIES : 1
ULCER_AT : 1
HIS_RIGHTS : 1
ADMISSION_PRESENT : 1
CARDIAC_SHOWS : 1
ACKNOWLEDGES_RECOMMENDATION : 1
SHOULD_NEWLY : 1
YEARS_HE : 1
CARE_SPECIAL : 1
YESTER_AND : 1
OF_NIGHT : 1
LIVING_SITUATION : 2
HAS_OF : 2
APNEA_GOALWHAT : 1
WENT_SO : 1
PATIENT_ADVOCATE : 1
IS_FUTURE : 1
MEDICATION_PUFFS : 1
OF_DAILY : 1
ADMITTED_THERE : 1
GOOD_OR : 1
PROVIDER_OFF : 1
NO_PROBLEM : 2
CONTROLLED_PATIENT : 1
PAST_NAME : 1
DOES_HAVE : 2
OF_POSSIBLE : 1
BELONGINGS_IER : 1
BEFORE_DURING : 1
CAME_BACK : 1
CLOSE_YOU : 1
ADMISSION_DENIES : 1
SETTING_EACH : 1
EATS_GOOD : 1
RIGHT_RIB : 2
TO_BACK : 1
SECONDARY_DIAGNOSIS : 2
ON_TYPE : 1
MENTAL_CLINIC : 1
RESPIRATION_ISSUE : 1
PULSE_WAS : 1
URINATION_PATIENT : 1
CAUSED_LEFT : 1
WAS_OUT : 1
GOLYTELY_MORNING : 1
SESSION_WAS : 1
VISIT_BY : 1
WITHIN_ONE : 1
NAUSEA_ADDENDUM : 1
TO_SURVEY : 1
APPLICATIONS_CAN : 1
REVIEWED_MEDICATION : 1
FLAT_AFFECT : 1
TREATMENT_IN : 1
ALSO_ITCHING : 1
IN_TRIAGE : 1
AS_NEEDED : 2
WILL_TAKE : 1
GROUPS_INCLUDE : 1
WATER_TAKE : 1
PHONES_BREATH : 1
CC_HEPLOCK : 1
IMPROVED_FEVER : 1
FROM_EDUCATION : 1
HE_SAID : 2
HOW_DEPENDING : 1
AND_CURRENT : 1
HOWEVER_DIAGNOSIS : 1
ELBOW_PER : 1
GEN_SITTING : 1
REMOVING_TOBACCO : 1
BACK_CONDITION : 1
QH_FOR : 2
GOOD_CONTACT : 1
YES_CHEST : 1
TO_EVENTS : 1
TOOTH_NO : 1
HAD_PUT : 1
USED_SKIN : 1
VITAL_SIGNS : 4
CONTROLLED_MEDICATION : 1
RETURN_CALL : 1
BARRETTS_ESOPHAGUS : 1
FOLLOWING_MEDICATION : 1
CP_WORSE : 1
TAB_FEB : 1
QUESTIONS_CONCERNS : 1
NOTHING_AND : 1
SELECTING_THE : 1
PERFORM_EVALUATION : 1
UPPER_ABOV : 1
PLACED_WITH : 1
WHEN_ASKED : 1
NURSING_ALERT : 1
DRINKS_STATES : 1
MA_VOC : 1
OBTAINED_THE : 1
TTP_EPIGASTRIC : 1
DIAGNOSIS_STANDARD : 1
TO_LEARN : 1
AND_PRESSURE : 1
AND_VERY : 1
ACTIVE_ADMINISTRATION : 1
MONITORING_ARE : 1
EDUCATION_UTILIZED : 1
HIS_STRESSORS : 1
PART_DIPPY : 1
ADDENDUM_SELECT : 1
AMBULATION_DISTANCE : 1
DESCRIPTION_PROCEDURE : 1
IS_EASILY : 1
PREVIOUS_AND : 1
ACTIVE_MAR : 1
FT_WHERE : 1
TRIAGE_NOV : 1
ON_IT : 1
JAPANESE_OF : 1
UD_REDUCTION : 1
RECORDS_YOU : 1
MAR_APPEARANCE : 1
THAT_HAVE : 1
PATIENT_CP : 1
FOR_ADMISSION : 1
WHY_COULDNT : 1
CURRENT_WORST : 1
AGO_HE : 1
RISK_HIGH : 1
DIAGNOSIS_RADIOTHERAPY : 1
CHANGE_IN : 3
HERE_REMOVAL : 1
AND_WAS : 4
ADDENDUM_LONG : 1
EXERCISE_ADVISED : 1
STATE_CONSISTING : 1
OF_MRIS : 1
HAS_EMPLOYMENT : 1
REHAB_AS : 1
IDEATION_VERBALIZED : 1
ALMOST_DAILY : 1
FLUIDS_SPHENOIDAL : 1
THE_TRANSFERRING : 1
MODERATE_PCP : 1
HOSPITAL_HE : 1
AT_SAME : 1
AND_DENIES : 1
BE_NORMAL : 1
MOBILITY_CORRELATION : 1
CLONAZEPAM_AT : 1
TIME_URINATING : 1
PRESSURE_INPATIENT : 1
TREATMENT_NOTE : 1
HYPERTENSION_INTERDISCIPLINARY : 1
THORACIC_COULD : 1
PT_USE : 1
OR_BECOMING : 1
NOT_HAD : 1
IN_EPIGASTRIC : 1
CHART_OUR : 1
LUNG_CANCER : 1
LEVEL_CURRENT : 1
ASSISTANCE_ASSIST : 1
TOTAL_INDEPENDENT : 1
MORNING_GOING : 1
WHO_WERE : 1
EACH_TWICE : 1
OF_TREATMENT : 1
ARE_AND : 1
AT_TOOK : 1
HISTORY_DIARRHEA : 1
GROUP_YES : 1
SERVICES_HE : 1
WERE_FROM : 1
FED_PUTTING : 1
VET_AT : 1
THANK_YOU : 1
MOVE_HIS : 1
MALE_VIA : 2
NO_WOUNDS : 1
STOP_FAMILY : 1
SINCE_DISCHARGE : 1
DOES_FAMILY : 2
FROM_RIGHT : 1
RIGHT_SIDE : 2
ANY_OTHER : 1
DIAGNOSIS_HEMATURIA : 1
MRIS_BEEN : 1
DISPATCH_GROUPS : 1
SIGNS_WEIGHT : 1
POSTVOID_HISTORY : 1
THAT_TAKEN : 1
EDGE_BED : 1
HE_DID : 2
WITH_STANDING : 1
PRESENT_PSA : 1
ACCEPTABLE_PATIENT : 2
CARE_MD : 1
RISK_UPON : 2
NORMAL_BEDREST : 2
MEDS_HAS : 1
SIMVASTATIN_WOULD : 1
ION_FOR : 1
KNOW_WAY : 1
OTHERS_PATIENT : 1
IS_ALERT : 2
THIS_PLACE : 1
MAKE_PREOP : 1
SO_FRIGHTENING : 1
HISTORY_UNEMPLOYED : 1
NOTICED_HES : 1
MEDICATION_IN : 1
NO_ORTHOPNEA : 1
AM_HAS : 1
DOCTOR_SHOULD : 1
THE_PRIMARY : 1
NEEDED_ALBUMIN : 1
DOCTOR_THOUGHT : 1
THE_STEPS : 1
ANY_COMPLAINTS : 1
PT_VSS : 1
EFFECTS_WITH : 1
STATE_ED : 1
PHYSICIAN_PERFORM : 1
INCLUDING_PC : 1
GATIFLOXACIN_MG : 1
OUTPATIENT_INCLUDING : 2
TSH_THE : 1
WT_LB : 2
TO_HEALTH : 1
ARE_CLEAR : 1
ABLE_INCREASE : 1
BECAUSE_DID : 1
THAT_DISCUSSION : 1
HYPERLIPIDEMIA_CHLORIDE : 1
WRITE_AN : 1
PROBLEM_MEDICATIONS : 1
PAIN_UNDUE : 1
IT_TO : 1
BODY_INDEX : 3
DUTY_STATUS : 1
ANKLES_TOES : 1
ORIGIN_OF : 1
ALBUTEROL_IPRATROP : 1
LE_LIMITED : 1
DOCUMENTATION_GIVEN : 1
DIABETIC_FOOT : 2
MEDS_WILL : 1
CAN_EXTEND : 1
ER_ENCOURAGEMENT : 1
HYPOVENTILATION_STUDY : 1
CANCER_RADIATION : 1
WORTH_HYDROCODONE : 1
ESOPHAGEAL_DEPRESSION : 1
WAS_PROVIDED : 1
TO_MORPHINE : 1
AND_DRY : 2
MEDS_CAN : 1
FEELS_IS : 1
SUGGESTED_WORK : 1
CARE_LOPC : 1
MONITOR_VSS : 1
NERVE_SC : 2
TYLENOL_FISH : 1
TASK_FOCUSED : 1
IS_HIGHLY : 1
MEDICATIONS_TAKING : 1
HOSPITAL_GIVE : 1
MEDICATIONS_VALVE : 1
SWELL_AND : 1
FINDINGS_NUMBER : 1
NEEDING_ASSISTANCE : 1
CAP_TAKE : 1
WOUND_FOR : 1
BE_PICKED : 1
PHARMACY_MEDICATION : 1
SITUATIONS_HAS : 1
UPSETTING_THAT : 1
OF_NERVE : 2
DEPRESSION_NOTE : 1
STUDY_THIS : 1
ROOMED_KRISTEY : 1
AID_BEDREST : 2
CLOSE_TO : 1
NURSE_FILED : 1
PHARMACY_EXERCISE : 1
NO_HERE : 1
POSITIVE_RESPONSES : 1
ABNORMALITY_NO : 1
SPEAKS_PT : 1
FLUID_FROM : 1
APPT_MILITARY : 1
EKG_BEDSIDE : 1
ORAL_MEMBRANE : 1
SW_THE : 1
DELTOID_REACTION : 1
IMMEDIATE_WITHIN : 1
CHRONIC_PROBLEMS : 1
NO_BRUISE : 1
PREOPERATIVE_DIAGNOSIS : 1
PATIENT_HAVE : 1
STATE_FELT : 1
ACUTE_BODY : 1
ADVANCE_INFORMATION : 1
CEREBRAL_ABNORMALITY : 1
TREATMENT_ADDENDUM : 1
SUPPER_HEIGHT : 1
IN_AN : 1
LIVES_OF : 1
HAS_HAD : 2
OF_AGE : 1
SENT_MICROSCOPIC : 1
OF_UPPER : 1
FROM_SPC : 1
IN_CLASS : 1
HIS_DECEASED : 1
BY_JAPANESE : 1
ON_THE : 7
CALL_THIS : 1
MED_PATIENT : 1
WITH_SWELLING : 1
WAS_THAT : 1
TOBACCO_FROM : 1
BECAUSE_HE : 2
TO_HELP : 1
LAST_INFO : 1
RELAPSE_PREVENTION : 1
OF_THE : 4
BACK_IS : 2
CAPSULE_TEST : 1
APPT_EST : 1
INFORMATION_BE : 1
MAKING_IT : 1
REDUCTION_DONE : 1
THE_MOTIVATED : 1
NURSING_MOBILITY : 1
DISTAL_MET : 1
DINNER_GOOD : 1
TO_EVALUATED : 1
WOUNDS_PRESSURE : 1
COMBAT_HAVE : 1
PATI_LOWER : 1
TREATMENT_CHANGES : 1
PND_ALERT : 1
DURING_MOBILITY : 1
IDENTIFIED_THE : 1
HAS_NOT : 2
PULSE_SOCIAL : 1
STARTED_ON : 1
THAT_OCCUR : 1
CP_SOB : 1
SYMPTOMS_ANXIETY : 1
LIMITATION_DX : 1
APPT_DM : 1
LAST_UDS : 1
LASIX_HE : 1
NAVIGATE_STEPS : 1
LITTLE_BIT : 1
AND_REVIEWED : 1
VET_TO : 1
WASHED_IN : 1
YES_YOU : 1
WILL_HELP : 1
WHICH_PATIENTS : 1
MARRIED_DEPRESSION : 1
THE_STAGES : 1
IDEATION_THIS : 1
DISCUSSION_WITH : 1
OF_MEDICATIONS : 2
PT_HE : 1
READY_TO : 1
REVIEW_CHRONIC : 1
AROUND_MONTHS : 1
AND_NURSE : 1
WITH_HIS : 1
ADMISSION_YES : 1
SOURCES_FOR : 1
ANY_NIGHTMARES : 1
ME_UPSET : 1
EXPIRATION_JULY : 1
ND_PART : 1
TO_EXCEED : 2
PAIN_WANTED : 1
TO_EYES : 1
AFLUABA_REACTION : 1
WITH_IDEATIONS : 1
REDUCE_PERSISTENT : 1
EDUCATED_ABOUT : 1
PROVIDED_PATIENT : 2
ANYTHING_TO : 1
PAST_FULL : 1
WILL_CONTINUE : 1
SHORTNESS_BREATH : 3
RISKS_AND : 1
SPENT_PATIENTS : 1
FROM_SOURCES : 1
MED_TEAM : 1
ENACT_ADVANCE : 1
ASSESSMENT_SCREENING : 1
INSTRUCTION_HAVE : 1
CALL_NURS : 1
ENCOUNTER_LOCATION : 1
TH_DISTAL : 1
ROOM_TO : 1
WITH_ABOUT : 1
EXIT_RECEIVED : 1
HE_OF : 1
WORKING_SOCIAL : 1
TIME_FROM : 2
ABOUT_PEOPLE : 1
YOUR_HEALTH : 2
YOUR_OR : 2
OLD_FSOME : 1
SGPT_WAS : 1
AREA_THICKNESS : 1
ORIENTED_TO : 2
HAS_DOCUMENTATION : 1
WHERE_HE : 1
BEFOR_SEEING : 1
FLUID_PATIENT : 1
NEWLY_ORDERED : 1
HIS_TRUNK : 1
CONSULT_BY : 1
HAD_NUTRITION : 1
AND_IDEATION : 1
FACILITY_CARE : 1
AZ_LN : 1
PAPERWORK_EVEN : 1
OF_THEM : 1
OTHER_TYLENOL : 1
LEARNING_NONE : 1
CORONARY_DISEASE : 1
THIS_RTU : 1
ULCERS_ANY : 1
TRUE_AND : 1
NOTE_OF : 1
DR_PT : 1
BED_FOR : 1
COOPERATIVE_FAIR : 1
TIME_IDEATION : 1
SHOULDER_TO : 1
HYPERLIPIDEMIA_POTASSIUM : 1
RESOLVING_FYI : 1
FOR_RECOVERY : 1
THIS_DIFFICULTY : 1
HE_DIABETES : 1
VERBALIZES_OF : 1
DATED_SECONDARY : 1
AND_HELP : 1
AND_ACTIVE : 1
ATTENTION_FROM : 1
ALSO_INDICATES : 1
ATTENDED_THE : 1
TO_RILEY : 1
AMBULATORY_RATION : 1
MOUNTAIN_HOSPITAL : 1
OFFER_HIM : 1
VS_IF : 1
LAST_PT : 1
COUPLE_OF : 1
SMILE_EXPRESSING : 1
PAIN_IN : 1
HH_SERVICES : 1
ENDS_TRIUMPH : 1
BEEN_WITHIN : 1
SEVERE_ADDENDUM : 1
WORKER_WRITE : 1
YEAROLD_MALE : 1
TYPE_OF : 1
AT_FACILITY : 1
BEEN_TAKING : 1
THE_ACTIVITY : 1
MOOD_LABILITY : 1
OF_DECEMBER : 1
VA_MEDS : 1
AMBULATORY_WEIGHT : 1
ON_LUBIPRO : 1
PSYCHOLOGY_OFTEN : 1
IDEATION_ONE : 1
OR_DRINKS : 1
PEOPLE_VISITED : 1
AND_GENDER : 1
PHYSICAL_THERAPY : 2
MUCUS_SOB : 1
TO_ADVANCE : 1
PATIENTS_NURSING : 1
NO_PULSE : 1
ETOH_HX : 1
RECOVERY_MEANS : 1
FEB_APNEA : 1
IN_WT : 1
HOUR_FOR : 1
MEDICATION_PAIN : 1
PRESENT_DURING : 1
RAMSAY_SCORE : 1
PATIENTS_WANTED : 1
SEEING_HIM : 1
SIMVASTATIN_TAB : 1
TREATMENT_ONLY : 1
TO_STIMULANT : 1
NOT_DISPOSITION : 1
WIFE_AND : 2
SIGNIFICANT_HISTORY : 1
EVERY_TIME : 1
NECK_TREATMENT : 1
TO_DISCHARGE : 1
IS_AND : 1
VERIFIED_COULD : 1
CANCEL_YOUR : 1
ADDENDUM_NONE : 1
HAS_BOUTS : 1
ADDENDUM_VERBALIZES : 1
EVALUATION_THE : 1
OF_CYST : 1
DIAGNOSIS_NO : 1
NOTE_MARRIED : 1
MCG_ORAL : 2
HIM_ST : 1
DOCUMENTED_THIS : 1
LUBIPRO_ORAL : 2
IS_AS : 1
INFLUENZA_SYMPTOMS : 1
PATIENT_WAS : 2
PT_REQUESTING : 1
DISEASE_NO : 1
OF_REPORTS : 1
BEEN_REFILLED : 1
VET_STATING : 1
ANXIETY_ACTIVE : 1
CUT_MEDICATION : 1
BURSITIS_PLAN : 1
SSOME_OF : 1
HEART_AND : 1
PATIENT_VS : 1
OF_FIBRILLATION : 1
RIGHT_MVA : 1
IS_PATIENT : 2
NURS_VESTING : 1
PRECAUTIONS_WILL : 1
ACCEPTED_BY : 1
THAT_AN : 2
HE_BRING : 1
TAKEN_ANY : 1
CM_ACTIVE : 1
PENDING_EXPRESSING : 1
PATIENT_GIVEN : 1
EXERTION_AMBULATION : 1
WEEK_MAY : 1
WOULD_THAT : 1
CC_SALINE : 1
GAIT_TRANSFERRING : 2
TEST_RESULT : 1
CHANGE_HOME : 1
GRADUALLY_UNTIL : 1
MEMBRANE_HAVING : 1
TRANSPORTATION_OF : 1
PSYCH_EVALUATOR : 1
PATIENT_THE : 1
DM_OSA : 1
KRISHNASWAMY_PC : 1
EMOTIONAL_PSYCHOLOGICAL : 1
PATHOLOGY_REPORT : 1
DOES_THE : 1
LAST_PAIN : 1
ALERT_JR : 1
APPOINTMENT_NOTED : 1
PAIN_SPECIALIST : 1
FLUID_BE : 1
COMPUTER_INDEPENDENTLYX : 1
BIOPSY_DATE : 1
HAD_PAIN : 1
REPORTS_HE : 1
OS_SWSDISCHARGE : 1
JAW_SWELLING : 1
NURSE_FOR : 1
ANTIBIOTIC_THERAPY : 1
INPATIENT_NOTE : 1
ACCIDENT_IMMMUNIZATION : 1
MEDICATIONS_LASIX : 1
WITH_PHYSICIAN : 1
SENT_FOR : 1
CARE_REGIMEN : 1
GET_VETERAN : 1
LOW_POSITION : 1
SOB_WITH : 1
AS_AND : 1
ACTIVE_LOR : 1
WITH_ASSISTANCE : 1
EXTERNAL_RIGHT : 1
NEURO_SENSATION : 2
INTERDISCIPLINARY_PATIENT : 1
LOCATION_MEDIASTINUM : 1
CHART_DOCUMENTATION : 1
RECHECK_COPD : 1
CARE_REVIEWED : 1
THIS_YOU : 1
SEEING_AND : 1
SHOULD_COMPARED : 1
RESIDENTS_OF : 1
BLOOD_INPATIENT : 1
MALATHI_PC : 1
LEADER_AND : 1
SOMEONE_TO : 1
KNOWN_ABOUT : 1
PC_PRIMARY : 1
MOISTURE_MOIST : 1
IN_LEGS : 1
PASSED_ON : 1
FROM_COMPLETED : 1
SUMMER_WITH : 1
DRAINS_PROBLEM : 1
ACTIVE_MONFRI : 1
VETERAN_RECOMMENDED : 1
VERIFY_THIS : 2
FORMS_FROM : 1
TIME_DISCHARGE : 1
PER_LEVEL : 1
EACH_NOSTRIL : 1
CHAIR_WITH : 1
SATSUN_BLOOD : 1
AND_CLONAZEPAM : 1
PRESENT_CHEST : 1
YOUR_NURSE : 1
TO_CANCEL : 1
INJ_AMIODARONE : 1
TID_DOSING : 1
EDUCATION_PATIENT : 1
AFFECT_YOUR : 2
DEPENDING_FINDINGS : 1
TEXT_PB : 1
ACHIEVE_MAINTAIN : 1
DISPLAYED_ABILITY : 1
PROCESSING_CONNECTION : 1
MIX_WATER : 1
PAIN_HISTORY : 2
HAVE_VETERAN : 1
ONE_GAIT : 1
EVER_HAD : 1
ICDCM_DISPOSITION : 1
TAKE_TABLETS : 2
VETERAN_IS : 1
YOU_HOW : 1
KG_ELBOW : 1
HERE_EVALUATION : 2
THIS_HE : 2
DOCUMENTATION_RECORDS : 1
TO_RELAX : 1
SYMPTOMS_CHEST : 1
OCT_RESPIRATION : 1
BUT_ABLE : 1
IMPINGMENT_SYND : 1
SPONDYLOSIS_CONSULTANTS : 1
ULCER_RESOLVED : 1
THIS_VISIT : 2
EASY_NO : 1
READING_APPOINTED : 1
CLINIC_MULTIPLE : 1
SYMPTOMS_OF : 1
TO_YOUR : 2
SUPPLIES_AMARILLO : 1
LET_HIM : 1
SC_EXTERNAL : 1
DENIES_FEELINGS : 1
CHRONIC_THIS : 1
SCREENING_ORIGIN : 1
VETERANS_IN : 1
VERIFY_PATIENT : 2
BEDREST_LB : 1
EYE_CORNEA : 1
RANGE_DRAINAGE : 1
OPD_NURSING : 1
ACCEPTABLE_TO : 2
MAINTENANCE_OCCURS : 1
THIS_WEEKEND : 1
HAS_ANSWERED : 2
OLD_FOR : 1
FOR_ND : 1
CANCER_HAS : 1
PROCEDURE_HE : 1
IER_AM : 1
TUMOR_THE : 1
IS_OPERATION : 1
MALE_SAO : 1
MEDICATIONS_STATUS : 3
PHARMACY_COUNSELING : 1
EXERCISE_EDUCATIONAL : 1
OF_PT : 2
WITH_PCP : 1
PLEASE_YOUR : 2
AND_MH : 1
IS_DECLINED : 1
ESOPHAGEAL_RADIATION : 1
AN_IS : 1
MAKE_NURSING : 1
HX_OF : 1
IS_IT : 1
CARE_NURSE : 1
ML_TKO : 1
TO_WRITE : 2
SIGNIFICANT_OTHER : 2
EXTRACTION_ERUPTED : 1
POWER_OF : 1
IS_NOT : 1
TO_MR : 1
MODERATE_SEDATION : 1
WORSE_ADDENDUM : 1
INTERVENTIONS_UA : 1
OF_PAIN : 4
RESPIRATIONS_REGULAR : 1
VERBALIZES_UNDERSTANDING : 2
DISTRACTIBLE_NA : 1
CAR_TRUNK : 1
REQUEST_ON : 1
RESULTS_PLEASE : 1
TO_HAD : 1
RESULTS_CALL : 1
TOTAL_NOT : 1
TAKE_GRAPEFRUIT : 1
CONTACT_NURSE : 1
NSTEMI_AID : 1
GAME_AT : 1
SON_DESCRIBES : 1
PATIENT_HEALTH : 1
PATTI_RN : 1
EXTEND_ALL : 1
BODY_STANDS : 1
CANE_MIDLINE : 1
COUMADIN_OF : 1
WITH_LOWER : 1
THROUGH_ASKED : 1
SO_HYPERLIPIDEMIA : 1
PCCNURSING_VITAL : 1
PAMPHLET_POSTION : 1
EYE_NO : 1
ENCOUNTER_VISIT : 1
BANDAGES_DAILY : 1
GOAL_VERBALIZES : 1
FALL_STANDARD : 1
PATIENT_PULSE : 2
IF_MED : 1
CHEST_RADIATION : 1
FOLLOWING_LIST : 1
ILLNESS_MALE : 1
THE_MONTH : 1
WITH_PHARMACY : 1
FROM_PEERS : 1
BE_UP : 1
COULD_BE : 3
THE_THANK : 1
TO_ENDOSCOPIC : 1
THE_IARD : 1
REMAINS_PRSE : 1
DESPERATE_HE : 1
SERVICES_THIS : 1
HAS_STARTED : 1
THIS_PULSE : 1
PT_PLACED : 1
ALL_OF : 1
UNSPECIFIED_OUTPATIENT : 1
FROM_THE : 3
ELECTRONICALLY_FILED : 1
TASKS_BE : 1
FIBER_SUPPLEMENT : 1
ENDO_TELEPHONE : 1
TC_FROM : 1
CM_DATE : 1
SCHEDULED_HE : 1
INSTRUCTION_PROVIDED : 1
THEM_SO : 1
BURNING_URINATION : 1
IN_BOTH : 1
PROVIDED_BY : 1
SOCIETY_THERAPEUTIC : 1
TO_DRESSING : 1
OF_CANCER : 2
AVAILABLE_TO : 1
AFFECT_HEALTH : 2
PROCEDURE_REMOVAL : 1
SERVICES_TO : 1
OTHER_BELONGINGS : 1
THIS_SPOKE : 1
GOAL_DISCHARGE : 1
BEEN_AGREE : 1
NOTE_EMOTIONAL : 1
SUPPLIES_TELEPHONE : 1
APPT_THIS : 1
HYPOVENTILATION_FROM : 1
JUST_STANDING : 1
DID_BRING : 1
HOWEVER_SHE : 1
CHARLOTTE_SUS : 1
BRADEN_SCALE : 1
RECEIVED_STATING : 1
OFF_AT : 1
RELAPSE_AND : 1
PSYCHIATRIC_OF : 1
IS_MAKING : 1
INQUIRE_AS : 1
PLEASE_CALL : 2
LMSW_SPC : 1
ONE_TRANSFERRING : 1
TRANSPORTATION_PROZAC : 1
REGION_AS : 1
OPH_SOLN : 1
SPONDYLOSIS_IF : 1
VET_HAS : 1
TO_WERE : 1
HELP_MR : 2
VOMITING_USE : 1
PUTTING_CLOTHING : 1
PLACED_AS : 1
IN_HOSPITAL : 2
BIT_LAST : 1
OUT_OF : 1
DATE_BIRTH : 1
BED_THE : 1
NERVE_STUDY : 1
PATIENT_RISK : 1
HE_CAME : 2
SWEATS_COUGH : 1
TIMES_BED : 1
COMPLETED_CALLER : 1
EXPIRED_OUTPATIENT : 1
EXPERIENCES_VETERANS : 1
INCLUDING_AMARILLO : 1
THE_CLINIC : 2
PHYSICAL_DAILY : 1
PSYCH_AT : 1
PROCEDURE_INVOLVES : 1
SHOES_BED : 1
OFFICE_TO : 1
TEAM_NOTE : 1
THIS_AFTERNOON : 1
ENCOUNTER_SHOT : 1
HOURS_SECONDARY : 1
NURSING_EXIT : 1
TELEMETRY_EXERTION : 1
WEBSITE_TIPS : 1
AS_STATUS : 1
RELAX_MORPHINE : 1
FROM_FAMILY : 1
RISK_PAIN : 2
LONG_NEED : 1
DYSPHAGIA_ANATOMICAL : 1
IN_ENCOUNTER : 1
OF_ALTERED : 1
TWICE_AS : 1
REMOVAL_CYST : 1
HOME_SERVICES : 1
GAIN_FROM : 1
WALKS_BRISKLY : 1
OF_RETIRING : 1
SOLN_DROP : 1
PENDING_SMILE : 1
HOME_CARE : 1
LORAZEPAM_MG : 2
NOTE_PROGRESS : 1
THIS_WOULD : 1
IMPROVING_THE : 1
PARTICIPATED_PSYCHOEDUCATIONAL : 1
IMAGING_CONSULT : 1
EXCHANGE_VERSION : 1
NOT_IDENTIFY : 1
METOPROLOL_MG : 1
HOSPITAL_STAFF : 1
AT_DEL : 1
PSA_WAS : 1
HAS_TRANSFERRED : 1
KNEES_ANKLES : 1
SUMMER_EMPLOYMENT : 1
PRIMARY_INVOLVING : 1
TIMES_TWO : 1
THIS_TIME : 8
MRS_CODE : 1
PREINSTRUCTIONS_GOLYTELY : 1
NEED_TO : 1
HYDROCODONE_IT : 1
VS_BP : 1
BEEN_THROUGH : 1
CLINIC_PAIN : 1
PUFFS_ORAL : 1
SEEN_AND : 1
SEDATION_BETTS : 1
MY_HAVE : 1
BLOOD_TEST : 1
HOURS_DIAGNOSIS : 1
MONITOR_ATRIAL : 1
INCE_PROVIDER : 1
PLANS_TO : 1
EC_TAKE : 1
OFF_AM : 1
ORIENTED_BOWERMAN : 1
REALITY_CLINICAL : 1
PATIENT_SSN : 1
THE_BETTER : 1
PRODUCTIVE_COUGH : 1
COMPUTER_ADDENDUM : 1
RIGHT_LE : 1
PCP_NOV : 1
ORIENTED_WORK : 1
DISCHARGE_TO : 1
PATIENT_ABLE : 1
HE_WORK : 1
TID_OF : 1
INFLUENZA_BUT : 1
SAYS_WILL : 1
EDUCATION_RISKS : 1
MEDICAL_PROBLEMS : 1
TOBACCO_USER : 1
MH_ASSESSMENT : 1
COULD_MAKE : 1
SERVICE_IF : 1
ADMISSION_CPT : 1
HIS_DIZZINESS : 1
NEEDS_KNOWN : 1
VIA_PODIATRY : 1
MG_CAPSULE : 1
FAIR_CONTACT : 1
HEPLOCK_AFTER : 1
BIL_EPITHELIALIZATION : 1
REEVAL_FLUIDS : 1
AND_REQUESTED : 1
REMINDER_INCREASED : 1
PRE_VISIT : 1
YOUR_PHYSICIAN : 2
HER_WHO : 1
TRANSFERRED_TO : 1
GATIFLOXACIN_GUAFENESIN : 2
RN_REHABILITATION : 1
HUD_VASH : 1
PRESENTED_TO : 1
TKO_START : 1
NONE_ENDO : 1
PT_WAS : 4
AWARE_OF : 2
USED_NOT : 1
AT_BIOPSY : 1
MUTUAL_PATIENT : 1
SITTER_DISCHARGED : 1
FOR_WITHIN : 1
BLOOD_PULSE : 1
IN_ORDER : 1
TIME_DIFFICULTY : 1
PSYCHOLOGY_REPORT : 1
REGULARY_THE : 1
OR_MHSBDI : 1
DOCUMENTED_IN : 1
SITE_INTACT : 1
IN_LB : 1
LOCATION_GASTROENTEROLOGY : 1
COULD_FAXED : 1
PER_ORTHOPEDICS : 1
FROM_TAKEN : 1
LN_VERBAL : 1
PATIENT_SIGNIFICANT : 1
OPERATE_WILL : 1
RESULTS_OF : 1
CHRONIC_AND : 1
WAS_FRIGHTENING : 1
ELEVATED_RETURN : 1
ORTHOPNEA_PND : 1
CC_TH : 1
IS_CONFUSED : 1
PROBLEMS_PATIENT : 1
KNEE_THIS : 1
SKIN_WARM : 1
IN_FACILITY : 1
SECONDARY_NO : 1
HH_HE : 1
NO_AT : 1
MG_DEXTROSE : 1
HOURS_FROM : 1
EYE_ODPUNCTURE : 1
RISK_HAS : 1
YOU_SCHEDULED : 1
OFFERS_COUNSELING : 1
BEDSIDE_IN : 1
AGE_DIARRHEA : 1
TEAM_HIS : 1
APNEA_CONSISTING : 1
MINUTES_OF : 1
RIGHT_RETINAL : 1
VISITED_AS : 1
ULCER_PREVENTION : 1
EDUCATION_LUBIPRO : 1
IS_PRECAUTIONS : 1
OR_ASK : 1
FLUID_MAY : 1
IS_STATION : 1
BOWERMAN_KAREN : 1
TO_EXERCISE : 1
COMBAT_VETERANS : 1
BLACK_MALE : 1
WORST_STATUS : 1
CHRONIC_ISCHEMIC : 1
PATIENT_ALERT : 1
FROM_ENVIRONMENT : 1
BEDTIME_DO : 1
REVIEW_OF : 2
BIL_THERE : 1
DONATION_DISEASE : 1
WT_KG : 2
MITRAL_INSUFFICIENCY : 1
CLASS_IV : 1
KG_NONE : 1
TO_REGARDING : 1
YES_CORONARY : 1
THE_BATHROOM : 1
AND_WILL : 3
LUMOSACRAL_AND : 1
NURSE_REGARDING : 1
THIS_NOTE : 1
HE_THAT : 1
RESPIRATION_UNSCHEDULED : 1
WELL_WAS : 1
MOVEMENT_NONE : 1
WALKIN_FOR : 1
HE_WITH : 1
OSA_LUBIPRO : 1
EASY_SOB : 1
BREATH_TO : 1
IN_CM : 4
TO_HER : 1
HE_MAY : 1
AND_EFFECTIVE : 1
FASTING_LAB : 1
INDEPENDENT_NOT : 1
MONTHS_KNOWN : 1
NO_VOMITING : 1
BUT_HIS : 1
IS_AWARE : 1
BASIS_THAT : 1
PRESENT_COMPLAINT : 1
APPE_DIABETES : 1
PATIENT_AND : 1
CAN_BEFOR : 1
THE_ACCIDENT : 1
MEDS_NOT : 1
NOT_ETOH : 1
YEAROLD_PATIENT : 1
MET_HEAD : 1
NO_SUICIDALITY : 1
OLD_DAUGHTER : 1
DIRECTIVE_YEAR : 1
DRAINAGE_AT : 1
PRN_PATIENT : 1
SC_LUMOSACRAL : 1
AND_RECENTLY : 1
TO_ANOTHER : 1
DISCHARGE_JUN : 1
EXPLANATION_FOR : 1
AFTER_DISCHARGE : 1
MG_TAB : 5
IN_THE : 10
APT_DR : 1
LEAVE_EXAM : 1
OF_MIGRAINES : 1
TO_TRIAGE : 1
REPORTS_BASIS : 1
PT_PAIN : 1
PRURITUS_ITCH : 1
PAIN_AND : 1
PAIN_MONTHS : 1
SCREENING_TOBACCO : 1
REPORT_OFTEN : 1
THE_OFF : 1
WILL_NHCU : 1
MY_STOOL : 1
IN_WATER : 1
WHOLE_BREAD : 1
MARRIED_SPC : 1
HAS_GIVEN : 1
ATIVAN_QUESTIONS : 1
AZ_VERDE : 1
CLONAZEPAM_AND : 1
BEFORE_AND : 2
UP_MORE : 1
INTERDISCIPLINARY_OF : 1
WITH_VET : 1
OR_ADDENDUM : 2
HEART_PCCTELEPHONE : 1
HIS_DIARRHEA : 1
EKG_TAKEN : 1
MH_PATCHROTATE : 1
COPD_ADDENDUM : 1
PROBLEM_NO : 1
DEC_MED : 1
FAMILY_ADVISED : 1
NAMEJOE_LONGSTREET : 1
HIS_INDEPENDENT : 1
NOT_HAVE : 2
THIS_CARDIOVASCULAR : 1
LIMITATION_PLEASE : 1
BY_WIFE : 1
OF_SIDE : 2
VETERANS_BEEN : 1
HOSPITAL_WITH : 1
KAREN_PHYSICIAN : 1
OTHER_WHY : 1
ORGAN_MG : 1
CRISIS_AND : 1
MEALS_THEN : 1
STATES_MAY : 1
FIND_THAT : 1
MORNING_TO : 1
BATH_PT : 1
GOALWHAT_PAIN : 1
PRESENTS_TO : 2
ULCERS_OTHER : 1
ITCH_YO : 1
PHYSICIAN_TO : 2
NO_ADDITIONAL : 1
GET_VISIT : 1
ESOPHAGUS_AT : 1
TRIAGE_MH : 1
INVOLVING_REGION : 1
PRN_IV : 1
SOB_ALONG : 1
IN_CAR : 1
APPT_PRIMARY : 1
TAKE_PAIN : 1
ASK_TO : 1
PLAN_EDUCATION : 1
INCREASED_SALIVA : 1
CALL_AM : 1
DOCUMENTATION_OUR : 1
AROUND_NECK : 1
ACUTE_SOI : 1
LOC_ANICT : 1
APPLICATIONS_PT : 1
STATED_HIS : 1
TEAM_THAT : 1
INCLUDE_ALSO : 1
MG_CLONAZEPAM : 2
BE_TO : 2
WERE_OBTAINED : 1
INTERVENTIONS_ALERT : 1
WORK_AFTER : 1
DISCHARGE_PLANS : 1
ATTENDING_THE : 1
PT_LET : 1
PARTICIPATED_IN : 1
WOUND_CLINIC : 1
IS_NONEXISTANT : 1
MEDS_TO : 1
HEALTH_ACTIVE : 1
REHABILITATION_SPECIALIST : 1
YEAR_HISTORY : 1
AMBULATE_YOUR : 1
FY_SAME : 1
VETERAN_BEEN : 1
ORAL_PUFF : 1
MEDICAL_APPT : 1
NO_DATE : 1
ASSIST_AT : 1
NOT_TO : 4
FIRST_WITH : 1
THIS_WRITER : 1
OF_UNDERSTANDING : 2
MEDICATIONS_PLEASE : 1
HE_HAD : 4
HE_OUT : 2
WE_BE : 1
FEEL_WE : 1
DISCUSSION_PT : 1
NECK_JAW : 1
ON_CLONAZEPAM : 1
WHO_ARE : 1
TO_WATCH : 1
CC_DIARRHEA : 1
NOV_RETURN : 1
PULSE_ADVISED : 1
WAS_CALL : 1
AT_ENCOUNTER : 6
IDENTIFY_ON : 1
CYST_FOREHEAD : 1
THOUGH_UNDERWENT : 1
NOTE_WILL : 1
CALLING_ACCEPTED : 1
DEVELOPED_PAIN : 1
ADVISED_GRADUALLY : 1
PSOME_PRIMARY : 1
DERMATOLOGY_CLINIC : 1
MAY_GO : 1
SOME_APNEA : 1
WAS_NEEDED : 1
TO_YOU : 2
IS_YOUR : 1
FOLLOWUP_RESPIRATIONS : 1
CLINICAL_LEADER : 1
LIST_MEDICATIONS : 1
ON_PRE : 1
EPISODIC_COMPLEX : 1
YOU_EVER : 1
FORMS_OUR : 1
HOURS_IF : 1
GROUP_NO : 1
BENIGN_REC : 1
THAT_NOTE : 1
ACCOMPANIED_HIS : 1
ENCOUNTER_RA : 1
MEDICATIONS_BOTH : 1
ORDER_TO : 1
AND_NURSING : 1
SUBSTANCE_REDUCE : 1
ATYPICAL_METABOLIC : 1
MINIMAL_ASSISTANCE : 1
THIS_EACH : 1
BROUGHT_OF : 1
DECISIONMAKING_CAPACITY : 1
JUDY_IT : 1
MISSED_APPOINTMENTS : 1
USE_PULSE : 1
ACTIVE_REM : 1
EST_APPT : 1
HE_REQUESTED : 1
SHOWS_ATRIAL : 1
NAMEJOE_PHONE : 1
CLONIDINE_AT : 1
PATIENT_DEMEROL : 1
DRINKING_ETOH : 1
THAT_TOBACCO : 1
GO_BACK : 1
BY_SURGERY : 1
ORTHO_PREOP : 1
DOCUMENTATION_IS : 1
NO_OF : 1
WITH_GRAPEFRUIT : 1
NICOTINE_DEPENDENCE : 1
SHORT_TEST : 1
THESE_RESULTS : 1
EPIS_HOW : 1
ISSUE_DATE : 1
THAT_SHE : 1
SELF_SIGNIFICANT : 1
BE_AND : 1
DIAGNOSIS_OBJECTIVES : 1
LOCATION_DESCRIPTION : 1
ABNORMALITY_LETHALITY : 1
THE_ONLY : 1
VOC_SPECIALIST : 1
WORSENS_THIS : 1
DIMINISHED_BIL : 1
BUT_IN : 1
ADMITTED_WITHIN : 1
WELL_THE : 1
OR_LIVING : 2
TO_PRN : 2
CLONAZEPAM_HS : 1
FOLLOW_ADVICE : 1
HIGH_RISK : 1
FINGERS_THE : 1
LEAVE_PAPERWORK : 1
WAS_IDENTIFY : 1
SAME_HR : 1
COVERING_PCP : 1
OBSTRUCTION_FOLLOWING : 1
PHYSICIAN_ON : 1
IV_PUSH : 1
LEVELS_AMONG : 1
ID_GUN : 1
STUDY_CALL : 1
IPRATROP_PO : 1
EYE_MOVEMENT : 1
WILL_MAILED : 1
DISCHARGE_AND : 1
YOU_AND : 1
EXPIRED_MEDICATIONS : 1
IODINATED_IN : 1
REFER_CARE : 1
NSTEMI_ESOPHAGEAL : 1
REGION_WELL : 1
THE_RELAXATION : 1
APPROPRIATE_PEOPLE : 1
REASON_CALL : 1
COMPLICATIONS_ENDO : 1
DEXTROSE_ACTIVE : 1
BANDAGES_CHANGED : 1
NOW_DOSE : 1
EPISODE_AND : 1
IDENTIFIED_RELATIONSHIP : 1
CC_AGE : 1
OVERSIGHT_AND : 1
MURMUR_DATE : 1
TRIUMPH_AND : 1
ESOPHAGEAL_CA : 1
TAB_MG : 3
BY_MCCULLY : 1
ED_HEIGHT : 1
PRODUCTS_FROM : 1
MEATUS_IS : 1
HE_DOES : 1
IDENTIFIED_AMBULANCE : 1
WEBSITE_HYPERTENSION : 1
UNDUE_NO : 1
STUDY_TITLE : 1
MILITARY_SERVICE : 1
EFFORTS_ARRANGE : 1
ALLERGIES_CARE : 1
OFFICE_DIAST : 1
TALKED_WITH : 1
PT_TREATMENT : 1
THAN_MEDS : 1
TIME_PT : 1
OTHERS_EDUCATION : 1
LITTLE_OF : 1
SWELLING_OF : 1
GOING_MOVE : 1
NIGHTMARES_ABOUT : 1
OF_AVAILABLE : 1
BUPROPION_HCL : 1
GETTING_WORSE : 1
TAKE_ONE : 2
STATE_THE : 1
FACILITY_APPOINTED : 4
EDUCATION_NOTE : 1
BETTS_DENIES : 1
AT_ACTIVE : 1
NOTE_WITH : 1
PRE_OPD : 1
WILL_CONTACT : 3
FAMILY_LIVING : 2
TRAUMA_NEXT : 1
THEY_STILL : 1
ELBOW_ORTHOPEDICS : 1
OF_AT : 3
AN_STATES : 1
AND_EPIS : 1
ALL_ML : 1
ABOUT_SITUATIONS : 1
THE_VITAL : 1
NAUSEA_NO : 1
USED_BY : 1
PROCESS_NONE : 1
BUT_DIMINISHED : 1
SOUNDS_CLEAR : 1
CONFUSED_HIGHLY : 1
DOING_WELL : 1
TEAM_YEAR : 1
LATERAL_MOVEMENT : 1
READING_WAS : 1
OR_NEED : 1
JUNCTIONAL_WITH : 1
INPATIENT_MEDICATIONS : 3
AS_THOUGH : 1
INDEX_APR : 1
ATTENDING_AND : 1
INCE_IS : 1
IN_ESOPHAGUS : 1
USE_FY : 1
FOR_SO : 1
OR_TO : 2
STATE_LONGSTREET : 1
CONTACT_RELAYED : 1
FLP_TOOTH : 1
HER_BACK : 1
RELATIONSHIP_PATIENT : 1
ELABORATION_MEDICATION : 1
WORKER_TO : 1
AND_THAT : 2
GUAFENESIN_MG : 1
SKILL_COMPLETING : 1
MEDIAN_NERVE : 2
NEAREST_ROOM : 1
THE_STAFF : 1
DESIGNATES_HIS : 1
METFORMIN_MG : 1
SETTING_IN : 1
INTAKE_ACHIEVE : 1
ESOPHAGUS_DIAGNOSIS : 1
BH_FOLLOWUP : 1
PCP_HERE : 1
FELICIANO_LOPEZ : 1
HIM_ABOUT : 1
ENEMA_YESTER : 1
TO_OPERATING : 1
HE_SAYS : 1
ORTHOPEDICS_STRESSOR : 1
AUG_MALE : 1
FEVER_NIGHT : 1
DAUGHTER_ERDMAN : 1
PAIN_NO : 3
DISORDER_UNSPECIFIED : 1
RESOLVING_PCP : 1
PT_STATES : 1
ADVISED_TO : 2
ORAL_QH : 1
HAND_GRASP : 1
SELF_REPORT : 1
WORTH_OF : 1
EVERY_HE : 1
WALKS_MINUTE : 1
SYMPTOMS_OCCUR : 1
HE_DO : 1
WAS_GIVEN : 2
RETIRING_THE : 1
SAID_USE : 1
MOST_THE : 1
DOCUMENTATION_COMMENT : 1
HAVE_FOR : 1
TOBACCO_USE : 2
ESOPHEGAEAL_ADENOCARCINOMA : 1
ASSISTANCE_OF : 1
MG_QH : 2
STATE_APNEA : 1
OF_PATIENTS : 1
OF_ON : 2
THEN_RETURNED : 1
VETERANS_ADMINISTRATION : 1
DOOR_VITAL : 1
EFFECT_USE : 2
AND_HAND : 1
WITH_HERE : 1
PER_AND : 1
STUDY_COMPLETED : 1
ILL_BELONGINGS : 1
CONSULT_NOTE : 1
FROM_SETTING : 1
CHANGES_TO : 3
MOBILITY_YES : 1
SC_WEIGHT : 1
INFLUENZA_REMINDER : 1
THAN_PHONE : 1
TO_OF : 2
TO_SPEAK : 1
AS_TOLERATED : 1
PHYSICIAN_MG : 1
MENTAL_WALK : 1
DAILY_RISK : 1
CDCS_WEBSITE : 1
OF_ANY : 2
LEG_PAIN : 1
ABUSE_WT : 1
GETTING_THE : 1
ON_LIGHT : 1
LEVELS_DIFFERENT : 1
THE_PROBLEMS : 1
EDUCATION_CAP : 1
AS_INDICATED : 1
UPON_CHANGE : 2
REHABILITATION_THE : 1
TOLERATED_PROVIDER : 1
PHYSICIAN_CHART : 1
RECONCILIATION_PERFORMED : 1
OR_ALMOST : 1
OUTDOORS_AS : 1
CURRENT_USER : 1
LB_ADDENDUM : 1
THE_WAS : 4
INDIVIDUAL_SESSION : 1
PHONE_WITH : 1
SITTING_CHAIR : 1
IMP_TOOTH : 1
NURSE_IF : 1
FOR_HEPLOCK : 1
URINAL_ACTIVE : 1
YO_PT : 1
INTERVENTIONS_PLAN : 1
HEMORRHOIDS_ADVISED : 1
THAT_NO : 1
SCREEN_FY : 1
REQUEST_PHYSICIAN : 1
ONE_COUNSELING : 2
TEST_AT : 1
UNDERSTANDING_PHYSICIAN : 1
TO_THEM : 1
DISCHARGE_TAKE : 1
DEPRESSION_THIS : 1
IP_NURSING : 1
ALERT_ICU : 1
SUBSTANCE_ABUSE : 1
INHALE_CAPSULE : 1
AND_FULL : 1
PAIN_HOWEVER : 1
MASS_INDEX : 3
ACCESSED_BY : 1
TO_KAREN : 1
BY_JUDY : 1
WAS_VISIT : 1
SAYS_HYDROCODONE : 1
RIGHT_PER : 1
ACCIDENT_HE : 1
EFFORTS_TO : 1
AN_ATTEMPT : 1
WAS_NOT : 3
THEM_COPD : 1
THICKNESS_THAT : 1
DEL_WHOSE : 1
PROVIDED_SAID : 1
ADOPT_FOR : 1
ABLE_AMBULATE : 1
TEMAZEPAM_CAP : 1
REPORT_OBSERVATIONS : 1
MEDS_WITHOUT : 1
SIDE_RIB : 2
FOR_AND : 3
BE_USED : 1
OR_VISION : 1
PATIENTS_IDEATION : 1
CARE_PLAN : 1
ACTIVE_RECENTLY : 1
BUT_SSOME : 1
UNDERSTANDING_GOOD : 2
OCCURS_FOR : 1
FLAT_BUT : 1
COUNSELED_TO : 1
MEDICATIONS_PHYSICAL : 1
TO_DATE : 1
SCREENING_USE : 1
PSYCHIATRY_WORK : 1
BP_MARRIED : 1
AM_HEALTH : 1
THE_PAST : 2
THE_WOUND : 1
PATIENT_SUICIDE : 1
PATIENT_CHEST : 1
IDEATIONS_HIM : 1
FOLLOW_AND : 1
PATIENT_DESCRIPTION : 1
SSOME_THOUGHTS : 1
FILED_DEMONSTRATED : 1
CONDUCTION_STUDY : 1
TALKED_WORKING : 1
AND_ALERT : 1
ENDOSCOPIC_SEEN : 1
SODIUM_DIURETICS : 1
OF_COMPTON : 1
PRESENT_LAST : 1
HE_CAD : 1
PERFORM_THE : 1
ON_BEDREST : 1
JUST_WITH : 1
PERFORMED_DEPENDING : 1
AN_TO : 1
WANTED_REFERRAL : 1
WAS_WORSENED : 1
OF_SERVICE : 1
DESPERATE_SAYS : 1
TRIED_GAIN : 1
NO_OS : 1
RISE_ON : 1
TIME_AND : 1
BE_DONE : 1
NURSE_EXPERIENCING : 1
NOT_LEAVE : 1
AND_FAMILY : 1
OT_ASSESSED : 1
NOT_GAINED : 1
PRESSURE_PAIN : 1
PT_JUST : 1
MIDLINE_NEEDS : 1
WHEELCHAIR_CARDIOLOGY : 1
SOLN_AMP : 1
WITH_HIM : 1
NURSING_EXTRACTION : 1
ACTIVITIES_INTERACTING : 1
ACTIVITY_SALIVA : 1
SAFE_EFFECTIVE : 1
SUPPER_CM : 1
PATIENT_IDENTIFY : 1
AND_REISSUE : 1
CURRENT_LIST : 1
DISCHARGE_THAT : 1
CARCINOMA_OF : 1
MY_RHINORRHEA : 1
RLL_HEART : 1
OPTIMISM_ABOUT : 1
HOMICIDAL_ONE : 1
VET_HAVING : 1
TIME_HAS : 1
NORMAL_BMS : 1
LEFT_STRONG : 1
DISORDER_ICDCM : 2
ANICT_SCLERA : 1
TIME_THE : 2
SEE_HIS : 1
IS_FROM : 1
SISTER_PATIENT : 1
TARGETED_EVEN : 1
ATIVAN_MG : 1
IMPROVED_MOOD : 1
MEDS_PT : 1
PT_ON : 3
AND_ACTIVITIES : 1
MOVE_SURGERY : 1
DATE_SERVICE : 1
PCP_ASHOK : 1
HIS_APPT : 1
OBJECTIVES_ENHANCE : 1
MH_MAKES : 1
REST_BODY : 1
LOPEZ_MA : 1
FOR_MINUTES : 1
TOMORROW_IS : 1
INSTEAD_CALL : 1
NA_RISK : 1
CONCERNS_REGARDING : 1
AGREES_TO : 1
MITRAL_VALVE : 1
CM_FOR : 1
OT_CONSULT : 1
DRINKS_ALSO : 1
MIN_FEVER : 1
IDENTIFY_SYMPTOMS : 1
TEMAZEPAM_ORAL : 1
JUST_WEEKS : 1
MENU_SELECT : 1
AMARILLO_TEXAS : 1
PT_TO : 3
DIURETICS_NO : 1
TOBACCO_ABUSE : 1
AND_VISITED : 1
OBSTRUCTION_MEDICATION : 1
ANTIHYPERTENSIVES_DIURETICS : 1
OR_TOBACCO : 1
PROZAC_CAPSULE : 1
OPTIMISM_HIMSELF : 1
THERAPEUTIC_INJURY : 1
VISITED_AND : 1
LAST_ISSUE : 1
ACETAMINOPHEN_PER : 1
TAKE_OF : 1
NOTE_PARTICIPATING : 1
PAIN_IS : 2
FOR_INFILTRATE : 1
SAYS_TWO : 1
HIS_WAS : 1
HCL_TAB : 2
COMPLICATIONS_NONE : 1
ON_CC : 1
BE_DATE : 1
PART_OF : 1
WITH_PSYCHIATRIC : 1
SUPPLIES_CLONIDINE : 1
INSOMNIA_WAS : 1
ADENOCARCINOMA_PATIENTS : 1
THE_MICU : 1
YEARS_SERVED : 1
OR_SIGNIFICANT : 2
PRIMARY_CARE : 4
COUNSELED_OF : 1
ON_DOOR : 1
DO_HIS : 1
PROTOCOL_NA : 1
GOAL_SAFE : 1
PATIENTS_HOMICIDAL : 1
MEDICATION_HAS : 1
THE_GAIT : 1
DISCOMFORT_RESPIRATION : 1
DEC_ST : 1
TEAM_AND : 1
CLOTHING_SHOES : 1
PULSE_PATIENT : 1
THE_WHEELCHAIR : 1
INCOME_FOR : 1
RSF_PARRAFING : 1
MONTH_OLD : 1
AND_EASY : 1
HIS_SHE : 1
HTN_ATRIAL : 1
IS_BY : 1
IODINATED_HAS : 1
VERIFIED_BE : 1
VETERAN_BANDAGES : 1
FIRM_ON : 1
OF_TRANSPORTATION : 2
ULCERS_OR : 1
HIM_AND : 2
CONDITION_DISCHARGE : 1
ORAL_PO : 1
HE_LETTER : 1
GROSS_HEMATURIA : 1
PATIENT_OF : 4
ACTIVE_MEDICATIONS : 7
WEIGHT_LB : 3
MASS_APR : 1
ORIENTED_SOCIAL : 1
YOUR_LEVEL : 1
DIRECTIVE_ORGAN : 1
IN_FROM : 1
DIAGNOSIS_POSSIBLY : 1
GAME_THIS : 1
CALLER_SCALE : 1
NO_COMMENTS : 1
GETTING_NOW : 1
INSOMNIA_THAT : 1
MVA_WB : 1
PHYSICIAN_NAME : 1
LIMITS_MOUTH : 1
MURMUR_OF : 1
PT_THE : 2
RETURNS_TO : 1
FACTORS_NO : 1
TUMOR_IN : 1
TELEMETRY_WITH : 1
CAPSULE_RESULTS : 1
DENIES_THAT : 1
FAMILY_AND : 1
CARDIAC_MONITOR : 1
THIS_GAME : 1
AND_HIS : 1
THIS_SW : 1
KG_WEARING : 1
LAST_WEEK : 1
ACTIVITY_USE : 1
NONVA_FINAL : 1
OPERATION_BE : 1
INITIATED_PATIENT : 1
CC_CD : 1
RECOMMENDED_TALKED : 1
TAKE_ONEHALF : 1
STATUS_DEPRESSION : 1
HOSPITAL_AWARE : 1
RIGHT_GUAFENESIN : 1
AND_SHOUDLER : 1
HEALTH_EDUCATION : 1
OSA_BIPOLAR : 1
THE_FLUID : 1
EXPERIENCE_WAS : 1
THE_ADMITS : 1
MALE_WHO : 1
RATION_OF : 1
NEUROPATHY_ACTIVE : 1
LISINOPRIL_TAB : 1
RESECTION_BY : 1
BREATH_QUESTIONS : 1
IS_NOTICED : 1
YOUR_HOW : 1
BOTH_ERIE : 1
GOT_FROM : 1
POSSIBLE_TRANSFER : 1
BATHROOM_PAJAMAS : 1
METABOLIC_ARE : 1
CHANGE_CARE : 1
ALL_SOURCES : 1
FOR_USE : 1
AS_RELAXATION : 1
SWMF_WOULD : 1
HISTORY_PRESENT : 2
MORE_CONTACT : 1
NOTED_BELONGINGS : 1
LEVEL_WORST : 1
NA_PATCHROTATE : 1
DPAHC_PT : 1
SPECIAL_INSTRUCTIONS : 1
TO_PATIENT : 7
CONTACT_NUMBER : 2
MG_PO : 3
DR_CHERRY : 1
ON_WHOLE : 1
WENT_HE : 1
SURGERY_DUE : 1
IN_UNIT : 1
CLARIFICATION_OR : 1
MF_PVCS : 1
PERFORMED_ON : 1
VITALS_MOST : 1
DAUGHTER_DONNA : 1
ANTIPSYCHOTIC_METABOLIC : 1
HIS_IMPROVE : 1
ABNORMAL_MALE : 1
AND_RECOVERY : 1
AND_TAKING : 1
IDENTIFIERS_WERE : 2
NO_SOB : 2
BEEN_WITH : 1
WITH_MUCUS : 1
MEMBER_EXPLANATION : 1
SCHEDULED_AGAIN : 1
ACCEPTED_ACTIVE : 1
NATURALLYOCCURRING_IN : 1
SAO_DOES : 1
ASK_SPEAK : 1
THE_MAY : 1
LAST_MED : 1
ASSOCIATE_PROVIDER : 2
AFFECTS_SCHEDULED : 1
DATED_DIAGNOSIS : 1
SELF_OR : 2
NOTED_EDGE : 1
PT_VISITED : 1
SEEN_AS : 1
NOT_NEEDED : 1
SUICIDAL_AND : 1
USE_GUN : 1
PT_ALERT : 1
CANCEL_APPOINTMENT : 1
THO_PER : 1
AGO_HAD : 1
THE_DOSING : 1
THIS_FROM : 1
AND_STATED : 1
VOICEMAIL_TOOTH : 1
SPAN_EASILY : 1
ADMISSION_CHANGE : 2
ANY_NEW : 1
LAST_NO : 1
BETTER_OFF : 1
INFLUENZA_NO : 1
IN_PATIENT : 1
ASSIGNED_ALLERGIES : 1
HEPLOCK_RIGHT : 1
OIN_WHICH : 1
IMPROVED_AND : 1
ONE_WEEK : 1
TIME_BEFORE : 1
TO_HAS : 1
PLACED_FA : 1
BEHAVIOR_PULSE : 1
YOU_KNOW : 1
RATES_HISTORY : 1
TO_PREFERRED : 1
PT_SEEN : 2
VETERAN_OFFERS : 1
BACK_REALITY : 1
WITH_INFARCTION : 1
ASHOK_LANS : 1
LETTER_THAT : 1
REMOVING_PRODUCTS : 1
ON_ANTIBIOTIC : 1
DEPRESSION_TIME : 1
IDENTIFIED_SISTER : 1
JUDY_MCCULLY : 1
APPARENTLY_HE : 1
PLEASE_OPERATION : 1
HAVE_TAKEN : 1
VITAL_WEIGHT : 1
TITLE_IMPACT : 1
STATUS_CHANGE : 2
PREINSTRUCTIONS_MORNING : 1
ADVANCE_BUCKEYE : 1
OF_HYPOVENTILATION : 1
SIGNIFICANT_MEDICAL : 1
MALE_PATIENT : 1
BEEN_BEFORE : 1
HIGH_NO : 1
ASSESSMENTCOMPREHENSIVE_ADDENDA : 1
PT_THERE : 1
EXAM_HE : 1
CP_RETURNING : 1
WORKING_HE : 1
SIGNIFICANT_FOR : 1
ACUTE_COMPLAINTS : 1
ACTIVE_DESCRIPTION : 1
REQUEST_BE : 1
GATIFLOXACIN_GATIFLOXACIN : 1
TEST_THIS : 1
OR_REMOVING : 1
DRINK_WAS : 1
SCALE_HIGH : 1
RESULT_REF : 1
WAS_RECEIVED : 1
MOVE_HAS : 1
SOURCE_OF : 1
MOBILITY_ACTIVITIES : 1
FROM_THEIR : 1
DT_NSA : 1
NEEDS_THIS : 1
OCT_TYPE : 1
HAVE_BEEN : 2
DOES_TAKE : 1
OTHER_NO : 1
ACUTE_AT : 1
CONDITION_ON : 1
DX_REFER : 1
REFLECTING_POOR : 1
TRANSPORT_THE : 1
NOTE_CONTINUED : 1
CONTINUE_MONITOR : 1
THAT_CODE : 1
ADVOCATE_ALBUTEROL : 1
FOR_APPOINTMENT : 1
ESOPHAGUS_CM : 1
HAVE_NO : 1
AS_OF : 1
SAW_HIM : 1
HYDROCODONE_CAUSED : 1
WAS_BELONGINGS : 1
WALKS_THE : 1
KNOWN_INJURY : 1
YESTER_TUMOR : 1
WOULD_PASSED : 1
PHARMACIST_MEDICAL : 1
WIFE_KLEIN : 1
IT_CUT : 1
TO_ADVICE : 1
HEART_DISEASE : 1
INTERACTING_OTHERS : 1
GUSONS_OFFICE : 1
OUR_RECORDS : 1
AND_HER : 1
ATYPICAL_ANTIPSYCHOTIC : 1
TAB_BID : 1
FELT_HE : 1
YOU_THROUGH : 1
PRIMARY_CALLER : 1
AFTER_THE : 1
GENDER_MALE : 1
STATE_PROVIDER : 1
REACH_URINAL : 1
STATUS_TO : 1
THAT_TIME : 1
SHIFT_DT : 1
PATIENT_ON : 2
CRISIS_NOTE : 1
REMAIN_FOCUSED : 1
PROVIDER_ASSIGNED : 1
BE_SCHEDULED : 1
SAME_NO : 1
THAT_SIGNIFICANT : 1
HIS_POOR : 1
PAST_MONTH : 1
WHO_NOT : 1
TO_DISCUSS : 2
BELONGINGS_INCLUDING : 1
NONHEALING_DENIES : 1
SIGNS_OF : 1
ALL_THE : 1
HAS_SINCE : 1
THIS_INFORMATION : 1
SPHENOIDAL_SINUSITIS : 1
MEDICATION_LIST : 1
THE_NIGHT : 1
OF_DISC : 1
DIAST_PRESSURE : 1
EC_TAB : 1
MOUTH_CURRENTLY : 1
OR_MISSING : 1
UNCONTROLLED_DIABETIC : 1
BEEN_HAVE : 1
SUICIDAL_BUT : 1
THE_EMERGENCY : 1
PLAN_AND : 1
INSUFFICIENCY_WAS : 1
MEQ_PKT : 1
WITH_NAUSEA : 1
PROGRESS_FROM : 1
LEVEL_IS : 1
ABOUT_HIS : 1
NORMAL_PROCEDURE : 1
PUEBLORED_PATTI : 1
THE_SOCIETY : 1
DIABETIC_TELERETINAL : 1
NO_DOCUMENTED : 1
CONSULT_REQUEST : 1
BUT_GOOD : 1
VASH_HAVE : 1
MARITAL_MARRIED : 2
RIGHT_STRONG : 1
AN_ALCOHOL : 1
SOLN_INSTILL : 1
LIKE_THAT : 1
CHRONIC_CARE : 1
REORDER_PTS : 1
POSTION_EXERSIONAL : 1
! Stats words=1766  pairs=8564
