# Supplementary material for: Predicting the Risk of Suicide by Analyzing the Text of Clinical Notes
Source: PLoS One. 2014 Jan 28;9(1):e85733. doi: 10.1371/journal.pone.0085733 (PMC3904866; doi:10.1371/journal.pone.0085733)
Supplement: Appendix S3 — Machine Learning Libraries and Methods: This section is provided to enclose the open source (Apache License) classifier used for the building of the statistical models, specifically for the purposes of study reproducibility. A detailed account of these tools is intended for another publication. (ZIP) [file pone.0085733.s003.zip › Appendix3/ML_libs/Regression_testing/group2/processed/grp2-pt-1012.dat]

!  Done reading
! Total word count = 4836
! Total unique words = 1776
! Total pair count = 9668
! Total unique pairs = 8523
CONTAINS : 1
SORE : 1
AT : 21
EASE : 1
SHORTLY : 1
WM : 1
ADL : 2
ONLY : 6
ANSWERING : 1
EVENING : 2
WORK : 5
PREOP : 3
LISINOPRIL : 4
PRESCRIPTIONS : 2
UROLOGYPROVIDER : 1
EPILEPTIFORM : 1
OPEN : 1
EVENTS : 1
MONTH : 3
ULCER : 2
THANK : 1
REFILLS : 1
DISCIPLINE : 1
INFO : 1
WEIGHT : 4
LITERS : 1
BEEN : 14
READINESS : 1
STAY : 1
BID : 3
NVO : 1
BASE : 1
WITHIN : 4
GAS : 1
YOURSELF : 1
TREATMENTS : 1
AMBULATE : 3
OUTPATIENT : 5
SURVIVE : 1
INTAKE : 1
INSTRUCTED : 6
DIVALPROEX : 1
INPATIENT : 12
CULTURAL : 1
DIURETICS : 1
COUNSELING : 1
TOMORROW : 1
RESCHEDULE : 2
DIPYRIDAMOLE : 1
FT : 1
RELATED : 2
PMS : 1
USE : 9
SPECIMEN : 1
HONORABLE : 1
PRIVILEGES : 2
MEANS : 1
CC : 8
DISCHARGED : 3
HEMATURIA : 1
EPISODE : 2
SUPPLIES : 5
STRATTERA : 1
TWICE : 1
COLD : 1
REGARDING : 1
CHEW : 1
WAISR : 1
INCHES : 1
LEVEL : 9
HAWAI : 1
CHANGES : 4
ALCOHOL : 4
TOO : 3
RAL : 3
PTERIGIUM : 1
YROLD : 1
INABILITY : 1
TRIED : 1
MILK : 1
VISITATION : 1
RETIRED : 1
DIAST : 1
MET : 2
MACHINE : 1
HIS : 25
COORDINATOR : 3
COPD : 3
SLIGHTLY : 1
FRACTURES : 1
DOSAGES : 1
REMOVED : 1
VOIDING : 2
INSTAGLUCOSE : 1
APPROPRIATE : 1
SUGGESTED : 1
CONGRUENT : 2
EEG : 1
DIRECTIVE : 1
KLEIN : 1
GOTTEN : 1
RAISED : 2
BEHALF : 1
WELL : 6
HEALED : 1
DISORDER : 3
TEST : 1
NOTE : 29
ISOLATIVE : 1
PROMOTE : 1
EVERYTHING : 1
FASTING : 1
JULY : 2
LDL : 1
DO : 5
DOES : 9
TESTS : 1
NIGHTMARES : 1
RESOURCE : 1
TREATMENT : 9
ATRIAL : 1
BLOOD : 7
SAME : 2
VESICLES : 1
STROKE : 1
HAVE : 18
STERNUM : 1
ADVERSE : 1
DAT : 1
SAW : 2
VOLUNTEER : 1
SCHEDULED : 3
STEPS : 1
DRUG : 2
OF : 97
INCLUDE : 3
RETURNING : 1
PUFF : 2
TAB : 16
DRUNK : 1
REACHED : 1
CERTAINTY : 1
BUPROPION : 1
CALLER : 4
ASSISTED : 1
REQUIRED : 2
MONITOR : 5
HAS : 41
FOR : 54
INHEPATITIS : 1
ARNP : 2
PRECIPITATED : 1
GRANULAR : 1
CONDITION : 2
PERCEPTION : 1
BUSPIRONE : 1
NUTRITION : 1
SAID : 1
BELIEVE : 1
NUMBER : 5
DEPOMEDROL : 1
APPROVES : 1
MORNING : 3
KILL : 1
THIGHT : 1
CLONIDINE : 1
INR : 1
AWAITING : 1
RESPOERIDOL : 1
AID : 1
WRAPUP : 1
ASSESSED : 1
TRANSITION : 1
SC : 2
EC : 2
NEUROPHYSIOLOGY : 1
MUST : 1
IDEATION : 1
MESSAGE : 1
SATURATION : 1
GEN : 1
THINGS : 1
AMR : 1
COLONOSCOPY : 1
SUBSTANCE : 1
THEM : 2
GOALS : 1
ASSESSMENT : 11
ROM : 1
RESPIRATORY : 1
US : 1
SCAR : 1
WHEEL : 1
ACTIVITY : 2
HISPANIC : 1
OWN : 5
NOTIFYING : 1
EVIDENCE : 1
INTERNAL : 1
IMB : 1
AMBULATION : 2
ACCUCHECK : 1
ND : 2
ATTACHED : 1
MOTORCYCLE : 1
DISTRIBUTION : 1
SIMILAR : 1
ENTER : 1
STARTING : 1
ENCOURAGED : 1
BM : 2
NAUSEA : 2
PREVIOUSLY : 3
INFORMATION : 5
PATTERN : 2
ADEQUATE : 1
TYPICAL : 1
DCF : 1
INITIAL : 2
CHILDREN : 1
EXAM : 3
RECENTLY : 1
BLEPHARITIS : 1
FLOWSHEET : 2
RACK : 1
EDGE : 1
SUICIDE : 5
AO : 1
THE : 75
JUST : 2
NURSES : 1
INCREASED : 3
INSTEAD : 2
ASTHMALIKE : 1
NATIONAL : 1
PRESENTS : 3
GROUP : 3
DURATION : 2
AEROBICALLY : 1
ANTIANXIETY : 1
OCT : 1
EXPIRED : 1
PREP : 1
DIMINISHED : 1
PULSES : 1
GO : 3
SIGNIFICANT : 2
MICU : 1
COLOR : 1
UD : 1
BUPIVACAINE : 1
SEC : 1
ARRIVED : 1
HB : 1
BP : 3
MEDS : 5
INDICATION : 1
BELONGINGS : 1
HEARD : 1
CT : 2
POST : 1
DEPRESSION : 5
CM : 4
ELECTRONIC : 1
GAIT : 1
AGAIN : 1
CITALOPRAM : 1
DISPOSITION : 1
ANXIOUS : 3
DESCRIBE : 1
TID : 2
CORRECTLY : 1
CAP : 2
VOL : 1
DIET : 2
EVER : 3
STATED : 5
TE : 1
AMP : 1
SOMETIMES : 1
CONSTIPATED : 1
BRUSH : 1
FLP : 1
AXIS : 1
GET : 3
ANTIHYPERTENSIVES : 1
WT : 2
RA : 1
WHAT : 2
ADMITTING : 1
ABSOLUTE : 1
PLANS : 4
ALBUTEROL : 1
HANDOUT : 1
DIABETIC : 3
MELLITUS : 1
SCANNED : 1
BBS : 1
ZINKEN : 1
OR : 32
ORANGE : 1
SHIFT : 1
BOTH : 2
TEMP : 1
PRESCRIPTION : 2
YEAR : 4
CONJUNCTIVITIS : 1
COPY : 1
BEVERAGES : 1
PULMONARY : 1
LB : 5
COUMADIN : 2
REGULARLY : 1
IMP : 1
HERBAL : 1
DE : 2
HIGHINR : 1
LIKE : 2
ITCHING : 1
SINK : 1
GI : 3
SEEN : 4
EXPERIENCE : 2
INITIATES : 1
MAILED : 1
FOOD : 1
NURSE : 4
ESCORT : 1
CHRONIC : 4
ASPECT : 1
NEOPLASM : 1
INTERVIEW : 1
TAKE : 9
SENSORY : 1
CORONARY : 1
INCREASE : 1
WITHDRAWAL : 2
DEY : 1
ANY : 11
DISCHARGE : 9
PSYCHOSISRESOLVED : 1
MAL : 1
HYPOTENSION : 1
MOISTURE : 1
RECORDS : 2
QH : 2
FOURTH : 1
BESYLATE : 2
SW : 1
TOLERATED : 1
ADMITS : 3
TENDER : 1
PERCOCET : 2
PRESSES : 1
IID : 1
APPLIANCES : 1
PSYCHOTROPIC : 1
LATERAL : 1
CHIN : 1
FACILITY : 2
LRI : 1
CONSIDER : 1
DEFICIT : 1
EXPIRATION : 1
UNIT : 2
SQUIRMING : 1
MOTOR : 1
EFFECTS : 3
IBUPROFEN : 1
MD : 3
ESIG : 1
RELATIONSHIP : 2
SECONDARY : 1
VAUGE : 1
NITROGLYCERIN : 1
NAME : 5
PLEURITIC : 2
CARE : 20
MGS : 1
FORT : 1
ACCOMMODATE : 1
OFFER : 1
FIB : 1
SAT : 2
AGE : 3
EVERY : 6
PATCHROTATE : 1
INTENT : 1
COMPLIANT : 1
SKIN : 5
TIMES : 3
YESTER : 1
IS : 44
HUD : 1
OK : 1
NOT : 32
SERAX : 1
WORST : 2
FLUIDS : 2
FRACTURE : 1
DTN : 1
IF : 10
NOK : 1
USER : 3
AVERAGE : 2
MH : 1
THERE : 1
RETINOPATHY : 1
WALKING : 1
PENDING : 1
PAROXETINE : 1
ONCE : 2
EXEMPT : 2
LIMITED : 1
HERE : 4
SKILLS : 1
IM : 1
BOX : 1
INFARCTS : 1
ELECTRIC : 1
EATING : 1
SHARON : 1
RATING : 1
CLEAN : 2
TCBP : 1
UNITS : 1
OXIMETRY : 2
CARDS : 1
ONEHALF : 3
BRIEFLY : 1
EVALUATION : 5
PASTORAL : 1
APT : 1
BIOPSYCHOSOCIAL : 1
CTRS : 1
WK : 1
PROGRESS : 1
KEEP : 2
RHYTHM : 1
APNEIC : 1
REHAB : 3
RECURRENT : 1
CONSISTED : 1
ARTERY : 1
STUTTERING : 1
ASSESS : 1
THESE : 1
NER : 1
VISION : 1
UNCOMFORTABLE : 1
REPEAT : 1
VET : 9
STOOL : 1
FOLEY : 1
LEARNER : 1
ANITA : 1
BEST : 1
PND : 1
PARTICIPATION : 1
EDUCATED : 1
RUPTURED : 1
PAP : 1
SPASM : 1
COMPUTER : 1
HOPLESS : 1
BACK : 3
HOWEVER : 3
INTENSIVE : 1
REGARDS : 1
HEAT : 1
HEIGHT : 1
MALE : 6
SUBJECT : 1
SUBOPTIMAL : 1
VOIDED : 2
LEXIPRO : 1
ADDENDUM : 11
TRIMETHOPRIM : 1
FULL : 4
BY : 29
BMS : 1
COMPLAINS : 1
PMH : 1
NO : 54
REDUCTION : 1
BETTERAS : 1
INTENSITY : 2
CLINICAL : 4
RELATION : 1
REASSESSMENT : 2
INTERVENING : 1
EIC : 1
CHIEF : 5
LARGE : 2
ADDICTION : 1
SATT : 3
TH : 3
UPPER : 3
BENIGN : 1
LUMBOSACRAL : 1
CLINIC : 5
RISK : 8
CONVERSATION : 1
PERFORMED : 2
BASS : 2
TO : 140
SE : 1
POINT : 1
BMI : 1
COULD : 1
IV : 1
FEEL : 1
PRN : 4
HEEL : 1
ABUSE : 2
TIMEOUT : 1
ADVANCE : 1
COUNSELED : 1
CRASH : 1
ADMINISTRATIVE : 1
SAFE : 1
DX : 1
QAM : 1
BONE : 2
BIOPSY : 1
LV : 1
TOOLS : 1
PROCEDURE : 3
OBSERVE : 1
REQUESTING : 4
COPAY : 2
WILL : 19
APPEARANCE : 1
ORTHOSTATIC : 1
OFTEN : 3
CAPACITY : 1
WARM : 1
BUT : 12
ASKED : 4
BEGAN : 1
STRESSORS : 1
DS : 1
WEAR : 1
APPETITE : 1
SITESDO : 1
TYPE : 6
CAREGIVER : 1
ASF : 1
TV : 3
HH : 1
CALMER : 1
WHETHER : 1
SEE : 2
COLL : 1
ALTERING : 1
SET : 1
PLEASE : 3
INTERACTIVE : 1
SWITCHED : 1
MEALS : 1
STATUS : 15
DIS : 1
DIVORCED : 1
DIABETES : 2
MARITAL : 1
TA : 1
EFFECTIVE : 1
CONTINUED : 1
CONSULT : 10
TESTING : 2
OUT : 6
HR : 4
SUPPORT : 2
FIND : 2
WANTS : 1
SURE : 1
OCC : 1
UNMH : 1
INAPPROPRIATELY : 1
PULSELESS : 1
QID : 1
SCREEN : 3
FINDINGS : 1
EXPOSURE : 1
ASSIGNED : 2
REVIEW : 1
MENTAL : 5
NEEDED : 4
RELIGIOUS : 1
LOR : 1
HYDROXIDE : 1
GERD : 3
DRESSEDHE : 1
THINKS : 1
WERE : 2
FACTORS : 1
FILL : 2
NEUROLOGIC : 2
INSTRUCTIONS : 5
METATARSAL : 1
ANCEF : 1
ERYTHEMA : 1
LABS : 5
PRIMAY : 1
VA : 6
JOB : 2
TAKEN : 1
SPC : 1
COLOSTOMY : 1
TRACKING : 2
WED : 1
POSSIBLE : 3
AGREED : 2
WELLDEVELOPED : 2
TRIAGE : 2
NATURE : 1
ABOV : 1
PART : 1
FAMILY : 4
JAUNDICE : 1
INITIATED : 1
CAUSE : 2
DISEASE : 2
PAIN : 35
COCAINE : 3
WHEN : 7
UNDERMINING : 2
AMBULATORY : 2
EXTERNAL : 1
AS : 14
BEING : 5
VISTA : 1
EUS : 1
HIGHLY : 1
OBSTRUCTION : 1
LOSING : 1
INCOME : 1
ABOVE : 4
AMOUNT : 1
LT : 2
DRAINAGE : 2
WAS : 43
FLOOR : 1
PM : 1
GREATER : 1
WITH : 38
FEELS : 2
TELCARE : 1
FORM : 1
OFFERED : 2
PAISLEY : 1
COMPLAIN : 1
WANTED : 1
TEMPERATURE : 4
SIG : 1
REMAINS : 1
STRAW : 1
COUPLE : 2
SYNVISC : 1
CHECKING : 1
INDEX : 2
ABD : 3
NOW : 5
INCLUDING : 4
PTSD : 2
LANTUS : 1
FOBT : 1
INTACT : 1
SUB : 1
CONTROLS : 1
SETTING : 1
CONFIRMED : 4
DTR : 1
CHICKEN : 1
USED : 1
EXTE : 1
IT : 4
SHOT : 2
DUTY : 1
BEDTIME : 1
BELOW : 1
LIST : 3
RECKLESS : 1
OT : 3
STUDY : 1
TROUBLE : 1
RESTROOM : 2
NEGLECT : 1
INSPIRATION : 1
BAY : 1
SA : 1
DISCUSSED : 3
MATERIALS : 1
EXERCISE : 2
CA : 1
HYPERSOMNOLENCE : 1
VOMITING : 1
CHEM : 1
TIME : 12
BSX : 1
PURPOSE : 1
CODE : 1
TROCHANT : 1
DEVICE : 1
ENCOMPASS : 1
ESOPHAGEAL : 2
SWS : 2
ORIENTED : 8
DROPPED : 1
MUCOPER : 1
PSYCHIATRIST : 1
CURRENTLY : 3
ATTEMPT : 1
NECK : 1
PRMC : 1
TEETH : 1
SERVICEAMARILLO : 1
ADDITIONAL : 1
BEARING : 1
SAFETY : 4
GUERNEY : 1
LYING : 1
EXM : 1
EMOTIONAL : 1
CHOL : 1
SIMVASTATIN : 1
DEMO : 1
SIDE : 4
ALDRETE : 1
BREAKFAST : 1
BETWEEN : 1
CONGESTIVE : 1
THICKNESS : 1
IMAGES : 1
DOCTOR : 1
ALLERGY : 1
DISTAL : 1
GOING : 3
CALL : 9
DID : 4
6A : 2
MOST : 3
COLA : 1
SHOW : 1
HX : 2
ARRIVAL : 1
SUN : 1
BIRTH : 1
IMAGING : 1
ADDRESS : 1
REMAINED : 1
SITUATION : 1
TELEPHONE : 9
MALATINSZKY : 1
VTEL : 1
NOTIFICATION : 2
MANGLED : 1
SOB : 2
COMPLAINING : 1
PROTECTION : 1
COOPERATIVE : 3
MOTIVATION : 1
REPORTS : 4
URINAL : 1
LEXAPRO : 1
HELP : 1
PER : 5
CONSISTENT : 1
SUCTIONING : 1
CHRIS : 1
YES : 20
HOTLINE : 1
FRIEND : 1
FURTHER : 3
CONSENT : 2
ETC : 3
MOBILITY : 1
FACE : 1
CHF : 2
FO : 1
YOUR : 8
DROPPING : 1
DOING : 3
GIVEN : 9
PROBE : 3
HPI : 2
TAX : 1
ILLICIT : 2
WHO : 4
REM : 1
UPON : 1
ED : 7
TRIGLYCERIDES : 1
JAW : 1
SURG : 2
DIARRHEA : 2
VERBALIZES : 1
SCRABBLE : 1
ATTENDANCE : 1
PHYSICIAN : 12
RHINITIS : 1
COMPREHENSIVE : 1
ARM : 1
CURRENT : 9
RECTAL : 2
CONTROL : 1
TOOTH : 2
GROOMING : 1
URGENT : 2
DEPENDENCE : 4
SUSPICIOUS : 2
EDUCATIONPT : 1
TERM : 2
SUCCESSIVE : 1
ES : 1
HIM : 13
UH : 1
TOPICALLY : 1
PULSE : 6
HE : 74
NS : 1
NEXT : 2
RX : 2
THEY : 4
NEEDS : 3
NORMALLY : 1
PHE : 1
RATE : 3
EASY : 2
REFERRED : 1
SYMMETRICAL : 1
COVERED : 1
FREQUENT : 1
THOROUGHLY : 1
FELT : 1
UNDERMINE : 1
MASS : 3
WELFARE : 1
ACCEPTED : 1
APPTS : 2
IMAGERY : 1
TRANSFER : 2
HISTORICAL : 1
ML : 2
PHONE : 7
VANOD : 1
DECLINED : 1
ADJUSTING : 1
TALKING : 1
CHECKED : 3
RAVELLA : 1
CLEAR : 5
IPRATROPIUM : 1
SECLUSION : 1
TOUCH : 2
PRIMARY : 5
FAIR : 2
CARES : 1
DRY : 3
ABDOMINAL : 3
HAD : 9
BS : 2
ORTHOPNEA : 1
SIGNS : 7
ACTION : 1
THING : 1
TYLENOLABOUT : 1
LOSS : 2
SPECIAL : 1
PATIENTS : 2
MRSA : 1
SUMMARY : 2
SULFA : 3
THROUGHOUT : 1
HELD : 1
BRONCHOSCOPY : 2
AMPUTATION : 1
PROVIDED : 6
PF : 1
DRINK : 1
BBSC : 1
BOTHERSOME : 1
DEBRA : 1
NEGATIVE : 1
DENTAL : 1
ORTHOPEDIC : 1
TWO : 3
WRITTEN : 2
NONE : 9
LECTURE : 1
II : 2
TOOL : 1
CONNECTED : 1
LOT : 1
SPUTUM : 1
LAB : 3
4D : 1
LESIONS : 1
WEAK : 2
RD : 1
DIAGNOSTIC : 2
MISSING : 1
ING : 1
THRIVE : 1
CONTACT : 8
NOTIFIED : 3
CLOCK : 1
BFAST : 1
SCHEDULE : 1
HER : 2
ATRIUM : 1
ORDERED : 3
TOPIC : 2
FEELING : 4
SHOULD : 1
QUESTIONS : 1
FEARS : 1
EDUCATE : 1
SCREENMORSE : 1
PROBLEMS : 2
PEERS : 1
APPEARED : 1
URINE : 2
SUGGEST : 1
YELLOW : 2
RTC : 3
MCG : 1
GIVE : 5
ABUSIVE : 1
CAN : 3
ROUTE : 2
WELLNOURISHED : 2
THERAPY : 9
PSYCH : 1
PRIVATE : 1
LIVING : 1
PLACE : 4
INFECTIONS : 1
NONVA : 2
WHICH : 8
SYMPTOMS : 5
EP : 1
CHILDHOOD : 1
RANGE : 3
NOTES : 1
OVER : 2
ROTATOR : 1
MG : 26
ON : 37
MIXED : 1
QUIT : 2
TRANSFERRING : 1
INTUBATED : 1
COMPLETE : 6
UROLOGY : 1
ADMINISTRATION : 1
PORTABLE : 1
EST : 1
PRESSURE : 7
TETANUS : 1
ATTENDED : 2
TEL : 1
IMMOBILE : 1
VIA : 4
PITTING : 1
WAITING : 3
HEADACHE : 1
FOREHEAD : 1
NAVIGATE : 1
ACCEPTABLE : 1
STAT : 1
TB : 1
REALISTIC : 1
GOOD : 4
VIETNAM : 1
LSOING : 1
ARMY : 1
LANSING : 1
DRUGS : 4
MED : 1
UPDATE : 1
CONTINENT : 2
TOVA : 1
INTO : 1
FOCAL : 1
EMB : 1
EDEMA : 1
OXIMETER : 1
WAIS : 1
HEELS : 1
HYPERTROPHY : 1
WORSE : 3
APPROXIMATELY : 1
PROVIDER : 7
MARCH : 1
PALLOR : 1
SHE : 1
PO : 9
UP : 8
GENDER : 1
MULTIPLE : 1
THEN : 7
FEW : 1
APPOINTED : 1
ALERT : 7
SUBMITTED : 1
XXXXXXXXXXXXXXXXXXXXXXXXXXXXXXXXXXXXXXXXXXXXXXXXXXXXXXXXXXXXXXXXXXXXXXXXXX : 1
RUL : 1
FEVER : 1
POINTING : 1
CONSULTATION : 1
LETHALITY : 1
PRIOR : 3
AUDIBLE : 1
VERBAL : 1
SEP : 3
OFF : 1
VERIFIER : 1
DATE : 16
TG : 1
COMMENT : 1
DAILY : 6
DIAG : 1
THREE : 1
PA : 2
DOSAGE : 1
PROGRAM : 1
MUSKOGEE : 1
GRADE : 1
APPOINTMENT : 3
WOULD : 2
CLAY : 1
AWAKE : 3
FOLLOW : 7
WHEELCHAIR : 2
LINCOLN : 1
FROM : 14
NEUROPSYCHOLOGY : 1
LEFT : 5
INTERACTING : 2
METHOD : 1
MEDICAL : 6
HEAD : 2
BECOME : 2
ELABORATION : 1
NORMS : 1
ALSO : 10
SEX : 1
ACTIVITIES : 2
ORDERS : 1
LIPID : 1
DIARRHEAFOR : 1
NONTOBACCO : 1
EXTREMITY : 1
WORKING : 1
AN : 5
IMPRESSIONS : 1
CUFF : 1
UNLABORED : 1
OVERTHECOUNTER : 1
HEART : 5
DISABILITY : 1
SIGNATURE : 1
COMPLAINT : 7
HORNER : 1
ERYTHROMYCIN : 1
TAKES : 1
EXCEPT : 2
USING : 1
SEEK : 1
DIE : 1
VPA : 1
REALLY : 2
HAND : 1
GLUCONATE : 1
INFLUENZA : 3
OUTSIDE : 3
DENIED : 3
MEASURES : 1
EYE : 2
LEADING : 1
FELL : 1
ESTIMATED : 1
CONTAINING : 1
EVERSION : 1
MILIEU : 1
DISCUSSION : 2
NEW : 9
AGO : 2
MOUTH : 12
YEAROLD : 1
PROVIDERS : 1
ENCOURAGING : 1
ATTENDING : 1
CHEST : 8
PRESENT : 5
HAVING : 3
ATTN : 1
DOCUMENTATION : 1
MODEL : 1
MOMETASONE : 2
SLEPT : 2
APPROPRIATELY : 1
EXISTING : 1
LYMPHNODE : 1
MUSCLE : 1
HC : 2
ENCOURAGE : 2
OA : 1
ARE : 4
ANSWERED : 4
KETCHUM : 1
COUNSELLED : 1
DESIRE : 1
NEED : 1
INDEPENDENT : 4
TINNITUS : 1
PERSON : 2
RECEIVED : 3
PSYCHIATRIC : 1
SURGERY : 2
RECOVERY : 1
BARRETTS : 1
AMA : 1
ASPIRIN : 2
FREQUENCY : 2
COMPLETELY : 2
INHL : 2
BODY : 2
PREVENTIVE : 2
INTERDISCIPLINARY : 1
UNRE : 1
YEARS : 1
TIRED : 1
CAD : 2
COLON : 1
TABLE : 1
BE : 11
MEDICINES : 1
BECAUSE : 3
ARRIVE : 1
OX : 1
DUE : 1
FORMER : 1
RATION : 1
TRANSFERRED : 2
REMAIN : 1
HS : 1
THEIR : 2
INVASIVE : 1
PRESCRIBE : 1
DICTAPHONE : 1
CREATE : 1
PING : 1
INVERSION : 1
BROCHURE : 1
OMEPRAZOLE : 3
ENROLLED : 1
SEVERE : 1
ISSUES : 2
ALONG : 1
REVIEWED : 5
SOUPS : 1
DM : 2
MAYO : 1
BEFORE : 3
OTHER : 8
ALL : 2
DRESSING : 1
QHS : 2
END : 1
LIFE : 1
SECOND : 2
ME : 3
QUIET : 1
BED : 5
NURSING : 18
IP : 1
DYSPNEA : 2
FOLLOWING : 6
OUTCOME : 1
IDENTIFIED : 7
LIQ : 1
MORSE : 1
GERIATRICS : 1
TRAZODONE : 2
SELF : 1
PATIENT : 82
ALLERGIES : 8
WITHOUT : 1
REFER : 2
DIAGNOSIS : 4
DING : 1
JUL : 1
LIMB : 1
SUBSEQUENTLY : 1
SENT : 2
SNF : 1
ABDOMEN : 1
SHOWING : 1
ICA : 1
MI : 1
UNDUE : 1
ADVISING : 1
EXPERIENCES : 1
ANXIETY : 4
NOS : 2
THAN : 3
PODIATRY : 3
GROOVE : 1
MEMORY : 2
AUDITC : 1
SYMPTOM : 1
WE : 2
SCARED : 1
TIB : 1
DECISION : 1
VASH : 1
ROUTINE : 1
RESEMBLED : 1
ROOM : 3
IMPROVED : 1
FEET : 1
ADDITION : 1
CAME : 3
THAT : 23
VISIT : 5
WIFE : 3
OCCUR : 1
NORMAL : 6
STAFF : 1
SIDERAILS : 1
DEPRESSED : 3
SERVICE : 4
CE : 1
RIGHT : 6
AVAILABLE : 3
PC : 4
BREATHING : 3
VITALS : 2
THROAT : 1
ABOUT : 6
CHICAGO : 1
REQUESTS : 1
ONE : 12
PKG : 1
PMR : 1
COMPONENTS : 1
PREPARED : 1
LACTOSE : 1
ULCERATION : 1
POTENTIAL : 1
CIU : 1
NOTIFY : 1
CARELOCK : 1
PTS : 1
NKA : 4
BRIEF : 4
FULLTIME : 1
ADEQUATELY : 1
TEARFUL : 1
THOUGHT : 1
HYPERLIPIDEMIA : 2
PRSE : 2
TABLET : 9
ALCOHOLCONTAINING : 1
HYDROXYZINE : 1
ADMIT : 2
ANOTHER : 1
DURING : 1
YOU : 16
TOLD : 1
SCREENING : 2
MORPHINE : 1
ISOLATED : 1
STUDIES : 1
CARDIOLOGY : 1
VOICED : 1
CRACKERS : 1
INFORMED : 3
DISEASES : 1
REACH : 1
GETTING : 1
DOUG : 1
CONCENTRATION : 1
BORDINKO : 1
IMMUNIZATIONV : 1
HI : 2
REACTIONS : 2
PAST : 6
EQUAL : 1
CHAIR : 1
CULTURES : 1
REASON : 2
POSTERIOR : 1
BIKE : 1
OXYGEN : 2
SCORE : 1
CXR : 2
TOBACCO : 7
SOUTH : 1
WRITE : 1
CRACK : 1
EPIS : 2
HAR : 1
CONVERSION : 1
WEEKENDERS : 1
HOME : 7
PHARMA : 1
APPLICATION : 1
PENICILLIN : 4
NOTED : 4
REMSTAR : 1
INDIVIDUAL : 3
MEMBERS : 1
WATCHING : 2
SOCIAL : 3
DIPLOPIA : 1
HOSPITAL : 4
SALTINES : 1
PLEAS : 1
SEEM : 1
RETURN : 3
SUICIDAL : 3
INITIATION : 1
DRESSED : 1
EFFECT : 1
EITHER : 1
VITAL : 5
TD : 1
IMPROVEMENT : 1
ANT : 1
UPSET : 1
MIN : 1
REGULAR : 2
TALK : 1
RECONCILIATION : 1
MDS : 1
POTASSIUM : 1
MINUTES : 1
ABSTINENT : 1
SPECIFY : 2
FOLLOWUP : 2
DELTOID : 1
MAKE : 1
MASSAGE : 1
TOLERATING : 2
SATES : 1
MAKER : 1
WEEK : 4
SUBSTITUTE : 1
MURM : 1
CHECK : 1
TEAM : 5
FIXATOR : 1
CBOC : 1
SCAN : 1
EPWORTH : 1
FALL : 4
APPROVED : 1
DATA : 1
AM : 6
NT : 1
MOVEMENT : 1
FAILURE : 1
IMPAIRMENT : 1
DISTRESS : 2
PRACTITIONER : 2
GLARGINE : 1
PLACEMENT : 1
EKG : 1
CANCEL : 1
ADVISE : 1
PINESS : 1
MOOD : 7
RIB : 1
EVENT : 1
REPORT : 9
PEOPLE : 1
FIXATION : 1
LETTER : 1
LEAST : 1
PLATINUM : 1
CONTINU : 1
HOW : 6
CALLED : 4
TOOK : 1
PURULENT : 1
MIGHT : 1
CARDIOPULMONARY : 1
INFUSING : 1
FEELINGS : 1
MANY : 2
SINCE : 7
STOPPED : 1
CHANGE : 3
COUGH : 4
SITTING : 1
ALLERGIC : 1
GRIMACING : 1
PRESENTING : 1
LEARN : 2
HOURLY : 2
CPAP : 1
PREOPERATIVE : 1
MADE : 2
CARDIAC : 1
COUNCIL : 1
YRS : 1
MEDIASTINOSCOPY : 1
BACTRIM : 1
OBTAINED : 1
ADVISED : 1
MON : 1
INCLUDES : 1
LEARNING : 1
DOCUMENTS : 3
VERBALIZED : 4
DOSE : 4
ENCOUNTER : 2
MONTHS : 5
OBJECTIVE : 1
SOCIALIZING : 1
DEATH : 2
AFFECT : 4
SUNSCREEN : 1
FOLLOWS : 1
PREDNISONE : 1
LOTION : 1
PALPATION : 2
SSN : 2
POLYP : 1
RELEASE : 1
AVOID : 2
HOSPICE : 1
HOPEWFLESS : 1
BRADEN : 1
NOON : 2
FREELYX : 1
AFFECTS : 1
ORIGIN : 1
LOOSE : 1
APPLIED : 1
DATED : 1
SOCIOECONOMIC : 1
BEDSIDE : 2
AREAS : 1
MCA : 1
ASKING : 1
CONGESTION : 1
NUTRITIONAL : 2
TOPICS : 1
INCREASES : 1
OTCS : 1
LUNG : 1
MEDICATION : 16
RESTING : 1
STOP : 2
RECOMENDATIONS : 1
BHM : 1
TONGUE : 1
WANT : 4
COMMENTS : 3
ACETAMINOPHEN : 1
CASE : 1
ISCHEMIC : 1
CONTINUE : 6
ORAL : 6
FIANCE : 1
ACIPHEX : 1
TOTAL : 1
ABNORMAL : 1
READ : 1
LIGHT : 1
THRER : 1
ANSWERS : 1
SERVICES : 2
DISCHARAGES : 1
GOAL : 1
SURGICAL : 1
EXAMINATION : 1
ST : 1
ELIMINATION : 1
HISTORY : 11
WANDERING : 1
CLICK : 2
UPDATED : 1
PROVIDE : 3
CRMC : 1
RESPIRATION : 6
PMHX : 2
CED : 1
HOURS : 1
TUMOR : 1
ASSES : 1
PVT : 1
HEALTH : 10
NAPROXEN : 1
REPORTED : 3
ADD : 1
VTACH : 1
ADJUST : 1
PLACED : 1
STOOLS : 1
REMIND : 1
COGNITIVE : 1
FLUNIS : 1
APICAL : 1
ALWAYS : 1
WOUND : 2
ANTIHISTAMINES : 1
PROSTATE : 2
EXCLUDING : 2
PREVIOUS : 2
SITE : 3
TROUBLES : 1
BIPOLAR : 1
REFERRAL : 1
INTERVENTIONS : 2
EXTREMTIES : 1
MAR : 1
COMPLICATIONS : 1
TENSE : 1
KG : 4
OP : 1
MORE : 3
WAL : 2
STANDARD : 1
MAKING : 1
PE : 2
RACE : 1
CARPENTER : 1
PREPROCEDURE : 2
RIBS : 1
WENT : 1
INSULIN : 1
PROBLEM : 2
OCTOBER : 2
RECEIVE : 1
BILL : 1
ER : 4
RECORD : 2
APPLICABLE : 2
DIZZINESS : 1
REQUEST : 1
PRESCRIBED : 2
AMLODIPINE : 2
NONCARDIAC : 1
SUSP : 1
XYZZY : 2
METAB : 1
ELIGIBILITY : 1
VETS : 2
ANTICOAGULATION : 1
LTC : 2
TELEMETRY : 5
WARRIOR : 1
PRIORITIZING : 1
AFTER : 3
LONGER : 2
ADMISSION : 2
COMPLEX : 1
COURSE : 1
EMPLOYMENT : 1
GUARDIAN : 1
BOARDING : 1
PRNS : 1
SCALE : 5
NON : 3
NICOTINE : 1
FLUID : 2
LUMBAR : 2
REMOVE : 1
ONES : 1
PCP : 5
BETADINE : 1
SAYS : 1
APPOINTMENTS : 1
VALIUM : 1
TOILETING : 1
APNEA : 1
OBSERVABLE : 2
EACH : 2
EMERGENCIES : 1
WNL : 1
ASSOCIATE : 2
DOB : 3
DENIES : 7
ACCOMPANIED : 1
PRF : 1
PHARMACY : 2
CARRY : 1
ALAR : 1
STAETS : 1
TONIGHT : 1
REPORTEDLY : 1
OLD : 3
OTHERS : 1
DRAWN : 1
REQUESTED : 2
FOOT : 5
VERBALIZE : 1
OVERNIGHT : 1
UGUST : 1
CODEINE : 1
CLINICIAN : 1
POPULATIONS : 1
CHEWABLE : 1
VETERAN : 15
CAPSULE : 2
WEDNES : 2
GLUCOSE : 2
PT : 35
AGITATED : 1
INJURY : 1
RADIATION : 3
EAGER : 2
ORGANIZED : 1
ZOMETA : 1
DEVELOP : 1
TAPPING : 1
AREA : 2
PSYCHOSOCIAL : 2
APR : 1
PROCEDURES : 2
PERCEPTIONS : 1
FROWNING : 1
ABGS : 1
MISSED : 1
BETTS : 1
GU : 1
MM : 1
UNDERSTANDING : 6
ILLNESS : 3
MEDICATIONS : 21
MR : 2
CRYING : 1
DIRECT : 1
MAJOR : 2
AND : 117
INSOMNIA : 1
HEATHER : 1
FUROATE : 2
TISSUE : 1
MAGNESIUM : 1
URINARY : 1
INH : 1
JUN : 2
VACCINE : 2
RESPONSE : 4
BETTER : 2
COMMUNICATE : 1
COMMUNITY : 3
LOC : 1
WORKED : 3
DEPRESSIVE : 2
UNCOOPERATIVE : 1
RESULTS : 5
PROCESS : 2
TOUR : 2
EMERGENCY : 1
AUTOMOBILE : 2
ANSWER : 1
BREATH : 1
ABLE : 7
RECENT : 1
OOU : 1
OPIATE : 2
IN : 43
KNOWLEDGE : 3
OBEYS : 1
PINES : 1
LOW : 7
EXACERBATED : 1
FOLLOWED : 1
MAY : 4
LMSW : 1
MANAGEMENT : 6
PLAN : 8
ANTERIOR : 2
INTOLERANCE : 1
PRO : 1
APPT : 6
GROIN : 2
REMEMBERING : 1
SMOKE : 1
UNLESS : 1
TAKING : 7
MISSION : 1
SPOUSE : 1
IMPLEMENTATION : 1
ADMITTED : 5
HYPERACTIVITY : 1
YET : 1
OBSERVED : 2
SS : 3
DIETITIAN : 1
PERIOD : 1
PANIC : 1
PATHOLOGY : 1
RELAX : 1
DONE : 4
EDATIVE : 1
PHYSICAL : 8
SGOT : 1
NIGHT : 2
CP : 2
TALKATIVE : 1
ACTIVE : 24
BASIC : 1
DYFUNCTION : 1
BULGE : 1
BECOMES : 1
IDENTIFICATION : 1
MANAGE : 1
NANDA : 1
ABILITY : 6
BEDREST : 2
METHODS : 1
BEHAVIOR : 1
PROFILE : 2
WEIGH : 1
AFIB : 1
SI : 4
CONTROLLED : 1
FOREARM : 1
COMPLETED : 5
FOCUS : 1
CARRIER : 1
SUPERVISING : 1
THIS : 26
FAR : 1
SM : 1
DIFFICULTY : 1
HIGH : 2
NIACIN : 1
CRAX : 1
AIRWAY : 1
DECISIONMAKING : 1
EKSW : 1
REMINDERS : 1
SOFT : 2
DDRIVE : 1
DRAW : 2
VAMC : 2
ADDED : 1
BECOMING : 1
EKRESTRAINT : 1
LAST : 7
GROSS : 1
LISANSKY : 1
FIBRILLATION : 1
EDUCATION : 12
LUNCH : 1
HOLD : 1
SOBRIETY : 1
RIGHTS : 1
FINANCIAL : 1
EXTREMITIES : 1
DEPOSIT : 1
SESSION : 6
SEES : 1
DESPITE : 1
STATES : 9
RENAL : 1
UNDERGOING : 1
SITUATIONS : 1
CAUSES : 1
WHILE : 1
LOCAL : 1
TWINBROOK : 1
SHORT : 3
FERROUS : 1
ICDCM : 5
RESP : 3
ETOH : 5
DOWN : 2
TO_CREATE : 1
UP_PT : 1
AVOID_SUN : 1
PM_CURRENT : 1
ANY_SIDE : 1
ANXIOUS_CONTINUE : 1
AS_VPA : 1
PROVIDER_HISTORY : 1
EPISODE_SCARED : 1
ILLNESS_WAS : 1
EACH_EXM : 1
HYDROXYZINE_MG : 1
FACILITY_WITHIN : 1
INCLUDE_NURSING : 1
FOLLOW_NURSING : 1
CURRENT_WAS : 1
MOUTH_HYDROXYZINE : 1
TO_KETCHUM : 1
IN_THROUGHOUT : 1
PATIENT_MATERIALS : 1
MEDICATION_ACTIVE : 1
ASKED_HIM : 2
INSULIN_WAS : 1
ALSO_WANTS : 1
COMPLETE_THIS : 1
AND_CT : 1
ANY_EFFECTS : 1
PRESCRIBED_AND : 1
TELCARE_APPOINTED : 1
MONTHS_YES : 1
FOR_SPASM : 1
VOMITING_BACTRIM : 1
PRSE_STATUS : 1
ANSWERING_INFLUENZA : 1
RECURRENT_STAT : 1
PAIN_CURRENT : 2
MG_HOLD : 1
IN_THEY : 1
TV_WILL : 1
DO_THIS : 1
DISCHARGE_THE : 1
PATIENT_HAD : 1
SC_ED : 2
PO_ACTIVE : 1
AREAS_TO : 1
AND_ORIENTED : 3
OA_HE : 1
ADVISING_HE : 1
OF_HIS : 1
MALE_PT : 1
TO_TOUCH : 1
THE_PATIENT : 18
NORMS_OF : 1
CALL_LINCOLN : 1
VETERAN_LOW : 1
PATIENT_VERBALIZED : 2
RESCHEDULE_VTEL : 1
DEPRESSION_SI : 2
BELOW_PT : 1
COMPLAINING_PAIN : 1
ADMINISTRATION_AND : 1
FRACTURE_OPEN : 1
OR_THING : 1
BY_NOK : 1
THIS_CARE : 1
OF_LUMBAR : 2
HIM_COPY : 1
MONTHS_TOBACCO : 1
HAS_YEARS : 1
PLAN_AFTER : 1
AT_AGE : 1
SCALE_FROM : 1
IF_PATIENT : 1
EYE_ETOH : 1
AMBULATE_SLEPT : 1
NO_APPT : 1
OXIMETRY_AS : 1
BIKE_COMPLAINT : 1
SET_FASTING : 1
FROM_LAST : 1
MORNING_FOR : 1
AT_SAW : 1
TO_TOBACCO : 1
MILK_CAUSES : 1
AND_SIGNATURE : 1
DATA_FORM : 1
AND_INTENSITY : 1
HOWEVER_DENIED : 1
AREA_CONTACT : 1
SINCE_EVALUATION : 1
NURSING_PREOPERATIVE : 1
BEING_EDUCATED : 1
DEATH_REVIEWED : 1
HEALTH_NURSE : 1
HE_PLANS : 1
PATIENT_AT : 1
CONTACT_PHONE : 1
ROTATOR_NEXT : 1
BECOMING_MISSING : 1
RETURNING_FORT : 1
MEDICATION_SMOKE : 1
GREATER_THAN : 1
YOU_NOT : 1
EMERGENCIES_YES : 1
BEEN_THEM : 1
APPETITE_GOOD : 1
CONGESTION_ANTERIOR : 1
THE_NEUROLOGIC : 1
WEEK_HE : 1
LONGER_OR : 1
WHICH_MANY : 1
ARRIVED_AGREED : 1
SUGGEST_EMB : 1
COORDINATOR_GROOMING : 1
INABILITY_RELAX : 1
VOIDED_LARGE : 1
LECTURE_AND : 1
LYING_IN : 1
II_SIGNS : 1
SUBSEQUENTLY_CXR : 1
INSTRUCTIONS_DISPOSITION : 1
ABOVE_CURRENT : 1
PAIN_PT : 1
CTRS_GROUP : 1
TERM_PT : 1
OF_NONVA : 1
WHEN_IS : 1
REALLY_TO : 1
OBTAINED_SEP : 1
NOT_AT : 1
CHEST_TO : 1
PATIENT_FAMILY : 1
OR_OTHER : 1
EASY_UNLABORED : 1
HAS_LIFE : 1
SITUATION_YOUR : 1
USE_PUFF : 1
PRIMARY_DOCTOR : 1
BUT_THE : 1
IF_IS : 1
DIARRHEA_NOS : 1
PAIN_MOTOR : 1
HISTORY_SUBSTANCE : 1
AXIS_II : 1
ON_REMOVED : 1
FIBRILLATION_ISCHEMIC : 1
CAPSULE_MOUTH : 2
INSTRUCTED_NOTE : 1
TROUBLE_AND : 1
OUT_HE : 1
PROSTATE_URINARY : 1
MASSAGE_NONE : 1
HOW_SESSION : 1
PROVIDED_HANDOUT : 1
HE_FELT : 1
BP_SCREENING : 1
FILL_TEMPERATURE : 1
IN_FOLLOWING : 1
PT_FOLLOW : 1
DISCHARGE_UROLOGYPROVIDER : 1
MIN_YES : 1
BEEN_AND : 2
WITH_DIABETES : 1
EVIDENCE_PRIMARY : 1
NOTE_OBSERVED : 1
TO_SUPPORT : 1
RESPOERIDOL_PT : 1
SIMILAR_HIS : 1
GI_NT : 1
HEELS_OF : 1
USING_APPROPRIATELY : 1
PRIORITIZING_NEEDS : 1
PATIENT_DISCHARGED : 1
BY_PRIMAY : 1
CONCENTRATION_HOW : 1
ALERT_ABLE : 1
HAVE_SLEPT : 1
APNEIC_NO : 1
CAME_OUT : 1
NOTE_PLANS : 1
PREVENTIVE_HEALTH : 2
THE_RISK : 1
ARMY_JUL : 1
STATES_UNDERSTANDING : 1
GROUP_EDUCATION : 1
PAIN_RECEIVED : 1
PAIN_PM : 1
TE_ANSWERING : 1
ANY_DYSPNEA : 1
CONSISTED_DISCUSSION : 1
VACCINE_IS : 1
FOLLOWING_OF : 1
SENT_TO : 1
AMOUNT_URINE : 1
ASF_PREPROCEDURE : 1
POSTERIOR_ABD : 1
4D_INPATIENT : 1
MORE_VISIT : 1
COMPLAINT_NONVA : 1
LIPID_COLL : 1
SKIN_AND : 1
PODIATRY_CLINIC : 1
PLANS_BE : 2
ON_TREATMENT : 1
INCLUDES_TOBACCO : 1
OF_BIRTH : 1
AS_AS : 1
TO_NOTIFY : 1
PRESENT_ILLNESS : 2
REASON_REFERRAL : 1
HISTORY_INAPPROPRIATELY : 1
FEELINGS_PERCEPTIONS : 1
COOPERATIVE_TE : 1
SKIN_VANOD : 1
II_NONE : 1
FOLLOWS_WILL : 1
DYFUNCTION_THE : 1
PROBLEMS_WITH : 1
UNDERMINING_REPORTEDLY : 1
UNDERSTANDING_PRMC : 1
PLEAS_CONTACT : 1
MEMORY_GOOD : 1
READINESS_METHOD : 1
RISK_SPECIAL : 1
REPORT_BY : 1
WAITING_OF : 1
PAIN_ENCOURAGE : 1
PLEURITIC_NATURE : 1
MEDICATION_YET : 1
THERAPY_BREATHING : 1
EVENING_HEALTH : 1
PLEASE_NOTIFY : 1
ATTENDANCE_TO : 1
TEAM_LOC : 1
CHRONIC_MEDICAL : 1
ABILITY_CHEST : 1
DISCHARGED_SUCTIONING : 1
DRUG_USE : 1
AWAITING_BOARDING : 1
YES_BMS : 1
IN_NO : 2
DATE_TEMPERATURE : 1
REACTIONS_PATIENT : 1
MD_TOBACCO : 1
OCT_RADIATION : 1
TO_SHARON : 1
REMAIN_AVAILABLE : 1
AN_BUT : 1
ARE_TO : 1
OF_TUMOR : 1
OF_DEATH : 1
PATIENT_INAPPROPRIATELY : 1
WITH_TD : 1
MG_MG : 1
INDICATION_ROUTE : 1
HISPANIC_ORIGIN : 1
NO_SYMPTOMS : 1
REFER_DIETITIAN : 1
ATRIAL_FIBRILLATION : 1
RESP_ETOH : 1
AND_TRAZODONE : 1
LOR_STATUS : 1
TO_MANAGE : 1
AND_AGREED : 1
DENTAL_NOTIFYING : 1
TREATMENT_IS : 1
TO_MRSA : 1
EVENT_EXPERIENCE : 1
TALKATIVE_BUT : 1
PATHOLOGY_SUBMITTED : 1
CURRENT_CRYING : 1
LEVEL_SYMPTOMS : 1
TO_TO : 4
GUARDIAN_COMPLETE : 1
ME_SAW : 1
OF_HEALTH : 1
PATIENTS_ACCEPTABLE : 1
MEDICATIONS_HAS : 1
ATTENDANCE_IN : 1
AND_WITHIN : 1
IS_TOBACCO : 1
ISOLATED_ACETAMINOPHEN : 1
REFERRED_TYPE : 1
INCLUDING_CRACK : 1
AND_TENSE : 1
INPATIENT_SUICIDE : 1
RETINOPATHY_BUT : 1
WRITE_THE : 1
HE_RETURN : 1
TID_PRN : 1
ER_WHICH : 1
PRESCRIPTIONS_HE : 1
TAKING_MEDICATION : 1
REM_TOOTH : 1
CONSENT_EXACERBATED : 1
MEDICATIONS_NOT : 1
AT_ALL : 1
ZINKEN_NICOTINE : 1
ON_ABOUT : 1
TELEPHONE_NOTE : 3
LEFT_THIGHT : 1
TO_HIM : 2
ATTENDED_GROUP : 1
WITH_CONVERSATION : 1
WHEN_NEW : 1
THICKNESS_MEASURES : 1
WERE_AND : 1
LT_LATERAL : 1
HIS_GROIN : 2
CONSULT_BFAST : 1
IN_MONTHS : 1
SIGNS_ERYTHROMYCIN : 1
NEW_IS : 1
PATIENT_DROPPED : 1
WITH_YELLOW : 1
AND_REMAINS : 1
SULFA_TRIMETHOPRIM : 1
EDEMA_DISTAL : 1
LISANSKY_BEEN : 1
RETURNING_TO : 1
BREATHING_MASSAGE : 1
GRIMACING_OF : 1
COPAY_STATUS : 2
OF_PROVIDERS : 1
CURRENT_CLEAR : 1
THINGS_PROBLEM : 1
COMPLETELY_SEEN : 1
NONE_WORST : 1
CARRIER_CLOCK : 1
CARRY_PLAN : 1
NUMBER_IS : 1
HER_NEEDS : 1
BY_OBTAINED : 1
PATIENT_USED : 1
MEMBERS_ATTENDANCE : 1
THE_PRACTITIONER : 1
YES_PAIN : 1
PRESSURE_COPAY : 1
TEST_IN : 1
CHEST_COURSE : 1
NOTIFIED_PAIN : 1
IPRATROPIUM_INHL : 1
HE_COUMADIN : 1
TIME_NOTIFICATION : 1
BLEPHARITIS_NOS : 1
FILL_DATE : 1
PRIORITIZING_HER : 1
EITHER_OF : 1
ORAL_VET : 1
NURSING_CLEAR : 1
REPORTED_THAT : 2
REPEAT_PAP : 1
THE_UPPER : 1
FULL_OF : 1
MICU_EVERY : 1
SIGNS_DO : 1
INFLUENZA_IS : 1
NOTED_AM : 1
TO_NOTE : 1
SHOWING_SIGNS : 1
NON_EXEMPT : 1
NO_PLAN : 1
SUGGEST_ICA : 1
AVOID_ALCOHOLCONTAINING : 1
PRIMARY_PURPOSE : 1
SCRABBLE_RELATIONSHIP : 1
KEEP_6A : 1
RTC_ON : 1
UP_APPT : 1
FOR_VA : 1
CONTINUED_VOMITING : 1
HUD_YOU : 1
SOBRIETY_AND : 1
EFFECTS_THE : 1
FOOT_AND : 1
TID_NORMAL : 1
FROM_MENTAL : 1
BEHALF_BECOMES : 1
NAME_HYPOTENSION : 1
LANSING_PHONE : 1
LMSW_IS : 1
NEW_PRESCRIPTIONS : 1
MEDICATIONS_NOTE : 1
HAD_AND : 1
COMMENTS_PLEURITIC : 1
FEET_ARE : 1
IS_GOING : 2
CONTROL_PATIENT : 1
HE_NOT : 4
KNOWLEDGE_DEFICIT : 1
PATIENT_TAKING : 1
HONORABLE_PANIC : 1
REALLY_HIM : 1
MAL_AVOID : 1
PRIMAY_SET : 1
TO_ME : 2
HYDROXIDE_ORAL : 1
MEALS_ACTIVE : 1
BE_EXTERNAL : 1
ADL_FLOWSHEET : 2
THAT_MEMBERS : 1
MALATINSZKY_TEAM : 1
TREATMENT_USE : 1
DRUG_ETOH : 2
IS_PROVIDED : 1
ON_HIS : 4
PATIENT_REPORTED : 2
ROOM_MOST : 1
BY_HYDROXYZINE : 1
LOW_FOURTH : 1
RADIATION_ON : 1
UNCOOPERATIVE_NO : 1
IN_RIGHT : 2
COMPLAIN_COUGH : 1
EEG_EPILEPTIFORM : 1
HANDOUT_THE : 1
MISSING_FROM : 1
UP_SERVICE : 1
HE_FELL : 1
MAR_EXAM : 1
STATUS_THE : 1
NURSING_SUMMARY : 1
PROCEDURES_PROVIDER : 1
THAT_HAS : 3
COUGH_WITH : 1
PT_FOR : 2
PRO_PHONE : 1
PATIENT_SEES : 1
DENIED_ILLICIT : 1
IN_REGARDS : 1
WITH_IN : 3
SC_DOCUMENTS : 1
COMMUNITY_NURSE : 1
WILL_CHECK : 1
PCP_MEDICATION : 1
SUPPORT_OF : 1
RESTING_BED : 1
DECLINED_NEEDED : 1
MM_NO : 1
IS_VET : 1
OF_FREQUENCY : 1
NUMBER_SAME : 1
NEXT_DENIES : 1
AT_HOME : 1
TO_GREATER : 1
FOR_ATTN : 1
MEDICATIONS_EXCLUDING : 2
LITERS_ELIMINATION : 1
EXPERIENCE_VERBAL : 1
STATES_HAS : 1
PATIENT_CARE : 1
IS_ACCOMPANIED : 1
WEIGH_SELF : 1
NO_COLOR : 1
TO_SELF : 1
ALONG_PREDNISONE : 1
BY_VOLUNTEER : 1
LIFE_DATA : 1
DROPPED_BY : 1
WORK_AT : 2
TO_GOAL : 1
LOR_PT : 1
DEPENDENCE_ANOTHER : 1
INCLUDING_DATE : 1
TO_OWN : 4
OUTSIDE_RECORDS : 1
STATUS_FILL : 1
SIG_ONEHALF : 1
CHANGE_NEEDED : 1
CHILDHOOD_AIRWAY : 1
TO_IS : 1
HEALTH_MANAGEMENT : 2
SUICIDAL_IDEATION : 1
TIMES_VESICLES : 1
RECONCILIATION_BODY : 1
LESIONS_COUPLE : 1
WAS_LONGER : 1
NOTE_PLEURITIC : 1
VAMC_GEN : 1
DOSE_SIDE : 1
LEFT_FOOT : 1
BED_THROUGHOUT : 1
NO_ADJUSTING : 1
PINESS_SCALE : 1
LIMITED_OPEN : 1
TO_FOLLOW : 3
IMAGERY_MASSAGE : 1
ANTIHISTAMINES_NO : 1
INTO_TROUBLE : 1
AND_ANXIOUS : 2
WEEK_AGO : 1
EASY_ANY : 1
TO_MILIEU : 1
TRANSITION_AWAITING : 1
THE_WORK : 1
BEEN_OVER : 1
CRACKERS_ONLY : 1
OF_MAY : 1
ALLERGY_HISTORY : 1
OF_THERAPY : 2
HAS_ISOLATED : 1
FOR_YOUR : 1
PERSON_AND : 1
KG_DOES : 1
FOCUS_TO : 1
LIPID_PROFILE : 1
IT_SULFA : 1
AND_AREA : 1
INSTRUCTIONS_TO : 1
PATIENT_UNDERSTANDING : 1
SIGNS_MONITOR : 1
BARRETTS_AND : 1
DIRECT_TO : 1
DRY_RAISED : 3
PLACE_AND : 1
MEDICATIONS_FAIR : 1
TO_WT : 1
IMPROVED_SINCE : 1
AREA_LANSING : 1
COOPERATIVE_EYE : 1
PATIENT_PLACEMENT : 1
AND_POSSIBLE : 1
RATE_INCREASES : 1
LAST_PCP : 1
MALATINSZKY_ORANGE : 1
ASKED_TO : 1
REPORT_WOUND : 1
AT_VIA : 1
REPORTS_REMEMBERING : 1
TO_APPEARANCE : 1
SPC_ALSO : 1
VET_HAVE : 1
SERVICE_VIETNAM : 1
SIGNS_ASSES : 1
DRAINAGE_TRACKING : 1
CONSISTENT_TROCHANT : 1
HE_STANDARD : 1
DRAINAGE_OR : 1
PVT_MDS : 1
BEFORE_BREAKFAST : 1
YOUR_OF : 1
PERSON_PLACE : 1
LABS_SECOND : 1
ORTHOSTATIC_VET : 1
SUSPICIOUS_FOR : 1
OT_FOR : 1
CODEINE_PENICILLIN : 1
IN_EXAM : 1
PLEURITIC_IN : 1
SERVICE_PULMONARY : 1
AND_OUT : 1
THIGHT_AND : 1
TINNITUS_SERVICE : 1
THE_DISCUSSION : 1
SUSP_ORAL : 1
KNOWLEDGE_RESPONSE : 1
OA_SYMMETRICAL : 1
PATIENT_PAIN : 2
DAILY_NOTE : 2
VETS_PRESENTS : 1
USER_BLOOD : 1
MEDICAL_RECORDS : 1
AWAKE_AND : 2
DISEASE_CONGESTIVE : 1
RESP_EASY : 1
CARE_DCF : 1
WAS_TO : 5
ADMITTED_TELEMETRY : 1
ASSESSMENT_MOISTURE : 1
MEDICATIONS_AND : 2
DIAGNOSIS_FURTHER : 1
ACTIVITY_WORK : 1
AND_TYLENOLABOUT : 1
AREAS_NOTED : 1
PHONE_SERVICES : 1
STOOLS_PAIN : 1
FOLLOW_CALLED : 1
LSOING_ALSO : 1
NONE_TO : 1
CALL_VET : 1
ABUSE_NEGLECT : 1
VISIT_DENIES : 1
DEPRESSED_HE : 1
ACIPHEX_TAB : 1
COMMENT_GIVEN : 1
NOON_GLUCOSE : 1
SURGICAL_NOTE : 1
OF_TELEPHONE : 1
OT_DAILY : 1
NO_IMPAIRMENT : 1
COULD_TRANSFERRED : 1
OMEPRAZOLE_MG : 2
NOTE_TO : 2
HIS_AND : 2
PENICILLIN_PRIORITIZING : 1
WILL_THE : 1
ABD_PAIN : 1
DOING_VOLUNTEER : 1
COMPLAINT_CONDITION : 1
PLAN_PT : 1
NOT_HEEL : 1
ONLY_TV : 1
TO_RIGHT : 1
INTERACTIVE_TENSE : 1
OF_PROCEDURE : 1
FOR_SINCE : 1
HAS_CAD : 1
PAP_SCAN : 1
HAS_FOLEY : 1
COMPUTER_INITIATES : 1
PHYSICAL_EMOTIONAL : 1
ORAL_MCG : 1
REVIEWED_CARE : 1
CALL_HOSPITAL : 1
DONE_PM : 1
VESICLES_RUPTURED : 1
EAGER_LEARN : 2
NO_AFTER : 1
DRESSEDHE_THINKS : 1
VOIDING_LRI : 1
INITIATION_PAIN : 1
IID_DISCHARGE : 1
MANAGEMENT_PALPATION : 1
TO_CHANGE : 1
DOES_CALMER : 1
COVERED_DIABETIC : 1
ACCOMMODATE_HE : 1
TAB_PO : 7
WHEELCHAIR_MOBILITY : 1
PLACEMENT_SNF : 1
PAIN_LEVEL : 5
EIC_ON : 1
ABILITY_AM : 1
HAVE_CONSULT : 1
YES_FOLEY : 1
OTHER_THAN : 1
COMPLETED_THE : 1
YOUR_NEXT : 1
RAL_AND : 2
OF_ALLERGIES : 3
TOPICALLY_BENIGN : 1
CARE_AS : 1
FEELS_HE : 1
PATIENT_XXXXXXXXXXXXXXXXXXXXXXXXXXXXXXXXXXXXXXXXXXXXXXXXXXXXXXXXXXXXXXXXXXXXXXXXXX : 1
TOLERATING_MEDS : 1
PSYCHIATRIC_FOLLOW : 1
NONTOBACCO_EXTREMITIES : 1
VISIT_RESPIRATION : 1
DATE_INITIATED : 1
LEVEL_NURSING : 1
FOR_NOT : 1
ORGANIZED_ATTENDED : 1
CA_RADIATION : 1
REHAB_HERE : 1
HAS_PING : 1
HIM_TO : 2
ADDED_PROVIDED : 1
NO_BUT : 1
THE_PER : 1
CHEWABLE_CHEW : 1
WILL_FURTHER : 1
ORAL_MARITAL : 1
IS_OLD : 1
LOSING_AND : 1
WHICH_YES : 1
FOBT_CARDS : 1
OFFERED_MANAGEMENT : 1
ICDCM_RELATIONSHIP : 1
FOR_THE : 2
NOTE_SUICIDAL : 1
HEAD_APPT : 1
YES_OUTSIDE : 1
THREE_FOR : 1
DIPLOPIA_VISION : 1
DYSPNEA_RA : 1
TIMES_THE : 1
USE_MEDICATION : 1
TYPICAL_ALSO : 1
PERIOD_OF : 1
BLOOD_IN : 1
SERVICE_PHARMACY : 1
THERAPY_REPORT : 1
ANXIETY_PREVENTIVE : 1
BECAUSE_LOW : 1
COMPLAINT_AND : 2
PRESCRIBE_AND : 1
THEN_CT : 1
HE_WILL : 1
TO_ERYTHEMA : 1
GIVE_TO : 1
ORAL_ACTIVE : 1
AID_NONE : 1
WILL_TO : 3
PAST_ENCOURAGED : 1
WHEN_BEGAN : 1
THIS_INCLUDE : 1
VTEL_UP : 1
PROVIDE_WITH : 1
PTSD_ICDCM : 1
SWS_AT : 1
CHECKED_BUT : 1
HIS_COMPLAINT : 1
REALISTIC_TALKING : 1
HISTORY_PER : 1
XYZZY_NVO : 2
FIANCE_SUMMARY : 1
CBOC_CARE : 1
TOLERATED_OR : 1
AND_FEELING : 1
REMINDERS_FOLLOWS : 1
DATE_OF : 2
VET_WILL : 1
DENIED_HAVING : 1
OF_SESSION : 1
HAS_APPETITE : 1
NOTIFY_THAT : 1
AT_TIMES : 1
REMOVED_WELL : 1
PREPARED_TO : 1
POINT_HE : 1
PHONE_CALL : 1
ABILITY_DIAST : 1
SESSION_EVERY : 1
SURE_WHAT : 1
THAT_COUMADIN : 1
BUT_OVER : 1
WORK_IM : 1
EXACERBATED_BY : 1
HR_FOLLOWING : 1
STRATTERA_TRAZODONE : 1
EXISTING_OF : 1
EMB_SM : 1
SUMMARY_INSTRUCTED : 1
WEEKENDERS_THAT : 1
SYMMETRICAL_ALSO : 1
COOPERATIVE_BUT : 1
ORDERED_WELL : 1
FOR_PAIN : 1
EDUCATION_MATERIALS : 1
MARCH_PRECIPITATED : 1
PROFILE_COLL : 1
YEAR_BEFORE : 1
STOOLS_OR : 1
COORDINATOR_BESYLATE : 1
THE_WILL : 1
OR_PULSE : 1
THROUGHOUT_NIGHT : 1
BRIEF_HISTORY : 3
NEEDS_STAY : 1
IPRATROPIUM_ORAL : 1
OF_DISCUSSION : 1
OUT_BUT : 1
BONE_TRACKING : 1
COMPLEX_OCC : 1
AS_PATIENTS : 1
REPORT_INPATIENT : 1
MEDICATION_ALBUTEROL : 1
AND_REQUESTING : 1
AND_DEPRESSED : 1
IS_OUTSIDE : 1
VITAL_DO : 1
DISCHARGE_WILL : 1
PHYSICIAN_YES : 1
AND_REFER : 1
BLOOD_TEMPERATURE : 1
FRIEND_DOES : 1
YRS_CALLER : 1
CONSULT_HEIGHT : 1
DOSAGES_ROUTE : 1
APPTS_UNDERSTANDING : 1
POPULATIONS_HAS : 1
COLD_WEEK : 1
FROM_MEDIASTINOSCOPY : 1
REDUCTION_INTERNAL : 1
EYE_CONTACT : 1
REASSESSMENT_FOLLOW : 1
ITCHING_NOT : 1
OUTPATIENT_RESPONSE : 1
FAMILY_OR : 1
PAIN_ON : 1
OK_CULTURES : 1
MEDICAL_UNLESS : 1
YOU_6A : 1
TIME_AVAILABLE : 1
PULSE_BP : 1
DESIRE_MOTIVATION : 1
BEING_INDEPENDENT : 1
TIME_NO : 1
MONITOR_SKIN : 1
ONLY_FALL : 1
COOPERATIVE_AND : 1
PREP_INSTRUCTIONS : 1
EDUCATION_TWO : 1
CARE_SOCIAL : 1
FROM_INTENSIVE : 1
AS_WILL : 1
NOT_APPROVED : 1
SCALE_TYPE : 1
HE_WENT : 1
CARE_SEP : 1
INSULIN_CED : 1
HIGH_DRUGS : 1
PROBE_UNDERMINE : 1
PO_DAILY : 1
STATES_ASPIRIN : 1
WELFARE_AS : 1
CURRENT_MEDICATIONS : 1
GOAL_WHETHER : 1
RIGHT_FOREARM : 1
IN_IS : 1
RESPIRATION_REFER : 1
FROM_MEDICATIONS : 1
WRAPUP_GROUP : 1
SM_EITHER : 1
TO_VA : 1
HERE_HE : 1
PAP_AT : 1
HERE_VA : 1
AND_ONLY : 1
SUICIDAL_BRIEF : 1
TOLERATING_IF : 1
INTERVENTIONS_NURSES : 1
COUNCIL_HE : 1
FOOT_THE : 1
RIGHT_ML : 1
PC_STATES : 1
APPT_WITH : 2
FOR_TROUBLES : 1
DIABETES_MELLITUS : 1
PT_HERE : 1
QUIT_RESPIRATION : 1
PROVIDED_ON : 1
SUCTIONING_NO : 1
SOUTH_PT : 1
WAS_FOR : 1
ANY_OTCS : 1
VISTA_IMAGING : 1
ACTIVE_AVOID : 1
SKIN_MOISTURE : 1
REQUESTING_OF : 1
AGAIN_HIM : 1
SCHEDULE_COORDINATOR : 1
NOT_OF : 3
MULTIPLE_FRACTURES : 1
UNDERSTANDING_AND : 1
IBUPROFEN_TAB : 1
EYE_COLOR : 1
OCTOBER_MR : 1
OBSERVABLE_CHANGES : 2
HIM_WANTED : 1
ESOPHAGEAL_PLACE : 1
PT_REPORTS : 1
NOTIFYING_AND : 1
WARM_DRY : 1
BORDINKO_CHRIS : 1
MILIEU_THE : 1
APPT_PAIN : 1
WHEN_HE : 1
PRESSURE_BUT : 1
YEAROLD_THREE : 1
VA_CLINICAL : 1
APPOINTMENT_PHYSICIAN : 1
CC_VIA : 1
IN_HAWAI : 1
TO_DO : 2
ADMITS_THAT : 1
CUFF_NEXT : 1
THE_WAIS : 1
AS_CURRENT : 1
NO_ELIGIBILITY : 1
CONTINUE_AS : 1
SHORT_ONE : 1
MASS_HIGHLY : 1
PRESCRIBE_ADJUST : 1
SENSORY_NO : 1
PAIN_MEDS : 1
ORIENTED_ROM : 1
INFORMATION_BEEN : 1
THEN_WHICH : 1
CALLED_LEFT : 1
MANAGEMENT_CODE : 1
FOR_DIABETIC : 1
IS_FEELING : 1
SINCE_PREPROCEDURE : 1
VETERAN_HIM : 1
ER_PINES : 1
KNOWLEDGE_DISEASES : 1
THEN_PT : 1
WHEN_HIS : 1
DRESSED_WITH : 1
SIDE_AFFECTS : 1
SUICIDAL_ND : 1
BUT_STATES : 1
VERIFIER_ES : 1
WAS_ENROLLED : 1
DISCUSSED_PRIORITIZING : 1
PENICILLIN_MG : 1
RHYTHM_EXTREMTIES : 1
CXR_AND : 1
MULTIPLE_HERE : 1
NORMAL_PATIENT : 1
HIS_HER : 1
SURGERY_NOTE : 1
NO_LETHALITY : 1
THE_FOBT : 1
BEARING_ETC : 1
MONTHS_WITH : 1
DRUGS_THAN : 1
FOR_PRF : 1
ALCOHOL_PTSD : 1
GIVEN_ON : 1
INTERVENING_PT : 1
NOTE_THAT : 1
HIS_6A : 1
VETS_BECOMES : 1
YOUR_FROM : 1
WEEK_OTHER : 1
RX_WAL : 1
HOME_NUMBER : 1
PLEASE_CONTINUE : 1
PLEURITIC_COMPONENTS : 1
MEDICATION_RECONCILIATION : 1
LEVEL_IN : 1
TO_ON : 3
NAME_SSN : 1
CC_ROUTINE : 1
GLUCONATE_TAB : 1
DELTOID_TO : 1
DATE_RANGE : 1
EDUCATION_VETERAN : 1
TINNITUS_CONNECTED : 1
ORDERED_AND : 1
AT_PHARMACY : 1
REPORT_SUBMITTED : 1
MEDICATION_TOPICALLY : 1
FOR_COUPLE : 1
PRN_HEADACHE : 1
CURRENTLY_BEING : 1
HIS_HR : 1
GAS_DENIES : 1
PSYCHOSISRESOLVED_CHIEF : 1
DENTAL_CARE : 1
FEELING_LIST : 1
THE_DIVALPROEX : 1
ANSWERED_NOTED : 1
WIFE_TO : 1
CLINICAL_HISTORY : 1
THE_PROVIDE : 1
METAB_HE : 1
CONTINUE_TO : 3
DOB_PATIENT : 1
OF_PROBE : 1
INTERACTING_PROVIDE : 1
HEMATURIA_HAS : 1
MEDIASTINOSCOPY_INFORMATION : 1
STRESSORS_EXCEPT : 1
HAVE_DRINK : 1
OR_ALERT : 1
DYFUNCTION_AND : 1
VET_HE : 2
WAS_NEGATIVE : 1
MI_IN : 1
NO_ASSESS : 1
IS_IMPROVEMENT : 1
HE_BEEN : 5
THROAT_SUPPLIES : 1
HOSPITAL_CONTINUED : 1
DOES_TYPICAL : 1
DONE_BY : 1
EPIS_OF : 1
HIM_MOST : 1
HAVE_REPEAT : 1
RIGHT_GROIN : 2
OF_HEAD : 1
RESCHEDULE_PSYCHIATRIC : 1
CONTACT_MANAGEMENT : 1
ALSO_ALLERGIC : 1
MALE_MARITAL : 1
NO_SA : 1
OP_DESIRE : 1
TYPE_DATE : 1
PT_BEING : 1
REMSTAR_RISK : 1
THIS_AND : 2
PODIATRY_VET : 1
NOT_SHOWING : 1
DISORDER_RECURRENT : 1
WITH_CONGESTION : 1
AND_PERSON : 1
VITAL_WITH : 1
AND_ONE : 1
LYING_BED : 1
WORSE_THE : 1
VET_THIS : 1
APPT_DATE : 1
ATTENDING_HYPERLIPIDEMIA : 1
OCCUR_RESPIRATION : 1
HISTORY_DOES : 1
ON_TOPIC : 1
COPY_OF : 1
LONGER_THE : 1
ON_PRSE : 1
AND_AWAKE : 2
LETTER_VETERAN : 1
CARDIOLOGY_ORDERED : 1
ASKED_CREATE : 1
DIAGNOSTIC_DATE : 1
CHEST_PAIN : 2
GET_MORE : 1
FERROUS_MG : 1
AND_RAISED : 1
RISK_FACTORS : 1
FIB_LIMITED : 1
THIS_PLAN : 1
TO_ACCUCHECK : 1
AMPUTATION_OF : 1
WITH_MEDICAL : 1
PMHX_OF : 1
MADE_PCP : 1
OXIMETER_FOR : 1
NOTE_NOTIFICATION : 1
DIVORCED_PERIOD : 1
AMP_AM : 1
NEW_STUTTERING : 1
IS_PRESENT : 1
HIM_THIS : 1
WHICH_AN : 1
SAYS_IN : 1
CONSENT_INSTRUCTED : 1
MG_TA : 1
GRANULAR_SIGNS : 1
RTC_SYMPTOMS : 1
GIVE_THIS : 1
STATUS_OF : 1
PORTABLE_OMEPRAZOLE : 1
CARDIOPULMONARY_RECTAL : 1
WITH_ETOH : 1
OF_RIGHTS : 1
WAS_SEEN : 1
DOCTOR_FOLLOW : 1
FOR_NAUSEA : 1
ESIG_TONGUE : 1
CONNECTED_CBOC : 1
MORE_THAN : 1
MEDICATION_MOMETASONE : 1
NO_TOUR : 1
PROVIDE_UNDERSTANDING : 1
ABDOMEN_IS : 1
SPECIAL_POPULATIONS : 1
NURSING_DATE : 1
FOLLOWUP_POTENTIAL : 1
HIGHINR_CALLED : 1
BUT_STATED : 1
DEBRA_NURSE : 1
EDUCATED_LEARNING : 1
INITIAL_ALCOHOL : 1
NONE_WILL : 1
HE_AGREED : 1
NO_URINE : 1
DO_BELIEVE : 1
MATERIALS_TO : 1
IS_TOOL : 1
OR_INJURY : 1
RISK_STATUS : 1
AND_FEARS : 1
HAS_US : 1
VERBALIZED_UNDERSTANDING : 3
DIAG_WEAK : 1
OXIMETRY_NO : 1
TO_ER : 1
IN_INSTRUCTIONS : 1
WAITING_ROOM : 1
CALLER_LANSING : 1
SKIN_RISK : 1
HISPANIC_ASPIRIN : 1
BE_WORSE : 1
BUT_INCREASED : 1
TO_BE : 8
JUN_JUL : 1
PINES_CRMC : 1
COUGH_AM : 1
CHEM_AND : 1
BASIC_KNOWLEDGE : 1
INCREASED_FROM : 1
BETTER_TEST : 1
PATIENT_DEPRESSED : 1
DOSAGE_SIDE : 1
PRESCRIBED_ALONG : 1
DO_THAT : 1
ACCEPTABLE_OF : 1
AUTOMOBILE_HE : 1
PALPATION_ANT : 1
RECTAL_EXAM : 1
AND_MG : 1
THE_VETERAN : 5
ULCERATION_HIS : 1
MALE_RACE : 1
MG_PATHOLOGY : 1
OR_PND : 1
DECLINED_CHANGE : 1
HAS_USING : 1
WITH_THE : 2
WAS_HE : 1
PER_PHYSICIAN : 1
SHARON_MENTAL : 1
PLACE_CALL : 1
THIS_EPISODE : 1
DIARRHEA_NO : 1
IMPROVEMENT_FOLLOWING : 1
WAIS_CONVERSION : 1
THIS_REMAIN : 1
PRACTITIONER_RECORD : 1
INFECTIONS_HYPERACTIVITY : 1
HAS_OVER : 1
ADMIT_MICU : 1
UP_DENIES : 1
JOB_NUMBER : 1
WHEN_SEEK : 1
EMERGENCY_TREATMENT : 1
ADDENDUM_BESYLATE : 1
YOU_THAT : 1
ABLE_BE : 1
PROVIDER_WHEN : 1
REFERRED_FREQUENCY : 1
ENROLLED_WITH : 1
THE_TYPE : 1
AM_AGAIN : 1
INCLUDING_WHEN : 1
SCREEN_INFORMED : 1
NIGHTMARES_OF : 1
IS_SOFT : 1
WITH_EXTE : 1
NOT_HR : 1
REPORT_GIVE : 1
ONEHALF_TABLET : 3
HIM_REQUEST : 1
NECK_PAIN : 1
ASSESS_PAIN : 1
STATES_THIS : 1
SI_ANXIOUS : 1
ML_DAILY : 1
DRUNK_HIGH : 1
ORIENTED_PERSON : 1
INFORMATION_ENTER : 1
NO_MADE : 1
HOSPITAL_AND : 1
MASS_NORMAL : 1
THAT_LIFE : 1
PEERS_ON : 1
AT_DOSE : 1
OXIMETER_WNL : 1
FINANCIAL_HOSPITAL : 1
LRI_APPROVES : 1
TALKING_WITH : 1
ACTIVE_TRAZODONE : 1
FREQUENCY_RANGE : 1
IF_HE : 1
AND_ROM : 1
WAS_TAB : 2
NORMS_INSTEAD : 1
HAD_MOTORCYCLE : 1
DEPRESSION_WITH : 1
THE_DIAGNOSTIC : 1
PAIN_WEEK : 1
ILLICIT_DRUG : 1
THE_SITTING : 1
CHF_VET : 1
DYSPNEA_NO : 1
MEDS_NO : 1
WHO_INSTRUCTED : 1
HAS_BEEN : 12
NEEDED_BE : 1
HR_AND : 1
REPORT_CHRONIC : 1
SWITCHED_TOMORROW : 1
FOR_FOLLOW : 1
DE_OF : 1
FOR_FINANCIAL : 1
WAS_EVERYTHING : 1
PATIENT_MOTORCYCLE : 1
YES_HISTORICAL : 1
FOLLOWED_NANDA : 1
POSSIBLE_TERM : 1
SESSION_DATE : 2
ANTERIOR_POSTERIOR : 1
LOCAL_6A : 1
CHOL_DOES : 1
BE_AS : 1
SCAR_GROOVE : 1
ROM_HEAD : 1
HELD_INSTAGLUCOSE : 1
HIGHLY_FOR : 1
WITH_ON : 2
BRIEF_WITH : 2
OF_FOLLOWING : 2
FOR_TAB : 1
PROMOTE_STATUS : 1
ACTIVE_PT : 2
PHYSICAL_PATIENT : 1
OF_MEDICAL : 1
PLEURITIC_HE : 1
IN_CHICAGO : 1
OTHERS_HIS : 1
TB_TEST : 1
WILL_CONTINU : 1
REQUESTING_TO : 2
PSYCH_FACILITY : 1
MOOD_HAS : 1
GO_DENIES : 1
AND_SUCTIONING : 1
INTERNAL_FIXATION : 1
DENIES_ANY : 3
OXIMETRY_ORDERED : 1
BY_DOING : 1
TO_OR : 1
EXEMPT_PULSE : 1
MEDICATION_EDUCATION : 2
IS_CHECKED : 2
OR_COMPLICATIONS : 1
MG_CAP : 2
MORE_REALISTIC : 1
MANY_HIS : 1
DOSAGE_AND : 1
CHANGES_THIS : 2
TOBACCO_PATIENT : 1
TOO_LOW : 1
EDUCATION_ADDICTION : 1
SITE_DELTOID : 1
CARE_DOCTOR : 1
FALL_SCREENMORSE : 1
HEALED_ALAR : 1
AT_BEDTIME : 1
HIS_WHEN : 1
RECKLESS_HE : 1
CARE_TYPE : 1
RECEIVE_ALL : 1
MONTH_ADDENDUM : 1
OF_NOT : 1
FEELS_LIKE : 1
PATIENT_IS : 8
OF_MOUTH : 1
REQUEST_COPY : 1
UROLOGY_RECOMENDATIONS : 1
OR_THERE : 1
ARM_CHEST : 1
MEDS_ETC : 1
THERAPY_NOTE : 1
CLOCK_CORRECTLY : 1
CLEAR_RESP : 1
DESPITE_AND : 1
PLAN_PATIENT : 1
WEEK_FOLLOWING : 1
CONSULT_PRIMARY : 1
ADVISE_IF : 1
IN_WHEELCHAIR : 1
FIXATOR_DEVICE : 1
REACTIONS_THE : 1
GERD_HYPERLIPIDEMIA : 1
LB_PATIENT : 1
PREPROCEDURE_SURGICAL : 1
GIVEN_YES : 2
CONTROLS_TABLE : 1
DENIES_OTHER : 1
REQUESTED_4D : 1
FOR_REASSESSMENT : 1
FURTHER_PATIENT : 1
PT_RETIRED : 1
VOICED_OR : 1
BEEN_IN : 1
GERD_AND : 1
CONTINUE_PRESENT : 1
ADEQUATELY_DEMO : 1
ACTIVE_PLAN : 1
SSN_PATIENT : 1
EDGE_OF : 1
EXTREMTIES_PITTING : 1
DATED_CAN : 1
BMS_NO : 1
OF_INSTRUCTIONS : 1
AND_THE : 1
BUPIVACAINE_CC : 1
DISTAL_INTACT : 1
SATT_EDUCATION : 1
NO_INFORMATION : 1
CARE_AND : 1
PROGRESS_NOTE : 1
KEEP_SCHEDULED : 1
MORPHINE_OBJECTIVE : 1
BELOW_STATES : 1
TIMES_FOR : 1
GIVEN_AND : 1
INCLUDE_ING : 1
SCORE_TO : 1
EKG_LABS : 1
BMI_MASS : 1
PATIENT_THAT : 3
CHANGE_REPORTED : 1
DO_RECEIVE : 1
REALLY_SCARED : 1
THAT_MEMORY : 1
AND_EVERSION : 1
SUICIDE_IS : 1
UPDATED_HR : 1
STRESSORS_FOR : 1
OR_HERBAL : 1
PUFF_ORAL : 1
ENCOURAGE_INTAKE : 1
PER_TRANSFER : 1
AUDIBLE_ANTERIOR : 1
HE_TO : 9
CARPENTER_LAST : 1
ANSWER_JAW : 1
ILLICIT_DRUGS : 1
CARPENTER_WORKED : 1
ADMINISTRATIVE_NOTE : 1
RHINITIS_BELONGINGS : 1
BENIGN_PROSTATE : 1
YEAR_STATES : 1
SCREENING_APNEA : 1
AWAITING_MEDICAL : 1
FOCUS_OF : 1
GOING_TO : 3
HAS_LOT : 1
CPAP_VACCINE : 1
GIVEN_EDUCATION : 1
BIOPSY_WAS : 1
MEDICATION_REVIEWED : 1
WORST_EXCEPT : 1
FOLLOW_TINNITUS : 1
DOING_THINGS : 1
STATUS_PT : 2
LANTUS_UNITS : 1
RECEIVED_DENTAL : 1
EACH_SITE : 1
ON_WILL : 1
ON_OF : 3
TEMPERATURE_CALLER : 2
CAUSE_FOR : 1
TO_TOLERATING : 1
PULSE_OXIMETER : 1
SYMPTOMS_ADJUSTING : 1
LAB_LB : 1
NURSE_TIMEOUT : 1
FO_PT : 1
COMPLIANT_DEPRESSIVE : 1
SEES_PVT : 1
TRANSFERRED_EXTERNAL : 1
CHRIS_HORNER : 1
DISEASE_MEDICAL : 1
OF_RESCHEDULE : 1
OR_GREATER : 1
INSTRUCTIONS_PATIENT : 1
WHEELCHAIR_AND : 1
CAN_OTHER : 1
BUT_BY : 1
GRADE_FEVER : 1
GEN_ALERT : 1
YES_NORMALLY : 1
PERCEPTION_NO : 1
SEP_PULSE : 1
WANTS_INFECTIONS : 1
INPATIENT_MEDICATION : 1
HOME_DM : 1
CARRY_OUT : 1
COOPERATIVE_TALKATIVE : 1
EVERYTHING_THIS : 1
DIPYRIDAMOLE_MGS : 1
HAVE_TRANSFERRING : 1
ON_SAFETY : 1
SUICIDAL_PLAN : 1
PROVIDER_INFORMED : 1
LABS_WITH : 1
MOST_OF : 3
WHICH_RESEMBLED : 1
ILLNESS_THEN : 1
KLEIN_SPC : 1
YES_APPETITE : 1
THE_CALLER : 1
TO_IN : 2
MG_CHEW : 1
STATUS_CURRENT : 1
OLD_PMHX : 1
NKA_MOUTH : 1
SKIN_TISSUE : 1
AWAKE_ABLE : 1
FROM_TAX : 1
WAS_PT : 1
PCP_BRIEF : 1
REPEAT_OF : 1
IMPROVED_ADMISSION : 1
NUMBER_REFERRED : 1
LUNCH_NOON : 1
ANXIOUS_WILL : 1
CALL_BHM : 1
SURGERY_PROGRESS : 1
ABOV_PF : 1
WAITING_RESULTS : 1
COMPLAINT_ABDOMINAL : 1
MEMBERS_IN : 1
HELD_FOOD : 1
DRAW_THE : 1
PTS_TROUBLES : 1
DIURETICS_WAS : 1
PEOPLE_DOING : 1
PAIN_NONE : 1
PROCEDURES_CC : 1
STATUS_FULLTIME : 1
MOMETASONE_FUROATE : 2
CONSULT_WITH : 1
EVERY_PTERIGIUM : 1
CALL_IF : 1
TRIAGE_NO : 1
PRN_FOR : 2
PRIMARY_OF : 1
HERE_FOR : 1
AND_DOB : 2
ETC_PROSTATE : 1
SIGNS_ALLERGIES : 1
BED_HIS : 1
AT_CC : 1
HAS_TO : 2
THE_DATE : 1
INDEX_RANGE : 1
APPLIED_LT : 1
OF_COMPLAINT : 2
PAIN_FROM : 1
RESOURCE_WELL : 1
NO_WILL : 1
HE_DIARRHEAFOR : 1
NUMBER_SERVICES : 1
INFORMED_HIM : 1
WHO_WAS : 2
PLATINUM_NOTE : 1
HIS_IS : 1
NOT_ABSOLUTE : 1
ACCEPTED_FOR : 1
SS_AND : 2
THEY_ASKED : 1
ANTIANXIETY_MEDS : 1
INSTAGLUCOSE_FOOD : 1
EVERSION_FOOT : 1
PLAN_OBSERVE : 1
TUMOR_CHRONIC : 1
TEAM_UNMH : 1
WALKING_WITH : 1
IMPROVEMENT_IN : 1
KNOWLEDGE_INITIATES : 1
SEEN_BY : 2
TOUCH_LTC : 1
CARRIER_DRAW : 1
MON_AND : 1
HEARD_NO : 1
ABOUT_THE : 2
GROOMING_PHYSICIAN : 1
PAST_OFTEN : 1
JUST_WHAT : 1
STATED_MAY : 1
ASSESSMENT_AMLODIPINE : 1
WAS_ASSESSED : 1
ER_WILL : 1
DRUNK_OR : 1
VET_BEEN : 1
BREAKFAST_WRITE : 1
APPLIANCES_OBSERVABLE : 1
LUNG_BRONCHOSCOPY : 1
FOR_EVALUATION : 1
GOOD_MAKING : 1
WAITING_ALERT : 1
QUIT_RAL : 1
TO_ABUSE : 1
WOUND_THINKS : 1
DATE_WANT : 1
PATTERN_DISTRESS : 1
MEDICATIONS_CONCENTRATION : 1
THOROUGHLY_SATT : 1
CARE_UNLESS : 1
THE_FOCUS : 1
NEEDED_COPD : 1
GI_METAB : 1
ABLE_ALSO : 1
NON_CLINICAL : 1
AMBULATE_RESTROOM : 1
TOOTH_ER : 1
MEDICATION_TO : 1
NICOTINE_SULFA : 1
INR_FOR : 1
BIPOLAR_MIXED : 1
BRIEF_CLINICAL : 1
ADMITTED_TO : 3
PROVIDE_LDL : 1
NO_PROVIDER : 2
SINK_BRUSH : 1
PER_PATIENT : 3
MAJOR_FACTORS : 1
PAIN_CP : 1
IF_VET : 1
PROBLEMS_PT : 1
TO_MODEL : 1
WELL_YES : 1
EDUCATION_PT : 1
TO_HOSPITAL : 1
GIVEN_NO : 1
TO_HEART : 1
TO_PLEASE : 1
ED_READINESS : 1
ALCOHOL_USE : 2
GIVE_HIS : 1
SERVICE_CBOC : 1
BE_SWITCHED : 1
MUCOPER_TOOTH : 1
HIS_FEET : 1
BACK_AFTER : 1
NO_HISTORY : 1
INITIAL_ASSESSMENT : 1
HE_HE : 5
THIS_TOO : 1
LOTION_EIC : 1
UPSET_THAT : 1
LT_ST : 1
ED_NURSING : 1
THAT_REMIND : 1
AS_ABOUT : 1
FELT_AND : 1
UNIT_VOIDED : 1
CONGRUENT_MOOD : 1
OF_RECORD : 1
CT_WHICH : 1
INSTRUCTIONS_THIS : 1
AO_WARM : 1
CLAY_WERE : 1
INCREASED_IN : 1
SMOKE_ACTIVE : 1
ORANGE_TEAM : 1
APPEARED_HPI : 1
HIS_WIFE : 2
NONE_HISTORY : 1
DAILY_BEFORE : 1
IF_OF : 2
WILL_WITHDRAWAL : 1
TO_GUERNEY : 1
ADDENDUM_REPORT : 1
SURG_PREOP : 1
OF_ONE : 1
DEPENDENCE_WHO : 1
HEART_PAST : 1
REPORTS_INDEPENDENT : 1
TOOTH_FLP : 1
AT_THAT : 1
REPORTEDLY_TO : 1
PAST_WITH : 1
HEADACHE_PATIENT : 1
THE_DEATH : 1
DS_ORAL : 1
DOES_DISCHARGE : 1
EXCEPT_FOR : 2
OF_IN : 1
FOR_LUNG : 1
NONE_BEDREST : 1
WORK_WITH : 1
PE_BLOOD : 1
CONSIDER_NEUROLOGIC : 1
LEFT_MESSAGE : 1
OF_ALERT : 1
CALL_BACK : 1
ALERT_AND : 4
WITH_AUDIBLE : 1
AS_MAJOR : 1
CLEAR_LIQ : 1
HI_THE : 1
HERE_AT : 1
VOIDING_YES : 1
ALONG_WITH : 1
FAR_BUT : 1
HIS_MEDICATIONS : 1
EFFECTIVE_OF : 1
FOR_SAFETY : 3
HISTORY_CONFIRMED : 1
TRANSFER_COORDINATOR : 1
ANTIHYPERTENSIVES_YES : 1
ORAL_CARE : 1
PROGRESS_INITIAL : 1
ABDOMEN_SOFT : 1
MENTAL_COUNCIL : 1
THE_FLOOR : 1
BLOOD_PRESSURE : 4
BOARDING_CAME : 1
TOBACCO_BUT : 1
FROM_YEAR : 1
ML_WILL : 1
TH_METATARSAL : 1
FOLEY_NURSING : 1
NO_CP : 1
ISSUES_HE : 1
DEVELOP_WILL : 1
THE_OF : 4
SAFETY_PATTERN : 2
PAIN_ASSESSMENT : 3
PATIENT_EDUCATION : 3
FROM_IP : 1
DAILY_FOR : 1
FREELYX_NOT : 1
ASSESSED_PT : 1
ONE_CAPSULE : 2
PRNS_VITAL : 1
STATES_EPISODE : 1
NONVA_OR : 1
PAIN_WITH : 1
IS_ADMITTED : 1
HAS_THEN : 1
WRITTEN_INFORMATION : 1
TO_MONITOR : 2
MEDS_YOU : 1
DIABETIC_ULCER : 1
HISTORY_PHYSICAL : 1
PT_HAS : 3
IN_OCTOBER : 1
CHIEF_COMPLAINT : 4
ARE_CULTURAL : 1
NO_JAW : 1
RIGHT_TAKING : 1
FOR_ANXIETY : 1
ABOV_BUPIVACAINE : 1
NURSE_COORDINATOR : 1
NOTE_HAS : 1
SERVICEAMARILLO_COMMUNITY : 1
VIETNAM_DISCHARGE : 1
THAT_HE : 10
BACK_HE : 1
OF_MACHINE : 1
CANCEL_PSYCHIATRIC : 1
TREATMENT_INITIATED : 1
MAKER_FROM : 1
LIST_NONE : 1
ENCOUNTER_THE : 1
TO_BONE : 2
DISPOSITION_HOME : 1
PATIENT_STATED : 1
CALLED_IS : 1
THE_FOR : 3
CIU_YES : 1
PROTECTION_DIABETES : 1
BEFORE_THE : 1
MOTIVATION_EAGER : 1
NONE_PROVIDER : 1
AND_BEEN : 1
ALAR_NER : 1
THIS_THE : 2
PREVIOUSLY_WILL : 1
WAS_TOLD : 1
TIB_FRACTURE : 1
HOWEVER_ANOTHER : 1
DO_YOU : 1
ORIENTED_MOOD : 1
IS_COMMUNICATE : 1
DEPRESSIVE_NOS : 1
HISTORY_WITH : 1
TOOK_TWO : 1
PT_HAD : 1
ABUSE_INCLUDING : 1
SOUPS_CRACKERS : 1
HIS_EDUCATION : 1
TEAM_IS : 1
COPD_NO : 1
FOR_PHYSICAL : 1
FEARS_EDUCATE : 1
NOT_WORKED : 1
AND_INVERSION : 1
OR_THAN : 1
PHYSICIAN_MED : 1
ONE_BY : 6
NEW_HYPERSOMNOLENCE : 1
MANAGEMENT_HC : 1
PAIN_SCALE : 3
CARE_TEAM : 1
RELATIONSHIP_PT : 1
OF_WHAT : 1
WILL_SCHEDULED : 1
ATTACHED_THIS : 1
GET_ME : 1
ENCOURAGING_CALL : 1
ORIENTED_FAIR : 1
HR_CONTROLLED : 1
TAPPING_DROPPING : 1
INFORMED_OF : 2
KG_CALLED : 1
PATIENT_DECISIONMAKING : 1
TWICE_MON : 1
APPROVED_BLOOD : 1
AXIS_NONE : 1
SULFA_DRUGS : 2
BEEN_ACCEPTED : 1
SPECIFY_WAS : 1
THIS_AM : 1
WHICH_CONSISTED : 1
BID_MEALS : 1
BASS_HAS : 1
AGREED_HAVE : 1
CONSULT_GIVE : 1
SUPPLIES_DID : 1
MOBILITY_AND : 1
MILK_DIARRHEA : 1
BID_ACTIVE : 1
PATIENT_PLANS : 1
HAVING_HE : 1
PATIENT_OFFER : 1
ASKED_IF : 1
TO_OTHERS : 1
RATE_LEVEL : 1
HAS_CONTACT : 1
ARE_THE : 1
AND_TAKES : 1
ACCUCHECK_WAS : 1
EASY_AND : 1
CONTACT_SATES : 1
AND_ADMIT : 1
IMPRESSIONS_ADDITIONAL : 1
BAY_PINES : 1
INITIATED_WEDNES : 1
PER_DOWN : 1
TOUR_MOOD : 1
DATE_OCT : 1
DENIES_STRESSORS : 1
CONSULT_DATE : 1
PHYSICIAN_CHIEF : 1
PERCEPTIONS_AND : 1
NOTED_MEDICATIONS : 1
NUTRITION_AND : 1
MISSED_APPTS : 1
INTERVENTIONS_AND : 1
PERSON_EDUCATED : 1
WEIGH_DAILY : 1
ESOPHAGEAL_CALL : 1
DIFFICULTY_TO : 1
STATUS_PULSE : 1
AGAIN_ASKED : 1
TRAZODONE_TAB : 1
WAS_PATIENT : 3
ORIENTED_OF : 1
OF_ILLNESS : 3
DIARRHEA_BLEPHARITIS : 1
ON_CONSISTENT : 1
COVERED_FOOT : 1
CHANGE_CALL : 1
TELEPHONE_FOLLOWUP : 1
MOUTH_ON : 1
SERVICES_TYPE : 1
WILL_MEDICATION : 1
THAT_EPIS : 1
TOPIC_PROCEDURES : 1
TO_NO : 4
NURSING_ASSESSMENT : 2
AS_BELOW : 1
VA_CARE : 1
WORSE_MANAGEMENT : 1
ABDOMINAL_ELIGIBILITY : 1
USING_PRIVILEGES : 1
PUFF_INHL : 1
WK_PROCEDURE : 1
PULSE_RESPIRATION : 1
RIGHT_NOTE : 1
HAWAI_WAS : 1
TIME_HE : 1
EMERGENCY_FOLLOWUP : 1
MAY_OVERNIGHT : 1
BEEN_REVIEWED : 1
BREATHING_COUGH : 1
NAPROXEN_TAB : 1
ARE_GETTING : 1
HOME_EDUCATION : 1
LEVEL_AT : 1
TO_DOUG : 1
STRATTERA_AND : 1
INFORMED_PHYSICIAN : 1
HIS_MOOD : 2
RANGE_IS : 1
FREQUENT_PROMOTE : 1
BODY_MASS : 2
NO_CHANGE : 1
CONDITION_ARRIVAL : 1
FORT_UGUST : 1
TH_MET : 1
BASE_GRANULAR : 1
THE_NOK : 1
NOTE_CLINICAL : 1
VITALS_INDEPENDENT : 1
BID_PAIN : 1
EXPOSURE_OR : 1
PAIN_ONLY : 1
LOSS_WAS : 1
TERM_RESTING : 1
APPOINTMENT_WITH : 1
HE_YES : 1
OT_STAY : 1
FEELING_LISINOPRIL : 1
ON_HEELS : 1
FOLEY_NO : 1
BED_EVER : 1
NAUSEA_OA : 1
RA_ABDOMEN : 1
AS_RECENT : 1
NOTE_DIMINISHED : 1
ASF_OOU : 1
MADE_WITH : 2
VETERAN_PROVIDE : 1
HAVE_SEEN : 1
NON_TENDER : 1
CHRONIC_ARE : 1
VOIDING_NORMALLY : 1
TO_AMA : 1
THIS_TEL : 1
MEDICATIONS_REVIEWED : 1
REPORTEDLY_PLANS : 1
BEEN_DISCHARGED : 1
SETTING_WANT : 1
WITH_OWN : 1
FULLTIME_ENCOURAGING : 1
FAIR_EYE : 1
LEFT_UPPER : 1
FOR_WILL : 1
ADMITTED_ON : 1
PAST_HISTORY : 1
WORKED_AT : 1
ALAR_GROOVE : 1
OR_INTENT : 1
WAS_CED : 1
DO_WANT : 1
SELF_BEFORE : 1
CHAIR_AMBULATE : 1
DUTY_LOR : 1
MEDICATIONS_APPLICABLE : 1
SALTINES_PKG : 1
HYPERLIPIDEMIA_PODIATRY : 1
PAIN_ARE : 1
ELIGIBILITY_VA : 1
ALLERGIES_PATIENT : 2
ASSESSMENT_THE : 1
BEEN_DURATION : 1
RADIATION_THERAPY : 2
MOOD_METAB : 1
COGNITIVE_EMOTIONAL : 1
PSYCHIATRIST_PRESCRIBE : 1
PT_DECLINED : 1
IP_PSYCH : 1
REVIEWED_PLAN : 1
IM_AT : 1
CONGESTIVE_FAILURE : 1
EITHER_BECAUSE : 1
DEATH_AN : 1
TESTING_FULL : 1
MG_BID : 2
TIME_LEFT : 1
MOTOR_RESPONSE : 1
PO_MEALS : 1
RISK_SUICIDE : 1
HISTORY_LAST : 1
PLACE_RUL : 1
CLINICAL_PROCEDURES : 1
DEPOSIT_HE : 1
ABD_NON : 1
ABLE_GET : 1
RHYTHM_PITTING : 1
REASSESSMENT_SIMVASTATIN : 1
LEARNING_ORDERS : 1
AVERAGE_RIGHT : 1
PRESENT_NURSING : 1
TO_SITE : 1
TRANSITION_PROGRAM : 1
INPATIENT_RISK : 1
VITAL_ASSES : 1
ACTIVE_COLONOSCOPY : 1
REFILLS_WEIGHT : 1
MANAGE_ETC : 1
ALCOHOL_THE : 1
TYLENOLABOUT_ONCE : 1
MEDICINES_TO : 1
BECAUSE_HAD : 1
TELEMETRY_BM : 1
ACTIVE_PROFILE : 1
MACHINE_SUICIDE : 1
ADMINISTRATIVE_NON : 1
ACTIVITY_ACTIVITIES : 1
APPTS_VERBALIZED : 1
ORDERS_CXR : 1
ANY_ABOVE : 2
DATE_UNDERGOING : 1
INPATIENT_ADDENDUM : 1
YES_NOTIFIED : 1
PRESCRIPTION_DE : 1
EVERYTHING_AND : 1
ONE_POINT : 1
BY_EVERY : 1
THE_CONSULTATION : 1
WILL_HIM : 1
PHYSICIAN_UGUST : 1
UNDERSTANDING_OF : 2
FIANCE_DISCHARGE : 1
DAILY_MOOD : 1
TO_CONSULT : 2
INFUSING_AT : 1
NEOPLASM_BRONCHOSCOPY : 1
SPOUSE_MALE : 1
PLAN_UPDATED : 1
RACK_PLACE : 1
WOULD_RACK : 1
PATIENT_STATES : 2
NOTE_ACTIVE : 1
METATARSAL_OK : 1
IBUPROFEN_MG : 1
OF_WITHOUT : 1
ADVANCE_DIRECTIVE : 1
THE_LAST : 1
PT_STOPPED : 1
WHICH_UNRE : 1
ATTN_HEALTH : 1
AND_STROKE : 1
PHARMA_IS : 1
SEEK_TREATMENT : 1
ER_FOR : 1
LEVEL_LEAST : 1
TREATMENT_FOR : 1
OFF_HIS : 1
FEW_AND : 1
PATCHROTATE_SITESDO : 1
HE_DENIED : 1
WNL_PT : 1
FOR_PRESSURE : 2
MOST_NIGHT : 1
MALE_CALLER : 1
WORKING_ENCOURAGING : 1
PO_QAM : 1
TRIGLYCERIDES_INFLUENZA : 1
IMAGES_ATTACHED : 1
DECISION_MAKING : 1
DISABILITY_HAS : 1
ASSESSMENT_MAY : 1
PC_TELCARE : 1
HIS_INSULIN : 1
REMAINED_ROOM : 1
DIARRHEA_CP : 1
OBEYS_THERAPY : 1
ASSESSMENT_PREPROCEDURE : 1
WAS_ABLE : 3
TO_FEELINGS : 1
INDIVIDUAL_THIS : 1
RACE_NOT : 1
SLIGHTLY_TOO : 1
NO_ANSWER : 1
ANTERIOR_CHEST : 1
NOT_REQUIRED : 1
ADEQUATELY_VERBALIZED : 1
BEEN_PING : 1
OF_PAP : 1
IS_NO : 2
WELLNOURISHED_ALERT : 2
DISCHARGE_SUMMARY : 2
BUT_SYMMETRICAL : 1
TABLE_TELEPHONE : 1
CONSTIPATED_NO : 1
OR_WELFARE : 1
THERAPY_IMAGERY : 1
CRACK_BASS : 1
CONSULT_INCHES : 1
ON_CPAP : 1
RTC_MONTHS : 1
URINE_IN : 1
DISCHARGE_FOLLOWUP : 1
ANTIHISTAMINES_ADDENDUM : 1
SUNSCREEN_NO : 1
FEEL_BEFORE : 1
FOR_FAMILY : 1
TO_ONLY : 1
ACTIVE_PATIENT : 2
NIGHT_ARM : 1
SCREEN_AUDITC : 1
GERD_BARRETTS : 1
TWO_NEW : 1
TREATMENT_POTENTIAL : 1
JAUNDICE_NONE : 1
BONE_OR : 1
IDENTIFICATION_SSN : 1
BEFORE_TO : 1
WEIGHT_KG : 2
HANDOUT_ON : 1
REMOVE_OLD : 1
WANT_THRIVE : 1
THIS_PATIENT : 2
BEEN_HAVING : 1
TOUR_ACTIVITIES : 1
ISOLATIVE_THIS : 1
OF_LARGE : 1
PHYSICAL_CTRS : 1
II_NOTED : 1
BEING_FOLLOWED : 1
NORMAL_IMMOBILE : 1
ABD_CP : 1
PUFF_ACTIVE : 1
PHONE_STATED : 1
TO_UPDATE : 1
HIS_RESP : 1
DRUGS_MORE : 1
MARCH_WHICH : 1
OCCUR_AGE : 1
HAS_YES : 1
THEY_ABLE : 1
WILL_RETURN : 1
LABS_SIGNS : 1
SHORT_OF : 1
OWN_ABILITY : 4
COMMENTS_OXIMETRY : 1
CERTAINTY_TWO : 1
NOT_RELATED : 1
FULL_TO : 1
AND_VOICED : 1
IDENTIFIED_WHEN : 1
NOT_PROBE : 1
OF_BREATH : 1
BP_CONTROL : 1
WILL_RESULTS : 1
TETANUS_ADDENDUM : 1
ASSESSMENT_SKIN : 2
FOBT_REPORT : 1
AND_WATCHING : 1
FOLLOW_APPT : 1
STATUS_IN : 1
ON_NIGHTMARES : 1
ON_PATIENT : 1
SEP_ADMITTING : 1
LSOING_JOB : 1
CONTINU_FALL : 1
INDEPENDENT_CONTINENT : 1
YOUR_PRIOR : 1
CAN_THE : 1
MAY_EVENTS : 1
SIGNS_DATE : 1
POTENTIAL_FOR : 1
HE_SERVICE : 1
USER_EXTREMITIES : 1
AND_OCC : 1
TOOLS_ON : 1
ARMY_JUN : 1
COMPLETE_REASON : 1
FOCAL_DOSE : 1
RAL_ELECTRIC : 1
ADMITS_TO : 1
IN_NATURE : 1
LABS_TO : 1
WITH_APPROPRIATE : 1
TEARFUL_SHORTLY : 1
EACH_OF : 1
NAME_AGE : 1
BLOOD_WAS : 1
HOW_YOUR : 1
CHF_TELEMETRY : 1
VET_ADVISE : 1
SUMMARY_CURRENT : 1
HE_QUIT : 1
TAKING_NEW : 1
SHE_MAKE : 1
ROTATOR_CUFF : 1
BID_RESPIRATION : 1
SERVICES_PATIENT : 1
PREVIOUSLY_ENROLLED : 1
PAIN_YES : 1
NO_LB : 1
TO_ALTERING : 1
POINT_WENT : 1
NEEDED_HE : 1
CURRENT_ACTIVE : 1
TO_CHEST : 1
ASPECT_OF : 1
PAIN_EVALUATION : 1
SPECIFY_BED : 1
BRADEN_SKIN : 1
OR_ILLICIT : 1
SAME_WITH : 1
DATE_OBTAINED : 1
ABOUT_SIDE : 1
INPATIENT_EXCLUDING : 2
ADDENDUM_RECEIVED : 1
SAFETY_SWS : 1
TENDER_WITH : 1
EPIS_WERE : 1
CARE_VOIDED : 1
ORTHOSTATIC_HYPOTENSION : 1
IMPAIRMENT_RISK : 1
RISK_PATIENT : 1
HAVE_OF : 1
LARGE_AMOUNT : 1
ST_DRESSED : 1
THIS_RESPIRATION : 1
DISCUSSED_AS : 1
DOCUMENTS_FROM : 1
ROOM_ABOUT : 1
TREATMENT_LITERS : 1
ORTHOPNEA_OR : 1
TO_COMPLETE : 3
THE_SHOT : 1
PROBLEMS_STATES : 1
SOCIALIZING_DESCRIBE : 1
NOT_GOING : 1
CM_CM : 1
FIND_IF : 1
LEVEL_PRIVILEGES : 1
PATIENT_FORMER : 1
AND_ON : 1
THEN_POSSIBLE : 1
USED_TOBACCO : 1
TYPE_PATIENT : 1
INSTEAD_THE : 1
PT_INDIVIDUAL : 1
LUMBOSACRAL_CARRIER : 1
AN_CERTAINTY : 1
WAISR_AS : 1
DEPRESSED_ANXIOUS : 1
IDENTIFIED_BY : 2
CLEAR_FLUID : 1
WITH_ME : 1
COUGH_INSPIRATION : 1
HEALTH_ASSESSMENT : 1
NAUSEA_BUT : 1
CONVERSION_INSTEAD : 1
SHOULD_ONLY : 1
HIGHINR_PATIENT : 1
NO_DISCHARAGES : 1
PA_STRATTERA : 1
MG_TOTAL : 1
ABOUT_YOUR : 1
MALE_NOT : 1
MANAGEMENT_TOUCH : 1
AND_PULSE : 1
ARNP_PA : 2
SHORT_BREATH : 1
PC_RAVELLA : 1
COLL_AMBULATORY : 1
SOCIALIZING_INCLUDE : 1
OF_NURSING : 3
ADDITION_HAD : 1
THAT_LUNCH : 1
INHL_ORAL : 2
SGOT_RD : 1
IMAGERY_BREATHING : 1
HEALTH_ADVISING : 1
NT_BSX : 1
MEDICATIONS_BY : 1
BEEN_FEELING : 2
HEART_RATE : 1
FLOWSHEET_IF : 1
NOTE_ON : 1
YELLOW_IN : 1
FIBRILLATION_CHRONIC : 1
ON_TOOLS : 1
ALLERGIC_ADDENDUM : 1
WILL_HAVE : 1
ON_HOLD : 1
VOMITING_ADDENDUM : 1
PATIENT_PER : 1
OR_WEAR : 1
RESPIRATION_COMPLETELY : 1
NORMAL_TO : 1
PRESENT_INFLUENZA : 1
AS_PT : 3
INCLUDING_SUPPLIES : 3
AS_WRITTEN : 1
WNL_FOR : 1
MOUTH_EVERY : 2
INSTRUCTED_EXERCISE : 1
BE_SUICIDE : 1
ALSO_ACTIVE : 1
POTASSIUM_LB : 1
HEEL_DROPPING : 1
ASSESSMENT_SINCE : 1
ONCE_EVERY : 1
TH_HEAD : 1
OFFERED_HAVE : 1
WAS_ABOUT : 2
VERBAL_SENSORY : 1
MEDICATION_FUROATE : 1
HOW_WHEN : 1
MONTHS_AGO : 1
THE_REPORTS : 1
LOW_OF : 1
DM_ESOPHAGEAL : 1
PLANS_CALL : 1
RAISED_LESIONS : 1
COMPLETED_SCHEDULED : 1
TO_PODIATRY : 1
CHF_NOTE : 1
PRIVILEGES_THIS : 1
MURM_RHYTHM : 1
WAS_LEXIPRO : 1
STATUS_ATTENDED : 1
MOOD_AFFECT : 1
RATE_ONLY : 1
BETTER_PHONE : 1
ARE_ON : 1
CARE_IS : 1
WHAT_MEDICATIONS : 1
INPATIENT_CARE : 1
DING_HAS : 1
RESPONSE_PHYSICAL : 1
SYMPTOM_PSYCHOSISRESOLVED : 1
AN_OLD : 1
PAIN_PATIENT : 2
SIGNS_PROBE : 1
STATUS_HE : 1
MEDICATIONS_THE : 1
RESCHEDULE_DEPRESSIVE : 1
NUMBER_VALIUM : 1
OUTSIDE_OF : 1
ORAL_INH : 1
OF_SITUATIONS : 1
CPAP_TETANUS : 1
NO_PURULENT : 1
SIGNS_MULTIPLE : 1
BACK_MONTH : 1
VISIT_WITH : 1
ACTIVITY_EXERCISE : 1
STATES_WILL : 1
ON_IMAGING : 1
LIST_DONE : 1
ELECTRONIC_PATIENT : 1
ORIGIN_ASPIRIN : 1
NO_MAJOR : 1
ELABORATION_GOOD : 1
INPATIENT_PROFILE : 1
CARE_UPDATED : 1
WRITE_DOWN : 1
MONTHS_TELEPHONE : 1
BY_PATIENT : 1
BY_NANDA : 1
PULSE_RESP : 1
MAKE_IS : 1
RESPIRATION_RATE : 1
MEDICAL_PT : 1
JULY_ND : 1
EASE_MENTAL : 1
PKG_FOLLOWING : 1
PLAN_THE : 1
MOUTH_LIPID : 1
DIRECTIVE_AT : 1
PATIENT_REPORTS : 2
UNCOMFORTABLE_HAVE : 1
WAS_GOOD : 1
UPPER_FACE : 1
TAB_ONE : 3
WELL_SCAR : 1
HIS_KLEIN : 1
AT_VETERAN : 1
PREOP_PHYSICIAN : 1
TO_VISIT : 1
TEAM_PROVIDER : 1
PO_QH : 1
BE_EVALUATION : 1
ABSOLUTE_CERTAINTY : 1
IN_HE : 4
CM_UNCOOPERATIVE : 1
ANCEF_OK : 1
EKSW_ACTIVE : 1
WEEK_DENIES : 1
NOTE_BREATHING : 1
SEEM_TO : 1
MOMETASONE_PATIENT : 1
MATERIALS_PROVIDED : 1
TOBACCO_IN : 1
OR_THIS : 1
USE_OF : 1
YES_ARTERY : 1
PAIN_TIME : 1
FOLLOW_PRESCRIBED : 1
APR_HAS : 1
QUIET_AND : 1
NOW_FROM : 1
ASSESSMENT_SI : 1
THRIVE_INSTEAD : 1
MONITOR_SATURATION : 1
HAD_DIARRHEAFOR : 1
ROOM_TEAM : 1
BUT_TRANSFERRED : 1
ONLY_INCREASES : 1
BE_COMPLIANT : 1
CAD_HAD : 1
TERM_POINT : 1
REPORT_TO : 3
BIOPSYCHOSOCIAL_FORM : 1
FIND_YOU : 1
HE_ALSO : 3
HE_LAST : 1
INFO_TO : 1
PHYSICAL_EXERCISE : 1
BED_TOOK : 1
CONVERSATION_INTERACTING : 1
HAND_THRER : 1
ACIPHEX_MG : 1
RIGHT_BRIEF : 1
NEGATIVE_ALLERGIC : 1
WAS_SHORT : 1
ANXIETY_MAY : 1
THE_EDUCATION : 1
NOS_ICDCM : 2
SCALE_ANTIHYPERTENSIVES : 1
IN_RUL : 1
OF_THIS : 2
DS_QH : 1
FULL_CONSENT : 1
REQUESTING_MOMETASONE : 1
RELIGIOUS_TO : 1
HEART_HEALTH : 1
BRUSH_DISCIPLINE : 1
MORE_AFTER : 1
WITHIN_REACH : 1
BELONGINGS_DONE : 1
CONSULT_TO : 1
ANCEF_PENDING : 1
CURRENT_ACTIVITY : 1
NIGHTMARES_COMPLAINING : 1
ALSO_CHILDHOOD : 1
HIS_CUFF : 1
FOREARM_WILL : 1
PANIC_STATES : 1
AND_REHAB : 1
HE_REPORTS : 1
ANT_RIBS : 1
NO_PROBE : 1
GET_BETTER : 1
IS_THE : 3
SIG_TAKE : 1
ZOMETA_AT : 1
PT_BY : 2
LB_HE : 1
APPTS_TO : 1
ADDITIONAL_COMMENTS : 1
HPI_HAS : 1
ACETAMINOPHEN_MG : 1
MOOD_DEPRESSED : 1
PROVIDER_GENDER : 1
WAS_BY : 1
VISTA_PT : 1
ERYTHEMA_DRAINAGE : 1
IF_YES : 1
EXTREMTIES_EDEMA : 1
ONE_FOLLOWING : 1
STUDIES_WILL : 1
NOT_PT : 1
CARDIOPULMONARY_EXAM : 1
ADDENDUM_TH : 1
PRMC_IDENTIFIED : 1
VISIT_DIZZINESS : 1
NOT_CHECKED : 3
ANXIETY_TOBACCO : 1
NOTE_EDGE : 1
HAVE_NOT : 1
FROM_HEALTH : 2
THE_OTHER : 1
PREVIOUS_ASSESSMENT : 1
PRF_IS : 1
HOLD_FOR : 1
SINCE_FELL : 1
COMMENT_EMERGENCIES : 1
FOR_VISIT : 1
SLEPT_IN : 1
PLACED_CONSULT : 1
MONITOR_LABS : 1
SOCIAL_SERVICEAMARILLO : 1
CONFIRMED_PROGRESS : 1
DATE_TREATMENT : 1
ANXIOUS_AND : 1
FOR_MONTH : 2
CHILDHOOD_INFECTIONS : 1
BM_YES : 1
DIAGNOSIS_IN : 1
BEDREST_IMMOBILE : 1
WITHDRAWAL_SMOKE : 1
COMPLETED_IDENTIFIED : 1
TO_KNOWLEDGE : 1
PLANS_DICTAPHONE : 1
NO_ASSOCIATE : 2
DONE_THIS : 1
NO_DYSPNEA : 1
ZINKEN_NURSE : 1
SHOW_HEELS : 1
RIBS_SIMILAR : 1
OR_ER : 1
WAS_LOSING : 1
APPROPRIATE_CARE : 1
DRY_AREAS : 1
TONIGHT_LARGE : 1
OR_SITUATION : 1
YOU_KEEP : 1
UP_TO : 1
SESSION_GOOD : 1
INTENT_TOUR : 1
FEELINGS_AND : 1
THREE_TIMES : 1
BEEN_ONE : 1
VALIUM_MG : 1
SITTING_IN : 1
CLINICAL_INVASIVE : 1
CM_ADDRESS : 1
PING_WELL : 1
SMOKE_INPATIENT : 1
HER_RIGHT : 1
DISTRIBUTION_INFARCTS : 1
NOTIFICATION_OTHER : 1
WITH_NONE : 1
BRIEFLY_IS : 1
MEDICAL_CARE : 1
THAT_RESPIRATION : 1
DRESSING_LT : 1
VERBALIZED_DEMO : 1
THEIR_FEELING : 1
INCREASE_THE : 1
INFECTIONS_AIRWAY : 1
ORDERED_AS : 1
OFFERED_TO : 1
GLUCONATE_MG : 1
CONSULT_AVERAGE : 1
AND_HISTORY : 1
ICDCM_HEALTH : 1
THEN_TO : 1
ONLY_GET : 1
ADVERSE_REACTIONS : 1
PT_RTC : 2
ILLNESS_PATIENT : 1
MOOD_EVENT : 1
SIMILAR_TO : 1
CLAY_THEY : 1
SKIN_OR : 1
PURPOSE_OF : 1
PAIN_WT : 1
GIVEN_REVIEWED : 1
COPD_PSYCHOTROPIC : 1
POINTING_HIS : 1
TO_DIETITIAN : 1
BSX_GU : 1
TO_COLON : 1
PULSELESS_ABDOMINAL : 1
TOVA_DOCUMENTS : 1
UNDERMINING_VETERAN : 1
PRIOR_SITE : 1
BIRTH_NURSING : 1
WITHIN_PRIVATE : 1
SEE_HIM : 1
ED_TOPIC : 1
THE_COMPLETED : 1
PMS_AID : 1
HE_EVER : 1
VACCINE_NEUROPHYSIOLOGY : 1
ADEQUATE_AND : 1
WANTED_UPDATE : 1
ON_MORE : 1
IN_MOBILITY : 1
WED_NURSING : 1
GERIATRICS_CLINIC : 1
MOUTH_FROM : 1
MG_QAM : 1
NO_CHEST : 1
ENCOUNTER_PHYSICIAN : 1
IDENTIFIED_CURRENT : 1
ALDRETE_EQUAL : 1
BETTS_MEDICATION : 1
POST_CARE : 1
AND_ETOH : 1
JULY_OF : 1
SERVICE_ALCOHOL : 1
DRINK_CONTAINING : 1
HE_MEDICATIONS : 1
AND_MOTIVATION : 1
OF_DISEASES : 1
YOUR_CALL : 1
POLYP_VOL : 1
ON_AND : 5
PRESSURE_ASKING : 1
HOPLESS_NOT : 1
SCALE_BILL : 1
PSYCHOSOCIAL_SURGERY : 1
EPIS_FEW : 1
PSYCHOSOCIAL_SI : 1
PT_SAT : 1
FOLLOWUP_PSYCHIATRIST : 1
HE_WOULD : 2
PREPROCEDURE_ON : 1
FREELYX_ISSUES : 1
OOU_PREPROCEDURE : 1
THAT_PLACED : 1
SURVIVE_WHAT : 1
HOWEVER_DOES : 1
TOOL_DIE : 1
HAVE_PLACED : 1
CARE_HISTORY : 1
TOOTH_DX : 1
PO_PRN : 2
BETADINE_TYPE : 1
PAISLEY_ASSOCIATE : 1
SYMPTOMS_TO : 1
VACCINE_NOT : 1
AND_COOPERATIVE : 1
VISITATION_AS : 1
FOR_WEEK : 1
PROBE_TO : 2
PROCEDURES_PRACTITIONER : 1
OOU_NOTE : 1
BM_VOIDED : 1
RANGE_PERCOCET : 1
COMPLAINT_MEDICATION : 1
SE_RD : 1
ANY_THAT : 1
PT_NO : 1
PO_NOON : 1
WORSE_WITH : 1
DTN_SYMPTOM : 1
HC_LOTION : 1
RESTROOM_AND : 1
DRUGS_OMEPRAZOLE : 1
PULMONARY_ALCOHOL : 1
HAD_DISCHARGED : 1
TAKING_INSULIN : 1
DISCHARGE_HE : 1
HE_DIAG : 1
HE_CURRENT : 1
IS_NEXT : 1
AM_PT : 1
PATCHROTATE_NOT : 1
TETANUS_VACCINE : 1
STATES_USED : 1
WAS_COOPERATIVE : 1
AND_SIDE : 2
CLEAR_SPUTUM : 1
CARE_PROVIDER : 1
ABGS_AND : 1
HOW_TO : 1
BEEN_PRIMARY : 1
STATUS_INTAKE : 1
OUTCOME_NO : 1
DIS_HAS : 1
PATIENT_COORDINATOR : 1
MENTAL_STATUS : 4
ALSO_GIVE : 1
BECOME_DRUNK : 1
REQUIRED_IDENTIFICATION : 1
TO_STOP : 1
DATE_SEP : 1
SNF_HE : 1
SUICIDE_TALK : 1
CARE_PAISLEY : 1
NO_ADDRESS : 1
FOR_SUGGESTED : 1
AND_OF : 4
EXTREMITIES_BLOOD : 1
OR_STRATTERA : 1
TENSE_NOT : 1
LOW_RISK : 1
CHEST_NO : 1
IN_WHICH : 1
CAREGIVER_EDUCATION : 1
HISTORY_PATIENT : 3
RESPIRATION_ATRIUM : 1
ADDENDUM_RETURN : 1
ALSO_SYMPTOMS : 1
HE_NEED : 1
NEEDS_OT : 1
CARE_UNIT : 1
NONE_PHYSICAL : 1
COMMUNITY_HOME : 2
THERAPY_TO : 1
PHYSICIAN_OF : 2
LEARNER_ASSESSMENT : 1
MEDICATION_BMI : 1
IS_CHICAGO : 1
IN_HIS : 3
TOPICS_COVERED : 1
THERAPY_AMBULATION : 1
AM_HELD : 1
VET_ETOH : 1
NO_CARDIAC : 1
NURSE_NICOTINE : 1
CC_CC : 1
BRIEFLY_THIS : 1
REVIEWED_WITH : 1
NO_CONTACT : 1
PART_SUICIDE : 1
OTHER_THRER : 1
HIS_STERNUM : 1
DDRIVE_PHONE : 1
SUBSEQUENTLY_HAD : 1
SESSION_SCRABBLE : 1
TO_FT : 1
HOPEWFLESS_VOICED : 1
COUPLE_THERAPY : 1
CHEST_PRESSURE : 1
PAIN_ALLERGIES : 1
WILL_PRESENT : 1
OCC_ONCE : 1
RIGHT_DENIES : 1
AND_SENT : 1
NANDA_EUS : 1
ETOH_WHO : 1
CALMER_MORE : 1
HAS_HAVING : 1
FOOD_POTASSIUM : 1
OF_ATTEMPT : 1
HERE_NOW : 1
DONE_BUT : 1
OF_CURRENT : 2
TENSE_SIGNATURE : 1
TRANSFER_TO : 1
SEP_DIAGNOSIS : 1
REACHED_IS : 1
GOALS_PATIENT : 1
PLACED_FOR : 1
MAKING_SKILLS : 1
HIGH_FOR : 1
INTERACTING_PEERS : 1
PATIENT_ADMITTED : 2
OR_HOPLESS : 1
CONSULT_HOSPICE : 1
PATTERN_MEDICATIONS : 1
SCAR_ALAR : 1
ACCOMPANIED_BY : 1
ETOH_AND : 2
NOT_BEEN : 2
CLINIC_NEEDED : 1
VA_INPATIENT : 1
AFFECT_WAS : 1
HAS_IN : 1
CONGRUENT_TO : 1
FIB_FRACTURE : 1
TO_AS : 3
AGE_THE : 1
IS_AN : 1
SWS_NEEDED : 1
MONITOR_OF : 1
SIGNATURE_NOT : 1
PT_BED : 1
LINCOLN_HOSPITAL : 1
YOU_ALL : 1
OF_LOSS : 1
OF_ALBUTEROL : 1
IF_ANY : 3
THEIR_ONE : 1
EXACERBATED_BREATHING : 1
HIS_SITE : 1
MANGLED_FIB : 1
DISCHARGE_INCREASE : 1
NOT_DENTAL : 1
SITTING_THE : 1
HX_EPIS : 1
TO_VIA : 1
QHS_POST : 1
ELIMINATION_LRI : 1
PURPOSE_THE : 1
CA_GERD : 1
THIS_SHIFT : 1
BUT_CURRENT : 1
LUMBAR_OR : 1
PC_CLINICIAN : 1
AT_VAMC : 1
AT_VA : 2
LABS_THE : 1
TESTING_THIS : 1
VETERAN_AT : 1
SKIN_NOTE : 1
PLAN_TO : 1
ON_THIS : 1
ANITA_EUS : 1
CAN_ONES : 1
PREVIOUS_VITALS : 1
MUST_DO : 1
SUPPLIES_INSTRUCTIONS : 1
HE_HPI : 1
STATES_HE : 3
ON_SHIFT : 1
REPORT_THAT : 1
FOLLOWUP_NOTE : 1
AVAILABLE_RESOURCE : 1
NOTE_APPLICABLE : 1
EVERY_TELEPHONE : 1
NO_TO : 2
FOLLOWING_PMH : 1
PT_SEES : 1
ADD_HC : 1
RATION_LUMBAR : 1
IS_IN : 1
OBSERVABLE_AT : 2
THAN_HISTORICAL : 1
FOR_WEIGHT : 1
WAS_PURULENT : 1
CLINIC_FOR : 1
FOR_BY : 2
INDIVIDUAL_TESTING : 1
STEPS_SITTING : 1
WITH_THEM : 1
ASSESSMENT_AO : 1
RETURN_TELEPHONE : 1
ADDED_MANY : 1
IN_WILL : 1
FORM_AXIS : 1
PCP_APPT : 1
ICDCM_HEART : 1
EKG_AND : 1
ADDENDUM_IS : 1
OF_MEDICATION : 1
NANDA_ANITA : 1
SHIFT_REMAINED : 1
ORAL_MALE : 1
VETERAN_MENTAL : 1
PRIVILEGES_AND : 1
MOISTURE_NOTE : 1
EDUCATION_NOT : 1
HOPEWFLESS_AND : 1
CLINICAL_DOCUMENTATION : 1
REQUESTING_TRANSFER : 1
TRAZODONE_PERSON : 1
NO_SWS : 1
NONE_WHEELCHAIR : 1
NO_ON : 1
TALKING_STAFF : 1
RUPTURED_CLEAR : 1
AMBULATORY_NONE : 1
INTENSIVE_CARE : 1
PATIENT_COUNSELED : 1
WITH_UNCOOPERATIVE : 1
THEN_WITH : 1
THRER_TG : 1
TOLD_POSSIBLE : 1
DIMINISHED_UP : 1
IN_AND : 3
INPATIENT_RESP : 1
MADE_PC : 1
DIAGNOSIS_CARES : 1
TO_HX : 1
COMPLETED_SSN : 1
TO_REPORT : 2
TELEPHONE_AND : 1
REALISTIC_AFTER : 1
DOCUMENTS_NOTES : 1
ABLE_TRIGLYCERIDES : 1
RESPIRATION_YOUR : 1
HAS_PAIN : 1
INSOMNIA_ACTIVE : 1
TRANSFERRING_NORMAL : 1
CHF_PODIATRY : 1
TO_AREA : 1
THAT_COULD : 1
SCREENING_FOR : 1
HPI_STATUS : 1
TID_TCBP : 1
TREATMENT_PLAN : 1
COMPONENTS_HE : 1
BOX_FULL : 1
OVERTHECOUNTER_OR : 1
NOT_IN : 1
CRMC_CLICK : 1
MONTHS_LABS : 1
ME_BETTER : 1
NOTE_OBSERVABLE : 1
THE_SCHEDULED : 1
ABOVE_MEDS : 1
PROCEDURES_CONSULT : 1
SUPPLIES_OCTOBER : 1
YOU_DRUNK : 1
RECORD_FOR : 1
PATIENT_PC : 1
UP_HEART : 1
SYMPTOMS_HISTORY : 1
AND_CHIEF : 1
VISIT_ABLE : 1
THEN_OBJECTIVE : 1
PATIENT_OR : 1
ICDCM_DTR : 1
FLOOR_IS : 1
ACTIVE_DUTY : 1
THINKS_THEY : 1
AT_TIME : 3
THERE_NO : 1
INPATIENT_STATED : 1
TO_VETERAN : 2
CONTROLLED_FOLLOWING : 1
ONLY_ITCHING : 1
PATIENT_EXACERBATED : 1
PRSE_AND : 1
NO_KNOWLEDGE : 1
IDENTIFIED_IS : 1
INJURY_ORTHOPEDIC : 1
VA_IF : 1
YES_NO : 3
AS_PREVIOUSLY : 1
EDUCATION_LECTURE : 1
SUPPLIES_DISCHARGE : 1
HC_PRO : 1
THIS_WAS : 1
WALKING_IN : 1
LUNCH_GLUCOSE : 1
TO_SEP : 1
NOT_SURE : 1
DCF_INTERVENING : 1
GOOD_DECISION : 1
NOW_TAKING : 1
MOOD_DOUG : 1
OF_REVIEWED : 1
TO_AMBULATE : 2
NONE_NOTED : 1
USE_ICDCM : 1
FEW_FAR : 1
NONE_REASON : 1
COMPLETE_THE : 1
IDENTIFICATION_COMPLETED : 1
INSTAGLUCOSE_POTASSIUM : 1
ASSOCIATE_IDENTIFIED : 2
SATES_HE : 1
HEALTH_INSTRUCTED : 1
PRESCRIBED_LEXIPRO : 1
FUROATE_INH : 1
TABLE_AND : 1
CARES_TO : 1
AND_POSTERIOR : 1
DOING_BETTERAS : 1
EPISODE_REALLY : 1
HISTORY_TIME : 1
USE_BY : 3
TO_SEEK : 1
OF_IS : 3
SEEN_PRIMAY : 1
EXAM_ROOM : 1
PATIENT_MEDICAL : 1
HISTORICAL_OUTSIDE : 1
TRACKING_UNDERMINING : 2
ESTIMATED_LOSS : 1
CAN_NAVIGATE : 1
THE_RESTROOM : 1
WAS_CONGRUENT : 1
ADVERSE_PATIENT : 1
OCTOBER_PROVIDERS : 1
THE_ULCER : 1
ALLERGIES_CURRENT : 1
IF_NEEDED : 1
NO_MAL : 1
NONE_THE : 1
VISION_CHANGES : 1
VANOD_SIMVASTATIN : 1
MEDS_OUTPATIENT : 1
LRI_OF : 1
THAT_DOSE : 1
STATUS_ORIENTED : 4
HE_ON : 1
AFTER_JOB : 1
HAS_QUIT : 1
LAST_STATES : 1
TO_CALL : 2
AND_IS : 3
REACH_PE : 1
PATIENT_PATIENT : 2
PRMC_PT : 1
HAVE_HIM : 1
STATED_SHE : 1
MONTH_NURSE : 1
FOLLOWING_SOCIALIZING : 1
YEARS_SOBRIETY : 1
THIS_IS : 1
MEDICATIONS_IS : 1
AND_PLANS : 1
HAVING_PROBLEMS : 1
APPROPRIATELY_AND : 1
DIAGNOSTIC_THE : 1
TO_FEEL : 1
4D_NURSING : 1
TONGUE_RATE : 1
MCA_DISTRIBUTION : 1
PHARMA_PT : 1
HYPERTROPHY_BENIGN : 1
AMP_GLARGINE : 1
AND_INFORMED : 1
DOWN_DEPRESSED : 1
FUROATE_ALSO : 1
ALL_EDUCATION : 1
SPUTUM_LOW : 1
OUTPATIENT_MEDICATIONS : 4
AND_ANY : 1
HE_CAN : 1
OF_BED : 1
NORMALLY_YES : 1
AGO_SINCE : 1
BE_POLYP : 1
TWO_MCA : 1
NO_UNDUE : 1
GERD_FOOT : 1
ALSO_REPORTS : 1
GROUP_WHICH : 1
MISSION_PATIENT : 1
PATIENT_ANSWERED : 4
MCA_INFARCTS : 1
EDUCATION_SAFETY : 1
TAB_TAKE : 6
HI_DENIED : 1
HIS_WILL : 1
PRN_ACTIVE : 1
ONE_TABLET : 5
CULTURES_WAS : 1
REACTIONS_DISCUSSION : 1
JULY_PATIENT : 1
PLEASE_VET : 2
NURSING_DIAGNOSIS : 1
HE_SHOULD : 1
THE_VA : 1
DRESSED_BETADINE : 1
EVERY_ALSO : 1
ACTIVE_NORMAL : 1
WITH_STAFF : 1
DATE_ADVISED : 1
IMAGING_PT : 1
GIVEN_SIGNS : 2
CHIN_TO : 1
CONTACT_THEM : 1
LEXAPRO_TAB : 1
MEDICATIONS_WAS : 1
RESCHEDULE_HIS : 1
DISCHARGE_IF : 1
THE_RELEASE : 1
IS_ABLE : 1
LOT_THEN : 1
OF_SUSPICIOUS : 1
NOTE_NURSING : 1
THIS_COMPLETELY : 1
ETOH_WITHDRAWAL : 1
MEDIASTINOSCOPY_THIS : 1
BROCHURE_AND : 1
CE_PHONE : 1
CODE_PRO : 1
PSYCHOTROPIC_PHYSICIAN : 1
NEEDED_TO : 1
MG_GIVEN : 1
RECORDS_SC : 1
SOB_PROCEDURE : 1
THEM_ON : 1
ON_MARCH : 1
TAKING_IT : 1
MISSION_DATE : 1
VPA_LEVEL : 1
OF_AN : 1
SUMMARY_EMPLOYMENT : 1
MR_BASS : 2
TWO_STUTTERING : 1
CALL_TO : 1
TO_CARDIOLOGY : 1
AND_FAR : 1
AMA_ANY : 1
ADDENDUM_FAMILY : 1
NIACIN_OMEPRAZOLE : 1
COORDINATOR_PAIN : 1
WITH_REGARDS : 1
HC_PHONE : 1
ABUSE_COCAINE : 1
TYPE_PAIN : 1
PALLOR_OR : 1
TO_WEIGH : 1
THE_RUPTURED : 1
CAME_TOVA : 1
CALL_YOU : 1
THIS_MORNING : 2
AND_WRITE : 1
IN_PHYSICIAN : 1
LEVEL_BUSPIRONE : 1
SPECIFY_UNCOMFORTABLE : 1
WHILE_WAS : 1
MALE_STATUS : 1
TO_WAS : 2
ALERT_TO : 2
NO_PREOPERATIVE : 1
EXCLUDING_DISCHARGE : 1
HAD_BEEN : 1
CHANGES_VETERAN : 1
TIMES_HE : 1
HE_NO : 1
SITUATION_AFFECT : 1
OF_NO : 1
OF_CARE : 1
IF_FIND : 1
SAYS_AUTOMOBILE : 1
NEEDED_FIANCE : 1
INTERACTIVE_AND : 1
PATIENT_TYPE : 1
MI_THE : 1
CHECKING_WAS : 1
COMPLETED_CONFIRMED : 1
DEPENDENCE_SULFA : 1
OF_HPI : 1
AND_PENICILLIN : 1
GIVE_LEVEL : 1
CTRS_SATT : 1
BED_TV : 1
EXCEPT_FINANCIAL : 1
PHYSICIAN_MISSION : 1
CONTACT_NO : 1
METHOD_ED : 1
MAY_NEED : 1
HE_COPD : 1
UPPER_LIMB : 1
THE_INTUBATED : 1
INCHES_CM : 1
WAS_THE : 1
OR_BLOOD : 1
INCREASE_DIVALPROEX : 1
LEXIPRO_ALONG : 1
UNMH_IS : 1
CULTURAL_EAGER : 1
NEW_WILL : 1
GOOD_RESULTS : 1
YES_BY : 1
HISTORY_INCLUDES : 1
AND_LEFT : 1
PALLOR_JAUNDICE : 1
POST_OP : 1
HIM_OF : 1
ONLY_IN : 1
PATIENT_DOWN : 1
EXAM_ABOUT : 1
HIS_LOCAL : 1
AND_MAKER : 1
FROM_HIS : 1
OBSERVE_BEHAVIOR : 1
TO_CALLER : 1
FOLLOWING_UROLOGY : 1
PF_BUPIVACAINE : 1
STATES_TOBACCO : 1
THEY_BE : 1
FOR_PTS : 1
HISTORICAL_RESULTS : 1
MOUTH_MG : 1
DTR_IS : 1
HOW_DID : 1
BSX_NO : 1
AFIB_CONTROLLED : 1
INFLUENZA_IMMUNIZATIONV : 1
THERAPY_THEN : 1
TO_REHAB : 1
ABD_SOFT : 1
SUICIDE_FOR : 1
COUNCIL_ADVISING : 1
PRIMAY_APT : 1
NO_OBSERVABLE : 2
INCREASES_IN : 1
OTHER_DRUGS : 1
SUGGESTED_HE : 1
BIOPSY_ALSO : 1
ACTIVE_INPATIENT : 3
APPROVES_OF : 1
TOTAL_CC : 2
CONNECTED_PRIMARY : 1
TO_PCP : 1
FOLLOWING_INSTRUCTIONS : 1
ACTIVE_SUICIDAL : 1
COMPLAINT_HE : 1
IID_NURSING : 1
CED_DATE : 1
NOK_SPOUSE : 1
PSYCHIATRIST_INTERVENTIONS : 1
MDS_REGULARLY : 1
NO_PAIN : 3
PREPROCEDURE_NOTE : 1
TELCARE_FACILITY : 1
AS_ABOVE : 1
TO_THIS : 2
ALSO_NEGATIVE : 1
INTAKE_OF : 1
UGUST_OF : 1
RECURRENT_EPISODE : 1
SHARON_STATUS : 1
PTSD_INSOMNIA : 1
AND_PLACE : 1
DISCHARGED_TO : 1
NO_APPLIANCES : 1
AND_ADDED : 1
HIM_INR : 1
LAB_NONE : 1
KG_PATIENT : 1
THIS_GROUP : 1
TALK_WEIGHT : 1
HAWAI_RECORDS : 1
EXTE_IN : 1
RESPONSE_TO : 2
NO_REPORTED : 1
THE_RESPOERIDOL : 1
AMOUNT_YELLOW : 1
OK_PENDING : 1
PATIENT_ED : 2
SUPERVISING_PRACTITIONER : 1
INFLUENZA_HOWEVER : 1
EXTE_HEALTH : 1
NO_INPATIENT : 1
HERBAL_ALCOHOL : 1
GET_INTO : 1
IN_INTERVENTIONS : 1
PO_STOP : 1
WHILE_HE : 1
RECTAL_DING : 1
BLOOD_LTC : 1
TELEPHONE_TRIAGE : 2
MEDICATION_AND : 1
GI_ABD : 1
OFFER_TOILETING : 1
FACTORS_SPECIAL : 1
MEALS_PAIN : 1
CONSULT_ORDERED : 1
ROOM_THE : 1
SUPPLIES_WHEN : 1
FOLLOW_USE : 1
AND_PT : 2
TABLET_MOUTH : 7
HE_HAS : 13
REPORT_FOLLOW : 1
TO_DING : 1
NURSE_CLINICAL : 1
MORNING_AND : 2
LABS_CARDIOLOGY : 1
FOR_NURSING : 1
YES_YET : 1
SAFE_AND : 1
RESPIRATION_SEX : 1
ON_LEFT : 1
SCRABBLE_TO : 1
WILL_SEE : 1
FLUNIS_CHICKEN : 1
HOSPICE_ATTN : 1
COORDINATOR_PHYSICIAN : 1
FURTHER_CARES : 1
RELATION_MALE : 1
PE_STATUS : 1
ASSESSMENT_ACCEPTABLE : 1
NORMAL_AFFECT : 1
FURTHER_NEEDED : 1
OTHER_HX : 1
FALL_DATE : 1
YOU_CALLER : 1
TRIGLYCERIDES_ALSO : 1
VERBALIZED_PRMC : 1
FACE_YOU : 1
RECENT_VPA : 1
FOLLOW_THE : 1
BLOOD_CC : 1
NO_DRAINAGE : 1
AND_REQUESTS : 1
WITH_RAVELLA : 1
HEALTH_OR : 1
PROVIDED_FOR : 1
TIME_PATIENT : 2
NOW_OF : 1
DOB_ER : 1
ATRIAL_CHRONIC : 1
YES_SCALE : 1
CRACKERS_DOES : 1
OR_TISSUE : 1
SINCE_PART : 1
CP_CHEST : 1
RESPIRATION_WELLDEVELOPED : 1
ME_HIS : 1
VISION_VETERAN : 1
TOBACCO_REM : 1
THESE_TWO : 1
ANY_OCCUR : 1
SC_IMAGES : 1
YOUR_APPOINTMENT : 1
NO_OR : 4
NOTE_PARTICIPATION : 1
THIS_REALLY : 1
UNITS_AM : 1
FOR_PLEASE : 1
PLACE_LIGHT : 1
HIS_BIKE : 1
PT_PVT : 1
DAILY_WITH : 1
TO_PERSON : 1
WHEN_YOU : 1
PINESS_TYPE : 1
MEDICAL_BOARDING : 1
PUFF_BY : 1
OVER_CHIEF : 1
DENIED_NUTRITIONAL : 1
TAB_ONEHALF : 2
DEPOMEDROL_CC : 1
SCAN_AT : 1
WHEN_DID : 1
BETTER_TB : 1
TO_SESSION : 1
HAVE_ARRIVED : 1
CONFIRMED_ALLERGY : 1
VA_MEDICATION : 1
ABILITY_DYFUNCTION : 1
ON_FOREHEAD : 1
ABOUT_OF : 1
EPISODE_CHEM : 1
WAS_PHYSICIAN : 1
TD_SHOT : 1
HR_PE : 1
PC_MANAGEMENT : 1
BACK_PAIN : 1
DELTOID_INABILITY : 1
ESCORT_COMPLETE : 1
EVERSION_OF : 1
ADL_IF : 1
PULSES_NONCARDIAC : 1
SECONDARY_TO : 1
FACILITY_PCP : 1
MEDICATIONS_THIS : 1
INAPPROPRIATELY_IDENTIFIED : 1
PHE_VERBALIZED : 1
QHS_INSOMNIA : 1
EXPERIENCES_PAIN : 1
LOW_SOCIOECONOMIC : 1
OR_INHEPATITIS : 1
BUT_TO : 1
FLUID_IMB : 1
OF_SKIN : 1
NOTED_THAT : 1
DM_CA : 1
OR_AGO : 1
TOUR_AND : 1
OR_ALCOHOL : 1
THERAPY_ON : 1
HYPERLIPIDEMIA_COPD : 1
COMPLAINING_OF : 1
SEX_MALE : 1
VETERAN_FROM : 1
OLD_WITH : 1
SA_TOUR : 1
VETERAN_IN : 1
HIS_HAS : 1
SUMMARY_UROLOGYPROVIDER : 1
HE_DOING : 2
REGULAR_EXTREMTIES : 1
CHEM_DRAWN : 1
ALSO_INFLUENZA : 1
BILL_RIGHTS : 1
MAILED_HIM : 1
NOT_RECEIVED : 1
NOON_NEW : 1
HAD_ANY : 1
WEAR_SUNSCREEN : 1
GROUP_RECOVERY : 1
SEES_MDS : 1
MEDS_GIVEN : 1
IS_ABSTINENT : 1
PODIATRY_NOTE : 1
CONTACT_WITH : 1
MIXED_HAS : 1
SATES_IS : 1
NURSING_TELEPHONE : 3
PT_OT : 1
WEEKENDERS_HE : 1
IS_YEAR : 1
JUL_HONORABLE : 1
HEAD_IS : 1
WITH_SOB : 1
ON_ON : 1
MOTOR_OBEYS : 1
SOCIOECONOMIC_LEADING : 1
ALLERGIES_HAS : 2
AND_TO : 5
RELATIONSHIP_MOOD : 1
FOOT_BODY : 1
MORSE_FALL : 1
PAIN_MEDICATION : 1
VETERAN_ACCOMPANIED : 1
HAS_RESPIRATION : 1
PCP_BETTS : 1
PAIN_PAIN : 2
CHRONIC_THE : 1
HOME_DESPITE : 1
THERAPY_THE : 1
CLINICAL_OBSERVED : 1
WHEN_CHECKING : 1
PREOP_INSTRUCTIONS : 1
PRIMARY_PAIN : 1
PROBE_BONE : 2
BE_REACHED : 1
THIS_FOR : 1
ACTIVE_FROM : 1
ON_TWO : 1
ARTERY_DISEASE : 1
OF_TIME : 1
SCALE_RTC : 1
ON_ULCERATION : 1
INFARCTS_ICA : 1
MEDICATIONS_INCLUDING : 2
AFTER_TALKING : 1
RESOURCE_AS : 1
TIME_OF : 1
ACTIVITIES_ACTIVITY : 1
TELEPHONE_REGULAR : 1
ME_TB : 1
WAL_ADEQUATELY : 1
OUT_TRANSFERRED : 1
HAS_LAST : 1
VETS_WIFE : 1
AMR_DIRECT : 1
MAY_PER : 1
PHONE_MIN : 1
WANTED_TO : 1
TO_PHYSICIAN : 2
ADDICTION_HOW : 1
ACTIVE_WILL : 1
BELONGINGS_LIST : 1
ASSIGNED_PRIMARY : 1
WAS_PRESCRIBED : 1
FORM_II : 1
RISK_SKIN : 1
TO_JOB : 1
OF_MUSKOGEE : 1
ALCOHOL_SCREEN : 1
MONTH_UP : 1
HOME_PATIENT : 3
DATED_PT : 1
STEPS_IN : 1
DIZZINESS_IS : 1
OF_ETC : 1
SITE_UPPER : 1
ANXIOUS_NO : 1
NO_WEIGHT : 1
WAS_NOTIFIED : 1
PHYSICAL_FOR : 1
DATE_PT : 2
NO_NOTED : 1
DUE_GROSS : 1
TIMEOUT_INVASIVE : 1
WITH_AT : 1
ETOH_HAS : 1
BY_ACTIVE : 7
COUGH_CLEAR : 1
URINARY_OBSTRUCTION : 1
ARRIVAL_HERE : 1
SHORT_TERM : 2
NOTE_MG : 1
LATERAL_MET : 1
MEDICAL_HE : 1
NO_EXISTING : 1
CAME_TO : 2
EFFECTS_FINDINGS : 1
PO_POST : 1
ANTICOAGULATION_NOTE : 1
FOR_CONTINUED : 1
CHEW_ONE : 1
GIVE_UP : 1
SYMPTOMS_DEVELOP : 1
BRADEN_RISK : 1
HEART_PSYCHOSOCIAL : 1
ALSO_COMPLAINS : 1
OPIATE_AND : 2
BOTH_AND : 2
RESULTS_WHICH : 1
ADDENDUM_LIST : 1
ED_TO : 2
SERVICEAMARILLO_NURSING : 1
NO_WT : 1
UP_TINNITUS : 1
FROM_VAMC : 1
SOCIAL_LDL : 1
TAPPING_HEEL : 1
HAS_IMPROVED : 1
APPOINTED_PCP : 1
FLUIDS_INFUSING : 1
NUMBER_IV : 1
NORMAL_RANGE : 1
INVASIVE_PROCEDURES : 1
AND_LOW : 1
EDUCATION_COVERED : 1
AFFECT_MEMORY : 1
THERAPY_DAILY : 1
PT_MEDS : 1
WAS_LYING : 1
DISCHARAGES_OR : 1
WHO_FOR : 1
RECTAL_HAS : 1
ACCEPTABLE_LEVEL : 1
WHEELCHAIR_TIMEOUT : 1
TOLD_ABOUT : 1
APPLICABLE_OXYGEN : 1
INCHES_IN : 1
PHONE_NUMBER : 4
NO_NURSING : 2
RADIATION_CAD : 1
VIA_GUERNEY : 1
RESTROOM_FALL : 1
PASTORAL_CARE : 1
TO_ZOMETA : 1
HAS_HAS : 1
CONSULT_PRIOR : 1
ED_NOTE : 1
MEDICATIONS_VITAL : 1
PROVIDER_OF : 1
OF_HISPANIC : 1
EVER_SLEPT : 1
ZOMETA_WORKED : 1
PROSTATE_WITHOUT : 1
CARE_INITIAL : 1
HAS_APPTS : 1
CT_OF : 1
INCLUDES_ANXIETY : 1
COLD_AGO : 1
PRESCRIPTION_DOSAGE : 1
VASH_YOU : 1
EQUAL_TO : 1
URINAL_WITHIN : 1
SCAN_MAYO : 1
AND_DRESSEDHE : 1
APPLICATION_COUPLE : 1
BEDREST_STATUS : 1
ONE_AT : 1
HEATHER_FIANCE : 1
PT_NEEDS : 1
UNCOOPERATIVE_PATIENT : 1
SIGNIFICANT_OF : 1
TAX_BOX : 1
NOON_SUICIDAL : 1
GLUCOSE_PRESCRIPTION : 1
NO_MURM : 1
AND_COUGH : 1
DEPRESSED_OR : 1
FREQUENCY_DATE : 1
THEY_WERE : 1
TAKE_CAPSULE : 2
FOR_NUTRITIONAL : 1
AND_LABS : 1
GROIN_ABD : 1
DIAGNOSTIC_EXAMINATION : 1
HEALTH_ON : 2
RELATIONSHIP_DTR : 1
REHAB_PATIENT : 1
NKA_PATIENT : 1
SUICIDE_ATTEMPT : 1
IDENTIFIED_NAME : 2
CARDIAC_HISTORY : 1
NOTIFY_VET : 1
VOIDED_HR : 1
BY_HOME : 1
ALBUTEROL_IPRATROPIUM : 1
PERCEPTION_IMPAIRMENT : 1
GOOD_LOW : 1
PULSE_WNL : 1
WAS_IN : 2
NOTED_TO : 1
ICDCM_AT : 1
PATIENT_TOPIC : 1
OF_VIETNAM : 1
PT_SENT : 1
IN_SHORT : 1
AREA_OF : 1
IN_ANY : 1
THE_TERM : 1
PROBLEMS_DEPRESSION : 1
PHONE_IS : 1
WITH_ELABORATION : 1
PHONE_HOURS : 1
EDUCATED_IDENTIFIED : 1
OPIATE_SERAX : 1
LIMITED_REDUCTION : 1
TO_EVERY : 2
CHECKED_ADL : 2
WITH_VASH : 1
PROCESS_THEIR : 1
SNF_THAT : 1
LEVEL_PAIN : 1
CHECKED_COMPLETE : 2
EVALUATION_CODE : 1
HEAD_THAT : 1
RUL_HIGHLY : 1
MD_OR : 2
REGULARLY_NEW : 1
BHM_RX : 1
SCARED_HIM : 1
CLEAR_DEY : 1
WHICH_OR : 1
AND_AFFECT : 1
PROCEDURE_CONSULT : 1
TO_AEROBICALLY : 1
SEEN_CIU : 1
XXXXXXXXXXXXXXXXXXXXXXXXXXXXXXXXXXXXXXXXXXXXXXXXXXXXXXXXXXXXXXXXXXXXXXXXXX_THE : 1
DID_PROBE : 1
COMPLICATIONS_WILL : 1
EVALUATION_MANAGEMENT : 1
REFILLS_EXPIRATION : 1
INSOMNIA_NAPROXEN : 1
SURG_PREP : 2
CAPSULE_BY : 2
CUFF_WEEK : 1
ROOM_OF : 1
SUB_ST : 1
CONDITION_DIAGNOSIS : 1
COMMENTS_INFORMATION : 1
URGENT_SEP : 1
WHEN_YOUR : 1
RECENTLY_INPATIENT : 1
CHECK_RESULTS : 1
NOTIFIED_ADDENDUM : 1
NURSING_NOTE : 6
ADDENDUM_NURSE : 1
ICDCM_CONTACT : 1
DONE_AN : 1
DOSE_AND : 2
AND_PATIENT : 1
RAISED_AREAS : 1
ALSO_HIM : 1
CARE_WORK : 1
MAJOR_RISK : 1
ON_STERNUM : 1
OR_PA : 2
BASE_IS : 1
ADDENDUM_NEUROPHYSIOLOGY : 1
WAS_BUPROPION : 1
FEELING_HOPEWFLESS : 1
BREATH_FOLLOWING : 1
THERAPY_ABOUT : 1
CM_WITH : 2
PCP_ORDERED : 1
AT_PATIENT : 1
DO_TELEPHONE : 1
DIPLOPIA_OR : 1
SUSPICIOUS_LUNG : 1
YOU_TO : 1
BILL_OF : 1
YEAR_SEEN : 1
LEFT_WITH : 1
CALLER_UNDERSTANDING : 1
ANXIETY_RELATED : 1
ACTIVE_WITH : 1
PKG_THE : 1
GOTTEN_ANXIOUS : 1
AMBULATION_WEIGHT : 1
THE_ELECTRONIC : 1
EXAM_ABDOMINAL : 1
EXPERIENCE_OR : 1
HAS_DECISIONMAKING : 1
YES_THE : 1
CLINICIAN_NOTE : 1
VERBAL_ASSESSMENT : 1
UNDERSTANDING_SUPPORT : 1
NEUROLOGIC_CAUSE : 1
THERAPY_PATIENT : 1
DUE_TO : 1
HS_ABUSIVE : 1
DATE_AND : 1
HEATHER_DISCHARGE : 1
INFORMED_PATIENT : 1
AT_GEN : 1
CURRENTLY_NONTOBACCO : 1
KG_MENTAL : 1
OF_YOUR : 1
DISORDER_PLEAS : 1
OR_MEDICATION : 1
CONTINUE_PREVIOUSLY : 1
FLOOR_PATIENT : 1
TIB_FIB : 1
TWICE_ON : 1
CHEST_OLD : 1
EKSW_NOTE : 1
ADMITTED_FOR : 1
BONE_ERYTHEMA : 1
ALCOHOLCONTAINING_HOSPITAL : 1
THAN_OF : 1
TO_UP : 1
ON_ROTATOR : 1
NAME_YRS : 1
SAID_DOES : 1
DE_RATION : 1
PLACE_TIME : 1
CLINIC_REVIEW : 1
RESULTS_ALERT : 1
THING_HAS : 1
HYPERLIPIDEMIA_CLINIC : 1
AS_COMPLIANT : 1
TO_COUPLE : 1
HEART_SS : 1
JUST_TO : 1
ORIENTED_COOPERATIVE : 1
TAB_INFORMED : 1
GIVE_PO : 1
INCREASED_ANXIETY : 1
EPILEPTIFORM_OR : 1
PT_GO : 1
OCT_UNDERGOING : 1
ALDRETE_SCORE : 1
THE_IS : 4
THE_TIME : 1
OUT_IF : 1
HERE_HOWEVER : 1
WITH_CARE : 1
SEEN_LISANSKY : 1
YROLD_VET : 1
MANY_OF : 1
HOURS_NATIONAL : 1
BED_WATCHING : 1
FAILURE_CHF : 1
COPAY_EXEMPT : 1
DATE_TO : 1
AND_GI : 1
BENIGN_OF : 1
ROOM_REHAB : 1
DRUGS_JULY : 1
TO_THAT : 1
HOME_DOB : 1
BY_NAME : 2
DYSPNEA_ORTHOPNEA : 1
NOTED_FOR : 1
LOCAL_TREATMENT : 1
GOING_INTERVIEW : 1
REHAB_AT : 1
ANTICOAGULATION_MANAGEMENT : 1
PHYSICIAN_DOES : 1
UP_WHEEL : 1
SURVIVE_ARE : 1
FROM_COCAINE : 1
APPLICABLE_MONITOR : 1
APPOINTMENTS_HE : 1
EXPERIENCES_ON : 1
SQUIRMING_INVERSION : 1
SIGNIFICANT_VERBALIZES : 1
NS_CC : 1
SPUTUM_AND : 1
RESPIRATION_AGE : 1
HE_COULD : 1
PT_OXYGEN : 1
MANAGEMENT_NOTE : 1
HEAD_URGENT : 1
HISTORY_BIPOLAR : 1
UPSET_AT : 1
ETOH_USE : 1
INTERVENING_FOR : 1
DROPPING_SQUIRMING : 1
SINCE_THEN : 1
SOBRIETY_IS : 1
COMPLAIN_OF : 1
WANT_CHANGE : 1
NUMBER_SUCCESSIVE : 1
PLAN_CARE : 1
EMOTIONAL_EVALUATION : 1
POSSIBLE_SIDE : 1
TOOK_NITROGLYCERIN : 1
RESPIRATORY_LITERS : 1
NORMAL_MOOD : 1
ULCER_NOT : 1
AUTOMOBILE_CONSULT : 1
ALLERGIES_ERYTHROMYCIN : 1
WANT_TO : 4
DISTRIBUTION_SUGGEST : 1
TEARFUL_MEDICATIONS : 1
HISTORY_OF : 3
LAST_PATIENT : 1
ACTIVE_NO : 1
IDENTIFIED_AS : 1
YES_HAS : 1
FOR_OXYGEN : 1
ACETAMINOPHEN_TAB : 1
INDEPENDENT_IN : 1
PULSE_YES : 1
IN_ATTENDANCE : 1
RECOMENDATIONS_INPATIENT : 1
AND_NORMAL : 1
NO_DIPLOPIA : 1
DEVICE_THE : 1
CHECKING_IN : 1
PMS_AMBULATORY : 1
MET_VETERAN : 1
SUPPORT_THEIR : 1
ASPIRIN_MAR : 1
NOON_ACTIVE : 1
POSSIBLE_COMMENT : 1
CALLED_REPORT : 1
UNRE_TRIGLYCERIDES : 1
BASS_SIGNIFICANT : 1
ACCEPTED_ADDENDUM : 1
UROLOGYPROVIDER_INSTRUCTED : 1
LEARN_ABILITY : 1
CT_CONFIRMED : 1
HIS_ADDENDUM : 1
LOTION_LV : 1
ED_PCP : 1
PATIENT_LEFT : 1
USER_HAS : 1
NO_FURTHER : 1
PRESENT_COMPUTER : 1
RISK_ASSESSMENT : 2
VIA_PCP : 1
AGE_SEX : 1
KG_FUROATE : 1
HIM_AGREED : 1
CONSENT_BY : 1
AFFECTS_VETERAN : 1
CARE_ENCOUNTER : 1
RX_PHE : 1
OTHER_UNDERSTANDING : 1
ALERT_ORIENTED : 4
ARRIVAL_PT : 1
INTENSITY_NAUSEA : 1
WEIGHT_ETC : 1
INPATIENT_YES : 1
RELATION_SPOUSE : 1
QH_ORAL : 1
MG_QHS : 2
EXPOSURE_WEAR : 1
TO_MICU : 1
ANSWERED_NKA : 4
COPAY_NON : 1
GU_NO : 1
USE_AUDITC : 1
EVER_HAVING : 1
COCAINE_MH : 1
LISINOPRIL_FOR : 1
ENCOURAGED_COMPLETE : 1
NO_TOLERATED : 1
FROM_PSYCH : 1
WITHIN_PE : 1
ALSO_OUTPATIENT : 1
OF_CHEST : 1
PATIENT_YEAROLD : 1
DRESSING_APPLIED : 1
HIS_LONGER : 1
FLP_DX : 1
RESPONSE_ISSUES : 1
NOTE_NO : 2
WORST_LEAST : 1
WHICH_PAIN : 1
AND_IT : 1
SA_ACTIVITIES : 1
WANDERING_OR : 1
SPOUSE_VET : 1
NEW_MEDICATIONS : 2
MEANS_CARRY : 1
PRIOR_STARTING : 1
SINCE_PT : 1
PHYSICAL_SATT : 1
UNDUE_DYSPNEA : 1
ACTIVE_PHONE : 1
NO_ABDOMINAL : 1
WITH_SYNVISC : 1
PATIENT_NAME : 3
THERAPY_WOUND : 1
VIA_AMR : 1
BEDSIDE_TABLE : 1
CALLER_INSTRUCTED : 1
MEDICINES_MAILED : 1
TUMOR_PAIN : 1
DID_NOT : 2
COUMADIN_MG : 1
PATIENT_REGARDING : 1
CXR_THEN : 1
SM_BECAUSE : 1
MONTHS_PATIENT : 1
AND_DUTY : 1
OUTSIDE_AVAILABLE : 1
MELLITUS_YOUR : 1
ADDRESS_INFORMATION : 1
HIS_LEFT : 1
OF_ADDENDUM : 1
ICA_SM : 1
RX_DIPYRIDAMOLE : 1
AND_EAGER : 1
SAT_BBSC : 1
ON_FLOOR : 1
PRIMARY_TUMOR : 1
ICA_EMB : 1
SUCTIONING_URINE : 1
DIRECTIVE_THIS : 1
PRSE_ACTIVE : 1
TO_TRACKING : 1
ADDRESS_ENTER : 1
PREVIOUSLY_WITH : 1
THE_LIMB : 1
NOTE_MOOD : 1
DEPRESSION_THE : 1
ON_FROM : 1
REQUESTS_HH : 1
ALLERGIES_LATERAL : 1
EDUCATE_FAMILY : 1
BE_ABLE : 1
HEALTH_VETERAN : 1
ON_FOR : 1
TO_LAB : 1
WORK_HUD : 1
WELL_TO : 1
ETC_NOT : 1
STAY_ON : 1
RECEIVED_TELEPHONE : 1
WITH_BS : 1
ONLY_HAS : 1
CONFIRMED_HISTORY : 1
OR_ON : 1
FIXATION_PATIENT : 1
HAS_HAVE : 1
IS_YROLD : 1
INFORMATION_BOX : 1
OF_CANCEL : 1
CREATE_WHICH : 1
ML_PO : 1
CONTINUE_FOLLOW : 1
CHIEF_DEPRESSION : 1
CONTACT_ABNORMAL : 1
WITHOUT_OBSTRUCTION : 1
YOUR_FAMILY : 1
PALPATION_OF : 1
NER_PHYSICAL : 1
EFFECTS_HIS : 1
DAILY_CONSULT : 1
UP_NEUROPSYCHOLOGY : 1
THIS_YROLD : 1
NONCARDIAC_CHEST : 1
STARTING_ZOMETA : 1
QUIT_HIS : 1
MOTIVATION_TO : 1
PROVIDERS_HAS : 1
AND_NEUROLOGIC : 1
NAUSEA_VOMITING : 1
NO_NAUSEA : 1
IDEATION_ND : 1
ETOH_OPIATE : 2
PRIOR_DISCHARGE : 1
BARRETTS_ESOPHAGEAL : 1
CONSISTENT_WITH : 1
TIME_QUIT : 1
NOT_TAPPING : 1
PATIENT_HAS : 7
PRESSURE_GOOD : 1
COMMUNITY_HEALTH : 1
DOSE_HE : 1
MOUTH_ANTERIOR : 1
PRECIPITATED_MANY : 1
PATIENT_BY : 1
HAVE_DONE : 1
INFORMATION_FULL : 1
GIVEN_RIGHT : 1
CHICAGO_AND : 1
VETERAN_COOPERATIVE : 1
JUN_PATIENT : 1
AUTOMOBILE_WOULD : 1
PHYSICIAN_THE : 1
BP_YOU : 1
OF_FOR : 3
FOR_ON : 1
LDL_AM : 1
FOR_PAST : 1
MORE_TROUBLE : 1
WITH_ADDITION : 1
DEPENDENCE_PTSD : 1
HERBAL_USE : 1
LOW_FEVER : 1
AND_COMPLEX : 1
TO_MD : 1
HR_ESTIMATED : 1
HAS_NO : 2
ANITA_LYMPHNODE : 1
ANXIETY_TO : 1
CHICKEN_CHIEF : 1
FOOT_ADMITS : 1
APPETITE_PATIENT : 1
TAB_LEXAPRO : 1
BY_MD : 2
PROFILE_FROM : 1
DOUG_WAS : 1
MOTORCYCLE_ON : 1
ALWAYS_FOR : 1
MAGNESIUM_SUSP : 1
PHYSICIAN_CRAX : 1
ASPIRIN_TAB : 1
PT_UNDERSTANDING : 1
UNLESS_KEEP : 1
DISPOSITION_TO : 1
FULL_REPORT : 1
NEW_ACTION : 1
WILL_CONSULT : 1
APPLICATION_OF : 1
SHOT_TO : 1
HIM_LEVEL : 1
FOR_HOSPICE : 1
BULGE_HIS : 1
DISCHARGE_YOU : 1
RESEMBLED_AN : 1
BM_BMS : 1
DIABETES_AND : 1
RESPOERIDOL_SHOT : 1
FEVER_HE : 1
TRAZODONE_MG : 1
LEARN_COMPREHENSIVE : 1
THAT_JUST : 1
CRACK_MR : 1
YOU_CALL : 1
ONE_BEFORE : 1
AGE_MALE : 2
BETWEEN_BUT : 1
DIAGNOSIS_CHF : 1
PROVIDER_IDENTIFIED : 2
AND_TAKE : 1
HERE_BECAUSE : 1
ABILITY_TO : 1
LIKE_HIS : 1
PRIMARY_PROVIDER : 1
IN_DISTRESS : 1
SCARED_AND : 1
DIABETES_TO : 1
WHO_PRESENTS : 1
NECK_WITH : 1
REHAB_TEAM : 1
SOMETIMES_SESSION : 1
RELATED_KNOWLEDGE : 1
MET_THAT : 1
SAW_WAITING : 1
ANSWERING_IMMUNIZATIONV : 1
SITESDO_NOT : 1
AFTER_MONTH : 1
HAS_REVIEWED : 1
PAST_YES : 1
ALSO_PRESENT : 1
MINUTES_PAIN : 1
WOULD_APPOINTMENT : 1
ADDENDUM_BELONGINGS : 1
UPDATED_AFIB : 1
CONSULTATION_ACTIVE : 1
TO_DIABETIC : 1
PRESENT_MEDICATIONS : 1
MEDICATION_INFORMATION : 1
ABOVE_IS : 2
DO_TO : 1
BECOMING_FROM : 1
IS_DOING : 1
URGENT_APPT : 1
SET_LABS : 1
PATIENT_YEAR : 1
ALCOHOLCONTAINING_BEVERAGES : 1
AS_ORDERED : 1
OF_PRESSES : 1
TG_PAIN : 1
WITH_PRIMARY : 1
VETERAN_BEDSIDE : 1
PAST_GLUCONATE : 1
MICU_FOR : 1
ADMIT_TIME : 1
VETERAN_INSTRUCTED : 1
LB_MENTAL : 1
REASSESSMENT_VANOD : 1
TO_BEING : 1
GEN_AWAKE : 1
ESIG_ES : 1
OXYGEN_SATURATION : 1
DEPRESSION_VAUGE : 1
ICDCM_PLEAS : 1
THE_BUT : 2
PRIVILEGES_APPROPRIATELY : 1
DIETITIAN_HEART : 1
HE_SHE : 1
HAS_TAKING : 1
OR_VETERAN : 1
PATIENT_HE : 1
RECORD_THIS : 1
POTASSIUM_KG : 1
NOTE_LOC : 1
CALLED_TO : 1
AVERAGE_UNITS : 1
GOAL_AND : 1
IN_SUPPORT : 1
EFFECTS_FROM : 1
ON_CURRENT : 1
SIDE_FROM : 1
HAD_IN : 1
DE_CHICKEN : 1
WOULD_MAKE : 1
DOWN_OR : 1
HAVE_EVER : 2
DEPOMEDROL_TOTAL : 1
CURRENTLY_PATIENT : 1
CARE_DESIRE : 1
CALMER_AND : 1
TEMPERATURE_TEMPERATURE : 1
PRIOR_TO : 3
FERROUS_GLUCONATE : 1
ADMITS_HE : 1
HIS_MAILED : 1
TAKEN_OTCS : 1
DISORDER_NOS : 1
PAIN_ITCHING : 1
THE_DID : 1
AND_BETWEEN : 1
PATIENT_CURRENTLY : 3
WORSE_COUGH : 1
WRITTEN_MEDICATION : 1
LIMB_ABOV : 1
PT_IS : 2
MOMETASONE_ORAL : 1
HI_ILLICIT : 1
MANAGEMENT_FOR : 1
HEAT_THERAPY : 1
NOTE_YES : 1
GERD_DIABETIC : 1
MORNING_TAKE : 1
TO_HE : 1
CAUSE_PTS : 1
DISEASE_PAST : 1
WHAT_CULTURAL : 1
CONGRUENT_WITH : 1
DECISIONMAKING_HOW : 1
FAMILY_IN : 1
ASKING_WHEN : 1
EXISTING_KNOWLEDGE : 1
FOREARM_ML : 1
PSYCHOSOCIAL_ASSESSMENT : 1
FROM_PT : 1
GOING_GIVE : 1
OXIMETRY_PALLOR : 1
CARE_BRIEF : 1
ASSESSMENT_BUT : 1
OBSERVE_DOCUMENTS : 1
CURRENT_CONCENTRATION : 1
EVENT_OR : 1
NAUSEA_BACTRIM : 1
PAIN_PALPATION : 1
ETOH_MEDICATION : 1
TO_INTERVIEW : 1
OF_TO : 3
TV_CONTROLS : 1
ASSESSMENT_MEDICATION : 1
TIME_COMPLETELY : 1
NOW_CONTINUE : 1
FOREHEAD_REMOVED : 1
THAT_PATIENT : 1
MORNING_MEDICATION : 1
RESTROOM_ONLY : 1
SINCE_SEEN : 1
WE_HOW : 1
AN_ASPECT : 1
ORAL_QID : 1
OF_REMSTAR : 1
WITHIN_SLIGHTLY : 1
FULL_PRESCRIPTIONS : 1
DIAST_DYFUNCTION : 1
ABOVE_WARRIOR : 1
PATTERN_AM : 1
SUBJECT_RELATIONSHIP : 1
FROM_BRONCHOSCOPY : 1
KILL_NO : 1
WAS_GOING : 1
PMR_DAILY : 1
THE_FAMILY : 1
ASSISTED_BY : 1
CONTINU_MORSE : 1
LETHALITY_HE : 1
HE_OFF : 1
OF_OF : 3
WIFE_LMSW : 1
WELL_AND : 1
DRAW_CLOCK : 1
TREATMENT_ELIMINATION : 1
CANCEL_RESCHEDULE : 1
GAIT_NORMAL : 1
GROUP_LECTURE : 1
AMLODIPINE_MG : 2
AND_FALL : 1
CLICK_ON : 2
VETERAN_PLANS : 1
INCLUDING_COCAINE : 1
INDIVIDUAL_EVERY : 1
CURRENT_TOBACCO : 1
STATES_EPIS : 1
DISCIPLINE_THERAPY : 1
PATIENTS_MEDICATION : 1
OTHER_ILLICIT : 1
ONCE_FEET : 1
FRACTURES_HERE : 1
AND_OPIATE : 2
COORDINATOR_AMLODIPINE : 1
FOR_CASE : 1
INFORMATION_OF : 1
FOR_ASKED : 1
SPECIFY_WHO : 1
FEELING_IN : 1
CONTINENT_LARGE : 1
DOSE_JUST : 1
YOU_OFTEN : 1
IS_PHYSICIAN : 1
WAS_MED : 1
DEATH_OF : 1
CLINIC_ADD : 1
MOOD_NORMAL : 1
AND_THIS : 2
FALL_ANTIHYPERTENSIVES : 1
STANDARD_GUARDIAN : 1
MOOD_AND : 2
EQUAL_OR : 1
MEDICAL_PER : 1
ASKING_HIS : 1
TRANSFERRED_FIXATOR : 1
CALL_TV : 1
BEFORE_RETURNING : 1
MAY_TO : 1
LIST_PAIN : 1
DEPENDENCE_WAS : 1
PLAN_APPROXIMATELY : 1
STUTTERING_ANXIETY : 1
BIRTH_DISCHARGE : 1
PA_AND : 1
INFORMATION_HAS : 1
PRN_SCANNED : 1
YES_WANDERING : 1
IN_THAT : 1
ER_BAY : 1
PRESCRIPTIONS_ETC : 1
DEPRESSION_FOR : 1
TROUBLE_END : 1
DIET_LOW : 1
BHM_WAL : 1
BEING_TO : 2
CARE_SITUATIONS : 1
HAVE_CONTAINING : 1
MONTHS_DUE : 1
ICDCM_CLINIC : 1
CRASH_MARCH : 1
RANGE_TO : 1
TOBACCO_DEPENDENCE : 1
PITTING_EDEMA : 1
OTHER_VERBALIZES : 1
NOTE_IDEATION : 1
AND_MESSAGE : 1
BEVERAGES_HOSPITAL : 1
MEDICATIONS_SUPPLIES : 4
DOB_AND : 1
MG_REPORT : 1
MCG_PUFF : 1
EC_CAP : 2
LIKE_MOOD : 1
DEPENDENCE_HOWEVER : 1
ADMITTING_CHF : 1
THIS_TO : 1
ACTIVITY_IM : 1
NOK_RELATION : 1
OPEN_REDUCTION : 1
THROAT_INCLUDING : 1
TRANSFER_REHAB : 1
AND_HOW : 1
ON_COUMADIN : 1
IF_THE : 1
TO_SPECIFY : 1
TO_INPATIENT : 2
LAST_IN : 1
HIS_HE : 1
BROCHURE_GIVEN : 1
MISSED_OFFERED : 1
MARITAL_STATUS : 1
CHANGES_AT : 2
OUTPATIENT_PLEASE : 1
DIAG_COMMENTS : 1
PT_RESTING : 1
PC_VISIT : 1
APPLICABLE_PE : 1
HIS_MEDICINES : 1
JOB_ALSO : 1
MEDICATIONS_REFILLS : 1
NAME_PATIENT : 1
DIABETES_BP : 1
PAIN_WORST : 1
HYDROXIDE_SUSP : 1
INCLUDE_FROWNING : 1
INCLUDE_INTOLERANCE : 1
PREPARED_COMPLETE : 1
REMEMBERING_ACCUCHECK : 1
HH_MUSKOGEE : 1
CALL_ONE : 1
CRMC_ON : 1
PRESENTS_CLINIC : 1
LIMB_PF : 1
THE_EXAM : 1
THIS_PROCESS : 1
LIGHT_CONTROLS : 1
RESULTS_AND : 1
PCP_ORANGE : 1
WAS_SENT : 1
STAFF_PT : 1
THEIR_AND : 1
PATIENT_CHRONIC : 1
SUSPICIOUS_SKIN : 1
NITROGLYCERIN_ACTIVE : 1
VIA_AND : 1
IDENTIFIED_MALE : 1
STROKE_REHAB : 1
TIME_PULSE : 1
SUICIDE_RISK : 2
PRN_MG : 1
JUN_PULSE : 1
CONSULTATION_INPATIENT : 1
TOUCH_COPAY : 1
ETOH_DEPENDENCE : 1
SYMPTOMS_SEEM : 1
HAVE_YOU : 2
DO_OR : 1
WK_PERFORMED : 1
REPORT_EEG : 1
DURATION_OF : 2
EXERCISE_AEROBICALLY : 1
ED_POINTING : 1
SPASM_MG : 1
HOTLINE_TALK : 1
NEUROPSYCHOLOGY_DATE : 1
EFFECTS_DISCUSSED : 1
NOT_FOR : 1
INSTRUCTED_ADMINISTRATIVE : 1
WATCHING_NO : 1
DISCUSSION_FOCUS : 1
PATIENT_YOU : 1
PULSE_OXIMETRY : 2
POSSIBLE_EMERGENCIES : 1
CALLER_VERBALIZED : 1
MEDICAL_HISTORY : 2
MEDICAL_INCLUDES : 1
REVIEWED_CHANGE : 1
TO_POSSIBLE : 1
KG_MOMETASONE : 1
ROUTE_TOPICALLY : 1
ACTIVE_APPT : 1
SEE_BACK : 1
AND_HAVE : 2
THESE_MCA : 1
OR_FOR : 1
NOTIFIED_BY : 1
ATTN_COMMUNITY : 1
CARE_CARE : 1
AND_HEART : 1
OCTOBER_BASS : 1
MONITOR_DATE : 1
WITHOUT_URINARY : 1
SYMMETRICAL_HE : 1
FOR_SAFE : 1
DENIES_DIZZINESS : 1
YOU_STATES : 1
QUIT_TAKING : 1
EVERY_BLOOD : 1
ANY_SAT : 1
VERBALIZED_CC : 1
ASSIGNED_CARE : 1
AND_SOCIAL : 1
PT_TOLERATING : 1
HAS_MISSED : 1
GOOD_FOR : 1
VERBALIZED_OF : 1
INPATIENT_NURSING : 1
TAKING_CARE : 1
SEEM_BE : 1
ADJUSTING_TO : 1
CORRECTLY_TO : 1
RD_SURG : 2
COURSE_BS : 1
OF_FOOT : 1
CALL_FROM : 1
AT_LOCAL : 1
LEAST_RIGHT : 1
WILL_DONE : 1
FACE_HAVE : 1
QHS_OP : 1
INPATIENT_STATUS : 1
SATT_GROUP : 1
SAT_NOTE : 1
WERE_ASKED : 1
WATCHING_TV : 2
TO_COMMUNICATE : 1
CAME_THE : 1
BED_HE : 1
TAB_SIG : 1
DIE_FROM : 1
THE_SHORT : 1
PAIN_INTENSITY : 1
SOCIAL_HOME : 1
ADDENDUM_AMBULATE : 1
WANDERING_BECOMING : 1
OF_THEN : 1
NOW_ANSWERS : 1
APNEA_ON : 1
DIET_CHOL : 1
AND_INTERVENING : 1
ATTENDED_WRAPUP : 1
PATIENT_BEING : 2
TO_HIS : 5
MONTHS_USE : 1
PROCEDURE_PERFORMED : 1
HYPERSOMNOLENCE_ANXIETY : 1
HE_SHORT : 1
NEW_NOT : 1
AT_THIS : 7
TAKING_THEM : 1
PT_NOT : 1
CONTACT_JUN : 1
ARTERY_AND : 1
ADMITTED_JUN : 1
DICTAPHONE_NUMBER : 1
HAS_FOR : 1
NO_ONLY : 1
OF_LEVEL : 1
SLEPT_WELL : 1
EVER_EKSW : 1
EMPLOYMENT_STATUS : 1
PATIENT_APNEIC : 1
HE_WAS : 7
PATIENT_DENIES : 1
LINCOLN_FO : 1
ISCHEMIC_DISEASE : 1
AND_SINCE : 1
PATIENT_FALL : 1
REACTIONS_HAS : 1
FAMILY_IS : 1
DEMO_ROUTINE : 1
NURSING_DEPRESSION : 1
LONGER_TOLERATED : 1
INSTRUCTIONS_SUPERVISING : 1
ETC_HE : 1
REPORTS_THAT : 2
RESULTS_MONTH : 1
WEEK_AND : 1
CHANGES_ASSESSMENT : 1
UNDERSTANDING_INSTRUCTIONS : 1
IMB_BETTER : 1
FORMER_TOBACCO : 1
METHODS_NO : 1
YES_LAB : 1
BEHAVIOR_PRNS : 1
OF_THAT : 2
OF_ORIGIN : 1
CLINICAL_YES : 1
APPROPRIATELY_INTERACTING : 1
THAT_LETTER : 1
DE_CHIEF : 1
FOR_ED : 1
TO_WED : 1
PAISLEY_NO : 1
CHEST_SECONDARY : 1
BEEN_OF : 2
BREATHING_AND : 1
BEDSIDE_COOPERATIVE : 1
OF_DM : 1
AND_DOES : 1
AND_INTERACTING : 1
THE_OFFER : 1
REHAB_UNMH : 1
SEP_RESPIRATORY : 1
PLAN_HISTORY : 1
HOSPICE_COMMUNITY : 1
THE_MEANS : 1
INFORMATION_ADDENDUM : 1
ENTER_FLUIDS : 1
HE_CARE : 1
THAN_WAS : 1
MONTHS_CONTACT : 1
OF_SOBRIETY : 1
NEEDED_AT : 1
FOR_HIS : 1
NOT_APPLICABLE : 2
THE_ARM : 1
DIAST_AND : 1
VETERAN_TO : 1
STATUS_EXEMPT : 2
ED_ATTACHED : 1
SATT_INDIVIDUAL : 2
CLOCK_ABILITY : 1
BUT_OA : 1
STATES_MILK : 1
ETC_STAETS : 1
ED_IMAGES : 1
DEFICIT_OF : 1
ABD_BSX : 1
APPLICABLE_HR : 1
LEARN_TELEMETRY : 1
UNDERSTANDING_PERFORMED : 1
HIM_BACK : 1
REVIEWED_AND : 1
PATIENT_YES : 1
SOB_MG : 1
SCALE_LEVEL : 1
EASY_DENIES : 1
RESULTS_ON : 1
EXAM_II : 1
NO_EVIDENCE : 1
CAP_ONE : 2
TEAM_PARTICIPATION : 1
BY_DAILY : 1
PATIENT_WANTS : 1
HISTORY_CURRENT : 1
CONTINUED_NAUSEA : 1
FIXATION_ALLERGIES : 1
SESSION_EVENING : 1
THE_TOPIC : 1
CAN_HELP : 1
LOOSE_TONIGHT : 1
RX_MGS : 1
NO_SGOT : 1
ON_UNIT : 1
OUTPATIENT_TO : 1
THIS_PREVIOUS : 1
PREVIOUSLY_PATIENT : 1
OF_SUBSTANCE : 1
SOFT_NON : 1
ANXIETY_LOW : 1
NONVA_MEDICATION : 1
WENT_ON : 1
NOT_PREPARED : 1
MEDICATION_DOSE : 1
UNDERMINING_MM : 1
HEALTH_COUNCIL : 1
NITROGLYCERIN_AND : 1
NUMBER_ASSIGNED : 1
VETERAN_UNDERSTANDING : 1
SLIGHTLY_LOW : 1
FRIEND_HE : 1
RACK_TO : 1
REQUIRED_IN : 1
TREATMENTS_EVIDENCE : 1
SLEPT_MOST : 1
HAND_TG : 1
PATIENT_REQUIRED : 1
RENAL_PROTECTION : 1
RELEASE_WEEKENDERS : 1
RETURN_FOR : 1
CONSULT_AS : 1
FULL_THICKNESS : 1
OT_SUBSTITUTE : 1
DISCUSSED_SESSION : 1
FOR_PROTECTION : 1
COMPLETE_SAME : 1
NATURE_WITH : 1
DISCUSSED_HOW : 1
OR_REMOVE : 1
TYPE_FREQUENCY : 1
MIGHT_HAVE : 1
GLUCOSE_PHYSICIAN : 1
WIFE_PRESENTS : 1
SUPPLIES_EXPIRED : 1
ARRIVE_WITH : 1
WAS_ADMITTED : 3
HE_HAVE : 1
SCALE_DIURETICS : 1
DISEASE_AND : 1
PLACE_MASS : 1
TE_INFLUENZA : 1
CLONIDINE_SKIN : 1
KLEIN_LMSW : 1
HOSPITAL_THAT : 1
TEETH_THERAPY : 1
NEW_NONVA : 1
HB_ALSO : 1
CASE_TOUCH : 1
LYMPHNODE_WAS : 1
NOTE_INCLUDE : 1
TO_CHAIR : 1
DENIES_PAIN : 2
TELEPHONE_NOON : 1
INCOME_DEPOSIT : 1
BY_BREATHING : 1
SAT_RA : 1
OFTEN_YOU : 1
YROLD_WITH : 1
MR_WAS : 1
COUMADIN_NOW : 1
LYMPHNODE_BIOPSY : 1
ABNORMAL_HEALTH : 1
INPATIENT_OUTPATIENT : 1
EMOTIONAL_PSYCHOSOCIAL : 1
WAITING_REHAB : 1
ABOUT_WORK : 1
BE_INCLUDE : 1
SUBMITTED_BY : 1
IN_HER : 1
HYPERLIPIDEMIA_PSYCHOTROPIC : 1
INSTRUCTED_COMPLETE : 1
PAROXETINE_ACIPHEX : 1
ONLY_DOES : 1
VETERAN_SECOND : 1
LANSING_CONTACT : 1
CURRENT_PHYSICAL : 1
HOME_PMHX : 1
OF_EPWORTH : 1
DURING_THE : 1
CALL_DTN : 1
PRESSURE_TEMPERATURE : 1
YOU_FIND : 1
MEDICATION_BE : 1
MOUTH_ACTIVE : 7
REQUEST_OF : 1
ADD_LOTION : 1
PRESENT_AND : 1
TOO_TOO : 1
PATIENT_CALLED : 1
INFLUENZA_BORDINKO : 1
QUIET_ISOLATIVE : 1
QID_ACTIVE : 1
THAT_MUST : 1
SE_SURG : 1
ELIGIBILITY_FOR : 1
WEAK_AND : 1
SCREENING_DIABETIC : 1
UNCOMFORTABLE_BED : 1
SWITCHED_TO : 1
PHYSICAL_ACTIVITY : 2
WITH_FOR : 2
MEDICATIONS_CALL : 1
ANSWER_NONE : 1
BY_THE : 1
HAS_FEELING : 2
BM_TONIGHT : 1
DOING_EVERY : 1
FOR_PATIENT : 2
APPEARANCE_CLEAN : 1
RELATED_RECTAL : 1
FOR_TO : 2
BREATH_AMBULATION : 1
HISTORY_PCP : 1
RANGE_TOO : 1
WHETHER_IT : 1
ANXIOUS_DIPLOPIA : 1
BY_HIS : 1
IS_MEDICAL : 1
OCTOBER_OF : 1
URINE_INTERVENTIONS : 1
FROWNING_GRIMACING : 1
SHORT_PT : 1
NOTE_SORE : 1
BECAUSE_ALLERGIES : 1
SCREENMORSE_FALL : 1
IS_ALSO : 1
EDUCATION_COPD : 1
SENT_LAB : 1
STOP_VITAL : 1
PREOPERATIVE_ASSESSMENT : 1
ON_CLICK : 1
OF_FACE : 1
TYPE_RX : 1
OF_PRESENT : 2
THEM_AS : 1
RECORD_AT : 1
OF_DROPPED : 1
TOO_CAN : 1
PAIN_FOR : 1
EXPIRED_INPATIENT : 1
NAPROXEN_MG : 1
WITH_PMHX : 1
HPI_AMPUTATION : 1
BS_IID : 1
AT_HE : 1
CHEST_WITH : 1
ADMITTED_NURSING : 1
MONTH_FOLLOW : 1
CARE_OF : 1
ITCHING_HAS : 1
STAT_CHEM : 1
ORIGIN_TAB : 1
SINCE_HE : 3
DEPRESSION_AFFECT : 1
IN_FOREARM : 1
ROUTINE_WITH : 1
CONFIRMED_THE : 2
TO_MEDS : 1
ALERT_NOT : 1
DIAGNOSIS_DEPRESSION : 1
DOB_INTERACTIVE : 1
REQUIRED_PT : 1
COMPLETE_ADVANCE : 1
WORKED_HAR : 1
ISSUES_ADMITS : 1
CM_MM : 1
GOALS_METHOD : 1
AFIB_HR : 1
CARE_YES : 1
WENT_DISABILITY : 1
AND_PROVIDED : 1
DING_HAD : 1
HE_LIKE : 1
DID_LAST : 1
TO_WORSE : 1
DATE_EXTREMITY : 1
MRSA_DECLINED : 1
YOU_OF : 1
MORSE_SCALE : 1
SUCCESSIVE_NO : 1
SPECIAL_HE : 1
REM_IMP : 1
PSYCHOTROPIC_EDATIVE : 1
CC_PCP : 1
RESPONSE_NEW : 2
PATIENT_INSTRUCTED : 2
AND_WITH : 1
DOWN_THE : 1
TOBACCO_DISORDER : 1
NOT_PATIENT : 1
THE_HAS : 2
EVENING_PTERIGIUM : 1
CONDITION_OR : 1
MEDICATIONS_EXPIRATION : 1
SEP_COMMENTS : 1
HAS_WORKED : 1
IN_OF : 2
RACE_OF : 1
AVOID_EXPOSURE : 1
NOT_INCOME : 1
ED_TESTS : 1
OUT_PLAN : 1
MG_EC : 2
TREATMENT_SETTING : 1
AND_COMMENT : 1
OF_MONTHS : 1
BBSC_ABDOMEN : 1
MEDICATION_ROUTE : 1
ABLE_ACCOMMODATE : 1
VTACH_PAIN : 1
ROUTINE_VISIT : 1
AVAILABLE_IBUPROFEN : 1
TO_HAVE : 3
CURRENT_ILLNESS : 1
OF_ONCE : 1
PODIATRY_CONSULT : 1
VA_DOCUMENTATION : 1
NOW_BECAUSE : 1
SUICIDE_HOTLINE : 1
MG_SIG : 1
SHIFT_IN : 1
TEAM_NOTIFIED : 1
REASON_CONTACT : 1
ARE_WORSE : 1
TEMPERATURE_WELLDEVELOPED : 1
MEDICATION_ED : 1
CC_PLAN : 1
CHANGE_HEATHER : 1
TOBACCO_WAS : 1
NEW_DIPYRIDAMOLE : 1
ANXIETY_DEPENDENCE : 1
TO_DEFICIT : 1
HER_OBSERVE : 1
ORANGE_PROVIDER : 1
HAD_MI : 1
MANAGEMENT_TREATMENT : 1
DOCUMENTS_TAX : 1
FOR_NOW : 1
IS_NORMAL : 1
IS_PRESENTS : 1
NOW_CARE : 1
NOS_CONJUNCTIVITIS : 1
ABOUT_POSSIBLE : 1
DURING_IMPLEMENTATION : 1
TAB_GIVEN : 1
ACTIVE_TAB : 2
DIARRHEAFOR_CONDITION : 1
PREOP_AND : 1
CONTACT_AND : 1
NOTED_HIS : 1
AWAKE_ALERT : 3
NURSING_BREATHING : 1
PRESSURE_STATED : 1
MOOD_IMPROVED : 1
MONTH_NECK : 1
OR_CM : 1
WITH_PREDNISONE : 1
FOR_ULCERATION : 1
GIVEN_IN : 1
SIGNATURE_REQUIRED : 1
AMPUTATION_STATUS : 1
OXYGEN_VIA : 1
LAST_YEAR : 1
DID_YOU : 2
HAS_HISTORY : 1
NONVA_REVIEWED : 1
BEEN_LISINOPRIL : 1
MAR_CARDIOPULMONARY : 1
GIVEN_PT : 1
ADMITTING_DIAGNOSIS : 1
TA_DS : 1
ADDITION_HE : 1
NO_ISSUES : 1
REFER_MD : 1
WORKED_HAWAI : 1
PHYSICIAN_HE : 1
PERIOD_SERVICE : 1
DX_ER : 1
CHEST_EASE : 1
PERFORMED_MAR : 1
NOT_SINCE : 1
AVAILABLE_IS : 1
IT_PAIN : 1
MG_DEPOMEDROL : 1
UPDATE_ON : 1
STATES_WM : 1
VETERAN_COMPLETED : 1
COMPONENTS_SUBSEQUENTLY : 1
AIRWAY_HYPERACTIVITY : 1
ENROLLED_DIABETES : 1
HE_MUST : 1
AND_NONE : 1
CONTINENT_APPLIANCES : 1
ASKED_WHEN : 1
ACTIVE_OUTPATIENT : 4
ND_TIME : 1
MDS_NEW : 1
NEEDS_NOW : 1
ATTENDED_INDIVIDUAL : 1
OTHER_EXCEPT : 1
ABLE_TO : 6
THAT_HIS : 1
DENIES_DYSPNEA : 1
PAIN_REPORTS : 1
TELEMETRY_IN : 1
ETC_BP : 1
PRIVATE_NO : 1
MAKER_RAL : 1
MELLITUS_TO : 1
WAS_UNRE : 1
ICDCM_GERIATRICS : 1
PRIVILEGES_AT : 1
EDUCATIONPT_ED : 1
IN_ASSESSMENT : 1
HYDROXYZINE_HS : 1
IN_WATCHING : 1
AND_BP : 1
NO_MAGNESIUM : 1
FROM_DOCUMENTS : 1
ALLERGIES_SULFA : 1
ED_NOTES : 1
HE_SAW : 1
TREATMENT_THE : 1
NO_XXXXXXXXXXXXXXXXXXXXXXXXXXXXXXXXXXXXXXXXXXXXXXXXXXXXXXXXXXXXXXXXXXXXXXXXXX : 1
PODIATRY_STATES : 1
REMOVE_PATCHROTATE : 1
LOSS_CC : 1
DOSE_PER : 1
DIAGNOSIS_TELEMETRY : 1
TO_MEDICATIONS : 2
AND_TIRED : 1
NO_WITH : 1
DIABETIC_RETINOPATHY : 1
PULSE_AS : 1
PRESENT_THE : 1
AGO_TO : 1
AND_NIGHTMARES : 1
LOW_DOES : 1
BRUSH_TEETH : 1
HE_GOTTEN : 1
TO_HOME : 2
HIS_FOOT : 1
DTN_PSYCHOSISRESOLVED : 1
TREATMENT_TEAM : 2
PT_IDENTIFICATION : 1
REPORTS_BEING : 1
IN_DIABETES : 1
IF_YOU : 3
PT_DEPRESSION : 1
DIABETIC_CARE : 1
TO_HERE : 1
SI_DENIED : 1
GENDER_DURATION : 1
MEDS_ACTIVE : 1
ANSWERED_BLOOD : 1
PO_TID : 1
CARE_EVALUATION : 1
INABILITY_TO : 1
PT_ATTENDED : 1
RECORD_VAMC : 1
COMMENTS_WEAK : 1
INDEPENDENT_WHEELCHAIR : 1
UNDERMINING_CM : 1
VISIT_NOTE : 1
APR_HE : 1
WEIGHT_MANAGEMENT : 1
PATIENT_SPECIFY : 1
AND_THEY : 1
PT_THAT : 1
DOES_WANT : 1
IS_ASSIGNED : 1
TO_REPEAT : 1
NURSE_TO : 1
PHONE_PATIENT : 1
COMPLAINT_HX : 1
WHICH_OF : 1
CLEAN_DRY : 1
DEMO_CC : 1
PAIN_CHRONIC : 1
NO_SHOW : 1
TRANSFERRING_BEDREST : 1
PHYSICIAN_PRIMARY : 1
STATED_WAS : 2
WOUND_BASE : 1
FOR_AMBULATION : 1
HE_BEGAN : 1
RECEIVE_OF : 1
ESCORT_REASON : 1
CURRENT_THEN : 1
HIM_TEL : 1
AND_CLONIDINE : 1
BEING_ADMITTED : 1
CONSULT_OF : 1
MG_TAKE : 5
IF_HAVE : 2
INH_USE : 1
DRAINAGE_NO : 1
LAST_FILL : 2
MEMORY_PRESSURE : 1
USE_WAS : 1
THIS_LOT : 1
SQUIRMING_AND : 1
TO_CHIN : 1
ADDENDUM_METATARSAL : 1
PAST_PATIENT : 1
CARELOCK_PMS : 1
WIFE_ALWAYS : 1
ELECTRIC_RESPONSE : 1
RIB_PAIN : 1
THE_TAKING : 1
CRAX_PKG : 1
HE_COMPLAINS : 1
LISANSKY_HAS : 1
NS_AT : 1
TO_WAITING : 1
ATTACHED_TO : 1
SECOND_WITH : 1
PATIENT_IDENTIFIED : 1
OWN_CHEST : 1
OR_WITHIN : 1
LABS_VITAL : 1
WORSE_ULCER : 1
HORNER_AS : 1
HAD_WHICH : 1
RECKLESS_SAID : 1
NUMBER_WEEK : 1
CHRONIC_HEART : 1
VISIT_ATRIUM : 1
SUBSTITUTE_NOT : 1
TO_MOUTH : 1
RECEIVED_RETURN : 1
THE_FOLLOWING : 2
DID_HAVE : 1
LEFT_HE : 1
OF_LOOSE : 1
RATING_RECONCILIATION : 1
BETTS_REQUESTED : 1
SEP_TREATMENT : 1
MAY_IDENTIFIED : 1
MOUTH_DAILY : 1
UPON_PT : 1
OF_TIMES : 1
EVERY_MONTHS : 1
INTERNAL_ALLERGIES : 1
BUT_THAT : 1
EDUCATE_PATIENT : 1
NO_CHANGES : 3
FEELING_MG : 1
PROVIDE_SOCIAL : 1
VAMC_AWAKE : 1
DISCHARGE_INSTRUCTIONS : 2
NO_SUBOPTIMAL : 1
YES_PATIENT : 4
HOW_DATE : 1
CALL_MIN : 1
DRINK_ALCOHOL : 1
RESPIRATION_RAL : 1
OF_URGENT : 1
QUESTIONS_YOUR : 1
CAN_EFFECT : 1
NOTE_BM : 1
EVER_IN : 1
PALPATION_CONSISTENT : 1
MM_PROBE : 1
ASPIRIN_MG : 1
TO_SEVERE : 1
SYMPTOMS_NO : 2
TO_GERD : 1
ER_INSTRUCTIONS : 1
INTENT_THIS : 1
ALSO_DURATION : 1
COLL_DAT : 1
WHICH_THE : 1
ON_YES : 1
SUICIDE_PRF : 1
SUBSTITUTE_FOR : 1
MEDICATIONS_NURSING : 1
EVERY_PT : 1
REACHED_VETERAN : 1
CBOC_PRIMARY : 1
CHEST_REMOVE : 1
NOT_ALL : 1
THIS_MOOD : 1
QHS_PTSD : 1
AND_NO : 3
SITE_DATE : 1
ORDERED_EKG : 1
NEGLECT_SCREEN : 1
YOU_THE : 1
HEALTH_BROCHURE : 1
CT_THE : 1
NURSING_REASSESSMENT : 1
BUPROPION_MG : 1
FEELING_IMPROVEMENT : 1
HE_STAETS : 1
NONVA_HERBAL : 1
ONCE_HIS : 1
ACTIVE_PROCEDURE : 1
BUT_HE : 4
YOU_DRINK : 1
WAS_AND : 3
TROCHANT_RESULTS : 1
FOLLOWING_RECOMENDATIONS : 1
BUT_ADMITS : 1
BECOME_AND : 1
OLD_SITESDO : 1
KILL_YOURSELF : 1
MOOD_IS : 1
DATE_PATIENT : 1
LACTOSE_INTOLERANCE : 1
IN_TO : 2
VIA_ORDERED : 1
READINESS_GOALS : 1
DOCUMENTS_MEDICATIONS : 1
ACTIVE_NAPROXEN : 1
SETTING_TO : 1
OMEPRAZOLE_EC : 2
DESCRIBE_INCLUDE : 1
CHEST_WHILE : 1
FOLLOWUP_FOR : 1
WORK_AND : 1
INVERSION_AND : 1
TO_SLEPT : 1
INSTRUCTED_WEIGH : 1
TOOTH_MUCOPER : 1
SURGICAL_ATTENDING : 1
MG_TABLET : 1
CLEAN_AND : 1
UGUST_IN : 1
TEAM_YES : 1
FOLLOWED_BY : 1
ETC_IS : 1
EVENTS_WILL : 1
REMEMBERING_TO : 1
CALL_LIGHT : 1
FOR_INCREASED : 1
MEDICATION_YES : 1
ANSWERS_WITH : 1
DEY_DRESSING : 1
NO_ADDENDUM : 1
MEDICATION_PHYSICAL : 1
TALK_OFFERED : 1
OF_RATING : 1
AFFECT_AND : 1
OF_PROBLEM : 1
THE_WAITING : 1
ALSO_BORDINKO : 1
WAS_ALSO : 1
CLINICAL_LAST : 1
NER_COGNITIVE : 1
PENICILLIN_SC : 1
EIC_FOREHEAD : 1
OF_PRESSURE : 1
METHODS_COPD : 1
PROVIDER_DURING : 1
HAD_DONE : 1
CHRONIC_PAIN : 1
WILL_BE : 2
STATUS_LAST : 1
ALERT_IN : 1
GUERNEY_WHEN : 1
PHYSICIAN_SPECIFY : 1
HOW_THIS : 1
THIS_EDUCATION : 1
VITALS_IF : 1
ANTIANXIETY_PAIN : 1
NIGHT_ON : 1
II_VITAL : 1
OBSTRUCTION_ICDCM : 1
MG_PAIN : 1
LONGER_IN : 1
SAW_DEBRA : 1
SPECIMEN_COMPLETED : 1
ANY_SI : 1
VETERAN_PREPARED : 1
DOCTOR_UP : 1
INH_MCG : 1
BY_SS : 2
THROUGHOUT_THE : 1
DIET_CLEAR : 1
RIGHT_PATIENT : 1
DISCHARGED_FROM : 1
COMMUNICATE_RESPIRATION : 1
FROM_SOUTH : 1
DISCHARGED_ON : 1
TIME_REMAIN : 1
SHOT_REPORTS : 1
HIM_HIM : 1
GRIMACING_UPPER : 1
RECONCILIATION_BMI : 1
MEDS_IF : 1
PTS_AN : 1
DATE_NAME : 1
YOURSELF_NO : 1
TO_CARRY : 1
CONTINUE_WITHDRAWAL : 1
TO_YOURSELF : 1
NO_STUDIES : 1
TOO_EFFECT : 1
FUROATE_ORAL : 1
LAST_APPT : 1
PROSTATE_SCREENING : 1
SKILLS_DISCUSSED : 1
DIE_MAKER : 1
SCREEN_PC : 1
VISIT_WAS : 1
AN_WIFE : 1
PATIENT_RECORD : 1
PCP_MALATINSZKY : 1
ABOUT_PRESENTS : 1
PROBLEM_NURSING : 1
ORAL_INHL : 1
DOES_PATIENT : 1
BY_AND : 1
WITHDRAWAL_NO : 1
MAILED_TO : 1
OBTAINED_COMMENTS : 1
FEET_ON : 1
THIS_ENCOUNTER : 1
EFFECTIVE_USE : 1
HOWEVER_HE : 2
OFTEN_TO : 1
SOB_LISINOPRIL : 1
WARM_AND : 1
APPEARED_HAS : 1
GROOVE_PHYSICAL : 1
NOTES_FROM : 1
AS_4D : 1
PENICILLIN_OMEPRAZOLE : 2
INFLUENZA_VACCINE : 1
BEEN_FOR : 1
PROVIDER_YES : 1
RATE_IN : 1
WILL_SOCIAL : 1
SCHEDULED_BLOOD : 1
VETERAN_WAS : 1
TRIAGE_PLEURITIC : 1
HB_SYMPTOMS : 1
PLAN_OF : 1
NO_IN : 2
REGARDING_NUTRITION : 1
SCREEN_PROVIDER : 1
PATIENT_TOPICS : 1
LEVEL_OF : 2
DRUGS_SINCE : 1
AND_MORPHINE : 1
INCLUDE_APPT : 1
ALTERING_EXPERIENCE : 1
MGS_BID : 1
NOT_COMPLAIN : 1
EVERY_EVENING : 1
INTERVENTIONS_PRESCRIBE : 1
PREVIOUS_LEARNER : 1
IS_NONTOBACCO : 1
OR_MONTHS : 1
WITH_HUD : 1
AS_WELL : 2
YEAROLD_TIMES : 1
PT_IN : 2
AVAILABLE_WHICH : 1
PAST_FERROUS : 1
MG_TID : 1
RATING_MEDICATION : 1
RESULTS_FOR : 1
NAME_SS : 2
PHYSICIAN_WILL : 1
ORIENTED_OWN : 4
AMBULATORY_CARE : 1
MRSA_PT : 1
THEY_ADDED : 1
OF_WAISR : 1
OR_UNDERMINE : 1
PULMONARY_USE : 1
INTERDISCIPLINARY_PLAN : 1
FOURTH_LEADING : 1
LABS_MEDICATION : 1
PATIENT_PROVIDED : 1
NT_GU : 1
ML_CHECK : 1
FULL_MEASURES : 1
GI_TO : 1
CONTACT_APPOINTMENTS : 1
INDEX_NORMAL : 1
NAME_AND : 2
MENTAL_ORIENTED : 4
ABLE_TOUCH : 1
MD_ARNP : 2
NOTE_NON : 1
OTHER_OUT : 1
AND_ED : 1
TO_HEMATURIA : 1
CLEAR_YELLOW : 1
CONFIRMED_HE : 1
TROUBLES_VETS : 1
TOOLS_CLICK : 1
ORAL_ML : 1
SITUATIONS_THAT : 1
BUT_AGITATED : 1
AND_DIE : 1
THEN_HAS : 1
REFERRAL_PHYSICAL : 1
IN_SINCE : 1
WILL_AS : 1
PATIENT_HERE : 1
NOT_CONSIDER : 1
HOSPITAL_WOUND : 1
BEARING_BP : 1
FOR_HEALTH : 1
JAUNDICE_COMPLICATIONS : 1
DOES_CONSIDER : 1
IDENTIFIED_LEARNING : 1
SERVICES_THAT : 1
OF_ABOVE : 3
BUSPIRONE_MG : 1
MARITAL_DIVORCED : 1
ISCHEMIC_HEART : 1
BEVERAGES_WAS : 1
TELEMETRY_SEP : 1
ABILITY_ANTIHISTAMINES : 1
LAB_WAITING : 1
THE_SUPERVISING : 1
SW_VETERAN : 1
VISITATION_REQUESTED : 1
ON_WAS : 1
UP_CONSULT : 1
WANTS_CHILDHOOD : 1
COUNSELLED_ABOUT : 1
DOCUMENTS_BEHAVIOR : 1
PROTECTION_IN : 1
ANY_OF : 3
CLEAR_REASSESSMENT : 1
BY_REQUESTING : 1
WED_INCLUDE : 1
CONTAINS_THE : 1
CC_PRIOR : 1
CHIEF_AND : 2
SEEN_THE : 1
LETHALITY_ISSUES : 1
ACTIVE_SIGNIFICANT : 1
CLINIC_HC : 1
BP_PAIN : 1
TO_SUICIDAL : 1
OBEYS_PHYSICAL : 1
KG_HOW : 1
AND_MORE : 1
THE_ER : 1
ANY_INTENT : 1
PAIN_EXTE : 1
AND_ANSWERING : 1
COGNITIVE_PSYCHOSOCIAL : 1
SUBOPTIMAL_AVOID : 1
HAS_BIOPSYCHOSOCIAL : 1
TO_ABILITY : 4
BESYLATE_MG : 2
PHYSICIAN_EDATIVE : 1
INFORMATION_FLUIDS : 1
WEDNES_TAKES : 1
TOLERATED_WITHIN : 1
COUPLE_TIMES : 1
WITH_MELLITUS : 1
RECOMENDATIONS_NURSING : 1
AND_PC : 1
LARGE_LOOSE : 1
SURGERY_SCHEDULE : 1
HR_WHEN : 1
VOL_CE : 1
CONSISTED_OF : 1
OUT_MOUTH : 1
MALE_VET : 1
AT_HIM : 1
AVERAGE_NOW : 1
TO_EDGE : 1
THE_AND : 4
ALLERGIES_LT : 1
DDRIVE_HOURS : 1
COLONOSCOPY_CONSULT : 1
ALBUTEROL_INHL : 1
DATE_STUDY : 1
OR_DAILY : 1
TO_RESCHEDULE : 1
VAUGE_NO : 1
CARDIAC_PATIENT : 1
NOTE_AND : 1
OX_HAS : 1
AND_THOROUGHLY : 1
ON_OTHER : 1
PRESENTING_COMPLAINT : 1
LEAST_AVERAGE : 1
LEARNING_NEEDS : 1
WITH_TO : 2
BY_HAS : 1
TCBP_RADIATION : 1
OF_AMPUTATION : 1
TIME_PREVIOUS : 1
SI_PLAN : 1
PAIN_THE : 1
BEEN_ASSIGNED : 1
FAMILY_REGARDING : 1
APT_SET : 1
TO_CLINIC : 2
EVALUATION_SURGICAL : 1
HAD_CXR : 1
SIDERAILS_APICAL : 1
THICKNESS_CM : 1
REVIEWED_PATIENT : 1
INSTRUCTIONS_THE : 1
DRESSEDHE_THEY : 1
SHOW_ON : 1
YES_ENCOURAGE : 1
TO_RTC : 1
UNDERSTANDING_ALLERGIES : 1
CALL_TYPE : 2
HAVING_WITH : 1
FOR_REVIEW : 1
TOBACCO_HOWEVER : 1
BY_PMS : 1
IS_THREE : 1
OF_GOAL : 1
BY_ANITA : 1
LTC_STATUS : 2
CHRONIC_GETTING : 1
AM_STATES : 1
HEIGHT_IN : 1
RESULTS_AVAILABLE : 1
IN_BED : 3
BEDSIDE_TELEPHONE : 1
MAJOR_DISORDER : 1
DISTRESS_FIBRILLATION : 1
AVAILABLE_AS : 1
LOW_BACK : 1
SYMPTOMS_WILL : 1
CC_SITE : 1
VET_THAT : 1
HEALTH_COORDINATOR : 1
REPORT_ANY : 1
AS_STATED : 1
RISK_DENIED : 1
THEN_STOPPED : 1
YEAR_RETURNING : 1
CONTACT_CASE : 1
DEPRESSION_NONE : 1
TO_OUTPATIENT : 1
HE_IN : 1
FRACTURE_LIMITED : 1
UH_YES : 1
IN_SNF : 1
WAIS_NORMS : 1
WHICH_INCREASED : 1
INITIATES_FREELYX : 1
WELFARE_REMINDERS : 1
ARM_OR : 1
SENT_VIA : 1
PHONE_SAME : 1
SULFA_PENICILLIN : 2
RESPIRATION_DDRIVE : 1
VITAL_ALLERGIES : 1
COPD_SERVICE : 1
ABOVE_TRANSITION : 1
LAB_PROVIDER : 1
THAT_IS : 2
POINTING_TO : 1
ALCOHOL_YES : 1
HE_FEELS : 1
POPULATIONS_HE : 1
FOR_SUICIDE : 1
VET_STATES : 1
BED_ONCE : 1
FOR_MUSCLE : 1
CRASH_ON : 1
OF_MEMORY : 1
HIS_NEW : 1
ARRIVED_HE : 1
SUBSTANCE_INCLUDING : 1
DIETITIAN_SS : 1
APICAL_HEART : 1
HE_DISCHARGED : 1
AT_DESPITE : 1
ON_IP : 1
BORDINKO_HORNER : 1
MOOD_ALTERING : 1
ON_LISINOPRIL : 1
IN_WORSE : 1
WITHIN_WEEK : 1
UPDATE_ME : 1
CURRENT_LOW : 1
AND_HE : 6
PT_IDENTIFIED : 2
DISEASES_NURSING : 1
RECORDS_ED : 1
DIZZINESS_PATIENT : 1
TRIED_TO : 1
MOBILITY_ONLY : 1
TWINBROOK_PT : 1
WORSE_EVALUATION : 1
OR_ADMISSION : 1
EXCLUDING_SUPPLIES : 2
IS_SURE : 1
PREPROCEDURE_EVALUATION : 1
INDIVIDUAL_OUTCOME : 1
BED_HAVE : 1
CURRENTLY_FOLLOWED : 1
BLOOD_PATIENT : 1
THERE_WAS : 1
AND_ESOPHAGEAL : 1
THE_THEY : 1
NOTE_PMR : 1
FOR_HEADACHE : 1
PRESENT_BASIC : 1
RELATED_TO : 2
WELL_HEALED : 1
NOTED_TIME : 1
AND_OUTPATIENT : 2
UNDERMINE_THERE : 1
NURSING_INPATIENT : 3
MORE_AND : 1
NOTE_OT : 1
ADL_RESPIRATION : 1
COLOR_ETOH : 1
LDL_PT : 1
PAIN_PRESSURE : 1
ALLERGIES_PHYSICAL : 1
HIGH_ON : 1
SAFETY_TELEPHONE : 1
FOLLOW_NEUROPSYCHOLOGY : 1
ACTIVE_ANTERIOR : 1
TRANSFERRED_OTHER : 1
TO_RESTROOM : 2
INSTRUCTIONS_SOCIALIZING : 1
ON_AUTOMOBILE : 1
PATIENT_CONSENT : 1
HAVING_NOTE : 1
ENCOUNTER_IS : 1
HAS_SIGNIFICANT : 1
MG_ON : 1
NVO_RIGHT : 1
USE_SCREEN : 1
VALIUM_PATHOLOGY : 1
NO_NO : 3
SCANNED_THERAPY : 1
FOOT_SQUIRMING : 1
HOME_HAVING : 1
PT_NAVIGATE : 1
SIDERAILS_UP : 1
ACTIVITIES_PHYSICAL : 1
YOU_TRIED : 1
SCHEDULED_VERBALIZED : 1
PC_FACILITY : 1
HAS_NKA : 4
HAS_WEAK : 1
TO_VETS : 1
COCAINE_OTHER : 1
ILLICIT_ETOH : 1
RESP_BP : 1
BRIEF_OF : 1
BREATHING_MET : 1
PATIENT_TO : 4
ACCOMMODATE_HIM : 1
COMPLETE_ADL : 2
SHOULD_GO : 1
FOOT_ULCER : 1
PSYCHIATRIC_VTEL : 1
TO_BRUSH : 1
PATIENT_FREQUENT : 1
RUL_MASS : 1
MINUTES_RIB : 1
SUSPICIOUS_OR : 1
ORDERED_INPATIENT : 1
BUPROPION_TAB : 1
WARRIOR_PROGRAM : 1
SITE_EXM : 1
STANDARD_ESCORT : 1
END_IN : 1
TO_FORT : 1
VA_VA : 1
TRAZODONE_BEING : 1
WITH_AND : 1
REQUESTING_WAL : 1
APPROVED_FOR : 1
ES_TONGUE : 1
AFFECT_CONGRUENT : 2
CONSENT_PATIENT : 1
PATIENT_ANY : 1
WITH_WK : 1
PMH_DE : 1
RECTAL_ABDOMINAL : 1
HAD_US : 1
GROIN_STATES : 1
METHOD_PATIENT : 1
TO_WITH : 2
PROCESS_NOTE : 1
THANK_THE : 1
IS_GRANULAR : 1
ADVISED_PT : 1
ALLERGIC_RHINITIS : 1
ISOLATED_FOR : 1
STATES_HAVE : 1
NONE_SEE : 1
HERE_MONTH : 1
MEDICATIONS_PATIENT : 1
TEAM_NO : 1
OF_OR : 1
EP_WILL : 1
WITH_RESULTS : 1
CONTACT_ARMY : 1
OF_WITH : 2
ER_ON : 1
UD_LEXAPRO : 1
WITH_INTERACTING : 1
OF_PROSTATE : 1
IS_RISK : 1
FALL_PREVIOUS : 1
MET_AT : 1
FLUIDS_REFER : 1
OF_ABUSE : 1
BEDREST_WHEELCHAIR : 1
THOROUGHLY_INDIVIDUAL : 1
PREOP_VITALS : 1
DOSE_PRIOR : 1
PATIENT_URGENT : 1
MANGLED_TIB : 1
UP_APICAL : 1
HEARD_MURM : 1
PF_CC : 1
IS_TO : 5
TYPE_BHM : 1
PATIENT_SCREEN : 1
DCF_AND : 1
CHECKED_OUT : 1
WAS_OF : 1
COLOR_AND : 1
PERFORMED_CARDIOPULMONARY : 1
UNDERGOING_RADIATION : 1
COLOSTOMY_NO : 1
VITAL_MONITOR : 1
IN_CIU : 1
MG_HS : 1
ASSESSMENT_PERCEPTION : 1
ABDOMINAL_PAIN : 1
HE_MISSED : 1
DURATION_COMPLAINT : 2
MAJOR_DEPRESSIVE : 1
TELEMETRY_PLACE : 1
INPATIENT_AND : 1
DEY_APPLIED : 1
SITE_LEFT : 2
COMPLETELY_AND : 1
BAY_CRMC : 1
SUN_EXPOSURE : 1
LISINOPRIL_RENAL : 1
THE_MEDICATION : 1
HIS_ARE : 1
SUN_OR : 1
GERD_CAD : 1
REFERRAL_THERAPY : 1
CORONARY_ARTERY : 1
FUROATE_PATIENT : 1
FOR_CONTACT : 1
NONE_CHILDREN : 1
RECOVERY_PROCESS : 1
FOR_HIM : 1
LOSING_EVERYTHING : 1
ALLERGIES_DRUGS : 1
PATIENT_NOT : 3
PAST_THEN : 1
LIFE_BIOPSYCHOSOCIAL : 1
IT_BECAUSE : 1
WELL_VOIDING : 1
NOT_ANY : 2
OBJECTIVE_FOR : 1
TESTS_PROCEDURES : 1
NO_HYDROXIDE : 1
AND_ORAL : 1
GET_HB : 1
BMS_COLOSTOMY : 1
DEPRESSION_CONGRUENT : 1
MISSING_TREATMENT : 1
WAS_BLOOD : 1
DISCHARGE_ARRIVED : 1
PLACEMENT_IN : 1
FILL_DOSAGES : 1
WITHDRAWAL_SYMPTOMS : 1
PROVIDED_TO : 1
FOURTH_CAUSE : 1
PREVIOUSLY_WRITTEN : 1
AND_CONGESTIVE : 1
LITERS_VOIDING : 1
SECOND_BUT : 1
DEPRESSED_HOPLESS : 1
NORMAL_DISCHARGE : 1
PT_WITH : 1
LATERAL_TH : 1
WILL_ARRIVE : 1
TISSUE_DIAGNOSTIC : 1
QH_PRN : 1
MOUTH_TAPPING : 1
CONSIDER_CAUSE : 1
IT_ALLERGIES : 1
DRAINAGE_MAL : 1
THIS_VAMC : 1
JAW_TIME : 1
SIDE_VETERAN : 1
WILL_TELEPHONE : 1
VACCINE_ADDENDUM : 1
PROVIDE_AND : 1
USE_DISORDER : 1
FT_AND : 1
PCP_EKG : 1
MURM_REGULAR : 1
PATIENT_REPORT : 1
ABUSIVE_TO : 1
IMP_MUCOPER : 1
HAS_CAPACITY : 1
FOOT_BRIEF : 1
VTACH_ASSESSMENT : 1
MUSCLE_SPASM : 1
ASSESSED_NEEDS : 1
PENICILLIN_NIACIN : 1
MED_CRAX : 1
CALLER_PAIN : 1
PERFORMED_PREOP : 1
ALLERGY_CONFIRMED : 1
COPD_PHYSICIAN : 1
APPROXIMATELY_OR : 1
TOMORROW_NO : 1
IT_WAS : 1
TO_DENIES : 1
EFFECTS_AS : 1
WILL_ROUTE : 1
DAILY_HIS : 1
REGARDS_TO : 1
PREDNISONE_HIS : 1
AND_GRADE : 1
TO_DRAW : 1
ARRIVE_WALKING : 1
RESP_PAIN : 1
MAY_THE : 1
MEDICATION_EDUCATIONPT : 1
LOSS_READ : 1
OUT_NURSING : 1
BRONCHOSCOPY_THE : 1
GERIATRICS_ADD : 1
IS_LOW : 1
DRAW_SPECIMEN : 1
YOU_APPROPRIATE : 1
PO_QHS : 2
MEDICAL_SC : 1
ELIMINATION_VOIDING : 1
AT_BEDSIDE : 1
HIS_DID : 1
BUT_OT : 1
FLOWSHEET_COMPLETELY : 1
ALSO_OF : 1
AND_CONFIRMED : 1
OPIATE_ETOH : 1
CAD_HYPERLIPIDEMIA : 1
LAST_DATE : 1
PER_WILL : 1
AMA_DENIES : 1
TESTING_REPORT : 1
COMPLETED_MAY : 1
WE_DISCUSSED : 1
NEW_OVERTHECOUNTER : 1
MEDICATIONS_MONITOR : 1
IS_TAKING : 1
SAT_TELEMETRY : 1
YOU_GAIT : 1
CONVERSATION_PROVIDE : 1
RETURN_APPT : 1
PATIENT_NO : 1
IV_VALIUM : 1
BEDREST_NURSE : 1
ABD_NT : 1
FOR_ACETAMINOPHEN : 1
ONCE_MONTHS : 1
THAN_OUT : 1
VISIT_SOB : 1
FOR_INPATIENT : 1
HE_BE : 1
TEMPERATURE_VERBALIZED : 1
UP_HIS : 1
JULY_PART : 1
NIGHT_OR : 1
ANSWERED_IS : 1
HE_WANTED : 1
WEDNES_AND : 1
TAKES_COMPLEX : 1
DAT_CARE : 1
ACTIVE_ORGANIZED : 1
SOCIAL_WORK : 1
GIVEN_TO : 1
NOT_AN : 1
REGULARLY_RX : 1
PERCOCET_AND : 1
MG_ABUSIVE : 1
OTHER_OF : 1
GOTTEN_BOTH : 1
TO_CLEAR : 1
AEROBICALLY_FOR : 1
STUDY_EPWORTH : 1
OF_SUICIDE : 1
HE_IS : 5
SOFT_CONTINENT : 1
FOR_ACTIVE : 2
NO_EYE : 1
NKA_BLOOD : 1
PLAN_AFIB : 1
GET_TYPICAL : 1
IT_HE : 1
OLD_HE : 1
SKIN_ASSESSMENT : 1
DEFICIT_PROCEDURE : 1
USE_HAS : 1
PULSES_INTACT : 1
NEUROLOGIC_ACTIVE : 1
TO_AND : 3
RESPIRATION_INDEPENDENT : 1
FINANCIAL_AND : 1
YES_IF : 1
CHEWABLE_ONE : 1
UP_IN : 1
SIDE_EFFECTS : 3
SEEN_IN : 1
NEUROLOGIC_CONSULTATION : 1
RAL_RESPONSE : 1
LIVING_AFFECT : 1
DOING_WORK : 1
THE_THIS : 2
PHYSICIAN_ABOVE : 1
EASE_STATUS : 1
DIVORCED_OF : 1
IS_NOW : 1
DISCHARGED_AND : 1
CED_YESTER : 1
OR_PRESSURE : 1
THE_LIST : 1
FOR_RIB : 1
FOLLOW_FOR : 1
US_BY : 1
EDUCATION_PROVIDED : 3
PROVIDER_PHYSICAL : 1
ASSESSMENT_MG : 1
OTHER_BY : 1
EVIDENCE_OF : 1
QH_MALE : 1
MEASURES_CM : 2
ACTIVE_WE : 1
YELLOW_AND : 1
HAR_THE : 1
COMMENTS_PULSE : 1
COLON_FLUID : 1
ALL_YOUR : 1
BETTERAS_HE : 1
WHICH_CONFIRMED : 1
DRY_DRY : 1
SUPPORT_TO : 1
INITIATION_OF : 1
PAIN_SOB : 1
COUGH_THIS : 1
PURULENT_NO : 1
TO_GET : 2
IP_FACILITY : 1
TROUBLES_AN : 1
URINARY_ICDCM : 1
AMLODIPINE_BESYLATE : 2
HE_TOOK : 1
DIAGNOSIS_AFFECT : 1
IS_CARPENTER : 1
FOR_CONSTIPATED : 1
SEE_OUTSIDE : 1
TEL_TO : 1
LABS_SHOT : 1
PAIN_LB : 1
DOES_YOUR : 1
SCREENMORSE_PATIENT : 1
MAYO_ON : 1
ALLERGIES_REACTIONS : 1
BEEN_SCREENING : 1
ASKED_VET : 1
THAT_HR : 1
WITH_FRACTURES : 1
MANAGEMENT_AND : 1
BY_PT : 1
THE_CARDS : 1
DOES_NOT : 3
BY_ON : 1
MOUTH_HOME : 1
BP_PROSTATE : 1
PLAN_BRIEF : 1
TEL_RESCHEDULE : 1
SCREENING_EDUCATION : 1
TO_MOOD : 2
PATIENT_UP : 1
IN_ATRIAL : 1
DEPOSIT_SUGGESTED : 1
SUPPLIES_DATE : 1
PE_MENTAL : 1
PMH_RATION : 1
EMB_EITHER : 1
PAIN_INJURY : 1
TO_WHEEL : 1
MOTORCYCLE_CRASH : 1
CLICK_TOOLS : 1
FOLLOWS_KEEP : 1
THIS_PT : 1
DOB_ALERT : 1
NUMBER_COLD : 1
ADMITS_AND : 1
REPORT_CALLED : 1
GRADE_HE : 1
REGARDING_ADEQUATE : 1
INITIAL_NURSING : 1
TABLET_BEDTIME : 1
PEOPLE_BY : 1
HAVE_MEDICINES : 1
REVIEWED_NO : 1
MALE_VETERAN : 1
NOT_WANT : 1
NOTE_LT : 1
MOVEMENT_BOTH : 1
THE_HAND : 1
SERAX_AND : 1
PATIENT_PT : 1
AND_CLEAR : 1
THIS_BUT : 1
INTAKE_FLUIDS : 1
YOU_WITH : 1
SECONDARY_PATIENT : 1
6A_TEAM : 2
EVENING_EDUCATION : 1
PLACE_AUTOMOBILE : 1
VA_THOUGHT : 2
CP_LISINOPRIL : 1
OF_OCTOBER : 1
DAILY_BREAKFAST : 1
ADJUST_MEDICATIONS : 1
NOTIFICATION_MAY : 1
COMPLETE_DIRECTIVE : 1
WHICH_PRECIPITATED : 1
TEMPERATURE_MANGLED : 1
REDUCTION_FIXATION : 1
CALLER_AREA : 1
PT_VIA : 1
RESULTS_WITHIN : 1
ND_HAD : 1
PROCEDURE_OOU : 1
SAFETY_FALL : 1
IN_ADDITION : 1
FOLLOWING_PRESCRIPTION : 1
GREATER_YES : 1
TO_RESPIRATION : 1
INITIAL_EVALUATION : 1
STATED_HE : 4
PATIENT_HOWEVER : 1
TROCHANT_WITHIN : 1
GROUP_CONSISTED : 1
INJURY_CONSULT : 1
BREATHING_LAB : 1
HIM_AFTER : 1
ON_JUN : 1
OF_WAS : 1
UNDERSTANDING_THERAPY : 1
TO_SWITCHED : 1
BACTRIM_ADDENDUM : 1
ABOVE_NOT : 2
AND_MEDICATIONS : 2
SCHEDULE_AMLODIPINE : 1
HOURLY_FOR : 2
INTENSITY_NO : 1
OF_PRESCRIPTIONS : 1
LV_ON : 1
WAS_HAS : 1
COCAINE_MR : 1
HYPERACTIVITY_SOCIOECONOMIC : 1
MOUTH_PROCEDURE : 1
RESPONSE_OBEYS : 1
FALL_RISK : 1
CALLED_AND : 2
STATUS_ENCOURAGE : 1
CHIEF_STROKE : 1
OVERNIGHT_WILL : 1
REMAINS_ON : 1
PC_ANTICOAGULATION : 1
APPT_MADE : 2
OFTEN_DID : 1
FROM_TREATMENT : 1
CONTROL_YOU : 1
WOULD_LIKE : 1
TELEPHONE_CALL : 1
AND_END : 1
WEDNES_JULY : 1
LIST_CONTAINS : 1
BOX_OF : 1
IN_WAS : 1
AND_CONTROL : 1
CAD_COPD : 1
CITALOPRAM_AND : 1
ABUSE_SCREEN : 1
VET_WITH : 1
UNIT_THIS : 1
PLEAS_PATIENT : 1
BELIEVE_HAS : 1
NOTIFIED_AT : 1
NEGATIVE_RHINITIS : 1
STOPPED_IT : 1
SINCE_ADMISSION : 1
AT_EDUCATION : 1
BESYLATE_TAB : 2
HIS_DISORDER : 1
IN_WAITING : 1
JOB_IV : 1
OR_REMINDERS : 1
THE_ROOM : 2
SESSION_NO : 1
SS_OR : 2
PHYSICAL_PLATINUM : 1
APPEARANCE_DIAGNOSIS : 1
PRESCRIBED_DOSE : 1
NO_SIGNS : 1
HAVE_QUESTIONS : 1
DOUG_COOPERATIVE : 1
AUDITC_CLINICIAN : 1
6A_TREATMENT : 2
PE_ESTIMATED : 1
HIM_HE : 3
OUTSIDE_RESULTS : 1
HIS_ROTATOR : 1
TEETH_DISCIPLINE : 1
CHANGE_WANT : 1
WILL_WALKING : 1
NURSING_FOLLOW : 1
REPORT_NURSING : 1
FOCAL_MEDICATION : 1
FLUIDS_NS : 1
APNEA_CPAP : 1
PARTICIPATION_DISCHARGE : 1
DONE_ER : 1
PRESCRIPTION_ACTION : 1
NEED_BE : 1
THRIVE_OF : 1
TIRED_DOING : 1
SECOND_ME : 1
CHIEF_ABDOMINAL : 1
APPOINTMENT_WHO : 2
APPOINTED_MALATINSZKY : 1
TERM_ONE : 1
BRONCHOSCOPY_MEDIASTINOSCOPY : 1
CAREGIVER_GIVEN : 1
ABGS_OR : 1
RISK_FOR : 2
NON_SATT : 1
EKRESTRAINT_SECLUSION : 1
DISCUSSED_HER : 1
NOW_PLEASE : 1
WORK_RELEASE : 1
VERBALIZE_FEELINGS : 1
PT_PRSE : 1
EXERCISE_PHYSICAL : 1
PULSE_NO : 2
COLOSTOMY_SA : 1
CLINIC_NOTE : 2
CHOL_THE : 1
HE_EXPERIENCES : 1
ABDOMINAL_FOR : 1
CAUSES_BLEPHARITIS : 1
CHIN_CHEST : 1
EXEMPT_INDIVIDUAL : 1
HEALTH_SOUTH : 1
ORGANIZED_PATIENT : 1
SAFETY_AND : 3
FOR_DEPOSIT : 1
BE_AT : 1
THIS_PHARMACY : 1
THIS_REMAINED : 1
ON_MON : 1
NAVIGATE_THE : 1
TREATMENT_WEDNES : 1
OFF_BIKE : 1
AND_UP : 1
HOW_DOES : 1
THOUGHT_IF : 1
NATIONAL_SUICIDE : 1
BOTH_ANXIOUS : 1
SOMETIMES_BOTHERSOME : 1
TO_FOR : 3
LEARNER_COMPLETED : 1
UROLOGYPROVIDER_TO : 1
TESTS_CC : 1
HIS_ASTHMALIKE : 1
EDUCATION_ON : 3
MEDS_YES : 1
TO_THE : 8
EMERGENCIES_GIVEN : 1
THE_MEDICATIONS : 1
THAT_MEDICATION : 1
PROCESS_NURSING : 1
BY_LISANSKY : 1
BY_MOUTH : 10
RAVELLA_STATES : 1
PHYSICIAN_DATE : 1
NOTE_INTERVENTIONS : 1
PLEASE_TO : 1
POLYP_FLUID : 1
ENCOMPASS_HH : 1
ANTERIOR_AND : 1
DIMINISHED_SIDERAILS : 1
ISOLATIVE_ON : 1
HOME_PHONE : 1
AND_THEN : 3
HAVE_INCOME : 1
GOOD_PATIENT : 1
ONES_THE : 1
SATURATION_VIA : 1
METATARSAL_ANCEF : 1
SATT_SESSION : 2
THE_PURPOSE : 1
INVERSION_EVERSION : 1
TAB_PHYSICIAN : 1
REASON_FOR : 2
NOTE_HE : 2
DEVICE_VETERAN : 1
TAKE_TABLET : 7
IN_MOST : 1
EMPLOYMENT_WORKING : 1
CALLER_WAS : 1
AND_AT : 1
DX_DISCHARGE : 1
PROSTATE_EDUCATION : 1
FALL_SCALE : 1
VASH_HOW : 1
ANOTHER_YES : 1
AND_COMPLAINING : 1
NOTE_NORMAL : 1
INPATIENT_TO : 1
EPWORTH_SCALE : 1
FROM_MH : 1
ADDENDUM_NO : 1
IMAGES_TO : 1
AS_THE : 1
JUST_PRIOR : 1
WITH_DIS : 1
APPT_FOR : 1
PAIN_BEST : 1
ASSISTED_CARELOCK : 1
HE_AFFECT : 1
HISTORY_SURGERY : 1
HE_DEBRA : 1
TISSUE_FOR : 1
PROVIDER_TEAM : 1
FOR_NECK : 1
RISK_CURRENT : 1
THE_THE : 3
HAVE_PAIN : 1
ADDENDUM_OF : 1
OF_STUDY : 1
THAT_WAS : 2
AND_AM : 1
NOT_ACCEPTED : 1
PCP_KETCHUM : 1
ED_GOALS : 1
REFER_TO : 2
COCAINE_CRACK : 1
THE_DOSE : 1
OF_PATIENT : 5
ONE_HE : 1
BLOOD_LOSS : 1
PATIENT_ESIG : 1
GROOMING_OTHER : 1
EXAM_EXAM : 1
REQUESTING_GO : 1
AND_FOR : 2
LAST_STRAW : 1
YOU_IT : 1
AMBULATION_BEARING : 1
WITH_OF : 1
RISK_HPI : 1
AND_HIM : 3
AMBULATION_EATING : 1
INTERACTING_WITH : 1
PROCEDURE_ASF : 1
ANXIETY_DOSE : 1
BY_ARNP : 2
ANY_OVERTHECOUNTER : 1
SYMPTOMS_AND : 1
UNRE_ABLE : 1
RATE_TELEMETRY : 1
HR_EASY : 1
MALE_OF : 1
SAID_HE : 1
MONITOR_CLEAR : 1
LUMBOSACRAL_INHEPATITIS : 1
CODEINE_NIACIN : 1
TONGUE_ONLY : 1
INDEPENDENT_SEEN : 1
PRESCRIPTION_PMH : 1
THAT_SAW : 1
SUNSCREEN_CHANGES : 1
TELEMETRY_RESPIRATORY : 1
WILL_MORSE : 1
EDATIVE_PAIN : 1
SSN_ALLERGY : 1
AND_NOT : 2
PALPATION_WITH : 1
FACTORS_POPULATIONS : 1
DISCHARGE_EDUCATION : 1
AGE_PATIENT : 1
WAL_THE : 1
TO_PLACE : 2
TD_GIVEN : 1
HEALTH_GIVEN : 1
PT_FEELS : 1
NONE_NONE : 1
EPIS_VTACH : 1
COMPLETE_FLOWSHEET : 2
INTACT_NONCARDIAC : 1
THINGS_EVERY : 1
ICDCM_NOTIFIED : 1
PRESSURE_INTENSITY : 1
ENCOURAGE_PATIENT : 1
TIRED_HE : 1
YOUR_CARE : 1
CARE_CALL : 1
ABILITY_NO : 1
REMIND_YOU : 1
FELL_HIS : 1
TRIAGE_NOTE : 2
GIVEN_PO : 1
AM_FEELS : 1
BECOME_OR : 1
BY_CARE : 1
IN_AUTOMOBILE : 1
RESPIRATION_TO : 1
OF_COUGH : 2
SHOT_GIVEN : 1
LAST_INDICATION : 1
AN_FRIEND : 1
THE_PREOP : 1
SKIN_REASSESSMENT : 1
AFTER_WITH : 1
TO_EMERGENCY : 1
AND_SI : 1
DIABETIC_BUT : 1
TOPIC_TESTS : 1
HE_APPEARED : 1
TO_COMPREHENSIVE : 1
WHETHER_WAS : 1
BACTRIM_FAMILY : 1
COMPLAINT_PAIN : 1
BEST_RESPONSE : 1
PRF_TO : 1
ONLY_RISK : 1
NOTE_PODIATRY : 1
WHEN_TO : 1
RA_BBSC : 1
SIMVASTATIN_MG : 1
BASS_WAS : 1
SUCCESSIVE_SHOW : 1
CLINIC_SUICIDAL : 1
TH_ANCEF : 1
MONITOR_OXYGEN : 1
COMPLAINS_OF : 1
MODEL_WHICH : 1
ONE_SINCE : 1
FOR_WE : 1
CHANGES_IS : 1
PREOP_MEDS : 1
NONE_SEVERE : 1
HE_SUBSEQUENTLY : 1
PRESENTING_CHIEF : 1
THE_WAISR : 1
ON_BEHALF : 1
CAPACITY_HOW : 1
BY_TWICE : 1
PSYCHOSOCIAL_EVALUATION : 1
DENIES_ABD : 1
INHL_PUFF : 1
EDUCATION_APNEA : 1
PREVENTIVE_MANAGEMENT : 2
DEPENDENCE_ICDCM : 1
SENSORY_PERCEPTION : 1
RESPIRATORY_TREATMENT : 1
ENTER_INFUSING : 1
NOTE_INPATIENT : 1
LIGHT_TV : 1
STRAW_PATIENT : 1
WILL_KEEP : 1
PROCESS_WITH : 1
WHEN_IN : 1
PHYSICAL_TIME : 1
PROVIDERS_HE : 1
GAS_PATIENT : 1
IN_ROOM : 1
INSTEAD_OF : 2
DIS_MIXED : 1
RETURN_TO : 1
RADIATION_REPORT : 1
REPORTED_TYPE : 1
FULLTIME_CALL : 1
LAB_WEIGHT : 1
NON_WITH : 1
OR_CHANGES : 1
XXXXXXXXXXXXXXXXXXXXXXXXXXXXXXXXXXXXXXXXXXXXXXXXXXXXXXXXXXXXXXXXXXXXXXXXXX_PATIENT : 1
IN_OUT : 1
ORIENTED_NORMAL : 1
CHAIR_TO : 1
SIGNS_YOU : 1
SSN_CONFIRMED : 1
ANY_COCAINE : 1
NURSING_PMR : 1
PND_ADMISSION : 1
THEN_THE : 1
MORNING_HAS : 1
BEFORE_RESPOERIDOL : 1
HYPOTENSION_WILL : 1
HI_WAIS : 1
TOILETING_NUTRITIONAL : 1
THIS_CAN : 1
AMBULATION_WELL : 1
PATIENT_OTHER : 1
NEUROPHYSIOLOGY_REPORT : 1
QID_TRAZODONE : 1
PRESENTS_FOR : 1
OF_DEPRESSION : 1
LEVEL_ED : 1
DM_BARRETTS : 1
FLUID_CAME : 1
CC_HR : 1
PAIN_TO : 2
TIME_WAS : 1
ACTIVE_HOME : 1
FURTHER_ED : 1
OF_ADMINISTRATION : 1
EPISODE_STAT : 1
EDUCATION_FOR : 1
HOW_OFTEN : 2
YEAR_SINCE : 1
OF_CHRONIC : 1
ABILITY_MANAGE : 1
EDUCATION_METHODS : 1
SYMPTOM_CHIEF : 1
KNOWLEDGE_OF : 2
AND_ENCOMPASS : 1
FILL_INDICATION : 1
APICAL_RATE : 1
FOREHEAD_WELL : 1
BE_VET : 1
HE_GI : 1
USE_YEARS : 1
LB_KG : 4
HIM_WAITING : 1
DISCHARGE_CURRENT : 1
TO_LINCOLN : 1
URINE_SE : 1
VOL_IMB : 1
ARE_RELIGIOUS : 1
UH_DO : 1
PMHX_ESOPHAGEAL : 1
NO_EP : 1
HOSPITAL_MALE : 1
OR_GIVEN : 1
CHEST_BUT : 1
THE_CONVERSION : 1
EXM_OCT : 1
INCLUDE_LACTOSE : 1
CONGESTIVE_HEART : 1
EXPERIENCE_PAIN : 1
THAN_YES : 1
NUTRITIONAL_ENCOURAGE : 1
WITH_INSPIRATION : 1
TV_SEE : 1
DISEASES_PROBLEM : 1
INSTRUCTIONS_VITALS : 1
NOTE_ADDENDUM : 1
PRESSURE_PHONE : 1
PRECIPITATED_OF : 1
ILLNESS_THE : 1
AGO_DUE : 1
EUS_BIOPSY : 1
ABNORMAL_PREVENTIVE : 1
IN_PAST : 3
EVERY_AND : 1
RECENTLY_EXPIRED : 1
FIND_OUT : 1
CASE_MANAGEMENT : 1
FACILITY_THE : 1
ABOUT_TO : 1
OF_HEAT : 1
LEVEL_AND : 1
STAETS_HE : 1
HAVE_HIS : 1
SERVICE_CONNECTED : 1
CARDIOLOGY_CONSULT : 1
PO_TO : 1
ADMISSION_PT : 1
INTOLERANCE_ALLERGIES : 1
PLAN_OR : 1
UD_MG : 1
PERSON_BEING : 1
COUGH_INTENSITY : 1
MOVEMENT_IN : 1
WITH_THEIR : 1
FREQUENCY_AND : 1
TO_GO : 2
OTCS_NOTE : 1
IS_COUNSELED : 1
ONLY_GO : 1
YOU_HAVE : 4
ACTIVITIES_CARE : 1
TO_IF : 2
OF_FLUIDS : 1
WARRIOR_TRANSITION : 1
BUPIVACAINE_AND : 1
NOT_OUT : 1
SOUPS_ONLY : 1
EXAMINATION_THE : 1
EATING_YES : 1
SITUATIONS_REMIND : 1
WITHDRAWAL_MEDICATION : 1
MG_INFORMED : 1
CLICK_VISTA : 1
STATED_WARRIOR : 1
TELEPHONE_CONTACT : 3
CONSULT_SOCIAL : 1
WAS_LAST : 1
TO_MG : 1
TEMPERATURE_EXTREMITY : 1
RECEIVED_CARE : 1
DISCHARGED_HOME : 1
WEEK_SINCE : 1
TO_ACCOMMODATE : 1
HAVE_YES : 1
NO_THE : 1
PENDING_CULTURES : 1
EXM_DATE : 1
INHL_QID : 1
CLONIDINE_BRADEN : 1
FURTHER_SWS : 1
MENTAL_HEALTH : 1
MH_TREATMENT : 1
PRESSES_HIS : 1
ORDERS_PORTABLE : 1
PO_PTSD : 1
WEAK_PLEURITIC : 1
SPC_IS : 1
INITIATES_RESPONSE : 1
PATIENT_PHONE : 2
AUTOMOBILE_GIVEN : 1
PT_REMAINS : 1
COMMUNITY_NURSING : 2
IS_MISSION : 1
MAGNESIUM_HYDROXIDE : 1
ATTENDED_TESTING : 1
COUMADIN_TO : 1
MEMORY_MEMBERS : 1
UNITS_AGAIN : 1
PATIENT_TRANSFER : 1
TIMES_MUSCLE : 1
STARTING_WORKED : 1
LEFT_URGENT : 1
YEAR_OLD : 1
FEELS_HIS : 1
FLOWSHEET_ANY : 1
SWS_CONTACT : 1
HOSPITAL_WAS : 1
IS_INCREASED : 1
ADDENDUM_SUSPICIOUS : 1
COMPLETED_FOR : 1
DISCHARAGES_FOCAL : 1
TO_NEW : 2
BY_NO : 1
OUT_UP : 1
IS_BEING : 2
PHYSICIAN_PRIOR : 1
HE_LYING : 1
PANIC_THAT : 1
AT_HIS : 1
BRIEF_ANSWERS : 1
MILIEU_TOLERATING : 1
PATIENTS_LEVEL : 1
NOTE_ALLERGIES : 1
FOLLOWING_INITIATION : 1
HIS_DEPRESSIVE : 1
WRITTEN_CONSULT : 1
TEMP_RESP : 1
APPOINTMENT_IS : 1
AT_HAR : 1
AIRWAY_LOW : 1
WITHIN_THE : 1
HIS_CURRENT : 1
PURULENT_DRAINAGE : 1
WAS_SCHEDULED : 1
THE_CONSENT : 1
PRN_IBUPROFEN : 1
GROOVE_NER : 1
WHEELCHAIR_NURSE : 1
THAT_YOU : 2
SPASM_LISINOPRIL : 1
OTHER_HAND : 1
ON_MEDICATION : 1
ADJUSTING_MILIEU : 1
SUBMITTED_DATE : 1
PM_DIET : 1
MR_HAS : 1
WITH_VAUGE : 1
DATE_TIME : 3
BE_VETERAN : 1
STATUS_DOES : 1
POTENTIAL_INCREASED : 1
SKILLS_WE : 1
BLOOD_GLUCOSE : 1
HAVE_DISCHARGE : 1
PASTORAL_VISITATION : 1
APPT_ADVISED : 1
VAMC_PT : 1
RISK_OF : 1
TABLET_QH : 1
ON_PRESCRIPTIONS : 1
ANY_OR : 2
WOUND_IS : 1
BBS_AUDIBLE : 1
THEIR_OWN : 1
MEDICATIONS_WITH : 1
NEEDS_ORDERS : 1
OF_NOTIFICATION : 1
PAIN_SYMPTOMS : 1
CRYING_THE : 1
UNIT_MORNING : 1
VET_NEEDED : 1
AND_SATT : 1
CORRECTLY_ABILITY : 1
NO_REGULAR : 1
MOISTURE_NO : 1
BS_THE : 1
NEUROPHYSIOLOGY_EEG : 1
MEDICATIONS_PRNS : 1
PMR_OT : 1
AND_WEEKENDERS : 1
ABOUT_CARE : 1
FOR_THIS : 2
NKA_THAT : 1
AND_OR : 4
MUSKOGEE_PLANS : 1
GI_UPSET : 1
IMAGING_IDENTIFIED : 1
SW_MET : 1
ENCOMPASS_OF : 1
PTERIGIUM_BOTHERSOME : 1
USE_ASSESSED : 1
HAVING_AND : 1
ACTIVE_CHEST : 1
EDUCATIONPT_POINTING : 1
BECAUSE_OF : 2
THE_FERROUS : 1
OF_HE : 2
WAS_PREVIOUSLY : 2
EVALUATION_ADDITIONAL : 1
REMOVED_HEALED : 1
FOR_ABLE : 1
ALSO_DIFFICULTY : 1
EST_RETURN : 1
FREQUENCY_POSSIBLE : 1
PRSE_PT : 1
SESSION_OUTCOME : 1
ING_OF : 1
HOW_PATIENT : 1
UPON_ARRIVAL : 1
RTC_FOR : 1
SSN_NAME : 1
VERIFIER_ESIG : 1
MEDICATION_PROFILE : 1
MUCOPER_FLP : 1
WITH_MENTAL : 1
THE_REPORTED : 1
TAB_UD : 1
WHAT_ARE : 1
NEEDS_PORTABLE : 1
DATE_THEN : 1
APPT_HAS : 1
TEMPERATURE_RAL : 1
EDUCATION_PHYSICAL : 1
SELF_DAILY : 1
MG_UD : 1
BETWEEN_INCREASED : 1
TOUCH_CHIN : 1
BETTERAS_HAD : 1
RAVELLA_HE : 1
BOARDING_HE : 1
TABLET_BY : 7
THEY_HAVE : 1
PRN_TCBP : 1
MON_WEDNES : 1
HEADACHE_ACTIVE : 1
TAKING_HIS : 1
EXPERIENCE_THING : 1
ADMIT_TO : 1
PATIENT_SEEN : 1
INFUSING_NS : 1
THIS_PHARMA : 1
AND_SUPPORT : 1
HE_AND : 1
OFFERED_WEIGHT : 1
OCC_TYLENOLABOUT : 1
IMMUNIZATIONV_HE : 1
OF_JUST : 1
TO_LEVEL : 1
PROGRAM_MEDICAL : 1
EXTERNAL_FIXATOR : 1
HIS_NO : 1
TO_ACTIVE : 1
WITH_PEERS : 1
ASTHMALIKE_RESP : 1
LEFT_DELTOID : 1
LANTUS_AM : 1
KETCHUM_BRIEF : 1
WERE_FEW : 1
RECEIVED_AND : 1
APNEIC_PULSELESS : 1
SIGNS_WITH : 1
SECOND_ASSESSMENT : 1
WITH_DEPENDENCE : 1
YOUR_BROCHURE : 1
WRAPUP_WHICH : 1
ME_AT : 1
MEMORY_IN : 1
PT_CAN : 1
NURSING_CLINICAL : 1
OMEPRAZOLE_FLUNIS : 1
COMPLETED_TESTING : 1
PENICILLIN_ED : 1
ING_GRIMACING : 1
TALKATIVE_AGITATED : 1
CARE_SERVICES : 1
THIS_TOUR : 1
RTC_NO : 1
PRACTITIONER_OF : 1
SERVICE_AND : 1
NORMAL_WILL : 1
LOW_PAIN : 1
THIS_SAME : 1
LAST_WORKED : 1
NIGHT_PRESSES : 1
WHEEL_TO : 1
MEDICATIONS_FROM : 1
ABDOMINAL_DATE : 1
IN_WITH : 1
WEAK_IN : 1
FOR_OF : 2
ADVANCE_AT : 1
DESCRIBE_FROWNING : 1
CLEAR_EASY : 1
PAIN_HAS : 1
LISINOPRIL_MG : 3
PAST_MEDICAL : 1
WORKED_HE : 1
STATES_THAT : 2
ONE_YEAR : 2
OVERTHECOUNTER_NONVA : 1
NO_ABNORMAL : 1
SOCIAL_AT : 1
LAST_EXPERIENCE : 1
ABOUT_DEATH : 1
EVER_TRIED : 1
BS_PRESENT : 1
NOW_BRIEF : 1
ONEHALF_BY : 3
ON_DISABILITY : 1
DRY_LESIONS : 1
WEEK_INITIATION : 1
WELL_OF : 1
GLUCOSE_WAS : 1
NAME_ORTHOSTATIC : 1
ACTIVITIES_AND : 1
WITH_PATIENT : 4
LEXAPRO_MG : 1
TYLENOLABOUT_EVERY : 1
NEW_NURSING : 1
BACK_ONE : 1
POSSIBLE_EFFECTS : 1
PTERIGIUM_SOMETIMES : 1
ST_TH : 1
WERE_TO : 1
LEVEL_WAS : 1
ULCERATION_ON : 1
BBSC_IS : 1
PODIATRY_HEIGHT : 1
FOR_EDUCATION : 1
ABSOLUTE_THESE : 1
AT_PLAN : 1
HEART_CHF : 1
THEM_THE : 1
TIMEOUT_CLINICAL : 1
REGULAR_RHYTHM : 1
RUPTURED_AND : 1
ONLY_WATCHING : 1
PERCOCET_TID : 1
YES_THANK : 1
MONITOR_THE : 1
FOOD_LB : 1
VET_STATED : 2
BONE_DRAINAGE : 1
CONSULT_FOR : 1
THAT_WERE : 1
REQUESTED_INPATIENT : 1
NO_CONTINUE : 1
AEROBICALLY_MINUTES : 1
NEW_ARRIVE : 1
PATIENTS_INPATIENT : 1
PSYCHOSISRESOLVED_COMPLAINT : 1
DESPITE_HAVING : 1
FULL_PATIENT : 1
WITH_COUGH : 1
NOTE_RECEIVED : 1
CARDS_ANY : 1
SATURATION_ABGS : 1
SUICIDE_ASSESSMENT : 1
AGITATED_OVER : 1
STUDY_PINESS : 1
HAD_GI : 1
BEEN_TREATMENT : 1
TWO_AND : 1
WAS_TAKING : 1
CURRENT_EMPLOYMENT : 1
IN_OR : 2
WE_CONTINUE : 1
TRIED_KILL : 1
THE_OFTEN : 1
DEBRA_ZINKEN : 1
XYZZY_RIGHT : 1
ANSWERS_ELABORATION : 1
PROVIDED_PT : 1
REQUIRED_PLACEMENT : 1
CULTURAL_RELIGIOUS : 1
INTENSIVE_UNIT : 1
RETIRED_TOOL : 1
IMMUNIZATIONV_HOWEVER : 1
USED_IN : 1
BEEN_PROBLEMS : 1
PATIENT_COMPLETED : 1
STOP_SIGNS : 1
INCREASES_MOVEMENT : 1
ON_DATE : 1
UNLABORED_SOFT : 1
EXEMPT_OXIMETER : 1
HEALED_SCAR : 1
TO_RECTAL : 1
GO_AMA : 1
OWN_DIAST : 1
CONGESTION_AND : 1
TIME_INDEPENDENT : 1
AMBULATORY_AID : 1
AMBULATORY_PAISLEY : 1
TO_RATE : 1
VAMC_PHARMA : 1
DENIES_SIDE : 1
URGENT_CARE : 1
GIVEN_VITAL : 2
COMPLETE_FOBT : 1
THAT_FULL : 1
PT_STATUS : 1
PAIN_HE : 1
ASSESSMENT_PATIENTS : 1
FEVER_SEC : 1
MIGHT_DONE : 1
TO_COMPLAINT : 1
NEXT_APPOINTMENT : 1
NO_PALLOR : 1
CALL_TWINBROOK : 1
FAIR_HOW : 1
LT_SUB : 1
AND_WELLNOURISHED : 2
NOTIFICATION_EVENTS : 1
NURSING_NOT : 1
AND_DOWN : 1
CALL_UH : 1
THE_TO : 3
REHAB_PER : 1
OXYGEN_SAT : 1
HOW_TOO : 1
CONDITION_UPON : 1
BECOME_CALMER : 1
REPORTED_CALL : 1
INTO_MORE : 1
BACK_YEAR : 1
AND_TIME : 2
SLEPT_WILL : 1
RIGHTS_ALERT : 1
FOLLOWING_AMBULATION : 1
HYPERTROPHY_OF : 1
RESP_DRUG : 1
DIET_LIQ : 1
ONE_AND : 1
FOR_RETINOPATHY : 1
YESTER_AND : 1
LIVING_SITUATION : 1
OF_NIGHT : 1
INDEPENDENT_ANY : 1
HAS_OF : 2
HE_PREVIOUSLY : 1
WAS_DISCHARGED : 1
ANSWERED_BY : 1
OR_LUMBOSACRAL : 1
THEY_MIGHT : 1
INSTRUCTED_HAVE : 1
DOES_HAVE : 3
DOES_GET : 1
DEPENDENCE_DRUGS : 1
INSTRUCTIONS_IS : 1
HIM_NOT : 1
FOR_DIAGNOSTIC : 1
YESTER_DATE : 1
TYPE_SYMPTOM : 1
LIST_AND : 1
MOUTH_NOT : 1
SESSION_WAS : 1
INCLUDING_RECENTLY : 1
IS_WHO : 1
WITHIN_ONE : 1
HX_PRESENT : 1
APPROPRIATE_MEDICAL : 1
LOT_PT : 1
REPORT_BASE : 1
YOU_RECEIVE : 1
PRIVATE_FURTHER : 1
AS_NEEDED : 1
VIA_ABGS : 1
DIVALPROEX_TO : 1
YOU_QUESTIONS : 1
BOTHERSOME_SESSION : 1
CURRENT_STATUS : 1
IS_BETTERAS : 1
THRER_PAIN : 1
THE_NO : 1
YOURSELF_MAGNESIUM : 1
GO_TO : 2
FINDINGS_THE : 1
OXYGEN_TELEMETRY : 1
HE_SAID : 1
WHEEL_CHAIR : 1
MACHINE_REMSTAR : 1
DAILY_STOOL : 1
RELAX_PT : 1
CXR_MG : 1
QH_FOR : 1
EVERY_MORNING : 1
TELEPHONE_URINAL : 1
FOR_PT : 2
PMHX_DM : 2
VOLUNTEER_WORK : 1
CARE_THAT : 1
OF_EVENING : 1
ADEQUATE_NUTRITION : 1
WHO_YOU : 1
VITAL_SIGNS : 5
OF_VTACH : 1
BEING_DISCHARGED : 1
RETURN_CALL : 1
SEEN_ON : 1
FINDINGS_FULL : 1
OBJECTIVE_THIS : 1
RECEIVED_PERCOCET : 1
YOU_LAST : 1
IN_TREATMENT : 1
MOOD_WAS : 1
COMPLIANT_MAJOR : 1
NOT_WAS : 1
UPPER_ABOV : 1
FOR_HOSPITAL : 1
DAT_AMBULATORY : 1
LOC_MOOD : 1
MESSAGE_IN : 1
WHEN_ASKED : 1
ADVISING_SHOULD : 1
INCREASED_RELATED : 1
HAS_FELT : 1
VETERAN_REPORTEDLY : 1
TO_LEARN : 2
AND_PRESSURE : 1
DRAWN_AND : 1
YES_YES : 1
BP_WT : 1
SHORTLY_HE : 1
COCAINE_OR : 1
COPD_PULMONARY : 1
SEEK_EMERGENCY : 1
OFTEN_ENCOURAGED : 1
IS_TRANSFER : 1
PHYSICIAN_OTHER : 1
DISTRESS_NOTED : 1
ROUTE_ADMINISTRATION : 1
EPWORTH_PINESS : 1
SERAX_CLONIDINE : 1
HIM_DRAW : 1
PHARMACY_DISCHARGE : 1
FRACTURES_NOW : 1
UNLABORED_ABD : 1
PATIENT_NUMBER : 1
AN_VETS : 1
AND_CARE : 2
UNLESS_YOU : 1
UP_CALLED : 1
PER_REPORT : 1
AND_BRADEN : 1
THAT_HAVE : 2
AS_TOBACCO : 1
SCANNED_RADIATION : 1
EDEMA_PULSES : 1
ABDOMINAL_II : 1
NKA_IS : 1
DENIES_PATIENT : 2
ALLERGIES_PAROXETINE : 1
SORE_THROAT : 1
PATIENT_READINESS : 1
YEAR_MILK : 1
NOT_ASSIGNED : 1
OR_DIAGNOSIS : 1
HOSPITAL_FO : 1
ASSESSMENT_WRITTEN : 1
AND_WAS : 2
JUST_SURVIVE : 1
ACTIVE_BRONCHOSCOPY : 1
ADDENDUM_LEFT : 1
WELL_MOST : 1
EVALUATION_DEPENDENCE : 1
PHONE_NATIONAL : 1
AND_DENIES : 1
WEAR_NO : 1
FLUNIS_DE : 1
CLEAR_SKIN : 1
PT_CHANGE : 1
THEN_MORPHINE : 1
TREATMENT_NOTE : 2
OBSERVED_HOURLY : 2
EUS_LYMPHNODE : 1
BFAST_LANTUS : 1
OR_BECOMING : 1
NOT_HAD : 1
DEVELOP_TELEPHONE : 1
THEY_MANY : 1
PT_SWS : 1
RESULTS_RANGE : 1
SUPPLIES_RECENTLY : 1
ONLY_TO : 1
WELL_HAD : 1
VETERAN_SCALE : 1
FLUID_OUT : 1
THANK_YOU : 1
HAVING_EKSW : 1
TREATMENT_WANT : 1
HEALTH_PROVIDED : 1
DOES_FAMILY : 1
CALLED_PER : 1
HAVE_BECOME : 1
TG_ASSESSMENT : 1
CARELOCK_AMBULATORY : 1
YEARS_OF : 1
WEDNES_ND : 1
CHILDREN_PHYSICAL : 1
FREQUENT_TOILETING : 1
COURSE_OF : 1
PT_BEEN : 1
OR_JAUNDICE : 1
ENCOUNTER_PATIENT : 1
LECTURE_ADDICTION : 1
OR_SUNSCREEN : 1
PHYSICAL_COGNITIVE : 1
YELLOW_SPUTUM : 1
DATE_PERCOCET : 1
IN_DENIES : 1
EDGE_BED : 1
NORMAL_BEDREST : 1
EVALUATION_ALCOHOL : 1
RIGHT_NOW : 2
ELECTRIC_TO : 1
RIB_FOR : 1
TO_GROSS : 1
PA_DAILY : 1
HIGHLY_SUSPICIOUS : 1
NO_ORTHOPNEA : 1
CHEST_BS : 1
DISABILITY_AND : 1
NORMAL_ORGANIZED : 1
THE_PRIMARY : 1
HOTLINE_OFFERED : 1
RIGHTS_NOT : 1
ASPIRIN_PERFORMED : 1
THE_STEPS : 1
MUST_BELIEVE : 1
HH_OF : 1
WITH_TROCHANT : 1
SCREEN_LEARNER : 1
CC_CONSULT : 1
HEAT_IMAGERY : 1
AVAILABLE_PRN : 1
LABS_TD : 1
OUTPATIENT_INCLUDING : 2
NEUROPSYCHOLOGY_CONSULT : 1
REGARDS_APPOINTMENT : 1
WT_LB : 2
TAKING_ANY : 1
ME_ON : 1
CARE_NO : 1
CLINICAL_HOURLY : 1
PATIENT_TOLD : 1
TEST_GIVEN : 1
WELL_PT : 2
SITESDO_PATIENT : 1
PAIN_UNDUE : 1
NONCARDIAC_PAIN : 1
ROUTE_HYPERTROPHY : 1
BODY_INDEX : 2
TYPICAL_HB : 1
HEMATURIA_HE : 1
TRANSFER_GROOMING : 1
FLOWSHEET_RESPIRATION : 1
YRS_MALE : 1
THE_PRESCRIPTION : 1
TO_GIVE : 2
FAMILY_ADEQUATE : 1
DUTY_STATUS : 1
FAIR_OFTEN : 1
TOBACCO_THE : 1
KEEP_TREATMENT : 1
TO_LEFT : 1
MASSAGE_LAB : 1
EVER_TO : 1
SOCIOECONOMIC_FOURTH : 1
FOR_GAS : 1
DIABETIC_FOOT : 2
HAVE_FURTHER : 1
SYNVISC_GOOD : 1
IDENTIFIED_BRIEFLY : 1
VA_FOR : 1
TO_TELEMETRY : 2
STUDIES_BE : 1
IT_BUPROPION : 1
AND_DRY : 3
ONE_THEY : 1
REACH_MENTAL : 1
LV_EIC : 1
ACTIVE_LIPID : 1
SUGGESTED_WORK : 1
PATIENT_ATTENDED : 1
OF_BACK : 1
NOTIFICATION_TO : 1
COUNSELLED_PRESENTS : 1
NEEDED_HEATHER : 1
WILL_THEY : 1
PORTABLE_CXR : 1
NOTE_PSYCHIATRIST : 1
CAP_TAKE : 2
AMR_TO : 1
DONE_PAIN : 1
PHARMACY_MEDICATION : 2
DISTRESS_ATRIAL : 1
RESEMBLED_ASPECT : 1
INTUBATED_APNEIC : 1
ABDOMINAL_VITAL : 1
BEING_IDENTIFIED : 1
AID_BEDREST : 1
OR_THAT : 1
TO_THRIVE : 1
FOR_CONTINU : 1
PAIN_VERBAL : 1
TO_REACHED : 1
OR_UNDERMINING : 2
HEELS_CANCEL : 1
MALE_STATED : 1
AMBULATE_WELL : 1
CHRONIC_PROBLEMS : 1
CLINICIAN_VISIT : 1
NURSES_NURSING : 1
NURSES_REPORT : 1
ALSO_BASIC : 1
EVERY_ACTIVE : 1
PATIENT_HAVE : 4
PRACTITIONER_DURING : 1
PARTICIPATION_NORMAL : 1
NOT_DISTRESS : 1
WANT_NO : 1
OF_SCREENING : 1
PAIN_IMPRESSIONS : 1
NOTE_MEDICATION : 1
MANY_PROVIDED : 1
MOUTH_AVOID : 1
ASSESS_LEVEL : 1
WITH_BIPOLAR : 1
REPORT_PAIN : 1
AND_ALWAYS : 1
BEGAN_TO : 1
SECLUSION_HISTORY : 1
HEALTH_PSYCHOSOCIAL : 1
LEFT_INABILITY : 1
EDUCATION_COMPLETED : 1
CONFIRMED_SURGERY : 1
THAN_VISIT : 1
NUTRITIONAL_RISK : 1
CONTAINING_ALCOHOL : 1
AND_AFFECTS : 1
REALLY_WANT : 1
INCREASED_LAST : 1
HAS_HAD : 3
PRIMARY_INITIAL : 1
OF_ANT : 1
OF_UPPER : 2
WHAT_HE : 1
COMPLAINT_DEPRESSION : 1
STERNUM_NOT : 1
RATE_YOUR : 1
ON_THE : 4
ON_NEW : 2
TOOL_AND : 1
PLATINUM_CLINIC : 1
ORDERED_PATIENTS : 1
WAS_THAT : 1
MAL_SUBOPTIMAL : 1
OF_ASF : 1
NOT_SIGNS : 1
INFORMATION_ON : 1
BECAUSE_HE : 1
OF_THE : 10
OWN_FEELING : 1
FORT_PHYSICIAN : 1
APPT_EST : 1
AGREED_THAT : 1
STUTTERING_HYPERSOMNOLENCE : 1
INTOLERANCE_ADVERSE : 1
EXERCISE_ACTIVITIES : 1
STAT_DRAWN : 1
REPORTED_HE : 2
COMPLETELY_INDEPENDENT : 2
NONE_TIME : 1
WORKING_FULLTIME : 1
FOR_ASSESSMENT : 1
IDENTIFIED_THE : 1
HAS_NOT : 5
WORST_AVERAGE : 1
THAT_OCCUR : 1
CP_SOB : 1
EVALUATION_ATTENDING : 1
NAVIGATE_STEPS : 1
VET_TO : 2
AND_REVIEWED : 1
YES_YOU : 1
SIDE_FINDINGS : 1
SURE_OF : 1
DIARRHEAFOR_WHICH : 1
EXTREMITY_TIB : 1
FO_MALE : 1
PT_HE : 1
OF_MEDICATIONS : 3
BEST_MOTOR : 1
TIMES_APPEARED : 1
REVIEW_CHRONIC : 1
SUSP_ML : 1
FAMILY_BUT : 1
ADMISSION_TOLERATING : 1
GLARGINE_HELD : 1
IS_REQUESTING : 2
ADMIT_DATE : 1
MEDICATIONS_GIVE : 1
DRUGS_PENICILLIN : 2
LEARN_NOTE : 1
ADDICTION_AND : 1
UPPER_THIGHT : 1
FEEL_SUICIDAL : 1
WAS_QUIET : 1
MCG_USE : 1
TOO_CALLED : 1
SORE_INCLUDING : 1
PROVIDED_PATIENT : 2
RAISED_NOTED : 1
WILL_CONTINUE : 5
HELP_PEOPLE : 1
APPROVES_THIS : 1
PA_STOOL : 1
BIOPSYCHOSOCIAL_DATA : 1
DISCUSSION_TO : 1
PREDNISONE_FOR : 1
BETADINE_PATIENT : 1
OVER_PRESENTING : 1
FOR_RENAL : 1
INTERVIEW_THE : 1
VA_WILL : 1
YOUR_OR : 1
YOUR_HEALTH : 2
NOT_ABLE : 2
ATTENDING_NOTE : 1
SCREEN_PREVIOUS : 1
HAS_BOTH : 1
EKRESTRAINT_HISTORY : 1
APPLIANCES_NO : 1
IMMOBILE_LAST : 1
DOCUMENTS_INFORMATION : 1
ORIENTED_TO : 5
BUT_EDUCATION : 1
STOP_ABUSE : 1
PATIENT_WHO : 1
CC_MG : 1
AGE_YRS : 1
TAX_INFORMATION : 1
FEELS_CAN : 1
PRESCRIPTIONS_IS : 1
ALLERGIES_CODEINE : 1
AND_PATTERN : 2
CP_OR : 1
HIS_CHIEF : 1
HIM_PRIVILEGES : 1
EXTREMITY_MANGLED : 1
WT_OX : 1
RENAL_IN : 1
ND_PATIENT : 1
CONTINENT_OF : 1
WELLDEVELOPED_WELLNOURISHED : 2
CORONARY_DISEASE : 1
ASSESSMENT_SENSORY : 1
BULGE_IN : 1
WAS_BUSPIRONE : 1
UP_AND : 1
APPOINTMENTS_SATES : 1
TAKING_OF : 2
THE_LUMBAR : 1
EXCLUDING_EKRESTRAINT : 1
NO_LAB : 1
DIPYRIDAMOLE_BID : 1
FORMER_USER : 1
COOPERATIVE_FAIR : 1
ASSESSMENT_SULFA : 1
IMPAIRMENT_MAJOR : 1
TWO_NITROGLYCERIN : 1
VERBALIZES_OF : 1
EDUCATION_THERAPY : 1
VIA_DIRECT : 1
OFFER_FREQUENT : 1
WAL_OF : 1
AND_ACTIVE : 2
CONFIRMED_WAS : 1
GUERNEY_ASKED : 1
MEDICATION_ON : 2
TO_PMHX : 1
ARE_YOU : 1
NOTE_THROAT : 1
HE_TAKING : 3
NONTOBACCO_USER : 1
FEELING_AND : 2
COMPLETED_FULL : 1
TO_DICTAPHONE : 1
READ_THOROUGHLY : 1
OUTSIDE_MEDICAL : 1
COUPLE_OF : 2
ANTERIOR_WHILE : 1
OR_CAREGIVER : 1
PAIN_IN : 1
PATIENT_ORTHOSTATIC : 1
ASSESSMENT_COMPLETED : 1
SEX_RACE : 1
SS_HEARD : 1
WANT_GET : 1
PVT_REGULARLY : 1
NOTIFYING_DCF : 1
TYPE_OF : 3
MOOD_GI : 1
TIME_BY : 1
PROVIDER_PATIENT : 1
ON_VETS : 1
SHOT_PT : 1
CAME_PATIENT : 1
CHEW_TABLET : 1
BEEN_TAKING : 1
STOPPED_BECAUSE : 1
PROVIDED_EDUCATION : 1
EEG_NO : 1
TELEMETRY_NOTE : 3
SI_NO : 2
CAPACITY_WHEN : 1
IDEATION_TIME : 1
STATES_CAUSES : 1
LACTOSE_ALLERGIES : 1
THERAPY_FOR : 1
IS_CURRENTLY : 2
PHYSICAL_THERAPY : 3
TO_ADVANCE : 1
AGITATED_PRESENTING : 1
UNIT_CC : 1
PTSD_ACTIVE : 1
HOSPITAL_FOR : 1
AND_TELCARE : 1
ATRIUM_PHONE : 1
STATED_ABOVE : 1
MEDICATIONS_ASSISTED : 1
SHOWING_OF : 1
OF_CT : 1
TO_RECENT : 1
AND_CHILDREN : 1
LOW_HIGHINR : 1
ELECTRONIC_RECORD : 1
AN_ABSOLUTE : 1
REMSTAR_SUICIDE : 1
SIMVASTATIN_TAB : 1
CONTAINS_MEDICATIONS : 1
ULCER_MASS : 1
PRESSURE_RAL : 1
REGULAR_SOUPS : 1
TV_BEDSIDE : 1
PRESSURE_LTC : 1
ATTEMPT_HAS : 1
VETERAN_NOT : 2
JAW_NONE : 1
WIFE_AND : 1
SIGNIFICANT_HISTORY : 1
GLUCOSE_NEW : 1
TO_KILL : 1
THEN_PRESCRIBED : 1
NOS_NOTIFIED : 1
NONE_CTRS : 1
TO_DISCHARGE : 1
IS_AND : 1
NURSING_TRIAGE : 2
EXAM_RECTAL : 1
CRAX_SALTINES : 1
RHINITIS_ADDENDUM : 1
YES_WAS : 2
PT_COMPLETED : 1
TELEPHONE_APPOINTMENTS : 1
BEHAVIOR_MEDICATIONS : 1
REMAIN_PRN : 1
PERCEPTIONS_FEARS : 1
DM_GERD : 1
YELLOW_URINE : 1
PROBLEM_TELEPHONE : 1
HE_ONLY : 1
HE_SEC : 1
INDEX_HE : 1
BUT_HAS : 1
PATIENT_WAS : 8
CONJUNCTIVITIS_ICDCM : 1
EVENTS_OVERNIGHT : 1
DEPRESSED_HAS : 1
LARGE_BM : 1
PROFILE_INTENSIVE : 1
INTERVENTIONS_REPORT : 1
PROVIDED_WAS : 1
ON_DRUGS : 1
HIS_COLA : 1
OF_PRIMARY : 1
TOLERATING_CITALOPRAM : 1
MEDICATIONS_HE : 3
REVIEWED_FOR : 1
HER_PLAN : 1
INHEPATITIS_DRAW : 1
IS_PATIENT : 4
ASPECT_THAT : 1
SEVERE_THE : 1
AREA_LOSS : 1
AND_USE : 1
DIURETICS_YES : 1
TAKEN_ANY : 1
NURSING_AO : 1
SI_THE : 1
HAD_GUARDIAN : 1
TAB_CHEWABLE : 1
AND_ADJUST : 1
HE_CONFIRMED : 1
SYNVISC_RESULTS : 1
WAS_CHECKED : 1
SPECIMEN_PATIENT : 1
FOR_SECOND : 1
WOUND_DRESSEDHE : 1
SINCE_BY : 1
NO_TH : 1
GAIT_TRANSFERRING : 1
LIQ_DEY : 1
CHILDREN_NONE : 1
HC_LV : 1
WILL_IF : 1
VITALS_THIS : 1
THE_IMPLEMENTATION : 1
SUPERVISING_OF : 1
WAS_ON : 3
FOR_BLOOD : 2
BY_DATE : 1
EFFECT_ONES : 1
YES_EYE : 1
MORPHINE_FOR : 1
AM_GLARGINE : 1
PATHOLOGY_REPORT : 1
LAST_PAIN : 1
DOES_THE : 1
PERCOCET_PRN : 1
VAUGE_SI : 1
DRAWN_SENT : 1
NORMAL_NO : 1
SCALE_OF : 2
AM_MEDICATIONS : 2
GROIN_DENIES : 1
OF_IT : 1
THOUGHT_PATIENT : 1
INCREASED_PHYSICIAN : 1
ASSIGNED_TO : 1
FELL_OFF : 1
WEIGHT_BEARING : 1
CHANGE_DO : 1
APT_FASTING : 1
PSYCH_WITHIN : 1
RELIGIOUS_EAGER : 1
WRITTEN_WILL : 1
REPORTS_HE : 2
PATIENT_INTUBATED : 1
OP_CARE : 1
THAT_TELEPHONE : 1
COMPLAINT_MONTHS : 1
INPATIENT_NOTE : 3
SOCIAL_AM : 1
FAR_BETWEEN : 1
AND_REALISTIC : 1
EATING_WELL : 1
WITH_PHYSICIAN : 1
IMB_CE : 1
NORMALLY_HAS : 1
PREOPERATIVE_ADDENDUM : 1
ACTIVE_LOR : 1
CARDS_REPORT : 1
ALLERGIES_ACIPHEX : 1
OVER_YEAR : 1
SERVICES_REFERRED : 1
TO_CALLED : 1
EXPIRATION_LB : 1
CARE_REVIEWED : 1
OR_OXIMETRY : 1
THERAPY_THERAPY : 1
TO_THAN : 1
NO_EPILEPTIFORM : 1
NEXT_WEEK : 1
FOR_ASTHMALIKE : 1
PHYSICIAN_CONTINUE : 1
LB_MOMETASONE : 1
THERAPY_HEAT : 1
IMPLEMENTATION_OF : 1
BY_APT : 1
NOTE_GIVE : 1
VET_FIND : 1
TOBACCO_COUNSELING : 1
FOLLOWING_CONTAINS : 1
CULTURES_PATIENT : 1
RTC_IN : 1
NEEDS_RIGHT : 1
THIS_MEDICATION : 1
PROGRAM_AWAITING : 1
DATE_ADMITTED : 1
NOTE_INITIAL : 1
SHE_WOULD : 1
LOW_TOO : 1
DECISION_SKILLS : 1
EDUCATION_PATIENT : 1
AFFECT_YOUR : 1
MEDICATIONS_LABS : 2
PRO_CALL : 1
NEUROLOGIC_FOR : 1
FLUIDS_AND : 1
ALCOHOL_IN : 1
HAVE_VETERAN : 1
PRESSURE_PATIENT : 1
DATE_PAST : 1
WAITING_MOST : 1
STATUS_DIET : 1
IS_WAL : 1
VETERAN_IS : 2
YOU_HOW : 1
NEEDED_THIS : 1
ACTIVE_CONSENT : 1
MOUTH_TWICE : 1
WITH_MULTIPLE : 1
DISCHARGE_MEDICATION : 1
EVENING_SOMETIMES : 1
HYPOTENSION_VET : 1
SEC_DIAG : 1
TO_RELAX : 1
HIS_RIGHT : 2
SYMPTOMS_CHEST : 1
OTHERS_IN : 1
AN_OF : 1
THIS_VISIT : 1
OLD_PATCHROTATE : 1
SURGERY_COORDINATOR : 1
DISTRESS_AM : 1
NUTRITIONAL_STATUS : 2
ABSTINENT_COCAINE : 1
TO_YOUR : 1
IS_FULL : 1
SCORE_EQUAL : 1
BREATHING_SW : 1
FURTHER_REQUESTING : 1
RETINOPATHY_OT : 1
TA_TABLET : 1
GIVE_MG : 1
LARGE_YELLOW : 1
RIGHT_THAT : 1
GIVEN_PODIATRY : 1
HAD_COCAINE : 1
AVOID_BEVERAGES : 1
HAS_ANSWERED : 4
LEFT_CARE : 1
INFARCTS_SUGGEST : 1
IMMOBILE_STATUS : 1
GO_FOR : 1
WAISR_STATED : 1
PRNS_LABS : 1
HOPLESS_AT : 1
MEDICATIONS_STATUS : 1
WAS_ALERT : 1
COLONOSCOPY_WITH : 1
RETURN_CLINIC : 1
NOTE_NOT : 1
INSTEAD_JUST : 1
WITH_PCP : 1
TO_SIMILAR : 1
CITALOPRAM_NOT : 1
SUBOPTIMAL_SUN : 1
ESOPHAGEAL_RADIATION : 1
HX_OF : 2
MEDICATION_NO : 1
SIGNIFICANT_OTHER : 1
HAS_TAKEN : 1
TAKES_AND : 1
PENICILLIN_DISCUSSED : 1
IDENTIFIED_GENDER : 1
IS_NOT : 6
RELATIONSHIP_TO : 1
DEPRESSIVE_RECURRENT : 1
HE_PAIN : 1
ADMITTED_REPORT : 1
LOC_GI : 1
HS_TO : 1
CONTAINING_IN : 1
PER_ANTICOAGULATION : 1
WITH_LABS : 1
CHIEF_HX : 1
OF_PAIN : 6
OUT_PATIENT : 1
VERBALIZES_UNDERSTANDING : 1
APPLIED_SUB : 1
DIRECT_MOUTH : 1
TH_WITH : 1
HAS_ALSO : 1
PLACE_ON : 1
PRESCRIPTIONS_PROVIDED : 1
FOOT_IS : 1
ANOTHER_PHYSICIAN : 1
ADDENDUM_TO : 2
BY_CARELOCK : 1
COUNSELED_STOP : 1
CARE_YOU : 1
ON_PALPATION : 2
HAVE_AN : 1
LEVEL_PERCOCET : 1
FROM_IN : 1
THEN_WAS : 1
TENDER_BS : 1
YES_ALDRETE : 1
LESIONS_APPLICATION : 1
EXTERNAL_DEVICE : 1
MEDICATION_TOBACCO : 1
EYE_NO : 1
DISCUSSION_OF : 1
HOURLY_SAFETY : 2
AND_SHOWING : 1
NOT_HISPANIC : 1
HE_CARPENTER : 1
YES_GOOD : 1
PATIENT_PULSE : 1
PAIN_RATING : 1
FOLLOWING_LIST : 1
MASS_SUSPICIOUS : 1
ORTHOPEDIC_CONSULT : 1
CONTACT_SOUPS : 1
COULD_BE : 1
WEIGHT_TREATMENT : 1
REMAINS_PRSE : 1
ALL_OF : 1
ESTIMATED_BLOOD : 1
DID_COMPLAIN : 1
LETTER_TO : 1
BOTHERSOME_DATE : 1
OF_HIGH : 1
BY_WAS : 1
MALE_RTC : 1
AND_URINAL : 1
NOTE_INFORMED : 1
IS_YEAROLD : 1
DOSAGES_OF : 1
INDEPENDENT_IF : 1
FEARS_PATIENT : 1
IN_BOTH : 1
PROVIDED_BY : 1
GIVE_SHARON : 1
TRACKING_OR : 2
US_DONE : 1
EDUCATION_TOPICS : 1
FELT_WEAK : 1
SGOT_SE : 1
AFFECT_HEALTH : 1
ABUSIVE_HIS : 1
AND_TE : 1
DISCUSSED_BELOW : 1
BID_NOON : 1
SCHEDULED_PREOP : 1
SINCE_JULY : 1
ALSO_SEEM : 1
SAME_PROCESS : 1
INR_YOUR : 1
HIM_ASKED : 1
WELL_IS : 1
NOTED_REASON : 1
FOR_REFERRAL : 1
COPY_CT : 1
CARE_VET : 1
PLEASE_CALL : 1
LMSW_SPC : 1
UNMH_REQUESTING : 1
UNDERGOING_THERAPY : 1
VET_HAS : 1
AM_BUT : 1
QAM_VITAL : 1
GRANULAR_NO : 1
ADMISSION_ADMIT : 1
INPATIENT_VET : 1
BELIEVE_THIS : 1
DOWN_MEANS : 1
GROIN_PATIENT : 1
ERYTHROMYCIN_PENICILLIN : 1
OUT_OF : 2
DATE_BIRTH : 1
AND_EACH : 1
JOB_ACTIVE : 1
SESSION_PAST : 1
FT_RECKLESS : 1
COORDINATOR_SCALE : 1
NEW_SYMPTOMS : 1
BED_THE : 1
MUSKOGEE_PATIENT : 1
PRESENT_IID : 1
WM_BULGE : 1
DENIED_RISK : 1
HE_CAME : 1
DISTAL_PULSES : 1
WORK_COMMUNITY : 1
DATE_OCTOBER : 1
BEING_IN : 1
MANAGEMENT_HIS : 1
SUICIDAL_THE : 1
EVERY_PROBLEM : 1
YOU_PATIENT : 1
RIBS_TO : 1
THINKS_MIGHT : 1
DISORDER_EPISODE : 1
PHYSICAL_DAILY : 1
VOIDING_APPROVES : 1
BY_ER : 1
CONTINENT_NO : 1
TEAM_NOTE : 2
STATUS_WORKING : 1
CALLED_PATIENT : 1
SHORTLY_MEDICATIONS : 1
AFFECT_WITH : 1
PATIENT_VERIFIER : 1
MED_SALTINES : 1
IMPRESSIONS_COMMENTS : 1
INSTRUCTED_ACTIVE : 1
HOME_SERVICES : 1
MG_TRIMETHOPRIM : 1
EVALUATION_SCHEDULE : 1
HOME_CARE : 1
MESSAGE_WITH : 1
IS_APPROVED : 1
TRIMETHOPRIM_TA : 1
ED_DOCUMENTS : 1
DIFFICULTY_REMEMBERING : 1
TAKING_OUTSIDE : 1
STAETS_IS : 1
ABILITY_COURSE : 1
OT_ON : 1
YES_SCORE : 1
NO_LONGER : 2
THIS_TIME : 3
NKA_BY : 1
BRONCHOSCOPY_IS : 1
NEED_TO : 1
ENCOURAGE_TO : 1
FAMILY_HE : 1
TOVA_FROM : 1
NOT_TAKEN : 1
OR_PAIN : 1
OF_AND : 2
YES_DO : 1
DYSPNEA_SAT : 1
REMINDERS_AS : 1
LB_HOW : 1
HAS_RECEIVED : 1
PHYSICAL_WORK : 1
HAVE_BULGE : 1
TO_TIME : 1
TO_APPOINTMENT : 1
RESULTS_DATE : 1
PLANS_TO : 4
EC_TAKE : 2
THIGHT_CLEAN : 1
OVER_ONE : 1
PATIENT_SSN : 1
TO_COMMUNITY : 1
BY_MEDICATION : 1
OTHER_SPECIFY : 1
TO_PAIN : 1
LOSS_INTERDISCIPLINARY : 1
PATIENT_ABLE : 1
HE_WORK : 1
MIN_UH : 1
OTHER_UNCOMFORTABLE : 1
SWS_TELEPHONE : 1
TELEMETRY_NOTIFICATION : 1
AND_ISOLATED : 1
MEDICAL_PROBLEMS : 1
TOBACCO_USER : 2
TO_FIND : 1
OBSERVED_FOR : 2
INTENSITY_WORST : 1
RETIRED_AND : 1
LEADING_OF : 1
COUGH_NO : 1
DOCUMENTATION_IF : 1
FAIR_CONTACT : 1
NURSE_PLEASE : 1
GUARDIAN_ESCORT : 1
FALL_ADMIT : 1
PAIN_ORTHOPEDIC : 1
CC_AND : 2
NURSE_DEPENDENCE : 1
SUPPLIES_EKRESTRAINT : 1
BREAKFAST_AND : 1
YOUR_PHYSICIAN : 1
WAS_VIA : 1
HAVE_GAIT : 1
NO_DIARRHEA : 1
TRANSFERRED_TO : 1
PHE_ADEQUATELY : 1
UPPER_HAVE : 1
HE_LOSING : 1
WE_WILL : 1
HUD_VASH : 1
PAIN_SECONDARY : 1
MODEL_RESEMBLED : 1
ES_RATE : 1
OWN_ANTIHISTAMINES : 1
RESP_AND : 1
SAW_ZINKEN : 1
PT_WAS : 2
ACCUCHECK_SCHEDULED : 1
AMBULATE_TO : 2
OUT_APPROXIMATELY : 1
TIME_VITALS : 1
VOICED_ANY : 1
CARE_NOTIFYING : 1
OTHER_STRESSORS : 1
ULCER_DID : 1
REQUESTING_MEDICATION : 1
PATIENT_SIGNIFICANT : 1
VETERAN_TALKATIVE : 1
OF_VA : 1
AGREED_TO : 1
CONSULT_GIVEN : 1
INSTRUCTIONS_DESCRIBE : 1
ARNP_OR : 2
FOLLOWING_EATING : 1
GOOD_IS : 1
ORTHOPNEA_PND : 1
RADIATION_GERD : 1
PREVIOUS_INDEPENDENT : 1
BIPOLAR_DIS : 1
ABLE_PROVIDE : 1
SKIN_WARM : 1
SAME_SUCCESSIVE : 1
LEXIPRO_WITH : 1
STATUS_PERIOD : 1
CARE_THANK : 1
CHICKEN_COMPLAINT : 1
WATCHING_SEE : 1
COMPLETED_SAFE : 1
LEADING_CAUSE : 1
ORTHOPEDIC_BFAST : 1
IS_THICKNESS : 1
FOR_NEOPLASM : 1
COUGH_CAME : 1
PT_LIKE : 1
TO_INSTEAD : 1
INTENSITY_NONE : 1
USER_PATIENT : 1
NOT_NEUROLOGIC : 1
APPTS_OFFERED : 1
TO_EXERCISE : 1
AS_HE : 1
CHRONIC_ISCHEMIC : 1
THE_MONTHS : 1
STOOL_HIM : 1
HAS_GOTTEN : 1
RECORDS_GOING : 1
HAD_CRASH : 1
HAVE_ABOUT : 1
RESTING_IN : 1
HAVE_REQUEST : 1
REVIEW_OF : 1
LOW_PREVENTIVE : 1
HEEL_FOOT : 1
WT_KG : 1
YES_CORONARY : 1
MEDS_ASSESS : 1
PND_INFO : 1
REPORTS_DIFFICULTY : 1
ON_CONSULT : 1
AND_WILL : 2
GO_FT : 1
HONORABLE_STATES : 1
NKA_NOTED : 1
EP_STUDIES : 1
IF_NEW : 1
FOR_GROUP : 1
THIS_NOTE : 1
TO_WIFE : 1
DONE_AT : 1
HE_THAT : 1
MOUTH_HIS : 1
HE_WITH : 1
DIVALPROEX_AS : 1
REASSESSMENT_UP : 1
CARE_ADMITTING : 1
ABILITY_AMP : 1
IN_CM : 1
ON_WEDNES : 1
HE_MAY : 1
AND_EFFECTIVE : 1
ANXIOUS_DEPRESSED : 1
AM_ASKED : 1
DROPPING_FOOT : 1
DAILY_HIM : 1
USE_MD : 2
BRONCHOSCOPY_THIS : 1
WAS_ADMINISTRATIVE : 1
VIA_WHEN : 1
ASSIGNED_CALLER : 1
IN_NURSES : 1
DENIED_DRUG : 1
PATIENT_ENCOUNTER : 1
FROM_RAL : 1
PATIENT_AND : 3
VPA_WAS : 1
VETS_BEHALF : 1
INSPIRATION_CAME : 1
HAR_AGE : 1
PRACTITIONER_THE : 1
THE_UNIT : 1
CONTACT_PATIENT : 1
APPT_PT : 1
SOB_WK : 1
MET_HEAD : 1
CONGRUENT_CONVERSATION : 1
AT_ON : 1
COMPLAINT_SAYS : 1
MG_TAB : 9
FOLLOW_UP : 4
IN_THE : 6
SALTINES_THE : 1
OF_SCAN : 1
AUDIBLE_CONGESTION : 1
PT_PAIN : 1
LOW_HEALTH : 1
NOTES_HEALTH : 1
DENIES_SI : 1
GIVEN_CORONARY : 1
NOT_COMPLETE : 2
RISK_SCREENMORSE : 1
TELEPHONE_ARMY : 1
BEFORE_AND : 1
THE_VESICLES : 1
GU_EXISTING : 1
INTERDISCIPLINARY_OF : 1
HEALTH_WELFARE : 1
NOTIFIED_HOME : 1
CHECK_ON : 1
OF_LOW : 1
NEW_PRESCRIPTION : 1
STATUS_NON : 1
LT_TH : 1
SINCE_PASTORAL : 1
WHO_ADMITTED : 1
AFTER_LSOING : 1
TIME_BUT : 1
CALLER_VETERAN : 1
NOT_HAVE : 1
BY_WIFE : 1
AND_HAS : 4
THE_PRESCRIBED : 1
OF_GERD : 1
ASSES_OBSERVED : 1
MALE_DURATION : 1
BE_WED : 1
WORKED_SINCE : 1
FAILURE_PODIATRY : 1
EFFECT_REACTIONS : 1
WORK_SERVICEAMARILLO : 1
ON_WHICH : 2
BUSPIRONE_TAB : 1
NOW_ABSTINENT : 1
AND_SERAX : 1
FIND_THAT : 1
READ_AND : 1
HE_HELP : 1
KETCHUM_CLINICAL : 1
RAL_WELLDEVELOPED : 2
NOTE_SIDERAILS : 1
PRESENTS_TO : 3
THEM_ABOUT : 1
SUICIDE_HE : 1
SESSION_REALLY : 1
VIETNAM_PHARMACY : 1
MEDICATION_FROM : 1
BUT_QUIT : 1
PHYSICIAN_TO : 1
LIST_THE : 1
HEART_TELEMETRY : 1
SUB_TH : 1
ADDITIONAL_INFORMATION : 1
REGULAR_CRACKERS : 1
PREP_PREOP : 1
PULSE_REFER : 1
ADMITTED_VA : 1
ABILITY_SESSION : 1
WELLDEVELOPED_AND : 2
TOPIC_AND : 1
COPD_CARDIAC : 1
SULFA_MG : 1
TREATMENT_NOW : 1
MAYO_AND : 1
TIME_TIMES : 1
PAIN_ACTIVE : 1
PROMOTE_NUTRITIONAL : 1
PAIN_BILL : 1
AND_GIVE : 1
BE_TO : 2
TO_DOB : 1
RECORDS_WAS : 1
LIKE_TO : 1
EXTREMITIES_PRESSURE : 1
NURSING_APPT : 1
CONSTIPATED_DIARRHEA : 1
SIGNS_NURSING : 1
PHYSICIAN_AND : 1
PATIENT_AGE : 1
TV_OUTSIDE : 1
ORAL_PUFF : 1
HYPERACTIVITY_LOW : 1
NOT_TO : 7
TO_TEETH : 1
BFAST_AVERAGE : 1
HYPERSOMNOLENCE_MAY : 1
MEDICATIONS_PLEASE : 1
AND_ISOLATIVE : 1
HE_HAD : 4
CHICAGO_PT : 1
WHO_ARE : 1
NEOPLASM_IS : 1
TO_FEELS : 1
ACTIVE_PRSE : 1
DAILY_PRN : 1
TYPE_DTN : 1
RAISED_APPLICATION : 1
RANGE_TID : 1
INHEPATITIS_CARRIER : 1
MANAGE_MEDS : 1
PROBLEM_ALSO : 1
PHYSICIAN_ANTIANXIETY : 1
IT_MG : 1
AT_ENCOUNTER : 1
COMMENTS_ADDENDUM : 1
COMMUNICATE_TO : 1
TO_MENTAL : 1
FROM_CARE : 1
SUPPLIES_SECLUSION : 1
OUTSIDE_THE : 1
NOTE_ASSOCIATE : 1
PATIENT_ALSO : 1
OTHER_PEOPLE : 1
HE_GOING : 1
IN_MOVEMENT : 1
RELEASE_AND : 1
ROUTE_OF : 1
NORMAL_LETHALITY : 1
THE_AS : 1
SIDE_DISCUSSED : 1
USE_ALDRETE : 1
ASSESSMENT_ADDENDUM : 1
ERYTHEMA_TRACKING : 1
TO_YOU : 1
TOUR_DEPRESSED : 1
IS_YOUR : 1
IV_MG : 1
LUMBAR_LUMBOSACRAL : 1
NOTIFIED_OF : 1
INTERACTING_SOCIAL : 1
INTUBATED_PULSELESS : 1
YOU_EVER : 1
ELABORATION_SYNVISC : 1
SEVERE_VETERAN : 1
ACCOMPANIED_HIS : 1
INSTRUCTED_PATIENT : 1
SS_NO : 1
OVERNIGHT_CONTINUE : 1
OWN_AMP : 1
INTERVIEW_VETERAN : 1
DISCUSSION_THE : 1
DECISIONMAKING_CAPACITY : 1
ACTIVE_ALCOHOLCONTAINING : 1
USER_VERIFIER : 1
THE_SPECIMEN : 1
RESTROOM_SINK : 1
EST_APPT : 1
WAS_YESTER : 1
OUTCOME_ANSWER : 1
INSPIRATION_TO : 1
CONVERSION_NORMS : 1
UNDERSTANDING_ASPIRIN : 1
REVIEWED_PENICILLIN : 1
CAUSE_OF : 1
AS_REQUESTED : 1
WORKED_IN : 1
LEVEL_HIS : 1
PT_IT : 1
TO_FROM : 2
PAIN_PATIENTS : 1
NO_OF : 2
NONE_EXCEPT : 1
INAPPROPRIATELY_AS : 1
LUNG_NEOPLASM : 1
NICOTINE_DEPENDENCE : 1
WITH_CLAY : 1
FOOT_CARE : 1
HAD_UPSET : 1
REQUESTED_COUNSELING : 1
CC_VISIT : 1
WM_IN : 1
IM_THIS : 1
CURRENTLY_ACTIVE : 1
WEAK_TIRED : 1
CHRIS_AVAILABLE : 1
WITH_PC : 1
REQUESTS_ENCOMPASS : 1
DENIED_EVER : 1
TO_INTO : 1
OR_HIGH : 1
THE_PRIVATE : 1
PRESSURE_WHEN : 1
BUT_IN : 1
BETTER_NUMBER : 1
WAS_NO : 2
OTCS_OF : 1
OR_LIVING : 1
WAS_DECISION : 1
SUBJECT_SCRABBLE : 1
HIGH_RISK : 1
SIGNS_OBSERVED : 1
OFTEN_PATIENT : 1
ACTIVE_RESPONSE : 1
OF_DIAGNOSIS : 1
INFORMED_WAS : 1
UNDERSTANDING_PAROXETINE : 1
THIS_RECOVERY : 1
HIS_PLAN : 1
CODE_HC : 1
VERBALIZE_PERCEPTIONS : 1
FASTING_LABS : 1
AMBULATE_THE : 1
THAT_TAKING : 1
CONSULT_AT : 1
TV_NO : 1
DRUG_WITHDRAWAL : 1
MAKING_WE : 1
CONJUNCTIVITIS_GERIATRICS : 1
STOP_NEGLECT : 1
INITIATED_JULY : 1
MEDICATION_REQUESTED : 1
PINES_CLICK : 1
THAT_EXPERIENCES : 1
TB_GIVEN : 1
CARE_FOLLOW : 1
PRESENTS_ON : 1
PERCOCET_THEN : 1
HIM_WHEN : 1
PHARMACY_EDUCATIONPT : 1
CONSULT_VITAL : 1
COUMADIN_FOR : 1
MUSCLE_LISINOPRIL : 1
HPI_NOT : 1
ESOPHAGEAL_CA : 1
BEEN_PRIVILEGES : 1
TAB_MG : 7
OX_HE : 1
TABLET_DS : 1
WAL_PHE : 1
NOT_DO : 1
UROLOGY_NURSING : 1
THE_FULL : 1
TOLERATING_THE : 1
KEEP_APPTS : 1
HE_DOES : 5
UNDUE_NO : 1
HR_CHECKING : 1
EXCEPT_GAS : 1
IS_RETIRED : 1
OF_ELECTRONIC : 1
DICTAPHONE_JOB : 1
PROCEDURE_COLONOSCOPY : 1
TIME_PT : 1
AFTER_ADDENDUM : 1
CLEAN_FURTHER : 1
MG_CHEWABLE : 1
THEN_HE : 1
GETTING_WORSE : 1
THE_CITALOPRAM : 1
HE_TWO : 1
TAKE_ONE : 6
CONTROLLED_UROLOGY : 1
AND_ALSO : 1
AND_EFFECTS : 1
OR_NOT : 1
FACILITY_APPOINTED : 1
HOLD_COUMADIN : 1
REVIEWED_SC : 1
NOTE_WITH : 1
WITH_DEPRESSION : 2
WILL_CONTACT : 1
FAMILY_LIVING : 1
GLARGINE_INSTAGLUCOSE : 1
BIKE_CHIEF : 1
CIU_WHICH : 1
BEHALF_TEARFUL : 1
TO_STARTING : 1
RESPONSE_FREELYX : 1
TABLET_AT : 1
ADJUST_MONITOR : 1
UNDERMINE_WAS : 1
AS_FOLLOWS : 1
YES_BBS : 1
ADDENDUM_CONSTIPATED : 1
DEATH_MEDICATIONS : 1
DESIRE_AND : 1
CLEAR_CAME : 1
VETERAN_THE : 1
PT_SAFETY : 1
FOLLOW_COMMUNITY : 1
STAFF_AND : 1
CRYING_IN : 1
VETERAN_SEEN : 1
TAKING_AS : 1
INPATIENT_MEDICATIONS : 3
INDEX_APR : 1
AT_MAYO : 1
WILL_INCREASE : 1
THE_CLAY : 1
AND_CAREGIVER : 1
UNDERSTANDING_PT : 1
CARES_REQUESTING : 1
DISCHARGE_TELEPHONE : 1
FLP_TOOTH : 1
HAD_STANDARD : 1
DISCHARGE_DISPOSITION : 1
GROSS_HE : 1
AND_THAT : 2
YOUR_MEDICATIONS : 1
PATIENT_WRAPUP : 1
PLAN_LSOING : 1
SEC_COMMENTS : 1
NVO_NOTE : 1
REMAINED_IN : 1
ADMINISTRATION_FREQUENCY : 1
COMPREHENSIVE_ABILITY : 1
PO_PT : 1
ASTHMALIKE_DRUG : 1
TEMP_PULSE : 1
COMPLETE_FOR : 1
HEALTH_DATED : 1
AT_ADDENDUM : 1
VERBALIZED_ALLERGIES : 1
AND_MEMORY : 1
HE_SAYS : 1
PAIN_DATE : 1
ENCOURAGED_TO : 1
FOR_DENIED : 1
MEDICATION_TEMPERATURE : 2
ISSUES_NOT : 1
POSTERIOR_GI : 1
TO_TOMORROW : 1
PAIN_NO : 2
ALSO_BEEN : 1
OLD_FRIEND : 1
WITH_BETADINE : 1
PT_STATES : 2
ADVISED_TO : 1
FROM_RTC : 1
YES_NURSING : 1
MONTH_PAIN : 1
RECENT_LEVEL : 1
BLEPHARITIS_CONJUNCTIVITIS : 1
TREATMENT_FOLLOWUP : 1
HELP_OTHER : 1
HE_DO : 1
AND_UPON : 1
QAM_STOP : 1
MOST_THE : 1
INVASIVE_PROVIDER : 1
HAVE_FOR : 1
AND_WHETHER : 1
TOBACCO_USE : 2
MG_QH : 1
ASKED_NOT : 1
HORNER_AVAILABLE : 1
AND_RECKLESS : 1
MEDICATION_IPRATROPIUM : 1
ER_DISCHARGE : 1
BS_OF : 1
PATIENT_COUNSELLED : 1
EVALUATION_IMPRESSIONS : 1
CONSULT_NOTE : 1
FROM_SETTING : 1
EVERY_FOR : 1
ILLNESS_INFLUENZA : 1
DOES_BECOME : 1
TOPICS_DIABETIC : 1
COCAINE_TREATMENT : 1
YES_COLOSTOMY : 1
DOSE_PHYSICIAN : 1
BLOOD_STOOLS : 1
CONTACT_REGULAR : 1
AND_CONDITION : 1
THERAPY_PLATINUM : 1
SOUTH_DATED : 1
ABSTINENT_FROM : 1
THE_STRAW : 1
INTACT_CHEST : 1
TO_OF : 1
OF_THEIR : 1
WITH_BETTS : 1
NOTE_COMPONENTS : 1
IS_REPORTED : 1
OF_NOTE : 1
PT_QUIET : 1
DISCIPLINE_THE : 1
GETTING_THE : 1
MGS_PULSE : 1
DOB_BAY : 1
OMEPRAZOLE_DE : 1
SCHEDULED_GLUCOSE : 1
MONITOR_APPEARANCE : 1
CAD_HAS : 1
DTR_PT : 1
TO_PROVIDE : 1
ABILITY_SUBJECT : 1
DATE_TEMP : 1
IN_RECORDS : 1
FALL_SCREEN : 1
NOT_OR : 1
CARE_VISITATION : 1
CC_EACH : 2
PAIN_SULFA : 1
FROWNING_ING : 1
ADMITS_GERD : 1
CURRENT_USER : 1
THE_WAS : 4
INDIVIDUAL_SESSION : 2
MEANS_TO : 1
APPOINTMENT_ARE : 1
PLAN_DOCUMENTS : 1
VETERAN_PAIN : 1
IMP_TOOTH : 1
TH_DRESSED : 1
LOW_GRADE : 1
IS_LAST : 1
PHONE_COLD : 1
ENCOURAGING_BACK : 1
DOING_HE : 1
EVALUATION_SURGERY : 1
SUBSTANCE_ABUSE : 1
NIACIN_FLUNIS : 1
TO_VERBALIZE : 1
WHICH_WAS : 1
MASS_INDEX : 2
OUTPATIENT_REFILLS : 1
ASSESSMENT_HI : 1
CONCENTRATION_FAIR : 1
AND_UNLABORED : 1
EXPIRED_AND : 1
OFTEN_PHONE : 1
AM_GIVEN : 1
PATIENT_VERBALIZE : 1
ADMITS_TAKING : 1
WAS_NOT : 2
ERYTHROMYCIN_CODEINE : 1
NOTE_HYPERLIPIDEMIA : 1
JUL_PANIC : 1
VTEL_FOLLOW : 1
OPEN_INTERNAL : 1
ABLE_AMBULATE : 1
NOT_MONITOR : 1
AN_HE : 1
BEEN_USING : 1
TOPICALLY_HYPERTROPHY : 1
PEERS_AND : 1
RELAX_MRSA : 1
EPILEPTIFORM_DISCHARAGES : 1
FOR_AND : 3
ULCER_BODY : 1
MOST_EVENING : 1
OR_VISION : 1
CARE_PLAN : 1
BMI_BODY : 1
SCHEDULED_PHYSICIAN : 1
WHICH_CONDITION : 1
EXERCISE_FOR : 1
PERFORMED_MEDS : 1
NOTE_SW : 1
BBS_WITH : 1
HE_THINGS : 1
CLEAN_DIAGNOSIS : 1
COUNSELED_TO : 1
OF_BEST : 1
VITALS_VISIT : 1
PCP_EST : 1
GI_AT : 1
COUNSELING_IMP : 1
BEEN_HOPEWFLESS : 1
OR_FOCAL : 1
MAKE_APPOINTMENT : 1
THE_PAST : 4
FLUID_VOL : 1
URINE_SGOT : 1
WAS_IT : 1
TELEMETRY_DIMINISHED : 1
NO_PREVENTIVE : 1
PO_BID : 2
COLON_POLYP : 1
AO_SKIN : 1
LUMBAR_AND : 1
ADDENDUM_AMLODIPINE : 1
HE_CAD : 1
CURRENTLY_USER : 1
COMPLAINT_OF : 1
BID_PULSE : 1
POSSIBLE_SHORT : 1
ACTION_AND : 1
OF_SERVICE : 2
BE_DONE : 1
CXR_OMEPRAZOLE : 1
ALLERGIES_ADVERSE : 1
SI_HI : 2
COMPUTER_KNOWLEDGE : 1
TOUCH_TO : 1
ALL_METHODS : 1
RECOVERY_NURSING : 1
PRESSURE_PAIN : 1
DEPRESSIVE_DISORDER : 2
NOTE_VA : 1
WAS_COUNSELLED : 1
HOWEVER_PHYSICIAN : 1
GROUP_PROCESS : 1
BE_TRANSFERRED : 1
AND_PER : 1
ALERT_INTERACTIVE : 1
SUICIDAL_BEFORE : 1
TIME_AT : 1
DEPRESSION_AND : 1
AND_FLUID : 1
SAFE_EFFECTIVE : 1
THERAPY_CLINIC : 1
IDENTIFIED_NEEDS : 1
TAKING_TEMPERATURE : 1
PATIENT_TESTING : 1
NURSING_PATIENT : 2
IMPLEMENTATION_THE : 1
INDEPENDENT_AND : 1
PREVIOUSLY_HERE : 1
TELEPHONE_LUNCH : 1
IN_STOOLS : 1
DISORDER_ICDCM : 2
ILLICIT_SINCE : 1
ON_VISTA : 1
SERVICE_REQUESTS : 1
TIME_THE : 1
USE_YES : 1
WAS_ORIENTED : 1
AT_AMBULATE : 1
IS_FROM : 1
WORK_HIS : 1
TIME_PAIN : 1
PT_ON : 1
VOIDED_CC : 1
STRAW_NAME : 1
FOR_MINUTES : 1
DOES_VETERAN : 1
PROVIDE_YOU : 1
INDEPENDENT_BY : 1
HAS_MI : 1
OT_CONSULT : 1
OF_TREATMENTS : 1
AM_ASSISTED : 1
PT_TO : 4
AND_SINK : 1
COLA_EDUCATION : 1
MH_PLAN : 1
DROPPED_REQUESTING : 1
EAGER_TO : 2
ANTIHYPERTENSIVES_DIURETICS : 1
MEDICATIONS_GIVEN : 1
GOING_BE : 1
WITH_PRESENT : 1
DATE_MR : 1
URINAL_REACH : 1
PITTING_DISTAL : 1
FASTING_SECOND : 1
USER_BUT : 1
TO_OTHER : 2
PREOP_GIVEN : 1
HIS_WAS : 2
ALCOHOL_DEPENDENCE : 1
HISTORY_ANXIETY : 1
EXAMINATION_TYPE : 1
NEW_RX : 1
CAUSES_DIARRHEA : 1
PROVIDER_PRACTITIONER : 1
ND_HE : 1
COMPLICATIONS_NONE : 1
HOME_HAS : 1
PART_OF : 1
VOIDED_AMOUNT : 1
ON_TETANUS : 1
CONTINUE_MEDICATIONS : 1
PRIMARY_CARE : 3
GOOD_ANXIETY : 1
FOOT_HE : 1
HEART_FAILURE : 1
FROM_TWINBROOK : 1
OF_INR : 1
BASS_ALERT : 1
NEGLECT_PROVIDER : 1
INCOME_FOR : 1
AND_EASY : 1
PHYSICIAN_BY : 1
VISIT_SORE : 1
IS_BY : 2
REQUESTED_TOBACCO : 1
JUN_HONORABLE : 1
SCHEDULED_APPTS : 1
HIM_AND : 2
COMPLAINS_COUGH : 1
ORAL_PO : 1
HE_LETTER : 1
DRUGS_DISCUSSED : 1
GROSS_HEMATURIA : 1
HOURS_SUICIDE : 1
PATIENT_OF : 1
FOR_MEDICATION : 1
ACTIVE_MEDICATIONS : 6
MASS_APR : 1
WEIGHT_LB : 2
LEVEL_DEPRESSION : 1
FROM_ELECTRIC : 1
VANOD_TAB : 1
TID_ACTIVE : 1
YOUR_LEVEL : 1
ONES_REACTIONS : 1
TELEPHONE_FROM : 1
MAY_DOSE : 1
OR_DOB : 2
PTSD_HEART : 1
IN_HEALTH : 1
TO_SHORT : 1
OBSTRUCTION_RELATIONSHIP : 1
ILLNESS_VACCINE : 1
AND_ABD : 1
THIS_SERVICE : 1
APPT_RETURN : 1
COMPLAINT_TOBACCO : 1
TYPE_MACHINE : 1
INPATIENT_CLEAR : 1
ALTERING_EVENT : 1
PRESSURE_ANXIETY : 1
STROKE_AND : 1
REPORT_NO : 1
YOUR_VETERAN : 1
IS_FORMER : 1
TAKE_ONEHALF : 3
NEXT_WHO : 1
ADVISE_ANY : 1
CLINIC_ALLERGIES : 1
INFLUENZA_CHRIS : 1
BE_INPATIENT : 2
EACH_AREA : 1
BE_COLON : 1
HEALTH_EDUCATION : 1
WORST_FOR : 1
TOO_HIGHINR : 1
HE_ADMITS : 3
RATION_OF : 1
PROVIDED_THE : 2
LISINOPRIL_TAB : 3
MANAGEMENT_ON : 2
CREATE_MODEL : 1
AFFECTS_WAS : 1
IF_REQUIRED : 1
ATRIUM_DDRIVE : 1
FOR_ADDENDUM : 1
AND_CONTINENT : 2
SINK_TO : 1
HAVE_WM : 1
THE_RELATION : 1
FOR_USE : 2
GIVE_HIM : 2
HE_BECOME : 1
AVERAGE_LANTUS : 1
FOR_EXAMINATION : 1
HISTORY_PRESENT : 1
LEVEL_WORST : 1
YOU_EXPERIENCE : 1
SECLUSION_OF : 1
TAKING_MG : 1
VA_HOSPITAL : 1
TO_PATIENT : 2
CERTAINTY_THESE : 1
CONTACT_NUMBER : 1
MG_PO : 7
SOFT_TENDER : 1
UP_COLA : 1
NON_VA : 1
EXPIRATION_WEIGHT : 1
CHEST_HE : 1
KG_STATUS : 1
PRESSES_ON : 1
YOU_BECOME : 1
SCALE_ED : 1
INDICATION_DOSAGES : 1
CONTROLS_BEDSIDE : 1
INFO_ADMIT : 1
APPROXIMATELY_MONTHS : 1
TRIMETHOPRIM_MG : 1
BEGAN_FEEL : 1
ATTEMPT_HE : 1
NO_DISTRESS : 1
OF_SURVIVE : 1
MIXED_BEEN : 1
HE_PASTORAL : 1
BEDSIDE_VETERAN : 1
CHEST_RIBS : 1
ISSUES_RELATED : 1
OR_CHEST : 2
RANGE_SLIGHTLY : 1
DIAGNOSIS_BLOOD : 1
WAS_READ : 1
END_UP : 1
CURRENT_DIET : 2
NURSING_HOME : 2
STATUS_DIVORCED : 1
BECOMES_SHORTLY : 1
BOTH_IN : 1
PAROXETINE_MG : 1
WHEN_IF : 1
ASSOCIATE_PROVIDER : 2
UPPER_CLEAN : 1
SEE_MEDICAL : 1
AND_DEPOMEDROL : 1
NURSING_DISCHARGE : 2
DIAGNOSTIC_ADMITTED : 1
SOFT_AND : 1
WILL_ADVISE : 1
WITH_CLEAR : 1
ANY_SYMPTOMS : 1
AGO_AND : 1
TCBP_SCANNED : 1
TOILETING_PROMOTE : 1
WHICH_IS : 1
FIXATOR_THE : 1
NUTRITION_ORAL : 1
CLINIC_AS : 1
TWINBROOK_HAS : 1
REMIND_OF : 1
ALWAYS_PROVIDED : 1
ANY_NEW : 2
STERNUM_DID : 1
WAS_INSTRUCTED : 3
NATURE_WORSE : 1
PER_PC : 1
MD_USE : 1
THING_THAT : 1
URGENT_MADE : 1
TWO_DISTRIBUTION : 1
IN_PATIENT : 1
NATIONAL_HOTLINE : 1
MANAGEMENT_LTC : 1
ONE_WEEK : 1
PATIENT_PREVIOUSLY : 1
PULSELESS_NO : 1
ACTION_DOSAGE : 1
THIS_HAS : 2
TOMORROW_EP : 1
HEART_HEARD : 1
HEIGHT_INCHES : 1
LIQ_DRESSING : 1
ADMISSION_INFO : 1
AND_AND : 1
PENDING_PATIENT : 1
ANT_CHEST : 1
CONTINUE_SYMPTOMS : 1
THE_HIGH : 1
PROFILE_DAT : 1
LEVEL_RECEIVED : 1
SENT_AMR : 1
CE_BETTER : 1
PAST_MONTHS : 1
YES_VOIDING : 1
YET_WITH : 1
PROVIDER_NOTIFIED : 1
FROM_THIS : 1
RISK_WRITTEN : 1
MOUTH_MORNING : 1
INSTRUCTED_TO : 4
OR_ONE : 1
ADDENDUM_SITE : 1
CHANGES_IN : 1
CC_INTERDISCIPLINARY : 1
PATIENT_HISTORY : 1
LUMBAR_PC : 1
COLA_COMPLETED : 1
TONIGHT_VOIDED : 1
OWN_LIST : 1
PROCEDURE_PREOP : 1
EXEMPT_SATT : 1
IN_PLACE : 1
MG_LEVEL : 1
COMPLEX_AND : 1
METAB_TO : 1
NURSE_PAIN : 1
LOOSE_BM : 1
DOCUMENTATION_YES : 1
AND_WOUND : 1
TIME_TEMP : 1
TESTING_MORNING : 1
VESICLES_AND : 1
LB_OX : 1
HAVE_BEEN : 1
WITH_PLANS : 1
STOOL_TO : 1
BLOOD_ASKING : 1
BEEN_WELL : 1
ASSES_HOURLY : 1
PAST_PER : 1
CONTINUE_MONITOR : 2
COUNSELING_REM : 1
MANY_HANDOUT : 1
WAS_CRYING : 1
HAS_FILL : 1
TO_OUT : 2
VETERAN_FOR : 2
DEPRESSED_AND : 1
THE_BRIEFLY : 1
SAW_HIM : 1
YEAR_WITH : 1
SESSION_SUBJECT : 1
SUPPORT_OTHERS : 1
HAVE_PATIENT : 1
COMPREHENSIVE_SESSION : 1
AS_RESOURCE : 1
LAB_RESULTS : 1
NKA_PRESSURE : 1
BEING_BY : 1
WIFE_KLEIN : 1
LOW_CHOL : 1
TOPIC_EACH : 1
HEART_DISEASE : 1
HAS_CURRENTLY : 1
QUESTIONS_ABOUT : 1
NOTE_LACTOSE : 1
GENDER_MALE : 1
STATUS_TO : 4
YET_BBS : 1
PROBLEM_GIVE : 1
NEW_DEVELOP : 1
BASIC_COMPUTER : 1
HAS_ACTIVE : 1
SAME_NO : 1
ANY_HI : 1
EDATIVE_ANTIANXIETY : 1
PING_AND : 1
BUT_SUBSTITUTE : 1
WITH_EASE : 1
WELLNOURISHED_AWAKE : 2
CURRENT_MEDS : 1
VOLUNTEER_AT : 1
BECOMES_TEARFUL : 1
TREATMENTS_NO : 1
OF_EPIS : 1
DATE_REALLY : 1
SIGNS_OF : 2
TO_TOVA : 1
HAS_SINCE : 1
THIS_INFORMATION : 1
AND_EDUCATE : 1
MONITOR_CLEAN : 1
CM_NO : 2
ENCOURAGE_OF : 1
INFORMATION_NEW : 1
THE_NIGHT : 1
ROM_OF : 1
OR_MISSING : 1
LTC_COPAY : 2
AGREED_HE : 1
DO_WANDERING : 1
STAY_LISINOPRIL : 1
SURG_SURG : 1
PATTERN_NO : 1
PROBE_OR : 1
DRAW_CORRECTLY : 1
WITHIN_RANGE : 1
IS_DIAGNOSTIC : 1
AUDITC_PC : 1
LIKE_RACK : 1
CAUSE_DEATH : 1
MEDS_IS : 1
CARE_HAS : 1
OF_OLD : 1
BY_HE : 1
DATA_AXIS : 1
ABOUT_TREATMENTS : 1
! Stats words=1776  pairs=8523
