# Supplementary material for: Predicting the Risk of Suicide by Analyzing the Text of Clinical Notes
Source: PLoS One. 2014 Jan 28;9(1):e85733. doi: 10.1371/journal.pone.0085733 (PMC3904866; doi:10.1371/journal.pone.0085733)
Supplement: Appendix S3 — Machine Learning Libraries and Methods: This section is provided to enclose the open source (Apache License) classifier used for the building of the statistical models, specifically for the purposes of study reproducibility. A detailed account of these tools is intended for another publication. (ZIP) [file pone.0085733.s003.zip › Appendix3/ML_libs/Regression_testing/group2/processed/grp2-pt-1017.dat]

!  Done reading
! Total word count = 4870
! Total unique words = 1752
! Total pair count = 9736
! Total unique pairs = 8655
LOBE : 1
AT : 30
PERTINENT : 1
ONLY : 1
PALPITATIONS : 2
SEPOCT : 1
WORK : 3
EVENING : 2
GIVING : 1
LISINOPRIL : 1
SURROUNDINGS : 1
LOWER : 3
POUNDS : 1
SCRNADMISSION : 1
EVENTS : 1
MONTH : 4
OEF : 1
ULCER : 1
THANK : 1
REFILLS : 1
WEIGHT : 5
EVENTUALLY : 1
AUDIOLOGY : 1
COPIED : 1
BEEN : 17
STAY : 1
READINESS : 2
STRETCHING : 1
BID : 2
GLASGOW : 1
WITHIN : 7
QUADRANTS : 1
LOCK : 2
REFILL : 1
DONNING : 1
MILD : 5
APARTMENTS : 1
AA : 1
CLAVICLE : 1
DEXTROAMPHETAMINE : 1
AMBULATE : 1
OUTPATIENT : 9
INSTRUCTED : 1
INTAKE : 2
SHORTNESS : 1
AH : 1
INPATIENT : 3
DOFFING : 1
COUNSELING : 1
TOMORROW : 2
RESCHEDULE : 1
ELOPEMENT : 1
RELATED : 5
USE : 3
PRIVILEGES : 1
SPECIMEN : 2
HILAR : 1
MEANS : 1
CC : 4
DISCHARGED : 4
EPISODE : 1
SUPPLIES : 1
TWICE : 2
ASA : 1
REGARDING : 6
READING : 1
HARM : 2
VETERANS : 3
INCHES : 1
VASCULAR : 1
LEVEL : 9
LL : 1
ALCOHOL : 3
TOO : 1
CHANGES : 1
RACING : 1
RESIDUAL : 1
PERSONAL : 1
ROOMAIR : 1
TRAUMA : 2
MET : 2
MACHINE : 1
HIS : 34
FUNCTIONING : 1
BRING : 2
COPD : 1
ARIPIPRAZOLE : 1
ID : 1
MEAL : 1
REMOVED : 1
EDUCTION : 1
VOIDING : 2
ASYMMETRICAL : 1
APPROPRIATE : 3
NEURO : 2
SUGGESTED : 1
FIGHTS : 1
STAIRS : 1
EEG : 1
DIRECTIVE : 3
OXY : 1
ACID : 2
STRONGER : 1
FISH : 1
CYCLES : 2
WELL : 8
DISORDER : 2
HEALED : 1
KNOWN : 2
SHOWED : 1
MEDICINE : 1
TEST : 4
NOTE : 40
CONTACTED : 1
TENDS : 1
LDL : 1
BAKER : 1
DO : 3
DOES : 9
TALKED : 1
NIGHTMARES : 1
UNDERSTANDS : 1
TREATMENT : 8
HTN : 3
ATRIAL : 2
BLOOD : 12
SAME : 1
WORKER : 1
ACCESS : 2
CV : 1
SOONER : 1
ASSIST : 1
HAVE : 15
EXPECT : 1
EVIDENCED : 1
SCHEDULED : 2
ASK : 1
OF : 87
DRUG : 1
CRISIS : 1
PUFF : 1
TAB : 15
DRUNK : 1
STABLE : 2
PSYCHIATRY : 2
REQUIRED : 2
DILANTIN : 1
MONITOR : 5
DEC : 2
HAS : 28
TUNNEL : 1
FOR : 60
SHAVE : 1
CONDITION : 3
NUTRITION : 4
SAID : 2
MECHANICALLY : 1
SUSPECTED : 1
NUMBER : 4
STATEMENTS : 1
ABSTRACTS : 1
PROTRUSION : 1
HOMELESS : 1
STRIP : 2
MORNING : 5
ACCUCHEK : 1
CLONIDINE : 1
INR : 1
AWAITING : 2
OBTAINING : 1
AID : 3
NONCONTRIBUTORY : 1
KNEE : 2
HEAR : 1
ULCERS : 1
PARONYCHIA : 1
SC : 6
MS : 1
OUTPT : 1
EXAMINE : 1
MY : 3
MARBLE : 1
NURS : 1
FRUSTRATED : 1
DECLINE : 1
MUST : 2
STREETS : 1
MESSAGE : 2
ELICITED : 1
AMR : 1
MANATEE : 1
COLONOSCOPY : 1
THEM : 2
ASSESSMENT : 5
RESPIRATORY : 1
AUTH : 1
DOG : 1
WISHES : 1
ACTIVITY : 4
OWN : 3
REFERRING : 1
AMBULATION : 2
ATTACHED : 2
ENTER : 1
ENCOURAGED : 1
EXPLORING : 1
BM : 2
NAUSEA : 2
FRIENDS : 1
PREVIOUSLY : 2
INFORMATION : 5
RINGS : 1
ADEQUATE : 2
PATTERN : 2
DISCONTINUED : 2
VISITMENTAL : 1
REFERENCE : 1
INITIAL : 1
ILL : 1
EXAM : 6
RVSP : 1
RECENTLY : 3
INFUSIONS : 1
CD : 2
ATTEMPTS : 1
THE : 85
AUTO : 1
CARCINOMA : 2
JUST : 2
INCREASED : 1
EXP : 1
GROUP : 5
PRESENTS : 3
BELLO : 1
ADVANCED : 1
REST : 2
APPEARS : 1
OCT : 1
ANTIANXIETY : 1
EXPIRED : 1
GO : 2
PEACE : 1
SIGNIFICANT : 2
BOWEL : 3
COLOR : 1
UD : 1
SEC : 3
TOES : 1
TECHNIQUES : 1
ARRIVED : 3
BP : 3
LEG : 1
MEDS : 3
OPT : 1
INDICATION : 2
LIMITATION : 1
INFILTRATED : 1
RAPID : 1
CT : 3
DEPRESSION : 4
LAC : 1
ASYMPTOMATIC : 3
CM : 3
RECALL : 1
POWERLESS : 1
AGGRAVATING : 1
GAIT : 2
AGAIN : 2
DISPOSITION : 2
ANXIOUS : 1
WANTING : 1
TID : 1
DESCRIBE : 3
OCCUPATION : 1
CLENCHING : 1
CAP : 2
RECOMME : 1
EVER : 2
STATED : 7
BATHING : 1
HEARING : 2
IRREGULAR : 2
BRUSH : 1
FLP : 2
POSITIONS : 1
GET : 4
WHAT : 3
RA : 1
CDL : 1
PLANS : 1
BENEFITS : 1
ALBUTEROL : 3
HANDOUT : 2
INCAPACITATING : 1
RUBBER : 1
CARDIOVASCULAR : 1
UNRESOLVED : 1
MELLITUS : 1
OR : 36
UC : 1
BOTH : 3
SHIFT : 1
TEMP : 2
YEAR : 4
COPY : 1
CONCERNS : 1
SEIZURES : 1
LB : 4
POSSIBILITY : 1
COUMADIN : 2
IMP : 2
AURORA : 1
APLIGRAFT : 1
AIR : 1
DE : 1
TRANSCRIPTIONIST : 2
LIKE : 4
PUT : 1
GI : 2
THROMBOEMB : 1
SEEN : 7
RT : 1
INITIATES : 1
FEVERCHEST : 1
NURSE : 3
CALLS : 1
UNKNOWN : 2
SX : 1
CLICKING : 2
MUCH : 2
LABORATORY : 1
FINALLY : 2
BEDS : 1
CHRONIC : 2
RELAPSE : 1
URINATION : 1
VIVID : 1
TAKE : 7
SECTION : 1
SENSORY : 1
INCREASE : 3
WITHDRAWAL : 2
CORRESPOND : 1
ACCU : 1
ANY : 7
WALKIN : 1
DISCHARGE : 7
SUSPICIOUSAPPEARING : 1
FEEDBACK : 1
PAYMENT : 1
STRENGTHS : 1
MOISTURE : 3
QH : 1
SCHED : 1
BESYLATE : 2
TOLERATED : 3
SW : 2
OTHERNOTE : 1
ATIENT : 1
MOODS : 1
INJECT : 1
HEALTHIER : 1
PSYCHOTROPIC : 1
LATERAL : 2
PRBLM : 1
FACILITY : 1
NITROGEN : 1
UNIT : 2
EXPIRATION : 2
THINK : 2
EFFECTS : 1
MD : 4
RELATIONSHIP : 1
SECONDARY : 2
INTERACTS : 1
NAME : 5
1010M : 2
CARE : 16
ADAMANTLY : 1
UROLOGICAL : 1
OFFER : 1
PAN : 1
OLANZAPINE : 1
SAT : 1
FUNCTIONS : 1
AGE : 6
EVERY : 4
MULTIVITAMIN : 1
INVOLVED : 1
PREVMED : 1
INTENT : 1
SKIN : 8
TIMES : 5
IS : 53
DL : 1
DOSES : 1
OK : 1
NOT : 14
COMPENSABLE : 1
WORST : 1
OCCULT : 1
SOCIABLE : 1
START : 1
GUARD : 1
IF : 12
ENOUGH : 1
NOK : 1
HOUSEKEEPING : 1
MH : 3
THERE : 3
PENDING : 1
WALKING : 2
EXPECTED : 1
BAND : 1
ONCE : 1
RESENTMENTS : 1
SOUNDLY : 1
BITING : 1
REGULARITY : 1
DEXTROA : 1
BELL : 1
HERE : 4
IM : 1
SKILLS : 1
EATING : 1
CVA : 1
POSITIVE : 1
CHARLOTTE : 1
CLEAN : 1
UNITS : 1
OXIMETRY : 1
CARDS : 1
ANGER : 1
ONEHALF : 1
INFLAMMATION : 1
NAUSE : 1
FEB : 1
PPD : 1
EVALUATION : 4
PROGRESS : 1
WK : 1
KEEP : 2
RHYTHM : 3
MMHG : 1
REFUSED : 2
RECURRENT : 1
HP : 2
ASSESS : 3
DISPENSED : 1
SOMETHNG : 1
CHEWING : 1
ERDMAN : 1
RALES : 1
VET : 7
LOGGED : 1
EXPLAINED : 3
COMPLETION : 2
PR : 1
SPEARFISH : 1
KIN : 1
PARTICIPATION : 1
STORE : 1
ASSOCIATED : 1
COMPUTER : 2
HOWEVER : 2
BACK : 4
TRYING : 1
EMS : 1
RESOURCES : 1
SOURCE : 3
TRANSPORTATION : 1
MARRIED : 1
FX : 1
DICTATED : 2
HEIGHT : 2
MALE : 11
WHEELED : 1
ADDENDUM : 19
FULL : 1
BY : 18
STERILE : 1
PMH : 1
NO : 60
INTENSITY : 1
CLINICAL : 3
REASSESSMENT : 4
ACCESSION : 1
CHIEF : 4
CHANGED : 1
LUNGS : 2
MEETING : 2
PREPPED : 1
UPPER : 2
TH : 1
WILKES : 1
VH : 1
GUARDED : 1
LUMBOSACRAL : 1
CLINIC : 7
RISK : 11
HAIRLESS : 1
PRACTICE : 1
RECEIVING : 2
HAGERSTOWN : 1
INDIGESTION : 1
VERBALLY : 1
TO : 131
POINT : 1
COLLINS : 2
PRN : 3
COULD : 3
IV : 6
ABUSE : 2
ADVANCE : 2
HYDRATED : 1
COUNSELED : 1
CREST : 1
DREAMS : 1
SAFE : 4
BIOPSY : 1
QAM : 2
DX : 5
AFTERCARE : 1
PROCEDURE : 4
ASSOCIATION : 1
REQUESTING : 2
CHAIGING : 1
WILL : 18
WARM : 1
OFTEN : 2
BUT : 10
PORT : 1
ANKLES : 1
ASKED : 3
THOUGHTS : 3
CTA : 1
VIM : 1
STRESSORS : 2
WEAR : 1
REPRESENTATIVE : 1
TYPE : 4
CAREGIVER : 1
TV : 1
LIQUID : 2
APPRECIATED : 1
LIKES : 1
SEE : 4
GETS : 1
CIGARETTES : 1
SUCCESSFULLY : 1
CBC : 1
PLEASE : 9
INDICATES : 2
MEALS : 2
KIT : 1
STATUS : 7
CFCF : 1
TENTATIVELY : 1
DIABETES : 2
MARITAL : 1
SPENT : 1
MHICM : 1
DRINKS : 1
EFFECTIVE : 1
TROPONIN : 1
CONTINUED : 2
CONSULT : 3
TESTING : 2
OUT : 6
COMFORT : 1
HR : 2
TEND : 1
VOLUMES : 1
SUPPORT : 1
WANTS : 1
DEPENDING : 1
QHPRN : 1
QID : 1
SCREEN : 4
FINDINGS : 2
ENHANCE : 1
BARRIERS : 2
REVIEW : 4
NEEDED : 4
MENTAL : 3
ABNORMALITIES : 1
GERD : 1
WERE : 2
ACET : 1
FACTORS : 4
SHEET : 1
VIEW : 3
STRAIGHTEN : 1
MAN : 1
NEUROLOGIC : 1
INSTRUCTIONS : 4
WALKS : 2
METATARSAL : 1
LABS : 1
VA : 6
JOB : 1
TAKEN : 2
CLOSED : 1
POSSIBLE : 1
HELPFUL : 1
AGREED : 1
INDUCED : 1
TRIAGE : 1
PART : 1
SL : 1
SMOKER : 1
FAMILY : 5
CAUSE : 1
DISEASE : 2
PAIN : 36
WHEN : 9
AMBULATORY : 4
THURS : 1
AS : 19
FALLS : 1
EUS : 1
INTRAVENOUS : 1
ABOVE : 4
WAS : 33
INTERIM : 1
RESTLESS : 1
FLOOR : 2
PM : 1
WITH : 52
SPEAKING : 1
FEELS : 2
OFFERED : 1
LEAVING : 1
COMPLAIN : 1
TEMPERATURE : 3
REDNESS : 1
REMAINS : 1
BASIS : 2
NOW : 4
ABD : 3
INCLUDING : 1
PTSD : 1
NA : 2
SUB : 1
COPING : 1
POSTVIETNAM : 1
CONTROLS : 1
CONFIRMED : 1
ONSET : 2
USED : 1
UNAVAILABLE : 1
IT : 9
DUTY : 1
HHA : 1
BELOW : 2
BEDTIME : 1
LIST : 5
NECESSARY : 2
OT : 1
DEMONSTRATED : 2
COPIES : 2
ABLATIVE : 1
FACILITATING : 1
IMPRESS : 1
DISCUSSED : 3
SUPPLY : 1
CA : 1
EXERCISE : 3
FLUOROSCOPY : 1
FEVERS : 1
VOMITING : 4
TIME : 19
CODE : 1
ANG : 1
ESOPHAGEAL : 5
OCCASIONALLY : 2
DSG : 1
ORIENTED : 3
HYGIENE : 2
MUCOPER : 2
PSYCHIATRIST : 2
CURRENTLY : 3
LOOK : 1
NECK : 2
TEETH : 1
ADDITIONAL : 3
WALK : 1
ACETAMENOPHEN : 1
SAFETY : 2
SIMVASTATIN : 1
SIDE : 4
JOINT : 1
ALDRETE : 2
BREAKFAST : 2
RESPIRATIONS : 2
BETWEEN : 1
PROSTHETICS : 1
SEAT : 1
RECEPTIVE : 1
REPAIR : 1
ACCOMPLISHED : 1
GOING : 1
DID : 3
CALL : 12
MOST : 1
EXPRESSED : 1
REALTIME : 1
DYSPHAGIA : 1
RECTUM : 1
SHOW : 3
HX : 1
DEB : 1
ARRIVAL : 2
MHC : 1
CONCERNED : 1
SITUATION : 1
ADDRESS : 2
TELEPHONE : 11
PROJECTED : 1
UNSPECIFIED : 1
SOB : 1
REPORTS : 3
MOTIVATION : 4
GANG : 1
SUBJECTIVE : 1
RATES : 2
URINAL : 7
HELP : 4
LIFETIME : 1
FRI : 1
PER : 5
CONTINUES : 1
COMING : 1
YES : 11
FRIEND : 1
FURTHER : 1
TOE : 1
BUN : 1
SOA : 1
CONSENT : 4
CHF : 2
MOBILITY : 4
FO : 1
YOUR : 7
PRECAUTIONS : 1
TTP : 1
DOING : 1
GIVEN : 11
UNSURE : 1
MASSES : 1
MGMT : 1
TACHYCARDIA : 1
STATIONED : 1
HPI : 1
LITTLE : 1
COMA : 1
MCBRIDE : 1
WHO : 3
REM : 2
CONFIRM : 1
UPON : 3
ED : 8
TRIGLYCERIDES : 1
LUBBOCK : 1
BRONCH : 1
DIARRHEA : 2
VERBALIZES : 1
GWINN : 1
BASED : 1
PHYSICIAN : 7
ATHETOID : 1
LACERATION : 1
DAUGHTER : 2
COMPREHENSIVE : 1
ARM : 1
CURRENT : 3
PERSONS : 1
CONCLUDED : 1
CONTROL : 2
TOOTH : 5
URGENT : 1
DEPENDENCE : 1
TERM : 3
HIM : 7
NONBLOODY : 1
CESSATION : 1
FAXED : 1
PULSE : 6
HE : 59
NS : 1
NEXT : 4
RX : 4
THEY : 5
NEEDS : 6
RATE : 2
EASY : 2
TR : 1
REFERRED : 1
TYLENOL : 1
BLOCK : 1
STR : 1
INTERMITTENTLY : 1
COVERED : 2
FELT : 2
FRO : 1
APPTS : 1
MEMBER : 2
BONTKE : 1
UREA : 1
TRANSFER : 2
ECTOPY : 2
ACHES : 1
ML : 2
PHONE : 6
DECLINED : 1
BRONCHIAL : 1
VISN : 1
CLEAR : 1
IPRATROPIUM : 1
ELBOW : 2
RUNS : 1
VENESSA : 1
PRIMARY : 5
ISOLATE : 1
PROPH : 1
CURRNETLY : 1
ABDOMINAL : 1
HAD : 12
BS : 3
POSSIBLY : 1
ATTACK : 1
ORTHOPNEA : 1
SIGNS : 6
WITHDRAWL : 1
HYDRATION : 1
THING : 1
SPECIAL : 1
LOSS : 2
PATIENTS : 7
QUETIAPINE : 1
SUMMARY : 1
MRSA : 3
DISTURBANCE : 3
THROUGHOUT : 2
DESIRES : 1
RONCHI : 1
MINNICH : 1
CONSTIPATION : 1
CONSTITUTE : 1
PROVIDED : 5
SLIDING : 1
DRINK : 1
BBSC : 1
YO : 4
NEGATIVE : 4
SUPPLE : 1
TWO : 2
WRITTEN : 2
NONE : 9
RECOMMENDATIONS : 1
II : 2
LAB : 3
CONNECTED : 1
DECREASED : 1
LOT : 1
WEAK : 1
ANGRY : 1
SALINE : 2
LESIONS : 1
MIND : 1
TRANSPORTED : 1
ELIGIBILTY : 1
COMPLAINTS : 4
CONTACT : 7
NOTIFIED : 1
NOTICE : 1
NPO : 1
SCHEDULE : 2
RETURNS : 1
HER : 7
TOPIC : 1
ATRIUM : 1
SEVERITY : 1
FEELING : 5
QUESTIONS : 2
TERAZOSIN : 2
FEARS : 1
PROBLEMS : 3
PEERS : 2
YELLOW : 1
NASAL : 2
NEUROLOGICAL : 1
SUBMET : 1
MCG : 1
XS : 1
CARPAL : 1
GIVE : 3
CAN : 5
NEG : 2
KNEES : 1
THERAPIST : 1
THERAPY : 4
PSYCH : 1
TXT : 1
PRIVATE : 1
PLACE : 4
LIVING : 2
SEND : 2
MANDATORY : 1
AWARE : 2
NONVA : 2
WHICH : 3
UNFORTUNATE : 1
SYMPTOMS : 4
SACPREPRIMARY : 1
TURGOR : 2
INTERN : 1
KVO : 1
OVER : 1
LLQ : 1
GABAPENTIN : 1
MG : 18
VISITS : 1
ON : 35
TRANSFERRING : 1
QUIT : 2
COMPLETE : 2
ADMINISTRATION : 2
PCC : 1
PRESSURE : 8
ATTENDED : 1
APART : 1
PILL : 1
IMMOBILE : 1
COVER : 1
IOR : 1
WAITING : 1
LONELY : 1
VIA : 4
EXERTION : 1
AMPHETAMINE : 2
HEADACHE : 1
SPECIALIST : 1
GOOD : 7
TRUNK : 1
COMPREHENSVE : 1
REG : 1
MIRTAZAPING : 1
DRUGS : 2
MED : 4
ELDER : 1
NOC : 1
INTO : 2
FIRE : 1
EDEMA : 1
SEIZURE : 1
WORSE : 3
WEEKEND : 1
ATTENTIVE : 1
SAO : 1
PINHOLE : 1
PROVIDER : 5
MARCH : 1
MORNINGPAIN : 1
DONT : 1
INSURANCE : 1
SHE : 7
PO : 12
UP : 9
GENDER : 1
HL : 1
TONJA : 1
THEN : 3
MULTIPLE : 4
USES : 1
DEAR : 1
DIAGNOSED : 1
FEW : 2
LOCATION : 5
MANIFESTATIONS : 1
TELL : 2
ALERT : 4
XXXXXXXXXXXXXXXXXXXXXXXXXXXXXXXXXXXXXXXXXXXXXXXXXXXXXXXXXXXXXXXXXXXXXXXXXX : 1
RUL : 1
PHOENIX : 1
FEVER : 1
PALE : 1
AWAY : 1
PRIOR : 3
OFF : 2
UNDER : 2
ULCERATIONS : 1
TG : 1
HPK : 1
DATE : 15
DETACHED : 1
FA : 1
COMMENT : 2
DAILY : 12
DIAG : 2
SLIGHT : 1
THREE : 2
DENYING : 1
RENT : 1
PERCENT : 1
COLLECTION : 2
PROGRAM : 1
LONG : 5
ANTICANCER : 1
GRADE : 1
FORMAT : 1
PAPERWORK : 1
ACCEPTING : 1
APPOINTMENT : 6
CONVENIENCE : 1
WOULD : 5
ELSE : 1
BRUZZESE : 1
FOLLOW : 2
WHEELCHAIR : 3
FROM : 9
LEFT : 7
INTERACTING : 1
METHOD : 1
INDICATE : 2
BATH : 1
MEDICAL : 6
SENSORINEUR : 1
HEAD : 1
BODIES : 2
SELFMONITORING : 1
ALSO : 3
SPOKE : 1
SEX : 1
AORTIC : 1
LORAZEPAM : 1
ACTIVITIES : 4
ORDERS : 4
SURGEON : 1
WORKING : 1
AN : 12
ONCOLOGY : 2
MOIST : 2
CUFF : 1
UNLABORED : 1
MOVEMENTS : 2
HEART : 4
ARENT : 1
COMPLAINT : 5
DISABILITY : 2
SIGNATURE : 1
INFILTRATION : 1
ORDER : 2
WRAPPED : 1
EXCEPT : 2
NL : 1
USING : 3
JBLUE : 1
STOCKING : 1
SEPERATED : 1
HAND : 6
FOUR : 1
CMP : 1
BRIGHTER : 1
CONSUMING : 1
PHARMACIST : 1
EXCEED : 1
BERKLEY : 1
EXTRACTION : 1
SPO : 1
GAVE : 1
LIFESTYLE : 1
ESTIMATED : 1
CONTAINING : 1
DONNA : 1
DISTENDED : 2
NEW : 9
MOUTH : 12
DECIDED : 1
ATTENDING : 1
CHEST : 2
URGENCY : 1
PRESENT : 1
TP : 1
EXPIRES : 1
HAVING : 4
DOCUMENTATION : 1
SOME : 5
CALENDAR : 1
LEWY : 1
BALL : 1
APPROPRIATELY : 2
HRS : 1
PERRIN : 1
EXPLAIN : 1
MUSCLE : 1
ENCOURAGE : 2
DOW : 1
ARE : 5
DESIRE : 4
INDEPENDENT : 3
HYPERTENSION : 2
NEED : 4
ELEVATED : 4
WASHING : 1
ADDITIONALLY : 1
LISA : 1
RECEIVED : 1
CPRS : 2
RECOVERY : 1
FECAL : 1
BRAKES : 1
FREQUENCY : 2
SEABOLT : 1
COMPLETELY : 1
BURNING : 1
STOCKINGS : 2
RES : 1
CONSTA : 1
MOUNTAINCREST : 1
INHL : 3
MOVING : 1
ENTRY : 2
PREVENTIVE : 1
DOCUSATE : 1
INTERDISCIPLINARY : 2
YEARS : 3
SELFLIMITED : 1
COLON : 2
TABLE : 1
REMINDED : 1
BE : 17
RINSE : 1
BECAUSE : 2
RUN : 1
OX : 1
CANCER : 5
OL : 2
BILLING : 1
DUE : 3
BRANCH : 1
REMAIN : 1
CLASS : 2
THEIR : 1
DISC : 2
DISCOMFORT : 1
PING : 4
LESION : 2
OMEPRAZOLE : 1
SULF : 1
PH : 1
DELUSIONS : 1
SEVERE : 3
ISSUES : 3
ALONG : 1
INTERSCAPULAR : 1
REVIEWED : 5
DM : 1
ISSUE : 2
MAYO : 1
BEFORE : 1
OTHER : 12
ALL : 8
DRESSING : 2
AUTHOR : 1
GS : 1
QHS : 1
SECOND : 1
LIFE : 1
ELEVATION : 1
ME : 1
BED : 6
NURSING : 18
INHALE : 2
FOLLOWING : 10
SATUR : 1
IDENTIFIED : 7
PATIENT : 64
SELF : 3
ALLERGIES : 5
WITHOUT : 3
REFER : 4
DIAGNOSIS : 8
RISPERDAL : 2
LFA : 1
PROV : 1
WEIGHS : 1
SENT : 1
INVOLVEMENT : 1
VERIFIED : 1
DROWSYNESS : 1
ABDOMEN : 2
IODOSORB : 1
ANXIETY : 3
SPINE : 1
METOPROLOL : 2
THAN : 2
VALVE : 1
RARELY : 2
PODIATRY : 1
GYNECOMASTIA : 1
ACUTE : 1
HEALTHPSYCHIATRIC : 1
AUDITC : 1
SYMPTOM : 1
WE : 7
HURTFUL : 1
PHYSIATRIST : 1
PROTOCOL : 1
DISTANCE : 1
FEE : 2
COME : 1
SYND : 1
FUNCTIONAL : 1
VOIDS : 1
FOUND : 2
AMOXICILLIN : 1
LOOKING : 1
PATCHES : 1
ROOM : 4
SELFCARE : 1
CAME : 1
THAT : 25
VISIT : 5
PAINS : 1
CHART : 3
NORMAL : 5
OCCUR : 1
WIFE : 2
DEPRESSED : 2
SIDERAILS : 1
STAFF : 4
CE : 1
SERVICE : 6
AVAILABLE : 2
RIGHT : 12
BREATHING : 4
PC : 4
VITALS : 1
CERTAIN : 1
SYSTEMIC : 1
ABOUT : 3
ANYTHING : 2
PEDAL : 1
ATROVENT : 1
ONE : 6
IMPULSE : 1
PREPARED : 1
TELE : 1
PLEASANT : 1
POTENTIAL : 1
NOTIFY : 1
ANATOMICAL : 1
NKA : 1
PTS : 3
MONEY : 1
BRIEF : 1
RESPONSIBILITY : 1
THOUGHT : 3
SPONDYLOSIS : 4
HYPERLIPIDEMIA : 3
PAT : 1
TABLET : 7
ADMIT : 1
WRITER : 3
ANOTHER : 1
DURING : 4
REC : 1
YOU : 12
XEROSIS : 1
COMMON : 1
TOLD : 1
PASTED : 1
DIRECTED : 1
LISTED : 2
SCREENING : 4
JAWS : 1
CRITERIA : 1
VOICED : 2
CARDIOLOGY : 1
INFORMED : 5
ERUPTED : 1
REACH : 4
GETTING : 1
HI : 1
PAST : 4
CHAIR : 1
DOCUMENT : 3
NUMB : 2
REASON : 3
DISABILITIES : 1
PROPER : 1
SCORE : 5
NONLABORED : 1
TOBACCO : 1
HA : 1
ACT : 1
BASELINE : 1
REMINDER : 1
SP : 1
ORTHO : 1
DIFFICILE : 1
EPIS : 2
HOME : 9
SIX : 1
POWER : 1
AGREEABLE : 1
AMBULATING : 1
PENICILLIN : 1
WEAKNESS : 2
NOTED : 6
DR : 1
INDIVIDUAL : 1
SOCIAL : 3
LN : 1
HOSPITAL : 2
MYOKYMIC : 1
RETURN : 3
SUICIDAL : 4
HOPELESS : 1
RESTARTED : 1
MODERATE : 3
ATTEMPTING : 1
EFFECT : 2
DEPT : 2
EITHER : 1
VITAL : 4
SHAKE : 1
SO : 5
IMPROVEMENT : 1
UPSET : 1
BURNT : 1
MIN : 2
REPLACED : 1
RECONCILIATION : 3
PNEUMOVAX : 1
ISNT : 2
MINUTES : 4
PROSTHESIS : 1
TINGLING : 1
HEMMORRHOID : 1
STRESS : 1
FOLLOWUP : 7
MAKE : 4
RECORDED : 1
ACKNOWLEDGES : 1
RISKS : 2
WEEK : 2
ARTERIOSCLEROTIC : 1
MAKES : 2
TEAM : 2
CHECK : 5
SCAN : 1
FALL : 4
APPROVED : 1
SICK : 1
NEITHER : 1
DATA : 1
AM : 7
NUR : 1
MOVEMENT : 2
BRAIN : 2
DISTRESS : 1
IMPAIRMENT : 2
MOUNTAIN : 1
OCCASION : 1
RUNNING : 1
HOYT : 1
EKG : 2
DYSLIPIDEMIA : 1
FLAT : 1
MOOD : 2
WHERE : 1
RIB : 1
LIVES : 1
GUILLIANBARRE : 1
EVENT : 1
REPORT : 4
HEALTHCARE : 1
DEMENTIA : 2
HOW : 9
CALLED : 6
PROPERTY : 1
TOOK : 2
MIGHT : 1
SUPERVISION : 1
BEAT : 2
INFUSING : 1
ALLAMANDSOME : 1
FEELINGS : 3
MANY : 2
SINCE : 5
ESOPHAGITIS : 1
FLU : 1
STOPPED : 3
CHANGE : 5
DISCUSS : 2
GAIN : 1
PRESENTING : 1
LEARN : 3
ESOPHAGUS : 1
NG : 1
SOAP : 2
UNALABORED : 1
MADE : 3
OFFICE : 2
CARDIAC : 1
TEACHING : 1
MEDIASTINOSCOPY : 1
ADVISED : 2
MON : 3
INCLUDES : 1
OBTAINED : 3
LEARNING : 2
STOMACH : 2
PRINTED : 1
DOSE : 1
ENCOUNTER : 1
OBJECTIVE : 1
MONTHS : 1
SMOKING : 3
AFFECT : 3
MRI : 1
PALPATION : 1
MEASUREMENT : 2
SSN : 2
AVOID : 1
RELEASE : 1
AUDC : 1
CONCERN : 1
BRUSHINGS : 1
APPLIED : 1
LOOSE : 1
SOMEONE : 1
DATED : 1
BEDSIDE : 1
SUBMERGED : 1
AREAS : 1
ALONE : 1
ORINTED : 1
TOD : 1
INSIGHT : 1
NARROWING : 1
TOPICS : 1
LUNG : 2
MEDICATION : 17
RESTING : 2
BHM : 1
WRIST : 1
PARANOID : 1
WANT : 4
COMMENTS : 5
ATTEMPTED : 1
FLAKING : 1
CASE : 4
SINGLE : 1
CONTINUE : 3
ORAL : 5
ABNORMAL : 1
TOTAL : 3
READ : 1
SWELLING : 1
LIGHT : 4
ANSWERS : 1
NSVT : 2
ADM : 1
CYSTOSCOPY : 1
SERVICES : 1
SINUS : 1
SURGICAL : 1
EXAMINATION : 1
ST : 2
ELIMINATION : 1
SUCH : 1
HISTORY : 10
CLICK : 1
PROVIDE : 2
RESPIRATION : 2
TEXT : 1
PMHX : 1
HOURS : 2
LEGS : 1
HEALTH : 7
AMIODARONE : 1
REPORTED : 2
SUCCESS : 1
COVERAGE : 1
RATIVE : 1
PLACED : 2
SYNCOPE : 2
THIRD : 1
UA : 1
APICAL : 1
NOV : 1
REDUCE : 2
DIPPY : 1
CR : 1
INCIDENT : 1
PROSTATE : 1
ILLNESSES : 1
EXCLUDING : 1
PREVIOUS : 2
SITE : 4
PICKED : 1
REFERRAL : 1
STANDING : 1
INTERVENTIONS : 3
TENSE : 1
KG : 4
MORE : 11
RACE : 3
RIBS : 1
WILLING : 1
AUG : 1
EYES : 1
PROBLEM : 4
CLONAZEPAM : 1
RECEIVE : 1
AGENCY : 1
ER : 2
ELIGIBLE : 1
RECORD : 1
DIZZINESS : 1
REQUEST : 2
PRESCRIBED : 3
AMLODIPINE : 2
UNABLE : 1
RN : 3
XYZZY : 2
WARFARIN : 1
ADLS : 2
LNC : 1
PUFFS : 2
CAUSATIVE : 1
VETS : 1
ANTICOAGULATION : 1
IMPRO : 1
TELEMETRY : 3
READY : 1
AFTER : 6
PARTICIPATED : 2
LONGER : 1
ADMISSION : 4
STILL : 1
GUARDIAN : 1
DIFFICULTIES : 1
WORSENED : 1
CONCERNING : 1
SCALE : 3
LESS : 1
ACTUAL : 1
NON : 1
OBESE : 1
FLUID : 1
OPENING : 1
COUGHING : 1
REMOVE : 1
PCP : 6
CULTURE : 1
SAYS : 6
APPOINTMENTS : 4
HAVWE : 1
TOILETING : 1
WOUNDS : 1
WAY : 1
EACH : 2
FORAMEN : 1
WNL : 1
SPECIFIC : 1
ASSOCIATE : 2
DOB : 1
DENIES : 8
PHARMACY : 1
EXPERIENCED : 1
OLD : 5
PROCESSED : 1
OTHERS : 5
REQUESTED : 2
MODIFIED : 1
FOOT : 1
OVERNIGHT : 1
VERBALIZE : 1
ALCO : 1
VETERAN : 9
CAPSULE : 1
GLUCOSE : 1
RELIEF : 1
PT : 50
REGION : 1
INJURY : 2
RADIATION : 2
MOVE : 2
URETHERA : 1
REPLIED : 1
FEBRILE : 2
FAM : 1
ETHNIC : 1
RBC : 1
AREA : 3
HEMATOLOGY : 1
INTERDIGITAL : 1
APR : 1
PERCEPTIONS : 1
MANAGED : 1
CONTRIBUTING : 1
CATHETER : 1
MISSED : 1
MINIMAL : 1
YAMAMOTO : 1
SIBLINGS : 1
CERVICAL : 3
PAUSE : 1
MM : 1
AROUND : 1
UNDERSTANDING : 5
ILLNESS : 1
MEDICATIONS : 8
MR : 4
DIRECT : 1
GOALDIRECTED : 1
MAJOR : 2
AND : 129
PACEMAKER : 2
ENLARGEMENT : 1
QUESTIONAIRE : 1
INSOMNIA : 3
DESCRIPTION : 1
DELIVERY : 1
SELECT : 1
DRIVING : 1
JUN : 1
RECOMMENDED : 2
RESPONSE : 1
BETTER : 3
LOC : 1
LOWEST : 1
COMMUNITY : 4
DEPRESSIVE : 2
UNCOOPERATIVE : 1
RESULTS : 1
TOUR : 1
EMERGENCY : 2
ANSWER : 1
BREATH : 1
ABLE : 6
RECENT : 3
CHO : 2
AR : 2
IN : 50
RESCIND : 1
POSITION : 1
LOW : 3
CUT : 1
BR : 1
MAY : 5
REGIMEN : 1
MANAGEMENT : 2
STATE : 3
CONTROLED : 1
PLAN : 14
DERMATOLOGY : 1
LENGTH : 2
MITRAL : 1
SWABS : 1
APPT : 3
SMOKE : 1
CONTENT : 1
TAKING : 4
SPOUSE : 1
ADMITTED : 6
OBSERVED : 1
YET : 1
WEARS : 1
PERIOD : 1
SS : 1
IDT : 1
VERY : 2
DONE : 3
CONTRIBUTE : 1
EDATIVE : 1
PHYSICAL : 5
DJD : 1
NIGHT : 2
CP : 1
ACTIVE : 24
COMPLAINED : 1
BECOMES : 1
CADMIX : 1
MANAGER : 4
ABILITY : 2
CTR : 1
BEDREST : 3
VICTIM : 1
BEHAVIOR : 3
EPIGASTRIC : 1
WEAPONS : 1
WEIGH : 1
COBAN : 1
SI : 1
CO : 1
FOREARM : 1
SUGARS : 1
COMPLETED : 4
CLOTS : 1
FOCUS : 1
IMPORTANT : 1
THIS : 35
EVEN : 4
DIFFICULTY : 2
SM : 1
LPN : 1
DEFICITS : 1
HIGH : 3
NIACIN : 1
TEMPER : 1
REMINDERS : 1
CAPABLE : 1
QRS : 1
REMEMBER : 1
SOFT : 4
VAMC : 3
KEPT : 1
LAST : 9
EXR : 1
PAGE : 1
TLC : 1
RELAXED : 1
FIBRILLATION : 1
EDUCATION : 6
MEDICATED : 2
FINANCIAL : 1
CRACKING : 1
FLASHBACKS : 1
SESSION : 4
CY : 2
STATES : 6
PRECEEDED : 1
SITUATIONS : 1
ASSUMES : 1
WHILE : 1
FORAMINAL : 1
TWINBROOK : 1
CELL : 2
RESENTMENT : 1
FIRST : 2
ICDCM : 3
ASSESSES : 1
OIF : 1
RESP : 1
COGNITION : 1
UNCLEAR : 1
DOWN : 2
ITS : 1
TO_PT : 2
INFLAMMATION_METOPROLOL : 1
HEALTHIER_TRANSCRIPTIONIST : 1
DISTURBANCE_THE : 2
BP_THAT : 1
DESCRIBE_FACTORS : 1
EXAM_MODIFIED : 1
APPOINTMENT_UNABLE : 1
BUT_IS : 1
CLINICAL_NOTE : 1
BRING_ALL : 1
INITIAL_AND : 1
NO_NON : 1
HIS_NOK : 1
TOLERATED_WELL : 2
RETURN_AS : 1
OTHER_PROBLEMS : 1
IN_THROUGHOUT : 1
VIVID_SO : 1
WRITER_WOULD : 1
ILLNESSES_DIABETES : 1
STRESSORS_FUNCTIONAL : 1
CALL_PRN : 1
ELBOW_PATIENT : 1
BEEN_DIAGNOSED : 1
BEEN_ADMITTED : 1
BEEN_TO : 2
THE_RECOMMENDATIONS : 1
CLINIC_MED : 1
UP_THE : 1
DEMONSTRATED_UNDERSTANDING : 1
HHA_FOR : 1
THE_BENEFITS : 1
RAPID_CHANGE : 1
ADDITIONAL_AT : 1
IN_THEY : 1
OF_GOOD : 3
OPENING_LATERAL : 1
TURGOR_GOOD : 1
SC_ED : 3
PATIENT_HAD : 2
PO_ACTIVE : 7
NOTE_PROVIDED : 1
AND_ORIENTED : 1
AND_DRUNK : 1
DO_HIM : 1
OF_HIS : 2
TOES_KNEE : 1
HELP_THIS : 1
MALE_ADDITIONAL : 1
FALLS_APART : 1
FOLLOWUP_IV : 1
THE_PATIENT : 12
DOG_WAS : 1
AGAIN_STATES : 1
AND_DAILY : 1
CONSULT_CHART : 1
AND_OBJECTIVE : 1
RELATIONSHIP_EDUCATION : 1
ADMINISTRATION_AND : 1
DISEASE_EXERCISE : 1
ASSESS_HISTORY : 2
QUESTIONS_NASAL : 1
ADEQUATE_FOR : 1
EVALUATION_FOR : 1
ADDRESS_AND : 1
AND_APICAL : 1
APPT_YES : 1
HAS_UNFORTUNATE : 1
MEDICAL_MENTAL : 1
ON_ST : 1
ARE_THAT : 1
VISN_PATIENT : 1
AT_VISIT : 1
OUTPATIENT_EXCLUDING : 1
FROM_ACTIVITIES : 1
SEE_CPRS : 1
GUARDIAN_WHEN : 1
RETURN_ON : 1
BREATHING_THE : 1
DRESSING_DAILY : 1
BODIES_THE : 1
POSITIVE_FEEDBACK : 1
AUDITC_NEGATIVE : 1
WITHIN_PT : 1
INDEPENDENT_IDENTIFIED : 1
SUPPLIES_COMMUNITY : 1
RISK_SCREEN : 1
DISC_ADDRESS : 1
READ_OCT : 1
FEELING_OR : 1
SMOKING_MORE : 1
LEWY_BODIES : 1
LAST_IM : 1
NPO_FOR : 1
INTENT_NO : 1
AND_WIFE : 1
SSN_MEDICATION : 1
ACTIVE_PTS : 1
WANTS_TO : 1
LOOSE_HER : 1
SW_YEAR : 1
METHOD_HANDOUT : 1
REQUESTED_EUS : 1
WK_MONTHS : 1
STRIP_STRIP : 1
FINALLY_TO : 1
CTA_NO : 1
MOVEMENT_HYDRATION : 1
GABAPENTIN_THAT : 1
FOR_NO : 1
II_SIGNS : 1
COMPLAINT_LONELY : 1
ACT_RECEIVE : 1
HOME_PROVIDER : 1
RACE_NURSING : 1
PAIN_PT : 1
MAKE_KNOWN : 1
PM_UROLOGICAL : 1
RECOMME_INCHES : 1
SHOW_ALCO : 1
ED_ADMINISTRATION : 1
WHEN_IS : 2
RA_ST : 1
ST_LOW : 1
TOE_HEAR : 1
NOT_AT : 1
PATIENT_FAMILY : 1
OR_OTHER : 2
HAVE_SIGNS : 1
SYND_AND : 1
FROM_CALL : 1
INTERIM_NEEDED : 1
MORE_RELAXED : 1
PER_PERRIN : 1
HE_EXPLAINED : 1
NO_CY : 1
WOULD_OTHERNOTE : 1
LENGTH_SPOKE : 1
MALE_ADMITTED : 1
ACTIVE_LB : 1
SAO_PAIN : 1
WITH_OR : 1
AT_ITS : 1
IF_IS : 1
OBSERVED_RESTING : 1
PROVIDE_OF : 1
PORT_SOAP : 1
NECK_BREATHING : 1
PRESSURE_OR : 1
LPN_WILL : 1
CAPSULE_MOUTH : 1
FAM_TO : 1
INFORMATION_OBTAINED : 1
CLONAZEPAM_MG : 1
MORE_DRINKS : 1
RECENTLY_ADMITTED : 1
TELL_HIM : 1
AFTER_CURRENT : 1
DEPRESSION_NAME : 1
UC_APPT : 1
HE_FELT : 1
THAT_COPIES : 1
AS_FAMILY : 1
HAND_AFTER : 1
UC_WITH : 1
ON_OWN : 1
ON_AWAITING : 1
POSSIBLE_BARRIERS : 1
MD_ORDERS : 2
EXPECT_HER : 1
IS_TRYING : 1
ARE_BASED : 1
TIMES_AND : 1
NEGATIVE_HERE : 1
TO_SUPPORT : 1
EYES_AND : 1
USING_APPROPRIATELY : 1
OWN_BEHAVIOR : 1
PATIENT_DISCHARGED : 1
VISIT_CERVICAL : 1
IN_MANY : 1
HIGH_HOME : 1
RISK_PART : 1
HAS_INSURANCE : 1
PREVENTIVE_HEALTH : 1
NAME_MONTH : 1
ENTRY_DATE : 1
BLOCK_YOUR : 1
FOLLOWING_OF : 1
DOB_SAYS : 1
WARM_SO : 1
IT_HELPFUL : 1
SAFE_EFFECT : 1
ANGRY_THEIR : 1
WAS_HELPFUL : 1
PLACE_OR : 1
FOUND_APPROPRIATE : 1
COPIED_PASTED : 1
AND_WOULD : 1
TOMORROW_PT : 1
OL_TOTAL : 1
MH_NURSING : 1
RIBS_IS : 1
OF_REPORT : 1
ACTIVE_LOWER : 1
SKIN_AND : 1
WELL_DIAG : 1
AMIODARONE_TAB : 1
PODIATRY_CLINIC : 1
EXAM_BLOOD : 1
PAIN_ALL : 1
BRUZZESE_SUICIDAL : 1
UNDERSTANDS_AND : 1
AS_AS : 1
PRESENT_ILLNESS : 1
FEELINGS_PERCEPTIONS : 1
DEPRESSION_SHE : 1
REASON_VET : 1
CLINIC_NO : 1
MENTAL_HEALTHPSYCHIATRIC : 1
IT_RUNNING : 1
NUTRITION_RISK : 1
MUCH_STAFF : 1
PROBLEMS_WITH : 1
BE_SOFT : 1
HOW_RELAXED : 1
DROWSYNESS_AND : 1
SHAVE_PLAN : 1
TWINBROOK_PLEASE : 1
FEELING_GOOD : 1
STATED_THEY : 1
DISABILITY_IS : 1
FOR_SELFMONITORING : 1
PROTRUSION_WITH : 1
NORMAL_AORTIC : 1
VOIDING_FALL : 1
PSYCHIATRY_EXAMINATION : 1
DOSE_EFFECTS : 1
COMPENSABLE_SC : 1
REPORT_OF : 1
BETWEEN_NO : 1
MANAGER_WILL : 1
NIGHT_CONTINUE : 1
DESIRE_TO : 1
HOURS_PT : 1
THEY_DECREASED : 1
COMMENT_KIT : 1
REALTIME_BE : 1
RISKS_OF : 2
LIQUID_MG : 1
OR_HOPELESS : 1
WILL_THINK : 2
SKIN_NOTED : 1
IN_NO : 2
ASSESSMENT_TOTAL : 1
AND_INTERVENTIONS : 1
AMLODIPINE_TAB : 2
ANY_AT : 1
TALKED_HER : 1
ARE_TO : 1
MADE_PROSTHETICS : 1
INSTRUCTIONS_OUTPATIENT : 1
HAS_MULTIPLE : 1
NO_SYMPTOMS : 1
CLOSED_EVEN : 1
UP_REMAIN : 1
CESSATION_MEDIASTINOSCOPY : 1
DISCUSSED_MEDICATION : 1
NO_ELICITED : 1
ATRIAL_FIBRILLATION : 1
ADMINISTRATION_PATIENT : 1
HR_REDNESS : 1
OFF_THE : 2
HIS_ISSUES : 1
ABSTRACTS_COPIED : 1
PCP_CONSULT : 1
COLLINS_ONCOLOGY : 1
MAY_IS : 1
PULSE_BLOOD : 1
ENCOURAGED_HER : 1
FEEDBACK_PATIENT : 1
COULD_DAILY : 1
GOOD_AND : 1
OBESE_BS : 1
REGULARITY_MOVEMENT : 1
NO_YES : 1
HOME_INFORMED : 1
NONE_MINUTES : 1
QUADRANTS_PO : 1
ADDRESS_SOME : 1
VETERAN_HAS : 1
FROM_FOR : 1
CALLED_REGARDING : 1
ACETAMENOPHEN_POSITIVE : 1
TO_TO : 4
SUGARS_BEEN : 1
NEW_CHANGED : 1
LOCATION_SITE : 1
ACTIVE_PLEASE : 1
ACTIVE_MENTAL : 1
HILAR_PLAN : 1
NO_DREAMS : 1
AND_WITHIN : 1
REQUESTED_CT : 1
DOSES_IN : 1
NEEDS_REST : 1
WAS_SCORE : 1
VIVID_DREAMS : 1
SOME_STATE : 1
SYMPTOMS_LENGTH : 1
WITH_PT : 1
HAD_NAUSEA : 1
THE_TERAZOSIN : 1
COMING_FOR : 1
TAKING_MEDICATION : 1
HEALTH_PRBLM : 1
REM_TOOTH : 2
SOME_BLOOD : 1
BAKER_NOTE : 1
LAC_FROM : 1
ALL_TIME : 1
TRANSCRIPTIONIST_COLLINS : 2
TELEPHONE_NOTE : 2
MONITOR_AND : 1
BUN_CR : 1
WERE_AND : 1
NO_RONCHI : 1
NOTE_ED : 1
ALL_TYPE : 1
URETHERA_ANYTHING : 1
DELIVERY_METHOD : 1
IN_SUPPLE : 1
INTO_HER : 1
AND_ASSESSMENT : 1
AND_NEED : 1
OTHERS_WEIGHT : 1
NUR_MORNING : 1
IN_COPIES : 1
FIRST_FLOOR : 1
SEPERATED_HER : 1
PRIOR_ADMISSION : 1
CHF_DM : 1
HAVE_ADVANCED : 1
NUMBER_IS : 1
POSSIBLY_WORK : 1
PLAN_ALL : 1
HIM_REPLIED : 1
CHANGE_PREVIOUS : 1
RX_REFILL : 1
IPRATROPIUM_INHL : 1
OPT_VISITS : 1
MENTAL_HISTORY : 1
PROGRAM_GYNECOMASTIA : 1
EXAM_MENTAL : 1
NOTE_TRANSPORTED : 1
TRANSFER_REVIEWED : 1
SELF_HIS : 1
ACTIVITY_PLAN : 1
AND_RESP : 1
FULL_OF : 1
DOES_PAIN : 1
STAY_IF : 1
ISSUE_IS : 1
RESIDUAL_ER : 1
COMMENT_TEACHING : 1
STR_GET : 1
INCHES_WEIGHS : 1
RX_PSYCHIATRY : 1
NO_PLAN : 1
NEXT_APPT : 1
LENGTH_MIN : 1
PHYSICIAN_SULF : 1
CHECK_MEDICATED : 1
TO_PLAN : 1
WERE_PATIENT : 1
BLOOD_MIN : 1
UP_CDL : 1
CHART_AND : 2
CONTINUED_VOMITING : 1
BEEN_ABLE : 1
DATE_STATUS : 1
RELATED_DOES : 1
WALK_IN : 1
THINK_ABOUT : 1
LAST_VISIT : 1
OBJECTIVE_OF : 1
IN_THIS : 1
GUARDIAN_ADDENDUM : 1
CASE_YAMAMOTO : 1
TO_EVENTUALLY : 1
HAD_AND : 2
INCHES_AND : 1
NOTE_MH : 1
ON_SPOUSE : 1
COLONOSCOPY_RACE : 2
WALKING_HAS : 1
PRESCRIBED_PATIENT : 1
OR_RESENTMENT : 1
ALERT_GOOD : 1
FORMAT_ONLY : 1
HAD_SOME : 1
PATIENT_TAKING : 1
MILD_NO : 1
ORDER_DATE : 1
MOVEMENT_MONITOR : 1
NO_TOBACCO : 1
TELEMETRY_PLAN : 1
MOUTH_TIMES : 2
HOWEVER_PHARMACIST : 1
DOCUMENT_YEAR : 1
RECOMMENDED_LOCATION : 1
OUT_SCREENING : 1
MY_HEALTHIER : 1
NEEDED_THE : 1
NEEDED_CONTROL : 1
VETERAN_DEMONSTRATED : 2
TO_STR : 1
ON_HIS : 3
FEBRILE_AFTER : 1
RIB_DISCOMFORT : 1
UNCOOPERATIVE_NO : 1
SYMPTOMS_WELL : 1
HAS_PRESCRIBED : 1
LOW_BRAKES : 1
DISC_PROTRUSION : 1
PLACED_PT : 1
THAT_HAS : 2
PT_FOR : 1
WARFARIN_ADVISED : 1
WEAKNESS_DUE : 1
SCHEDULED_MEDICAL : 1
THEY_PROBLEM : 1
ALL_COVERED : 1
TWO_MASSES : 1
MOUTH_LATERAL : 1
ALL_TAKEN : 1
RESTING_BED : 2
BEEN_DIARRHEA : 1
MET_MR : 1
GROUP_HEALTH : 1
AT_HOME : 3
CONSENT_FOR : 1
IS_NEITHER : 1
EDUCTION_AND : 1
YOUR_NURSING : 1
TO_MAKE : 2
MEDICATIONS_EXCLUDING : 1
STATES_HAS : 1
TEST_USE : 1
CONSENT_WAS : 1
APPROVED_VA : 1
PAIN_HIS : 1
TABLET_EVENING : 1
FOR_WITH : 1
LOCATION_LIQUID : 1
NOTE_IV : 2
WITHIN_RESPONSE : 1
MOIST_RISK : 1
ADEQUATE_COUNSELING : 1
IS_SCREEN : 1
OF_WRITTEN : 1
TO_LEARNING : 2
YAMAMOTO_PH : 1
OBTAINED_IS : 1
MAY_BE : 1
THE_REC : 1
TO_OWN : 1
IS_SOURCE : 1
SUCCESSFULLY_PATIENT : 1
REPRESENTATIVE_SIGNIFICANT : 1
HAD_NO : 2
WITH_ACETAMENOPHEN : 1
BUT_ISNT : 1
CHANGE_NEEDED : 1
FROM_WILKES : 1
LEFT_ATRIAL : 1
CMP_CBC : 1
HEALTH_MANAGEMENT : 1
WAS_MADE : 1
HEMATOLOGY_CLINIC : 1
DOFFING_THE : 1
PASTED_AT : 1
REFILL_COUMADIN : 1
AND_PHONE : 2
ADDENDUM_PROBLEM : 1
NO_APLIGRAFT : 1
DOSE_SIDE : 1
COMPLAINTS_PRESENTING : 1
LEFT_FOOT : 1
VOIDING_RISK : 1
TRANSPORTATION_SW : 1
STOCKING_WHICH : 1
BED_THROUGHOUT : 1
LOWER_KNEES : 1
TO_FOLLOW : 1
THAT_WILL : 1
VETERAN_INSIGHT : 1
NO_MOUTH : 1
HTN_AND : 1
PACEMAKER_DID : 1
HE_AGREEABLE : 1
COMPLETELY_CASE : 1
TID_REFER : 1
AND_VOMITING : 1
TO_WORK : 1
ACCOMPLISHED_FOLLOWUP : 1
DIAGNOSIS_LUNG : 1
DESIRES_OTHER : 1
PT_CALL : 1
GET_STRONGER : 1
DISCHARGED_WITH : 2
THIS_SKIN : 1
CONCERNS_SHE : 1
NOW_TIME : 1
NEURO_CARDS : 1
OR_NONE : 1
PAGE_SMOKING : 1
ELOPEMENT_RISK : 1
DRESSING_RIGHT : 1
FOCUS_TO : 1
ABLATIVE_TXT : 1
MALE_ARRIVED : 1
INSTRUCTIONS_TO : 1
TWO_RUL : 1
SCREENING_SIGNS : 1
DIRECT_TO : 1
WITH_REGARDING : 1
STRESSORS_HE : 1
PREVMED_MORNING : 1
PAIN_INITIAL : 1
AND_POSSIBLE : 1
VISITS_POSSIBILITY : 1
FORMAT_ADDENDUM : 1
TERM_PTS : 1
SHEET_FOR : 1
ASKED_TO : 1
SOME_PLEASE : 1
INFORMATION_OR : 1
ENLARGEMENT_OF : 1
FOLLOWING_XXXXXXXXXXXXXXXXXXXXXXXXXXXXXXXXXXXXXXXXXXXXXXXXXXXXXXXXXXXXXXXXXXXXXXXXXX : 1
OF_LN : 1
TEXT_DOCUMENT : 1
HOWEVER_INDICATE : 1
SITUATIONS_THEN : 1
AND_TABLET : 1
MG_FEB : 1
YOUR_OF : 1
MH_MHICM : 1
BIOPSY_OF : 1
EVEN_FOR : 1
ABNORMAL_RHYTHM : 1
TAKING_AND : 1
ACHES_INFORMED : 1
HEALTH_MANAGED : 1
NSVT_METOPROLOL : 1
HER_THAT : 1
AM_IN : 1
CHANGE_BOWEL : 1
HEADACHE_AFTER : 1
MAKE_LIFESTYLE : 1
NA_ADDENDUM : 1
DISTANCE_ADDENDUM : 1
FUNCTIONS_EVIDENCED : 1
BE_DURING : 1
INTERACTS_WELL : 1
BREATH_HOUSEKEEPING : 1
SOMETHNG_THAT : 1
MON_PO : 1
WITHDRAWAL_FEBRILE : 1
DAILY_NOTE : 1
STATE_DO : 1
VA_ASSESSMENT : 1
BATHING_ASSIST : 1
HRS_DATE : 1
PATIENT_SAYS : 1
TO_LOW : 1
CPRS_SCHEDULE : 1
CARE_URINAL : 1
WAS_TO : 5
SKIN_PROBLEMS : 1
WANTING_TO : 1
MIND_MEMBER : 1
DIRECTED_SINGLE : 1
PUFFS_ACTIVE : 1
FOR_IN : 1
WILL_PATIENT : 1
IS_TEAM : 1
SUBJECTIVE_DISCUSSED : 1
MEASUREMENT_HEALED : 1
FLASHBACKS_VITAL : 1
HIS_TEMPER : 1
FLUID_PREVENTIVE : 1
PRESSURE_ALL : 1
LABS_FELT : 1
ASK_THE : 1
MEDICATION_REQUIRED : 1
NUTRITION_ED : 1
PATIENTS_OF : 2
APPOINTMENTS_WITH : 1
FOLLOWUP_URGENT : 1
GOOD_OF : 2
OFFICE_SC : 1
RISPERDAL_HOSPITAL : 1
OCCASION_THE : 1
FEVERS_ABDOMINAL : 1
MCG_CFCF : 1
SIGNS_COMPUTER : 1
OF_TELEPHONE : 2
ACCEPTING_THE : 1
PLAN_FOR : 1
CT_DX : 1
THROUGHOUT_TO : 1
UPON_ADMISSION : 1
SHE_NUMB : 1
WAY_CATHETER : 1
NOTE_TO : 1
CP_SHORTNESS : 1
SELFCARE_SIDERAILS : 1
HIS_AND : 6
MAJOR_CAUSE : 1
ABD_PAIN : 2
HEALTH_SUMMARY : 1
NEEDS_TO : 2
TO_RIGHT : 1
OUTPATIENT_RECONCILIATION : 1
OF_PROCEDURE : 2
PT_FROM : 1
HAND_ASSESSMENT : 1
SO_PUT : 1
CARE_NOTE : 1
MESSAGE_BLOOD : 1
NEW_CHIEF : 1
RIBS_OUT : 1
MEDICATIONS_EXPLAINED : 1
OK_TO : 1
INDICATION_ENTRY : 1
ASSESS_CAUSATIVE : 1
VENESSA_THIS : 1
GRADE_AND : 1
NO_ALLERGIES : 1
WITH_BERKLEY : 1
EVERY_MOUTH : 1
PATIENTS_MRI : 1
PT_ADMITTED : 1
ENOUGH_AND : 1
PUFFS_BY : 2
HER_ISSUES : 1
CT_FROM : 1
MODERATE_RATIVE : 1
BERKLEY_AND : 1
STATED_STOPPED : 1
WHO_HAS : 1
TAB_PO : 9
MOVEMENTS_ATHETOID : 1
PT_AWAITING : 1
PALPITATIONS_VITAL : 1
PAIN_LEVEL : 3
EVEN_NONLABORED : 1
INCREASE_SOA : 1
IS_HIS : 2
TO_PAGE : 1
OR_AND : 1
HIM_PATIENT : 1
METATARSAL_HEAD : 1
YOUR_NEXT : 1
IN_PT : 3
KIT_CALL : 1
FLU_SX : 1
FOR_FOLLOWING : 1
GIVEN_DISCHARGE : 2
PAYMENT_FULL : 1
VETERAN_NEITHER : 1
CARE_CASE : 1
LEVEL_NURSING : 1
NEGATIVE_NG : 1
SAYS_HAS : 1
SAFE_FAM : 1
WRAPPED_WITH : 1
CONSTIPATION_CANCER : 1
IS_OLD : 1
ADMINISTRATION_SECONDARY : 1
IN_PAIN : 1
MOBILITY_AS : 1
MAY_MORE : 1
FOR_THE : 4
DISABILITY_MANY : 1
PROPERTY_AND : 1
PUT_DSG : 1
OR_PSYCHIATRIST : 1
BEEN_BY : 1
NOTE_PULSE : 1
COMPLAINTS_THIS : 1
MANY_YEARS : 1
INTERACTS_BUT : 1
USE_MEDICATION : 1
CDL_TEND : 1
ADMITTED_FURTHER : 1
FEB_AMLODIPINE : 1
PERIOD_OF : 1
THE_STRAIGHTEN : 1
LIKES_TO : 1
COMPLAINT_AND : 1
ACTIVITIES_OF : 1
NEEDS_ADDENDUM : 1
HE_WILL : 4
AND_POUNDS : 1
KVO_IS : 1
ORAL_ACTIVE : 1
WILL_TO : 2
AS_PERRIN : 1
AID_NONE : 2
FUNCTIONING_NORMAL : 1
VOMITING_ACCESS : 1
NOT_BED : 1
SEEN_PHYSICIAN : 1
FOR_RIGHT : 1
TRIAGE_SMOKING : 1
CD_THE : 1
ACTIVE_QUETIAPINE : 1
HYPERLIPIDEMIA_HTN : 1
AT_ACETAMENOPHEN : 1
PULSE_DEPRESSIVE : 1
RISPERDAL_CD : 1
HIS_CERVICAL : 1
BS_NO : 1
VERBALLY_REM : 1
URINAL_EASY : 1
SOA_AN : 1
SHE_GETS : 1
HAS_AN : 1
TO_SW : 1
AND_FEELING : 1
SHAKE_BIOPSY : 1
DISCHARGE_INTERIM : 1
ULCERATIONS_LEFT : 1
SURROUNDINGS_NEG : 1
DATE_OF : 2
VET_WILL : 1
DOCUMENT_PAST : 1
OF_SESSION : 2
ON_FIRST : 1
TO_DISC : 1
SURGEON_SAFETY : 1
PATIENT_AWARE : 1
RONCHI_ALSO : 1
AND_THOUGHTS : 1
APPOINTMENT_LIKE : 1
STOCKINGS_TO : 1
GROUP_IF : 1
PHONE_CALL : 1
PERRIN_TOLERATED : 1
DELIVERY_HANDOUT : 1
IS_ELIGIBLE : 1
LOBE_HOME : 1
CHART_CHECK : 1
AWAITING_CALL : 1
RECONCILIATION_UA : 1
BEDTIME_MIN : 1
AS_DIRECTED : 1
GAIN_POWER : 1
RATIVE_ADDRESS : 1
WILL_PAIN : 1
HIGH_AT : 1
IS_MORE : 2
FOR_PAIN : 2
VIA_LFA : 1
NG_FOR : 1
COPING_LIVING : 1
BECOMES_IMPORTANT : 1
THE_WILL : 2
MOUNTAINCREST_DECREASED : 1
SPECIALIST_WILL : 1
URGENT_VA : 1
BRIEF_HISTORY : 1
IPRATROPIUM_ORAL : 1
ISNT_FOR : 1
FEELING_DEPRESSED : 1
MY_NOTE : 1
HEALTH_CARDIOLOGY : 1
BOWEL_REGULARITY : 1
DISORDER_SYNCOPE : 1
SC_IN : 1
PT_HAVE : 1
COMA_NEUROLOGIC : 1
AND_REQUESTING : 1
ALSO_SAYS : 1
CLAVICLE_RIBS : 1
TIME_REASSESSMENT : 1
NO_EXPRESSED : 1
IF_KNEE : 1
AWAY_AND : 1
TEND_STAY : 1
TREATMENT_GAIT : 1
HAS_MEDICATION : 1
VETERANS_WERE : 1
HEART_ASSOCIATION : 1
FACILITATING_AND : 1
AT_YOUR : 1
BREATHING_RINSE : 1
FOR_ORTHO : 1
ELEVATED_AT : 1
ME_CD : 1
ORAL_EVALUATION : 1
SPOUSE_TO : 1
IS_IRREGULAR : 1
CALL_TLC : 1
NO_IDENTIFIED : 1
PROPH_TELE : 1
NOTE_CASE : 1
FAMILY_OR : 1
PAYMENT_IN : 1
OCT_NOTE : 1
DESIRE_MOTIVATION : 2
NOTE_MANATEE : 1
INJURY_SKIN : 1
DECLINE_TO : 1
BREATHING_WELL : 1
MONITOR_SKIN : 1
AND_OFFER : 1
POWERLESS_ISSUES : 1
MR_HIS : 1
HAND_WASHING : 1
AT_THE : 1
PROTOCOL_REVIEWED : 1
NOTE_OXIMETRY : 1
SEE_NURSE : 1
HEALTH_NURSING : 1
BEEN_ELEVATED : 1
SOME_INITIAL : 1
NONE_ADDENDUM : 1
SCREENING_ASYMPTOMATIC : 1
ONE_OF : 1
IN_ER : 1
PRBLM_PC : 1
FOR_TERM : 2
AND_CMP : 1
PO_DAILY : 2
EXERTION_THE : 1
ST_ECTOPY : 1
SCORE_CLINICAL : 1
DENIES_SIGNS : 1
TIME_EXPLORING : 1
LENGTH_VISIT : 1
CALL_PLACED : 1
CARE_KEPT : 1
IDENTIFIED_FLU : 1
VIA_URINAL : 1
EDUCATION_ENTER : 1
FOLLOWING_COPIED : 1
CONTACT_CONTACTED : 1
CC_ATROVENT : 2
TO_LOWER : 1
RATE_OTHER : 1
THIS_MULTIPLE : 1
TO_VA : 1
ON_MAY : 1
OVERNIGHT_DOES : 1
FRI_TO : 1
CD_PATIENTS : 1
TO_PULSE : 1
CLINIC_THAT : 1
SIGNATURE_INFORMED : 1
DIRECTIVE_NO : 2
REPORTED_AS : 1
CV_GLUCOSE : 1
OF_ARM : 1
ASSESSMENT_WEIGHT : 1
COPY_WRITTEN : 1
MEANS_ARRIVAL : 1
RIGHT_ML : 1
MORNING_INJECT : 1
PRIOR_PAIN : 1
APPT_WITH : 1
DIABETES_MELLITUS : 1
PT_HERE : 2
MG_QHPRN : 1
ISSUES_BACK : 1
FELT_SICK : 1
TTP_LIGHT : 1
WAS_FOR : 2
AND_PROVIDE : 1
DIFFICULTY_NAME : 1
SPONDYLOSIS_MODERATE : 1
HER_SPENT : 1
ALLERGIES_SEE : 1
CALL_PC : 1
TELEPHONE_CONTACTED : 1
MAJOR_OF : 1
RADIATION_TO : 1
SKIN_MOISTURE : 1
CANCER_SHE : 1
TAB_DAILY : 1
PT_VOIDS : 1
ASKED_PT : 1
DATE_HEIGHT : 1
PULSE_ON : 1
INDICATES_IS : 2
GETS_DURING : 1
TREATMENT_NO : 1
PUT_ON : 1
CLICKING_THE : 2
GIVEN_ORDERS : 1
RISK_LEFT : 1
GO_HOME : 1
PLEASE_GET : 1
AMPHETAMINE_PT : 1
REFERRAL_NONE : 1
MALE_WILLING : 1
ESOPHAGEAL_CO : 1
STATES_HAD : 1
WIFE_BEEN : 1
DEB_THE : 1
WHEN_HE : 4
AM_MARCH : 1
NOV_THEY : 1
ESOPHAGEAL_CANCER : 2
DIRECTED_MR : 1
INHALE_PUFFS : 2
ON_IDENTIFIED : 1
BALL_RUBBER : 1
YOU_ARE : 1
DO_USE : 1
CALLED_OUTPATIENT : 1
TOLERATED_TREATMENT : 1
PROBLEM_POTENTIAL : 1
OFFICE_MANAGER : 1
OTHER_AFTERCARE : 1
THE_SHEET : 1
PAIN_MEDS : 1
THE_CE : 1
TEMPERATURE_PHYSICIAN : 1
SP_OF : 1
OTHERNOTE_RECOVERY : 1
MOUTH_YES : 1
ENHANCE_LIVING : 1
REPORT_SINCE : 1
SOCIAL_NOTE : 2
DISTURBANCE_AMBULATORY : 1
TO_RN : 1
AND_CAN : 1
IS_FEELING : 2
CHAIR_MOST : 1
AUTO_CUFF : 1
FEE_EXAM : 1
ANYTHING_WRITER : 1
LNC_PT : 1
BILLING_ADVISED : 1
ALL_DEC : 1
DUTY_HX : 1
BY_SINUS : 1
THEN_PT : 1
WILL_CUT : 1
ARE_TAKING : 1
ILLNESS_NOTE : 1
CORRESPOND_TO : 1
HE_DISCUSS : 1
PRESSURE_ULCERS : 1
ATTENDING_SURGEON : 1
GOOD_STERILE : 1
SICK_AND : 1
HAS_COMPENSABLE : 1
AND_FACTORS : 1
PT_AGREED : 1
POSSIBLE_TO : 1
BONTKE_BLOOD : 1
ELEVATION_RVSP : 1
MEDICATED_WITH : 1
WEAPONS_AT : 1
THE_ALLERGIES : 1
ADAMANTLY_ANY : 1
FACILITATING_FACTORS : 1
CT_CHEST : 1
ABD_INDIGESTION : 1
HIS_HER : 3
YOUR_BLOOD : 1
ACTIVE_ELEVATION : 1
CHART_MET : 1
TIMES_PREVIOUSLY : 1
WAS_IF : 1
DATE_ANXIETY : 1
NEITHER_CAPABLE : 1
ABDOMINAL_HAS : 1
INFORMATION_HE : 1
OTHER_FOLLOWUP : 1
WITH_MG : 1
NOTE_THAT : 2
AND_GIVEN : 2
RES_TIMES : 1
WITHIN_EASY : 2
MALE_VERIFIED : 1
MALE_NURSING : 1
AND_PARTICIPATED : 2
TELL_PATIENT : 1
WILL_FALL : 1
MMHG_HOWEVER : 1
MEDICATION_RECONCILIATION : 3
AND_CODE : 1
TO_ON : 3
HIS_HAD : 1
FINANCIAL_STRESSORS : 1
YES_EXPLAIN : 1
NAME_SSN : 2
VETERAN_GOOD : 1
NO_PREVIOUS : 1
BUT_RECALL : 1
FECAL_BLOOD : 1
LIFESTYLE_HEALTHIER : 1
IN_ACTIVITY : 1
ADDENDUM_DONNING : 1
WILL_VETERANS : 1
SOME_NOW : 1
SITUATIONS_AND : 1
PLEASE_BECOMES : 1
UNKNOWN_OCCUPATION : 1
AND_WE : 1
DL_FEB : 1
STORE_PT : 1
INDEPENDENT_NONE : 1
WITH_CT : 1
SCREEN_VOMITING : 1
OLD_IPRATROPIUM : 1
TELEMETRY_IV : 1
DIAGNOSIS_PT : 1
PREVIOUSLY_SEEN : 1
EDUCATION_INSTRUCTIONS : 1
ISSUES_FUNCTIONAL : 1
CLINICAL_HISTORY : 1
LAST_READINESS : 1
CE_STOPPED : 1
CONTINUE_TO : 3
SCORE_RN : 1
HOME_AM : 1
SELFLIMITED_TIME : 1
DX_MALE : 1
MORE_TENTATIVELY : 1
REPLACED_WITH : 1
HAVE_DRINK : 1
SELFCARE_DESCRIBE : 1
ASKED_THERE : 1
AT_AM : 1
PT_SAID : 1
RACING_THOUGHTS : 1
WAS_NEGATIVE : 1
MILD_AN : 1
HE_BEEN : 1
ALL_CANCER : 1
HOSPITAL_CONTINUED : 1
HAVWE_SECOND : 1
EXERCISE_WITH : 1
TEST_COLLECTION : 1
SIX_OR : 1
NEW_HE : 1
LIST_OF : 1
CARDIAC_RHYTHM : 1
LB_CHIEF : 1
IN_URINAL : 1
GABAPENTIN_SO : 1
AN_HISTORY : 1
TREATMENT_PROCEDURE : 1
INR_ADDENDUM : 1
SO_HE : 2
DISORDER_RECURRENT : 1
THIS_VET : 1
SHIFT_INDEPENDENT : 1
PROSTHESIS_KNEE : 1
APPOINTMENTS_BE : 1
COMMUNITY_MEETING : 2
AND_ONE : 2
COUMADIN_TELEPHONE : 1
WITH_RUL : 1
TECHNIQUES_SELFMONITORING : 1
MANAGEMENT_LEVEL : 1
TAKEN_THE : 1
CLOTS_GAVE : 1
HARM_TO : 1
OFFICE_NOTE : 1
OF_DROWSYNESS : 1
COPY_OF : 1
AT_PSYCH : 1
FELT_OR : 1
THAT_WRITER : 1
GET_MORE : 1
INITIAL_INSOMNIA : 1
RISK_FACTORS : 1
PRINTED_FOR : 1
MEDICINE_WOULD : 1
INFILTRATION_INFLAMMATION : 1
NOTE_SECONDARY : 1
THIS_PLAN : 1
COMPUTER_IS : 1
OCCASIONALLY_NURSING : 1
WEEK_DATA : 1
DE_DISC : 1
ANY_NASAL : 1
ALCOHOL_TEST : 1
HAND_HAND : 1
THOUGHTS_VIVID : 1
DAILY_AND : 1
DR_ADDENDUM : 1
OF_STRENGTHS : 1
LUNG_SHE : 1
DAILY_ACTIVE : 3
NOTE_DEPT : 1
HEALTH_CALENDAR : 1
NA_PROBLEM : 1
AR_ON : 1
YOU_NEED : 1
TIMES_TENTATIVELY : 1
HE_AN : 1
WAS_SEEN : 1
PERSONAL_TELEPHONE : 1
FOR_NAUSEA : 1
WITH_NEUROLOGICAL : 1
MORE_THAN : 1
COMPUTER_THE : 1
MAKE_SOMETHNG : 1
KNEES_TOES : 1
WAS_RESENTMENTS : 1
LUMBOSACRAL_ACTIVE : 1
IF_MEDICATION : 1
NEW_AT : 1
COMPLAIN_SOME : 1
AVAILABLE_MRSA : 1
NAUSE_VOMITING : 1
SIGNS_DENIES : 1
MON_RECEIVED : 1
LAST_PRESSURE : 1
BUT_STATED : 1
INTERSCAPULAR_SPECIAL : 1
MEDICAL_INTERN : 1
IS_SAFE : 1
MON_STATED : 1
WARFARIN_AND : 1
LUNGS_CTA : 1
NSVT_RUN : 1
SIX_MORE : 1
AND_FEARS : 1
TO_REC : 1
ARTERIOSCLEROTIC_DISEASE : 1
HIS_BACK : 1
TO_ER : 1
LOOSE_HIS : 1
OF_BURNT : 1
ILL_HE : 1
AND_MET : 1
NEW_MIRTAZAPING : 1
SLIGHT_IMPROVEMENT : 1
IN_LOWEST : 1
PROTOCOL_AND : 1
AFFECT_MOOD : 1
STOCKINGS_MECHANICALLY : 1
BE_WORSE : 1
PATIENT_COMPLAINTS : 1
TO_BE : 5
SURGICAL_PLACE : 1
UNITS_UNDER : 1
FRIENDS_HAD : 1
THE_EVENING : 1
WITHIN_URINAL : 1
PULSE_PRESSURE : 1
INVOLVEMENT_PATIENTS : 1
DOES_COMPLAIN : 1
PRESCRIBED_AR : 1
MOUTH_FOR : 1
WEAK_AR : 1
APPOINTMENT_SOMETHNG : 1
TERAZOSIN_INTERVENTIONS : 1
PATIENT_WELL : 1
ADVISED_VETERAN : 1
BETTER_BLOOD : 1
STAFF_STILL : 1
THE_VETERAN : 5
MALE_RACE : 1
CADMIX_DJD : 1
GET_DONE : 1
PATIENT_RARELY : 1
LORAZEPAM_TAB : 1
HAS_USING : 1
FROM_FACILITY : 1
WITH_THE : 7
PLACE_CALL : 1
ENTER_DATE : 1
PATIENT_FACILITATING : 1
FOR_SHAKE : 1
DIARRHEA_NO : 1
PAIN_RATE : 1
ROOM_IN : 1
GIVEN_OUTPT : 1
AND_PERSONS : 1
HEALTH_CARE : 1
INTERDISCIPLINARY_TREATMENT : 1
NOW_AND : 1
WASHING_EVER : 1
SUICIDAL_PATIENT : 1
EPIGASTRIC_WITH : 1
BOWEL_MOVEMENTS : 1
SPO_CHANGE : 1
WEAPONS_HOME : 1
OF_SOME : 1
PROBLEM_AND : 1
SELECT_ONE : 1
REMAINS_HIGH : 1
CHRONIC_ESOPHAGEAL : 1
MUCH_EXPLORING : 1
HOME_SW : 1
SKIN_PHONE : 1
AROUND_WHILE : 1
NIGHTMARES_OF : 1
MACHINE_NONVA : 1
COMPLAINT_SUMMARY : 1
WILLING_TO : 1
OF_INFILTRATION : 1
ACTIVITIES_DATE : 1
REQUIRED_HELP : 1
ONEHALF_TABLET : 1
COULD_AND : 1
HEARING_MALE : 1
VIA_AMBULATORY : 1
PO_QHPRN : 1
BY_SEVERE : 1
BREAKFAST_PERCENT : 1
INCREASE_AMBULATION : 1
HANDOUT_COMMENTS : 1
THE_MEDS : 1
WAS_HOW : 1
LEVEL_BY : 2
YES_CAN : 1
INDICATION_DATE : 1
LITTLE_LESS : 1
SL_DISTENDED : 1
ESOPHAGITIS_PRINTED : 1
CHANGE_PAIN : 1
FOUR_FOR : 1
PEERS_ON : 1
GROUP_BEHAVIOR : 1
COMPLAINTS_NOTED : 1
DISPOSITION_CONSULT : 1
OUT_TO : 1
VOMITING_LAST : 1
ONCOLOGY_NOTE : 1
IF_HE : 1
RIGHT_ATRIUM : 1
SUMMARY_CARDIOLOGY : 1
PNEUMOVAX_AGE : 1
EXAM_LOCATION : 2
BOTH_WHEN : 1
COLON_NECESSARY : 1
NO_EPIS : 1
MEDS_NO : 1
HAS_BEEN : 10
SCALE_NEUROLOGIC : 1
THEY_AND : 1
NO_PROBLEMS : 1
REST_NIGHT : 1
ANY_BEDS : 1
SPECIALIST_BE : 1
ASSOCIATED_RIGHT : 1
HIM_REQUIRED : 1
BE_INVOLVED : 1
NASAL_OF : 1
OF_WITHDRAWAL : 2
DM_DJD : 1
NO_PHYSICAL : 1
DUTY_PERTINENT : 1
DIAGNOSIS_SUSPICIOUSAPPEARING : 1
PROVIDER_FOR : 1
DOSES_HRS : 1
ACID_ADDENDUM : 2
FOR_MRSA : 1
RESCIND_HIS : 1
SESSION_DATE : 1
DENIES_PT : 1
RECENT_LABS : 1
DRUNK_HIS : 1
MEDICATION_WITH : 1
DEAR_PATCHES : 1
WITH_ON : 2
OF_FOLLOWING : 2
LIQUID_ORAL : 1
URINATION_CC : 1
ADM_IN : 1
POSITION_BRAKES : 1
VET_APPOINTMENTS : 1
BE_TAB : 1
TO_MUCH : 1
MOISTURE_PHYSICIAN : 1
TOOTH_REM : 1
DENIES_ANY : 3
OCCULT_BLOOD : 1
YEARS_WITH : 1
TO_OR : 1
LOCATION_NONBLOODY : 1
PATIENT_DESCRIBE : 1
MG_CAP : 1
MANY_HIS : 1
LAST_AGE : 1
CHANGES_THIS : 1
KNOWN_ALLERGIES : 1
POSITIVE_WHEN : 1
MILD_INCREASE : 1
OTHER_DESIRE : 1
PSYCH_PT : 1
ACTIVE_ONCE : 1
SEE_THAT : 1
AT_BEDTIME : 1
MED_SHOW : 1
TO_SOFT : 1
SUPPLIES_RESOURCES : 1
RATIVE_DISC : 1
VA_FEE : 1
FEELING_DRUNK : 1
OF_NOT : 1
PATIENT_IS : 5
AT_WITH : 2
PAST_WEEK : 1
AUDITC_WAS : 1
PAIN_THIS : 1
LEVEL_AS : 1
MONTH_AND : 1
TO_REVIEW : 1
HIS_AWAITING : 1
EKG_YES : 1
ARM_CHEST : 1
NURSE_AND : 1
NG_MOTIVATION : 1
THERAPY_NOTE : 1
LEGS_ANKLES : 1
DOING_PHYSICIAN : 1
ASSESSMENT_THAT : 1
QHS_ACTIVE : 1
TYPE_CONTACT : 2
DISCHARGE_APPOINTMENT : 1
MULTIPLE_PREVIOUSLY : 1
REDUCE_ACID : 1
LB_PATIENT : 1
IS_CONNECTED : 1
STOPPED_THIS : 1
DM_COPD : 1
AND_EVEN : 1
THOUGHT_LAST : 1
AFTER_MRSA : 1
ACID_NONE : 1
CONTROLS_TABLE : 1
FOR_MONTHS : 1
ASSESS_OF : 2
WHICH_BEEN : 1
BP_THE : 1
BEEN_IN : 2
HAD_FEVER : 1
INHALE_ACTIVE : 1
EPIS_INDICATES : 1
STERILE_TO : 1
CARCINOMA_PENICILLIN : 1
PRESCRIBED_PT : 1
OCCASIONALLY_PHYSICAL : 1
GUARDED_AND : 1
GROUP_DISTURBANCE : 1
ABNORMALITIES_BRONCH : 1
DAILY_TELEMETRY : 1
VIEW_APARTMENTS : 1
OF_INSTRUCTIONS : 1
AND_THE : 6
MEMBER_SPEAKING : 1
BLOOD_SPECIMEN : 1
CARE_AND : 1
PROGRESS_NOTE : 1
EXPIRATION_INTERSCAPULAR : 1
GS_BOTH : 1
LAST_PNEUMOVAX : 1
HYDRATION_STATUS : 1
TIMES_FOR : 1
GIVEN_AND : 1
HE_REPLIED : 1
PATIENT_THAT : 3
NOW_NPO : 1
OR_MEDICATIONS : 1
WHAT_PAIN : 1
PROBLEMS_SEIZURES : 1
BECAUSE_APPEARS : 1
DICTATED_PRIMARY : 1
INDIGESTION_CHANGE : 1
THAN_ATTEMPTING : 1
TENDS_TO : 1
KG_ADEQUATE : 1
PRIMARY_DIAGNOSIS : 1
AND_MODERATE : 1
SINCE_NOW : 1
PUFF_ORAL : 1
PC_OUTPATIENT : 1
HE_TO : 7
UA_NEGATIVE : 1
FOR_SEIZURE : 1
HIS_PAIN : 1
NOT_YET : 1
CY_SPONDYLOSIS : 1
PLACED_GS : 1
FOCUS_OF : 1
TACHYCARDIA_PEDAL : 1
FIRE_AND : 1
USE_ACUTE : 1
ACTIVE_PERTINENT : 1
MEDICAL_SURGICAL : 1
CALL_APPROPRIATELY : 1
MINUTES_PT : 1
AGE_WHO : 1
MOOD_CALLED : 1
BARRIERS_TO : 2
PT_REGARDING : 1
INDEPENDENT_MANAGER : 1
TO_AREAS : 1
TO_FA : 1
UP_TG : 1
AND_STAIRS : 1
DESCRIPTION_OF : 1
STRENGTHS_DEFICITS : 1
ON_OR : 2
COBAN_THEN : 1
BM_DENIES : 1
IN_VOIDING : 1
MAY_RETURN : 1
GWINN_WORKER : 1
ON_PT : 1
FACILITY_NEED : 1
CAN_HR : 1
CALL_PROVIDER : 1
PHYSICIAN_RECENTLY : 1
RISK_PSYCHIATRIST : 1
PROBLEMS_QRS : 1
HIS_DISTANCE : 1
MONTH_NO : 2
ATTENTIVE_PARTICIPATED : 1
CHO_TOTAL : 1
HE_NEEDS : 2
VETERANS_AND : 1
TO_EVALUATION : 1
FO_PT : 1
TIME_CALLED : 1
THIS_VA : 1
FELT_NUMB : 1
SOB_CONTINUES : 1
ACTIVE_HEALTHPSYCHIATRIC : 1
RISK_SITUATION : 1
WHEELCHAIR_AND : 1
WORSE_FREQUENCY : 1
CERVICAL_SPINE : 1
TIME_PLAN : 1
THOUGHTS_TO : 1
OTHER_WAS : 1
FEBRILE_TYLENOL : 1
BE_BASIS : 1
LOWER_LEFT : 1
HAS_WITH : 1
PING_RESPIRATIONS : 1
MOUTH_THREE : 2
OLD_ADMITTED : 1
ADMINISTRATION_NOTE : 1
LOWER_BACK : 2
BR_OX : 1
ACTIVITIES_ENTER : 1
BEEN_COMPLAINT : 1
RUL_MASSES : 1
WAS_HIS : 2
INSTRUCTIONS_AND : 1
NONE_GIVEN : 1
HAVE_ELEVATED : 1
SEE_PCC : 1
MOST_OF : 1
FLUID_COLLECTION : 1
RACE_RACE : 1
HERE_WAS : 1
TO_IN : 2
CALL_BELL : 1
ROOM_BBSC : 1
THAT_THIS : 1
FALLS_AFTER : 1
TIME_PUFFS : 1
OR_REPRESENTATIVE : 1
PICKED_UP : 1
RUNS_BEAT : 1
WORK_THE : 1
MILD_DEMENTIA : 1
HAS_BRAIN : 1
WOULD_BE : 1
MANAGER_REMINDERS : 1
AS_IN : 1
COGNITION_OR : 1
NUMBER_OF : 2
HEIGHT_CM : 2
CALL_BHM : 1
LEFT_SIDE : 1
REACH_DIAGNOSIS : 1
HOME_THURS : 1
EXAMINE_THE : 1
WITHOUT_OF : 1
OF_MINUTES : 1
WITH_MR : 2
WITH_MANIFESTATIONS : 1
START_ADDENDUM : 1
WEEKEND_BRUSH : 1
PT_GROUP : 1
VERY_GUARDED : 1
GET_CD : 1
HAS_ADMITTED : 1
OTHER_THERAPY : 1
TO_DOES : 1
RISK_NORMAL : 1
PLEASE_REVIEW : 1
AN_PALPITATIONS : 1
SINUS_BOWEL : 1
PRN_FOR : 1
LENGTH_OF : 1
PRIMARY_OF : 1
HERE_FOR : 1
AND_DOB : 1
DOCUSATE_NA : 1
BM_TO : 1
AGGRAVATING_CERTAIN : 1
CR_TROPONIN : 1
HERE_ORDER : 1
AND_RUBBER : 1
HE_TRUNK : 1
NO_ECTOPY : 2
VIEW_OF : 2
IS_MEDICATION : 1
AND_BARRIERS : 1
BETTER_FOR : 1
LOC_OTHER : 1
VOIDS_CLEAR : 1
PLAN_SAFETY : 1
BEEN_GIVEN : 1
INFORMED_HIM : 1
HIS_IS : 2
SS_AND : 1
HAD_BUT : 1
YO_INTRAVENOUS : 1
ANTIANXIETY_MEDS : 1
EVENT_PROVIDED : 1
OF_GIVING : 1
ONCOLOGY_CLINIC : 1
DILANTIN_MONTH : 1
LIST_MAYO : 1
AR_FROM : 1
SEEN_BY : 1
TWO_TIMES : 1
ABOUT_THE : 1
MM_THE : 1
MARBLE_WITH : 1
PAST_OFTEN : 1
AM_NEW : 1
HAVING_AT : 1
LAST_AREA : 1
NO_PATIENT : 2
AND_SEEN : 1
DONT_REMEMBER : 1
AMBULATION_BR : 1
WAS_SO : 1
FLU_LIKE : 1
PSYCHIATRY_INDIVIDUAL : 1
INTAKE_NOTE : 2
VET_BEEN : 1
OUT_AMBULATING : 1
MOOD_BRIGHTER : 1
FOR_EVALUATION : 1
ASYMPTOMATIC_IN : 1
ADDITIONAL_HELP : 1
WHERE_LIVES : 1
NEUROLOGIC_ORIENTED : 1
WALKING_GOING : 1
PRIMARY_NEXT : 1
DIARRHEA_THE : 1
ENOUGH_MEDICATION : 1
THEY_ARE : 1
FOREARM_PT : 1
RENT_SPEARFISH : 1
THE_FOCUS : 1
ERDMAN_PM : 1
AND_REPLACED : 1
OXIMETRY_WAY : 1
TIME_INHALE : 1
THE_APPROPRIATE : 2
HAVING_PT : 1
MEDICATION_TO : 1
RUBBER_BAND : 1
BRIEF_CLINICAL : 1
ADMITTED_TO : 2
LATERAL_HERE : 1
RELATED_FOLLOWUP : 1
NO_PROVIDER : 2
INTERDIGITAL_CHECK : 1
ADDENDUM_THIS : 1
AS_EXPECTED : 1
MIRTAZAPING_DONT : 1
HER_EXERCISE : 1
POSITIONS_STANDING : 1
AMBULATION_ADDENDUM : 1
DISABILITY_RELATED : 1
MUSCLE_ACHES : 1
TO_HOSPITAL : 1
TO_PLEASE : 1
PRIVATE_COVERAGE : 1
CARE_TREATMENT : 1
MUCOPER_TOOTH : 2
MIRTAZAPING_MG : 1
HE_THINK : 1
PAIN_ITS : 1
YES_INDEPENDENT : 1
FOLLOWING_ALLERGIES : 1
HE_HE : 1
COUNSELING_FOR : 1
OF_WHEELCHAIR : 1
EVER_BEEN : 1
DISCUSSED_CHF : 1
NEURO_SENSORY : 1
IF_HAD : 1
FELT_AND : 1
WITH_COMPLAINT : 1
INSOMNIA_NIGHTMARES : 1
YOU_REFUSED : 1
NITROGEN_DL : 1
MEAL_TO : 1
INFORMED_CONSENT : 3
GROUP_OXY : 1
COMMENTS_FOLLOWING : 1
EXERCISE_EDUCATION : 1
HIS_WIFE : 2
DAILY_BEFORE : 1
VOICED_UNDERSTANDING : 1
COMA_SCALE : 1
CONTACT_PERSONAL : 1
PLAN_PREVIOUS : 1
THIS_REMINDED : 1
INFORMED_THE : 1
MEDICATION_DISCHARGED : 1
CONSENT_ALDRETE : 1
TOOTH_FLP : 2
WITH_NAUSE : 1
CONCERNED_BECAUSE : 1
INDICATES_PATIENT : 1
NURSE_WILLING : 1
CLEAN_THAT : 1
NO_TTP : 1
AN_TACHYCARDIA : 1
SOAP_ONLY : 1
ASSIST_PHYSICIAN : 1
STOMACH_ADDENDUM : 2
UROLOGICAL_TERAZOSIN : 1
CAP_TAB : 1
SIDE_DISCOMFORT : 1
NONE_BEDREST : 2
WORK_WITH : 1
MAKES_PAIN : 1
ALERT_AND : 2
IN_TR : 1
TO_NEEDS : 1
EXAM_WNL : 1
MOUNTAIN_CREST : 1
MG_REMEMBER : 1
ASSIST_PSYCHOTROPIC : 1
NO_BLOOD : 1
WITHIN_PRIMARY : 1
URGENCY_FREQUENCY : 1
CERVICAL_AGE : 1
WITH_SINCE : 1
LACERATION_CLINIC : 1
DIZZINESS_OCCUR : 1
AT_NO : 1
CONFIRMED_BY : 1
GI_INTERMITTENTLY : 1
ABDOMEN_SOFT : 1
PATIENT_MAY : 1
NEGATIVE_MOTIVATION : 1
THE_FLOOR : 1
QRS_LONG : 1
BLOOD_PRESSURE : 6
OCCUPATION_NONE : 1
TH_METATARSAL : 1
TO_FAMILY : 1
HAD_PHYSICAL : 1
ELIGIBILTY_PATIENT : 1
THE_OF : 4
PAIN_ASSESSMENT : 1
NO_DATA : 1
HE_WISHES : 1
DAUGHTER_WEEKEND : 1
PATIENT_EDUCATION : 1
THE_SOURCE : 1
VA_THEY : 1
PREVIOUS_SKIN : 1
ONE_CAPSULE : 1
PAIN_WITH : 2
CALENDAR_THE : 1
INSURANCE_COVERAGE : 1
INDIVIDUAL_MHC : 1
TO_SEAT : 1
EPISODE_CERVICAL : 1
MOUNTAIN_FOR : 1
TO_MONITOR : 2
SHE_REQUESTED : 1
HISTORY_PHYSICAL : 1
SAFE_FEELING : 1
PT_HAS : 1
AMBULATE_DIFFICULTY : 1
RESPIRATION_EXPIRED : 1
CHIEF_COMPLAINT : 4
HE_SOME : 1
FORAMEN_TO : 1
TO_PEERS : 1
COMPLETED_MALE : 1
TEMPERATURE_OF : 1
FOR_ANXIETY : 1
PATIENT_NOTIFIED : 1
DIAGNOSIS_INDUCED : 1
HISTORY_ESOPHAGEAL : 1
AS_IMPRESS : 1
BID_WEIGHT : 1
IS_BOTH : 1
THAT_HE : 12
MODERATE_DE : 1
MON_AM : 1
PHONE_DATE : 2
SOB_TO : 1
HAD_PLEASE : 1
HAS_EATING : 1
ENCOUNTER_THE : 1
COMING_IN : 1
PATIENT_STATED : 1
PROBLEMS_AMBULATORY : 1
THE_FOR : 1
INVOLVEMENT_OF : 1
TO_HAIRLESS : 1
BEEN_PAST : 1
AND_BEEN : 1
ACTIVE_BOWEL : 1
REDNESS_OR : 1
THIS_THE : 3
IOR_DELUSIONS : 1
OBTAINING_INFORMED : 1
HYPERLIPIDEMIA_FLOOR : 1
MR_MALE : 1
NO_DAILY : 1
HIS_SAFE : 1
OTHER_PT : 1
PT_HAD : 1
SCORE_LPN : 1
DOCUMENT_ATTACHED : 1
BLOOD_HEART : 1
ORTHOPNEA_ASSESSES : 1
TO_SUBMET : 1
QUESTIONS_OR : 1
READING_ON : 1
ANY_SP : 1
AM_HEART : 1
PHYSIATRIST_RECENTLY : 1
AS_SEC : 1
ONE_BY : 2
STOCKINGS_VOICED : 1
SUICIDAL_MONTH : 1
MRI_WILL : 1
FOLLOWING_NASAL : 1
EFFECTIVE_NO : 1
TOPIC_HANDOUT : 1
PAIN_SCALE : 1
DAILY_REDUCE : 1
RECOMME_DYSLIPIDEMIA : 1
FOLLOWING_SEE : 1
CALLED_INDICATE : 1
FOR_ATTACK : 1
ATTACHED_THIS : 1
WITHOUT_REDNESS : 1
CTR_AND : 1
AUG_TAKING : 1
WEIGHT_CASE : 1
AND_CONTRIBUTING : 1
GET_ME : 1
ADDITIONAL_CELL : 1
INFORMED_OF : 1
HOME_MONEY : 1
IT_WHEN : 1
NAME_SHE : 1
TRANSCRIPTIONIST_VA : 1
MCBRIDE_GWINN : 1
DOES_AFFECT : 1
RECTUM_COLON : 1
WAS_AN : 1
AND_USING : 1
SLIGHT_YOU : 1
THIS_AM : 3
COVER_FOR : 1
WITH_THIS : 1
HYDRATED_THE : 1
REVIEWED_PTS : 1
THAT_GETS : 1
FOR_NOTE : 1
FEELINGS_SYMPTOMS : 1
OF_CYCLES : 1
OTHER_SKIN : 1
FOR_ELEVATED : 1
NUTRITION_CARDIOVASCULAR : 1
RACING_NO : 1
SIMVASTATIN_HIS : 1
HRS_ADDENDUM : 1
MULTIPLE_REASSESSMENT : 1
CALL_SMOKING : 1
AN_VISIT : 1
INSTRUCTIONS_CONDITION : 1
BID_ACTIVE : 2
PACEMAKER_SAID : 1
NO_OVERNIGHT : 1
THE_THAT : 1
MINIMAL_THE : 1
CD_OF : 1
WHEN_AND : 1
REPRESENTATIVE_DESIRES : 1
FROM_GROUP : 1
ASKED_IF : 1
TO_OTHERS : 2
WIFE_IS : 1
WHO_PATIENT : 1
FOUND_EFFECTIVE : 1
HIS_FOR : 1
SINCE_DOING : 1
ALSO_STATED : 1
SYSTEMIC_DISEASE : 1
MODIFIED_ALDRETE : 1
OF_EPIGASTRIC : 1
NONE_DATE : 1
DECIDED_GO : 1
OCCASION_IN : 1
AND_EVALUATION : 1
TO_RETURN : 1
IN_LAST : 2
DO_INTRAVENOUS : 1
PERCEPTIONS_AND : 1
DEMONSTRATED_GOOD : 1
HL_EMS : 1
ENTRY_NO : 1
DEAR_MR : 1
INTERVENTIONS_AND : 1
THAT_THEY : 1
FOOT_WITH : 1
FALL_SHE : 1
ORTHO_WEIGHT : 1
IF_NO : 2
SERVICE_AT : 1
ARE_CLEAN : 1
PALPATION_LUMBOSACRAL : 1
ON_ULCERATIONS : 1
POWER_OVER : 1
PROPH_ST : 1
DENYING_FEELINGS : 1
ACTIVE_BY : 1
LATERAL_KNEE : 1
OLD_CVA : 1
SMOKER_WITH : 1
NON_DISTENDED : 1
TO_NO : 2
AS_BELOW : 2
IS_GRADE : 1
PATIENT_RIGHT : 1
HE_MEDICAL : 1
RX_CYCLES : 1
USING_PRIVILEGES : 1
MD_PRESSURE : 1
PUFF_INHL : 1
NEEDED_AS : 1
TIME_HE : 2
HE_IT : 1
THERE_ANY : 1
MHICM_NOTE : 1
HP_BY : 1
PAIN_BY : 2
DAILY_TOUR : 1
THIS_DISABILITIES : 1
RECENTLY_FOR : 1
COMPLETE_HP : 1
VET_STILL : 1
NO_CHANGE : 3
SOME_URGENCY : 1
FRI_RESCHEDULE : 1
EVEN_MISSED : 1
HE_YES : 1
TONJA_INVOLVEMENT : 1
NO_CERVICAL : 1
GROUP_ACET : 1
YES_REFERRING : 1
ADDENDUM_TYPE : 1
WHAT_MAKES : 1
CARDS_FOR : 1
RETURN_LAB : 1
OWN_ASSESS : 1
HYPERTENSION_ICDCM : 1
HIS_PRN : 1
AND_PRIVATE : 1
FALL_WHEN : 1
LOCATION_SEE : 1
SITE_WITHOUT : 1
MOVEMENT_TOE : 1
HAS_FALL : 1
TO_SKIN : 1
ON_PCP : 1
BREATHING_ABOUT : 1
TEST_WAS : 1
TABLET_AS : 1
PAST_HISTORY : 1
IN_ACCU : 1
JUST_FEW : 1
PATIENTS_VIEW : 2
MINUTES_ARRIVED : 1
HYPERLIPIDEMIA_CHRONIC : 1
PATIENT_RECEPTIVE : 1
SKIN_NO : 1
PLAN_SURGEON : 1
MAY_GET : 1
IN_WEIGHT : 1
NEW_COMPLAINTS : 1
MOBILITY_IS : 1
SCHED_AT : 1
TO_BRING : 1
PT_DECLINED : 1
PT_ARRIVED : 1
GET_RELIEF : 1
MG_BID : 1
RESPONSIBILITY_OWN : 1
SIGNATURE_CONSENT : 1
SERVICE_IS : 1
NO_BUN : 1
GIVEN_LIST : 1
INTENT_PLAN : 1
FREQUENCY_PAIN : 1
USING_NASAL : 1
FOR_BURNING : 1
AREAS_OF : 1
THIS_IN : 1
INPATIENT_INTERDISCIPLINARY : 1
ADMISSION_DIAGNOSIS : 1
VAMC_SUPPLY : 1
PRESENT_NURSING : 1
TIMES_DAILY : 1
THAT_IF : 1
OF_LUNG : 1
ALCOHOL_THE : 1
GET_THIS : 1
SUPPLE_BREATHING : 1
MINIMAL_EXERTION : 1
HAD_OVERNIGHT : 1
CAREGIVER_SPEAKING : 1
TAKING_WARFARIN : 1
SCHEDULE_THIS : 1
TP_CHRONIC : 1
LEVEL_THIS : 1
AND_FALLS : 1
THE_WEEK : 1
TTP_TO : 1
BY_EVERY : 1
STOPPED_HIM : 1
PROSTATE_TESTING : 1
AND_CRACKING : 1
UNDERSTANDING_OF : 1
UPON_COMPLETION : 1
MOVING_DOES : 1
FX_CLAVICLE : 1
YES_ICDCM : 1
ON_GUARD : 1
FOR_HEARING : 1
PATIENT_BEEN : 1
CLOSED_AND : 1
RECORD_HERE : 1
HIS_HAND : 1
NIACIN_HR : 1
SUICIDAL_PT : 1
IRREGULAR_NO : 1
AGE_SCHEDULED : 1
OF_LL : 1
THEY_REQUESTED : 1
ORDER_FECAL : 1
IN_BOWEL : 1
IMMOBILE_SCREEN : 1
PROVIDER_DISCUSS : 1
SCHEDULED_TOPIC : 1
SAYS_WEARS : 1
PARTICIPATED_COMMUNITY : 1
AND_IN : 7
MOVEMENT_HEAR : 1
DAUGHTER_THIS : 1
KEEP_APPOINTMENTS : 1
PATIENT_STATES : 1
ALLERGIES_NKA : 1
LAST_TALKED : 1
MEDICATIONS_ARE : 1
AND_OFF : 1
ADVANCE_DIRECTIVE : 2
TAKEN_WITHIN : 1
EXPECTED_YES : 1
IN_RESTING : 1
THE_LAST : 2
SYNCOPE_PACEMAKER : 1
AT_TWINBROOK : 1
IN_THOUGHT : 1
MULTIPLE_MEDICAL : 2
INDICATES_HE : 1
SEE_DESCRIPTION : 1
COLLECTION_HEALTH : 1
PING_ASSESS : 1
AND_BAKER : 1
ON_HAS : 1
WELL_ARE : 1
PRESSURE_REGARDING : 1
DOCUMENT_OFFICE : 1
HEALTHCARE_LIST : 1
FOR_PRESSURE : 1
PT_TOLERATED : 1
CAN_PUT : 1
CHARLOTTE_NOTE : 1
DIAGNOSED_DEPRESSION : 1
ALLAMANDSOME_DO : 1
PO_QAM : 2
PO_RX : 1
PULSE_NONVA : 1
DIFFICULTIES_POSSIBLY : 1
CY_CERVICAL : 1
PTS_AND : 1
WAS_ABLE : 1
TO_FEELINGS : 1
NEW_OR : 1
EXCEED_DOSES : 1
MINUTES_BETWEEN : 1
SUICIDAL_HAS : 1
REGION_NEEDS : 1
TELEMETRY_AMIODARONE : 1
NO_ANSWER : 1
AWAITING_FOR : 1
CATHETER_PLACE : 1
PCP_YES : 1
IS_NO : 3
DEPT_1010M : 2
PT_ABOVE : 1
ON_BOTH : 1
IN_AMBULATING : 1
ADDENDUM_TERM : 1
AND_EITHER : 1
MANAGED_OFFICE : 1
TABLE_TELEPHONE : 1
HOW_YOU : 1
SELF_HARM : 1
INFORMATION_OTHER : 1
THAT_THERE : 1
SCRNADMISSION_TOOK : 1
OF_FEELINGS : 1
SECTION_THE : 1
FOR_SIGNS : 1
SALINE_IN : 1
SPECIMEN_COLLECTION : 1
RIB_PT : 1
NOTE_AS : 1
ADDITIONALLY_WE : 1
WERE_ANGRY : 1
INHALE_BY : 1
PAN_URINAL : 1
ADEQUATE_FUNCTIONS : 1
CLASS_CONCLUDED : 1
CURRENTLY_CAPABLE : 1
UP_AT : 2
CFCF_ORAL : 1
SINCE_MEDICAL : 1
HE_ENOUGH : 1
NURSING_TO : 1
PAST_VETERAN : 1
MUCH_NURSING : 1
SCRNADMISSION_PLACE : 1
EXPERIENCED_THE : 1
ECTOPY_INSTRUCTIONS : 1
WEIGHT_KG : 4
MORE_RELIEF : 1
HISTORY_REMINDER : 1
IN_MOUNTAINCREST : 1
REMOVE_OLD : 1
WITH_ADLS : 1
SEVERITY_HPK : 1
STOMACH_ACID : 2
THIS_PATIENT : 2
PSYCHIATRY_MD : 1
ADLS_FUNCTIONING : 1
TOUR_ACTIVITIES : 1
BEEN_HAVING : 1
NASAL_SP : 1
NORMAL_IMMOBILE : 1
DESCRIBE_FACILITATING : 1
REGARDING_HIM : 1
CLENCHING_MOUTH : 1
AS_ASK : 1
LESS_DEPRESSED : 1
MYOKYMIC_RECONCILIATION : 1
GOOD_UNDERSTANDING : 1
ORAL_MG : 1
WILL_WITH : 1
FROM_WRIST : 1
WITH_ESOPHAGEAL : 1
PHYSICAL_ALLAMANDSOME : 1
ID_PR : 1
PAIN_TELEPHONE : 1
DIAGNOSIS_COLLECTION : 1
UNDERSTANDING_PATIENTS : 1
WHAT_TO : 1
PT_DISCHARGED : 1
REQUEST_NO : 1
OWN_ABILITY : 1
APPT_YO : 1
CELL_FAMILY : 1
NURSING_PROGRESS : 1
ORINTED_IS : 1
HOME_NO : 1
MONTHS_FOR : 1
HAGERSTOWN_TELEPHONE : 1
REPORTS_FOLLOWUP : 1
FEW_CLOTS : 1
BEDS_THE : 1
PULSE_CC : 1
MUST_CLONIDINE : 1
EXPECT_ENCOURAGED : 1
OF_BREATH : 1
EMS_PC : 1
AND_STRESSORS : 1
ONE_OCCASION : 1
MOVE_CHART : 1
NO_PRESSURE : 1
PH_PATIENT : 1
ON_PATIENT : 1
SUBMET_HPK : 1
IMMOBILE_NUTRITION : 1
THE_THING : 1
SOUNDLY_EVEN : 1
BLOOD_NEGATIVE : 1
PALPITATIONS_II : 1
IMPAIRMENT_ARRIVED : 1
MIND_FAMILY : 1
MH_SCREENING : 1
SPINE_THE : 1
HE_SERVICE : 1
REMINDED_NEEDS : 1
HEMMORRHOID_THOUGHT : 1
ORDER_PROCESSED : 1
ADMITTED_AGENCY : 1
TREATMENT_ALL : 1
COMMUNITY_PRECEEDED : 1
ITS_IS : 1
AFFECT_VERY : 1
HAVE_THAT : 1
SELECT_OF : 1
MELLITUS_II : 1
TEXT_ATTACHED : 1
TO_TECHNIQUES : 1
LIKES_HELP : 1
ORIENTED_REG : 1
EACH_OF : 1
WAS_BRUSHINGS : 1
PRESSURE_PRIMARY : 1
MEETING_BY : 1
OF_MUSCLE : 1
FOLLOWUP_SITE : 1
NOW_PROBLEMS : 1
ENTER_STATUS : 1
INDICATE_IS : 1
ADDENDUM_INDICATES : 1
NONVA_DEXTROA : 1
DX_BLOOD : 1
SHE_MAKE : 1
BRING_ANOTHER : 1
MOST_SHIFT : 1
LEFT_LL : 1
PAIN_LOWER : 1
YO_MALE : 2
APART_CURRENT : 1
PATIENT_COMMUNITY : 1
AND_WALKING : 1
DONE_SOONER : 1
FOLLOWING_CARCINOMA : 1
THERAPY_WHEELED : 1
HX_HP : 1
COMPREHENSVE_EVALUATION : 1
MORE_CIGARETTES : 1
OUTPT_RX : 1
LEG_AND : 1
NOTE_RECEIVE : 1
ALL_MEDICATIONS : 1
WITHIN_ELIMINATION : 1
FEELS_ESTIMATED : 1
CARE_PINHOLE : 1
AN_ADDITIONAL : 1
OPENING_PT : 1
COLLECTION_AND : 1
EFFECT_NO : 1
NUTRITION_CONSULT : 1
IOR_GOALDIRECTED : 1
RUNS_NSVT : 1
REFILLS_XEROSIS : 1
COMMENTS_IS : 1
OXY_ACET : 1
TO_TRANSPORTATION : 1
WAS_RX : 1
REPAIR_RIGHT : 1
LAST_MEAL : 1
ADM_SWABS : 1
NOC_EYES : 1
TO_COMPLETE : 2
OX_ROOMAIR : 1
MOBILITY_PT : 1
BE_PREPARED : 1
FLUOROSCOPY_MAY : 1
CLINIC_VISITMENTAL : 1
FOLLOWING_CRITERIA : 1
READINESS_LEARN : 2
LUNG_LESION : 1
AND_ON : 1
ATHETOID_MEDICATION : 1
WOUNDS_ULCERS : 1
OTHERS_THE : 2
DRUGS_PRESENT : 1
IDENTIFIED_BY : 1
MOUTH_NAME : 1
PT_AWARE : 1
ONCOLOGY_TRANSCRIPTIONIST : 1
PRESCRIBED_IT : 1
SIGNS_GERD : 1
PAIN_SCREENING : 1
AMIODARONE_MG : 1
NSVT_TAB : 1
OF_SUSPECTED : 1
OTHER_WORK : 1
SULF_MG : 1
THE_SEC : 1
PT_CLEAR : 1
VH_DELUSIONS : 1
CONSTIPATION_ESOPHAGEAL : 1
RX_HAD : 1
INHL_ORAL : 2
HEALTHCARE_WITH : 1
PT_CALLED : 1
CHECK_TO : 1
HIS_DONNA : 1
WORKER_PATIENT : 1
AIR_ABDOMEN : 1
DATA_AVAILABLE : 1
HEART_RATE : 1
LOW_NO : 1
REGARDING_HER : 1
WAS_WRAPPED : 1
FOR_ETHNIC : 1
COMPLETED_YO : 1
PATIENT_PER : 1
CAN_WITHOUT : 1
TO_MILD : 1
RECENT_RESULTS : 1
TENDS_ISOLATE : 1
RESPIRATORY_FUNCTIONS : 1
AS_WRITTEN : 1
ADDRESS_PHONE : 1
AT_NURSING : 1
TELEPHONE_AN : 1
DOING_SEEN : 1
MOUTH_EVERY : 2
PATIENT_SOCIABLE : 1
SENSORINEUR_YOUR : 1
FURTHER_HOMELESS : 1
OR_MOBILITY : 1
TO_AVOID : 1
RISK_TELEMETRY : 1
TH_HEAD : 1
HTN_SUICIDAL : 1
MONITOR_JOB : 1
SEEN_TEAM : 1
INDICATE_OF : 1
AND_RIBS : 1
AND_NEW : 1
CHAIGING_HIS : 1
HOMELESS_CHIEF : 1
MORE_ON : 1
SKILLS_ABOVE : 1
STAIRS_WILL : 1
ANGER_RESENTMENT : 1
TOILETING_PT : 1
TRYING_TO : 1
RALES_RONCHI : 1
ARE_ON : 1
PAT_ALBUTEROL : 1
FOR_ACUTE : 1
EXCEPT_AS : 1
CELL_PATIENT : 1
IN_FOR : 2
TENSE_ANG : 1
BURNT_BODIES : 1
AFTER_EVER : 1
LONG_CARE : 2
AND_ONSET : 2
RELATED_FORAMINAL : 1
RISK_AND : 1
IN_EDUCTION : 1
EATING_AND : 1
SC_TEXT : 1
STAFF_CONCERNED : 1
CURRENTLY_OF : 1
PROVIDED_THIS : 1
BY_PATIENT : 1
AND_PATIENTS : 2
VERY_TENSE : 1
DENIES_USING : 1
INFILTRATED_FROM : 1
CONSUMING_ON : 1
ULCER_NOTED : 1
SEPOCT_TIMES : 1
IV_SALINE : 1
FOR_SCRNADMISSION : 1
DIRECTIVE_AT : 1
PATIENT_REPORTS : 1
NOTE_RESPIRATIONS : 1
TAB_ONE : 1
IN_BASELINE : 1
OR_UNSPECIFIED : 1
FINDINGS_PATIENT : 1
BACK_WORK : 1
RESPIRATION_PULSE : 1
THE_QUESTIONS : 1
COMPLETION_DISCUSSED : 1
LEFT_COVERED : 1
FIBRILLATION_IV : 1
NOT_USE : 1
PO_QH : 1
ADDENDUM_STATED : 1
WAS_OBTAINED : 1
IN_HE : 1
STATUS_EXAM : 1
USE_OF : 1
COMMUNITY_MANAGED : 1
THAT_MAY : 1
ELEVATED_CHO : 1
VITALS_MH : 1
TREATMENT_PRIOR : 1
FORAMINAL_DISC : 1
PERTINENT_PER : 1
ED_CALENDAR : 1
AND_SEE : 1
FACTORS_CERTAIN : 1
BED_PAN : 1
SUCCESS_THE : 1
CARE_CURRNETLY : 1
REMINDED_DENIES : 1
REPORT_TO : 1
REGIMEN_PATIENT : 1
PLAN_UNRESOLVED : 1
DEPENDENCE_CHO : 1
ED_DUE : 1
DRINKS_ONE : 1
ATTEMPTED_TO : 1
DIABETES_TYPE : 1
OF_THIS : 3
NUTRITION_MOVE : 1
NO_RALES : 1
INTERVENTIONS_NITROGEN : 1
FOR_TEST : 1
ALL_COLON : 1
DECLINED_ADM : 1
OUTPATIENT_TRANSPORTED : 1
BELOW_BEEN : 1
ED_PAST : 1
ASYMMETRICAL_LAST : 1
ASA_BY : 1
CONCERNED_HE : 1
PT_ASYMPTOMATIC : 2
REC_CTR : 1
VETS_CONCERN : 1
BREATHING_DO : 1
WITHIN_REACH : 4
REMOVED_RIGHT : 1
WAS_WAITING : 1
RHYTHM_PAIN : 1
COMMENT_PT : 1
OR_PALPITATIONS : 1
DONE_YES : 1
IN_ADDENDUM : 1
EXPLAINED_IT : 1
SMOKING_OR : 1
EXPECTED_HYPERTENSION : 1
PTS_TOMORROW : 1
NO_LOCATION : 1
IS_THE : 2
MOOD_DATE : 1
USE_STRIP : 1
PT_BY : 1
UNLABORED_TELEMETRY : 1
URINAL_VOIDING : 1
FLOOR_AT : 1
BLOOD_NOW : 1
VISIT_COMPREHENSIVE : 1
ADDENDUM_PAIN : 1
RECONCILIATION_CONTINUE : 1
MG_DONT : 1
JOB_STOCKING : 1
WITH_LIST : 1
TIME_WALKS : 1
WHEELED_AND : 1
IF_YES : 2
NONE_NOTE : 1
THAT_FELT : 1
NEEDS_OCCUR : 1
BASED_THE : 1
REGARDING_EXERCISE : 1
ON_CALL : 1
IF_EXPLAIN : 1
MEETING_PRECEEDED : 1
AM_AN : 1
BRONCHIAL_BRUSHINGS : 1
GUILLIANBARRE_SYND : 1
RN_ARRIVAL : 1
IN_COMMUNITY : 1
FROM_HEALTH : 1
ON_INITIATES : 1
LNC_ON : 1
AM_TREATMENT : 1
DURING_THIS : 1
HAD_EFFECT : 1
AIR_BBSC : 1
BUT_ASSESS : 1
WHICH_SAYS : 1
MILD_OF : 1
BUT_THEY : 2
ORIENTED_OTHER : 1
FOOT_COVERED : 1
ANSWERS_ADDITIONALLY : 1
COULD_FOR : 1
YOUR_PT : 1
BEDREST_IMMOBILE : 1
HAVE_GIVEN : 1
CARE_PRACTICE : 1
INPATIENT_PLAN : 1
NO_ASSOCIATE : 2
OR_SWELLING : 1
PHYSICAL_STATE : 1
MINNICH_SELFCARE : 1
INTENSITY_SCALE : 1
SLIDING_ORDERS : 1
ATROVENT_BED : 1
NUMBER_DATE : 1
AS_AGE : 1
BELLO_SOME : 1
MG_INTERVENTIONS : 1
DEMONSTRATED_INTO : 1
KEEP_PATIENT : 1
LOGGED_CPRS : 1
FURTHER_BURNING : 1
MET_PT : 1
STRONGER_PT : 1
YES_ARTERIOSCLEROTIC : 1
IN_QUADRANTS : 1
NUMB_DETACHED : 1
WITH_AMBULATION : 1
UP_TO : 1
HAD_OF : 1
FEELINGS_AND : 2
THREE_TIMES : 1
IS_DATE : 1
TOTAL_DOES : 1
PING_WELL : 1
EVALUATION_EXAMINE : 1
REPORTS_RESPIRATION : 1
RESP_REG : 1
SITE_OR : 1
INJECT_COMFORT : 1
MADE_HIM : 1
STATE_NO : 1
ISNT_VITAL : 1
HAVE_OR : 1
MEDS_DEPRESSION : 1
SCREENING_FEELING : 1
ELBOW_CONDITION : 1
INCREASE_THE : 1
ATHETOID_MYOKYMIC : 1
OF_CARCINOMA : 1
HERE_TO : 1
METOPROLOL_TAB : 2
INTERVENTIONS_AS : 1
ULCER_TO : 1
BEHAVIOR_AND : 1
THE_STATES : 1
NORMAL_APPROVED : 1
ON_NO : 1
CONVENIENCE_STORE : 1
PATIENTS_HTN : 1
MEDICATION_PRESCRIBED : 1
PARONYCHIA_DICTATED : 1
TELE_ST : 1
PAGE_FIRE : 1
IT_NOT : 1
NO_FEVERS : 1
MANAGER_YAMAMOTO : 1
WORST_IS : 1
CONTENT_IN : 1
RESIDUAL_IN : 1
DX_PLEASE : 1
SUSPECTED_LUNG : 1
SAYS_NEEDS : 1
THE_COMPLETED : 1
ACTIVE_NOTE : 1
REGARDING_RECENT : 1
ASKED_WHAT : 1
RESENTMENTS_HOW : 1
OF_GUILLIANBARRE : 1
CAN_EMERGENCY : 1
UPPER_ARM : 1
ABOVE_IF : 1
HAGERSTOWN_NURSING : 1
THERAPIST_THE : 1
OF_PATTERN : 2
RHYTHM_MOVEMENTS : 1
FEELS_BETTER : 1
MG_QAM : 2
SKIN_INFUSING : 1
POSSIBLY_SOCIAL : 1
THE_MENTAL : 1
DRINK_CONTAINING : 1
ASSESSMENT_BP : 1
THIS_WILL : 1
AND_MOTIVATION : 1
TO_CURRENT : 1
HIS_ANXIETY : 1
ON_AND : 1
INCLUDING_CANCER : 1
AN_ASSOCIATION : 1
LLQ_VET : 1
NEW_SITE : 1
COMPREHENSVE_ORAL : 1
AS_NECESSARY : 1
ACTIVITY_OCCASIONALLY : 2
VA_SCHEDULE : 1
HE_WOULD : 2
AH_IOR : 1
NEEDED_FEELS : 1
UPPER_OR : 1
MITRAL_AREA : 1
MALE_ESOPHAGEAL : 1
TO_PPD : 1
TOOTH_DX : 2
PO_PRN : 1
HAS_PRIVATE : 1
CHARLOTTE_SOAP : 1
STRIP_ACTIVE : 1
NONE_RECORDED : 1
TO_SMOKE : 1
MALE_PRESENTS : 1
WE_COULD : 1
BACK_TO : 1
CAN_MY : 1
NUMBER_WITH : 1
CTR_THE : 1
BRING_THE : 1
OBTAINED_BY : 1
PT_NO : 1
DUE_OLD : 1
II_OR : 1
PC_JBLUE : 1
DE_RATIVE : 1
CASE_WE : 1
NOTE_FLAT : 1
THE_THIRD : 1
FALL_DOES : 1
PROGRAM_ACTIVE : 1
ACTIVE_LEGS : 1
AT_WORST : 1
PAIN_NAUSE : 1
RADIATION_CYCLES : 1
TIME_OUT : 1
ON_MODERATE : 1
NOTE_PLAN : 1
ONSET_OF : 1
PATIENT_REQUESTING : 1
NO_MEDICATION : 1
EXTRACTION_TOOTH : 1
AM_PT : 1
LOWER_MEDICATED : 1
TEMP_PAIN : 1
MANIFESTATIONS_THAT : 1
MEDICAL_THIS : 1
ICDCM_HISTORY : 1
PAIN_DERMATOLOGY : 1
FROM_ADDENDUM : 1
AUDC_GYNECOMASTIA : 1
LEARN_COMMENTS : 1
ORTHOPNEA_PEDAL : 1
TO_SHE : 1
ACTIVE_TELEMETRY : 1
SWABS_LAST : 1
FROM_YOU : 1
HOW_TO : 1
PLAN_FOLLOWUP : 1
BED_LOWEST : 1
GIVEN_NUTRITION : 1
BUT_WILL : 2
MENTAL_STATUS : 2
ON_AM : 2
THE_CLASS : 1
FOLLOWING_MEDS : 1
APPOINTMENTS_TO : 2
ED_AT : 1
PATIENTS_FUNCTIONING : 1
SHAVE_PATIENT : 1
YOUR_PEACE : 1
AND_OF : 4
DURING_CRISIS : 1
SHORTNESS_OF : 1
RATES_ANXIETY : 1
WHEELED_TOILETING : 1
SCREEN_PART : 1
QUIT_ALCOHOL : 1
ALL_UNRESOLVED : 1
MAKES_POWERLESS : 1
PCP_ON : 1
INSOMNIA_IMPULSE : 1
ELSE_WE : 1
WITH_SPOUSE : 1
AR_AURORA : 1
WELL_REPORT : 1
IT_MORE : 1
STATUS_CODE : 1
MEDICATION_REVIEW : 1
REVIEW_AND : 2
FOUND_NO : 2
NO_IS : 1
MONITOR_HYDRATION : 1
EXAMINE_RECTUM : 1
DIAGNOSIS_SCREENING : 1
APPOINTMENTS_IF : 1
TELEPHONE_FX : 1
ISSUES_STRESSORS : 1
MAY_AS : 1
DISCHARGE_LIST : 1
INDICATE_AREAS : 1
MARBLE_DEMENTIA : 1
ON_UC : 1
GOING_AND : 1
FOR_ACID : 1
THIS_HIGH : 1
RELATED_PROCEDURE : 1
TERM_WE : 1
CC_CC : 1
LISA_CM : 1
MOTIVATION_LEARN : 1
NONE_PAIN : 2
COMPLETE_BY : 1
FOR_ABLATIVE : 1
TRANSPORTATION_HOME : 1
ORIENTED_RESP : 1
METATARSAL_RIGHT : 1
THEN_AGAIN : 1
HE_MORE : 2
AS_NOTED : 1
MOUNTAINCREST_THEY : 1
WITH_MILD : 1
OF_ESOPHAGEAL : 1
STABLE_WITHOUT : 1
CELL_NUMBER : 1
THE_RISKS : 2
PREPPED_OR : 1
EVER_SELF : 1
WRITTEN_INSTRUCTIONS : 1
EXCEED_IN : 1
LONG_AND : 1
PING_SOUNDLY : 1
MEALS_STOMACH : 1
DESCRIBE_UP : 1
OBTAINED_TIME : 1
SO_IF : 1
IS_LITTLE : 1
AREA_UPPER : 1
REALTIME_MAY : 1
NEGATIVE_MONITOR : 1
WORSE_HOW : 1
HOME_IS : 1
THE_WANT : 1
HAD_SAFE : 1
VOMITING_IV : 1
FIRST_NOTICE : 1
THE_INTERDIGITAL : 1
ED_DOCUMENT : 3
ETHNIC_GROUP : 1
SURROUNDINGS_COLONOSCOPY : 1
DISEASE_NOT : 1
FOLLOWUP_VOICED : 1
THE_NEW : 1
PARANOID_STAFF : 1
PRN_YEAR : 1
FEELING_HIS : 1
ELEVATED_ALL : 1
HE_FEELING : 2
DONNING_DOFFING : 1
SO_OFTEN : 1
GUILLIANBARRE_SELFLIMITED : 1
DISC_BELLO : 1
PATIENT_ADMITTED : 3
INTERACTING_PEERS : 1
PT_MANDATORY : 1
GO_OUT : 1
PARTICIPATION_THAN : 1
THEN_APART : 1
ATTEMPTS_SKIN : 1
BRONCH_UP : 1
NURSE_UNITS : 1
THREE_MILD : 1
TYLENOL_CONCERNED : 1
SC_DISABILITY : 2
URGENCY_AND : 1
PT_RATES : 1
UNDERSTANDING_COMMENT : 1
PATIENT_FOLLOWING : 1
AM_THE : 1
WHEN_PT : 1
TO_AS : 1
NOK_HIS : 1
HIS_DAUGHTER : 1
THING_NOTICE : 1
AS_MR : 1
DURING_SITUATIONS : 1
INFILTRATION_OR : 1
HPK_LESION : 1
ADDENDUM_PATIENT : 1
TOPICS_LABS : 1
OF_DISTURBANCE : 2
NAME_STATED : 1
COMPLAINT_USING : 1
HOME_ALONE : 1
DATE_REPORT : 1
HAVE_SEAT : 1
MORE_AFFECT : 1
SHE_VAMC : 1
LIFETIME_OF : 1
PRESSURE_ON : 1
PATIENT_SAFE : 1
LIST_YOUR : 1
ADDENDUM_PT : 2
FOLLOWUP_PROCEDURE : 1
WILL_REVIEW : 1
DURING_OIF : 1
INCREASE_IN : 1
IODOSORB_MOBILITY : 1
SAID_SECOND : 1
NS_VIA : 1
TO_NARROWING : 1
AT_VAMC : 1
EVENTUALLY_STRAIGHTEN : 1
MIN_WITH : 1
MANATEE_AND : 1
PLAN_TO : 1
ADEQUATE_RESPIRATORY : 1
ACT_NOTE : 1
UP_DOWN : 1
AT_LENGTH : 1
ELDER_ABUSE : 1
TLC_THIS : 1
ALCO_MAKES : 1
RBC_ASA : 1
RISPERDAL_CONSTA : 1
STATES_HE : 4
THIS_CORRESPOND : 1
WITH_LAC : 1
NO_TO : 2
COMMENT_TESTING : 1
FOLLOWING_DURING : 1
PROBLEM_HYPERTENSION : 1
EVALUATION_OF : 1
IS_IN : 1
THOUGHTS_CONTRIBUTE : 1
ASSOCIATION_CAN : 1
SEVERE_DISEASE : 1
MEDICATION_ENTRY : 1
FOR_WEIGHT : 1
QUIT_CONSUMING : 1
CLINIC_FOR : 2
BREATHING_MOUTH : 1
FOR_BY : 1
SCREENING_NOTE : 1
TERAZOSIN_MG : 1
RVSP_AT : 1
MGMT_WILL : 1
SEEN_PHYSIATRIST : 1
URINATION_RESIDUAL : 1
HAD_TO : 2
PCP_APPT : 1
PHYSICAL_THE : 1
ADDENDUM_IS : 1
OF_MEDICATION : 2
IN_IN : 1
RESULTS_UP : 1
DATED_PATIENT : 1
PROCEDURE_THOUGHT : 1
HE_COMPLAIN : 1
DISABILITIES_NONE : 1
RESCHEDULE_YOUR : 1
CYCLES_OF : 1
WITH_NURSING : 1
PRIVILEGES_AND : 1
PHONE_PT : 1
YES_BEEN : 1
LIGHT_RBC : 1
HELP_AT : 1
HOME_HIS : 1
ON_THROMBOEMB : 1
MEDICAL_AMBULATORY : 1
NONE_WHEELCHAIR : 2
EPIGASTRIC_PAIN : 1
EXPIRATION_REGION : 1
MY_WAS : 1
AS_BY : 1
MR_WHO : 1
OF_INDEPENDENT : 1
SERVICE_PROVIDED : 1
WEEK_DOG : 1
AMBULATORY_NONE : 2
NOTE_HERE : 1
PROBLEM_UPON : 1
NONE_SERVICE : 1
MACHINE_AMPHETAMINE : 1
OF_ALL : 2
CARDIOVASCULAR_NO : 1
PATIENT_COUNSELED : 1
AMBULATION_TO : 1
PATIENT_MEDICATION : 1
FOR_CALL : 1
PREVIOUS_AS : 1
USES_VOIDING : 1
IN_AND : 2
SIDE_IS : 1
NEEDS_DIZZINESS : 1
ON_ROOMAIR : 1
BLOOD_CULTURE : 1
TO_REPORT : 1
TELEPHONE_AND : 2
THE_VIEW : 2
HOW_VETERANS : 1
ADMISSION_HE : 1
ABDOMEN_WITH : 1
IN_ALL : 1
APPOINTMENT_THANK : 1
RACE_OCCUPATION : 1
IS_PLEASANT : 1
HAS_CHAIGING : 1
TRANSFERRING_NORMAL : 1
AND_ANG : 1
TRUNK_MOVEMENTS : 1
TO_AREA : 1
THIS_THANK : 1
TELEPHONE_EXTRACTION : 1
OF_MEAL : 1
UNDER_MEDICAL : 1
DESIRE_AN : 1
TREATMENT_PLAN : 2
APPOINTMENT_YOU : 1
HAVWE_PAUSE : 1
MECHANICALLY_REDUCE : 1
PRIVATE_INSURANCE : 1
VETERAN_COMPENSABLE : 1
NOTE_INTERIM : 1
ARIPIPRAZOLE_MG : 1
ACTIVE_TWICE : 1
INTRAVENOUS_THERAPY : 1
NO_FINDINGS : 1
TO_START : 1
PATCHES_OF : 1
REFUSED_INSOMNIA : 1
HELPFUL_NO : 1
EVENING_AND : 1
SEE_OF : 1
HIS_RISPERDAL : 1
MHC_HE : 1
INSOMNIA_ICDCM : 1
CARE_WE : 1
MAKE_HAVING : 1
ASSESSMENT_PHONE : 1
PTS_SC : 1
PATIENT_PC : 1
IS_RELATED : 2
TIME_HOW : 1
INTO_ADDENDUM : 1
TO_IDENTIFIED : 1
THE_NEXT : 1
PATIENT_OR : 1
BED_REST : 1
ACTIVE_DUTY : 1
ATTACHED_IV : 1
AT_TIME : 8
NOTE_UNDER : 1
MAKE_MY : 1
REACH_PATIENT : 1
EDUCATION_SUCCESSFULLY : 1
CHRONIC_CONSTIPATION : 1
DEPRESSED_HOPELESS : 1
THAN_WHEN : 1
HAS_RECEIVING : 1
TO_VIEW : 1
MEDICATION_PT : 1
TO_SEVERITY : 1
OF_EITHER : 1
YES_NO : 2
DEMENTIA_PT : 1
AND_INFORMATION : 1
FUNCTIONAL_GROUP : 1
THINK_VETERANS : 1
PHONE_VETS : 1
KIT_PROVIDED : 1
ADDENDUM_REFUSED : 1
AND_ORDERS : 2
OXY_GIVEN : 1
VOMITING_WITH : 1
OF_REVIEWED : 1
TO_AMBULATE : 1
VASCULAR_PLEASE : 1
ASSUMES_FOR : 1
CONSENT_TIME : 1
PREVIOUS_ATTEMPTS : 1
REMINDER_PLAN : 1
FEVERCHEST_PAIN : 1
PARTICIPATED_CLASS : 1
MASSES_ASSOCIATED : 1
DRIVING_APPOINTMENTS : 1
ASSOCIATE_IDENTIFIED : 2
SCHEDULE_WILL : 1
ABILITY_ANGER : 1
TABLE_AND : 1
WITH_BM : 1
EMERGENCY_DEPT : 2
PATCHES_AFFECT : 1
OF_IS : 1
FEELS_THAT : 1
UREA_MG : 1
WALKIN_JBLUE : 1
ESTIMATED_LOSS : 1
LEFT_FORAMEN : 1
NIGHT_IM : 1
WEAR_SUPPORT : 1
MOODS_ARE : 1
TO_DR : 1
DIAGNOSIS_RADIATION : 1
RESPIRATIONS_CARPAL : 1
ALBUTEROL_CFCF : 1
PRESSURE_HIGH : 1
IS_PROBLEM : 1
BRAIN_INJURY : 1
STATUS_ORIENTED : 1
HAS_QUIT : 1
TO_CALL : 1
THERE_ANYTHING : 1
AND_IS : 5
PRECAUTIONS_TELEMETRY : 1
HE_STOPPED : 1
HAVE_HIM : 1
PATIENT_PATIENT : 1
STATED_SHE : 2
BEAT_RUN : 1
PCP_APPOINTMENT : 1
OTHERS_TRAUMA : 1
PROPERTY_IT : 1
DISPOSITION_ONCOLOGY : 1
THIS_IS : 1
ANSWERS_WE : 1
LEFT_FA : 1
PERRIN_EXPIRES : 1
APPROPRIATELY_AND : 1
SOFT_WITH : 2
RECONCILIATION_NOTE : 1
STATUS_WNL : 1
LONG_WALKING : 1
LOBE_PATIENTS : 1
AND_STRETCHING : 1
GAIN_OVER : 1
INFORMED_THAT : 1
AND_INFORMED : 1
WELL_BUT : 1
DOWN_DEPRESSED : 1
NOTE_IS : 1
ACTIVITY_COMPLETELY : 1
INTERVENTIONS_UREA : 1
OUTPATIENT_MEDICATIONS : 5
NEG_NORMAL : 1
RISK_INTERVENTIONS : 1
NOTE_PRIMARY : 1
COMPLAINT_FINANCIAL : 1
CHANGED_EXPLAINED : 1
SINCE_VISIT : 1
CANCER_TESTING : 1
WITH_FRIEND : 1
AH_VH : 1
MM_MITRAL : 1
PEACE_MIND : 1
THAT_THE : 1
TAB_TAKE : 4
TR_PRESSURE : 1
ONE_TABLET : 3
MEDICATIONS_READINESS : 1
USED_THIS : 1
FEE_AND : 1
EXPRESSED_THOUGHTS : 1
TOD_DOW : 1
CURRENTLY_HAVING : 1
ABUSE_VOMITING : 1
MET_WITH : 1
WEAKNESS_TO : 1
FACILITY_TO : 1
LONG_TERM : 3
PLEASE_BRING : 1
THE_OR : 1
NOTE_PATIENT : 1
ASYMPTOMATIC_GRADE : 1
IS_THAT : 1
WITH_STAFF : 1
BE_AWAY : 1
DATE_LAST : 1
HERE_ON : 1
DIFFICULTY_DATE : 1
SUSPICIOUSAPPEARING_LESION : 1
APPROPRIATE_CHANGE : 1
SC_EXERCISE : 1
BAND_FOR : 1
VITAL_MEDICATION : 1
IS_ABLE : 2
WNL_SAID : 1
TO_COMMON : 1
NOTE_NURSING : 2
AGENCY_VET : 1
TO_FOLLOWUP : 2
SCREEN_NO : 1
DOW_CELL : 1
IMPRO_MED : 1
PSYCHOTROPIC_PHYSICIAN : 1
NEEDED_TO : 1
ED_TEXT : 1
COLLECTION_RETURN : 1
SOURCE_PATIENT : 1
ASYMMETRICAL_YOUR : 1
NOTE_MAKES : 1
COULD_DO : 1
REASON_HAS : 1
PHONE_EXAM : 1
ON_MARCH : 1
IF_NECESSARY : 1
OF_AN : 1
REASON_ASSESS : 1
SCREENING_DOWN : 1
NEITHER_CURRENTLY : 1
TOOK_PLACE : 1
FOR_HE : 1
MALE_PER : 1
CALL_TO : 2
GIVEN_SEABOLT : 1
EVEN_UNALABORED : 1
CURRENT_SKIN : 1
VA_PINHOLE : 1
CONCERNING_HIS : 1
HELPFUL_YES : 1
EITHER_MORE : 1
CARE_REFERRING : 1
DAILY_PENDING : 1
DIAGNOSIS_FLUID : 1
PREVMED_AND : 1
REACH_WITHIN : 1
AND_DEFICITS : 1
TO_WEIGH : 1
HEART_PRIMARY : 1
BRAKES_ON : 1
DREAMS_IF : 1
TELEPHONE_VISIT : 1
REDUCE_STOMACH : 1
TEMPER_ENHANCE : 1
EXPIRES_TOLERATED : 1
BASIS_FOR : 1
IN_REFERENCE : 1
CALLED_MEDICATION : 1
MISSED_MORNING : 1
TOLERATED_WAS : 1
MD_BLOOD : 1
NURSING_NURSING : 1
ED_MEDICATION : 1
MEALS_FOR : 1
TO_WAS : 1
NOT_SAFE : 1
PAIN_OR : 1
AS_MEMBER : 1
BED_NOT : 1
JOB_WHICH : 1
EEG_HAS : 1
REASSESSMENT_TOLD : 1
HAD_BEEN : 1
CV_TEST : 1
HE_NO : 2
GUARD_SEVERE : 1
TIME_SKIN : 1
OF_NO : 1
SIGNS_OR : 1
HE_INFORMED : 1
OF_CARE : 4
SERVICE_POSTVIETNAM : 1
PT_PRESENTS : 1
HE_ASKED : 1
REPLIED_YES : 1
MED_FOR : 1
FUNCTIONS_AS : 1
AND_BAND : 1
IS_ABUSE : 1
PING_BETTER : 1
HIS_ADDITIONALLY : 1
MD_FOR : 1
AND_PAIN : 1
INCAPACITATING_COMPLAINTS : 1
SEEN_NEURO : 1
STATES_IS : 1
PROCEDURE_MEDICAL : 1
PHYSIATRIST_WAS : 1
THE_SO : 1
OTHER_HEART : 1
INPATIENT_UP : 1
PROVIDER_WITHIN : 1
STRETCHING_FINALLY : 1
NS_INFUSING : 1
BELL_ON : 1
EVEN_WITH : 1
IDENTIFIED_AUTHOR : 2
PAUSE_AND : 1
INFUSING_LFA : 1
ACTIVE_REFER : 2
FEARS_ATIENT : 1
THREE_AS : 1
AMPHETAMINE_DEXTROA : 1
PREPARED_PTS : 1
THE_GABAPENTIN : 1
COLLINS_DISPOSITION : 1
MONITOR_IDT : 1
HAD_SEPERATED : 1
DENIES_HAVING : 1
VERY_SO : 1
BRANCH_SERVICE : 1
CHEWING_MOUTH : 1
TOES_LATERAL : 1
IS_VERY : 1
ENLARGEMENT_THE : 1
CHECK_PAIN : 2
LAC_HL : 1
PROCEDURE_LOCATION : 1
INJURY_ATTEMPTED : 1
ATTEMPTING_TO : 1
SOME_WHEN : 1
PATTERN_AND : 2
NEEDS_COMA : 1
IN_YEARS : 1
NEGATIVE_EVENT : 1
OTHER_SOCIAL : 1
MUST_LOGGED : 1
HIM_OF : 1
SECONDARY_RELATED : 1
NOTED_WEAKNESS : 1
STATUS_NOTED : 1
THIS_DUTY : 1
OF_FLUOROSCOPY : 1
RELATIONSHIP_ACTIVITIES : 1
FOR_STOMACH : 1
GANG_RECOMMENDED : 1
MED_PAIN : 1
EVENING_STRETCHING : 1
BEAT_RUNS : 1
BE_WITH : 1
ABLATIVE_SEEN : 1
BASELINE_CONTINUES : 1
CHF_MEDICATION : 1
ONCE_TO : 1
THEY_BE : 1
FOR_PTS : 1
PATIENT_PROVIDER : 1
CM_WEIGHT : 1
AT_UNIT : 1
CANCER_SCREEN : 1
PREVIOUSLY_AND : 1
HOW_DID : 2
PREPPED_CONDITION : 1
MIGHT_SOURCE : 1
ABD_SOFT : 1
YOUR_SUGGESTED : 1
SESSION_QUESTIONAIRE : 1
URINAL_WALKS : 1
SAFETY_BED : 1
RESULTS_LDL : 1
PSYCH_UNIT : 1
MRI_AND : 1
SELFLIMITED_AND : 1
TO_PCP : 1
SERVICE_PRIMARY : 1
AREAS_STRENGTHS : 1
RELIEF_MOOD : 1
SPONDYLOSIS_AGE : 1
REPORTS_FOR : 1
SKILLS_MEDICATION : 1
NO_AVAILABLE : 1
NO_PAIN : 2
ETHNIC_OXY : 1
ARE_WARM : 1
TO_THIS : 2
RECURRENT_EPISODE : 1
GOALDIRECTED_THOUGHT : 1
OR_BLOCK : 1
MEDICATION_ADMINISTRATION : 2
FOR_LEVEL : 1
AT_HOWEVER : 1
MILD_IN : 1
AND_ACT : 1
DISORDER_HTN : 1
DISCHARGED_TO : 1
IS_UP : 1
BILLING_VETERAN : 1
CAN_MAKE : 1
HIM_INR : 1
POSSIBILITY_GUILLIANBARRE : 1
KG_PATIENT : 1
TO_ALBUTEROL : 1
ER_HEIGHT : 1
NO_NEEDED : 1
NOTE_DECIDED : 1
RESPONSE_TO : 1
YOU_MUST : 1
PATIENT_ED : 1
QAM_BOWEL : 1
REASON_VETERAN : 1
TO_COMPLETED : 1
TO_TAKEN : 1
OR_CONCERNS : 1
OCCUR_RAPID : 1
SSN_AND : 1
CARCINOMA_ESOPHAGUS : 1
IMPORTANT_THAN : 1
IMPULSE_CONTROL : 1
HEART_CARE : 1
THE_STREETS : 1
IN_INTERVENTIONS : 1
PCP_ALL : 1
TELEPHONE_TRIAGE : 1
MEDICATION_REGIMEN : 1
WRITTEN_CONDITION : 1
MEDICATION_AND : 2
AND_PLEASANT : 1
NAUSEA_AND : 1
OFFERED_DUE : 1
ON_HERE : 1
MARCH_THE : 1
NOTE_CHARLOTTE : 1
TIME_WILL : 2
QUIT_AND : 1
CAME_IN : 1
HIS_DIAGNOSIS : 1
AND_PT : 4
NEUROLOGICAL_STATES : 1
TABLET_MOUTH : 4
PROSTHETICS_WAS : 1
TRIGLYCERIDES_WERE : 1
PT_HAVING : 1
HOURS_DURING : 1
SAFETY_IN : 1
HE_HAS : 11
HOPELESS_GANG : 1
LONELY_FINANCIAL : 1
REQUEST_UNCLEAR : 1
AND_COLON : 1
HAVE_SO : 1
NO_SCORE : 1
BOWEL_SC : 1
MORNING_AND : 3
TO_EXPECT : 1
ILL_HAD : 1
POUNDS_TO : 1
IN_LOWER : 1
FOR_NURSING : 1
IN_AT : 1
PAIN_AT : 3
AND_ABLE : 2
REQUESTED_VAMC : 1
ON_LEFT : 1
BEEN_AR : 1
WILL_SEE : 1
FOLLOWING_ABSTRACTS : 1
OF_DEC : 1
ONLY_HELP : 1
HE_LIVES : 1
HAS_COME : 1
FOLLOWING_IF : 1
BITING_CLENCHING : 1
PT_DENIES : 1
COMPLAINED_PAIN : 1
INSOMNIA_CONTROL : 1
TO_GAIN : 1
WHO_HAVWE : 1
TREATMENT_CALLED : 1
TEST_STRIP : 1
DRESSING_WITH : 1
FOR_THEM : 1
THE_STOCKINGS : 1
DENIES_VITAL : 1
SLIDING_SCALE : 1
TIME_PATIENT : 3
GAVE_BETTER : 1
NURSE_REQUESTING : 1
NO_AN : 1
TO_FAXED : 1
ICDCM_OF : 1
APPROPRIATE_MEASUREMENT : 2
CONNECTED_AND : 1
NO_THOUGHTS : 1
OVERNIGHT_PATIENT : 1
SCAN_WILKES : 1
GOOD_LEVEL : 1
IN_OBSERVED : 1
IS_UNSURE : 1
UNIT_SM : 1
OR_WITH : 2
OF_NOTED : 1
APPT_MILD : 1
ABOVE_STATES : 1
YOUR_APPOINTMENT : 1
SUBMERGED_AGAIN : 1
TEAM_AWAITING : 1
NO_OR : 1
MALE_BEDS : 1
NOTE_PARTICIPATION : 1
TREATMENT_WELL : 1
SESSION_HOW : 1
INFORMATION_DEPRESSIVE : 1
UNAVAILABLE_MANAGER : 1
PLACE_LIGHT : 1
DAILY_WITH : 1
NEXT_OF : 1
RIGHT_ELBOW : 2
WHEN_YOU : 1
HOME_ADDENDUM : 1
NO_SALINE : 1
DIRECTIVE_TOTAL : 1
HIM_DISCONTINUED : 1
TERAZOSIN_IT : 1
NECESSARY_AGE : 1
ENHANCE_COPING : 1
THE_JOINT : 1
BELOW_HAS : 1
TAB_ONEHALF : 1
RELIEF_CALLED : 1
TO_SESSION : 1
ED_OFFICE : 1
WILL_DISCHARGED : 1
AND_THEM : 1
AREA_NORMAL : 1
FOR_NEW : 1
THAT_FRIENDS : 1
AND_AUDIOLOGY : 1
TESTING_FOR : 1
UNALABORED_NEW : 1
PATIENTS_ADLS : 1
OFFERED_ED : 1
PC_MANAGEMENT : 1
COLON_SCREEN : 1
CALL_WITHIN : 1
BRIGHTER_DATE : 1
PULSE_WAY : 1
ANXIETY_OTHER : 1
NECESSARY_THE : 1
TO_DESCRIBE : 1
MEDICATIONS_DISCHARGE : 1
STATUS_EXPIRATION : 1
CPRS_ADDENDUM : 1
FOR_OK : 1
VOICED_HE : 1
DISCUSSED_AND : 1
HAS_WHERE : 1
LESIONS_TO : 1
SAFE_NO : 1
NURSING_INTAKE : 2
LEVEL_PATIENT : 1
SSN_MONTH : 1
LIKE_LAST : 1
HE_FEVER : 1
INCREASE_HIS : 1
SEVERITY_SUBMET : 1
WHEN_RETURNS : 1
NOTED_THAT : 1
HAS_REPORTED : 1
TOUR_AND : 1
SHE_TO : 1
TEAM_ON : 1
SOUNDLY_RESPIRATIONS : 1
REFER_THE : 2
TREATMENT_AND : 1
MORNING_COMMUNITY : 1
WILL_AND : 1
PROBLEMS_AID : 1
SEX_MALE : 1
WOULD_GIVE : 1
PLAN_MD : 1
RECEIVING_LUNGS : 1
MORNING_VET : 1
BAND_NURSING : 1
MADE_AWARE : 1
NOTE_CHRONIC : 1
LIFE_HAVE : 1
PHYSICIAN_VITALS : 1
RHYTHM_THE : 1
CANCER_TO : 1
FOLLOWING_EVENTS : 1
TO_SC : 1
YOU_HR : 1
HYPERLIPIDEMIA_CONSTIPATION : 1
WISHES_RESCIND : 1
RATE_IRREGULAR : 1
THAT_MANY : 1
PATIENT_ADDENDUM : 1
ATTACK_MG : 1
CYCLES_RADIATION : 1
PODIATRY_NOTE : 1
ML_USES : 1
NURSING_TELEPHONE : 1
UPPER_PATIENTS : 1
IS_YEAR : 1
TO_LOCATION : 1
LEARN_EDUCATION : 1
WITH_SOB : 1
SAID_HAVWE : 1
ON_ON : 1
SAFETY_SELFCARE : 1
FOR_BEHAVIOR : 1
MG_UREA : 1
DOWN_HE : 1
AUG_CURRENTLY : 1
OF_DATE : 1
AND_TO : 3
HERE_UC : 1
PROBLEM_OBJECTIVE : 1
LEG_NECK : 1
PAIN_MEDICATION : 3
VOLUMES_ENLARGEMENT : 1
SO_CAN : 1
DISEASE_INCAPACITATING : 1
MIN_SPOKE : 1
RBC_CONFIRMED : 1
IT_IS : 4
OF_LAST : 2
CONSENT_THE : 1
BE_YO : 1
PRIMARY_PAIN : 1
UNABLE_TO : 1
FLOOR_PT : 1
DIFFICULTIES_AND : 1
LISTED_HAS : 1
CLINICAL_CLINICAL : 1
ON_WITH : 1
APPRECIATED_PHONE : 1
MEDICATIONS_TO : 1
COUMADIN_PAIN : 1
HAS_WORSENED : 1
DEB_TELL : 1
IN_INTERDIGITAL : 1
MAYO_CLINIC : 1
EDUCATION_DISCUSSED : 1
TIME_OF : 1
IS_INSOMNIA : 1
AMR_DIRECT : 1
HEALED_NOTED : 1
ESOPHAGEAL_COMING : 1
LESION_HEMATOLOGY : 1
EXP_AS : 1
TO_PHYSICIAN : 1
WELL_ACCU : 1
NOTE_DICTATED : 1
NAME_EDUCATION : 1
THAN_CAME : 1
KG_COMPLAINT : 1
MAY_REGARDING : 1
WAS_PRESCRIBED : 1
LEVEL_CARE : 1
PRESENTING_UPON : 1
SICK_HAD : 1
PLAN_BED : 1
NOT_WITH : 1
PHYSICIAN_IF : 1
BODIES_BEEN : 1
HURTFUL_TO : 1
WAS_APPOINTMENTS : 1
DATE_PT : 1
FOR_FROM : 1
BARRIERS_LEARNING : 1
YET_FOR : 1
BY_ACTIVE : 1
EXPLAINED_INDICATION : 1
FOLLOW_APPOINTMENTS : 1
HER_LOOSE : 1
SCORE_DOES : 1
TO_MM : 1
HYGIENE_AGREED : 1
SYMPTOMS_STATES : 1
ANTICOAGULATION_NOTE : 1
FOR_CONTINUED : 1
GIVE_UP : 1
ACCU_MEDICATED : 1
GENDER_ADDITIONAL : 1
SM_PROPH : 1
STR_TO : 1
NAME_RELATIONSHIP : 1
SAYS_THAT : 3
ED_TO : 2
SURGEON_MINNICH : 1
OWN_SEC : 1
COMPREHENSIVE_DOES : 1
WITH_SLIDING : 1
SPEARFISH_PROGRAM : 1
WITHIN_HYGIENE : 1
RIGHT_LOBE : 1
MONTHS_BATHING : 1
SESSION_RESENTMENTS : 1
CONTACT_IS : 1
PAPERWORK_NOTIFIED : 1
RECEIVING_WK : 1
AID_TO : 1
HIS_DIFFICULTIES : 1
SATUR_AND : 1
THERAPY_DAILY : 1
RESENTMENT_YOUR : 1
OF_INFORMATION : 2
WALKS_OCCASIONALLY : 2
ANKLES_LATERAL : 1
YEARS_THIS : 1
SEE_HE : 1
PRN_RATES : 1
PHONE_NUMBER : 3
ACTUAL_OUTPATIENT : 1
CLICKING_APPROPRIATE : 2
CLINICAL_REMINDER : 1
IN_SC : 1
BELLO_STATE : 1
INFORMATION_TELEPHONE : 1
OF_HOURS : 1
REACH_PLAN : 1
NKA_TIME : 1
PRESSURE_PULSE : 1
COVERAGE_NOK : 1
AGREED_AND : 1
CONSUMING_ALCOHOL : 1
FUNCTIONING_COLOR : 1
MIN_PRIMARY : 1
EUS_CT : 1
HIS_PRIOR : 1
WILKES_FACILITY : 1
URINAL_WITHIN : 4
FOR_HISTORY : 1
HIS_CONSTA : 1
ONE_AT : 1
AFTERCARE_VETERAN : 1
UNCOOPERATIVE_PATIENT : 1
TENTATIVELY_GO : 1
AND_PACEMAKER : 2
PRESCRIBED_FOR : 1
WITH_LEWY : 1
DEPRESSED_OR : 1
REPORT_GIVEN : 1
THE_SAYS : 1
STABLE_RACING : 1
TAKE_CAPSULE : 1
MILD_ELEVATION : 1
MG_DISPENSED : 1
NAUSE_AND : 1
AND_SEND : 1
OPT_THE : 1
OUTPATIENT_VA : 1
FAMILY_STATE : 1
HOSPITAL_CD : 1
HAD_VASCULAR : 1
INTERIM_AS : 1
MET_ID : 1
IDENTIFIED_NAME : 1
MED_NO : 1
IF_WAS : 1
FOLLOWUP_HAS : 1
ALBUTEROL_IPRATROPIUM : 1
IN_SPECIMEN : 1
EITHER_OR : 1
UPSET_FO : 1
WAS_IN : 2
WHEN_HOW : 1
CYSTOSCOPY_ON : 1
NOTED_TO : 1
LOW_PLANS : 1
AND_PHYSICAL : 1
MD_EXAMINATION : 1
FEELS_MANY : 1
OTHER_THIS : 1
RUN_METOPROLOL : 1
PT_SENT : 1
WITHOUT_INFILTRATION : 1
AREA_OF : 1
SEEN_TO : 1
BENEFITS_GIVING : 1
YEARS_NUR : 1
CONTROL_IMPAIRMENT : 1
SOFT_BS : 1
ACCESSION_NO : 1
SOCIABLE_NURSING : 1
IS_OBESE : 1
OUT_MOUNTAIN : 1
OCCULT_TEST : 1
MEDICAL_AGE : 1
TO_COVER : 1
MORE_YEARS : 1
LDL_AT : 1
REFERRED_EVALUATION : 1
RACE_UNKNOWN : 2
COMPLAINTS_OF : 1
CONTENT_THIS : 1
HE_FRUSTRATED : 1
ALCOHOL_SCREENING : 1
THIRD_TIME : 1
ABUSE_HE : 1
WRITER_DO : 1
NURS_CONTACT : 1
REFILL_ON : 1
REFILLS_EXPIRATION : 1
AGE_SAO : 1
SPECIMEN_RES : 1
THIS_SOONER : 1
NOTE_THIS : 1
CAPSULE_BY : 1
SCORE_BRIEF : 1
NOT_DESIRE : 1
CONDITION_DIAGNOSIS : 3
RECENTLY_INPATIENT : 1
HANDOUT_EXPLAINED : 1
NURSING_NOTE : 11
WORST_ABUSE : 1
THE_DILANTIN : 1
PAIN_INDIGESTION : 1
MANAGEMENT_OF : 1
AND_PATIENT : 6
IT_WORKING : 1
CHIEF_LONELY : 1
THE_FEW : 1
NOTIFY_LONG : 1
PO_AND : 1
CMP_DIFFICILE : 1
NURSING_HE : 1
IN_URETHERA : 1
ELDER_AS : 1
SYND_SELFLIMITED : 1
THOUGHT_BE : 1
DYSPHAGIA_PATIENT : 1
TLC_PRN : 1
SEVERE_LENGTH : 1
ML_URINAL : 1
UNKNOWN_NONE : 1
LOWER_LEGS : 1
COUMADIN_NURS : 1
YOU_TO : 1
AGE_TEMP : 1
DONNING_AND : 1
LEFT_WITH : 1
DENIES_CURRENT : 1
MORE_TO : 2
REGARDING_LOOKING : 1
CHEST_PAINS : 1
PATIENT_ARRIVED : 1
ADDENDUM_NONVA : 1
DIRECT_PER : 1
HE_CONTENT : 1
DESIRE_FOR : 1
USING_ANY : 1
JUST_SHOWED : 1
YOU_NEG : 1
DRIVING_WITH : 1
EVENING_DICTATED : 1
RISK_HARM : 1
NORMAL_ETHNIC : 1
CONVENIENCE_PT : 1
EVER_DIAGNOSED : 1
DUE_TO : 2
DATE_AND : 1
VERBALIZES_SUCCESSFULLY : 1
INJECT_ACCUCHEK : 1
HELP_THE : 1
OF_YOUR : 1
MMHG_TO : 1
AND_NECK : 1
UNIT_WAS : 1
OF_AFFECT : 1
AWAITING_RECOMME : 1
SHAKE_WELL : 1
CHEST_OLD : 1
AT_VISITS : 1
ADMITTED_FOR : 2
TO_UP : 1
RESTLESS_LABORATORY : 1
ANY_ALLERGIES : 1
DEMENTIA_WITH : 1
MONITOR_EFFECT : 1
CUFF_MINUTES : 1
WAS_ELSE : 1
WARM_HE : 1
DRUGS_HISTORY : 1
TAKEN_NEW : 1
EXPERIENCED_FOLLOWING : 1
HEARING_FROM : 1
PROVIDER_HAVE : 1
PACEMAKER_PT : 2
URINAL_FALL : 1
AS_EVIDENCED : 1
FAMILY_PRBLM : 1
GROUP_NURSING : 1
KNOWN_OF : 1
IDENTIFIED_PAIN : 1
CERVICAL_SPONDYLOSIS : 2
ALDRETE_SCORE : 1
LABORATORY_PHOENIX : 1
THE_IS : 3
OF_COMPLETED : 1
SCALE_NPO : 1
THE_TIME : 3
MANY_OF : 1
SPONDYLOSIS_DE : 1
MEDICATION_AT : 2
DATE_TO : 1
SHE_HAVE : 1
TO_THAT : 1
OTHER_PHYSICAL : 2
BY_NAME : 1
DATE_SLIGHT : 1
DESCRIBE_SIDERAILS : 1
OUT_IN : 1
FX_LEFT : 1
ANTICOAGULATION_MANAGEMENT : 1
WORSE_MOVING : 1
MH_NOTE : 1
PT_AND : 4
SINUS_RHYTHM : 1
ALDRETE_ANXIOUS : 1
SPEARFISH_AUDC : 1
TO_APARTMENTS : 1
CONTRIBUTE_TO : 1
AN_CELL : 1
MANAGEMENT_NOTE : 1
PAIN_EKG : 1
OR_DESIRES : 1
ARE_STABLE : 1
MANAGER_RN : 1
LUBBOCK_SHE : 1
OR_WHILE : 1
CONSTA_HE : 1
IMPULSE_MCBRIDE : 1
MORE_CO : 1
LONG_RECOVERY : 1
PMHX_LISTED : 1
SPOKE_WITH : 1
DISTANCE_ISSUE : 1
DISCHARGE_ACTIVE : 1
HIGH_FALL : 1
STATED_WIFE : 1
IRREGULAR_RATE : 1
COMPLAIN_OF : 1
TO_STOMACH : 1
ADDITIONALLY_OTHER : 1
PLAN_CARE : 3
SKIN_TEMPERATURE : 2
VERIFIED_AND : 1
BE_IN : 1
MOOD_REGARDING : 1
DEPRESSIVE_HTN : 1
AND_SYMPTOMS : 1
SCREENING_TEST : 1
FOR_FALL : 1
PRESSURE_II : 1
WANT_TO : 2
WAS_ASKED : 1
HISTORY_OF : 4
OF_WILL : 1
OR_CHANGED : 1
PPD_PAIN : 1
CARE_COMPLETED : 1
INDEPENDENT_IN : 1
CA_COMING : 1
CONFIRMED_ASA : 1
RELEASE_OUTPATIENT : 1
OIF_WORSE : 1
IMPRO_BEEN : 1
ADDENDUM_AMPHETAMINE : 1
MOVEMENTS_MYOKYMIC : 1
BOTH_HE : 1
APPTS_TOPIC : 1
ESOPHAGEAL_PRESENTS : 1
RELATED_COGNITION : 1
FOLLOWUP_EEG : 1
ACETAMENOPHEN_FEEDBACK : 1
RECEIVE_RISPERDAL : 1
NONBLOODY_NO : 1
WOULD_NOTIFY : 1
FALL_PRECAUTIONS : 1
HAND_PT : 1
ANY_MALE : 1
ACUTE_LORAZEPAM : 1
SEIZURES_SINCE : 1
THE_ATRIUM : 1
DEPENDENCE_ELEVATED : 1
CALL_FOR : 1
OF_VISIT : 1
ANY_SIGNS : 1
OUTPATIENT_REVIEW : 1
LIST_PATIENT : 2
LIQUID_NO : 1
DEFICITS_AND : 1
GIVEN_AN : 1
RISK_SELF : 1
PROCESSED_TIME : 1
AGE_SEX : 1
CPRS_NKA : 1
PAIN_TEMP : 1
ARRIVED_WITH : 1
AFFECT_PATIENTS : 1
RX_OF : 1
YOUR_AT : 1
ALERT_ORIENTED : 2
DICTATED_BY : 1
HOMELESS_NO : 1
PHONE_NONE : 1
AND_BE : 1
PATIENT_SIDE : 1
TINGLING_HA : 1
SYSTEMIC_NOT : 1
THOUGHTS_PT : 1
AND_UNSURE : 1
MG_QHS : 1
INDIGESTION_IN : 1
YOU_MED : 1
TO_MOTIVATION : 1
HYDRATED_THROUGHOUT : 1
OF_REMINDED : 1
INCAPACITATING_GI : 1
EVIDENCED_BY : 1
ABLE_WEIGH : 1
IF_PROVIDED : 1
LUNGS_NO : 2
PAIN_WORSENED : 1
APPOINTMENT_TIME : 1
ANSWER_FLU : 1
NEW_WAS : 1
MODIFIED_ANXIOUS : 1
PAIN_WORSE : 1
SKIN_STATUS : 1
AND_CONSTITUTE : 1
EDEMA_WELL : 1
NOTE_SOCIAL : 1
ATRIAL_VOLUMES : 1
DISTENDED_BUT : 1
FLP_DX : 2
TOLERATED_IN : 1
PHYSICIAN_TURGOR : 1
APPOINTMENT_LOOK : 1
TO_AFTER : 1
WHEELCHAIR_UNKNOWN : 1
BARRIERS_CARE : 1
AND_IT : 1
IS_BREAKFAST : 1
DISCONTINUED_INFORMATION : 1
PATIENT_NURSING : 2
MALE_SMOKER : 1
OUT_THE : 1
NEGATIVE_CLICK : 1
SIGNIFICANT_TO : 1
ADMITTED_NA : 1
NO_ABLE : 1
YES_ISSUE : 1
THOUGHT_UNDERSTANDS : 1
ARRIVED_VIA : 1
ACTIVE_HAIRLESS : 1
AUDC_PROGRAM : 1
MAKES_YOU : 1
THEY_HIS : 1
LIFE_THAT : 1
REVIEW_MY : 1
CY_VET : 1
MEASUREMENT_PMH : 1
NO_ABDOMINAL : 1
TYPE_II : 1
HEALTH_METHOD : 1
FEE_BASIS : 1
VIA_AMR : 1
BEDSIDE_TABLE : 1
NOTE_PT : 2
AM_IS : 1
STATE_REFER : 1
DID_NOT : 1
OF_HEMMORRHOID : 1
FOLLOWING_QUESTIONS : 1
AND_FOUND : 2
LISTED_PING : 1
AN_RX : 1
PENDING_MEDICATION : 1
STRESS_WHERE : 1
HOW_MAKE : 1
MEDICATIONS_INDICATION : 1
HIS_LEFT : 1
GYNECOMASTIA_ACTIVE : 1
VA_PARONYCHIA : 1
TO_GOOD : 1
OF_ADDENDUM : 1
FAMILY_MEMBER : 2
ANXIETY_SLIGHT : 1
LIVING_THE : 1
GOOD_TO : 1
BED_IN : 2
KG_CHIEF : 1
APPROPRIATE_NO : 1
REMAINS_AT : 1
MANAGED_CARE : 1
COUNSELED_DESIRE : 1
RIGHT_LEVEL : 1
THEY_WILL : 1
BACK_LEG : 1
DIRECTIVE_THIS : 1
SENSORY_ABLE : 1
SCREEN_LAST : 1
APPEARS_TO : 1
HISTORY_ILLNESS : 1
AND_INITIATES : 1
OF_CONTACT : 3
FISH_CALL : 1
SX_MONTH : 1
ON_FOR : 1
WILL_DISCUSS : 1
TO_LAB : 1
SUICIDAL_IS : 1
ADDENDUM_TUNNEL : 1
PAIN_MGMT : 1
ACHES_HE : 1
NO_RISK : 2
ANYTHING_WE : 1
WITH_BS : 2
LESS_SINCE : 1
DONNA_ERDMAN : 1
DYSPHAGIA_AND : 1
OR_ON : 1
FEELING_LITTLE : 1
ML_PO : 1
CONTINUE_FOLLOW : 1
PATIENT_TOLERATED : 1
RISKS_BENEFITS : 1
COBAN_AND : 1
SHE_THAT : 1
AFTER_MEALS : 1
THE_CTR : 1
ADMISSION_THEN : 1
TIMES_BREATHING : 1
REFER_COMPLETE : 1
CARE_FAMILY : 1
MOTIVATION_TO : 1
PATIENT_RECENTLY : 1
RECOMMENDATIONS_ARE : 1
BEEN_REPORTED : 1
NAUSEA_VOMITING : 1
VICTIM_ELDER : 1
IS_COUGHING : 1
PRIOR_DISCHARGE : 1
STRESSORS_IMPAIRMENT : 1
CLASS_EXCEPT : 1
HELP_OR : 1
TO_STAY : 1
STATE_NEW : 1
DAILY_HAND : 1
SUPPLY_SOMEONE : 1
THE_PROSTHESIS : 1
ANY_PAIN : 1
FRO_TIME : 1
PATIENT_HAS : 4
UNSURE_TO : 1
COMMUNITY_HEALTH : 1
PENDING_OUTPATIENT : 1
EEG_BEEN : 1
UNKNOWN_COULD : 1
UROLOGICAL_MED : 1
THE_EVENTUALLY : 1
LIVES_ONE : 1
DURING_PROCEDURE : 1
FINDINGS_EXCEPT : 1
TUNNEL_RIGHT : 1
CURRENT_SUICIDAL : 1
OF_FOR : 1
FOR_ON : 1
ATRIUM_ML : 1
IDT_RARELY : 1
FOR_PAST : 1
OUTPATIENT_NOTE : 1
REVIEW_RESPIRATION : 1
OR_WHEN : 1
AND_ARIPIPRAZOLE : 1
HAS_NO : 1
RELAPSE_ALSO : 1
TELEPHONE_JUN : 1
VISN_HEALTH : 1
MANDATORY_PROBLEM : 1
IS_GOOD : 1
ADDENDUM_HELP : 1
BY_MD : 1
LUBBOCK_WANTS : 1
REASSESSMENT_NOTE : 3
PHOENIX_ACCESSION : 1
ELEVATED_YOUR : 1
SEC_RUNS : 1
FOUR_TIMES : 1
FOR_VITAL : 1
THEIR_FRIENDS : 1
MADE_TO : 1
PATIENT_VET : 1
NO_NEW : 3
ACTIVITY_INDEPENDENT : 1
RECONCILIATION_PT : 1
PUFFS_MOUTH : 1
HIS_DECLINE : 1
EASY_ABNORMALITIES : 1
FOR_HIGH : 1
HAVE_ANY : 2
FAM_ABLE : 1
FACTORS_PSYCHIATRIST : 1
SITE_STABLE : 1
OF_RIGHT : 2
NOT_EVEN : 1
VOICED_REPORTS : 1
ADDENDUM_DEPENDENCE : 1
AGE_MALE : 1
TO_WITHOUT : 1
SCREENING_AUDITC : 1
PROVIDER_IDENTIFIED : 3
AND_TAKE : 2
ESOPHAGUS_OMEPRAZOLE : 1
WITHDRAWL_DEPRESSIVE : 1
YAMAMOTO_RN : 1
VISIT_HAGERSTOWN : 1
DIABETES_HYPERLIPIDEMIA : 1
TERM_THIS : 1
IN_DISTRESS : 1
ADDENDUM_ISSUE : 1
LN_TO : 1
OR_DETACHED : 1
LIGHT_WITHIN : 1
HISTORY_AND : 2
ABD_EPIGASTRIC : 1
MORNING_MEETING : 1
ACTIVE_MOUTH : 2
BEHAVIOR_MOTIVATION : 1
UNDERSTANDING_SAYS : 1
CYSTOSCOPY_DONE : 1
OXIMETRY_CATHETER : 1
DISCUSS_HEALTHCARE : 1
LEFT_CLAVICLE : 1
NASAL_TRAUMA : 1
WOULD_APPOINTMENT : 1
ACTIVE_MORNING : 1
RARELY_MOIST : 2
MODERATE_ENLARGEMENT : 1
ON_AIR : 1
WEAR_STOCKINGS : 1
FOR_FOLLOWUP : 2
MEMBER_PHYSICAL : 1
KG_TOLERATED : 1
HOME_AND : 1
BREAKFAST_MINUTES : 1
OLD_VERIFIED : 1
CURRNETLY_PATIENT : 1
WAS_AT : 2
CHF_REGIMEN : 1
WHILE_STATIONED : 1
DAILY_IODOSORB : 1
AS_NEGATIVE : 1
WAY_IN : 1
VISIT_RELATED : 1
THE_AORTIC : 1
PATIENT_COMPLAINED : 1
ADMIT_TIME : 1
BLOOD_PLEASE : 1
MEDICATION_NOTE : 2
NOTED_RINGS : 1
ACTIVE_WEIGHT : 1
HIS_OWN : 1
RVSP_MMHG : 1
BOWEL_ED : 1
LOOKING_AND : 1
STOPPED_SIMVASTATIN : 1
ELSE_COULD : 1
PLAN_GAIT : 1
PRIVILEGES_APPROPRIATELY : 1
HE_SHE : 1
MANAGER_NOTE : 1
AND_FINALLY : 1
PATIENT_HE : 1
ABOUT_WHEN : 1
SERVICE_HAND : 1
BY_PHYSICIAN : 1
PROVIDER_THAT : 1
RATE_PT : 1
CALLED_TO : 2
TEETH_HAND : 1
FALL_THE : 1
NOTE_TOUR : 1
MOVEMENTS_BREAKFAST : 1
WAS_BRONCHIAL : 1
NOTE_FX : 1
HYDRATION_SKIN : 1
ARRIVED_UNIT : 1
WOULD_MAKE : 1
DOWN_OR : 1
DISCHARGE_ED : 1
HAVE_EVER : 1
ACCESS_REFERRAL : 1
PILL_BUT : 1
DEC_IT : 1
FOR_DIPPY : 1
FEB_BESYLATE : 1
PRIOR_TO : 2
PATIENT_AN : 1
NONBLOODY_FEVERS : 1
IS_PAIN : 1
EXAMINATION_AND : 1
TO_PALPATION : 1
DOB_HE : 1
VETERAN_VOICED : 2
CONTRIBUTING_FACTORS : 1
ADMITTED_PR : 1
VISIT_DISABILITIES : 1
YES_HOW : 1
NEG_APPROVED : 1
VERBALIZES_PATIENT : 1
ME_OF : 1
MOBILITY_LIMITATION : 1
PT_IS : 8
EDUCATION_ACTIVITIES : 1
FLOOR_ASKED : 1
NEUROLOGIC_ALERT : 1
THAT_EACH : 1
SOME_AND : 1
IN_WELL : 1
MORNING_TAKE : 2
DIAGNOSIS_OF : 3
TO_HE : 3
SECONDARY_COMPREHENSVE : 1
FOLLOWUP_PCP : 1
DEPRESSION_ARIPIPRAZOLE : 1
RESPONSIBILITY_FOR : 1
TIMES_AS : 1
AND_PROSTATE : 1
TOO_AND : 1
DIPPY_TEST : 1
FACTORS_POSITIONS : 1
AWAY_REPLACED : 1
HA_WEAKNESS : 1
STRONGER_TOLERATED : 1
MUST_BE : 2
APPLIED_STERILE : 1
YES_YO : 1
IN_POSITION : 1
TROPONIN_BLOOD : 1
PALE_ILL : 1
ORTHO_UNAVAILABLE : 1
LN_LESIONS : 1
OF_TO : 3
TV_CONTROLS : 1
WORSENED_WITH : 1
AND_MAY : 1
COPD_CANCER : 1
ELBOW_INSTRUCTED : 1
COMFORT_CV : 1
LEARNING_SCHEDULED : 1
URETHERA_WAS : 1
PLEASE_MY : 1
RACE_REASSESSMENT : 1
PRN_THIS : 1
VA_DEPRESSION : 1
REACH_ABNORMALITIES : 1
SINCE_SEEN : 1
ORAL_QID : 1
REPAIR_LEVEL : 1
OTHER_AS : 1
SECONDARY_ORAL : 1
CURRENT_PATIENT : 1
CALL_EXAM : 1
BLOOD_ACTIVE : 1
XXXXXXXXXXXXXXXXXXXXXXXXXXXXXXXXXXXXXXXXXXXXXXXXXXXXXXXXXXXXXXXXXXXXXXXXXX_ESOPHAGUS : 1
ADMISSION_ACTIVE : 1
CALL_PULSE : 1
UNDERSTANDING_HE : 1
TO_PROSTHETICS : 1
BS_IN : 1
AT_NEEDED : 1
WELL_AND : 1
GAIT_NORMAL : 1
NO_FEBRILE : 1
INPATIENT_SAT : 1
EDUCATION_NURSING : 1
PILL_WAS : 1
REASSESSMENT_IV : 1
REASSESSMENT_CASE : 1
EFFECT_OF : 1
TO_MOVE : 2
HYPERTENSION_PT : 1
CANCER_HYPERLIPIDEMIA : 1
NEEDED_SECTION : 1
AT_DX : 1
INSTRUCTIONS_CHF : 1
FEEDBACK_WHEN : 1
DATE_UPON : 1
HAS_UNDER : 1
GIVEN_THIS : 1
NOT_INCAPACITATING : 1
PRECEEDED_AN : 1
PLEASE_ME : 1
MEMBER_CAREGIVER : 1
EXAM_STATUS : 1
ONLY_ADDENDUM : 1
TAKING_COUMADIN : 1
THE_YOU : 1
LOSS_SENSORINEUR : 1
JBLUE_PSYCHIATRY : 1
BLOOD_READING : 1
LOSS_MIN : 1
NONE_IDENTIFIED : 1
HE_SELECT : 1
CAN_BE : 2
MEASUREMENT_CHF : 1
GI_ANATOMICAL : 1
NOTED_HAND : 1
USES_URINAL : 1
UNFORTUNATE_HISTORY : 1
SITE_REMOVED : 1
PT_BACK : 1
NOTICE_INSOMNIA : 1
OLD_PT : 1
AWAITING_DYSLIPIDEMIA : 1
SEEN_CLINIC : 1
NEXT_SUGGESTED : 1
CALL_TV : 1
EXAM_LAB : 1
HYGIENE_PT : 1
CHECK_LEVEL : 2
NOC_WITH : 1
MILD_RISK : 1
AS_EVENT : 1
IF_PAIN : 2
PAST_YEAR : 1
OF_FAMILY : 2
SIGNS_ADMINISTRATION : 1
THE_ED : 1
RATES_HIS : 1
PAIN_RN : 1
DEMENTIA_IF : 1
MOTIVATION_WAS : 1
LOCK_IN : 1
IT_RIGHT : 1
BURNING_NO : 1
SPINE_PATIENT : 1
LOGGED_INTO : 1
CARDIAC_PAIN : 1
ACTUAL_RELEASE : 1
WAS_ATTENTIVE : 1
TRANSFER_PROTOCOL : 1
RECONCILIATION_SEEN : 1
CHECK_FOR : 1
HAVE_CONTAINING : 1
TOBACCO_DEPENDENCE : 1
FOLLOWUP_KEEP : 1
WEARS_BUT : 1
OL_WAS : 1
NURSE_NOTE : 1
HELP_SUPERVISION : 1
MEDICATIONS_SUPPLIES : 1
STABLE_OF : 1
NEXT_KIN : 1
MOISTURE_RARELY : 2
SYMPTOMS_WITHDRAWAL : 1
OR_LABORATORY : 1
THIS_TO : 1
DEPRESSED_SINCE : 1
PT_ABLE : 1
AND_HOW : 2
ON_COUMADIN : 1
IF_THE : 2
NOTE_THE : 1
HOW_CAN : 1
CONTINUED_TO : 1
STRESS_HE : 1
DURING_AND : 1
FECAL_OCCULT : 1
COVERED_ABD : 1
HIS_HE : 1
MARITAL_STATUS : 1
CHANGES_AT : 1
CARE_SHAVE : 1
SEVERE_SYSTEMIC : 1
DIAG_COMMENTS : 2
NOTE_PORT : 1
THIS_APPOINTMENT : 1
ON_ROOM : 1
SELF_ROOM : 1
OVER_TRAUMA : 1
FORAMINAL_PROTRUSION : 1
MEDICATIONS_REFILLS : 1
INVOLVED_IN : 1
PAST_MY : 1
CLASS_AS : 1
TURGOR_PLAN : 1
WEEK_NO : 1
WEAKNESS_PAIN : 1
LAST_BLOOD : 1
COMMENTS_MEDICAL : 2
RUNNING_NO : 1
PRESENTS_CLINIC : 1
THE_EXAM : 1
WAS_FROM : 1
IT_NO : 1
LIGHT_CONTROLS : 1
ACET_GIVEN : 1
WAS_SENT : 1
LB_CARDIAC : 1
DISCHARGE_NOTE : 1
EVENT_MONITOR : 1
DIAGNOSIS_TO : 1
THE_CHART : 1
DUE_OPT : 1
CT_SCAN : 1
FREQUENCY_PATIENT : 1
PC_PROV : 1
BRUSH_HIS : 1
WILL_PCC : 1
DIAGNOSIS_RELATED : 1
BASIS_LAB : 1
RECORD_WAS : 1
NO_PREPARED : 1
ALONE_HE : 1
ELIGIBLE_LONG : 1
HAVE_YOU : 1
PAIN_NURSING : 1
HOUSEKEEPING_CONFIRMED : 1
GUARD_MODERATE : 1
CALL_WAS : 1
SEND_PT : 1
IDENTIFIED_REVIEWED : 1
ATRIAL_MODERATE : 1
MEDICATION_WAS : 2
MORE_FOR : 1
COMPLETION_WE : 1
MG_DAILY : 2
HAVING_ON : 1
NOT_FOR : 2
PHYSICIAN_SYSTEMIC : 1
NOTE_SC : 1
PATIENT_PLAN : 1
TOTAL_OL : 1
PULSE_OXIMETRY : 1
ACCUCHEK_COMFORT : 1
ALSO_DYSPHAGIA : 1
THE_SC : 1
TO_YES : 1
MEDICAL_HISTORY : 2
TRANSPORTED_VET : 1
EMS_CALL : 1
SCREENING_OF : 1
IS_SCHED : 1
LL_FORAMEN : 1
AND_HAVE : 1
GLUCOSE_STRIP : 1
NEW_ONSET : 1
SIGNIFICANT_WAS : 1
LOWEST_PHARMACY : 1
MORE_IMPRO : 1
MYOKYMIC_MEDICATION : 1
ANXIOUS_OR : 1
THAT_ALERT : 1
DROWSYNESS_FEELING : 1
HER_ENHANCE : 1
HOYT_THIS : 1
ERUPTED_EXR : 1
PAIN_PILL : 1
TO_OBTAINING : 1
BECAUSE_WAS : 1
FOR_SAFE : 1
AFTER_OBTAINING : 1
IS_THIS : 1
FACTORS_ONSET : 1
HAD_RELAPSE : 1
ANXIOUS_RESTLESS : 1
BENEFITS_OF : 1
GANG_HAVE : 1
HEART_SC : 1
DECREASED_HIS : 1
DONNA_ABOUT : 1
UNFORTUNATE_OF : 1
DRINKS_ON : 1
COMMENTS_THE : 1
AND_SOCIAL : 1
ON_ACTUAL : 1
AA_AS : 1
TAKING_YOUR : 1
IMPROVEMENT_HAVE : 1
AND_VOIDS : 1
CE_HIM : 1
TOO_LONG : 1
NONCONTRIBUTORY_TO : 1
CTA_PLACED : 1
EXR_VISITMENTAL : 1
LOCK_PLACE : 1
LEARN_ACCEPTING : 1
FOR_VICTIM : 1
THIS_BE : 1
RATES_SIBLINGS : 1
ALERT_OTHER : 1
CALL_FROM : 1
LEWY_HAS : 1
LOCATION_URGENT : 1
ATTENDED_AND : 1
MAKE_NEEDS : 1
TAKING_FEVERCHEST : 1
PT_AUDIOLOGY : 1
HEAD_RIGHT : 1
THIS_ACTIVE : 1
SIGNS_WITHDRAWAL : 1
SEIZURES_DOING : 1
CAME_THE : 1
RELATED_HIS : 1
FOR_FOR : 1
HOME_HE : 1
FLAKING_CRACKING : 1
PAIN_INTENSITY : 1
TOLERATED_REPORT : 1
WAITING_FRO : 1
HEMATOLOGY_ONCOLOGY : 1
BHM_MESSAGE : 1
CARDIOLOGY_REPORTS : 1
UNSPECIFIED_NEUROLOGICAL : 1
TO_HIS : 5
DESCRIPTION_TREATMENT : 1
CAPABLE_OF : 1
TEST_SPECIMEN : 1
MEDICATION_THIS : 1
AT_THIS : 11
PT_NOT : 1
CONTACT_JUN : 1
EKG_COMPUTER : 1
AS_IS : 1
IDENTIFIED_HAVE : 1
WITH_SCALE : 1
MORE_WAS : 1
NORMAL_LEFT : 1
NUMBER_AN : 1
LIGHT_HOUSEKEEPING : 1
FOR_RENT : 1
LIST_OLANZAPINE : 1
CATHETER_IN : 1
PATIENT_MR : 1
THEM_TO : 1
HE_WAS : 3
GYNECOMASTIA_ONCE : 1
UP_APPOINTMENTS : 1
PATIENT_DENIES : 1
SELFMONITORING_THERAPY : 1
NONLABORED_MISSED : 1
EXCLUDING_COMMUNITY : 1
TEAM_AM : 1
RESPONSE_EDUCATION : 1
LIST_CLINIC : 1
SCALE_ALERT : 1
SAME_HE : 1
RISK_BLOOD : 1
MY_LIFESTYLE : 1
AS_WOULD : 1
OUTPATIENT_STATUS : 2
THE_PATIENTS : 2
BY_PCP : 1
TO_VERBALIZES : 1
OF_REQUEST : 1
APPROPRIATELY_INTERACTING : 1
FOR_ED : 1
RECENT_CONVENIENCE : 1
LIGHT_PALPATION : 1
HE_LONGER : 1
CAUSATIVE_CONTRIBUTING : 1
EDEMA_AS : 1
AND_INTERACTING : 1
KIN_CONDITION : 1
GI_COMPLAINTS : 1
WITH_POSITIVE : 1
BETWEEN_EPIS : 1
ER_MIGHT : 1
AGREEABLE_STR : 1
TIME_COMPLAINTS : 1
NOTIFY_OTHERNOTE : 1
TROPONIN_CULTURE : 1
MEDICATION_RESPIRATION : 1
OBTAINED_AM : 1
INVOLVED_TR : 1
SOFT_SL : 1
HIS_DRESSING : 1
SOURCE_INFORMATION : 1
STOCKINGS_VETERAN : 1
HEALED_ULCER : 1
PER_AGENCY : 1
ALLERGIES_ACTIVE : 1
INTERDIGITAL_PAIN : 1
FINALLY_REPORTED : 1
PRESSURE_THIS : 1
LIVING_ABOVE : 1
MANAGER_CLINICAL : 1
DOG_RX : 1
DONE_NO : 1
PEERS_INTERACTS : 1
NOTE_TP : 1
AMPHETAMINE_TAB : 1
BUT_OF : 1
HR_WITHOUT : 1
COME_OF : 1
THE_PHYSICIAN : 1
FINDINGS_COMMENT : 1
REVIEWED_AND : 2
CARE_OFFICE : 1
PAIN_DUE : 1
SCALE_LEVEL : 1
HE_YOU : 1
DONE_ON : 1
PATIENT_RETURN : 1
AS_YES : 1
NEXT_PLAN : 1
TIME_CONCERNING : 1
AND_TRIGLYCERIDES : 1
CAP_ONE : 1
IMPROVEMENT_YOU : 1
THE_SKIN : 1
SOA_MILD : 1
BY_DAILY : 1
ACTIVE_OTHER : 1
CONTINUED_NAUSEA : 1
RUN_NSVT : 1
BERKLEY_WILL : 1
WAS_RECEIVING : 1
FROM_OTHERS : 1
DEPRESSION_SPONDYLOSIS : 1
TELEPHONE_ERUPTED : 1
PAIN_SOME : 1
CUT_AND : 1
ON_UNIT : 1
POUNDS_INCREASED : 1
PRBLM_WALKIN : 1
RIGHT_OF : 1
FAMILY_HEALTH : 1
SOFT_NON : 1
PAIN_MOVING : 1
WHICH_HAS : 1
FOR_EEG : 1
PAINS_DENIES : 1
PRESSURE_HEART : 1
SUPPLE_ABOUT : 1
EKG_COMPLETED : 1
GIVE_OF : 1
SPONDYLOSIS_ACTIVE : 1
ANYTHING_ELSE : 1
TO_HEALTHCARE : 1
VETERAN_UNDERSTANDING : 1
WITH_INCREASE : 1
SOFT_DISTENDED : 2
UNIT_THROMBOEMB : 1
EDUCATION_RECENT : 1
WILL_PAYMENT : 1
THE_VAMC : 1
YOUR_WE : 1
CARE_LN : 1
PAINS_CP : 1
STANDING_LONG : 1
CONFIRM_IS : 1
FO_STATED : 1
IN_CHAIR : 1
OR_REMOVE : 1
SIMVASTATIN_ON : 1
BUN_TROPONIN : 1
BACK_LEFT : 1
PAT_MCG : 1
OR_MORE : 4
PALE_AND : 1
LLQ_OFFERED : 1
WAS_ADMITTED : 2
OR_CIGARETTES : 1
TRAUMA_BUT : 1
AND_ROOM : 1
AR_PT : 1
VISIT_TELEPHONE : 1
RESP_EVEN : 1
IS_FRUSTRATED : 1
ADVISED_IS : 1
BS_NL : 1
WRITER_CALL : 1
DENIES_PAIN : 1
PAUSE_NEED : 1
WHEELCHAIR_PATIENT : 1
INDICATE_HE : 1
OF_BASIS : 1
PLANS_OF : 1
LOOK_FOR : 1
WILL_IT : 1
OFTEN_YOU : 2
NAUSEA_IV : 1
DEXTROAMPHETAMINE_MOUTH : 1
INPATIENT_OUTPATIENT : 1
HTN_GI : 1
FLUOROSCOPY_REALTIME : 1
APPOINTMENTS_VIEW : 1
DEPRESSION_TAB : 1
CALENDAR_OFF : 1
SMOKING_RISK : 1
INITIATES_ENCOURAGE : 1
LAB_MARBLE : 1
MONTH_BETTER : 1
DURING_THE : 1
COMFORT_GLUCOSE : 1
TO_IV : 1
YEAR_MALE : 3
CARE_PATIENT : 1
MOUTH_ACTIVE : 5
REQUEST_OF : 1
VIM_GIVEN : 1
HER_HIS : 1
PATIENT_CALLED : 1
MEDICATION_MIRTAZAPING : 1
MEDICATIONS_PC : 1
SOURCE_LIST : 1
QID_ACTIVE : 1
PATIENT_LIFETIME : 1
WITH_SOFT : 1
JUST_COME : 1
RECOMMENDED_DEB : 1
PRN_HE : 1
RECENT_FELT : 1
ENTRY_IF : 1
SEAT_CAN : 1
TEST_AUDITC : 1
BY_THE : 3
PROCESSED_DATE : 1
DEXTROA_PT : 1
FOR_RINSE : 1
FOR_PATIENT : 3
REMINDERS_RESPIRATIONS : 1
CUT_AWAY : 1
SUBJECTIVE_PATIENT : 1
HAVING_PAIN : 1
EXPIRATION_XEROSIS : 1
FOR_TO : 3
CLINIC_TO : 1
WITHIN_TO : 1
ALSO_WITH : 1
ADDENDUM_TOBACCO : 1
HAS_SC : 1
HIM_LOOKING : 1
IS_WHAT : 1
LOCK_SALINE : 1
PALPATION_DEPRESSION : 1
SCREEN_HE : 1
AA_EXP : 1
IN_WEEK : 1
ABNORMALITIES_PLAN : 1
WITHOUT_DATE : 1
HPI_DIFFICULTY : 1
PATIENT_DIFFICULTY : 1
HAVING_WEAPONS : 1
AM_NO : 1
OF_TAKING : 1
COMPLAINTS_AT : 1
UREA_NITROGEN : 1
BOTH_ULCERATIONS : 1
EXPIRED_INPATIENT : 1
WITH_PMHX : 1
SOONER_PCP : 1
HAS_ESOPHAGEAL : 1
OF_DIFFICULTIES : 1
FAMILY_NO : 1
NUMB_DURING : 1
SHE_STATED : 1
ADLS_COLOR : 1
CAUSE_FALL : 1
SINCE_HE : 1
SAYS_HE : 6
LONELY_STRESSORS : 1
PRIMARY_ELIGIBILTY : 1
HIS_UNCLEAR : 1
REPORT_CONTACT : 1
DOES_DESIRE : 1
HEARING_IMPAIRMENT : 1
GIVEN_MD : 1
APPOINTMENT_WE : 1
VISIT_FOLLOWUP : 1
ORIENTED_PHYSICAL : 1
COMPLETE_ADVANCE : 1
SEIZURE_VISN : 1
MORNINGPAIN_LLQ : 1
PCP_MON : 1
FACTORS_POSSIBLE : 1
CARE_YES : 1
NEW_TO : 1
BUT_IT : 1
FOR_LIKE : 1
RISK_PROTOCOL : 1
IM_HAVING : 1
ACTIVE_REVIEWED : 1
REST_OF : 1
SERVICES_SINCE : 1
BELOW_PING : 1
SPENT_TIME : 1
AGE_DOES : 1
REST_CLONAZEPAM : 1
MRSA_SCRNADMISSION : 1
SAME_HAS : 1
SHOW_HOW : 1
CLOTS_PING : 1
MRSA_DECLINED : 1
GET_PT : 1
FEVERCHEST_OR : 1
UA_CLICK : 1
THE_CONCLUDED : 1
REM_IMP : 2
PSYCHOTROPIC_EDATIVE : 1
HAD_BM : 1
NO_AH : 1
PATIENT_INSTRUCTED : 1
AND_WITH : 4
PAIN_SCORE : 2
DISCUSSED_HIS : 1
COMPLETED_ORDER : 1
RESOURCES_ACCESS : 1
MEMBER_OTHER : 1
DEC_TYPE : 1
RECENT_LAB : 1
TO_ADMISSION : 2
PLACE_NOT : 1
ACET_AT : 1
CONDITION_OR : 3
VA_BUT : 1
MEDICATIONS_EXPIRATION : 2
ACTIVE_NAME : 1
WHEN_CAME : 1
ADDENDUM_MG : 1
IN_FIRST : 1
BEDS_ON : 1
OTHER_IMPRO : 1
ULCERATIONS_ON : 1
TO_CONTROL : 1
REVIEWED_CHANGES : 1
BBSC_ABDOMEN : 1
ACTIVE_BS : 1
COGNITION_MOBILITY : 1
MALE_JAWS : 1
SESSION_WITH : 1
TO_HAVE : 1
AGREED_APPRECIATED : 1
BEHAVIOR_THOUGHTS : 1
SHIFT_IN : 1
PATIENTS_AGE : 1
URINAL_KEPT : 1
TAKE_BY : 2
NOTE_SALINE : 1
AS_WALK : 1
CONTACT_REALTIME : 1
MARRIED_OF : 1
FOR_OR : 1
INSTRUCTIONS_DISCUSSED : 1
VETERANS_MOBILITY : 1
HE_COUGHING : 1
OL_AND : 1
YOU_BE : 1
ALSO_HE : 1
IS_NORMAL : 1
BUT_CAUSATIVE : 1
EXERCISE_GROUP : 1
THIS_OLD : 1
REFERENCE_NUTRITION : 1
TO_TREATMENT : 1
THERAPY_MAJOR : 1
ACTIVE_TAB : 1
SPEAKING_FOR : 1
ALONE_IS : 1
TERM_CARE : 2
OTHER_DAUGHTER : 1
TO_HP : 1
CONTACT_AND : 1
CONFIRM_BED : 1
ON_APPT : 1
WRITTEN_PATIENT : 1
HIS_AMBULATION : 1
MON_FOR : 1
NURSING_PULSE : 1
NEUROLOGICAL_MANIFESTATIONS : 1
ALBUTEROL_MCG : 1
TO_SEE : 1
HAS_HISTORY : 1
DID_YOU : 2
TREATMENT_ACKNOWLEDGES : 1
ACTIVE_ABNORMAL : 1
LONGER_EXPRESSED : 1
HOWEVER_TO : 1
TO_EXAMINE : 1
INHL_PUFFS : 1
STATUS_MARRIED : 1
DIRECTIVE_BE : 1
HAS_NEW : 1
CONCERN_GIVEN : 1
MH_INTERDISCIPLINARY : 1
YOU_BEEN : 2
BEEN_LUNGS : 1
TO_CVA : 1
PERIOD_SERVICE : 1
DSG_ON : 1
TEAM_RECOMME : 1
TOOTH_EXR : 1
AGE_MEDICAL : 1
SCHEDULED_APPT : 1
AT_RISK : 1
THROMBOEMB_PROPH : 1
WORK_NOTE : 2
OCT_HE : 1
LOOK_TO : 1
PT_VASCULAR : 1
BED_URINAL : 1
INFLAMMATION_TAB : 1
THAT_MADE : 1
ABSTRACTS_AND : 1
LIST_VENESSA : 1
WEIGHT_UNAVAILABLE : 1
CADMIX_DM : 1
LABS_NUMB : 1
CVA_GIVEN : 1
HE_MUST : 1
TO_LUBBOCK : 1
ESOPHAGEAL_WHICH : 1
OTHERS_BECOMES : 1
ACTIVE_OUTPATIENT : 3
THIS_NEW : 1
ABLE_TO : 6
CONTROLED_DONE : 1
THIS_DONE : 1
TOE_LOSS : 1
BUT_THINK : 1
PULSE_MACHINE : 1
CARE_AM : 1
EXPIRATION_FLAKING : 1
TO_HEIGHT : 1
VAMC_ACCESSION : 1
BEAT_NSVT : 2
HOW_PAIN : 1
DECIDED_TO : 1
RETURN_MON : 1
WE_AFTERCARE : 1
NURS_TELEPHONE : 1
ON_RA : 1
DISEASE_SC : 1
LATERAL_PT : 1
STOCKING_HE : 1
ADDRESS_BELLO : 1
LOSS_ASYMMETRICAL : 1
ABOVE_ARE : 1
FOR_ENTRY : 1
ISNT_RIGHT : 1
TOOTH_CLINIC : 1
AND_BP : 1
AND_SUBMERGED : 1
SHEET_VITAL : 1
BE_COMPLETED : 1
LOSS_CC : 1
AND_ENCOURAGE : 1
DEPRESSED_TYPE : 1
TRANSFER_PATIENT : 1
NO_WITH : 1
SINGLE_MALE : 1
TO_SEABOLT : 1
INSOMNIA_DRUGS : 1
AND_NIGHTMARES : 1
CONCERNING_REQUEST : 1
BRUSH_TEETH : 1
FOR_SCORE : 1
AT_MMHG : 1
NURSING_AGAIN : 1
NOTE_DATED : 1
JOINT_BE : 1
INITIATES_PATIENT : 1
TO_HOME : 2
TWICE_ACTIVE : 1
ER_IN : 1
AFFECT_ADLS : 1
IF_YOU : 1
GAIT_MAJOR : 1
MALE_INFORMATION : 1
THE_ON : 2
CD_NEXT : 1
PATIENTS_BRAIN : 1
MOTIVATION_ADEQUATE : 1
REQUESTING_INCREASE : 1
PO_TID : 1
VIM_ACTIVITY : 1
SIGNS_SYMPTOMS : 1
AND_APPRECIATED : 1
THE_MEASUREMENT : 2
APR_DX : 1
HURTFUL_THE : 1
INCREASED_MM : 1
PATIENT_HPI : 1
AND_ARE : 1
HIS_WERE : 1
TOPICS_RECENT : 1
AND_THEY : 1
IS_MOBILITY : 1
ELICITED_RISK : 1
NONVA_AMPHETAMINE : 2
DOES_WANT : 2
OT_SPECIFIC : 1
TIMES_NEEDED : 1
OR_HA : 1
TIME_LAST : 1
PLEASANT_WITH : 1
NO_SHOW : 3
AND_WEIGHS : 1
TRANSFERRING_BEDREST : 1
SOCIAL_WORKER : 1
THEY_VERY : 1
AUTO_BP : 1
LB_HAVE : 1
STATED_WAS : 1
WELL_SEC : 1
EXAM_CHECK : 1
PATIENT_WANT : 2
URINAL_ELIMINATION : 1
PRESENTS_WITH : 2
BASIS_THE : 1
MG_TAKE : 4
MD_MESSAGE : 1
NOT_ADDITIONAL : 1
REGARDING_ABOVE : 1
ANOTHER_SPECIMEN : 1
ELICITED_ELOPEMENT : 1
PER_CM : 1
PO_INPATIENT : 1
ALL_PAIN : 1
VET_WAS : 1
AT_AND : 1
LEARN_TOPICS : 1
ATTACHED_TO : 1
ELEVATED_BLOOD : 1
LEARNING_IDENTIFIED : 1
HIS_LIFE : 1
WE_OTHER : 1
HIS_ANSWERS : 1
WASHING_AFTER : 1
THE_FOLLOWING : 10
DID_HAVE : 3
TO_COGNITION : 1
LL_RELATED : 1
MINUTES_EPIS : 1
AND_IF : 1
WITH_DESCRIBE : 1
ASSESSMENT_NOTE : 1
ABILITY_DOES : 1
RECEIVING_CTA : 1
DEXTROA_CALLED : 1
WHAT_MEDICINE : 1
MOUTH_DAILY : 2
WITH_RIGHT : 1
NURSE_MALE : 1
NO_CHANGES : 1
DISCHARGE_INSTRUCTIONS : 2
THEN_SUBMERGED : 1
SAFE_TO : 1
PHYSICAL_EXCEPT : 1
CERVICAL_THE : 2
IRREGULAR_COMPLAINTS : 1
WITHIN_HOURS : 1
DRINK_ALCOHOL : 1
HAS_INJURY : 1
PHYSICIAN_PHYSIATRIST : 1
LIGHT_REACH : 1
ANATOMICAL_LOCATION : 1
LESION_NEXT : 1
OF_ABD : 1
ASSESSMENT_PARONYCHIA : 1
WORSE_MRSA : 1
WHILE_IN : 1
EFFECTS_PHYSICIAN : 1
THERAPY_LUNGS : 1
INFORMATION_SUCH : 1
BREATH_LIGHT : 1
CHEST_REMOVE : 1
ADDENDUM_CARPAL : 1
HIM_HER : 1
AND_NO : 1
QHS_PTSD : 1
THIS_MORNINGPAIN : 1
ACKNOWLEDGES_CONVENIENCE : 1
WHEN_PATIENT : 1
THIS_PROCEDURE : 1
DATE_IS : 2
NURSING_REASSESSMENT : 3
REMOVED_FROM : 1
BP_SPO : 1
ABOUT_UROLOGICAL : 1
WILL_PICKED : 1
PAIN_CLINIC : 1
AND_MD : 2
TELEPHONE_NURSING : 1
FAMILY_OTHER : 1
ATIENT_SECONDARY : 1
EXAM_LIQUID : 1
YOU_DRINK : 1
WAS_AND : 3
FOR_PLAN : 1
CYCLES_BE : 1
YO_THERAPY : 1
ON_AROUND : 1
CAPABLE_SUCCESS : 1
DATE_PATIENT : 3
MED_AND : 1
ELEVATED_COVERED : 1
IN_TO : 1
PC_WALKIN : 1
FAMILY_REPRESENTATIVE : 1
KEEP_ABOVE : 1
ADMITTED_THIS : 1
SEPERATED_HIS : 1
STRIP_LOWER : 1
CONSTITUTE_PAYMENT : 1
NL_NO : 1
HIS_PROPERTY : 1
PROJECTED_TO : 1
REMEMBER_PING : 1
AFTER_INFORMED : 1
HE_GET : 1
TOOTH_MUCOPER : 2
MRSA_TOOK : 1
TO_ALONE : 1
ABOUT_IT : 1
INTERVENTIONS_REVIEWED : 1
ATTENDING_MINNICH : 1
CHO_WAS : 1
FLOOR_TWINBROOK : 1
ATTACK_LORAZEPAM : 1
HOWEVER_PATIENT : 1
CALL_LIGHT : 2
MEDICATION_UA : 1
AM_FOR : 1
NO_ADDENDUM : 1
RESPIRATION_RECENTLY : 1
ALLERGIES_TO : 1
THIS_LLQ : 1
NO_PALPITATIONS : 1
BELL_APPROPRIATELY : 1
MULTIVITAMIN_TAB : 1
REMINDER_ACTIVITY : 1
MOBILITY_NO : 1
WHEN_SHE : 1
TO_ENCOURAGED : 1
DIFFICILE_NORMAL : 1
TO_DOSES : 1
UNSURE_WHAT : 1
MANDATORY_HYPERTENSION : 1
ONSET_FEELINGS : 1
WHEN_NEEDS : 1
MULTIPLE_ISSUES : 1
NOTE_SMOKING : 1
BASELINE_SOB : 1
UD_LIQUID : 1
CHRONIC_PAIN : 1
NIACIN_BP : 1
PATIENT_REASSESSMENT : 1
SELFMONITORING_DRUG : 1
WILL_BE : 4
FEVER_NEW : 1
NO_COMPLAINT : 1
GRADE_SPONDYLOSIS : 1
THE_CRITERIA : 1
APLIGRAFT_GS : 1
BOWEL_MOVEMENT : 1
ANTIANXIETY_PAIN : 1
HIM_LOOSE : 1
INJURY_TO : 1
II_VITAL : 1
TOMORROW_WITH : 1
HAND_HYGIENE : 1
IN_ASYMPTOMATIC : 1
AMOXICILLIN_CAP : 1
NOTE_MARITAL : 1
SELF_AND : 1
GWINN_SOCIAL : 1
AUDIOLOGY_DEPENDING : 1
AFTER_SSN : 1
WILL_DATE : 1
ON_ABDOMEN : 1
BY_SS : 1
XEROSIS_FLAKING : 1
THROUGHOUT_THE : 2
APARTMENTS_FOR : 1
RIGHT_PATIENT : 2
DISCHARGED_FROM : 2
DISCHARGED_ON : 1
LOCATION_OF : 1
COMMENTS_NONVA : 1
PRN_ANXIETY : 1
ISSUE_THAT : 1
TO_CARE : 3
IMPAIRMENT_BEHAVIOR : 1
IN_BACK : 1
INFUSING_VIA : 1
AGE_HTN : 1
DATE_NAME : 1
IV_SITE : 2
TRANSFER_PAPERWORK : 1
SOCIABLE_INTAKE : 1
OF_BODIES : 1
SELF_BRUSH : 1
SHE_MAY : 1
NUMBER_HEMMORRHOID : 1
PT_HIS : 2
BETTER_ESTIMATED : 1
ACTIVE_POINT : 1
TO_ED : 1
CO_ON : 1
ISOLATE_TELEPHONE : 1
PAIN_FEELING : 1
ORAL_INHL : 2
REDUCE_THE : 1
DOES_PATIENT : 4
BY_AND : 1
HE_SICK : 1
DIPPY_THIS : 1
WITHDRAWAL_NO : 1
RECEIVED_PO : 1
THIS_ENCOUNTER : 1
PATIENT_PRESENTING : 1
OF_STAFF : 1
BEEN_LIST : 1
REMAIN_HYDRATED : 1
BUT_ARE : 1
WILL_CONSTITUTE : 1
EVALUATION_RIGHT : 1
UPON_TO : 1
VETERAN_HE : 1
RESPIRATIONS_UNLABORED : 1
PENICILLIN_OMEPRAZOLE : 1
CHART_ACCOMPLISHED : 1
PHYSICAL_DESIRE : 1
PATIENT_FOR : 1
PT_INDICATES : 1
RATE_IN : 1
ABOUT_SAME : 1
HIM_HAVE : 1
1010M_YO : 1
PLAN_OF : 3
CULTURE_NG : 1
NO_IN : 2
NO_IV : 1
LEVEL_OF : 5
ROOM_ARE : 1
RIGHT_PODIATRY : 1
TUNNEL_REPAIR : 1
HIM_THE : 1
PRACTICE_GROUP : 1
AGAIN_TWO : 1
MECHANICALLY_THE : 1
EVERY_EVENING : 1
LUNG_NEXT : 1
XYZZY_PATIENT : 2
BLOOD_SUGARS : 1
PULSE_WITHDRAWL : 1
AS_WELL : 1
ON_ONE : 1
SECTION_VETERAN : 1
COMMUNITY_ACCESS : 1
PT_IN : 1
ON_RISKS : 1
OF_DOES : 1
SOFT_ACTIVE : 1
MG_TID : 1
NAME_SS : 1
OTHER_SUCH : 1
HTN_SYNCOPE : 1
EXPLAIN_MORE : 1
PHYSICIAN_WILL : 1
ORIENTED_OWN : 1
ADDENDUM_DATE : 1
MRSA_PT : 1
IF_SERVICE : 1
HISTORY_PATTERN : 2
NO_ATTEMPTS : 1
FOR_RESPONSE : 1
INTERDISCIPLINARY_PLAN : 2
NAME_AND : 1
MENTAL_ORIENTED : 1
HE_DECIDED : 1
SINCE_OF : 1
RX_INDIVIDUAL : 1
MONTH_FINALLY : 1
CASE_CLINICAL : 1
SUBMET_LESION : 1
AND_ED : 1
WE_FOR : 1
CLEAR_YELLOW : 1
DSG_HIS : 1
PATIENT_UNDERSTANDS : 1
IS_BS : 1
PT_OBESE : 1
ORAL_ML : 1
VOICED_HAVING : 1
HEALTH_PC : 1
STILL_TENDS : 1
RIGHT_UPPER : 1
WITH_RAPID : 1
EVENTUALLY_OUT : 1
HE_HIS : 1
RT_PT : 1
MULTIPLE_PROBLEMS : 1
DENIES_PLANS : 1
CARE_CALLED : 1
REVIEWED_FOUND : 2
MARRIED_PERIOD : 1
TEMP_LB : 1
UNIT_PT : 1
VA_SOURCE : 1
WITH_ABD : 1
DISCONTINUED_TERAZOSIN : 1
WITH_SEIZURES : 1
ANY_OF : 1
DIFFICILE_NEG : 1
TO_SERVICE : 1
PLAN_FOLLOW : 1
BASED_ON : 1
ALLERGIES_REPORT : 1
SEEN_THE : 1
TAKEN_HOURS : 1
SCALE_ORDERS : 1
GIVEN_ACTIVITY : 1
PROV_OUTPATIENT : 1
PSYCHIATRY_MHC : 1
CHO_OL : 2
TAB_MOUTH : 1
BY_CLICKING : 2
CONCERNS_MAY : 1
SIGNS_TEMPERATURE : 1
BURNING_HOMELESS : 1
THE_POSSIBILITY : 1
NOT_ATTACHED : 1
SEND_IT : 1
AND_TOOK : 1
READING_RECORD : 1
EMERGENCY_1010M : 2
EDUCATION_VERBALIZES : 1
BID_ABNORMAL : 1
TO_ABILITY : 1
BESYLATE_MG : 2
PHYSICIAN_EDATIVE : 1
WITH_SYNCOPE : 1
THE_WITH : 1
TO_SPENT : 1
DESIRE_LONG : 1
WITHDRAWAL_AM : 1
MESSAGE_YOUR : 1
BE_FROM : 1
VOMITING_STOPPED : 1
SCALE_NOW : 1
SENSORY_XS : 1
LOT_AA : 1
FROM_HAS : 1
MADE_THAT : 1
AUTH_AND : 1
SEND_TO : 1
HANDOUT_ADDENDUM : 1
SALINE_NO : 1
REMOVE_ALBUTEROL : 1
SOCIAL_PATIENT : 1
INCLUDING_PROSTATE : 1
THAT_CONSENT : 1
WELL_CHECK : 1
TWINBROOK_DX : 1
THE_AND : 3
STABLE_NO : 1
AVAILABLE_FOR : 2
LIVES_SELECT : 1
ONE_IN : 1
APPOINTMENTS_YOU : 1
IM_BEEN : 1
ALBUTEROL_INHL : 1
TYLENOL_STAFF : 1
WITHOUT_DIFFICULTY : 1
NOT_WANTING : 1
ABOVE_RECOMMENDATIONS : 1
VETERAN_THAT : 1
FLAT_PARTICIPATION : 1
TO_RESCHEDULE : 1
SYNCOPE_HE : 1
VIA_FISH : 1
NOTE_AND : 2
FOR_LONG : 2
TAB_DISPENSED : 1
COLOR_NORMAL : 1
GERD_COMPUTER : 1
ADVISED_THAT : 1
WITH_TO : 2
ARRIVED_AMBULATORY : 1
EACH_IF : 1
IN_BLOOD : 1
YES_STATEMENTS : 1
PCP_NEURO : 1
INTENSITY_NOW : 1
URINAL_IN : 1
INSIGHT_HIS : 1
IS_RECEPTIVE : 1
PAIN_THE : 1
BRING_IN : 1
ACCESS_DISCONTINUED : 1
COMMENTS_MULTIPLE : 2
TO_CLINIC : 1
PAN_WITHIN : 1
NOTICE_IS : 1
PT_SCHED : 1
PER_HP : 1
FOLLOWING_ACTIVITIES : 1
YELLOW_VIA : 1
ONSET_HEADACHE : 1
CALL_TYPE : 1
FOREARM_STATED : 1
SERVICE_ASSESSMENT : 1
PREVIOUSLY_IN : 1
NEEDS_GET : 1
MANAGER_WE : 1
HEIGHT_IN : 2
EVIDENCED_SINUS : 1
STATES_NO : 1
YES_NONE : 1
IN_BED : 2
BEDSIDE_TELEPHONE : 1
CHEST_DENIES : 1
MAJOR_DISORDER : 1
RIGHT_RESTARTED : 1
TURGOR_MH : 1
CLINICAL_REMINDERS : 1
NL_TTP : 1
BE_FAXED : 1
AND_REPORTED : 1
WAS_DRIVING : 1
PROJECTED_START : 1
ENCOURAGE_HAND : 1
DEPRESSION_NONE : 1
TO_OUTPATIENT : 1
ORDERS_TREATMENT : 1
THE_EXPERIENCED : 1
MOBILITY_ARTERIOSCLEROTIC : 1
BELOW_SOUNDLY : 1
AND_HAD : 2
PAIN_AFFECT : 1
MEDICATION_MAYO : 1
PLACE_IN : 1
ARM_OR : 1
SENT_VIA : 1
ON_RECEIVED : 1
MOIST_AMLODIPINE : 1
VERIFIED_ADDRESS : 1
INCLUDES_AN : 1
NORMAL_THE : 1
THAT_IS : 5
HEADACHE_FEBRILE : 1
OTHERS_NEED : 1
PICKED_BY : 1
HISTORY_SMOKING : 1
PROSTATE_CANCER : 1
APPOINTMENTS_PT : 1
NOT_HOME : 1
ONE_EVERY : 1
RESPIRATIONS_EVEN : 1
ACCEPTING_COMMENTS : 1
IS_SERVICE : 1
COUGHING_SOME : 1
IS_SESSION : 1
TOOK_ON : 1
POSITION_ON : 1
NEED_CURRENT : 1
NO_INDICATES : 1
SAFE_USE : 1
TOMORROW_AT : 1
DRUGS_MAKES : 1
RIGHT_WRIST : 1
OTHERS_ACTIVITIES : 1
INFILTRATED_REMOVED : 1
BM_ABD : 1
NO_LIMITATION : 1
AND_HE : 3
PRIMARY_PRACTICE : 1
PT_IDENTIFIED : 1
RISK_TRANSFER : 1
RETURNS_LUBBOCK : 1
PATIENT_USING : 1
WANT_ADDITIONAL : 1
EXCLUDING_SUPPLIES : 1
AND_NONLABORED : 1
PLEASE_ALL : 1
AVOID_SYMPTOM : 1
MOUTH_OPENING : 1
THERE_WAS : 1
AS_TO : 1
ALLERGIES_CPRS : 1
APPOINTMENT_DATE : 2
PPD_EKG : 1
DISCOMFORT_PT : 1
MULTIVITAMIN_CAP : 1
NO_DOES : 1
RELATED_TO : 4
KVO_HE : 1
CARDIOVASCULAR_AN : 1
INHL_INHALE : 1
FOR_VISN : 1
AND_OUTPATIENT : 1
FOR_ASSIST : 1
REDNESS_SWELLING : 1
RX_AND : 1
NURSING_INPATIENT : 2
KNEE_MOVEMENT : 1
AROUND_STATIONED : 1
FISH_TLC : 1
MINUTES_COMPREHENSIVE : 1
NECK_AGGRAVATING : 1
PAIN_PRESSURE : 1
USED_DURING : 1
WEIGHS_POUNDS : 1
EXAMINATION_BAKER : 1
SITE_MORE : 1
CHANGE_SECTION : 1
EXPLAIN_HOW : 1
ONSET_FEBRILE : 1
FEW_LOT : 1
SCORE_DO : 1
UNDERSTANDING_APPLIED : 1
THOUGHTS_DENIES : 1
AN_ADVANCED : 1
PLAN_HIS : 1
NO_NO : 5
RECEPTIVE_TO : 1
RESCIND_DECLINE : 1
SIDERAILS_UP : 1
OR_SHE : 1
ALBUTEROL_CC : 2
FLAT_BETTER : 1
GETS_NUMB : 1
SINGLE_JAWS : 1
REGARDING_DESIRE : 1
FRIEND_VENESSA : 1
SMOKE_PPD : 1
SIBLINGS_CONTINUED : 1
MY_DOG : 1
TIME_ACTIVITY : 1
OF_PNEUMOVAX : 1
SYNCOPE_HAS : 1
THE_TH : 1
EUS_UNCOOPERATIVE : 1
CARE_SINCE : 1
OF_WARFARIN : 1
HE_TELEPHONE : 1
KNEE_TOE : 1
LIKE_CONSENT : 1
PATIENT_TO : 4
QHPRN_FOR : 1
PROVIDE_HOME : 1
IS_AGREEABLE : 1
ACTIVE_EVERY : 1
ANATOMICAL_SEE : 1
AND_POSSIBLY : 1
OR_GUARD : 1
HTN_BRUZZESE : 1
HER_EDUCATION : 1
BE_GETTING : 1
SKIN_EVERY : 1
PAIN_OF : 1
COMMENTS_IT : 1
SHE_NOT : 1
NOTE_CONTINUE : 1
NEW_MEDICATION : 1
NASAL_BUT : 1
SO_THAT : 1
DEMENTIA_LEWY : 1
REGIMEN_WITH : 1
MALE_TO : 2
WAS_WAS : 1
WITH_AND : 6
OTHER_SYMPTOMS : 1
REGARDING_TELEPHONE : 1
WE_INCREASE : 1
PSYCHIATRIST_NOTE : 2
DISTENDED_CAP : 1
CONSENT_PATIENT : 1
PATIENT_ANY : 1
SAFETY_DESCRIBE : 1
HAS_SEEN : 2
CUFF_PT : 1
ASSESSMENT_TEMP : 1
THE_HE : 5
TO_WITH : 4
THEY_EUS : 1
WITH_DYSPHAGIA : 1
ADVISED_PT : 1
COMPLAINTS_LOCATION : 1
HOME_ASSOCIATE : 1
APR_CT : 1
NO_PT : 1
BRONCH_FOLLOW : 1
COULD_NOT : 1
UPPER_LOBE : 1
OF_OR : 2
CRISIS_SITUATIONS : 1
COULD_CONFIRM : 1
DELUSIONS_THOUGHT : 1
MOTIVATION_FOR : 1
BY_YEAR : 1
FEELING_LESS : 1
WILKES_NEED : 1
QHPRN_ELEVATED : 1
SPONDYLOSIS_ABOVE : 1
AGAIN_NURSING : 1
OF_ABUSE : 1
ESOPHAGITIS_AUTH : 1
BEDREST_WHEELCHAIR : 2
FEVERS_NO : 1
FEBRILE_NO : 1
MRSA_SWABS : 1
GOOD_APPLIED : 1
VIA_KVO : 1
TOOTH_GENDER : 1
CARE_PAIN : 1
DOCUMENT_NOTE : 1
TO_ANY : 1
THE_THERAPY : 1
IS_TO : 9
TYPE_BHM : 1
WALKS_NURSING : 1
DATE_QUESTIONAIRE : 1
HAVE_HER : 1
LFA_KVO : 1
ICDCM_DIAGNOSIS : 1
DYSLIPIDEMIA_AND : 1
ABDOMEN_ATRIAL : 1
THE_SINCE : 1
ABDOMINAL_PAIN : 1
PREPARED_FOR : 1
MAJOR_DEPRESSIVE : 1
AND_HURTFUL : 1
INPATIENT_AND : 1
THEIR_HAD : 1
ATTENTIVE_AND : 1
THE_STOPPED : 1
STOPPED_THE : 1
CONSULT_COLLINS : 1
YEAR_DEMONSTRATED : 1
FOR_HARM : 1
HAND_ADDENDUM : 1
THE_MEDICATION : 2
HIS_TO : 1
STAFF_PERSONS : 1
IS_OTHER : 1
DAILY_CONTACT : 1
SELF_LOW : 1
SUGGESTED_FOR : 1
WAITING_APPOINTMENT : 1
FOR_HIM : 1
RECEIVE_HOSPITAL : 1
CAN_DSG : 1
PATIENT_NOT : 1
1010M_MELLITUS : 1
NOT_ANY : 1
SAT_IN : 1
HER_TEMPER : 1
TO_AN : 1
SHOWED_FEW : 1
PRIMARY_RADIATION : 1
OR_SCREENING : 1
WHICH_HE : 1
RHYTHM_BOWEL : 1
RECTUM_AND : 1
HAVE_RESPIRATORY : 1
SIGNS_REPORT : 1
BATH_ROOM : 1
PROVIDED_TO : 1
CLONIDINE_MG : 1
CERTAIN_POSITIONS : 1
WHO_DOES : 1
RISK_SUGARS : 1
ESOPHAGEAL_ON : 1
NOTE_OR : 1
BE_CUT : 1
BY_BONTKE : 1
MED_MG : 1
PEERS_WELL : 1
THE_SAME : 1
XEROSIS_AND : 1
THE_EDEMA : 1
PT_WITH : 2
IN_EXCEPT : 1
CARCINOMA_HAS : 1
ATIENT_DIAGNOSIS : 1
STATED_THAT : 3
HAS_MORE : 1
INSTRUCTIONS_ACTIVE : 1
ADMISSION_TOMORROW : 1
SUB_METATARSAL : 1
QH_PRN : 1
ANTICANCER_SEPOCT : 1
LITTLE_DEPRESSED : 1
THE_PAIN : 1
RECOVERY_PLEASE : 1
PLAN_TRANSFERRING : 1
WILL_TELEPHONE : 1
YOUR_NOTE : 1
NA_LIQUID : 1
PEACE_OF : 1
IMP_MUCOPER : 2
NEW_HEADACHE : 1
HAVE_SIX : 1
ADVANCE_NO : 1
PENICILLIN_NIACIN : 1
DOES_OR : 1
ABOVE_APPOINTMENTS : 1
CONTRIBUTE_PATIENT : 1
CBC_NEG : 1
SW_OLD : 1
HAVE_THE : 2
STILL_TO : 1
TO_DENIES : 1
SUGGESTED_PLAN : 1
MEALS_SELF : 1
TO_EDUCATION : 2
CIGARETTES_PROVIDED : 1
DENIES_RISK : 1
ABLE_QUIT : 1
IN_BUT : 1
OL_CHO : 1
SUPPLY_TO : 1
BREATHING_NOT : 1
LAST_NIGHT : 1
DX_PAINS : 1
TO_INDICATE : 2
PEDAL_AT : 1
THING_IS : 1
SMOKING_CESSATION : 1
RISK_NO : 2
HPI_URINATION : 1
YOU_NO : 1
PO_QHS : 1
STRIP_USE : 1
RN_PATIENT : 1
WORKING_SIGNS : 1
PROVIDE_COPY : 1
AMBULATORY_LIKES : 1
BUT_OT : 1
RECEIVING_HHA : 1
THEM_TECHNIQUES : 1
PATIENTS_OR : 1
AGREEABLE_TO : 1
WE_DISCUSSED : 1
INFORMED_FOR : 1
CC_RESIDUAL : 1
IS_TAKING : 1
YOU_POWERLESS : 1
VETERAN_REPORTS : 1
FULL_COPIES : 1
EVENTS_DURING : 1
RISKS_TAKING : 1
TOOK_TO : 1
GIVE_NARROWING : 1
PATIENT_NO : 3
CT_PATIENT : 1
HR_SPO : 1
BEDREST_NURSE : 2
PROCEDURE_THE : 1
SUCH_FAMILY : 1
WIFE_HAD : 1
HYGIENE_NA : 1
HE_BE : 1
NONE_MINIMAL : 1
RINGS_BELL : 1
TO_ISOLATE : 1
ROOM_CLEAN : 1
RADIATION_ESOPHAGITIS : 1
THE_NOC : 1
VISITMENTAL_DELIVERY : 1
MEDICATION_MG : 1
HE_DENYING : 1
OR_YEARS : 1
DELUSIONS_GOALDIRECTED : 1
SOCIAL_WORK : 2
GIVEN_TO : 1
NEXT_VET : 1
TO_ACCEPTING : 1
IF_HAS : 1
NOT_AN : 1
ABD_SL : 1
ATTENDED_PARTICIPATED : 1
ABOVE_HE : 1
DATE_IN : 1
APPEARS_BE : 1
FOLLOWUP_LOCATION : 1
TENTATIVELY_TO : 1
HE_IS : 11
FOR_ACTIVE : 1
ROOMAIR_ATRIAL : 1
DISCUSSED_SEEN : 1
XYZZY_IS : 1
AND_SHAVE : 1
ANY_CURRENT : 1
THERE_NOV : 1
OF_DURING : 1
SEEN_WITH : 1
IT_HE : 1
SKIN_ASSESSMENT : 1
DX_FOR : 1
MEASUREMENT_ULCER : 1
LIKE_SX : 1
REQUESTING_REFILL : 1
STATIONED_IN : 1
TO_AND : 2
THOUGHT_THE : 1
ALLERGIES_CHIEF : 1
UP_IN : 2
SEEN_IN : 4
SIDE_EFFECTS : 1
ISOLATE_NOTE : 1
OF_POSTVIETNAM : 1
PAIN_NONCONTRIBUTORY : 1
SC_SACPREPRIMARY : 1
OF_URINAL : 1
SIDE_PHYSICIAN : 1
CRACKING_IN : 1
AWARE_THAT : 1
WE_LOOK : 1
NEW_BUT : 1
LISTED_BELOW : 2
COME_OUT : 1
THEM_BOTH : 1
TAB_AUG : 1
IS_NOW : 1
AND_INJECT : 1
WITH_ADVISED : 1
COMPUTER_ORDER : 1
CESSATION_REFUSED : 1
HOURS_THE : 1
OR_PRESSURE : 1
FEELING_WHEN : 1
LOCATION_MODIFIED : 1
PC_FOR : 1
HE_STRESS : 1
SW_IDT : 1
AS_LISTED : 2
PEDAL_ASSESSES : 1
NAUSEA_THE : 1
FOR_INTERDISCIPLINARY : 1
DO_YO : 1
AND_ISNT : 1
MEDICATION_WRITTEN : 1
HAS_TRUNK : 1
SUPPORT_TO : 1
CURRENTLY_PAIN : 1
UP_CHAIR : 1
FINALLY_HAND : 2
TO_GET : 2
WILL_MONITOR : 1
NOTE_SOAP : 1
CONTRIBUTING_AND : 1
AMLODIPINE_BESYLATE : 2
CERTAIN_STANDING : 1
THIS_ACTIVITY : 1
EVER_MEALS : 1
REMINDERS_NOTE : 1
AWARE_COPIES : 1
PREVIOUSLY_ALERT : 1
RECONCILIATION_NEGATIVE : 1
TO_TRANSFER : 1
REPORT_YES : 1
DAILY_FINALLY : 1
TURGOR_VITALS : 1
PLEASE_THE : 1
MANAGEMENT_AND : 1
AS_PENDING : 1
BREAKFAST_PLEASE : 1
TG_AT : 1
DOES_NOT : 2
OF_KIN : 1
FOR_KEEP : 1
BED_IS : 1
HP_PCP : 1
THURS_INFORMED : 1
DESIRE_ADVANCE : 1
OR_FLUID : 1
THIS_DENIES : 1
BE_PATIENT : 1
FIRE_RISK : 1
ALLERGIES_TIME : 1
COMPLAINT_DROWSYNESS : 1
AN_SCREENING : 1
CURRNETLY_HAS : 1
BEFORE_MEALS : 1
WAS_PRIOR : 1
ALCO_DRUGS : 1
TEMPERATURE_REPORT : 1
BEEN_SEEN : 2
YOUR_PAIN : 1
IS_NURSING : 1
NOTED_NOT : 1
OR_FROM : 1
DISCUSSED_ANSWERS : 1
THIS_PT : 1
INDUCED_AUTH : 1
SCHEDULE_AND : 1
PAIN_QUIT : 1
TABLET_BEDTIME : 1
REVIEWED_NO : 1
BE_CLONIDINE : 1
THE_ABSTRACTS : 1
TACHYCARDIA_ORTHOPNEA : 1
TELEPHONE_AM : 1
NOT_WANT : 2
AMBULATING_HIS : 1
IN_CLINIC : 1
PROCEDURE_OR : 1
EDUCTION_COMPLETED : 1
PATIENT_PT : 1
TEACHING_ON : 1
WALKS_PHYSICAL : 1
THIS_BUT : 1
CONTACT_RELATIONSHIP : 1
ERUPTED_TOOTH : 1
OR_AROUND : 1
BS_BM : 1
TO_INCREASE : 1
NOT_ELIGIBLE : 1
WITH_HL : 1
INTAKE_MANATEE : 1
STANDING_TOO : 1
IMPRESS_OR : 1
WEAK_BOTH : 1
NOTE_FORMAT : 1
AFTER_NAME : 1
THE_PLEASE : 1
ADDENDUM_TOTAL : 1
RECOVERY_BRING : 1
SI_INTENT : 1
HIS_RELEASE : 1
HOME_TELEPHONE : 1
STATED_HE : 2
PALPITATIONS_TACHYCARDIA : 1
HAVING_FOR : 1
CRACKING_THE : 1
VET_GIVEN : 1
OR_YES : 1
DO_NOT : 1
PAIN_SUBJECTIVE : 1
IN_MEETING : 1
THE_SUB : 1
HAND_WAS : 2
BE_DISCHARGED : 1
IS_HIGH : 1
AND_MEDICATIONS : 1
CHANGED_MEDICATIONS : 1
ABLE_MAKE : 1
NOTED_IMPRESS : 1
TIMES_BEFORE : 1
CANCER_REQUESTED : 1
PRESENTING_PROBLEM : 1
COMMUNITY_DOES : 1
FACTORS_NOTE : 1
FALL_RISK : 2
THOUGHT_MIGHT : 1
REGARDING_THIS : 1
CALLED_AND : 1
TECHNIQUES_FOR : 1
STATE_PLEASE : 1
BS_ALL : 1
PATTERN_DISTURBANCE : 2
THIS_INHALE : 1
BRAIN_ATTEMPTED : 1
PC_ANTICOAGULATION : 1
OFTEN_DID : 2
WITHOUT_OR : 1
WOULD_LIKE : 1
OTHER_BEEN : 1
OR_SYMPTOMS : 1
OR_PRIOR : 1
VETERANS_ANGRY : 1
NIGHT_BEEN : 1
HE_WEARS : 1
MULTIPLE_TIMES : 1
MALE_WITH : 2
IS_WITH : 2
TO_ADDENDUM : 2
AND_ACCUCHEK : 1
HAVE_REVIEWED : 1
WAS_ELEVATED : 1
STATUS_AND : 1
SAFE_OR : 1
SMOKING_FIRE : 1
IN_WAS : 1
NON_MULTIVITAMIN : 1
HE_APPEARS : 1
ABUSE_SCREEN : 1
TAKING_TO : 1
GIVEN_EXERTION : 1
TO_GETTING : 1
NEXT_MORNING : 1
NURSING_FRI : 1
HILAR_AND : 1
FOR_TREATMENT : 2
ORDERS_FOR : 1
WITH_WALKING : 1
COMMON_OF : 1
BESYLATE_TAB : 2
FROM_OK : 1
MEDICINE_HE : 1
RECALL_SPECIFIC : 1
THE_ROOM : 1
GIVEN_APPOINTMENT : 1
RELAXED_MOOD : 1
CURRENT_ASSESSMENT : 1
NOTE_SITE : 1
OF_PERSONAL : 1
CONTROLED_CYSTOSCOPY : 1
SS_OR : 1
OF_MIND : 1
NUTRITION_AT : 1
COLLINS_VA : 1
NO_PLACED : 1
HIM_HE : 1
INTERN_NOTE : 1
TO_CURRENTLY : 1
DAILY_OR : 1
FIRST_THING : 1
BEDTIME_LENGTH : 1
SWELLING_NOTED : 1
OR_OTHERS : 1
VITALS_MHICM : 1
WITH_TEAM : 1
KG_RHYTHM : 1
CONSULT_CHECK : 1
DEFICITS_CAN : 1
OFFER_EXCEED : 1
AND_HOWEVER : 1
NEED_BE : 1
SEPOCT_DAILY : 1
IS_PROJECTED : 1
TAB_TABLET : 2
GOOD_HAND : 1
DILANTIN_SINCE : 1
RECORDED_BETWEEN : 1
AID_LIKES : 1
NOTIFIED_COMMUNITY : 1
PROCEDURE_EXAM : 1
REGARDING_STATES : 1
MUSCLE_HE : 1
INFORMED_THIS : 1
TELEPHONE_ASKED : 1
PULSE_ALBUTEROL : 1
RISK_FOR : 1
OLD_PRESENTS : 1
CALL_PAGE : 1
MONITOR_SW : 1
VERBALIZE_FEELINGS : 1
THE_RIGHT : 1
PROVIDER_STATED : 1
TIME_TO : 1
FAXED_PHONE : 1
CLINIC_NOTE : 2
NECESSARY_MOBILITY : 1
EXPIRES_WAS : 1
SEIZURE_PATIENT : 1
YEAR_VETERAN : 1
CARDS_MH : 1
DONT_PING : 1
SUICIDAL_THOUGHTS : 1
NO_LOCK : 1
DIFFICULTY_CC : 1
STATIONED_NEW : 1
ADLS_DEC : 1
NOTE_SAFETY : 1
TO_OLD : 1
ON_MON : 3
REPORTED_NEGATIVE : 1
REVIEW_RECENTLY : 1
TESTING_PROVIDED : 1
IS_WANTING : 1
WEARS_THEY : 1
TIME_IN : 1
OF_STOCKINGS : 1
FOR_BREATHING : 2
MEDICATIONS_AT : 1
CLENCHING_CHEWING : 1
PREVIOUS_INTERVENTIONS : 1
APART_AFTER : 1
SHE_IS : 1
AND_UP : 1
DATE_THE : 1
GIVEN_BALL : 1
IN_LOW : 1
THAT_PROBLEM : 1
VAMC_NO : 2
UNDERSTANDS_IS : 1
SWABS_IN : 1
HOW_DOES : 1
ON_RT : 1
RECALL_INCIDENT : 1
IT_DR : 1
TO_FOR : 1
HI_INTENT : 1
IT_NOW : 1
PLEASE_REFER : 3
HE_ALERT : 1
TO_THE : 9
NO_VH : 1
PRACTICE_IF : 1
HISTORY_ASSESSMENT : 1
OCCUPATION_GIVEN : 1
BATHING_PSYCHOTROPIC : 1
THE_MEDICATIONS : 1
YES_WHEN : 1
RADIATION_INDUCED : 1
YO_MAN : 1
VETERANS_BEHAVIOR : 1
BY_MOUTH : 7
INTAKE_PORT : 1
QUETIAPINE_MG : 1
MANIFESTATIONS_STATES : 1
ELIMINATION_HYGIENE : 1
QUESTIONAIRE_COMPLETION : 1
PLACED_TO : 1
TRAUMA_OT : 1
NEEDED_THAT : 1
BR_PULSE : 1
HARM_LOW : 1
CLINIC_ABLATIVE : 1
LFA_HE : 1
BETTER_WHEN : 1
PLEASE_TO : 3
DIAGNOSIS_THEN : 1
FAXED_PATIENT : 1
WITH_BASELINE : 1
CLICK_HERE : 1
EFFECT_DAILY : 1
AN_ADVANCE : 2
ON_BP : 1
TABLET_EVERY : 1
IN_NEW : 2
REFUSED_MEDIASTINOSCOPY : 1
AND_THEN : 2
KNOWN_ACTIVE : 1
SPECIFIC_HE : 1
INSTRUCTED_KEEP : 1
NO_REASON : 1
CLINIC_HEALTH : 1
ADDENDUM_AND : 1
DECREASED_RISPERDAL : 1
REASON_FOR : 1
ORDERS_FACTORS : 1
GAVE_PING : 1
PATIENT_PHARMACIST : 1
UNDER_SKIN : 1
NOTE_HE : 2
TAKE_TABLET : 6
IN_MOST : 1
LEGS_KNEES : 1
AND_AT : 1
RUL_WITH : 1
ELIGIBLE_FOR : 1
WITH_ASSOCIATED : 1
OR_METOPROLOL : 1
ADDENDUM_INSOMNIA : 1
AND_FREQUENCY : 1
FLAKING_AND : 1
PERSONAL_EXTRACTION : 1
OR_PATIENT : 1
TO_DESIRE : 1
INTO_CPRS : 1
SPO_NO : 1
DOES_ANGER : 1
OMEPRAZOLE_NIACIN : 1
PTS_CHART : 1
OFFICE_CASE : 1
MAKES_WORSE : 1
REFUSED_ICDCM : 1
NEG_COLONOSCOPY : 1
CLONAZEPAM_TAB : 1
PATIENTS_HOME : 1
ENTRY_PATIENT : 1
IN_ANOTHER : 1
ACTIVE_IN : 1
NEGATIVE_BREATHING : 1
AT_AS : 1
SO_YES : 1
NO_BARRIERS : 1
CARPAL_TUNNEL : 1
PROVIDED_STOCKING : 1
ADDENDUM_OF : 2
PROVIDED_JOB : 1
GIVE_CDL : 1
THAT_WAS : 1
OR_SHORTNESS : 1
CLAVICLE_AND : 1
NONE_PSYCHIATRIST : 1
REFER_TO : 4
PLANS_RISK : 1
JUN_HE : 1
MARCH_EXAM : 1
OF_PATIENT : 2
THE_EVERY : 1
BLOOD_LOSS : 1
SMOKER_TWO : 1
AND_FOR : 3
APPROPRIATE_PMH : 1
OK_SEND : 1
MONITOR_OFFER : 1
NORMAL_ATRIAL : 1
GIVING_OR : 1
AND_HIM : 1
INTERACTING_WITH : 1
LEVEL_UNDERSTANDING : 3
AND_ORINTED : 1
AGAIN_TIMES : 1
WAS_CYCLES : 1
BP_CUFF : 1
SAID_HE : 1
BEHAVIOR_PATIENT : 1
EFFECTIVE_AT : 1
DISTRESS_REASON : 1
DAILY_MOUTH : 1
ORDERS_AGGRAVATING : 1
RECOMMENDED_FOLLOWUP : 1
HYPERLIPIDEMIA_ASKED : 1
UD_ORAL : 1
BP_HR : 1
UNDER_THE : 1
BUT_PT : 1
WITH_COBAN : 1
EDATIVE_PAIN : 1
LONG_PLEASE : 1
NOW_WOULD : 1
AT_NOTE : 1
AND_NOT : 1
HIS_SIDE : 1
SESSION_SHOW : 1
OUTPATIENT_MEDICATION : 2
PALPITATIONS_ORTHOPNEA : 1
SCORE_BREATHING : 1
UNITS_THE : 1
SUBMERGED_TWO : 1
HER_LIFE : 1
ENCOURAGE_PATIENT : 1
CRITERIA_MUST : 1
ST_TO : 1
NPO_DIPPY : 1
TRIAGE_NOTE : 1
IS_VETERANS : 1
TEETH_WASHING : 1
MONTH_PLAN : 1
BEDREST_NUTRITION : 1
TO_REST : 1
EXR_CLINIC : 1
EVALUATION_DX : 1
RESTARTED_TO : 1
SKIN_REASSESSMENT : 1
TIME_ARRIVED : 1
TRANSCRIPTIONIST_DISPOSITION : 1
ARE_VERY : 1
MAYO_FOR : 1
WITH_TAKEN : 1
THE_XXXXXXXXXXXXXXXXXXXXXXXXXXXXXXXXXXXXXXXXXXXXXXXXXXXXXXXXXXXXXXXXXXXXXXXXXX : 1
OFFER_TO : 1
DEMONSTRATED_INSIGHT : 1
GETTING_FREQUENCY : 1
VETERANS_AS : 1
RARELY_MILD : 1
CONCLUDED_WITH : 1
WISHES_TO : 1
COVERAGE_HIS : 1
ATTACHED_CAN : 1
VET_REGARDING : 1
WAS_FRO : 1
IDENTIFIED_APPTS : 1
OUT_FOR : 1
PT_RINGS : 1
COPIES_CT : 1
FOR_AT : 1
VETERAN_EXPERIENCED : 1
BY_TWICE : 1
FOR_QUESTIONS : 1
TERAZOSIN_IS : 1
INHL_PUFF : 1
AND_COPY : 1
TELL_THE : 1
NEEDS_GLASGOW : 1
AND_NUMBER : 1
AND_GOING : 1
PREVENTIVE_MANAGEMENT : 1
COMPLAINT_INFORMED : 1
PHARMACIST_RECONCILIATION : 1
NOTE_INPATIENT : 1
LIGHT_TV : 1
SMOKING_REFUSED : 1
STRESSORS_DOES : 1
MEAL_READINESS : 1
CALLED_HIM : 1
APPRECIATED_CALL : 1
WHEN_IN : 1
SINCE_TYPE : 1
SL_BUT : 1
IN_ROOM : 1
DISPENSED_AUG : 1
WHEN_CALLS : 1
PROTRUSION_DEAR : 1
RETURN_TO : 1
ELEVATED_OL : 1
CC_BED : 1
LEFT_IS : 1
ARRIVAL_TO : 1
WRITER_STATED : 1
LEVEL_CLICKING : 2
UNCLEAR_OF : 1
HI_PLAN : 1
BLOOD_ALL : 1
ANXIETY_IMPROVEMENT : 1
NURSING_LISINOPRIL : 1
HIS_DAILY : 1
RESENTMENT_BLOCK : 1
DEPENDING_ON : 1
CASE_NOTE : 1
RUBBER_FOR : 1
CYCLES_TO : 1
ORDER_OCCULT : 1
TP_PAIN : 1
WAS_THIS : 1
IT_ISNT : 2
THIS_CAN : 1
INCREASE_GABAPENTIN : 1
OLANZAPINE_TAB : 1
ATRIUM_USES : 1
SHE_WANTS : 1
OTHERS_MORE : 1
HE_MEANS : 1
THE_FIRST : 2
VISIT_MINUTES : 1
REACH_PRIMARY : 1
YEARS_MG : 1
RESENTMENTS_AND : 1
WITH_BODIES : 1
AREA_LOT : 1
PAIN_TO : 1
EXPLORING_VETERANS : 1
AND_CALLED : 1
TIME_WAS : 1
RUNNING_ASSOCIATE : 1
EXPLORING_HOW : 1
UP_HE : 1
DISCOMFORT_RATES : 1
AUTHOR_TONJA : 1
TELEPHONE_FRI : 1
PRECAUTIONS_NOTE : 1
DREAMS_SO : 1
CHECK_MARBLE : 1
HOW_OFTEN : 2
MORE_PRIOR : 1
OF_RADIATION : 1
IMPAIRMENT_GROUP : 1
ADDENDUM_WHEN : 1
SERVICE_PROJECTED : 1
STATUS_HAND : 1
AN_DIAGNOSIS : 1
AORTIC_SEC : 1
MORE_MOOD : 1
LB_KG : 4
PROVIDER_TO : 1
RIGHT_RIGHT : 2
TO_APPOINTMENTS : 1
CONSTA_BECAUSE : 1
AND_TOILETING : 1
VAMC_HE : 1
TEMP_WEIGHT : 1
AORTIC_BEAT : 1
VOIDS_YELLOW : 1
SCORE_AT : 1
AFTER_KNOWN : 1
THE_SIMVASTATIN : 1
FIRST_AT : 1
IS_RUNNING : 1
SITE_OF : 1
UNALABORED_FOR : 1
OR_SAYS : 1
MAN_WITH : 1
FOLLOWUP_ON : 1
HTN_UPSET : 1
WITH_BILLING : 1
ESOPHAGUS_PENICILLIN : 1
CREST_THE : 1
STRETCHING_DAILY : 1
THE_ACTIVITIES : 1
DIAGNOSED_WITH : 1
OF_ARRIVAL : 1
KIN_INFORMATION : 1
DICTATED_BONTKE : 1
NOTE_ADDENDUM : 1
WITH_CLONAZEPAM : 1
THEN_IS : 1
RT_FOREARM : 1
WITH_FOLLOWING : 2
YES_HYPERTENSION : 1
DIARRHEA_FOR : 1
IODOSORB_PT : 1
HIS_PT : 1
SINCE_LAST : 1
OLD_MALE : 3
IN_PAST : 1
WANT_ED : 1
EVERY_AND : 2
RECENTLY_EXPIRED : 1
HISTORY_AGE : 1
LEAVING_HOME : 1
SERVICE_CONNECTED : 1
OR_SURROUNDINGS : 1
ADMISSION_PT : 1
OF_LIGHT : 1
DEPT_DIABETES : 1
CHECK_ACCOMPLISHED : 1
HISTORY_CLINICAL : 1
PRINTED_AND : 1
NOTE_CONTACT : 1
TO_GO : 2
IS_COUNSELED : 1
ROOM_PAIN : 1
NKA_OF : 1
YOU_HAVE : 3
ACTIVITIES_CARE : 1
ACTIVITY_WALKS : 2
TO_IF : 1
SYMPTOMS_PT : 1
CONTACT_NAME : 1
PRESSURE_MACHINE : 1
ACCESS_INFORMATION : 1
IS_IMPULSE : 1
BEEN_HIS : 2
REPORT_LAST : 1
WIFE_TRYING : 1
MINUTES_HIGH : 1
HIGH_SITUATION : 1
TELEPHONE_CONTACT : 2
NEURO_AND : 1
PO_NURSING : 1
TO_INVOLVED : 1
THERE_IN : 1
AMPHETAMINE_DEXTROAMPHETAMINE : 1
YOU_ADDENDUM : 1
PERCENT_FOR : 1
AM_ORTHO : 1
REVIEW_NOTE : 1
DISCHARGED_HOME : 1
PAIN_DONE : 1
BED_LOW : 1
MG_ML : 1
AGENCY_CY : 1
BUT_ALSO : 1
MONTH_NOW : 1
MEETING_NOT : 1
NO_THE : 1
INHL_QID : 1
EKG_DONE : 1
DRUNK_LEFT : 1
THE_EDUCTION : 1
MH_TREATMENT : 1
TO_FORAMINAL : 1
WANT_NUTRITION : 1
ANGRY_THAT : 1
BEEN_RESTING : 1
SOURCE_FOR : 1
COUNSELING_THEM : 1
NO_TOTAL : 1
CURRENTLY_COUMADIN : 1
PO_PTSD : 1
WITH_DEC : 1
PATIENT_PHONE : 2
EPIS_NO : 2
MOVEMENTS_PERCENT : 1
SACPREPRIMARY_DISTURBANCE : 1
SINCE_MONTH : 1
RECURRENT_CERVICAL : 1
AT_TRANSFER : 1
MORNING_WAS : 1
EVENING_FOR : 1
HAS_STRESS : 1
CONTROL_MCBRIDE : 1
YEAR_OLD : 3
OLANZAPINE_MG : 1
NOT_NUTRITION : 1
ABUSE_AS : 1
THE_RECTUM : 1
WHEN_ASSUMES : 1
EDUCATION_INTAKE : 1
NOTE_EMERGENCY : 1
IS_FOR : 1
COVERED_WITH : 2
IMPRESS_PLEASE : 1
CM_THIS : 1
TOTAL_HOURS : 1
TENSE_AND : 1
CARE_LESIONS : 1
SUMMARY_REPORTS : 1
HIS_TEETH : 1
SPONDYLOSIS_OUTPATIENT : 1
THIS_AS : 1
NOTE_MANAGER : 1
REFERRAL_NEEDS : 1
TO_KEEP : 1
LIMITATION_ELICITED : 1
WHICH_JUST : 1
NOTE_RISPERDAL : 1
OUTPATIENT_MEDS : 1
HAVE_DISCONTINUED : 1
SITE_INFILTRATED : 1
DISCONTINUED_THE : 1
YOU_SURROUNDINGS : 1
VALVE_IS : 1
IV_INFILTRATED : 1
HEALTHIER_COLLINS : 1
WHEELCHAIR_NURSE : 2
NO_EDUCATION : 1
VISITS_THE : 1
RENT_IN : 1
CONTINUED_ENCOURAGE : 1
MR_HAS : 1
NO_RACING : 1
DATE_TIME : 2
OEF_AFTER : 1
LEVEL_CALL : 1
CT_UNCOOPERATIVE : 1
CARE_THIS : 1
CONSENT_OBTAINED : 2
HIS_LOWER : 1
OF_SUCCESS : 1
SOAP_TP : 1
AND_ALLAMANDSOME : 1
RISK_OF : 1
ANXIETY_DEPRESSION : 1
ANY_OR : 1
TO_BR : 1
SURGICAL_HISTORY : 1
SITE_PAIN : 1
ONCOLOGY_CONSULT : 1
FOR_ALDRETE : 1
COUMADIN_FEVERCHEST : 1
HOW_HURTFUL : 1
FUNCTIONAL_IMPAIRMENT : 1
HIS_TRIGLYCERIDES : 1
SACPREPRIMARY_GROUP : 1
EVEN_AMBULATION : 1
TR_BLOOD : 1
BEEN_RECEIVING : 1
NO_HI : 1
ASYMPTOMATIC_PROPER : 1
YES_DIAGNOSIS : 1
BBSC_SOFT : 1
ACTIVITIES_YOU : 1
RECENTLY_WAS : 1
HAD_HAD : 1
NIGHTMARES_BURNT : 1
OTHERS_LB : 1
YET_READY : 1
AND_OR : 4
CALLS_BACK : 1
AT_LEVEL : 1
DOW_OR : 1
TO_SINCE : 1
IS_OF : 2
SUPERVISION_WITH : 1
GI_UPSET : 1
VITAL_TEMPERATURE : 1
IV_RISK : 1
UPSET_INTERMITTENTLY : 1
HISTORY_PLACE : 1
WAS_PREVIOUSLY : 1
MED_COMPLAINT : 1
JAWS_BITING : 1
HE_NOTED : 1
FOLLOWING_MUST : 1
CIGARETTES_WAS : 1
BREATHING_SHAKE : 1
SYNCOPE_AND : 1
PRESENTS_CHIEF : 1
EXPLAINED_IMP : 1
AND_SPONDYLOSIS : 1
IS_MANDATORY : 1
DX_GENDER : 1
WAS_HHA : 1
LIKE_BRING : 1
IS_YET : 1
UPON_ARRIVAL : 1
DIABETES_CHRONIC : 1
NAME_TREATMENT : 1
DURING_OEF : 1
OF_FALL : 1
MUCOPER_FLP : 2
SC_DOCUMENT : 2
BE_FOR : 2
RATES_PAIN : 1
RECEPTIVE_LEARNING : 1
SECOND_AND : 1
MOUTH_AFTER : 1
DEC_COMMENTS : 1
POTENTIAL_SKIN : 1
VENESSA_HOYT : 1
TOD_OR : 1
RELEASE_MEDICATIONS : 1
QRS_ADDENDUM : 1
TABLET_BY : 4
PROSTHETICS_AND : 1
AND_DOFFING : 1
RISPERDAL_BECAUSE : 1
OF_YES : 1
OR_SKIN : 1
SHOWED_CLOTS : 1
RARELY_AMLODIPINE : 1
FOR_ANY : 1
AMOXICILLIN_MG : 1
HL_FROM : 1
THURS_THAT : 1
FAMILY_CAREGIVER : 1
TELEPHONE_HE : 1
HOSPITAL_THE : 1
COPIED_AND : 1
HE_AND : 1
PART_EKG : 1
ARRIVAL_WHEELCHAIR : 1
COMPLAINT_SIGNATURE : 1
FOR_TXT : 1
TEST_AM : 1
TINGLING_WEAKNESS : 1
HIS_NO : 1
WITH_PEERS : 1
DUE_SEVERITY : 1
WITH_AN : 1
NUMB_CRISIS : 1
ATRIAL_FOLLOWUP : 1
UPON_THIS : 1
FEBRILE_EPIS : 1
ANXIETY_AND : 1
ELOPEMENT_FACTORS : 1
VET_TENDS : 1
VET_RECENT : 1
LIGHT_DEPRESSION : 1
RESTARTED_LEFT : 1
PINHOLE_LIST : 1
OF_ACHES : 1
SWELLING_PT : 1
DYSLIPIDEMIA_INCHES : 1
MEDICATION_HE : 1
TEMPERATURE_WOUNDS : 1
UNDERSTANDING_LEVEL : 1
SKIN_MORNING : 1
EASY_OF : 1
CHIEF_OF : 1
THIS_LEVEL : 1
ACTIVE_DAILY : 1
WRIST_RESTARTED : 1
INFORMATION_MAJOR : 1
BRAKES_CALL : 1
CARE_SERVICES : 1
HE_LEAVING : 1
APPOINTMENT_YEARS : 1
PHARMACY_INSTRUCTIONS : 1
SERVICE_AND : 1
AMBULATORY_FISH : 1
OCCASIONALLY_NOTE : 1
CELL_OF : 1
OF_REASON : 2
IN_WITH : 2
PROBLEMS_ADDENDUM : 1
ABOUT_PM : 1
THERAPY_GAIT : 1
FOR_OF : 2
IN_PREVIOUS : 1
NOTE_HISTORY : 1
ADVANCE_AT : 1
USING_HIS : 1
WOULD_TO : 2
ADDENDUM_HIM : 1
PAIN_HAS : 2
BALL_AND : 1
LISINOPRIL_MG : 1
PAST_MEDICAL : 1
ASSESSES_THE : 1
PAIN_REQUIRED : 1
ATROVENT_PAN : 1
STATES_THAT : 2
NUR_PREVMED : 1
ABOVE_MEDICATION : 1
ACTIVE_RHYTHM : 1
OR_NOTED : 1
REQUEST_ANSWER : 1
ONEHALF_BY : 1
REMEMBER_BUT : 1
WELL_OF : 1
WORKING_VITAL : 1
HE_ADAMANTLY : 1
ACTIVITIES_AND : 1
WITH_PATIENT : 1
HOME_YEAR : 1
HERE_ELEVATED : 1
PHARMACIST_MEDICATION : 1
OF_FEE : 1
XS_TO : 1
ALL_PO : 1
DRUGS_YOU : 1
THOUGHTS_NO : 1
AND_DEPRESSION : 1
ASK_PATIENT : 1
ON_DAILY : 1
REACH_OF : 1
ILLNESSES_HYPERLIPIDEMIA : 1
BEEN_PRESCRIBED : 1
REGARDING_HIS : 1
CLEAR_VIA : 1
BOTH_AR : 1
HE_DENIES : 1
USE_ACTIVE : 1
BRIGHTER_ANXIETY : 1
SITUATION_NO : 1
WORSE_AFTER : 1
LDL_UP : 1
PSYCHIATRIST_OTHER : 1
AND_APPROPRIATE : 1
TYPE_OR : 1
GOOD_TESTING : 1
CM_PSYCH : 1
BEEN_AS : 1
HAS_TIMES : 1
DIFFICULTY_URINATION : 1
VH_IOR : 1
LOT_EXP : 1
WAS_ANYTHING : 2
WE_CONTINUE : 1
AND_CHECK : 1
ISSUE_HEIGHT : 1
REST_WITH : 1
MOTIVATION_TREATMENT : 1
PT_OUT : 1
DENIES_OR : 1
MODERATE_SEVERE : 2
IF_WHEN : 1
PT_MRSA : 1
PCC_NOTE : 1
VERBALLY_EXPLAINED : 1
LPN_REVIEW : 1
ORDERS_BLOOD : 1
REFERRED_TO : 1
SSN_TREATMENT : 1
HAND_WRAPPED : 1
EXPLAINED_REM : 1
CONTACT_CALLED : 1
NOTE_TAB : 1
PLACED_APLIGRAFT : 1
SEVERE_SYMPTOMS : 2
SIDERAILS_BED : 1
SUCCESS_DATE : 1
BE_INTO : 1
OR_TINGLING : 1
UP_BY : 1
MEDICAL_NOTE : 1
VET_OFFERED : 1
OF_URGENCY : 1
REVIEWED_CHART : 2
AS_PER : 1
AND_ADEQUATE : 1
ASSESSES_AT : 1
FOR_HPI : 1
BE_OF : 1
SM_TELE : 1
STREETS_HE : 1
AS_THIS : 1
AMBULATORY_AID : 3
RELAPSE_BUT : 1
PROPER_SAO : 1
BODIES_ALONG : 1
SW_MOISTURE : 1
BLOCK_PEACE : 1
MS_BERKLEY : 1
URGENT_CARE : 1
REQUIRED_AT : 1
NOW_NO : 1
WHAT_EXPECT : 1
RIGHT_WITH : 1
DISTRESS_VETERAN : 1
PSYCHIATRIST_CONTACT : 1
REGION_SPECIAL : 1
HOYT_INCLUDES : 1
ALDRETE_OR : 1
NUMBER_PT : 1
SPONDYLOSIS_WHO : 1
NOTE_CESSATION : 1
OTHER_BE : 1
MAY_HAVE : 1
HPK_HEMATOLOGY : 1
THIS_SELF : 1
KG_CARDIAC : 1
ANY_QUESTIONS : 1
IS_RX : 1
CLINICAL_ACTIVITY : 1
WANTING_GIVE : 1
AND_DOWN : 1
OF_ELDER : 1
THE_NEED : 1
PROCEDURE_SURGICAL : 1
CURRENT_ALLERGIES : 1
ABILITY_ASSESS : 1
AN_EXERCISE : 1
CHIEF_HEALTH : 1
CM_AT : 2
TO_ENCOURAGE : 1
MOVE_CONSULT : 1
THE_TO : 2
OF_BRAIN : 1
STATEMENTS_ISSUE : 1
EXAM_WHO : 1
AND_TIME : 1
PATIENT_LIKE : 1
TO_PER : 1
TELL_HAVE : 1
NEW_ALLERGIES : 2
BASIS_EXAM : 1
ENCOUNTER_PAIN : 1
DO_FOR : 1
CHRONIC_SOME : 1
NURSING_AMBULATORY : 1
OF_NIGHT : 1
HAS_OF : 1
WAS_DISCHARGED : 2
PT_DID : 1
TO_LIGHT : 1
ADDENDUM_PHONE : 1
NOTE_NONE : 1
ROOM_IS : 1
PAST_HOW : 1
HE_CONSENT : 1
DOES_HAVE : 2
TIMES_MORE : 1
ADDENDUM_CALL : 1
EXP_PER : 1
CODE_EACH : 1
RIGHT_RIB : 1
SECONDARY_DIAGNOSIS : 1
HAS_STOPPED : 1
HYPERTENSION_WELL : 1
RIGHT_PREPPED : 1
APICAL_IS : 1
WAS_OUT : 1
SESSION_WAS : 1
CHECK_DEMENTIA : 1
PATIENT_RESPONSIBILITY : 1
MAY_AND : 1
SP_AN : 1
HOW_HAVE : 1
HYGIENE_DOCUSATE : 1
AS_NEEDED : 3
PAIN_CHANGE : 1
MORE_IMPORTANT : 1
ROOMAIR_ABDOMEN : 1
THIS_RISK : 1
IS_AT : 1
NEG_RACE : 1
THAT_OF : 3
HISTORY_SEX : 1
GO_TO : 1
FINDINGS_THE : 1
DENIES_NEEDS : 1
APPROPRIATELY_ON : 1
USE_FOR : 1
MELLITUS_TYPE : 1
QH_FOR : 1
TO_DEMENTIA : 1
EVERY_MORNING : 2
TELEPHONE_URINAL : 1
FOR_PT : 2
LABORATORY_VAMC : 1
HEAR_LOSS : 1
TOILETING_WAS : 1
PATIENT_DISCUSSED : 1
PCP_YOUR : 1
WITH_EYES : 1
WRITTEN_ASK : 1
OF_ASYMPTOMATIC : 1
THE_GUARDIAN : 1
SULF_TAB : 1
ACID_AND : 1
HELP_PEERS : 1
VITAL_SIGNS : 4
NOT_READY : 1
WITH_THERAPIST : 1
FOLLOWING_MEDICATION : 1
IN_TREATMENT : 1
AND_TURGOR : 1
QUESTIONS_CONCERNS : 1
MONEY_NO : 1
SERVICE_NURSING : 1
HOUSEKEEPING_RBC : 1
YEARS_PREVMED : 1
WILL_ABOUT : 1
EXCEPT_PT : 1
TO_LEARN : 3
DETACHED_FROM : 1
CHEWING_OPENING : 1
TO_CONSUMING : 1
SEVERE_SEVERE : 1
JOINT_WILL : 1
SPECIFIC_INCIDENT : 1
AMBULATION_DISTANCE : 1
ASKED_MEDICINE : 1
PT_DISCHARGE : 1
NOTE_STATUS : 1
GIVEN_RISK : 1
SAFE_RECOMMENDED : 1
ACTIVITIES_OR : 1
PHARMACY_DISCHARGE : 1
PATIENT_NUMBER : 2
NURSING_INTERDISCIPLINARY : 1
AND_CARE : 1
WRIST_TO : 1
KEPT_EASY : 1
THAT_HAVE : 1
WE_HIS : 1
FOR_ADMISSION : 1
SOME_FIGHTS : 1
OR_DIAGNOSIS : 3
NONLABORED_MORNING : 1
TREATMENT_MEDICAL : 1
CHANGE_IN : 4
AND_WAS : 2
ADDENDUM_LONG : 1
MENTAL_EXAM : 1
UNKNOWN_PATIENT : 1
REFUSED_ON : 1
TO_NUTRITION : 1
PATIENT_GUARDIAN : 1
DIARRHEA_EXAM : 1
WITH_PULSE : 1
STAIRS_HE : 1
PATIENT_COULD : 1
AND_CONTRIBUTE : 1
APPOINTMENT_LIST : 1
TRAUMA_CLASS : 1
PASTED_PAIN : 1
WEAKNESS_ABD : 1
JBLUE_COMPLETION : 1
ICDCM_CONTROLED : 1
PLAN_CONCERNING : 1
NARROWING_OF : 1
MRSA_ADM : 1
PC_PROVIDER : 1
YES_HEART : 1
BRUZZESE_MONTH : 1
SENSORINEUR_ASYMMETRICAL : 1
CONTACT_TELEPHONE : 2
VAMC_SOMEONE : 1
AN_UNFORTUNATE : 1
AURORA_SATUR : 1
RALES_ALSO : 1
CONTACTED_REGARDING : 1
LUNG_CANCER : 1
MORE_ESOPHAGEAL : 1
NOTED_THE : 1
CARE_GROUP : 1
IMPORTANT_ATTEMPTING : 1
ALCOHOL_DAILY : 1
DATE_SSN : 1
OF_TREATMENT : 1
HAS_MOVEMENTS : 1
CANCER_HE : 1
OUTPT_PSYCHIATRY : 1
NEW_VA : 1
MOTIVATION_PATIENT : 1
SERVICES_HE : 1
THANK_YOU : 1
WE_DAILY : 1
MOVE_HIS : 1
MALE_VIA : 1
NO_WOUNDS : 1
AND_SIGNIFICANT : 1
INTRAVENOUS_GAIT : 1
DERMATOLOGY_MED : 1
CALLED_PER : 1
FROM_RIGHT : 1
RIGHT_SIDE : 2
AND_ATTENDING : 1
AT_REMAIN : 1
INSTRUCTIONS_OR : 1
PT_BEEN : 1
AND_WAITING : 1
POSTVIETNAM_PRIMARY : 1
IS_TOMORROW : 1
AND_EVENING : 1
PHYSICAL_AND : 1
TOBACCO_ELEVATED : 1
MOVE_PROPERTY : 1
NORMAL_BEDREST : 1
AND_CE : 1
IS_ALERT : 1
PT_BALL : 1
AND_REQUIRED : 1
DENIES_CP : 1
ARTERIOSCLEROTIC_HEART : 1
UNSPECIFIED_WITH : 1
BEFORE_FOR : 1
NO_BE : 1
ANG_LIVING : 1
HAND_WEAKNESS : 1
DECLINE_TRANSFER : 1
WITH_MOBILITY : 1
RECORDED_MINUTES : 1
ISSUES_MENTAL : 1
INSURANCE_HIS : 1
BRAIN_MRI : 1
TO_RESCIND : 1
ILLNESS_NURSING : 1
STRAIGHTEN_OUT : 1
NEW_IV : 1
CDL_HE : 1
ECTOPY_EDUCATION : 1
ABDOMEN_FIBRILLATION : 1
WORK_MH : 1
FRO_APPOINTMENT : 1
FOR_EACH : 1
SUPERVISION_THE : 1
XXXXXXXXXXXXXXXXXXXXXXXXXXXXXXXXXXXXXXXXXXXXXXXXXXXXXXXXXXXXXXXXXXXXXXXXXX_CARCINOMA : 1
FOR_OWN : 1
TO_WEIGHT : 1
ACTIVE_CONTACT : 1
CARE_NO : 1
DIAG_MULTIPLE : 2
ACCOMPLISHED_TO : 1
POSTVIETNAM_ELIGIBILTY : 1
ABLE_INCREASE : 1
PTS_DISABILITY : 1
SPONDYLOSIS_THE : 1
PR_NA : 1
WELL_GIVEN : 1
FOR_REST : 1
IT_TO : 1
NECK_ORDERS : 1
MEDICATED_APR : 1
STATES_IT : 1
DIAGNOSIS_AND : 1
ORDERS_LEVEL : 1
SHOW_TINGLING : 1
PORT_CHARLOTTE : 1
TO_GIVE : 2
ECTOPY_SKIN : 1
ELEVATION_OF : 1
ANKLES_TOES : 1
RIGHT_AND : 1
HOPELESS_HAVE : 1
SC_IS : 1
HE_SESSION : 1
TO_LEFT : 1
ANOTHER_ANTICANCER : 1
1010M_DIABETES : 1
ALL_QUADRANTS : 1
COMPLETED_INCLUDING : 1
NOTIFIED_HEALTH : 1
MHC_HAS : 1
VA_FOR : 1
WAS_PROVIDED : 1
THROMBOEMB_SM : 1
PT_ID : 1
STRENGTHS_AND : 1
PATIENT_ATTENDED : 1
DISCUSS_MS : 1
TREATMENT_BARRIERS : 1
CAP_TAKE : 2
WHEELCHAIR_MALE : 1
AMR_TO : 1
LIVING_SKILLS : 1
ON_NURS : 1
BE_PICKED : 1
TOLD_NURSING : 1
NOTE_COMPREHENSVE : 1
POSITIONS_TOO : 1
YELLOW_HIS : 1
BE_EMERGENCY : 1
CC_PRIMARY : 1
AID_BEDREST : 2
COLOR_FOR : 1
NOTED_OR : 1
AND_EXPLAINED : 1
PATIENTS_TELEPHONE : 1
FOR_DRUG : 1
ON_FOLLOWING : 1
IV_STABLE : 1
BUT_NOT : 1
FOLLOWUP_VETERAN : 1
UNAVAILABLE_CASE : 1
COMPLAINTS_ANATOMICAL : 1
OF_SYND : 1
WORSE_OF : 1
HIS_DESIRE : 1
TRANSPORTED_THIS : 1
PATIENT_HAVE : 2
EVERY_ACTIVE : 1
HAVE_RECOMMENDED : 1
CLICK_TO : 1
MALE_ADDRESS : 1
YEARS_OLANZAPINE : 1
HAS_THE : 1
REFERRING_BRANCH : 1
SHOW_BUN : 1
DEXTROAMPHETAMINE_TAB : 1
CONTAINING_ALCOHOL : 1
JAWS_CLENCHING : 1
TWICE_FOR : 1
GOOD_COMMENT : 1
LIKE_MR : 1
OF_AGE : 1
HAS_HAD : 2
CONTINUES_TO : 1
OF_UPPER : 1
IN_CLASS : 1
WHAT_HE : 1
NOTE_SIGNS : 1
THAT_THEIR : 1
ON_THE : 4
LIST_FRIEND : 1
NO_SOFT : 1
DEPRESSION_LUMBOSACRAL : 1
LIQUID_NONBLOODY : 1
RHYTHM_AND : 1
GIVEN_INSTRUCTIONS : 1
CANCER_FLOOR : 1
BECAUSE_HE : 2
TO_HELP : 1
XS_ABLE : 1
OF_THE : 4
TWICE_MENTAL : 1
HELP_INTERACTS : 1
APARTMENTS_RENT : 1
NEURO_XS : 1
ADVANCED_DIRECTIVE : 1
COLLINS_ASSESSMENT : 1
TRYING_MOVE : 1
ON_FOOT : 1
PAIN_SIBLINGS : 1
COMPLETELY_INDEPENDENT : 1
HAIRLESS_AREA : 1
WOUNDS_PRESSURE : 1
TIME_DATE : 1
HIS_SPINE : 1
SEEN_THERE : 1
THIS_EXAM : 1
FOLLOWUP_ABOVE : 1
VOLUMES_MODERATE : 1
TO_NEXT : 1
DESIRES_SIGNIFICANT : 1
CLINIC_PT : 1
AGE_MOBILITY : 1
AND_REVIEWED : 1
VET_TO : 1
YES_YOU : 1
REPORTED_PCP : 1
INCIDENT_HE : 1
SOME_INSOMNIA : 1
STOPPED_MORNINGPAIN : 1
PROBLEM_INJURY : 1
PT_HE : 2
OF_MEDICATIONS : 1
WOULD_CORRESPOND : 1
TO_POWER : 1
WITH_HIS : 2
CC_IN : 1
IS_REQUESTING : 1
ADMIT_DATE : 1
HIS_HIS : 1
OCCUR_WITH : 1
ACTIVITY_OF : 1
READ_NOTE : 1
TO_EXCEED : 1
MIGHT_BE : 1
DR_AMOXICILLIN : 1
INDIVIDUAL_HE : 1
DISPOSITION_STATED : 1
DISCHARGE_NURSING : 1
WILL_CONTINUE : 2
SHORTNESS_BREATH : 1
SPECIAL_NEEDS : 1
COMPLETED_CURRNETLY : 1
WEEK_MY : 1
THAT_DEB : 1
CARE_ASSESSMENT : 1
CALL_MADE : 1
DL_AMLODIPINE : 1
IN_NECK : 1
REASSESSMENT_AND : 1
SUSPICIOUSAPPEARING_LUNG : 1
THINK_IT : 1
NEEDS_LEVEL : 1
EPIS_SOFT : 1
PMH_CADMIX : 1
ORIENTED_TO : 1
WHERE_HE : 1
IN_PHARMACY : 1
HA_ABD : 1
TG_UP : 1
TO_RECOMMENDED : 1
CP_OR : 1
COMPLETED_AND : 1
TO_REFERENCE : 1
BURNT_ALONG : 1
KG_HAVE : 1
BY_NEURO : 2
ASSESSMENT_VETS : 1
ACCU_CHECK : 1
UP_AND : 1
PULSE_OX : 1
ESOPHAGEAL_CARCINOMA : 1
EVALUATION_SECONDARY : 1
STERILE_DRESSING : 1
CR_BLOOD : 1
MORE_NUR : 1
BED_FOR : 1
FRUSTRATED_WITH : 1
STAFF_AID : 1
FOLLOWING_NOT : 1
VIA_DIRECT : 1
NO_OTHER : 1
AND_HELP : 1
NEED_PACEMAKER : 1
RETURN_NECESSARY : 1
MONITOR_PROVIDED : 1
AN_OUTPT : 1
REVIEW_INFORMATION : 1
DENYING_SUICIDAL : 1
WANTS_SEE : 1
FEELING_AND : 1
WITH_AS : 1
WITH_CHANGE : 1
PAIN_IN : 1
SEX_RACE : 1
OBESE_NL : 1
MISSED_COMMUNITY : 1
ASSOCIATION_HOW : 1
ALCOHOL_ON : 1
TYPE_OF : 2
NURSING_STATES : 1
FEELINGS_BEEN : 1
REQUESTING_RX : 1
TELEMETRY_NOTE : 2
MADE_HER : 1
MORE_OTHER : 1
VA_MEDS : 1
NO_STATEMENTS : 1
MAY_USED : 1
WAS_AVAILABLE : 1
OF_HAND : 1
OBTAINED_OUT : 1
OR_DRINKS : 1
UP_SOME : 1
IS_ASYMPTOMATIC : 1
CALLS_TELL : 1
REFERENCE_TO : 1
WITH_DEAR : 1
IS_CURRENTLY : 1
PHYSICAL_THERAPY : 1
BY_IS : 1
TO_SEND : 1
ARIPIPRAZOLE_TAB : 1
WELL_CYSTOSCOPY : 1
HOSPITAL_FOR : 1
PTSD_ACTIVE : 1
OF_CT : 1
ALONG_PLEASE : 1
COVERED_SLIDING : 1
AND_ILL : 1
IN_HRS : 1
MULTIPLE_NURSING : 1
REC_AND : 1
ADVANCED_NO : 1
CONTACT_FLUOROSCOPY : 1
NOTE_EACH : 1
QUIT_EATING : 1
THANK_MED : 1
RISK_PRECAUTIONS : 1
TV_BEDSIDE : 1
START_PT : 1
MR_PATCHES : 1
TOLD_AGAIN : 1
FEVER_AND : 1
IS_THERE : 1
VETERAN_NOT : 1
HEART_HOW : 1
TO_DISCHARGE : 2
REPORTED_TO : 1
IS_AND : 1
NURSING_TRIAGE : 1
BEEN_MED : 1
DISCONTINUED_OBTAINED : 1
ADDENDUM_NONE : 1
IMPAIRMENT_MALE : 1
PART_COMPLETED : 1
EATING_CMP : 1
DRUG_THERAPY : 1
SCAN_FROM : 1
DAILY_MEALS : 1
HISTORY_CALL : 1
PCC_NURSE : 1
THE_VALVE : 1
PERCEPTIONS_FEARS : 1
EVALUATION_THE : 1
PROV_NOTE : 1
SPEAKING_PATIENT : 1
MCG_ORAL : 1
VISITMENTAL_HEALTH : 1
RECENT_STORE : 1
PATIENT_IF : 1
HIM_PALE : 1
GERD_IS : 1
PATIENT_WAS : 5
ALL_WITH : 1
ICDCM_DRUGS : 1
DOWN_STAIRS : 1
MINUTES_ABILITY : 1
FLASHBACKS_DENIES : 1
SEAT_SO : 1
PRECEEDED_BY : 1
ANXIETY_ACTIVE : 1
THIS_DOCUMENTATION : 1
EXERCISE_SESSION : 1
MOBILITY_EXPECTED : 1
DISCHARGED_HAS : 1
HAS_ABLE : 1
YO_WITH : 2
TO_MECHANICALLY : 1
EASY_REACH : 2
TO_READ : 1
FROM_HOME : 1
VIA_HIS : 1
HX_PER : 1
CONSULT_TRANSCRIPTIONIST : 1
AWARE_THIS : 1
PATIENT_GIVEN : 1
FINANCIAL_HE : 1
CARPAL_REPAIR : 1
DOFFING_OF : 1
DEPENDING_HIS : 1
COMPLAINED_OF : 1
OR_PLEASE : 1
GAIT_TRANSFERRING : 1
EXPLAINED_IS : 1
WEIGHS_INCREASED : 1
BLOOD_HAVE : 1
WILL_IF : 1
BACK_HIM : 1
PT_VOMITING : 1
PRIMARY_PATIENT : 1
ST_NO : 1
FOR_BLOOD : 2
PATIENT_THE : 1
EXAM_PULSE : 1
NEGATIVE_SCORE : 1
DOES_THE : 1
OR_WHEELED : 1
STRAIGHTEN_PAIN : 1
PAIN_SPECIALIST : 1
HAVE_ADEQUATE : 1
SCREEN_NOTED : 1
PLEASE_OTHERS : 2
THOUGHT_PATIENT : 1
NOTE_UNITS : 1
AM_ON : 1
ROOM_VOIDING : 1
ACUTE_ATTACK : 1
BOTH_AURORA : 1
HAVING_DIARRHEA : 1
ACTIVE_PING : 1
BOTH_ON : 1
DATA_FOR : 1
LOOKING_PALE : 1
THE_EVENTS : 1
REPORTS_PULSE : 1
GROUP_MOTIVATION : 1
ABILITY_HISTORY : 1
LOW_POSITION : 1
GIVEN_AT : 1
WE_THE : 1
QAM_ACTIVE : 2
DONE_PCP : 1
BETTER_RISK : 1
TO_CALLED : 1
CARE_REVIEWED : 1
PTS_ADMISSION : 1
REASON_PATIENT : 1
SOMEONE_TO : 1
MOISTURE_MOIST : 2
GIVE_ADMIT : 1
THEM_WHEN : 1
YES_AND : 1
LOWEST_DISCHARGE : 1
UNABLE_MAKE : 1
USING_PRN : 1
HEALTH_PROGRESS : 1
TYPE_PCP : 1
CONTACT_VET : 1
MASSES_WITH : 1
SCREEN_EKG : 1
INTERVENTIONS_LISTED : 1
OF_RVSP : 1
COPING_SKILLS : 1
PROVIDED_CALL : 1
THERAPY_OR : 1
WEEKEND_SELF : 1
UNCLEAR_HIS : 1
SAT_UP : 1
STATED_VOMITING : 1
SHOW_OR : 1
MD_AND : 1
QUESTIONS_TRAUMA : 1
PATIENT_DIARRHEA : 1
CHAIGING_DRESSING : 1
SHE_WOULD : 1
REG_UNALABORED : 1
ARENT_MALE : 1
ANYTHING_THIS : 1
EDUCATION_PATIENT : 1
ORINTED_APICAL : 1
SOURCE_THE : 1
CLONIDINE_TAB : 1
AND_TOLD : 1
ALCOHOL_IN : 1
ARRIVAL_ER : 1
STAY_YES : 1
RINSE_AFTER : 1
PROBLEM_ADMISSION : 1
DAILY_POINT : 1
CURRENT_KNOWN : 1
PHOENIX_VAMC : 1
VETERAN_IS : 2
REPORTS_WEAPONS : 1
FOR_BATHING : 1
SPECIMEN_ANTICANCER : 1
MOUTH_TWICE : 2
HERE_EVALUATION : 1
THIS_HE : 1
DISCHARGE_MEDICATION : 1
FOR_BOTH : 1
SEC_DIAG : 2
SEABOLT_UPON : 1
SUCH_AS : 1
DX_REM : 1
IDENTIFIED_IDENTIFIED : 1
THIS_VISIT : 3
EXCEPT_COMMENT : 1
GLASGOW_SCALE : 1
HE_INTERN : 1
OR_HE : 1
SYMPTOMS_OF : 2
MOUTH_FOUR : 1
TO_YOUR : 2
OF_SHOW : 1
DAILY_CARE : 1
MOVING_HOW : 1
IN_FULL : 1
FALL_NORMAL : 1
HEART_PT : 1
AURORA_ON : 1
PAIN_WILL : 1
RINSE_MOUTH : 1
SUSPECTED_CANCER : 1
NOTE_ACTIVITIES : 1
OR_GANG : 1
THIS_WEEKEND : 1
NO_FAM : 1
NOT_CONFIRM : 1
WITH_ADDITIONAL : 1
DENIES_GLASGOW : 1
ID_ADMITTED : 1
PCP_DATE : 1
COLLECTION_PREVENTIVE : 1
MEDS_NAME : 1
WITHDRAWL_DISORDER : 1
DISPOSITION_PATIENT : 1
DESCRIBE_SITE : 1
NOW_BREAKFAST : 1
MEDICATIONS_STATUS : 2
ARENT_ANY : 1
PATIENT_MADE : 2
GLUCOSE_TEST : 1
BOWEL_BREAKFAST : 1
ML_BID : 1
WITH_CLOSED : 1
MEALS_AND : 1
IN_MILD : 1
PERTINENT_HX : 1
DJD_ESOPHAGEAL : 1
RIGHT_LACERATION : 1
FOR_HAS : 1
LOCATION_CARE : 1
YES_MALE : 1
SIGNIFICANT_OTHER : 2
EXTRACTION_ERUPTED : 1
FA_WITH : 1
OF_DERMATOLOGY : 1
IS_NOT : 5
APPROPRIATE_HEALED : 1
APPROPRIATELY_ROOM : 1
DISPENSED_CURRENTLY : 1
PROPER_AGE : 1
YOU_SIX : 1
DEPRESSIVE_RECURRENT : 1
HEALTH_ED : 1
PT_ACKNOWLEDGES : 1
INFORMATION_CONDITION : 1
CONTAINING_IN : 1
PATIENT_MOISTURE : 1
PER_ANTICOAGULATION : 1
DONE_WHICH : 1
DAILY_TO : 1
OF_PAIN : 4
ALONG_THE : 1
FACTORS_AND : 2
NO_DIABETES : 1
KNEE_HAS : 1
ACCESSION_CY : 1
PLACE_ON : 1
PROVIDED_AT : 1
PATIENT_HEALTH : 1
MODERATE_OF : 1
SUICIDAL_FEELINGS : 1
HAVE_AN : 1
UNLABORED_AMIODARONE : 1
GOALDIRECTED_PATIENT : 1
JUN_AND : 1
APPT_DOCUMENTATION : 1
HIS_HOME : 1
APICAL_IRREGULAR : 1
HAS_LIFETIME : 1
MHICM_SCREENING : 1
HAIRLESS_OF : 1
FOLLOWING_LIST : 1
AN_SESSION : 1
TOTAL_CHO : 1
NURSING_PHONE : 1
NOK_IS : 1
HOW_ALCO : 1
SUCCESSFULLY_EDUCATION : 1
BE_UP : 1
SIGNS_MEDICATION : 1
PO_FOR : 1
PRESSURE_PALPITATIONS : 1
OFF_DILANTIN : 1
ORDERS_PATIENT : 1
THE_BATH : 1
ESTIMATED_BLOOD : 1
OTHERS_OR : 1
OR_YOU : 1
TO_PAPERWORK : 1
HE_TEND : 1
PT_CALLS : 1
THE_VICTIM : 1
AND_PASTED : 1
RX_ON : 1
AND_URINAL : 1
NOTE_INFORMED : 1
MOTIVATION_COUNSELING : 1
BLOOD_REMAINS : 1
OR_SUSPICIOUSAPPEARING : 1
PING_RISK : 1
CRITERIA_BE : 1
FOR_ASSESS : 1
DOCUMENT_THIS : 1
RA_NO : 1
NOTED_EVEN : 1
TO_WEAR : 1
SUPPORT_STOCKINGS : 1
VITAL_GERD : 1
EDUCATION_TOPICS : 1
WHO_BRAIN : 1
HIS_RT : 1
TOTAL_SCORE : 1
WELL_MOODS : 1
APPT_THIS : 1
DEC_OF : 1
ON_WRITER : 1
ALDRETE_BRIEF : 1
AND_BM : 1
STAFF_VET : 1
SEABOLT_RN : 1
OX_ON : 1
VET_HAS : 1
AREA_AA : 1
ON_AUTO : 1
AREA_IS : 1
OR_CHECK : 1
LOCK_NO : 1
ACCESS_NEEDS : 1
FOR_MUCH : 1
OVER_OTHERS : 1
INTERMITTENTLY_PT : 1
OUT_OF : 2
HEALTH_LEVEL : 1
EACH_ENTRY : 1
PER_LISA : 1
TERM_SC : 1
PING_MOODS : 1
BED_THE : 1
CONCLUDED_THERAPIST : 1
PT_RECENT : 1
DISORDER_EPISODE : 1
PHYSICAL_DAILY : 1
CALLED_PATIENT : 1
STATED_CALL : 1
GOOD_PLAN : 1
NO_SI : 2
ALL_WITHIN : 1
MONITOR_NO : 1
WILL_EFFECT : 1
ED_PHYSICIAN : 1
MEETING_DOES : 1
HOME_SERVICES : 1
CREST_FOR : 1
OR_RESTLESS : 1
POINT_PING : 1
HOME_CARE : 1
ELEVATED_ACTIVE : 1
LORAZEPAM_MG : 1
REQUESTING_WE : 1
ON_OCCASION : 1
THIS_WOULD : 2
PM_MED : 1
LEFT_LEG : 1
BIOPSY_SUSPECTED : 1
SIDE_ELBOW : 1
METOPROLOL_MG : 2
WITH_TOD : 1
NO_LONGER : 1
KNEES_ANKLES : 1
THIS_TIME : 8
MR_OF : 1
ON_SATUR : 1
DAILY_ON : 1
TIME_FOR : 1
NARROWING_LEFT : 1
TREATMENT_MEDICATION : 1
NEED_TO : 3
EVEN_UNLABORED : 1
ENCOURAGE_TO : 1
WELL_BIOPSY : 1
OR_PAIN : 1
BY_FOUR : 1
OF_AND : 6
AND_LIVING : 1
REQUIRED_THIS : 1
ARE_NO : 1
PAIN_GIVEN : 1
BLOOD_AND : 1
BLOOD_TEST : 1
ELIMINATION_DOCUSATE : 1
WE_NOTE : 1
PLEASE_NOTE : 1
HE_BUT : 1
IN_AUDC : 1
ITS_WORST : 1
AGE_BRUZZESE : 1
STORE_AND : 1
EACH_THE : 1
PT_STATED : 2
TIME_TALKED : 1
PAIN_WAS : 3
DISCHARGE_TO : 1
PAPERWORK_PATIENT : 1
MEDICATIONS_YOU : 1
OBTAINED_AT : 1
MEDICAL_PROBLEMS : 1
WITH_CA : 1
MOODS_STABLE : 1
OR_OF : 2
MEDS_ILLNESSES : 1
SITUATION_LNC : 1
CO_RA : 1
THROUGHOUT_NOC : 1
EVEN_TELEMETRY : 1
NEEDS_KNOWN : 1
YOU_TAKING : 1
PARTICIPATION_BETTER : 1
URINAL_ACTIVITY : 1
COPIES_ALL : 1
THE_PILL : 1
PHYSICAL_FINDINGS : 2
SX_LAST : 1
AND_REQUESTED : 1
UP_BED : 1
SEND_PRESENTS : 1
ARRIVED_ON : 1
BUT_ATTACHED : 1
BE_LOGGED : 1
QAM_REVIEWED : 1
WAS_VIA : 1
NO_DIARRHEA : 1
WE_WILL : 1
MIN_CC : 1
LAB_VA : 1
VOMITING_ALSO : 1
THERE_ARENT : 1
HE_WHAT : 1
PT_WAS : 3
AWARE_OF : 1
OF_CALL : 1
READY_FOR : 1
ON_DEPENDING : 1
WALK_WITH : 1
ORAL_INHALE : 1
TEMPER_COPING : 1
BLOOD_PULSE : 1
FOR_WITHIN : 1
BEHAVIOR_SEC : 1
TO_SUB : 1
MEANS_OF : 1
FOR_FEELING : 1
CULTURE_NEGATIVE : 1
SAID_HAS : 1
CC_CARE : 1
ARRIVAL_UNKNOWN : 1
PT_TEACHING : 1
TIME_ADAMANTLY : 1
INR_PATIENT : 1
AND_ISSUES : 1
PATIENT_STATE : 1
PERSONS_OBSERVED : 1
MR_REGARDING : 1
ABLE_CARE : 1
SIBLINGS_NONCONTRIBUTORY : 1
BY_AN : 1
NOT_GI : 1
CONSULT_COLON : 1
SYMPTOM_OF : 1
RISK_CHANGE : 1
HP_HYPERLIPIDEMIA : 1
NO_AT : 2
DATE_VETERAN : 1
STATUS_PERIOD : 1
CASE_MANAGER : 4
OEF_WORSE : 1
PER_CY : 1
NECK_SUPPLE : 1
BECOMES_MORE : 1
SYMPTOM_MUSCLE : 1
SECOND_PAUSE : 1
HIS_FOREARM : 1
IF_PT : 1
REVIEW_PROVIDE : 1
SCORE_NOT : 1
TRAUMA_THE : 1
ACTIVE_REGULARITY : 1
POWER_OTHERS : 1
VERY_WARM : 1
FREQUENCY_OF : 1
SEE_ALLERGIES : 1
ADMISSION_THIS : 1
BEEN_UNDER : 1
AND_DONNING : 1
ASYMPTOMATIC_AGE : 1
AS_HE : 1
TELEPHONE_RELATED : 1
IV_INFUSIONS : 1
HOW_BEHAVIOR : 1
RESTING_IN : 2
NO_ILLNESSES : 1
LISA_AT : 1
SUICIDAL_NO : 1
ECTOPY_NS : 1
OWN_TABLET : 1
IN_SPEARFISH : 1
OF_PROPER : 1
TO_REGARDING : 1
AFTER_PT : 1
DISTURBANCE_AND : 2
PATIENT_ATTENTIVE : 1
OR_INFLAMMATION : 1
ACTIVITIES_FEE : 1
HE_RATES : 1
SKIN_QRS : 1
WITH_TWO : 1
HIS_MONEY : 1
AND_WILL : 4
ON_CONSULT : 1
DRESSING_TO : 1
DISABILITIES_RECORDED : 1
INJURY_POTENTIAL : 1
LAST_HIS : 1
FOR_GROUP : 1
HAS_WILL : 1
HE_THAT : 3
FROM_EMS : 1
WELL_WAS : 1
AND_NAUSEA : 1
MOIST_BESYLATE : 1
METHOD_VERBALLY : 1
BE_GIVE : 1
RECOMMENDED_THAT : 1
HAS_ENOUGH : 1
IN_CM : 2
IV_LOCK : 1
TO_HER : 1
OF_REFERRED : 1
AUTHOR_INVOLVEMENT : 1
HE_MAY : 1
AND_EFFECTIVE : 1
MALE_BITING : 1
READY_PT : 1
ADMITTED_SEIZURE : 1
SIGNS_FLASHBACKS : 1
DEPT_YO : 1
INTO_HIS : 1
IS_AWARE : 1
ELIGIBILTY_REPORTS : 1
ICDCM_WELL : 1
HEAD_LACERATION : 1
PLEASANT_STAFF : 1
SIDE_WEAK : 1
PATIENT_AND : 4
AND_INCLUDING : 1
EXERTION_JOINT : 1
HAVING_IN : 1
MEDS_NOT : 1
VISIT_HIS : 1
INFUSIONS_NO : 2
CONTACT_PATIENT : 1
MEDICATION_INDICATION : 1
QUADRANTS_NURSING : 1
TELEMETRY_TAB : 1
ORDERS_MESSAGE : 1
AT_ON : 1
PLACE_URETHERA : 1
MG_TAB : 4
FOLLOW_UP : 1
IN_THE : 7
NOTE_LISINOPRIL : 1
OF_SCAN : 1
FREQUENCY_HOWEVER : 1
PROVIDE_TRANSPORTATION : 1
PT_PAIN : 1
WITH_MS : 1
BRANCH_OF : 1
SO_HOW : 1
ADDENDUM_PROVIDER : 1
GIVEN_MINIMAL : 1
PATIENT_BRONCHIAL : 1
COUGHING_UP : 1
CHF_CADMIX : 1
WAS_WITH : 1
EXPRESSED_SUICIDAL : 1
HE_SO : 1
DESCRIBE_LOCATION : 1
ACKNOWLEDGES_RECENT : 1
CONCERN_PT : 1
INCIDENT_HAD : 1
CONTROL_GWINN : 1
INTERDISCIPLINARY_OF : 1
WALKING_PATIENT : 1
REPLACED_THE : 1
WITH_VET : 1
THEN_FALLS : 1
DOCUMENTATION_RELATED : 1
NOTE_OTHER : 1
ON_JUST : 1
THE_REVIEW : 1
CONNECTED_HAS : 1
FOR_SELF : 1
MESSAGE_PAIN : 1
RONCHI_SAYS : 1
NURSING_STAFF : 1
HR_NO : 1
TIME_BUT : 1
NOT_HAVE : 1
IS_SUICIDAL : 1
AND_HAS : 2
IN_THERAPY : 1
OF_SIDE : 1
HE_RECEIVING : 1
AFTERCARE_FOLLOWUP : 1
IF_THERE : 1
ANGER_OR : 1
CRISIS_AND : 1
BRONCHIAL_RIGHT : 1
THE_HAD : 1
ON_WHICH : 1
GIVEN_OF : 1
RECOMMENDATIONS_BASED : 1
THAT_OBTAINED : 1
PRESSURE_REMAINS : 1
MINUTES_FOR : 1
HER_OCT : 1
RESPIRATORY_AS : 1
YES_RESTING : 1
PNEUMOVAX_SCHEDULED : 1
CAN_BASIS : 1
TEND_TO : 1
PRESENTS_TO : 2
ER_THOUGHT : 1
CARE_HEALTH : 1
ULCERS_OTHER : 1
CHART_PATIENT : 1
INCLUDES_ICDCM : 1
AGE_NO : 1
FOR_FURTHER : 1
TOTAL_OF : 1
GO_THURS : 1
DAILY_AS : 1
LAB_OUTPATIENT : 1
ADDITIONAL_INFORMATION : 1
SUB_TH : 1
HP_HTN : 1
INTERMITTENTLY_FO : 1
ADMITTED_VA : 1
ALLAMANDSOME_STATE : 1
CARDIOLOGY_RESPIRATION : 1
VIEW_REASON : 2
ARRIVED_LAC : 1
ON_RECORD : 1
NONE_CALL : 1
STATED_HIS : 1
PMH_CHF : 1
LOCATION_ALDRETE : 1
APPROVED_FEE : 1
TEMP_LOC : 1
AVAILABLE_ANY : 1
LONGER_SUICIDAL : 1
PARTICIPATED_IN : 2
SCHEDULE_APPOINTMENT : 1
LIKE_TO : 1
RIGHT_HILAR : 1
TALKED_TO : 1
CY_WILL : 1
CPRS_ALLERGIES : 1
THE_CHECK : 1
RELAXED_AFFECT : 1
PHYSICIAN_AND : 1
DICTATED_NEXT : 1
AUTH_PRINTED : 1
ORAL_PUFF : 1
MEDICAL_APPT : 1
RINGS_CALL : 1
THAT_ARENT : 1
NEED_PLEASE : 1
THIS_WRITER : 2
NOT_TO : 3
EPISODE_SPONDYLOSIS : 1
HIS_ADMISSION : 1
OF_UNDERSTANDING : 3
HE_HAD : 4
MG_DL : 1
AVOID_COMMON : 1
BODIES_HAS : 1
FEARS_EVALUATION : 1
AN_DIRECTIVE : 3
LEARN_INDEPENDENT : 1
EXCEPT_NOTED : 1
CA_IN : 1
COPD_ESOPHAGEAL : 1
AN_ICDCM : 1
RAPID_IN : 1
RN_LPN : 1
PHYSICIAN_ANTIANXIETY : 1
MANAGER_WHAT : 1
AT_ENCOUNTER : 1
COMMENTS_ADDENDUM : 1
MESSAGE_PRESSURE : 1
TELEPHONE_CALLED : 1
UNRESOLVED_PAIN : 1
FROM_CARE : 1
TO_PAT : 1
PERSONS_IN : 1
PATIENTS_FAMILY : 1
ALLERGIES_OUTPATIENT : 1
HEALTHPSYCHIATRIC_AND : 1
ANY_SUICIDAL : 1
DISC_WITH : 1
DX_CHEST : 1
DUE_AT : 1
CLASS_WITH : 1
PLAN_NO : 2
DERMATOLOGY_CLINIC : 1
ANTICANCER_RES : 1
THE_AS : 1
FOR_THIRD : 1
ASSESSMENT_ADDENDUM : 1
TIME_OUTPATIENT : 1
BE_SOURCE : 1
PARANOID_OF : 1
MEDICAL_ISSUES : 1
YOU_EVER : 1
GROUP_NO : 1
JUST_OUT : 1
PLEASE_THAT : 1
EYES_CLOSED : 1
ED_OFF : 1
SOMEONE_AFTER : 1
GUARDED_TENSE : 1
LAB_LDL : 1
TXT_THERE : 1
THERAPY_NO : 1
TEMPERATURE_NO : 1
AND_NURSING : 1
POTENTIAL_TEMPERATURE : 1
PROCEDURE_SITE : 1
INSOMNIA_AND : 1
IS_CONTENT : 1
SALINE_LOCK : 2
TO_HEARING : 2
STREETS_SAYS : 1
LIFETIME_HISTORY : 1
PCP_SENSORY : 1
HANDOUT_VERBALLY : 1
PT_NUTRITION : 1
CAUSE_OF : 1
HEARING_YOU : 1
TWICE_BREATHING : 1
DOCUMENTATION_IS : 1
WERE_THAT : 1
PT_IT : 1
TO_FROM : 1
PAIN_PATIENTS : 1
NO_OF : 1
WITH_ACTIVE : 1
AS_OUTPATIENT : 1
WILL_SEND : 1
NO_CHIEF : 1
ADLS_COMMENTS : 1
COMMUNITY_RESOURCES : 1
ISSUE_DATE : 1
THAT_SHE : 1
OTHER_IRREGULAR : 1
ACCUCHEK_CV : 1
NEEDED_DIRECTED : 1
PING_BUT : 1
LOCATION_DESCRIPTION : 1
CHIEF_SIGNATURE : 1
LIKE_WHO : 1
LEARN_YES : 1
AMBULATING_WITH : 1
THIS_AN : 1
WITH_PROSTHESIS : 1
ASA_PHYSICIAN : 1
TIME_PLEASE : 1
OMEPRAZOLE_BP : 1
STATUS_INTERSCAPULAR : 1
STATUS_PROV : 1
GOOD_HAS : 1
OBTAINING_CONSENT : 1
TO_LISA : 1
HIGH_RISK : 2
RN_WILL : 1
DATE_VIM : 1
MOUTH_AS : 1
OWN_AND : 1
WANT_PROVIDER : 1
INFORMED_WAS : 1
LIMITATION_ELOPEMENT : 1
PT_AUTO : 1
REPLIED_YOU : 1
NONE_SCORE : 1
BE_VIM : 1
FOR_DICTATED : 1
HOURS_STATES : 1
VERBALIZE_PERCEPTIONS : 1
COMPLETE_AN : 1
AT_HYDRATED : 1
ACTIVE_MILD : 1
OTHER_TO : 1
LAST_FEW : 1
IV_DISCONTINUED : 1
CHANGE_NECK : 1
HEAR_SENSORINEUR : 1
LONG_PTS : 1
PERCENT_MINUTES : 1
ADDENDUM_SCHEDULE : 1
1010M_MAN : 1
YOU_AND : 1
DISCHARGE_AND : 1
TWO_MORE : 1
REFER_CARE : 1
CONSTITUTE_IN : 1
THE_DENIES : 1
SKIN_NS : 1
NURSING_FLAT : 1
GROUP_AMBULATORY : 1
CARE_VA : 1
AT_TOD : 1
VASCULAR_GET : 1
THE_AVOID : 1
REASSESSMENT_PROVIDED : 1
CALLED_GIVEN : 1
ESOPHAGEAL_CA : 1
BEEN_PRIVILEGES : 1
TAB_MG : 9
MEDIASTINOSCOPY_ON : 1
WITH_DAUGHTER : 1
SATUR_MAY : 1
IN_BATH : 1
HARM_DENIES : 1
HE_DOES : 1
THIRD_IN : 1
TO_STRONGER : 1
IV_NO : 2
CLEAN_WAS : 1
OCCASIONALLY_FINDINGS : 1
WHICH_SHOWED : 1
IDT_MOISTURE : 1
PT_TREATMENT : 1
DECLINED_MRSA : 1
QID_QUETIAPINE : 1
KNOWN_LEVEL : 1
BM_OF : 1
TIME_PT : 1
RN_PH : 1
NO_COMPLAINTS : 2
FEELING_DOWN : 1
GETTING_WORSE : 1
TAKE_ONE : 4
AND_ALSO : 1
WITH_MUCH : 1
FOLLOW_WISHES : 1
RESPIRATION_WITHDRAWL : 1
MORE_SAFE : 1
COMPLETED_COMPUTER : 1
WITH_DEPRESSION : 1
MEDIASTINOSCOPY_PATIENT : 1
WILL_CONTACT : 1
DATE_GIVEN : 1
REQUIRED_OR : 1
FA_PULSE : 1
STAFF_BECAUSE : 1
SYMPTOMS_IN : 1
WRITER_COULD : 1
OF_AT : 2
MORNINGPAIN_VET : 1
THE_HOW : 1
VISIT_NONE : 1
LEAVING_HIS : 1
ASSESS_AND : 1
WITH_APR : 1
INTERSCAPULAR_REGION : 1
RECENTLY_HIS : 1
TABLET_AT : 2
DESIRE_AND : 1
VETERAN_THE : 1
REMAIN_THROUGHOUT : 1
NOTED_HE : 1
WANT_COMPLETE : 1
STAFF_AND : 1
OUTPATIENT_READINESS : 1
RN_UPON : 1
LATERAL_MOVEMENT : 1
SAO_TEMP : 1
TAKING_AS : 1
NEED_PT : 1
EVENTS_OIF : 1
AN_HEART : 1
TIME_NOTE : 1
MY_DATED : 1
TREATMENT_TO : 1
CFCF_INHL : 1
AND_CARDS : 1
GIVE_DATE : 1
FLP_TOOTH : 2
HER_BACK : 1
YOUR_MEDICATIONS : 1
PLAN_DISCHARGE : 1
SEC_COMMENTS : 2
YO_SMOKER : 1
COMPREHENSIVE_ABILITY : 1
ACTIVE_DAUGHTER : 1
MOUTH_CARE : 1
NURSING_SAT : 1
NOW_FOR : 1
AGGRAVATING_FACTORS : 1
TIME_MONITOR : 1
GLASGOW_COMA : 1
AT_ADDENDUM : 1
HIS_ACTUAL : 1
KEPT_WITHIN : 1
HE_SAYS : 3
FEE_SCHEDULE : 1
FRIEND_HOYT : 1
ENCOURAGED_TO : 1
ADDITIONAL_OTHER : 1
MUCH_TIME : 1
WK_FOR : 1
DETACHED_OTHERS : 1
DAUGHTER_ERDMAN : 1
WORK_MARITAL : 1
PAIN_NO : 2
AND_MAJOR : 1
LAST_FEELS : 1
PT_STATES : 2
LAST_MONTH : 1
SUGARS_HAVE : 1
HYPERLIPIDEMIA_GI : 1
THE_ABOVE : 1
WAS_GIVEN : 1
MGMT_SPECIALIST : 1
TOOK_THEM : 1
OF_HARM : 1
THIS_COULD : 1
MG_QH : 1
OF_PATIENTS : 3
ADDITIONAL_NUMBER : 1
AND_COMPLAINED : 1
VOMITING_THIS : 1
THIS_TELEPHONE : 1
AND_RETURN : 2
PHONE_CONCERN : 1
BEEN_SEPERATED : 1
TOPIC_COMMENTS : 1
EFFECT_USE : 1
TEMPERATURE_MOISTURE : 1
LUNGS_RALES : 1
CALL_REFERRED : 1
DISCUSS_WITH : 2
WORKER_ATTENDED : 1
DIZZINESS_WITH : 1
SMOKE_PAIN : 1
EFFECTS_SULF : 1
EVERY_FOR : 1
RHYTHM_INTENSITY : 1
WNL_WHO : 1
PROGRESS_SOAP : 1
OTHERNOTE_LONG : 1
NONCONTRIBUTORY_CONTINUED : 1
UPON_WE : 1
WALKING_AND : 1
THAN_TO : 1
MOBILITY_YES : 1
STATE_YO : 1
SOAP_NOTE : 1
CAUSATIVE_AND : 1
HYPERTENSION_MET : 1
PRESSURE_TAKEN : 1
PHYSICIAN_MG : 1
ED_THIS : 1
FEW_GAVE : 1
PT_MON : 1
INDICATION_DOSE : 1
COLON_CANCER : 1
PHYSICIAN_REVIEW : 1
ON_LIGHT : 1
ACTIVE_TO : 2
SO_HAS : 1
WHO_SAID : 1
PROSTHESIS_IF : 1
TO_TELEPHONE : 1
TO_PROVIDE : 1
INFORMATION_BY : 1
VICTIM_OF : 1
TEACHING_THE : 1
FIGHTS_WHEN : 1
COMMON_SYMPTOM : 1
WILLING_WEAR : 1
PATIENT_ASSUMES : 1
REDUCE_EDEMA : 1
THE_WAS : 3
WRAPPED_COBAN : 1
PHONE_WITH : 1
HAND_DUE : 1
THAT_VETERAN : 1
IMP_TOOTH : 2
HEMMORRHOID_PROCEDURE : 1
PRIOR_MGMT : 1
WANT_HELP : 1
AFTER_TYLENOL : 1
NO_SKIN : 1
AT_OPT : 1
AFTER_STAFF : 1
BEHAVIOR_DIAG : 1
BHM_PCP : 1
WEIGH_RISKS : 1
INDUCED_ESOPHAGITIS : 1
REGARDING_LAB : 1
GIVING_AND : 1
TO_VERBALIZE : 1
RESPIRATIONS_ADDENDUM : 1
BUT_PARANOID : 1
OUTPATIENT_REFILLS : 1
EXPIRED_AND : 1
AT_TG : 1
CANCER_PRESENTS : 1
PATIENT_VERBALIZE : 1
POINT_WELL : 1
IS_OUT : 1
BE_ADMIT : 1
SPOUSE_PROVIDE : 1
ABLE_AMBULATE : 1
DOES_OF : 1
CARCINOMA_WHICH : 1
IDENTIFIED_SCHEDULED : 1
BEEN_USING : 1
PEERS_AND : 1
QUESTIONAIRE_UPON : 1
BE_USED : 1
SIDE_RIB : 1
LESIONS_DESCRIBE : 1
CARE_PLAN : 1
SEC_BEAT : 1
UNDERSTANDING_GOOD : 3
UP_BLOOD : 1
QUETIAPINE_TAB : 1
ASSOCIATED_HILAR : 1
PROVIDED_FOLLOWING : 1
COLON_IF : 1
ADDENDUM_INJURY : 1
COUNSELED_TO : 1
LOC_RATE : 1
ALERT_TURGOR : 1
LESION_ONCOLOGY : 1
ABNORMAL_AND : 1
MAKE_APPOINTMENT : 1
STAFF_AMBULATORY : 1
THE_PAST : 2
NEEDS_NONE : 1
DISTENDED_PT : 1
WAS_IT : 2
NONVA_DEXTROAMPHETAMINE : 1
CBC_DIFFICILE : 1
BEEN_ALL : 1
PO_BID : 2
BREAKFAST_TIME : 1
LEFT_AND : 2
GS_ON : 1
HAVE_NEW : 1
HIS_REQUEST : 2
TXT_SEEN : 1
HAD_FIGHTS : 1
AND_ALERT : 1
DAILY_TOOK : 1
DOCUSATE_UD : 1
BRUSHINGS_RIGHT : 1
ALLERGIES_COMPLAINT : 1
ASSUMES_RESPONSIBILITY : 1
COMPLAINT_OF : 1
ATTEMPTED_CALL : 1
THREE_ACTIVE : 1
APPLIED_DRESSING : 1
ISSUES_STATUS : 1
WELL_CONTROLED : 1
MILD_IF : 1
AT_UP : 1
CANCER_PRESCRIBED : 1
OF_SERVICE : 2
OTHER_ASKED : 1
MANATEE_HISTORY : 1
YOU_CAN : 1
ANG_AND : 1
THIS_INCLUDES : 1
MOIST_MILD : 1
PATIENT_DISCHARGE : 1
THIS_HAGERSTOWN : 1
OT_RECALL : 1
TO_WALK : 1
SI_HI : 1
HE_RETURNS : 1
WILL_WHEN : 1
STOPPED_AND : 1
ELBOW_PREPPED : 1
RESOURCES_REFERRAL : 1
GOING_UP : 1
SCORE_DUE : 1
NECESSARY_PHYSICIAN : 1
DEPRESSIVE_DISORDER : 2
WE_NURSING : 1
UNRESOLVED_WILL : 1
SOONER_APPOINTMENT : 1
PROVIDED_PLACED : 1
TESTING_KIT : 1
MONTH_FEELS : 1
COMPUTER_PROCESSED : 1
MAN_PMHX : 1
COMPLAINT_HEALTH : 1
PR_ADDENDUM : 1
TO_FECAL : 1
HARM_OTHERS : 1
BEEN_CHAIGING : 1
PER_HYPERLIPIDEMIA : 1
TIME_HAS : 1
OF_LEFT : 1
PT_VETERANS : 1
BACK_WITH : 1
WITH_ALBUTEROL : 1
TIME_THE : 1
MEDS_WANT : 1
COVER_SHEET : 1
NORMAL_VA : 1
PRESCRIBED_WAS : 1
IN_NOV : 1
COMPLETION_PSYCHIATRY : 1
PT_ON : 5
FEELINGS_HAS : 1
THE_IF : 2
FIGHTS_HE : 1
CHAIR_OF : 1
DATE_SERVICE : 1
DATED_RECENTLY : 1
VOMITING_NIGHT : 1
HELP_HIM : 1
BY_RHYTHM : 1
OFF_STREETS : 1
TOMORROW_IS : 1
REPORTS_HAVING : 1
VITAL_FLASHBACKS : 1
MITRAL_VALVE : 1
REPORT_BEEN : 1
STATEMENTS_DATE : 1
NO_THIS : 1
INDEPENDENT_ROOM : 1
BACK_TELL : 1
ORAL_DX : 1
COMPENSABLE_DISABILITY : 1
STATES_OTHER : 1
MEDICATION_AS : 1
PT_TO : 2
IF_NEED : 1
AFFECT_BRIGHTER : 1
GOOD_HYGIENE : 1
PRESSURE_READING : 1
STATUS_PC : 1
ISSUES_TO : 1
NEXT_PCP : 1
PH_WAS : 1
VET_ED : 1
THE_SYNCOPE : 1
URINAL_REACH : 1
TRUNK_ATHETOID : 1
IS_LEAVING : 1
LIVING_OFF : 1
SIDE_RIGHT : 1
HEALTH_DELIVERY : 1
PAIN_IS : 1
THE_IT : 1
HIS_TEAM : 1
BE_DATE : 1
TO_REDUCE : 2
CALLED_PAT : 1
OR_SIGNIFICANT : 1
THAT_TELL : 1
PRIMARY_CARE : 2
TREATMENT_PT : 1
BY_THREE : 2
ONCE_DAILY : 1
CONTINUES_SMOKE : 1
LAST_TIME : 1
REFERRING_DIAGNOSIS : 1
AFFECT_IS : 1
OF_INR : 1
SPECIMEN_AND : 1
YOUR_LAST : 1
SPOKE_HIS : 1
CLINIC_ADDENDUM : 1
AND_LIKE : 1
DEPRESSION_OR : 1
CAREGIVER_FOR : 1
MEDICATED_PAIN : 1
EVALUATION_ATIENT : 1
ENCOURAGE_GOOD : 1
DX_IMP : 1
MOISTURE_TURGOR : 1
LAB_CHECK : 1
WEIGH_THE : 1
REQUESTED_SUPPLY : 1
WRITER_NOTIFY : 1
SCHEDULED_APPTS : 1
ULCERS_OR : 1
HIM_AND : 1
IDENTIFIED_TONJA : 1
DIAGNOSIS_BRANCH : 1
PAIN_LOC : 1
PT_GIVEN : 3
PATIENT_OF : 2
TO_ORDER : 1
THE_DEMONSTRATED : 1
DISCHARGE_DISCHARGE : 1
ACTIVE_MEDICATIONS : 3
WEIGHT_LB : 4
NOV_AND : 1
MED_TERAZOSIN : 1
DATE_DISCHARGED : 1
TID_ACTIVE : 1
RESCHEDULE_APPOINTMENT : 1
COPIES_OF : 2
AUDIOLOGY_ON : 1
ADMISSION_WAS : 1
OR_DOB : 1
FOR_MH : 1
INTERN_EMERGENCY : 1
CONSULT_ALL : 1
PLAN_AH : 1
AM_VETERAN : 1
THIS_SERVICE : 1
FRUSTRATED_BILLING : 1
PLAN_BRONCH : 1
MILD_ALCOHOL : 1
RETURNS_TO : 1
INSIGHT_INTO : 1
DISTENDED_MULTIVITAMIN : 1
TO_ELBOW : 1
WITHDRAWAL_THIS : 1
AND_HIS : 3
RECEIVED_RX : 1
BRAIN_AND : 1
HAS_MEANS : 1
PMHX_AS : 1
LAST_WEEK : 1
WELL_PARANOID : 1
NIGHT_WILL : 1
TESTING_PRESCRIBED : 1
TO_QUIT : 1
ALSO_THAT : 1
MS_AND : 1
TAKE_ONEHALF : 1
BONTKE_MD : 1
BITING_CHEWING : 1
RESTLESS_PHOENIX : 1
SPECIAL_DIZZINESS : 1
THAT_AVAILABLE : 1
MCBRIDE_SOCIAL : 1
IS_GUARDED : 1
VOIDING_URINAL : 1
PARONYCHIA_NOTE : 1
OBSERVED_IN : 1
PROVIDED_THE : 2
LISINOPRIL_TAB : 1
LUMBOSACRAL_SPONDYLOSIS : 1
SESSION_ADLS : 1
FEW_AREA : 1
KNEE_PAIN : 1
COMPLETED_PATIENT : 1
PLACE_BUT : 1
OF_SHIFT : 1
INDEPENDENT_CASE : 1
HAVE_REGARDING : 1
HAVE_MADE : 1
MAKE_CURRENTLY : 1
HISTORY_PRESENT : 1
OF_CREST : 1
VALVE_AREA : 1
SOMETHNG_LIKE : 1
VA_HOSPITAL : 1
TO_PATIENT : 4
NUTRITION_SCREEN : 2
WILL_SUBJECTIVE : 1
FRIENDS_RELAPSE : 1
MG_PO : 10
LOW_DENIES : 1
GAIT_CAUSE : 1
BS_TO : 1
COMPLAINTS_PROBLEM : 1
DAUGHTER_DONNA : 1
CONTROLS_BEDSIDE : 1
HAS_JUST : 1
PHYSICIAN_SEVERE : 1
AN_THIS : 1
RIGHT_FOR : 1
DRUG_LUNGS : 1
BEEN_WITH : 1
MANY_WITH : 1
NO_DISTRESS : 1
THE_MORNING : 1
ONE_THE : 1
PLAN_ATTENDING : 1
OR_CHEST : 1
OUT_PAIN : 2
CONTROL_HEARING : 1
APPTS_HANDOUT : 1
WALKIN_COMPLETION : 1
BETTER_THAN : 1
HER_TO : 1
REGULARITY_MONITOR : 1
ASSOCIATE_PROVIDER : 2
AMBULATE_WITHOUT : 1
NOTED_PT : 1
HAD_GIVE : 1
NURSING_DISCHARGE : 1
DISTURBANCE_AID : 1
PT_ALERT : 1
TELE_TO : 1
HE_MULTIPLE : 1
FORAMEN_RELATED : 1
KEEP_HAD : 1
VOIDING_IN : 1
IV_ACCESS : 1
EXERCISE_DISPOSITION : 1
INDICATION_SIDE : 1
NO_VIVID : 1
CLINIC_AS : 1
REG_EVEN : 1
ANY_NEW : 1
OIF_OEF : 1
LAST_NO : 1
NUMB_OR : 1
AND_PLAN : 1
PER_PC : 1
ADDENDUM_AMOXICILLIN : 1
BY_EXERCISE : 1
MALE_ON : 1
ATTEMPTING_GAIN : 1
BE_DEPT : 1
TONJA_OF : 1
NORMAL_FOR : 1
PATIENT_PREVIOUSLY : 1
IN_SOA : 1
OR_CELL : 1
PINHOLE_SOURCE : 1
PCP_MESSAGE : 1
HEALTHPSYCHIATRIC_HISTORY : 1
IS_DENYING : 1
ISNT_WORKING : 1
PT_SEEN : 1
BATH_PAIN : 1
ERDMAN_ABOUT : 1
AT_DISCHARGE : 1
IDENTIFIED_LIKE : 1
AND_AND : 4
NSVT_BEAT : 1
URINAL_AND : 1
HOW_DRUGS : 1
BACK_MEDICATED : 1
LIFESTYLE_TRANSCRIPTIONIST : 1
ALERT_ORINTED : 1
COMPLETION_MD : 1
EDUCATION_DISPOSITION : 1
DISCHARGE_HOME : 1
SENT_AMR : 1
WITH_IODOSORB : 1
IS_WEAK : 1
IS_SOCIABLE : 1
SOAP_FORMAT : 1
II_UNSPECIFIED : 1
THERAPIST_FOCUS : 1
HHA_WK : 1
INSTRUCTED_TO : 1
READINESS_TO : 2
NA_UD : 1
FOLLOWUP_INFUSIONS : 1
OF_MOISTURE : 1
EXERCISE_SACPREPRIMARY : 1
NO_LNC : 1
FOLLOW_HE : 1
FOLLOWING_SERVICE : 1
HE_DRIVING : 1
OUT_RIGHT : 1
CVA_PT : 1
POWERLESS_AND : 1
NOTE_LEFT : 1
UNDER_PAST : 1
IN_PLACE : 2
VIEW_FOR : 1
BAKER_ACT : 1
TEST_THIS : 1
WITH_DOW : 1
ABOVE_INDICATION : 1
THE_COVER : 1
IRREGULAR_HEART : 1
THIS_YEAR : 1
SPENT_MUCH : 1
SOURCE_OF : 1
DATE_UNABLE : 1
LACERATION_PODIATRY : 1
RES_SEPOCT : 1
ANSWER_IDENTIFIED : 1
HAVE_BEEN : 2
INCREASED_TO : 1
LESION_PCP : 1
IDENTIFIED_SCORE : 1
DX_REFER : 1
SHOW_CR : 1
BLOOD_REGARDING : 1
VETS_PT : 1
CONTINUE_MONITOR : 2
CORRESPOND_MILD : 1
OBJECTIVE_SESSION : 1
ADAMANTLY_DENIES : 1
AMBULATORY_CALL : 1
ADMITTED_PER : 1
AND_ADVISED : 1
PROBLEM_MET : 1
TO_OUT : 1
MEDICATION_PRIOR : 1
HIS_URINAL : 1
VET_BE : 1
HOW_MORE : 1
NO_EXAM : 1
CODE_FOR : 1
LAB_RESULTS : 1
NOTE_PHONE : 1
HER_READ : 1
APLIGRAFT_ON : 1
SCHED_TOMORROW : 1
DJD_COPD : 1
OLD_ALBUTEROL : 1
HEART_DISEASE : 1
FIBRILLATION_FOLLOWUP : 1
REVIEWED_THE : 1
SERVICE_MULTIPLE : 1
AS_FEELS : 1
PER_EXPIRES : 1
GENDER_MALE : 1
WORSENED_WALKING : 1
REACH_URINAL : 1
STATUS_TO : 1
OF_SMOKING : 1
ROOM_AIR : 1
PATIENT_ON : 3
EXPLAINED_DOSE : 1
ASYMPTOMATIC_AND : 2
EDATIVE_ANTIANXIETY : 1
OF_MOUNTAIN : 1
MONEY_SAFE : 1
BRUSHINGS_UPPER : 1
NITROGEN_MG : 1
SCREEN_CARDIOVASCULAR : 1
TO_DISCUSS : 1
LIST_YEARS : 1
TRIGLYCERIDES_PATIENT : 1
MON_WRITER : 1
SIGNS_OF : 1
LOW_ECTOPY : 1
ALL_THE : 2
CURRENTLY_TAKING : 1
CONTACTED_VET : 1
BP_MINUTES : 1
MEDICATED_FOR : 1
MEDICATION_LIST : 1
THE_MITRAL : 1
MINNICH_SAFETY : 1
ESOPHAGEAL_HYPERLIPIDEMIA : 1
AND_CBC : 1
CM_LB : 1
PLAN_AND : 1
PTSD_TO : 1
WAS_BUT : 1
WITH_CHIEF : 1
GIVEN_COMPLETELY : 1
MR_SINGLE : 1
LEFT_VOLUMES : 1
DISABILITY_IN : 1
THINK_WERE : 1
ATTEMPTS_TEMPERATURE : 1
MARITAL_MARRIED : 1
WAS_MOUNTAINCREST : 1
AN_ALCOHOL : 1
LIKE_THAT : 1
FROM_JUST : 1
NOTE_WHAT : 1
POSSIBILITY_OF : 1
OR_SUPERVISION : 1
! Stats words=1752  pairs=8655
