# Supplementary material for: Predicting the Risk of Suicide by Analyzing the Text of Clinical Notes
Source: PLoS One. 2014 Jan 28;9(1):e85733. doi: 10.1371/journal.pone.0085733 (PMC3904866; doi:10.1371/journal.pone.0085733)
Supplement: Appendix S3 — Machine Learning Libraries and Methods: This section is provided to enclose the open source (Apache License) classifier used for the building of the statistical models, specifically for the purposes of study reproducibility. A detailed account of these tools is intended for another publication. (ZIP) [file pone.0085733.s003.zip › Appendix3/ML_libs/Regression_testing/group2/processed/grp2-pt-1018.dat]

!  Done reading
! Total word count = 5312
! Total unique words = 1974
! Total pair count = 10620
! Total unique pairs = 9425
CONTL : 1
LOBE : 1
SORE : 1
AT : 34
WM : 1
DENY : 1
ONLY : 1
PALPITATIONS : 1
WORK : 6
EVENING : 2
PREOP : 4
SURROUNDINGS : 1
LISINOPRIL : 2
SH : 1
LOWER : 1
EVENTS : 1
MONTH : 2
ULCER : 1
REFILLS : 1
LAND : 1
ACCIDENT : 1
DANGER : 1
WEIGHT : 4
BEEN : 16
STAY : 1
GOALWHAT : 2
WITHIN : 7
BASE : 2
QUADRANTS : 1
ECH : 1
LOCK : 2
ACCORDING : 1
SELFREFERRED : 1
PROBELMS : 1
MINUTE : 2
TREATMENTS : 1
OUTPATIENT : 8
GOES : 2
WEEKLY : 1
INSTRUCTED : 1
INTAKE : 4
SHORTNESS : 1
INPATIENT : 8
DIURETICS : 2
LO : 1
TOMORROW : 4
COUNSELING : 4
COORDINATES : 1
ELOPEMENT : 1
FT : 1
AGENT : 1
RELATED : 6
PURIFIED : 1
USE : 7
SIZED : 1
PEPPER : 1
IRVING : 1
CC : 4
RR : 1
DISCHARGED : 2
PARTICULARLY : 1
SUPPLIES : 2
STRATTERA : 1
TWICE : 3
PHD : 1
REGARDING : 4
ASA : 1
SECURITY : 1
CHEW : 1
HARM : 2
VETERANS : 3
READING : 4
SCHEDULING : 1
LEVEL : 10
CHANGES : 2
ALCOHOL : 7
TWI : 1
INABILITY : 1
TRIED : 2
PERSONAL : 2
FAX : 1
COLLABORATE : 1
CHARACTERISTICS : 1
VISITATION : 1
SEEMS : 1
IDENTIFYING : 2
WASHINGTON : 1
TRAUMA : 1
SHOULDER : 1
MACHINE : 1
HIS : 34
COORDINATOR : 2
COPD : 2
LATEST : 1
TUBERCULIN : 1
ID : 4
SOURCES : 1
CREATOR : 1
MEAL : 1
APPARENTLY : 1
GM : 1
MAX : 1
TIRES : 1
ERYTHEMIA : 1
ASARCO : 1
NEURO : 1
APPROPRIATE : 3
SUGGESTED : 1
DIAMETER : 1
LUE : 1
DIRECTIVE : 3
ATTORNEY : 3
WELL : 4
KNOWN : 1
SHOWED : 1
HEALED : 1
DISORDER : 3
MEDICINE : 1
FOSTER : 1
TEST : 8
NOTE : 35
ISOLATIVE : 1
REASONS : 2
INCREASING : 1
TRIGEMINY : 1
CONTACTED : 2
HARD : 2
LDL : 2
PARENTS : 1
JULY : 1
PEN : 1
FSOME : 1
DO : 1
DOES : 5
TALKED : 3
TESTS : 2
EXTENSIONS : 1
TREATMENT : 10
BLOOD : 4
SAME : 3
WORKER : 1
ACCESS : 1
CV : 1
ASSIST : 2
BATTERY : 1
HAVE : 11
ADVERSE : 1
LOGICAL : 3
DOLLARS : 1
VOLUNTEER : 1
SCHEDULED : 3
ASK : 1
ARGE : 1
DRUG : 2
OF : 109
PUFF : 1
TAB : 15
DRUNK : 1
DU : 1
CALLER : 3
STABLE : 1
REQUIRED : 2
PSYCHIATRY : 2
HAS : 29
FOR : 70
CAREY : 1
ORCHARD : 1
SHAVE : 1
DOWNGRADED : 1
ANWER : 1
GRANULAR : 1
PERCEPTION : 1
CONDITION : 5
NUTRITION : 4
SAID : 1
FEV : 1
NUMBER : 7
DETOX : 1
UNDERSTAND : 1
PERIAPICAL : 1
DOMINANT : 1
HOMELESS : 1
MORNING : 1
STAPERT : 1
ACCUCHEK : 1
MUCOUS : 1
ASSESSED : 1
AID : 3
OBTAINING : 1
SPONGE : 1
KNEE : 1
INTENSE : 1
HEAR : 1
ULCERS : 1
ASTHMA : 1
SC : 5
FIBER : 1
ABILIFY : 1
CLOTHING : 1
MY : 2
NURS : 1
LEGAL : 2
MUST : 1
IDEATION : 5
MONOFILAMENT : 1
TXC : 3
RECREATION : 2
SATURATION : 2
MESSAGE : 3
THY : 1
PARANOIA : 1
COLONOSCOPY : 2
DOUCHE : 1
THEM : 1
SUBSTANCE : 3
GOALS : 1
ASSESSMENT : 9
RESPIRATORY : 1
DEFINITIVE : 1
MEDIAN : 1
QUITTING : 1
ACTIVITY : 2
BUSY : 1
INVOLUNTARY : 1
METAL : 1
HISPANIC : 1
OWN : 3
NOTIFYING : 1
GATZMAN : 1
SHOWS : 2
ND : 1
ATTACHED : 2
ACCUCHECK : 1
CONSULTS : 1
ENCOURAGED : 3
BM : 1
REGISTERED : 1
PARTICIPANTS : 1
INFORMATION : 8
ANONYMOUS : 1
TYPICAL : 1
DCF : 1
INITIAL : 3
RECIPIENT : 1
ISUFF : 1
DEXTROSE : 1
CENTER : 1
EXAM : 4
PROSTATITIS : 1
RECON : 1
NONVISIT : 1
RESPONDS : 1
ROLLING : 1
COLLISION : 1
ACHIEVE : 1
SUICIDE : 1
MEDICARE : 1
THE : 110
NURSES : 1
INFORM : 1
JUST : 3
INCREASED : 1
FILED : 1
PHONED : 2
PRESENTS : 2
GROUP : 8
DURATION : 1
IDENTIFY : 1
TBBX : 1
REST : 1
CBCB : 1
ANTIANXIETY : 2
OCT : 1
PULSES : 2
GO : 1
SIGNIFICANT : 3
UCC : 1
BOWEL : 2
UD : 1
COLOR : 2
LEG : 1
BP : 4
OPT : 1
MEDS : 10
CASCADE : 1
KNOWING : 1
POSE : 1
CT : 1
PREVENTION : 1
POST : 1
DEPRESSION : 2
SEPTEMBER : 1
SON : 1
BYPASS : 1
CM : 3
DISCOVERED : 1
RECALL : 1
AGREEMENT : 1
AGAIN : 3
CITALOPRAM : 2
ANXIOUS : 1
DESCRIBE : 1
TID : 2
CAP : 3
SILLY : 1
DIET : 4
STATED : 9
BATHING : 4
HEARING : 1
SHOES : 1
ATTEND : 1
FINANCES : 1
POSITIONS : 1
AXIS : 1
GET : 1
ANTIHYPERTENSIVES : 2
WT : 3
WHAT : 5
RA : 2
RESTRICTIONS : 1
PLANS : 2
DIETARY : 1
WHEREIN : 1
JOKING : 1
AROUSABLE : 1
BENEFITS : 1
ALBUTEROL : 3
BOTHERED : 1
STARTED : 5
LIFT : 1
ASSISTANCE : 1
INJECTED : 1
DIABETIC : 2
SCANNED : 1
YE : 1
MELLITUS : 1
BBS : 1
OR : 29
SHIFT : 2
DESIGNED : 1
CITY : 1
YEAR : 3
TEMP : 2
PRESCRIPTION : 4
COPY : 3
ALREADY : 2
PULMONARY : 1
CONCERNS : 1
LB : 3
COUMADIN : 1
AIR : 1
DE : 1
TRANSCRIPTIONIST : 1
LIKE : 2
CALORIE : 2
LORATADINE : 1
PUT : 2
GI : 3
PRE : 1
SEEN : 1
EXPERIENCE : 1
UNREST : 1
FOOD : 1
MAILED : 1
NURSE : 7
SX : 1
APARTMENT : 1
MUCH : 2
LABORATORY : 1
UDS : 1
BREADTH : 1
CHRONIC : 2
STOLEN : 1
CLINICS : 1
TAKE : 8
INTERVIEW : 2
SECTION : 2
SENSORY : 2
EXHIBITED : 1
INCREASE : 1
ATTACKS : 1
WITHDRAWAL : 1
MONITORED : 1
GIVES : 1
TRY : 1
ANY : 10
DISCHARGE : 9
PAYMENT : 1
RECORDS : 1
SYSTEMS : 1
MOISTURE : 1
QH : 2
FACILITIES : 1
ALTERED : 1
BESYLATE : 3
SW : 4
TOLERATED : 1
INTRAMUSCULAR : 1
TENDER : 1
PERCOCET : 1
IID : 2
INJECT : 1
APPLIANCES : 1
PSYCHOTROPIC : 2
NONCOMPLIANCE : 1
MAINTAIN : 2
FACILITY : 3
MALATHI : 2
MHSGENERAL : 1
EXPIRATION : 1
LASER : 1
UNIT : 9
THINK : 1
RESOLVES : 1
EFFECTS : 2
THRUSH : 1
MD : 3
TOB : 1
SECONDARY : 3
INTERACTS : 1
NAME : 5
CARE : 22
MSE : 1
FORT : 1
OFFER : 2
ANYMORE : 1
EVERY : 1
AGE : 2
AMBULATED : 2
RESTRICTIVE : 1
RESOLVE : 1
KUWAIT : 1
PATCHROTATE : 1
INTENT : 1
SKIN : 6
RATED : 1
TIMES : 2
YESTER : 3
IS : 51
NOT : 28
BENEFIT : 3
FLUIDS : 1
METHACH : 1
IF : 15
HARDCOPY : 1
PERVIOUSLY : 1
RETINOPATHY : 1
HOUSEKEEPING : 2
CHLORIDE : 1
MH : 8
THERE : 4
PENDING : 1
EXPECTED : 1
PERSONNEL : 1
BAND : 3
ONCE : 3
PERRLA : 1
HERE : 4
UPSETTING : 1
BOND : 1
FACET : 1
SKILLS : 1
IM : 3
ANES : 1
EATING : 1
CVA : 1
POSITIVE : 1
TCBP : 1
CLEAN : 1
OXIMETRY : 1
NPDR : 1
ANGER : 1
ONEHALF : 2
TRANSFERS : 2
NAUSE : 1
FEB : 1
EVALUATION : 7
AORTOCORONARY : 1
ACKNOWLEDGED : 1
CTRS : 3
PASTORAL : 2
ANTIDIABETICS : 1
BUYING : 1
WK : 2
PROGRESS : 3
RHYTHM : 2
REFUSED : 1
CMM : 1
REHAB : 1
PSYCHOTHERAPY : 1
RADIOLOGIC : 1
MOVIE : 1
THESE : 1
ASSESS : 4
REPEAT : 2
VISION : 1
TRAITS : 1
VET : 8
STOOL : 1
ANITA : 1
UPCOMING : 1
BEST : 2
COMPLETION : 1
NONPRESCRIPTION : 1
VERDSOME : 2
CASTS : 1
CORP : 1
DATIVE : 1
ENGE : 2
DP : 1
TSH : 1
DROP : 1
PARTICIPATION : 1
EDUCATED : 1
EXPERIENCING : 1
NEUROPSYCHOLO : 1
PAINFUL : 1
HOWEVER : 2
BACK : 4
HYPERVENTILATON : 1
CURVE : 1
SOURCE : 1
TUES : 1
VISITING : 1
TRANSPORTATION : 2
HEIGHT : 3
MALE : 7
SUBJECT : 2
HIGHWAY : 1
VOIDED : 2
CAR : 2
ADDENDUM : 15
FULL : 1
BY : 22
SITES : 2
PMH : 1
BMS : 1
NO : 58
INTENSITY : 3
CLINICAL : 1
ADMINISTER : 1
HEMOGLOBIN : 2
BENZOS : 1
SHARE : 1
REASSESSMENT : 1
CASTLE : 1
KNOWS : 1
INTERVENING : 1
ACCESSION : 1
CHIEF : 3
ANTIHIS : 1
LARGE : 4
PB : 1
VEHICLE : 1
SATT : 3
OBVIOUS : 1
MEETING : 1
INJURIES : 1
UPPER : 1
TH : 1
CONVERSE : 1
HYPOTHYROIDISM : 1
CONVERSATION : 1
GUARDIANSHIP : 1
LUMBOSACRAL : 2
MEET : 2
RISK : 9
CLINIC : 7
GUARDED : 1
DISTRACTION : 1
RECEIVING : 1
VERBALLY : 1
TO : 155
BMI : 1
POINT : 1
COLLINS : 3
HYPERMETAB : 1
NARRATIVE : 1
IV : 4
PRN : 4
DECIDE : 1
DIPTHERIA : 1
DOENPEZIL : 1
ABUSE : 4
GOLD : 1
ADVANCE : 3
COUNCELLED : 1
COUNSELED : 1
SINUSES : 1
PROUD : 1
FM : 1
BONE : 1
DX : 4
QAM : 2
PROCEDURE : 6
OBSERVE : 1
REQUESTING : 1
WILL : 16
SEEMING : 1
OFTEN : 1
PORT : 1
BUT : 8
ASKED : 3
THOUGHTS : 2
COORDINATION : 1
WEAR : 2
SITESDO : 1
TYPE : 4
REPRESENTATIVE : 1
CAREGIVER : 1
TV : 1
WOULDS : 1
LIQUID : 1
WHETHER : 1
SEE : 8
PAYMENTS : 1
GETS : 1
NONS : 1
PLEASE : 2
ANEMIA : 1
KIT : 1
OCCASSIONAL : 1
STATUS : 9
DYSPLASIA : 1
LLY : 1
CONTINENCE : 1
LOSE : 1
DIABETES : 1
DC : 1
MARITAL : 1
SPENT : 2
EFFECTIVE : 1
SUGGESTIVE : 1
CONTINUED : 2
CONSULT : 2
TESTING : 1
PLAYING : 1
OUT : 7
COMFORT : 1
HR : 2
EFFORTS : 1
EABLE : 1
SUPPORT : 1
BSOME : 1
FIND : 1
WANTS : 4
PANICKED : 1
FOCI : 1
DEPENDING : 2
QHPRN : 1
AIRFLOW : 1
QID : 1
SCREEN : 1
PRESENTED : 1
ONC : 1
EVALUATED : 1
SIGN : 1
ASSIGNED : 1
FREELY : 1
REVIEW : 4
LIKELY : 3
MAINTAINED : 1
HIMSELF : 1
NEEDED : 5
MENTAL : 5
COMES : 1
ABNORMALITIES : 1
INJECTION : 1
GERD : 1
THREATENING : 1
BROUGHT : 1
WERE : 3
HFA : 1
FACTORS : 2
IMMOBILIZATION : 1
MAN : 1
AVAILABLITY : 1
FILL : 2
MICROSCOPIC : 1
RESIDENT : 3
WALKS : 1
CHANGING : 1
INSTRUCTIONS : 4
METATARSAL : 1
LABS : 3
VA : 7
JOB : 1
SPC : 2
TRACKING : 1
WAYS : 1
HELPFUL : 1
PRISION : 1
TRIAGE : 1
RESIDENCE : 1
CH : 1
ATTENDENCE : 1
HELPING : 1
WORTH : 1
PART : 1
INTRODUCER : 1
SMOKER : 1
DETERMINED : 1
FAMILY : 5
RESPO : 1
DISEASE : 2
PAIN : 37
PCRN : 1
WHEN : 11
AMBULATORY : 4
AS : 24
VISTA : 1
BEING : 5
STOKING : 1
RESTRAINTS : 1
WITHHOLDING : 1
JOBS : 1
BIOMEDICAL : 1
INCOME : 1
ABOVE : 2
AMOUNT : 3
DRAINAGE : 1
LT : 1
WAS : 42
FLOOR : 1
RIDE : 2
PM : 4
INTEG : 1
MULT : 1
WITH : 61
ORI : 1
ENGES : 1
TUB : 1
GLUCOSAMINE : 1
COMINGT : 1
AFFAIRS : 1
THEREFORE : 1
OFFERED : 2
FORM : 3
CONDITIONS : 2
AC : 1
TEMPERATURE : 3
PUTTING : 2
SIG : 1
METHEADS : 1
ALTERCATION : 1
COUPLE : 1
DRINKING : 2
BASIS : 1
INDEX : 1
SWMF : 1
CDI : 1
ABD : 2
NOW : 5
TMS : 1
INCLUDING : 3
PTSD : 2
EQUATES : 1
CALLERS : 3
INTACT : 2
SUB : 2
COPING : 1
NORVASC : 1
CONFIRMED : 1
HYDROCODONE : 2
USED : 1
IT : 8
SHOT : 2
STRAP : 1
BEDTIME : 1
BELOW : 2
LIST : 3
STUDY : 1
TROUBLE : 1
ALLEGES : 1
NEGLECT : 2
COPIES : 1
MOSTLY : 1
STAFFED : 1
SA : 1
DISCUSSED : 6
CA : 1
SUCCINATE : 1
IRRG : 1
SHOWER : 1
VOMITING : 1
CHEM : 1
TIME : 20
LIPS : 1
CODE : 1
DEVICE : 2
INTRAORAL : 1
ESOPHAGEAL : 1
ORIENTED : 6
QUATTLEBAUM : 2
MJ : 1
HCL : 1
CURRENTLY : 2
NECK : 1
TEETH : 1
ADDITIONAL : 2
OXYCODONE : 2
SAFETY : 1
SIDE : 1
SIMVASTATIN : 1
JOINT : 1
RESPIRATIONS : 2
BETWEEN : 1
SUSTAINS : 1
ALLERGY : 1
DOCTOR : 1
REPAIR : 1
SEDATION : 1
GOING : 3
DID : 2
CALL : 6
ESTABLISHED : 1
MOST : 2
6A : 1
RESULT : 1
DYSPHAGIA : 1
HX : 4
MHC : 1
BIRTH : 1
PROFESSIONAL : 1
ADDRESS : 1
TELEPHONE : 14
COHERENT : 1
FACILITATORS : 1
PRINCIPAL : 1
REFERRALS : 1
UNSPECIFIED : 2
SOB : 1
VNS : 1
COMPLAINING : 3
COOPERATIVE : 3
MOTIVATION : 2
REPORTS : 3
RELIABLE : 1
SUBJECTIVE : 3
SODA : 1
INGUINAL : 1
HEM : 1
HELP : 2
OPTIONS : 1
FRI : 1
PER : 1
COMING : 1
CONTINUES : 1
YES : 15
FRIEND : 1
SMILING : 1
ETC : 1
CONSENT : 2
NOTICED : 1
MOBILITY : 1
CHF : 1
WHOM : 1
YOUR : 7
PRECAUTIONS : 1
LEISURE : 1
DOING : 1
GIVEN : 8
MASSES : 1
PROBE : 1
VACCINATION : 1
LETTING : 1
TACHYCARDIA : 1
SUCCESSFUL : 1
HPI : 2
ILLICIT : 1
QUITE : 3
WHO : 4
HT : 1
HES : 1
UPON : 1
ED : 6
EXCEPTION : 1
LUBBOCK : 1
SURG : 1
DIARRHEA : 3
INSTITUTE : 1
VERBALIZES : 1
BASED : 1
MEMBRANES : 1
COOPERATING : 1
PHYSICIAN : 8
DAUGHTER : 2
LACERATION : 1
COMPREHENSIVE : 1
COMPLIANCE : 1
INTOXICATED : 1
CURRENT : 11
CONTROL : 1
URGENT : 1
TOOTH : 2
STRAIGHTENED : 1
DEPENDENCE : 1
HIM : 12
DEMOGRAPHICS : 1
UH : 2
CESSATION : 1
PULSE : 7
HE : 63
CRAMPING : 1
NEXT : 3
TEMPORARY : 1
RX : 1
THEY : 2
NEEDS : 3
AGERELATED : 1
RATE : 2
EASY : 1
REFERRED : 1
MANUAL : 1
MEDIUM : 1
ADA : 1
COVERED : 2
FREQUENT : 1
MASS : 1
FELT : 2
PHYSIOLOGICAL : 1
ACCEPTED : 1
TIS : 1
WATER : 1
HAYS : 1
TRANSFER : 4
VSS : 2
PROGRESSIVELY : 1
PSYPC : 1
VALUABLES : 1
PHONE : 12
ML : 4
VANOD : 1
ADJUSTING : 1
CHECKED : 2
CLEAR : 5
PREDICTING : 1
MSW : 1
NOSTRIL : 1
IPRATROPIUM : 2
PAMPHLET : 1
PRIMARY : 8
FAIR : 1
DRY : 2
PUNCTURE : 1
SIERRA : 1
CHERRY : 1
ABDOMINAL : 1
UNTIL : 2
BS : 1
HAD : 5
RALIZED : 1
AVH : 1
SIGNS : 6
SOUNDED : 1
CAUTIOUS : 1
SEV : 1
DEPARTMENT : 1
LOSS : 2
SISTER : 3
PATIENTS : 9
PASSIVE : 1
SUMMARY : 1
MRSA : 3
DISTURBANCE : 1
IMFC : 1
ROI : 1
HUMAN : 1
ASSISTING : 1
BRONCHOSCOPY : 3
CONSTITUTE : 1
PROVIDED : 6
SLIDING : 1
DRINK : 2
PRESENTLY : 1
JOE : 1
YO : 3
NEGATIVE : 3
SUPPLE : 1
NEUROLOGY : 1
TWO : 3
KLINE : 1
NONE : 7
WRITTEN : 5
COUPLES : 1
RECOMMENDATIONS : 1
OUTCOMES : 1
II : 1
LOT : 1
SPUTUM : 1
LAB : 5
4D : 1
ANGRY : 1
SALINE : 2
WEAK : 1
LESIONS : 1
TRAVEL : 1
RD : 1
DIAGNOSTIC : 2
ING : 1
THINKING : 1
COMPLAINTS : 1
TTNA : 1
CONTACT : 11
NOTIFIED : 1
VASC : 1
CALM : 1
SCHEDULE : 3
HER : 6
TOPIC : 2
ORDERED : 4
PPP : 2
DAILYTX : 1
TURN : 1
FEELING : 2
SHOULD : 1
TERAZOSIN : 1
FEARS : 1
IMPAIRED : 1
EDUCATE : 1
BEHAVIORAL : 2
PEERS : 2
PROBLEMS : 5
URINE : 3
YELLOW : 1
RTC : 5
NEUROLOGICAL : 1
GIVE : 3
ROUTE : 1
KNEES : 1
CAN : 3
THERAPIST : 1
CATS : 1
THERAPY : 8
SEEING : 1
PSYCH : 1
PLACE : 3
PRIVATE : 3
LIVING : 2
LITTL : 1
AWARE : 1
NONVA : 1
WHICH : 6
SYMPTOMS : 4
COMFORTABLE : 1
RANGE : 1
NOTES : 1
INTERN : 1
KVO : 1
OVER : 2
TOPIRAMATE : 1
MG : 25
VISITS : 1
ON : 42
QUIT : 4
ADMINISTRATION : 1
PRESSURE : 3
TETANUS : 1
ATTENDED : 2
VIA : 1
WAITING : 1
EXERTION : 1
HEADACHE : 1
SPECIALIST : 1
ACCEPTABLE : 2
HANDOUTS : 1
SITED : 1
GOOD : 9
ARMED : 1
FALLING : 2
REG : 1
LANSING : 1
DRUGS : 2
MED : 2
UPDATE : 1
SWINGS : 2
CONTINENT : 2
INHALER : 1
FIRE : 1
REMEMBERED : 1
EDEMA : 1
SODIUM : 1
SEIZURE : 1
HEELS : 1
WORSE : 1
WEEKEND : 1
PROVIDER : 8
DONT : 2
SHE : 2
INSURANCE : 1
PO : 9
UP : 9
MULTIPLE : 1
THEN : 1
LOCATION : 1
FEW : 3
APPOINTED : 2
KEEPING : 1
ALERT : 5
ZZPALLIATIVE : 1
LETHALITY : 1
IL : 1
PRIOR : 3
VERBAL : 4
SEP : 1
OFF : 7
UNDER : 2
DOCUMENTED : 2
GOT : 2
DATE : 12
TG : 2
GALLY : 1
PARALYSIS : 1
COMMENT : 1
UNCERTAIN : 1
RELATES : 1
DAILY : 4
STUPID : 1
THREE : 2
PA : 1
STEP : 1
GRASP : 1
OVERDRESSED : 1
DOSAGE : 1
DARK : 1
COLLECTION : 1
ICU : 1
PROGRAM : 2
MUSKOGEE : 1
LONG : 2
GRADE : 1
SATP : 1
ACCEPTING : 4
APPOINTMENT : 7
WOULD : 7
TUCSON : 1
FOLLOW : 2
WHEELCHAIR : 3
HOUSING : 1
FROM : 12
ENEMA : 1
LEFT : 10
FACILITATED : 1
METHOD : 1
BATH : 1
WEDDING : 1
WHEEZING : 2
REALITY : 1
HOMICIDAL : 1
MEDICAL : 11
HEAD : 3
STRING : 1
IR : 1
BECOME : 1
AMITRIPTYLINE : 1
CONTRAST : 1
ALSO : 7
SPOKE : 1
SERIOUS : 1
APPENDICEAL : 1
SYSTEM : 1
SEX : 2
ASSUMED : 1
LORAZEPAM : 1
ACTIVITIES : 2
ORDERS : 3
MRS : 1
AI : 1
QUIETLY : 1
WORKING : 2
AN : 8
MOIST : 1
ONCOLOGY : 1
CUFF : 2
UNLABORED : 1
FIREARMS : 1
SOFTERS : 1
HEART : 3
COMPLAINT : 3
SIGNATURE : 1
ORDER : 1
USING : 3
CHILD : 1
SEEK : 2
FIANC : 1
ETHNICITY : 1
ADENOCA : 1
REALLY : 1
EASILY : 1
FULLY : 1
HAND : 5
MFG : 1
BOTTLE : 1
FOUR : 1
OUTSIDE : 1
DENIED : 1
PHARMACIST : 1
EXCEED : 2
EYE : 6
BERKLEY : 1
EXTRACTION : 1
HCT : 1
URGING : 1
HYPO : 1
FELL : 1
GAVE : 2
KICKED : 1
MILIEU : 1
HIGHS : 1
DISCUSSION : 3
NEW : 2
MOUTH : 7
INQUIRE : 1
EMER : 1
YEAROLD : 2
SNORING : 1
ATTENDING : 2
CHEST : 2
HEPATITIS : 2
PRESENT : 2
OPTIC : 1
HAVING : 1
DOCUMENTATION : 1
SOME : 5
WEIGHING : 1
DT : 1
REDEFINED : 1
APPROPRIATELY : 1
SLEPT : 2
HRS : 1
PERMISSION : 1
OA : 1
ENCOURAGE : 2
ARE : 9
ANSWERED : 1
KETCHUM : 1
CECAL : 2
DESIRE : 2
STRATEGY : 1
INDEPENDENT : 1
ZOCOR : 1
NEED : 2
CORRECT : 1
PERSON : 2
WASHING : 1
CSS : 1
HORRIBLE : 1
RECEIVED : 5
ALMOST : 2
CPRS : 1
PSYCHIATRIC : 1
SURGERY : 4
RECOVERY : 1
BARRETTS : 1
LAT : 1
FREQUENCY : 1
COMPLETELY : 1
UNINTERESTED : 1
BODY : 2
INHL : 4
VENTRICULAR : 1
PREVENTIVE : 1
TLH : 1
LIES : 1
GENERAL : 2
INTERDISCIPLINARY : 1
NUMBNESS : 2
YEARS : 1
COLON : 1
EL : 1
REMINDED : 1
BE : 22
BISUL : 1
MEDICINES : 2
YR : 1
MACULAR : 1
RUN : 1
OX : 2
CANCER : 1
REFRRAL : 1
JIM : 1
GLASSES : 2
DUE : 6
RATION : 1
CLASS : 3
KRISHNASWAMY : 2
HS : 3
THEIR : 4
DISCOMFORT : 2
PING : 2
RITA : 1
QUALIFIES : 1
BRIGHT : 1
COUP : 1
SEVERE : 1
ISSUES : 2
ALONG : 2
MAINLY : 1
SOUNDS : 2
REVIEWED : 6
HEILIGENTHAL : 1
NE : 1
ISSUE : 1
DIGITS : 1
BEFORE : 2
OTHER : 8
PRODUCTIVE : 2
DRESSING : 1
ALL : 5
CAROTID : 1
QHS : 1
LIFE : 1
SECOND : 1
ME : 2
BED : 6
NURSING : 15
INHALE : 1
COMP : 1
IP : 1
ADDRESSPVH : 1
GLAXO : 1
FOLLOWING : 6
FMH : 1
IDENTIFIED : 5
ESCORTED : 1
MORSE : 2
DIAGNOSES : 2
TRAZODONE : 1
SELF : 2
PATIENT : 69
SEPARATED : 1
ALLERGIES : 3
RISPERDAL : 1
MITRALVALVE : 1
WITHOUT : 3
DIAGNOSIS : 6
REFER : 2
NONDUAL : 1
JUL : 2
SUBSEQUENTLY : 2
TRIGGERS : 1
GAYLORD : 1
PROCEEDED : 1
BRUITS : 1
SHOWING : 1
IODOSORB : 1
SLUGGISH : 1
TRAININGS : 1
SUPPOSE : 1
INTEGUMENTARY : 1
ATTENTION : 1
ANXIETY : 8
METOPROLOL : 1
NOS : 1
ARRANGEMENTS : 1
SAY : 2
THAN : 2
RARELY : 1
VALVE : 1
PODIATRY : 2
VOICE : 1
ACUTE : 4
SB : 1
SENSATION : 1
AUDITC : 2
WE : 4
QUANTUM : 1
TOILET : 1
CLOPIDOGREL : 1
PROTOCOL : 2
DECREASE : 1
DISTANCE : 1
FEE : 1
COME : 2
MCCORD : 1
ROUTINE : 1
FOUND : 3
LOOKING : 1
SAM : 1
ROOM : 3
IMPROVED : 1
FRACTURED : 1
FEET : 2
CAME : 1
THAT : 31
VISIT : 6
CHART : 1
INCREAED : 1
WIFE : 2
SIDERAILS : 2
DEPRESSED : 4
STAFF : 6
CE : 3
SERVICE : 4
AVAILABLE : 2
RIGHT : 2
PC : 2
RANDOM : 1
BREATHING : 1
VITALS : 4
SOLACE : 1
TRAILER : 1
THROAT : 1
CERTAIN : 1
ABOUT : 9
PEDAL : 1
NONNEOVASCULAR : 1
RECHECK : 2
ONE : 4
ISSU : 1
XL : 1
WANKER : 1
POTENTIAL : 2
NOTIFY : 1
NKA : 1
PTS : 2
RESPONSIBILITY : 1
SPEC : 1
ADEQUATELY : 1
THOUGHT : 4
HYPERLIPIDEMIA : 1
SPONDYLOSIS : 3
TOGETHER : 1
TABLET : 4
HYDROXYZINE : 1
ACCUSE : 1
WRITER : 1
DURING : 3
BRIDGE : 1
REC : 1
YOU : 7
JEEP : 1
ENVIRONMENT : 1
SEVERAL : 2
LISTED : 1
DIRECTED : 1
SCREENING : 3
BX : 1
CHECKS : 1
CRITERIA : 1
CYCLE : 1
VOICED : 2
INFORMED : 3
ERUPTED : 1
REACH : 3
GETTING : 4
ISSUED : 1
PAST : 4
HI : 2
CHAIR : 1
OS : 1
DOCUMENT : 1
PSA : 1
INTERESTED : 1
NUMB : 1
REASON : 2
DISABILITIES : 1
OXYGEN : 2
SCORE : 6
CXR : 1
COFFEE : 1
TOBACCO : 2
EKNUTRITION : 1
XYGEN : 1
REMINDER : 2
ROLE : 1
MDD : 1
HOME : 9
HYPERGLYCEMIA : 1
NEVER : 2
UTILITY : 1
AGREEABLE : 1
POWER : 2
CHAPLAINS : 1
NOTED : 12
WEAKNESS : 1
WORSEN : 1
DR : 1
INDIVIDUAL : 3
SOCIAL : 10
HOSPITAL : 3
RECOMMENDATION : 1
ENDORSES : 1
MAIN : 1
CROWS : 1
RETURN : 1
SUICIDAL : 7
LETHARGY : 1
MODERATE : 3
TRACKED : 1
OTHERWISE : 1
MUM : 1
EFFECT : 1
VITAL : 5
INJ : 2
MODIFICATIONS : 1
SO : 2
UPSET : 1
IMMINENT : 1
BROCHURES : 1
MIN : 2
REGULAR : 2
POOR : 1
SETTINGS : 1
TALK : 1
RECONCILIATION : 1
HEA : 1
PROTECTIVE : 1
ISNT : 2
MENINGITIS : 1
COMPUTERIZED : 1
JUDY : 1
MODE : 2
NONESSENTIAL : 1
MINUTES : 2
STRESS : 1
SWSINPATIENT : 1
BIL : 1
FOLLOWUP : 4
TOLERATING : 1
STIMULI : 1
FALLRISK : 1
IRRIGATION : 1
RISKS : 1
ARTERIOSCLEROTIC : 1
WEEK : 2
VIAL : 1
TEAM : 2
CBOC : 1
EPWORTH : 1
FALL : 7
APPRECIATION : 1
APPROVED : 1
SICK : 1
ANYWAY : 1
MOS : 1
NERVE : 1
AM : 3
PVCS : 1
MOVEMENT : 1
FAILURE : 1
IMMATURITY : 1
IMPAIRMENT : 2
MNT : 1
ONTO : 1
RUNNING : 1
GLARGINE : 1
EKG : 1
PLACEMENT : 1
DERIVATIVE : 1
PINESS : 1
MOOD : 6
WHERE : 1
MONTGOMERY : 1
RIB : 1
LIVES : 2
DNR : 2
EVENT : 1
REGIONAL : 1
REPORT : 7
PEOPLE : 1
SIGNED : 1
LEAST : 1
HARRINGTON : 1
ELECTRONICALLY : 1
DEMENTIA : 1
SPIRITUALITY : 1
HOW : 3
CALLED : 3
LIFTS : 1
MIGHT : 1
INFUSING : 1
ALLAMANDSOME : 1
FEELINGS : 2
MANY : 1
GUITAR : 1
SINCE : 3
FLU : 1
STOPPED : 1
THOSE : 1
COVERING : 1
DISCUSS : 2
CHANGE : 6
COUGH : 2
SITTING : 1
HOURLY : 1
LEARN : 2
ESOPHAGUS : 1
SOLN : 2
CPAP : 1
SOAP : 1
ONCOLOGIST : 1
TAP : 1
OFFICE : 2
MADE : 2
CARDIAC : 1
TEACHING : 1
YRS : 1
ADVISED : 5
OBTAINED : 1
MON : 2
VERBALIZED : 3
PRINTED : 1
DOSE : 3
ALVETA : 1
ENCOUNTER : 3
MONTHS : 9
SMOKING : 4
RULE : 1
AFFECT : 1
RETAINED : 1
FOLLOWS : 1
SPICIENESS : 1
LESSON : 1
UNLISTED : 1
RELEASE : 1
AVOID : 2
HOSPICE : 2
BRADEN : 1
ORIGIN : 1
LOOSE : 2
DIALOG : 1
SOMEONE : 1
BEDSIDE : 2
UCINATIONS : 1
AREAS : 1
PROCESSING : 1
ALONE : 1
STALKING : 1
WHY : 3
INSIGHT : 1
IMMEDIATE : 2
TOPICS : 2
MEDICATION : 9
RESTING : 2
STOP : 2
SURVEILLANCE : 2
WRIST : 1
ROGER : 1
COLLAGENOUS : 1
THICK : 1
COMMENTS : 5
CAUC : 1
ACETAMINOPHEN : 4
SUPPORTIVE : 1
CASE : 4
KIMBERLY : 1
ORAL : 10
CONTINUE : 4
FIANCE : 1
TOTAL : 6
ABNORMAL : 3
MVA : 2
LIGHT : 2
LBED : 1
ATTEMPS : 1
OVERSIGHT : 1
SERVICES : 4
CYSTOSCOPY : 1
GOAL : 3
SURGICAL : 1
EXAMINATION : 1
ST : 2
SUCH : 1
HISTORY : 8
PROVIDE : 1
UPDATED : 1
DEPARTEMNT : 1
RESPIRATION : 2
TEXT : 2
CED : 1
HOURS : 4
LEGS : 3
LATINO : 1
HEALTH : 8
AMIODARONE : 3
REPORTED : 4
ADD : 1
ELLIE : 1
COVERAGE : 1
PROGNOSIS : 1
HERNIA : 1
PLACED : 2
SYNCOPE : 1
REPEATABLE : 1
CANDIDATES : 1
WOUND : 4
MENTION : 1
IDEATIONS : 1
EOTH : 1
INDICATED : 3
ANTIHISTAMINES : 3
ENOXAPARIN : 1
SITE : 1
PREVIOUS : 4
SLOT : 1
SD : 2
PICKED : 1
REFERRAL : 1
INTERVENTIONS : 2
COGENTIN : 1
APPROVE : 1
STATING : 2
KG : 4
WAL : 1
VS : 1
OP : 3
MORE : 8
STANDARD : 1
SEROQUEL : 1
MAKING : 1
MINOR : 1
MUSSP : 1
RACE : 1
WENT : 3
INSULIN : 2
PROBLEM : 6
CLONAZEPAM : 1
AGENCY : 1
RECEIVE : 1
BILL : 2
SPOT : 1
DECEASED : 1
RECHECKED : 1
BLUE : 1
ER : 1
RECORD : 1
RARE : 1
CLASSIFICATION : 1
APPLICABLE : 1
SHOWN : 1
CABG : 1
REQUEST : 1
PRESCRIBED : 4
AMLODIPINE : 3
RN : 2
UNABLE : 2
XYZZY : 2
THROUGH : 4
ADLS : 1
OUTPUT : 2
PUFFS : 4
BEERS : 1
HOUSE : 3
AMT : 1
CAUSATIVE : 1
VETS : 2
HEENT : 2
LAWS : 1
AFTER : 5
PARTICIPATED : 1
ADMISSION : 6
COURSE : 1
EMPLOYMENT : 1
GUAIFENESIN : 1
STILL : 1
EMPLOYED : 1
SCALE : 9
DEF : 1
LESS : 1
NON : 1
POW : 1
NICOTINE : 1
FLUID : 1
LUMBAR : 2
GROUPS : 2
PCP : 4
INTRODUCED : 1
LCSW : 2
SAYS : 2
FUTURE : 2
APPOINTMENTS : 1
WAY : 1
TOILETING : 1
EACH : 3
ICAL : 1
INFUSED : 1
SPECIFIC : 1
ASSOCIATE : 3
DENIES : 8
PHARMACY : 3
TERMS : 1
TONIGHT : 1
OLD : 2
OTHERS : 3
FORCES : 1
REQUESTED : 2
VISITORS : 1
FOOT : 4
OVERNIGHT : 1
VERBALIZE : 1
DISPLAY : 1
DECREASING : 1
STATEMENT : 1
VETERAN : 9
LS : 1
GLUCOSE : 1
PT : 44
AGITATED : 2
REGION : 1
EKREGULAR : 1
WBC : 1
MOVE : 2
TRIES : 1
POSTSURGICAL : 1
PULM : 1
IRON : 1
PROCEDURES : 1
PSYCHOSOCIAL : 1
HEMATOLOGY : 1
AREA : 4
PL : 2
PERCEPTIONS : 1
SOON : 1
TENSION : 1
SKILLED : 1
FAWCETT : 2
CRITICAL : 1
GUIDE : 1
MISSED : 1
BETTS : 1
GU : 1
CONTAMINATED : 1
CERVICAL : 1
DBC : 2
UNDERSTANDING : 8
EXPIRATORY : 1
MEDICATIONS : 14
MR : 2
OCCASIONAL : 1
AND : 125
BILATERAL : 5
SIMETHICONE : 1
HEATHER : 1
INSOMNIA : 2
TOPIMAX : 1
INH : 1
VACCINE : 1
JUN : 3
RECOMMENDED : 1
PORCELAIN : 1
BETTER : 6
CTGUIDED : 1
DEPRESSIVE : 1
PROCESS : 3
RESULTS : 4
RPP : 1
EMERGENCY : 4
CONTINUITY : 1
BREATH : 4
ABLE : 2
RECENT : 3
COMDYSPHAGIA : 1
HBAC : 1
IN : 57
SLITTING : 1
POSITION : 1
LOW : 2
FOLLOWED : 2
MAY : 5
REGIMEN : 1
MANAGEMENT : 4
STATE : 7
CONTROLED : 1
GUN : 1
PLAN : 10
LOCKED : 1
DERMATOLOGY : 1
CAGE : 1
CONCURRED : 1
APPT : 4
SMOKE : 1
TAKING : 5
UNLESS : 1
COSIGNER : 1
PREANESTHETIC : 1
AGREE : 1
SPOUSE : 2
ADMITTED : 3
OBSERVED : 2
YET : 1
SS : 1
PATHOLOGY : 1
PANIC : 1
VERY : 4
AFEBRILE : 1
TBNA : 1
DONE : 3
EDATIVE : 1
DEPOSITS : 1
PALPABLE : 1
PHYSICAL : 1
REASSESSED : 1
PROTEIN : 1
WEARING : 1
NIGHT : 1
DISTRAUGHT : 1
DIVERTICULUM : 1
ACTIVE : 27
ANTIBODY : 1
KNOW : 3
ADOPT : 1
CHARETED : 1
LACK : 1
PCCNURSING : 1
NANDA : 1
TRS : 3
ABILITY : 1
WALS : 1
VICTIM : 1
INTRAOPERATIVE : 1
BEHAVIOR : 2
EPIGASTRIC : 1
PROFILE : 1
TOLERATE : 1
NEWLY : 3
SI : 3
CONTROLLED : 1
FOREARM : 1
COMPLETED : 5
CLOTS : 1
IMPRESSION : 1
FOCUS : 2
SOLUTION : 1
THIS : 29
HCTZ : 1
DIFFICULTY : 2
LORI : 1
HIGH : 2
IVFS : 1
EKSW : 1
SOFT : 1
APP : 1
BLANK : 1
VAMC : 2
ADDED : 1
LAST : 8
EXR : 1
PUPILS : 1
ORIFICE : 1
EDUCATION : 9
MULTIDOSE : 1
FINANCIAL : 1
SESSION : 2
SEES : 1
STATES : 16
INTENSELY : 1
PHYSICALLY : 1
OU : 2
SITUATIONS : 2
STANDARDMEDS : 1
LOCAL : 1
DETAILS : 1
PARK : 1
AFFECTED : 1
CELL : 1
ROS : 1
INTRUSIVE : 1
THOUSAND : 1
FLORIDA : 1
GROOMED : 1
CATEGORYPHYSICAL : 1
FIRST : 4
ICDCM : 6
SBA : 1
COGNITION : 1
RESP : 1
URINATE : 1
UNCLEAR : 1
PICK : 1
RENO : 1
ETOH : 1
DOWN : 2
ITS : 4
HM : 1
AND_MOST : 1
PATIENT_INFORMATION : 1
TO_PT : 2
DIRECTIVE_DISCUSSION : 1
TESTS_AND : 1
GOAL_OF : 1
HE_EABLE : 1
OUTPATIENT_BARRETTS : 1
CECAL_VALVE : 1
BUT_IS : 1
CLOTHING_WEIGHING : 1
ON_SEROQUEL : 1
OXYGEN_THERAPY : 1
WALS_THE : 1
MAKING_ARRANGEMENTS : 1
HCTZ_HE : 1
TO_DIFFICULTY : 1
OF_DISCHARGE : 3
IS_MIN : 1
NUMBNESS_LEGS : 1
DOWN_PAIN : 1
GUAIFENESIN_MG : 1
INSULIN_WAS : 1
LOOSE_SITESDO : 1
INPATIENT_PATIENT : 1
BEEN_TO : 1
TO_CREATOR : 1
GOAL_TO : 1
MONTHS_YES : 1
NONNEOVASCULAR_MACULAR : 1
AND_PUTTING : 1
FOR_MEDICINES : 1
ON_TO : 1
CONTINUE_THE : 1
TO_BRONCHOSCOPY : 1
KG_REMINDER : 1
PASTORAL_MHSGENERAL : 1
ORIGIN_PAIN : 1
PTS_DECREASING : 1
COLOR_TO : 1
PROBLEMS_TEMP : 1
MEDICINES_OUT : 1
OF_GOOD : 1
SC_ED : 1
DOWN_SCORE : 1
PO_ACTIVE : 3
VISTA_HOSPITAL : 1
AND_ORIENTED : 2
WAYS_DID : 1
OF_HIS : 3
NOTE_ROUTINE : 1
LEFT_THAT : 1
IF_ISNT : 1
YOUR_CLINIC : 1
THE_PATIENT : 11
PERSONAL_OF : 1
SEEK_STAFF : 1
OF_EVALUATION : 1
PATIENT_VERBALIZED : 1
LOGICAL_DIET : 1
ADDITIONAL_IF : 1
AIR_OX : 1
NOT_AND : 1
OFFERED_AND : 1
TO_STIMULI : 1
SUBSTANCE_AMLODIPINE : 1
ADMINISTRATION_AND : 1
LATINO_BLOOD : 1
IS_YRS : 1
OVERDRESSED_ALSO : 1
SUBSEQUENTLY_EVALUATED : 1
YES_AS : 1
FACTORS_MOVIE : 1
LORATADINE_ORAL : 1
PLAN_AXIS : 1
IF_PATIENT : 1
TWICE_AT : 1
TO_ABOUT : 1
NO_HE : 1
AT_VISIT : 2
TOGETHER_WITH : 1
THOUGHT_HE : 1
PATIENTS_PROCEDURE : 1
THAT_CAN : 1
BY_BARRETTS : 1
YESTER_INFUSED : 1
WITH_STATES : 1
CONTRAST_THE : 1
INFORM_THAT : 1
STATES_WAS : 2
REPEAT_DOSE : 1
AUDITC_NEGATIVE : 2
ON_FRI : 1
PRN_PODIATRY : 1
TOLERATE_LIQUID : 1
NO_COOPERATIVE : 1
TIME_TYPE : 1
QUIT_HERE : 1
COMP_AND : 1
SWINGS_PANICKED : 1
HAS_HAND : 2
IS_CBOC : 1
WANTS_TO : 2
FORM_RECEIVED : 1
FOR_MEAL : 1
WK_MONTHS : 2
VOIDED_LARGE : 2
COLLECTION_SPEC : 1
PING_MAINLY : 1
CPAP_THERAPY : 1
MVA_WITH : 1
ADDENDUM_OXYCODONE : 1
SERIOUS_ABOUT : 1
SYMPTOMS_DEPENDENCE : 1
SHOULD_ANY : 1
SOME_IS : 1
DUE_BE : 1
II_SIGNS : 1
FOR_NO : 1
ABLE_BREATH : 1
HE_FOUND : 1
HAS_QUITE : 1
HCL_CAP : 1
MR_SLEPT : 1
CONTACT_WAS : 1
JULY_OCT : 1
WITH_CURRENT : 2
CTRS_GROUP : 1
PROTOCOL_USED : 1
INTRUSIVE_THOUGHTS : 1
WITH_SIZED : 1
CHANGE_IF : 1
HEMATOLOGY_KNOWS : 1
PATIENT_FAMILY : 2
WAS_UNDERSTANDING : 1
FORM_TO : 1
PULSE_ACCEPTING : 1
CAROTID_PULSES : 1
ITS_PSYCHOSOCIAL : 1
MALE_ADMITTED : 1
AT_ITS : 1
RARE_NOTED : 1
IF_IS : 1
INDIVIDUAL_PSYCHOTHERAPY : 1
PATIENT_PRIMARY : 1
HIS_SECTION : 1
INJECTED_USE : 1
SITE_NO : 1
AND_BENEFITS : 1
OUT_HE : 1
MH_RECREATION : 1
DERMATOLOGY_RESIDENT : 1
ACTIVE_CAP : 1
PRIMARY_GROUP : 1
CLONAZEPAM_MG : 1
WAS_REPORTED : 1
MH_CONTACT : 1
AT_URGING : 1
WBC_CALL : 1
ON_OWN : 1
BEEN_AND : 1
CODE_UNLISTED : 1
DIETARY_RESTRICTIONS : 1
CE_ASSISTING : 1
METOPROLOL_XL : 1
PATIENT_DISCHARGED : 1
CANDIDATES_SEE : 1
TO_FINANCIAL : 1
NO_FACILITY : 1
HIS_WHOM : 1
TO_ADOPT : 1
IDENTIFIED_OTHER : 1
TALKED_ABOUT : 2
HAS_INSURANCE : 1
PREVENTIVE_HEALTH : 1
IF_APPLICABLE : 1
THE_ACCUCHECK : 1
NEXT_RECALL : 1
TWICE_CASCADE : 1
THE_AREA : 1
JUN_HBAC : 1
AMOUNT_URINE : 1
ON_MACHINE : 1
FOR_THEIR : 2
4D_INPATIENT : 1
NOTICED_SOME : 1
IS_YES : 1
WITH_YOUR : 1
OF_ACTIVE : 1
SEE_PATIENT : 2
PT_WILL : 1
ME_CLASS : 1
AMIODARONE_TAB : 1
PODIATRY_CLINIC : 2
BATHING_TUB : 1
OF_WORKING : 1
OF_BIRTH : 1
AS_AS : 1
TO_NOTIFY : 1
FEELINGS_PERCEPTIONS : 1
ATTENDING_ON : 1
SKIN_VANOD : 1
USE_DENIES : 1
CLINIC_NO : 1
THROUGH_NON : 1
FOR_PRINTED : 1
SURGERY_DEPARTEMNT : 1
NOTICED_GERD : 1
CASE_WAS : 1
IN_PSYCHIATRY : 1
OF_WITHHOLDING : 1
CHECKED_ON : 1
NOS_NOTIFYING : 1
MEET_NEEDS : 1
TRANSFER_INFORMATION : 1
DESIRE_TO : 2
IS_VETERAN : 1
OUT_YOUR : 1
HE_PRESENTED : 1
SHOT_STARTED : 1
COMMENT_KIT : 1
CARE_MEDS : 1
TO_RENO : 1
DRUG_USE : 1
PAST_OR : 1
DATE_TEMPERATURE : 1
AND_INTERVENTIONS : 1
TOTAL_ENCOUNTER : 1
ML_TRANSCRIPTIONIST : 1
AMLODIPINE_TAB : 1
COMPLETED_VET : 1
AND_THERAPY : 1
IDENTIFYING_OCCASIONAL : 1
TO_THOUGHTS : 1
ARE_TO : 1
OF_ATTORNEY : 2
SUBJECTIVE_DOING : 1
MG_MG : 1
IS_BAND : 1
MAINTAINED_ENCOURAGED : 1
PRIVATE_PATIENT : 1
VENTRICULAR_TACHYCARDIA : 1
PARTICIPATED_WALKS : 1
AND_TRAZODONE : 1
CV_PARALYSIS : 1
DIARRHEA_DOENPEZIL : 1
EVALUATION_AND : 1
THERAPY_STATUS : 1
WEIGHT_HAS : 1
PROCESS_COHERENT : 1
IS_RARE : 1
DIARRHEA_STATED : 1
AFTER_HE : 1
CONDITION_NOTED : 1
MG_LAST : 1
BE_WELL : 1
COPD_RECEIVE : 1
ON_HIM : 1
QUADRANTS_PO : 1
RANDOM_DRUG : 1
DRUG_GENERAL : 1
GIVEN_SUICIDE : 1
LITTL_PATIENT : 1
CALLED_REGARDING : 1
MOST_RECENT : 1
LEVEL_SYMPTOMS : 1
REMEMBERED_HIS : 1
TO_TO : 5
MUM_PA : 1
ED_HEALED : 1
WAS_CALLED : 1
OF_HEALTH : 1
TBNA_DEFINITIVE : 1
HOME_FEE : 1
DT_GLUCOSE : 1
LESIONS_THRUSH : 1
LOCATION_TELEPHONE : 1
ARRANGEMENTS_WOULD : 1
LAND_ORIFICE : 1
COLONOSCOPY_MODERATE : 1
IMPAIRMENT_LLY : 1
PATIENT_REFUSED : 1
WAS_SCORE : 2
GROUPS_DOSE : 1
TTNA_TBBX : 1
FT_COLLINS : 1
CAN_GIVE : 1
TESTS_UNSPECIFIED : 1
MENTAL_HEA : 1
CA_PATIENT : 1
AMITRIPTYLINE_HS : 1
GIVEN_THAT : 1
TID_PRN : 1
SPC_WAS : 1
CHANGING_NEVER : 1
GOOD_OUT : 1
AN_PARTICIPATION : 1
AN_BASIS : 1
RECOVERY_ARE : 1
MEDICATIONS_IDENTIFIED : 1
MOVE_TO : 1
SOCIAL_TRIGGERS : 1
NOTED_PPP : 2
PATIENT_WITH : 2
GIVEN_ONE : 1
BETTER_THE : 1
GOOD_THE : 1
TRANSCRIPTIONIST_COLLINS : 1
TELEPHONE_NOTE : 3
ATTENDED_GROUP : 1
TO_HIM : 1
CLEAR_THIS : 1
THEM_WITH : 1
INHL_ACTIVE : 1
STATE_PHONE : 1
TOOTH_DIAGNOSTIC : 1
EVENING_MEAL : 1
WEEKLY_RULE : 1
IN_MONTHS : 1
AGITATED_PROCEEDED : 1
PROVIDER_ADDED : 1
PATIENT_RELATES : 1
IN_COPIES : 1
HARDCOPY_AND : 1
PRIOR_ADMISSION : 1
TOPIC_OF : 1
WILL_RECHECK : 1
BEHAVIORAL_COUNSELING : 1
POSITIONS_NEVER : 1
IV_HAD : 1
PREVIOUS_SITES : 1
BEEN_NEWLY : 3
PT_SITTING : 1
NOTE_EVALUATION : 1
SX_LASER : 1
DRINKING_IN : 1
MUCH_BETTER : 1
SYMPTOMS_REPORT : 1
TO_PICK : 1
IN_TURN : 1
YES_PAIN : 2
EXAM_TEST : 1
CHANGE_PREVIOUS : 1
VIAL_TELEPHONE : 1
TEST_IN : 1
OPT_VISITS : 1
IPRATROPIUM_INHL : 2
WELL_COMPLETELY : 1
TO_ACKNOWLEDGED : 1
HAND_TO : 1
FIRST_ISSUES : 1
THE_ANTIHYPERTENSIVES : 1
OTHERS_RESTRICTIVE : 1
AGERELATED_MACULAR : 1
FILL_DATE : 1
SODA_PEPPER : 1
TEAM_AS : 1
REPORTED_THAT : 2
CONTRAST_AGENT : 1
SHAVE_IF : 1
FULL_OF : 1
PRESCRIPTION_MEDICATIONS : 1
SHOWING_SIGNS : 1
STATUS_STRATTERA : 1
NO_PLAN : 1
SHOWED_GRADE : 1
RISK_ADMISSION : 1
HEIGHT_AMOUNT : 1
LUMBOSACRAL_NO : 1
PHONE_ALLAMANDSOME : 1
RTC_ON : 1
CARE_PHYSICIAN : 1
DISCUSSED_PHYSICIAN : 1
RISK_STANDARD : 1
CHEW_RESULTS : 1
PM_HE : 2
CAR_TRANSFERS : 1
FOOT_AND : 1
DUE_OF : 1
UP_GOLD : 1
GLUCOSAMINE_HIM : 1
SPENT_HIS : 1
RISK_CLONAZEPAM : 1
FILED_FAWCETT : 1
KLINE_VIAL : 1
IMPAIRED_LOCATION : 1
THINK_ABOUT : 1
STATE_LAB : 1
CUFF_TAKE : 1
IDENTIFIED_PROBLEM : 1
IN_THIS : 1
SPUTUM_OF : 1
NOTE_MH : 1
PATIENT_HIS : 2
IS_GOING : 1
ON_SPOUSE : 1
TOTAL_ML : 1
WOULD_LIKELY : 1
HE_NOT : 3
DURING_HOME : 1
SEVERAL_ATTEMPS : 1
TRAUMA_CATS : 1
DEPENDENCE_WEEKEND : 1
SI_THINKING : 1
ANEMIA_CHF : 1
STABLE_CONDITION : 1
ONCOLOGY_RETINOPATHY : 1
NO_WEEKEND : 1
IS_DROP : 1
BREATH_FREELY : 1
ASARCO_COPY : 1
OPTIC_BRONCHOSCOPY : 1
IS_THROUGH : 1
FACILITATED_HAYS : 1
MOVE_RENO : 1
IN_PM : 1
PERSONAL_HISTORY : 1
TXC_PATIENT : 1
NO_EVENTS : 1
MOUTH_QHPRN : 1
IS_PROVIDED : 1
URINATE_HOURS : 1
WHICH_WILL : 1
NAME_MG : 1
BY_LCSW : 1
ON_HIS : 1
APPLIANCES_BOWEL : 1
PATIENT_REPORTED : 1
VAMC_HIS : 1
HAS_PRESCRIBED : 1
DEVICE_BATHING : 1
CARE_AGENCY : 1
KG_HEIGHT : 1
DIET_EKREGULAR : 1
HE_FELL : 1
ANGER_ANXIETY : 1
READING_DOCUMENTED : 2
COUNCELLED_STOP : 1
LARGE_URINE : 1
SIGNS_OXYGEN : 1
ONLY_GOALWHAT : 1
NURSING_GOALS : 1
AM_WITH : 1
NO_IF : 1
THAT_HAS : 1
PT_FOR : 2
WE_TALKED : 2
THE_LIVES : 1
MED_RECEIVED : 1
ONE_IF : 1
RA_COVERAGE : 1
MD_BLANK : 1
THE_CURRENT : 1
HOUSE_JUST : 1
AND_AFFAIRS : 1
AT_HOME : 1
WRITTEN_COPY : 1
BREATH_WHICH : 1
SERVICES_MOOD : 1
OR_BRUITS : 1
BUYING_HOUSE : 1
STATES_HAS : 1
PATIENT_CARE : 1
ASSESS_THE : 1
CONSENT_WAS : 1
NOTE_WE : 1
PPP_ASSISTANCE : 1
FEW_NOTED : 1
EMPLOYMENT_EPWORTH : 1
VSS_HEM : 1
OBTAINING_WALS : 1
COMPLETED_TOMORROW : 1
PROCEEDED_TO : 1
WILL_PCRN : 1
SCHEDULING_CRITERIA : 1
BE_CALORIE : 1
FOR_WITH : 1
BEST_IS : 1
NOTE_FOLLOWING : 1
IN_LAT : 1
COMPLAINING_INABILITY : 1
UP_TOMORROW : 1
MEDICATIONS_ON : 1
FROM_ALL : 1
AGENT_THE : 1
IRVING_PARK : 1
BEEN_ASKED : 1
MAY_BE : 1
ENVIRONMENT_JOB : 1
OF_STAPERT : 1
CONFIRMED_THAT : 1
SELF_AS : 1
TO_OWN : 1
SKILLS_METHOD : 1
IS_SOURCE : 1
ACCESSION_MUSSP : 1
AND_GUARDED : 1
SIG_ONEHALF : 1
STATUS_FILL : 1
GOES_OFF : 1
CBCB_APPOINTMENT : 1
BRIGHT_AND : 1
HER_AND : 1
SITES_FOOD : 1
PER_REQUEST : 1
OUTPUT_HPI : 1
BE_DETERMINED : 1
TO_IS : 1
HEALTH_MANAGEMENT : 1
SUICIDAL_IDEATION : 4
TWO_TO : 1
LOGICAL_GOAL : 1
GOING_SHIFT : 1
REPORT_SKIN : 1
PROVIDER_IF : 1
HS_ANXIETY : 1
READING_MCCORD : 1
SODIUM_IRRG : 1
AFFAIRS_BILL : 1
CVA_IRON : 1
HERE_PRIMARY : 1
WHEELCHAIR_NONNEOVASCULAR : 1
PUTTING_TRAILER : 1
PINESS_SCALE : 1
OF_SKILLS : 1
TO_FOLLOW : 1
URINE_THIS : 1
VS_PROCEDURES : 1
NOTED_BILATERAL : 2
CONTINENCE_PLACE : 1
AM_PASSIVE : 1
THERAPY_OTHER : 1
OF_UNCERTAIN : 1
ANTIHISTAMINES_NO : 3
AND_VOMITING : 1
OR_AT : 1
AND_ANXIOUS : 1
TO_MILIEU : 1
PHYSICIAN_ICAL : 1
TO_WORK : 1
SS_HIMSELF : 1
BENEFIT_THAT : 1
CROWS_FOOT : 1
DEPARTMENT_MD : 1
SATURATION_EKG : 1
DISCHARGED_WITH : 1
FROM_LUBBOCK : 1
OF_THERAPY : 1
ACCEPTING_AS : 1
ENCOURAGED_PATIENT : 1
WHAT_IT : 1
ELOPEMENT_RISK : 1
TO_DRAINAGE : 1
BEST_GETS : 1
FOR_SEEING : 1
FOCUS_TO : 1
ON_SEPTEMBER : 1
PATIENT_UNDERSTANDING : 1
VACCINE_AGE : 1
VERBAL_ON : 1
AFFECTED_TWI : 1
TO_WT : 1
THERE_DROP : 1
NOT_HE : 1
AREA_LANSING : 1
AND_ALCOHOL : 1
COOPERATIVE_EYE : 1
CAREY_PRIMARY : 1
ANTIHISTAMINES_COLLABORATE : 1
CM_COOPERATIVE : 1
ABOUT_INITIAL : 1
LIFE_ISNT : 1
ALONE_STATES : 1
TOMORROW_MORNING : 1
DT_SPEC : 1
ALONG_KUWAIT : 1
THOUGHT_LOGICAL : 1
AND_FLOOR : 1
TO_MEDICAL : 1
HE_HOME : 1
OR_COMPLAINTS : 1
DRUGS_OR : 1
AND_AORTOCORONARY : 1
ANXIETY_COPD : 1
AND_STATES : 2
DRAINAGE_TRACKING : 1
DRAINAGE_OR : 1
TEXT_DOCUMENT : 1
GLUCOSE_CARE : 1
THE_IL : 1
NOW_ACTIVITY : 1
THERAPY_FACILITATED : 1
APPENDICEAL_CECAL : 1
STOP_ALCOHOL : 1
HER_THAT : 1
THE_SHOULD : 1
THE_REASONS : 1
NOW_IM : 1
PATIENT_SEE : 2
ROGER_REVIEW : 1
OF_BOND : 1
THE_DISCUSSION : 1
SOMEONE_THAT : 1
PARK_PHONE : 1
ON_OUTPATIENT : 1
TOBACCO_ASSESS : 1
INSTRUCTIONS_ON : 1
HRS_WK : 1
OCCASSIONAL_PRODUCTIVE : 1
WHO_WITH : 1
AND_DEPOSITS : 1
NO_SPONDYLOSIS : 1
MEDICAL_RECORDS : 1
ASSISTING_TRANSFER : 1
ANXIETY_ANXIETY : 1
APPROPRIATELY_WITH : 1
WAS_TO : 3
SEEMS_WHO : 1
MEDICATIONS_AND : 1
WAITING_LIST : 1
UDS_TO : 1
PROCEEDED_TAKE : 1
THE_BATTERY : 1
NONE_TO : 1
VOICE_WHY : 1
MG_OF : 1
AND_CONTINUE : 1
IN_SIGNIFICANT : 1
NAME_PC : 1
ABUSE_NEGLECT : 1
CLINICS_PULM : 1
SIGNED_AND : 1
DEPRESSED_HE : 1
SW_PLACED : 1
GOOD_OF : 1
THE_MEETING : 1
TO_TOGETHER : 1
SURGICAL_NOTE : 1
ACUTE_TOPIC : 1
SEE_PAIN : 1
PLAN_FOR : 2
NO_IMPAIRMENT : 1
USING_THE : 1
NOTE_TO : 2
LETTING_IT : 1
DEMENTIA_AND : 1
HIS_AND : 1
ABD_PAIN : 1
BEHAVIOR_HIS : 1
MOVE_WEIGHT : 1
OBTAINED_PM : 1
NEEDS_TO : 1
MJ_FOR : 1
PASSIVE_WITH : 1
MIN_ASSIST : 1
ENCOUNTER_MINUTES : 1
SCREENING_SD : 1
IN_PHYSIOLOGICAL : 1
HELPING_DENIES : 1
WAY_TO : 1
ABOUT_WHETHER : 1
LEVEL_THE : 1
CARE_NOTE : 2
SCHEDULE_SEIZURE : 1
TEETH_NOTED : 1
HE_QUALIFIES : 1
DISCUSSION_IN : 1
WITHIN_DEXTROSE : 1
ASSESS_CAUSATIVE : 1
VERY_HE : 2
NO_AFTER : 1
TWI_TELEPHONE : 1
AT_BEST : 1
RECONCILIATION_MFG : 1
AS_FOR : 1
EDUCATION_COUNSELING : 1
TO_AFFECTED : 1
SMOKING_IN : 1
TO_CHANGE : 1
PUFFS_BY : 2
NOT_BEING : 1
REG_PARALYSIS : 1
ONCOLOGIST_ABOUT : 1
PROVIDED_WITH : 2
TAB_PO : 6
FILL_SURROUNDINGS : 1
CARE_ALL : 1
PAIN_LEVEL : 9
ALCOHOL_BREATH : 1
ADVISED_ADOPT : 1
HAVE_CONSULT : 1
OR_AND : 1
IN_PRISION : 1
AND_TBNA : 1
WITH_AFTER : 1
METATARSAL_HEAD : 1
YOUR_NEXT : 1
IN_PT : 2
NOTED_WITH : 1
COOPERATIVE_THOUGHT : 1
OF_ALLERGIES : 1
FRI_INITIAL : 1
THAT_PROVIDE : 1
DARK_PRESCRIPTION : 1
HAVE_HARDCOPY : 1
FOR_FOLLOWING : 1
CARE_AS : 2
JUDY_POINT : 1
PAYMENT_FULL : 1
AMBULATORY_YOU : 1
SITES_HAD : 1
PRESCRIPTION_BY : 1
VET_DISPLAY : 1
AFTER_TO : 1
IS_YO : 1
SPC_TO : 1
PROBELMS_WITH : 1
FOR_NOT : 2
PRN_ACETAMINOPHEN : 1
HAS_PING : 1
OR_OUT : 1
IS_OLD : 2
IN_PAIN : 1
PROCEDURE_CONCURRED : 1
IN_HOURLY : 1
HEENT_MUCOUS : 1
FOR_THE : 3
FINANCES_WORK : 1
MEDICAL_ABOVE : 1
LONG_PL : 1
WITH_SEDATION : 1
BILATERAL_LS : 1
HAVE_EXPIRATORY : 1
MEDS_EVALUATION : 1
STATE_IF : 1
BEEN_BY : 1
EVALUATION_SINUSES : 1
DIAGNOSES_LUMBAR : 1
COMPLAINTS_THIS : 1
CHANGE_STATUS : 2
GETTING_SOME : 1
AND_SMILING : 1
PREOP_CONVERSE : 1
THE_BACK : 1
THE_PROCEDURE : 1
MENTAL_AND : 1
ALL_HAS : 1
THE_FROM : 1
AND_REALITY : 1
TOGETHER_HIS : 1
THIS_LESSON : 1
PRIVATE_MD : 1
PURIFIED_DERIVATIVE : 1
ORAL_ACTIVE : 2
AID_NONE : 2
WILL_TO : 4
ST_PREVIOUS : 1
LOOKING_TO : 1
STATUS_AFTER : 1
ITS_BEST : 1
BED_NUTRITION : 1
ACTIVE_HYDROXYZINE : 1
TO_VISITING : 1
DETOX_PROGRAM : 1
TEMPERATURE_CALLERS : 1
SEE_THE : 1
TRAININGS_VET : 1
RECEIVE_TEST : 1
HOSPITAL_FORT : 1
OR_EFFECTS : 1
WHEN_INTOXICATED : 1
SITED_MAY : 1
LAB_SURGERY : 1
NOTED_TEMP : 1
MR_IS : 1
BUSY_MAINTAIN : 1
TERAZOSIN_HCL : 1
PHONE_ANWER : 1
DOWN_AND : 1
CBOC_TELEPHONE : 1
CONCURRED_THE : 1
DATE_OF : 6
CHIEF_HAS : 1
AS_TOTAL : 1
CAP_ORAL : 3
VITAL_PATIENT : 1
AND_WITHOUT : 1
AT_TIMES : 1
UD_PO : 1
EVENT_ALERT : 1
RA_SOCIAL : 1
PICK_UP : 1
HBAC_IN : 1
LB_NORVASC : 1
MEDICAL_GUARDIANSHIP : 1
NEEDS_IN : 1
PHONE_CALL : 1
FOR_SKIN : 1
XL_TAB : 1
OF_ACCORDING : 1
DECIDE_QUIT : 1
CARE_PROGRESS : 1
VITAL_ABNORMALITIES : 1
NOT_GIVEN : 1
REMINDER_UNIT : 1
WENT_TO : 1
ESOPHAGUS_TOBACCO : 1
AN_YEAROLD : 1
STRATTERA_TRAZODONE : 1
ROOM_PULSE : 1
MG_SC : 1
WITH_DIAGNOSIS : 1
DU_WEDDING : 1
ACTIVE_SEEMING : 1
CHAIR_BEDSIDE : 1
AS_DIRECTED : 1
ACTIVE_CLINICS : 1
PT_AS : 1
WITH_AGERELATED : 1
NOT_RECEIVING : 1
MAINTAIN_AVOID : 1
COLOR_ADJUSTING : 1
RELIABLE_VETERAN : 1
FOR_PAIN : 3
CURRENT_MEDICAL : 1
DEPRESSION_ACTIVE : 1
HS_THOUGHT : 1
COMMENTS_HCL : 1
BUT_WHEN : 1
YR_DOSAGE : 1
THE_WILL : 1
PATIENT_RESPIRATION : 1
QUITE_DEPRESSED : 1
ALMOST_RUNNING : 1
THOUGHTS_APPARENTLY : 1
REVIEWED_PLEASE : 1
IPRATROPIUM_ORAL : 2
NOTE_VITALS : 1
FINANCES_AND : 1
THERAPY_PVCS : 1
CALL_QUADRANTS : 1
TRACKED_HARDCOPY : 1
ACTIVITY_IRVING : 1
BONE_TRACKING : 1
CLASS_WAS : 1
PT_HAVE : 1
NONE_SATT : 1
BEDSIDE_AT : 1
TO_IDEATION : 1
COMPLIANCE_WITH : 1
RESIDENT_DATE : 1
VACCINATION_SKIN : 1
HEA_ERUPTED : 1
DONT_KNOW : 2
DENIES_MESSAGE : 1
SATT_THERAPY : 1
UPDATE_HER : 1
SOLN_CONTROL : 1
MH_WORK : 1
EDUCATION_FROM : 1
BS_NOT : 1
FROM_UPPER : 1
EYE_CONTACT : 2
COMMENTS_TERAZOSIN : 1
MEDICATIONS_NUMBNESS : 1
ACCUSE_THIS : 1
ARE_SITUATIONS : 1
PRESENTED_AGITATED : 1
PHARMACY_VET : 1
PAYMENT_IN : 1
OF_OFFICE : 1
INTERDISCIPLINARY_TEAM : 1
IMMOBILIZATION_PATIENT : 1
DESIRE_MOTIVATION : 2
AS_UH : 1
CARE_COUGH : 1
FIND_RIDE : 1
RETINOPATHY_HEENT : 1
FOR_THERAPY : 1
IMPAIRMENT_RELATED : 1
HIMSELF_AND : 1
IS_RECEIVING : 1
WAS_COMPLAINING : 1
VITALS_GENERAL : 1
HAND_WASHING : 1
HE_WENT : 1
INSULIN_CED : 1
FINANCIAL_HIS : 1
UNIT_ML : 1
ONE_OF : 1
FALL_ADMISSION : 1
PT_ASKED : 1
OF_UNCLEAR : 1
HIGH_DRUGS : 1
STATE_CONTACT : 1
OF_DIARRHEA : 1
4D_NOTE : 1
CURRENT_MEDICATIONS : 2
INTAKE_URINE : 1
IMFC_CARE : 1
SI_CE : 1
MUM_INFORMED : 1
THE_CREATOR : 1
OR_COVERING : 1
NOTED_LEG : 1
IN_IS : 2
NO_MUSSP : 1
WERE_DRINKING : 1
GOALS_PAIN : 1
MEDICAL_CLINICAL : 1
TEAM_NEEDED : 1
TO_VA : 1
NO_ABOUT : 1
FIANCE_SKIN : 1
NO_TRAUMA : 1
JUN_THIS : 1
ANY_VASC : 1
DECREASING_TO : 1
YEARS_TO : 1
DATE_OTHER : 1
TO_URINATE : 1
IN_VA : 1
STAFF_HARM : 1
THE_PROBLEM : 1
NURSING_SEE : 1
SCALE_SEE : 1
DIABETES_MELLITUS : 1
AND_FM : 1
LABS_ORDERED : 1
ICAL_GROUP : 1
FORCES_OF : 1
BETTS_CRAMPING : 1
SEE_PREVIOUS : 1
WHY_IS : 1
SX_NO : 1
CARE_BEEN : 1
OFF_FEW : 1
FOR_SOLUTION : 1
AMOUNT_LAST : 1
CATEGORYPHYSICAL_INPATIENT : 1
ACTIVE_VERBAL : 1
PROCEDURE_AND : 1
OF_VACCINATION : 1
FEELING_ALREADY : 1
AND_HEARING : 1
FLUID_CE : 1
FOREARM_DATE : 1
CONTL_SOLN : 1
MONTH_FELT : 1
SCHEDULE_COORDINATOR : 1
DID_THE : 1
HE_NOTICED : 1
LUMBOSACRAL_VETERAN : 1
FEET_CATEGORYPHYSICAL : 1
EABLE_MOVE : 1
SKIN_TESTS : 1
POSITIVE_METHACH : 1
TIME_WAITING : 1
ABNORMAL_MOVEMENT : 1
UNDERSTANDING_AND : 1
MIGHT_ASTHMA : 1
OXYCODONE_IR : 1
TO_HOUSE : 1
TREATMENT_NO : 1
EVALUATION_SCANNED : 1
SEEING_MY : 1
TAKE_BP : 1
LUE_PARTICULARLY : 1
LUBBOCK_THEREFORE : 1
NO_ONE : 1
WHICH_POSE : 1
PATIENT_ADDRESS : 1
PT_REPORTS : 1
SIGNS_ABNORMALITIES : 1
NOT_THE : 1
URGING_OF : 1
NOTIFYING_AND : 1
STATES_HAD : 2
MILIEU_THE : 1
WHEN_HE : 2
FOOT_PERCOCET : 1
DUE_SUICIDAL : 1
AREA_DUE : 1
HAS_VET : 1
UNDERSTANDING_THERE : 1
INTRODUCED_SELF : 1
PRECAUTIONS_IN : 1
INHALE_PUFFS : 1
CAUTIOUS_CHANGING : 1
YO_FOR : 1
ACCORDING_THE : 1
HERE_APPOINTED : 1
RECHECKED_WAS : 1
ACCIDENT_HIS : 1
FOR_CYSTOSCOPY : 1
NOT_SUPPOSE : 1
ANWER_SEVERAL : 1
WITH_IS : 2
PATIENTS_NEXT : 1
DISCHARGE_TRANSFER : 1
SENSORY_NO : 1
OBSERVED_HCT : 1
PAIN_MEDS : 2
MENTION_OF : 1
MANAGEMENT_CODE : 1
CSS_NONVISIT : 1
OF_QUATTLEBAUM : 1
SOCIAL_NOTE : 2
TO_RN : 1
YRS_PATIENT : 1
HOURS_ALL : 1
STATUS_ALERT : 1
VENTRICULAR_HOME : 1
TO_TOLERATE : 1
BILATERAL_LUMBAR : 1
MAY_MINOR : 1
OP_WITH : 1
PHONED_MRS : 1
SUICIDAL_ND : 1
DEPRESSED_ONE : 1
PERSONNEL_COORDINATES : 1
ANXIETY_IS : 1
NOTED_HAVE : 1
OR_SIDE : 1
GOAL_FOR : 1
TRAILER_ON : 1
ON_WHAT : 1
TOLERATED_MED : 1
SURG_DEVICE : 1
QUIT_SMOKING : 1
ENGE_IN : 1
DATE_ANXIETY : 1
LEGS_AND : 1
CONCURRED_WITH : 1
FIBER_BRONCHOSCOPY : 1
DRUGS_THAN : 1
PAIN_GOALWHAT : 2
FIANCE_ASSESSMENT : 1
MACHINE_APPOINTMENT : 1
AND_TALKED : 1
ACTIVITY_AIRFLOW : 1
NOTE_THAT : 1
GIVEN_ON : 1
INTERVENING_PT : 1
LEFT_ICU : 1
HAS_CAR : 1
MULTIDOSE_NURSING : 1
MODIFICATIONS_HELPING : 1
SINCE_UNTIL : 1
HOME_NUMBER : 1
YES_WRITTEN : 1
CONTINUE_TREATMENT : 1
SI_AND : 1
STATE_SUBSEQUENTLY : 1
OF_HYDROXYZINE : 1
HEALTH_AS : 1
NORVASC_MG : 1
WHOM_HAS : 1
MEDICATION_RECONCILIATION : 1
TO_ON : 2
THEN_LIVING : 1
ISSU_PT : 1
ARE_HELPING : 1
YES_SHAVE : 1
IT_AND : 2
HIS_NEEDS : 1
TCBP_CLINIC : 1
SLEPT_COMPLETELY : 1
FOR_COUPLE : 1
CURRENTLY_BEING : 1
APPOINTMENT_DISCUSS : 1
OUT_ALL : 1
DOES_CORRECT : 1
STATES_THE : 1
LOCAL_IN : 1
CE_BEFORE : 1
FM_HAS : 1
SPONGE_NO : 1
HFA_INH : 1
YE_PT : 1
RESULTS_TELEPHONE : 1
THE_SB : 1
CONTINUE_TO : 1
BREATH_TEST : 1
WITH_MRSA : 1
MEDICAL_CONDITION : 2
DATE_ADMISSION : 1
NOTE_URGING : 1
ISOLATIVE_INTERACTS : 1
GOOD_SYNCOPE : 1
USE_INHALER : 1
COLONOSCOPY_MELLITUS : 1
OR_ALERT : 1
INTAKE_GOOD : 1
FACILITY_KNOWN : 1
TO_DESIGNED : 1
COMPLIANCE_CURRENT : 1
HEMOGLOBIN_LAB : 1
YES_BP : 1
LACK_OF : 1
SPOKE_PT : 1
VET_HE : 2
CH_HEMATOLOGY : 1
CASE_HE : 1
TOPIMAX_ABILIFY : 1
STARTED_TO : 1
WAS_NEGATIVE : 2
ORDERS_SI : 1
NO_ASSESS : 1
PLAYING_GUITAR : 1
HE_BEEN : 3
NURSE_ELLIE : 1
AND_DURATION : 1
NOTE_STAFF : 1
VNS_FOR : 1
SHOWED_HIGH : 1
SO_LONG : 1
NOTE_CALLED : 1
CAUSATIVE_FACTORS : 1
CAN_CALORIE : 1
HIM_DIARRHEA : 1
TREATMENT_PROCEDURE : 1
IV_SHOWS : 1
THIS_AND : 1
NOT_SHOWING : 1
COUMADIN_TRANSFER : 1
CARE_ON : 1
USE_GENERAL : 1
DYSPLASIA_MICROSCOPIC : 1
PT_SUICIDE : 1
INTERACTS_PEERS : 1
APPOINTED_KETCHUM : 1
EDUCATION_SATP : 1
USE_INTAKE : 1
WITHHOLDING_MEDICATIONS : 1
PROBLEM_LAST : 1
DEVICE_DEVICE : 1
AND_SS : 1
ATTENTION_STAPERT : 1
APPT_DATE : 1
FIRST_TO : 1
THY_CAROTID : 1
THE_EXCEPTION : 1
COPY_OF : 2
FELT_OR : 1
COVERED_MEDICARE : 1
PLAN_WAS : 1
INCREASING_OF : 1
CHEST_PAIN : 2
NOTE_RITA : 1
TAB_DATE : 2
RISK_FACTORS : 1
PRINTED_FOR : 1
BLOOD_DONE : 1
BOND_ATTENDED : 1
HER_IN : 1
GERD_ICDCM : 1
AND_VET : 1
ISOLATIVE_APPROPRIATELY : 1
TO_AMIODARONE : 1
WITH_MEDICAL : 1
ADDRESSPVH_FT : 1
URINE_LEGS : 1
TAB_MENINGITIS : 1
ALCOHOL_TEST : 3
OF_ROI : 1
ON_MEDICINES : 1
KG_CDI : 1
ACTIVE_CHANGE : 1
SOUNDS_CURRENT : 1
THE_ATTENDED : 1
GLAXO_KLINE : 1
QUIETLY_LBED : 1
HAS_UPCOMING : 1
AVH_MSE : 1
DAILY_ACTIVE : 1
THE_GROUP : 1
TRAZODONE_CARDIAC : 1
FOR_SON : 1
AND_MAKING : 1
TO_PROVIDER : 1
CUFF_CONSULT : 1
LOW_AND : 1
CALLED_DUE : 1
HOSPITAL_SO : 1
STATED_SUBJECT : 1
CURRENT_SIGNS : 2
THE_FORCES : 1
ONCE_EKNUTRITION : 1
SUPPORT_SOCIAL : 1
SAYS_NOT : 1
ASSIST_SOME : 1
PERSONAL_TELEPHONE : 1
VETS_REQUEST : 1
NOTE_DT : 1
MORE_THAN : 1
AGREE_THAT : 1
PROVIDER_COLLECTION : 1
CARE_INTERVIEW : 1
PHONE_AND : 1
PROTOCOL_CE : 1
BILATERAL_LEGS : 1
PCRN_RECEIVED : 1
NAUSE_VOMITING : 1
OXYCODONE_CAP : 1
NURSING_DATE : 1
THE_REQUESTED : 1
ITS_ANYWAY : 1
THE_BASE : 1
MEDICAL_INTERN : 1
IF_INSTRUCTIONS : 1
COGENTIN_ACTIVE : 1
WILL_STATE : 1
FLORIDA_SINCE : 1
ADA_LAWS : 1
AMBULATORY_WITH : 1
STARTED_LUMBOSACRAL : 1
ANSWERED_CT : 1
WHEN_RETURN : 1
COMPREHENSIVE_EXAM : 1
RESTRICTIVE_TUBERCULIN : 1
BEEN_DEPRESSED : 1
HIS_NOTE : 1
AND_FEARS : 1
INFORMED_HER : 1
IS_PUPILS : 1
VERBALIZED_UNDERSTANDING : 2
HYPERVENTILATON_CONTACTED : 1
NOTE_FOUR : 1
NOTED_WAS : 1
ML_SC : 1
ARTERIOSCLEROTIC_DISEASE : 1
USE_CALORIE : 1
REPEATABLE_BATTERY : 1
DOSE_PLAN : 1
TRS_CTRS : 3
PERVIOUSLY_VITAL : 1
BRONCHOSCOPY_WHICH : 1
CALLER_LANSING : 1
ABOUT_AND : 2
SAME_TYPE : 1
MFG_ID : 1
TO_BE : 9
UP_REFRRAL : 1
THE_RESULTS : 1
ASKED_HE : 1
FEW_VIA : 1
INVOLUNTARY_MOVEMENT : 1
PEOPLE_SOCIAL : 1
NOTED_WILL : 1
THE_EVENING : 1
IS_QUITE : 1
KETCHUM_EMER : 1
FORT_THESE : 1
PRESCRIPTION_ON : 1
DISEASE_REVIEWED : 1
STANDARD_PATIENT : 1
RECOMMENDATIONS_CHIEF : 1
MOUTH_FOR : 1
NOTES_DETAILS : 1
NOTE_LAST : 1
WHERE_WERE : 1
NONE_IS : 1
CARE_HOSPICE : 1
PALPABLE_FREQUENCY : 1
THEIR_PLEASE : 1
AND_BEFORE : 2
SLIDING_SEE : 1
THOUGHT_THAT : 1
CHEST_AN : 1
THE_VETERAN : 2
REQUIRED_NO : 1
INPATIENT_NOTED : 1
ABUSE_WANTS : 1
MALE_RACE : 1
PT_CONVERSATION : 1
DIET_TO : 1
NUTRITION_FIANCE : 1
WITH_THE : 5
TO_TRY : 1
MEDS_PATIENT : 1
OTHERS_PT : 1
ALONE_PT : 1
COLLISION_ON : 1
ACCUSE_NURSE : 1
WELL_HE : 1
WEEK_HISTORY : 1
FOR_RECOMMENDED : 1
STRAP_CROWS : 1
HEALTH_CARE : 1
FOLLOWING_PROBLEMS : 1
LABS_RTC : 1
TO_LETHALITY : 1
TRAUMA_OU : 1
PROTECTIVE_SENSATION : 1
EPIGASTRIC_WITH : 1
WHEN_SEEK : 1
ON_AT : 1
CXR_CLEAR : 1
PO_HS : 2
SWINGS_TENSION : 1
IF_KNOWN : 1
MR_YRS : 1
ADDENDUM_ECH : 1
WERE_OFFERED : 1
FOR_HOUSEKEEPING : 2
FOR_CALORIE : 1
THE_TYPE : 1
MAINLY_TO : 1
HOME_SW : 1
YOUR_SPOUSE : 1
MG_IN : 1
BIRTH_HCTZ : 1
FIREARMS_NO : 1
RECREATION_SLITTING : 1
YES_COPY : 1
ONEHALF_TABLET : 2
BEFORE_GOT : 1
LIFT_HAS : 1
OF_TOPIC : 1
ASSESS_PAIN : 1
TIME_TEMPERATURE : 1
COLONOSCOPY_DIABETES : 1
BY_SPECIALIST : 1
TELEPHONE_TREATMENT : 1
ML_DAILY : 1
NOT_NONVA : 1
BLUE_BAND : 1
OF_CLASS : 1
DRUNK_HIGH : 1
NO_GALLY : 1
HERE_AM : 1
IT_BE : 2
MALE_FOR : 2
ACTIVE_EXPERIENCE : 1
INDICATED_BELOW : 1
MOSTLY_NOT : 1
THEREFORE_WAS : 1
TAB_ORAL : 1
CHARACTERISTICS_USE : 1
PROGRAM_OFFER : 1
PHONE_INITIAL : 1
MISSED_AND : 1
THAT_LIFE : 1
AND_AMBULATED : 1
WATER_WITHIN : 1
DIABETIC_HEENT : 1
CTRS_PATIENT : 1
PHONE_OF : 1
WORSEN_GIVEN : 1
COMMENTS_REPORT : 1
REALITY_DIET : 1
HIM_SHOWN : 1
THE_RHYTHM : 1
FEW_INTAKE : 1
NEED_KUWAIT : 1
HEAD_MDD : 1
IS_JUST : 1
PHYSICAL_DURING : 1
MONTHS_TO : 1
IF_HE : 3
ING_WAYS : 1
GET_HE : 1
WANTS_MUCH : 1
ORI_LLY : 1
ILLICIT_DRUG : 1
ADMINISTRATION_DURATION : 1
LEGS_ONTO : 1
WILL_PT : 1
BBS_TO : 1
PMH_SH : 1
NO_COLLISION : 1
MEDS_NO : 1
HIS_COGENTIN : 1
BISUL_REASON : 1
HAS_BEEN : 11
NEEDED_BE : 1
CATEGORYPHYSICAL_NURSING : 1
PROVIDER_WANKER : 1
INTERVIEW_UNABLE : 1
NO_PROBLEMS : 2
APPROPRIATE_MANUAL : 1
ADDENDUM_INCREASE : 1
UNSPECIFIED_COUNSELING : 1
INTAKE_SUBJECTIVE : 1
PRESCRIPTION_NAME : 1
HOME_TOBACCO : 1
THAT_BEING : 1
6A_GROUP : 1
FOLLOWED_NANDA : 1
INTRAMUSCULAR_MR : 1
LEISURE_ASSESSMENT : 1
SCALE_STANDARDMEDS : 1
AS_PATIENT : 1
PRESSURE_APPROPRIATE : 1
DEPRESSED_THE : 1
SKIN_COLOR : 1
MEDICATION_WITH : 1
BE_AS : 1
YRS_OLD : 1
DOES_UNDERSTAND : 1
NOTE_WEEK : 1
OF_FOLLOWING : 3
FOR_IS : 2
OP_SHOES : 1
ACTIVE_PT : 1
OF_MEDICAL : 1
POW_PLAN : 1
LESSON_SPIRITUALITY : 1
FOLLOWING_HIM : 1
SERVICES_ADDRESSPVH : 1
PATIENT_MINUTE : 1
REALITY_NUTRITION : 1
SOLUTION_AS : 1
REQUESTING_TO : 1
AM_MUCH : 1
CONTINUITY_TREATMENT : 1
WASHINGTON_TOPICS : 1
STAFFED_AND : 1
PROBLEM_UNSPECIFIED : 1
DENIES_ANY : 4
QHS_PRN : 1
THERAPY_PSYCHOTHERAPY : 1
AND_BUYING : 1
TO_OR : 3
LEVEL_USING : 1
STILL_CHLORIDE : 1
THAT_PERSONNEL : 1
APPROVED_IMFC : 1
ATTENDED_THERAPY : 1
NOTE_FOLLOWED : 1
BBS_NOTED : 1
INCREASED_SOB : 1
BRONCHOSCOPY_MONTGOMERY : 1
FOLLOW_AS : 1
THE_PSYCHIATRIC : 1
BEEN_ESTABLISHED : 1
XYGEN_SATURATION : 1
VA_FEE : 1
PSYCHIATRIC_UNIT : 1
MACULAR_RATION : 1
RESTRAINTS_FIRE : 1
PATIENT_IS : 6
AT_WITH : 1
NURSING_RECEIVED : 1
WEAKNESS_DENIES : 1
TIME_IF : 1
AUDITC_WAS : 2
SEVERE_ACKNOWLEDGED : 1
HAS_READING : 1
TO_REVIEW : 1
MORE_APPROPRIATE : 1
NURSE_AND : 1
ADDENDUM_WRITTEN : 1
MEDICAL_PROCESS : 1
ACTIVITIES_AS : 1
ARGE_BMS : 1
ON_MEDICAL : 1
SECONDARY_CTGUIDED : 1
LLY_SC : 1
SUCH_REFERRALS : 1
THERAPY_HER : 1
THE_HOUSING : 1
RHYTHM_SS : 1
THE_STATED : 1
TYPE_CONTACT : 1
MEDICAL_CONDITIONS : 1
EVALUATION_EXAM : 1
UPSETTING_IN : 1
WAS_CURRENT : 1
USING_IT : 1
NEGATIVE_PULSE : 1
GIVEN_YES : 1
PSA_EYE : 1
SIGNS_SPONDYLOSIS : 1
WHY_THEY : 1
OF_WAY : 1
BEING_VICTIM : 1
CASE_QUALIFIES : 1
FOR_MONTHS : 3
KG_MG : 1
LISINOPRIL_HCTZ : 1
SC_ACTIVE : 1
PAIN_NUMBNESS : 1
DAUGHTER_TEMPERATURE : 1
INCREASE_MEDS : 1
CITY_STATE : 1
BIRTH_LISINOPRIL : 1
ADLS_VNS : 1
OF_INSTRUCTIONS : 1
ARE_REALLY : 1
HE_ANY : 1
PRESCRIBED_ANY : 3
AND_THE : 3
REGION_THE : 1
THAT_TRACKED : 1
HOURS_AND : 1
CARE_AND : 1
AND_THOUGHT : 1
REPORTED_ON : 1
PMH_FMH : 1
ABNORMAL_PT : 1
PROGRESS_NOTE : 3
ALCOHOL_VETERANS : 1
ON_PRESCRIPTION : 2
MASSES_OR : 1
COMING_SHIFT : 1
LBED_VS : 1
INJECTED_DRUG : 1
YES_LUMBOSACRAL : 1
GM_USE : 1
OXYGEN_EKG : 1
BMI_MASS : 1
PRESCRIPTION_IS : 1
PATIENT_THAT : 4
PLACE_PLAN : 1
THIS_MALE : 1
SIGNS_WORK : 1
CHIEF_ANXIETY : 1
AS_GUIDE : 1
BATHING_BATH : 1
EFFECTIVE_BEHAVIOR : 1
FOR_CARE : 1
MANAGEMENT_SERVICE : 1
PICKED_TOMORROW : 1
PRIMARY_DIAGNOSIS : 1
INTAKE_OUTPUT : 1
THE_ATTENTION : 1
REQUESTED_EXAMINATION : 1
IF_ARE : 1
PUFF_ORAL : 1
SC_DAILY : 1
METHOD_OF : 1
MFG_BIOMEDICAL : 1
HE_TO : 5
NONESSENTIAL_NUMBNESS : 1
IN_STATUS : 2
SAYS_FELL : 1
HIS_PAIN : 2
RISK_BED : 1
OF_SWSINPATIENT : 1
NOT_YET : 1
ALCOHOL_ONCE : 1
BE_HELPFUL : 1
FOCUS_OF : 2
GOING_TO : 1
THROUGH_VA : 1
FIRE_AND : 1
INITIAL_CONVERSATION : 1
MORSE_FOR : 1
MEDICATIONS_PROBLEM : 1
INSULIN_HUMAN : 1
UNIT_OUTPATIENT : 1
OFF_SHIFT : 1
TO_RECEIVED : 1
UP_TG : 1
UNSPECIFIED_DISORDER : 1
MORE_OVERSIGHT : 1
PAIN_EDUCATION : 1
PANIC_NEED : 1
RISK_ADDENDUM : 1
DIETARY_AS : 1
FOR_SOME : 1
WITH_DBC : 1
TEST_BY : 1
NEUROPSYCHOLO_VACCINATION : 1
ASSESSED_THE : 1
ON_PT : 1
LDL_OF : 1
MEDICATIONS_IN : 1
ON_WILL : 1
HERNIA_IS : 1
TO_TOLERATING : 1
RALIZED_ANXIETY : 1
PLAN_PROBLEMS : 1
STAFF_NEEDED : 1
PHONE_LB : 1
BX_SHOWED : 1
PUFFS_HOURS : 1
MEDS_PROBLEM : 1
SKIN_INSOMNIA : 1
FELT_NUMB : 1
MANAGEMENT_STATED : 1
IP_RESIDENT : 1
EVALUATION_NAME : 1
OF_UNTIL : 1
CHF_ISUFF : 1
BEST_IT : 1
PERCEPTION_NO : 1
FROM_OFF : 1
HIGH_DYSPLASIA : 1
LEVEL_BRIDGE : 1
PATIENT_REMEMBERED : 1
OLD_ADMITTED : 1
OF_QUITTING : 1
IN_CESSATION : 1
HARRINGTON_TXC : 1
TLH_CSS : 1
APPOINTMENT_ME : 1
ID_BAND : 2
HE_TRIES : 1
TELEPHONE_PATIENT : 3
GOOD_EYE : 1
MOST_OF : 1
SOCIAL_ENVIRONMENT : 1
WHY_HERE : 1
SIERRA_REGIONAL : 1
THE_CALLER : 1
TO_IN : 2
MG_CHEW : 1
ACTIVE_NOT : 1
FALLING_IMMEDIATE : 2
RESTING_QUIETLY : 1
DATE_SITED : 1
MEDICATION_ISSUE : 1
ARE_PT : 1
PICKED_UP : 1
PROCESS_PASTORAL : 1
GAYLORD_IF : 1
THIS_SPIRITUALITY : 1
OF_II : 1
WOULD_BE : 4
MORE_NOT : 1
WAS_PT : 2
PAIN_HYPOTHYROIDISM : 1
COGNITION_OR : 1
TOMORROW_SURVEILLANCE : 1
WOUND_CARE : 2
NUMBER_OF : 1
LIKELY_HYPERVENTILATON : 1
HEIGHT_CM : 2
UP_WASHINGTON : 1
SOON_AS : 1
TRANSPORTATION_AMBULATORY : 1
WEARING_DARK : 1
PROSTATITIS_SIDE : 1
WRITER_SELF : 1
STAFF_ONLY : 1
STATES_COMPLIANCE : 1
NO_DIAGNOSIS : 1
BERKLEY_ROGER : 1
WITHOUT_OF : 1
WANTS_SNORING : 1
PROBLEM_COOPERATING : 1
OFFICE_VISIT : 1
COMPUTERIZED_LIST : 1
TBBX_TBNA : 1
DURING_HIS : 1
AND_HES : 1
PTSD_WAS : 1
OF_TOPIMAX : 1
THERE_ALSO : 1
PRN_FOR : 1
INTENSITY_RESPONDS : 1
NONE_REST : 1
HOMICIDAL_IDEATION : 1
MH_TELEPHONE : 1
DBC_FOR : 1
ANXIETY_DAILY : 1
EMERGENCY_DEPARTMENT : 1
WAS_DOWNGRADED : 1
READING_PHD : 1
DISORDER_THROAT : 1
BEEN_GIVEN : 1
NO_BEHAVIOR : 1
THE_PLAN : 2
JOBS_IN : 1
WAS_PAIN : 1
PING_WITHOUT : 1
HIS_IS : 1
HISTORY_NPDR : 1
SAME_LAST : 1
SIZED_CUFF : 1
ABOUT_CANCER : 1
SIZED_MANUAL : 1
ANTIANXIETY_MEDS : 2
TO_CHAPLAINS : 1
AND_DEPARTMENT : 1
SIDERAILS_ID : 1
ATTORNEY_FOR : 1
DIAGNOSIS_RIGHT : 1
PLAN_AT : 1
DIARRHEA_ADDENDUM : 1
MEAL_RPP : 1
CONTACT_WBC : 1
REC_PHARMACY : 1
SEEN_BY : 1
OVER_PAST : 1
IM_HERE : 1
EYE_BUT : 1
ABOUT_THE : 2
ON_COPING : 1
BEEN_BOTHERED : 1
CONTINUITY_OF : 1
IMMINENT_SUICIDAL : 1
STATED_MAY : 1
MOVE_LOSS : 1
RPP_IN : 1
NKA_DESIRE : 1
HEARING_BACK : 1
CHARETED_ENOXAPARIN : 1
WAS_SO : 1
IS_PING : 1
DRUNK_OR : 1
RECALL_DATE : 1
NOT_COMPLAINING : 1
THOUGHT_PROCESS : 2
ARE_DUE : 1
UNDERSTANDING_SIGNATURE : 1
ACTIVITY_SNORING : 1
FOR_EVALUATION : 1
HOUSEKEEPING_STATES : 1
HE_DISCUSSED : 1
REASONS_AND : 1
BENEFIT_IS : 1
USE_INFORMATION : 1
WEDDING_ISSUES : 1
STOP_XYGEN : 1
OUTPUT_ROS : 1
THEY_ARE : 1
DOCUMENTATION_HE : 1
TIME_GOES : 1
METAL_NO : 1
YES_FALL : 1
IN_SMOKING : 1
SECTION_PROCEDURE : 1
APPROPRIATE_SIZED : 1
COUPLES_COUNSELING : 1
THE_FOCUS : 1
COMPLAINING_CHEST : 1
TRACKED_RX : 1
HIS_LUE : 1
LOWER_FAMILY : 1
ADDED_COSIGNER : 1
ADMITTED_TO : 2
GIVEN_TIME : 1
MG_ACETAMINOPHEN : 1
RELATED_FOLLOWUP : 1
INDIVIDUAL_OR : 1
NO_PROVIDER : 3
RATION_VETERAN : 1
IF_VET : 1
VASC_PT : 1
SLUGGISH_RESPO : 1
HS_FOR : 2
THE_MED : 1
SAME_EFFECTS : 1
REGULAR_RATE : 1
VANOD_REHAB : 1
EDUCATION_PT : 1
GIVEN_NO : 1
MH_PROVIDER : 1
WOULD_MORE : 1
THROUGH_NIGHT : 1
ARE_WHERE : 1
PAIN_ITS : 1
RECREATION_THERAPY : 2
CYCLE_ALONE : 1
HE_HE : 2
SOME_PRESENT : 1
HOUSEKEEPING_AND : 1
SEE_HISTORY : 1
APPARENTLY_AN : 1
VETERAN_DISCHARGED : 1
PROSTATITIS_OR : 1
HAVE_MAY : 1
NO_ONCOLOGIST : 1
CAR_LETTING : 1
OBSERVED_SEP : 1
BLANK_FOLLOW : 1
PHD_FOCUS : 1
INFORMED_CONSENT : 1
HM_WK : 1
CURRENT_SUBSTANCE : 1
HIS_WIFE : 2
WHEELCHAIR_NURSING : 1
TRANSFERS_HAS : 2
THERAPY_RESPIRATORY : 1
VOICED_UNDERSTANDING : 2
COOPERATING_PLAN : 1
ADDENDUM_REPORT : 1
CONTACT_PERSONAL : 1
PEERS_THE : 1
VITALS_LAST : 2
TOOTH_REVIEW : 1
AND_QUIT : 1
COUNSELING_HOME : 1
ALSO_SEES : 1
WITH_NAUSE : 1
NOTIFIED_PT : 1
TERAZOSIN_CAP : 1
RATE_VISITORS : 1
EL_ECH : 1
HIS_STATEMENT : 1
ASSESSMENT_ILLICIT : 1
IV_PHYSICIAN : 1
PHYSICIAN_SPOUSE : 1
LEFT_MESSAGE : 1
ALERT_AND : 3
ASKED_INFORMATION : 1
THICK_OF : 1
OP_CLEAR : 1
STOPPED_COGENTIN : 1
TO_DENY : 1
HPI_PRESENTS : 1
LEVEL_REPORTED : 1
ALONG_WITH : 1
HIS_MEDICATIONS : 1
PATIENT_PRIVATE : 1
FOR_SAFETY : 1
AT_DONE : 1
ANTIHYPERTENSIVES_YES : 2
PARANOIA_PT : 1
ANES_PREANESTHETIC : 1
SCORE_CONTINUE : 1
EVENING_HOUSING : 1
BLOOD_PRESSURE : 2
USING_RHYTHM : 1
IS_APPROPRIATE : 1
TH_METATARSAL : 1
WITH_ARE : 1
THAT_DISTRACTION : 1
BMS_ASA : 1
POTENTIAL_LETHALITY : 1
MEAL_IID : 1
THE_OF : 8
IF_WORSEN : 1
OR_WENT : 1
BEDTIME_DEPRESSION : 1
THE_SOURCE : 1
PATIENT_EDUCATION : 4
HIGH_GRADE : 1
SUBSEQUENTLY_AND : 1
VETERAN_GROUP : 1
PAIN_WITH : 3
INTAKE_TO : 1
WAS_DOMINANT : 1
ASSESSMENT_DU : 1
HUMAN_UNIT : 1
WRITTEN_INFORMATION : 2
ADDENDUM_MEDICATION : 1
ROOM_ON : 1
PT_YO : 1
PT_HAS : 4
TO_ACCUSE : 1
CHIEF_COMPLAINT : 3
CHECKED_MINUTE : 1
MITRALVALVE_SUBSTANCE : 1
HE_SOME : 1
TEMPERATURE_OF : 1
EMERGENCY_CONTACT : 1
FOR_ANXIETY : 1
STATES_AFFECT : 1
BILATERAL_HAND : 1
THAT_HE : 5
MVA_WHEN : 1
DOSAGE_FORM : 1
VERBAL_INSTRUCTIONS : 1
IMMATURITY_AND : 1
ICDCM_OUTPATIENT : 1
MINUTE_VITAL : 1
TO_OFF : 2
TO_BONE : 1
NEGLECT_PATIENT : 1
THE_FOR : 3
LOSS_OF : 1
MORE_PHYSICALLY : 1
DENIED_IDEATION : 1
ONTO_FLOOR : 1
FOR_IMMINENT : 1
INDIVIDUAL_OTHERS : 1
NAME_PROVIDER : 1
THIS_THE : 1
SCHEDULE_APPT : 1
FOREARM_WITH : 1
HAVE_BE : 1
SINCE_THE : 1
DEPRESSIVE_NOS : 1
GLUCOSE_MH : 1
PULSE_PULSE : 1
HISTORY_WITH : 1
DISORDER_HEELS : 1
POINT_OF : 1
PT_HAD : 2
FACTORS_UNIT : 1
RIB_CAGE : 1
MACULAR_DE : 1
CONDITION_PASTORAL : 1
DOCUMENT_ATTACHED : 1
BLOOD_HEART : 1
PLACE_PATIENT : 1
TWO_PRIOR : 1
OF_ICDCM : 1
CARE_INDICATED : 1
NERVE_BREATH : 1
ONE_BY : 1
EFFECTIVE_NO : 1
PAIN_SCALE : 3
RESTRICTIVE_PURIFIED : 1
WILL_SCHEDULED : 1
CARE_NURSING : 2
OR_FOLLOWING : 1
SECTION_DISCHARGE : 1
ATTACHED_THIS : 1
ORIENTED_FAIR : 1
AND_SISTER : 1
HE_GOT : 2
CARE_PT : 1
INFORMED_OF : 1
AN_PHYSICIAN : 1
AND_ADVERSE : 1
LATINO_HEMOGLOBIN : 1
IS_PENDING : 1
AND_JUST : 1
SAFETY_TO : 1
ORCHARD_ALSO : 1
AIRFLOW_POSITION : 1
AND_TURN : 1
WHAT_YOUR : 1
THE_PT : 1
COVERED_PLAN : 1
FRIEND_NO : 1
FOR_NOTE : 1
DISCOVERED_AND : 1
EYE_HISTORY : 1
PT_DNR : 1
TYPE_CLOTHING : 1
NURSE_REPORT : 1
THE_THAT : 1
NEXT_THE : 1
PATIENT_OFFER : 1
ASKED_IF : 2
ACCUCHECK_WAS : 1
FOUND_EFFECTIVE : 1
CLEAR_DIET : 1
TO_MALATHI : 1
TEST_FOR : 1
HIS_FOR : 1
SOME_ICDCM : 1
OF_EPIGASTRIC : 1
CASTS_DX : 1
PSYCHOTHERAPY_YOUR : 1
TRANSFER_DEVICE : 1
ATTENTION_OF : 1
OUT_CLEAR : 1
LARGE_HYPERMETAB : 1
TO_RETURN : 1
PSYPC_CONTACT : 1
TIME_TOMORROW : 1
NOT_COFFEE : 1
CUFF_TO : 1
PROVIDER_APPROVED : 1
PERCEPTIONS_AND : 1
ORDERED_LEFT : 1
SIGNS_HOURS : 1
INTERVENTIONS_AND : 1
HOSPICE_MG : 1
ENGE_SAY : 1
ANEMIA_COPD : 1
DOUCHE_YES : 1
PATIENT_PROGNOSIS : 1
NEW_DISTANCE : 1
VISIT_READING : 1
AND_FEELINGS : 1
HYPOTHYROIDISM_DEF : 1
SERVICE_AT : 1
DECREASE_IN : 1
WAS_PATIENT : 2
APPROVE_NO : 1
OF_DOLLARS : 1
PATIENT_CHECKED : 1
PEDAL_EDEMA : 1
INVOLUNTARY_SCALE : 1
OFF_THIS : 1
WEEK_WAS : 1
COMMENTS_AS : 1
DAILYTX_IRRIGATION : 1
SHOT_WOULDS : 1
TO_NO : 1
NURSING_ASSESSMENT : 2
AS_BELOW : 2
PSYCHOSOCIAL_PATIENT : 1
HYPERVENTILATON_VET : 1
APPOINTMENT_APPT : 1
OF_ADVANCE : 1
MEDS_COMPUTERIZED : 1
PUFF_INHL : 1
TRANSFER_BATHING : 1
ASSESSMENT_DIRECTIVE : 1
TIME_HE : 1
DEPENDING_WHAT : 1
VIA_WHEELCHAIR : 1
TIME_SLOT : 1
INDIVIDUAL_ABNORMAL : 1
WHAT_THE : 1
DEVICE_WAS : 1
CASE_STATED : 1
RATE_AND : 1
PAST_TWO : 1
PAIN_BY : 1
PATIENTS_NAME : 1
STRATTERA_AND : 1
MALE_POW : 1
ENDORSES_MOOD : 1
CA_HAS : 1
BODY_MASS : 1
NO_CHANGE : 2
BASE_GRANULAR : 1
HOUSEKEEPING_SECONDARY : 1
GOLD_IN : 1
TRS_TXC : 3
MNT_NUTRITION : 1
HARD_NOT : 1
ASSESSMENT_NURSES : 1
GLASSES_GLASSES : 1
APPOINTMENT_WITH : 1
REQUEST_AFTER : 1
ML_ONCE : 1
LESS_TUBERCULIN : 1
STAY_HOSPITAL : 1
WHEN_POSITIONS : 1
NURSE_DISCHARGE : 1
THOUGHT_VITAL : 1
UNDERSTANDING_PTSD : 1
COMPLAINT_INSIGHT : 1
TRAITS_TAB : 1
MEDICATIONS_REVIEWED : 1
TIME_FAWCETT : 1
APPT_SEIZURE : 1
ON_SOCIAL : 1
FAIR_EYE : 1
TOLERATED_THE : 1
HIM_ASSESSMENT : 1
BY_MENTAL : 1
TEST_WAS : 2
VA_AT : 1
MUSSP_TO : 1
OR_INTENT : 1
WAS_CED : 1
THIS_AT : 1
HORRIBLE_OR : 1
BY_FAX : 1
INTACT_CONVERSE : 1
ON_DIAGNOSIS : 1
ALLERGIES_PATIENT : 1
PATIENT_FROM : 1
PCP_DENIES : 1
FOLLOWUP_STOP : 1
SEX_POW : 1
STATUS_SEPARATED : 1
FEW_PCCNURSING : 1
EXAM_AFEBRILE : 1
IS_NON : 1
EKG_RIB : 1
DIALOG_ACTIVE : 1
SUPPORTIVE_IN : 1
AGERELATED_DE : 1
HIM_STATING : 1
ALCOHOL_MOS : 1
DEPENDENCE_NO : 1
UNDERSTANDING_REQUESTING : 1
POSE_DANGER : 1
EXPIRATION_STATUS : 1
INABILITY_URINATE : 1
SISTER_HAS : 1
FREQUENCY_PAIN : 1
CONFIRMED_SISTER : 1
ADMITTED_MEDICINE : 1
THIS_IN : 1
PT_DIFFICULTY : 1
HEMOGLOBIN_OF : 1
BE_ONE : 1
NUTRITION_ASSESS : 1
SETTINGS_PROVIDE : 1
PEOPLE_AND : 1
ANY_MEDS : 1
CONSENT_SIGNED : 1
FORT_COLLINS : 1
PROBLEMS_LITTL : 1
LETHALITY_THAN : 1
BY_EVERY : 1
THE_ISSUED : 1
WASHING_TO : 1
NOTE_PB : 1
UNDERSTANDING_OF : 3
DOES_DRINK : 2
PATIENT_BEEN : 4
ADMISSION_OF : 1
YES_NUTRITION : 1
SUICIDAL_PT : 1
INFUSING_AT : 1
LEFT_ON : 2
GOT_THE : 1
AND_IN : 2
FALLING_OR : 2
AND_SBA : 1
TUB_SHOWER : 1
PUFFS_IN : 1
MOOD_TENSION : 1
PRECAUTIONS_BED : 1
TMS_ERYTHEMIA : 1
ICDCM_HEELS : 1
ON_UNDERSTANDING : 1
ADVANCE_DIRECTIVE : 3
RETAINED_TEETH : 1
THE_LAST : 2
HEENT_PERRLA : 1
INSOMNIA_DEPRESSIVE : 1
DIAGNOSTIC_CASTS : 1
SMOKE_PATIENT : 1
HE_FRACTURED : 1
TO_BENZOS : 1
EXAM_WHEN : 1
FOR_LABS : 1
DOSE_MAY : 1
AID_FROM : 1
SPENT_MINUTES : 1
ON_HAS : 1
SEIZURE_FILED : 1
THREE_IN : 1
FOCI_OF : 1
PATCHROTATE_SITESDO : 1
ENGE_TO : 1
KEEPING_ADDENDUM : 1
RATION_OS : 1
FOR_PRESSURE : 2
RECON_TO : 1
DOLLARS_AND : 1
HYDROCODONE_TAB : 1
PO_QAM : 2
EVENTS_PATIENT : 1
LABS_PLEASE : 1
BAND_CURRENT : 1
HIS_INSULIN : 1
PROVIDER_INSTRUCTIONS : 1
HAS_SOMEONE : 1
THE_THEN : 1
FREELY_SURGICAL : 1
RECIPIENT_THAT : 1
MONTH_SKIN : 1
HOWEVER_COLLISION : 1
PRISION_FOR : 1
ANY_WITHDRAWAL : 1
OF_CALLED : 1
FROM_YESTER : 1
TO_FEELINGS : 1
TIME_SPENT : 2
ACTIVITIES_TOLERATED : 1
IS_DU : 1
TO_ULCER : 1
OF_PICKED : 1
GOAL_ORIENTED : 1
DNR_IS : 1
DRESSING_CHANGES : 1
SERVICES_AT : 1
RECOMMENDATION_HIS : 1
NOT_REQUIRED : 1
IS_NO : 1
CHILD_NEGLECT : 1
DISCHARGE_SUMMARY : 1
FACET_JOINT : 1
WHETHER_HE : 1
SELF_HARM : 2
SUICIDAL_DONT : 1
ABILIFY_AND : 1
LEFT_EYE : 1
FRACTURED_CURRENTLY : 1
THAT_THERE : 1
RTC_MONTHS : 1
URINE_IN : 1
JULY_UNTIL : 1
GENERAL_INFORMATION : 1
YOU_WERE : 1
SALINE_IN : 1
EDUCATION_ACTIVE : 1
RECHECK_TSH : 1
INHALE_BY : 1
PROBLEMS_NOTED : 1
CALLED_REFERRAL : 1
TO_SURGERY : 1
IODOSORB_PATIENT : 1
UP_AT : 2
YO_WM : 1
NURSING_TO : 1
FOR_HEA : 1
THAN_OTHER : 1
WEIGHT_KG : 1
NOTE_MODE : 1
GLASSES_AND : 1
IF_DOSE : 1
WITH_ADLS : 1
PUTTING_STRING : 1
STATED_ALCOHOL : 1
THIS_PATIENT : 2
AND_CARDIAC : 1
OF_LARGE : 1
COVERED_OF : 1
AND_LEGAL : 1
RESPONDS_VERBAL : 1
BEING_FOLLOWED : 1
DIRECTED_WITH : 1
APPROVE_BUT : 1
RISK_ILLICIT : 1
OF_FOCUS : 1
ALERT_FLUIDS : 1
DISCHARGE_FOUR : 1
AT_AT : 1
OF_HYPERGLYCEMIA : 1
PHONE_APPT : 1
DRUGS_MORE : 1
IDENTIFYING_OR : 1
ECH_HEPATITIS : 1
CLEAN_CONTAMINATED : 1
ORAL_MG : 3
SPOKE_WILL : 1
SECOND_HEAD : 1
TACHYCARDIA_HOME : 1
LOOSE_PATCHROTATE : 1
OWN_ABILITY : 1
DUE_METHOD : 1
ON_INTERVIEW : 1
PHYSICIAN_FOLLOWUP : 1
WAS_OUTPATIENT : 1
NURSING_PROGRESS : 2
ADDENDUM_REVIEWED : 1
DISTRACTION_URGENT : 1
UCC_NOTE : 1
MONTHS_FOR : 3
IR_CAP : 1
BY_MH : 1
MESSAGE_HER : 1
FEW_CLOTS : 1
AND_NONESSENTIAL : 1
MOVEMENT_MH : 1
OF_BREATH : 1
ALERT_FULLY : 1
HT_IN : 1
HE_CONTINUES : 1
OR_UNINTERESTED : 1
LAWS_MODERATE : 1
FEB_AID : 1
KG_AI : 1
INDEPENDENT_CONTINENT : 1
TYPICAL_YOU : 1
HAVE_DIFFICULTY : 1
CALORIE_TO : 1
POTENTIAL_FOR : 1
IS_ACCEPTED : 1
ACCESS_FIREARMS : 1
OX_PULSE : 1
CANDIDATES_HPI : 1
GOING_FROM : 1
PL_WAYS : 1
SAM_LIKELY : 1
WAS_REPEATABLE : 1
SIGNS_TIME : 1
IS_TELEPHONE : 2
ITS_IS : 1
FAMILY_AT : 1
THE_LISINOPRIL : 1
INJURIES_SOME : 1
TEXT_ATTACHED : 1
WITH_APPROPRIATE : 1
AT_SUPPORTIVE : 1
ACTIVE_IMPRESSION : 1
HAS_HEMOGLOBIN : 1
PREOP_DX : 1
FOR_COUNSELING : 1
IT_OR : 1
PHYSICIAN_NOTE : 2
XL_MG : 1
HRS_FOR : 1
MSW_DBC : 1
IS_WITHOUT : 1
HE_QUIT : 1
SATURATION_ON : 1
CLOPIDOGREL_BISUL : 1
LUMBAR_WITH : 1
PAIN_YES : 1
HAS_COMINGT : 1
BED_CALL : 1
INCOME_MOISTURE : 1
CURRENT_ACTIVE : 1
YO_MALE : 2
GOING_CENTER : 1
MINOR_ANGER : 1
ANONYMOUS_STATES : 1
NOT_SUCH : 1
WORK_HEARING : 1
TIME_QUADRANTS : 1
LIGHT_SIDERAILS : 1
VOIDED_AMT : 1
SOLACE_ATTENDED : 1
OF_IMMEDIATE : 2
COPING_STRATEGY : 1
AND_TRAININGS : 1
RESPONSIBILITY_NO : 1
RISK_PATIENT : 1
ACTIVE_HOWEVER : 1
PROTOCOL_NOT : 1
LARGE_AMOUNT : 1
HCT_PRODUCTIVE : 1
SUBSEQUENTLY_ESCORTED : 1
CONTROLED_ON : 1
UNLESS_OTHERWISE : 1
CONDITION_SIGNIFICANT : 1
DAUGHTER_IS : 1
UNREST_WITH : 1
LOSE_HE : 1
THICK_SPUTUM : 1
PM_ON : 1
HAS_MEDICAL : 1
TO_LOGICAL : 1
YET_RECEIVED : 1
ACCEPTING_PULMONARY : 1
THE_SHOT : 2
OF_WHICH : 1
AND_PEN : 1
HE_WEARING : 1
HAS_SHOWN : 1
AND_ON : 1
COLLINS_TREATMENT : 1
WAS_BENZOS : 1
IDENTIFIED_BY : 1
WITH_ME : 2
WRITER_INTRODUCED : 1
AREAS_HIGH : 1
SHOWS_EYE : 1
AMIODARONE_MG : 1
BATHING_VETERAN : 1
PROBLEM_OTHER : 1
AND_PULSE : 1
AVH_ALERT : 1
OCCASSIONAL_SENSORY : 1
GENERAL_CBCB : 1
YOUR_WAY : 1
REPORT_FOR : 1
MEDICINE_AND : 1
WAS_HEART : 1
LEFT_LOBE : 1
INHL_ORAL : 4
PROBLEM_TREATMENT : 1
ENGES_PL : 1
HEART_RATE : 1
CAN_HIM : 1
NOTE_ON : 2
LAB_RECHECK : 1
CALORIE_INTAKE : 1
HYPERMETAB_AREA : 1
YELLOW_IN : 1
BOWEL_TREATMENT : 1
ETOH_BEERS : 1
WILL_HAVE : 1
PROBLEM_CHEM : 1
NUMBER_PLAN : 1
RECENT_RESULTS : 1
HI_NO : 1
SODIUM_CHLORIDE : 1
DISCUSSED_BLOOD : 1
DE_OS : 1
NOTE_OP : 1
INCLUDING_SUPPLIES : 2
BLOOD_HEMOGLOBIN : 1
HIM_FOR : 1
TO_HISTORY : 1
MOUTH_EVERY : 1
PRIVATE_THROUGH : 1
CORRECT_FOR : 1
OR_MOBILITY : 1
TO_AVOID : 1
THE_SECOND : 1
INFORMATION_SUICIDAL : 1
ADA_BATHING : 1
IID_IN : 1
PATIENT_IDENTIFYING : 1
OFFERED_ENCOURAGED : 1
TH_HEAD : 1
WITH_SUCCESSFUL : 1
PUPILS_LEFT : 1
TREATMENT_HORRIBLE : 1
SUMMARY_GOOD : 1
HOW_WHEN : 1
BOND_SERVICES : 1
LEVEL_NONE : 1
LIST_PATIENTS : 1
COUNSELED_THE : 1
CONVERSE_PROBLEM : 1
IMPRESSION_CABG : 1
FAMILY_WIFE : 1
EVALUATION_PATIENT : 2
OF_MEDIAN : 1
ARE_INTERESTED : 1
PEN_CITY : 1
GOALS_GROUP : 1
IN_FOR : 2
RENO_BE : 1
MEDICATIONS_THE : 3
OUTSIDE_OF : 1
ORAL_INH : 1
TAKE_CARE : 1
BOTHERED_BY : 1
ACCESS_TO : 1
LOT_SODA : 1
AS_ADMINISTER : 1
RISK_AND : 1
RELATES_HE : 1
SC_TEXT : 1
REGARDING_DATE : 1
FAMILY_LEGAL : 1
CLINIC_CARE : 1
CALL_BETTER : 1
TAKE_DECEASED : 1
CLEAR_VISIT : 1
BY_NANDA : 1
PT_CBOC : 1
HE_TROUBLE : 1
COMMENTS_IF : 1
FIRST_THREE : 1
NEEDED_TAKE : 1
HER_OF : 1
THE_RECIPIENT : 1
BE_HFA : 1
ULCER_NOTED : 1
IV_SALINE : 1
COPD_MITRALVALVE : 1
FOR_PUPILS : 1
PATIENT_REPORTS : 2
INFORMATION_EACH : 2
MANAGEMENT_THOUGHTS : 1
VITALS_LEVEL : 1
TEMP_STARTED : 1
WHICH_DANGER : 1
WITHOUT_DIAGNOSIS : 1
AVAILABLE_SA : 1
CAROTID_PO : 1
ALL_HOSPICE : 1
TAB_ONE : 1
HE_TWICE : 1
ANY_PROBELMS : 1
AT_SOME : 1
OF_WEAKNESS : 1
GRADE_MICROSCOPIC : 1
AN_MALE : 1
OTHER_CLINICS : 1
DATE_JUN : 1
REQUESTING_PICK : 1
CLEAR_ASKED : 1
DEPOSITS_WE : 1
HCT_SEP : 1
RESIDENT_YEAR : 1
ACTIVE_OF : 1
PO_QH : 1
WAS_OBTAINED : 1
IN_HE : 1
WITH_BEHAVIORAL : 1
YES_ANTIHIS : 1
SON_POWER : 1
OUT_CXR : 1
USE_OF : 1
FOLLOWUP_DRINKING : 1
FOR_RISK : 1
OF_TIS : 1
AFTER_ATTEMPS : 1
IS_PAINFUL : 1
EXPERIENCING_MOOD : 1
SI_PROTOCOL : 1
ON_CONFIRMED : 1
TRIED_HARD : 1
REPORT_TO : 2
REPORTED_AND : 1
ALERT_JOKING : 1
SOME_FACILITIES : 1
FROM_CENTER : 1
GALLY_PULSES : 1
HE_ALSO : 1
TO_ASSIST : 1
AGREEABLE_REPEAT : 1
SUSTAINS_SECOND : 1
PLACED_NURSE : 1
TURN_PHYSIOLOGICAL : 1
THY_GALLY : 1
OF_THIS : 4
BE_APPROPRIATE : 1
MEDICINES_PAIN : 1
TO_XYGEN : 1
TO_ARMED : 1
NOTIFY_PROVIDER : 1
DIAGNOSTIC_DX : 1
AND_UCINATIONS : 1
PSYCHOTROPIC_DATIVE : 1
INTACT_TOTAL : 1
WITHIN_REACH : 1
IDENTIFIED_APPROVED : 1
ISNT_RARELY : 1
RECEIVED_THE : 1
CONSULT_TO : 1
SMILING_HE : 1
LB_CDI : 1
ON_CHEST : 1
ADMITTED_TAB : 1
STATUS_RATED : 1
OF_COMES : 1
EOTH_NO : 1
IN_ADDENDUM : 1
NO_AVH : 1
AFTER_SEVERAL : 1
OFF_BY : 1
DENIES_HIS : 1
NO_PROBE : 1
FOLLOWING_WITHIN : 3
IS_THE : 4
SIG_TAKE : 1
DENY_IDEATION : 1
TENDER_AMLODIPINE : 1
OBSERVED_TO : 1
PATIENT_CAREGIVER : 1
WITH_ALL : 1
ADDITIONAL_COMMENTS : 1
ARE_HERE : 1
MOOD_DEPRESSED : 1
THAT_TO : 1
ACETAMINOPHEN_MG : 2
SUPPLIES_LB : 1
ALLEGES_HIS : 1
ANY_THE : 3
KLINE_MULTIDOSE : 1
IF_YES : 1
HIS_PER : 1
CAP_MG : 3
OTHER_PULM : 1
EMPLOYED_IMPRESSION : 1
HE_ADMINISTER : 1
TELEPHONE_APP : 1
CLINIC_REVIEWED : 1
NOT_PT : 1
MONTHS_RESIDENT : 1
DENIES_CRAMPING : 1
ACCUCHEK_CURVE : 1
LAST_SEVERAL : 1
HAS_FOUND : 1
GROUP_MARITAL : 1
YEAROLD_MAN : 1
YES_RISK : 1
TO_ADVISED : 1
THE_OTHER : 1
INTOXICATED_MULTIPLE : 1
ING_DID : 1
HIS_PICKED : 1
THIS_PAIN : 1
WITH_ANTIHISTAMINES : 1
FOR_VISIT : 1
THIS_YO : 1
AGAIN_HE : 1
FOR_APPT : 1
REPORT_FROM : 1
LEGAL_RELATED : 1
WITH_DIABETIC : 1
TO_APPROVE : 1
APPLICABLE_DECREASE : 1
TURN_BENEFIT : 1
VETERAN_PL : 1
PEDAL_NOTED : 1
NURSING_WK : 1
DRINKING_ATTEND : 1
CARE_STARTED : 1
NURSES_SICK : 1
NO_ASSOCIATE : 3
COUNSELING_INTENSELY : 1
THOUSAND_AND : 1
REVIEWED_TEAM : 1
BROUGHT_THE : 1
INTENSITY_SCALE : 2
TAB_WAL : 1
NONE_ORDERS : 1
THREE_JOBS : 1
PROVIDED_OUTPATIENT : 1
NOTES_FOR : 1
ADDENDUM_HEIGHT : 1
CATS_OU : 1
IDEATION_HE : 1
AND_THINKING : 1
TONIGHT_LARGE : 1
TIME_AMBULATED : 1
MADE_HIS : 1
AFEBRILE_VSS : 1
UP_TO : 2
SCORE_READING : 1
PROCEDURE_BILATERAL : 1
ADDENDUM_INTERN : 1
CURRENT_LEVEL : 1
HISTORY_EFFECT : 1
FEELINGS_AND : 1
PATIENT_JIM : 1
KG_AMBULATORY : 1
SITTING_IN : 1
SEE_DOCUMENTATION : 1
WRITTEN_PAMPHLET : 1
MHC_YEAR : 1
ISSUE_ETOH : 1
HOME_APARTMENT : 1
RIDE_IF : 1
IS_ACCEPTABLE : 2
RANDOM_SCREENING : 1
STATES_HES : 1
SCALE_MH : 1
IN_NURSE : 1
WAS_DOCUMENTED : 2
DAILY_DRESSING : 1
TOLERATE_CLEAR : 1
DID_PATIENT : 1
WAS_ADDENDUM : 1
OF_INHALER : 1
ICDCM_MONTHS : 1
TO_PREVENTIVE : 1
THESE_TOPICS : 1
STATING_THAT : 1
ORDERED_AS : 1
INTERVENTIONS_AS : 1
HS_ACTIVE : 1
AVAILABLE_SO : 1
HIM_NO : 1
TOPICS_PLAN : 1
ULCER_TO : 1
MRS_INFORMED : 1
AND_HISTORY : 1
MAY_OVER : 1
MINUTES_FAWCETT : 1
SD_CASE : 1
MULTIPLE_SOME : 1
ANYWAY_PSYCHOTROPIC : 1
CURRENT_CONDITIONS : 1
WANTS_ACTIVITY : 1
ACUTE_EVENTS : 1
CONTINUE_CARE : 1
ICU_NURSING : 1
PATIENT_UPCOMING : 1
ALREADY_AND : 1
COMPLETED_TO : 1
GIVEN_AGREE : 1
FROM_GOING : 1
NURSING_SCHEDULING : 1
ASSESSMENT_NEURO : 1
ON_YOUR : 1
COLLINS_PATIENT : 1
CREATOR_OF : 1
ACTIVE_NOTE : 1
REGARDING_RECENT : 1
KNOWN_SIERRA : 1
TO_TUCSON : 1
FOR_WOUND : 1
ON_MORE : 1
PROTECTIVE_SWMF : 1
SOUNDS_WOUND : 1
TO_MORE : 1
SPEC_MH : 1
LIVING_THAT : 1
ACCEPTING_HX : 1
AWARE_PROBLEM : 1
RESPIRATIONS_AND : 1
DIARRHEA_STARTED : 1
MG_QAM : 2
BEEN_PT : 2
AMBULATED_FEET : 2
NONE_RESIDENT : 1
PROCESS_ADDENDUM : 1
SHOULDER_STATES : 1
THROUGH_DETOX : 1
ICDCM_CRITICAL : 1
IMPRESSION_PROCEDURE : 1
DRINK_LOT : 1
ILLICIT_INJECTED : 1
OF_MSW : 1
SW_AT : 1
PATIENTS_UPDATED : 1
DISCUSSION_REQUIRED : 1
TO_CURRENT : 1
ON_AND : 2
ACKNOWLEDGED_VETERANS : 1
WITH_INTERDISCIPLINARY : 1
PTSD_ITS : 1
NOTE_TEXT : 1
HE_WOULD : 3
VA_SCHEDULE : 1
CONVERSATION_STATE : 1
KIMBERLY_RN : 1
AND_POSTSURGICAL : 1
JOE_TRS : 1
TRAVEL_ON : 1
MG_AT : 1
NON_PHYSICIAN : 1
CLEAN_NURSING : 1
LUMBAR_JOINT : 1
SPOUSE_THAT : 1
PO_PRN : 2
TOOTH_DX : 1
MALATHI_ENCOUNTER : 1
SYMPTOMS_TO : 1
NPDR_OU : 1
EASY_BBS : 1
AND_COOPERATIVE : 1
VISITATION_AS : 1
TO_LONG : 1
PROBE_TO : 1
MODIFICATIONS_ARE : 1
EFFECTS_CHIEF : 1
HAS_PRIVATE : 1
GI_SERVICE : 1
BREATH_AND : 1
BM_VOIDED : 1
LEFT_MACHINE : 1
BACK_TO : 1
OFF_BED : 1
PATIENT_FLU : 1
STATUS_NOTE : 1
YET_THE : 1
NOT_GIVE : 1
NOT_FALL : 1
LIES_PAIN : 1
PLANS_PSYPC : 1
TACHYCARDIA_PHONE : 1
CONTACT_TRS : 1
VERBALIZES_PT : 1
WITH_SIGNIFICANT : 1
TAKING_INSULIN : 1
MEDS_STATES : 1
PAIN_SITES : 1
FOLLOWING_FROM : 1
PAIN_NAUSE : 1
PATIENT_FSOME : 1
ROUTINE_BLOOD : 1
NOTE_PLAN : 1
LISINOPRIL_HE : 1
SOCIAL_JOB : 1
EXTRACTION_TOOTH : 1
NO_AGAIN : 1
COUPLE_THOUSAND : 1
WELL_ON : 1
PATCHROTATE_NOT : 1
AFFECTED_AREA : 1
CARE_PROVIDER : 1
AI_ALL : 1
REPORTS_DEPENDING : 1
WITH_NEW : 1
TIME_SAYS : 1
HOW_TO : 1
ORIENTED_GROOMED : 1
ST_METHEADS : 1
PLAN_FOLLOWUP : 1
PATHOLOGY_DIAGNOSIS : 1
TO_PHYSICAL : 1
BUT_WILL : 1
MENTAL_STATUS : 1
MENTAL_STAFF : 1
COPY_TO : 1
VETERAN_STAFFED : 1
EMER_CARE : 1
BECOME_DRUNK : 1
WHEN_LIES : 1
TO_STOP : 1
ANTIHIS_OF : 1
RISK_CLOPIDOGREL : 1
THAT_GIVE : 1
THAT_RESULTS : 1
HELP_BE : 1
AND_OF : 6
SHORTNESS_OF : 1
THIS_STAFF : 1
MANAGEMENT_NO : 1
IN_WHICH : 2
MAINTAIN_CE : 1
WITH_SPOUSE : 1
HISTORY_FALLING : 2
HE_NEED : 1
OF_SUICIDAL : 1
THERAPY_TO : 1
IT_MORE : 1
RA_ALCOHOL : 1
REVIEW_AND : 1
FOUND_NO : 1
ADMISSION_ANXIETY : 1
IN_HIS : 1
HAVE_WHEEZING : 1
ACTIVE_LEFT : 1
EXCEED_MG : 2
THE_ANTIHISTAMINES : 2
TOPICS_COVERED : 1
MON_AMBULATORY : 1
OF_APPT : 1
NOSTRIL_TWICE : 1
RELATED_PROCEDURE : 1
EMERGENCY_ACCEPTING : 1
MOTIVATION_LEARN : 2
DEPENDING_YOUR : 1
REVIEWED_WITH : 2
TALKED_IMMATURITY : 1
MEDICINE_SERVICE : 1
FEET_WITH : 2
HEM_ONC : 1
DEFINITIVE_WILL : 1
DNR_TRIGEMINY : 1
CANCER_MON : 1
MALE_MRSA : 1
METATARSAL_RIGHT : 1
SHE_KICKED : 1
LIST_IS : 2
STATEMENT_IS : 1
KRISHNASWAMY_MALATHI : 2
CHERRY_FRIEND : 1
PERMISSION_ALVETA : 1
NOT_VERY : 2
BUT_WAS : 1
DAILY_THE : 1
RIDE_ANES : 1
THE_RISKS : 1
CHANGE_HOURLY : 1
SEE_TO : 1
TO_WHICH : 1
WRITTEN_INSTRUCTIONS : 1
EXCEED_IN : 1
TOPICS_AS : 1
AND_GUAIFENESIN : 1
STATE_TO : 1
AND_REC : 1
TO_INDIVIDUAL : 1
OF_PATHOLOGY : 1
LIKELY_CONTACTED : 1
ORDER_HEIGHT : 1
PRESCRIBED_OF : 3
ANY_CHEST : 1
RESPIRATORY_ROOM : 1
DONT_WHY : 2
COUGH_INTRODUCER : 1
COLON_WITH : 1
CONSULTS_FOR : 1
ED_DOCUMENT : 1
SCORE_PULSE : 1
INSIGHT_OF : 1
THE_NEW : 1
METAL_RETAINED : 1
FORM_OF : 1
LESSON_MUST : 1
MG_FILL : 1
LOBE_AND : 1
KETCHUM_CAREY : 1
BED_BRADEN : 1
BEING_SEEN : 1
VISION_NOT : 1
MOUTH_TO : 1
VISIT_HE : 1
NOT_BEEN : 1
THE_SHOULDER : 1
MH_AND : 1
CALORIE_AMBULATORY : 1
CONTINUE_WOUND : 1
NEURO_OF : 1
FACILITY_IF : 1
DIPTHERIA_MANAGEMENT : 1
NURSING_FOR : 1
USING_CUFF : 1
DARK_NAME : 1
REPEATABLE_FOR : 1
HIS_DAUGHTER : 1
WEIGHT_LOSS : 1
IS_AN : 2
RECEIVED_PATIENT : 1
EYE_PEOPLE : 1
ADMITTED_THE : 1
NO_NAME : 2
MUST_REDEFINED : 1
WOULD_EABLE : 1
PRESCRIPTION_PROVIDED : 2
SIGNATURE_NOT : 1
PT_BED : 1
PAIN_SHORTNESS : 1
DAILY_CHANGE : 1
CED_ONCE : 1
REGIONAL_HOSPITAL : 1
CONTROLED_CURRENT : 1
CITY_FACILITY : 1
COMINGT_THE : 1
ACTIVE_MEDICATION : 1
LOSS_PROGRAM : 1
MENINGITIS_IN : 1
AND_NUMBNESS : 1
COME_HIS : 1
ESTABLISHED_DENIES : 1
FOLLOWUP_PROCEDURE : 1
VET_MAY : 1
UNTIL_WILL : 1
IF_YE : 1
CALLERS_TELEPHONE : 3
HIS_FELT : 1
SUCH_AND : 1
AS_THOUGHT : 1
INCREASE_IN : 1
CONTROLLED_SUBSTANCE : 1
GOES_DIURETICS : 1
STATED_DIARRHEA : 1
MDD_ADD : 1
SURVEILLANCE_SMOKING : 1
VALVE_THE : 1
DISTRAUGHT_AND : 1
SC_LIKELY : 1
CT_MOTIVATION : 1
DEXTROSE_ANTIHISTAMINES : 1
STATES_HE : 7
CONTAMINATED_INPATIENT : 1
UPCOMING_APPOINTMENT : 1
LONG_THE : 1
BACK_REPAIR : 1
ON_SHIFT : 1
JUST_PHONED : 1
FOLLOWUP_NOTE : 1
HAVING_ATTACKS : 1
IM_SUICIDAL : 1
NO_TO : 1
TENDER_BESYLATE : 1
COMMENT_TESTING : 1
TABLET_OF : 1
BRONCHOSCOPY_PRE : 1
OR_REPORTED : 1
EVALUATION_OF : 2
WILL_LCSW : 1
IS_IN : 4
AT_MG : 1
TEMP_CALLED : 1
FOR_BENEFITS : 1
COURSE_THAT : 1
NURSE_CONTINUE : 1
FMH_SH : 1
GOES_FEW : 1
CHART_PAIN : 1
OF_INDIVIDUAL : 1
THIS_SAYS : 1
ON_ZOCOR : 1
FOR_LIGHT : 1
INJ_MG : 1
VISIT_HEAD : 1
COMING_ASSESSMENT : 1
ORAL_NO : 2
FOUR_WEEK : 1
ACETAMINOPHEN_CONTINUED : 1
HYDROXYZINE_ORAL : 1
HIM_RIDE : 1
SA_ADDENDUM : 1
NANDA_ANITA : 1
ASSESSED_WEAR : 1
RESULTS_UP : 1
HIGHS_NOT : 1
MAINTAIN_NONPRESCRIPTION : 1
NO_LESIONS : 1
ROLLING_SBA : 1
GROOMED_WAS : 1
REMEMBERED_GOAL : 1
CHRONIC_SODIUM : 1
HE_TIME : 1
DISABILITIES_NONE : 1
ROI_SW : 1
ON_OBTAINING : 1
ADDENDUM_FLUID : 1
STRATEGY_BUSY : 1
POSITION_OXYGEN : 1
WITH_NURSING : 1
OF_RALIZED : 1
QUITE_OF : 1
KRISHNASWAMY_OR : 1
ORCHARD_HE : 1
PT_PULSES : 1
ISSUES_THIS : 1
OR_TRIGGERS : 1
HEAR_MEDS : 1
HEMOGLOBIN_COMPREHENSIVE : 1
MG_FOR : 1
FILED_SUBJECTIVE : 1
INFORMATION_ABOUT : 2
LEARN_HOWEVER : 1
EPIGASTRIC_PAIN : 1
EKG_CAGE : 1
DESIGNED_PHONED : 1
NO_ON : 1
AMBULATORY_NONE : 2
NOTE_HERE : 1
PATIENT_DNR : 1
OF_ALL : 1
THE_LAWS : 1
BUT_UPDATE : 1
PATIENT_COUNSELED : 1
IF_AVAILABLE : 1
GI_PT : 1
SCALE_NONE : 1
CM_ASSIGNED : 1
PREVIOUS_AS : 1
ICDCM_EDEMA : 1
NAME_SIMETHICONE : 1
IN_AND : 1
DRY_MUCOUS : 1
UNCERTAIN_INCREAED : 1
ANY_RUN : 1
IDEATION_CONTINUED : 1
LOOKING_FOR : 1
TO_REPORT : 2
LORAZEPAM_BY : 1
ADMISSION_HE : 1
MIN_APPOINTMENTS : 1
RESP_ADMISSION : 1
RTC_DERMATOLOGY : 1
CERTAIN_WE : 1
SODA_DR : 1
HYPO_HYPERGLYCEMIA : 1
INSOMNIA_ACTIVE : 1
BATH_SHOWER : 1
AND_PROCEEDED : 1
LOT_OF : 1
CURRENT_FINANCIAL : 1
TO_AREA : 2
DOLLARS_NOW : 1
PROVIDER_AN : 1
SERIOUS_THEIR : 1
TO_DETERMINED : 1
TELEPHONE_METOPROLOL : 1
POTENTIAL_THAN : 1
REPORTS_ABUSE : 1
TID_TCBP : 1
SEV_MONTHS : 1
LONG_VETERAN : 1
THAT_MORE : 1
TREATMENT_PLAN : 5
HI_LO : 1
IS_PHONED : 1
PRIVATE_INSURANCE : 1
PRESENTLY_IS : 1
CLEAR_INSTRUCTIONS : 1
FORM_ROUTE : 1
COPING_KEEPING : 1
DURATION_THERAPY : 1
EYE_EXAM : 1
SEVERAL_MONTHS : 1
STALKING_HIS : 1
TIMES_VIA : 1
YOU_DRUNK : 1
PATIENT_PC : 1
ACCEPTED_AT : 1
THESE_AS : 1
ATTACKS_ALONG : 1
SYMPTOMS_HISTORY : 1
SOUNDED_AND : 1
CVA_HYPOTHYROIDISM : 1
THE_NEXT : 1
PARTICIPANTS_SOCIAL : 1
BED_REST : 1
ATTACHED_IV : 1
SUBJECT_RULE : 1
TOMORROW_MRSA : 1
RESTRICTIONS_CONTINENT : 1
AT_TIME : 8
INPATIENT_STATED : 1
BRONCHOSCOPY_BRONCHOSCOPY : 1
WOUND_ETC : 1
PATIENT_ACTIVE : 1
NUMBER_STATE : 1
EDUCATED_TO : 1
DIVERTICULUM_THE : 1
YES_NO : 3
STARTED_FRI : 1
AND_INFORMATION : 1
RETAINED_NOTED : 1
ED_PARANOIA : 1
OF_AMBULATORY : 1
IS_BUT : 1
PART_ONE : 1
EL_ADDENDUM : 1
ML_ID : 1
ATTORNEY_SISTER : 1
THIS_WAS : 1
KIT_PROVIDED : 1
CURRENT_STRATEGY : 1
DCF_INTERVENING : 1
WOUND_CLEAN : 1
PLAN_IT : 1
TO_BERKLEY : 1
VOMITING_WITH : 1
HEART_LEFT : 1
COOPERATIVE_CALM : 1
TO_MEDICINE : 1
GRASP_LIFTS : 1
SURG_TRANSFER : 1
PRN_HYDROCODONE : 1
DC_RESPIRATIONS : 1
ASSOCIATE_IDENTIFIED : 3
SAY_RECHECKED : 1
DANGER_TO : 1
SCHEDULE_WILL : 1
INPATIENT_BILATERAL : 1
HIS_UDS : 1
CONDITION_ACUTE : 1
HAS_PATIENT : 3
FOR_MENTAL : 1
NONCOMPLIANCE_INTENSE : 1
VERBAL_IDENTIFYING : 1
BIL_OF : 1
USE_BY : 1
OF_IS : 2
TO_SEEK : 2
INTAKE_PATIENT : 1
MULTIPLE_INJURIES : 1
OLD_THAT : 1
HAVE_PUT : 1
ONC_PHYSICIAN : 1
EKNUTRITION_ATTENDING : 1
EXHIBITED_ED : 1
NOTE_LS : 1
WORK_ON : 1
TO_VERBAL : 1
NOW_AT : 1
IF_NEEDED : 1
CMM_TYPE : 1
MAY_GIVEN : 1
ARE_PUT : 1
HER_CELL : 1
RESTING_PATIENT : 1
VOICE_HE : 1
SHE_DOES : 1
KNOWS_WHEN : 1
PT_PALPABLE : 1
MG_ASSOCIATE : 1
FOR_ABOUT : 1
IS_COVERED : 1
VISIT_PATIENT : 1
STATUS_ORIENTED : 2
AND_SOME : 1
DRUG_SD : 1
NEGATIVE_NONE : 1
MRSA_SURVEILLANCE : 2
TOTAL_TIME : 1
TO_CALL : 2
HAVE_HIM : 1
PATIENT_PATIENT : 2
WBC_CMM : 1
PPP_NEEDS : 1
CAREY_EMER : 1
CONTINUED_ACCUSE : 1
WITH_DOCTOR : 1
MRSA_NO : 1
PSYCHOSOCIAL_REMEMBERED : 1
PRE_LABORATORY : 1
OF_COLLAGENOUS : 1
THIS_IS : 4
MEDICATIONS_IS : 1
AND_PLANS : 1
DURING_DISCUSSION : 1
NO_ENEMA : 1
CARE_ADDRESSPVH : 1
LEGS_IS : 1
EDEMA_NOTED : 1
HOUSEKEEPING_DIAGNOSES : 1
DETERMINED_BY : 1
RECONCILIATION_NOTE : 1
THIS_FACILITY : 1
IS_POOR : 1
IDEATION_INTENT : 1
AND_INFORMED : 1
ON_IN : 1
AND_RHYTHM : 1
SERVICE_OUTSIDE : 1
SINUSES_CLEAR : 1
COHERENT_LOGICAL : 1
HOURS_OF : 1
OUTPATIENT_MEDICATIONS : 5
HE_CAN : 1
THE_HISTORY : 1
SCHEDULE_NURSE : 1
ALCOHOL_CONDITIONS : 1
OF_BED : 1
MANAGEMENT_HE : 1
RISK_INTERVENTIONS : 1
WORKING_ON : 1
RATE_RHYTHM : 1
ON_CELL : 1
WHEEZING_AND : 1
TALKED_ME : 1
AT_IN : 1
LEFT_UNIT : 1
THINKING_LIFE : 1
CAR_HE : 1
TAKE_PRIMARY : 1
AGENCY_OF : 1
FRIEND_ONE : 1
LT_REVIEW : 1
EDUCATE_AS : 1
FOR_DETAILS : 1
THAT_THE : 5
PATIENT_ANSWERED : 1
CONTACTED_IN : 1
BILL_THE : 1
CABG_NOTE : 1
UNIT_ON : 1
NOTIFIED_CHECKED : 1
TAB_TAKE : 3
DEF_COPD : 1
HIS_WILL : 1
SPIRITUALITY_MUST : 1
FORM_FOR : 1
THERAPY_COUP : 1
ONE_TABLET : 1
FEE_AND : 1
PHYSIOLOGICAL_BENEFIT : 1
REDEFINED_AS : 1
SUBJECT_ALCOHOL : 1
BATTERY_FOR : 1
THE_VA : 3
OF_JUN : 2
THE_OR : 1
BASIS_GATZMAN : 1
MAKING_LIVING : 1
ONCOLOGY_DIABETIC : 1
NOTE_PATIENT : 2
ON_INITIAL : 1
WHETHER_WOULD : 1
WITH_STAFF : 1
KNOWING_HE : 1
CATS_MH : 1
ACTIVE_NONE : 2
RESOLVES_WHEN : 1
WHEREIN_PATIENTS : 1
COMDYSPHAGIA_RTC : 1
HEALTH_THEM : 1
SYNCOPE_HYPERVENTILATON : 1
VETERANS_TO : 1
NO_EASY : 1
EVERY_TO : 1
DERIVATIVE_ML : 1
LEFT_AT : 1
REPORT_IF : 1
PAIN_HANDOUTS : 1
WEEK_OF : 1
ONCOLOGIST_THE : 1
WEAK_ICU : 1
CRAMPING_MESSAGE : 1
INFUSED_WILL : 1
GAVE_FORM : 1
PSYCHOTROPIC_PHYSICIAN : 2
NEEDED_TO : 3
INSOMNIA_UNSPECIFIED : 1
INH_GM : 1
MEDICATIONS_EKSW : 1
ED_TEXT : 1
ROLE_HE : 1
FOLLOWUP_OR : 1
CAUC_HX : 1
ATTORNEY_AND : 1
SMOKING_YES : 1
IN_STABLE : 1
SHOWER_SPONGE : 1
MCCORD_PHD : 1
SATT_RECREATION : 1
DOWNGRADED_TO : 1
DRINKING_THE : 1
PHONE_THIS : 1
FOR_HE : 1
MG_WAL : 1
WEIGHING_ON : 1
CALL_TO : 1
AS_DIETARY : 1
PERVIOUSLY_SIGNS : 1
THE_INGUINAL : 1
THE_ASSESSMENT : 1
PROCEDURE_WAS : 1
DEPRESSED_FOR : 1
GRADE_DYSPLASIA : 1
BEDSIDE_PATIENT : 1
WITH_DOSE : 1
STATES_FEELING : 1
SIGNS_THERAPY : 1
TEST_RESULTS : 1
GOALWHAT_LEVEL : 2
INFORMATION_AND : 1
VALVE_SUSTAINS : 1
TELEPHONE_VISIT : 1
VET_BETTER : 1
ROOM_DISCHARGE : 1
RN_AS : 1
NURSING_NURSING : 1
SESSION_INVOLUNTARY : 1
LAST_AND : 1
EMERGENCY_DISCHARGE : 1
PAIN_NOT : 1
TO_WAS : 1
MR_GOOD : 1
ORAL_PUFFS : 1
ORDER_EKREGULAR : 1
NOTED_ALSO : 1
THAT_DID : 1
NURSE_CALL : 1
HAD_BEEN : 2
PROTEIN_ML : 1
WENT_OF : 1
AND_ANXIETY : 2
AND_MAINTAIN : 1
DEPARTEMNT_FOR : 1
OF_NO : 1
CHF_MITRALVALVE : 1
FOR_MINUTE : 1
AND_UDS : 1
OF_CARE : 3
RISPERDAL_MG : 1
PT_PRESENTS : 1
PRESENTS_EVALUATION : 1
MG_NO : 1
HI_CONTL : 1
HIM_ISSUE : 1
IN_LATEST : 1
QUALIFIES_FOR : 1
DONE_RESULT : 1
PROCESSING_WITH : 1
AND_PAIN : 1
DEPRESSION_HOW : 1
EASILY_IVFS : 1
GROUP_6A : 1
PROCEDURE_MEDICAL : 1
STATES_IS : 3
TABLET_ACTIVE : 1
MESSAGE_KRISHNASWAMY : 1
PRIMARY_SUPPORT : 1
ASSESSMENT_INJECTED : 1
CTRS_SATT : 1
GROUP_PAIN : 1
WHO_COORDINATES : 1
WE_SCHEDULED : 1
THE_ALCOHOL : 1
WAS_DIVERTICULUM : 1
HOSPICE_GUAIFENESIN : 1
CONTACT_NO : 2
OX_HEART : 1
KG_AMOUNT : 1
PO_GOOD : 1
MAY_NEED : 1
TALK_ONCOLOGY : 1
DIAGNOSTIC_OPTIC : 1
ROLLING_AND : 1
BACK_SHOULDER : 1
LAND_APPENDICEAL : 1
DECIDE_TO : 1
THE_DISTANCE : 1
ITS_TIME : 1
IS_VERY : 1
OR_BLOOD : 1
WAS_THE : 1
MG_BY : 1
MDD_CURRENT : 1
NO_HPI : 1
COUMADIN_SECTION : 1
RECREATION_LEISURE : 1
DIPTHERIA_EVALUATION : 1
IT_GETS : 1
ORIFICE_CECAL : 1
FOLLOWUP_APPOINTMENT : 1
BSOME_LAB : 1
QUITTING_DIET : 1
LESIONS_NO : 1
FIRST_DX : 1
DX_VENTRICULAR : 1
AND_THREATENING : 1
AND_LEFT : 1
PROFESSIONAL_HEALTH : 1
FREQUENT_FOR : 1
ALREADY_ITS : 1
SOON_HE : 1
NOW_HT : 1
POST_OP : 1
SECONDARY_RELATED : 1
CASTLE_UH : 1
DISCOMFORT_CONTINUES : 1
STATUS_NOTED : 1
TCBP_PODIATRY : 1
SCHEDULED_MESSAGE : 1
REGION_HERNIA : 1
PATIENT_GLARGINE : 1
TO_CALLER : 1
AM_THROUGH : 1
BE_WITH : 1
ATTORNEY_HEALTH : 1
INTERVIEW_PT : 1
POSTSURGICAL_BYPASS : 1
FOOT_PT : 1
NEVER_WENT : 1
ACKNOWLEDGED_EFFORTS : 1
TAKE_OUT : 1
TO_PSYCHOTROPIC : 1
TIME_DOES : 1
LIES_DOWN : 1
PATIENTS_FALL : 1
MEDS_OUT : 1
QH_ENCOURAGED : 1
MD_NOTE : 1
BETTER_TOB : 1
HAS_TROUBLE : 1
ON_REGARDING : 1
RELATED_PHYSICAL : 1
SKIN_INTACT : 1
ENVIRONMENT_RELATED : 1
SAID_PT : 1
TAB_ISSU : 1
ABD_SOFT : 1
DX_REVIEW : 1
HIS_TAKING : 1
PRIMARY_INQUIRE : 1
RESULTS_LDL : 1
CURRENT_CONTROLLED : 1
ACTIVE_INPATIENT : 1
PSYCH_UNIT : 1
CAN_NOT : 1
TOTAL_CC : 2
AND_AFTER : 1
TO_PCP : 1
REST_NURSE : 1
AND_JOE : 1
CENTER_OF : 1
TO_MEET : 2
HEALTH_POSTSURGICAL : 1
EFFECTS_COMPLAINT : 1
WORKING_AS : 1
SERVICES_ALTERED : 1
RETINOPATHY_DRY : 1
PAIN_PHYSICIAN : 1
LABORATORY_MONTGOMERY : 1
VISIT_PAIN : 1
WAS_JUST : 1
NO_PAIN : 2
INSIGHT_AWARE : 1
TO_THIS : 1
BLOOD_AC : 1
THE_PM : 1
ASSESSMENT_OF : 1
SLEPT_THROUGH : 1
HE_LEFT : 1
MEDICATION_PATIENT : 1
DISCHARGED_TO : 2
MODERATE_HAVE : 1
NO_APPLIANCES : 1
SINCE_SHE : 1
CHERRY_NO : 1
VERBAL_PAMPHLET : 1
TO_ALBUTEROL : 1
PROGRESSIVELY_OF : 1
SYSTEMS_UNLESS : 1
IDENTIFY_REASONS : 1
TO_LAST : 1
LCSW_JUDY : 1
AMOUNT_YELLOW : 1
FOR_THOUGHT : 1
TO_COMPLETED : 1
HAND_INPATIENT : 1
TO_PREVIOUS : 1
MINUTE_WRITER : 1
IN_INTERVENTIONS : 1
AND_RANDOM : 1
ASKED_FOR : 1
TELEPHONE_TRIAGE : 1
STATED_HAS : 1
MEDICATION_AND : 2
JUST_PUTTING : 1
SAM_SYNCOPE : 1
GOT_HOME : 1
DISTRAUGHT_ANXIOUS : 1
OFF_THOSE : 1
LESS_RESTRICTIVE : 1
OFFER_TOILETING : 1
CONTINENCE_SUGGESTED : 1
ABNORMAL_SUB : 1
DIAGNOSIS_ABOUT : 1
ROOM_THE : 1
ACTIVE_HE : 1
TIME_WILL : 1
CHILD_AND : 1
RACE_STOOL : 1
REFUSED_FLU : 1
PC_NONVISIT : 1
TABLET_MOUTH : 3
INFORMATION_WHETHER : 1
WHEN_CHANGING : 1
FAMILY_HX : 1
DOENPEZIL_AS : 1
HE_HAS : 10
PRESENT_NO : 1
OR_NO : 3
THRUSH_EMERGENCY : 1
CONDITION_NO : 2
MG_MOUTH : 1
CPRS_BROCHURES : 1
BRADEN_FOR : 1
AXIS_CURRENT : 1
MEMBRANES_OP : 1
PAYMENTS_AND : 1
INSTRUCTIONS_WHEN : 1
DBC_AND : 1
DISPLAY_MINOR : 1
DIAGNOSIS_WILL : 1
EACH_BOTTLE : 1
MEDIUM_AMOUNT : 1
STATES_BACK : 1
IN_AT : 1
FOR_NURSING : 1
PAIN_AT : 1
HE_MIN : 1
ENCOURAGE_AS : 1
OF_COMDYSPHAGIA : 1
OTHERWISE_INDICATED : 1
AND_WANTS : 1
FOCUS_TOPIC : 1
REVIEW_AS : 1
ICDCM_PEDAL : 1
PT_DENIES : 2
BX_AREAS : 1
WITH_MODERATE : 1
SLUGGISH_NECK : 1
THAT_PT : 2
QUITTING_ORDER : 1
DRESSING_WITH : 1
THIS_NURSE : 1
TRIAGE_REPORT : 1
PERMISSION_FOR : 1
SLIDING_SCALE : 1
LOW_LOCKED : 1
WAS_ALONG : 1
ATTORNEY_TO : 1
CE_PATIENT : 1
YES_SCALE : 1
PREANESTHETIC_EVALUATION : 1
OVERNIGHT_PATIENT : 1
BMS_YESTER : 1
APPOINTED_FOR : 1
JOKING_AND : 1
EFFECT_PROFILE : 1
SPICIENESS_OF : 1
MVA_MULT : 1
INPATIENT_THIS : 1
NO_OR : 2
JIM_FRIEND : 1
OU_MH : 1
ORAL_WITH : 1
FOR_PLEASE : 1
BE_DESIGNED : 1
WHEN_YOU : 2
MUCOUS_MEMBRANES : 1
NO_SALINE : 1
MINUTES_STARTED : 1
TAB_ONEHALF : 1
THE_PHONE : 1
HIM_CARE : 1
ABUSE_YEARS : 1
IP_PSYCHIATRY : 1
VERY_GOOD : 2
SHE_HIM : 1
IID_THE : 1
BACK_PAIN : 2
MODE_OF : 2
LETHALITY_OTHER : 1
WORSE_NOW : 1
ZOCOR_MG : 1
SECONDARY_TO : 1
CLOTS_NOTED : 1
STOKING_WAS : 1
FACILITY_PCP : 1
INQUIRE_PT : 1
BS_TENDER : 1
MEET_HIS : 1
DISCUSSED_AND : 1
DENY_SUICIDAL : 1
EXAM_MONOFILAMENT : 1
FAX_CALLER : 1
HEENT_TMS : 1
QHS_INSOMNIA : 1
IS_INCREASING : 1
ASSESSMENT_PATIENT : 1
EVENING_PRIMARY : 1
THAT_TUES : 1
WITH_EDUCATION : 1
RESTRAINTS_SMOKING : 1
GOT_NEXT : 1
SIGNIFICANT_STATES : 1
AT_FACILITIES : 1
HOME_JIM : 1
OR_ALCOHOL : 1
SOCIAL_SETTINGS : 1
REFER_THE : 1
AMIODARONE_STARTED : 1
NEED_ALONG : 1
PROGRAM_TRIES : 1
COMPLAINING_OF : 2
RESOLVE_ITS : 1
CERTAIN_SITUATIONS : 1
SEX_MALE : 2
ADDENDUM_LUMBOSACRAL : 1
HIS_HAS : 1
NUTRITION_HEATHER : 1
REPORTED_THE : 2
ON_REASONS : 1
DURING_ADMISSION : 1
VISITORS_BED : 1
HEAD_LIFT : 1
MAILED_HIM : 1
NOT_RECEIVED : 1
PATIENT_MDD : 1
WITHIN_OF : 1
TO_SC : 1
CARE_AMIODARONE : 1
MEDS_GIVEN : 1
PATIENT_ADDENDUM : 2
PODIATRY_NOTE : 2
SEVERAL_TO : 1
AND_WENT : 1
NURSING_TELEPHONE : 1
WHAT_WILL : 1
NOT_RIDE : 1
IS_YEAR : 1
CMM_CALL : 1
EMPLOYMENT_PINESS : 1
DAILY_AMIODARONE : 1
AGREE_MORE : 1
ON_ON : 1
ALLERGIES_HAS : 1
AND_TO : 5
GOOD_SOFT : 1
BEEN_CV : 1
MORSE_FALL : 1
ALTERED_DEPRESSED : 1
IT_IS : 1
PCP_BETTS : 1
BREATHING_CARE : 1
ADENOCA_HAS : 1
VOLUNTEER_IN : 1
HEALTH_CLINIC : 1
PAIN_PAIN : 2
ACTIVE_THE : 1
TBNA_WITHOUT : 1
ATTENDED_SERVICES : 1
BEFORE_HE : 1
HAD_ALTERCATION : 1
IMPAIRMENT_ORI : 1
PROBE_BONE : 1
UNABLE_TO : 2
COUNSELING_PRIVATE : 1
PROTOCOL_WAS : 1
PROVIDED_DATE : 1
HOUSE_AS : 1
HIS_VETS : 1
ON_WITH : 1
HE_APPRECIATION : 1
OX_WAS : 1
ALTERCATION_PARTICIPATION : 1
OF_TIME : 2
WITH_TUB : 1
MEDICATIONS_INCLUDING : 2
IL_ARE : 1
WATER_REACH : 1
FALLRISK_STANDARDMEDS : 1
CONSULT_INHALE : 1
RUNNING_PT : 1
OFF_PASSIVE : 1
NO_FUTURE : 1
MH_THERAPY : 1
LIVING_SECONDARY : 1
TIME_OF : 3
INTENSELY_AREA : 1
STIMULI_INTENSITY : 1
SHOWER_OR : 1
BREATH_SOUNDS : 1
AGAIN_PM : 1
HEALED_NOTED : 1
FEELINGS_VERBALIZES : 1
NOW_COUNCELLED : 1
TEST_EXAM : 1
HIS_TELEPHONE : 1
IN_AFTER : 1
TO_PHYSICIAN : 1
MEDICARE_WITH : 1
RIDE_HE : 1
PATIENT_RECEIVED : 1
AND_MADE : 1
LOSE_WEIGHT : 1
TO_WASHINGTON : 1
MALATHI_COVERING : 1
SCHEDULED_PAYMENTS : 1
MNT_SATP : 1
GETTING_STRAIGHTENED : 1
VETERAN_SELFREFERRED : 1
VANOD_PLACEMENT : 1
OF_MUSKOGEE : 1
MRSA_COMPLETED : 1
PLAN_CHANGES : 1
GOOD_ABD : 1
NEEDED_ENCOURAGED : 1
BACK_FROM : 1
CESSATION_YES : 1
REGISTERED_PATIENT : 1
JUL_WORKING : 1
NO_NOTED : 1
VETERAN_ED : 1
WITH_AT : 1
BY_ACTIVE : 3
POSITION_SATURATION : 1
VIA_UNREST : 1
CAME_TO : 1
PROGRESS_TEXT : 1
QAM_OF : 1
REALLY_PUT : 1
THE_PSYCHOSOCIAL : 1
PATIENT_HOME : 1
VETERANS_SUBJECT : 1
SIGNS_WITHIN : 1
IN_INTEGUMENTARY : 1
ABILITY_MORSE : 1
LITTL_RECEIVED : 1
ED_TO : 2
ONTO_THE : 1
OFF_TIMES : 1
THAT_NEEDS : 1
MONTHS_BATHING : 1
ANXIETY_ICDCM : 2
SEROQUEL_AND : 1
FROM_VAMC : 1
APPOINTED_PCP : 1
SUPPLIES_AND : 1
TO_RECIPIENT : 1
NONE_ALLERGY : 1
APPT_REPORTS : 1
HAND_4D : 1
HEATHER_SKIN : 1
AMIODARONE_IN : 1
AND_NEXT : 1
ADVERSE_SMOKING : 1
PHARMACIST_DISCHARGE : 1
EXAMINATION_WAS : 1
NEEDS_GOING : 1
INQUIRE_ABOUT : 1
THE_LAT : 1
ERYTHEMIA_TOTAL : 1
NEEDS_TERMS : 1
SUICIDAL_OR : 1
PHONE_NUMBER : 3
CLINICAL_REMINDER : 1
NO_MJ : 1
LARGE_INTENSELY : 1
OTHERWISE_NEUROLOGICAL : 1
LEGS_COME : 1
OTHER_MY : 1
MOS_TEST : 1
PASTORAL_CARE : 2
TELEPHONE_FAX : 1
HAS_TALKED : 1
BEEN_LORAZEPAM : 1
BE_UNABLE : 1
RATED_DISABILITIES : 1
GIVES_DIARRHEA : 1
PAMPHLET_SALINE : 1
GROUP_TO : 1
DISORDER_NOTIFYING : 1
WALKS_GROUPS : 1
BEEN_REG : 1
SPONDYLOSIS_EOTH : 1
PROBLEM_CH : 1
FOSTER_HOME : 1
CC_IM : 1
TREATMENT_WOUND : 1
ICDCM_ICDCM : 1
HEATHER_FIANCE : 1
CPRS_OR : 1
AS_APPOINTED : 1
ACTIVITY_PARK : 1
THAT_ON : 1
OTHERS_STATES : 1
IDENTIFIED_PT : 1
INDICATED_STUPID : 1
VETERAN_HERE : 1
HEALTH_PATIENT : 1
LEFT_REGION : 1
DISCHARGE_STATES : 1
DIRECTIVE_MEDICATIONS : 1
THEY_WERE : 1
REPORT_GIVEN : 2
VISION_VERY : 1
MESSAGE_ON : 2
NAUSE_AND : 1
ANY_MRSA : 1
OUTPATIENT_VA : 1
TO_CASE : 1
WITH_NONDUAL : 1
INDICATED_USED : 1
WAS_DARK : 1
PREVIOUS_SURGERY : 1
SUICIDAL_VET : 1
ADD_MEDICATIONS : 1
FOR_HEPATITIS : 1
OTHER_ANXIETY : 1
REHAB_PATIENT : 1
METHEADS_HAS : 1
IN_CHECKS : 1
HYPERMETAB_IN : 1
LEGS_LOW : 1
IF_WAS : 1
SIGNIFICANT_MUM : 1
ACUTE_INSTRUCTED : 1
OXIMETRY_PAIN : 1
ALBUTEROL_IPRATROPIUM : 2
PERCEPTION_IMPAIRMENT : 1
NOT_IDENTIFIED : 1
WAS_IN : 2
NOTED_TO : 2
EDUCATED_MEDICATION : 1
AT_IPRATROPIUM : 1
ON_CHART : 1
SERVICE_WAS : 1
NOTE_MFG : 1
PRESENTS_COMPLAINING : 1
HELP_YOU : 1
TO_CHRONIC : 1
DISCHARGE_INFORMATION : 1
SEEN_TO : 1
LUBBOCK_HE : 1
THEY_HERE : 1
SOFT_BS : 1
LEVEL_CONDITION : 1
ACCESSION_NO : 1
VET_SHOWS : 1
IS_BLUE : 1
IT_DIET : 1
YES_FMH : 1
DIET_HEATHER : 1
GOOD_EVENING : 1
THE_FOREARM : 1
ZZPALLIATIVE_CARE : 1
LEVEL_PAIN : 1
EVALUATION_CODE : 1
MEDICATIONS_MON : 1
PARK_RD : 1
HE_JUST : 1
BY_LISINOPRIL : 1
HCTZ_IS : 1
AND_INTENSE : 1
ANGRY_AND : 1
BATHING_HAVE : 1
MONTHS_ONCOLOGIST : 1
LDL_AT : 1
CLEAR_LIQUID : 1
DESCRIBE_MH : 1
TIME_FIRST : 1
PTS_HR : 1
IRRG_SOLN : 1
ALCOHOL_SCREENING : 2
INTRAOPERATIVE_PREOP : 1
THE_HAVE : 1
OCCASIONAL_USE : 1
INTENT_THE : 1
REMINDED_THERE : 1
STATES_AS : 1
STATEMENT_RELIABLE : 1
EVALUATION_MANAGEMENT : 2
REFILLS_EXPIRATION : 1
MEDICAL_TREATMENT : 1
NOTE_THIS : 1
UH_TWICE : 1
HAS_BILATERAL : 1
HOWEVER_IS : 1
SUB_ST : 1
PROBELMS_MVA : 1
NURSING_NOTE : 4
OF_PROTECTIVE : 1
SERVICES_GAYLORD : 1
AND_PATIENT : 1
ALSO_HIM : 2
BP_FOOT : 1
THE_FEW : 1
MANY_STATED : 1
SHIFT_ASSESSMENT : 1
PROVIDED_SUMMARY : 1
INSULIN_GLARGINE : 1
BASE_IS : 1
WANKER_ACUTE : 1
LEAST_PATIENTS : 1
THE_DOES : 1
TEST_RANDOM : 1
RECOMMENDATION_OF : 1
NONE_DUE : 1
RECORD_HISTORY : 1
STAPERT_DBC : 1
YOU_TO : 1
PATIENT_CHARACTERISTICS : 1
DOCUMENTATION_SICK : 1
SA_SW : 1
COUNSELED_ON : 1
LEFT_WITH : 1
DECEASED_HOUSE : 1
ANXIETY_RELATED : 1
NO_ENDORSES : 1
OF_MVA : 1
THAT_JEEP : 1
NEXT_CLINIC : 1
NOTED_OBSERVE : 1
FOR_LAST : 1
SOCIAL_INFORMED : 1
JEEP_VET : 1
INTEGUMENTARY_CONTACT : 1
REFER_ADDITIONAL : 1
TAKE_TO : 1
NONDUAL_SATT : 1
DUE_TO : 4
INITIAL_VERDSOME : 1
STAFF_ADDENDUM : 1
ORDERS_AND : 2
COVERAGE_ORDERED : 1
INJECT_ACCUCHEK : 1
ENCOUNTER_WRITTEN : 1
OF_YOUR : 1
PROCEDURE_NOTE : 1
MEDS_RUN : 1
FOLLOWUP_VERBALLY : 1
ARE_WITH : 1
CALM_PROCESS : 1
KUWAIT_HIGHWAY : 1
SURROUNDINGS_NURS : 1
FLOOR_PATIENT : 1
ABOVE_WRITTEN : 1
EKSW_NOTE : 1
AT_VISITS : 1
BETTER_NOW : 1
TO_UP : 2
DE_RATION : 1
PROCEDURE_ACTIVE : 1
OUTPATIENT_BASIS : 1
ANTIBODY_AT : 1
WAS_VALUABLES : 1
DUE_THE : 1
IN_VS : 1
HE_OVERDRESSED : 1
NO_SX : 1
ORIENTED_COOPERATIVE : 1
GROUP_NURSING : 1
THE_IN : 1
WT_HX : 1
PT_GO : 1
THE_CANCER : 1
HE_PHARMACY : 1
IDENTIFY_FOR : 1
CERVICAL_SPONDYLOSIS : 1
HOW_VERBAL : 1
SH_SEE : 1
THE_IS : 2
OF_COMPLETED : 1
PT_UNABLE : 1
GIVES_HIM : 1
VERBAL_PATIENT : 1
SCORE_PAIN : 1
NICOTINE_PATIENT : 1
ON_GROUPS : 1
AND_UTILITY : 1
AND_GI : 1
TRIES_AT : 1
IF_INCOME : 1
DATE_DISCHARGE : 1
UNIT_FOR : 1
SOLN_USE : 1
OVER_THE : 2
NOTED_FOR : 1
SINUSES_THIS : 1
RUN_OUT : 1
MH_NOTE : 1
AND_PHARMACY : 1
PT_AND : 1
JOB_PROBLEMS : 1
ACTIVE_VETERAN : 1
PRIMARY_NURSING : 2
NOTE_PAIN : 1
LOSS_PROTECTIVE : 1
FALL_CLONAZEPAM : 1
MORE_ACTIVE : 1
OF_PARTICIPANTS : 1
FOR_PTSD : 1
APPOINTMENT_COMMENT : 1
ENCOUNTER_MEDICAL : 1
BE_GIVEN : 1
NO_MSE : 1
LAST_VETERAN : 1
FLOOR_THE : 1
FSOME_STATE : 1
DISCUSSED_FOR : 1
EACH_PROVIDED : 1
ANYMORE_SECONDARY : 1
INTERVENING_FOR : 1
ETOH_USE : 1
AMT_DOWN : 1
GO_LAB : 1
TAB_RESULTS : 1
HAS_STATED : 1
RATE_WAS : 1
COMPLAINT_HAS : 1
PLAN_CARE : 2
AND_GLASSES : 1
SOFTERS_ADDENDUM : 1
CRITERIA_POTENTIAL : 1
BE_ALBUTEROL : 1
URINE_DOWN : 1
INTERN_FOLLOWED : 1
YEAROLD_WHO : 1
HR_AT : 1
CALLER_INSULIN : 1
TUES_WENT : 1
AND_SYMPTOMS : 1
HEIGHT_TO : 1
WEAR_AND : 1
SCREENING_TEST : 2
FOR_FALL : 1
PC_WANKER : 1
TELEPHONE_ASSESSMENT : 1
COMDYSPHAGIA_ICDCM : 1
TO_ISSUES : 1
TO_IMMOBILIZATION : 1
HISTORY_OF : 4
OF_WILL : 1
ACTIVE_NO : 2
YES_HAS : 1
ACETAMINOPHEN_TAB : 2
RANGE_CHIEF : 1
VITALS_NOTE : 1
PULSE_YES : 1
BEEN_ACETAMINOPHEN : 1
SITUATIONS_TALKED : 1
RELATED_COGNITION : 1
HAVE_NURSE : 1
AVAILABLE_WE : 1
INSTRUCTIONS_OBTAINING : 1
AN_ALTERCATION : 1
EXCEED_ACETAMINOPHEN : 1
FALL_PRECAUTIONS : 1
MALE_HIS : 1
BASIS_KIMBERLY : 1
HEA_EXTRACTION : 1
OF_POSITIVE : 1
SLOT_WAS : 1
MHSGENERAL_NOTE : 1
CC_VISION : 1
TEST_HEPATITIS : 1
THE_MORE : 1
OBSERVE_HAND : 1
THE_WHO : 1
WELL_GROOMED : 1
WEAK_NURSING : 1
HOUSE_STATES : 1
PRESSURE_RISK : 1
RISK_ASSESSMENT : 1
LIKE_TALK : 1
CALL_BUT : 1
PRESENT_CHANGE : 1
VERBAL_STIMULI : 1
AGE_SEX : 2
PUNCTURE_SUCCESSFUL : 1
DISCOMFORT_RESPIRATIONS : 1
ALERT_ORIENTED : 4
SELFREFERRED_TO : 1
HOMELESS_NO : 1
INTACT_ERYTHEMIA : 1
SUCCESSFUL_ON : 1
AND_BE : 1
CM_OF : 1
PAST_YOU : 1
THOUGHTS_PT : 1
NPDR_NO : 1
MG_QHS : 1
WILL_UPDATE : 1
LLY_ED : 1
HT_CM : 1
MEDICAL_REVIEWED : 1
YES_FAMILY : 1
ANSWERED_NKA : 1
BY_ARGE : 1
FOLLOWS_WITH : 1
FOUND_INDIVIDUAL : 1
SOCIAL_DUE : 1
FAILURE_RANGE : 1
STATES_SHE : 1
ADDENDUM_CLOPIDOGREL : 1
SUBJECTIVE_HX : 1
MAN_FOLLOWS : 1
APPOINTMENT_TIME : 1
ADVANCE_PULSE : 1
INFUSING_KVO : 1
ABNORMAL_INVOLUNTARY : 1
AND_PROTOCOL : 1
NEURO_LOSS : 1
FLU_VACCINE : 1
TRAITS_SIMVASTATIN : 1
TO_NURSE : 1
PATIENT_YEAROLD : 1
AND_CONSTITUTE : 1
AND_ALMOST : 1
PO_BSOME : 1
HOSPITAL_IN : 1
ABD_BS : 1
SUSTAINS_HEAD : 1
MG_CONTINUED : 1
TEAM_PATIENT : 1
EMERGENCY_PULSE : 1
TRY_TO : 1
CDI_DIALOG : 1
FUTURE_COMMENT : 1
NOTE_NO : 1
AND_PLAYING : 1
WHOM_MEDICAL : 1
OF_AMIODARONE : 1
AIR_PULSE : 1
ON_ITS : 1
AND_IT : 2
YESTER_LUE : 1
OR_APPOINTMENT : 1
THREATENING_TO : 1
OUT_THE : 1
EXPECTED_WILL : 1
YOUR_DEPENDING : 1
HER_TIRES : 1
CHLORIDE_SOLN : 1
DOCTOR_IN : 1
MH_PATIENT : 1
TELEPHONE_THE : 1
GROUP_ORCHARD : 1
QUADRANTS_INTAKE : 1
ICDCM_COPD : 1
HIM_MEDICINES : 1
DATIVE_PAIN : 1
MY_DAUGHTER : 1
CARE_HOME : 1
THROAT_INCREASED : 1
MITRALVALVE_ISUFF : 1
PROGRESS_TIME : 1
AT_OF : 2
IMMATURITY_LACK : 1
PATIENT_NAME : 1
AND_IM : 1
CALLER_PATIENT : 1
HOSPICE_OF : 1
IS_AROUSABLE : 1
MSE_FULLY : 1
CALLER_STATE : 1
PRISION_STALKING : 1
DIAGNOSES_TREATMENTS : 1
VERBALIZED_APPRECIATION : 1
CT_DESIRE : 1
AM_IS : 1
REFUSED_VACCINE : 1
SURGERY_NOTES : 1
PATIENT_REGARDING : 1
HIS_PRIVATE : 1
AND_FOUND : 1
EXAM_RESULT : 1
MONTHS_PATIENT : 1
ALSO_TALKED : 1
MINUTE_CURRENT : 1
INFORMED_AT : 1
HIS_LEFT : 1
TO_PATIENTS : 1
ADDENDUM_SPONDYLOSIS : 1
BED_IN : 1
APPROPRIATE_NO : 1
JUST_VAMC : 1
AVOID_NONPRESCRIPTION : 1
IS_PROGRESSIVELY : 1
CE_TO : 1
BREATH_TG : 1
NUMBER_PATIENT : 5
THEIR_ARE : 1
DOWNGRADED_FIRST : 1
COME_YES : 1
WORKING_GETTING : 1
HISTORY_OU : 1
OF_CONTACT : 5
MEETING_HIS : 1
PLANS_RESPIRATIONS : 1
TO_LAB : 1
THE_HERNIA : 1
CURVE_LO : 1
PREANESTHETIC_SCANNED : 1
OF_SPC : 1
HOME_NURSING : 1
NORVASC_PRINCIPAL : 1
PERSON_AWARE : 1
PERSON_INSIGHT : 1
COPY_THE : 1
DYSPHAGIA_AND : 1
OR_ON : 1
VERY_TO : 1
SHIFT_PT : 1
OP_WT : 1
ABNORMAL_STATES : 1
CALL_FEELING : 1
COUGH_FREELY : 1
ARE_PROVIDED : 1
LAST_LDL : 1
INSTRUCTIONS_FEW : 1
MG_PRINCIPAL : 1
LASER_TRAUMA : 1
CONTACT_ABNORMAL : 1
YES_WEIGHT : 1
ISSUE_USE : 1
HE_WANTS : 2
OXYCODONE_TAB : 1
UNDER_RTC : 1
QUIT_HIS : 1
IN_HOURS : 2
MOTIVATION_TO : 2
ASSIST_DC : 1
IDEATION_ND : 1
ON_HER : 2
HEALTH_SHARE : 1
DATE_EMPLOYMENT : 1
TO_STAY : 1
TRIGGERS_AND : 1
DECREASE_PAIN : 1
TIME_QUIT : 1
ANY_PAIN : 1
MEDICATION_WHAT : 1
PATIENT_HAS : 4
FOR_HOURS : 1
MEDICATIONS_ACTIVE : 1
LAT_PCCNURSING : 1
SOCIAL_ACTIVITIES : 1
TBBX_AND : 1
OTHER_UNSPECIFIED : 1
CLEAR_WHEN : 2
MENTAL_EDUCATION : 1
AREA_IN : 1
SITES_BEEN : 1
SLITTING_TIRES : 1
PHONE_HOMELESS : 1
GUIDE_BETTER : 1
QUITE_FOR : 1
OF_FOR : 1
BETTER_HEALTH : 1
WITH_INFORMATION : 1
GROUP_DISCUSSED : 1
CURRENT_PAIN : 1
FOR_ON : 1
THAT_BE : 1
FOR_PAST : 1
THE_KNOW : 1
ABOUT_FALL : 1
ANTIDIABETICS_SECONDARY : 1
TO_MD : 1
TO_VOICE : 1
HIS_HOUSE : 1
ANXIETY_TO : 1
AND_ADDENDUM : 1
PHYSICIAN_INPATIENT : 1
ALL_ALBUTEROL : 1
MG_HOURS : 1
YES_REACH : 1
STATES_DOES : 1
IS_DNR : 2
RESPIRATION_BESYLATE : 1
GUN_DECEASED : 1
CLOTS_THERE : 1
DX_LT : 1
PROVIDER_AS : 1
SOME_TRANSFERS : 1
SHOT_TO : 1
POOR_CLINIC : 1
PRESCRIBED_LORAZEPAM : 1
EXPIRATORY_WHEEZING : 1
PUFFS_MOUTH : 2
THEREFORE_HE : 1
INTENSITY_IT : 1
DISORDER_INCREASED : 1
PING_DUE : 1
HEPATITIS_RISK : 1
TAB_ACTIVE : 1
ENGE_TEST : 1
SPEC_GLUCOSE : 1
ALCOHOL_ATTEND : 1
LEFT_WEAK : 1
PRN_INSOMNIA : 1
AGE_MALE : 2
PROVIDER_IDENTIFIED : 3
SCREENING_AUDITC : 2
PRIMARY_PROVIDER : 1
SHOES_WITH : 1
FOSTER_CARE : 1
IRRIGATION_OF : 1
WORK_PHONE : 1
SESSION_ABNORMAL : 1
BED_SCALE : 1
BY_OR : 1
AT_PT : 1
ABD_EPIGASTRIC : 1
WORSEN_PT : 1
HAS_AND : 1
ANXIETY_AT : 1
DOES_LOT : 1
SITESDO_NOT : 1
SICK_HE : 1
AFEBRILE_HEM : 1
METOPROLOL_SUCCINATE : 1
ON_COMING : 1
NEVER_THROUGH : 1
CTRS_EDUCATION : 1
THERAPY_INDIVIDUAL : 1
DIRECTIVE_ACTIVE : 1
THIS_PLACED : 1
GUITAR_ON : 1
RARELY_MOIST : 1
RX_FM : 1
NEUROLOGY_CONSULT : 1
ORDERED_THIS : 1
WE_ABOUT : 2
DIFFICULTY_WHAT : 1
THE_COMPLAINT : 1
HE_PERVIOUSLY : 1
AGREEMENT_INTEGUMENTARY : 1
YESTER_MORSE : 1
FOR_FOLLOWUP : 2
MEDICATION_INFORMATION : 2
CLINICS_AND : 1
ACCUCHECK_PT : 1
GROUPS_TRAININGS : 1
HOME_AND : 1
ON_AMBULATORY : 1
TEAM_RESP : 1
AS_ORDERED : 2
CORRECT_TOTAL : 1
TREATMENT_CARE : 1
WAS_AT : 4
ULCERS_FOOT : 1
SCALE_RESPONDS : 1
TUB_BATH : 1
AND_DIAGNOSIS : 1
YOU_INTERESTED : 1
PT_BRIGHT : 1
TO_EXPIRATORY : 1
OFF_BEFORE : 1
VISIT_RELATED : 1
PHONE_WEIGHT : 1
REGISTERED_WAS : 1
REASSESSMENT_VANOD : 1
HARD_COPY : 1
THAN_IN : 1
MEDICATION_NOTE : 1
MULT_SURG : 1
COOPERATIVE_APPROPRIATELY : 1
BEHAVIOR_CALM : 1
OXYGEN_SATURATION : 1
MY_ANXIETY : 1
PT_INITIAL : 1
BETTER_STEP : 1
INPATIENT_COMMENTS : 1
AND_JOKING : 1
LOSS_OFFER : 1
VISIT_BOWEL : 1
THE_EFFECTS : 1
AVAILABLITY_OF : 1
OF_TEACHING : 1
USED_IDENTIFIED : 1
CALLED_TO : 1
DATE_QUANTUM : 1
PT_OF : 1
ANGER_AND : 1
FALL_THE : 1
REASONS_THEIR : 1
EFFECTS_FROM : 1
ON_CURRENT : 1
SIDE_FROM : 1
CONSENT_AND : 1
STRESS_SOCIAL : 1
ANTIHIS_ABD : 1
IRON_DEF : 1
EXAM_ABNORMAL : 1
NO_SHAVE : 1
PRIOR_TO : 3
MEET_TOGETHER : 1
NEUROLOGICAL_REVIEWED : 1
RITA_ROGER : 1
SW_ATTORNEY : 1
IS_PAIN : 1
DISORDER_NOS : 1
SIGNIFICANT_EVENT : 1
NOTED_VSS : 1
AS_NOSTRIL : 1
PATIENT_CURRENTLY : 1
WRITTEN_MEDICATION : 2
DISTRACTION_CARE : 1
NONNEOVASCULAR_AGERELATED : 1
PT_IS : 2
WOULDS_ON : 1
UPSET_PATCHROTATE : 1
THOUGHTS_THERE : 1
WORK_GAVE : 1
OF_CC : 1
CASTS_BEDTIME : 1
TO_COMMENTS : 1
REASSESSED_AND : 1
RELATED_PROBLEMS : 1
DESIGNED_WELL : 1
MEDS_HE : 2
DIAGNOSIS_OF : 1
APPT_WRITER : 1
XYZZY_VISION : 1
DENIES_THERE : 1
CONTACT_QUATTLEBAUM : 1
COMMENTS_INDICATED : 1
VERBAL_WRITTEN : 1
THROAT_SOB : 1
AND_LOGICAL : 1
FLU_AGE : 1
RESIDENT_PROGRESS : 1
HER_PHONE : 1
BLOOD_WITH : 1
SOUNDS_TREATMENT : 1
MUST_BE : 1
BOTTLE_TEST : 1
MOOD_STATED : 1
OU_NO : 1
EVENT_OR : 1
MUSKOGEE_WITH : 1
GIVEN_PATIENT : 1
PA_AT : 1
OUTPUT_TOTAL : 1
DERIVATIVE_ID : 1
OF_TO : 2
OUT_AND : 1
POSE_TO : 1
REHAB_PLACEMENT : 1
RACE_HIS : 1
PREOP_SKIN : 1
PRN_THIS : 1
REQUIRED_HAS : 1
ORAL_QID : 1
AND_STAFF : 2
BATHING_DEVICE : 1
CURRENT_PATIENT : 1
ANONYMOUS_CONDITIONS : 1
IT_WOULD : 2
OTHERS_GLUCOSAMINE : 1
HOURLY_CHECKS : 1
FOOT_HAS : 1
REFRRAL_DIRECTIVE : 1
CELL_PHONE : 1
DIARRHEA_HE : 1
OPTIONS_AND : 1
CONDITIONS_SEE : 1
HAD_ESTABLISHED : 1
ANTIHISTAMINES_AGAIN : 1
OF_OF : 1
RITA_BERKLEY : 1
NURSING_ENCOUNTER : 1
DURING_PATIENT : 1
BEDTIME_FOR : 1
AMLODIPINE_MG : 2
EDUCATION_NURSING : 1
REPEAT_BRONCHOSCOPY : 1
PHARMACY_PRIMARY : 1
ENCOUNTER_TIME : 1
INFUSED_RECHECK : 1
HEALTH_ADDENDUM : 2
PSYCHIATRY_RESIDENT : 1
EFFECT_OF : 1
ACTIVE_DISCUSSED : 1
ACUTE_OVERNIGHT : 1
TV_SMOKING : 1
TO_MOVE : 1
IN_LEFT : 2
CAN_FIND : 1
MODERATE_TO : 2
PATIENTS_MEDICATION : 1
FOR_STOP : 1
SAYS_DOES : 1
BAND_ON : 2
PRESENT_AT : 1
YOUR_APPOINTMENTS : 1
TEXT_MODE : 1
FOCI_ADENOCA : 1
VERDSOME_STATE : 2
URGENT_SERVICES : 1
NEUROLOGICAL_DISEASE : 1
ANTIBODY_ORDERED : 1
AND_PUT : 1
BROUGHT_TO : 1
FEELING_IN : 1
TAKING_COUMADIN : 1
DIAGNOSIS_FROM : 1
CONTINENT_LARGE : 1
PT_DISCUSSED : 1
KICKED_OUT : 1
MEDICATIONS_STRATTERA : 1
EXPERIENCE_ABDOMINAL : 1
SESSION_HARRINGTON : 1
CAN_BE : 1
AND_THIS : 1
ALCOHOL_MANY : 1
ATTACKS_NEED : 1
CRITICAL_TEST : 1
PT_BACK : 1
VA_THIS : 1
MOOD_AND : 2
TREATMENTS_AND : 1
VETERANS_STATED : 1
THAT_ACCEPTED : 1
PHYSICIAN_POOR : 1
MG_EXERTION : 1
OF_AFEBRILE : 1
UNCLEAR_THIS : 1
USING_MORE : 1
SPONGE_EASY : 1
CALL_TV : 1
PATIENT_MENTAL : 1
SURVEILLANCE_NO : 1
COORDINATES_SERVICES : 1
MAY_TO : 1
HE_STATES : 1
PAST_YEAR : 1
OF_FAMILY : 1
ACUTE_CH : 1
THE_ED : 1
PM_PM : 1
LOCK_IN : 1
ASSESSMENT_SEE : 1
YEAR_MORE : 1
RUNNING_SITTING : 1
FROM_MEDS : 1
SCALE_FOR : 1
FRACTURED_HIS : 1
DEPRESSED_PART : 1
SEEING_DAUGHTER : 1
UPON_IN : 1
HYPO_NOTED : 1
BEING_TO : 2
SERVICE_NO : 1
AND_BEHAVIOR : 1
IMMOBILIZATION_DURING : 1
AS_COSIGNER : 1
QAM_MOOD : 1
DISCOVERED_SI : 1
EXPIRATORY_OCCASSIONAL : 1
STARTED_ADDENDUM : 1
PROBLEMS_DIAGNOSES : 1
INDICATED_PROTOCOL : 1
OCT_GIVE : 1
MEDICATIONS_SUPPLIES : 2
HIS_ON : 1
EACH_PRESCRIPTION : 2
PTSD_AND : 1
FROM_VA : 1
ARGE_YESTER : 1
MOISTURE_RARELY : 1
PATIENT_ABUSE : 1
ENCOUNTER_VERBAL : 1
SILLY_ON : 1
FAWCETT_AM : 1
AND_HM : 1
IS_LOOKING : 1
BY_DISCUSSED : 1
PT_ABLE : 1
NOTE_THE : 2
HYPERGLYCEMIA_OBSERVE : 1
CONTINUED_TO : 2
AFTER_IN : 1
TIME_BLOOD : 1
TO_INPATIENT : 2
CARE_TO : 1
PROFESSIONAL_MENTAL : 1
HIS_HE : 1
VA_DOES : 1
MARITAL_STATUS : 1
PT_COMPLAINING : 1
CHANGES_AT : 1
PRN_PAIN : 1
PHARMACY_HAS : 1
ADDENDUM_RESPIRATION : 1
PT_RESTING : 1
MONTHS_NURSE : 1
INDICATED_NEUROLOGICAL : 1
CONTACT_RESPIRATION : 1
EKREGULAR_HEIGHT : 1
FEARS_CURRENT : 1
AND_SUICIDAL : 1
HEPATITIS_ANTIBODY : 1
INGUINAL_REGION : 1
PSYCHOTHERAPY_MIN : 1
HYPERGLYCEMIA_NOTED : 1
WHEN_CONTACTED : 1
MEDICATIONS_REFILLS : 1
VACCINE_SEX : 1
WEDDING_LEGAL : 1
TO_RESOLVE : 1
KIMBERLY_GATZMAN : 1
HAVE_WITH : 1
BRUITS_THY : 1
NO_COLLABORATE : 1
APPLIANCES_EATING : 1
SWMF_IS : 1
CONTL_USE : 1
APPROPRIATE_HIM : 1
ENOXAPARIN_INJ : 1
ON_PER : 1
ABLE_TOLERATE : 1
CRITERIA_FOR : 1
GENERAL_NOTE : 1
PREDICTING_SORE : 1
OF_GI : 1
UD_QH : 1
WITH_SITES : 1
WAS_FROM : 1
ID_ACTIVE : 1
IS_ADVISED : 1
DISCHARGE_NOTE : 2
DIAGNOSIS_TO : 1
MOOD_PART : 1
QUIT_IDENTIFYING : 1
DUE_OPT : 1
RECEIVING_CARE : 1
ADMISSION_CA : 1
PATIENT_IN : 1
DIAGNOSIS_RELATED : 1
WALKS_AND : 1
HANDOUTS_CPRS : 1
HAVE_YOU : 2
STATES_LOW : 1
BILATERAL_STATES : 1
PUTTING_TRAVEL : 1
PATIENT_WORK : 1
MORE_PATIENT : 1
NOW_HAVING : 1
WORK_DONE : 1
DURATION_OF : 1
NURSING_NOTED : 1
AMBULATORY_AI : 1
TO_WOUND : 1
DISCOMFORT_REGULAR : 1
MORE_FOR : 1
NOT_FOR : 1
INSTRUCTED_FALL : 1
THE_PERSONAL : 1
LO_CONTL : 1
STATUS_PEDAL : 1
SETTINGS_THAT : 1
PATIENT_PLAN : 1
ALLERGIES_TELEPHONE : 1
PULSE_OXIMETRY : 1
ACCUCHEK_COMFORT : 1
ALSO_DYSPHAGIA : 1
THE_SC : 1
MEDICAL_HISTORY : 2
TO_ADEQUATELY : 1
WHO_SITUATIONS : 1
WELL_PHONED : 1
AND_HAVE : 1
WHO_SERIOUS : 1
READING_AND : 1
SCREEN_PRIOR : 1
OTHER_ADMITTED : 1
TALK_WITH : 1
DEF_ANEMIA : 1
PUTTING_SILLY : 1
COMMENTS_OXYCODONE : 1
WHY_ARE : 1
PRIOR_ACCIDENT : 1
PRESSURE_WITH : 1
CARE_CARE : 1
IS_IS : 1
ERUPTED_EXR : 1
PULM_AND : 1
UH_NOSTRIL : 1
AT_IF : 1
PHYSIOLOGICAL_WILL : 1
QUIT_TAKING : 1
THE_FALL : 1
BENEFITS_OF : 1
MOOD_MOSTLY : 1
INTERESTED_SMOKING : 1
YOU_DRINKING : 1
CURRENT_HIS : 1
HEART_SC : 1
ADDENDUM_HEPATITIS : 1
NONVA_COUGH : 1
ONE_HOME : 1
AND_LACK : 1
ADVISED_PATIENT : 1
OFTEN_HAVE : 1
FIBER_OPTIC : 1
ANXIETY_GETTING : 1
TO_THINK : 1
AND_SOCIAL : 2
THE_TREATMENT : 1
GOOD_FOR : 1
THEN_MAKING : 1
FACILITATORS_TRS : 1
WITH_INJURIES : 1
UPDATE_IN : 1
VERBALIZED_OF : 1
INPATIENT_NURSING : 1
APPOINTMENT_OR : 1
INJECTION_UNDER : 1
PULMONARY_SPOT : 1
SIGNED_ON : 1
THERE_IS : 2
CC_NOT : 2
EYE_SINCE : 1
LEARN_ACCEPTING : 2
LOCK_PLACE : 1
OUTCOMES_BE : 1
ATTENDED_ALTERED : 1
ADJUSTING_TO : 1
JUL_STATE : 1
THIS_BE : 1
ENCOURAGE_ACTIVITIES : 1
SEE_NURSES : 1
TAKE_ALL : 1
IM_PRIMARY : 1
HAS_TTNA : 1
HIS_ROOM : 1
PATIENT_STOPPED : 1
INPATIENT_STATUS : 1
RD_TEMPORARY : 1
SATT_GROUP : 2
COMFORTABLE_ALONE : 1
HEAD_RIGHT : 1
TO_ADDITIONAL : 2
SEE_MD : 1
THIS_ACTIVE : 1
HOME_HE : 2
FOR_FOR : 3
SW_ADDENDUM : 1
TAB_SIG : 1
PAIN_INTENSITY : 3
HS_NONE : 1
WOULD_UNABLE : 1
AMBULATORY_WHEN : 1
AND_INTERVENING : 1
PT_LIVES : 1
PATIENT_BEING : 1
DIRECTIVE_OX : 1
TO_HIS : 6
FALLRISK_PT : 1
REFERRAL_PRIMARY : 1
EXTENSIONS_COMMENTS : 1
PANICKED_GUARDED : 1
SOCIAL_ONCE : 1
DONE_JOBS : 1
TO_ELOPEMENT : 1
MEET_WITH : 1
CV_REG : 1
PERSON_WEAR : 1
AT_THIS : 12
ADEQUATELY_MEET : 1
TO_SEEING : 1
MON_PT : 1
UNLABORED_IDEATION : 1
CONTACT_JUN : 1
PATIENT_WEIGHT : 1
NOT_UNDERSTAND : 1
HAS_FOR : 1
OR_IN : 1
LOWER_LOBE : 1
SOAP_GENERAL : 1
SLEPT_WELL : 1
INPATIENT_ADDRESS : 1
FOR_YO : 1
TRIED_NO : 1
SCHEDULED_LEFT : 1
LIGHT_HOUSEKEEPING : 1
DRINK_COFFEE : 1
AFTER_CHANGE : 1
BRIGHT_ALERT : 1
WHAT_HELP : 1
UNIT_ACTIVE : 1
HORRIBLE_UPSETTING : 1
HE_WAS : 7
VERBALIZED_SIGNATURE : 1
HEAR_ANY : 1
PATIENT_DENIES : 1
HAVING_PANIC : 1
ADMISSION_WILL : 1
PHONE_UCC : 1
WITH_SCREEN : 1
FAWCETT_TO : 1
ANXIOUS_DONT : 1
SCREEN_COMPLETED : 1
REPORTS_THAT : 2
WEEK_AND : 1
MH_IP : 1
VISITING_NURSE : 1
WANTS_SAY : 1
MICROSCOPIC_FOCI : 1
UPCOMING_NURSING : 1
TYPICAL_WHEN : 1
OF_THAT : 1
SPECIALIST_AND : 1
OUTPATIENT_STATUS : 1
HIS_PARTICULARLY : 1
SPOT_DESIRE : 1
THE_PATIENTS : 5
TOMORROW_BY : 1
AND_PL : 1
MG_ACTIVE : 1
TIME_CALL : 1
FOR_ED : 1
ABUSE_ASSESS : 1
ML_INJECT : 1
WEEKEND_ENDORSES : 1
BROCHURES_TO : 1
TO_ACHIEVE : 1
FIRST_TREATMENT : 1
THE_OFFER : 1
DOCTOR_EL : 1
QUATTLEBAUM_TRS : 2
AN_CASE : 1
LEGS_STATES : 1
TOILET_AND : 1
LIPS_CLEAR : 1
HEMOGLOBIN_AC : 1
SIDERAILS_SMOKING : 1
FOR_HIS : 1
MOBILITY_HAS : 1
DENIES_TAKING : 1
VETERAN_TO : 2
LAST_LONG : 1
PRODUCTIVE_MEDIUM : 1
NONDUAL_GROUP : 1
HEALED_ULCER : 1
MONTH_COLOR : 1
SATT_INDIVIDUAL : 1
HER_THE : 1
NOS_DCF : 1
DATE_MAY : 1
CASE_IT : 1
INCLUDING_ASSESS : 1
GIVE_REFERRALS : 1
FOR_CPAP : 1
ER_GOOD : 1
IT_FOR : 2
PROCESSING_VET : 1
ALTERED_MOOD : 1
RIB_AND : 1
LETHARGY_AREAS : 1
CARDIAC_PHONE : 1
REVIEWED_AND : 1
ON_PHONE : 1
PAIN_DUE : 1
JOBS_THE : 1
SCALE_LEVEL : 1
THIS_CALL : 1
PULMONARY_HX : 1
PHYSICIAN_DATIVE : 1
TO_ATTENTION : 1
DONE_ON : 1
IS_WM : 1
ADDITIONAL_NONCOMPLIANCE : 1
MALE_NO : 1
DETAILS_PRESENTS : 1
NEEDED_PATIENT : 2
KIT_DISCHARGE : 1
TO_CONTRAST : 1
ON_PAIN : 1
IDEATIONS_VET : 1
ADDENDUM_IN : 1
PROBLEM_IS : 1
BELOW_SPECIFIC : 1
ACTIVE_OTHER : 1
LEFT_FLORIDA : 1
CHANGES_BE : 1
RECEIVING_NONVA : 1
HISPANIC_LATINO : 1
LOOSE_TONIGHT : 1
ABILITY_TOTAL : 1
ON_UNIT : 1
JUN_IN : 1
NICOTINE_EDUCATION : 1
WAS_FIRST : 1
CLASS_WANTS : 1
PRODUCTIVE_PERCEPTION : 1
BUT_DOES : 1
PRESSURE_HEART : 1
BATHING_HM : 1
ANXIETY_DISORDER : 1
COUNCELLED_TO : 1
YESTER_HIS : 1
DOMINANT_PRIOR : 1
HE_SEES : 1
OR_SEEMS : 1
JUST_MRS : 1
WILL_NOTE : 1
THE_SYSTEM : 1
HEPATITIS_ORDERED : 1
THERAPY_ASSESSMENT : 1
VETERANS_EFFORTS : 1
PO_INTAKE : 1
LEFT_NURSING : 1
OTHER_COUNSELING : 1
EABLE_TO : 1
CHANGING_POSITIONS : 1
SUB_METHEADS : 1
ASTHMA_REASONS : 1
WILL_PAYMENT : 1
MENTION_COMDYSPHAGIA : 1
AND_SERVICES : 1
SOCIAL_SKILLS : 1
COLLAGENOUS_PT : 1
IMMINENT_IDEATION : 1
INTENSE_UCINATIONS : 1
RETURN_FOR : 1
BENEFIT_PATIENTS : 1
FEV_WITH : 1
DOING_BETTER : 1
IN_CHAIR : 1
NOT_EXCEED : 2
HANDOUTS_FROM : 1
REFERRALS_ADDENDUM : 1
OR_MORE : 1
URINE_TOTAL : 1
OF_ADENOCA : 1
TO_COMING : 1
MENINGITIS_WHICH : 1
CONTACT_SITUATIONS : 1
AS_VOLUNTEER : 1
PROBLEM_LIST : 1
REACH_BAND : 1
TWICE_HOME : 1
IS_ASSIST : 1
TO_PERMISSION : 1
DENIES_PAIN : 1
INCOME_ISNT : 1
DENIES_AND : 1
AT_ALBUTEROL : 1
OFTEN_YOU : 1
HAND_DOMINANT : 1
NONVA_CARE : 1
IN_FUTURE : 1
ME_IS : 1
VERBALIZED_IS : 1
THE_COORDINATION : 1
TOB_TO : 1
PICK_HARD : 1
WITH_CONTROLLED : 1
WILL_EDUCATE : 1
SMOKING_PSYCHIATRY : 1
OF_CERTAIN : 1
HYPERLIPIDEMIA_ON : 1
COMPLETED_JUL : 1
SMOKING_RISK : 1
TLH_CASCADE : 1
BEHAVIOR_TO : 1
DR_PEPPER : 1
OF_EPWORTH : 1
CONSULT_TUCSON : 1
WITH_HEENT : 1
CLOTHING_WHEN : 1
TO_IV : 1
YEAR_MALE : 1
OVERNIGHT_HAS : 1
MOUTH_ACTIVE : 3
FOR_HIMSELF : 1
HIS_GOAL : 3
MOSTLY_HIGHS : 1
QID_ACTIVE : 1
IN_CVA : 1
MONTGOMERY_VAMC : 1
HEALTH_INTRUSIVE : 1
WITH_FOR : 1
NOT_CORRECT : 1
REPORTS_HIS : 1
KNOWN_VISTA : 1
PROCESS_AND : 1
MHC_FOR : 1
HERE_AS : 1
BENEFIT_ASK : 1
TEST_AUDITC : 2
VA_PHYSICIAN : 1
BY_THE : 4
BM_TONIGHT : 1
RR_NEXT : 1
VEHICLE_WAS : 1
OPT_AN : 1
PSYPC_TELEPHONE : 1
DIFFICULTY_WITH : 1
HIS_NOW : 1
ARE_BUT : 1
SUBJECTIVE_PATIENT : 1
CONTROL_EMPLOYED : 1
ALLEGES_THAT : 1
SO_SCHEDULED : 1
FOR_TO : 4
SWSINPATIENT_ASSESSMENT : 1
NOTE_HEALTH : 1
CLINIC_TO : 1
SHIFT_ASSUMED : 1
NO_APPOINTMENT : 1
ALSO_WITH : 1
CRAMPING_LEFT : 1
IS_WHAT : 1
CARE_KRISHNASWAMY : 1
MVA_INTOXICATED : 1
LOCK_SALINE : 1
FOOT_SENSORY : 1
FIANC_HE : 1
COUP_STATUS : 1
IRRG_DAILYTX : 1
HX_AMBULATORY : 1
BETTER_AM : 1
SCALE_NOT : 1
WORTH_LIVING : 1
PLACED_ELLIE : 1
UNINTERESTED_ARE : 1
ACHIEVE_AND : 1
IN_PROSTATITIS : 1
COMPLAINTS_AT : 1
PCCNURSING_INTAKE : 1
DX_BEDTIME : 1
UCINATIONS_THREATENING : 1
SURGERY_ASSESSMENT : 1
REASON_ADMISSION : 1
TO_POTENTIAL : 1
FOOT_EXAM : 1
ETHNICITY_NOT : 1
CARE_OF : 2
CURRENT_VERBALIZED : 1
FOR_PROCESS : 1
ERYTHEMIA_NOT : 1
SAYS_HE : 1
IS_WORSE : 1
TO_IDENTIFYING : 1
TUBERCULIN_PURIFIED : 1
VISIT_FOLLOWUP : 1
HEADACHE_NOT : 1
NO_ACUTE : 2
REQUIRED_PT : 1
BRUITS_NO : 1
COGENTIN_FELT : 1
HEENT_DRY : 1
CALL_PO : 1
ELLIE_PT : 1
HISTORY_TYPE : 1
PULSES_BIL : 1
NOTE_ASSESSMENT : 1
IM_HAVING : 1
TO_COUGH : 1
AND_PROVIDED : 1
HE_LIKE : 2
HOMICIDAL_MENTAL : 1
RECEIVED_DIPTHERIA : 1
GIVEN_ACCEPTING : 1
UPPER_MAILED : 1
DISCUSSION_WHICH : 1
ABOVE_PROFILE : 1
INTEGUMENTARY_EMERGENCY : 1
BAND_VITAL : 1
NOT_ACETAMINOPHEN : 1
PRESENTLY_IN : 1
MORSE_SCALE : 1
AGENCY_MUSKOGEE : 1
NO_LASER : 1
PSYCHOTROPIC_EDATIVE : 1
IN_GU : 1
MEDICATION_ETOH : 1
WAS_COMMENTS : 1
TOB_COUNCELLED : 1
RECEIVED_FROM : 2
AND_WITH : 2
PAIN_SCORE : 2
WITH_EXERTION : 1
VITAL_WITHIN : 1
RECENT_LAB : 1
TOBACCO_DISORDER : 1
EVALUATION_TO : 1
NOTED_OF : 1
TO_ADMISSION : 1
FOR_ZZPALLIATIVE : 1
PLACE_NOT : 1
THE_HAS : 1
TIMES_REGULAR : 1
RN_SLUGGISH : 1
MEDICATIONS_EXPIRATION : 1
BILL_UH : 1
UNCLEAR_AT : 1
IN_OF : 1
INPATIENT_CONTINUE : 1
MD_REPORTS : 1
SUPPORTIVE_PATIENT : 1
BEEN_ACTIVE : 1
INFORM_HER : 1
CECAL_THE : 1
IN_FIRST : 1
APPOINTMENTS_DEPENDING : 1
BEERS_ANY : 1
CALLERS_NUMBER : 3
TIME_CONTACT : 3
LEFT_RESIDENCE : 1
HIS_BEING : 1
AT_PM : 3
INTRAORAL_PERIAPICAL : 1
DECEASED_PARENTS : 1
COGNITION_MOBILITY : 1
YEARS_WANTS : 1
IF_OR : 1
THIS_WRITTEN : 1
PATIENT_UCC : 1
FALL_UPON : 1
TO_HAVE : 4
PHONE_NO : 2
NO_EXPERIENCING : 1
WITH_NONNEOVASCULAR : 1
KNOWING_WHAT : 1
PARTICULARLY_IN : 1
MG_SIG : 1
WITHIN_MONTHS : 2
STATE_ASKED : 1
SHOWN_HEMOGLOBIN : 1
REGULAR_AND : 2
HIS_WORKER : 1
HIS_OF : 1
WRITTEN_VERBAL : 1
ACETAMINOPHEN_TO : 1
FOR_OR : 2
LS_LUMBAR : 1
AND_WHAT : 1
DNR_RARE : 1
IN_BILATERAL : 1
PATIENT_ADD : 1
CONTACTED_PHARMACY : 1
YOU_BE : 1
REPORT_PREOP : 1
MEDICAL_REMINDER : 1
OA_KNEE : 1
HE_ANGRY : 1
MD_PATIENT : 2
SHOWS_FACILITY : 1
CHECKS_MAINTAINED : 1
TO_TAKE : 4
ON_OTHERS : 1
ETC_WHEN : 1
SKIN_INTEG : 1
DOWN_LEGS : 1
ACTIVE_TAB : 1
ALSO_THE : 1
PARTICIPANTS_MH : 1
LIKELY_RESOLVE : 1
SUCCINATE_MG : 1
COMMENTS_MEDS : 1
CLINIC_VISIT : 1
PULSE_HEIGHT : 1
PRIMARY_PHYSICIAN : 1
APPOINTMENT_TESTING : 1
PREVIOUS_TREATMENT : 1
STAFFED_ON : 1
SIGNATURE_REQUIRED : 1
FOR_IMPAIRMENT : 1
MORE_KNOW : 1
MEETING_AND : 1
TO_SEE : 3
MONOFILAMENT_TEST : 1
PHONED_SISTER : 1
TOMORROW_TIME : 1
AND_GETTING : 2
LAB_IS : 1
SD_PATIENT : 1
INTRODUCED_AS : 1
AND_STATING : 1
MODE_TRANSPORTATION : 2
INHL_PUFFS : 1
RANGE_RECOMMENDATIONS : 1
HAS_APPOINTMENT : 1
YOU_BEEN : 1
MED_TO : 1
DIURETICS_ANTIHIS : 1
IID_NO : 1
OFFERED_QH : 1
TOOTH_EXR : 1
LEGAL_ISSUES : 1
ACCEPTED_SOME : 1
WORK_NOTE : 2
FALL_FALLRISK : 1
TOILETING_FOR : 1
BY_ACCUCHECK : 1
MOUTH_OR : 1
MONTHS_DERMATOLOGY : 1
INJ_ML : 1
NONE_BED : 1
NO_BP : 1
MD_ETHNICITY : 1
CONTINENT_APPLIANCES : 1
INTOXICATED_WITH : 1
PHONED_HIS : 1
ACTIVE_OUTPATIENT : 5
ND_TIME : 1
WITH_CC : 1
PENDING_TELEPHONE : 1
ABLE_TO : 2
THAT_HIS : 5
CLINIC_DIAMETER : 1
PLAYING_ON : 1
THROUGH_THE : 1
THAT_WIFE : 1
OF_ACTIVITIES : 1
BILATERAL_NO : 1
SMOKE_NICOTINE : 1
VAMC_ACCESSION : 1
COLOR_INCREAED : 1
BATHING_AND : 1
SCORE_NO : 1
ON_RA : 1
LEAST_WERE : 1
ITS_OF : 1
SENSATION_WHAT : 1
WITH_PROBLEMS : 1
DISEASE_SC : 1
RECORD_MEDICAL : 1
COUNSELING_REC : 1
PROGNOSIS_DISTRAUGHT : 1
ORDERED_UNIT : 1
NOTE_TOPIRAMATE : 1
OUTPUT_URINE : 1
LORATADINE_TAB : 1
DISEASE_EYE : 1
BE_COMPLETED : 1
GETTING_PATIENT : 1
GLARGINE_UNIT : 1
OR_LATINO : 1
PUFFS_INHL : 1
FIRST_TOOTH : 1
BP_AND : 2
TRANSFER_PATIENT : 1
RHYTHM_FOR : 1
HAVE_TRACKED : 1
NOTE_CANDIDATES : 1
NO_WITH : 1
OR_SELF : 1
SPECIALIST_HIS : 1
DIABETIC_RETINOPATHY : 1
FOR_SCORE : 1
EDUCATION_MNT : 1
ANYWAY_PHYSICIAN : 1
NOTE_TREATMENT : 1
HIM_IF : 1
STUDY_PT : 1
TO_HOME : 1
HIS_FOOT : 1
EXPERIENCE_DISCOMFORT : 1
THE_ON : 3
WRITTEN_IV : 1
IS_WILL : 1
TO_HERE : 1
WORK_MODE : 1
ARMED_INSTITUTE : 1
ANTIHISTAMINES_EXPERIENCING : 1
PROVIDE_URGENT : 1
DRUGS_AND : 1
ISNT_MOISTURE : 1
PO_TID : 1
FOR_ANTIBODY : 1
CARE_EVALUATION : 1
INABILITY_TO : 1
CHLORIDE_IRRG : 1
ACCEPTING_RN : 1
PROBLEMS_COMPLAINTS : 1
DISTANCE_GLASSES : 1
AND_ARE : 1
TEMPERATURE_IN : 1
PATIENT_ACCESS : 1
TIME_ROUTINE : 1
ITS_THE : 1
PT_THAT : 6
NOTE_BASED : 1
BETTER_SHARE : 1
OS_NOT : 1
PSYCHIATRY_NOTE : 1
IS_ASSIGNED : 1
NURSE_TO : 2
TO_REPEAT : 1
WITH_ONLY : 1
PHONE_PATIENT : 2
LAB_TEST : 1
CM_IS : 1
PAIN_CHRONIC : 2
IN_VICTIM : 1
NUMBER_PARTICIPANTS : 1
OVERSIGHT_WITH : 1
SOCIAL_WORKER : 1
ADMISSION_RELEASE : 1
WOUND_BASE : 1
GATZMAN_RN : 1
NURS_MOVE : 1
BIOMEDICAL_FOR : 1
SHOT_THE : 1
AND_FROM : 1
IN_ROLE : 1
EMPLOYED_CABG : 1
BIOMEDICAL_CORP : 1
NOTE_BLANK : 1
NOT_NICOTINE : 1
ETC_HOW : 1
BILATERAL_NEEDS : 1
MG_TAKE : 2
PROGRAM_CYCLE : 1
INH_USE : 1
NO_ORAL : 1
WILL_YOU : 1
LAST_FILL : 1
INTENSE_AND : 1
ORAL_LESIONS : 1
HOSPICE_AGENCY : 1
OR_MANY : 1
CARE_COORDINATOR : 1
INFORMATION_THE : 1
NOT_AMLODIPINE : 1
KRISHNASWAMY_TOTAL : 1
UP_DATE : 1
WITH_OBVIOUS : 1
AND_LOCKED : 1
OTHER_MEDS : 1
WRIST_CUFF : 1
MONTHS_SINCE : 1
BE_MORE : 2
DISCOMFORT_HE : 1
WAS_STABLE : 1
COUNSELING_PERSON : 1
SUPPLE_MASSES : 1
PATIENT_ADDITIONAL : 1
WAS_AGITATED : 1
ASSESSMENT_IS : 1
ATTACHED_TO : 1
ADD_CURRENT : 1
OCT_WILL : 1
OF_FALLING : 2
HIM_HAS : 1
OR_WITHIN : 2
IS_COMPLAINING : 1
SC_BREATH : 1
BEFORE_ASSISTING : 1
AND_CHART : 1
REVIEW_SOLUTION : 1
INCLUDING_NUTRITION : 1
AGITATED_REPORTED : 1
TREATMENT_AIR : 1
AND_SUBSEQUENTLY : 1
THE_FOLLOWING : 5
TO_RESTING : 1
TO_COGNITION : 1
OF_LOOSE : 1
DAILY_OVER : 1
DP_PULSES : 1
OUTPATIENT_IDENTIFIED : 1
UNDERSTANDING_ABOVE : 1
MINUTES_ON : 1
DONE_EXAM : 1
SHOULDER_PAIN : 1
HEILIGENTHAL_HE : 1
OBVIOUS_BX : 1
WANTS_TRY : 1
MJ_PAST : 1
NOTE_FOLLOW : 1
PC_NOTE : 1
SD_REGISTERED : 1
ROUTINE_WORK : 1
CLASSIFICATION_CONTAMINATED : 1
CITALOPRAM_UPSET : 1
DISCHARGE_INSTRUCTIONS : 1
YES_PATIENT : 2
ASSESSMENT_APP : 1
IN_MEDS : 1
WITHIN_HOURS : 1
UCINATIONS_AND : 1
PARTICULARLY_THE : 1
PLANS_REVIEWED : 1
AFTER_COMPLETION : 1
TIRES_SILLY : 1
NOT_THINK : 1
OF_ABD : 1
WITH_REFERRAL : 1
TO_SEVERE : 1
APPENDICEAL_ORIFICE : 1
STATED_MORE : 1
RISPERDAL_AMITRIPTYLINE : 1
WHICH_THE : 1
ON_YES : 1
NO_OBVIOUS : 1
ARE_IS : 1
NOW_WANTS : 1
LEVEL_NOTED : 1
TEMPERATURE_TYPE : 1
SW_SERVICES : 1
FACILITY_STATED : 1
TEACHING_VETERAN : 1
NEGATIVE_OTHERWISE : 1
FACTORS_NUTRITION : 1
AND_NO : 2
SEES_PROGRESS : 1
AMIODARONE_AT : 1
ALSO_WE : 1
HOURS_EMERGENCY : 1
PA_INFORMED : 1
TWICE_TLH : 1
SITESDO_SMOKE : 1
RECOMMENDATIONS_COMPLAINT : 1
COUP_ALERT : 1
AN_ACUTE : 1
SUICIDAL_TO : 1
NEEDS_BE : 1
CONDITIONS_SHE : 1
WAS_AND : 1
AGAIN_VERBALIZED : 1
AN_SERVICE : 1
TRIGEMINY_AT : 1
WAS_TEMPERATURE : 1
CM_ORIGIN : 1
PULSES_PO : 1
CLASS_HE : 1
SIGNS_PATIENT : 1
IN_TO : 2
DIGITS_HE : 1
APPROPRIATELY_INTERACTS : 1
LEVEL_NOW : 1
WORSE_AND : 1
INTRAOPERATIVE_REPORT : 1
WITHIN_NO : 1
CONSTITUTE_PAYMENT : 1
BETWEEN_AND : 1
NO_PRESENT : 1
RESIDENCE_AND : 1
NO_VITAL : 1
BY_THOSE : 1
PLEASE_DISCUSS : 1
SURGICAL_ATTENDING : 1
MANAGEMENT_INTRUSIVE : 1
ABOUT_IT : 1
INTERVENTIONS_REVIEWED : 1
NO_AGREEABLE : 1
AND_CITALOPRAM : 1
WHEN_WEIGHING : 1
FOLLOWED_BY : 2
CALL_LIGHT : 1
COUNSELING_AND : 1
HX_TRIED : 1
PROCEDURE_RECORD : 1
CORP_GLAXO : 1
MSW_AND : 1
STILL_SODIUM : 1
TO_BY : 2
REMINDER_ACTIVITY : 1
PCP_EXPECTED : 1
SECTION_TRANSFER : 1
QH_PATIENT : 1
OF_PROBLEM : 1
THE_WAITING : 1
MINOR_AND : 1
WAS_ALSO : 2
NO_EVALUATION : 1
REACH_ID : 1
IN_RECOMMENDATION : 1
PORT_HE : 1
WEAR_OFF : 1
AROUSABLE_INFUSING : 1
THE_NONDUAL : 1
WILL_BE : 4
SAME_PROBLEM : 1
STATUS_LAST : 1
PERSONNEL_WHO : 1
SELFREFERRED_THE : 1
ACTIVE_COMFORT : 1
GI_LOOSE : 1
KG_NORVASC : 1
CARE_SMOKER : 1
OP_IF : 1
ANTIANXIETY_PAIN : 2
II_VITAL : 1
EXERTION_PERRLA : 1
PCP_VERBALIZED : 1
ASTHMA_IDENTIFY : 1
VA_DIAGNOSIS : 1
PATIENT_INSULIN : 1
OR_DEPENDENCE : 1
DRINKING_ALCOHOL : 1
HES_BETTER : 1
THE_TWO : 1
PATIENT_HOMELESS : 1
NOT_AS : 1
TO_CARE : 4
ORAL_GM : 1
GOES_ANTIHYPERTENSIVES : 1
DANGER_THE : 1
WILL_BP : 1
SUICIDAL_IDEATIONS : 1
CONTACT_NOTE : 1
IV_SITE : 1
HE_THE : 4
SORE_ADDENDUM : 1
MINUTE_APPT : 1
CHECKED_CURRENT : 1
VISIT_WAS : 1
IN_CASE : 2
PERSON_ASSESSED : 1
TRIED_NOT : 1
ASSISTANCE_FROM : 1
ORAL_INHL : 2
FOR_SKILLED : 1
BOWEL_CONTINENCE : 1
NO_CATS : 1
MAILED_TO : 1
WHERE_THEY : 1
EQUATES_TO : 1
THIS_ENCOUNTER : 1
HOWEVER_HE : 1
NOTE_DATE : 1
HAND_PRIOR : 1
AT_TO : 1
STOPPED_HIS : 1
WILL_CONSTITUTE : 1
TRANSPORTATION_WHEN : 1
PRESSURE_SORE : 1
ABOUT_AVAILABLITY : 1
RECENT_RECONCILIATION : 1
RTC_YR : 1
THE_EXAMINATION : 1
ASSIST_FOR : 1
TXC_CTRS : 3
TO_FACILITATED : 1
STATUS_ICDCM : 1
HIM_HAVE : 1
VETERAN_WAS : 2
UNDERSTANDING_ABD : 1
INSTRUCTED_ABOUT : 1
MSE_ALERT : 1
MALATHI_OR : 1
PLAN_OF : 2
NO_IN : 2
AND_LETTING : 1
AT_PUFFS : 1
LEVEL_OF : 1
TWO_OFTEN : 1
LETHARGY_BX : 1
WAS_PEERS : 1
PRODUCTIVE_SENSORY : 1
BYPASS_ICDCM : 1
CURRENT_PRESCRIPTION : 1
FOR_LEFT : 1
AGAIN_TWO : 1
MASS_JUL : 1
WOULDS_HIS : 1
ED_SC : 1
OR_MONTHS : 2
RESPO_NECK : 1
SOCIAL_THAT : 1
DROP_IN : 1
PROGNOSIS_SOUNDED : 1
ALMOST_PT : 1
HE_VERY : 2
PT_IN : 2
ON_RISKS : 1
MG_TID : 1
INFORMED_PT : 1
PHYSICIAN_IS : 1
COORDINATOR_VETERAN : 1
ORIENTED_OWN : 1
PHYSICALLY_DISCUSSED : 1
RESPIRATIONS_PSYPC : 1
UP_NEEDED : 1
HIS_STARTED : 1
THE_DIURETICS : 1
HAD_TBBX : 1
PATIENT_PROVIDED : 2
CAME_SD : 1
PAIN_CONDITION : 1
SPONDYLOSIS_ARTERIOSCLEROTIC : 1
COORDINATES_THE : 1
NAME_AND : 1
MENTAL_ORIENTED : 1
BY_IMFC : 1
TIME_MINUTES : 2
LEVEL_ALLERGY : 1
SECURITY_INFORMED : 1
STAY_IN : 1
AND_ED : 2
BILL_CASTLE : 1
WAS_EVALUATED : 1
SCORE_FOR : 1
NONE_FOUND : 1
OF_OUTPUT : 1
REQUESTED_IS : 1
MONTH_YOU : 1
ALL_CARE : 1
BUT_AGITATED : 1
OPTIC_PRE : 1
RIGHT_UPPER : 1
AND_GOES : 1
HEARING_AID : 1
ROLE_AGAIN : 1
PT_PT : 1
IVFS_AT : 1
HE_HIS : 2
FOR_HEALTH : 1
WITHOUT_DEFINITIVE : 1
SCALE_NARRATIVE : 1
OF_RESPONSIBILITY : 1
ATTENDING_AT : 1
HAVE_STAY : 1
TELEPHONE_NUMBER : 3
OF_ABOVE : 1
CXR_WHEN : 1
SIGNS_INTAKE : 1
DATIVE_ANTIANXIETY : 1
WITH_EXCEPTION : 1
WHAT_IS : 2
NO_TEETH : 1
STANDARDMEDS_PT : 1
REVIEWED_FOUND : 1
NUTRITION_WEIGHT : 1
EDUCATION_BEHAVIORAL : 1
STATE_AND : 1
VISITATION_REQUESTED : 1
AMIODARONE_OFF : 1
ON_WOULD : 1
WHICH_SUGGESTIVE : 1
ICDCM_RECEIVE : 1
THE_CASE : 1
ANY_OF : 3
STATED_THE : 1
TO_SERVICE : 1
BASED_ON : 1
PPP_IID : 1
APARTMENT_BEHAVIORAL : 1
TOILETING_MONTHS : 1
SCALE_ORDERS : 1
ABUSE_ALLERGIES : 1
HOUSE_TO : 1
TO_SUICIDAL : 3
AND_MORE : 1
PRIMARY_PREOP : 1
REPEAT_WHICH : 1
PARALYSIS_MEDIAN : 1
SWSINPATIENT_IF : 1
POWER_ATTORNEY : 2
NOT_ATTACHED : 1
GIVEN_CLEAR : 1
AND_VALVE : 1
VICTIM_ROLE : 1
OF_LAB : 1
GLASSES_MR : 1
SUBJECT_WEEKLY : 1
REQUESTED_WAS : 1
TO_ABILITY : 1
BESYLATE_MG : 3
PHYSICIAN_EDATIVE : 1
BATH_OR : 1
THE_WITH : 2
YOUR_CONDITION : 1
JUST_FROM : 1
RIDE_PREANESTHETIC : 1
GUARDED_FEELINGS : 1
COORDINATOR_INTRAOPERATIVE : 1
FEW_TIMES : 1
DP_PT : 1
ADDENDUM_MEDICAL : 1
LIQUID_DIET : 1
LARGE_LOOSE : 1
SURGERY_SCHEDULE : 1
IMMEDIATE_OR : 2
SHOWS_NO : 1
HAD_SAME : 1
ABUSE_CAUSATIVE : 1
OF_EMPLOYMENT : 1
SALINE_NO : 1
PERRLA_INTACT : 1
AND_VOIDED : 1
BED_YES : 1
STRING_HER : 1
PAYMENTS_UTILITY : 1
HE_CONTACTED : 1
BY_PROFESSIONAL : 1
THE_AND : 3
OF_METHACH : 1
STABLE_NO : 1
HEPATITIS_ASSESSMENT : 1
NEGLECT_AND : 1
REGARDING_SCALE : 1
WITH_SURG : 1
LEVEL_ACCEPTABLE : 2
ALBUTEROL_INHL : 2
INTERVIEW_CRITERIA : 1
XYZZY_CC : 2
PAIN_WRITTEN : 1
AND_RECENT : 1
FOR_LONG : 1
SYMPTOMS_OR : 1
ON_OTHER : 1
ADVISED_THAT : 1
PARANOIA_ALLEGES : 1
PCP_THE : 1
OR_BROCHURES : 1
INTRAMUSCULAR_SLEPT : 1
TWO_ARGE : 1
TROUBLE_MAINLY : 1
WEAKNESS_TAKING : 1
ANY_DISCOMFORT : 1
TO_WHY : 1
HIM_ASSESS : 1
AORTOCORONARY_BYPASS : 1
REVIEWED_PATIENT : 1
SUBSTANCE_YEARS : 1
TO_RTC : 1
LEG_MODERATE : 1
DISTURBANCE_ANTIDIABETICS : 1
THERAPIST_FACILITATORS : 1
CORP_FOR : 1
CALL_TYPE : 1
FOR_REVIEW : 1
CAREGIVER_VOICED : 1
MED_RECON : 1
NOTE_MEDS : 1
BY_ANITA : 1
AT_HR : 1
FOR_ALVETA : 1
MEDIUM_VITALS : 1
HEIGHT_IN : 2
PULSE_IN : 1
IN_BED : 1
BED_LIGHT : 1
LOW_BACK : 1
ICDCM_ACTIVE : 1
RESULTS_FALL : 1
EXAMINATION_PATIENT : 1
REFRRAL_ADVANCE : 1
SATURATION_RIB : 1
PHYSICIAN_GROUP : 1
VET_THAT : 1
FOLLOWUP_FOLLOWING : 1
ALCOHOL_ALCOHOL : 1
REMINDED_THAT : 1
HE_IN : 2
ESCORTED_PATIENT : 1
TO_ADA : 1
UH_YES : 1
SISTER_DID : 1
PHARMACY_COMPLETED : 1
ADMINISTER_BY : 1
BEEN_OTHER : 1
ISSUED_FSOME : 1
WAS_REFERRED : 1
ALMOST_OVER : 1
PAIN_AFFECT : 1
NO_ORDERED : 1
ABDOMINAL_DISCOMFORT : 1
OF_WHEN : 1
AORTOCORONARY_STATUS : 1
SOFTERS_MEDICAL : 1
CHECKS_ENCOURAGED : 1
BODY_POSITION : 1
DRY_AND : 1
THAT_IS : 4
RECEIVED_THIS : 1
PATIENT_ENCOURAGE : 1
AMOUNT_TO : 1
BELOW_STUPID : 1
STATES_SINCE : 1
CHEM_MAX : 1
TEMPORARY_BENEFIT : 1
OR_SPONGE : 1
ORIFICE_STRAP : 1
LBED_CHARETED : 1
PM_GROUP : 1
SCALE_PREDICTING : 1
PRESENTS_OF : 1
AC_EYE : 1
AND_TRIED : 1
SAY_LEAST : 1
VET_STATES : 1
TRIES_TIMES : 1
CONTINUE_WITH : 1
NUTRITION_EDUCATION : 1
STATUS_VSS : 1
NEEDED_HAS : 1
MED_FORM : 1
MORE_THE : 1
FLUIDS_QH : 1
ADEQUATELY_HIS : 1
AT_WAS : 1
PROVIDED_INFORMATION : 1
REVIEWED_REASON : 1
NO_EMERGENCY : 1
FOR_HAND : 1
CTGUIDED_PUNCTURE : 1
AND_HE : 4
THAT_IN : 1
IN_HYDROCODONE : 1
SEROQUEL_STATES : 1
FAWCETT_SUBJECTIVE : 1
WITH_SPICIENESS : 1
FELL_TWICE : 1
NOTE_GOALWHAT : 1
METHOD_TEACHING : 1
CURRENTLY_FOLLOWED : 1
VA_NOT : 1
BEDSIDE_THIS : 1
THEIR_REFER : 1
BRIDGE_PORCELAIN : 1
THERE_WAS : 1
AS_TO : 2
AND_ANTIHYPERTENSIVES : 1
GRANULAR_PROBE : 1
WITHHOLDING_HIS : 1
APPOINTMENT_DATE : 2
SC_EYE : 1
RELATED_TO : 4
FRI_ON : 1
OR_SA : 1
HELP_HE : 1
RX_AND : 1
IDEATION_OR : 1
NURSING_INPATIENT : 3
MORE_AND : 2
HI_AVH : 1
MEDICAL_CALLERS : 1
PTS_POWER : 1
DIAGNOSIS_FOCUS : 1
WORKER_STOKING : 1
GROUP_PORT : 1
OF_SODA : 1
VERY_OUT : 1
PANICKED_AND : 1
REGIMEN_NO : 1
APPOINTMENT_TO : 2
BY_MEDICARE : 1
HIGH_ON : 1
ANWER_AFTER : 1
JOKING_SMILING : 1
RECORDS_OF : 1
TROUBLE_PING : 1
LISTED_SKIN : 1
CARDIAC_NUMBER : 1
HIM_MEDICATION : 1
THOUGHTS_DENIES : 1
THIS_PUFFS : 1
TO_CHILD : 1
PROGRAM_HE : 1
AS_CONTINENT : 1
AND_AS : 1
NO_NO : 5
COVERING_VERBALIZED : 1
RENO_TO : 1
QUANTUM_SOLACE : 1
SIDERAILS_UP : 1
SEEMING_TO : 1
TO_VETS : 1
HAS_NKA : 1
ORDERED_RESTRICTIONS : 1
BRIDGE_BASE : 1
THE_TH : 1
EMERGENCY_ROOM : 1
JUN_RESPIRATION : 1
PATIENT_TO : 6
QHPRN_FOR : 1
PATIENT_FREQUENT : 1
CARE_IT : 1
ATTENDENCE_BENEFIT : 1
IS_GETTING : 1
YOU_IN : 1
WEIGHING_HYPERLIPIDEMIA : 1
OF_ABILIFY : 1
COUGH_THE : 1
LORAZEPAM_MH : 1
PAIN_OF : 1
SHE_NOT : 1
SIGNS_CERVICAL : 1
NOTE_CONTINUE : 1
OCCASIONAL_OF : 1
HERE_WHAT : 1
REGIMEN_WITH : 1
SUPPLIES_PATIENT : 1
WAS_WAS : 1
WITH_ONCOLOGY : 1
WITH_AND : 4
REGARDING_TELEPHONE : 1
TUCSON_DEPARTEMNT : 1
HELPFUL_TO : 1
RESTING_VERBAL : 1
PATIENT_ANY : 1
PERIAPICAL_FIRST : 1
APP_OF : 1
UNIT_DATE : 1
AT_CYSTOSCOPY : 1
BREADTH_PALPITATIONS : 1
BODY_OXYGEN : 1
PRESENT_MG : 1
STATES_GIVES : 1
UNIT_TO : 1
FAMILY_TRIED : 1
TO_WITH : 4
IS_GRANULAR : 1
TRIED_ASSOCIATE : 1
CE_WAS : 1
WITH_DYSPHAGIA : 1
BASE_NO : 1
PAIN_ADDENDUM : 1
ADVISED_PT : 1
MAY_SUICIDAL : 1
OFFICE_FOR : 1
THEIR_DISCUSSION : 1
ABOUT_THEIR : 1
THE_UPDATED : 1
AS_SOON : 1
ADLS_HAS : 1
PATIENT_DEMOGRAPHICS : 1
SIGN_AND : 1
HEM_PHYSICIAN : 1
ISSU_STATES : 1
OF_WITH : 1
NURSING_INTERVIEW : 1
SCREENING_PATIENT : 1
MONOFILAMENT_DONE : 1
MOVIE_DATE : 1
PHARMACY_IN : 1
ED_PT : 1
PATIENT_ISSUED : 1
BEING_GIVEN : 1
PT_ALSO : 1
ID_CORP : 1
LACERATION_DRESSING : 1
AT_ADVANCE : 1
AT_KVO : 1
ROGER_FOR : 1
ICDCM_RTC : 1
CHANGES_IODOSORB : 1
HIM_NOTE : 1
NONS_PATIENT : 1
ENCOUNTER_PROBLEM : 1
IS_TO : 5
WORKER_IS : 1
OBTAINING_FROM : 1
PHD_THE : 1
EMER_PRIMARY : 1
DCF_AND : 1
HX_HARD : 1
WAS_OF : 1
THOSE_WHO : 1
MG_HS : 3
TOILET_VOIDED : 1
SUBJECTIVE_REFUSED : 1
NURSE_NURSING : 1
LIQUID_PT : 1
COMPLETELY_AND : 1
GOAL_NO : 1
FAILURE_TO : 1
QUALIFIES_CPAP : 1
AND_HRS : 1
LIKE_BE : 1
CERVICAL_ARTERIOSCLEROTIC : 1
PAIN_NOW : 1
SUGGESTED_FOR : 1
LABS_RECOMMENDED : 1
SHOWS_BETTER : 1
INFORMATION_NONCOMPLIANCE : 1
PRINCIPAL_PREOP : 1
FOR_HIM : 1
THE_LEFT : 3
IMPAIRMENT_TO : 1
OF_COLOR : 1
PATIENT_NOT : 2
NOT_ANY : 1
FROM_CLINIC : 1
BACK_UNIT : 1
AND_HOMICIDAL : 1
PLAN_USING : 1
PHONE_REGARDING : 1
TELEPHONE_TELEPHONE : 1
ASA_FALL : 1
MALATHI_TOTAL : 1
WITHDRAWAL_SYMPTOMS : 1
UTILITY_DEPOSITS : 1
PATIENTS_AND : 1
PREVENTION_PCP : 1
WHEELCHAIR_UNREST : 1
THE_SAME : 3
PT_WITH : 2
VETS_PERMISSION : 1
RECORDS_DATE : 1
VETS_FOR : 1
STATED_THAT : 2
ABOUT_RISK : 1
CHARETED_PROCEDURES : 1
UNLISTED_EVALUATION : 1
SUB_METATARSAL : 1
AI_WITH : 1
QH_PRN : 1
TEMPERATURE_HT : 1
HISTORY_ABOVE : 1
NEGATIVE_UNLESS : 1
ABOVE_EFFECT : 1
IN_TERMS : 1
IN_YR : 1
RALIZED_DISORDER : 1
AVAILABLITY_PASTORAL : 1
WITH_TAP : 1
MONITORED_THEIR : 1
USE_DISORDER : 1
COSIGNER_OF : 1
YES_ARE : 1
PRIVATE_HOME : 1
DRY_MEMBRANES : 1
PATIENT_REPORT : 1
PATIENTS_ON : 1
JUST_TRAVEL : 1
DOING_MUCH : 1
ANTIDIABETICS_NO : 1
ACTIVE_BENEFIT : 1
HOWEVER_NO : 1
CLASS_ON : 1
WILL_REASSESSED : 1
TYPE_CHRONIC : 1
SKIN_RELATED : 1
THIS_DOWNGRADED : 1
ABNORMALITIES_OUTPUT : 1
INCREAED_ALERT : 1
DISCHARGE_COUNSELING : 1
HCL_ORAL : 1
INTACT_PREOP : 1
SUGGESTED_PLAN : 1
NOT_SUICIDAL : 1
TWI_CALLERS : 1
GATZMAN_THIS : 1
LUE_IN : 1
HAS_GUARDIANSHIP : 1
IN_BUT : 1
IF_CAN : 1
MAY_THE : 1
WE_PAYMENTS : 1
ASSESSMENT_FOR : 1
SCALE_WAS : 1
EKSW_TOPIRAMATE : 1
SOLN_DAILYTX : 1
NO_BBS : 1
MEDICATION_COUNSELING : 1
ASSESS_PATIENTS : 2
HAND_LIFTS : 1
SMOKING_CESSATION : 1
MEDICATIONS_WITHIN : 3
SITUATIONS_WHERE : 1
BEEN_READING : 1
PO_QHS : 1
MEDICAL_AFTER : 1
AT_BEDSIDE : 2
EXPERIENCING_IMPROVED : 1
HIS_IF : 1
RN_PATIENT : 1
REASSESSED_ED : 1
HIGHWAY_SWINGS : 1
TREATMENT_ROOM : 1
NANDA_PAIN : 1
SOCIAL_IS : 1
TOPIC_INSTRUCTED : 1
PTSD_THIS : 1
PATIENTS_OR : 1
AGREEABLE_TO : 1
HOUSE_AND : 1
ASSUMED_PT : 1
COMPLETED_MAY : 1
PROBLEM_CALLERS : 1
NUTRITION_SUBJECT : 1
IS_TAKING : 1
PT_HOME : 1
IN_IL : 1
THE_INDIVIDUAL : 1
BY_FOSTER : 1
QUATTLEBAUM_TXC : 2
FULL_COPIES : 1
WM_TO : 1
DISEASE_SOCIAL : 1
ULCERS_PT : 1
NEGLECT_THAT : 1
AID_RESIDENT : 1
PLEASE_WITH : 1
SO_WE : 1
SOUNDED_DISTRAUGHT : 1
ADDRESSPVH_COLLINS : 1
MALE_HX : 1
IS_DEPRESSED : 1
CARE_SPOKE : 1
SOCIAL_WORK : 2
PL_ING : 1
GIVEN_TO : 3
OF_SURGERY : 2
AT_REFRRAL : 1
CONTACT_WORK : 1
IF_HAS : 1
TO_ACCEPTING : 3
HE_STATED : 3
WAS_PROCESSING : 1
LIFTS_KNEES : 1
PREDICTING_PRESSURE : 1
AND_QUATTLEBAUM : 1
TO_CLEAR : 1
SPECIFIC_MOOD : 1
HE_IS : 8
TO_BILL : 1
ME_AFTER : 1
CALLER_WILL : 1
CURRENT_DIAGNOSES : 1
COPD_ICDCM : 1
SKIN_ASSESSMENT : 1
DX_FOR : 1
TERMS_OF : 1
TO_AND : 5
NOT_GOOD : 2
TREATMENT_AXIS : 1
UP_IN : 1
OTHER_MUM : 1
SIDE_EFFECTS : 1
CAGE_AND : 1
PT_CARE : 1
EDUCATION_INPATIENT : 1
WITH_RECOMMENDATION : 1
LISTED_BELOW : 1
RESPO_SUPPLE : 1
CED_YESTER : 1
THE_LIST : 1
OR_STAFF : 1
ONCE_INFUSED : 1
HIS_FIANC : 1
AS_LISTED : 1
GOOD_SAM : 1
EDUCATION_PROVIDED : 1
HIS_FAMILY : 1
TO_KRISHNASWAMY : 1
AND_CITY : 1
ON_CHANGE : 1
CBOC_NOTE : 1
SORE_RISK : 1
WM_ADMITTED : 1
NEWLY_PRESCRIBED : 3
EYE_STEP : 1
EXR_DIAGNOSTIC : 1
YOU_FELT : 1
RUN_CXR : 1
RESIDENCE_TUES : 1
SUBSTANCE_WITH : 1
TO_GET : 1
VNS_HOUSEKEEPING : 1
OWN_QUITE : 1
SEEMING_HAVE : 1
AMLODIPINE_BESYLATE : 3
SISTER_WHOM : 1
PRESCRIBED_BY : 1
WITH_EACH : 1
QUITE_PROUD : 1
CURVE_HI : 1
COMP_PEN : 1
TIME_OFF : 1
UP_AS : 1
NO_THERAPIST : 1
DETERMINED_PROFESSIONAL : 1
EXAM_VSS : 1
MONTHS_NO : 1
ASKED_VET : 1
TETANUS_EVALUATION : 1
WELL_HIS : 1
TG_AT : 1
DOES_NOT : 4
WAS_SUBSEQUENTLY : 1
TSH_AND : 1
ABOVE_ALLERGIES : 1
SUPPLE_NO : 1
UNIT_AT : 2
KNOW_BETTER : 1
THE_SATT : 1
WAS_PRISION : 1
WAS_DISCUSSED : 3
WITH_LOCAL : 1
SINCE_PERSONAL : 1
STAFF_PAIN : 1
FIRE_RISK : 1
BE_PATIENT : 1
ASSISTANCE_GOING : 1
THE_WOULDS : 1
TO_RANGE : 1
STAFF_RA : 1
AN_SCREENING : 2
AN_INPATIENT : 1
SPONDYLOSIS_DISCHARGED : 1
VITAL_CERVICAL : 1
FOR_KLINE : 1
OF_LISINOPRIL : 1
THAT_SINCE : 1
YO_ADMITTED : 1
PULSE_READING : 2
GETTING_SAME : 1
REVIEW_SYSTEMS : 1
LOGICAL_REALITY : 1
YOUR_PAIN : 1
PCP_CAREY : 1
RARELY_MISSED : 1
IV_PSYCHOTROPIC : 1
SPC_FOLLOW : 1
WE_GAVE : 1
THIS_PT : 2
VALUABLES_CALL : 1
SPIRITUALITY_BE : 1
LIKELY_TO : 1
SCHEDULE_AND : 1
CASE_WOULD : 1
AND_GOAL : 1
ACTIVE_EMPLOYED : 1
VERBAL_PAIN : 1
IN_CLINIC : 1
LIFT_BILATERAL : 1
THE_HAND : 1
PHONE_MEETING : 1
6A_GOALS : 1
THIS_BUT : 1
FOR_PROVIDER : 1
LIVING_ANYMORE : 1
OFFICE_UNTIL : 1
PHYSICAL_IMMOBILIZATION : 1
DATE_HBAC : 1
ALBUTEROL_ORAL : 1
TTNA_AND : 1
ERUPTED_TOOTH : 1
DOCUMENTED_AT : 2
BE_POSE : 1
HAS_TOMORROW : 1
AND_SW : 1
REVIEWED_LABS : 1
FOR_STALKING : 1
GUAIFENESIN_TAB : 1
IS_WEDDING : 1
UNIT_QUIETLY : 1
WITH_STATED : 1
STATED_ASSESS : 1
CALLER_AREA : 1
EXAM_TYPICAL : 1
PT_EXHIBITED : 1
WAS_RATE : 1
NO_ANWER : 1
EXPECTED_OUTCOMES : 1
ATTEND_ANONYMOUS : 1
WORKING_VOLUNTEER : 1
CUFF_NEUROLOGY : 1
FOR_EVENING : 1
COUGH_SMOKER : 1
PO_MOOD : 1
PTS_OF : 1
INITIAL_EVALUATION : 1
STATED_HE : 4
MORE_PARTICIPATED : 1
FOR_TOTAL : 1
ATTEMPS_CALL : 1
OR_YES : 2
FOR_PREDICTING : 1
PAIN_SUBJECTIVE : 1
THE_SUB : 1
OF_WAS : 1
MUSSP_AGREEABLE : 1
SIGNIFICANT_OTHERS : 1
NE_ENGE : 1
NUTRITION_CLASS : 1
COUPLES_AND : 1
PATIENTS_REPORTED : 1
AND_MEDICATIONS : 1
PHONE_TO : 1
DEPRESSED_MOOD : 1
LOGICAL_ORIENTED : 1
ACTIVE_ORDERS : 1
CAUSATIVE_INCLUDING : 1
SCORE_TREATMENT : 1
MY_PRESENTLY : 1
SKILLED_WK : 1
BEEN_THE : 1
FALL_RISK : 5
REGARDING_THIS : 1
COMMENTS_IR : 1
TRAVEL_TRAILER : 1
MH_COORDINATOR : 1
HARD_TO : 2
TRY_RISPERDAL : 1
SKIN_IS : 1
IDENTIFIED_BETWEEN : 1
TRIGEMINY_NOTED : 1
WHO_THE : 1
THE_AN : 1
WOULD_LIKE : 2
RELATED_PSYCH : 1
CARE_ACTIVE : 1
KNEE_REVIEW : 1
ATTEND_ALCOHOL : 1
REPEAT_MAY : 1
MALE_WITH : 1
IS_WITH : 1
PARENTS_HOUSE : 1
OUTPATIENT_ESOPHAGUS : 1
AFTER_INFORM : 1
STATUS_AND : 1
DRINK_OF : 1
TESTS_TREATMENTS : 1
SMOKING_FIRE : 1
CHIEF_PERSON : 1
CAUTIOUS_WHEN : 1
SAY_BP : 1
BRONCHOSCOPY_LABORATORY : 1
OTHER_HE : 2
INTENSITY_BEST : 1
SOB_THICK : 1
CITALOPRAM_AND : 1
STAFF_ALMOST : 1
THINKING_THAT : 1
UNIT_THIS : 1
FOR_COUPLES : 1
COMPLETION_OF : 1
RESTRICTIONS_AS : 1
SEDATION_LAND : 1
BESYLATE_TAB : 3
STALKING_TELEPHONE : 1
APPROPRIATE_WITH : 1
WITH_DATE : 1
MEDIAN_SC : 1
OF_ADMISSION : 1
NO_ORI : 1
FOLLOWS_LOCAL : 1
OF_PERSONAL : 1
PROCEDURE_VERBALLY : 1
CONTINUED_DENY : 1
HIM_HE : 1
INJ_ACTIVE : 1
HIM_NURSING : 1
CALL_OTHER : 1
INTERN_NOTE : 1
HE_ADVISED : 1
FALL_UNDER : 1
ANXIETY_MY : 1
BY_WHO : 1
HAS_YET : 1
OWN_ANYWAY : 1
HER_THIS : 1
TREATMENT_HAVE : 1
NIGHT_NO : 1
LEFT_FOREARM : 1
OR_OTHERS : 1
MG_WITH : 1
WITH_TEAM : 2
BEEN_BROUGHT : 1
GIVEN_PREVENTION : 1
PRESCRIPTION_SIMETHICONE : 1
CALLED_SLIDING : 1
FROM_OF : 1
WANKER_AN : 1
NEED_BE : 1
TAB_TABLET : 1
DIVERTICULUM_CHIEF : 1
GOOD_HAND : 1
INTERDISCIPLINARY_AS : 1
NEVER_PERIAPICAL : 1
LATEST_VITALS : 1
RARE_TRIGEMINY : 1
TREATMENT_MAIN : 1
WITH_LORI : 1
WERE_IN : 1
WITH_CONDITION : 1
BEEN_WRIST : 1
DEMENTIA_MADE : 1
LASER_NO : 1
AND_YOUR : 1
DOENPEZIL_HE : 1
NONPRESCRIPTION_AND : 1
HPI_PREVIOUS : 1
OR_THE : 2
NOT_SMOKE : 1
WITHOUT_ANY : 1
BE_WHEN : 1
FROM_AND : 1
DOES_GIVE : 1
ED_UP : 1
TEST_WITH : 1
APPT_ELECTRONICALLY : 1
IDEATION_SUICIDAL : 1
YO_CAUC : 1
VERBALIZE_FEELINGS : 1
THAT_SISTER : 1
INSURANCE_THROUGH : 1
RECOVERY_REALLY : 1
FMH_SEE : 1
CONTACT_TO : 2
PROBLEMS_PSYCH : 1
TIME_TO : 1
ALL_VITAL : 1
CLINIC_NOTE : 2
DOSE_OF : 1
SUICIDAL_THOUGHTS : 1
AND_POWER : 1
KNOW_THEY : 1
HERNIA_PAINFUL : 1
ADDRESS_MENTAL : 1
ZZPALLIATIVE_BEEN : 1
PASSIVE_STAFF : 1
NO_LOCK : 1
STARTED_GU : 1
BYPASS_STATUS : 1
SISTER_TO : 1
SHOULD_HEAR : 1
ST_IV : 1
YES_OF : 2
HE_ASSESS : 1
ISUFF_SUBSTANCE : 1
CHANGE_CONDITION : 1
ON_MON : 2
AND_PSA : 1
ANY_CONCERNS : 1
WEIGHT_PROGRAM : 1
TESTING_PROVIDED : 1
THERE_AND : 1
IF_INDICATED : 1
VETERANS_NAME : 1
TIME_IN : 2
FACILITY_HE : 1
FOR_BREATHING : 1
RECEIVED_FOR : 1
BUT_DRINK : 1
PREVIOUS_INTERVENTIONS : 1
THE_AT : 1
AND_UP : 1
IN_LOW : 1
VAMC_NO : 1
MCCORD_THE : 1
AGITATED_PATIENT : 1
FOR_RECHECK : 1
TO_FOR : 5
MUCH_NOW : 1
IDEATION_TO : 1
COURSE_NEEDS : 1
PLEASE_REFER : 1
ON_MG : 1
CTRS_AND : 1
MEDS_YES : 2
TO_THE : 16
TID_NO : 1
IMPAIRED_DESCRIBE : 1
PAINFUL_BUT : 1
PATIENTS_ARE : 1
BRONCHOSCOPY_WILL : 1
WAS_STAFFED : 1
ONLY_PAIN : 1
THE_MEDICATIONS : 3
PO_STATE : 1
BY_MOUTH : 7
PEN_STATE : 1
OR_SW : 1
STARTED_HIM : 1
TRACKING_REPORTED : 1
TO_TALK : 1
PLEASE_TO : 1
HE_THOUGHT : 2
COSIGNER_TOTAL : 1
ASARCO_MADE : 1
EOTH_MJ : 1
IS_MAN : 1
SUBSEQUENTLY_WAS : 1
HOME_PHONE : 1
AND_THEN : 1
LEFT_INGUINAL : 1
WHICH_CASE : 1
DISCHARGE_PHARMACIST : 1
PL_TO : 1
MARITAL_SEPARATED : 1
INHALER_BE : 1
THEM_YOUR : 1
SATT_SESSION : 1
IN_DOSAGE : 1
REASON_FOR : 2
AND_MEDICATION : 1
DEVICE_VETERAN : 1
IN_MOST : 1
TAKE_TABLET : 3
AND_AT : 1
SEPTEMBER_FOR : 1
OFFER_CYCLE : 1
BE_ASTHMA : 1
TALKED_FINANCES : 1
SUGGESTIVE_OF : 1
BENZOS_ADVISED : 1
LIVING_ARRANGEMENTS : 1
FALL_SCALE : 1
THE_THREE : 1
INTENSITY_NURSING : 1
PROCEDURES_ENOXAPARIN : 1
OR_PATIENT : 1
METHACH_NE : 1
CARE_HIS : 1
THROUGH_PROGRAM : 1
EPWORTH_SCALE : 1
FROM_MH : 1
STRAIGHTENED_AND : 1
ADDENDUM_NO : 1
AS_THE : 4
WITHIN_YES : 1
TO_INFORM : 1
QH_HYDROCODONE : 1
MACHINE_REGARDING : 1
NO_SUB : 1
CLONAZEPAM_TAB : 1
CHANGE_HIS : 1
PAIN_BEST : 1
SITED_OVER : 1
NOT_BY : 1
BATTERY_THE : 1
HYPERLIPIDEMIA_ZOCOR : 1
HISTORY_SURGERY : 1
AND_MANAGEMENT : 1
TO_STAFF : 1
JUL_VERDSOME : 1
PT_REPORT : 1
HAS_TIME : 1
IS_STOKING : 1
RECEIVED_TETANUS : 1
THE_PLACE : 1
DAILY_CHANGES : 1
THAT_WAS : 1
MESSAGE_TO : 1
PCP_KETCHUM : 1
CURRENT_COPING : 1
REFER_TO : 2
ADDENDUM_RA : 1
DOSE_WHICH : 1
OF_PATIENT : 3
YOUR_OPTIONS : 1
FOUND_SOMEONE : 1
AND_EMERGENCY : 1
TO_BP : 2
AND_FOR : 2
TO_ACCIDENT : 1
NEXT_VISIT : 1
PORCELAIN_BASE : 1
SAID_THAT : 1
VACCINATION_TESTS : 1
WITH_OF : 5
DU_LEGAL : 1
NURSING_ADVANCE : 1
HYPOTHYROIDISM_IRON : 1
DENIES_WITHDRAWAL : 1
SMILING_AS : 1
CHEM_HEMATOLOGY : 1
LEVEL_UNDERSTANDING : 1
NOW_TOB : 1
SYMPTOMS_AND : 1
MALE_OF : 1
PROBLEM_WEEK : 1
HOUSING_PRIMARY : 1
DO_AS : 1
FIRST_DIGITS : 1
UP_SITED : 1
FOLLOWING_COMP : 1
GIVE_RIDE : 1
GROUPS_REPEAT : 1
UNDER_THE : 1
URINATE_FOR : 1
LOGICAL_ADDENDUM : 1
EDATIVE_PAIN : 1
COORDINATOR_NURSE : 1
UNIT_RESTING : 1
HAYS_LCSW : 1
AND_NOT : 2
DIET_NUTRITION : 1
UNDERSTANDING_ADVANCE : 1
ADDED_AS : 1
UNSPECIFIED_LARGE : 1
METHACH_ENGE : 1
ISSUES_AT : 1
REGULAR_UNLABORED : 1
ABOUT_HE : 1
SCORE_NONE : 1
TO_PLACE : 1
IODOSORB_RELATES : 1
RHYTHM_ST : 1
FOR_ULCERS : 1
APPARENTLY_HAD : 1
NONE_NONE : 1
COFFEE_BUT : 1
WILL_HER : 1
FEV_DOSE : 1
IID_PRESENT : 1
ENCOURAGE_PATIENT : 1
OFFERED_DRUGS : 1
PAIN_BRIDGE : 1
WENT_DETOX : 1
COLLINS_PROCEDURE : 1
CLINIC_PRIMARY : 1
AID_BED : 1
ALONG_HIGHWAY : 1
MH_CARE : 1
BECOME_OR : 1
RESPIRATION_TO : 1
COLLINS_EDUCATION : 1
NOTE_BLOOD : 1
ALL_II : 1
MULT_TRANSFER : 1
PREVENTION_BETTS : 1
ANY_RESPIRATIONS : 1
SKIN_REASSESSMENT : 1
LAB_PENDING : 1
TO_EMERGENCY : 1
AND_SI : 1
METHEADS_PT : 1
OPTIONS_CONTINUE : 1
MICROSCOPIC_OF : 1
IS_UNDERSTANDING : 1
STATE_WHEN : 1
FROM_CPRS : 1
DISCHARGE_ER : 1
WHEN_TO : 2
CARE_MHSGENERAL : 1
SIMVASTATIN_MG : 1
PAIN_TYPE : 1
SOME_IF : 1
LORI_DOES : 1
ATTACHED_CAN : 1
LOGICAL_INCREASE : 1
OU_RECREATION : 1
VET_REGARDING : 1
REACH_WATER : 1
CHART_YES : 1
GOING_ASSUMED : 1
PREOP_MEDS : 1
WITHIN_ID : 1
TIS_PT : 1
USE_THROAT : 1
BY_TWICE : 1
DIARRHEA_NOT : 1
HAS_PT : 1
INHL_PUFF : 1
FOUR_HISTORY : 1
TYPE_ADMITTED : 1
HAND_WOULD : 1
PREVENTIVE_MANAGEMENT : 1
MEDS_REACH : 1
SENSORY_PERCEPTION : 1
RESPIRATORY_TREATMENT : 1
LIKELY_THIS : 1
LIGHT_TV : 1
BETWEEN_TO : 1
SENSORY_EXAM : 1
TO_RISPERDAL : 1
IN_ROOM : 1
TO_MY : 1
STANDARD_BEING : 1
HEMATOLOGY_MAX : 1
AMOUNT_AFFECTED : 1
ACTIVITIES_HIS : 1
DIGITS_SAYS : 1
SATP_CLASS : 1
LEFT_HIM : 1
PVCS_COUP : 1
AND_CECAL : 1
MHSGENERAL_NONS : 1
ICU_ASSESSMENT : 1
YEAR_THE : 1
HIS_DAILY : 1
BLUE_ON : 1
BAND_SIDERAILS : 1
DEPENDING_ON : 2
THE_FUTURE : 1
DEPARTMENT_NOTE : 1
BY_QHPRN : 1
ANY_DP : 1
ORDERED_AT : 1
THIS_CAN : 1
STUDY_CLINIC : 1
REPORTS_NEGLECT : 1
PATIENT_OTHER : 1
TAP_ON : 1
ACTIVE_ABDOMINAL : 1
THE_FIRST : 1
VA_SYSTEM : 1
IN_AGREEMENT : 1
WEEKLY_READING : 1
OR_UPSETTING : 1
AREA_THE : 1
PROBLEMS_TESTS : 1
PROCEDURES_INJ : 1
PRESENTS_FOR : 1
NEVER_INTRAORAL : 1
THE_YEAR : 1
ON_ULCERS : 1
HOMELESS_BMI : 1
PATIENTS_RISK : 1
LIGHT_SECONDARY : 1
NO_MASSES : 1
BENEFIT_WILL : 1
ATTORNEY_THE : 1
IVFS_INFUSING : 1
PAIN_TO : 2
TIME_WAS : 2
PLACEMENT_PATIENT : 1
DISTANCE_AND : 1
OF_ADMINISTRATION : 1
ALLERGIES_MEDICATION : 1
IN_GROUPS : 1
PROVIDED_OF : 1
INTENSELY_HYPERMETAB : 1
PM_SEPTEMBER : 1
HOW_OFTEN : 1
ATTENDENCE_THAT : 1
EYE_FLORIDA : 1
FOOT_TID : 1
ROI_THIS : 1
ORIENTED_FLUIDS : 1
ALCOHOL_ANONYMOUS : 1
DID_TAKE : 1
NO_SECONDARY : 1
WEIGHT_HE : 1
HIS_JEEP : 1
NUMBER_ALLAMANDSOME : 1
BE_VET : 1
LAST_OBSERVED : 2
LB_KG : 3
WHICH_BE : 1
BY_TELEPHONE : 1
VITALS_PAIN : 1
NOW_TEMPERATURE : 1
SHOES_MODIFICATIONS : 1
DEPRESSION_PROVIDER : 1
ACTIVE_ATTENDENCE : 1
SCORE_AT : 1
SAME_CHIEF : 1
REFERRALS_AND : 1
UH_DO : 1
QUIT_STRESS : 1
OR_GIVEN : 1
THERE_BUYING : 1
EKNUTRITION_NOTE : 1
BE_BY : 2
COORDINATION_CE : 1
NURSING_COME : 1
SECOND_LIFT : 1
AS_LABS : 1
STOOL_ADDENDUM : 1
REPORT_HIS : 1
NOTE_ADDENDUM : 1
CHARACTERISTICS_OCCASIONAL : 1
HISTORY_REVIEWED : 1
MAINLY_DUE : 1
HIGHS_VERY : 1
ADMITTED_LORATADINE : 1
BETTER_ALREADY : 1
UNDERSTANDING_DISCHARGE : 1
NOT_DOENPEZIL : 1
APPLICABLE_IN : 1
SEP_OF : 1
OLD_MALE : 1
IN_PAST : 2
RESPIRATION_AMLODIPINE : 1
CASE_MANAGEMENT : 1
VETERAN_ATTENDED : 1
TAKING_SECTION : 2
LEVEL_AND : 1
THIS_HEILIGENTHAL : 1
GOT_HE : 1
ASSISTING_WITH : 1
MESSAGE_LEFT : 1
NEW_GLASSES : 1
THIS_POINT : 1
ACCEPTING_YES : 1
THE_SERVICES : 1
HIS_SOCIAL : 1
WITH_MEDICATION : 1
RELATED_PREVIOUS : 1
RELEASE_OF : 1
PLAN_OR : 1
ADDENDUM_BLOOD : 1
PRINTED_AND : 1
TO_BREATH : 1
HISPANIC_OR : 1
AGREEMENT_EMERGENCY : 1
HAVE_ACCESS : 1
TO_IF : 1
BROCHURES_GIVEN : 1
UNTIL_THAT : 1
YESTER_ASA : 1
EQUATES_CHILD : 1
CONTACT_SPC : 1
IN_FEV : 1
NO_APPOINTED : 1
RELATED_CURRENT : 1
UPDATED_MEDICATION : 1
INSTRUCTIONS_DISCHARGE : 1
REACH_THE : 1
TOPIRAMATE_TAB : 1
TELEPHONE_CONTACT : 3
HOURS_ACETAMINOPHEN : 1
TO_MG : 2
LONG_PATIENT : 1
APPOINTED_MINUTE : 1
DISCHARGED_HOME : 1
BP_RECHECKED : 1
EACH_IS : 1
MG_ML : 1
BED_LOW : 1
DR_DX : 1
MOOD_SWINGS : 2
CODE_EVALUATION : 1
LIFE_WORTH : 1
NARRATIVE_REPORT : 1
BE_THREE : 1
TO_MANAGEMENT : 1
INHL_QID : 1
MY_IS : 1
BE_REDEFINED : 1
MENTAL_HEALTH : 3
LEFT_LOWER : 1
PAINFUL_RESOLVES : 1
CREATOR_THIS : 1
THE_MG : 1
RECALL_COLON : 1
OF_TEST : 1
RISKS_ADVERSE : 1
SOURCE_FOR : 1
PATIENT_ETHNICITY : 1
STATES_GLUCOSAMINE : 1
CURRENTLY_COUMADIN : 1
HIMSELF_HIS : 1
WILL_ASK : 1
THIS_UNCLEAR : 1
DIAMETER_THE : 1
BE_ON : 1
ADDRESS_STATUS : 1
PROUD_SPC : 1
PATIENT_PHONE : 5
WHICH_IT : 1
SPUTUM_UNCERTAIN : 1
TEST_AND : 1
ENCOURAGED_SEEK : 1
AT_BRIGHT : 1
TRAILER_SIGNIFICANT : 1
SERVICE_ASSOCIATE : 1
LEVEL_PORCELAIN : 1
LIPS_OP : 1
CROWS_AND : 1
YEAR_OLD : 1
KNOW_THE : 1
OVERDRESSED_BEEN : 1
VS_CHARETED : 1
COLLABORATE_INTERDISCIPLINARY : 1
SISTER_TAKE : 1
WORK_WE : 1
PSA_LEFT : 1
NAME_PROCEDURE : 1
SEVERAL_SINCE : 1
AND_RELATED : 1
ABOUT_OR : 1
COMPLETED_FOR : 1
HAS_NURSING : 1
IS_FOR : 2
DATE_COLON : 1
IS_BEING : 2
COHERENT_AND : 1
ON_CAR : 1
LIFTS_OFF : 1
MILIEU_TOLERATING : 1
MALE_SKILLED : 1
NEUROPSYCHOLO_SKIN : 1
THE_OP : 1
FSOME_AND : 1
TOTAL_MORSE : 1
GRASP_KNEES : 1
MH_PSYCHIATRY : 1
ALL_ADLS : 1
EXTENSIONS_ADDENDUM : 1
TRAZODONE_PHONE : 1
HOME_BEHAVIORAL : 1
OF_SENSATION : 1
LACK_SOCIAL : 1
WITHIN_THE : 3
WILL_REFER : 1
FOR_LIKELY : 1
OUTPATIENT_MEDS : 1
WAY_AVOID : 1
PEPPER_VENTRICULAR : 1
SUICIDE_PCP : 1
SILLY_STRING : 1
THOUSAND_DOLLARS : 1
MEDICARE_DISCUSSED : 1
WHEELCHAIR_NURSE : 1
OF_EXAM : 1
OTHER_HAND : 1
ADJUSTING_MILIEU : 1
TOTAL_CONTINUE : 1
ARMED_FORCES : 1
THAT_RESIDENCE : 1
TO_MEDICATION : 1
DATE_TIME : 1
RESULT_PT : 1
BETTER_IN : 1
CONDITIONS_STATES : 1
INTERESTED_IN : 1
CONSENT_OBTAINED : 1
COMPLAINT_BEEN : 1
OFFICE_THAT : 1
HER_CAR : 1
PASTORAL_VISITATION : 1
SIMETHICONE_CHEW : 1
FOR_INFORMATION : 1
PARENTS_STATES : 1
ANXIETY_DEPRESSION : 1
WOUND_IS : 1
VASC_DP : 1
PLACE_NAME : 1
DIABETIC_SENSORY : 1
SCALE_TEMPERATURE : 1
VA_COUPLE : 1
HE_FOR : 1
THEIR_OWN : 1
GUARDIANSHIP_TO : 1
PAIN_SYMPTOMS : 1
TAKE_GUN : 1
SWINGS_HIGHS : 1
VET_NEEDED : 1
INTAKE_FOR : 1
NO_HI : 1
ON_AN : 1
CLOPIDOGREL_REASON : 1
WAS_OVERDRESSED : 1
OF_SYSTEMS : 1
JOB_RELATED : 1
WITH_TRANSFER : 1
MEDICAL_SEE : 1
SUBJECT_BREATH : 1
FOR_THIS : 2
AND_OR : 2
ASSESSMENT_IF : 1
EDUCATION_FEW : 1
PT_GAVE : 1
IS_OF : 2
GI_UPSET : 1
GAYLORD_AVAILABLE : 1
PCCNURSING_SUBJECTIVE : 1
WAYS_THE : 1
INTRUSIVE_DENIES : 1
NECK_NO : 1
TEMP_REGARDING : 1
MAIN_MEDICAL : 1
OF_HE : 2
NURSE_INTRAOPERATIVE : 1
LIST_RR : 1
NOTED_NO : 1
ACTIVE_AMIODARONE : 1
THE_AVAILABLITY : 1
ISUFF_ABUSE : 1
MEDICAL_MAIN : 1
TEST_CALLER : 1
TOPIC_NOTE : 1
FINANCIAL_BEING : 1
IDENTIFIED_TERAZOSIN : 1
RTC_FOR : 2
TESTS_INSOMNIA : 1
CONTACT_CMM : 1
TOPIMAX_AND : 1
OF_CALLER : 1
SC_FOR : 1
THE_REPORTED : 1
FOR_TRANSFERS : 1
ADVANCE_ACTIVE : 1
DIET_ADVISED : 1
NOW_PAIN : 1
BE_FOR : 1
TAB_UD : 1
INJ_INJECT : 1
STANDARDMEDS_ABLE : 1
OXIMETRY_INTENSITY : 1
BE_WHICH : 1
WEEKEND_DEPRESSED : 1
OR_PCP : 1
JUL_AS : 1
REMINDER_DIALOG : 1
IS_RELIABLE : 1
BUT_RESOLVES : 1
DIET_OF : 1
POTENTIAL_SKIN : 1
INJURIES_ANXIETY : 1
MG_UD : 1
TIS_RECENT : 1
AFTER_OF : 1
GOOD_4D : 1
FULLY_WELL : 1
DETOX_HE : 1
NO_EXTENSIONS : 1
VISIT_SUBJECTIVE : 1
IM_NOT : 1
RECOMMENDED_RTC : 1
EDUCATION_UNDERSTANDING : 1
LAWS_BATHING : 1
TABLET_BY : 3
INSTRUCTIONS_EDUCATION : 1
EACH_NEW : 1
PRN_TCBP : 1
HEADACHE_ACTIVE : 1
FIREARMS_VETERANS : 1
BP_ENEMA : 1
THE_SCALE : 1
TAKING_HIS : 2
DIAGNOSIS_INQUIRE : 1
FAMILY_CAREGIVER : 1
OLD_PATIENT : 1
MH_SOCIAL : 1
AGITATED_AND : 1
MEDICATIONS_OUTPATIENT : 1
SURGERY_SWSINPATIENT : 1
HE_AND : 1
COUNSELING_LARGE : 1
MG_LDL : 1
SYNCOPE_LIKELY : 1
BED_MOST : 1
MUSKOGEE_CALLED : 1
LEGAL_REPRESENTATIVE : 1
STRING_ON : 1
SKIN_ADJUSTING : 1
OF_OUT : 1
PLAN_HORRIBLE : 1
COME_WRITTEN : 1
WITH_PEERS : 1
MOOD_ACTIVE : 1
SEPARATED_DISABILITIES : 1
BUYING_AND : 1
PROVIDER_NOTE : 1
CONTINUE_ASSIST : 1
PARALYSIS_OF : 1
HE_NEVER : 1
ANXIETY_AND : 1
PARTICIPATION_PLACED : 1
ELOPEMENT_FACTORS : 1
VET_RECENT : 1
SUICIDE_PREVENTION : 1
INFORMATION_STATES : 1
PROVIDER_MALATHI : 1
HR_DECREASING : 1
FOUND_SATT : 1
NO_CANDIDATES : 1
PREOP_ACUTE : 1
CLASS_WEEKLY : 1
WHY_HE : 1
OF_HYPO : 1
SESSION_FACILITATORS : 1
IS_PODIATRY : 1
USE_CONTROL : 1
PSYCHIATRIC_AT : 1
IF_SIERRA : 1
PAIN_CVA : 1
IN_ORIGIN : 1
HUMAN_ML : 1
OFF_AND : 1
CONCERNS_MRSA : 1
CARE_SERVICES : 1
BE_PHYSICALLY : 1
SERVICE_AND : 1
NOTE_ID : 1
LOW_PAIN : 1
VETS_AND : 1
DIET_PT : 1
CELL_OF : 1
OFF_GOING : 1
REASONS_FOR : 2
VISTA_REGIONAL : 1
TAB_IF : 1
TO_AMITRIPTYLINE : 1
ACCEPTING_PAIN : 1
SS_FOR : 1
CURRENT_VITAL : 2
BY_TOMORROW : 1
IN_WITH : 2
FOR_OF : 5
IN_PREVIOUS : 1
WOULD_TO : 3
SPENT_IN : 1
GROUP_MG : 1
KUWAIT_MOOD : 1
OF_MH : 1
OF_HAS : 1
SWMF_WHAT : 1
LISINOPRIL_MG : 1
PREVIOUS_IV : 1
WILL_GIVE : 1
STATES_THAT : 2
LARGE_AMT : 1
REACH_FOOD : 1
NO_ABNORMAL : 1
ONEHALF_BY : 2
IRON_ANEMIA : 1
CONDITION_EVENT : 1
CH_CHEM : 1
ALVETA_SON : 1
TRIAGE_FOR : 1
SBA_FEET : 1
HOME_VA : 1
COLLABORATE_WITH : 1
WITH_PATIENT : 5
PB_OF : 1
LB_HEIGHT : 1
DISCUSSED_SIGN : 1
INCREAED_WHEEZING : 1
FOOD_WITHIN : 1
ALSO_DIVERTICULUM : 1
PHONE_TEMPORARY : 1
DUE_MHC : 1
BILL_FROM : 1
PURIFIED_PROTEIN : 1
PALPITATIONS_THIS : 1
FELT_OUTPATIENT : 1
LEVEL_WAS : 1
MONTHS_FALL : 1
PHARMACIST_MEDICATION : 1
ADOPT_USE : 1
AND_DEPRESSION : 1
OF_PRN : 1
FAWCETT_SCHEDULE : 1
GROOMED_HE : 1
FOR_EDUCATION : 1
EFFORTS_BE : 1
ASSESS_FALL : 1
REACH_OF : 1
BEEN_PRESCRIBED : 4
SUPPLIES_WT : 1
ED_FOR : 1
PERCOCET_TID : 1
USE_ACTIVE : 1
WHEEZING_PRODUCTIVE : 1
HE_DENIES : 1
POW_NO : 1
VET_STATED : 2
BONE_DRAINAGE : 1
LDL_UP : 1
HOME_NOTICED : 1
GLASSES_ARE : 1
SIDERAILS_DATE : 1
AT_IV : 1
MH_SPECIALIST : 1
WHO_FOLLOWS : 1
ADDENDUM_COMMENTS : 1
SC_SOUNDS : 1
LO_SOLN : 1
ABUSE_AMLODIPINE : 1
DATE_COLONOSCOPY : 1
SON_PTS : 1
STRATEGY_KEEPING : 1
WAS_TAKING : 1
NOTE_WORK : 1
BY_STUDY : 1
PLAN_CURRENT : 1
ALLERGIES_WRITTEN : 1
IDEATIONS_STATES : 1
AMITRIPTYLINE_MG : 1
OF_DENIES : 1
PATHOLOGY_AND : 1
LEARN_PULMONARY : 1
EVALUATION_DATE : 1
HOUSING_SUPPORT : 1
SATURATION_RA : 1
GAVE_NOTE : 1
SEEMS_UNINTERESTED : 1
ROS_PRESENTS : 1
MODERATE_SEVERE : 1
SNORING_BODY : 1
SOURCES_ALBUTEROL : 1
ORAL_IN : 1
COMINGT_PATIENT : 1
PAIN_VITAL : 1
MEDICATION_PRIVATE : 1
ANXIOUS_STATING : 1
REFERRED_TO : 1
NOTE_TAB : 1
TEMP_ALSO : 1
OTHERS_LESS : 1
TUBERCULIN_PROTEIN : 1
IDENTIFIED_TO : 1
INGUINAL_THE : 1
PEPPER_DX : 1
HERE_BUT : 1
UP_BY : 1
WITH_NO : 3
MEDICAL_NOTE : 1
HE_DOWN : 1
TRANSPORTATION_CONSULTS : 1
DIURETICS_PMH : 1
HE_GOOD : 2
DISPLAY_ANGER : 1
AFFAIRS_REPRESENTATIVE : 1
RESIDENT_NOTE : 2
ACETAMINOPHEN_TABLET : 1
SOME_ANXIETY : 1
PROVIDED_DISCHARGE : 1
PROCEDURE_DIAGNOSTIC : 1
PROCEDURE_FIBER : 1
CC_ML : 1
BREATH_COUGH : 1
WITH_REACH : 1
SOCIAL_ENGES : 1
AMBULATORY_AID : 2
ESOPHAGUS_USE : 1
TO_RATE : 1
URGENT_CARE : 1
WITH_BATHING : 1
WHEREIN_ARE : 1
PALPITATIONS_AT : 1
THAT_WOULD : 2
KNOW_IM : 1
PATIENTS_MONITORED : 1
CABG_PROCEDURE : 1
UP_COPY : 1
WITH_HR : 1
ANITA_PAIN : 1
ABOUT_IMMATURITY : 1
NONVISIT_OP : 1
TYPE_DISTURBANCE : 1
ATTEMPS_TO : 1
NEXT_APPOINTMENT : 1
LIVES_HIS : 1
THAT_OVERSIGHT : 1
PCP_UNDERSTANDING : 1
CLINICAL_ACTIVITY : 1
PLACED_PHONE : 1
REASSESSMENT_REHAB : 1
SEDATION_APPENDICEAL : 1
PATIENT_LIVES : 1
REST_WHEELCHAIR : 1
SPECIFIC_SYMPTOMS : 1
OF_IMMINENT : 1
IRRIGATION_HISTORY : 1
PSYCHIATRY_VITALS : 1
THAT_FRACTURED : 1
TO_ENCOURAGE : 1
THE_TO : 1
BREADTH_AT : 1
GAVE_THE : 1
NURSE_DENIED : 1
AND_TIME : 3
CONVERSE_ACUTE : 1
BACK_AND : 1
STATING_KNOW : 1
NO_BODY : 1
PLANS_WITH : 1
MEDS_STOPPED : 1
LAT_FEW : 1
TELEPHONE_MEDICAL : 1
SWINGS_MOSTLY : 1
WEARING_PRESCRIPTION : 1
EDUCATION_DATE : 1
WHY_IM : 1
YOU_DECIDE : 1
WENT_THROUGH : 1
LUMBAR_FACET : 1
AXIS_MEDICAL : 1
ANXIETY_ALMOST : 1
PAST_HOW : 1
OF_TSH : 1
COLLINS_THESE : 1
VETERAN_YO : 1
XYGEN_ON : 1
FUTURE_APPOINTMENT : 1
HIM_NOT : 1
ADMISSION_ESOPHAGEAL : 1
ORIENTED_SLEPT : 1
SKIN_IMPAIRMENT : 1
COLOR_WHEEZING : 1
CAR_AND : 1
INTERACTS_WITH : 1
OWN_TOTAL : 1
IN_NOTED : 1
TO_BACK : 2
GROUP_THERAPY : 3
CSS_PC : 1
SECONDARY_DIAGNOSIS : 1
HOSPITAL_ACTIVE : 1
PULSE_WAS : 3
DEMOGRAPHICS_PROGNOSIS : 1
TRANSCRIPTIONIST_TREATMENT : 1
ORI_ED : 1
HOW_HAVE : 1
SOLACE_BOND : 1
NURSING_NARRATIVE : 1
MIN_YOUR : 1
WORK_AID : 1
AS_NEEDED : 3
IS_AT : 1
THE_ALSO : 1
PROVIDER_COMMENTS : 1
THE_NO : 1
DISCHARGE_BREATH : 1
ARRANGEMENTS_THAT : 1
STATED_NAME : 1
TELEPHONE_SPC : 1
GO_TO : 1
DRUG_SCREENING : 1
SERVICE_OF : 1
WAS_MEDS : 1
SOME_HE : 1
HE_SAID : 1
AND_CURRENT : 2
PATIENT_LUBBOCK : 1
GOOD_CONTACT : 1
FOR_PT : 2
APPOINTMENT_RECALL : 1
LABORATORY_VAMC : 1
DISCUSSION_BUT : 1
ANYMORE_TO : 1
WEAR_THE : 1
QID_SEEMING : 1
OF_EVENING : 1
VITAL_SIGNS : 5
MAIN_CLINICAL : 1
BEING_DISCHARGED : 1
BARRETTS_ESOPHAGUS : 1
AND_PEERS : 1
INSTITUTE_PATHOLOGY : 1
RISK_TAB : 1
BY_HAYS : 1
OUTCOMES_WILL : 1
DAUGHTER_NOW : 1
PUT_CONSULT : 1
WHEN_ASKED : 2
UCC_INITIAL : 1
GETS_ADVISED : 1
SYSTEMS_NEGATIVE : 1
EASILY_AROUSABLE : 1
GUN_PARENTS : 1
ID_ON : 1
TO_LEARN : 2
LOBE_FAMILY : 1
ON_SIGNIFICANT : 1
PROGRESSIVELY_INCREASING : 1
HIS_MD : 1
GUIDE_TO : 1
AND_REASON : 1
COLLECTION_DT : 1
EXR_CASTS : 1
PROCESS_CARE : 1
INHALER_MIGHT : 1
DOSE_BE : 1
SEEK_EMERGENCY : 1
BOWEL_PLACE : 1
THEIR_BUT : 1
FACET_INJECTION : 1
RESPONDS_TO : 1
YOUR_TO : 1
CHECKED_AGAIN : 1
IS_EASILY : 1
SKILLS_DUE : 1
ROUTE_ADMINISTRATION : 1
EPWORTH_PINESS : 1
ON_IT : 1
MRS_AND : 1
HEALTH_AND : 1
GROUP_RECREATION : 1
WRIST_TO : 1
WAITING_FOR : 1
THAT_HAVE : 1
FOR_ADMISSION : 1
EDUCATION_VOICED : 1
PHYSICALLY_ACTIVE : 1
HER_PUTTING : 1
RECHECKED_AND : 1
MG_OXYCODONE : 1
COMPLETED_CONSULTS : 1
AREAS_SHOWED : 1
IN_WALKS : 1
JEEP_HAS : 1
ONE_SIMVASTATIN : 1
NO_THY : 1
TREATMENT_MEDICAL : 1
AND_WAS : 3
CHANGE_IN : 5
PROFILE_TOPIMAX : 1
SPONDYLOSIS_HEART : 1
RECENT_MEDICATION : 1
COMPLAINT_ICDCM : 1
PATIENTS_DISCHARGE : 1
OF_DIET : 1
NONESSENTIAL_MEDICATIONS : 1
ALMOST_DAILY : 1
AROUSABLE_IVFS : 1
WITH_WHEN : 1
EXHIBITED_WITH : 1
DURING_THEIR : 1
CONTAMINATED_NURSING : 1
RELEASE_RESPONSIBILITY : 1
BP_DIABETIC : 1
FEARS_PRESCRIPTION : 1
OF_THOUSAND : 1
PC_PROVIDER : 1
PT_ALLEGES : 1
CONTACT_TELEPHONE : 1
SKILLED_NURSING : 1
CE_CALLED : 1
VEHICLE_STOLEN : 1
GOOD_THROUGH : 1
CONTACTED_REGARDING : 1
AGAIN_AT : 1
RESOLVE_ON : 1
LANSING_ABUSE : 1
MH_MEDS : 1
ENOXAPARIN_MG : 1
NOTED_THE : 1
OF_MEDIUM : 1
PATIENT_BE : 1
HYDROXYZINE_CAP : 1
BUT_NO : 2
OF_TREATMENT : 1
PCRN_TO : 1
HISTORY_DIARRHEA : 1
PT_APPARENTLY : 1
TO_APPT : 1
DID_GUN : 1
INFORMATION_CBCB : 1
OF_SOLACE : 1
RECEIVE_CRITICAL : 1
PT_VERBAL : 1
NOTE_TEMP : 1
FACILITIES_IF : 1
NOTED_AT : 1
HOME_OF : 1
PATIENT_NOTIFY : 1
RN_THIS : 1
HAVE_BECOME : 1
BETTER_EYE : 1
FROM_RIGHT : 1
TUCSON_SURGERY : 1
ANGRY_AGITATED : 1
FREQUENT_TOILETING : 1
RESPONSIBILITY_ORAL : 1
PT_BEEN : 2
RESPIRATIONS_TELEPHONE : 1
NIGHT_WITH : 1
PUT_TO : 1
THOUGHT_COHERENT : 1
ACCEPTABLE_PATIENT : 2
THAT_VEHICLE : 1
RISK_UPON : 1
MEDS_HAS : 1
THE_SUSTAINS : 1
HOURS_DISCHARGE : 1
AND_CE : 1
TO_RADIOLOGIC : 1
WASHINGTON_COVERED : 1
SOLUTION_DIRECTED : 1
DENIED_SUICIDAL : 1
MORNING_TIME : 1
SPOUSE_POWER : 1
HIS_YES : 1
ARTERIOSCLEROTIC_HEART : 1
THAT_ISNT : 1
THE_PRIMARY : 1
PLAN_DISCUSSED : 1
PREOP_OA : 1
AT_BE : 1
GALLY_CAROTID : 1
OF_BRADEN : 1
OBVIOUS_LETHARGY : 1
OF_MENTAL : 1
STARTED_WEAR : 1
ONE_TIME : 1
LORI_VA : 1
ACTIVE_HEILIGENTHAL : 1
PHARMACY_NOT : 1
WORK_MH : 1
BOTHERED_THE : 1
OUTPATIENT_INCLUDING : 2
COPY_TAKE : 1
INTERVIEW_SCHEDULING : 1
CANCER_ON : 1
SCALE_PROVIDER : 1
WT_LB : 2
TO_WEIGHT : 1
FOR_OWN : 1
SMOKING_BAND : 1
TO_HEALTH : 2
ADMINISTER_MOUTH : 1
DAILYTX_HISTORY : 1
RISK_UNIT : 1
OF_PASTORAL : 1
ABOUT_PT : 1
PAIN_MODERATE : 1
HIS_STOOL : 1
INTEG_INTACT : 1
STUPID_SPECIFIC : 1
DIAGNOSIS_AND : 1
BODY_INDEX : 1
THE_ADA : 1
SMOKING_ID : 1
GOOD_CAR : 1
PATIENT_PING : 1
ORIGIN_OF : 1
YOU_BOTHERED : 1
ROOM_NOTE : 1
LEISURE_NEURO : 1
DX_OA : 1
DIABETIC_FOOT : 1
NUMBNESS_IN : 2
SPENT_STARTED : 1
EATING_BOWEL : 1
ALLAMANDSOME_WHEN : 1
ABDOMINAL_HE : 1
IS_SUGGESTIVE : 1
OUT_CAME : 1
VA_FOR : 1
PRIOR_PATIENTS : 1
RESOLVES_HE : 1
THE_LOWER : 1
IR_ORAL : 1
BEEN_MG : 1
NUMB_SEEMS : 1
SURVEILLANCE_RESTRAINTS : 1
PANIC_ATTACKS : 1
NO_TOPIC : 1
INDEX_WORKING : 1
NERVE_SC : 1
NOTE_AT : 1
SO_THE : 1
ATTENDING_UNIT : 1
UNCERTAIN_COLOR : 1
TAKING_HE : 2
EDUCATION_YO : 1
UPSETTING_THAT : 1
OF_NERVE : 1
ORDERS_MOST : 1
DEFINITIVE_DIAGNOSIS : 1
PAMPHLET_IV : 1
MUCH_TO : 1
VERDSOME_TELEPHONE : 1
OR_THAT : 2
KICKED_HIM : 1
AREA_CALLERS : 1
ALREADY_HE : 1
ASA_MORSE : 1
HE_PATIENTS : 1
AS_SLUGGISH : 1
SW_THE : 1
VERBALLY_WITH : 1
PT_COLONOSCOPY : 1
OF_COURSE : 1
BUT_NOT : 1
HIS_PERCOCET : 1
IMMEDIATE_WITHIN : 2
MADE_GOOD : 1
OF_BASED : 1
STATE_TELEPHONE : 1
TO_FOOT : 1
SUPPORT_GROUP : 1
ONC_FOLLOWUP : 1
PATIENT_HAVE : 1
MOUTH_TLH : 1
BOWEL_SOUNDS : 1
OR_SOCIAL : 1
LEGAL_AFFAIRS : 1
NO_BMI : 1
OUTPATIENT_KIMBERLY : 1
BEEN_COMINGT : 1
TG_PROBLEMS : 1
ASSESS_LEVEL : 1
TIMES_WHEELCHAIR : 1
HARM_OF : 2
WIFE_AT : 1
REPORT_PAIN : 1
SNORING_AIRFLOW : 1
FELL_AT : 1
EXPIRATION_LAST : 1
HE_LIES : 1
MONTHS_THE : 1
HEELS_WELL : 1
NO_IID : 1
CARE_GIVEN : 1
HAS_THE : 1
SEVERE_VETERANS : 1
WENT_THE : 1
LAST_TO : 1
TWICE_FOR : 1
THERAPY_COMPLETED : 1
HAS_HAD : 1
CONTINUES_TO : 1
RTC_LABS : 1
WHAT_HE : 1
NOTE_BILATERAL : 1
ON_THE : 6
PROVIDE_DISTRACTION : 1
HIS_VEHICLE : 1
GIVEN_INSTRUCTIONS : 1
BREATH_IS : 1
ORIENTED_SI : 1
INFORMATION_ON : 2
NOT_SIGNS : 1
AND_ITS : 2
DEPRESSED_STATES : 1
TO_HELP : 1
COMPLETED_VERDSOME : 1
OF_THE : 11
HYDROCODONE_ACETAMINOPHEN : 2
INSTRUCTIONS_PHARMACIST : 1
RECEIVED_REPORT : 1
GOOD_HE : 1
WANTS_VERY : 1
ALSO_BROUGHT : 1
QHPRN_PAIN : 1
INITIAL_NOTE : 1
THERAPY_SLITTING : 1
ON_FOOT : 1
REPORTED_HE : 1
TRANSFER_NO : 1
WERE_MONITORED : 1
COMPLETELY_INDEPENDENT : 1
FROM_THEREFORE : 1
PARTICIPATION_NURSE : 1
FIRST_DOSE : 1
FOR_ASSESSMENT : 1
SHARE_WITH : 1
SITES_REACH : 1
TREATMENT_CHANGES : 1
ONCE_MOS : 1
HAS_NOT : 2
IS_SEEN : 1
STARTED_ON : 2
RULE_READING : 1
EYE_NPDR : 1
IN_PRIMARY : 1
PROCEDURE_NOT : 1
CLINIC_PT : 1
AND_REVIEWED : 3
VET_TO : 1
YES_YOU : 1
WILL_HELP : 1
TXC_SATT : 1
PRIMARY_SPOKE : 1
EDUCATION_CLOTS : 1
FACILITIES_INCOME : 1
GROUPS_AND : 1
EFFECTS_MH : 1
WHICH_PATIENTS : 1
VERBALLY_CONCURRED : 1
UP_HARD : 1
WITHDRAWAL_OR : 1
SEEK_PULSE : 1
SHIFT_PTS : 1
SCALE_TO : 1
PT_HE : 2
PERSONAL_METOPROLOL : 1
SUBJECTIVE_AM : 1
PAIN_SIGNS : 1
AND_TREATMENT : 1
RESP_ESOPHAGEAL : 1
WITH_HIS : 2
YOUR_MEDICAL : 1
AT_HOSPITAL : 1
WITH_FIANC : 1
REPORT_OFF : 1
VALUABLES_BED : 1
DENIES_VASC : 1
ORIENTED_NO : 1
TO_EXCEED : 2
ADENOCA_BEEN : 1
MIGHT_BE : 1
DISCUSSED_VA : 1
HAS_CV : 1
BELOW_SKIN : 1
STOLEN_AND : 1
WAL_DATE : 1
ALSO_STARTED : 1
FULLY_ORIENTED : 1
RISKS_AND : 1
FROM_SOURCES : 1
PRINCIPAL_DX : 1
PLAN_CONTINUITY : 1
WAS_NOTED : 1
IV_SITES : 1
WITH_ABOUT : 1
THINK_IT : 1
SW_THAT : 1
HE_AT : 1
ATTENDING_NOTE : 1
STAFF_OF : 1
MINUTES_TO : 1
PROCESS_LOGICAL : 1
WITH_MODIFICATIONS : 1
DEPARTEMNT_THEIR : 1
ORIENTED_TO : 1
BY_MRSA : 1
FLUID_PATIENT : 1
CHAPLAINS_OFFICE : 1
TG_UP : 1
INTRAORAL_FIRST : 1
SB_PREVIOUS : 1
PATIENT_TETANUS : 1
YES_PMH : 1
MAX_WHEN : 1
PRESSURE_SCHEDULED : 1
ALLERGY_ORDERS : 1
CONTINENT_OF : 1
BETTER_AND : 1
SELF_THE : 1
DISCUSSION_CONSENT : 1
BE_IDENTIFY : 1
UNIT_WITH : 1
PAIN_COMES : 1
DIFFICULTY_KNOWING : 1
PULSE_OX : 2
UNIT_GROUPS : 1
NOTE_OF : 2
CLINIC_BOWEL : 1
GU_TO : 1
PATIENTS_APPOINTMENT : 1
TXC_AND : 1
PHONED_AND : 1
TV_SIDERAILS : 1
COOPERATIVE_FAIR : 1
COMPLAINT_PERSON : 1
MONITORED_DURING : 1
MONTHS_PRINTED : 1
DONE_HIM : 1
OFFER_FREQUENT : 1
TOMORROW_THE : 2
WAL_OF : 1
THE_SEVERAL : 1
CONTINUES_LOSE : 1
AND_ACTIVE : 2
FILL_NURS : 1
ARE_MR : 1
MEDICATION_ON : 2
BY_WHEELCHAIR : 1
REVIEW_INFORMATION : 1
ARE_YOU : 1
TWO_BMS : 1
STOP_DRINKING : 1
TAB_OF : 1
HE_TAKING : 2
SOME_PATIENT : 1
THE_CHIEF : 1
PVCS_STATUS : 1
COUPLE_OF : 1
ALREADY_TAKING : 1
PLACED_CALL : 1
STATE_FACILITY : 1
ACTIVE_FOR : 1
CC_HPI : 1
SEX_RACE : 1
YEAROLD_MALE : 1
ADDENDUM_BISUL : 1
PROGRESS_ADDENDUM : 1
NOTIFYING_DCF : 1
TYPE_OF : 2
AT_FACILITY : 1
ABUSE_BESYLATE : 1
DISCHARGE_TEMP : 1
PROVIDED_EDUCATION : 1
TSH_PSA : 1
THE_DBC : 1
NO_SESSION : 1
CALL_VETS : 1
SI_NO : 1
SISTER_ELOPEMENT : 1
VA_MEDS : 1
AND_NOW : 2
HOME_ABUSE : 1
IDEATION_TIME : 1
HEALTH_GROUP : 1
IF_DECREASE : 1
THE_ARMED : 1
WAS_AVAILABLE : 1
PORT_ORCHARD : 1
MANY_VETERANS : 1
CLEAR_WT : 1
NE_TEST : 1
THE_LEAST : 1
IS_CURRENTLY : 1
REPAIR_THIS : 1
STATE_NUMBER : 1
THAN_PARTICIPATED : 1
POINT_TIME : 1
INCLUDING_WT : 1
IRVING_RD : 1
WITH_ROLLING : 1
HOSPITAL_FOR : 1
LCSW_WITH : 1
ID_ONCE : 1
SHOWING_OF : 1
IDENTIFIED_COMMENTS : 1
CLEAR_HX : 1
WIFE_BEDSIDE : 1
WAS_VISITORS : 1
OF_NEGATIVE : 1
MON_AID : 1
GUITAR_IT : 1
PUT_OFF : 1
WHAT_AND : 1
BEING_CLEAR : 1
SIMVASTATIN_TAB : 1
STIMULI_PAIN : 1
TELEPHONE_ENCOUNTER : 1
DIFFICULTY_SPICIENESS : 1
ISNT_LIVING : 1
PEERS_WITH : 1
RISK_PRECAUTIONS : 1
PROBLEMS_UNIT : 1
ARE_SERIOUS : 1
HIM_OUT : 1
TO_NEGLECT : 1
IN_CARE : 1
VETERAN_NOT : 1
ML_INJ : 1
SUGGESTIVE_POSITIVE : 1
EYE_TYPICAL : 1
PULSES_PALPABLE : 1
COMPLETED_PRIOR : 1
TO_DISCHARGE : 1
THEY_OFFERED : 1
REPORTED_TO : 1
CTRS_JOE : 1
WAS_WEARING : 1
NOT_GETTING : 1
MEDS_ORDERED : 1
ACCIDENT_PAIN : 1
WHEN_WERE : 1
COMPLAINT_ANXIETY : 1
MONTGOMERY_ACCESSION : 1
STAFF_WITHHOLDING : 1
PERCEPTIONS_FEARS : 1
YELLOW_URINE : 1
PROBLEM_TELEPHONE : 1
DOCUMENTED_THIS : 2
SHORTNESS_BREADTH : 1
PATIENT_WAS : 2
BY_OUTPATIENT : 1
PT_REQUESTING : 1
EVENTS_OVERNIGHT : 1
SEIZURE_ELECTRONICALLY : 1
LARGE_BM : 1
DROP_FEV : 1
GETTING_MEDICINES : 1
TUES_AND : 1
NO_TWO : 1
IN_GOLD : 1
REPRESENTATIVE_CASTLE : 1
ON_DRUGS : 1
IN_EL : 1
OVER_LAST : 1
TOLERATING_CITALOPRAM : 1
DECREASING_AMIODARONE : 1
TO_SOCIAL : 2
REVIEWED_FOR : 1
DBC_PLAN : 1
WERE_DURING : 1
WEIGHT_PT : 1
ID_BIOMEDICAL : 1
HEALTH_STAFF : 1
JOE_QUATTLEBAUM : 1
COMFORTABLE_PT : 1
RECON_HAVE : 1
DIURETICS_YES : 2
HOW_WRITTEN : 1
EVALUATED_HOSPITAL : 1
DIET_ORDER : 1
MEMBRANES_LIPS : 1
UP_MESSAGE : 1
STAPERT_MSW : 1
WAS_CHECKED : 1
NKA_CT : 1
INSURANCE_ASARCO : 1
ON_AGAIN : 1
CONTACT_CERTAIN : 1
ABNORMALITIES_INTAKE : 1
GM_PUFFS : 1
SCHEDULED_AN : 1
MOOD_ANXIETY : 1
AT_FOR : 1
PROBLEMS_OR : 1
WAS_ON : 2
TO_SD : 1
HE_CONTINUED : 1
SCORE_FALL : 1
FOR_BLOOD : 1
OWN_PSYCHOTROPIC : 1
TO_FIREARMS : 1
SOCIAL_ALCOHOL : 1
NEGATIVE_SCORE : 2
WITH_CATEGORYPHYSICAL : 1
REFILLS_STATUS : 1
PERCOCET_PRN : 1
THOUGHT_PERVIOUSLY : 1
DIAGNOSIS_REFER : 1
THEIR_QUITE : 1
SEE_PCP : 1
OF_IT : 1
HAVE_KNOWING : 1
BENEFIT_WHEREIN : 1
GETS_DIET : 1
ASSIGNED_TO : 1
ALVETA_PTS : 1
DIAGNOSES_TESTS : 1
UNDERSTANDING_IS : 1
RISK_RELEASE : 1
JOINT_INJECTION : 1
ISSUED_STATE : 1
COPY_MADE : 1
PL_ED : 1
UNDERSTAND_LEFT : 1
INPATIENT_NOTE : 3
APARTMENT_HEALTH : 1
DISCUSS_OPTIONS : 1
HIS_IN : 2
WITH_PHYSICIAN : 1
PATIENT_MNT : 1
THERAPY_LEISURE : 1
ANITA_ADDENDUM : 1
MOST_MEDICATION : 1
LCSW_THE : 1
SOB_WITH : 1
NOTE_TELEPHONE : 1
AS_AND : 1
WE_THE : 1
THE_OUTCOMES : 1
CALM_THOUGHT : 1
ADVISED_QUIT : 1
REQUEST_AND : 1
HE_BY : 1
DENIES_WITH : 1
QAM_ACTIVE : 1
DX_TACHYCARDIA : 1
VIAL_NURSING : 1
LAST_LEVEL : 1
HEALTH_FROM : 1
MOUTH_THE : 1
NONE_HAVE : 2
MOISTURE_MOIST : 1
IN_LEGS : 2
DRY_TIME : 1
MAX_KNOWS : 1
SEPTEMBER_WILL : 1
FAMILY_VOICED : 2
ALBUTEROL_HFA : 1
BUSY_ADDENDUM : 1
INFORMATION_APPOINTMENT : 1
REG_OF : 1
DNR_BLUE : 1
NURSE_NOTIFIED : 1
INTERVENTIONS_LISTED : 1
MOUTH_HOWEVER : 1
GLUCOSAMINE_GIVES : 1
HPI_SEE : 1
NURSING_6A : 1
CONTACT_ACCORDING : 1
SPONDYLOSIS_VETERAN : 1
MAINTAINED_TO : 1
WHEELCHAIR_WITH : 2
BAND_CHEST : 1
TEMPORARY_WHEREIN : 1
ABILIFY_CITALOPRAM : 1
AND_JUDY : 1
RTC_IN : 2
OF_RECORDS : 1
AND_DRUG : 1
PULM_HOSPICE : 1
PATIENTS_PROVIDED : 1
NOTIFY_IF : 1
TOPIC_ABOUT : 1
AND_AGE : 1
ACTIVE_ACCUCHEK : 1
LABS_DISCUSS : 1
TENSION_AND : 1
PULSE_PAIN : 1
TRANSFER_DISCHARGE : 1
AS_HAS : 1
ECH_RISK : 1
FM_PHARMACY : 1
THROUGH_COPY : 1
SOURCE_THE : 1
NOTE_DIAMETER : 1
TEXT_PB : 1
ACHIEVE_MAINTAIN : 1
CASCADE_CSS : 1
UNLISTED_AND : 1
HEART_SCHEDULED : 1
SURVEILLANCE_ACUTE : 1
TO_PROSTATITIS : 1
DYSPHAGIA_AGE : 1
VETERAN_IS : 1
MOUTH_TWICE : 1
FOR_BATHING : 1
ONE_TRAITS : 1
WITH_MULTIPLE : 1
THIS_HE : 1
DISCHARGE_MEDICATION : 1
HARDCOPY_RX : 1
EASY_NOTED : 1
OTHERS_IN : 1
VISITORS_VALUABLES : 1
PALPABLE_BIL : 1
CONDITION_PROCESS : 1
THAT_SOCIAL : 1
VISITING_TO : 1
DOUCHE_NO : 1
KVO_SITE : 1
MUCOUS_LIPS : 1
THIS_VISIT : 4
CAUC_MALE : 1
SURGERY_COORDINATOR : 1
OF_DR : 1
TO_YOUR : 2
INCLUDING_PATIENT : 1
THAT_PROCEDURE : 1
NOT_RISK : 1
HOSPITAL_OUTPATIENT : 1
LATEST_PAIN : 1
OF_MIGHT : 1
MORE_COUNSELED : 1
ADDENDUM_PRESSURE : 1
IN_FULL : 1
TELEPHONE_REPORT : 1
LARGE_YELLOW : 1
ABOUT_RECOVERY : 1
SHAVE_YE : 1
FROM_COMP : 1
UNREST_MEDICAL : 1
UNIT_EQUATES : 1
ACCEPTABLE_TO : 2
PATIENT_ADVISED : 1
AMBULATED_WITH : 2
NAME_COMPLETED : 1
TO_RISK : 1
HAS_ANSWERED : 1
DERMATOLOGY_PROGRESS : 1
OF_COOPERATING : 1
AVOID_LB : 1
UNIT_INJ : 1
WORTH_ANYMORE : 1
LCSW_AND : 1
TEST_PATIENT : 1
CONDITION_TO : 1
APP_FOR : 1
DONE_THREE : 1
MEDICATIONS_STATUS : 2
NOT_COVERED : 1
INFORMATION_IDEATIONS : 1
COLONOSCOPY_WITH : 1
COMPLETION_ROI : 1
OF_PT : 1
WORK_NO : 1
RETURN_FOLLOWUP : 1
STAFF_AS : 1
DETAILS_PT : 1
CONTROL_ACTIVE : 1
REASON_MEDICATION : 1
IN_NUMBER : 1
CITALOPRAM_NOT : 1
BASED_CHANGE : 1
COMPLETED_BY : 1
SUBSTANCE_REGIMEN : 1
BENEFITS_QUITTING : 1
RESULT_ABNORMAL : 1
AND_DISCOVERED : 1
SLEPT_GOOD : 1
RIGHT_LACERATION : 1
HX_OF : 1
NOTED_EXHIBITED : 1
SCANNED_CLEAR : 1
HES_FEELING : 1
SIGNIFICANT_OTHER : 1
MOVEMENT_SCALE : 1
EXTRACTION_ERUPTED : 1
POWER_OF : 2
IS_ALREADY : 1
IS_NOT : 3
HIS_SISTER : 1
THE_NUMBER : 1
NONE_YOU : 1
NO_HOME : 1
TREATMENT_WILL : 1
MODERATE_SEDATION : 1
PM_DISCUSSED : 1
GENERAL_VITALS : 1
PRE_BRONCHOSCOPY : 1
DAUGHTER_PRESENTLY : 1
EDUCATION_HANDOUTS : 1
HOUSE_DAILY : 1
DAILY_TO : 1
OF_PAIN : 2
RESPIRATIONS_REGULAR : 1
IS_PROUD : 1
VERBALIZES_UNDERSTANDING : 1
CONDITION_FAILURE : 1
ALONG_THE : 1
WITH_THICK : 1
MASSES_BRUITS : 1
CECAL_STRAP : 1
TOTAL_NOT : 1
IDEATION_MENTAL : 1
ADDENDUM_TO : 1
REMINDER_IRVING : 1
NO_VETERANS : 1
STRAP_FOOT : 1
EYE_NO : 1
DISCUSSED_OUTPATIENT : 1
TEMPERATURE_ALLERGIES : 1
AND_SHOWING : 1
NOT_HISPANIC : 1
DIABETES_WITHOUT : 1
FALL_STANDARD : 1
HELPING_PT : 1
SUBJECTIVE_FAMILY : 1
WHEEZING_OCCASSIONAL : 1
BELOW_REASSESSMENT : 1
DISCUSS_HIM : 1
INTRODUCER_ATTENDING : 1
THE_MONTH : 2
PO_FOR : 1
AND_NEEDED : 1
BUT_AM : 1
THIS_PULSE : 1
ALL_OF : 1
BARRETTS_TOBACCO : 1
FROM_THE : 2
ELECTRONICALLY_FILED : 1
FOR_DEPRESSION : 1
AID_BACK : 1
MON_REPORTS : 1
FUTURE_HEAR : 1
CONTACT_BUT : 1
MALE_RTC : 1
FOLLOWED_TWO : 1
IS_YEAROLD : 2
ETHNICITY_HISPANIC : 1
WAS_DUE : 1
SHARE_THEM : 1
PROVIDED_BY : 2
DOCUMENT_THIS : 1
ELLIE_NOTIFIED : 1
IDENTIFYING_CHARACTERISTICS : 1
RA_NO : 1
TRACKING_OR : 1
TO_WEAR : 1
DIAGNOSTIC_FIBER : 1
SHOWN_OF : 1
OR_TRANSFER : 1
TRANSFER_YES : 1
TOTAL_SCORE : 2
REQUIRED_THERAPIST : 1
SINCE_JULY : 1
WAS_ESCORTED : 1
BEEN_AGREE : 1
LS_FACET : 1
DENIES_PROBELMS : 1
NEUROLOGY_INHALE : 1
BRADEN_SCALE : 1
OFF_AT : 1
MANUAL_NEUROLOGY : 1
CONTACT_FUTURE : 1
TO_AT : 1
OTHER_TREATMENT : 1
GRANULAR_NO : 1
PPP_NO : 1
INPATIENT_VET : 1
MORE_MORE : 1
LOCK_NO : 1
MADE_EYE : 1
AND_IMPAIRED : 1
AS_ENCOURAGED : 1
BUT_REQUIRED : 1
RECHECK_DIABETIC : 1
IN_HOSPITAL : 1
SH_NOTE : 1
OUT_OF : 4
DATE_BIRTH : 1
HER_STATES : 1
THEIR_RECOVERY : 1
IL_AREA : 1
EVALUATED_AT : 1
HE_CAME : 1
ABNORMAL_ST : 1
VOICED_THERE : 1
BEING_IN : 1
THREE_DIGITS : 1
OFFER_COMFORTABLE : 1
PT_RECENT : 1
CONSULT_PUFFS : 1
BLANK_UP : 1
THE_CLINIC : 2
BE_CAUTIOUS : 1
YOUR_AND : 2
VETERAN_AS : 1
CONTINENT_NO : 1
BILATERAL_GRASP : 1
DISCUSSED_WITH : 3
THAT_STATES : 1
DISTURBANCE_NO : 1
VAMC_YESTER : 1
NO_SI : 1
ROS_COMPLAINING : 1
THE_OFFICE : 1
OF_DIFFICULTY : 1
MOIST_TOILET : 1
ED_PHYSICIAN : 1
SPICIENESS_ENCOURAGE : 1
WALS_FROM : 1
POSTSURGICAL_AORTOCORONARY : 1
OBSERVE_FOR : 1
SPONDYLOSIS_NO : 1
HOURS_HYDROCODONE : 1
ON_GETTING : 1
MAY_DENIED : 1
YOU_RTC : 1
TIRES_PUTTING : 1
FROM_REPAIR : 1
REGIONAL_ACTIVE : 1
NOTED_THERE : 1
IN_FORT : 1
DX_OF : 1
ENGES_AND : 1
SEP_PRODUCTIVE : 1
MEDS_SAID : 1
NEWLY_ANY : 3
YES_SCORE : 1
YESTER_ONCE : 1
THIS_TIME : 8
MEDICINES_STRAIGHTENED : 1
GOING_HAVE : 1
NEED_TO : 1
BSOME_STATE : 1
ENCOURAGE_TO : 1
HFA_ORAL : 1
COMES_AND : 1
VISIT_PULSE : 1
YES_DO : 1
OF_AND : 4
PUFFS_ORAL : 1
INITIAL_PT : 1
LAST_SURROUNDINGS : 1
OF_OTHERS : 1
AND_AVOID : 1
CC_TRANSCRIPTIONIST : 1
PSYCHIATRY_LATEST : 1
HIS_UP : 1
TOPICS_GUIDE : 1
CPAP_PVCS : 1
BATHING_MODERATE : 1
NOTE_HIM : 1
AMT_URINE : 1
ASSESSMENT_NEUROPSYCHOLO : 1
OFF_AM : 1
FIANC_DENIES : 1
REFERRED_THE : 1
THE_BETTER : 1
SENSORY_MONOFILAMENT : 1
THRUSH_ROOM : 1
STAFF_SELF : 1
TO_PAIN : 1
OF_LESSON : 1
PAIN_WAS : 1
SEV_ADVISED : 1
BED_OF : 1
HE_ALREADY : 1
BEERS_DENIES : 1
HE_NEEDED : 1
OBTAINED_AT : 1
SCALE_FALLRISK : 1
RECOMMENDED_IN : 1
ACUTE_SERVICE : 1
NO_EATING : 1
HEILIGENTHAL_PRESENTED : 1
INSOMNIA_THIS : 1
TETANUS_DIPTHERIA : 1
ASSUMED_CARE : 1
BEFORE_WITH : 1
CECAL_CROWS : 1
FAIR_CONTACT : 1
WITH_ED : 1
COPIES_ALL : 1
CHAIR_AT : 1
CLASS_SUBJECT : 1
BUT_ATTACHED : 1
SLOT_AVAILABLE : 1
AS_GOT : 1
SOME_GERD : 1
AGENT_REQUESTED : 1
ACUTE_OUTSIDE : 1
STOP_SATURATION : 1
COMPUTERIZED_PROBLEM : 1
PATIENT_RESP : 1
VOMITING_ALSO : 1
PLACE_SUGGESTED : 1
STRAIGHTENED_OUT : 1
FEELINGS_UNDERSTANDING : 1
FOR_YEAR : 1
IN_COOPERATIVE : 1
DYSPLASIA_FOCI : 1
PT_WAS : 2
AWARE_OF : 1
NUMBER_PHONE : 4
USED_NOT : 1
SMOKER_THE : 1
APPRECIATION_IS : 1
JOINT_UNDER : 1
BISUL_FOR : 1
WHEN_HYPERLIPIDEMIA : 1
FUTURE_SHOULD : 1
TO_SUB : 1
OF_PRIVATE : 1
CASCADE_PC : 1
ACCEPTING_HE : 1
PATIENT_SIGNIFICANT : 1
CALORIE_FEB : 1
BEEN_QUITE : 1
VSS_WILL : 1
OF_VA : 1
MORSE_SCORE : 1
CENTER_BED : 1
FOLLOW_IN : 1
STATING_DONT : 1
UNDERSTAND_HE : 1
ANES_EVALUATION : 1
IM_PANIC : 1
HPI_ROS : 1
CRITICAL_RESULTS : 1
SUPPOSE_LAST : 1
NO_RETAINED : 1
REVIEWED_SECURITY : 1
COOPERATIVE_ISOLATIVE : 1
ACTIVITIES_DURING : 1
SECONDARY_DIAGNOSES : 1
AFTER_CLASS : 1
PROBLEMS_PATIENT : 1
ACETAMINOPHEN_OXYCODONE : 1
AS_WITH : 1
SUCCINATE_XL : 1
RISK_CHANGE : 1
REQUESTED_HE : 1
HOURS_FROM : 1
AGAIN_PRIOR : 1
QUANTUM_OF : 1
CURRENT_PROBLEMS : 1
SINCE_KICKED : 1
NECK_SUPPLE : 1
HIS_LOGICAL : 1
DBC_WILL : 1
READING_PLAYING : 1
MAINTAIN_FLUID : 1
IF_PT : 2
GIVE_SUCH : 1
EATING_CONTINENCE : 1
NOTE_TIME : 1
AN_OUTPATIENT : 1
WITH_VISITING : 1
HIM_SEROQUEL : 1
FREQUENCY_OF : 1
SCALE_DOES : 1
AND_LARGE : 1
ADMISSION_THIS : 1
UNLESS_INDICATED : 1
NO_USING : 1
PEERS_OR : 1
AC_COMPREHENSIVE : 1
USE_PUFFS : 1
RESULTS_APPLICABLE : 1
AS_HE : 4
COORDINATION_AND : 1
TELEPHONE_RELATED : 1
MEDICAL_PROBLEM : 1
RESTING_IN : 1
CHEW_TAB : 1
USING_WRIST : 1
ADMISSION_EDUCATE : 1
GLARGINE_HUMAN : 1
REVIEW_OF : 2
INDEX_JUL : 1
WT_KG : 3
DOMINANT_TO : 1
POST_SHOES : 1
TRANSFERS_HE : 2
QUIT_IS : 1
EDUCATE_PT : 1
AND_WILL : 2
MORNING_SLOT : 1
ASSESSMENT_LOSS : 1
RADIOLOGIC_CONTRAST : 1
TO_TOPICS : 1
UNLABORED_HOMICIDAL : 1
CARE_REPORT : 1
HE_THAT : 4
FOR_GLAXO : 1
AND_KNOW : 1
REVIEW_MEDICAL : 1
COLLISION_UP : 1
CYSTOSCOPY_CLASSIFICATION : 1
ORAL_ATTENDENCE : 1
IN_CM : 3
FAX_THE : 1
IV_LOCK : 1
PM_STATED : 1
GIVE_RECON : 1
TO_HER : 1
COMPLAINING_ANY : 1
HE_MAY : 1
ORAL_MENINGITIS : 1
IN_EDUCATED : 1
STATUS_EKSW : 1
AND_EFFECTIVE : 1
DOSE_TREATMENT : 1
INTEG_PREOP : 1
IT_PRN : 1
MANAGEMENT_UNLISTED : 1
IF_EDUCATION : 1
DISCUSSED_ALONG : 1
PING_ANY : 1
ICDCM_WELL : 1
FOOT_CECAL : 1
HEAD_LACERATION : 1
ASSIGNED_CALLER : 1
ANY_WITH : 1
STAFF_RUNNING : 1
PATIENT_AND : 1
PROUD_OF : 1
THERE_AN : 1
MONTHS_ADVISED : 1
NEEDS_ASSISTANCE : 1
THE_UNIT : 2
HERE_DIAGNOSIS : 1
DC_PLANS : 1
BILATERAL_PPP : 2
SAFETY_PRIMARY : 1
APPRECIATION_QUITE : 1
NOTE_BY : 1
OF_NEW : 1
PORCELAIN_METAL : 1
ADMISSION_RALIZED : 1
ASSESS_FACTORS : 1
CARE_PREOP : 1
GOLD_CLINIC : 1
AVOID_AND : 1
AT_ON : 1
LABS_AS : 1
DISCHARGE_JUN : 1
HAYS_AND : 1
INTENT_SCALE : 1
FOLLOW_UP : 2
MG_TAB : 8
SITUATIONS_WE : 1
IN_THE : 12
SCHEDULING_POTENTIAL : 1
NOTE_VETERAN : 1
PT_PAIN : 1
SECTION_GI : 1
AVOID_WT : 1
PAIN_AND : 2
NO_LUMBOSACRAL : 1
THE_OFF : 1
OXYCODONE_MG : 1
WAS_WITH : 3
WELL_INDEPENDENT : 1
ONCE_LAB : 1
WAS_STOLEN : 1
HAS_GIVEN : 1
DESCRIBE_LOCATION : 1
ME_JUST : 1
SLITTING_HER : 1
POSITIONS_INTRAORAL : 1
DATE_JUL : 1
ORIENTED_OFFERED : 1
MEDICAL_DATE : 1
VISITS_AN : 1
MISSED_TOILET : 1
SPOT_MOTIVATION : 1
SEE_ORDERS : 1
ALSO_NURSING : 1
WITH_VET : 1
JIM_CHERRY : 1
CONVERSATION_VERDSOME : 1
NOTE_IF : 1
HIS_DIARRHEA : 1
TO_BETTER : 1
AVAILABLE_OR : 1
VITAL_OXYGEN : 1
DIAMETER_WOUND : 1
TIME_BUT : 1
WRITTEN_OF : 1
FT_PATIENT : 1
OF_AMOUNT : 1
DISABILITIES_FOUND : 1
OF_PSYCHIATRIC : 1
SERVICES_FT : 1
FELT_ACTIVE : 1
CAGE_DISCOVERED : 1
LIKELY_PTSD : 1
AREA_TWI : 1
ENCOURAGED_SOCIAL : 1
AT_GAYLORD : 1
GOALWHAT_PAIN : 2
TREATMENT_DIAGNOSTIC : 1
LETTING_DRY : 1
MEDS_AS : 1
HAND_HE : 1
NO_HYPO : 1
BED_WHEELCHAIR : 1
RPP_IID : 1
STEP_AND : 1
TMS_INTACT : 1
LIST_THE : 1
VA_ICAL : 1
ON_EACH : 2
ML_COLLINS : 1
HAS_VNS : 1
TOTAL_OF : 1
SUB_TH : 1
ADDITIONAL_INFORMATION : 1
RIGHT_MAILED : 1
ASK_TO : 1
SOFT_NOT : 1
ALLAMANDSOME_STATE : 1
NEW_OF : 1
STATED_HIS : 2
AND_WORK : 1
ASSESSMENT_HR : 1
INFORMATION_COMPLIANCE : 1
HAS_GOOD : 2
BE_TO : 3
CHEST_SHORTNESS : 1
ON_UP : 2
ORDERS_VITALS : 1
BE_FEB : 1
DISCHARGE_WHICH : 1
UPPER_TO : 1
PARTICIPATED_IN : 1
CLINIC_REMINDED : 1
LIKE_TO : 2
HIS_CURRENTLY : 1
WILL_FOR : 1
NURSING_APPT : 1
HAD_TTNA : 1
PHYSICIAN_AND : 1
SOUNDS_TG : 1
HX_SPOT : 1
SEE_NOTE : 1
ORAL_PUFF : 1
HISTORY_PAIN : 1
THE_STUDY : 1
ON_PTSD : 1
ADDENDUM_MAINTAIN : 1
GETTING_AND : 1
NOT_TO : 5
VETERAN_BEING : 1
PATIENT_SUBSEQUENTLY : 1
ADDENDUM_PULSE : 1
ONCE_ACTIVE : 1
DIALOG_UNIT : 1
CONTROLLED_REGIMEN : 1
OF_UNDERSTANDING : 1
HIS_ADMISSION : 1
SOCIAL_SECURITY : 1
NURS_WEIGHT : 1
FOLLOWING_MEDICATIONS : 3
HE_HAD : 2
TO_HEALED : 1
HAD_AN : 1
LAST_SKIN : 1
SMOKER_CASE : 1
WHO_ARE : 2
WIFE_HIM : 1
MOUTH_EXPERIENCE : 1
UNTIL_OCT : 1
VETERAN_HAND : 1
PHYSICIAN_ANTIANXIETY : 2
COMMENTS_ADDENDUM : 1
AT_ENCOUNTER : 1
AND_SETTINGS : 1
NO_IMPROVED : 1
CAREGIVER_UNDERSTANDING : 1
OUTSIDE_THE : 1
MELLITUS_MENTION : 1
DUE_AT : 1
PLAN_NO : 1
BP_DOUCHE : 1
FOOD_WATER : 1
DEMOGRAPHICS_SOUNDED : 1
AM_DOING : 1
JUDY_THIS : 1
HE_GOING : 1
COMPREHENSIVE_EYE : 1
AN_IN : 1
ROUTE_OF : 1
WEAR_SAME : 1
AND_ONTO : 1
IN_COLLINS : 1
NOTE_ATTENDING : 1
HELPFUL_MEET : 1
DIAGNOSES_CTGUIDED : 1
PSYCH_EQUATES : 1
STATES_SOON : 1
ORDERED_LABS : 1
RESULTS_UNDER : 1
IS_YOUR : 1
ORDERS_SOAP : 1
SUPPOSE_TO : 1
TEETH_LEG : 1
TO_CLASS : 1
PROVIDER_PT : 1
WILL_WOULD : 1
WEIGHT_EDUCATION : 1
ADDENDUM_ATTORNEY : 1
KVO_IV : 1
COMFORT_HI : 1
LAB_LDL : 1
CYCLE_COMFORTABLE : 1
LIST_FOR : 1
OBSERVED_RADIOLOGIC : 1
DIAGNOSIS_DEMENTIA : 1
SALINE_LOCK : 2
THAT_DEPENDING : 1
GOAL_WORKING : 1
ED_MESSAGE : 1
COMFORT_CURVE : 1
GLAXO_MULTIDOSE : 1
WAS_YESTER : 1
LANSING_SUBSTANCE : 1
AS_REQUESTED : 1
AS_VETERAN : 1
UPDATED_LIST : 1
HIGHWAY_MOOD : 1
GAVE_HIM : 1
TWICE_BREATHING : 1
NO_OF : 1
OUT_OFFICE : 1
MAY_DISPLAY : 1
NONCOMPLIANCE_AND : 1
THAT_SHE : 1
TAP_THE : 1
MOVIE_QUANTUM : 1
OA_LT : 1
OR_TOMORROW : 1
UNDER_MALE : 1
BE_AND : 1
RESPIRATION_ABLE : 1
MODERATE_LAND : 1
UNDER_AN : 1
THIS_AN : 1
PAIN_AN : 1
INJECTION_MALE : 1
PAIN_MVA : 1
SENSATION_SWMF : 1
FEET_ROLLING : 1
ADMISSION_IS : 1
APPT_OTHER : 1
OR_HIGH : 1
RADIOLOGIC_AGENT : 1
GOOD_HAS : 1
STOOL_SOFTERS : 1
INFORMED_WAS : 1
LUMBAR_PUNCTURE : 1
RD_PHONE : 1
QUITE_ENGE : 1
COVERING_PCP : 1
VERBALIZE_PERCEPTIONS : 1
THIS_THAT : 1
FOLLOWING_AND : 1
AND_GOOD : 1
MUCH_GET : 1
PHYSICIAN_ON : 1
BEDSIDE_SUPPORTIVE : 1
FACILITATORS_HARRINGTON : 1
HARRINGTON_TRS : 1
OTHER_TO : 1
AND_ING : 1
PB_MODE : 1
GROUP_SIGN : 1
NO_STATES : 1
AND_HOSPICE : 1
THAT_POST : 1
FILL_JUN : 1
MIN_FOR : 1
NONS_HEALTH : 1
RELIABLE_SELFREFERRED : 1
ADVERSE_QUIT : 1
AND_DONT : 1
BE_RTC : 1
WITHOUT_MENTION : 1
CONSTITUTE_IN : 1
THE_DENIES : 1
SCHEDULED_AND : 1
ACTIVE_EKNUTRITION : 1
ASSIST_WITH : 1
UNIT_REPEAT : 1
THIS_HEAD : 1
LOCAL_DOCTOR : 1
ICAL_PORT : 1
DEPOSITS_ALSO : 1
NOTE_STATING : 1
SCANNED_SINUSES : 1
UDS_WAS : 1
NOT_DRINK : 1
RIGHT_DAILY : 1
VSS_WOULD : 1
EXERTION_HEENT : 1
ESOPHAGEAL_CA : 1
PT_ANY : 1
SYMPTOMS_MOOD : 1
TAB_MG : 5
PROTEIN_DERIVATIVE : 1
TRAININGS_SHOWS : 1
WITH_DAUGHTER : 1
AMOUNT_VITALS : 1
TIMES_TO : 1
SYMPTOMS_SWINGS : 1
TOLERATING_THE : 1
AS_DISCUSSION : 1
THAT_RESTING : 1
APPROPRIATE_FOR : 1
TALKED_WITH : 1
THAN_MEDS : 1
TIME_PT : 1
WITH_PARANOIA : 1
DISCUSSED_LORI : 1
LT_KNEE : 1
PATIENT_AGREEMENT : 1
NOTED_PAIN : 1
THERAPIST_SESSION : 1
TAKING_IS : 1
RTC_TO : 1
GETTING_WORSE : 1
THE_CITALOPRAM : 1
TAKE_ONE : 1
STATE_THE : 1
THE_CHAPLAINS : 1
AND_ALSO : 1
ALTERCATION_PLACED : 1
FACILITY_APPOINTED : 1
CASTLE_YES : 1
BETTS_DENIES : 1
NEEDED_DEMOGRAPHICS : 1
FLUIDS_OFFERED : 1
SW_PHONE : 1
TO_LOOKING : 1
WHAT_WANTS : 1
ADVISED_RTC : 1
APPT_PATIENT : 1
BEHAVIORAL_PERSON : 1
YE_HAS : 1
TYPE_OTHER : 1
PROFILE_OF : 1
RATED_NONE : 1
TEST_DONE : 1
AIRFLOW_BODY : 1
OF_AT : 1
VOLUNTEER_AND : 1
COOPERATING_TREATMENT : 1
CLINIC_IN : 1
ID_CURRENT : 1
PT_CHECKED : 1
AS_RESPO : 1
CITALOPRAM_GI : 1
ACTIVE_ISSU : 1
HOME_COME : 1
PT_SAFETY : 1
WENT_OUT : 1
FROM_OR : 1
CHANGES_WITH : 1
SOMEONE_CAN : 1
READING_WAS : 2
YOU_NUMB : 1
QUIT_IN : 1
OVERSIGHT_APPOINTMENT : 1
CALL_APPROVE : 1
INPATIENT_MEDICATIONS : 1
LOCKED_DESCRIBE : 1
FAMILY_EDUCATION : 1
VET_IM : 1
UNINTERESTED_WHO : 1
TO_RECOMMENDATIONS : 1
UNDERSTANDING_PT : 1
FOR_SO : 1
OR_TO : 1
SOURCES_IPRATROPIUM : 1
HX_DESIRE : 1
AND_THAT : 2
LIVES_BATHING : 1
SEEK_AS : 1
CONSULTS_COUPLES : 1
HAS_HOME : 1
OTHER_PA : 1
MEDIAN_NERVE : 1
WITHIN_ANTIHYPERTENSIVES : 1
INTAKE_ACHIEVE : 1
CDI_REMINDER : 1
COUNSELING_ASSESSED : 1
FEE_SCHEDULE : 1
ENCOURAGED_TO : 3
HIM_ON : 1
COFFEE_DOES : 1
WK_FOR : 2
BEHAVIOR_COOPERATIVE : 1
NAME_DATE : 1
WITH_NURSE : 1
IN_LBED : 1
TO_TOMORROW : 1
UNTIL_HIS : 1
ACTIVE_HOW : 1
PAIN_NO : 2
HIS_SOFTERS : 1
GIVE_MED : 1
PATIENT_ADMISSION : 1
TERMS_MENTAL : 1
ALSO_BEEN : 1
PT_STATES : 4
ADVISED_TO : 4
OR_LESS : 1
GROUP_SOCIAL : 1
HAND_GRASP : 1
HARM_HARM : 1
LAST_MONTH : 1
IT_DRY : 1
MOST_THE : 1
TOBACCO_USE : 1
LAST_MONTHS : 1
PENDING_TRIAGE : 1
OF_PATIENTS : 1
OF_ON : 1
THIS_TELEPHONE : 1
BY_TWO : 1
TO_CONTINUE : 1
ACCORDING_TO : 1
BE_REASSESSED : 1
SIERRA_VISTA : 1
MEDICATION_ORDERS : 1
VITALS_OBSERVED : 2
DISCUSS_WITH : 1
SECONDARY_POTENTIAL : 1
CONDITIONS_MEDICAL : 1
EDEMA_BILATERAL : 1
FEELING_BETTER : 2
TRIGGERS_ENGES : 1
OU_SX : 1
PREOP_INTEG : 1
COME_TO : 1
MOBILITY_YES : 1
IF_FIRST : 1
RECEIVED_BILL : 1
EMERGENCY_WBC : 1
AS_TOLERATED : 1
RR_PATIENTS : 1
TREATMENTS_PLANS : 1
SECURITY_CONSENT : 1
TO_LOSE : 1
OF_NOTE : 2
FOUND_THAT : 1
NUTRITION_THE : 1
OWN_ENGE : 1
EVENING_RPP : 1
LEG_PAIN : 1
OXYGEN_OTHER : 1
PERIAPICAL_TOOTH : 1
GETTING_THE : 1
PHYSICIAN_REVIEW : 1
ACTIVE_TO : 2
RULE_MCCORD : 1
THE_PROBLEMS : 1
TG_CURRENT : 1
AS_INDICATED : 1
AND_COMPLETION : 1
RHYTHM_SB : 1
UPON_CHANGE : 1
ANXIETY_PRESENT : 1
EXCEPTION_TIME : 1
ENEMA_YES : 1
BUT_EXTENSIONS : 1
NOT_OR : 1
TEACHING_THE : 1
IDENTIFYING_STRESS : 1
NO_LETHARGY : 1
PUNCTURE_WITH : 1
RECENT_COLONOSCOPY : 1
OR_INTRAMUSCULAR : 1
CARE_VISITATION : 1
REPORT_WORSEN : 1
SOLN_IRRIGATION : 1
LAB_FOR : 2
STATES_WITH : 1
GI_PROCEDURE : 1
HE_VERBALIZED : 1
WHEEZING_ALERT : 1
NOTE_IP : 1
THE_WAS : 6
INDIVIDUAL_SESSION : 1
SITTING_CHAIR : 1
BE_LIKELY : 1
ORDERED_DIETARY : 1
NURSE_MAY : 1
LOCKED_IMPAIRED : 1
MEDICINES_INTENSITY : 1
NOTE_COMMENTS : 1
PINESS_WAS : 1
AND_HOUSE : 1
PATIENT_NEWLY : 3
MULTIDOSE_VIAL : 1
OX_OXIMETRY : 1
SOCIAL_DURING : 1
CONCERNS_SURVEILLANCE : 1
KNEES_OFF : 1
AT_OPT : 1
SCHEDULED_ON : 1
MEDICATIONS_VETERAN : 1
HEELS_CONTROLED : 1
SUBSTANCE_ABUSE : 2
NUMBNESS_BILATERAL : 1
THERAPY_MARITAL : 1
INSTITUTE_OF : 1
PULSES_BSOME : 1
REGARDING_LAB : 1
LIVES_WITH : 2
TO_VERBALIZE : 1
MASS_INDEX : 1
REDEFINED_THE : 1
OUTPATIENT_REFILLS : 1
EKREGULAR_IN : 1
AND_UNLABORED : 1
AT_TG : 1
WERE_DRUGS : 1
BEST_UNDERSTANDING : 1
PATIENT_VERBALIZE : 1
EFFORTS_TO : 1
WAS_NOT : 1
INCREASING_NOTE : 1
INDIVIDUAL_MIN : 1
NURSES_DOCUMENTATION : 1
MONTHS_LIGHT : 1
APPT_INTRODUCED : 1
APPOINTMENT_NURSING : 1
PREVIOUS_MEDICAL : 1
ADOPT_FOR : 1
TO_REGULAR : 1
BEEN_USING : 1
PEERS_AND : 1
HAS_SHOT : 1
FOR_AND : 7
SPOUSE_AND : 1
UNABLE_VOICE : 1
BMI_BODY : 1
UNDERSTANDING_GOOD : 1
THERAPY_PHARMACY : 1
QAM_HEADACHE : 1
FIND_ANES : 1
ORIENTED_WELL : 2
OF_ENCOURAGE : 1
JUN_AMLODIPINE : 1
RESULTS_IF : 1
THE_PAST : 3
THE_WOUND : 1
INITIAL_INTERVIEW : 1
THE_REPEATABLE : 1
ABOUT_FINANCES : 1
REC_THERAPY : 1
NO_COVERAGE : 1
AREA_ARE : 1
PERRLA_TMS : 1
RECHECK_OF : 1
THE_STARTED : 1
AND_ALERT : 1
SOAP_VITALS : 1
NOTE_COLLECTION : 1
INTRODUCER_SURGICAL : 1
SYSTEM_DEMENTIA : 1
CASE_REFERRED : 1
HIS_LEVEL : 2
PT_REMINDED : 1
THAT_STATEMENT : 1
WELL_CONTROLED : 1
AT_UP : 1
AFFECT_APPROPRIATE : 1
OF_SERVICE : 1
LAB_SCHEDULE : 1
SIMETHICONE_MG : 1
TO_CAUTIOUS : 1
NARRATIVE_RECEIVED : 1
BE_DONE : 1
HR_TO : 1
STOLEN_HE : 1
SI_HI : 1
AREA_SUBSTANCE : 1
AND_FAMILY : 1
SYSTEM_DIAGNOSIS : 1
UTILITY_ALSO : 1
SCORE_DUE : 2
DEPRESSIVE_DISORDER : 1
DENIES_CONCERNS : 1
WITH_HIM : 2
VERY_DEPRESSED : 1
UNIT_MOVIE : 1
ASSESSMENT_PTS : 1
WITH_ADDENDUM : 1
TESTING_KIT : 1
MAN_WHO : 1
MOUTH_INTRAMUSCULAR : 1
WILL_MED : 1
CESSATION_NO : 1
STATED_PATIENTS : 1
ASSESSMENT_ADVANCE : 1
MALE_LORATADINE : 1
HARM_OTHERS : 1
OF_PALPITATIONS : 1
OF_BREADTH : 1
OUT_GETTING : 1
WHEN_DECIDE : 1
INDEPENDENT_AND : 1
THE_NOTED : 1
TO_FEELING : 1
CARE_HOW : 1
TOMORROW_IN : 1
NEW_BOTTLE : 1
AT_TOBACCO : 1
SITUATIONS_THEY : 1
BREATHING_ZZPALLIATIVE : 1
OF_INABILITY : 1
MG_PREOP : 1
DISORDER_ICDCM : 1
NONPRESCRIPTION_NONESSENTIAL : 1
PAST_SEV : 1
REPAIR_PATIENT : 1
MOOD_HEADACHE : 1
BEHAVIORAL_CLINIC : 1
TIME_THE : 1
HAVE_TO : 3
RECHECK_BP : 1
VERDSOME_PHONE : 1
COMPLAINING_WEAKNESS : 1
SURROUNDINGS_MOVE : 1
NURSE_STAFF : 1
BOTTLE_OF : 1
HX_KG : 1
TO_RITA : 1
IMPROVED_MOOD : 1
FLORIDA_JULY : 1
HBAC_MONTHS : 1
SUMMARY_ER : 1
MEDS_PT : 1
PT_ON : 1
AND_ACTIVITIES : 1
DISCUSSION_SIGNED : 1
RELATES_THAT : 1
HOME_CHERRY : 1
ON_SIDERAILS : 1
WAS_HAND : 1
TRANSFER_ANTIHISTAMINES : 1
HAD_THE : 1
INPATIENT_INPATIENT : 1
NO_THRUSH : 1
MENTAL_EXTRACTION : 1
YEAR_OR : 2
IN_CONDITION : 2
STATE_IS : 1
GI_RECORD : 1
BLOOD_WORK : 1
LAST_HCT : 1
PT_TO : 7
TOBACCO_ABUSE : 1
DISCHARGE_THIS : 1
MOIST_MISSED : 1
MEDICAL_FAILURE : 1
ISSUES_TO : 1
SBA_AMBULATED : 1
CLASSIFICATION_CLEAN : 1
TO_SCHEDULE : 1
NOTE_NONS : 1
TREATMENT_WAS : 1
ANTIHYPERTENSIVES_DIURETICS : 2
SAME_OF : 1
UNABLE_ADEQUATELY : 1
WHICH_PROGRESSIVELY : 1
PAIN_STILL : 1
ACCEPTING_HOWEVER : 1
GERD_ACTIVE : 1
KEEPING_BUSY : 1
TAKE_OF : 1
NOSTRIL_FOR : 1
PREOP_GIVEN : 1
SAY_THE : 1
PAIN_IS : 2
PER_VETS : 1
WOULD_HELPFUL : 1
HIS_WAS : 3
WAS_SUPPOSE : 1
BP_TRIED : 1
ND_HE : 1
URINE_CC : 1
NEGLECT_ALLERGIES : 1
SIGN_SYMPTOMS : 1
NOT_BETWEEN : 1
VOIDED_AMOUNT : 1
SCALE_NURSING : 1
GUARDED_VERBALIZES : 1
NO_EOTH : 1
AND_GUITAR : 1
THIS_ALMOST : 1
RESULTS_BY : 1
CARE_ETC : 1
SD_TO : 1
BIL_FREQUENCY : 1
PRIMARY_CARE : 6
WOUND_TO : 1
WILL_GO : 1
THE_POST : 1
TWO_HOW : 1
AFFECT_IS : 1
AND_SLEPT : 1
SB_ST : 1
AND_SERVICE : 1
CLINIC_ADDENDUM : 1
THE_WHEELCHAIR : 1
URGING_GI : 1
VA_COMPUTERIZED : 1
STOKING_THE : 1
WAS_ALLERGIES : 1
WITHOUT_DISCOMFORT : 1
FOLLOWING_LITTL : 1
IS_BY : 1
REALLY_OFF : 1
PHONE_BENEFIT : 1
OF_TRANSPORTATION : 2
TIME_MORNING : 1
VISIT_SOUNDS : 1
TOTAL_FALL : 1
HIM_AND : 1
QUIETLY_IN : 1
WITH_SPUTUM : 1
ORAL_PO : 1
BE_LCSW : 1
PT_GIVEN : 1
FOR_MEDICATION : 1
PATIENT_OF : 2
ACTIVE_MEDICATIONS : 7
WEIGHT_LB : 1
THE_PERSONNEL : 1
FACILITATED_BY : 1
REPORT_MENTAL : 1
OR_MR : 1
SATP_NUTRITION : 1
YOUR_LEVEL : 1
TID_ACTIVE : 1
IN_FROM : 1
PAIN_STATES : 1
COPIES_OF : 1
DATE_COMPLETED : 1
NO_COMMENTS : 1
ESCORTED_AND : 1
IT_WENT : 1
OTHER_RESPIRATORY : 1
FOR_WASHING : 1
COPD_CHF : 1
FACTORS_INCLUDING : 1
CBCB_TO : 1
STARTED_IN : 1
WASHING_PAIN : 1
VSS_ONC : 1
INJECT_ACTIVE : 1
BASE_METAL : 1
AND_SEX : 1
HYDROCODONE_MG : 1
FAMILY_AND : 1
WITH_MULT : 1
HIS_GI : 1
STRESS_OR : 1
AND_HIS : 4
FOR_CONTINUITY : 1
THIS_SW : 2
LAST_WEEK : 1
VET_CC : 1
QUITE_TO : 1
VOICED_OF : 1
VISITS_ALCOHOL : 1
TO_QUIT : 2
FREELY_INTRODUCER : 1
TAKE_ONEHALF : 2
GUARDIANSHIP_AFTER : 1
BE_INPATIENT : 2
COVERAGE_LEFT : 1
HEALTH_EDUCATION : 1
MEDICATION_RR : 1
DATE_CONTACT : 1
PROVIDED_THE : 1
APPROVED_BY : 1
LISINOPRIL_TAB : 1
OF_NEUROPSYCHOLO : 1
ACUTE_PROBLEM : 1
PRODUCTIVE_OF : 1
ISNT_WORTH : 1
NOT_TENDER : 1
DEPRESSION_ADDED : 1
OP_HE : 1
LUMBOSACRAL_SPONDYLOSIS : 2
CONTINUE_PLAN : 1
AND_CONTINENT : 1
COVERED_BY : 1
ALL_SOURCES : 1
FOR_USE : 1
GIVE_HIM : 1
SUICIDAL_HE : 1
PLACE_BUT : 1
UPSET_LOOSE : 1
SEPARATED_RATED : 1
TO_UNIT : 2
TAKING_MEDS : 1
PT_CAUC : 1
SEE_SURGERY : 1
TAB_FILL : 1
CHRONIC_ANTIDIABETICS : 1
TO_PATIENT : 5
WOUND_CLASSIFICATION : 1
MG_PO : 6
EMERGENCY_MD : 1
COLLINS_TOPICS : 1
NON_VA : 1
YR_FORM : 1
GET_HELP : 1
SITE_SHOWS : 1
PATIENT_REGISTERED : 1
STEP_PEOPLE : 1
OF_SPENT : 2
VERY_MUCH : 1
TO_PRIMARY : 2
YOU_BECOME : 1
NEXT_SHOT : 1
JUN_SW : 1
ACTIVE_COURSE : 1
ISSUES_RELATED : 1
ALLERGY_SI : 1
FEB_AMBULATORY : 1
THOSE_ARE : 1
THE_FORM : 2
MORE_APPOINTMENT : 1
THREE_SAYS : 1
WHEN_IF : 2
DEXTROSE_NO : 1
EVERY_PREVENTIVE : 1
SEE_MEDICAL : 1
ASSOCIATE_PROVIDER : 3
NOTED_PT : 1
ESOPHAGEAL_HAS : 1
WIFE_LEFT : 1
GROUP_ENVIRONMENT : 1
LOCATION_MH : 1
CALLED_WITH : 1
NONVISIT_NOTE : 1
NURSING_DISCHARGE : 1
DO_UH : 1
SUICIDAL_AND : 1
TAKE_AND : 1
GOOD_TRANSFERS : 1
BENZOS_PT : 1
EDUCATION_GROUP : 1
ANY_SYMPTOMS : 1
REVIEWED_SOCIAL : 1
HIM_ALL : 1
AND_STATED : 1
THREATENING_BEHAVIOR : 1
PAIN_MG : 1
WHICH_IS : 2
WITH_DC : 1
PAIN_FAMILY : 1
CYSTOSCOPY_WOUND : 1
PAIN_USING : 1
POSITIVE_NE : 1
DRINK_BUT : 1
NUMB_OR : 1
PUT_BY : 1
BETTER_OFF : 1
WITHIN_ANTIHISTAMINES : 1
INCREASED_WITH : 1
MRSA_SCREEN : 1
MRSA_RESTRAINTS : 1
IMPROVED_AND : 1
COLLAGENOUS_TIS : 1
OF_CLOTHING : 1
WITH_VA : 1
OF_DIRECTIVE : 1
ESTABLISHED_PT : 1
HX_COLLAGENOUS : 1
KNEE_OF : 1
ST_PT : 1
IF_PROTOCOL : 1
MOS_LAB : 1
AND_AND : 2
WHEN_WITH : 1
FOR_SEV : 1
CC_OUTPUT : 1
UNSPECIFIED_DEPRESSIVE : 1
ADDENDUM_ABLE : 1
HEART_WAS : 1
YEAROLD_WITH : 1
RECENT_DIABETES : 1
ITS_OWN : 1
SERVICES_OF : 1
PAST_MONTHS : 1
OF_SOCIAL : 1
WITH_IODOSORB : 1
CHRONIC_DISTURBANCE : 1
TENSION_PANICKED : 1
PROVIDER_KRISHNASWAMY : 1
BEHAVIORAL_HEALTH : 1
FROM_THIS : 1
ARE_ABOUT : 1
THE_DEXTROSE : 1
HOURLY_MAINTAINED : 1
STATUS_CHANGE : 1
RESIDENT_IS : 1
SPOUSE_CONFIRMED : 1
COMES_GOES : 1
PUPILS_WEAK : 1
PATIENT_HISTORY : 1
HR_ALBUTEROL : 1
TONIGHT_VOIDED : 1
SUCCESSFUL_TAP : 1
KNOWS_TO : 1
THROUGH_ASARCO : 1
CM_ISOLATIVE : 1
COLON_COLONOSCOPY : 1
ER_SAM : 1
REFERRAL_PATIENT : 1
HEAD_PATIENT : 1
ON_WALS : 1
IN_PLACE : 1
ASK_PCRN : 1
DISCUSS_YOUR : 1
DIRECTIVE_CONSENT : 1
FORM_THE : 1
STUPID_SYMPTOMS : 1
LDL_LEVEL : 1
PATIENTS_WERE : 1
LOOSE_BM : 1
MELLITUS_WITHOUT : 1
OS_VETERAN : 1
PRESENTED_ANGRY : 1
HM_HRS : 1
HERE_IS : 1
HAD_USING : 1
ENEMA_DOUCHE : 1
DIRECTED_EACH : 1
ONCE_WILL : 1
DISCHARGE_OR : 1
INSTRUCTIONS_HE : 1
REGARDING_APPOINTMENT : 1
PART_TRAITS : 1
THE_EXPECTED : 1
NO_FOR : 1
PLACEMENT_HAS : 1
HAVE_BEEN : 1
WITH_PLANS : 1
MANUAL_CUFF : 1
HELP_HAS : 1
CHAPLAINS_FOR : 1
ALLERGIES_CALLERS : 1
IDENTIFIED_LIVES : 1
HE_EASILY : 1
AND_ADVISED : 1
SICK_NEVER : 1
TO_OUT : 1
AS_OF : 1
DEPRESSED_AND : 1
IN_SEE : 1
RECIPIENT_THE : 1
TELEPHONE_SUCCINATE : 1
THIS_GOES : 1
UNDERSTANDING_NOT : 1
GU_EDUCATED : 1
LAB_RESULTS : 1
ENDORSES_DEPRESSED : 1
SC_HISTORY : 1
FORCES_INSTITUTE : 1
KNEES_BED : 1
ALSO_GAVE : 1
BEING_BY : 1
DOSAGE_ROUTE : 1
IDEATION_HEALTH : 1
SURGERY_FOR : 2
SIGNIFICANT_OR : 1
HEART_DISEASE : 1
SPC_PROCESSING : 1
VICTIM_AGAIN : 1
ADDENDUM_LABS : 1
AND_HER : 1
ZOCOR_LAST : 1
IS_COME : 1
STATUS_TO : 1
TIME_FEET : 1
TO_SAY : 2
ADMISSION_AND : 1
ROOM_AIR : 1
EXCEPTION_OF : 1
PATIENT_ON : 1
DIRECTIVE_PULSE : 1
ADDENDUM_GIVEN : 1
BE_SCHEDULED : 1
REPRESENTATIVE_BILL : 1
ADVANCE_DISCUSSION : 1
TELEPHONE_NO : 1
EDATIVE_ANTIANXIETY : 1
PAST_MONTH : 1
STATING_PT : 1
OFF_YES : 1
TO_DISCUSS : 1
SIGNS_OF : 1
ALL_THE : 1
CURRENTLY_TAKING : 1
CONTACTED_VET : 1
MEDICATION_LIST : 1
IMFC_FOSTER : 1
THE_NIGHT : 1
TO_MHC : 1
CTGUIDED_LUMBAR : 1
ELECTRONICALLY_FAWCETT : 1
TOPIRAMATE_MG : 1
THIS_AMBULATED : 1
PREVIOUS_NOTES : 1
KNOW_WHY : 2
APPOINTMENTS_ON : 1
REGARDING_SLIDING : 1
SERVICE_PT : 1
MADE_OF : 1
PRIVATE_APARTMENT : 1
INDICATED_DISEASE : 1
USE_BEERS : 1
HEAD_HAS : 1
SERVICES_OUT : 1
POOR_PODIATRY : 1
LEVEL_IS : 2
TRANSPORTATION_COMPLETED : 1
PATIENTS_COORDINATION : 1
COORDINATOR_NOTE : 1
WITH_MVA : 1
SEES_NURSING : 1
CHRONIC_STILL : 1
AN_ALCOHOL : 2
SEE_SOAP : 1
NOT_FIND : 1
BERKLEY_FOR : 1
LACERATION_DAILY : 1
! Stats words=1974  pairs=9425
