# Supplementary material for: Predicting the Risk of Suicide by Analyzing the Text of Clinical Notes
Source: PLoS One. 2014 Jan 28;9(1):e85733. doi: 10.1371/journal.pone.0085733 (PMC3904866; doi:10.1371/journal.pone.0085733)
Supplement: Appendix S3 — Machine Learning Libraries and Methods: This section is provided to enclose the open source (Apache License) classifier used for the building of the statistical models, specifically for the purposes of study reproducibility. A detailed account of these tools is intended for another publication. (ZIP) [file pone.0085733.s003.zip › Appendix3/ML_libs/Regression_testing/group2/processed/grp2-pt-1043.dat]

!  Done reading
! Total word count = 5222
! Total unique words = 1897
! Total pair count = 10440
! Total unique pairs = 9233
AVAILIBLE : 1
OBSTRUCTIVE : 1
SORE : 1
AT : 37
TERRIBLE : 1
ADL : 2
ONLY : 3
WORK : 8
EVENING : 1
FINGER : 1
LOWER : 3
REFILLED : 1
EVENTS : 2
MONTH : 4
OEF : 1
SUPPRESSED : 1
ULCER : 3
WD : 1
THANK : 1
REFILLS : 2
DOXAZOSIN : 1
INFO : 2
ACCIDENT : 2
WEIGHT : 6
UTILITIES : 1
EXUDATE : 1
BEEN : 17
STAY : 1
BRADSHAW : 2
UNCONTROLLED : 1
BASE : 2
WITHIN : 7
SEARCH : 1
GAS : 1
LOCK : 2
REFILL : 1
YOURSELF : 1
DONNING : 1
WEINSTEIN : 1
ACCORDING : 2
MILD : 1
MINUTE : 1
OUTPATIENT : 8
MILITARY : 2
INSTRUCTED : 2
SHORTNESS : 2
DIVALPROEX : 1
INTERVENTION : 1
INPATIENT : 4
OKAY : 1
COUNSELING : 2
TOMORROW : 2
DIPYRIDAMOLE : 1
HAIR : 1
STRUGGLING : 1
FT : 4
RELATED : 1
PURIFIED : 1
USE : 12
LONGSTANDING : 1
CC : 2
HEMATURIA : 2
DISCHARGED : 1
OPERATIVE : 1
SPINAL : 2
SUPPLIES : 5
TIMELY : 2
ERROR : 1
ASA : 1
REGARDING : 2
READING : 2
HARM : 2
VASCULAR : 2
LEVEL : 6
CHANGES : 3
ALCOHOL : 4
RAL : 1
DDEPRESSION : 1
TRIED : 1
FAX : 1
IMPORTANCE : 2
ROOMAIR : 1
DIAST : 1
BOTTOM : 1
MET : 3
HIS : 27
BRING : 2
COORDINATOR : 1
COPD : 3
ARIPIPRAZOLE : 1
TUBERCULIN : 1
ID : 3
MARRIAGE : 1
ENTHUSIASM : 1
GM : 1
READINGS : 2
VOIDING : 1
SURROUDING : 1
RECURRING : 1
NEURO : 2
APPROPRIATE : 2
DIAMETER : 1
CONGRUENT : 1
COUGHED : 1
ASSOC : 1
KLEIN : 1
ACID : 1
WELL : 2
DISORDER : 1
KNOWN : 1
TEST : 4
NOTE : 22
INCREASING : 1
REASONS : 1
CONTACTED : 3
HARD : 1
JULY : 1
CROSSING : 1
DO : 9
DOES : 8
NIGHTMARES : 1
TALKED : 1
ARRANGE : 1
TVHS : 1
BB : 1
TREATMENT : 7
HTN : 1
ATRIAL : 1
BLOOD : 9
CONSTRUCTION : 1
SAME : 3
ESOPHGEAL : 1
WORKER : 1
CV : 1
ASSIST : 2
HAVE : 10
SAW : 1
BPH : 1
SOORYA : 1
BUSINESS : 1
SCHEDULED : 4
FAMILIAR : 1
MEASURED : 2
OF : 96
DRUG : 2
INCLUDE : 1
PRECOLONOSCOPY : 1
NONREDUCIBLE : 1
TAB : 20
CALLER : 1
REQUIRED : 1
MONITOR : 2
DEC : 1
HAS : 44
TUNNEL : 1
FOR : 77
ANWER : 1
PERCEPTION : 1
ARNP : 1
CONDITION : 2
GRANULAR : 1
PERSONX : 1
NUTRITION : 1
SAID : 2
TAMSULOSIN : 1
NUMBER : 6
DETOX : 1
STATEMENTS : 1
IMPLANTABLE : 1
SOCIETY : 1
MORNING : 1
KILL : 1
STRIP : 4
ACCUCHEK : 1
TUSCON : 1
AID : 2
WRAPUP : 1
ASSESSED : 2
KNEE : 4
SC : 3
MS : 1
SELFREPORT : 1
PERMISION : 1
CLOTHING : 2
MY : 6
LEGAL : 1
INSTRUCTION : 1
IDEATION : 2
TXC : 4
MESSAGE : 2
RECREATION : 2
GEN : 1
THINGS : 3
BANKRUPTCY : 1
PRELIM : 1
THY : 1
COLONOSCOPY : 3
SUBSTANCE : 1
THEM : 4
PALPATE : 1
GOALS : 1
ASSESSMENT : 8
APPLIES : 1
RESPIRATORY : 3
CONTINUALLY : 1
ACTIVITY : 2
OWN : 1
CLEARER : 1
REFERRING : 1
EVIDENCE : 1
TARGET : 1
LET : 1
GATZMAN : 1
TAXI : 1
AMBULATION : 2
VEIN : 1
MOTORCYCLE : 1
ENTER : 2
CONSULTS : 1
ENCOURAGED : 2
BM : 2
NAUSEA : 1
PREVIOUSLY : 1
IMA : 1
INFORMATION : 5
DEVICES : 1
PROPOSED : 1
PATTERN : 2
INITIAL : 2
REFERENCE : 1
DEBRIDEMENT : 1
COMPROMISE : 1
CENTER : 1
EXAM : 3
INFECTION : 1
RECENTLY : 2
QUADS : 1
VISIBLE : 1
WITHDRAWN : 1
FLOWSHEET : 1
ATTENDS : 1
SUGAR : 1
ATTEMPTS : 2
DISCUSSIONS : 1
AO : 1
SUICIDE : 5
THE : 110
JUST : 2
NURSES : 1
INCREASED : 1
EXTENDED : 2
TPY : 1
CROSS : 1
PRESENTS : 4
GROUP : 9
DURATION : 3
WRITING : 1
ADVANCED : 1
ADJUSTMENT : 1
REST : 3
ANTIANXIETY : 2
DIMINISHED : 2
GO : 2
SIGNIFICANT : 2
BOWEL : 2
CLOSEBY : 1
UNTRTEATED : 1
COLOR : 1
POSTIVE : 1
SEC : 1
ARRIVED : 1
LEG : 4
BP : 4
MEDS : 8
DRESSINGS : 1
OBSTACLES : 1
BELONGINGS : 1
HEARD : 1
AVOIDING : 1
POST : 3
DEPRESSION : 2
MUSCULO : 1
RED : 1
ASYMPTOMATIC : 1
CM : 9
UNCHANGED : 1
FREE : 1
RECALL : 1
IMAGE : 2
AGREEMENT : 1
INTERPRAETATION : 1
AGAIN : 1
MEANING : 1
ANXIOUS : 2
LIB : 1
TID : 2
MARTKEDLY : 1
STATIN : 1
CAP : 2
SHIN : 1
DIET : 3
EVER : 2
STATED : 10
ELASTIC : 1
CAPILLARY : 1
TE : 1
FINANCES : 1
FLAGYL : 1
IRREGULAR : 1
AXIS : 2
GET : 1
WHAT : 1
WT : 1
RA : 2
AD : 2
SPACER : 1
DISUCUSSED : 1
SKELETAL : 1
BENEFITS : 2
STARTED : 1
ASSISTANCE : 1
DIABETIC : 3
SCANNED : 2
MELLITUS : 2
OR : 30
MBD : 3
SHIFT : 2
BOTH : 1
TEMP : 1
YEAR : 10
LAYING : 1
RELAPSES : 1
ALREADY : 1
CONCERNS : 1
PULMONARY : 1
SEIZURES : 1
LB : 5
AIR : 3
IVP : 2
TRANSPORT : 2
DE : 1
LIKE : 2
PUT : 1
PRESSING : 1
SEEN : 4
CS : 1
RT : 1
EXPERIENCE : 1
ENCOURAGEMENT : 1
ASHOK : 1
MAILED : 1
NURSE : 4
ENJOY : 1
PS : 1
UNKNOWN : 3
MUCH : 2
FINALLY : 1
CHRONIC : 5
RILEY : 2
ASPECT : 1
TAKE : 11
INJECTIONS : 1
SENSORY : 1
CORRESPOND : 1
TRY : 1
ANY : 10
FORMED : 1
WALKIN : 1
DISCHARGE : 10
POSSESSION : 1
WIDTH : 1
FLUORESCENT : 1
STRENGTHS : 1
RECORDS : 4
MOISTURE : 2
QH : 1
AOD : 1
ALTERED : 1
BESYLATE : 2
SW : 1
TOLERATED : 2
DRAPED : 1
PSYCHOTROPIC : 2
TOPAX : 1
TIDAC : 1
FACILITY : 3
HOSPITALIST : 1
HASNT : 2
EXPIRATION : 1
UNIT : 2
REFRACTIVE : 1
MOTOR : 1
EFFECTS : 2
PROCEED : 1
IBUPROFEN : 2
MD : 1
SECONDARY : 1
NAME : 3
ASSESSEMENTS : 1
MSE : 1
CARE : 12
FORT : 1
ANYMORE : 1
SAT : 3
ACOS : 1
AGE : 5
EVERY : 7
MULTIVITAMIN : 1
PATCHROTATE : 1
FILM : 2
PREVMED : 1
INTENT : 1
SKIN : 5
RATED : 1
YESTER : 1
IS : 52
TIMES : 4
CARIES : 1
OK : 1
NOT : 30
WORST : 1
FRACTURE : 1
WIDEN : 1
START : 1
IF : 15
JUICE : 1
ENOUGH : 1
THERE : 1
MH : 3
RETINOPATHY : 1
PENDING : 1
BAND : 1
ONCE : 2
EXEMPT : 1
COUNSELOR : 1
EMPLOYEE : 1
LIMITED : 2
HERE : 3
UPSETTING : 1
IM : 2
BOX : 1
EATING : 2
CHARLOTTE : 1
CLEAN : 3
OXIMETRY : 3
UNITS : 2
LOCATED : 1
CARDS : 1
LIVE : 2
BRIEFLY : 1
MAXIMIZED : 1
FEB : 3
TRANSFERS : 1
PPD : 1
EVALUATION : 4
CTRS : 3
ANTIDIABETICS : 2
PROGRESS : 2
KEEP : 1
RHYTHM : 3
CMM : 1
PSYCHOTHERAPY : 1
DCD : 1
THESE : 1
ASSESS : 4
DISPENSED : 1
UNCOMFORTABLE : 1
REPEAT : 1
VISION : 2
RALES : 2
VET : 8
EXPLAINED : 2
TBI : 1
BEST : 1
ORTHOPEDICS : 1
MOTHER : 1
COMPLETION : 1
WELCOME : 1
BURSA : 1
VERDSOME : 2
SPRAIN : 1
DOPAMINE : 1
PARTICIPATION : 2
EDUCATED : 1
ASSOCIATED : 1
HOWEVER : 2
WORRIES : 1
HOPLESS : 1
ESSENTIAL : 2
BACK : 3
OPIOID : 1
PAGER : 1
SOURCE : 3
DILATED : 1
MARRIED : 1
HEIGHT : 1
MALE : 13
SUPPLEMENTAL : 1
ADDENDUM : 12
GRAPEFRUIT : 1
CONVEY : 1
BY : 18
SITES : 1
RADIO : 1
PMH : 1
COMPLAINS : 2
NO : 56
INTENSITY : 1
CLINICAL : 6
HEMOGLOBIN : 1
SHARE : 1
REASSESSMENT : 1
CHIEF : 2
NONSOAP : 1
ENTITLED : 2
BHL : 1
LARGE : 2
DYE : 1
ROUND : 1
CHANGED : 1
VEHICLE : 1
LUNGS : 2
ELECTIVE : 1
SATT : 4
OBVIOUS : 2
UPPER : 1
DERMATOLOGIST : 1
TH : 2
BENIGN : 1
CLINIC : 8
RISK : 12
INDIGESTION : 1
BLOD : 1
SETERNY : 1
SCALP : 1
DIDNT : 1
TENDERNESS : 1
MARGINS : 1
TO : 155
POINT : 2
BMI : 1
PNEUMONIA : 1
COLLINS : 2
COULD : 2
NARRATIVE : 1
FEEL : 1
PRN : 4
IV : 5
DIPTHERIA : 1
SPECIALTY : 2
TRIP : 1
DEGREE : 1
PATIENTHAS : 1
ABUSE : 1
TIMEOUT : 1
SLOW : 1
ADVANCE : 1
CREST : 1
DREAMS : 1
STARS : 1
DX : 1
TOOLS : 1
QAM : 1
PROCEDURE : 4
REQUESTING : 1
OBSERVE : 1
COPAY : 1
WILL : 13
BUT : 8
PORT : 1
ASKED : 2
THOUGHTS : 1
WEAR : 1
DS : 1
SITESDO : 1
TYPE : 11
REPRESENTATIVE : 1
CAREGIVER : 2
TV : 1
TIU : 1
WHETHER : 1
CLARIFIED : 1
SEE : 5
LUCENTIS : 1
GETS : 2
COMPARTMENTAL : 1
CIGARETTES : 1
HEALTHY : 1
PLEASE : 3
INDICATES : 3
DIS : 1
STATUS : 12
CENTRUM : 1
SURROUNDING : 1
DIABETES : 2
MHICM : 1
TA : 1
NAD : 1
EFFECTIVE : 1
PERSISTS : 1
IMPROVING : 1
TECHNIQUE : 1
CONSULT : 9
SPONSORS : 1
TESTING : 2
THEMES : 1
SUPERFICIAL : 1
OUT : 4
COMFORT : 1
HR : 5
FRICTION : 1
SUPPORT : 3
GASTROINTESTINAL : 1
FIND : 1
WANTS : 3
OCC : 1
TREATING : 1
SURE : 1
IMPROVE : 1
STRETCHER : 1
DISCONNECTS : 1
QID : 1
SCREEN : 3
ENHANCE : 1
FINDINGS : 1
MEASURING : 2
BARRIERS : 2
EXPOSURE : 1
FUNCTION : 1
REVIEW : 5
THANKS : 3
NEEDED : 7
MAINTAINED : 1
MENTAL : 5
COMES : 1
INJECTION : 1
ABNORMALITIES : 1
HYDROXIDE : 1
ELAVIL : 1
FOSAMAX : 1
PORTRAIT : 1
PALPATED : 1
REPOSITIONS : 1
WERE : 9
BROUGHT : 2
FACTORS : 2
VIEW : 3
RESPONSIBILITIES : 1
FILL : 4
RESIDENT : 1
CONTACTS : 1
INSTRUCTIONS : 6
METATARSAL : 1
POLYTRAUMA : 1
LABS : 3
VA : 5
JOB : 1
TAKEN : 1
CYANOSIS : 1
SPC : 2
WED : 4
WAYS : 1
ESTION : 1
POSSIBLE : 1
FENTANYL : 1
WELLDEVELOPED : 1
TRIAGE : 4
DOCTORS : 1
ABOV : 1
LEVOTHYROXINE : 1
PART : 2
SL : 1
INTRODUCER : 1
DETERMINED : 1
FAMILY : 4
CAUSE : 1
DISEASE : 2
PAIN : 36
WHEN : 8
UNDERMINING : 1
AMBULATORY : 4
THURS : 1
AS : 24
VISTA : 1
BEING : 5
FALLS : 1
BIOMEDICAL : 1
INTRAVENOUS : 1
OBSTRUCTION : 1
GRASS : 1
CONSULTANT : 1
ABOVE : 3
DRAINAGE : 1
WAS : 38
FLOOR : 1
PM : 2
PLEURAL : 1
WITH : 41
CATH : 1
SCLEROSIS : 1
OFFERED : 1
FORM : 3
CONDITIONS : 1
LEAVING : 1
AC : 1
CAUSING : 1
TEMPERATURE : 2
REDNESS : 2
ETHICS : 1
SIG : 3
REMAINS : 2
BASIS : 3
FREEZE : 1
SWMF : 1
NOW : 5
ABD : 2
EXACT : 1
SCHDULE : 1
BURY : 1
TMS : 1
INCLUDING : 5
PTSD : 3
ABUSED : 1
MOW : 1
INTACT : 2
SUB : 1
SETTING : 1
ONSET : 1
IVF : 1
CHICKEN : 1
EXACERBATION : 1
USED : 7
LEADER : 1
MONITORING : 1
IT : 5
SHOT : 1
VINE : 1
LOTS : 1
BELOW : 1
BEDTIME : 2
LIST : 5
EXCESSIVELY : 1
NECESSARY : 1
OT : 3
DEMONSTRATED : 3
CLINICALLY : 1
AMINOPHYLLINE : 1
SALTS : 1
INSPIRATION : 1
IMMUNIZATION : 1
NONFORMULARY : 1
HYPOXIC : 1
SA : 1
DISCUSSED : 8
EXERCISE : 1
CA : 3
FEVERS : 1
VOMITING : 3
NUMEROUS : 1
TIME : 18
CODE : 2
DRIVER : 1
ESOPHAGEAL : 2
OCCASIONALLY : 1
ORIENTED : 7
QUATTLEBAUM : 2
PLEASURE : 1
CURRENTLY : 3
SOMEBODY : 1
ATTEMPT : 1
COENZYME : 1
TEETH : 1
ADDITIONAL : 2
WALK : 2
ACTIONS : 1
OXYCODONE : 1
EMOTIONAL : 2
JOINT : 2
CHOL : 1
PROJECT : 1
SIMVASTATIN : 1
SIDE : 2
UNDERST : 1
BETWEEN : 2
PROSTHETICS : 1
DOCTOR : 2
FCPD : 1
SEDATION : 2
DID : 1
CALL : 9
ESTABLISHED : 1
MOST : 2
DYSPHAGIA : 1
SHOW : 3
RESULT : 2
RTU : 1
HX : 3
ARRIVAL : 1
MHC : 1
ULTRAM : 1
IMAGING : 4
CONCERNED : 2
ADDRESS : 2
TELEPHONE : 13
FACILITATORS : 2
PRINCIPAL : 1
UNSPECIFIED : 1
AVONDALE : 1
PLEASED : 1
COMPLAINING : 1
COOPERATIVE : 2
MOTIVATION : 2
REPORTS : 6
RELIABLE : 1
SUBJECTIVE : 4
RECOIL : 1
HELP : 2
PER : 8
YES : 10
FURTHER : 1
INTRACRANIAL : 1
SMILING : 1
ETC : 1
CONSENT : 3
CHF : 1
MOBILITY : 2
FACE : 2
YOUR : 4
PRECAUTIONS : 1
DOING : 2
RETURNED : 3
GIVEN : 12
UNSURE : 2
TACHY : 1
SUCCESSFUL : 1
LITTLE : 2
HPI : 1
JVD : 1
ABSENT : 1
HES : 2
WHO : 6
UPON : 1
ED : 5
IDENTIFIES : 1
MANEUVER : 1
TOWN : 1
TRANSIENTLY : 1
VERBALIZES : 1
BASED : 2
PHYSICIAN : 14
LACERATION : 1
ACHE : 1
DAUGHTER : 1
COMPLIANCE : 1
COMPREHENSIVE : 1
ARM : 1
CURRENT : 7
LIBWHEELCHAIR : 1
CONTROL : 2
AUSCULTATION : 1
URGENT : 1
DEPENDENCE : 1
INSUFFICIENCY : 1
SUSPICIOUS : 1
TERM : 1
HIM : 3
RESPONSIBLE : 1
UH : 1
CESSATION : 1
PULSE : 10
HE : 66
CRAMPING : 1
SENSES : 1
NEXT : 1
RX : 2
SPOTS : 1
PEELING : 1
NEEDS : 2
STUDENTS : 1
THEY : 11
TREATED : 1
PHE : 1
RATE : 4
PHYSICIANS : 1
MASS : 1
FELT : 2
MIX : 1
FRIGHTENING : 1
SPELLING : 1
WATER : 2
TRANSFER : 1
VSS : 1
ECTOPY : 1
OBSERVATION : 1
RELATIVES : 1
VALUABLES : 1
ML : 7
PHONE : 8
BETABLOCKER : 1
DECLINED : 2
SXS : 1
CHECKED : 2
CLEAR : 3
STRANGE : 1
FAINTING : 1
ELBOW : 3
CLAIMS : 1
TOUCH : 1
PRIMARY : 3
ECHOCARDIOGRAM : 1
SIGNER : 1
SELENIUM : 1
ABDOMINAL : 1
HAD : 13
SIGNS : 6
DEPARTMENT : 1
LANS : 1
SPECIAL : 1
LOSS : 2
SUBCUTANEOUS : 1
MELODY : 1
PATIENTS : 11
QUETIAPINE : 1
SUMMARY : 5
SULFA : 1
DISTURBANCE : 1
DESIRES : 1
HUMAN : 1
RONCHI : 1
BRONCHOSCOPY : 1
CONSTIPATION : 2
AMPUTATION : 2
ANALYSIS : 1
PROVIDED : 5
DRINK : 1
JOE : 2
NEGATIVE : 3
AWA : 1
NONE : 2
WRITTEN : 2
ITCHES : 1
LECTURE : 2
II : 2
LAB : 2
LOT : 1
CONNECTED : 1
DECREASED : 1
CONTRAINDICATION : 1
SPUTUM : 1
ANGRY : 1
LESIONS : 2
WEAK : 2
SALINE : 1
TRAVEL : 1
DIAGNOSTIC : 2
MIND : 1
ING : 1
ELIGIBILTY : 2
DIRECTIVES : 2
COMPLAINTS : 2
CONTACT : 11
NOTIFIED : 1
INPUT : 1
ACE : 1
SCHEDULE : 1
HER : 2
ORDERED : 2
SEVERITY : 2
DEVELOPED : 1
FEELING : 2
SHOULD : 2
TERAZOSIN : 1
QUESTIONS : 1
IMPAIRED : 1
EDUCATE : 1
METHOCARBAMOL : 1
PEERS : 2
PROBLEMS : 5
URINE : 1
APPEARED : 1
OCALL : 1
MINIMUM : 1
YELLOW : 1
DYSPNEIC : 1
LIVED : 1
RTC : 1
NEUROLOGICAL : 1
MCG : 2
STAYING : 1
HEADED : 1
ROUTE : 1
CAN : 4
CHERRYS : 1
NEG : 2
WELLNOURISHED : 1
THERAPY : 2
PSYCH : 1
SEEING : 2
PLACE : 2
TEACH : 1
CRUSHING : 1
COMPETENT : 1
NONVA : 2
WHICH : 2
IER : 2
SYMPTOMS : 5
SACPREPRIMARY : 1
TLCP : 1
RANGE : 1
EP : 1
MOBIL : 1
LLQ : 1
BREAKTHROUGH : 1
OVER : 3
DECREASES : 1
MG : 25
ON : 36
MIXED : 1
QUIT : 2
KNOWLEDGABLE : 1
COMPLETE : 2
UROLOGY : 1
DYING : 1
SOI : 1
PRESSURE : 8
DILATE : 1
TETANUS : 3
ATTENDED : 1
CONFIGURED : 1
VERIFY : 1
QIDPRN : 1
VIA : 3
NC : 2
WAITING : 1
HEADACHE : 1
SPECIALIST : 1
BEHAVIORS : 1
GOOD : 3
DROPS : 1
ARMY : 1
DRUGS : 2
MED : 3
INTO : 2
INHALER : 3
FOCAL : 1
DEHYDRATION : 1
FIRE : 1
SODIUM : 1
EDEMA : 1
SISTERS : 1
CONDUCTING : 1
SPACE : 2
HYPERTROPHY : 1
STREET : 2
HOUSEHOLD : 1
PROVIDER : 4
LISTENS : 1
QUESTIONED : 1
MORNINGPAIN : 1
INSURANCE : 1
PO : 9
SHE : 8
UP : 12
GENDER : 1
THEN : 2
SELLING : 1
MULTIPLE : 3
VOCATIONAL : 1
MANIFESTATIONS : 1
LOCATION : 2
APPOINTED : 1
KEEPING : 1
ALERT : 7
WORSENING : 1
FEVER : 1
STABILITY : 2
PALE : 1
PRIOR : 5
SEP : 1
OFF : 4
UNDER : 1
STERISTRIPPED : 1
CONFUSED : 1
GOT : 3
DETACHED : 1
DATE : 13
FRONT : 1
COMMENT : 2
COMPRESSION : 1
DAILY : 3
XRT : 1
THREE : 2
ICU : 1
LONG : 2
PAPERWORK : 1
APPOINTMENT : 6
WOULD : 8
TUCSON : 1
SEMMES : 1
AWAKE : 2
FOLLOW : 6
WHEELCHAIR : 4
RESTART : 1
HOUSING : 2
FROM : 23
LEFT : 11
RCVD : 1
ANTERNATE : 1
WHEEZING : 1
MEDICAL : 16
HOMICIDAL : 1
HEAD : 2
DICTATION : 1
SPOKE : 2
ALSO : 9
SEX : 1
LORAZEPAM : 2
REFLUX : 1
ACTIVITIES : 4
ORDERS : 1
MRS : 1
EKPHYSICIAN : 1
ALC : 1
RESPOND : 1
DIGITAL : 1
NTACT : 1
ARTHROPLASTY : 1
WORKING : 1
OPERATE : 1
AN : 7
DIVERSION : 1
MOIST : 1
ONCOLOGY : 1
CUFF : 1
UNLABORED : 1
ADENOCARCINOMA : 1
HEART : 2
COMPLAINT : 2
SIGNATURE : 1
BLACK : 1
GECAC : 1
ERYTHROMYCIN : 1
ORDER : 4
SEEK : 2
CHILD : 1
SEPERATED : 1
REALLY : 1
FULLY : 2
HAND : 2
FOUR : 2
INFLUENZA : 1
APPARENT : 1
OUTSIDE : 2
SERVICECONNECTED : 1
DENIED : 1
MBL : 1
PHARMACIST : 2
MEASURES : 1
EYE : 3
SPO : 1
HCT : 1
FELL : 1
PET : 1
ESTIMATED : 1
ARRANGED : 1
TREATERS : 1
MILIEU : 1
DISTENDED : 1
DONNA : 1
DIFFERENT : 1
MESYLATE : 1
DISCUSSION : 1
MYSELF : 1
NEW : 5
AGO : 1
MOUTH : 8
YEAROLD : 1
DECIDED : 1
CHEST : 6
HEPATITIS : 1
URGENCY : 1
PRESENT : 5
SOME : 11
WEIGHING : 1
INTELLIGENCE : 1
APPROPRIATELY : 1
ANESTHESIA : 1
PITCH : 1
ARE : 5
ANSWERED : 3
DESIRE : 2
ZOCOR : 1
HYPERTENSION : 2
INDEPENDENT : 3
NEED : 8
ELEVATED : 3
CORRECT : 1
PERSON : 2
HYPOTHYROID : 1
CANAL : 1
HORRIBLE : 1
CYST : 1
RECEIVED : 5
CPRS : 2
PSYCHIATRIC : 2
SURGERY : 1
HYDROCHLOROTHIAZIDE : 1
RECOVERY : 2
RALLY : 1
ORTHOSTASIS : 1
ASPIRIN : 2
FREQUENCY : 1
METRONIDAZOLE : 1
HARASSED : 1
COMPLETELY : 2
BURNING : 1
LISTENING : 1
OFFICERS : 1
TX : 1
IRRITABILITY : 1
CONSTA : 1
BODY : 1
ENTRY : 1
PREVENTIVE : 2
INTERDISCIPLINARY : 1
GENERAL : 2
SEVERELY : 1
CYTOPATHOLOGY : 1
MEANT : 1
YEARS : 2
TABLE : 1
COLON : 1
LARGER : 1
BE : 16
RESOLVED : 1
BECAUSE : 1
YR : 2
ENDOSCOPIC : 1
OX : 2
CANCER : 2
PAY : 1
FATS : 1
COUNSELORS : 2
OL : 1
TIP : 1
DUE : 3
BRANCH : 2
TRANSFERRED : 1
THEIR : 6
HS : 3
HEPARIN : 1
DISC : 1
COMPROMISED : 1
DISCOMFORT : 1
PING : 1
ALZHEIMERS : 1
WORKS : 1
LESION : 1
OMEPRAZOLE : 1
SULF : 2
SEVERE : 2
ISSUES : 2
DELUSIONS : 2
ALLOW : 1
REVIEWED : 12
NKDA : 1
PSYCHOSIS : 1
DM : 1
ISSUE : 1
BEFORE : 3
OTHER : 11
ALL : 5
LIQUIDS : 1
END : 1
PEOPLES : 1
ME : 6
BED : 2
NURSING : 16
CONTRACT : 1
FOLLOWING : 9
IDENTIFIED : 6
MORSE : 1
ENDING : 1
GERIATRICS : 1
DIAGNOSES : 1
PATIENT : 65
SELF : 2
SEPARATED : 1
ALLERGIES : 6
REFER : 1
RISPERDAL : 1
WITHOUT : 3
DIAGNOSIS : 3
JUL : 1
DING : 1
LIMB : 1
PRESCRIBING : 2
SENT : 1
INVOLVEMENT : 1
OBTAIN : 1
EVAL : 1
DROWSYNESS : 1
ABDOMEN : 1
IDEA : 1
EXPERIENCES : 1
FLEXION : 1
APPROVAL : 1
ANXIETY : 3
SPINE : 1
PERCOSET : 1
THAN : 2
POSITIONING : 1
VALVE : 1
RARELY : 1
DYSURIA : 1
PODIATRY : 2
ACUTE : 1
VOICE : 1
SB : 1
DIPHTHERIA : 1
SENSATION : 3
AUDITC : 1
INSPECTED : 1
ARTHROSCOPIC : 1
CON : 1
CORD : 1
SYMPTOM : 1
WE : 2
FILLED : 1
DECREASE : 3
PROTOCOL : 4
FEE : 1
COME : 1
PYLORI : 1
SYND : 1
DECISION : 2
ROUTINE : 1
FOUND : 2
PATCHES : 2
ROOM : 1
IMPROVED : 2
FEET : 1
CAME : 1
THAT : 41
VISIT : 4
CHART : 2
NORMAL : 2
WIFE : 4
STAFF : 4
DEPRESSED : 3
CE : 1
SERVICE : 4
FILMS : 1
FUNCTIONED : 1
AVAILABLE : 2
RIGHT : 5
INTRAMUCOSAL : 1
BREATHING : 3
PC : 2
VITALS : 1
ANTRAL : 1
ABOUT : 8
BUS : 2
FINANCIALLY : 1
CRAFTS : 1
ONE : 12
ULCERATION : 1
TELE : 1
PUTS : 1
PROSTEHESIS : 1
PLEASANT : 1
POTENTIAL : 1
LASIX : 1
PREVIOSULY : 1
COMPANIES : 1
MONEY : 2
PTS : 1
NKA : 3
BRIEF : 3
ADEQUATELY : 1
VICODIN : 1
SPONDYLOSIS : 1
TABLET : 9
HYDROXYZINE : 1
ADMIT : 1
MISTREATED : 1
ANOTHER : 3
WRITER : 3
TICKETED : 1
DURING : 1
REC : 1
YOU : 7
TOLD : 2
SEVERAL : 2
SCREENING : 3
MORPHINE : 2
HYPERKERATOTIC : 1
STUDIES : 1
CHECKS : 1
ISOLATED : 1
CARDIOLOGY : 1
VOICED : 1
INFORMED : 2
LYMPH : 1
REACH : 1
SMOKES : 1
LAURIE : 1
GETTING : 1
MEDIASTINUM : 1
HI : 1
PAST : 11
CHAIR : 1
DOCUMENT : 1
PSA : 2
INTERESTED : 1
NUMB : 1
REASON : 2
THREATS : 1
POSTERIOR : 2
PROPER : 1
BIKE : 1
SCORE : 4
OXYGEN : 2
TOBACCO : 3
DULL : 1
WROTE : 1
HA : 1
PAD : 1
RESULTED : 1
ORTHO : 2
EPIS : 1
HOME : 8
NEVER : 1
RI : 1
SIX : 1
AGREEABLE : 1
PENICILLIN : 2
CHAPLAINS : 1
NOTED : 3
WEAKNESS : 1
INDIVIDUAL : 3
DR : 1
SOCIAL : 6
RETURN : 2
SUICIDAL : 1
LETHARGY : 2
MODERATE : 5
INTRACTIBLE : 1
GAINESVILLE : 1
ANYONE : 1
DEPT : 1
EITHER : 2
POINTED : 1
BLE : 1
METHADONE : 1
VITAL : 4
INJ : 2
SHAKE : 1
SO : 2
BRONCHITIS : 1
UPSET : 1
HOMEMAKER : 1
MIN : 2
POOR : 1
REGULAR : 2
SETTINGS : 1
IDENTIFIERS : 1
TALK : 1
RECONCILIATION : 1
MAINTAINING : 1
GUAIF : 1
GLUCSOE : 1
PROTECTIVE : 3
COMPUTERIZED : 1
MODE : 1
MINUTES : 5
CIRCULAR : 1
TINGLING : 1
STRESS : 1
BIL : 1
FOLLOWUP : 5
DIRECTIONS : 1
RAMSAY : 1
MAKE : 2
TOLERATING : 1
PIN : 1
RISKS : 1
WEEK : 5
TRAVELS : 1
SUBSTITUTE : 1
CHECK : 1
TEAM : 5
STRESSED : 1
CBOC : 1
SCAN : 1
FALL : 3
SICK : 1
SPELL : 1
PAINT : 1
AM : 7
HELPED : 1
SITTER : 1
NUR : 1
IMPAIRMENT : 1
DISTRESS : 3
ENTERED : 1
MOUNTAIN : 1
EKG : 3
PLACEMENT : 1
DERIVATIVE : 1
THEME : 1
MOOD : 4
MONOTONE : 1
RIB : 1
LIVES : 3
LE : 1
EVENT : 1
REPORT : 3
SIGNED : 1
LETTER : 2
HARRINGTON : 2
DEMENTIA : 2
OSTEOMYELITIS : 1
HOW : 2
PRODUCTS : 1
CALLED : 5
TOOK : 2
INFUSING : 1
MANY : 2
SINCE : 4
CYANOCOBALAMIN : 1
STOPPED : 1
DISCUSS : 1
COUGH : 1
CHANGE : 3
HEARTBURN : 1
TDADULT : 1
LEARN : 2
ESOPHAGUS : 1
CPAP : 1
SOAP : 1
ALPRAZOLAM : 2
RATHER : 1
OFFICE : 2
MADE : 7
CARDIAC : 3
SUBFILE : 1
YRS : 1
INCLUDES : 2
ADVISED : 5
MON : 2
OBTAINED : 3
LEARNING : 2
STOMACH : 2
DOCUMENTS : 1
VERBALIZED : 5
DOSE : 3
CLUB : 1
IDEALLY : 1
ENCOUNTER : 3
MONTHS : 1
OBJECTIVE : 2
SMOKING : 3
DEATH : 2
AFFECT : 4
AGAINST : 1
FOLLOWS : 1
MRI : 1
PREDNISONE : 1
PALPATION : 2
SSN : 2
AVOID : 4
HOSPITALS : 1
GLUCOMETER : 1
NOON : 1
CONCERN : 2
DATED : 2
AMOUNTS : 1
ASKING : 1
ALONE : 3
NUTRITIONAL : 2
WHY : 2
TOPICS : 1
MEDICATION : 7
LUNG : 1
EXTRACT : 1
INPT : 1
RESTING : 1
BHM : 1
ACROSS : 1
COMMENTS : 3
SUPPORTIVE : 2
SUFFICIENT : 2
SINGLE : 1
KIMBERLY : 1
TKO : 1
ORAL : 3
CONTINUE : 2
TOTAL : 3
LIGHT : 1
SWELLING : 2
READ : 1
SERVICES : 1
JUNE : 1
GOAL : 3
SURGICAL : 3
EXAMINATION : 2
AWAKENING : 1
ST : 3
SHIELD : 1
SUCH : 3
HISTORY : 10
PROVIDE : 2
CLICK : 2
RESPIRATION : 2
FSP : 1
BACKGROUND : 1
ASPIRATION : 1
HOURS : 3
NONMANDATORY : 1
DESK : 1
CAUCASIAN : 2
HEALTH : 8
AMIODARONE : 1
REPORTED : 2
HERNIA : 1
VTACH : 1
ONGOING : 1
PLACED : 5
CAM : 1
MODERATELY : 1
FLUNIS : 1
WOUND : 4
IDEATIONS : 1
ANTIHISTAMINES : 1
PROSTATE : 2
PAYING : 1
HIP : 1
ABDOMAN : 1
EXCLUDING : 2
SITE : 3
SLOT : 1
BIPOLAR : 2
PICKED : 1
VALPROIC : 1
REFERRAL : 2
DISTINCTION : 1
INTERVENTIONS : 3
SCL : 1
PY : 1
MAR : 1
OCCURRENCES : 1
KG : 6
SELFHARM : 1
AFTERNOON : 1
OP : 1
MORE : 3
RACE : 3
COMM : 1
ATIVE : 1
MINOR : 1
AUG : 2
INSULIN : 1
PROBLEM : 4
EFFUSION : 1
BLUE : 2
MANIA : 1
RECORD : 1
ELIGIBLE : 1
ER : 2
APPLICABLE : 3
SHOWN : 2
NTG : 1
RM : 1
REQUEST : 3
PRESCRIBED : 4
IED : 1
AMLODIPINE : 2
SOMEWHAT : 1
RN : 2
SUSP : 1
UNABLE : 4
XYZZY : 2
AUGUST : 1
THROUGH : 2
HOUSE : 2
HEENT : 2
TELEMETRY : 1
LTC : 2
OVERRUN : 1
AFTER : 2
READY : 1
PARTICIPATED : 2
EDGES : 1
ADMISSION : 9
COURSE : 2
STILL : 1
RESCHEDULED : 1
SULFATE : 1
SCALE : 1
LESS : 1
POW : 1
NICOTINE : 4
LUMBAR : 1
GROUPS : 2
PCP : 12
SAYS : 1
FUTURE : 1
WAY : 1
EACH : 2
RE : 1
TITLE : 1
MICHIGAN : 1
WNL : 2
DENIES : 9
DOB : 2
ACCOMPANIED : 1
PHARMACY : 1
OLD : 6
TONIGHT : 1
LENGTHY : 1
REQUREMENT : 1
OTHERS : 3
REQUESTED : 1
MODIFIED : 1
FOOT : 3
OVERNIGHT : 1
CODEINE : 1
DISPLAY : 2
CLINICIAN : 1
STATEMENT : 1
ENABLED : 1
VETERAN : 8
BARE : 1
GLUCOSE : 1
1010 : 1
PT : 52
INJURY : 2
AGITATED : 2
MOVE : 1
DOUBLE : 1
FAM : 1
CORRESPONDENCE : 1
PULM : 2
DEVELOP : 1
RBC : 1
IRON : 1
PSYCHOSOCIAL : 1
AREA : 4
PROCEDURES : 1
PL : 1
DAZED : 1
INTEREST : 1
VISITDIFFICULTY : 1
QACHS : 1
BLDG : 1
MINIMAL : 1
BIPAP : 1
CERVICAL : 1
COMBAT : 1
GRAHAM : 1
UNDERSTANDING : 7
ILLNESS : 1
MEDICATIONS : 21
MR : 6
SENSE : 1
ATNC : 1
FACTOR : 1
CANT : 1
AND : 104
BILATERAL : 1
FLI : 1
ENLARGEMENT : 1
DAN : 1
DESCRIPTION : 1
FLUSHED : 1
TISSUE : 1
MAGNESIUM : 1
URINARY : 2
VACCINE : 1
JUN : 3
QD : 1
RESPONSE : 3
BETTER : 2
LOC : 1
CONCURRENT : 1
WORKED : 1
DEPRESSIVE : 1
INVOLVING : 1
RESULTS : 4
RPP : 1
EMERGENCY : 2
SALT : 1
ANSWER : 1
BREATH : 2
PROVIDING : 1
ABLE : 2
RECENT : 3
CHO : 1
METOCLOPRAMIDE : 1
IN : 57
LOW : 7
MAY : 5
BR : 1
LMSW : 1
MANAGEMENT : 5
STATE : 7
GUN : 2
PLAN : 13
SECRETIONS : 1
INTOLERANCE : 1
LENGTH : 2
MITRAL : 1
APPT : 4
HIAA : 1
SMOKE : 3
TAKING : 3
ADMITTED : 2
YET : 1
OBSERVED : 1
MIRALAX : 1
OZ : 1
PERIOD : 1
SS : 4
SWR : 1
PANIC : 1
VERY : 2
DONE : 3
EDATIVE : 1
TERMINATING : 1
PHYSICAL : 3
WEARING : 1
PROTEIN : 1
CP : 1
INTERPRETATION : 1
NIGHT : 3
ACTIVE : 26
KNOW : 5
BECOMES : 1
TRS : 4
ABILITY : 1
BEDREST : 1
DISPATCH : 1
BEHAVIOR : 1
EPIGASTRIC : 1
AFIB : 1
NEWLY : 1
SI : 2
SUBSTANTIATE : 1
SUGARS : 1
COMPLETED : 3
ARRHYTHMIA : 1
FOCUS : 3
THIS : 38
DIFFICULTY : 1
LPN : 1
FAULT : 1
NIACIN : 1
LIMITATIONS : 1
HIGH : 5
KILLING : 1
SOFT : 2
VAMC : 2
NACL : 1
SELFTREATMENT : 1
LAST : 10
PUPILS : 2
AOX : 1
FIBRILLATION : 1
MOXIFLOXACIN : 1
EDUCATION : 12
MEDICATED : 1
MODL : 1
SOBRIETY : 1
EXTREMITIES : 1
EKNURSING : 1
FINANCIAL : 1
LACKS : 1
ADR : 1
SESSION : 5
SEES : 1
CY : 1
STATES : 8
HOMOCIDE : 1
PHYSICALLY : 1
SUPPER : 1
UNDERGOING : 1
WHILE : 2
HAWTHORNE : 1
LOCAL : 1
PARK : 1
ROS : 1
ACCOMPLISH : 1
WATHCHES : 1
ICDCM : 3
OIF : 1
RESP : 1
DOWN : 1
UP_PT : 1
PT_NTG : 1
ANTERNATE_NUMBER : 1
TO_PT : 7
SCORE_SURGERY : 1
ANY_SIDE : 1
PITCH_HE : 1
GOAL_OF : 1
ONE_STATES : 1
BEDTIME_CHO : 1
HIGH_REQUREMENT : 1
HEALTH_ADVANCED : 1
SPC_ALERT : 1
CLOTHING_WEIGHING : 1
FOLLOW_NURSING : 1
FACTORS_IDENTIFIED : 1
AGE_EDUCATION : 1
GROUP_OCCURRENCES : 1
CONSULT_NEED : 1
WAS_AS : 1
HAS_FLI : 1
WRITER_WOULD : 1
QID_CONTROL : 1
SYND_HCT : 1
INSURANCE_COMPANIES : 1
BEEN_ADMITTED : 1
ALSO_WANTS : 1
REVIEWED_WHEN : 1
WITH_FOSAMAX : 1
ANY_EFFECTS : 1
PAST_USE : 1
BEEN_TO : 3
UP_THE : 1
DEMONSTRATED_UNDERSTANDING : 1
ANSWER_MARRIED : 1
NOT_TAKING : 1
GOAL_TO : 1
THE_BENEFITS : 1
PATIENTS_POTENTIAL : 1
THE_SPECIAL : 1
PT_TRAVELS : 1
REPORTS_CHRONIC : 1
ELECTIVE_COMMENT : 1
BY_AMPUTATION : 1
IN_THEY : 1
LOCK_FLUSHED : 1
DETERMINED_TO : 1
SI_SHE : 1
APPOINTED_SOORYA : 1
SC_ED : 1
PATIENT_HAD : 1
PROBLEM_WHILE : 1
USE_THE : 1
PO_ACTIVE : 6
AS_AM : 1
PHYSICIAN_NTACT : 1
AND_ORIENTED : 3
MIRALAX_GM : 1
LOCATED_ON : 1
MET_HIS : 1
OF_HIS : 3
DYSPHAGIA_WITH : 1
LEFT_THAT : 1
INTO_MY : 1
COLLINS_ALL : 1
RISK_SURGICAL : 1
TO_TOUCH : 1
THE_PATIENT : 10
DOES_MEDICATION : 1
SEEK_STAFF : 1
OF_EVALUATION : 1
PATIENT_VERBALIZED : 1
CONSTRUCTION_IS : 1
CHAPLAINS_PEERS : 1
MANY_DIFFERENT : 1
IS_PRESSING : 1
THEIR_SOBRIETY : 1
SITE_FEB : 1
ASSISTANCE_BEFORE : 1
BEEN_CLINICALLY : 1
NOT_AND : 1
LEVEL_INTENT : 1
EYE_DROPS : 1
NKA_UNABLE : 1
LOWER_CURRENT : 1
CANCER_INTRODUCER : 1
OCCURRENCES_RECENTLY : 1
UNITS_SUBCUTANEOUS : 1
ELAVIL_REFERRING : 1
BETWEEN_THE : 1
MONITOR_HE : 1
HAS_YEARS : 1
AND_AID : 1
REQUESTED_THAT : 1
DISORDER_THE : 1
PALPATE_QUADS : 1
ML_ALC : 1
PATIENT_STATUS : 1
AVOID_SMOKING : 1
ARE_THAT : 1
NEGATIVE_PTSD : 1
RESPONSE_IS : 1
ORDER_ENHANCE : 1
SAT_PULSE : 1
PREDNISONE_LOCATION : 1
MOUTH_PENDING : 1
THE_BEST : 1
CURRENTLY_HOWEVER : 1
AT_VISIT : 1
ADMISSION_SUFFICIENT : 1
MADE_MULTIPLE : 1
PATIENT_CURRENT : 1
SPECIALTY_CARDIOLOGY : 1
TREATMENT_PUT : 1
INDIVIDUAL_MAKE : 1
TRANSFER_PLAN : 1
OUTPATIENT_EXCLUDING : 2
REST_JUST : 1
FROM_ACTIVITIES : 1
MORNING_FOR : 1
AGAIN_BEFORE : 1
THAT_CAN : 1
HIM_LOT : 1
TO_TOBACCO : 1
ACOS_FOR : 1
NOT_DROWSYNESS : 1
IF_ADDENDUM : 1
HARM_RISK : 1
REPEAT_DOSE : 1
AUDITC_NEGATIVE : 1
DIRECTIONS_HE : 1
IMPORTANCE_OF : 1
BEING_EDUCATED : 1
MEANT_HE : 1
SOME_MONTH : 1
TEMPERATURE_AIR : 1
REFERRAL_ANESTHESIA : 1
PATIENT_AT : 1
SUPPLIES_RECEIVED : 1
AFFECT_COORDINATOR : 1
NEEDED_INPATIENT : 1
CATH_INTACT : 1
DENIED_MANIA : 1
WILL_ASSESS : 1
ORDERED_HUMAN : 1
SITE_AND : 1
BEEN_THEM : 2
NEW_FUNCTIONED : 1
IS_ANXIOUS : 1
TUNNEL_DENIES : 1
WEEK_HE : 1
PUT_IN : 1
WANTS_TO : 2
VALUABLES_BELONGINGS : 1
JUL_MULTIPLE : 1
BEEN_VISIBLE : 1
JUST_INSTRUCTIONS : 1
SL_MD : 1
ALONE_HOUSE : 1
THREATS_SELFHARM : 1
STRIP_STRIP : 1
FINALLY_TO : 1
PHYSICIAN_WITH : 1
POST_RESTING : 1
SEE_ABOUT : 1
II_SIGNS : 1
PROCEDURE_TOTAL : 1
USE_NO : 1
CONTACT_WAS : 1
NO_MOBIL : 1
AREA_ISOLATED : 1
TO_BLUE : 1
PAIN_PT : 1
HERNIA_BECOMES : 1
BE_CONTACTED : 1
STOMACH_PAIN : 1
PLACED_IN : 1
HELP_DEATH : 1
CTRS_GROUP : 1
STATE_DISCUSSED : 1
PROTOCOL_USED : 3
BROUGHT_TRANSPORT : 1
TIME_RESULT : 1
ENJOY_DIVERSION : 1
TERM_PT : 1
ST_LOW : 1
REGULAR_UNITS : 1
NUMBER_CONTACT : 1
STATE_MANAGEMENT : 1
NOT_AT : 4
SKIN_ON : 1
AND_THURS : 1
ARRIVED_TO : 1
FINGER_TIMES : 1
THEY_HAD : 1
GRANULAR_HYPERKERATOTIC : 1
FORM_TO : 1
EXAM_STAFF : 1
MR_AN : 1
HE_SUBSTANTIATE : 1
MIN_CHECKS : 1
FOLLOWING_MOTORCYCLE : 1
ANTRAL_ULCER : 1
SOME_RATE : 1
MEDICATIONS_PS : 1
PEELING_STOMACH : 1
INDIVIDUAL_PSYCHOTHERAPY : 1
COMPLAINT_PSYCHIATRIC : 1
FOLLOWING_MELLITUS : 1
FOLLOWUP_PLAN : 1
OTHER_PEOPLES : 1
COLONOSCOPY_SCANNED : 1
RECURRING_OF : 1
MEDS_EXTRACT : 1
WAS_DO : 1
DECLINED_AND : 1
MEDICAL_OR : 1
INFORMATION_OBTAINED : 1
OUT_HE : 1
PROSTATE_URINARY : 1
MOOD_STABILITY : 1
PLEASE_DATE : 1
INTRAMUCOSAL_CONSTIPATION : 1
HE_FELT : 1
TELEPHONE_SELFREPORT : 1
PULSE_VETERAN : 1
JOINT_CYST : 1
PER_ESTION : 1
PATIENT_METHOCARBAMOL : 1
FEB_TO : 1
OCCURRENCES_REMAINS : 1
SUFFICIENT_MOTIVATION : 1
NOTE_COMPLETION : 1
EXAM_ORIENTED : 1
PATIENT_TAB : 1
WHEN_IM : 1
LOW_MODERATE : 1
LETTER_AND : 1
NORMAL_OXIMETRY : 1
HIGH_HOME : 1
AVONDALE_HE : 1
DERMATOLOGIST_WILL : 1
NEEDED_BRANCH : 1
FINANCES_CURRENTLY : 1
PREVENTIVE_HEALTH : 2
THE_RISK : 1
THE_LOCAL : 1
IF_APPLICABLE : 1
SPECIALIST_MAY : 1
IN_INDICATES : 1
FAMILY_COUNSELOR : 1
FEELING_HYPERTROPHY : 1
GROUP_EDUCATION : 1
PRODUCTS_WITHIN : 1
LAST_PULSE : 1
MH_NURSING : 1
THEY_PUT : 1
MONITOR_BREATH : 1
ABUSE_PROBLEM : 1
RECEIVED_NOTE : 1
ESTION_CONTACTED : 1
PT_WILL : 1
LEFT_SXS : 1
AMIODARONE_TAB : 1
WITH_HEALTH : 1
SMOKES_CIGARETTES : 1
BEING_DAZED : 1
SUICIDE_IDEATION : 2
OF_INTRAMUCOSAL : 1
FRIGHTENING_FOR : 1
AT_YES : 1
AMBULATORY_ADDENDUM : 1
CURRENT_YEARS : 1
DURATION_SIGNIFICANT : 1
CONDITION_OF : 1
APPLICABLE_ICU : 1
CHOL_NO : 1
PATIENT_OBTAINED : 1
WED_LAST : 1
REPORT_OF : 1
AND_CRAFTS : 1
WRITER_FURTHER : 1
DESIRE_TO : 1
PHYSICAL_EXAM : 2
HE_ABLE : 1
AND_ME : 1
RX_MS : 1
CHRONIC_MEDICAL : 2
CAREGIVER_COUNSELING : 1
HR_MG : 1
TAB_SA : 1
RISK_WAS : 1
PO_SUBJECTIVE : 1
DRUG_USE : 1
IN_NO : 1
AND_INTERVENTIONS : 1
DEPT_AN : 1
TOTAL_ENCOUNTER : 1
NOTE_PERSON : 1
AMLODIPINE_TAB : 1
PT_AWAKE : 1
TALKED_HER : 1
CONCERN_ABOUT : 1
SUBJECTIVE_DOING : 1
WORKS_INFO : 1
SOAP_FOR : 1
RPP_PT : 1
AUG_AGE : 1
HAS_MULTIPLE : 1
APPEARED_ENJOY : 1
ATRIAL_FIBRILLATION : 1
WAS_MINUTES : 1
QUADS_NO : 1
EVALUATION_AND : 1
COORDINATOR_CLINICAL : 1
YET_SAID : 1
NO_VOICED : 1
SOAP_SCREEN : 1
TID_PTSD : 1
SURROUNDING_MG : 1
AND_CM : 1
MULTIVITAMIN_VERDSOME : 1
PUTS_RECOVERY : 1
ABLE_MOW : 1
INTERVENTIONS_USED : 1
MANY_CLINIC : 1
ABOUT_ALL : 1
OF_HEPARIN : 1
ADDRESS_SOME : 1
VETERAN_HAS : 1
MOST_RECENT : 1
MESSAGE_PATIENT : 1
TO_TO : 8
AND_GROUPS : 1
SXS_SUCH : 1
FALLS_MAINTAINED : 1
WAS_CALLED : 1
MEDICATIONS_HAS : 1
SERVICE_SEPERATED : 1
IS_UNKNOWN : 1
INJURY_AMPUTATION : 1
BRADSHAW_THE : 2
WAS_SCORE : 1
AND_ER : 1
SOME_STATE : 1
FT_COLLINS : 1
TX_THE : 1
DR_OFFICE : 1
RETINOPATHY_BUT : 1
IN_IMPROVED : 1
LEFT_ASKED : 1
WITH_PT : 1
CA_PATIENT : 1
MIX_IN : 1
AM_VITALS : 1
TID_PRN : 1
TO_TERRIBLE : 1
SCHEDULED_ADVISED : 1
TAKING_MEDICATION : 1
OL_LAST : 1
ABOUT_LESION : 1
AN_BASIS : 1
MEDICATIONS_NOT : 1
AT_ALL : 1
REACH_VETERAN : 1
EXPOSURE_OTHER : 1
ENDING_AM : 1
RISK_INHALER : 1
FULLY_MILIEU : 1
WITH_MILITARY : 1
NO_THEN : 1
THIS_DEVELOPED : 1
PATIENT_WITH : 1
DONE_ADDENDUM : 1
ELBOW_PAD : 1
STATED_VET : 1
GOOD_THE : 1
TELEPHONE_NOTE : 6
STAFF_CHAPLAINS : 1
NONREDUCIBLE_PT : 1
APPLICABLE_FOUR : 1
WERE_AND : 1
NO_RONCHI : 1
STATE_PHONE : 1
DO_PAY : 1
DISCHARGE_ING : 1
WNL_ENDING : 1
SELFREPORT_THE : 1
CBOC_DENIED : 1
PAST_NEW : 1
DISCUSSED_ASKING : 1
FEVER_DRAPED : 1
PRIOR_ADMISSION : 1
OUTPATIENT_DIET : 1
IN_FAMILY : 1
COPAY_STATUS : 1
URINARY_SXS : 1
WED_OPIOID : 1
BEEN_NEWLY : 1
HAND_PEELING : 1
TYPE_PT : 1
HISTORY_GUN : 1
JUN_AGE : 1
MUCH_BETTER : 1
MOW_GRASS : 1
PCP_TO : 1
SIGNS_CYANOSIS : 1
FILL_DATE : 1
RX_MG : 1
SUBJECTIVE_SIG : 1
SPECIALTY_CLINIC : 1
PAIN_HOMEMAKER : 1
PATIENTS_INCLUDES : 1
NO_RHYTHM : 1
REPORTED_THAT : 1
TOBACCO_TETANUS : 1
THE_UPPER : 1
PROBLEMS_NO : 1
INCLUDING_ADJUSTMENT : 1
HE_LIVED : 1
TESTING_MODERATE : 1
HTN_PHYSICAL : 1
BASIS_HIS : 1
THE_BETWEEN : 2
FILL_TAKE : 1
PHYSICIAN_SAT : 1
PHYSICIAN_SULF : 1
REFILL_PT : 1
WORST_PAIN : 1
MAY_TIP : 1
UP_APPT : 1
TOUCH_FORMED : 1
CHART_AND : 1
NUMBER_TOLD : 1
MEDS_DISCHARGE : 1
SOBRIETY_AND : 1
OF_BECAUSE : 1
DATE_STATUS : 1
ACTIVE_ALLERGIES : 1
PLACED_RM : 1
WHO_IS : 1
INFO_AT : 1
YOU_TAKE : 1
HASNT_TO : 1
LMSW_IS : 1
MEASURES_ON : 1
DEPRESSED_THIS : 1
HELPED_IMPROVE : 1
DULL_EXTREMITIES : 1
REC_SOME : 1
PRESSURE_RBC : 1
HE_NOT : 5
ONSET_DURATION : 1
CM_DX : 1
ALLERGIES_HYPERTENSION : 1
FORM_WRITTEN : 1
MG_FSP : 1
PATIENT_TAKING : 2
TO_CERVICAL : 1
OR_HI : 1
IS_MEASURES : 1
PAPERWORK_OP : 1
DO_PAST : 1
MHC_FOLLOWUP : 1
ADENOCARCINOMA_PATIENT : 1
HYDROXIDE_ORAL : 1
TO_ME : 2
ME_WOULD : 1
ADL_FLOWSHEET : 1
GAS_DISCOMFORT : 1
AS_NO : 1
NKDA_NO : 1
CONTACT_RECREATION : 1
COOPERATIVE_TV : 1
IMAGE_OF : 1
ACTIVE_WHILE : 1
MOBIL_TO : 1
RCVD_PCP : 1
ON_HIS : 1
UP_PATIENT : 1
PATIENT_REPORTED : 1
JUICE_AGE : 1
TAB_HR : 1
TREATMENT_PATIENT : 1
IN_RIGHT : 1
ALL_TO : 1
HE_FELL : 1
IMAGE_TYPE : 1
MEDS_HOW : 1
STATUS_THE : 2
NURSING_SUMMARY : 1
CAN_TREATMENT : 1
IED_NO : 1
SPELLING_EKG : 1
CLARIFIED_ON : 1
HISTORY_HE : 1
ORIENTED_DATE : 1
CLEAR_ALLERGIES : 1
THAT_HAS : 1
PT_FOR : 5
CALL_BEEN : 1
PROVIDED_ADEQUATELY : 1
WITH_IN : 1
SUPPORT_OF : 1
BURSA_CYST : 1
IN_DIAMETER : 1
MET_MR : 1
KG_LABS : 1
AT_HOME : 3
ANXIETY_LONGSTANDING : 1
USED_DO : 1
MINUTES_RESTING : 1
FUTURE_POINTED : 1
TO_MAKE : 1
IDENTIFIED_MEDIASTINUM : 1
MEDICATIONS_EXCLUDING : 2
STATES_HAS : 3
TEST_USE : 1
ASSESS_THE : 1
CONSENT_WAS : 1
WELL_ADDENDUM : 1
PULSE_NAME : 1
PRESENT_FOR : 1
HER_HE : 1
RESPONSIBILITIES_VALUABLES : 1
BEHAVIORS_PAST : 1
FOR_WITH : 1
TO_LEARNING : 2
BELOW_PRIOR : 1
MAY_BE : 2
MANAGEMENT_HEENT : 1
IN_AFTERNOON : 1
NOT_LAST : 1
IS_SOURCE : 1
OUTSIDE_RECORDS : 2
ACTIVE_AND : 1
BOTTOM_HIS : 1
HIS_SLOT : 1
STATUS_FILL : 2
WHILE_CROSSING : 1
WOULD_NECESSARY : 1
HAD_WAS : 1
USED_VERIFY : 1
FEB_MEDICATIONS : 1
VOIDING_AMOUNTS : 1
THINGS_TO : 2
EVALUATION_UNDERSTANDING : 1
LEFT_ELBOW : 1
TO_IS : 1
HEALTH_MANAGEMENT : 2
HE_FAMILY : 1
MEDICAL_FOLLOWUP : 2
ASSESSMENT_IN : 1
OTHER_MOST : 1
HIM_LETTER : 1
PULSE_GASTROINTESTINAL : 1
STATUS_POST : 1
APPOINTMENT_WAS : 1
DEPRESSIVE_BEING : 1
ISOLATED_BY : 1
BREATH_CAN : 1
COPD_PT : 1
HEPATITIS_CONCERNED : 1
THAT_WILL : 1
TO_FOLLOW : 3
XYZZY_PROBLEM : 2
AND_INJECTION : 1
CROSSING_STREET : 1
THERAPY_OTHER : 1
ANTIHISTAMINES_NO : 1
HIS_WROTE : 1
LEFT_KNEE : 1
OFFICE_PT : 1
MEANT_HAD : 1
OR_DEVICES : 1
TO_WORK : 1
BLUE_CROSS : 1
WANTS_SUPPORTIVE : 1
THE_WORK : 1
ASSIST_THEM : 1
TO_THREE : 1
TAMSULOSIN_AT : 1
THANKS_PRESSURE : 1
SHOWN_ENTITLED : 2
SHARE_ENABLED : 1
THE_GLUCOMETER : 1
DO_OPERATE : 1
HAS_TEST : 1
FINANCES_HAS : 1
FOCUS_TO : 2
TIME_SESSION : 1
THE_DIVERSION : 1
INSTRUCTIONS_TO : 2
PATIENT_UNDERSTANDING : 1
PATIENT_LABS : 1
UNKNOWN_NO : 1
SOMEWHAT_HYPERTROPHY : 1
WITH_REGARDING : 1
OF_BURSA : 1
THAT_PUTS : 1
PERIOD_RECENT : 1
FLOWSHEET_WATHCHES : 1
COLLINS_BUS : 1
AND_POSSIBLE : 1
FOR_TRANSPORT : 1
STATE_WHAT : 1
CRAMPING_STARTED : 1
ASKED_TO : 1
LIB_NO : 1
FULLY_COMPETENT : 1
RED_TREATED : 1
SOME_ON : 1
AN_PULSE : 1
AND_STATES : 2
HIS_DOB : 1
RI_ANXIETY : 1
IDEATIONS_AT : 1
METOCLOPRAMIDE_MG : 1
PERSON_PLACE : 1
PER_PCP : 1
SPOKE_OBSTACLES : 1
RISKS_PATCHROTATE : 1
FAULT_NOT : 1
NOT_REFILLED : 1
LUNG_AND : 1
LB_ID : 1
OSTEOMYELITIS_NURSE : 1
OT_FOR : 1
CODEINE_PENICILLIN : 1
OIF_MARRIAGE : 1
CHANGE_BOWEL : 1
ASKED_PATIENT : 1
TO_ALERT : 1
AND_ASSESS : 1
THE_DISCUSSION : 1
MANAGEMENT_WAS : 1
TRS_SATT : 1
DULL_ACHE : 1
SUSP_ORAL : 1
TIMELY_APPOINTMENT : 1
MON_PO : 1
THANKS_PATIENT : 1
MEDICAL_RECORDS : 4
EACH_UNCHANGED : 1
KILL_THEY : 1
AWAKE_AND : 1
VET_HEAD : 1
TO_LOW : 1
WAS_TO : 4
MEDICATIONS_AND : 2
APPOINTMENT_FOR : 1
PROSTEHESIS_IMPLANTABLE : 1
ADMISSION_DECISION : 1
ADJUSTMENT_BE : 1
SUPPLIES_RECOVERY : 1
COMPETENT_ACTIVITIES : 1
PANIC_HAD : 1
OF_DISCUSSED : 1
CONSULT_DENIES : 1
SOORYA_LANS : 1
SULFATE_SUSPICIOUS : 1
FOSAMAX_MG : 1
STOMACH_METRONIDAZOLE : 1
ONLY_IT : 1
NEVER_AT : 1
OF_TELEPHONE : 1
AS_PANIC : 1
IS_EDEMA : 1
PLAN_FOR : 1
GETTING_OF : 1
NO_IMPAIRMENT : 1
OCCASIONALLY_LAST : 1
IN_SOCIETY : 1
HIS_AND : 4
WILL_THE : 1
ABD_PAIN : 1
TETANUS_IMMUNIZATION : 1
NUTRITIONAL_WITHIN : 1
MAY_READY : 1
PLAN_PT : 2
GET_READINGS : 1
TAKE_AS : 1
TO_RIGHT : 2
WAS_ACTIVE : 1
ENCOUNTER_MINUTES : 1
FOR_SINCE : 1
OF_PROCEDURE : 1
TREATED_HEMATURIA : 1
NOW_CLICK : 1
BOWEL_COENZYME : 1
PT_FROM : 1
UNDERSTANDING_SELF : 1
KG_REVIEWED : 1
DYE_INTO : 1
MY_AND : 2
RISK_PHYSICIAN : 1
MANAGEMENT_NEED : 1
CAPILLARY_SEC : 1
PLACE_TO : 1
NO_AFTER : 1
NEEDED_HELP : 1
FACE_AND : 1
PHYSICIAN_PULSE : 1
ACTIVITY_IS : 1
PT_ADMITTED : 1
AUG_LOW : 1
NOT_BEING : 1
TO_CONVEY : 1
INTEREST_PLEASURE : 1
PULSE_BARRIERS : 1
COLON_CA : 1
DISORDER_PATIENT : 1
TAB_PO : 4
PAIN_LEVEL : 1
CAME_THIS : 1
OR_HAND : 1
OR_AND : 2
WEEK_ALERT : 1
DO_BLOOD : 1
NO_TREATMENT : 1
ASKED_WHY : 1
METATARSAL_HEAD : 1
IN_PT : 1
RAL_AND : 1
RALES_SAT : 1
INDIVIDUAL_LABS : 1
APPOINTMENT_BLOOD : 1
VIA_SIGNER : 1
MODERATE_MOST : 1
FOR_FOLLOWING : 1
NO_PL : 1
PROBLEM_REFRACTIVE : 1
SIGNS_WEAR : 1
SPC_TO : 2
YES_READING : 1
WORK_UP : 1
NO_REVIEWED : 1
WERE_FOR : 1
STATUS_PAST : 1
AFTER_ATTEMPTS : 1
ASKING_HELP : 1
COMMENTS_SELENIUM : 1
IS_OLD : 3
IN_PAIN : 1
ADDENDUM_WRITER : 1
CURRENT_ESOPHAGEAL : 1
FOR_THE : 5
EATING_MINIMUM : 1
ULCER_IV : 1
FOLLOWUP_OF : 1
WIFE_DOES : 1
FOR_GECAC : 1
AND_COMPRESSION : 1
WAS_DONE : 1
STRUGGLING_SOME : 1
HAS_SCL : 1
WITH_JUICE : 1
VA_HAS : 1
CONCURRENT_SIGNATURE : 1
THE_FROM : 1
HISTORY_COLONOSCOPY : 1
EDUCATION_KILL : 1
DROPS_DILATE : 1
MG_ULTRAM : 1
COPD_MANAGEMENT : 1
HE_WILL : 1
SMOKING_EXPOSURE : 1
PURIFIED_DERIVATIVE : 1
IS_BASIS : 1
PROTECTIVE_ABSENT : 1
AID_NONE : 1
WILL_TO : 2
SEEING_SOMEBODY : 1
WITH_PROVIDER : 1
DOCTORS_INSTRUCTIONS : 1
COMPLETELY_IF : 1
MAR_CONSENT : 1
ON_TIU : 1
THE_EATING : 1
SCHEDULED_TO : 1
PSA_EDUCATION : 1
WNL_THIS : 1
GOALS_TO : 1
BLOOD_CUFF : 1
TO_RESPOND : 1
INCREASED_OR : 1
SEPERATED_PLEASE : 1
CONDITION_IS : 1
CY_SITE : 1
TO_SW : 1
QID_FSP : 1
IN_DOB : 1
BB_FALL : 1
DISCUSSED_MEDICATIONS : 1
OR_PROTOCOL : 1
DATE_OF : 3
FOLLOWUP_DOXAZOSIN : 1
VET_WILL : 1
CAP_ORAL : 1
OF_SESSION : 1
KNOW_NUMBER : 1
HIS_WRITTEN : 1
AT_TIMES : 2
ON_PLACED : 2
OF_ADENOCARCINOMA : 1
CONSTA_HTN : 1
COMES_TO : 1
FOR_PHYSICIANS : 1
AT_SB : 1
REQUEST_YEARS : 1
MANEUVER_MY : 1
FOLLOWING_FACTOR : 1
BM_BESYLATE : 1
HAS_INTERVENTIONS : 1
NOT_GIVEN : 1
DIPTHERIA_SUBJECTIVE : 1
IS_ELIGIBLE : 1
PATIENTS_AT : 1
SO_FOR : 1
HERNIA_NONREDUCIBLE : 1
EXAM_GRANULAR : 1
CLOTHING_FOR : 1
WITH_TREATMENT : 1
TRIAGE_SUICIDE : 1
AGE_PSA : 1
ME_HE : 1
HEALTH_BP : 1
CARE_WOUND : 1
HIGH_AT : 1
FOR_PAIN : 3
SUPPORT_WILL : 1
ML_ML : 1
ANOTHER_IN : 1
UP_AD : 1
PATIENT_RESPIRATION : 1
THE_WILL : 1
HAD_DREAMS : 1
ABLE_ACCOMPLISH : 1
PREVMED_HAVE : 1
DRIVER_FOR : 1
AN_WHEN : 1
DIDNT_LEFT : 1
BRIEF_HISTORY : 2
NURSING_FORM : 1
THREE_TERAZOSIN : 1
PATIENT_CLEAR : 1
FEELING_DEPRESSED : 1
NICOTINE_PRODUCTS : 1
GIVEN_ORDERED : 1
FROM_TO : 3
PLAN_STATUS : 1
MALE_RESULT : 1
MALE_NEED : 1
SPINAL_CANAL : 1
MONOTONE_VOICE : 1
CLINICALLY_ACCORDING : 1
MSE_PT : 1
THE_BRONCHOSCOPY : 1
IS_LESS : 1
PT_PRESENT : 1
TOLERATED_SCANNED : 1
RATHER_REFERRAL : 1
SPELL_ADMISSION : 1
SATT_THERAPY : 1
URGENCY_BOWEL : 1
STRUGGLING_WITH : 1
PRESSURE_WAS : 1
EYE_CONTACT : 1
IF_DIABETIC : 1
FEB_DX : 1
OPERATIVE_AND : 1
MARRIED_MALE : 1
THANKS_BLOOD : 1
PULSE_BP : 1
DESIRE_MOTIVATION : 1
AT_HEALTH : 1
FOR_THERAPY : 1
GERIATRICS_EXTENDED : 1
THEIR_PEERS : 1
CAUSING_HIM : 1
MR_HIS : 1
AT_THE : 2
OF_WEEK : 1
SERVICECONNECTED_CAUCASIAN : 1
THEY_ONLY : 1
ARNP_BRING : 1
GROUP_OLD : 1
TO_MANEUVER : 1
FOR_TERM : 1
PO_DAILY : 1
ALZHEIMERS_OT : 1
BOTH_LIQUIDS : 1
TOMORROW_FIRE : 1
CURRENT_MEDICATIONS : 2
FRONT_THE : 1
THE_MANAGEMENT : 1
CALL_ONCE : 1
EDUCATION_ENTER : 1
SUICIDE_AN : 1
ASSESSMENT_TO : 2
PAIN_MEDICATIONS : 1
FROM_MEDICATIONS : 1
WRAPUP_GROUP : 1
AOD_PROVIDED : 1
TO_VA : 1
RATE_OTHER : 1
ON_MAY : 1
AND_PSYCHOTROPIC : 1
NEEDED_BUT : 1
TAB_ZOCOR : 1
MEDICATION_FOR : 1
IVF_AND : 1
IS_ACTIVE : 1
CV_GLUCOSE : 1
MINUTES_STRUGGLING : 1
RISK_RESULTS : 1
HEALTHY_THEIR : 1
HAS_PHONE : 1
DIABETES_MELLITUS : 2
PT_HERE : 2
FROM_PRESENTS : 1
ELEVATED_ADDENDUM : 1
PROVIDED_ON : 1
YOU_ONE : 1
FOR_DIGITAL : 1
DISTINCTION_THE : 1
ELECTIVE_OUTPATIENT : 1
MEASURED_BY : 1
GRAPEFRUIT_JUICE : 1
VISTA_IMAGING : 1
EXTRACT_KNOWN : 1
EXPLAINED_TO : 1
GIVEN_THE : 1
SKIN_MOISTURE : 1
INCLUDING_OPERATIVE : 1
CONTINUALLY_DATE : 1
POSSESSION_AND : 1
NOT_OF : 1
UNDERST_ALLERGIES : 1
CAN_THEIR : 1
PULSE_ON : 1
IBUPROFEN_TAB : 1
RECENTLY_CAUCASIAN : 1
DOING_DECLINED : 1
OTHER_DISCUSSIONS : 1
TO_HOUSE : 1
FOR_HEARTBURN : 1
TOTAL_ARTHROPLASTY : 1
REGARDING_RESPONSIBILITIES : 1
AT_RILEY : 1
THIS_SSN : 1
WEEK_THE : 1
FT_ON : 1
LEG_MBD : 1
NOT_KNOW : 2
BLOOD_APPLIES : 1
ESOPHAGEAL_CANCER : 1
LOW_AXIS : 1
CHANGES_SEE : 1
SUFFICIENT_WAS : 1
ABOUT_OBSTACLES : 1
TO_DO : 1
ACCORDING_THE : 1
FOR_YRS : 1
EMOTIONAL_WILL : 1
NOTE_IMPORTANCE : 1
PING_BREATHING : 1
OF_WED : 1
ANWER_SEVERAL : 1
CONTINUE_AS : 1
WITH_FORMED : 1
CAN_AND : 1
SHOW_LETTER : 1
SENSES_SECONDARY : 1
DONNING_FLEXION : 1
INTACT_NO : 1
DIMINISHED_BLOOD : 1
SENSORY_NO : 1
PAIN_MEDS : 2
WELCOME_PHARMACIST : 1
ESTIMATED_LENGTH : 1
ST_MEASURING : 1
FOR_DIABETIC : 1
EACH_FROM : 1
FROM_CHERRYS : 1
SYMPTOMS_ADDENDUM : 1
IS_FEELING : 1
SIX_MONTHS : 1
FCPD_DISPATCH : 1
STATUS_ALERT : 2
THEIR_WHEN : 1
TOMORROW_SMOKING : 1
RETURNED_CLINIC : 1
ESOPHAGUS_FROM : 1
REPRESENTATIVE_DISCUSS : 1
ASA_BB : 1
CORRESPOND_TO : 1
ROUTINE_BREATHING : 1
ANXIOUS_IS : 1
DOCTOR_EYE : 1
SITE_FOR : 1
STABILITY_CHRONIC : 1
PERCOSET_AND : 1
LEARN_DESIRE : 1
DISCONNECTS_PAST : 1
PM_ADMISSION : 1
CAUSE_EMOTIONAL : 1
DING_DRAINAGE : 1
COUNSELOR_PATIENT : 1
COUGH_NOTED : 1
THE_ALLERGIES : 1
ABD_INDIGESTION : 1
CONCERNED_ABOUT : 1
CHANGES_LEFT : 1
TEST_THE : 1
GOAL_FOR : 2
CHART_MET : 1
WAS_IF : 1
DM_GUAIF : 1
PROJECT_TO : 1
RESPIRATION_ABDOMAN : 1
SULFATE_OF : 1
NOTE_THAT : 1
COULD_NO : 1
IF_FOUR : 1
CRAFTS_ALTERED : 1
INDEPENDENT_TOTAL : 1
WITH_PROVIDED : 1
THAN_THANKS : 1
SPOTS_THE : 1
AND_PARTICIPATED : 1
NOTE_BEHAVIORS : 1
DAILY_STOMACH : 1
SI_AND : 1
DILATE_WIDEN : 1
OF_HYDROXYZINE : 1
DECREASE_ADVANCE : 1
MEDICATION_RECONCILIATION : 1
AND_CODE : 1
TRIAGE_DIAST : 1
LEVEL_IN : 1
TO_ON : 3
ADDENDUM_PRIOR : 1
ME_IER : 1
NAME_SSN : 1
NUTRITION_ASSESSMENT : 1
WHAT_PRESENT : 1
RESPIRATORY_DISTRESS : 1
INTACT_REDNESS : 1
DOCTORS_DISCHARGE : 1
LOT_PROBLEMS : 1
APPROPRIATELY_FIBRILLATION : 1
CHECK_ONE : 1
AND_COUNSELOR : 1
WHO_REPORTS : 1
PSYCHOSIS_NO : 1
IN_MONITOR : 1
AND_WE : 1
OR_PAST : 1
IMAGING_DIGITAL : 1
CLINICAL_UP : 1
UNSURE_THIS : 1
TAKING_NEGATIVE : 1
NOTE_ORDER : 1
DEPARTMENT_NURSING : 1
TO_PEOPLES : 1
FOLLOWUP_MEDICAL : 1
INHALER_USE : 1
EVERY_EDUCATION : 1
FOR_PRIOR : 1
HAS_ASKING : 1
ABOUT_SKIN : 1
DELUSIONS_OF : 1
DIGITAL_PAGER : 1
CLINICAL_HISTORY : 2
STATUS_FULLY : 1
SYMPTOMS_COMPLAINS : 1
CONTINUE_TO : 1
MEDICAL_CONDITION : 1
TDADULT_SUBJECTIVE : 1
DATE_ADMISSION : 1
PRIMARY_CODE : 1
PATIENT_AFIB : 1
YES_THIS : 1
FAINTING_REFERRAL : 1
NURSING_INTERVENTIONS : 1
AT_AM : 2
IMPLANTABLE_DEVICES : 1
PT_SAID : 1
VET_HE : 1
YOUR_CURRENT : 1
UNDERSTANDING_SPECIALTY : 1
WAS_NEGATIVE : 1
PATIENTS_MEDICATIONS : 1
GIVEN_PAST : 1
HE_BEEN : 3
THAT_WEAK : 1
EPIS_OF : 1
NO_IMPROVING : 1
KG_KG : 1
THEY_AS : 1
LIST_OF : 1
CARDIAC_RHYTHM : 1
NOT_CURRENTLY : 1
YET_HE : 1
BREATH_DENIES : 1
RE_SCHEDULED : 1
SYMPTOMS_AS : 2
FACTORS_EXPLAINED : 1
OBSERVED_DISTRESS : 1
THIS_AND : 1
SO_HE : 1
ON_THEY : 1
OF_AWA : 1
WAS_HIGH : 1
ACTIVITY_TREATMENT : 1
OTHERS_ADDENDUM : 1
ALERT_RELATIVES : 1
CARE_ON : 1
COMM_FAX : 1
IN_DISCUSSION : 1
NEEDS_NURSING : 1
FORM_ANXIOUS : 1
TOOK_REST : 1
DIPYRIDAMOLE_MG : 1
SURROUDING_KNEE : 1
ESTABLISHED_CONSULT : 1
CARDIAC_PING : 1
NOTE_BEING : 1
IS_IMPROVED : 1
IT_PATIENT : 1
PLAN_FILMS : 1
HARM_TO : 1
HE_PROVIDE : 1
INTELLIGENCE_FINANCIAL : 1
DECISION_MOISTURE : 1
BLOD_GLUCSOE : 1
TRAVEL_FOR : 1
FELT_OR : 1
AND_AWAKE : 1
INCREASING_OF : 1
CHEST_PAIN : 2
THAT_WRITER : 1
ICDCM_HOURS : 1
RISK_FACTORS : 1
TAB_DATE : 1
ONCE_IS : 1
RHYTHM_CLEAN : 1
TAB_TO : 1
REVIEWED_OPERATIVE : 1
AMPUTATION_OF : 1
INPT_PLAN : 1
PULMONARY_ACUTE : 1
WITHOUT_REPORTS : 1
ALCOHOL_TEST : 1
JUN_FLUORESCENT : 1
NOTE_ADMITTED : 1
IN_MASS : 1
EXTRACT_NO : 1
THE_TUNNEL : 1
WHEN_PAIN : 1
INFORMATION_CLINICAL : 1
CLEAR_UNDERST : 1
TO_DELUSIONS : 1
THE_CARE : 1
IS_PRESENT : 1
IN_BY : 2
WELL_OTHER : 1
SKELETAL_INDEPENDENT : 1
TO_EACH : 1
OF_FOUND : 1
MONEY_LIVE : 1
AND_FINANCES : 1
UNIT_AND : 1
WEAK_PER : 1
THE_GROUP : 3
PLACED_DOPAMINE : 1
FOR_ANALYSIS : 1
STATUS_OF : 1
RECEIVED_AT : 1
REPORT_IDEATION : 1
ONE_NIGHT : 1
PROBLEMS_PAIN : 1
WAS_SEEN : 2
JUN_DYE : 1
LAST_PC : 1
PCP_ADDENDUM : 1
WITH_NEUROLOGICAL : 1
PHYSICIAN_OR : 1
DOSE_MG : 1
MORE_THAN : 1
BED_BREATH : 1
INSPIRATION_STATES : 1
INTACT_FALLS : 1
NICOTINE_OR : 1
SISTERS_UTILITIES : 1
COUNSELING_MITRAL : 1
PHONE_AND : 1
OVER_KILLING : 1
SELENIUM_SULFATE : 1
INVOLVING_LEG : 1
DIMINISHED_CMM : 1
MON_RECEIVED : 1
HAS_IMPROVE : 1
PER_SITE : 1
CORD_OR : 1
EFFUSION_HAS : 1
THE_AFTERNOON : 1
LECTURE_BIOMEDICAL : 1
BRONCHOSCOPY_AND : 1
RECENT_BRONCHOSCOPY : 1
MARRIED_BLACK : 1
ENDOSCOPIC_COLONOSCOPY : 1
ADVISED_HR : 1
CLINIC_DOSE : 1
VERBALIZED_UNDERSTANDING : 5
IN_MEDICATIONS : 1
MOUTH_HOURS : 1
TO_ER : 1
RILEY_TO : 1
BED_ADL : 1
RIGHT_SURROUDING : 1
TRS_CTRS : 3
PATIENT_ST : 1
AND_MET : 1
STATED_IT : 1
ACTIVE_IM : 1
SAME_TYPE : 1
NO_LORAZEPAM : 1
OBTAINED_FROM : 2
TO_BE : 7
PHONE_STATE : 1
WITH_AOD : 1
NO_ST : 1
ASKED_HE : 1
ARE_FAMILIAR : 1
SUBJECTIVE_WE : 1
OR_ABILITY : 1
PRESENT_IS : 1
BEHAVIORS_TRIP : 1
SCREEN_DEPRESSION : 1
OF_SEVERITY : 1
PROVIDE_ON : 1
AND_DS : 1
IN_LEVOTHYROXINE : 1
THE_TEAM : 1
WAS_AGAINST : 1
EKNURSING_RN : 1
VALUABLES_MONTH : 1
MD_MODERATELY : 1
PRESENT_TYPE : 1
ON_BOTTOM : 1
WAS_HEADED : 1
MALE_RACE : 1
MEDICATIONS_WERE : 1
THE_ANESTHESIA : 1
LORAZEPAM_TAB : 1
WITH_THE : 6
PULM_INJURY : 1
PER_PHYSICIAN : 2
VOMITING_HE : 1
TO_TRY : 1
TOLERATED_VISIT : 1
ENTER_DATE : 1
CONSTRUCTION_HE : 1
SERVICECONNECTED_MALE : 1
IN_THINGS : 1
MCG_FENTANYL : 1
TO_IBUPROFEN : 1
HEALTH_CARE : 1
PAIN_RHYTHM : 1
NOW_AND : 1
THEMES_ACTIVE : 1
ENOUGH_ROOM : 1
PROTECTIVE_SENSATION : 2
WHEN_SEEK : 1
IDENTIFIED_PROTECTIVE : 1
EMERGENCY_TREATMENT : 1
HIS_PLACED : 1
CA_AND : 1
PO_HS : 2
POSTIVE_PPD : 1
GROUPS_WITH : 1
MEDICATIONS_SPC : 1
AND_SCAN : 1
REMAINS_HIGH : 1
THE_TYPE : 2
DISTURBANCE_WAITING : 1
ANGRY_OF : 1
FLAGYL_ELAVIL : 1
LOCK_PER : 1
ACTIVITIES_DATE : 1
VINE_THE : 1
RN_DOES : 1
TIMELY_TO : 1
FOLLOWING_SETTINGS : 1
ASSESS_PAIN : 1
ABOUT_REPORTS : 1
CONDITIONS_HE : 1
FOLLOWING_THIS : 1
ERROR_INJECTIONS : 1
ELASTIC_TAB : 1
VSS_UNLABORED : 1
ML_DAILY : 1
DENIES_SUICIDAL : 1
SPOTS_ON : 1
THE_MEDS : 1
AGE_WITHOUT : 1
ORIENTED_PERSON : 1
ALCOHOL_OCCASIONALLY : 1
FOR_INTERVENTION : 1
LOW_SODIUM : 1
CHECK_IN : 1
START_HOMEMAKER : 1
MEASURED_PATIENT : 1
WITH_MINIMAL : 1
THEY_MAINTAINING : 1
FULLY_ASSESS : 1
READING_LUNGS : 1
SMOKE_THE : 1
SEC_ATTENDS : 1
THE_RHYTHM : 1
OR_IMPLANTABLE : 1
RECONCILIATION_COMPLETED : 1
OF_HEPATITIS : 1
OUT_TO : 1
OBSTACLES_THEY : 1
ORIENTED_PULSE : 1
PAIN_WEEK : 1
UNABLE_ASSESS : 1
WAS_MODERATE : 1
ALLERGIES_ALLERGIES : 1
UTILITIES_ANSWER : 1
VASCULAR_FOR : 1
RECOVERY_CLINICAL : 1
PHONE_VET : 1
TO_WIDEN : 1
SHOW_PODIATRY : 1
MEDS_NO : 2
JUST_GOT : 1
DATE_WITH : 1
HAS_BEEN : 12
SLOT_THANKS : 1
AGO_NOW : 1
RECORDS_HERE : 1
OR_NOW : 1
NO_PROBLEMS : 1
SHIN_ROOM : 1
HAD_PLAN : 1
REVIEW_DUE : 1
AND_FOOT : 1
FOR_FOLLOW : 2
MENTAL_NOTE : 2
PRESSURE_IN : 1
PAINT_CLINICAL : 1
SHAKE_TO : 1
AN_DID : 1
WANTS_KNOW : 1
SESSION_DATE : 1
AS_PATIENT : 1
CHRONIC_NURSE : 1
MYSELF_KNOW : 1
KNOW_ABOUT : 1
CHIEF_PSYCHIATRIC : 1
AGREEMENT_PCP : 1
NO_RECENT : 1
CLINIC_COMM : 1
WITH_ON : 1
LABS_ECHOCARDIOGRAM : 1
TOLD_THAT : 1
OF_FOLLOWING : 1
UNDERGOING_FOR : 1
THE_REQUEST : 1
OF_MEDICAL : 1
AD_LIBWHEELCHAIR : 1
RILEY_AND : 1
HE_KNOWLEDGABLE : 1
SOBRIETY_SHARE : 1
PATIENT_MINUTE : 1
THAT_BOX : 1
BY_THIS : 1
REVIEWED_MEDICATIONS : 1
OBSTRUCTIVE_PULMONARY : 1
AM_MUCH : 1
PROVIDE_FOR : 1
INDEPENDENT_CARE : 1
EXERCISE_TEST : 1
CONTACTED_GIVEN : 1
DENIES_ANY : 2
YEARS_WITH : 1
AT_POINT : 1
PHYSICIAN_ED : 1
PATIENTS_APPEARED : 1
IS_CHECKED : 1
PROPER_INHALER : 1
RECONCILIATION_MEDICATION : 1
KNOWN_ALLERGIES : 1
HAS_PPD : 1
NEGATIVE_EXERCISE : 1
VERY_FAMILIAR : 1
AOX_SMILING : 1
AT_BEDTIME : 1
TIME_THAT : 1
PROTECTIVE_FACTORS : 1
FOLLOW_AS : 1
WORK_TOMORROW : 1
EFFECTS_ROS : 1
PATIENT_IS : 4
SHIN_ENOUGH : 1
NURSING_RECEIVED : 1
KEEP_CURRENT : 1
AUDITC_WAS : 1
PAIN_THIS : 1
ONLY_SIG : 1
LEVEL_AS : 1
MONTH_AND : 1
TO_REVIEW : 2
TO_CM : 1
KNOW_OF : 1
STOMACH_AVOID : 1
ON_MEDICAL : 1
PLAN_PATIENT : 1
FAMILY_COLON : 1
WHEN_YES : 1
IN_BROUGHT : 1
MS_MG : 1
GAINESVILLE_PLAN : 1
TYPE_CONTACT : 1
IN_WHEELCHAIR : 3
NOT_PAY : 1
CYTOPATHOLOGY_BRIEF : 1
MEDICAL_CONDITIONS : 1
UPSETTING_IN : 1
READINGS_MR : 1
AS_HEMATURIA : 1
STOPPED_THIS : 1
WAS_SUPPORT : 1
ALSO_SPOKE : 1
INHALER_PRESCRIBED : 1
ASSESS_OF : 1
PLAN_AWAKE : 1
DEMENTIA_MULTIPLE : 1
BP_THE : 1
BEEN_IN : 1
DRUG_DRINK : 1
ILLNESS_RECREATION : 1
DECISION_AND : 1
DISCHARGE_REFER : 1
BRING_THEIR : 1
OF_MEDS : 1
CONGRUENT_ASSESS : 1
SHOULD_TO : 1
ALONE_AT : 1
OLD_REALLY : 1
LECTURE_ABUSE : 1
ANTERNATE_TELEPHONE : 1
CM_INPT : 1
RESPOND_ULCERATION : 1
OF_INSTRUCTIONS : 1
TH_OF : 1
AND_THE : 1
HE_ANY : 1
PRESCRIBED_ANY : 1
SATT_EDUCATION : 1
CARE_AND : 1
FOR_TARGET : 1
COMPLETELY_DOES : 1
PROGRESS_NOTE : 1
NACL_INFUSING : 1
PAYING_SISTERS : 1
SB_OBJECTIVE : 1
SEARCH_MELODY : 1
TELEPHONE_TLCP : 1
PATIENT_THAT : 1
HIS_DO : 1
NO_KNOWN : 1
PATTERN_AN : 1
PATIENT_RIB : 1
INDIGESTION_CHANGE : 1
STRIP_CPRS : 1
INDICATES_FOCUS : 1
SUPPLIES_WILL : 1
THEME_BEING : 1
PNEUMONIA_WAS : 1
THAT_IT : 1
HE_TO : 1
THAT_STARTED : 1
SUPPLEMENTAL_OXYGEN : 1
DONNING_HIS : 1
OF_CAN : 1
ELASTIC_RECOIL : 1
BENIGN_PROSTATE : 1
HE_BOX : 1
FOCUS_OF : 3
FIRE_AND : 1
THROUGH_VA : 1
RESULTS_DISCUSSED : 1
MEDICAL_SURGICAL : 1
PT_ALONE : 1
BARRIERS_TO : 2
AS_TUSCON : 1
THIS_YET : 1
IN_EVENING : 1
THE_STREET : 1
CHERRYS_OFFICE : 1
THEY_THEM : 1
DOING_THINGS : 1
ON_SITTER : 1
GIVEN_SL : 1
DESCRIPTION_OF : 1
FOR_SOME : 2
SPUTUM_ARE : 1
TIME_TIMEOUT : 1
ON_PT : 3
NO_INDIVIDUAL : 1
CM_DIAMETER : 1
GROUP_LEVEL : 1
RA_AMLODIPINE : 1
FOR_THURS : 1
WIDTH_IMPROVED : 1
STAFF_NEEDED : 1
ECHOCARDIOGRAM_REVIEWED : 1
HE_NEEDS : 2
SCREENING_PLAN : 1
LITTLE_TO : 1
HOURS_STATUS : 1
ABDOMAN_SOFT : 1
LIB_DIFFICULTY : 1
FELT_NUMB : 1
EMOTIONAL_PSYCHIATRIC : 1
SI_HOWEVER : 1
WORK_CONSULTANT : 1
SOCIAL_GENERAL : 1
BASE_HYPERKERATOTIC : 1
WHEELCHAIR_AND : 1
HAS_FOLLOWING : 1
COMPRESSION_HAS : 1
WED_NICOTINE : 1
NO_PY : 1
NTG_PER : 1
HE_NURSING : 1
SPINAL_IS : 1
WORST_IMA : 1
PERCEPTION_NO : 1
HAS_WITH : 1
FROM_VIEW : 1
CURRENT_OF : 1
SL_PER : 1
AOX_THIS : 1
HARRINGTON_TXC : 2
CLEAN_FLOOR : 1
LB_INTRACRANIAL : 1
LOWER_BACK : 1
PATTERN_ALCOHOL : 1
ACTIVITIES_ENTER : 1
ARRANGED_FOR : 1
PT_EDUCATION : 1
INSTRUCTIONS_AND : 1
ID_BAND : 1
ISSUE_RAL : 1
SIX_TREATING : 1
AND_YES : 1
TELEPHONE_PATIENT : 2
MEDICATIONS_CONSTIPATION : 1
POSTERIOR_TYPE : 1
GOOD_EYE : 1
MAKE_BE : 1
FROM_CARDIAC : 1
LB_LABS : 1
AN_ONGOING : 1
RACE_RACE : 1
THOUGHTS_SUICIDE : 1
MET_MEASURING : 1
TO_IN : 1
AND_MOBILITY : 1
HEMOGLOBIN_INDIVIDUAL : 1
CON_REC : 1
FILMS_ECHOCARDIOGRAM : 1
THAT_THIS : 1
PICKED_UP : 1
FREE_ML : 1
MILD_DEMENTIA : 1
SKIN_TISSUE : 1
WOULD_BE : 2
AXIS_NO : 1
SERVICES_FOLLOWING : 1
SC_TO : 1
HAVE_DROWSYNESS : 1
ANOTHER_APPOINTMENT : 1
NO_APPARENT : 1
OF_ADL : 1
SURE_HE : 1
EDGES_LESIONS : 1
ACTIVE_HAS : 1
NOTE_STATES : 1
ABUSE_IS : 1
SOME_DRAPED : 1
CALL_BHM : 1
IRRITABILITY_LONGSTANDING : 1
BIPAP_PRESSURE : 1
OR_LITTLE : 1
LIMITED_MOTORCYCLE : 1
WITH_DEMENTIA : 1
ONE_PATIENT : 1
CONTACT_VA : 1
CMM_ABNORMALITIES : 1
OF_MINUTES : 1
WITH_MR : 1
WITH_MANIFESTATIONS : 1
RETURN_THERE : 1
DIFFERENT_SHE : 1
CHF_EDUCATION : 1
COMPUTERIZED_LIST : 1
THEIR_BEHAVIOR : 1
INSTRUCTIONS_DISCONNECTS : 1
HAS_MOOD : 1
NOW_LARGER : 1
TIME_SURGICAL : 1
OBSERVE_PALPATE : 1
WITH_EVENTS : 1
AND_HES : 1
FLAGYL_FROM : 1
TO_DOES : 1
RISK_NORMAL : 1
EDUCATION_IMPORTANCE : 1
LENGTH_OF : 1
PRN_FOR : 2
RESPIRATION_ORDER : 1
HERE_FOR : 3
THE_ESSENTIAL : 1
AND_DOB : 1
BOTTOM_OF : 1
AND_IMAGING : 1
HAS_TO : 2
AT_CC : 1
DISCUSSED_SKIN : 1
NO_ECTOPY : 1
THEY_KNOW : 1
WIDTH_DIABETIC : 1
THREATS_OR : 1
MENTAL_ALERT : 2
NURSING_VETERAN : 1
SUICIDE_YES : 1
EMERGENCY_DEPARTMENT : 1
TO_PSA : 1
PROCEDURE_VISIT : 1
TIME_PAST : 1
BP_SCORE : 1
BEEN_GIVEN : 1
WHO_WAS : 1
THE_PLAN : 1
IN_ELEVATED : 1
FOOT_ON : 1
FEEL_CLEARER : 1
WAS_PAIN : 1
MAY_CATH : 1
HIS_IS : 1
RESOLVED_PHARMACIST : 1
URINE_HIAA : 1
PRESCRIBED_YOU : 1
SS_AND : 1
ANTIANXIETY_MEDS : 2
TIME_RI : 1
DISCUSSED_ACTIVE : 1
CONSTIPATION_QUETIAPINE : 1
PSA_CALL : 1
CPRS_ON : 1
IDEATION_THREATS : 1
REQUESTING_IF : 1
QUIT_IDEALLY : 1
THAT_TIMEOUT : 1
HOMICIDAL_QIDPRN : 1
EYE_BUT : 1
OTHERS_DENIES : 1
HEARD_NO : 1
OF_BEING : 1
NONVA_COENZYME : 1
WROTE_LETTER : 1
PHYSICAL_TPY : 1
NO_PATIENT : 3
TO_DEATH : 1
AND_SEEN : 1
YOU_FACILITATORS : 1
WAS_ASSESSED : 1
LUMBAR_WAS : 1
WAS_SO : 1
HE_DIVALPROEX : 1
STAFF_THE : 1
IN_SEEING : 1
PERIOD_NO : 1
NEEDED_SERVICE : 1
ADMISSION_FEB : 1
JUN_HAS : 1
ENTHUSIASM_MODERATE : 1
ASYMPTOMATIC_IN : 1
MUCH_OF : 1
AT_NACL : 1
WHEELCHAIR_NTACT : 1
CALLED_ONE : 1
PCP_UP : 1
ULCERATION_SUB : 1
THEY_ARE : 3
PALE_SOAP : 1
EVENING_WRAPUP : 1
WORKER_MON : 1
HAD_DECREASE : 1
THE_FOCUS : 2
LESIONS_EATING : 1
LIVES_AT : 1
HISTORY_STATED : 1
AND_ORDER : 1
BIPOLAR_MIXED : 1
BRIEF_CLINICAL : 2
CONTACT_BLUE : 1
ALSO_PAYING : 1
ADMITTED_TO : 1
BECOMES_NONREDUCIBLE : 1
PHONE_HAD : 1
ASSESS_DEGREE : 1
WRITTEN_GOAL : 1
PAST_VISIT : 1
SSN_YES : 1
PROBLEMS_PT : 1
CARE_INDICATES : 1
THE_MED : 1
YOU_ANY : 2
EXEMPT_LAB : 1
INJURY_OR : 1
HIS_FEET : 1
ELEVATED_OR : 1
RECREATION_THERAPY : 1
UNDERSTANDING_REPOSITIONS : 1
BOWEL_NONVA : 1
INITIAL_ASSESSMENT : 1
TV_LISTENS : 1
HE_HE : 1
CM_IMAGE : 1
BURY_ME : 1
ME_THAN : 1
IF_HAD : 1
TOLERATED_PROCEDURE : 1
DOES_ADMIT : 1
MARTKEDLY_IMPROVED : 1
IN_GROUP : 1
RECORDS_INCLUDING : 1
WITH_PLACEMENT : 1
CPAP_BIPAP : 1
INTERVENTIONS_PERCEPTION : 1
LEFT_AREA : 1
ALL_TRAVEL : 1
LEVOTHYROXINE_WHICH : 1
DISCUSSED_POSSIBLE : 1
WEEK_NEEDED : 1
HIS_WIFE : 2
VA_DECLINED : 1
IF_OF : 1
SENSATION_OVER : 1
STATUS_QUETIAPINE : 1
DOES_TO : 1
REFILL_SEC : 1
CLEAR_PT : 1
INDICATES_PATIENT : 1
AMBULATORY_MUCH : 1
IN_HOUSE : 1
LAURIE_STATES : 1
MOVE_INTO : 1
HIS_STATEMENT : 1
CAP_TAB : 1
NO_MARRIED : 1
NONE_BEDREST : 1
LEFT_MESSAGE : 2
PT_CARDIAC : 1
ALERT_AND : 3
TRANSPORT_AOX : 1
ADMISSION_HAS : 1
AND_CONCERNS : 1
HOURS_WITHOUT : 1
HAS_VOICE : 1
HIS_MEDICATIONS : 2
MOUNTAIN_CREST : 1
SEMMES_EDUCATION : 1
HE_INSULIN : 1
PODIATRY_DEBRIDEMENT : 1
PATIENT_ASPIRIN : 1
AT_NO : 1
LIST_ERROR : 1
PATIENT_MAY : 1
PUPILS_FOR : 1
THE_FLOOR : 1
PCP_IS : 1
BLOOD_PRESSURE : 6
IS_APPROPRIATE : 2
PT_ANTERNATE : 1
TO_FAMILY : 1
ISSUES_HE : 1
LACKS_MOTIVATION : 1
THE_OF : 10
PATIENT_EDUCATION : 2
THE_SOURCE : 1
DAILY_FOR : 3
MEDS_AND : 1
RESULTS_TESTING : 1
PYLORI_NEG : 1
TO_MONITOR : 1
WIFE_WHO : 1
NURSING_APPOINTMENT : 1
DIABETIC_ULCER : 1
LEG_KNEE : 1
PT_HAS : 2
DIABETIC_OF : 1
DEATH_BENEFITS : 1
CHIEF_COMPLAINT : 2
FOLLOWING_INTERPRAETATION : 1
CHECKED_MINUTE : 1
HE_SOME : 2
UNITS_TIDAC : 1
ABDOMEN_LARGE : 1
STATED_SEVERAL : 1
ENJOY_THE : 1
AGREEMENT_PT : 1
USE_UNCHANGED : 1
PRN_ANTIDIABETICS : 1
MEASURING_IN : 2
CLINIC_PLACED : 1
THAT_HE : 16
NOON_DEC : 1
MON_AM : 1
ORDERS_MAGNESIUM : 1
DEVICES_NO : 1
HEADED_UP : 1
LONG_NO : 1
CHRONIC_OSTEOMYELITIS : 1
TYPE_TEMPERATURE : 1
LIGHT_THE : 1
SMILING_SESSION : 1
CONTROL_PAIN : 1
IF_THIS : 1
UP_OF : 1
CLINIC_CONFIGURED : 1
NO_POW : 1
ANY_LIMITATIONS : 1
ONCOLOGY_SCREENING : 1
THE_FOR : 1
LOSS_OF : 2
REVIEWED_CONSULTS : 1
INSUFFICIENCY_SPO : 1
FOLLOWS_PLEASE : 1
AND_BEEN : 3
REDNESS_OR : 1
SUPPORTIVE_IV : 1
PREVIOUSLY_WILL : 1
HYPERTENSION_NKDA : 1
PREDNISONE_PAIN : 1
DO_YOU : 2
CHEST_OBTAIN : 1
NOTE_HIS : 1
HISTORY_WITH : 1
PT_HAD : 2
OBSERVATION_CHECKS : 1
PT_FAM : 1
CONDUCTING_AND : 1
GETS_DISCHARGED : 1
VISITDIFFICULTY_BREATHING : 1
PATCHES_NICOTINE : 1
NOT_WORKED : 1
ADDENDUM_LB : 1
ADEQUATELY_DEMONSTRATED : 1
ONE_BY : 6
YES_FINDINGS : 1
EFFECTIVE_NO : 1
APPARENT_PROBLEM : 1
CARE_TEAM : 1
CONTACT_RECEIVED : 1
ANXIOUS_AFFECT : 1
WITH_ABOVE : 1
NOTE_MED : 1
HE_GOT : 1
ALPRAZOLAM_TAB : 1
FRICTION_NO : 1
EXPLAINED_THIS : 1
AIR_POLYTRAUMA : 1
SULFA_DRUGS : 1
VA_THE : 1
BLDG_PAIN : 1
EVERY_HOURS : 2
AND_NICOTINE : 1
FACTORS_AT : 1
BEEN_WORKING : 1
THE_PT : 1
MELODY_STAFF : 1
REVIEWED_PTS : 1
AS_PLEASE : 1
POSITIONING_TRANSFERS : 1
MEASURED_THANKS : 1
NIGHT_LASIX : 1
SENSES_VISION : 1
COUNSELOR_ARRIVED : 1
PC_TELEPHONE : 1
TYPE_CLOTHING : 1
REQUEST_THANKS : 1
AMOUNTS_OF : 1
IN_PER : 1
THE_THAT : 1
LAST_PAST : 1
ASSESSED_TO : 1
VISIT_HYPOXIC : 1
ALZHEIMERS_WHO : 1
TO_OTHERS : 1
INJURY_MULTIPLE : 1
TEAM_NEED : 1
TEAM_HE : 1
FOUND_EFFECTIVE : 1
HIS_FOR : 4
SUPPLEMENTAL_ICDCM : 1
PALPATION_INSPIRATION : 1
PHYSICIAN_IED : 1
TIMELY_AND : 1
WEIGHT_AT : 1
TO_RETURN : 2
SINCE_HIS : 1
INTERVENTIONS_AND : 1
OVERRUN_NOT : 1
LENGTH_AND : 1
ALLERGIES_MOUTH : 1
WITH_FALL : 1
PERSON_EDUCATED : 1
THAT_THEY : 3
MANAGEMENT_ADVANCED : 1
NORMAL_PRESCRIBED : 1
DO_BEST : 1
CARE_SITE : 1
COLOR_SKELETAL : 1
DECREASE_IN : 2
HIS_SAW : 1
WAS_PATIENT : 1
CURRENT_NOT : 1
DISCHARGE_PLEASE : 1
OF_ILLNESS : 1
FROM_SCORE : 1
PATIENT_CHECKED : 1
OVER_LOWER : 1
TO_DILATE : 1
IRRITABILITY_BUT : 1
FOLLOWING_TO : 1
DOCUMENTS_NEXT : 1
CORD_INJURY : 1
RECORDS_FOR : 1
PROJECT_THE : 1
REVIEWED_PAIN : 1
ALSO_STOMACH : 1
ER_SUPPORT : 1
AFIB_AND : 1
HAS_POSTIVE : 1
DEC_NOTE : 1
SUBSTANTIATE_MR : 1
TO_NO : 2
NURSING_ASSESSMENT : 3
UNDERSTANDING_PULM : 1
SISTERS_NO : 1
SIGNS_ACTIVE : 1
PHYSICIANS_REFERENCE : 1
OF_CYANOSIS : 1
ON_EKG : 1
COURSE_HE : 1
RED_DIAGNOSES : 1
PHYSICAL_ORTHO : 1
TIME_HE : 1
WAS_GATZMAN : 1
EMERGENCY_FOLLOWUP : 1
WHAT_THE : 1
WHEELCHAIR_THE : 1
DROPS_TO : 1
DID_START : 1
VET_REQUESTING : 1
POINT_VET : 1
SHIFT_WEAK : 1
IER_THAN : 1
IN_DISCUSSIONS : 1
INVOLVEMENT_CC : 1
THE_CANAL : 1
INFORMED_PHYSICIAN : 1
ELBOW_RIGHT : 1
SOCIAL_WEIGHT : 1
NO_CHANGE : 1
TRS_TXC : 4
SPACE_ENLARGEMENT : 1
IDEALLY_WITHIN : 1
OK_AT : 1
HAD_MAXIMIZED : 1
OR_YOUR : 1
APPOINTMENT_WITH : 1
ML_ONCE : 1
NOTE_PM : 1
THE_BASIS : 1
SOI_MS : 1
SHIFT_UNABLE : 1
GRANULAR_BASE : 1
AT_PAST : 1
PAST_INCLUDES : 1
MEDICATIONS_REVIEWED : 1
HAD_JOB : 1
MONEY_HAS : 1
IBUPROFEN_METHADONE : 1
CONCERNED_THAT : 1
PAST_SURGICAL : 2
ENDOSCOPIC_SCANNED : 1
MILITARY_PATIENT : 1
HAVE_SPELL : 1
CM_IN : 3
TEST_WAS : 1
CIRCULAR_HARD : 1
LAST_MG : 1
PAST_HISTORY : 3
INTEREST_OR : 1
VISIT_LB : 1
HORRIBLE_OR : 1
THIS_AT : 1
USED_CONVEY : 1
AND_HYPOTHYROID : 1
ALLERGIES_PATIENT : 3
RETURNED_TO : 2
RECENTLY_STRESSED : 1
PATIENT_FROM : 1
SIG_ONE : 1
USE_WITH : 2
REQUEST_SLOT : 1
CALLED_KIMBERLY : 1
FALLS_TELEMETRY : 1
SORE_SENSATION : 1
TO_BRING : 1
ACTIVE_PATIENTS : 1
OF_JOINT : 1
CANT_THE : 1
HEALTH_HEENT : 1
KILLING_MHC : 1
KNOWN_DRUG : 1
CLEAR_AUSCULTATION : 1
DIRECTIVES_DOCUMENTS : 1
SOFT_OBSERVE : 1
WOUND_INSTRUCTED : 1
PALPATE_IMPAIRED : 1
SUMMARY_SEP : 1
FOR_YES : 1
ACUTE_RX : 1
IM_DYING : 1
ORTHO_RECORDS : 1
THE_NURSING : 1
THE_RESIDENT : 1
OUTPATIENT_ALPRAZOLAM : 1
DISCOMFORT_NO : 1
WORK_MENTAL : 1
EP_PATIENT : 1
STARTED_WEAK : 1
DEVELOP_OF : 1
HASNT_HAD : 1
LEFT_URINARY : 1
KLEIN_MOOD : 1
DO_CARE : 1
FORT_COLLINS : 1
HE_DIAGNOSIS : 1
LEVEL_THIS : 1
ANY_ABOVE : 1
IF_APPT : 1
BY_EVERY : 3
THEIR_COMPLETED : 1
WAS_BROUGHT : 1
UNDERSTANDING_OF : 2
PATIENT_BEEN : 3
RECALL_JVD : 1
EXACERBATION_WITH : 1
BHM_FOLLOW : 1
INFUSING_AT : 1
PAD_RIGHT : 1
MODERATE_SYMPTOMS : 1
WILL_FULLY : 1
IN_BOWEL : 1
OF_RESULT : 1
AND_IN : 5
GOT_THE : 1
AND_SAYS : 1
BOX_SOME : 1
PENICILLIN_OF : 1
PRIMARY_SPECIALTY : 1
ESOPHAGEAL_INTRODUCER : 1
OF_WITHOUT : 1
WHEN_ARE : 1
DISCHARGE_IED : 1
THE_LAST : 2
ACCIDENT_WHO : 1
MOUTH_TELEPHONE : 1
BURY_FT : 1
MICHIGAN_SEVERITY : 1
KNOW_ANYONE : 1
GIVEN_MCG : 1
ACCIDENT_WAS : 1
YES_IN : 1
CHARLOTTE_TELEPHONE : 1
REQUESTED_THE : 1
SEEK_TREATMENT : 1
TREATMENT_FOR : 1
LIVED_IN : 1
OFF_HIS : 1
DEGREE_OF : 1
COLON_PHYSICIAN : 1
NONMANDATORY_MEANING : 1
SHORTNESS_YRS : 1
OF_FEET : 1
NOT_COMPREHENSIVE : 1
PATCHROTATE_SITESDO : 1
DOB_AGE : 1
YR_BP : 1
FOR_PRESSURE : 2
PT_TOLERATED : 1
STRESSED_FINANCIALLY : 1
FELT_THAT : 1
LIST_REFRACTIVE : 1
PO_QAM : 1
PO_RX : 1
SS_SUPPORT : 1
ARM_DAILY : 1
LONGSTANDING_BUT : 1
CONSENT_UNDERSTANDING : 1
DISCUSSED_CARE : 1
MEANING_HE : 1
REQUESTING_MRI : 1
PTS_AND : 1
INDICATES_APPROVAL : 1
WAS_ABLE : 1
WITH_COMPLAINTS : 1
SHIELD_OF : 1
UNSURE_WHY : 1
ENOUGH_TO : 1
LACERATION_SURROUNDING : 1
SYMPTOM_SELFTREATMENT : 1
ASSESSEMENTS_REPORTS : 1
NOT_OPERATE : 1
COOPERATIVE_WATHCHES : 1
PRESENT_CONDITION : 1
NO_ANSWER : 1
TRY_GROUP : 1
CHILD_PHYSICALLY : 1
ATNC_ME : 1
REPEAT_TO : 1
NOT_REQUIRED : 1
LB_WEARING : 1
ADEQUATELY_VERBALIZED : 1
WITH_PARTICIPATION : 1
PCP_IDENTIFIED : 1
ML_INTRAVENOUS : 1
WELLNOURISHED_ALERT : 1
BREATHING_ABDOMINAL : 1
MOBILITY_OR : 1
PLEASANT_IN : 1
DISCHARGE_SUMMARY : 3
SEEING_IN : 1
ADMITTED_EPIGASTRIC : 1
AND_EITHER : 1
SELF_HARM : 1
WIFE_ALZHEIMERS : 1
MOBILITY_SUBJECTIVE : 1
ADDENDUM_DEPT : 1
ITCHES_WITH : 1
REGULAR_INJ : 1
OF_COMBAT : 1
AND_SHARE : 1
ELIGIBILTY_SERVICE : 1
FT_GAS : 1
WALK_AND : 1
YOU_WERE : 1
PT_ATTENDS : 1
SEE_TELEPHONE : 1
IF_PLEASE : 1
IV_CARE : 1
NURSING_THAT : 1
LEGAL_STATUS : 1
MEDICATIONS_PRESCRIBED : 1
KNOW_WHEN : 1
ACTIVE_PATIENT : 3
VITAL_PULSE : 1
DATE_SESSION : 1
FAMILIAR_AND : 1
VEHICLE_FOR : 1
DISCHARGED_HE : 1
UP_AT : 1
ARRHYTHMIA_PRESENT : 1
TO_ABNORMALITIES : 1
THE_PUPILS : 1
WHY_SPUTUM : 1
ACHE_LEFT : 1
WEEK_DISCUSSED : 1
WEIGHT_KG : 5
RONCHI_INFORMED : 1
NOT_DEATH : 1
OF_VOCATIONAL : 1
FOR_INFO : 1
PATIENTS_PAIN : 1
TIP_INTACT : 1
THIS_PATIENT : 5
SELLING_CLOTHING : 1
DIAGNOSES_AND : 1
BODY_HAS : 1
TESTING_CAUSE : 1
TO_MEASURED : 1
PT_DEMONSTRATED : 1
UPON_HIS : 1
BELONGINGS_AND : 1
LESS_DEPRESSED : 1
ORAL_MG : 1
TEETH_AND : 1
VETERAN_STATES : 1
OX_BAND : 1
IM_FROM : 1
BEEN_SISTERS : 1
CORRECT_YES : 1
VEIN_TO : 1
NURSING_SHIFT : 1
DIABETIC_RESULTS : 1
NONVA_MEDS : 1
GENERAL_NONSOAP : 1
PATIENTHAS_NOT : 1
RHYTHM_STRIP : 1
PAIN_CARDIAC : 1
EKG_TO : 1
UNDERGOING_XRT : 1
MALE_VASCULAR : 1
ONE_PER : 1
WITH_RISK : 1
HEARD_REGULAR : 1
PULSE_MENTAL : 1
CONSULTANT_WHO : 1
OBJECTIVE_INPATIENT : 1
BM_CARDIAC : 1
DISTRESS_LTC : 1
HE_APPOINTMENT : 1
PRESSING_ON : 1
OF_BREATH : 1
SIGNER_SITE : 1
DETOX_NUMEROUS : 1
AVOID_BPH : 1
SIGNED_CONTRACT : 1
FOLLOW_APPT : 1
HAVE_TALKED : 1
ON_PATIENT : 2
FEE_OFFICE : 1
JUNE_LENGTH : 1
YOUR_PRIOR : 1
CANCER_RALLY : 1
CONFUSED_OR : 1
ENDING_AT : 1
POTENTIAL_FOR : 1
PATIENT_NONVA : 1
MED_TEACH : 1
WATER_COMMENTS : 1
SITTER_OF : 1
COMPANIES_NOT : 1
INSTRUCTED_SHAKE : 1
PATIENT_VERBALIZES : 1
TEMPERATURE_PATIENT : 1
MUCH_BODY : 1
PROVIDER_RESPONSIBLE : 1
NOT_YR : 1
THE_DIFFERENT : 1
PMH_SOFT : 1
VETERAN_BEFORE : 1
HOSPITALIST_BEEN : 1
ANYMORE_IT : 1
MELLITUS_II : 1
THIS_SWR : 1
BLOOD_WAS : 1
ME_RELATIVES : 1
MOST_APPEARED : 1
ALERT_PCP : 1
DISEASE_MANAGEMENT : 1
NOT_MEDICATION : 1
TO_ACCOMPLISH : 1
PER_ADDENDUM : 1
ENTER_STATUS : 1
OPERATIVE_IMAGING : 1
OF_RED : 1
PAIN_CRUSHING : 1
PORT_TELEPHONE : 1
IF_WOULD : 1
DISPATCH_CONTACTED : 1
MEDICATIONS_AS : 1
WORKING_WITH : 1
THIS_SESSION : 1
PAIN_VISITDIFFICULTY : 1
TO_CHEST : 1
EDUCATION_SUBSTANCE : 1
SEE_SW : 1
IN_PLAN : 1
WEIGHT_HX : 1
UNDERSTANDING_WILL : 1
LEG_AND : 1
REFILLS_LAST : 1
ER_IF : 1
JOB_WAS : 1
CARDIAC_MANAGEMENT : 1
PROTOCOL_NOT : 3
DUE_CPRS : 1
PRESENT_TO : 1
IMPORTANCE_ENTER : 1
MADE_SEE : 1
BUSINESS_MOISTURE : 1
UP_LIBWHEELCHAIR : 1
PT_TELEPHONE : 1
PT_NEGATIVE : 1
OX_ROOMAIR : 1
PROBLEMS_STATES : 1
HIS_GOALS : 1
CM_CM : 1
PYLORI_ADDENDUM : 1
IN_FRONT : 1
DERMATOLOGIST_CONSULT : 1
TYPE_CLEAR : 1
SIGNIFICANT_EVENTS : 1
GENDER_PULSE : 1
PER_TUSCON : 1
MEDICATION_MADE : 1
HE_WALK : 1
OBJECTIVE_ACTIVE : 1
RESIDENT_PROVIDING : 1
HE_UNSURE : 1
COLONOSCOPY_ADVISED : 1
THEM_WRITING : 1
REDNESS_RATE : 1
IDENTIFIED_BY : 1
THANKS_HAS : 1
PT_VOIDING : 1
THE_PROVIDER : 1
PAIN_SCREENING : 1
AMIODARONE_MG : 1
THE_WERE : 1
DOCTOR_APPLIES : 1
SULF_MG : 2
COMMENT_IN : 1
TO_ULCERATION : 1
HIS_MOTHER : 1
PALPATION_AND : 1
HAVE_PHYSICIAN : 1
RX_HAD : 1
CHRONIC_LOWER : 1
MEDICAL_NEG : 1
NICOTINE_THAT : 1
DIVERSION_SATT : 1
BRONCHITIS_MOXIFLOXACIN : 1
NURSING_IN : 1
REMAINS_FINANCIALLY : 1
NEW_PS : 1
HAVE_PLACE : 1
PLEASE_VETERAN : 1
HEART_RATE : 1
IS_RESPONSIBLE : 1
DEVELOP_SENSE : 1
LOTS_OF : 1
LOW_NO : 1
ON_TOOLS : 1
PATIENTS_FOR : 1
IN_CLINICAL : 1
TO_INVOLVEMENT : 1
HAD_FUNCTIONED : 1
MESYLATE_TAB : 1
TO_MILD : 1
INTACT_AVOID : 1
PHARMACY_NOTE : 1
THEN_DISPLAY : 1
INFORMATION_WAS : 1
MIX_OZ : 1
LABS_COMMENT : 1
TABLET_ULTRAM : 1
INCLUDING_SUPPLIES : 3
AS_WRITTEN : 1
INFORMATION_PAINT : 1
ADDRESS_PHONE : 1
MOUTH_EVERY : 4
SICK_VICODIN : 1
FOUND_CIRCULAR : 1
AVONDALE_AREA : 1
UNDERSTANDING_PROPOSED : 1
TO_AVOID : 1
SCAN_THE : 1
DCD_CATH : 1
WITHIN_THIS : 1
HEARTBURN_YES : 1
VISIT_CHRONIC : 1
HOW_WHEN : 1
AO_FINANCIAL : 1
SINCE_THIS : 1
AND_PREDNISONE : 1
THEY_WOULD : 2
THINGS_WOULD : 1
PROBLEM_CROSSING : 1
TO_PODIATRY : 1
MY_LEG : 1
TOWN_HE : 1
CONTACT_LECTURE : 1
TO_ARRANGE : 1
MORE_ON : 1
HIGH_HE : 1
SIGNIFICANT_IN : 1
ICDCM_EVERY : 1
SENSATION_ABSENT : 1
INHALER_TO : 1
STATUS_IER : 1
PULM_CLINIC : 1
RELATIVES_UPSET : 1
DAN_TO : 1
RALES_RONCHI : 1
ME_FT : 1
CARDIAC_PLACED : 1
REVIEW_TO : 1
TIMES_LIVED : 1
AND_REQUREMENT : 1
PATTERN_PHYSICIAN : 1
ELBOW_STERISTRIPPED : 1
VERY_WITH : 1
TLCP_DIAST : 1
IN_FOR : 2
WHO_BE : 1
ACID_HE : 1
MEDICATIONS_THE : 1
NO_PROCEDURE : 1
MEDICAL_CYTOPATHOLOGY : 1
SS_SEE : 1
WOULD_CALL : 1
AS_WAS : 1
CANAL_IS : 1
CLINICIAN_ORDER : 1
WOULD_ONLY : 1
IN_PSYCH : 1
DRESSINGS_WD : 1
BY_PODIATRY : 1
ABSENT_VIA : 1
ED_MODERATE : 1
RISK_FACTOR : 1
WALK_TREATMENT : 1
RISK_AND : 1
PRESCRIBING_CONSTA : 1
PAST_DENIES : 1
ASSISTANCE_GETTING : 1
HAS_SOME : 1
VET_THE : 1
MOISTURE_SITES : 1
NURSES_FEVERS : 1
FACILITY_BEEN : 1
PULSE_RESP : 1
INFO_PCP : 1
MEDICAL_PT : 1
NO_DRUG : 2
AT_KEEP : 1
PODIATRY_APPT : 1
EDUCATION_REGARDING : 1
USE_ALCOHOL : 1
IV_SALINE : 1
MOTIVATION_CONTINUALLY : 1
DATE_WITHIN : 1
WAS_GOOD : 1
UNKNOWN_OUTPATIENT : 1
TAB_ONE : 6
KNOW_MY : 1
OR_UNSPECIFIED : 1
FCPD_DONNA : 1
BLOOD_DIMINISHED : 1
GUN_WOUND : 1
SETERNY_SPELLING : 1
DATE_JUN : 1
WAS_WILL : 1
SCALE_PT : 1
EXCLUDING_FELT : 1
IN_THEIR : 1
BY_STATUS : 1
TO_VISIT : 1
TEAM_PROVIDER : 1
NO_LETTER : 1
ONLY_CHANGE : 1
WAS_OBTAINED : 2
STAFF_SPONSORS : 1
ALCOHOL_SMOKING : 1
OPIOID_PCP : 1
SUPPLIES_AS : 1
INTERPRAETATION_ON : 1
RIGHT_WITHIN : 1
USE_OF : 2
MINUTES_SULF : 1
DYING_IF : 1
HES_BEEN : 2
THAT_MAY : 1
HAS_RECURRING : 1
ALCOHOL_LAST : 1
DID_PAIN : 1
LEFT_AMBULATORY : 1
MASS_AND : 1
YEAR_CANCER : 1
PTSD_SCREEN : 1
CALLED_RESULTS : 1
SOME_DDEPRESSION : 1
REALLY_ALL : 1
NOTE_DR : 1
HIS_CLOTHING : 1
BEEN_MORE : 1
BUT_EVIDENCE : 1
WOULD_SERVICECONNECTED : 1
DISCUSSED_DATE : 1
ED_DUE : 1
TO_ASSIST : 2
INFO_TO : 1
DIABETES_TYPE : 1
HE_COURSE : 1
TH_HE : 1
PROVIDER_IS : 1
OF_THIS : 3
THE_DESK : 1
NO_RALES : 2
THEY_ANGRY : 1
TYPE_NOTE : 1
VIA_ON : 1
HISTORY_SC : 1
FROM_REFERRING : 1
PROCEED_ATRIAL : 1
PANIC_MR : 1
RN_MH : 1
TO_THEIR : 1
NOTED_SUB : 1
THEM_CALLED : 1
VITAL_ACTIVE : 1
WAS_CHANGED : 1
BUT_LARGER : 1
PT_ASYMPTOMATIC : 1
BREATHING_DO : 1
CIGARETTES_TO : 1
MEDICATIONS_DOES : 1
GUN_HIS : 1
LOWER_LEG : 1
IN_ADDENDUM : 1
SMOKING_OR : 1
AFTERNOON_THAT : 1
STATE_ADDRESS : 1
YOU_BUT : 1
AFTER_SEVERAL : 1
RELIABLE_DISPATCH : 1
FOLLOWING_WITHIN : 1
THAT_VET : 1
IS_THE : 6
USE_STRIP : 2
CLOSEBY_THAT : 1
REPORT_SUICIDE : 1
SIG_TAKE : 1
PT_BY : 1
PATIENT_CAREGIVER : 1
GUN_SHOT : 1
VALVE_INSUFFICIENCY : 1
MELODY_DISCUSSED : 1
ADDITIONAL_COMMENTS : 1
THAT_TO : 1
MOOD_DEPRESSED : 1
COMPLETED_MEDICATION : 1
WAS_BY : 2
CHANGE_PATTERN : 1
SEIZURES_HOUSEHOLD : 1
ANY_THE : 1
TYPE_EDUCATION : 2
IF_YES : 1
LIST_NOT : 1
CAP_MG : 1
BASED_THE : 1
TUNNEL_SI : 1
IS_SCHEDULED : 1
AC_PSYCHOTHERAPY : 1
NEED_AVOID : 1
SIGNATURE_BY : 1
LOWER_CARIES : 1
MEDICATIONS_VA : 1
NOT_CHECKED : 1
VISIT_NEW : 1
SYMPTOM_ALLERGIES : 1
REST_NEED : 1
NKA_NOTE : 2
GRASS_SAID : 1
TO_ADVISED : 1
THE_OTHER : 1
INJECTIONS_PHYSICIAN : 1
SINCE_FELL : 1
DURING_THIS : 1
FOR_VISIT : 2
PRIOR_UNTRTEATED : 1
LUNGS_OCC : 1
FOR_APPT : 1
LB_FOCAL : 1
PAIN_ROUTINE : 1
ASPECT_UNDERSTANDING : 1
AND_BREATHING : 1
BY_MINOR : 1
FOR_MONTH : 2
BUT_THEY : 1
ON_STATED : 1
SEE_DEC : 1
STRIP_FROM : 1
NECESSARY_AT : 1
THE_CHEST : 1
CONTACT_HE : 1
SCHEDULED_APPOINTMENT : 1
QD_IN : 1
HASNT_TAKEN : 1
OR_SWELLING : 1
PHONE_COMMENTS : 1
CONSTIPATION_TAB : 1
BY_FOR : 1
OF_CRUSHING : 1
AND_AMBULATION : 1
QACHS_INTRAVENOUS : 1
IV_SKIN : 1
WRITER_TO : 1
STATE_WIFE : 1
NICOTINE_WITHIN : 1
NUMB_DETACHED : 1
UP_TO : 1
HISTORY_PT : 1
THREE_TIMES : 1
NAD_AFFECT : 1
TRANSIENTLY_ON : 1
WITH_VISION : 1
CLAIMS_ALLERGIES : 1
PAIN_RIGHT : 1
INTENSITY_OR : 1
STREET_WORK : 1
COUGH_PULSE : 1
RHYTHM_PING : 1
FAULT_WAS : 1
RIGHT_LEFT : 1
CLEAN_THE : 1
KG_PAIN : 1
PHYSICIAN_MEDS : 1
USE_TO : 1
RIGHT_STATUS : 1
CP_ENDOSCOPIC : 1
REVIEWED_INCLUDING : 1
HE_GO : 1
AND_MEDICAL : 1
DECISION_PROCEED : 1
ONCE_PATIENT : 1
NEEDED_CONTACT : 1
LOW_ANXIETY : 1
HS_ACTIVE : 2
DEHYDRATION_UNDERGOING : 1
ECHOCARDIOGRAM_AN : 1
PC_INTELLIGENCE : 1
THEN_TO : 1
TA_PT : 1
SOME_FROM : 1
THROUGH_BP : 1
TO_LE : 1
MEDICATION_PRESCRIBED : 1
TELE_ST : 1
SKIN_OR : 1
ID_CC : 1
PULSE_PROPER : 1
PAIN_WT : 1
WITH_SURROUNDING : 1
COMPLETED_TO : 2
AS_ACTIVE : 1
TO_MHICM : 1
POOR_LUNG : 1
ON_YOUR : 1
EDUCATION_MCG : 1
ON_MR : 1
CARE_REPORTS : 1
NOT_ABOUT : 1
MOST_PATIENTS : 1
SAYS_NEEDS : 1
THE_COMPLETED : 1
AND_TPY : 1
ME_OTHERS : 1
PROBLEMS_COMPUTERIZED : 1
PERMISION_FOR : 1
TO_TUCSON : 1
IN_MOBILITY : 1
RETURNED_LEFT : 1
PROTECTIVE_SWMF : 1
ABOVE_IF : 1
AND_FOLLOWING : 2
SALT_PORT : 1
PT_SCHEDULED : 1
AGAINST_BARE : 1
NO_DURATION : 1
COUNSELORS_LET : 1
MG_QAM : 1
NO_CHEST : 1
PATIENT_TAKE : 1
AND_FRONT : 1
COMPREHENSIVE_PAIN : 1
ACTIVE_ADDENDUM : 1
NTACT_MEDS : 1
FOLLOWING_DIABETES : 1
SEE_SC : 1
JULY_OF : 1
ABUSED_CHILD : 1
BE_EXCESSIVELY : 1
HAS_RESPONSE : 1
IN_SALT : 1
EXPERIENCE_THAT : 1
HR_FOR : 1
HOUSING_SEARCH : 1
ENTITLED_PART : 2
PAIN_CON : 1
ON_AND : 3
LLQ_VET : 1
AND_PUPILS : 1
LIVES_ALONE : 2
HOPLESS_NOT : 1
PATIENT_VISION : 1
WORK_WHO : 1
HE_WOULD : 2
KIMBERLY_RN : 1
PARTICIPATION_MODERATE : 1
JOE_TRS : 2
PROCEDURE_GIVEN : 1
THE_DO : 1
PENICILLIN_SUMMARY : 1
ZOCOR_IT : 1
HAD_CHF : 1
MG_AT : 1
RA_PAIN : 1
EDUCATION_MH : 1
ACTIVE_ACTIVITIES : 1
EPIGASTRIC_AND : 1
TETANUS_PAST : 1
NURSE_IN : 1
TO_MED : 1
PO_PRN : 2
PARTICIPATION_ALSO : 1
TRIAGE_TLCP : 1
FOR_WEEK : 2
PT_THIS : 1
ADVANCE_DOCUMENTS : 1
STRIP_ACTIVE : 1
MALE_PRESENTS : 1
MONITORING_OF : 1
BEDTIME_NEEDED : 1
CONSULTS_CHRONIC : 1
BACK_TO : 1
BROUGHT_IN : 1
DX_DEHYDRATION : 1
CLEAN_DISCHARGE : 1
ELIGIBLE_LTC : 1
WITHIN_VITAL : 1
ANY_THAT : 1
OBTAINED_BY : 1
PT_NO : 1
II_OR : 1
IS_ABOUT : 2
INTRAVENOUS_ESOPHGEAL : 1
OFFICE_IN : 1
DEPT_FOR : 1
LEFT_HIP : 1
WITH_LOTS : 1
INJECTIONS_WITH : 1
ALSO_THEY : 1
HAD_ELEVATED : 1
PERCOSET_ITCHES : 1
WHEN_WHY : 1
NUR_HAVE : 1
STAY_AT : 1
LE_PT : 1
ASPIRATION_AND : 1
THIS_VIEW : 1
SOME_INDICATES : 1
PATCHROTATE_NOT : 1
MG_ALC : 1
HOUSEHOLD_INFORMED : 1
CARE_PROVIDER : 1
SOME_RANGE : 1
AVOID_NO : 1
HOW_TO : 1
FOR_HELP : 1
CAUCASIAN_WHO : 1
TRANSIENTLY_PLACED : 1
PLAN_FOLLOWUP : 1
KEEPING_THEM : 1
AT_REASON : 1
MENTAL_STATUS : 2
CARE_SALINE : 1
ATTEMPT_PT : 1
ON_AM : 1
HEMATURIA_INCREASED : 1
DRUGS_PATIENTS : 1
ON_HEENT : 1
IMMUNIZATION_AT : 1
OBTAIN_AND : 1
TAXI_AND : 1
AND_OF : 2
SHORTNESS_OF : 1
AREA_MUCH : 1
LOW_RISK : 1
PATIENT_DESIRES : 1
THIS_YOUR : 1
OCCASIONALLY_TOBACCO : 1
AM_APPOINTED : 1
GUAIF_MG : 1
DATE_UNKNOWN : 1
WED_THE : 1
PCP_ON : 1
SATT_GENERAL : 1
PROCEDURE_FOR : 1
MEANING_THAT : 1
CONTACTS_ENCOURAGED : 1
STATUS_CODE : 1
ATRIAL_NURSING : 1
MODERATE_RESULTS : 1
FOUND_NO : 1
AWAKENING_DECREASE : 1
RESCHEDULED_ANOTHER : 1
NO_IS : 1
YELLOW_COLOR : 1
IN_HIS : 2
WAS_UNSURE : 1
XRT_ESOPHAGEAL : 1
MG_PRN : 1
LPN_EVAL : 1
CHECKS_TOBACCO : 1
EVALUATION_BRANCH : 1
OF_INTOLERANCE : 1
DAUGHTER_SOME : 1
LETTER_STATES : 1
TO_FUTURE : 1
REVIEWED_WITH : 1
MOTIVATION_LEARN : 1
MINOR_DEBRIDEMENT : 1
IS_DOSE : 1
JULY_TH : 1
DIGITAL_PT : 1
HEARTBURN_CHANGES : 1
CLINIC_SHE : 1
AID_THE : 1
HE_PCP : 1
IS_ON : 1
HEPARIN_LOCK : 1
LIST_IS : 1
STATEMENT_IS : 1
TO_FT : 1
WITHIN_SIX : 1
BUT_WAS : 1
MAY_DISCUSS : 1
FT_RILEY : 2
HAS_DISCUSSED : 1
FUNCTION_UH : 1
AND_SENT : 1
THE_RISKS : 1
NOTE_FROM : 1
WERE_EVER : 1
FOR_DUE : 1
TO_INDIVIDUAL : 1
FOR_PHYSICIAN : 1
GOT_PT : 1
PRESCRIBED_OF : 1
OF_CURRENT : 2
ANY_CHEST : 1
EMERGENCY_NURSING : 1
ANTRAL_PRELIM : 1
FSP_WORST : 1
VAMC_CONTACT : 1
GIVEN_AS : 1
IS_DECREASED : 1
HE_FEELING : 1
PHYSICAL_GRANULAR : 1
SELFHARM_OR : 1
PRESSURE_THAN : 1
HIGH_FOR : 1
MG_FILL : 1
CM_DEHYDRATION : 1
OR_HOPLESS : 1
SITE_INSPECTED : 1
ACTIVE_GUAIF : 1
ACCOMPANIED_BY : 1
NOT_BEEN : 3
SIG_STRIP : 1
STATEMENTS_HE : 1
SHIFT_ASSISTANCE : 1
PATIENT_MH : 1
OF_URINARY : 1
NEURO_OF : 1
VIEW_DOCUMENT : 1
DEMONSTRATED_HIS : 1
IN_ORIENTED : 1
CLEARER_PT : 1
BEEN_HOSPITALS : 1
NURSING_FOR : 1
LIVE_ON : 1
PROSTATE_SCREEN : 1
MILITARY_HISTORY : 1
HAS_IN : 1
GIVEN_FOR : 1
WAITING_TO : 1
UNDERMINING_NEW : 1
AND_TOPAX : 1
TO_AS : 2
UNSURE_PATIENT : 1
MINIMUM_DEMONSTRATED : 1
NOTE_MEDICAL : 1
PET_WERE : 1
PHONE_APPLICABLE : 1
SECRETIONS_ARE : 1
LEFT_ST : 2
WIFE_THAT : 1
SCORE_IV : 1
SCORE_SCREEN : 1
COMPARTMENTAL_SYND : 1
CARE_PCP : 1
DENIES_LOSS : 1
PATIENTHAS_BEEN : 1
PULSE_IER : 1
PAIN_SHORTNESS : 1
IF_ANY : 1
HCT_OF : 1
RELIABLE_FCPD : 1
CONCERNED_IM : 1
ACTIVE_MEDICATION : 1
LOW_BIPOLAR : 1
SALINE_FLUSHED : 1
EVENTS_INTERVENTIONS : 1
YEAR_UNKNOWN : 1
ADDENDUM_PT : 1
KNEE_LAST : 1
HX_EPIS : 1
TO_VIA : 1
VA_EP : 1
WITH_SIGNED : 1
AT_FAULT : 1
WITH_CONTRACT : 1
TECHNIQUE_WAS : 1
ENCOUNTER_INSTRUCTED : 1
HIAA_IN : 1
OF_VERBALIZED : 1
INSUFFICIENCY_VIA : 1
ARRIVED_TIMELY : 1
PAIN_ACHE : 1
BE_INTERESTED : 1
PLAN_TO : 1
MEDICATIONS_LIST : 1
COUNSELING_ACTIONS : 1
ON_ARRIVAL : 1
BLOOD_CHECK : 1
URINARY_SUCH : 1
OF_STAYING : 1
RISPERDAL_CONSTA : 1
STATES_HE : 5
THIS_CORRESPOND : 1
SYMPTOMS_HEART : 1
INTRACTIBLE_MOOD : 1
THE_DERMATOLOGIST : 1
NO_TO : 1
CM_TO : 1
CONNECTED_PRESENTS : 1
SIGNS_PULSE : 1
AT_MG : 1
CM_WIDTH : 1
SIG_FROM : 1
FOR_RECREATION : 1
ADDITIONAL_PROCEDURE : 1
CLINIC_FOR : 2
CLINICAL_PORTRAIT : 1
TERAZOSIN_MG : 1
INJ_MG : 1
ON_ONGOING : 1
CLINICIAN_DIAGNOSTIC : 1
METHOCARBAMOL_MG : 1
TEETH_SAYS : 1
SATT_NONSOAP : 1
ORAL_NO : 1
WAS_TICKETED : 1
HYDROXYZINE_ORAL : 1
ADDENDUM_IS : 1
OF_MEDICATION : 1
CONTRAINDICATION_TO : 1
AID_OF : 1
POST_FOLLOWING : 1
DECREASED_PT : 1
IMPROVE_STABILITY : 1
FLOWSHEET_COOPERATIVE : 1
WAS_DURING : 1
BIOMEDICAL_ETHICS : 1
CIRCULAR_TO : 1
CAUCASIAN_OLD : 1
MYSELF_THEY : 1
WAS_LOW : 1
NAD_IS : 1
NONE_WHEELCHAIR : 1
EPIGASTRIC_PAIN : 1
MULTIPLE_PATIENT : 1
AMBULATORY_NONE : 1
COUNSELORS_OTHER : 1
BIPAP_NOTE : 1
PAIN_REC : 1
RESPIRATION_OF : 1
THAT_WANTS : 1
AND_CLARIFIED : 1
IN_AND : 4
MOXIFLOXACIN_AND : 1
RECEIVED_CALL : 1
ON_ROOMAIR : 1
SPECIALTY_JUL : 1
SOME_CONCERN : 1
EKG_STRIP : 1
ADMISSION_HE : 1
THE_ELIGIBILTY : 1
TREATED_DIAGNOSES : 1
NONE_MEDICATIONS : 1
MANAGEMENT_TMS : 1
PER_VA : 1
CORRESPONDENCE_RESPIRATORY : 1
LOC_DYSPHAGIA : 1
HAS_PAIN : 1
PHYSICIAN_ATIVE : 1
LOT_OF : 1
WITHOUT_AWAKENING : 1
VAMC_AND : 1
PATIENT_CAME : 1
TO_AREA : 1
THAT_COULD : 1
SCREENING_FOR : 1
FACILITY_HAS : 1
PULM_JUL : 1
TREATMENT_PLAN : 3
TELEPHONE_SETTING : 1
APPOINTMENT_YOU : 1
LARGER_AND : 1
INDICATES_REPOSITIONS : 1
DONE_WELL : 1
NURSING_MEDICAL : 1
DIRECTIVES_EDUCATION : 1
PHONE_NOT : 1
REVIEW_SEE : 1
COME_THE : 1
SHOT_WOUND : 1
SUPERFICIAL_OVER : 1
CAN_WALK : 1
BIL_SEMMES : 1
MANIA_INTERPRETATION : 1
TO_IDENTIFIED : 1
EVER_ABUSED : 1
AT_TIME : 6
AN_ELEVATED : 1
MG_VET : 1
MEDICATIONS_SYMPTOMS : 1
ACTIVE_TRIAGE : 1
ULCER_PRELIM : 1
TAB_ANYMORE : 1
IDENTIFIED_IS : 1
REPORTS_DECREASE : 1
TO_VIEW : 2
HOUSE_FOR : 1
PER_ORDER : 1
OF_EITHER : 1
TO_SEVERITY : 1
YES_NO : 1
DEMENTIA_PT : 1
MEDICATIONS_ESOPHAGEAL : 1
AND_INFORMATION : 1
THE_CLINICIAN : 1
AS_PREVIOUSLY : 1
EDUCATION_LECTURE : 1
ML_ID : 1
LEFT_ALONE : 1
FOR_MONITORING : 1
BASE_EDEMA : 1
LASIX_TERAZOSIN : 1
THIS_WAS : 2
KILLING_YOURSELF : 1
BARE_ARM : 1
CLINICAL_SEE : 1
VETERAN_AGAIN : 1
CLINICALLY_ASSESSED : 1
GOOD_DECISION : 1
OT_LEFT : 1
WITH_DELUSIONS : 1
MADE_ATTEMPTS : 1
FROM_CYANOCOBALAMIN : 1
BE_HIGH : 1
EVER_ANY : 1
VET_IS : 1
OR_KILLING : 1
CONTACTED_THEY : 1
THINGS_SERVICECONNECTED : 1
VETERAN_WITH : 1
FURTHER_INFO : 1
ESSENTIAL_IN : 1
AM_OFF : 1
ACTIONS_ACTIVE : 1
CYANOCOBALAMIN_TAB : 1
HAS_PATIENT : 2
LEFT_METATARSAL : 1
ADVISED_FOLLOW : 2
ACTIONS_OUTPATIENT : 1
OF_IS : 1
TO_SEEK : 2
HE_MADE : 1
OVER_OR : 1
RECURRING_THEME : 1
DECISION_RARELY : 1
SELFHARM_NOW : 1
HYDROCHLOROTHIAZIDE_TAB : 1
RHYTHM_VSS : 1
EXACT_DATE : 1
CLEAN_BASED : 1
APPOINTMENT_THE : 1
WORK_ON : 1
WORRIES_ABOUT : 1
DISCHARGE_GIVEN : 1
IF_NEEDED : 2
OR_PLEASURE : 1
PAST_TRIP : 1
POST_HR : 1
EMPLOYEE_NOTE : 1
ASSESSED_DURING : 1
VOICE_HE : 1
SCREEN_EDUCATE : 1
PATCHES_WED : 1
PRESSURE_HIGH : 1
THIS_ADMISSION : 2
MD_ORDER : 1
WITH_TRANSFERS : 1
BEFORE_OUT : 1
VISIT_PATIENT : 1
STATUS_ORIENTED : 2
BY_SAT : 1
STATE_HAD : 1
TOTAL_TIME : 1
SWELLING_PATIENTS : 1
TO_CALL : 3
FIND_AND : 1
AS_DESIRES : 1
OPERATE_MOTOR : 1
PAYING_UTILITIES : 1
DATE_WELLDEVELOPED : 1
PCP_APPOINTMENT : 1
NUMEROUS_HE : 1
STRANGE_NO : 1
SKIN_AVOID : 1
LEG_CARIES : 1
PROVIDING_ESSENTIAL : 1
CLEAN_ANTRAL : 1
THIS_IS : 5
IS_TE : 1
HIAA_AND : 1
TIMEOUT_WAS : 1
MEDICAL_RECORD : 1
POINTED_THAT : 1
STATE_STATED : 1
DIAGNOSTIC_THE : 1
TO_FEEL : 1
CERVICAL_NURSING : 1
NEED_INSTRUCTIONS : 1
MASS_RETURNED : 1
PLEURAL_HAS : 1
ONE_ASPIRIN : 1
THIS_FACILITY : 1
PHONE_ACTIVE : 1
HYPERTROPHY_BENIGN : 1
SAME_SACPREPRIMARY : 1
INFORMED_THAT : 1
DOWN_DEPRESSED : 1
TO_COUNSELORS : 1
PROTOCOL_CARE : 1
SHE_INTRACTIBLE : 1
OUTPATIENT_MEDICATIONS : 5
PTSD_NIGHT : 1
OF_BED : 1
WEAK_BEFORE : 1
RISK_INTERVENTIONS : 1
NOW_LIGHT : 1
GERIATRICS_AND : 1
NO_EFFECTS : 1
LIMITED_FINANCES : 1
DOCUMENTS_TO : 1
DISCHARGE_PHYSICIAN : 1
AT_IN : 1
DEPRESSED_OF : 1
TRANSPORT_TO : 1
EDUCATION_CHIEF : 1
DISCUSSIONS_PREVMED : 1
THAT_THE : 3
PATIENT_ANSWERED : 3
HEALTH_NOTE : 3
KNOW_THAT : 1
REVIEWED_CHRONIC : 1
TIMES_SOMEWHAT : 1
TAB_TAKE : 6
PRN_ACTIVE : 1
MG_NEED : 1
THE_LEVEL : 1
ONE_TABLET : 6
IMMUNIZATION_GIVEN : 1
MET_WITH : 1
IN_OZ : 1
FLUORESCENT_DYE : 1
LONG_TERM : 1
THE_VA : 1
HE_SHOULD : 2
QUESTIONED_THE : 1
EVALUATION_TOOK : 1
IS_THAT : 1
ROUND_NURSES : 1
RECEIVED_PROGRESS : 1
ACTIVITIES_ADDENDUM : 1
ORTHOPEDICS_OF : 1
DATE_LAST : 1
DISEASE_STATE : 1
POINT_WILL : 1
DISCHARGE_IF : 1
MAKE_HE : 1
SUPPORT_ARIPIPRAZOLE : 1
ABOVE_COMPLAINTS : 1
BRADSHAW_PART : 2
OF_SUSPICIOUS : 1
SOCIAL_CONSULTANT : 1
DIAGNOSTIC_IF : 1
DERIVATIVE_ML : 1
EVERY_TO : 1
PSYCHOTROPIC_PHYSICIAN : 2
NEEDED_TO : 2
MG_GIVEN : 1
WERE_YOU : 1
SOURCE_PATIENT : 1
ADMISSION_SHE : 1
PCP_FOLLOW : 1
RBC_CMM : 1
MOOD_ANXIOUS : 1
PM_UNITS : 1
NO_USE : 1
AND_DISCUSSED : 3
THAN_BLOOD : 1
BETTER_PAIN : 1
HAS_PROTOCOL : 1
RATE_YEAR : 1
PT_SUPERFICIAL : 1
INSTRUCTIONS_GIVEN : 2
READINGS_IN : 1
CALL_TO : 1
DESK_MEDICATION : 1
NIACIN_OMEPRAZOLE : 1
FSP_CONTROL : 1
SWMF_THE : 1
EITHER_MORE : 1
EVAL_SHE : 1
LENGTH_CM : 1
HAD_NEGATIVE : 1
IS_PT : 1
TYPE_PAIN : 1
XYZZY_LIST : 1
TEST_RESULTS : 1
PSYCHOTHERAPY_HPI : 1
ALREADY_FROM : 1
MINUTES_QUESTIONED : 1
CHEST_CARDIAC : 1
IN_PHYSICIAN : 1
WITH_AID : 1
HEALTH_TOLERATING : 1
PRELIM_NEG : 1
PAIN_NOT : 1
TO_WAS : 2
DENIES_CHEST : 1
ALERT_TO : 1
IN_GAINESVILLE : 1
AS_COMPLETE : 1
MEDS_REVIEWED : 1
DEC_TELEPHONE : 1
CV_TEST : 1
ALL_CURRENT : 1
PROTEIN_ML : 1
WORK_HEALTH : 1
TIMES_HE : 1
IDENTIFIES_PATIENT : 1
TBI_WORKER : 1
FOLLOWUP_FOLLOWUP : 1
WITHIN_ENCOUNTER : 1
MET_CM : 1
IVP_FOR : 1
OF_NO : 1
COMPROMISE_COPD : 1
OF_CARE : 2
ADDENDUM_HE : 1
TO_TIMES : 1
PAST_SIX : 1
NUMBER_NO : 1
IV_MAY : 1
RCVD_FROM : 1
HAWTHORNE_NO : 1
EDUCATION_WITH : 1
IMPROVED_DIABETIC : 1
RESPIRATION_PMH : 1
AND_PAIN : 2
HE_SUFFICIENT : 1
DAN_VAMC : 1
TYPE_CLINICAL : 1
HYDROCHLOROTHIAZIDE_MG : 1
DISCHARGE_FROM : 1
THE_SO : 1
OTHER_HEART : 1
HIS_SCHEDULE : 1
PY_DISUCUSSED : 1
HE_TAB : 1
NOTED_OX : 1
TALK_ONCOLOGY : 1
COMMENT_LOW : 1
UPPER_LIMB : 1
DEPARTMENT_TRIAGE : 1
TO_NONE : 1
FROM_AM : 1
SPACE_WITHIN : 1
RESTART_TONIGHT : 1
BRANCH_SERVICE : 2
RBC_TO : 1
GLUCOMETER_TIME : 1
WAS_THE : 1
SMOKING_REFERRAL : 1
ARTHROPLASTY_TO : 1
IMPAIRED_MODE : 1
NURSE_STUDENTS : 1
CALLER_RESPONSE : 1
LITTLE_OR : 1
PCP_TERRIBLE : 1
START_HOME : 1
WITHDRAWN_AND : 1
HIM_OF : 1
IF_AGE : 1
DISCUSS_CLINIC : 1
CONTACT_THAT : 1
FOR_STOMACH : 1
PHYSICIAN_ESTION : 1
FREQUENCY_OR : 1
FROM_HIS : 1
CONSULTS_OBSTRUCTIVE : 1
BE_WITH : 1
WORSENING_DEPRESSIVE : 1
SUICIDE_ON : 1
OR_ED : 1
RESPOND_NOTED : 1
CRUSHING_EDUCATION : 1
DISPLAY_COMPROMISE : 1
HES_AMBULATORY : 1
ANY_CIGARETTES : 1
OR_PSYCHIATRIC : 1
PRESSURE_CHECK : 1
NO_SAT : 1
MEDS_OUT : 1
SEEING_STARS : 1
MEDS_POINTED : 1
FOR_CAM : 1
ALONE_ALSO : 1
CANCER_SCREEN : 1
SKIN_INTACT : 1
FOR_SEE : 1
FOR_SCALP : 1
ELEVATED_HES : 1
ADL_TOTAL : 1
ABD_SOFT : 1
OF_PROCEDURES : 1
TRY_SATT : 1
ORIENTED_ERYTHROMYCIN : 1
ACTIVE_INPATIENT : 4
ABOUT_THOUGHTS : 1
OF_TX : 1
TENDERNESS_MARTKEDLY : 1
LENGTH_STAY : 1
NIGHT_WEAK : 1
TO_PCP : 4
HAVE_ADVISED : 1
AND_JOE : 2
DISCUSSED_WHETHER : 1
OXIMETRY_INHALER : 1
NO_BRIEF : 1
NO_PAIN : 1
TO_ADDRESS : 1
TICKETED_AND : 1
AWAKENING_REPORTS : 1
IER_AND : 1
TO_THIS : 5
MORPHINE_PAIN : 1
ASSESSMENT_OF : 1
OL_STATUS : 1
DISCUSSION_NO : 1
TKO_IV : 1
HE_LEFT : 1
SHOULD_TALKED : 1
EDUCATION_INSTRUCTION : 1
OF_CAPILLARY : 1
REFERRAL_FROM : 1
AT_LASIX : 1
ESSENTIAL_SUICIDE : 1
HAS_CONCERN : 1
PLAN_MEDICAL : 1
NOTE_WRITER : 1
NONSOAP_INPUT : 1
IDENTIFIED_NOW : 1
MOIST_PRECAUTIONS : 1
RESPONSE_TO : 1
UNABLE_RESPOND : 1
PHYSICIAN_ASSOCIATED : 1
TO_COMPLETED : 1
RANGE_RT : 1
OX_ID : 1
ORDERS_HYDROXIDE : 1
PRIMARY_TEAM : 1
SYMPTOMS_SUCH : 1
AND_EKG : 1
LOCK_TEMPERATURE : 1
TELEPHONE_TRIAGE : 3
STATED_HAS : 1
HIS_APPOINTMENT : 1
ANESTHESIA_SUBFILE : 1
MEDICATION_AND : 1
DENIES_IDEATIONS : 1
PUTS_HOMICIDAL : 1
BUS_TRAVEL : 1
OFFERED_DUE : 1
EKPHYSICIAN_MH : 1
OR_SEEING : 1
SUGARS_FATS : 1
BEING_ACCUCHEK : 1
EXERCISE_STRESS : 1
MAINTAINED_IS : 1
AND_PT : 1
ANALYSIS_HOSPITALIST : 1
COMPLAINT_EXAM : 1
LAB_AND : 1
TABLET_MOUTH : 7
SMOKE_HISTORY : 1
NEEDS_APPOINTMENT : 1
BY_PENDING : 1
HE_HAS : 10
OR_NO : 2
IM_IN : 1
PULSE_TO : 1
SELFTREATMENT_ALLERGIES : 1
PRIOR_YR : 1
PUPILS_SPECIAL : 1
MODIFIED_SEDATION : 1
PAY_DEATH : 1
TAB_EVERY : 1
DISC_HE : 1
PATIENT_SECRETIONS : 1
WAS_GOT : 1
SUGAR_FREE : 1
SITES_LOCATED : 1
PAIN_AT : 2
COULD_PROVIDE : 1
BRANCH_ENTERED : 1
WILL_HOME : 1
EYE_PATIENTS : 1
SENT_ANALYSIS : 1
WEIGHING_YES : 1
MEDICAL_WERE : 1
DIET_SALTS : 1
PAIN_WORKS : 1
FLUNIS_CHICKEN : 1
HE_LIVES : 2
BPH_NO : 1
OTHER_HX : 1
TIME_VITAL : 1
POSTERIOR_CLEAR : 1
HOWEVER_STATED : 1
TEST_STRIP : 1
CAM_LE : 1
YEAR_ABD : 1
DEPRESSION_DICTATION : 1
ONE_TAB : 1
THAT_PT : 1
ADDENDUM_OTHER : 1
THIS_NURSE : 1
TRIAGE_REPORT : 1
HAS_CARE : 1
VIA_ADDITIONAL : 1
ICDCM_OF : 1
ISSUES_REPRESENTATIVE : 1
CURRENTLY_SI : 1
OR_TISSUE : 1
DRUGS_ALCOHOL : 1
IS_UNSURE : 1
HS_MEDICATION : 1
OR_WITH : 1
SEDATION_PLAN : 1
SERVICE_CM : 1
HAS_STATE : 1
CONDITION_NOTE : 1
FT_UNDER : 1
EDUCATION_THIS : 1
NO_OR : 1
RE_COLONOSCOPY : 1
ACOS_GERIATRICS : 1
WAS_BARE : 1
ANALYSIS_NOTE : 1
SEVERAL_REASONS : 1
RPP_VOIDING : 1
ANTIDIABETICS_LEFT : 1
HIS_BIKE : 1
TO_PERSON : 1
RIGHT_ELBOW : 1
SELFREPORT_IS : 1
STILL_HAS : 1
SUFFICIENT_SHE : 1
WHEN_DID : 1
TO_SESSION : 1
ABOUT_OF : 1
ROS_PATIENT : 1
TE_HE : 1
OFFERED_ED : 1
RECOVERY_COORDINATOR : 1
GIVEN_INDIVIDUAL : 1
BACK_PAIN : 1
LEAVING_TO : 1
TO_ARE : 1
WHETHER_SKIN : 1
FACILITY_PCP : 1
SAME_ALSO : 1
WAS_ISOLATED : 1
MEDICATIONS_THIS : 1
CONSULT_ESTABLISHED : 1
CAUCASIAN_MALE : 1
DISTRESS_USE : 1
CURRENTLY_CARE : 1
IN_NONVA : 1
SCL_AC : 1
HEENT_TMS : 1
REPORT_FEVERS : 1
PHE_VERBALIZED : 1
ACTIVE_TELEPHONE : 1
IMA_PT : 1
TIME_TREATMENT : 1
BUT_TO : 1
OF_SKIN : 1
ESOPHGEAL_CA : 1
ELAVIL_FROM : 1
DEBRIDEMENT_FOLLOWING : 1
SHE_TO : 1
REFER_THE : 1
IT_RECOVERY : 1
NONMANDATORY_THAT : 1
CONTACT_FOR : 2
COMPLAINING_OF : 1
SEX_MALE : 1
VETERAN_IN : 1
ST_METATARSAL : 1
PRESCRIBED_LAB : 1
TO_CLEAN : 1
YEAR_PROSTATE : 1
DURING_ADMISSION : 1
BLDG_CON : 1
WOULD_PT : 1
ABNORMALITIES_CARE : 1
HAD_ANY : 1
DYSURIA_INCREASED : 1
RATE_IRREGULAR : 1
STARTED_DOSE : 1
IDENTIFIERS_USED : 1
SEVERAL_TO : 1
NOTE_MALE : 1
PATIENTS_SPOKE : 1
CONFUSED_SEEING : 1
NURSING_TELEPHONE : 1
PT_OT : 1
IS_YEAR : 3
ALCOHOL_AVOID : 1
INHALER_HIS : 1
ALLERGIES_HAS : 2
RHYTHM_LYMPH : 1
BHL_COMMENTS : 1
AND_TO : 4
MORSE_FALL : 1
CC_YEAR : 1
OR_ISSUES : 1
SUFFICIENT_TO : 1
HEAD_BURY : 1
PRINCIPAL_LEFT : 1
ENTRY_PULM : 1
ALTERED_DEPRESSED : 1
MEDICAL_WITH : 1
IT_IS : 1
PAIN_PAIN : 1
DO_SINCE : 1
FLUORESCENT_INTO : 1
ADMISSION_COULD : 1
OF_LAST : 2
VOICED_AT : 1
BEFORE_HE : 1
FROM_NURSING : 1
UNABLE_TO : 4
SMOKE_INTERDISCIPLINARY : 1
THIS_FOR : 1
COMPLETELY_HE : 1
COLONOSCOPY_DO : 1
FLOOR_PT : 1
TO_USE : 2
BIPOLAR_ANY : 1
PROVIDED_DATE : 1
ANXIETY_PANIC : 1
ON_WITH : 1
OF_TIME : 2
BE_THANKS : 1
TAKEN_TO : 1
CONSULT_ALERT : 1
UP_DOES : 1
YES_LIST : 1
WITH_REFLUX : 1
MEDICATIONS_INCLUDING : 3
RESPONSIBLE_MONITORING : 1
RALLY_PLEASANT : 1
TIME_OF : 3
LAST_SIG : 1
BACK_HEENT : 1
PLAN_WILL : 1
PCP_STILL : 1
FOR_ESOPHAGEAL : 1
HELP_THESE : 1
DONE_MAR : 1
PART_THE : 2
TO_PHYSICIAN : 2
ARE_YELLOW : 1
AND_MADE : 2
ADL_COOPERATIVE : 1
IMAGE_VISTA : 1
JOB_EMOTIONAL : 1
MOXIFLOXACIN_PREDNISONE : 1
MONTH_UP : 1
TO_SPECIALTY : 1
FILL_THE : 1
WAS_NOTIFIED : 1
FOLLOWUP_MESYLATE : 1
FOR_FROM : 2
NO_NOTED : 1
BARRIERS_LEARNING : 2
NICOTINE_PATCHES : 1
BY_ACTIVE : 1
TOBACCO_DIPHTHERIA : 1
URINARY_OBSTRUCTION : 1
SUPPLIES_TIME : 1
AIR_ENLARGEMENT : 1
LESIONS_HAIR : 1
SOCIAL_ON : 1
BE_WAS : 1
MEDICAL_HE : 2
THE_ORDER : 1
CAME_TO : 1
TA_HAS : 1
ALSO_WOULD : 1
FOR_EKNURSING : 1
CLINIC_MG : 1
NACL_AT : 1
MINUTES_POST : 1
ALSO_COMPLAINS : 1
TIMES_COUGH : 1
FLEXION_WE : 1
AND_HIGH : 1
BOTH_AND : 1
BIKE_NOT : 1
OF_BLOOD : 1
HE_HUMAN : 1
ED_TO : 2
TITLE_VIEW : 1
STATEMENTS_HAS : 1
PATIENT_TELE : 1
CARDIOLOGY_WITH : 1
BLUE_SHIELD : 1
OBSTRUCTIVE_DISEASE : 1
SEVERE_IN : 1
ORTHOSTASIS_FROM : 1
APPOINTED_PCP : 1
HX_HEPATITIS : 1
BREATHING_CANT : 1
SOCIAL_TO : 1
COMPARTMENTAL_HCT : 1
OF_INFORMATION : 1
WHO_FOR : 1
INTRODUCER_PLEASANT : 1
MEDICATION_MITRAL : 1
PRESSURE_COMPARTMENTAL : 1
VA_LIST : 1
PHONE_NUMBER : 2
OR_ANWER : 1
PCP_MANIA : 1
INFORMATION_TELEPHONE : 1
HAS_HAS : 1
MOST_MIND : 1
OF_IMPORTANCE : 1
STRETCHER_SHIFT : 1
PROSTATE_WITHOUT : 1
VIA_SPO : 1
DISCUSSED_NEED : 1
DIVERSION_GENERAL : 1
HIS_PRIOR : 1
APPT_BE : 1
MBD_MBL : 1
OBSERVED_OF : 1
SOI_RX : 1
ONE_AT : 1
INVOLVING_LOWER : 1
CONCERNS_TESTING : 1
PAIN_IMA : 1
HAS_MISTREATED : 1
DEPRESSED_OR : 1
ED_IN : 1
SURGICAL_INTERVENTION : 1
VERDSOME_WIFE : 1
HOURS_SHORTNESS : 1
TIDAC_SUBCUTANEOUS : 1
MG_DISPENSED : 1
CLOSEBY_MAY : 1
INSPIRATION_IT : 1
DIAGNOSTIC_EXAMINATION : 1
TIME_AS : 1
ELBOW_HAS : 1
COLONOSCOPY_YOU : 1
WITH_SOME : 1
HAD_VASCULAR : 1
HEALTH_ON : 1
TOPICS_MYSELF : 1
SUICIDE_ATTEMPT : 1
IDENTIFIED_NAME : 1
HOME_MEDICATIONS : 1
THE_RESPIRATION : 1
RALES_INFORMED : 1
BRIEFLY_WHAT : 1
ACCIDENT_STATES : 1
RARELY_PRECAUTIONS : 1
PERCEPTION_IMPAIRMENT : 1
EITHER_OR : 1
NO_SUPPORTIVE : 1
NOT_IDENTIFIED : 3
PULSE_WNL : 1
WAS_IN : 4
MED_OK : 1
DATE_RAL : 1
AND_PHYSICAL : 2
AND_EFFUSION : 1
VERY_LUNG : 1
OFFICE_GAINESVILLE : 1
MH_GROUPS : 1
HE_ADMIT : 1
RECOVERY_PLAN : 1
SEEN_TO : 2
DIAGNOSIS_FAMILY : 1
NICOTINE_HISTORY : 1
HAD_AMLODIPINE : 1
PSYCHOSOCIAL_NOTE : 1
HEENT_ENDING : 1
MINUTES_MORPHINE : 1
COMPETENT_MILIEU : 1
THIS_VETERAN : 1
CHECKED_ADL : 1
NO_HAS : 1
CHECKED_COMPLETE : 1
WHEELCHAIR_GUN : 1
PREVMED_YOU : 1
HERE_URGENT : 1
CALL_PT : 1
HE_JUST : 1
PRN_PTSD : 1
ADMISSION_PATIENT : 1
AND_HEALTHY : 1
PPD_BRIEF : 1
UNDERSTANDING_BY : 1
KG_INTRACRANIAL : 1
RACE_UNKNOWN : 2
ALCOHOL_SCREENING : 1
HYPERTENSION_ATTEMPT : 1
ANY_SMOKES : 1
HE_MET : 1
STATEMENT_RELIABLE : 1
PARTICIPATION_HAS : 1
REFILLS_EXPIRATION : 1
PATIENT_CYANOCOBALAMIN : 1
CROSS_SHIELD : 1
OBSTRUCTION_CARE : 1
PROPER_USE : 1
TO_LIVE : 2
SUB_ST : 1
DO_HAVE : 1
COMMENTS_INFORMATION : 1
NURSING_NOTE : 2
RESTING_HR : 1
OF_PROTECTIVE : 1
ON_AMBULATION : 1
PAIN_INDIGESTION : 1
MONTHS_TREATING : 1
POSSESSION_SCHEDULE : 1
NEW_PROTOCOL : 1
CALLED_WAS : 1
SHIFT_ASSESSMENT : 1
CURRENT_VA : 1
PO_AND : 1
BASE_IS : 1
PATIENT_THOUGHTS : 1
THE_DOES : 1
THANKS_WEIGHT : 1
AT_PATIENT : 1
MSE_PRESENT : 1
VIEW_VET : 1
CA_OR : 1
THEY_NEED : 1
BLOOD_MORE : 1
TACHY_REASON : 1
DYSPNEIC_PALE : 1
THEY_MY : 1
TO_NEEDED : 1
LEFT_WITH : 1
PRINCIPAL_PROCEDURE : 1
SACPREPRIMARY_OCCURRENCES : 1
RHYTHM_FROM : 1
MILITARY_INCLUDING : 1
PATIENT_ARRIVED : 1
IMPROVE_MOOD : 1
WIDEN_PUPILS : 1
PT_AMBULATION : 1
IN_OUTPATIENT : 1
NO_STRETCHER : 1
DESIRE_FOR : 1
RISK_HARM : 1
BY_DAUGHTER : 1
SIGNS_WAITING : 1
INITIAL_NUTRITION : 1
BACKGROUND_DURATION : 1
BRIEFLY_STATE : 1
REVIEW_UPON : 1
PAPERWORK_ASSESSEMENTS : 1
INFORMATION_PATIENT : 1
IF_MALE : 1
CARE_PERMISION : 1
DUE_TO : 3
DATE_AND : 1
SCHEDULE_NUMBER : 1
REQUEST_THE : 2
WITHIN_LAST : 2
PER_MD : 1
AGAINST_ARM : 1
LITTLE_INTEREST : 1
CONTINUE_PREVIOUSLY : 1
LISTENING_DESIRE : 1
ADMITTED_FOR : 1
BETTER_NOW : 1
DOXAZOSIN_MG : 1
TO_UP : 2
SC_ADDRESS : 1
OTHER_RETURNED : 1
PLACE_TIME : 1
CLINIC_REVIEW : 1
COMPLAINTS_NACL : 1
DEMENTIA_WITH : 1
HOME_SINGLE : 1
AC_INDIVIDUAL : 1
HEART_SS : 1
OF_ELASTIC : 1
TXC_GROUP : 2
AND_SHOULD : 1
ORIENTED_COOPERATIVE : 1
GROUP_NURSING : 1
IDENTIFIED_PAIN : 1
CERVICAL_SPONDYLOSIS : 1
IN_WRAPUP : 1
THE_IS : 1
SHORTNESS_AGO : 1
STREET_ADDRESS : 1
OTHER_STAFF : 1
THE_TIME : 1
PT_UNABLE : 1
ABOUT_BANKRUPTCY : 1
MANY_OF : 1
IT_THEY : 1
COPAY_EXEMPT : 1
ALSO_ASSOC : 1
FAX_1010 : 1
FAM_EDUCATION : 1
MODERATE_PATIENTS : 1
POW_PY : 1
EXAM_ASSESSMENT : 1
BENIGN_OF : 1
BY_NAME : 1
WILL_MADE : 1
WOULD_NEED : 1
OVER_THE : 1
THAT_IM : 1
AT_REST : 1
TOPAX_HELPED : 1
MH_NOTE : 1
PT_AND : 1
TAB_WHEN : 1
LOSS_PROTECTIVE : 1
FIBRILLATION_NURSING : 1
DEPRESSED_SUMMARY : 1
TOOK_OFF : 1
HUMAN_INSULIN : 1
AND_PLACED : 1
KEEPING_ELEVATED : 1
WALK_NO : 1
HE_COULD : 2
AGE_PROBLEMS : 1
BECAUSE_DOES : 1
AGO_BUT : 1
DISCUSSED_FOR : 1
LAST_READ : 1
SURGICAL_VITAL : 1
SPOKE_WITH : 1
OF_COMPLIANCE : 1
ANXIETY_MR : 1
ANESTHESIA_TECHNIQUE : 1
LIGHT_AT : 1
BM_MAXIMIZED : 1
WD_PATIENT : 1
FAMILY_UNIT : 1
WITHIN_PAST : 2
TIME_INPATIENT : 1
IRREGULAR_RATE : 1
YEAR_SOFT : 1
AND_INTO : 1
CURRENTLY_LIVES : 1
PULMONARY_DISEASE : 1
COMPLAINT_HAS : 1
PLAN_CARE : 2
CONTACTED_WAS : 1
BELONGINGS_MONTH : 1
DEMONSTRATED_SPECIALTY : 1
BE_IN : 1
NUMBER_OR : 1
ADR_HAS : 1
THEIR_PRESCRIBING : 1
TERRIBLE_STILL : 1
CAPILLARY_REFILL : 1
YEAROLD_WHO : 1
CHICKEN_STOPPED : 1
ALSO_MODERATE : 1
AND_SYMPTOMS : 1
THIS_SEPARATED : 1
REFERRAL_KLEIN : 1
SCREENING_TEST : 1
SECRETIONS_YELLOW : 1
INFORMATION_SULFATE : 1
HISTORY_OF : 3
SHE_REVIEWED : 1
TERMINATING_THE : 1
MONTHS_COPD : 1
TOOLS_IMAGING : 1
SEC_PT : 1
EVENT_LOW : 1
FROM_IF : 1
YOUR_LIST : 1
RTC_IF : 1
SIG_USE : 1
PLACEMENT_OVERNIGHT : 1
THAT_HAD : 2
MAXIMIZED_CARDIAC : 1
EXTREMITIES_LEFT : 1
FEELING_SOMEWHAT : 1
LANS_PC : 1
FORMED_EDGES : 1
MEDICATION_CHANGES : 1
NOTED_PATIENTS : 1
ORIENTED_COMPRESSION : 1
SOMEBODY_PSYCH : 1
PATIENT_BACK : 1
PAIN_JOINT : 1
FOR_NUTRITION : 1
GIVEN_CP : 1
LESIONS_CHANGES : 1
FOR_OSTEOMYELITIS : 1
TO_TEACH : 1
COMPREHENSIVE_SCREENING : 1
DRUG_HYPERTENSION : 1
UNTRTEATED_HE : 1
MY_REST : 1
LIKE_TALK : 1
SEEING_SMOKE : 1
FOR_WORSENING : 1
TAKE_LOTS : 1
OBSERVE_AND : 1
RISK_SELF : 1
ALL_HX : 1
AGE_SEX : 1
ISOLATED_PALPATION : 1
HAS_INTRACTIBLE : 1
FAX_CORRESPONDENCE : 1
PROTOCOL_IV : 1
EXTENDED_CARE : 1
NOTED_LEFT : 1
ADMISSION_ASSESSMENT : 2
TRIAGE_ADDITIONAL : 1
ALERT_ORIENTED : 5
ULTRAM_MG : 1
SEE_MAGNESIUM : 1
NOTE_MILITARY : 1
SPONSORS_CHAPLAINS : 1
WORK_ASSIST : 1
TIME_SIGNS : 1
HYPOXIC_DYSPNEIC : 1
PSYCHOSIS_INTERPRETATION : 1
TOMORROW_HE : 1
CAUSE_UNCOMFORTABLE : 1
ANGRY_MANY : 1
TINGLING_HA : 1
PAST_YOU : 1
QH_ORAL : 1
PRESSURE_ULCER : 1
INDIGESTION_IN : 1
MEDICAL_REVIEWED : 1
RELATED_CONCERNS : 1
DECREASE_THE : 1
EVERY_ANY : 1
HOMEMAKER_HEALTH : 1
ANSWERED_NKA : 3
MEDICAL_TEAM : 1
AND_QUADS : 1
PRECAUTIONS_NURSING : 1
HOSPITALS_NURSING : 1
STATES_SHE : 2
LUNGS_NO : 1
RADIO_NURSING : 1
INTERPRETATION_RISK : 1
WHO_BROUGHT : 1
HISTORY_SHOT : 1
AT_IVP : 1
POINT_SEIZURES : 1
FATS_JUN : 1
GRAHAM_ARNP : 1
NEURO_LOSS : 1
MEDS_OVER : 1
SHE_ME : 1
WORKED_MENTAL : 1
TO_NURSE : 1
PATIENT_YEAROLD : 1
MALE_ARMY : 1
FEET_THAT : 1
SUICIDE_THREATS : 1
SCL_HEMOGLOBIN : 1
THE_DIABETES : 1
POSITIONING_AND : 1
EVALUATION_VERBALIZED : 1
ASPIRIN_NO : 1
NORMAL_PULSE : 1
IMAGING_AND : 1
THE_SYMPTOMS : 1
OPERATE_VEHICLE : 1
CONTROL_THEIR : 1
OUT_THE : 1
NEW_MEDICATIONS : 1
MEDICATION_COMPLIANCE : 1
SINCE_PT : 1
CPRS_CLICK : 1
LOTS_WATER : 1
HAS_LENGTHY : 1
TELEPHONE_THE : 1
ACTIVE_SUICIDE : 1
TO_EXCESSIVELY : 1
SEE_DATED : 1
RADIO_MEDICAL : 1
SCHDULE_BIPOLAR : 1
PSYCH_SOME : 1
VTACH_DIPYRIDAMOLE : 1
AT_OF : 1
SEMMES_WEINSTEIN : 1
PATIENT_MEDICATIONS : 1
TYPE_II : 1
LACERATION_WITH : 1
EXTENDED_MG : 1
PROCEDURES_MODIFIED : 1
FEE_BASIS : 1
GROUP_ACTIVITY : 1
MODE_STRETCHER : 1
DIPYRIDAMOLE_AMINOPHYLLINE : 1
NOTE_PT : 1
IF_WEIGHT : 1
OF_SIGNIFICANT : 1
AM_IS : 1
YES_DEPRESSED : 1
AND_FOUND : 1
CM_SPOTS : 1
IS_REQUIRED : 1
SEES_LIGHT : 1
SEVERAL_FOR : 1
IS_CONCERNED : 1
OUT_THAT : 1
NEW_ON : 1
OF_CLINICAL : 1
NOTE_ASPIRATION : 1
FOR_PODIATRY : 1
TO_PATIENTS : 2
STABILITY_MEDICAL : 1
REMAINS_AT : 1
APPROPRIATE_NO : 2
HIS_GRASS : 1
PPD_IN : 1
ABD_ARRHYTHMIA : 1
DIDNT_AREA : 1
PHYSICIANS_DICTATION : 1
FREEZE_IN : 1
THE_LIMB : 1
DONE_CONSENT : 1
DIABETES_SC : 1
OF_CONTACT : 3
OF_MODERATE : 1
HIGH_NUTRITIONAL : 1
BE_ABLE : 1
DIAGNOSES_HEMATURIA : 1
WELL_TO : 1
THE_HERNIA : 1
NO_RISK : 1
REST_OBJECTIVE : 1
REVIEWED_PATIENTS : 1
INTENT_OF : 1
TRAVELS_WHEELCHAIR : 1
WORKED_PULSE : 1
ADDENDUM_FOR : 1
ARRHYTHMIA_TYPE : 1
QUIT_TETANUS : 1
INSTRUCTIONS_QUESTIONS : 1
INPATIENT_INCLUDING : 2
TREATING_COPD : 1
HAS_HAVE : 1
HYPERTENSION_SUICIDE : 1
RAMSAY_SEDATION : 1
SIGNER_PROCEDURE : 1
IN_FEE : 1
AVOID_OR : 1
THE_TECHNIQUE : 1
ML_PO : 2
PER_HOME : 1
RISKS_BENEFITS : 1
EDUCATED_COMFORT : 1
INSTRUCTION_PHE : 1
WITHOUT_OBSTRUCTION : 1
ESTION_HAVE : 1
NOT_YEAR : 1
EFFECTS_HIS : 1
HE_WANTS : 1
FLOOR_GOT : 1
MOTIVATION_TO : 2
DISEASE_SOI : 1
WAYS_THEY : 1
CURRENTLY_HAS : 1
NAUSEA_VOMITING : 1
NO_NAUSEA : 1
DENIES_USE : 1
SCHEDULED_GECAC : 1
PRIOR_DISCHARGE : 1
WITHIN_TOTAL : 1
OEF_MARRIAGE : 1
CONSENT_MEASURED : 1
ANY_PAIN : 1
PROCEED_APPROPRIATELY : 1
CONSTA_AS : 1
PATIENT_HAS : 9
MIND_AND : 1
CLINICAL_OF : 1
DONNA_CONTACTED : 1
JUN_PATIENT : 1
NOTE_HAD : 1
ASSESSED_ACCORDING : 1
VISION_DIAGNOSIS : 1
EXTENDED_INDICATES : 1
PERMISION_THE : 1
OF_FOR : 2
RATE_RANGE : 1
THIS_NO : 1
CURRENT_PAIN : 1
UP_GASTROINTESTINAL : 1
FOR_ON : 1
THAT_BE : 1
FOR_CONSULT : 1
HYPERKERATOTIC_WOUND : 1
FOR_PAST : 1
CRAMPING_THAT : 1
THE_KNOW : 1
MEDIASTINUM_THE : 1
NONSOAP_PROVIDE : 1
CALLED_SOCIAL : 1
HIS_HOUSE : 1
LEARNING_EMPLOYEE : 1
TEMPERATURE_CHECKED : 1
AND_ADDENDUM : 1
INCREASING_LEVEL : 1
PRECOLONOSCOPY_INSTRUCTIONS : 1
DISTENDED_OBSERVE : 1
OUTPATIENT_ORIENTED : 1
FACE_FACE : 1
TIME_DCD : 1
REASSESSMENT_NOTE : 1
STAFF_ASSESSMENT : 1
YES_MEDS : 1
LE_TRAVELS : 1
OTHER_CALL : 2
LEARNING_NO : 1
MAGNESIUM_SUSP : 1
ALERT_ERYTHROMYCIN : 1
JUNE_ESTIMATED : 1
PT_UNDERSTANDING : 2
RM_AIR : 1
MADE_TO : 2
PATIENT_VET : 1
IS_REPEAT : 1
WILL_CONSULT : 2
NO_NEW : 1
SUPERFICIAL_EXUDATE : 1
SHOT_TO : 1
YOU_ABUSED : 1
PRESSURE_CUFF : 1
PULSE_HEALTH : 1
ADDENDUM_BELOW : 1
INTO_CHAIR : 1
ARMY_CONDUCTING : 1
FROM_PROVIDER : 1
DEMONSTRATED_EXUDATE : 1
TAB_ACTIVE : 3
THAT_JUST : 1
HER_MEANT : 1
CPRS_PATIENT : 1
HAVE_ANY : 1
AVAILIBLE_FOR : 1
ALLOW_OF : 1
HOME_HOW : 1
ORTHOPEDICS_DESCRIPTION : 1
ESSENTIAL_CHANGE : 1
HAS_VERY : 1
TE_IS : 1
AGE_MALE : 2
ADDENDUM_DEPENDENCE : 1
SCREENING_AUDITC : 1
COLLINS_TAXI : 1
ABILITY_TO : 1
THE_UNDERSTANDING : 1
WITH_SITTER : 1
AM_LEAVING : 1
MY_FOOT : 2
IN_DISTRESS : 1
HISTORY_NEG : 1
OR_DETACHED : 1
BEING_BUT : 1
WORK_PHONE : 1
HISTORY_AND : 1
SSN_SMOKING : 1
ACTIVE_STATUS : 1
WHO_PRESENTS : 1
WEEK_AS : 1
WALKIN_ABOVE : 1
NOTE_ADDITIONAL : 1
CURRENT_RECALL : 1
SITESDO_NOT : 1
PATCHES_THAT : 1
COMPLAINS_LEFT : 1
HAS_REVIEWED : 1
ANOTHER_CARE : 1
SAID_EKPHYSICIAN : 1
LAST_YR : 1
ACTIVITY_LEVEL : 1
RARELY_MOIST : 1
AND_STATE : 1
SUPPRESSED_AND : 1
MOBIL_THEN : 1
SOCIAL_INFORMATION : 1
ON_AIR : 1
ORDERED_HE : 1
GROUP_COUNSELORS : 1
BARE_DAILY : 1
FOOT_REST : 1
ABOVE_IS : 1
PCP_SOORYA : 1
FACTOR_THIS : 1
REC_BURNING : 1
CPRS_DOES : 1
KG_DIABETES : 1
BE_MADE : 1
AS_EITHER : 1
AS_ORDERED : 1
WAS_AT : 2
TAKE_WITH : 1
DISUCUSSED_WITH : 1
MIN_TOBACCO : 1
LIMB_PT : 1
RESULTS_THE : 2
CAUSING_LOT : 1
NECESSARY_TIMES : 1
FOR_THROUGH : 1
AD_LIB : 1
DATE_IDEALLY : 1
STATES_GETS : 1
CHECKS_USE : 1
NO_LPN : 1
JVD_MG : 1
SHOULD_HAVE : 1
TLCP_BLOOD : 1
KNEE_POST : 1
CALL_SPC : 1
HAS_CBOC : 1
OF_DULL : 1
HIS_YR : 1
HAS_TAKING : 1
THEN_IMAGING : 1
ATTEMPTS_CALL : 1
DOSE_TO : 1
AND_FINALLY : 1
YOUR_REPRESENTATIVE : 1
AMINOPHYLLINE_MG : 1
REFLUX_BOTH : 1
TV_TO : 1
LESIONS_SKIN : 1
BY_PHYSICIAN : 2
IS_CAUSING : 1
URGENCY_NO : 1
CHANGES_MESSAGE : 1
USED_IDENTIFIED : 3
RATE_PT : 1
CALLED_TO : 1
UP_AOD : 1
OBTAINED_PATIENT : 2
CARDS_BUT : 1
FATS_HAS : 1
IN_SUPPORT : 1
EFFECTS_FROM : 1
DOSE_ROUTE : 1
SIDE_FROM : 1
DE_CHICKEN : 1
HAD_IN : 2
ACTIVE_HOMOCIDE : 1
DOWN_OR : 1
POLYTRAUMA_TELEPHONE : 1
HAVE_EVER : 1
CREST_IN : 1
INCLUDING_ANTIHISTAMINES : 1
CA_TOLD : 1
PUPILS_DILATED : 1
SIGNIFICANT_NURSING : 1
HOME_ON : 1
ACTIVITIES_YOUR : 1
PRIOR_TO : 4
HS_PT : 1
FOLLOWING_IDENTIFIERS : 1
PATIENT_PRESENTS : 1
MENTAL_UNIT : 1
WITH_RESIDENT : 1
IS_UNCOMFORTABLE : 1
IN_HOSPITALS : 1
THEY_CONTROL : 1
MALE_THE : 1
LIMB_ABOV : 1
DISCHARGE_ACCIDENT : 1
PT_IS : 2
FILM_ENTITLED : 2
AS_WALKIN : 1
ADMIT_AT : 1
EDUCATION_ACTIVITIES : 1
OVERRUN_BUT : 1
TAKE_ASPIRIN : 2
SOME_AND : 1
TEACH_FOR : 1
DENIES_PER : 1
ADR_PATIENT : 1
DIAGNOSIS_OF : 1
AWA_IN : 1
WORKING_PT : 1
TO_HE : 3
IMAGING_PAGER : 1
FOLLOWUP_PCP : 1
WAYS_ARE : 1
THEME_OF : 1
ON_TABLE : 1
JUST_NEED : 1
TIMES_AS : 1
FAMILY_IN : 1
ATTEMPTS_TO : 1
WITH_OXYCODONE : 1
SWELLING_OTHER : 1
PERSONX_HOWEVER : 1
FOUR_ACTIVE : 1
SENSATION_THE : 2
HA_WEAKNESS : 1
WAS_MR : 1
GASTROINTESTINAL_WNL : 1
PRESSURE_FOR : 1
ACTIVE_PROBLEMS : 1
HEMATURIA_AND : 1
FROM_IS : 1
THE_IDEA : 1
DERIVATIVE_ID : 1
OF_TO : 3
ACCIDENT_LAURIE : 1
NOT_MOTOR : 1
SCHEDULED_FOR : 1
THE_CONDITION : 1
BEFORE_SCHEDULED : 1
MR_TO : 1
TRAVELS_IN : 1
SOME_FEVER : 1
ORDERED_BY : 1
COMFORT_CV : 1
GENERAL_PSYCHOSOCIAL : 1
RECENT_AND : 2
FOR_BIPOLAR : 1
IMPROVING_AND : 1
WROTE_HIM : 1
GROUPS_REVIEWED : 1
SPRAIN_NO : 1
MONTH_DDEPRESSION : 1
REFILLS_SULFA : 1
TOTAL_CARE : 1
CS_WHILE : 1
UNIT_PARK : 1
PATIENT_SENSES : 1
IDEATION_NO : 1
OBJECTIVE_TELE : 1
HE_OFF : 1
WAS_WHEELCHAIR : 1
OF_OF : 3
DE_VOMITING : 1
RECOIL_TAB : 1
LEVEL_REPEAT : 1
SUCH_TERMINATING : 1
PRESSURE_DIMINISHED : 1
CHEST_BETWEEN : 1
BEDTIME_FOR : 1
GROUP_LECTURE : 1
AMLODIPINE_MG : 1
EDUCATION_NURSING : 1
REMAINS_STRESSED : 1
ENCOUNTER_TIME : 1
GROUP_THAT : 1
CLICK_ON : 2
SPO_NC : 1
FALL_INFORMATION : 1
IN_LEFT : 1
YES_BEING : 1
AND_POST : 1
ORDER_MODERATELY : 1
VA_CALL : 1
PALE_SCREEN : 1
TID_PATIENT : 1
MENTAL_ILLNESS : 1
LEARN_MEDICATIONS : 1
ITCHES_MORPHINE : 1
ABOVE_NO : 1
CONTRACT_RESPONSE : 1
VERDSOME_STATE : 2
HOME_IN : 2
BROUGHT_TO : 1
THE_YOU : 1
MRS_FREEZE : 1
DIET_IN : 1
INTERPRAETATION_MAY : 1
ACTIVE_AREA : 1
REPOSITIONS_AD : 1
PROSTHETICS_FOR : 1
OF_MICHIGAN : 1
HARASSED_AT : 1
SESSION_HARRINGTON : 1
DEATH_OF : 1
CAN_BE : 1
CPAP_NOTE : 1
COULD_WALK : 1
AND_THIS : 1
PCP_MIRALAX : 1
TUSCON_EP : 1
CONTROL_WORST : 1
YRS_AGO : 1
PROCEDURE_LEFT : 1
MOOD_AND : 1
OFFICERS_SOCIAL : 1
NURSING_ICU : 1
TETANUS_MEDICAL : 1
PATIENT_MENTAL : 1
SAID_FELT : 1
PRESCRIBED_DO : 1
HE_STATES : 1
PAST_YEAR : 1
NOTE_BRANCH : 1
SCALP_LESIONS : 1
THE_ED : 1
DEMENTIA_IF : 1
ALONE_HOME : 1
INDEPENDENT_WITH : 1
THY_SATT : 1
TABLET_METHADONE : 1
TESTING_IS : 1
BEING_NUMEROUS : 1
ASHOK_PC : 1
MRI_CAN : 1
UNCONTROLLED_ORTHO : 1
NIGHT_LORAZEPAM : 1
THERE_AS : 1
REVIEWED_RESULTS : 1
PAIN_AM : 1
DIET_LOW : 3
CHANGES_MADE : 1
EXAM_BASE : 1
RESPIRATORY_USE : 1
SCALE_PLAN : 1
UNKNOWN_THY : 1
PARTICIPATED_EVENING : 1
IN_VET : 1
NEEDED_PLEASE : 1
RISK_INFORMATION : 1
MEDICATIONS_SUPPLIES : 5
RISK_IDENTIFIED : 1
MADE_ORDERS : 1
PTSD_AND : 1
MIN_HPI : 1
ACTIVE_COMPUTERIZED : 1
BEEN_MISTREATED : 1
PLEASURE_DOING : 1
PT_RESPONSE : 1
REVIEWED_RISKS : 1
WOUND_RIGHT : 1
MOISTURE_RARELY : 1
TO_VERIFY : 1
IV_INTACT : 1
OCC_WHEEZING : 1
STABILITY_IS : 1
INTERVENTION_SIGNS : 1
ISSUES_WAY : 1
OF_ENCOURAGED : 1
WE_WHETHER : 1
SPECIALTY_PULM : 1
SPONDYLOSIS_NURSING : 1
MESYLATE_MG : 1
SEEN_ELEVATED : 1
NOTE_THE : 1
IF_THE : 1
PAIN_START : 1
SORE_OVER : 1
RESTING_DECREASES : 1
AMBULATION_AND : 1
VETERAN_TIMELY : 1
HIS_HE : 1
IS_CAUSE : 1
APPLICABLE_OLD : 1
FIBRILLATION_DISCHARGE : 1
ANYONE_CLOSEBY : 1
NC_PLACED : 2
VOIDING_LARGE : 1
OTHER_SPONSORS : 1
PSYCHOTHERAPY_MIN : 1
MEDICATIONS_REFILLS : 1
CHART_AVAILABLE : 1
LAST_ABD : 1
FOR_DISCHARGE : 2
KIMBERLY_GATZMAN : 1
GEN_TO : 1
WEAKNESS_PAIN : 1
RECORDS_WERE : 1
HYDROXIDE_SUSP : 1
UPSET_WITH : 1
OBSERVATION_MIN : 1
ATIVE_ANTIANXIETY : 1
MCG_GIVEN : 1
GENERAL_NOTE : 1
PRESENTS_CLINIC : 2
WAS_FROM : 1
RESULTS_AND : 1
BY_TRANSPORT : 1
ICU_NO : 1
ID_ACTIVE : 1
QAM_CS : 1
COOPERATIVE_TIME : 1
COULD_REASON : 1
SUSPICIOUS_SKIN : 1
ARM_FOR : 1
CONTACT_VETERAN : 1
TIME_PULSE : 1
MET_GOAL : 1
INHALER_REVIEWED : 1
PATIENT_IN : 1
VERBALIZED_PT : 1
CONCERNED_HIS : 1
TEAM_WORK : 1
FOR_UP : 1
LAB_NOT : 1
OTHER_ON : 1
VALVE_VIA : 1
REVIEWED_CLARIFIED : 1
HAVE_YOU : 2
USE_NEEDED : 1
SSN_CESSATION : 1
INSTRUCTIONS_RE : 1
ECTOPY_BRIEFLY : 1
THEIR_TO : 1
DURATION_OF : 2
RESULTED_THEIR : 1
CONSULT_WEIGHT : 1
IF_HERNIA : 1
READ_AUG : 1
NOT_FOR : 2
HYPERKERATOTIC_MARGINS : 1
OR_URGENCY : 1
AS_PATIENTHAS : 1
PAIN_IV : 1
MORPHINE_SULF : 1
OZ_VET : 1
ABDOMEN_ROUND : 1
ACCUCHEK_COMFORT : 1
PULSE_OXIMETRY : 3
ALSO_DYSPHAGIA : 1
SUPPLIES_AFFECT : 1
SIGNED_CALLER : 1
MEDICAL_HISTORY : 3
INJ_TIDAC : 1
HAD_CALLED : 1
PATIENT_NEURO : 1
COUNSELORS_STAFF : 1
UNCOMFORTABLE_EMOTIONAL : 1
AND_HAVE : 1
DCD_MAY : 1
GLUCOSE_STRIP : 1
FROM_SETERNY : 1
OR_FOR : 1
MAINTAINED_TENDERNESS : 1
TALK_WITH : 1
SUBCUTANEOUS_INJ : 1
APPT_ALERT : 1
CONSULTANT_PROVIDED : 1
GIVEN_PRIOR : 1
FOR_CHO : 1
OFF_ACID : 1
WITHOUT_URINARY : 1
MALE_PSA : 1
ADDITIONAL_SIGNER : 1
ADMISSION_WERE : 1
CARE_MADE : 1
WAS_INPATIENT : 1
SUPPER_PM : 1
ADVISED_PATIENT : 1
CONTACT_CROSS : 1
AND_DEGREE : 1
AND_SOCIAL : 2
THE_TREATMENT : 1
FACILITATORS_TRS : 2
VERBALIZED_OF : 2
BEEN_SCL : 1
WOULD_USE : 1
POINTED_OUT : 1
MG_ROUTE : 1
PATIENT_HIGH : 1
PROVIDING_THE : 1
IMAGING_CALLED : 1
BEING_OVERRUN : 1
THIS_BE : 1
WRAPUP_STATED : 1
MOTOR_VEHICLE : 1
WORK_GENERAL : 1
CALL_FROM : 1
NTACT_DRESSINGS : 1
ATTENDED_AND : 1
OUT_BED : 1
INPATIENT_STATUS : 1
TO_COPD : 1
CLEAR_POSTERIOR : 1
SATT_GROUP : 2
DO_THE : 3
SKIN_EATING : 1
THIS_ACTIVE : 1
PRESSURE_BEDTIME : 1
PTSD_RELATED : 1
FREE_PO : 1
MORNING_BLOOD : 1
FOR_FOR : 1
FROM_PATIENT : 2
SESSION_PT : 1
VALPROIC_COMPLETELY : 1
HAD_AGE : 1
DIET_CHOL : 1
SCHDULE_FOR : 1
PT_LIVES : 1
UNSPECIFIED_NEUROLOGICAL : 1
COMPLAINT_PATIENT : 1
TO_HIS : 5
ALLERGIES_NKDA : 1
HIS_SCHEDULED : 1
WERE_REVIEWED : 2
AT_THIS : 10
PAIN_LOCATION : 2
TAKING_THEM : 1
TIME_LOW : 1
CLINICAL_NURSE : 1
PT_NOT : 1
NEURO_PROTECTIVE : 1
PCP_LONG : 1
LEG_SURROUDING : 1
DISTINCTION_BETWEEN : 1
NEEDED_CLEAN : 1
OR_IN : 2
HPI_RETURNED : 1
NOT_RTU : 1
RISK_PSYCHOTROPIC : 1
PUPILS_PT : 1
BEEN_SUPPRESSED : 1
TIMES_WEEK : 1
HORRIBLE_UPSETTING : 1
HE_WAS : 4
SSN_CORRECT : 1
NURSE_GUN : 1
PEOPLES_SMOKE : 1
PATIENT_DENIES : 1
POINT_NO : 1
FOR_RILEY : 1
MEDICATED_AND : 1
PATIENT_AFFECT : 1
REPORTS_THAT : 1
BASIS_IN : 1
WEEK_AND : 1
NUMBER_CALLED : 1
BEEN_ASSESSED : 1
PCP_IN : 2
IDENTIFIED_FACTORS : 1
THIS_FORM : 1
ARTHROSCOPIC_SURGERY : 1
IS_NONMANDATORY : 1
TO_FILL : 1
BEST_CAN : 1
PER_DESCRIPTION : 1
OUTPATIENT_STATUS : 1
AS_WOULD : 1
IS_FCPD : 1
KILL_MYSELF : 1
THE_PATIENTS : 4
PEERS_RELAPSES : 1
PHARMACIST_FULLY : 1
SCANNED_MEDICAL : 2
TITLE_TO : 1
MG_ACTIVE : 1
RECORD_BRIEF : 1
UNIT_RECREATION : 1
TO_WED : 2
IMPORTANCE_MEDICATION : 1
DURATION_GROUP : 1
DATED_PM : 1
HIS_RETURN : 1
VIA_WEINSTEIN : 1
OKAY_WORK : 1
QUATTLEBAUM_TRS : 2
DYSPNEIC_SOAP : 1
DATE_FLUORESCENT : 1
ADDENDUM_OR : 2
ACTIVE_ANY : 1
MESSAGE_THAT : 1
HEMOGLOBIN_AC : 1
NEEDED_AT : 1
ACID_COMPLETELY : 1
NOT_APPLICABLE : 2
EKNURSING_MH : 1
TAKE_NO : 1
VITAL_DISTURBANCE : 1
STATUS_EXEMPT : 1
STRESS_WITH : 1
SOURCE_INFORMATION : 1
UNDER_GAS : 1
IN_GOT : 1
BREATHING_UNLABORED : 1
GROUP_KNOW : 1
COMPANIES_DO : 1
SCAN_WERE : 1
FINALLY_REPORTED : 1
SATT_INDIVIDUAL : 1
RECORDS_LOCATION : 1
ENLARGEMENT_LOSS : 1
TX_SERVICES : 1
WORSENING_YES : 1
TETANUS_DIPHTHERIA : 1
ALTERED_MOOD : 1
PRN_SYMPTOMS : 1
CHANGE_AM : 1
PAIN_WAY : 1
DILATED_FOR : 1
THE_PHYSICIAN : 1
VITALS_RECENT : 1
MR_PM : 1
INITIAL_ESTABLISHED : 1
REVIEWED_AND : 2
CHAIR_MEDICATED : 1
FINGER_THREE : 1
LAB_EKG : 1
BLOOD_SINCE : 1
VICODIN_PERCOSET : 1
FEB_CM : 1
MULTIVITAMIN_STATE : 1
OF_BODY : 1
NO_EVIDENCE : 1
HR_EXTENDED : 1
CAP_ONE : 1
PROBLEM_IS : 2
MCG_TAB : 1
CROSSING_THE : 1
STERISTRIPPED_WITH : 1
THESE_HE : 1
FROM_OTHERS : 1
IS_CONGRUENT : 1
POOR_FUNCTION : 1
RETURNED_AVONDALE : 1
OUTPATIENT_TO : 1
CLARIFIED_BASED : 1
LMSW_MOOD : 1
STATUS_WITHIN : 1
AND_DILATED : 1
NOTE_FOR : 1
ORDER_OF : 1
DISUCUSSED_VET : 1
EDUCATION_GIVEN : 1
WHICH_HAS : 1
NONREDUCIBLE_HERE : 1
BANKRUPTCY_FACTORS : 1
MEASURING_CM : 2
SIGNS_SELFTREATMENT : 1
NOTE_RESPIRATION : 1
ADDENDUM_WHO : 1
PATIENT_INITIAL : 1
TO_SCHDULE : 1
OR_STARS : 1
HE_TOLERATED : 1
REACH_THIS : 1
HE_SEES : 1
MADE_AT : 1
SURGICAL_GUN : 1
TYPE_VINE : 1
MESSAGE_HAD : 1
COPD_AND : 1
COUNSELORS_THE : 1
BUT_NOW : 1
MALE_IS : 1
ABOUT_HOUSING : 1
SOFT_DISTENDED : 1
WRITING_PARTICIPATED : 1
SELF_LIB : 1
TO_CONTACT : 4
OCC_NO : 1
CHRONIC_OBSTRUCTIVE : 1
THE_VAMC : 2
EDUCATION_COMPLAINT : 1
WITH_MOXIFLOXACIN : 1
OT_SUBSTITUTE : 1
DOING_BETTER : 1
PARTICIPATION_HE : 1
PNEUMONIA_VACCINE : 1
FILMS_REVIEWED : 1
REVIEWED_COMMENT : 1
MISTREATED_SUPPRESSED : 1
MIRALAX_QD : 1
NOTE_TOLERATING : 1
ACHE_EXTREMITIES : 1
THOUGHTS_OF : 1
OR_MORE : 1
LLQ_OFFERED : 1
HE_HAVE : 2
HOSPITALS_AND : 1
FOOT_JUST : 1
KLEIN_LMSW : 1
TO_DEVELOP : 1
HAS_SENSATION : 1
STATE_STRANGE : 1
BETTER_BLDG : 1
VACCINE_WAS : 1
THE_HYPERTENSION : 1
PROBLEM_LIST : 2
CALL_HAS : 1
MEASURED_AMPUTATION : 1
FOR_CHRONIC : 1
YEARS_THE : 2
ACCORDING_HER : 1
AO_INTELLIGENCE : 1
SERVICE_FOUND : 1
ARE_COLOR : 1
FILL_PC : 1
WRITER_CALL : 1
DENIES_PAIN : 1
DOCTOR_WAS : 1
DENIES_AND : 1
WILL_IT : 1
SAT_RA : 2
IS_WITHDRAWN : 1
HAS_WELL : 1
YR_UNCONTROLLED : 1
INPATIENT_OUTPATIENT : 1
AFTER_MELODY : 1
SUPPLIES_FELT : 1
RESPIRATORY_RATE : 1
SUBJECTIVE_BELOW : 1
JUICE_JUN : 1
RESULT_EVALUATION : 1
SIGNS_OXIMETRY : 1
VACCINE_RECEIVED : 1
SMOKING_RISK : 1
BENEFITS_SITESDO : 1
HAD_CAREGIVER : 1
EXAM_NORMAL : 1
COMFORT_GLUCOSE : 1
CLOTHING_WHEN : 1
INTRACTIBLE_AND : 1
YEAR_MALE : 5
NONVA_OVER : 1
AIR_SPACE : 1
MOUTH_ACTIVE : 3
PY_WITH : 1
PATIENT_CALLED : 1
HIS_GOAL : 3
SEP_DIPTHERIA : 1
EXAMINATION_OF : 1
SCREENING_DIABETIC : 1
ILLNESS_UNIT : 1
ALL_BUS : 1
TEST_AUDITC : 1
WAS_MAKE : 1
BY_THE : 1
GOT_AND : 1
HAS_THAT : 1
OCALL_GLUCSOE : 1
VOMITING_MOBIL : 1
FROM_WELCOME : 1
COMPLAINTS_IF : 1
FOR_TO : 5
PROVIDED_PHE : 1
PSYCH_FOR : 1
ALSO_WITH : 1
WATHCHES_TV : 1
SCREEN_PATIENT : 1
INDICATES_UNDERSTANDING : 1
COENZYME_CAP : 1
NUMBER_SHOW : 1
SKELETAL_WITH : 1
TO_FACE : 1
BY_HIS : 1
MY_SHE : 1
IN_NUR : 1
APPLIES_DROPS : 1
YES_DAZED : 1
IS_ALSO : 1
CLEAN_SUMMARY : 1
SETTINGS_EMERGENCY : 1
MOOD_SUMMARY : 1
IS_WHY : 1
MY_CHAIR : 1
OEF_AND : 1
VET_ALSO : 1
DOES_KNOW : 2
IN_WEEK : 1
CARE_CBOC : 1
FOR_STRUGGLING : 1
THEM_AS : 1
CARE_WAS : 1
OF_PRESENT : 1
BENEFITS_STATE : 1
LAYING_TELEPHONE : 1
COMPLAINTS_AT : 1
CBOC_PCP : 1
EXPOSURE_TO : 1
CURRENTLY_ALONE : 1
OUTPATIENT_MG : 1
PAIN_FOR : 1
OF_WIFE : 1
RELATED_TESTING : 1
REASON_ADMISSION : 2
TIMES_NO : 1
COPD_EXACERBATION : 1
APPLIES_EYE : 1
AT_END : 1
ENCOURAGEMENT_ARIPIPRAZOLE : 1
HEALTH_READING : 1
ENLARGEMENT_AND : 1
CHEST_WITH : 1
COURSE_LENGTHY : 1
SENSE_AWA : 1
STRIP_TO : 1
PLAN_LABS : 1
CARE_OF : 1
MONTH_FOLLOW : 1
REPORTS_LIMITED : 1
SHE_STATED : 1
APPROVAL_OF : 1
SINCE_HE : 2
SAYS_HE : 1
PRIMARY_ELIGIBILTY : 1
REPORT_CONTACT : 1
PAIN_RATED : 1
TO_MEDS : 1
SHE_HE : 1
TUBERCULIN_PURIFIED : 1
PCP_RISK : 1
OXYCODONE_WORKS : 1
DECREASES_TO : 1
FOLLOWING_EMERGENCY : 1
LIMITED_FOLLOWING : 1
IN_INVOLVING : 1
MORNINGPAIN_LLQ : 1
PCP_MON : 1
SCLEROSIS_CORD : 1
HISTORY_TYPE : 1
AWAKE_STATED : 1
FRONT_OF : 1
SAT_OXIMETRY : 1
ONE_VET : 1
CLEARER_TO : 1
ACTIVE_REVIEWED : 1
AMPUTATION_HAS : 1
HE_LIKE : 1
PRESCRIBED_IS : 1
REST_OF : 1
MEDICATIONS_ME : 1
MRI_BE : 1
HEALTH_ASPIRATION : 1
IS_MALE : 1
USED_TO : 3
PORTRAIT_THE : 1
SETTING_DATE : 1
FOR_BELONGINGS : 1
PROCEDURE_HIS : 1
GIVEN_ANOTHER : 1
MORSE_SCALE : 1
NOT_DECREASE : 1
ACTIVE_LAST : 1
YES_SUCH : 1
STATUS_COMPETENT : 1
PSYCHOTROPIC_EDATIVE : 1
PITCH_IS : 1
SUPPLIES_NUMB : 1
HAD_BM : 2
THE_WHICH : 1
RESPONSE_NEW : 1
RECEIVED_FROM : 2
AND_WITH : 3
PAIN_SCORE : 1
PEERS_ETC : 1
TOBACCO_DISORDER : 1
HASNT_BM : 1
THESE_BEFORE : 1
MEDICATIONS_EXPIRATION : 1
HAS_WORKED : 1
DURATION_SYMPTOM : 1
NO_DISUCUSSED : 1
OTHER_TYPE : 1
BUT_DISCUSSED : 1
THE_DAN : 1
IN_OF : 2
YES_SULF : 1
HOUSING_CHRONIC : 1
PMH_ABDOMAN : 1
FOR_DAN : 1
DOES_PLACE : 1
OUT_THANK : 1
TIME_CONTACT : 1
DEPRESSED_AT : 1
PART_FOCUS : 2
OF_WERE : 1
AGITATED_SIGNATURE : 1
NOTE_PAST : 1
IT_IF : 1
OF_CONCERNED : 1
HAS_WORKING : 1
IF_OR : 1
TO_HAVE : 1
LETHARGY_HEALTH : 2
PHONE_NO : 1
PODIATRY_CONSULT : 1
REFILLED_SOME : 1
IT_AT : 1
BOWEL_EVALUATION : 1
PULSE_AND : 1
COMMENTS_OUTPATIENT : 1
VETERAN_PARTICIPATED : 1
POST_DISCHARGE : 1
PATIENT_SELFREPORT : 1
TAKE_BY : 1
HIS_OF : 1
VA_MEDICATIONS : 1
METHADONE_FLAGYL : 1
TERMINATING_USE : 1
SUBCUTANEOUS_METOCLOPRAMIDE : 1
STRIP_FINGER : 1
RESPONSE_OTHER : 1
NEEDS_RISK : 1
TOBACCO_WAS : 1
QD_MIX : 1
MEDICAL_MANAGEMENT : 1
REFRACTIVE_LUCENTIS : 1
DISEASE_ACUTE : 1
IS_PRESENTS : 1
PO_DM : 1
RT_BIPAP : 1
ALL_KEEP : 1
CONTACT_PT : 1
GETS_TOMORROW : 1
FOR_LTC : 1
NOT_MEDIASTINUM : 1
ACTIVE_TAB : 1
THAT_BLOOD : 1
NO_DIFFICULTY : 1
ALONE_IS : 1
AND_OTHERS : 1
CONTACT_STATED : 1
TABLE_SAW : 1
MODERATE_ALSO : 1
ENTER_APPLICABLE : 1
MILITARY_PT : 1
AWAKE_ALERT : 1
STUDENTS_NURSING : 1
ULTRAM_TABLET : 1
EVALUATION_MELLITUS : 1
DOPAMINE_PT : 1
DESIRES_IS : 1
SAW_HIS : 1
AMPUTATION_STATUS : 1
NEUROLOGICAL_MANIFESTATIONS : 1
MEDICATION_TUBERCULIN : 1
TO_SEE : 1
LAST_YEAR : 1
THE_END : 1
SESSION_IS : 1
ELIGIBILTY_PRIMARY : 1
NUMBER_THROUGH : 1
HAS_HISTORY : 1
GIVEN_PT : 1
REFERENCE_BACKGROUND : 1
LAB_IS : 1
FORM_AGITATED : 1
NOTE_RECORD : 1
ORIENTED_CODEINE : 1
ON_NC : 2
PT_PREVIOSULY : 1
SPACE_AND : 1
HAVE_CONTACTED : 1
PROVIDER_ARNP : 1
DOXAZOSIN_MESYLATE : 1
PAIN_RESOLVED : 1
COMPROMISE_FROM : 1
TREATERS_REVIEW : 1
SOFT_PRESENT : 1
MIXED_STATE : 1
PER_AT : 1
REFERENCE_ONSET : 1
TELEMETRY_TENDERNESS : 1
PT_VASCULAR : 1
AND_RESOLVED : 1
YOUR_PEELING : 1
SOCIETY_WHICH : 1
WEINSTEIN_EDUCATION : 1
ULCER_THE : 1
NOT_PULSE : 1
INJ_ML : 1
CLINICAL_SCHEDULED : 1
PAST_TO : 1
ACTIVE_OUTPATIENT : 4
IVF_TRANSIENTLY : 1
ABLE_TO : 2
HER_AS : 1
UNCONTROLLED_LAYING : 1
THAT_HIS : 3
YEAR_TO : 1
SICK_ON : 1
NEW_SPOTS : 1
VERDSOME_STREET : 1
BE_MEASURED : 1
THROUGH_THE : 1
THAT_WIFE : 1
WITH_PROGRESS : 1
FOR_YET : 1
AS_DYSURIA : 1
ENABLED_THEIR : 1
CARE_QUESTIONS : 1
DISTURBANCE_TO : 1
ST_MET : 1
DETOX_TIMES : 1
ALSO_IF : 1
SMOKE_NICOTINE : 1
THAT_NOW : 1
STRANGE_DREAMS : 1
ON_BACK : 1
MELLITUS_TO : 1
INTERDISCIPLINARY_PT : 1
AT_HIGH : 1
CHOL_ANTIDIABETICS : 1
BY_WITH : 1
SWMF_PATIENTS : 1
FOCAL_PAIN : 1
TO_SENSE : 1
END_OF : 1
FOR_ENTRY : 1
OTHERS_PAIN : 1
BLOOD_BEDTIME : 1
OF_SEDATION : 1
ETHICS_PATIENTS : 1
AT_HS : 1
SURROUDING_AND : 1
DOSE_PER : 1
NOTIFIED_NO : 1
TO_MEDICATIONS : 1
DIABETIC_RETINOPATHY : 1
SC_IMAGE : 1
SMOKES_ADVISED : 1
IF_II : 1
PSA_CENTER : 1
INTERPRETATION_NO : 1
ACTIVITY_INTOLERANCE : 1
WHEN_STATES : 1
IM_MY : 1
ROOMAIR_LARGE : 1
NOTE_DATED : 2
NO_LEAVING : 1
CESSATION_THE : 1
TO_HOME : 1
TREATMENT_TEAM : 1
GECAC_ASSESSMENT : 1
STARS_FROM : 1
ALC_SUGAR : 1
LEADER_STUDENTS : 1
DOUBLE_ON : 1
THE_ON : 2
ROS_DENIES : 1
MILIEU_ACTIVITIES : 1
CONTACTED_AND : 1
NKDA_LUNGS : 1
MR_DONNING : 1
ASSIST_PLACEMENT : 1
PO_TID : 2
CHEST_PATIENT : 1
TECHNIQUE_SUBFILE : 1
NOTE_BEEN : 1
NO_OBSERVED : 1
PT_ATTENDED : 1
DENIES_OF : 2
UNDERMINING_CM : 1
WORKS_WELL : 1
ASSESSMENT_LEVEL : 1
FOR_INITIAL : 1
VEIN_ALLOW : 1
ALC_FREE : 1
PT_THAT : 3
ABOV_TOLERATED : 1
SHOW_MAILED : 1
OR_HA : 1
NO_SHOW : 3
NTG_SL : 1
SOCIAL_WORKER : 1
THEY_VERY : 1
SURGERY_RIGHT : 1
WITH_REPORT : 1
WOUND_BASE : 1
GATZMAN_RN : 1
CONSTIPATION_PATIENT : 1
OF_ML : 1
NOT_NICOTINE : 1
REFILLED_FOR : 1
MONITOR_ARE : 1
FOR_SIMVASTATIN : 1
HI_LIMITED : 1
BENEFITS_VERDSOME : 1
LEFT_MET : 1
HEADED_AD : 1
STUDIES_YES : 1
MG_TAKE : 5
IRON_RESPIRATORY : 1
INTRACRANIAL_PRESSURE : 1
LAST_FILL : 2
USE_WAS : 1
HE_CURRENTLY : 1
OF_PROPOSED : 1
BRONCHITIS_WITH : 1
INFORMATION_THE : 1
UP_DATE : 2
COMMENT_PAIN : 1
IT_PUTS : 1
WITH_OBVIOUS : 2
RIB_PAIN : 1
THE_TAKING : 1
VET_WAS : 1
HE_COMPLAINS : 1
WED_HEIGHT : 1
WAS_AGITATED : 1
MULTIPLE_ATTEMPTS : 1
TO_BETABLOCKER : 1
SERVICE_BRANCH : 1
LEARNING_IDENTIFIED : 1
BEEN_THAT : 1
COMMENTS_RAMSAY : 1
OR_WITHIN : 1
SUMMARY_CAREGIVER : 1
PROVIDER_GRAHAM : 1
READY_DISCHARGE : 1
MY_NUMBER : 1
AGITATED_REPORTED : 1
CAN_DONE : 1
HE_AS : 1
TACHY_AT : 1
AND_OFFICERS : 1
THE_FOLLOWING : 7
VINE_FOR : 1
AND_IF : 1
SUCCESSFUL_HOUSING : 1
UNDERSTANDING_ABOVE : 1
TIME_SUMMARY : 1
TABLET_MG : 1
DEGREE_ACTIVITY : 1
WANTS_TRY : 1
ASSESSMENT_NOTE : 2
FINDINGS_RECENTLY : 1
PLEASED_THEIR : 1
PC_NOTE : 1
STRENGTHS_OF : 1
ARE_THEIR : 1
ML_QACHS : 1
HAS_NIGHTMARES : 1
RESIDENT_THE : 1
IN_PARK : 1
EDUCATE_PATIENT : 1
HS_REVIEWED : 1
IS_EYE : 1
REFERRING_WERE : 1
HEIGHT_LAST : 1
DISCHARGE_INSTRUCTIONS : 1
POST_THE : 1
PRIMARY_CLINIC : 1
ON_DOPAMINE : 1
LOW_RI : 1
PATIENT_CALL : 1
DRINK_ALCOHOL : 1
AXIS_DENIES : 1
CONVEY_PATIENT : 1
DISPLAY_TO : 1
DO_TAKE : 1
VALPROIC_ACID : 1
INTENT_THIS : 1
NEGATIVE_FOR : 1
TPY_MEDICAL : 1
ATTEMPTS_PATIENT : 1
WHO_THAT : 1
NO_OBVIOUS : 2
SUBSTITUTE_FOR : 1
CARE_LOCK : 1
FEB_INFLUENZA : 1
NOT_ALL : 1
PAIN_AMLODIPINE : 1
SELLING_HIS : 1
AND_NO : 1
AWA_SS : 1
THIS_MORNINGPAIN : 1
MAILED_ADDENDUM : 1
CARDIAC_MEDICAL : 1
INSULIN_REGULAR : 1
THEIR_IN : 1
INFECTION_PATIENT : 1
DATE_IS : 1
NURSING_REASSESSMENT : 1
OF_INFECTION : 1
TO_USED : 1
FROM_MR : 1
WILL_PICKED : 1
HEIGHT_READ : 1
SITESDO_SMOKE : 1
FAMILY_OTHER : 1
BUT_HE : 1
VOCATIONAL_BIOMEDICAL : 1
WAS_AND : 1
THE_HYDROCHLOROTHIAZIDE : 1
FOR_PLAN : 2
CONCERN_HE : 1
DISCUSSIONS_NUR : 1
MOOD_IS : 1
TO_ASSESS : 1
IN_TO : 2
FOR_VETERAN : 1
ASSESSMENT_CM : 1
INPT_OF : 1
DISTRESS_WITH : 1
ARTHROPLASTY_VIEW : 1
DEPENDENCE_ON : 1
AREA_LIVES : 1
BETWEEN_AND : 1
PERSISTS_PSYCHOTROPIC : 1
ORDERED_TO : 1
WORK_AND : 1
INTERVENTIONS_REVIEWED : 1
YEAR_BUT : 1
PATIENT_SMOKING : 1
MG_TABLET : 2
EFFECTS_PATIENT : 1
VET_IDEA : 1
THE_CAN : 1
PALPATION_AID : 1
WHEN_WEIGHING : 1
EVENTS_WILL : 1
WITH_PHONE : 1
RECALL_NO : 1
PSYCHIATRIC_EXAM : 1
FLEXION_AND : 1
HPI_PT : 1
THIS_LLQ : 1
SEIZURES_INFORMED : 1
FINANCIALLY_ABOUT : 1
TO_BY : 4
ASSESSED_THIS : 1
MALE_THIS : 1
TO_ENCOURAGED : 1
CONCERN_SKIN : 1
USE_ANY : 1
OF_PATCHES : 1
MINOR_AND : 1
PT_OCALL : 1
NO_EVALUATION : 1
FOR_MONEY : 1
LAST_TETANUS : 1
WILL_BE : 3
STATUS_LAST : 2
DELUSIONS_AS : 1
AND_REPORTS : 1
DISCUSSED_PATIENTS : 1
FLI_TO : 1
NURSING_MIN : 1
ETC_ASSIST : 1
THIS_WEEK : 1
BY_PALPATION : 1
INTERESTED_SEEING : 1
ANTIANXIETY_PAIN : 2
LENGTHY_HISTORY : 1
WEAK_DOSE : 1
SMOKE_PT : 1
DISCHARGED_TOMORROW : 1
II_VITAL : 1
IS_HAS : 1
OBSTRUCTION_ICDCM : 1
PROVIDER_FUTURE : 1
IN_ASYMPTOMATIC : 1
PHYSICALLY_MSE : 1
RATE_RT : 1
INFUSING_CC : 1
OTHER_COMPLAINTS : 1
THE_SPACE : 1
RN_ALL : 1
PLAN_PAPERWORK : 1
ON_ABDOMEN : 1
BY_SS : 1
ENTERED_SEPERATED : 1
FOLLOWING_RISK : 1
TEAM_COMM : 1
GAINESVILLE_IS : 1
MOOD_TOPAX : 1
NIGHT_SHIFT : 1
SHARE_HEALTHY : 1
MOUNTAIN_RESULTED : 1
BE_READY : 1
WERE_AVAILIBLE : 1
TO_CARE : 1
INSULIN_INJ : 1
STATE_HAS : 1
SUICIDAL_IDEATIONS : 1
DATE_EXACT : 1
EMOTIONAL_OR : 1
FOR_AVOID : 1
THAT_LACKS : 1
CONTACT_NOTE : 2
AS_TERMINATING : 1
DISCHARGE_SCORE : 1
NOW_BLDG : 1
HAS_HX : 1
IF_MRI : 1
INFECTION_SOURCE : 1
SURGICAL_TVHS : 1
EXCESSIVELY_RISK : 1
SHE_MADE : 1
IN_VISTA : 1
TO_ED : 1
THEIR_PROGRESS : 1
TVHS_NOT : 1
RISK_LOW : 1
PHONE_WHEN : 1
ADDENDUM_CURRENTLY : 1
ASPECT_CONSENT : 1
HEAD_MEASURING : 1
DOES_PATIENT : 3
TOOLS_THEN : 1
HE_SICK : 1
RECEIVED_PO : 1
HISTORY_SCHEDULED : 1
THIS_ENCOUNTER : 2
HOWEVER_HE : 1
RETURNED_CALL : 1
MOIST_NURSING : 1
DISPLAY_CALLED : 1
APPT_TO : 2
CALL_CENTER : 1
THE_THINGS : 1
AND_ALTERED : 1
POST_TELEPHONE : 1
PENICILLIN_OMEPRAZOLE : 1
IMAGING_REPORTS : 1
TXC_CTRS : 3
PATIENT_FOR : 2
BEEN_FOR : 1
AN_APPT : 1
ACTIVE_TOWN : 1
RATE_IN : 1
RILEY_THAT : 1
WILL_SOCIAL : 2
NO_BRIEFLY : 1
BACKGROUND_ONSET : 1
ENTRY_FROM : 1
GATZMAN_PT : 1
QUESTIONED_PATIENT : 1
SERVICE_SERVICE : 1
VISITDIFFICULTY_CANT : 1
LARGE_AMOUNTS : 1
PLAN_OF : 2
NO_IN : 1
LEVEL_OF : 2
BLACK_WITH : 1
AS_CALLED : 1
CIGARETTES_ADVISED : 1
WHEN_THEY : 1
REFRACTIVE_ERROR : 1
SW_HOUSING : 1
ENCOURAGED_DEVELOP : 1
UP_PULSE : 1
WRITTEN_FOR : 1
USED_NICOTINE : 1
SITE_PERMISION : 1
VISIBLE_ON : 1
FOR_LESIONS : 1
OF_TEMPERATURE : 1
THEY_AGE : 1
INVOLVEMENT_ID : 1
CONCERNS_IS : 1
PT_IN : 3
WILL_CALL : 1
REGARDING_PATIENT : 1
MG_TID : 2
NAME_SS : 1
ANTIDIABETICS_BRIEF : 1
PHYSICIAN_WILL : 1
INFORMED_PT : 1
INPUT_WAYS : 1
SHE_WAS : 1
NARRATIVE_PT : 1
THAT_CALLED : 1
CONVEY_INSTRUCTIONS : 1
ORTHO_TELEPHONE : 1
UP_NEEDED : 1
ELEVATED_PULSE : 1
AN_ELECTIVE : 1
THE_SIGNS : 1
MANIA_PSYCHOSIS : 1
ABDOMINAL_IS : 1
PATIENT_PROVIDED : 1
DAILY_GEN : 1
EXUDATE_OVER : 1
SUMMARY_THEMES : 1
NAME_AND : 1
HEPATITIS_THAT : 1
HE_HEADED : 1
SCORE_LOC : 1
SPOKE_ABOUT : 1
SPINAL_CORD : 1
MONTH_FINALLY : 1
TIME_MINUTES : 1
ASSESSMENT_FEB : 1
SERVICE_PRESENTS : 1
FOR_AVOIDING : 1
COMPROMISED_NUTRITIONAL : 1
WORK_PSYCHOSOCIAL : 1
ORAL_ML : 1
PRESENT_PRIOR : 1
MONTH_YOU : 1
TBI_SOCIAL : 1
BRIEF_CONTACTS : 1
BUT_AGITATED : 1
LECTURE_ETHICS : 1
WILL_AS : 1
FINANCIAL_CHRONIC : 1
PT_PT : 1
SHE_HAS : 3
HE_HIS : 1
THAT_URINE : 1
TOLD_THEY : 1
ARRIVAL_PATIENT : 1
CUFF_WAS : 1
WHEELCHAIR_FROM : 1
THE_USE : 1
TELEPHONE_NUMBER : 2
MEDS_WHEN : 1
OF_ABOVE : 2
SESSION_AM : 1
CARE_INSTRUCTIONS : 1
APPT_AS : 1
TIP_NO : 1
FALL_PLAN : 1
REVIEWED_FOUND : 1
WOULD_INTERESTED : 1
URGENT_HYPOXIC : 1
CARE_TX : 1
ABSENT_BIL : 1
LEFT_POSTERIOR : 1
SOME_OF : 1
REASONS_THIS : 1
RESPIRATORY_YEAR : 1
SOORYA_ASHOK : 1
ASPIRIN_BEING : 1
ANY_OF : 2
PALPATED_DISCHARGE : 1
BASED_ON : 1
PAIN_ISSUES : 1
ROUTINE_VISITDIFFICULTY : 1
LOWER_PAIN : 1
ALL_STRENGTHS : 1
TRANSPORT_FT : 1
TKO_OTHER : 1
AND_MY : 1
IS_HIM : 1
HE_CONCERN : 1
FURTHER_NOT : 1
BP_PAIN : 2
HYPOXIC_PALE : 1
PATIENTS_ELIGIBILTY : 1
CHO_OL : 1
REVIEWED_GIVEN : 1
THE_ER : 1
WILL_NEED : 2
PRESENT_DURATION : 1
TOPAX_HAS : 1
SUCCESSFUL_SEARCH : 1
AND_TOOK : 2
YES_BLOOD : 1
FAMILY_SIGNIFICANT : 1
LAST_TOBACCO : 1
BESYLATE_MG : 2
PHYSICIAN_EDATIVE : 1
TOWN_AREA : 1
PT_NONMANDATORY : 1
IS_BE : 1
SLOW_MINUTES : 1
DESIRE_LONG : 1
WNL_AT : 1
SITTER_REPORT : 1
FUNCTION_AND : 1
ASSOCIATED_VISION : 1
ADDENDUM_BY : 1
VOMITING_STOPPED : 1
FRACTURE_HYDROXYZINE : 1
EXTREMITIES_ELBOW : 1
TOTAL_KNEE : 1
OTHER_IN : 1
CALLED_PLAN : 1
SUBJECTIVE_ADDENDUM : 1
MBD_MODL : 2
AVAILABLE_FOR : 2
FROM_AIR : 1
THE_PRESENT : 1
OVER_FROM : 1
LUCENTIS_PHYSICIAN : 1
DM_MG : 1
VETERAN_THAT : 1
ELIGIBILTY_INCLUDES : 1
WORK_OF : 1
PLEASE_CONTACT : 1
NOTE_AND : 1
CREST_RESULTED : 1
OLD_AMBULATORY : 1
FOR_LONG : 1
ON_OTHER : 1
TAB_DISPENSED : 1
DYE_THE : 1
KNEE_STATUS : 1
TRIP_MOUNTAIN : 1
MARRIAGE_FAMILY : 1
ADVISED_THAT : 1
WITH_TO : 1
AND_BETTER : 1
AT_NIGHT : 1
ULCER_PYLORI : 1
MARGINS_CM : 1
SITE_INFLUENZA : 1
WHICH_TO : 1
THE_DOCTOR : 1
EFFECTIVE_DURATION : 1
SURE_GETS : 1
TO_CLINIC : 3
MEDICAL_ACE : 1
REVIEWED_PATIENT : 1
WORRIES_BANKRUPTCY : 1
OF_RECEIVED : 1
OF_TETANUS : 1
TO_RTC : 1
WATER_PROCEDURES : 1
CALL_TYPE : 1
FOR_REVIEW : 3
MOUTH_LAST : 1
GM_QD : 1
AT_HR : 1
MADE_ME : 1
ABOV_PT : 1
LTC_STATUS : 1
STATED_MET : 1
HISTORY_PTSD : 1
ME_THAT : 1
THE_DOCUMENT : 1
VET_NEED : 1
IN_BED : 1
SUMMARY_PATIENT : 2
SKIN_PIN : 1
SUBSTANCE_PROBLEM : 1
LEAVING_EXPLAINED : 1
THEMES_DISCUSSED : 1
AND_REPORTED : 1
SCHEDULED_PROVIDER : 1
FENTANYL_IVP : 1
HE_IN : 2
BAND_SSN : 1
UH_YES : 1
MY_WHEELCHAIR : 1
THIS_WHEN : 1
REFERRING_PROVIDER : 1
ASSESSMENT_IRON : 1
AND_HAD : 1
FOR_DEPRESSIVE : 1
THE_IDENTIFIERS : 1
COMMENTS_MODIFIED : 1
ON_RECEIVED : 1
MANIFESTATIONS_WILL : 1
OF_WHEN : 1
NURSING_OBSERVATION : 1
WOULD_CAUCASIAN : 1
PRESCRIBED_COMPLETELY : 1
SULFA_PENICILLIN : 1
INCLUDES_AN : 1
OF_ANYONE : 1
MEDS_HAWTHORNE : 1
TOMORROW_STATES : 1
INCLUDING_TIME : 1
STAYING_PRESENT : 1
GROUPS_TO : 1
ML_SUGAR : 1
AS_UP : 1
THAT_IS : 5
OF_ALCOHOL : 1
BACK_VA : 1
OF_TREATED : 1
HE_FAINTING : 1
FOR_SUICIDE : 1
PROSTATE_CANCER : 1
NO_DISCHARGE : 1
ONE_EVERY : 1
HE_COUGHED : 1
WERE_TELEPHONE : 1
NOT_NURSING : 1
DIPHTHERIA_GIVEN : 1
RESPONSE_CALL : 1
VET_STATES : 1
BASIS_LEVEL : 1
DEATH_VERDSOME : 1
OF_TUNNEL : 1
RN_PT : 1
IDEA_INSURANCE : 1
FACILITY_IS : 1
MEDICAL_MEDICAL : 1
HE_DISCHARGED : 1
MED_FORM : 1
OR_EXPOSURE : 1
AT_WAS : 1
PROVIDED_INFORMATION : 1
OTHERS_ACTIVITIES : 1
COMMENT_DIET : 1
APPLICABLE_YEAR : 1
FOR_SHORTNESS : 1
CURRENT_LOW : 1
AND_HE : 6
PT_IDENTIFIED : 1
THE_SETERNY : 1
TRIED_TO : 1
THAT_IN : 1
PLACED_ON : 4
SHE_MEASURES : 1
CENTRUM_VERDSOME : 1
EXCLUDING_SUPPLIES : 2
UNLABORED_OBSERVED : 1
HAS_SORE : 1
AS_TO : 1
SOMEBODY_IN : 1
PAIN_DULL : 1
AND_DOCTOR : 1
PHYSICIAN_NO : 1
TREATING_EXACERBATION : 1
EMPLOYEE_HEALTH : 1
AND_OUTPATIENT : 1
RX_AND : 1
HE_TE : 1
FOR_IMAGING : 1
REDNESS_SWELLING : 2
HAVE_WED : 1
IDEATION_OR : 1
MORE_AND : 1
AGE_RACE : 2
TOOK_THE : 1
ACTIVE_CS : 1
PT_LARGE : 1
WHILE_THE : 1
ANWER_AFTER : 1
TIME_MORPHINE : 1
BAND_NAME : 1
ING_MOBILITY : 1
NURSING_STATED : 1
ERROR_LUCENTIS : 1
WHY_PATIENT : 1
WILL_RESTART : 1
PATIENT_CONSENT : 1
MBD_MBD : 3
DEHYDRATION_XRT : 1
PHONE_TIME : 1
NO_NO : 1
ASSOC_SPOKE : 1
MUSCULO_INDEPENDENT : 1
ULCER_ON : 1
LOWER_SPINE : 1
CLEAR_GIVEN : 1
SPOKE_MRS : 1
CALL_DELUSIONS : 1
ANY_PROTOCOL : 1
VOICE_PITCH : 1
REGARDING_DESIRE : 1
WOUND_MARGINS : 1
CM_NEW : 1
THEM_IN : 2
EKPHYSICIAN_JUNE : 1
HAS_NKA : 3
LOW_IN : 1
MH_ESTIMATED : 1
THE_TH : 1
RESP_BP : 1
MILIEU_AND : 1
PATIENT_TO : 6
COMPLETE_ADL : 1
HE_DONE : 1
SHOULD_GO : 1
FOOT_ULCER : 1
CHEST_AND : 1
TEAM_TO : 1
SUSPICIOUS_OR : 1
LAST_NURSING : 1
WEEK_PHONE : 1
MG_PT : 1
HE_LACKS : 1
PRESCRIBING_RISPERDAL : 1
FAINTING_RATHER : 1
RANGE_CPAP : 1
PAIN_OF : 2
TO_CONTINUALLY : 1
IF_LIST : 1
TO_NURSING : 2
DEPRESSION_IRRITABILITY : 1
WOUND_PT : 1
SO_THAT : 1
TO_FORT : 1
YOU_CARDS : 1
MALE_TO : 1
ANSWERED_PHARMACY : 1
SCORE_SKIN : 1
PROVIDED_ARRIVAL : 1
WITH_ONCOLOGY : 1
WITH_AND : 3
THEY_CAN : 1
TIME_ACTIVE : 1
AFFECT_CONGRUENT : 1
COMPLETION_SELLING : 1
REFERRAL_THE : 1
NUMBER_TO : 1
SEVERITY_OR : 1
LARGE_ROUND : 1
PROCEDURE_FEB : 1
THE_HE : 1
TO_WITH : 4
IMAGE_IN : 1
MICHIGAN_OF : 1
LUCENTIS_INJECTIONS : 1
RESULT_AND : 1
AVOID_ALCOHOL : 1
KNOWLEDGABLE_ALL : 1
HERE_MONTH : 1
TRANSFERS_AND : 1
IF_VITAL : 1
MEDICATIONS_MULTIVITAMIN : 1
STATED_REASONS : 1
SINCE_YEAR : 1
FEELING_LESS : 1
DIAGNOSIS_PNEUMONIA : 1
OF_PROSTATE : 1
IMAGING_DISPLAY : 2
ED_PT : 1
TOUCH_WITH : 1
EITHER_MSE : 1
PT_ALSO : 1
BEDREST_WHEELCHAIR : 1
IER_THAT : 1
FEVERS_NO : 1
PHYSICALLY_PT : 1
REPORTS_PHYSICAL : 1
CARE_PAIN : 1
ORDER_STUDIES : 1
IS_TO : 5
PAGER_PT : 1
TO_ENHANCE : 1
OF_RECENT : 1
GENERAL_PROVIDE : 1
EXUDATE_ESOPHAGUS : 1
PLAN_CALL : 1
TYPE_BHM : 1
CALL_PHONE : 1
HR_RPP : 1
ICDCM_DIAGNOSIS : 1
MG_HS : 3
ABDOMINAL_PAIN : 1
AND_DISEASE : 1
FROM_CM : 1
THE_BECOMES : 1
THE_DISTINCTION : 1
INPATIENT_AND : 1
THE_OEF : 1
PT_PRECOLONOSCOPY : 1
IN_WIDTH : 1
NO_MODE : 1
FOR_HARM : 1
FINANCIAL_STABILITY : 1
ON_OXYGEN : 1
HR_DECREASES : 1
ASSESSMENT_WAS : 1
HIS_TO : 1
INTO_VEIN : 1
HYPERTENSION_ALLERGIES : 1
CONCERN_THAT : 1
IVP_OF : 1
PATIENT_NOT : 3
CTRS_ENTHUSIASM : 1
HOME_BY : 1
IN_NAD : 1
FROM_CLINIC : 2
PORTRAIT_OF : 1
PROPOSED_PROCEDURE : 1
PAIN_PERSISTS : 1
LET_GROUP : 1
UNCHANGED_NO : 1
CLINIC_TEAM : 1
CHEST_PALPATION : 1
ANOTHER_HEALTH : 1
PREVIOUSLY_WRITTEN : 1
PATIENTS_AND : 1
CALLED_THE : 1
CALL_LEFT : 1
NUMBER_FILLED : 1
CYANOSIS_CAPILLARY : 1
TUCSON_VAMC : 1
HUMAN_REGULAR : 1
DEPRESSED_HOPLESS : 1
AND_LIMITED : 2
VERBALIZED_DEMONSTRATED : 1
THE_SAME : 2
PODIATRY_MINOR : 1
FOLLOWING_HE : 1
NONFORMULARY_REQUEST : 1
JUN_GENDER : 1
CRAFTS_MOOD : 1
STATED_THAT : 6
BURSA_OR : 1
HAS_MORE : 1
COMM_1010 : 1
ABOUT_RISK : 1
DIPTHERIA_TDADULT : 1
IN_IVF : 1
TISSUE_DIAGNOSTIC : 1
QH_PRN : 1
GOAL_THE : 1
CONSULT_GOOD : 1
OF_OFF : 1
THE_PAIN : 1
FOR_DIS : 1
WERE_HARRINGTON : 1
ABOUT_THAT : 1
COLONOSCOPY_SCHEDULED : 1
TREATMENT_LEGAL : 1
DISCOMFORT_OTHER : 1
GECAC_TARGET : 1
FT_TREATERS : 1
ANXIOUS_AGITATED : 1
ML_ACTIVE : 1
USE_DISORDER : 1
FT_AND : 1
PEELING_ALSO : 1
DICTATION_BACKGROUND : 1
OF_EDUCATION : 2
COMPLETED_PROJECT : 1
CANAL_WITHDRAWN : 1
INFO_NOT : 1
DOING_MUCH : 1
ANTIDIABETICS_NO : 2
PENICILLIN_NIACIN : 1
NO_SWELLING : 1
TIME_PCP : 1
AGE_GENDER : 1
TONIGHT_AT : 1
SUICIDE_CONSTRUCTION : 1
HIS_TABLE : 1
HE_HASNT : 2
ENABLED_PEERS : 1
HAVE_THE : 1
PHONE_FILLED : 1
APPOINTMENT_HAVE : 1
TO_DENIES : 1
OSTEOMYELITIS_COMES : 1
ACTIVITIES_SUBJECTIVE : 1
WAS_ADVISED : 1
READ_DIET : 1
QACHS_ESOPHGEAL : 1
FOR_DISTRESS : 1
DENIES_RISK : 1
UNTRTEATED_COURSE : 1
VIA_SEMMES : 1
RESP_PAIN : 1
IF_CAN : 1
RECORDS_PAIN : 1
CRUSHING_TYPE : 1
MAY_THE : 1
DIFFERENT_CLINIC : 1
ASSESSMENT_FOR : 1
MADE_TIME : 1
AT_ADMISSION : 1
MY_MEDICATED : 1
CHICKEN_VOMITING : 1
MEDICATION_COUNSELING : 1
ASSESS_PATIENTS : 2
SMOKING_CESSATION : 1
PHYSICIAN_SYMPTOMS : 1
MESSAGE_ASKED : 1
MEDICATIONS_WITHIN : 1
BLUE_BLUE : 1
THAT_COMPANIES : 1
CYANOCOBALAMIN_MCG : 1
STRIP_USE : 1
COMPLAINTS_MALE : 1
BUT_OT : 1
LEARN_LISTENING : 1
ALSO_OF : 1
TAXI_BUS : 1
THE_ALPRAZOLAM : 1
WITH_POSITIONING : 1
SCLEROSIS_SPINAL : 1
AND_MOVE : 1
NUMBER_WAS : 1
LAST_DATE : 1
HAD_WEIGHT : 1
LIVES_COMPLAINT : 1
PER_WILL : 1
AGREEABLE_TO : 1
WE_DISCUSSED : 1
LOCAL_DERMATOLOGIST : 1
AS_OR : 1
ADVANCE_DIRECTIVES : 1
INTOLERANCE_TREATMENT : 1
FOLLOW_ISSUE : 1
QUATTLEBAUM_TXC : 2
IDENTIFIED_EMPLOYEE : 1
FILLED_THE : 1
EXTENDED_PO : 1
MEDICATIONS_HOURS : 1
PATIENT_NO : 1
THINGS_DECLINED : 1
BEDREST_NURSE : 1
WED_TAMSULOSIN : 1
SWR_THE : 1
AUGUST_DATE : 1
HE_BE : 1
THREE_MG : 1
FUTURE_MEDS : 1
DOB_AUG : 1
TERAZOSIN_ONE : 1
AND_SAT : 1
FOLLOWING_WERE : 1
FOOT_PRESSING : 1
MRS_IN : 1
SOCIAL_WORK : 3
GIVEN_TO : 2
PL_ING : 1
CARIES_MBD : 2
IN_SINGLE : 1
HE_STATED : 2
ON_THEN : 1
ATTENDED_PARTICIPATED : 1
AND_PERCOSET : 1
ACTIVE_EDUCATION : 1
LIQUIDS_AND : 1
OTHER_OF : 1
PATIENTS_EATING : 1
AND_QUATTLEBAUM : 2
METHADONE_ELAVIL : 1
OF_SUICIDE : 1
HE_IS : 8
FOR_ACTIVE : 1
MG_QID : 1
NO_BEING : 1
CHANGED_AS : 1
NOT_GOOD : 1
TO_AND : 6
GLUCOMETER_DATE : 1
PSYCHIATRIC_ORIENTED : 1
SEEN_IN : 1
SIDE_EFFECTS : 2
FLUSHED_PER : 1
NOT_PRESCRIBED : 1
PROPOSED_GIVEN : 1
MORE_VISIBLE : 1
NEED_GIVEN : 1
RETURN_HE : 1
IN_PRESCRIBING : 1
OZ_WATER : 1
DENIES_AS : 1
FENTANYL_GIVEN : 1
SHOW_FOR : 1
HIS_AUG : 1
NURSING_ADMISSION : 1
CHRONIC_PULMONARY : 1
FRACTURE_CAP : 1
REVIEW_HIS : 2
EDUCATION_PROVIDED : 3
CAUCASIAN_YEAR : 1
IN_JOINT : 1
EVIDENCE_OF : 1
NO_CLINIC : 1
ACTIVE_WE : 1
MEASURES_CM : 1
RESPONSIBILITIES_FOR : 1
REPORTS_LOWER : 1
CYANOSIS_REFILL : 1
READING_PRESCRIBING : 1
SUPPORTIVE_MADE : 1
NEWLY_PRESCRIBED : 1
WATER_VET : 1
COMPLETED_CHANGES : 1
LEG_THAT : 1
TO_GET : 1
URINARY_ICDCM : 1
DATED_ADMISSION : 1
ADDRESS_WORK : 1
AMLODIPINE_BESYLATE : 2
MALE_MENTAL : 1
NOT_SI : 1
OUT_HIS : 1
THE_AIR : 1
THE_SPINE : 1
NEW_INITIAL : 1
OXIMETRY_PROPER : 1
AS_LAB : 1
NO_AM : 1
THE_PROVIDING : 1
ASSESS_POTENTIAL : 1
YOURSELF_FOLLOWUP : 1
UP_AS : 1
PAIN_LB : 1
BECOMES_PT : 1
BB_MORSE : 1
IMPROVED_HAS : 1
ANOTHER_HAS : 1
WHEN_DISC : 1
FOCAL_IN : 1
ENHANCE_THE : 1
GRASS_PT : 1
FOLLOW_DIRECTIONS : 1
REPOSITIONS_SELF : 1
THAT_HR : 1
TESTING_SEVERE : 1
STAFF_DISCUSSED : 1
TREATMENT_INHALER : 1
DOES_NOT : 2
DECREASE_MOBILITY : 1
PT_NEEDED : 1
TEACH_TEAM : 1
HEAD_ATNC : 1
THE_SATT : 1
AUGUST_EXACT : 1
IMPROVED_HE : 1
PATIENT_UP : 1
FIRE_RISK : 1
GET_SOME : 1
MAINTAINING_THEIR : 1
AN_SCREENING : 1
ON_DUE : 1
RISPERDAL_AS : 1
NO_AMIODARONE : 1
CAN_FOR : 1
DONE_THE : 1
SPINE_CURRENT : 1
OR_FROM : 1
INPUT_ON : 1
AM_EXPLAINED : 1
SPC_FOLLOW : 1
HOMICIDAL_PLAN : 1
THE_SOCIAL : 2
CLICK_TOOLS : 1
SELENIUM_OF : 1
REST_THE : 1
THIS_PT : 1
SUBFILE_CHANGED : 1
ADDENDUM_WEIGHT : 1
SCHEDULE_AND : 1
MALE_VETERAN : 2
SEEN_FACE : 1
CHART_NOT : 1
BE_PLEASED : 1
FOR_DISCUSSED : 1
EVAL_HAS : 1
THE_HAND : 1
ME_UNDER : 1
QIDPRN_HEARTBURN : 1
CONTINUALLY_SESSION : 1
THIS_BUT : 1
VEHICLE_WEEK : 1
DELUSIONS_DENIES : 1
SCORE_ARTHROSCOPIC : 1
LENGTHY_OF : 1
GIVEN_SLOW : 1
INTELLIGENCE_STABILITY : 1
CALLER_OTHER : 1
TAB_NEED : 1
NOT_ELIGIBLE : 1
THE_TBI : 1
DISCUSSION_AXIS : 1
SELFTREATMENT_ADR : 1
PLAN_ONE : 1
NO_ANWER : 1
AREA_WOULD : 1
KG_EVALUATION : 2
LOCATION_ACROSS : 1
HOME_TELEPHONE : 1
DDEPRESSION_FINDINGS : 1
SPUTUM_SECRETIONS : 1
STATED_HE : 5
LYMPH_BASED : 1
ELEVATED_BEEN : 1
AMBULATORY_OF : 1
ALLERGIES_ADR : 1
RONCHI_PT : 1
GOAL_BECAUSE : 1
PAIN_SUBJECTIVE : 1
BACK_PERSISTS : 1
DO_NOT : 2
WOUND_UNDERMINING : 1
BED_MONITOR : 1
LIBWHEELCHAIR_TUBERCULIN : 1
ABOVE_NOT : 1
CA_OBTAINED : 1
AND_MEDICATIONS : 1
TO_MEANT : 1
PLEASURE_IN : 1
OF_PTSD : 1
QUIT_DATE : 1
MAY_PATIENT : 1
ARE_MAINTAINING : 1
BEEN_THE : 1
AGAIN_HIS : 1
FALL_RISK : 2
EDUCATED_ACCUCHEK : 1
CALLED_AND : 1
PROVIDE_REASON : 1
HARD_TO : 1
NAME_CORRECT : 1
STATIN_BB : 1
OVERNIGHT_WILL : 1
SIGNATURE_ACOS : 1
INJURY_SCLEROSIS : 1
HIM_VALPROIC : 1
PLEURAL_EFFUSION : 1
WOULD_LIKE : 1
ACCOMPLISH_HIS : 1
OR_SYMPTOMS : 1
OFF_OF : 1
CONGRUENT_EYE : 1
PRESSURE_PROTOCOL : 1
NEED_ALL : 1
TREATMENT_NEED : 1
MALE_WITH : 1
IS_WITH : 2
NIGHT_THREE : 1
TO_ADDENDUM : 1
BRING_COMPLETED : 1
CONTRAINDICATION_BETABLOCKER : 1
OF_AIR : 1
MODERATE_RISK : 1
STATUS_AND : 1
SMOKING_FIRE : 1
CONSULT_RIB : 1
TRANSFER_LABS : 1
OTHER_HE : 1
BEEN_AMBULATORY : 1
CONSULT_MR : 1
WILL_DO : 1
SUBSTITUTE_INITIAL : 1
FOR_TREATMENT : 1
SINCE_ADMISSION : 1
BEHAVIOR_THEY : 1
BESYLATE_TAB : 2
AND_FEEL : 1
APPROPRIATE_WITH : 2
ALERT_ME : 1
OF_ADMISSION : 1
ANY_PROSTEHESIS : 1
SEDATION_LOC : 1
ADMISSION_YOU : 1
ALSO_MOST : 1
SS_OR : 1
NO_SIGNS : 1
BELOW_THIS : 1
FROM_ARTHROSCOPIC : 1
MOTHER_FOR : 1
DISCHARGE_PL : 1
URGENT_VISIT : 1
ARMY_VETERAN : 1
THIS_SOME : 1
REVIEW_FORM : 1
VIEW_POINT : 1
AND_HARASSED : 1
NONVA_CAP : 1
REALLY_NEED : 1
NOT_NOW : 1
EATING_MR : 1
HER_THIS : 1
SWELLING_NOTED : 1
THAT_SHOULD : 1
SOCIAL_PAINT : 1
AND_ORDERED : 1
AS_CHILD : 1
SEPARATED_YEAR : 1
PT_BLOD : 1
TAMSULOSIN_HIS : 1
MR_SUPPER : 1
SETTINGS_DEPARTMENT : 1
NEED_BE : 2
NOTE_SELLING : 1
OWN_SOBRIETY : 1
SYMPTOMS_ACTIVE : 1
TAB_TABLET : 1
NOT_BUSINESS : 1
RECOIL_ZOCOR : 1
PRESENT_EVERY : 1
MALE_AGE : 1
EDEMA_NEURO : 1
READINGS_FROM : 1
HEADACHE_DENIES : 1
INFORMED_THIS : 1
INSTRUCTED_RTC : 1
RISK_FOR : 2
NOT_SMOKE : 1
INCLUDES_PRIMARY : 1
FROM_AND : 1
RALES_RA : 1
TEST_WITH : 1
FLUSHED_CY : 1
YOU_HAD : 1
WITHOUT_NO : 1
TO_ENOUGH : 1
GO_THE : 2
PATIENT_SPUTUM : 1
HE_EXPERIENCES : 1
HELP_OF : 1
IS_NEURO : 1
KNOW_THEY : 1
ENTERED_DISCHARGE : 1
ARNP_UROLOGY : 1
DECREASED_ALSO : 1
BE_AT : 3
NURSE_LEADER : 1
SAT_PAIN : 1
BLOOD_LEVEL : 1
ON_MON : 2
CODE_SERVICE : 1
EVENTS_NURSING : 1
INTRODUCER_RALLY : 1
SOME_ABOUT : 1
MARRIAGE_AND : 1
TYPE_DURATION : 1
VASCULAR_CAREGIVER : 1
THE_AXIS : 1
CALL_MESSAGE : 1
AVOID_TELEMETRY : 1
HEALTH_CONSULT : 2
EACH_USE : 1
AM_WORK : 1
CALLED_GET : 1
USE_DRUGS : 1
OFF_BIKE : 1
UNKNOWN_THE : 1
THE_AT : 1
SHE_IS : 1
HOW_DOES : 1
CORRESPONDENCE_RATE : 1
AGITATED_PATIENT : 1
APPOINTMENT_FALL : 1
THE_MEDICAL : 2
TO_FOR : 3
PERSISTS_AND : 1
MUCH_NOW : 1
PHARMACY_COMPLETION : 1
PLEASE_REFER : 1
CTRS_AND : 2
POLYTRAUMA_NOTE : 1
OXYCODONE_PAIN : 1
TO_THE : 13
VTACH_AMINOPHYLLINE : 1
SOME_DEPRESSION : 1
GROUP_RECENTLY : 1
IMPAIRMENT_AMIODARONE : 1
WHILE_UP : 1
CLINIC_SCHDULE : 1
TO_COME : 1
THE_EKG : 1
VICODIN_AND : 1
BETABLOCKER_WED : 1
THE_MEDICATIONS : 2
MED_ANXIOUS : 1
THAT_SPC : 1
UNDERST_MOUTH : 1
BY_MOUTH : 7
HAD_RACE : 1
QUETIAPINE_MG : 1
ACTIVE_CAME : 1
HELP_AVOIDING : 1
TO_TALK : 1
THE_MANY : 1
ED_IMAGE : 1
THE_CALL : 1
PLEASE_TO : 1
ASPIRATION_OR : 1
PT_TAKE : 1
IS_KNOWLEDGABLE : 1
TRANSFERS_AMBULATION : 1
ADMISSION_NOTE : 1
WALKIN_WITH : 1
SCANNED_OUTSIDE : 2
SUMMARY_WHO : 1
RATED_AS : 1
RILEY_TREATERS : 1
DENIES_ROUTINE : 1
METRONIDAZOLE_MG : 1
AMPUTATION_THAT : 1
COPD_HIGH : 1
VOMITING_HAS : 1
ONCOLOGY_OF : 1
AVAILABLE_REVIEW : 1
PRELIM_PYLORI : 1
EVERY_AGE : 1
NEW_USED : 1
TELEPHONE_ADDENDUM : 1
SATT_SESSION : 1
UPSET_VETERAN : 1
REASON_FOR : 2
DRAINAGE_IS : 1
TAKE_TABLET : 7
ENCOUNTER_TO : 1
AND_AT : 2
THE_CLUB : 1
ANYMORE_IS : 1
TO_WHEN : 1
BEEN_TRANSFERRED : 1
SUPPORT_TAB : 1
TO_INSTRUCTIONS : 1
OLD_ARMY : 1
ELIGIBLE_FOR : 1
WITH_ASSOCIATED : 1
FALL_SCALE : 1
DEBRIDEMENT_AND : 1
IN_SODIUM : 1
DATE_AUGUST : 1
ED_AS : 1
BASE_WOUND : 1
PTS_CHART : 1
AS_THE : 2
THE_SPINAL : 1
LOCATION_OBJECTIVE : 1
GROUP_MINUTES : 1
STRIP_SUICIDE : 1
CM_HARD : 1
STATED_IS : 1
TO_MOUNTAIN : 1
NEG_COLONOSCOPY : 1
PATIENTS_HOME : 1
SEEN_FOR : 2
VSS_BREATHING : 1
HAD_EXPERIENCE : 1
AT_AS : 1
THAT_GOAL : 1
TISSUE_FOR : 1
NO_BARRIERS : 1
PROTECTIVE_EXPLAINED : 1
TO_STAFF : 1
REFILLS_PULSE : 1
VA_SPECIALIST : 1
HAVE_PAIN : 1
TEAM_FAX : 1
PROVIDE_INPUT : 1
STATUS_CONSTIPATION : 1
NUTRITION_IRON : 1
SAT_NO : 1
THAT_WAS : 6
OT_IN : 1
PATIENT_REVIEWED : 1
THEM_HES : 1
DATE_SIGNED : 1
REFER_TO : 1
IS_IMPROVING : 1
PAGER_WAS : 1
ANSWERED_UNABLE : 1
SMILING_THIS : 1
DESCRIPTION_PAIN : 1
OF_PATIENT : 4
RESULTED_IN : 1
CLUB_ON : 1
LISTENING_MOTIVATION : 1
TAB_TAB : 1
TOPICS_KILL : 1
ACE_STATIN : 1
CONTACTED_PHYSICIAN : 1
APPLICABLE_NURSING : 1
FORM_HIS : 1
AND_FOR : 2
NO_LOW : 1
PRODUCTS_THE : 1
RESTART_IT : 1
WITH_OF : 3
AND_HIM : 1
TRIED_REACH : 1
PET_SCAN : 1
THERAPY_HOWEVER : 1
STUDENTS_AND : 1
SWELLING_RATE : 1
NO_PRINCIPAL : 1
CONSULT_ON : 1
USED_ANY : 1
NURSING_REVIEW : 1
GROUP_STATED : 1
SAID_HE : 1
PAIN_BLE : 1
CODEINE_NIACIN : 1
PREVIOSULY_DETERMINED : 1
GOALS_AND : 1
PRESSURE_MORE : 1
STRESSED_WORRIES : 1
SEARCH_AFTER : 1
HE_DEVELOPED : 1
IN_LENGTH : 1
DROWSYNESS_SPELL : 1
VETERAN_DECLINED : 1
THE_INDICATES : 1
INJECTION_OF : 1
INCREASED_FREQUENCY : 1
AWAKE_THAT : 1
MEDS_DRESSINGS : 1
DELUSIONS_PT : 1
EDATIVE_PAIN : 1
COORDINATOR_NURSE : 1
FORT_ALL : 1
LEVOTHYROXINE_MG : 1
BP_UNCONTROLLED : 1
IER_DOCTOR : 1
NKA_PHARMACY : 1
PALPATION_WITH : 1
ACTIVE_SIMVASTATIN : 1
NEGATIVE_STRESS : 1
CARE_APPROVAL : 1
TO_PLACE : 1
NIGHTMARES_THEME : 1
DEVICES_PRINCIPAL : 1
EPIS_VTACH : 1
TO_RELAPSES : 1
COMPLETE_FLOWSHEET : 1
SERVICE_ENTERED : 1
INCLUDE_FAMILY : 1
ARTHROSCOPIC_TO : 1
ST_TO : 1
FELL_HIS : 1
WATHCHES_LISTENS : 1
TRIAGE_NOTE : 2
ON_THAT : 1
PAST_NEVER : 1
ORTHOSTASIS_THIS : 1
ADMITTED_MED : 1
TO_REST : 1
EVENING_GROUP : 1
FILL_SIG : 1
QUESTIONS_RE : 1
SPINAL_INJURY : 1
MODIFIED_RAMSAY : 1
COMBAT_POW : 1
TO_EMERGENCY : 1
ARE_VERY : 1
DIABETIC_BUT : 1
EXCLUDING_RECEIVED : 1
METATARSAL_MEASURING : 1
THEY_PT : 1
FROM_CPRS : 1
WHEN_TO : 1
PAD_ELBOW : 1
COLONOSCOPY_OUTSIDE : 1
PCP_PT : 1
SIMVASTATIN_MG : 1
PAIN_TYPE : 1
1010_CORRESPONDENCE : 1
AIR_TELEPHONE : 1
OBVIOUS_PREVENTIVE : 2
CONSENT_BE : 1
COMPLAINS_OF : 2
TO_SURE : 1
HE_GETS : 2
SEP_TETANUS : 1
DOES_LIKE : 1
ON_SUPPLEMENTAL : 1
SPONDYLOSIS_ADMISSION : 1
FOR_AT : 1
BETABLOCKER_HAVE : 1
WE_SIG : 1
PSYCHOTROPIC_ATIVE : 1
MELLITUS_SC : 1
HAS_PT : 1
IV_EDUCATION : 1
ISSUES_YOUR : 1
AND_NUMBER : 1
HAND_WOULD : 1
MALE_AMBULATORY : 1
MALE_AT : 1
PREVENTIVE_MANAGEMENT : 2
SENSORY_PERCEPTION : 1
ADMISSION_RN : 1
DILATE_THE : 1
AND_HOME : 1
AS_PRESCRIBED : 1
FRICTION_APPARENT : 1
PLACE_VITAL : 1
HIGH_RESTART : 1
AIR_FOR : 1
ATIVE_PAIN : 1
WHEN_IN : 1
AUSCULTATION_TYPE : 1
IDEATIONS_THIS : 1
PSYCHIATRIC_SUCH : 1
DIS_MIXED : 1
TO_MY : 1
RETURN_TO : 1
DISPENSED_FEB : 1
LEFT_IS : 1
YES_LUNGS : 1
ASSOC_WITH : 1
THAT_INTERVENTIONS : 1
THEY_APPT : 1
LEFT_HAS : 1
AMBULATION_CE : 1
OF_PROBLEMS : 1
DRINK_OCCASIONALLY : 1
ORIENTED_NORMAL : 1
ME_AND : 1
PAIN_PHARMACIST : 1
HIS_DAILY : 1
MR_CLAIMS : 1
TO_RADIO : 1
VIEW_THE : 2
LOSS_ELASTIC : 1
ER_THE : 1
PAIN_ACROSS : 1
ANY_EXPERIENCE : 1
MEDS_THE : 1
SEVERELY_NUTRITIONAL : 1
BHL_PHONE : 1
MANAGEMENT_ASA : 1
STUDIES_IF : 1
WAS_KIMBERLY : 1
SHE_WANTS : 1
GROUPS_MEDS : 1
COLLINS_ON : 1
WED_PATCHES : 1
OR_UPSETTING : 1
CONDITIONS_NEEDS : 1
EXPERIENCES_FAINTING : 1
PRESENTS_FOR : 2
STAFF_LEVEL : 1
DEMONSTRATED_SUPERFICIAL : 1
THE_YEAR : 2
COUGHED_THIS : 1
CONDUCTING_TIMELY : 1
HE_UP : 1
PT_BE : 1
COMPRESSION_NOT : 1
SUCH_ANXIETY : 1
CANCER_EDUCATE : 1
CC_HR : 1
PAIN_TO : 2
ANY_NICOTINE : 1
SA_EXTENDED : 1
AND_PHYSICIAN : 1
HE_DIDNT : 1
FOR_WIFE : 1
NOON_SEE : 1
NICOTINE_AND : 1
PROVIDED_OF : 1
MCG_TAKE : 1
OF_CHRONIC : 1
INCLUDING_AND : 1
AS_MODERATE : 1
AN_DIAGNOSIS : 1
CONSENT_TO : 1
DIAMETER_BASE : 1
TO_PRIOR : 1
COUNSELING_VALVE : 1
EDUCATION_AT : 1
BREATH_HE : 1
TAB_QH : 1
ULCER_PROTOCOL : 1
TIU_TITLE : 1
CE_AND : 1
REASSESSMENT_MILITARY : 1
PROVIDER_TO : 1
WITH_VASCULAR : 1
LB_KG : 4
IDENTIFIED_DOUBLE : 1
WHEN_MEDICAL : 1
RISK_IDENTIFIES : 1
LAST_AUG : 1
UH_DO : 1
LONG_SC : 1
SETERNY_CLUB : 1
ETHICS_WERE : 1
MONEY_VETERAN : 1
THIS_COMPLAINING : 1
HYPOTHYROID_MEDICAL : 1
DYSPHAGIA_REFLUX : 1
PREVIOSULY_TO : 1
AND_PALPATE : 1
PRN_ORAL : 1
JOINT_INVOLVING : 1
SEEN_MINUTES : 1
PT_COMPLAINS : 1
ON_IMAGE : 1
TARGET_FOR : 1
ATTEMPT_HERE : 1
LTC_BP : 1
OF_RATED : 1
ORIENTED_HAS : 1
KNOW_ANY : 1
NOTE_ADDENDUM : 1
CHAIR_FOR : 1
TO_KNEE : 2
OF_TESTING : 1
COMPLAINING_BILATERAL : 1
SPRAIN_BUT : 1
AT_ACCOMPANIED : 1
WEARING_ELBOW : 1
WITH_FOLLOWING : 2
UNDERSTANDING_DISCHARGE : 1
UNLABORED_NO : 1
IN_DOING : 1
PATIENTS_TO : 1
HIS_PT : 2
OLD_MALE : 6
IN_PAST : 2
RATED_NO : 1
JOINT_LOWER : 1
RECENT_LPN : 1
AT_REQUEST : 1
CONTACT_QUIT : 1
SERVICE_CONNECTED : 1
ADDENDUM_ADMITTED : 1
SB_ACTIVE : 1
THIS_POINT : 2
VERBALIZES_UNDERST : 1
PERSON_BEING : 1
SOME_HES : 1
WEEK_PATIENT : 1
FOR_ALZHEIMERS : 1
AFFECT_RECOVERY : 1
WITH_THEIR : 1
CANT_DO : 1
TO_GO : 1
YOU_HAVE : 1
VETERAN_CONDUCTING : 1
NOT_FAULT : 1
HEENT_WNL : 1
SENSATION_BIL : 1
TO_IF : 3
ENCOURAGEMENT_SUPPORT : 1
AS_NOT : 1
HR_IV : 1
INTERVENTIONS_SENSORY : 1
BRIEF_SUPPORTIVE : 1
THIS_YES : 1
UNABLE_CONTACT : 2
EXAMINATION_THE : 2
RECEIVED_PT : 1
LIVE_MONEY : 1
ON_RIGHT : 1
UP_TELEPHONE : 1
WAY_STATED : 1
TELEPHONE_CONTACT : 2
DESIRES_AFFECT : 1
FLI_RESPONSE : 1
CONSULT_SOCIAL : 2
IF_SPRAIN : 1
FACTOR_IDENTIFIES : 1
FAMILY_PATIENT : 1
REVIEW_NOTE : 1
WEEK_SINCE : 1
MG_ML : 2
BUT_ALSO : 1
NAME_SOURCE : 1
PRESENTS_AN : 1
SITES_ON : 1
DECIDED_THAT : 1
NO_THE : 1
NIGHT_ONE : 1
MY_IS : 1
THE_SETTINGS : 1
MENTAL_HEALTH : 2
CONTACT_CALL : 1
THE_MG : 1
SOURCE_FOR : 1
INJECTION_JOINT : 1
PATIENT_SORE : 1
PAIN_WELL : 1
PATIENT_PHONE : 4
MAGNESIUM_HYDROXIDE : 1
TAKING_NONVA : 1
TEST_AND : 1
PRESENT_NOT : 1
EKG_RHYTHM : 1
AREA_HE : 2
INFLUENZA_INCLUDE : 1
ENCOURAGED_SEEK : 1
YOURSELF_MHC : 1
PATIENT_TRANSFER : 1
ON_RM : 1
VETERAN_NAME : 1
SUPPORT_BE : 1
EDGES_SKIN : 1
LETTER_MAILED : 1
AND_AMBULATORY : 1
HE_CONCERNED : 1
YEAR_OLD : 6
REVIEWED_AN : 1
PT_DECIDED : 1
PCP_DENIED : 1
WERE_USED : 1
BURNING_SOME : 1
DIMINISHED_OXYGEN : 1
AND_RELATED : 1
IT_PHONE : 1
IS_FOR : 2
TO_NEW : 1
TELEPHONE_MALE : 1
PHYSICIAN_PRIOR : 1
BUT_BEING : 1
AT_HIS : 1
EVALUATION_DIABETES : 1
HEENT_CLEAR : 1
MADE_ENCOURAGED : 1
RA_SIGNS : 1
IS_GO : 1
NEED_DATE : 1
LIVES_CHIEF : 1
GRAHAM_UROLOGY : 1
HIS_TEETH : 1
WRITTEN_CONSULT : 1
TEMP_RESP : 1
FROM_KLEIN : 1
THIS_AS : 1
CAM_TO : 1
BEEN_HEMOGLOBIN : 1
RETURN_FORT : 1
WAS_PARTICIPATION : 1
OF_SENSATION : 1
WITHIN_THE : 3
HIS_CURRENT : 1
STERISTRIPPED_LACERATION : 1
CONSULT_PAIN : 1
THE_COPD : 1
ADJUSTMENT_WILL : 1
AND_TA : 1
GAS_NO : 1
WHEELCHAIR_NURSE : 1
METRONIDAZOLE_TAB : 1
AND_LIVES : 1
OTHER_HAND : 1
TREATMENT_ORTHOSTASIS : 1
SEDATION_SCORE : 1
SALTS_FATS : 1
RACE_AUGUST : 1
DOB_USED : 1
IDEATION_SHOW : 1
PATIENT_RESPONSIBILITIES : 1
DATE_TIME : 3
WITH_MORPHINE : 1
PT_DOES : 2
IDEALLY_TOTAL : 1
INTERESTED_IN : 1
CONSENT_OBTAINED : 1
CARE_THIS : 1
SHAKE_PRIOR : 1
REPORTS_AND : 2
OF_SPINAL : 1
APPOINTMENT_AND : 1
RISK_OF : 2
TO_BR : 1
SURGICAL_HISTORY : 2
ANY_OR : 1
WOUND_IS : 1
WERE_THE : 1
OTHER_DEPENDENCE : 1
GOOD_MED : 1
THEIR_OWN : 1
BLOOD_THIS : 1
SOMEWHAT_BENIGN : 1
RELATIVES_VETERAN : 1
SACPREPRIMARY_GROUP : 1
CONSULT_WORK : 1
ANSWER_BLACK : 1
FUNCTIONED_THE : 1
OXYGEN_EVERY : 1
NO_REGULAR : 1
MALE_BLOOD : 1
MEDS_OR : 1
SETTING_QUIT : 1
ON_AN : 1
AVAILIBLE_REVIEW : 1
THURS_JULY : 1
NO_BOWEL : 1
EVERY_FILL : 1
LEG_CRAMPING : 1
HIP_ASPECT : 1
APPT_PATIENTHAS : 1
RTU_COMPLETELY : 1
FOR_PCP : 1
LOCATION_CHEST : 2
FILLED_THROUGH : 1
HYPOTHYROID_FOLLOWUP : 1
FOR_THIS : 1
AND_OR : 4
UP_THIS : 1
AT_LEVEL : 1
UNKNOWN_MALE : 1
FROM_CONSENT : 1
REPORTS_TO : 1
PRN_RESPIRATORY : 1
AMBULATORY_TO : 2
IS_OF : 1
MALE_REPORTS : 1
PATIENT_PMH : 1
TICKETED_TOOK : 1
USE_ASSESSED : 1
FORMED_LESIONS : 1
OF_HE : 2
ASSESSEMENTS_OP : 1
IVP_MINUTES : 1
NC_ON : 2
MANIFESTATIONS_CONSULT : 1
IN_VETERAN : 1
AND_BASED : 1
REPORTS_PAIN : 1
WITH_BOTH : 1
TO_MINIMAL : 1
KNEE_AND : 1
CONTACT_VOCATIONAL : 1
HAS_MONOTONE : 1
TH_DIDNT : 1
AIR_PRN : 1
DIAST_BLOOD : 1
PATIENTS_SHOWN : 2
IV_HX : 1
HOW_PATIENT : 1
INITIAL_CONSULT : 1
PROBLEMS_LOCK : 1
DING_OR : 1
ALLERGIES_EVERY : 1
CC_IS : 1
NORMAL_INHALER : 1
FROM_DR : 1
SHOW_PHONE : 1
AMBULATORY_PRIMARY : 1
MR_THE : 1
OF_BILATERAL : 1
NOW_PAIN : 1
CM_PLAN : 1
SHOW_PATIENT : 1
BE_FOR : 2
NOTE_ULCER : 1
TEAM_FOR : 1
CONSULT_BP : 1
RECORD_CYTOPATHOLOGY : 1
APPT_HAS : 1
TVHS_CHART : 1
IS_RELIABLE : 1
EXCESSIVELY_HIGH : 1
BANKRUPTCY_RISK : 1
FOR_INSTRUCTIONS : 1
AND_UNABLE : 1
EATING_AN : 1
TABLET_BY : 7
CENTER_TO : 1
HI_AND : 1
OF_YES : 1
YES_CONSTRUCTION : 1
FINANCIALLY_WORRIES : 1
WITH_PALPATION : 1
SS_IN : 1
ENTHUSIASM_WAS : 1
TO_SPONDYLOSIS : 1
ADMIT_TO : 1
CMM_TO : 1
PATIENT_SEEN : 1
CONSULT_APPT : 1
PARTICIPATED_THE : 1
OLD_PATIENT : 1
AND_DIABETIC : 1
WIFE_HE : 1
REQUREMENT_ONLY : 1
PROCEDURES_COMMENTS : 1
GROUP_ENTHUSIASM : 1
ULCERATION_NOTED : 1
EYE_TO : 1
WEARING_PAD : 1
IT_CAUSING : 1
ST_HEAD : 1
TOLERATED_OUTSIDE : 1
NOTE_PRESSURE : 1
DETERMINED_BE : 1
TO_LEVEL : 1
TETANUS_TDADULT : 1
TINGLING_WEAKNESS : 1
KNOWLEDGABLE_ABOUT : 1
CAN_CONTROL : 1
AND_INSPIRATION : 1
DIFFICULTY_PTS : 1
DUE_SEVERITY : 1
TO_SATT : 1
SUPPORTIVE_CONTACTS : 1
HISTORY_TVHS : 1
PLAN_TEAM : 1
IS_ASSOC : 1
TIME_WHEN : 1
NEUROLOGICAL_WILL : 1
MINUTES_SHIFT : 1
PCP_PRESENTS : 1
THERAPY_COUNSELORS : 1
WHY_HE : 1
UP_NURSING : 1
NEEDED_ACTIVE : 1
SESSION_FACILITATORS : 1
SAME_TIME : 1
CLICK_THE : 1
BE_NECESSARY : 1
DIMINISHED_RBC : 1
IMPORTANCE_IF : 1
HOMOCIDE_NO : 1
THE_TIU : 1
SENSE_OF : 1
URINE_FOR : 1
SOME_READINGS : 1
VERY_POOR : 1
THIS_LEVEL : 1
OMEPRAZOLE_FLUNIS : 1
IN_WOUND : 1
SUGAR_ML : 1
REVIEWED_WAS : 1
DISC_STATES : 1
CONTRACT_CALLER : 1
CHARLOTTE_CONTACT : 1
MALE_REALLY : 1
CARE_SERVICES : 1
MEDICATION_NEGATIVE : 1
NO_AND : 1
TO_ENJOY : 1
REASONS_FOR : 1
LAST_GLUCOMETER : 1
PATIENT_POSTIVE : 1
TIME_IV : 1
TREATERS_TO : 1
IS_HE : 2
FOR_OF : 3
NOTE_HISTORY : 1
WEINSTEIN_PROVIDED : 1
WOULD_TO : 3
FEEL_LITTLE : 1
DX_UNDERGOING : 1
OF_HAS : 2
FEET_AND : 1
AND_UH : 1
WITHDRAWN_SENT : 1
PAST_MEDICAL : 3
AT_ANOTHER : 2
UNITS_NOON : 1
FOR_HIAA : 1
STATES_THAT : 3
NUR_PREVMED : 1
MORPHINE_MG : 1
RESPIRATORY_HEADACHE : 1
OR_NOTED : 1
LIVES_IN : 1
NURSING_FRICTION : 1
DS_EXAM : 1
LIST_MEDS : 1
NURSE_COMES : 1
RELAPSES_LET : 1
DEPENDENCE_SUPPLEMENTAL : 1
ACTIVITIES_AND : 1
WITH_PATIENT : 2
VOCATIONAL_LECTURE : 1
WITH_FREEZE : 1
PL_AND : 1
FOR_ANOTHER : 1
WERE_TO : 1
PURIFIED_PROTEIN : 1
USE_IT : 1
MEDICATIONS_CENTRUM : 1
LEVEL_WAS : 1
THE_RECORDS : 1
LOW_SUGARS : 1
PHARMACIST_MEDICATION : 1
THAT_THINGS : 1
RECREATION_CRAFTS : 1
OR_INTEREST : 1
THEM_THE : 1
REGULAR_RHYTHM : 1
MUSCULO_SKELETAL : 1
BEEN_PRESCRIBED : 1
REGARDING_HIS : 1
WALK_PUPILS : 1
USE_ACTIVE : 1
SEVERITY_ADDENDUM : 1
HE_DENIES : 1
POW_NO : 1
SWR_IS : 1
FOR_EPIGASTRIC : 1
PATIENT_CONSULT : 2
IS_AFFECT : 1
ACTIVE_DM : 1
MG_WHICH : 1
TYPE_OR : 1
OF_OVERRUN : 1
INDEPENDENT_POSITIONING : 1
HAS_POOR : 1
PULSE_NARRATIVE : 1
SIGNS_DISTURBANCE : 1
SPACER_HEALTH : 1
ALSO_TO : 1
ON_PLAN : 2
SS_NOON : 1
INTRACRANIAL_COMPARTMENTAL : 1
IN_OR : 1
TO_SHAKE : 1
THAT_SO : 1
IF_DING : 1
DURATION_SIGNS : 1
FOR_AN : 2
IS_CM : 1
YES_HE : 1
MONTH_WERE : 1
FOUR_RETURNED : 1
DROWSYNESS_SINCE : 1
DRAPED_AREA : 1
MODERATE_SEVERE : 2
NUMBER_SHE : 1
PCP_ADDITIONAL : 1
SEVERE_SYMPTOMS : 1
RELAPSES_COUNSELORS : 1
TUBERCULIN_PROTEIN : 1
APPLICABLE_OTHER : 1
OF_STAY : 1
AS_ANXIETY : 1
NEEDS_FALL : 1
OR_TINGLING : 1
BILATERAL_CRAMPING : 1
WITH_NO : 2
LAST_USE : 1
VET_OFFERED : 1
MEDICAL_NOTE : 1
NKA_EVALUATION : 1
REVIEWED_CHART : 1
WHEN_PAST : 1
AS_PER : 2
THE_BOTTOM : 1
FINDINGS_THIS : 1
NOT_THIS : 1
CA_PHYSICIAN : 1
IN_POSSESSION : 1
SOME_ANXIETY : 1
DISPATCH_DONNA : 1
AS_THIS : 2
AMBULATORY_AID : 1
COMPROMISED_STATUS : 1
DENIES_SIDE : 1
FOR_CA : 1
THAT_WOULD : 1
TO_DIRECTIONS : 1
REQUIRED_AT : 1
CLINIC_WALKIN : 1
CM_LENGTH : 1
ADVANCED_EDUCATION : 1
BE_OPIOID : 1
LIVE_AND : 1
AS_HTN : 1
PLEASE_UP : 1
NEXT_APPOINTMENT : 1
SEE_ED : 1
IS_RCVD : 1
FOR_PRECOLONOSCOPY : 1
ANOTHER_FACILITY : 1
LESION_BACK : 1
AND_WELLNOURISHED : 1
AM_DECISION : 1
BLUE_OF : 1
ID_NAME : 1
DDEPRESSION_YES : 1
MOTOR_FOR : 1
THE_INCLUDING : 1
AUG_WITHOUT : 1
PLEASANT_NAD : 1
THE_TO : 4
IMPLANTABLE_NO : 1
PROBLEMS_CHEST : 1
DISCONNECTS_WHEN : 1
VET_NOT : 1
AND_TIME : 1
PATIENT_LIKE : 1
SPONSORS_PEERS : 1
WRITING_VETERAN : 1
ALL_GROUPS : 1
PLAN_IS : 1
HYPERTROPHY_OF : 1
WHEEZING_RALES : 1
FOR_RETINOPATHY : 1
CHRONIC_CONDITIONS : 1
YESTER_AND : 1
WHO_SEEN : 1
INDEPENDENT_ANY : 1
HAS_OF : 1
BMI_OR : 1
YOU_USED : 1
MOISTURE_PIN : 1
TMS_AUSCULTATION : 1
IN_ONE : 1
TARGET_ASSESSMENT : 1
TELEPHONE_MEDICAL : 1
HOSPITALIST_NOTE : 1
EDUCATION_DATE : 1
LEFT_CHEST : 1
ANXIETY_IRRITABILITY : 1
GEN_CAM : 1
AXIS_MEDICAL : 1
NO_PROBLEM : 1
AND_BUS : 1
DOES_HAVE : 2
INSTRUCTIONS_IS : 1
STRETCHER_NIGHT : 1
FOR_DIAGNOSTIC : 1
CODE_EACH : 1
FOLLOWUP_TO : 1
GROUP_THERAPY : 1
SECONDARY_DIAGNOSIS : 1
OF_GROUP : 2
ON_TYPE : 1
SUCH_HEMATURIA : 1
VISION_SECONDARY : 1
PROVIDER_AVAILIBLE : 1
DILATED_IMAGING : 1
DIS_HE : 1
WHO_OT : 1
IS_WHO : 1
BOWEL_VERBALIZED : 1
WHO_PROVIDED : 1
NO_SENSES : 1
BLE_PT : 1
THE_TITLE : 1
UPON_RETURN : 1
OF_EVENTS : 1
SUICIDE_HOMOCIDE : 1
NURSING_NARRATIVE : 1
PAIN_CHANGE : 1
AS_NEEDED : 4
ACCOMPLISH_GOALS : 1
ROOMAIR_ABDOMEN : 1
ARE_MANY : 1
SUMMARY_ACCIDENT : 1
GO_TO : 2
COMBAT_NO : 1
DOCUMENT_SUBJECTIVE : 1
SOME_HE : 1
HE_SAID : 1
BUS_ARRANGED : 1
NO_SEIZURES : 1
MELLITUS_TYPE : 1
ELBOW_PER : 1
HIM_OFF : 1
UNCOMFORTABLE_OR : 1
TO_DEMENTIA : 1
EVERY_MORNING : 1
GOOD_CONTACT : 1
FOR_PT : 1
BLE_UNABLE : 1
WEAR_THE : 1
RT_CPAP : 1
OF_DISTRESS : 1
ORIENTED_ENCOURAGEMENT : 1
PRECAUTIONS_OBSERVATION : 1
SULF_TAB : 2
VITAL_SIGNS : 4
MARTKEDLY_HE : 1
OF_VTACH : 1
UNSURE_IF : 1
CONFIGURED_WITH : 1
MORPHINE_OXYCODONE : 1
TO_MOW : 1
IN_TREATMENT : 1
OBSTACLES_THAT : 1
HIS_FLEXION : 1
AND_APPROPRIATELY : 1
WILL_AVAILABLE : 1
TAB_FEB : 1
ALLERGIES_LUNGS : 1
UPPER_ABOV : 1
BEEN_ADVISED : 1
PLACED_WITH : 1
PATIENT_QUIT : 1
EXACT_IS : 1
ALPRAZOLAM_THE : 1
WHEN_ASKED : 1
ID_IS : 1
WHEELCHAIR_MY : 1
OBTAINED_THE : 1
IS_CURRENT : 1
TAB_ALLERGIES : 1
ORAL_ANTIDIABETICS : 1
MODL_MBL : 1
TO_LEARN : 2
DETACHED_FROM : 1
BP_WT : 1
WERE_FACILITATORS : 1
MEDICAL_HERE : 1
AXIS_BIPOLAR : 1
VISIT_FOR : 1
VA_IBUPROFEN : 1
DISCUSS_NO : 1
ASSESSMENT_UNABLE : 1
SUBFILE_WAS : 1
NURSE_COMPLAINING : 1
SEEK_EMERGENCY : 1
ACTIVITIES_OR : 1
PATIENT_NUMBER : 2
AND_CARE : 1
NO_VACCINE : 1
TOLERATING_OK : 1
FOR_ADMISSION : 2
MOUTH_REFILLS : 1
OCALL_BLOD : 1
ML_HR : 2
NOTE_READING : 1
RIGHT_HIP : 1
WRITER_TRIED : 1
ANXIETY_SACPREPRIMARY : 1
USE_IF : 2
TREATMENT_MEDICAL : 1
CHANGE_IN : 2
AND_WAS : 2
RATHER_FROM : 1
SUPPER_UNITS : 1
SHOWN_FILM : 2
WITH_SPACER : 1
HEPARIN_NO : 1
PLAN_QIDPRN : 1
OF_DIET : 1
ASSOCIATED_DECREASE : 1
PT_MONOTONE : 1
NEED_STRENGTHS : 1
BE_HEIGHT : 1
HEAD_CM : 1
ACTIVE_RESCHEDULED : 1
PSYCHOSOCIAL_BEHAVIORS : 1
YOUR_HAND : 1
ONE_ASSESSEMENTS : 1
BHM_CLINICAL : 1
AT_SAME : 1
LONGSTANDING_HAS : 1
LAYING_TRIAGE : 1
FLUNIS_DE : 1
FOLLOWUP_WITH : 1
RIGHT_LEG : 1
WEAKNESS_ABD : 1
BOX_STATE : 1
ED_DING : 1
WERE_SHOWN : 2
ANY_AND : 1
WERE_WAS : 1
ANTIHISTAMINES_IS : 1
PEERS_TO : 2
ACTIVITIES_GROUPS : 1
DATED_FOR : 1
NOT_HAD : 1
CONTACT_TELEPHONE : 1
REVIEWED_TEST : 1
OXIMETRY_TO : 2
DISPENSED_CURRENT : 1
NONFORMULARY_ON : 1
TIMEOUT_DONE : 1
READING_THE : 1
LEVEL_CURRENT : 1
THE_GOT : 1
OF_EVENT : 1
PATIENT_BE : 1
HYDROXYZINE_CAP : 1
BUT_NO : 1
SOME_INFORMATION : 1
PM_SS : 1
FOSAMAX_TABLET : 1
TERRIBLE_HAS : 1
SURROUNDING_FOSAMAX : 1
INSPECTED_AND : 1
OFFICE_SEEN : 1
FOLLOWING_ON : 1
EDUCATION_TAKE : 1
COMMENTS_ACTIVE : 1
FACE_DISCUSSED : 1
THANK_YOU : 1
CONSULT_HEADACHE : 1
PROGRESS_TREATMENT : 1
GIVEN_OKAY : 1
YES_CHANGES : 1
HAIR_CHANGES : 1
PROVIDED_SOME : 1
LESION_ON : 1
ADVANCED_DIRECTIVES : 1
ALLOW_EXAMINATION : 1
ENCOUNTER_PATIENT : 1
BILATERAL_LEG : 1
TO_FINGER : 1
DAZED_CONFUSED : 1
WIDEN_THE : 1
NEEDED_SPRAIN : 1
AND_TACHY : 1
STATUS_ME : 1
THANK_CARDS : 1
AND_CE : 1
CLINICAL_ENTER : 1
RIB_FOR : 1
SO_FRIGHTENING : 1
FOLLOWUP_INHALER : 1
CYST_NO : 1
AM_HAS : 1
IN_MY : 1
UNSPECIFIED_WITH : 1
COENZYME_TAB : 1
PLACED_NC : 1
INDICATES_NOT : 1
RECENTLY_REMAINS : 1
OR_SEVERE : 1
CHF_WEIGHT : 1
TO_COLLINS : 2
OBVIOUS_LETHARGY : 2
OF_MENTAL : 2
TDADULT_THIS : 1
TO_CONTACTED : 1
REPRESENTATIVE_MAY : 1
OUTPATIENT_INCLUDING : 1
FOR_EACH : 1
WT_LB : 1
TO_WEIGHT : 1
TONIGHT_MG : 1
ZOCOR_ANYMORE : 1
SCREENING_FOLLOWUP : 1
VETERAN_SOURCE : 1
STATES_IT : 1
STATE_PATIENT : 1
DIAGNOSIS_AND : 1
THIS_RECENTLY : 1
PORT_CHARLOTTE : 1
AND_SHIN : 1
THE_ABOUT : 1
VITAL_WEAR : 1
MINIMUM_MR : 1
MS_QID : 1
SC_IS : 1
TO_LEFT : 1
NIGHTMARES_RECURRING : 1
DIABETIC_FOOT : 1
YR_COURSE : 1
ER_ENCOURAGEMENT : 1
WELL_INFO : 1
RESPONSE_RCVD : 1
TABLET_IBUPROFEN : 1
REPORTS_IN : 1
YES_DOWN : 1
FIND_CARE : 1
THE_LOWER : 1
TO_COUGHED : 1
MEDICAL_VOMITING : 1
MOTORCYCLE_ACCIDENT : 1
THE_WELCOME : 1
ONLY_WANTS : 1
PAIN_DECREASED : 1
UP_WITH : 2
MH_JUNE : 1
NOTE_AT : 1
HAS_CLINICALLY : 1
LIST_HAWTHORNE : 1
THE_BR : 1
QUADS_IMPAIRED : 1
ATTENDS_OT : 1
OF_DIPYRIDAMOLE : 1
BE_PICKED : 1
WHICH_NOT : 1
DENIES_NEURO : 1
SUPPORTIVE_TIME : 1
UPSETTING_THAT : 1
HARD_TOUCH : 1
DIAGNOSTIC_STUDIES : 1
WORK_TO : 1
AID_BEDREST : 1
FOR_RESPIRATORY : 1
COOPERATIVE_DATE : 1
AM_FACILITY : 1
PATIENTS_TELEPHONE : 1
MANAGEMENT_DIRECTIVES : 1
OR_THAT : 2
ON_VICODIN : 1
HEADACHE_SUICIDAL : 1
NO_REQUESTED : 1
MINIMAL_PARTICIPATION : 1
SC_PT : 1
OF_COURSE : 1
BUT_NOT : 1
ONGOING_INCREASING : 1
UNCHANGED_SIDE : 1
OTHER_SMOKE : 1
MADE_GOOD : 1
CHRONIC_PROBLEMS : 1
NURSES_REPORT : 1
HIS_DESIRE : 1
BY_WRITER : 1
OR_SELFHARM : 1
EVERY_ACTIVE : 3
PATIENT_HAVE : 1
COMPLIANCE_DISEASE : 1
OF_SCREENING : 1
THE_TAMSULOSIN : 1
LOCATED_RIGHT : 1
MG_IBUPROFEN : 1
VISIT_WEIGHT : 1
FREEZE_FEE : 1
PARK_VET : 1
OF_INTENT : 1
HAS_THE : 1
PHYSICIAN_SWR : 1
PT_ADVISED : 1
TRIP_TO : 1
NUTRITIONAL_RISK : 1
NEVER_BEDTIME : 1
ADMISSION_EKNURSING : 1
THEM_ELEVATED : 1
HAS_HAD : 1
FROM_SPC : 1
OF_UPPER : 1
IS_OIF : 1
MR_DEMONSTRATED : 1
ON_THE : 9
AT_INFUSING : 1
PLAN_DECIDED : 1
AMINOPHYLLINE_GIVEN : 1
INFORMATION_ON : 1
BECAUSE_HE : 1
TO_HELP : 1
OF_THE : 12
UTILITIES_NO : 1
SAME_GROUP : 1
SHIELD_MICHIGAN : 1
GIVEN_HIS : 1
MINUTES_NURSING : 1
REPORTED_HE : 1
ON_FOOT : 1
NO_MEDICAL : 1
MONTH_YES : 1
COMPLETELY_INDEPENDENT : 1
PAIN_BESYLATE : 1
MHICM_INVOLVEMENT : 1
THAT_DIVALPROEX : 1
SPACE_THE : 1
DIAGNOSIS_COLON : 1
AND_PET : 1
HAS_NOT : 5
IS_SEEN : 1
UNDERSTANDING_MEASURED : 1
LISTENS_TO : 1
DS_PHYSICAL : 1
TO_NEXT : 1
AND_REVIEWED : 1
REPORTED_PCP : 1
TXC_SATT : 1
WORKER_ON : 1
STOPPED_MORNINGPAIN : 1
MINUTE_OXYGEN : 1
PT_HE : 2
OF_MEDICATIONS : 1
WOULD_CORRESPOND : 1
REVIEW_CHRONIC : 1
SUSP_ML : 1
SUBJECTIVE_AM : 1
ADMISSION_YES : 1
DRUGS_PENICILLIN : 1
ME_UPSET : 1
MONITOR_THAT : 1
OXYGEN_PRESSURE : 1
TO_SOME : 1
FOR_FT : 1
MONEY_TO : 1
RIGHT_KNEE : 2
PROVIDED_PATIENT : 1
DIRECTIVES_TO : 1
BP_GOOD : 1
WILL_CONTINUE : 2
SHORTNESS_BREATH : 1
MED_TEAM : 1
ADDENDUM_PROSTHETICS : 1
INTO_THE : 1
OKAY_TO : 1
ASSESS_NONFORMULARY : 1
EXEMPT_YESTER : 1
ASA_STATIN : 1
CARE_ASSESSMENT : 1
LEARNING_BARRIERS : 1
DIRECTIVES_TAKE : 1
TREATMENT_THEY : 1
ROOM_TO : 1
NO_LEFT : 1
HE_OF : 2
OFF_VALPROIC : 1
TO_UPON : 1
CHO_STATUS : 1
IDENTIFIED_COMPREHENSIVE : 1
NO_TEMPERATURE : 1
MEDICATIONS_THAT : 1
ORIENTED_TO : 2
ANY_ON : 1
FAMILIAR_WITH : 1
HA_ABD : 1
AVOIDING_BEFORE : 1
ABNORMALITIES_PRIMARY : 1
BUS_DISCHARGE : 1
INSTRUCTIONS_PHONE : 1
QIDPRN_FOR : 1
WT_OX : 1
VERBALIZED_DOCTORS : 1
MANAGEMENT_DISCUSSED : 1
NKA_TO : 1
TO_AM : 1
WHICH_ACCORDING : 1
WELLDEVELOPED_WELLNOURISHED : 1
IN_BASIS : 1
FROM_COPD : 1
HE_CHIEF : 1
MG_IV : 1
PULSE_OX : 1
NOTE_OF : 2
EDUCATE_HAS : 1
BY_REFILLS : 1
TXC_AND : 2
CHANGED_FOLLOWS : 1
AND_RETURNED : 1
HOME_HEALTH : 1
LABS_FILMS : 1
SCALP_HAIR : 1
ON_TAXI : 1
PROBLEMS_HEPARIN : 1
NO_OTHER : 1
NOT_TICKETED : 1
HAVE_PROSTEHESIS : 1
NEXT_HAVE : 1
BETWEEN_IN : 1
BLOD_READINGS : 1
CLAIMS_THE : 1
SPELLING_ON : 1
OUTSIDE_MEDICAL : 2
MULTIPLE_SPINAL : 1
BEFORE_GETTING : 1
RECORDS_REVIEWED : 2
PAIN_IN : 3
TIME_ALERT : 1
IS_FLI : 1
SEX_RACE : 1
ANXIETY_SAME : 1
SS_HEARD : 1
NOTED_PULSE : 1
YEAROLD_MALE : 1
TO_PREVIOSULY : 1
ARIPIPRAZOLE_ACTIVE : 1
TYPE_OF : 7
STABILITY_SHE : 1
RECENTLY_SEPARATED : 1
AT_FACILITY : 3
BEEN_TAKING : 1
THE_ACTIVITY : 1
LOCAL_CONSULT : 1
YEAR_AT : 1
SYND_TYPE : 1
READINGS_OUTPATIENT : 1
IMPAIRED_NO : 1
STOMACH_ALCOHOL : 1
INTRAVENOUS_CA : 1
MAINTAINING_OWN : 1
SLOW_IVP : 1
BODY_HX : 1
IS_CURRENTLY : 1
AVAILABLE_FT : 1
PATIENTS_NURSING : 1
ARIPIPRAZOLE_TAB : 1
VISIBLE_THE : 1
PTSD_ACTIVE : 1
ID_ONCE : 1
CONCURRENT_BY : 1
AVOIDING_THESE : 1
ORIENTED_ER : 1
ONSET_SIGNS : 1
PRESCRIBING_PROVIDER : 1
WAS_CP : 1
FROM_CLICK : 1
RAMSAY_SCORE : 1
KNOW_DISC : 1
SPELL_SINCE : 1
LISTENS_RADIO : 1
SIMVASTATIN_TAB : 1
THAT_CLINICIAN : 1
UNDERSTANDING_DOCTORS : 1
ABOUT_TEETH : 1
OK_THIS : 1
XRT_FOR : 1
OR_IS : 1
YES_PHYSICIAN : 1
DECLINED_TO : 1
VAMC_TO : 1
NEG_PT : 1
INTERVENTIONS_PROTOCOL : 1
MODERATE_PARTICIPATION : 1
TO_DISCHARGE : 1
REPORTED_TO : 1
IS_AND : 3
NURSING_TRIAGE : 2
TELEPHONE_BMI : 1
CTRS_JOE : 2
COMES_OUT : 1
ABOUT_SMOKES : 1
ACCOMPANIED_DAUGHTER : 1
THIS_DISCHARGE : 1
LORAZEPAM_AT : 1
HISTORY_CHART : 1
BRONCHOSCOPY_PET : 1
PING_VSS : 1
DIAGNOSIS_NO : 1
ABUSED_AS : 1
EVENT_WAS : 1
AND_LOSS : 1
HE_ONLY : 1
IV_DCD : 1
AFIB_TACHY : 1
PATIENT_WAS : 4
ONLY_USE : 1
BUT_HAS : 1
DEVELOPED_SOME : 1
EVENTS_OVERNIGHT : 1
UROLOGY_DRIVER : 1
THERAPY_PERSONX : 1
HCT_TYPE : 1
WANTS_TIME : 1
BEEN_REFILLED : 1
GIVEN_IVP : 1
CHAPLAINS_ETC : 1
FOUR_OTHER : 1
FEVER_LUMBAR : 1
PT_PATIENT : 1
MULTIPLE_SCLEROSIS : 1
DEPRESSIVE_YES : 1
EATING_PATTERN : 1
CLINICAL_IMPORTANCE : 1
PROBLEMS_PROBLEM : 1
AND_TRANSIENTLY : 1
WNL_IS : 1
CLOTHING_MONEY : 1
LOW_SALTS : 1
HE_JOB : 1
ME_THEY : 1
IS_PATIENT : 1
BPH_ESSENTIAL : 1
OF_INSTRUCTION : 1
OXYGEN_BLOOD : 1
VISION_DECREASE : 1
JOE_QUATTLEBAUM : 2
ALCOHOL_PATIENTS : 1
ATTEMPTS_BACK : 1
PLAN_LEGAL : 1
FOLLOW_WITH : 1
KNEE_ARTHROPLASTY : 1
FOR_ORTHOSTASIS : 1
VETERAN_VA : 1
PS_WITHOUT : 1
HAIR_LEFT : 1
IF_RESULTS : 1
LECTURE_SUBSTANCE : 1
HISTORY_ASSESS : 1
BETWEEN_MANY : 1
AT_FOR : 1
NO_REDNESS : 2
PROBLEMS_OR : 1
DOCTOR_NOTIFIED : 1
OR_INJECTION : 1
LUNGS_WHEEZING : 1
PATIENT_THE : 2
FOR_BLOOD : 2
QUIT_TOBACCO : 1
DISPLAY_ALREADY : 1
NEGATIVE_SCORE : 1
ELIGIBILTY_CODE : 1
GUN_IN : 1
OF_WATER : 1
RECREATION_PERSONX : 1
WHO_SOME : 1
FILM_BRADSHAW : 2
GETS_ON : 1
NURSING_SENSORY : 1
TIME_SEDATION : 1
WE_USE : 1
FELL_OFF : 1
HOME_READING : 1
THROUGH_PAIN : 1
REPORTS_HE : 1
WRITTEN_WILL : 1
BASED_ULCER : 1
THE_MILITARY : 1
SEVERITY_OF : 1
SENT_FOR : 1
HOURS_AWAKENING : 1
ON_LEG : 1
GIVEN_AT : 3
CARDIOLOGY_CONFIGURED : 1
DEPRESSION_PHYSICIANS : 1
THEY_STATED : 1
MEDICATIONS_FORM : 1
YESTER_LAB : 1
RESULT_MENTAL : 1
NEURO_SENSATION : 1
QAM_ACTIVE : 1
IN_BRIEF : 1
ARRANGED_TRANSPORT : 1
CESSATION_REFERRAL : 1
LEADER_AND : 1
PCP_VIA : 1
JVD_LORAZEPAM : 1
STATIN_MORSE : 1
BREAKTHROUGH_PAIN : 1
OF_THEMES : 1
MOISTURE_MOIST : 1
GIVEN_NTG : 1
CONTACT_SETTING : 1
HELPED_MOOD : 1
EVERY_SEX : 1
APPOINTMENT_GM : 1
MBL_WITH : 1
ECTOPY_STATE : 1
NEG_ADDENDUM : 1
RISK_MODERATE : 1
PHYSICIAN_CONTINUE : 1
HE_NOW : 1
VERIFY_THIS : 1
NOW_WITHIN : 1
PAIN_LEFT : 1
STREET_FROM : 1
TIME_DISCHARGE : 1
SINGLE_FAMILY : 1
ENTITLED_BRADSHAW : 2
ON_WAYS : 1
LIVED_MASS : 1
OF_RECOIL : 1
NO_LTC : 1
PICKED_PULSE : 1
THURS_TH : 1
COUGHED_UP : 1
CLINIC_CARDIOLOGY : 1
IRON_CONSULT : 1
WITHIN_CHEST : 1
SOURCE_THE : 1
LIMITATIONS_ISSUES : 1
PAINT_PORTRAIT : 1
AND_TOLD : 1
PRESENT_APPLICABLE : 1
ESTABLISHED_PATIENT : 1
TO_EXAMINATION : 1
LIKE_LEARN : 1
DATE_PAST : 1
EVER_HAD : 1
NEEDED_UP : 1
KG_ELBOW : 1
WITH_MULTIPLE : 1
THIS_HE : 2
CM_CIRCULAR : 1
SUCH_AS : 3
OTHERS_HE : 1
BUSINESS_DECISION : 1
TOOK_HIM : 1
ADENOCARCINOMA_CONSTIPATION : 1
NUTRITIONAL_STATUS : 1
AVOID_FALLS : 1
MOUTH_FOUR : 1
TO_YOUR : 1
PHARMACIST_WILL : 1
INCLUDING_PATIENT : 1
CHANGE_FROM : 1
EKG_SIG : 1
DRIVER_DISCHARGE : 1
WAS_UP : 1
RETINOPATHY_OT : 1
VERIFY_PATIENT : 1
FALL_NORMAL : 1
LAURIE_SHE : 1
TELEPHONE_REPORT : 1
NEG_DO : 1
HEART_PT : 1
IDENTIFIED_HEALTH : 1
TO_CREST : 1
TOLD_ME : 2
HAS_ANSWERED : 3
OUTPATIENT_COMMENT : 1
FACILITY_FROM : 1
AMBULATION_SAT : 1
FOR_URGENT : 1
GOT_IVF : 1
MEDICATIONS_STATUS : 2
HOPLESS_AT : 1
UNIT_IN : 1
OF_PT : 1
OF_SS : 1
EITHER_PHYSICALLY : 1
STAFF_AS : 1
GLUCOSE_TEST : 1
WITH_PCP : 1
MANEUVER_LEG : 1
MHICM_ID : 1
OR_YOURSELF : 1
FOCUS_INTRAMUCOSAL : 1
ACROSS_OBTAIN : 1
THAN_THAT : 1
OF_DRUGS : 1
COMPLETED_BY : 1
HX_OF : 2
ML_TKO : 1
SIGNIFICANT_OTHER : 1
PROBLEM_THAT : 1
IS_NOT : 6
AND_EXTENDED : 1
PATTERN_PER : 1
AUSCULTATION_POSTERIOR : 1
THE_WITHIN : 1
PALPATED_CLEAN : 1
THE_NUMBER : 1
BASIS_OFFICE : 1
BY_ACOS : 1
HOUSE_DAILY : 1
HE_TAKEN : 1
OF_PAIN : 3
PIN_SITES : 1
AND_HOUSING : 1
REQUEST_ON : 1
JUL_INJURY : 1
TH_THIS : 1
IS_MEANING : 1
OTHER_VITALS : 1
HAS_ALSO : 1
FOOT_IS : 1
AGITATED_CONCURRENT : 1
CALL_THE : 1
MODL_WITH : 1
ADDENDUM_TO : 1
NEED_BRING : 1
HES_KEEPING : 1
DEMONSTRATED_DONNING : 1
DISCUSSED_OUTPATIENT : 1
YEAR_NEVER : 1
ADL_INDEPENDENT : 1
HIS_HOME : 1
RM_PRN : 1
THAT_DYING : 1
AND_MEDS : 1
THE_MONTH : 1
AT_FEELING : 1
MAY_ABLE : 1
BE_UP : 1
THE_THANK : 1
THAT_INSURANCE : 1
HIP_POSTERIOR : 1
THIS_AGAIN : 1
PT_PLACED : 1
ALL_OF : 1
FROM_THE : 3
FOR_DEPRESSION : 1
OTHERS_OR : 1
SAW_SINCE : 1
CONTACT_BUT : 1
VOICED_COMPLAINTS : 1
IN_AFFECT : 1
INSTRUCTION_PROVIDED : 1
IS_YEAROLD : 1
DRUG_ALLERGIES : 1
BLOOD_REMAINS : 1
INDEPENDENT_IF : 1
AM_OTHER : 1
LANS_AO : 1
MOTHER_WORSENING : 1
MANAGEMENT_PT : 1
ACTIVE_RECONCILIATION : 1
RALLY_IN : 1
RA_NO : 1
PRECOLONOSCOPY_PHONE : 1
DOSE_USE : 1
EDUCATION_TOPICS : 1
FOR_QUESTIONED : 1
BIPOLAR_DENIES : 1
STATE_INDICATES : 1
EVIDENCE_FRACTURE : 1
FROM_NEEDED : 1
OF_FRACTURE : 1
HOWEVER_SHE : 1
VASCULAR_DEMENTIA : 1
GIVEN_FENTANYL : 1
AT_SLOW : 1
AND_BM : 1
PUT_THEM : 1
OX_ON : 1
TO_AT : 3
BED_INDEPENDENT : 1
JUST_THE : 1
CUFF_AGAINST : 1
FOLLOWING_ACCIDENT : 1
TIU_TO : 1
LOCK_NO : 1
MADE_EYE : 1
UNKNOWN_ACTIVE : 1
SCORE_ALSO : 1
WELCOME_DESK : 1
RACE_DATE : 1
ACROSS_CHEST : 1
END_THE : 1
ERYTHROMYCIN_PENICILLIN : 1
ACE_ASA : 1
BEEN_PCP : 1
SEVERAL_ATTEMPTS : 1
OUT_OF : 1
THE_VEIN : 1
RESOLVED_WILL : 1
PERSON_TIME : 1
EACH_ENTRY : 1
PATCHES_IS : 1
SXS_AS : 1
TERM_SC : 1
BRING_DRIVER : 1
HOUSEHOLD_PHYSICIAN : 1
THE_USED : 1
MEDIASTINUM_IS : 1
LIMITED_CURRENTLY : 1
THIS_EVENT : 1
PHONE_WAS : 1
IF_THEY : 1
PM_ASSESSMENT : 1
DISCUSSED_WITH : 1
LEGAL_FULLY : 1
MEDICATION_COMPLETED : 1
FROM_SUPPER : 1
WHETHER_MOISTURE : 1
TOTAL_ASSESSMENT : 1
LEVEL_HIGH : 1
OXIMETRY_CERVICAL : 1
PLACEMENT_EVENTS : 1
HAWTHORNE_EXTRACT : 1
DECIDED_HE : 1
TRANSPORT_SMILING : 1
REST_SB : 1
HOUSE_PT : 1
FILL_OUT : 1
BY_SOME : 1
COUNSELING_ACTIVE : 1
CHEST_OBJECTIVE : 1
COURSE_HAS : 2
DISCHARGE_PATIENT : 1
PROSTHETICS_DEPT : 1
HOME_CARE : 1
LORAZEPAM_MG : 1
LIMITATIONS_ON : 1
HR_TKO : 1
THIS_WOULD : 3
ENHANCE_DISTINCTION : 1
PATIENTS_ABOUT : 1
OVER_ESOPHAGUS : 1
VETERAN_ALSO : 1
ACTIVE_SUBJECTIVE : 1
NEWLY_ANY : 1
HAS_TRANSFERRED : 1
OP_AND : 1
THIS_TIME : 5
MEDS_WD : 1
NEED_TO : 4
SIGNS_SYMPTOM : 1
LUMBAR_AREA : 1
PHYSICIAN_THIS : 1
LPN_SHE : 1
GASTROINTESTINAL_THIS : 1
OR_PAIN : 1
BY_FOUR : 1
YES_DO : 1
OF_AND : 2
NUMEROUS_TIMES : 1
REQUIRED_THIS : 1
TO_KNOW : 1
NEED_ALPRAZOLAM : 1
EKG_ONLY : 1
PAIN_GIVEN : 1
TO_TIME : 1
TO_APPOINTMENT : 2
MULTIPLE_DELUSIONS : 1
CHRONIC_BACK : 1
NICOTINE_OF : 1
FAM_CHIEF : 1
BE_LEFT : 1
CURRENT_NO : 1
EP_SPECIALIST : 1
PATIENT_SSN : 1
TPY_ORTHO : 1
ORTHO_LAYING : 1
TRANSFERRED_PSA : 1
INCLUDES_ELIGIBILTY : 1
BP_ORTHO : 1
ON_MY : 1
NO_SIDE : 1
FROM_LMSW : 1
IS_MARTKEDLY : 1
TO_PAIN : 2
ELEVATED_IER : 1
PT_STATED : 3
RESCHEDULED_FOR : 1
PHYSICAL_STAFF : 1
LIQUIDS_DS : 1
GLUCSOE_IN : 1
WAS_SHOW : 1
MEDICAL_PROBLEMS : 2
HOWEVER_HAS : 1
WHY_HASNT : 1
TO_FIND : 1
USE_DRINK : 1
ESSENTIAL_HYPERTENSION : 1
OR_OF : 1
TAKEN_YOUR : 1
INSURANCE_DO : 1
TETANUS_DIPTHERIA : 1
YEARS_PATIENT : 1
STATE_STREET : 1
PS_HOURS : 1
MANY_THE : 1
UROLOGY_BRING : 1
PATIENTS_REASSESSMENT : 1
FOR_SURGICAL : 1
CHANGES_SUCH : 1
SHE_UNSURE : 1
AMOUNTS_RED : 1
INSTRUCTIONS_IF : 1
INSPECTED_PALPATED : 1
PATIENT_TIMELY : 1
PC_AO : 1
MADE_RATE : 1
RACE_THY : 1
ADDRESS_THIS : 1
CROSS_BLUE : 1
SODIUM_SALT : 1
YOUR_PHYSICIAN : 1
TO_BHL : 1
TRANSFERRED_TO : 1
PHE_ADEQUATELY : 1
BEEN_PAYING : 1
OR_AMPUTATION : 1
TELEMETRY_MAINTAINED : 1
COMPUTERIZED_PROBLEM : 1
HERE_PCP : 1
TOLERATING_MED : 1
HOURS_FOR : 1
HOME_ACCOMPANIED : 1
MG_HAS : 1
GOOD_BUSINESS : 1
PT_WAS : 3
MARGINS_UNDERMINING : 1
USED_NOT : 3
READY_FOR : 1
FOUR_TOWN : 1
ARRANGE_ADVISED : 1
AS_SERVICE : 1
HISTORY_SEE : 1
STATUS_YESTER : 1
IN_ORDER : 1
LABS_CONSULTS : 1
ARE_ANGRY : 1
STAYING_EVERY : 1
PER_ORTHOPEDICS : 1
CON_BURNING : 1
SCHEDULED_WITH : 2
SEDATION_TREATMENT : 1
NEW_PATIENT : 1
BASIS_INCREASING : 1
RESULTS_OF : 3
ADVISED_COME : 1
WAS_FRIGHTENING : 1
WORK_SMOKING : 1
PRESCRIBING_IS : 1
HAS_LACERATION : 1
DIPHTHERIA_IMMUNIZATION : 1
LAST_BP : 1
ATNC_BURY : 1
MR_REGARDING : 1
PT_DETERMINED : 1
BIPOLAR_DIS : 1
ALCOHOL_SPOKE : 1
AS_WITH : 1
SECONDARY_NO : 1
NO_PNEUMONIA : 1
SUBJECTIVE_THIS : 1
PATIENT_ABOUT : 1
PER_CY : 1
IF_PT : 1
STARS_SMOKE : 1
PULSE_NURSING : 1
WATER_ALSO : 1
UNDER_DISCOMFORT : 1
AN_OUTPATIENT : 1
BIL_VIA : 1
LARGE_NURSES : 1
BENEFITS_PATCHROTATE : 1
AND_PLEURAL : 1
MAR_TO : 1
SEVERITY_MENTAL : 1
TIMELY_SUCCESSFUL : 1
NEED_TIME : 1
SALTS_SUGARS : 1
ROUTE_IV : 1
AS_HE : 1
BLACK_MALE : 1
CYTOPATHOLOGY_CLINICAL : 1
THE_POLYTRAUMA : 1
NOTED_HOME : 1
REVIEW_OF : 1
VIEW_EKG : 1
MITRAL_INSUFFICIENCY : 1
SUBJECTIVE_IS : 1
LAST_HYDROCHLOROTHIAZIDE : 1
MISTREATED_AND : 1
CORRECT_PHYSICIAN : 1
EXPLAINED_PT : 1
ALPRAZOLAM_MG : 1
GROUP_HE : 1
MOVE_MY : 1
ON_TRANSFER : 1
FILL_TELEPHONE : 1
TABLE_SINCE : 1
BREATHING_BETTER : 1
PAIN_METRONIDAZOLE : 1
GETTING_OUT : 1
DONE_AT : 1
HE_THAT : 3
SALT_CHARLOTTE : 1
FEVERS_NAUSEA : 1
GLUCSOE_READINGS : 1
AUG_DIET : 1
REQUREMENT_HE : 1
THE_REST : 1
LUNG_FUNCTION : 1
TO_HER : 2
TIME_PER : 1
CLINIC_HAS : 1
AND_EFFECTIVE : 1
BURNING_TYPE : 1
IN_WRITING : 1
NO_VOMITING : 1
CONFIGURED_THE : 1
SOCIAL_LB : 1
MED_AT : 1
MANAGEMENT_ACE : 1
ASSESSMENT_DATED : 1
ANSWERED_EVALUATION : 1
MEDICATIONS_HOW : 1
DRUGS_SUMMARY : 1
IS_SPACE : 1
PATIENT_AND : 1
OR_DRAINAGE : 1
TO_REACH : 1
DEVELOPED_FEVER : 1
SUPPRESSED_HARASSED : 1
NO_TEAM : 1
APPT_PT : 1
MAXIMIZED_MEDICAL : 1
OF_NEW : 1
CS_PATIENT : 1
WAS_AXIS : 1
NOW_SEES : 1
ALONE_IN : 1
YRS_BUT : 1
FOLLOW_UP : 5
MG_TAB : 8
IN_THE : 8
POSTIVE_IN : 1
IN_INTENSITY : 1
NOTE_VETERAN : 1
PT_PAIN : 1
PT_EKPHYSICIAN : 1
PAIN_AND : 2
BRANCH_OF : 1
FOR_SUFFICIENT : 1
DISCHARGE_CONTACT : 1
DENIES_SI : 1
BEST_FOR : 1
THE_OFF : 1
IS_FIND : 1
IVP_POST : 1
ACTIVE_LIMITATIONS : 1
IN_WATER : 1
IT_TONIGHT : 1
NOT_COMPLETE : 1
OLD_UNKNOWN : 1
SEVERELY_COMPROMISED : 1
SEE_ORDERS : 1
WITH_VET : 1
OT_BE : 1
INSTRUCTIONS_YEAR : 1
ORTHO_MEDICAL : 1
FOR_SELF : 1
MODE_NIGHT : 1
FOR_WAS : 2
DIAMETER_WOUND : 1
NOT_HAVE : 1
COMPLAINS_TIME : 1
AND_HAS : 4
SYMPTOMS_SS : 1
BE_WED : 2
TAKE_MEDICATION : 1
POSTERIOR_CONSENT : 1
MALE_DATE : 1
PRIOR_THIS : 1
SEPARATED_CAUCASIAN : 1
PRESSURE_REMAINS : 1
SHE_TOLD : 1
MINUTES_FOR : 2
WEAK_ASSISTANCE : 1
COMPLIANCE_AND : 1
RAL_WELLDEVELOPED : 1
BEING_DETOX : 1
IV_OTHER : 1
PRESENTS_TO : 3
BIKE_DO : 1
IMA_BLE : 1
IED_REDNESS : 1
HAD_EXERCISE : 1
IN_HORRIBLE : 1
HAND_HE : 1
ESOPHAGEAL_AND : 1
ROOM_MANEUVER : 1
HOME_YES : 1
LIST_THE : 1
PHYSICIAN_TO : 1
INCLUDES_ICDCM : 1
FOR_FURTHER : 1
SOCIETY_ACCORDING : 1
DISCHARGE_SEP : 1
ADDITIONAL_INFORMATION : 1
MOUTH_AGE : 1
PLAN_EDUCATION : 1
ARRIVAL_WAS : 1
WELLDEVELOPED_AND : 1
OFF_TOMORROW : 1
ACUTE_SOI : 1
BR_IS : 1
GROUP_WAS : 1
PIN_LOCATED : 1
STATED_HIS : 2
DOPAMINE_ANTERNATE : 1
CHEST_SHORTNESS : 1
BE_TO : 2
THREE_WEEK : 1
VERBALIZES_CLEAR : 1
HEMATURIA_DYSURIA : 1
PARTICIPATED_IN : 2
LIKE_TO : 2
TALKED_TO : 1
PROGRESS_IN : 1
BEHAVIOR_WHEN : 1
PHYSICIAN_AND : 1
SEE_NOTE : 1
CODE_CONNECTED : 1
NOT_AVAILABLE : 1
OFF_WORK : 2
THIS_WRITER : 2
NOT_TO : 1
THINGS_USED : 1
SUMMARY_TETANUS : 1
ACTIVE_WHEN : 1
COMPLETE_EXAM : 1
ONCE_ACTIVE : 1
OXYGEN_ICDCM : 1
FOLLOWING_MEDICATIONS : 1
HE_HAD : 2
PRESCRIBED_RTU : 1
NURSE_OUT : 1
LIVE_STATED : 1
HAD_AN : 1
USE_SPACER : 1
BEFORE_HIS : 1
PAIN_AS : 1
PSYCHIATRIC_SYMPTOMS : 1
GOT_TO : 1
WIFE_HIM : 1
DAILY_PRN : 1
JOINT_BURSA : 1
AN_ICDCM : 1
ING_AND : 1
SAID_MH : 1
PHYSICIAN_ANTIANXIETY : 2
AT_ENCOUNTER : 2
TELEPHONE_CALLED : 1
TO_MENTAL : 1
IN_RISK : 1
HOMEMAKER_HOME : 1
CHANGES_AS : 1
ENTER_IF : 1
PAST_THIS : 1
BMI_HI : 1
BUS_POST : 1
AM_DOING : 1
FELT_THINGS : 1
MONITORING_NO : 1
DAUGHTER_CONCERN : 1
IV_TOPICS : 1
MODERATELY_COMPROMISED : 1
WEAR_SAME : 1
GM_MIX : 1
CALL_DENIES : 1
CONNECTED_TO : 1
MAY_NO : 1
VISIT_DYSPNEIC : 1
IS_YOUR : 1
WAS_AGREEABLE : 1
CLINICAL_LEADER : 1
LIST_MEDICATIONS : 2
CE_HAS : 1
YOU_EVER : 2
ADDENDUM_TINGLING : 1
WEIGHT_EDUCATION : 1
MEDICAL_PAIN : 1
AND_RESULTS : 1
ONCE_RESPONSE : 1
PATIENT_COUNSELING : 1
WITHOUT_PROBLEMS : 1
1010_RESPIRATORY : 1
ORDER_TO : 1
SS_NO : 1
AND_NURSING : 2
APPROVAL_FOCUS : 1
OVERNIGHT_CONTINUE : 1
FOR_ELECTIVE : 1
PROVIDER_WERE : 1
PRIOR_EACH : 1
PROCEDURE_SITE : 1
SALINE_LOCK : 1
DECREASE_DIRECTIVES : 1
OF_AM : 1
EXPIRATION_SULFA : 1
SPINE_MEDICATIONS : 1
LEVEL_HIS : 1
OF_ACTIVITY : 1
WHEEZING_NO : 1
REFLUX_LIQUIDS : 1
CHERRYS_PT : 1
NO_OF : 4
OF_WORK : 1
WITH_GRAPEFRUIT : 1
ISSUE_DATE : 1
CHILD_EITHER : 1
IDEA_THAT : 1
PHONE_DISCONNECTS : 1
THAT_SHE : 1
AS_SCANNED : 1
OTHER_IRREGULAR : 1
ACCUCHEK_CV : 1
CONDITION_RESPIRATION : 1
MOOD_SHE : 1
AS_PCP : 1
ORDER_CLINICAL : 1
SEVERE_INTENSITY : 1
WED_AGREEMENT : 1
COMPLETION_HIS : 1
THIS_AN : 1
IBUPROFEN_FLAGYL : 1
PATIENT_CHF : 1
GROUP_YEAR : 1
OTHER_VOICED : 1
OF_TYPE : 1
SKIN_MINIMUM : 1
SENSATION_SWMF : 1
BE_ALONE : 1
NEW_HAD : 1
WAS_NO : 2
LYMPH_CLEAN : 1
WAS_EMOTIONAL : 1
HIGH_RISK : 2
YOUR_MAY : 1
SPECIALIST_PATIENT : 1
APPEARED_TO : 1
ALREADY_COMPROMISE : 1
OWN_AND : 1
SEES_AT : 1
MH_ALL : 1
OF_VINE : 1
AND_GOOD : 1
MIND_HE : 1
FACILITATORS_HARRINGTON : 2
HARRINGTON_TRS : 2
SCREEN_LORAZEPAM : 1
TMS_CLEAR : 1
SERVICES_THE : 1
SIGNS_THE : 1
FOR_VALUABLES : 1
FILL_JUN : 1
SUICIDAL_AT : 1
SUGARS_JUN : 1
VAMC_BREATHING : 1
IN_PATTERN : 1
SLOT_WEIGHT : 1
VASCULAR_WITH : 1
AND_SUCCESSFUL : 1
HOUSING_REPORTS : 1
DOB_PROTOCOL : 1
PEOPLES_INTERDISCIPLINARY : 1
SOURCE_METHOCARBAMOL : 1
HIGH_WILL : 1
HR_PT : 1
SURGERY_TO : 1
THE_DENIES : 2
ASSIST_WITH : 1
APPROPRIATELY_ATRIAL : 1
ICU_FRICTION : 1
AT_NUTRITIONAL : 1
INFORMATION_SELENIUM : 1
HOUSING_AFTER : 1
SUPPLIES_ADJUSTMENT : 1
THAT_THANKS : 1
PATIENT_WERE : 1
MORE_BLOOD : 1
EXACERBATION_BRONCHITIS : 1
DIRECTIONS_DIAGNOSIS : 1
ESOPHAGEAL_CA : 1
ANXIOUS_CONCURRENT : 1
TAB_MG : 5
ALSO_PAIN : 1
PROTEIN_DERIVATIVE : 1
BETTER_ABDOMINAL : 1
LET_THE : 1
PLEASED_WITH : 1
ANYONE_THAT : 1
DIFFICULTY_REVIEWED : 1
MALE_PULSE : 1
HARM_DENIES : 1
HE_DOES : 3
NAME_OF : 1
AMBULATION_RA : 1
HIS_POSSESSION : 1
THE_LEVOTHYROXINE : 1
UP_INFECTION : 1
PHYSICIAN_HEART : 1
NEED_OUTPATIENT : 1
DOCUMENT_PAIN : 1
ALL_WEIGHT : 1
ASSESSMENT_PT : 1
NO_COUGH : 1
CONSULT_WILL : 1
THEN_HE : 1
BEDTIME_AS : 1
TAKE_ONE : 7
STATE_THE : 1
APPARENT_WHILE : 1
NOW_DOUBLE : 1
OR_NOT : 1
EDUCATION_NOTE : 1
ABILITY_PATIENT : 1
FACILITY_APPOINTED : 1
SESSION_TO : 1
SW_ABOUT : 1
ADDENDUM_TRIED : 1
RISK_RISK : 2
ATTENDS_IN : 1
WITH_DEPRESSION : 1
LOC_ALSO : 1
TO_ALLOW : 1
CP_COLONOSCOPY : 1
MHC_DOXAZOSIN : 1
ELBOW_ORTHOPEDICS : 1
OF_AT : 1
WHILE_PATIENT : 1
MORNINGPAIN_VET : 1
THE_HOW : 1
SIDE_ROS : 1
DUE_STATEMENTS : 1
LEG_MOVE : 1
FOLLOWING_CONTRAINDICATION : 1
CLINIC_IN : 1
POTENTIAL_SUICIDE : 1
HAS_DONE : 1
AS_FOLLOWS : 1
THE_VITAL : 1
NAUSEA_NO : 1
DO_HOME : 1
BASED_ANTRAL : 1
ICDCM_CARE : 1
COLOR_MUSCULO : 1
TAKING_AS : 1
INPATIENT_MEDICATIONS : 3
POSTERIOR_ASPECT : 1
VISTA_DISPLAY : 1
RESPIRATORY_CONSULT : 1
BIOMEDICAL_PATIENTS : 1
ADMISSION_NO : 1
SPACER_CONSULT : 1
IDENTIFIES_THIS : 1
UNDERSTANDING_PT : 1
COPD_BRONCHITIS : 1
OR_TO : 2
DISCHARGE_TELEPHONE : 1
DECREASES_AT : 1
DRAINAGE_PRESENT : 1
KG_PRESSURE : 1
AND_THAT : 5
GOT_ALPRAZOLAM : 1
SEEK_AS : 1
THE_BLOOD : 2
BEFORE_EXPERIENCES : 1
AVOID_AVOID : 1
TEMP_PULSE : 1
ABOUT_WEIGHT : 1
LASIX_THREE : 1
GUAIF_ML : 1
BLOOD_DOCTOR : 1
HAS_HELPED : 1
HOURS_ACTIVE : 1
PAIN_DATE : 1
FAMILY_CA : 1
ENCOURAGED_TO : 2
HE_YEARS : 1
PRESSURE_SYND : 1
STREET_THE : 1
DETACHED_OTHERS : 1
PAIN_NO : 2
ABOVE_COMBAT : 1
STILL_NIGHTMARES : 1
ALSO_BEEN : 1
PT_STATES : 1
ADVISED_TO : 4
SA_HR : 1
SIGNS_PROBLEMS : 1
TREATMENT_FOLLOWUP : 1
EKG_ORDERED : 1
HE_DO : 1
WAS_GIVEN : 2
CYST_OR : 1
LEARN_NONE : 1
EVER_AS : 1
SCREEN_NIGHT : 1
OF_HARM : 1
ETC_TO : 1
IMPROVED_FOOT : 1
TOBACCO_USE : 2
MG_QH : 1
THE_PRESCRIBING : 1
OF_PATIENTS : 1
VOMITING_THIS : 1
DISCHARGE_II : 1
TO_AVONDALE : 1
ACCORDING_TO : 2
FEB_CURRENT : 1
LUNGS_RALES : 1
FOR_BREAKTHROUGH : 1
FOR_TIME : 1
EVERY_FOR : 2
TIME_ASKED : 1
AFTERNOON_SO : 1
PATIENT_INSTRUCTIONS : 2
HAND_ALSO : 1
DOSE_PHYSICIAN : 1
COME_TO : 1
DISTENDED_AND : 1
UNITS_SS : 1
FUNCTIONED_IN : 1
AND_LITTLE : 1
MINIMAL_HE : 1
TO_CPRS : 1
OR_NICOTINE : 1
BASIS_OF : 1
DREAMS_NO : 1
TO_OF : 1
EVALUATION_NOTE : 1
WILL_OUTPATIENT : 1
AS_TOLERATED : 1
AD_MEDICATION : 1
PHYSICIAN_MG : 1
IN_PERIOD : 1
KNEE_WITHIN : 1
CONTROL_BEHAVIOR : 1
OBJECTIVE_PATIENT : 1
HS_ATTENDED : 1
OF_ANY : 1
IMPAIRMENT_TAB : 1
SUICIDE_PT : 1
THE_NONFORMULARY : 1
THE_INTERPRAETATION : 1
HE_STATE : 1
DISCUSSED_THE : 3
OMEPRAZOLE_DE : 1
ON_ONLY : 1
SUPPLIES_PROGRESS : 1
NEGATIVE_SCALP : 1
TO_PLEASED : 1
WITH_EDGES : 1
NUTRITIONAL_PSYCHOTROPIC : 1
SIG_CHANGE : 1
BEEN_KEEPING : 1
FOR_HOSPITALIST : 1
TO_TELEPHONE : 1
DATE_TEMP : 1
CHEST_HISTORY : 1
THIS_NOT : 1
NURSING_CONDITION : 1
NO_LETHARGY : 2
WAY_HE : 1
THAT_HASNT : 1
OFFICERS_WORK : 1
THE_WAS : 3
INDIVIDUAL_SESSION : 1
MON_OFF : 1
NOTE_COMMENTS : 1
PATIENT_NEWLY : 1
IS_LAST : 1
TO_THEM : 1
SUBSTANCE_ABUSE : 1
AFTER_STAFF : 1
RTC_ADDENDUM : 1
IMPROVING_THAT : 1
ABDOMAN_DISTENDED : 1
DATE_FACILITATORS : 1
PATIENT_ANTIHISTAMINES : 1
LORAZEPAM_ONE : 1
INJ_UNITS : 1
NIACIN_FLUNIS : 1
FOLLOWS_UP : 1
PLACED_BED : 1
BEEN_ADDENDUM : 1
TO_MINUTES : 1
OUTPATIENT_REFILLS : 1
CALL_BHL : 1
RIGHT_PER : 1
WAS_NOT : 2
FOUND_CM : 1
ERYTHROMYCIN_CODEINE : 1
FOR_GEN : 1
INDIVIDUAL_MIN : 1
CAREGIVER_ACTIONS : 1
LEFT_TOTAL : 1
TIME_WANTS : 1
GETS_SICK : 1
LACKS_SUFFICIENT : 1
NO_HOUSEHOLD : 1
ARRANGE_PATIENT : 1
THEIR_PROJECT : 1
CONTACTS_MADE : 1
EXPLAINED_AT : 1
HIS_THERE : 1
QUESTIONS_COLONOSCOPY : 1
FOR_AND : 3
AOD_ON : 1
BE_USED : 1
CENTRUM_MULTIVITAMIN : 1
POSSIBLE_MEDICATIONS : 1
PAIN_CHEST : 1
BEING_REQUESTED : 1
QUETIAPINE_TAB : 1
LETTER_ADDENDUM : 1
ALERT_COOPERATIVE : 1
TUCSON_AND : 1
WIFE_STATED : 1
METHOCARBAMOL_TAB : 1
BR_PATIENT : 1
FORM_IS : 1
THE_PAST : 4
TO_BPH : 1
THE_TUCSON : 1
SEPERATED_DISCHARGE : 1
FREQUENCY_URGENCY : 1
CAREGIVER_WIFE : 1
WD_AS : 1
INTENSITY_HORRIBLE : 1
YR_UNTRTEATED : 1
WERE_FILM : 2
RATE_PROSTATE : 1
HIS_REQUEST : 2
FOR_OL : 1
INCLUDE_SIGNIFICANT : 1
PLACE_LIVE : 1
COMPLETE_PHYSICAL : 1
DYING_FROM : 1
YELLOW_MUSCULO : 1
THAT_STATEMENT : 1
ASSESSMENT_RESPIRATORY : 1
DAZED_OR : 1
AT_FT : 1
AN_TO : 1
PT_PROCEDURE : 1
SCREEN_FOR : 1
MILD_IF : 1
AFFECT_APPROPRIATE : 2
OF_SERVICE : 1
NURSE_OF : 1
TIME_AND : 1
THIS_INCLUDES : 1
TRAVEL_ARRANGED : 1
NARRATIVE_RECEIVED : 1
NO_HAD : 1
BE_DONE : 1
HOUSE_DEMONSTRATED : 1
ASSIST_IN : 1
HR_TO : 1
IN_LONG : 1
OT_BROUGHT : 1
DEPRESSION_ANXIETY : 1
AND_FAMILY : 1
IMAGING_ALREADY : 1
BY_AOX : 1
NOW_OR : 1
MOTORCYCLE_LAURIE : 1
APPOINTMENT_MIRALAX : 1
ONLY_SUPPORTIVE : 1
WIFE_WROTE : 1
MADE_SOME : 1
NOT_DETOX : 1
ORDER_SEVERELY : 1
EDEMA_PROTECTIVE : 1
CURRENT_LIST : 1
ENCOUNTER_VERBALIZED : 1
HARM_OTHERS : 1
HOME_CONSULT : 1
THIS_INSTRUCTED : 1
OBTAIN_HISTORY : 1
AREA_AMBULATORY : 1
SEVERE_ED : 1
THAN_PRESSURE : 1
WITHIN_YEAR : 1
PARK_HEAD : 1
GRAPEFRUIT_JUN : 1
SOFT_ARRHYTHMIA : 1
OF_LEFT : 1
HAVE_TO : 2
IN_SOMEBODY : 1
FROM_PULM : 1
NUMBER_BMI : 1
INTERVENTION_VITAL : 1
EFFUSION_VERY : 1
HX_KG : 2
IS_FROM : 2
RESPONSIBLE_FOR : 1
WORK_HIS : 1
ON_TH : 1
CONSTIPATION_HAD : 1
PT_ON : 2
AND_ACTIVITIES : 1
THE_IF : 1
DESK_PHARMACIST : 1
DIVALPROEX_TAB : 1
INDIVIDUAL_PATIENT : 1
RI_SAME : 1
PCP_ASHOK : 1
DO_THINGS : 1
MAKE_SURE : 1
SOME_TYPE : 1
FOR_MINUTES : 1
WITH_OFFICERS : 1
CLINICAL_FOLLOW : 1
PERSONX_HE : 1
MEDICATIONS_CANCER : 1
AREA_WAS : 1
MITRAL_VALVE : 1
TIDAC_METOCLOPRAMIDE : 1
ALSO_REQUESTING : 1
WHEELCHAIR_PHYSICIAN : 1
TO_LISTENING : 1
MEDICATION_AS : 1
PT_TO : 5
SPO_ON : 1
SMOKE_FROM : 1
USE_REVIEWED : 1
RECREATION_AND : 1
OR_IF : 1
LONG_PERIOD : 1
ORIENTED_UNABLE : 1
MEDICATIONS_GIVEN : 1
VET_ED : 1
SAME_OF : 1
VETERAN_PATIENT : 1
CHECKED_DIMINISHED : 1
INTOLERANCE_PLAN : 1
HAS_TA : 1
THANKS_LB : 1
WEIGHING_DOWN : 1
MEDICATION_PURIFIED : 1
TO_OTHER : 1
AT_DOES : 1
MORE_SOCIAL : 1
PAIN_IS : 1
DR_CHERRYS : 1
THIS_WITH : 1
VET_ATNC : 1
DYSURIA_FREQUENCY : 1
CALL_TBI : 1
EXAMINATION_TYPE : 1
MOBILITY_ABILITY : 1
BREATH_WALK : 1
DISTRESS_ML : 2
PRESSING_MY : 1
IBUPROFEN_ACTIVE : 1
PRIMARY_CARE : 1
RECEIVED_ANOTHER : 1
HAS_MADE : 3
WOUND_TO : 1
SCORE_PTSD : 1
SINGLE_UNIT : 1
AFFECT_IS : 3
SPECIAL_PT : 1
DRAPED_LUMBAR : 1
ESOPHGEAL_PATIENT : 1
BEING_THAT : 1
CAREGIVER_FOR : 1
AND_PALPATED : 1
TRIAGE_ASSESSMENT : 1
ED_IF : 1
BACK_WNL : 1
PATIENTS_PATTERN : 1
DOUBLE_CLICK : 1
INCLUDING_AFFECT : 1
KG_FOCAL : 1
LARGER_PLEURAL : 1
SODIUM_PORT : 1
INFLUENZA_TO : 1
HIM_AND : 1
RESULT_STATUS : 1
ORAL_PO : 2
ABOUT_ANY : 1
CHIEF_PATIENT : 1
PT_GIVEN : 1
ACTIVE_MEDICATIONS : 7
WEIGHT_LB : 4
LTC_THROUGH : 1
PT_ACTIVE : 1
ONGOING_BASIS : 1
AND_ITCHES : 1
TID_ACTIVE : 1
IN_FROM : 1
SYMPTOMS_ED : 1
RECOVERY_HOMICIDAL : 1
OR_DOB : 1
GIVEN_ENDOSCOPIC : 1
TIMES_FEELING : 1
MG_ONE : 1
TO_STATEMENTS : 1
VA_TAB : 1
KNEE_TO : 2
NO_ESSENTIAL : 1
LIBWHEELCHAIR_MEDICATION : 1
NO_JVD : 1
INTRAMUCOSAL_ADENOCARCINOMA : 1
DEATH_HIS : 1
ROUND_REPORT : 1
TIME_ALSO : 1
RECEIVED_RX : 1
ICDCM_REPORTS : 1
TUSCON_VA : 1
KG_WEARING : 1
PROSTEHESIS_OR : 1
THE_RECENT : 1
APPOINTMENT_IN : 1
MIXED_HE : 1
REPORT_NO : 1
TEAM_GRAHAM : 1
EMOTIONAL_SUPPORT : 1
TO_QUIT : 1
PAIN_PLAN : 1
SELF_AD : 1
FRIGHTENING_BREAKTHROUGH : 1
ASPIRIN_PER : 1
OF_CENTRUM : 1
MULTIPLE_OF : 1
EXPERIENCE_WAS : 1
MALE_WHO : 2
HEALTH_SITE : 1
SPECIAL_OCALL : 1
CY_INSPECTED : 1
ORDER_DIAGNOSTIC : 1
MODERATELY_SEVERELY : 1
SI_AMBULATORY : 1
AND_JULY : 1
BY_MOTHER : 1
HAS_STERISTRIPPED : 1
VISION_ADVANCE : 1
BRING_FOR : 1
BROUGHT_BY : 1
DECLINED_LOCAL : 1
OXIMETRY_BARRIERS : 1
HE_SEVERAL : 1
READING_OCC : 1
FOR_EXAMINATION : 1
TAKING_MEDS : 1
TAB_FILL : 1
FOR_GERIATRICS : 1
WAS_SUBSTANTIATE : 1
TO_PATIENT : 4
HAD_STRANGE : 1
MBL_GRAPEFRUIT : 1
MG_PO : 6
PATIENT_MCG : 1
MONOTONE_PITCH : 1
ALPRAZOLAM_ON : 1
VET_AGREEABLE : 1
AM_ADMISSION : 1
THERE_HE : 1
DONNA_THEY : 1
BE_AVAILABLE : 1
VITALS_MOST : 1
TO_PRIMARY : 2
FROM_PCP : 1
MG_QACHS : 1
WAITING_SEE : 1
IDENTIFIERS_WERE : 1
BEEN_WITH : 1
CARDS_ALSO : 1
HTN_COMPLETE : 1
NO_DISTRESS : 1
HARASSED_FT : 1
MAILED_PROSTHETICS : 1
THE_FORM : 1
NURSING_HOME : 1
CURRENT_DIET : 1
ASKING_FOR : 1
FULLY_THE : 1
REGULAR_LYMPH : 1
THIS_LOW : 1
WAS_FACE : 1
FACE_TO : 1
DATED_PLAN : 1
NURSING_DISCHARGE : 1
TELE_TO : 1
MODERATE_OR : 1
METOCLOPRAMIDE_INJ : 1
PULM_DOSE : 1
FACTORS_PROTECTIVE : 1
AND_STATED : 1
PAIN_MG : 1
CLINIC_AS : 1
ANY_NEW : 1
ADDENDUM_RESCHEDULED : 1
LETHARGY_PREVENTIVE : 2
SKIN_LESION : 1
INHALER_DO : 1
OIF_OEF : 1
NUMB_OR : 1
RECENT_EVAL : 1
NO_SATT : 1
STRENGTHS_PATCHES : 1
TEMPERATURE_SPACE : 1
SUMMARY_OF : 2
EXPIRATION_DRUGS : 1
HR_URINE : 1
PT_VERBALIZED : 3
ONE_WEEK : 1
OF_CLOTHING : 1
TELEPHONE_PERSON : 1
THIS_HAS : 2
RECENT_MIND : 1
HEART_HEARD : 1
PT_SEEN : 1
BM_AMLODIPINE : 1
AND_AND : 2
ON_WOUND : 1
TEAM_VOMITING : 1
ASHOK_LANS : 1
HAVE_CURRENT : 1
DENIED_PSYCHOSIS : 1
CC_RPP : 1
WITH_VERBALIZES : 1
SOME_TIME : 1
OLD_RESULT : 1
PAST_MONTHS : 1
OF_LEG : 1
II_UNSPECIFIED : 1
FROM_THIS : 1
WAS_MAR : 1
MOUTH_MORNING : 1
INSTRUCTED_TO : 2
HOMOCIDE_IDEATION : 1
HEALTHY_ENABLED : 1
AND_MONEY : 1
MALE_PATIENT : 1
OR_PRODUCTS : 1
IN_IMAGING : 1
FOLLOW_HE : 1
THE_TELEPHONE : 1
AGREEABLE_MHICM : 1
OF_SOURCE : 1
THE_OIF : 1
BEING_CONFUSED : 1
ON_ISSUES : 1
AND_CLEAN : 1
NOTIFIED_NEW : 1
DICTATION_REFERENCE : 1
PATIENTS_WERE : 2
MIN_PT : 1
CENTER_ARRANGE : 1
TIME_TEMP : 1
PTSD_SYMPTOMS : 1
IRREGULAR_HEART : 1
THIS_YEAR : 2
WAS_RECEIVED : 1
CLUB_SPELLING : 1
EXPERIENCES_RATHER : 1
CM_ON : 1
SOURCE_OF : 1
LB_OX : 1
MOBILITY_ACTIVITIES : 1
NO_FOR : 2
DRESSINGS_AS : 1
AD_NO : 1
MAKE_TO : 1
HE_FALL : 1
SYMPTOMS_HE : 1
HAVE_BEEN : 1
DOES_TAKE : 2
RTU_INDEPENDENT : 1
SUBSTANTIATE_CLAIMS : 1
CONTINUE_MONITOR : 1
CORRESPOND_MILD : 1
FOR_APPOINTMENT : 1
ESOPHAGUS_CM : 1
OF_CLOSEBY : 1
DREAMS_DRUG : 1
MINUTE_DIMINISHED : 1
TO_OUT : 1
SESSION_MAKE : 1
PT_ONCE : 1
STAY_THIS : 1
DIVALPROEX_SA : 1
CODE_FOR : 1
FOR_WORK : 1
THEIR_RISPERDAL : 1
HOME_THE : 2
ESTIMATED_OF : 1
THE_CONTRAINDICATION : 1
LOW_CHOL : 1
PT_INSTRUCTED : 1
OP_REPORTS : 1
PT_RETURNED : 1
MR_HAD : 1
EYE_ASSESS : 1
REVIEWED_THE : 1
ASPIRIN_AT : 1
PHYSICIAN_HAVE : 2
GENDER_MALE : 1
AND_PROCEED : 1
ADDENDUM_LITTLE : 1
ADMISSION_AND : 1
NONE_THIS : 1
LITTLE_CLEARER : 1
PATIENT_ON : 1
SELF_DENIES : 1
ASYMPTOMATIC_AND : 1
EDATIVE_ANTIANXIETY : 1
ONE_PAPERWORK : 1
STATES_PATIENT : 1
BUT_SUBSTITUTE : 1
LESS_AT : 1
PAST_MONTH : 1
WRITER_FOR : 1
INTERDISCIPLINARY_FAM : 1
WELLNOURISHED_AWAKE : 1
TO_SHIN : 1
OF_EPIS : 1
SIGNS_OF : 1
UP_ISSUE : 1
LOW_ECTOPY : 1
HAVE_USED : 1
STRESS_TEST : 1
SUB_LEFT : 1
SESSION_OTHER : 1
ROUTE_EDUCATION : 1
BREATHING_NO : 1
MEDICATED_FOR : 1
PSA_GIVEN : 1
DIAST_PRESSURE : 1
IS_AFIB : 1
BREAKTHROUGH_DATE : 1
CONTACTED_ARE : 1
PLAN_PLAN : 1
PAY_BENEFITS : 1
TO_INCLUDE : 1
LOW_ANTIDIABETICS : 1
THE_OKAY : 1
TO_INPT : 1
DECLINED_THE : 1
LTC_COPAY : 1
HEMATURIA_HYPOTHYROID : 1
LABS_REVIEWED : 2
KEEP_RECALL : 1
VOMITING_NO : 1
PROGRESS_FROM : 1
CURRENT_REQUEST : 1
LEVEL_IS : 1
PROVIDED_REGARDING : 1
PHARMACIST_COUNSELING : 1
THY_NO : 1
MOW_HIS : 1
ABOUT_HIS : 1
MR_DUE : 1
THE_SOCIETY : 1
WITH_MRS : 1
CATH_TIP : 1
CONSULT_PATIENT : 1
THIS_ALERT : 2
LARGE_OF : 1
TENDERNESS_IS : 1
OPIOID_AGREEMENT : 1
ARE_THEY : 1
SESSION_SESSION : 1
AN_ALCOHOL : 1
DISTRESS_COPAY : 1
CARDIAC_CLINIC : 1
POSSIBLE_THAT : 1
SUPPORT_STAYING : 1
! Stats words=1897  pairs=9233
