# Supplementary material for: Predicting the Risk of Suicide by Analyzing the Text of Clinical Notes
Source: PLoS One. 2014 Jan 28;9(1):e85733. doi: 10.1371/journal.pone.0085733 (PMC3904866; doi:10.1371/journal.pone.0085733)
Supplement: Appendix S3 — Machine Learning Libraries and Methods: This section is provided to enclose the open source (Apache License) classifier used for the building of the statistical models, specifically for the purposes of study reproducibility. A detailed account of these tools is intended for another publication. (ZIP) [file pone.0085733.s003.zip › Appendix3/ML_libs/Regression_testing/group2/processed/grp2-pt-1049.dat]

!  Done reading
! Total word count = 4859
! Total unique words = 1839
! Total pair count = 9714
! Total unique pairs = 8684
SPURRING : 1
COLORED : 1
OBSTRUCTIVE : 1
AT : 27
ONLY : 3
ANSWERING : 1
WORK : 1
PREOP : 1
ALIMENT : 1
FINGER : 1
VOICES : 1
OPEN : 1
LOWER : 3
REFILLED : 1
EVENTS : 1
MONTH : 1
OEF : 1
ATIVAN : 1
THANK : 2
INFO : 1
HISTORIAN : 1
WEIGHT : 9
AUDIOLOGY : 1
BEEN : 13
STAY : 3
REMOVING : 1
WITHIN : 13
BASE : 1
GAS : 2
LOCK : 1
ARIZONA : 1
SPHENOIDAL : 1
MILD : 1
DRAINING : 1
OUTPATIENT : 5
MINUTE : 1
GOES : 1
MILITARY : 1
INTAKE : 2
INSTRUCTED : 1
SHORTNESS : 1
SPEECH : 1
INTERVENTION : 2
INPATIENT : 7
CULTURAL : 2
DIURETICS : 1
COUNSELING : 1
DOSING : 1
CLOSE : 1
RELATED : 4
USE : 2
SPECIMEN : 1
MEANS : 1
CC : 5
DISCHARGED : 1
HEMATURIA : 2
SUPPLIES : 4
SUPP : 1
CASUAL : 1
TWICE : 3
ALF : 1
ERROR : 1
ASA : 2
REGARDING : 2
VETERANS : 2
HOA : 1
LEVEL : 4
IMAG : 1
TOO : 1
ALCOHOL : 3
CHANGES : 5
RACING : 1
RAL : 3
AZ : 1
PERSONAL : 1
ISCHEMIA : 1
IMPORTANCE : 2
SEEMS : 1
WELTS : 1
RETIRED : 1
NEUROCARDIOGENIC : 1
MET : 5
MACHINE : 1
HIS : 28
SLIGHTLY : 1
COPD : 3
ID : 1
BRISK : 1
SOURCES : 1
MARRIAGE : 1
ACCEPTANCE : 1
GENITOURINARY : 1
MALODOR : 2
NEURO : 1
APPROPRIATE : 2
DIAMETER : 1
DIRECTIVE : 1
HOPELESSNESS : 1
RAISED : 1
ACID : 2
CONNECTS : 1
WELL : 3
ODYNOPHAGIA : 1
SHOWED : 1
KNOWN : 1
DISORDER : 2
INTERPRETING : 1
MEDICINE : 2
SWOLLEN : 1
TEST : 1
DETAILED : 1
NOTE : 23
CONTACTED : 2
RELATIVELY : 1
FASTING : 1
OPERABLE : 1
DSMIV : 1
DO : 4
DOES : 4
TESTS : 1
UNDERSTANDS : 1
TREATMENT : 3
BB : 1
CATEGORY : 1
HTN : 2
BLOOD : 9
SAME : 1
WORKER : 1
ACCESS : 3
ASSIST : 2
HAVE : 18
ADVERSE : 3
OPTION : 1
SCHEDULED : 5
OF : 87
DRUG : 4
CRISIS : 1
INCLUDE : 3
TAB : 11
BUPROPION : 1
CALLER : 2
REQUIRED : 1
STABLE : 1
PSYCHIATRY : 1
ASSISTED : 1
MONITOR : 5
HAS : 34
DEC : 3
TUNNEL : 1
FOR : 74
CONDITION : 2
PERCEPTION : 2
NUTRITION : 5
SAID : 2
TIBIAL : 1
NUMBER : 3
UNDERSTAND : 1
HOMELESS : 1
HOLDING : 1
MORNING : 2
INR : 3
OBTAINING : 1
AID : 3
SC : 3
MS : 2
EC : 1
MY : 2
IDEATION : 2
TXC : 2
EIGHT : 1
MESSAGE : 2
THINGS : 1
SWER : 1
DOUCHE : 1
THEM : 3
SUBSTANCE : 1
HOSTILITY : 1
ASSESSMENT : 16
US : 4
TRANSDERMAL : 1
QUITTING : 1
ACTIVITY : 4
OWN : 2
HISPANIC : 1
HYPERINFLATION : 1
EVIDENCE : 1
ARMS : 1
LET : 1
AMBULATION : 1
IMB : 1
ATTACHED : 2
POX : 1
CONSULTS : 1
ENCOURAGED : 1
ACTIVITYLIMITATIONS : 1
REGISTERED : 1
INORDER : 1
FRIENDS : 1
INFORMATION : 6
OW : 1
DISCONTINUED : 1
ADEQUATE : 1
INITIAL : 4
ILL : 1
DEBRIDEMENT : 1
ISUFF : 1
DEXTROSE : 1
COMPROMISE : 1
EXAM : 2
RECENTLY : 1
NONVISIT : 1
MCO : 1
SUGAR : 1
CD : 2
AO : 1
THE : 83
JUST : 1
INCREASED : 3
FILED : 1
GROUP : 2
PRESENTS : 1
BELLO : 1
ADVANCED : 1
REST : 1
OCT : 1
ANTIANXIETY : 2
DIMINISHED : 1
PULSES : 2
GO : 1
SIGNIFICANT : 2
TALKS : 1
BOWEL : 2
SUPERIOR : 1
SEC : 2
MTP : 1
ARRIVED : 2
BP : 5
LEG : 1
MEDS : 8
INDICATION : 1
LIMITATION : 1
POSTOPS : 1
KNOWING : 1
HEARD : 1
POST : 4
PREVENTION : 2
DEPRESSION : 2
SON : 1
BARRIER : 2
HEMATOMA : 1
CM : 3
FREE : 1
DISCOVERED : 1
RECALL : 1
ELECTRONIC : 1
STAYED : 1
EXTENSION : 1
AGREEMENT : 2
CITALOPRAM : 3
GAIT : 1
AGAIN : 1
DISTRACT : 1
LIB : 1
TID : 1
OCCUPATION : 1
CAP : 1
DIET : 5
DEFIBRILLATION : 1
STATED : 8
BATHING : 1
FINANCES : 1
ATTEND : 1
HANDS : 1
CONSTIPATED : 1
IRREGULAR : 1
AXIS : 1
GET : 2
ANTIHYPERTENSIVES : 1
WT : 5
WHAT : 2
AD : 2
SUPPOSITORY : 1
RESTRICTIONS : 2
HEALTHSOUTH : 1
PLANS : 1
DIETARY : 1
SPACER : 1
CHATHAM : 1
TOP : 1
BENEFITS : 1
ALBUTEROL : 3
STARTED : 2
HANDOUT : 1
IADLS : 1
ASSISTANCE : 3
KINETRON : 1
SCANNED : 1
CARDIOVASCULAR : 1
OR : 28
ADJUSTED : 1
ORANGE : 1
THERAPEUTIC : 1
DESIGNED : 1
BOTH : 1
SHIFT : 1
BEATY : 1
YEAR : 2
TEMP : 4
PRESCRIPTION : 2
CONSIDERED : 1
CREAM : 1
PULMONARY : 1
IMPRES : 1
LB : 6
VETIN : 1
COUMADIN : 2
PROBES : 1
GUNS : 1
AIR : 2
RETROCOLLIS : 1
OLECRANON : 1
LIKE : 3
CONTINGENCY : 1
CALORIE : 1
PUT : 2
STAYS : 1
SEEN : 5
FOOD : 2
FEBRUARY : 1
ENCOURAGEMENT : 2
NURSE : 4
OBLIGATIONS : 1
UNKNOWN : 3
SX : 1
VAGUE : 1
GRANDIOSITY : 1
FINALLY : 1
MCH : 1
CHRONIC : 4
RELAPSE : 2
INTERVIEW : 3
TAKE : 11
SENSORY : 2
MOUNTING : 1
JACHI : 1
ANY : 14
DISCHARGE : 8
HYPOTENSION : 1
RECORDS : 1
QH : 2
LIP : 1
BESYLATE : 2
SW : 1
TOLERATED : 1
MOM : 1
IID : 2
APPLIANCES : 1
PSYCHOTROPIC : 2
LATERAL : 1
AMPULE : 1
PRBLM : 1
METFORMIN : 1
FACILITY : 3
MALATHI : 1
CONSIDER : 1
UNIT : 6
REFRACTIVE : 1
EFFECTS : 3
CLEARED : 1
IBUPROFEN : 1
CEL : 1
MD : 2
RELATIONSHIP : 1
SECONDARY : 5
INTERACTS : 2
NAME : 5
1010M : 2
CARE : 21
MSE : 1
AGE : 9
PROXIMAL : 1
EVERY : 5
EVALUATE : 1
MULTIVITAMIN : 1
KUWAIT : 1
RESOLVE : 1
COMPLIANT : 1
SKIN : 6
TIMES : 1
YESTER : 3
IS : 50
SCHOOL : 1
DL : 2
NOT : 29
WORST : 2
ANOTHERS : 1
WRISTS : 1
START : 2
INDURATION : 1
IF : 4
AGED : 1
DURABLE : 1
EXIT : 2
CHLORIDE : 2
THERE : 2
MH : 6
EXPECTED : 2
PENDING : 1
WALKING : 1
BAND : 1
ONCE : 1
ANICT : 1
COUNSELOR : 1
SCLERA : 1
BELL : 1
HERE : 2
RUB : 1
UPSETTING : 1
SEPT : 1
BOND : 1
IM : 1
FOURCHE : 1
EATING : 1
CVA : 1
POSITIVE : 1
RATING : 1
SHARON : 1
CLEAN : 1
UNITS : 1
OXIMETRY : 1
PSYCHOLOGIST : 1
ANGER : 3
ONEHALF : 1
BRIEFLY : 1
TRANSFERS : 2
FEB : 3
EVALUATION : 1
PRESCRIBER : 2
HUMOR : 1
CTRS : 2
BIOPSYCHOSOCIAL : 1
PROGRESS : 2
WK : 1
ELECTS : 1
REHAB : 1
PSYCHOTHERAPY : 1
EGO : 1
DCD : 2
HP : 2
COLLECTS : 1
THESE : 2
MOVIE : 1
ASSESS : 1
VET : 8
BLOODWORK : 1
FOLEY : 1
CARDIOGENIC : 1
EXPLAINED : 2
RESTRICTION : 1
UPCOMING : 1
MOTHER : 3
PASSING : 1
HELPFULNESS : 1
DI : 1
DATIVE : 2
RESISTED : 1
BELT : 1
RULES : 1
PARTICIPATION : 2
EDUCATED : 2
ASSOCIATED : 1
HOWEVER : 1
BACK : 3
MARRIED : 1
HEIGHT : 1
MALE : 14
LR : 1
HIGHWAY : 1
CAR : 1
ADDENDUM : 15
FULL : 2
TREAT : 1
BY : 18
SUFFERS : 1
PMH : 2
NO : 59
INTENSITY : 2
CLINICAL : 2
REASSESSMENT : 7
DOE : 1
NONSOAP : 2
CHIEF : 4
LARGE : 2
UBE : 1
CHANGED : 1
ADDICTION : 2
LUNGS : 1
EXCESSIVE : 1
COPC : 1
SATT : 2
ARABELLA : 1
UPPER : 2
HYPOTHYROIDISM : 1
BENIGN : 1
RRR : 1
MEET : 2
RISK : 4
CLINIC : 8
CYRNG : 1
FINISHED : 1
PERFORMED : 1
INITIALLY : 1
CONFERENCE : 1
MINS : 2
VERBALLY : 1
SCALP : 1
TENDERNESS : 1
BUCKEYE : 2
TO : 142
BMI : 2
COULD : 1
PRN : 3
IV : 4
PREFERRED : 1
ABUSE : 1
GOLD : 1
ION : 1
KING : 1
MURMUR : 1
LYRICA : 1
CHOREIC : 1
BONE : 1
QAM : 2
TOOLS : 1
PROCEDURE : 6
REQUESTING : 3
INSERT : 1
WILL : 16
SERVICECONNECT : 1
APPEARANCE : 2
CAPACITY : 1
OFTEN : 1
BUT : 8
THOUGHTS : 3
COORDINATION : 1
APPETITE : 1
WEAR : 1
TYPE : 6
UNEMPLOYMENT : 1
SEE : 3
GETS : 1
NONENGLISH : 1
HEALTHY : 1
PLEASE : 3
INTERACTIVE : 1
ANEMIA : 1
WAR : 1
STATUS : 12
DYSPLASIA : 1
BONNIE : 1
CONTINENCE : 1
INNER : 1
BRUISING : 1
MHICM : 1
MARITAL : 2
SPENT : 1
DRINKS : 2
NAD : 2
TROPONIN : 1
SUGGESTIVE : 1
CONTINUED : 2
CONSULT : 6
TESTING : 1
OUT : 3
CONT : 1
SUPPORT : 4
QID : 1
SCREEN : 4
FINDINGS : 1
PRESENTED : 1
REACTION : 1
BARRIERS : 2
EXPOSURE : 1
ASSIGNED : 1
FUNCTION : 1
REVIEW : 2
NEEDED : 1
MENTAL : 2
DISCUSSING : 1
COMES : 2
HBO : 1
RELIGIOUS : 3
INJECTION : 1
DIVERTICULOSIS : 1
THINKS : 1
WERE : 3
LES : 1
FACTORS : 1
VIEW : 2
BOGGIO : 1
COLLABORATIVE : 1
CHANGING : 1
INSTRUCTIONS : 3
ERYTHEMA : 3
LABS : 2
VA : 6
JOB : 2
TAKEN : 1
SURGEONS : 1
SPC : 3
CONSUME : 1
WED : 1
PREFERENCES : 1
HELPFUL : 1
AGREED : 3
APRIL : 1
TRIAGE : 1
DOCTORS : 1
DISPUTES : 1
NU : 1
PART : 3
FAMILY : 7
IMPACT : 1
OFFERING : 1
ECS : 1
DISEASE : 1
PAIN : 39
COCAINE : 1
SEEMED : 2
WHEN : 5
UNDERMINING : 1
AMBULATORY : 4
AS : 14
FALLS : 1
WAKES : 1
BEING : 4
VISTA : 1
BAPTIST : 1
SINUSITIS : 1
MISERABLE : 1
CREATININE : 1
INEFFECTIVE : 1
OBSTRUCTION : 1
ABOVE : 1
AMOUNT : 1
DRAINAGE : 2
WAS : 29
GREATER : 1
PM : 2
IDN : 1
WITH : 56
RTL : 1
SPEAKING : 1
RECTALLY : 1
CATH : 1
MOVES : 1
FORM : 1
CONDITIONS : 1
TEMPERATURE : 1
WANTED : 1
REDNESS : 1
COMMUNICATION : 3
SIG : 2
DRINKING : 1
BASIS : 1
INDEX : 2
CDI : 1
NOW : 3
EXACT : 1
SMOKED : 1
INCLUDING : 5
PTSD : 1
INTACT : 3
SUB : 3
COPING : 1
SETTING : 1
CONFIRMED : 2
HYDROCODONE : 1
DISABLED : 1
ONSET : 2
USED : 3
EXACERBATION : 1
VARIOUS : 1
MONITORING : 1
IT : 7
TARGETS : 1
HHA : 1
BEDTIME : 1
BELOW : 1
LIST : 1
INCLUDED : 1
OT : 2
SIZE : 1
IMMUNIZATION : 2
NONFORMULARY : 1
DISCUSSED : 10
WWII : 1
EXERCISE : 1
CA : 1
DENTURES : 2
FEVERS : 1
TIME : 18
PURPOSE : 1
CODE : 1
DRIVER : 2
ESOPHAGEAL : 1
ORIENTED : 6
HYGIENE : 1
QUATTLEBAUM : 1
HCL : 1
PURULENCE : 1
CONVERTED : 1
CURRENTLY : 1
LOOK : 1
ATTEMPT : 1
ADDITIONAL : 1
ACTIONS : 1
OXYCODONE : 1
SAFETY : 3
EMOTIONAL : 1
LYING : 1
PROJECT : 1
DIFFERENCE : 1
SIMVASTATIN : 2
SIDE : 3
RESPIRATIONS : 1
IPC : 1
BETWEEN : 3
SEAT : 1
DOCTOR : 2
ALLERGY : 1
ESI : 1
GOING : 1
VALUES : 1
CALL : 11
DID : 11
EXPRESSED : 2
DYSPHAGIA : 1
SHOW : 1
RESULT : 1
INTERMITTENT : 1
HX : 1
MHC : 1
SUN : 1
CONCERNED : 1
IMAGING : 1
SITUATION : 1
TELEPHONE : 4
MALATINSZKY : 1
FACILITATORS : 1
WORRY : 1
SOB : 3
PROTECTION : 1
TRAFFIC : 1
IOP : 1
INTERVENE : 1
COOPERATIVE : 1
CIGARETTE : 1
REPORTS : 4
GE : 1
SUBJECTIVE : 1
URINAL : 1
VARIGATED : 1
HELP : 2
OPTIONS : 1
TABLETS : 1
PER : 7
CONTINUES : 1
YES : 15
HOTLINE : 1
FURTHER : 2
ETC : 1
CONSENT : 2
CHF : 1
MOBILITY : 4
ERA : 1
LINEN : 1
AURICLE : 1
YOUR : 2
PRECAUTIONS : 1
ORGANISM : 1
GIVEN : 9
PROBE : 1
LITTLE : 1
HPI : 1
LAMVIUDINE : 1
QUITE : 1
HT : 1
WHO : 5
ED : 7
LUBBOCK : 1
DIARRHEA : 2
BASED : 1
ATTENDANCE : 1
PHYSICIAN : 15
DAUGHTER : 2
ARM : 1
CURRENT : 10
RECTAL : 1
XENGLISH : 1
CONTROL : 1
GROOMING : 1
THIIS : 1
HIM : 6
DEMOGRAPHICS : 1
CESSATION : 2
PAPER : 1
FELODIPINE : 1
PULSE : 6
HE : 49
NS : 1
NEXT : 2
POA : 3
NEEDS : 3
THEY : 5
BIT : 1
OBESITY : 1
RATE : 1
EASY : 1
REFERRED : 3
NEUROPATHY : 2
STR : 1
COVERED : 1
UNDERMINE : 1
MASS : 2
VETERNS : 1
ALARM : 1
UAL : 1
CORNER : 1
WATER : 1
TRANSFER : 2
VSS : 2
OBSERVATION : 1
HISTORICAL : 1
PRINT : 1
ML : 3
PHONE : 9
VANOD : 1
SXS : 2
CLEAR : 2
CHECKED : 1
TALKING : 1
MSW : 2
IPRATROPIUM : 2
PAMPHLET : 1
PRIMARY : 6
FAIR : 1
HEMOPTYSIS : 1
INSTRUCTIONPCC : 1
CARES : 1
BILLS : 1
PUNCTURE : 1
UNTIL : 2
CHERRY : 1
HAD : 15
ATTACK : 1
AVH : 1
STRUGGLE : 1
FINISHING : 1
SIGNS : 6
HALF : 1
HYDRATION : 2
ACTION : 2
LOSS : 4
PATIENTS : 8
CSTAT : 2
MORTGAGE : 1
FATHER : 3
BRONCHOSCOPY : 1
CONSTIPATION : 1
PROVIDED : 3
BBSC : 1
WAVE : 1
JOE : 1
YO : 4
DENTAL : 1
NEGATIVE : 1
AWA : 1
OUR : 3
ORTHOPEDIC : 1
NEUROLOGY : 1
WRITTEN : 1
NONE : 6
RECOMMENDATIONS : 1
LECTURE : 1
SPUTUM : 1
LAB : 2
DECREASED : 2
4D : 1
WEAK : 3
ANGRY : 1
TRAVEL : 1
DIAGNOSTIC : 1
ING : 2
COMPLAINTS : 2
DRESS : 1
CONTACT : 5
NOTIFIED : 1
NOTICE : 1
NPO : 1
HER : 3
TOPIC : 1
REFLECT : 1
PPP : 1
DEVELOPED : 1
FEELING : 5
MEDICATIONSCRESTOR : 1
TERAZOSIN : 1
QUESTIONS : 4
BEHAVIORAL : 1
VIEWING : 1
PEERS : 1
PROBLEMS : 4
APPEARED : 1
URINE : 3
CHAPTER : 1
NASAL : 1
MP : 1
NEUROLOGICAL : 1
STAYING : 1
GIVE : 3
SEVERED : 2
CAN : 5
HIT : 1
THERAPIST : 1
THERAPY : 1
PSYCH : 3
LITERATURE : 1
CARDIOVERSION : 1
CAUSED : 1
PLACE : 2
LIVING : 3
SEND : 1
NONVA : 1
ORGANOMEGALY : 1
WHICH : 4
SYMPTOMS : 4
IER : 1
COMFORTABLE : 2
RANGE : 2
TURGOR : 1
NOTES : 3
CONFIDENT : 1
SPEAKS : 1
APPEAR : 1
OVER : 2
GABAPENTIN : 1
UNDERSTSANDS : 1
MG : 25
ON : 39
MIXED : 1
COMPLETE : 2
SPIRITUAL : 1
PRESSURE : 7
SOI : 1
TETANUS : 1
ATTENDED : 1
TOT : 1
READMISSION : 1
LONELY : 1
SPECIALIST : 1
BECAME : 1
GOOD : 6
DROPS : 1
VIETNAM : 1
FALLING : 1
ARMY : 1
UPDATE : 2
NORMALIZED : 1
AFRAID : 1
CONTINENT : 1
INTO : 1
INHALER : 1
SODIUM : 1
REMEMBERED : 1
EDEMA : 4
SPACE : 1
SADNESS : 1
HYPERTROPHY : 1
LINKSF : 1
ATTENTIVE : 1
PROVIDER : 9
DONT : 1
PO : 9
SHE : 10
BVA : 1
ROTH : 1
UP : 6
GIM : 1
THEN : 1
MULTIPLE : 2
USUAL : 1
FEW : 1
LOCATION : 1
TELL : 1
APPOINTED : 1
ALERT : 9
SUBMITTED : 1
PEACH : 1
FINGERS : 1
RC : 1
PRIOR : 5
VERBAL : 3
OFF : 1
UNDER : 1
SEP : 3
STAGING : 2
ULCERATIONS : 1
DOCUMENTED : 1
GOT : 1
DATE : 19
FRONT : 2
CAUDAL : 1
RELATES : 2
DAILY : 12
XRT : 2
DIAG : 2
THREE : 2
PA : 1
STEP : 3
REQUIRE : 1
NOX : 2
DARK : 1
ICU : 1
MUSKOGEE : 1
PROGRAM : 2
LONG : 2
GRADE : 2
PAPERWORK : 1
APPOINTMENT : 5
ACCEPTING : 1
WOULD : 4
WHEELCHAIR : 1
FOLLOW : 1
FEEDS : 1
FROM : 17
ENEMA : 1
LEFT : 14
METHOD : 2
CLOTHES : 1
IMPULSIVE : 1
WHEEZING : 1
HOMICIDAL : 3
MEDICAL : 12
HEAD : 1
BODIES : 1
ALSO : 8
SEX : 4
LORAZEPAM : 1
ACTIVITIES : 2
ORDERS : 3
REPLACES : 1
EKPHYSICIAN : 1
CONTRAINDICATED : 1
CHALK : 1
INADEQUATE : 1
EXTREMITY : 2
WORKING : 1
AN : 7
EKBHINTERDISCIPLINARY : 1
MOVEMENTS : 2
ADENOCARCINOMA : 1
FIREARMS : 1
DEFERRED : 1
HEART : 4
HURTING : 1
BLACK : 1
COMPLAINT : 4
ORDER : 3
EXCEPT : 1
TAKES : 1
USING : 1
CHILD : 1
PROXIMALLY : 1
ETHNICITY : 1
HAND : 1
FULLY : 2
RETIREE : 1
AMENDS : 1
INFLUENZA : 4
DENIED : 3
BOWENS : 1
EXCEED : 2
STAND : 1
COMPRESSIONS : 1
GAVE : 1
LIFESTYLE : 1
CONTAINING : 1
DISCUSSION : 1
AGO : 3
NEW : 5
SYNCOPY : 1
MOUTH : 5
NAPROSYN : 1
EMER : 2
FOCUSED : 1
ENCOURAGING : 1
ATTENDING : 1
CHEST : 8
CLEMENT : 1
NEUROPATHIC : 1
SENTENCES : 1
PRESENT : 5
HAVING : 3
DOCUMENTATION : 3
FACILITATOR : 1
SOME : 5
DT : 1
APPROPRIATELY : 1
SLEPT : 1
HRS : 2
ANESTHESIA : 1
ENCOURAGE : 1
LATER : 1
ARE : 7
ANSWERED : 6
NONUSER : 1
KETCHUM : 1
INDEPENDENT : 3
HYPERTENSION : 2
NEED : 4
PERSON : 2
APPLY : 1
HORRIBLE : 1
LISA : 1
DEBILITATED : 1
RECEIVED : 5
SURGERY : 1
STUDENT : 2
RALLY : 1
APPROACH : 1
BARRETTS : 3
AMA : 1
LIGHTING : 1
STRUCTURE : 1
BRAKES : 1
ASPIRIN : 2
FREQUENCY : 5
COMPLETELY : 1
TX : 3
EAR : 1
RECEPTIVITY : 1
INHL : 3
BODY : 2
GENERAL : 3
INTERDISCIPLINARY : 2
UNRE : 1
NUMBNESS : 1
TRUE : 1
CYTOPATHOLOGY : 1
PERIWOUND : 2
YEARS : 1
CAD : 2
STRIPPED : 1
NUMBING : 1
BE : 14
RESOLVED : 1
LWBS : 1
YESX : 1
BECAUSE : 3
OX : 1
DUE : 2
REARING : 1
TIP : 1
TRANSFERRED : 1
LEVITRA : 1
KRISHNASWAMY : 1
HS : 1
THEIR : 3
CONCUR : 1
DISCOMFORT : 2
FLUSH : 1
PING : 1
REDIRECTABLE : 1
DEPENDENT : 1
LESION : 1
ISSUES : 1
SEVERE : 1
ALLOW : 1
ALONG : 1
SOUNDS : 1
NERVES : 1
REVIEWED : 4
ISSUE : 2
PHARYNX : 1
OTHER : 8
ALL : 2
DRESSING : 1
AUTHOR : 1
BELLE : 1
QHS : 2
END : 1
SECOND : 1
ME : 3
BED : 4
NURSING : 19
VOID : 1
CONTRACT : 1
PERIPHERAL : 1
DYSPNEA : 1
FOLLOWING : 9
OUTCOME : 3
IDENTIFIED : 4
NOPHEN : 1
ESCORTED : 1
RELAYED : 1
LANGUAGE : 3
MORSE : 2
ENDING : 1
HESITATE : 1
TRAZODONE : 1
PATIENT : 71
SELF : 4
ACCEPT : 1
ALLERGIES : 5
MITRALVALVE : 1
WITHOUT : 6
DIAGNOSIS : 5
JUL : 2
DING : 2
SUBSEQUENTLY : 1
SENT : 2
EVAL : 1
ADMISSIONS : 1
AGREES : 1
ABDOMEN : 1
ALTERNATING : 1
REDUCED : 1
CALLING : 2
MI : 1
EXPERIENCES : 2
ETATION : 1
ANXIETY : 5
METOPROLOL : 1
THAN : 5
PODIATRY : 3
VOICE : 2
ACUTE : 4
MEMORY : 1
COUNTY : 1
CON : 1
REQUIRES : 1
WE : 3
SCARED : 1
PROTOCOL : 3
PRACTICES : 1
FEE : 1
COME : 2
SYND : 1
TRAINED : 1
PATCH : 1
VOIDS : 1
CBI : 1
ROUTINE : 1
FOUND : 1
DESIGNATED : 1
LOOKING : 1
PATCHES : 1
ROOM : 2
ADDITION : 1
CAME : 1
THAT : 27
VISIT : 4
CHART : 1
TEGRETOL : 1
NORMAL : 3
WIFE : 3
SIDERAILS : 1
DEPRESSED : 4
STAFF : 6
CE : 3
SERVICE : 1
AVAILABLE : 1
RIGHT : 4
RANDOM : 1
BREATHING : 1
PC : 2
VITALS : 2
THROAT : 1
ABOUT : 9
DEVELOPMENTS : 1
RESTORING : 1
PEDAL : 1
CHAR : 1
AL : 1
ONE : 9
REQUESTS : 2
PMR : 1
COMPONENTS : 1
WANKER : 1
ULCERATION : 2
PLEASANT : 3
POTENTIAL : 2
ANATOMICAL : 1
NKA : 3
PTS : 1
BRIEF : 2
NSAIDS : 1
THOUGHT : 1
HYPERLIPIDEMIA : 3
TABLET : 4
MILEWSKI : 1
ANOTHER : 4
WRITER : 3
DURING : 4
REC : 2
YOU : 12
EPIDURAL : 1
ISOLATION : 1
PSYCHI : 1
TOLD : 2
SEVERAL : 2
SCREENING : 1
MORPHINE : 2
DOESNT : 1
CHECKS : 2
CRITERIA : 1
VOICED : 1
INFORMED : 3
METASTATIC : 1
LYMPH : 1
REACH : 4
SMOKES : 1
GETTING : 1
MEDIASTINUM : 1
PAST : 5
REACTIONS : 2
HI : 3
DOCUMENT : 1
RECONTACT : 1
INTERESTED : 2
REASON : 1
TRACE : 1
AFFECTIVE : 1
POSTERIOR : 1
ESPECIALLY : 1
SCORE : 4
TOBACCO : 2
SOUTH : 1
DELAYED : 1
TRULY : 1
REMINDER : 2
SP : 2
HOME : 2
NEVER : 2
SIX : 1
AMBULATING : 1
QUO : 1
WEAKNESS : 1
ALTHOUGH : 1
NOTED : 4
STL : 1
DR : 4
INDIVIDUAL : 4
TUBEFEEDING : 1
MARCIA : 1
MEMBERS : 1
ESTABLISH : 1
WATCHING : 1
LN : 1
HOSPITAL : 4
RECOMMENDATION : 1
RETURN : 3
SUICIDAL : 1
RESTARTED : 1
HOPELESS : 1
MODERATE : 6
EXPECTATIONS : 1
DEPT : 1
HEP : 1
BLE : 2
INJ : 1
VITAL : 3
MODIFICATIONS : 1
SO : 3
INTENSIFIED : 1
BURNT : 1
MIN : 2
GEC : 1
REGULAR : 3
QUANTITY : 1
PARASTHESIAS : 1
TALK : 1
POTASSIUM : 1
MENTALLY : 1
MINUTES : 5
AVOIDANCE : 1
FOLLOWUP : 1
DRIVE : 1
DIRECTIONS : 1
DELTOID : 2
MAKE : 2
INDETERMINATE : 1
ARISING : 1
WEEK : 1
REPSONSES : 1
PREVENTATIVE : 1
TEAM : 6
CHECK : 3
STRESSED : 1
FALL : 5
PSYCHOTIC : 1
MEMORIES : 2
READS : 1
DATA : 2
NERVE : 1
AM : 3
PRESENTATION : 1
REL : 1
BRAIN : 1
IMPAIRMENT : 1
HAPPENS : 1
PRACTITIONER : 1
RUNNING : 1
OCCASION : 1
EKG : 1
DYSLIPIDEMIA : 1
MOOD : 2
WHERE : 1
CONSPIRACY : 1
APAP : 1
LIVES : 2
DNR : 1
REPORT : 4
PEOPLE : 3
INDEPENDENCE : 1
CAPSULES : 1
HARRINGTON : 1
ELECTRONICALLY : 1
PLATINUM : 1
HOW : 4
PRODUCTS : 1
CALLED : 4
PURULENT : 1
MIGHT : 1
INFUSING : 2
MOTIVATED : 1
ADVIL : 1
SINCE : 5
MANY : 3
NSTEMI : 1
CRAVINGS : 1
COUGH : 1
DISCUSS : 3
CHANGE : 2
BENDING : 1
PRESENTING : 1
ESOPHAGUS : 2
FIDDLEHEADS : 1
PREOPERATIVE : 1
MADE : 2
REESTABLISH : 1
TEACHING : 2
CARDIAC : 3
AUTHORIZATION : 1
AMEND : 1
YRS : 1
INFECTIOUS : 1
ADVISED : 1
OBTAINED : 1
AGGRESSIVE : 1
LEARNING : 3
STOMACH : 3
DOSE : 2
MEASURE : 1
ENCOUNTER : 2
PROXIMITY : 1
OBJECTIVE : 1
MONTHS : 5
SMOKING : 3
MRI : 1
PREDNISONE : 1
MEASUREMENT : 1
ELSEWHERE : 1
SSN : 4
AVOID : 1
CONCERN : 3
RAMBLE : 1
DIALOG : 1
REFUSES : 1
VALIDATES : 2
BEDSIDE : 1
ANTIBIOTIC : 1
NPHO : 1
NUTRITIONAL : 1
WHY : 3
IMMEDIATE : 1
TORICOLLIS : 1
MEDICATION : 5
STOP : 2
RESTING : 1
WRIST : 1
SLIP : 1
WANT : 2
COMMENTS : 7
ACETAMINOPHEN : 1
ATTEMPTED : 2
CASE : 1
AFRICAN : 1
SINGLE : 1
HAVENT : 1
ITEMS : 1
ORAL : 2
CONTINUE : 3
FIANCE : 1
TOTAL : 6
TENDENCIES : 1
READ : 2
SWELLING : 2
LIGHT : 2
HOPE : 1
CYSTOSCOPY : 1
SERVICES : 4
AB : 1
RECIEVED : 1
EXAMINATION : 1
ENGLISH : 2
ST : 3
ELIMINATION : 1
SUCH : 2
HISTORY : 10
UPDATED : 1
CLICK : 3
FAT : 1
TEXT : 1
CED : 1
BACKGROUND : 1
OTC : 1
HOURS : 3
CONSULTED : 1
LATINO : 1
RESPONDING : 1
HEALTH : 6
AMIODARONE : 2
REPORTED : 2
GINGIVA : 1
HERNIA : 1
PLACED : 3
SYNCOPE : 4
PRESYNCOPE : 1
PURPOSES : 1
PRRC : 1
WCT : 1
BRIDGEWORK : 1
BILAT : 2
WOUND : 2
PAYING : 1
PROSTATE : 1
EXCLUDING : 1
SD : 1
BIPOLAR : 3
RIGHTSIDED : 1
VERDE : 1
REFERRAL : 2
INTERVENTIONS : 2
TREMORS : 1
STATING : 1
COMPLICATIONS : 1
LEAD : 2
TENSE : 1
KG : 5
OP : 2
WAL : 2
VS : 1
MORE : 3
SEROQUEL : 1
MAKING : 1
PE : 1
STANDARD : 1
RFA : 1
RACE : 3
PREPROCEDURE : 1
AUG : 2
WENT : 2
PROBLEM : 5
RECEIVE : 1
NEEDING : 1
ER : 4
RECORD : 5
DIAB : 1
SPELLED : 1
REQUEST : 5
PRESCRIBED : 1
AMLODIPINE : 2
SOMEWHAT : 1
RN : 2
XYZZY : 2
HUBER : 1
CARDIOLOGIST : 1
ADLS : 2
ENAMA : 1
PUFFS : 1
OUTPUT : 3
DECUBITUS : 1
STEROID : 1
ELIGIBILITY : 1
VETS : 1
ANTICOAGULATION : 2
HEENT : 1
BASES : 1
TELEMETRY : 1
GUMS : 1
HYG : 1
AFTER : 5
EKSUICIDE : 1
PARTICIPATED : 1
INTESTINE : 1
LONGER : 1
ADMISSION : 6
EMPLOYMENT : 1
TIFIED : 1
STILL : 5
GIPATEL : 1
DIFFICULTIES : 1
OUPT : 1
DIVERTICULITIS : 1
SCALE : 2
DEF : 1
SINGARAJAH : 1
NY : 1
PROPORTIONAL : 1
DESPONDENT : 1
POW : 1
NON : 1
OBESE : 1
NICOTINE : 2
FLUID : 3
ALEVE : 1
VOICEMAIL : 1
LUMBAR : 1
INDICATORS : 1
MMM : 1
ONES : 1
PCP : 4
SAYS : 2
WAY : 1
APNEA : 1
EACH : 1
SPECIFIC : 1
ASSOCIATE : 1
DOB : 1
TELERET : 1
DENIES : 8
ACCOMPANIED : 2
NUTRIENTS : 1
PHARMACY : 1
OLD : 3
OTHERS : 1
DRAWN : 1
EMOTIONALY : 1
INFLAMMED : 1
OVERNIGHT : 1
VERBALIZE : 1
DISPLAY : 1
VETERAN : 13
GLUCOSE : 2
PT : 40
INJURY : 2
RADIATION : 2
MOVE : 1
DOUBLE : 1
CORRESPONDENCE : 1
SIT : 2
FAM : 1
NP : 1
ETHNIC : 1
DEVELOP : 1
IRON : 1
AREA : 1
PSYCHOSOCIAL : 3
PROCEDURES : 1
APR : 1
PL : 1
CLOTRIMAZOLE : 1
SOON : 1
SKILLED : 2
FAWCETT : 1
BLDG : 1
MISSED : 1
ASSAULT : 1
PERFORM : 1
EXCHANGE : 2
MM : 1
INDEPENDENTLY : 1
AROUND : 1
UNDERSTANDING : 5
MEDICATIONS : 13
RATIONAL : 1
PNEUMOCOCCAL : 2
MR : 5
SENSE : 1
FOODS : 1
FACTOR : 1
AND : 101
HEATHER : 1
INSOMNIA : 2
HOUR : 3
ETODOLAC : 1
URINARY : 2
UNSTEADY : 1
MOTRIN : 1
JUN : 1
VACCINE : 2
CRACKLES : 1
GUIDELINES : 1
NWB : 1
RESPONSE : 2
BETTER : 3
LOC : 1
INTOXILYZER : 1
FRIENDLY : 1
RESULTS : 1
PATENT : 2
EMERGENCY : 1
ANSWER : 2
BREATH : 3
ABLE : 6
INTRINSICALLY : 1
NAIL : 1
PN : 1
IN : 62
POSITION : 3
ADMINISTERED : 2
LOW : 3
FOLLOWED : 1
MAY : 7
VARDENAFIL : 1
MANAGEMENT : 3
STATE : 1
SPORADIC : 1
PLAN : 15
LOCKED : 1
STRUGGLED : 1
LENGTH : 1
CONCURRED : 1
APPT : 3
GROIN : 1
STAFFING : 1
SMOKE : 3
MARICOPA : 1
TAKING : 2
ICS : 1
UNLESS : 1
AGREE : 1
ADMITTED : 4
SS : 1
PERIOD : 2
SERIES : 1
SWR : 1
SATS : 1
VERY : 6
DONE : 2
PALPABLE : 1
PHYSICAL : 3
WEARING : 1
NIGHT : 1
CP : 1
COMPLAINED : 1
ACTIVE : 20
BASIC : 1
KNOW : 1
FRUSTRATION : 1
HEADHEALED : 1
GOVERNMENT : 1
IDENTIFICATION : 1
SUSPENSION : 1
MANAGER : 1
THRUSTING : 1
TRS : 2
ABILITY : 1
BEDREST : 1
INTERPERSONAL : 1
OPPORTUNITY : 2
METHODS : 1
INPLACE : 1
BEGIN : 1
GRANULOMATOUS : 1
NEWLY : 1
CONTROLLED : 1
SI : 6
FOREARM : 1
MIDDLE : 2
COMPLETED : 1
IMPRESSION : 1
FOCUS : 1
THIS : 27
FAR : 1
EVEN : 1
DIFFICULTY : 2
LPN : 2
HIGH : 2
ALLOWING : 1
DECISIONMAKING : 1
REMINDERS : 1
CAPABLE : 1
DMII : 1
UFH : 1
APP : 1
BECOMING : 1
LAST : 11
COWORKERS : 1
EDUCATION : 10
HOLD : 1
DISPOSTITON : 1
DIED : 1
EKNURSING : 1
EXTREMITIES : 1
ADR : 1
SELFTALK : 1
SESSION : 1
THIN : 1
STATES : 6
OCCUPATIONAL : 1
PUSH : 1
TRUCK : 1
GASTRITIS : 1
PHYSICALLY : 2
CARAFATE : 1
REACHE : 1
CAUSES : 1
CHEMO : 1
DETAILS : 1
WHILE : 3
LOCAL : 1
STIMULATOR : 1
CELL : 1
RESENTMENT : 1
INTRUSIVE : 2
GROOMED : 1
LIMITS : 1
MAXILLARY : 1
WAIT : 1
SPS : 1
ICDCM : 3
OIF : 1
SBA : 2
RESP : 3
COGNITION : 2
ETOH : 1
ITS : 2
UP_PT : 1
SERVICES_CAD : 1
AGE_HISTORY : 1
TO_PT : 3
ASA_PO : 1
SHOWED_FOR : 1
AUTHORIZATION_VETERAN : 1
HEP_AB : 1
CC_PT : 1
CLINICAL_NOTE : 1
SHE_AFRAID : 1
PAIN_BBSC : 1
MG_PATIENT : 1
TO_DIFFICULTY : 1
TO_KETCHUM : 1
CALLING_REQUEST : 1
OF_DISCHARGE : 1
APAP_INTERVENTIONS : 1
WHICH_CAUSED : 1
VETERAN_ANSWERED : 1
IS_MIN : 1
APPOINTMENT_CHAR : 1
RELATES_MEDS : 1
VA_ON : 1
HALF_OF : 1
BEEN_ADMITTED : 1
ASSESSMENT_AD : 1
BEEN_TO : 2
ACTIVE_INTERDISCIPLINARY : 1
PRESENT_HIS : 1
MONTHS_YES : 2
THE_BENEFITS : 1
FLUID_IN : 1
OR_TENDENCIES : 1
COMPRESSIONS_CARDIOVERSION : 1
TWICE_PATIENT : 1
MH_NEW : 1
SOME_PATIENTS : 1
CARE_WILL : 1
KG_REMINDER : 1
VALIDATES_THAT : 2
SINCE_CONTACT : 1
HAS_CHANGING : 1
ADDENDUM_PLACED : 1
MS_ROTH : 1
OF_GOOD : 2
THE_PEOPLE : 1
PATIENT_HAD : 1
SC_ED : 1
MOUTH_NIGHT : 1
UP_GOING : 1
PO_ACTIVE : 3
NEEDED_TEXT : 1
LET_KNOW : 1
CARE_APPOINTMENT : 1
AND_ORIENTED : 1
FRIENDS_AND : 1
OF_HIS : 5
SPELLED_MR : 1
REST_BENIGN : 1
PEOPLE_HAVE : 1
PT_VERY : 1
THE_PATIENT : 6
ABILITY_BRIDGEWORK : 1
AND_DAILY : 1
AND_OBJECTIVE : 1
NOT_AND : 1
VISIT_AS : 1
TIFIED_AND : 1
NEEDS_INTERESTED : 1
PM_CARE : 1
WAKES_TO : 1
CONDITION_POST : 1
PCP_VA : 1
BEING_TAKEN : 1
BB_LOW : 1
FOURCHE_ALBUTEROL : 1
YO_SEEN : 1
SUB_ACUTE : 1
LEFT_SUB : 2
SHIFT_HE : 1
COMPLIANT_WITH : 1
INPATIENT_DEFERRED : 1
PREDNISONE_TAB : 1
FOLLOWING_CARE : 1
AT_VISIT : 1
PATIENTS_PROCEDURE : 1
QUESTIONS_PATIENT : 1
CESSATION_IS : 1
MORNING_FOR : 1
THAT_CAN : 1
EXPERIENCES_FROM : 1
ALLOWING_PEOPLE : 1
DISCUSSED_ACTIVITY : 1
EXPLAINED_THAT : 1
BEING_EDUCATED : 1
AGE_LATERAL : 1
IMPORTANCE_OF : 2
TIME_SEX : 1
LATINO_DOCUMENTATION : 1
PARASTHESIAS_IDN : 1
CATH_INTACT : 1
ON_WEIGHT : 1
GREATER_THAN : 1
PLEASE_DO : 1
HAS_HAND : 1
AND_WIFE : 1
CALLING_TO : 1
APPROACH_WED : 1
AND_SENSE : 1
FAR_HERE : 1
PHYSICALLY_WENT : 1
INTERPRETING_HOA : 1
PROPORTIONAL_TO : 1
LONG_DRIVE : 1
LIMITS_GIVE : 1
LYING_IN : 1
FOR_NO : 1
USE_NO : 1
HCL_CAP : 1
WITH_CURRENT : 1
COMMENTS_PT : 1
PLACED_IN : 1
PROTOCOL_USED : 2
ARM_PAIN : 1
VERDE_LN : 1
OBTAINED_SEP : 1
SKIN_ON : 1
LINKSF_WELTS : 1
COOPERATIVE_INTERACTS : 1
HISTORY_TO : 1
ARRIVED_TO : 1
HHA_MAY : 1
PROVIDED_RECEPTIVITY : 1
NOT_DISCUSS : 1
ALERT_INFLUENZA : 1
EXERCISE_MINUTES : 1
APPEAR_SCHEDULED : 1
BUT_THE : 1
MALE_ADMITTED : 1
AND_ARM : 1
AT_ITS : 1
PT_ANGRY : 1
IF_IS : 1
OR_PREFERENCES : 1
WILL_PULSE : 1
INDIVIDUAL_PSYCHOTHERAPY : 1
HOW_DRINKS : 1
THEM_THIS : 1
TORICOLLIS_PLAN : 1
EDUCATION_NO : 1
NEW_MG : 1
DRESSING_CHRONIC : 1
FAM_TO : 1
REFILLED_SPORADIC : 1
PROSTATE_URINARY : 1
MORE_DRINKS : 1
VARIOUS_PROBLEM : 1
NURSE_PROTOCOL : 1
TO_NONVA : 1
NORMAL_GIVE : 1
TWICE_ADDENDUM : 1
PATIENTS_TETANUS : 1
WITH_HOW : 1
PLACED_PERIPHERAL : 1
LARGE_INTESTINE : 1
BEEN_AND : 1
TO_SUPPORT : 1
AGREED_VISIT : 1
IN_BREATH : 1
MEDICINE_PROBLEMS : 1
SECOND_PRESSURE : 1
RIGHT_APPOINTED : 1
DRAINING_LIGHT : 1
FOR_REGULAR : 1
HAD_ANOTHER : 1
FAMILY_COUNSELOR : 1
FOLLOWING_HAS : 1
SENT_TO : 2
4D_INPATIENT : 1
COMMENTS_WEIGHT : 1
RELIGIOUS_CULTURAL : 2
ALL_COMPONENTS : 1
WITH_YOUR : 1
BY_CLINIC : 1
OF_ACTIVE : 1
REGULAR_MONITORING : 1
PT_WILL : 1
PODIATRY_CLINIC : 1
DETAILS_HIS : 1
ALCOHOL_FINGER : 1
AS_AS : 1
SEP_PRESSURE : 1
BILAT_LES : 1
VETERAN_HAD : 1
SKIN_VANOD : 1
PM_IF : 1
WRITER_STAY : 1
PROBLEMS_WITH : 1
PROBLEM_WRITER : 1
HAVE_UP : 1
DRIVE_RATIONAL : 1
ON_PULSES : 1
BETWEEN_UNITS : 1
SMOKE_AND : 2
DOSE_EFFECTS : 1
REPORT_OF : 1
PA_VISIT : 1
AND_ME : 1
MORPHINE_INTRUSIVE : 1
NAME_IMPULSIVE : 1
AMLODIPINE_TAB : 1
REACTIONS_PATIENT : 1
ACTIVE_WAS : 1
EXCESSIVE_WORRY : 1
ACTIVE_FOLLOWING : 1
SCALE_PHYSICALLY : 1
ARE_TO : 1
CONCERN_ABOUT : 1
REDUCED_TO : 1
OF_HURTING : 1
NAPROSYN_OR : 1
VERBAL_FACILITATORS : 1
WEIGHT_TOTAL : 1
DENIES_SENSORY : 1
MOM_HER : 1
APPEAR_FOR : 1
EVALUATION_AND : 1
LATER_OF : 1
HAVING_IS : 1
CARDIOGENIC_SYNCOPE : 1
AND_THAN : 1
RACE_MOM : 1
SAFETY_INPATIENT : 1
TO_DEBRIDEMENT : 1
STOP_RELIGIOUS : 1
INDURATION_LEFT : 1
AIR_MALODOR : 1
WAL_WILL : 1
ACID_TAB : 2
AN_STATUS : 1
PHYSICIAN_MAKING : 1
CHILD_PRACTICES : 1
RANDOM_DRUG : 1
MORNING_WITH : 1
REFERRAL_TO : 2
TO_TO : 1
AS_TRUCK : 1
SXS_SUCH : 1
CLEAR_ICS : 1
NEW_MEDS : 1
MOTHER_AT : 1
BECAUSE_HIS : 1
CHECKED_PT : 1
IS_UNKNOWN : 1
AND_JUN : 1
ORIENTED_PLEASANT : 1
REFERRED_TYPE : 2
AND_ER : 1
ANOTHER_IDENTIFICATION : 1
REACTION_TO : 1
PATIENT_VOICES : 1
AND_TENSE : 1
VET_AND : 1
WITH_PT : 2
HE_RETURN : 1
BIOPSYCHOSOCIAL_HIS : 1
SUPPLIES_MEDICINE : 1
HEALTH_PRBLM : 1
ABOUT_LESION : 1
OBESITY_AND : 1
ENDING_AM : 1
WITH_MILITARY : 1
TO_US : 1
ON_ABOUT : 1
PATIENT_WITH : 2
NOTED_PPP : 1
STATED_VET : 1
LUNGS_AT : 1
DECUBITUS_CURRENT : 1
TELEPHONE_NOTE : 2
TO_HIM : 1
MONITOR_AND : 1
PATIENT_CHIEF : 1
REACHE_GET : 1
INHL_ACTIVE : 1
FEVERS_HOME : 1
ATTEMPTED_PUNCTURE : 1
UNDERSTSANDS_HOW : 1
IS_PROPORTIONAL : 1
HEMOPTYSIS_SAYS : 1
IS_PATIENTS : 1
DIAGNOSIS_ALBUTEROL : 1
HURTING_THRUSTING : 1
WT_NEUROPATHIC : 1
IN_MONTHS : 1
SCARED_ADVERSE : 1
PER_DISCUSSION : 1
LARGE_BOWEL : 1
EXTREMITY_MH : 1
DUE_UNEMPLOYMENT : 1
ANXIETY_OR : 1
NONE_WORST : 1
BEEN_NEWLY : 1
UNDERSTSANDS_TO : 1
BILAT_OTHER : 1
COMPLAINTS_AROUND : 1
NOX_AUTHOR : 1
YES_PAIN : 1
IPRATROPIUM_INHL : 1
SINGLE_AGE : 1
YES_SMOKES : 1
DIAGNOSIS_IPRATROPIUM : 1
BIT_TREATMENT : 1
MOVEMENTS_CLINICAL : 1
INADEQUATE_TO : 1
CONFIRMED_PROCEDURE : 1
GABAPENTIN_WOULD : 1
LAB_VALUES : 1
FOR_MG : 1
ONLY_WHICH : 1
TEGRETOL_FEELING : 1
HAD_NURSING : 1
BRONCHOSCOPY_CALLER : 1
MANAGEMENT_REVIEWED : 1
BY_BONNIE : 1
ACTIVITY_PLAN : 1
HIS_XRT : 1
REPORTED_THAT : 1
TAKEN_PATIENT : 1
WAS_GLUCOSE : 1
DOSING_ION : 1
OF_REGULAR : 1
FOR_TID : 1
NURSING_ACTIVE : 1
SIMVASTATIN_COMMUNICATION : 1
RESPONSE_BRISK : 1
TO_NOTE : 3
HEALTHY_EATING : 1
BASIS_HIS : 1
NO_PLAN : 1
HCL_TAKE : 1
THE_BETWEEN : 2
REPORTS_SXS : 1
THIS_CONSIDER : 1
RETIREE_OF : 1
AND_EXPOSURE : 1
CARE_PHYSICIAN : 1
OR_RESOLVED : 1
EFFECTS_DIRECTIONS : 1
OF_ITS : 1
THE_CORNER : 1
MAY_TIP : 1
EVERY_BY : 1
UP_APPT : 1
MCO_BEATY : 1
VETERAN_SSN : 1
ADDENDUM_ELECTS : 1
RISK_STANDARD : 1
GIVEN_WAKES : 1
BEEN_ABLE : 1
CAR_TRANSFERS : 1
INTERPERSONAL_WITH : 1
NOTE_MS : 1
FROM_HERE : 1
HOTLINE_THE : 1
VITAL_LIVES : 1
INFORMATION_VARDENAFIL : 1
YOU_TAKE : 1
FOR_YOU : 1
INFLAMMED_SWOLLEN : 1
HP_BRIEFLY : 1
LAST_VISIT : 1
OBJECTIVE_OF : 1
CAUDAL_EPIDURAL : 1
THEN_TOLD : 1
ABOUT_PARTICIPATION : 1
BECOMING_MOTIVATED : 1
HE_NOT : 1
ADDENDUM_EFFECTS : 1
CHLORIDE_DROPS : 1
MAY_UP : 1
NAD_HE : 1
HIS_ELIGIBILITY : 1
LANGUAGE_XENGLISH : 1
ANEMIA_CHF : 1
MOVE_ANOTHER : 1
PAYING_MORTGAGE : 1
ABOUT_HOWEVER : 1
NOT_EXPECTED : 1
FOR_HYDROCODONE : 1
UPDATE_STATED : 1
TO_ME : 1
DIAMETER_ERYTHEMA : 1
ALSO_WAL : 1
MINUTE_CHECKS : 1
MALATINSZKY_TEAM : 1
PERSONAL_HISTORY : 1
MEMORIES_AVOIDANCE : 1
SOME_NEW : 1
DISEASE_CONSTIPATION : 1
IS_CONSIDERED : 1
ANGRY_SHIFT : 1
EVEN_HIS : 1
TO_STR : 1
ON_HIS : 1
WANT_BE : 1
THE_IMMUNIZATION : 1
FOR_AID : 1
US_CURRENTLY : 1
LOW_BRAKES : 1
LEFT_WRIST : 1
FOLLOWED_OP : 1
PER_IN : 1
METASTATIC_ADENOCARCINOMA : 1
THAT_HAS : 1
WITH_IN : 2
INTACT_RFA : 1
WITH_GRADE : 1
FOR_INDIVIDUAL : 1
IS_DISCUSS : 1
GAVE_NUMBER : 1
CHANGES_PLACED : 1
TELERET_IMAG : 1
AMIODARONE_AMIODARONE : 1
IN_DIAMETER : 1
HER_WOULD : 1
AT_HOME : 1
REHAB_SHE : 1
HYGIENE_CURRENT : 1
JACHI_OBTAINED : 1
ARM_PN : 1
IMPULSIVE_AND : 1
STATES_HAS : 1
PATENT_FLUSH : 1
THOUGHTS_ANXIETY : 1
TESTS_MEDIASTINUM : 1
MADE_BY : 1
CARE_PRINT : 1
MILD_PERIWOUND : 1
ALEVE_OR : 1
DOSE_IS : 1
CLINIC_WHEN : 1
TO_SELF : 1
MINUTES_PRIOR : 1
AS_CONSULTS : 1
FOR_WITH : 3
CURRENT_MEDICATION : 1
FROM_ALL : 1
OPTIONS_FINANCES : 1
SI_SPEAKING : 1
CSTAT_VET : 2
TAB_DI : 1
PT_EXPLAINED : 1
TO_LEARNING : 1
PN_NO : 1
MAY_BE : 1
AND_RESENTMENT : 1
DESIGNED_TO : 1
TO_OWN : 1
OBESITY_OFFERING : 1
YOU_REQUIRE : 1
STATUS_QUO : 1
SERVICECONNECT_PT : 1
THIS_FULL : 1
NOTES_RESULT : 1
HAD_NO : 1
POTASSIUM_TYPE : 1
SPC_WOULD : 1
IN_AZ : 1
ADMISSION_EKG : 1
SUICIDAL_IDEATION : 1
MALODOR_PERIWOUND : 1
DISCHARGE_DIETARY : 1
ASSESSMENT_IN : 1
IV_PATIENT : 1
ACUTE_CARE : 1
RECORDS_BE : 1
DOSE_SIDE : 1
CARE_THAN : 1
VERBAL_THEY : 1
STATUS_POST : 1
CVA_IRON : 1
MARICOPA_OCCUPATION : 1
ONSET_TO : 2
URINE_THIS : 1
METHODS_VERBAL : 1
FELODIPINE_PER : 1
TAKING_AT : 1
ASSISTANCE_SATT : 1
ING_ON : 1
SI_MHC : 1
AN_BREATH : 1
AND_SHE : 1
ALLERGY_HISTORY : 1
OF_THERAPY : 1
SYMPTOMS_WITH : 1
PT_LEFT : 1
BUCKEYE_AZ : 1
HAD_APPETITE : 1
HAVING_OF : 1
IS_MADE : 1
WITHIN_MINUTES : 1
GIVEN_IER : 1
HIS_CHEST : 2
CLICK_HISTORY : 1
SEROQUEL_BEDTIME : 1
POST_DENIES : 1
PATIENT_UNDERSTANDING : 1
CONCUR_ASSESSMENT : 1
PMH_HAS : 1
CC_WELTS : 1
ICDCM_INFORMATION : 1
THESE_ON : 1
WITH_REGARDING : 1
HE_SPENT : 1
TO_STATE : 1
VET_ON : 1
ALBUTEROL_SO : 1
REVIEW_THAT : 1
AND_ALCOHOL : 1
DRUG_CONSULT : 1
PT_SMOKE : 1
REGARDING_IF : 1
SUGGESTIVE_AGE : 1
NO_GOOD : 1
ALONG_KUWAIT : 1
SEE_WANKER : 1
AM_MALE : 1
TO_MEDICAL : 1
MALATINSZKY_ORANGE : 1
AND_WRITER : 1
SMOKE_PRIOR : 1
DATE_MEDICAL : 1
TO_APPEARANCE : 1
LPN_MH : 1
SERVICE_VIETNAM : 1
DAILY_IN : 1
OCT_INFLUENZA : 1
CONTINUE_SAFETY : 1
SEEN_PLATINUM : 1
MG_FEB : 1
PREVENTION_THE : 1
OF_CATEGORY : 1
COPD_HYPERLIPIDEMIA : 1
ANY_PERCEPTION : 1
HAS_REFERRED : 1
AD_ACTIVITY : 1
IS_STILL : 1
POST_ENCOURAGEMENT : 1
NOT_CIGARETTE : 1
OIF_MARRIAGE : 1
OF_CONCERN : 2
HAPPENS_FINALLY : 1
VET_AGREED : 2
THIS_HAD : 1
PATIENT_PAIN : 1
NEVER_CONVERTED : 1
HAVE_MOOD : 1
VA_AND : 1
DENTAL_PATIENT : 1
APPROPRIATELY_WITH : 1
INTACT_CBI : 1
GIVEN_PING : 1
OF_CHECK : 1
WAS_TO : 1
OPEN_CLOTHES : 1
APPOINTMENT_FOR : 1
ENCOUNTER_ED : 1
MINS_MINS : 1
DIFFICULTY_PO : 1
FOR_IN : 1
WILL_PATIENT : 2
AND_TELL : 1
APPEARED_BE : 1
MG_OF : 1
ASPIRIN_NSAIDS : 1
INSTRUCTIONS_PAIN : 1
INTERPERSONAL_BOND : 1
HEMATURIA_COUMADIN : 1
FOLLOWUP_NO : 1
ARABELLA_VIEW : 1
NAME_PAIN : 1
SP_SP : 1
THIS_DENIED : 1
OF_TELEPHONE : 1
WAS_NEUROLOGICAL : 1
PLAN_FOR : 2
NO_IMPAIRMENT : 1
OR_IV : 1
SMOKES_US : 1
FINGER_INTERMITTENT : 1
NOTE_TO : 1
USING_THE : 1
MAY_CD : 1
ALCOHOL_BE : 1
HIS_AND : 3
WILL_THE : 1
STRUGGLE_SOMEWHAT : 1
OXIMETRY_PER : 1
MINUTES_TIMES : 1
TETANUS_IMMUNIZATION : 1
CONSULTS_AND : 1
PLAN_PT : 1
TAKE_AS : 1
OF_RELAPSE : 1
MIN_ASSIST : 1
INTERACTIVE_TENSE : 1
CLICK_ADMISSION : 1
PT_FROM : 1
AND_EMOTIONALY : 1
PRIOR_ANY : 1
BLE_NOTED : 1
MY_AND : 1
MEASURE_HAD : 1
BE_EDUCATION : 1
VERY_HE : 1
ADVERSE_DRUG : 1
QAM_INTERDISCIPLINARY : 1
NEEDS_WAL : 1
PATIENTS_MRI : 1
WITH_VETERNS : 1
ASSESSMENT_INFO : 1
STAGING_STAYED : 1
WHO_HAS : 1
TAB_PO : 5
ME_NEVER : 1
WORST_CHALK : 1
ALCOHOL_BREATH : 1
BARRETTS_REPORT : 1
SERVICE_ERA : 1
OTHER_THAN : 1
GETTING_PSYCHI : 1
FACTOR_HIS : 1
DARK_PRESCRIPTION : 1
BEEN_ON : 1
THINGS_THE : 1
POSTERIOR_WEAK : 1
THREE_MONTHS : 1
NEVER_DID : 1
IS_YO : 3
RESULT_TWICE : 1
BEING_DEPRESSED : 1
NURSING_UAL : 1
UP_LIB : 1
FOR_NOT : 1
LEVEL_NURSING : 1
TOP_APPLY : 1
MG_INSERT : 1
SAYS_HAS : 1
THIIS_BEEN : 1
HIM_TO : 2
WORST_IN : 1
THE_PER : 1
CONSULTED_PODIATRY : 1
IS_OLD : 1
IN_PAIN : 1
PROCEDURE_CONCURRED : 1
DIVERTICULITIS_WHO : 1
TURGOR_WITHIN : 1
FOR_THE : 8
DAILY_PROGRESS : 1
PLAN_VOICES : 1
PHONE_VOICEMAIL : 1
TOTAL_ALARM : 1
OUTPUT_DECREASED : 1
CHANGE_STATUS : 1
TO_REACHE : 1
DONE_TO : 1
TO_ORDERS : 1
PERIOD_OF : 2
BLOOD_IN : 1
IN_VOICE : 1
MALE_ACTIVE : 1
XRT_MEDICAL : 1
SODIUM_NASAL : 1
AND_DEBILITATED : 1
ACTIVITIES_OF : 1
HE_WILL : 2
IS_BASIS : 1
ORAL_ACTIVE : 1
AID_NONE : 1
WILL_TO : 2
PLANS_DESIGNED : 1
WITH_PROVIDER : 1
LEAD_EKG : 1
FOR_WED : 1
PATIENT_STABLE : 1
TERAZOSIN_HCL : 1
INCREASED_OR : 1
NO_SMOKING : 1
OF_INDEPENDENCE : 1
SIGNIFICANT_WT : 1
CONCURRED_THE : 1
HAS_AN : 1
TO_SW : 1
OUT_BODY : 1
CARDIOVASCULAR_COLLECTS : 1
DATE_OF : 2
ODYNOPHAGIA_CHANGE : 1
OF_SESSION : 1
UNKNOWN_WITH : 1
NAD_SEEN : 1
MENTALLY_ILL : 1
ON_SPUTUM : 1
BUT_OP : 1
HYPERINFLATION_GRANULOMATOUS : 1
EVEN_CHEST : 1
PROBLEMS_REFUSES : 1
HISTORY_VA : 1
RECEIVE_METFORMIN : 1
PREFERRED_LEARNING : 1
DEFERRED_FOR : 1
BENDING_YESX : 1
WENT_TO : 2
RULES_AMBULATORY : 1
STAFF_IS : 1
PCP_EVALUATION : 1
WANT_CONSULT : 1
DONE_LINEN : 1
MG_SC : 1
REQUEST_REPORT : 1
NOT_APPEAR : 1
YRS_DATE : 1
NOTE_ADEQUATE : 1
DRESSING_EVERY : 1
COMPLAINT_FEELING : 1
FOR_PAIN : 1
RIGHT_SCALP : 1
MEDICAL_FALL : 1
NO_THREE : 1
CONTINUED_THE : 1
ANOTHER_IN : 1
UP_AD : 1
YES_PERFORM : 1
DISCHARGE_TERAZOSIN : 1
CHEST_SUGGESTIVE : 1
BRIEF_HISTORY : 1
GE_HE : 1
PO_ASPIRIN : 1
IPRATROPIUM_ORAL : 1
HANDOUT_PATIENT : 1
GRADE_EVALUATE : 1
JUST_TAKE : 1
DR_PATIENT : 1
ELECTRONICALLY_BY : 1
PT_HAVE : 1
PRODUCTS_FOR : 1
MM_DIAMETER : 1
LAST_HE : 1
PATIENTS_LB : 1
AND_DEPRESSED : 1
GOOD_PMR : 1
NO_EXPRESSED : 1
VETIN_ROUTINE : 1
LOSS_DID : 1
COMMUNICATION_NONE : 1
ME_CD : 1
SYMPTOMS_ASSOCIATED : 1
PAIN_ON : 1
REGARDING_PT : 1
PULSE_BP : 1
ADDENDUM_SCARED : 1
WHY_CONT : 1
ADDENDUM_ALLERGIES : 1
HER_PRIMARY : 1
TO_ADMITTED : 1
UNDERMINE_NO : 1
PART_IOP : 1
FOR_THERAPY : 1
BRIEF_PSYCHOSOCIAL : 1
NAPROSYN_TIME : 1
EPIDURAL_INJECTION : 1
AVOIDANCE_EMOTIONAL : 1
AT_THE : 1
POSITION_COMFORTABLE : 2
PT_COULD : 1
RISK_PULSE : 1
METFORMIN_ALSO : 1
PLAN_WAIT : 1
ADDITIONAL_FROM : 1
PHONE_PHYSICIAN : 1
PROBE_UNDERMINE : 1
DRINKS_ALCOHOL : 1
PO_DAILY : 2
WITH_SUICIDAL : 1
XYZZY_REFRACTIVE : 2
CURRENT_MEDICATIONS : 2
FRONT_THE : 1
QUESTIONS_LEARNING : 1
STIMULATOR_HE : 1
MOTHER_DIED : 1
HAS_APPT : 1
CONTACT_CONTACTED : 1
HEALTHSOUTH_SHE : 1
ASSESSMENT_TO : 1
IN_IS : 1
BE_SELF : 1
TO_VA : 1
SHIFT_BECAUSE : 1
ON_MAY : 1
THEIR_FROM : 1
HIM_IN : 1
PROXIMITY_HIS : 1
CD_PATIENTS : 1
ONE_TO : 1
NO_BASIC : 1
MTP_DISCOVERED : 1
CLINIC_THAT : 1
ESI_NERVE : 1
DO_SMOKE : 1
THE_PROBLEM : 1
OR_UNDERSTANDS : 1
REGARDING_UNIT : 1
APPT_WITH : 1
ANSWERED_REQUESTING : 1
WAS_FOR : 1
PROCEDURE_AND : 1
DOCUMENTATION_OF : 1
OTHER_SURGEONS : 1
VISTA_IMAGING : 1
INTERVIEW_ELECTRONICALLY : 1
DEPENDENT_AND : 1
REQUESTING_OF : 1
GIVEN_THE : 1
THIS_SCARED : 1
AGO_WEIGHT : 1
DID_THE : 1
NOT_OF : 1
SEVERED_THE : 1
NORMALIZED_NOT : 1
CAN_THEIR : 1
TO_FOLLOWING : 1
UNDERSTANDING_AND : 1
AGGRESSIVE_TENDENCIES : 1
PATIENT_DID : 1
OR_INDICATORS : 1
AS_DURABLE : 1
TOLERATED_XRT : 1
PUT_ON : 2
DRAINAGE_MALODOR : 1
PLEASE_GET : 1
PT_REPORTS : 1
NOT_THE : 1
BOWEL_ALSO : 1
STATES_HAD : 1
UNKNOWN_THAT : 1
NOT_PLEASE : 1
HS_PSYCH : 1
CE_THIS : 1
INCREASED_RIGHTSIDED : 1
IMPORTANCE_RESTORING : 1
THIS_SCHEDULED : 1
SLIP_FEW : 1
NAD_RELATES : 1
TEAM_ENCOURAGE : 1
FOR_CYSTOSCOPY : 1
SCREEN_RELAPSE : 1
WHO_CAN : 1
JOB_HERE : 1
MEMORY_ABLE : 1
SPUTUM_THINKS : 1
PROBLEM_POTENTIAL : 2
INTACT_NO : 1
SENSORY_NO : 1
PAIN_MEDS : 3
PLAN_NEXT : 1
MINUTES_TIFIED : 1
AT_DOCTORS : 1
THE_ARMY : 1
INSTRUCTIONS_DESIGNATED : 1
MANY_THEIR : 1
IN_SHORTNESS : 1
TO_RN : 1
HOURS_ALL : 1
NEEDING_UP : 1
THEIR_WHEN : 1
DISCOMFORT_VSS : 2
IN_ENGLISH : 1
PSYCHOLOGIST_NOTE : 1
STATUS_PAIN : 1
DYSPNEA_WITH : 1
RN_MARCIA : 1
THIS_FINISHED : 1
SEE_DR : 1
PEOPLE_TO : 1
PLAN_STILL : 1
TUBEFEEDING_METHOD : 1
RELATIVELY_UNRE : 1
CONCERNED_ABOUT : 1
HIS_HER : 1
TEST_THE : 1
TO_NOT : 1
CONCURRED_WITH : 1
MONITOR_LAB : 1
CARDIOLOGIST_NPHO : 1
WITH_MG : 1
NOTE_THAT : 1
AND_GIVEN : 1
CHEMO_AT : 1
AS_HISTORICAL : 1
HAS_CAR : 1
LEFT_VA : 1
AGO_BY : 1
PT_SHOWED : 1
ABOUT_LONG : 1
MALE_NURSING : 1
MH_REMINDERS : 1
AND_PARTICIPATED : 1
HYDROCODONE_OXYCODONE : 1
DAILY_STOMACH : 1
HUBER_ENCOURAGING : 1
PCP_AT : 1
THROAT_THE : 1
NAME_SSN : 1
NUTRITION_ASSESSMENT : 1
INTACT_REDNESS : 1
AND_COUNSELOR : 1
PSYCHI_GENERAL : 1
DATE_RANGE : 2
MARCIA_RN : 1
DELTOID_SSN : 1
DL_FEB : 1
NERVES_HE : 1
BEING_NO : 1
INTERVENE_HIS : 1
ATTEMPT_ANSWERED : 1
INHALER_USE : 1
MEET_PATIENT : 1
UNDERSTANDING_PATIENT : 1
ABOUT_SKIN : 1
SYMPTOMS_ALL : 1
SEE_BY : 1
USUAL_MONTHS : 1
NOTE_UNDERSTANDING : 1
LOCAL_PRESCRIPTION : 1
ONCE_HAVE : 1
PATIENT_NU : 1
MALE_POST : 1
EDUCATION_OF : 1
DECREASED_OBTAINING : 1
BREATH_TEST : 1
CONTINUE_TO : 2
MEDICAL_CONDITION : 1
METHOD_NO : 1
ON_CRITERIA : 1
MADE_THIS : 1
DETAILED_REQUEST : 1
AD_REPORTED : 1
AT_AM : 1
EDUCATION_INSTRUCTIONPCC : 1
INEFFECTIVE_DEPRESSION : 1
DIFFERENCE_BETWEEN : 1
HISTORY_DIED : 1
RACING_THOUGHTS : 1
WANKER_BE : 1
HE_BEEN : 4
PCP_FOR : 1
SOB_OT : 1
MEET_RIGHT : 1
TAKING_ABOUT : 1
AS_REQUESTS : 1
SIX_OR : 1
OPPORTUNITY_PRESENT : 1
APPOINTMENT_DAILY : 1
NOT_CURRENTLY : 1
SYMPTOMS_AS : 1
TYPE_DATE : 2
WAY_NPO : 1
AS_PERSONAL : 1
THIS_AND : 4
SO_HE : 1
OF_AWA : 1
TAKE_NSAIDS : 1
AND_SXS : 1
VITAL_WITH : 1
BUT_LATER : 1
INTERACTS_PEERS : 1
MONITOR_CHANGES : 1
LYING_BED : 1
ACTIVITY_PROVIDER : 1
ANY_METHOD : 1
HERE_ONLY : 1
CREAM_APPLY : 1
HAVE_HEALTH : 1
STRUGGLED_WITH : 1
COORDINATION_PROBLEMS : 1
HAS_DEVELOPED : 1
NOTES_ALLERGIES : 1
AND_ETODOLAC : 1
BLOOD_SUGAR : 1
PLAN_WAS : 1
OF_INDETERMINATE : 1
HIS_SKIN : 1
CHEST_PAIN : 5
NUTRITION_OF : 1
PROCEDURE_MAY : 1
SOMEWHAT_ALSO : 1
AZ_COUNTY : 1
KING_HOSPITAL : 1
AND_VET : 1
NORMALIZED_TO : 1
WITH_MEDICAL : 1
ASSOCIATED_PAIN : 1
EMOTIONALY_HOUR : 1
ALCOHOL_TEST : 1
TO_LABS : 1
IN_RELATED : 1
DEC_TO : 1
STL_FALLS : 1
DROPS_ML : 1
TO_ASSAULT : 1
WHEN_PAIN : 1
FINGERS_INCLUDE : 1
IN_DAILY : 1
AROUND_TAB : 1
TO_EXAM : 1
ADMITTED_BUT : 1
FEB_MIDDLE : 1
AND_RETIREE : 1
RETIREE_GE : 1
PPP_PER : 1
HAS_UPCOMING : 1
TENDENCIES_STAFF : 1
HAD_HAVING : 1
DIFFICULTY_THE : 1
THE_DIFFERENCE : 1
DAILY_ACTIVE : 3
LOCAL_FOR : 1
IN_LANGUAGE : 1
PERFORM_OCCUPATIONAL : 1
THE_VARIOUS : 1
WITH_RESPONDING : 1
CURRENT_SIGNS : 1
ELIGIBILITY_AND : 1
WITH_ETOH : 1
ASSIST_SOME : 1
ME_PLACE : 1
COUNTY_OCCUPATION : 1
NAME_PHONE : 1
DENIED_PLAN : 1
STATUS_BRONCHOSCOPY : 1
TEACHING_VERBAL : 1
CLINIC_SAID : 1
STEP_OF : 1
CYSTOSCOPY_ANTIBIOTIC : 1
SINCE_SEPT : 1
RESP_NURSING : 1
HAD_UAL : 1
MOM_THAT : 1
WT_LOSS : 1
ION_INFORMATION : 1
DISCUSSING_ADDICTION : 1
NURSING_SCREEN : 1
HAD_ATTACK : 1
PREFERENCES_THAT : 1
VOIDS_OF : 1
BRONCHOSCOPY_AND : 1
SIX_MORE : 1
AFTER_CONTINUE : 1
ML_SC : 1
OWN_FRONT : 1
TO_ER : 2
OF_BURNT : 1
TRS_CTRS : 2
ST_DISCOVERED : 1
THE_HOSPITAL : 1
AGED_MALE : 1
HAD_GRADE : 1
HEALTH_EXERCISE : 1
PROGRAM_AND : 1
TO_BE : 6
BASE_NURSING : 1
OBSERVATION_ALERT : 1
NO_ST : 1
MEDICAL_ETC : 1
SECONDARY_SMOKE : 1
WITHIN_URINAL : 1
INORDER_TO : 1
HELPFULNESS_IN : 1
FOR_MANY : 1
AND_VITALS : 1
PSYCHOSOCIAL_RELAPSE : 1
CARDIOLOGIST_HOA : 1
STAFF_PERSON : 1
LIKE_START : 1
SUBJECTIVE_SUBMITTED : 1
INHALER_NO : 1
AND_MG : 2
AND_GETS : 1
NONENGLISH_DISPOSTITON : 1
HYPERINFLATION_OLD : 1
THE_VETERAN : 4
REQUIRED_NO : 1
ON_SINCE : 1
PATIENT_RELIGIOUS : 1
MALE_RACE : 3
INHL_ML : 1
TOTAL_YES : 1
COMPLAINT_WITH : 1
LORAZEPAM_TAB : 1
WITH_THE : 2
AND_EGO : 1
WAS_HE : 1
PER_PHYSICIAN : 1
WELL_HE : 1
ANY_THOUGHTS : 1
OR_SEC : 1
INDIVIDUAL_WITH : 1
CEL_LEFT : 1
HEALTH_CARE : 1
CP_PT : 1
FOLLOWING_PROBLEMS : 1
DENTURES_COMPLETE : 1
MY_DOCTOR : 1
ACCESS_CARE : 1
INTERDISCIPLINARY_TREATMENT : 1
EXTREMITY_MOVEMENTS : 1
AUDIOLOGY_WHEN : 1
IID_INTACT : 1
VISIT_REL : 1
DEPRESSION_SUICIDAL : 1
TO_BLOOD : 1
TO_REFLECT : 1
COLORED_PLAN : 1
DECUBITUS_MEDICATIONS : 1
SOB_SEEN : 1
LES_OTHER : 1
REFERRED_FREQUENCY : 2
PROBLEM_AND : 1
FEELING_MISERABLE : 1
AGED_ACTIVE : 1
CONTINENCE_IV : 1
MG_IN : 2
TO_CHANGES : 1
SCALP_AURICLE : 1
ONEHALF_TABLET : 1
QUITTING_ALL : 1
ASSISTANCE_ADVERSE : 1
MR_WILL : 1
CONDITIONS_HE : 1
ML_DAILY : 1
TELL_IT : 1
THIS_WORKER : 1
HANDOUT_COMMENTS : 1
INTRUSIVE_OF : 1
ASSISTANCE_ALLERGIES : 1
PATIENT_ASSIGNED : 1
FIDDLEHEADS_RECORD : 1
HAS_AGREED : 1
MALE_FOR : 1
AMOUNT_ACTIVE : 1
VETERAN_SCHEDULED : 1
WORKING_FEELING : 1
COMMENTS_WOULD : 1
GENERAL_MD : 1
AND_COWORKERS : 1
OCT_INHALER : 1
HOSTILITY_US : 1
SLEPT_ONLY : 1
WATER_WITHIN : 1
UFH_DRAWN : 1
PHONE_OF : 1
HRS_QAM : 1
UP_LEFT : 1
FREQUENCY_RANGE : 2
BREATHING_NY : 1
ASSESSMENT_DATE : 1
THE_MOUNTING : 1
DEPRESSION_WITH : 1
BUCKEYE_THIS : 1
BRIEF_NOT : 1
GE_WHERE : 1
OR_NERVE : 1
NO_RUB : 1
CONSIDER_TO : 1
POA_NUMBER : 1
MEDS_NO : 2
HYPERTENSION_CURRENT : 1
HAS_BEEN : 11
FOR_HOMELESS : 1
TO_HS : 1
AGO_NOW : 1
ORDERS_MENTAL : 1
DAILY_ACTIVITIES : 1
OF_COVERED : 1
COULD_DISCUSS : 1
FOR_FOLLOW : 1
COCAINE_FOR : 1
MANY_DRINKS : 1
UNTIL_COMES : 1
ULCERATION_TO : 1
PROVIDER_FOR : 1
ORIENTED_AT : 1
THERE_PHYSICAL : 1
LOWER_EXTREMITY : 1
AS_PATIENT : 1
NO_STAGING : 1
FOR_PRESENTING : 1
BE_AS : 1
UNRE_HE : 1
TAKE_EACH : 1
UPDATED_LAST : 1
CONFERENCE_WITH : 1
OF_FOLLOWING : 3
COMES_IN : 1
WITH_OTHER : 1
APR_COMMUNICATION : 1
BETTER_EXPECTED : 1
URINE_METHOD : 1
MEDS_RESTARTED : 1
HE_APP : 1
SIGNS_AND : 1
BILLS_WHEN : 1
PROVIDER_EXAMINATION : 1
POSITION_BRAKES : 1
LABS_WT : 1
OBSTRUCTIVE_PULMONARY : 1
REQUESTING_TO : 1
WAIT_RETURN : 1
CHANGES_CONCERN : 1
WK_WITH : 1
GROUP_VETERAN : 1
NO_ORIENTED : 1
CONTACTED_BUCKEYE : 1
ED_NURSE : 1
CONTINGENCY_WAS : 1
ANTIBIOTIC_DAILY : 1
GO_DENIES : 1
DENIES_ANY : 3
OPTION_AND : 1
ASSISTANCE_ACID : 1
TO_OR : 3
CLOTHES_ASSISTANCE : 1
EMOTIONALY_SLEPT : 1
ENCOURAGEMENT_PAIN : 1
REMOVING_FROM : 1
DEFERRED_PRN : 1
CHANGES_THIS : 1
HEAD_NO : 1
NUMBNESS_AND : 1
GOLD_SERVICES : 1
PSYCH_PT : 1
AT_BEDTIME : 1
ANXIETY_EXCESSIVE : 1
VA_FEE : 1
FROM_SEVERAL : 1
EDUCATION_LANGUAGE : 1
PATIENT_IS : 10
POSITIVE_INTERVENTION : 1
THIS_PROVIDER : 1
TO_REVIEW : 2
UNIT_FOUND : 1
AXIS_CHECK : 1
PATIENTS_DISCUSSED : 1
WAS_EACH : 1
ALSO_ABOUT : 1
PLAN_PATIENT : 1
CURRENTLY_MG : 1
MONITOR_SIGNS : 1
OT_PAIN : 1
IMMUNIZATION_EDUCATION : 1
SINCE_APR : 1
THE_STATED : 1
PL_ON : 1
CURRENT_ORDER : 1
TYPE_CONTACT : 1
WITHIN_NORMAL : 1
UPSETTING_IN : 1
COMPLAINT_DEPRESSED : 1
RELIGIOUS_INFLAMMED : 1
GIVEN_YES : 1
ISSUES_OF : 1
AND_EVEN : 1
BE_INTERMITTENT : 1
THE_PROXIMITY : 1
ACTIVE_PLAN : 1
OFF_SOME : 1
ICDCM_ONLY : 1
NO_MILD : 1
ABLE_BIPOLAR : 1
NUMBING_USED : 1
DISCUSSED_GUNS : 1
PRESCRIBED_ANY : 1
AND_THE : 4
STAFF_NOT : 1
SIT_FURTHER : 1
CARE_AND : 1
BY_NEW : 1
THE_INTESTINE : 1
REPLACES_FELODIPINE : 1
TO_AID : 1
HYDRATION_STATUS : 1
SEEMED_WHAT : 1
GIVEN_AND : 1
BMI_MASS : 2
PER_PROVIDER : 1
PREVENTION_INITIAL : 1
ADVERSE_EVENTS : 1
OR_RADIATION : 1
PATIENT_REVIEW : 1
BELT_PROBLEM : 1
SX_HI : 1
CARDIOVERSION_NONE : 1
IN_EDUCATION : 1
FOR_CARE : 1
LIFESTYLE_MODIFICATIONS : 1
STATUS_DISABLED : 1
INTAKE_OUTPUT : 1
THAT_IMPACT : 1
THE_HIM : 1
SC_DAILY : 1
YESX_THREE : 1
ENCOURAGE_INTAKE : 1
METHOD_OF : 1
HE_TO : 2
COMPLICATIONS_CARDIAC : 1
IN_STATUS : 1
HIS_PAIN : 1
DID_MEASURE : 1
BENIGN_PROSTATE : 1
ELECTS_TRANSFER : 1
HISTORICAL_SINCE : 1
VARIGATED_RESP : 1
AFFECTIVE_MIXED : 1
FOCUS_OF : 1
BUT_FREQUENCY : 1
GRADE_DMII : 1
MORSE_FOR : 1
BARRIERS_TO : 1
EKBHINTERDISCIPLINARY_TX : 1
FROM_ABOVE : 1
WED_PATIENT : 1
THE_CONDITIONS : 1
STATUS_PT : 1
FOR_SOME : 2
ON_PT : 1
LIB_FOR : 1
RESTRICTION_IS : 1
FEELING_DID : 1
FROM_BVA : 1
ON_WILL : 1
ON_OF : 1
CM_UPDATE : 1
FATHER_THOUGHTS : 1
ACTIVITY_AD : 1
COMPLAINT_VETERAN : 1
HOUR_WHICH : 1
VA_PURPOSE : 1
BACKGROUND_DO : 1
FOR_THEN : 1
BRUISING_HYGIENE : 1
WHEN_DIARRHEA : 1
INITIAL_LAST : 1
IPC_MET : 1
PRIOR_INFLUENZA : 1
SETTING_PATIENT : 1
ATTEMPTED_CONTACT : 1
NOW_IS : 1
BACK_STATUS : 1
THIS_SIMVASTATIN : 1
CHF_ISUFF : 1
HAD_PT : 1
PT_AMEND : 1
PERCEPTION_NO : 1
DCD_FROM : 1
HAS_WITH : 2
HANDS_INCLUDE : 1
SPACER_ADDENDUM : 1
HIGH_DYSPLASIA : 1
DISCUSSED_PATIENT : 1
MSW_STUDENT : 1
FOLLOWING_ITEMS : 1
HARRINGTON_TXC : 1
LOWER_BACK : 1
CONSIDERED_BE : 1
NOT_JOB : 1
ID_BAND : 1
AS_SOB : 1
COUNSELING_HAS : 1
ARE_REQUIRED : 1
FEELING_LONELY : 1
FEELING_PHYSICALLY : 1
MEDICINE_COORDINATION : 1
VOICES_HOMICIDAL : 1
LOCATION_BACK : 1
SERVICECONNECT_ATTENDED : 1
RACE_RACE : 1
NOTE_POTASSIUM : 1
ORIENTED_EXTREMITIES : 1
TO_IN : 5
FREQUENCY_HAS : 1
OTHERS_DOSING : 1
HAS_OUTCOME : 1
CON_REC : 1
FALLING_IMMEDIATE : 1
CALL_BELL : 1
MALE_MULTIPLE : 1
THAT_THIS : 1
REL_DEVELOPMENTS : 1
MASS_AUG : 1
CRISIS_HOTLINE : 1
REPORT_ADDENDUM : 1
COGNITION_OR : 2
SIGNS_CALL : 1
EXAM_FOR : 1
NUMBER_OF : 1
SUFFERS_CARDIOGENIC : 1
HEIGHT_CM : 1
SOON_AS : 1
SYNCOPE_IS : 1
OF_CONSUME : 1
ACID_MG : 2
TREATMENT_CURRENT : 1
SUPPLIES_CALL : 1
WWII_RUNNING : 1
SMOKED_HAD : 1
WEARING_DARK : 1
NO_APPETITE : 1
WITH_MR : 1
UNIT_GIVEN : 1
DIALOG_NURSE : 1
CHERRY_TO : 1
GINGIVA_NO : 1
EDUCATED_ALERT : 1
AFFECTIVE_DISORDER : 1
TAKE_DOUBLE : 1
PAIN_NONE : 1
SMOKING_IS : 1
GET_CD : 1
DURING_HIS : 1
HOURS_YES : 1
HAS_ADMITTED : 1
POTASSIUM_PAIN : 1
CONSULT_WITH : 1
NOTICE_ANY : 1
PRN_FOR : 2
WE_IOP : 1
ACTIVE_REACH : 1
GASTRITIS_OF : 1
CHANGED_ASSESSMENT : 1
HAS_TO : 3
AT_CC : 1
GRANULOMATOUS_ADDENDUM : 1
FORM_YESTER : 1
SURGERY_PROCEDURE : 1
HOMICIDAL_IDEATION : 1
YOU_HELP : 1
NO_WILL : 1
EXTREMITIES_ALLERGIES : 1
PHYSICAL_BEHAVIORAL : 1
OFFERING_TO : 1
INFORMED_HIM : 1
NO_WAVE : 1
WHO_WAS : 1
PSYCHOSOCIAL_OF : 1
IF_TRUE : 1
MAY_CATH : 1
MG_MEMBERS : 1
ANTIANXIETY_MEDS : 2
ADDENDUM_COUNSELING : 1
WHEN_ON : 1
NKA_SELF : 1
FAT_UPPER : 1
AND_ABOVE : 1
THAT_HHA : 1
ACCOMPANIED_FOR : 1
KINETRON_SIT : 1
SCANNED_CONSENT : 1
SEEN_BY : 1
OVER_PAST : 1
CAN_CONFERENCE : 1
COMPLAINTS_COMMENTS : 1
NUTRITION_PMH : 1
PT_THEM : 1
ABOUT_THE : 1
MOOD_RACING : 1
BEING_DATE : 1
US_SEEMS : 1
COMPLETE_MAXILLARY : 1
NO_PATIENT : 3
AND_OUTPUT : 1
LEARNING_ABLE : 1
MEDICATIONS_USUAL : 1
HAVE_DEPRESSED : 1
AS_FOLLOWING : 1
PATIENTS_IN : 1
CONTRAINDICATED_RECORD : 1
ACCESS_MEDICAL : 1
DIED_AT : 1
PRESENT_PROJECT : 1
FOR_EVALUATION : 1
EMOTIONAL_USED : 1
REASSESSMENT_PATIENT : 2
THEN_HIM : 1
WHY_CARAFATE : 1
CONFERENCE_CALL : 1
CRITERIA_YO : 1
GOT_ON : 1
ULCERATION_SUB : 1
THEY_ARE : 2
THE_COPC : 1
PAIN_EXPRESSED : 1
HEART_THE : 1
DL_LR : 1
DRUG_REACTIONS : 1
ON_OTC : 1
COMMENTS_LIKE : 1
MEDICATION_TO : 1
ACUTE_MONITOR : 1
CE_RETURN : 1
FOR_EVIDENCE : 1
HYDRATION_AND : 1
LB_AMLODIPINE : 1
PAIN_HYPERINFLATION : 1
ADMITTED_TO : 1
DURING_OUR : 1
WORRY_AND : 1
MG_ACETAMINOPHEN : 1
HOW_MANY : 1
SIGNS_INCREASED : 1
HYDROCODONE_UNTIL : 1
NO_PROVIDER : 1
MET_TEAM : 1
WIFE_COMPLAINED : 1
AUG_HE : 1
AFTER_GENITOURINARY : 1
OTHER_WHO : 1
HIS_OTHER : 1
REASSESSMENT_SHE : 1
EXIT_INTERVIEW : 2
DIMINISHED_BED : 1
REQUEST_BLOOD : 1
AFTER_DOES : 1
YOU_ANY : 1
UNSTEADY_GAIT : 1
FEELING_INADEQUATE : 1
GIVEN_NO : 1
TO_PLEASE : 1
KNOWN_OUR : 1
TEAM_DELTOID : 1
GIVE_HIS : 1
GIVEN_OPPORTUNITY : 1
MOVEMENTS_VETERAN : 1
FINANCES_END : 1
NU_SIDE : 1
YOUR_PRIMARY : 1
PRESYNCOPE_PT : 1
HE_OR : 1
HE_HE : 2
INDEPENDENTLY_ON : 1
SSN_IMPULSIVE : 1
THREE_FEW : 1
ED_NURSING : 2
OF_SCREEN : 1
TOLERATED_PROCEDURE : 1
ACTIVITY_PER : 1
BLOODWORK_IS : 1
NOT_FOLLOWING : 1
INCREASED_IN : 1
READS_ENGLISH : 1
ORTHOPEDIC_WITH : 1
INFORMED_CONSENT : 1
WITHIN_PSYCHOTROPIC : 1
LAMVIUDINE_IN : 1
BED_REASSESSMENT : 1
ORANGE_TEAM : 1
BED_ALARM : 1
WITH_CONSULT : 1
HIS_WIFE : 2
TRAVEL_ADVANCED : 1
TRANSFERS_HAS : 2
ENCOURAGEMENT_IS : 1
VOICED_UNDERSTANDING : 1
YESTER_REFLECT : 1
URINAL_URINE : 1
PRESENT_SI : 1
SYNCOPE_WEAKNESS : 1
INFORMED_THE : 1
DOES_TO : 1
DENIES_DENIES : 1
ALSO_NEEDS : 1
BLE_PULSES : 1
CLEAN_THAT : 1
TERAZOSIN_CAP : 1
DID_SMOKE : 1
RESTING_AT : 1
STAFF_POST : 1
EXCEPT_FOR : 1
OF_IN : 2
NONE_BEDREST : 1
OF_NEURO : 1
PATIENT_TIME : 1
SIDE_FACILITY : 1
LEFT_MESSAGE : 1
CALL_BACK : 1
ALERT_AND : 3
APPOINTMENT_NO : 1
FOLLOWING_INORDER : 1
CAPACITY_OR : 1
PATIENT_DATE : 1
HELPFULNESS_SPECIMEN : 1
ABLE_FUNCTION : 1
OUR_AFTER : 1
SEVERAL_TIMES : 1
LANGUAGE_BARRIERS : 1
REASSESSMENT_DEMOGRAPHICS : 1
ALCOHOL_YOU : 1
HISTORY_CONFIRMED : 1
TAB_CONTACT : 1
BELLO_PATIENT : 1
STATES_APP : 1
THERE_NONE : 1
INTERMITTENT_NUMBNESS : 1
BLOOD_PRESSURE : 7
PROVIDER_MENTAL : 1
IS_INTACT : 1
POA_AND : 1
ARMS_WRISTS : 1
TO_FAMILY : 1
NOW_STAYING : 1
THE_OF : 7
NO_DATA : 1
PAIN_ASSESSMENT : 4
PATIENT_EDUCATION : 4
RADIATION_IS : 1
HIGH_GRADE : 1
DAILY_FOR : 1
SUBSEQUENTLY_AND : 1
USE_LEFT : 1
MEDS_AND : 1
HUMOR_LEAD : 1
THE_THROAT : 1
BY_PLATINUM : 1
STILL_ABLE : 1
CURRENTLY_DRINKING : 1
WRISTS_FINGERS : 1
TO_SEAT : 1
WITH_STOMACH : 1
PREVENTION_NEED : 1
TO_MONITOR : 1
THAT_STAFFING : 1
PT_YO : 1
LOW_BP : 1
HISTORY_PHYSICAL : 1
PT_HAS : 2
CHIEF_COMPLAINT : 4
RESENTMENT_ANOTHERS : 1
VITALS_LEAD : 1
FOR_ANXIETY : 1
ROTH_NO : 1
TOBACCO_PRODUCTS : 1
DATA_RESP : 1
THAT_HE : 6
ONLY_DECREASED : 1
HAVE_SPECIFIC : 1
AND_PNEUMOCOCCAL : 1
LATERAL_NO : 1
ABOUT_NOT : 1
RELAPSE_BOTH : 1
AGREE_FOR : 1
TO_BONE : 1
INJECTION_NO : 1
SINGARAJAH_CLEMENT : 1
PATIENT_STATED : 1
PRACTICES_INCLUDE : 1
THE_FOR : 1
CHAPTER_WERE : 1
MONITOR_VALUES : 1
DESIGNATED_DRIVER : 1
LOSS_OF : 1
SPECIFIC_WALKING : 1
OBTAINING_INFORMED : 1
WAS_TOLD : 1
TAKE_EAR : 1
THAT_PASSING : 1
DO_YOU : 1
HIGHWAY_PAIN : 1
HE_STILL : 1
MAY_MR : 1
ACUTE_REHAB : 1
DOCUMENT_ATTACHED : 1
DYSPLASIA_EVALUATE : 1
TABLETS_PO : 1
CHRONIC_ON : 1
ONE_BY : 3
CELL_IT : 1
MRI_WILL : 1
TOPIC_HANDOUT : 1
SEX_ED : 1
HAS_CONSTIPATED : 1
PAIN_SCALE : 1
WILL_SCHEDULED : 1
NY_SMOKED : 1
ATTACHED_THIS : 2
INTO_SCHOOL : 1
GET_ME : 1
ENCOURAGING_CALL : 1
GAVE_POA : 1
PT_ATTEND : 1
INFORMED_OF : 1
PATIENT_DECISIONMAKING : 1
NEW_REC : 1
OF_OUTPATIENT : 1
INDEX_SEP : 1
TO_AFFECTIVE : 1
BLDG_PAIN : 1
CALL_WITH : 1
PRESSURE_REPLACES : 1
WAS_AN : 1
TENDERNESS_CDI : 1
THIS_AM : 1
MAKE_ANOTHER : 1
WITH_THIS : 1
THE_PT : 4
DETAILED_ATTEMPTED : 1
NO_MALE : 1
RECEIVED_DEPT : 1
SOME_MEDICATIONSCRESTOR : 1
ABOVE_PROVIDER : 1
DISPUTES_PERFORM : 1
LAST_THE : 2
THE_THAT : 1
CD_OF : 1
PUNCTURE_PHYSICIAN : 1
FAT_ARMS : 1
GIVEN_SPC : 1
HIS_FOR : 1
POST_ALLERGIES : 1
ALSO_STATED : 1
HIS_BED : 1
MAXILLARY_UPPER : 1
RECTAL_COPD : 1
LEFT_FATHER : 1
OCCASION_IN : 1
TO_RETURN : 1
GETS_IT : 1
OF_WOUND : 2
IN_LAST : 3
WITHOUT_ASSISTANCE : 2
CONSULT_DATE : 1
HOME_BUT : 1
TX_NEEDS : 1
CULTURAL_ETHNIC : 1
WELTS_FAMILY : 1
DATE_LEARNING : 1
INTENSIFIED_HAS : 1
CHAR_MH : 1
FOLEY_AMBULATORY : 1
VALUES_DIAGNOSIS : 1
VOICE_PAIN : 1
WEIGHT_MONTHS : 1
THAT_THEY : 1
PERSON_EDUCATED : 1
ADVIL_ALEVE : 1
ANEMIA_COPD : 1
HIS_THE : 1
FROM_FOLEY : 1
WE_GROUP : 1
DOUCHE_YES : 1
HOPELESSNESS_ANY : 1
LR_CYRNG : 1
HYPOTHYROIDISM_DEF : 1
TRAZODONE_TAB : 1
CLINIC_MONTHS : 1
KG_DIAG : 1
WAS_PATIENT : 1
INCLUDE_DIFFERENCE : 1
MALE_OUTPATIENT : 1
BOGGIO_CLEARED : 1
SERVICES_TYPE : 2
SUPPLIES_LIFESTYLE : 1
TREAT_FOR : 1
CONTROLLED_ADDENDUM : 1
DISPOSTITON_DT : 1
THREE_YES : 1
MESSAGE_WILL : 1
MD_SPEECH : 1
BIPOLAR_MAY : 1
STAYING_HIS : 1
TO_NO : 3
CRITERIA_IS : 1
NURSING_ASSESSMENT : 1
WOUND_PURULENT : 1
NUMBING_COCAINE : 1
VETERAN_DID : 1
PSYCH_PRESCRIBER : 1
MANAGEMENT_FAT : 1
TO_HOW : 1
BASES_GLUCOSE : 1
HE_IT : 1
THERE_ANY : 1
BEEN_REVIEWED : 1
WAS_RECENTLY : 1
DID_START : 1
EMER_THE : 1
CARE_DISCUSSED : 1
ANY_SXS : 1
HYPERLIPIDEMIA_CAD : 1
PATIENTS_NAME : 1
CHANGES_OF : 1
KG_CLINICAL : 1
INFORMED_PHYSICIAN : 1
CLINIC_ON : 1
PROXIMALLY_TO : 1
BODY_MASS : 2
EXPECTED_AND : 1
NO_CHANGE : 1
TRAFFIC_DENIES : 1
TRS_TXC : 2
PATCH_HRS : 1
RECIEVED_FROM : 1
DISCOMFORT_RESPONSE : 1
AT_SBA : 2
ANSWERED_RELIGIOUS : 1
THE_BASIS : 1
ELIMINATION_SKIN : 1
TX_TEAM : 1
ING_ASSISTED : 1
DRAINAGE_FEB : 1
COUNSELOR_SPC : 1
HYPERTENSION_ICDCM : 1
TEAM_WAS : 1
TO_AMA : 1
HOLDING_BB : 1
PATIENT_UNDERSTSANDS : 1
FOR_WILL : 1
AM_AND : 1
ON_RESTRICTION : 1
THE_PRESENTATION : 1
PAST_HISTORY : 2
DEPRESSED_DURING : 1
CHAPTER_COVERED : 1
HORRIBLE_OR : 1
NEED_REGULAR : 1
PAIN_ARE : 1
ALLERGIES_PATIENT : 2
SIG_ONE : 1
VANOD_SAFETY : 1
LOWER_LIP : 1
CONTACT_THE : 1
PATIENT_TUBEFEEDING : 1
DAILY_MM : 1
IS_CREATININE : 1
NO_ISSUE : 1
OF_VET : 1
WHEEZING_SOUNDS : 1
BECAUSE_WOUND : 1
TAB_ISSUE : 1
ENCOURAGE_FLUID : 1
TOTAL_BED : 1
FREQUENCY_PAIN : 1
QAM_MR : 1
HOMICIDAL_HOMICIDAL : 1
TOLD_HIM : 1
ICDCM_DIET : 1
RACE_IV : 1
CED_SUB : 1
MONITOR_PATIENT : 1
IT_FROM : 1
LIP_TORICOLLIS : 1
REQUIRE_WITH : 1
ALERT_CC : 1
BECAUSE_HAD : 1
POTENTIAL_VAGUE : 1
FOR_AS : 1
WITH_CARES : 1
BY_EVERY : 3
OVERNIGHT_BECAUSE : 1
UNDERSTANDING_OF : 1
NOT_ADDENDUM : 1
ANOTHER_PT : 1
UPPER_ED : 1
PATIENT_BEEN : 3
KNOWING_WHY : 1
BENDING_NO : 1
CHIEF_DEPRESSED : 1
WWII_AGAIN : 1
FAIR_RECOMMENDATION : 1
INFUSING_AT : 1
MODERATE_SYMPTOMS : 1
RESOLVED_IN : 1
IADLS_OR : 1
LEFT_CALLED : 1
NON_DATE : 1
AND_IN : 2
SADNESS_NEGATIVE : 1
PATIENT_STATES : 2
PLAN_PERIOD : 1
FALLING_OR : 1
TX_EKBHINTERDISCIPLINARY : 1
ETHNIC_PREFERENCES : 1
SAFETY_DIET : 1
AND_OFF : 1
PARTICIPATION_WAS : 2
DISCHARGE_REGULAR : 1
OF_WITHOUT : 1
SAFETY_ACTIVE : 1
THE_LAST : 3
UAL_AT : 1
DATE_APRIL : 1
OUTPUT_AFTER : 1
YES_FOR : 2
PROVIDER_ATTACHED : 1
HOME_RESISTED : 1
MULTIPLE_MEDICAL : 1
OF_SPEAKS : 1
HEP_NEVER : 1
FOR_LABS : 2
PROCEDURE_YOU : 1
NURSE_FOCUSED : 1
DOB_AGE : 1
NEUROCARDIOGENIC_SYNCOPE : 1
IN_RELAYED : 1
PT_TOLERATED : 1
FOR_PRESSURE : 1
ASSESSMENT_APPOINTMENT : 1
TORICOLLIS_OF : 1
VOICED_AND : 1
UNIT_AMBULATORY : 1
PO_QAM : 1
WHICH_ALSO : 1
THAN_RAL : 1
CONSTIPATED_FREQUENCY : 1
SSN_HEART : 1
WITH_UNDERSTSANDS : 1
IS_CONCERN : 1
AFTER_VIEWING : 1
EVERY_AT : 1
PRESCRIPTION_FOR : 1
OPTIONS_ESPECIALLY : 1
ATIVAN_MEMBERS : 1
NO_ANSWER : 1
SIDERAILS_LIGHTING : 1
EXCHANGE_WT : 1
PRESSURE_FELODIPINE : 1
COPD_HTN : 1
STATUS_SAYS : 1
RESTARTED_HAS : 1
DELTOID_TEMPERATURE : 1
CHECK_DID : 1
MARITAL_SINGLE : 1
PATIENT_EXPLAINED : 1
IS_NO : 2
HOPE_NOW : 1
TREATMENT_STATUS : 1
EXCLUDING_IPC : 1
DEPT_1010M : 1
PRESENT_WHICH : 1
DESPONDENT_REACTION : 1
INSTRUCTED_ON : 1
DEPRESSED_LONELY : 1
HPI_MALE : 1
TO_MEMORY : 1
FROM_HOSPITAL : 1
SIG_TIME : 1
HYG_FAIR : 1
YOU_WERE : 1
MEDICATION_BELLO : 1
ABOUT_ONE : 1
WITH_IDEATION : 1
ACUTE_HAS : 1
TEMP_DYSPNEA : 1
NOTE_CONNECTS : 1
ACTIVE_PATIENT : 1
CAD_NEED : 1
CC_URINE : 1
UP_AT : 1
PRESENTATION_FROM : 1
VET_SOME : 1
PSYCHOLOGIST_TELEPHONE : 1
AND_AGREEMENT : 1
ANATOMICAL_RIGHT : 1
IDENTIFICATION_SSN : 1
RESOLVE_HEMATURIA : 1
WEIGHT_KG : 4
HAS_HERNIA : 1
ADMISSION_PRESCRIBER : 1
BY_THOUGHTS : 1
IF_DOSE : 1
TEMP_WITH : 1
WITH_ADLS : 1
AUG_CLINIC : 1
MUSKOGEE_TEMP : 1
AS_DO : 1
TIME_COMMUNICATION : 1
TIP_INTACT : 1
IMPORTANCE_ALLOWING : 1
BEEN_HAVING : 1
NASAL_SP : 1
DATE_DEC : 1
ESCORTED_ACCOMPANIED : 1
PRIOR_BP : 1
MEDICATION_THE : 1
ELSEWHERE_VETERAN : 1
CALLED_HER : 1
STATUS_MONITOR : 1
WILL_RETURN : 1
PAIN_TELEPHONE : 1
SCHEDULED_STL : 1
ESOPHAGUS_SINCE : 1
ALLERGIES_TWICE : 1
MEDICINE_ADVANCED : 1
OWN_ABILITY : 1
GENERAL_NONSOAP : 2
WAS_MG : 1
ARE_ADJUSTED : 1
ADDENDUM_DRUG : 1
CONSIDER_TALKING : 1
MONTHS_FOR : 1
NOT_PROBE : 1
INCLUDING_DIET : 1
OF_BREATH : 1
ALERT_FULLY : 1
RECONTACT_THANK : 1
DAUGHTER_WHO : 1
ONE_OCCASION : 1
FOLLOW_APPT : 1
ON_PATIENT : 1
SHE_NONUSER : 1
FEEDS_SELF : 1
INDEPENDENT_CONTINENT : 1
YOUR_PRIOR : 1
OBSTRUCTION_INFORMATION : 1
ENDING_AT : 1
IN_WAY : 1
ACCESS_FIREARMS : 1
ASA_RESTARTED : 1
TOOLS_ON : 1
MEDICAL_OF : 1
TO_SIDE : 1
PUT_SOME : 1
ING_COPD : 1
THIS_SWR : 1
PRESSURE_PRIMARY : 1
SHARON_QUO : 1
PHYSICIAN_NOTE : 1
EKPHYSICIAN_EKNURSING : 1
ORIENTED_REQUIRES : 1
QUO_EXCEPT : 1
NO_CLICK : 1
NEW_MEDICATIONSCRESTOR : 1
VA_DATE : 1
INFORMATION_THAT : 1
FAWCETT_PAIN : 1
ALLOW_FOR : 1
NO_LB : 1
PAIN_LOWER : 1
CURRENT_ACTIVE : 1
CARE_BRUISING : 1
YO_MALE : 3
CONTINUES_READ : 1
DT_PAIN : 1
DAILY_STOP : 1
DATE_OBTAINED : 1
CLOTRIMAZOLE_TOP : 1
REPLACES_PER : 1
THE_STOMACH : 2
DATE_DENTURES : 1
LEG_AND : 1
OF_IMMEDIATE : 1
CONTINUED_RESOLVED : 1
MALATHI_NURSING : 1
PT_ANSWERING : 1
LAST_SPELLED : 1
HAVE_OF : 1
ORDER_WITH : 1
PROTOCOL_NOT : 2
RETURN_INTERVENTIONS : 1
AND_AIR : 1
SUBSEQUENTLY_ESCORTED : 1
ASSESSMENT_INPATIENT : 1
AT_AFTER : 1
FAMILY_THAT : 1
PERIPHERAL_PULSES : 1
PT_FOUND : 1
QH_STOP : 1
WEAKNESS_FROM : 1
ADENOCARCINOMA_IN : 1
NUTRIENTS_FROM : 1
HE_WEARING : 1
THINGS_PATIENT : 1
UNDERSTANDING_THE : 1
IN_FRONT : 1
TO_MENTALLY : 1
WITH_FURTHER : 1
WEAR_SEAT : 1
AND_ON : 1
HOSPITAL_NON : 1
TOO_REDUCED : 1
CC_HOUR : 1
ETC_PT : 1
TUBEFEEDING_ANY : 1
HOMELESS_YES : 1
PRESSURE_NUTRITION : 1
MIDDLE_MALE : 1
FOR_RANDOM : 1
AMIODARONE_MG : 1
EIGHT_ON : 1
AFRICAN_AM : 1
WE_CHECKED : 1
HOWEVER_AFTER : 1
HIS_MOTHER : 2
INNER_IMB : 1
SCHOOL_AS : 1
CARDIOVASCULAR_DISABLED : 1
NO_DOUCHE : 1
READS_IN : 1
INHL_ORAL : 2
NICOTINE_THAT : 1
IMAG_GOLD : 1
WOULD_REFERRAL : 1
DIALOG_ED : 1
LONGER_IS : 1
HIS_CARE : 1
DATA_AVAILABLE : 1
BRUISING_DECUBITUS : 1
OF_BOTH : 1
LPN_MILEWSKI : 1
ON_TOOLS : 1
FOR_HEART : 1
WILL_HAVE : 1
WEAKNESS_TREMORS : 1
PATIENT_PER : 1
FROM_COORDINATION : 1
ABILITY_FRONT : 1
BETTER_EVEN : 1
JUST_CARE : 1
MOBILITY_PROBLEMS : 1
SODIUM_CHLORIDE : 1
SPC_BUCKEYE : 1
REFLECT_THIS : 1
INCLUDING_SUPPLIES : 4
MOUTH_EVERY : 3
LITTLE_HOPE : 1
OR_MOBILITY : 3
DCD_CATH : 1
LIMITATION_SITUATION : 1
SW_DENIED : 1
WAS_ABOUT : 1
TENDENCIES_WITH : 1
MONTHS_AGO : 1
TO_PODIATRY : 1
LAST_NEUROPATHY : 1
OF_PC : 1
MORE_ON : 2
SIGNIFICANT_IN : 1
GIVEN_INFORMATION : 1
VERY_HELPFUL : 1
STILL_TAKING : 1
AND_ATTEMPTED : 1
ANGER_RESENTMENT : 1
ADLS_DIETARY : 1
ACTIVE_POSITIVE : 1
MET_NURSING : 1
LAMVIUDINE_HEP : 1
IV_CHECK : 1
STATUS_HYPERLIPIDEMIA : 1
CARE_IS : 1
TIMES_PER : 1
PEOPLE_TEGRETOL : 1
PLAN_AGE : 1
SERVICES_MAY : 1
IN_FOR : 7
COMFORTABLE_GAS : 2
BURNT_BODIES : 1
NEUROPATHY_DIVERTICULITIS : 1
MEDICATIONS_THE : 1
WCT_READ : 1
STATUS_HEMOPTYSIS : 1
MEDICAL_CYTOPATHOLOGY : 1
TIME_PRESENT : 1
WHY_NAME : 1
DR_INTERPRETING : 1
BEING_ADJUSTED : 1
AS_WAS : 1
PULSE_DUE : 1
TAKE_CARE : 1
INFLAMMED_DING : 1
FOR_EXTENSION : 1
NO_PURULENT : 1
MHICM_ASSESSMENT : 1
ACCESS_TO : 1
SHE_LIKE : 1
THEIR_EXPERIENCES : 1
ED_MODERATE : 1
STATES_WILL : 1
LABS_HER : 1
ON_IMAGING : 1
PLACE_PAPER : 1
COPD_RAL : 1
CHLORIDE_REASSESSMENT : 1
IN_HEP : 1
INTERVENE_IN : 1
VET_THE : 1
PLACE_FOR : 1
CARE_WITH : 1
BY_PATIENT : 1
VIEW_LARGE : 1
REARING_TO : 1
PULSE_RESP : 1
HOUR_EIGHT : 1
SPC_CONTACTED : 2
EVIDENCE_CONTINUED : 1
THOUGHTS_EXCESSIVE : 1
COPD_MITRALVALVE : 1
BLOOD_PRIMARY : 1
FOR_MEDICAL : 2
TAB_ONE : 2
WELTS_HISTORY : 1
FINDINGS_PATIENT : 1
LOWER_INDIVIDUAL : 1
DEMOGRAPHICS_ANY : 1
NO_MH : 2
YES_WITHIN : 1
OTC_APAP : 1
ON_OFF : 1
WEAK_STATES : 1
AN_MALE : 1
HIGHWAY_BLDG : 1
OF_GABAPENTIN : 1
MIDDLE_INITIAL : 1
REPORT_AND : 1
TO_VISIT : 1
AID_IN : 1
SIGNIFICANT_LOSS : 1
THE_BEING : 1
TO_TX : 1
ADLS_IADLS : 1
INCLUDED_THE : 1
PO_QH : 2
RELATED_THIS : 1
ORDERS_PING : 1
IN_HE : 1
FEELING_TREATMENT : 1
ON_PSYCH : 2
MANAGEMENT_WITH : 1
VETERAN_STRUGGLED : 1
TRAFFIC_PRESENT : 1
ESPECIALLY_MAY : 1
FATHER_PATIENT : 1
FRONT_BRIDGEWORK : 1
TO_ACCESS : 1
APPOINTMENT_MH : 1
DID_PAIN : 1
IN_AGREED : 1
1010M_HAVE : 1
HIS_WITH : 1
FOR_RISK : 1
SELF_COMPLAINT : 1
STAGING_PURPOSES : 1
APPT_WILL : 1
PREVENTATIVE_MEDICINE : 1
REPORT_TO : 1
HE_ALSO : 1
RISK_SAME : 1
TO_ASSIST : 1
NEW_ULCERATION : 1
THEM_THAT : 2
HOSPITAL_GENITOURINARY : 1
DRINKS_ONE : 1
ATTEMPTED_TO : 1
AND_ENCOURAGEMENT : 1
AUTHOR_SHARON : 1
RISK_DUE : 1
PREFERENCES_IMPACT : 1
MEDICAL_CURRENT : 1
TO_WRIST : 1
LIGHTING_THIS : 1
OF_THIS : 1
JUN_PNEUMOCOCCAL : 1
LN_PHONE : 1
NUTRITION_AMLODIPINE : 1
SEEN_RESTING : 1
TO_THEIR : 1
NEED_WEAR : 1
RIGHT_PEOPLE : 1
FOLEY_THIN : 1
PSYCHOTROPIC_DATIVE : 2
WITHIN_REACH : 3
COMPLETE_UPPER : 1
TOBACCO_DATE : 1
PATIENT_PLACED : 1
RECEIVED_THE : 1
YES_ASSESSMENT : 1
EAR_FOR : 1
HESITATE_TO : 1
OF_COMES : 1
DUE_DIFFICULTY : 1
IN_ADDENDUM : 2
SMOKING_OR : 1
FOR_ATIVAN : 1
UNDERSTANDS_TROPONIN : 1
HE_REPORTS : 1
CYTOPATHOLOGY_ADENOCARCINOMA : 1
ESI_OR : 1
INFLUENZA_CC : 1
GOING_COPING : 1
MAKING_AMENDS : 1
FOLLOWING_WITHIN : 1
IS_THE : 3
AZ_MARICOPA : 1
AGREEMENT_CURRENT : 1
SIG_TAKE : 1
PT_BY : 1
SEEN_LYING : 1
AND_HOLDING : 1
FIREARMS_UNKNOWN : 1
DIFFICULTY_PHYSICIAN : 1
MOOD_DEPRESSED : 1
WAS_BY : 1
PERIPHERAL_PATIENT : 1
ANY_THE : 2
HAD_QUESTIONS : 1
REMINDERS_PAIN : 1
ISUFF_DNR : 1
OF_LIVING : 1
ESOPHAGEAL_TREATMENT : 1
IS_SCHEDULED : 1
HOPE_STILL : 1
WORK_CELL : 1
PRESENT_LEVEL : 1
SWELLING_OCT : 1
ON_CALL : 1
HISTORY_ADMISSION : 1
REMEMBERED_NOT : 1
THE_IMPORTANCE : 2
HOPELESS_INADEQUATE : 1
RECIEVED_CALL : 1
PT_MALE : 1
THEM_KNOW : 1
AM_AN : 1
WAS_THAN : 1
DIAG_UNSTEADY : 1
FROM_HEALTH : 1
MAKE_SYMPTOMS : 1
HEALTH_MS : 1
PRN_GIVE : 1
MEDS_VS : 1
NEXT_SC : 1
SINGLE_THANK : 1
THE_CHEST : 1
EDEMA_BILAT : 1
PROGRESS_ALLERGIES : 1
WITH_WAS : 1
MEDICATIONSCRESTOR_MG : 1
SCHEDULED_APPOINTMENT : 1
NURSING_WK : 1
TO_FUNCTION : 1
NO_ASSOCIATE : 1
FAMILY_HISTORY : 1
REVIEWED_TEAM : 1
HAND_PMR : 1
OUR_TO : 1
EGO_DISCUSSED : 1
ER_AND : 1
PATENT_AND : 1
THAT_RELATIVELY : 1
ONE_HOUR : 1
UP_TO : 1
SEVERAL_WITH : 1
HIS_ENAMA : 1
WAY_SINCE : 1
IID_LEFT : 1
INTERVIEW_SENSORY : 1
ADVERSE_RESOLVE : 1
URINARY_CC : 1
MAY_TELERET : 1
WITH_NONE : 1
ACTIVE_FOOD : 1
BRIEFLY_IS : 1
MEDICAL_CARE : 1
HAVE_OR : 1
SOB_NOTED : 1
DID_PATIENT : 1
SO_THOUGHT : 1
AND_MEDICAL : 1
TO_DOCTOR : 1
STATING_THAT : 1
WHEELCHAIR_TYPE : 1
ANY_DAILY : 1
METOPROLOL_TAB : 1
BETTER_NEW : 1
HEART_RRR : 1
AND_MHC : 1
PROVIDER_PHYSICIAN : 1
WAS_STATING : 1
ANXIETY_WAS : 1
ON_NO : 2
WATCHING_HBO : 1
ADVERSE_REACTIONS : 2
TRIAGE_SKIN : 1
UBE_KINETRON : 1
PAIN_WT : 1
PURPOSE_OF : 1
LIVES_MUSKOGEE : 1
THE_COMMENTS : 1
ICU_NURSING : 1
MALE_ED : 1
BATHING_TOTAL : 1
IT_NOT : 2
PATIENT_UPCOMING : 1
AS_ACTIVE : 1
SBA_AT : 1
ETODOLAC_PODIATRY : 1
RESP_NOTE : 1
BBSC_RESPIRATIONS : 1
THE_SIDE : 1
ON_MR : 1
OP_PROBLEM : 1
FEEDS_DISCHARGE : 1
IDENTIFIED_HOSPITAL : 1
ACTIVE_ICU : 1
WIFE_SUBJECTIVE : 1
SO_IS : 1
CONSENT_PROXIMALLY : 1
OF_TRACE : 2
WITH_DENIES : 1
HOME_VET : 1
SEVERED_IN : 2
GRANDIOSITY_THERE : 1
RESPIRATIONS_AND : 1
PRINT_AND : 1
DIARRHEA_STARTED : 1
MG_QAM : 1
NO_CHEST : 1
AND_FRONT : 1
POST_CARE : 1
AND_INTAKE : 1
TESTING_WITH : 1
THE_MENTAL : 1
DOES_HISTORY : 1
NONUSER_TOBACCO : 1
IS_WORKING : 1
RECORD_PROGRESS : 1
NP_SCHEDULED : 1
HRS_IS : 1
FOR_ISOLATION : 1
BLE_EDEMA : 1
HOSPITAL_CARE : 1
PAIN_CON : 1
TO_CURRENT : 1
BARRETTS_SINCE : 1
HIS_ANXIETY : 1
ON_AND : 2
FEB_BLE : 1
EXTENSION_REPORT : 1
CM_PT : 1
LOOK_FINISHING : 1
YES_PREOP : 1
CA_INPATIENT : 1
JOE_TRS : 1
FOR_ONSET : 1
NO_MEDS : 1
ORDERS_PTS : 1
VACCINE_AT : 1
PO_PRN : 2
WAS_TOO : 1
PARTICIPATION_ALSO : 1
PT_THIS : 1
ANXIETY_WORRY : 1
THEY_DISCUSSED : 1
TO_SMOKE : 1
HIM_HAD : 1
PHYSICAL_OR : 1
MALE_PRESENTS : 1
MONITORING_OF : 1
START_NURSING : 1
UNDERSTAND_WHY : 1
BELOW_INDIVIDUAL : 1
LOW_DMII : 1
HEART_BLOOD : 1
PT_NO : 1
US_SEVERED : 1
REPORTED_CHEST : 1
NURSE_ASSESSMENT : 1
ESOPHAGUS_SCANNED : 1
DISCHARGE_HE : 1
AT_WORST : 1
ACCEPTANCE_PROPORTIONAL : 1
FOR_CALLED : 1
IN_MORE : 1
SEEMS_HAVE : 1
STIMULATOR_HAS : 1
MSW_MANAGER : 1
IN_MALE : 1
MTP_INTERVENTION : 1
CONSULT_OPEN : 1
PATIENT_REQUESTING : 2
PERIWOUND_ERYTHEMA : 2
PAPER_CONTINGENCY : 1
ADMINISTERED_ALCOHOL : 1
AND_FREE : 1
CARE_PROVIDER : 4
DAILY_OXIMETRY : 1
GREATER_IN : 1
HOW_TO : 1
ORIENTED_GROOMED : 1
NO_LIVING : 1
OUTCOME_NO : 1
DIAB_IMAG : 1
RECORD_CONTINGENCY : 1
WEIGHT_YES : 1
NURSING_SERVICES : 1
APP_CC : 1
EXPRESSED_BBSC : 1
CONSTIPATION_AND : 1
CAPSULES_MOUTH : 1
OCCUPATION_DRIVER : 1
VET_SEEMED : 1
DATE_SEP : 1
UNEMPLOYMENT_AS : 1
DENTAL_FINDINGS : 1
EVAL_URINARY : 1
AND_OF : 3
PLEASE_IN : 1
THEIR_CONTINUED : 1
STEP_CARE : 1
SHORTNESS_OF : 1
HTN_PLANS : 1
DATE_UNKNOWN : 1
BUPROPION_FOR : 1
PRN_STOP : 1
ANXIETY_SYND : 1
SATT_GENERAL : 2
INFORMATION_FOR : 2
FOR_RETURN : 1
HISTORY_FALLING : 1
FOLLOWING_PRIMARY : 1
RTL_MG : 1
ADMISSIONS_STAFF : 1
LIMITATION_LIVING : 1
GROIN_HE : 1
TRANSFERRED_BVA : 1
REVIEW_AND : 1
MIXED_LEFT : 1
PULSE_FALLS : 1
MONITOR_HYDRATION : 1
THEY_QUITE : 1
NURSING_ACUTE : 1
CLOSE_SBA : 1
IN_HIS : 2
ACETAMINOPHEN_PATCH : 1
EXCEED_MG : 2
IN_RECEIVED : 1
OF_APPOINTMENT : 1
REQUEST_MEDICATION : 1
AND_PROGRESS : 1
WITH_ANY : 1
MOTHER_WHILE : 1
OTHER_USED : 1
DAUGHTER_SOME : 1
LISA_CM : 1
REVIEWED_WITH : 1
CHEST_SKIN : 1
DIAGNOSTIC_IMPRES : 1
PLEASANT_AND : 2
HELPFUL_CALLED : 1
VETERAN_SEVERED : 1
LOSS_THE : 1
IS_ON : 2
KRISHNASWAMY_MALATHI : 1
DISPUTES_YES : 1
LEFT_VOICEMAIL : 1
FOUND_TO : 1
HAS_DISCUSSED : 1
AND_DENIED : 1
PATIENT_PHYSICIAN : 1
SWELLING_INFLUENZA : 1
SEE_TO : 1
CD_MAY : 1
NOTE_FROM : 1
EXCEED_IN : 1
WHEEZING_VERY : 1
IMPAIRMENT_METOPROLOL : 1
PRESCRIBED_OF : 1
OF_CURRENT : 1
ORIENTED_MOVES : 1
WAVE_CHANGES : 1
NO_MALODOR : 1
DENIED_OTHER : 1
ANXIETY_WITHIN : 1
IN_WE : 1
FREQUENCY_CALLED : 1
AND_FRIENDLY : 1
LIST_PROVIDED : 1
FULL_LAST : 1
ED_DOCUMENT : 1
REPORTED_FOR : 1
TRANSFER_TO : 2
INFECTIOUS_ORGANISM : 1
STRUCTURE_QUESTIONS : 1
THE_DETAILS : 1
ACTIVE_PROBLEM : 1
ALCOHOL_DID : 1
NUTRITION_MORSE : 1
IDENTIFIED_DIVERTICULOSIS : 1
ADEQUATE_BESYLATE : 1
NO_TENDERNESS : 1
DAILY_SHE : 1
URINE_FROM : 1
SINUSITIS_PAIN : 1
APPOINTMENT_BIPOLAR : 1
DT_POX : 1
NO_PSYCH : 2
STAND_AT : 1
ACCOMPANIED_BY : 1
NOT_BEEN : 1
THE_SUBJECTIVE : 1
VISIT_HE : 1
LEFT_TEMPERATURE : 1
VERY_FROM : 1
OF_URINARY : 1
CHALK_BY : 1
MIN_NURSING : 1
NURSING_FOR : 1
TO_MULTIPLE : 1
WHEN_PT : 1
TO_AS : 2
HIS_DAUGHTER : 1
WEIGHT_LOSS : 2
WITH_MEDS : 1
RECEIVED_PATIENT : 1
COMMENTS_UNSTEADY : 1
CONFIDENT_THEY : 1
WIFE_VET : 1
LEFT_ST : 2
BILLS_ETC : 1
SC_NOX : 1
ADDENDUM_PATIENT : 1
STAYING_WITH : 1
IN_LIVING : 1
LIVING_IN : 1
TEAM_ANGER : 1
THE_LONG : 1
LOSS_PROGRAM : 1
TRAVEL_DIRECTIVE : 1
PRESSURE_ON : 1
COMMUNICATION_ENGLISH : 1
RECOMMENDATIONS_PROCEDURE : 1
ADDENDUM_PT : 1
WHAT_PATIENTS : 2
TUNNEL_UNDERMINE : 1
CITALOPRAM_AT : 1
BY_JACHI : 1
CHRONIC_ULCERATIONS : 1
ENCOUNTER_EXTREMITY : 1
PROJECT_AND : 1
RC_MODERATE : 1
ENGLISH_LANGUAGE : 1
OTHER_YOU : 1
NONE_LYMPH : 1
THIS_SHIFT : 1
APPT_LEFT : 1
AT_VA : 1
WILL_HEALTH : 1
KING_AFTER : 1
PRESCRIPTION_HYDROCODONE : 1
TESTING_THIS : 1
TYPE_CALL : 1
AT_LENGTH : 1
ABDOMEN_NO : 1
BLOOD_CHECK : 1
SOMEWHAT_CONTINUES : 1
OF_LECTURE : 1
STATES_HE : 5
UPCOMING_APPOINTMENT : 1
NOT_TUNNEL : 1
HAVE_DISCUSSED : 1
NO_TO : 1
CALLED_CEL : 1
IS_IN : 2
FALL_POTENTIAL : 1
PRINT_FOR : 1
SWER_IN : 1
OR_DIAG : 1
BARRIER_MCH : 1
OF_THINKS : 1
SCREEN_HYPERTENSION : 1
FOR_WEIGHT : 1
DIMINISHED_TOTAL : 1
CLINIC_FOR : 1
RTL_INSERT : 1
CITALOPRAM_THIS : 1
INDIVIDUAL_TESTING : 1
INJ_MG : 1
MOVEMENTS_MH : 1
AND_EXACERBATION : 1
SATT_NONSOAP : 2
THE_INTOXILYZER : 1
TO_RFA : 1
HAD_TO : 3
PT_MACHINE : 1
CTRS_TRS : 1
LUMBAR_BY : 1
CHERRY_PEACH : 1
GROOMED_WAS : 1
TX_ANGER : 1
PHYSICAL_PHYSICIAN : 1
FOR_WHILE : 2
PHONE_PT : 1
EDUCATION_NOT : 1
CRAVINGS_CESSATION : 1
WILL_PRINT : 1
PAIN_SUCH : 1
EPIDURAL_STEROID : 1
CONSULTS_THAT : 1
METFORMIN_WHICH : 1
FATHER_AND : 1
DENIED_SI : 1
CURRENT_FOR : 1
UP_COPING : 1
MARRIED_AGE : 1
MG_FOR : 1
HEART_BELOW : 1
FAWCETT_CLINIC : 1
NONE_WHEELCHAIR : 1
DOUBLE_WE : 1
PAPERWORK_PROTECTION : 1
THE_BOWEL : 1
SPEAKS_YES : 1
INSERT_RECTALLY : 1
ALERT_WITH : 1
AFTER_DOCTORS : 1
AMBULATORY_NONE : 1
IS_AFRAID : 1
IN_ADLS : 1
PAIN_REC : 1
FOR_CALL : 1
PERIWOUND_AND : 1
DMII_NEXT : 1
IN_AND : 1
HEMATURIA_ANTICOAGULATION : 1
NUTRIENTS_FOODS : 1
COMPLETED_SSN : 1
PHYSICIAN_MAY : 1
LOOKING_FOR : 1
SOME_CONCERN : 1
THE_PROGRAM : 1
BARRIERS_4D : 1
CASE_AT : 1
ESOPHAGUS_CONSENT : 1
IS_PLEASANT : 1
INSOMNIA_ACTIVE : 1
MEDICAL_HEATHER : 1
WALKING_AROUND : 1
AT_BUT : 1
LARGE_MODERATE : 1
SADNESS_AND : 1
NOTIFIED_MILEWSKI : 1
LONG_RATIONAL : 1
TO_AREA : 1
PROVIDER_HOSPITAL : 1
YOU_MAY : 1
ANXIETY_HYPERTENSION : 1
OF_CONSPIRACY : 1
SCHOOL_HE : 1
AGO_HAS : 1
TREATMENT_PLAN : 1
RESTRICTIONS_DATE : 1
MESSAGE_MAKE : 1
PSYCHOTIC_SI : 1
OUR_ONE : 1
TEGRETOL_WAS : 1
OVER_RESULTS : 1
ADDENDUM_ODYNOPHAGIA : 1
MISERABLE_PHYSICALLY : 1
CURRENT_TO : 1
NURSING_MEDICAL : 1
HAD_TAKE : 1
SPIRITUAL_IS : 1
THAT_RELATIONSHIP : 1
NERVES_SO : 1
TEXT_ENDING : 1
OUTCOME_PATIENT : 1
RESOLVED_HUBER : 1
TO_START : 1
WHILE_BUT : 1
FEBRUARY_EXACT : 1
NOT_IN : 1
WELL_NOT : 1
VISIT_STL : 1
PART_PROVIDER : 1
CONSULT_EXERCISE : 1
PATIENT_PC : 1
FAMILY_MOTHER : 1
WAS_ADMINISTERED : 1
CVA_HYPOTHYROIDISM : 1
EACH_STEP : 1
PALPABLE_CALL : 1
CORRESPONDENCE_WAS : 1
THAT_REFERRED : 1
AT_TIME : 8
SEX_CHRONIC : 1
CONSPIRACY_PROTECTION : 1
NUMBER_THERAPIST : 1
RATE_AMIODARONE : 1
EDEMA_PPP : 1
TO_VETERAN : 1
ATTENDANCE_RAL : 1
FOR_ONEHALF : 1
TALKING_HIS : 1
AND_RECEIVED : 1
IDENTIFIED_IS : 1
MS_OBESE : 1
TO_VIEW : 1
YES_NO : 4
SKIN_SHE : 1
PEDAL_PULSES : 1
THE_SUBMITTED : 1
THE_FACILITATOR : 1
RESTRICTIONS_ISSUE : 1
FOR_MONITORING : 1
PT_SINCE : 1
TO_SEP : 1
TUNNEL_NO : 1
INTERVENTION_PT : 1
HOUR_IS : 1
OF_REVIEWED : 1
FEELING_HOPELESS : 1
DARK_YOU : 1
STATE_ARIZONA : 1
STRESSED_NOT : 1
THE_BOND : 1
REMINDER_PLAN : 1
SETTING_APPEARANCE : 1
ORDERS_GIVEN : 1
THIS_PATIENTS : 1
IDENTIFICATION_COMPLETED : 1
ASSOCIATE_IDENTIFIED : 1
LEVITRA_CHLORIDE : 1
THE_RECORD : 1
CARES_TO : 1
HAS_PATIENT : 1
FROM_WITH : 1
AT_CLOSE : 1
EMERGENCY_DEPT : 1
WT_HT : 1
PAIN_ALERT : 2
MODERATE_TOTAL : 1
EXAM_ROOM : 1
LAST_YES : 1
SIGNS_IN : 1
ADVERSE_PATIENT : 1
HIS_GIVEN : 1
AUTHORIZATION_THE : 1
EXACT_DATE : 1
READ_WHY : 1
DRUG_SCREEN : 1
PRESSURE_CARE : 1
YOU_WITHIN : 1
INTERVIEW_PERCEPTION : 1
PHYSICALLY_TO : 1
TO_DR : 2
INFECTIOUS_DIARRHEA : 1
CBI_DRAINING : 1
RIGHT_FACILITY : 1
US_HE : 1
UNDERMINING_PRIOR : 1
SON_WOULD : 1
OF_DID : 2
NASAL_DROPS : 1
SUFFERS_OF : 1
REFILLED_MORPHINE : 1
UNDERMINE_ACUTE : 1
NEUROPATHY_THINGS : 1
HYG_GROOMING : 1
HE_ON : 2
TOTAL_TIME : 1
LAST_STATES : 1
TO_CALL : 1
AND_IS : 2
SUPPLIES_MODIFICATIONS : 1
PATIENT_PATIENT : 1
DIFFICULTIES_ACCESS : 1
THE_CAUSES : 1
THIS_IS : 1
SHE_VOICED : 1
BARRIER_NONE : 1
NO_ENEMA : 1
MEDICAL_RECORD : 3
EDEMA_NOTED : 1
4D_NURSING : 1
SCALP_SUPERIOR : 1
COMPLAINTS_WALKING : 1
HYPERTROPHY_BENIGN : 1
AND_INFORMED : 1
NOTE_IS : 1
ON_IN : 1
ARMY_SEVERED : 1
EXAMINATION_CC : 1
NOTE_TX : 1
LWBS_ACTIVE : 1
OUTPATIENT_MEDICATIONS : 5
EXPECTED_SENSE : 1
POA_FOR : 2
LUNGS_CRACKLES : 1
OF_BED : 1
REPORTS_NO : 1
HER_CARE : 1
PURPOSES_STAYED : 1
HAVE_REACHE : 1
PING_WAKES : 1
ASSESSMENT_PLAN : 1
WITHIN_VOIDS : 1
PULSES_ARE : 1
OF_HALF : 1
LENGTH_MINUTES : 1
ON_INJURY : 1
SHE_TROPONIN : 1
OF_SYNCOPE : 1
THESE_AND : 1
ONE_HYDRATION : 1
CAR_HE : 1
ALSO_REPORTS : 1
AN_OPTION : 1
ADMITTED_AGREES : 1
PROXIMALLY_PROBES : 1
PHYSICIAN_NOPHEN : 1
THAT_THE : 3
PATIENT_ANSWERED : 3
KNOW_THAT : 1
TAB_TAKE : 3
DEF_COPD : 1
RUNNING_IID : 1
MEDICAL_WELL : 1
ONE_TABLET : 3
REGULAR_OF : 1
MOOD_STILL : 1
ALLERGIES_RESULT : 1
MET_WITH : 3
CHIEF_VETIN : 1
APPROPRIATE_TO : 1
MARCIA_DING : 1
THE_VA : 1
OF_INTERVIEW : 1
NOTE_PATIENT : 4
IS_THAT : 1
VETERAN_STATED : 1
WITH_STAFF : 2
CHAR_CHATHAM : 1
WORRY_SI : 1
KNOWING_HE : 1
WAS_NONE : 1
DISCHARGE_IF : 1
TRACE_BLE : 1
CAPSULES_BY : 1
IN_CAN : 1
HIS_LONG : 1
INTAKE_AND : 1
SWOLLEN_GUMS : 1
AID_HIM : 2
HIS_SERVICES : 1
ASSISTANCE_GENERAL : 1
SIZE_ERYTHEMA : 1
DISPLAY_CORRESPONDENCE : 1
ARRIVED_OUR : 1
MENTALLY_OR : 1
PSYCHOTROPIC_PHYSICIAN : 2
RESP_WITHOUT : 1
DATE_SKILLED : 2
MG_ASA : 1
PATIENT_PAST : 1
INPATIENT_CURRENT : 1
DRIVER_AFTER : 1
AND_DISCUSSED : 1
PM_DOSE : 1
INHL_USE : 1
OF_AN : 1
SUGAR_PODIATRY : 1
FUNCTION_INDEPENDENTLY : 1
DIRECTIONS_MEDICATION : 1
MH_LPN : 1
UNEMPLOYMENT_TRUCK : 1
INPATIENT_PRN : 1
AMA_ANY : 1
YES_WERE : 1
CLEARED_CYSTOSCOPY : 1
DOUBLE_ADVISED : 1
THE_ASSESSMENT : 1
DATE_FEB : 1
ASA_HAS : 1
GRADE_DYSPLASIA : 1
MISSED_AS : 1
FOR_BLOODWORK : 1
DAILY_PENDING : 1
IS_PT : 1
HERNIA_MY : 1
KNOW_PT : 1
TO_INTERVENTIONS : 1
REACH_WITHIN : 1
BRAKES_ON : 1
NOTE_ACTIVITY : 1
CHECKS_PROTOCOL : 1
AIR_NO : 1
INITIAL_FOR : 1
SEEN_AM : 1
FALLS_EDUCATION : 1
ORIENTED_THE : 1
MALE_STATUS : 1
PAIN_NOT : 1
WITH_POST : 1
LOWER_PLAN : 1
PAIN_OR : 1
DONE_YESTER : 1
ALERT_TO : 1
INEFFECTIVE_WITH : 1
MACHINE_TO : 1
ORAL_PUFFS : 1
INJURY_PREVENTION : 1
MG_WORK : 1
HAD_BEEN : 1
CALLER_EMER : 1
AND_ANXIETY : 1
VETERANS_DISCUSSED : 2
OUTCOME_COMMENTS : 1
SSN_PAIN : 1
PROGRAM_WITH : 1
OF_NO : 1
CHF_MITRALVALVE : 1
PHONE_BARRIERS : 1
OF_CARE : 6
FOR_NSTEMI : 1
CAPACITY_HE : 1
ATTENTIVE_OF : 1
IV_MAY : 1
TRUCK_PHYSICIAN : 1
PURPOSE_INFORMATION : 1
CONTACT_MARITAL : 1
INTERACTIVE_AND : 1
CARAFATE_SUSPENSION : 1
COMPLETED_CONFIRMED : 1
AND_PAIN : 1
FOLLOWING_CONDITIONS : 1
SUSPENSION_QID : 1
PUNCTURE_BY : 1
STAFF_NEED : 1
FRONT_PHARYNX : 1
INPATIENT_UP : 1
CTRS_SATT : 1
NS_INFUSING : 1
CALLING_CRISIS : 1
HAS_INTENSIFIED : 1
THE_GABAPENTIN : 1
PRBLM_KNOWING : 1
PROGRAM_OTHER : 1
CONT_CARAFATE : 1
SPACE_WITHIN : 1
DISCOVERED_PT : 1
ATTEND_SKIN : 1
IS_VERY : 2
TO_RECEIVE : 1
WAS_THE : 1
NWB_ON : 1
STILL_IN : 1
EXPERIENCES_DISCUSSED : 1
NO_HPI : 1
THE_YESTER : 1
FINDINGS_AMBULATORY : 1
WOUND_NO : 1
FIREARMS_STRIPPED : 1
NOTE_TOLERATED : 1
CALLER_RESPONSE : 1
HIS_NONVA : 1
ADDENDUM_NONFORMULARY : 1
ONSET_VIEW : 1
ANY_PHYSICAL : 1
DIURETICS_FALL : 1
OPPORTUNITY_HAVE : 1
POST_OP : 1
HIM_OF : 2
MORPHINE_SPORADIC : 1
SECONDARY_RELATED : 2
MD_COMPLAINT : 1
STATUS_NOTED : 1
FOR_STOMACH : 1
UBE_MINS : 1
DRUG_AND : 1
FROM_HIS : 1
TO_CALLER : 1
VERY_SOB : 1
AMPULE_ACTIVE : 1
ONCE_TO : 1
ITS_HELPFULNESS : 1
TO_PSYCHOTROPIC : 1
PRESSURE_CHECK : 1
ANGER_FRUSTRATION : 1
STAFFING_TOO : 1
NOTE_SYMPTOMS : 1
MD_NOTE : 1
HOW_DID : 1
PATIENT_PRESSURE : 1
SP_ML : 1
UPDATED_WITHIN : 1
PARTICIPATED_ONE : 1
GAIT_DID : 1
PATIENT_CLEARED : 1
NONE_MOVIE : 1
SAFETY_BED : 1
PSYCH_UNIT : 1
ACTIVE_INPATIENT : 2
MRI_AND : 1
OTHER_DENTAL : 1
TO_PCP : 2
LYRICA_OF : 1
DRESS_TO : 1
WOULD_THIS : 1
MUSKOGEE_DYSPNEA : 1
SPECIMEN_FEB : 1
NO_AVAILABLE : 1
TO_REFILLED : 1
RETURN_THE : 1
TOLD_HAD : 1
TO_THIS : 4
IER_AND : 1
SX_SI : 1
TWICE_NO : 1
ASSESSMENT_OF : 1
NO_PURULENCE : 1
SHARON_STATUS : 1
NO_COMPRESSIONS : 1
AND_ASSOCIATED : 1
MEDICATION_PATIENT : 2
PTSD_INSOMNIA : 1
INCLUDING_LIFESTYLE : 1
TEMP_HAD : 1
EXCLUDING_MET : 1
NO_APPLIANCES : 1
PER_TO : 1
HIM_INR : 1
BLOOD_URINE : 1
RESTRICTION_PATIENT : 1
RISK_OR : 1
BLOOD_ADDENDUM : 1
VERBAL_PAMPHLET : 1
NO_NEEDED : 1
TYPE_HAS : 1
HELP_TO : 1
ASSIST_ASSAULT : 1
MEDS_WEIGHT : 1
IDENTIFIED_CARE : 1
SSN_AND : 1
NEGATIVE_THE : 1
ON_INSOMNIA : 1
ISCHEMIA_NURSING : 1
PSYCHOSOCIAL_MHICM : 1
WILL_AMEND : 1
TELEPHONE_TRIAGE : 1
SON_NEED : 1
HHA_SERVICES : 1
STATED_HAS : 1
RAMBLE_ON : 1
WHILE_SHE : 1
DURING_AMBULATION : 1
LOSS_WITH : 1
DENTURES_MAXILLARY : 1
AND_PLEASANT : 1
COMMENTS_DR : 1
EKPHYSICIAN_MH : 1
DISCUSSED_CHILD : 1
PUT_WEIGHT : 1
ANOTHERS_WE : 1
PC_NONVISIT : 1
TABLET_MOUTH : 4
BIPOLAR_REQUEST : 1
THESE_NUTRIENTS : 1
SAFETY_IN : 1
HE_HAS : 9
PRESENT_NO : 1
PULSE_TO : 1
IM_IN : 1
POSTERIOR_TIBIAL : 1
BE_CHIEF : 1
MIGHT_SELF : 1
INTERVENTION_TIME : 1
HUMOR_CAN : 1
PAIN_AT : 2
HE_MIN : 1
DISCHARGE_MEDICATIONS : 1
WITH_EIGHT : 1
NOTE_RATING : 1
OF_PHONE : 1
IS_STRESSED : 1
VOICE_OF : 1
FOR_BUT : 2
CONTACT_OBESITY : 1
FURTHER_CARES : 1
GET_FROM : 1
FOLLOWING_IF : 1
ELIGIBILITY_THAN : 1
AMEND_GEC : 1
VIEW_ALERT : 1
KG_SIGNS : 1
PER_WITH : 1
IN_MUSKOGEE : 1
ON_SYNCOPY : 1
THE_APPOINTMENT : 1
HISTORY_MG : 1
FOLLOWING_BEEN : 1
ACTIVITY_UP : 1
NO_DRAINAGE : 2
AND_REQUESTS : 1
CTRS_HARRINGTON : 1
THAT_PT : 1
REESTABLISH_ELIGIBILITY : 1
VOICES_NO : 1
PROVIDED_FOR : 1
OF_SPUTUM : 1
BE_OPTION : 1
TIME_PATIENT : 1
SELF_MEDICATIONS : 1
RECEPTIVITY_ATTENTIVE : 1
SUCH_BP : 1
CHANGES_NEUROPATHIC : 1
IN_LOCATION : 1
LAST_CHIEF : 1
AFTER_OPTIONS : 1
CLEAR_PSYCHOTIC : 1
CONDITION_NOTE : 1
UNLESS_CONTRAINDICATED : 1
PEACH_NUTRITION : 1
NO_OR : 1
THIS_HTN : 1
NUMBNESS_PARASTHESIAS : 1
SUB_REHAB : 1
XENGLISH_DISPOSTITON : 1
CARE_PA : 1
CALL_ACTIVE : 1
MILITARY_CE : 1
NEXT_OF : 1
LOW_SIGNIFICANT : 1
HER_CEL : 1
TEAM_FRUSTRATION : 1
WITHOUT_MURMUR : 1
DOES_CONTINUE : 1
OBTAINED_BLOOD : 1
THE_PHONE : 2
SELF_DISCHARGE : 1
WAS_IS : 1
WHEN_DID : 1
CONFIRMED_ALLERGY : 1
FOR_NEW : 1
EMOTIONAL_NUMBING : 1
READ_PATIENT : 1
PC_MANAGEMENT : 1
ORDERS_LAST : 1
HI_RELATES : 1
FACTORS_STAGING : 1
CALL_WITHIN : 2
THAN_AND : 1
HOLD_THIS : 1
SCREENING_MULTIVITAMIN : 1
ADDICTION_WAS : 1
SWOLLEN_DING : 1
TO_ONE : 1
SECONDARY_TO : 1
GOT_HIS : 1
FACILITY_PCP : 1
OR_AGGRESSIVE : 1
RELIGIOUS_FACTORS : 1
LONELY_SATS : 1
QHS_INSOMNIA : 1
OBLIGATIONS_PT : 1
ASSESSMENT_PATIENT : 2
BUT_TO : 1
APNEA_MEDICAL : 1
NOTED_THAT : 1
OR_CHART : 1
OR_ALCOHOL : 1
THAT_ANESTHESIA : 1
WITH_CE : 1
FAMILY_TIME : 1
TO_BAPTIST : 1
HRS_TRANSDERMAL : 1
BED_AND : 1
MH_TO : 1
WILL_AND : 1
SEX_MALE : 4
RESPONSE_RATE : 1
VETERAN_IN : 1
REASSESSMENT_YES : 1
PT_INDICATION : 1
INTENSITY_SYMPTOMS : 1
CHRONIC_SINUSITIS : 1
BLDG_CON : 1
WITHIN_OF : 2
COMPLETE_SENTENCES : 1
TALKS_OF : 1
MISERABLE_WENT : 1
MEDS_GIVEN : 1
PODIATRY_NOTE : 1
CEL_PHONE : 1
MG_TRANSDERMAL : 1
FEVERS_AT : 1
PAPERWORK_CONSPIRACY : 1
DMII_PLAN : 1
NURSING_TELEPHONE : 1
INJURY_VAGUE : 1
IS_YEAR : 1
AND_FACILITATORS : 1
COMPRESSIONS_DEFIBRILLATION : 1
ATTEND_STR : 1
AND_DIVERTICULITIS : 1
BEING_CAN : 1
ALLERGIES_HAS : 2
OF_DATE : 1
NEEDS_SHE : 1
AND_TO : 2
OR_TIME : 1
PROBLEM_OBJECTIVE : 1
MORSE_FALL : 1
OR_AM : 1
INCLUDE_NO : 1
MEDICAL_WITH : 1
AND_ACCOMPANIED : 1
IT_IS : 2
NKA_FEEDS : 1
IF_SPHENOIDAL : 1
RECORD_NOTES : 1
PAIN_PAIN : 2
NO_NWB : 1
AS_BP : 1
1010M_PMH : 1
CONSENT_THE : 1
IS_TETANUS : 1
SELF_BOWEL : 1
SELF_EGO : 1
PENDING_HISTORY : 1
MEDICATIONS_TO : 1
ADDENDUM_DIVERTICULOSIS : 1
MEDICATIONS_INCLUDING : 4
SCORE_GET : 1
WATER_REACH : 1
FEB_PEDAL : 1
THAT_MEET : 1
BELT_ACTIVE : 1
ARE_CALL : 1
DYSPHAGIA_IN : 1
TIME_OF : 1
INTERPRETING_CARDIOLOGIST : 1
REPORTED_MEDS : 1
PLAN_WILL : 1
LATER_TALKS : 1
COMPLICATIONS_COMPROMISE : 1
WAS_VERY : 2
WANTED_TO : 1
SEP_HAS : 1
TO_PHYSICIAN : 1
FOR_HOUR : 1
BEEN_DOCUMENTED : 1
PATIENT_RECEIVED : 1
ADMINISTERED_STEP : 1
PROBLEMS_OF : 1
THEY_NOT : 1
EVENTS_HEMATURIA : 1
NONSOAP_OWN : 1
MHC_TELEPHONE : 1
REGISTERED_PATIENT : 1
NO_WEIGHT : 1
START_CHLORIDE : 1
NO_NOTED : 1
BARRIERS_LEARNING : 1
NICOTINE_PATCHES : 1
OR_ACTIVE : 2
WITH_AT : 1
URINARY_OBSTRUCTION : 1
EXPLAINED_INDICATION : 1
FAMILY_THE : 1
RELAPSE_IN : 1
CAME_TO : 1
XRT_STUDENT : 1
ANTICOAGULATION_NOTE : 1
DISCONTINUED_DIARRHEA : 1
CARE_CATEGORY : 1
FALL_HIGH : 1
REACTIONS_PAIN : 2
FACILITATORS_QUATTLEBAUM : 1
OF_BLOOD : 1
ED_TO : 1
MANY_YES : 1
ANESTHESIA_WILL : 1
AMBULATING_IN : 1
WITH_TRAFFIC : 1
CODE_BATHING : 1
GLUCOSE_DL : 1
OBSTRUCTIVE_DISEASE : 1
ANXIETY_ICDCM : 1
SEVERE_IN : 1
CC_CAD : 1
DAILY_VETERANS : 1
APPOINTED_PCP : 1
SUPPLIES_AND : 1
CBI_INFUSING : 1
SLEPT_HOUR : 1
DOCTORS_THIS : 1
TO_ATTEND : 1
MET_HEADHEALED : 1
AMIODARONE_IN : 1
TO_ANGER : 1
OF_INFORMATION : 1
HT_ABDOMEN : 1
WHO_FOR : 1
TOLD_ABOUT : 1
YES_REASON : 1
CONSULT_REPORT : 1
NUMBER_PATIENTS : 1
IS_FOLLOWED : 1
OF_TESTS : 1
NO_NURSING : 2
MORE_NOW : 1
REST_HYPERTROPHY : 1
KUWAIT_BLDG : 1
ADMINISTERED_AN : 1
CLINICAL_REMINDER : 1
ADDENDUM_LENGTH : 1
INDETERMINATE_MI : 1
GROUP_PHONE : 1
AT_HOUR : 1
TO_PM : 1
ED_NOTE : 2
TRUE_PATIENT : 1
EDUCATED_DATE : 1
IN_DIAGNOSTIC : 1
ABOUT_ALTHOUGH : 1
URINE_VOIDS : 1
INDEPENDENTLY_IT : 1
PROSTATE_WITHOUT : 1
NURSING_AND : 1
DISCUSSED_NEED : 1
PULSES_PATIENT : 1
GABAPENTIN_COMMENTS : 1
TO_PLACED : 1
VA_OF : 1
MEMORIES_BURNT : 1
STATUS_DEFERRED : 1
URINAL_WITHIN : 1
FAMILY_FRIENDS : 1
CC_IM : 1
WHICH_SUPPORT : 1
WITH_OLECRANON : 1
ONE_AT : 1
HEATHER_FIANCE : 1
FUNCTION_ON : 1
CAUSED_TO : 1
STATUS_EDUCATION : 1
AND_COUGH : 1
INTACT_WITH : 1
NPO_SINCE : 1
FREQUENCY_DATE : 2
DISCHARGE_STATES : 1
HEALTH_PATIENT : 1
ALARM_ON : 1
REPORT_GIVEN : 1
HAPPENS_HE : 1
AND_SEND : 1
POX_PAIN : 1
FALLS_RISK : 1
WAS_DARK : 1
TO_ALIMENT : 1
OF_EXPERIENCES : 1
MODERATE_QUITTING : 1
CALL_COPC : 1
DOCUMENTED_VETERAN : 1
LIFESTYLE_INCLUDING : 1
MIXED_MESSAGE : 1
JUN_DOB : 1
HEADHEALED_NURSING : 1
ITS_IN : 2
INTERESTED_ETHNICITY : 1
IN_SPECIMEN : 1
ALBUTEROL_IPRATROPIUM : 2
PERCEPTION_IMPAIRMENT : 1
ISSUE_MEDICAL : 1
NOT_IDENTIFIED : 3
UNDERSTAND_CONT : 1
WAS_IN : 2
AND_PHYSICAL : 1
MEMBERS_SAID : 1
SI_WHILE : 1
OF_VIETNAM : 1
ICS_INTERDISCIPLINARY : 1
FULL_HRS : 1
LEFT_WILL : 1
PHONE_IS : 1
SYNCOPE_DOESNT : 1
AFRAID_THAT : 1
LUBBOCK_HE : 1
TIME_EXCLUDING : 1
THIS_VETERAN : 1
TO_EVERY : 1
LEVEL_PAIN : 1
PATIENT_COMMENTS : 1
CALL_PT : 1
WAS_LIVES : 1
TIME_ABLE : 1
HE_BECAME : 1
HOLDING_LOW : 1
LIVING_DISCUSSED : 1
RELATED_PROBLEM : 1
RACE_UNKNOWN : 2
CASUAL_DRESS : 1
TO_CYRNG : 1
CURRENT_PLAN : 1
THE_HAVE : 1
STATE_THAT : 1
FOR_VS : 1
CONSULTED_TO : 1
SCORE_DATA : 1
SUB_ST : 2
DENIES_HOPELESSNESS : 1
PROBES_TO : 1
NURSING_NOTE : 9
CORNER_THIS : 1
ANSWER_LEFT : 1
DENIES_SX : 1
ECS_CODE : 1
OUTPUT_TO : 1
MANAGEMENT_OF : 1
AND_PATIENT : 3
RULES_AID : 1
NO_SHOWED : 1
GUMS_GINGIVA : 1
FOR_BP : 1
ADDENDUM_FROM : 1
FLUID_UNLESS : 1
NUTRITION_PLAN : 1
CM_WITH : 1
KRISHNASWAMY_NURSING : 1
ASSESS_HYDRATION : 1
AT_PATIENT : 1
ULCERATIONS_HEIGHT : 1
COMMENTS_DID : 1
AGE_TEMP : 1
AND_HIT : 1
LEFT_WITH : 3
ACCESS_INFECTIOUS : 1
INDIVIDUAL_AS : 1
FOR_LAST : 1
PATIENT_ARRIVED : 1
PHYSICIAN_US : 1
DIAB_TELERET : 1
BY_STAY : 1
NOT_CAPABLE : 1
RELATED_ISCHEMIA : 1
HAS_DECISIONMAKING : 1
BY_DAUGHTER : 1
BBSC_REGULAR : 1
OF_ALLOWING : 1
DUE_TO : 2
THERAPY_PATIENT : 1
TO_RESPONDING : 1
POTENTIAL_REASSESSMENT : 1
REQUEST_THE : 1
WITHIN_LAST : 2
IS_PATENT : 1
PATIENT_LOCAL : 1
IN_URINE : 1
SUPPLIES_TYPE : 1
COUMADIN_MIGHT : 1
KUWAIT_HIGHWAY : 1
ADMITTED_FOR : 1
CM_ADDENDUM : 1
TO_ROOM : 1
TYPE_DISCHARGE : 1
INCLUDE_CHEST : 1
STEP_TIME : 1
INFUSING_DRAINING : 1
AVH_AT : 1
VITAL_RECIEVED : 1
AND_RECORD : 1
VARDENAFIL_LEVITRA : 1
NO_FALL : 1
OBLIGATIONS_THE : 1
YO_CASUAL : 1
FAMILY_PRBLM : 1
WITH_PLAN : 1
GIVE_PO : 1
THE_IN : 2
QUESTIONS_VETERAN : 1
GROIN_SAYS : 1
ALSO_NEEDING : 1
CHANGED_LAST : 1
ANXIETY_ORDER : 1
THE_IS : 1
INDICATORS_PRESENT : 1
DYSPNEA_ADLS : 1
REQUEST_TO : 1
THE_TIME : 1
ON_LET : 1
PERSON_TO : 1
MEDICATIONS_HEMOPTYSIS : 1
STAFF_COMPLIANT : 1
MANY_OF : 1
PROXIMAL_OF : 1
MEDICATION_AT : 1
DISCOVERED_INTERVENTION : 1
PROCEDURES_CLOTRIMAZOLE : 1
MODERATE_PATIENTS : 1
SHE_HAVE : 1
BENIGN_OF : 1
TO_THAT : 1
CHALK_TALK : 1
PODIATRY_ATTEMPTED : 1
INFO_HAS : 1
AND_BEING : 1
NEED_REESTABLISH : 1
ANSWERED_CALL : 1
WOULD_NEED : 1
SUPPOSITORY_TWICE : 1
OVER_THE : 1
ANTICOAGULATION_MANAGEMENT : 1
AND_PHARMACY : 1
PT_AND : 3
TWICE_RECOMMENDATIONS : 1
NOTE_PAIN : 2
PT_TRANSFERRED : 1
EKNURSING_LPN : 1
INTAKE_UNLESS : 1
CONTINUE_ACTIVE : 1
PAIN_TIBIAL : 1
FAMILY_STATED : 1
TO_STAND : 1
CAUSES_RELAPSE : 1
MANAGEMENT_NOTE : 1
OF_GETTING : 1
NO_ING : 1
DISCUSSED_FOR : 1
EVALUATE_STAGING : 1
CAN_LEAD : 1
NOT_WORKING : 1
EDUCATED_PRIOR : 1
HEART_ATTACK : 1
MINS_SIT : 1
WITHIN_PAST : 1
USED_COCAINE : 1
AMPULE_IN : 1
VARIGATED_IRREGULAR : 1
AND_NEGATIVE : 1
PULMONARY_DISEASE : 1
PLAN_CARE : 4
ISSUES_PAPERWORK : 1
AT_SHE : 1
HIS_MEDICAL : 1
DEC_BACKGROUND : 1
BE_IN : 1
WAS_ORDER : 1
DEPRESSED_RACING : 1
TIME_PATIENTS : 1
TIME_JUL : 2
ACTIVITYLIMITATIONS_RESTRICTIONS : 1
UNKNOWN_STRIPPED : 1
AND_SYMPTOMS : 1
COMPLIANT_MEDS : 1
FOR_FALL : 1
WANT_TO : 1
LPN_NOTIFIED : 1
HISTORY_OF : 5
OF_WILL : 1
NEUROPATHY_AND : 1
AMBULATION_RALLY : 1
IF_TO : 1
INFORMATION_ESTABLISH : 1
CONSULT_ADDENDUM : 1
PO_REASSESSMENT : 1
IN_ATTENDANCE : 1
THAT_HAD : 2
AN_PRACTITIONER : 1
ALLOWING_TO : 1
RELATED_COGNITION : 2
SEP_SYNCOPE : 1
BY_ONSET : 1
EXCEED_ACETAMINOPHEN : 1
SCREENING_ASSESSMENT : 1
UNIT_SECONDARY : 1
DOESNT_WANT : 1
AND_ABOUT : 1
HISTORY_MOTHER : 1
DURABLE_FOR : 1
AGE_LN : 1
SKIN_SCALP : 1
REACTION_THE : 1
HAND_PT : 1
ITEMS_INTERVENTION : 1
DO_REQUIRE : 1
TOT_DENIED : 1
BACK_MARITAL : 1
TROPONIN_UFH : 1
MONTHS_BY : 1
LOSS_EDUCATION : 1
INCLUDED_IMPORTANCE : 1
ED_PCP : 1
CAUDAL_STEROID : 1
FACILITY_ENCOURAGING : 1
ERYTHEMA_INDURATION : 1
ANY_SIGNS : 1
ER_YESTER : 1
AND_SUFFERS : 1
WELL_GROOMED : 1
NO_FURTHER : 1
FOR_MET : 1
RANGE_SKILLED : 2
WITHIN_FOR : 1
AGE_SEX : 4
OLECRANON_SPURRING : 1
POTENTIAL_HISTORIAN : 1
ERYTHEMA_AND : 1
AND_CONCUR : 1
AS_ON : 1
ALERT_ORIENTED : 4
RESULT_ADDENDUM : 1
HOMELESS_NO : 1
THAT_HER : 1
BONNIE_MSW : 1
BRISK_AMIODARONE : 1
EVERY_NIGHT : 1
OBSERVATION_INTERACTIVE : 1
MEDICATIONS_HYPERLIPIDEMIA : 1
WITHOUT_PO : 1
PAST_YOU : 1
TIME_CONTRACT : 1
TELEMETRY_TO : 1
AND_SPIRITUAL : 1
MG_QHS : 2
SEP_PT : 1
CHECKS_WILL : 1
COMPLETE_PATIENT : 1
MCH_LYMPH : 1
COUGH_RESULTS : 1
SOI_MONITOR : 1
DISCUSSED_BENEFITS : 1
ARMS_HANDS : 1
ROOM_FOR : 1
ANSWERED_NKA : 3
LIP_RETROCOLLIS : 1
MH_CLINICAL : 1
THRUSTING_LIP : 1
HAVE_LOOKING : 1
IT_PARTICIPATION : 1
ALSO_CONTINUES : 1
STATES_SHE : 1
APPOINTMENT_TIME : 1
AGE_THANK : 1
LIKE_REFERRAL : 1
NEURO_MOVES : 1
SKIN_STATUS : 1
ASSESSMENT_NURSING : 1
DECREASED_AFTER : 1
HAD_VITAL : 1
WHO_VERY : 1
STOMACH_AND : 2
SLIGHTLY_RIGHTSIDED : 1
DIET_MANAGEMENT : 1
SUPPORT_FROM : 1
HOSPITAL_IN : 1
THIN_AGED : 1
WEIGHT_SINCE : 1
AXIS_IV : 1
TEAM_PATIENT : 1
PRESENT_POSTOPS : 1
AN_PSYCHI : 1
CDI_DIALOG : 1
LAST_NAME : 1
KG_AMLODIPINE : 1
AND_IT : 1
PAIN_BETTER : 1
MEDS_AMBULATING : 1
ALBUTEROL_MANAGEMENT : 1
STAFF_WITH : 1
PATIENT_NURSING : 1
CONTROL_THEIR : 1
SHE_ON : 1
ADENOCARCINOMA_ARISING : 1
CALL_MARITAL : 1
NO_ABLE : 1
ASSESSMENT_INITIAL : 1
WOUND_POST : 1
MH_WITH : 1
THIN_MIDDLE : 1
AND_EDEMA : 1
LONG_PSYCHOSOCIAL : 1
DATIVE_PAIN : 2
MG_DI : 1
IF_TRULY : 1
MITRALVALVE_ISUFF : 1
PARTICIPATED_FOR : 1
AT_OF : 1
COMMUNICATION_EXAM : 1
WAS_BETTER : 1
PATIENT_NAME : 2
MSE_FULLY : 1
SINCE_COMMUNICATION : 1
CC_GIVEN : 1
RESENTMENT_ON : 1
SAID_TAKES : 1
NOTE_PT : 1
GRADE_PLAN : 1
IPC_WITH : 1
DID_NOT : 6
AT_MET : 1
SCREEN_FALL : 1
ALSO_TOLD : 1
ON_ADDICTION : 1
WITH_DR : 1
LIVING_THE : 1
HEARD_STATUS : 1
BED_IN : 1
APPEARANCE_IS : 1
AND_TOT : 1
CE_TO : 1
NOX_STOP : 1
DISCUSSED_REMOVING : 1
HAVE_DID : 1
ARISING_BARRETTS : 1
OF_CONTACT : 2
ADMISSION_MEDICAL : 1
MS_POW : 1
THREE_SLIP : 1
STILL_THEM : 1
NUTRITION_ADEQUATE : 1
FOR_BIOPSYCHOSOCIAL : 1
HE_SEEMS : 1
ASSESSMENT_SECONDARY : 1
ON_FOR : 2
TO_LAB : 1
SMOKE_GOVERNMENT : 1
WELL_TO : 1
NO_RISK : 1
OF_SPC : 1
SOME_WHAT : 1
CONFIRMED_HISTORY : 1
AGAIN_TO : 1
SITUATION_APRIL : 1
MINUTES_PHYSICIAN : 1
METHODS_PAMPHLET : 1
IS_THAN : 1
CONTINUED_WATCHING : 1
WITHOUT_OBSTRUCTION : 1
DOCTOR_AND : 1
NEEDS_EKBHINTERDISCIPLINARY : 1
CARE_FAMILY : 1
IN_HOURS : 1
PRIOR_DISCHARGE : 1
OLD_SEEN : 1
IPRATROPIUM_MANAGEMENT : 1
PROXIMITY_TO : 1
TO_STAY : 1
OEF_MARRIAGE : 1
AL_FOLLOWING : 1
SW_PLAN : 1
PATIENT_HAS : 8
RC_BATHING : 1
GIM_VISIT : 1
OT_COMPLETE : 1
NUTRITIONAL_OF : 1
CORNER_HTN : 1
MEDICATIONS_ACTIVE : 1
PATIENT_DOCUMENTATION : 2
HP_UPDATED : 1
ALL_ARE : 1
ADDENDUM_MINUTES : 1
THIS_NO : 1
CAPABLE_INCREASED : 1
ESOPHAGUS_HAD : 1
FOR_ON : 2
PATIENT_BLOOD : 1
MEDIASTINUM_THE : 1
LET_THEM : 1
KG_VITAL : 1
TO_VOICE : 1
HAS_NO : 2
PATIENT_CAPABLE : 1
MG_NICOTINE : 1
CM_NEUROPATHY : 1
OF_HEMATOMA : 1
CALL_OUTPATIENT : 1
PHYSICIAN_INPATIENT : 1
IN_HUBER : 1
MALODOR_MILD : 1
CD_DIAB : 1
DIVERTICULITIS_HE : 1
MG_HOURS : 1
TIME_DCD : 1
AT_HEALTHSOUTH : 1
DISCUSSED_REARING : 1
CONSULT_CLOTHES : 1
REASSESSMENT_NOTE : 3
DATE_CLICK : 1
BED_TOT : 1
CARE_ADMISSION : 1
APNEA_PAST : 1
LR_PREOPERATIVE : 1
ASPIRIN_TAB : 1
FOR_VITAL : 1
CLINIC_TELEPHONE : 1
SAID_THEY : 1
SOME_TRANSFERS : 1
REPSONSES_WERE : 1
FATHER_SMOKED : 1
BY_SUN : 1
OF_EXPECTATIONS : 1
BEDTIME_DISCUSSED : 1
CLEMENT_ASSESSMENT : 1
FROM_PROVIDER : 1
HE_OUTCOME : 1
RATIONAL_OF : 1
TRAZODONE_MG : 1
NOX_RELIGIOUS : 1
HAVE_ANY : 1
FAM_ABLE : 1
CRACKLES_AT : 1
NEUROLOGICAL_SYNCOPE : 1
BARRIER_APNEA : 1
VARIOUS_AND : 1
COMPLAINT_FOR : 1
LEFT_WEAK : 1
WITHOUT_COMPLICATIONS : 1
AGE_MALE : 5
GENERAL_JOB : 1
SMOKING_AND : 1
REACH_FOR : 1
PROVIDER_IDENTIFIED : 1
MODERATE_HYPERINFLATION : 1
PRIMARY_PROVIDER : 4
EXACERBATION_RAL : 1
ER_IDN : 1
SERIES_THE : 1
WAS_CONCERNED : 1
WAS_TAKE : 1
BEATY_CASE : 1
LIGHT_WITHIN : 1
REQUIRE_HELP : 1
WORK_PHONE : 1
DESPONDENT_IN : 1
OF_BLE : 1
HISTORY_AND : 1
GIVE_TABLETS : 1
AT_PT : 1
LOOK_INTO : 1
WHO_PRESENTS : 1
APAP_TOTAL : 1
NOX_QUANTITY : 1
EVALUATION_ETODOLAC : 1
HAS_AND : 1
OF_ANXIETY : 1
WHO_HE : 1
FOLLOWING_TRUE : 1
DISCUSSED_PER : 1
PATCHES_THAT : 1
SERVICES_BE : 1
HAS_REVIEWED : 1
ACUTE_PATIENT : 1
THEM_ONE : 1
RAL_AO : 1
HE_FINALLY : 1
SIMVASTATIN_BARRIER : 1
ARE_PALPABLE : 1
PRECAUTIONS_ON : 1
NOT_INTERESTED : 2
ONE_ASSESS : 1
LIGHTING_AT : 1
WHEN_RAMBLE : 1
ON_AIR : 1
PHYSICIAN_TIFIED : 1
REMINDER_ED : 1
MALATHI_AND : 1
THE_INFLUENZA : 2
IS_WHEEZING : 1
DENIES_AVH : 1
PATIENT_YEAR : 1
CODE_RC : 1
TAKE_IMPRESSION : 1
CHECK_OF : 1
PT_ADMISSIONS : 1
RETURN_TOTAL : 1
TO_BUT : 1
AND_DIAGNOSIS : 1
WITH_PRIMARY : 1
REGISTERED_WAS : 1
AD_LIB : 1
IT_THIIS : 1
REASSESSMENT_VANOD : 1
PE_PATIENTS : 1
TIME_STILL : 1
THAN_IN : 1
TO_BEING : 1
NKA_INTERVIEW : 1
IMPACT_HAD : 1
TEAM_DIURETICS : 1
COOPERATIVE_APPROPRIATELY : 1
TRUCK_INFORMED : 1
EAR_IMPRESSION : 1
OF_WCT : 1
NEEDS_NOT : 1
STILL_THE : 1
CARDIAC_DECREASED : 1
HE_SHE : 3
USE_IN : 1
CAP_CAPSULES : 1
THEIR_WATCHING : 1
WAR_EXPERIENCES : 1
DID_ONCE : 1
THE_EFFECTS : 1
POSITION_FOR : 2
PATIENT_HE : 2
OF_VERBAL : 1
FEB_INITIAL : 1
BY_PHYSICIAN : 2
OF_TEACHING : 1
USED_IDENTIFIED : 2
ANGER_AND : 1
EFFECTS_FROM : 1
ANOTHER_LOSS : 1
SIDE_FROM : 1
HYDRATION_SKIN : 1
ARRIVED_UNIT : 1
FINALLY_ED : 1
IN_TEMP : 1
INTRUSIVE_MEMORIES : 2
IS_BETTER : 2
DISORDER_GIPATEL : 1
IN_NONFORMULARY : 1
GENITOURINARY_ALERT : 1
IRON_DEF : 1
PRIOR_TO : 4
SEROQUEL_AT : 1
FURTHER_ACTION : 1
AND_LAST : 1
THEY_CONTROL : 1
NOTED_VSS : 1
WRITTEN_MEDICATION : 1
ME_OF : 1
STATED_WILL : 1
INFLUENZA_INHALER : 1
OR_AFRICAN : 1
IS_ENCOURAGED : 1
MOBILITY_LIMITATION : 1
PT_IS : 6
OF_CC : 1
RECORD_FIANCE : 1
TAKE_ASPIRIN : 1
MINUTE_WILL : 1
NOTE_YES : 1
MH_THESE : 1
STOP_GIVE : 1
AWA_IN : 1
TO_HE : 1
AO_LYING : 1
INCLUDING_PREVENTATIVE : 1
PSYCHOSOCIAL_ASSESSMENT : 1
HAD_ADR : 1
ACTIVE_HELPFUL : 1
HRS_PT : 1
PAIN_ACUTE : 1
MINUTES_SEVERAL : 1
BVA_TO : 1
HER_PHONE : 1
VSS_RESPONSE : 1
GAIT_WHEN : 1
TELL_ABOUT : 1
VIEW_SENT : 1
EXPERIENCES_THEY : 1
FOR_RELATED : 1
VA_MILITARY : 1
MET_WILL : 1
ACTIVE_PROBLEMS : 1
IN_POSITION : 1
MASS_SEP : 1
OF_TO : 3
HISTORY_TOBACCO : 1
LATINO_CHART : 1
SCHEDULED_FOR : 2
MR_TO : 2
HAVE_NEVER : 1
CC_FAMILY : 1
INTENSIFIED_HE : 1
THAT_PATIENT : 1
PTS_GIM : 1
ON_SOME : 1
UNIT_ANSWERED : 1
AND_INFLUENZA : 1
AND_STAFF : 2
PRESENT_SUPPORT : 1
COMMENTS_LB : 1
HAVE_CONTINUED : 1
YOU_NY : 1
THE_FAMILY : 1
NO_THINGS : 1
MR_DATE : 1
MEDICINE_TRAVEL : 1
INSTRUCTIONPCC_NO : 2
CONCERN_THE : 1
IDEATION_NO : 1
DIARRHEA_HE : 1
NEUROCARDIOGENIC_DOESNT : 1
FLUSH_FREE : 1
REQUEST_PREFERRED : 1
RACE_MORPHINE : 1
OF_OF : 3
THERAPIST_ASSIST : 1
EMER_AL : 2
CITALOPRAM_FOR : 1
NONE_NO : 1
CHEST_BETWEEN : 1
BEDTIME_FOR : 1
AMLODIPINE_MG : 1
STR_REASSESSMENT : 1
CLICK_ON : 2
BUT_DID : 1
STAND_SBA : 1
TARGETS_REPORTED : 1
BEEN_ELSEWHERE : 1
TO_MOVE : 1
IN_LEFT : 2
VOICE_SHORTNESS : 1
MIN_ACUTE : 1
FULL_PT : 1
STOMACH_INITIAL : 1
HOA_NPHO : 1
BAND_ON : 1
FINISHING_AS : 1
IMMUNIZATION_STEP : 1
STOMACH_PERSON : 1
FOR_COMFORTABLE : 2
INFORMATION_OF : 1
STAFFING_WAS : 1
PLEASE_ME : 1
AND_PUT : 1
ONLY_ADDENDUM : 1
MORTGAGE_MEDICAL : 1
COLLABORATIVE_CARDIAC : 1
AND_GAVE : 1
YOU_OFTEN : 1
CALL_NICOTINE : 1
FILED_BY : 1
BREATH_DIAGNOSTIC : 1
AND_THIS : 1
ON_PERIPHERAL : 1
ASSESSMENT_DISCUSSED : 1
TO_HORRIBLE : 1
FOR_LEVITRA : 1
DSMIV_CRITERIA : 1
SEEN_CLINIC : 1
RECEIVE_WHICH : 1
BEEN_REFERRED : 1
ACTIVITIES_TURGOR : 1
OLD_BLACK : 1
HE_STATES : 1
OF_FAMILY : 1
IF_CHRONIC : 1
NEUROPATHIC_LEFT : 1
NURSE_TOTAL : 1
INDEX_AUG : 1
ASSESSMENT_SEE : 1
REVIEWED_IN : 1
PREPROCEDURE_ALSO : 1
FLUID_FLUID : 1
TOLD_PRRC : 1
PERFORMED_BARRIERS : 1
FINISHED_PAIN : 1
TO_METFORMIN : 1
LWBS_CALL : 1
NONENGLISH_MEASUREMENT : 1
TREATMENT_INPATIENT : 2
CREAM_MODERATE : 1
HI_LOCK : 1
CHANGES_MADE : 1
ON_HEIGHT : 1
NOTE_IDEATION : 1
IN_VET : 2
ADMISSION_HISTORY : 1
MEDICATIONS_SUPPLIES : 4
FREE_OF : 2
IER_HAD : 1
INFLUENZA_IM : 1
SUGAR_AND : 1
FROM_VA : 1
BE_ADMITTED : 1
ERYTHEMA_OR : 1
YOU_BREATHING : 1
THIS_TO : 2
WILL_WAIT : 1
INDEPENDENT_INDEPENDENT : 1
HYPERLIPIDEMIA_PT : 1
TO_FASTING : 1
CESSATION_MH : 1
PULSE_INDEPENDENT : 1
ON_COUMADIN : 1
SENSORY_ACTIVE : 1
RANDOM_SCREEN : 1
YEARS_ALSO : 1
MEDICATIONS_HCL : 1
PAIN_START : 1
DURING_AND : 1
AMBULATION_AND : 1
THERAPIST_TO : 1
BE_DELAYED : 1
HIS_HE : 1
MARITAL_STATUS : 2
CHANGES_AT : 2
PRN_PAIN : 1
DIAG_COMMENTS : 2
IMB_DURING : 1
SPIRITUAL_ENCOURAGEMENT : 1
WED_AS : 1
SYMPTOMS_QUITTING : 1
REQUIRES_WITH : 1
HOPELESS_DUE : 1
THE_ORIENTED : 1
ON_ROOM : 1
PSYCHOTHERAPY_MIN : 1
FINGERS_CHOREIC : 1
FOR_DISCHARGE : 1
PT_ED : 1
HAVE_WITH : 1
SOB_DISCOMFORT : 1
OR_CAN : 1
GLUCOSE_HEART : 1
NO_HORRIBLE : 1
YES_REPSONSES : 1
PERCEPTION_OUTPATIENT : 1
ER_SECONDARY : 1
GENERAL_NOTE : 1
APPETITE_TRAZODONE : 1
INTERESTED_PATIENT : 1
URINE_FOLEY : 1
PCP_ORANGE : 1
WHEN_WAS : 1
DISCHARGE_NOTE : 1
HAD_HEART : 1
THE_NEURO : 1
DIAGNOSIS_TO : 3
DR_BE : 1
LIVES_FAR : 1
FOR_BARRETTS : 1
TIME_PULSE : 1
CALL_LWBS : 1
FREQUENCY_PATIENT : 1
MALE_IN : 1
NO_RECEIVED : 1
DIAGNOSIS_RELATED : 2
DIAG_SYNCOPE : 1
HAVE_YOU : 1
CLINIC_HE : 1
PT_MINUTES : 1
PRESSURE_GREATER : 1
MEDICATION_PROVIDED : 1
SPACER_EFFECTS : 1
MAY_DIAB : 1
PATIENT_WORK : 1
VA_AUTHORIZATION : 1
BACK_PLAN : 1
AM_YEAR : 1
INDEX_NEUROCARDIOGENIC : 1
MG_DAILY : 2
LEFT_TO : 1
NOT_FOR : 1
PT_CONSULT : 1
NOW_HE : 1
SPENT_YEARS : 1
TO_PURPOSE : 1
PULSE_OXIMETRY : 1
WITH_MOTHER : 2
EKG_WCT : 1
MEDICAL_HISTORY : 2
CALLING_HOTLINE : 1
VERY_FAR : 1
COMPLAINT_VETIN : 1
BUT_AGREES : 1
DCD_MAY : 1
PULMONARY_CONSTIPATION : 1
INTERESTED_MORE : 1
NEW_ONSET : 2
DEF_ANEMIA : 1
WILL_REVIEWED : 1
ADMISSION_FALL : 1
POW_TOPIC : 1
FOOD_ESI : 1
AND_HEART : 1
PE_WEIGHT : 1
WITHOUT_URINARY : 1
EXCHANGE_LEVEL : 1
BEGIN_PT : 1
AFTER_OBTAINING : 1
QHS_TAB : 1
BENEFITS_OF : 1
REQUESTS_CHIEF : 1
ASSESSMENT_ACTIVE : 1
ON_ASSISTED : 1
CITALOPRAM_STATED : 1
DISCHARGE_PROCEDURES : 1
WERE_OTHER : 1
ADDENDUM_OUTCOME : 1
GLUCOSE_MG : 1
DRINKS_ON : 1
CURRENT_SECOND : 1
GOOD_FOR : 1
DATE_SUPP : 1
MORPHINE_PUSH : 1
UNIT_ORDERS : 1
INPATIENT_NURSING : 1
PAIN_DISCOMFORT : 1
ORDER_RECEIVED : 1
NOTE_NUTRITION : 1
SIGNS_RECIEVED : 1
PLEASE_COME : 1
APPROACH_FOR : 1
DEVELOPMENTS_SINCE : 1
BACK_INSOMNIA : 1
CALL_FROM : 1
ATTENDED_AND : 1
MEASUREMENT_DT : 1
INPATIENT_STATUS : 2
MOTIVATED_TO : 1
SSN_IS : 1
DAILY_REACH : 1
MORNING_BLOOD : 1
CAME_THE : 1
TAB_SIG : 1
VACCINE_THIS : 1
PAIN_INTENSITY : 1
AND_SYND : 1
MI_ST : 1
JOB_HAVING : 1
AUG_MISERABLE : 1
TOTAL_USUAL : 1
PROCEDURE_EPIDURAL : 1
DENIES_PRESENT : 1
PHYSICIAN_ION : 1
PT_LIVES : 1
TO_HIS : 6
CAPABLE_OF : 1
REQUEST_CONSULT : 1
HIT_HEAD : 1
MEDICATION_THIS : 1
BOND_SELF : 1
ALTERNATING_WITH : 1
UNDERSTANDS_UFH : 1
HIS_PRIMARY : 1
DENIES_PSYCHOTIC : 1
GIVE_ML : 1
AT_THIS : 9
INSTRUCTIONS_ALSO : 1
INSTRUCTED_INJURY : 1
PAIN_LOCATION : 1
WHICH_NEEDS : 1
WITH_BOGGIO : 1
TAKING_THEM : 1
CHATHAM_REC : 1
PATIENT_WEIGHT : 1
STABLE_HAS : 1
HAVE_ON : 1
REACHE_PLEASE : 1
SOURCES_SMOKING : 1
OR_IN : 2
PROBLEM_ACTIVITYLIMITATIONS : 1
PRRC_ALTHOUGH : 1
TIMES_WEEK : 1
ACTIVE_MSE : 1
HAVING_ONLY : 1
HORRIBLE_UPSETTING : 1
PROBLEM_FOLLOWUP : 1
HE_WAS : 5
PATIENT_DENIES : 1
WERE_PM : 1
DENIED_ANY : 2
REACTIONS_HAS : 1
CIGARETTE_WITHIN : 1
IBUPROFEN_MOTRIN : 1
REPORTS_THAT : 1
AURICLE_RAISED : 1
INITIALLY_VETERAN : 1
UNDERSTANDING_INSTRUCTIONS : 1
ASSESSMENT_HP : 1
WITH_IPRATROPIUM : 1
HEATHER_SCORE : 1
BETTER_BY : 1
SI_RELATES : 1
PAIN_DIET : 2
REGARDING_RULES : 1
PHONE_CURRENT : 1
PERCEPTION_ACTIVE : 1
OUTPATIENT_STATUS : 1
HERNIA_IN : 1
THE_PATIENTS : 1
INTERVENTIONS_SCORE : 1
HE_ADMITTED : 1
BEEN_OUPT : 1
FOR_ED : 1
WHEN_COOPERATIVE : 1
INR_SINCE : 1
ILL_OR : 1
CONSUME_THESE : 1
GOING_INEFFECTIVE : 1
PAIN_COUGH : 1
MINUTES_CHECK : 1
READMISSION_DO : 1
CIGARETTE_MINUTES : 1
REDIRECTABLE_APPEARANCE : 1
TO_ISCHEMIA : 1
ACTIVE_FOLLOWUP : 1
AND_INITIAL : 1
SELFTALK_THE : 1
NOTE_LUNGS : 1
READ_BY : 1
QUATTLEBAUM_TRS : 1
TID_WITH : 1
IMAGING_PAIN : 1
PROPORTIONAL_LONGER : 1
INFORMATION_ADDENDUM : 1
BIPOLAR_DISORDER : 2
PATIENTS_ATTENDANCE : 1
LOCATION_LOWER : 1
EDEMA_AIR : 1
QUANTITY_AUTHOR : 1
WT_ABDOMEN : 1
CONTACTED_CE : 1
IS_ADDENDUM : 2
EKNURSING_MH : 1
RECOMMENDATION_PROTOCOL : 1
ANGER_SADNESS : 1
TIME_THIS : 1
SEVERAL_PER : 1
PATENT_FOR : 1
ITEMS_DATE : 1
VETERAN_TO : 2
HEENT_SCLERA : 1
BEEN_CONSTIPATED : 1
ED_ATTACHED : 1
DOES_PROBE : 1
DOCUMENTED_ELSEWHERE : 1
IDEATION_PLAN : 1
HTN_NO : 1
RESOLVE_THERAPEUTIC : 1
PATIENT_CHANGE : 1
COMPROMISE_DIMINISHED : 1
PRESENTED_AMBULATORY : 1
MEDICATIONSCRESTOR_TAB : 1
NO_PURPOSES : 1
THE_PHYSICIAN : 1
EDUCATION_HEALTHY : 1
REVIEWED_AND : 1
TIME_GETS : 1
ON_PHONE : 2
CYRNG_DIAGNOSIS : 1
HYPERTENSION_CONTROLLED : 1
AGREEMENT_WITH : 2
PHYSICIAN_DATIVE : 2
OR_DRUG : 1
SWELLING_OR : 1
EVERY_WITH : 1
SPEAKING_TO : 1
SXS_PATIENTS : 1
ADDENDUM_IN : 1
PHYSICIAN_PLACED : 1
APPT_PCP : 1
BY_DAILY : 2
HISTORY_CURRENT : 1
IN_CHEST : 1
IN_INTRINSICALLY : 1
REC_BLOOD : 1
PASSING_BMI : 1
HOMICIDAL_PATIENT : 1
AGREED_BEGIN : 1
HISPANIC_LATINO : 1
SOI_WT : 1
STATUS_SCREENING : 1
HURTING_LOWER : 1
INFO_PATIENT : 1
CAN_HELP : 1
ON_UNIT : 1
IN_OT : 1
ALERT_PERIOD : 1
MET_PATIENT : 2
ARE_THERE : 1
WILL_THIS : 1
YESTER_RECEIVED : 1
OCCUPATIONAL_YESX : 1
HAS_HIM : 1
HOUR_ONLY : 1
NOTE_FOR : 1
IN_RAL : 2
FAMILY_HEALTH : 1
WHICH_HAS : 2
RAL_FOCUS : 1
MI_NO : 1
NICOTINE_MG : 1
SI_LOCK : 1
NURSING_UNDERSTANDING : 1
CELL_IS : 1
NOW_PL : 1
STANDARD_RADIATION : 1
OPTION_HE : 1
MADE_AT : 1
FEE_AUTHORIZATION : 1
SPECIALIST_WANTED : 1
ERA_TO : 1
MG_SUPPOSITORY : 1
COMFORTABLE_EXCHANGE : 2
TO_CONTACT : 1
CHRONIC_OBSTRUCTIVE : 1
WHILE_TOLD : 1
SEP_NEUROCARDIOGENIC : 1
IN_ACTIVE : 2
BASIC_OF : 1
WITHIN_AND : 1
NOT_EXCEED : 2
TYPE_FREQUENCY : 2
DIETARY_INSTRUCTIONS : 1
TEMPERATURE_PAIN : 1
TO_INTERVENE : 1
PLAN_SEC : 1
OR_MORE : 1
THOUGHTS_OF : 1
MEDICATIONS_PRIOR : 1
WAS_ADMITTED : 1
HE_HAVE : 1
RECOMMENDATIONS_VERBALLY : 1
HIS_GRANDIOSITY : 1
DISEASE_AND : 1
SUBMITTED_SUN : 1
HAVE_INTERVENE : 1
DEFIBRILLATION_CARDIOVERSION : 1
RESISTED_TO : 1
TO_DEVELOP : 1
SECONDARY_1010M : 1
OVER_OF : 1
FOR_ONE : 1
REACH_BAND : 1
ORDER_FOR : 1
LONG_STAY : 1
UNITS_CARE : 1
EVALUATE_FOR : 1
IS_ASSIST : 1
LARGE_ALSO : 1
DENIES_PAIN : 2
NPO_APR : 1
NOT_ON : 1
SURGEONS_WHO : 1
DOCTOR_WAS : 1
WILL_IT : 1
ANOTHER_ATTEMPT : 1
WAVE_OF : 1
OFTEN_YOU : 1
IT_HAS : 1
CORRESPONDENCE_RECEIVED : 1
LENGTH_PHYSICIAN : 1
YES_ENEMA : 1
SUBMITTED_BY : 1
DRINKS_CONTAINING : 1
MINS_KINETRON : 1
RETROCOLLIS_TORICOLLIS : 1
WITH_BUT : 1
DI_DATE : 1
DAILY_NOTES : 1
YEAR_MALE : 1
CARE_PATIENT : 1
HEALTHY_FOR : 1
ULCERATION_LEFT : 2
FEW_NOW : 1
RECORD_INTAKE : 1
SCALE_MOBILITY : 1
PMH_BEEN : 1
CONTINUE_STRUGGLE : 1
WITH_FOR : 2
WITH_HIGH : 1
TRAINED_WITHOUT : 1
REPORTS_HIS : 1
UNIT_STRUCTURE : 1
SP_ACTIVE : 1
BREATH_USING : 1
PEACH_COLORED : 1
BE_REVIEWED : 1
FOR_PATIENT : 1
APPEARANCE_CLEAN : 1
ACTIVITIES_YES : 1
OCCUPATIONAL_BENDING : 1
STAFF_REDIRECTABLE : 1
NOTES_MEDICAL : 1
FOR_TO : 5
KG_SEC : 1
RELIGIOUS_LITERATURE : 1
PRECAUTIONS_NWB : 1
SYNCOPY_WAS : 1
HE_TAKES : 1
TOBACCO_FOR : 1
CHRONIC_SPHENOIDAL : 1
BETWEEN_PATIENT : 1
CARE_KRISHNASWAMY : 1
ADMISSION_LEAD : 1
AGE_INDETERMINATE : 1
ST_WAVE : 1
PSYCHOSOCIAL_HISTORY : 1
ALF_AFTER : 1
CHILD_REARING : 1
OEF_AND : 1
ON_CHECKS : 1
SENT_LAB : 1
ON_CLICK : 1
HI_PRESYNCOPE : 1
COMMENTS_SYNCOPE : 1
APPOINTMENT_FURTHER : 1
AVOIDANCE_NUMBING : 1
APPLIANCES_NURSING : 1
TO_UNKNOWN : 1
SOB_PT : 1
NP_PA : 1
FROM_MEDICINE : 1
PAIN_FOR : 1
EXPOSURE_TO : 1
GOOD_WITH : 1
XYZZY_ERROR : 1
REASON_ADMISSION : 1
COPD_EXACERBATION : 1
GOES_HOLDING : 1
FACILITY_HAD : 1
ETHNICITY_NOT : 1
STAY_ASSESSMENT : 1
METHOD_BASIC : 1
SENSE_AWA : 1
CARE_OF : 1
THAT_SERVICES : 1
SINCE_HE : 2
NOW_STILL : 1
SAYS_HE : 1
RIGHTSIDED_CHEST : 1
BEEN_CRISIS : 1
BEHAVIORAL_INDICATORS : 1
SUB_MET : 1
REPORT_CONTACT : 1
TO_MEDS : 1
YESX_NO : 1
NO_ACUTE : 1
YOU_ON : 1
FOLLOWING_PROGRAM : 1
NEW_TO : 1
FRONT_OF : 1
LIGHT_TO : 1
CONSTIPATION_WHEN : 1
BREATH_OR : 1
GIVEN_ACCEPTING : 1
ADR_MULTIPLE : 1
PHONE_IT : 1
SHOW_HOW : 1
WAS_OPPORTUNITY : 1
IS_MALE : 5
IN_US : 1
WRITER_PAIN : 1
MORSE_SCALE : 1
ACTIVE_LAST : 1
ABOUT_ALF : 1
OF_PEOPLE : 1
SECONDARY_AND : 1
AND_LORAZEPAM : 1
FOR_TAKE : 1
PATIENT_INSTRUCTED : 1
AND_WITH : 3
PAIN_MADE : 1
PAIN_SCORE : 1
ANTICOAGULATION_SUPPORT : 1
AS_CP : 1
NORMAL_GROOMING : 1
NOT_PATIENT : 2
THE_HAS : 5
STILL_PL : 1
CONTACTED_POA : 1
PATIENTS_PRESENT : 1
DEVELOP_VERBAL : 1
COUMADIN_TID : 1
INFUSING_LIGHT : 1
IN_OF : 1
IOP_VETERAN : 1
AVOID_EXPOSURE : 1
TIME_CONSIDER : 1
EKSUICIDE_ASSESSMENT : 1
WRIST_WITH : 1
IS_STABLE : 1
WITH_ACID : 1
LAST_PRESENTING : 1
GIM_WAS : 1
ULCERATIONS_ON : 1
REVIEWED_CHANGES : 1
PLACE_FIDDLEHEADS : 1
PLAN_CARDIAC : 1
DISCUSSED_TEAM : 1
CONCERNED_THE : 1
COGNITION_MOBILITY : 2
EXCHANGE_LB : 1
TO_HAVE : 5
REPORTS_HAD : 1
ESPECIALLY_FINANCES : 1
NEUROPATHY_NO : 1
MG_SIG : 1
HIM_DID : 1
NO_WEAKNESS : 1
EDUCATION_HAS : 1
WITHIN_MONTHS : 1
AB_CONVERTED : 1
INITIAL_INITIALLY : 1
TAKE_BY : 1
ASPIRIN_IBUPROFEN : 1
REGULAR_AND : 1
WITH_NS : 1
CARDIAC_OUTPUT : 2
HIS_HOSTILITY : 1
BP_CONSULTS : 1
DOE_UNIT : 1
CHRONIC_PERIWOUND : 1
PSYCHIATRY_MS : 1
FOR_OR : 2
BEHAVIORAL_PRESENT : 1
REC_FAWCETT : 1
CONTAINING_DID : 1
RESPONSE_OTHER : 1
BODIES_KUWAIT : 1
THROAT_WITH : 1
OR_OR : 1
FOCUSED_ASSESSMENT : 1
SPEAKING_THIS : 1
CALL_CM : 1
ANY_NO : 1
CAN_UNDERSTAND : 1
TO_TAKE : 1
ETC_WHEN : 1
HISTORY_ACID : 1
REASSESSMENT_SAFETY : 1
SEEMED_NURSING : 1
FULLY_VOID : 1
NOT_RESTRICTION : 1
ALSO_THE : 1
ARE_NOT : 1
CONTACT_AND : 1
BEEN_PATIENT : 1
DEC_AGE : 1
ASSESSMENT_PMH : 1
OF_TOBACCO : 2
ANSWER_CALL : 1
SPEECH_NORMAL : 1
GIVEN_IN : 1
SPECIFIC_COMPLAINTS : 1
PATIENT_AMBULATORY : 1
SHE_WILL : 1
CONSENT_PROBES : 1
TO_SEE : 2
FALL_PULSE : 1
NURSING_HOMICIDAL : 1
COLORED_NUTRITION : 1
DID_YOU : 2
PLACED_LYRICA : 1
EDEMA_MALODOR : 1
SD_PATIENT : 1
IDEATION_HOMICIDAL : 1
NEUROLOGICAL_NO : 1
TAB_EC : 1
ENGLISH_YES : 1
INHL_PUFFS : 1
HI_HIS : 1
STATUS_MARRIED : 1
HOLD_CONSULT : 1
AND_BLOOD : 2
HAS_APPOINTMENT : 1
ABOUT_MIGHT : 1
CONCERN_GIVEN : 1
PRESENT_WHILE : 1
PERIOD_SERVICE : 1
POA_GAVE : 1
DENTURES_SUBSTANCE : 1
SCHEDULED_APPT : 1
CHEST_DEFIBRILLATION : 1
SCORE_ARE : 1
NAME_CURRENT : 1
PROBLEM_FALL : 1
CTRS_GENERAL : 1
THIS_OUTCOME : 1
PROVIDER_ARABELLA : 1
FORM_DONE : 1
ANSWER_HAS : 1
SEAT_ACTIVE : 1
GOLD_REFERRED : 1
CONTINENT_APPLIANCES : 1
ACTIVE_OUTPATIENT : 5
THE_DENIED : 1
ABLE_TO : 5
THAT_HIS : 5
TO_VET : 1
SUBSTANCE_WWII : 1
CHLORIDE_NASAL : 1
STUDENT_OF : 1
THAT_CHEST : 2
RUB_ADMISSION : 1
HIGH_IV : 1
TEAM_VETERAN : 1
SEEN_THIS : 1
ST_MET : 1
ELECTS_TO : 1
TALK_BY : 1
ON_BACK : 1
IN_SIZE : 1
CONDITION_STAYS : 1
SCHEDULED_READMISSION : 1
ONSET_ULCERATION : 1
SCORE_NO : 1
AT_SPS : 1
ABOVE_ARE : 1
DEBILITATED_BUT : 1
APRIL_ON : 1
AM_REPORTS : 1
OR_LATINO : 1
PUFFS_INHL : 1
1010M_PROVIDER : 1
BP_AND : 1
TO_MEDICATIONS : 1
TO_INCLUDED : 1
BOGGIO_PATIENT : 1
OF_EDEMA : 1
VERDE_PHONE : 1
TO_BIPOLAR : 1
DING_NO : 1
THE_INTERPERSONAL : 1
PT_IDENTIFICATION : 1
NONE_SUBSTANCE : 1
LEARNING_METHODS : 1
ON_EATING : 1
FIANCE_SCORE : 1
SEEMED_SOME : 1
TO_INNER : 1
QAM_FOR : 1
PATIENTS_BRAIN : 1
SI_EXPRESSED : 1
STILL_ING : 1
TO_EAR : 1
BE_WITHOUT : 1
REASSESSMENT_LUNGS : 1
NOTE_SKIN : 1
CONVERTED_THOUGHT : 1
DIAGNOSIS_WENT : 1
SIGNS_SYMPTOMS : 2
SO_ML : 1
ACCEPTING_RN : 1
PHONE_AGE : 1
CHOREIC_MOVEMENTS : 1
PT_ATTENDED : 1
BREATHING_FATHER : 1
OR_READS : 1
THE_MORTGAGE : 1
BAPTIST_LATER : 1
PRESENT_OF : 1
UNIT_MR : 1
PATIENT_ACCESS : 1
SINGARAJAH_NUTRITION : 1
SUB_MTP : 1
HAS_COMPLAINTS : 1
KETCHUM_NURSING : 1
ETATION_MAKING : 1
START_AT : 1
PRESCRIPTION_HOW : 1
IS_ASSIGNED : 1
ACTIVE_HAVE : 1
PRESSURE_WEIGHT : 1
NO_AMBULATORY : 1
PAIN_CHRONIC : 1
OFF_FOR : 1
ED_FOCUSED : 1
LB_HAVE : 1
AGREES_WITH : 1
FOR_SCHEDULED : 2
INTERVENTION_WAS : 1
SO_INHL : 1
SIT_STAND : 1
AND_FROM : 1
RELAPSE_CONTROLLED : 1
POSITIVE_ITEMS : 1
1010M_PART : 1
REFLECT_OUTCOME : 1
MG_TAKE : 2
DRAINAGE_NO : 1
ADDITIONAL_URINE : 1
SCLERA_MMM : 1
CALL_ICDCM : 1
INFORMATION_THE : 1
PER_CM : 1
PO_INPATIENT : 1
INDETERMINATE_LATERAL : 1
APPEARANCE_PATIENT : 1
MINUTES_IPC : 1
VET_WAS : 1
OX_CURRENT : 1
NO_ACTION : 2
NS_AT : 1
NO_ORGANOMEGALY : 1
ATTACHED_TO : 2
ASSESSMENT_IS : 1
ASSESSMENT_INITIALLY : 1
OF_FALLING : 1
EDUCATION_PREDNISONE : 1
EC_PO : 1
OR_WITHIN : 1
OF_CHAPTER : 1
FROM_DAILY : 1
STAGING_BARRETTS : 1
TO_REQUEST : 1
DID_HAVE : 4
THE_FOLLOWING : 7
LEFT_HE : 1
TO_COGNITION : 2
PREOPERATIVE_WENT : 1
WOUND_HEMATOMA : 1
DAUGHTER_WAS : 1
ABUSE_RUNNING : 1
CONT_SUSPENSION : 1
TRUE_TO : 1
PC_NOTE : 1
MOUTH_DAILY : 2
SD_REGISTERED : 1
FACILITATORS_JOE : 1
INSOMNIA_CITALOPRAM : 1
ICDCM_PTS : 1
JUL_AGE : 2
WERE_CAUSES : 1
ADDENDUM_DYSPHAGIA : 1
NO_CHANGES : 1
AN_AND : 1
DISCHARGE_INSTRUCTIONS : 1
YES_PATIENT : 2
WITHIN_HOURS : 1
SYNCOPE_TREMORS : 1
LIGHT_REACH : 1
VS_NURSING : 1
DO_TAKE : 1
MALE_TIME : 1
NPHO_MD : 1
HIS_WHO : 1
SYND_WITHIN : 1
ANSWERED_DYSLIPIDEMIA : 1
EXPECTATIONS_GUIDELINES : 1
DURABLE_POA : 1
TENSE_BASED : 1
IMPRESSION_FOR : 1
ICDCM_CURRENT : 1
ROUTINE_FOLLOW : 1
US_THANK : 1
ENAMA_GIVEN : 1
RANGE_NURSING : 2
AMENDS_TO : 1
QHS_PTSD : 1
AND_NO : 2
AWA_SS : 1
KNOWN_TO : 1
YOU_THE : 2
TO_OUR : 2
NURSING_REASSESSMENT : 3
DATE_IS : 1
BE_BUT : 1
SPORADIC_MEMORIES : 1
TARGETS_HE : 1
FOR_SLIGHTLY : 1
HTN_HYPERLIPIDEMIA : 1
PAIN_CLINIC : 1
PUSH_ALSO : 1
COUGH_OVER : 1
PSYCH_MH : 2
RECEIVED_ATIVAN : 1
FOR_STAFF : 1
THE_BELOW : 1
HERE_HAVING : 1
EMPLOYMENT_OBLIGATIONS : 1
IN_CITALOPRAM : 1
TEMP_OF : 1
DATE_PATIENT : 1
DEBILITATED_CONDITION : 1
IN_TO : 5
PART_WE : 1
APPROPRIATELY_INTERACTS : 1
BETWEEN_AND : 1
MALE_SEEN : 2
CONCERN_NONVISIT : 1
CITALOPRAM_MG : 1
MR_BE : 2
AFTER_INFORMED : 1
AMIODARONE_INJ : 1
ABOUT_IT : 1
BECAME_DESPONDENT : 1
AND_CITALOPRAM : 1
LAB_SECONDARY : 1
FOR_INCREASED : 1
CALL_LIGHT : 1
MIDDLE_AGED : 1
DOSING_PHYSICIAN : 1
MISSED_TAKE : 1
MOBILITY_NO : 1
REMINDER_ACTIVITY : 1
CONCERN_SKIN : 1
PERFORM_BENDING : 1
ACTIVE_IS : 1
HAVE_HISTORY : 1
WAS_ALSO : 1
PT_PUT : 1
WHY_WAS : 1
REACH_ID : 1
WAS_MEDICAL : 1
INTOXILYZER_PATIENT : 1
WILL_BE : 3
ATTENDING_SINGARAJAH : 1
AND_REPORTS : 1
ANATOMICAL_SIDE : 1
PRESENTATION_THE : 1
SOB_HE : 1
STAY_PSYCHOSOCIAL : 1
PHYSICIAN_INFORMATION : 1
PAIN_MOBILITY : 1
REC_PRESSURE : 1
INTRINSICALLY_MOTIVATED : 1
DISCHARGE_CONSULT : 1
NURSING_SIGNS : 1
ANTIANXIETY_PAIN : 2
OBSTRUCTION_ICDCM : 1
IS_HAS : 1
AND_MAKE : 1
ANY_SI : 2
SELF_AND : 1
HEALTH_KNOWING : 1
HE_SEEMED : 1
IN_DEXTROSE : 1
INFUSING_CC : 1
COUMADIN_BE : 1
ABOUT_LEARNING : 1
WAS_CVA : 1
THE_SPACE : 1
DYSPHAGIA_CHANGE : 1
MOTHER_BELLE : 1
SPHENOIDAL_PAIN : 1
NOTE_CRACKLES : 1
WITH_HER : 1
ACUTE_ADMISSION : 1
TO_INTERPRETING : 1
DIET_CLEAR : 1
ACTIONS_COOPERATIVE : 1
DISCHARGED_FROM : 1
PRIMARY_NP : 1
FROM_SOUTH : 1
PRN_ANXIETY : 1
SATS_ON : 1
TO_CARE : 1
HOURS_NEUROPATHY : 1
STAY_WITH : 1
SCHEDULED_VISIT : 1
DATE_EXACT : 1
INDURATION_TO : 1
PT_STATING : 1
SBA_BILAT : 1
HELP_SUPPORT : 1
OF_BODIES : 1
CARE_PRIMARY : 1
LEARNING_ASSESSMENT : 1
CHANGES_ADDENDUM : 1
PT_HIS : 1
VISIT_WAS : 1
PHYSICIAN_IN : 1
TAKING_CITALOPRAM : 1
PCP_MALATINSZKY : 1
MODIFICATIONS_INCLUDING : 1
THE_HBO : 1
ALSO_FROM : 1
ORAL_INHL : 1
STARTED_HE : 1
FOOD_FOR : 1
BOWEL_CONTINENCE : 1
VACCINE_WILL : 1
HAD_CURRENT : 1
WAR_THEY : 1
THE_LARGE : 2
THIS_ENCOUNTER : 2
AN_ANESTHESIA : 1
NOTE_DATE : 1
HIGH_SAME : 1
PATIENT_RECEPTIVITY : 1
AT_TO : 1
IPRATROPIUM_REVIEWED : 1
OUTCOME_UBE : 1
DEPRESSED_FEELING : 1
BELLO_NAME : 1
HOPELESSNESS_DENIES : 1
DING_GUMS : 1
WELL_KNOWN : 1
BEEN_CALLING : 1
ASSIST_FOR : 1
INFLUENZA_VACCINE : 1
TXC_CTRS : 2
PATIENT_FOR : 1
BEEN_FOR : 2
SKIN_PROBLEM : 1
RELAPSE_HYPERTENSION : 1
AND_CONTRACT : 1
YES_ATTENDING : 1
INTERACTS_OTHERS : 1
MH_PRESCRIBER : 1
DELTOID_PAIN : 1
ONE_WITH : 1
VETERAN_WAS : 1
DISCUSS_TX : 1
DISPOSTITON_MEASUREMENT : 1
DL_TO : 1
MSE_ALERT : 1
PLAN_OF : 5
THIS_CONSULT : 1
NO_IN : 2
RIGHT_EXTREMITY : 1
LOCK_PRESENT : 1
DOESNT_TO : 1
LEVEL_OF : 3
DENTURES_NONE : 1
STEROID_NO : 1
HIM_THE : 1
NOTED_PER : 1
REFRACTIVE_ERROR : 1
SCHEDULED_WILL : 1
MINS_TO : 1
VETIN_FOR : 1
FACILITATOR_NOT : 1
THIS_BIPOLAR : 1
COMPONENTS_ARE : 1
OR_MONTHS : 1
PRESSURE_TOTAL : 1
SHE_QUESTIONS : 1
ORGANOMEGALY_NO : 1
ON_ONE : 1
YES_QUANTITY : 1
LYMPH_ANICT : 1
HE_VERY : 1
ON_HEALTHY : 1
AM_OLD : 1
EXCHANGE_OF : 1
SHOWED_THIS : 1
OTHER_SUCH : 1
CHECK_NOT : 1
MALODOR_NO : 1
ORIENTED_OWN : 1
ETODOLAC_MG : 1
PROCEDURE_DESIGNATED : 1
PLEASANT_SUFFERS : 1
HP_WITHIN : 1
INTERDISCIPLINARY_PLAN : 2
THE_SIGNS : 1
PATIENT_PROVIDED : 1
DIRECTIONS_WRITTEN : 1
TO_CED : 1
AS_MINUTE : 1
NAME_AND : 1
AO_SEEN : 1
CHEST_IS : 1
TO_REESTABLISH : 1
TIME_MINUTES : 1
DEPRESSED_MORE : 1
AND_ED : 1
UNSTEADY_WHEN : 1
WE_FOR : 1
SUPPORT_HAD : 1
DRINKING_ASA : 1
BRIDGEWORK_NORMAL : 1
SCORE_FOR : 1
THIS_BECAUSE : 1
TOOLS_CLICK : 1
ARE_ABLE : 1
CONSIDERED_TO : 1
MONTH_YOU : 1
AGE_VERDE : 1
THE_VACCINE : 1
PROGRESS_NOTES : 3
CHECK_PATIENT : 1
AND_GOES : 1
REGULAR_CLOTRIMAZOLE : 1
TAKE_SOON : 1
PATIENT_PERFORMED : 1
FOR_HEALTH : 1
XENGLISH_NONENGLISH : 1
MULTIPLE_PROBLEMS : 1
THE_AUDIOLOGY : 1
SYNCOPE_WANT : 1
NONE_MCH : 1
TELEPHONE_NUMBER : 1
ON_NERVES : 1
DATIVE_ANTIANXIETY : 2
PHONE_LEFT : 1
ASPIRIN_EC : 1
MEDS_DATE : 1
WHAT_IS : 1
OR_STIMULATOR : 1
TIP_NO : 1
BENEFITS_HALF : 1
SUBJECTIVE_BY : 1
UNIT_PT : 1
ABLE_ALIMENT : 1
DL_BLE : 1
PHYSICIAN_FOR : 1
JACHI_DATE : 1
DRIVER_YES : 1
IMMUNIZATION_STATUS : 1
TRANSDERMAL_QAM : 1
MURMUR_RUB : 1
LITERATURE_INFLAMMED : 1
PNEUMOCOCCAL_DOB : 1
ANY_OF : 4
BASED_ON : 1
QUITTING_COMPONENTS : 1
MEDS_BEING : 1
HE_REPORTED : 1
ON_ANOTHERS : 1
BP_PAIN : 1
HEMATURIA_THERAPEUTIC : 1
BE_UNTIL : 1
MM_IN : 1
THE_ER : 1
RISK_EDUCATION : 1
IS_RETIREE : 1
AT_YEAR : 1
SEND_IT : 1
MALE_RESTING : 1
EMERGENCY_1010M : 1
NAIL_IN : 1
INTESTINE_MODERATE : 1
IS_BLOOD : 1
SAME_IV : 1
MMM_PT : 1
DROPS_SP : 1
TO_ABILITY : 1
BESYLATE_MG : 2
OXIMETRY_CHECKS : 1
THE_WITH : 1
AND_RESPONSE : 1
FOR_BUPROPION : 1
BY_LOSS : 1
MOTRIN_NAPROSYN : 1
IMMEDIATE_OR : 1
CHOREIC_VETERAN : 1
OF_EMPLOYMENT : 1
SEND_TO : 1
REQUEST_SECOND : 1
ANSWERED_PATIENT : 1
HUBER_FACILITY : 1
BEATY_MSW : 1
CONNECTS_THROAT : 1
IN_BUCKEYE : 1
BEEN_FACTOR : 1
AIR_REST : 1
COUNSELING_EDUCATION : 1
DOCTOR_COUMADIN : 1
DNR_TO : 1
ANOTHERS_PART : 1
FOR_DO : 1
THE_AND : 2
STABLE_NO : 1
NAD_AO : 1
ONE_IN : 1
RECTALLY_PATIENT : 1
TOBACCO_OF : 1
WAS_FEELING : 1
HE_DURING : 1
ALBUTEROL_INHL : 2
WITHOUT_DIFFICULTY : 1
SUPP_RTL : 1
INDIVIDUAL_ECS : 1
VETERAN_THAT : 2
PRRC_HE : 1
NOTE_AND : 1
AND_AGGRESSIVE : 1
PRESENTING_COMPLAINT : 1
MARRIAGE_FAMILY : 1
TO_NEUROLOGY : 1
WITH_TO : 2
IN_EVIDENCE : 1
NSAIDS_ADVIL : 1
KG_BESYLATE : 1
NONE_ABUSE : 1
GAS_LEVEL : 1
CHANGES_ULCERATION : 1
NO_ANTIBIOTIC : 1
MCH_HEENT : 1
AURICLE_VARIGATED : 1
ON_MINUTE : 1
DOCTOR_ABOUT : 1
FOR_PROBLEM : 1
GIPATEL_MAY : 1
ACCESS_DISCONTINUED : 1
PROBLEMS_LOSS : 1
PATIENTS_IMMUNIZATION : 1
WHILE_THEN : 1
TO_WHY : 1
DRUG_REQUEST : 1
CALL_TYPE : 1
AND_DIRECTIONS : 1
EXTENSION_GIVEN : 1
LAST_HAS : 1
HEIGHT_IN : 1
HIS_THAT : 1
PATIENTS_REPORT : 1
CONTRAINDICATED_AND : 1
IN_BED : 1
ABOUT_ASSESS : 1
HYPERLIPIDEMIA_DISCUSSED : 1
VET_THAT : 2
CLINICAL_REMINDERS : 1
LB_CURRENT : 1
HE_IN : 1
EXCESSIVE_AND : 1
HIS_SO : 1
HE_RELATES : 1
RISK_HIM : 1
RRR_MURMUR : 1
AND_HAD : 2
PAIN_CORRESPONDENCE : 1
OR_BE : 1
NURSING_OBSERVATION : 1
TAKE_CAPSULES : 1
THAN_DOES : 1
RESULTS_ANY : 1
HOSPITAL_BECAUSE : 1
ALSO_SPECIALIST : 1
BEEN_SIGNIFICANT : 1
THE_MR : 1
ORGANISM_IDENTIFIED : 1
THAT_IS : 3
PLEASANT_OF : 1
TETANUS_STATUS : 1
HE_PASSING : 1
LIMITS_TABLETS : 1
NOPHEN_TAB : 1
RECORD_PLAN : 1
DELTOID_VETERAN : 1
POSITION_ON : 1
IMPULSIVE_OR : 1
BY_ROTH : 1
NUTRITION_EDUCATION : 1
AS_INFORMED : 1
SPEAKS_ENGLISH : 1
NO_PRESENTED : 1
NEVER_PT : 1
DIRECTIVE_DIET : 1
TOO_TO : 1
PROVIDED_INFORMATION : 1
OF_FAT : 1
SCHEDULED_INDIVIDUAL : 1
VAGUE_HE : 1
ANICT_MMM : 1
ML_SP : 1
RESTORING_INTERPERSONAL : 1
SIT_WITH : 1
DATA_HAVE : 1
NO_LIMITATION : 1
CARE_CARDIAC : 1
AND_HE : 1
WITH_INFUSING : 2
WITH_LAMVIUDINE : 1
THAT_IN : 1
PLACED_ON : 2
EDUCATION_BEEN : 1
POSTOPS_NO : 1
DYSLIPIDEMIA_ICDCM : 1
FOR_THERAPIST : 1
STAFF_ENCOURAGEMENT : 1
VETERAN_WIFE : 1
CAN_TO : 2
MOUNTING_MEDICAL : 1
WHAT_REPORT : 1
HYPERLIPIDEMIA_IS : 1
METHOD_TEACHING : 1
SUSPENSION_CONSULTED : 1
OR_MONITOR : 1
BASED_DSMIV : 1
THERE_WAS : 1
THE_THEY : 1
NOTE_STAYS : 1
RFA_PATENT : 1
COPING_INEFFECTIVE : 1
PASSING_OUT : 1
APPOINTMENT_DATE : 1
MEASUREMENT_POX : 1
FAR_FROM : 1
NO_DOES : 1
ANESTHESIA_PRACTITIONER : 1
IN_INTRUSIVE : 1
RELATED_TO : 3
PAMPHLET_NOTICE : 1
OW_APPROACH : 1
ETATION_AMENDS : 1
CARDIAC_DIMINISHED : 1
ABLE_DOES : 1
DID_ANSWER : 1
REDNESS_SWELLING : 1
NURSING_INPATIENT : 1
DISCUSS_NEEDS : 1
BP_HT : 1
AUTHOR_HEARD : 1
OF_HYPERTENSION : 1
TO_PEACH : 1
JOB_PATIENT : 1
PHONE_REPORT : 1
AMBULATORY_WITHOUT : 1
BLOODWORK_IN : 1
AFTER_ALERT : 1
WHY_PATIENT : 1
HAS_SIGNIFICANT : 1
ERA_DEC : 1
THOUGHTS_DENIES : 1
PT_APPEARED : 1
PROBE_TUNNEL : 1
EC_MG : 1
ERYTHEMA_TO : 1
EGO_VETERANS : 1
ALLERGIES_DRUG : 1
ADDENDUM_NEUROPATHY : 1
PSYCHI_MD : 1
NO_NO : 2
AVAILABLE_HAVE : 1
MET_RECORDS : 1
SIDERAILS_UP : 1
OR_SHE : 1
RESTORING_THE : 1
HE_FEVERS : 1
MOVEMENTS_DID : 1
INCLUDING_HEART : 1
HAS_NKA : 3
SYNCOPE_HAS : 1
ADVISED_WE : 1
RESP_BP : 1
MEDICAL_RISK : 1
SYNCOPY_VET : 1
ADR_TO : 1
PATIENT_TO : 4
MEMORIES_OF : 1
RECORD_AND : 1
CHEST_AND : 3
TEAM_TO : 1
CARE_IT : 1
COPING_DEPRESSION : 1
SOME_BUT : 1
GOOD_GASTRITIS : 1
CALORIE_MONITOR : 1
NO_POSITION : 1
NEEDING_TO : 1
OTHER_4D : 1
ONLY_HE : 1
PAIN_OF : 1
TELEPHONE_MARITAL : 1
REQUESTS_FAMILY : 1
HAS_ADR : 1
TO_NURSING : 1
PULSE_RISK : 1
LISA_PT : 1
ANSWERING_MACHINE : 1
DIVERTICULOSIS_THAT : 1
STATUS_AGE : 2
MALE_TO : 1
CONTROLLED_OUTCOME : 1
HEALTHSOUTH_IS : 1
WITH_AND : 7
THEY_CAN : 1
REQUESTING_WAL : 1
CONSENT_PATIENT : 1
BESYLATE_PATIENT : 1
NONFORMULARY_DRUG : 1
TX_LAMVIUDINE : 1
OPERABLE_PROBLEMS : 1
MAKE_ATTEMPT : 1
MILD_ERYTHEMA : 1
TYPE_ACUTE : 1
HYPERTENSION_ADDENDUM : 1
LEFT_LEFT : 1
YES_OTHER : 1
DATA_BASE : 1
IS_TAKE : 1
UNIT_TO : 1
PURULENCE_NOT : 1
TO_WITH : 4
DEVELOPED_IN : 1
NOT_DOUBLE : 1
OVERNIGHT_OF : 1
TIBIAL_WEAK : 2
NEEDED_ENDING : 1
DRAINING_CHERRY : 1
NOTES_NOTES : 1
COULD_NOT : 1
AS_SOON : 1
NO_HANDOUT : 1
BE_ILL : 1
POST_BRONCHOSCOPY : 1
OF_OR : 2
MACHINE_PLEASE : 1
IS_SOUNDS : 1
PATIENT_DEMOGRAPHICS : 1
MOOD_THOUGHTS : 1
MOVES_ALLERGIES : 1
WRITER_WITH : 1
PLAN_SEX : 1
THAT_PAIN : 1
NURSING_INTERVIEW : 1
WITH_SUCH : 1
IMAGING_DISPLAY : 1
OF_PROSTATE : 1
USE_AMPULE : 1
PT_ALSO : 1
BEDREST_WHEELCHAIR : 1
MH_EKNURSING : 1
SCREEN_PHYSICIAN : 1
VISIT_THE : 1
SCALE_NO : 1
TO_PRESENT : 1
HE_BETWEEN : 1
QHS_ASPIRIN : 1
OR_REDIRECTABLE : 1
TO_ANY : 1
WT_CHANGES : 1
IS_TO : 5
ASSESSMENT_AND : 1
INTRINSICALLY_TO : 1
ADLS_DISCHARGE : 1
XRT_CHEMO : 1
WAS_OF : 1
OLECRANON_PAIN : 1
PROVIDER_LINKSF : 1
FROM_CM : 1
THE_OEF : 1
OCCUPATION_THAN : 1
COMPLETELY_AND : 1
GOVERNMENT_OF : 1
AND_GUIDELINES : 1
HT_NO : 1
THE_MEDICATION : 1
ON_DSMIV : 1
HIS_ARE : 1
IDENTIFIED_ADDENDUM : 1
SEEMS_TO : 1
NERVE_STIMULATOR : 1
YO_CALLING : 1
OF_COMMUNICATION : 1
OXYCODONE_COMES : 1
PATIENT_NOT : 4
TO_SECONDARY : 1
NOT_ANY : 1
IN_NAD : 1
REDUCED_ALLOW : 1
FOLLOWING_POSITIVE : 1
CHEST_EXPRESSED : 1
WHICH_HE : 1
BUT_GOT : 1
BY_MS : 1
CLINIC_TEAM : 1
NO_PLANS : 1
DYSLIPIDEMIA_ORDERS : 1
SKILLED_SERVICES : 1
CALLED_THE : 1
CALL_LEFT : 1
DRIVE_TYPE : 1
PAIN_SIG : 1
DIET_RESTRICTIONS : 1
TRULY_TARGETS : 1
PT_WITH : 1
ACTIVITY_APPEARANCE : 1
FOLLOWING_HE : 1
NONFORMULARY_REQUEST : 1
STEP_WHO : 1
PENDING_PERSONAL : 1
STATED_THAT : 2
COMPLAINT_SEVERED : 1
QH_PRN : 2
AD_DISCUSSED : 1
PALPABLE_BELL : 1
COWORKERS_LORAZEPAM : 1
CESSATION_EKPHYSICIAN : 1
BASIC_ACTIVITIES : 1
SCORE_SUPPORT : 1
ARISING_IN : 1
IS_STATED : 1
ML_ACTIVE : 1
TIME_SIMVASTATIN : 1
DEPRESSED_HIS : 1
NO_PREOP : 1
DAILY_LIVING : 2
AROUND_SIMVASTATIN : 1
TEACHING_THEY : 1
REVIEW_THEM : 1
PATIENT_REPORT : 1
BELL_WITHIN : 1
HIS_INR : 1
HAS_CAPACITY : 1
ADMITTED_PAST : 1
HAVE_SIX : 1
RN_NO : 1
NO_SWELLING : 1
ALLERGY_CONFIRMED : 1
GROUP_NAME : 1
ON_OUPT : 1
IN_NURSING : 1
MOBILITY_ATTENDING : 1
SMOKES_PHYSICIAN : 1
IT_WAS : 1
ML_AMPULE : 1
STILL_TO : 1
TO_DENIES : 1
BEDSIDE_TO : 1
TENDERNESS_REMINDER : 1
TOTAL_MINUTES : 1
RESP_PAIN : 1
AT_PART : 1
TO_TRAFFIC : 1
JUL_SEX : 2
WEEK_BLOOD : 1
DISORDER_MESSAGE : 1
PREFERRED_METHODS : 1
NAIL_CLINIC : 1
SMOKING_CESSATION : 2
USING_INTOXILYZER : 1
MEDICATIONS_WITHIN : 1
THE_NORMALIZED : 1
RELATIVELY_ABLE : 1
PO_QHS : 2
PROBLEMS_AGREEMENT : 1
ALF_HOWEVER : 1
AT_BEDSIDE : 1
RADIATION_GASTRITIS : 1
REMOVING_GUNS : 1
ANY_ACTIVITIES : 1
NIGHT_ADDENDUM : 1
GENITOURINARY_ORIENTED : 1
ATTENDANCE_FOCUS : 1
PROVIDER_ARE : 1
AMA_DENIES : 1
EDEMA_PRIOR : 1
INR_SUPPORT : 1
MEDS_REQUESTS : 1
PAIN_PN : 1
FRUSTRATION_SADNESS : 1
SUN_DATE : 1
SIGNS_LIVES : 1
AS_OR : 1
IS_TAKING : 1
THE_INDIVIDUAL : 1
VETERAN_REPORTS : 1
QUATTLEBAUM_TXC : 1
GINGIVA_PRECAUTIONS : 1
ENCOUNTER_MOVEMENTS : 1
PATIENT_FOLLOWED : 1
WAS_EDUCATED : 1
ADDENDUM_CARDIAC : 1
PATIENT_NO : 3
WALKING_SIMVASTATIN : 1
THE_NAIL : 1
ISSUE_DENTURES : 1
BEDREST_NURSE : 1
FAMILY_SPC : 1
MODERATE_ACTIVE : 1
CYRNG_PREOPERATIVE : 1
WT_OVER : 1
SWR_THE : 1
RECALL_TO : 1
HE_TRANSFER : 1
BILAT_SSN : 1
OR_DEPENDENT : 1
INFLUENZA_ADMINISTERED : 1
UP_ON : 1
NO_SYNCOPE : 1
MALE_HX : 1
DATE_FEBRUARY : 1
MONTHS_PAIN : 1
BUT_LIKE : 1
AUG_FEELING : 1
PRACTICES_TO : 1
THE_INFORMATION : 1
OR_EDEMA : 1
GIVEN_TO : 2
PL_ING : 1
MILEWSKI_FULLY : 1
UPPER_ARMS : 1
TO_ACCEPTING : 1
DRUG_PHYSICAL : 1
PHARMACY_NEED : 1
HE_STATED : 3
ATTENDED_PARTICIPATED : 1
MOTRIN_ALEVE : 1
PREDNISONE_MG : 1
SEAT_BELT : 1
UNLESS_AND : 1
HE_IS : 9
WITHIN_LIMITS : 1
THIS_INTERVIEW : 1
STRUGGLE_ALSO : 1
REPORTS_PATIENTS : 1
CLEAR_DENIES : 1
OX_MEDICATION : 1
TO_AND : 6
ST_MTP : 1
DELAYED_UNTIL : 1
TO_SETTING : 1
SUPPLIES_HEART : 1
SEEN_IN : 2
SIDE_EFFECTS : 2
REDNESS_OCT : 1
MOVE_OR : 1
EVAL_OF : 1
POSTOPS_ORIENTED : 1
THE_THIS : 1
HEALTH_SCREEN : 1
PRIOR_DEBRIDEMENT : 1
SYND_OF : 1
STAYED_BECAUSE : 1
HAS_CULTURAL : 1
IS_NOW : 1
DATE_ACTIVE : 1
STAYS_SELF : 1
CHRONIC_PULMONARY : 1
DISCUSSED_OF : 1
DOES_PLEASE : 1
GROOMING_NURSE : 1
BETWEEN_PRIMARY : 1
CRACKLES_BASES : 1
OR_STAFF : 1
ER_HS : 1
AUDIOLOGY_CLINIC : 1
EDUCATION_PROVIDED : 1
MS_YO : 1
HIS_FAMILY : 1
EVIDENCE_OF : 1
SIGNS_ETOH : 1
NEWLY_PRESCRIBED : 1
LANGUAGE_EDUCATION : 1
WERE_IF : 1
HPI_WITH : 1
PURULENT_NO : 1
YOU_PM : 1
THIS_APPT : 1
URINARY_ICDCM : 1
AMLODIPINE_BESYLATE : 2
OUT_HIS : 1
OF_DISPUTES : 1
ALIMENT_AGREE : 1
ANTIHYPERTENSIVES_NO : 1
MANAGER_AT : 1
PURPOSES_OVERNIGHT : 1
REMINDERS_NOTE : 1
AND_LAB : 1
OF_READ : 1
PAIN_LB : 1
TO_TRANSFER : 1
PT_INR : 1
HISTORY_VITALS : 1
PSYCHIATRY_YO : 1
ALLERGIES_REACTIONS : 1
MANAGEMENT_AND : 1
AS_PENDING : 1
STEP_AT : 1
NURSING_CARE : 1
DOES_NOT : 2
WAS_SUBSEQUENTLY : 1
BY_ON : 1
MEDICAL_STUDENT : 1
SIG_DATE : 1
FROM_SERIES : 1
VALIDATES_HE : 2
MSW_MEANS : 1
VITALS_ADMISSION : 1
OR_FLUID : 2
ON_THIIS : 1
ACCEPTANCE_IS : 1
PATENT_INTACT : 1
BE_PATIENT : 1
WHILE_SPEAKING : 1
LOCKED_UNIT : 1
TEMP_CURRENT : 1
ESTABLISH_PSYCHOSOCIAL : 1
SPORADIC_INTRUSIVE : 1
RESTRICTIONS_NOTE : 1
WAS_PRIOR : 1
YO_ADMITTED : 1
ADDENDUM_RECOMMENDATIONS : 1
STATUS_INJURY : 1
TRANSFER_VA : 1
HOMICIDAL_PLAN : 2
CLICK_TOOLS : 1
THIS_PT : 2
AND_RALLY : 1
RECONTACT_US : 1
REVIEWED_NO : 1
ASSESSMENT_YOUR : 1
NUMBER_INSTRUCTIONS : 1
ANSWERED_QUESTIONS : 1
MOTIVATED_DEVELOP : 1
IN_CLINIC : 2
FOR_DISCUSSED : 1
CHART_INDIVIDUAL : 1
CYSTOSCOPY_NO : 1
YOU_ASSESSMENT : 1
WITH_PAIN : 1
PAST_AND : 1
DIET_NUTRITIONAL : 1
MEANS_COMMUNICATION : 1
EKG_OF : 1
IS_MISSED : 1
OWN_EXPERIENCES : 1
TREAT_WITH : 1
RECTAL_ING : 1
SERVICES_HYPERLIPIDEMIA : 1
FOODS_ADDITION : 1
SCARED_ALLERGIES : 1
BETWEEN_WAS : 1
WRITTEN_BELLO : 1
CALLER_OTHER : 1
SELFTALK_FACILITATOR : 1
CAUSED_HIM : 1
ASSISTED_ABOUT : 1
HOSPITAL_OF : 1
WITH_STATED : 2
CALLER_AREA : 1
WITHIN_GETTING : 1
VETERAN_WILL : 1
WITH_HX : 1
REMEMBERED_DO : 1
IN_ADDITION : 1
BE_REFILLED : 1
SUCH_CP : 1
VIETNAM_ERA : 1
STATED_HE : 1
STILL_DEPRESSED : 1
DRIVER_THAN : 1
VET_GIVEN : 1
OR_YES : 2
WITHOUT_COLLABORATIVE : 1
AND_INTACT : 1
DO_NOT : 3
REACH_BLOODWORK : 1
BRIEFLY_PT : 1
OF_BIT : 1
ACETAMINOPHEN_NICOTINE : 1
MEDICATIONS_CARDIOVASCULAR : 1
LYMPH_HEENT : 1
TOTAL_GET : 1
BE_MENTALLY : 1
AND_VETERANS : 1
HAVING_PATIENT : 1
AND_MEDICATIONS : 1
DISCHARGE_RECORDS : 1
PULSE_CHECKS : 1
OF_GE : 1
HAS_HE : 1
DEPRESSED_MOOD : 1
CE_AMBULATION : 1
HEAD_TWICE : 1
TEMPERATURE_MODERATE : 1
EMER_EMER : 1
NEUROLOGY_STATES : 1
SKILLED_WK : 1
WATCHING_THE : 1
FALL_RISK : 3
BEEN_THE : 1
FAIR_NURSE : 1
PRESCRIPTION_YOU : 1
CONVERTED_SO : 1
CONTACT_ON : 1
MG_SEROQUEL : 1
TIFIED_HAS : 1
DISTRACT_PLACE : 1
INTENSITY_MODERATE : 1
FATHER_CLEAR : 1
WHO_THE : 1
PC_ANTICOAGULATION : 1
OFTEN_DID : 1
MEDICAL_PROGRESS : 1
WOULD_LIKE : 3
QID_CONSULTED : 1
MALE_WITH : 2
IS_WITH : 2
APPROPRIATE_PATIENT : 1
TO_ADDENDUM : 1
THOUGHT_TO : 1
STATUS_AND : 1
ELECTRONIC_VIEW : 1
EDUCATION_HIM : 1
OTHERS_NONE : 1
BE_FINGER : 1
SIT_TO : 1
CONSPIRACY_OF : 1
WEAK_WEAK : 1
FOCUSED_SECONDARY : 1
ANY_TESTS : 1
UP_MG : 1
YO_OBESE : 1
BESYLATE_TAB : 1
REQUESTS_FOR : 1
EVERY_CHRONIC : 1
PHYSICALLY_AND : 1
THE_EXPECTATIONS : 1
CAD_BODY : 1
IS_EXPECTED : 1
OF_ADMISSION : 1
FOR_FLUSH : 1
WE_HAVENT : 1
NOT_OPERABLE : 1
PO_PHYSICIAN : 1
SCHEDULED_DAILY : 1
HAVE_QUESTIONS : 1
PROCEDURE_VERBALLY : 1
VITALS_DISCHARGE : 1
VETERANS_CHILD : 1
MOTHER_FOR : 1
APPT_LEG : 1
OUTCOME_MINS : 1
RIGHT_LOWER : 1
ADDENDUM_BRIEFLY : 1
ROOM_REST : 1
THE_AID : 1
VETERNS_ON : 1
PAIN_PERIWOUND : 1
LEFT_FOREARM : 1
NORMAL_PREVENTION : 1
NOT_TAKE : 1
CHECK_ANY : 1
WITH_TEAM : 3
AT_BASES : 1
MORPHINE_IV : 1
TO_SHOW : 1
INR_NO : 1
REHAB_FACILITY : 1
WANKER_AN : 1
NEED_BE : 1
WEIGHT_DISCHARGE : 1
INDEPENDENT_COMPLETELY : 1
UNDERMINING_TO : 1
INTERVENTION_DATE : 1
GOOD_HAND : 1
APPOINTED_MALATINSZKY : 1
HAS_HIT : 1
PATIENT_GLUCOSE : 1
DESIGNED_AID : 1
INFORMED_THIS : 1
BUT_POST : 1
ANOTHER_HUMOR : 1
NOT_SMOKE : 1
FROM_AND : 1
ATTENTIVE_NUMBER : 1
SIGNIFICANT_FACTOR : 1
HAS_DIFFICULTIES : 1
THE_RIGHT : 1
WITHOUT_NO : 1
THAN_AN : 1
ANSWER_PATIENT : 1
PMR_DISCHARGE : 1
REL_HISTORICAL : 1
BE_CED : 1
CLINIC_NOTE : 1
STRUCTURE_ANSWERED : 1
MULTIPLE_PAIN : 1
FINGER_NUMBNESS : 1
DATE_PREFERRED : 1
BEGIN_HAS : 1
WITH_HE : 1
BE_COLLABORATIVE : 1
BP_TAKEN : 1
PROCEDURE_JUN : 1
YOU_PAIN : 1
WAS_DCD : 1
CITALOPRAM_HE : 1
HEALTH_SOUTH : 1
VETERAN_NOTED : 1
CRAVINGS_SMOKING : 1
CONTINGENCY_PLAN : 1
AND_DIFFICULTIES : 1
MARICOPA_DRIVER : 1
PLATINUM_SWER : 1
DISCHARGE_LEFT : 1
DAILY_YES : 1
KINETRON_MINS : 1
AND_PARASTHESIAS : 1
WEIGHT_PROGRAM : 1
SOME_ABOUT : 1
MARRIAGE_AND : 1
CALL_MESSAGE : 1
OWN_WAR : 1
HEALTH_CONSULT : 1
ER_NOTE : 1
RECEIVED_FOR : 1
SHE_IS : 4
IN_LOW : 1
PM_DONE : 1
CED_TO : 1
IT_DR : 1
THE_MEDICAL : 1
TO_FOR : 5
PRBLM_WHY : 1
CHATHAM_NEW : 1
ON_PART : 1
INTO_FINISHING : 1
EXTREMITIES_PATIENT : 1
PROTOCOL_LPN : 1
OTC_INTERVENTIONS : 1
EDUCATION_ON : 1
MEDS_YES : 1
FOR_WOULD : 1
LEVITRA_SODIUM : 1
REGULAR_PROCEDURES : 1
COMPROMISE_TOTAL : 1
TOTAL_MEDICATIONS : 1
TO_THE : 9
VERBAL_ARE : 1
ADMISSION_FOR : 1
TO_COME : 2
THE_MEDICATIONS : 1
OBESE_DRESS : 1
IDENTIFIED_PATIENT : 1
HAD_ON : 1
STARTED_UP : 1
FROM_FOODS : 1
BY_MOUTH : 5
HERE_AND : 1
EDUCATED_DEC : 1
EXPRESSED_RESPIRATIONS : 1
EMPLOYMENT_THE : 1
PRACTITIONER_WILL : 1
PATIENT_ENCOURAGED : 1
ADMITTED_NSTEMI : 1
DOCTORS_AND : 1
OR_WEIGHT : 1
YESTER_TO : 1
ATTEMPTED_LUMBAR : 1
ALERT_PLEASANT : 2
HYGIENE_DECUBITUS : 1
CARE_BOWENS : 1
AMBULATORY_EXAM : 1
INPLACE_OF : 1
GOOD_PATIENT : 1
NAME_MR : 1
ONES_THE : 1
COVERED_WERE : 1
TIME_AGE : 3
STAY_HIS : 1
PULSE_COMPLETELY : 1
ADDENDUM_AND : 2
REASON_FOR : 1
TAKE_TABLET : 4
IDN_SECONDARY : 1
AND_AT : 2
HAS_CAUSED : 1
CASUAL_APPROPRIATE : 1
THE_PSYCHOTROPIC : 1
SUGGESTIVE_OF : 1
NOT_THAT : 1
FALL_SCALE : 1
THE_THREE : 1
REVIEW_UPDATE : 1
ED_AS : 1
INCLUDE_THE : 1
NOTE_NORMAL : 1
WRITER_DISORDER : 1
NEGATIVE_SELFTALK : 1
WITHIN_YES : 1
STATED_IS : 1
ACTIVE_IN : 1
AGAIN_IID : 1
WITH_ANTIHYPERTENSIVES : 1
HISTORY_SURGERY : 1
TO_STAFF : 1
THOUGHT_SEE : 1
COPC_MENTAL : 1
THE_THE : 1
OPPORTUNITY_TO : 2
NONSOAP_JOB : 1
STRESSED_ABOUT : 1
PLAN_STEP : 1
THAT_WAS : 2
HAVENT_CHECKED : 1
PCP_KETCHUM : 1
ADJUSTED_CAN : 1
OF_PATIENT : 1
THE_EVERY : 1
THIS_HIS : 1
VSS_RATE : 1
AND_EMERGENCY : 1
REQUESTING_GO : 1
TO_BP : 1
AND_FOR : 7
SXS_CARE : 1
WITH_OF : 1
REGULAR_EASY : 1
AND_HIM : 1
HYPOTHYROIDISM_IRON : 1
HAVING_JOB : 1
FOR_VARDENAFIL : 1
THAT_ENAMA : 1
GOOD_UPDATED : 1
MAY_ASPIRIN : 1
LEVEL_UNDERSTANDING : 2
WENT_MY : 1
VARDENAFIL_SODIUM : 1
PHONE_YRS : 1
LOCK_POSTOPS : 1
INTERVIEW_FILED : 1
HEENT_ANICT : 1
UNRE_ABLE : 1
VETERAN_PT : 1
LEAD_OF : 1
SAID_HE : 1
RELAYED_THIS : 1
REQUEST_ATTEMPTED : 1
OF_RESTORING : 1
PER_ORDERS : 1
DAILY_HE : 1
HIS_PROJECT : 1
LAST_HOURS : 2
HE_DEVELOPED : 1
WILL_DAILY : 1
HIT_TWICE : 1
AGREE_APPROACH : 1
UNDER_THE : 1
MAKING_TO : 1
CE_PT : 1
SSN_ALLERGY : 1
AND_NOT : 2
EDUCATION_LEVEL : 1
ACTIVE_ASSESSMENT : 1
GENERAL_OWN : 1
SHE_UNDERSTANDS : 1
ADDITION_TO : 1
SESSION_SHOW : 1
WAL_THE : 1
AND_HEAD : 1
ANSWERING_TO : 1
SECOND_BLOOD : 1
MONTHS_NOX : 1
LOWER_RETROCOLLIS : 1
NOT_DRINKING : 1
TO_RECONTACT : 1
STAGING_FOR : 1
DURING_LONG : 1
ANY_MADE : 1
ADDENDUM_STATES : 1
HEART_WITHOUT : 1
TO_NAD : 1
YOUR_CARE : 1
ACTION_WRITER : 1
DIET_NO : 1
DISCHARGE_PT : 1
ALONG_HIGHWAY : 1
TRIAGE_NOTE : 1
REFUSES_VACCINE : 1
BLE_PEDAL : 1
OF_UNIT : 1
MEDICAL_APPOINTMENT : 1
NO_NOT : 1
WHERE_SPENT : 1
SKIN_REASSESSMENT : 3
DATE_COMPLETE : 1
AND_CALLER : 1
TIME_ARRIVED : 1
PURULENCE_DOES : 1
ANSWERED_FEEDS : 1
AND_SI : 1
TO_NAIL : 1
NORMAL_HYG : 1
VERY_CVA : 1
SIMVASTATIN_MG : 1
PAIN_TYPE : 1
INFORMATION_STAFFING : 1
INTACT_TO : 1
ERYTHEMA_EDEMA : 2
CURRENT_VITALS : 1
ACTIONS_WHEN : 1
SATS_ROOM : 1
EATING_HEART : 1
SMOKED_AND : 1
IBUPROFEN_ADVIL : 1
REACH_WATER : 1
INITIAL_MEDICAL : 1
TO_PRESSURE : 1
RECEIVED_INSTRUCTED : 1
OF_THRUSTING : 1
PA_SCHEDULED : 1
PREOP_MEDS : 1
UNITS_PRIMARY : 1
PRESENTING_CHIEF : 1
ATTEMPT_VETERAN : 1
WITHIN_ID : 1
DIARRHEA_NOT : 1
SEEN_AT : 1
ON_FAMILY : 1
HISTORIAN_REPORTS : 1
SENSORY_PERCEPTION : 2
TIME_MET : 1
FOR_ESI : 1
ONE_ONE : 1
NOTE_INPATIENT : 1
ISUFF_TO : 1
PER_LPN : 1
PAPER_RECORD : 1
ONLY_DISPUTES : 1
NO_PRECAUTIONS : 1
MILITARY_TO : 1
THE_DRIVE : 1
BY_WEIGHT : 1
MEDICATIONS_TERAZOSIN : 1
SOURCES_CRAVINGS : 1
TO_MY : 1
RETURN_TO : 1
HAS_ON : 2
WORKER_REVIEW : 1
FROM_ER : 1
AND_GOVERNMENT : 1
AND_COPD : 1
WITH_COMPLIANT : 1
VIEWING_OPTIONS : 1
NOTICE_SIGNS : 1
ICU_ASSESSMENT : 1
IN_MEMORIES : 1
EDEMA_UNDERMINING : 1
SSN_CONFIRMED : 1
BAND_SIDERAILS : 1
VIEW_THE : 1
MEDS_SIG : 1
FOLLOWED_IN : 1
ING_HTN : 1
SIZE_INDURATION : 1
UNDER_FOLLOWING : 1
WAS_THIS : 1
SMOKING_EKPHYSICIAN : 1
TO_INDEPENDENT : 1
NO_INDEPENDENT : 1
OR_UPSETTING : 1
DATE_LECTURE : 1
UP_LIGHTING : 1
EXIT_SENSORY : 1
PRESENTS_FOR : 1
FAMILY_VETERAN : 1
OF_EVERY : 1
REDIRECTABLE_ACTIVITY : 1
HEARD_SHARON : 1
ORIENTED_ASSISTANCE : 1
PT_BE : 1
INFLUENZA_AT : 1
HOMICIDAL_PERIOD : 1
PAIN_TO : 2
NORMAL_LIMITS : 1
MANY_HOMELESS : 1
SINUSITIS_ASSESSMENT : 1
ML_USE : 1
HOW_OFTEN : 1
NUTRITIONAL_MANAGEMENT : 1
AS_MODERATE : 1
INTESTINE_PE : 1
SOON_REMEMBERED : 1
FRIENDLY_ANY : 1
FOLLOWUP_ACTIVITYLIMITATIONS : 1
LB_KG : 5
RIGHT_SUPERIOR : 1
EVERY_ACCOMPANIED : 1
FOCUS_GROUP : 1
TRULY_HE : 1
DCD_KING : 1
ATTACK_WANT : 1
THE_GEC : 1
OR_ANOTHER : 1
OR_DISCOMFORT : 1
ETOH_IN : 1
PAIN_ORIENTED : 1
FOR_MEDS : 1
KG_YOU : 1
AND_PATENT : 1
BRIDGEWORK_PHARYNX : 1
PAST_DURING : 1
WILL_JUST : 1
MEDS_ASA : 1
THRUSTING_LOWER : 1
AFTER_AND : 1
AMEND_THE : 1
ADDENDUM_ADVERSE : 1
POA_HEALTH : 1
ABUSE_WWII : 1
IN_REACTION : 1
THAT_ANXIETY : 1
UPDATE_PHYSICIAN : 1
LECTURE_THESE : 1
SHOW_ACCEPTANCE : 1
HOSPITAL_ADDENDUM : 1
STATES_CC : 1
INTAKE_CONTRAINDICATED : 1
EXAM_PAST : 1
HIS_PT : 1
SINCE_LOW : 1
PCP_NURSING : 1
SINCE_LAST : 1
IN_PAST : 1
OLD_MALE : 1
DEBRIDEMENT_NO : 1
URINARY_ADDITIONAL : 1
BY_ALTERNATING : 1
VSS_CONTINUE : 1
END_GOING : 1
HOA_MD : 1
NEED_FOR : 1
FOR_LB : 1
IMPRESSION_THE : 1
MESSAGE_LEFT : 1
AN_SYMPTOMS : 1
REFUSES_PNEUMOCOCCAL : 1
NO_METOPROLOL : 1
ASSESSMENT_MHICM : 1
FROM_DISCUSSED : 1
PLAN_OR : 1
PERSON_BEING : 1
THAN_AFTER : 1
LAB_CARE : 1
SAYS_IT : 1
MR_ARRIVED : 1
TO_GO : 1
HISPANIC_OR : 1
YOU_HAVE : 2
APPOINTMENT_SC : 1
TO_IF : 1
HAVE_ACCESS : 1
HOW_ACCEPTANCE : 1
NAME_SPELLED : 1
UNTIL_THAT : 1
PATIENTS_CARE : 1
ON_RIGHT : 1
CONTACT_SPC : 1
COMMUNICATION_BARRIER : 2
SBA_SPS : 1
ADEQUATE_AMLODIPINE : 1
CLICK_VISTA : 1
IN_NPO : 1
PO_NURSING : 1
OUT_ADDENDUM : 1
EDUCATION_PERFORMED : 1
CLEAN_INFORMATION : 1
TO_MG : 3
LIB_REPORTED : 1
SPS_CLOSE : 1
BED_LOW : 1
MG_ML : 1
HP_ADDENDUM : 1
AND_POA : 1
ALSO_CALLED : 1
HTN_THE : 1
AGGRESSIVE_WITH : 1
UNKNOWN_HE : 1
ON_DISCUSSED : 1
NO_THE : 1
CARE_OTHER : 1
THINKS_HAD : 1
TROPONIN_DRAWN : 1
MENTAL_HEALTH : 2
HE_DESPONDENT : 1
PATIENT_ETHNICITY : 1
PRESCRIBER_TO : 2
VERBAL_JOE : 1
PO_PTSD : 1
BE_ON : 2
PATIENT_PHONE : 3
BY_FATHER : 1
AND_MEET : 1
EXPRESSED_PAIN : 1
HE_CONCERNED : 1
YEAR_OLD : 2
IDN_1010M : 1
UPPER_WRISTS : 1
BP_SIGNIFICANT : 1
NAME_PROCEDURE : 1
STUDENT_MEANS : 1
WITH_BUPROPION : 1
HE_COMPLAINED : 1
ACTION_BY : 1
IS_FOR : 1
TO_NEW : 1
WITHOUT_SATT : 1
PHYSICIAN_PRIOR : 1
THEIR_ACTIONS : 1
EDUCATION_DOCUMENTATION : 2
DURING_ONE : 1
CLINIC_PATIENT : 1
FOREARM_CE : 1
ARIZONA_TO : 1
PATIENTS_LEVEL : 1
IN_ADDICTION : 1
BECOMING_INTRINSICALLY : 1
TOTAL_MORSE : 1
SKIN_RIGHT : 1
STR_SKIN : 1
HYPERLIPIDEMIA_PATIENT : 1
OF_TELEMETRY : 1
PROBLEMS_WELL : 1
TEMP_RESP : 1
THIS_AS : 1
SHE_UNDERSTANDING : 1
DEBRIDEMENT_PURULENCE : 1
WITHIN_THE : 3
HAVING_HERE : 1
CHANGING_THE : 1
PMH_PATIENT : 1
MEMBERS_THEY : 1
IMMUNIZATION_ADMINISTERED : 1
HIS_CURRENT : 1
AB_NEVER : 1
PURULENT_DRAINAGE : 1
OTHER_ALBUTEROL : 1
HI_PRESENT : 1
PAIN_CHLORIDE : 1
EIGHT_VETERNS : 1
CLOSE_EDEMA : 1
HE_ANOTHER : 1
THAT_YOU : 1
WHEELCHAIR_NURSE : 1
UNKNOWN_DISCUSS : 1
SI_PSYCHOLOGIST : 1
ER_TO : 1
TO_MEDICATION : 2
SOUTH_AND : 1
DATE_TIME : 5
THE_SERIES : 1
FULLY_TRAINED : 1
INTERESTED_IN : 1
TEAM_DISCUSS : 1
PATIENT_AGREED : 1
ANY_OR : 1
WERE_THE : 1
NO_CDI : 1
REQUESTS_COMPLAINT : 1
NEW_BLOOD : 1
CARE_LINEN : 1
THAT_ARIZONA : 1
INR_SEPT : 1
TID_SPACER : 1
OTHER_PROTOCOL : 1
EXAM_APNEA : 1
DOCUMENT_TO : 1
ENAMA_IER : 1
QUESTIONS_ANSWERED : 1
PAIN_SUGGESTIVE : 1
SPECIMEN_RECEIVED : 1
PT_CREATININE : 1
WITH_TEGRETOL : 1
FEE_THE : 1
WITH_SPURRING : 1
MODERATE_AMOUNT : 1
FOR_PCP : 1
FOREARM_IMB : 1
TO_WELL : 1
QUANTITY_HEARD : 1
LITERATURE_SWOLLEN : 1
MEDICAL_ALTERNATING : 1
FOR_THIS : 1
AND_OR : 3
PAYING_THE : 1
AMBULATORY_TO : 1
IS_OF : 3
AGE_YOU : 1
LINEN_CHANGED : 1
IN_BARRETTS : 1
STATING_HIS : 1
BECAUSE_OF : 2
MY_LEFT : 1
SEVERAL_DISCUSSED : 1
JOB_IS : 1
DESIGNATED_YES : 1
MG_DEPRESSION : 1
QUITE_THAT : 1
LITTLE_MORE : 1
HANDS_FINGERS : 1
SC_DOCUMENT : 1
FOR_TRANSFERS : 1
BE_FOR : 1
PRESSURE_THE : 1
CULTURAL_NO : 1
HELPFUL_MCO : 1
RECORD_CYTOPATHOLOGY : 1
YES_OCCUPATIONAL : 1
REMINDER_DIALOG : 1
RACING_ANXIETY : 1
PHONE_CELL : 1
DONT_CONSULT : 1
POTENTIAL_SKIN : 1
ISOLATION_NOT : 1
HAD_AT : 1
VOID_WITHOUT : 1
HISTORIAN_HE : 1
ROTH_POW : 1
FULLY_WELL : 1
WERE_YES : 1
STAYED_OVERNIGHT : 1
PROVIDER_ORDERS : 1
THEY_STARTED : 1
PROBES_BONE : 1
STATUS_INPATIENT : 1
NO_LOC : 1
RECEIVED_MIDDLE : 1
TABLET_BY : 4
FLUID_READS : 1
THEY_HAVE : 1
OF_YES : 1
SC_BIPOLAR : 1
SS_IN : 1
GRANDIOSITY_AS : 1
AN_ED : 1
WIFE_HE : 1
HEART_DONT : 1
ASSISTED_ALF : 1
LEARNING_VERBAL : 1
DRAWN_TO : 1
MEDICATIONS_OUTPATIENT : 1
GOOD_POSITION : 1
FOLLOWING_AGREEMENT : 1
BUCKEYE_COUNTY : 1
HS_LOCKED : 1
COORDINATION_LOSS : 1
DISCUSSED_OTHER : 1
IN_FOURCHE : 1
OTHER_FINDINGS : 1
HE_COMPLETE : 1
INCLUDING_NUTRITIONAL : 1
WITH_CBI : 1
ANTIBIOTIC_WILL : 1
CAN_CONTROL : 1
WITH_PEERS : 1
OUTPUT_RELATED : 1
THIS_ADDENDUM : 1
LEFT_DELTOID : 1
SIGNS_WITH : 1
PROVIDER_MALATHI : 1
NOTE_RIGHT : 1
SUPPOSITORY_RECTALLY : 1
VISIT_UNDER : 1
WHY_HE : 1
CONSUME_NUTRIENTS : 1
DURING_CA : 1
TABLETS_QH : 1
MEET_THE : 2
SENSE_OF : 1
HALF_CHAPTER : 1
HYPERLIPIDEMIA_THE : 1
FINALLY_SEEMED : 1
FROM_KING : 1
SELF_CHIEF : 1
DENIES_THOUGHTS : 1
SENT_CURRENT : 1
BRAKES_CALL : 1
NO_AND : 2
VETS_AND : 1
FELODIPINE_LISA : 1
AND_WRITTEN : 1
HYPOTENSION_WAS : 1
OUPT_OTC : 1
MANY_CONTAINING : 1
BB_BP : 1
CURRENT_VITAL : 1
INFORMATION_UNIT : 1
WILL_ANOTHER : 1
HAVE_WITHIN : 2
TIME_IV : 1
PROCEDURES_TOP : 1
IS_HE : 1
FOR_OF : 4
WOULD_TO : 2
THAN_STATE : 1
SINCE_HAD : 1
DIET_FOR : 1
PAST_MEDICAL : 2
FEELING_BIT : 1
WAS_PLACE : 1
RETROCOLLIS_PLAN : 1
CURRENT_CALORIE : 1
STATES_THAT : 1
BOWEL_CALLED : 1
PHONE_OBESITY : 1
REACH_FOOD : 1
HOSPITAL_AFTER : 1
LIVES_IN : 1
OR_VSS : 1
ONE_FOR : 1
ONEHALF_BY : 1
IRON_ANEMIA : 1
IN_PULSE : 1
IS_GREATER : 1
NAME_CHRONIC : 1
WITH_PATIENT : 3
INITIAL_RECORD : 1
RECEIVED_FEB : 1
VANOD_BED : 1
OF_HELPFULNESS : 1
FOOD_WITHIN : 1
GIPATEL_CD : 1
PARASTHESIAS_ER : 1
ENCOUNTER_SC : 1
AID_DID : 1
OF_FEE : 1
NO_ACTIVITIES : 1
GROOMED_HE : 1
SHE_CONSIDERED : 1
DIARRHEA_ORGANISM : 1
BEEN_PRESCRIBED : 1
MH_ON : 1
CARDIOGENIC_WHICH : 1
RESPONDING_TO : 1
POW_NO : 1
YES_TURGOR : 1
SWR_IS : 1
LAST_ASSESSMENT : 1
CONSULT_FOR : 1
CAD_BMI : 1
THINKS_HE : 1
COMMENTS_GAIT : 1
PRESSURE_ADDENDUM : 1
AND_APPROPRIATE : 1
ORDER_ORTHOPEDIC : 1
ADDENDUM_COMMENTS : 1
IN_AB : 1
ON_SECONDARY : 1
WAS_STILL : 1
ALSO_TO : 1
LEVEL_OBSERVATION : 1
FOODS_IN : 1
WAS_TAKING : 1
ON_LYRICA : 1
AT_PROXIMAL : 1
TAKES_BETWEEN : 1
REFERRAL_NEUROLOGY : 1
CALL_DYSLIPIDEMIA : 1
MONTH_WERE : 1
INPLACE_THE : 1
SP_VERY : 1
DENIES_OR : 1
YES_SURGEONS : 1
MODERATE_SEVERE : 1
EXACERBATION_NAD : 1
ARIZONA_RELATIONSHIP : 1
LAST_CONTACT : 1
REFERRED_TO : 1
PEOPLE_WITH : 1
CHIEF_PT : 1
MP_ADDENDUM : 1
THAT_SON : 1
ABLE_HE : 1
THE_WHAT : 1
ACTIVITY_CLEAN : 1
OUTPUT_IS : 1
MEDICAL_NOTE : 2
WITH_NO : 1
HELP_WITH : 1
ORAL_IID : 1
FEW_AGO : 1
GO_AMA : 1
HE_GOOD : 2
DISCUSSED_DR : 1
SHE_OUT : 1
SERIES_CORNER : 1
CONFIDENT_THAT : 1
ABLE_ACCEPT : 1
AMBULATORY_AID : 1
OR_ETHNIC : 1
BODIES_ALONG : 1
ON_WHILE : 1
CURRENT_PRIOR : 1
HIS_UNRE : 1
RIGHT_WITH : 1
RRR_WITHOUT : 1
ROOM_EVAL : 1
FOR_FREQUENCY : 1
DEVELOP_AND : 1
NEXT_APPOINTMENT : 1
WELL_DID : 1
LESION_BACK : 1
THE_HOURS : 1
AND_VERBAL : 1
CLINICAL_ACTIVITY : 1
THE_NEED : 1
THESE_FROM : 1
DISCHARGED_HEALTH : 1
NURSING_PHARMACY : 1
INTRUSIVE_ANGER : 1
COMPLAINT_PT : 1
THE_TO : 2
REQUEST_DATE : 1
NEW_ASA : 1
OF_BRAIN : 1
FOR_UNTIL : 1
OF_SEROQUEL : 1
PART_EXAMINATION : 1
DECREASED_CARDIAC : 1
COLLECTS_SERVICECONNECT : 1
SYNCOPE_WHICH : 1
IID_TO : 1
STRIPPED_BECAME : 1
HYPERTROPHY_OF : 1
BELL_REACH : 1
BACK_AND : 1
HE_RETIRED : 1
YEARS_HE : 1
COME_IN : 1
YESTER_AND : 1
LIVING_SITUATION : 1
DISCHARGE_MET : 1
TOT_ANY : 1
ADDENDUM_NUTRITION : 1
CALORIE_HYDRATION : 1
OF_DAILY : 1
HAS_DOCUMENTED : 1
CLINIC_SWER : 1
WEARING_PRESCRIPTION : 1
UPCOMING_CHAR : 1
SLIP_AGO : 1
SO_TO : 1
OTHER_DIAGNOSIS : 1
CARDIOVERSION_DENTURES : 1
DOES_HAVE : 1
HIM_NOT : 1
SEVERED_INTRUSIVE : 1
INJECTION_SMOKING : 1
INTERACTS_WITH : 2
IN_NOTED : 1
DOSE_MISSED : 1
MAKE_AN : 1
OF_GROUP : 1
SECONDARY_DIAGNOSIS : 2
WORST_THE : 1
PROBLEM_THIS : 1
PHYSICIAN_NOT : 1
IT_SEEMED : 1
ELIMINATION_STATUS : 1
IS_WHO : 1
WHO_PROVIDED : 1
BECAME_IN : 1
BY_SHE : 1
DIET_CALORIE : 1
DOCUMENTATION_INDIVIDUAL : 1
CAD_DISCUSSED : 1
WILL_TAKE : 1
ER_INITIAL : 1
RESTARTED_BEEN : 1
EXCEPT_SLIGHTLY : 1
MADE_BETTER : 1
IMPACT_PATIENT : 1
ENGLISH_EDUCATION : 1
THE_NO : 1
STATED_NAME : 1
SWER_FOR : 1
SPELLED_DATE : 1
SOME_HE : 1
CARDIAC_COMPROMISE : 1
HE_SAID : 1
PLACE_THE : 1
LIKE_THIS : 1
QH_FOR : 1
EVERY_MORNING : 2
QID_TO : 1
FOR_PT : 2
STAYS_TO : 1
FOUND_HAVE : 1
ADMISSIONS_IS : 1
MALE_CHRONIC : 1
DID_PT : 1
TO_XRT : 1
TAKEN_NO : 1
VITAL_SIGNS : 3
OF_PAPERWORK : 1
RETURN_CALL : 1
THERAPEUTIC_INR : 1
FACILITY_SHE : 1
BARRETTS_ESOPHAGUS : 2
FOLLOWING_MEDICATION : 1
NONSOAP_WAR : 1
SS_DAILY : 1
NONE_PHYSICIAN : 1
TO_DAUGHTER : 1
YES_PULSE : 1
BUT_ON : 1
RAISED_IRREGULAR : 1
EXACT_IS : 1
PHYSICIAN_SINGARAJAH : 1
REASSESSMENT_PT : 1
AND_WHO : 1
NURSING_ALERT : 1
HIS_DOCTOR : 1
PREVENTATIVE_TRAVEL : 1
ID_ON : 1
PRIOR_ALERT : 1
AND_PRESSURE : 1
BED_ON : 1
PPP_DISCUSSION : 1
BP_WT : 3
LB_VITAL : 1
MP_HP : 1
ARE_BEING : 1
CLEMENT_NUTRITION : 1
OT_SENTENCES : 1
NONVA_DOCTOR : 1
PT_DISCHARGE : 1
SMOKE_MINUTES : 1
IS_TRANSFER : 1
HYPOTENSION_PT : 1
PRESSURE_IS : 1
THAN_EXPECTED : 1
VS_LEVEL : 1
STAY_OUT : 1
ON_IT : 1
CONTROL_ACTIONS : 1
CYTOPATHOLOGY_METASTATIC : 1
DISCOMFORT_WILL : 1
FIDDLEHEADS_PAPER : 1
ALERT_SENT : 1
DIET_MONITOR : 1
URINE_RELAYED : 1
TEACHING_REASSESSMENT : 1
DISCUSS_THE : 1
FOR_ADMISSION : 1
IS_CITALOPRAM : 1
LANGUAGE_OTHER : 1
UNDERSTANDING_PROCEDURE : 1
NO_AMBULATING : 1
HAS_APPEARED : 1
RISK_HIGH : 1
SUPPORT_FAMILY : 1
CHANGE_IN : 2
AND_WAS : 1
BAPTIST_BUT : 1
WITH_SPACER : 1
DISORDER_MIXED : 1
CONTACT_FOLLOWING : 1
VERBALIZE_PROCEDURE : 1
CHLORIDE_NURSING : 1
COMMENTS_PATIENT : 2
ANY_SENSORY : 1
IADLS_MOBILITY : 1
CONCUR_WITH : 1
NONE_DOSING : 1
AND_DENIES : 1
OTHER_PROCEDURE : 1
TIME_TALKING : 1
ANTICOAGULATION_INR : 1
CE_DURING : 1
DIFFICULTIES_TO : 1
AMBULATING_WAY : 1
PROVIDER_BOWENS : 1
CONTACT_TELEPHONE : 1
PLEASANT_APPROPRIATE : 1
SKILLED_NURSING : 2
SPURRING_PAIN : 2
NOT_NO : 1
ON_INPLACE : 1
THEY_MANY : 1
COLLECTS_PT : 1
PODIATRY_FOR : 1
FALL_SKIN : 1
MH_CHATHAM : 1
NONVA_ABOUT : 1
AND_MONITOR : 1
PHARMACY_STAFF : 1
MAY_GIPATEL : 1
ASSAULT_BUCKEYE : 1
APPLIANCES_MEDICAL : 1
WITH_US : 1
SUPPORT_AND : 2
THANK_YOU : 2
GUIDELINES_HAS : 1
DEVELOPED_HERNIA : 1
MR_IF : 1
SINCE_DISCHARGE : 1
DISCUSS_DETAILS : 1
TAKE_ADVISED : 1
OF_WHERE : 1
CALLED_PER : 1
ANY_OTHER : 1
UNTIL_OXYCODONE : 1
LESION_ON : 1
INPATIENT_ACTIVITY : 1
DAILY_NOX : 1
RALLY_DEBILITATED : 1
APPLY_AMOUNT : 1
BONNIE_STUDENT : 1
PHYSICAL_AND : 1
OP_CLINIC : 1
PSYCHOTHERAPY_NURSING : 1
ION_FOR : 1
WRISTS_HANDS : 1
IS_ALERT : 3
REFRACTIVE_LEFT : 1
INNER_FOREARM : 1
MOBILITY_ACTIVE : 1
IN_MY : 1
LONELY_PAIN : 1
REQUIRES_ASSISTANCE : 1
GEC_DONE : 1
THE_PRIMARY : 1
OR_SEVERE : 1
PATIENT_PNEUMOCOCCAL : 1
SUPERIOR_AURICLE : 1
BRAIN_MRI : 1
ANY_COMPLAINTS : 1
POX_SCORE : 1
LEFT_PT : 1
FAMILY_FOR : 1
NOT_MEASURE : 1
TELERET_GOLD : 1
ECS_RC : 1
INITIALLY_STRUGGLED : 1
OUTPATIENT_INCLUDING : 4
LEAD_TO : 1
APPLY_MODERATE : 1
FOR_READMISSION : 1
THIS_SC : 1
WT_LB : 2
IDEATION_SI : 1
COMMUNICATION_SPEAKS : 1
CARE_NO : 1
WITH_DISCHARGE : 1
WAS_ANGRY : 1
SUN_JACHI : 1
PAIN_AVH : 1
PRESCRIBER_IN : 2
RECEPTIVITY_NUMBER : 1
DIAGNOSIS_ON : 1
PAIN_MODERATE : 1
GUNS_FROM : 1
STEROID_INJECTION : 1
IT_TO : 1
HX_BARRETTS : 1
BODY_INDEX : 2
YRS_MALE : 1
GOOD_CAR : 1
TO_GIVE : 1
STARTED_WAS : 1
TO_LOOK : 1
THAT_ADMISSION : 1
RECEIVED_INFLUENZA : 1
NEVER_SO : 1
TO_LEFT : 3
FOR_GAS : 2
IDENTIFIED_ASSOCIATE : 1
WORKING_TO : 1
DEC_BRIEF : 1
BE_AN : 1
INORDER_RECEIVE : 1
THIS_EXTREMITY : 1
GUIDELINES_VET : 1
NO_TOPIC : 1
FOR_PERSON : 2
YOU_NOTICE : 1
NOTES_BY : 2
CAP_TAKE : 1
NO_RESTRICTIONS : 2
SAME_ACCESS : 1
VALUES_SECONDARY : 1
WRIST_NS : 1
LIVES_VERY : 1
UPSETTING_THAT : 1
CHEMO_THIS : 1
AID_BEDREST : 1
AND_EXPLAINED : 1
RATING_AT : 1
BELLE_FOURCHE : 1
OR_THAT : 1
ACTIVE_MM : 1
FOR_DRUG : 1
TELEMETRY_PRESCRIBER : 1
ENCOURAGED_LOOK : 1
THAT_EXPLAINED : 1
PROVIDER_FULL : 1
OR_UNDERMINING : 1
BED_NURSING : 1
VERBALLY_WITH : 1
EDUCATION_ASSESSMENT : 1
FROM_VARIOUS : 1
CONDITION_BUT : 1
BUT_NOT : 2
IMMEDIATE_WITHIN : 1
SEE_ER : 1
OFFERING_REFERRAL : 1
STOP_LITERATURE : 1
DENIED_OR : 1
HIS_RELATIVELY : 1
PREOPERATIVE_DIAGNOSIS : 1
COMPLAINTS_DR : 1
BOND_WITH : 1
BY_WRITER : 1
PATIENT_HAVE : 1
LANGUAGE_INSTRUCTIONPCC : 1
CURRENT_BARRIERS : 1
MILEWSKI_TRAINED : 1
TESTS_IS : 1
SPS_AT : 1
TO_INDEPENDENTLY : 1
THOUGHTS_HURTING : 1
DATE_RECORD : 1
HEALTH_PSYCHOSOCIAL : 1
CALLED_LARGE : 1
UAL_SCREEN : 1
HAS_THE : 1
PHYSICIAN_SWR : 1
XRT_AT : 1
CONFIRMED_SURGERY : 1
ABOUT_PRRC : 1
SIDE_AND : 1
EXPRESSED_INTENSITY : 1
TO_BEGIN : 1
CONTAINING_ALCOHOL : 1
MONITORING_BLOOD : 1
AMBULATORY_ASSISTANCE : 1
WENT_THE : 1
DRESS_APPROPRIATE : 1
CM_TRANSFERRED : 1
HAS_HAD : 2
OF_AGE : 1
OF_UPPER : 1
CONTINUES_TO : 1
IS_OIF : 1
INCLUDE_MOVEMENTS : 1
NOTE_SIGNS : 1
RETIRED_FROM : 1
ON_THE : 3
MEASURE_TEMP : 1
ON_NEW : 1
COMES_PULSE : 1
ACTIVE_STATES : 1
PLATINUM_CLINIC : 1
ENGLISH_IS : 1
WAS_THAT : 1
GROOMING_FAIR : 1
BECAUSE_HE : 1
LAST_INFO : 1
BE_MORPHINE : 1
COPC_HEALTH : 1
CSTAT_VALIDATES : 2
OF_THE : 9
CARE_DATA : 1
FROM_FRIENDS : 1
PULSE_TAKE : 1
SUPPLIES_PREVENTATIVE : 1
SCALE_AND : 1
NY_FATHER : 1
ADVANCED_DIRECTIVE : 1
SEPT_HE : 1
TEST_USING : 1
COMPLETELY_INDEPENDENT : 1
DECREASED_OUTPUT : 1
MEDICATIONS_NOPHEN : 1
FOR_ASSESSMENT : 1
TIME_DATE : 1
REC_PAIN : 1
SUPPORT_HAS : 1
SPACE_THE : 1
HAS_NOT : 1
STARTED_ON : 1
CP_SOB : 1
GIVEN_PROXIMITY : 1
GOOD_RADIATION : 1
SYMPTOMS_ANXIETY : 1
STATED_YOU : 1
SEP_BLOOD : 1
MURMUR_NO : 1
TXC_SATT : 1
VERBALLY_CONCURRED : 1
PROBLEM_INJURY : 1
DISCUSSION_WITH : 1
STATED_JUST : 1
EXPOSURE_SECONDARY : 1
TREATMENT_AGE : 1
THE_DRESSING : 1
WITH_HIS : 3
IS_REQUESTING : 1
RECEIVED_EMERGENCY : 1
SCORE_THERE : 1
RESPONDING_QUESTIONS : 1
ADDICTION_AND : 1
ACTIVITY_OF : 1
RATIONAL_TYPE : 1
BRIEF_DO : 1
TO_EXCEED : 2
MIGHT_BE : 1
MEDICATION_INORDER : 1
PAIN_WANTED : 1
PNEUMOCOCCAL_PLAN : 1
STANDARD_OR : 1
SPC_VETS : 1
TRACE_OF : 1
MODERATE_TIME : 1
HEMATOMA_POST : 1
DI_ISSUE : 1
EFFECTS_EVENTS : 1
PROVIDED_PATIENT : 2
PAST_FULL : 1
WILL_CONTINUE : 2
MG_TO : 1
SHORTNESS_BREATH : 1
BVA_ER : 1
FULLY_ORIENTED : 1
FROM_SOURCES : 1
UFH_SENT : 1
POST_AND : 1
QUESTIONS_REGARDING : 1
PATIENT_INTERACTS : 1
NOTE_HOMICIDAL : 1
NO_LEFT : 1
DATE_RTL : 1
HE_OF : 1
NO_TRAZODONE : 1
DATE_AUG : 1
TALKS_ITS : 1
NOT_ABLE : 2
CC_BMI : 1
MINUTES_TO : 1
DECISIONMAKING_HE : 1
FRIENDS_COWORKERS : 1
TWICE_LOC : 1
ORIENTED_TO : 1
WHERE_HE : 1
WAS_HOPELESS : 1
AGE_YRS : 1
NEXT_STEP : 1
OXYCODONE_IN : 1
WT_OX : 1
APPEARANCE_INFORMATION : 1
CARDIAC_RELATED : 1
PROXIMAL_PART : 1
ICDCM_ORDERS : 1
OBESE_CASUAL : 1
IN_RECALL : 1
GET_SUPPORT : 1
BURNT_ALONG : 1
CARE_HYGIENE : 1
YOU_MEET : 1
MODERATE_OLD : 1
KG_HAVE : 1
MD_CHIEF : 1
STRUGGLED_TO : 1
BETTER_AND : 1
ATTENDING_PHYSICIAN : 1
PAIN_COMES : 1
HAS_RELIGIOUS : 1
NOTE_OF : 1
SMOKE_AVOID : 1
CONTRACT_GIVEN : 1
UPDATE_PATIENT : 1
CAN_HAVE : 1
AND_OVER : 1
HIS_OBLIGATIONS : 1
HER_SON : 1
NOPHEN_MG : 1
TO_COLORED : 1
IN_GRANDIOSITY : 1
PHYSICAL_ETATION : 1
EKSUICIDE_PREVENTION : 1
WAL_OF : 1
STOMACH_STOMACH : 1
SCREEN_MORSE : 1
ETOH_BREATH : 1
TRAINED_VOID : 1
GETTING_AN : 1
NONUSER_OF : 1
PLAN_MOOD : 1
OUTPUT_PATIENT : 1
NOT_CALL : 1
BETWEEN_IN : 1
DR_CARDIOLOGIST : 1
HE_TAKING : 1
VETERAN_CALL : 1
LAST_PT : 1
WANT_REQUEST : 1
GOOD_HP : 1
PAIN_IN : 1
HERE_HAS : 1
REQUIRED_PRESENTED : 1
OP_TEAM : 1
BEEN_WITHIN : 1
HX_ESOPHAGUS : 1
TRANSFERRED_FROM : 1
SEX_RACE : 2
PATIENTS_WEIGHT : 1
TYPE_OF : 2
PRESENTED_WITHOUT : 1
HAD_STAY : 1
DR_DOE : 1
DRIVER_POSITION : 1
INTERVIEW_IS : 1
PERFORMED_LANGUAGE : 1
PATIENT_STILL : 1
BARRIERS_OTHER : 1
INR_AND : 1
WEAK_PATIENT : 3
MEMORY_TO : 1
INR_TO : 1
STATED_DOES : 1
ORGANOMEGALY_TENDERNESS : 1
NURSE_MEDICATIONS : 1
ANOTHER_WEIGHT : 1
OR_DRINKS : 1
OLD_CHANGES : 1
APPROPRIATE_EDUCATION : 1
PT_THEY : 1
BOWENS_ARABELLA : 1
AN_OPPORTUNITY : 1
BARRIER_EXAM : 1
NO_DESIGNED : 1
NO_PULSE : 1
PERIOD_NUTRITION : 1
PTSD_ACTIVE : 1
MULTIVITAMIN_DATE : 1
DEMOGRAPHICS_TUBEFEEDING : 1
IT_VET : 1
IDENTIFIED_NO : 1
ALSO_RETIRED : 1
SIMVASTATIN_TAB : 1
FOR_SEVERAL : 1
INFORMATION_BRIEF : 1
NSAIDS_IBUPROFEN : 1
DEC_SEP : 1
YES_PHYSICIAN : 1
ANGRY_THIS : 1
VETERAN_NOT : 1
HOME_DID : 1
BELLE_ALBUTEROL : 1
NO_RECTAL : 2
PULSES_PALPABLE : 1
TO_DISCHARGE : 1
DISABLED_COLLECTS : 1
IS_AND : 4
NURSING_TRIAGE : 1
ACCOMPANIED_DAUGHTER : 1
WAS_WEARING : 1
COUNSELOR_CONTACTED : 1
ON_DISCUSSING : 1
PT_COMPLETED : 1
SWELLING_FLUID : 1
TEAM_FLUID : 1
TURGOR_NORMAL : 1
UNTIL_HAPPENS : 1
VIETNAM_DEC : 1
BE_PLACED : 1
DOCUMENTATION_PREDNISONE : 1
DISCHARGE_CHRONIC : 1
PER_PROTOCOL : 1
INITIAL_NAME : 1
IV_DCD : 1
FATHER_IS : 1
WHILE_TO : 1
RECORDS_WILL : 1
PATIENT_WAS : 5
NURSING_HYPERLIPIDEMIA : 1
VET_RESISTED : 1
VERBALIZE_UNDERSTANDING : 1
WITH_ASSESSMENT : 1
HE_APPT : 1
INADEQUATE_DUE : 1
ANXIETY_ACTIVE : 1
IN_HOSTILITY : 1
MAY_TAKE : 1
HEART_AND : 1
NOTE_SPEECH : 1
DSMIV_IS : 1
REVIEWED_FOR : 2
TO_READ : 1
AVH_THIS : 1
IS_PATIENT : 1
PATIENT_HOPELESSNESS : 1
TO_UNDER : 1
BELOW_AS : 1
HAD_FEVERS : 1
PER_WEEK : 1
MAY_DELAYED : 1
JOE_QUATTLEBAUM : 1
FROM_HOME : 1
THAT_AN : 1
PATIENT_GIVEN : 1
INSTRUCTIONS_DRIVER : 1
DIET_ORDER : 1
PNEUMOCOCCAL_DEC : 1
IV_ANY : 1
WITH_PROCEDURE : 1
PHARYNX_NORMAL : 1
TREMORS_MEDICINE : 1
AGO_STAYING : 1
COMPLAINED_OF : 1
FOURCHE_SO : 1
REASSESSMENT_ALSO : 1
AT_FOR : 1
NO_REDNESS : 1
IN_BELLE : 1
SC_DETAILED : 1
WAS_ON : 1
IRREGULAR_RESP : 1
SCORE_FALL : 1
MG_HRS : 1
PATIENT_THE : 1
FOR_BLOOD : 1
WEEK_TO : 1
TO_FIREARMS : 1
HAS_CALLING : 1
MONITOR_WT : 1
DRAWN_SENT : 1
PAIN_SPECIALIST : 1
NUMBER_PREPROCEDURE : 1
PUSH_PATIENT : 1
THIIS_HAS : 1
OF_IT : 1
CULTURAL_FACTORS : 1
HEMATURIA_ON : 1
FEELING_PAIN : 1
ASSIGNED_TO : 1
BILAT_GLUCOSE : 1
ARE_QUITE : 1
ADVANCED_SAFETY : 1
OP_CARE : 1
CA_TREATMENT : 1
INPATIENT_NOTE : 2
LAST_HRS : 1
RADIATION_SIGNS : 1
IS_OPERABLE : 1
FLUID_OR : 1
FOR_SYNCOPY : 1
HIS_IN : 1
LOCKED_PSYCH : 1
ASSESSMENT_ICU : 1
RECORD_HEATHER : 1
IMB_CE : 1
RECORD_METASTATIC : 1
LOW_POSITION : 1
BLACK_OR : 1
OLD_OR : 1
AS_THERE : 1
NOT_ONCE : 1
WITH_UPDATE : 1
MULTIVITAMIN_AUG : 1
QAM_ACTIVE : 1
UNDERSTANDING_HP : 1
APP_CAD : 1
SERVICES_REFERRED : 2
CHART_DOCUMENTATION : 1
TO_OW : 1
CARE_REVIEWED : 1
HIS_VET : 1
HBO_PRESENTATION : 1
NONE_NEUROLOGICAL : 1
MULTIPLE_MEDS : 1
US_ARMY : 1
CONTACT_VET : 1
PROVIDER_TOTAL : 1
PN_FAM : 1
HE_NOW : 1
FLUID_INTAKE : 1
ATTACK_DONT : 1
WHICH_STATED : 1
NIGHT_AT : 1
AND_REFERRAL : 1
NURSING_DISCHARGED : 1
THAT_AND : 1
NOTE_INITIAL : 1
OTHER_INPATIENT : 1
VETS_POA : 1
INJ_AMIODARONE : 1
SHE_WOULD : 1
RECENTLY_FROM : 1
INTOXILYZER_SD : 1
PATCH_MG : 1
EDUCATION_PATIENT : 1
WITHIN_CHEST : 1
NO_SLIP : 1
AS_HAS : 1
THE_FREQUENCY : 1
DING_GINGIVA : 1
FINISHING_SCHOOL : 1
PAIN_HISTORY : 1
FULL_WAS : 1
IS_WAL : 1
AND_UPDATE : 1
GIVEN_LEFT : 1
VETERAN_IS : 2
YOU_HOW : 2
WITH_MULTIPLE : 1
PAIN_MP : 1
ALTHOUGH_HE : 1
SEC_DIAG : 2
REPORTS_UP : 1
PNEUMOCOCCAL_VACCINE : 1
WITHOUT_ALLERGIES : 1
MEDICATIONS_WEIGHT : 1
SUCH_AS : 2
AMBULATORY_MIDDLE : 1
DOUCHE_NO : 1
THIS_VISIT : 1
EASY_NO : 1
THIS_STILL : 1
SYMPTOMS_OF : 1
TO_YOUR : 1
SAFETY_NO : 1
ADDENDUM_PROCEDURE : 1
FURTHER_REQUESTING : 1
LOC_AND : 1
NOTED_DISCOMFORT : 1
GIVE_MG : 1
HIS_STAY : 1
RETIRED_SEVERAL : 1
NO_FAM : 1
HAS_ANSWERED : 3
WITH_BARRETTS : 1
PATIENT_CONCUR : 1
VETERAN_CAME : 1
DISCONTINUED_INFECTIOUS : 1
INCLUDE_CHOREIC : 1
APRIL_CLICK : 1
THE_US : 1
FEELING_WELL : 1
MEDICATIONS_STATUS : 3
EDUCATION_SCREENING : 1
UPDATE_MEDICATIONS : 1
BASES_BILAT : 1
OF_SS : 1
PHONE_CONTACT : 1
WITH_PCP : 1
NO_SOI : 1
FACILITATOR_NORMALIZED : 1
MENTAL_PSYCHIATRY : 1
CHIEF_VETERAN : 1
WHEN_APPROPRIATELY : 1
CARE_NURSE : 1
PULSES_IS : 1
MORE_HOPE : 1
RN_DING : 1
IS_NOT : 3
RELATIONSHIP_TO : 1
THE_WITHIN : 1
YOU_SIX : 1
DATE_CLINIC : 1
IS_MG : 1
NOTIFIED_FULLY : 1
COMMENTS_DOE : 1
PLEASE_NOT : 1
ADDICTION_PARTICIPATION : 1
AT_BILAT : 1
PER_ANTICOAGULATION : 1
THIS_UBE : 1
DIAMETER_SIZE : 1
OF_PAIN : 2
RESPIRATIONS_REGULAR : 1
OUT_PATIENT : 1
ANY_MEDIASTINUM : 1
SKIN_PATIENT : 1
STAFF_TO : 2
ACTIVE_CAN : 1
ADMISSION_TELEMETRY : 1
MG_PODIATRY : 1
BLOOD_WEIGHT : 1
DATE_BACKGROUND : 1
BREATH_IMPRES : 1
CON_FAWCETT : 1
CALL_THE : 1
DISABLED_SERVICECONNECT : 1
SECONDARY_SEE : 1
EFFECTS_ADVERSE : 1
FROM_IN : 1
CARE_NP : 1
NOT_HISPANIC : 1
FALL_STANDARD : 1
YES_GOOD : 1
CARE_TIME : 1
HIS_HOME : 1
PAIN_RATING : 1
RAL_WE : 1
THE_MONTH : 1
YEAR_BLACK : 1
ORTHOPEDIC_CONSULT : 1
MODERATE_PE : 1
DR_TO : 1
FROM_THE : 3
ELECTRONICALLY_FILED : 1
HIS_EMPLOYMENT : 1
GETS_FROM : 1
FOR_DEPRESSION : 1
OPEN_WITHOUT : 1
PROGRAM_THE : 1
INDIVIDUAL_DURABLE : 1
LES_DIAGNOSIS : 1
THERAPEUTIC_ANTICOAGULATION : 1
NSTEMI_AND : 1
ADDENDUM_DECREASED : 1
LEG_ARM : 1
NOTE_INFORMED : 1
LIGHT_CHERRY : 1
ETHNICITY_HISPANIC : 1
STAY_OF : 1
HAD_RADIATION : 1
VETERANS_THE : 1
PT_ME : 1
WILL_STATES : 1
AGREED_GIVE : 1
PEDAL_ARE : 1
PTS_LAST : 1
TO_WEAR : 1
CALLED_BEATY : 1
NOTE_EDUCATION : 1
OT_CHEST : 1
HISTORICAL_DEVELOPMENTS : 1
INDEPENDENCE_IN : 1
VERY_ABOUT : 1
RADIATION_MONITOR : 1
TOTAL_SCORE : 2
INFLUENZA_IMMUNIZATION : 1
WAS_ESCORTED : 1
VERY_PLEASANT : 1
IT_THE : 1
TO_AT : 3
PODIATRY_LUMBAR : 1
OUR_PHYSICIAN : 1
PHONE_ANATOMICAL : 1
VET_HAS : 2
WITH_ORTHOPEDIC : 1
QUITE_CONFIDENT : 1
MAXILLARY_PT : 1
DRUG_DEPENDENT : 1
ASSESSMENT_PAIN : 1
INFORMATION_ONLY : 1
SITUATION_DATE : 1
ERROR_LEFT : 2
RELIGIOUS_OR : 1
CONTACTED_VETS : 1
CALL_PATCHES : 1
SENTENCES_PATIENT : 1
FOR_HOW : 1
IN_HOSPITAL : 1
CHECKS_PER : 1
OUT_OF : 1
FOR_ROUTINE : 1
AMENDS_ONES : 1
PER_LISA : 1
SXS_AS : 1
PATCHES_IS : 1
BOWENS_ELECTRONIC : 1
REPORT_PT : 1
DOCUMENTATION_LEVEL : 1
SOUTH_AGO : 1
APPETITE_TAB : 1
MEDIASTINUM_IS : 1
NKA_CULTURAL : 1
RESTRICTIONS_NURSING : 1
PHYSICAL_DAILY : 1
THE_CLINIC : 2
CONTINENT_NO : 1
DISCUSSED_WITH : 3
WITH_ISOLATION : 1
NURSING_EXIT : 1
CALLED_PATIENT : 1
HIS_HHA : 1
INPATIENT_NUTRITION : 1
PHYSICIAN_CLEMENT : 1
HAS_VETERAN : 1
NO_SI : 1
MONITOR_NO : 1
MEDS_LEVEL : 1
ACCEPT_PT : 1
FROM_FAMILY : 1
NKA_EXIT : 1
MOTHER_IN : 1
MHC_PSYCHOLOGIST : 1
BY_SOME : 1
ALEVE_NAPROSYN : 1
ON_VET : 1
SYNCOPE_PT : 1
AFRAID_HE : 1
OTHER_SXS : 1
ADMISSION_DATA : 1
MESSAGE_WITH : 1
LORAZEPAM_MG : 1
NOTED_SCALE : 1
ON_OCCASION : 1
STATED_DURING : 1
LEFT_LEG : 1
UNKNOWN_MOM : 1
IS_ODYNOPHAGIA : 1
DYSPLASIA_STAGING : 1
DEFIBRILLATION_DENTURES : 1
METOPROLOL_MG : 1
NEWLY_ANY : 1
CATEGORY_PRIMARY : 1
AIR_HYPERTROPHY : 1
EXPECTED_THAT : 1
THIS_TIME : 6
MR_OF : 1
INDEX_FEELING : 1
NUTRITION_COUNSELING : 1
AMOUNT_MSE : 1
SAYS_IS : 1
NEED_TO : 3
STATUS_EXCEPT : 1
ELECTRONIC_ALERT : 1
BY_SPC : 1
PHYSICIAN_THIS : 1
COMES_AND : 1
VISIT_PULSE : 1
OR_PAIN : 1
DO_HESITATE : 1
OF_AND : 1
PUFFS_ORAL : 1
FROM_HE : 1
HAVE_CONFERENCE : 1
RECOMMENDATION_USED : 1
ANGER_AVOIDANCE : 1
AND_COULD : 1
AND_AVOID : 1
ALLOW_STAFF : 1
SEEMED_ED : 1
ARE_NO : 1
NEURO_ORIENTED : 1
OF_ESTABLISH : 1
NOT_TEMP : 1
MEDICATIONS_PHYSICIAN : 1
BLOOD_AND : 1
MCO_CALLED : 1
BATHING_MODERATE : 1
PLANS_TO : 1
HOW_ORDER : 1
CATEGORY_LANGUAGE : 1
REFERRED_THE : 1
PATIENT_SSN : 1
ITS_WORST : 1
ASSESSMENT_ASSESSMENT : 1
TO_PAIN : 1
PAIN_WAS : 1
OW_AGREE : 1
PHONE_PER : 1
BUT_WOULD : 1
MOUNTING_BILLS : 1
PATIENT_ELECTS : 1
DEPENDENT_MEET : 1
EXPERIENCES_THE : 1
CHECKED_HIS : 1
MEDICAL_PROBLEMS : 1
INJURY_THE : 1
DURING_ESOPHAGEAL : 1
INTENSITY_WORST : 1
COVERED_THE : 1
ANOTHER_VETERAN : 1
IMPRES_BECAUSE : 1
INPATIENT_DIET : 1
TOTAL_REPSONSES : 1
PSYCHOSOCIAL_SCREEN : 1
PARTICIPATION_BETTER : 1
ABDOMEN_ORGANOMEGALY : 1
DR_WANKER : 1
MAY_END : 1
INFLUENZA_USE : 1
VA_FEBRUARY : 1
ARRIVED_ON : 1
DRINKING_MG : 1
WRITER_FINISHED : 1
AS_REL : 1
IN_OP : 1
LIVING_VETERANS : 1
MALE_MORPHINE : 1
YOUR_PHYSICIAN : 1
ORDER_CLEAR : 1
DRAINAGE_DATE : 1
STUDENT_POTASSIUM : 1
RECENTLY_DCD : 1
EACH_ONE : 1
IN_BECOMING : 1
PT_WAS : 4
INITIAL_VETERAN : 1
USED_NOT : 2
MALE_CALLING : 1
INCREASED_INDEPENDENCE : 1
INTERVENTIONS_TOTAL : 2
TIME_VITALS : 1
OF_GIVEN : 1
TO_SUB : 2
MEANS_OF : 1
SURGEONS_PROVIDED : 1
STATED_OUR : 1
HIS_NERVES : 1
OUR_AT : 1
PT_TEACHING : 1
ACCEPTING_MARCIA : 1
ME_HAVE : 1
VSS_WILL : 1
OF_VA : 1
MORSE_SCORE : 1
AGREED_TO : 3
CARE_DONE : 1
RETURN_NICOTINE : 1
CHEST_COMPRESSIONS : 1
RESULTS_OF : 1
VACCINE_PLAN : 1
AND_ISSUES : 1
READMISSION_YOU : 1
MR_REGARDING : 1
ASSESS_STATUS : 1
ABLE_CARE : 1
GAS_EXCHANGE : 2
SOUNDS_VERY : 1
DISCUSSION_MR : 1
ARE_CONFIDENT : 1
VERY_AND : 1
PROBLEMS_PATIENT : 1
IN_FACILITY : 1
HAD_LOW : 1
NO_AT : 1
MG_DEXTROSE : 1
UPPER_PT : 1
HOURS_FROM : 1
CLINIC_RAMBLE : 1
CASE_MANAGER : 1
US_YOU : 1
WAS_PUT : 1
IF_PT : 1
DISPLAY_PAIN : 1
BEDSIDE_IN : 1
NWB_RIGHT : 1
MINUTES_OF : 1
INTERMITTENT_AND : 1
FREQUENCY_OF : 1
INTENSITY_NONE : 1
CONNECTS_THE : 1
VOICEMAIL_TO : 1
HAVE_PSYCHOSOCIAL : 1
PEERS_OR : 1
ONES_AND : 1
PT_TRULY : 1
CONTINUED_OR : 1
AS_HE : 1
CC_ADDITIONAL : 1
THE_MONTHS : 1
PATIENT_ALERT : 2
MITRALVALVE_DNR : 1
RESTING_BEDSIDE : 1
SUICIDAL_NO : 1
HAD_GOOD : 1
WT_KG : 1
WAKES_VOICE : 1
TRANSFERS_HE : 2
COME_FASTING : 1
PATIENT_ATTENTIVE : 1
CULTURAL_OR : 1
SPENT_HE : 1
SBA_EDEMA : 1
AND_WILL : 2
ACCEPT_TO : 1
INJURY_POTENTIAL : 1
AND_IMPORTANCE : 1
ADMINISTERED_PEOPLE : 1
ASSESSMENT_HISTORY : 1
THIS_NOTE : 1
IN_MODERATE : 1
FURTHER_BY : 1
HE_THAT : 3
TEMP_HISTORY : 1
ROUTINE_UP : 1
ORDER_ICS : 1
MANAGER_HEALTHSOUTH : 1
EASY_SOB : 1
VOIDS_METHOD : 1
ASSAULT_IN : 1
IN_CM : 1
SPC_SHE : 1
ICS_TREATMENT : 1
NO_WEAK : 1
NPHO_CHIEF : 1
VERY_MCO : 1
NORMAL_EKSUICIDE : 1
LECTURE_CONSUME : 1
ANSWERED_EXIT : 1
ASSIGNED_CALLER : 1
PATIENT_AND : 2
IS_SPACE : 1
APR_BARRIER : 1
STILL_LITTLE : 1
THE_UNIT : 1
INSERT_SUPPOSITORY : 1
THAT_HAPPENS : 1
TO_AUDIOLOGY : 1
NOTE_BY : 1
AT_ON : 1
TO_ANOTHER : 1
RAL_TREAT : 1
ALL_CRAVINGS : 1
LINEN_LAST : 1
ASSESSMENT_WHAT : 1
FOLLOW_UP : 1
MG_TAB : 5
IN_THE : 6
IN_INTENSITY : 1
PAIN_AND : 3
HOW_IS : 1
OF_INCREASED : 2
DENIES_SI : 2
PRESENTS_HEMATURIA : 1
WANTED_PT : 1
TIME_WITH : 1
IN_CSTAT : 2
DATE_JUL : 2
INTERDISCIPLINARY_OF : 1
WIFE_THE : 1
YES_NOX : 1
READ_PHYSICIAN : 1
ANY_CHANGES : 1
DISORDER_MAY : 1
DRUG_PAIN : 1
STUDENT_NOTE : 1
MINUTES_EXCLUDING : 1
AND_PODIATRY : 1
FOR_MR : 1
PRIMARY_LANGUAGE : 1
SUPP_MG : 1
FOR_EVAL : 1
STATUS_CARDIOVASCULAR : 1
LOSS_NEEDS : 1
ABOUT_HAVING : 1
TIME_BUT : 1
NOT_HAVE : 3
CALLED_MSW : 1
MARRIED_VERDE : 1
AND_HAS : 3
MORNING_FOOD : 1
BIPOLAR_AFFECTIVE : 1
MY_GROIN : 1
PRIMARY_XENGLISH : 1
PATIENT_REQUESTS : 1
HEALTH_PSYCHIATRY : 1
MIDDLE_LAST : 1
VERY_STRESSED : 1
GIVEN_OF : 1
COCAINE_MANY : 1
FROM_AMBULATORY : 1
MALE_DATE : 1
RATING_ITS : 1
DOE_TO : 1
STATUS_PROBLEM : 1
THEM_ABOUT : 1
PART_WOUND : 1
ALIMENT_OW : 1
CARE_HEALTH : 1
BOWEL_AXIS : 1
LB_SEC : 1
PHYSICIAN_TO : 2
VAGUE_HISTORIAN : 1
RAISED_VARIGATED : 1
DAILY_AS : 2
VETERNS_DISCUSSING : 1
DISCUSSED_DENTAL : 1
CHEST_REASSESSMENT : 1
THIS_ON : 1
DNR_INCLUDE : 1
BUT_TALKS : 1
ACUTE_SOI : 1
GROUP_WAS : 1
IRREGULAR_BE : 1
WITH_FOOD : 1
STATED_HIS : 1
CHANGING_DRESSING : 1
COMMENTS_VERBALIZE : 1
AMBULATORY_THIN : 1
BY_MEDICAL : 1
TO_STRUGGLE : 1
HAS_GOOD : 2
BE_TO : 1
PT_WHEEZING : 1
ON_UP : 1
PT_LET : 1
AL_THE : 1
LIKE_TO : 2
AND_OFFERING : 1
WILL_FOR : 1
STOMACH_BEING : 1
PHYSICIAN_AND : 1
EXPECTED_AN : 1
PREPROCEDURE_INSTRUCTIONS : 1
TYPE_LWBS : 1
LYRICA_INPLACE : 1
QUO_FOR : 1
SEE_NOTE : 1
RAL_NAD : 1
PODIATRY_NEW : 1
GUMS_NO : 1
ORIENTED_AND : 1
NO_DATE : 1
MOVES_EXTREMITIES : 1
NOT_TO : 5
THIS_WRITER : 2
STL_PULSE : 1
HEMOPTYSIS_HE : 1
IN_HUMOR : 1
PATIENT_SUBSEQUENTLY : 1
OF_UNDERSTANDING : 2
FOLLOWING_MEDICATIONS : 1
HE_HAD : 5
HE_OUT : 1
HAD_AN : 1
MEDICAL_BILLS : 1
PAIN_AS : 1
MG_DL : 2
PLEASANT_FRIENDLY : 1
WEIGHT_AGO : 1
HIS_MEDS : 1
RELAYED_TO : 1
PHYSICIAN_ANTIANXIETY : 2
AT_ENCOUNTER : 2
AFRICAN_AN : 1
KETCHUM_TELEPHONE : 1
MSW_CASE : 1
NOT_ANSWER : 1
FOOD_WATER : 1
PATIENT_ALSO : 1
ARE_ATTACHED : 1
DR_BOGGIO : 1
DAUGHTER_CONCERN : 1
IN_LUBBOCK : 1
PROCEDURE_INSTRUCTIONS : 1
EFFECTS_DAILY : 1
DIVERTICULOSIS_STATES : 1
LEFT_INNER : 1
PROVIDER_PT : 1
IMAG_SERVICES : 1
FASTING_FOR : 1
WEIGHT_EDUCATION : 1
HAS_PUT : 1
ANGER_EMOTIONAL : 1
SCLERA_PT : 1
RUB_CLICK : 1
ASA_NURSING : 1
CLEAR_INTERDISCIPLINARY : 1
SHE_HAD : 1
PRESYNCOPE_HYPOTENSION : 1
COMPLAINED_FEELING : 1
RESP_BE : 1
VA_LUBBOCK : 1
ON_REMOVING : 1
LIST_FOR : 1
CLOTRIMAZOLE_CREAM : 1
INTERVIEW_VETERAN : 1
INSOMNIA_AND : 1
ENCOURAGEMENT_PATENT : 1
DECISIONMAKING_CAPACITY : 1
COUNTY_MARICOPA : 1
BARRETTS_SCANNED : 1
OUTCOME_ANSWER : 1
THANK_BREATHING : 1
PULSE_FOR : 1
MODIFICATIONS_DIET : 1
REPSONSES_YES : 1
MORTGAGE_MOUNTING : 1
SCANNED_PROXIMALLY : 1
INDEPENDENT_BOWEL : 1
TELEPHONE_STATUS : 1
MG_CLINIC : 1
CONDITIONS_IS : 1
GOVERNMENT_ISSUES : 1
TEACHING_PT : 1
FILED_BONNIE : 1
SCREEN_AT : 1
NO_HOMICIDAL : 1
WILL_SEND : 1
BUT_SHE : 1
INDEPENDENCE_ADLS : 1
ONLY_OF : 1
TO_INTERACTS : 1
ISSUE_DATE : 2
DONT_WANT : 1
BREATH_CHEST : 1
CREATININE_MG : 1
SCREEN_PHYSICAL : 1
TOP_CREAM : 1
ACTION_NEEDED : 1
COWORKERS_TAB : 1
SEVERE_INTENSITY : 1
LEARNING_MEMORY : 1
WITH_DAILY : 1
DOCUMENTATION_PSYCHOTHERAPY : 1
IM_GIVEN : 1
NERVE_HE : 1
SUPPORT_SPIRITUAL : 1
TO_INTO : 1
HAVE_PLEASE : 1
TO_SOMEWHAT : 1
ACUTE_FACILITY : 1
TO_DEPRESSED : 1
EDUCATION_NEEDS : 1
ADMITTED_WITHIN : 1
DISCUSSED_MANY : 1
OBTAINING_CONSENT : 1
PROBLEMS_KNOWN : 1
YOU_MANY : 1
APPEARED_TO : 1
MOUTH_AS : 2
OCCASION_OT : 1
LUMBAR_PUNCTURE : 1
FASTING_LABS : 1
AND_GOOD : 1
FOLLOWING_AND : 1
BLOOD_IS : 1
PHYSICIAN_ON : 1
BP_BEING : 1
OF_CONTINUED : 1
HARRINGTON_TRS : 1
CAN_WHY : 1
OTHER_TO : 1
IV_PUSH : 1
HOTLINE_YESTER : 1
MAY_ARRIVED : 1
IV_DISCONTINUED : 1
MIN_FOR : 1
ONE_STEP : 1
OF_NAME : 1
DEC_TEMP : 1
QUESTIONS_UNIT : 1
INSTRUCTIONS_PLAN : 1
HAD_OPPORTUNITY : 1
THE_DENIES : 1
NEUROLOGY_HE : 1
NONSOAP_PATIENT : 1
CHECK_NO : 1
POST_PATIENT : 1
CARE_VA : 1
AND_WHEN : 1
LABS_BP : 1
OF_PRODUCTS : 1
DEXTROSE_ACTIVE : 1
PROTECTION_HIS : 1
FOR_OTHER : 1
DOB_DEC : 1
SECONDARY_PART : 1
RATE_BRISK : 1
COUMADIN_FOR : 1
APPT_HOLD : 1
VERBAL_YOU : 1
HI_HYPOTENSION : 1
ESOPHAGEAL_CA : 1
PT_ANY : 1
TAB_MG : 6
PROTECTION_OF : 1
ALSO_PAIN : 1
SELF_INDEPENDENT : 1
ED_TEACHING : 1
REQUESTING_PRESCRIPTION : 1
NOT_DO : 1
ADDITION_INCLUDED : 1
LAB_PM : 1
HE_DOES : 2
LOOKING_THE : 1
ADDICTION_TO : 1
INTERVENTIONS_MORSE : 1
THE_SD : 1
LEARNING_NEXT : 1
ANSWERED_REGARDING : 1
BY_MSW : 1
PATIENT_YO : 1
THE_BIOPSYCHOSOCIAL : 1
PERSON_SIT : 1
HIS_AS : 1
SHE_GOT : 1
ME_FIDDLEHEADS : 1
NO_COMPLAINTS : 1
NOTED_PAIN : 1
CONTRACT_INFORMATION : 1
TAKE_ONE : 4
SUPERIOR_RAISED : 1
FACILITY_APPOINTED : 1
SESSION_TO : 1
GOES_BB : 1
NOTE_WITH : 1
DING_HPI : 1
GASTRITIS_IS : 1
WILL_SAFETY : 1
AND_ANOTHER : 1
VIEWING_ESPECIALLY : 1
LABS_CALLED : 1
TO_ALLOW : 1
DISCUSSING_PARTICIPATION : 1
BIPOLAR_DETAILED : 1
ALERT_REQUIRES : 1
OF_AT : 1
ARE_ANY : 1
CLINIC_IN : 2
PROVIDER_NURSE : 1
IMPRES_HOSPITAL : 1
DEPRESSED_LITTLE : 1
THE_VITAL : 1
PT_DENIED : 1
NOTED_HE : 1
ORDERS_HEALTH : 1
PEOPLE_WHO : 1
SI_PRESYNCOPE : 1
FALL_PHYSICALLY : 1
FOR_CESSATION : 1
PROCEDURE_CAUDAL : 1
PLAN_IN : 1
SEPT_WAS : 1
FACTOR_IN : 1
INPATIENT_MEDICATIONS : 2
VISTA_DISPLAY : 1
RIGHTSIDED_PAIN : 1
IN_ESOPHAGUS : 1
DOCUMENTATION_MG : 1
CAUSES_OF : 1
TRANSDERMAL_FOR : 1
TO_ONES : 1
CARES_REQUESTING : 1
SCREEN_THIS : 1
STOP_MG : 1
LPN_WITH : 1
LUBBOCK_CITALOPRAM : 1
RELATIONSHIP_PATIENT : 1
AND_THAT : 2
WORKER_TO : 1
ASSESSMENT_MULTIVITAMIN : 1
PLAN_DISCHARGE : 1
EXPLAINED_ADMISSION : 1
BACKGROUND_BRIEF : 1
SEC_COMMENTS : 2
MOVIE_CHALK : 1
IS_WIFE : 1
AREA_EMER : 2
RESISTED_AGREED : 1
TEMP_PULSE : 1
HAVE_STARTED : 1
HE_OT : 1
NOT_HAVING : 1
AT_ADDENDUM : 1
PATIENTS_PT : 1
CDI_REMINDER : 1
VOICEMAIL_CALL : 1
BLOOD_REPLACES : 1
HE_SAYS : 1
ENCOURAGED_TO : 1
HE_YEARS : 1
ASSESSMENT_MP : 1
OF_NUTRITION : 1
WK_FOR : 1
PAIN_NO : 3
PATIENT_EDUCATED : 1
ASSISTANCE_WITH : 1
WAIT_FOR : 1
BIT_STATUS : 1
ORANGE_DELTOID : 1
ALTERNATING_ALBUTEROL : 1
WITH_OTHERS : 1
WAS_GIVEN : 2
BACK_MOOD : 1
TO_LONGER : 1
PROCEDURE_XRT : 1
ACTIVE_TAKE : 1
LAST_MONTHS : 1
LOSS_OVER : 1
MG_QH : 1
OF_PATIENTS : 2
TX_WITH : 1
MMM_SEEN : 1
GLUCOSE_SSN : 1
PLAN_OUTPUT : 1
TOPIC_COMMENTS : 1
BASE_RESP : 1
DISCUSS_WITH : 1
FEB_AGE : 1
FOR_TIME : 1
INDIVIDUAL_CODE : 1
CONSULT_NOTE : 1
THANK_PAIN : 1
PT_VA : 1
EVERY_FOR : 1
AGREEMENT_HIS : 1
IOP_GROUP : 1
PHONE_NU : 1
NKA_RELIGIOUS : 1
COME_TO : 1
THAN_TO : 1
MOBILITY_YES : 2
REQUESTING_LOCAL : 1
BUCKEYE_CE : 1
BASIS_OF : 1
MORE_EDUCATION : 1
TO_OF : 1
OF_THEIR : 1
PHYSICIAN_MG : 1
SSN_RRR : 1
DIAGNOSIS_BASED : 1
PAIN_SATS : 1
INDEPENDENT_CONTINENCE : 1
REARING_PRACTICES : 1
ALARM_OF : 1
OF_ANY : 1
SURGERY_CAUDAL : 1
IMPAIRMENT_TAB : 1
INDICATION_DOSE : 1
ON_LIGHT : 1
CARE_PROBLEM : 1
ESTABLISH_BRIEF : 1
EDEMA_LES : 1
DISCUSSED_THE : 1
CARAFATE_QID : 1
PROCEDURE_CHEMO : 1
REASSESSMENT_VOICED : 1
OF_POSTERIOR : 1
AND_SELFTALK : 1
PHYSICALLY_EMOTIONALY : 1
ENEMA_YES : 1
DATE_TEMP : 1
BRISK_INJ : 1
NOT_OR : 1
NURSING_CONDITION : 1
TEAM_ANTIHYPERTENSIVES : 1
ISOLATION_BUT : 1
HIM_BECOMING : 1
THE_WAS : 2
MONTHS_DURING : 1
BONE_AT : 1
COME_FOR : 1
VETERAN_PAIN : 1
ILL_DRUG : 1
APPROPRIATE_SETTING : 1
RUNNING_AGAIN : 1
LOW_GRADE : 1
GRANULOMATOUS_CHANGES : 1
PATIENT_NEWLY : 1
CONSULT_OLECRANON : 1
CONTINENCE_AXIS : 1
ENCOURAGING_BACK : 1
TO_THEM : 1
DIRECTIVE_SAFETY : 1
IN_IADLS : 1
SUBSTANCE_ABUSE : 1
AND_FULL : 1
CESSATION_ADDENDUM : 1
ACTIVE_VERY : 1
UNDERSTANDING_AGREEMENT : 1
US_NOT : 1
WILL_MAKE : 1
DIETARY_CARE : 1
MASS_INDEX : 2
LIVING_DATE : 1
LATERAL_MI : 1
AVOID_TO : 1
PATIENT_VERBALIZE : 1
IS_OUT : 1
INDIVIDUAL_MIN : 1
WITH_SELF : 1
STATUS_SINGLE : 1
OR_BEHAVIORAL : 1
OF_SUGAR : 1
ABOUT_COUMADIN : 1
HELP_ANY : 1
YESTER_THE : 1
WRITER_BIPOLAR : 1
HAVE_MET : 1
HOSTILITY_WITH : 1
PEERS_AND : 1
FOR_AND : 5
ST_CHANGES : 1
BMI_BODY : 2
CARE_PLAN : 1
OUPT_APAP : 1
METASTATIC_ARISING : 1
UNDERSTANDING_GOOD : 2
EXERCISE_FOR : 1
ORIENTED_WELL : 1
NSTEMI_COPD : 1
ON_PREVENTION : 1
WIFE_STATED : 1
SPUTUM_HE : 1
BEING_DURING : 1
THE_PAST : 2
MONTHS_WEIGHT : 1
ACTIVITYLIMITATIONS_NO : 1
USED_FOR : 1
DETAILS_OF : 1
PAIN_BLOOD : 1
NU_ANATOMICAL : 1
HEALTH_AGO : 1
MG_PHONE : 1
VET_VALIDATES : 2
LEFT_AND : 1
THE_STARTED : 1
PRODUCTS_LAST : 1
HIS_REQUEST : 1
VITALS_AT : 1
RAMBLE_FOR : 1
PATIENT_REFUSES : 1
ODYNOPHAGIA_DYSPHAGIA : 1
NONVISIT_TX : 1
PSYCH_THESE : 1
ACCOMPANIED_RANDOM : 1
THAT_CONNECTS : 1
AN_TO : 1
PT_PROCEDURE : 1
CARE_FALL : 1
OF_SERVICE : 1
NURSE_OF : 1
WEAK_FATHER : 1
THE_DIARRHEA : 1
TIME_AND : 3
ETHNIC_THAT : 1
ASSIST_IN : 1
DEPRESSION_ANXIETY : 1
ALLERGIES_ADVERSE : 2
SI_HI : 3
AND_FAMILY : 2
WILL_HOLD : 1
TWICE_PHONE : 1
SPEECH_HYG : 1
SI_PAIN : 1
INCLUDING_CALL : 1
FINISHED_ASSESSMENT : 1
PROTOCOL_NOTIFIED : 1
BEEN_CHANGING : 1
PRESSURE_NO : 1
EVENTS_RESOLVE : 1
WITH_ADDENDUM : 1
INCREASED_CHEST : 1
MALE_OBSTRUCTIVE : 1
FRUSTRATION_AND : 1
ALERT_INTERACTIVE : 1
DEPRESSION_AND : 1
HAD_ABOUT : 1
STATED_PATIENTS : 1
NOT_HESITATE : 1
WAS_PAST : 1
CURRENT_LIST : 1
THOUGHTS_CLEAR : 1
QUESTIONS_REPORTS : 1
NURSING_PATIENT : 1
PEOPLE_CAN : 1
INDEPENDENT_AND : 1
THE_NOTED : 1
TO_FEELING : 1
MG_SAID : 1
ANICT_SCLERA : 1
WITH_ALBUTEROL : 1
CURRENT_ADMISSION : 1
ON_VISTA : 1
TIME_THE : 1
HAVE_TO : 2
VETERAN_ADMINISTERED : 1
THIS_OPEN : 1
CARE_NON : 1
IID_IS : 1
ATIVAN_MG : 1
EXPECTATIONS_AND : 1
MEMORIES_ANGER : 1
THE_IF : 1
NURSE_RECOMMENDATION : 1
RELATES_THAT : 1
FLUSH_AND : 1
INSTRUCTIONS_CARE : 1
PAIN_POSTERIOR : 1
UNIT_DIAGNOSIS : 1
ON_SIDERAILS : 1
FOR_MINUTES : 1
HAD_THE : 1
ARABELLA_ELECTRONIC : 1
AGREES_TO : 1
NEUROPATHIC_ULCERATION : 1
PAMPHLET_YOU : 1
WITH_ANSWERING : 1
TO_LR : 1
PING_TO : 1
THAN_MAKE : 1
DIURETICS_NO : 1
PT_TO : 5
BLACK_AFRICAN : 1
INDICATORS_WHICH : 1
EXTREMITY_INDIVIDUAL : 1
MEDS_ARE : 1
CHANGE_VOICE : 1
HAVE_CALL : 1
ANTIHYPERTENSIVES_DIURETICS : 1
PSYCHOTIC_SX : 1
BARRETTS_EXTENSION : 1
USUAL_WEIGHT : 1
FEB_TIME : 1
TAKE_OF : 1
SIDE_RIGHT : 1
PREOP_GIVEN : 1
VOID_DIFFICULTY : 1
FRIENDLY_DENIES : 1
PAIN_IS : 2
HAVE_CIGARETTE : 1
HIS_WAS : 1
VA_WITH : 1
ALTHOUGH_WAS : 1
CONSTIPATED_FOR : 1
PART_OF : 1
DISTRACT_ME : 1
LAST_GIM : 1
PERSONAL_ACID : 1
INSOMNIA_WAS : 1
PRIMARY_CARE : 5
MENTAL_CONSULT : 1
AND_SLEPT : 1
OF_INR : 1
HAVE_ANSWERED : 1
GIVE_WIFE : 1
TXC_HARRINGTON : 1
FIANCE_NO : 1
INCREASED_SWELLING : 1
AND_EASY : 1
TALKING_TO : 1
RELATES_HIS : 1
CARE_EDUCATION : 1
HBO_FROM : 1
PMR_PT : 1
RFA_AND : 1
BEEN_LOOKING : 1
TO_ORDER : 1
ACTIVE_MEDICATIONS : 7
TO_STATES : 1
PHYSICIAN_ETATION : 1
WEIGHT_LB : 4
EKBHINTERDISCIPLINARY_TEAM : 1
ASSESSMENT_NEXT : 1
IN_FROM : 1
LEFT_GROIN : 1
BUPROPION_SMOKING : 1
ADLS_OR : 1
CREATININE_DL : 1
ANY_SPECIFIC : 1
SYMPTOMS_ED : 1
ADMISSION_WAS : 1
NO_COMMENTS : 1
ESCORTED_AND : 1
PATIENT_INTERESTED : 1
LIKE_WORKER : 1
COPD_CHF : 1
ADJUSTED_UNDERSTAND : 1
OPERABLE_FOLLOWING : 1
AND_DISTRACT : 1
WCT_BY : 1
OLD_GRANULOMATOUS : 1
FACTORS_NO : 1
THERAPY_IN : 1
TO_ADMISSIONS : 1
ISCHEMIA_NOTE : 1
YESTER_VETERAN : 1
HAVENT_HIS : 1
GUNS_HIS : 1
WITHIN_URINE : 1
SUPPORT_DISTRACT : 1
FAMILY_AND : 1
AND_HIS : 3
BRAIN_AND : 1
CRISIS_YESTER : 1
YES_IS : 1
HOURS_NO : 2
THIS_SW : 1
EXTREMITY_ECS : 1
REPORT_NO : 1
OF_SWELLING : 1
WHO_HELP : 1
START_MEDICATION : 1
CLEARED_FOR : 1
REESTABLISH_HIS : 1
BOTH_ADDICTION : 1
ALSO_THAT : 1
TAKE_ONEHALF : 1
ADMITTED_BAPTIST : 1
FOR_HEMATURIA : 1
WITH_PERIOD : 1
SLIGHTLY_INCREASED : 1
TRANSFER_PT : 1
NOW_WITH : 1
MALE_WHO : 1
PROVIDED_THE : 1
TIME_SUPP : 1
PT_RECENTLY : 1
LEAD_ANGER : 1
OUR_PSYCHOTROPIC : 1
DAILY_PULSE : 1
ABOUT_ASSESSMENT : 1
DELAYED_THAT : 1
BONE_PROXIMAL : 1
DIET_BUT : 1
HIM_NEW : 1
AND_CONTINENT : 1
MALODOR_DRAINAGE : 1
LANGUAGE_NONENGLISH : 1
ALL_SOURCES : 1
REFERRAL_MOVE : 1
ADMISSION_BASE : 1
ST_HEADHEALED : 1
COLLABORATIVE_COMPLICATIONS : 1
TO_UNIT : 1
FREQUENCY_INTENSIFIED : 1
BIOPSYCHOSOCIAL_THAT : 1
FINANCES_MAY : 1
TO_PATIENT : 3
NUTRITION_SCREEN : 1
MG_PO : 7
EFFECTS_AND : 1
MONITOR_ELIMINATION : 1
NON_VA : 1
IN_UNIT : 1
TALK_FATHER : 1
VERY_HYPOTHYROIDISM : 1
PATIENT_REGISTERED : 1
STEP_PEOPLE : 1
NURSE_TYPE : 1
PRACTITIONER_BE : 1
RN_RN : 1
PATIENT_SMOKES : 1
HAVE_THEIR : 1
DONE_CHANGED : 1
NO_SOB : 1
PHARYNX_EKSUICIDE : 1
RALLY_CONDITION : 1
ONE_THE : 1
TO_UNEMPLOYMENT : 1
TO_LOCKED : 1
OR_CHEST : 1
OF_STRUCTURE : 1
INITIAL_THE : 1
END_UP : 1
THE_FORM : 1
CURRENT_DIET : 2
BETTER_THAN : 1
BOTH_IN : 1
AVAILABLE_MET : 1
ASSOCIATE_PROVIDER : 1
HOUR_WITH : 1
EXAMINATION_LINKSF : 1
ACTIVITIES_DAILY : 1
NONVISIT_NOTE : 1
NICOTINE_PATCH : 1
GOOD_TRANSFERS : 1
PT_ALERT : 1
MODERATE_OR : 1
ADVIL_MOTRIN : 1
AGO_AND : 1
AND_STATED : 1
IV_ACCESS : 1
LEFT_FREQUENCY : 2
INDICATION_SIDE : 1
SKIN_LESION : 1
OIF_OEF : 1
TO_QUESTIONS : 2
AND_PLAN : 1
PER_PC : 1
UNIT_RULES : 1
IN_PATIENT : 1
ED_REASSESSMENT : 1
LONGER_HE : 1
ON_LOWER : 1
COMPONENTS_REQUIRED : 1
FOR_SMOKING : 1
DIAGNOSTIC_HOSPITAL : 1
GEC_FORM : 1
CLOTHES_WITHOUT : 1
TO_CSTAT : 2
PT_SEEN : 2
AT_DISCHARGE : 1
FOR_TESTING : 1
AND_AND : 1
RESPONSE_PROTOCOL : 1
TO_ACCOMPANIED : 1
MHICM_AD : 1
ENCOURAGEMENT_DENIES : 1
SOME_TIME : 1
PHYSICIAN_YOU : 1
PAST_MONTHS : 1
ACTIVE_IID : 1
PROVIDER_KRISHNASWAMY : 1
GAS_WT : 1
HESITATE_RECONTACT : 1
MOUTH_MORNING : 2
COMES_GOES : 1
LOC_SHE : 1
SPECIALIST_PT : 1
MH_STAFF : 1
LINKSF_CC : 1
BLOOD_ON : 1
PLACED_RECALL : 1
IN_PLACE : 1
THE_OIF : 1
DISCUSS_YOUR : 1
SOUNDS_SOB : 1
PATIENT_ACTION : 1
MOBILITY_REASON : 1
PERIWOUND_OR : 1
FACILITY_CALL : 1
WAS_REDUCED : 1
TIME_TEMP : 1
TO_PAYING : 1
WHEN_THE : 1
ORGANISM_NOT : 1
HYDRATION_ELIMINATION : 1
WAS_RECEIVED : 2
HOWEVER_VIEWING : 1
ENEMA_DOUCHE : 1
ELSEWHERE_CAME : 1
GIVEN_BY : 1
LB_OX : 1
ACTIVE_ALERT : 1
NO_FOR : 1
EXIT_ELECTRONICALLY : 1
HAVE_BEEN : 1
WORST_MOVIE : 1
DEPT_PMH : 1
HEMATOMA_ALLERGIES : 1
CHECKS_CONTINUE : 1
CLINIC_NUMBER : 1
ADVISED_HAVENT : 1
RECALL_COME : 1
ARMY_IN : 1
CONTINUE_MONITOR : 1
OBJECTIVE_SESSION : 1
STATED_PATIENT : 1
TO_ACUTE : 1
FOR_APPOINTMENT : 1
AN_GENERAL : 1
NEEDS_TX : 1
AS_POA : 1
MOVIE_TALK : 1
TAB_PHONE : 1
PROJECT_TELL : 1
WE_TREAT : 1
TO_OUT : 1
IN_SEE : 1
SAID_ARE : 1
PT_HIGH : 1
DIFFICULTY_PAYING : 1
RELATES_SERVICES : 1
PT_TARGETS : 1
NOTE_DISCHARGED : 1
SENTENCES_COMMENTS : 1
DIFFERENCE_PATIENT : 1
OUT_BMI : 1
HOUR_PT : 1
LAST_THREE : 1
EVERY_ULCERATIONS : 1
YES_POSITION : 1
EATING_FOR : 1
CHRONIC_ERYTHEMA : 1
IN_DELTOID : 1
LN_AGE : 1
RECTALLY_TWICE : 1
QUESTIONS_ABOUT : 1
DID_APPEAR : 1
DIED_OF : 1
VOICE_DENIES : 1
RAL_OF : 1
WITH_ENCOURAGE : 1
REACH_URINAL : 1
THAT_TIME : 1
ADMISSION_AND : 1
ROOM_AIR : 1
PATIENT_ON : 3
TEXT_AT : 1
TELEPHONE_PREPROCEDURE : 1
EXPLAINED_DOSE : 1
HEADHEALED_EXIT : 1
BE_SCHEDULED : 1
ANY_HI : 2
PAST_MONTH : 1
TO_DISCUSS : 1
SIGNS_OF : 2
NUMBER_FOR : 1
LB_CLINICAL : 1
WAL_SHE : 1
IS_NONUSER : 1
SPHENOIDAL_SINUSITIS : 1
MEDICATION_LIST : 1
CONCERN_PC : 1
PMH_HAVE : 1
PHYSICIAN_PATIENT : 1
ASSOCIATED_WITH : 1
TO_INCLUDE : 2
TAKES_UNITS : 1
TREMORS_FROM : 1
TENSE_DIAGNOSIS : 1
REPORTS_NEEDING : 1
TO_SIT : 1
CURRENT_REQUEST : 1
OF_CARDIOGENIC : 1
OF_FEELING : 1
DEXTROSE_ASSESSMENT : 1
AS_REMEMBERED : 1
CATH_TIP : 1
CONSULT_PATIENT : 1
CONSULT_REQUEST : 1
TO_ACCEPT : 1
MONTHS_ESOPHAGEAL : 1
PREVENTION_ASSESSMENT : 1
MARITAL_MARRIED : 1
ACTION_TEXT : 1
AN_ALCOHOL : 1
FEBRUARY_DATE : 1
STRIPPED_HE : 1
VA_IN : 1
DEVELOPMENTS_LAST : 1
WEAR_BELT : 1
STAFF_ACTIVITY : 1
OF_BRUISING : 1
! Stats words=1839  pairs=8684
