# Supplementary material for: Predicting the Risk of Suicide by Analyzing the Text of Clinical Notes
Source: PLoS One. 2014 Jan 28;9(1):e85733. doi: 10.1371/journal.pone.0085733 (PMC3904866; doi:10.1371/journal.pone.0085733)
Supplement: Appendix S3 — Machine Learning Libraries and Methods: This section is provided to enclose the open source (Apache License) classifier used for the building of the statistical models, specifically for the purposes of study reproducibility. A detailed account of these tools is intended for another publication. (ZIP) [file pone.0085733.s003.zip › Appendix3/ML_libs/Regression_testing/group2/processed/grp2-pt-1050.dat]

!  Done reading
! Total word count = 5008
! Total unique words = 1806
! Total pair count = 10012
! Total unique pairs = 8785
COLORED : 2
OBSTRUCTIVE : 1
AT : 33
PERIARTICULAR : 1
SICKLE : 1
WM : 1
ADL : 1
PALPITATIONS : 1
STEADY : 2
GIVING : 1
WORK : 1
EVENING : 1
PREOP : 2
CATIGNANI : 1
LISINOPRIL : 1
PRESCRIPTIONS : 2
VOICES : 2
LOWER : 3
EVENTS : 2
MONTH : 3
PDF : 2
REFILLS : 3
WEIGHT : 4
KRISTEN : 1
BEEN : 9
BID : 3
GOALWHAT : 2
WITHIN : 6
LOCK : 2
REFILL : 2
DONNING : 1
SPHENOIDAL : 1
ACCORDING : 2
MILD : 1
AA : 1
TREATMENTS : 1
OUTPATIENT : 10
MILITARY : 1
INSTRUCTED : 1
WEEKLY : 2
PREFERS : 1
INTAKE : 3
SHORTNESS : 1
INTERVENTION : 1
SPEECH : 1
INPATIENT : 4
CULTURAL : 1
TOMORROW : 2
COUNSELING : 2
DOFFING : 1
FT : 5
RELATED : 2
USE : 11
KINZEY : 1
SEALY : 1
MEANS : 1
PASS : 1
CC : 7
RR : 1
DISCHARGED : 3
CONTINUOUS : 1
SUPPLIES : 4
SURGERYAPPT : 1
TWICE : 1
ASA : 1
REGARDING : 1
VETERANS : 2
ATT : 1
READING : 3
HARM : 1
SCHEDULING : 1
LEVEL : 6
TOO : 1
CHANGES : 1
ALCOHOL : 6
RAL : 1
INABILITY : 1
PERSONAL : 1
SEEMS : 1
DISCUS : 1
MET : 2
HIS : 21
BRING : 1
COORDINATOR : 3
VISTARIK : 1
SLIGHTLY : 1
COPD : 2
SALMETEROL : 1
FRACTURES : 2
BUPROPRION : 1
BOTHERING : 1
INFANTS : 1
READINGS : 1
BMT : 1
VOIDING : 1
PSYCHO : 1
INSTAGLUCOSE : 1
NEURO : 1
APPROPRIATE : 2
SUGGESTED : 1
BOOTS : 1
CELEXA : 1
DIRECTIVE : 1
HOPELESSNESS : 1
CHANCES : 1
RASH : 2
WELL : 7
KNOWN : 2
DISORDER : 4
MEDICINE : 1
TEST : 2
NOTE : 38
CONTACTED : 2
INCREASING : 1
HARD : 2
JULY : 1
DSMIV : 1
DO : 3
DOES : 6
TESTS : 1
UNDERSTANDS : 1
TREATMENT : 10
FIFTH : 1
BLOOD : 7
SAME : 3
WORKER : 1
ACCESS : 1
DEFICIENCY : 1
CV : 2
STROKE : 1
BATTERY : 1
ASSIST : 2
HAVE : 17
EXPECT : 1
SCHEDULED : 2
BUSINESS : 1
ASK : 1
DRUG : 1
OF : 89
INCLUDE : 2
HEAVINESS : 1
TAB : 12
SWAB : 1
CALLER : 3
ASSISTED : 1
STABLE : 1
PSYCHIATRY : 2
QUICKLY : 2
REQUIRED : 5
ARREST : 1
MONITOR : 1
HAS : 32
TUNNEL : 1
LOSSED : 1
FOR : 70
BAC : 1
PERCEPTION : 1
ARNP : 1
NUTRITION : 1
SAID : 1
NUMBER : 5
PRECLUDES : 1
DETOX : 1
CLC : 1
CURRETNLY : 1
UNDERSTAND : 1
KILL : 1
STRIP : 2
HOLDING : 1
MORNING : 1
WEATHER : 1
ACCUCHEK : 1
INR : 1
BACKING : 1
INTENSE : 1
ABSTINENCE : 1
SC : 7
MS : 2
EC : 1
OUTPT : 1
FRUSTRATED : 1
CHAPLAINSPIRITUAL : 1
IDEATION : 2
BLUNTED : 1
MESSAGE : 1
CLERICAL : 1
PARANOIA : 1
SWER : 1
MYOCARDIAL : 1
SUBSTANCE : 1
THEM : 3
GOALS : 2
INITIALY : 1
ASSESSMENT : 18
RESPIRATORY : 1
US : 1
TRANSDERMAL : 1
QUITTING : 3
WHEEL : 1
ACTIVITY : 6
WISHES : 1
OWN : 1
INVOLUNTARY : 1
ARMS : 1
TARGET : 1
REFERRING : 1
EVIDENCE : 3
SHOWS : 1
ACCUCHECK : 1
ATTACHED : 5
DISTRIBUTION : 1
RECOMMENTATIONS : 1
STARTING : 1
CONSULTS : 1
ITCHY : 1
ENCOURAGED : 3
BILATERALLY : 1
BM : 1
NAUSEA : 2
FRIENDS : 1
PREVIOUSLY : 1
DEVICES : 1
INFORMATION : 11
CHAPEL : 2
ADEQUATE : 1
PATTERN : 1
INITIAL : 2
ESOPHOGEAL : 1
CHILDREN : 1
CENTER : 1
EXAM : 4
ERE : 1
ESSENTIALLY : 1
RECENTLY : 1
ADN : 1
ORBITS : 1
NODULES : 1
ATTEMPTS : 2
PSYCHOLOGICAL : 1
SUICIDE : 3
PVU : 1
THE : 84
JUST : 2
CARCINOMA : 1
EOMI : 2
INSTEAD : 1
PHONED : 1
GROUP : 8
DURATION : 4
IDENTIFY : 1
APPEARS : 3
EXPIRED : 1
OCT : 4
PREP : 1
PULSES : 1
CARVEDILOL : 1
GO : 2
IODINE : 1
SIGNIFICANT : 5
TECHNIQUES : 2
RESIDENTS : 1
ARRIVED : 2
BP : 5
MEDS : 7
KNOWING : 1
RAPID : 1
CT : 1
POST : 1
PREVENTION : 2
DEPRESSION : 6
MUSCULO : 1
MAURER : 1
STRESSFUL : 1
BYPASS : 1
CM : 5
FREE : 2
ELECTRONIC : 2
IMAGE : 2
EXTENSION : 1
LAD : 1
AGREEMENT : 1
GAIT : 2
AGAIN : 2
DISPOSITION : 2
TID : 1
CAP : 1
SHIN : 1
DIET : 2
STATED : 3
EVER : 1
SQ : 1
BATHING : 1
HEARING : 3
AMP : 1
ATTEND : 1
AXIS : 3
GET : 5
SEATING : 1
WHAT : 4
WT : 4
CDL : 1
PLANS : 1
WHEREIN : 1
PARTIAL : 2
SOLDIER : 1
SKELETAL : 1
FIVE : 1
CHATHAM : 1
BENEFITS : 3
STARTED : 3
HANDOUT : 2
ASSISTANCE : 6
VN : 1
DIABETIC : 1
CARDIOVASCULAR : 1
OR : 39
EXPLORE : 1
THERAPEUTIC : 1
SHIFT : 1
BOTH : 2
TEMP : 4
PRESCRIPTION : 1
YEAR : 8
CONSIDERED : 1
COPY : 1
ALREADY : 1
PULMONARY : 2
LB : 5
RYAN : 1
NARCOTICS : 1
TRANSPORT : 1
DE : 1
OLECRANON : 1
LIKE : 3
STANDS : 1
PUT : 1
GI : 4
SEEN : 5
RT : 2
EXPERIENCE : 2
FEBRUARY : 1
FOOD : 3
MAILED : 2
NURSE : 8
ENJOY : 1
PS : 1
SX : 1
MUCH : 2
LABORATORY : 2
UDS : 1
CHRONIC : 5
RILEY : 3
VESTIBULAR : 1
NEOPLASM : 1
INTERVIEW : 1
TAKE : 13
SENSORY : 1
INCREASE : 2
CORONARY : 1
ANTISEIZURE : 1
ANY : 6
WALKIN : 1
DISCHARGE : 10
POSSESSION : 1
COCHLEAR : 1
HYPOTENSION : 1
MOISTURE : 1
STRENGTHS : 1
QH : 1
FOURTH : 1
ALTERED : 1
WWW : 1
SW : 1
TOLERATED : 1
ALOT : 1
EVOLUTIONAL : 1
APPLIANCES : 1
NONCOMPLIANCE : 1
CUP : 1
TIDAC : 1
FACILITY : 1
GTT : 1
SUSPICION : 1
HOSPITALIST : 1
MALATHI : 1
CLIN : 1
EXPIRATION : 1
UNIT : 3
MOTOR : 1
EFFECTS : 1
MD : 1
RELATIONSHIP : 1
NEOADJ : 1
NAME : 6
CARE : 18
MSE : 1
FORT : 1
DISCOURAGED : 1
AGE : 6
EVERY : 10
INVOLVED : 1
INFARCTION : 1
INTENT : 1
ET : 1
COMPLIANT : 1
SKIN : 4
INVERSIONPT : 1
RATED : 1
YESTER : 2
TIMES : 5
IS : 52
NOT : 30
START : 1
IF : 17
ENOUGH : 2
THERE : 1
HOUSEKEEPING : 1
MH : 2
NONTENDER : 1
WALKING : 1
PENDING : 3
CANCELLED : 1
PERRLA : 1
OPTOMETRY : 1
INTERVENTIONAL : 1
SCLERA : 1
HERE : 4
UPSETTING : 1
INFARCTS : 1
EATING : 1
POSITIVE : 1
CLEAN : 1
BACTERIAL : 1
UNITS : 1
OXIMETRY : 2
LAMOTRIGEN : 2
ANGER : 1
ONEHALF : 2
PSYCHOLOGIST : 1
EVALUATION : 5
AORTOCORONARY : 1
CONDUCTED : 1
PROGRESS : 3
WK : 1
PESSIMISM : 1
RHYTHM : 1
RECURRENT : 2
CMM : 1
REHAB : 2
UNEMPLOYED : 1
ARTERY : 1
WORTHLESSNESS : 1
ASSESS : 2
THESE : 3
VISION : 2
VET : 9
STOOL : 1
PSYCHOEDUCATIONAL : 1
EXPLAINED : 2
DIVORCE : 1
RLE : 1
COMPANY : 1
APHDR : 1
BEST : 1
COMPLETION : 2
PASSING : 3
BURSA : 3
VERDSOME : 2
DOPAMINE : 1
PARTICIPATION : 2
MUSIC : 1
ASSOCIATED : 2
WORRIES : 1
HOWEVER : 3
BACK : 8
BLAME : 1
TRYING : 2
SOURCE : 2
TRANSPORTATION : 1
VISITING : 2
MARRIED : 1
HEIGHT : 2
MALE : 12
SUBJECT : 1
CAR : 1
ADDENDUM : 13
FULL : 3
BY : 24
PMH : 1
HYPERKALEMIA : 1
NO : 60
RELAXATION : 1
EXPEDITOR : 1
INTENSITY : 1
CLINICAL : 3
KNOWS : 1
NORTH : 1
CHIEF : 10
PB : 1
ROUND : 1
SATT : 1
MEETING : 1
UPPER : 2
TH : 2
HYPOTHYROIDISM : 1
WILKES : 1
NONICT : 1
RELEASED : 1
RRR : 1
CONVERSATION : 3
CLINIC : 7
RISK : 11
HAIRLESS : 1
WATERY : 2
HAGERSTOWN : 1
INITIALLY : 1
MECHANICAL : 1
CIRCUMSTANCES : 1
TO : 150
BMI : 1
COLLINS : 1
PRN : 1
COULD : 4
IV : 5
NOTET : 1
ABUSE : 3
ADVANCE : 1
MURMUR : 1
CRASH : 1
ADMINISTRATIVE : 2
FM : 1
OPINION : 1
SAFE : 3
QAM : 1
DX : 1
BIOPSY : 2
AFTERCARE : 1
PROCEDURE : 5
OBSERVE : 1
REQUESTING : 4
EDUCATIONAL : 2
ORDERING : 1
WILL : 12
SEEMING : 1
WELLBUTRIN : 1
OFTEN : 4
BUT : 9
ASKED : 1
THOUGHTS : 5
COORDINATION : 1
STRESSORS : 1
APPETITE : 2
TYPE : 8
MANOR : 1
CAREGIVER : 1
SEE : 9
GETS : 1
ACTING : 1
PERHAPS : 1
ALTERING : 1
SET : 2
INTERACTIVE : 1
PLEASE : 4
MEALS : 1
KIT : 1
DIS : 1
STATUS : 12
DEESCALATION : 1
LOWERING : 1
EKIPAA : 1
DIABETES : 1
DIVORCED : 1
MARITAL : 1
DC : 1
DRINKS : 1
EFFECTIVE : 1
CONTINUED : 2
CONSULT : 6
TESTING : 1
OUT : 5
COMFORT : 1
HR : 3
CONT : 1
AIMS : 1
LBS : 1
GASTROINTESTINAL : 1
FIND : 1
WANTS : 1
DEPENDING : 1
UNMH : 1
STRETCHER : 2
SCREEN : 3
NERVOUS : 1
PERRL : 1
PRESENTED : 3
SLOWED : 1
EVALUATED : 2
BARRIERS : 1
SIGN : 1
FUNCTION : 2
ASSIGNED : 1
REVIEW : 3
THANKS : 1
NEEDED : 3
MENTAL : 2
HIMSELF : 4
DISCUSSING : 1
RELIGIOUS : 1
INJECTION : 1
LOR : 1
GOUT : 1
DIVERTICULOSIS : 2
GERD : 2
THREATENING : 1
REEVALUATION : 1
WERE : 5
FACTORS : 1
VIEW : 2
MAN : 3
BUDDY : 1
RESIDENT : 2
CONTACTS : 1
WALKS : 2
INSTRUCTIONS : 5
JUSTIFICATION : 1
LABS : 3
NONSMOKER : 1
VA : 2
SYNCOPAL : 1
SPC : 1
HYDROCEPHALUS : 1
ORIENTEE : 1
WED : 1
WAYS : 1
PREFERENCES : 2
AGREED : 1
NATURE : 1
TRIAGE : 2
CH : 1
HELPING : 1
PART : 1
FAMILY : 1
SMOKER : 1
BAD : 1
IMPACT : 1
INITIATED : 1
OSTOMY : 1
OFFERING : 1
CAUSE : 2
DISEASE : 2
PAIN : 41
WHEN : 5
AMBULATORY : 2
EXTERNAL : 2
AS : 24
FALLS : 1
VISTA : 1
WAKES : 1
BEING : 2
COUNSELE : 1
CRUSTED : 1
SINUSITIS : 1
ADMMITTED : 1
INCOME : 1
ABOVE : 3
WAS : 39
APPX : 1
PM : 5
TOX : 1
WITH : 59
FEELS : 1
WORRIED : 1
OFFERED : 2
MOVES : 1
LEAVING : 2
TEMPERATURE : 2
HIV : 1
CONTINUD : 1
REEVAL : 1
REDNESS : 1
CENTRAL : 1
SIG : 3
DRINKING : 1
BASIS : 1
HEALING : 1
INDEX : 1
BENADRYL : 1
NOW : 5
INCLUDING : 5
PTSD : 1
NA : 2
INTACT : 1
COPING : 1
POSTVIETNAM : 1
ONSET : 1
USED : 2
LEADER : 1
PTC : 1
IT : 6
DUTY : 2
HHA : 1
BEDTIME : 2
BELOW : 1
LIST : 2
INCLUDED : 1
OT : 2
STUDY : 1
TROUBLE : 1
DEMONSTRATED : 1
NEGLECT : 2
BAY : 1
COPIES : 1
MOMENT : 1
PARTNERS : 1
HYPOALBUMINEMIA : 1
ROLLATOR : 1
SA : 1
DSHI : 1
COLONIC : 1
DISCUSSED : 1
EATS : 1
DENTURES : 2
SUPPLY : 1
EXERCISE : 1
CA : 1
MMMOIST : 1
SHOWER : 1
FEVERS : 2
VOMITING : 1
POSITIVES : 1
TIME : 15
PURPOSE : 1
TROCHANT : 1
ENCOMPASS : 1
SWS : 1
ESOPHAGEAL : 2
OCCASIONALLY : 1
ORIENTED : 4
HYGIENE : 1
HCL : 2
CURRENTLY : 3
ATTEMPT : 1
PAID : 1
NECK : 3
WALK : 1
ADDITIONAL : 3
OXYCODONE : 2
SAFETY : 3
EXM : 1
JOINT : 2
SIDE : 2
SIMVASTATIN : 2
RESPIRATIONS : 1
IPC : 1
SEAT : 1
PROSTHETICS : 1
THICKNESS : 1
IMAGES : 1
REPAIR : 1
PAK : 4
DOCTOR : 2
ALLERGY : 1
ESI : 1
SPEAK : 1
DISTAL : 1
GOING : 2
DID : 5
CALL : 11
EXPRESSED : 1
PROVISIONAL : 1
LFT : 1
DYSPHAGIA : 1
DRIVEWAY : 1
SHOW : 2
ARRIVAL : 3
HX : 3
MHC : 2
BIRTH : 2
HYPERSOMNOLANCE : 1
IMAGING : 1
ROSENTHAL : 1
SITUATION : 2
TELEPHONE : 8
UNSPECIFIED : 2
REFERRALS : 1
SOB : 1
COMPLAINING : 1
RACY : 1
COOPERATIVE : 2
MOTIVATION : 1
REPORTS : 7
RATES : 1
SUBJECTIVE : 2
CX : 1
URINAL : 2
NONACUTE : 1
LEXAPRO : 1
HELP : 2
OPTIONS : 1
TABLETS : 2
PER : 6
CONSISTENT : 1
COMING : 1
CONTINUES : 2
YES : 10
FRIEND : 1
FURTHER : 2
SMILING : 1
PAINLESS : 1
CONSENT : 1
MOBILITY : 1
FACE : 3
CHF : 2
PACKS : 1
YOUR : 6
WITNESSED : 1
RETURNED : 1
DOING : 2
GIVEN : 9
CDRH : 1
TACHY : 1
LITTLE : 1
SUCCESSFUL : 1
HPI : 2
WHO : 4
UPON : 1
ED : 9
IRGUIDED : 1
DIARRHEA : 2
BASED : 1
ATTENDANCE : 1
PHYSICIAN : 13
ARM : 1
CURRENT : 7
DME : 1
RECTAL : 1
OUTDATE : 1
DEPENDENCE : 1
URGENT : 2
MCMULLEN : 1
EDUCATIONPT : 1
SEEKING : 1
TERM : 1
ES : 1
HIM : 12
RESPONSIBLE : 3
CESSATION : 1
FAXED : 1
PULSE : 9
HE : 69
SENSES : 1
NS : 1
NEXT : 1
RX : 2
NORMALLY : 1
THEY : 5
STUDENTS : 1
NEEDS : 7
TREATED : 2
OBESITY : 1
RATE : 3
REFERRED : 2
PHYSICIANS : 1
STR : 1
HAPPY : 1
MASS : 2
FELT : 3
MONTHLY : 1
ACCEPTED : 1
UAL : 1
FRIGHTENING : 1
HAYS : 1
TRANSFER : 2
PREFERENCE : 1
ML : 1
PHONE : 7
ADJUSTING : 1
SUBSPECIALTY : 1
MASSESS : 1
CLEAR : 2
RAN : 1
ELBOW : 1
RESPONSES : 1
VENESSA : 1
PRIMARY : 4
AAS : 1
AIRWAYS : 1
FAIR : 3
KEYS : 1
DISKUS : 1
CARES : 2
PUNCTURE : 2
ABDOMINAL : 1
HAD : 10
FDA : 1
SIGNS : 2
RALIZED : 1
ZELL : 2
HALF : 1
ACTION : 2
THING : 1
EKHISTORY : 1
LOSS : 1
SPECIAL : 2
SUBCUTANEOUS : 1
SISTER : 2
PATIENTS : 11
QUETIAPINE : 2
MRSA : 1
SUMMARY : 3
GLUCOSEFINGER : 1
PURSUE : 1
HUMAN : 1
HELD : 1
ASSISTING : 1
FATHER : 1
MINNICH : 1
CONSTIPATION : 3
PROVIDED : 3
DRINK : 2
LOADED : 1
YO : 3
WAVE : 1
OUR : 1
ORTHOPEDIC : 1
TWO : 4
SEN : 1
NONE : 9
MENS : 1
II : 2
LAB : 1
DECREASED : 2
LOT : 2
CONNECTED : 2
HOUGH : 1
4D : 1
WEAK : 1
SALINE : 3
LESIONS : 1
TRAVEL : 1
MIND : 2
TRANSPORTED : 1
ING : 2
COMPLAINTS : 4
CONTACT : 8
NPO : 1
SCHEDULE : 1
RETURNS : 1
PROBABLY : 1
PPP : 2
GUIDED : 1
TURN : 1
FEELING : 4
SHOULD : 1
TERAZOSIN : 1
COURT : 1
WTIH : 1
PROBLEMS : 5
URINE : 2
YELLOW : 1
LEAVENWORTH : 1
NEUROLOGICAL : 1
MCG : 1
STAYING : 1
CARPAL : 1
GIVE : 1
CAN : 2
THERAPY : 2
PSYCH : 3
DOOR : 1
CAUSED : 1
PLACE : 2
PRIVATE : 1
AWARE : 1
NONVA : 3
POLYPS : 1
FISHER : 1
WHICH : 3
IER : 2
SYMPTOMS : 4
RANGE : 2
NOTES : 1
INTERN : 1
BREAKTHROUGH : 1
LOUD : 1
DEAL : 1
MG : 21
ON : 31
COMPLETE : 3
PCC : 1
SPIRITUAL : 1
PRESSURE : 4
JUMPED : 1
TETANUS : 1
ATTENDED : 4
SUDDEN : 1
GATHERED : 1
PILL : 4
VIA : 4
MOLESTATION : 1
EVERYONE : 1
NOTABLE : 1
ACCEPTABLE : 2
BECAME : 1
GOOD : 7
DROPS : 1
FALLING : 2
REG : 1
TRIGLY : 1
MED : 1
UPDATE : 2
FRAME : 1
CONTINENT : 2
CHANTIX : 1
NOC : 1
INTO : 2
RESTRICTED : 1
CONSTANTLY : 1
FIRE : 1
EDEMA : 2
SEIZURE : 1
HEELS : 1
SAO : 1
SPRITS : 1
ROHLFS : 1
PROVIDER : 7
DONT : 1
PO : 10
SHE : 5
RAILS : 2
UP : 13
GENDER : 1
GIM : 1
MULTIPLE : 2
THEN : 1
DEAR : 1
LOCATION : 2
FEW : 1
MOD : 1
ALERT : 7
DETERMINE : 2
WORSENING : 1
RUL : 1
FEVER : 1
AWAY : 1
PRIOR : 9
VERBAL : 1
MEDIASTINAL : 1
SEP : 3
SETTLED : 1
DATE : 13
COMMENT : 2
PACE : 1
ADENOPATHY : 1
DAILY : 6
XRT : 1
MUCUS : 1
THREE : 1
PA : 1
DARK : 1
COLLECTION : 1
ICU : 1
MUSKOGEE : 1
PROGRAM : 3
LONG : 1
STABILIZATION : 1
APPOINTMENT : 7
RADIOLOGY : 1
WOULD : 8
FOLLOW : 2
REPLACEMENT : 2
FROM : 8
LEFT : 6
FACILITATED : 1
CIGARS : 1
HOMICIDAL : 3
MEDICAL : 11
HEAD : 2
VISUALIZES : 1
ALSO : 7
SPOKE : 1
SYSTEM : 2
SEX : 2
TASERED : 1
ASSUMED : 1
ACTIVITIES : 2
EXTREMITY : 1
QUIETLY : 1
WORKING : 1
DEMANDING : 1
AN : 6
IMPRESSIONS : 1
YOUNGER : 1
MOVEMENTS : 2
FIREARMS : 1
DEFERRED : 1
FAIRVIEW : 1
HEART : 3
BLACK : 1
COMPLAINT : 10
ORDER : 2
ERYTHROMYCIN : 3
NOTARIZED : 1
USING : 1
SEEK : 2
EASILY : 1
AFFAIR : 1
FULLY : 2
FAILING : 1
CN : 1
INTRAMUSCULARLY : 1
STAND : 1
MEASURES : 1
EYE : 2
LEADING : 1
UNSCHEDULED : 2
ULTRASOUND : 1
FELL : 1
GAVE : 3
PET : 1
ESTIMATED : 1
MILIEU : 1
CONTAINING : 1
DISTENDED : 1
DIFFERENT : 1
DISCUSSION : 1
NEW : 7
MOUTH : 9
YEAROLD : 1
DECIDED : 1
ATTENDING : 2
CHEST : 8
IIXII : 1
HEPATITIS : 1
REPRODUCABLE : 1
BELCH : 1
INDICATIONS : 1
PRESENT : 4
OPTIC : 1
HAVING : 3
DOCUMENTATION : 2
USEFUL : 1
SOME : 1
DT : 1
LINE : 1
HRS : 3
EXISTING : 1
BOTHERS : 1
ARE : 7
ANSWERED : 1
COUNSELLED : 1
RULED : 1
WALKED : 1
DESIRE : 1
HYPERTENSION : 1
INDEPENDENT : 2
NEED : 2
ELEVATED : 1
STORES : 1
INCAPACITATION : 1
APPLY : 1
HORRIBLE : 2
CYST : 2
RECEIVED : 1
CPRS : 1
ALMOST : 1
PSYCHIATRIC : 3
SURGERY : 8
RECOVERY : 1
STUDENT : 1
BARRETTS : 1
ENDORSING : 1
HOSPITALIZATIONS : 1
ASAP : 1
STRUCTURE : 2
BRAKES : 1
ASPIRIN : 1
FREQUENCY : 2
COMPLETELY : 1
STOCKINGS : 1
TX : 1
CRUTCH : 1
CONSTA : 1
INHL : 1
MOUNTAINCREST : 1
BODY : 3
ENTRY : 2
PREVENTIVE : 1
MAINTENANCE : 1
INTERDISCIPLINARY : 2
BCC : 1
NUMBNESS : 2
CAD : 2
YEARS : 3
BIOPSIES : 1
EL : 1
BE : 29
REMINDED : 1
INFORMATI : 1
RESOLVED : 1
MEDICINES : 2
BECAUSE : 2
CANCER : 2
OX : 3
FE : 1
LEAVE : 1
JIM : 1
OL : 2
DUE : 4
BONANTI : 1
REMAIN : 1
KRISHNASWAMY : 1
THEIR : 2
INVASIVE : 1
HS : 1
PING : 1
TRACH : 1
OMEPRAZOLE : 2
PH : 1
CANE : 1
DELUSIONS : 1
SEVERE : 1
ISSUES : 2
NERVES : 1
REVIEWED : 4
STANDARDS : 1
UNDERGO : 1
DM : 1
ISSUE : 2
BEFORE : 3
OTHER : 5
ALL : 9
PRODUCTIVE : 1
AUTHOR : 1
CAROTID : 1
LIFE : 3
SECOND : 1
ME : 3
BED : 2
NURSING : 20
CONTRACT : 1
PERIPHERAL : 2
ADDRESSPVH : 1
DYSPNEA : 1
FOLLOWING : 5
OUTCOME : 1
IDENTIFIED : 4
BETH : 1
INSURE : 1
NEEDLE : 2
MORSE : 1
REQUIRING : 1
ENDING : 1
DIAGNOSES : 1
PATIENT : 71
SELF : 3
ALLERGIES : 4
RISPERDAL : 1
REFER : 1
DIAGNOSIS : 5
PROV : 1
CRISTEN : 1
DING : 1
JUL : 2
ENERGY : 1
SENT : 2
TRIGGERS : 1
EVAL : 1
VERIFIED : 1
POINTER : 1
ADMISSIONS : 1
AGREES : 1
ABDOMEN : 4
SUPPOSE : 1
CALLING : 1
MI : 2
ADVISING : 1
EXPERIENCES : 1
ANXIETY : 3
METOPROLOL : 1
SAY : 1
ACUTE : 2
VOICE : 1
MEMORY : 1
CORD : 1
REQUIRES : 1
WE : 1
PROTOCOL : 2
FEE : 2
COME : 4
TRAINED : 1
PATCH : 4
FUNCTIONAL : 1
ROUTINE : 2
FOUND : 2
LOOKING : 1
ROOM : 1
IMPROVED : 1
THAT : 42
VISIT : 5
CHART : 1
AGENTS : 1
WIFE : 5
NORMAL : 7
DEPRESSED : 3
STAFF : 4
SERVICE : 4
CE : 3
RIGHT : 2
AVAILABLE : 1
PC : 4
BREATHING : 2
VITALS : 1
ABOUT : 11
ANYTHING : 2
SHELLFISH : 1
ATARAX : 1
PEDAL : 1
CHAR : 1
REQUESTS : 1
ONE : 10
PMR : 1
COMPONENTS : 1
GLCCS : 1
PTS : 3
FACILITATE : 1
NKA : 1
BRIEF : 3
SPEC : 1
THOUGHT : 3
PRSE : 2
TOGETHER : 1
TABLET : 5
HYDROXYZINE : 1
ANOTHER : 2
EXHAUSTED : 1
DURING : 3
REC : 1
YOU : 19
ELECTRODIAGNOSTIC : 1
TOLD : 2
ENVIRONMENT : 2
SEVERAL : 1
LISTED : 3
SCREENING : 10
MORPHINE : 1
CHECKS : 1
VOICED : 2
CARDIOLOGY : 2
INFORMED : 1
DISEASES : 1
REACH : 2
GETTING : 2
DOUG : 1
SNIEWSKI : 1
CONCENTRATION : 1
PAST : 7
HI : 1
DOCUMENT : 4
CHAIR : 1
CULTURES : 1
PSA : 2
REASON : 2
THREATS : 1
SCORE : 3
CXR : 1
TOBACCO : 6
DULL : 1
SUS : 1
REMINDER : 1
PACKAGING : 1
ASKS : 1
PREASSURE : 1
HOME : 6
SIX : 2
PENICILLIN : 2
NOTED : 3
WEAKNESS : 2
INDIVIDUAL : 3
STL : 1
ESTABLISH : 1
SOCIAL : 3
HOSPITAL : 2
RETURN : 2
SUICIDAL : 4
MODERATE : 2
HOPELESS : 1
BLSTR : 1
EXPECTATIONS : 1
GAINESVILLE : 1
EFFECT : 2
ISOP : 1
VITAL : 3
AMBER : 2
SO : 6
UPSET : 2
MIN : 1
REGULAR : 1
POOR : 1
TALK : 1
MDS : 1
RECONCILIATION : 1
PROTECTIVE : 1
MENINGITIS : 1
COMPUTERIZED : 1
MODE : 2
PROPRANOLOL : 1
HANG : 1
STRESS : 2
SPECIFY : 1
DRIVE : 1
ALTERATION : 1
RISKS : 4
WEEK : 4
TEAM : 3
CHECK : 2
FIXATOR : 1
SCAN : 2
FALL : 5
IC : 1
NEITHER : 1
DAY : 1
NERVE : 1
EMESIS : 1
AM : 10
SLEEP : 1
MOVEMENT : 1
SITTER : 2
IMPAIRMENT : 1
OCCASION : 1
GLARGINE : 1
EKG : 2
HOYT : 1
PLACEMENT : 1
MOOD : 5
WHERE : 1
LIVES : 3
DNR : 1
EVENT : 1
REPORT : 7
PEOPLE : 1
GOV : 1
EA : 1
FIXATION : 1
SIGNED : 2
LETTER : 1
HOW : 6
STUDYRELATED : 1
PRODUCTS : 1
CALLED : 2
MIGHT : 2
FEELINGS : 1
SINCE : 3
MANY : 2
ESOPHAGITIS : 1
STOPPED : 1
DISCUSS : 2
COUGH : 6
CHANGE : 2
HOURLY : 1
LEARN : 1
ALPRAZOLAM : 1
PREOPERATIVE : 1
TAP : 1
ACHING : 1
MADE : 3
OFFICE : 3
CARDIAC : 1
INFECTIOUS : 1
INCLUDES : 1
OBTAINED : 4
ADVISED : 3
STOMACH : 1
VERBALIZED : 2
LEARNING : 1
DIPHENHYDRAMINE : 1
ALVETA : 1
ENCOUNTER : 5
MONTHS : 6
SMOKING : 5
DEATH : 1
AFFECT : 4
AGAINST : 1
FOLLOWS : 1
MRI : 1
PALPATION : 3
GUGYN : 1
ELEVEN : 1
SOMEONE : 1
SMILE : 1
BEDSIDE : 1
UCINATIONS : 2
DATED : 3
MCA : 1
ALONE : 2
CONGESTION : 1
NUTRITIONAL : 1
WHY : 1
IMMEDIATE : 2
MEDICATION : 9
LUNG : 3
INPT : 1
RESTING : 1
BHM : 1
WRIST : 2
WANT : 1
THICK : 1
COMMENTS : 5
ATTACKED : 1
ATTEMPTED : 1
ACETAMINOPHEN : 1
SUPPORTIVE : 2
CASE : 3
STRENGTH : 1
FRONTOPARIETAL : 1
ORAL : 1
CONTINUE : 3
ABNORMAL : 2
MVA : 1
SWELLING : 2
LIGHT : 2
ANSWERS : 1
SERVICES : 5
RECIEVED : 1
SINUS : 1
ENGLISH : 1
INTERUPTED : 1
HAZARDS : 1
SUCH : 3
HISTORY : 8
PROVIDE : 1
PMHX : 3
BRIGHTENED : 1
ASPIRATION : 1
HOURS : 5
MAIL : 2
LEGS : 1
HEALTH : 5
NAPROXEN : 2
URI : 1
RDW : 1
IDGE : 1
REPORTED : 1
INFECTINO : 1
ONGOING : 1
PLACED : 2
SYNCOPE : 1
STOOLS : 1
NOSE : 2
GESTURES : 1
FLUNIS : 1
NOV : 1
WOUND : 2
DEBILITY : 1
INDICATED : 1
ANTIHISTAMINES : 1
PROSTATE : 4
CHAPLAIN : 1
EXCLUDING : 1
PREVIOUS : 4
GASTRIC : 1
BIPOLAR : 1
REFERRAL : 4
HYDRONEPHROSIS : 1
INTERVENTIONS : 2
POLYSOMNOGRAPHY : 1
COMPLICATIONS : 1
KG : 3
SELFHARM : 1
WAL : 5
MORE : 2
STANDARD : 1
MAKING : 1
WILLING : 2
INSULIN : 1
EYES : 1
PROBLEM : 5
EFFUSION : 1
AGENCY : 2
RECHECKED : 1
ER : 3
RECORD : 3
APPLICABLE : 1
DIZZINESS : 1
NTG : 1
REQUEST : 1
PRESCRIBED : 4
AMLODIPINE : 1
UNABLE : 1
RN : 2
XYZZY : 2
THROUGH : 1
OUTPUT : 1
THORACIC : 1
HOUSE : 1
CAUSATIVE : 1
ELIGIBILITY : 1
ANTICOAGULATION : 1
HEENT : 3
HEADACHES : 2
READY : 1
AFTER : 3
PARTICIPATED : 1
ADMISSION : 6
LONGER : 1
STILL : 4
RESCHEDULED : 1
SCALE : 1
DEF : 1
NON : 2
NICOTINE : 4
COUGHING : 2
LUMBAR : 2
REMOVE : 1
MMM : 1
PCP : 2
ULA : 1
LCSW : 1
FUTURE : 2
WAY : 2
DISCONTINUE : 1
EACH : 1
OBSERVATIONS : 1
ELECTRICAL : 1
ASSOCIATE : 1
DENIES : 9
QUALITY : 2
PHARMACY : 2
OLD : 4
REQUESTED : 1
FREQUENTLY : 1
CODEINE : 2
EMPOWER : 1
VETERAN : 17
WEDNES : 1
CAPSULE : 1
GLUCOSE : 2
RELIEF : 1
PT : 30
REGION : 2
RADIATION : 2
WBC : 1
URETHERA : 1
TRIES : 1
DESCRBE : 1
POSTSURGICAL : 1
DEVELOP : 1
IRON : 1
ETHNIC : 1
HEMATOLOGY : 1
PSYCHOSOCIAL : 3
PL : 2
AREA : 3
PROCEDURES : 2
CATHETER : 1
SOON : 1
DEMONSTRATION : 1
FLATUS : 1
SKILLED : 1
RETINAL : 1
MINIMAL : 2
CRITICAL : 2
GU : 1
ASSAULT : 1
PERFORM : 1
SEXUAL : 1
PERSISTENT : 1
CERVICAL : 1
INFLAMMATORY : 1
COMBAT : 1
AROUND : 1
UNDERSTANDING : 8
RATIONAL : 1
MEDICATIONS : 16
LOST : 1
MR : 3
COLACE : 1
MAJOR : 2
CANT : 1
AND : 106
BILATERAL : 1
DESCRIPTION : 1
VACCINE : 1
BETTER : 2
COMMUNITY : 1
DEPRESSIVE : 3
PATENT : 1
INVOLVING : 1
RESULTS : 1
PROCESS : 3
EMERGENCY : 1
ANSWER : 1
BREATH : 2
PROVIDING : 1
HTTP : 1
APPARATUS : 1
LACE : 1
ABLE : 2
RECENT : 1
CHO : 2
METOCLOPRAMIDE : 1
IN : 54
KNOWLEDGE : 1
TRUCKS : 1
LOW : 1
POSITION : 2
ADMINISTERED : 1
PINES : 1
MARY : 1
EXACERBATED : 1
FOLLOWED : 2
MAY : 5
VARDENAFIL : 1
MANAGEMENT : 3
STATE : 3
CONTROLED : 1
GUN : 1
EXPR : 1
PLAN : 15
ITEM : 2
SECRETIONS : 1
APPT : 3
ANYTIME : 1
PROCEEDURES : 1
SMOKE : 1
TAKING : 3
ICS : 1
ADMITTED : 3
YET : 1
AGR : 1
PERIOD : 1
SERIES : 1
HELLO : 1
XVETERAN : 1
PATHOLOGY : 3
VERY : 2
DONE : 3
PHYSICAL : 5
INDENTIFIED : 1
WEARING : 2
TEAR : 1
CP : 1
NIGHT : 2
ACTIVE : 24
COMPLAINED : 1
KNOW : 1
MANAGER : 3
BEDREST : 1
DISPATCH : 1
BEHAVIOR : 2
BEGIN : 1
AFIB : 1
SI : 3
FOREARM : 1
COMPLETED : 4
ARRHYTHMIA : 1
FOCUS : 1
CARRIER : 1
THIS : 30
PREPS : 1
DIFFICULTY : 2
TRIAGED : 1
HIGH : 4
MIDSTERNAL : 1
NIACIN : 1
EKSW : 1
SOFT : 2
SCOPE : 2
ADDED : 1
LAST : 5
KEY : 1
TELEPHONED : 1
HEALTHAMBULATORY : 1
LUNCH : 1
EDUCATION : 13
GAF : 1
HOLD : 1
MEDICATED : 1
DIED : 1
EKNURSING : 1
EXTREMITIES : 2
LOWFAT : 1
ADR : 1
HANDLE : 2
SESSION : 2
ANODONTIA : 1
STATES : 7
THIN : 1
SITUATIONS : 1
MOVED : 1
DETAILS : 2
LOCAL : 2
STIMULATOR : 1
QUESTION : 1
CELL : 1
SHORT : 1
ROS : 1
CORRELATE : 1
CNS : 1
INQUIRING : 1
GROOMED : 1
SOMETHING : 1
FIRST : 1
ICDCM : 4
RESP : 3
URINATE : 1
DOWN : 2
PATIENT_INFORMATION : 1
TO_PT : 2
PATIENTS_PREFERENCE : 1
CAP_ESOPHAGEAL : 1
BEDTIME_CHO : 1
ABOVE_HX : 1
CURRENT_AND : 1
COMPLAINT_CC : 1
AGE_EDUCATION : 2
IN_YEAR : 1
PUT_THE : 1
HIM_HOW : 1
ABOVE_PLAN : 1
WHICH_PER : 1
TO_DIFFICULTY : 1
STABILIZATION_HX : 1
ENDORSING_OF : 1
RECONCILIATION_DONE : 1
SPIRITUAL_PLAN : 1
GET_HEALTH : 1
WERE_AS : 1
SPECIAL_CARE : 1
NURSING_WRIST : 1
APPLICABLE_TAKE : 1
WILLING_COME : 1
HOSPITAL_SYNCOPE : 1
DIAGNOSIS_ENCOURAGED : 1
COMPLAINTS_CHEST : 1
PASSING_PHYSICAL : 1
MONTHS_YES : 1
APPOINTMENT_GIVEN : 1
GTT_AT : 1
FOR_THESE : 1
MH_NEW : 1
SIG_PMHX : 1
SITUATION_HAS : 1
ON_TO : 2
DEFICIENCY_AT : 1
HOMICIDAL_THOUGHTS : 1
VETERAN_PSYCHOEDUCATIONAL : 1
IN_THEY : 1
OF_GOOD : 2
COMPLETED_NO : 1
PATIENT_HAD : 6
SC_ED : 5
PO_ACTIVE : 4
CLINIC_APPOINTMENT : 1
AND_ORIENTED : 2
BUPROPRION_QUETIAPINE : 1
ACTIVE_PAST : 1
HAS_CONT : 1
HIS_VISITING : 1
OF_HIS : 2
ASSISTANCE_PROTECTIVE : 1
URINE_NOT : 1
FOR_SHORT : 1
YOUR_CLINIC : 1
PRSE_LOR : 1
THE_PATIENT : 10
PERSONAL_OF : 1
SEEK_STAFF : 1
PAIN_FIFTH : 1
DEPRESSION_SI : 1
ER_THEN : 1
ENCOUNTER_NURSING : 1
DOCUMENT_SC : 1
DIS_GET : 1
OR_THING : 1
OF_BAC : 1
PILL_PSYCHIATRY : 1
PAIN_IER : 1
DIARRHEA_MONTHS : 1
ALERT_SMOKING : 2
EXTERNAL_EVENTS : 1
NIGHT_UP : 1
PENDING_ISSUES : 1
WISHES_WITNESSED : 1
EVALUATION_FOR : 2
STOMACH_COMPLAINT : 1
COMPLIANT_WITH : 1
TO_ABOUT : 1
OR_DOCUMENTATION : 1
DOOR_PATIENT : 1
STORES_HE : 1
PURSUE_INCREASE : 1
GERD_PHONE : 1
TO_TOBACCO : 2
SEE_CPRS : 1
AND_INTENSITY : 1
LOWER_REGION : 1
CLC_PT : 1
TURN_STOOL : 1
WITH_WHICH : 1
AND_DISCHARGE : 1
INSTRUCTIONS_CC : 1
PARTIAL_ALPRAZOLAM : 1
PATIENT_AT : 2
CONTACT_PHONE : 2
NAME_DEPRESSIVE : 1
IF_SHOULD : 1
MONTHLY_PT : 1
DATED_IS : 1
INFECTIOUS_INFLAMMATORY : 1
DRINK_CUP : 1
HYPOALBUMINEMIA_CHEST : 1
ENCOURAGED_MR : 1
APPETITE_GOOD : 2
WEEK_HE : 1
CALLING_TO : 1
WANTS_TO : 1
HE_STANDS : 1
DECIDED_SEEK : 1
ON_RN : 1
UPDATE_CHIEF : 1
MOMENT_THOUGHTS : 1
ADVANCE_SCREENING : 1
NOTE_DOCUMENT : 1
DIFFERENT_AGENTS : 1
THREATS_SELFHARM : 1
STRIP_STRIP : 1
PHYSICAL_ADL : 1
DENIES_HE : 1
VESTIBULAR_COCHLEAR : 1
COLLECTION_SPEC : 1
WAS_PRIMARY : 1
FOR_NO : 1
BENEFITS_VISION : 1
CHF_ICDCM : 1
ACCEPTED_HEMATOLOGY : 1
HE_FOUND : 1
PRIOR_ATTEMPT : 1
CDL_PHYSICAL : 1
REQUIRED_SITTER : 1
PAIN_PT : 1
WITH_CURRENT : 1
PLACED_IN : 1
PROTOCOL_USED : 2
CONTINUED_TREATMENT : 1
NUMBER_CONTACT : 1
RETURNED_AT : 1
SKIN_ON : 1
NOT_AT : 1
HERE_BE : 1
AND_THORACIC : 1
IN_JUL : 2
MEDICATIONS_PROSTHETICS : 1
HAS_LIFE : 1
FAIR_MALE : 1
TO_ANTICOAGULATION : 1
PAIN_MONITOR : 1
MALE_ADMITTED : 1
BUT_THE : 1
YES_KEY : 1
CHILDREN_USE : 1
OR_PREFERENCES : 1
COULD_GO : 1
FOR_SYNCOPE : 1
AXIS_II : 1
TRUCKS_WIFE : 1
FOR_GIVEN : 2
CAPSULE_MOUTH : 1
INFORMATION_OBTAINED : 1
AND_BENEFITS : 3
THIS_INVOLVING : 1
DUE_SI : 1
MORE_DRINKS : 1
HIS_PACE : 1
ACTIVE_HIM : 1
THAT_COPIES : 1
HE_FELT : 2
HOME_WITH : 1
TO_GROUP : 1
NURSE_HOLDING : 1
JOINT_CYST : 1
IF_SITUATION : 1
PSYCHOEDUCATIONAL_IN : 1
ARE_BASED : 1
CE_ASSISTING : 1
PROVIDING_HIGH : 1
FRIENDS_REPORTS : 1
IN_MEDICAL : 1
WAS_BAD : 1
IN_MANY : 1
LOR_TAB : 1
IN_ABOUT : 1
KRISHNASWAMY_BY : 1
SWELLING_DYSPNEA : 1
MARRIED_APPOINTMENT : 1
TO_APPX : 1
PREVENTIVE_HEALTH : 1
NEEDS_ARE : 1
FIXATION_TOBACCO : 1
TROUBLE_WITH : 1
ALERT_APPEARS : 1
CURRENT_NURSING : 1
PAIN_PM : 1
AT_SEP : 2
SENT_TO : 2
CNS_ABOUT : 1
SAFE_EFFECT : 2
REFERRAL_MANAGER : 1
RELIGIOUS_CULTURAL : 1
LOCAL_EXPEDITOR : 1
EASILY_RETURNS : 1
ALL_COMPONENTS : 1
OF_ACTIVE : 1
PC_INTAKE : 1
BE_HE : 1
TIME_VETERAN : 2
PAIN_ALL : 1
ON_TREATMENT : 1
OF_BIRTH : 2
AS_AS : 2
SW_DISCHARGE : 1
HEARING_MORNING : 1
ONE_REQUESTED : 1
ONE_SCORE : 1
GETS_FRUSTRATED : 1
SUICIDE_IDEATION : 1
WELL_DONE : 1
JUST_CANT : 1
DURATION_SIGNIFICANT : 1
SUPPLIES_ASSESS : 1
STRESS_AT : 1
THE_ASAP : 1
NONVA_MEDICATIONS : 1
BAC_WHAT : 1
EDUCATIONAL_GROUP : 1
ORIENTEE_NONE : 1
PARTIAL_BODY : 1
PROCEDURES_NURSING : 1
DESIRE_TO : 1
BE_DISCUSSED : 1
CHECK_NOTET : 1
THEY_DECREASED : 1
COMMENT_KIT : 1
MOUTH_INFORMED : 1
RISKS_OF : 1
TREATED_THIS : 1
OR_HOPELESS : 1
NONE_PATIENT : 1
PAST_OR : 1
AND_INTERVENTIONS : 1
HIM_INTO : 1
AMLODIPINE_TAB : 1
STAFF_PATIENT : 1
FOR_UPPER : 1
ANY_AT : 1
DIAGNOSIS_MR : 1
OF_DEATH : 1
MYOCARDIAL_MI : 1
EVALUATED_COMPLAINT : 1
SUBJECTIVE_DOING : 1
MG_MG : 1
IN_SX : 1
COUGH_PT : 1
SOME_IN : 1
HIS_BUPROPRION : 1
PREVIOUS_ADMISSIONS : 1
PATHOLOGY_HE : 1
REG_UNITS : 1
EVALUATION_AND : 1
COORDINATOR_CLINICAL : 1
ARMS_THE : 1
PCP_FOLLOWED : 1
THAT_PER : 1
OTHER_CLINIC : 1
EXPLAINED_INCLUDING : 1
IS_PASSING : 1
COMPLETION_VETERAN : 1
AFTER_HE : 1
BURSA_STRUCTURE : 1
HE_WELL : 1
NO_YES : 1
SHE_WHAT : 1
WEIGHT_PMR : 1
NO_HEIGHT : 1
EVENT_EXPERIENCE : 1
ABOUT_ALL : 1
HAVING_AFFAIR : 1
VETERAN_HAS : 1
BY_GOING : 1
REFERRAL_TO : 2
BENEFITS_IF : 1
TO_TO : 4
CONTINUE_ABSTINENCE : 1
DT_GLUCOSE : 1
ATTENDANCE_IN : 1
FOR_PURPOSE : 1
LEGS_DATED : 1
REFERRED_TYPE : 1
PAIN_WAYS : 1
TH_IPC : 1
FT_COLLINS : 1
PATIENT_VOICES : 2
WITH_PT : 2
DISCUSSED_YES : 1
ASSESSMENT_ACCUCHECK : 1
WOULD_CONSIDERED : 1
SPEC_ASSESSMENT : 1
COORDINATOR_HIM : 1
RELATED_PARANOIA : 1
OBESITY_AND : 1
ENDING_AM : 1
INITIAL_TX : 1
FOUND_HIS : 1
ALL_TIME : 1
HEART_METOCLOPRAMIDE : 1
NOTED_PPP : 1
STATED_VET : 2
NONE_OX : 1
ATTENDED_GROUP : 1
TO_HIM : 3
THICKNESS_MEASURES : 1
SHOW_TELEPHONE : 1
SCORE_SCORE : 1
NOTE_ED : 3
PT_IV : 1
DISCHARGE_ING : 1
XRT_HAD : 1
LEARN_BY : 1
FOR_ISSUE : 1
SEP_CLEAR : 1
CM_WEARING : 1
MALATHI_BY : 1
ADMISSION_WTIH : 1
QUIETLY_CH : 1
CIRCUMSTANCES_THAT : 1
ASSAULT_NEGLECT : 1
IS_SINCE : 1
BRIEF_HPI : 1
GASTROINTESTINAL_ENDING : 1
PINES_DISCUSSING : 1
FOR_MALE : 1
DRINKING_IN : 1
TWO_PAIN : 1
FRUSTRATED_ANYTIME : 1
WEIGHT_NA : 1
NEUROLOGICAL_VACCINE : 1
PAST_FEW : 1
APPROPRIATE_TAB : 1
VISUALIZES_ER : 1
CURRENT_AORTOCORONARY : 1
LUNCH_TO : 1
HOWEVER_APPEARS : 1
WWW_GOV : 1
HE_UNDERSTANDING : 1
ESSENTIALLY_AT : 1
RYAN_ROS : 1
TERM_AS : 1
WAS_ALREADY : 1
BE_GOOD : 1
ASSESSMENT_HAD : 1
IS_DISPOSITION : 1
STILL_SMOKING : 1
SIX_PRIMARY : 1
CURRENTLY_PING : 1
LIGHT_ALLERGIES : 1
FOR_FEVER : 1
TO_NOTE : 3
NO_PLAN : 2
SUICIDE_ATTEMPTS : 1
SIGNIFICANT_SCORE : 1
WILL_READY : 1
STANDS_HE : 1
GLUCOSE_DISCUS : 1
PT_KNOWN : 1
UP_APPT : 1
WITNESSED_AND : 1
BACK_IN : 1
NO_DIZZINESS : 1
RISK_STANDARD : 1
FOR_VA : 1
UP_ABOUT : 1
TRANSPORTATION_HAD : 1
MONTHS_NOT : 1
HIS_CONTINUES : 1
NERVES_EVIDENCE : 1
CH_THAT : 1
MEDICINE_THAT : 1
NOTE_ORBITS : 1
WHO_IS : 2
RASH_PENICILLIN : 1
CM_SKIN : 1
WALK_IN : 1
FOR_YOU : 1
FALLS_OF : 1
ALTERATION_IN : 1
REG_HUMAN : 1
BENEFITS_MALE : 1
NEITHER_ONE : 1
FREE_CALLER : 1
LUNG_PULSE : 1
LEVEL_EVENING : 1
NOTE_MH : 1
WAS_WELLBUTRIN : 1
HE_PS : 1
WITH_OUTPATIENT : 1
HE_NOT : 1
TEAM_CAUSATIVE : 1
DIVERTICULOSIS_CHRONIC : 1
PATIENT_TAKING : 1
PROVIDER_KNOW : 1
AND_ABDOMEN : 1
TREATED_DURING : 1
TO_ME : 1
MEALS_ACTIVE : 1
NURSE_BY : 1
FACILITATED_HAYS : 1
FALL_PREVENTION : 1
REPAIR_ADDENDUM : 1
MOUTH_TIMES : 1
PERSONAL_HISTORY : 1
INVOLUNTARY_SPEECH : 1
TO_STR : 1
COMPLETE_NONE : 1
FALL_DUE : 1
ON_HIS : 2
BY_LCSW : 1
ANGER_FALL : 1
ALL_TO : 1
TO_AGE : 1
LOW_BRAKES : 1
LEFT_WRIST : 1
VET_SET : 1
PATIENTS_LOCAL : 1
STEADY_GAIT : 1
TOLD_LAMOTRIGEN : 1
SET_TO : 1
IN_THESE : 1
NURSING_SUMMARY : 1
FAIR_FOR : 1
WBC_SEP : 1
NO_RACY : 1
AM_WITH : 1
HISTORY_HE : 1
EXAM_CN : 1
THAT_HAS : 3
BID_ALTERATION : 1
HOPELESSNESS_ANGER : 1
MUCH_LOUD : 1
PULSE_UP : 2
FOREARM_CRUTCH : 1
NO_NOTE : 1
INPT_PSYCHIATRY : 1
RISK_PALPITATIONS : 1
SITUATION_BEEN : 1
BURSA_CYST : 1
NUMBER_SAME : 1
AND_REFERRALS : 1
IV_INTERVENTIONAL : 1
HAS_SUBJECT : 1
REQUESTS_WAL : 1
CONSENT_FOR : 1
INVOLVING_THE : 1
HISTORY_HYPERKALEMIA : 1
MEDICATIONS_EXCLUDING : 1
NOTED_YOU : 1
AGAIN_AND : 1
TEST_USE : 1
ASSESS_THE : 1
PPP_ASSISTANCE : 1
REHAB_COULD : 1
OSTOMY_CARE : 1
USEFUL_ADDENDUM : 1
HOURS_INTERUPTED : 1
TO_SELF : 1
PAIN_HIS : 2
THOUGHTS_FEELINGS : 1
SINCE_PATIENT : 1
TO_SI : 1
AND_RESTING : 1
SEE_PET : 1
TO_LEARNING : 1
IS_SET : 1
MAY_BE : 4
FREQUENTLY_NO : 1
GI_PATHOLOGY : 1
OBESITY_OFFERING : 1
IS_SOURCE : 2
ACTIVE_AND : 2
LIST_NONCOMPLIANCE : 1
AT_EVIDENCE : 1
DME_DATE : 1
ROUND_NONTENDER : 1
TIMES_ONE : 1
FROM_WILKES : 1
YES_CURRENT : 1
EVALUATION_UNDERSTANDING : 1
HEADACHES_HE : 1
TO_IS : 2
SUICIDAL_IDEATION : 1
EDUCATION_NOTED : 1
SCREENING_APPT : 1
BETH_FOR : 1
DOFFING_THE : 1
NORMAL_THOUGHTS : 1
PSYCHIATRY_PILL : 1
VETERANS_THIS : 1
IER_IF : 1
ON_POSITIVES : 1
THIS_CONTACT : 1
ACTIVITY_SCREENING : 1
FULL_DENTURES : 1
TO_ALL : 1
NOTED_BILATERAL : 1
SUCCESSFUL_VETERAN : 1
AND_INJECTION : 1
NEW_HEIGHT : 1
ANTIHISTAMINES_NO : 1
MEMORY_PT : 1
RACY_DENIES : 1
OFFICE_PT : 1
NOTED_VOIDING : 1
HAVING_STAYING : 1
TO_MILIEU : 1
PAK_STL : 1
PENDING_DESCRIPTION : 1
LOADED_GUN : 1
UP_APPROPRIATE : 1
DISCHARGED_WITH : 1
OF_THERAPY : 1
PAID_WILL : 1
YEAR_IS : 1
FOR_YOUR : 1
ROUTINE_ADVANCE : 1
OR_NONE : 1
WHAT_IT : 1
FIVE_KEYS : 1
HIS_CHEST : 1
MALE_ARRIVED : 1
HE_SAFE : 1
ENTRY_IS : 1
TO_SHELLFISH : 1
PASSING_TRUCKS : 1
ELECTRODIAGNOSTIC_EVALUATION : 1
DOCUMENTATION_VISTA : 1
TO_STATE : 1
DURATION_BLAME : 1
OF_BURSA : 1
DUTY_PATIENT : 1
LOSSED_TO : 1
NOTE_RAPID : 1
WILL_EVALUATION : 1
SO_KNOWS : 1
ON_ATTEMPTED : 1
DT_SPEC : 1
OR_RISK : 1
MI_TIMES : 1
TO_MEDICAL : 1
DRIVEWAY_ADN : 1
WAS_OR : 1
OR_MOLESTATION : 1
AND_STATES : 1
SHIN_WITH : 1
CONSISTENT_TROCHANT : 1
ENVIRONMENT_OF : 1
UNSPECIFIED_ICDCM : 1
METOCLOPRAMIDE_MG : 1
NOTE_PULMONARY : 1
NURSING_RATIONAL : 1
IS_STILL : 1
NOT_GET : 1
IRON_REPLACEMENT : 1
NEEDLE_ASPIRATION : 1
CODEINE_PENICILLIN : 1
ASSISTANCE_THICK : 1
AND_DATED : 1
PATIENT_SEE : 1
EVERY_TWO : 1
ADMINISTRATIVE_PROCEEDURES : 1
FOLLOWING_OR : 1
LISTED_AND : 1
THE_DISCUSSION : 1
INSTRUCTIONS_DENTURES : 1
FDA_CDRH : 1
RT_INITIAL : 1
PERIARTICULAR_OR : 1
GAINESVILLE_BRING : 1
ALOT_HAS : 1
WHO_WITH : 1
VETERAN_SO : 1
PLEASE_DATED : 1
AS_ALSO : 1
ASSISTING_TRANSFER : 1
SO_PHYSICIAN : 1
RATED_UNDERSTANDING : 1
CLC_CONSULT : 1
TEMPERATURE_TO : 1
WAS_TO : 2
HANDOUT_STILL : 1
HS_PENDING : 1
PTC_OFFERED : 1
SKIN_PROBLEMS : 1
TO_ABDOMINAL : 1
MEDICATIONS_AND : 1
MEDICINE_THE : 1
HIS_REPORTS : 1
HRS_SURGERY : 1
WILL_PATIENT : 1
WITH_EXTENSION : 1
ABUSE_NEGLECT : 2
FIXATOR_AND : 1
PATIENTS_OF : 1
SIGNED_AND : 2
NEGLECT_SEALY : 1
OTHER_AGENCY : 1
AND_CURRENTLY : 1
PATIENT_DOES : 2
OCCASION_THE : 1
SX_IS : 1
UNIT_PRIOR : 1
OF_TELEPHONE : 1
IN_INDIVIDUAL : 1
PLAN_FOR : 1
NO_IMPAIRMENT : 1
BRING_HIS : 1
WEEK_ALSO : 1
OMEPRAZOLE_MG : 1
AT_CM : 1
HIS_AND : 1
BEHAVIOR_HIS : 1
IMPACT_NEW : 1
SEALY_URGENT : 1
PHYSICIAN_SCHEDULED : 1
NEEDS_TO : 1
CHIEF_CC : 1
PLAN_PT : 1
LEAVENWORTH_MODE : 1
NURSING_MEANS : 1
WILL_UNDERGO : 1
COMPLETE_GOALS : 1
RISK_SEE : 1
WAY_TO : 2
MEDICAL_MEDICATION : 1
ACHING_LOWER : 1
CARE_NOTE : 1
PSYCH_AND : 1
THE_SCAN : 1
ARE_CURRENT : 1
OX_II : 1
ALERT_WAS : 1
ASSESS_CAUSATIVE : 1
BE_SO : 1
SEE_WELL : 1
NOT_MENTAL : 1
PT_ADMITTED : 1
ACTIVITY_IS : 1
AS_FOR : 2
CT_FROM : 1
WHO_HAS : 1
TAB_PO : 7
PC_PTSD : 1
AND_VISIT : 2
PAIN_LEVEL : 2
MANAGEMENT_CC : 1
KINZEY_OF : 1
HRS_PATCH : 2
TRACH_NO : 1
ALCOHOL_BREATH : 1
AND_EXPIRED : 1
CRUSTED_ON : 1
OR_AND : 1
HIM_PATIENT : 1
NO_TREATMENT : 1
IN_PT : 2
DARK_PRESCRIPTION : 1
BEEN_ON : 1
HE_PRESENT : 1
ACUTE_OF : 1
FOR_FOLLOWING : 1
GIVEN_DISCHARGE : 1
OPINION_TREATMENT : 1
COMPLAINTS_AS : 1
REQUEST_PERIPHERAL : 1
CARRIER_WITH : 1
CONCENTRATION_TEMPERATURE : 1
IS_YO : 2
TWO_IN : 1
HE_EXPRESSED : 1
INCLUDE_BAY : 1
THAT_MRI : 1
TELEPHONE_PROTOCOL : 1
AFFECT_COOPERATIVE : 1
WOULD_CAUSE : 1
ANYTHING_NEW : 1
HIM_TO : 2
NO_BUT : 1
STORES_BUSINESS : 1
AND_CELL : 1
IS_OLD : 1
CLIN_BEDTIME : 1
AND_MOOD : 1
FOR_THE : 6
DISCUSSING_THE : 1
TREATMENT_HOWEVER : 1
NO_LAD : 1
GIVE_CONSENT : 1
PATIENT_VERIFIED : 1
URI_DIED : 1
CC_INFORMATION : 1
DOING_PT : 1
OUTPUT_DECREASED : 1
INTERVENTIONAL_AN : 1
BEEN_BY : 1
DONE_TO : 1
SUCH_PUNCTURE : 1
THE_PROCEDURE : 1
USE_MEDICATION : 2
PERIOD_OF : 1
REQUESTED_FOR : 1
MHC_AIMS : 1
XVETERAN_SIGNIFICANT : 1
HOMICIDAL_PARTICIPATION : 1
HE_WILL : 3
WEATHER_BAD : 1
IN_REQUESTS : 1
OCT_ACCEPTED : 1
LOOKING_TO : 1
TRIES_TO : 1
SEX_PATIENT : 1
HAVING_DIFFICULTY : 1
WITH_PROVIDER : 1
ED_MEDS : 1
WOULD_WITH : 1
SIMVASTATIN_PT : 1
THIS_INCLUDE : 1
PROBLEMS_SENSES : 1
NOTE_COMPLETED : 1
OR_PROCEDURES : 1
MEDICATIONS_PAIN : 1
MR_IS : 2
PSA_EDUCATION : 2
SINCE_ABOUT : 1
ANOTHER_STILL : 1
WHEN_ABOUT : 1
PER_MEDICAL : 1
IN_TOBACCO : 1
TRANSPORTED_CARPAL : 1
OF_SUPPORTIVE : 1
KRISTEN_ORTHOPEDIC : 1
TO_PSYCHOSOCIAL : 1
CM_ARRIVAL : 1
REPORTS_CE : 1
AND_FEELING : 1
IMAGING_NURSING : 1
ACTIVITY_THIS : 1
DATE_OF : 2
PATIENT_AWARE : 1
VITAL_PATIENT : 1
DISCONTINUE_DIPHENHYDRAMINE : 1
RR_PATIENT : 1
EVERYONE_AGAINST : 1
APPLY_GETTING : 1
COUNSELE_TESTING : 1
DATED_WITH : 1
STATUS_CARDIOLOGY : 1
DIVERTICULOSIS_OBSTRUCTIVE : 1
WITHIN_RISK : 1
CHF_MEDS : 1
EXACERBATED_BY : 1
IN_SO : 1
THAT_EVALUATED : 1
ABSTINENCE_OUTPATIENT : 1
FOR_BCC : 1
DUE_ABNORMAL : 1
WITH_TREATMENT : 1
EXISTING_OF : 1
AGE_PSA : 2
ENCOMPASS_MUSKOGEE : 1
FOR_PAIN : 2
MAILED_ON : 1
NEW_IN : 1
FACE_DISCHARGE : 1
LOR_NAPROXEN : 1
ON_HE : 1
TABLETS_MOUTH : 1
MOUNTAINCREST_DECREASED : 1
SAO_TAKE : 1
ATTENDING_STAFF : 1
BRIEF_HISTORY : 1
BY_NURSE : 1
DISCHARGE_MRSA : 1
DEMONSTRATION_RELATIONSHIP : 1
NICOTINE_PRODUCTS : 1
FEELING_DEPRESSED : 1
FROM_TO : 1
PAIN_CERVICAL : 1
PRESSURE_HEAVINESS : 1
PLAN_PARTICIPATION : 1
PATIENTS_LB : 1
CM_SEE : 1
PSYCHIATRY_STL : 1
HAS_KEY : 1
TECHNIQUES_TO : 1
NO_REQUESTING : 1
NAME_JIM : 1
UNITS_NO : 1
TO_DETAILS : 1
SYMPTOMS_HOPELESSNESS : 1
NON_MEDICAL : 1
WEEK_CALL : 1
AND_RESPIRATIONS : 1
TOGETHER_AS : 1
BY_CALL : 1
PSYCHIATRIC_MEDICAL : 1
GOOD_SPRITS : 1
PAIN_ON : 1
MEDIASTINAL_CRISTEN : 1
CHEST_ACUTE : 1
PULSE_BP : 2
WAL_WITH : 1
NURSE_WALKIN : 1
SCLERA_PERRL : 1
TO_ADMITTED : 1
BRIEF_PSYCHOSOCIAL : 1
WAS_COMPLAINING : 1
LISTED_OUTPATIENT : 1
PAIN_OFFICE : 1
AT_THE : 2
YOU_WILLING : 1
THE_PRESCRIPTIONS : 2
HELLO_SURGERY : 1
PROVIDER_ANTICOAGULATION : 1
ONE_OF : 2
OL_LOCATION : 1
FOR_TERM : 1
DC_NOTE : 1
PO_DAILY : 2
PRESENTED_HE : 1
FEW_EMESIS : 1
FAIRVIEW_AND : 1
STIMULATOR_HE : 1
PREVIOUS_PSYCHIATRIC : 1
THE_MANAGEMENT : 1
VIA_URINAL : 1
HAD_SUICIDAL : 1
UPON_KG : 1
ASSESSMENT_TO : 1
WERE_DRINKING : 1
DISCHARGE_BETH : 1
TO_LOWER : 1
THE_BODY : 1
TOX_OR : 1
NOT_VERBALIZED : 1
KEYS_TO : 1
TO_URINATE : 1
ROLLATOR_SEAT : 1
FOLLOWING_ACCUCHEK : 1
ESI_NERVE : 1
GI_VITAL : 1
CONSULT_ARRIVED : 1
CV_GLUCOSE : 1
OF_ARM : 1
MEANS_ARRIVAL : 1
CHIEF_INFORMATI : 1
ENOUGH_FROM : 1
HYGIENE_SELF : 1
EVIDENCE_MANY : 1
SLIGHTLY_PRODUCTIVE : 1
OFFICE_SIMVASTATIN : 1
ED_PREOP : 1
AXIS_DEFERRED : 1
PER_CONSULT : 1
CONTACT_OF : 1
METOCLOPRAMIDE_TAB : 1
VISTA_IMAGING : 1
STATUS_CARDIAC : 1
TO_MANY : 1
ICDCM_EVIDENCE : 1
EXPLAINED_TO : 1
RADIATION_TO : 1
SKIN_MOISTURE : 1
REQUESTING_OF : 2
TO_BETH : 1
NOT_OF : 1
LIVES_BY : 1
ENOUGH_DRIVE : 1
SEP_PATIENT : 1
SAFE_RETURN : 1
TEAM_RECOVERY : 1
MULTIPLE_FRACTURES : 1
UNDERSTANDING_AND : 2
PM_LEADING : 1
PRESENTED_THE : 1
WORKING_REVIEW : 1
AT_RILEY : 1
PERHAPS_LAMOTRIGEN : 1
YOUNGER_USE : 1
CONTACT_PHYSICIAN : 2
FT_ON : 1
STAFF_COMPLETED : 1
DEF_YO : 1
WEEK_PHYSICAL : 1
EFFECTS_TOBACCO : 1
BLOOD_HEIGHT : 1
WHEN_HE : 2
WATERY_STOOLS : 1
MEDICAL_ASSESS : 1
STRUCTURE_EXPECTATIONS : 1
VETERAN_ACCESS : 1
OF_TRIGGERS : 1
SWER_WITH : 1
TO_DO : 3
OCT_AGE : 1
DUTY_RILEY : 1
DOCTOR_GAVE : 1
YOU_ARE : 1
ING_CRASH : 1
RECHECKED_WAS : 1
NEW_ADDED : 1
SALINE_DROPS : 1
NOT_SUPPOSE : 1
INTRAMUSCULARLY_TWO : 1
LAB_MASS : 1
SHOW_LETTER : 1
SCOPE_THE : 1
SENSORY_NO : 1
PAIN_MEDS : 1
IN_URGENT : 1
BODY_REPORTS : 1
EVERY_PATIENT : 1
RECORD_CALL : 1
THE_REPORT : 1
EVALUATED_ACTIVE : 1
STANDARD_GAIT : 1
ER_PINES : 1
KNOWLEDGE_DISEASES : 1
ME_DAILY : 1
STATUS_PAIN : 1
HEARING_EKNURSING : 1
RULED_OUT : 1
OF_HYDROCEPHALUS : 1
WE_AFTER : 1
REQUESTED_SOMETHING : 1
ADDITIONAL_THE : 1
MEDICATED_WITH : 1
FOR_DC : 1
HR_INFORMATION : 1
KG_SITTER : 1
SURGERY_NOTE : 1
INDICATIONS_AM : 1
CERVICAL_WITH : 1
MORPHINE_SQ : 1
PAIN_GOALWHAT : 2
CONTINUED_SPIRITUAL : 1
ARREST_OF : 1
NOTE_THAT : 2
APPOINTMENT_ISSUES : 1
OF_PARTICIPATION : 1
BAD_HE : 1
RX_WAL : 1
ENDORSING_THOUGHTS : 1
DAILY_STOMACH : 1
SI_AND : 1
INQUIRING_PATHOLOGY : 1
NOTE_ONE : 1
OR_AFFECT : 1
MEDICATION_RECONCILIATION : 1
TO_ON : 2
NORTH_AT : 1
CENTRAL_NERVOUS : 1
ARE_HELPING : 1
PRESSURE_CHEST : 1
AMBULATORY_PATIENT : 1
FEVER_AT : 1
TO_ENTRY : 1
SYSTEM_HOW : 1
DATE_RANGE : 1
OR_PAST : 1
DING_OF : 1
NO_ARRHYTHMIA : 1
CARE_LEVEL : 1
HOME_RECOMMENTATIONS : 1
MG_HELLO : 1
HEIGHT_NO : 1
FOLLOWING_PATIENT : 1
CURRENTLY_BEING : 1
UNDERSTANDING_PATIENT : 1
HISTORY_NATURE : 1
DONE_PRIOR : 1
PREOPERATIVE_ENCOURAGED : 1
LOCAL_IN : 1
CE_BEFORE : 1
NO_BEDTIME : 1
CONNECTED_GOALS : 1
SERVICE_GOALS : 1
DISEASE_MYOCARDIAL : 1
NOW_ALSO : 1
NEEDS_MEDS : 1
NOTE_NONVA : 1
DOCUMENT_PLACED : 1
BREATH_TEST : 1
TRAVEL_FROM : 1
BACTERIAL_HAS : 1
TELEPHONE_PHYSICIAN : 1
JUSTIFICATION_FOR : 1
HAVE_DRINK : 1
SEAT_MUSCULO : 1
NEEDS_ACTIVE : 1
TEMPERATURE_WOUND : 1
PASSING_CDL : 1
AT_AM : 2
HIM_VET : 1
HE_BEEN : 1
LFT_FRONTOPARIETAL : 1
SIX_OR : 1
MILIEU_CHANCES : 1
MOTIVATION_EXPLAINED : 1
GAVE_CRITICAL : 1
WEDNES_TH : 1
PAIN_MANAGEMENT : 2
CAUSATIVE_FACTORS : 1
TYPE_DATE : 1
SELF_WITH : 2
BOTHERS_HEARING : 1
NONTENDER_WITH : 1
INTERACTIVE_COOPERATIVE : 1
DEPRESSED_DIS : 1
HE_MIGHT : 1
CANCER_IS : 1
DISORDER_RECURRENT : 2
BOTHERING_HIM : 1
IN_DISCUSSION : 1
PSYCHIATRIC_HISTORY : 1
WELL_FAIR : 1
LABORATORY_HE : 1
AND_ONE : 1
FURTHER_POLYSOMNOGRAPHY : 1
OUR_AGENCY : 1
CHANGE_YES : 1
AND_ABNORMAL : 1
ASK_CHIEF : 1
CAUSE_TO : 1
YES_BRIEF : 1
CHECK_HE : 1
LAMOTRIGEN_IS : 1
INCREASING_OF : 1
CHEST_PAIN : 3
INSURE_PHYSICIAN : 1
NURSING_OF : 1
SCREENING_PREFERENCES : 1
IN_MVA : 1
COLACE_SEEMS : 1
ADDRESSPVH_FT : 1
PMHX_OF : 1
HE_CM : 1
OF_NEOPLASM : 1
THAT_PHYSICIAN : 2
ALCOHOL_TEST : 1
MEDS_ADMINISTERED : 1
AS_DEAR : 1
AMP_AM : 1
DAILY_AND : 2
EXPECTATIONS_HE : 1
STATUS_OUTPUT : 1
APPT_SCHEDULED : 1
OPTOMETRY_CONSULT : 1
AND_EVERYONE : 1
BENEFITS_COMMENT : 1
PAID_VETERAN : 1
ALLERGIES_EXACERBATED : 1
AA_NA : 1
CUP_HE : 1
ABOUT_SMOKING : 1
APPROPRIATE_GI : 1
DAILY_ACTIVE : 2
THE_GROUP : 1
MEDICATIONS_PRIMARY : 1
LCSW_HE : 1
AS_COULD : 1
TO_PROVIDER : 2
HOYT_LB : 1
RLE_DEPENDING : 1
CURRENT_SIGNS : 1
EKHISTORY_OBSERVE : 1
YOU_THESE : 1
SERIES_IS : 1
GOOD_SAFETY : 1
NAME_PHONE : 1
TIME_THOUGHT : 1
BUT_STRESS : 1
DONT_PET : 1
HYDROCEPHALUS_NEOPLASM : 1
OF_VETERAN : 2
CHF_NO : 1
FOR_MI : 1
SIGNIFICANT_LIFE : 1
NONE_NORMAL : 1
EXPLAINED_HIM : 1
GAIT_NO : 2
DISPOSITION_REPORT : 1
HYPOTHYROIDISM_PROSTHETICS : 1
AND_PART : 1
MEDICAL_INTERN : 1
NEEDS_AT : 1
ANOTHER_SHOULD : 1
PC_CHIEF : 1
COPD_HAVE : 1
HE_AGREED : 1
PREFERENCES_THAT : 1
PRESCRIPTIONS_MOTIVATION : 1
FLUNIS_HISTORY : 1
NORTH_AND : 1
BEEN_DEPRESSED : 1
WEEK_BEDSIDE : 1
RISK_STATUS : 1
SIX_MORE : 1
OXIMETRY_DATE : 1
WELL_ORIENTED : 1
VERBALIZED_UNDERSTANDING : 2
JUST_THIS : 1
MOUTH_HOURS : 1
HIS_BACK : 2
FOR_CC : 1
AND_SCORE : 1
PROCEDURES_WERE : 1
ASSESSMENT_GUGYN : 1
STUDYRELATED_PROCEDURES : 1
CE_JUMPED : 1
SYNCOPAL_NOTABLE : 1
OBTAINED_FROM : 1
TO_BE : 14
OUTPATIENT_YES : 1
INCLUDING_OTHER : 1
TOBACCO_FREE : 2
STATE_BEEN : 1
WITHIN_URINAL : 1
FOR_VISTARIK : 1
ALLERGIES_BY : 1
PATIENTS_WIFE : 1
VARDENAFIL_MG : 1
SCREEN_DEPRESSION : 1
NONE_IS : 1
INFANTS_AND : 1
HAVE_LIGHT : 1
HEALTH_PARTNERS : 1
ADDENDUM_UNSCHEDULED : 1
EKNURSING_RN : 1
DYSPHAGIA_ESOPHAGEAL : 1
EVAL_BE : 1
RUL_MEDIASTINAL : 1
AND_BEFORE : 1
WAS_WELL : 1
AND_TECHNIQUES : 1
PRESENT_TYPE : 1
THOUGHT_THAT : 1
THE_VETERAN : 3
ON_SINCE : 1
PAIN_HI : 1
PATIENT_RELIGIOUS : 1
MEDICATIONS_WERE : 1
COMPLAINT_WITH : 1
THE_HEALTH : 1
FROM_FACILITY : 1
WITH_THE : 5
PRIOR_EKG : 1
SCAN_NO : 1
ANSWERS_SHE : 1
ULA_TO : 1
STUDY_CONSULT : 1
IN_PC : 1
NOC_DIFFICULTY : 1
HOURS_BLAME : 1
FEBRUARY_THAT : 1
DIARRHEA_NO : 1
WELL_HE : 1
ANY_THOUGHTS : 1
MECHANICAL_NURSING : 1
IS_DISCHARGED : 1
CONTRACT_AND : 1
ACTIVE_MODERATE : 1
INTERDISCIPLINARY_TREATMENT : 1
TELEPHONE_UP : 1
NOTET_MINNICH : 1
NOW_AND : 1
ABOUT_YESTER : 1
OF_HAZARDS : 1
NONVA_STATUS : 1
ANY_WILL : 1
OF_IDENTIFIED : 1
TO_BLOOD : 2
LOWER_AND : 1
ACTIVE_NONVA : 1
YOU_THAT : 1
PO_HS : 1
HAS_ATTENDED : 1
REFERRED_FREQUENCY : 1
INITIALLY_BUT : 1
PTS_PEDAL : 1
UNSCHEDULED_ASSESSMENT : 2
FOR_HOUSEKEEPING : 1
REPORT_WALKING : 1
THOUGHT_CAREGIVER : 1
THICK_YELLOW : 1
HOME_DURING : 1
FELT_SAFE : 1
ALSO_STATES : 1
WILLING_TO : 2
BUT_CV : 1
PLACEMENT_AND : 1
TOBACCO_SIG : 1
NOT_GIVING : 1
ONEHALF_TABLET : 1
LEGS_NOT : 1
RUL_NODULES : 1
QUITTING_ALL : 1
VIA_AMBULATORY : 1
ABOUT_REPORTS : 1
PSYCHOEDUCATIONAL_GROUP : 1
SEEN_HE : 1
OF_NOW : 1
DENIES_SUICIDAL : 1
FOOD_MEDICAL : 1
PLAN_WOULD : 1
LOCATION_PHYSICIANS : 1
MALE_FOR : 1
CLINICAL_LABORATORY : 1
AND_RATIONAL : 1
THAT_LIFE : 1
CC_PAIN : 1
VET_MIGHT : 1
PHONE_OF : 1
STRESS_IS : 1
SLEEP_CONSULT : 1
DEPRESSION_HIGH : 1
CAREGIVER_MAY : 1
FREQUENCY_RANGE : 1
FRUSTRATED_AS : 1
IF_HE : 2
TO_PHARMACY : 1
ASSESSMENT_DATE : 1
FREE_ALCOHOL : 1
STUDY_PATIENT : 1
STAND_BY : 1
RECOVERY_CLINICAL : 1
OR_NERVE : 1
BY_TRYING : 1
CONTINUE_SERVICES : 1
HAS_BEEN : 8
DATE_WITH : 1
LAMOTRIGEN_ANTISEIZURE : 1
TO_MOVEMENTS : 1
PASS_HAS : 1
OR_NOW : 1
TIME_ANY : 2
CONTINUED_PREVIOUSLY : 1
PA_NOTE : 1
DE_OF : 1
SHE_REPORTS : 1
THERAPEUTIC_EA : 1
ADDENDUM_MDS : 1
CRITICAL_NOTE : 1
KNOW_ABOUT : 1
KILL_PT : 1
RAILS_UP : 2
PESSIMISM_HOPELESSNESS : 1
BE_AS : 1
PH_LEFT : 1
HELD_INSTAGLUCOSE : 1
WITH_ON : 1
FOLLOWED_WITH : 1
OF_FOLLOWING : 2
FOR_IS : 1
TAKE_HIM : 1
RILEY_AND : 1
APPX_PACKS : 1
THOUGHTS_THIS : 1
FEBRUARY_TIME : 1
SERVICES_ADDRESSPVH : 1
PATIENT_MODERATE : 1
TO_VITALS : 1
ADMINISTERED_HANDOUT : 1
SUDDEN_DIZZINESS : 1
POSITION_BRAKES : 1
OBSTRUCTIVE_PULMONARY : 1
REQUESTING_TO : 1
ACTIVITY_BEDREST : 1
NOT_MUCH : 1
DENIES_ANY : 4
TREATMENT_PULSE : 1
STANDARD_STEADY : 1
TO_OR : 1
WOULD_HIMSELF : 1
MG_CAP : 1
SEVERE_DEPRESSION : 1
CHANGES_THIS : 1
NUMBNESS_AND : 1
OLD_MOBILITY : 1
SO_MENS : 1
BY_SUS : 1
ENVIRONMENT_CLEAR : 1
AT_BEDTIME : 1
ESOPHOGEAL_PT : 1
ED_PROVIDER : 1
OF_NOT : 2
PASSING_DAILY : 1
SUSPICION_OF : 1
XRT_PATIENT : 1
PATIENT_IS : 7
WEAKNESS_DENIES : 1
ARM_CHEST : 1
TAKE_TWO : 1
CARE_NOT : 1
ALSO_ABOUT : 1
HAS_BACK : 1
TYPE_CONTACT : 1
DISCHARGE_APPOINTMENT : 1
DATE_UNMH : 1
PT_WM : 1
HISTORY_HEENT : 1
ADDENDUM_SEX : 1
UPSETTING_IN : 1
SEALY_CARE : 1
PHYSICIAN_BODY : 1
NORMALLY_WALKS : 1
DURATION_DIABETES : 1
HIS_MADE : 1
LISTED_IN : 1
GOALS_CARE : 1
HOUSEKEEPING_ALLERGIES : 1
BEEN_IN : 1
WT_STABLE : 1
LIVES_HERE : 1
THE_RELIEF : 1
DIVORCE_UNEMPLOYED : 1
USEFUL_ALSO : 1
OF_MEDS : 1
ON_SEE : 1
INFORMATION_FROM : 1
ARRIVED_AT : 1
BEST_HE : 1
AND_THE : 5
ADDENDUM_FALL : 1
CARE_AND : 2
SITTER_REQUIRED : 1
PROGRESS_NOTE : 2
OF_ENGLISH : 1
THOUGHTS_COME : 1
BIRTH_SEX : 1
HAVE_EVALUATED : 1
THE_EVAL : 1
ARE_JUST : 1
THIS_MOMENT : 1
PATIENT_THAT : 2
NO_KNOWN : 1
COORDINATOR_UNDERSTAND : 1
UP_TIMES : 2
YOU_HCL : 1
OWN_REQUEST : 1
FURTHER_DISPOSITION : 1
IDENTIFY_IF : 1
SURGERY_URINE : 1
THAT_IMPACT : 1
INFARCTS_WITHIN : 1
PC_OUTPATIENT : 1
THE_HIM : 1
THAT_IT : 1
NURSE_AGE : 1
LAST_HYDROXYZINE : 1
HE_TO : 5
HIGH_CARE : 1
IN_STATUS : 1
NOT_YET : 1
ADMINISTRATIVE_NOTE : 1
ATTEND_NAME : 1
OR_ADMISSIONS : 1
MADE_WOULD : 1
FIRE_AND : 1
AGENTS_THE : 1
TOGETHER_HE : 1
MORE_PERIPHERAL : 1
SO_ADDENDUM : 1
TELEPHONE_RECOMMENTATIONS : 1
INSULIN_HUMAN : 1
BARRIERS_TO : 1
AN_PAID : 1
WOUND_HAS : 1
ALLERGIES_TAB : 1
DESCRIPTION_OF : 1
RISK_THIS : 1
NUTRITION_DAILY : 1
AND_REVIEW : 1
ON_PT : 1
IT_FAILING : 1
LUMBAR_PRESENTED : 1
PT_BECAME : 1
INQUIRING_ABOUT : 1
MAIL_HE : 1
FACILITY_NEED : 1
AM_DISCUSS : 1
MINIMAL_QUITTING : 1
ANTISEIZURE_DURING : 1
COMPLAINT_VETERAN : 1
NO_ALLERGY : 1
USE_SITUATION : 1
RALIZED_ANXIETY : 1
TWO_TABLETS : 1
STAFF_NEEDED : 1
ASKS_ABOUT : 1
HE_NEEDS : 2
IT_HEALTH : 1
ORAL_ALERT : 1
HX_TO : 1
MOTOR_STRENGTH : 1
PREVENTION_VETERAN : 1
MONTH_HOW : 1
HELP_FORT : 1
RESTRICTED_INITIALLY : 1
AREA_FULL : 1
TIME_PLAN : 1
SIGNIFICANT_CHANGE : 1
PERCEPTION_NO : 1
HAS_WITH : 1
MOUTH_THREE : 1
PT_DESCRBE : 1
IS_PROBABLY : 1
OLD_ADMITTED : 1
OX_NAME : 1
LOWER_BACK : 2
NOTE_RISK : 1
BONANTI_FULLY : 1
VA_OUTPATIENT : 1
BREATHING_COMPLAINTS : 1
BE_REFERRED : 1
HE_TRIES : 1
BY_OTHER : 1
ARE_REQUIRED : 1
HOWEVER_COULD : 1
PATIENT_RESOLVED : 1
VOICES_HOMICIDAL : 2
LOCATION_BACK : 1
PHYSICIAN_RETURN : 1
HEART_MG : 1
HAS_ABOVE : 1
TO_IN : 3
NONE_UNIT : 1
HERE_IN : 1
FOR_PROVIDING : 1
FALLING_IMMEDIATE : 2
RESTING_QUIETLY : 1
HE_ABOUT : 1
TO_MCMULLEN : 1
WOULD_BE : 2
AS_IN : 1
HE_CHRONIC : 1
WAS_PT : 1
HEARING_PSYCHOSOCIAL : 1
MINIMAL_EYE : 1
THAT_ADVISING : 1
DAY_ATTACHED : 1
NUMBER_OF : 3
IODINE_SHELLFISH : 1
EOMI_PERRL : 1
HEIGHT_CM : 1
SOON_AS : 1
PATIENT_WHEEL : 1
CALL_BHM : 1
HS_PATIENT : 1
SURGERY_PROGRESS : 1
WEARING_DARK : 1
FOR_SYMPTOMS : 1
LABS_CHEST : 1
NPO_IS : 1
HELD_FOOD : 1
SHE_HAVING : 1
OFFICE_VISIT : 1
COMPUTERIZED_LIST : 1
PATIENT_FREE : 1
PERIPHERAL_HE : 1
UNABLE_HANDLE : 1
PROBLEMS_FOR : 1
CONTINUD_SW : 1
IS_DSHI : 1
YES_STOOLS : 1
LIFE_SUBJECT : 1
MEDICATION_EVERY : 1
CALL_IF : 1
INCLUDING_DAILY : 1
REVIEW_BLOOD : 1
VITAL_WBC : 1
PRN_FOR : 1
HERE_FOR : 1
HIMSELF_PT : 1
AT_CC : 1
HAS_TO : 2
MAILED_PER : 1
CARDIOLOGY_NOTE : 1
PATCH_QAM : 1
YEARS_SUMMARY : 1
THREATS_OR : 1
CC_SPHENOIDAL : 1
RECORD_PATHOLOGY : 1
OFFERING_TO : 1
IN_QUITTING : 1
SHOWS_DISTRIBUTION : 1
PDF_FOR : 1
INFORMED_HIM : 1
THE_PLAN : 2
PSYCHOSOCIAL_OF : 1
PRESSURE_HEIGHT : 1
GU_SOFT : 1
SHOULD_BE : 1
NERVOUS_SYSTEM : 1
CN_IIXII : 1
MONTHS_ALCOHOL : 1
THIS_OR : 1
FEELS_DEPRESSIVE : 1
NO_RECONCILIATION : 1
OR_SLOWED : 1
FOLLOWING_PRESCRIPTIONS : 2
INSTAGLUCOSE_FOOD : 1
ORIENTED_COMPLETELY : 1
SPEAK_WITH : 1
LAST_YEARS : 1
PROBLEMS_TIME : 1
IS_HERE : 1
IDEATION_THREATS : 1
GIVEN_SAME : 1
RESIDENT_RAPID : 1
AFTERCARE_ALL : 1
PLAN_MR : 1
EXTERNAL_FIXATION : 1
HE_ENCOURAGED : 1
NO_PATIENT : 1
SCREEN_ACTION : 1
UPSET_SO : 1
TIDAC_LAST : 1
OPTIONS_FOR : 1
PROSTHETICS_NONE : 1
WAS_SO : 2
IS_PING : 1
INTAKE_NOTE : 3
PATIENTS_IN : 1
THOUGHT_PROCESS : 1
DATED_ATTACHED : 1
SAME_WEEK : 1
YEAR_SERVICE : 1
DIED_AT : 1
HE_CONT : 1
FOR_EVALUATION : 1
ADDED_CURRENT : 1
DISCOURAGED_CHAPLAIN : 1
COMPLAINTS_IS : 1
SENT_PHARMACY : 1
ALONE_HERE : 1
SYSTEM_COMPLAINTS : 1
TWICE_THE : 1
COMMENTS_BED : 1
PHYSICIAN_IDGE : 1
THEY_ARE : 1
GROUP_FOR : 1
YOU_SMOKER : 1
LB_VET : 1
PACE_ASK : 1
FAMILY_HYPERKALEMIA : 1
MEDICATION_TO : 2
WAS_INVOLVED : 1
FOR_EXTREMITIES : 1
PHYSICAL_IS : 1
PATIENT_ER : 1
AND_EXPECTATIONS : 1
ADMITTED_TO : 1
OBTAINED_HAS : 1
NO_PROVIDER : 1
DIET_RALIZED : 1
ANTISEIZURE_AND : 1
SOFT_GI : 1
DISCHARGED_DEPRESSION : 2
YOUR_MOVEMENT : 1
TO_HOSPITAL : 1
ALCOHOL_USE : 1
CARE_TREATMENT : 1
FAILING_COMPANY : 1
THE_EVALUATION : 1
PHYSICAL_INFORMATION : 1
NO_HISTORY : 1
BACK_AFTER : 1
YOUR_PRIMARY : 1
INITIAL_ASSESSMENT : 1
HE_HE : 3
HE_CURRETNLY : 1
NORMAL_LFT : 1
FOLLOWING_PCC : 1
PLANS_LIVES : 1
CONTACTED_DISPATCH : 1
INCLUDING_ACTIVE : 1
OF_TEMP : 1
DIRECTIVE_ANXIETY : 1
ED_NURSING : 1
INVASIVE_PROCEDURE : 1
THE_DRIVEWAY : 1
TOLERATED_PROCEDURE : 1
QUETIAPINE_AND : 1
THE_HEAD : 1
PROBLEM_USE : 1
WITH_PLACEMENT : 1
BMT_TO : 1
WORRIED_PRSE : 1
NURSE_STAND : 1
THAT_SYMPTOMS : 1
ITCHY_BOTHERING : 1
STATUS_NO : 1
THIS_FEE : 1
QUICKLY_FELL : 1
IT_MAILED : 1
RECONCILIATION_PATIENT : 1
NEEDS_PHYSICAL : 1
ON_NURSING : 1
ALCOHOL_MONTHS : 1
POINTER_HANDOUT : 1
WITHIN_MONTH : 1
HIS_WIFE : 1
VOICED_UNDERSTANDING : 1
COUGH_DESCRBE : 1
HISTORY_PSYCH : 1
ELECTRICAL_ICU : 1
ASA_PROGRESS : 1
OF_COMPLETION : 1
AND_ASKED : 1
IN_DETERMINE : 1
VISTARIK_PO : 1
OF_COLORED : 2
TIME_VOICED : 1
MANOR_AND : 1
AT_THAT : 1
OPTIC_NERVES : 1
PLAN_VETERAN : 1
REQUIRES_TO : 1
ASSESSMENT_ITEM : 1
DIPHENHYDRAMINE_BENADRYL : 1
LEFT_SESSION : 1
OF_IN : 3
PMH_SIGNIFICANT : 1
SUMMARY_ISSUES : 1
PENICILLIN_HAVE : 1
CALL_BACK : 2
ALERT_AND : 3
PREP_DETAILS : 1
ME_CAN : 1
REPAIR_LEFT : 1
FAXED_NERVOUS : 1
UNIT_STABILIZATION : 1
DEESCALATION_PRIOR : 1
REEVAL_OF : 1
PRODUCTS_INSTRUCTIONS : 1
FIFTH_VITAL : 1
BILATERALLY_REFER : 1
PERIARTICULAR_STRUCTURE : 1
PREVENTIVE_NOTE : 1
PATIENT_ASPIRIN : 1
COOPERATIVE_WITH : 2
GIVEN_LEVEL : 1
URINE_HARD : 1
SMOKING_IMAGE : 1
ORAL_CARE : 1
HI_OR : 1
EXERCISE_WAYS : 1
ABDOMEN_SOFT : 2
WILL_CONTINUED : 1
ACTIVE_IMPROVED : 1
COMPANY_IT : 1
BLOOD_PRESSURE : 3
AN_PERFORM : 1
ASSESSMENT_NAME : 1
CONTRACT_UDS : 1
AFTER_WAS : 1
NO_BMT : 1
SAME_II : 1
HPI_MR : 1
AUTHOR_CANCELLED : 1
THE_OF : 3
CURRENTLY_LISTED : 1
PAIN_ASSESSMENT : 2
MR_YO : 2
COMPLAINT_DULL : 1
THE_SOURCE : 1
PATIENT_EDUCATION : 3
DAILY_FOR : 2
MEDS_AND : 1
ONE_CAPSULE : 1
PAIN_WITH : 1
TELEPHONE_REFERRAL : 1
PROCEDURE_WELL : 1
IN_AM : 2
TREATMENTS_CARE : 1
CAD_DM : 1
MECHANICAL_ICU : 1
ROOM_ON : 1
VISIT_SURGERY : 1
PT_HAS : 3
CHIEF_COMPLAINT : 10
SEIZURE_HIM : 1
SUS_EDUCATIONAL : 1
EMERGENCY_CONTACT : 1
WEAK_SA : 1
INSTRUCTIONS_FULL : 1
CHRONIC_ADMMITTED : 1
THAT_HE : 10
AT_PATIENTS : 1
THOUGHTS_UNDERSTANDING : 1
PLEASE_SPECIFY : 1
HYPOTENSION_DOPAMINE : 1
POLYPS_GI : 1
INDIVIDUAL_PSYCHOLOGICAL : 1
MG_HR : 1
UDS_SURGERY : 1
THEIR_PREVIOUS : 1
PATIENTS_POSITIVE : 1
MEDICAL_TREATED : 1
THE_FOR : 4
TO_HAIRLESS : 1
WITH_NEEDLE : 1
REDNESS_OR : 1
ALSO_ON : 2
MET_AREA : 1
THIS_THE : 1
EXPLORE_HIS : 1
ONE_SOMETHING : 1
EVERY_REFILLS : 2
YEAR_CONNECTED : 1
HE_STILL : 1
SINCE_THE : 1
PULSE_PULSE : 1
BACK_INFANTS : 1
DISORDER_HEELS : 1
PATIENT_HEARING : 1
ATTENDED_PSYCHO : 1
PING_HAVE : 1
STRENGTH_NORMAL : 1
COLORED_ABDOMEN : 1
WHO_HERE : 1
DOCUMENT_ATTACHED : 1
ARMS_AND : 1
BUT_COULD : 1
FOR_CONTINUD : 1
MADE_FOR : 1
FT_SOLDIER : 1
ONE_BY : 4
HAS_BACKING : 1
STOCKINGS_VOICED : 1
INVOLVING_ARREST : 1
PT_UP : 1
EFFECTIVE_NO : 1
SPHENOIDAL_INVOLUNTARY : 1
SURGERY_MALE : 1
CARE_NURSING : 1
AGAINST_GROUP : 1
PROCEDURE_CONSULTS : 1
PAIN_SI : 1
TRYING_FOCUS : 1
ATTACHED_THIS : 4
TRIAGE_CHIEF : 1
MMMOIST_MANAGER : 1
AT_QUICKLY : 1
ALPRAZOLAM_TAB : 1
PAINLESS_OF : 1
PT_ATTEND : 1
SERVICES_FOR : 1
NO_ADVISED : 1
NEW_REC : 1
LUNG_ATTENDING : 1
CONTINUE_NURSING : 1
EVERY_HOURS : 1
HE_DESIRE : 1
WAS_AN : 1
THIS_AM : 1
WITH_THIS : 1
THE_PT : 2
BID_MEALS : 1
RAPID_TRIAGE : 1
THAT_GETS : 1
FOR_NOTE : 1
DEMANDING_BE : 1
DOES_HYPERSOMNOLANCE : 1
UNDERSTANDING_AGREES : 1
SEAT_WHICH : 1
WAS_GATHERED : 1
NOT_FEELING : 2
TO_PERSISTENT : 1
BID_ACTIVE : 2
HIS_WISHES : 1
FOR_WHERE : 1
THE_THAT : 1
NEXT_THE : 1
HE_NORMALLY : 1
ASSESSMENT_DAY : 1
ASKED_IF : 1
ACCUCHECK_WAS : 1
DIFFICULTY_STAYING : 1
FOUND_EFFECTIVE : 1
HIS_FOR : 1
MOVEMENTS_NORMAL : 1
NEW_FUNCTIONAL : 1
OUT_NOTET : 1
THEM_BE : 1
NO_SIG : 1
DEVICES_NURSING : 1
EACH_ITEM : 1
MMM_PATENT : 1
POSITIVE_FOR : 1
TOBACCO_ASSESSMENT : 1
NO_COURT : 1
BAY_PINES : 1
VETERAN_WHEN : 1
OCCASION_IN : 1
IN_LAST : 2
DATE_OCT : 2
TO_RETURN : 1
THE_ASSISTANCE : 1
SUBJECTIVE_PT : 1
CULTURAL_ETHNIC : 1
DEMONSTRATED_GOOD : 1
CHAR_MH : 1
SESSION_VETERAN : 1
TAKING_COLACE : 1
INTERVENTIONS_AND : 1
THAT_MOOD : 1
BE_TOMORROW : 1
FOR_UPDATE : 1
HIS_THE : 1
PO_INHL : 1
SIGNS_CMM : 1
YEAR_PROBLEM : 1
AND_TREATED : 1
PROCEDURE_HAVE : 1
CHIEF_DULL : 1
WAS_LEAVE : 1
THIN_BLOOD : 1
MUSIC_HEARING : 1
PEDAL_EDEMA : 1
ON_CONSISTENT : 1
YOU_YOUR : 1
SERVICES_TYPE : 1
VOICE_MESSAGE : 1
NODULES_ADENOPATHY : 1
ALSO_WORRIES : 1
DIAGNOSIS_PATIENTS : 1
NURSING_ASSESSMENT : 4
MALE_HEPATITIS : 1
IMPAIRMENT_PRESENT : 1
SCHEDULED_RETURN : 1
HE_INTRAMUSCULARLY : 1
VA_CARE : 1
CARDIOVASCULAR_EXAM : 1
ENOUGH_INCOME : 1
ASSESSMENT_DISCUS : 1
HAPPY_HANDLE : 1
COUGHING_SLIGHTLY : 1
HYPERSOMNOLANCE_IDEATION : 1
TOMORROW_THOUGHT : 1
TIME_HE : 1
BE_RELEASED : 1
RATE_AND : 1
BREATHING_COUGH : 1
NAPROXEN_TAB : 2
DROPS_TO : 1
IS_ED : 1
DESCRIPTION_ALTERED : 1
UNDERSTANDING_WAS : 1
HIS_MOOD : 1
DATE_NEEDS : 1
SEIZURE_TOLD : 1
BODY_MASS : 1
TH_MET : 1
ALMOST_ALL : 1
NOTE_CLINICAL : 1
WERE_INCLUDING : 1
HIM_APPOINTMENT : 1
BID_PAIN : 1
PATCH_HRS : 2
VETERAN_CONTACT : 1
RAN_REFERRAL : 1
TO_SET : 1
APPOINTMENT_WITH : 2
INCLUDES_INFORMATION : 1
FAILING_AND : 1
BEDSIDE_QUICKLY : 1
EXTREMITY_NUMBNESS : 1
DATE_CHRONIC : 1
TELEPHONED_INQUIRING : 1
LOSSED_UNABLE : 1
TOLERATED_THE : 1
NORMAL_FRONTOPARIETAL : 1
TO_SKIN : 1
INDEPENDENT_MAIL : 1
THOUGHTS_AND : 1
NO_THAT : 1
CRISTEN_CATIGNANI : 1
LEXAPRO_PO : 1
FOR_NEXT : 1
HIM_UNDERSTAND : 1
ADMITTED_ON : 1
ADVISING_THE : 1
PAST_HISTORY : 1
OF_THOUGHT : 1
HORRIBLE_OR : 2
IV_LINE : 1
MEETING_AFTERCARE : 1
SURGERY_PTC : 1
HEADACHES_NEW : 1
ELIGIBILITY_VA : 1
AT_AROUND : 1
ASSESSMENT_THE : 1
HAS_SKIN : 1
RADIATION_THERAPY : 1
DEF_DIVORCED : 1
SIG_ONE : 2
MOVEMENT_DISCHARGED : 1
ED_INSTRUCTIONS : 1
IN_PAINLESS : 1
OF_JOINT : 1
CONSTANTLY_ACTIVITY : 1
PREFERENCE_LOCAL : 1
CC_NS : 1
REFERRAL_OTHER : 1
TRANSPORTED_FROM : 1
MG_BID : 3
PROVIDED_THAT : 1
PO_MEALS : 1
MILITARY_THE : 1
DROPS_CLEAR : 1
COCHLEAR_AS : 1
CHANGE_SINCE : 1
INABILITY_URINATE : 1
INTENT_PLAN : 1
ENERGY_MOTIVATION : 1
INTERVENTIONAL_RADIOLOGY : 1
FREQUENCY_PAIN : 1
SURGERY_OCT : 2
KNOWN_SURGERY : 1
TOLD_HIM : 1
APPOINTMENT_WELL : 1
THIS_IN : 1
STILL_CONDUCTED : 1
STRETCHER_AND : 1
IS_TOO : 1
AND_MOVES : 1
THAT_IF : 1
QUALITY_CARE : 1
NORMAL_STRENGTH : 1
DISCUSS_QUESTION : 1
ALCOHOL_THE : 1
OF_LUNG : 1
GET_THIS : 1
MOOD_TO : 1
TRIGGERS_PRESENTED : 1
CAD_DIVERTICULOSIS : 1
CA_EXPIRATION : 1
FOR_AS : 1
UP_IF : 1
THE_WEEK : 2
IF_WILL : 1
BY_EVERY : 4
WILL_HIM : 1
FOR_ANSWER : 1
UNDERSTANDING_OF : 1
THAT_DEPRESSIVE : 1
ADMISSION_OF : 1
AN_ASSESSMENT : 1
CANCER_SCREENING : 1
BLOOD_DURATION : 1
NEITHER_WITHIN : 1
MONTH_THE : 1
SUCH_HHA : 1
AND_IN : 2
OF_TARGET : 1
PATIENT_STATES : 3
NOTE_ACTIVE : 1
FALLING_OR : 2
BMT_ADVISED : 1
ETHNIC_PREFERENCES : 1
WHO_YOUR : 1
ICDCM_HEELS : 1
ADVANCE_DIRECTIVE : 1
THE_LAST : 1
ITEM_AND : 1
REQUIRED_PATIENT : 1
OF_INFECTINO : 1
THAT_SHOWS : 1
HYPERKALEMIA_BMI : 1
ENERGY_GOOD : 1
THORACIC_SURGERY : 1
PREOP_NURSING : 1
NO_FALLS : 1
MEETING_SATT : 1
DESCRBE_AS : 1
PROPRANOLOL_FOR : 1
COPING_TRYING : 1
AND_REFILLS : 1
IF_FEELING : 1
ALOT_TO : 1
FM_RYAN : 1
CHAPLAIN_SCOPE : 1
FOR_PRESSURE : 1
VIA_TELEPHONE : 2
GESTURES_PSYCHIATRIC : 1
DISPOSITION_COME : 1
VOICED_AND : 1
IMAGES_ATTACHED : 1
PATIENT_INDICATIONS : 1
UNDERSTAND_HOW : 1
MANAGEMENT_OFFICE : 1
HYPERTENSION_FOR : 1
PATIENT_PRESCRIBED : 1
SWAB_OBTAINED : 1
ABDOMEN_GI : 1
COUNSELING_PROVIDED : 1
VISTA_NURSING : 1
IN_SPRITS : 1
WAS_WEAK : 1
OF_CALLED : 1
NEW_OR : 1
OX_GERD : 1
INDIVIDUAL_THIS : 1
SYSTEM_NO : 1
VERDSOME_APPOINTMENT : 1
PSYCHOLOGIST_WORKER : 1
ALVETA_VOICE : 1
ENOUGH_TO : 1
PROCEDURE_BIOPSY : 1
CATHETER_PLACE : 1
WIFE_AS : 1
NOT_REQUIRED : 2
CLEAR_MUCUS : 1
COMMENTS_ABDOMEN : 1
IN_INQUIRING : 1
ON_BOTH : 1
STATUS_MHC : 1
AXIS_LIVES : 1
SELF_HARM : 1
SEVERAL_EXTREMITIES : 1
FAXED_CENTRAL : 1
COMPLETED_ADMISSION : 1
LEFT_EYE : 2
SEN_MESSAGE : 1
WORSENING_PAIN : 1
AM_TIME : 1
TAKING_TERAZOSIN : 1
INTERVIEW_AND : 1
PARTIAL_LAB : 1
YOU_WERE : 3
SALINE_IN : 1
TO_FAIRVIEW : 1
WOULD_NOT : 1
HOSPITALIZATIONS_PRIOR : 1
HIS_CALL : 1
SCORE_BEDREST : 1
ACTIVE_PATIENT : 1
COMPLETE_ET : 1
VETERAN_FOLLOWING : 1
CALLED_REFERRAL : 1
NONVA_INTO : 1
RATE_SENSORY : 1
TO_SURGERY : 1
UP_AT : 2
ARRHYTHMIA_PRESENT : 1
PROVIDED_SMOKING : 1
TREATMENT_REVIEW : 1
PROCESS_THAT : 1
MOISTURE_PAIN : 1
AND_AGREEMENT : 1
ABDOMEN_DISTENDED : 1
PATIENT_OUT : 2
WEIGHT_KG : 2
ASSESSMENT_PROBLEM : 1
ON_POSTSURGICAL : 1
WELL_POOR : 1
IN_MOUNTAINCREST : 1
TEMP_WITH : 1
REMOVE_OLD : 1
INFARCTS_NEITHER : 1
CRASH_MULTIPLE : 1
BELOW_OUTPATIENT : 1
OR_CIRCUMSTANCES : 1
MEDICAL_ABUSE : 1
THIS_PATIENT : 3
BEING_FOLLOWED : 1
CARE_SUBSPECIALTY : 1
AN_THE : 1
ASSESSMENT_MS : 1
LEFT_SHIN : 1
UNDERSTANDING_CHEST : 1
NURSING_PROGRESS : 1
ADVISED_REMAIN : 1
TO_EKG : 1
NA_MEETING : 1
SUCCESSFUL_COMPLETION : 1
EYES_PERRLA : 1
HAGERSTOWN_TELEPHONE : 1
OR_CONTINUES : 1
PREFERENCES_AT : 1
OF_BREATH : 1
ALERT_FULLY : 1
GAVE_WHEN : 1
HE_CONTINUES : 1
ONE_OCCASION : 1
COMPLETION_ATTENDED : 1
SIGNED_CONTRACT : 1
UNDERGO_CONTINUED : 1
CARE_HIMSELF : 1
ENCOUNTER_FACE : 1
STATUS_IN : 1
COOPERATIVE_CONVERSATION : 1
ON_PATIENT : 3
IF_SOMEONE : 1
EVERY_LAST : 2
INDEPENDENT_CONTINENT : 1
EXPECT_SUCH : 1
YOUR_PRIOR : 1
HAVE_DIFFICULTY : 1
ENDING_AT : 1
NURSING_COMMENTS : 1
ACCESS_FIREARMS : 1
OX_PULSE : 1
NOTE_CHECK : 1
GOING_FROM : 1
COMPLAINTS_HEARING : 1
CARE_CLINIC : 1
HANG_WITH : 1
REQUIRED_VERY : 1
HAVE_THAT : 2
BEFORE_AM : 1
MEDICAL_RESIDENT : 1
CANCELLED_DIABETIC : 1
SMOKE_APPX : 1
DC_FOR : 1
NO_CONSTIPATION : 1
GERD_FOREARM : 1
PHYSICIAN_NOTE : 1
PARANOIA_WITH : 1
CHECKS_COMPLETED : 1
FOR_DATE : 2
PERIPHERAL_FRACTURES : 1
HAS_OR : 1
IF_METOPROLOL : 1
ASSESSMENT_REPORT : 1
REEVALUATION_REFILLS : 1
TO_ALTERING : 1
PAIN_LOWER : 1
MEDICATIONS_ABOVE : 1
TO_CHEST : 1
YO_MALE : 1
WILL_IN : 1
PRIOR_SUICIDE : 1
AS_THAT : 1
GOING_CENTER : 1
DEPRESSION_ONGOING : 1
MOD_EFFUSION : 1
BACK_THIS : 1
INPATIENT_EXCLUDING : 1
NOT_SUCH : 1
INITIATED_XVETERAN : 1
WITH_SWER : 1
HEARING_EKSW : 1
EKG_VIA : 1
HIS_RECENT : 1
WITH_SURGERY : 1
TWICE_IN : 1
OF_IMMEDIATE : 2
REFILLS_LAST : 2
WITH_SIDE : 1
OBSERVE_DOCUMENT : 1
DETAILS_WHICH : 1
AN_ADDITIONAL : 1
INFARCTION_MI : 1
PROTOCOL_NOT : 1
PRESENT_TO : 1
CONTROLED_ON : 1
MUCUS_YOU : 1
EXTERNAL_OR : 1
GI_GU : 1
READY_DC : 1
PROBLEMS_SAFETY : 1
OL_TRIGLY : 1
DURATION_HOURS : 1
TO_COMPLETE : 1
WK_DATE : 1
RETINAL_APPT : 1
HE_WEARING : 1
ABNORMAL_CASE : 1
MORE_AIRWAYS : 1
ON_MEDS : 1
SIGNIFICANT_EVENTS : 1
RYAN_COUGH : 1
EXPR_MAY : 1
REEVAL_COMPLETION : 1
INFORMATION_NUMBER : 1
BIOPSY_STAFF : 1
MAN_PMH : 1
WOULD_EXPECT : 1
TRIAGE_COMPLAINT : 1
INVERSIONPT_GIVEN : 1
ALTERED_THOUGHT : 1
SOB_TH : 1
NAUSEA_BUT : 1
PRESCRIBED_IT : 1
SWAB_HAS : 1
PATIENT_HOLD : 1
WALKING_COMPLETED : 1
PLAN_NONACUTE : 1
ARNP_PA : 1
PL_PROCEDURE : 1
PARANOIA_DELUSIONS : 1
CC_IV : 1
AND_DISPOSITION : 1
ORBITS_NERVES : 1
LOWERING_MEDICATION : 1
SMILING_NURSE : 1
INCREASE_SX : 1
YES_THERE : 1
FEELING_THE : 1
MAINTENANCE_AND : 1
HEENT_MMMOIST : 1
HEART_RATE : 1
AND_HYPOTENSION : 1
SELF_MET : 1
IN_ADJUSTING : 1
FOR_HEART : 2
COPD_DM : 1
PREVIOUSLY_IT : 1
SIX_CARE : 1
SEATING_CH : 1
COPING_BY : 1
DELUSIONS_TAB : 1
PAIN_REPRODUCABLE : 1
PERSISTENT_PAIN : 1
INFORMATION_WAS : 1
THEIR_ON : 1
INCLUDING_SUPPLIES : 3
MOUTH_EVERY : 5
PC_ONE : 1
THEY_VETERAN : 1
TECHNIQUES_BARRETTS : 1
LOADED_CE : 1
WAS_ABOUT : 1
THE_REPORTS : 1
AND_NEW : 1
MORE_ON : 1
DID_NOTE : 1
GIVEN_INFORMATION : 1
ASSESSMENT_FURTHER : 1
EXAM_RAL : 1
MOOD_AFFECT : 2
KRISTEN_NOTE : 1
TRYING_TO : 1
APPOINTMENT_IF : 1
TIMES_PER : 1
PACKAGING_HIS : 1
SHOWER_SELF : 1
MODE_TRANSPORT : 1
PAIN_PATIENT : 1
KG_ERYTHROMYCIN : 1
AN_AFFAIR : 1
WITH_DIARRHEA : 1
LOT_EXPIRATION : 1
IN_FOR : 2
PRIOR_OBTAINED : 1
BE_OR : 1
RESPONSES_TO : 1
AGE_ADDENDUM : 1
AS_WAS : 2
TAKE_CARE : 1
ACCESS_TO : 1
BACK_MONTH : 1
STATES_WILL : 1
ASSESSMENT_PUT : 1
STL_PAK : 1
RISK_AND : 1
FELL_HE : 1
EATING_AND : 1
WITH_JUST : 1
EXPECTATIONS_OFFERED : 1
MEDICINES_ADDED : 1
CAP_DYSPHAGIA : 1
BAD_AND : 1
BY_PATIENT : 1
HE_TROUBLE : 1
PULSE_RESP : 3
SPC_CONTACTED : 1
HANDOUT_RESPONSIBLE : 1
FELL_AS : 1
USE_ALCOHOL : 1
IV_SALINE : 1
FOR_MEDICAL : 1
PATIENT_REPORTS : 1
VETERAN_ADDITIONAL : 1
WAS_GOOD : 1
THE_ARREST : 1
PROCESS_NECK : 1
TAB_ONE : 1
TO_TEMP : 1
STOOL_NO : 1
WEEK_INITIATED : 1
ONE_MONTH : 1
OF_WEAKNESS : 1
VISITING_HOLDING : 1
SCALE_PT : 1
PER_EATS : 1
RESIDENT_YEAR : 1
REPORT_AND : 1
ACTIVE_OF : 1
BASED_UPON : 1
YEAR_FE : 1
MONITOR_CONTINUOUS : 1
NO_LETTER : 1
INCLUDED_THE : 1
PO_QH : 1
DO_ANYTHING : 1
BE_EVALUATION : 1
IN_HE : 1
ABOUT_RESPIRATIONS : 1
GAVE_HE : 1
HIS_PM : 1
USE_OF : 3
INSTAGLUCOSE_GLUCOSEFINGER : 1
PATIENT_WILL : 2
THAT_MAY : 1
BMI_MINIMAL : 1
PRSE_REPORT : 1
DEVELOP_MOVEMENT : 1
BETTER_OF : 1
UNSPECIFIED_DSMIV : 1
TREATMENT_PRIOR : 1
IS_CALLING : 1
EXPEDITOR_SC : 1
HX_PSYCH : 1
DISCHARGE_SWAB : 1
EDUCATION_CALL : 1
TYPE_MEDICATION : 1
INVOLUNTARY_MOVEMENTS : 1
ROS_COUGH : 1
THE_OT : 1
SEE_FOR : 1
ADVISED_CONTINUE : 1
FIND_YOU : 1
FROM_CENTER : 1
RISK_SAME : 1
HE_ALSO : 4
TO_ASSIST : 2
OXYCODONE_NOT : 1
YOUR_DEVELOP : 1
DRINKS_ONE : 1
ATTEMPTED_TO : 1
CC_TO : 1
MAY_GUIDED : 1
ABUSE_IF : 1
OF_OCT : 1
SIMVASTATIN_WEEK : 1
PREFERENCES_IMPACT : 1
HOUSEKEEPING_EXACERBATED : 1
OR_WORSENING : 1
BE_APPROPRIATE : 1
ABOUT_REPORT : 1
RN_MH : 1
VIA_NECK : 1
LOOKING_EXPLORE : 1
AND_UCINATIONS : 1
CONSTIPATION_YES : 1
MEASURES_WITH : 1
OT_BRING : 1
WITHIN_REACH : 1
ACTIVITY_SIDE : 1
OUTPATIENT_VETERAN : 1
ARRIVAL_STRETCHER : 1
PER_CLC : 1
SOMEONE_DIAGNOSIS : 1
BEEN_CHAPLAINSPIRITUAL : 1
IF_VETERAN : 1
ON_CHEST : 1
ERE_ARE : 1
YESTER_WAS : 1
VIA_HE : 1
ESI_OR : 1
CAN_OF : 1
KINZEY_LEVEL : 1
COMPLAINT_TYPE : 1
DENIES_HIS : 1
THAT_EVERYONE : 1
OUTPT_INTAKE : 1
THAT_VET : 2
IS_THE : 2
AGREEMENT_CURRENT : 1
USE_STRIP : 1
SIG_TAKE : 2
THERAPY_SEE : 1
PHYSICIAN_JUST : 1
ADDITIONAL_COMMENTS : 1
PHARMACY_DIAGNOSIS : 1
THAT_TO : 1
ACETAMINOPHEN_MG : 1
APHDR_UP : 1
EKSW_ASSESSMENT : 1
IV_FAMILY : 1
WAS_BY : 2
BILATERALLY_TO : 1
IN_LIFE : 1
HE_DEMANDING : 1
HIM_LISINOPRIL : 1
HAVE_YET : 1
CARES_YEAR : 1
FALLS_HISTORY : 1
IF_YES : 1
SINCE_NONE : 1
OF_DX : 1
PT_WILLING : 1
TOBACCO_SCREENING : 1
CARES_FOR : 1
PHONE_PHONE : 2
FROM_STORES : 1
ON_CALL : 1
LIFE_STRESSORS : 1
COMPLETED_YES : 1
CALL_IDGE : 1
HAVE_NOT : 1
FUTURE_CLINIC : 1
CRISTEN_NO : 1
IN_COMMUNITY : 1
YEAROLD_MAN : 1
WT_ALERT : 1
TO_RELAXATION : 1
INTAKE_NO : 1
DESIRE_CONTINUE : 1
PHONE_RETURNED : 1
DURING_THIS : 1
HYDRONEPHROSIS_PATIENTS : 1
HAVING_AN : 1
HAD_EFFECT : 2
FOR_STABILIZATION : 1
FOR_VISIT : 1
AGAIN_HE : 1
ABOUT_HOURS : 1
BEHAVIOR_CONTINUE : 1
CELL_INFORMATION : 1
TRIAGE_INTAKE : 1
SIGNED_WITNESSED : 1
NOTE_ESSENTIALLY : 1
PEDAL_NOTED : 1
QUETIAPINE_PERHAPS : 1
NURSING_WK : 1
BUDDY_SYSTEM : 1
WAS_EVERY : 1
CHRONIC_ANTIHISTAMINES : 1
NO_ASSOCIATE : 1
COMPLIANT_STAFF : 1
CLINIC_YESTER : 1
FAMILY_HISTORY : 1
TIME_FRAME : 1
WAYS_ALCOHOL : 1
ENTRY_SC : 1
YET_OBTAINED : 1
ADDITIONAL_OBTAINED : 1
HAVE_IS : 1
REQUESTING_NARCOTICS : 1
CERVICAL_REGION : 1
CDRH_PB : 1
CALL_BY : 1
FORT_INSTEAD : 1
TELEPHONE_HIV : 1
ER_AND : 2
ACTIVE_AT : 1
CARE_DOWN : 1
WWW_FDA : 1
MET_PT : 1
THOUGHTS_SELF : 1
INSTRUCTIONS_NOTE : 2
PRECLUDES_PASSING : 1
EA_RATE : 1
HAD_OF : 1
AT_FOURTH : 1
WITH_NAPROXEN : 1
UNDERSTANDING_GIVEN : 1
WED_ER : 1
THREE_TIMES : 1
HIS_SCOPE : 1
TEMPERATURE_DING : 1
ATARAX_TAB : 1
DING_ENCOMPASS : 1
YOU_RESPONSIBLE : 1
WAS_MAILED : 1
WHICH_MUSCULO : 1
HEART_TO : 1
CLEAR_YOU : 1
ED_PAIN : 2
DISTRIBUTION_INFARCTS : 1
DOWN_TO : 1
IS_ACCEPTABLE : 2
OF_STRESS : 1
FACE_WORRIED : 1
WAS_LINE : 1
SET_ROUTINE : 1
HEENT_NATURE : 1
DOING_SOURCE : 1
HAVE_OR : 1
HAVE_ATTEMPTED : 1
MI_TWO : 1
CP_ROS : 1
FOREARM_FT : 1
SEX_PAIN : 1
SC_COMBAT : 1
IS_CURRETNLY : 1
OUTPT_TRIAGE : 1
STOPPED_THEY : 1
VETERAN_ADJUSTING : 1
OFFERED_TO : 1
HERE_TO : 2
METOPROLOL_TAB : 1
AXIS_GAF : 1
EXPRESSED_TO : 1
HIM_NO : 1
AM_CONVERSATION : 1
LOWFAT_DIET : 1
PROVIDER_PHYSICIAN : 1
CN_NORMAL : 1
ISOP_VERY : 1
AT_COOPERATIVE : 1
ANXIETY_WAS : 1
MOOD_EVENT : 1
PROVISIONAL_DIAGNOSIS : 1
PS_PM : 1
IF_IT : 1
PURPOSE_OF : 1
PAIN_WT : 2
ICU_NURSING : 1
USE_SALINE : 1
TO_ALMOST : 1
COMPLETED_TO : 1
BLSTR_INHL : 1
ALREADY_AND : 1
NO_FEVERS : 1
COMPLAINT_SINUS : 1
ABOUT_PATHOLOGY : 1
STATUS_CHF : 1
INFORMATION_PHONE : 1
OLD_FE : 1
CHEST_COUGH : 1
CLINIC_ASAP : 1
SEE_HIM : 1
LEAVE_HARD : 1
PROBLEMS_COMPUTERIZED : 1
EXAM_CUP : 1
UPPER_ARM : 1
LOUD_BOTHERS : 1
HAGERSTOWN_NURSING : 1
TOBACCO_YES : 1
READINGS_CORRELATE : 1
PATIENT_TAKE : 1
HAS_LOST : 1
OF_ELBOW : 1
VETERAN_ABLE : 1
DRINK_CONTAINING : 1
IS_WORKING : 1
OF_DISEASES : 1
EXPERIENCE_THAT : 1
GOOD_DENIES : 1
EXAM_DRINK : 1
ORDER_NUMBER : 1
WAS_FOUND : 1
PREVENTION_DUE : 1
HAD_OUT : 1
ON_AND : 3
TO_INSURE : 1
LIVES_ALONE : 2
REGION_SIGNIFICANT : 1
HE_WOULD : 2
GROUP_VOICES : 1
PARTICIPATION_MODERATE : 1
SO_THEY : 1
NEGLECT_IN : 1
HE_SEEKING : 1
PRESENTED_AFTER : 1
UPPER_OR : 1
PB_FOR : 1
CONTACT_ORTHOPEDIC : 1
PATIENT_WALKED : 1
PO_PRN : 1
PT_THIS : 2
NEEDLE_BE : 1
EDUCATIONAL_INDEPENDENT : 1
STRIP_ACTIVE : 1
TO_SMOKE : 1
NOTE_PATIENTS : 1
THE_COLACE : 1
BEDTIME_NEEDED : 1
HEADACHES_BUT : 1
BACK_TO : 1
DURING_ORDER : 1
ENCOUNTER_FEE : 1
STATUS_NOTE : 1
FIREARMS_DETAILS : 1
PULSE_PSYCHOLOGIST : 1
CYST_WITH : 1
ACTIVE_ALTERATION : 1
ANY_THAT : 1
CRITICAL_CARE : 1
THE_NOW : 1
OBTAINED_RATE : 1
PT_NO : 1
STRESS_TOO : 1
TO_BEST : 1
REFILLS_HYDROXYZINE : 1
AND_KINZEY : 1
WITH_SIGNIFICANT : 1
DISCHARGE_HE : 1
DUTY_STATES : 1
STIMULATOR_HAS : 1
CONTACTED_AGAIN : 1
MG_PATCH : 1
CHAPLAINSPIRITUAL_PROBLEM : 1
ONSET_OF : 1
PATIENT_REQUESTING : 2
CONTACT_KRISTEN : 1
NO_MEDICATION : 1
ASPIRATION_AND : 1
THIS_VIEW : 1
WELL_ON : 1
LOWER_MEDICATED : 1
ASSESSMENT_CARDIOLOGY : 1
WALKED_WAY : 1
MURMUR_RISK : 1
TETANUS_VACCINE : 1
ALCOHOL_HE : 1
CARE_PROVIDER : 2
WITH_NEW : 1
BASED_KG : 1
HOW_TO : 1
ORIENTED_GROOMED : 1
DO_ON : 1
TO_CHAPEL : 2
RETINAL_SCREENING : 1
COPY_TO : 1
ANYTIME_HE : 1
ASSESSMENT_CALLER : 1
APPOINTMENT_PCP : 1
HAVE_SYNCOPAL : 1
THE_TIMES : 1
AND_OF : 3
SHORTNESS_OF : 1
FEW_YEARS : 1
CHEST_NO : 1
PCP_ON : 1
PAK_PILL : 2
SAFETY_NEW : 1
SUMMARY_PENDING : 1
HISTORY_FALLING : 2
CONTACTS_ENCOURAGED : 1
SHORT_REHAB : 1
SURGERY_DATE : 1
FOUND_NO : 1
NO_IS : 1
DIAGNOSIS_SCREENING : 1
IN_HIS : 2
IN_RECEIVED : 1
ROUTINE_DISCHARGE : 1
DISCHARGE_LIST : 1
PT_PLEASE : 1
AM_HELD : 1
JUL_SCREENING : 1
REPORT_HE : 1
WITH_WATERY : 1
LEFT_ADDENDUM : 1
NONE_PAIN : 1
JULY_TH : 1
GROUP_CONSULT : 1
CANCER_EDUCATION : 1
ISSUE_CHRONIC : 1
IS_ON : 3
MOUNTAINCREST_THEY : 1
LIST_IS : 1
TO_FT : 1
KRISHNASWAMY_MALATHI : 1
ACTIVE_PROVIDED : 1
OF_ESOPHAGEAL : 1
CHEST_PRESSURE : 1
AND_GO : 1
NORMAL_HEART : 1
NONACUTE_CARE : 1
OR_SITTER : 1
FT_RILEY : 3
WILL_HERE : 1
AND_DURING : 1
EXPIRATION_DATE : 1
ACTION_INDICATED : 1
THE_RISKS : 1
BACK_HPI : 1
TO_WHICH : 1
HRS_NICOTINE : 2
HIS_DUE : 1
SCREENING_AIMS : 1
HAD_SCREENING : 3
UAL_EDUCATION : 1
ADVISED_CALL : 1
CAUSE_THEM : 1
ACUTE_ONSET : 1
AREA_UPPER : 1
HOME_INSTRUCTIONS : 1
ORIENTED_MOVES : 1
MORNING_THE : 1
ASKS_CHANTIX : 1
CHEST_ABDOMEN : 1
HAD_SAFE : 2
COPY_PCP : 1
OPTIONS_TO : 1
ED_DOCUMENT : 1
NOTE_WEIGHT : 1
LAB_BODY : 1
TRANSFER_TO : 1
HX_ACCORDING : 1
SHE_WHEN : 1
TOX_SCREEN : 1
BYPASS_HX : 1
ASSISTED_OTHER : 1
DONNING_DOFFING : 1
SELFHARM_OR : 1
PTSD_COMPLAINT : 1
PSYCH_MINIMAL : 1
WHICH_SKELETAL : 1
FOOD_OR : 1
AND_COMPLETELY : 1
SUBCUTANEOUS_MEDICAL : 1
CONSTIPATION_ALSO : 1
NOT_BEEN : 2
SERVICE_LABORATORY : 1
NEXT_MEDICATION : 1
MEDICAL_UNIT : 1
SUSPICION_ABUSE : 1
NURSING_FOR : 1
ONGOING_AND : 1
HAS_IN : 1
PAIN_ASSOCIATED : 1
HE_GAVE : 1
PROVIDER_TREATMENT : 1
PROBLEM_BATTERY : 1
TO_MULTIPLE : 1
EDUCATION_HE : 1
PER_ADMINISTRATIVE : 1
VISIT_ACTIVE : 1
PHONE_APPLICABLE : 1
NOTE_AUTHOR : 1
WIFE_THAT : 2
HAVE_BLOOD : 1
LAST_AT : 1
INCLUDES_REGARDING : 1
NIGHT_HAS : 1
CURRENT_STANDARDS : 1
PROVIDER_PREVIOUS : 1
OF_SUBJECTIVE : 1
HAVE_PROCEDURE : 1
CONTROLED_CURRENT : 1
EXACERBATED_BREATHING : 1
DNR_ALERT : 1
BLUNTED_PROBLEMS : 1
REPLACEMENT_PRODUCTS : 1
FOR_SWELLING : 1
PATIENT_SAFE : 2
ADDENDUM_PT : 1
VISIT_PT : 1
SUBSPECIALTY_SCHEDULED : 1
ANOTHER_CAR : 1
BUDDY_AND : 1
WITH_SIGNED : 1
RETURN_HOME : 1
WITH_CONTRACT : 1
PROVIDED_STILL : 1
LAMOTRIGEN_TOGETHER : 1
INFORMATI_OF : 1
BY_ZELL : 1
INCREASE_IN : 2
THOUGHTS_AT : 1
PRESENT_WOUND : 1
ABOUT_PAIN : 1
NOSE_TO : 1
SUPPORTIVE_EVERY : 1
TRIES_DO : 1
ULTRASOUND_OR : 1
EVERY_IRON : 1
WERE_CHO : 1
ON_THIS : 1
CHEST_HEAVINESS : 1
ON_ARRIVAL : 2
AM_WAS : 1
RISPERDAL_CONSTA : 1
COUNSELING_AT : 1
STATES_HE : 3
EXTREMITY_AND : 1
TAKING_THE : 1
NO_TO : 2
COMMENT_TESTING : 1
REPORT_DIAGNOSIS : 1
STAYING_AS : 1
OF_RRR : 1
OF_INDIVIDUAL : 1
CLINIC_FOR : 1
REACH_NONVA : 1
FOR_LIGHT : 1
FOR_BY : 1
THAT_CAREGIVER : 1
WITH_THEM : 1
ED_PROCEDURE : 1
HIMSELF_GOING : 1
WISHES_SIGNED : 1
BLUNTED_ACTIVE : 1
HAD_TO : 1
THE_MIND : 1
LB_II : 1
OF_MEDICATION : 2
PMR_RT : 1
IN_IN : 2
BY_STAFF : 1
GROOMED_WAS : 1
DIET_ANXIETY : 1
HE_TIME : 1
PSYCH_DX : 1
APPOINTMENT_AS : 1
YEAR_RATED : 1
WILLING_SET : 1
MRSA_SWAB : 1
HELP_AT : 1
MANOR_GLCCS : 1
CURRENT_FOR : 1
MG_FOR : 1
SCREENING_WITH : 3
MIND_ENVIRONMENT : 1
IV_AT : 1
RESPIRATIONS_BUT : 1
VISIT_GERD : 1
MEDICINES_IS : 1
PATIENT_DNR : 1
PILL_TAKE : 2
HEALTH_RISKS : 1
OF_ALL : 2
ADMISSION_OR : 1
OF_APPETITE : 1
FOR_CALL : 1
NO_WHICH : 1
DISTAL_HEAD : 1
IN_AND : 2
ELECTRODIAGNOSTIC_FOR : 1
ORTHOPEDIC_DOCUMENT : 1
IN_TWICE : 1
OPTOMETRY_IMAGE : 1
PRESCRIBED_LEXAPRO : 1
FISHER_UPDATE : 1
MED_PRIOR : 1
PRIMARY_NURSE : 1
PER_VA : 1
AND_YOUNGER : 1
FRACTURES_SKIN : 1
LOT_OF : 1
IT_STRESSFUL : 1
TO_AREA : 2
SCREENING_FOR : 1
FAIR_RESPONSIBLE : 1
MEDICATION_WAL : 1
CANT_FUNCTION : 1
IN_FACE : 1
TREATMENT_PLAN : 5
CHEST_CHEST : 1
STRENGTHS_PULSE : 1
ESTIMATED_ARE : 1
ADDENDUM_AVAILABLE : 1
TO_PARANOIA : 1
PATIENT_DEMONSTRATION : 1
TOBACCO_AND : 1
IN_IF : 1
TO_START : 1
MANAGER_PENDING : 1
PHONE_NOT : 2
DEPENDENCE_CURRENT : 1
MI_INPATIENT : 1
PRIOR_LEAVING : 1
HIS_RISPERDAL : 1
WILL_APPROPRIATE : 1
EFFUSION_OLECRANON : 1
MEDS_NONE : 1
COME_THE : 1
VETERAN_DSHI : 1
BEEN_ESI : 1
HPI_ESTIMATED : 1
GAIT_STEADY : 1
SET_UP : 1
EXTREMITIES_MOD : 1
ON_HAVE : 1
ON_CELEXA : 1
PATIENT_OR : 1
ACTIVE_DUTY : 1
ALL_NARCOTICS : 1
NORMAL_MOTOR : 1
ATTACHED_IV : 1
AT_TIME : 8
TO_VETERAN : 1
DEATH_TEMP : 1
NOTE_CC : 1
CHRONIC_CONSTIPATION : 1
WITH_PMH : 1
DEPRESSED_HOPELESS : 1
HE_INVOLVED : 1
PATIENT_ACTIVE : 1
SCORE_EACH : 1
AXIS_REVIEW : 1
YES_NO : 2
AND_INFORMATION : 1
AS_PREVIOUSLY : 1
OF_AMBULATORY : 1
NS_IV : 1
STROKE_EDUCATION : 1
KIT_PROVIDED : 1
WHICH_OUR : 1
TRAINED_ROSENTHAL : 1
UP_NOTE : 1
WEEKLY_NOTE : 1
HOURS_HAVING : 1
ASAP_TO : 1
OF_REVIEWED : 1
WITH_DELUSIONS : 1
EXPLORE_OPTIONS : 1
DARK_YOU : 1
EVER_ANY : 1
VET_IS : 2
WILL_DURATION : 1
GOOD_LABS : 1
HISTORY_INTERVENTIONS : 1
ASSOCIATE_IDENTIFIED : 1
THIS_PATIENTS : 1
SAY_RECHECKED : 1
UDS_THORACIC : 1
HAS_PATIENT : 1
NONCOMPLIANCE_INTENSE : 1
ON_JULY : 1
TYPE_ENCOUNTER : 1
USE_BY : 1
TO_SEEK : 2
BODY_AND : 1
OF_IS : 1
IS_WILLING : 1
FEELS_THAT : 1
IMAGE_ADEQUATE : 1
SELFHARM_NOW : 1
CODEINE_SWELLING : 1
STAYING_EASILY : 1
DISCHARGE_GIVEN : 1
WORRIES_ABOUT : 1
RT_ASSESSMENT : 1
NONE_THE : 1
PRESSURE_CARE : 1
HOYT_WEIGHT : 1
SPOKE_PATIENT : 1
LAST_MEDICAL : 1
THIS_ADMISSION : 2
IF_DIAGNOSIS : 1
BE_SOME : 1
NEEDED_ISSUE : 1
APPT_DIRECTIVE : 1
REMAIN_FREE : 1
TO_CALL : 3
THERE_ANYTHING : 1
AND_IS : 4
BODY_MIND : 1
US_REQUIRED : 1
MAINTENANCE_MAN : 1
HOPELESS_FAIR : 1
CC_INABILITY : 1
FREE_ASSESSMENT : 1
WBC_CMM : 1
PPP_NEEDS : 1
WITH_DOCTOR : 1
PRESENTED_AT : 1
BE_STATES : 1
THIS_IS : 4
READINGS_ELECTRONIC : 1
RADIOLOGY_AN : 1
SHE_VOICED : 1
SHELLFISH_CP : 1
ABOUT_RACY : 1
CARE_ADDRESSPVH : 1
EDEMA_NOTED : 2
PLAN_FEVERS : 1
4D_NURSING : 1
NONE_GASTROINTESTINAL : 1
MCA_DISTRIBUTION : 1
BEEN_COPING : 1
GUIDED_ULTRASOUND : 1
AMP_GLARGINE : 1
INFORMED_THAT : 1
DATE_IMAGE : 1
IS_GROUP : 1
DOOR_THIS : 1
IODINE_FM : 1
NOTE_IS : 1
DOWN_DEPRESSED : 1
AND_RHYTHM : 1
ON_IN : 2
NO_DETAILS : 1
BRING_LEAVING : 1
OUTPATIENT_MEDICATIONS : 8
TAB_TWO : 1
BE_CONSIDERED : 1
COUNSELLED_NO : 1
OF_BED : 1
NPO_STATUS : 1
RISK_INTERVENTIONS : 1
AS_WE : 1
BETTER_HAGERSTOWN : 1
REPORTS_NO : 1
RATE_RHYTHM : 1
NEEDED_FOR : 2
TO_UPSET : 1
ASSESSMENT_PLAN : 2
FOR_CONSTIPATION : 1
KG_ALLERGIES : 1
PACKAGING_PM : 1
UNDERSTANDING_LABS : 1
DEPRESSED_OF : 1
VETERANS_BEGIN : 1
THAT_THE : 4
OF_CANE : 1
PATIENT_ANSWERED : 1
MCA_INFARCTS : 1
HEALTH_NOTE : 1
TAB_TAKE : 4
NO_INDICATED : 1
CARE_CC : 1
ONE_TABLET : 3
CMM_ENVIRONMENT : 1
KG_COLONIC : 1
MET_WITH : 1
FACILITY_TO : 1
SUBJECT_ALCOHOL : 1
LAST_ESOPHOGEAL : 1
OF_INTERVIEW : 1
BOTH_BARRETTS : 1
NOTE_PATIENT : 3
IS_THAT : 1
SCREENING_IDENTIFY : 1
WITH_STAFF : 1
CHAR_CHATHAM : 1
KNOWING_HE : 1
PALPATION_NTG : 1
HERE_ON : 1
DOES_SUPPLY : 1
DISCHARGE_IF : 1
DIAGNOSES_DURING : 1
IS_ABLE : 1
VETERANS_TO : 1
TIMES_EXPR : 1
WEEK_OF : 1
PROVIDE_NURSE : 1
SOME_PROGRESS : 1
SMOKING_ASKS : 1
ABOUT_FIRE : 1
DATE_SKILLED : 1
APPX_PER : 1
LOWER_CERVICAL : 1
MODERATE_LEFT : 1
INSTRUCTIONS_GIVEN : 1
CLINIC_IER : 1
DRINKING_THE : 1
REGION_EVOLUTIONAL : 1
SO_SHE : 1
YEAR_DEPRESSION : 1
FOR_HE : 1
LABS_WALK : 1
COMPLETED_PT : 1
ACTIVE_FT : 1
MONTHS_AND : 2
HOMICIDAL_UNDERSTANDING : 1
NIACIN_OMEPRAZOLE : 1
IS_QUIETLY : 1
SWS_NUMBER : 1
PROBABLY_PREFERS : 1
CARE_REFERRING : 1
CHIEF_WITH : 1
WAS_ENCOURAGED : 1
TYPE_PAIN : 1
REACH_WITHIN : 1
GOALWHAT_LEVEL : 2
VN_VET : 1
DO_CONCENTRATION : 1
BRAKES_ON : 1
FROM_LISTED : 1
AND_MR : 1
CURRETNLY_ON : 1
INFORMATION_AND : 1
CARDIOLOGY_THE : 1
CHANTIX_WAS : 1
INFLAMMATORY_ADDITIONAL : 1
THIS_MORNING : 1
WITH_SEAT : 1
OFTEN_DEPRESSION : 1
ALLERGY_TO : 1
BUT_COME : 1
AND_FEVERS : 1
ORIENTED_THE : 1
TUNNEL_LEFT : 1
TO_WAS : 1
PAIN_OR : 1
INTAKE_ADDENDUM : 1
ALERT_TO : 1
AND_TRIAGED : 1
BURSA_NEEDLE : 1
YOU_CONSTANTLY : 1
PHYSICAL_CHEST : 1
NAUSEA_CV : 1
CV_TEST : 1
TIMES_HE : 1
ADDENDUM_NURSING : 1
HE_NO : 2
YEAR_NOT : 1
JUL_PATIENT : 1
IS_AGAINST : 1
PROGRAM_WITH : 1
NOW_THIS : 1
AND_UDS : 1
PATIENTS_STRENGTHS : 1
STRUCTURE_CYST : 1
OF_BUDDY : 1
OF_CARE : 2
OLECRANON_THE : 1
SERVICE_POSTVIETNAM : 1
IF_FIND : 1
CONSULT_PT : 1
USED_WAS : 1
GERD_OF : 1
PURPOSE_INFORMATION : 1
HTTP_FDA : 1
SEATING_SUGGESTED : 1
OR_NOTE : 1
EDUCATION_WITH : 3
NURSING_STANDARDS : 1
SESSION_THE : 1
DRIVE_TO : 1
GLUCOSEFINGER_MEDICAL : 1
HAS_BELCH : 1
KEY_SYMPTOMS : 1
SOFT_ROUND : 1
REPLACEMENT_YOU : 1
THREE_AS : 1
COMING_THE : 1
FOLLOWING_TESTS : 1
PROCEDURE_THAT : 1
HELP_LITTLE : 1
PROGRAM_CLC : 1
WAS_THE : 2
CONSULTS_HAVE : 1
WEAKNESS_RECTAL : 1
NO_HPI : 1
CHO_TRIGLY : 1
EMPOWER_VETERANS : 1
NURSE_STUDENTS : 1
TWO_BY : 1
HARD_SLIGHTLY : 1
PH_EYE : 1
LB_GERD : 1
FEELING_HAGERSTOWN : 1
AND_THREATENING : 1
HR_WEEK : 1
IF_AGE : 2
HHA_BE : 1
PHYSICIAN_HIV : 1
FOR_STOMACH : 1
BENADRYL_IF : 1
THEM_PATIENT : 1
GETTING_ABOUT : 1
UNMH_PTC : 1
FROM_HIS : 1
INITIALLY_QUICKLY : 1
TO_CALLER : 1
SEE_ENOUGH : 1
THAT_CM : 1
NA_PMR : 1
BE_WITH : 1
PSYCHIATRIC_SNIEWSKI : 1
OF_ASSISTANCE : 1
SALMETEROL_MCG : 1
OR_WERE : 1
PATIENT_PRESENTED : 1
POSTSURGICAL_BYPASS : 1
WANT_YOUR : 1
COMBAT_MALE : 1
CARE_FEELING : 1
AND_PREASSURE : 1
SKIN_INTACT : 1
HOW_DID : 3
FOR_OUTDATE : 1
ABUSE_IN : 1
AMBULATORY_NECK : 1
RATES_AS : 1
SAFETY_BED : 1
ACTIVE_INPATIENT : 4
TO_WHAT : 1
TO_PCP : 1
CENTER_OF : 1
ATTENDED_ACTIVE : 1
GUGYN_PROBLEMS : 1
GIVEN_VISTARIK : 1
THE_CONSTIPATION : 1
TIME_MEDICATIONS : 1
NO_PAIN : 2
NO_BRIEF : 1
TO_THIS : 6
WELL_PRIOR : 1
NEW_EXM : 1
ELECTRONIC_PATHOLOGY : 1
ARTERY_WITH : 1
ASSESSMENT_OF : 1
TO_SERVICES : 2
TROCHANT_MONTHLY : 1
IV_STARTED : 1
LEFT_PH : 1
APPEARS_MAKING : 1
IDENTIFIED_THIS : 1
HHA_COULD : 1
NO_APPLIANCES : 1
NAME_RR : 1
BLOOD_ADDENDUM : 1
PLAN_MEDICAL : 1
THIS_GROUP : 1
FRAME_COMPLETE : 1
DEMONSTRATION_MODERATE : 1
NO_REPORTED : 1
PREFERENCES_THIS : 1
HE_PATIENT : 1
TIME_ATTENDED : 1
HAS_REEVAL : 1
PLAN_NONE : 1
THIS_PC : 1
NO_NUTRITIONAL : 1
TO_WILL : 1
DETERMINE_IF : 2
GET_INTO : 1
MG_HE : 1
THIN_DURATION : 1
HANG_SELF : 1
MEDICATION_AND : 1
THAT_MEASURES : 1
PHYSICIAN_AM : 1
MEALS_PAIN : 1
ATTEMPT_HANG : 1
WERE_CONTINUED : 1
OR_REQUIRED : 1
INFECTINO_WOUND : 1
AND_PT : 1
TABLET_MOUTH : 5
EYE_LEFT : 1
SAFETY_IN : 1
HE_HAS : 9
OR_NO : 1
GET_FOR : 1
WELL_ENOUGH : 1
MG_MOUTH : 1
REPORT_FOLLOW : 1
GASTRIC_LOT : 1
SUPPLIES_ACTIVE : 1
OTHER_FUTURE : 1
AGAIN_THEY : 1
GIVEN_HX : 1
IN_LOWER : 1
DATE_EMERGENCY : 1
FOR_NURSING : 1
QUALITY_HOSPITALIST : 1
COUNSELING_PREFERENCES : 1
PRESCRIPTIONS_ENERGY : 1
SINUS_READING : 1
LB_ANODONTIA : 1
ON_LEFT : 1
FOR_OBSERVATIONS : 1
WILL_SEE : 1
DULL_PAIN : 1
BOTHERING_SISTER : 1
GET_EVALUATED : 1
HE_LIVES : 2
FISHER_FOR : 1
NORMAL_AFFECT : 1
VIEW_ALERT : 2
THE_STRESS : 1
AS_DATE : 1
PT_DENIES : 1
COMPLAINED_PAIN : 1
TEST_STRIP : 1
NUMBER_MONTHS : 1
ACTIVITY_UP : 1
THAT_PT : 1
VOICES_NO : 2
CARE_MEDICAL : 1
THE_STOCKINGS : 1
RESCHEDULED_AS : 1
TIME_PATIENT : 1
COMMENTS_VESTIBULAR : 1
TO_FAXED : 1
SCAN_WILKES : 1
HOPELESS_VISION : 1
NONVA_LISINOPRIL : 1
PDF_PB : 1
HAS_LBS : 1
ASSISTANCE_CANE : 1
SMOKING_CIGARS : 2
OR_WITH : 1
SC_IMAGES : 1
MG_NON : 1
YOUR_APPOINTMENT : 1
RANGE_PERCEPTION : 1
NO_OR : 2
HIS_SIGNED : 1
MONTHS_BM : 1
ENGLISH_CARE : 1
RIGHT_ELBOW : 1
RISK_FALL : 1
WHEN_YOU : 2
SENSES_HEARING : 1
BODY_THAT : 1
CHEST_MEDS : 1
PAST_NOT : 1
THIS_PROPRANOLOL : 1
NO_SALINE : 1
TRANSDERMAL_APPLY : 1
GERD_NAME : 1
AM_HEADACHES : 1
STABLE_ALERT : 1
THE_JOINT : 2
TAB_ONEHALF : 2
ROOM_ELEVEN : 1
WHEN_DID : 1
DIVORCE_NOT : 1
LABS_NEEDS : 1
CALL_INITIATED : 1
IDGE_KINZEY : 1
RECOVERY_COORDINATOR : 1
MODE_OF : 2
BACK_PAIN : 2
CALL_WITHIN : 1
FOR_NURSE : 1
SEEN_PC : 1
BACK_RESIDENT : 1
FUNCTION_PHYSICIAN : 1
BACK_LEGS : 1
WAKES_AT : 1
MIN_RATE : 1
SEE_ZELL : 1
MORNING_INVOLVING : 1
SX_HE : 1
NURSING_INTAKE : 1
NOV_HAD : 1
EXPERIENCES_PAIN : 1
ASSESSMENT_PATIENT : 1
SIDE_UP : 2
CONSIDERED_SHORT : 1
CONTINUOUS_BE : 1
WALKS_WITH : 1
OR_MAJOR : 1
IER_SOMEONE : 1
MH_TO : 1
COMPLAINING_OF : 1
SEX_MALE : 2
OLD_WITH : 1
VETERAN_IN : 2
DSHI_DISPOSITION : 1
RECORD_BACK : 1
ASSUMED_CARES : 1
MADE_AWARE : 1
NOTE_CHRONIC : 1
HE_DOING : 1
DSMIV_HEENT : 1
DURING_ADMISSION : 1
CHRONIC_SINUSITIS : 1
VESTIBULAR_AND : 1
MEDS_MG : 1
HAD_ANY : 1
HIS_MALE : 1
HRS_HELLO : 1
WHO_ABOVE : 1
PSYCH_TO : 1
CMM_SEP : 1
HOWEVER_WOULD : 1
NURSING_TELEPHONE : 1
CESSATION_PROGRAM : 1
IS_YEAR : 1
ATTEND_STR : 1
PROVIDER_OXYCODONE : 1
EVOLUTIONAL_ADDENDUM : 1
CHILDREN_SALINE : 1
MIDSTERNAL_PAIN : 1
AND_TO : 6
TASERED_AND : 1
HISTORY_IS : 1
DATED_NOT : 1
RELATIONSHIP_MOOD : 1
MORSE_FALL : 1
REHAB_LONG : 1
RECURRENT_DSMIV : 1
IT_IS : 3
ABDOMINAL_ASSOCIATED : 1
RECORD_NOTES : 1
VACCINE_STATUS : 1
HEALTH_CLINIC : 1
PAIN_PAIN : 3
WEEKLY_TO : 1
ACTIVE_THE : 2
WITH_GI : 1
HEART_THIN : 1
DENTURES_DENTURES : 1
SI_AXIS : 1
MCMULLEN_FOR : 1
PREASSURE_NO : 1
EMESIS_NO : 1
SURGERYAPPT_FOR : 1
ACTIVE_INTAKE : 1
PREOP_INSTRUCTIONS : 1
IS_INCAPACITATION : 1
SYMPTOMS_AFFECT : 1
POINTER_PROVIDED : 1
UNABLE_TO : 1
RILEY_PRSE : 1
THIS_FOR : 1
INCLUDE_ED : 1
TO_USE : 1
CM_WILL : 1
AUTHOR_PTS : 1
FOR_HAVING : 1
ARTERY_DISEASE : 1
INVERSIONPT_MORPHINE : 1
PAST_PSYCHIATRIC : 1
ALCOHOL_PHYSICIAN : 1
THROUGH_UNEMPLOYED : 1
MEDICATIONS_INCLUDING : 3
PLAN_CONSULT : 1
TARGET_MEDICATIONS : 1
IN_RLE : 1
CORRELATE_ELECTRONIC : 1
TO_NUMBER : 1
EDUCATION_PROCEDURE : 1
REFERRALS_BY : 1
MASS_DIAGNOSIS : 1
OF_SUCCESSFUL : 1
AS_CURRENTLY : 1
PC_IN : 1
TO_PHYSICIAN : 2
COUGH_URI : 1
AS_CAN : 1
PHYSICIAN_BCC : 1
MEDS_PLEASE : 1
QUALITY_ADEQUATE : 1
WAS_PRESCRIBED : 1
DESCRBE_PAIN : 1
STATES_ARE : 1
ADMISSIONS_BRIEF : 1
OF_MUSKOGEE : 1
READING_VIEW : 1
SWELLING_RASH : 1
NOT_WITH : 1
THEY_NOT : 2
SISTER_SEN : 1
ROUTINE_APPT : 1
STILL_AND : 1
WITH_WEARING : 1
REFERRALS_STAFF : 1
BARRIERS_LEARNING : 1
OR_PREVIOUS : 1
STATE_PROVIDE : 1
BY_ACTIVE : 2
SHORT_TERM : 1
NOTE_MG : 1
DUE_MEDS : 1
THE_ORDER : 1
REEVALUATION_AND : 1
WORKER_SUICIDE : 1
NO_EXISTING : 1
OCT_STUDYRELATED : 1
NONICT_EOMI : 1
TO_INDICATIONS : 1
NONSMOKER_SINCE : 1
SCREENING_WAS : 1
INFORMATION_DISCHARGE : 1
UPDATE_COMPLAINT : 1
WOULD_THEM : 1
PT_CARES : 1
THEY_VET : 1
SEE_ADMISSION : 1
NEEDS_LABS : 1
BOTH_AND : 1
ED_TO : 1
EXHAUSTED_AFFECT : 1
ALLERGIES_QUETIAPINE : 1
ADDENDUM_KNOWLEDGE : 1
MOVES_ALL : 1
THAT_NEEDS : 1
OBSTRUCTIVE_DISEASE : 1
ANXIETY_ICDCM : 1
PULSE_COUGHING : 1
PTC_TO : 1
SISTER_BUT : 1
ALSO_TYPE : 1
SIMVASTATIN_IS : 1
TO_ATTEND : 1
AFFECT_MEMORY : 1
SOCIAL_TO : 1
IS_ONGOING : 1
OF_INFORMATION : 3
NEEDS_GOING : 1
ATTENDED_EDUCATIONAL : 1
WERE_CONSTANTLY : 1
PA_AUTHOR : 1
TEMP_PATIENT : 1
CHAIR_SAO : 1
MALE_PM : 1
MALE_ICS : 1
AIRWAYS_AND : 1
NUMBER_PATIENTS : 1
THOUGHT_DID : 1
NEW_WORSENING : 1
OR_NONVA : 1
PHONE_NUMBER : 2
WAS_HAVING : 1
DETERMINE_ANOTHER : 1
NO_NURSING : 1
READING_COMPLAINT : 1
NO_PPP : 1
WAS_TRUCKS : 1
COUNSELING_THAT : 1
CLINICAL_REMINDER : 1
TERAZOSIN_MAIL : 1
CHART_PEDAL : 1
OF_HOURS : 1
DEFICIENCY_IDENTIFIED : 1
MARY_FULLY : 1
ED_NOTE : 1
MANAGEMENT_SEE : 1
IN_PTS : 1
PUNCTURE_PRESENTED : 1
DETERMINE_HE : 1
TABLETS_BY : 2
NURSING_AND : 1
HEAVINESS_PMHX : 1
GROUP_TO : 3
SINUSITIS_MOVEMENTS : 1
SPEAK_SWER : 1
WILKES_FACILITY : 1
WHEREIN_ANOTHER : 1
URINAL_WITHIN : 1
HEPATITIS_WITH : 1
HIS_CONSTA : 1
KNOWN_OR : 1
SC_VN : 1
AND_COUGH : 3
DEPRESSED_OR : 1
HEALTH_PATIENT : 1
FREQUENCY_DATE : 1
NO_NORMAL : 1
TAKE_CAPSULE : 1
TIDAC_SUBCUTANEOUS : 1
DURATION_BE : 1
TIME_AS : 1
REACH_HIM : 1
WAS_DARK : 1
WAS_UAL : 1
FOR_HEPATITIS : 1
NKA_PATIENT : 1
TO_STOPPED : 1
CONGESTION_READING : 1
WITH_STEADY : 1
IN_NEED : 1
LAST_HCL : 1
IF_WAS : 1
CHART_EDEMA : 1
CHO_LOWERING : 1
PERCEPTION_IMPAIRMENT : 1
CC_CHRONIC : 1
NOT_IDENTIFIED : 2
XVETERAN_NURSE : 1
DECREASED_ELECTRICAL : 1
WAS_IN : 5
PROCEDURE_FAIR : 1
CONSTIPATION_ANTIHISTAMINES : 1
FELT_PARTICIPATED : 1
ABOVE_NONACUTE : 1
DIZZINESS_WEAKNESS : 1
EASILY_SMILE : 1
OTHER_THIS : 1
ICS_INTERDISCIPLINARY : 1
NOTET_ATTENDING : 1
AREA_OF : 1
PROBLEM_USED : 1
PAIN_DEBILITY : 1
NUMBER_HOURS : 1
LACE_SENT : 1
WEEKLY_SUMMARY : 1
TIME_PC : 1
SERVICES_SUCH : 1
ABOVE_DIARRHEA : 1
AM_HAPPY : 1
THIS_VETERAN : 1
THAT_CHIEF : 1
EL_SOCIAL : 1
MD_OR : 1
PMH_FOR : 1
AND_INTENSE : 1
INTERUPTED_PATIENT : 1
OR_JUL : 1
BHM_RX : 1
CHECK_AS : 1
SUPPLIES_VETERAN : 1
PHYSICIAN_OFFICE : 1
THEN_PATIENT : 1
PATIENTS_OWN : 1
HE_FRUSTRATED : 1
ALCOHOL_SCREENING : 1
ON_HARD : 1
PATIENT_TELEPHONE : 1
CURRENT_PLAN : 1
ING_COORDINATOR : 1
ASSESSMENT_UPDATE : 1
COME_AND : 1
ARRIVAL_WITH : 1
NOTE_THIS : 1
CAPSULE_BY : 1
SKIN_TEAR : 1
CHIEF_YEAR : 1
ASSESSMENT_EKHISTORY : 1
NURSING_NOTE : 6
CAROTID_US : 1
AND_PATIENT : 4
COME_YOUR : 1
PLAN_PAIN : 1
THE_FEW : 1
DATE_SURGERY : 1
OR_PA : 1
LEFT_IN : 1
AGR_SHE : 1
TABLETS_ACTIVE : 1
IN_URETHERA : 1
THE_DOES : 1
CM_WITH : 1
THE_BURSA : 1
ELEVEN_ATTENDED : 1
AT_PATIENT : 1
REMINDER_THIS : 1
LESIONS_KNOWN : 1
YOU_TO : 1
SLOWED_RESTRICTED : 1
DONNING_AND : 1
PRSE_NAPROXEN : 1
PATIENT_ARRIVED : 1
CANE_PT : 1
WITH_PROTECTIVE : 1
HAVE_THIS : 1
IF_DEVELOP : 1
BY_ASSISTED : 1
EXPERIENCE_OR : 1
OXYCODONE_IS : 2
POSSESSION_VITAL : 1
REPORTED_HOURLY : 1
AND_DIS : 1
GLUCOSEFINGER_STUDENT : 1
ORTHOPEDIC_NOTE : 1
TAKE_TO : 1
BE_RESCHEDULED : 1
VET_VET : 1
AND_PARTIAL : 1
STABILIZATION_GIVEN : 1
CLIN_FOR : 1
IF_MALE : 2
DUE_TO : 4
THERAPY_PATIENT : 1
DATE_AND : 1
BLOOD_OF : 1
HOSPITAL_EXPEDITOR : 1
SETTLED_WILL : 1
SEEN_DOES : 1
CHEST_OLD : 1
THE_CHAPEL : 2
TO_DIAGNOSIS : 1
MANAGER_SUMMARY : 1
HE_MILITARY : 1
TO_UP : 1
REPRODUCABLE_WITH : 1
AND_FURTHER : 1
FOR_REPLACEMENT : 1
BY_MAURER : 1
MALE_DOES : 1
MRI_SHOWS : 1
THING_HAS : 1
PAIN_FEVER : 1
HEARING_ON : 1
SITUATIONS_HE : 1
WITH_PLAN : 1
BASIS_SO : 1
THE_IN : 1
DEATH_PATIENT : 1
ADDENDUM_MORSE : 1
IF_WERE : 1
TRAINED_ORIENTEE : 1
THE_IS : 2
THE_TIME : 2
AROUND_AM : 1
MEDICATION_AT : 2
THORACIC_PROGRESS : 1
TO_THAT : 1
BE_GUIDED : 1
UNIT_FOR : 1
TO_SCHEDULING : 1
TEAM_COORDINATOR : 1
DAILY_WEIGHT : 1
INTO_IMAGING : 1
TELEPHONE_TO : 1
CDRH_PDF : 1
CHEST_NEEDS : 1
PT_AND : 2
PREVIOUS_PATIENT : 1
PRIMARY_NURSING : 1
EXPERIENCES_ON : 1
ORIENTEE_COMPLICATIONS : 1
SUPPLIES_THE : 1
NORMALLY_WITH : 1
HE_COULD : 1
WAVE_INVERSIONPT : 1
ENCOUNTER_MEDICAL : 1
ALSO_ALL : 1
PRESCRIBED_OL : 1
STRENGTHS_RESP : 1
WEARING_BOOTS : 1
AT_BEFORE : 1
CONSTA_HE : 1
UPSET_AT : 1
SPOKE_WITH : 1
SIG_WHO : 1
SAME_ED : 1
RRR_MOOD : 1
CHEST_DEBILITY : 1
PT_AM : 1
NOT_OBTAINED : 1
WITHIN_PAST : 1
NOTE_RDW : 1
HIGH_FALL : 2
WORRIES_SMOKING : 1
PULMONARY_DISEASE : 1
COMMENTS_WALKED : 1
SKELETAL_SHOWER : 1
PLAN_CARE : 2
CONTINUE_REFERRED : 1
APPROPRIATE_METOPROLOL : 1
PROGRAM_THEIR : 1
WAS_TIMES : 1
PMHX_FOR : 1
BE_IN : 2
REPORTS_LIVES : 1
YEAROLD_WHO : 1
PROVISIONAL_HYDRONEPHROSIS : 1
NORMAL_MOOD : 1
THE_MUSIC : 1
STABLE_SMOKING : 1
IMAGING_TREATMENT : 1
ALLERGIES_ERYTHROMYCIN : 1
FOR_ELECTRODIAGNOSTIC : 1
RX_CONTACT : 1
USE_MHC : 1
DIFFERENT_FOR : 1
AM_IF : 1
PTS_RETINAL : 1
SMOKING_SMOKING : 1
HISTORY_OF : 4
PARTNERS_BY : 1
YES_HAS : 1
CONSULT_ADDENDUM : 1
INFORMATION_ESTABLISH : 1
ACETAMINOPHEN_TAB : 1
IN_ATTENDANCE : 1
SURGERY_ATTACHED : 1
GOOD_REVIEWED : 1
THAT_HAD : 1
CAD_ACTIVE : 1
MOLESTATION_KEYS : 1
EDUCATIONAL_TO : 1
TREATMENT_FALL : 1
AFIB_NOW : 1
PHYSICAL_LABS : 1
NEED_SUPPORTIVE : 1
AND_ABOUT : 1
NOT_ENOUGH : 1
PINES_THE : 1
DEPRESSION_IS : 1
ACCEPTED_ADDENDUM : 1
PATIENT_BACK : 1
OCT_PROCEDURES : 1
NOTE_TRIAGE : 1
ABNORMAL_CXR : 1
ACTIVITIES_WEDNES : 1
ACTIVITY_FREQUENTLY : 1
CALL_FOR : 1
PM_MMMOIST : 1
PATIENT_LEFT : 1
COUGH_SYMPTOMS : 1
NOW_NOT : 1
ABUSE_ASSAULT : 1
WELL_GROOMED : 1
RISK_ASSESSMENT : 1
RANGE_SKILLED : 1
OBSERVE_AND : 1
SHOULD_STILL : 1
NOT_BETTER : 1
AGE_SEX : 2
DIAGNOSIS_IDENTIFY : 1
IS_SEEKING : 1
SQ_SKIN : 1
IS_STRESSFUL : 1
ALERT_ORIENTED : 3
INTENSITY_NAUSEA : 1
MENS_EDUCATION : 1
DEBILITY_OR : 1
WORK_ASSIST : 1
VISIT_DATE : 1
TREATMENT_HE : 1
PAST_YOU : 1
CAUSED_CX : 1
ANSWERED_NKA : 1
MEDICAL_TEAM : 1
FOLLOWS_WITH : 1
IS_MASS : 1
FURTHER_IC : 1
BECAUSE_HAS : 1
AND_PREVIOUS : 1
MAN_FOLLOWS : 1
STRESSFUL_ON : 1
INITIAL_STRENGTHS : 1
SOON_WE : 1
CXR_MANAGER : 1
PER_PATIENTS : 1
TAP_NOTE : 1
PATIENT_YEAROLD : 1
CALLER_NAME : 1
DECREASED_MECHANICAL : 1
ALTERED_PROCESS : 1
SUICIDE_THREATS : 1
PT_EVALUATION : 1
DONE_PATIENT : 1
AXIS_IV : 1
ASPIRIN_NO : 1
WITH_RAILS : 1
NOTE_NO : 2
WITH_OCT : 1
SOMEONE_ES : 1
IN_HOLD : 1
FEELINGS_WHY : 1
AND_IT : 2
GOALS_OF : 1
LIFE_HIMSELF : 1
THREATENING_TO : 1
WALKIN_ACTIVE : 1
DOCTOR_IN : 1
ARRIVED_VIA : 1
TACHY_REGULAR : 1
PATIENT_COUNSELE : 1
DIAGNOSIS_FIXATION : 1
RN_TO : 1
THEY_HIS : 1
KEYS_QUITTING : 1
PSYCH_RELATED : 1
AT_OF : 1
NOW_WAVE : 1
ICDCM_NONICT : 1
REGARDING_REQUIRES : 1
BY_HISTORY : 1
PATIENT_NAME : 1
CLEAR_OF : 1
MSE_FULLY : 1
FEE_BASIS : 1
RN_ON : 1
NOT_SHE : 1
OF_SIGNIFICANT : 1
RECORD_REPORT : 1
AND_FOUND : 1
COMPLETE_HOURS : 1
RESOLVED_NEW : 1
YEARS_EMESIS : 1
HIS_LEFT : 1
NOTE_FURTHER : 1
FUNCTIONAL_DEFICIENCY : 1
MAKING_PROGRESS : 1
PAIN_ONSET : 1
MILD_ALL : 1
NO_SUBCUTANEOUS : 1
BED_IN : 1
GOOD_TO : 1
TRANSFER_STATES : 1
REGARDING_THE : 1
PLEASE_ADMINISTRATIVE : 1
NO_WALKS : 1
WALKS_NO : 1
WATERY_PER : 1
OF_ELEVATED : 1
THE_MAINTENANCE : 1
INR_PLEASE : 1
NECK_BLOOD : 1
APPEARS_TO : 2
PLAN_TYPE : 1
ATARAX_MG : 1
HOME_SUCH : 1
WITH_WAVE : 1
OF_CONTACT : 2
ADMISSION_MEDICAL : 1
INTERACTIVE_CONVERSATION : 1
EXPR_DATE : 1
BE_HERE : 1
IS_INSTRUCTED : 1
BE_ABLE : 1
HIS_OPTIONS : 1
FEVERS_OR : 1
PATCH_HR : 1
NURSING_OUTPT : 1
WELL_TO : 1
TEAR_HIS : 1
NO_RISK : 3
PAIN_MAJOR : 1
SEEKING_OPINION : 1
ERYTHROMYCIN_SWELLING : 1
ARRHYTHMIA_TYPE : 1
DEVELOP_DISCHARGED : 1
NURSING_ORBITS : 1
SHIFT_PT : 1
REFERRAL_SMOKING : 1
SEEN_PHARMACY : 1
ML_TIDAC : 1
HIGH_QUALITY : 1
AND_PRIOR : 1
THE_COMMUNITY : 1
INFANTS_YOUNGER : 1
POSTVIETNAM_BEEN : 1
NURSE_LOADED : 1
WIFE_PERSONAL : 1
PATIENT_TOLERATED : 1
RISKS_BENEFITS : 3
ACTIVE_INFORMED : 1
ROHLFS_FOR : 1
EVALUATION_REEVALUATION : 1
PULSE_RADIATION : 1
HE_WANTS : 1
GROUP_EXTERNAL : 1
OR_REASON : 1
WIFE_HISTORY : 1
WITH_MYOCARDIAL : 1
NO_NAUSEA : 2
NAUSEA_VOMITING : 1
DENIES_USE : 1
PRIOR_DISCHARGE : 3
FULL_SITUATIONS : 1
CONSISTENT_WITH : 1
ORDERING_HYPERTENSION : 1
ANY_PAIN : 1
MANAGER_CALL : 1
PATIENT_HAS : 3
HOSPITALIZATIONS_AND : 1
GIM_VISIT : 1
MIND_AND : 1
PENDING_OUTPATIENT : 1
INFORMATION_REGARDING : 1
NICOTINE_REPLACEMENT : 1
PATIENT_DOCUMENTATION : 1
ALCOHOL_TO : 1
APPETITE_DENIES : 1
WHEEL_SAO : 1
ALL_ARE : 1
DETOX_DOCTOR : 1
MENTAL_EDUCATION : 1
SHELLFISH_FM : 1
GASTROINTESTINAL_CONTINENT : 1
PHYSICIAN_THE : 1
TO_TRAVEL : 1
OR_PLAN : 1
HCL_MG : 2
RATE_RANGE : 1
ISSUES_PRIOR : 1
FOR_ON : 1
THAT_BE : 1
STATUS_LUNG : 1
OUTPATIENT_NOTE : 1
FOR_FULL : 1
BEEN_ASSESSMENT : 1
HE_WALKS : 1
TIME_DENIES : 2
HIS_HOUSE : 1
HAS_NO : 1
READING_CHIEF : 1
CARE_ALERT : 1
MG_NICOTINE : 2
AIMS_EXAM : 1
PDF_PDF : 1
TO_PROGRAM : 2
FACE_FACE : 1
BY_MD : 1
THIS_CHAR : 1
BE_REEVALUATION : 1
FRACTURES_MOISTURE : 1
PARTICIPATION_ACTIVE : 1
AND_GLCCS : 1
NO_TIDAC : 1
PRODUCTIVE_PATIENT : 1
IS_DNR : 1
OF_YEARS : 1
AN_WITH : 1
MADE_TO : 1
DISPOSITION_TO : 1
FULL_REPORT : 1
WILL_CONSULT : 1
NO_NEW : 2
SOMETHING_FOR : 1
DISCHARGE_YOU : 1
REFILLS_PAIN : 1
OT_LEAVING : 1
FOR_HIGH : 1
SPEC_GLUCOSE : 1
SURGERY_STUDYRELATED : 1
SKIN_BREAKTHROUGH : 1
SUBJECTIVE_NO : 1
HAVE_ANY : 1
OF_RIGHT : 1
LEFT_WEAK : 1
HAS_VERY : 1
BIOPSIES_PATIENT : 1
AGE_MALE : 2
THE_BUDDY : 1
PROVIDER_IDENTIFIED : 1
BY_CHIEF : 1
SITTER_ADMISSION : 1
PATIENT_OT : 1
WOUND_LEFT : 1
PRECLUDES_CDL : 1
PRIMARY_PROVIDER : 2
NOTE_APPOINTMENT : 1
PAIN_SKIN : 1
IS_ANTISEIZURE : 1
OF_EVAL : 1
LIGHT_WITHIN : 1
IN_REHAB : 1
ON_VETERANS : 1
TIME_SUICIDE : 1
ABOVE_ACCORDING : 1
WEIGHT_AND : 1
AND_REQUIRING : 1
AFTER_MONTH : 1
BENEFITS_SOB : 1
BOTHERS_THIS : 1
OBTAINED_AFIB : 1
GIVEN_MG : 1
FOR_SW : 1
GIVEN_ERYTHROMYCIN : 1
CARE_NONE : 1
USE_AND : 2
UPON_ALLERGIES : 1
FOR_GU : 1
DIFFICULTY_WHAT : 1
IS_MUCH : 1
IMPROVED_LIKE : 1
MINNICH_IS : 1
MEDICAL_WALKIN : 1
DO_TO : 1
IS_DOING : 1
SW_INTERVENTION : 1
ACCUCHECK_PT : 1
RIGHT_BURSA : 1
COMPLETED_DATE : 1
MESSAGE_SWS : 1
DME_EXM : 1
ANY_DENIES : 1
BY_PTS : 1
APPLY_ACTIVE : 1
GOING_THROUGH : 1
COMMENT_LOSS : 1
PATIENT_COMPLAINED : 1
CALLED_BUT : 1
HARD_COPY : 1
DAILY_HAS : 1
CALL_SPC : 1
INR_ADMINISTRATIVE : 1
MONITOR_DURATION : 1
IN_WAL : 1
YOU_CURRENT : 1
CARDIAC_DECREASED : 1
USING_OR : 1
MANAGER_NOTE : 1
AND_SICKLE : 1
AND_ROHLFS : 1
YO_SC : 1
PATIENT_HE : 1
SUPPLY_REPORTS : 1
BY_PHYSICIAN : 1
DENIES_AXIS : 1
USED_IDENTIFIED : 1
PT_OF : 1
TAKING_ALREADY : 1
OBTAINED_PATIENT : 1
TO_GOALS : 1
ON_CURRENT : 1
DOWN_OR : 1
HAVE_EVER : 1
HEALTH_RECORD : 1
CURRENT_WEIGHT : 1
TO_IODINE : 1
BELCH_FLATUS : 1
SEXUAL_MOLESTATION : 1
FALL_SAME : 1
PRIOR_TO : 7
VET_NO : 1
URINE_ABDOMEN : 1
NAME_GENDER : 1
SEE_PHYSICIAN : 1
VETERAN_VOICED : 1
DOCUMENT_MOOD : 1
PATIENT_CURRENTLY : 1
PULMONARY_CRITICAL : 1
GOOD_PAIN : 1
HIMSELF_ASK : 1
PT_IS : 3
ENJOY_TO : 1
LBS_CARCINOMA : 1
FOR_GIM : 1
TAKE_ASPIRIN : 1
NOTE_YES : 1
ABOUT_NO : 2
TO_HE : 3
TREATED_WITH : 1
AND_NEUROLOGICAL : 1
RESTRICTED_BUT : 1
TIMES_AS : 1
EOMI_MMM : 1
EXISTING_KNOWLEDGE : 1
ATTEMPTS_TO : 1
PSYCHOSOCIAL_ASSESSMENT : 2
ANXIETY_MSE : 1
HAD_ADR : 1
PAIN_ACUTE : 1
GOUT_BREATHING : 1
DISCUSS_PLANS : 1
PHYSICIAN_HOUGH : 1
VIEW_SENT : 1
MOUTH_AT : 2
DIET_LOWFAT : 1
NOTE_ARTERY : 1
AND_DATE : 2
IN_POSITION : 1
ACTIVE_PROBLEMS : 1
HAYS_AGAIN : 1
BLACK_SUDDEN : 1
EVENT_OR : 1
PAIN_PALPATION : 1
MUSKOGEE_WITH : 1
COMMUNITY_NPO : 1
NARCOTICS_BE : 1
OF_TO : 2
OUT_AND : 1
SCHEDULED_FOR : 1
MR_TO : 1
OR_BOTHERING : 1
SC_PREOP : 1
TID_TO : 1
AS_DONE : 1
COMFORT_CV : 1
PHYSICAL_OBSERVE : 1
RECENT_AND : 1
CX_OF : 1
IS_NONSMOKER : 1
CONTINUED_AS : 1
RELATED_CHEST : 1
INTERVENTION_DISCHARGE : 1
OF_AMBER : 1
FOR_CAD : 1
NURSING_PROTOCOL : 1
HOURLY_CHECKS : 1
IC_SLEEP : 1
PATIENT_SENSES : 1
INDEX_PATIENT : 1
OR_BATTERY : 1
STARTING_PM : 1
HIM_ALVETA : 1
UNDERSTANDING_HE : 1
OF_OF : 1
WELL_AND : 1
FOCUS_POSITIVES : 1
MAIL_HAS : 1
ON_TEAM : 1
EVENTS_OR : 1
NURSING_ENCOUNTER : 1
STRESS_THE : 1
RISK_HE : 1
STANDS_NORMALLY : 1
BEDTIME_FOR : 1
OPINION_FOR : 1
EDUCATION_NURSING : 1
AMLODIPINE_MG : 1
PATIENT_HALF : 1
MASS_NOV : 1
PHYSICIAN_CANT : 1
SICKLE_INFORMATION : 1
KNOWN_FOOD : 1
REQUIRING_PT : 1
PSYCHIATRY_RESIDENT : 1
EFFECT_OF : 2
TARGET_ABOVE : 1
SO_FELT : 1
MODERATE_TO : 1
HE_INDENTIFIED : 1
PEOPLE_FT : 1
NORMAL_SUICIDAL : 1
HOURS_AS : 1
AGREED_TRYING : 1
ABOVE_NO : 1
PMHX_IS : 1
DONT_SEE : 1
TO_REMAIN : 1
OBTAINED_NONE : 1
VERDSOME_STATE : 2
URGENT_SERVICES : 1
II_DEFERRED : 1
CONT_HAVE : 1
NS_STARTED : 1
YOU_OFTEN : 3
BE_PER : 1
CAN_BE : 1
NOSE_DROPS : 1
AND_THIS : 1
GIM_THANKS : 1
YELLOW_UP : 1
NURSING_WEEKLY : 1
MOOD_AND : 1
SHOW_TO : 1
TO_HORRIBLE : 1
RETURNS_SMILE : 1
SEP_AND : 1
PROBLEM_DOOR : 1
SAID_FELT : 1
HE_STATES : 1
PAST_YEAR : 3
UCINATIONS_TREATMENT : 1
TALK_HE : 1
PUNCTURE_BACTERIAL : 1
PATENT_ON : 1
VARDENAFIL_HCL : 1
LOCK_IN : 1
REVIEWED_IN : 1
GIVEN_FOLLOWING : 1
YES_TREATMENT : 1
IN_THAT : 1
ER_BAY : 1
DEPRESSION_FOR : 1
SCREEN_NONVA : 1
ESOPHAGEAL_BIOPSIES : 1
THOUGHT_NOTE : 1
SUGGESTED_THAT : 1
BHM_WAL : 1
TRANSPORT_AMBULATORY : 1
AND_BEHAVIOR : 1
HARM_HE : 1
BACK_TAP : 1
HAVE_CONTAINING : 1
EMPOWER_TO : 1
UNDERSTANDING_HYPOALBUMINEMIA : 1
NURSE_NOTE : 1
GROUP_IN : 1
LOCATION_RESIDENT : 1
ABUSE_YES : 1
MMMOIST_CASE : 1
REGION_RADIATION : 1
TIME_GIVEN : 1
MEDICATIONS_SUPPLIES : 4
VISUALIZES_THE : 1
ACTIVE_COMPUTERIZED : 1
EC_CAP : 1
BE_ADMITTED : 1
PHYSICIAN_ADMISSION : 1
HOME_CHEST : 1
OUT_CULTURES : 1
THIS_TO : 1
THIS_SHE : 1
GLCCS_DETERMINE : 1
IS_LOOKING : 1
OF_UNABLE : 1
ASAP_GET : 1
RISK_IT : 1
MUSIC_BOTHERS : 1
GROUP_INDIVIDUAL : 1
AND_HOW : 1
IF_THE : 1
VA_PROCEEDURES : 1
LAD_NO : 1
CARE_TO : 1
HIS_HE : 1
MARITAL_STATUS : 1
PT_COMPLAINING : 1
CHANGES_AT : 1
PROCEEDURES_CHECK : 1
UNSCHEDULED_NURSING : 2
PRN_PAIN : 1
ACTION_ACTION : 1
YES_DEPENDENCE : 1
ADMISSION_HIGH : 1
AND_COME : 1
IF_YOUR : 1
INVOLVED_IN : 1
NAME_PATIENT : 1
LEAVING_AND : 1
HORRIBLE_REASON : 1
INDENTIFIED_TROUBLE : 1
OF_OBESITY : 1
FLATUS_LOST : 1
FOOD_GLUCOSEFINGER : 1
NON_PROCEDURE : 1
CARVEDILOL_TAB : 1
ADMITTED_DUE : 1
NO_MURMUR : 1
BEGIN_OR : 1
NO_FREQUENCY : 1
DISCHARGE_NOTE : 1
WHEN_WAS : 1
EATING_HOSPITALIZATIONS : 1
PAIN_REDNESS : 1
YES_DID : 1
MANY_PEOPLE : 1
TIME_PULSE : 2
CT_SCAN : 1
PRODUCTIVE_MEDS : 1
VERBAL_FOR : 1
PC_PROV : 1
PATIENT_IN : 3
HOURS_NEEDED : 1
FOR_GI : 1
VERDSOME_PROVIDE : 1
HAVE_YOU : 1
RESPIRATIONS_YESTER : 1
INTO_VISTA : 1
MRSA_OBTAINED : 1
COMPANY_AND : 1
DURATION_OF : 2
AS_RETURNS : 1
MG_DAILY : 2
YES_SIG : 1
II_DEF : 1
NOTE_SC : 4
ABDOMEN_ROUND : 1
PULSE_OXIMETRY : 2
WAYS_AND : 1
ACCUCHEK_COMFORT : 1
COMPLAINT_HAD : 1
ADMISSION_OXIMETRY : 1
GUN_CE : 1
MANY_ADDENDUM : 1
RELEASED_INCLUDES : 1
QAM_APPLY : 1
RESTING_SEATING : 1
TO_YES : 1
SA_HE : 1
PT_WELL : 1
TO_QUITTING : 1
SEE_BACK : 1
UNEMPLOYED_NOT : 1
REVIEW_BAC : 1
GLUCOSE_STRIP : 1
MAILED_VA : 1
NOTES_NOTE : 1
DIRECTIVE_SCREENING : 1
BLAME_USE : 1
OR_FOR : 1
DX_AND : 1
DOCUMENTATION_AAS : 1
NO_CLIN : 1
APPLIANCES_ACETAMINOPHEN : 1
PO_PENDING : 1
SMOKE_PACKS : 1
CONTINUE_CURRENT : 1
IS_IS : 1
VET_IN : 2
FOR_CHO : 1
MALE_PSA : 2
BECAUSE_WAS : 1
DEPRESSION_CHEST : 1
FUTURE_CM : 1
YOU_DRINKING : 1
DECREASED_HIS : 1
ADMISSIONS_NO : 1
REVIEWED_REPORT : 1
GOV_CDRH : 1
DRINKS_ON : 1
COMMENTS_THE : 1
THE_TREATMENT : 1
VERBALIZED_OF : 1
COULD_PRESENT : 1
MG_IS : 1
LOCK_PLACE : 1
OR_CYST : 1
FOR_EXTREMITY : 1
MOVEMENTS_OF : 1
LEVEL_PARTICIPATION : 1
YEARS_AND : 1
ME_AM : 1
ADJUSTING_TO : 1
GTT_STARTED : 1
BURSA_PERIARTICULAR : 1
NURSING_ACCUCHECK : 1
AGREED_WITH : 1
WALK_FOR : 1
INPATIENT_STATUS : 2
DO_THE : 1
DISCUSS_DISCHARGE : 1
GAVE_ME : 1
THIS_ACTIVE : 1
ENCOUNTER_UNSCHEDULED : 1
CONSULT_WOULD : 1
GU_ABDOMEN : 1
UP_ASSISTANCE : 2
URINAL_CC : 1
OFFERED_NO : 1
HANDLE_WITH : 1
THERAPEUTIC_ACTIVITIES : 1
ORDER_ENTRY : 1
PAIN_BACK : 1
BATTERY_THIS : 1
REQUIRES_HIM : 1
ASSESSMENT_CHIEF : 1
PLAN_NOTE : 1
PATIENT_BEING : 1
COMPLAINT_PATIENT : 1
TO_HIS : 5
DISORDER_HAS : 1
TRANSPORTATION_PATIENT : 1
DM_CHRONIC : 1
MEDICATION_THIS : 2
MONTHS_USE : 1
SLOWED_AFFECT : 1
MIGHT_ENJOY : 1
CARVEDILOL_MG : 1
RX_TO : 1
PREOP_DAY : 1
AT_THIS : 9
PAIN_LOCATION : 1
INFLAMMATORY_COMMENTS : 1
CHATHAM_REC : 1
CLINICAL_NURSE : 1
TIME_HYPERSOMNOLANCE : 1
PT_NOT : 2
WALKING_ASSUMED : 1
UNDERSTANDING_STRESS : 1
CALL_IN : 2
AGENTS_FOR : 1
TETANUS_MARITAL : 1
CLINIC_IS : 1
WORKING_AND : 1
HAS_FOR : 1
NURSE_ADDENDUM : 1
OFFERED_COMPLAINTS : 1
MEDICATED_GI : 1
LAST_LESIONS : 1
MUSCULO_HYGIENE : 1
LIGHT_HOUSEKEEPING : 1
MEDICATIONS_MHC : 1
CATHETER_IN : 1
SCOPE_AND : 1
HORRIBLE_UPSETTING : 1
SISTER_THE : 1
THEM_TO : 1
HE_WAS : 12
TEMPERATURE_ENCOMPASS : 1
ACTIVITY_ADL : 1
PCP_DISCOURAGED : 1
SEP_PVU : 1
NOT_PATTERN : 1
AND_MRI : 1
NEURO_EXAM : 1
WAS_LEXAPRO : 1
REPORTS_THAT : 2
FROM_RECENT : 1
VISITING_NURSE : 2
INFORMATION_GATHERED : 1
WANTS_SAY : 1
BEEN_OUT : 2
VOMITING_NURSING : 1
DSHI_REPORT : 1
AS_HHA : 1
MAURER_EVALUATION : 1
OUTPATIENT_STATUS : 4
THE_PATIENTS : 5
HEAD_AREA : 1
PVU_PENDING : 1
RECURRENT_MODE : 1
FOR_ED : 1
TO_WED : 1
FACILITATE_HEALING : 1
ED_CHF : 1
NONE_THOUGHT : 1
BREATHING_AND : 1
PAIN_COUGH : 1
AND_DOES : 1
DOCTOR_EL : 1
COLONIC_POLYPS : 1
PARTICIPATION_PT : 1
SYMPTOMS_IS : 1
MAIL_MEDICATIONS : 1
PATIENTS_ATTENDANCE : 1
BIPOLAR_DISORDER : 1
BARRETTS_ESOPHAGITIS : 1
YO_DIVORCED : 1
THANKS_GERD : 1
AND_AGREES : 1
DISCUS_AND : 1
NEEDED_AT : 1
CRITICAL_RESPONSES : 1
FOR_HIS : 2
NOT_APPLICABLE : 1
EKNURSING_MH : 1
TAKE_NO : 1
DENIES_TAKING : 1
FORT_LEAVENWORTH : 1
DISEASE_TIME : 1
SOURCE_INFORMATION : 1
STOCKINGS_VETERAN : 1
HEENT_SCLERA : 1
ED_ATTACHED : 2
POLYPS_LABORATORY : 1
DATE_MAY : 1
CONSTIPATION_NO : 1
ED_IMAGES : 1
ARE_AVAILABLE : 1
HIM_BACK : 1
DEBILITY_REDNESS : 1
REVIEWED_AND : 1
TREATMENT_RECOVERY : 1
THIS_CALL : 1
AGREEMENT_WITH : 1
PULMONARY_DATE : 1
OR_DRUG : 1
EVERY_WITH : 1
ANYTHING_FAIR : 1
IS_WM : 1
WITH_RISKS : 3
OF_BODY : 1
NO_EVIDENCE : 1
WITH_NTG : 1
LOSS_INDIVIDUAL : 1
PROBLEM_IS : 1
PSYCHOLOGICAL_REPORT : 1
YEARS_NURSING : 1
COMPLAINTS_COURT : 1
THESE_HE : 1
HAS_AM : 1
HISTORY_ATTEMPT : 1
URINATE_PT : 1
PART_TREATMENT : 1
DOES_VERBAL : 1
MOVEMENT_HOME : 1
ON_UNIT : 1
ORDER_OF : 1
NOTE_FOR : 4
EDUCATION_GIVEN : 2
TO_HANDLE : 2
BUT_DOES : 1
TO_DONE : 1
NICOTINE_MG : 3
USED_PATIENT : 1
ABOUT_ALCOHOL : 1
MANY_ARE : 1
MOMENT_BUT : 1
AT_FORT : 1
ANXIETY_DISORDER : 1
UPSET_LUNCH : 1
LEVEL_EVERY : 1
NURSE_SIGNIFICANT : 1
ACTIVITY_AND : 1
MCG_BLSTR : 1
NOTE_TAKE : 1
CANCELLED_PTS : 1
THE_SYSTEM : 1
OF_UP : 1
ABDOMEN_NOT : 1
OLD_PATCH : 1
THE_READINGS : 1
COLORED_COUGHING : 1
ON_ACTIVITY : 1
CHRONIC_OBSTRUCTIVE : 1
INTENSE_UCINATIONS : 1
HIMSELF_THROUGH : 1
FULL_THICKNESS : 1
INITIALY_VISIT : 1
THAT_DETOX : 1
PENICILLIN_ERYTHROMYCIN : 1
OR_REMOVE : 1
PUT_PATIENT : 1
TYPE_FREQUENCY : 1
MIGHT_HAVE : 1
OR_MORE : 1
THOUGHTS_OF : 1
ALSO_ADDENDUM : 1
HE_HAVE : 1
SCORE_ACTIVITY : 1
COULD_REACH : 1
PAST_TURN : 1
TERM_REHAB : 1
PROBLEM_LIST : 1
ATT_GAF : 1
NOTE_INCLUDE : 1
REPLACEMENT_SPECIAL : 1
ABOUT_CHANTIX : 1
DENIES_PAIN : 1
TO_SYNCOPAL : 1
PAIN_ADMMITTED : 1
APHDR_PLEASE : 1
ULA_PRIOR : 1
HIMSELF_FOR : 1
PAIN_EXERCISE : 1
NOT_ON : 1
BY_BREATHING : 1
MALE_PAIN : 1
NOW_FEELING : 1
HIS_SURGERYAPPT : 1
QUICKLY_AS : 1
OFTEN_YOU : 3
IN_FUTURE : 1
BECAME_AT : 1
INPATIENT_OUTPATIENT : 1
TO_MANOR : 1
INDICATED_OF : 1
BE_INCLUDE : 1
THE_COORDINATION : 1
PSYCHOLOGICAL_ASSESSMENT : 1
AT_BACK : 1
PERSISTENT_ABDOMINAL : 1
NON_MEDICATION : 1
SMOKING_RISK : 1
BEHAVIOR_TO : 1
BLAME_THEIR : 1
IS_RESTING : 1
DURING_THE : 2
AFTER_GETTING : 1
TO_IV : 1
COMFORT_GLUCOSE : 1
EXAM_NORMAL : 1
WITHIN_TURN : 1
YEAR_MALE : 1
YOU_FIND : 1
MEDICATION_BE : 1
MOUTH_ACTIVE : 3
RR_HAS : 1
ELIGIBILITY_FOR : 1
TO_APPETITE : 1
REPORT_WILL : 1
WITH_FOR : 2
PHYSICAL_ACTIVITY : 1
REPORTS_HIS : 2
EXTREMITIES_DIET : 1
HAS_FEELING : 1
SEVERAL_MOD : 1
BACTERIAL_MENINGITIS : 1
CARDIOVASCULAR_NORMAL : 1
BOTH_ARMS : 1
SPEECH_OF : 1
COMPLAINT_CHRONIC : 1
FOR_PATIENT : 1
AMBER_COLORED : 1
DISORDER_AND : 1
SUS_MAURER : 1
TAKE_COPD : 1
FOR_TO : 6
CANT_SEE : 1
CLINIC_TO : 1
OUTPATIENT_PRIMARY : 1
WM_WITH : 1
IS_ANYTHING : 1
BY_HIS : 2
TO_FACE : 1
CHRONIC_SPHENOIDAL : 1
REPORT_HEADACHES : 1
CARE_KRISHNASWAMY : 1
LOCK_SALINE : 1
APPOINTMENT_NONCOMPLIANCE : 1
IS_ALSO : 2
PSYCHOSOCIAL_HISTORY : 1
NONACUTE_LEVEL : 1
NO_ABDOMEN : 1
VET_ALSO : 1
AT_GASTRIC : 1
EVIDENCE_FOLLOWING : 1
SIGNS_HOME : 1
TYPE_RX : 1
OF_PRESENT : 1
LUNG_COUGHING : 1
RADIATION_YES : 1
UCINATIONS_THREATENING : 1
GOOD_WITH : 1
SURGERY_ASSESSMENT : 1
REASON_ADMISSION : 1
BCC_AND : 1
POSITIVE_SCREEN : 1
WITH_PMHX : 1
NAPROXEN_MG : 2
EDUCATIONPT_CHF : 1
NOT_PREVENTIVE : 1
CARE_OF : 1
ON_ER : 1
ISSUES_WILL : 1
READING_THIS : 1
VET_BIPOLAR : 1
APPLICABLE_TABLETS : 1
PHARMACY_EXTERNAL : 1
COOPERATIVE_COMPLIANT : 1
NOTE_STABLE : 1
SHE_HE : 1
TO_MEDS : 1
BE_ALSO : 1
HAZARDS_UP : 1
CARE_YES : 1
FOR_LIKE : 1
FELT_WAS : 1
PRESCRIBED_IS : 1
HE_LIKE : 1
PSYCHIATRIC_PRIOR : 1
OR_BY : 1
AGAINST_INDIVIDUAL : 1
ADR_MULTIPLE : 1
RESPONSES_ALMOST : 1
IS_MALE : 1
GET_PT : 1
MEDICATIONS_HYPOTHYROIDISM : 1
SINCE_NO : 1
MORSE_SCALE : 1
JUST_FUNCTION : 1
STILL_THAT : 1
GO_MEDICAL : 1
SEEK_HELP : 1
HAZARDS_WITH : 1
BE_UPSET : 1
PATIENT_PROSTATE : 3
PATIENT_INSTRUCTED : 1
AND_WITH : 3
EVALUATION_INDEPENDENT : 1
FOR_OUTPATIENT : 2
STATUS_HX : 1
HOW_THE : 1
IV_BY : 1
ASSESSMENT_TX : 1
PLACE_NOT : 1
THE_HAS : 1
HE_WORRIES : 1
CLINIC_ARRIVED : 1
IN_OF : 3
COLONIC_GI : 1
FROM_DURING : 1
CLERICAL_NOTE : 1
SIGNS_CARE : 1
AM_APPETITE : 1
MG_EC : 1
VETERAN_THOUGHT : 1
LIVES_HIMSELF : 1
AT_PM : 2
GIVEN_NOTED : 1
REVIEWED_CHANGES : 1
UPPER_EXTREMITY : 1
AND_COMMENT : 1
OF_MONTHS : 1
HEADACHES_OR : 1
CP_RYAN : 1
ALL_TELEPHONED : 1
NOT_DISTENDED : 1
RIGHT_OLECRANON : 1
TO_HAVE : 3
SUICIDAL_DENIES : 1
EXERCISE_ALCOHOL : 1
KNOWING_WHAT : 1
APPOINTMENT_SAME : 1
HAS_DISORDER : 1
VETERAN_PARTICIPATED : 1
WITHIN_MONTHS : 2
POST_DISCHARGE : 1
SUCH_NICOTINE : 1
TAKE_BY : 1
GI_EDUCATION : 1
THE_STORES : 1
HAS_CHRONIC : 1
IN_SIMVASTATIN : 1
AS_ANYTIME : 1
CARDIAC_OUTPUT : 1
ANY_NEEDS : 1
SIGNIFICANT_AGENCY : 1
FOR_OR : 1
SAO_SIG : 1
AND_WHAT : 1
SI_SEVERE : 1
RILEY_HAVE : 1
MEDICATION_ED : 1
AROUND_HE : 1
NOTE_REMINDER : 1
DEAL_WITH : 1
ISOP_OFTEN : 1
NEGLECT_SEXUAL : 1
OCCASIONALLY_PREASSURE : 1
ABNORMAL_MOVEMENTS : 1
SYMPTOMS_HAS : 1
GIVE_VERBAL : 1
SCORE_ONE : 1
TO_TAKE : 2
WERE_PRESCRIBED : 1
TO_INFORMATION : 1
NOT_REACH : 1
DAILY_YOUR : 1
COME_BEFORE : 1
TELEPHONE_NON : 1
ALMOST_ANSWERS : 1
THIS_UNSCHEDULED : 1
PATIENT_PREP : 1
ARE_NOT : 1
THESE_THOUGHTS : 1
ANTICOAGULATION_COMMENTS : 1
FUNCTION_FOR : 1
STUDENTS_NURSING : 1
NURSING_PULSE : 1
DEPENDENCE_WEIGHT : 1
PREVIOUS_TREATMENT : 1
PALPATION_TO : 1
CPRS_COMPLETE : 1
WRIST_HE : 1
OF_TOBACCO : 1
NOTE_BARRIERS : 1
DOPAMINE_PT : 1
PENDING_PRIOR : 1
TO_SEE : 1
NONVA_MG : 1
DID_YOU : 4
SPRITS_SMILING : 1
TREATMENT_ACTIVITY : 1
TOMORROW_TIME : 1
PROGRESS_PHONE : 1
LB_HAS : 1
UPDATE_OF : 1
IV_LIVES : 1
MODE_TRANSPORTATION : 1
STATUS_MARRIED : 1
HAS_APPOINTMENT : 1
ACTIVITIES_MIN : 1
PM_BUPROPRION : 1
PERIOD_SERVICE : 1
SCHEDULED_APPT : 1
OCT_HE : 1
ACCORDING_VITALS : 1
AND_RESOLVED : 1
MONTH_OF : 1
PAIN_OMEPRAZOLE : 1
GIVEN_HR : 1
AM_HE : 1
HAD_PROSTATE : 3
AND_NONE : 1
CONTINENT_APPLIANCES : 1
ACTIVE_OUTPATIENT : 3
WITH_CC : 1
IMPRESSIONS_SCOPE : 1
ABLE_TO : 2
THE_VESTIBULAR : 1
THAT_HIS : 1
STR_GENDER : 1
LAST_INTERN : 1
PATIENTS_MANAGEMENT : 1
INFORMATION_TO : 1
PAIN_REPORTS : 1
DECIDED_TO : 1
CHAIR_SIG : 1
MEDICAL_TO : 1
OR_FT : 1
BATHING_AND : 1
BIOPSY_ATTENDING : 1
CC_OF : 1
PESSIMISM_WORTHLESSNESS : 1
OFFICE_DATED : 1
QUITTING_SUCH : 1
URINAL_NO : 1
EDUCATIONPT_ED : 1
BACKING_OUT : 1
ACTION_SUSPICION : 1
SATT_AFTERCARE : 1
VISTARIK_MG : 1
AS_PLAN : 1
HEIGHT_RESULTS : 1
PROTECTIVE_DEVICES : 1
MULTIPLE_SKIN : 1
BP_AND : 1
TRANSFER_PATIENT : 2
SLEEP_STUDY : 1
UP_DATED : 1
BY_READING : 1
PT_ROLLATOR : 1
PRESENT_THE : 1
AND_UNDERSTANDS : 1
NAME_MALE : 1
DEPRESSION_DENIES : 1
WAY_DOWN : 1
INDEPENDENT_UNDERSTANDING : 1
ITCHY_OR : 1
HOSPITAL_SC : 1
SUPPLY_SHE : 1
CHANTIX_ON : 1
TO_HOME : 1
ELECTRICAL_MECHANICAL : 1
TREATMENT_TEAM : 2
THEM_FRIENDS : 1
INCAPACITATION_TO : 1
NURSE_MEDICAL : 1
STATES_NEW : 1
IF_YOU : 2
LEADER_STUDENTS : 1
THE_ON : 3
DISPOSITION_HEADACHES : 1
ROSENTHAL_COMPLICATIONS : 1
PATHOLOGY_ALSO : 1
PO_NON : 1
ON_ARMS : 1
FACILITATE_THE : 1
CONTACTED_AND : 1
MEDS_ACTIVE : 2
ACTING_ED : 1
ASSIST_PLACEMENT : 1
VITALS_HEALTHAMBULATORY : 1
INABILITY_TO : 1
BE_USEFUL : 1
AMBER_NO : 1
VOIDING_VIA : 1
ADMMITTED_TO : 1
PATIENT_DEMONSTRATED : 1
DE_HISTORY : 1
DENIES_OF : 1
IDGE_AND : 1
EVALUATED_FOR : 1
AND_ARE : 1
VETERAN_AN : 2
AND_THEY : 1
WITH_DME : 1
PRESCRIPTION_HOW : 1
IS_ASSIGNED : 1
NURSE_TO : 1
PHONE_PATIENT : 1
THROUGH_DIVORCE : 1
PHYSICIAN_GET : 1
NO_SHOW : 2
SOCIAL_WORKER : 1
AND_DT : 1
THAT_MEDICATIONS : 1
AGREES_WITH : 1
STATED_WAS : 1
PREVIOUS_TIMES : 1
INFORMATI_TYPE : 1
YEARS_TELEPHONE : 1
INCOME_FROM : 1
MVA_WHEREIN : 1
SOFT_NONTENDER : 1
BUSINESS_SAID : 1
RILEY_SOLDIER : 1
FAIR_POOR : 1
BREATHING_CHEST : 1
OR_DEPRESSIVE : 1
LOWERING_AND : 1
MIGHT_COMING : 1
AS_NECK : 1
DIVERTICULOSIS_DATE : 1
BILATERAL_NEEDS : 1
WAS_CARE : 1
MG_TAKE : 4
CLINIC_PSYCHIATRIC : 1
TIMES_HAD : 1
BY_AT : 2
PROPRANOLOL_IN : 1
SINUS_CONGESTION : 1
INTENSE_AND : 1
ADDENDUM_EXISTING : 1
INFORMATION_THE : 1
NIGHT_ALOT : 1
PATIENT_MEDS : 1
DEMONSTRATED_SAFETY : 1
AREA_PULSE : 1
HAS_SITTER : 1
VET_WAS : 1
PALPATION_GTT : 1
RDW_CHRONIC : 1
AT_AND : 2
VISIT_HAS : 1
FULL_PARTIAL : 1
USE_NOSE : 1
NO_ACTION : 1
WAL_MCG : 1
HIM_TRAVEL : 1
ATTACHED_TO : 5
OF_FALLING : 2
HOWEVER_DOUG : 1
OR_WITHIN : 3
EKHISTORY_PHYSICAL : 1
ABNORMAL_NONE : 1
HIS_LIFE : 1
BEFORE_ASSISTING : 1
UP_VERDSOME : 1
INCLUDING_NUTRITION : 1
THE_FOLLOWING : 4
DID_HAVE : 4
INITIALY_PT : 1
PTS_DIABETIC : 1
HANDLE_TEMP : 1
FOR_COMPLAINT : 1
AND_IF : 3
AND_PROPRANOLOL : 1
USE_SCREENING : 2
STAFF_WILL : 1
MAY_IMAGE : 1
INTERN_REASON : 1
PATIENT_TRIAGED : 1
NO_SUDDEN : 1
INCREASE_PERIOD : 1
BRIEF_ESTIMATED : 1
ADDENDUM_STRUCTURE : 1
COORDINATOR_WILL : 1
PC_NOTE : 1
STRETCHER_WITH : 1
WAS_ATTACKED : 1
NO_PMHX : 2
FATHER_DIED : 1
RAN_CASE : 1
MENS_CNS : 1
TO_OT : 1
INCAPACITATION_DUE : 1
NO_CHANGES : 1
AN_AND : 1
NURSE_ACTIVE : 1
REHAB_HOWEVER : 1
SMILE_DUTY : 1
DISCHARGE_INSTRUCTIONS : 2
PL_CRASH : 1
SAFE_TO : 1
IS_PREFERS : 1
PATIENT_CALL : 1
UCINATIONS_AND : 1
DRINK_ALCOHOL : 1
SMOKING_OPTOMETRY : 1
REPORT_COMPLETED : 1
LIGHT_REACH : 1
PROCEDURE_DISCHARGE : 1
CALLED_COULD : 1
THE_TESTS : 1
WORKER_PREVENTION : 1
WITH_REFERRAL : 1
PALPATION_CONSISTENT : 1
DO_TAKE : 1
NONE_LISTED : 1
EXTREMITIES_EFFUSION : 1
TO_RELEASED : 1
SC_COORDINATOR : 1
AND_LEVEL : 1
LOUD_MUSIC : 1
PAINLESS_SWELLING : 1
CONGESTION_STROKE : 1
STATUS_ASSESSMENT : 1
AT_COMPLIANT : 1
CHEST_REMOVE : 1
RANGE_NURSING : 1
GO_ROHLFS : 1
INDIVIDUAL_THE : 1
FACTORS_NUTRITION : 1
AND_NO : 2
KNOWN_TO : 1
THIS_PROCEDURE : 1
SUPPLIES_MALE : 1
NO_ACTIVITY : 1
ULTRASOUND_BOTH : 1
TELEPHONE_NURSING : 1
BUT_HE : 1
MEDICATIONS_CARDIAC : 1
NEEDS_BE : 1
YOU_DRINK : 1
WAS_AND : 1
PATIENT_UNDERGO : 1
LABORATORY_TOBACCO : 1
ADN_ACTING : 1
FOR_PLAN : 1
THEIR_PROVIDER : 1
PAK_PSYCHIATRY : 1
EMERGENCY_KRISTEN : 1
IN_TO : 1
PATIENT_READY : 1
ABOUT_MILITARY : 1
NONVA_DOCUMENTATION : 1
RT_DISTAL : 1
ESOPHAGITIS_HISTORY : 1
OMEPRAZOLE_EC : 1
WITHIN_NO : 2
SERVICES_PAIN : 1
REFERRAL_AND : 1
THE_TID : 1
BEHAVIOR_CURRENT : 1
NECK_HAVE : 1
INTERVENTIONS_REVIEWED : 1
VERY_YEAR : 1
ATTENDING_MINNICH : 1
SA_STANDS : 1
PREASSURE_MEDICATION : 1
AND_COCHLEAR : 1
PULMONARY_CARE : 1
SEE_RISK : 1
COME_GO : 1
ATTENDED_NA : 1
SUMMARY_NOTE : 1
FOLLOWED_BY : 1
CALL_LIGHT : 1
INSULIN_REG : 1
THIS_ENTRY : 1
ALCOHOL_AND : 1
NO_ADDENDUM : 1
OF_DIABETES : 1
STRUCTURE_OR : 1
NO_PALPITATIONS : 1
PRESSURE_ORAL : 1
TO_BY : 2
REMINDER_ACTIVITY : 1
NARCOTICS_TO : 1
OBTAINED_TOX : 1
NURSING_TREATMENT : 2
AFFECT_AND : 1
OF_PROBLEM : 1
ASSISTANCE_DEVICES : 1
INFORMATION_NURSE : 1
REQUESTING_SPEAK : 1
TO_DISCOURAGED : 1
EDUCATION_RECORD : 1
CHRONIC_PAIN : 2
WAVE_GIVEN : 1
WILL_BE : 4
OUTCOME_PROSTATE : 1
STARTED_PROBLEMS : 1
AND_REPORTS : 1
RAILS_VERDSOME : 1
BREAKTHROUGH_IER : 1
PATIENT_HANDOUT : 1
DEPRESSIVE_SYMPTOMS : 1
PALPITATIONS_PULSES : 1
AND_YOU : 2
HAS_AA : 1
DISCHARGED_TOMORROW : 1
SMOKER_YES : 1
ACHING_PAIN : 1
ADMMITTED_INPT : 1
FOLLOW_PLEASE : 1
JIM_SERVICE : 1
ASSAULT_OR : 1
MS_FOR : 1
MAN_AND : 1
NOT_CATHETER : 1
FULL_THAT : 1
PLAN_INITIAL : 1
INTENT_OR : 1
DUE_FIXATOR : 1
AMBER_PAIN : 1
THE_TWO : 1
VET_LONGER : 1
DATE_CANCER : 1
BE_INCLUDES : 1
IN_SOCIAL : 1
MHC_NO : 1
WITH_INVERSIONPT : 1
STATE_HAS : 1
AND_POSSESSION : 1
RECORD_NOTE : 1
CM_DIAGNOSES : 1
FT_TYPE : 1
NOTE_MEANS : 1
UPPER_NUMBNESS : 1
HE_THE : 1
MRI_MCA : 1
PROSTATE_SCREENING : 4
MEDICATIONS_INSULIN : 1
SUPPLIES_HAS : 1
BEEN_MEDS : 1
TESTS_OR : 1
ICDCM_NO : 1
HAS_HX : 1
GET_PAID : 1
PET_MAY : 1
OFFERED_TRANSFER : 1
PHYSICIAN_IN : 1
MH_HAIRLESS : 1
TO_AWAY : 1
ASSISTANCE_FROM : 1
WILL_COME : 1
ELBOW_SEVERAL : 1
RADIATION_XRT : 1
CAD_MI : 1
DOES_PATIENT : 1
FOOD_FOR : 1
AFIB_RATE : 1
BY_AND : 1
THEM_AND : 1
CONT_TO : 1
IS_SC : 1
THIS_ENCOUNTER : 3
THE_PREVIOUS : 1
RETURNED_CALL : 1
MR_CALL : 1
BE_USING : 1
WHEN_REMINDED : 1
PREPS_OTHER : 1
LABORATORY_PATIENT : 1
COMPLETE_LABS : 1
SMOKING_PROGRAM : 1
PROVIDED_INCLUDED : 1
VETERAN_HE : 1
CHAPEL_HAVING : 1
URINE_COUGHING : 1
POST_TELEPHONE : 1
PENICILLIN_OMEPRAZOLE : 1
ADJUSTING_PROGRAM : 1
BEEN_FOR : 1
PATIENT_FOR : 1
FIREARMS_BP : 1
SPECIAL_NONE : 1
LUNCH_EVIDENCE : 1
WAS_EATING : 1
WILL_SOCIAL : 1
RILEY_THAT : 1
PROCESS_AT : 1
TO_FACILITATED : 1
AMBER_URINE : 1
DISKUS_POSSESSION : 1
INSTRUCTIONS_NURSING : 1
MSE_ALERT : 1
PLAN_OF : 1
LEVEL_OF : 3
HIM_THE : 2
TUNNEL_REPAIR : 1
ASSESSMENT_PHYSICAL : 1
DEESCALATION_TECHNIQUES : 1
SPECIFY_NOT : 1
ALTERING_EXPERIENCE : 1
EVERY_EVENING : 1
MAKING_SOME : 1
COMPONENTS_ARE : 1
VITALS_MENTAL : 1
OR_MONTHS : 3
WAS_TREATED : 1
OUTCOME_CANCER : 1
COMPLAINT_OLD : 1
AS_WELL : 1
ON_ONE : 1
CONTINUOUS_REFERRED : 1
WAS_WHEEL : 1
RESULTS_FOR : 1
ALL_ADMINISTERED : 1
AGR_SO : 1
GOOD_COMPLAINTS : 1
CUP_BECAUSE : 1
COORDINATOR_VETERAN : 1
SHE_WAS : 1
PLANS_HE : 1
FOR_PERSISTENT : 1
VENESSA_WEIGHT : 1
COMPLICATIONS_PATIENT : 1
INCLUDING_VETERAN : 1
INTERDISCIPLINARY_PLAN : 2
FOURTH_LEADING : 1
MOLESTATION_FIVE : 1
PM_FOURTH : 1
HEPATITIS_CARRIER : 1
PACKS_COPD : 1
ADDENDUM_HEMATOLOGY : 1
CENTRAL_SYSTEM : 1
HE_DECIDED : 1
APPOINTMENT_SETTLED : 1
MD_ARNP : 1
SINCE_OF : 1
THOUGHTS_PATIENT : 1
TREATED_SURGERY : 1
OBSERVATIONS_FOR : 1
SCORE_FOR : 1
ANY_DEPRESSION : 1
DIAGNOSIS_HYDRONEPHROSIS : 1
TRIAGED_AT : 1
EYE_SESSION : 1
URINAL_FOR : 1
CARRIER_NO : 1
MONTH_YOU : 2
BP_CHECK : 1
BRIEF_CONTACTS : 1
MANAGER_TYPE : 1
HCL_ATARAX : 1
MEDICAL_YOUR : 1
AGE_PAK : 1
PATIENT_HERE : 1
LEFT_SA : 1
AGE_ACCEPTED : 1
BY_PSYCHIATRIC : 1
MHC_SHOW : 1
WAL_PHONE : 1
NERVES_NORMAL : 1
TAKE_PILL : 2
GIVEN_CODEINE : 1
ARRIVAL_PATIENT : 2
DEPRESSION_OBSERVATIONS : 1
FOR_VET : 1
ISSUES_SETTLED : 1
PB_PDF : 1
OF_ABOVE : 1
FIXATOR_PATIENT : 1
INCLUDING_PREPS : 1
WHAT_IS : 1
OR_STIMULATOR : 1
FOLLOWING_ENERGY : 1
OUTDATE_STARTING : 1
REVIEWED_FOUND : 1
SELF_EXTENSION : 1
UNIT_PT : 1
RECIEVED_PREP : 1
PHYSICIAN_FOR : 1
CESSATION_WITH : 1
NUTRITION_WEIGHT : 1
TRANSDERMAL_QAM : 1
REMINDED_CARVEDILOL : 1
COUNSELLED_ABOUT : 1
ES_NODULES : 1
ANSWER_PURPOSE : 1
WED_INCLUDE : 1
DYSPNEA_RASH : 1
NONE_VETERAN : 1
MEDS_SINCE : 1
QUITTING_COMPONENTS : 1
THAT_WORKING : 1
PROV_OUTPATIENT : 1
HOUSE_TO : 1
CALLER_JIM : 1
BUT_THOUGHTS : 1
ENCOUNTER_BASIS : 1
BP_PAIN : 2
CHO_OL : 2
BP_LB : 1
AND_MORE : 1
SECRETIONS_WITH : 1
CONVERSATION_HAS : 3
THE_ER : 1
TAB_MOUTH : 1
PRESENT_DURATION : 1
RISK_EDUCATION : 1
THE_BUSINESS : 1
NOT_ATTACHED : 1
NO_UCINATIONS : 1
UNEMPLOYED_HAVE : 1
VISION_FAIR : 1
TOLD_DAILY : 1
FRONTOPARIETAL_REGION : 1
ACUTE_PSYCH : 1
MOOD_BEHAVIOR : 1
MILD_QUITTING : 1
HIV_SICKLE : 1
IMMEDIATE_OR : 2
MADE_THAT : 1
SHE_KNOWS : 1
ANSWERED_PATIENT : 1
SALINE_NO : 1
MALE_VET : 1
RATIONAL_THE : 1
TAKING_IF : 1
STATUS_PATIENT : 2
PROBLEMS_DAILY : 1
REPORTS_CC : 1
HAVE_SEIZURE : 1
AVAILABLE_FOR : 1
THE_AND : 3
ONE_IN : 1
ANSWERS_GAVE : 1
LEVEL_ACCEPTABLE : 2
DENTURES_MG : 1
VETERAN_THAT : 2
TIME_SHE : 1
EKSW_PSYCHOSOCIAL : 1
LETTER_BE : 1
NEOPLASM_INFECTIOUS : 1
NEEDLE_AND : 1
APPT_ARE : 1
WITH_TO : 2
TRANSPORT_PATIENT : 1
ARRIVED_AMBULATORY : 1
AT_NIGHT : 2
INVASIVE_CONSULTS : 1
REGULAR_MURMUR : 1
HALF_DOWN : 1
PARTNERS_CLINIC : 1
BECAME_UPSET : 1
PAIN_THE : 2
PATIENT_TOBACCO : 1
THE_DOCTOR : 1
NOTARIZED_WAS : 1
EXTREMITIES_WITH : 1
WEAKNESS_TAKING : 1
TO_CLINIC : 4
THAT_SEEMING : 1
THE_WIFE : 1
AORTOCORONARY_BYPASS : 1
GUN_TABLET : 1
HE_CALLING : 1
BREATH_TEMPERATURE : 1
CALL_TYPE : 2
PPP_BILATERALLY : 1
TYPE_INITIAL : 1
SERVICES_ANSWER : 1
COMPLAINT_INFORMATI : 1
AT_HR : 1
GOUT_COMPLAINTS : 1
HEIGHT_IN : 1
COMMENTS_CRITICAL : 1
ASSESSMENT_ISSUE : 1
STATES_NO : 1
SUMMARY_PATIENT : 2
MAJOR_DISORDER : 2
NO_CC : 1
RELAXATION_DEESCALATION : 1
STEADY_NO : 2
HAVE_PRIMARY : 1
WITH_MAINTENANCE : 1
PRIVATE_OFFICE : 1
BE_FAXED : 1
PROCESS_HAVE : 1
UNIT_MED : 1
REMINDED_THAT : 1
THEM_ASKED : 1
ADENOPATHY_CATIGNANI : 1
PROVIDER_HYPERTENSION : 1
MEMORY_NAME : 1
ANYTIME_TRIES : 1
PLACE_IN : 1
STATUS_DONNING : 1
ARM_OR : 1
OF_WHEN : 1
PHONE_SAME : 1
AORTOCORONARY_STATUS : 1
SERIES_PATIENT : 1
BEFORE_DRINK : 1
OCT_EMERGENCY : 1
STOPPED_STATES : 1
AS_UP : 1
THAT_IS : 5
OF_ALCOHOL : 1
HE_PASSING : 2
WAS_DEMANDING : 1
STRESSORS_PART : 1
NO_RESULTS : 1
YOU_WANT : 1
PROSTATE_CANCER : 1
FOLLOWED_UP : 1
COULD_TO : 2
PROBLEM_PERRLA : 1
OUT_NUMBER : 1
SUICIDAL_THIS : 1
FOR_AMBER : 1
CONTINUE_WITH : 1
PER_PROBLEMS : 1
POLYSOMNOGRAPHY_SLEEP : 1
CONTACT_VENESSA : 1
POSITION_ON : 1
AND_NOTARIZED : 1
SAFE_USE : 2
IS_SECOND : 1
HALF_WAY : 1
HOW_THAT : 1
REFERRAL_CASE : 1
SKIN_COMMENTS : 1
MOOD_ALTERING : 1
BEFORE_EXAM : 1
AND_HE : 5
IS_FIRST : 1
THE_POSITIVE : 1
PSYCHO_GROUP : 1
PROBLEM_TOBACCO : 1
AND_BIOPSY : 1
THAT_IN : 1
GETS_AS : 1
EXCLUDING_SUPPLIES : 1
SAFETY_COMPLETED : 1
NOT_NIGHT : 1
BLOOD_PATIENT : 1
RISKS_OBESITY : 1
CURRENTLY_FOLLOWED : 1
ATTENDED_THIS : 1
VISIT_DATED : 1
DISEASE_WITH : 1
OL_MEDICATION : 1
PASSING_OUT : 1
TO_ABNORMAL : 1
AS_EASILY : 1
PHYSICIAN_SNIEWSKI : 1
RELATED_TO : 2
AND_OUTPATIENT : 1
IDEATION_OR : 1
SCALE_ADDENDUM : 1
MEDICATIONS_CARE : 1
NAME_MAJOR : 1
RETURN_ERE : 1
PATIENT_POINTER : 1
WAS_PLACED : 1
NOT_DOES : 1
AND_LAMOTRIGEN : 1
ALSO_RASH : 1
PVU_OUTPATIENT : 1
CONSIDERED_FOR : 1
INTAKE_TAKE : 1
PT_WOULD : 1
STRESSORS_AND : 1
ESOPHOGEAL_LESIONS : 1
PSYCH_BMI : 1
AM_NOT : 2
PATHOLOGY_FROM : 1
IS_FAILING : 1
LEARNING_PRESSURE : 1
UNSPECIFIED_OF : 1
LONG_AS : 1
AT_PROBLEMS : 1
MALATHI_SUS : 1
NO_NO : 1
SCREEN_OR : 1
FIVE_TO : 1
ASSESSMENT_EYES : 1
NUMBNESS_COLLECTION : 1
SEEMING_TO : 1
FRIEND_VENESSA : 1
LOWFAT_RALIZED : 1
QUIETLY_SEATING : 1
STROKE_RISK : 1
HAS_NKA : 1
ADENOPATHY_CRISTEN : 1
VERY_OFTEN : 1
RESP_BP : 2
KNOWS_WHAT : 1
INFECTINO_PRESENT : 1
DISEASES_PROTOCOL : 1
ATTEMPTS_EMPOWER : 1
ADR_TO : 1
READING_RISK : 1
PATIENT_TO : 4
IN_FEBRUARY : 1
ERYTHROMYCIN_THAT : 1
EVIDENCE_TO : 1
LOST_CARCINOMA : 1
STATES_PT : 1
OUTDATE_AT : 1
CHEST_AND : 1
BE_NEED : 1
REFER_FAIRVIEW : 1
ATTENDED_AA : 1
BUT_BRIGHTENED : 1
TEAM_ASSESS : 1
MEDICAL_FOR : 1
PAIN_OF : 1
VACCINE_MARITAL : 1
INSTRUCTIONS_PATIENTS : 2
HAS_ADR : 1
ASSOCIATED_WATERY : 1
ACTIVE_PC : 1
SO_THAT : 1
RECOMMENTATIONS_YOU : 1
IN_DEPENDING : 1
PHYSICIAN_AN : 2
NA_RT : 1
SUPPLIES_PATIENT : 1
WAS_WAS : 1
ADDITIONAL_OF : 1
WITH_AND : 6
REQUESTING_WAL : 2
ENJOY_COMING : 1
WEEKLY_ASSIST : 1
PAIN_STARTING : 1
REC_SUBJECTIVE : 1
ACTIVE_DISCONTINUE : 1
HAS_SEEN : 1
THE_HE : 1
TO_WITH : 4
CURRETNLY_CELEXA : 1
WALKIN_VISIT : 1
RT_TH : 1
MOVEMENTS_SPEECH : 1
LAD_MASSESS : 1
AND_ALL : 1
NO_PT : 1
ALL_WAY : 1
CONTINUD_INTERVENTION : 1
BEST_PS : 1
COULD_NOT : 1
AS_SOON : 1
MEDICATIONS_PATIENT : 2
PROCEDURES_EXPLAINED : 1
PREPS_FUTURE : 1
PSYCHIATRIC_SUBSTANCE : 1
NO_FUNCTIONAL : 1
HYDROCEPHALUS_INFECTIOUS : 1
WILKES_NEED : 1
LIFE_PACE : 1
MS_ZELL : 1
SEXUAL_FIVE : 1
LINE_FAMILY : 1
EDUCATIONAL_EVALUATION : 1
IN_WHEREIN : 1
OF_ABUSE : 1
FEVERS_NO : 1
RISK_PREVENTION : 1
OF_INTERUPTED : 1
PATIENT_URGENT : 1
ITEM_VETERAN : 1
RESP_PSYCHOLOGIST : 1
CARE_PAIN : 1
AS_CARES : 1
IS_TO : 12
ASSESSMENT_AND : 2
HOLDING_LOADED : 1
EVENING_BLOOD : 1
TYPE_BHM : 1
HYDROXYZINE_HCL : 1
ATTACKED_HIS : 1
PO_DISKUS : 1
WITH_CORD : 1
CHANCES_OF : 1
HIMSELF_SEEN : 1
CHANGE_WATERY : 1
WAS_OF : 2
FRACTURES_HE : 1
BY_HEENT : 1
ITEM_SCORE : 1
NECK_IN : 1
MG_HS : 1
ABDOMINAL_PAIN : 1
FEE_FOR : 1
REFERRING_WHICH : 1
MAJOR_DEPRESSIVE : 2
FOR_ET : 1
INPATIENT_AND : 1
TREATMENT_PSYCHIATRIC : 1
CARDIOLOGY_COMMENTS : 1
COMPLETELY_AND : 1
THE_MEDICATION : 1
FROM_PM : 1
ASSESSMENT_WAS : 1
CORONARY_ARTERY : 1
NO_INTERDISCIPLINARY : 1
GESTURES_PAST : 1
SEEMS_TO : 1
NORMAL_EVIDENCE : 1
NERVE_STIMULATOR : 1
INFORMATION_ADDITIONAL : 1
FOR_HIM : 1
HIGH_SEE : 1
RISK_OUTCOME : 1
PATIENT_NOT : 1
THE_ENTRY : 1
INCLUDE_SC : 1
NOT_ANY : 1
GIVEN_PATIENTS : 1
TESTS_PROCEDURES : 1
HOLDING_GUN : 1
TO_CESSATION : 1
BE_CENTRAL : 1
WHICH_AGENCY : 1
TO_THIN : 1
JUL_IN : 1
SUBSTANCE_IF : 1
FOURTH_CAUSE : 1
COLORED_URINE : 2
CRASH_WITH : 1
PATIENTS_AND : 1
WERE_EXPLAINED : 1
BMI_MILD : 1
ADDENDUM_IV : 1
PT_WITH : 1
EYES_EOMI : 1
STATED_THAT : 1
BURSA_OR : 1
PO_INVASIVE : 1
APPT_ADVANCE : 1
QH_PRN : 1
WITH_RADIATION : 1
ANTICOAGULATION_NO : 1
DEAR_CAUSED : 1
EA_MIN : 1
OUT_BLOOD : 1
PRESENT_HAS : 1
RALIZED_DISORDER : 1
MCG_PO : 1
NOT_CAROTID : 1
HEENT_OF : 1
CC_AMBER : 2
HAD_PREVIOUS : 1
FT_AND : 1
PREVIOUS_HE : 1
EDUCATION_DISCHARGE : 1
OF_EDUCATION : 1
EVAL_TO : 1
ACTIVE_GETTING : 1
BONANTI_MARY : 1
HAVE_SIX : 2
PENICILLIN_NIACIN : 1
WITNESSED_NOTARIZED : 1
NO_DIVERTICULOSIS : 1
BUT_TACHY : 1
PAST_YEARS : 1
IT_WAS : 2
DID_THAT : 1
NOT_SUICIDAL : 1
ADEQUATE_HOSPITALIST : 1
HOUGH_AM : 1
WILL_PHYSICIAN : 1
PULSES_BILATERALLY : 1
IN_BUT : 1
JUSTIFICATION_ADMISSION : 1
RESP_PAIN : 2
COMING_TO : 1
IF_CAN : 1
MEDICATION_EDUCATIONPT : 1
SIGN_PATIENT : 1
CASE_CALL : 1
MEDICATIONS_CONTINUED : 1
SELF_HE : 1
ASSOCIATED_ALLERGIES : 1
AFFECT_RESTRICTED : 1
ASSESS_PATIENTS : 1
SMOKING_CESSATION : 1
RISK_NO : 1
FAIR_WOUND : 1
STILL_BE : 1
BEEN_VERY : 1
HIS_IF : 1
STRIP_USE : 1
AT_BEDSIDE : 1
SHIN_CLEAN : 1
CIGARS_ABOUT : 1
SCREENING_SCHEDULED : 1
ALSO_OF : 1
AND_MEDICINES : 1
DIAGNOSIS_ES : 1
IT_ITCHY : 1
ASSUMED_PT : 1
AT_SPC : 1
OFFICE_INSURE : 1
INSURE_THAT : 1
THE_INDIVIDUAL : 1
VETERAN_REPORTS : 1
RETURN_APPT : 1
PATIENT_NO : 3
WHEREIN_CAR : 1
TOBACCO_SUCH : 1
PROVIDING_QUALITY : 1
MONTHS_BRIEF : 1
ALL_VET : 1
WORSENING_SI : 1
ADMINISTRATIVE_BP : 1
NOTED_ARE : 1
NOW_TYPE : 1
HE_BE : 3
SUPPLIES_INPATIENT : 1
ED_LUNG : 1
ADDRESSPVH_COLLINS : 1
BE_MAKING : 1
HOMICIDAL_NO : 1
IS_DEPRESSED : 1
WAS_ITCHY : 1
CLEAN_NO : 1
AVAILABLE_HIM : 1
THE_INFORMATION : 1
OR_EDEMA : 1
SOCIAL_WORK : 1
WELLBUTRIN_IN : 1
PL_ING : 1
ALL_SHE : 1
OF_SURGERY : 1
YES_DIVERTICULOSIS : 1
NOT_AN : 1
HE_STATED : 1
HOUSE_DUE : 1
HE_ME : 1
APPEARS_BE : 3
PSYCHOLOGIST_SOCIAL : 1
CALL_ME : 1
PREVIOUSLY_PRESCRIBED : 1
TO_CLEAR : 1
CONTACTED_WILL : 1
HE_IS : 8
FOR_ACTIVE : 1
TID_SEEMS : 1
FOR_PAINLESS : 1
ATTEMPTS_CPRS : 1
HE_ALONE : 2
FREE_MONTHS : 1
COPD_ICDCM : 1
TO_SEEN : 1
WAS_STARTED : 1
WHY_NOT : 1
RATED_VERBALIZED : 1
TO_AND : 5
NOTE_OPTIC : 1
SEEN_IN : 1
ANY_IDEATION : 1
OF_POSTVIETNAM : 1
REQUIRED_PHYSICAL : 1
WAS_CHAIR : 1
THE_THIS : 1
CV_REGULAR : 1
AWARE_THAT : 1
PTSD_CHIEF : 1
HISTORY_PRIOR : 1
LISTED_BELOW : 1
HELPING_WITH : 1
HAS_CULTURAL : 1
MEDIASTINAL_ADENOPATHY : 1
CHRONIC_PULMONARY : 1
TX_CONSULT : 1
MEDICATION_YOU : 1
ONEHALF_ICDCM : 1
VITAL_HOME : 1
AS_LISTED : 1
JUMPED_ON : 1
URETHERA_DETERMINE : 1
FEELING_PATIENT : 1
EVIDENCE_OF : 1
ROUND_WITH : 1
MEASURES_CM : 1
THE_PROCESS : 1
CONTACT_FRIEND : 1
COUNSELE_COMMENT : 1
SUPPORTIVE_MADE : 1
ALL_ANSWERS : 1
WAS_ASSOCIATED : 1
PAIN_HPI : 1
TELEPHONE_EXPRESSED : 1
FOOD_DRUG : 1
TO_GET : 3
WILL_MONITOR : 1
HEAD_FULL : 1
DISCOURAGED_IMPRESSIONS : 1
SEEMING_HAVE : 1
OFTEN_YEAR : 1
DEAR_THAT : 1
TO_MUCUS : 1
PT_CONTACTED : 1
DIET_DIET : 1
ANYTHING_CONCENTRATION : 1
IN_SHIFT : 1
THE_LOUD : 1
NO_AM : 1
AND_LAB : 1
AWARE_COPIES : 1
PAIN_LB : 2
TO_TRANSFER : 1
PT_INR : 1
AGE_PILL : 1
AND_APPARATUS : 1
CM_TEAR : 1
MONTHS_NO : 1
OF_EXERCISE : 1
WITH_FRACTURES : 1
PT_DOING : 1
FOR_FUNCTION : 1
VIA_FOR : 1
TO_ACCORDING : 1
ELEVEN_VETERANS : 1
DOES_NOT : 2
AA_MEETING : 1
MEDICAL_STUDENT : 1
HELLO_PREOP : 1
EVALUATED_CHIEF : 1
SCREENING_EDUCATION : 4
TO_MOOD : 1
WITH_LOCAL : 1
ADMISSION_PREVIOUS : 1
EDUCATION_DECIDED : 1
GOOD_RATES : 1
THIS_DENIES : 2
FIRE_RISK : 1
BE_PATIENT : 1
ASSISTANCE_GOING : 1
RAL_CARDIOVASCULAR : 1
ESTABLISH_PSYCHOSOCIAL : 1
ON_DUE : 1
MONTHS_FREQUENCY : 1
BE_MAILED : 1
BEEN_SEEN : 1
PULSES_PPP : 1
STRENGTH_ELIGIBILITY : 1
ALREADY_TERAZOSIN : 1
OR_HIM : 1
HOMICIDAL_PLAN : 2
ISSUE_HE : 1
PULSE_BELOW : 1
REQUIRED_US : 1
THIS_PT : 1
PAIN_MR : 1
CONNECTED_COULD : 1
REVIEWED_NO : 1
NEW_DME : 1
APPARATUS_DEAR : 1
WAS_TASERED : 1
COMMENT_VISION : 1
OF_LOSSED : 1
NEEDS_PLEASE : 1
REFERRED_ORDERING : 1
TO_RESCHEDULED : 1
THIS_BUT : 1
ORIENTED_INDEPENDENT : 1
MANAGER_WIFE : 1
HEARING_THIS : 1
ENCOUNTER_PREFERENCE : 1
CALLER_OTHER : 1
INDICATIONS_AMP : 1
BETTER_CARE : 1
AFFECT_INTERACTIVE : 1
DISCUSSION_AXIS : 1
TO_INCREASE : 1
PEOPLE_AT : 1
STILL_OPTOMETRY : 1
EVENTS_ACTIVITY : 1
ASSISTANCE_THE : 1
PRSE_WILL : 1
SQ_INTACT : 1
CALLER_AREA : 1
UP_ROUTINE : 1
HAS_BIPOLAR : 1
VETERAN_WILL : 2
SI_INTENT : 1
OF_PRESENTED : 1
ABLE_TAKE : 1
DISEASE_DATE : 1
SUICIDE_COORDINATOR : 1
THIS_SWS : 1
POSITION_SPECIAL : 1
HOME_TELEPHONE : 1
STILL_DEPRESSED : 1
EXHAUSTED_BLUNTED : 1
AS_MIGHT : 1
IN_EFFECTS : 1
BY_PC : 1
HR_PATCH : 1
PROVIDER_SUBSPECIALTY : 1
REPLACEMENT_WHEN : 1
DISCHARGE_COMPLAINED : 1
YES_TAKE : 1
CORRELATE_VIEW : 1
HIM_AFTER : 1
AND_PERHAPS : 1
OF_WAS : 1
REC_NO : 1
RAILS_IF : 1
SO_MANY : 1
ALONE_THE : 1
BE_DISCHARGED : 1
AND_MEDICATIONS : 3
INTENSITY_NO : 1
PATIENTS_SCREEN : 1
TECHNIQUES_ESOPHAGITIS : 1
MENTAL_HEALTHAMBULATORY : 1
CHIEF_SINUS : 1
CAUSATIVE_INCLUDING : 1
SKILLED_WK : 1
FALL_RISK : 3
PRESCRIPTION_YOU : 1
DEAL_THEM : 1
WHICH_PROGRAM : 1
HARD_TO : 1
LIKE_PURSUE : 1
TO_EKIPAA : 1
WERE_PHYSICAL : 1
DIZZINESS_OR : 1
BEFORE_TOMORROW : 1
SAME_AXIS : 1
RESP_SOCIAL : 1
OFTEN_DID : 3
ENTRY_TALK : 1
WOULD_LIKE : 3
SAFETY_WITH : 1
VN_COMBAT : 1
REQUIRED_NEEDS : 1
PT_WTIH : 1
FUTURE_PATIENT : 1
EFFECTS_OF : 1
MALE_WITH : 1
IS_WITH : 2
TO_ADDENDUM : 1
DISCUSSION_ATT : 1
WEDNES_JULY : 1
BENEFITS_COUGH : 1
WELL_STATES : 1
STATUS_AND : 1
SMOKING_FIRE : 1
ELECTRONIC_VIEW : 1
SAY_BP : 1
DOCUMENT_BEHAVIOR : 1
AFFECT_INITIALLY : 1
WILL_PLEASE : 1
HE_APPEARS : 1
ALLERGY_IODINE : 1
CONSULT_CLERICAL : 1
COMPLETION_OF : 1
SENT_HORRIBLE : 1
PREVIOUS_DEMONSTRATION : 1
FUNCTIONAL_IDENTIFIED : 1
OR_NORMAL : 1
FOR_TREATMENT : 1
AT_EDUCATION : 1
MALE_CARRIER : 1
WIFE_WAS : 1
THE_ROOM : 1
GIVEN_APPOINTMENT : 1
FOLLOWS_LOCAL : 1
HAVE_MEDICINE : 1
OR_FALL : 1
AS_NICOTINE : 1
PHONE_VERIFIED : 1
DISCHARGE_PL : 1
EKG_AFIB : 1
OUR_DOES : 1
INTERN_NOTE : 1
RECTAL_PAIN : 1
VISIT_OUTPATIENT : 1
TO_MAILED : 1
CARE_YESTER : 1
FOR_ACTIVITIES : 1
IRGUIDED_PUNCTURE : 1
PATIENTS_REQUEST : 1
NOT_TAKE : 1
COURT_ON : 1
INITIATED_BY : 1
VISIT_THANKS : 1
SALINE_NOSE : 1
SMILING_STAND : 1
WAL_CONTACT : 1
ALERT_ON : 1
FROM_OF : 1
NEED_BE : 1
DETAILS_BP : 1
OBTAINED_SCREEN : 1
GLCCS_TO : 1
MUCUS_VARDENAFIL : 1
DURING_WEEK : 1
PROCESS_TALK : 1
MALE_AGE : 2
RESPONSIBLE_READING : 1
WERE_IN : 1
PMHX_WHO : 1
TO_FACILITATE : 1
OR_THE : 1
IDENTIFY_CALLER : 1
DOES_GIVE : 1
WELLBUTRIN_EFFECTS : 1
FUNCTION_SEE : 1
YOU_HAD : 1
TOO_THE : 1
TIME_TO : 1
ANXIETY_HE : 1
LEFT_CLEAN : 1
MOTOR_NORMAL : 1
SCREENING_NURSING : 1
MULTIPLE_PAIN : 1
YEAR_VETERAN : 1
ESTIMATED_NEEDS : 1
SUICIDAL_THOUGHTS : 1
HE_EXPERIENCES : 1
WOULD_KILL : 1
NO_LOCK : 1
BYPASS_STATUS : 1
CALL_FUNCTION : 1
NOTE_CANCELLED : 1
PROGRAM_PER : 1
NURSE_LEADER : 1
ACTIVITIES_ON : 1
WITH_INSTRUCTIONS : 1
MHC_EXAM : 1
TYPE_DURATION : 1
TESTING_PROVIDED : 1
AND_BACK : 1
OF_STOCKINGS : 1
ANY_HOMICIDAL : 1
SCLERA_EOMI : 1
FOR_BREATHING : 1
IRGUIDED_LUMBAR : 1
STATED_UNDERSTANDING : 1
IN_LOW : 1
QUESTION_VIA : 1
AND_COLLECTION : 1
SWELLING_RIGHT : 1
THEY_FELT : 1
TO_FOR : 2
HI_INTENT : 1
ONE_PT : 1
TERAZOSIN_AND : 1
4D_MDS : 1
CHATHAM_NEW : 1
ON_MG : 1
OT_SEE : 1
HE_ALERT : 1
ACCORDING_WHAT : 1
RELAXATION_AND : 1
FOR_WOULD : 1
HANDOUT_FOR : 1
ON_EKNURSING : 1
TO_THE : 9
NEOADJ_DONT : 1
IMPRESSIONS_VISUALIZES : 1
TO_COME : 2
ASSIST_VETERAN : 1
WALKED_HALF : 1
PLACEMENT_OR : 1
YES_WHEN : 1
YO_MAN : 1
REQUESTING_ALL : 1
SIMVASTATIN_LAST : 1
BY_MOUTH : 8
CARE_INTAKE : 1
PATIENTS_SEE : 1
QUETIAPINE_MG : 1
PLACED_TO : 1
TWO_YEARS : 1
SUCH_LUMBAR : 1
ASPIRATION_OR : 1
ESSENTIALLY_THAT : 1
HEAVINESS_NO : 1
IDEATION_DENIES : 1
ES_RUL : 1
ADMISSION_NOTE : 1
IS_MAN : 2
CAREGIVER_BE : 1
DENTURES_ALPRAZOLAM : 1
AND_THEN : 1
BLOOD_TIMES : 1
THE_NEUROLOGICAL : 1
SEP_ENVIRONMENT : 1
WIFE_SHE : 1
HAVE_INCOME : 1
TRAVEL_AWAY : 1
FURTHER_TO : 1
THICK_SECRETIONS : 1
GOALS_HOURS : 1
TO_BELCH : 1
BRIGHTENED_REMINDED : 1
TIMES_PAIN : 1
ADDENDUM_AND : 1
DECREASED_RISPERDAL : 1
REASON_FOR : 2
NOTE_HE : 2
TAKE_TABLET : 4
PROSTATE_EDUCATION : 3
NOTE_WT : 1
FALL_SCALE : 1
DONE_MADE : 1
HELPING_THE : 1
PTS_CHART : 1
IMAGES_TO : 1
AS_THE : 1
NOT_ONE : 1
WITHIN_YES : 1
CXR_CASE : 1
DIVERTICULOSIS_OF : 1
APPT_FOR : 1
PATIENTS_HOME : 1
PROBLEMS_FRAME : 1
ACTIVE_IN : 1
AT_AS : 1
STARTED_AT : 2
HAD_EXPERIENCE : 1
WEARING_THESE : 1
HISTORY_SURGERY : 1
EXTERNAL_PROBLEM : 1
STARTING_AT : 1
NO_BARRIERS : 1
TO_STAFF : 1
LEAVING_WIFE : 1
CARPAL_TUNNEL : 1
THE_THE : 1
HEALING_PROCESS : 1
HAVE_TOLD : 1
START_WEEK : 1
THAT_WAS : 2
THE_CORRELATE : 1
AND_AM : 1
WHAT_TOLD : 1
MALE_HAS : 1
REFER_TO : 1
FOOD_GOUT : 1
CM_MEDICAL : 1
OF_PATIENT : 2
TO_BP : 1
BIOPSY_CXR : 1
YET_TOX : 1
WITH_OF : 2
THERE_NEW : 1
HAS_RECIEVED : 1
STUDENTS_AND : 1
LEVEL_UNDERSTANDING : 2
BY_ARNP : 1
NEOADJ_THERAPY : 1
LOCATION_PRIVATE : 1
SAID_HE : 1
ATTACKED_BY : 1
TROUBLE_BATHING : 1
CODEINE_NIACIN : 1
CHF_PLEASE : 1
RAL_EXAM : 1
SHE_GAVE : 1
TO_VETERANS : 1
MEDICATION_REFILL : 2
COLLINS_OF : 1
NEW_MEDICINES : 1
INJECTION_OF : 1
LONGER_ENDORSING : 1
SERVICE_BEEN : 1
COORDINATOR_NURSE : 1
HAYS_LCSW : 1
AND_NOT : 3
ALVETA_SEN : 1
HPI_IS : 1
PALPATION_WITH : 1
WATERY_MONTHS : 1
STAFF_NOTE : 1
FUTURE_WILL : 1
WAL_THE : 2
ASSOCIATED_COMPLAINTS : 1
AND_HEAD : 1
WORTHLESSNESS_ANGER : 1
OTHER_ASSESSMENT : 1
BE_YES : 1
PERRL_MMM : 1
TYPE_REFILL : 1
YOUR_CARE : 1
MAILED_AND : 1
COMPLETED_WEEKLY : 1
TO_GAINESVILLE : 1
TREATMENTS_SPECIAL : 1
URGENT_CLINIC : 1
TRIAGE_NOTE : 1
SEEN_WAS : 1
CARE_GASTROINTESTINAL : 1
ON_THAT : 1
ATTEMPT_TO : 1
STATUS_RELATED : 1
HOLD_PATIENT : 1
NOTE_BLOOD : 1
DATE_FALL : 1
OF_HIMSELF : 1
IN_DRIVEWAY : 1
PROVIDE_VISITING : 1
EYE_PH : 1
NATURE_OF : 1
DURATION_CONTINUOUS : 1
IT_PARTNERS : 1
EVERY_HEART : 1
CALL_TAP : 1
PER_COPD : 1
OPTIC_NORMAL : 1
ADDENDUM_SALINE : 1
ANODONTIA_POLYPS : 1
RISK_TIME : 1
TO_ANYTHING : 1
ASSESSMENT_SURGERY : 1
RISK_THAT : 1
EVALUATION_THERAPEUTIC : 1
WHAT_HEALTH : 1
RX_SENT : 1
HE_GETS : 1
REVIEW_THE : 1
HE_SUICIDAL : 1
THAT_CAUSE : 1
REQUIRING_DOPAMINE : 1
OUT_FOR : 1
IS_ATTACHED : 1
COPIES_CT : 1
MENTAL_CARE : 1
GASTRIC_CA : 1
DIARRHEA_NOT : 1
GROUP_FACE : 1
AS_FEVERS : 1
SENSORY_PERCEPTION : 1
IF_ANOTHER : 1
FOR_ESI : 1
IN_HOWEVER : 1
AS_PRESCRIBED : 1
CALLING_FOR : 1
SURGERY_CLINIC : 1
CV_TACHY : 1
CARCINOMA_LUNG : 1
BLOOD_CRUSTED : 1
IN_ROOM : 1
INSTEAD_OF : 1
TO_PEOPLE : 1
DIAGNOSIS_EXTERNAL : 1
SKELETAL_HYGIENE : 1
CHAPLAIN_IMPRESSIONS : 1
ME_AND : 1
NURSE_OTHER : 1
THE_MAN : 1
ICU_ASSESSMENT : 1
SPRITS_NURSE : 1
DISCONTINUE_BENADRYL : 1
TEMP_THE : 1
ANYTHING_THAT : 1
AS_LONG : 1
DEPENDING_ON : 1
THEN_THE : 1
CASE_NOTE : 1
MYOCARDIAL_INFARCTION : 1
THE_FUTURE : 1
ATT_AXIS : 1
ANY_EXPERIENCE : 1
AFFECT_ACTIVE : 1
MS_MCMULLEN : 1
OF_PULSE : 1
RHYTHM_NEURO : 1
SESSION_DURATION : 1
FIXATION_PROBLEM : 1
THE_FIRST : 1
FIRST_IN : 1
TALK_THAT : 1
TO_PILL : 1
NOC_HAVING : 1
OR_UPSETTING : 1
STATE_VISITING : 1
AN_IRGUIDED : 1
ITEM_THE : 1
THE_YEAR : 3
INTACT_MIDSTERNAL : 1
NO_AMLODIPINE : 1
OF_EVERY : 1
VISION_IN : 1
PT_BE : 1
SCHEDULING_CONTACTED : 1
SPC_DISPATCH : 1
CASE_SUMMARY : 1
IMAGE_QUALITY : 1
INPT_MEDICAL : 1
CC_HR : 1
PAIN_TO : 2
TIME_WAS : 1
DISCHARGE_FISHER : 1
AND_PHYSICIAN : 1
BUT_FEELS : 1
XYZZY_RECORD : 2
HOW_OFTEN : 3
SURGERY_UNMH : 1
DM_DIVERTICULOSIS : 1
NONE_LOCATION : 1
KNOWLEDGE_OF : 1
PLAN_FALL : 1
YOU_FOR : 1
LB_KG : 2
PROVIDER_TO : 1
OF_STRETCHER : 1
INCLUDING_MALE : 1
CONSTA_BECAUSE : 1
MOISTURE_BREAKTHROUGH : 1
WITH_RN : 1
LUNG_MASS : 1
PMHX_ESOPHAGEAL : 1
BUPROPRION_AND : 1
MAN_WITH : 1
EXM_OCT : 1
COORDINATION_CE : 1
EFFECTIVE_ACTIVITY : 1
OF_ARRIVAL : 1
PASSING_WIFE : 1
ADMINISTRATIVE_SC : 1
DISEASES_PROBLEM : 1
MDS_NURSING : 1
LAST_TWO : 1
FEVER_ACTIVE : 1
NOTE_ADDENDUM : 2
FRAME_TO : 1
THE_WAY : 1
SKIN_MIDSTERNAL : 1
CE_TABLET : 1
CRUTCH_PATIENT : 1
CLERICAL_WT : 1
DATE_PAIN : 1
HAD_GESTURES : 1
HIMSELF_INDENTIFIED : 1
DETOX_GAVE : 1
ALL_REQUIRED : 1
IN_PAST : 4
OLD_MALE : 1
OLECRANON_BURSA : 1
RECENTLY_EXPIRED : 1
ABOUT_TO : 1
VETERAN_ATTENDED : 3
APPARATUS_AS : 1
EDUCATION_CARE : 1
SERVICE_CONNECTED : 2
PCP_CHAPLAIN : 1
ADDENDUM_ADMITTED : 1
ASSISTING_WITH : 1
CURRENT_NA : 1
INCLUDE_ER : 1
ADMISSION_PT : 1
TIME_DID : 1
DIABETES_YEARS : 1
COULD_PLACED : 1
STUDENT_RDW : 1
ME_FOR : 1
COUGH_INTENSITY : 1
PALPATION_DO : 1
WITH_THEIR : 1
HEENT_NONICT : 1
YOU_HAVE : 5
ASSESSMENT_WRIST : 1
BE_SEEN : 2
ACTIVITY_WALKS : 1
THE_WELL : 1
TO_IF : 2
IS_PRIMARY : 1
DATE_HE : 1
BRIEF_SUPPORTIVE : 1
YESTER_PATIENT : 1
FOR_PATIENTS : 1
AM_TO : 2
WITH_FRIENDS : 1
PSYCHOSOCIAL_UPDATE : 1
ICDCM_YOU : 1
TELEPHONE_CONTACT : 1
CONSULT_SOCIAL : 1
OTHER_PULSE : 1
DEPRESSED_LOT : 1
ENVIRONMENT_SO : 1
COURT_HEARING : 1
MONTHLY_INR : 1
LUMBAR_BACTERIAL : 1
HEENT_CASE : 1
TO_FOCUS : 1
DISCHARGED_HOME : 2
REVIEW_NOTE : 1
WRIST_IN : 1
DETAILS_WT : 1
BP_RECHECKED : 1
BED_LOW : 1
BATTERY_DOOR : 1
YES_ADDENDUM : 1
NO_THE : 1
UNMH_OFFERED : 1
EXM_DATE : 1
MENTAL_HEALTH : 1
AWAY_FROM : 1
STATUS_HEALTH : 1
NO_ENDORSING : 1
SOURCE_FOR : 1
INJECTION_JOINT : 1
WAS_HOWEVER : 1
MEDICAL_DAILY : 1
BE_ON : 2
IN_SESSION : 1
TOBACCO_AS : 1
PATIENT_PHONE : 1
NO_SUMMARY : 1
TO_DETERMINE : 1
FOCUS_ON : 1
ENCOURAGED_SEEK : 1
WITH_DIET : 1
EVENING_FOR : 1
PLACED_PTS : 1
RLE_ON : 1
YEAR_OLD : 3
IN_CHART : 1
SWS_CONTACT : 1
NOV_PATIENT : 1
THAT_INCLUDED : 1
INFARCTION_TIMES : 1
IS_FOR : 1
GROUP_THE : 1
BE_CONDUCTED : 1
HOWEVER_GO : 1
IS_BEING : 2
PHYSICIAN_PRIOR : 1
EDUCATION_DOCUMENTATION : 1
CLINIC_PATIENT : 2
LIFE_AND : 1
RESIDENTS_NOTE : 1
MADE_ENCOURAGED : 1
HAVE_THESE : 1
PATIENTS_LEVEL : 1
OF_ESSENTIALLY : 1
ADMISSION_DATE : 1
ADVISING_PATIENT : 1
SCHEDULE_PT : 1
TEMP_RESP : 2
STATUS_APPOINTMENT : 1
CPRS_FOR : 1
AS_SHE : 1
SHE_UNDERSTANDING : 1
COUGHING_HARD : 1
PATIENT_GIVE : 1
USE_ADVISED : 1
CURRENTLY_THEY : 1
NORMAL_RATE : 1
DATED_REQUIRED : 1
SERVICE_CLINICAL : 1
IV_ADDENDUM : 1
THAT_YOU : 2
PERIPHERAL_AIRWAYS : 1
ADN_ED : 1
PT_MOVED : 1
RECENTLY_OUTPATIENT : 1
TEST_WEEKLY : 1
SPECIFY_IF : 1
HARD_PRODUCTIVE : 1
LEAVENWORTH_INSTEAD : 1
DUTY_FT : 1
DATE_TIME : 2
THE_SERIES : 1
FULLY_TRAINED : 1
GAIT_REPORTED : 1
HR_ADDITIONAL : 1
EATS_ALL : 1
STOOLS_PER : 1
HIS_LOWER : 2
ABDOMEN_TRANSPORTED : 1
HE_FOR : 1
PLEASE_IF : 1
FEE_SO : 1
PAIN_SYMPTOMS : 1
SIGNIFICANT_STRESSORS : 1
CONSULT_WORK : 1
AFFAIR_THE : 1
DOCUMENT_TO : 1
LB_IS : 1
PM_EXAM : 1
DISCUSS_EKG : 1
TEMP_PHONED : 1
INDIVIDUAL_GROUP : 1
ALTERATION_RESPIRATORY : 1
CARE_TRACH : 1
ADEQUATE_NOTE : 1
WTIH_LIFE : 1
MAN_THAT : 1
WITH_TRANSFER : 1
UAL_MENS : 1
VISION_RESPONSIBLE : 1
SUBJECT_BREATH : 1
AND_OR : 3
UP_THIS : 1
HANDLE_TO : 1
WITH_DIFFERENT : 1
PERRL_PATENT : 1
SUICIDAL_GESTURES : 1
REQUESTS_SALMETEROL : 1
ENCOMPASS_OF : 1
OF_NEOADJ : 1
NECK_NO : 1
BEEN_REEVAL : 1
IF_FELT : 1
DOCUMENT_WAS : 1
OF_HE : 1
EXAM_CARDIOVASCULAR : 1
REFILL_EVERY : 1
GIVING_HIM : 1
ENCOUNTER_PATIENTS : 1
SYNCOPE_AND : 1
REPORTS_PAIN : 1
DOUG_TO : 1
NOTED_VIA : 1
VERIFIED_CALL : 1
BENADRYL_YOUR : 1
PROVIDER_NO : 1
COMPLAINTS_ALLERGIES : 1
SHOW_FOLLOW : 1
HIV_AND : 1
YOUR_HEART : 1
MILITARY_ALL : 1
VERBAL_CONSENT : 1
MI_ACTIVE : 1
MANAGEMENT_RESIDENTS : 1
SC_DOCUMENT : 1
GROUP_ATTEMPTS : 1
BE_FOR : 2
RATES_PAIN : 1
COMBAT_VET : 1
CURRENTLY_IN : 1
SETTLED_BE : 1
STARTED_CC : 1
EATS_VET : 1
DIABETIC_RETINAL : 1
CALL_AT : 1
PLAN_AGREED : 1
NO_HOURLY : 1
FULLY_WELL : 1
VENESSA_HOYT : 1
REFILLS_NONE : 1
FDA_GOV : 1
ON_FOLLOWED : 1
RAPID_CHIEF : 1
TABLET_BY : 5
AND_DOFFING : 1
RISPERDAL_BECAUSE : 1
THEY_HAVE : 1
WITH_PALPATION : 2
TAKING_HIS : 1
ADL_SCREENING : 1
EXPERIENCE_THING : 1
STRESSFUL_PT : 1
SICKLE_CELL : 1
AT_ALOT : 1
RESPIRATORY_RELATED : 1
PARTICIPATED_THE : 1
TELEPHONE_HE : 1
BELCH_PASS : 1
INCOME_THE : 1
WIFE_HE : 1
YOUR_PROVIDER : 1
DEPRESSION_PRESSURE : 1
BIOPSY_ABNORMAL : 1
MUSKOGEE_CALLED : 1
NOTE_PRESSURE : 1
TO_LEVEL : 1
THE_ADN : 1
CONTACT_OFFICE : 1
INFORMATION_ROUTINE : 1
TO_LITTLE : 1
ARE_NEEDS : 1
ABOUT_NOC : 1
CAUSED_OF : 1
RISK_CARDIOLOGY : 1
SUPPORTIVE_CONTACTS : 1
WITH_VITAL : 1
ATTENDED_PSYCHOEDUCATIONAL : 1
PLAN_TEAM : 1
EKIPAA_ASSESSMENT : 1
TO_HANG : 1
PROVIDER_MALATHI : 1
SUICIDE_PREVENTION : 1
TRIGLY_PRIVATE : 1
DNR_AND : 1
ARREST_VETERAN : 1
CHIEF_OF : 3
NURSING_CLINICAL : 1
OMEPRAZOLE_FLUNIS : 1
PAIN_INTERDISCIPLINARY : 1
COLLINS_TYPE : 1
HUMAN_ML : 1
ADDENDUM_SINCE : 1
PATIENTS_HE : 1
WEAK_HE : 1
RECENT_SCOPE : 1
MEDS_STATE : 1
BRAKES_CALL : 1
CARE_SERVICES : 2
CHECK_OUT : 1
RDW_CONSTIPATION : 1
PHYSICIANS_SIMVASTATIN : 1
LISTED_ELECTRONIC : 1
AT_CONVERSATION : 1
PREP_NO : 1
NEGLECT_OR : 1
PT_YEAR : 1
CURRENT_VITAL : 1
RESULTS_TO : 1
BLACK_NO : 1
NTG_GTT : 1
STOOL_BLACK : 1
FOR_OF : 2
ASSISTANCE_YELLOW : 1
WOULD_TO : 3
QUICKLY_BRIGHTENED : 1
PULSE_ACTIVITY : 1
PMHX_JUSTIFICATION : 1
COUGH_NUMBNESS : 1
LISINOPRIL_MG : 1
REVIEWED_AAS : 1
ONE_YEAR : 1
STATES_THAT : 4
OR_NOTED : 1
LIVES_IN : 1
ONE_FOR : 1
KIT_BY : 1
ONEHALF_BY : 1
BLOOD_PER : 1
NOT_TRACH : 1
RULED_BLOOD : 1
WITH_PATIENT : 3
LEXAPRO_MG : 1
DATE_HIGH : 1
KG_HAS : 1
DIPHENHYDRAMINE_IF : 1
CULTURES_IV : 1
ANODONTIA_COLONIC : 1
TWO_NO : 1
FEELING_SUICIDAL : 1
AN_GET : 1
ATTEMPTS_SEE : 1
AND_DEPRESSION : 1
ACTIVE_POSITION : 1
GROOMED_HE : 1
HIM_IS : 1
ZELL_HE : 1
SURGERY_PREOP : 1
SURGERY_COLORED : 1
ALSO_UNSCHEDULED : 1
HAVE_ENOUGH : 1
RECEIVED_WALKING : 1
MUSCULO_SKELETAL : 1
USE_ACTIVE : 1
OUTPUT_ELECTRICAL : 1
HIM_SISTER : 1
TIME_WERE : 1
PATIENT_CONSULT : 1
CONSULT_FOR : 1
WATERY_DIARRHEA : 1
AGENCY_ACTIVE : 1
AT_WAKES : 1
BIRTH_OCT : 1
WHO_FOLLOWS : 1
PAST_STOOL : 1
EVOLUTIONAL_CHANGE : 1
RECURRENT_UNSPECIFIED : 2
WITH_COUGH : 2
ING_WITH : 1
LEAVE_COPY : 1
REPORTED_SAFETY : 1
FOUND_BY : 1
CHANGE_ADDENDUM : 1
SOCIAL_HE : 1
WAS_TAKING : 1
SEE_GROUP : 1
WAKES_UP : 1
IN_OR : 1
THAT_SO : 1
OF_DENIES : 1
DX_VISIT : 1
FOR_ABUSE : 1
MONTH_WERE : 1
WE_CAN : 1
REVIEWED_WALK : 1
EDUCATION_ERYTHROMYCIN : 1
PER_ALL : 1
HOURS_OR : 1
IF_WHEN : 1
NO_ALCOHOL : 1
PCC_NOTE : 1
MED_EKG : 1
REFERRED_TO : 1
HAS_INCREASE : 1
SUGGESTED_VET : 1
CONTACT_CALLED : 1
YOUR_METOCLOPRAMIDE : 1
MIDSTERNAL_IS : 1
UNSPECIFIED_MODE : 1
CRUSTED_THEM : 1
MEDICAL_NOTE : 3
WITH_NO : 3
TX_PLAN : 1
TOBACCO_MONTHS : 1
RESIDENT_NOTE : 1
BE_OF : 1
AND_FACE : 1
OR_ETHNIC : 1
URETHERA_IF : 1
URGENT_CARE : 2
WITH_BATHING : 1
THAT_WOULD : 4
NEED_OF : 1
MURMUR_NUTRITIONAL : 1
CNS_PACKAGING : 1
QUESTION_TELEPHONE : 1
PLEASE_UP : 1
NOT_HIM : 2
HAVE_HOMICIDAL : 1
PAIN_PROBLEMS : 1
HAVE_THOUGHTS : 1
INHL_DISKUS : 1
TWO_GOALWHAT : 1
RELIEF_HE : 1
ACTIVE_MINIMAL : 1
INSTEAD_MODE : 1
DENIES_ANXIETY : 1
MIGHT_SEIZURE : 1
BOOTS_FACILITATE : 1
ROUTINE_MRSA : 1
SCOPE_SURGERY : 1
CLINICAL_ACTIVITY : 1
MOUTH_PM : 1
MS_AS : 1
ROSENTHAL_ORIENTEE : 1
BACKING_FOR : 1
WEAKNESS_NO : 1
VET_MALE : 1
TAKE_BETTER : 1
CE_ON : 1
THE_TO : 5
DOES_HOW : 1
HIMSELF_HE : 1
SYNCOPE_HYPOTENSION : 1
UNDERSTAND_THE : 1
OF_PHYSICAL : 1
SET_BE : 1
IS_HAVE : 1
SEN_VOICE : 1
BREATH_ELEVATED : 1
PENDING_MEDICATIONS : 1
URI_FATHER : 1
PROBABLY_TO : 1
MOOD_CONTINUES : 1
LAMOTRIGEN_FOR : 1
PRESCRIBED_MEDICATIONS : 1
DISPATCH_AGAIN : 1
PLAN_IS : 1
BACK_AND : 1
LOST_LBS : 1
SEE_CONSULT : 1
COUGH_SOB : 1
AS_WEATHER : 1
COME_IN : 1
CX_HIS : 1
NOSE_WAS : 1
PATIENT_ROUTINE : 1
IN_GOOD : 1
THE_OWN : 1
BID_COUNSELING : 1
ON_DUTY : 1
FOR_TOGETHER : 1
OF_ENCOUNTER : 1
IN_ONE : 1
BCC_NOSE : 1
HOSPITALIST_NOTE : 1
WEARING_PRESCRIPTION : 1
THE_NPO : 1
CALLER_IF : 1
AN_LUMBAR : 1
RETURN_SERVICES : 1
DOES_HAVE : 1
ON_ELEVEN : 1
IF_ONE : 1
LIST_AND : 1
OF_GROUP : 1
PRESCRIPTIONS_PATIENT : 1
REFILL_CONVERSATION : 1
SCREENING_ANXIETY : 1
MONTHS_NOW : 1
WITHIN_ONE : 1
PATIENT_CHECK : 1
OF_EVENTS : 1
FOR_INITIALY : 1
QUICKLY_WHEN : 1
DOCUMENT_ING : 1
LABS_FOR : 1
AS_NEEDED : 3
THANKS_OF : 1
IPC_RX : 1
IS_COMPANY : 1
FOR_ITEM : 1
THE_NO : 1
THAT_OF : 1
JUST_READING : 1
LUNG_BIOPSY : 1
GO_TO : 1
DENIES_NEEDS : 1
HE_SAID : 1
BIRTH_AGE : 2
AND_CURRENT : 2
WHEEL_CHAIR : 1
PAIN_RLE : 1
WAS_COMMENT : 1
PLAN_UCINATIONS : 1
QH_FOR : 1
FOR_PT : 2
FROM_TUNNEL : 1
DAILY_IMPROVED : 1
LFT_REGION : 1
PRODUCTS_SPECIAL : 1
PATCH_TRANSDERMAL : 1
INTRAMUSCULARLY_EVERY : 1
SITUATIONS_GAVE : 1
THE_SITUATION : 1
BE_NAME : 1
COLACE_TID : 1
VITAL_SIGNS : 2
BEING_DISCHARGED : 1
SEEN_ON : 1
BED_OSTOMY : 1
ON_ASA : 1
ICDCM_HAVE : 1
ARE_RESPONSIBLE : 1
CHAPEL_PT : 1
BY_HAYS : 1
FELT_TO : 1
STATE_ISSUES : 1
NOT_WAS : 1
PERFORM_EVALUATION : 1
ANXIETY_EATING : 1
NOT_SUPPLY : 1
AND_SEVERE : 1
WAS_COUNSELE : 1
AM_GOOD : 1
DOES_UNDERSTANDS : 1
GOING_DIVORCE : 1
TO_LEARN : 1
REFILLS_ESOPHOGEAL : 1
INFORMATION_INTERVIEW : 1
BP_WT : 3
WIFE_STATES : 1
EVERY_AS : 1
CONSENT_NURSE : 1
NONE_OF : 1
SITUATION_THAT : 1
COLLECTION_DT : 1
MIN_RANGE : 1
ESOPHAGITIS_BY : 1
ASKED_IT : 1
PRESSURE_IS : 1
YOUR_TO : 1
EDUCATION_URGENT : 1
QUITTING_YES : 1
ALERT_SENT : 1
THAT_HAVE : 1
TACHY_NO : 1
STATES_TAKING : 1
MOUTH_REFILLS : 2
FOR_ADMISSION : 2
FRIGHTENING_OR : 1
DENIES_PATIENT : 1
PM_QUETIAPINE : 1
DIVORCED_VN : 1
RECHECKED_AND : 1
TO_VERDSOME : 1
SEP_PENDING : 1
OR_DIAGNOSIS : 1
RISK_HIGH : 1
VETERAN_VERBALIZED : 1
TREATMENT_MEDICAL : 2
AND_WAS : 3
WT_VET : 1
DISTENDED_CATHETER : 1
REHAB_AS : 1
NO_ACETAMINOPHEN : 1
HAS_SYMPTOMS : 1
IF_NOT : 3
COMPLETED_ASSUMED : 1
MOOD_CONTINUE : 1
REPORT_DENIES : 1
FOR_IC : 1
COMMENTS_PATIENT : 1
LIFE_ALCOHOL : 1
SEEMS_HELP : 1
YOUNGER_CHILDREN : 1
WILL_FOLLOW : 1
TYPE_PATIENTS : 1
APPOINTMENT_LIST : 1
MAY_QUALITY : 1
BRIGHTENED_WHEN : 1
TAP_THIS : 1
OF_PSYCH : 1
FLUNIS_DE : 1
TO_ORDERING : 1
HE_MSE : 1
OF_SHORTNESS : 1
TO_WISHES : 1
BLSTR_PO : 1
FALL_ADDENDUM : 1
LOSS_IN : 1
SYNCOPAL_IS : 1
CONTACT_TELEPHONE : 1
THAT_CAUSED : 1
AFFECT_BLUNTED : 1
SKILLED_NURSING : 1
NOT_NO : 2
CARES_HIS : 1
TRYING_AGENTS : 1
WAS_EXTERNAL : 1
EXPRESSED_DESIRE : 1
PATIENT_FEE : 1
BEING_HOME : 1
MH_CHATHAM : 1
PROGRAM_MILIEU : 1
CANCER_HE : 1
RILEY_ON : 1
FOR_NEGLECT : 1
SNIEWSKI_IN : 1
HE_NONSMOKER : 1
NONSMOKER_ABOUT : 1
ADDENDUM_THE : 1
KNOWS_HE : 1
WORTHLESSNESS_OR : 1
MALE_VIA : 1
CALLER_NOT : 1
RATIONAL_PATIENT : 1
TO_FIXATOR : 1
BEEN_COMPLETION : 1
DEVICES_COMMENTS : 1
PT_BEEN : 1
TURN_BLACK : 1
HYPOTENSION_REQUIRING : 1
PACKS_PER : 1
CARES_OLD : 1
DEFERRED_PRECLUDES : 1
TO_DEAL : 1
MEDS_OMEPRAZOLE : 1
CONDUCTED_OR : 1
ACCEPTABLE_PATIENT : 2
PHYSICAL_AND : 1
AND_CE : 2
IS_ALERT : 1
TELEPHONE_FOLLOW : 1
AND_REQUIRED : 1
SO_FRIGHTENING : 1
RESCHEDULED_SOON : 1
INCREASING_CHANCES : 1
EDUCATION_REVIEWED : 1
AND_PERIPHERAL : 1
PAIN_ISSUE : 1
SAFETY_CHECKS : 1
IS_DUE : 1
LEARN_READING : 1
WITH_TROCHANT : 1
LACE_RX : 1
DISKUS_AND : 1
COMPLAINT_PHYSICIAN : 1
PHYSICIAN_PERFORM : 1
WAS_EVENTS : 1
GETTING_HOURS : 1
EVERY_WAS : 1
ADDENDUM_APPOINTMENT : 1
OUTPATIENT_INCLUDING : 3
FALL_ASSESSMENT : 1
FOR_EACH : 1
EVENTS_CIRCUMSTANCES : 1
THIS_SC : 1
WT_LB : 3
UNITS_ML : 1
CARE_NO : 1
EXPLAINED_PREPS : 1
COPD_CAD : 1
HAS_COMPLAINT : 3
WELL_PT : 1
FRACTURES_APPEARS : 1
YOU_DISCHARGE : 1
BODY_INDEX : 1
ELEVATED_DING : 1
HIM_WOULD : 1
PREFERS_LEARN : 1
FOR_COMPLETE : 1
NEURO_CN : 1
TO_LEFT : 1
STATES_THEY : 1
IDENTIFIED_ASSOCIATE : 1
PRESCRIBED_CHO : 1
CHECKS_ADMISSION : 1
UNDERSTANDS_TO : 1
MEDICAL_VISIT : 1
ING_HIM : 1
HANDLE_ACCORDING : 1
ADMINISTERED_RESPONSIBLE : 1
TO_PSYCHIATRY : 1
UP_WITH : 4
EDUCATION_ABOUT : 1
PATIENT_STRETCHER : 1
NO_TAB : 1
PHARMACY_MEDICATION : 1
HOSPITALIST_CORONARY : 1
VA_ADMINISTRATIVE : 1
DIVORCED_SC : 1
WITH_HOUGH : 1
UPSETTING_THAT : 1
COMMUNITY_STATUS : 1
WORK_TO : 1
JOINT_PERIARTICULAR : 1
ACTING_NURSING : 1
NONE_ASSESSMENT : 1
MUCH_TO : 1
PATIENTS_TELEPHONE : 1
INTERUPTED_NO : 1
OR_THAT : 3
BEDREST_RAILS : 1
CURRENT_YES : 1
AN_UNDERSTANDING : 1
COMPLAINTS_ASSIGNED : 1
AFFAIR_WITH : 1
SYSTEM_AND : 1
BOTH_TECHNIQUES : 1
OR_REFERRALS : 1
BUT_NOT : 3
GAF_REVIEW : 1
IMMEDIATE_WITHIN : 2
OFFERING_REFERRAL : 1
IN_RESPIRATORY : 1
RISK_AXIS : 1
CC_NO : 1
PREOPERATIVE_DIAGNOSIS : 1
ACTIVE_WOULD : 1
LUNG_PROVISIONAL : 1
AT_MOMENT : 1
OR_SELFHARM : 1
EVERY_ACTIVE : 2
ALLERGIES_AS : 1
SITUATION_WOULD : 1
TAKE_PAK : 2
NOT_VETERAN : 1
FROM_NONE : 1
HE_INCREASE : 1
RECOMMENTATIONS_IF : 1
ED_MANAGEMENT : 2
OR_BOTH : 1
HEELS_WELL : 1
HYPERTENSION_SCREEN : 1
IC_POLYSOMNOGRAPHY : 1
HAS_THE : 1
NUTRITIONAL_RISK : 1
AGREES_THE : 1
TO_BEGIN : 1
CONTAINING_ALCOHOL : 1
SITTER_THIS : 1
HAS_HAD : 1
OF_AGE : 1
CONTINUES_TO : 2
OF_UPPER : 1
WHAT_HE : 3
ME_IF : 1
ON_THE : 1
PATIENT_EKIPAA : 1
WM_NO : 1
PROBLEMS_COMMENTS : 1
FELT_VETERAN : 1
BECAUSE_HE : 2
TO_HELP : 2
RASH_ERYTHROMYCIN : 1
OF_THE : 9
HUMAN_UNITS : 1
BACK_IS : 1
TO_PASS : 1
RECEIVED_REPORT : 1
INFORMATION_BE : 2
SEE_MAY : 1
STAFF_GAIT : 1
HYPOALBUMINEMIA_PAIN : 1
SYMPTOMS_NUMBNESS : 1
DISTAL_MET : 1
TWO_WAS : 1
ACTIVE_ABOUT : 1
COMPLETELY_INDEPENDENT : 1
THAT_CARVEDILOL : 1
HAIRLESS_AREA : 1
PRIOR_ATTEMPTS : 1
TO_EVALUATED : 1
FOR_ASSESSMENT : 1
ASSESSMENT_PROSTATE : 1
HOLD_JUL : 1
THE_HEALING : 1
SCAN_SHOW : 1
HAS_NOT : 4
QUALITY_AND : 1
HAS_CHIEF : 3
TREATMENT_TYPE : 1
GATHERED_HOWEVER : 1
NONE_MED : 1
IMAGE_CLERICAL : 1
AND_REVIEWED : 1
THERAPY_XRT : 1
PRIVATE_PHYSICIANS : 1
WILL_SEEN : 1
RANGE_SENSORY : 1
OF_MEDICATIONS : 1
PTS_STATES : 1
ON_THEM : 1
GLARGINE_HELD : 1
ENTRY_PROCESS : 1
REPORT_PREOPERATIVE : 1
EXCLUDING_ASSESS : 1
CC_IN : 1
IS_REQUESTING : 3
POLYSOMNOGRAPHY_STUDY : 1
REQUIRED_DOES : 1
PROCEEDURES_BP : 1
SIGNIFICANT_CAD : 1
RECTAL_OR : 1
COMMENTS_SAFETY : 1
SOLDIER_LOR : 1
PREVENTION_COORDINATOR : 1
GOALS_OR : 1
RESPONSIBLE_PROVIDING : 1
INTERVENTIONS_PAIN : 1
MARY_TRAINED : 1
SHORTNESS_BREATH : 1
RISKS_AND : 3
FULLY_ORIENTED : 1
REPRODUCABLE_PALPATION : 1
THIS_PROBABLY : 1
EKG_OBTAINED : 1
HIS_NURSE : 1
STR_NAME : 1
IN_NECK : 1
HAS_CM : 1
TH_DISTAL : 1
NO_LFT : 1
SOLDIER_PRSE : 1
EKG_QUESTION : 1
MENINGITIS_HAS : 1
HPI_NEEDS : 1
THIS_ATTEMPTS : 1
DYSPNEA_PENICILLIN : 1
ATTENDING_NOTE : 1
PRESENT_NOW : 1
VET_TELEPHONED : 1
EXAM_IIXII : 1
AREA_THICKNESS : 1
WITH_SIG : 1
CONSTIPATION_DEPENDENCE : 1
NTG_STARTED : 1
POOR_EVERY : 1
PRESCRIPTIONS_IS : 1
ALLERGIES_CODEINE : 1
EYE_DURATION : 1
PMR_INITIAL : 1
ACTIVE_COUNSELING : 1
WT_OX : 2
LINE_HISTORY : 1
TO_AM : 1
PROGRAM_INCREASING : 1
CORONARY_DISEASE : 1
WAS_INTRAMUSCULARLY : 1
SISTER_ALVETA : 1
UP_AND : 1
NOSE_AND : 1
HAS_RELIGIOUS : 1
PULSE_OX : 1
DIFFICULTY_KNOWING : 1
NOTE_OF : 3
GIVEN_SQ : 1
TH_LACE : 1
EVERY_DISCONTINUE : 1
ADL_FOR : 1
ANSWER_OF : 1
BUSINESS_HE : 1
WAL_OF : 2
WITH_ABSTINENCE : 1
FOLLOW_NOTE : 1
ADDENDUM_INTERVENTIONAL : 1
OCT_CONTACT : 1
OTHER_LISTED : 1
LONGER_THOUGHTS : 1
EL_HISTORY : 1
EC_DYSPHAGIA : 1
ARE_YOU : 2
TO_RILEY : 1
NODULES_MEDIASTINAL : 1
FM_CP : 1
ET_PULSE : 1
HR_CALL : 1
HYDROXYZINE_ATARAX : 1
PAIN_IN : 4
REPORTS_KNOWN : 1
TEST_COMPLETED : 1
REPORTS_FROM : 1
DEMANDING_TO : 1
PATIENTS_WEIGHT : 1
PT_SIGNIFICANT : 1
MODERATE_MINIMAL : 1
RISK_GAIT : 1
REPORT_SITUATIONS : 1
HIM_NONVA : 1
SPIRITUAL_TREATMENT : 1
TYPE_OF : 4
PILL_PC : 1
ADDENDUM_RADIOLOGY : 1
OR_TECHNIQUES : 1
IN_INFANTS : 1
SPECIAL_FULL : 1
BELOW_MEDICATIONS : 1
HEALTH_GROUP : 1
SERVICE_HE : 1
PUNCTURE_MENINGITIS : 1
OR_DRINKS : 1
PT_THERAPEUTIC : 1
AWAY_HOME : 1
IS_CURRENTLY : 2
WAL_CONVERSATION : 1
WITH_TRYING : 1
SUDDEN_OR : 1
SATT_AND : 1
WITH_HAS : 3
HOSPITAL_FOR : 1
OF_CT : 1
HIS_BODY : 1
HYGIENE_SHOWER : 1
HIS_WRIST : 1
AND_CHILDREN : 1
WAY_THE : 1
ELECTRONIC_RECORD : 1
ASSESSMENT_OUTCOME : 1
ADDENDUM_AGE : 1
GI_SIGNS : 1
UPDATE_ALL : 1
IDENTIFIED_NO : 1
ONGOING_THAT : 1
CONSULTS_MEDICINE : 1
IIXII_NORMAL : 1
PROGRESS_REHAB : 1
TELEPHONE_ENCOUNTER : 1
OBSERVATIONS_ABUSE : 1
II_YO : 1
INDEX_NOV : 1
ONEHALF_COPD : 1
FOR_SEVERAL : 1
NEEDS_BASED : 1
INFORMATION_BRIEF : 1
AND_DOCUMENT : 2
SECOND_OPINION : 1
OWN_PERIPHERAL : 1
OR_SEXUAL : 1
IS_THERE : 1
VET_WHO : 1
NO_RECTAL : 1
FIFTH_SIGN : 1
HE_RASH : 1
LOT_LOSSED : 1
TO_DISCHARGE : 4
NURSING_TRIAGE : 1
IS_AND : 3
ET_NONE : 1
THE_TETANUS : 1
SEVERE_HIGH : 1
BAY_DISCUSSING : 1
WAS_WEARING : 1
GOOD_ASSOCIATED : 1
SEEK_AT : 1
SCAN_FROM : 1
WHEN_WERE : 1
BE_PLACED : 1
PCC_NURSE : 1
TASERED_REPORTS : 1
GAVE_RESPONSES : 1
EVALUATION_THE : 1
PROV_NOTE : 1
STATE_APPOINTMENT : 1
ASSESSMENT_HE : 1
VOICE_THIS : 1
AND_ENVIRONMENT : 1
BETTER_TELEPHONE : 1
COUGH_FATHER : 1
SERVICES_AS : 1
DOWN_NORTH : 1
PATIENT_WAS : 7
PAK_TAKE : 2
SUPPORTIVE_FOR : 1
ALL_WITH : 1
PT_REQUESTING : 1
HE_FROM : 1
EXAM_HEART : 1
QUITTING_TOBACCO : 2
MOTIVATION_GOOD : 1
IN_EL : 1
MENINGITIS_BEEN : 1
LCSW_AGAIN : 1
AGENCY_OUTPATIENT : 1
INTERVIEW_PREVIOUS : 1
XYZZY_NOTES : 1
PROBLEMS_PROBLEM : 1
YO_WITH : 2
FT_DEMONSTRATED : 1
HEART_AND : 1
USING_ULTRASOUND : 1
SOB_RT : 1
APPT_ERE : 1
MINNICH_WHO : 1
HIM_LAMOTRIGEN : 1
TIMES_REQUESTED : 1
FROM_HOME : 1
THAT_AN : 2
PATIENT_GIVEN : 1
WITH_ASPIRATION : 1
CARPAL_REPAIR : 1
THE_FIFTH : 1
VOICED_ACCESS : 1
CATIGNANI_AMLODIPINE : 1
NO_HEADACHES : 1
DOFFING_OF : 1
COMPLAINED_OF : 1
PM_TO : 1
VISIT_IS : 1
MOOD_EXHAUSTED : 1
VETERAN_PSYCHO : 1
MODERATE_RELATIONSHIP : 1
CURRENT_MEDICINES : 1
IMPROVED_WOULD : 1
OR_INJECTION : 1
WAS_ON : 3
HX_ICDCM : 1
NA_SATT : 1
MG_HRS : 3
PATIENT_THE : 1
FOR_BLOOD : 1
IIXII_MOTOR : 1
AM_GLARGINE : 1
PROSTHETICS_UNIT : 1
WAS_IV : 1
NO_MIND : 1
CONNECTED_HE : 1
TO_FIREARMS : 1
PATHOLOGY_REPORT : 1
PRESENT_WHY : 1
TEAR_ON : 1
DAILY_POSITION : 1
SC_ING : 1
HIM_THAT : 1
NO_INFECTINO : 1
ANOTHER_RAN : 1
NOTE_HRS : 1
HAVE_KNOWING : 1
ASSIGNED_TO : 1
GROUP_PSYCHOLOGICAL : 1
PILL_PAK : 4
REPORTS_HE : 2
PL_ED : 1
NOT_EXPECT : 1
SECOND_FOR : 1
SUBJECTIVE_ALLERGY : 1
TO_MS : 2
PLAN_HOWEVER : 1
WITH_PHYSICIAN : 3
GET_VETERAN : 1
LOW_POSITION : 1
AS_AND : 1
NOT_SEEN : 2
TEAM_REVIEW : 1
OR_MOOD : 1
WITH_ASSISTANCE : 4
THEY_STATED : 1
HYPOTHYROIDISM_NONE : 1
QAM_ACTIVE : 1
MARRIED_AS : 1
PRESCRIBED_INSULIN : 1
SERVICES_REFERRED : 1
CARE_REVIEWED : 1
FOLLOWING_COMFORT : 1
EDEMA_VOIDING : 1
HYPERSOMNOLANCE_SUICIDE : 1
LEADER_AND : 1
SEE_RESIDENTS : 1
BREAKTHROUGH_PAIN : 1
REGULAR_NO : 1
MULTIPLE_MEDS : 1
NOTE_REASON : 1
INHL_AND : 1
MEDS_HANDOUT : 1
ADMISSION_TO : 1
YES_WATERY : 1
SNIEWSKI_FEBRUARY : 1
NOW_WITHIN : 1
IER_IN : 1
THESE_SYMPTOMS : 1
LOCAL_HOSPITAL : 1
AND_REFERRAL : 1
KILL_HIMSELF : 1
SOCIAL_HISTORY : 1
PATCH_MG : 3
HOUGH_HAPPY : 1
EDUCATION_PATIENT : 1
WRIST_QUITTING : 1
AIMS_RAL : 1
COMPLAINT_YEAR : 1
SOURCE_THE : 1
ICDCM_HEENT : 1
NURSING_CARDIOLOGY : 1
ALCOHOL_IN : 1
GOOD_SMILING : 1
OR_ALLERGIES : 1
PRESSURE_PATIENT : 1
STATED_HYPOALBUMINEMIA : 1
EVER_HAD : 1
IS_WAL : 2
VETERAN_IS : 2
TAKE_TABLETS : 2
NEEDED_UP : 1
YOU_HOW : 3
WITH_MULTIPLE : 1
THAT_CX : 1
PATIENT_RECIEVED : 1
PM_BEFORE : 1
SUCH_AS : 2
VISITING_TO : 1
CONDUCTED_IF : 1
EXPEDITOR_ED : 1
NUTRITIONAL_STATUS : 1
HE_STARTED : 1
PAK_PC : 1
OR_HE : 1
TO_YOUR : 2
TRIGLY_LOCATION : 1
THAT_MIGHT : 1
FRIGHTENING_HORRIBLE : 1
WAS_UP : 1
PATIENT_AMP : 1
TRIGGERS_TO : 1
IDENTIFIED_HEALTH : 1
WAL_SALMETEROL : 1
PAIN_WILL : 1
BREATH_COMPLETED : 1
TOLD_ME : 1
ACCEPTABLE_TO : 2
SUPPOSE_HOSPITAL : 1
DIABETES_NURSING : 1
ER_MORE : 1
GAF_OF : 1
NOTE_ACTIVITIES : 1
HAS_ANSWERED : 1
TO_NORTH : 1
PROCEDURE_HE : 1
GO_FOR : 1
COMPLAINT_CONGESTION : 1
PRIOR_LEVEL : 1
II_PRECLUDES : 1
ENCOUNTER_GROUP : 1
MEDICATIONS_STATUS : 7
INTACT_PAIN : 1
OLD_NAME : 1
OF_PT : 1
PHONE_CONTACT : 2
PATIENT_MADE : 1
STAFF_AS : 1
GLUCOSE_TEST : 1
WITH_PCP : 1
MEDICAL_SUBSTANCE : 1
OCCASIONALLY_NO : 1
MEDICATION_DONE : 1
OF_FOREARM : 1
VIA_REFERRAL : 1
BEGIN_AND : 1
DELUSIONS_NAPROXEN : 1
HX_OF : 1
MASSESS_CC : 1
CARE_NURSE : 1
THE_REQUIRES : 1
ZELL_PTS : 1
SIGNIFICANT_OTHER : 1
INTERVENTION_PL : 1
WRIST_HAS : 1
ACTIVE_PRESENTED : 1
BARRETTS_BY : 1
IS_NOT : 1
SCREENING_COUNSELING : 1
OXIMETRY_RADIATION : 1
HIS_SISTER : 1
MAY_DISCUSSED : 1
MEDS_SPECIFY : 1
RELATIONSHIP_TO : 1
AND_SUICIDE : 1
SESSION_HOURS : 1
YOU_SIX : 2
DEPRESSIVE_RECURRENT : 2
HE_PAIN : 1
ENGLISH_OSTOMY : 1
CONTAINING_IN : 1
FOR_VOICES : 1
CURRENT_SMOKER : 1
ARE_WILLING : 1
POOR_MALE : 1
OF_PAIN : 5
DRUG_QUETIAPINE : 1
AT_PVU : 1
WITH_THICK : 1
SECRETIONS_UP : 1
DOPAMINE_WAS : 1
STILL_FEELS : 1
GET_MENTAL : 1
SOFT_EDUCATION : 1
PATIENT_HEALTH : 1
BATHING_THAT : 1
DISCUSSED_HAS : 1
CARE_YOU : 1
TELEPHONED_IN : 1
SUICIDAL_FEELINGS : 1
ON_PALPATION : 1
HIS_NEXT : 1
IS_NOTABLE : 1
ERE_YOU : 1
SCHEDULING_PT : 1
HOURLY_SAFETY : 1
ELEVATED_TEMPERATURE : 1
YOU_PRESCRIBED : 1
FALL_STANDARD : 1
LEAVING_HE : 1
HAIRLESS_OF : 1
PATENT_ARRIVAL : 1
INTERVENTIONS_ASSESSMENT : 1
THE_MONTH : 1
MAY_ABLE : 1
ACTION_NO : 1
PO_FOR : 1
COULD_BE : 1
RRR_EXHAUSTED : 1
PM_HEENT : 1
THIS_PULSE : 1
FROM_THE : 1
FOR_DEPRESSION : 1
LETTER_TO : 1
CONTACT_BUT : 1
SCOPE_VISUALIZES : 1
REQUEST_FRACTURES : 1
MANAGEMENT_VISIT : 1
SO_HORRIBLE : 1
IS_YEAROLD : 1
DRUG_ALLERGIES : 1
PREOP_ASSESSMENT : 1
WORRIED_ABOUT : 1
HR_TRANSDERMAL : 1
ADDITIONAL_ASSESSMENT : 1
PROVIDED_BY : 1
SEEKING_SECOND : 1
IS_GIVING : 1
POSTVIETNAM_COPING : 1
HAVE_CRUSTED : 1
MAIL_HYPOTHYROIDISM : 1
OF_FRIEND : 1
RASH_BOTH : 1
PHYSICIANS_OFFICE : 1
OXYCODONE_OXYCODONE : 1
IDEATION_USE : 1
PAIN_HEENT : 1
FOLLOWED_ZELL : 1
TO_AT : 3
VERIFIED_RETURNED : 1
VET_HAS : 2
AM_BUT : 1
HIS_BEST : 1
APPETITE_RATES : 1
LOCK_NO : 1
FACE_PT : 1
DATED_SIGNED : 1
ERYTHROMYCIN_PENICILLIN : 1
RELIGIOUS_OR : 1
OCT_CANCER : 1
RHYTHM_EXAM : 1
PTS_WIFE : 1
FOR_HOW : 1
OUT_OF : 1
DATE_BIRTH : 2
ACTIVITIES_EA : 1
HTTP_WWW : 1
SIGNS_WBC : 1
SHOWS_MCA : 1
DISCUSSING_HEALTH : 1
MOBILITY_ASSISTANCE : 1
OX_DEF : 1
EXPIRED_OUTPATIENT : 1
CAN_GETTING : 1
THE_CLINIC : 2
CONTINENT_NO : 1
OFFICE_TO : 1
TEAM_NOTE : 1
FOR_SISTER : 1
PREVENTION_TO : 1
FOR_NOSE : 1
ASPIRIN_BMT : 1
MEDICINES_AND : 2
CELEXA_MG : 1
AND_DEESCALATION : 1
HE_CARES : 1
HE_TOLD : 1
OXIMETRY_OF : 1
POSTSURGICAL_AORTOCORONARY : 1
WHERE_IS : 2
DENIES_DEPRESSION : 1
OF_ALTERED : 1
BE_STOPPED : 1
HOME_SERVICES : 2
ON_VET : 1
AND_PRESCRIBED : 1
NEW_DEFICIENCY : 1
DISCHARGE_PATIENT : 1
ASSISTANCE_COUGH : 1
SHIFT_MOVED : 1
HOME_CARE : 1
REFERRING_TO : 1
PERHAPS_FOR : 1
ON_OCCASION : 1
AMBULATORY_HERE : 1
METOPROLOL_MG : 1
NERVOUS_NO : 1
NO_LONGER : 1
WAS_PASSING : 1
TIMES_TWO : 1
THIS_TIME : 6
LBS_OF : 1
REQUIRED_CAROTID : 1
ROLLATOR_WITH : 1
TREATMENT_MEDICATION : 1
AND_OCCASIONALLY : 1
NEED_TO : 1
ELECTRONIC_ALERT : 1
STRIP_THE : 1
OR_PAIN : 1
DIS_NOT : 1
OF_AND : 2
REQUIRED_THIS : 1
TO_KNOW : 1
HE_APHDR : 1
FOR_NUMBER : 1
SEEN_AND : 1
ENCOURAGED_USE : 1
OF_ESTABLISH : 1
EXTENSION_CORD : 1
MCMULLEN_CONTINUD : 1
TO_APPOINTMENT : 1
COUGH_ULA : 1
CHRONIC_BACK : 1
PLEASE_NOTE : 1
HOW_ORDER : 1
THIS_INPATIENT : 1
DISTENDED_IN : 1
STRETCHER_TASERED : 1
PATIENT_VIA : 1
EVIDENCE_THE : 1
EACH_THE : 1
FLATUS_HAS : 1
YOU_INSTRUCTIONS : 1
MUCH_DO : 1
EMESIS_AND : 1
TO_PAIN : 4
ESOPHAGEAL_PT : 1
ZELL_AS : 1
PAIN_WAS : 1
DEPRESSION_VETERAN : 1
TO_DRIVE : 1
NIGHT_WAKES : 1
FIRST_THE : 1
REPORT_NEW : 1
EDUCATION_RISKS : 3
AREA_OTHER : 1
LABORATORY_PATHOLOGY : 1
MEDICAL_PROBLEMS : 1
REMOVE_NICOTINE : 1
OR_OF : 1
MILIEU_INCREASING : 1
ZELL_WIFE : 1
INFORMATION_INFORMATION : 1
TRYING_DIFFERENT : 1
LEADING_OF : 1
COUGH_NO : 1
CAR_RAN : 1
BEFORE_WITH : 1
COCHLEAR_APPARATUS : 1
WHY_NOW : 1
PARTIAL_DENTURES : 1
SUBCUTANEOUS_LAST : 1
HERE_INITIALY : 1
SERVICES_GOALWHAT : 1
WOUND_BEEN : 1
BUT_ATTACHED : 1
BUT_STILL : 1
FOLLOWING_INFORMATION : 1
SURGERYAPPT_MADE : 1
USE_RELAXATION : 1
YOUR_PHYSICIAN : 1
SENSES_EKSW : 1
CONVERSATION_WITH : 3
COMPUTERIZED_PROBLEM : 1
EOMI_MARY : 1
PRESENTED_TO : 2
PT_WAS : 3
PERRLA_EOMI : 1
NUMBER_PHONE : 1
USED_NOT : 1
READY_FOR : 1
DISCUS_ITEM : 1
FE_RR : 1
FOR_ACTION : 1
DIFFICULTY_AS : 1
PLEASE_GROUP : 1
MEANS_OF : 1
UNIT_DENIES : 1
ORDERING_PROVIDER : 1
BEEN_RULED : 1
REGION_WITH : 1
PHONED_REQUESTS : 1
CENTER_BED : 1
INCLUDED_ADVISING : 1
ARNP_OR : 1
NEOPLASM_INFLAMMATORY : 1
WAS_FRIGHTENING : 1
WALKS_FREQUENTLY : 1
BURSA_THE : 1
GAVE_AND : 1
ONSET_SHORTNESS : 1
AND_GIM : 1
RELEASED_INFORMATION : 1
CONTINENT_AT : 1
PAIN_OUTDATE : 1
PROBLEMS_PATIENT : 1
CRITICAL_TO : 1
GOV_PDF : 1
NO_AT : 1
CASE_MANAGER : 3
APPOINTMENT_DEAL : 1
HOME_DEPRESSION : 1
LEADING_CAUSE : 1
MG_EVERY : 1
CHANCES_SUCCESSFUL : 1
OL_LOWERING : 1
THOUGHTS_PRESENT : 1
ML_NO : 1
FE_NAME : 1
FREQUENCY_OF : 1
MAURER_EDUCATIONAL : 1
NURSING_THE : 1
AND_DONNING : 1
BLOOD_ORAL : 1
SCHEDULE_MONTHLY : 1
PDF_WHERE : 1
AS_HE : 5
COORDINATION_AND : 1
EVALUATION_ACTIVITIES : 1
HIM_RELIEF : 1
PATIENT_ALERT : 1
THE_DETOX : 1
PURSUE_IN : 1
READING_STROKE : 1
GI_LABORATORY : 1
HERE_RECEIVED : 1
NUMBER_PL : 1
REPORTS_JUMPED : 1
REVIEW_OF : 2
URINATE_HAS : 1
SPEECH_RRR : 1
SOCIAL_SUICIDE : 1
NO_MASSESS : 1
GUGYN_DENIES : 1
CULTURAL_OR : 1
UCINATIONS_PLAN : 1
NOT_PHARMACY : 1
AND_WILL : 1
VERY_LOT : 1
ALPRAZOLAM_MG : 1
PULSE_LISTED : 1
THIS_NOTE : 4
PROBLEM_PROTOCOL : 1
PAIN_OCCASIONALLY : 1
ROS_URI : 1
AFTER_COMPLETE : 1
CH_SUGGESTED : 1
FEVERS_NAUSEA : 1
CONSTIPATION_NOW : 1
HE_WITH : 1
AS_PAIN : 1
DOING_OF : 1
MIND_ANY : 1
TO_LEAVING : 1
PERIPHERAL_AND : 1
AAS_AND : 1
IN_CM : 1
IV_LOCK : 1
MASSESS_NS : 1
ON_WEDNES : 1
STATUS_ADDENDUM : 1
ICS_TREATMENT : 1
AND_EFFECTIVE : 1
STOMACH_CHIEF : 1
ASK_FOR : 1
IN_SERIES : 1
CONTINUES_BE : 1
NO_VOMITING : 1
DETAILS_OUR : 1
USE_MD : 1
INTO_HIS : 1
ICDCM_WELL : 1
MESSAGE_THIS : 1
BASIS_THAT : 1
ASSIGNED_CALLER : 1
THESE_AT : 1
COMPLAINT_NOT : 2
PATIENT_AND : 2
PET_BE : 1
OF_INTERVENTIONS : 1
MONTHS_ADVISED : 1
CONNECTED_OF : 1
NEEDS_ASSISTANCE : 1
THE_UNIT : 1
THE_ATT : 1
CONTACT_PATIENT : 1
BILATERAL_PPP : 1
PALPITATIONS_NO : 1
MET_HEAD : 1
FUNCTION_YOU : 1
MEDICAL_DIAGNOSES : 1
ASSESS_FACTORS : 1
CIGARS_ASKS : 1
AND_RECENTLY : 1
SMOKER_NO : 1
AT_ON : 1
RACY_MIND : 1
OF_USE : 1
ALONE_IN : 2
AND_APPEARS : 1
PLACE_URETHERA : 1
MG_TAB : 5
FOLLOW_UP : 1
IN_THE : 11
EOMI_BONANTI : 1
OF_SCAN : 2
CDL_IS : 1
NOTE_VETERAN : 1
YOU_VARDENAFIL : 1
PT_PAIN : 1
SIDE_RAILS : 2
PAIN_AND : 1
HOW_IS : 1
GAINESVILLE_OT : 1
DISCHARGE_CONTACT : 1
WEIGHT_PRESCRIBED : 1
DENIES_SI : 1
EXPIRATION_AND : 1
COUGHING_UP : 1
VITAL_SIGN : 1
WITH_THESE : 1
WAS_WITH : 1
CLINIC_BY : 1
THE_ACCUCHEK : 1
DRIVE_GAINESVILLE : 1
HE_SO : 1
NOTARIZED_DOCUMENT : 1
CLINICAL_PATIENT : 1
EKIPAA_PSYCHOSOCIAL : 1
CULTURES_ADDENDUM : 1
INTERDISCIPLINARY_OF : 1
STUDENT_NOTE : 1
STANDARDS_OF : 1
MOVED_TO : 1
NOT_RATED : 1
MANY_AT : 1
TO_BETTER : 1
NOT_HAVE : 2
FT_PATIENT : 1
AND_HAS : 2
ANGER_OR : 1
GIVING_THE : 1
SERVICES_FT : 1
BE_WED : 1
ABDOMEN_FROM : 1
TO_EXPLORE : 1
GIVEN_OF : 1
PSYCHO_EDUCATIONAL : 1
FIND_THAT : 1
CHAPEL_FOR : 1
UPSET_THEY : 1
DULL_ACHING : 1
GOALWHAT_PAIN : 2
APPLIANCES_TAB : 1
WITH_SCHEDULE : 1
ADDENDUM_ARE : 1
PROGRESS_MG : 1
OF_MOOD : 1
LIST_THE : 1
PHYSICIAN_TO : 2
EFFUSION_RIGHT : 1
WEEK_AT : 1
RECIEVED_NO : 1
TO_EMPOWER : 1
FOR_FURTHER : 1
BY_VISITING : 1
CAN_AFTER : 1
ADDITIONAL_INFORMATION : 1
HOURS_NOC : 1
IN_SEALY : 1
ABLE_INFORMATION : 1
INITIAL_PATIENTS : 1
BY_XVETERAN : 1
CALL_AM : 1
ARRIVAL_WAS : 2
GROUP_WAS : 1
CA_LOT : 1
THEIR_USE : 1
PROCEDURE_LUNG : 1
IN_ELECTRONIC : 1
BLOOD_CULTURES : 1
WITH_FOOD : 1
FAIR_TEMPERATURE : 1
PAIN_ACTIVE : 2
REDNESS_EDEMA : 1
BE_TO : 4
ON_UP : 1
DISCHARGE_PLANS : 1
DIAGNOSES_TREATED : 1
IS_LUNG : 1
PARTICIPATED_IN : 1
LIKE_TO : 3
GLUCOSE_ASSESSMENT : 1
PATTERN_CHANGE : 1
AND_OFFERING : 1
FEE_SERVICES : 1
PROGRESS_IN : 1
LEARNING_BLOOD : 1
PHYSICIAN_AND : 2
THE_CM : 1
SEE_NOTE : 1
NURSING_TEAM : 1
NO_DATE : 1
YESTER_NOT : 1
ORIENTED_AND : 1
MOVES_EXTREMITIES : 1
NOT_TO : 3
COUGH_RT : 1
PLEASE_SEE : 1
IDENTIFIED_PREVENTIVE : 1
OF_UNDERSTANDING : 2
BED_ENGLISH : 1
EXTENSION_THE : 1
SMILE_ACTIVE : 1
HE_HAD : 3
VET_ENJOY : 1
OTHER_AT : 1
OXIMETRY_THERAPY : 1
PAIN_AS : 2
LABS_MALE : 1
JOINT_BURSA : 2
COMPLETION_NEOADJ : 1
PATTERN_YES : 1
HEALING_AT : 1
AT_ENCOUNTER : 3
TELEPHONE_CALLED : 1
ADMITTED_ACUTE : 1
TO_MENTAL : 1
NOT_HELPING : 1
DONE_WWW : 1
YEAR_PT : 1
HE_ATTACKED : 1
PER_THE : 1
INVOLVED_MVA : 1
ANY_SUICIDAL : 1
GI_ABDOMEN : 1
PLAN_NO : 2
OF_CA : 1
WAS_STRETCHER : 1
PLAN_HAS : 1
ADMISSION_PULSE : 1
THE_AS : 1
ADDED_AND : 1
HYPERKALEMIA_PSYCH : 1
RETURNS_ACTIVE : 1
PROCEDURE_INSTRUCTIONS : 1
HOWEVER_NOT : 1
STRUCTURE_AND : 1
BE_PHYSICIAN : 1
POSITIVES_IN : 1
GETTING_LABS : 1
AIRWAYS_BIOPSY : 1
IS_YOUR : 1
CLINICAL_LEADER : 1
SUPPOSE_TO : 1
PHYSICAL_PHONE : 1
THE_VERBALIZED : 1
AS_REPLACEMENT : 1
YOU_EVER : 1
NORMAL_OF : 1
AND_SURGERY : 1
NOT_IT : 1
NECK_AND : 1
ASA_NURSING : 1
HEALTHAMBULATORY_CARE : 1
MIND_DENIES : 1
ATTENDING_WHO : 1
AND_NURSING : 2
LITTLE_BUT : 1
CLEAN_WITH : 1
IRON_WHEN : 1
TELEPHONE_IF : 1
HOW_READINGS : 1
SI_IV : 1
VETERAN_GIVEN : 1
SALINE_LOCK : 2
DAY_SURGERY : 1
AGAIN_WAS : 1
ALL_EXTREMITIES : 1
CAUSE_OF : 1
PASS_FLATUS : 1
HOURS_SLOWED : 1
AT_LEAVENWORTH : 1
ON_LEAVE : 1
NO_OF : 3
IER_SHIFT : 1
NO_HOMICIDAL : 2
BUT_QUICKLY : 1
NONCOMPLIANCE_AND : 1
ISSUE_DATE : 2
HIS_BUT : 1
OR_WEAKNESS : 1
ACCUCHEK_CV : 1
AAS_REPORT : 1
CHAPEL_BECAME : 1
FREQUENTLY_RISK : 1
DEPRESSION_RISK : 1
THIS_ROLLATOR : 1
BY_HIMSELF : 1
SITTER_OR : 1
SHOWER_MET : 1
NERVE_HE : 1
HANDOUT_PROVIDED : 1
PATIENT_GOOD : 1
STAND_ASSISTED : 1
HIGH_RISK : 3
HAVING_GET : 1
CALL_PHYSICIAN : 1
CLINIC_NURSING : 1
RN_DUTY : 1
WANT_PROVIDER : 1
PS_FROM : 1
GROUP_FACILITATED : 1
ADMITTED_INTERDISCIPLINARY : 1
LUMBAR_PUNCTURE : 2
SAME_HR : 1
HX_CHF : 1
AS_EXPR : 1
EVENTS_SCORE : 1
NUMBNESS_AFFECT : 1
THIS_THAT : 1
THAT_TAKING : 1
OTHER_TO : 1
RESPONSIBLE_THE : 1
JIM_CLINICAL : 1
PATIENT_MAJOR : 1
CARE_EVERY : 1
SUICIDAL_AT : 1
CONTINENT_ENDING : 1
EXPECT_LUMBAR : 1
THERAPY_DONT : 1
EXPIRED_MEDICATIONS : 1
MEDS_VERDSOME : 1
UP_STATE : 1
SURGERY_TO : 1
HOPELESSNESS_WORTHLESSNESS : 1
ORBITS_OPTIC : 1
SCHEDULED_AND : 1
ALCOHOL_OR : 1
ASSIST_WITH : 1
THAT_EXPERIENCES : 1
TOO_MUCH : 1
LOCAL_DOCTOR : 1
REASON_CALL : 1
PHARMACY_EDUCATIONPT : 1
MINIMAL_MILD : 1
CAROTID_NOT : 1
TRIAGED_SEP : 1
IF_APPROPRIATE : 1
PING_THEY : 1
PT_ANY : 1
TAB_MG : 8
PATIENT_PHONED : 1
NOTE_CORONARY : 1
PROBLEM_EYES : 1
STANDARDS_APPETITE : 1
DOES_TIME : 1
THE_FULL : 1
HE_DOES : 1
NAME_OF : 2
WITH_LOWFAT : 1
BIOPSIES_AT : 1
SIGNIFICANT_EVOLUTIONAL : 1
NURSING_USED : 1
APPROPRIATE_FOR : 1
SINUSITIS_INVOLUNTARY : 1
JULY_IPC : 1
NONICT_SCLERA : 1
AND_NEURO : 1
PROVIDER_SCREEN : 1
ASSISTANCE_ULA : 1
HIS_AS : 1
SWELLING_OF : 1
OF_SELF : 1
NO_COMPLAINTS : 2
DOUG_APPEARS : 1
ABSTINENCE_MEDICATIONS : 1
FEELING_DOWN : 1
REFILL_WITH : 1
HARM_WILL : 1
TAKE_ONE : 4
BEDTIME_AS : 1
SOMETHING_GIVEN : 1
FATHER_AT : 1
PROTOCOL_PATIENT : 1
THAT_TAB : 1
PT_UPSET : 1
EDUCATION_NOTE : 1
SUBSPECIALTY_PHYSICIAN : 1
FEELING_AT : 1
WILL_CONTACT : 1
WHAT_WANTS : 1
GLARGINE_INSTAGLUCOSE : 1
CHAPLAINSPIRITUAL_ASSESSMENT : 1
KNOW_TO : 1
HAVING_TO : 1
TO_AROUND : 1
OLD_NICOTINE : 1
OF_AT : 5
KG_ANODONTIA : 1
PROCESS_CM : 1
LEAVING_HIS : 1
AM_TOMORROW : 1
FRIENDS_PATIENT : 1
IPC_LACE : 1
THE_VITAL : 1
REMAIN_TOBACCO : 1
NAUSEA_NO : 1
DIARRHEA_CONSTIPATION : 1
PROTECTIVE_NURSING : 1
DOING_WELL : 1
GIVEN_MORPHINE : 1
GOOD_EXPLAINED : 1
SUICIDAL_PAST : 1
INPATIENT_MEDICATIONS : 3
HAS_RULED : 1
STL_PILL : 1
OR_TO : 1
DISCHARGE_TELEPHONE : 1
TO_PSYCH : 1
INTO_HOUSE : 1
AND_THAT : 5
NKA_TOLERATED : 1
SEEK_AS : 1
DISPATCH_AND : 1
ABOUT_PACKAGING : 1
FOLLOW_SEE : 1
STATUS_STRUCTURE : 1
CORD_THE : 1
CE_BY : 1
PHONED_IN : 1
TEMP_PULSE : 2
COMPLETE_FOR : 1
AND_MEMORY : 1
FRIEND_HOYT : 1
ENCOURAGED_TO : 3
VERBALIZED_AN : 1
TECHNIQUES_PRIOR : 1
WK_FOR : 1
DISORDER_UNSPECIFIED : 2
PLAN_HE : 2
SO_UAL : 1
PT_STATES : 1
ADVISED_TO : 3
NATURE_THE : 1
TOMORROW_DEPRESSION : 1
THE_ABOVE : 1
YES_SUPPORTIVE : 1
ERYTHROMYCIN_HAVE : 1
CYST_OR : 1
PT_WORRIED : 1
DEPRESSIVE_HE : 1
OF_HARM : 1
HAVE_FOR : 1
UNDERSTANDS_HOW : 1
TOBACCO_USE : 2
ASSISTANCE_OF : 1
MG_QH : 1
EVIDENCE_HYDROCEPHALUS : 1
OF_REFERRING : 1
OF_PATIENTS : 2
SIGN_POINTER : 1
BM_CHANGE : 1
PACE_HIMSELF : 1
NURSING_NO : 1
NOTE_WIFE : 1
CATIGNANI_NO : 1
ACCORDING_TO : 2
TO_CONTINUE : 2
EFFECT_USE : 2
FOR_TIME : 1
PATIENT_COUNSELLED : 1
CONSULT_NOTE : 2
MDS_WEEKLY : 1
EVERY_FOR : 3
CELL_MAY : 1
FEELING_BETTER : 1
EDEMA_BILATERAL : 1
RADIOLOGY_IRGUIDED : 1
IN_REPORT : 1
PAK_PTSD : 1
COME_TO : 2
PROCEDURES_OUTPT : 1
GET_HIM : 1
ALL_ISOP : 1
TO_OF : 1
TO_SPEAK : 1
DISTRIBUTION_NEITHER : 1
IN_PERIOD : 1
VISION_LOSS : 1
CANE_EVALUATION : 1
ON_LIGHT : 1
ESTABLISH_BRIEF : 1
HE_STATE : 1
OMEPRAZOLE_DE : 1
USE_ON : 1
HE_OFFERED : 1
FACE_POST : 1
WITH_NORMAL : 1
MOUTH_BEDTIME : 1
UP_COOPERATIVE : 1
DATE_TEMP : 2
APPOINTMENT_IER : 1
ON_WELLBUTRIN : 1
STATUS_IS : 1
GATHERED_DOUG : 1
SAME_PL : 1
GI_PROCEDURE : 1
BIPOLAR_AND : 1
MEDICATIONS_REG : 1
THE_WEATHER : 1
NO_FOOD : 1
CONSTANTLY_PHYSICAL : 1
THE_WAS : 4
INDIVIDUAL_SESSION : 1
HEALTH_OF : 1
THAT_VETERAN : 1
DOCTOR_ME : 1
THAT_NO : 1
NOTE_COMMENTS : 1
EDUCATION_CNS : 1
OX_OXIMETRY : 1
PREVIOUS_NO : 1
WHEN_THAT : 1
TO_FEE : 1
STARTED_SIMVASTATIN : 1
HELP_BUT : 1
LIKE_DISCUSS : 1
EVERY_FOOD : 1
HEELS_CONTROLED : 1
SUBSTANCE_ABUSE : 1
NIACIN_FLUNIS : 1
PSYCHIATRIC_PHYSICIAN : 1
UNDERSTANDING_AGREEMENT : 1
US_NOT : 1
IT_INCAPACITATION : 1
MASS_INDEX : 1
RATE_WITH : 1
IDENTIFIED_OXYCODONE : 2
CONCENTRATION_FAIR : 1
WTIH_SIGNIFICANT : 1
POSITIVES_HIS : 1
IMPACT_NO : 1
IS_OUT : 1
ERYTHROMYCIN_CODEINE : 2
THICKNESS_THAT : 1
NONE_PULSE : 1
CONTACTS_MADE : 1
PATIENT_APPOINTMENT : 1
FOR_AND : 2
OR_VISION : 1
ACTIVE_RECENTLY : 1
UNDERSTANDING_GOOD : 2
PLACED_HIS : 1
UP_BLOOD : 1
QUETIAPINE_TAB : 1
ORIENTED_WELL : 1
INFORMATION_MAY : 1
GUIDED_USING : 1
SCREENING_USE : 1
WIFE_STATED : 1
ESOPHAGEAL_SUBJECTIVE : 1
NEEDED_PAIN : 1
THE_PAST : 5
NOTES_THAT : 1
RASH_ON : 1
TRUCKS_PERSONAL : 1
BP_AS : 1
NEW_SUBJECTIVE : 1
CLEAR_HAZARDS : 1
PATIENT_DESCRIPTION : 1
CARDIOLOGY_PUT : 1
PO_BID : 3
AFTERCARE_AND : 1
MINIMAL_LEFT : 1
FOR_OL : 1
CLINIC_MALE : 1
UNDERSTANDING_MAIL : 1
INDICATED_SUSPICION : 1
ASSISTED_ASSESSMENT : 1
INSTRUCTIONS_INABILITY : 1
COMPLAINT_OF : 3
PERFORM_THE : 1
ATTEMPTED_CALL : 1
THOUGHT_NECK : 1
AT_FT : 1
LISTED_ASSESSMENT : 1
MANAGEMENT_REPORTS : 1
BE_HTTP : 1
WELL_CONTROLED : 1
SCREEN_FOR : 2
OF_SERVICE : 1
ARE_UPON : 1
AFTER_YOU : 1
THE_DIARRHEA : 1
ABOUT_PRSE : 1
NO_HAD : 1
BE_DONE : 1
PATIENT_DISCHARGE : 1
ETHNIC_THAT : 1
IS_REPRODUCABLE : 1
ASSIST_IN : 1
EVALUATION_UPPER : 1
LIKE_GET : 1
SI_HI : 1
CODEINE_DYSPNEA : 1
LONG_PLAN : 1
NOW_OR : 1
PARTICIPATION_PAIN : 1
COUGH_PRIOR : 1
DEPRESSIVE_DISORDER : 2
WAS_COUNSELLED : 1
PRESSURE_NO : 1
VERY_DEPRESSED : 1
BEDSIDE_FELL : 1
WITH_VIA : 1
TESTING_KIT : 1
MAN_WHO : 1
JUMPED_HIS : 1
OF_TRANSPORT : 1
ESOPHAGEAL_AT : 1
SYMPTOMS_PESSIMISM : 1
ON_SITUATION : 1
ARE_FOR : 1
CARCINOMA_OF : 1
NURSING_PATIENT : 1
PRIOR_SCHEDULING : 1
INDEPENDENT_AND : 1
LEFT_MORSE : 1
AND_MAIL : 1
ACTIVITY_HAS : 1
DISORDER_ICDCM : 1
OUT_ATTENDING : 1
INDENTIFIED_WITH : 1
BACK_WITH : 1
UP_PHYSICIAN : 1
TIME_THE : 1
HAVE_TO : 1
WAS_ORIENTED : 1
SEE_MS : 1
CALL_MEDICATION : 1
COMPLAINING_WEAKNESS : 1
MEDICATIONS_ADDENDUM : 1
RESPONSIBLE_FOR : 2
MOVED_AND : 1
RELIEF_THAT : 1
PT_ON : 1
YES_MEDICATION : 1
REPORT_PARTIAL : 1
NURSE_START : 1
DEPENDING_ACTIVITY : 1
HAD_THE : 1
TOMORROW_IS : 1
DIAGNOSIS_RUL : 1
FOR_IRON : 1
AGENCY_DOES : 1
YEAR_OR : 1
TO_DISCHARGED : 1
ALSO_REQUESTING : 1
HOURS_THEIR : 1
NO_THIS : 1
THESE_TO : 1
SCREENING_CALLER : 1
HE_CRITICAL : 1
ACTIVE_DIPHENHYDRAMINE : 1
EVERYONE_IS : 1
PT_TO : 4
COMPLAINTS_PAIN : 1
ISSUES_TO : 1
OR_IF : 1
OF_SURGERYAPPT : 1
MORPHINE_SKIN : 1
COMMENTS_SOFT : 1
NEW_YOU : 1
DONE_HTTP : 1
WAS_HOSPITALIZATIONS : 1
RATE_NOW : 1
DOCUMENTATION_INTO : 1
NORMAL_ELIGIBILITY : 1
MAY_USEFUL : 1
TO_OTHER : 1
INDIVIDUAL_ASSESSMENT : 1
PAIN_IS : 3
NOTE_CHAR : 1
HCL_TAB : 1
NONE_SUICIDAL : 1
SEE_HIGH : 1
COMPLICATIONS_NONE : 1
SLIGHTLY_PATIENT : 1
MOVEMENTS_NONE : 1
MVA_ANOTHER : 1
KEY_PESSIMISM : 1
NO_PULSES : 1
PRIMARY_CARE : 4
FOR_GOUT : 1
BY_THREE : 1
GOOD_ANXIETY : 1
WOUND_TO : 1
MALE_SERVICE : 1
CONTINUES_SMOKE : 1
VETERANS_ATTENDED : 1
ALL_MEDS : 1
MEDICAL_REFILL : 1
GROUP_PATIENT : 1
MALE_EVERY : 1
COMPLAINT_ACHING : 1
ORIENTED_ALL : 1
OSTOMY_NOT : 1
FRONTOPARIETAL_SIGNIFICANT : 1
HEALTHAMBULATORY_FEELING : 1
NEUROLOGICAL_TETANUS : 1
THE_RN : 1
HYDRONEPHROSIS_HOME : 1
OF_TRANSPORTATION : 1
FULLY_ROSENTHAL : 1
PULSE_DATE : 1
SEEN_TREATMENT : 1
OUTPATIENT_CARE : 1
ROHLFS_ELECTRODIAGNOSTIC : 1
DRINK_BECAUSE : 1
ALLERGIES_CURRENTLY : 1
CHIEF_PATIENT : 1
POSSESSION_CURRENT : 1
TO_ORDER : 1
PATIENT_OF : 2
ACTIVE_MEDICATIONS : 7
WEIGHT_LB : 2
NAME_SERVICE : 1
SUICIDE_SEE : 1
FACILITATED_BY : 1
PT_NAME : 1
BM_PATTERN : 1
HE_PRIMARY : 1
POSITION_TREATMENTS : 1
COPIES_OF : 1
SEEN_MEDICATION : 1
NO_COMMENTS : 1
FACTORS_INCLUDING : 1
STARTED_IN : 1
UP_ONE : 1
PSYCHOSOCIAL_EKHISTORY : 1
REPORT_GUGYN : 1
CYST_NEEDLE : 1
TO_PURSUE : 1
STAFF_STEADY : 1
ALTERING_EVENT : 1
AT_CONTACTED : 1
INSTRUCTED_AGE : 1
YES_IS : 1
HOURS_NO : 1
LAST_WEEK : 1
MOBILITY_WITH : 1
YEAR_MOBILITY : 1
FEVERS_HE : 1
NECK_LAD : 1
NEEDLE_MAY : 1
AMBULATORY_NO : 1
WITH_SPOKE : 1
COUGHING_BLOOD : 1
BETH_FISHER : 1
TIME_PROV : 1
ALSO_THAT : 1
TAKE_ONEHALF : 2
ALSO_ASA : 1
PAIN_PLAN : 1
NOW_WITH : 1
VOIDING_URINAL : 1
HEALTH_EDUCATION : 2
CIRCUMSTANCES_SEEMING : 1
OTHER_ACTIVE : 1
PRESCRIBED_MG : 1
EXPERIENCE_WAS : 1
MALE_WHO : 1
ASSISTANCE_IN : 1
RESPONSIBLE_JUST : 1
LISINOPRIL_TAB : 1
HIS_TYPE : 1
PREFERS_TO : 1
FOR_ADDENDUM : 1
AND_CONTINENT : 1
THESE_BOOTS : 1
ELBOW_FOR : 1
BEDREST_SIDE : 1
FOR_USE : 1
PM_AM : 1
PLACE_BUT : 1
PATHOLOGY_PREOPERATIVE : 1
ARRIVED_SEP : 1
TO_UNIT : 1
OUT_DAILY : 1
SPECIAL_INSTRUCTIONS : 1
AT_LUNCH : 1
MEDICATIONS_PLAN : 1
TO_PATIENT : 5
ACTIVITY_VET : 1
PAST_SERVICE : 1
CONTACT_NUMBER : 2
STOOLS_EATS : 1
MG_PO : 9
NOT_BM : 1
OR_PROBLEM : 1
USE_COUNSELING : 1
PREFERENCE_HOSPITAL : 1
OF_ASSAULT : 1
PO_PATIENT : 1
RIGHT_FOR : 1
CURRENT_POSTSURGICAL : 1
MALE_CONNECTED : 1
HAS_CHAPLAINSPIRITUAL : 1
DIABETIC_SCREENING : 1
LESIONS_PT : 1
OR_CHEST : 1
ATTENDANCE_TWICE : 1
OUT_PAIN : 1
BUT_MUCH : 1
ORDER_PROCESS : 1
THE_MAY : 1
BY_TO : 1
ENVIRONMENT_IN : 1
AM_SUPPOSE : 1
AND_LEGS : 1
ASSOCIATE_PROVIDER : 1
CAR_REFERRAL : 1
FACE_TO : 1
CALLED_WITH : 1
CORD_INFORMATION : 1
NICOTINE_PATCH : 3
SWER_SPOKE : 1
DSMIV_ICDCM : 1
RESIDENTS_FOR : 1
NOTABLE_THAT : 1
EDUCATION_GROUP : 1
ACUTE_RELATED : 1
AND_STATED : 2
THREATENING_BEHAVIOR : 1
HIM_HIS : 1
RESPIRATORY_STATUS : 1
INFECTIOUS_ADDITIONAL : 1
DYSPHAGIA_BIOPSIES : 1
AND_PLAN : 1
NEW_THAT : 1
THING_THAT : 1
NEEDS_APHDR : 1
SUMMARY_OF : 1
REQUIRED_ISOP : 1
NORMAL_FOR : 1
TO_HAS : 1
COMPONENTS_REQUIRED : 1
STUDYRELATED_NURSING : 1
AND_TRANSPORTED : 1
TIMES_MEDICAL : 1
DENIES_PROBLEMS : 1
IMPAIRMENT_ARRHYTHMIA : 1
PT_SEEN : 1
PUNCTURE_AFTER : 1
AND_AND : 1
PENDING_PATIENT : 1
WITH_INFARCTION : 1
BACK_MEDICATED : 1
YEARS_NO : 1
NOTE_STATED : 1
PT_ABOUT : 1
ACTIVE_TRIGGERS : 1
YELLOW_SECRETIONS : 1
PART_NURSING : 1
PROVIDER_KRISHNASWAMY : 1
BOOTS_TO : 1
VETERAN_AGR : 1
RESOLVED_MEDICINES : 1
INSTRUCTED_TO : 1
IDENTIFIED_AT : 1
OT_WELL : 1
RESIDENT_IS : 1
BEEN_BACKING : 1
MEDS_INPATIENT : 1
CELEXA_HE : 1
BAC_AND : 1
MALE_PATIENT : 2
FROM_CARPAL : 1
TO_POST : 1
STEADY_FALLS : 1
ABOUT_WAS : 1
BLOOD_ON : 1
GIVEN_ARE : 1
REFERRAL_PATIENT : 1
SIGNIFICANT_FOR : 1
IN_PLACE : 2
HEAD_PATIENT : 1
NONE_CONTINENT : 1
SC_PAIN : 2
MALE_PMHX : 1
PATIENTS_PULSE : 1
INFORMATION_PCC : 1
TIME_TEMP : 2
NAME_HIS : 1
NO_TELEPHONE : 1
CM_ON : 1
SOURCE_OF : 1
ENCOUNTER_NON : 1
GENDER_SERVICE : 1
IN_RECORD : 1
LB_OX : 2
UP_NIGHT : 1
NEEDS_THIS : 1
NO_FOR : 1
PHYSICAL_LOOKING : 1
SYMPTOMS_HE : 2
DOES_TAKE : 1
TROCHANT_SCHEDULE : 1
ANTIHISTAMINES_PT : 1
PPP_REFER : 1
SCREENING_MHC : 1
IMAGE_CONSULT : 1
JUL_DIAGNOSIS : 1
TO_ACUTE : 1
TO_SMOKING : 1
MOD_RIGHT : 1
CRUTCH_FT : 1
AND_ADVISED : 2
FAIRVIEW_MANOR : 1
NO_JUSTIFICATION : 1
HE_KILL : 1
DEPRESSED_AND : 1
MEDICATION_PRIOR : 1
CYST_NORMAL : 1
MUCH_THE : 1
SALMETEROL_BLSTR : 1
WAS_LEFT : 1
WALKS_THE : 1
NUMBNESS_INTERACTIVE : 1
THAT_WANT : 1
LITTLE_STILL : 1
NOTE_PHONE : 2
HOME_THE : 1
FEELINGS_PRESENT : 1
OF_GASTRIC : 1
BEING_BY : 1
DOCUMENTATION_REVIEWED : 1
THE_NEEDLE : 1
NOTABLE_PER : 1
OF_CRUTCH : 1
HAS_IT : 1
ADDENDUM_4D : 1
DIED_OF : 1
MASS_PROVISIONAL : 1
NONTENDER_PALPATION : 1
VETERAN_BE : 1
VOICED_TO : 1
TRACH_CLIN : 1
FELT_HE : 1
GENDER_MALE : 1
REACH_URINAL : 1
STATUS_TO : 1
TO_SAY : 1
THAT_TIME : 2
PATIENT_ON : 1
PROVIDED_MOUTH : 1
NOTE_ALERT : 1
ADDENDUM_GIVEN : 1
DEPRESSION_AGR : 1
REFILL_WAL : 1
NOTE_4D : 1
PAST_MONTH : 1
COMMENTS_PULMONARY : 1
TO_SHIN : 1
TO_DISCUSS : 2
VIEW_WAS : 1
ALL_THE : 2
SPHENOIDAL_SINUSITIS : 1
PSA_GIVEN : 2
PER_CAD : 1
IN_BEFORE : 1
NON_INVASIVE : 1
LOT_DATE : 1
ASSOCIATED_WITH : 1
MMM_ON : 1
GETTING_COMPLETE : 1
TO_INPT : 1
BE_ASSISTANCE : 1
PLAN_RISK : 1
LABS_REVIEWED : 1
HEAD_HAS : 1
WITH_CHIEF : 3
VOMITING_NO : 1
LEVEL_IS : 2
HAPPY_TO : 1
DRIVEWAY_ACTING : 1
ABOUT_HIS : 1
DEFERRED_PASSING : 1
PATIENTS_COORDINATION : 1
FOR_CHIEF : 2
PATHOLOGY_REPORTS : 1
ONE_TARGET : 1
IF_BE : 1
CAUSE_DEATH : 1
PSYCHIATRY_MEDICAL : 1
PERRLA_BONANTI : 1
CONSULT_PATIENT : 1
ACTIVE_TREATMENTS : 1
THIS_ALERT : 1
CONSULT_THE : 1
AGENCY_NOT : 1
MARITAL_MARRIED : 1
WAS_MOUNTAINCREST : 1
ADMITTED_ICS : 1
WEATHER_WAS : 1
UNDERGO_SPIRITUAL : 1
YESTER_BUT : 1
STRETCHER_SIDE : 1
DENTURES_PARTIAL : 1
START_THE : 1
! Stats words=1806  pairs=8785
