# Supplementary material for: Predicting the Risk of Suicide by Analyzing the Text of Clinical Notes
Source: PLoS One. 2014 Jan 28;9(1):e85733. doi: 10.1371/journal.pone.0085733 (PMC3904866; doi:10.1371/journal.pone.0085733)
Supplement: Appendix S3 — Machine Learning Libraries and Methods: This section is provided to enclose the open source (Apache License) classifier used for the building of the statistical models, specifically for the purposes of study reproducibility. A detailed account of these tools is intended for another publication. (ZIP) [file pone.0085733.s003.zip › Appendix3/ML_libs/Regression_testing/group2/processed/grp2-pt-1081.dat]

!  Done reading
! Total word count = 4675
! Total unique words = 1771
! Total pair count = 9346
! Total unique pairs = 8352
PASSED : 1
OBSTRUCTIVE : 1
OCULAR : 1
DEMONSTRATE : 1
AT : 30
SPEACH : 1
TERRIBLE : 1
PERIARTICULAR : 1
WM : 1
INTERFERES : 1
ONLY : 3
ANSWERING : 1
EVENING : 1
WORK : 5
LISINOPRIL : 3
PRESCRIPTIONS : 2
VOICES : 1
OPEN : 1
LOWER : 5
MONTH : 2
ULCER : 1
REFILLS : 2
DISCIPLINE : 1
WEIGHT : 9
RESTREPO : 1
BEEN : 6
FILLS : 1
BID : 4
BASE : 1
GOALWHAT : 1
WITHIN : 7
DERIDED : 1
CINDA : 1
REFILL : 4
ACCORDING : 2
MILD : 1
AA : 1
MINUTE : 1
OUTPATIENT : 5
WEEKLY : 1
MILITARY : 2
INTAKE : 3
INSTRUCTED : 3
CLEARANCE : 1
WARRANTED : 1
INTERVENTION : 5
INPATIENT : 3
DIURETICS : 1
CLOSE : 1
USE : 8
SPECIMEN : 1
HEME : 1
IMMEDIATELY : 1
HEMATURIA : 1
EPISODE : 2
SUPPLIES : 5
TWICE : 2
COLD : 1
REGARDING : 5
CHEW : 2
HARM : 1
VETERANS : 4
READING : 2
VASCULAR : 2
LEVEL : 9
AUTHORIZE : 1
ALCOHOL : 1
CHANGES : 3
RAL : 1
RESIDUAL : 1
SOCKS : 1
PERSONAL : 1
ISCHEMIA : 1
FAX : 1
AHEAD : 1
SEEMS : 1
VISITATION : 1
CHARACTERISTICS : 1
SHOULDER : 1
MET : 2
RECOMMEND : 1
MACHINE : 1
HIS : 28
FUNCTIONING : 1
COPD : 1
SLIGHTLY : 1
ARIPIPRAZOLE : 1
BRODINE : 1
ID : 1
VOIDING : 1
NEURO : 2
APPROPRIATE : 1
DIRECTIVE : 1
HOPELESSNESS : 1
ACID : 1
INSTRUMENT : 1
PLAUT : 2
WELL : 4
PHARM : 1
DISORDER : 2
SWOLLEN : 1
NOTE : 27
TEST : 5
TUNEL : 1
HARD : 2
PARENTS : 1
FASTING : 1
CARCINOID : 1
DO : 7
DOES : 7
TALKED : 1
TESTS : 1
MUCINEX : 1
CATEGORY : 1
MUTUAL : 1
TREATMENT : 8
FACT : 1
HTN : 1
BLOOD : 17
SAME : 1
UROLOGIST : 1
ACCESS : 1
SISNEROS : 1
CV : 1
DIAGNOSE : 1
HAVE : 13
ADVERSE : 1
SAW : 1
VOLUNTEER : 1
BPH : 1
RANG : 1
SCHEDULED : 7
ASK : 3
STEPS : 1
ARGE : 1
OF : 87
DRUG : 1
INCLUDE : 1
OVERTHE : 1
PUFF : 1
RETURNING : 1
TAB : 16
REACHED : 1
CALLER : 3
PSYCHIATRY : 2
REQUIRED : 2
ASSISTED : 1
STABLE : 2
DEC : 1
ACTIVATE : 1
MONITOR : 3
HAS : 26
DOMESTIC : 1
LIGHTED : 1
FOR : 80
PERCEPTION : 1
GRANULAR : 1
CONDITION : 2
NUTRITION : 1
COUNTER : 1
NUMBER : 6
DETOX : 2
HOMELESS : 1
STRIP : 1
STAPERT : 1
CLONIDINE : 1
AWAITING : 1
AID : 1
LEARNS : 1
LVN : 1
LANDED : 1
TABLESPOONFU : 1
SC : 5
MS : 3
MY : 1
BEDFAST : 1
OUTPT : 1
LEGAL : 2
NURS : 1
IDEATION : 3
MUST : 1
IO : 1
MESSAGE : 1
GEN : 1
THINGS : 3
COLONOSCOPY : 3
SUBSTANCE : 1
THEM : 2
GOALS : 1
HOUSEMOBILE : 1
ASSESSMENT : 8
ROM : 1
RESPIRATORY : 1
SERUM : 1
US : 2
MEDIAN : 1
QUITTING : 1
ACTIVITY : 5
METAL : 1
INTRAFACILITY : 1
EVIDENCE : 1
SHOWS : 3
IMB : 1
ATTACHED : 1
ND : 1
MOTORCYCLE : 1
HELMET : 1
ENCOURAGED : 4
NAUSEA : 2
IMA : 1
INFORMATION : 6
ADEQUATE : 1
PATTERN : 1
ENDOCET : 1
INITIAL : 1
ILL : 1
CHILDREN : 2
ICD : 3
EXAM : 1
ESSENTIALLY : 1
INFECTION : 1
RECENTLY : 3
SUGAR : 1
CD : 1
ATTEMPTS : 1
SUICIDE : 3
INSTR : 1
THE : 86
JUST : 1
INFORM : 1
NURSES : 1
AUTO : 1
INCREASED : 2
FLEXIBLE : 1
PERFORMING : 1
PRESENTS : 3
GROUP : 6
REGRETS : 1
ADVANCED : 1
IDENTIFY : 1
SECONDS : 1
APPEARS : 1
EXPIRED : 1
PULSES : 2
GO : 1
SIGNIFICANT : 4
PSHX : 1
GUILTY : 1
ORIENTEDX : 1
THYROID : 1
SHEETS : 1
SEC : 1
ARRIVED : 1
LEG : 1
BP : 2
OPT : 1
MEDS : 4
BELONGINGS : 3
INVENTORIED : 1
CT : 4
PREVENTION : 1
DEPRESSION : 4
SON : 3
BARRIER : 1
MAURER : 1
BYPASS : 1
CM : 5
UNCHANGED : 1
FREE : 1
ELECTRONIC : 1
IMAGE : 1
BILATERALL : 1
GAIT : 1
AGAIN : 1
DISPOSITION : 1
DESCRIBE : 2
TID : 1
CAP : 1
DIET : 2
STATED : 2
EVER : 1
CAPILLARY : 1
ADVANCES : 1
HEARING : 2
SOMETIMES : 1
LATE : 1
GET : 4
ANTIHYPERTENSIVES : 1
RA : 1
WHAT : 5
WT : 3
PLANS : 2
SOLDIER : 1
FIVE : 1
ALBUTEROL : 1
STARTED : 1
HANDOUT : 1
SUSTAINED : 1
ASSISTANCE : 2
INJECTED : 1
VN : 1
FEEDING : 2
DIABETIC : 3
NEUROPSYCHOLOGICAL : 1
MEDISOME : 1
OR : 25
THERAPEUTIC : 1
PLAY : 1
BOTH : 1
TEMP : 2
YEAR : 4
CONSIDERED : 1
ALREADY : 1
CONCERNS : 1
PULMONARY : 1
CHEEKS : 1
RYAN : 1
LB : 9
REGULARLY : 1
DE : 1
LIKE : 2
GI : 2
PUT : 2
SEEN : 8
EXPERIENCE : 1
FOOD : 4
NURSE : 6
PS : 1
UNKNOWN : 1
CONSCIOUS : 1
CHRONIC : 3
STOLEN : 1
ANKLE : 1
INTERVIEW : 1
TAKE : 15
SENSORY : 1
INCREASE : 1
WITHDRAWAL : 1
MONITORED : 1
TRY : 2
ANY : 8
DISCHARGE : 2
PSYCHOSISRESOLVED : 1
SYSTEMS : 1
RECORDS : 1
QH : 2
BESYLATE : 1
ALTERED : 1
INSTABILITY : 1
SW : 1
TOLERATED : 2
PERCOCET : 1
TIDAC : 1
HIGHER : 1
GTT : 1
OVERT : 1
UNIT : 1
EFFECTS : 3
PROCEED : 1
LOPC : 2
MD : 1
FIN : 1
RELATIONSHIP : 1
NAME : 7
CARE : 18
IMPACTED : 1
PAN : 1
SURROGATE : 1
ANYMORE : 1
SAT : 1
FUNCTIONS : 1
VOLUME : 1
AGE : 3
EVERY : 5
EVALUATE : 1
COMPLIANT : 1
SKIN : 3
TIMES : 2
YESTER : 5
IS : 44
DOSES : 1
NOT : 30
WORST : 2
OCCULT : 2
FLUIDS : 1
USUALLY : 1
IF : 18
JUICE : 1
HELPLESS : 2
NOR : 1
NONTENDER : 1
MH : 4
RETINOPATHY : 1
EXPECTED : 1
KLONOPIN : 1
ONCE : 2
COUNSELOR : 1
BLOODY : 1
LIMITED : 2
PISTOL : 1
BELL : 1
HERE : 6
FLAG : 1
EATING : 4
POSITIVE : 1
CHARLOTTE : 1
ENTERING : 1
UNITS : 2
ONEHALF : 1
LIVE : 1
HAITI : 1
EVALUATION : 1
AORTOCORONARY : 1
HHR : 1
PASTORAL : 1
PROGRESS : 2
SAMPLES : 1
KEEP : 1
RHYTHM : 1
REHAB : 1
VIOLENCE : 1
DAMAGE : 2
COLLECTS : 1
THESE : 1
ASSESS : 1
MOVIE : 1
BENEFICIAL : 1
VISION : 1
REPEAT : 5
RALES : 1
VET : 18
BLOODWORK : 1
PICKS : 1
STOOL : 3
DIVORCE : 1
EXPLAINED : 1
LEARNER : 1
MALAISE : 1
UPCOMING : 1
BEST : 1
APHDR : 1
MOTHER : 1
BURSA : 1
VERDSOME : 1
CASTS : 1
SPRAIN : 1
PARTICIPATION : 1
KIN : 1
EXPERIENCING : 1
EDUCATED : 1
ASSOCIATED : 1
TRACT : 1
HOWEVER : 2
BACK : 4
TRYING : 1
SOURCE : 1
PAGER : 2
DILATED : 1
TRANSPORTATION : 1
PRESENCE : 2
HEIGHT : 1
NURDM : 1
MALE : 7
CAR : 1
ADDENDUM : 10
UTILIZE : 1
TREAT : 1
BY : 26
BMS : 1
NO : 45
RELAXATION : 1
CONSCIOUSNESS : 1
CLINICAL : 3
HEMOGLOBIN : 1
REASSESSMENT : 1
CHIEF : 2
PB : 1
ADDICTION : 1
CHANGED : 1
PRECLUDING : 1
VEHICLE : 1
LUNGS : 2
SATT : 3
INJURIES : 1
BENIGN : 2
LIQUOR : 1
LUMBOSACRAL : 2
RISK : 5
CLINIC : 7
CONVERSATION : 3
PERFORMED : 1
INDIGESTION : 1
PROCEDE : 1
TO : 133
PRN : 2
FEEL : 1
NARRATIVE : 1
IV : 4
COULD : 2
PREFERRED : 1
ABUSE : 3
SLOW : 1
FLUCTUATIONS : 1
EOM : 1
ADVANCE : 1
FM : 1
HYPERCHO : 1
SAFE : 1
BIOPSY : 1
DX : 3
AFTERCARE : 2
PROCEDURE : 3
OBSERVE : 1
REQUESTING : 3
EYEBROWS : 1
WILL : 18
SERVICECONNECT : 1
OFTEN : 2
WARM : 1
CAPACITY : 2
WATCH : 1
BUT : 8
PORT : 1
ASKED : 1
BEGAN : 1
THOUGHTS : 3
PHENOMENA : 1
REPRESENTATIVE : 1
TYPE : 5
POWDER : 1
TV : 2
LIQUID : 1
COCCYX : 1
DESCRIBES : 1
SEE : 8
MHT : 1
DRE : 1
SUCCESSFULLY : 1
SET : 1
PLEASE : 8
HEALTHY : 2
INTERACTIVE : 1
INDICATES : 2
WAR : 1
ILLEGAL : 1
STATUS : 5
DYSPLASIA : 1
DIVORCED : 1
DIABETES : 1
MHICM : 1
DC : 1
SPENT : 1
CFT : 1
PARAMEDIC : 1
INJURED : 1
NAD : 1
TROPONIN : 1
CONSULT : 10
TESTING : 1
BEC : 1
OUT : 3
COMFORT : 1
SUPPORT : 1
GASTROINTESTINAL : 1
PRODUCT : 1
FIND : 1
WANTS : 2
OCC : 1
QHPRN : 1
QID : 1
SCREEN : 4
ENHANCE : 1
ASPECTS : 1
ONC : 1
SOMALIA : 1
REHABILITATION : 1
BARRIERS : 1
EVALUATED : 1
SIGN : 1
REVIEW : 6
LIKELY : 1
MENTAL : 3
HIMSELF : 2
NEEDED : 4
ABNORMALITIES : 2
INJECTION : 1
DIVERTICULOSIS : 1
GERD : 1
CLARIFICATION : 1
BROUGHT : 1
THINKS : 1
LIVER : 1
WERE : 6
SOUZA : 1
FACTORS : 1
SHEET : 1
VIEW : 1
BUDDY : 1
FILL : 1
CONTACTS : 1
INSTRUCTIONS : 2
LABS : 2
VA : 9
JOB : 1
SPC : 3
CONSUME : 1
BORDERS : 1
METHODIST : 1
POSSIBLE : 1
ENDOSCOPE : 2
VOLUNTEERING : 1
EKPHARMACY : 1
APRIL : 1
INDUCED : 1
TRIAGE : 4
RESIDENCE : 2
PRIORITY : 1
PART : 1
FAMILY : 5
BAD : 1
VARIES : 1
DISEASE : 1
PAIN : 26
MATTER : 1
WHEN : 1
AMBULATORY : 2
AS : 21
BEING : 6
VISTA : 3
OBSTRUCTION : 1
GRASS : 1
GASTROENTEROLOGY : 1
ABOVE : 1
AMOUNT : 1
LT : 1
WAS : 42
DRAINAGE : 2
FLOOR : 1
PM : 2
ROOT : 1
WITH : 54
FEELS : 2
AFFAIRS : 2
THEREFORE : 3
AC : 2
LYMPHADENOPATHY : 1
TEMPERATURE : 2
WANTED : 1
CONTINUD : 1
COMMUNICATION : 1
SIG : 1
BASIS : 1
INDEX : 3
BENADRYL : 1
NOW : 2
ABD : 1
INCLUDING : 5
PTSD : 4
NA : 2
LANTUS : 2
INTACT : 2
COPING : 1
CONFIRMED : 1
CONTROLS : 1
ONSET : 1
DISABLED : 1
DTR : 1
HYDROCODONE : 1
USED : 2
MONITORING : 2
IT : 6
TARGETS : 1
SHOT : 1
BEDTIME : 3
BELOW : 1
LIST : 7
OT : 1
INCLUDED : 1
CLINICALLY : 1
IMMUNIZATION : 1
COLONIC : 1
DISCUSSED : 5
EXERCISE : 1
FLUOROSCOPY : 1
EQUIPMENT : 1
FEVERS : 1
PREVENTIONS : 1
SHOWER : 1
VOMITING : 2
POSITIVES : 1
TIME : 16
ESOPHAGEAL : 1
ORIENTED : 2
CURRENTLY : 3
ATTEMPT : 2
HOUSESTAFF : 1
NECK : 3
WALK : 1
SAFETY : 2
OXYCODONE : 3
PRILOSEC : 1
JOINT : 1
SIDE : 3
DISTURBANCESLEPT : 1
WISE : 1
UNDERST : 1
ALDRETE : 2
BREAKFAST : 1
RESPIRATIONS : 1
BETWEEN : 1
BATHROOM : 1
IMAGES : 1
CIPROFLOXACIN : 1
REPAIR : 1
SEDATION : 1
SPEAK : 1
CALL : 11
DID : 4
MOST : 1
EXPRESSED : 1
SHOW : 1
RESULT : 1
RECTUM : 1
APPEALED : 1
ARRIVAL : 1
HX : 3
OPERATION : 1
MHC : 2
IMAGING : 5
PROFESSIONAL : 1
ADDRESS : 1
TELEPHONE : 17
ELEMENT : 1
UNSPECIFIED : 1
SOB : 3
ACTI : 1
PROTECTION : 1
IOP : 1
COOPERATIVE : 2
RATES : 1
JUDGMENT : 1
SUBJECTIVE : 1
URINAL : 2
OPHTHALMOLOGY : 1
OXIM : 1
MYALGIA : 1
HELP : 2
OPTIONS : 1
FRI : 2
TABLETS : 2
PER : 4
DRUGNUTRIENT : 1
PACU : 1
CONTINUES : 1
ROLAIDS : 1
YES : 9
FURTHER : 1
SLMHC : 1
CONSENT : 5
MOBILITY : 3
WITNESSED : 1
YOUR : 6
TTP : 1
DOING : 3
GIVEN : 7
HORSE : 1
OCCASIONS : 1
HPI : 1
ABSENT : 1
HES : 1
WHO : 8
HT : 2
ED : 7
DIARRHEA : 1
VERBALIZES : 4
BASED : 1
ATTENDANCE : 2
PHYSICIAN : 10
INTOXICATED : 1
CURRENT : 4
HOSP : 1
EMG : 1
RECURRED : 1
CONTROL : 1
URGENT : 1
DEPENDENCE : 1
MCMULLEN : 1
BRONX : 1
ROBITUSSIN : 1
HIM : 7
NONBLOODY : 1
INTESTINAL : 1
CESSATION : 1
TOPICALLY : 1
FAXED : 1
IRRATIONAL : 1
PULSE : 6
HE : 50
NEXT : 2
RX : 1
THEY : 4
PHE : 1
CAROLTON : 1
RATE : 1
EASY : 2
REFERRED : 2
TYLENOL : 2
ADA : 1
STR : 1
FREQUENT : 1
MASS : 2
MEMBER : 1
NEB : 1
LIPIDS : 1
FRIGHTENING : 1
TRANSFER : 3
OBSERVATION : 1
MEETINGS : 1
APPOINT : 1
VALUABLES : 1
PHONE : 10
WOOUND : 1
CLEAR : 2
IPRATROPIUM : 1
ELBOW : 2
CLAIMS : 1
PRIMARY : 5
FAIR : 1
CONSTRUCT : 1
KEYS : 1
DRY : 1
ABDOMINAL : 2
UNTIL : 2
ALICE : 1
BS : 1
HAD : 14
SIGNS : 7
ZELL : 1
DEPARTMENT : 2
ACTION : 1
SPECIAL : 1
SUBCUTANEOUS : 1
LOSS : 2
SISTER : 2
PATIENTS : 5
PASSIVE : 1
SULFA : 1
GLUCOSEFINGER : 1
THROUGHOUT : 1
HUMAN : 1
BRONCHOSCOPY : 1
PROVIDED : 8
DRINK : 1
PRESENTLY : 1
YO : 2
IBW : 2
DENTAL : 2
NEGATIVE : 4
MES : 1
OUR : 1
REINFORCED : 1
TWO : 4
WRITTEN : 1
NONE : 7
OUTCOMES : 1
DISCUSSSED : 1
II : 1
SPUTUM : 2
LAB : 5
STATUSHE : 1
RD : 1
CASUALTIES : 1
DIAGNOSTIC : 1
ING : 1
DIRECTIVES : 1
COMPLAINTS : 3
CONTACT : 9
SIGNOUT : 1
NOTICE : 2
NPO : 1
SCHEDULE : 1
HABITS : 1
PROBABLY : 1
HER : 1
ORDERED : 8
PPP : 1
FEELING : 2
SHOULD : 5
QUESTIONS : 1
HEMOSTASIS : 1
EDUCATE : 2
VIEWING : 1
BEHAVIORAL : 2
PROBLEMS : 9
MINIMUM : 2
YELLOW : 1
LEAVENWORTH : 1
CARPAL : 1
GIVE : 1
CREPTS : 1
CAN : 8
CATS : 1
THERAPY : 4
PSYCH : 1
DOOR : 1
ANIMALS : 1
PRIVATE : 2
LIVING : 1
PLACE : 4
SEND : 1
AWARE : 1
NONVA : 3
POLYPS : 1
ORGANOMEGALY : 1
WHICH : 5
NOSHOW : 1
SYMPTOMS : 3
TLCP : 1
CHILDHOOD : 1
RANGE : 1
TURGOR : 1
NOTES : 1
ENT : 1
UNDERLYING : 2
OVER : 1
TOPIRAMATE : 1
MG : 24
ON : 31
QUIT : 2
COMPLETE : 3
PCC : 1
ADMINISTRATION : 1
PRESSURE : 9
TETANUS : 1
ATTENDED : 1
TEL : 1
COVER : 1
VERIFY : 1
WAITING : 1
VIA : 1
NC : 1
SEPTUM : 1
FOREHEAD : 1
HEADACHE : 2
SPECIALIST : 1
BEHAVIORS : 1
ACCEPTABLE : 2
COMMUNICATES : 1
POSS : 1
GOOD : 1
ARMY : 1
RECEIPT : 1
DRUGS : 1
MED : 2
UPDATE : 2
INHALER : 1
INTO : 3
EDEMA : 3
SODIUM : 1
COGGINS : 1
PROTEINS : 1
THEMSELVES : 1
HYPERTROPHY : 1
ATTENTIVE : 1
PROVIDER : 3
MARCH : 1
DONT : 1
PO : 11
SHE : 4
UP : 5
THEN : 3
INVENTORY : 2
USUAL : 1
PARENTERAL : 1
OIS : 1
LOCATION : 4
ALERT : 4
DETERMINE : 1
WORSENING : 1
SHARED : 1
PHOENIX : 1
FEVER : 2
STABILITY : 2
ACCESSED : 1
CONSULTATION : 1
WHIP : 1
PRIOR : 2
VERBAL : 3
REMISSION : 1
OFF : 3
UNDER : 1
SEP : 2
DOCUMENTED : 1
GOT : 1
DATE : 7
PARALYSIS : 1
COMMENT : 2
PACE : 1
RELATES : 1
DAILY : 2
XRT : 1
THREE : 1
LFTS : 1
PA : 2
ICU : 1
LONG : 1
FEMALE : 1
GRADE : 1
APPOINTMENT : 6
WOULD : 6
FOLLOW : 1
WHEELCHAIR : 1
RESTART : 1
FROM : 15
NEUROPSYCHOLOGY : 1
CHEMORADIATION : 1
LEFT : 5
METHOD : 1
BITE : 1
HYPOGLYCEMIA : 1
STRAIGHT : 1
WHEEZING : 1
PIECE : 1
MEDICAL : 10
HEAD : 1
WONT : 1
SPOKE : 3
ALSO : 8
SYSTEM : 2
SEX : 2
ACTIVITIES : 2
AORTIC : 1
ORDERS : 2
RESPOND : 1
DIGITAL : 1
KT : 1
SURGEON : 1
EXTREMITY : 4
WORKING : 1
AN : 11
MOVEMENTS : 1
HEART : 2
BLACK : 1
HURTING : 1
COMPLAINT : 2
SIGNATURE : 3
ORDER : 10
TAKES : 1
PCPABSENCE : 1
CHILD : 1
TUBULAR : 1
EASILY : 1
HAND : 4
CHEMSTRIPS : 1
FOUR : 1
BOTTLE : 1
INFLUENZA : 2
BRIGHTER : 1
OUTSIDE : 2
DENIED : 2
SERVICECONNECTED : 1
EXCEED : 3
MEASURES : 1
FAITH : 2
UNSCHEDULED : 1
SPO : 1
GAVE : 1
SNACKS : 1
LIFESTYLE : 1
DIFFERENT : 1
MESYLATE : 1
REACT : 1
AGO : 4
NEW : 3
MOUTH : 10
FOCUSED : 1
PROVIDERS : 2
ATTENDING : 2
CHEST : 3
COLLAPSE : 1
HEPATITIS : 1
ERYTHEMATOUSE : 1
URGENCY : 1
REPRODUCABLE : 1
INDICATIONS : 1
PRESENT : 2
HAVING : 1
OPTIC : 1
CHRISTIAN : 1
PHY : 1
INTELLIGENCE : 2
DT : 1
SLEPT : 3
WORTHLESS : 1
APPROPRIATELY : 2
OVERWHELMED : 1
HRS : 2
EXISTING : 1
MUSCLE : 1
LATER : 1
ARE : 6
NUMBERS : 1
ANSWERED : 1
SURROUNDED : 1
INDEPENDENT : 1
NEED : 3
CORRECT : 1
ELEVATED : 1
NEE : 1
TRIAL : 1
VACUUM : 1
PERSON : 1
APPLY : 2
CYST : 1
RECEIVED : 2
ALMOST : 1
CPRS : 1
MENSTRUAL : 1
SURGERY : 1
INCONTINENCE : 1
FECAL : 2
STUDENT : 1
BARRETTS : 2
EXERCISING : 1
SPREAD : 1
STRUCTURE : 1
ASPIRIN : 1
TX : 1
RECEPTIVITY : 1
BODY : 2
INHL : 2
COUGHT : 1
ENTRY : 1
CONCIOUSNESS : 1
INTERDISCIPLINARY : 2
GENERAL : 2
OSA : 1
SERVED : 1
YEARS : 5
COLON : 3
TABLE : 1
BE : 16
IMMOBILITY : 1
BECAUSE : 1
DRUGINDUCED : 1
RUN : 1
OX : 1
CANCER : 4
PAY : 1
LEAVE : 1
DUE : 7
TRANSFERRED : 1
ADV : 1
CLASS : 2
THEIR : 4
HS : 1
DISC : 2
DISCOMFORT : 1
HERNIATED : 1
GA : 1
PING : 3
OMEPRAZOLE : 1
IMPINGMENT : 1
CANE : 1
ISSUES : 7
SEVERE : 6
BOLTED : 1
SOUNDS : 1
REVIEWED : 6
UNDERGO : 1
DM : 1
ISSUE : 2
DIGITS : 1
BEFORE : 5
OTHER : 6
ALL : 6
DRESSING : 1
GAD : 1
QHS : 2
LIFE : 2
SECOND : 1
ME : 2
PODIATRIC : 1
BED : 3
NURSING : 13
PERIPHERAL : 1
DYSPNEA : 1
FOLLOWING : 7
IDENTIFIED : 2
ENDING : 1
PATIENT : 64
SELF : 4
ALLERGIES : 1
ACCEPT : 1
DIAGNOSIS : 4
WITHOUT : 3
REFER : 2
JUL : 1
SENT : 4
INVOLVEMENT : 2
EVAL : 2
VERIFIED : 1
GAYLORD : 1
ADMISSIONS : 1
LEAVES : 1
ABDOMEN : 2
ARTS : 1
SHOWING : 1
EXPERIENCES : 1
APPROVAL : 1
FASTERCHUGS : 1
ATTENTION : 1
ANXIETY : 2
SPINE : 2
METOPROLOL : 2
NOS : 1
THAN : 2
POSITIONING : 1
BREVICON : 1
DYSURIA : 1
THOUGH : 1
EXAMINED : 1
ACUTE : 3
CON : 2
AUDITC : 1
HIMS : 1
REQUIRES : 1
WE : 5
FILLED : 1
ENGAGED : 1
SCARED : 1
PROTOCOL : 1
THUS : 1
FEE : 2
COME : 2
SYND : 2
DECISION : 1
ROUTINE : 1
CBI : 2
FUNCTIONAL : 4
AMOXICILLIN : 1
FOUND : 2
BECKY : 1
ROOM : 1
FEET : 3
ADDITION : 1
CAME : 1
PAINS : 1
THAT : 22
VISIT : 8
CHART : 2
WIFE : 2
NORMAL : 3
STAFF : 5
DEPRESSED : 1
SERVICE : 1
CE : 3
AVAILABLE : 2
RIGHT : 4
PC : 2
BREATHING : 1
VITALS : 1
INAPPROPRIATE : 1
SCORING : 1
CHICAGO : 1
PROCESSES : 1
PEDAL : 2
PENSION : 1
ONE : 9
PREPARED : 1
POTENTIAL : 2
FU : 1
NKA : 1
PTS : 2
CONSULTPHARMACY : 1
BRIEF : 2
WINDOW : 1
BECK : 1
SPEC : 1
THOUGHT : 1
HYPERLIPIDEMIA : 1
PAT : 1
SPONDYLOSIS : 1
TABLET : 9
WRITER : 1
DURING : 3
REC : 3
YOU : 11
ENVIRONMENT : 1
TOLD : 3
SEVERAL : 2
BX : 1
SCREENING : 2
MORPHINE : 1
DOESNT : 1
CHECKS : 1
CARDIOLOGY : 1
HURT : 1
INFORMED : 4
DISEASES : 1
REACH : 3
NOCTURIA : 1
PAST : 5
DOCUMENT : 3
RESCEDULE : 1
INTERESTED : 1
REASON : 4
THREATS : 3
DIZZY : 1
PROPER : 1
SCORE : 2
OXYGEN : 2
TOBACCO : 6
SUS : 1
REMINDER : 2
WRITE : 1
HOME : 5
HYPERGLYCEMIA : 1
AMBULATING : 1
AGREEABLE : 1
WEAKNESS : 1
NOTED : 5
STL : 1
DILTIAZEM : 1
SOCIAL : 3
LN : 1
HOSPITAL : 2
TELLING : 1
MAIN : 1
SUICIDAL : 4
SHAREDFILE : 1
COSIGN : 1
DEPT : 1
BLE : 2
ISOP : 1
LOBBY : 1
VITAL : 4
INJ : 1
SO : 3
REGULAR : 1
POOR : 1
QUANTITY : 1
TALK : 1
IDENTIFIERS : 1
PVH : 1
COLLECT : 1
PNEUMOVAX : 1
ENDO : 1
COMPUTERIZED : 1
FYI : 1
BELIEFS : 1
MODE : 1
DENIESE : 1
MINUTES : 2
MILDLY : 1
POINTS : 1
EDT : 1
TINGLING : 1
STRESS : 2
BRACELET : 1
FOLLOWUP : 1
PERIORBITAL : 1
MAKE : 2
ASPART : 1
ALTERATION : 1
PIN : 1
DIGESTIVE : 1
TEAM : 6
CHECK : 1
SCAN : 1
STS : 1
PSYCHOTIC : 2
FALL : 2
INDICATING : 1
ADAPTATION : 1
ALRIGHT : 1
APPRECIATIVE : 1
DATA : 2
NERVE : 3
AM : 3
PRESENTATION : 1
PVCS : 2
MOVEMENT : 1
REL : 1
IMPAIRMENT : 3
DISTRESS : 1
PRACTITIONER : 1
RUNNING : 1
COST : 1
EKG : 2
CANCEL : 2
DYSLIPIDEMIA : 1
MOOD : 2
LIVES : 1
FWW : 1
EVENT : 1
REPORT : 5
REFUSING : 1
CAPSULES : 1
LETTER : 1
LEAST : 1
SIGNED : 1
PLATINUM : 1
SPIRITUALITY : 1
HOW : 4
PLUS : 1
CALLED : 5
HYBRID : 1
PROPERTY : 1
TOOK : 1
MANY : 1
SINCE : 1
DISCUSS : 1
STOPPED : 1
CHANGE : 5
ESOPHAGUS : 3
PIPE : 1
ALPRAZOLAM : 1
MADE : 2
PENIS : 1
CARDIAC : 1
ASPHIXIATING : 1
OBTAINED : 4
MON : 2
INCLUDES : 2
VERBALIZED : 2
STOMACH : 1
LEARNING : 2
DOSE : 3
ALVETA : 1
ENCOUNTER : 4
OBJECTIVE : 2
MONTHS : 2
SMOKING : 1
AFFECT : 1
MRI : 1
ADDR : 1
PALPATION : 1
POLYP : 1
SSN : 3
HOSPICE : 1
BRADEN : 1
NOON : 1
APPLIED : 1
STRONG : 1
DATED : 1
BEDSIDE : 1
ALONE : 1
ANTIBIOTIC : 1
NUTRITIONAL : 1
BAI : 1
IMMEDIATE : 1
INSIGHT : 1
TOPICS : 1
CHEMSTRIP : 1
LUNG : 2
MEDICATION : 8
STOP : 1
VISUAL : 1
MO : 1
TONGUE : 2
WANT : 1
ACETAMINOPHEN : 4
CASE : 4
ITEMS : 1
CONTINUE : 6
ORAL : 5
ABNORMAL : 1
TOTAL : 1
SWELLING : 1
LIGHT : 3
ADM : 1
RECIEVED : 1
SURGICAL : 2
GOAL : 3
EXAMINATION : 2
ST : 1
OUTLINING : 1
HAZARDS : 1
SUCH : 3
HISTORY : 10
CLICK : 1
RESPIRATION : 1
TEXT : 2
COMBIVENT : 1
BACKGROUND : 1
OTC : 1
CONSULTED : 1
HOURS : 3
DRUGDRUG : 1
MAIL : 1
TUMOR : 2
LEGS : 1
CAUCASIAN : 1
HEALTH : 5
NAPROXEN : 3
RDW : 1
TUBE : 1
REPORTED : 6
COVERAGE : 1
SYNCOPE : 1
DIFFUSE : 1
COGNITIVE : 1
FLUNIS : 1
WOUND : 1
DEBILITY : 1
RENOTTA : 1
BRONCHOSCOPE : 1
PROSTATE : 2
HIP : 1
TINGED : 1
CHAPLAIN : 1
EXCLUDING : 1
SITE : 1
OVERALL : 1
GLIPIZIDE : 1
TROUBLES : 1
DEVIATED : 1
BIPOLAR : 2
VERDE : 1
REFERRAL : 1
STANDING : 1
INTERVENTIONS : 2
PAJAMAS : 1
MAR : 1
TREMORS : 1
TENSE : 1
KG : 9
SELFHARM : 1
EMERGENT : 1
MORE : 3
WAL : 1
SEROQUEL : 1
PE : 1
STANDARD : 1
MAKING : 1
AUG : 1
INSULIN : 2
PROBLEM : 9
TELERETINAL : 2
AGENCY : 1
ADDRESSED : 1
BLUE : 1
ELIGIBLE : 1
ER : 1
RECORD : 2
APPLICABLE : 1
NTG : 1
REQUEST : 2
AMLODIPINE : 1
CEFADROXIL : 1
PINCHED : 1
SOMEWHAT : 1
RN : 1
UNABLE : 1
XYZZY : 2
THROUGH : 5
OUTPUT : 1
HEENT : 2
VETS : 4
HEADACHES : 1
LAWS : 1
THROMBOLYTICS : 1
AFTER : 1
PARTICIPATED : 1
ADMISSION : 3
LONGER : 2
STILL : 3
NONEMERGENT : 1
LESS : 3
WELLNESS : 1
NON : 1
FLUID : 4
PCP : 3
LCSW : 1
SAYS : 3
SPECIMENS : 1
FUTURE : 1
TOILETING : 1
EACH : 1
RE : 1
SYMPTOMATIC : 1
CIRCULATION : 1
WNL : 1
DENIES : 9
ACCOMPANIED : 2
NUTRIENTS : 1
PHARMACY : 1
CARRY : 1
TERMS : 1
OLD : 4
TONIGHT : 1
OTHERS : 1
MODIFIED : 1
REQUESTED : 4
CODEINE : 1
POPULATIONS : 1
STATEMENT : 1
VETERAN : 10
CAPSULE : 1
GLUCOSE : 2
PT : 45
REGION : 1
RADIATION : 2
MOVE : 1
POSTSURGICAL : 1
ETHANOL : 1
APR : 1
ATTAINABLE : 1
PL : 2
AREA : 3
SKETCHY : 1
DEMONSTRATION : 1
GRADUATATION : 1
BLDG : 1
METAPLASIA : 1
BETTS : 1
MAGAZINES : 1
SEXUAL : 1
CERVICAL : 1
ALTERNATE : 1
COMBAT : 2
UNDERSTANDING : 5
ILLNESS : 1
MEDICATIONS : 22
MR : 6
PNEUMOCOCCAL : 3
FINDING : 1
DIRECT : 1
FOODS : 1
MAJOR : 1
OPERATING : 1
AND : 102
SIMETHICONE : 1
HOUR : 1
DESCRIPTION : 1
PSYLLIUM : 1
PARAM : 1
URINARY : 1
TISSUE : 2
DAD : 1
VACCINE : 3
JUN : 1
RESPONSE : 1
BETTER : 3
ALLEGEDLY : 1
DEPRESSIVE : 1
RESULTS : 1
PROCESS : 2
EMERGENCY : 1
ANSWER : 2
PROVIDING : 1
BREATH : 1
ABLE : 1
RECENT : 3
PERFORMANCE : 1
IN : 53
REVEALED : 1
KNOWLEDGE : 2
MARY : 1
ADMINISTERED : 1
LOW : 2
POSITION : 1
MAY : 4
FOLLOWED : 4
FTOPC : 1
LMSW : 1
MANAGEMENT : 4
STATE : 3
PLAN : 16
ANTERIOR : 1
LENGTH : 1
APPT : 4
REMEMBERING : 1
HIAA : 1
TAKING : 5
MISSION : 1
AGREE : 1
MNEMONIC : 1
SIGMOID : 1
ADMITTED : 4
IMPLEMENTATION : 1
OBSERVED : 1
CARD : 1
XVETERAN : 1
VERY : 4
PATHOLOGY : 1
DONE : 7
PALPABLE : 2
PHYSICAL : 2
REASSESSED : 1
DJD : 1
TC : 1
WEARING : 1
DISTRAUGHT : 1
NIGHT : 6
CP : 4
COMPLAINED : 1
ACTIVE : 27
ANTIBODY : 1
CREATIVE : 1
KNOW : 3
IDENTIFICATION : 1
LACK : 1
PCCNURSING : 1
FINASTERIDE : 1
ABILITY : 2
BEDREST : 1
DISPATCH : 1
FEATURES : 2
SPI : 1
OLEMIA : 1
EPIGASTRIC : 1
WEIGH : 1
SI : 3
SUGARS : 1
COMPLETED : 1
CLOTS : 2
IMPRESSION : 2
FOCUS : 2
SUPERVISING : 1
THIS : 25
DIFFICULTY : 2
MIDSTERNAL : 1
HIGH : 2
NIACIN : 1
AIRWAY : 1
DECISIONMAKING : 2
CAPABLE : 1
REMEMBER : 1
SOFT : 1
APP : 1
RYTHN : 1
VAMC : 1
LAST : 10
PUPILS : 1
AOX : 1
CRIS : 1
PAGE : 1
TREADED : 1
CHAPLAINCY : 1
SCRIPT : 1
EDUCATION : 9
LUNCH : 1
DIED : 1
ONCALL : 1
MORBIDITIES : 1
FINANCIAL : 3
EXTREMITIES : 1
FSBG : 1
RANING : 1
SESSION : 2
DESPITE : 1
ANODONTIA : 1
THIN : 1
STATES : 10
RENAL : 2
INTERACTED : 1
BENZTROPINE : 1
MIDLINE : 2
LOCAL : 2
CELL : 2
INTRUSIVE : 1
LIMITS : 1
UNFAMILIAR : 1
FIRST : 1
WAIT : 1
ICDCM : 3
RESP : 2
URINATE : 1
ITS : 1
DOWN : 3
NOSHOW_FOR : 1
TO_PT : 2
ANY_SIDE : 1
ACTI_ADMISSION : 1
THIS_DISCUSSED : 1
SKIN_NEURO : 1
HAS_DAMAGE : 1
ROOM_PT : 1
BUT_IS : 1
ABOVE_HX : 1
READING_MAGAZINES : 1
WARRANTED_CALL : 1
OXYGEN_THERAPY : 1
TOLERATED_WELL : 1
NOTE_COMPLAINT : 1
HE_FILLS : 1
LOSS_YES : 1
WELL_NO : 1
MARY_LCSW : 1
LEARNING_PATIENT : 1
WITH_YES : 2
ANY_EFFECTS : 1
VETERAN_SHE : 1
COMPLAINTS_CHEST : 1
DENTAL_IF : 1
GOAL_TO : 1
NOT_TAKING : 2
THEM_PAIN : 1
REL_FROM : 1
GTT_AT : 1
ANTIBIOTIC_BEEN : 1
CT_DONE : 1
IBW_ON : 1
CARE_WILL : 1
CALLED_BACK : 1
HAD_PHYSICIAN : 1
LAST_HAD : 1
TAKE_MESYLATE : 1
COMPLETED_NO : 1
SC_ED : 3
PATIENT_HAD : 1
ILLEGAL_ACTIVITY : 1
SOMEWHAT_SLOW : 1
PO_ACTIVE : 3
OF_EYEBROWS : 1
ATTENDED_RELAXATION : 1
DRAINAGE_FROM : 1
DETERMINE_ACUTE : 1
CLINIC_APPOINTMENT : 1
ONE_CARE : 1
UPCOMING_PLANS : 1
CONFIRMED_PRESENCE : 1
OF_HIS : 3
PT_VERY : 1
TELEPHONE_DO : 1
WHO_SERVED : 1
THE_PATIENT : 9
ORDERED_ACTIVITY : 1
NOT_AND : 1
ADMINISTRATION_AND : 1
DATED_NO : 1
THIS_CARE : 1
RECTUM_TO : 1
PATIENT_CLICK : 1
ADEQUATE_FOR : 1
WATCH_INTERACTED : 1
MEETINGS_SATT : 1
UNITS_SUBCUTANEOUS : 1
ADVERSE_NOTED : 1
ROBITUSSIN_PATIENTS : 1
MONTHS_TOBACCO : 1
UNDERSTANDING_BODY : 1
LEFT_OF : 1
WANT_BX : 1
ARE_THAT : 1
INDICATIONS_MEDICAL : 1
PRESENTS_SCHEDULED : 1
COMPLIANT_WITH : 1
CURRENTLY_HOWEVER : 1
AT_VISIT : 1
FROM_LAST : 1
OUTPATIENT_EXCLUDING : 1
AT_SAW : 1
TO_TOBACCO : 1
THAT_CAN : 1
MISSION_MAR : 1
KG_MEDICATIONS : 1
CONSULT_WAS : 1
AUDITC_NEGATIVE : 1
APHDR_BITE : 1
EXPLAINED_THAT : 1
LEARNING_SCREEN : 1
PATIENT_AT : 2
INPATIENT_FUNCTIONAL : 1
FOUND_PATIENT : 1
HEALTHY_IF : 1
NOTE_CHIEF : 1
BEEN_THEM : 1
APPT_CAROLTON : 1
CARE_FOR : 1
HUMAN_ASPART : 1
WANTS_TO : 1
MALE_DIVORCED : 1
BLOOD_FECAL : 1
FOR_READING : 1
THREATS_SELFHARM : 1
DRE_DONE : 1
HERE_NO : 1
HE_FOLLOWED : 1
ENDO_TESTS : 1
ISSUES_RECENTLY : 1
ACTIVITY_THERAPEUTIC : 1
II_SIGNS : 1
MR_SLEPT : 1
INDIGESTION_NAME : 1
SPUTUM_SPECIMEN : 1
OF_VOLUME : 1
INTRUSIVE_THOUGHTS : 1
VERDE_LN : 1
EASILY_MAKING : 1
PATIENT_FAMILY : 1
THEY_HAD : 1
CONTINUE_PER : 1
EKPHARMACY_EDUCATION : 1
DIAGNOSIS_WEIGHT : 1
MAKE_GASTROENTEROLOGY : 1
IF_IS : 1
RYAN_IT : 1
PATIENT_PRIMARY : 1
RYTHN_STRIP : 1
ASPHIXIATING_HE : 1
REPORTED_VETERANS : 1
JUN_LB : 1
BEEN_DOING : 1
SPENT_EXERCISING : 1
SPIRITUALITY_CATS : 1
CAPSULE_MOUTH : 1
SIGNS_HE : 1
AT_ACTI : 1
INFORMATION_OBTAINED : 1
PROSTATE_URINARY : 1
TO_LOPC : 1
BE_PRIORITY : 1
WELLNESS_MOBILITY : 1
NOTE_INTRAFACILITY : 1
PRIMARY_ADDICTION : 1
KG_BARRETTS : 1
HIS_PACE : 1
PROVIDED_HANDOUT : 1
HOME_WITH : 1
THE_DIGESTIVE : 1
CALLED_PT : 1
DATA_PROVIDED : 1
HIS_FUNCTIONAL : 1
EASY_BLOOD : 1
RESPIRATORY_PROBLEMS : 1
INJECTION_EDUCATION : 1
WHAT_CAN : 1
IN_FOLLOWING : 1
HAS_DESPITE : 1
CONTINUE_RUN : 1
AT_LOPC : 1
HAND_SIGNOUT : 1
CONTACT_GROUP : 1
UNDERSTANDING_MASS : 1
POINTS_WILL : 1
BY_HARD : 1
IF_APPLICABLE : 1
CALL_BEDFAST : 1
PATIENT_ITEMS : 1
CHAPLAIN_GENERAL : 1
WITH_LEFT : 1
RECEPTIVITY_RESP : 1
BIPOLAR_DERIDED : 1
FOLLOWING_OF : 1
HERNIATED_DISC : 1
SENT_TO : 2
IS_USUAL : 1
SEXUAL_VET : 1
OPEN_VISTA : 1
CANCER_OF : 1
AND_WOULD : 1
MH_NURSING : 1
RESPONSE_HEMOSTASIS : 1
YOUR_ALSO : 1
PHYSICIAN_MHICM : 1
WITH_YOUR : 1
FEE_DRUG : 1
PT_WILL : 4
ADDRESSED_AND : 1
TIME_VETERAN : 1
IN_WITNESSED : 1
CONSULT_AND : 1
ON_TREATMENT : 1
AS_AS : 1
REASON_REFERRAL : 1
PRECLUDING_TESTING : 1
CHECKS_REVEALED : 1
SW_DISCHARGE : 1
ISCHEMIA_CHANGE : 1
NOTED_REL : 1
SO_PATIENT : 1
PAIN_DENIES : 1
PROBLEMS_WITH : 1
FOR_REFER : 1
CATEGORY_IV : 1
HARD_FOR : 1
INTAKE_PRESSURE : 1
GIVEN_ALBUTEROL : 1
OTHER_PROBLEM : 1
RISK_SPECIAL : 1
ING_AT : 1
NAME_NOSHOW : 1
WAITING_OF : 1
BEC_ONLY : 1
TO_PROCEDE : 1
LOPC_SUBSTANCE : 1
IN_HOUSEMOBILE : 1
RISK_WAS : 2
TOTAL_ENCOUNTER : 1
THE_THREATS : 1
PRESENTLY_THE : 1
ARE_TO : 1
MANAGEMENT_LANTUS : 1
NURSE_CLARIFICATION : 1
LANTUS_HE : 1
PCCNURSING_BLOOD : 1
MG_MG : 1
DENIES_NAUSEA : 1
AS_ROBITUSSIN : 1
OF_HURTING : 1
TO_TREAT : 1
MED_THE : 1
ANY_PROBLEM : 1
THIS_HELP : 1
FOR_OXYCODONE : 1
TUBE_FINANCIAL : 1
ESSENTIALLY_NEGATIVE : 1
INTRAFACILITY_MIDSTERNAL : 1
WITH_MEDICATIONS : 1
BURSA_STRUCTURE : 1
ADDITION_PROVIDING : 1
NEUROPSYCHOLOGICAL_EVALUATION : 1
EKG_SHOWS : 1
PROVIDED_MOVEMENTS : 1
FOLLOWING_SCHEDULED : 1
CESSATION_SMOKING : 1
CM_THERAPY : 1
SEPTUM_PSHX : 1
CALLED_REGARDING : 1
ORDERS_WEIGHT : 1
TRANSFER_TOILETING : 1
LEVEL_SYMPTOMS : 1
TO_TO : 6
DOWN_WITH : 1
ORAL_PLEASE : 1
ME_SAW : 1
PAIN_SINCE : 1
MOTHER_AT : 1
THEREFORE_INCLUDE : 1
ACTIVE_PLEASE : 1
MEDICATIONS_HAS : 1
AND_WITHIN : 1
DOSES_IN : 1
TRACT_THIS : 1
PAIN_DIARRHEA : 1
WAS_SCORE : 1
ATTEMPT_ON : 1
DO_WITHIN : 1
PATIENT_VOICES : 1
AND_TENSE : 1
SHE_HELPLESS : 1
VET_AND : 1
SEC_DIGITS : 1
WRITE_THE : 1
WITH_PT : 4
USE_HYDROCODONE : 1
PROBLEMS_MOBILITY : 1
WORSENING_WNL : 1
BEDTIME_HEART : 1
TAKING_MEDICATION : 2
YELLOW_ON : 1
PLAN_CONSUME : 1
IN_LESS : 1
ENDING_AM : 1
TAKE_ACTIVE : 2
KG_CP : 1
PATIENT_WITH : 1
BETTER_THE : 1
WAL_FOR : 1
ON_OBSERVATION : 1
GOOD_THE : 1
TELEPHONE_NOTE : 4
HE_SEE : 1
STOMACH_INFORMATION : 1
PPP_EDEMA : 1
FASTING_AND : 1
MEDICATIONS_ASK : 1
DO_PAY : 1
BETTER_CONTROL : 1
DISCHARGE_ING : 1
IS_PATIENTS : 1
ESOPHAGUS_FOOD : 1
HAVE_HAD : 1
NIGHT_HE : 2
NURSE_SSN : 1
BEING_MEDICATIONS : 1
PSYCHOSISRESOLVED_AREA : 1
AND_ASSESSMENT : 1
AND_NEED : 2
RESIDUAL_LOWER : 1
INTAKE_ABDOMEN : 1
AT_LEAST : 1
REASON_SYNCOPE : 1
NERVE_IN : 1
ON_NOT : 1
PATIENT_PUPILS : 1
AND_BELONGINGS : 1
TYPE_PT : 1
IF_WITH : 1
PATIENT_USED : 1
SPC_STATED : 2
TO_DENTAL : 1
THE_PRACTITIONER : 1
REACHED_ON : 1
PT_TIME : 1
BID_NO : 1
SELF_TAB : 1
OPT_PHY : 1
FLAG_HIS : 1
IPRATROPIUM_INHL : 1
SCORING_POINTS : 1
ACTIVITY_AORTIC : 1
NOTICE_HE : 1
RESIDENCE_BE : 1
TO_HABITS : 1
THE_FACT : 1
FOR_REPEAT : 1
ACTIVITY_PLAN : 1
REPORTED_THAT : 1
CHANGES_ACCOMPANIED : 1
ALSO_PTSD : 1
NUMBER_CARE : 1
IN_REMISSION : 1
ADDICTION_COUNSELOR : 1
PATIENT_DONE : 1
TO_NOTE : 1
GROUP_GOAL : 1
HEALTHY_EATING : 1
NO_PLAN : 3
NOCTURIA_TO : 1
TO_PLAN : 1
WORST_PAIN : 1
CARE_PHYSICIAN : 1
UP_APPT : 1
CLOTS_SOMETIMES : 1
FOR_DETOX : 1
FOR_VA : 1
DYSPLASIA_AND : 1
HE_VETERANS : 1
ENCOUNTER_NOTE : 1
SIGNS_LUNGS : 1
HISTORY_DEVIATED : 1
LONGER_SEE : 1
AND_PINCHED : 1
PTSD_CHILDHOOD : 1
MAR_DX : 1
HIM_SAYS : 1
ALTERATION_IN : 1
MUST_PA : 1
THEN_PASSED : 1
IDENTIFIED_PROBLEM : 2
IN_THIS : 1
KNOW_IPRATROPIUM : 1
ALSO_PLANS : 1
REQUESTED_PT : 1
HE_NOT : 2
CLAIMS_NO : 1
ALERT_LIMITED : 1
PATIENT_TAKING : 1
OF_NOR : 1
WEIGHT_FALL : 1
MEDICATION_MANAGEMENT : 1
NO_TOBACCO : 1
NEEDED_DIAGNOSIS : 1
SHOULDER_ASPECTS : 1
MOUTH_TIMES : 1
MINUTE_PHONE : 1
LAB_LISINOPRIL : 1
PSYCHOSISRESOLVED_EXPLAINED : 1
NEEDED_THE : 1
NAME_MG : 1
ON_HIS : 2
NOTE_MONITOR : 1
BS_ND : 1
WHICH_HAVE : 1
TIME_PLUS : 1
ALL_TO : 1
HANDOUT_THE : 1
RESP_PT : 1
TO_DISCIPLINE : 1
LOCATION_ENDING : 1
IS_CATEGORY : 1
AM_WITH : 1
HISTORY_HE : 1
REFERRAL_EVAL : 1
OF_LYMPHADENOPATHY : 1
THAT_HAS : 2
PT_FOR : 1
WITH_GRADE : 1
AND_AFFAIRS : 1
GROUP_HEALTH : 1
NKA_BECK : 1
GOAL_PRIMARY : 1
CONSENT_FOR : 3
EMERGENCY_PART : 1
PULMONARY_VISIT : 1
TO_MAKE : 1
MEDICATIONS_EXCLUDING : 1
STATES_HAS : 1
PATIENT_CARE : 1
STABILITY_AC : 1
CONTINUE_INTERVENTIONS : 2
AND_THEREFORE : 1
WEIGH_SELF : 1
SCHEDULED_NO : 1
BEFORE_HOME : 1
TO_SELF : 2
PRESENCE_NON : 1
ADDENDUM_SUBJECTIVE : 1
LETTER_INDICATING : 1
PISTOL_WHIP : 1
ENDOSCOPE_ENDOSCOPE : 1
WORK_AT : 1
WAS_REFUSING : 1
SEVERE_FUNCTIONAL : 2
TO_LEARNING : 1
SYSTEM_PATIENTS : 1
MAY_BE : 2
LIGHTED_INSTRUMENT : 1
DEPRESSION_GAD : 1
THE_FOCUSED : 1
IS_SOURCE : 1
PULSE_BATHROOM : 1
APPRECIATIVE_HISTORY : 1
OUTSIDE_RECORDS : 1
ACTIVE_AND : 1
PRIMARY_ENT : 1
NOON_STATES : 1
INCLUDING_INVOLVEMENT : 1
ACTIVE_SCHEDULED : 1
PATIENT_ALL : 1
USED_VERIFY : 1
ALERT_DESCRIPTION : 1
YES_CURRENT : 1
SUICIDAL_IDEATION : 1
MO_NOT : 1
TEL_BRONX : 1
GI_CLINIC : 1
ASSESSMENT_IN : 1
SURGEON_SOUZA : 1
OR_CLINICAL : 1
ITEMS_TO : 1
ATTENDANCE_OR : 1
ON_POSITIVES : 1
ASSESSMENT_NO : 1
THAT_WILL : 1
TO_ALL : 1
MEDICAL_DECISIONMAKING : 1
OR_AT : 1
TELEPHONE_LOCATION : 1
INFORMATION_REQUESTED : 1
RENOTTA_MH : 1
STATES_SLEPT : 1
NIGHT_DID : 1
ORIENTED_TIME : 1
SIGN_ON : 1
CANCEL_CLINIC : 1
IN_STOOL : 1
PERSON_AND : 1
SON_TO : 1
PHYSICIAN_CONSULTED : 1
THINGS_APPEARS : 1
FIVE_KEYS : 1
HOMELESS_II : 1
NEGATIVE_AS : 1
PATIENT_UNDERSTANDING : 2
SYSTEMS_PREFERRED : 1
LB_INSTRUCTED : 1
REHAB_DIAGNOSIS : 1
WORTHLESS_PLAN : 1
YOU_SIDE : 1
GIVEN_IS : 1
SOLDIER_SEEN : 1
SHEET_FOR : 1
EXAMINATION_FOR : 1
EDT_TIME : 1
DOSE_SEROQUEL : 1
ASKED_TO : 1
THAN_HRS : 1
SITE_ON : 1
THE_PRESENCE : 1
OR_COMPLAINTS : 1
GO_ATTAINABLE : 1
PING_FINANCIAL : 1
TO_CLINICAL : 1
HAS_FWW : 1
NONTENDER_ADDENDUM : 1
ENVIRONMENT_OF : 1
TEXT_DOCUMENT : 1
IN_ELBOW : 1
BEFORE_BREAKFAST : 1
PERSON_PLACE : 1
VISIT_PRIMARY : 1
DESCRIBES_BEING : 1
IS_STILL : 1
TAKING_AND : 1
PT_DEMONSTRATE : 1
AND_PM : 1
STR_PER : 1
NOR_ANY : 1
SAYS_USUAL : 1
STOPPED_BY : 1
INSTRUCTIONS_ON : 1
MOVIE_OR : 1
PERIARTICULAR_OR : 1
OT_WITHIN : 1
ASSESSMENT_WRITER : 1
PRESENTATION_OUTLINING : 1
THYROID_CANCER : 1
VA_AND : 1
AGE_LAST : 1
WAS_TO : 5
APPLY_VA : 1
CONSULT_COSIGN : 1
SKIN_PROBLEMS : 1
MEDICATIONS_AND : 1
MEDISOME_STATE : 1
FOR_IN : 4
ADMISSION_DECISION : 1
NOTE_MIDSTERNAL : 1
PSHX_FYI : 1
SIGNED_AND : 1
OTHER_AGENCY : 1
REGULARLY_PATIENT : 1
TO_EVALUATE : 1
PATIENT_DOES : 1
FEVERS_ABDOMINAL : 1
SERVICECONNECT_PLAN : 1
OF_TELEPHONE : 1
NOSHOW_TO : 1
NO_IMPAIRMENT : 1
CT_DX : 1
AT_CM : 1
ENCOUNTER_VACCINE : 1
HIS_AND : 4
REQUESTING_BE : 1
PB_SCARED : 1
PATIENTS_ONLY : 1
OF_OBSERVED : 1
PLAN_PT : 1
WAS_ACTIVE : 1
ENCOUNTER_MINUTES : 1
INTERACTIVE_TENSE : 1
CLARIFICATION_ASK : 1
HOWEVER_THEN : 1
CARE_METOPROLOL : 1
DERIDED_SLIGHTLY : 1
ON_HIAA : 1
GLIPIZIDE_IS : 1
CARE_NOTE : 2
PSYCH_AND : 1
THE_IDEATION : 1
HANDOUT_INCLUDING : 1
REPORTED_THIS : 1
GRADE_AND : 1
PT_ADMITTED : 2
AS_FOR : 2
THEM_FILLS : 1
TO_CHANGE : 1
PROVIDED_WITH : 2
WHO_HAS : 1
TAB_PO : 7
PAIN_LEVEL : 3
HAND_AC : 1
LANTUS_RANING : 1
SUCCESSFULLY_ADDENDUM : 1
OBSTRUCTIVE_CHANGES : 1
AND_EXPIRED : 1
APPT_ON : 1
IN_PT : 1
RALES_SAT : 1
REVIEW_TRANSFER : 1
THINGS_THE : 1
ARE_SCREEN : 1
CARE_AS : 1
FOR_FOLLOWING : 2
OF_DIGESTIVE : 1
CURRENT_SI : 1
AT_CT : 1
IS_YO : 1
LABS_NOT : 1
HE_EXPRESSED : 1
WORK_UP : 1
FOR_NOT : 2
CAME_CLINIC : 1
HIM_TO : 3
WORST_IN : 1
IS_OLD : 2
IN_PAIN : 1
ON_DATA : 1
REPORTED_HOUSESTAFF : 1
MEDICATIONS_FIVE : 1
VACCINE_VACCINE : 1
HOME_MEDICAL : 1
TURGOR_WITHIN : 1
FOR_THE : 5
EATING_MINIMUM : 1
APPLIED_OPHTHALMOLOGY : 1
MR_HAVE : 1
GIVE_CONSENT : 1
CONSULT_KT : 1
PATIENT_VERIFIED : 1
HIS_DEPRESSION : 1
ROUTINE_FOLLOWUP : 1
LT_AND : 1
MHC_NOTE : 1
DOING_PT : 2
BEEN_BY : 1
NO_CURRENT : 1
NOTE_PULSE : 1
COMPLAINTS_THIS : 2
ACCESS_PROFESSIONAL : 1
DRINK_BOTTLE : 1
GIVEN_CONSULTATION : 1
DONE_TO : 3
THE_BACK : 1
EATING_TO : 1
THE_PROCEDURE : 1
CONTACT_ADDRESS : 1
MONITOR_YES : 1
BLOOD_IN : 1
MILDLY_AT : 1
WAS_UNDER : 1
FROM_PENIS : 1
CAPSULES_FOR : 1
XVETERAN_SIGNIFICANT : 1
CARE_ATTEMPT : 1
HE_WILL : 2
OF_MY : 1
TO_FREQUENT : 1
SIGNIFICANT_NURSE : 1
ORAL_ACTIVE : 1
AID_NONE : 1
WILL_TO : 3
ACUTE_FIN : 1
THROUGH_VISTA : 1
SEEN_PHYSICIAN : 1
WITH_PROVIDER : 1
CHANGES_TOTAL : 1
VIOLENCE_POTENTIAL : 1
DIET_AND : 1
NOTE_COMPLETED : 1
SCHEDULED_TO : 1
SOMEWHAT_TO : 1
AND_BARRETTS : 1
FOR_FEE : 1
PARTICIPATED_APPROPRIATELY : 1
SEX_YO : 1
EVIDENCE_LYMPHADENOPATHY : 1
TO_RESPOND : 1
URINAL_EASY : 1
INCREASED_OR : 1
NO_SMOKING : 1
HAS_AN : 1
STOP_CONVERSATION : 1
DATE_OF : 1
VET_WILL : 1
SIGNS_NONE : 1
TRANSFERRED_VA : 1
OF_SESSION : 1
IBW_INSTABILITY : 2
URGENT_PHYSICIAN : 1
PREPARED_TO : 1
ACTIVE_SENSORY : 1
TO_SIGMOID : 1
WHO_AT : 1
FOR_FASTING : 1
HAND_CHRISTIAN : 1
PT_ADDENDUM : 1
WARRANTED_DC : 1
PHONE_CALL : 1
BASED_RESULTS : 1
MRI_OF : 1
RESULT_NOR : 1
PASSED_HIS : 1
OF_FLUID : 1
THAT_EVALUATED : 1
OR_UNCHANGED : 1
MEDICATIONS_MUSCLE : 1
DOOR_STATED : 1
TOILETING_MINIMUM : 1
STAFF_IS : 1
BY_PATIENTS : 1
COMFORT_IN : 1
ONE_PHONE : 1
MILITARY_INTELLIGENCE : 1
TO_SEVERAL : 1
THE_REHAB : 1
WE_VETS : 1
BOTH_FEET : 1
WITH_DIAGNOSIS : 1
SHOULD_CANCEL : 1
EXISTING_OF : 1
AND_WORTHLESS : 1
PT_AS : 1
BELONGINGS_INVENTORIED : 1
AND_ADMISSION : 1
ORDERED_LEVEL : 1
PATIENT_SUCCESSFULLY : 1
FOR_PAIN : 3
IS_MORE : 1
SUPPORT_WILL : 1
TWO_DILTIAZEM : 1
NUMBER_PRIMARY : 1
FOLLOWING_PTS : 1
SUICIDAL_TREMORS : 1
WILL_AT : 1
HIS_MED : 1
TABLETS_MOUTH : 1
PROVIDED_ONE : 1
ATTENDING_STAFF : 1
BRIEF_HISTORY : 1
GAIT_ACTIVE : 1
IPRATROPIUM_ORAL : 1
PATIENT_CLEAR : 1
NOTE_VITALS : 1
YEARS_NURDM : 1
MENSTRUAL_ANXIETY : 1
FROM_TO : 1
INTERFERES_WITH : 1
VOMITING_PAIN : 1
GROUP_EXERCISE : 1
BE_ESOPHAGUS : 1
PSYCHIATRY_STL : 1
VETERANS_WERE : 1
BLOOD_TEMPERATURE : 1
LATER_WELL : 1
SATT_THERAPY : 1
ASSISTED_SO : 1
TABLET_BENIGN : 1
MH_WORK : 1
CHIEF_ASSESSMENT : 1
REFILL_BEING : 1
STAPERT_STOMACH : 1
LAST_DOCUMENTED : 1
US_TINGED : 1
APPRECIATIVE_OBTAINED : 1
INFORMATION_HEALTHY : 1
CALL_US : 1
TO_THREATS : 1
PING_TROUBLES : 1
WHAT_WOULD : 1
SUPPLIES_INTELLIGENCE : 1
READING_PT : 1
APPLICABLE_ALDRETE : 1
HRS_MONITOR : 1
WHEN_HAS : 1
IF_DOES : 1
AS_WHAT : 1
AT_THE : 4
SUICIDE_TIME : 1
THE_REGRETS : 1
REASON_CONSULT : 1
BE_MONITORED : 1
PAINS_PHONE : 1
MR_PROVIDED : 1
ASSISTANCE_GLUCOSE : 1
HEALTH_CHIEF : 1
PO_DAILY : 1
CURRENT_MEDICATIONS : 1
HARD_SKIN : 1
BE_BEFORE : 1
MOTHER_DIED : 1
THE_MANAGEMENT : 1
HAD_SUICIDAL : 1
ASSESSMENT_TO : 1
FOLLOWUP_VISIT : 1
EYEBROWS_PERIORBITAL : 1
FROM_MEDICATIONS : 1
MRI_NECK : 1
REC_TO : 1
AN_ALREADY : 1
VARIES_TO : 1
TO_VA : 1
VETERANS_THEIR : 1
FRI_TO : 1
MALE_SERVED : 1
KEYS_TO : 1
TO_URINATE : 1
SIGNATURE_INFORMED : 2
BRODINE_AND : 1
NOTE_CURRENT : 1
PERFORMED_WITH : 1
APPT_WITH : 1
RX_FLUIDS : 1
LACK_ATTENDANCE : 1
PT_HERE : 1
HELP_STILL : 1
MG_QHPRN : 1
TINGED_WITH : 1
ALDRETE_NONBLOODY : 1
ORDER_INPATIENT : 1
NOW_UNSCHEDULED : 1
WAS_FOR : 3
CONTACT_OF : 1
MAKE_APPT : 1
TIMES_DOES : 1
VISTA_IMAGING : 3
CHANGE_PT : 2
HEMATURIA_NOCTURIA : 1
AGAIN_PT : 1
ACTIVE_IDENTIFICATION : 1
AHEAD_OF : 1
AIRWAY_WITH : 1
CLOSE_BEDTIME : 1
SEP_PATIENT : 1
INDICATES_IS : 1
TIMES_TAB : 1
PATIENT_DID : 1
LEGS_HE : 1
DRUGNUTRIENT_PROBLEMS : 1
BY_RAL : 1
HAVE_SIDE : 1
TERRIBLE_HE : 1
ACCESSED_VISTA : 1
PUT_ON : 2
PATIENT_FEEDING : 1
LOWER_WEAKNESS : 1
NO_ONE : 1
GO_HOME : 1
YOU_AN : 1
IN_APRIL : 1
THIS_SSN : 1
EDEMA_EXTREMITIES : 1
STAFF_COMPLETED : 1
UNDERST_ABNORMAL : 1
BENZTROPINE_MG : 1
THE_DOOR : 1
ESOPHAGEAL_CANCER : 1
VERY_IN : 1
MOVEMENTS_FOREHEAD : 1
LOSS_CONSCIOUSNESS : 1
IDENTIFICATION_TWICE : 1
OCCASIONS_BY : 1
TO_DO : 1
INDICATING_CAPABLE : 1
ACCORDING_THE : 1
PLANS_PULSE : 1
ALVETA_TO : 1
PROBLEM_APPROVAL : 1
TREAT_DISORDER : 1
OTHER_AFTERCARE : 1
BREATHING_MAY : 1
AN_BEFORE : 1
SENSORY_NO : 1
THE_SHEET : 1
THE_CE : 1
THE_ARMY : 1
HIS_GRADUATATION : 1
SUICIDAL_MO : 1
FOR_DIABETIC : 2
NONE_CURRENTLY : 1
SOCIAL_NOTE : 2
SEXUAL_ABUSE : 1
INTERVIEW_FOR : 1
STATUS_ALERT : 1
KNOWLEDGE_DISEASES : 1
AND_STRAIGHT : 1
VETS_FREQUENT : 1
PSYCHOTIC_FEATURES : 2
HURT_FROM : 1
GET_IT : 1
HIS_AT : 1
OF_HERNIATED : 1
LAB_MG : 1
VISTA_GENERAL : 1
DONE_HERE : 1
FU_VISIT : 1
NO_II : 1
CE_WOULD : 1
CT_CHEST : 2
TRIAL_OTC : 1
GOAL_FOR : 1
AS_DONT : 1
ANSWER_THINGS : 1
TELLING_HOW : 1
ABDOMINAL_HAS : 1
PAIN_GOALWHAT : 1
TEAM_SAFETY : 1
UP_CHANGE : 1
AND_GIVEN : 1
THIS_DOESNT : 1
STRESS_MEDICAL : 1
WITHIN_EASY : 1
AT_NOTICE : 1
STILL_NOT : 1
TARGETS_IN : 1
DATED_BELOW : 1
TO_ON : 1
LEVEL_IN : 1
AGREE_THE : 1
MUTUAL_GOAL : 1
NAME_SSN : 1
THAN_SECONDS : 1
FECAL_BLOOD : 1
CHEMSTRIP_NO : 1
AND_WE : 1
ABNORMALITIES_HAS : 1
EDUCATION_VETERAN : 1
REGARDING_ALSO : 1
ORDERED_AND : 2
AT_LAB : 1
RESP_WILL : 1
UNDERLYING_IRRATIONAL : 1
INHALER_USE : 1
CURRENTLY_BEING : 1
THINKS_THE : 1
PT_SEVERAL : 1
PENSION_CONSTRUCT : 1
DIGITAL_PAGER : 1
FOR_MORE : 1
STATES_THE : 2
WIFE_TO : 1
CLINICAL_HISTORY : 1
FLUIDS_MEDICATIONS : 1
CONTINUE_TO : 3
FOLLOWING_THE : 1
MONITORED_WELL : 1
DIFFICULTY_SEC : 1
TLCP_TOOK : 1
COMPLETE_STRESS : 1
YES_THIS : 1
BID_WITH : 1
DOESNT_HELP : 1
UPDATE_CHEMSTRIPS : 1
AT_AM : 1
LACK_OF : 1
OR_CALLER : 1
VET_HE : 2
HISTORY_DIED : 1
CASE_HE : 1
WAS_NEGATIVE : 2
TROPONIN_NEGATIVE : 1
NO_ASSESS : 1
SUPPLIES_RESIDENCE : 1
PATIENTS_MEDICATIONS : 1
HE_BEEN : 2
HIM_MOST : 1
FAITH_BACKGROUND : 1
YESTER_DISCUSSED : 1
HOME_UNTIL : 1
HAND_AND : 1
PROBLEM_WITH : 1
SHOWS_WATCH : 1
HIS_ABDOMEN : 1
THIS_AND : 1
SO_HE : 1
WAS_HIGH : 1
CARE_ON : 1
EXTREMITY_WEAKNESS : 1
VOLUME_IMB : 1
OF_FOREHEAD : 1
PATIENT_BELONGINGS : 1
WELL_FAIR : 1
REVIEWED_TIME : 1
CALL_HIS : 1
MG_SENT : 1
CYST_OBTAINED : 1
HARM_TO : 1
NURSE_ADVANCES : 1
CAPACITY_MAKE : 1
INTELLIGENCE_FINANCIAL : 1
DIAGNOSIS_LB : 1
HISTORY_DOES : 1
ADDRESSED_ALICE : 1
GLUCOSEFINGER_ADVANCED : 1
CHEST_PAIN : 1
RISK_FACTORS : 1
PENIS_PATIENT : 1
THAT_CONTACTS : 1
TREATMENT_OPTIONS : 1
AND_VET : 2
APPLY_FOR : 1
WITH_MEDICAL : 1
GRADUATATION_HAVE : 1
LYMPHADENOPATHY_OR : 1
ALCOHOL_TEST : 1
VOMITING_ABDOMINAL : 1
LIST_YOU : 1
WEIGHT_FOR : 1
FEEL_GUILTY : 1
HIM_PO : 1
CLEAR_UNDERST : 1
ACUTE_CONSULT : 1
THE_CARE : 1
LN_THIS : 1
APRIL_PATIENT : 1
RX_IV : 1
COMMUNICATION_TRY : 1
CANE_LIVING : 1
REQUIRED_BY : 1
FIN_CONSULT : 1
AA_NA : 1
LOCAL_WILL : 1
HAS_UPCOMING : 1
ORGANOMEGALY_SAFETY : 1
DAILY_ACTIVE : 1
THE_GROUP : 1
ENTERING_HIP : 1
ORDER_COMPLETE : 1
YOU_NEED : 1
LOW_AND : 1
HAVING_HAVE : 1
THE_TRACT : 1
IMPAIRMENT_FUNCTIONAL : 1
RESPIRATION_MASS : 1
LOCATION_HAND : 1
TEMPERATURE_DISCUSS : 1
HE_AN : 1
WAS_SEEN : 2
LAST_PC : 1
NOTE_DT : 1
INCREASE_USE : 1
ED_CPRS : 1
SOLDIER_IS : 1
CARE_INTERVIEW : 1
PHONE_AND : 1
NONE_ONCE : 1
OF_VETERAN : 1
METAL_IN : 1
DURING_WHICH : 1
AHEAD_TIME : 1
IN_COMBAT : 1
SPECIAL_POPULATIONS : 1
HAITI_ENGAGED : 1
SCRIPT_SENT : 1
SHOULD_NOT : 1
OTC_MEDS : 1
IS_SAFE : 1
ADDENDUM_MH : 1
ADA_LAWS : 1
CONVERSATION_ROUTINE : 1
SUCH_VA : 1
KIN_PATIENT : 1
VERBALIZED_UNDERSTANDING : 2
MOUTH_HOURS : 1
PHONE_PISTOL : 1
TO_ER : 1
WEEKLY_MANAGEMENT : 1
BRONCHOSCOPY_WHICH : 1
CHRISTIAN_FAITH : 1
ALSO_REPORTED : 1
THE_HOSPITAL : 1
SKIN_RISK : 1
COMPLETE_PLEASE : 1
OBTAINED_FROM : 3
TO_BE : 3
AM_UNFAMILIAR : 1
IS_PL : 1
DONE_PT : 1
HELP_NOT : 1
FOR_REQUEST : 1
INVOLVEMENT_PATIENTS : 1
STANDARD_PATIENT : 1
REC_ALERT : 1
NOTE_LAST : 1
POLYP_THROUGHOUT : 1
SESSION_AREA : 1
THE_TEAM : 1
ACCEPTABLE_OF : 1
WE_DETERMINE : 1
PTS_ABILITY : 1
IF_SYMPTOMATIC : 1
AND_MG : 1
NEW_SURROGATE : 1
PROBLEMS_THE : 1
RECORDS_PATIENTS : 1
ANY_ISSUES : 1
MEDICATIONS_WERE : 1
WITH_THE : 6
MG_PER : 1
IS_LOBBY : 1
PLACE_CALL : 1
ORIENTED_ORAL : 1
ITS_TOBACCO : 1
SCAN_NO : 1
PRESSURE_NOT : 1
MEDS_PATIENT : 1
TREATMENT_SIGNIFICANT : 1
DEPENDENCE_IN : 1
ANY_THOUGHTS : 1
STATED_WE : 1
ARTS_WORK : 1
MYALGIA_HEADACHE : 1
TREAT_MOVEMENT : 1
CP_PT : 1
PRACTITIONER_RECORD : 1
BY_RECEIPT : 1
ANTERIOR_BREATH : 1
CURRENT_BP : 1
OF_HAZARDS : 1
DOES_NOTED : 1
FEET_PT : 1
THROMBOLYTICS_ADMINISTERED : 1
CONSIDERED_CARCINOID : 1
SEVERAL_PVCS : 1
YOU_THAT : 1
COME_VET : 1
FOR_KT : 1
UNSCHEDULED_ASSESSMENT : 1
THE_TYPE : 1
VIOLENCE_IDEATION : 1
PERCOCET_SULFA : 1
VETS_FIN : 1
APPOINTMENT_DO : 1
ALSO_TAKES : 1
ACTIVITY_ROOT : 1
ONEHALF_TABLET : 1
ASPART_UNITS : 1
NECK_PAIN : 2
PLAN_TREMORS : 1
ASSESS_PAIN : 1
FOR_FLAG : 1
DENIES_FEVER : 1
CAPACITY_INTO : 1
PO_QHPRN : 1
MENTAL_MOTORCYCLE : 1
PLAN_WOULD : 1
MODIFIED_LIQUID : 1
EQUIPMENT_CONSULT : 1
INCLUDING_THE : 1
MY_LEGS : 1
PRESSURE_RESPIRATIONS : 1
INTOXICATED_AND : 1
SPI_SHOWS : 1
DONE_DUE : 1
TISSUE_DX : 1
PHONE_OF : 1
TOILETING_PASTORAL : 1
OBSERVE_PTS : 1
NEURO_REVEALED : 1
THE_EACH : 1
NURSE_IT : 1
IF_HE : 1
PLACE_CLOSE : 1
TO_PHARMACY : 1
SEEN_MHICM : 1
WILL_PT : 1
NONE_WITHIN : 1
BY_TRYING : 1
WHO_INSTRUCTED : 2
FOR_REFILL : 1
HAS_BEEN : 5
PROBABLY_WITH : 1
MAY_REACHED : 1
OR_CHEW : 1
NO_PROBLEMS : 1
SOB_HAS : 1
RANING_FROM : 1
HAD_PLAN : 1
LOCATION_CHRISTIAN : 1
THAT_BEING : 1
FUNCTIONAL_SEVERE : 1
PROCEDURE_CLEAR : 1
KG_INSTRUCTED : 1
OF_WITHDRAWAL : 1
REVIEWED_PROVIDED : 1
MENTAL_NOTE : 1
DOSES_HRS : 1
CALL_AND : 1
ATTENDING_NA : 1
WANTS_KNOW : 1
LOWER_EXTREMITY : 4
AS_PATIENT : 1
RECENT_LABS : 1
WITH_ON : 1
TOLD_THAT : 1
OBSERVE_ABILITY : 1
FOCUSED_ON : 1
WAIT_FURTHER : 1
IN_CHICAGO : 1
SIGNS_AND : 1
CD_WITH : 1
REQUESTING_TO : 1
OUR_PROCESS : 1
THIS_NUTRITION : 1
HE_PING : 1
TUMOR_HAS : 1
DENIES_ANY : 3
OCCULT_BLOOD : 2
TO_OR : 1
PATIENT_DESCRIBE : 1
PROPER_INHALER : 1
MG_CAP : 1
ACTIVE_WERE : 1
LVN_CLINIC : 1
IN_DENIESE : 1
BY_SUS : 1
ENVIRONMENT_CLEAR : 1
PHOENIX_THOUGHTS : 1
AT_BEDTIME : 1
FRI_IF : 1
TOBACCO_MONTH : 1
DEMONSTRATION_VETERAN : 1
NEXT_THIS : 1
THE_LABS : 1
MOUTH_VITAL : 1
KNOW_BAD : 1
PATIENT_IS : 4
ADMITTED_DISTURBANCESLEPT : 1
ATTENTIVE_RESP : 1
BPH_PT : 1
TIME_IF : 1
AUDITC_WAS : 1
BE_THROUGH : 1
REQUESTED_PIN : 1
ALICE_PARENTS : 1
ARGE_BMS : 1
IMMEDIATE_DATA : 1
REHAB_DEBILITY : 1
STRONG_SENT : 1
MONITOR_SIGNS : 1
QHS_ACTIVE : 1
TYPE_CONTACT : 2
WITHIN_NORMAL : 1
PULSE_SIGNATURE : 1
LB_PATIENT : 1
NOTED_MR : 1
ORDERED_EDUCATION : 1
CONTROLS_TABLE : 1
HIAA_NORMAL : 1
ILLEGAL_AND : 1
THERAPY_MEDS : 1
IT_THROUGH : 1
REQUESTED_GIVEN : 1
KNOW_IF : 1
AND_STAPERT : 1
ON_MUTUAL : 1
DECISION_AND : 1
VIEWING_ON : 1
COLONIC_ACCOMPANIED : 1
SHOULD_TO : 1
INFORMATION_FROM : 1
CRIS_REQUESTING : 1
WAS_BENADRYL : 1
EXPRESSED_IRRATIONAL : 1
OF_INSTRUCTIONS : 1
AND_THE : 4
STAFF_NOT : 1
TREATMENT_THEREFORE : 1
VOICES_SUICIDAL : 1
ZELL_PATIENT : 1
TYLENOL_MUCINEX : 1
NOTE_EVERY : 1
HAVE_EVALUATED : 1
APPOINTMENT_IDENTIFIED : 1
MINUTES_TELEPHONE : 1
TELEPHONE_TLCP : 1
PATIENT_THAT : 1
REPRESENTATIVE_THE : 1
PAIN_CHARLOTTE : 1
AND_SPC : 1
PCC_OF : 1
OR_MEDICATIONS : 1
WHAT_PAIN : 1
PATIENT_REVIEW : 1
THIS_PATHOLOGY : 1
SURGEON_TOLD : 1
VERBALIZES_THOUGHTS : 1
GAD_PHYSICAL : 1
IDENTIFY_IF : 1
ARRIVED_FOR : 1
FOR_CARE : 2
PT_TOOK : 1
MARY_PLAUT : 1
INTAKE_OUTPUT : 1
PUFF_ORAL : 1
SLEPT_ON : 1
WORK_TIME : 1
METHOD_OF : 1
VASCULAR_PULSES : 1
HIS_PAIN : 1
BENIGN_PROSTATE : 1
LOCAL_PROVIDER : 1
FOCUS_OF : 1
DOCUMENT_PODIATRIC : 1
VERY_DISTRAUGHT : 1
MEDICAL_SURGICAL : 1
OF_PLAN : 1
BARRIERS_TO : 1
THE_REVIEWED : 1
INTACT_WT : 1
FALL_AND : 1
INTO_HIP : 1
DESCRIPTION_OF : 1
ON_OR : 1
AUTHORIZE_REPEAT : 1
AND_REVIEW : 1
SCREEN_TYPE : 1
ON_PT : 1
BE_ACCESSED : 1
MEDICATIONS_IN : 1
ACID_MEDICAL : 1
WERE_AVAILABLE : 1
SLIGHTLY_AT : 1
SCHEDULED_RENOTTA : 1
LEAVES_HE : 1
TWO_TABLETS : 1
HX_TO : 1
TELEPHONE_ADDRESS : 1
NEGATIVE_THEY : 1
AND_ALICE : 1
ABNORMALITIES_ANTIBIOTIC : 1
FLAG_MONITORING : 1
PRESENT_WEIGHT : 1
HAS_FOLLOWING : 1
BEHAVIORAL_CALLED : 1
BUT_BY : 1
APR_TAKE : 1
WORST_IMA : 1
DUE_PIECE : 1
PERCEPTION_NO : 1
SPEACH_AND : 1
ILLNESS_INVOLVEMENT : 1
MOUTH_THREE : 1
IS_PROBABLY : 1
CARRY_OUT : 1
PRESENCE_OF : 1
NURSING_EDEMA : 1
LMSW_CLASS : 1
RECEIPT_PARTICIPATION : 1
PT_EDUCATION : 1
SUICIDAL_PLAN : 2
TALK_THE : 1
TELEPHONE_PATIENT : 1
HEARING_ALSO : 1
MOST_OF : 1
UPDATE_ORDERED : 1
EVENING_DENIES : 1
ASPECTS_OF : 1
KG_DOCUMENT : 1
ONE_TAKING : 1
HAS_ABOVE : 1
TO_IN : 2
MG_CHEW : 1
SIDE_ACTIVE : 1
AND_MOBILITY : 1
HERE_IN : 1
WAS_DISTRAUGHT : 1
CON_REC : 1
CALL_BELL : 1
HOSP_NO : 1
MASS_AUG : 1
DO_NONE : 1
OF_HYPOGLYCEMIA : 1
TO_MCMULLEN : 1
CP_IS : 2
WOULD_BE : 1
WAS_PT : 1
AS_SEVERE : 1
FINANCIAL_FEELING : 1
OXYGEN_DYSPNEA : 1
HEIGHT_CM : 1
HEME_AND : 1
LUNCH_NOON : 1
POSITION_BOLTED : 1
HYPERGLYCEMIA_AND : 1
PUT_FINASTERIDE : 1
HISTORY_FROM : 1
COMPUTERIZED_LIST : 1
DURING_HIS : 1
TONGUE_MIDLINE : 2
AND_HES : 1
STRESS_RE : 1
TO_DOES : 1
CONTINUD_SW : 1
CALL_BETWEEN : 1
PLEASE_REVIEW : 1
NOTICE_ANY : 1
BETTER_ON : 1
PATTERN_UNTIL : 1
PRN_FOR : 2
DRY_SKIN : 1
OF_CAR : 1
FEEDING_AMBULATING : 1
PRIMARY_OF : 1
HERE_FOR : 3
HEALTH_WELLNESS : 1
HERE_ORDER : 1
LFTS_PER : 1
IS_MEDICATION : 1
PING_ON : 1
IN_INJURIES : 1
NURSE_TELEPHONE : 1
DEPRESSION_CONSENT : 1
STS_HIS : 1
SUICIDE_WAS : 1
SUICIDE_PREVENTIONS : 1
BEEN_GIVEN : 1
WHO_WAS : 3
THE_PLAN : 1
PLATINUM_NOTE : 1
HIS_IS : 2
SHOULD_BE : 2
CARE_ORDERED : 1
DIARRHEA_DESCRIBE : 1
ME_IN : 1
THEREFORE_THE : 1
DUE_SUCH : 1
OVERTHE_MEDICATIONS : 1
IDEATION_THREATS : 2
ORDER_NEB : 1
SAFETY_EDUCATION : 1
SEEN_BY : 2
RANG_AT : 1
OVER_PAST : 1
LIST_INCLUDES : 1
REC_REPEAT : 1
THE_PCCNURSING : 1
AFTERCARE_ALL : 1
OUTLINING_CHARACTERISTICS : 1
WORK_NURSING : 1
HEENT_THAT : 1
MORE_NURDM : 1
VACUUM_DISC : 1
DEMONSTRATE_INCREASED : 1
GLIPIZIDE_SCHEDULE : 1
WILL_NO : 1
WAS_SO : 1
IS_PING : 1
INTAKE_NOTE : 1
BREAKFAST_WRITE : 1
VET_HISTORY : 1
THOUGHT_PROCESS : 1
TO_ANTERIOR : 1
DIED_AT : 1
AA_MEETINGS : 1
SENT_PHARMACY : 1
IS_MODIFIED : 1
OF_WEIGHT : 2
PRIMARY_NEXT : 1
THEY_ARE : 1
STATED_IF : 1
AGO_WILL : 1
DISPATCH_STATED : 1
PER_PSYCHOSISRESOLVED : 1
PACE_ASK : 1
MEDICATION_TO : 2
VASCULAR_NURSING : 1
AND_ORDER : 1
SESSION_PSYCHOSISRESOLVED : 1
NAME_CALLER : 1
BRIEF_CLINICAL : 1
ADMITTED_TO : 1
MG_ACETAMINOPHEN : 2
OR_COLLECT : 1
SIGNS_INCREASED : 1
MAJOR_FACTORS : 1
YEARS_ANY : 1
IMPRESSION_AND : 1
BPH_DOES : 1
REQUESTED_WEIGHT : 1
DIFFUSE_TTP : 1
FOLLOWING_RECENT : 1
OBTAINED_PT : 1
REL_ISSUES : 1
STRAIGHT_AND : 1
YOU_ANY : 1
ALLERGIES_RX : 1
TO_PLEASE : 1
THROUGH_NIGHT : 1
LOCATION_AND : 1
CREPTS_BILATERALL : 1
HE_HE : 1
PHONE_PAJAMAS : 1
IF_FROM : 1
CALL_AMLODIPINE : 1
HELP_ALSO : 1
OF_SCREEN : 1
ED_NURSING : 1
TOLERATED_PROCEDURE : 1
CE_MONITOR : 1
WITH_COMPLAINT : 1
REPEAT_IN : 1
OF_RECORD : 1
NONVA_RECORDS : 1
SHOWS_OBSTRUCTIVE : 1
LIKELY_ELIGIBLE : 1
NURSE_PATIENT : 1
IN_PCPABSENCE : 1
INSTRUCTIONS_THIS : 1
PROCEDURE_ENVIRONMENT : 1
SLMHC_APPOINTMENT : 1
INFORMED_CONSENT : 2
VERBALIZED_BODY : 1
ST_MEDICAL : 1
NERVE_DAMAGE : 1
OPTIONS_INCLUDE : 1
EVALUATE_FINDING : 1
RESPOND_GEN : 1
DAILY_BEFORE : 1
DENIES_DENIES : 1
WITH_FLUOROSCOPY : 1
EMG_NO : 1
BLE_PULSES : 1
INDICATES_PATIENT : 1
REQUIRES_TO : 1
POSSIBLE_UNDERLYING : 1
WALK_AT : 1
OF_IN : 1
ACTIVITIES_MENTAL : 1
FOR_LUNG : 1
NONE_BEDREST : 1
LEFT_MESSAGE : 1
CALL_BACK : 1
OF_ALERT : 1
ALERT_AND : 1
APPOINTMENT_NO : 1
REPAIR_LEFT : 1
YEARS_MILITARY : 1
UNTIL_ANTIHYPERTENSIVES : 1
MONTH_CANCEL : 1
SCHEDULE_IS : 1
TO_EMERGENT : 1
AND_PHARM : 1
REPEAT_EXAM : 1
SEVERAL_TIMES : 1
HIS_MEDICATIONS : 1
NO_BLOOD : 2
PERIARTICULAR_STRUCTURE : 1
OXYCODONE_TRIAGE : 1
MD_RN : 1
PATIENT_ASPIRIN : 1
COOPERATIVE_WITH : 1
FILL_HE : 1
ORAL_CARE : 1
OUT_MANY : 1
HAS_BLDG : 1
DIGITS_TO : 1
ON_ALSO : 1
BLOOD_PRESSURE : 7
ORAL_SELF : 1
EVAL_FOR : 1
SITE_CARE : 1
VACUUM_PHENOMENA : 1
AND_BED : 1
SEP_SEX : 1
PRIORITY_ENTERING : 1
NO_CP : 1
AN_ACCEPTABLE : 1
LEAST_SO : 1
NIGHT_PATIENT : 1
BUT_SAYS : 1
ISSUES_HE : 1
THE_OF : 6
PAIN_ASSESSMENT : 1
NAME_PIN : 1
SUICIDAL_THREATS : 1
IMAGING_VIEW : 1
ADVERSE_EFFECTS : 1
THE_SOURCE : 1
MINUTE_CARD : 1
MOBILITY_EOM : 1
PATIENT_EDUCATION : 5
KT_HE : 1
PHONE_INTERFERES : 1
ONE_CAPSULE : 1
PT_TWO : 1
REPORT_ATTENDING : 1
PAIN_WITH : 2
AN_AT : 1
HOSPITAL_SOMALIA : 1
PROCEDURE_WELL : 1
SPOKE_XVETERAN : 1
ADDENDUM_MEDICATION : 1
TROPONIN_DATE : 1
PT_HAS : 2
CHIEF_COMPLAINT : 2
UNITS_TIDAC : 1
PROVIDERS_LT : 1
ICDCM_AND : 1
ISSUES_REVIEWED : 1
LUNGS_AND : 1
BEGAN_TELLING : 1
THAT_HE : 5
TELEPHONE_ACTIVE : 1
DRAINAGE_NOTED : 1
PLUS_ETHANOL : 1
CIPROFLOXACIN_PHONE : 1
CHEEKS_TREATMENT : 1
SOCKS_INTERVENTION : 1
HAS_EATING : 1
INCLUDES_VA : 1
PRILOSEC_AND : 1
IF_THIS : 1
PM_FROM : 1
THE_FOR : 3
LOSS_OF : 1
YES_OPTIONS : 1
AND_BEEN : 1
HAD_OBJECTIVE : 1
THIS_THE : 1
EVERY_REFILLS : 1
WAS_TOLD : 1
METAPLASIA_WITH : 1
PAIN_COMMUNICATION : 1
DO_YOU : 3
WITH_SPC : 2
PTS_STATUS : 1
DIRECT_STAFF : 1
HE_STILL : 1
ACTI_DECISION : 1
DEPRESSIVE_NOS : 1
NOTE_HIS : 1
TOOK_TWO : 1
ANSWER_TO : 1
UNDER_NUMBER : 1
DOCUMENT_ATTACHED : 1
BLOOD_HEART : 1
CONTACTS_CAN : 1
FOR_CONTINUD : 1
EACH_RESP : 1
ANYMORE_TAKES : 1
ONE_BY : 7
PT_SEEMS : 1
TO_PHONE : 1
EKPHARMACY_PATIENT : 1
DID_AND : 1
TO_LATER : 1
NOW_NURSING : 1
LOWER_PATIENT : 1
CARE_TEAM : 1
FYI_TO : 1
DUE_VETS : 1
DEPARTMENT_VETERANS : 1
VET_HAD : 2
CARE_NURSING : 3
ATTACHED_THIS : 1
TRYING_FOCUS : 1
APHDR_OR : 1
PATIENT_DECISIONMAKING : 1
LOCATION_HOSPITAL : 1
ENDOSCOPE_THIN : 1
DIABETIC_IMAGING : 2
SULFA_DRUGS : 1
WHAT_YOUR : 1
DISCUSSED_THAT : 1
HOW_ALTERATION : 1
BLDG_PAIN : 1
EVERY_HOURS : 1
WITH_MARY : 1
ACTIVE_MH : 1
COVER_FOR : 1
WITH_THIS : 1
THE_PT : 2
NO_MALE : 2
HE_TRY : 1
FOR_ELEVATED : 1
SUICIDAL_MOVIE : 1
EDUCATION_SCHEDULED : 1
YES_SEND : 1
BID_ACTIVE : 2
DIAGNOSIS_PAIN : 1
VA_CONSTRUCT : 1
THE_THAT : 3
ORDERS_NUTRITIONAL : 1
HOWEVER_QUIT : 1
OF_VETERANS : 1
CINDA_SISNEROS : 1
IS_MILDLY : 1
TO_ANSWER : 1
TEST_FOR : 1
HIS_FOR : 1
CARE_THE : 1
NONVA_OVERTHE : 1
SUPPLIES_STABLE : 1
MODIFIED_ALDRETE : 1
CASTS_DX : 1
NOTE_LMSW : 1
MON_THROUGH : 1
ALRIGHT_LONG : 1
WRITER_WAS : 1
WITHOUT_ASSISTANCE : 1
MILITARY_THEREFORE : 1
ENT_CONSULT : 1
HIS_DAD : 1
AMOUNT_EVERY : 1
WEIGH_DAILY : 1
IV_AND : 2
HOPELESSNESS_ANY : 1
RN_THINKS : 1
FOR_DECISIONMAKING : 1
ANSWER_THE : 1
TINGLING_LEARNER : 1
TEMP_AWAITING : 1
WAS_PATIENT : 2
FEET_MEDICATION : 1
SEVERE_WITH : 2
WITH_FLEXIBLE : 1
TO_SHOULD : 1
UNDERST_RYTHN : 1
TO_NO : 3
NURSING_ASSESSMENT : 1
ILLNESS_IN : 1
LOWER_PERIPHERAL : 1
VA_CARE : 1
DRUGINDUCED_DEPRESSION : 1
FOLLOWING_LEVEL : 1
PUFF_INHL : 1
ON_ACTIVE : 1
TIME_HE : 1
TEAM_TEAM : 1
ENDOSCOPE_IS : 1
DISPATCH_IF : 1
BE_SIGNIFICANT : 1
THIS_LIST : 2
RATE_AND : 1
NAPROXEN_TAB : 3
CANCER_GI : 1
PATIENT_SECOND : 1
FEATURES_APHDR : 1
ASKED_CONTACT : 1
HEMOGLOBIN_BLOOD : 1
IS_ED : 1
DESCRIPTION_ALTERED : 1
APPEALED_HEARING : 1
CLINIC_ON : 1
KLONOPIN_BEEN : 1
BODY_MASS : 2
PROSTATE_DRE : 1
WILL_INCREASED : 1
REQUIRED_TIME : 1
SC_INTO : 1
HE_REQUIRES : 1
BASE_GRANULAR : 1
MATTER_WE : 1
RECIEVED_FROM : 1
TO_CBI : 1
APPOINTMENT_WITH : 1
ONCALL_AND : 1
HISTORY_WAS : 1
FOCUS_SESSION : 1
XRT_ORDER : 1
WORST_BEING : 1
DILATED_CM : 1
AUTO_SCARED : 1
HOURS_CHRONIC : 1
MEDICATIONS_REVIEWED : 2
PERFORMING_OF : 1
AC_TIME : 1
NO_ABNORMALITIES : 1
PHYSICAL_IN : 1
TOLERATED_THE : 1
INTACT_DETOX : 1
COME_ER : 1
COMMENT_ENCOUNTER : 1
BY_MENTAL : 1
DEPARTMENT_VETERAN : 1
TEST_WAS : 1
ESOPHAGUS_DEPRESSION : 1
FOR_WILL : 1
AM_AND : 1
PAST_HISTORY : 2
IDEATION_AND : 1
COLLECT_SPEC : 1
OF_THOUGHT : 1
PM_RANING : 1
OF_LEGS : 1
VAMC_CALL : 1
SELF_BEFORE : 1
BED_ASSISTANCE : 1
ORDER_DIAGNOSE : 1
STATES_ACTIVE : 1
HEADACHES_NEW : 1
ON_DIAGNOSIS : 1
PLAN_PM : 1
RADIATION_THERAPY : 1
SIG_ONE : 1
USE_WITH : 1
OUTPUT_NO : 1
ED_INTO : 1
FEET_THROMBOLYTICS : 1
AND_BOLTED : 1
NONEMERGENT_COLON : 1
CONCIOUSNESS_PATIENT : 1
RELAXATION_GROUP : 1
INSTR_AUTO : 1
MG_BID : 3
SIGNATURE_CONSENT : 2
SPO_CONTINUE : 1
LAB_MAY : 1
DIABETIC_PLEASE : 1
MINIMUM_MS : 1
KG_OUTPUT : 1
THE_YES : 1
TOLD_HIM : 1
CASE_PT : 1
NO_OVERT : 1
CANCER_WAS : 1
CELL_CANCER : 1
INSIGHT_ADEQUATE : 1
MED_IN : 1
CONSENT_SIGNED : 1
THUS_MAKING : 1
FOR_AS : 1
RESTREPO_AM : 1
VA_WONT : 1
BY_EVERY : 3
UNDERSTANDING_OF : 2
WITH_ONSET : 1
SISTER_STOLEN : 1
ON_PROCESS : 1
FOR_MANAGEMENT : 2
HIS_HAND : 1
BEHAVIORS_WAS : 1
DIAGNOSIS_NECK : 1
CAN_DO : 1
ORDER_FECAL : 1
PLEASE_WAL : 1
NOT_PROSTATE : 1
HAS_APPEALED : 1
MONTH_THE : 1
SHE_FEELS : 1
AND_IN : 1
LEFT_ON : 1
GEN_NAD : 1
SOMETIMES_STOOL : 1
PATIENT_STATES : 2
NOTE_ACTIVE : 1
LEGAL_AS : 1
AND_OFF : 1
LENGTH_IDENTIFIED : 1
GENERAL_SURGERY : 1
INFORMATION_EKPHARMACY : 1
OF_WITHOUT : 2
ER_BRIEF : 1
ADVANCE_DIRECTIVE : 1
THE_LAST : 1
INDICATES_WOULD : 1
DIAGNOSTIC_CASTS : 1
NEURO_GI : 1
YESTER_NO : 1
LIVE_CHICAGO : 1
STATE_WANTED : 1
AND_CHANGES : 1
CHARLOTTE_TELEPHONE : 1
APPOINTMENT_PROVIDER : 1
ER_FOR : 1
NO_OUTPATIENT : 2
SEE_DUE : 1
HE_REVIEW : 1
NON_CELL : 1
OFF_HIS : 1
GASTROENTEROLOGY_NOTE : 1
COPING_TRYING : 1
MHC_PROVIDERS : 1
FM_RYAN : 1
WILL_AUTHORIZE : 1
HOW_CARE : 1
VETERAN_CONTINUES : 1
AORTIC_IS : 1
DOWN_TUBE : 1
MUST_UNDERGO : 1
FOR_TELEPHONE : 1
WITNESSED_CASUALTIES : 1
HAD_EMG : 1
FECAL_LAB : 1
HIS_INSULIN : 1
THE_THEN : 1
DISEASES_TISSUE : 1
NEW_OR : 1
THAT_REQUIRES : 1
LAST_BY : 1
PSYCH_CATS : 1
TIME_SPENT : 1
SHOULD_YOU : 1
VISIT_AND : 1
ATTENDANCE_WAS : 1
OR_FIVE : 1
EXCEED_DOSES : 1
ONLY_APPT : 1
YEARS_IN : 1
TIME_PERSON : 1
DIGITAL_PATIENT : 1
REACH_PAN : 1
TO_URGENCY : 1
ON_FEET : 1
BENADRYL_PO : 1
OSA_DERIDED : 1
NOT_REQUIRED : 1
IS_NO : 1
NOT_SPEACH : 1
TREATMENT_STATUS : 1
EPISODE_WITH : 2
AND_KEEP : 1
SUICIDE_SPECIALIST : 1
XVETERAN_OTHER : 1
TABLE_TELEPHONE : 1
ASPART_INJ : 1
BID_TONGUE : 1
SULFA_CEFADROXIL : 1
TUMOR_RECURRED : 1
FOR_SIGNS : 2
PB_AND : 1
THE_VET : 1
NURSING_THAT : 1
WOULD_NOT : 2
SCHEDULED_NEUROPSYCHOLOGICAL : 1
LOW_DYSPLASIA : 1
ACTIVE_PATIENT : 1
EXAMINATION_REVIEW : 1
PAN_URINAL : 1
MALAISE_AND : 1
PLAN_THESE : 1
WITH_MANAGEMENT : 1
YO_WM : 1
NEED_AT : 1
FILLS_ALPRAZOLAM : 1
ABUSE_MONTH : 1
BEING_MONITOR : 1
CHECKS_NO : 1
PAT_PATIENT : 1
WEIGHT_KG : 6
MIDLINE_METOPROLOL : 1
PCP_AVAILABLE : 1
WELL_POOR : 1
WITHDRAWAL_OBSERVED : 1
HE_PUT : 1
AND_IMMEDIATELY : 1
THIS_PATIENT : 2
EFFECTS_TOPICS : 1
DEMONSTRATION_CONTINUES : 1
HEME_ONC : 1
AND_LEGAL : 1
BEING_FOLLOWED : 2
AT_AT : 1
REVEALED_ABNORMALITIES : 1
GET_PLEASE : 1
OF_HYPERGLYCEMIA : 1
PHONE_APPT : 1
DOES_CONVERSATION : 1
SPEAK_YOUR : 1
EDUCATION_FOLLOWING : 1
GUILTY_PAST : 1
TO_PNEUMOCOCCAL : 1
THOUGHTS_HARM : 1
NONVA_MEDS : 1
EKG_TO : 1
VET_PARTICIPATED : 1
THINGS_THUS : 1
WITH_HISTORY : 2
APPOINTMENT_FOLLOW : 1
STATUSHE_CAN : 1
PRIORITY_BEFORE : 1
MESSAGE_HER : 1
OBJECTIVE_INPATIENT : 1
REFILLS_PARALYSIS : 1
HT_IN : 2
HEALTHY_LOSS : 1
NO_PRESSURE : 1
PROVIDED_CALLER : 1
TO_TREADED : 1
EVERY_LAST : 1
LB_FM : 1
BID_ORAL : 1
YOUR_PRIOR : 1
FOOD_AND : 1
BLACK_NOT : 1
CAN_THE : 1
MH_SCREENING : 1
RESPOND_NAD : 1
ENDING_AT : 1
USE_IS : 1
CONSULT_PARAM : 1
TO_PROCESSES : 1
AND_WELLNESS : 1
LEARNER_PATIENT : 1
PATIENT_VERBALIZES : 3
CM_BASE : 1
HAVE_THAT : 1
TEXT_ATTACHED : 1
AT_MORBIDITIES : 1
CONDITION_UNCHANGED : 1
FUTURE_NONEMERGENT : 1
LIGHTED_INTERDISCIPLINARY : 1
BLOOD_WAS : 1
NOT_MEDICATION : 1
OR_NAPROXEN : 1
PHARMACY_REFILL : 1
FLEXIBLE_BRONCHOSCOPE : 1
THERAPEUTIC_ADV : 1
FSBG_WAS : 1
PORT_TELEPHONE : 1
MEDICATIONS_AS : 2
PAIN_YES : 1
CHEMORADIATION_COLLECT : 1
FOREHEAD_PERIORBITAL : 1
FEELS_HELPLESS : 1
BRADEN_SKIN : 1
MHICM_SEVERE : 1
HEALTH_PHE : 1
PAST_MR : 1
PAIN_DISCUSS : 1
TOBACCO_EDUCATE : 1
LEG_AND : 1
HOSPICE_PAIN : 1
ALL_MEDICATIONS : 1
WILL_LIKELY : 1
REFILLS_LAST : 1
TO_APPLY : 1
ED_CHANGE : 1
DENTAL_CATEGORY : 1
ON_HOWEVER : 1
PROFESSIONAL_GIVEN : 1
TO_TRANSPORTATION : 1
ENTERING_INTO : 1
THE_FINANCIAL : 1
ATTENDANCE_FOR : 1
FOR_LISINOPRIL : 1
SAFETY_PROVIDED : 1
TO_COMPLETE : 1
NUTRIENTS_FROM : 1
BEDTIME_BECAUSE : 1
THINGS_PATIENT : 1
IS_DRUGINDUCED : 1
DID_AN : 1
WE_TISSUE : 1
ON_MEDS : 1
HRS_MR : 1
AND_ON : 1
USED_TOBACCO : 1
OPERATION_ATTENDING : 1
FEMALE_STL : 1
OBJECTIVE_ACTIVE : 1
INSTR_PB : 1
FEVER_MALAISE : 1
WITH_ME : 1
ALTERED_THOUGHT : 1
CHEW_HYPERTROPHY : 1
THE_PROVIDER : 1
DISCUSSED_TV : 1
SNACKS_JUICE : 1
INTELLIGENCE_THEREFORE : 1
PROTECTION_IF : 1
AND_PULSE : 1
WE_VERBAL : 1
REPORT_FOR : 2
OF_NURSING : 1
CURRENT_NPO : 1
INHL_ORAL : 2
CARDIOLOGY_YESTER : 1
PT_CALLED : 1
CAN_ESOPHAGUS : 1
USE_HIS : 1
QUITTING_IDENTIFY : 1
HEART_RATE : 1
PNEUMOCOCCAL_INJECTION : 1
THINGS_PT : 1
WORK_WOULD : 1
FOR_HEART : 1
AUG_THE : 1
TO_INVOLVEMENT : 1
WILL_HAVE : 1
MESYLATE_TAB : 1
ACTIVITIES_NONE : 1
COPING_BY : 1
PAIN_REPRODUCABLE : 1
INFORMATION_WAS : 1
TAKES_PRILOSEC : 1
THAT_THEMSELVES : 1
PUPILS_TONGUE : 1
INCLUDING_SUPPLIES : 4
AS_WRITTEN : 1
AT_NURSING : 1
MOUTH_EVERY : 3
LIST_PROBLEM : 2
CORRECT_FOR : 1
INFLUENZA_BRONCHOSCOPY : 1
SLOW_REACT : 1
ACID_PAST : 1
APPOINTMENT_LOCAL : 1
SEE_WEEKLY : 1
MYALGIA_AND : 1
INCLUDING_STEPS : 1
EXTREMITY_EDEMA : 1
THEY_WOULD : 1
LISINOPRIL_ORDERED : 1
COSIGN_PARAM : 1
TO_NURS : 1
LIPIDS_LFTS : 1
CIRCULATION_LISINOPRIL : 1
ENGAGED_IN : 1
FLOOR_SOCKS : 1
TRYING_TO : 1
IMMUNIZATION_BRONCHOSCOPY : 1
ORDERED_BETTER : 1
CARE_IS : 1
DEPARTMENT_OF : 2
ALL_AND : 1
OF_MEDIAN : 1
TEAM_CURRENT : 1
GASTROINTESTINAL_NAUSEA : 1
MALE_YO : 1
PATIENTS_BLOOD : 1
KG_ACTIVE : 1
WANT_PROSTATE : 1
BE_OR : 1
PRN_INDIGESTION : 1
POTENTIAL_DRUGDRUG : 1
BRONX_AGE : 1
ACCESS_TO : 1
THEIR_EXPERIENCES : 1
GROUP_HIS : 1
THIS_WE : 1
RESIDENCE_SHOULD : 1
CERVICAL_AREA : 1
CARE_UPDATE : 1
MORE_NEUROPSYCHOLOGY : 1
RISK_AND : 1
RELATES_HE : 1
CONTROL_FOR : 1
EATING_AND : 2
SC_TEXT : 1
VISIT_OXYGEN : 1
ELECTRONIC_PATIENT : 1
TO_BOTH : 1
PNEUMOCOCCAL_EDUCATION : 1
FAMILY_LEGAL : 1
WORSENING_HEENT : 1
BEHAVIORS_MR : 1
WRITE_DOWN : 1
AND_TV : 1
SIGMOID_COLON : 1
HAS_KNOWLEDGE : 1
QHS_MOOD : 1
FREE_POWDER : 1
PT_LIKELY : 1
CAN_ACCESSED : 1
FAX_MACHINE : 1
DIRECTIVE_AT : 1
FOR_MEDICAL : 2
SINCE_YOU : 1
OF_MORPHINE : 1
TAB_ONE : 3
VISIT_PHONE : 1
WHAT_VERBAL : 1
WAS_GO : 1
HELMET_CAUCASIAN : 1
REGRETS_HE : 1
FOR_INJECTION : 1
POLYPS_ACCOMPANIED : 1
ADDENDUM_DIGITAL : 1
CASE_SIGNED : 1
ON_OFF : 1
WAS_WILL : 1
MACHINE_PICKS : 1
NO_ACTIVE : 1
HAS_RECENT : 1
AT_VETERAN : 1
TO_VISIT : 1
PROBLEM_MONITOR : 1
THE_BEING : 2
TYLENOL_ROBITUSSIN : 1
TIME_EXERCISING : 1
PO_QH : 1
WAS_OBTAINED : 2
IN_HE : 1
WITH_BEHAVIORAL : 1
FOUND_ENCOURAGED : 1
SEEN_ADMISSION : 1
NUMBER_MINUTES : 1
STRAIGHT_NONTENDER : 1
TOBACCO_IN : 1
GROUP_AND : 1
EMG_BEFORE : 1
USE_OF : 2
SURROGATE_IF : 1
HIS_WITH : 1
PROTOCOL_NO : 1
FEEDING_ATTENTION : 1
HOSPITAL_AT : 1
BE_HOME : 1
SPI_TRY : 1
APPROPRIATE_PT : 1
BED_PAN : 1
DEC_REQUESTED : 1
BRIGHTER_LESS : 1
DISEASE_OR : 1
HERE_PULMONARY : 1
SEE_FOR : 1
FIND_YOU : 1
CHANGES_OCCASIONS : 1
HE_ALSO : 1
HE_LAST : 1
FOOD_PERSONAL : 1
IF_CASE : 1
IF_TUMOR : 1
DO_KNOW : 1
OR_WORSENING : 1
DATA_NOT : 1
NOS_ICDCM : 1
OF_THIS : 1
TAKE_INSULIN : 1
HES_BEING : 1
NO_RALES : 1
TO_THEIR : 2
DIAGNOSTIC_DX : 1
FOR_BEC : 1
EVERY_PLEASE : 1
WITHIN_REACH : 3
AND_NERVE : 1
SPREAD_CASE : 1
HEALTHY_AND : 1
TRANSFER_MINIMUM : 1
INVOLVEMENT_DID : 1
CONSULT_TO : 1
PVH_IS : 1
REGARDING_CONCERNS : 1
ANY_ELEMENT : 1
IF_VETERAN : 1
CASUALTIES_WAR : 1
CLASS_TREATMENT : 1
SYSTEMS_METHOD : 1
FOR_PNEUMOCOCCAL : 1
INTERVENTION_RELATIONSHIP : 1
DETERMINE_VETS : 1
SMOKING_OR : 1
FOLLOWING_WITHIN : 1
FU_PHONE : 1
OUTPT_INTAKE : 1
IS_THE : 1
TO_REMEMBER : 1
AND_PERSONAL : 1
SIG_TAKE : 1
ARE_NUTRITIONAL : 1
TUNEL_REPAIR : 1
PHYSICIAN_APPT : 1
ACETAMINOPHEN_MG : 2
THAT_TO : 1
WAS_BY : 2
SC_ACUTE : 1
IN_LIFE : 1
INTERFERES_NEW : 1
NURSES_TELEPHONE : 1
TIME_REPORTED : 1
IF_YES : 2
HAS_OBJECTIVE : 1
IS_SUCH : 1
PLEASE_US : 1
GAD_ADDENDUM : 1
MATTER_WHAT : 1
ON_CALL : 2
SPIRITUALITY_PSYCH : 1
CONDITION_AND : 1
PERFORMANCE_MH : 1
COMPLETED_YES : 1
MEDICAL_EQUIPMENT : 1
DISCUSSED_PT : 1
NO_UP : 1
SURROUNDED_BY : 1
STR_CONTINUE : 1
AGREEABLE_SCHEDULED : 1
WAS_COVERAGE : 1
MOVEMENT_MHC : 1
WILL_ATTEMPT : 1
THIS_PAIN : 1
FOR_VISIT : 1
LUNGS_OCC : 1
REPORT_FROM : 1
FLUCTUATIONS_ANXIETY : 1
PROBLEM_OF : 2
SUPPLIES_IV : 1
WHICH_SAYS : 1
VEHICLE_CALLED : 1
OIS_PHY : 1
AND_BREATHING : 1
TRIAGE_INTAKE : 1
FEEL_OVER : 1
ONCE_HE : 1
GUILTY_OVER : 1
CM_AWAITING : 1
SCHEDULED_APPOINTMENT : 2
BUDDY_SYSTEM : 1
BETTER_VERY : 1
PARAM_USE : 1
VITAL_NONE : 1
DONE_THIS : 1
FAMILY_HISTORY : 1
BY_FOR : 1
HAVE_IS : 1
EDT_PHE : 1
SENT_ALL : 1
NO_LEGAL : 1
KEEP_PATIENT : 1
MET_PT : 1
EXTREMITY_THE : 1
DENIED_FSBG : 1
FOR_HEALTHY : 1
IRRATIONAL_THEY : 1
MEMBER_SATT : 1
VET_APPROPRIATELY : 1
INDICATING_VET : 1
WITH_NAPROXEN : 1
ISSUES_BUT : 1
EXAM_CT : 1
PROCEDURE_PATHOLOGY : 1
NOTED_DENIES : 1
PRESCRIPTIONS_OPERATION : 1
OXYGEN_VARIES : 1
BORDERS_SURROUNDED : 1
TO_CONSCIOUS : 1
IS_ACCEPTABLE : 1
PLAUT_SIGN : 1
SHEETS_FAXED : 1
SC_COMBAT : 1
DECISION_PROCEED : 1
RISK_NOT : 2
OUTPT_TRIAGE : 1
BLOOD_MONITORING : 1
TELEPHONE_COPING : 1
METOPROLOL_TAB : 2
HERE_TO : 2
ONCE_MH : 1
AND_HISTORY : 1
THE_STATES : 1
BREATH_MEDICATIONS : 1
ACTIVITY_THAT : 1
TO_ITS : 1
LAST_FU : 1
OBSERVATION_BEDTIME : 1
ACCOMPANIED_SELF : 1
CM_TEMP : 1
NO_FEVERS : 1
HIGH_WITH : 1
IF_ADM : 1
IV_STATUS : 1
COLLAPSE_SPC : 1
LETTER_VET : 1
VIEW_IMAGES : 1
SEE_HIM : 1
ATTEMPT_CALL : 1
PROBLEMS_COMPUTERIZED : 1
ISSUES_THE : 1
TO_ACTIVITY : 1
STATES_KLONOPIN : 1
FLUOROSCOPY_FOR : 1
INCLUDE_THERAPY : 1
DENIES_OFTEN : 1
MAURER_TAKE : 1
ICD_DISORDER : 1
NOTE_REASSESSMENT : 1
LIVING_THAT : 1
PT_SCHEDULED : 1
KEEP_COMMUNICATES : 1
RESPIRATIONS_AND : 1
WIFE_HOW : 1
PERFORMING_FUNCTIONS : 1
PATIENT_TAKE : 1
BEEN_PT : 1
ENCOUNTER_PHYSICIAN : 1
THERAPY_GOAL : 1
ACTIVE_ADDENDUM : 1
MAIL_WANTS : 1
PA_CP : 1
LIGHT_BEDFAST : 1
THE_MENTAL : 1
EXPERIENCE_THAT : 1
IS_WORKING : 1
OF_DISEASES : 1
PER_PLAN : 1
DUE_URGENCY : 1
WAS_FOUND : 1
TO_CURRENT : 1
PAIN_CON : 1
ON_AND : 1
MONTH_SHOULD : 1
PULSE_NEXT : 1
TAB_HYPERTROPHY : 1
WITH_RENOTTA : 1
DRUGDRUG_PROBLEMS : 1
RISK_SHOULD : 1
THOUGHTS_HOW : 1
INTO_PAIN : 1
TO_PIECE : 1
IDEATION_WITH : 1
PROCESS_TIME : 1
PO_PRN : 1
VISITATION_AS : 1
PT_THIS : 1
TRIAGE_TLCP : 1
REACT_ANSWER : 1
LANTUS_AS : 1
SOFT_MILD : 1
OVERALL_OR : 1
OTHERS_OF : 1
ABUSE_VET : 1
TO_IMMUNIZATION : 1
YES_BARRIERS : 1
WE_COULD : 1
HIP_CLONIDINE : 1
REFUSING_ANSWER : 1
HAVE_HEME : 1
HEART_BLOOD : 1
ANY_THAT : 1
CLINICALLY_PATIENT : 1
REQUEST_OFF : 1
TO_BEST : 1
CASE_WE : 1
HE_SEEN : 1
WAR_PHARM : 1
USE_PATIENT : 1
WITH_SIGNIFICANT : 1
WOOUND_IS : 1
ACTIVE_OBJECTIVE : 1
YESTER_BP : 1
REPEAT_YEARS : 1
SHOT_IN : 1
STL_TABLETS : 1
DT_WILL : 1
CONSULTED_IS : 1
STATES_USED : 1
ENDOCET_PO : 1
TO_SHE : 1
FUTURE_EMERGENT : 1
WITH_NEW : 1
HOW_TO : 1
TWO_CAPSULES : 1
CAUCASIAN_WHO : 1
IS_TRANSFERRED : 1
WHAT_WE : 1
FOR_COMBIVENT : 1
THE_CLASS : 1
SEC_TO : 1
RUNNING_BLOODY : 1
DATE_SEP : 2
PROVIDED_INCLUDING : 1
HE_REFUSING : 1
OFF_PATIENT : 1
AND_OF : 3
ANKLE_HYBRID : 1
ANY_DOMESTIC : 1
WILL_NOT : 1
CARE_STAFF : 1
CORRECT_COMMENT : 1
ABILITY_USE : 1
USE_WHAT : 1
YEARS_ETHANOL : 1
ON_SIDE : 1
LONGER_DEPRESSED : 1
ELBOW_SULFA : 1
ADMISSIONS_STAFF : 1
SCREEN_IS : 1
MEDICATION_REVIEW : 1
REVIEW_AND : 1
SIGN_OFF : 1
LEARNS_VISUAL : 1
IN_HIS : 2
ACTIVE_LEFT : 1
EXCEED_MG : 2
OF_SEPTUM : 1
ACTIVE_INFORM : 1
MEDICAL_CLEARANCE : 1
OF_APPT : 1
CHARACTERISTICS_ASSOCIATED : 1
PRESSURE_YEAR : 1
SHARED_THEIR : 1
TO_FUTURE : 1
BLOOD_NO : 1
REVIEWED_WITH : 1
FEET_WITH : 1
THE_PA : 1
MEASURES_WOOUND : 1
TRIAGE_PT : 1
COPD_DEPRESSION : 1
AND_NEB : 1
LIST_IS : 1
OF_ESOPHAGEAL : 1
THE_COLON : 1
FOUND_TO : 1
AWARE_PLAN : 1
AND_DURING : 1
EXCEED_IN : 1
STATE_TO : 1
ON_NORMAL : 2
STAFF_RN : 1
VET_CD : 1
SEEN_VET : 1
UNKNOWN_DOWN : 1
HOME_IS : 1
RELAXATION_DISCUSSED : 1
ED_DOCUMENT : 2
BRACELET_ON : 1
HX_ACCORDING : 1
BEDTIME_THAT : 1
ANYMORE_ALSO : 1
APPOINT_ALVETA : 1
DISTRESS_OR : 1
IN_PA : 1
IMPAIRMENT_SUCH : 1
CLINICAL_HE : 1
AND_REGULARLY : 1
MOUTH_TO : 1
ACCOMPANIED_BY : 2
PM_MON : 1
HEARING_DOING : 1
BASIS_AMOUNT : 1
REMEMBERING_BIPOLAR : 1
DENIED_ACTI : 1
ASSOCIATED_SATT : 1
PT_RATES : 1
CATS_THE : 1
DYSLIPIDEMIA_IMPRESSION : 1
ON_APPOINT : 1
CURRENTLY_STRESS : 1
NURSING_FOR : 1
HEENT_TELEPHONE : 1
PHARM_REFILL : 1
TRANSPORTATION_HE : 1
OR_CONDITION : 1
TO_AS : 1
IS_AN : 1
APPOINTMENT_PROBLEM : 1
ADMITTED_THE : 1
NOTE_MEDICAL : 1
RESPIRATORY_PROPER : 1
OTHER_HEMOSTASIS : 1
FOCUSED_PRESENTATION : 1
GASTROINTESTINAL_NO : 1
ORDER_PROCEDE : 1
TOPICALLY_EVERY : 1
SIGNATURE_NOT : 1
POOR_ALTERNATE : 1
DENIES_LOSS : 1
LIMITED_AND : 1
INDEX_THE : 1
NIGHT_TERRIBLE : 1
IF_ANY : 1
NURSING_VITALS : 1
AT_WORK : 2
YEAR_UNKNOWN : 1
ADDENDUM_PT : 1
BEEN_BUT : 1
AND_PERFORMED : 1
INDUCED_POSSIBLE : 1
BS_SOFT : 1
ON_RESULTS : 1
FAITH_AS : 1
OF_ATTENDANCE : 2
HOME_SPOKE : 1
BY_ZELL : 1
INCREASE_IN : 1
GA_EPISODE : 1
EDEMA_THE : 1
THIS_FRI : 1
VET_ONCALL : 1
IS_INTERVENTION : 1
MHT_PARTICIPATION : 1
AT_VAMC : 1
AT_VA : 2
BIOPSY_ALERT : 1
VETERAN_AT : 1
ON_THIS : 1
PLAN_TO : 1
MEDICATIONS_LIST : 1
ROM_RIGHT : 1
ABDOMEN_NO : 1
BLOOD_CHECK : 1
AS_FAITH : 1
HEALTH_EDT : 1
HAD_TALKED : 1
STATES_HE : 4
FOR_PENSION : 1
NO_TO : 1
REPORT_DIAGNOSIS : 1
NEB_SEE : 1
OR_REPORTED : 1
NONEMERGENT_SAME : 1
IS_IN : 2
AT_MG : 1
PSYLLIUM_FREE : 1
DENIES_AFFECT : 1
FTOPC_TEAM : 1
AC_INTACT : 1
CLINIC_FOR : 2
YOUR_DO : 1
MEDICATIONS_INTOXICATED : 1
IN_WILL : 1
HAD_TO : 1
AND_RECIEVED : 1
BY_STAFF : 1
FUNCTIONS_OF : 1
CHILDHOOD_SEXUAL : 1
PROBLEM_SAMPLES : 1
DX_SEE : 1
NONE_LIFESTYLE : 1
MEDS_DOCUMENTED : 1
MEDICATION_PHONE : 1
IRRATIONAL_BELIEFS : 1
EDUCATION_NOT : 1
SHE_CAN : 1
FOR_YEARS : 1
VACCINE_STANDARD : 1
DENIED_SI : 1
MG_FOR : 2
SPINE_DISC : 1
TERMS_PRECLUDING : 1
HORSE_SERUM : 1
PATIENT_WEARING : 1
NONE_WHEELCHAIR : 1
WITH_MENSTRUAL : 1
EXTREMITY_PERIPHERAL : 1
VOLUME_CE : 1
AMBULATORY_NONE : 1
OF_ALL : 1
HAD_HIS : 1
BOTH_PROVIDED : 1
BE_SENT : 1
THE_LAWS : 1
INDICATES_LIKE : 1
PAIN_REC : 1
DISCIPLINE_CHILDREN : 1
NAME_SIMETHICONE : 1
CLINIC_LAB : 1
CAR_TRANSFER : 1
IN_AND : 1
TO_LEARNS : 1
NUTRIENTS_FOODS : 1
TO_INFLUENZA : 1
PHYSICIAN_MAY : 1
TELEPHONE_AND : 1
ABDOMEN_WITH : 1
DONE_INFLUENZA : 1
PATIENT_CAME : 1
SENT_PATIENT : 1
TONGUE_METOPROLOL : 1
OFF_PT : 1
NOT_SIGNIFICANT : 1
FAXED_TO : 1
CHILDREN_OF : 1
PATIENT_VETERAN : 1
TREATMENT_PLAN : 2
APPOINTMENT_YOU : 1
HIS_HURT : 1
QUIT_SHOULD : 1
NEGATIVE_TIME : 1
CURRENT_TO : 1
PARAMEDIC_ALLERGIES : 1
BELONGINGS_BY : 1
ARIPIPRAZOLE_MG : 1
ON_HIGHER : 1
CONSULTATION_HT : 1
METHODIST_FAITH : 1
PPP_LOWER : 1
SEE_OF : 2
TO_INSIGHT : 1
COLON_TO : 1
THE_SCHEDULED : 1
NEED_CANCEL : 1
CANE_ASSISTED : 1
BELONGINGS_INVENTORY : 1
FINASTERIDE_HOWEVER : 1
MEDS_NONE : 1
THE_PRESSURE : 1
TO_CE : 1
RECORD_FOR : 1
REPORT_THE : 1
RADIATION_ALONE : 1
REHABILITATION_THINKS : 1
SCRIPT_TO : 1
VALUABLES_PATIENT : 1
FAMILY_MOTHER : 1
ORAL_TABLESPOONFU : 1
LEVEL_THERAPEUTIC : 1
SET_UP : 1
SHOW_FIRST : 1
CAN_WALK : 1
AS_SEDATION : 1
CARD_HE : 1
SYMPTOMS_HISTORY : 1
EDUCATION_DONE : 1
AWAITING_HIS : 1
WHEELCHAIR_SODIUM : 1
PALPABLE_CALL : 1
ADM_DATE : 1
NOR_DOMESTIC : 1
WITH_ENDOSCOPE : 1
AT_TIME : 3
TENSE_CHANGES : 1
NO_CLOTS : 1
ORGANOMEGALY_EDUCATION : 1
EXTREMITY_ACCORDING : 1
IMAGING_GENERAL : 1
NIGHT_THAT : 1
MEDICATION_PT : 1
TO_VIEW : 1
PER_ORDER : 1
EDUCATED_TO : 1
SYND_MG : 1
YES_NO : 1
BY_NOT : 1
PEDAL_PULSES : 2
GIVEN_SCHEDULED : 1
OF_AMBULATORY : 1
NONVA_LAST : 1
VET_NUMBER : 1
AGENCY_REFERRED : 1
FOR_MONITORING : 1
THIS_WAS : 2
TO_SEP : 1
FOLLOWED_MEDICATIONS : 1
AND_ORDERS : 1
REQUESTED_STATES : 1
AT_HEENT : 1
HE_COOPERATIVE : 1
CT_NO : 1
IMPAIRMENT_NARRATIVE : 1
HS_AGAIN : 1
IMAGING_SURGERY : 1
EVER_ANY : 1
REMINDER_PLAN : 1
VET_IS : 1
PATIENT_PARENTERAL : 1
VETERAN_WITH : 1
UROLOGIST_AND : 1
SPINE_OF : 1
REVIEW_REPORT : 1
TABLE_AND : 1
COMPLETE_OPEN : 1
RENAL_WITH : 1
BEEN_BENEFICIAL : 1
EMERGENCY_DEPT : 1
OF_IS : 1
NOTED_FEVER : 1
OLD_THAT : 1
PHE_TO : 1
RUN_HHR : 1
MANAGEMENT_WE : 1
CARCINOID_BUT : 1
THE_ULCER : 1
DEPRESSION_PTSD : 1
MEDICAL_WHICH : 1
TO_VERBAL : 1
NONE_THE : 1
HER_CELL : 1
ISSUES_FASTERCHUGS : 1
OF_LUMBOSACRAL : 1
FOUR_BREVICON : 1
BREVICON_TAKE : 1
UNDERSTANDING_ALL : 1
LOWER_CAPILLARY : 1
VISIT_PATIENT : 1
STATUS_ORIENTED : 1
NEW_PHONE : 1
HE_ON : 2
TOTAL_TIME : 1
HAS_QUIT : 1
TO_CALL : 1
AND_IS : 1
REACH_BLOOD : 1
FOR_WINDOW : 1
PATIENT_PATIENT : 2
STRIP_PVCS : 1
THIS_IS : 2
HIS_CASE : 1
STATES_PLANS : 1
REGRETS_HAS : 1
VETERANS_SHARED : 1
ADVANCES_IT : 1
FOR_ADVANCES : 1
AS_HAD : 1
PROCEDE_NO : 1
PROTEINS_PATIENT : 1
BEEN_COPING : 1
VASCULAR_PEDAL : 1
YES_VIA : 1
HYPERTROPHY_BENIGN : 1
INFORMED_THAT : 1
NOTE_IS : 1
ON_IN : 1
REFERRED_AS : 1
MOOD_CHANGE : 1
OUTPATIENT_MEDICATIONS : 4
HE_CAN : 3
THE_HISTORY : 1
OF_BED : 1
VITALS_VACCINE : 1
DEPT_PART : 1
CHICAGO_CREPTS : 1
NEEDED_FOR : 1
ON_CELL : 1
MY_HE : 1
NO_EFFECTS : 1
PULSES_ARE : 2
LENGTH_MINUTES : 1
SIGNIFICANT_AID : 1
UNDERSTANDING_FOR : 1
SODIUM_SSN : 1
TEST_OLEMIA : 1
EDUCATE_AS : 1
PATIENT_ANSWERED : 1
WAS_SHOT : 1
HEALTH_NOTE : 1
UNIT_ON : 1
TAB_TAKE : 8
HIS_WILL : 2
ABSENT_SCHEDULE : 1
HAD_NIGHT : 1
THE_LEVEL : 3
ONE_TABLET : 6
ICD_APHDR : 1
MET_WITH : 1
THAT_NOT : 1
WEAKNESS_TO : 1
HE_SHOULD : 1
THE_VA : 2
MORE_LAST : 1
SHOWER_BUT : 1
MOTORCYCLE_HE : 1
THERAPY_ALONE : 1
DATE_LAST : 1
PALPATION_NTG : 1
ALDRETE_LIQUID : 1
MEDICATIONS_WAS : 1
NOT_STRESS : 1
DISCHARGE_IF : 1
HE_OBSERVE : 1
VITAL_MEDICATION : 1
CE_STANDING : 1
ONC_AND : 1
NOTE_NURSING : 1
EVERY_TO : 1
ED_TEXT : 1
COMPLETE_TEST : 1
SERVED_IN : 1
HIS_FOOD : 1
NO_USE : 1
AND_DISCUSSED : 1
BACK_NOTE : 1
HAVE_DISCUSSSED : 1
MANAGEMENT_PLAN : 1
ANIMALS_HE : 1
ON_MARCH : 1
MISSION_DATE : 1
HE_ASSISTANCE : 1
RECENT_VA : 1
BIOPSY_ORIENTEDX : 1
TOPICALLY_REFILLS : 1
OF_AN : 1
FOR_HE : 1
CALL_TO : 1
ALL_SPECIMENS : 1
SUGARS_AND : 1
SAYS_PO : 1
NIACIN_OMEPRAZOLE : 1
OTC_SUCH : 1
OXYCODONE_SCRIPT : 1
ALL_MHC : 1
EXERCISING_SESSION : 1
GRADE_DYSPLASIA : 1
FOR_BLOODWORK : 1
NUMBER_AND : 1
IS_NEGATIVE : 1
REGULARLY_THE : 1
LOSS_IF : 1
IS_PT : 2
MANY_FOR : 1
COLONOSCOPY_SURGEON : 2
TO_WEIGH : 1
GOALWHAT_LEVEL : 1
VN_VET : 1
INDEX_HAVE : 1
AND_DID : 2
IN_AREA : 1
LEG_HAS : 1
INFORMATION_AND : 1
SEROQUEL_BUT : 1
GRASS_PROBABLY : 1
WERE_VISIT : 1
FOR_COMPLAINED : 1
AND_WRITE : 1
IMMEDIATE_ASSESSMENT : 1
HIMS_NONVA : 1
AND_EATING : 1
ASSISTANCE_TO : 1
ORDER_COMBIVENT : 1
CHEST_ORDER : 1
TO_WAS : 1
PAIN_NOT : 2
ACUTE_AND : 1
PAIN_OR : 1
MR_GOOD : 1
ORDER_EVALUATE : 1
HAS_INSTRUCTIONS : 1
EFFECTS_NOTED : 1
THAT_DID : 1
NURSE_CALL : 1
NOW_ARE : 1
COLLAPSE_GAVE : 1
HE_NO : 2
DISC_PINCHED : 1
OF_NO : 1
VERY_INTOXICATED : 1
STRUCTURE_CYST : 1
NEE_INFORMATION : 1
STAFF_MD : 1
HE_INFORMED : 1
OF_CARE : 4
US_SPUTUM : 1
IF_FIND : 1
METHOD_LEARNING : 1
REVIEW_AN : 1
PING_BETTER : 1
INTERACTIVE_AND : 1
OVERWHELMED_HELPLESS : 1
MADE_THE : 2
SINCE_NOTICE : 1
AVAILABLE_THE : 1
EDUCATION_MOVEMENTS : 1
STATES_IS : 1
IS_THIN : 1
TABLET_ACTIVE : 1
DUE_SWOLLEN : 1
WAS_TELEPHONE : 1
OR_HEENT : 1
PHYSICIAN_MISSION : 1
TO_MOVEMENT : 1
FUNCTIONAL_STATUSHE : 1
VERDSOME_ACTIVE : 1
DATE_DISCUSSED : 1
FOR_CHILD : 1
INTERVIEW_CIRCULATION : 1
TO_NONE : 1
CHILDREN_VETERANS : 1
RESTART_TONIGHT : 1
VISUAL_DOING : 1
WAS_THE : 1
IS_VERY : 1
BELOW_MAIN : 1
PRESSURE_PREVENTION : 1
TWO_BY : 1
IS_COOPERATIVE : 1
DID_COMPLETE : 1
CALLER_RESPONSE : 1
HISTORY_INCLUDES : 1
TIME_WEIGHT : 1
CHILD_WHAT : 1
TO_OVERT : 1
IN_YEARS : 1
DUE_ITS : 1
OF_SHOULDER : 1
AMOUNT_TOPICALLY : 1
HARD_NEURO : 1
SCHEDULED_MESSAGE : 1
FROM_HIS : 2
PATIENT_PRESENT : 1
BE_WITH : 1
MORE_FOOD : 1
TWO_AGO : 1
FOOD_CONSULT : 1
STATES_TOBACCO : 1
GENERAL_CONSULT : 1
POSTSURGICAL_BYPASS : 1
LIST_IF : 1
HEADACHE_ADDENDUM : 1
DIURETICS_MALE : 1
PRESSURE_CHECK : 1
COMBAT_MALE : 1
NO_SAT : 1
THIN_ALDRETE : 1
PERFORMANCE_SOCIAL : 1
USUALLY_PT : 1
GOALS_HEALTH : 1
PROBLEMS_INHALER : 1
SEEN_VETS : 1
TO_REHAB : 1
ABD_SOFT : 1
SHOULD_NEED : 1
FURTHER_DETOX : 1
NEURO_CHECKS : 1
HERE_LVN : 1
TO_NA : 1
PERIPHERAL_VASCULAR : 1
ADMITTED_AND : 1
KG_OIS : 1
ACTIVE_INPATIENT : 2
TO_WHAT : 2
VISIT_TWICE : 1
VETERAN_ATTENDING : 1
LOCATION_AT : 1
VISIT_PAIN : 1
ELEMENT_POSITIVE : 1
NO_PAIN : 2
TO_THIS : 2
BEDFAST_MEDICATIONS : 1
SLEPT_THROUGH : 1
PT_INDEPENDENT : 1
MEDICATION_ADMINISTRATION : 1
DOES_STOP : 1
HAD_SUICIDE : 1
AND_PLACE : 1
JUST_TALKED : 1
FEEDING_POSITIONING : 1
PATHOLOGY_HAD : 1
CAN_MAKE : 1
CONVERSATION_TO : 1
KG_PATIENT : 1
TIME_CLINIC : 1
TWICE_TO : 1
NO_NEEDED : 2
CONSCIOUS_SEDATION : 1
TO_PROPERTY : 1
UNABLE_RESPOND : 1
NUMBERS_THE : 1
SUPERVISING_PRACTITIONER : 1
LIST_APPROVAL : 1
HISTORY_OBTAINED : 1
IMMOBILITY_AND : 1
LIFE_TERMS : 1
PRIMARY_TEAM : 1
TOLD_TO : 2
HE_US : 1
AND_ATTEMPTS : 1
PROPERTY_OF : 1
TO_CLINICALLY : 1
TELEPHONE_TRIAGE : 2
QUIT_YOU : 1
MEDICATION_AND : 2
STOOL_HEMATURIA : 1
PAGER_EDUCATION : 1
TROUBLES_OVERWHELMED : 1
VETS_OF : 1
FEET_COCCYX : 1
FACTORS_SPECIAL : 1
PATIENT_SIGNOUT : 1
TIME_WILL : 1
QUIT_AND : 1
OTHER_SATT : 1
CHILD_AND : 1
UNDERLYING_HAVE : 1
AND_PT : 2
IMPACTED_ON : 1
TABLET_MOUTH : 8
NOTE_OUTPATIENT : 1
ADDENDUM_PAGER : 1
LEVEL_UNSCHEDULED : 1
THESE_NUTRIENTS : 1
HE_HAS : 9
AND_COLON : 1
CATS_AND : 1
CANCER_DM : 1
OBTAINED_FOR : 1
LOCATION_OXIM : 1
SI_IS : 1
SUGAR_FREE : 1
TO_LISINOPRIL : 1
NO_STABLE : 1
BACK_STATES : 1
OF_PHONE : 1
PT_AOX : 1
PAJAMAS_BESYLATE : 1
OLEMIA_PAST : 1
ALLEGEDLY_UNDER : 1
ROOT_MILDLY : 1
PLAY_VET : 1
PER_SLEPT : 1
CHANGED_DOES : 1
AC_BLOOD : 1
TO_COGGINS : 1
PT_DENIES : 1
RESULT_OF : 1
ENDO_WERE : 1
PROBLEMS_RETURNING : 1
NO_DRAINAGE : 1
THAT_PT : 3
VOICES_NO : 1
TOLD_COME : 1
SYND_ENDO : 1
OF_SPUTUM : 1
LANDED_ON : 1
PERCOCET_DRUGS : 1
TO_CON : 1
RECEPTIVITY_ATTENTIVE : 1
BRONCHOSCOPE_LIGHTED : 1
VA_NONVA : 1
PREVENTION_PROTOCOL : 1
ALL_NIGHT : 1
PLEASE_THIS : 1
NO_THOUGHTS : 1
HEALTH_SPOKE : 1
BMS_YESTER : 1
ACUTE_CHRONIC : 1
EXPERIENCING_CASTS : 1
RETURNING_SPOKE : 1
FOR_BRIEF : 1
SENT_WITH : 1
NO_WHAT : 1
VISIT_IN : 1
YOUR_APPOINTMENT : 1
AND_STOPPED : 1
ASK_YOUR : 1
NO_OR : 2
BEDTIME_HE : 1
PO_PLEASE : 1
FOR_PLEASE : 1
PLACE_LIGHT : 1
NUTRITIONAL_SCREEN : 1
LABS_FAX : 1
TO_PERSON : 1
NEXT_OF : 1
MENTAL_FAMILY : 1
AND_AGREEABLE : 1
LEFT_HAD : 1
BP_HOURS : 1
CARRY_MANY : 1
LISINOPRIL_AS : 1
THE_JOINT : 1
TAB_ONEHALF : 1
TO_CONDITION : 1
HHR_PPP : 1
STANDARD_EDUCATION : 1
THAT_GRASS : 1
ADVANCED_WITH : 1
TO_OTC : 1
ORDERED_FOR : 1
MODE_OF : 1
CURRENTLY_QUIT : 1
CALL_WITHIN : 2
FOR_NURSE : 1
OR_HIS : 1
MEDICATIONS_THIS : 1
CAUCASIAN_MALE : 1
DISCUSSED_AND : 1
AN_ENDOSCOPE : 2
SEEMS_SOMEWHAT : 1
IMA_PT : 1
LONG_DONT : 1
REPORT_ONLY : 1
ADDENDUM_DC : 1
BUT_TO : 1
FLUID_IMB : 1
ICDCM_TRANSFER : 1
NOTED_THAT : 1
RD_VERDSOME : 1
REASON_REQUEST : 1
REFER_THE : 2
DIRECTIVES_WITH : 1
TREATMENT_AND : 1
NOTED_ISSUES : 1
WILL_AND : 1
DTR_WITH : 1
SEX_MALE : 1
OLD_WITH : 1
CANCEL_THEIR : 1
VETERAN_IN : 2
OF_DIVORCE : 1
ICD_DEPRESSIVE : 1
OUTPUT_ABDOMEN : 1
TREATMENT_ACTIVE : 1
REPORTED_THE : 1
DURING_ADMISSION : 1
NAME_HEALTH : 1
BLDG_CON : 1
QUITTING_CALLER : 1
OBSTRUCTION_VALUABLES : 1
TELERETINAL_CONSULT : 1
TO_SC : 1
HAD_ANY : 1
SURGERY_BUT : 1
IDENTIFIERS_USED : 1
WHO_ABOVE : 1
NURSING_TELEPHONE : 1
LEARNING_IS : 1
SLEPT_ALL : 1
IS_YEAR : 2
IMAGING_FOR : 2
FECAL_TEST : 1
MIDSTERNAL_PAIN : 1
DESCRIBE_THE : 1
SUSTAINED_FILLED : 1
AND_TO : 5
CHRISTIAN_AS : 1
REASON_ORDERED : 1
PAIN_MEDICATION : 1
MINIMUM_CARE : 1
SO_CAN : 1
FLUID_ELBOW : 1
PCP_BETTS : 1
DOCUMENT_CAN : 1
PAIN_PAIN : 1
NEGATIVE_SUICIDE : 1
CE_THEY : 1
DONT_LOCATION : 1
ACTIVE_THE : 1
OF_LAST : 1
WITH_GI : 1
MCMULLEN_FOR : 1
LEARNER_DJD : 1
BEFORE_HE : 1
LEVEL_ADV : 1
MONITORED_TOLERATED : 1
UNABLE_TO : 1
BE_REACHED : 1
THIS_FOR : 1
PROTOCOL_WAS : 1
EXPRESSED_UNDERLYING : 1
TO_USE : 2
ON_WITH : 3
REVIEW_REASON : 1
OF_TIME : 2
THROUGHOUT_ABDOMEN : 1
PARTICIPATION_NO : 1
HOURS_TIME : 1
EMERGENT_SAME : 1
AND_ESOPHAGUS : 1
PATIENT_ALLERGIES : 1
MEDICATIONS_INCLUDING : 4
NEUROPSYCHOLOGICAL_ON : 1
PLEASE_INFORM : 1
MIDLINE_TO : 1
PHYSICIAN_BE : 1
MONITOR_VIA : 1
PINCHED_NERVE : 1
ALERT_ORAL : 1
ROOT_IS : 1
ARE_CALL : 1
FSBG_AT : 1
CONSULT_RECENT : 1
TIME_OF : 3
CALL_ATTEMPT : 1
GAVE_VET : 1
IN_MILITARY : 2
BREATH_SOUNDS : 1
OUTSIDE_PATIENTS : 1
DIVERTICULOSIS_TOBACCO : 1
TO_NUMBER : 1
AND_CHRONIC : 1
AT_PLACE : 1
PLAN_WILL : 1
WAS_VERY : 1
ORDERED_CHEMSTRIPS : 1
CALLED_ORDER : 1
WANTED_TO : 1
HIS_BY : 1
TO_PHYSICIAN : 4
FOR_HOUR : 1
SEVERE_OBSTRUCTIVE : 1
TARGETS_THE : 1
COOPERATIVE_MEDS : 1
TEST_ORDERED : 1
PC_FU : 1
ASSISTED_LIVING : 1
SPC_SPC : 1
THEY_NOT : 1
HOME_PATIENT : 1
MALE_HERE : 1
MHC_TELEPHONE : 1
DISCUSSSED_HEME : 1
LIST_VA : 1
SURGICAL_RDW : 1
NURSING_PROBLEM : 1
OVERT_NOTED : 1
FOR_FROM : 1
NO_NOTED : 1
BARRIERS_LEARNING : 1
WITH_AT : 1
BY_ACTIVE : 3
URINARY_OBSTRUCTION : 1
SPECIMENS_TO : 1
FAMILY_THE : 1
IS_INDEPENDENT : 1
CAME_TO : 1
PROGRESS_TEXT : 1
ALSO_WOULD : 1
SCREENING_WAS : 1
BRADEN_RISK : 1
COMFORT_PAIN : 1
TUMOR_HAVE : 1
THAT_TARGETS : 1
PATIENT_AGREE : 1
TO_USUALLY : 1
IN_ED : 1
GEN_ED : 1
ENCOUNTER_PNEUMOCOCCAL : 1
ARMY_YEARS : 1
FEVER_NAUSEA : 1
ROM_ANKLE : 1
NEEDED_TOBACCO : 1
STOMACH_HURT : 1
OF_INFORMATION : 3
CARE_SELF : 1
THREATS_VA : 1
ACCEPTABLE_LEVEL : 1
LONGER_HIM : 1
NPO_MET : 1
NURS_NOTE : 1
VACCINE_NURSE : 1
SHOULD_PRIORITY : 1
NEW_WORSENING : 1
PHONE_NUMBER : 2
NO_NURSING : 1
TABLESPOONFU_BID : 1
TO_UTILIZE : 1
CLINICAL_REMINDER : 2
CV_WT : 1
CONSULT_REQUESTED : 1
PAIN_STATUS : 1
SPEAK_TO : 1
PASTORAL_CARE : 1
ON_EMERGENCY : 1
PCP_CARCINOID : 1
HAS_HAS : 1
ED_NOTE : 1
PRESSURE_PULSE : 1
MAR_CT : 1
PHY_INSTR : 1
CONTACT_TYPE : 1
PROSTATE_WITHOUT : 1
TABLETS_BY : 1
FROM_NIGHT : 1
OUTLINING_ASSOCIATED : 1
HAVE_PLAUT : 1
APPROPRIATELY_DISABLED : 1
VIA_SPO : 1
CT_OF : 1
NECK_SINCE : 1
URINAL_WITHIN : 2
INCONTINENCE_HE : 1
ABNORMALITIES_SEVERE : 1
PAIN_IMA : 1
NIGHT_RELATES : 1
DYSURIA_TO : 1
SC_VN : 1
STEPS_WISE : 1
PS_TO : 1
THE_NAPROXEN : 1
VET_CASE : 1
RE_MEDICAL : 1
THEY_WERE : 1
TAKE_CAPSULE : 1
AND_TX : 1
TIDAC_SUBCUTANEOUS : 1
APPOINTMENT_GAYLORD : 1
NIGHT_WHICH : 1
MESSAGE_ON : 1
SATT_HOW : 1
FOR_HEPATITIS : 1
RELATIONSHIP_DTR : 1
BACK_STRAIGHT : 1
TO_STOPPED : 1
PLACE_RESIDUAL : 1
PLAN_LANTUS : 1
IN_ILL : 1
BATHROOM_TELEPHONE : 1
SIGNIFICANT_AMBULATORY : 1
INAPPROPRIATE_MEDICATIONS : 1
ALSO_INCLUDED : 1
COST_VISIT : 1
AS_MOVE : 1
DIGESTIVE_TRACT : 1
ALBUTEROL_IPRATROPIUM : 1
PERCEPTION_IMPAIRMENT : 1
WAS_IN : 2
PROCEDURE_FAIR : 1
ANSWER_DOOR : 1
HIS_CONSENT : 1
TOBACCO_ASPHIXIATING : 1
USUALLY_BPH : 1
AND_PHYSICAL : 1
IN_EVENT : 1
SOUZA_TOLD : 1
RANGE_THAT : 1
ON_CHART : 1
JOB_HE : 1
BEDTIME_HEENT : 1
NOTE_ACUTE : 1
FTOPC_BLUE : 1
AN_PT : 1
SEEN_TO : 1
HYBRID_PRESENTLY : 1
INTESTINAL_WITH : 1
VOLUNTEER_BUT : 1
COMMUNICATES_MEDICATIONS : 1
THROUGHOUT_HIS : 1
COLD_BUT : 1
SOB_IS : 1
ON_PAGER : 1
WITH_RESIDUAL : 1
LEVEL_PAIN : 1
OCCULT_TEST : 1
MON_OR : 1
PHOENIX_INTRUSIVE : 1
TO_COVER : 1
MORE_YEARS : 1
CHECK_AS : 1
TRIAGE_PATIENT : 1
IN_GAYLORD : 1
THEN_TC : 1
NONVA_OUTSIDE : 1
COMPLAINTS_OF : 1
ALCOHOL_SCREENING : 1
PATIENT_TELEPHONE : 1
CRIS_IMMEDIATE : 1
STATUS_CONDITION : 1
GRANULAR_DRAINAGE : 1
IN_MARY : 1
BY_DRY : 1
CAPSULE_BY : 1
OF_GOT : 1
STEPS_TO : 1
SUCH_TYLENOL : 1
SYND_ACETAMINOPHEN : 1
NOT_BE : 3
PROPER_USE : 1
DO_HAVE : 1
DENIES_HOPELESSNESS : 1
NURSING_NOTE : 6
OF_CELL : 1
THIS_DATE : 1
MANAGEMENT_OF : 1
LEAVENWORTH_VA : 1
MAJOR_RISK : 1
CARE_REGARDING : 1
FINANCIAL_TROUBLES : 1
VISIT_THIS : 2
STAFF_LT : 1
PO_AND : 1
PROVIDED_MES : 1
BASE_IS : 1
SHOULD_TRY : 1
FIRST_ON : 1
TABLETS_ACTIVE : 1
AFTER_NEGATIVE : 1
FOR_BP : 1
DAD_AN : 1
LAWS_MINIMUM : 1
THE_BURSA : 1
PROBABLY_HIGH : 1
RECENT_HX : 1
AT_PATIENT : 1
TRANSFER_FAXED : 1
HAD_EKG : 1
PLACE_WAL : 1
INSULIN_SCORING : 1
DTR_ROOM : 1
ANIMALS_POINTS : 1
YOU_TO : 2
BE_DUE : 2
TEAM_FTOPC : 1
CONSIDERED_SYND : 1
NEURO_LIVER : 1
PREVENTIONS_SPECIALIST : 1
SUBJECTIVE_HUMAN : 1
CHEST_PAINS : 1
THE_ELECTRONIC : 1
DJD_BS : 1
DEBILITY_INITIAL : 1
HAS_DECISIONMAKING : 1
LIVING_SO : 1
YES_THE : 1
FROM_SENT : 1
VET_VET : 2
VERBAL_ASSESSMENT : 1
INFORMATION_PATIENT : 2
DUE_TO : 7
VERBALIZES_SUCCESSFULLY : 1
REQUEST_THE : 1
WITHIN_LAST : 1
PSYLLIUM_SUGAR : 1
ARE_WITH : 1
OR_FOOD : 1
PT_EXAMINED : 1
EVAL_DATE : 1
REPRODUCABLE_WITH : 1
APR_ONE : 1
BY_MAURER : 1
GAYLORD_ON : 1
INFLUENZA_NURSE : 1
VET_CURRENTLY : 1
TRIAGE_DO : 1
COLONOSCOPY_NOTE : 1
PAT_LEARNER : 1
MAKE_ADDENDUM : 1
BY_MHT : 1
CLEAR_ABNORMAL : 1
ANTIBODY_AT : 1
AND_SHOULD : 1
JUST_TO : 1
OFF_NIGHT : 1
THE_IN : 2
SHE_PLANS : 1
POLYP_HIS : 1
ALDRETE_SCORE : 1
REPORTED_YEAR : 1
SMOKING_THINGS : 1
ACTIVE_ROM : 1
PERSONAL_MS : 1
THROUGH_IMAGING : 1
THE_IS : 2
THE_TIME : 2
PT_UNABLE : 1
IV_FLUIDS : 1
STAFF_COMPLIANT : 1
IMPACTED_HIS : 1
IN_LUNGS : 1
SHOWS_TO : 1
TTP_WITHOUT : 1
BENIGN_OF : 1
TO_THAT : 1
CONTINUE_COMPLAINTS : 1
KG_OPT : 1
EPIGASTRIC_REGION : 1
OVERWHELMED_AND : 1
OTHER_NURSE : 1
MH_NOTE : 1
PT_AND : 2
PRIMARY_NURSING : 1
PT_TRANSFERRED : 1
TELEPHONE_EVERY : 1
THE_LOPC : 2
AND_PAGE : 1
SIGNIFICANT_VERBALIZES : 1
ACTIVITY_INDICATES : 1
HUMAN_INSULIN : 1
PREFERRED_METHOD : 1
INJURED_IN : 1
SPUTUM_AND : 1
YOU_DIABETES : 1
ON_GOAL : 1
SAT_THYROID : 1
SPOKE_WITH : 3
PLAN_UPDATE : 1
NOT_WORKING : 1
ON_PRESENTATION : 1
WITHIN_PAST : 1
DAMAGE_POSSIBLE : 1
ASPECTS_CAR : 1
MAKING_HARD : 1
ISSUE_REPEAT : 2
UNDER_TELEPHONE : 1
USE_TOBACCO : 1
PLAN_CARE : 4
IF_COULD : 1
WITNESSED_THE : 1
IOP_HE : 1
MALE_WAS : 1
BE_IN : 1
WAS_ORDER : 1
IMPINGMENT_ACETAMINOPHEN : 1
BE_ELIGIBLE : 1
CAPILLARY_REFILL : 1
DX_AMOXICILLIN : 1
LUNG_HE : 1
AND_SYMPTOMS : 1
URINATE_PROGRESS : 1
SCREENING_TEST : 1
VETERANS_ALLEGEDLY : 1
POSITIVE_PLACE : 1
FUNCTIONAL_CAN : 1
TEXT_EDUCATED : 1
HISTORY_OF : 2
THEIR_NAME : 1
ACTIVE_NO : 1
STS_FOLLOWED : 1
ACETAMINOPHEN_TAB : 2
CLASS_FOCUSED : 1
BRONCHOSCOPE_TUBULAR : 1
ALL_STAFF : 1
CM_WOOUND : 1
REVIEWED_THIS : 1
IV_HAND : 2
FOREHEAD_EYEBROWS : 1
CONTACT_CHANGE : 1
MON_PNEUMOVAX : 1
NONBLOODY_NO : 1
BENADRYL_MG : 1
EXCEED_ACETAMINOPHEN : 2
HISTORY_MOTHER : 1
INSTABILITY_ON : 1
HEALTH_PRN : 1
TELLING_WIFE : 1
ED_CONSIDERED : 1
INDICATIONS_SURGICAL : 1
HIGHER_OF : 1
TEST_HEPATITIS : 1
ED_PCP : 1
ANY_SIGNS : 1
LIQUID_NO : 1
LUNG_ALERT : 1
RISK_ASSESSMENT : 1
WITHIN_FOR : 1
AGE_SEX : 1
ALLERGIES_IV : 1
CARE_ENCOUNTER : 1
SAFE_RE : 1
ALERT_ORIENTED : 1
HYPERGLYCEMIA_HYPOGLYCEMIA : 1
EATING_BACK : 1
THAT_SPINE : 1
HOMELESS_NO : 1
OFTEN_DO : 1
LIKE_CONSULT : 1
IN_NOTE : 1
FROM_FASTERCHUGS : 1
OF_TRANSFER : 1
THE_TUBE : 1
NUTRITIONAL_GROUP : 1
WRITTEN_CLAIMS : 1
BE_SC : 1
MG_QHS : 2
TESTS_WERE : 1
PRESSURE_ULCER : 1
WILL_UPDATE : 1
PROFESSIONAL_RD : 1
TO_SENT : 1
HT_CM : 2
LESS_ADDENDUM : 1
ANSWERED_NKA : 1
OBJECTIVE_SIGNS : 1
THEM_HE : 1
MEDICAL_TEAM : 2
BY_ARGE : 1
HIP_PAIN : 1
IN_USE : 2
SEDATION_IS : 1
BECAUSE_HAS : 1
EDUCATION_TO : 2
STATES_SHE : 1
MALE_DOWN : 1
COSIGN_USE : 1
YESTER_GLUCOSEFINGER : 1
OF_CHEST : 2
AND_ALMOST : 1
SEPTUM_AND : 1
ALTERED_PROCESS : 1
DRESSING_APPLIED : 1
ABD_BS : 1
BEDFAST_INAPPROPRIATE : 1
ASPIRIN_NO : 1
TEAM_PATIENT : 1
ESOPHAGUS_OR : 1
CONTINUE_SEE : 1
TRY_TO : 1
PT_ICU : 1
SESSION_MR : 1
HIS_SCORING : 1
UTILIZE_THEIR : 1
OBSERVED_STAFF : 1
STAFF_WITH : 1
LIFE_HIMSELF : 1
EXPECTED_WILL : 1
STOOL_SPEC : 1
OR_VETS : 1
SPOKE_CRIS : 1
REPEAT_OXYCODONE : 1
HISTORY_DENIES : 1
PRESSURE_DO : 1
SUCCESSFULLY_MH : 1
WELL_WITH : 2
HIS_HOUSEMOBILE : 1
REPEAT_OPERATION : 1
BEHAVIORAL_PRN : 1
KEYS_QUITTING : 1
THE_DISPATCH : 1
AT_OF : 2
NO_ABDOMINAL : 1
PATIENT_NAME : 3
CLEAR_OF : 1
FEE_BASIS : 1
ONCALL_NUMBER : 1
BLOOD_PAIN : 1
BEDSIDE_TABLE : 1
MS_PLAUT : 1
SUBSTANCE_TELEPHONE : 1
HIS_EKG : 1
DID_NOT : 3
PATIENT_REGARDING : 1
ELBOW_SENT : 1
ASSESSMENT_HAS : 1
ANXIETY_BAI : 1
NEUROPSYCHOLOGY_THE : 1
FLOOR_TREADED : 1
REVIEW_THIS : 1
STATUS_OR : 1
FAMILY_MEMBER : 1
ASSESSMENT_DATA : 1
STOOL_NOT : 1
BED_IN : 1
PERIPHERAL_NURSING : 1
REGARDING_THE : 2
HIS_GRASS : 1
PAJAMAS_AMLODIPINE : 1
THEY_LEAVE : 1
WEEKLY_FOR : 1
DIRECTIVE_THIS : 1
AS_THEY : 1
NUMBER_PATIENT : 1
ON_FROM : 1
SEVERE_RIGHT : 1
OF_CONTACT : 4
EDUCATE_FAMILY : 1
PT_WHO : 1
MEDICAL_FEE : 1
PATIENT_IDENTIFICATION : 1
TO_LAB : 2
NURSING_OUTPT : 1
REFILL_LESS : 1
APPT_PLAN : 1
CONVERSATION_PT : 1
REVIEWED_NOT : 1
SERVED_THE : 1
ILL_CREPTS : 1
CHEMSTRIPS_QID : 1
DISCUSSED_OR : 1
INPATIENT_INCLUDING : 2
OF_UPDATE : 1
REMISSION_ACTIVATE : 1
NAD_ED : 1
REQUESTING_MORE : 1
VERBAL_HIMS : 1
PATIENT_TOLERATED : 1
INTAKE_BLOOD : 1
WERE_ENCOURAGED : 1
SHE_THAT : 1
NAME_TELEPHONE : 1
WITHOUT_OBSTRUCTION : 1
FEELING_HELPLESS : 1
UP_ESSENTIALLY : 1
EFFECTS_HIS : 1
HE_WANTS : 1
OXYCODONE_TAB : 1
DX_MG : 1
OF_MR : 2
OR_REASON : 1
THEN_OUT : 1
WATCH_LATER : 1
FUNCTIONAL_PERFORMANCE : 1
NO_NAUSEA : 1
NAUSEA_VOMITING : 2
ON_HER : 1
PRIOR_DISCHARGE : 1
CALL_NOTE : 1
HIS_RECEIVED : 1
HIMSELF_STATE : 1
SHOWS_PVCS : 1
OR_RESPIRATIONS : 1
STL_TWO : 1
TERRIBLE_NIGHT : 1
PROCEED_APPROPRIATELY : 1
PATIENT_HAS : 4
PRIVATE_VEHICLE : 1
SOCIAL_ACTIVITIES : 1
LIMITED_SKETCHY : 1
OTHER_UNSPECIFIED : 1
NOTE_HAD : 1
TELEPHONE_ENDING : 1
HX_ESOPHAGEAL : 1
MEDICATIONS_VERY : 1
BREATHING_BE : 1
SPEC_IF : 1
PHONE_HOMELESS : 1
PLEASE_ASK : 1
OF_FOR : 2
SERUM_PROTEINS : 1
GROUP_DISCUSSED : 1
INSTRUCTIONS_OUR : 1
FOR_ON : 1
FOR_CONSULT : 1
PHONE_FOR : 1
TETANUS_MG : 1
OUTPATIENT_NOTE : 1
IS_CARE : 1
EXTREMITY_VASCULAR : 1
LB_INTAKE : 1
ADMITTED_PLAN : 1
PROVIDING_TO : 1
AND_ADDENDUM : 2
CALLED_SPOKE : 1
SODIUM_FALL : 1
CONCERNS_CE : 1
FOR_PROBLEMS : 1
AREA_ALSO : 1
OF_CONVERSATION : 1
YEARS_DENIESE : 1
HEALTH_FOR : 1
CLINIC_AM : 1
INDUCED_DAMAGE : 1
PLEASE_OPEN : 1
FOUR_TIMES : 1
PRIVATE_CALLED : 1
FOR_VITAL : 1
NOT_BENZTROPINE : 1
PT_UNDERSTANDING : 1
DISPOSITION_TO : 1
NO_NEW : 1
STATUS_SCHEDULED : 1
CALLED_DIET : 1
TO_RD : 1
DISCHARGE_YOU : 1
CHARACTERISTICS_SATT : 1
PICKS_SIGNATURE : 1
OF_RELATIONSHIP : 1
TIME_BEING : 1
SIGNOUT_PROCEDURE : 1
CONSENT_PAIN : 1
ARRIVAL_PRIVATE : 1
NON_LUNG : 1
APPLICABLE_SCORE : 1
INTERVENTIONS_ID : 1
SHAREDFILE_HYDROCODONE : 1
POINTS_HE : 1
DISTURBANCESLEPT_UNTIL : 1
AGE_MALE : 1
THE_BUDDY : 1
REACH_FOR : 1
SCREENING_AUDITC : 1
MNEMONIC_AND : 1
WAS_MUTUAL : 1
PER_MR : 1
AND_COLLAPSE : 1
ABILITY_TO : 1
PLAN_BEHAVIORAL : 1
GAIT_PASSIVE : 1
VERY_LIMITED : 1
LIGHT_WITHIN : 1
SCARED_AND : 1
BUT_IF : 1
NAME_PUPILS : 1
PRIVATE_OUTSIDE : 1
THE_EPIGASTRIC : 1
ABOVE_ACCORDING : 1
RESPIRATION_BODY : 1
SAW_WAITING : 1
ORIENTEDX_MOBILITY : 1
OVERALL_STATUS : 1
SI_BP : 1
POSITIVE_ON : 1
OF_CONCIOUSNESS : 1
EDUCATION_PULSE : 1
DRUGNUTRIENT_LIST : 1
NUMBER_SISTER : 1
GIVEN_MG : 1
FOR_SW : 1
ARE_PALPABLE : 2
ACTIVITY_LEVEL : 1
EVALUATED_AND : 1
EVENING_ANY : 1
REPEAT_CT : 1
FROM_LUNCH : 1
REVIEW_LIST : 1
ORDERED_THIS : 2
PRESSURE_PCC : 1
RECEIPT_GASTROINTESTINAL : 1
VERBALIZES_NO : 1
PLAUT_AT : 1
REQUEST_TELERETINAL : 1
TO_FLOOR : 1
OF_CONSCIOUSNESS : 1
SW_INTERVENTION : 1
INVENTORY_ASSESS : 1
BE_MADE : 1
ANY_IS : 1
IN_INTELLIGENCE : 1
AS_ORDERED : 3
WAS_AT : 2
ACUTE_SPOKE : 1
PT_ADMISSIONS : 1
WITH_SON : 1
HAS_CHANGED : 1
TO_WISE : 1
STILL_PT : 1
WERE_PROVIDED : 1
ROBITUSSIN_MUCINEX : 1
THE_BUT : 2
CONTACT_HOURS : 1
HAS_TAKING : 1
METHODIST_BACKGROUND : 1
DOSE_TO : 2
OF_REQUESTED : 1
TV_TO : 1
YO_SC : 1
RECORD_THIS : 1
NEGATIVE_DATE : 1
CAPACITY_INJECTED : 1
TISSUE_SAMPLES : 1
OBTAINED_PATIENT : 2
DONE_HIAA : 1
INCLUDED_DRUGDRUG : 1
EFFECTS_FROM : 1
SIDE_FROM : 1
CONSENT_AND : 1
IN_TEMP : 1
FASTERCHUGS_ADDRESSED : 1
IS_BETTER : 1
HAVE_EVER : 1
NOT_THEM : 1
CLINIC_UNFAMILIAR : 1
SURGICAL_CONSULT : 1
IN_ICU : 1
REPEAT_PRESCRIPTIONS : 2
YESTER_WORK : 1
DEPENDENCE_REMISSION : 1
ATTENDANCE_ON : 1
PRIOR_TO : 2
KLONOPIN_HAS : 1
HS_PT : 1
HELPLESS_AND : 1
PNEUMOVAX_VISION : 1
CFT_DIGITS : 1
NONBLOODY_FEVERS : 1
RELATIONSHIP_ROOM : 1
WHICH_IMPACTED : 1
FOLLOWING_IDENTIFIERS : 1
EXAMINATION_AND : 1
IS_PAIN : 1
AN_AN : 1
PATIENT_PRESENTS : 1
CHRONIC_COLON : 1
SEE_PHYSICIAN : 1
DISORDER_NOS : 1
PLUS_YEARS : 1
INTERVENTION_ARTS : 1
PATIENT_CURRENTLY : 1
TLCP_PT : 1
MALE_THE : 1
HIMSELF_ASK : 1
AND_MED : 1
PT_IS : 6
LIFESTYLE_HE : 1
OF_ABNORMALITIES : 1
REASSESSED_AND : 1
ORDER_BECKY : 1
TAKE_ASPIRIN : 1
TO_IT : 1
NOTE_YES : 1
DIAGNOSIS_OF : 1
TO_HE : 2
TEST_HYPERCHO : 1
CM_WT : 2
PVCS_AND : 1
ALTERATION_COMFORT : 1
POTENTIAL_DRUGNUTRIENT : 1
EXISTING_KNOWLEDGE : 1
FRIGHTENING_PATIENT : 1
BUT_WANTS : 1
TO_TYPE : 1
HAITI_IN : 1
HER_PHONE : 1
BLOOD_WITH : 1
LANTUS_PM : 1
MEDS_LAST : 1
SPECIMEN_WAS : 1
OF_BEFORE : 1
MOUTH_AT : 1
ACTIVE_PROBLEMS : 2
IN_POSITION : 1
ISOP_TIME : 1
FROM_IS : 1
TV_CONTROLS : 1
OF_TO : 1
SCHEDULED_FOR : 1
MR_TO : 1
AND_MAY : 1
GIVEN_WITH : 1
THAT_PATIENT : 1
TELERETINAL_FOR : 1
WITH_PSYCHOTIC : 2
FOR_GRADUATATION : 1
OF_ALREADY : 1
INTERVENTION_DISCHARGE : 1
PATIENT_ABD : 1
PRESSURE_REGULAR : 1
DRY_HARD : 1
BE_ED : 1
THE_FAMILY : 1
BLOOD_ACTIVE : 1
YES_NC : 1
SUPPORT_PRESENCE : 1
CELL_PHONE : 1
SEEN_EXAMINED : 1
CE_BEING : 1
PAY_REFER : 1
HAVE_EFFECTS : 1
FOCUS_POSITIVES : 1
NURSING_ENCOUNTER : 1
BEDTIME_FOR : 1
TO_DIAGNOSE : 1
AMLODIPINE_MG : 1
AS_METHODIST : 1
ENCOUNTER_TIME : 1
FALL_INFORMATION : 1
AT_GERD : 1
THROUGH_FRI : 1
OBSTRUCTIVE_OCCASIONS : 1
XRT_IN : 1
HOURS_AS : 1
VERDSOME_STATE : 1
SEVERE_LOWER : 1
VEHICLE_REGARDING : 1
ANTIBODY_ORDERED : 1
AND_PUT : 1
AND_RESCEDULE : 1
SIGNIFICANT_ADAPTATION : 1
IS_PHYSICIAN : 1
NKA_ANXIETY : 1
WELL_COOPERATIVE : 1
CAN_BE : 3
SISNEROS_ENTRY : 1
MENTAL_OPERATING : 1
AT_SIGNATURE : 1
COMMENT_TOTAL : 1
PT_BACK : 1
FINANCIAL_HEMOGLOBIN : 1
CALL_TV : 1
BEFORE_RETURNING : 1
BENIGN_PS : 1
AND_AN : 1
HE_STATES : 1
BUT_BETTER : 1
SIGNS_ADMINISTRATION : 1
THE_ED : 1
INDEX_AUG : 1
RATES_HIS : 1
ACTIVE_EXCEED : 1
FLUID_FLUID : 1
PA_AND : 1
DISCOMFORT_OF : 1
YES_TREATMENT : 1
NOTE_LIST : 1
WITH_COLD : 1
TESTING_IS : 1
PVCS_PULSE : 1
ADDENDUM_NOTE : 1
LAST_FOR : 1
CHANGE_THIS : 1
IS_DENTAL : 1
COMPLAINED_IMMOBILITY : 1
IN_VET : 3
HAND_IN : 1
RISK_INFORMATION : 1
MEDICATIONS_SUPPLIES : 5
ACTIVE_COMPUTERIZED : 1
NEXT_KIN : 1
ARGE_YESTER : 1
SYMPTOMS_WITHDRAWAL : 1
TO_VERIFY : 1
OCC_WHEEZING : 1
ACTIVE_SIGNS : 1
WILL_WAIT : 1
GROUP_SPIRITUALITY : 1
OF_METAL : 1
MESYLATE_MG : 1
PARENTS_LIVE : 1
NOTE_THE : 1
NA_WITH : 1
YESTER_LEAVENWORTH : 1
VETS_LAST : 1
RHYTHM_PAST : 1
FECAL_OCCULT : 1
TELEPHONE_BEEN : 1
MEETINGS_AFTERCARE : 1
HIS_HE : 1
STABILITY_HEALTHY : 1
HAS_HYBRID : 1
UNSCHEDULED_NURSING : 1
PRN_PAIN : 1
THIS_CONVERSATION : 1
PC_VISIT : 1
DATA_BY : 1
HEPATITIS_ANTIBODY : 1
AND_LUMBOSACRAL : 1
LAST_SEEN : 1
BLOODY_BLE : 1
PULSE_PRIMARY : 1
UNTIL_DIURETICS : 1
PREPARED_COMPLETE : 1
GENERAL_NOTE : 1
WAS_FROM : 1
LIGHT_CONTROLS : 1
WISE_GENERAL : 1
NUMBERS_FOR : 1
TELEPHONE_FOR : 1
FOR_COMMENT : 1
CONTACT_VETERAN : 1
CLINIC_NA : 1
SUICIDE_RISK : 1
WITH_BLOOD : 1
CT_SCAN : 1
VERBAL_FOR : 1
NOTE_AGO : 1
INHALER_REVIEWED : 1
DIRECT_CARE : 1
PAGER_EMERGENCY : 1
HOURS_NEEDED : 1
ADDR_QUANTITY : 1
TELERETINAL_IMAGING : 2
DO_OR : 1
HAVE_YOU : 2
NPO_HEAD : 1
IF_DIFFERENT : 1
AND_OVERTHE : 1
QHS_HEADACHE : 1
ASSESSMENT_ALERT : 1
STILL_EXPERIENCING : 1
NO_AS : 1
MILD_TTP : 1
NURDM_BLOOD : 1
NOTE_DIET : 1
FOLLOWED_INSTRUCTIONS : 1
DJD_ABD : 1
DIET_NPO : 1
CONSULT_WEIGHT : 1
MG_DAILY : 1
CAN_LOCAL : 1
OF_LIQUOR : 1
NOT_FOR : 2
TO_DATED : 1
MEDICAL_ABILITY : 1
HE_ACTIVE : 1
WAS_KNOW : 1
PATIENT_PLAN : 1
COOPERATIVE_THE : 1
NO_SEE : 1
THE_SC : 1
INTERVENTION_STATES : 1
MEDICAL_HISTORY : 3
INJ_TIDAC : 1
MEDICAL_INCLUDES : 1
ALLEGEDLY_WAS : 1
COMPLAINT_YESTER : 1
HAD_CALLED : 1
USE_LIGHT : 1
TO_QUITTING : 1
TO_LIST : 1
VET_THEN : 1
NEW_ONSET : 1
READING_AND : 1
PATTERN_DISTURBANCESLEPT : 1
THE_LUMBOSACRAL : 1
WILL_REVIEWED : 1
REFILL_DESCRIBES : 1
DEPRESSION_AT : 1
PRESENT_LB : 1
COUNTER_MEDICATIONS : 1
LIVER_ORDER : 1
VET_IN : 1
WITHOUT_URINARY : 1
IS_THIS : 1
CPRS_VIEWING : 1
THIS_ROUTINE : 1
PAIN_WEIGHT : 1
HARM_SELF : 1
MORBIDITIES_CT : 1
IN_CERVICAL : 1
WITH_MINUTE : 1
AC_AND : 1
AND_SOCIAL : 1
VERBALIZED_OF : 1
INJECTION_VETERAN : 1
SIGNED_ON : 1
TAKING_CARE : 1
OR_CYST : 1
THE_VOICES : 1
MOVEMENTS_OF : 1
OUTCOMES_BE : 1
VET_TRIAL : 1
THIS_BE : 1
GTT_STARTED : 1
FILL_THEM : 1
BURSA_PERIARTICULAR : 1
TAKE_ALL : 1
CALL_FROM : 1
TRANSFER_NOTE : 1
MAY_INFORMATION : 1
CONTACT_DOSE : 1
OUT_BED : 1
TO_REACT : 1
NOTICE_SO : 1
EDEMA_TO : 1
SATT_GROUP : 1
NOT_RECENTLY : 1
SSN_IS : 1
REFILL_IN : 1
FOR_FOR : 1
TAB_SIG : 1
FROM_PATIENT : 4
DECISIONMAKING_VASCULAR : 1
ISCHEMIA_DOSE : 1
NOS_OTHER : 1
PARENTS_WHO : 1
PULSE_TEAM : 1
PLAUT_OFF : 1
TO_HIS : 1
DAMAGE_UNDERLYING : 1
MAY_PROBLEMS : 1
CAPABLE_OF : 1
NA_IF : 1
VETERAN_SPECIMEN : 1
PT_HOSPICE : 1
HIS_SCHEDULED : 1
WERE_REVIEWED : 1
AT_THIS : 6
ORAL_BID : 1
COMPLAINT_GOT : 1
EXTREMITIES_REFILL : 1
TAKING_THEM : 1
PT_NOT : 1
DM_BIPOLAR : 1
PATIENT_WEIGHT : 1
NO_CAUCASIAN : 1
HAVE_ON : 1
STATE_PROBLEMS : 1
SELF_OTHERS : 1
HAS_RECURRED : 1
SCHEDULED_LEFT : 1
OF_REGARDING : 1
TREATMENT_GOALS : 1
HE_WAS : 10
DRUGDRUG_DRUGNUTRIENT : 1
NO_DISPOSITION : 1
PATIENT_DENIES : 1
ADMISSION_WILL : 1
VISIT_FRI : 1
INTERVENTION_SUGAR : 1
CLOTS_NOTE : 1
HAND_RECEIVED : 1
UNDERSTANDING_INSTRUCTIONS : 1
ANXIETY_INDEX : 1
PATIENT_APPRECIATIVE : 1
LUMBOSACRAL_AFTER : 1
PULSE_FAMILY : 1
PLEASE_FEELING : 1
INJECTED_INTO : 1
OUTPATIENT_STATUS : 1
HES_FOLLOWED : 1
TUBE_ISSUES : 1
HE_ADMITTED : 1
RECENTLY_PLAN : 1
PHARMACY_FOR : 1
FOR_ED : 1
DOCUMENT_BE : 1
CONSUME_THESE : 1
ADDRESS_VERDE : 1
IMAGING_IBW : 1
ABSENT_GLIPIZIDE : 1
TO_ISCHEMIA : 1
COLONIC_POLYPS : 1
NOTE_INDUCED : 1
DOWN_COLD : 1
TREADED_SOCKS : 1
YO_DIVORCED : 1
NO_FOLLOW : 1
HEMOGLOBIN_AC : 1
EXTREMITY_APPRECIATIVE : 1
FOR_HIS : 2
BY_COMPLIANT : 1
IS_ADDENDUM : 1
SPRAIN_DIGITAL : 1
TAKE_NO : 1
SELF_HAS : 1
MONTH_RESP : 1
IMPAIRMENT_NURSING : 1
AFFAIRS_STATE : 1
PALPABLE_WITH : 1
HPI_NECK : 1
PRODUCT_TO : 1
DATE_MAY : 1
MAIN_OF : 1
PRESENTLY_PATIENT : 1
PTSD_FROM : 1
RECOMMEND_TO : 1
RESIDUAL_LEFT : 1
PLACE_ORDER : 1
IT_FOR : 1
PE_TO : 1
INTO_JOINT : 1
OIS_OPT : 1
IN_LOBBY : 1
DATE_MAR : 1
SWELLING_OR : 1
DONE_ON : 2
AS_CONSCIOUS : 1
IS_WM : 1
NEEDED_PATIENT : 1
HOSP_REASON : 1
BETTER_PT : 1
WITH_NTG : 1
NO_EVIDENCE : 1
CAP_ONE : 1
AS_NAME : 1
PROBLEM_IS : 1
REQUESTING_IMMEDIATE : 1
TRIAGE_YOU : 1
WITH_REQUESTING : 1
STOOL_DYSURIA : 1
IS_BRIGHTER : 1
PART_TREATMENT : 1
DOES_VERBAL : 1
PLEASE_PLACE : 1
ED_PODIATRIC : 1
NEW_FINDING : 1
ORDER_OF : 1
WAS_VETERAN : 1
EDUCATION_GIVEN : 1
PERIORBITAL_CHEEKS : 1
PRESSURE_HEART : 1
RIGHT_ANKLE : 1
ADMINISTERED_MODE : 1
APPT_CHILDREN : 1
NOT_PREPARED : 1
ACTIVITY_AND : 1
ISSUES_PATIENT : 1
HHR_EDEMA : 1
SEEN_MORBIDITIES : 1
NOTES_TEXT : 1
THE_SYSTEM : 1
HEPATITIS_ORDERED : 1
WITH_COCCYX : 1
OFTEN_IN : 1
USUAL_HIM : 1
YES_TYPE : 1
TO_CONTACT : 1
TO_BELONGINGS : 1
OCC_NO : 1
RENAL_PROTECTION : 1
VERY_INTERESTED : 1
LIST_BE : 1
CONTACT_VERDE : 1
BIPOLAR_WEIGHT : 1
ICU_LESS : 1
PAIN_LOSS : 1
STATEMENT_INFORMATION : 1
DOING_BETTER : 1
PATIENT_GROUP : 1
FOR_PROTECTION : 1
PVH_VERY : 1
AS_EPISODE : 1
NOT_EXCEED : 2
ATTENTION_TO : 1
TEMPERATURE_PAIN : 1
READING_OF : 1
CARE_RHYTHM : 1
OR_MORE : 2
THOUGHTS_OF : 2
ALSO_ADDENDUM : 1
WAS_ADMITTED : 1
PHENOMENA_AT : 1
EDUCATION_ISSUES : 1
MORPHINE_HE : 1
AFTER_TROPONIN : 1
PROBLEM_LIST : 1
FOR_CHRONIC : 1
PNEUMOCOCCAL_ORDERED : 1
WITH_PLAUT : 1
ORDER_FOR : 2
BLACK_TAKING : 1
SSN_FALL : 1
PIPE_WITH : 1
JUL_FOR : 1
ON_ORDER : 1
TID_PROVIDERS : 1
HIMSELF_FOR : 1
IS_LIMITED : 1
WILL_IT : 1
SAT_RA : 1
SPC_VET : 1
OFTEN_YOU : 1
PULSE_BRIEF : 1
MR_WAS : 1
HAS_REMEMBERING : 1
INCREASED_FUNCTIONING : 1
ANKLE_HAS : 1
TELEPHONE_CHANGE : 1
REGION_PT : 1
ETHANOL_NONE : 1
PATIENT_SLEPT : 1
MACHINE_UP : 1
WITH_SHOWER : 1
WILL_EDUCATE : 1
LAST_ON : 1
BY_VETS : 1
WANTED_GET : 1
KNOW_HOW : 1
DURING_THE : 1
SEE_VISTA : 1
HAZARDS_SEVERE : 1
OF_PERFORMING : 1
YEAR_MALE : 2
YOU_FIND : 1
PRESSURE_TEMPERATURE : 1
MOUTH_ACTIVE : 6
HIS_GOAL : 1
SPC_HAD : 1
JUDGMENT_FOR : 1
OLEMIA_ACID : 1
NOT_CORRECT : 1
COPD_PTSD : 1
SOCKS_CREATIVE : 1
STATES_DUE : 1
ADMISSION_ARE : 1
TEST_AUDITC : 1
WITH_ADVERSE : 1
BY_THE : 1
THE_DIRECT : 1
BE_REVIEWED : 1
FOR_PATIENT : 1
SUS_MAURER : 1
FOR_TO : 5
ETHANOL_CURRENTLY : 1
WAS_WORK : 2
CLINIC_TO : 1
MINUTES_IDENTIFIED : 1
LEAVE_PATIENT : 1
SPUTUM_TINGED : 1
MONITORING_HIS : 1
INITIAL_EVAL : 1
POSS_STUDENT : 1
MORE_VETS : 1
HOME_WAS : 1
VET_ALSO : 1
SENT_LAB : 1
IN_PHOENIX : 1
ACTIVATE_PRIOR : 1
PARENTERAL_NO : 1
PC_SPI : 1
ADDENDUM_GASTROENTEROLOGY : 1
THEM_AS : 1
RECORD_AT : 1
THROMBOLYTICS_MEDICATION : 1
PCCNURSING_INTAKE : 1
COMPLAINTS_AT : 2
BE_TOLERATED : 1
INSULIN_ANIMALS : 1
NAPROXEN_MG : 3
ATTAINABLE_BY : 1
HELPLESS_TO : 1
EXCLUDING_INTELLIGENCE : 1
SPC_GAVE : 1
CARE_OF : 1
ISSUES_WHICH : 1
SURROGATE_APPLICABLE : 1
COGNITIVE_VIOLENCE : 1
CONFIRMED_THE : 1
GOT_DIVORCE : 1
LCSW_AT : 1
INVENTORY_INVENTORIED : 1
NOT_AMBULATORY : 1
DONT_MOVE : 1
HYPERCHO_OLEMIA : 1
COMPLETE_ADVANCE : 1
OBSERVED_BY : 1
PAGE_FOR : 1
DENIESE_OTHER : 1
WEAKNESS_ACCORDING : 1
SEX_PSYCHIATRY : 1
COVERAGE_NEEDED : 1
USED_TO : 1
HE_DRINK : 1
FOR_TYLENOL : 1
ARE_HE : 1
GASTROENTEROLOGY_INDICATIONS : 1
CHAPLAINCY_PRESENCE : 1
NURSING_FAMILY : 1
AND_WITH : 3
DOWN_THE : 2
ASSESSMENT_PROVIDED : 1
FOR_CONTINUE : 1
MEMBER_OTHER : 1
ICDCM_PATIENT : 1
URGENCY_TO : 1
NOT_PATIENT : 2
THE_HAS : 3
OCULAR_NONE : 1
IN_OF : 2
PINCHED_IN : 1
ADDENDUM_TAB : 2
PATIENT_COMMUNICATES : 1
THREE_BEDTIME : 1
TIME_CONTACT : 2
BECK_INDEX : 1
WAS_VISTA : 1
VET_CALLED : 1
APPROPRIATELY_POSTSURGICAL : 1
PAST_NO : 1
DISCUSSED_TEAM : 1
PA_THEREFORE : 1
SEE_APPT : 1
ROUTINE_VISIT : 1
HEADACHES_OR : 1
CP_RYAN : 1
AGO_THE : 1
PHONE_NO : 1
IT_AT : 1
PULSE_AND : 1
AN_SCHEDULED : 1
KT_AS : 1
MG_SIG : 1
EDUCATION_HAS : 1
SERVICECONNECTED_OPERATING : 1
NAUSEA_ABDOMINAL : 1
HURT_INFORMATION : 1
TAKE_BY : 1
ADV_WIFE : 1
DO_FEEL : 1
REGULAR_AND : 1
CONSTRUCT_INDICATING : 1
REGARDING_TYPE : 1
SISTER_ALLEGEDLY : 1
EYEBROWS_AREA : 1
FOR_OR : 2
AND_WHAT : 1
RESPONSE_OTHER : 1
SOUZA_HIM : 1
PACU_ANTERIOR : 1
DYSURIA_NOCTURIA : 1
OR_OR : 1
GIVE_VERBAL : 1
UP_ICD : 1
TEAM_BLUE : 1
CASE_THAT : 1
DISC_AND : 1
TO_PROVIDING : 1
ACTIVE_ATTENDED : 1
TO_TAKE : 2
PASSED_OUT : 1
EVALUATION_ON : 1
KG_VETERAN : 1
DATE_REASON : 1
THIS_OLD : 1
DURING_IMPLEMENTATION : 1
PRESCRIPTIONS_MG : 1
FOR_CIRCULATION : 1
TO_TREATMENT : 3
MOTORCYCLE_WHICH : 1
VERY_AS : 1
TYPE_SPIRITUALITY : 1
ARE_NOT : 1
INJECTED_THE : 1
MON_FRI : 1
YOUR_REFERRED : 1
SOB_BRADEN : 1
TAB_TABLETS : 1
DENIESE_ANY : 1
PLAUT_LCSW : 1
THE_PTS : 1
OF_TOBACCO : 1
SIGNATURE_REQUIRED : 1
TO_SEE : 4
ALONE_OR : 1
HEALTH_CALLED : 1
OUTSIDE_REC : 1
GIVEN_PT : 1
LATE_ENTRY : 1
EXPERIENCES_IN : 1
NO_ISSUES : 1
REPEAT_FASTING : 1
AND_BLOOD : 2
HAS_APPOINTMENT : 1
GET_LOCAL : 1
KNOWLEDGE_THE : 1
WITH_XVETERAN : 1
IMAGE_COMPLETE : 1
LEGAL_ISSUES : 1
WORK_NOTE : 2
REC_FEE : 1
BED_URINAL : 1
INTERACTED_WELL : 1
HE_NEE : 1
CHECK_LISINOPRIL : 1
SUBCUTANEOUS_THE : 1
REMINDER_INDICATES : 1
WITHIN_INTERVENTION : 1
UP_WAS : 1
ACTIVE_OUTPATIENT : 3
HAVE_DIABETES : 1
MEDISOME_MAJOR : 1
ABLE_TO : 1
THAT_HIS : 2
TO_VET : 1
WORK_WAS : 1
IN_PERCOCET : 1
THROUGH_THE : 2
LOWER_EXTREMITIES : 1
SCREEN_MEDICATIONS : 1
REFILL_SYSTEM : 1
AS_CLAIMS : 1
PER_OF : 2
MEDICAL_TO : 1
QID_CHEMSTRIP : 1
WE_NEED : 1
DOSE_OPTIC : 1
INTERDISCIPLINARY_PT : 1
ALMOST_IMMEDIATELY : 1
CHEMSTRIP_WAS : 1
REVEALED_NO : 1
WITH_PROBLEMS : 1
NOT_CHANGED : 1
TREATMENT_YES : 1
SATT_AFTERCARE : 2
SURGICAL_OPHTHALMOLOGY : 1
SHEET_VITAL : 1
AT_HS : 1
SI_AT : 1
OUR_SEE : 1
VA_VOLUNTEER : 1
DENIES_SOB : 1
TO_MEDICATIONS : 1
HIS_APP : 1
BACK_DT : 1
DEC_MEDICATION : 1
NO_WITH : 2
DIABETIC_RETINOPATHY : 1
ASK_CARDIOLOGY : 1
DEPRESSION_DENIES : 1
HAVE_IMPACTED : 1
ONLY_DIAGNOSIS : 1
IS_DEPRESSION : 1
HEMOSTASIS_APPLIED : 1
ORDER_AND : 1
WITH_PRESENTS : 1
CLEARANCE_TO : 1
TO_HOME : 1
IT_CHANGE : 1
SEE_TUMOR : 1
TREATMENT_TEAM : 1
ON_EATING : 1
OF_REPEAT : 2
ORDER_ACTIVE : 1
IF_YOU : 2
IMMUNIZATION_WHICH : 1
COGGINS_BLOOD : 1
THE_ON : 1
IN_ALSO : 1
WERE_HANDOUT : 1
NORMAL_HAVE : 1
LFTS_ORDER : 1
REGARDING_ORDER : 1
PO_TID : 1
FOR_ANTIBODY : 1
CHEST_PATIENT : 1
CURRENTLY_SAFE : 1
SIGNS_SYMPTOMS : 2
RECORD_VAMC : 1
BLUE_MORE : 1
OF_COULD : 1
DENIES_OF : 1
PROBLEMS_COMPLAINTS : 1
PRESSURE_HEADACHES : 1
FILLED_WINDOW : 1
VETERAN_AN : 1
APP_IF : 1
DOES_WANT : 1
INVENTORY_NO : 1
PSYCHIATRY_NOTE : 1
TO_REPEAT : 1
CONCIOUSNESS_ALERT : 1
PHONE_PATIENT : 1
NERVE_CERVICAL : 1
NO_AMBULATORY : 1
LAB_TEST : 2
WITH_UNDERSTANDING : 1
ACETAMINOPHEN_MR : 1
PAIN_CHRONIC : 1
NO_SHOW : 1
SUPPLIES_LOCATION : 1
PLAN_MOVIE : 1
FOR_SCHEDULED : 2
PHYSICAL_ASSESSMENT : 1
NAUSEA_PULSE : 1
NECK_HPI : 1
PAIN_INTERFERES : 1
TOBACCO_CESSATION : 1
SHOT_THE : 1
TYPE_PSYCH : 1
FAIR_POOR : 1
FROM_SEXUAL : 1
PRESENTS_WITH : 1
TESTING_PL : 1
MG_TAKE : 7
ON_LOCATION : 1
APP_ANY : 1
IF_HAVE : 1
BY_AT : 1
STATUSHE_WALK : 1
REFERRAL_FOR : 1
MOUTH_PATIENT : 1
ON_LIFE : 1
AREA_PULSE : 1
ACTIVE_DEPENDENCE : 1
PALPATION_GTT : 1
AT_AND : 2
THE_WORST : 1
OLD_HISTORY : 1
IN_NOT : 1
NO_ORGANOMEGALY : 1
PROCEDE_LONGER : 1
NUMBER_HAD : 1
ELEVATED_BLOOD : 1
SECOND_WITH : 1
PAIN_TAB : 1
NC_CONTINUE : 1
NOTED_CALLED : 1
HIS_LIFE : 2
CARCINOID_SYND : 1
AND_CHART : 2
BARRIER_THINGS : 1
THE_FOLLOWING : 5
DID_HAVE : 1
HIS_SUGARS : 1
BY_IN : 1
FOLLOWING_APPOINTMENT : 1
PATIENT_ACTIVITY : 1
VERDE_OF : 1
WITH_IF : 1
FEVER_VOMITING : 1
GOAL_PATIENT : 1
PROBLEM_CP : 1
PHYSICAL_EXAMINATION : 1
EDUCATE_PATIENT : 1
LEFT_HIS : 1
SUICIDE_THE : 1
APPROVAL_FOR : 1
PSYCHOTIC_ICD : 2
NO_FOCUS : 1
LESS_THAN : 2
FOLLOWING_VA : 1
THAT_COST : 1
QUESTIONS_YOUR : 1
LIGHT_REACH : 1
OBJECTIVE_SYMPTOMS : 1
DO_TAKE : 1
POWDER_TABLESPOONFU : 1
CHANGED_PATIENT : 1
HIS_WHO : 1
ON_YES : 1
WHICH_THE : 1
WHAT_FOR : 1
AND_ADMITTED : 1
MEDICATIONS_NURSING : 1
SUBCUTANEOUS_DURING : 1
TO_ILLNESS : 1
MOVE_HOSPITAL : 1
ALL_AS : 1
DIAGNOSIS_DEBILITY : 1
ATTENDING_AA : 1
AND_NO : 1
QHS_PTSD : 1
FWW_THE : 1
THIS_PROCEDURE : 1
THEIR_IN : 1
NURSING_REASSESSMENT : 1
INTERDISCIPLINARY_HEALTH : 1
DIVORCE_AGO : 1
EVERY_CON : 1
SC_AND : 1
PS_REC : 1
FAMILY_OTHER : 2
HE_KNOWLEDGE : 1
BEFORE_INTO : 1
MONTHS_KNOWLEDGE : 1
BUT_HE : 2
FOLLOWED_HE : 1
WAS_AND : 2
THEIR_PATIENT : 1
TIDAC_DURING : 1
SUBJECTIVE_INSULIN : 1
PREVENTIONS_WHO : 1
INFORM_FEELING : 1
NUMBER_NUMBER : 1
DATE_PATIENT : 1
IN_TO : 4
CHRONIC_NECK : 1
COMMUNICATION_SPI : 1
TELEPHONE_NUMBERS : 1
PAIN_ELBOW : 1
LEVEL_NOW : 1
STARTED_NURSING : 1
AND_AIRWAY : 1
BETWEEN_AND : 1
ED_SUSTAINED : 1
EQUIPMENT_TEAM : 1
ORDERED_TO : 1
WORK_AND : 1
HABITS_IN : 1
CONTACT_THERAPY : 1
HE_GET : 1
INSTRUCTED_WEIGH : 1
NO_VITAL : 1
RANG_FOR : 1
FOR_FEEDING : 1
MED_REFILL : 1
REVIEWED_PLUS : 1
FREQUENT_IDEATION : 1
IN_ARMY : 1
TEAM_YES : 1
FOLLOWED_BY : 2
WONT_DO : 1
CALL_LIGHT : 3
SUSTAINED_LAST : 1
DISCIPLINE_TO : 1
APPEARS_HIS : 1
STRUCTURE_OR : 1
COMBAT_THE : 1
REMINDER_ACTIVITY : 2
TO_ENCOURAGED : 1
ONE_MINUTE : 1
TO_DOSES : 1
NURSING_TREATMENT : 1
PRESENT_THINGS : 1
XYZZY_CONTACT : 1
OF_PROBLEM : 1
HARD_HIM : 1
AND_ACCESS : 1
VETS_ACUTE : 1
HAD_DONE : 2
LAST_TETANUS : 1
CHRONIC_PAIN : 2
UNDERGO_ADDENDUM : 1
WILL_BE : 4
AND_PSHX : 1
SOB_HE : 1
ORDERED_SYNCOPE : 1
MARCH_ALVETA : 1
ABUSE_SHOULD : 1
HISTORY_DYSLIPIDEMIA : 1
POPULATIONS_TEMP : 1
ABDOMINAL_DIARRHEA : 1
HOME_EQUIPMENT : 1
DISPOSITION_STABLE : 1
II_VITAL : 1
OBSTRUCTION_ICDCM : 1
PROVIDER_FUTURE : 1
FLUNIS_HAVE : 1
DISORDER_TELEPHONE : 1
AMOXICILLIN_CAP : 1
VAMC_PLACE : 1
OVERT_DISTRESS : 1
SSN_CONTACT : 1
VETERAN_PREPARED : 1
YES_PT : 1
BX_DONE : 1
NEED_TISSUE : 1
MS_FOR : 1
SESSION_REPORTED : 1
THEREFORE_UNDERGO : 1
ND_MILD : 1
DISTRAUGHT_AS : 1
THIS_EXAMINATION : 1
HAD_JUST : 1
CONTINUE_CHANGE : 1
THE_TWO : 1
PATIENT_HOMELESS : 1
MEDICATIONS_SYSTEM : 1
WHO_LIVE : 1
WINDOW_SEE : 1
INSULIN_INJ : 1
TO_CARE : 1
IN_BACK : 1
HEARING_PT : 1
PICKS_UP : 1
TO_CARRY : 1
CONTACT_NOTE : 1
UNCHANGED_SUPERVISING : 1
JOB_WILL : 1
HE_THE : 2
US_BETWEEN : 1
NUMBER_TELEPHONE : 1
DAMAGE_TO : 1
PROVIDING_DISCIPLINE : 1
HAS_HX : 1
FEELS_DENIED : 1
DISCUSS_PCP : 1
NONE_HEALTH : 1
PT_HIS : 1
VISIT_WAS : 1
PHYSICIAN_IN : 1
IN_CASE : 1
SOMETIMES_BLACK : 1
PATIENT_RECORD : 1
YEARS_PLAN : 1
DIAGNOSE_PROBLEMS : 1
ORAL_INHL : 1
CHILDREN_SHARED : 1
HIM_TALK : 1
DOES_PATIENT : 3
VITALS_INFLUENZA : 1
BY_AND : 1
PAY_PLEASE : 1
THIS_ENCOUNTER : 1
HOWEVER_HE : 1
NOTE_DATE : 1
CONSULTPHARMACY_IN : 1
BREVICON_TAB : 1
SISTER_HAD : 1
PATIENT_RECEPTIVITY : 1
ITEMS_INVENTORY : 1
NO_OBJECTIVE : 1
ESOPHAGUS_IMPINGMENT : 1
GI_RESTREPO : 1
HOPELESSNESS_DENIES : 1
PTS_OVERALL : 1
HAVING_YOU : 1
INFLUENZA_VACCINE : 1
PATIENT_FOR : 1
ISSUES_FROM : 1
CHRONIC_PORT : 1
STATUS_ICDCM : 1
VETERAN_WAS : 1
PLAN_OF : 4
THE_DEPARTMENT : 1
RIGHT_EXTREMITY : 2
AND_WHIP : 1
LEVEL_OF : 3
AND_WERE : 1
PATIENT_PARAMEDIC : 1
YES_DESCRIBE : 1
ABDOMEN_THE : 1
BYPASS_ICDCM : 1
FOR_CLINICAL : 1
DUE_TRANSPORTATION : 1
EVERY_EVENING : 1
NO_SUICIDAL : 1
EDEMA_BOTH : 1
CONSENT_INFECTION : 1
DAILY_SENSORY : 1
SAYS_QH : 1
OF_TEMPERATURE : 1
ON_HEALTHY : 1
PT_IN : 3
WILL_CALL : 1
DENTAL_SERVICE : 1
MG_TID : 1
WITHIN_PSYLLIUM : 1
AMBULATORY_CARE : 1
MS_SIGN : 1
TETANUS_ENDOCET : 1
THEMSELVES_WERE : 1
FREE_ORAL : 1
UP_NEEDED : 1
SON_WAS : 1
RD_GIVEN : 1
INTERDISCIPLINARY_PLAN : 1
VACCINE_ORDERED : 1
PTSD_PCP : 1
PATIENT_PROVIDED : 1
DIFFUSE_WITHOUT : 1
EPISODE_SEVERE : 2
NAME_AND : 1
URGENCY_URINATE : 1
VITAL_LUNGS : 1
TIME_MINUTES : 1
AND_ED : 1
FOR_STABILITY : 1
BEING_THROUGH : 1
AREA_CHEEKS : 1
BEST_VISUAL : 1
DESCRIBE_WHO : 1
THEIR_FOR : 1
SCREENING_WRITER : 1
ARE_ABLE : 1
PROGRESS_NOTES : 1
BY_ONCE : 1
PATIENT_HERE : 2
IN_CAROLTON : 1
EXPERIENCES_WITH : 1
WORKING_VERBAL : 1
GIVEN_RECIEVED : 1
RADIATION_OSA : 1
SKETCHY_TELEPHONE : 1
INSULIN_ASPART : 1
FOR_VET : 1
TELEPHONE_NUMBER : 3
IS_DILATED : 1
THE_TAB : 1
PULSE_TREATMENT : 1
INTERESTED_VOLUNTEERING : 1
PIECE_METAL : 1
CARE_CALLED : 1
WHAT_IS : 1
YEARS_BLOOD : 1
REVIEW_IMPRESSION : 1
SEE_IMAGING : 1
FUNCTIONAL_IS : 1
IT_FAMILY : 1
RECURRED_DESPITE : 1
PHYSICIAN_FOR : 1
IBW_IBW : 1
THE_SUPERVISING : 1
IV_LOCATION : 1
VISITATION_REQUESTED : 1
NAME_WAS : 1
JUL_REASON : 1
THE_CASE : 1
ANY_OF : 2
TO_SERVICE : 1
TINGLING_PAT : 1
BASED_ON : 1
PIN_SITE : 1
SEEN_THE : 1
POOR_TELEPHONE : 1
TEAM_REGARDING : 1
HAS_NOW : 1
CONTINUES_AA : 1
CD_TC : 1
NONE_VETERAN : 1
FROM_CHILDHOOD : 1
SELFHARM_DUE : 1
HE_REPORTED : 1
COLONOSCOPY_COLONOSCOPY : 1
BE_UNTIL : 1
PNEUMOCOCCAL_PNEUMOCOCCAL : 1
AND_RENAL : 1
THERAPY_OCULAR : 1
RIGHT_HAS : 1
WILL_NEED : 1
PARALYSIS_MEDIAN : 1
LIQUOR_HE : 1
NURSES_LOCATION : 1
OF_LAB : 1
POSITION_AND : 1
FAMILY_SIGNIFICANT : 1
CHEMORADIATION_STOOL : 1
MD_REHABILITATION : 1
BESYLATE_MG : 1
EVALUATED_SPINE : 1
THE_WITH : 1
DONE_TOLD : 1
MONITORING_METAPLASIA : 1
IF_TYPE : 1
PROBLEM_WEIGHT : 1
MALE_VET : 1
OF_BUT : 1
AT_HIM : 1
HAD_CARPAL : 1
NOTE_DAMAGE : 1
PSYCHIATRY_TELEPHONE : 1
OFTEN_ALTERATION : 1
THE_AND : 3
AVAILABLE_FOR : 1
MOOD_PT : 1
EXAMINED_AND : 1
DESPITE_IN : 1
PHYSICIAN_SCREEN : 1
LEVEL_ACCEPTABLE : 1
HIS_MORPHINE : 1
ALBUTEROL_INHL : 1
RECIEVED_CONSULTATION : 1
IMPRESSION_EDUCATED : 1
USE_SHAREDFILE : 1
NOTE_AND : 1
FUNCTIONS_VA : 1
TALKED_VET : 1
WITH_TO : 1
DRAINAGE_REL : 1
ADDICTION_CINDA : 1
IN_CONTINUE : 1
NOTED_REPORTED : 1
FOR_BASIS : 1
UNCHANGED_THE : 1
NO_ANTIBIOTIC : 1
CHILDHOOD_ABUSE : 1
GET_TO : 1
PULSE_NURSE : 1
TWO_ARGE : 1
FAMILY_REGARDING : 1
TO_CLINIC : 2
AORTOCORONARY_BYPASS : 1
PAN_WITHIN : 1
REVIEWED_PATIENT : 1
MONTHS_EXISTING : 1
TEMP_HIS : 1
OF_TETANUS : 1
OBTAINED_FLUID : 1
FOR_REVIEW : 1
EVALUATE_NEW : 1
HISTORY_PTSD : 1
HEIGHT_IN : 1
SCAN_EVIDENCE : 1
LOWER_EDEMA : 1
MEDS_LOCATION : 1
PATIENTS_REPORT : 1
BEDSIDE_TELEPHONE : 1
FOLLOWING_OVERALL : 1
NC_SPO : 1
AWAITING_PAIN : 1
CALL_FIRST : 1
SCHEDULED_PROVIDER : 1
ASSISTANCE_CARRY : 1
HE_IN : 1
ENTRY_TO : 1
TO_ADA : 1
HE_RELATES : 1
OF_IF : 1
USE_EDUCATE : 1
HAD_TUNEL : 1
AND_HAD : 3
FOR_CLEARANCE : 1
THE_IDENTIFIERS : 1
MIDLINE_TAB : 1
NO_ORDERED : 1
COMBIVENT_WAS : 1
FOR_BASED : 1
AORTOCORONARY_STATUS : 1
VISIT_MEDICATION : 1
FROM_JOB : 1
GIVEN_STATE : 1
AND_DETOX : 1
THAT_IS : 1
ICDCM_SHEETS : 1
RECEIVED_THIS : 1
CLEARANCE_AND : 1
HE_APPEALED : 1
PL_COMPLAINTS : 1
WOUND_SURROUNDED : 1
NOT_HOME : 1
DIAGNOSE_IN : 1
ROOM_WITH : 1
VET_STATES : 1
CIRCULATION_MG : 1
SCREEN_SEVERE : 1
NEEDED_HAS : 1
THAT_HES : 1
INCLUDES_PATIENT : 1
PAST_BEHAVIORS : 1
HAS_DOING : 1
ENDOCET_MG : 1
AT_WAS : 1
CONTINUE_PT : 1
MINUTES_PROBLEM : 1
SYNCOPE_COLLAPSE : 1
TEAM_NAME : 1
ICDCM_VALUABLES : 1
AND_HE : 4
ACTIVE_EKG : 1
DE_THAT : 1
HIAA_CT : 1
SAYS_THIS : 1
FOR_SAYS : 1
FINANCIAL_THE : 1
SPONDYLOSIS_AFTER : 1
EXCLUDING_SUPPLIES : 1
WILL_LONGER : 1
EFFECTS_ALSO : 1
CURRENTLY_FOLLOWED : 1
VISIT_DATED : 1
AS_TO : 2
THE_THEY : 1
CLINIC_MARCH : 1
IN_INTRUSIVE : 1
SEND_MEDICAL : 1
RESTREPO_CLINIC : 1
RECENT_CHANGES : 1
NURSING_INPATIENT : 1
SHAREDFILE_ACETAMINOPHEN : 1
HAS_LEFT : 1
BATHROOM_PATIENT : 1
PAIN_PRESSURE : 1
SPEACH_ALMOST : 1
BLOODWORK_IN : 1
THE_IMAGES : 1
PULMONARY_TWICE : 1
MAURER_ONE : 1
AM_NOT : 1
WILL_RESTART : 1
PATIENT_CONSENT : 1
ENCOUNTER_IS : 1
CONTROL_AND : 1
ERYTHEMATOUSE_AT : 1
AND_COUNTER : 1
THOUGHTS_DENIES : 1
SLEPT_AND : 1
LONG_AS : 1
NO_NO : 2
HRS_CARDIAC : 1
AND_PE : 1
FIVE_TO : 1
WRITTEN_NO : 1
DISCUSSED_DIRECTIVES : 1
THROUGH_MANAGEMENT : 1
SEVERE_IMPAIRMENT : 2
COMPLAINT_ASSESSMENT : 1
IF_POSS : 1
PT_CHART : 1
EASILY_THUS : 1
THREATS_WONT : 1
NOT_FOUND : 2
HAS_NKA : 1
TO_VETS : 1
BY_SELF : 1
TO_LACK : 1
RENAL_CANCER : 1
SHOWING_PVCS : 1
BRIEF_OF : 1
UNFAMILIAR_THIS : 1
THINKS_PATIENT : 1
MONITORING_INTESTINAL : 1
PATIENT_TO : 2
TC_SPC : 1
THERAPY_YELLOW : 1
PATIENT_CONTACT : 1
QHPRN_FOR : 1
ISSUES_HAVE : 1
WEIGHT_PRESSURE : 1
HIMS_OUTSIDE : 1
CARE_IT : 1
IS_AGREEABLE : 1
AN_SERVICECONNECTED : 1
DIFFERENT_PATIENT : 1
SUCH_VET : 1
FLUCTUATIONS_SEX : 1
PAIN_OF : 1
SEEN_ME : 1
STOOL_IF : 1
STILL_DIAGNOSTIC : 1
SO_THAT : 1
ANSWERING_MACHINE : 1
PLAN_WHAT : 1
MALE_TO : 1
LIKE_FOR : 1
SUPPLIES_PATIENT : 1
CALL_RESCEDULE : 1
PRECLUDING_IS : 1
FEATURES_DEPRESSIVE : 1
ATTEMPTS_THE : 1
REFERRED_LEARNS : 1
PASSIVE_ACTIVE : 1
MANAGEMENT_DETERMINE : 1
MG_SCRIPT : 1
HAS_SEEN : 1
CONTACT_THEIR : 1
BECKY_SIMETHICONE : 1
SAME_COLON : 1
FOR_DEPARTMENT : 1
THE_HIGHER : 1
URINAL_INTERVENTION : 1
THE_HE : 2
MOBILITY_INTACT : 1
ABUSE_TELEPHONE : 1
RECENT_COMMENT : 1
IS_GRANULAR : 1
NOTE_PING : 1
ALREADY_MENTAL : 1
NEB_TX : 1
AND_ALL : 1
CONTINUD_INTERVENTION : 1
COULD_NOT : 1
STATUS_MUSCLE : 1
DOING_EDUCATION : 1
OF_OR : 1
NOT_DONE : 2
GET_DOWN : 1
NURSING_INTERVIEW : 1
SPO_INTERVENTIONS : 1
LIFE_PACE : 1
QHPRN_ELEVATED : 1
OF_PROSTATE : 1
UNSPECIFIED_ANODONTIA : 1
OXYCODONE_TELEPHONE : 1
OR_VITAL : 1
ADDENDUM_PHYSICAL : 1
IS_SUICIDE : 1
BEDREST_WHEELCHAIR : 1
FEVERS_NO : 1
OF_IO : 1
HAS_HEARING : 1
VISIT_THE : 1
DOCUMENT_NOTE : 1
THREATS_DUE : 1
IS_TO : 3
WOULD_VISIT : 1
PROGRESS_TO : 1
DYSPLASIA_BARRETTS : 1
THIS_REINFORCED : 1
OLD_HERE : 1
GA_AS : 1
MG_HS : 1
ABDOMINAL_PAIN : 2
MORBIDITIES_SCAN : 1
PERIORBITAL_AREA : 1
CAPABLE_PERFORMING : 1
COUGHT_US : 1
THE_CASUALTIES : 1
STOPPED_THE : 1
FINANCIAL_STABILITY : 1
CLINIC_IDENTIFIED : 1
WHO_VERBALIZED : 1
PAIN_NOW : 1
HOUSEMOBILE_PATIENT : 1
PARAMEDIC_RX : 1
HIS_TO : 1
STATE_RISK : 1
BITE_CHEW : 1
FOR_HIM : 2
TALK_TO : 1
WANTS_MATTER : 1
PATIENT_NOT : 1
CBI_HHR : 1
DIFFICULTY_CFT : 1
STAPERT_HIS : 1
NONTENDER_DEC : 1
SCORE_PROGRESS : 1
CAROLTON_GA : 1
SLIGHTLY_ERYTHEMATOUSE : 1
WHICH_HE : 2
TELEPHONE_TELEPHONE : 1
NOT_FILL : 1
IS_SUBJECTIVE : 1
RECTUM_AND : 1
HAD_OCCULT : 1
PLAN_PC : 1
UNFAMILIAR_WITH : 1
MENTAL_MEMBER : 1
PROVIDED_TO : 1
CLONIDINE_MG : 1
HTN_DYSLIPIDEMIA : 1
ADA_EATING : 1
PATIENT_DJD : 1
QUANTITY_THE : 1
REGION_STS : 1
CAROLTON_AS : 1
PT_WITH : 1
SHOWER_IF : 1
DISCOMFORT_SHOULDER : 1
VETS_FOR : 1
COMMENT_ORDER : 1
PODIATRIC_COLONOSCOPY : 1
FRI_PT : 1
TO_PROFESSIONAL : 1
ADMITTED_PATTERN : 1
NORMAL_RECOMMEND : 1
QH_PRN : 1
DOWN_YES : 1
PALPABLE_BELL : 1
FEVER_RAL : 1
DRAINAGE_PENIS : 1
WITH_COOPERATIVE : 1
FROM_MNEMONIC : 1
JUN_WEIGHT : 1
IN_TERMS : 1
CERVICAL_ALSO : 1
BUDDY_PATIENTS : 1
HOME_ATTAINABLE : 1
BLOOD_DO : 1
HAS_DIFFICULTY : 1
APPROPRIATELY_COLLECTS : 1
PCP_CONSIDERED : 1
KG_CAN : 1
BELL_WITHIN : 1
HAS_CAPACITY : 2
PROBLEMS_CAN : 1
PRESCRIPTIONS_REPORT : 1
FLUOROSCOPY_PRESENTS : 1
CLASS_ON : 1
TONIGHT_AT : 1
UNSPECIFIED_HYPERLIPIDEMIA : 1
WILL_REASSESSED : 1
STATEMENT_OF : 1
GROUP_NAME : 1
NURSING_CURRENT : 1
LB_VETERAN : 1
BEING_FOR : 1
OF_BECKY : 1
AOX_PT : 1
PAIN_MED : 1
IF_CAN : 1
MILITARY_WAS : 1
THE_MAIL : 1
BLOOD_GI : 1
CONTACT_DEMONSTRATION : 1
AT_ADMISSION : 1
LAST_NIGHT : 2
DX_PAINS : 1
IN_PATIENTS : 1
RECURRED_XRT : 1
SIGMOID_TO : 1
HOME_OR : 1
PO_QHS : 2
LIVER_IMAGE : 1
HIS_IF : 1
IS_EXPERIENCING : 1
FINANCIAL_ISSUES : 1
REASSESSED_ED : 1
AVAILABLE_BLOOD : 1
SAFE_STRESS : 1
CAN_MADE : 1
CLAIMS_LEGAL : 1
THE_ALPRAZOLAM : 1
THAN_PHYSICIAN : 1
STABILITY_HEMOGLOBIN : 1
PROBLEMS_BEFORE : 1
SIGNOUT_ENVIRONMENT : 1
PCP_NEXT : 1
SHOWS_SEVERE : 1
MEDICATIONS_PROVIDED : 1
BAD_QUANTITY : 1
CLOTS_NURS : 1
QH_ACTIVE : 1
SPECIMENS_LAB : 1
SERVICECONNECT_SUICIDAL : 1
INFORMED_FOR : 2
IS_TAKING : 1
BP_READING : 1
FOR_BIOPSY : 1
WM_TO : 1
VASCULAR_NOTE : 1
VA_PENSION : 1
PATIENT_NO : 1
CP_IT : 1
BEDREST_NURSE : 1
YES_HOME : 1
DIET_MET : 1
CELL_LUNG : 1
PAINS_PATIENT : 1
THUS_IT : 1
MALE_HX : 1
ACETAMINOPHEN_NAPROXEN : 1
OPERATING_MOTORCYCLE : 1
OR_YEARS : 1
HE_WANTED : 1
FOLLOWING_WERE : 1
IN_COMFORT : 1
PROVIDED_RESPONSE : 1
HYPERLIPIDEMIA_ANODONTIA : 1
SOCIAL_WORK : 2
ALSO_POTENTIAL : 1
PL_ING : 1
NORMAL_VET : 1
NOT_AN : 1
IF_HAS : 1
AUTO_PB : 1
AND_BLE : 1
ALONE_CHEMORADIATION : 1
THEY_CARPAL : 1
CONVERSATION_APPROPRIATE : 1
HIS_STATUSHE : 1
TIME_NURSES : 1
PAGER_DEPT : 1
MAY_NEE : 1
HE_IS : 5
REASSESSMENT_CONVERSATION : 1
WITHIN_LIMITS : 1
NOTE_LAB : 1
ADDENDUM_DEC : 1
TO_SEEN : 1
IT_HISTORY : 1
RECENT_FAX : 1
AMBULATORY_OUTPATIENT : 1
SKIN_ASSESSMENT : 1
OPTIONS_THEREFORE : 1
VET_INDICATES : 1
FOR_STR : 1
THIS_IF : 2
CHEW_REMINDER : 1
TERMS_OF : 1
AND_PISTOL : 1
COMMUNICATES_UNDERSTANDING : 1
AND_GLUCOSE : 1
IO_RHYTHM : 1
TO_AND : 3
VISION_BARRIER : 1
SIDE_EFFECTS : 2
ACTIVE_BEDTIME : 1
FOOD_VERBALIZED : 1
TX_SEE : 1
THE_THIS : 1
INFORMATION_PVH : 1
IMAGING_TO : 1
NURSE_AGENCY : 1
REVIEW_NURSING : 1
EXPLAINED_HE : 1
FOR_CLARIFICATION : 1
EATING_ACCESS : 1
PLAN_ABSENT : 1
OR_PNEUMOVAX : 1
OR_PRESSURE : 1
CBI_RUNNING : 1
OF_STATES : 1
AND_PRIMARY : 1
SHOW_CALL : 1
CLINICALLY_SIGNIFICANT : 1
OR_OBTAINED : 1
EDUCATION_PROVIDED : 2
TO_SWOLLEN : 1
CHANGE_SEEMS : 1
AM_PM : 1
LAST_OF : 2
FOLLOWED_ON : 1
IF_WE : 1
EVIDENCE_OF : 1
MEASURES_CM : 1
IN_HEMATURIA : 1
STABLE_RESIDENCE : 1
MEDICATION_WRITTEN : 1
GET_STILL : 1
MINIMUM_TO : 1
ALMOST_BEGAN : 1
WHICH_CONFIRMED : 1
BACK_MY : 1
BLOODY_PEDAL : 1
WM_ADMITTED : 1
INJURED_THE : 1
PAIN_HPI : 1
UNDERSTANDING_YOUR : 1
WHO_VET : 1
TO_GET : 2
URINARY_ICDCM : 1
AMLODIPINE_BESYLATE : 1
HAVE_BELONGINGS : 1
OUT_HIS : 1
AT_DENIES : 1
HE_BRONX : 1
PRIVATE_PROVIDERS : 1
THE_SPINE : 1
ANTIHYPERTENSIVES_NO : 1
TREATMENT_FAMILY : 1
CARE_ENT : 1
DIVORCE_YEARS : 1
PHONE_HE : 1
PAIN_LB : 1
YEARS_AGO : 1
KG_TO : 1
SOUNDS_MEDICATIONS : 1
WAS_INFORMED : 2
ASK_NURSE : 1
MONTHS_NO : 1
DEBILITY_EVAL : 1
AND_MUST : 1
FREQUENT_SUICIDAL : 1
MANAGEMENT_AND : 1
BY_PT : 2
TO_LESS : 1
DOES_NOT : 2
CHAPLAINCY_SUPPORT : 1
WERE_MADE : 1
OF_KIN : 1
MEDICAL_STUDENT : 1
FILLS_THE : 1
CONSULT_RECEIVED : 1
OR_FLUID : 2
THIS_SCREEN : 1
STABLE_PACU : 1
AN_SCREENING : 1
SEE_IF : 1
CAN_FOR : 1
YO_ADMITTED : 1
REVIEW_SYSTEMS : 1
YOUR_PAIN : 1
GLUCOSE_GOALWHAT : 1
IMB_BEING : 1
INTERACTED_WITH : 1
THIS_PT : 1
STANDING_NERVE : 1
PAIN_QUIT : 1
GIVEN_YESTER : 1
TRY_SEVERE : 1
NARRATIVE_THAT : 1
SOMALIA_HAITI : 1
NOT_WANT : 1
DRUG_HT : 1
IMPRESSION_VET : 1
WOULD_CONSULT : 1
LYMPHADENOPATHY_SPREAD : 1
CINDA_LATE : 1
OX_SIGNATURE : 1
VERBAL_PAIN : 1
IN_CLINIC : 2
NOTE_INDICATIONS : 1
PHYSICIAN_REMINDER : 1
REACT_AND : 1
TOLD_CURRENT : 1
DYSPNEA_FROM : 1
WITH_PAIN : 1
INTERVENTION_VET : 1
WE_HIMS : 1
LEFT_EXTREMITY : 1
INTACT_CV : 1
PC_COMMUNICATION : 1
BIPOLAR_LB : 1
ASSISTANCE_BLOOD : 1
FOODS_ADDITION : 1
BRODINE_STAPERT : 1
DAILY_BREAKFAST : 1
ALSO_HAVE : 1
MUCINEX_PATIENTS : 1
CALLER_OTHER : 1
COMPLETE_DIRECTIVE : 1
INTELLIGENCE_STABILITY : 1
AND_PLAY : 1
VERBAL_NONVA : 1
REQUESTING_FOOD : 1
HYPERCHO_ACID : 1
HOSPITAL_OXIM : 1
ADDENDUM_ARIPIPRAZOLE : 1
LIMITS_CONSULT : 1
OR_READING : 1
BEING_IF : 1
TEAM_OR : 1
AND_SHOWS : 1
EXPECTED_OUTCOMES : 1
WITH_HX : 1
INJURIES_LAST : 1
SEND_HOME : 1
IN_ADDITION : 1
INTERVENTION_PSYLLIUM : 1
TOPICS_ALSO : 1
PROPERTY_THE : 1
PO_MOOD : 1
HE_SLEPT : 1
TO_RESPIRATION : 1
HOW_ADDR : 1
AND_INTACT : 1
DO_NOT : 1
ENCOURAGED_PROGRESS : 1
TO_SUCH : 1
EPIGASTRIC_PT : 1
REACH_BLOODWORK : 1
LIST_DIABETIC : 1
BLOOD_ATTENDED : 1
WHICH_LANDED : 1
OF_WAS : 2
IF_CE : 1
IS_HIGH : 1
AND_MEDICATIONS : 2
STATUS_TRANSFER : 1
IMAGING_DIABETIC : 1
VETS_MEDICATION : 1
NURDM_PRESSURE : 1
OF_PRESCRIPTIONS : 2
AGO_PLAN : 1
ACTIVE_BENIGN : 1
PATIENT_AORTIC : 1
OF_PTSD : 1
SAMPLES_IN : 1
FALL_RISK : 2
CALLED_AND : 1
PAIN_PORT : 1
WHIP_SHE : 1
WOULD_LIKE : 2
VN_COMBAT : 1
AND_SNACKS : 1
MALE_WITH : 1
IS_WITH : 2
TRANSPORTATION_PROBLEMS : 1
TO_ADDENDUM : 2
PROCESSES_JUDGMENT : 1
DID_REPORT : 1
OF_FUNCTIONS : 1
DRINK_OF : 1
ST_PAST : 1
PULSE_STATEMENT : 1
PARENTERAL_FEEDING : 1
TESTS_VISIT : 1
TAKE_HIS : 1
NOTE_PROBLEMS : 1
PROBLEM_TELERETINAL : 1
HELPLESS_WORTHLESS : 1
TAKING_TO : 1
HOUSESTAFF_THAT : 1
ARRIVAL_VEHICLE : 1
VET_WITH : 2
ADDENDUM_EXAMINATION : 1
SUCH_INTERVENTION : 1
FOR_TREATMENT : 1
TOPICS_INCLUDED : 1
INTESTINAL_METAPLASIA : 1
BESYLATE_TAB : 1
WITH_FLUCTUATIONS : 1
WIFE_WAS : 1
AND_DISCOMFORT : 1
MEDIAN_SC : 1
RESCEDULE_APP : 1
NONE_LIVES : 1
MAY_MONITORED : 1
VA_IS : 1
CHART_TREATMENT : 1
YELLOW_BRACELET : 1
WOULD_FILL : 1
PLANS_FAMILY : 1
ABILITY_VASCULAR : 1
NO_SIGNS : 1
HAVE_QUESTIONS : 1
MUSCLE_ADDENDUM : 1
ED_INJURIES : 1
PHONE_VERIFIED : 1
DISCHARGE_PL : 1
RIGHT_LOWER : 2
SKIN_BEFORE : 1
ALDRETE_EPISODE : 1
PT_PATTERN : 1
TOLERATED_WITH : 1
OF_TINGLING : 1
UPCOMING_ALSO : 1
WITH_MH : 1
BENEFICIAL_HE : 1
PATIENTS_ASKED : 1
BUT_THIS : 2
MEDICATIONS_ED : 1
THEIR_CLINIC : 1
RETINOPATHY_CALL : 1
CV_LB : 1
NIGHT_NO : 1
OR_OTHERS : 1
NOT_TAKE : 1
FOR_TOBACCO : 1
WITH_TEAM : 1
LB_OIS : 1
WITH_AHEAD : 1
TC_WITH : 1
OF_INTERVENTION : 1
IN_GA : 1
METAPLASIA_LOW : 1
EXPERIENCING_DIAGNOSTIC : 1
YOUR_FOR : 1
VISIT_BELOW : 1
TAB_TABLET : 2
SHEETS_TO : 1
SECOND_ME : 1
UTILIZE_HERE : 1
SOB_SKIN : 1
PROVIDER_CONDITION : 1
MADE_IN : 1
ADAPTATION_ILLNESS : 1
OR_THE : 1
FILLED_FOR : 1
IDENTIFY_CALLER : 1
DOES_GIVE : 1
HAZARDS_ABNORMALITIES : 1
ED_UP : 1
RALES_RA : 1
TEST_WITH : 1
LOPC_FOR : 1
YOU_HAD : 2
IV_TREATMENT : 1
LIFE_IN : 1
HE_CONTINUE : 1
FOUND_BE : 1
THAT_SISTER : 1
ANSWERED_BECK : 1
IO_ST : 1
TIME_TO : 1
CLINIC_NOTE : 1
PT_INTERESTED : 1
CONSCIOUSNESS_PAT : 1
THEIR_HERE : 1
DOSE_OF : 1
FIN_WAS : 1
BYPASS_STATUS : 1
TELEPHONE_HOURS : 1
THREATS_ATTEMPTS : 1
WILL_ARE : 1
DIZZY_THEN : 1
LEVEL_CONCIOUSNESS : 1
LANDED_RIGHT : 1
REACH_PRESSURE : 1
PRESSURE_RATE : 1
BLOOD_LEVEL : 1
ON_MON : 1
CHANGE_AND : 1
ACCESSED_THROUGH : 1
AND_BACK : 1
AREA_THAT : 1
EDEMA_LABS : 1
RECEIVED_FOR : 1
PROBLEM_TISSUE : 1
RADIATION_DM : 1
ADDENDUM_HUMAN : 1
SLEPT_NIGHT : 1
THE_AT : 1
AND_UP : 2
IN_LOW : 1
TO_CHILDREN : 1
EXAMINATION_UROLOGIST : 1
OXIM_SOMALIA : 1
THE_MEDICAL : 1
TO_FOR : 8
YESTER_BLOOD : 1
SENT_SPECIMENS : 1
PLEASE_REFER : 2
AS_ACTIVITY : 1
FEE_APPLY : 1
NOCTURIA_USUALLY : 1
TO_THE : 10
CONTACT_TIME : 1
PATIENTS_ARE : 1
TO_COME : 2
STATUS_ACTIVE : 1
FACT_HIS : 1
DIGESTIVE_THIS : 1
FROM_FOODS : 1
BY_MOUTH : 10
PHYSICIAN_DATE : 1
PATIENT_ENCOURAGED : 1
HE_PTS : 1
AND_LFTS : 1
TO_TALK : 1
PLEASE_TO : 2
PHY_AUTO : 1
BACK_OF : 1
CARE_RIGHT : 1
CLICK_HERE : 1
AIRWAY_PERFORMED : 1
PRESENCE_WILL : 1
SIGNS_VETERAN : 1
INCLUDED_POTENTIAL : 1
AND_THEN : 1
BLOOD_RESTREPO : 1
TRY_GET : 1
WITH_ONE : 2
LOPC_STATES : 1
TIME_AGE : 1
NO_REASON : 1
REASON_FOR : 3
WOULD_COST : 1
BELONGINGS_MS : 1
TAKE_TABLET : 9
FOOD_ACTIVE : 1
HYPOGLYCEMIA_AND : 1
ELIGIBLE_FOR : 1
WITHOUT_HE : 1
NOT_THAT : 1
OR_YEAR : 1
ADMINISTERED_OF : 1
INTO_CPRS : 1
TO_CHAPLAIN : 1
FINASTERIDE_THEN : 1
ADDENDUM_NO : 1
AS_THE : 1
ASPIRIN_BLOOD : 1
FUNCTIONING_VIOLENCE : 1
ACTIVE_IN : 1
NOT_BY : 1
STARTED_AT : 1
HAD_EXPERIENCE : 1
TO_STAFF : 1
MALAISE_MYALGIA : 1
IF_ALDRETE : 1
INTELLIGENCE_THE : 1
THAT_WAS : 3
REFER_TO : 2
THE_DOSE : 1
HE_LANDED : 1
SIDE_OUTPATIENT : 1
OF_PATIENT : 1
WAR_AND : 1
EFFECTS_DENIES : 1
LIFESTYLE_ONCE : 1
INDIGESTION_GROUP : 1
AND_FOR : 3
EVAL_GAIT : 1
MOVEMENT_DISORDER : 1
NEXT_VISIT : 1
OF_FROM : 1
LAB_PHYSICIAN : 1
RESTART_IT : 1
HAVE_APPOINTMENT : 1
PREFERRED_OF : 1
WITH_OF : 4
NO_TAKING : 1
REGULAR_EASY : 1
SUGARS_EATING : 1
SYMPTOMS_AND : 1
VACCINE_EDUCATION : 1
FOLLOWING_DISCUSSED : 1
ENDOSCOPE_AN : 1
PAIN_BLE : 1
CODEINE_NIACIN : 1
TO_HOUSESTAFF : 1
MH_SHOW : 1
TO_VETERANS : 1
YOU_LIKE : 1
FOR_POSITIONING : 1
DRUGS_CEFADROXIL : 1
BUT_PT : 1
AT_NOTE : 1
AND_NOT : 4
ACTIVE_ASSESSMENT : 1
WINDOW_TO : 1
ADDITION_TO : 1
FACTORS_POPULATIONS : 1
STAFF_NOTE : 1
DIARRHEA_YES : 1
AGE_PATIENT : 1
DEMONSTRATE_COGNITIVE : 1
PRESENTATION_CHARACTERISTICS : 1
OTHER_AND : 1
RHYTHM_ST : 1
AGE_PLAN : 1
NERVE_TO : 1
STRIP_SHOWING : 1
PATIENT_ASSESSMENT : 1
FUNCTIONING_POTENTIAL : 1
PNEUMOVAX_BARRIER : 1
TRIAGE_NOTE : 1
AT_WOUND : 1
WILL_SC : 1
APPEARS_RATES : 1
ATTEMPT_TO : 1
WILL_MS : 1
OR_PAGE : 1
BLE_PEDAL : 1
RDW_CP : 1
BEFORE_WAS : 1
SET_APPT : 1
MS_SHE : 1
CAN_ONLY : 1
INCREASED_COGNITIVE : 1
OPHTHALMOLOGY_COSIGN : 1
ANODONTIA_POLYPS : 1
TWICE_OXYGEN : 1
YEARS_NONE : 1
APPEALED_HAS : 1
ATTACHED_CAN : 1
CANCER_THE : 1
PUT_WITH : 1
CHART_YES : 1
ATTEMPTS_SUICIDE : 1
PHYSICIAN_SOLDIER : 1
PATIENT_TWICE : 1
ANSWERING_PICKS : 1
WHO_IN : 2
OUT_FOR : 1
FOR_AT : 1
PTSD_ADDENDUM : 1
ONSET_SURROGATE : 1
DIFFERENT_FROM : 1
LIKE_DO : 1
ING_COMPLAINTS : 1
INHL_PUFF : 1
SEEN_AT : 1
CHEST_WAS : 1
SENSORY_PERCEPTION : 1
NOTE_INPATIENT : 1
LIGHT_TV : 1
HIGH_RESTART : 1
ISSUES_RESULT : 1
ACTIVITIES_HIS : 1
DECISIONMAKING_INJECTED : 1
NO_FEELS : 1
AGO_FOR : 1
REPAIR_VET : 1
RYAN_FAMILY : 1
NOTICE_SIGNS : 1
AS_LONG : 1
VIEW_THE : 1
ACTIVE_PS : 1
ANY_EXPERIENCE : 1
SOMALIA_ENGAGED : 1
ORDER_OCCULT : 1
ACTIVE_VITAL : 1
YES_OT : 1
MR_FOR : 1
ORDERED_AT : 2
MS_MCMULLEN : 1
THIS_CAN : 1
MEDICATION_ADMINISTERED : 1
LAST_PARALYSIS : 1
PTSD_DIVERTICULOSIS : 1
MEDICATIONS_KEYS : 1
TO_OPTIC : 1
OF_DEPRESSION : 1
PRESENTS_FOR : 2
GERD_ON : 1
TIME_SEP : 1
RIGHT_ACTIVE : 1
FOOD_PIPE : 1
PAIN_TO : 2
NORMAL_LIMITS : 1
APRIL_HERE : 1
CARPAL_TUNEL : 1
PROVIDED_OF : 1
MHT_RECEIPT : 1
EXAM_OF : 1
HOW_OFTEN : 2
OF_PREFERRED : 1
KNOWLEDGE_OF : 2
ALPRAZOLAM_EACH : 1
ULCER_PROTOCOL : 1
REACH_BED : 1
OR_LEVEL : 1
DRESSING_SURGICAL : 1
PROVIDER_TO : 2
LB_KG : 9
ANY_RECENT : 1
NOT_PING : 1
HIM_WAITING : 1
BORDERS_BY : 1
NOTES_IMPRESSION : 1
PHYSICIAN_INTERVENTIONS : 1
ONCE_LEAVES : 1
AND_PARENTS : 1
SSN_VETERAN : 1
SEVERE_CHANGES : 1
WITHOUT_INCONTINENCE : 1
ANXIETY_SEX : 1
ID_INTERDISCIPLINARY : 1
MUSCLE_SPRAIN : 1
OF_ARRIVAL : 1
DISEASES_PROBLEM : 1
KIN_INFORMATION : 1
INHL_QH : 1
PRESCRIPTIONS_OXYCODONE : 1
OF_TESTING : 1
WITH_FOLLOWING : 1
WITH_DIFFICULTY : 1
LAST_DENIES : 1
WARM_NO : 1
WHIP_VETERAN : 1
ALL_REQUIRED : 1
OLD_MALE : 3
IN_PAST : 1
FOOD_WITH : 1
FLUID_VITAL : 1
RECENTLY_EXPIRED : 1
INFORMED_HIS : 1
DIVERTICULOSIS_USE : 1
CASE_MANAGEMENT : 1
LIQUOR_BEFORE : 1
POSS_MEDICAL : 1
CASE_MAY : 1
BASIS_APPLY : 1
LEVEL_AND : 1
INTOXICATED_DIZZY : 1
FEMALE_PSYCHIATRY : 1
HAD_STOLEN : 1
EDUCATED_VET : 1
PLAN_OR : 1
VERBALIZES_UNDERST : 1
OR_CHEMORADIATION : 1
HRS_ARRIVED : 1
MR_ARRIVED : 1
BECK_ANXIETY : 1
TO_GO : 1
PALPABLE_DIFFICULTY : 1
YOU_HAVE : 3
BE_SEEN : 1
HEENT_WNL : 1
THE_WELL : 1
TO_IF : 3
INTAKE_ACUTE : 1
NOT_OUT : 1
SOUNDS_REVIEWED : 1
IS_PRIMARY : 1
ENHANCE_FUNCTIONAL : 1
ESOPHAGUS_SYND : 1
PHYSICIAN_CALLED : 1
HAD_NOT : 1
PATIENTS_CARE : 1
ACTION_WHAT : 1
ON_RIGHT : 2
AM_SIGNATURE : 1
WIFE_VERY : 1
URINATE_ENCOURAGED : 1
REPORT_LAST : 1
TOPIRAMATE_TAB : 1
TELEPHONE_CONTACT : 4
WAS_LAST : 1
DESPITE_XRT : 1
SHOULDER_MR : 1
TO_MG : 2
TO_FOCUS : 1
WOULD_LEAVE : 1
BED_LOW : 1
ORIENTED_CARE : 1
AND_OBSERVE : 1
INCONTINENCE_ALSO : 1
INSIGHT_JUDGMENT : 1
DIABETES_NO : 1
BLOOD_TIME : 1
EKG_DONE : 1
ORDER_OXYCODONE : 1
LEFT_LOWER : 1
MENTAL_HEALTH : 1
OF_TEST : 1
HAS_ARE : 1
TEMPERATURE_PCC : 1
THOUGH_AGO : 1
SOURCE_FOR : 1
OF_DEVIATED : 1
SPECIAL_TEMP : 1
CP_HE : 1
RECENTLY_REVIEW : 1
ICDCM_OTHER : 1
BE_ON : 1
PO_PTSD : 1
COLON_DATE : 1
PATIENT_PHONE : 4
HAD_ACTIVE : 1
PROCESS_WHO : 1
IS_MISSION : 1
HERNIATED_AND : 1
DO_URGENT : 1
AND_GAD : 1
FOCUS_ON : 1
IMMEDIATELY_TELLING : 1
HOUSESTAFF_HE : 1
LUNGS_AIRWAY : 1
YEAR_OLD : 4
CONSULT_DENTAL : 1
LIMITED_EOM : 1
IS_POSITIVE : 1
REPORTED_INCREASE : 1
RESIDENCE_RESIDENCE : 1
WERE_USED : 1
BECKY_NAME : 1
FAXED_MEDICATION : 1
THE_RECTUM : 1
INTERVENTION_DTR : 1
TO_NEW : 1
STRONG_MES : 1
IS_FOR : 2
HE_TEL : 1
IS_BEING : 1
PHYSICIAN_PRIOR : 1
CONSULTED_SOLDIER : 1
AND_LANTUS : 1
ACTIVE_TONGUE : 1
POLYPS_BY : 1
GIVEN_VERDSOME : 1
ACTIVE_ARIPIPRAZOLE : 1
CPRS_FOR : 1
AS_SHE : 1
TO_KEEP : 1
HORSE_PROTEINS : 1
TISSUE_TO : 1
INTERVENTIONS_COMPLAINTS : 1
WITHIN_THE : 2
STATE_ACTIVE : 1
PATIENT_GIVE : 1
TIMES_BREVICON : 1
PT_HEALTH : 2
ACTIVE_HAD : 1
AT_SET : 1
ICU_THAN : 1
GI_LIVER : 1
OPERATION_REPORT : 1
PARAM_SHAREDFILE : 1
THE_DIAGNOSIS : 1
ELBOW_PERCOCET : 1
THAT_YOU : 1
WHEELCHAIR_NURSE : 1
LATER_INTERACTED : 1
WNL_TELEPHONE : 1
DEVIATED_SEPTUM : 1
RECENTLY_OUTPATIENT : 1
TO_MEDICATION : 1
IS_AOX : 1
DATE_TIME : 1
ALREADY_SERVICECONNECTED : 1
TOBACCO_PRODUCT : 1
PT_DOES : 1
PROTEINS_CIPROFLOXACIN : 1
PHYSICIAN_CLINICAL : 1
XYZZY_TELEPHONE : 2
BAD_ADDR : 1
INTERESTED_IN : 1
BLOOD_GLUCOSE : 2
PASTORAL_VISITATION : 1
POSSIBLE_TUMOR : 1
SIMETHICONE_CHEW : 1
BEFORE_AS : 1
SURGICAL_HISTORY : 1
SECONDS_PHYSICIAN : 1
ILL_WITH : 1
ALPRAZOLAM_MONTH : 1
MEDICATIONS_WITH : 1
SON_HIM : 1
REACHED_PAGER : 1
PAIN_SYMPTOMS : 1
FUNCTIONAL_IMPAIRMENT : 2
HX_WAS : 1
WERE_AT : 1
ITS_ABUSE : 1
ON_OUR : 1
PLAN_GOALS : 1
LUMBOSACRAL_VACUUM : 1
OF_FUNCTIONAL : 1
FAITH_CHAPLAINCY : 1
LAST_ATTENDANCE : 1
OF_SYSTEMS : 1
UNDERSTANDING_MEDICATIONS : 2
MEDICATIONS_FOR : 1
BAI_YOU : 1
KNOW_HE : 1
TREATMENT_CONSUME : 1
FROM_UNITS : 1
VET_SEEN : 1
FOR_THIS : 2
AND_OR : 2
PENIS_HAS : 1
DX_TO : 1
AT_LEVEL : 1
UNKNOWN_MALE : 1
IS_OF : 1
ACTION_PLAN : 1
WORK_INDUCED : 1
INFORM_ALRIGHT : 1
RESIDENCE_STABLE : 1
INTRUSIVE_DENIES : 1
HAS_BENEFICIAL : 1
EVAL_MAY : 1
BELIEFS_WERE : 1
PRESENTS_CHIEF : 1
SYNCOPE_AND : 1
TIME_JUN : 1
UP_NOTED : 1
AND_SPONDYLOSIS : 1
FLUID_VOLUME : 1
ABNORMAL_STRIP : 1
NA_MEETINGS : 1
PROVIDER_NO : 1
THE_LUNGS : 1
FOLLOW_NEEDED : 1
REGARDING_DIET : 1
THROUGH_CASE : 1
VERBAL_CONSENT : 1
USE_ASPHIXIATING : 1
OF_CALLER : 1
FOLLOWING_ISSUES : 1
THE_REPORTED : 1
SC_DOCUMENT : 1
HPI_CHRONIC : 1
SWOLLEN_THROMBOLYTICS : 1
BE_FOR : 2
NO_MAIN : 1
COMBAT_VET : 1
FINDING_PHONE : 1
NO_BRADEN : 1
SELF_DAILY : 1
AND_FACT : 1
SYMPTOMS_HYPERGLYCEMIA : 1
LAST_FILLED : 1
TAKE_BENZTROPINE : 1
TREATMENT_OF : 1
DETOX_HE : 2
EXAMINED_DISCUSSED : 1
FOR_INDIGESTION : 1
SYMPTOMATIC_DATE : 1
TABLET_BY : 8
HEADACHE_ACTIVE : 1
DILTIAZEM_CAPSULES : 1
WITH_PALPATION : 1
MEDICATIONS_REFILL : 1
ICD_DIAGNOSIS : 1
LEARNING_RECEPTIVITY : 1
REFILL_AND : 1
DATE_THAT : 1
AMOXICILLIN_MG : 1
AOX_IS : 1
BRONCHOSCOPY_CONFIRMED : 1
HOSPITAL_THE : 1
THOUGH_MO : 1
WEIGHT_RISK : 1
MH_SOCIAL : 1
DIGITS_LACK : 1
HE_AND : 1
NAD_NURSING : 1
GIVEN_KNOW : 1
BAI_HAVE : 1
FEELS_DEPRESSED : 1
LEGAL_REPRESENTATIVE : 1
SUPPLIES_FINANCIAL : 1
VETERANS_PROVIDED : 1
NEED_LEAST : 1
HISTORY_IN : 2
ABUSE_HAD : 1
MEDICATIONS_NONE : 1
WITH_AN : 1
FLEXIBLE_TUBULAR : 1
MOOD_ACTIVE : 1
AN_APPOINTMENT : 2
PARALYSIS_OF : 1
DISC_PHENOMENA : 1
CHILDREN_AHEAD : 1
CURRENT_VERY : 1
THEREFORE_MUST : 1
POPULATIONS_WARM : 1
CONSUME_NUTRIENTS : 1
AGREE_WITH : 1
US_AM : 1
MR_REPORTED : 1
ME_AT : 1
PT_BEHAVIORAL : 1
REFUSING_TO : 1
CHIEF_OF : 1
HIGHER_DOSE : 1
SELFHARM_TO : 1
EACH_MONTH : 1
OMEPRAZOLE_FLUNIS : 1
WITH_WHO : 1
TREMORS_GLIPIZIDE : 1
CHARLOTTE_CONTACT : 1
DENIES_THOUGHTS : 1
DOMESTIC_HE : 1
PRACTITIONER_OF : 1
IMAGING_SC : 1
MED_DESCRIBES : 1
USE_HIMSELF : 1
CELL_OF : 1
AN_EMG : 1
AGE_PRESENT : 1
CONSULT_SAYS : 1
PROBLEMS_HE : 1
IN_WITH : 1
NTG_GTT : 1
STOOL_BLACK : 1
FOR_OF : 2
ADVANCE_AT : 1
PAIN_HAS : 1
DOMESTIC_ISSUES : 1
OX_INFORMED : 1
USE_CALL : 1
HIS_STOMACH : 1
LISINOPRIL_MG : 2
HOW_DO : 1
PAST_MEDICAL : 2
UNITS_NOON : 1
STATES_THAT : 2
HAD_TERRIBLE : 1
DYSPNEA_VARIES : 1
ONEHALF_BY : 1
SON_BROUGHT : 1
ALVETA_SON : 1
WELL_OF : 1
COGGINS_HABITS : 1
BENZTROPINE_MESYLATE : 1
ADDENDUM_WARRANTED : 1
WITH_PATIENT : 4
ANODONTIA_COLONIC : 1
WERE_TO : 2
LEVEL_WAS : 1
IN_MR : 1
JUDGMENT_ADEQUATE : 1
MH_NO : 1
IT_MOOD : 1
SOB_AWARE : 1
BE_OUT : 1
AND_ROLAIDS : 1
FEEDING_NO : 1
CATEGORY_CLASS : 1
WALK_THE : 1
YES_TURGOR : 1
IN_VOLUNTEERING : 1
ME_APRIL : 1
CONSULT_FOR : 1
BOLTED_TO : 1
MIDLINE_ORIENTED : 1
WITH_BILATERALL : 1
NOON_RANGE : 1
INCLUDES_NONVA : 1
PREVENTION_WAS : 1
CARE_NAME : 1
WAS_NOSHOW : 1
IDEATION_PRESENTS : 1
SUPPLIES_INVOLVEMENT : 1
SUGAR_POWDER : 1
GI_IMAGE : 1
ALSO_TO : 3
CHEMSTRIPS_CHEMSTRIP : 1
INTACT_HE : 1
FOODS_IN : 1
OPTIC_CHANGE : 1
FOR_PULMONARY : 1
THROUGH_TO : 1
PAIN_HERNIATED : 1
PLAN_CURRENT : 1
WE_CONTINUE : 1
SEE_WEIGHT : 1
THAT_SO : 1
AN_LEVEL : 1
SCARED_DID : 1
FOR_AN : 1
HAD_BLOOD : 1
NOW_THAT : 1
FOR_ABUSE : 1
THERAPEUTIC_WIFE : 1
COLONOSCOPY_EDUCATION : 1
IMPAIRMENT_SEVERE : 1
IF_WHEN : 1
PROVIDED_PT : 2
PCC_NOTE : 1
LB_BARRETTS : 1
REFERRED_TO : 2
USED_IN : 1
POTENTIAL_PRESENTS : 1
ON_DATE : 1
RECENTLY_OF : 1
IDENTIFICATION_TO : 1
MIDSTERNAL_IS : 1
MEDICAL_NOTE : 1
WITH_NO : 3
NOT_THIS : 1
AFFAIRS_REPRESENTATIVE : 1
BE_OF : 1
TAKE_MEDICATIONS : 1
ESSENTIALLY_AS : 1
AMBULATORY_AID : 1
ABLE_ACCEPT : 1
TIMES_STOP : 1
ENCOURAGED_UTILIZE : 1
DENIES_SIDE : 1
URGENT_CARE : 1
NERVE_ACUTE : 1
THAT_WOULD : 2
PROCESSES_INSIGHT : 1
FOR_SLMHC : 1
CM_OXYGEN : 1
PROCEDURE_PATIENT : 1
UNITS_LUNCH : 1
LIVES_HIS : 1
HIS_TREATMENT : 1
ELIGIBLE_STR : 1
FAITH_METHODIST : 1
ANTERIOR_SOUNDS : 1
INDEX_BAI : 1
CHICAGO_ILL : 1
MINUTES_NURSES : 1
LIST_REPORT : 1
CLINICAL_ACTIVITY : 2
AND_DOWN : 1
MEDICAL_HTN : 1
THESE_FROM : 1
LOBBY_TO : 1
VISION_PRESENT : 1
LOCAL_PLACE : 1
DENTAL_CLASS : 1
COULD_GET : 1
MOBILITY_OT : 1
FEE_CONSULTPHARMACY : 1
ON_FINASTERIDE : 1
OF_PRODUCT : 1
DIZZY_AND : 1
DENIED_AT : 1
APPOINTMENT_SCHEDULED : 1
MHICM_SCREEN : 1
VET_MALE : 1
CALLER_DIFFERENT : 1
THE_TO : 3
HIMSELF_HE : 1
AND_HYPERLIPIDEMIA : 1
OF_SEROQUEL : 1
GERD_MEDS : 1
COLLECTS_SERVICECONNECT : 1
CODEINE_OMEPRAZOLE : 1
TYPE_IN : 1
PLAN_IS : 1
HYPERTROPHY_OF : 1
BELL_REACH : 1
BACK_AND : 1
COME_IN : 1
DO_FOR : 1
WHEEZING_RALES : 1
OR_MG : 1
FROM_PARAMEDIC : 1
FOR_RETINOPATHY : 1
YESTER_AND : 1
FOR_BETTER : 1
HAS_OF : 2
PTSD_WARRANTED : 1
VA_HE : 1
MOVIE_READING : 1
AFFAIRS_FOR : 1
DESCRIBE_IDEATION : 1
MNEMONIC_ADDRESSED : 1
HAVE_VET : 1
AT_OXYGEN : 1
QH_TO : 1
CONSULT_BUT : 1
CALLER_IF : 2
MEDS_LIFESTYLE : 1
VETERAN_YO : 1
BEST_HEARING : 1
DOES_HAVE : 2
CONSULT_LABS : 1
APPT_ACTION : 1
INSTRUCTIONS_IS : 1
TREATMENT_DEPRESSION : 1
CONTACTS_BE : 1
NO_ADVERSE : 1
GROUP_THERAPY : 2
OF_GROUP : 1
BLOOD_SPENT : 1
VITAL_HE : 1
REPORTED_AN : 1
PHONE_LENGTH : 1
BLE_PT : 1
YES_DISPOSITION : 1
BLOOD_SOMETIMES : 1
REVIEWED_SIGNIFICANT : 1
NURSING_NARRATIVE : 1
YOU_QUESTIONS : 1
AS_NEEDED : 2
WHO_UNDERSTANDING : 1
OR_CANCER : 1
IS_AT : 1
BEC_HE : 1
THIS_SET : 1
CAPSULES_YESTER : 1
LUNG_BIOPSY : 1
COLONOSCOPY_SOUZA : 1
YOU_GUILTY : 1
IF_SEND : 1
CLINIC_MEDICAL : 1
VETS_SUICIDAL : 1
QH_FOR : 1
FAX_ANSWERING : 1
TELEPHONE_URINAL : 1
FOR_PT : 1
BLE_UNABLE : 1
WELL_MRI : 1
OTHER_ADAPTATION : 1
ADMISSIONS_IS : 1
THE_LANTUS : 1
MONITORING_SUGARS : 1
THEIR_APPOINTMENT : 1
PROBLEM_FOR : 1
ORDERED_FOLLOWING : 1
VITAL_SIGNS : 4
BARRETTS_ESOPHAGUS : 2
SECONDS_CONTINUE : 1
JUICE_WERE : 1
SCORE_NOTES : 1
UROLOGIST_WAS : 1
VOMITING_BRIEF : 1
AND_APPROPRIATELY : 1
HAVE_ITEMS : 1
ALTERNATE_TELEPHONE : 1
FASTING_LIPIDS : 1
TEMPERATURE_NOTE : 1
ACTIVE_PCP : 1
OUTCOMES_WILL : 1
CON_ALERT : 1
PHENOMENA_SEEN : 1
BY_TAKING : 1
AFFAIRS_MEDISOME : 1
VETERAN_SPUTUM : 1
AND_PRESSURE : 1
ROLAIDS_CODEINE : 1
SWOLLEN_FEET : 1
CONSULT_EXPECTED : 1
CONSENT_NURSE : 1
PO_PRIVATE : 1
DATE_CT : 1
PRESSURE_IS : 1
EXERCISE_HIS : 1
ACCORDING_PROCESSES : 1
DISTRESS_NOTED : 1
COLD_SHOWER : 1
BLOODWORK_CONTINUE : 1
HEALTH_AND : 1
AT_NUTRITION : 1
RATES_DEPRESSION : 1
PATIENT_NUMBER : 1
THAT_HAVE : 1
LONGER_FEELS : 1
DIVORCED_VN : 1
MG_OXYCODONE : 1
SEVERAL_DOES : 1
AND_PSYCHIATRY : 1
AND_WAS : 3
TREMORS_ABSENT : 1
ADDR_REFILLS : 1
ONC_WE : 1
SAFETY_IF : 1
ADEQUATE_MEDICAL : 1
WITH_WORST : 1
IF_NOT : 1
FEELING_OVERWHELMED : 1
COMBIVENT_OBTAINED : 1
HEAD_CM : 1
EVALUATION_PHYSICIAN : 1
AFTERCARE_HOW : 1
THIS_HOSPICE : 1
NOT_REPEAT : 1
WE_GET : 1
FLUNIS_DE : 1
REPORTED_IN : 1
EXTREMITY_PATIENT : 1
IS_EXAMINATION : 1
REC_DRUG : 1
PATIENT_OCCULT : 1
SHE_DO : 1
HERE_HIS : 1
CONTACT_TELEPHONE : 1
IN_EPIGASTRIC : 1
HEADACHE_ALCOHOL : 1
THEMSELVES_VETERANS : 1
DOSE_CLOTS : 1
STOP_DUE : 1
IT_HARD : 1
NOT_NO : 1
NURSE_BATHROOM : 1
ENT_REQUESTED : 1
GOOD_THROUGH : 1
CARD_EXPRESSED : 1
LUNG_CANCER : 1
ICD_WEIGHT : 1
DEPRESSED_DENIED : 1
BEEN_BLDG : 1
SPINE_VACUUM : 1
BEGAN_WIFE : 1
PHARM_MED : 1
GOALS_BEHAVIORAL : 1
INPATIENT_ENHANCE : 1
CHAPLAIN_NOTE : 1
THROUGH_RECTUM : 1
CANCER_HE : 1
VET_CAPABLE : 1
LAWS_EATING : 1
EXERCISE_GOAL : 1
PROGRESS_TREATMENT : 1
DISTRAUGHT_SHE : 1
PSHX_PE : 1
CALLER_NOT : 1
RIGHT_SIDE : 1
ANY_OTHER : 1
CONVERSATION_DUE : 1
NIGHT_WITH : 1
ADVANCED_DIRECTIVES : 1
CHANGES_THE : 1
TID_PRIVATE : 1
CYST_FLUID : 1
APPLY_AMOUNT : 1
RANGE_STATES : 1
HAS_NERVE : 1
IF_FLUOROSCOPY : 1
ACCEPTABLE_PATIENT : 1
CARE_MD : 1
WITH_FEATURES : 2
ONSET_IF : 1
NOTE_TEMPERATURE : 1
PIN_CARE : 1
AND_REQUIRED : 1
SO_FRIGHTENING : 1
WITH_LOW : 1
DENIES_CP : 1
BACKGROUND_SUPPORT : 1
OF_PRECLUDING : 1
OF_VOLUNTEER : 1
RESP_PROVIDER : 1
REQUIRES_ASSISTANCE : 1
DE_HAVE : 1
WAS_MET : 1
COCCYX_PAIN : 1
WITH_MOBILITY : 1
THE_STEPS : 1
NUTRITION_MEDICATIONS : 1
AND_HEADACHE : 1
OUTPATIENT_INCLUDING : 2
TO_FEET : 2
NEUROPSYCHOLOGY_CONSULT : 1
WAS_ESSENTIALLY : 1
PO_WITH : 1
PRIMARY_COUNSELOR : 1
WT_LB : 3
IDEATION_SELFHARM : 1
PROBLEMS_LIST : 2
TONIGHT_MG : 1
ANTIBIOTIC_HAS : 1
ENCOUNTER_AGO : 1
SEEN_DUE : 1
TV_SHOWS : 1
CFT_SEC : 1
BODY_INDEX : 2
RESULTS_WILL : 1
HIM_WOULD : 1
THE_ADA : 1
TABLETS_DEPENDENCE : 1
PORT_CHARLOTTE : 1
OXIM_HAITI : 1
INCLUDES_DOES : 1
SCHEDULE_NOT : 1
TOBACCO_THE : 1
TO_LEFT : 1
INCLUDING_IV : 1
SUCH_THREATS : 1
WORKING_TO : 1
CANCER_RADIATION : 1
VA_FOR : 1
MES_ALL : 1
WAS_PROVIDED : 1
PT_ID : 1
PARTICIPATION_GASTROINTESTINAL : 1
UP_WITH : 1
LABS_ANSWERING : 1
TUBULAR_INSTRUMENT : 1
ADMISSION_ORDERS : 1
NERVE_SC : 1
SPECIALIST_ENCOURAGED : 1
YOU_NOTICE : 1
WILL_THEY : 1
CAP_TAKE : 1
CAPILLARY_LESS : 1
LT_BRODINE : 1
HE_COUGHT : 1
DIVORCED_SC : 1
OF_NERVE : 1
AID_BEDREST : 1
JOINT_PERIARTICULAR : 1
FOR_RESPIRATORY : 1
NOTED_OR : 1
OT_TURGOR : 1
BY_REPORT : 1
AMBULATING_CANE : 1
REMISSION_PRIOR : 1
RA_RENAL : 1
REPORT_STAFF : 1
DIAGNOSIS_INITIAL : 1
FLUID_FROM : 1
PCPABSENCE_OF : 1
SYSTEM_AND : 1
UP_SIGNATURE : 1
GRASS_IS : 1
EDUCATION_ASSESSMENT : 1
SISNEROS_LATE : 1
TENSE_IN : 1
DERIDED_ERYTHEMATOUSE : 1
MEDICAL_REGARDING : 1
CHART_REVIEW : 1
PATIENT_HAVE : 2
CHEST_OR : 1
EVERY_ACTIVE : 1
CLICK_TO : 1
RDW_DENIES : 1
LEGAL_AFFAIRS : 1
ADDENDUM_CP : 1
CURRENT_BARRIERS : 1
ASSESS_LEVEL : 1
INCLUDING_RESIDENCE : 1
THOUGHTS_HURTING : 1
NOT_VETERAN : 1
SPINE_AND : 1
RATE_BREATHING : 1
DISCUSSSED_ONC : 1
OCCASIONS_ACCOMPANIED : 1
HAS_THE : 2
EOM_INTACT : 1
OF_IMMOBILITY : 1
BP_OF : 1
LB_DOCUMENT : 1
HAS_HAD : 1
VISTA_FOR : 1
COGNITIVE_FUNCTIONING : 1
CE_WHEN : 1
ASSESSMENT_NOT : 2
APPROPRIATE_IS : 1
ARMY_FOR : 1
WILL_ALL : 1
ON_THE : 2
TAB_BENIGN : 1
LIQUID_NONBLOODY : 1
WITH_CFT : 1
RETINOPATHY_PLEASE : 1
PLATINUM_CLINIC : 1
WAS_THAT : 1
INFORMATION_ON : 1
HE_RECENTLY : 1
TO_HELP : 1
BECAUSE_HE : 1
HOSPICE_PC : 1
OF_THE : 6
HYDROCODONE_ACETAMINOPHEN : 1
VA_TWO : 1
RECEIVED_REPORT : 1
NIGHT_AND : 1
MAKING_IT : 1
CARE_CHILD : 1
INCLUDE_RADIATION : 1
PAIN_LIST : 1
TAKING_SPEACH : 1
BELONGINGS_STATES : 1
HAS_NOT : 1
IS_SEEN : 1
AND_MON : 1
CP_SOB : 2
IMPRESSION_PLAN : 1
HISTORY_RDW : 1
IN_PRIMARY : 1
VET_TO : 2
HE_DIFFICULTY : 1
LIST_TO : 1
SCORING_ANIMALS : 1
ORIENTEDX_LIMITED : 1
ATTENTIVE_PT : 1
GIVEN_BENADRYL : 1
STATED_JUST : 1
PT_HE : 2
WITH_HIS : 1
CHANGE_DOSE : 2
IS_REQUESTING : 1
ISOP_OF : 1
RE_ISSUES : 1
THE_SIGMOID : 1
INDEPENDENT_FOR : 1
WELLNESS_AND : 1
ACTIVITY_OF : 1
TO_EXCEED : 3
PRILOSEC_ROLAIDS : 1
FURTHER_FOR : 1
CREATIVE_SOCIAL : 1
TYLENOL_PO : 1
FOR_PASSIVE : 1
KNOW_ALBUTEROL : 1
BROUGHT_HIM : 1
PROVIDED_PATIENT : 1
OF_LEARNING : 1
RA_THYROID : 1
WILL_CONTINUE : 2
REPRODUCABLE_PALPATION : 1
NECK_COULD : 1
INTO_THE : 1
NOT_FINANCIAL : 1
INSTRUCTED_DESCRIBE : 1
QUESTIONS_REGARDING : 1
MEDICATIONS_ORDERED : 2
TEST_MENSTRUAL : 1
ASSESSMENT_SCREENING : 1
HOUR_TIME : 1
AGO_NOT : 1
RETURNING_HOME : 1
TRANSFER_SHEETS : 1
FOR_RENAL : 1
SEP_TOLERATED : 1
NOT_ABLE : 1
ATTENDING_NOTE : 1
NTG_STARTED : 1
ORIENTED_TO : 1
PATIENT_WHO : 1
NOTE_DONE : 1
POTENTIAL_IDEATION : 1
TO_TRIAL : 1
AND_JUICE : 1
PTS_TO : 1
SCHEDULED_EVALUATION : 1
PM_THROUGH : 1
PCP_PHYSICIAN : 1
AND_ANSWER : 1
WOUND_BORDERS : 1
BETTER_AND : 1
ORDERS_LB : 1
REQUESTED_AND : 1
UNIT_WITH : 1
TELEPHONE_PRIMARY : 1
PULSE_OX : 1
NOTE_OF : 5
TAKING_OF : 1
SSN_RISK : 1
DENIES_RECENT : 1
SEROQUEL_STILL : 1
ROLAIDS_WHICH : 1
FIRST_ATTEMPT : 1
INFECTION_DISEASE : 1
VERBALIZES_OF : 1
FINDING_PAIN : 1
HX_PT : 1
RECOMMEND_CONSULT : 1
INTERVENTIONS_PT : 1
WRITER_INFORMED : 1
ALSO_INDICATES : 1
CHANGE_TO : 2
PROBLEM_SPOKE : 1
CONTACT_BEEN : 1
PUPILS_MIDLINE : 1
WOOUND_BASE : 1
ATTENDED_THE : 1
TWO_BMS : 1
TWICE_DYSPNEA : 1
SCREEN_GROUP : 1
SCREEN_NONE : 1
FM_CP : 1
LAST_PT : 1
OUTSIDE_MEDICAL : 1
PENSION_LETTER : 1
WITH_AS : 1
AN_INCREASE : 1
ACTIVE_FOR : 1
CHANGES_COMMENT : 1
PAIN_IN : 2
REPRESENTATIVE_FOR : 1
TYPE_OF : 3
TIME_BY : 1
MINIMUM_PASTORAL : 1
YESTER_AT : 1
WITH_CANE : 1
BEEN_TAKING : 1
MOUTH_HAD : 1
THE_ACTIVITY : 1
PROTECTION_WITH : 1
INVENTORIED_BY : 1
NOT_REPORT : 1
FOR_CONTROL : 1
HE_CALL : 1
DEPRESSED_SI : 1
MAGAZINES_SNACKS : 1
LMSW_THE : 1
DYSLIPIDEMIA_REVIEW : 1
PROBLEM_ISSUE : 2
OF_HAND : 1
HE_LEAVES : 1
DATA_FOUND : 1
TISSUE_IN : 1
PT_THEY : 1
IS_CURRENTLY : 2
TO_ADVANCE : 1
PATIENTS_NURSING : 1
ARIPIPRAZOLE_TAB : 1
SATT_AND : 1
PTSD_ACTIVE : 1
AGO_SUICIDAL : 1
PIECE_OF : 1
IN_WT : 2
IN_HRS : 1
ELECTRONIC_RECORD : 1
FROM_CLICK : 1
UPDATE_ALL : 1
ACCOMPANIED_FEVER : 1
STABILITY_LOSS : 1
WITH_ASSISTED : 1
FEET_PROVIDED : 1
WANTS_NO : 1
NOTE_COLONOSCOPY : 1
VARIES_FROM : 1
MAY_SKIN : 1
TELEPHONE_ENCOUNTER : 1
QUIT_EATING : 1
OUT_SON : 1
DC_CALL : 1
TV_BEDSIDE : 1
FOR_RECENT : 1
LEAVENWORTH_HE : 1
IN_CARE : 2
VET_WHO : 1
VETERAN_NOT : 1
PODIATRIC_NOTE : 1
FOOD_NEUROPSYCHOLOGY : 1
PULSES_PALPABLE : 2
HIM_HAND : 1
TO_DISCHARGE : 1
REPORTED_TO : 2
NURSING_TRIAGE : 1
DISABLED_COLLECTS : 1
IS_AND : 1
WAS_WEARING : 1
PRESENTS_LUNG : 1
CANCEL_YOUR : 1
FEELING_AS : 1
SWELLING_FLUID : 1
TURGOR_NORMAL : 1
DIRECTIVES_PATIENT : 1
ACTIVE_PERCEPTION : 1
MEDICATIONS_TIME : 1
DIAGNOSIS_NO : 1
TO_GEN : 1
PROVIDED_STRONG : 1
HOURS_JUN : 1
HE_ONLY : 2
PATIENT_WAS : 2
PT_REQUESTING : 1
NO_ATTENTION : 1
LIST_REVIEW : 1
CLOTS_STOOL : 1
SLOW_TO : 1
CANCER_NEURO : 1
MAKE_ON : 1
PT_PATIENT : 1
BILATERALL_EXTREMITY : 1
NOTE_PROBLEM : 2
MEDICATIONS_HE : 1
PROBLEMS_PROBLEM : 3
HEART_AND : 2
REVIEWED_FOR : 1
TUMOR_DISCUSSSED : 1
EASY_REACH : 1
ORDERS_ARE : 1
MUCINEX_ACTIVE : 1
MG_NAPROXEN : 1
NO_MATTER : 1
PATIENT_HOPELESSNESS : 1
STRESS_HYPERCHO : 1
ADVANCES_THROUGH : 1
ACTIVITY_PATIENT : 1
OPT_INSTR : 1
ACTIVE_MIDLINE : 1
THIN_MODIFIED : 1
WERE_THIS : 1
CARPAL_REPAIR : 1
DIET_ORDER : 1
TRIAGE_AGE : 1
THEREFORE_RADIATION : 1
NO_HEADACHES : 1
SHE_PULSE : 1
POWDER_ORAL : 1
COMPLAINED_OF : 1
OR_PLEASE : 1
STATED_HAD : 1
AT_FOR : 1
PROBLEMS_OR : 1
TO_SHOWS : 1
THE_IMPLEMENTATION : 1
ISSUE_OF : 2
LUNGS_WHEEZING : 1
SUPERVISING_OF : 1
INTERVENTION_CREATIVE : 1
WAS_ON : 3
BETTS_NEXT : 1
WHEN_STANDING : 1
NA_SATT : 1
PATIENT_THE : 3
FOR_BLOOD : 1
PROBLEMS_IN : 1
DM_OSA : 1
OCCULT_FECAL : 1
NEGATIVE_SCORE : 1
SUS_TAKE : 1
CONSCIOUS_IS : 1
BACKGROUND_CHAPLAINCY : 1
HIM_THAT : 1
WNL_TRIAGE : 1
OF_IT : 1
PRODUCT_DUE : 1
EATING_THE : 1
BE_CLINICALLY : 1
EDUCATION_EXERCISE : 1
PRESSURE_NURSE : 1
NOT_SOCIAL : 1
NURSE_FOR : 1
PL_ED : 1
MOBILITY_NONE : 1
FEATURES_ICD : 2
THE_MILITARY : 1
TO_MS : 1
FLUID_OR : 1
HIS_IN : 1
WITH_PHYSICIAN : 1
TO_PROBLEMS : 2
PE_FYI : 1
IMB_CE : 1
SHE_REPORTED : 1
LOW_POSITION : 1
LCSW_THE : 1
AS_AND : 1
GIVEN_AT : 1
ASPHIXIATING_HIMSELF : 1
THE_OUTCOMES : 1
REVIEWED_OR : 1
LVN_TO : 1
HELPLESS_AS : 1
ALSO_REFERRED : 1
AORTIC_ROOT : 1
LESS_HRS : 1
WHAT_YOU : 1
HE_UNDERLYING : 1
HIM_DUE : 1
BITE_OR : 1
LOBBY_REQUESTING : 1
RESP_THE : 1
HE_REQUEST : 1
ALL_EKPHARMACY : 1
SERVICE_SYMPTOMATIC : 1
BUT_DOING : 1
NO_SAFETY : 1
DOCUMENTED_DATA : 1
RAL_MALAISE : 1
PHYSICIAN_CONTINUE : 1
VERIFY_THIS : 1
HE_NOW : 1
TO_COUGHT : 1
IMPLEMENTATION_OF : 1
THIS_GERD : 1
DATE_SKIN : 1
CAN_GET : 1
SHOWING_HIS : 1
MALE_THAT : 1
THERAPY_OR : 1
LIKELY_BE : 1
APPLY_TOPICALLY : 1
IN_REQUESTING : 1
ERYTHEMATOUSE_THE : 1
GLUCOSE_MONITORING : 1
YOUR_NURSE : 1
IS_HAVING : 1
TO_CANCEL : 1
TX_ORDERS : 1
VALUABLES_RANG : 1
TWO_FOR : 1
ORDER_PLEASE : 1
PROBLEMS_PROPER : 1
AS_HAS : 1
EXTREMITIES_CAPILLARY : 1
SOURCE_THE : 1
WARM_VERBALIZES : 1
CLONIDINE_TAB : 1
MO_AGO : 1
FLUIDS_AND : 1
AND_TOLD : 1
ASSESSMENT_STATUS : 1
APPT_MON : 1
HAD_SEEN : 1
EATING_REGULARLY : 1
ENTRY_VISIT : 1
ON_OUTLINING : 1
WAITING_MOST : 1
ALL_INFORMATION : 1
EVER_HAD : 1
VERIFIED_PLATINUM : 1
SYSTEM_LUMBOSACRAL : 1
TAKE_TABLETS : 1
VETERAN_IS : 2
YOU_HOW : 1
INFORMED_VETERAN : 1
ADMINISTRATION_PLAY : 1
NOTE_INFLUENZA : 1
THIS_HE : 1
UNTIL_OR : 1
PNEUMOCOCCAL_VACCINE : 2
APPROVAL_FEE : 1
SUCH_AS : 1
IMPINGMENT_SYND : 1
THIS_VISIT : 1
SPUTUM_WITH : 1
EASY_NO : 1
NURS_DATE : 1
SKETCHY_PSYCHIATRY : 1
SYMPTOMS_OF : 2
MOUTH_FOUR : 1
TO_YOUR : 2
INSTRUMENT_INTERDISCIPLINARY : 1
ALRIGHT_AS : 1
HOW_BAD : 1
IS_CORRECT : 1
BY_ME : 1
TEL_TRIAGE : 1
FOLLOWUP_IN : 1
VERIFY_PATIENT : 1
BRACELET_CALL : 1
SEVERE_PSYCHOTIC : 2
ACCEPTABLE_TO : 1
PL_PCP : 1
HAS_ANSWERED : 1
COMPLIANT_MEDICATIONS : 1
ID_ADMITTED : 1
LIPIDS_AND : 1
GAYLORD_CLINIC : 1
IN_LVN : 1
ACTIVE_RIGHT : 1
OF_WAR : 1
TOOK_DILTIAZEM : 1
REVIEWED_AT : 1
FOR_URGENT : 1
DISCUSSED_REVIEWED : 1
MHC_STAFF : 1
MEDICATIONS_STATUS : 1
ADDENDUM_TOPIRAMATE : 1
HAND_FAITH : 1
DONE_HE : 1
OF_PT : 1
ANXIETY_FEMALE : 1
CHANGE_NOTED : 1
WITH_PCP : 1
BEING_INJURED : 1
REGARDING_YOUR : 1
PLEASE_YOUR : 1
PLACE_WITH : 1
WITH_CHILDREN : 1
THIS_DOES : 1
INJURIES_SUSTAINED : 1
ESOPHAGEAL_RADIATION : 1
AN_IS : 1
HX_OF : 1
SLEPT_GOOD : 1
INDEX_TAKE : 1
PT_EDT : 1
HEADACHE_AN : 1
SIGNIFICANT_OTHER : 2
FLUID_SIGNS : 1
INTERVENTION_PL : 1
TAKES_AND : 1
CARE_FTOPC : 1
OR_SPREAD : 1
HEMOSTASIS_DRESSING : 1
IS_NOT : 3
ABILITY_PEDAL : 1
PERSONAL_BELONGINGS : 1
AND_AC : 1
RESCEDULE_HIS : 1
THE_WITHIN : 1
AND_SUICIDE : 1
SPONDYLOSIS_TROPONIN : 1
NOT_ACCEPTABLE : 1
HABITS_BLOOD : 1
TO_INVENTORY : 2
IS_DENIED : 1
OPHTHALMOLOGY_CONSULT : 1
OF_PAIN : 3
RESPIRATIONS_REGULAR : 1
REMEMBERING_WEIGHT : 1
VERBALIZES_UNDERSTANDING : 1
AREA_PTSD : 1
REVIEWED_FLAG : 1
BMS_GLUCOSEFINGER : 1
COULD_HIM : 1
LIMITED_MOBILITY : 1
HAD_THOUGH : 1
INITIAL_DATE : 1
PLACE_ON : 1
CONVERSATION_FOLLOWUP : 1
UNDERGO_PA : 1
CALL_PAJAMAS : 1
DISABLED_SERVICECONNECT : 1
COUNSELOR_SISNEROS : 1
CONSULTATION_FROM : 1
VET_OF : 1
FROM_IN : 2
THEN_WAS : 1
HAVE_AN : 1
WITH_LOWER : 1
GOAL_VERBALIZES : 1
BACK_PT : 1
THAT_DAD : 1
HIS_HOME : 1
MAIL_BUT : 1
PT_SOMEWHAT : 1
NURSING_TRANSFER : 1
SIGNS_MEDICATION : 1
PO_FOR : 3
WHO_ENCOURAGED : 1
COULD_BE : 1
PING_NIGHT : 1
NONE_STRONG : 1
LAB_DONE : 1
SEX_FEMALE : 1
BY_WAS : 1
AND_URINAL : 1
FOLLOWED_TWO : 1
STABLE_TO : 1
PEDAL_ARE : 2
PROVIDED_BY : 1
DOCUMENT_THIS : 1
OBSERVATION_BECAUSE : 1
NOTE_EDUCATION : 1
OF_CANCER : 1
MEDICATIONS_REPEAT : 1
PAST_EXISTING : 1
IMAGE_ORDER : 1
FAIR_ALTERNATE : 1
COST_THE : 1
CARE_CONSULT : 1
INFLUENZA_IMMUNIZATION : 1
CONSCIOUSNESS_TINGLING : 1
FOR_REFERRAL : 1
SEE_TIME : 1
CHRONIC_POLYP : 1
FOLLOWED_ZELL : 1
IT_THE : 1
TO_AT : 1
PLEASE_CALL : 1
VET_HAS : 1
GRANULAR_NO : 1
SI_HOURS : 1
THAT_VETERANS : 1
RUNNING_AND : 1
CON_BODY : 1
COCCYX_DENIES : 1
THAN_CARDIAC : 1
IN_HOSPITAL : 1
BLOOD_STOOL : 1
HOUSEMOBILE_HOME : 1
OUT_OF : 1
LAB_ORDERED : 1
REC_INTERACTIVE : 1
SO_CONTACTS : 1
ASSESSMENT_AN : 1
NORMAL_CT : 1
BEING_IN : 2
EXPIRED_OUTPATIENT : 1
ASSOCIATED_GROUP : 1
YESTER_FOR : 1
REPEAT_LIPIDS : 1
ACTIVATE_TO : 1
DISCUSSED_WITH : 1
ON_CLOSE : 1
APPLIED_SURGICAL : 1
REQUESTED_BLOOD : 1
HAS_CBI : 1
LEVEL_HIGH : 1
NO_SI : 1
DIFFICULTY_BIPOLAR : 1
TRANSFER_INTRAFACILITY : 1
VOIDING_BRACELET : 1
ENGAGED_COMBAT : 1
ACCEPT_PT : 1
POSITIONING_AMBULATING : 1
TO_WEEKLY : 1
THAT_DUE : 1
USUAL_FOR : 1
POSTSURGICAL_AORTOCORONARY : 1
GROUP_OCULAR : 1
ENCOURAGED_VET : 1
OF_ALTERED : 1
PROBLEM_DIABETIC : 1
VIA_NC : 1
CEFADROXIL_SERUM : 1
VOMITING_PULSE : 1
ISSUES_DOING : 1
CAPACITY_TO : 1
ELEVATED_ACTIVE : 1
DIFFICULTY_REMEMBERING : 1
DILTIAZEM_YESTER : 1
WEIGHT_STABILITY : 1
GAVE_ONCALL : 1
LEFT_LEG : 1
IMAGING_CONSULT : 1
HE_THEMSELVES : 1
FWW_PRESENTLY : 1
STATES_LEFT : 1
METOPROLOL_MG : 2
NO_LONGER : 2
MAGAZINES_AND : 1
THIS_TIME : 1
MR_OF : 1
PAGE_REASON : 1
SAYS_IS : 1
NEED_TO : 1
NOTE_NAME : 1
CARDIOLOGY_AND : 1
PATIENTS_PRESSURE : 1
BY_FOUR : 1
APPOINT_SON : 1
OF_AND : 5
FROM_HE : 1
DENIES_HOW : 1
STABLE_SHOULD : 1
TO_KNOW : 1
BRONX_TRIAGE : 1
AS_WANTS : 1
SEEN_AND : 2
THE_REGION : 1
TO_TIME : 1
MCMULLEN_CONTINUD : 1
BLOOD_TEST : 1
GLUCOSE_INTESTINAL : 1
TIME_PHONE : 1
PLANS_TO : 1
PATIENT_SSN : 2
GENERAL_LMSW : 1
PAGER_PATIENT : 1
TO_PAIN : 1
THIS_UP : 1
ND_DIFFUSE : 1
DETOX_BEC : 1
TROUBLES_FEELING : 1
CONTINUES_ATTENDING : 1
LB_ACTIVE : 1
HE_IOP : 1
OF_ILLEGAL : 1
MH_ASSESSMENT : 1
OR_OF : 1
RAL_MYALGIA : 1
SERVICE_IF : 1
EOM_CV : 1
IN_ACTIVATE : 1
AS_TYLENOL : 1
OFF_ON : 1
ABDOMEN_ORGANOMEGALY : 1
MET_MEASURES : 1
BUT_STILL : 1
BREAKFAST_AND : 1
YOUR_PHYSICIAN : 1
TRANSFERRED_TO : 1
ADV_WAS : 1
RN_REHABILITATION : 1
WE_WILL : 1
THEY_ENCOURAGED : 1
COMPUTERIZED_PROBLEM : 1
CALLED_SUICIDE : 1
LIMITS_RECOMMEND : 1
HOURS_FOR : 1
TUNEL_LEFT : 1
FOR_YEAR : 1
PT_WAS : 3
AWARE_OF : 1
OF_CALL : 1
NUMBER_PHONE : 1
MUTUAL_PATIENT : 1
BROUGHT_IV : 1
IN_ORDER : 2
TUBULAR_LIGHTED : 1
BLOOD_PULSE : 1
DEVIATED_AND : 1
OF_PRIVATE : 1
TO_PACU : 1
ABNORMAL_RYTHN : 1
SELF_METOPROLOL : 1
SCHEDULED_WITH : 2
NORMAL_DONE : 1
ISSUES_AS : 1
AFTERCARE_OFTEN : 1
OF_VA : 1
WITH_CRIS : 1
WHICH_CODEINE : 1
WAS_FRIGHTENING : 1
QID_WAS : 1
LOCAL_PLEASE : 1
HISTORY_REPORTED : 1
THAT_SEEN : 1
ACTIVITIES_DURING : 1
CASUALTIES_OF : 1
VERY_AND : 1
ONLY_DRINK : 1
INVENTORY_BELONGINGS : 1
ACETAMINOPHEN_OXYCODONE : 1
WAS_PUT : 2
IF_PT : 1
PT_FOLLOWING : 1
DONE_ALSO : 1
ELEMENT_IS : 1
DESCRIBES_INJURED : 1
NONE_MENTAL : 1
ULCER_PREVENTION : 1
LAST_ENDOCET : 1
OR_ASK : 1
OR_PAY : 1
HELP_ANYMORE : 1
WOULD_PATIENT : 1
AS_HE : 2
THEN_CD : 1
SCORE_EPISODE : 1
THE_MONTHS : 2
CLINIC_IF : 1
VOLUNTEER_ISSUES : 1
CHEW_TAB : 1
ADMISSION_EDUCATE : 1
WITH_NONVA : 1
FOR_CARDIOLOGY : 1
AUTHORIZE_EXAM : 1
GLUCOSE_PAIN : 1
REVIEW_OF : 2
WT_KG : 3
CLASS_IV : 1
STAFF_PROVIDERS : 1
PATIENT_ATTENTIVE : 1
EDUCATE_PT : 1
AND_WILL : 3
ACCEPT_TO : 1
INDEPENDENT_FEEDING : 1
FOR_GROUP : 1
TABLESPOONFU_ORAL : 1
SAME_COLONOSCOPY : 1
THIS_NOTE : 1
IT_DOWN : 1
TRIAL_MEDS : 1
AS_PAIN : 1
PSYCHIATRY_TWO : 1
NOT_HEIGHT : 1
TWICE_TREAT : 1
HEAD_MEASURES : 1
EASY_SOB : 1
BRIEF_STATEMENT : 1
IN_CM : 3
TONGUE_ORIENTED : 1
HE_MAY : 1
ASK_FOR : 1
SCHEDULED_SLMHC : 1
FOR_SUBSTANCE : 1
MARCH_APPOINT : 1
NO_VOMITING : 1
THE_ILLEGAL : 1
SAYS_DOESNT : 1
CREATIVE_ARTS : 1
CBI_AND : 1
PHYSICAL_UROLOGIST : 1
NEEDED_PRESSURE : 1
PROVIDERS_BRODINE : 1
IS_AWARE : 1
SURROUNDED_DRY : 1
ADAPTATION_TO : 1
PATIENT_ENCOUNTER : 1
PATIENT_AND : 1
CONSTRUCT_LETTER : 1
NUMBER_LENGTH : 1
AN_HOUR : 1
THE_UNIT : 1
CONTACT_PATIENT : 1
REFILL_THAN : 1
LATE_TO : 1
NOTE_BY : 1
AGO_RECENTLY : 1
MET_HEAD : 1
HURTING_FALL : 1
SPRAIN_ADDENDUM : 1
IS_PLACE : 1
AND_RECENTLY : 1
YOUR_REFILL : 1
SLMHC_LOCAL : 1
UNDERLYING_BELIEFS : 1
DRUG_CONSULTPHARMACY : 1
MG_TAB : 8
FOLLOW_UP : 1
IN_THE : 11
PT_PAIN : 1
OF_NECK : 1
IF_MEDICAL : 1
TO_IDENTIFY : 1
OF_INCREASED : 1
MEDICATIONS_TELEPHONE : 1
DENIES_SI : 1
RENOTTA_NURSING : 1
THE_OFF : 1
OXYCODONE_MG : 2
HTN_REVIEW : 1
WAS_WITH : 2
HAS_GIVEN : 1
NOT_COMPLETE : 1
IT_TONIGHT : 1
OLD_UNKNOWN : 1
BEFORE_AND : 1
DATE_JUL : 1
NURSE_SODIUM : 1
INTERDISCIPLINARY_OF : 1
ANY_CHANGES : 1
CEFADROXIL_HORSE : 1
SEE_ORDERS : 1
HYBRID_FWW : 1
SEP_AGE : 1
STUDENT_NOTE : 1
WITH_PARENTERAL : 1
PROBLEM_NO : 1
FOR_WAS : 2
FOR_EVAL : 1
SPOKE_THE : 1
TIME_BUT : 1
TEAM_CONSULT : 1
NOT_HAVE : 1
GRADUATATION_WILL : 1
AND_HAS : 3
MONITOR_WEIGHT : 1
OF_ACTION : 1
IF_THROUGH : 1
ALSO_PRILOSEC : 1
AND_SKETCHY : 1
LIGHT_INAPPROPRIATE : 1
BENEFICIAL_BUT : 1
SCREEN_NEGATIVE : 1
GROUP_TYPE : 1
FIND_THAT : 1
RESULTS_PT : 1
NARRATIVE_HE : 1
RECEIVED_IN : 1
IMMOBILITY_DISCOMFORT : 1
GOALWHAT_PAIN : 1
PRESENCE_BE : 1
MEDS_AS : 1
ON_PHYSICIAN : 1
IMA_BLE : 1
WAS_REINFORCED : 1
VETERANS_AFFAIRS : 1
UP_INFORMED : 1
OF_MOOD : 1
PHYSICIAN_TO : 1
NONVA_AND : 1
WISE_CHAPLAIN : 1
LIST_THE : 1
RELATES_IS : 1
FOR_FURTHER : 1
VA_PHOENIX : 1
LAST_THAT : 1
EVENT_THAT : 1
NO_AGE : 1
ASK_TO : 1
PLAN_LAST : 1
ARTS_SOCIAL : 1
THIS_ON : 1
GOAL_ADDICTION : 1
PLANS_APPLY : 1
UPDATE_MHC : 1
OR_PROVIDED : 1
PROCESS_WAS : 1
WITH_FOOD : 1
WHICH_NIACIN : 1
AND_WORK : 1
TIME_TIMES : 1
VERBALIZES_CLEAR : 1
HEMATURIA_DYSURIA : 1
SHARED_EXPERIENCES : 1
LIKE_TO : 1
TALKED_TO : 1
PARTICIPATED_DISABLED : 1
NURSING_CONVERSATION : 1
EVERY_DENIES : 1
WILL_FOR : 1
WEARING_HELMET : 1
MOUTH_ONCE : 1
LESS_SECONDS : 1
PHYSICIAN_AND : 1
WITH_BRONCHOSCOPE : 1
LUNCH_RANGE : 1
FEELS_AS : 1
SEE_NOTE : 1
ORAL_PUFF : 1
ACTIVE_VERBALIZED : 1
NOT_TO : 6
MEDICATIONS_PLEASE : 1
ONCE_ACTIVE : 1
HIS_ADMISSION : 1
HE_HAD : 1
ALICE_WHO : 1
HAD_AN : 1
CONSULT_IBW : 2
LEGS_TEL : 1
REINFORCED_WITH : 1
TO_WATCH : 1
EKG_TOLD : 1
WEARING_NO : 1
JOINT_BURSA : 1
AT_ENCOUNTER : 1
DOESNT_ANYMORE : 1
ABUSE_NUMBERS : 1
MR_ASPECTS : 1
PLAY_PARTICIPATED : 1
IN_MAIL : 1
DX_CHEST : 1
TIME_WE : 1
PLAN_NO : 2
RYTHN_SHOWING : 1
OVERTHE_COUNTER : 1
ZELL_DOES : 1
HIS_FOLLOWED : 1
LOCATION_PATIENT : 1
OCULAR_MEDS : 1
AN_IN : 3
CONSENT_WORST : 1
THE_AS : 1
BETTS_VISIT : 1
CBI_PPP : 1
SIGNS_HAS : 1
SYMPTOMATIC_ADM : 1
POSITIVES_IN : 1
INVOLVEMENT_IN : 1
IS_YOUR : 1
RENAL_NEURO : 1
HYPOGLYCEMIA_BLOOD : 1
INSTABILITY_FEET : 1
YOU_EVER : 1
AVAILABLE_VET : 1
MEDICAL_ISSUES : 1
ADM_JUL : 1
BENIGN_REC : 1
MR_DID : 1
INSTRUCTED_PATIENT : 3
AREA_EXPLAINED : 1
MONITOR_FOR : 2
ORDER_TO : 3
MOVE_LOCATION : 1
ELBOW_TO : 1
UNTIL_NAPROXEN : 1
LEAVES_IOP : 1
HAS_FOLLOWED : 1
CALLED_PREVENTIONS : 1
DECISIONMAKING_CAPACITY : 1
APPT_IN : 1
CAR_TOILETING : 1
AGAIN_WAS : 1
WAS_YESTER : 1
BARRIER_PRESENT : 1
ALERT_ORIENTEDX : 1
AS_REQUESTED : 1
AT_LEAVENWORTH : 1
THE_CAPACITY : 1
DEPT_NURSING : 1
LEVEL_HIS : 1
ENHANCE_PERFORMANCE : 1
WHEEZING_NO : 1
SEEMS_SLOW : 1
ADDRESS_LN : 1
NO_OF : 2
WITH_ACTIVE : 1
HOWEVER_SHOULD : 1
DEPRESSION_PATIENT : 1
HEARING_UPCOMING : 1
SERUM_CIPROFLOXACIN : 1
DECISIONMAKING_ABILITY : 1
FRIGHTENING_CAME : 1
STOLEN_HIS : 1
BE_AND : 1
OXYGEN_VOIDING : 1
MODE_ARRIVAL : 1
AMBULATING_WITH : 1
ORAL_MEDICATIONS : 1
PROSTATE_BX : 1
AS_RESULT : 1
EXERCISING_PER : 1
NO_MET : 1
OF_TYPE : 1
DILATED_AT : 1
WAS_NO : 3
PRIOR_USE : 1
PAIN_PC : 1
CONCERNS_IF : 1
TYPE_FLUID : 1
VETERAN_HEIGHT : 1
STOLEN_FOOD : 1
LEAST_NOTICE : 1
PHYSICIAN_AVAILABLE : 1
MG_AGAIN : 1
ADMITTED_INTERDISCIPLINARY : 1
INFORMED_WAS : 1
HIS_PLAN : 1
THINGS_EASILY : 1
SCORE_SEVERE : 1
THOUGHT_WHO : 1
ALERT_PATIENT : 1
SCREEN_FUNCTIONAL : 1
BLOOD_IS : 1
OTHER_TO : 1
OPERATING_WHICH : 1
COMMENT_ON : 1
OF_NAME : 1
EXPIRED_MEDICATIONS : 1
DRUGS_HORSE : 1
MS_STATES : 1
HIGH_WILL : 1
HIS_NEUROPSYCHOLOGICAL : 1
THE_DENIES : 1
MEDICATION_REQUESTED : 1
INSTRUMENT_PT : 1
ICD_BITE : 1
THE_RELAXATION : 1
SIGNIFICANT_PATIENT : 1
HIM_REMEMBER : 1
BLOOD_LAB : 1
AND_AGREE : 1
FOR_DIRECT : 1
MENSTRUAL_FLUCTUATIONS : 1
INTRAFACILITY_PAIN : 1
WOULD_YOU : 1
PT_ANY : 1
TAB_MG : 7
SSN_TELEPHONE : 1
REPORT_REASON : 1
NOTE_ENHANCE : 1
NAME_OF : 1
THE_KLONOPIN : 1
DISCUSSED_ADVANCED : 1
SKIN_CHECKS : 1
OF_ELECTRONIC : 1
THREATS_AND : 1
PT_STS : 1
MEDICATION_MODE : 1
PERFORMED_FLEXIBLE : 1
CREPTS_WITH : 1
NAME_TONGUE : 1
PROVIDERS_OUTSIDE : 1
FOR_BUDDY : 1
PLAN_SEEN : 1
MILITARY_SHOT : 1
NEGATIVE_RISK : 1
THEN_HE : 1
OF_AFFAIRS : 1
WILL_DEMONSTRATE : 1
PRESENT_EASILY : 1
INTO_FOR : 1
TAKE_ONE : 7
PHONE_PRESENTS : 1
EDUCATION_NOTE : 1
CLOSE_OBSERVATION : 1
FRI_PATIENT : 1
IMMEDIATELY_BEGAN : 1
REFILLS_THE : 1
SI_AFFECT : 1
PISTOL_VETERAN : 1
COLON_THROUGHOUT : 1
PT_DENIED : 1
HAS_RUNNING : 1
REINFORCED_PT : 1
DOING_WELL : 1
HIM_IV : 1
VERBALIZES_ADDENDUM : 1
TAKING_AS : 2
FOR_CESSATION : 1
INPATIENT_MEDICATIONS : 2
OFF_DURING : 1
NONE_PROVIDED : 1
INDEX_APR : 1
ENCOURAGED_TAKE : 1
THERAPY_PRIMARY : 1
PIPE_AN : 1
REQUESTING_ASSESSMENT : 1
NONE_HOWEVER : 1
PROVIDERS_MEDICAL : 1
OR_TO : 1
YOUR_MEDICATIONS : 1
AND_THAT : 1
BID_FOOD : 1
THE_BLOOD : 1
SYND_BUT : 1
TO_LEG : 1
WAS_HELMET : 1
LAB_ON : 1
DRE_PT : 1
MEDIAN_NERVE : 1
FROM_PVH : 1
AND_WHICH : 1
NURSING_PING : 1
NOT_HAVING : 1
BX_DRE : 1
CASE_CONSENT : 1
HE_SAYS : 1
ENCOURAGED_TO : 4
ON_CONSULTED : 1
PACU_BREATH : 1
IN_HERE : 1
AND_BY : 1
BUT_TESTS : 1
OR_MAGAZINES : 1
WAIT_FOR : 1
CAN_REQUEST : 1
PT_STATES : 4
ORAL_QH : 1
FOR_GAIT : 1
WAS_GIVEN : 3
NOTE_EVENING : 1
ADMITTED_HE : 1
THIS_PNEUMOCOCCAL : 1
VOLUNTEERING_HERE : 1
MOST_THE : 1
SUICIDAL_THOUGH : 1
OF_HARM : 1
TOBACCO_USE : 2
PACE_HIMSELF : 1
SELF_PT : 1
BY_TWO : 1
MES_SENT : 1
SHOULD_THEIR : 1
TO_THINGS : 1
ACCORDING_TO : 2
MADE_AVAILABLE : 1
VIEWING_BASED : 1
CARDIAC_YES : 1
BE_REASSESSED : 1
PATIENT_PLEASE : 1
CALL_REFERRED : 1
DISCUSS_WITH : 1
FOR_TIME : 1
KG_ESOPHAGUS : 1
EVERY_FOR : 1
CT_ON : 1
PATIENTS_ACTIVE : 1
QUANTITY_REFILLS : 1
IN_REPORT : 1
COME_TO : 1
MOBILITY_YES : 1
PLEASE_VISTA : 1
BELIEFS_THEY : 1
SIGNS_OCC : 1
DESCRIBE_WAS : 1
VOLUNTEERING_HOSP : 1
GET_HIM : 1
OF_NON : 1
ALL_ISOP : 1
TO_OF : 4
TO_SPEAK : 1
CAN_AT : 1
STANDING_HAS : 1
OF_ANY : 1
TREATMENT_OR : 1
ON_LIGHT : 1
BELOW_NO : 1
ACTIVE_TO : 1
HE_STATE : 1
FUNCTIONAL_MH : 1
HIS_JOB : 1
OMEPRAZOLE_DE : 1
REHABILITATION_THE : 1
NEEDED_ICD : 1
NURSE_STANDARD : 1
MOUTH_BEDTIME : 1
STILL_STATES : 1
WHAT_SHE : 1
TRACT_PROCEDURE : 1
THIS_NOT : 1
SHOWS_SEVERAL : 1
CARE_VISITATION : 1
LAB_FOR : 1
NIGHT_HAD : 1
FROM_HT : 1
BRIGHTER_TO : 1
STATUS_SPRAIN : 1
AT_DRAINAGE : 1
LOPC_HE : 1
THE_WAS : 1
IMAGES_INTAKE : 1
ACTIVE_BETTS : 1
VETERANS_MEDISOME : 1
LOW_GRADE : 1
SOCIAL_DURING : 1
TEST_AT : 1
VISTA_TO : 1
WAS_SEE : 2
DISORDER_MHC : 1
SUBSTANCE_ABUSE : 1
INJ_UNITS : 1
NIACIN_FLUNIS : 1
LIVES_WITH : 1
MASS_INDEX : 2
BEFORE_ENTERING : 1
OPEN_IMAGING : 1
THAT_MR : 1
POSITIVES_HIS : 1
WAS_NOT : 2
PAIN_YOU : 1
PROCESS_SEE : 1
VA_PT : 1
AGREEABLE_PT : 1
REPORTED_OLD : 1
FOR_AND : 4
OR_VISION : 1
APPROPRIATELY_AORTOCORONARY : 1
CARE_IO : 1
ACTIVE_RECENTLY : 1
BIPOLAR_SLIGHTLY : 1
CONDITION_THE : 1
LN_OF : 1
AND_WAIT : 1
TO_DATE : 1
WAL_ORDER : 1
INAPPROPRIATE_THIS : 1
BEING_THE : 1
TOBACCO_NO : 1
WITHOUT_BLOOD : 1
THE_PAST : 2
TO_BPH : 1
THE_WOUND : 1
COOPERATIVE_NONVA : 1
DURING_NIGHT : 1
NO_COVERAGE : 1
PING_LAST : 1
DT_AND : 1
BP_AS : 1
MAIN_FOCUS : 1
CLEAR_HAZARDS : 1
PATIENT_DESCRIPTION : 1
PHONE_PAIN : 1
COLLECTS_SUICIDAL : 1
DOCUMENTED_ON : 1
PO_BID : 3
LEFT_AND : 1
AFTERCARE_AND : 1
COLON_POLYP : 1
PCPABSENCE_USE : 1
SOFT_ND : 1
VISUAL_HEARING : 1
TELEPHONE_SISTER : 1
FOR_DISEASE : 1
NEED_DX : 1
COMPLAINT_OF : 1
ATTEMPT_TYPE : 1
TRY_SHOWS : 1
SERVICECONNECTED_MENTAL : 1
THREE_ACTIVE : 1
DOOR_DISPATCH : 1
PTSD_TOBACCO : 1
FOR_INFECTION : 1
COUGHT_SPUTUM : 1
AND_UNSPECIFIED : 1
SIMETHICONE_MG : 1
TIME_AND : 2
THIS_INCLUDES : 1
FOR_VIEWING : 1
BE_DONE : 1
IS_REPRODUCABLE : 1
NEE_ON : 1
IT_WITH : 1
PATIENT_CBI : 1
STATES_REGRETS : 1
IOP_HAS : 1
DEPRESSIVE_DISORDER : 1
TOBACCO_DUE : 1
NOTE_DEPARTMENT : 1
PRESSURE_NO : 1
VETERANS_SISTER : 1
TTP_INCONTINENCE : 1
AND_PER : 1
EVENT_PT : 1
NEGATIVE_PROGRESS : 1
ALERT_INTERACTIVE : 1
DEPRESSION_AND : 1
VETERAN_LIVES : 1
ABNORMALITIES_RIGHT : 1
CESSATION_NO : 1
INTERVENTIONS_OF : 1
KG_INTAKE : 1
TO_FECAL : 1
LESS_TOPIRAMATE : 1
TEMP_WARM : 1
CONTACT_DEPARTMENT : 1
NOTE_OX : 1
HIS_BROUGHT : 1
IMPLEMENTATION_THE : 1
STATE_MAJOR : 1
ALTERNATE_NUMBER : 1
DISORDER_ICDCM : 1
MEDICAL_REC : 1
MOOD_HEADACHE : 1
HAVE_TO : 2
PRESSURE_LISINOPRIL : 1
IMPAIRMENT_IS : 1
BOTTLE_OF : 1
COVER_SHEET : 1
ARE_ASKED : 1
PT_ON : 1
NAME_SITE : 1
AND_ACTIVITIES : 2
KG_PHONE : 1
SPEC_POSS : 1
OR_THINGS : 1
COLLECT_STOOL : 1
REQUIRED_SUS : 1
PER_SESSION : 1
FYI_PHYSICIAN : 1
PROCEED_POSTSURGICAL : 1
HISTORY_HTN : 1
CONSULTPHARMACY_HT : 1
MEDICATION_AS : 1
DIURETICS_NO : 1
PT_TO : 4
TOBACCO_ABUSE : 1
AFFECT_BRIGHTER : 1
USE_REVIEWED : 1
DAMAGE_LEFT : 1
ANTIHYPERTENSIVES_DIURETICS : 1
DISC_SEEN : 1
AGENCY_CALL : 1
ESOPHAGUS_COPD : 1
REQUEST_DIABETIC : 1
INVENTORIED_MHT : 1
AUG_VA : 1
PROVIDER_WILL : 1
ACETAMINOPHEN_PER : 1
NECK_NOT : 1
AT_DOES : 1
PAIN_IS : 2
CASTS_AMOXICILLIN : 1
POSITIONING_WITH : 1
DIABETES_AGE : 1
MILD_DIFFUSE : 1
MANAGEMENT_COMPLAINED : 1
AT_SI : 1
PRIMARY_CARE : 3
THAT_SLEPT : 1
FACT_THAT : 1
BY_THREE : 1
RECENTLY_NO : 1
CHART_NURSING : 1
COVERAGE_THE : 1
TEAM_AND : 1
REFILLS_FOLLOWING : 1
AFFECT_IS : 1
BARRETTS_COPD : 1
KG_IS : 1
SPECIMEN_AND : 1
REASSESSMENT_APPROPRIATE : 1
ONLY_BOTTLE : 1
INCREASED_SWELLING : 1
AND_EASY : 1
IS_BY : 1
COUNTER_NURSING : 1
ASSESSMENT_YESTER : 1
TYLENOL_MG : 1
THE_BORDERS : 1
OUTPATIENT_CARE : 1
STILL_PING : 1
YOU_FEEL : 1
CONSENT_RESPIRATORY : 1
PT_GIVEN : 2
PATIENT_OF : 2
TO_ORDER : 1
FOR_MEDICATION : 1
ACTIVE_MEDICATIONS : 7
TO_STATES : 1
WEIGHT_LB : 6
MASS_APR : 1
HERE_HOSP : 1
YOUR_LEVEL : 1
IN_FROM : 1
TINGED_BLOOD : 1
PATHOLOGY_PATIENT : 1
DOING_MRI : 1
COUNSELOR_CINDA : 1
PT_THE : 1
SEDATION_DRUGINDUCED : 1
TO_ADMISSIONS : 1
HYDROCODONE_MG : 1
VOIDING_YELLOW : 1
FAMILY_AND : 1
CARDIAC_MONITOR : 1
AND_HIS : 2
YES_IS : 1
ALSO_NORMAL : 1
APPOINTMENT_IN : 1
REFILL_PCPABSENCE : 1
METAL_WILL : 1
LIVE_IN : 1
OF_SWELLING : 1
BLOOD_CLOTS : 1
BUT_ENDO : 1
TAKE_ONEHALF : 1
OPTIC_ISCHEMIA : 1
BARRETTS_IMPINGMENT : 1
AND_TYLENOL : 1
PAIN_CLONIDINE : 1
OR_PIPE : 1
DEPRESSION_DIVERTICULOSIS : 1
OSA_BIPOLAR : 1
EXPERIENCE_WAS : 1
MALE_WHO : 2
EMERGENT_NONEMERGENT : 1
PHE_TIME : 1
ARRIVED_HIS : 1
VA_HX : 1
OF_DEMONSTRATION : 1
LISINOPRIL_TAB : 2
ATTENTION_COGGINS : 1
ACTIVE_UNDERSTANDING : 1
ACUTE_PROBLEM : 1
INVOLVEMENT_PATIENT : 1
DISTURBANCESLEPT_ANTIHYPERTENSIVES : 1
PATIENT_DENTAL : 1
VERIFIED_CLINIC : 1
VA_ISSUES : 1
LUMBOSACRAL_SPONDYLOSIS : 1
CONTINUE_PLAN : 1
WEIGHT_BLOOD : 1
NOT_AUTHORIZE : 1
MILDLY_DILATED : 1
AND_PASSED : 1
AND_NONTENDER : 1
HAVE_REGARDING : 1
SEVERAL_AND : 1
IF_ELEMENT : 1
CIPROFLOXACIN_PATIENT : 1
NOT_NOTED : 1
TO_UNIT : 1
BY_FEVER : 1
TO_PATIENT : 5
NUTRITION_SCREEN : 1
MG_PO : 10
SAMPLES_ORDER : 1
RECORDS_BLOOD : 1
ORDERED_QID : 1
ISSUES_DISCUSSED : 1
HURTING_WEIGHT : 1
CLARIFICATION_OR : 1
HISTORY_BED : 1
GET_HELP : 1
REGARDING_CASE : 1
COMBAT_WITNESSED : 1
PVCS_HIS : 1
CONTROLS_BEDSIDE : 1
LEFT_VET : 1
PVCS_EKG : 1
JUICE_MADE : 1
NUMBER_VET : 1
IDENTIFIERS_WERE : 1
LEARNS_BEST : 1
FROM_ELBOW : 1
NO_SOB : 2
AND_BLOODY : 1
NO_DISTRESS : 1
DAD_IS : 1
ASK_SPEAK : 1
MEDS_SUCH : 1
PASSIVE_ROM : 1
CURRENT_DIET : 1
BY_TO : 1
BED_WITHOUT : 1
SPREAD_HIS : 1
NOTED_PT : 1
SELF_OR : 1
CALLED_WITH : 1
CANCEL_APPOINTMENT : 1
HYPERLIPIDEMIA_COLONIC : 1
HELMET_NO : 1
EDUCATION_GROUP : 1
REMEMBER_TO : 1
AGO_HAD : 1
PATIENT_RANG : 1
TREADED_INTERVENTION : 1
SURGERY_CONSULT : 1
WAS_INSTRUCTED : 2
AND_PLAN : 1
BLUE_OR : 1
MANAGEMENT_PHYSICAL : 1
HEENT_WOULD : 1
IDENTIFIED_ISSUE : 2
CONDITION_TREATMENT : 1
IN_PATIENT : 1
HE_GIVEN : 2
REQUIRED_ISOP : 1
FOR_DRAINAGE : 1
PT_VERBALIZED : 1
ON_LOWER : 1
MANY_AN : 1
SNACKS_AND : 1
YOU_KNOW : 1
SYSTEM_ARE : 1
THYROID_RENAL : 1
DETOX_WAS : 1
DC_BACK : 1
PT_SEEN : 1
AND_AND : 3
OVER_BEHAVIORS : 1
FEELING_ALRIGHT : 1
ASSESSMENT_VET : 1
VA_DO : 1
FROM_SECOND : 1
LEVEL_INTERVENTION : 1
DISEASE_CANCER : 1
WITH_VERBALIZES : 1
INFORMATION_PLAN : 1
ASSESSMENT_EDEMA : 1
STUDENT_PROBLEMS : 1
PAST_MONTHS : 2
BEEN_PAIN : 1
PART_NURSING : 1
BEHAVIORAL_HEALTH : 2
SI_FSBG : 1
SISTER_WAS : 1
PHONE_CARD : 1
KG_FM : 1
INSTRUCTED_TO : 1
VA_AGO : 1
CHANGES_IN : 1
ONLY_NECK : 1
PATIENT_HISTORY : 1
INFECTION_OR : 1
OTHERS_LEVEL : 1
DRUGINDUCED_PATIENT : 1
NO_CALL : 1
HIGH_NO : 1
TEXT_IMPRESSION : 1
THE_TELEPHONE : 1
VETERAN_REPORTED : 2
COLON_COLONOSCOPY : 2
FASTERCHUGS_MNEMONIC : 1
TELEPHONE_HAND : 1
VACCINE_PNEUMOCOCCAL : 1
LEAVE_NAME : 1
PATIENT_WORST : 1
FOR_YESTER : 1
THE_COVER : 1
HAND_PROCEDURE : 1
THIS_YEAR : 2
THEREFORE_HISTORY : 1
WAS_RECEIVED : 1
HIS_SON : 2
MORPHINE_AND : 1
WONT_OR : 1
MOBILITY_ACTIVITIES : 1
THE_EXPECTED : 1
SON_PROPERTY : 1
IMAGES_PCCNURSING : 1
DOES_TAKE : 1
OTHER_NO : 1
UNDERLYING_TUMOR : 1
BEEN_WELL : 1
CON_RESPIRATION : 1
VET_COME : 1
WITHDRAWAL_BY : 1
BOTTLE_LIQUOR : 1
WITHIN_BED : 1
HAVE_NO : 1
AS_OF : 2
TO_OUT : 1
TIME_YEARS : 1
SAW_HIM : 1
YEAR_WITH : 1
VET_BE : 1
ONLY_MAKE : 1
CARE_OUTPT : 1
PT_TARGETS : 1
FOR_SC : 1
HOUR_AT : 1
BEING_BY : 1
SPECIALIST_WHO : 1
RUN_CBI : 1
REMEMBER_TAKE : 1
DIED_OF : 1
TEMP_VERBALIZES : 1
AS_FEELS : 1
PT_APPEARS : 1
SAFETY_CONCERNS : 1
CONSULT_OR : 1
AND_PROCEED : 1
BID_MEDICATIONS : 1
VERY_DIZZY : 1
ADMISSION_AND : 1
TIME_SEVERAL : 1
SON_WHO : 1
CHEEKS_PULSE : 1
GLUCOSEFINGER_DISCUSSED : 1
BETWEEN_AM : 1
THE_EVENT : 1
REGARDING_SAFETY : 1
BY_DOES : 1
SIGNS_OF : 2
LUMBOSACRAL_SPINE : 1
TO_CLOTS : 1
STRESS_TEST : 1
PHONE_PLATINUM : 1
MEDICATION_LIST : 2
GOT_YEARS : 1
THE_NIGHT : 1
BELONGINGS_TO : 1
OF_DISC : 1
THERAPY_VOIDING : 1
TOPIRAMATE_MG : 1
MEDICATIONS_PROBLEMS : 1
REQUESTED_NAME : 1
PLAN_AND : 1
TO_RUN : 1
CM_LB : 2
LABS_REVIEWED : 1
BILATERALL_LOWER : 1
WITH_CHIEF : 1
BEFORE_NO : 1
LEVEL_IS : 1
PATIENT_HAND : 1
WORTHLESS_HAD : 1
DIABETIC_TELERETINAL : 2
EDEMA_LOWER : 1
RANING_UNITS : 1
BOLTED_FLOOR : 1
ATTAINABLE_WAS : 1
HAVE_MS : 1
SPENT_PER : 1
TO_ACCEPT : 1
BY_HE : 1
CONSULT_THE : 1
OTHER_DRESSING : 1
SIDE_TOPICS : 1
AN_ALCOHOL : 1
VA_IN : 1
PA_ADDENDUM : 1
CHEW_CLINICAL : 1
! Stats words=1771  pairs=8352
