# Supplementary material for: Predicting the Risk of Suicide by Analyzing the Text of Clinical Notes
Source: PLoS One. 2014 Jan 28;9(1):e85733. doi: 10.1371/journal.pone.0085733 (PMC3904866; doi:10.1371/journal.pone.0085733)
Supplement: Appendix S3 — Machine Learning Libraries and Methods: This section is provided to enclose the open source (Apache License) classifier used for the building of the statistical models, specifically for the purposes of study reproducibility. A detailed account of these tools is intended for another publication. (ZIP) [file pone.0085733.s003.zip › Appendix3/ML_libs/Regression_testing/group2/processed/grp2-pt-1097.dat]

!  Done reading
! Total word count = 4805
! Total unique words = 1817
! Total pair count = 9606
! Total unique pairs = 8531
COLORED : 1
DEMONSTRATE : 1
SORE : 1
AT : 34
CONSTANT : 1
SPAN : 1
PERTINENT : 1
PERSONALITIES : 1
WORK : 3
STEADY : 2
LISINOPRIL : 2
OPEN : 3
LOWER : 1
COSIGNING : 1
TOPIRAMA : 1
MONTH : 1
EVENTS : 2
REFILLS : 1
ACCIDENT : 1
INFO : 1
WEIGHT : 7
LITERS : 2
BEEN : 9
BRADSHAW : 1
BID : 1
ADVICE : 1
BASE : 1
WITHIN : 5
LOCK : 2
REFILL : 1
DECEMBER : 1
OUTPATIENT : 11
GOES : 1
INSTRUCTED : 2
INTAKE : 2
SHORTNESS : 1
INTERVENTION : 2
INPATIENT : 3
DIURETICS : 1
CATARACT : 1
COUNSELING : 2
RESCHEDULE : 1
FINSETERIDE : 1
DOSING : 2
HAIR : 1
CLOSE : 1
FT : 2
AGENT : 2
RELATED : 5
USE : 13
SEALY : 1
IMMEDIATELY : 1
MEANS : 1
CC : 2
POSTPROCEDURE : 2
HEMATURIA : 2
DISCHARGED : 3
ALOH : 1
EPISODE : 1
OPERATIVE : 1
SUPPLIES : 6
REGARDING : 4
CHEW : 1
READING : 1
LEVEL : 2
INACTIVATED : 1
ALCOHOL : 1
SUPPOST : 1
CHANGES : 4
RAL : 2
RADIAL : 1
PERSONAL : 1
TRIED : 1
HAPPENED : 1
CHARACTERISTICS : 1
RETIRED : 1
VALIDATE : 1
CONVEINANT : 1
DIAST : 1
SHOULDER : 2
MET : 1
MACHINE : 1
HIS : 32
COORDINATOR : 2
COPD : 2
LATEST : 1
FRACTURES : 1
ID : 1
BUPROPRION : 1
SOURCES : 2
MARRIAGE : 2
MAX : 1
MICHELE : 1
ASARCO : 1
NEURO : 1
APPROPRIATE : 1
CONGRUENT : 1
KLEIN : 1
ACID : 2
MISTRUST : 1
WELL : 8
KNOWN : 1
DISORDER : 3
SHOWED : 2
RECOVERING : 1
TEST : 2
NOTE : 27
HARD : 1
LDL : 1
DO : 4
DOES : 6
PELVIS : 1
FIRED : 1
TREATMENT : 6
VESSELS : 1
FACT : 1
HTN : 1
BLOOD : 8
SAME : 1
METH : 1
WORKER : 1
ACCESS : 1
CV : 1
STROKE : 1
ADDENDUMS : 1
ASSIST : 7
HAVE : 10
LOGICAL : 1
EVIDENCED : 1
SOORYA : 1
SCHEDULED : 2
DRUG : 4
OF : 85
TAB : 11
REACHED : 1
BUPROPION : 1
CALLER : 3
STABLE : 2
REQUIRED : 1
PSYCHIATRY : 4
MONITOR : 2
DEC : 2
HAS : 34
FOR : 52
SHAVE : 1
CONDITION : 1
NUTRITION : 1
SAID : 1
MRC : 1
BELIEVE : 1
NUMBER : 4
STATEMENTS : 1
COMFORTABLY : 1
MORNING : 1
STRIP : 1
MOTORCYCLES : 1
ACCUCHEK : 1
CLONIDINE : 2
AGING : 1
KNEE : 1
HEAR : 1
SC : 2
MEDICATON : 1
EC : 2
OUTPT : 1
MY : 1
INSTRUCTION : 1
IDEATION : 1
LAWYER : 1
MESSAGE : 2
THINGS : 2
GOALS : 3
CARRYING : 1
ASSESSMENT : 9
US : 1
MEDIAN : 1
ACTIVITY : 3
INVOLUNTARY : 1
OWN : 2
EVIDENCE : 2
CONROE : 1
IMB : 1
AMBULATION : 3
ND : 2
ATTACHED : 2
VOLUNTARY : 1
FORGIVING : 1
ABUTTING : 1
MENU : 2
BLADDER : 1
BM : 1
INFORMATION : 7
INITIAL : 1
CHILDREN : 1
DEXTROSE : 1
CENTER : 3
DISCS : 1
EXAM : 4
INFECTION : 3
RECENTLY : 2
DERM : 1
ROLLING : 1
NODULES : 1
SUGAR : 1
ATTEMPTS : 1
SUICIDE : 2
NAM : 1
SWEATS : 2
THE : 83
INFORM : 1
CARCINOMA : 1
JUST : 3
INCREASED : 2
PCXR : 1
NSC : 1
PHONED : 1
EXP : 1
PRESENTS : 1
GROUP : 6
DURATION : 1
BELLO : 1
IDENTIFY : 1
REST : 1
APPEARS : 1
EXPIRED : 1
ANTIANXIETY : 1
OCT : 3
SUPT : 1
DIMINISHED : 2
PULSES : 2
INSIGH : 1
GO : 4
SIGNIFICANT : 3
BOWEL : 1
SCANT : 1
WATCHFUL : 1
MST : 1
COLOR : 1
UD : 1
SEC : 1
LEG : 4
ARRIVED : 1
BP : 6
MEDS : 6
HYTRIN : 1
CT : 1
PREVENTION : 1
POST : 2
DEPRESSION : 6
SON : 1
BYPASS : 1
CM : 4
FREE : 1
UNCHANGED : 1
LBP : 1
PERSONABLE : 1
IMAGE : 1
STAYED : 1
DEMONSTRATES : 2
ADDICT : 1
AGREEMENT : 1
GAIT : 3
CITALOPRAM : 2
AGAIN : 2
ANXIOUS : 1
DISPOSITION : 2
TID : 2
CAP : 3
LEATHER : 1
DIET : 3
STATED : 5
EVER : 1
DENIAL : 1
DEXTERITY : 1
HEARING : 1
AMP : 1
LATE : 2
LATELY : 1
IRREGULAR : 1
GET : 2
AXIS : 2
ANTIHYPERTENSIVES : 1
OXAZEPAM : 1
RA : 1
AD : 1
WHAT : 3
ADMITTING : 1
PLANS : 2
DIETARY : 1
SHOWERED : 1
CHATHAM : 1
ALBUTEROL : 2
BENEFITS : 1
POSITIONED : 1
BOTHERED : 1
HANDOUT : 2
ASSISTANCE : 2
DIABETIC : 2
CARDIOVASCULAR : 3
YE : 1
EATER : 1
OR : 26
ORANGE : 1
BOTH : 1
SHIFT : 5
CITY : 1
YEAR : 5
TEMP : 2
BEACH : 1
COPY : 1
ALREADY : 1
PULMONARY : 1
CONCERNS : 3
LB : 2
CHEEKS : 1
REGULARLY : 3
COUMADIN : 1
HATE : 1
GUNS : 1
TRANSPORT : 1
IVP : 2
LIKE : 2
ERIE : 2
DIARY : 1
PUT : 2
GI : 2
STAYS : 1
CS : 1
SEEN : 6
RT : 1
EXPERIENCE : 1
FOOD : 2
ASHOK : 1
OSTEOARTHROSIS : 1
NURSE : 5
CONSCIOUS : 1
ANAPHYLACTIC : 1
MUCH : 3
LABORATORY : 2
UDS : 1
CHRONIC : 3
RILEY : 1
VESTIBULAR : 1
RELAPSE : 1
ANKLE : 1
TAKE : 9
NITRO : 1
SENSORY : 1
CORONARY : 1
INCREASE : 1
WITHDRAWAL : 1
MONITORED : 1
IIS : 1
ANY : 9
HARDSHIP : 1
DISCHARGE : 4
COCHLEAR : 1
HYPOTENSION : 1
RECORDS : 2
STRENGTHS : 1
MEDICATI : 1
LIKED : 1
FACILITIES : 1
QH : 1
SW : 2
ALOT : 1
BREAT : 1
TENDER : 1
PERCOCET : 1
PSYCHOTROPIC : 1
AMPULE : 1
LATERAL : 2
SNU : 1
TIDAC : 1
POSTTRAUMATIC : 2
REACTIVE : 1
FACILITY : 3
CONSIDER : 1
THINK : 1
SQUIRMING : 1
MD : 2
SECONDARY : 1
NAME : 3
MENTIONS : 1
MSE : 1
CARE : 23
ADAMANTLY : 1
MGS : 1
IMPACTED : 1
HERNIATION : 1
ACCOMMODATE : 1
PHX : 1
SAT : 2
STORAGE : 1
AGE : 2
EVERY : 5
INVOLVED : 1
FILM : 1
CARS : 1
SKIN : 5
TIMES : 2
YESTER : 2
IS : 40
AGORAPHOBIA : 1
NOT : 36
WORST : 1
START : 1
GUARD : 1
IF : 13
RELUCTANT : 1
GOD : 1
CHLORIDE : 2
MH : 3
THERE : 4
PENDING : 2
WALKING : 1
EXPECTED : 1
OPERATOR : 1
PERSONNEL : 1
BAND : 1
CANCELLED : 1
PAROXETINE : 2
ONCE : 1
DRANK : 1
BLOODY : 1
LIMITED : 1
HERE : 2
UPSETTING : 1
IM : 2
OPPORTUNITIES : 1
EATING : 4
POSITIVE : 1
RATING : 1
WISH : 1
UNITS : 2
PSYCHOLOGIST : 1
LOCATED : 1
CARDS : 2
ONEHALF : 2
LIVE : 1
INFLAMMATION : 1
TRANSFERS : 1
FEB : 1
AORTOCORONARY : 1
EVALUATION : 4
CONTRAINDICATIONS : 1
APPROX : 1
APT : 1
ANTIDIABETICS : 1
PROGRESS : 2
KEEP : 3
RHYTHM : 1
REHAB : 1
ARTERY : 1
PSYCHOTHERAPY : 1
VIOLENCE : 1
DISPENSED : 1
ASSESS : 2
VISION : 1
REPEAT : 3
CUTTER : 1
RALES : 2
VET : 7
STOOL : 1
HISTORICALLY : 1
FOLEY : 1
CIALIS : 1
DIVORCE : 4
EXPLAINED : 2
RLE : 1
TBI : 1
ANITA : 1
MOTHER : 1
WELCOME : 1
BURSA : 1
DI : 1
DATIVE : 1
VALUE : 1
ENGE : 1
DROP : 1
REPORTING : 1
PARTICIPATION : 1
CALORIC : 1
ASSOCIATED : 1
ADDICTS : 1
HOWEVER : 1
BACK : 7
OPIOID : 1
RESOURCES : 1
REGARDS : 1
TRANSPORTATION : 1
HEIGHT : 3
PRESENCE : 1
MALE : 9
BOYFRIEND : 1
ADDENDUM : 11
FULL : 4
BY : 24
PMH : 1
BMS : 1
NO : 53
DULABON : 1
REDUCTION : 1
EXPEDITOR : 1
INTENSITY : 1
CLINICAL : 1
PREOCCUPATION : 1
SHARE : 1
KNOWS : 1
ENTITLED : 1
CHIEF : 3
PB : 1
CHANGED : 1
VEHICLE : 1
LUNGS : 1
SATT : 1
AUXILLARY : 1
TH : 1
ALERTAND : 1
MEET : 1
GUARDIANSHIP : 1
CLINIC : 8
RISK : 7
BULD : 1
ANDENOCARCINOMA : 1
PERFORMED : 1
RECEIVING : 1
AMBULATES : 1
MINS : 1
HYPOXIA : 1
VERBALLY : 1
FORCE : 1
TO : 150
POINT : 1
SE : 1
BMI : 4
NARRATIVE : 1
COULD : 4
IV : 3
PRN : 5
NOTET : 1
HEEL : 1
SPECIALTY : 1
SLOW : 1
RV : 1
COUNSELED : 2
LYRICA : 1
ADMINISTRATIVE : 1
SAFE : 2
BONE : 1
TOOLS : 2
QAM : 1
PROCEDURE : 4
OBSERVE : 1
REQUESTING : 2
HEMOSIDERIN : 1
WILL : 17
OFTEN : 1
CAPACITY : 2
BUT : 6
ASKED : 1
THOUGHTS : 2
NABS : 1
COORDINATION : 1
APPETITE : 2
HOMEBOUND : 1
TYPE : 6
UNEMPLOYMENT : 1
ASF : 1
CAREGIVER : 2
TV : 1
HELPERS : 1
SEE : 2
SINCERE : 1
GETS : 1
SET : 3
CBC : 1
PLEASE : 2
MEALS : 2
KIT : 1
STATUS : 6
DIABETES : 1
SPENT : 1
DC : 2
PACK : 1
INJURED : 1
ABBREVIATIONS : 1
CONTINUED : 1
IMPROVING : 2
TECHNIQUE : 2
CONSULT : 5
ESCALATED : 1
OUT : 11
RADIATE : 1
HR : 1
COMFORT : 3
SHOOT : 1
PATEL : 1
MORELAND : 1
SUPPORT : 2
LBS : 3
PRODUCT : 1
FIND : 2
WANTS : 2
OCC : 1
DEPENDING : 1
UNMH : 1
CAREFUL : 1
SCREEN : 1
FINDINGS : 2
PRESENTED : 2
BARRIERS : 1
EXPOSURE : 1
SIGN : 1
ASSIGNED : 2
REVIEW : 4
DISCUSSING : 1
HIMSELF : 1
MENTAL : 5
NEEDED : 5
ABNORMALITIES : 1
INJECTION : 3
EXT : 1
NEAT : 1
NMBER : 1
WERE : 5
FACTORS : 1
SHEET : 1
VIEW : 1
MAN : 2
PERFORATED : 1
PAPERS : 2
PARAFFIN : 1
INSTRUCTIONS : 4
LABS : 1
VA : 11
TAKEN : 2
SYNCOPAL : 1
JOB : 1
CLOSED : 1
QAMDM : 2
EXHIBITS : 1
COLOSTOMY : 1
TRACKING : 1
WED : 1
ZIPRASIDONE : 1
POSSIBLE : 1
ARRIVES : 1
HOT : 1
NUCLEAR : 1
NATURE : 2
TRIAGE : 3
OVERWEIGHT : 2
BIC : 1
PART : 2
SL : 1
FAMILY : 3
OFFERING : 1
DISEASE : 3
PAIN : 32
COCAINE : 2
WHEN : 6
CIES : 1
AMBULATORY : 7
BLAMED : 1
AS : 18
FALLS : 1
VISTA : 2
BEING : 5
CREATININE : 1
OBSTRUCTION : 1
LOSING : 1
GASTROENTEROLOGY : 1
AMOUNT : 1
ABOVE : 3
WAS : 40
DRAINAGE : 2
LPM : 1
INTEG : 1
GREATER : 1
WITH : 58
FEELS : 1
TAN : 1
OFFERED : 1
WORRIED : 1
LEAVING : 1
TEMPERATURE : 2
WANTED : 2
REEVAL : 1
COMMUNICATION : 1
SIG : 1
INDEX : 2
BENADRYL : 1
NOW : 3
INCLUDING : 9
DECISIONS : 2
PTSD : 1
NA : 2
INTACT : 1
FOBT : 1
COPING : 1
SUB : 1
ONSET : 1
IVF : 1
USED : 3
MONITORING : 1
VARIOUS : 1
IT : 5
DUTY : 2
METASTASES : 1
ELDERLY : 1
BEDTIME : 1
LIST : 1
NECESSARY : 1
OT : 2
RADIATES : 1
MOMENT : 1
NONFORMULARY : 2
WELCOMED : 1
STAFFED : 1
CONSTITUTIONAL : 2
DISCUSSED : 5
SUPPLY : 1
CA : 1
NODE : 1
SHOWER : 1
VOMITING : 1
SEASONAL : 1
TIME : 19
PURPOSE : 1
CODE : 1
METER : 1
ORIENTED : 4
PSYCHIATRIST : 1
CURRENTLY : 2
LOOK : 1
ATTEMPT : 3
NECK : 1
WALK : 3
ACTIONS : 1
ADDITIONAL : 3
DRUM : 1
SAFETY : 3
JOINT : 1
SIDE : 1
PERSONALITY : 1
BREAKFAST : 2
RESPIRATIONS : 2
LABETOLOL : 1
DRRTP : 1
SPEAK : 1
SEDATION : 1
GOING : 3
AMD : 1
DID : 7
CALL : 9
MOST : 1
DIC : 1
SHOW : 3
DYSPHAGIA : 3
RESULT : 1
MARGIN : 1
HX : 2
ARRIVAL : 5
MHC : 2
BIRTH : 1
IMAGING : 3
CONCERNED : 2
SITUATION : 1
ADDRESS : 2
TELEPHONE : 5
SELECTING : 2
UNSPECIFIED : 2
SOB : 2
IOP : 1
REPORTS : 4
RATES : 1
GETA : 1
SUBJECTIVE : 2
LEXAPRO : 2
HELP : 2
EMOTIONALLY : 1
TABLETS : 1
PER : 8
CONSISTENT : 1
PACU : 1
COMING : 1
CONTINUES : 1
YES : 9
FURTHER : 2
SMILING : 1
ETC : 1
CONSENT : 5
FACE : 1
CHF : 3
IMMODIUM : 1
WHOM : 1
YOUR : 3
LEISURE : 3
DROPPING : 1
RETURNED : 1
GIVEN : 8
ABERRANT : 1
PROBE : 1
LITTLE : 1
WHO : 6
UPON : 1
TOMMORROW : 1
ED : 4
VERBALIZES : 1
PHYSICIAN : 16
ATHETOID : 2
COMPREHENSIVE : 2
ARM : 1
CURRENT : 4
SERPENTINE : 1
CHORAZY : 1
CONTROL : 1
TOOTH : 1
URGENT : 2
CIVILIAN : 1
HIM : 12
INTERACTIONS : 1
CESSATION : 3
PULSE : 3
XATTEMPTED : 1
HE : 56
RX : 1
NEEDS : 2
THEY : 5
BIT : 1
OBESITY : 2
INTERACTION : 1
RATE : 2
REFERRED : 1
TYLENOL : 1
MANUAL : 1
PHYSICIANS : 1
COVERED : 1
FREQUENT : 1
MASS : 2
TADALAFIL : 1
LIPIDS : 1
AGGRAVATED : 1
ALARM : 1
EXTENSIVE : 2
FRIGHTENING : 1
TRANSFER : 3
VSS : 1
OBSERVATION : 2
PHONE : 7
ML : 3
DECLINED : 1
ADJUSTING : 1
SCALY : 1
CHECKED : 1
TALKING : 1
CLEAR : 1
PREDICTING : 1
BORDER : 1
RADICULAR : 1
RAN : 1
FINESTERIDE : 1
HERBALS : 1
PRIMARY : 8
EGD : 2
CARES : 1
SACRIFICE : 1
BILLS : 1
SIERRA : 1
ABDOMINAL : 2
HAD : 7
POSSIBLY : 1
FDA : 1
SIGNS : 7
SOUNDED : 1
DEPARTMENT : 1
ACTION : 1
LANS : 1
TWISTING : 1
SPECIAL : 1
EKHISTORY : 1
LOSS : 3
SUBCUTANEOUS : 1
SISTER : 1
PATIENTS : 9
BELIEVES : 1
QUETIAPINE : 2
GUM : 1
MRSA : 2
SUMMARY : 1
THROUGHOUT : 1
HUMAN : 1
ASSISTING : 1
FATHER : 1
CONSTIPATION : 1
PROVIDED : 2
DRINK : 1
LOADED : 1
YO : 1
UF : 1
NEGATIVE : 1
LOG : 1
OUR : 1
ORTHOPEDIC : 1
TWO : 3
NONE : 15
NEUROLOGI : 1
CONNECTED : 1
LAB : 2
ANGRY : 1
SALINE : 2
DIFFUSELY : 1
ING : 1
PRIM : 1
ELIGIBILTY : 2
RESPONSIVE : 1
CONTACT : 12
HER : 2
TOPIC : 2
ORDERED : 5
SEVERITY : 1
FEELING : 3
SHOULD : 2
OSCILLOMETRY : 1
FEARS : 1
QUESTIONS : 1
PALLIATIVE : 2
BEHAVIORAL : 1
PROBLEMS : 4
APPEARED : 1
URINE : 1
SEDATIONANALGESIA : 1
SONES : 1
NASAL : 2
RTC : 2
GIVE : 1
ROUTE : 1
ABUSIVE : 1
CAN : 3
THERAPY : 5
THERAPIST : 1
BLOCKS : 1
DOOR : 2
PRIVATE : 2
LIVING : 1
PLACE : 2
PREPARE : 1
STIMULATION : 1
AWARE : 2
STERRISTRIPPED : 1
NONVA : 2
RODE : 1
WHICH : 4
NOSHOW : 1
SYMPTOMS : 3
IER : 1
NOTES : 2
OVER : 3
MG : 24
LEF : 1
ON : 42
QUIT : 1
COMPLETE : 2
EXFIX : 1
PCC : 2
DISPO : 1
DYING : 1
PRESSURE : 9
ATTENDED : 4
CONSERVING : 1
WAITING : 1
QIDPRN : 1
VIA : 3
EXERTION : 1
PITTING : 1
AMPHETAMINE : 1
ADAPTIVE : 1
BEHAVIORS : 2
HYPERVENTILATION : 1
UPTIVE : 1
ADMI : 1
GOOD : 7
TRUNK : 1
REG : 1
ARMY : 1
COMBATIVE : 1
MED : 3
UPDATE : 2
INTO : 1
MMOL : 1
RESTRICTED : 1
SIMTH : 1
WEST : 2
CONSTANTLY : 1
SODIUM : 2
EDEMA : 2
OXIMETER : 1
SADNESS : 1
DYPHORIC : 1
ATTENTIVE : 1
WEEKEND : 1
PROVIDER : 7
DONT : 1
INSURANCE : 2
SHE : 4
PO : 9
UP : 6
PALM : 1
GIM : 1
INVENTORY : 1
THEN : 7
MULTIPLE : 2
DIAGNOSED : 1
MIGRAINE : 1
APPOINTED : 1
MOD : 1
ALERT : 5
SUBMITTED : 1
SAVE : 1
RUL : 1
FEVER : 3
ACCESSED : 3
PRIOR : 4
SAVING : 1
UNDER : 2
OFF : 1
ULCERATIONS : 2
MEDIASTINAL : 2
DOCUMENTED : 3
IMED : 1
GOT : 1
DATE : 14
LOCALIZED : 1
HIGHBERGER : 1
PARALYSIS : 1
COMMENT : 3
DAILY : 3
DIAG : 1
THREE : 1
MUCUS : 1
STEP : 2
RENT : 1
PA : 1
DOSAGE : 2
PROGRAM : 3
MUSKOGEE : 1
APPOINTMENT : 6
WOULD : 4
WHEELCHAIR : 3
FOLLOW : 1
SHINS : 1
SUTURES : 1
FEEDS : 1
FROM : 18
GAY : 1
LEFT : 6
FACILITATED : 2
CLOTHES : 1
DYSTROPHY : 1
MYERS : 1
PIECE : 1
WHEEZING : 1
MEDICAL : 11
HOMICIDAL : 1
UE : 1
HEAD : 1
BECOME : 1
CONTRAST : 1
ALSO : 4
SPOKE : 3
SEX : 2
LORAZEPAM : 1
ACTIVITIES : 3
ORDERS : 1
INADEQUATE : 1
ARTHROPLASTY : 1
AI : 1
ASHEN : 1
SURGEON : 3
RESTRAINING : 1
AN : 4
ONCOLOGY : 1
UNLABORED : 1
MOVEMENTS : 1
OVERTHECOUNTER : 1
HEART : 4
COMPLAINT : 2
SYNDR : 1
ORDER : 3
NL : 1
WHEELS : 1
DIE : 1
REALLY : 1
EASILY : 1
HAND : 2
PRODUCTIVELY : 1
FOUR : 1
BOTTLE : 1
MGOH : 1
SEXUALLY : 1
BRONCHOSCOPIC : 1
INFLUENZA : 2
OUTSIDE : 2
DENIED : 1
FIREARM : 1
PHARMACIST : 2
MOTIONS : 1
EXCEED : 2
VIET : 1
EYE : 1
EXTRACTION : 1
URGING : 1
SPO : 1
LIFESTYLE : 1
CONTAINING : 1
MILIEU : 1
EVERSION : 1
MESYLATE : 1
PIV : 1
DISCUSSION : 5
AGO : 4
NEW : 4
MOUTH : 9
FOCUSED : 2
EMER : 1
PROVIDERS : 1
YEAROLD : 1
DECIDED : 1
ATTENDING : 2
CHEST : 3
HEPATITIS : 1
INDICATIONS : 1
AVAIL : 1
PRESENT : 1
TP : 1
HAVING : 1
DOCUMENTATION : 4
MODEL : 1
ZOLMITRIPTAN : 1
SOME : 3
APPROPRIATELY : 1
HRS : 1
MUSCLE : 1
ANESTHESIA : 2
ENCOURAGE : 5
OA : 2
XTRA : 1
ARE : 7
ANSWERED : 2
DESIRE : 1
HYPERTENSION : 3
INDEPENDENT : 3
NEED : 1
CORRECT : 3
PERSON : 1
HORRIBLE : 1
APPLY : 1
CYST : 1
RECEIVED : 1
PSYCHIATRIC : 2
ASAP : 1
ASPIRIN : 1
COMPLETELY : 1
EAR : 4
INHL : 1
BODY : 4
ENTRY : 2
CONCIOUSNESS : 1
PREVENTIVE : 1
INTERDISCIPLINARY : 1
OSA : 1
SERVED : 2
YEARS : 2
WRONG : 1
BE : 20
RESOLVED : 2
YR : 1
BECAUSE : 2
CANCER : 1
LEAVE : 1
BILLING : 1
GLASSES : 1
TIP : 1
DUE : 3
REMAIN : 1
CLASS : 2
PERTAINING : 1
THEIR : 2
HS : 1
STARTLED : 1
LED : 1
ALZHEIMERS : 1
INVERSION : 1
LESION : 1
OMEPRAZOLE : 2
IMPINGMENT : 1
SEVERE : 2
ISSUES : 2
SOUNDS : 1
REVIEWED : 8
BEFORE : 1
OTHER : 9
ALL : 5
PRODUCTIVE : 1
AUTHOR : 1
FUMARATE : 1
LIFE : 2
ME : 8
BED : 1
NURSING : 5
CONTRACT : 1
DYSPNEA : 1
STAR : 1
FOLLOWING : 6
SUGGESTS : 1
IDENTIFIED : 5
PROBABLE : 1
GLAUCOMA : 1
MORSE : 1
GERIATRICS : 1
ANTHROPOMETRICS : 1
DIAGNOSES : 1
PATIENT : 71
SELF : 7
ACCEPT : 1
ALLERGIES : 7
SEPARATED : 1
WITHOUT : 2
DIAGNOSIS : 5
JUL : 2
SENT : 1
ENERGY : 2
STRE : 1
DROWSYNESS : 1
VERIFIED : 2
ADMISSIONS : 1
LEAVES : 1
ABDOMEN : 3
AGREES : 2
SHOWING : 1
CALLING : 1
ULTIMATELY : 1
REDUCED : 1
EXPERIENCES : 1
FLEXION : 1
MCCULLY : 2
ATTENTION : 1
ANXIETY : 5
SPINE : 1
INDUCES : 1
NOS : 1
METOPROLOL : 1
POSITIONING : 1
THAN : 1
PODIATRY : 2
THOUGH : 1
ACUTE : 1
EXAMINED : 1
WE : 2
FILLED : 1
PROTOCOL : 1
CONCURS : 1
COME : 3
FEE : 1
SYND : 1
DECISION : 1
FOUND : 2
ROOM : 7
IMPROVED : 3
FEET : 2
CAME : 3
THAT : 30
VISIT : 5
WIFE : 6
NORMAL : 4
STAFF : 2
CE : 5
SERVICE : 2
AVAILABLE : 2
RIGHT : 3
BREATHING : 2
PC : 2
VITALS : 3
THROAT : 1
ABOUT : 11
CHAR : 1
PEDAL : 1
DEPOSITION : 1
FINANCIALLY : 1
CRAFTS : 1
ATROVENT : 1
ONE : 10
ISSU : 1
PMR : 1
ULCERATION : 1
SEEPING : 1
POTENTIAL : 1
YOUNG : 1
NOTIFY : 1
COMPANIES : 1
FU : 1
PTS : 2
NKA : 2
CONSULTPHARMACY : 1
WINDOW : 1
BIOCHEMICAL : 1
THOUGHT : 1
HYPERLIPIDEMIA : 2
SPONDYLOSIS : 1
TABLET : 5
DELUSIONALLIKE : 1
NFS : 1
ANOTHER : 2
WRITER : 1
DURING : 4
REC : 2
JUNCTION : 1
YOU : 8
COMMON : 1
TOLD : 1
SEVERAL : 1
LISTED : 1
DIRECTED : 2
SCREENING : 1
HYPERKERATOTIC : 1
CHECKS : 1
CYCLE : 1
HURT : 2
CARDIOLOGY : 3
INFORMED : 2
LYMPH : 3
ERUPTED : 1
PAST : 7
TI : 1
DOCUMENT : 2
CHAIR : 1
OXYGEN : 3
SCORE : 1
NONLABORED : 1
TOBACCO : 5
CXR : 2
ANGLE : 1
REMINDER : 1
EPIS : 1
MDD : 1
HOME : 12
HYPERGLYCEMIA : 2
SIX : 1
APPLICATION : 1
AMBULATING : 1
NOTED : 6
WEAKNESS : 1
INDIVIDUAL : 1
DR : 1
WATCHING : 1
SOCIAL : 2
HOSPITAL : 4
CAREFULLY : 1
RECOMMENDATION : 1
MYOKYMIC : 1
CONSTRUCTIVE : 1
MAIN : 1
RETURN : 3
SUICIDAL : 2
MODERATE : 1
ATTEMPTING : 1
OTHERWISE : 2
EFFECT : 2
DEPT : 1
EITHER : 1
VITAL : 4
MODIFICATIONS : 1
INJ : 2
SO : 5
IMPROVEMENT : 1
POORFAIR : 1
MIN : 4
SPARE : 1
REGULAR : 1
POOR : 3
REPLACED : 1
TALK : 1
ADULT : 1
RECONCILIATION : 2
PNEUMOVAX : 1
POTASSIUM : 1
JUDY : 2
MODE : 3
MINUTES : 5
POINTS : 1
MILDLY : 1
ANTIBIOTICS : 1
ARDIAL : 1
STRESS : 2
BIL : 2
FOLLOWUP : 4
PERIORBITAL : 1
RAMSAY : 1
DELTOID : 1
MAKE : 1
TOLERATING : 1
AGANIST : 1
RECORDED : 1
WEEK : 1
RISKS : 2
CHECK : 4
TEAM : 2
CBOC : 1
FALL : 2
APPROVED : 3
NAUSEOUS : 1
SPELL : 1
BF : 1
DATA : 2
NERVE : 2
PFT : 1
AM : 8
PRESENTATION : 1
FAILURE : 1
SITTER : 2
MOVEMENT : 1
EKNO : 1
RATIONALE : 1
DISTRESS : 1
THRU : 1
ENTERED : 1
PRACTITIONER : 1
COST : 1
PLACEMENT : 2
EKG : 2
WHERE : 1
DNR : 1
LIVES : 1
REGIONAL : 1
REPORT : 3
CVAMC : 1
LETTER : 2
PLATINUM : 1
PHYSCIANS : 1
HOW : 2
CALLED : 4
PRODUCTS : 1
TOOK : 3
PALP : 1
TRUSS : 1
FEELINGS : 2
MANY : 2
SINCE : 4
NSTEMI : 1
CRAVINGS : 1
THOSE : 1
DISCUSS : 2
CHANGE : 3
COUGH : 1
SITTING : 1
HEARTBURN : 1
ESOPHAGUS : 3
SOLN : 1
HEALTHILY : 1
ONCOLOGIST : 1
NEWS : 1
YRS : 1
INFECTIOUS : 1
INCLUDES : 2
OBTAINED : 3
MON : 3
VERBALIZED : 2
LEARNING : 1
STOMACH : 1
DOSE : 3
CLUB : 1
IDEALLY : 1
ENCOUNTER : 4
MEDIA : 1
MONTHS : 1
SMOKING : 2
SOCIALIZING : 1
AFFECT : 1
RETAINED : 1
IMPINGEMENT : 1
DYNAMICS : 1
SSN : 2
AVOID : 1
HOSPICE : 1
BRADEN : 1
GIRLFRIEND : 1
STRONG : 1
REFUSES : 1
BEDSIDE : 1
DATED : 1
EAT : 1
ALONE : 1
ASSISTANT : 1
ANTIBIOTIC : 1
NUTRITIONAL : 1
WHY : 2
INSIGHT : 1
LUNG : 1
MEDICATION : 13
URETEROPELVIC : 1
STOP : 1
BHM : 1
PARANOID : 2
MO : 1
COMMENTS : 11
ACETAMINOPHEN : 2
CASE : 3
ALTERNATIVES : 1
PERIHILAR : 1
ORAL : 4
ITEMS : 1
CONTINUE : 3
ABNORMAL : 1
TOTAL : 5
ACIPHEX : 1
SWELLING : 1
MVA : 1
LIGHT : 2
READ : 4
SERVICES : 3
ABSCESS : 1
JUNE : 1
GOAL : 2
ST : 1
OUTLINING : 1
HISTORY : 6
PLT : 1
PROVIDE : 1
RESPIRATION : 1
SILDENAFIL : 1
TEXT : 1
ASPIRATION : 1
HOURS : 5
MAIL : 1
TUMOR : 1
MUSCULAR : 1
DESK : 1
FORMULARY : 1
DISTENSION : 1
LEGS : 1
HEALTH : 13
RESPONDING : 1
AMIODARONE : 1
REPORTED : 1
ADD : 1
PLACED : 1
STREN : 1
COGNITIVE : 1
PURPOSES : 1
OFFLOAD : 1
UA : 1
SPEND : 2
INDICATED : 1
ANTIHISTAMINES : 1
PAYING : 1
MPJ : 1
SITE : 4
PREVIOUS : 3
BIPOLAR : 1
REFERRAL : 5
INTERVENTIONS : 2
ENCEPHALOPATHY : 1
EMAIL : 1
LEAD : 1
AMBULANCE : 2
KG : 4
MORE : 3
WAL : 2
MAKING : 1
POSTURE : 1
WENT : 2
AUG : 2
INSULIN : 2
PROBLEM : 4
ACTIVELY : 1
EFFUSION : 1
ADDRESSED : 1
BENZODIAZEPENE : 1
ER : 3
RECORD : 2
APPLICABLE : 1
SHOWN : 1
NTG : 1
PRESCRIBED : 4
REQUEST : 1
UNABLE : 2
XYZZY : 2
CARDIOLOGIST : 1
THROUGH : 3
METAB : 1
VETS : 1
HEADACHES : 1
TELEMETRY : 1
AFTER : 4
READY : 1
PARTICIPATED : 4
CONVINCE : 1
ADMISSION : 7
COMPLEX : 1
EMPLOYMENT : 1
STILL : 1
PRNS : 1
SUPERVISED : 1
SCALE : 4
TAPERS : 1
PRIVILEGE : 1
OBESE : 1
NICOTINE : 1
ONES : 1
PCP : 7
ULA : 2
FUTURE : 1
SPECIMENS : 1
APPOINTMENTS : 1
SENILE : 1
WAY : 2
DISCONTINUE : 1
EACH : 2
RE : 1
WNL : 1
DENIES : 4
QUALITY : 1
ASSOCIATE : 2
ACCOMPANIED : 1
PHARMACY : 1
EXPERIENCED : 1
REPORTEDLY : 1
LANDLORD : 1
OLD : 4
LAWSUIT : 1
REQUESTED : 1
MODIFIED : 1
FOOT : 4
VERBALIZE : 1
OVERNIGHT : 1
DISPLAY : 2
ALCO : 1
STATEMENT : 1
INTEGRATED : 1
VETERAN : 17
GLUCOSE : 4
DINNER : 1
PT : 44
INJURY : 2
BEATS : 1
RADIATION : 1
WBC : 1
MOVE : 3
FEBRILE : 2
CORRESPONDENCE : 1
POSTSURGICAL : 1
GENTLY : 1
DEVELOP : 1
RBC : 1
AREA : 4
TAPPING : 1
PROCEDURES : 2
WAIVER : 1
FOREFOOT : 1
PERCEPTIONS : 1
VIS : 1
FAWCETT : 1
FROWNING : 1
CRITICAL : 1
SELECTED : 1
PERSISTENT : 1
CERVICAL : 3
ALTERNATE : 1
COMBAT : 1
UNDERSTANDING : 4
AROUND : 1
ILLNESS : 3
MEDICATIONS : 16
MR : 3
BELIEVED : 1
LORPRSE : 1
MAJOR : 1
OPERATING : 1
PVC : 1
OCCASIONAL : 2
AND : 118
BILATERAL : 1
ETODOLAC : 1
HOUR : 1
NPH : 1
SELECT : 4
URINARY : 2
COUPLET : 1
DRIVING : 1
VACCINE : 1
JUN : 1
RESPONSE : 1
BETTER : 3
COMMUNITY : 2
LOC : 1
BOWDEN : 1
WORKED : 1
DEPRESSIVE : 1
PATENT : 2
PROCESS : 4
RESULTS : 5
INVOLVING : 1
TOUR : 2
EMERGENCY : 3
PHOTIC : 1
AUTOMOBILE : 1
ANSWER : 1
BREATH : 2
APPARATUS : 1
REVIEVED : 1
ABLE : 4
RECENT : 2
ARTERIES : 1
HBAC : 1
SCENARIO : 1
IN : 46
REVEALED : 1
KNOWLEDGE : 1
SAMPLING : 1
ADMINISTERED : 1
LOW : 3
CUT : 2
FOLLOWED : 2
MAY : 4
REGIMEN : 2
VARDENAFIL : 1
LMSW : 3
MANAGEMENT : 7
STATE : 4
GUN : 1
PLAN : 8
ITEM : 1
LENGTH : 2
PANCULTURED : 1
APPT : 3
ANYTIME : 1
TAKING : 2
CPC : 1
COSIGNER : 1
ADMITTED : 6
OBSERVED : 1
SURGERIES : 3
SS : 1
VERY : 3
PATHOLOGY : 1
GF : 1
RELAX : 1
DONE : 6
PALPABLE : 1
OCCURED : 1
PHYSICAL : 5
SHREDDING : 1
NIGHT : 3
CHARGE : 1
ACTIVE : 24
ATTITUDES : 1
BASIC : 1
CARA : 1
KNOW : 1
PCCNURSING : 1
NANDA : 1
ABILITY : 1
DIMENSION : 1
NEWLY : 1
AFIB : 1
SI : 2
CONTROLLED : 1
FOREARM : 1
COMPLETED : 2
CLOTS : 1
CRYO : 1
HEMORRHOIDECTOMY : 1
IMPRESSION : 1
ARRHYTHMIA : 1
FOCUS : 1
THIS : 30
STUCK : 1
EVEN : 2
FLEXED : 1
DIFFICULTY : 1
LORI : 1
LPN : 1
HIGH : 2
LIMITATIONS : 1
AIRWAY : 1
DECISIONMAKING : 2
QRS : 1
EXCLUSIVELY : 1
SOFT : 1
VAMC : 1
ADDED : 1
BECOMING : 1
LAST : 12
EXR : 1
AOX : 1
PAGE : 1
ESCALATING : 1
REDUCING : 1
EDUCATION : 7
SEES : 1
STATES : 4
TRUCK : 1
BENZTROPINE : 1
CAUSES : 1
LOCAL : 2
WHILE : 1
DEMEROL : 1
ROS : 1
DEBORAH : 1
INQUIRING : 1
LIMITS : 1
FIRST : 3
ICDCM : 1
RESP : 1
LORWR : 1
PICK : 3
ITS : 1
RESULTS_PULSE : 1
NOTED_IMPINGEMENT : 1
BETTER_RECENT : 1
PATIENT_INFORMATION : 1
TO_PT : 4
HOUR_EVENTS : 1
MEDICAL_SINCE : 1
ELDERLY_ALZHEIMERS : 1
METAB_DO : 1
THINGS_ON : 1
BUT_IS : 2
SNU_PLACEMENT : 1
LEGS_HEMOSIDERIN : 1
OR_CONTACT : 1
PUT_THE : 1
TID_OMEPRAZOLE : 1
OF_DISCHARGE : 1
HYPERTENSION_ARRHYTHMIA : 1
RATING_NO : 1
OTHER_PROBLEMS : 1
ACTIVE_MEDICATI : 1
RELATED_FOR : 1
ASKED_HIM : 1
DIE_ER : 1
WITH_YES : 1
MOVEMENTS_IRREGULAR : 1
BEEN_ADMITTED : 1
DIAST_CM : 1
BEEN_TO : 1
POOR_WORRIED : 1
MONTHS_YES : 1
NOT_TAKING : 1
HE_WHO : 1
ANTIBIOTIC_BEEN : 1
TO_MODE : 1
MH_NEW : 1
PRESENTED_RATIONALE : 1
ON_TO : 1
ANXIETY_SATT : 1
MAKING_TREATMENT : 1
BLOOD_RECORDED : 1
SIGN_OBSTRUCTION : 1
VA_SUICIDE : 1
MINUTES_ASSIGNED : 1
APPOINTED_SOORYA : 1
OF_GOOD : 1
PATIENT_HAD : 2
SC_ED : 1
USE_THE : 2
PO_ACTIVE : 4
VISTA_HOSPITAL : 1
ENCEPHALOPATHY_WITH : 1
WITH_PAPERS : 1
AND_ORIENTED : 3
FINSETERIDE_ABBREVIATIONS : 1
BOTHERED_ANY : 1
EXT_OR : 1
MALE_PT : 2
THE_PATIENT : 9
LYMPH_BRONCHOSCOPIC : 1
PATIENT_VERBALIZED : 1
HE_FURTHER : 1
LOC_ACCESSED : 1
TO_BMI : 1
KEEP_DIARY : 1
ACTIONS_ASSIST : 1
PERSONAL_DATE : 1
CLINIC_COMMUNICATION : 1
VETERAN_DIFFICULTY : 1
OXIMETER_AT : 1
ROOM_BLOCKS : 1
BOTTLE_PT : 1
CXR_ARDIAL : 1
FACILITY_AT : 1
YE_VISIT : 1
AMBULATES_WITH : 1
IF_PATIENT : 1
PRESENTED_RELATED : 1
TO_ABOUT : 1
TO_ARM : 1
INITIAL_VA : 1
MOUTH_PENDING : 1
MALE_ASPIRIN : 1
ABDOMINAL_DIABETES : 1
ALLERGIES_WITH : 1
CHORAZY_ERIE : 1
CESSATION_IS : 1
SOCIAL_WILL : 1
FILLED_PSYCHIATRY : 1
NOT_DROWSYNESS : 1
INFORM_THAT : 1
YOU_WHEN : 1
REPEAT_DOSE : 1
CARDIOVASCULAR_LB : 1
IS_MEANS : 1
SAFE_VET : 1
HEALTH_NURSE : 1
PATIENT_AT : 1
CONTACT_PHONE : 1
FOUND_PATIENT : 1
FOLLOWING_CPC : 1
MGS_DEPRESSION : 1
APPETITE_GOOD : 1
AND_WIFE : 1
JUST_MOST : 1
ABDOMINAL_US : 1
ACTION_AT : 1
DECISIONS_WITH : 1
MOMENT_THOUGHTS : 1
WIFE_HAS : 2
VESTIBULAR_COCHLEAR : 1
HE_FOLLOWED : 1
PHYSCIANS_BY : 1
ETODOLAC_CT : 1
CONCERNS_YOUR : 1
FOR_NO : 1
DR_AT : 1
TAKE_CHARGE : 1
REQUIRED_SITTER : 1
COMMENTS_PT : 1
KEEP_HIS : 1
PROTOCOL_USED : 1
SITE_OUTPATIENT : 1
AUG_ARRIVED : 1
VIA_IMPINGMENT : 1
COST_OF : 1
AS_BELLO : 1
SKIN_ON : 1
NOT_AT : 1
OR_OTHER : 1
HAVE_SIGNS : 1
STRESS_DISORDER : 1
CARE_ORAL : 1
DIAGNOSIS_WEIGHT : 1
EXTENSIVE_HEMOSIDERIN : 1
MALE_ADMITTED : 1
SPAN_MASS : 1
THAT_LATE : 1
BECOMING_HEALTH : 1
THE_ERIE : 2
INDIVIDUAL_PSYCHOTHERAPY : 1
FORMULARY_SILDENAFIL : 1
CARCINOMA_AORTOCORONARY : 1
CARE_ATTENTIVE : 1
WED_PT : 1
PERSONALITIES_TO : 1
PRESSURE_OR : 1
HISTORY_CHF : 1
AND_BENEFITS : 1
ACTIVE_CAP : 1
RESPIRATIONS_WITH : 1
CONTINUE_PROBLEM : 1
THE_DRUG : 1
MOVE_LEG : 1
MEDIA_CRAFTS : 1
HEALTH_SITTING : 1
ED_OUTPATIENT : 1
RECORDS_RECORDS : 1
AT_URGING : 1
ATTENTION_BODY : 1
AND_RESPONSIVE : 1
JOINT_CYST : 1
IMPINGMENT_FEELS : 1
PT_FOLLOW : 1
MAY_NONFORMULARY : 1
WITH_LOADED : 1
BEEN_AND : 2
BLADDER_DISTENSION : 1
CE_ASSISTING : 1
PATIENT_DISCHARGED : 2
PAIN_OPEN : 1
IN_MANY : 1
ADMISSIONS_INSIGHT : 1
CONTACT_GROUP : 1
HIS_WHOM : 1
IDENTIFIED_OTHER : 1
CAME_OUT : 2
PREVENTIVE_HEALTH : 1
THE_RISK : 1
FDA_OR : 1
POSTTRAUMATIC_DISORDER : 1
DOSING_OF : 1
WHEN_COMMENTS : 1
SEEN_EVALUATION : 1
WITH_LEFT : 1
DRRTP_GOAL : 1
SODIUM_ACTIVE : 1
MED_ED : 1
THE_RAN : 1
SAFE_EFFECT : 1
VERIFIED_YES : 1
EVENTS_YEAR : 1
LANS_SHOULD : 1
SIGNS_PT : 1
HIS_ADDRESS : 1
ON_MACHINE : 1
WELL_INVENTORY : 1
OVERNIGHT_FOR : 1
LIVE_AT : 1
PRIMARY_PA : 1
VITALS_NO : 1
USE_RADICULAR : 1
WITH_YOUR : 1
CONVEINANT_FOR : 1
THRU_PCP : 1
OF_ACTIVE : 1
FEE_DRUG : 1
BE_ORDERED : 1
PT_WILL : 3
AMIODARONE_TAB : 1
OPEN_TO : 2
PODIATRY_CLINIC : 1
KLEIN_SET : 1
CONSULT_AND : 1
MR_STATED : 1
OF_BIRTH : 1
AS_AS : 1
TO_NOTIFY : 1
NOT_PAIN : 1
PAIN_THAT : 1
NERVE_VETERAN : 1
VETERAN_HAD : 1
CHECKS_REVEALED : 1
FEELINGS_PERCEPTIONS : 1
ADD_TIME : 1
CM_IT : 1
FOR_ESCALATING : 1
OPERATIVE_PATIENT : 1
PATEL_URGING : 1
BEEN_SCHEDULED : 1
SEVERAL_VETERAN : 1
PHYSICIAN_PREVENTIVE : 1
RATE_SW : 1
REVIEW_TAKEN : 1
CONTACT_ATTEMPT : 1
DURATION_SIGNIFICANT : 1
MORNING_MEDICATIONS : 1
ONCOLOGY_PT : 1
CANCELLED_GIVEN : 1
TH_ACID : 1
AMD_CHEST : 1
FIRST_THOUGHTS : 1
DESIRE_TO : 1
HE_ABLE : 1
ANXIETY_GROUP : 1
ATTITUDES_RAL : 1
ORDERS_PT : 1
IVF_FOR : 1
RISKS_OF : 1
MODEL_AND : 1
DEPRESSION_GOALS : 1
DRUG_USE : 1
PERIHILAR_NOTE : 1
REPORTEDLY_IN : 1
SURGEON_AT : 1
AND_INTERVENTIONS : 1
TOTAL_ENCOUNTER : 1
SERPENTINE_NORMAL : 1
PCC_PATIENT : 1
ARE_TO : 1
FULL_IVF : 1
PREVIOUS_ADMISSIONS : 1
CLOSED_EVEN : 1
RECOVERING_FROM : 1
PACK_AND : 1
REG_UNITS : 1
EVALUATION_AND : 1
HOME_SERVED : 1
OBSTRUCTION_HEALTH : 1
WELL_RETURNED : 1
HE_WELL : 1
FREE_RALES : 1
RELAPSE_DISCUSSION : 1
ACID_TAB : 2
FEVER_PRESSURE : 1
CESSATION_SMOKING : 1
VETERAN_HAS : 1
REFERRAL_TO : 2
REDUCTION_SEVERITY : 1
HE_PARTICIPATED : 1
TO_TO : 5
LESION_NOTED : 1
OFF_TO : 1
WAS_CALLED : 1
PAIN_SINCE : 2
CAREGIVER_DYSPHAGIA : 1
SCALE_EXPERIENCED : 1
BRADSHAW_THE : 1
THEN_WE : 1
FIND_MORE : 1
SOME_STATE : 1
PFT_AIRWAY : 1
RETURN_DRIVING : 1
GOING_ON : 1
TID_PRN : 1
CONCURS_FINDINGS : 1
PT_PHONE : 1
PSYCHIATRIC_NAUSEOUS : 1
TIMES_ZOLMITRIPTAN : 1
IN_DISCUSSING : 1
OBESITY_AND : 2
AT_ALL : 1
ON_ABOUT : 1
ON_PATENT : 1
FROM_AS : 1
PATIENT_WITH : 2
HEMATURIA_IS : 1
GIVEN_ONE : 1
PAIN_CONTRACT : 1
TELEPHONE_NOTE : 1
MONITOR_AND : 1
ATTENDED_GROUP : 2
TO_HIM : 4
DOSE_PATIENT : 1
MAKE_CHANGES : 1
WERE_AND : 1
FOR_TEMPERATURE : 1
INCLUDING_ING : 1
OFFLOAD_THE : 1
OWN_TO : 1
MY_THERE : 1
IN_MONTHS : 1
WAS_INTO : 1
PROVIDER_ADDED : 1
THREE_PT : 1
ON_NOT : 1
TOPIC_OF : 1
WAS_MIN : 1
ONE_CAN : 1
RELAX_SHOWER : 1
NONE_WORST : 1
BEEN_NEWLY : 1
PULMONARY_AT : 1
ME_WITH : 1
MUCH_BETTER : 1
WEST_MORELAND : 1
TO_PICK : 3
SELF_TAB : 1
INFORMATION_VIS : 1
WAS_PAYING : 1
ROS_LISINOPRIL : 1
ORTHOPEDIC_WHO : 1
MG_GUM : 1
INFORMATION_ATTENTION : 1
PT_POOR : 1
HE_UNDERSTANDING : 1
GAIT_EGD : 1
PATIENTS_INCLUDES : 1
COMFORT_AND : 1
DISCUSSION_LORAZEPAM : 1
DOES_PAIN : 1
CONTACT_SITE : 1
TRANSPORT_HAS : 1
SHOWING_SIGNS : 1
SUICIDE_ATTEMPTS : 1
PERSONABLE_PLEASE : 1
CAPACITY_INFECTION : 1
TO_PLAN : 2
RTC_ON : 1
PRIVATE_HEIGHT : 1
OR_RESOLVED : 1
UP_APPT : 1
DISCUSSED_PHYSICIAN : 1
EKHISTORY_BP : 1
DEC_SITE : 1
MON_SEC : 1
THROUGHOUT_GROUP : 1
FOOT_AND : 1
MR_CONTINUES : 1
OSTEOARTHROSIS_PRIMARY : 1
WALK_PATIENT : 1
PATIENTS_CHIEF : 1
SEVERE_HYPOXIA : 1
YOU_TAKE : 1
OTHERWISE_BARRIERS : 1
REG_HUMAN : 1
IDENTIFIED_PROBLEM : 2
IN_THIS : 1
PARTICIPATED_HE : 1
NEAT_WELL : 1
YOU_CHARGE : 1
WITH_HYPERGLYCEMIA : 1
ENCEPHALOPATHY_CXR : 1
PHYSICIAN_SODIUM : 1
EXHIBITS_CERVICAL : 1
FOR_IMPROVED : 1
RAN_THIS : 1
HE_NOT : 6
ARRIVAL_VIA : 1
COSIGNER_DISCHARGED : 1
MOVE_ANOTHER : 1
MEDICATION_MANAGEMENT : 2
NO_SIGN : 1
RETAINED_OWN : 1
LANDLORD_FOR : 1
NOT_EXPECTED : 1
TO_ME : 3
MOUTH_TIMES : 1
ASAP_IF : 1
NOTES_IN : 1
AS_NO : 1
TO_POOR : 1
FACE_HE : 1
FACILITY_DISCHARGE : 1
ON_HIS : 3
FOR_PRIMARY : 1
CARE_EXAM : 1
BACK_CALL : 1
ADMITTED_FEB : 1
STEADY_GAIT : 2
TIME_ANXIETY : 1
SIX_OF : 1
NATURE_DOES : 1
ON_BE : 1
PERCOCET_TRIED : 1
OBTAINED_ATTENDING : 1
EXHIBITS_POOR : 1
THAT_HAS : 4
COUGH_WITH : 1
EXCLUSIVELY_AND : 1
PT_FOR : 2
POOR_POSTURE : 1
IN_REGARDS : 1
WITH_IN : 1
AND_LOWER : 1
COORDINATOR_VET : 1
ONE_IF : 1
OT_RETURN : 1
OA_SHOULDER : 1
AS_USE : 1
TEAM_COMMUNICATION : 1
BURSA_CYST : 1
PATIENT_EMERGENCY : 2
GETS_MAIN : 1
AT_HOME : 1
TO_MAKE : 1
TRACKING_SOB : 1
USED_EXCLUSIVELY : 1
WISH_GOD : 1
ASSESS_THE : 1
PRN_RESULT : 1
THROUGH_HE : 1
PROVIDER_VISIT : 1
TO_SELF : 2
PAIN_HIS : 1
CURRENT_MEDICATION : 1
EVALUATION_MON : 1
PROCESS_APPLICABLE : 1
FROM_ALL : 2
BOWDEN_DEBORAH : 1
FOR_CONSENT : 1
OPEN_ROOM : 1
PT_EXPLAINED : 1
TEMP_SEPARATED : 1
INSIGH_PLAN : 1
TO_LEARNING : 1
MAY_BE : 2
GI_PATHOLOGY : 1
WHO_ON : 1
TIME_HAVE : 1
THE_FOCUSED : 1
OBESITY_OFFERING : 1
DESK_HEALTH : 1
ACTIVE_AND : 2
HAD_NO : 2
DECISION_PATIENTS : 1
TIP_SURGEON : 1
DUTY_ALERT : 2
REGULARLY_BID : 1
FROM_GASTROENTEROLOGY : 1
WEIGHT_RELATED : 1
PANCULTURED_GLUCOSE : 1
AND_SELECT : 1
HEALTH_MANAGEMENT : 1
RISK_NURSING : 1
TECHNIQUE_ADMITTED : 1
RECORDS_BE : 1
ND_NTG : 1
LEFT_FOOT : 1
AND_PELVIS : 1
VERBALIZED_AND : 1
HIM_SHE : 1
NO_ADJUSTING : 1
REACHED_AT : 1
HEPATITIS_CONCERNED : 1
GET_ED : 1
TO_FOLLOW : 1
CONSULT_MIN : 1
AND_INJECTION : 1
THIS_CALLING : 1
ANTIHISTAMINES_NO : 1
DISTENSION_INTEG : 1
OR_AT : 1
TO_MILIEU : 1
TO_WORK : 1
ATHETOID_ANKLE : 1
AT_UNMH : 1
CHANGE_ASSESS : 1
LOADED_GUN : 1
THIS_YEAROLD : 1
PT_CALL : 1
EVENTS_CURRENT : 1
FOLLOWING_AUTOMOBILE : 1
RE_WILL : 1
AND_SHE : 1
AND_SON : 1
SHOWN_ENTITLED : 1
PERSON_AND : 1
FOCUS_TO : 1
MALE_ARRIVED : 1
INSTRUCTIONS_TO : 1
PATIENT_UNDERSTANDING : 1
RHYTHM_DEMONSTRATE : 1
HE_SPENT : 1
WITH_REGARDING : 2
PLACE_AND : 1
OF_BURSA : 1
ALBUTEROL_SO : 1
OF_CHF : 1
GIVEN_IS : 1
AND_ALCOHOL : 1
MORE_CONVEINANT : 1
TI_CC : 1
NO_GOOD : 1
UPDATE_YOU : 1
TO_DRINK : 1
LAST_PCP : 1
THOUGHT_LOGICAL : 1
PER_RECENT : 1
INCLUDING_DO : 1
HOME_MODE : 1
ASKED_TO : 1
OA_NTG : 1
HAS_RESULTS : 1
AND_WRITER : 1
DATE_MEDICAL : 1
HE_HOME : 1
DRAINAGE_TRACKING : 1
DRAINAGE_OR : 1
DAILY_IN : 1
DOES_REALLY : 1
PERSON_PLACE : 1
BULD_MODEL : 1
SHARE_AND : 1
INFLUENZA_UNABLE : 1
THERAPY_FACILITATED : 2
HER_THAT : 1
ACTIVITIES_FEELING : 1
NO_OMEPRAZOLE : 1
ORDERED_BE : 1
CONSTITUTIONAL_NO : 1
CRYO_PSYCHIATRIC : 1
AND_OUT : 2
EXPOSURE_OCCURED : 1
YES_FOLLOWING : 1
THIS_SAVING : 1
HIGHBERGER_ON : 1
HE_ULTIMATELY : 1
LETTER_FOR : 1
PROBLEM_ACTIVE : 1
ACTIVE_MST : 1
THINK_HE : 1
AGING_PROCESS : 1
ADVICE_NURSE : 1
AND_COPING : 1
INSTRUCTIONS_ON : 2
PATENT_RELATED : 1
DAILY_NOTE : 1
WITHDRAWAL_FEBRILE : 1
PRESENTATION_OUTLINING : 1
PROBLEM_TRUNK : 1
MORE_TAKING : 1
WHO_WITH : 1
VA_AND : 1
FOLEY_AT : 1
MEDICAL_RECORDS : 1
ASSISTING_TRANSFER : 1
WAS_TO : 7
INJECTION_SITE : 1
AND_NL : 1
MEDICATIONS_AND : 1
ARE_ESOPHAGUS : 1
CONSTIPATION_TEMP : 1
INVOLUNTARY_WEIGHT : 1
WITH_SITE : 1
APPEARED_BE : 1
FULL_TIME : 1
OBSERVATION_EXHIBITS : 1
MG_OF : 1
MEDICATIONS_DOCUMENTATION : 1
CAP_EC : 2
ACIPHEX_TAB : 1
SOORYA_LANS : 1
GO_MENTAL : 1
PATIENT_DOES : 2
APPROX_AGO : 1
US_ORDERED : 1
JUN_DOSING : 1
ON_SAT : 1
ON_HYTRIN : 1
OT_DAILY : 1
NO_SHOULDER : 1
DOCUMENTED_ALLERGIES : 1
NOTE_TO : 1
UNSPECIFIED_CONSULT : 1
SEALY_URGENT : 1
DYSPHAGIA_NO : 3
DUTY_AND : 2
LITTLE_TIME : 1
OF_RELAPSE : 1
CLINIC_DEPRESSION : 1
INDUCES_STRONG : 1
ENCOUNTER_MINUTES : 1
OF_PROCEDURE : 2
RALES_IN : 1
PT_FROM : 2
STATE_YES : 1
CE_AUXILLARY : 1
LIFE_SUPPORT : 1
CARE_NOTE : 2
ASSESSMENT_MANUAL : 1
BY_MICHELE : 1
HYPERLIPIDEMIA_UNITS : 1
DATED_TO : 1
TO_ALSO : 1
IS_CONSTANT : 1
NO_ALLERGIES : 1
ROLLING_EXCLUSIVELY : 1
PLT_CONSISTENT : 1
NEEDED_HELP : 1
INCLUDING_NIGHT : 1
AS_FOR : 2
URGENT_PLATINUM : 1
BECAUSE_SCHEDULED : 1
WELL_SHOWED : 1
TO_CHANGE : 1
ON_SCALE : 1
ASSESSMENT_INFO : 1
ALL_PARTICIPATED : 1
ONCOLOGIST_ABOUT : 1
DISORDER_PATIENT : 1
ACCOMMODATE_HE : 1
TAB_PO : 3
MGOH_SIMTH : 1
OUTPATIENT_ADDENDUM : 1
EVEN_NONLABORED : 1
RECOMMENDATION_TO : 1
USED_ROLLING : 1
AND_EXPIRED : 1
IS_HIS : 1
OR_AND : 2
HIM_PATIENT : 1
LOSING_ON : 1
CONTROL_BLOOD : 1
PALPABLE_NO : 1
APPT_ON : 1
COVERED_FOR : 1
RAL_AND : 1
RALES_SAT : 1
HEMORRHOIDECTOMY_PATIENT : 1
ISSU_EGD : 1
PATIENT_WHERE : 1
CONTACT_LOG : 1
AFTER_TO : 1
FOR_NOT : 1
MOTHER_MUSCULAR : 1
BULD_CARS : 1
PHX_HELP : 1
ASSESSMENT_CLINICAL : 1
HIM_TO : 1
THE_PER : 1
NPH_INSULIN : 1
PRIM_OPEN : 1
PHYSICIAN_WHO : 2
IS_OLD : 1
FINESTERIDE_WAS : 1
ON_DATA : 1
FOBT_CARDS : 1
NAM_PT : 1
COLOR_PAIN : 1
BELIEVE_BE : 1
FOR_THE : 3
STAR_RECORD : 1
WIFE_DOES : 1
AND_EMOTIONALLY : 1
NEW_ORDER : 1
PATIENT_VERIFIED : 1
USE_CUTTER : 1
ON_HS : 1
CESSATION_BUT : 1
STATE_IF : 1
BEEN_BY : 1
REVIEW_NOTES : 1
KNOW_WRONG : 1
CHANGE_STATUS : 1
LEFT_LAB : 1
MANY_YEARS : 1
WAS_DONE : 1
NUMBER_MOVE : 1
FEELING_CE : 1
THE_PROCEDURE : 1
USE_MEDICATION : 1
ADDRESS_HIS : 1
MOD_MAX : 1
MST_CONSTITUTIONAL : 1
BOYFRIEND_DIC : 1
THE_FROM : 1
WAS_PROCEDURES : 1
AXIS_AND : 1
UNMH_PAIN : 1
HURT_WELL : 1
WIFE_BEING : 1
ME_HS : 1
BECAUSE_LOW : 1
ACTIVITIES_OF : 1
HE_WILL : 2
INFORMATION_RECOMMENDATION : 1
MEDICATIONS_HERBALS : 1
APPLICATION_HAS : 1
KNEE_ALSO : 1
WILL_TO : 1
STATUS_AFTER : 1
THROUGH_VISTA : 1
TIME_PROGRAM : 1
WILL_WORK : 1
CERVICAL_AND : 1
WAS_TIME : 1
VIOLENCE_POTENTIAL : 1
ORDERED_THRU : 1
THEN_JUST : 1
BLADDER_INTEG : 1
AM_PRIOR : 1
HEALTH_YOU : 1
SITE_IVP : 1
WITH_UF : 1
NO_SMOKING : 1
NO_CAREGIVER : 1
CBOC_CARE : 1
PRODUCTIVELY_THE : 1
LOCATED_AND : 1
PELVIS_CONTRAST : 1
FAMILY_TO : 1
DATE_OF : 3
SHOULDER_SHOULDER : 1
CAP_ORAL : 1
PATIENT_AWARE : 2
MRC_APPROVED : 1
PICK_UP : 3
MO_AND : 1
HBAC_IN : 1
MEDICAL_GUARDIANSHIP : 1
SOURCES_PARTICIPATED : 1
ENCOURAGE_MY : 1
IT_SOUNDED : 1
ABUSIVE_COMBATIVE : 1
MOST_BOTTLE : 1
ADMITTED_HOME : 1
MET_SCALE : 1
PHARMACIST_OUTPATIENT : 1
TRUNK_LATERAL : 1
ASSOCIATED_STATED : 1
WAS_INCLUDING : 1
COMPREHENSIVE_TRIAGE : 1
BE_PULSE : 1
DEC_OFF : 1
AS_DIRECTED : 2
ME_HE : 1
TREATMENT_TIME : 1
ALCO_ADDICT : 1
NOT_RECEIVING : 1
RELATED_DEPRESSION : 1
COMPLAINT_FEELING : 1
ORDERED_WELL : 1
IS_MORE : 1
FOR_PAIN : 3
SO_DO : 1
YESTER_SHOWED : 1
WILL_AT : 1
INJURED_SUTURES : 1
TABLETS_MOUTH : 1
HAS_SET : 1
HEMOSIDERIN_OF : 1
ATROVENT_TO : 1
OF_PHYSICIAN : 1
HS_HYTRIN : 1
VISIT_EXAM : 1
THE_ONSET : 1
RISK_QRS : 1
OF_DISCUSSION : 2
GOOD_SMOKING : 1
TO_PNEUMOVAX : 1
FACTORS_NONE : 1
SCHEDULED_DURING : 1
GOALS_MET : 1
LAST_HE : 2
NOTED_LAST : 1
COCAINE_AND : 1
UP_ME : 1
THE_JUNCTION : 1
EXAM_PT : 1
DONT_KNOW : 1
SPELL_ADMISSION : 1
SATT_THERAPY : 1
BEHAVIORS_SI : 1
VOLUNTARY_HE : 1
ASSIST_THIS : 1
ND_MILDLY : 1
LAST_DOCUMENTED : 1
ANITA_NURSING : 1
AUG_FOR : 1
MONITORING_HAS : 1
UNITS_NO : 1
MENU_THEN : 2
BEDSIDE_AM : 1
PT_PHYSICIAN : 1
CHEEKS_FROWNING : 1
ATTITUDES_IN : 1
ALL_ANTIBIOTICS : 1
TIME_NO : 1
AMBULATION_BREATH : 1
AT_HEALTH : 1
AND_MOTIONS : 1
IS_RECEIVING : 1
NOTE_PEDAL : 1
POSTPROCEDURE_RELATED : 1
AT_THE : 6
DONE_CAN : 1
HEALTH_CLUB : 1
TIME_EACH : 1
BE_MONITORED : 1
EFFUSION_PATIENT : 1
FOR_CHEST : 1
TO_SHOOT : 1
FUMARATE_MG : 1
CURRENT_MEDICATIONS : 1
PATIENT_PALLIATIVE : 1
READ_NEEDS : 1
VIET_PT : 1
MSE_PROCESS : 1
FOOD_FOOD : 1
NOTE_FUTURE : 1
INTERVENTION_INSULIN : 1
MCCULLY_LMSW : 2
DISPLAY_SUBJECTIVE : 1
CC_ATROVENT : 2
FOLLOWUP_VISIT : 1
BILATERAL_PT : 1
WBC_PLT : 1
TO_VA : 1
NO_ABOUT : 1
THE_BODY : 1
PROGRAM_CONTACT : 1
PRN_ANTIHYPERTENSIVES : 1
THE_INDICATIONS : 1
SAFETY_HAS : 1
PREVIOUS_VISIT : 1
ONE_TO : 1
NO_BASIC : 1
TP_FAWCETT : 1
IN_VA : 1
LOGICAL_APPOINTED : 1
LIMITATIONS_REPORTED : 1
CV_GLUCOSE : 1
THE_PROBLEM : 1
EAR_INFECTION : 1
SELF_AMIODARONE : 1
MEANS_ARRIVAL : 1
COUPLET_OCCASIONAL : 1
HISTORY_FATHER : 1
CLINIC_WITHIN : 1
ON_FACE : 1
HELP_STILL : 1
AREA_WEST : 1
ESOPHAGUS_WITH : 3
QH_MG : 1
SHE_ADAMANTLY : 1
DOCUMENTATION_OF : 1
THOUGHTS_FIRST : 1
VISTA_IMAGING : 1
ROOM_STAYED : 1
ACTIVE_AVOID : 1
AGAIN_PT : 1
ON_WATCHFUL : 1
DID_TO : 1
NKA_NURSING : 1
PAPERS_PT : 1
MULTIPLE_FRACTURES : 1
UNDERSTANDING_AND : 1
CARE_DATE : 1
ADDENDUM_HOWEVER : 1
TH_MPJ : 1
BACK_THE : 1
FOR_HEARTBURN : 1
ACCESSED_VISTA : 1
TOTAL_ARTHROPLASTY : 1
SEXUALLY_BLOOD : 1
HIM_WANTED : 1
PT_REPORTS : 2
REFERRAL_NONE : 1
NOT_THE : 1
SUPERVISED_THE : 1
INTERVENTIONS_DIETARY : 1
URGING_OF : 1
HOMEBOUND_IN : 1
DOOR_OPEN : 2
MILIEU_THE : 1
EATER_AND : 1
WHEN_HE : 2
ME_REGULARLY : 1
BENZTROPINE_MG : 1
POSTURE_FLEXED : 1
APPOINTMENT_PHYSICIAN : 1
FATHER_COPD : 1
ALLERGIES_CONTRAINDICATIONS : 1
NOT_LIMITED : 1
SNU_SPOKE : 1
NONE_WEIGHT : 1
OCT_AGE : 1
INJ_AMP : 1
VETERAN_PICK : 1
SHOULDER_OA : 1
WITH_IS : 1
BREATHING_MAY : 1
ED_PHARMACIST : 1
PAIN_MEDS : 1
IN_URGENT : 1
THE_CE : 2
FOR_PLACEMENT : 1
CALLED_LEFT : 1
ANTIHISTAMINES_LAST : 1
FEARS_STAFFED : 1
FOR_DIABETIC : 1
HOURS_ALL : 1
APPETITE_IS : 2
IS_FEELING : 1
PHYSICIAN_ORTHOPEDIC : 1
FROM_MORELAND : 1
BP_HEADACHES : 1
SON_VETERAN : 1
SPOKE_HE : 1
INFLAMMATION_OR : 1
TWO_BUT : 1
HEAR_ABOUT : 1
WEEKEND_WILL : 1
EXAM_SIGNS : 1
WAL_SIGNS : 1
INSIGHT_GOOD : 1
EACH_HAVE : 1
DYSPNEA_WITH : 1
ALZHEIMERS_WIFE : 1
ATHETOID_SLOW : 1
SURGEON_FOR : 1
TO_REDUCED : 1
ADDITIONAL_THE : 1
WEEKEND_HE : 1
MULTIPLE_HERE : 1
DEMONSTRATE_BREATHING : 1
ANXIETY_IS : 1
TO_ADULT : 1
ON_WHAT : 1
MEALS_ON : 1
CERVICAL_WITH : 1
MIGRAINE_TO : 1
MACHINE_APPOINTMENT : 1
NONE_TELEPHONE : 1
AND_GIVEN : 1
RISKS_OVERWEIGHT : 1
EVEN_RESPIRATIONS : 1
STAFFED_WITH : 1
ON_AIRWAY : 1
PT_SHOWED : 1
DELUSIONALLIKE_PREOCCUPATION : 1
LEG_VETERAN : 1
RX_WAL : 1
PUT_INFORMATION : 1
AND_PARTICIPATED : 2
IVF_OVERNIGHT : 1
WHOM_HAS : 1
MEDICATION_RECONCILIATION : 2
TO_ON : 3
ESCALATED_USED : 1
RECENT_ARDIAL : 1
NAME_SSN : 1
JUST_SEEN : 1
IS_CONVEINANT : 1
NOT_INDIVIDUAL : 1
BOTH_EXTENSIVE : 1
SERVED_HIM : 1
AND_WE : 1
ABNORMALITIES_HAS : 1
MOTHER_DYSTROPHY : 1
PATIENTS_LORPRSE : 1
DID_THROAT : 1
ORDERED_AND : 1
SYNCOPAL_EPISODE : 1
FOR_EITHER : 1
PHONE_OR : 1
CAN_TRANSPORT : 1
MEET_PATIENT : 1
FOR_PRIOR : 1
AND_SAFETY : 1
CE_BEFORE : 1
OR_CONTRAINDICATIONS : 1
HAPPENED_TO : 1
PAIN_LOCATED : 1
MONITORED_POST : 1
TIME_FT : 1
DONE_LOCAL : 1
CONTACT_REGULARLY : 1
INTERVENTIONS_REFUSES : 1
THEY_SACRIFICE : 1
CONTINUE_TO : 2
MEDICAL_CONDITION : 1
SAFETY_WIFE : 1
QUALITY_ASSESSMENT : 1
MEDS_THERE : 1
PRIM_ANGLE : 1
GOES_OVER : 1
PRIMARY_CODE : 1
FOLLOWING_THE : 1
ACTIVITIES_BETTER : 1
STABLE_ASF : 1
EXCLUSIVELY_TO : 1
AVAILABLE_ACTIVE : 1
FACILITY_KNOWN : 1
AT_AM : 2
ULA_NEUROLOGI : 1
VET_HE : 1
DEPT_NOTE : 1
YOUR_CURRENT : 1
REPORTS_ACCIDENT : 1
DECISIONS_SPOKE : 1
CONSERVING_ADMITTED : 1
HE_BEEN : 2
BY_DULABON : 1
NAME_ASSOCIATE : 1
IF_COMMENTS : 1
KG_KG : 1
WAS_DELUSIONALLIKE : 1
HE_ALBUTEROL : 1
ARE_NURSING : 1
SUPPLIES_SHE : 1
PAIN_MANAGEMENT : 2
PSYCHIATRY_HE : 1
BIOCHEMICAL_DO : 1
HTN_INTEGRATED : 1
DOSING_BUPROPRION : 1
SO_HE : 1
NOT_SHOWING : 1
NOTED_MRSA : 1
IN_DISCUSSION : 1
HIGH_FACTORS : 1
VISIT_AMPHETAMINE : 1
HEART_PATIENT : 1
DEPRESSION_TO : 1
GASTROENTEROLOGY_DOCUMENTED : 1
ACTIVITY_FOR : 1
WITH_SEDATIONANALGESIA : 1
BLOOD_SUGAR : 1
LETTER_VETERAN : 1
CARDIOLOGY_ORDERED : 1
PAPERS_MO : 1
CHEST_PAIN : 2
JUNE_HOURS : 1
POSSIBLE_PERIHILAR : 1
RISK_FACTORS : 1
RADIATION_COMBAT : 1
LATERAL_OF : 1
COMMENTS_GOOD : 1
OWN_PERSONALITIES : 1
AND_VET : 1
TECHNIQUE_HYPERTENSION : 1
WITH_MEDICAL : 2
ACTIVE_DEPRESSION : 1
HAND_HAND : 1
CALORIC_PATIENT : 1
TIME_REPORTS : 1
NTG_GIVEN : 1
ALCOHOL_THROUGH : 1
CARA_AND : 1
CATARACT_DEPRESSIVE : 1
DEPRESSION_EVIDENCED : 1
DOCUMENTED_PATIENT : 1
THE_ATTENDED : 2
MEDICATIONS_PRIMARY : 1
THE_GROUP : 1
GOOD_ENCOURAGE : 1
CAREGIVER_LISINOPRIL : 1
TO_PROVIDER : 1
STATUS_OF : 1
THAT_ORDERED : 1
ONE_INFECTION : 1
SEDATIONANALGESIA_CONSCIOUS : 1
SPINE_ABDOMINAL : 1
WAS_SEEN : 2
PERSONAL_TELEPHONE : 1
IMPACTED_STOOL : 1
TO_LPM : 1
JUL_PRESENTED : 1
LUNG_AS : 1
CXR_EFFUSION : 1
WIFE_REPLACED : 1
PHONE_AND : 1
OF_VETERAN : 1
NEW_AT : 1
EVALUATION_REG : 1
NONE_NORMAL : 2
RADIATES_ARM : 1
ORDER_PATIENT : 1
DRIVING_AS : 1
PHYSICAL_THERAPIST : 1
AREA_FOR : 1
LYRICA_AS : 1
OR_INJURY : 1
AND_FEARS : 1
BIC_WITH : 1
VERBALIZED_UNDERSTANDING : 1
CHLORIDE_IN : 1
LPN_PATIENT : 1
MOUTH_HOURS : 2
SPARE_TIME : 1
PROGRAM_AND : 1
THEN_AS : 1
REACHED_THE : 1
TO_BE : 9
HERNIATION_OF : 1
OF_THINGS : 1
TOBACCO_FREE : 1
HAIR_CUT : 1
DONE_PT : 1
SAFETY_PSYCHIATRIC : 1
METER_BREAKFAST : 1
YO_RLE : 1
ON_HOT : 1
DISEASE_REVIEWED : 1
EXAMINED_THIS : 1
MENTAL_POSTTRAUMATIC : 1
MEDICATION_NA : 1
AND_HEALTHILY : 1
STATE_AUXILLARY : 1
LIVE_HOME : 1
NONE_IS : 1
CARE_HOSPICE : 1
PTS_ABILITY : 1
AND_BEFORE : 1
AND_MG : 1
PRESENT_TYPE : 1
THE_VETERAN : 4
PROBLEMS_THE : 1
PATIENT_DEPARTMENT : 1
INHL_ML : 1
AS_VIOLENCE : 1
VESSELS_THIS : 1
SURGERIES_ENCOURAGE : 1
THE_HEALTH : 1
LORAZEPAM_TAB : 1
WHERE_NECESSARY : 1
TOTAL_UNDER : 1
WAS_HE : 1
VOMITING_HE : 1
FOR_LYRICA : 1
ADDENDUM_COMMENT : 1
IMMEDIATELY_RELATED : 1
WITH_GOING : 1
APT_IN : 1
PAIN_TOTAL : 1
HAS_FOOT : 1
CONTRACT_AND : 1
HEALTH_CARE : 3
USE_WHEELCHAIR : 1
NATURE_NOT : 1
BETTER_THINGS : 1
KG_ALERT : 1
FEET_PT : 1
WITHIN_VOMITING : 1
TO_BLOOD : 1
PRESCRIBED_OUTSIDE : 1
LOSS_NO : 1
FOREFOOT_NOTED : 1
TIP_OF : 1
APPETITE_POORFAIR : 1
ON_AT : 3
MST_SCREENING : 1
GAIT_HOME : 1
IF_KNOWN : 1
THE_LYMPH : 1
CONSENT_RAMSAY : 1
OFFERED_TYPE : 1
MG_IN : 1
INCREASE_QUETIAPINE : 1
TO_CHANGES : 2
ONEHALF_TABLET : 2
RUL_NODULES : 1
NECK_PAIN : 1
OBSERVED_AND : 1
EXFIX_SKIN : 1
AOX_AMD : 1
VIA_AMBULATORY : 1
ALTERNATE_SCENARIO : 1
MR_WILL : 1
DISCUSSED_ILLNESS : 1
SELF_LIVE : 1
SEEN_HE : 1
STAFF_FROM : 1
PCP_WAS : 1
NOT_NONVA : 1
WITHIN_TWO : 1
CONSENT_TOTAL : 1
ORIENTED_PERSON : 1
MVA_HIS : 1
SHOOT_ON : 1
INCLUDING_THE : 1
MARRIAGE_SEPARATED : 1
WNL_ALERT : 1
INFORMATION_STATEMENT : 1
HYPERGLYCEMIA_MEDICATION : 1
DEPARTMENT_NURSE : 1
OBSERVE_PTS : 1
NEURO_REVEALED : 1
OF_HEPATITIS : 1
OUT_TO : 4
COGNITIVE_ATTENTION : 1
EVIDENCED_POTENTIAL : 1
IF_HE : 1
ORDER_AGREEMENT : 1
DONT_WANTS : 1
ASSESSMENT_DATE : 1
POSITIONED_HOT : 1
PNEUMOVAX_AGE : 1
SMOKING_WIFE : 1
ACTIVE_THROUGH : 1
ADDENDUM_ADDITIONAL : 1
ADDENDUM_MHC : 1
STOMACH_WELL : 1
CRITICAL_PERFORMED : 1
MON_REEVAL : 1
NO_EPIS : 1
DEPRESSION_AS : 1
MEDS_NO : 1
ACTIVE_TRUNK : 1
MOVEMENTS_SLOW : 1
HAS_BEEN : 8
INFECTION_SWELLING : 1
CALLING_REQUESTING : 1
CORRECT_ACTIVE : 1
DONE_SEEN : 1
SURGERIES_THIS : 1
HEALTH_WALK : 1
WHEELCHAIR_WENT : 1
UNSPECIFIED_COUNSELING : 1
PA_NOTE : 1
BE_INVOLVED : 1
OF_WITHDRAWAL : 1
REVIEWED_PROVIDED : 1
CUT_THROAT : 1
MEDICATIONS_FULL : 1
ALSO_HIS : 1
PER_MH : 1
SHOULDER_TOTAL : 1
SELECTED_FROM : 1
AS_PATIENT : 1
APPROVED_WILL : 1
NANDA_ED : 1
SKIN_COLOR : 1
GETS_HIS : 1
ATTEMPT_FOLLOWING : 1
APPROPRIATE_INTERVENTIONS : 1
WITH_ON : 1
OBSERVE_ABILITY : 1
OF_FOLLOWING : 1
FOCUSED_ON : 2
BM_NO : 1
CHANGES_DUE : 1
REQUESTING_TO : 2
OUR_PROCESS : 1
SHOULD_ASSIST : 1
NOT_MUCH : 1
OPEN_PATIENT : 1
MANAGEMENT_SITTING : 1
DENIES_ANY : 2
PROBLEM_UNSPECIFIED : 1
YEARS_WITH : 1
TO_OR : 1
POTENTIAL_LEVEL : 1
FINDINGS_AND : 1
GLAUCOMA_SENILE : 1
DECIDED_DIVORCE : 1
CHANGES_THIS : 1
UF_AND : 1
SITE_DELTOID : 1
ATTENDED_THERAPY : 2
SUPPOST_DRINK : 1
AN_AUTOMOBILE : 1
AT_BEDTIME : 1
HIS_WHEN : 1
IMMEDIATELY_POSTPROCEDURE : 1
NSC_DISPOSITION : 1
AOX_DNR : 1
PATIENT_IS : 6
FOR_COMPREHENSIVE : 1
TIME_IF : 1
PAIN_THIS : 2
HAVE_AD : 1
LOOK_HIS : 1
ABLE_COME : 1
BE_THROUGH : 1
RESULTS_OUTSIDE : 1
MEDICAL_PROCESS : 1
SIMTH_XTRA : 1
HAS_BACK : 1
NL_CBC : 1
PLAN_PATIENT : 2
EVALUATION_FEVER : 1
ABOVE_NUMBER : 1
MSE_THOUGHT : 1
LYMPH_AMBULATES : 1
WHEELCHAIR_HE : 1
RESOLVED_EAR : 1
CONSULT_PRIMARY : 1
TYPE_CONTACT : 3
IN_WHEELCHAIR : 1
WITHIN_NORMAL : 1
UNITS_BE : 1
IN_BASE : 1
FOLEY_TIP : 1
ON_TEXT : 1
EKG_NOTE : 1
ABBREVIATIONS_BF : 1
UPSETTING_IN : 1
SEALY_CARE : 1
MEDS_MEALS : 1
ABERRANT_BEATS : 1
AND_EVEN : 1
WAS_SUPPORT : 1
OF_WAY : 1
PAYING_HIS : 1
FOBT_WITH : 1
EMERGENCY_NURSE : 1
GOALS_CARE : 1
APPLICATION_BEEN : 1
BEEN_IN : 1
VET_JUST : 1
LIGHT_SCALY : 1
PT_REFERRAL : 1
ADDICTS_SACRIFICE : 1
SSN_PATIENT : 1
INTERACTION_BIOCHEMICAL : 1
EDUCATION_ASPIRATION : 1
HEAD_LEVEL : 1
WAS_BENADRYL : 1
CITY_STATE : 1
RODE_DISCUSS : 1
BMS_NO : 1
TO_SAVE : 1
AT_PB : 1
PRESCRIBED_ANY : 1
AND_THE : 3
CONCURS_WITH : 1
BENZODIAZEPENE_AND : 1
SITTER_REQUIRED : 1
INFORMATION_HEART : 1
PROGRESS_NOTE : 2
THOUGHTS_COME : 1
CALLED_ABOUT : 1
CHF_WAS : 1
NODULES_FALLS : 1
TIMES_FOR : 1
GIVEN_AND : 1
LATERAL_WITH : 1
THIS_MOMENT : 1
EKG_LABS : 1
BMI_MASS : 1
OR_ABOUT : 1
PATIENT_THAT : 2
PHONE_AM : 1
PATHOLOGY_TAKING : 1
BEING_SIDE : 1
IDENTIFY_IF : 1
FOR_CARE : 2
AND_EVERSION : 1
BE_SAFE : 1
EMER_COMMENTS : 1
PRIMARY_DIAGNOSIS : 1
HIS_KNEE : 1
CLINICAL_ADMITTING : 1
EXR_BENZTROPINE : 1
PER_TRANSFER : 1
HE_TO : 5
EVALUATION_REVIEW : 1
IN_STATUS : 1
GOOD_CE : 1
MUSCULAR_CITALOPRAM : 1
THE_INTERVENTIONS : 1
ADMINISTRATIVE_NOTE : 1
THOUGH_HE : 1
OR_ADMISSIONS : 1
FOCUS_OF : 1
DEVELOP_LEISURE : 1
GOING_TO : 1
CHF_MUSCULAR : 1
GIVEN_EDUCATION : 1
INSULIN_HUMAN : 1
PAIN_CORONARY : 1
BARRIERS_TO : 1
RECORDED_LAST : 1
CM_DYSPNEA : 1
ADMITTING_HYPERGLYCEMIA : 1
RISK_THIS : 1
FEELINGS_SHIFT : 1
STATUS_PT : 1
AND_REVIEW : 1
POINT_VIEW : 1
DATE_AGE : 1
ON_PT : 2
STAFF_GOALS : 1
BE_ACCESSED : 1
INQUIRING_ABOUT : 1
WELL_SHEET : 1
ARRIVAL_AMBULANCE : 1
PHYSICIAN_RECENTLY : 1
TO_TOLERATING : 1
BF_BOYFRIEND : 1
LEAVES_HE : 1
TWO_TABLETS : 1
PULSE_OXIMETER : 1
WHO_HIS : 1
DC_WILL : 1
DONE_IS : 1
TOTAL_ASSIST : 1
THIS_VA : 1
PLAN_SUBJECTIVE : 1
ULTIMATELY_ABLE : 1
MOD_ASSIST : 1
ABNORMALITIES_ANTIBIOTIC : 1
OR_GREATER : 1
INSTRUCTIONS_PATIENT : 1
READY_DIE : 1
REFERRAL_PHYSICIAN : 1
DATA_IMPRESSION : 1
CERVICAL_SPINE : 1
NOTE_CHLORIDE : 1
INSTRUCTIONS_SSN : 1
SCALE_THIS : 1
LIFE_CHANGES : 1
EFFECT_BUPROPION : 1
PRESENCE_OF : 1
OLD_ADMITTED : 1
ADMISSION_OCT : 1
LMSW_CLASS : 1
LITERS_BED : 1
ID_BAND : 1
TV_SOCIALIZING : 1
DENIAL_THE : 1
COUPLET_FREQUENT : 1
PLANS_MOD : 1
MOST_OF : 1
INFECTION_INFLAMMATION : 1
SIERRA_REGIONAL : 1
FOR_MOVE : 1
CHRONIC_PATIENT : 1
HIM_DIVORCE : 1
TO_IN : 3
MG_CHEW : 1
SOUNDED_TO : 1
AND_TI : 1
PER_HOSPICE : 1
MASS_AUG : 1
IMAGING_YEAR : 1
XATTEMPTED_TO : 1
WORK_THE : 1
PENDING_TIME : 1
WOULD_BE : 1
APPEARS_ASHEN : 1
HAVE_DROWSYNESS : 1
IN_VIET : 1
HEIGHT_CM : 3
DENIED_SIGNIFICANT : 1
INFECTIOUS_REVIEWED : 1
CALL_BHM : 1
ACID_MG : 2
TRANSPORTATION_AMBULATORY : 1
ONE_PATIENT : 1
ULA_PHYSICAL : 1
VERBALIZED_VETERAN : 1
THIS_RESOLVED : 1
SHE_FURTHER : 1
BEING_PATIENT : 1
SHOW_DESIRE : 1
PATIENT_FREE : 1
PAIN_NONE : 2
HAS_ADMITTED : 1
HIM_EMERGENCY : 1
FOLLOWED_VA : 1
DIRECTED_NEEDED : 1
ADDENDUMS_WHERE : 1
CONSULT_WITH : 1
PLEASE_REVIEW : 1
SHOOT_SELF : 1
PRN_FOR : 3
HERE_FOR : 1
HAS_TO : 2
CARDIOLOGY_NOTE : 1
PATIENT_ORIENTED : 1
FOUND_TECHNIQUE : 1
HOMICIDAL_IDEATION : 1
NUMBER_COMFORT : 1
PAIN_FROM : 1
WITH_CHF : 1
OFFERING_TO : 1
EMERGENCY_DEPARTMENT : 1
PALM_BEACH : 1
NO_ORANGE : 1
BEEN_GIVEN : 1
WHO_WAS : 1
BRONCHOSCOPIC_OXIMETER : 1
CONSIDER_PLACEMENT : 1
HIS_IS : 1
ABOUT_CANCER : 1
AGORAPHOBIA_MH : 1
THIS_OR : 1
REEVAL_FOR : 1
PATENT_LEFT : 1
CHIEF_IS : 1
ANTIANXIETY_MEDS : 1
ASPIRIN_PT : 1
SHIFT_HEIGHT : 1
ALSO_SUGGESTS : 1
NKA_SELF : 1
TOOK_NITRO : 1
FOOT_PER : 1
THE_FORMULARY : 1
EVERSION_FOOT : 1
IS_HERE : 1
QUIT_IDEALLY : 1
SEEN_BY : 3
FROM_CLONIDINE : 1
OVER_PAST : 1
AS_OXYGEN : 1
QAMDM_ACTIVE : 2
ABOUT_THE : 2
OF_BEING : 2
OUTLINING_CHARACTERISTICS : 1
PAST_OFTEN : 1
TO_CHAR : 1
BEEN_BOTHERED : 1
NO_PATIENT : 2
AIRWAY_RELATED : 1
WAS_SO : 1
IN_WORK : 1
INTAKE_NOTE : 1
DATE_THOUGHTS : 1
THOUGHT_PROCESS : 1
DATED_ATTACHED : 1
BREAKFAST_DATE : 1
FOR_EVALUATION : 1
GLUCOSE_AXIS : 1
NEGATIVE_REPEAT : 1
WANTS_WRONG : 1
MUCH_OF : 1
CURRENTLY_HE : 1
OF_WEIGHT : 1
FROM_MODE : 1
TADALAFIL_TRANSFER : 1
INTERVENTIONS_COUNSELING : 1
ULCERATION_SUB : 1
THEY_ARE : 1
INSURANCE_IS : 1
DIAGNOSIS_ADDENDUM : 1
OF_SPINE : 1
RLE_EXFIX : 1
COLOSTOMY_OMEPRAZOLE : 1
ANY_SE : 1
THEY_DID : 1
OF_ATTEMPTS : 1
MUCUS_IS : 1
TOPIC_DISCUSSED : 1
ALSO_VETS : 1
THE_FOCUS : 1
SURGEON_UNMH : 1
THE_APPROPRIATE : 1
DYNAMICS_MEET : 1
BEING_SEXUALLY : 1
ADDED_COSIGNER : 1
AMBULATION_CS : 1
FOR_EVIDENCE : 1
POSTURE_WITH : 1
ADMITTED_TO : 1
GIVEN_TIME : 1
CS_TOUR : 1
DENIAL_ALCO : 1
ANGRY_ANXIETY : 1
ACTIVE_CONSTIPATION : 1
MG_ACETAMINOPHEN : 1
STAR_WHO : 1
NO_PROVIDER : 2
PER_PATIENT : 2
WITH_CONTRAST : 1
DEPOSITION_EKG : 1
IMPRESSION_AND : 1
SSN_YES : 1
TRUCK_MEDICATION : 1
OBTAINED_PT : 1
AM_THAN : 1
TO_MODEL : 1
VIA_PHONE : 1
IMPACTED_WITH : 1
YOU_ANY : 1
TO_HOSPITAL : 1
MALE_HATE : 1
CALLER_WEST : 1
THE_PHYSICAL : 1
TO_PLEASE : 1
INJURY_OR : 1
DIAGNOSIS_LORWR : 1
WITH_RELAX : 1
NO_DYPHORIC : 1
YOUR_PRIMARY : 1
OF_WHEELCHAIR : 1
DIMENSION_AN : 1
PRESCRIBED_THE : 1
CONCERNS_FORGIVING : 1
ED_NURSING : 2
QUETIAPINE_AND : 1
SOB_IMPROVING : 1
NO_ONCOLOGIST : 1
MODERATE_SEDATIONANALGESIA : 1
RA_INFORMED : 1
INFORMED_CONSENT : 2
EASILY_STARTLED : 1
MORE_PRODUCTIVELY : 1
RESPONSE_THE : 1
ULCERATIONS_BILATERAL : 1
BED_ALARM : 1
HIS_WIFE : 1
PHYSCIANS_TO : 1
OVERTHECOUNTER_HERBALS : 1
NOT_CONVINCE : 1
THIS_SITUATION : 1
FROM_BECAUSE : 1
HISTORY_TBI : 1
AMBULATORY_IMPINGMENT : 1
CONTACT_PERSONAL : 1
IMPROVED_PANCULTURED : 1
AND_ASKED : 1
ANTHROPOMETRICS_IN : 1
CAREGIVER_AVAILABLE : 1
SHEET_COMPLETED : 1
PATIENT_ADDENDUMS : 1
UPTIVE_INCREASED : 1
PLAN_VETERAN : 1
NPH_MORSE : 1
OBESE_BODY : 1
USE_USED : 1
FEELING_IMB : 1
PMH_SIGNIFICANT : 1
CALLED_MUSKOGEE : 1
LEFT_MESSAGE : 1
JUL_ASSOCIATE : 1
OF_ALERT : 1
ALERT_AND : 4
ADMISSION_HAS : 1
AVOID_TEMP : 1
TOTAL_ONE : 1
FOR_SAFETY : 1
THERAPY_WITHIN : 1
IS_NEAT : 1
ALREADY_HAS : 1
WAS_SELECTED : 1
TRANSFER_COORDINATOR : 1
OUT_NOTE : 2
WIFE_BACK : 1
ORAL_CARE : 3
AT_NO : 1
ABDOMEN_SOFT : 1
PATIENT_MAY : 1
HER_ON : 1
CRAFTS_WERE : 1
PRESSURE_CONSTANTLY : 1
ASSIST_TOTAL : 1
PARANOID_TYPE : 1
RESPONDING_AND : 1
WOULD_ME : 1
BLOOD_PRESSURE : 6
AM_OPERATOR : 1
ORAL_SELF : 2
ADMITTED_RBC : 1
FAMILY_HIS : 1
AND_CIVILIAN : 1
ON_AUG : 1
ULCERATIONS_PER : 1
WE_UPDATE : 1
SERVICE_PATIENT : 1
THE_OF : 4
SHOWERED_TO : 1
SUPPORT_EXT : 1
PAIN_ASSESSMENT : 3
PATIENT_EDUCATION : 3
VETERAN_GROUP : 2
EVALUATION_INSULIN : 1
GAIT_ACTIONS : 1
PRESSURE_TRIED : 1
LOCALIZED_INVOLVING : 1
THE_WEEKEND : 1
TO_MONITOR : 1
SLOW_COMPLEX : 1
REPORTEDLY_OCCURED : 1
BOWEL_EVERY : 1
PT_HAS : 2
CHIEF_COMPLAINT : 2
NOTE_ROS : 1
COCAINE_WBC : 1
MET_BRADEN : 1
FOR_ANXIETY : 2
THROAT_PER : 1
ICDCM_AND : 1
TOBACCO_PRODUCTS : 1
ISSUES_REVIEWED : 1
ABOVE_LISTED : 1
COMMENTS_PAIN : 1
THAT_HE : 15
MORELAND_HOSPITAL : 1
BACK_HE : 1
CLINIC_DOES : 1
TAKING_VETERAN : 1
CM_AN : 1
TO_OVERWEIGHT : 1
COULD_SPEND : 1
TO_BONE : 1
UP_OF : 1
SPEND_MORE : 1
IS_ACID : 1
THE_FOR : 1
STRE_HEALTH : 1
THE_PCP : 1
DIET_TIME : 1
BLAMED_HIM : 1
WALKING_OXYGEN : 1
DO_YOU : 1
YEAR_RALES : 1
DEPRESSIVE_NOS : 1
POINT_OF : 1
WITH_GUN : 1
WITHIN_EKHISTORY : 1
PAST_SURGERIES : 1
PACU_AM : 1
BLOOD_HEART : 1
ABUTTING_SKIN : 1
SPECIMENS_STABLE : 1
SEEN_DULABON : 1
QUESTIONS_OR : 1
AND_INVERSION : 1
SINCE_RADIATES : 1
ONE_BY : 3
FROM_WEST : 1
PLACED_FINSETERIDE : 1
AM_FROM : 1
PAIN_SCALE : 2
INJURY_TOOK : 1
CARE_TEAM : 1
IS_IMB : 1
NONLABORED_RESPIRATIONS : 1
STATED_CURRENTLY : 1
WHEN_INFORMATION : 1
CARE_PT : 1
TAPPING_DROPPING : 1
SYMPTOMS_SEEN : 1
HIS_MOVE : 1
VACCINE_UNABLE : 1
PATIENT_DECISIONMAKING : 2
NONE_HE : 1
EXPLAINED_THIS : 1
OF_OUTPATIENT : 1
NEW_REC : 1
HE_COME : 1
NMBER_PT : 1
TOMMORROW_TO : 1
PROBABLE_RIGHT : 1
EVERY_HOURS : 2
CALL_WITH : 1
AND_NICOTINE : 1
PAST_OF : 1
YES_DERM : 1
PT_ASAP : 1
THIS_AM : 3
WITH_THIS : 1
OF_VARIOUS : 1
FAMILY_FATHER : 1
HEART_TOBACCO : 1
AMBULATORY_PSYCHIATRY : 1
RATIONALE_FOR : 1
LOOK_ON : 1
THE_FACILITY : 1
PT_DNR : 1
NOT_FEELING : 1
ARTERY_EAR : 1
VIOLENCE_LEVEL : 1
LAST_THE : 1
MEDICATIONS_OF : 1
HELPERS_WAS : 1
HATE_THE : 1
WIFE_IS : 1
CONSENT_EYE : 1
EACH_ITEM : 1
INFORMATION_COMPLAINT : 1
POSITIVE_FOR : 1
PHYSICAL_TO : 1
WNL_AND : 1
IN_LAST : 1
DATE_OCT : 1
WITHOUT_ASSISTANCE : 1
THE_OUT : 1
PHYSICIAN_CHIEF : 1
DEMEROL_MG : 1
PERCEPTIONS_AND : 1
REVIEW_OCT : 1
PHYSICAL_LIMITATIONS : 1
IS_ACCESSED : 1
GOT_SERVED : 1
CHAR_MH : 1
AND_DEMONSTRATES : 1
BEACH_WOULD : 1
THAT_THEY : 1
THERAPIST_AND : 1
MAJOR_VESSELS : 1
OR_VERBALIZES : 1
AND_FEELINGS : 1
IF_NO : 2
PATIENTS_MDD : 1
OF_ILLNESS : 1
ON_ULCERATIONS : 1
ADMINISTERED_RETAINED : 1
CONNECTED_PATIENT : 1
CHF_AND : 1
DOCUMENTATION_RESPIRATIONS : 1
WRONG_WISH : 1
PARANOID_ORDER : 1
FROM_MOUTH : 1
WAL_VITAL : 1
AREA_MINUTES : 1
TO_NO : 3
CURRENT_RECONCILIATION : 1
ACTIVITY_EATING : 1
DRIVING_TRUCK : 1
VA_CARE : 1
TO_HEAR : 1
ACTIVE_REPEAT : 1
COMMENT_MED : 1
DISCUSSION_TAB : 1
INTERVENTION_EVALUATION : 1
DEPENDING_WHAT : 1
WHAT_THE : 1
DISCONTINUE_USE : 1
RATE_AND : 1
VOLUNTARY_WAS : 1
CONSENT_MODIFIED : 1
WHEELCHAIR_THE : 1
THE_SURGEON : 1
CORRESPONDENCE_TEST : 1
IS_ED : 1
PATIENTS_NAME : 1
TIME_MEDICATION : 1
CLEAR_BUT : 1
BODY_MASS : 2
AMBULATORY_SYNDR : 1
IDEALLY_WITHIN : 1
HAVE_HOME : 1
APPOINTMENT_WITH : 1
WILL_INADEQUATE : 1
ANXIOUS_PARANOID : 1
WORKED_GOOD : 1
SYMPTOMS_JUST : 1
POSTPROCEDURE_NOTET : 1
NO_ABNORMALITIES : 1
CONCERNED_THAT : 1
ARRIVES_BY : 1
SILDENAFIL_TADALAFIL : 1
THOUGHTS_AND : 2
HE_READY : 1
HAVE_SPELL : 1
BY_MENTAL : 1
LEXAPRO_PO : 1
LAST_SCALE : 1
MED_REVIEWED : 1
REFUSES_COUNSELING : 1
BY_AMBULANCE : 1
PAST_HISTORY : 3
PROVIDER_STEP : 1
HORRIBLE_OR : 1
WALK_URINARY : 1
COPD_DIARY : 1
ON_ACTIVITIES : 1
ALLERGIES_PATIENT : 1
SIG_ONE : 1
EDEMA_IN : 1
AGAIN_SPOKE : 1
PHYSICIAN_BLOOD : 1
SERVICES_PRIVILEGE : 1
AND_JOB : 1
SERVICES_PROVIDE : 1
OF_JOINT : 1
POSITIONING_INJECTION : 1
TIMES_ANXIETY : 1
GOES_HOME : 1
HIS_NONE : 1
UNDERSTANDING_REQUESTING : 1
PARTICIPATED_DISCUSSION : 1
REGIMEN_INSTRUCTED : 1
COCHLEAR_AS : 1
LBP_AND : 1
SUPPLIES_QUETIAPINE : 1
AND_ENERGY : 1
SISTER_HAS : 1
GLASSES_AT : 1
DIETARY_MODIFICATIONS : 1
PRNS_SHOWERED : 1
PAIN_ADMISSION : 2
ZIPRASIDONE_ATHETOID : 1
IM_DYING : 1
ORDERED_DR : 1
TOLD_HIM : 1
AMP_IVP : 1
SKIN_MRSA : 1
BE_ONE : 1
STRESS_DIABETIC : 1
ABOUT_AS : 1
EXERTION_BIL : 1
CARE_CAME : 1
WILL_THAT : 1
FOR_AS : 1
WITH_CARES : 1
REQUESTED_ON : 1
BY_EVERY : 1
APPROX_YEAR : 1
NSTEMI_DEXTROSE : 1
ON_PROCESS : 1
PULMONARY_ON : 1
INDEPENDENT_SAFETY : 1
PATIENT_BEEN : 2
ON_GUARD : 1
BACK_PROBLEMS : 1
CLOSED_AND : 1
HIS_HAND : 2
WITH_BACK : 1
FOR_OPIOID : 1
TO_CONSULT : 1
LEFT_ON : 1
AND_IN : 1
PLACEMENT_ACTIVE : 1
PATIENT_STATES : 1
SINCE_WAS : 1
CARDS_WITH : 1
OF_WITHOUT : 1
ILLNESS_BUT : 1
THE_LAST : 1
ITEM_AND : 1
OPERATIVE_FINDINGS : 1
AND_STROKE : 1
HEALTH_HBAC : 1
MULTIPLE_MEDICAL : 1
COMMENTS_OFF : 1
GOD_WOULD : 1
ADMITTED_HYPERGLYCEMIA : 1
MASS_PAIN : 1
WITH_OXYGEN : 1
DOSE_MAY : 1
FEB_THIS : 1
KNEE_HE : 1
THINGS_IS : 1
AT_REQUESTED : 1
BOWDEN_MRC : 1
FOR_PRESSURE : 1
STATUS_OUTPATIENT : 1
AND_WELL : 3
DOSING_DO : 1
SELF_RESOURCES : 1
ULTIMATELY_BE : 1
NEW_OBTAINED : 1
PO_QAM : 1
COME_CONTACT : 1
THAT_CURRENTLY : 1
PATIENT_PRESCRIBED : 1
APPROPRIATELY_HEALTHILY : 1
THEY_AM : 1
PTS_AND : 1
WAY_VITAL : 1
WAS_ABLE : 2
TO_FEELINGS : 1
LAST_BY : 1
EMAIL_TO : 1
BEING_COMMON : 1
YOU_WEIGHT : 1
PT_ORDERS : 1
DIABETIC_BILATERAL : 1
CONSTITUTIONAL_FEVER : 1
MEDICATION_INSTRUCTED : 1
TO_MEALS : 1
TEST_ACTIVE : 1
FINESTERIDE_THAT : 1
BENADRYL_PO : 1
AN_SCENARIO : 1
OTHER_PULSES : 1
ON_BOTH : 1
AND_SUTURES : 1
MODEL_CARS : 1
HOME_NEAT : 1
FROWNING_SMILING : 1
VETERAN_CLASS : 1
COMMENTS_TWO : 1
RATES_NECK : 1
KEEP_OPEN : 1
THERE_MIN : 1
CARE_ITEMS : 1
YOU_WERE : 1
SALINE_IN : 1
FT_MYERS : 1
WOULD_NOT : 1
MUSKOGEE_COMMUNITY : 1
NO_PLATINUM : 1
OUTPATIENT_PHONE : 1
POORFAIR_AND : 1
OCT_PC : 1
INITIAL_PRIMARY : 1
EXPEDITOR_TO : 1
ARRHYTHMIA_PRESENT : 1
ONE_EAR : 1
CHECKS_NO : 1
NURSING_QRS : 1
EXPERIENCED_THE : 1
EAT_AND : 1
CARDS_AND : 1
DURING_IMMEDIATELY : 1
WEIGHT_KG : 1
PATIENT_OUT : 2
TO_HEAD : 1
ENCOUNTER_PAST : 1
WELL_IN : 1
THIS_PATIENT : 2
DIAGNOSES_AND : 1
RIGHT_LUNG : 1
BODY_HAS : 1
CIVILIAN_CITY : 1
RECONCILIATION_HIS : 1
BEING_FOLLOWED : 1
TELEPHONE_MODE : 1
LOCATED_INTACT : 1
REVEALED_ABNORMALITIES : 1
TO_UPDATE : 1
EDUCATION_FOLLOWING : 1
ORAL_MG : 1
TREATMENT_WERE : 1
LATELY_PHONE : 1
IM_FROM : 1
HAS_PANCULTURED : 1
BY_PATEL : 1
CORRECT_YES : 1
OR_EMAIL : 1
LBS_PATIENT : 1
NONVA_MEDS : 1
CARE_OBESITY : 1
NO_EXTENSIVE : 1
YR_OLD : 1
WITH_HISTORY : 1
NOT_RELATED : 1
VITAL_PERFORATED : 1
NOT_PROBE : 1
OF_BREATH : 1
CONTRAINDICATIONS_TO : 1
TAKE_COUMADIN : 1
ON_PATIENT : 2
FEEDS_SELF : 1
UNDERSTANDING_SW : 1
OFFLOAD_FOREFOOT : 1
FOOD_AND : 1
BF_DIC : 1
IN_WAY : 1
REPEAT_MSE : 1
INVOLVED_MAKING : 1
WELCOME_BEHAVIORAL : 1
OBTAINED_PAGE : 1
CARE_CLINIC : 1
MEDICAL_OF : 1
BIOCHEMICAL_METAB : 1
MUCH_BODY : 1
HIS_ALZHEIMERS : 1
HYPERTENSION_PRESENT : 1
HYPERKERATOTIC_NO : 1
IN_NATURE : 1
INCLUDING_USE : 1
LABS_TO : 1
METH_ALCOHOL : 1
COMFORT_CARE : 1
THERE_YEARS : 1
PHYSICIAN_NOTE : 3
DOCUMENTATION_WAS : 1
LEAD_REDUCED : 1
SELF_COMMUNITY : 1
HAS_OR : 1
CAPACITY_IDENTIFY : 1
PAROXETINE_MGS : 1
ADDRESS_HAND : 1
STABLE_NURSING : 1
SHEET_YES : 1
CURRENT_ACTIVE : 1
OF_CARDS : 1
DATE_OBTAINED : 1
VITAL_STABLE : 1
FORCE_FOR : 1
BACK_SKIN : 1
THERE_ALOT : 1
FROM_UNDER : 1
CARA_WRITER : 1
CONTINUED_RESOLVED : 1
REFILLS_LAST : 1
NONE_RETURN : 2
EVENTS_COMMENTS : 1
ORIENTED_APPETITE : 2
ALARM_DOOR : 1
TO_DEPRESSION : 1
SOME_DISCUSSION : 1
HAVE_OF : 1
PROTOCOL_NOT : 1
DEXTERITY_STATED : 1
DRAINAGE_AROUND : 1
NEEDS_WITH : 1
NO_BREAT : 1
READ_ON : 1
HOW_AS : 1
SOB_IMPINGEMENT : 1
HAS_MEDICAL : 2
OSCILLOMETRY_EXAM : 1
PATIENT_HOMEBOUND : 1
ACCEPT_THIS : 1
SIGNIFICANT_EVENTS : 1
AND_ON : 1
DEMONSTRATE_ADAPTIVE : 1
ADULT_CHILDREN : 1
HE_WALK : 2
MH_BY : 1
EXPERIENCES_THEN : 1
WITH_ME : 1
DISPOSITION_EMERGENCY : 1
NO_FEVER : 1
AMIODARONE_MG : 1
ABOUT_YOUR : 2
PROBLEM_OTHER : 1
NOTE_PHYSICIAN : 1
BE_THE : 2
AND_LOSING : 1
COMMUNICATION_NOTE : 1
OA_TOTAL : 1
TOBACCO_YEAR : 1
FAWCETT_APPROVED : 1
CHECK_TO : 1
ATROVENT_PRIOR : 1
CENTER_GIRLFRIEND : 1
DOSE_WILL : 1
HEART_RATE : 1
HIS_CONSULT : 1
RADIAL_ARE : 1
COMING_BACK : 1
LPM_YO : 1
SEE_MR : 1
PERSONALITY_HAS : 1
HIS_MAIN : 1
WIFE_IN : 1
PT_ROLLING : 1
MESYLATE_TAB : 1
STAYED_ABOUT : 1
COMPREHENSIVE_PSYCHIATRIC : 1
ADD_OF : 1
PHARMACY_NOTE : 1
SODIUM_CHLORIDE : 2
AS_PT : 2
INCLUDING_SUPPLIES : 6
HIM_FOR : 1
WILL_LITTLE : 1
MOUTH_EVERY : 4
OF_EKG : 1
AD_HOME : 1
CORRECT_FOR : 1
HEEL_DROPPING : 1
FURTHER_AGREES : 1
OTHERWISE_PER : 1
FOR_ABOVE : 1
FOREARM_DOSAGE : 1
LANDLORD_RENT : 1
METOPROLOL_DOSING : 1
THE_REPORTS : 1
KLEIN_UP : 1
NOW_EVEN : 1
CARE_VISIT : 2
COUNSELED_THE : 1
WITH_SW : 1
SAFETY_SERVICES : 1
FOR_WHAT : 1
ADVICE_IF : 1
SYND_PAIN : 1
CARE_IS : 2
OF_MEDIAN : 1
CONSULTPHARMACY_THERE : 1
BMI_BMI : 1
PATIENTS_BLOOD : 1
HE_CLINIC : 1
CXR_WITH : 1
OTHER_MH : 1
IN_FOR : 2
MEDICATIONS_THE : 1
REQUEST_PLAN : 1
THE_COUMADIN : 1
WOULD_CALL : 1
BOTHERED_BY : 1
GOING_SHOOT : 1
DISEASE_TOBACCO : 1
LOCAL_HEALTH : 1
DATE_RV : 1
LETTER_ADDITIONAL : 1
HOME_ATTEMPT : 1
ONES_IS : 1
REGARDING_DATE : 1
HIMSELF_SOCIAL : 1
KEEP_DOOR : 1
WITH_REMINDER : 1
CARE_WITH : 1
TIME_SPEND : 1
GROUP_HOMICIDAL : 1
MEDICAL_PT : 1
MARRIAGE_SHE : 1
EVIDENCE_CONTINUED : 1
ATTENTION_SPAN : 1
LAST_JUL : 1
CAN_ACCESSED : 1
DISTRESS_REGULAR : 1
IV_SALINE : 1
LENGTH_IS : 1
HAS_ALBUTEROL : 1
DEXTROSE_SOLN : 1
DATE_WITHIN : 1
TAB_ONE : 2
FINDINGS_PATIENT : 1
REQUESTING_PICK : 1
NO_ACTIVE : 2
PROCEDURE_PSYCHOTROPIC : 1
NONFORMULARY_RESTRICTED : 1
PSYCHIATRIST_INDEPENDENT : 1
PATIENT_PRESENCE : 1
PO_QH : 1
OF_COMMENTS : 1
BUPROPRION_TO : 1
PSYCHOLOGIST_WAS : 1
SELF_ENGE : 1
DID_RESCHEDULE : 1
DURING_OR : 1
USE_OF : 3
PAIN_TIME : 1
PULSE_INFLUENZA : 1
AWARE_HE : 1
ZIPRASIDONE_MYOKYMIC : 1
CHF_YR : 1
FOOT_ULCERATIONS : 1
COMMENTS_NEWS : 1
ROOM_ORDERED : 1
TYPE_MEDICATION : 1
LB_WNL : 1
REPORT_TO : 1
REGIMEN_PATIENT : 1
PARANOID_RESTRAINING : 1
HEALTH_PROVIDERS : 1
MOUTH_PROVIDER : 1
YR_MALE : 1
SW_MUSKOGEE : 1
ATTEMPT_LOG : 1
HE_ALSO : 1
TO_ASSIST : 2
HE_LAST : 2
PLEASE_EACH : 1
ACIPHEX_MG : 1
PERCOCET_TO : 1
THE_VOMITING : 1
OF_OCT : 1
JUNE_AT : 1
DATA_NOT : 1
NOS_ICDCM : 1
OF_THIS : 2
AM_OF : 2
THE_DESK : 1
FULL_CONSENT : 1
NO_RALES : 1
ME_VIA : 1
AGENT_SILDENAFIL : 1
NOTED_SUB : 1
BY_HIGHBERGER : 1
SPOKE_THAT : 1
TAB_OSTEOARTHROSIS : 1
VIET_NAM : 1
TRIAGE_DOCUMENTATION : 1
AND_LEAVE : 1
PSYCHOTROPIC_DATIVE : 1
PERTINENT_MEDICAL : 1
KG_WNL : 1
HRS_NONE : 1
AND_NERVE : 1
GUN_HIS : 1
REGARDING_CONCERNS : 1
SET_CARDS : 1
WHILE_LOW : 1
IF_VETERAN : 1
LOWER_LEG : 1
AND_REHAB : 1
IN_ADDENDUM : 2
MINUTES_DISTENSION : 1
SMOKING_OR : 1
YESTER_WAS : 1
TEMPERATURE_LAB : 1
METASTASES_BAND : 1
NO_ASSESSMENT : 2
CE_FORCE : 1
FOLLOWING_WITHIN : 1
OUTPT_INTAKE : 1
IS_THE : 1
WANTS_FINESTERIDE : 1
MAN_ARE : 1
SIG_TAKE : 1
DRAINAGE_SEEPING : 1
DURING_ARMY : 1
PT_BY : 1
ADDITIONAL_COMMENTS : 3
SL_BP : 1
SERPENTINE_NONE : 1
POOR_MEANS : 1
THAT_TO : 2
SHOULD_NEW : 1
WAS_DIAGNOSED : 1
ANY_THE : 1
WAITING_HEAR : 1
SAMPLING_THE : 1
TELEPHONE_NURSE : 1
IF_YES : 1
PARTICIPATED_DEMONSTRATES : 1
CAP_MG : 3
OF_LIVING : 1
PHONE_PHONE : 1
IN_HOME : 1
HIS_PATIENTS : 1
COMPLETED_YES : 1
PT_MALE : 1
ACETAMINOPHEN_FROM : 1
SYMPTOMS_HEALTH : 1
WRITER_CARE : 1
DELTOID_FOLLOWING : 1
YEAROLD_MAN : 1
BY_OF : 1
HAD_EFFECT : 1
LUNGS_OCC : 1
CHANGED_CLOTHES : 1
MD_TO : 1
AND_BREATHING : 1
SYMPTOMS_LOCAL : 1
THEY_CONCERNED : 1
NEUROLOGI_BED : 1
TRIAGE_INTAKE : 1
NEEDED_LAST : 1
SET_DATE : 1
ONCE_HE : 1
OF_MEDIASTINAL : 1
ADDENDUM_WAS : 1
BASE_NOT : 1
VITALS_BLOOD : 1
AND_BEHAVIORS : 1
GUM_PIECE : 1
NO_ASSOCIATE : 2
CLINIC_YESTER : 1
OUT_ABOUT : 1
TO_NPH : 1
DONE_THIS : 1
FAMILY_HISTORY : 1
COPD_MOTHER : 1
DURING_DATE : 1
TRIAGE_AND : 1
AND_TRANSFERS : 1
BELLO_SOME : 1
IMED_CONSENT : 1
TO_DISCONTINUE : 1
AND_AMBULATION : 1
RESPIRATION_PRN : 1
ER_AND : 1
BIC_DISCUSS : 1
ACTIVE_AT : 1
INFORMED_NATURE : 1
YRS_SERVED : 1
OF_VESSELS : 1
SUB_RIGHT : 1
WITH_AMBULATION : 1
NA_CONSISTENT : 1
ASHEN_PODIATRY : 1
RESULTS_SKIN : 1
FEELINGS_AND : 1
NOT_ALLERGIES : 1
NOTED_DENIES : 1
HIS_PCP : 1
WERE_ROOM : 1
KG_AMBULATORY : 1
SITTING_IN : 1
AGAIN_THAT : 1
RETURN_NORMAL : 1
ED_PAIN : 1
DENIES_NEW : 1
MDD_COMMENT : 1
AND_TADALAFIL : 1
ASSIST_ONE : 1
NOTET_AUTHOR : 1
NOTE_OBESITY : 1
MGOH_XTRA : 1
IN_MAKING : 1
OUTPT_TRIAGE : 1
GOALS_INTERVENTIONS : 1
ATHETOID_MYOKYMIC : 1
ORDERED_AS : 1
HERE_TO : 1
HIM_NO : 1
RESTRICTED_DRUG : 1
PT_RTC : 2
TO_ITS : 1
AMP_PRN : 1
LOCAL_CARDIOLOGIST : 1
DISPO_CARE : 1
IT_NOT : 1
SI_STATEMENTS : 1
LB_AMBULATORY : 1
MRC_PROTOCOL : 1
ENTERED_MEDICATON : 1
COUNSELING_TALK : 1
JUNCTION_IMPROVEMENT : 1
KNOWN_SIERRA : 1
TO_ACTIVITY : 1
AMBULANCE_WITH : 2
WANTED_UPDATE : 1
ARRIVAL_PSYCHIATRY : 1
LOCAL_CLUB : 1
AND_FOLLOWING : 1
GERIATRICS_CLINIC : 1
HTN_RESP : 1
OTHERWISE_NO : 1
FEELS_BETTER : 1
MG_QAM : 1
HERBALS_OUTSIDE : 1
BEEN_PT : 1
ACTIVE_ADDENDUM : 1
PROCESS_ADDENDUM : 1
DULABON_PLACED : 1
PROCESS_COMMENT : 1
THE_MENTAL : 1
MIN_VET : 1
EXPERIENCE_THAT : 1
ENTITLED_PART : 1
MONITORED_HYPERKERATOTIC : 1
BACK_VALUE : 1
ON_AND : 1
BIL_BREATH : 1
LIVES_ALONE : 1
PARTICIPATED_WELL : 1
UPTIVE_ANGRY : 1
HE_WOULD : 3
FOR_ONSET : 1
IMPROVEMENT_WEIGHT : 1
RECORD_WHO : 1
MG_AT : 1
OR_TRACKING : 1
WBC_NA : 1
MMOL_COMMENTS : 1
METOPROLOL_DO : 1
ILLNESS_HEART : 1
PATIENT_LPM : 1
IMPROVED_NIGHT : 1
READING_AT : 1
NURSE_IN : 1
AMPHETAMINE_BENZODIAZEPENE : 1
PO_PRN : 2
SYMPTOMS_TO : 1
ALOT_OF : 1
PROBE_TO : 1
PRODUCTS_ANTIDIABETICS : 1
STRIP_ACTIVE : 1
GI_SERVICE : 1
RECENTLY_FIRED : 1
SIGNIFICANT_BIPOLAR : 1
LEFT_MACHINE : 1
BEDTIME_NEEDED : 1
BACK_TO : 1
CALL_NMBER : 1
YOUNG_DATE : 1
IN_VITAL : 1
ON_NEEDS : 1
ANY_THAT : 1
SEVERE_ENCEPHALOPATHY : 1
IS_ABOUT : 1
CENTER_WAS : 1
DURING_BREAKFAST : 1
IV_HEART : 1
AND_FOOD : 1
HEALTH_MIN : 1
VERBALIZES_PT : 1
HIS_LANDLORD : 1
DISCHARGE_HE : 1
OF_FU : 1
WAS_RESPONDING : 1
ER_LIKED : 1
BUPROPION_WHY : 1
PHYSICIAN_SW : 1
ONSET_OF : 1
EXTRACTION_TOOTH : 1
ASPIRATION_AND : 1
NUMBER_ANYTIME : 1
WILL_LEAVE : 1
WERE_INJURED : 1
UNLABORED_ABNORMAL : 1
NOT_IMPACTED : 1
CARE_PROVIDER : 2
WE_ON : 1
CARES_AND : 1
REPORTS_DEPENDING : 1
AM_CALLING : 1
BP_AT : 1
WHERE_LMSW : 1
NONE_ATTEMPT : 1
ACTIVE_REFERRAL : 1
IS_FDA : 1
HAS_VSS : 1
PATIENT_COORDINATOR : 1
NOT_DIAGNOSED : 1
COPY_TO : 1
THE_CLASS : 1
MEDIASTINAL_BRONCHOSCOPIC : 1
FOR_RESPIRATION : 1
APPOINTMENTS_TO : 1
REVIEVED_AND : 1
TO_STOP : 1
PROVIDED_INCLUDING : 1
TO_PULMONARY : 1
TOUR_DYSPHAGIA : 1
ROUTE_MEDICATION : 1
AND_OF : 4
ADMI_YES : 1
SHORTNESS_OF : 1
WILL_NOT : 1
KEEP_OF : 1
EDUCATION_FAMILY : 1
ABILITY_USE : 1
WOULD_TRUSS : 1
NODULES_DENIES : 1
IDEATION_MEDS : 1
THE_CPC : 1
GUNS_IN : 1
IT_MORE : 1
THERAPY_TO : 2
INDEPENDENT_CARES : 1
REVIEW_AND : 1
TOUR_PT : 1
IN_HIS : 3
EXCEED_MG : 2
OF_APPOINTMENT : 1
AT_ANYTIME : 1
AND_PROGRESS : 1
CONTACT_ME : 1
IMPROVING_MENTAL : 1
OF_APPT : 1
GOING_AND : 1
CHARACTERISTICS_ASSOCIATED : 1
CC_CC : 1
FALL_EXPERIENCED : 1
PATIENT_SALINE : 1
REVIEWED_WITH : 2
LATE_FROM : 1
IS_DOSE : 1
WIFE_WERE : 1
CANCER_MON : 1
UA_ON : 1
PROGRAM_PATIENT : 1
THEN_AGAIN : 1
BP_THOUGHT : 1
TO_PART : 1
UDS_JUL : 1
IS_ON : 1
PLAN_INTERVENTION : 1
BUT_WAS : 1
NONE_NARRATIVE : 1
AND_GO : 1
OR_SITTER : 1
FT_RILEY : 1
PATIENT_PHYSICIAN : 1
THE_RISKS : 1
OPERATING_LOW : 1
PERSONALITY_DISORDER : 1
TO_WHICH : 1
EXCEED_IN : 1
HYPOTENSION_HAS : 1
UNCHANGED_FROM : 1
VITAL_THREE : 1
STABLE_PCC : 1
TAKEN_IT : 1
VA_PRIMARY : 1
SO_IF : 1
HERE_NOW : 1
JUN_METOPROLOL : 1
PRESCRIBED_OF : 1
HOME_IS : 1
ANTHROPOMETRICS_AMBULATING : 1
HAD_SAFE : 1
ANITA_ED : 1
MHC_IT : 1
POINTS_ABDOMEN : 1
TO_DINNER : 1
TRANSFER_TO : 1
INFECTION_ULCERATION : 1
PALM_HE : 1
ACTION_REQUESTED : 1
PSYCHIATRY_UPTIVE : 1
ACTIVE_PROBLEM : 1
MAIL_WINDOW : 1
HE_CONSIDER : 1
OR_GO : 1
INDEX_SINCE : 1
ON_ADMISSION : 1
IV_MEDICATION : 1
PICK_START : 1
REVIEVED_REVIEWED : 1
FOR_SAMPLING : 1
DRANK_MOST : 1
STATEMENT_INACTIVATED : 1
OPERATOR_REQUESTING : 1
TEXT_OPERATIVE : 1
PC_LETTER : 1
SCREENING_CONSTITUTIONAL : 1
FOLLOWUP_MESSAGE : 1
OBESITY_ADDENDUM : 1
MOUTH_TO : 1
ACCOMPANIED_BY : 1
HYPERKERATOTIC_BORDER : 1
NOT_BEEN : 1
THE_SUBJECTIVE : 1
RX_LENGTH : 1
COMPLAINT_NODULES : 1
SUPPLIES_NIGHT : 1
MH_PSYCHOTHERAPY : 1
FACILITY_IF : 1
RESPONDING_IMPROVING : 1
TALK_HER : 1
PROBLEM_LEFT : 1
PLANS_ASSIST : 1
HAS_IN : 2
WAITING_TO : 1
PROCESS_FACILITY : 1
OSA_OA : 1
WHEN_PT : 2
TO_AS : 2
WEIGHT_LOSS : 3
VA_HEALTH : 1
FOCUSED_PRESENTATION : 1
NURSE_STREN : 1
ADDENDUM_PATIENT : 1
CBC_UA : 1
NO_OA : 1
FINANCIALLY_EMOTIONALLY : 1
OF_SUBJECTIVE : 1
LIVING_IN : 1
REGIONAL_HOSPITAL : 1
IF_ANY : 1
INTERVENTION_THEY : 1
CITY_FACILITY : 1
CONCERNED_IM : 1
HANDOUT_HOW : 1
LOSS_PROGRAM : 1
SHOWER_GETA : 1
PROBLEMS_UNABLE : 1
PATIENT_SAFE : 1
OF_DRAINAGE : 1
MAX_ASSIST : 1
SINCE_AGGRAVATED : 1
PROVIDE_MANAGEMENT : 1
SPECIALTY_DOCUMENTED : 1
LIKE_POSSIBLY : 1
TO_VIA : 1
TELEPHONE_HYPERLIPIDEMIA : 1
CARE_ASSIGNED : 1
SHOWED_IN : 1
THIS_SHIFT : 1
OF_ABDOMEN : 1
AT_VA : 3
ON_THIS : 1
EATING_PSYCHIATRIC : 1
THE_FOREFOOT : 1
ON_ARRIVAL : 1
PRESCRIBED_ENTRY : 1
UP_CURRENT : 1
CM_ALTERNATE : 1
CHEST_ONE : 1
ABUSIVE_ROUTE : 1
REDUCED_OXYGEN : 1
AM_WAS : 1
XATTEMPTED_CALL : 1
STATES_HE : 2
MG_OSTEOARTHROSIS : 1
OR_VITALS : 1
AND_TYPE : 1
WITH_GIVEN : 1
TAKING_THE : 2
NO_TO : 1
SUPPORT_GIVEN : 1
PROBLEM_HYPERTENSION : 1
BIRTH_CORRECT : 1
IS_IN : 3
NOTES_HEIGHT : 1
SIMTH_STRE : 1
FOR_WEIGHT : 1
CLINIC_FOR : 2
DATE_DIAST : 1
AGO_PT : 1
PCP_APPT : 1
CONSTANT_IN : 1
EKG_AND : 1
OF_MEDICATION : 1
NANDA_ANITA : 1
BY_STAFF : 1
ENCOUNTER_INFORMATION : 1
EMAIL_REPORT : 1
MIN_HE : 1
MEDS_DOCUMENTED : 1
WAS_DURING : 2
GF_CLINIC : 1
READ_AT : 1
CRAVINGS_CESSATION : 1
WITH_CHRONIC : 1
CARDIOLOGIST_ORTHOPEDIC : 1
MG_FOR : 4
RECORDED_FILLED : 1
DIE_OTHER : 1
AND_SOCIALIZING : 1
SHREDDING_LOOK : 1
TO_OXYGEN : 1
SUICIDE_WHEN : 1
PROCEDURES_AND : 1
HAD_HIS : 1
PATIENT_MEDICATON : 1
PATIENT_COUNSELED : 2
ADMISSION_OR : 1
GI_PT : 1
SELECT_DISPLAY : 2
HOME_FOR : 1
THIS_ALSO : 1
IN_AND : 3
TO_REPORT : 1
AFTER_YEARS : 1
ADMISSION_HE : 1
PRESCRIBED_LEXAPRO : 1
WITH_GAIT : 2
ALTERNATIVES_RISKS : 1
NO_OBSERVE : 1
THE_ELIGIBILTY : 1
FRIGHTENING_NONE : 1
UP_ANXIOUS : 1
MAIN_CARE : 1
PAIN_ORAL : 1
POSITIONED_ON : 1
RAL_THEN : 1
AN_ALTERNATE : 1
TO_AREA : 2
MORE_ABOUT : 1
HOUR_YEAR : 1
MEDICATION_WAL : 1
CAREFULLY_SELECT : 1
LYMPH_METASTASES : 1
HIS_HURT : 1
HOWEVER_DID : 1
IMPINGEMENT_SYND : 1
BACK_WAS : 1
PRESCRIBED_LATE : 1
SE_WELL : 1
CHRONIC_SEVERE : 1
HIM_PHYSICIAN : 1
IN_IF : 1
ABOUT_FULL : 1
CHANGES_SO : 1
COUNSELING_BP : 1
YE_WAS : 1
AT_POINTS : 1
ADAMANTLY_SAID : 1
PRIOR_LEAVING : 1
SHOW_SINCERE : 1
MUCH_HIMSELF : 1
STATUS_NAME : 1
TO_CE : 1
NUMBER_AT : 1
SET_UP : 1
RESULTS_LAST : 1
BREATH_NO : 1
AND_CHIEF : 1
TO_IDENTIFIED : 1
OF_YOU : 1
VISIT_ABLE : 1
ACTIVE_DUTY : 2
WHEELS_PULSE : 1
ATTACHED_IV : 1
AT_TIME : 4
TO_VETERAN : 2
WISH_WOULD : 1
CASE_SUPERVISED : 1
ARRIVAL_PAIN : 1
EKNO_SHOW : 1
OTHER_RADIAL : 1
AND_RECEIVED : 1
NODE_ID : 1
VA_IF : 1
NURSING_PCP : 1
YES_NO : 1
PEDAL_PULSES : 1
NONVA_LAST : 1
OF_AMBULATORY : 2
ISSU_ESOPHAGUS : 1
ANXIETY_VERBALLY : 1
PCP_LBP : 1
TRUNK_LEFT : 1
THIS_WAS : 1
GAY_DOES : 1
HANDOUT_NONE : 1
WELL_SON : 1
PRESENTS_ME : 1
OF_REVIEWED : 1
NONE_NOTED : 1
EATING_NONE : 1
CIVILIAN_STATE : 1
EVER_ANY : 1
TO_BLOCKS : 1
PARTICIPATED_VETERAN : 1
HIM_ACCEPT : 1
ASSOCIATE_IDENTIFIED : 2
FROM_VET : 1
GOOD_EATING : 1
VETERAN_WITH : 1
SUGAR_MD : 1
INJURED_AND : 1
USE_AS : 1
HAS_PATIENT : 1
EMERGENCY_DEPT : 1
HEART_MEDICATIONS : 1
OF_IS : 1
LEATHER_PATIENTS : 1
PAPERS_AGO : 2
AT_CVAMC : 1
CLOTHES_SEVERAL : 1
STATES_PURPOSE : 1
SW_CALLED : 1
WORK_ON : 1
DISCHARGE_GIVEN : 1
IF_NEEDED : 1
MAY_GIVEN : 1
LAB_SPECIMENS : 1
PT_OFFERED : 1
THAT_WHEN : 1
LAST_PSYCHIATRY : 1
MEDS_OUTPATIENT : 1
RESULT_GLUCOSE : 1
SPOKE_PATIENT : 1
OF_BUPROPRION : 1
LORWR_DUTY : 1
OF_DID : 1
REVIEWED_EXAM : 1
MD_ORDER : 1
THIS_ADMISSION : 1
LMSW_AND : 1
ANDENOCARCINOMA_WITH : 1
NURSING_CERVICAL : 1
TOTAL_TIME : 2
TO_SAFE : 1
AND_CONTACT : 1
TO_CALL : 4
AND_IS : 2
JUST_BY : 1
REPORTS_OTHER : 1
PATIENT_PATIENT : 2
THIS_IS : 3
HIS_CASE : 1
WITH_DECISION : 1
NOTE_COMPLETE : 1
PT_THINK : 1
EDEMA_NOTED : 1
TO_DISPENSED : 1
APPROPRIATELY_AND : 1
EGD_SHOWED : 1
RECONCILIATION_NOTE : 1
IS_POOR : 1
SEXUALLY_PATIENT : 1
OR_TREATMENT : 1
BP_TO : 1
EVERY_OTHER : 1
OUTPATIENT_MEDICATIONS : 7
HIS_FACE : 1
HE_CAN : 1
NICOTINE_GUM : 1
BILLING_CIES : 1
PT_YES : 1
LEF_YESTER : 1
REPORTS_NO : 1
NEEDED_FOR : 2
SEEPING_FOLEY : 1
CHAIR_BIT : 1
PULSES_ARE : 1
LENGTH_MINUTES : 2
THOSE_DISCUSSION : 1
REPORTING_SYMPTOMS : 1
HOT_AND : 1
RADIAL_PULSES : 1
THE_URETEROPELVIC : 1
THE_FORCE : 1
EXPERIENCED_AND : 1
THAT_THE : 1
PATIENT_ANSWERED : 2
OSTEOARTHROSIS_LOCALIZED : 1
ADDRESSED_WHEN : 1
PERTAINING_BILLING : 1
DISCS_WITH : 1
GOAL_SHOWER : 1
DISORDER_CHRONIC : 1
TAB_TAKE : 5
HIS_WILL : 1
LEFT_LATERAL : 1
RESTRAINING_AGANIST : 1
WAL_LENGTH : 1
ONE_TABLET : 3
PSYCHIATRY_VOLUNTARY : 1
NOTE_QIDPRN : 1
TRUSS_THIS : 1
PALPABLE_EDEMA : 1
IN_EVERY : 1
AXIS_RESP : 1
PRESSURE_LAST : 1
GO_NICOTINE : 1
INDICATIONS_STATEMENT : 1
SURGEON_PHYSICIAN : 1
HIM_MHC : 1
THE_VA : 5
HE_SHOULD : 1
OF_JUN : 1
NOTE_PATIENT : 2
THE_PSYCHOLOGIST : 1
VETERAN_STATED : 1
IS_THAT : 1
RADIATE_OUTPATIENT : 1
CHAR_CHATHAM : 1
LEISURE_FEELING : 1
DATE_LAST : 1
WITH_TOPIC : 1
LEXAPRO_TAB : 1
COMPLEX_NONE : 1
BRADSHAW_PART : 1
FROM_THERE : 1
LABORATORY_DATA : 1
KG_LBS : 1
WILL_BECOME : 1
AVAILABLE_DURING : 1
IS_ABLE : 1
EVERY_TO : 1
DOCUMENTATION_ASPIRATION : 1
ONCOLOGIST_THE : 1
WITHOUT_OVER : 1
ENGE_WHICH : 1
BREAT_TELEMETRY : 1
FOR_SOCIAL : 1
PSYCHOTROPIC_PHYSICIAN : 1
NEEDED_TO : 1
IN_DYSPNEA : 1
THEIR_PERSONALITIES : 1
HOME_OVER : 1
STORAGE_SPECIAL : 1
AND_DISCUSSED : 1
MG_PRESENTS : 1
TOOK_ANTIBIOTICS : 1
INHL_USE : 1
PO_PSYCHIATRY : 1
INSTRUCTIONS_GIVEN : 1
UDS_NO : 1
PHONE_THIS : 1
AND_ACTIVELY : 1
CHORAZY_THE : 1
NURSE_HOURS : 1
AND_TWISTING : 1
SWEATS_NO : 1
IIS_TO : 1
ROOM_WEIGHT : 1
SHOWED_TUMOR : 1
TO_CARDIOLOGY : 1
COMMUNITY_AT : 1
COMMENTS_ASSESSMENT : 1
REDUCED_SUPPLY : 1
BP_NOTE : 1
PROCEDURE_WAS : 1
POSTPROCEDURE_TO : 1
WITH_REGARDS : 1
ALCOHOL_WENT : 1
STILL_URINARY : 1
AS_BELIEVES : 1
FILLED_MED : 1
MANY_FOR : 1
ARTERIES_OF : 1
TEST_RESULTS : 1
AND_DID : 2
GOAL_YOU : 1
IN_AREA : 1
INFORMATION_AND : 1
ANOTHER_PATIENT : 1
BUT_COME : 1
OXYGEN_THE : 1
AMOUNT_OF : 1
PAIN_NOT : 1
ACUTE_AND : 1
OF_NSTEMI : 1
DEMONSTRATES_CE : 1
PAIN_OR : 2
CASE_STRENGTHS : 1
REGARDING_BLOOD : 1
HAS_INSTRUCTIONS : 1
ROOM_DIMINISHED : 1
CV_TEST : 1
THE_PURPOSES : 1
AT_MEALS : 1
BETTER_HE : 1
CALLER_EMER : 1
HE_NO : 1
SIGNS_ABDOMEN : 1
HOURS_OVERWEIGHT : 1
VITAL_ABDOMEN : 1
OUTPATIENT_PCXR : 1
CALL_TELEPHONE : 1
OF_NO : 3
REEVAL_THAT : 1
OF_CARE : 3
ADDENDUM_HE : 1
REST_OUT : 1
PT_LOW : 1
READ_EACH : 1
RESULTS_HRS : 1
APPOINTMENT_BEEN : 1
MEDICATON_REVIEW : 1
PULSE_DOSE : 1
AND_PAIN : 1
AS_DISCHARGED : 1
THE_SO : 1
OF_SATT : 1
GROUP_PAIN : 1
IV_LABETOLOL : 1
FULL_NAME : 1
SYMPTOMS_SEES : 1
INTEGRATED_SUMMARY : 1
DEPARTMENT_TRIAGE : 1
CONTACT_MALE : 1
ORDERS_OBTAINED : 1
EVERY_RADIAL : 1
UP_START : 1
STATUS_PATIENTS : 1
ILLNESS_INCLUDES : 1
THAT_WANTED : 1
TWO_BY : 1
YES_BY : 1
RELAX_SHAVE : 1
ATTEMPTING_TO : 1
PAIN_DISTRESS : 1
FOLLOWUP_APPOINTMENT : 1
DRINK_AND : 1
IN_YEARS : 1
AND_LEFT : 1
DEMEROL_TAPERS : 1
HIMSELF_INTERACTION : 1
PRIOR_PT : 1
DUE_ITS : 1
NONE_TYPE : 1
AGREES_THEY : 1
NERVE_PAIN : 1
FROM_HIS : 1
TO_CALLER : 2
SUPPLY_PART : 1
ROOM_COMPREHENSIVE : 1
AMPULE_ACTIVE : 1
ANY_KNOWLEDGE : 1
POSTSURGICAL_BYPASS : 1
WAIVER_APPLICATION : 1
HAD_ALLERGIES : 1
NO_SAT : 1
PATIENTS_FALL : 1
ON_REGARDING : 1
VITALS_NOT : 1
PATIENT_PRESSURE : 1
CONSULT_FUTURE : 1
LIFE_EXT : 1
ANDENOCARCINOMA_ESOPHAGUS : 1
NEURO_CHECKS : 1
URINARY_PROBLEM : 1
ACTIVE_INPATIENT : 2
SIGNIFICANT_CITY : 1
TO_MEET : 1
LIFE_DUE : 1
TOOTH_BENZTROPINE : 1
COORDINATOR_COMFORT : 1
ALLERGIES_AT : 1
SURGEON_ASSISTANT : 1
IM_MG : 1
NO_AVAILABLE : 1
NO_PAIN : 4
TO_ADDRESS : 1
SACRIFICE_OWN : 1
TO_THIS : 3
TO_SPEND : 1
DISCHARGED_TO : 1
REFERRAL_FROM : 1
BILLING_VETERAN : 1
PER_TO : 1
ALCO_DRUG : 1
KG_PATIENT : 1
SINCERE_TO : 1
AT_OWN : 1
LABORATORY_NOT : 1
NOTES_AS : 1
OVER_AND : 1
AND_GENTLY : 1
WENT_CAME : 1
TREATMENT_CHECKED : 1
REFERRAL_AM : 1
OR_CONCERNS : 1
TO_WILL : 2
BMI_OF : 1
APPT_PERIORBITAL : 1
NO_INPATIENT : 1
PLT_NA : 1
HEMATURIA_THIS : 1
DIARY_YOU : 1
INFECTION_YEAR : 1
MEDICATION_REGIMEN : 2
CONCERNS_FEELINGS : 1
HIS_APPOINTMENT : 1
MOTORCYCLES_AND : 1
AUXILLARY_COLORED : 1
VISION_PT : 1
HE_THERE : 1
ROOM_TV : 1
GAY_WIFE : 1
MED_PHARMACIST : 1
CONSULT_ORDERED : 1
HIM_QUIT : 1
TIME_EXTENSIVE : 1
NO_AGENT : 1
OT_TO : 1
COMMON_EFFECT : 1
HE_SNU : 1
PIECE_IN : 1
CAME_IN : 1
CODE_NSC : 1
CVAMC_ON : 1
OR_REQUIRED : 1
AND_PT : 3
COMMENT_THE : 1
AND_PTSD : 1
TABLET_MOUTH : 4
OF_MALE : 1
REFERRAL_AWARE : 1
ALL_MISTRUST : 1
MAY_RESTRICTED : 1
BY_PENDING : 2
CONSENT_ENCOUNTER : 1
WHICH_LED : 1
HE_HAS : 9
THAT_XATTEMPTED : 1
STATEMENT_VIS : 1
BRADEN_FOR : 1
AND_WEIGHT : 1
MODIFIED_SEDATION : 1
MORNING_AND : 1
FIRED_SHOW : 1
LIMITED_ASSESS : 1
ADDICT_EATER : 1
INCREASE_AND : 1
PSYCHOTHERAPY_NOTE : 1
LABS_CARDIOLOGY : 1
OBTAINED_STIMULATION : 1
PAIN_AT : 1
FIRST_AND : 2
CRAFTS_PATIENTS : 1
PT_AOX : 1
FLEXION_FOR : 1
AND_CONTAINING : 1
SO_LATELY : 1
CARDIOVASCULAR_VSS : 1
OF_DEC : 1
HAS_COME : 1
OF_FACILITIES : 1
CALL_PATIENT : 2
POSITIONING_SITE : 1
INTEGRATED_CASE : 1
PT_DENIES : 1
BEEN_EATING : 1
IMPROVED_CARDIOLOGY : 1
OXAZEPAM_CAP : 1
FORCE_WHAT : 1
SO_RESULTS : 1
TEST_STRIP : 1
OBSERVATION_WITH : 1
DISPLAY_BACK : 1
CHEST_NONE : 1
NO_DRAINAGE : 1
WITH_MODERATE : 1
PURPOSE_VETERAN : 1
NOW_OF : 1
COMMENTS_VESTIBULAR : 1
WORRIED_BILLS : 1
SELECT_IMAGING : 2
COMMENTS_TABLETS : 1
EVENTS_OLD : 1
GAIT_ASSIST : 1
ME_HIS : 2
HAD_SPARE : 1
HATE_TO : 1
NOT_BECOME : 1
SS_ACTIVE : 1
FLEXION_TIMES : 1
NONLABORED_WILL : 1
SCREENING_NO : 1
CALLED_ON : 1
NO_OR : 4
IMAGE_ASSESSMENT : 1
ATHETOID_MOVEMENTS : 1
CARE_PA : 1
TO_PERSON : 1
NORMAL_TELEPHONE : 1
ON_AXIS : 1
RESPIRATION_RECENT : 1
CONSTANTLY_GUARD : 1
NO_SALINE : 1
OMEPRAZOLE_CAP : 2
RAN_OUT : 1
TAB_ONEHALF : 1
THE_PHONE : 1
MEDICATIONS_OVERTHECOUNTER : 1
WAS_IS : 1
DENIED_AND : 1
LABETOLOL_SITE : 1
SHE_HIM : 1
MODE_OF : 3
BACK_PAIN : 3
FOR_SHREDDING : 1
EVERSION_OF : 1
BODY_RAN : 1
PRESSURE_CARDIOVASCULAR : 1
IN_DOES : 1
TO_ONE : 1
FACILITY_PCP : 1
NECESSARY_THE : 1
ALZHEIMERS_IS : 1
DRUG_MED : 1
WANTS_THAT : 1
ASSESSMENT_PATIENT : 1
WITH_EDUCATION : 1
INCLUDES_BUT : 1
OF_INFORMED : 1
EXTENSIVE_DEPOSITION : 1
US_TO : 1
REGIMEN_ADMITTED : 1
ONCOLOGY_TO : 1
INVENTORY_SHEET : 1
DIET_CLINIC : 1
THAT_ANESTHESIA : 1
PATIENT_ALREADY : 1
TREATMENT_AND : 2
CONTACT_FOR : 1
BY_ACTIVITY : 1
TO_CONCERNS : 1
TO_CIES : 1
SEX_MALE : 2
OLD_WITH : 2
HIS_HAS : 1
OF_DIVORCE : 1
PATIENT_CARDIOVASCULAR : 1
REGULARLY_STATES : 1
NOTED_LBP : 1
OXYGEN_TO : 1
VESTIBULAR_AND : 1
TO_DID : 1
HAD_ANY : 1
IS_PMH : 1
CARE_AMIODARONE : 1
IMPINGMENT_SYNDR : 1
ARMY_SEASONAL : 1
ON_JUNE : 1
DECISIONMAKING_PATIENT : 1
THOSE_CONCERNS : 1
CONTACT_WITH : 1
RESPONSIVE_COPING : 1
PODIATRY_NOTE : 2
NOTE_MALE : 1
OBSERVATION_EXERTION : 1
AND_WENT : 1
IN_CHLORIDE : 1
IS_YEAR : 1
MED_PLAN : 1
WITH_SOB : 1
WORKER_PREPARE : 1
ALLERGIES_HAS : 1
AND_TO : 4
OF_DATE : 1
FEBRILE_HEART : 1
AND_COVERED : 1
HIS_STATED : 1
TO_SHARE : 1
MORSE_FALL : 1
UNABLE_ASSIST : 1
INSURANCE_PATIENT : 1
ARRIVAL_AMBULATORY : 1
OF_OVERWEIGHT : 1
CONTRAST_NO : 1
TO_PALP : 1
IT_IS : 2
NKA_FEEDS : 1
PCP_ANITA : 1
HEALTH_CLINIC : 1
DOCUMENT_CAN : 1
MAIN_HEALTH : 1
MOVE_PROGRAM : 1
OBESE_BMI : 1
ADMISSION_COULD : 1
NO_SPARE : 1
AMBULATORY_NOTE : 1
CHECKED_FOR : 1
PROBE_BONE : 1
UNABLE_TO : 2
BE_REACHED : 1
NONE_MEDICAL : 1
THERE_AFTER : 1
ASARCO_RETIRED : 1
PAIN_WEAKNESS : 1
SELF_IS : 1
TAKEN_AND : 1
TO_USE : 4
FIREARM_READ : 1
LEISURE_TIME : 1
SHOULDER_ARTHROPLASTY : 1
ON_WITH : 1
ARTERY_DISEASE : 1
OF_TIME : 1
TREATMENT_PLANS : 1
TAKEN_TO : 1
RESULTS_NONE : 1
POINTS_PATIENT : 1
MEDICATIONS_INCLUDING : 6
WHO_LIVES : 1
INCREASED_VERBALLY : 1
HELPERS_BUT : 1
STAFF_WEST : 1
LIGHT_TAN : 1
TIME_OF : 2
SOCIAL_BIOCHEMICAL : 1
GOING_IT : 1
NURSING_AFIB : 1
BREATH_SOUNDS : 1
THE_BEDSIDE : 1
AND_CHRONIC : 1
ATTEMPT_HAPPENED : 1
WAS_VERY : 1
PART_THE : 2
WANTED_TO : 2
IN_AFTER : 1
USE_IMPROVED : 1
TO_PHYSICIAN : 2
HIGH_PRESSURE : 1
NOTE_WAS : 1
TO_LENGTH : 1
PER_THEN : 1
SWEATS_PRODUCTIVE : 1
SITE_ACTIVE : 1
IN_LAWSUIT : 1
WITH_PAST : 1
LEISURE_ONCE : 1
WAS_PRESCRIBED : 1
EACH_YOU : 1
OUT_THEIR : 1
NORMAL_MODE : 1
NOT_WITH : 1
SUGAR_ORDER : 1
THEY_NOT : 1
AGO_GUNS : 1
ARE_CONCERNED : 1
NO_NOTED : 2
BARRIERS_LEARNING : 1
OR_PREVIOUS : 1
WITH_AT : 1
INJECTION_NAME : 1
BY_ACTIVE : 2
SOCIALIZING_WITH : 1
MEDICAL_HE : 2
CAME_TO : 3
UP_MEDICATIONS : 1
URETEROPELVIC_NUTRITIONAL : 1
BEING_TIME : 1
AND_HIGH : 1
CYCLE_ZOLMITRIPTAN : 1
HER_PRESCRIBED : 1
PLACEMENT_SPOKE : 1
ANESTHESIA_WILL : 1
AMBULATING_IN : 1
INDICATIONS_INFORMATION : 1
WILL_PREPARE : 1
THE_TOOLS : 2
TAPPING_HEEL : 1
OF_ERIE : 1
HAS_IMPROVED : 1
APPOINTED_PCP : 1
HX_HEPATITIS : 1
ORDERED_PCP : 1
AD_IS : 1
NEEDED_TOBACCO : 1
HE_PAST : 1
DISPOSITION_NO : 1
THRU_CHORAZY : 1
COMMENT_LIST : 1
STOMACH_HURT : 1
WHAT_THEY : 1
WERE_CONSTANTLY : 1
NOTE_PCP : 1
CARE_SELF : 2
SIX_ITEMS : 1
SEPARATED_YRS : 1
PERSONNEL_HE : 1
RESULT_LDL : 1
OCT_SEX : 1
YEARS_THIS : 1
ILLNESS_DISEASE : 1
SHOWED_INCREASED : 1
IS_FOLLOWED : 1
PHONE_NUMBER : 2
SKIN_POSTSURGICAL : 1
SPEAK_TO : 1
BELLO_STATE : 1
SPECIMENS_SENT : 1
CONTAINING_CARDS : 1
OVERTHECOUNTER_PRESCRIBED : 1
CONSULT_PRIOR : 1
ED_NOTE : 2
FT_TELEPHONE : 1
UNMH_HE : 1
TABLETS_BY : 1
AT_URETEROPELVIC : 1
DISCUSSION_HANDOUT : 1
ATTEMPTS_UNDER : 1
OUTLINING_ASSOCIATED : 1
PHYSICIAN_CONCURS : 1
FOR_GETS : 1
DOSE_ML : 1
GROUP_TO : 2
CT_OF : 1
INADEQUATE_MANAGEMENT : 1
PRODUCTS_NO : 1
ANTIBIOTICS_AS : 1
SENSORY_OSCILLOMETRY : 1
NODE_METASTASES : 1
AND_CHECKED : 1
NORMAL_TAPPING : 1
SAVING_THE : 1
THAT_ON : 2
DISCHARGE_STATES : 1
ALARM_ON : 1
MEDICATI_DONE : 1
NERVE_AS : 1
TIDAC_SUBCUTANEOUS : 1
HYPERTENSION_GOALS : 1
MESSAGE_ON : 1
THEN_ME : 1
AND_LABS : 1
BONE_NO : 1
DIARY_OF : 1
AGE_OF : 1
ROOM_PTS : 1
CLOTHES_FOR : 1
REHAB_PATIENT : 1
THERAPY_NORMAL : 1
APPROPRIATE_INCLUDING : 1
PAST_AT : 1
SUBCUTANEOUS_PARALYSIS : 1
IN_CHECKS : 1
WITH_STEADY : 1
DOCUMENTED_COMMENTS : 1
TELEPHONE_ADVICE : 1
THE_RESPIRATION : 1
FOLLOWUP_HAS : 1
CONROE_PTS : 1
ABDOMEN_ND : 1
WELL_BE : 1
STEP_REPEAT : 1
CONTACT_OCT : 1
WHO_AVAILABLE : 1
VET_HX : 1
NOT_IDENTIFIED : 1
RV_DIMENSION : 1
WAS_IN : 2
COSIGNING_PSYCHOLOGIST : 1
WINDOW_INSTRUCTION : 1
WAY_AND : 1
SERVICE_WAS : 1
CRYO_COMPREHENSIVE : 1
PROVIDERS_ATTENTIVE : 1
AVAIL_CLONIDINE : 1
VITALS_SHOWERED : 1
TO_CHRONIC : 1
PATIENT_CAREFUL : 1
OF_INJURY : 1
SELECT_THE : 1
CLINIC_THE : 1
LOG_FOLLOWING : 1
MYOKYMIC_ANKLE : 1
ROOM_DISCUSSING : 1
ARDIAL_EFFUSION : 1
WHEELS_BE : 1
SOB_IS : 1
THIS_VETERAN : 1
SUPT_CLINIC : 1
HOME_ADMITTED : 1
VET_WELCOMED : 1
TO_BULD : 1
CIES_VETERAN : 1
PMH_FOR : 1
HE_JUST : 1
ADMISSION_PATIENT : 1
BHM_RX : 1
SCHEDULED_SONES : 1
TIME_FIRST : 1
FOREFOOT_PCP : 1
COULD_LEAD : 1
BE_DISPENSED : 1
STATE_THAT : 1
COME_AND : 1
DIMINISHED_ULA : 1
MANAGEMENT_PROVIDER : 1
RISK_INTERDISCIPLINARY : 1
FOR_KNOWS : 1
MG_MEDICATION : 1
FALLS_MEDICATION : 1
AGGRAVATED_BY : 1
NOT_BE : 1
TO_LIVE : 1
RISK_INSIGH : 1
DO_HAVE : 2
COMMENTS_INFORMATION : 2
DO_BETTER : 1
SI_TO : 1
GET_HIS : 1
NURSING_NOTE : 2
PATEL_AT : 1
ARE_ANDENOCARCINOMA : 1
THIS_DATE : 1
NO_SOCIAL : 1
AND_PATIENT : 3
POTASSIUM_DEC : 1
MEDICATION_LABETOLOL : 1
PO_AND : 1
THE_DOES : 1
CM_WITH : 1
PCP_ORDERED : 1
AT_PATIENT : 1
BEHAVIORS_AND : 1
HOW_ADDICTS : 1
PLAN_ARRHYTHMIA : 1
THAT_RHYTHM : 1
PARAFFIN_ADDRESS : 1
ORAL_ACCOMPANIED : 1
COUNSELED_ON : 1
LEFT_WITH : 1
RADIATE_ACTIVE : 1
ANXIETY_RELATED : 1
FROM_BUPROPION : 1
OPEN_GLAUCOMA : 1
KNOW_WANTS : 1
LIGHT_VITAL : 1
OUT_GET : 1
DISCHARGED_DISCHARGE : 1
CAUSES_HIS : 1
TAKE_TO : 1
HAS_DECISIONMAKING : 2
YES_THE : 3
EXTENSIVE_EVALUATION : 1
AMBULATORY_DI : 1
ND_NABS : 1
INFORMATION_PATIENT : 1
GLASSES_RETAINED : 1
DUE_TO : 3
ANXIETY_ABUSIVE : 1
COUGH_MUCUS : 1
WAS_CANCELLED : 1
NONFORMULARY_DOCUMENTATION : 1
YEAR_NO : 1
HELP_THE : 1
LEG_THE : 1
SIGNIFICANT_COMMENTS : 1
AT_HERNIATION : 1
TO_BILLING : 1
PROCEDURE_NOTE : 1
ARE_WITH : 1
INJ_IN : 1
TWISTING_OF : 1
INVOLUNTARY_LOSS : 1
PULSE_IM : 1
HIS_THERAPY : 1
CM_ADDENDUM : 1
TO_DIAGNOSIS : 1
ARE_TRANSFER : 1
TO_UP : 5
SMOKING_PHONE : 1
TO_ROOM : 3
ATTEMPT_RETURN : 1
ANY_ALLERGIES : 1
DC_MON : 1
FULL_RECEIVED : 1
AMD_FOR : 1
ESOPHAGUS_NO : 1
SET_OF : 1
INCLUDES_IS : 1
OF_VIEW : 1
SMILING_ATHETOID : 1
KNOWLEDGE_PERTAINING : 1
AS_EVIDENCED : 1
YOU_LUNGS : 1
SAT_PATIENT : 1
PRESSURE_PERCOCET : 1
IDENTIFIED_PAIN : 1
THE_IN : 1
MANAGEMENT_ASSESSMENT : 1
INCREASED_ANXIETY : 1
FROM_SET : 1
THE_CANCER : 1
AND_REGIMEN : 1
CERVICAL_SPONDYLOSIS : 1
THROUGH_IMAGING : 1
THE_IS : 2
TIME_COMMENT : 1
THAT_AM : 1
BLAMED_FOR : 1
HEALTH_IN : 1
CAREFULLY_AND : 1
THE_TIME : 1
WITH_CARE : 1
FEVER_BLOOD : 1
MONITORING_IS : 1
FOLLOWUP_LEFT : 1
MEDICATION_AT : 1
HYPERLIPIDEMIA_CONSULT : 1
ALERT_VET : 1
TO_THAT : 1
INFO_HAS : 1
HEMORRHOIDECTOMY_ENCOURAGE : 1
DATE_DISCHARGE : 1
OVER_THE : 2
RESTRICTED_MED : 1
HOURS_TO : 2
THAT_IM : 1
TRANSFER_MONITOR : 1
PCC_TELEPHONE : 1
MH_NOTE : 1
PT_AND : 4
SQUIRMING_INVERSION : 1
AMBULATES_STEADY : 1
NOT_REALLY : 1
HE_COULD : 2
LIMITS_ALSO : 1
BE_GIVEN : 1
SIGNS_SOFT : 1
PRNS_VITALS : 1
RECENTLY_PT : 1
THEY_THEIR : 1
SPOKE_WITH : 2
ANESTHESIA_TECHNIQUE : 1
DIURETICS_AT : 1
SI_DYSPHAGIA : 1
ABOVE_PHONE : 1
DROPPING_SQUIRMING : 1
CYST_LISINOPRIL : 1
ULCERATIONS_FEET : 1
ON_PRESENTATION : 1
WITHIN_PAST : 1
EXAM_OSCILLOMETRY : 1
USED_COCAINE : 1
FEELING_ABOUT : 1
FOUND_ANESTHESIA : 1
AMPULE_IN : 1
TO_VOLUNTARY : 1
USE_TOBACCO : 2
APPT_AREA : 1
PLAN_CARE : 1
ASHEN_CLINIC : 1
CIES_WAS : 1
CARDIOVASCULAR_WEIGHT : 1
IOP_HE : 1
IS_MIGRAINE : 1
VARIOUS_RECOVERING : 1
HIS_MEDICAL : 1
SITTING_COMFORTABLY : 1
CONSERVING_TECHNIQUE : 1
HE_RESPONDING : 1
BE_IN : 2
TEMPERATURE_RESULTS : 1
TIME_JUL : 1
WHO_PLACED : 1
MDD_RESPONSE : 1
ABOVE_PFT : 1
PLANS_DECISIONS : 1
ACCIDENT_OPERATING : 1
REFERRAL_KLEIN : 1
SUPPORT_OR : 1
DIRECTED_AS : 1
DISEASE_USE : 1
HISTORY_OF : 4
ACTIVE_NO : 1
IF_TO : 1
SHOW_CHANGED : 1
NECK_WHICH : 1
CLASS_FOCUSED : 1
FROM_AT : 1
VERIFIED_NECK : 1
THAT_HAD : 1
AN_PRACTITIONER : 1
BENADRYL_MG : 1
EXCEED_ACETAMINOPHEN : 1
LANS_PC : 1
MEDICATION_CHANGES : 1
AS_PREVIOUS : 1
NOTED_RIGHT : 1
WANTS_WISH : 1
ANY_SIGNS : 1
DISCUSSION_WAS : 1
PATIENT_LEFT : 1
HAVE_KNOWLEDGE : 1
NOW_NOT : 1
PLEASE_NOTES : 1
PRESSURE_RISK : 1
LOADED_TO : 1
TO_ORDERED : 1
SERVED_WITH : 1
AGE_SEX : 1
YES_PROCEDURE : 1
THE_WENT : 1
LIKED_BULD : 1
HEALTH_THE : 2
PROBLEMS_AND : 2
DIMENSION_CM : 1
ALERT_ORIENTED : 3
DEPOSITION_OF : 1
TRIAGE_RESPIRATIONS : 1
PAST_YOU : 1
DATE_COMMENT : 1
WILL_UPDATE : 1
MEDICAL_REVIEWED : 1
PROCEDURES_ARRIVES : 1
STOP_LENGTH : 1
ROOM_FOR : 1
ANSWERED_NKA : 2
DOSING_YOU : 1
UE_LAB : 1
BEACH_HE : 1
LIGHT_SIGNS : 1
CONSTITUTIONAL_VITAL : 1
DID_KEEP : 1
FIRST_HAPPENED : 1
APPOINTMENT_TIME : 1
ORANGE_COMBAT : 1
BIPOLAR_PERSONALITY : 1
AGORAPHOBIA_PER : 1
YOU_INFORMATION : 1
WITH_YR : 1
HAS_MIGRAINE : 1
YEAR_AGO : 1
ABDOMEN_TOBACCO : 1
INDEPENDENT_DEMONSTRATES : 1
BUPROPION_CLONIDINE : 1
DONE_PATIENT : 1
ADMISSION_AGO : 1
REGULARLY_VIA : 1
IS_BELIEVED : 1
PLATINUM_PAIN : 1
WITH_OCCASIONAL : 1
COGNITIVE_INFORMATION : 1
APPOINTMENTS_CONTINUE : 1
WHOM_MEDICAL : 1
AND_IT : 2
GOALS_OF : 1
OUT_THE : 1
DIABETES_CAREGIVER : 1
ADDRESS_IMAGE : 1
ARRIVED_VIA : 1
DELUSIONALLIKE_WITH : 1
NECESSARY_LMSW : 1
DO_HE : 1
MEDIASTINAL_NODE : 1
DATIVE_PAIN : 1
SCANT_AMOUNT : 1
SHOWER_SHAVE : 1
OXYGEN_SUPPLY : 1
TECHNIQUE_RAL : 1
ALTERNATE_IS : 1
FACT_SAVING : 1
PROCEDURE_INDICATIONS : 1
AT_OF : 2
LOGICAL_FACILITY : 1
DECISIONMAKING_INFECTION : 1
NO_ABDOMINAL : 1
AVOID_CONSTIPATION : 1
SACRIFICE_THEIR : 1
NIGHT_PRODUCTIVE : 1
OTHER_MEDICAL : 1
PAIN_NEEDED : 1
PER_PODIATRY : 1
AND_ADAMANTLY : 1
OF_SIGNIFICANT : 1
WITH_STOOL : 1
NORMAL_ACTIVITY : 1
HOSPITAL_RISK : 1
DID_NOT : 3
PATIENT_REGARDING : 1
PROGRESS_SEX : 1
TELEPHONE_DATE : 1
EVERY_IF : 1
OF_ADDENDUM : 1
THAT_PRESCRIBED : 1
IER_TO : 1
STATED_WOULD : 1
NOTE_EXPERIENCES : 1
HE_STAYED : 1
TO_PATIENTS : 2
LIVING_THE : 1
PAIN_AGGRAVATED : 1
NO_SUBCUTANEOUS : 1
POSTTRAUMATIC_STRESS : 2
BLOODY_SEEPING : 1
AS_THEY : 2
ABLE_USE : 1
ABOUT_SITUATION : 1
PT_RELUCTANT : 1
NONE_ACTIVITY : 1
UNDER_HIS : 1
OF_CONTACT : 5
ADMISSION_MEDICAL : 1
WHAT_IIS : 1
HOSPITAL_ER : 1
PATIENT_NONE : 1
BE_ABLE : 1
MEDICAL_FEE : 1
PER_SELF : 1
NURSING_OUTPT : 1
WELL_TO : 2
NO_RISK : 1
DURING_ACTIVE : 1
ARRHYTHMIA_TYPE : 1
LATERAL_MARGIN : 1
DISCUSSED_OR : 1
VIEW_PATIENT : 1
INPATIENT_INCLUDING : 1
HAS_HAVE : 1
VISIT_IER : 1
RAMSAY_SEDATION : 1
IS_WAITING : 1
ML_TIDAC : 1
RISKS_BENEFITS : 1
WITH_GOAL : 1
SADNESS_PHARMACY : 1
EVERY_CONTROL : 1
MRSA_EVERY : 1
DI_UPTIVE : 1
DAILY_CONSULT : 1
FORMULARY_AGENT : 1
STAFFED_PHYSICIAN : 1
DO_LITTLE : 1
FAILURE_MEDICATIONS : 1
OF_MR : 1
IN_HOURS : 1
SONES_AT : 1
ASSIST_DC : 1
ACTIONS_AS : 1
CURRENT_DIAGNOSIS : 1
IN_APPEARS : 1
CONSISTENT_WITH : 1
PROVIDER_IN : 1
MON_WILL : 1
IDENTIFIED_PCP : 1
VALIDATE_VISIT : 1
PAGE_PHYSICIAN : 1
PATIENT_HAS : 7
PRIVATE_VEHICLE : 1
PITTING_ON : 1
TEST_GIM : 1
PROCEDURE_RISKS : 1
MEDICATIONS_ACTIVE : 1
WAS_ORDERED : 1
PATIENT_DOCUMENTATION : 2
PATIENT_BY : 1
STILL_HAVING : 1
OTHER_UNSPECIFIED : 2
MENTAL_EDUCATION : 1
COMMENT_PATIENT : 2
AM_UNCHANGED : 1
PHYSICIAN_THE : 1
NUTRITION_INVOLUNTARY : 1
MUCH_FOR : 1
READING_ADMISSION : 1
BREATHING_BE : 1
AND_MENTAL : 1
OF_FOR : 1
THIS_NO : 1
INSTRUCTIONS_OUR : 1
FOR_ON : 2
PATIENT_BLOOD : 1
HR_PAIN : 1
OUTPATIENT_NOTE : 1
CURRENTLY_LAWSUIT : 1
CARE_INSURANCE : 1
PROGRAM_NO : 1
AND_ADDENDUM : 1
ANXIETY_TO : 1
EVIDENCED_VIOLENCE : 1
IS_GOOD : 1
MG_HOURS : 1
FOR_PROBLEMS : 1
TAB_LEXAPRO : 1
NONFORMULARY_MEDICATIONS : 1
CHANGE_SOME : 1
PATIENT_ENTERED : 1
AND_BECOMING : 1
LISTED_ON : 1
PULSE_DEMEROL : 1
NO_TIDAC : 1
HEALTH_FOR : 1
HRS_FOUND : 1
FOUR_TIMES : 1
PC_SHOULD : 1
IS_REPEAT : 1
PROVIDER_AS : 1
BLOOD_THE : 1
STRONG_WELL : 1
AUTHOR_DEBORAH : 1
SELF_TO : 1
STOOL_DISCUSSED : 1
ANY_FURTHER : 1
CONSTANT_NATURE : 1
IVP_PRN : 1
BM_BMS : 1
BEHAVIORS_COMMENTS : 1
THAT_JUST : 1
ARRIVAL_PRIVATE : 1
HAVE_ANY : 3
ASSESSMENT_CARE : 1
TO_DECISIONS : 1
ATTACHED_MODE : 1
UNEMPLOYMENT_ARRIVES : 1
AGE_MALE : 1
PROVIDER_IDENTIFIED : 3
AND_TAKE : 1
SITTER_ADMISSION : 1
HERE_BECAUSE : 1
ABILITY_TO : 1
RV_DIAST : 1
PRIMARY_PROVIDER : 2
REGULARLY_PHONE : 1
PAIN_SKIN : 1
HYPERGLYCEMIA_AMBULATORY : 1
ASAP_ANY : 1
DATE_DIAGNOSES : 1
HE_XATTEMPTED : 1
OF_ANXIETY : 1
THIS_DYSPHAGIA : 1
OF_CONCIOUSNESS : 1
NO_LORWR : 1
GIVEN_MG : 1
ALREADY_SET : 1
ARE_PALPABLE : 1
PERSISTENT_ILLNESS : 1
FOLLOWING_PHYSICAL : 1
READ_BACK : 1
BELIEVE_TO : 1
HIS_THEY : 1
PO_PRESENTS : 1
CONTROLLED_PROBABLE : 1
FOR_FOLLOWUP : 1
EDUCATION_KIT : 1
PCP_SOORYA : 1
HOME_AND : 1
RESPIRATIONS_MULTIPLE : 1
DISPLAY_PLAN : 1
THOUGH_WAS : 1
IM_DEMEROL : 1
WITH_PRIMARY : 2
TAKE_AM : 1
DECLINED_REFERRAL : 1
TO_TALKING : 1
RESCHEDULE_VARDENAFIL : 1
DATE_IDEALLY : 1
CONTAINING_FOBT : 1
HARD_COPY : 1
ALERT_RESPONSIVE : 1
MEDICATION_NOTE : 1
SHOULD_HAVE : 1
LDL_GLUCOSE : 1
FEET_TYPE : 1
CONCERNED_WITH : 1
NURSING_POSTPROCEDURE : 1
HE_SHE : 1
COUMADIN_AT : 1
THEN_IMAGING : 2
SUTURES_BMI : 1
USE_IN : 1
INFLUENZA_DOSE : 1
CLINICAL_DIAGNOSIS : 1
BY_PHYSICIAN : 1
USED_IDENTIFIED : 1
SCENARIO_IS : 1
OBTAINED_PATIENT : 1
ON_CURRENT : 1
SIDE_FROM : 1
ANOTHER_LOSS : 1
PALLIATIVE_IS : 1
OCCASIONAL_UF : 1
HAD_IN : 1
VERIFIED_RATES : 1
HAVE_EVER : 1
WAS_INDEPENDENT : 1
WILL_QUETIAPINE : 1
ACCESS_REFERRAL : 1
CREATININE_DOCUMENT : 1
INSULIN_MORSE : 1
THIS_BP : 1
ADAPTIVE_AND : 1
PRIOR_TO : 4
DISORDER_NOS : 1
IN_CENTER : 1
INACTIVATED_INFLUENZA : 1
PT_IS : 2
FILM_ENTITLED : 1
ON_DIABETIC : 1
APPOINTMENT_EDUCATION : 1
LIFESTYLE_HE : 1
CA_RIGHT : 1
RECOMMENDATION_HOURS : 1
DECEMBER_INSTRUCTIONS : 1
CORRECT_PROCEDURE : 1
ABOUT_THIS : 1
TO_HE : 2
SET_QUIT : 1
BEATS_ALERTAND : 1
PRIMARY_VISIT : 1
THEY_APPEARED : 1
AS_MEDICATION : 1
INFORMATION_CARDIOLOGY : 1
MH_INDIVIDUAL : 1
COLOR_RATING : 1
COULD_CONVINCE : 1
AVAILABLE_DIET : 1
NONE_PRIMARY : 1
IT_TIME : 1
FROM_PT : 1
THIS_UNCHANGED : 1
OTHER_CERVICAL : 1
ONE_TRANSPORT : 1
ANGLE_GLAUCOMA : 1
MEDS_LAST : 1
WIFE_NOT : 1
STATUS_STAYS : 1
AT_HOURS : 1
AGO_NO : 1
DEXTERITY_VET : 1
PLAN_EVALUATION : 1
AFTER_INJECTION : 1
OF_TO : 2
OBSERVATION_PT : 1
AND_COUPLET : 1
MIN_THEN : 1
CONTACT_MR : 1
MR_TO : 1
AND_MAY : 1
PATIENTS_PROBLEM : 1
ORDERED_BY : 1
DISCHARGE_EAR : 1
COMFORT_CV : 1
FOR_BIPOLAR : 1
CONSCIOUS_OSA : 1
NOT_FDA : 1
MRSA_DEPRESSION : 1
HIS_RECORDS : 1
THE_ALCO : 1
WITH_ACTIONS : 1
WAS_GOING : 1
PMR_DAILY : 1
SEEN_EXAMINED : 1
WAS_WHEELCHAIR : 1
OF_OF : 2
NORMAL_HEEL : 1
THIS_PRIOR : 1
ADMITTED_WITH : 1
TO_INTERVENTION : 1
NO_FEBRILE : 1
MENTIONS_THAT : 1
ENCOUNTER_TIME : 1
SAID_SHE : 1
EVALUATION_NAUSEOUS : 1
EFFECT_OF : 1
DELTOID_EDUCATION : 1
TO_MOVE : 1
RESULTS_LETTER : 1
NOTE_CARE : 2
IVP_ANTIHYPERTENSIVES : 1
REACTIVE_SADNESS : 1
MENTAL_ILLNESS : 1
PRODUCTIVE_WITH : 1
FRACTURES_HERE : 1
WAS_ATTITUDES : 1
PREVENTION_RE : 1
PROBLEM_MEDS : 1
IS_POORFAIR : 1
TO_REMAIN : 1
CONSENT_IS : 1
WITH_ATTENDING : 1
AND_PUT : 1
NOT_AD : 1
PERFORMED_YES : 1
NARRATIVE_TWO : 1
APPLICABLE_PAROXETINE : 1
AN_APT : 1
PT_DISCUSSED : 1
OUT_VARIOUS : 1
NUCLEAR_CATARACT : 1
TOOLS_MENU : 2
CAN_BE : 2
AGING_NOT : 1
COULD_WALK : 1
AND_THIS : 1
MEDICATION_EKNO : 1
PHYSICIAN_POOR : 1
MYERS_CONTACT : 1
SERVICES_STATUS : 1
CLUB_PATIENT : 1
COMBAT_DURING : 1
POOR_DECISIONS : 1
HE_STATES : 1
CONSENT_HEALTH : 1
INDEX_AUG : 1
RIGHT_OTHERWISE : 1
INDEPENDENT_WITH : 1
LOCK_IN : 1
AND_IMPROVING : 1
REVIEWED_IN : 1
SCALE_FOR : 1
DECISIONS_WORRIED : 1
RA_IMED : 1
DECEMBER_DISCHARGE : 1
CONTACT_FAWCETT : 1
ASHOK_PC : 1
UPON_IN : 1
INSTRUCTION_PATIENT : 1
OF_CONSENT : 1
TO_TOOK : 1
BHM_WAL : 1
BEING_TO : 1
GOING_PHYSICIAN : 1
IF_FOR : 1
RESULTS_ADDITIONAL : 1
ITEM_CAREFULLY : 1
PITTING_EDEMA : 1
INVENTORY_COMPLETED : 1
AS_COSIGNER : 1
PIECE_MOUTH : 1
PRN_DIURETICS : 1
LAST_WAS : 1
JUL_NO : 1
AND_MESSAGE : 1
MEDICATIONS_SUPPLIES : 6
NONVA_SIX : 1
NSTEMI_ADDENDUM : 1
OCC_WHEEZING : 1
AMOUNT_BLOODY : 1
WEST_HOSPITAL : 1
AROUND_FOLEY : 1
MESYLATE_MG : 1
IF_THE : 1
NA_WITH : 1
AFTER_IN : 1
AMBULATION_AND : 1
CARE_TO : 1
THERAPIST_TO : 1
DIRECTED_NO : 1
HIS_HE : 1
CHANGES_AT : 1
PRN_PAIN : 1
DIAG_COMMENTS : 1
POOR_OF : 1
RTC_MANY : 1
HEALTHILY_OF : 1
CONTRACT_LOCATED : 1
LAST_SEEN : 2
FINSETERIDE_BF : 1
INVOLVED_IN : 1
LEAVING_AND : 1
APPLY_DEMONSTRATE : 1
SPO_READ : 1
COMMENTS_MEDICAL : 1
DISPOSITION_AGENT : 1
SOUNDS_ARE : 1
BMI_OXAZEPAM : 2
PREDICTING_SORE : 1
NONE_OT : 1
OF_GI : 1
WAS_FROM : 1
MRSA_MOUTH : 1
DISEASE_PAIN : 1
CRITICAL_VALUE : 1
SS_OF : 1
THEIR_AND : 1
INFECTION_NOTED : 1
ANY_WELL : 1
ASSISTANT_ACTIVE : 1
VIA_AND : 1
STROKE_REHAB : 1
COMMENTS_ONE : 1
NO_REPORTEDLY : 1
PRN_MG : 1
RECEIVING_CARE : 1
PROGRESS_IF : 1
SORE_NURSING : 1
OBSERVED_DOCUMENTED : 1
PATIENT_IN : 1
DEPRESSION_PROBLEMS : 1
HOURS_NEEDED : 1
NOTIFY_SUPPORT : 1
HAVE_YOU : 2
FOR_ZIPRASIDONE : 1
VISION_HEARING : 1
ST_STEP : 1
FLEXED_INJECTION : 1
DURATION_OF : 1
PVC_AND : 1
AMBULATORY_AI : 1
AGO_EXPOSURE : 1
FOLLOWED_INSTRUCTIONS : 1
OR_OBESE : 1
MEDICATION_WAS : 1
EITHER_SEC : 1
MORE_FOR : 1
HYPERTENSION_PROBABLE : 1
TOOK_ALL : 1
WITH_FINDINGS : 1
REPORT_INADEQUATE : 1
MG_CT : 1
ARM_TOOK : 1
TAKE_MEDS : 1
BREAKFAST_OF : 1
MEALS_WHEELS : 1
ACCUCHEK_COMFORT : 1
BLOODY_DRAINAGE : 1
HAS_EDEMA : 1
CONSULT_APPOINTMENT : 1
LEATHER_CRAFTS : 1
MEDICAL_HISTORY : 2
WILL_ULTIMATELY : 1
PERTINENT_PAST : 1
HAS_CARDIOVASCULAR : 1
USE_LIGHT : 1
WELL_PHONED : 1
GLUCOSE_STRIP : 1
IMMODIUM_STATES : 1
VET_THEN : 1
WAIVER_HAS : 1
WILL_REVIEWED : 1
ADDENDUMS_NECESSARY : 1
SINCE_THAT : 1
USED_METH : 1
ERUPTED_EXR : 1
BECAUSE_WAS : 1
AT_IF : 1
ALL_POINTS : 1
MARGIN_LEG : 1
PREPARE_FOR : 1
ADMISSIONS_NO : 1
XYZZY_REPORTS : 2
CHANGES_WILL : 1
OFTEN_HAVE : 1
FOCUSED_HANDOUT : 1
AT_METER : 1
REQUESTED_MEALS : 1
COMMENTS_THE : 1
TO_THINK : 1
THE_TREATMENT : 1
ARE_VISION : 1
ASSESSMENT_ARTERY : 1
OUTPATIENT_MEDICATI : 1
THERE_IS : 1
ARTHROPLASTY_CORRESPONDENCE : 1
HERBALS_PRESCRIBED : 1
NO_CAP : 1
MODERATE_CONSCIOUS : 1
THIS_NMBER : 1
LOCK_PLACE : 1
APPT_JUNE : 1
ADJUSTING_TO : 1
ATTEMPTS_WHEN : 1
OF_FOOT : 1
TRANSFER_NOTE : 1
AT_LOCAL : 1
ATTENDED_AND : 1
AS_AMBULATION : 1
INPATIENT_STATUS : 1
SATT_GROUP : 1
SPENT_THE : 1
TEMP_MARRIAGE : 1
WATCHING_TV : 1
SCHEDULED_BREAKFAST : 1
LORI_HIGHBERGER : 1
CONGRUENT_SADNESS : 1
UPDATE_WHEN : 1
THE_ACTIVE : 1
SIGNS_WITHDRAWAL : 1
INJ_SODIUM : 1
VETERAN_ADMITTED : 1
TAB_SIG : 1
MEDICATIONS_RESULT : 1
PAIN_INTENSITY : 1
FROM_PATIENT : 1
CHILDREN_EVEN : 1
NOS_OTHER : 1
IS_FORMULARY : 1
PAIN_BACK : 1
DYPHORIC_AFFECT : 1
PLAN_NOTE : 1
RLE_ABUTTING : 1
NO_CONROE : 1
PATIENT_BEING : 2
TO_HIS : 6
DISORDER_HAS : 1
TREATMENT_PROVIDED : 1
MEDICATION_THIS : 1
TO_VAMC : 1
CONSCIOUS_OA : 1
MEET_WITH : 1
OR_OBESITY : 1
AT_THIS : 7
CHATHAM_REC : 1
MON_PT : 1
OF_MONITORING : 1
PT_NOT : 3
PHYSICIAN_COMPLETELY : 1
AS_IS : 1
USE_OUTPATIENT : 1
NOT_ACTIVE : 1
HAS_FOR : 1
THE_PARAFFIN : 1
WITH_DIVORCE : 1
CLOSE_HIS : 1
TRIED_NO : 1
ORTHOPEDIC_PHYSICIAN : 1
EXP_AGE : 1
AFTER_CHANGE : 1
THIS_FACT : 1
HISTORY_BEING : 1
OUTPATIENT_MAN : 1
HORRIBLE_UPSETTING : 1
HE_WAS : 8
SSN_CORRECT : 1
DOCUMENT_SELECTED : 1
PATIENT_DENIES : 3
WERE_VETERAN : 1
FOR_RILEY : 1
LAST_NONE : 1
REPORTS_THAT : 2
WAS_LEXAPRO : 1
AS_ADDICTS : 1
BP_MSE : 1
WITH_SIGN : 1
IMPROVING_KG : 1
NUMBER_IF : 1
VIA_AMBULANCE : 1
WORKER_WILL : 1
OUTPATIENT_STATUS : 1
THE_PATIENTS : 3
WITH_SI : 1
HEMOSIDERIN_DEPOSITION : 1
CONCERNED_HIM : 1
TO_WED : 1
RISK_NONE : 1
DOCUMENT_BE : 1
BREATHING_AND : 1
SUPPLIES_SHIFT : 1
FACILITIES_RECOVERING : 1
PC_ASSIST : 1
ON_OPEN : 1
PARTICIPATION_PT : 1
PER_CXR : 1
CONTINUE_HYPERTENSION : 1
FOR_HIS : 1
NOT_APPLICABLE : 1
PROVIDED_ADDITIONAL : 1
CENTER_HAS : 1
CUTTER_AS : 1
VETERAN_TO : 1
SENILE_NUCLEAR : 1
SHE_SAID : 1
ABOUT_HEALTH : 1
PRIMARY_FEET : 1
DOES_PROBE : 1
RAL_HYPERTENSION : 1
PRODUCT_TO : 1
HOMEBOUND_SEALY : 1
DATE_MAY : 1
DNR_AMD : 1
WITH_FLEXED : 1
PRESENTED_AMBULATORY : 1
ON_LEISURE : 2
JOB_DUE : 1
THE_PHYSICIAN : 1
REVIEWED_AND : 1
ON_PHONE : 1
HYPERTENSION_CONTROLLED : 1
WAS_DECEMBER : 1
PHYSICIAN_DATIVE : 1
POSTPROCEDURE_AUTHOR : 1
SWELLING_OR : 1
OR_DRUG : 1
OR_READ : 1
TOMMORROW_CALL : 1
WALKING_NASAL : 1
OF_BODY : 2
ON_PAIN : 1
OF_HOME : 2
NO_EVIDENCE : 1
THE_SKIN : 1
ING_ATHETOID : 1
NOTE_APPOINTMENTS : 1
STARTLED_INFECTIOUS : 1
ON_LATERAL : 1
MEDS_WAS : 1
WHICH_IMPROVED : 1
RECEIVING_NONVA : 1
CONSULTPHARMACY_IS : 1
FOOD_SAFETY : 1
HEALTH_POSTTRAUMATIC : 1
PRESSURE_AND : 1
INFO_PATIENT : 1
AND_EXAMINED : 1
RATE_CALLED : 1
PLAN_PROGRESS : 1
AGANIST_SET : 1
AND_COCAINE : 1
ADDENDUM_DEXTROSE : 1
AMBULATORY_OTHER : 1
TO_SAMPLING : 1
NOTE_FOR : 2
COUMADIN_THE : 1
IN_RAL : 1
MILDLY_TENDER : 1
PERIORBITAL_CHEEKS : 1
WHICH_HAS : 1
WAL_MINUTES : 1
NOTE_CAREGIVER : 1
WEIGHT_ANTHROPOMETRICS : 1
TO_DONE : 1
PRESSURE_HEART : 1
BY_HOSPITAL : 1
SAID_NO : 1
NICOTINE_MG : 1
MOMENT_BUT : 1
SEDATIONANALGESIA_OSA : 1
MMOL_DEC : 1
HE_GERIATRICS : 1
THINGS_HE : 1
NFS_REFERRAL : 1
BIT_ASHEN : 1
ACTIVITY_AND : 1
RIGHT_DELTOID : 1
ISSUES_PATIENT : 1
HOSPITAL_HIGH : 1
SMILING_MOVEMENTS : 1
NORMAL_THIS : 1
ARMY_ALLERGIES : 1
HIS_ELDERLY : 1
OTHER_COUNSELING : 1
TAKEN_ROOM : 1
TO_CONTACT : 1
PA_MUCH : 1
OCC_NO : 1
DISCUSSED_ATTENDING : 1
THE_VAMC : 1
ME_ADMITTED : 1
CONSULT_AS : 1
IN_ACTIVE : 1
BASIC_OF : 1
ACTIVITIES_WORK : 1
CHANGED_FOR : 1
CVAMC_AT : 1
ML_PATIENT : 1
WITHIN_AND : 1
IN_CHAIR : 1
LOC_BY : 1
NOT_EXCEED : 2
RAL_CONTROLLED : 1
HE_HAVE : 1
WAS_ADMITTED : 1
EDUCATION_ISSUES : 1
FATHER_CHF : 1
ESOPHAGUS_MEDIASTINAL : 1
MEDICATION_SITE : 1
ONSET_OUT : 1
INTERACTIONS_DOSAGE : 1
TO_DEVELOP : 1
GO_MG : 1
STERRISTRIPPED_TYPE : 1
SW_AND : 1
PC_RESULTS : 1
FOR_ONE : 1
REMINDER_OF : 1
DISCUSSED_MODIFIED : 1
FIREARM_OR : 1
COMFORTABLY_IN : 1
PARTICIPATED_SPENT : 1
ANY_PERTAINING : 1
BLOOD_CARDIOVASCULAR : 1
IS_LIMITED : 1
AND_FIRST : 1
NOW_FEELING : 1
PHOTIC_STIMULATION : 1
SAT_RA : 1
OFTEN_YOU : 1
COMPLETED_ACTIVITIES : 1
NONVA_CARE : 1
WITH_CLOTS : 1
OF_SURGEON : 1
SUBMITTED_BY : 1
PAROXETINE_ACIPHEX : 1
THE_COORDINATION : 1
PICK_HARD : 1
LAST_ON : 1
HOME_CUTTER : 1
TO_IV : 1
COMFORT_GLUCOSE : 1
PIV_LEFT : 1
YEAR_MALE : 3
YOU_FIND : 1
CARE_PATIENT : 1
MOUTH_ACTIVE : 2
PATIENT_CALLED : 1
AMBULATION_GOOD : 1
FOR_HIMSELF : 1
HER_HIS : 1
DISCUSSION_ATTITUDES : 1
DOOR_TO : 2
WITH_WITH : 1
NURSE_CAME : 1
DEPRESSION_NL : 1
VEHICLE_HEIGHT : 1
TIMES_CYCLE : 1
GOOD_THIS : 1
STAYED_THERE : 1
KNOWN_VISTA : 1
INCLUDING_DIETARY : 1
BY_THE : 4
CHLORIDE_PHYSICIANS : 1
ABOUT_COST : 1
NOT_KEEP : 1
SURGERIES_AT : 1
OR_STARTLED : 1
USE_ESCALATED : 1
BE_REVIEWED : 2
ACETAMINOPHEN_MEDICATION : 1
FROM_WELCOME : 1
ARE_BUT : 1
TRANSFERS_BM : 1
HEALTHILY_TYPE : 1
VA_WE : 1
SUBJECTIVE_PATIENT : 1
SELECTING_TOOLS : 2
DIAGNOSIS_URGENT : 1
CHARGE_OF : 1
FOR_TO : 2
MUSCLE_THIS : 1
LISTED_PFT : 1
ESCALATING_BEHAVIORS : 1
NOTE_HEALTH : 1
CONSIDER_SNU : 1
URINE_AMOUNT : 1
PATIENT_IV : 1
IER_NO : 1
ULA_LITERS : 2
RT_BASE : 1
SHE_AGREES : 1
LOCK_SALINE : 1
RECORDS_PT : 1
LYMPH_SHINS : 1
FOOT_SENSORY : 1
EGD_YESTER : 1
VA_VERBALIZES : 1
LPM_NONE : 1
TALKING_ABOUT : 1
DISCUSSED_MANAGEMENT : 1
IF_ST : 1
MALE_HISTORY : 1
CLEAR_DIMINISHED : 1
SUICIDAL_HOWEVER : 1
DISCUSSION_FORGIVING : 1
AM_PROCEDURE : 1
TYPE_RX : 1
OCT_SO : 1
PEDAL_HIS : 1
MALE_PMH : 1
GIVEN_OFFERED : 1
AROUND_AT : 1
SAT_ENCOURAGE : 1
READ_CRITICAL : 1
PCCNURSING_INTAKE : 1
SEEN_DID : 1
ADULT_NOW : 1
QUALITY_CLINICAL : 1
REPORT_DATED : 1
FOOT_EXAM : 1
VA_FROM : 1
AT_HE : 1
CHEST_WITH : 1
CARE_BY : 1
CLASS_DENIAL : 1
SENILE_CATARACT : 1
DISCUSSING_DISPO : 1
SINCE_HE : 2
THE_MEDIASTINAL : 1
STRONG_AND : 1
PRIMARY_ELIGIBILTY : 1
TO_MEDS : 1
GOT_DIVORCE : 1
APPOINTMENT_HAS : 1
NO_ACUTE : 1
OF_CERVICAL : 1
MEDS_AM : 1
HIS_FULL : 1
ASSISTANCE_DAILY : 1
HE_LIKE : 2
ADDENDUM_SCREENING : 1
REST_OF : 1
HAVE_PRIM : 1
GO_UP : 1
REACTIVE_PHARMACY : 1
ORDER_GIVE : 1
SUBJECTIVE_HAS : 1
CORRECT_ANSWER : 1
NOTE_SODIUM : 1
FACT_THE : 1
LEFT_UE : 1
NURSE_TRIAGE : 1
PHYSICIAN_CARA : 1
DIAGNOSES_MEDICATION : 1
IS_MALE : 1
MORSE_SCALE : 1
FOR_TYLENOL : 1
LITERS_NEUROLOGI : 1
FT_PERSONNEL : 1
PATIENT_INSTRUCTED : 1
AND_WITH : 4
METH_AND : 1
LENGTH_BLADDER : 1
WITH_EXERTION : 1
THE_ADVICE : 1
RESOURCES_ACCESS : 1
YES_SUBMITTED : 1
NOT_PATIENT : 1
PLACE_NOT : 1
THE_HAS : 3
URINE_SCANT : 1
CAREFUL_FOLLOWING : 1
IN_OF : 1
WHEN_CAME : 1
PB_DONE : 1
INFORM_HER : 1
NO_SHE : 1
ABDOMINAL_ORDERED : 1
BIL_SOUNDS : 1
PROCEDURES_BACK : 1
TIME_CONTACT : 1
PART_FOCUS : 1
CESSATION_WIFE : 1
TO_CONTROL : 1
REVIEWED_CHANGES : 1
OF_CONCERNED : 1
ABERRANT_PATIENT : 1
PER_NOTES : 1
POST_HYPERKERATOTIC : 1
ABLE_ACCOMMODATE : 1
LESION_PT : 1
FALL_UPON : 1
DINNER_HE : 1
LORPRSE_DUTY : 1
JUL_AMBULATORY : 1
SUPPLIES_FUMARATE : 1
NOW_BECAUSE : 1
MG_SIG : 1
SHIFT_IN : 2
NIGHT_DONT : 1
SPEND_LEISURE : 1
OF_REFERRAL : 1
FEELINGS_HEIGHT : 1
AT_THAN : 1
ILLNESS_REDUCING : 1
PTS_DISPO : 1
AND_WHAT : 1
FOR_OR : 1
MGS_FOR : 1
FEB_HEMATURIA : 1
NASAL_ULA : 2
SODIUM_INJ : 1
UNDER_PRESSURE : 1
MARRIAGE_YRS : 1
TO_TAKE : 2
ELDERLY_WIFE : 1
TO_INFORMATION : 1
CONTACT_PT : 1
REPORTING_TO : 1
VALUE_PERFORMED : 1
POST_VISIT : 1
FROM_SPECIALTY : 1
COCAINE_PLT : 1
EMERGENCY_PHYSICIAN : 1
REDUCING_RISK : 1
OF_TOBACCO : 2
FOLLOWING_LIMITATIONS : 1
VERY_INDEPENDENT : 1
WEIGHT_AMBULATING : 1
PROCEDURE_INFORMATION : 1
HAS_SCHEDULED : 1
PHONED_SISTER : 1
TO_SEE : 1
HAS_HISTORY : 1
ELIGIBILTY_PRIMARY : 1
ASSIST_PATIENT : 1
OUTSIDE_REC : 1
GIVEN_PT : 3
ADMITTING_DIAGNOSIS : 1
LATE_ENTRY : 2
NOTE_RECORD : 1
SPONDYLOSIS_LATE : 1
MODE_TRANSPORTATION : 1
GLUCOSE_ON : 1
NUTRITION_DIAGNOSIS : 1
VIS_INFLUENZA : 1
AND_BLOOD : 1
BASE_COULD : 1
YOU_BEEN : 1
SKIN_PAIN : 2
DONE_PB : 1
TOOTH_EXR : 1
FROM_AFTER : 1
AT_RISK : 2
TBI_PTSD : 1
REC_FEE : 1
CARRYING_FIREARM : 1
UPDATE_ON : 1
MALE_PAST : 1
GIVEN_HR : 1
EVEN_HE : 1
SKIN_ABSCESS : 1
IS_WHICH : 1
AND_IIS : 1
AND_NONE : 1
UNSPECIFIED_REPEAT : 1
PHONED_HIS : 1
WELCOMED_ER : 1
ACTIVE_OUTPATIENT : 6
BE_IM : 1
ABLE_TO : 4
THE_VESTIBULAR : 1
THAT_HIS : 1
DISPENSED_MEDICATIONS : 1
CONCIOUSNESS_TEMP : 1
CARDIOVASCULAR_MUSCLE : 1
AFFECT_REACTIVE : 1
DECIDED_TO : 1
PHYSICIAN_SUICIDAL : 1
TOOK_PAIN : 1
ASSIST_ASSIST : 2
TO_CHECK : 1
BY_WITH : 1
REVEALED_NO : 1
CARDIOLOGIST_PHYSICIAN : 1
THIS_DOCUMENT : 1
WORKED_SO : 1
IF_CBOC : 1
ENTRY_FOR : 1
OUR_SEE : 1
BP_AND : 1
GAIT_TO : 1
ABOUT_HOW : 1
INPATIENT_QIDPRN : 1
TO_MEDICATIONS : 1
DOES_RADIATE : 1
WAS_MH : 1
NO_WITH : 1
REC_NEED : 1
NOTE_CERVICAL : 1
DEPRESSION_ZIPRASIDONE : 1
COMMENTS_PHYSCIANS : 1
NONE_OUTSIDE : 1
BY_SELECTING : 2
TO_HOME : 2
COORDINATOR_HAS : 1
REMAIN_AREA : 1
WEIGHT_LUNGS : 1
PT_PHYSCIANS : 1
CESSATION_TOLD : 1
THE_ON : 1
REMINDER_APPOINTMENT : 1
EAR_APPROX : 1
SON_THE : 1
MEDS_ACTIVE : 1
HOME_HERNIATION : 1
PO_TID : 2
DI_ANGRY : 1
SO_ML : 1
TAB_POTASSIUM : 1
MANAGEMENT_CALORIC : 1
PER_ADDENDUMS : 1
THAN_RODE : 1
DENIES_OF : 1
MOTORCYCLES_ALERT : 1
WEIGHT_MANAGEMENT : 1
AND_ARE : 1
FOR_INITIAL : 1
HIS_WERE : 1
NOTE_LORI : 1
PT_THAT : 1
DISCUSSED_CONSENT : 1
WEST_BEACH : 1
CONSTANTLY_ON : 1
PSYCHIATRY_NOTE : 1
IS_ASSIGNED : 2
CONCIOUSNESS_ALERT : 1
AND_CONSIDER : 1
PHONE_PATIENT : 1
CM_IS : 1
ROOM_HE : 1
SOB_SYND : 1
NTG_SL : 1
SOCIAL_WORKER : 1
MANAGEMENT_REDUCING : 1
VISTA_IS : 1
PHYSICAL_ASSESSMENT : 2
AND_REFUSES : 1
SO_INHL : 1
ALERTAND_INDEPENDENT : 1
TOBACCO_CESSATION : 2
ALERT_TEMP : 1
ASSOCIATED_MR : 1
REVIEW_PC : 1
HAVING_SYMPTOMS : 1
CONTROL_THE : 1
MG_TAKE : 4
AND_DOCUMENTED : 1
GETA_HAIR : 1
WILL_YOU : 1
NOTE_NANDA : 1
BY_CHECK : 1
SUGGESTS_IN : 1
HAVING_URINARY : 1
WORST_WEIGHT : 1
CARE_COORDINATOR : 1
DISEASE_EAR : 1
SQUIRMING_AND : 1
ADAPTIVE_BREATHING : 1
ANY_HORRIBLE : 1
HAS_SITTER : 1
VET_COMPLETED : 1
ADDENDUM_WITH : 1
CASE_NOT : 1
ATTACHED_TO : 2
DISCUSSION_SUICIDE : 1
MINUTES_BLADDER : 1
INDEX_PAIN : 1
STIMULATION_INDUCES : 1
HIM_HAS : 1
LEARNING_IDENTIFIED : 1
EC_PO : 2
INFORMATION_SPAN : 1
EKHISTORY_PHYSICAL : 1
SERVICES_TREATMENT : 1
BEFORE_ASSISTING : 1
CHRONIC_HEART : 1
TABLET_PENDING : 1
SHAVE_HAIR : 1
THE_FOLLOWING : 2
DID_HAVE : 1
CONSENT_NATURE : 1
FOLLOWING_APPOINTMENT : 1
AND_IF : 1
ON_HANDOUT : 1
PHONE_RATES : 1
NUMBER_TOMMORROW : 1
EVERY_MEDICATIONS : 1
RESOLVED_TAB : 1
WITH_IF : 1
ENCOUNTER_FOR : 1
AND_SPOKE : 1
TO_OT : 1
NO_CHANGES : 1
ABOUT_THINGS : 1
ADMITTED_HEMATURIA : 1
DISCHARGE_INSTRUCTIONS : 1
MEDICATIONS_PT : 1
YES_PATIENT : 2
SUTURES_PATIENT : 1
PT_ACCIDENT : 1
CAREGIVER_MG : 1
OVERNIGHT_HYPOTENSION : 1
WITH_SEVERE : 1
KIT_CONTAINING : 1
CBOC_PRIMARY : 1
PROGRAM_DECLINED : 1
CORRESPONDENCE_RESULTS : 1
ALL_AS : 1
NOT_ALL : 1
HIM_SHREDDING : 1
ORDERED_EKG : 1
YOU_THE : 1
CT_THE : 1
OF_INFECTION : 1
DIVORCE_AGO : 1
PRESSURE_HEMORRHOIDECTOMY : 1
AUXILLARY_URINE : 1
VA_CENTER : 2
DIAGNOSIS_SURGERIES : 1
BP_SPO : 1
LMSW_TIME : 1
REGIONAL_HIGH : 1
WAS_AND : 2
COULD_MORE : 1
OCCURED_IN : 1
LOW_MESSAGE : 1
MANAGEMENT_THE : 1
OPEN_ANGLE : 1
PULSES_HIS : 1
THEIR_HOME : 1
DATE_PATIENT : 2
IMAGING_PLAN : 1
TIME_METER : 1
IN_TO : 2
TO_ASSESS : 1
IS_CRAVINGS : 1
AND_SOUNDED : 1
FOR_VETERAN : 3
FROM_COGNITIVE : 1
IDEALLY_TWO : 1
FURTHER_THAT : 1
OMEPRAZOLE_EC : 2
RISK_PROBLEMS : 1
ORDERED_TO : 1
FOLLOWUP_FOR : 1
INVERSION_AND : 1
WORK_AND : 1
GOOD_THAT : 1
CITALOPRAM_MG : 1
VERY_STRONG : 1
INTACT_NONE : 1
CONTACT_THERAPY : 1
STATUS_USED : 1
CORRECT_SITE : 1
AND_COCHLEAR : 1
COME_GO : 1
CARDIOLOGY_OUTPATIENT : 1
TEAM_YES : 1
FOLLOWED_BY : 1
GIM_SKIN : 1
CALL_LIGHT : 1
OTHER_COMPANIES : 1
INSULIN_REG : 1
MEDICATION_PHYSICAL : 1
ALLERGIES_TO : 1
TRANSFERS_NO : 1
OCCASIONAL_ABERRANT : 1
TO_BY : 2
ACTIVE_IS : 1
SOCIAL_INTERACTION : 1
CHLORIDE_INJ : 1
ADMITTED_FROM : 1
HAVE_HISTORY : 1
INFORMATION_NURSE : 1
REQUESTING_SPEAK : 1
WHY_WAS : 1
NO_URGENT : 1
MULTIPLE_ISSUES : 1
CARS_MOTORCYCLES : 1
PHYSICIAN_ASSISTANT : 1
CHRONIC_PAIN : 1
WILL_BE : 5
ASSISTANCE_OVER : 1
BIT_PODIATRY : 1
VET_ER : 1
VITALS_IF : 1
OF_FEBRILE : 1
VETERAN_PROCEDURES : 1
CLOTS_MEDICATION : 1
BOWEL_MOVEMENT : 1
IT_BEING : 1
PERSONNEL_THAT : 1
ANTIANXIETY_PAIN : 1
INDUCES_VERY : 1
IS_HAS : 1
YES_PT : 1
RELATED_HE : 1
NEEDED_SHORTNESS : 1
AND_ALBUTEROL : 1
PHYSICIAN_PURPOSES : 1
THROUGHOUT_THE : 1
MAX_TOTAL : 1
DISTRESS_UNLABORED : 1
WALK_BEING : 1
MUCH_PER : 1
BREATH_ARE : 1
NIGHT_SHIFT : 1
PRN_ANXIETY : 1
ADMI_PATIENT : 1
URINARY_SYMPTOMS : 1
TO_CARE : 1
HEARING_PT : 1
CAN_WIFE : 1
BILATERAL_FEET : 1
STATUS_FULL : 1
LAST_APPT : 1
HE_THE : 1
DISCHARGED_AMBULATORY : 1
HAS_HX : 2
SELF_ON : 1
DEVELOP_CONSTRUCTIVE : 1
IT_COMMON : 1
PT_HIS : 1
PHYSICAL_BP : 1
IF_CLOSED : 1
VISIT_WAS : 1
ON_PALLIATIVE : 1
IN_CASE : 1
TO_ED : 1
ACTIVE_POINT : 1
ASSIST_HIM : 1
ACTIVITIES_IN : 1
SKIN_CARCINOMA : 1
TOOLS_THEN : 2
BY_AND : 1
IS_CLOSE : 1
WITHDRAWAL_NO : 1
THE_ESOPHAGUS : 1
EATER_THE : 1
IS_SC : 1
LEISURE_MEDIA : 1
THIS_ENCOUNTER : 2
AN_ANESTHESIA : 1
ATTENDED_ON : 1
OXAZEPAM_ORAL : 1
AT_TO : 1
PRESSURE_SORE : 1
ON_READ : 1
NOTES_FROM : 1
ANKLE_TIMES : 1
DECISION_ACTIVE : 1
INFLUENZA_VACCINE : 1
PATIENT_FOR : 1
PROVIDER_YES : 1
UNCHANGED_PREVIOUS : 1
CODE_PATIENT : 1
RILEY_THAT : 1
TO_FACILITATED : 2
VISIT_TO : 1
ONE_WITH : 1
BECOME_IMPACTED : 1
VETERAN_WAS : 2
ROLLING_TO : 1
FIRED_PT : 1
ENTRY_FROM : 1
PLAN_OF : 1
DIMINISHED_IN : 1
CONSENT_HYPERVENTILATION : 1
ATTENTIVE_THROUGHOUT : 1
LEVEL_OF : 2
TIDAC_PARALYSIS : 1
HIS_BP : 1
GOOD_CRAVINGS : 1
RILEY_PERSONNEL : 1
PHARMACIST_MAN : 1
COMPREHENSIVE_AND : 1
RALES_RT : 1
SERVED_DIVORCE : 1
EDEMA_BOTH : 1
MEDS_OF : 1
DROP_IN : 1
AS_WELL : 1
HYPOXIA_ENCEPHALOPATHY : 1
SIGNS_THREE : 1
COMMUNITY_ACCESS : 1
GOOD_GOING : 1
ON_RISKS : 1
MG_TID : 2
COMMENTS_VITALS : 1
PHYSICIAN_IS : 1
SPOKE_ONCOLOGY : 1
AIRWAY_PATENT : 1
ADDENDUM_DATE : 1
DEPRESSION_CBC : 1
AMBULATORY_CARE : 1
ETODOLAC_MG : 1
LIMITS_THIS : 1
PCXR_THIS : 1
MUSCLE_COULD : 1
NOTE_LABORATORY : 1
WALK_TO : 1
INTERDISCIPLINARY_PLAN : 1
ATTEMPTING_PUT : 1
SOUNDED_ME : 1
MUSCULAR_DYSTROPHY : 1
ABNORMAL_BREAT : 1
HEPATITIS_THAT : 1
HIM_OTHERWISE : 1
ARTERIES_AND : 1
SCORE_LOC : 1
INDICATED_PATIENT : 1
TIME_MINUTES : 1
ARM_NITRO : 1
NOTE_SPONDYLOSIS : 1
REVIEWED_ADMISSION : 1
INCLUDING_MODIFICATIONS : 1
AREA_CHEEKS : 1
NONE_FOUND : 1
LEG_SKIN : 1
MONTH_YOU : 1
BETTER_ABOUT : 1
STATE_CE : 1
PLAN_STAFF : 1
SOME_PARTICIPATION : 1
TIME_MED : 1
SHE_HAS : 1
HEAR_HIS : 1
PATIENT_HERE : 1
ON_COMFORT : 1
HE_HIS : 1
INTERACTION_METAB : 1
HAIR_POSTTRAUMATIC : 1
ARRIVAL_PATIENT : 1
WHEELCHAIR_FROM : 1
MG_ONEHALF : 1
THE_USE : 2
AMBULATION_BIL : 1
DR_PATEL : 1
DATIVE_ANTIANXIETY : 1
IN_FIND : 1
MENTAL_INCLUDES : 1
WEAKNESS_INFORMATION : 1
EMER_ADDITIONAL : 1
REVIEW_IMPRESSION : 1
FURTHER_INTAKE : 1
PATIENT_CALLER : 1
MEDIA_LEATHER : 1
ON_WAS : 1
CE_NONE : 1
WORST_ANTHROPOMETRICS : 1
TRUSS_FOR : 1
SOORYA_ASHOK : 1
ANY_OF : 3
DECISIONS_ABOUT : 1
FEARS_VET : 1
CC_PRIOR : 1
CHIEF_AND : 1
LIMITATIONS_ARE : 1
SHE_BLAMED : 1
BUT_THOUGHTS : 1
APT_PHX : 1
PT_BLOOD : 1
PATIENTS_ELIGIBILTY : 1
TO_SURGEON : 1
PARALYSIS_MEDIAN : 1
PRESENT_DURATION : 1
NOT_ATTACHED : 1
SIGN_OF : 1
AVAILABLE_DYSPHAGIA : 1
ITS_ANOTHER : 1
VISIT_STERRISTRIPPED : 1
REGARDING_AND : 1
THE_WITH : 1
DIFFUSELY_DOCUMENT : 1
OPERATOR_TO : 1
NO_BLAMED : 1
PLACEMENT_WITH : 1
PT_USED : 1
OF_EMPLOYMENT : 1
AS_REFILLS : 1
SALINE_NO : 1
NEWS_HE : 1
FU_APPT : 1
FULL_NO : 1
GETA_CUT : 1
GET_NURSING : 1
THE_AND : 5
INFORMED_EYE : 1
LOCALIZED_PRIMARY : 1
ZOLMITRIPTAN_MG : 1
ALBUTEROL_INHL : 1
ALL_ABDOMEN : 1
VETERAN_THAT : 2
DEBORAH_APPROVED : 1
THAT_ALLERGIES : 1
YEAR_IN : 1
ITEMS_OF : 1
RESPONSIVE_WITH : 1
ELIGIBILTY_INCLUDES : 1
PT_NEW : 1
DYSTROPHY_TAB : 1
NOTE_AND : 2
NEUROLOGI_ALARM : 1
WELCOMED_LIKED : 1
LOSING_JOB : 1
WITH_TO : 1
MEDICATIONS_NUMBER : 1
IN_CONTINUE : 1
ARRIVED_AMBULATORY : 1
NURSE_DRRTP : 1
IN_EVIDENCE : 1
TELEPHONE_OF : 2
NO_ANTIBIOTIC : 1
PCP_THE : 1
WHICH_TO : 1
PATIENT_TOBACCO : 1
PHX_OFFLOAD : 1
COMMENTS_MULTIPLE : 1
START_CARE : 1
TO_CLINIC : 1
PURPOSES_EPISODE : 1
DIVORCE_PAPERS : 2
AORTOCORONARY_BYPASS : 1
REVIEWED_PATIENT : 1
AM_CARRYING : 1
TO_RTC : 1
CALL_TYPE : 2
DRUG_REQUEST : 1
POORFAIR_FAMILY : 1
AND_OCCASIONAL : 1
SAME_EACH : 1
MUSKOGEE_ACTION : 1
LAST_HAS : 1
ORIENTED_WITH : 1
HEIGHT_IN : 3
ME_THAT : 1
HEALTH_STRESS : 1
LOW_BACK : 2
HOSPITAL_CALLED : 1
SO_WILL : 1
REGARDING_MVA : 1
BYPASS_PATIENTS : 1
DISCS_AND : 1
DOSE_INCREASE : 1
ORDER_AGANIST : 1
MISTRUST_HAS : 1
BAND_SSN : 1
FREQUENT_BEATS : 1
AI_LAST : 1
CONCERNS_DISCUSSION : 1
WAS_REFERRED : 1
VERBALIZED_HIS : 1
WITH_PHARMACIST : 1
PALP_DIFFUSELY : 1
JOB_ON : 1
APPOINTMENT_PATIENT : 1
CLUB_THE : 1
URINARY_MEDS : 1
AORTOCORONARY_STATUS : 1
IDENTIFIED_NORMAL : 1
HANDOUT_ACTIVITY : 1
NOTE_LPN : 1
HERNIATION_DISCS : 1
SHIFT_OF : 1
NOT_HIS : 2
PT_ADMI : 1
CERVICAL_POSTURE : 1
THAT_IS : 2
SKIN_TOTAL : 1
ABOUT_VET : 1
DISCHARGE_METOPROLOL : 1
FROM_WEAKNESS : 1
CONNECTED_EDUCATION : 1
ADDENDUM_INJ : 1
STREN_DRRTP : 1
ASSIST_AS : 1
PT_HISTORICALLY : 1
COULD_TO : 1
MYOKYMIC_FLEXION : 1
SCALE_PREDICTING : 1
WHAT_BELIEVE : 1
SUICIDAL_THIS : 1
PHYSICIANS_POINT : 1
NABS_TENDER : 1
LATERAL_CHEST : 1
DOSAGE_STORAGE : 1
HURT_HIS : 1
SAFE_USE : 1
MINUTES_TOTAL : 1
CE_COLORED : 1
ER_INQUIRING : 1
FULL_PROGRAM : 1
MOUTH_DATE : 1
IS_LBS : 1
YOUR_YOU : 1
PRIOR_ARRIVAL : 1
DIABETIC_ULCERATIONS : 1
PATIENT_ROOM : 1
ALONE_AN : 1
WITHIN_WEEK : 1
UPDATE_ME : 1
AGANIST_HIM : 1
FOR_SHORTNESS : 1
MEALS_PRNS : 1
AND_HE : 4
TRIED_TO : 1
THAT_IN : 1
PLACED_ON : 1
INTO_ROOM : 1
INDEX_MALE : 1
TOTAL_MIN : 1
AND_NONLABORED : 1
REGARDING_PRESSURE : 1
APPOINTMENT_PAIN : 1
FOR_AFTER : 1
ASSIST_CAN : 1
BLOOD_PATIENT : 1
REPLACED_PULSE : 1
MISTRUST_HE : 1
TO_DRIVING : 1
BEDSIDE_THIS : 1
THERE_WAS : 1
AS_TO : 1
APPOINTMENT_DATE : 1
LEISURE_ACTIVITIES : 1
INFORMATION_CHIEF : 1
ANESTHESIA_PRACTITIONER : 1
RELATED_TO : 3
ABOUT_ARRIVAL : 1
WATCHFUL_OR : 1
ERIE_VA : 2
THERAPY_STATED : 1
PROCESS_MR : 1
HAS_LEFT : 1
SELF_AT : 2
WITHOUT_SKIN : 1
AMBULATORY_WITHOUT : 1
PAIN_PRESSURE : 1
PHYSICIAN_PROGRESS : 1
AREA_INCLUDING : 1
DISCONTINUE_THE : 1
BAND_NAME : 1
PLAN_FROM : 1
AM_NOT : 1
ACTIVELY_VETERAN : 1
WILL_ME : 1
WITH_PER : 1
CALLED_INQUIRING : 1
CONCERNS_AND : 1
NURSING_ASF : 1
BORDER_NO : 1
EC_MG : 2
AT_PROBLEMS : 1
FOOT_SQUIRMING : 1
NO_NO : 1
VAMC_SERVICES : 1
CARDIOVASCULAR_THIS : 1
ALBUTEROL_CC : 2
SELF_ADMISSION : 1
MAN_ANDENOCARCINOMA : 1
STRESS_CHRONIC : 1
HE_MENTIONS : 1
NOT_FOUND : 1
HAS_NKA : 2
PATIENT_ALERTAND : 1
ASSESSMENT_ETC : 1
SOCIALIZING_GOAL : 1
DIVORCE_AND : 1
EMERGENCY_ROOM : 1
WHO_CONCURS : 1
LATELY_CONTACT : 1
PNEUMOVAX_EXP : 1
SWELLING_INFLAMMATION : 1
PATIENT_TO : 7
ACCOMMODATE_HIM : 1
ENTRY_ACTIVE : 1
BOTH_LEGS : 1
TREATMENT_INJURED : 1
HARDSHIP_APPLICATION : 1
FOR_TOPIRAMA : 1
RECORD_VALIDATE : 1
ADDENDUM_DOES : 1
THIS_DATA : 1
COMMENT_VERBALIZED : 1
DATE_WAS : 1
DISCUSSION_ONES : 1
OVERWEIGHT_OF : 1
FINDINGS_WAS : 1
SEEN_ME : 1
VAMC_FOR : 1
NOTED_IN : 1
COMMENTS_CURRENT : 1
LIKE_FOR : 1
MALE_TO : 1
WITH_ONCOLOGY : 1
OTHER_SYMPTOMS : 1
WITH_AND : 6
SUPPORT_PT : 1
DIAST_DIMENSION : 1
APPROVED_FOR : 1
FEVER_SWEATS : 1
RESPIRATIONS_CONTINUE : 1
YOUR_DIAGNOSIS : 1
AFFECT_CONGRUENT : 1
PATIENT_ANY : 1
NONFORMULARY_DRUG : 1
TO_STILL : 1
TI_ALBUTEROL : 1
IS_TAKE : 1
ABOUT_BILLS : 1
THE_HE : 3
TO_WITH : 5
SL_GIVEN : 1
VALUE_YES : 1
VA_TREATMENT : 1
PCXR_DONE : 1
FOR_THEY : 1
COULD_NOT : 1
TEAM_NO : 1
OF_OR : 5
DID_CUT : 1
HYPERVENTILATION_OBTAINED : 1
RELUCTANT_MAKE : 1
AREA_PALM : 1
LORI_MD : 1
TELEPHONE_TP : 1
NOW_THOUGH : 1
UD_LEXAPRO : 1
IMAGING_DISPLAY : 2
USE_AMPULE : 1
RUL_DENIES : 1
WHEN_PRESSURE : 1
FEBRILE_NO : 1
VISIT_THE : 1
HAVE_ORDER : 1
INTEG_PATENT : 1
CHLORIDE_ACTIVE : 1
IS_TO : 9
REDUCING_THE : 1
FEBRILE_ILLNESS : 1
TYPE_BHM : 1
MED_REQUEST : 1
PATIENT_SCREEN : 1
CHECKED_OUT : 1
WAS_OF : 1
VETS_WAIVER : 1
COLOSTOMY_NO : 1
CARE_FOLLOWUP : 1
COMPANIES_AND : 1
ABDOMINAL_PAIN : 1
PERIORBITAL_AREA : 1
FAILURE_NONE : 1
SPEND_ON : 1
ELIGIBILTY_NSC : 1
SITE_LEFT : 1
NL_UA : 1
TO_OBSERVATION : 1
JUST_DRANK : 1
ON_FINSETERIDE : 1
NOTET_BOWDEN : 1
ANAPHYLACTIC_MOVEMENT : 1
CORONARY_ARTERY : 1
ASSESSMENT_WAS : 1
HIS_TO : 2
TOPIC_DISCUSSION : 1
EXFIX_ABUTTING : 1
MG_QAMDM : 2
TALK_TO : 1
FOR_HIM : 1
INSULIN_FALL : 1
OBTAINED_PHOTIC : 1
HAS_FT : 1
PATIENT_NOT : 2
ENERGY_CONSERVING : 1
NOT_ANY : 2
HELP_OFFLOAD : 1
EXAM_AMPHETAMINE : 1
BELIEVED_BE : 1
TO_DIVORCE : 1
BENEFITS_DISCUSSED : 1
BMS_COLOSTOMY : 1
CLINIC_TEAM : 1
MRSA_AND : 1
COLORED_URINE : 1
PATIENTS_AND : 1
TO_GAY : 1
REALLY_FOR : 1
BE_TALKING : 1
REPORTS_WHILE : 1
PROCEDURE_ALTERNATIVES : 1
THE_SAME : 1
REPORTED_HEARING : 1
PT_WITH : 1
STATED_THAT : 4
BURSA_OR : 1
ALL_APPLY : 1
LMSW_PATIENT : 1
QH_PRN : 1
OF_MANY : 1
ABOVE_ADDRESSED : 1
MANAGEMENT_PAST : 1
EAR_SERVICE : 1
GIRLFRIEND_OF : 1
OF_OBSTRUCTION : 1
BASIC_ACTIVITIES : 1
THE_PAIN : 1
LAWYER_HAS : 1
RE_PT : 1
TO_SINCERE : 1
PT_POST : 1
SHINS_AMBULATES : 1
CLONIDINE_NOW : 1
OR_VA : 1
PCP_EKG : 1
MINUTES_AFTER : 1
ATTENTIVE_THE : 1
DAILY_LIVING : 1
AUTOMOBILE_CURRENTLY : 1
HAS_CAPACITY : 2
REGULARLY_THAT : 1
WILL_LETTER : 1
ADMITTED_PAST : 1
ANTIDIABETICS_NO : 1
CLASS_ON : 2
UNSPECIFIED_HYPERLIPIDEMIA : 1
EFFECT_FROM : 1
FU_PERIORBITAL : 1
IT_WAS : 1
ML_AMPULE : 1
DID_THAT : 1
PT_PITTING : 1
WHILE_OPERATING : 1
DEMONSTRATES_REPORTING : 1
FAWCETT_FOR : 1
SHIFT_THE : 1
REGARDS_TO : 1
YOU_OUT : 1
NOT_SUICIDAL : 1
AND_STATEMENTS : 1
IN_PHX : 1
PERFORATED_EAR : 1
IN_BUT : 1
HAS_GUARDIANSHIP : 1
COMING_TO : 1
CAN_REACHED : 1
MAY_THE : 1
SUPPLY_TO : 1
ITEMS_INFORMED : 1
MIN_BP : 1
AT_ADMISSION : 1
TO_TRUCK : 1
ASSESS_PATIENTS : 2
SMOKING_CESSATION : 1
MEDICATIONS_WITHIN : 1
MEDICAL_AFTER : 1
AT_BEDSIDE : 1
WITH_POSITIONING : 1
RIGHT_EDUCATION : 1
NONE_PMR : 1
PO_QAMDM : 2
VETERAN_REPORTS : 1
WHEELCHAIR_ETODOLAC : 1
CPC_PROGRESS : 1
HR_SPO : 1
PATIENT_NO : 2
CARDIOLOGY_HOUR : 1
BE_WIFE : 1
RESP_INTEGRATED : 1
AM_AWARE : 1
FOR_INPATIENT : 1
SEASONAL_ADDENDUM : 1
FIRST_CLOSED : 1
HE_BE : 2
MODIFICATIONS_IMPROVED : 1
UA_GLUCOSE : 1
UP_ON : 1
VEHICLE_IN : 1
VET_STAFFED : 1
ENCOUNTER_SURGERIES : 1
COMMON_SIDE : 1
HE_WANTED : 2
VERY_PARANOID : 1
GIVEN_TO : 2
FEVER_OR : 1
WAS_COUNSELED : 1
NAME_NO : 1
HE_STATED : 2
ACTIVITY_TWISTING : 1
FOR_WHICH : 1
OUTSIDE_VA : 1
MANAGEMENT_FOLLOWUP : 1
OF_GOING : 1
PREDICTING_PRESSURE : 1
CALL_ME : 2
OTHER_OF : 1
IS_ENGE : 1
OF_SUICIDE : 1
HE_IS : 4
TO_OVERTHECOUNTER : 1
FOR_ACTIVE : 2
WITHIN_LIMITS : 1
OF_DURING : 1
ROOM_PCP : 1
WALK_OUT : 1
THIS_IF : 1
WHY_NOT : 1
HIM_SET : 1
TO_AND : 4
WHEN_UNDER : 1
DURING_SEASONAL : 1
DISEASE_ADMISSION : 1
RESOLVED_INJURY : 1
COMBATIVE_IV : 1
YES_IF : 1
ACTIVE_BEDTIME : 1
OF_TBI : 1
MOVE_OR : 1
THE_THIS : 1
THE_BELLO : 1
AWARE_THAT : 1
HOSPITAL_PICK : 1
NONE_TAPPING : 1
OUTPATIENT_IS : 1
EXPLAINED_HE : 1
PRESSURE_MUSCLE : 1
STAYS_SELF : 1
ALSO_HARDSHIP : 1
BE_STATE : 1
THEY_TO : 2
AND_MGS : 1
RECOVERING_VET : 1
NIGHT_SWEATS : 2
AGE_DATE : 1
HIS_FAMILY : 1
FOLLOWED_ON : 1
EVIDENCE_OF : 2
NO_CLINIC : 1
SORE_RISK : 1
MAN_IS : 1
SUICIDAL_DID : 1
NEWLY_PRESCRIBED : 1
TO_GET : 2
CENTER_GF : 1
NASAL_LITERS : 2
HE_TOOK : 1
WAS_UNEMPLOYMENT : 1
SWEATS_ABDOMINAL : 1
SISTER_WHOM : 1
NO_WORKER : 1
HIS_RENT : 1
ANTIHYPERTENSIVES_NO : 1
BETTER_PER : 1
CUT_PER : 1
MALE_RBC : 1
HYPERLIPIDEMIA_WITH : 1
IMED_INFORMED : 1
IMPROVING_LBS : 1
SHOW_FOLLOWUP : 1
MIGRAINE_WHICH : 1
THIS_MAN : 1
AND_APPARATUS : 1
WITH_FRACTURES : 1
RELUCTANT_TO : 1
WELL_HIS : 2
DOES_NOT : 5
NEGATIVE_ON : 1
AT_PROCEDURE : 1
BY_ON : 1
CLINIC_STAR : 1
PREVIOUS_HEIGHT : 1
HIGHBERGER_MD : 1
WAS_DISCUSSED : 1
VET_SITTER : 1
ADMISSION_PREVIOUS : 1
AND_EMAIL : 1
IMPINGEMENT_PAIN : 1
STARTLED_DISEASE : 1
COPING_MEDICAL : 1
NO_AGORAPHOBIA : 1
ON_DUE : 1
POTASSIUM_MMOL : 1
AND_HURT : 1
PULSE_READING : 1
LAB_SENT : 1
HE_WAITING : 1
ACCESSED_SELECTING : 2
TRANSFER_VA : 1
THIS_PT : 4
TAB_MMOL : 1
THE_SHIFT : 1
STOOL_TOPIC : 1
MICHELE_YOUNG : 1
REGULARLY_HE : 1
EMOTIONALLY_REFERRAL : 1
REVIEWED_NO : 1
ARTHROPLASTY_TEST : 1
SUGGESTS_REDUCTION : 1
APPT_OF : 1
QIDPRN_HEARTBURN : 1
THAT_DOES : 1
PAST_AND : 1
TIME_PRESENTED : 1
THIS_BUT : 1
THAT_THAT : 1
ORIENTED_INDEPENDENT : 1
DATE_FIRST : 1
YEAROLD_ARE : 1
ERUPTED_TOOTH : 1
DEXTROSE_INJ : 1
HEAD_OF : 1
READ_RISK : 1
NKA_ARE : 1
COMPREHENSIVE_EVALUATION : 1
RODE_BIC : 1
SUPPLIES_HE : 1
FOOD_WIFE : 1
ASSISTANCE_THE : 1
CALLER_AREA : 2
PARANOID_STERRISTRIPPED : 1
CHAIR_APPEARS : 1
TRUCK_AS : 1
QRS_WITH : 1
BELIEVES_SHOULD : 1
PSYCHIATRY_MED : 1
FURTHER_PCCNURSING : 1
LEG_REST : 1
AGREES_GET : 1
WILL_REPORT : 1
STATED_HE : 2
LEGS_EXTENSIVE : 1
AMBULATORY_OF : 1
WITH_LABORATORY : 1
AUTOMOBILE_IS : 1
FOR_TOTAL : 1
RATING_PAIN : 1
PRIMARY_FOLLOWUP : 1
FOR_PREDICTING : 1
AND_INTACT : 1
DO_NOT : 1
REPORT_TOPIC : 1
OF_WAS : 1
HAND_WAS : 2
OVERWEIGHT_BMI : 1
YRS_GOT : 1
FREQUENT_ABERRANT : 1
PHONE_ACCUCHEK : 1
STEP_IF : 1
QUIT_DATE : 1
SIDE_EFFECT : 1
FALL_RISK : 1
ILLNESS_MANAGEMENT : 1
CALLED_AND : 1
CHIEF_STROKE : 1
HARD_TO : 1
WEIGHT_OCC : 1
WILL_ON : 1
NAME_CORRECT : 1
WHICH_HIS : 1
ON_AGO : 1
FROM_TREATMENT : 1
WOULD_LIKE : 2
COPD_KEEP : 1
OR_SYMPTOMS : 1
SOFT_NABS : 1
SAFETY_WITH : 1
REPEAT_MAY : 1
MALE_WITH : 2
MARGIN_OF : 1
DYSTROPHY_CITALOPRAM : 1
AFTER_INFORM : 1
NITRO_FROM : 1
SCALY_STUCK : 1
CITALOPRAM_AND : 1
VET_WITH : 1
ARRIVAL_VEHICLE : 1
WILL_DO : 1
CERVICAL_LATE : 1
REVIEWED_CONSTITUTIONAL : 1
PATIENT_POSITIVE : 1
VA_SKIN : 1
FOR_TREATMENT : 1
SINCE_ADMISSION : 1
WITH_WALKING : 1
FOR_SS : 1
MEDIAN_SC : 1
IS_EXPECTED : 1
THE_ROOM : 3
FOLLOWUP_REPORT : 1
MAY_MONITORED : 1
SEDATION_LOC : 1
OF_PERSONAL : 1
HAS_APPROVED : 1
NO_SIGNS : 1
HAVE_QUESTIONS : 1
STIMULATION_VERY : 1
PHONE_VERIFIED : 1
DOCUMENTATION_PATIENT : 1
EXAM_DONE : 1
HIM_HE : 1
DINNER_WALK : 1
REMAIN_IN : 1
SHINS_WITH : 1
CONSISTENT_SEVERE : 1
HYPERLIPIDEMIA_DOSAGE : 1
BY_WHO : 1
BE_POST : 1
DENIES_FURTHER : 1
CARE_YESTER : 1
DECLINED_NFS : 1
SCREEN_POSITIVE : 1
BY_YOUNG : 1
APPROVED_PROTOCOL : 1
PSYCHIATRIC_SERVICES : 1
NIGHT_NO : 1
LEFT_FOREARM : 1
DESK_BEHAVIORAL : 1
INJ_SOLN : 1
FOR_TOBACCO : 1
MINUTES_MYERS : 1
TO_SHOW : 1
EACH_CAREFULLY : 1
PLACE_TI : 1
AMBULANCE_SI : 1
THEN_SELECT : 2
NEED_BE : 1
ORIENTED_IS : 2
STATES_WHEN : 1
IN_IT : 1
SCHEDULED_AT : 1
DURING_OUTPATIENT : 1
SUMMARY_STRENGTHS : 1
APPLY_RHYTHM : 1
VARDENAFIL_IS : 1
PFT_ON : 1
WAY_GENTLY : 1
WITH_EXFIX : 1
MY_MEDS : 1
LATEST_VITALS : 1
LIPIDS_DONE : 1
CATARACT_DISORDER : 1
IS_RESOLVED : 1
WITH_CONDITION : 1
WERE_IN : 1
MOUTH_NO : 1
IDENTIFY_CALLER : 1
INCLUDES_PRIMARY : 1
DYSPNEA_WALKING : 1
RALES_RA : 1
ANXIETY_NERVE : 1
REVIEWED_SURGEON : 1
TV_AND : 1
CLOTS_PHARMACIST : 1
YOU_HAD : 1
VERBALIZE_FEELINGS : 1
INSURANCE_THROUGH : 1
TIME_TO : 2
GO_THE : 2
CLINIC_NOTE : 1
NOTE_PULSES : 1
INTEG_PIV : 1
NUTRITIONAL_AND : 1
RHYTHM_ADAPTIVE : 1
BUPROPRION_ENCOURAGE : 1
NO_LOCK : 1
INDEPENDENT_EATING : 1
BYPASS_STATUS : 1
THROAT_SELF : 1
LEVEL_CONCIOUSNESS : 1
CRAVINGS_SMOKING : 1
SHARE_CONCERNS : 1
BE_AT : 3
PRESSURE_RATE : 1
HEALTH_TAKE : 1
ON_MON : 1
ACCESSED_THROUGH : 1
WEIGHT_PROGRAM : 1
MARRIAGE_AND : 1
TYPE_DURATION : 1
DIVORCE_HIM : 1
VETERAN_CHECK : 1
IF_INDICATED : 1
PARAFFIN_TO : 1
HEALTH_CONSULT : 1
GIVE_INSULIN : 1
DEMONSTRATES_DIFFICULTY : 1
STOP_MINUTES : 1
WITH_MOUTH : 1
TP_APPROVED : 1
THE_AT : 2
STATED_UNDERSTANDING : 1
HEART_EDUCATION : 1
TAKING_IMMODIUM : 1
TO_DC : 1
SUBJECTIVE_PATIENTS : 1
ATTENDED_CLASS : 1
TO_FOR : 5
CHATHAM_NEW : 1
MD_ON : 1
AM_RODE : 1
ACUTE_ARTERIES : 1
ENERGY_TECHNIQUE : 1
COORDINATOR_MONITOR : 1
PATIENT_DISPOSITION : 2
CA_LUNG : 1
TO_THE : 11
HEARTBURN_ATTENDED : 1
LAB_LAST : 1
ASSIST_VETERAN : 1
TO_COME : 1
AGO_STATES : 1
THE_MEDICATIONS : 1
CHIEF_RUL : 1
IF_STEP : 1
IRREGULAR_SERPENTINE : 1
BY_MOUTH : 5
NEEDED_AND : 1
QUETIAPINE_MG : 1
PRACTITIONER_WILL : 1
BEEN_ATTEMPTING : 1
FRIGHTENING_RESULTS : 1
OR_WEIGHT : 1
ASPIRATION_OR : 1
PATIENT_GO : 1
PT_ACCESSED : 1
SELECT_CORRECT : 1
NOTE_INDICATED : 1
AND_THEN : 2
CONTINUES_SHOW : 1
VOMITING_HAS : 1
DIAGNOSIS_DOES : 1
CARDIOLOGY_GLUCOSE : 1
WITH_ONE : 1
TADALAFIL_ARE : 1
GIRLFRIEND_CLINIC : 1
ABNORMAL_TELEMETRY : 1
THAT_MIN : 1
DISPENSED_NONFORMULARY : 1
OPIOID_TOTAL : 1
INVERSION_EVERSION : 1
ADDENDUM_AND : 1
OUT_LPN : 1
AND_MEDICATION : 1
NOTE_HE : 1
TAKE_TABLET : 5
UNDERSTANDING_PLAN : 1
CENTER_HE : 2
INTERVENTIONS_INCLUDING : 1
NOT_THAT : 1
FALL_SCALE : 1
THIS_SUGGESTS : 1
IN_SODIUM : 1
AND_ABDOMINAL : 1
ACCOMPANIED_HOSPITAL : 1
GLUCOSE_EVENTS : 1
THE_AGENT : 1
AS_THE : 1
SEVERE_PATIENT : 1
TO_INFORM : 1
POSITIVE_DEPRESSION : 1
MACHINE_REGARDING : 1
SEEN_FOR : 1
ENTRY_PATIENT : 1
HAD_EXPERIENCE : 1
AT_AS : 1
PSYCHIATRIST_COMPLETELY : 1
PROVIDER_TEAM : 1
NO_BARRIERS : 1
TEXT_FINDINGS : 1
RATIONALE_TREATMENT : 1
HAVE_PAIN : 1
MPJ_ACID : 1
NAUSEOUS_FEVER : 1
AXIS_HTN : 1
THAT_WAS : 6
OWN_INSIGH : 1
THE_MARRIAGE : 1
IS_IMPROVING : 1
PAIN_DIABETES : 1
OF_PATIENT : 2
SEPARATED_GOT : 1
THIS_HIS : 1
VERIFIED_SUBMITTED : 1
EXAM_EXAM : 1
LIFESTYLE_ONCE : 1
AND_FOR : 1
DIC_IN : 1
INTACT_NOTED : 1
WITH_OF : 2
AND_HIM : 2
CHEW_PIECE : 1
LEVEL_UNDERSTANDING : 1
PHYSICAL_HEADACHES : 1
TO_SUPT : 1
FOLLOWING_DISCUSSED : 1
MENTIONS_HE : 1
ABLE_SAVE : 1
GOALS_AND : 1
DAILY_MOUTH : 1
MEDICATION_REFILL : 1
DROWSYNESS_SPELL : 1
BP_HR : 1
TIME_CHANGE : 1
COMPLETED_IN : 1
INJECTION_OF : 1
INCLUDING_QUETIAPINE : 1
COMPLETELY_EATING : 1
SELF_ORAL : 1
PSYCHIATRY_ED : 1
ADDICT_OVER : 1
ON_COMPREHENSIVE : 1
AND_NOT : 3
EXTENSIVE_AND : 1
ADDED_AS : 1
WINDOW_TO : 1
PROVIDER_PARANOID : 1
PRESENTATION_CHARACTERISTICS : 1
OTHER_AND : 1
PROBLEMS_SINCE : 1
TO_PLACE : 1
REGULAR_UNLABORED : 1
ABOUT_HE : 1
BEEN_SONES : 1
PAIN_WHICH : 1
LOSS_RELATED : 1
PATIENT_ASSESSMENT : 1
THE_ALREADY : 1
ON_ENCOUNTER : 1
ENCOURAGE_PATIENT : 4
TYPE_REFILL : 1
YOUR_CARE : 1
PATIENT_AGREES : 1
PHYSICAL_ETC : 1
DIET_NO : 3
ALSO_REDUCTION : 1
DC_MOD : 1
URGENT_CLINIC : 1
SHIFT_KNOW : 1
USE_CESSATION : 1
TRIAGE_NOTE : 1
HOSPITAL_TO : 1
ATTEMPT_TO : 2
DOSAGE_TO : 1
WED_OBSERVATION : 1
SURGERIES_AMBULATORY : 1
SET_APPT : 1
WILL_STAFF : 1
MODIFIED_RAMSAY : 1
NATURE_OF : 1
BEATS_PATIENT : 1
ANSWERED_FEEDS : 1
TO_EMERGENCY : 1
AND_SI : 1
SI_TAKEN : 1
PURPOSE_WAS : 1
INADEQUATE_PAIN : 1
WITH_TAKEN : 1
STEADY_TO : 1
ANAPHYLACTIC_BOWEL : 1
LATEST_IF : 1
RESOLVED_ACID : 1
RISK_TIME : 1
HYPERGLYCEMIA_REGIMEN : 1
CURRENT_VITALS : 1
WHO_RECENTLY : 1
MONITOR_LORPRSE : 1
EVEN_THOUGH : 1
WATCHING_AND : 1
SCORE_ACCESSED : 1
PCP_NANDA : 1
OUT_FOR : 1
ANSWER_TEMPERATURE : 1
SYNCOPAL_AND : 1
DEPRESSION_PAROXETINE : 1
MINUTES_FROM : 1
STATE_VERIFIED : 1
AND_NUMBER : 1
THE_PRN : 1
PREVENTIVE_MANAGEMENT : 1
PCP_NOTED : 1
HE_DRANK : 1
PAGE_PT : 1
ONE_ONE : 1
PHARMACIST_RECONCILIATION : 1
COMPLAINT_IS : 1
TOPIRAMA_ON : 1
PROVIDER_LAST : 1
SENSORY_EXAM : 1
VETERAN_AND : 2
ACTIVE_PROVIDER : 1
COMPLETE_THAT : 1
IN_ROOM : 2
PT_WHY : 1
XTRA_MENTAL : 1
TO_MY : 1
APPOINTMENT_NOSHOW : 1
PHYSICIANS_OF : 1
HEALTH_OLD : 1
RETURN_TO : 3
RBC_LYMPH : 1
WHICH_CAUSES : 1
ARDIAL_PATIENT : 1
MEDIASTINAL_LYMPH : 2
OSCILLOMETRY_DONE : 1
PREPARE_LETTER : 1
IN_OUT : 1
SHOWERED_NOT : 1
CARS_AND : 1
HAS_BLOOD : 1
WILL_ALLERGIES : 1
BLOOD_PERCOCET : 1
MED_LIST : 1
DEPENDING_ON : 1
ASSESSMENT_ADMITTING : 1
NEEDED_REFILLS : 1
MINUTES_FT : 1
ANY_EXPERIENCE : 1
SADNESS_NOTE : 1
MANUAL_VET : 1
MEDICATION_ADMINISTERED : 1
DRRTP_AS : 1
JUDY_LMSW : 2
THE_PNEUMOVAX : 1
INJURY_DURING : 1
OR_UPSETTING : 1
FOR_RADICULAR : 1
PHYSICIAN_PSYCHIATRIST : 1
DISCUSS_VETS : 1
GOAL_AS : 1
STORAGE_INSTRUCTIONS : 1
FOOT_NO : 1
TOUR_FOR : 1
SUICIDE_RE : 1
PT_BE : 1
PATIENTS_RISK : 1
HEARING_ADMI : 1
CASE_SUMMARY : 1
IMAGE_QUALITY : 1
PAIN_TO : 3
ANTIDIABETICS_ONCOLOGIST : 1
BIRTH_DEC : 1
NORMAL_LIMITS : 1
HAS_ATTEMPTING : 1
KG_IV : 1
SCALY_ON : 1
PANCULTURED_CARDIOLOGY : 1
TO_AGING : 1
ML_USE : 1
INSTRUCTED_REMAIN : 1
HOW_OFTEN : 1
MG_TAPERS : 1
PACK_COVERED : 1
BE_VET : 1
LB_KG : 2
THEN_ON : 1
INJECTION_RIGHT : 1
BODY_OUT : 1
WAS_PRESENTED : 1
HOSPITAL_GOALS : 1
ALSO_VERBALIZED : 1
OR_ANOTHER : 1
ON_OBSERVED : 1
ADMISSION_MAY : 1
PAYING_LANDLORD : 1
ONCE_LEAVES : 1
VA_UNDERSTANDING : 1
HAS_SUGAR : 1
CONROE_OBSERVE : 1
BE_BY : 1
COORDINATION_CE : 1
BIL_CONTINUE : 1
MINS_AOX : 1
TAN_SCALY : 1
PRIVILEGE_STAYS : 1
NAME_MDD : 1
DIAGNOSED_WITH : 1
OF_ARRIVAL : 3
LOSS_TO : 1
OVER_WEEKEND : 1
FIND_PT : 1
NOTE_ADDENDUM : 2
THE_WAY : 1
PIV_PATENT : 1
TIME_LEATHER : 1
HISTORY_REVIEWED : 1
AND_LAWYER : 1
DIC_DROP : 1
BRONCHOSCOPIC_PULSE : 1
UNLABORED_NO : 1
INFORMATION_REVIEVED : 1
METER_EAT : 1
INTAKE_GI : 1
CONSENT_OF : 1
OLD_MALE : 4
PICK_CURRENT : 1
IN_PAST : 1
SEX_HATE : 1
FIND_OUT : 1
RECENTLY_EXPIRED : 1
VETERAN_ATTENDED : 4
NOTE_FINANCIALLY : 1
APPARATUS_AS : 1
SINCERE_DESIRE : 1
SERVICE_CONNECTED : 1
CARDIOLOGY_CONSULT : 1
PO_TO : 1
ASSISTING_WITH : 1
MESSAGE_LEFT : 1
PROBLEM_GOALS : 1
WITH_MEDICATION : 1
UD_MG : 1
STEP_NEGATIVE : 1
CITALOPRAM_TAB : 1
ME_FOR : 1
WEEK_PATIENT : 1
BE_GAY : 1
ADDENDUM_PRESENTED : 1
EXAM_VITAL : 1
TO_GO : 1
IS_COUNSELED : 1
RELATED_RATIONALE : 1
OUT_DINNER : 1
YOU_HAVE : 1
ONE_TAN : 1
BE_SEEN : 1
BE_COMING : 1
REVIEW_FROM : 1
AT_OPERATIVE : 1
UNABLE_CONTACT : 1
YESTER_PATIENT : 1
SENT_STABLE : 1
WHICH_CONSTANT : 1
ARRIVES_AMBULANCE : 1
AM_TO : 1
IN_NAM : 1
NONE_WITH : 1
TELEPHONE_CONTACT : 1
WAS_LAST : 2
THAN_BIC : 1
TO_INVOLVED : 1
TO_MG : 2
TIME_MINS : 1
NOT_FIREARM : 1
DISCHARGED_HOME : 1
TO_ACCOMMODATE : 1
PRESSURE_STATUS : 1
NO_THE : 2
CARE_OTHER : 1
PROVIDE_MEDICATION : 1
DIABETES_NO : 1
LEG_TO : 1
MENTAL_HEALTH : 4
INJECTION_JOINT : 1
ON_WHEELS : 1
CHANGE_PARTICIPATION : 1
CARE_ACCOMPANIED : 1
PREVENTION_PT : 1
ICDCM_OTHER : 1
EDUCATION_HOME : 1
HEADACHES_HIGH : 1
PATIENT_PHONE : 1
EPIS_NO : 1
BECOMING_MENTAL : 1
GREATER_OBESE : 1
PROVIDED_ADDENDUM : 1
THERE_ABOUT : 1
RELATED_THAT : 1
PATIENT_TRANSFER : 1
NO_CLONIDINE : 1
BID_GERIATRICS : 1
YEAR_OLD : 3
DRUG_ESCALATED : 1
DEMONSTRATES_GOOD : 1
PAIN_PRIM : 1
ETC_MANUAL : 1
ON_DENIAL : 1
KG_CARE : 1
ER_CALLED : 1
REDUCTION_IN : 1
IS_BEING : 2
WRONG_GOD : 1
EDUCATION_DOCUMENTATION : 2
CLINIC_PATIENT : 2
PHYSICIAN_HAS : 1
MILIEU_TOLERATING : 1
IS_HOMEBOUND : 1
WHO_ALONE : 1
ADMISSION_DATE : 3
DOSAGE_SPECIAL : 1
IDEATION_NONVA : 1
FROM_KLEIN : 1
REFERRAL_NEEDS : 1
NITRO_PAIN : 1
COMPLETE_ALL : 1
WITHIN_THE : 1
EGD_WITH : 1
HIS_CURRENT : 1
MAKING_PLANS : 1
WAS_SCHEDULED : 1
PT_RECORDS : 1
MEDICATIONS_LDL : 1
HISTORY_NSTEMI : 1
AGGRAVATED_ACTIVITY : 1
SUPPLIES_ERUPTED : 1
INCLUDING_SELECT : 1
SC_ADMITTED : 1
SPO_PAIN : 1
ADJUSTING_MILIEU : 1
PUT_CARDIOLOGY : 1
SEDATION_SCORE : 1
RECENTLY_OUTPATIENT : 1
ER_TO : 1
TO_MEDICATION : 1
DATE_TIME : 2
TO_CONSTRUCTIVE : 1
TOBACCO_PRODUCT : 1
DIMINISHED_NASAL : 1
PSYCHOTHERAPY_HE : 1
SUPT_BY : 1
APPOINTMENT_AND : 1
RISK_OF : 1
ANY_OR : 1
WERE_THE : 1
DIABETIC_SENSORY : 1
MINUTES_INJECTION : 1
VA_SO : 1
HE_FOR : 1
THEIR_OWN : 1
YES_SECONDARY : 1
GUARDIANSHIP_TO : 1
SAVE_HIS : 1
OCT_WORKED : 1
EXAMINED_AM : 1
SEVERITY_ANXIETY : 1
PROBABLE_CA : 1
DRUM_CONNECTED : 1
AMBULATION_TRANSFERS : 1
IMB_WHEN : 1
HAND_THEN : 1
MEDS_OR : 1
ON_OUR : 1
YES_DIAGNOSIS : 1
PMR_OT : 1
ADMITTED_LYMPH : 1
TRANSFER_EDUCATION : 1
UF_PVC : 1
MIN_COULD : 1
UNDERSTANDING_ALSO : 1
WITH_TRANSFER : 1
MEDICATION_OXYGEN : 1
HIS_ADULT : 1
FOR_THIS : 1
POSTTRAUMATIC_DIABETIC : 1
AND_OR : 2
CALORIC_THIS : 1
PAIN_ETODOLAC : 1
MEDICATIONS_INSTRUCTIONS : 1
MEALS_OR : 1
FACILITATED_JUDY : 2
BECAUSE_OF : 1
DOCUMENT_WAS : 1
HYPOTENSION_WHICH : 1
HIS_IMAGE : 1
MEDS_ANTIHISTAMINES : 1
THIS_NUMBER : 1
FOLLOWING_AN : 1
PT_ATTENDING : 1
CLINIC_OF : 1
CONTRAINDICATIONS_THE : 1
LED_SOME : 1
INTAKE_KEEP : 1
MIN_PRIOR : 1
BECOME_WITH : 1
RESCHEDULE_CIALIS : 1
THE_MENU : 2
RETURN_WORK : 1
SIGNS_EAR : 1
PATIENTS_SHOWN : 1
HISTORICALLY_RELUCTANT : 1
INTERVENTION_AS : 1
SILDENAFIL_AND : 1
DUE_AGING : 1
RTC_FOR : 1
HIS_HEALTH : 2
HOMICIDAL_NONVA : 1
PELVIS_WITH : 1
POSSIBLY_DC : 1
FOLLOWING_ISSUES : 1
VA_MEDICAL : 2
ADDENDUM_NOT : 1
RATES_PAIN : 1
BE_FOR : 1
TAB_UD : 1
CURRENTLY_IN : 1
THERAPY_ARE : 1
MALE_SIGNIFICANT : 1
DEC_COMMENTS : 1
LAST_FILLED : 1
MG_UD : 1
AFTER_OF : 1
ORDER_HIM : 1
AND_UNABLE : 1
WEIGHT_LBS : 1
TABLET_BY : 5
IN_MOUTH : 1
AND_ASAP : 1
THINK_WILL : 1
MEDICATI_PCXR : 1
CHECK_NOTE : 2
PATIENT_SEEN : 1
SELECT_AT : 1
USE_PARAFFIN : 1
DOCUMENTATION_MONITORING : 1
TAKE_THE : 1
HAS_DECIDED : 1
ULCERATION_NOTED : 1
MEDICATIONS_OUTPATIENT : 1
MEDICATIONS_PHONE : 1
OUTPATIENT_HIS : 1
ALL_THAT : 1
ARRIVAL_WHEELCHAIR : 1
ABOUT_MIN : 1
RECORD_LIVES : 1
MEDICATIONS_NONE : 1
NAM_DENIED : 1
ON_CRYO : 1
CONTINUE_ASSIST : 1
PARALYSIS_OF : 1
FEBRILE_EPIS : 1
YES_DENIES : 1
ANXIETY_AND : 1
LIKED_TO : 1
SUICIDE_PREVENTION : 1
ENCOUNTER_PALLIATIVE : 1
COMMENTS_AFFECT : 1
TEMP_VET : 1
CONTROLLED_CA : 1
AGENT_RADIATION : 1
WHY_HE : 1
TIME_EAT : 1
SAME_TIME : 1
THE_STATE : 1
SAVE_HOME : 1
IF_PRIMARY : 1
HIS_LEG : 2
ADDENDUM_SUICIDAL : 1
IF_SIERRA : 1
HUMAN_ML : 1
OLD_ANAPHYLACTIC : 1
DNR_FOR : 1
THIS_TOUR : 2
CARE_SERVICES : 1
CHECK_OUT : 2
LOW_PAIN : 2
COMMENTS_DYPHORIC : 1
OTHERWISE_AS : 1
VISTA_REGIONAL : 1
ALLERGIES_WAS : 1
THIS_LABORATORY : 1
OBSTRUCTION_HOME : 1
PROBLEMS_HE : 1
IN_WITH : 1
NEEDS_CALL : 1
FINDINGS_PLAN : 1
FOR_OF : 5
WOULD_TO : 1
PAIN_HAS : 1
OF_HAS : 1
USE_CALL : 1
HIS_STOMACH : 1
FEET_AND : 1
LISINOPRIL_MG : 2
PAST_MEDICAL : 2
HIS_VETERAN : 1
STATES_THAT : 3
OR_NOTED : 1
NO_ABNORMAL : 1
LIVES_IN : 1
GIVEN_BP : 1
ONEHALF_BY : 2
START_OF : 1
CARE_PER : 1
PRESSURE_SURGERIES : 1
BENZTROPINE_MESYLATE : 1
LEXAPRO_MG : 2
WITH_PATIENT : 4
NO_BMS : 1
SEE_ON : 1
HOME_YEAR : 1
DEPRESSION_ATHETOID : 1
OR_USE : 1
CALLING_OPERATOR : 1
LBS_LBS : 1
ANYTIME_CONSENT : 1
REPEAT_BP : 1
PHARMACIST_MEDICATION : 1
THE_LISTED : 1
FEELING_SUICIDAL : 1
ASSESSMENT_ADMISSION : 1
EXAM_BENZODIAZEPENE : 1
AND_DEPRESSION : 1
MOTIONS_OF : 1
NO_ACTIVITIES : 1
INFLUENZA_ML : 1
CHECK_RECORD : 1
LETTER_COMMENTS : 1
DRUG_ADDICT : 1
ASSESS_FALL : 1
BEEN_PRESCRIBED : 1
WALK_THE : 1
USE_ACTIVE : 1
WE_FOCUSED : 1
VET_STATED : 1
BONE_DRAINAGE : 1
LAST_ASSESSMENT : 2
AND_APPROPRIATE : 1
NOT_PAYING : 1
ACETAMINOPHEN_ALL : 1
ADDENDUM_COMMENTS : 1
CONDITION_ADDENDUM : 1
PSYCHIATRIC_PRIVILEGE : 1
HYPERGLYCEMIA_SURGERIES : 1
TO_PUT : 1
THIS_PAST : 1
ABBREVIATIONS_BOYFRIEND : 1
METASTASES_ID : 1
MEDICAL_ENCOURAGE : 1
TAKE_OTHER : 1
IMPROVED_SAFETY : 1
THAT_SO : 1
PENDING_DATE : 1
LEFT_ULCERATIONS : 1
SEE_PULMONARY : 1
COMFORT_WILL : 1
DOCUMENTATION_AND : 1
TO_AVAIL : 1
MONTH_WERE : 1
DROWSYNESS_SINCE : 1
CAUSES_BP : 1
LATE_FOR : 1
RETURNED_PACU : 1
ENGE_LED : 1
URETEROPELVIC_JUNCTION : 1
VIEW_SEEN : 1
PCC_NOTE : 2
MAN_BELIEVED : 1
REFERRED_TO : 1
ACTIVE_RISK : 1
SCENARIO_THAT : 1
WITH_NO : 2
GO_VERY : 1
EGD_MODERATE : 1
IN_BIL : 1
AS_PER : 1
NUTRITIONAL_IMPROVEMENT : 1
PHYSICIAN_ACTIVE : 1
SPARE_TO : 1
ACCEPT_FACT : 1
BY_COSIGNING : 1
URGENT_CARE : 1
PHYSICAL_ARE : 1
OPIOID_CONSENT : 1
THIS_CALLED : 1
BE_BACK : 1
ALTERNATIVES_AND : 1
PAIN_HE : 2
AND_MOTORCYCLES : 1
NONE_ANESTHESIA : 1
APPEARS_BIT : 1
TEMPERATURE_WEIGHT : 1
AND_AGAIN : 1
UP_COPY : 1
COMFORT_NO : 1
WITH_RLE : 1
NOT_HIM : 1
NONE_LAST : 1
DOCUMENTED_BEHAVIORS : 1
HYPERVENTILATION_IS : 1
ANY_QUESTIONS : 1
THERAPY_HE : 1
BENZODIAZEPENE_COCAINE : 1
AFTER_PATIENTS : 1
EDUCATION_AND : 1
FEE_CONSULTPHARMACY : 1
OF_PRODUCT : 1
DATA_REVIEW : 1
ID_NAME : 1
RADICULAR_IN : 1
EAR_TOOK : 1
TO_ENCOURAGE : 1
REHAB_PER : 1
THE_TO : 1
AND_HYPERLIPIDEMIA : 1
VETERAN_DEMONSTRATES : 1
PATIENT_BMI : 2
SEES_LOCAL : 1
VESSELS_IN : 1
THE_ABDOMEN : 1
TO_PROCESS : 1
SENT_NURSING : 1
NEW_ALLERGIES : 1
BACK_AND : 2
HE_RETIRED : 1
COME_IN : 1
WHEEZING_RALES : 1
OR_MG : 1
LABORATORY_REVIEW : 1
HAS_OF : 3
FROM_WELCOMED : 1
BMI_OR : 1
WAS_DISCHARGED : 1
PT_DID : 2
THAT_RADIATES : 1
OF_DAILY : 1
CONVINCE_OTHERWISE : 1
IN_YEAROLD : 1
NOTE_NONE : 1
WENT_THROUGH : 1
LEFT_CHEST : 1
SEX_ASPIRIN : 1
CALLER_IF : 1
PAST_HOW : 1
TID_FOR : 1
TOOK_BID : 1
DOES_HAVE : 3
NOSHOW_ASSESSMENT : 1
MANY_PRIOR : 1
THERE_SC : 1
NOTE_HOME : 1
ON_IF : 1
SPEAK_THE : 1
GROUP_THERAPY : 4
OF_GROUP : 1
SECONDARY_DIAGNOSIS : 1
MENTAL_CLINIC : 1
FINANCIALLY_AND : 1
SHOWED_NIGHT : 1
ASSESSMENT_KEEP : 1
WITHIN_ONE : 1
CREATININE_CAN : 1
PATIENT_CHECK : 2
ASSESSMENT_DOOR : 1
HOW_HAVE : 1
CARE_SIX : 1
OF_EVENTS : 1
HYTRIN_FINESTERIDE : 1
AS_NEEDED : 4
IMPROVEMENT_AND : 1
IMPROVED_FEVER : 1
DRANK_OF : 1
GO_TO : 1
TEMP_COMPLETED : 1
USE_FOR : 2
EVERY_MORNING : 1
GOOD_CONTACT : 1
TALKING_THIS : 1
FORGIVING_ONES : 1
NOTE_PREVENTIVE : 1
PATIENT_DISCUSSED : 1
LIMITED_TO : 1
SYND_INTENSITY : 1
WAS_RELATED : 1
STAYS_TO : 1
REPORTED_VISION : 1
DID_PT : 1
REVIEW_WAS : 1
VITAL_SIGNS : 4
BEING_DISCHARGED : 1
PSYCHIATRIC_EVALUATION : 1
IN_TREATMENT : 1
EXT_GO : 1
FEELS_MUCH : 1
SCALE_AT : 1
TO_DIFFUSELY : 1
QAM_AT : 1
QUESTIONS_CONCERNS : 1
SELECTING_THE : 2
CALL_HOME : 1
MESSAGE_IN : 1
ALERTAND_ORIENTED : 1
VALIDATE_YE : 1
ASSESSMENT_FAMILY : 1
AI_PAIN : 1
BED_ON : 1
YES_YES : 1
UNDERSTANDING_RATE : 1
INFECTIOUS_DISEASE : 1
FAMILY_DOSE : 1
DIAGNOSIS_INVOLUNTARY : 1
FROM_PREVIOUS : 1
THREE_TO : 1
ACETAMINOPHEN_EKNO : 1
VISIT_FOR : 1
STEP_ST : 1
WILL_REEVAL : 1
DOSE_BE : 1
HE_CLOSE : 1
TO_PSYCHIATRIST : 1
ON_IT : 1
ONES_SELF : 1
VISIT_PARANOID : 1
FRACTURES_NOW : 1
MANAGEMENT_PERTINENT : 1
IVP_LATEST : 1
AND_CARE : 2
MILDLY_TO : 1
OF_BEHAVIORS : 1
INFORMATION_OUTPATIENT : 1
EMPLOYMENT_PAIN : 1
TOPIC_ILLNESS : 1
NOTED_UDS : 1
SERVED_PAPERS : 1
ALLERGIES_PAROXETINE : 1
EYE_HBAC : 1
SITUATION_AND : 1
FOR_TRIAGE : 1
DRINK_WITH : 1
AND_WAS : 3
CHANGE_IN : 2
TO_NUTRITION : 1
DATE_NONFORMULARY : 1
SITUATION_APPROPRIATELY : 1
THIS_APPROPRIATELY : 1
SHOWN_FILM : 1
IF_NOT : 1
DIVORCE_OPPORTUNITIES : 1
DYSPHAGIA_DIET : 3
AT_SAME : 1
THEN_SPOKE : 1
PRESSURE_WERE : 1
LOCAL_PRIVATE : 1
THE_IMMODIUM : 1
FROM_DISPOSITION : 1
JUST_AS : 1
WERE_SHOWN : 1
MANAGEMENT_COMFORTABLY : 1
BILLS_OF : 1
PAIN_PARTICIPATED : 1
REC_DRUG : 1
PT_USE : 1
CALL_VITAL : 1
EATING_ENERGY : 1
REQUEST_INTERVENTION : 1
AMBULATING_WAY : 1
MON_DIAG : 1
NO_COLOSTOMY : 1
CONTACT_TELEPHONE : 1
MR_CONTACT : 1
FEEDS_COMMUNITY : 1
MAIL_INSTRUCTION : 1
BY_PHYSICAL : 1
DEC_CORRECT : 1
METAB_BETTER : 1
FIND_WITH : 1
NOT_CIALIS : 1
STATES_VETERAN : 1
PATIENT_BE : 1
ACTIVE_ESOPHAGUS : 1
MEDICATON_OCT : 1
MH_CHATHAM : 1
COPING_WITH : 1
NOT_SUPPOST : 1
THAT_SAT : 1
OUT_MEDS : 1
DESIRE_DEVELOP : 1
VSS_MAIL : 1
DENIES_FALLS : 1
ITS_PLAN : 1
ON_ASSISTANCE : 1
BREAKFAST_TAKE : 1
IS_PHOTIC : 1
CUT_STRESS : 1
MALE_VIA : 1
OWN_RISK : 1
AND_SIGNIFICANT : 1
PATIENT_SHARE : 1
MEDICATION_SHOW : 1
LIST_WITH : 1
HIGH_BLOOD : 1
HOME_OF : 2
CALLER_NOT : 1
OF_ULCERATION : 1
YEARS_OF : 1
STUCK_CRYO : 1
LUNG_OTHERWISE : 1
ASSESSMENT_CORONARY : 1
ENCOUNTER_PATIENT : 1
OR_DISCHARGE : 1
BY_ANY : 1
DEBORAH_MRC : 1
HE_HURT : 1
SIGNIFICANT_CIVILIAN : 1
CHANGES_LAB : 1
HOT_PACK : 1
ADDICTS_THEY : 1
POST_PROVIDER : 1
HE_DID : 1
OR_REGULAR : 1
NEW_ORDERS : 1
OR_EASILY : 1
SERVICES_OR : 1
LAST_DONE : 1
RISK_UPON : 1
MEDICATION_GLASSES : 1
SUPPLIES_DO : 1
PROVIDERS_THROUGHOUT : 1
AND_CE : 1
CONVEINANT_HIM : 1
SO_FRIGHTENING : 1
PT_EXHIBITS : 1
BUT_VERY : 1
ONE_OBSERVATION : 1
STEADY_LEF : 1
SUBJECTIVE_CHIEF : 1
EKNO_CHANGED : 1
PLEASE_READ : 1
FOREARM_INTERACTIONS : 1
PHYSICIAN_PT : 1
EMOTIONALLY_PT : 1
ONE_TIME : 1
OFFERED_CALL : 1
OUTPATIENT_INCLUDING : 5
COPY_TAKE : 1
LEAD_TO : 1
HIS_CHILDREN : 1
CANCER_ON : 1
REGARDS_APPOINTMENT : 1
THIS_CASE : 1
UNITS_ML : 1
ME_ON : 3
TO_HEALTH : 1
ANTIBIOTIC_HAS : 1
CARE_NO : 3
DIAG_MULTIPLE : 1
MPJ_TAB : 1
ARE_CLEAR : 1
WELL_PT : 3
NO_EDEMA : 1
OR_PRNS : 1
CHF_MOTHER : 1
ANSWERED_ARE : 1
CONTACT_PLEASE : 1
IT_TO : 1
BODY_INDEX : 2
BREATHING_ENERGY : 1
OXIMETER_READING : 1
NONE_COMMENTS : 1
TO_GIVE : 1
FOR_PALLIATIVE : 1
FOR_COMPLETE : 1
YOU_BOTHERED : 1
NOTE_ORAL : 1
NOTE_STAR : 1
DIABETIC_FOOT : 1
NEEDED_AMBULATION : 1
CONCERNS_ABOUT : 1
VA_PREVENTION : 1
WAS_PROVIDED : 1
STATEMENTS_DYSPHAGIA : 1
THE_WELCOME : 1
TO_PSYCHIATRY : 1
UP_WITH : 1
OF_BACK : 1
HEADACHES_AND : 1
NERVE_SC : 1
MANUAL_DEXTERITY : 1
BID_HE : 1
USE_BUT : 1
HOME_CLINIC : 1
BE_OBSERVATION : 1
TO_YE : 1
SOME_AGAIN : 1
PATIENT_DECLINED : 1
DISCUSSION_VA : 1
UPSETTING_THAT : 1
PRESENCE_FEBRILE : 1
OF_NERVE : 1
CLOSE_TO : 1
DROP_CENTER : 1
PERSISTENT_MENTAL : 1
TENDER_PALP : 1
PT_PURPOSE : 1
OR_THAT : 1
KNOWLEDGE_TO : 1
IF_GOES : 1
MEDICATION_OUTPATIENT : 1
SEEPING_AROUND : 1
OCCURED_VIET : 1
EDUCATION_ASSESSMENT : 1
BUT_NOT : 3
VETERAN_TREATMENT : 1
OFFERING_REFERRAL : 1
DYNAMICS_TO : 1
PRIVATE_CARDIOLOGIST : 1
BREAT_NOTE : 1
MG_THE : 1
ARE_OUTPT : 1
REALLY_MUCH : 1
AT_MOMENT : 1
PATIENT_HAVE : 1
EVERY_ACTIVE : 1
SAMPLING_OF : 1
PAIN_FOLLOWUP : 1
HISTORY_COPD : 1
MOUTH_AVOID : 1
TOLD_SHE : 1
PULSES_ADDRESS : 1
NOT_VETERAN : 1
ON_ABBREVIATIONS : 1
REPORT_PAIN : 1
SPINE_AND : 1
RATE_BREATHING : 1
ED_MANAGEMENT : 1
MONTHS_THE : 1
PREOCCUPATION_WITH : 1
BEING_MEDICATION : 1
ANGRY_INCREASED : 1
PLAN_ENCOURAGE : 1
HAS_THE : 1
FOR_PSYCHIATRY : 1
IN_AN : 1
AMBULATORY_ASSISTANCE : 1
SITTER_THIS : 1
HAPPENED_NUTRITION : 1
SOLN_IVP : 1
CONTINUES_TO : 1
PERFORATED_DRUM : 1
NO_ANTIHISTAMINES : 1
CE_WHEN : 1
IS_SEXUALLY : 1
FUTURE_CONTINUE : 1
RETIRED_FROM : 1
FROM_EVERY : 1
ON_THE : 4
STERRISTRIPPED_OF : 1
ON_NEW : 1
CALL_THIS : 2
NOT_SIGNS : 1
TO_HELP : 1
LAST_INFO : 1
LDL_AXIS : 1
EXPLAINED_WHY : 1
AM_FU : 1
OF_THE : 8
FOR_HYPOTENSION : 1
HUMAN_UNITS : 1
QRS_AFIB : 1
MORELAND_ER : 1
POTENTIAL_OF : 1
SCALE_AND : 1
WHAT_FACILITY : 1
NO_MEDICAL : 1
COMPLETELY_INDEPENDENT : 1
NAME_RESPONSE : 1
SHIFT_DOSING : 1
PROVIDER_STREN : 1
HAS_NOT : 2
IMPRESSION_PLAN : 1
ALLERGIES_THIS : 1
ASARCO_HE : 1
LAST_UDS : 1
AND_REVIEWED : 1
AND_SERVED : 1
BE_ABOUT : 1
WAS_PREOCCUPATION : 1
UP_HARD : 1
TIME_BP : 2
WILL_SEEN : 1
CHECK_PT : 1
GROUP_WITHIN : 1
WITHOUT_PAIN : 1
GIVEN_BENADRYL : 1
INFECTION_APPROX : 1
OF_MEDICATIONS : 1
PT_HE : 2
READY_TO : 1
STATED_RATE : 1
ANSWER_FOR : 1
NOTE_INSTRUCTED : 1
WITH_HIS : 1
HIS_HIS : 1
PATHOLOGY_NOT : 1
BACK_CRITICAL : 1
HYPOXIA_CXR : 1
TO_EXCEED : 2
ABDOMEN_PELVIS : 1
TO_SOME : 2
ENERGY_APPOINTMENT : 1
AND_WBC : 1
TYLENOL_PO : 1
FOR_FT : 1
MOTIONS_THE : 1
MONITOR_COMFORT : 1
ON_LEGS : 1
RELAPSE_HANDOUT : 1
PAST_FULL : 1
WILL_CONTINUE : 1
SHORTNESS_BREATH : 1
WILL_PLAN : 1
RISKS_AND : 1
TOTAL_FROM : 1
FROM_SOURCES : 2
NABS_MILDLY : 1
INTO_THE : 1
HEALTH_PER : 1
ANGLE_SENILE : 1
ABOVE_WHEN : 1
VA_WILL : 1
YOUR_HEALTH : 1
NOT_ABLE : 1
ATTENDING_NOTE : 1
STAFF_OF : 1
PROCESS_LOGICAL : 1
TBI_AND : 1
ORIENTED_TO : 1
EVALUATION_EITHER : 1
LYRICA_USE : 1
UNDER_SURGERIES : 1
COMPLEX_SERPENTINE : 1
PTS_TO : 1
QIDPRN_FOR : 1
TO_AM : 1
LEARNING_NONE : 1
FOUR_CYCLE : 1
OXYGEN_NASAL : 1
CORONARY_DISEASE : 1
HOURS_DISCUSS : 1
BENEFITS_CONSENT : 1
FOR_PROGRAM : 1
SITE_FOREARM : 1
VET_ACTIVITIES : 1
ATTENDING_PHYSICIAN : 2
NOTE_OF : 1
LOSS_CALORIC : 1
ABOUT_CURRENT : 1
ADMISSION_HAD : 1
CIALIS_IS : 1
HOME_HEALTH : 2
GENTLY_LOWER : 1
FIRST_ATTEMPT : 1
NOT_EATING : 1
FREE_YEAR : 1
HISTORY_CONSTITUTIONAL : 1
NO_OTHER : 1
PHOTIC_INDUCES : 1
HAS_HIS : 1
MHC_MANAGEMENT : 1
OUTSIDE_MEDICAL : 1
MANAGEMENT_TO : 1
STATE_FACILITY : 1
PAIN_IN : 1
BEEN_WITHIN : 1
IMPROVED_WITH : 1
CPC_PHYSICIAN : 1
STATE_HE : 1
POSSIBLY_MON : 1
TYPE_OF : 4
INDICATED_CHECK : 1
PRESENTED_WITHOUT : 1
IMPROVING_BECOMING : 1
TELEMETRY_NOTE : 1
PRESSURE_DISCHARGE : 1
OR_IMMEDIATELY : 1
HEALTH_GROUP : 1
ANOTHER_WEIGHT : 1
LMSW_THE : 1
WAS_AVAILABLE : 1
PLACEMENT_NO : 1
ON_REMINDER : 1
HE_LEAVES : 1
DATA_FOUND : 1
QUETIAPINE_SHIFT : 1
ATTENDED_ACTIVELY : 1
COMPANIES_WHAT : 1
BODY_HX : 1
IS_CURRENTLY : 1
MUCUS_SOB : 1
ALLERGIES_REVIEWED : 1
SIGNS_PERFORATED : 1
DOSAGE_UNITS : 1
READ_ITEM : 1
PROCEDURES_UNEMPLOYMENT : 1
VETERAN_CALLED : 1
SHOWING_OF : 1
VARIOUS_FACILITIES : 1
IN_NEURO : 1
MG_LOCALIZED : 1
FACTORS_NARRATIVE : 1
MYERS_TELEPHONE : 1
LOSS_MANAGEMENT : 1
AND_VERBALIZED : 1
RAMSAY_SCORE : 1
NOT_DATE : 1
ONE_LIGHT : 1
SPELL_SINCE : 1
EATING_SAFETY : 1
HAD_HELPERS : 1
CUTTER_DIRECTED : 1
FOR_SEVERAL : 1
AT_TEXT : 1
YEARS_EMPLOYMENT : 1
PERFORMED_DERM : 1
DUE_POOR : 1
VETERAN_NOT : 1
CONSTRUCTIVE_LEISURE : 1
PULSES_PALPABLE : 1
ME_AUG : 1
BP_ADMINISTRATIVE : 1
IS_AND : 2
NURSING_TRIAGE : 1
PAIN_ALOH : 1
OCCASIONAL_FREQUENT : 1
VA_COLOR : 1
FROM_VISIT : 1
APPROVED_LYRICA : 1
ADDENDUM_NONE : 1
PATIENTS_COMPLAINT : 1
BLOOD_MD : 1
PERCEPTIONS_FEARS : 1
DIAGNOSIS_NO : 2
AND_LOSS : 1
ABDOMEN_PATIENT : 1
RECORDS_WILL : 1
PATIENT_WAS : 6
PT_REQUESTING : 1
HE_FROM : 1
THE_REGULARLY : 1
ANXIETY_ACTIVE : 1
HAS_PAST : 1
TOLERATING_CITALOPRAM : 1
TIME_EVALUATION : 1
YO_WITH : 1
HEART_AND : 1
CHEW_IN : 1
REVIEWED_FOR : 1
DEPRESSION_KNOWS : 1
LITERS_PHYSICAL : 1
IS_PATIENT : 1
DISCUSSING_PTS : 1
FROM_HOME : 1
PT_PLACEMENT : 1
FOLLOW_WITH : 1
CANCELLED_SUPPORT : 1
THAT_AN : 1
OTHER_CHAR : 1
DISCHARGED_DECEMBER : 1
PATIENT_GIVEN : 1
SURGEON_PRN : 1
DIAGNOSIS_HYPERGLYCEMIA : 1
ACTIVE_PHYSICIANS : 1
SEEN_PHYSICAL : 1
IRREGULAR_COMPLEX : 1
LPN_DISCUSSED : 1
EXERTION_AMBULATION : 1
INSURANCE_ASARCO : 1
ESCALATING_OF : 1
WEEK_MAY : 1
SINCE_BY : 1
OR_INJECTION : 1
LUNGS_WHEEZING : 1
MOVE_THE : 1
KNOWS_CALL : 1
WAS_ON : 2
THE_LEG : 1
PATIENT_THE : 2
AT_FULL : 1
TAPERS_AT : 1
ELIGIBILTY_CODE : 1
LAST_PAIN : 1
FILM_BRADSHAW : 1
FACILITIES_FROM : 1
INQUIRING_ON : 1
OF_IT : 1
AWARE_IT : 1
ASSIGNED_TO : 2
PRODUCT_DUE : 1
THE_EXP : 1
COSIGNER_AMBULATORY : 1
AT_LIPIDS : 1
OFF_ONE : 1
NO_LESION : 1
REPORTS_HE : 1
CARES_AMBULATION : 1
LIST_REVIEWED : 1
INPATIENT_NOTE : 1
MOVEMENT_EVERY : 1
LAST_HRS : 1
SEVERITY_OF : 1
WITH_PHYSICIAN : 5
NONE_TOUR : 1
EATING_WELL : 1
IMB_CE : 1
WEAKNESS_COGNITIVE : 1
SHAVE_GETA : 1
DRUG_THERE : 1
ALLERGIES_ACIPHEX : 1
REVIEWED_OR : 1
QAM_ACTIVE : 1
DERM_HAS : 1
AND_CONSERVING : 1
CARE_REVIEWED : 1
SUPPOST_TO : 1
SEVERE_HAD : 1
ON_ENCOURAGE : 1
THE_CORRECT : 1
BLOCKS_NASAL : 1
ASSISTANT_INPATIENT : 1
IF_TOMMORROW : 1
RBC_SHINS : 1
REGULAR_NO : 1
GASTROENTEROLOGY_ALLERGIES : 1
AGENT_AND : 1
BY_DR : 1
GLUCOSE_HTN : 1
PATENT_THAT : 1
DOCUMENTED_DATA : 1
MODIFICATIONS_FEVER : 1
PT_INCREASED : 1
TOUR_DIET : 1
ASF_NOTET : 1
ENTITLED_BRADSHAW : 1
IS_SUPERVISED : 1
MICHELE_DATE : 1
CONTACT_READ : 1
PERSONABLE_REVIEW : 1
AND_REFERRAL : 1
RTC_IN : 1
BLOCKS_DIMINISHED : 1
RESULTS_INFLUENZA : 1
PATIENT_PAGE : 1
EDUCATION_PATIENT : 1
ESOPHAGUS_EGD : 1
ROOM_CARDIOVASCULAR : 1
MO_AGO : 1
GOOD_LATELY : 1
ASPIRIN_HISTORICALLY : 1
ALLERGIES_ADDENDUM : 1
TWO_EKHISTORY : 1
ON_OUTLINING : 1
ALLERGIES_OR : 1
ADDENDUM_LAST : 1
NONE_DIAGNOSIS : 1
HAS_PROBLEMS : 1
EVER_HAD : 1
COUNSELING_REPEAT : 1
NEWS_THAT : 1
WITH_MULTIPLE : 1
PREOCCUPATION_FOOD : 1
IVP_VITALS : 1
OTHER_PATIENT : 1
IDENTIFIED_CONTRACT : 1
SEC_DIAG : 1
OR_POSTPROCEDURE : 1
LED_TO : 1
BIL_PROBLEM : 1
YES_ALTERNATIVES : 1
NOTIFY_LIFE : 1
CONDITION_PROCESS : 1
MANAGEMENT_THIS : 1
VETERAN_TWO : 1
IDENTIFIED_IDENTIFIED : 1
CONTACT_TP : 1
THROUGH_WERE : 1
HURT_KNEE : 1
LABETOLOL_IVP : 1
MOUTH_FOUR : 1
WAS_THEN : 1
DO_AT : 1
DAILY_CARE : 1
BY_ME : 1
NOT_RADIATE : 1
VETERAN_TIME : 1
AUG_ENCOUNTER : 1
AND_INSTRUCTIONS : 1
ANKLE_FLEXION : 1
AMPHETAMINE_AND : 1
COME_HOSPITAL : 1
HAS_ANSWERED : 2
OUT_DOCUMENT : 1
WHAT_DID : 1
REVIEWED_AT : 1
TUMOR_THE : 1
HYTRIN_WANTS : 1
DISCUSSED_REVIEWED : 1
MEDICATIONS_STATUS : 2
DONE_HE : 1
INCREASED_NIGHT : 1
OF_PT : 1
PHONE_CONTACT : 1
MHC_AND : 1
GLUCOSE_TEST : 1
IN_CONTACT : 1
COST_DIVORCE : 1
HIS_HEAD : 1
SHIFT_ADDRESSED : 1
CITALOPRAM_NOT : 1
ALLERGIES_BE : 1
AN_IS : 1
ASSESSMENT_DONE : 1
SYNDR_MUCH : 1
HX_OF : 2
SOME_LORAZEPAM : 1
EVIDENCE_INJURY : 1
NOT_MH : 1
WAS_TAKEN : 1
CARE_NURSE : 2
STUCK_ON : 1
THAT_ELDERLY : 1
EXTRACTION_ERUPTED : 1
IS_NOT : 5
PLAN_HYPERTENSION : 1
HIS_SISTER : 1
SITE_RIGHT : 1
OXYGEN_NA : 1
RISK_RELAPSE : 1
IN_YES : 1
PT_SHOW : 1
OF_PAIN : 1
AND_REPORT : 1
GROUP_IDEATION : 1
VERBALIZES_UNDERSTANDING : 1
EXPOSURE_REPORTEDLY : 1
HOSPICE_CALL : 1
TO_HAD : 1
HEMATURIA_WITH : 1
JUNCTION_NUTRITIONAL : 1
LOG_APPOINTMENT : 1
CALL_THE : 1
LAWSUIT_MVA : 1
INJECTION_PATIENTS : 1
COUNSELED_STOP : 1
SOME_VERIFIED : 1
PAIN_MGOH : 1
HEARTBURN_VETERAN : 1
CARDS_YES : 1
NMBER_DID : 1
AND_SHOWING : 1
OCCASIONAL_PVC : 1
NURSE_CBOC : 1
HIS_HOME : 2
LEAVING_HE : 1
PAIN_RATING : 1
ERIE_MEDICAL : 2
VETERAN_REFERRED : 1
THAT_DYING : 1
AND_MEDS : 1
THE_MONTH : 1
STATUS_BLOOD : 1
PO_FOR : 2
AND_STATUS : 1
PERIHILAR_PCC : 1
LEG_OUT : 1
FROM_THE : 1
NUMBER_ACCUCHEK : 1
FOR_DEPRESSION : 3
MON_REPORTS : 1
WHEN_EXPLAINED : 1
SW_CARA : 1
OF_OPPORTUNITIES : 1
PHYSICIAN_REGARDING : 1
CM_DATE : 1
REPORT_ATTACHED : 1
CHILDREN_NOW : 1
MALE_RTC : 1
NOTED_NEURO : 1
DIVORCE_MO : 1
COMBATIVE_ROUTE : 1
IN_ASSESS : 1
IMAGING_IS : 1
WORRIED_ABOUT : 1
OF_BLOODY : 1
DISORDER_SEVERE : 1
THINGS_GOING : 1
TELEMETRY_ORAL : 1
ACTIVELY_PARTICIPATED : 1
NO_RECORD : 1
EDEMA_ON : 1
PROBLEMS_GOALS : 1
TO_NORMAL : 1
FUMARATE_TAB : 1
SERVICES_TO : 1
AMBULATORY_STEADY : 1
MEDICATION_PERTINENT : 1
DERM_PT : 1
HIM_ASKED : 1
BRADEN_SCALE : 1
TO_CAUSES : 1
COMPLETE_MHC : 1
AND_BM : 1
TO_AT : 1
CARE_VET : 1
JUST_THE : 1
MD_AXIS : 1
VET_HAS : 2
VA_MENTAL : 1
IS_SEE : 1
RECORD_TO : 1
REPLACED_RESULTS : 1
PERSONALITIES_INTERVENTION : 1
EASILY_INFECTIOUS : 1
CHANGES_TEMPERATURE : 1
LOCK_NO : 1
ACCESS_NEEDS : 1
PRN_MEDICATIONS : 1
WELCOME_DESK : 1
PARTICIPATION_AGAIN : 1
TO_LIFE : 2
OUT_OF : 3
DISCUSSION_NONE : 1
DATE_BIRTH : 1
IN_HELP : 1
SURGERIES_HEMORRHOIDECTOMY : 1
EMPLOYMENT_COMMENTS : 1
NOTED_SOB : 1
ESCALATED_COCAINE : 1
HE_CAME : 2
SWEATS_COUGH : 1
REFUSES_TALK : 1
APPLICABLE_ALLERGIES : 1
EXPIRED_OUTPATIENT : 1
ADMITTED_PSYCHIATRY : 1
GUARD_OR : 1
OXYGEN_ULA : 1
THE_CLINIC : 1
WAS_POSITIONED : 1
DISCUSSED_WITH : 2
TEAM_NOTE : 1
PUT_INTO : 1
NOTE_SEX : 1
GOOD_PLAN : 1
PRIVILEGE_STATUS : 1
HAS_VETERAN : 1
NO_TIME : 2
CHEEKS_INCLUDING : 1
HOME_USE : 1
ENTERED_REVIEW : 1
POSTSURGICAL_AORTOCORONARY : 1
HAD_TWO : 1
IV_CHRONIC : 1
CBC_GLUCOSE : 1
HOME_SERVICES : 1
VIA_HEMATURIA : 1
APPROVED_USED : 1
ADDENDUM_FINANCIALLY : 1
MALE_BOWEL : 1
HOME_CARE : 2
MESSAGE_WITH : 1
LORAZEPAM_MG : 1
IDENTIFIED_LAST : 1
WANTED_USE : 1
GOOD_NEWS : 1
NARRATIVE_COMMENTS : 1
INTAKE_COPD : 1
INCLUDING_EXTRACTION : 1
BOYFRIEND_DROP : 1
DENIES_PRESENCE : 1
DISCHARGE_ONE : 1
SCALE_ADMISSION : 1
DENIES_MEDICATION : 1
HOSPITAL_STAFF : 1
VARDENAFIL_THE : 1
NEWLY_ANY : 1
EXPECTED_THAT : 1
PRIMARY_INVOLVING : 1
LYMPH_PULSE : 1
THIS_TIME : 4
REC_EXPEDITOR : 1
SIGNS_PCC : 1
NEED_TO : 1
ENCOURAGE_TO : 4
PRIVATE_PHYSICIAN : 1
HIM_WITH : 1
PATIENTS_PRESSURE : 1
BY_FOUR : 1
OF_AND : 5
AGREES_THAT : 1
ER_COMPANIES : 1
GOOD_WAS : 1
REQUIRED_THIS : 1
SEEN_AND : 1
ARE_NO : 1
QUETIAPINE_FUMARATE : 1
PAIN_READ : 1
BLOOD_AND : 1
TO_APPOINTMENT : 1
IS_OBTAINED : 1
WORK_PARTICIPATED : 1
FALLS_CHANGES : 1
CHRONIC_BACK : 1
CURRENT_NO : 1
HE_SPEND : 1
COMMUNICATION_ROS : 1
REFERRED_THE : 1
PATIENT_SSN : 1
PRODUCTIVE_COUGH : 1
INCLUDES_ELIGIBILTY : 1
KEEP_CONSULT : 1
AND_DYNAMICS : 1
TO_PAIN : 1
PTSD_AN : 1
FOR_THAT : 1
LITTLE_AT : 1
DRUM_SERVICE : 1
AMBULATORY_GAIT : 1
LABORATORY_PATHOLOGY : 1
HE_IOP : 1
MEDICAL_PROBLEMS : 1
TO_FIND : 1
OR_OF : 1
MINS_PT : 1
INTENSITY_WORST : 1
SAT_IMED : 1
ANOTHER_VETERAN : 1
PSYCHOLOGIST_WHO : 1
BEFORE_WITH : 1
COCHLEAR_APPARATUS : 1
WHY_NOW : 1
BUT_ATTACHED : 1
AND_SHIFT : 2
SUMMARY_PERSONABLE : 1
THE_SOME : 1
BREAKFAST_AND : 1
ROS_CAREGIVER : 1
THE_SYNCOPAL : 1
STRIP_ISSU : 1
INVOLVING_FEET : 1
WE_WILL : 1
CHRONIC_FAILURE : 1
OVER_EATER : 1
HAD_WHO : 1
RESULTS_GIM : 1
LORPRSE_ACTIVE : 1
TOTAL_CORRESPONDENCE : 1
PT_WAS : 2
DIAGNOSED_CHF : 1
AWARE_OF : 1
USED_NOT : 1
DONE_CASE : 1
FOR_WITHIN : 1
CAPACITY_SWELLING : 1
MEANS_OF : 1
OF_PRIVATE : 1
CARRYING_OR : 1
DISPOSITION_DEPT : 1
ABUTTING_ON : 1
FOR_ENERGY : 1
ALOT_THINGS : 1
NEW_PATIENT : 1
VERBALLY_COMBATIVE : 1
COULD_PATIENT : 1
SELF_CARE : 1
LYMPH_NODE : 1
RIGHT_MPJ : 1
ASSIST_NEEDED : 1
WAS_FRIGHTENING : 1
AGO_LOSING : 1
VERY_ANXIOUS : 1
LOWER_HIS : 1
OR_PHONE : 1
ISSUES_ENCOURAGE : 1
WITH_PERIHILAR : 1
CHEST_SINCE : 1
PROBLEMS_PATIENT : 1
VERY_AND : 2
SECONDARY_NO : 1
RISK_CHANGE : 1
NO_AT : 2
REFILL_VITAL : 1
HOURS_FROM : 1
GOAL_RELAX : 1
AND_US : 1
TIME_NOT : 1
THEN_POSITIONED : 1
COLORED_SCANT : 1
AFIB_WITH : 1
RADIATES_TO : 1
WAS_PUT : 1
GENTLY_HIS : 1
AGENT_ORANGE : 1
NFS_AM : 1
MOVEMENT_OTHER : 1
ML_NO : 1
INTENSITY_NONE : 1
CYCLE_MG : 1
BELIEVES_HE : 1
BP_EXPLAINED : 1
COMBAT_ARMY : 1
WHEN_TOOK : 1
ROUTE_IV : 1
CONTINUED_OR : 1
COORDINATION_AND : 1
ANESTHESIA_RAL : 1
EPISODE_HE : 1
RESTRAINING_ORDER : 1
MORE_YOUR : 1
SKIN_LATERAL : 1
GI_LABORATORY : 1
GLUCOSE_PAIN : 1
HEEL_FOOT : 1
GUM_CHEW : 1
FEVER_DRUG : 1
PALLIATIVE_COMFORT : 1
PAIN_ABSCESS : 1
PVC_COUPLET : 1
LBS_LB : 1
AND_WILL : 3
SPECIALTY_GASTROENTEROLOGY : 1
EXP_DATE : 1
GROUP_HE : 1
ASSESSMENT_HISTORY : 1
RELATED_NOTIFY : 1
TRANSPORTATION_OTHER : 1
DONE_AT : 2
HE_THAT : 2
APPARATUS_PATIENT : 1
WAS_ALOT : 1
MALE_ANAPHYLACTIC : 1
TO_LEAVING : 1
GUN_TO : 1
CE_EATING : 1
LORWR_ACTIVE : 1
WHO_FIRED : 1
IN_CM : 3
THE_REST : 1
IV_LOCK : 1
INDIVIDUAL_NOTE : 1
TO_HER : 2
ND_SL : 1
AGREEMENT_OPIOID : 1
DROPPING_FOOT : 1
AT_ABOVE : 1
AFIB_OCCASIONAL : 1
HOURS_DEPRESSION : 1
ASSIGNED_CALLER : 2
SCALE_DATE : 1
OTHER_ER : 1
HELP_HAVING : 1
ACTIVITY_TO : 1
CS_THIS : 1
NEEDS_ASSISTANCE : 1
CONTACT_PATIENT : 1
DC_PLANS : 1
NO_TEAM : 1
BE_NONFORMULARY : 1
NOTE_BY : 1
MVA_AND : 1
MEDICAL_DIAGNOSES : 1
AND_RECENTLY : 1
SUBMITTED_MICHELE : 1
AT_ON : 1
DRUG_CONSULTPHARMACY : 1
DISCHARGE_JUN : 1
SPAN_BODY : 1
OUT_THIS : 1
ALONE_IN : 1
MG_TAB : 6
FOLLOW_UP : 1
COCAINE_METH : 1
LIPIDS_AT : 1
IN_THE : 5
PAROXETINE_FOR : 1
KIT_FOBT : 1
RISK_THE : 1
HEMATURIA_CLOTS : 1
FROM_PACU : 1
WAS_WITH : 1
CLINIC_BY : 1
AS_YOU : 1
HAS_GIVEN : 1
TOOK_REGULARLY : 1
DATE_JUL : 1
INTERDISCIPLINARY_OF : 1
FORGIVING_SELF : 1
ON_PACK : 1
CHECK_ON : 1
OR_ADDENDUM : 1
OF_LOW : 1
WAS_EDUCATION : 1
NOTE_IF : 1
FOR_WAS : 1
NO_EXPOSURE : 1
NOT_HAVE : 5
IN_THERAPY : 1
HIS_VA : 1
MIN_TO : 1
BE_WED : 1
OUT_ESCALATING : 1
AGREEMENT_FOR : 1
THE_HAD : 1
DID_WELL : 1
PRIOR_THIS : 1
FOR_SERVICES : 1
IN_GF : 1
PRESENTS_TO : 1
ME_PRIMARY : 1
NOT_RESCHEDULE : 1
NO_INSIGHT : 1
ADAMANTLY_NO : 1
PCP_DELUSIONALLIKE : 1
SHOW_CLOTHES : 1
SUB_TH : 1
ADDITIONAL_INFORMATION : 2
IN_SEALY : 1
PODIATRY_PEDAL : 1
PHYSICIAN_ADDENDUM : 1
EMERGENCY_PCP : 1
AND_PERSONALITY : 1
ARRIVAL_WAS : 1
CURRENTLY_HAD : 1
TO_POSSIBLY : 1
TWO_PHYSICAL : 1
OR_PROVIDED : 1
NAUSEOUS_BLOOD : 1
WITH_FOOD : 1
NONE_CALL : 1
AND_WORK : 1
NO_ARTERIES : 1
BE_TO : 1
IS_CAREFUL : 1
PROCESS_NOT : 1
PARTICIPATED_IN : 2
HE_GOES : 1
LIKE_TO : 1
WILL_FOR : 1
AND_OFFERING : 1
PHYSICIAN_AND : 1
HOME_NONE : 1
EXPECTED_AN : 1
TO_ATTENDED : 1
TEMPERATURE_LBS : 1
NOT_TO : 7
DIETARY_IMPROVED : 1
NEW_EXPEDITOR : 1
OF_UNDERSTANDING : 1
RT_COULD : 1
PATIENT_THOSE : 1
HE_HAD : 2
THE_SUPT : 1
FOLLOWING_MEDICATIONS : 1
HE_OUT : 3
PAIN_AS : 1
TIME_MEDIA : 1
WIFE_HIM : 1
HIS_INITIAL : 1
JOINT_BURSA : 1
AXIS_OBSERVED : 1
PHYSICIAN_ANTIANXIETY : 1
ASSIST_MAX : 1
AT_ENCOUNTER : 2
DISPO_AND : 1
STRESS_FOOT : 1
WITH_MHC : 1
OUTSIDE_THE : 1
PLANS_AND : 1
WITH_HYPOXIA : 1
IN_REGARDING : 1
DYING_MOUTH : 1
AN_IN : 1
PCCNURSING_COPD : 1
MG_POTASSIUM : 1
MAY_GO : 1
IF_CHECK : 1
AND_KIT : 1
DRUG_OVER : 1
WITH_LIGHT : 1
PLAN_ANOTHER : 1
LEISURE_LIFESTYLE : 1
PROGRAM_EVIDENCE : 1
LEG_WITHOUT : 1
FAMILY_DYNAMICS : 1
AS_APPEARED : 1
EAR_PAIN : 1
IN_STEP : 1
MEDICAL_ISSUES : 1
YOU_EVER : 1
HOURS_IF : 1
APPT_USE : 1
TREATMENT_MINS : 1
NOTE_GI : 1
INSTRUCTED_PATIENT : 1
DOCUMENTATION_WITH : 1
BEHAVIORAL_CONSULT : 1
ORDER_TO : 1
ATTENDING_WHO : 1
DEPT_PHYSICIAN : 1
AND_PAROXETINE : 1
ALSO_MENTIONS : 1
LEAVES_IOP : 1
HAS_FOLLOWED : 1
SUPPLIES_EXTRACTION : 1
DECISIONMAKING_CAPACITY : 2
INACTIVATED_VACCINE : 1
SALINE_LOCK : 2
FOLLOWUP_DATED : 1
THAT_DEPENDING : 1
EDUCATION_HOMICIDAL : 1
NO_CHECK : 1
AGAIN_WAS : 1
ADMINISTRATIVE_COMPLETE : 1
ETC_DEXTERITY : 1
STATEMENTS_DIET : 1
RECENT_CXR : 1
NEAT_AND : 1
GLUCOSE_HOUR : 1
CUT_POSTTRAUMATIC : 1
WHEEZING_NO : 1
NO_OF : 4
MEDICAL_CENTER : 2
LIKE_TRUSS : 1
RESPIRATIONS_WILL : 1
RECENT_MEDICATIONS : 1
COMMUNITY_RESOURCES : 1
TO_TOPIC : 1
ACCUCHEK_CV : 1
DULABON_WHO : 1
XYZZY_NO : 1
IDENTIFIED_NONE : 1
EATING_INVENTORY : 1
HIS_DECISION : 1
MODE_ARRIVAL : 2
PAIN_CALL : 1
GF_GIRLFRIEND : 1
SITTER_OR : 1
PROCEDURE_CANCELLED : 1
WITH_DAILY : 1
BELIEVED_TO : 1
FDA_VA : 1
WHEN_REVIEVED : 1
OCT_RESULTS : 1
DIMINISHED_BIL : 1
MCCULLY_ADD : 1
AND_ATTEMPT : 1
RETAINED_AT : 1
BUT_IN : 1
PERTAINING_TO : 1
ADMITTED_WITHIN : 1
AND_DISORDER : 1
WELL_THE : 1
PATIENT_NFS : 1
CONSTRUCTIVE_LIFESTYLE : 1
HIGH_RISK : 1
APPEARED_TO : 1
SEVERAL_HAS : 1
WITH_ACUTE : 1
INVOLVING_TYPE : 1
CALL_NUMBER : 1
CE_FOR : 1
TAPERS_THE : 1
OF_HORRIBLE : 1
DISCUSS_ALSO : 1
VERBALIZE_PERCEPTIONS : 1
FEET_OF : 1
CLINIC_PHYSICIAN : 1
THERAPY_THEY : 1
AND_GOOD : 2
AT_TIP : 1
OF_CONTINUED : 1
SIGNS_STABLE : 1
LAWYER_HIS : 1
NO_STATES : 1
HIS_LEISURE : 1
SUICIDAL_AT : 1
POST_BORDER : 1
COMMUNITY_ACTION : 1
FUTURE_APPOINTMENTS : 1
SELECT_NOT : 1
EXPIRED_MEDICATIONS : 1
GAIT_LEF : 1
EAR_ALL : 1
WITH_AGORAPHOBIA : 1
NORMAL_EATING : 1
CONTRAST_WITH : 1
AT_PAIN : 1
ASSIST_WITH : 1
SHOW_LOW : 1
OF_PRODUCTS : 1
AND_READ : 1
ROOM_WATCHING : 1
EPISODE_AND : 1
ARE_REPORTED : 1
NURSE_DOCUMENTATION : 1
WORK_OT : 1
SHREDDING_TOPIRAMA : 1
PT_ANY : 1
SONES_CVAMC : 1
TAB_MG : 5
WITH_POSSIBLE : 1
REGIMEN_WAS : 1
GUARD_WATCHFUL : 1
BY_MCCULLY : 2
SOURCES_HE : 2
INSIGH_INTERDISCIPLINARY : 1
CHF_OLD : 1
DISTENSION_PIV : 1
VACCINE_TO : 1
TOLERATING_THE : 1
HE_DOES : 1
WRITER_COORDINATOR : 1
BILLS_COST : 1
TENDER_TO : 1
SURGERIES_AI : 1
SHIFT_ABOVE : 1
AND_DECISIONS : 1
RETURNED_FROM : 1
TIME_PT : 2
HIS_TIME : 2
PATIENT_AGREEMENT : 1
TIME_MIN : 1
VSS_WINDOW : 1
THE_CITALOPRAM : 1
TAKE_ONE : 3
BEDTIME_AS : 1
IN_RT : 1
ZOLMITRIPTAN_FOR : 1
AND_ALSO : 1
ACCIDENT_WHILE : 1
FOOT_SHOULDER : 1
CONVINCE_HIM : 1
FACILITY_APPOINTED : 1
EDUCATION_NOTE : 1
WITH_MEDIASTINAL : 1
PB_LIPIDS : 1
LITERS_ASSESSMENT : 1
FEELING_AT : 1
AMBULANCE_HEMATURIA : 1
WILL_CONTACT : 1
ENCOURAGE_MEDS : 1
ING_SMILING : 1
UNDER_LEG : 1
OF_AT : 1
THE_HOW : 1
LEG_MOVE : 1
PROVIDER_NURSE : 1
GOOD_CS : 1
PT_DENIED : 1
ACTIVE_ISSU : 1
BUT_DIMINISHED : 1
PALLIATIVE_CARE : 2
SOUNDS_CLEAR : 1
PRESSURE_RECORDED : 1
INFLAMMATION_OTHER : 1
THROUGH_TREATMENT : 1
QAMDM_INSURANCE : 1
OF_GREATER : 1
FOR_CESSATION : 1
SEE_WILL : 1
INPATIENT_MEDICATIONS : 2
OPPORTUNITIES_TO : 1
IN_ESOPHAGUS : 1
ACTIVE_OMEPRAZOLE : 1
WILL_INCREASE : 1
UNITS_TO : 1
UNDERSTANDING_PT : 1
OR_TO : 3
BORDER_SIGNS : 1
OVERWEIGHT_OBESITY : 1
URINARY_JUST : 1
HIM_GOING : 1
AND_THAT : 1
IMMODIUM_REGULARLY : 1
OPERATING_BACK : 1
SEC_COMMENTS : 1
BY_LORI : 1
MOUTH_CARE : 1
AREA_EMER : 1
CARCINOMA_POSTSURGICAL : 1
RECONCILIATION_OUTPATIENT : 1
MEDIAN_NERVE : 1
GIVEN_WILL : 1
VITALS_PRESSURE : 1
HOSPICE_THEN : 1
HOURS_ACTIVE : 1
LOW_FOLLOWUP : 1
AUG_MALE : 1
MEDICATION_TEMPERATURE : 1
OR_LISINOPRIL : 1
FEVER_NIGHT : 1
HARDSHIP_WAIVER : 1
STRENGTHS_PERSONABLE : 1
PAIN_NO : 3
ASSISTANCE_WITH : 1
INTERACTIONS_STORAGE : 1
AND_MAJOR : 1
TRIAGE_PERSISTENT : 1
UE_SPECIMENS : 1
MOVE_PATIENT : 1
PT_STATES : 1
SAFE_HAS : 1
NATURE_THE : 1
IIS_BELIEVE : 1
EAR_DRUM : 1
THE_ABOVE : 2
WAS_GIVEN : 2
RADIATION_DURING : 1
GOD_CALL : 1
CYST_OR : 1
PALP_CREATININE : 1
THIS_COULD : 1
ANY_PCCNURSING : 1
TOBACCO_USE : 1
MG_QH : 1
NOT_COMING : 1
ULCERATIONS_PODIATRY : 1
OUT_MORE : 1
VIS_INACTIVATED : 1
HAS_PITTING : 1
NONE_YO : 1
ASSESSMENT_ORAL : 1
EFFECT_USE : 1
SCANT_OF : 1
SIERRA_VISTA : 1
DISCUSS_WITH : 1
CONSULT_NOTE : 1
NA_PATIENTS : 1
CHANGES_TO : 1
VERBALLY_ABUSIVE : 1
FEELING_BETTER : 1
OF_MAJOR : 1
TO_DIE : 1
PATIENTS_ACTIVE : 2
REGARDING_THOSE : 1
WITH_LYMPH : 1
COME_TO : 1
MG_SS : 1
IF_FIRST : 1
VETS_HARDSHIP : 1
TO_OF : 3
OF_THEIR : 1
TO_SPEAK : 1
HYPERTENSION_MET : 1
MENTAL_WALK : 1
CLONIDINE_PT : 1
PLATINUM_CHEST : 1
COUNSELING_TO : 1
SAVING_MARRIAGE : 1
CLONIDINE_USE : 1
RENT_FOR : 1
ACTIVE_TO : 1
TIME_ADMINISTERED : 1
HE_STATE : 1
ASF_POSTPROCEDURE : 1
PHONE_ATTEMPT : 1
WAS_SUPPOST : 1
DIFFICULTY_SYMPTOMS : 1
UPON_CHANGE : 1
AUTHOR_BOWDEN : 1
QAMDM_NO : 1
TO_PROVIDE : 1
THIS_NOT : 1
NOT_OR : 1
PATENT_UE : 1
OF_OTHER : 1
REPEAT_ON : 1
RECEIVED_IVF : 1
FROWNING_ING : 1
PHYSICIAN_PHYSICIAN : 1
BIPOLAR_AND : 1
GIVE_NPH : 1
THE_WAS : 1
ALOH_SIMTH : 1
NURSE_IF : 1
ORANGE_RADIATION : 1
COMMENTS_NURSE : 1
EATING_PMR : 1
COMPLAINT_RUL : 1
PATIENT_NEWLY : 1
PREVIOUS_NO : 1
BY_THERAPIST : 1
BP_GO : 1
RELATED_LIFE : 1
OSA_ND : 1
STRE_MENTAL : 1
AND_APPETITE : 2
AND_FULL : 1
MAJOR_IN : 1
CAPACITY_PATIENT : 1
EITHER_MON : 1
TO_VERBALIZE : 1
MASS_INDEX : 2
TO_DISCUSSION : 1
ACCESSED_BY : 2
PHARMACY_ADDENDUM : 1
BY_JUDY : 2
CHARACTERISTICS_MR : 1
SPEND_PRODUCTIVELY : 1
PATIENT_VERBALIZE : 1
WAS_NOT : 4
GET_ACETAMINOPHEN : 1
NOTE_HYPERLIPIDEMIA : 1
PROCESS_SEE : 1
HAD_GUNS : 1
VA_PT : 1
CARDS_WILL : 1
SHOULD_THIS : 1
EXPLAINED_AT : 1
RIGHT_TH : 1
FOR_AND : 4
BMI_BODY : 1
ACTIVE_RECENTLY : 1
LBP_MRSA : 1
OF_DISCS : 1
UNDERSTANDING_GOOD : 1
BEEN_APPROVED : 1
COUNSELED_TO : 1
TO_DATE : 1
TOBACCO_NO : 1
NOT_CARRYING : 1
AND_SURGEON : 1
THE_PAST : 2
DIET_BASIC : 1
NEEDS_NONE : 1
SPONDYLOSIS_ENTRY : 1
SOURCES_MISTRUST : 1
CASE_IS : 2
HIS_ACETAMINOPHEN : 1
BREATH_SOCIAL : 1
HURT_PHONED : 1
ADMINISTERED_GLASSES : 1
BE_ALLERGIES : 1
CARDIOVASCULAR_MAIL : 1
EXPERIENCES_AND : 1
DOCUMENTED_ON : 1
MAKE_SO : 1
DISPLAY_PROCEDURES : 1
CARE_RV : 1
DIFFICULTY_REPORTING : 1
WERE_FILM : 1
ANTIBIOTICS_DIRECTED : 1
HAVE_NEW : 1
AND_ALERT : 1
SOFT_ND : 1
PATIENT_HEART : 1
DYING_FROM : 1
INCLUDING_HE : 1
HIS_LEVEL : 1
ML_ENTERED : 1
ACTIVE_ADDED : 1
SCREEN_FOR : 1
OF_SERVICE : 1
SSN_THE : 1
AND_UNSPECIFIED : 1
TIME_AND : 1
AND_PERSISTENT : 1
HIS_FROM : 1
BE_DONE : 1
NO_AVAIL : 1
EKG_PROCEDURE : 1
AND_FAMILY : 2
RETIRED_THERE : 1
RESOURCES_REFERRAL : 1
IOP_HAS : 1
DEPRESSIVE_DISORDER : 1
SOLN_AMP : 1
PCP_USE : 1
TOBACCO_DUE : 1
TO_ARRIVAL : 1
WITH_HIM : 1
HIM_COMPLETE : 1
WITH_ADDENDUM : 1
AND_PER : 2
AND_HYPERTENSION : 1
DEPRESSION_AND : 1
NOTE_PSYCHOTROPIC : 1
CESSATION_NO : 1
TO_WE : 1
PATIENT_IDENTIFY : 1
ADDRESS_QUALITY : 1
PREVIOUS_IER : 1
TWISTING_MOTIONS : 1
WIFE_TOLD : 1
INDEPENDENT_AND : 1
BETTER_WOULD : 1
MANAGEMENT_REPORT : 1
DISORDER_ICDCM : 1
MEDICAL_REC : 1
CIALIS_VARDENAFIL : 1
WAS_THRU : 1
ADDRESSED_PT : 1
CALL_MEDICATION : 1
BOTTLE_OF : 1
TIME_ADMINISTRATIVE : 1
NOTE_MUCH : 1
LEAVE_ALLERGIES : 1
SEES_PRIVATE : 1
TRANSPORT_WIFE : 1
HBAC_MONTHS : 1
SC_VETERAN : 1
PT_ON : 1
NURSE_RECOMMENDATION : 1
LEAVE_THAT : 1
PCP_ASHOK : 1
SLOW_IRREGULAR : 1
FOR_MINUTES : 2
TWO_HELPERS : 1
RADICULAR_PAIN : 1
AGREES_TO : 1
CE_COMMENTS : 1
BEHAVIORS_GOOD : 1
ABSCESS_MRSA : 1
CONGRUENT_REACTIVE : 1
OT_CONSULT : 1
NO_THIS : 1
WITH_THAT : 1
COMFORTABLY_CHAIR : 1
MENU_SELECT : 2
LEF_EGD : 1
DIURETICS_NO : 1
PT_LOADED : 1
PT_TO : 3
HAS_SO : 1
APPOINTMENT_DID : 1
TREATMENT_WAS : 2
MONITOR_PATIENTS : 1
ANTIHYPERTENSIVES_DIURETICS : 1
ANYTIME_FULL : 1
LEFT_INTERACTIONS : 1
VETERAN_PATIENT : 2
PAIN_ADJUSTING : 1
SEASONAL_ALLERGIES : 1
WEST_PALM : 1
HIS_DOSE : 1
TO_OTHER : 2
FACE_WHEN : 1
TAKE_OF : 1
PAIN_IS : 1
WAS_READY : 1
PTSD_FOLLOWING : 1
SYNDR_FEELS : 1
HIS_WAS : 1
SIGNS_INFECTION : 1
CXR_POSSIBLE : 1
PER_NOTE : 2
WAY_SIGNS : 1
PART_OF : 1
NO_LAST : 1
MIN_EXPLAINED : 1
GROUP_ALOH : 1
PRIMARY_CARE : 5
ON_DOOR : 1
COMMENTS_CHIEF : 1
DID_STATE : 1
SUPERVISED_BY : 1
HEART_FAILURE : 1
TECHNIQUE_FROM : 1
SPECIAL_PT : 1
CALLED_COMMUNITY : 1
GERIATRICS_PATIENT : 1
DISCHARGED_STEADY : 1
OVERWEIGHT_OR : 1
THE_WHEELCHAIR : 1
URGING_GI : 1
IS_BY : 2
TYLENOL_MG : 1
OF_TRANSPORTATION : 1
BMI_CAP : 1
ANXIOUS_RESTRAINING : 1
WENT_TREATMENT : 1
HS_WANTS : 1
HIM_AND : 2
ORAL_PO : 1
ABOUT_ON : 1
PER_PREVIOUS : 1
RECONCILIATION_EXPERIENCES : 1
PT_GIVEN : 1
NOSHOW_PAIN : 1
PCP_CHORAZY : 1
ACTIVE_MEDICATIONS : 7
WEIGHT_LB : 2
RECEIVED_OVERNIGHT : 1
TRACKING_NOTED : 1
FACILITATED_BY : 2
TID_ACTIVE : 1
IN_FROM : 2
SITE_LATEST : 1
CAREFUL_ABOUT : 1
DYPHORIC_CONGRUENT : 1
CLONIDINE_WHY : 1
NO_COMMENTS : 1
COPD_CHF : 1
ALOH_MGOH : 1
PT_THE : 1
COMPLETED_SECONDARY : 1
VETERAN_SCREEN : 1
TUMOR_IN : 1
CONSTIPATION_MARRIAGE : 1
ABOUT_FOLLOWING : 1
GUNS_HIS : 1
AND_HIS : 3
FULL_HYPERVENTILATION : 1
THE_RECENT : 1
THIS_ABOVE : 1
STROKE_AND : 1
STRENGTHS_PLEASE : 1
ALSO_THAT : 1
TAKE_ONEHALF : 2
AND_TYLENOL : 1
GUARDIANSHIP_AFTER : 1
THIS_FIRST : 1
SPENT_SHIFT : 1
HX_SUICIDE : 1
SELECTED_SPECIALTY : 1
AREA_ADDITIONAL : 1
HEALTH_EDUCATION : 1
OTHER_INSURANCE : 1
PRESCRIBED_MG : 1
EXPERIENCE_WAS : 1
INCLUDING_FROWNING : 1
LBS_KG : 3
SUPPLIES_SELECT : 1
DATE_CONTACT : 1
PROVIDED_THE : 1
LISINOPRIL_TAB : 2
HE_REGULARLY : 1
ON_MARGIN : 1
HIS_MEDICATION : 1
ALL_SOURCES : 2
SHE_DECIDED : 1
OUTPATIENT_STOMACH : 1
REFERRAL_MOVE : 1
UP_VERY : 1
POSSIBLE_PCC : 1
PLACE_BUT : 1
OF_SHIFT : 1
INSTRUCTION_TO : 1
PSYCHIATRY_INPATIENT : 1
RESP_CASE : 1
EYE_HEALTH : 1
SO_GOOD : 1
ME_HOME : 1
DIRECTED_LESION : 1
SPECIAL_INSTRUCTIONS : 1
INJURY_EAR : 1
OA_ND : 1
WATCHFUL_EASILY : 1
TO_PATIENT : 3
CONTACT_NUMBER : 1
PURPOSES_SYNCOPAL : 1
MG_PO : 9
CHARGE_MANY : 1
FOUND_DATE : 1
WENT_HE : 1
ISSUES_DISCUSSED : 1
EAR_PRESSURE : 1
PRIMARY_ADDENDUM : 1
THAT_APPLY : 1
PRACTITIONER_BE : 1
HEALTH_YEAR : 1
MEDICAL_AND : 1
REPEAT_AND : 1
WITH_MUCUS : 1
MANY_WITH : 1
STREN_GOAL : 1
TAN_STUCK : 1
EXR_MESYLATE : 1
INSTRUCTIONS_PT : 1
HOWEVER_CUT : 1
UNEMPLOYMENT_BY : 1
PACU_AT : 1
BY_TO : 1
EXPEDITOR_NEED : 1
PAROXETINE_MG : 1
ASSOCIATE_PROVIDER : 2
SAFETY_GAIT : 1
REFILLS_DONE : 1
NOTED_PT : 1
FLEXED_POSITIONING : 1
CALLED_WITH : 1
ACTIVITIES_DAILY : 1
AND_DOSING : 1
EDUCATION_GROUP : 1
AGO_AND : 1
AGO_HAD : 1
AND_STATED : 1
MR_THAT : 1
COMPLETE_MEDICATION : 1
IN_APT : 1
PHONE_AT : 1
PAIN_MG : 1
WHICH_IS : 1
IF_SE : 1
SUPPLIES_NOT : 2
HIM_HIS : 1
THE_URINARY : 1
WITH_DC : 1
ANY_NEW : 1
CONTACT_WORKED : 1
AND_PLAN : 2
ACTIVE_INSURANCE : 1
MANAGEMENT_PHYSICAL : 1
GOALS_BRADEN : 1
RENT_THE : 1
GIM_CARCINOMA : 1
NSC_PATIENT : 1
SE_TO : 1
ONE_WEEK : 1
REVIEWED_DATE : 1
MINUTES_IS : 1
ACTIVITY_RETURN : 1
LAWSUIT_REGARDING : 1
IMAGING_PROCEDURES : 1
HANDOUT_ABOUT : 1
TOPIRAMA_LOOK : 1
HAS_REPLACED : 1
HOME_FEB : 1
EFFUSION_AGREES : 1
THIS_LEAD : 1
PT_SEEN : 1
AT_DISCHARGE : 1
AND_AND : 1
WHEELCHAIR_PAIN : 1
TO_VALIDATE : 1
CONTACT_CONTINUES : 1
ASHOK_LANS : 1
URGENT_CHEST : 1
PT_BELIEVES : 1
JUDY_MCCULLY : 2
ST_NEGATIVE : 1
NOTE_DOSAGE : 1
YOUNG_OBTAINED : 1
OR_DISTRESS : 1
MHC_MEDICATION : 1
OF_LEG : 1
RECENT_PRN : 1
XTRA_STRE : 1
BEHAVIORAL_HEALTH : 1
AS_FIND : 1
MOUTH_MORNING : 1
INSTRUCTED_TO : 2
STATUS_CHANGE : 1
TOBACCO_ANTIDIABETICS : 1
THEN_FOCUSED : 1
OR_ONE : 1
PATIENT_DISCONTINUE : 1
THEN_CALL : 1
THE_ANSWER : 1
LMSW_ADD : 1
TO_POST : 1
ABDOMEN_AND : 1
HIS_LAWYER : 1
SUBCUTANEOUS_OF : 1
THE_TELEPHONE : 1
KNOWS_TO : 1
THROUGH_ASARCO : 1
PSYCHIATRY_DI : 1
WERE_ON : 1
SIGNIFICANT_FOR : 1
IN_PLACE : 1
WORK_RETURN : 1
AMBULATORY_LAST : 1
DISCUSS_YOUR : 1
DATE_ASSESSMENT : 1
BY_VA : 1
SC_PAIN : 1
PATIENTS_WERE : 1
CURRENT_BLOOD : 1
THE_WATCHING : 1
THIS_GETS : 1
ACTIVE_ALERT : 2
REGARDING_APPOINTMENT : 1
PRODUCTIVELY_TAKING : 1
HAVE_BEEN : 1
WITH_PLANS : 1
BEEN_WELL : 1
CONTINUE_MONITOR : 1
GREATER_BMI : 1
TREATMENT_BECAUSE : 1
HE_CARDIOVASCULAR : 1
IN_SEVERITY : 1
ADDENDUM_MST : 1
YESTER_TUMOR : 1
LAB_RESULTS : 1
WHO_PCP : 1
HOME_THE : 1
POOR_CERVICAL : 1
INSIGHT_WAS : 1
BEING_BY : 1
EATING_FOR : 1
NOT_HISTORY : 1
SHIFT_DONT : 1
HEART_DISEASE : 1
PT_RETURNED : 1
RESPONSE_COMMENT : 1
NUCLEAR_DEPRESSIVE : 1
STATUS_TO : 1
NONE_THIS : 1
PATIENT_ON : 1
CARE_PROVIDERS : 1
REFILL_WAL : 1
NOTE_ALL : 1
ENERGY_FOLLOWUP : 1
AVAIL_PT : 1
PAST_MONTH : 1
NA_THE : 1
BLOOD_WERE : 1
TO_DISCUSS : 1
DID_HIM : 1
SIGNS_OF : 4
NUMBER_FOR : 1
PHYSICAL_KEEP : 1
OTHER_SEES : 1
ABSCESS_MOUTH : 1
CONSTITUTIONAL_EXAM : 1
STABLE_TELEPHONE : 1
HISTORICALLY_TO : 1
PREVIOUS_NOTES : 1
SERVICE_PT : 1
THE_EMERGENCY : 1
OPPORTUNITIES_MEDICATIONS : 1
PT_PROVIDER : 1
DIVORCE_TO : 1
EAT_BREAKFAST : 1
ABOUT_HIS : 1
PATIENTS_COORDINATION : 1
FOLLOWING_NOSHOW : 1
APPROVED_AND : 1
OF_BOTTLE : 1
NOT_ANXIETY : 1
COVERED_MINUTES : 1
TO_ACCEPT : 1
EPIS_CONROE : 1
MCCULLY_AND : 1
DIFFUSELY_CREATININE : 1
GLAUCOMA_NUCLEAR : 1
INCREASED_SWEATS : 1
COSIGNING_WHO : 1
THE_COSIGNING : 1
! Stats words=1817  pairs=8531
