# Supplementary material for: Predicting the Risk of Suicide by Analyzing the Text of Clinical Notes
Source: PLoS One. 2014 Jan 28;9(1):e85733. doi: 10.1371/journal.pone.0085733 (PMC3904866; doi:10.1371/journal.pone.0085733)
Supplement: Appendix S3 — Machine Learning Libraries and Methods: This section is provided to enclose the open source (Apache License) classifier used for the building of the statistical models, specifically for the purposes of study reproducibility. A detailed account of these tools is intended for another publication. (ZIP) [file pone.0085733.s003.zip › Appendix3/ML_libs/Regression_testing/group2/processed/grp2-pt-1099.dat]

!  Done reading
! Total word count = 4505
! Total unique words = 1710
! Total pair count = 9006
! Total unique pairs = 8065
COLORED : 1
DEMONSTRATE : 1
SORE : 2
AT : 37
WM : 1
ONLY : 1
SEPOCT : 1
WORK : 5
LISINOPRIL : 2
SHEDULED : 1
VOICES : 1
LOWER : 3
POUNDS : 1
CLEMENS : 1
REFILLED : 1
MONTH : 2
OEF : 1
ULCER : 3
THANK : 1
REFILLS : 5
ACCIDENT : 2
INFO : 1
WEIGHT : 8
BEEN : 11
CAULIFLOWER : 1
STRETCHING : 1
GLASGOW : 1
GOALWHAT : 1
BASE : 2
WITHIN : 1
TERATOGENIC : 1
REFILL : 2
WEINSTEIN : 1
MILD : 1
DECEMBER : 1
OUTPATIENT : 5
MINUTE : 2
GOES : 2
WEEKLY : 1
INTAKE : 1
INSTRUCTED : 4
SHORTNESS : 3
CLEARANCE : 1
NOSTRILS : 1
SPEECH : 2
INTERVENTION : 1
INPATIENT : 10
CULTURAL : 1
TOMORROW : 1
AWAIT : 1
GALESBURG : 1
HAIR : 1
CLOSE : 1
RELATED : 2
USE : 8
SUD : 1
SPECIMEN : 1
PASS : 1
MEANS : 1
CC : 4
HGB : 1
DISCHARGED : 4
HEMATURIA : 1
SUPPLIES : 3
ERROR : 1
REGARDING : 1
VETERANS : 1
LEVEL : 12
TOO : 1
ALCOHOL : 6
TWI : 1
RACING : 1
RAL : 3
AZ : 1
PERSONAL : 1
TRIED : 1
FAX : 1
DOXEPIN : 1
IDENTIFYING : 1
SHOULDER : 1
BOTTOM : 1
MET : 3
HIS : 29
FUNCTIONING : 1
COPD : 3
ARIPIPRAZOLE : 1
FRACTURES : 1
ID : 1
BOTHERING : 1
MEAL : 1
GM : 1
VOIDING : 1
PSYCHO : 1
FATIGUE : 1
APPROPRIATE : 2
NEURO : 2
DIRECTIVE : 2
RAISED : 1
EFFEXOR : 1
APPROACHING : 1
PLAUT : 1
WELL : 1
SHOWED : 1
DISORDER : 2
MEDICINE : 2
TEST : 2
NOTE : 30
CONTACTED : 3
DSMIV : 1
DO : 7
DOES : 11
TALKED : 2
CATEGORY : 1
TREATMENT : 7
BLOOD : 4
ATRIAL : 1
SAME : 1
METH : 1
WORKER : 3
ACCESS : 1
HAVE : 18
REFLEX : 1
ADVERSE : 2
OPTION : 3
OUTLINE : 1
SCHEDULED : 2
FAMILIAR : 1
STEPS : 1
OF : 82
DRUG : 2
CRISIS : 1
VIEWED : 1
ILINTACT : 1
TAB : 9
BUPROPION : 1
CERTAINTY : 1
CALLER : 1
PSYCHIATRY : 1
REQUIRED : 3
ASSISTED : 1
DEC : 1
HAS : 25
MONITOR : 2
FOR : 62
SHAVE : 1
ASU : 1
GRANULAR : 1
NUTRITION : 3
SAID : 1
NUMBER : 4
STATEMENTS : 1
WOMEN : 1
COMFORTABLY : 1
MODALITIES : 1
EXPLANATION : 1
IBURPROFEN : 1
MORNING : 1
WEATHER : 1
COVERS : 1
INR : 1
OBTAINING : 1
KNEE : 1
SC : 2
EC : 2
MY : 2
DECLINE : 1
IDEATION : 3
LAWYER : 1
TXC : 1
GROGGY : 1
RECREATION : 1
SATURATION : 1
GEN : 1
THINGS : 1
MYOCARDIAL : 1
COLONOSCOPY : 2
THEM : 2
SUBSTANCE : 3
GOALS : 3
ASSESSMENT : 13
US : 1
AUTH : 1
ACTIVITY : 2
BUSY : 2
OWN : 1
LET : 1
AMBULATION : 1
ND : 1
ATTACHED : 1
SABOTAGE : 1
SIMILAR : 1
STARTING : 1
ITCHY : 1
MENU : 2
ENCOURAGED : 1
BM : 3
INFORMATION : 8
DEGREES : 1
ADEQUATE : 2
INITIAL : 2
REFERENCE : 2
PI : 1
HUGGER : 1
CHILDREN : 1
EXAM : 4
ESSENTIALLY : 1
VISIBLE : 1
ATTEMPTS : 1
PSYCHOLOGICAL : 1
SUICIDE : 4
AO : 1
THE : 78
INFORM : 1
CARCINOMA : 1
JUST : 3
LASTING : 1
INCREASED : 2
FILED : 1
NSC : 1
PHONED : 1
PRESENTS : 2
GROUP : 8
DURATION : 2
IDENTIFY : 2
WRITING : 1
TRIALS : 1
ENJOYED : 1
DIMINISHED : 2
PULSES : 1
GO : 2
SIGNIFICANT : 7
PSHX : 1
BOWEL : 1
SCANT : 1
UD : 1
COLOR : 3
LSU : 1
TECHNIQUES : 1
ARRIVED : 2
BP : 8
MEDS : 6
LIMITATION : 1
CT : 1
SEPTEMBER : 1
DEPRESSION : 4
CM : 3
FREE : 1
DISCOVERED : 1
LBP : 1
IMAGE : 1
CITALOPRAM : 1
GAIT : 1
AGAIN : 3
DISPOSITION : 1
ANXIOUS : 1
TID : 3
DESCRIBE : 1
CORRECTLY : 2
BIO : 1
CAP : 3
ADJUSTMENTS : 1
DIET : 4
STATED : 9
HEARING : 2
HANDS : 1
FLAGYL : 2
AXIS : 1
GET : 1
WHAT : 3
RA : 1
WT : 3
ABSOLUTE : 1
BENEFITS : 1
STARTED : 1
SUSTAINED : 1
ASSISTANCE : 2
PROCTOFOAM : 1
FEEDING : 1
DIABETIC : 3
CARDIOVASCULAR : 2
SCANNED : 1
BBS : 1
OR : 27
THERAPEUTIC : 1
BOTH : 1
SHIFT : 2
NODENTURES : 1
YEAR : 4
TEMP : 1
PRESCRIPTION : 4
FIBEROPTIC : 1
COPY : 1
ALREADY : 1
CONCERNS : 2
SOFTNER : 1
CHEEKS : 1
LB : 6
COUMADIN : 1
CANDIDA : 1
HERBAL : 1
DE : 1
LIKE : 6
SUCRALAFATE : 1
SEEN : 3
PRE : 1
EXPERIENCE : 1
JEWELRY : 1
INLAW : 1
MAILED : 1
FOOD : 1
USAGE : 1
NURSE : 5
CLICKING : 1
MUCH : 3
DEPAKOTE : 1
LABORATORY : 2
LIFESUSTAINING : 1
FINALLY : 1
CHRONIC : 3
URINATION : 1
TAKE : 9
INTERVIEW : 2
AMARILLO : 1
EXHIBITED : 1
INCREASE : 2
MONITORED : 1
ANY : 10
WALKIN : 1
DISCHARGE : 7
SAFELY : 1
PREEXAM : 1
MOISTURE : 1
SYSTEMS : 2
RECORDS : 1
NSG : 1
LIP : 1
OD : 2
SW : 1
IID : 1
TIDWM : 1
INJECT : 1
FLOW : 1
INTEGRITYSKIN : 1
SARCASM : 1
STOMA : 2
EXPIRATION : 2
UNIT : 4
THINK : 2
RIS : 1
EFFECTS : 1
IBUPROFEN : 2
LOPC : 1
CEL : 1
MD : 2
RELATIONSHIP : 1
UNREALISTIC : 1
SECONDARY : 2
NAME : 4
CARE : 8
MGS : 1
FORT : 1
SURROGATE : 1
LENS : 1
PHX : 1
ACOS : 1
AGE : 3
EVERY : 4
MULTIVITAMIN : 1
INFARCTION : 1
INTENT : 1
ET : 1
SKIN : 5
YESTER : 2
TIMES : 1
IS : 45
SCHOOL : 1
NOT : 24
SUPINE : 1
START : 1
TILL : 1
IF : 15
LABILITY : 1
MH : 2
THERE : 2
WALKING : 2
PHYSIOLOGY : 1
PERSONNEL : 1
BAND : 1
ONCE : 1
EXEMPT : 1
OPTOMETRY : 2
REGULARITY : 1
LIMITED : 1
HERE : 4
IMPROVES : 1
UPSETTING : 1
HIATAL : 1
FLAG : 1
SKILLS : 1
IM : 2
OPPORTUNITIES : 1
COMPREHENSION : 1
POSITIVE : 2
WISH : 1
UNITS : 1
OXIMETRY : 1
LAMOTRIGEN : 1
ONEHALF : 1
ANGER : 1
TRANSFERS : 1
EVALUATION : 2
PPD : 3
APPROX : 1
CTRS : 1
PROGRESS : 3
KEEP : 2
REFUSED : 1
RECURRENT : 1
REHAB : 4
DCD : 2
THESE : 1
ASSESS : 5
CHEWING : 1
REPEAT : 1
VISION : 1
VET : 15
STOOL : 2
DIVORCE : 2
TBI : 1
COMPLETION : 1
PARTICIPATE : 1
REPORTING : 1
PARTICIPATION : 1
EDUCATED : 2
STORE : 1
ASSOCIATED : 1
ESSENTIAL : 1
COMPUTER : 1
BACK : 7
BROKED : 1
TRYING : 1
PAGER : 1
SOURCE : 1
HEIGHT : 1
MARRIED : 2
DICTATED : 1
MALE : 9
SUBJECT : 1
CAR : 1
ADDENDUM : 10
FULL : 1
TREAT : 1
BY : 18
PMH : 1
BMS : 1
NO : 35
INTENSITY : 1
CONSCIOUSNESS : 1
CLINICAL : 3
OADDRESS : 1
REAL : 1
REASSESSMENT : 1
DOE : 1
NONSOAP : 1
CHIEF : 8
LARGE : 1
WIDEPRESSION : 1
RETENTION : 1
CHANGED : 2
LUNGS : 1
SATT : 3
MEETING : 1
UPPER : 4
BENIGN : 2
BACLOFEN : 1
CONVERSATION : 2
LUMBOSACRAL : 1
CLINIC : 11
RISK : 6
PERFORMED : 1
HAIRLESS : 1
BUCKEYE : 1
TO : 138
BMI : 1
COLLINS : 1
PRN : 2
IV : 3
COULD : 3
DEGREE : 1
ABUSE : 5
RHONCHI : 1
ADVANCE : 2
PRESCRIPTIVE : 1
SAFE : 1
TOOLS : 2
BIOPSY : 2
AFTERCARE : 1
PUPIL : 1
PROCEDURE : 8
OBSERVE : 1
REQUESTING : 3
CHAIGING : 1
GAG : 1
CONTRACTOR : 1
COPAY : 1
WILL : 10
APPEARANCE : 1
OFTEN : 1
WARM : 1
BUT : 7
OTS : 1
ASKED : 3
THOUGHTS : 2
STRESSORS : 1
COORDINATION : 1
WEAR : 1
APPETITE : 1
HOMEBOUND : 1
TYPE : 4
SUPPLEMENTATION : 1
CAREGIVER : 4
LIQUID : 2
SEE : 5
PLEASE : 3
INDICATES : 2
MALEATE : 1
DIS : 1
STATUS : 5
LOSE : 1
CONTROLLING : 1
MARITAL : 1
DC : 1
TA : 1
DRINKS : 1
NAD : 3
EFFECTIVE : 2
TOL : 1
JELLY : 1
SUGGESTIVE : 1
CONTINUED : 2
CONSULT : 10
TESTING : 1
ESCALATED : 1
OUT : 6
MUCOSAL : 1
HR : 2
FRICTION : 1
CONT : 2
TEENA : 1
SUPPORT : 4
FIND : 1
GASTROINTESTINAL : 1
PRODUCT : 1
WANTS : 2
ISLE : 1
SMRS : 1
TREATING : 2
UNMH : 1
LEVELS : 1
STRETCHER : 1
SCREEN : 1
PRESENTED : 2
EVALUATED : 2
MANDY : 1
XX : 1
ASSIGNED : 1
EXPOSURE : 1
FUNCTION : 2
REVIEW : 5
LIKELY : 1
THANKS : 1
INFORMATIONAL : 1
MENTAL : 2
NEEDED : 4
COMES : 4
INJECTION : 1
DIVERTICULOSIS : 2
GERD : 1
ELAVIL : 2
FOSAMAX : 2
REPOSITIONS : 1
BROUGHT : 1
LIVER : 1
WERE : 6
HYDROCORDONE : 1
SHEET : 1
AVAILBLE : 1
EXPANDED : 1
NEUROLOGIC : 1
PAPERS : 1
INSTRUCTIONS : 1
LABS : 1
NONSMOKER : 1
VA : 4
JOB : 1
CLOSED : 2
COLOSTOMY : 1
WED : 1
WAYS : 1
POSSIBLE : 1
WDVA : 1
NUCLEAR : 1
APRIL : 1
COVENIENCE : 1
TRIAGE : 1
CH : 1
PART : 1
SUFFERED : 1
SMOKER : 1
FAMILY : 9
DETERMINED : 1
IMPACT : 1
INITIATED : 2
DISEASE : 1
LOOSING : 1
PAIN : 32
MATTER : 1
COCAINE : 1
SEEMED : 2
WHEN : 5
AMBULATORY : 4
EXTERNAL : 2
AS : 18
BEING : 3
VISTA : 1
CRUSTED : 1
INEFFECTIVE : 1
AASU : 1
GASTROENTEROLOGY : 1
AMOUNT : 1
WAS : 42
FLOOR : 1
LPM : 1
PM : 6
WITH : 47
FEELS : 4
FORM : 1
OFFERED : 1
WORRIED : 1
TEMPERATURE : 3
GAUGE : 1
REMAINS : 1
DRINKING : 1
MEN : 1
BASIS : 2
HEALING : 1
INDEX : 1
CDI : 1
ABD : 1
NOW : 3
SCHDULE : 1
INCLUDING : 4
DECISIONS : 1
PTSD : 5
NA : 2
COPING : 1
SETTING : 1
HYDROCODONE : 1
USED : 2
EXACERBATION : 1
LEADER : 1
MONITORING : 2
UNAVAILABLE : 1
VARIOUS : 1
IT : 3
EKGNL : 1
SHOT : 1
HHA : 1
LIST : 1
EXCESSIVELY : 1
IRWIN : 1
OT : 1
SIZE : 1
TROUBLE : 1
DISCUSSED : 3
EATS : 2
MATERIALS : 1
TIGHTNESS : 1
EXERCISE : 3
CA : 2
NUMEROUS : 1
TIME : 15
PURPOSE : 1
GATIFLOXACIN : 1
UNCONSCIOUS : 1
ESOPHAGEAL : 1
DRIVER : 1
ORIENTED : 3
HYGIENE : 1
QUATTLEBAUM : 1
HCL : 2
PSYCHIATRIST : 1
CURRENTLY : 1
ATTEMPT : 1
DISCLOSE : 1
NECK : 5
TEETH : 1
SAFETY : 4
LYING : 1
DIFFERENCE : 1
SIMVASTATIN : 2
SIDE : 1
JOINT : 1
RESPIRATIONS : 3
BATHROOM : 1
ALLERGY : 1
SPEAK : 1
SEDATION : 1
GOING : 2
DID : 3
CALL : 6
SHOW : 1
RESULT : 1
ARRIVAL : 1
HX : 4
BIRTH : 2
SUN : 1
ULTRAM : 2
IMAGING : 2
CONCERNED : 1
PROFESSIONAL : 1
SITUATION : 1
ADDRESS : 1
TELEPHONE : 7
SELECTING : 1
SOB : 3
MICHALSKE : 1
COMPLAINING : 1
COOPERATIVE : 1
REPORTS : 2
TRMT : 1
AVF : 2
RATES : 1
SUBJECTIVE : 2
GUAFENESIN : 1
OPHTHALMOLOGY : 1
HELP : 1
OPTIONS : 1
PER : 6
STIMULATE : 1
CONTINUES : 1
YES : 4
FRIEND : 1
SIMPLE : 1
TOE : 2
XR : 1
SMILING : 1
NOTICED : 1
CONSENT : 1
ETC : 2
FACE : 1
MOBILITY : 1
ERA : 1
YOUR : 5
LEISURE : 1
ALTE : 1
DOING : 3
RETURNED : 2
GIVEN : 11
ALT : 1
VACCINATION : 1
PACKET : 1
COMA : 1
HPI : 2
ABSENT : 1
WHO : 2
HES : 1
ED : 5
UPON : 5
IDENTIFIES : 1
VERBALIZES : 1
BASED : 1
BAR : 1
PHYSICIAN : 15
LACERATION : 1
RHINITIS : 1
ACHE : 1
CURRENT : 11
PERSONS : 1
OPTS : 1
URGENT : 1
TERM : 1
AIDS : 1
HIM : 10
NONBLOODY : 1
CESSATION : 1
FAXED : 1
PULSE : 2
HE : 64
NS : 2
NEXT : 1
RX : 1
RECV : 1
NEEDS : 1
THEY : 5
RATE : 1
REFERRED : 1
IMPRESSED : 1
FELT : 2
MASS : 3
MEMBER : 3
LIPIDS : 1
AGGRAVATED : 1
VIDEO : 1
WATER : 1
FIXATURE : 1
TRANSFER : 2
OBSERVATION : 1
HISTORICAL : 1
ACHES : 1
PHONE : 5
ML : 2
CHECKED : 1
CLEAR : 3
PREDICTING : 2
MSW : 1
ELBOW : 2
PRIMARY : 2
CARBAMAZEPINE : 1
HEMOPTYSIS : 1
LIMIT : 1
DRY : 1
CARES : 1
BILLS : 1
UNTIL : 1
FLORINEF : 1
HAD : 10
SIGNS : 5
HALF : 1
CROSSED : 1
DEPARTMENT : 1
ACTION : 4
SPECIAL : 1
LOSS : 1
BELIEVES : 1
SISTER : 2
PATIENTS : 4
SUMMARY : 1
DEADLINES : 1
SULFA : 1
HUMAN : 1
ASSISTING : 1
BRONCHOSCOPY : 1
PSYCHOEDUCATION : 1
PROVIDED : 4
PRONE : 1
JOE : 1
NEGATIVE : 1
OUR : 1
STANDPOINT : 1
SUPPLE : 1
WRITTEN : 1
NONE : 5
LECTURE : 2
II : 3
DECREASED : 1
CONNECTED : 1
LAB : 4
LOT : 1
4D : 1
ANGRY : 1
TRAVEL : 1
RD : 1
DIAGNOSTIC : 1
MIND : 2
ING : 1
TRANSPORTED : 1
COMPLAINTS : 4
CONTACT : 9
CRESTOR : 1
CLOCK : 1
SCHEDULE : 1
HER : 2
RETURNS : 1
ATRIUM : 1
ORDERED : 1
PPP : 1
FEELING : 3
SHOULD : 1
QUESTIONS : 3
ATYPIA : 1
PEERS : 1
PROBLEMS : 3
URINE : 2
APPEARED : 3
ENDOSCOPY : 1
BOWERMAN : 1
BLED : 2
MCG : 2
GIVE : 1
CAN : 3
THERAPY : 6
PSYCH : 2
TEMPLATE : 1
LIVING : 1
PLACE : 1
SMOOTH : 1
RECEIVES : 1
NONVA : 3
WHICH : 3
NOSHOW : 1
SYMPTOMS : 1
IMPLANT : 1
COMFORTABLE : 1
RANGE : 1
NOTES : 1
UNDERLYING : 1
OVER : 4
MG : 27
ON : 35
TRANSFERRING : 1
CONNECTION : 1
MIXED : 1
QUIT : 4
COMPLETE : 2
UROLOGY : 1
PRESSURE : 4
INTAKETO : 1
IMMOBILE : 1
VIA : 9
EXERTION : 1
SEPTUM : 1
LIGHTHEADEDNESS : 1
ACCEPTABLE : 2
HANDOUTS : 1
CDC : 1
GOOD : 4
VIETNAM : 1
ARMY : 1
MED : 3
DRUGS : 1
INTO : 1
INHALER : 1
FOCAL : 1
EDEMA : 1
SODIUM : 1
THEMSELVES : 1
PROVIDER : 6
QUESTIONED : 1
INSURANCE : 2
SHE : 7
PO : 9
UP : 11
GENDER : 1
THEN : 1
MULTIPLE : 1
USES : 2
USUAL : 3
PROTECTOR : 1
LOCATION : 3
ALERT : 3
FEVER : 1
BOSS : 1
LETHALITY : 1
AWAY : 1
VERBAL : 1
MEDIASTINAL : 1
SEP : 1
UNDER : 1
OFF : 1
STERISTRIPPED : 1
CONFUSED : 1
DATE : 11
COMMENT : 1
DAILY : 8
ICU : 1
LONG : 2
FEMALE : 1
PROGRAM : 3
ANTICANCER : 1
GRADE : 1
APPOINTMENT : 5
ACCEPTING : 1
WOULD : 5
SEMMES : 1
AWAKE : 1
FOLLOW : 2
WHEELCHAIR : 3
FACING : 1
REPLACEMENT : 1
FROM : 8
OPIATES : 1
LEFT : 5
METHOD : 2
ANTERNATE : 1
WHEEZING : 1
HOMICIDAL : 1
MEDICAL : 6
CONTRAST : 1
SELFMONITORING : 1
ALSO : 7
SPOKE : 2
SYSTEM : 1
SEX : 2
ASSUMED : 1
ACTIVITIES : 3
COMPLIMENTARY : 1
CABBAGE : 1
EXTREMITY : 1
PLAVIX : 1
QUIETLY : 3
WORKING : 2
AN : 7
MOIST : 1
UNLABORED : 1
BEDSITE : 1
OVERTHECOUNTER : 2
HEART : 4
ADT : 1
COMPLAINT : 8
SIGNATURE : 1
ORDER : 5
USING : 1
SEEK : 1
CHILD : 1
LEFTSIDED : 1
EASILY : 1
BOTTLE : 1
FOUR : 1
INFLUENZA : 1
APPARENT : 1
DENIED : 1
MEASURES : 2
EYE : 3
PETROLEUM : 1
CLOT : 1
ARRANGED : 1
MILIEU : 1
KICKED : 1
DIFFERENT : 1
BRONCHSOCOPY : 1
NEW : 7
AGO : 4
MOUTH : 6
FOCUSED : 1
COMBING : 1
ATTENDING : 2
CHEST : 2
HEPATITIS : 1
PRESENT : 5
HAVING : 5
USEFUL : 1
SOME : 2
FACILITATOR : 1
PSOME : 1
ENCOURAGE : 1
LATER : 1
ARE : 5
ANSWERED : 1
DESIRE : 1
INDEPENDENT : 1
NEED : 6
HYPERTENSION : 2
ELEVATED : 1
WASHING : 1
PERSON : 2
HYPOTHYROID : 1
APPLY : 2
WELLBEING : 1
RECEIVED : 2
CPRS : 1
PSYCHIATRIC : 1
SURGERY : 2
LAMICTAL : 1
BARRETTS : 1
AMA : 1
KAREN : 1
FREQUENCY : 4
ASPIRIN : 1
NUTRIONAL : 1
COMPLETELY : 2
TX : 1
RES : 2
CONSTA : 1
INHL : 1
BROCC : 1
BODY : 2
KERATOSIS : 1
ENTRY : 1
PREVENTIVE : 1
GENERAL : 3
YEARS : 2
CAD : 1
TIRED : 1
COLON : 2
BE : 14
RESOLVED : 1
MEDICINES : 1
BECAUSE : 3
ENDOSCOPIC : 2
CANCER : 1
OX : 1
DUE : 3
GLASSES : 1
REMAIN : 1
HS : 2
THEIR : 3
PERTAINING : 1
DISCOMFORT : 1
LED : 1
PING : 1
SUITE : 1
OMEPRAZOLE : 1
TRACH : 2
AGITATION : 1
IMPINGMENT : 1
CANE : 1
ISSUES : 2
TRK : 1
SOUNDS : 1
REVIEWED : 6
HEILIGENTHAL : 1
DM : 2
PASSAGE : 1
ISSUE : 1
MAYO : 1
BEFORE : 2
OTHER : 12
PRODUCTIVE : 1
ALL : 4
DRESSING : 1
AUTHOR : 1
QHS : 2
LIFE : 2
SECOND : 1
BED : 4
NURSING : 15
INHALE : 1
DYSPNEA : 2
FOLLOWING : 8
OUTCOME : 1
IDENTIFIED : 3
PLESSNESS : 1
ENDING : 2
DIAGNOSES : 1
PATIENT : 64
SELF : 1
INTEGRILIN : 1
ALLERGIES : 3
ACCEPT : 1
WITHOUT : 3
DIAGNOSIS : 6
JUL : 1
LIMB : 1
SUBSEQUENTLY : 1
OBTAIN : 1
EVAL : 5
VERIFIED : 1
ADMISSIONS : 1
ATYPICAL : 1
PROCEEDED : 1
AGREES : 1
ABDOMEN : 1
IODOSORB : 1
CALLING : 1
LSPINE : 1
MI : 1
APPROVAL : 1
ANXIETY : 2
THAN : 4
RARELY : 1
THOUGH : 1
ACUTE : 1
SENSATION : 1
WE : 1
REQUIRES : 2
PROTOCOL : 2
FEE : 2
COME : 1
SYND : 1
ROUTINE : 1
ROOM : 3
IMPROVED : 1
CAME : 2
VISIT : 12
THAT : 26
PULS : 1
CHART : 2
NORMAL : 1
TEGRETOL : 1
WIFE : 1
DEPRESSED : 2
STAFF : 7
SERVICE : 4
CE : 2
RIGHT : 5
AVAILABLE : 1
BREATHING : 1
PC : 2
VITALS : 2
AMBU : 1
CERTAIN : 1
VISITED : 1
SELFDISAPPOINTMENT : 1
ABOUT : 12
PEDAL : 1
PEARCE : 1
REQUESTS : 2
ONE : 9
ULCERATION : 3
UNSUCCESSFUL : 1
PLEASANT : 1
POTENTIAL : 1
NOTIFY : 2
ANATOMICAL : 1
FU : 1
PTS : 1
NKA : 1
BRIEF : 1
SPONDYLOSIS : 2
HYPERLIPIDEMIA : 2
TABLET : 8
WRITER : 3
DURING : 3
YOU : 11
TOLD : 1
ENVIRONMENT : 2
PSYCHI : 1
DIRECTED : 2
SCREENING : 4
STUDIES : 1
DOESNT : 2
CHECKS : 1
CARDIOLOGY : 4
LYMPH : 1
INFORMED : 3
REACH : 1
GETTING : 1
TRAPPED : 1
PAST : 10
REACTIONS : 2
EQUAL : 1
TI : 1
LAVERNE : 1
PSA : 1
INTERESTED : 1
REASON : 4
OXYGEN : 2
NONLABORED : 1
TOBACCO : 3
SOUTH : 1
ESP : 1
DELAYED : 1
REMINDER : 1
EPIS : 1
HOME : 8
SIX : 1
YOUD : 1
AGREEABLE : 1
ONYCHOMYCOTIC : 1
PENICILLIN : 1
NOTED : 2
STL : 1
AORTA : 1
INDIVIDUAL : 2
MEMBERS : 1
SOCIAL : 8
LN : 1
HOSPITAL : 3
MAIN : 1
RETURN : 2
SUICIDAL : 2
MODERATE : 1
PRAVASTATIN : 1
DEPT : 1
EITHER : 4
HEP : 1
METHADONE : 2
INJ : 1
VITAL : 5
RESECTION : 1
SO : 4
BRONCHITIS : 1
MIN : 2
REGULAR : 1
CONTACTING : 1
POOR : 3
REPLACE : 1
QUANTITY : 1
SETTINGS : 1
REPLACED : 1
RECONCILIATION : 3
NONCOUNT : 1
CCTV : 1
PROTECTIVE : 1
ENDO : 1
JUDY : 1
PROSTHESIS : 1
MINUTES : 2
POINTS : 1
AVOIDED : 1
GREAT : 1
BIL : 2
FOLLOWUP : 1
SOC : 1
SPECIFY : 1
PERIORBITAL : 1
MAKE : 2
INDETERMINATE : 1
RECORDED : 2
NONOBSTRUCTING : 1
WEEK : 1
RISKS : 1
ADMIS : 1
TEAM : 1
DROWSY : 1
CHECK : 4
FINE : 2
SCAN : 1
PSYCHOTIC : 1
BHCL : 1
FALL : 2
INDICATING : 1
APPROVED : 1
DATA : 1
NERVE : 1
AM : 8
PVCS : 1
SITTER : 2
IMMATURITY : 1
THRU : 1
BEIN : 1
HAPPENS : 1
ENTERED : 1
RUNNING : 2
OCCASION : 1
GLARGINE : 1
EKG : 1
PLACEMENT : 2
COST : 1
FLAT : 1
MOOD : 1
LIVES : 1
DNR : 1
RIB : 1
EVENT : 2
REPORT : 7
LEAST : 1
PLATINUM : 1
ELECTRONICALLY : 1
ROSUVASTATIN : 1
HOW : 5
WITB : 1
CALLED : 3
TOOK : 2
PROPERTY : 1
PHQ : 2
SUPERVISION : 1
INFUSING : 1
SPECTACLE : 1
SINCE : 8
MANY : 2
CRAVINGS : 1
WOMENS : 1
COUGH : 1
DISCUSS : 1
CHANGE : 1
ALLERGIC : 1
PRESENTING : 1
ESOPHAGUS : 1
SOAP : 2
PREOPERATIVE : 2
OFFICE : 1
MADE : 1
TEACHING : 2
MEDIASTINOSCOPY : 1
YRS : 1
INCLUDES : 2
OBTAINED : 1
ADVISED : 1
PRINTED : 1
DOSE : 4
ENCOUNTER : 2
MONTHS : 1
SMOKING : 2
AFFECT : 2
SUNSCREEN : 1
PREDNISONE : 1
MEASUREMENT : 1
ECHO : 1
SSN : 1
AVOID : 2
GIRLFRIEND : 1
BRADEN : 2
USMC : 1
APOLOGIZED : 1
DIALOG : 1
CIRCULATING : 1
BEDSIDE : 1
DATED : 1
ASKING : 1
ALONE : 3
ASSISTANT : 1
EXPECTANCY : 1
NUTRITIONAL : 1
TRAMADOL : 1
WHY : 1
OTCS : 1
LUNG : 1
MEDICATION : 11
STOP : 1
RESTING : 6
DISSEMINATED : 1
WRIST : 2
ACROSS : 1
WANT : 3
ACETAMINOPHEN : 1
LP : 1
ITEMS : 1
CONTINUE : 2
ORAL : 3
ABNORMAL : 1
LBED : 1
SERVICES : 2
INSIDE : 1
EXAMINATION : 1
ST : 1
AWAKENING : 1
SUCH : 2
HISTORY : 10
SMACKING : 1
RESPIRATION : 2
PMHX : 2
BACKGROUND : 1
HOURS : 1
TUMOR : 1
RESPERIDONE : 1
HEALTH : 7
SCRUBBED : 1
REPORTED : 1
JAX : 1
HERNIA : 1
PLACED : 1
STOOLS : 1
FLUNIS : 1
REDUCE : 2
APICAL : 2
DIPPY : 1
WOUND : 2
DEBILITY : 1
ANTIHISTAMINES : 2
PROSTATE : 3
QS : 2
EXCLUDING : 1
SITE : 1
PREVIOUS : 3
SD : 1
OVERALL : 1
DEVIATED : 1
BIPOLAR : 3
BEINGS : 1
EFFORT : 2
PICKED : 1
VERDE : 1
REFERRAL : 1
OUTREACH : 1
INTERVENTIONS : 2
COMPLICATIONS : 2
PUNCH : 2
DENTURE : 1
KG : 6
PROPANOLOL : 1
VS : 2
WAL : 4
MORE : 5
SEROQUEL : 1
PE : 1
CWT : 2
GAOLS : 1
AUG : 1
INSULIN : 1
WENT : 4
SUMPTER : 1
EYES : 1
PROBLEM : 3
SLIPPED : 1
CLONAZEPAM : 2
RECEIVE : 1
AGENCY : 2
BLUE : 1
FILLION : 1
ER : 3
RECORD : 2
IMI : 1
APPLICABLE : 2
REQUEST : 2
PRESCRIBED : 2
OXYMIZER : 1
UNABLE : 1
RN : 2
XYZZY : 2
CORRECTION : 2
ADLS : 1
THROUGH : 1
PUFFS : 1
FACETOGENIC : 1
AMT : 1
HEENT : 1
ANTICOAGULATION : 2
TELEMETRY : 1
LTC : 1
HEADACHES : 1
AFTER : 4
COURSE : 1
STRUCTURED : 2
ADMISSION : 4
LONGER : 1
GUAIFENESIN : 1
SEPTOPLASTY : 1
SAVAHCS : 1
STILL : 3
CONCERNING : 1
SCALE : 4
ACTUAL : 1
LESS : 3
FINICAL : 1
NON : 2
NICOTINE : 1
LUMBAR : 1
ENALAPRIL : 1
GROUPS : 3
PCP : 2
BRUSHING : 1
ULA : 1
SAYS : 1
FUTURE : 3
APPOINTMENTS : 1
EXUDATIVE : 1
BEHAVIOURS : 1
EACH : 1
OBSERVATIONS : 1
SYMPTOMATIC : 1
ASSOCIATE : 2
DENIES : 5
DOB : 1
OPD : 1
SNALL : 1
TERMS : 1
OLD : 3
TONIGHT : 1
HAMOT : 1
DRAWN : 1
REQUESTED : 1
FOOT : 4
OVERNIGHT : 1
CLINICIAN : 2
STATEMENT : 1
TOLERABLE : 1
VETERAN : 12
CAPSULE : 2
GLUCOSE : 2
DINNER : 1
PT : 44
AGITATED : 1
INJURY : 2
RADIATION : 3
MOVE : 2
REPLIED : 1
PAATIENT : 1
IRON : 1
PSYCHOSOCIAL : 2
AREA : 3
PROCEDURES : 3
SKILLED : 1
VIS : 1
ABGS : 1
FROWNING : 1
MINIMAL : 1
GU : 1
SELECTED : 1
CERVICAL : 1
MM : 1
UNDERSTANDING : 1
ILLNESS : 2
MEDICATIONS : 18
RATIONAL : 1
LOST : 3
PNEUMOCOCCAL : 1
MR : 2
COLACE : 1
FACTOR : 1
RECREATIONAL : 1
AND : 83
BILATERAL : 1
INSOMNIA : 1
HOUR : 1
DAN : 1
DESCRIPTION : 2
SELECT : 2
URINARY : 2
DRIVING : 1
RECOMMENDED : 2
JUN : 4
CRACKLES : 1
VACCINE : 2
RESPONSE : 2
BETTER : 4
COMMUNICATE : 1
CVAS : 1
SLURRED : 1
CONCURRENT : 1
RESULTS : 4
PROCESS : 2
EMERGENCY : 2
ANSWER : 1
BREATH : 4
ABLE : 3
RECENT : 4
ATE : 1
OLLECTED : 1
IN : 42
LOW : 4
CUT : 1
REGIMEN : 1
MAY : 6
VARDENAFIL : 1
MANAGEMENT : 3
STATE : 2
DISCONNECTED : 1
PLAN : 13
WABLE : 1
LENGTH : 1
APPT : 4
SMOKE : 1
TAKING : 4
ADMITTED : 2
CARD : 1
PERIOD : 1
SS : 1
XVETERAN : 2
SATS : 1
PANIC : 1
DONE : 2
PHYSICAL : 4
TEAR : 1
NIGHT : 5
CP : 3
ACTIVE : 20
KNOW : 1
COPAYMENTS : 1
BULGE : 1
CHARETED : 1
LACK : 1
MANAGE : 1
TRS : 1
ABILITY : 2
BEDREST : 1
COMMITTED : 1
PSYCHAITRIST : 1
WALS : 2
METHODS : 1
FAIRLY : 1
CONTAINMENT : 1
EPIGASTRIC : 1
NEWLY : 1
SI : 2
STIFFNESS : 1
SUGARS : 1
CLOTS : 1
IMPRESSION : 1
FOCUS : 1
SOLUTION : 1
THIS : 29
TEMPORAL : 1
EVEN : 2
HIGH : 4
OLDER : 1
EKSW : 1
REMINDERS : 1
DDRIVE : 1
APP : 1
DRAW : 1
SCOPE : 1
VAMC : 2
DISORIENTED : 1
LAST : 11
GROSS : 1
TLC : 1
RELAXED : 1
FIBRILLATION : 1
MOXIFLOXACIN : 1
LUNCH : 1
EDUCATION : 11
HOLD : 2
EKNURSING : 1
SWITCH : 1
SESSION : 4
STATES : 15
WIFES : 1
ACCUCHECKS : 1
SUPPER : 2
SITUATIONS : 1
LOCAL : 1
WHILE : 2
DETAILS : 2
STIMULATOR : 1
PARK : 1
AFFECTED : 2
SHORT : 2
RESENTMENT : 1
ACCOMPLISH : 1
VASELINE : 1
FIRST : 1
WAIT : 1
PROCED : 1
ICDCM : 4
COGNITION : 1
OIF : 1
RESP : 5
ETOH : 1
DOWN : 1
UP_PT : 1
AVOID_SUN : 1
OR_HEALTH : 1
CURRENT_REGULAR : 1
RESP_ABNORMAL : 1
ANTERNATE_NUMBER : 1
PAIN_WEIGHT : 1
TO_PT : 3
COLON_NO : 1
FLAG_CATEGORY : 1
DC_SIMVASTATIN : 1
STATED_CONCERNS : 1
YOU_DRINKING : 1
YRS_NOW : 1
ADMISSIONS_NO : 1
AND_LACK : 1
EATS_SUPPER : 1
PULSES_INPATIENT : 1
ED_VISITED : 1
DRINKS_ON : 1
CC_PT : 1
OR_CONTACT : 2
ULCER_GIVEN : 1
BULGE_RIGHT : 1
INPATIENT_NURSING : 1
HIS_PSYCH : 1
THERE_IS : 1
MG_PATIENT : 1
WAS_AS : 1
SPEECH_CLEAR : 1
WHEELCHAIR_IMPINGMENT : 1
PROBLEMS_PERSONAL : 1
PATIENT_HIGH : 1
AT_ANY : 1
INCLUDES_COMBING : 1
RISK_WEIGHT : 1
NEW_OVERNIGHT : 1
WRITER_WOULD : 1
YEARS_AND : 1
MM_INPATIENT : 1
PATIENT_MATERIALS : 1
CORRECTLY_TO : 1
THIS_DECEMBER : 1
HYPERLIPIDEMIA_RECEIVED : 1
TAKE_ALL : 1
KG_WITH : 1
HALF_OF : 1
SAME_COMPLAINT : 1
TRIED_CALL : 1
HIS_ROOM : 1
INPATIENT_STATUS : 1
BEEN_TO : 1
UP_THE : 1
COMFORTABLE_ALONE : 1
SATT_GROUP : 1
POOR_WORRIED : 1
CARD_WITH : 1
PARK_FOR : 1
HYPOTHYROID_QS : 1
HAVING_SHORTNESS : 1
CAME_THE : 1
HOME_HE : 2
FOR_FOR : 1
RECONCILIATION_GROSS : 1
ON_TO : 1
SYND_NURSING : 1
VA_PSYCH : 1
LEVEL_NEED : 1
STATED_LEVEL : 1
OFFERED_NO : 1
AT_RECONCILIATION : 1
HAD_OWN : 1
ORDER_ENTRY : 1
SEMMES_COMPUTER : 1
OF_GOOD : 1
DO_SO : 1
PATIENT_HAD : 2
SC_ED : 1
PO_ACTIVE : 1
ASSESSMENT_CHIEF : 1
AT_USUAL : 1
SCHDULE_FOR : 1
DESCRIPTION_TREATMENT : 1
TO_HIS : 6
AMBU_4D : 1
SEPTUM_SEPTOPLASTY : 1
JEWELRY_PROCEDURE : 1
TEMPERATURE_RESPIRATION : 1
TO_OUTLINE : 1
OF_HIS : 3
EDEMA_BIL : 1
PATIENT_CONTACTED : 1
AGITATION_NA : 1
FOR_SHORT : 1
THE_PATIENT : 10
PERSONAL_OF : 1
PRESENT_FUTURE : 1
AT_THIS : 5
OPTION_AS : 1
ACCESS_ADDENDUM : 1
AND_INFORMATIONAL : 1
EFFECTIVE_PATIENT : 1
AND_HEIGHT : 1
DEPRESSION_SI : 1
UNAVAILABLE_OUTPATIENT : 1
CHIEF_PAST : 1
MG_TIDWM : 1
PT_NOT : 1
PRN_CONTACT : 1
LEVEL_INTENT : 1
NEURO_PROTECTIVE : 1
VISIT_AS : 2
HAVE_AND : 1
AORTA_FOR : 1
CLINIC_IS : 1
IMPRESSION_PERSONS : 1
RECEIVES_PRESCRIPTION : 1
WORKING_AND : 1
ON_VS : 1
CONTACTED_OFFICE : 1
ANY_INDIVIDUAL : 1
MAKE_THE : 1
YEARS_SELFDISAPPOINTMENT : 1
OR_IN : 1
MEDS_IN : 1
GM_ORAL : 1
REASON_PROCEDURE : 1
OVERNIGHT_ANTIHISTAMINES : 1
HPI_RETURNED : 1
REFILLS_FOSAMAX : 1
ORIENTED_ADDENDUM : 1
WAS_ADT : 1
MOVE_RESP : 1
HE_WAS : 7
IF_PATIENT : 1
EXCLUDING_PSYCHIATRY : 1
NO_APPT : 1
OXIMETRY_AS : 1
AT_VISIT : 4
DENIED_ANY : 1
SELFMONITORING_THERAPY : 1
SUITE_INPATIENT : 1
OUTPATIENT_EXCLUDING : 1
NUTRITION_FREQUENCY : 1
MONTH_HE : 1
REPORTS_THAT : 1
LN_PATIENT : 1
ACOS_FOR : 1
PCP_OFFERED : 1
YES_MCG : 1
PER_LED : 1
PERSONNEL_EXAM : 1
BREATHING_THE : 1
DRESSING_DAILY : 1
INFORM_THAT : 1
REPEAT_DOSE : 1
DATE_MG : 1
APPARENT_SKIN : 1
CONSULT_WAS : 1
RESULT_PLEASE : 1
GROUPS_TESTING : 1
TEMPORAL_RESP : 1
IMMOBILE_TYPE : 1
FUTURE_DATE : 1
SISTER_THAT : 1
NURSE_THAT : 1
WERE_INSTRUCTED : 1
ABOUT_TERATOGENIC : 1
ACTIVITY_BIOPSY : 1
BACKGROUND_THIS : 1
OF_THAT : 2
WITH_SECONDARY : 1
PATIENT_AT : 1
WALS_TO : 1
FLAT_AND : 1
MORNING_BM : 1
POSSIBLE_MUCOSAL : 1
THE_PATIENTS : 1
WAS_CLOSE : 1
LENGTH_SCHEDULED : 1
HAVE_PARK : 1
FOR_ED : 1
TO_WED : 1
NOT_WEIGHT : 1
IT_BLED : 1
TIME_AXIS : 1
PSYCHAITRIST_ALERT : 1
PO_PER : 1
COMPLICATIONS_LOCATION : 1
WANTS_TO : 1
ML_INJECT : 1
MODALITIES_THERAPEUTIC : 1
DOSE_THINK : 1
OPD_NOTE : 1
MEDICATIONS_CLOSED : 1
BEEN_VISIBLE : 1
MEDS_ABUSE : 1
VIA_WEINSTEIN : 1
EVAL_OVER : 1
QUATTLEBAUM_TRS : 1
STILL_HAVE : 1
PSYCHOTIC_ANXIOUS : 1
WITH_UNDERLYING : 1
PROGRAM_OF : 1
LATER_IT : 1
BIPOLAR_DISORDER : 1
STAFF_INSOMNIA : 1
VACCINATION_SHEET : 1
THAN_WAS : 1
FU_FORT : 1
NO_LIGHTHEADEDNESS : 1
BROCC_CABBAGE : 1
BED_WITH : 1
LYING_IN : 1
NOT_APPLICABLE : 1
EKNURSING_MH : 1
FOR_NO : 1
CONCERNS_YOUR : 1
OBTAINED_AM : 1
HISTORY_NO : 1
HCL_CAP : 1
DCD_SOCIAL : 1
USE_NO : 1
TERMS_PSYCHOTIC : 1
STATUS_EXEMPT : 1
VETERAN_TO : 2
HIS_DRESSING : 1
REQUIRED_SITTER : 1
CHART_TO : 2
PROTOCOL_USED : 1
AM_ASSOCIATE : 1
VERDE_LN : 1
MEDS_SUBSTANCE : 1
COST_OF : 1
MAY_MAKE : 1
NONSOAP_FACILITATOR : 1
HALF_DINNER : 1
NOT_AT : 1
CLOCK_ABILITY : 1
DIAGNOSTIC_PERSONS : 1
DATE_MAY : 1
AZ_GAG : 1
PATIENT_FAMILY : 1
IMI_QS : 1
THEY_HAD : 1
HHA_MAY : 1
NAD_INPATIENT : 1
PTS_AFFECT : 1
OR_OTHER : 2
POINTS_PHYSICIAN : 1
AT_USE : 1
PROCEDURE_ANTIHISTAMINES : 1
DENIES_ALERT : 1
SMOKER_HX : 1
PERFORMED_ENDOSCOPY : 1
THE_TOBACCO : 1
MALE_ADMITTED : 1
BUT_THE : 1
PSYCHO_DESCRIBE : 1
IF_IS : 1
OLLECTED_BP : 1
SAYS_ADMISSION : 1
COULD_GO : 1
ARRIVED_THE : 1
OTHER_STATES : 1
COMPLAINT_PSYCHIATRIC : 1
PROCEDURES_LAST : 1
CALLING_IN : 1
ADDENDUM_STAFF : 1
JUN_LB : 1
LOW_XX : 1
PO_TAKE : 1
LASTING_USE : 1
CALLED_THIS : 1
WITH_RISKS : 1
EDUCATION_NO : 1
PRESSURE_OR : 1
CAPSULE_MOUTH : 2
PHYSICIAN_ASSISTANCE : 1
SIGNS_HE : 1
THE_NOTES : 1
NAD_FAXED : 1
THE_IMPACT : 1
OUT_HE : 2
AND_BENEFITS : 1
CAP_ONE : 2
WOMENS_TYPE : 1
MORE_DRINKS : 1
ENDO_COLONOSCOPY : 1
VETERAN_BED : 1
IMAGE_CAN : 1
PRESENT_MAY : 1
HISTORY_LET : 1
BENIGN_NEED : 1
HISTORY_FIRST : 1
HE_FELT : 1
MUCH_EXERCISE : 1
HEMOPTYSIS_OR : 1
TO_GROUP : 2
AGAIN_APP : 1
IN_PHYSICAL : 1
GROGGY_INTERVIEW : 1
PROVIDER_PEARCE : 1
EATS_AT : 1
CUT_AND : 1
FOR_PRESCRIPTIVE : 1
NUTRIONAL_DIABETIC : 1
WITH_HOW : 1
ON_UNIT : 2
BEEN_AND : 1
APPETITE_VETERAN : 1
AT_LOPC : 1
CE_ASSISTING : 1
OXYMIZER_LPM : 1
CONTROLLING_BP : 1
PATIENT_DISCHARGED : 2
OF_SUBSTANCE : 1
NOTE_FOR : 2
IN_MANY : 1
PERIORBITAL_CHEEKS : 1
AVOIDED_THEY : 1
CONTACT_GROUP : 2
OTS_THERAPEUTIC : 1
SPEAK_SEE : 1
SYND_ED : 1
ANXIETY_DISORDER : 1
TALKED_ABOUT : 2
LIST_THAT : 1
PREVENTIVE_HEALTH : 1
FOCAL_COMPLAINTS : 1
THE_RISK : 1
NKA_IBURPROFEN : 1
THE_TERMS : 1
REAL_BUSY : 1
NURSE_SIGNIFICANT : 2
VISIT_VERDE : 1
PROCTOFOAM_BIOPSY : 1
OPTION_HE : 1
EYES_RESPIRATIONS : 1
CARE_CHIEF : 1
LAST_AM : 1
IF_APPLICABLE : 1
CLINIC_AND : 1
SHOT_DONE : 1
PAIN_PM : 1
GROUP_EDUCATION : 1
NO_SKILLED : 1
INCLUDING_OTCS : 1
CLOTS_HAS : 1
BUT_NOW : 1
ERA_TO : 1
MEDS_WENT : 1
USE_SYSTEMS : 1
TO_AGREES : 1
GOOD_AT : 1
FOR_THEIR : 1
COMPLETE_SUICIDE : 1
4D_INPATIENT : 1
IMPRESSION_PRESENT : 1
DEPRESSED_BE : 1
WAS_BECAUSE : 1
REVIEWED_DISCHARGE : 1
HOME_BECAUSE : 1
WITH_YOUR : 1
THE_VAMC : 1
SOCIAL_SKILLS : 1
NEED_ACCOMPLISH : 1
SKIN_AND : 1
WITH_MOXIFLOXACIN : 1
DURING_INTERVIEW : 1
PT_WILL : 1
VET_REFUSED : 1
DOING_BETTER : 2
STATEMENT_INFORMATION : 1
TIME_VETERAN : 1
INDIVIDUAL_FOR : 1
PARTICIPATION_HE : 1
PAIN_ALL : 1
THINK_PSYCHOSOCIAL : 1
ON_TREATMENT : 2
RIGHT_TEMPORAL : 1
OF_BIRTH : 2
NONVA_MULTIVITAMIN : 1
HIS_VAMC : 1
PRESENT_ILLNESS : 1
NOT_PAIN : 1
QUANTITY_FOSAMAX : 1
ASSISTANCE_FOR : 1
THOUGHTS_OF : 1
OR_MORE : 2
ATTENDING_ON : 1
PTSD_WITH : 1
HE_HAVE : 1
WITH_GLUCOSE : 1
WAS_ADMITTED : 1
HEALTH_OVER : 1
DO_CIRCULATING : 1
LIST_HE : 1
TERM_REHAB : 1
BEDSITE_NAD : 1
THAT_IDENTIFIED : 1
LAMICTAL_PO : 1
UPPER_LOWER : 1
FEELING_GOOD : 1
HAVE_ONE : 1
PLESSNESS_DOSE : 1
FOR_SELFMONITORING : 1
NEW_NONVA : 1
WITH_PLAUT : 1
COMPLAINTS_CP : 1
NONVA_MEDICATIONS : 1
COMFORTABLY_IN : 1
HS_USUAL : 1
DENIES_PAIN : 1
WORK_BEHAVIOURS : 1
SHEDULED_FOR : 1
WHEELCHAIR_PATIENT : 1
REPORT_OF : 2
GOOD_COLOR : 1
RES_BP : 1
ON_TEMPLATE : 1
THAN_SCHOOL : 1
LSPINE_AND : 1
PHYSICAL_EXAM : 1
PLEASE_NOTIFY : 1
AVAILABLE_SOCIAL : 1
COUMADIN_POSITIVE : 1
OADDRESS_ST : 1
CRISIS_FROM : 1
CRESTOR_MG : 1
HE_PRESENTED : 1
SHORT_SESSION : 1
PROCEDURES_NAD : 1
OFTEN_YOU : 1
MR_WAS : 1
SIMILAR_NONVA : 1
DRUG_USE : 1
AMT_HE : 1
AVAILBLE_IN : 1
NONE_PATIENT : 1
PAST_OR : 1
ATTEMPTS_ALERT : 1
APPROPRIATE_SETTINGS : 1
SHOW_APPOINTMENT : 1
LIKE_RECV : 1
COVERS_DIAGNOSIS : 1
IMPRESSED_HIM : 1
AT_SMOKING : 1
PT_RETURNS : 1
MEDICATION_HIM : 1
LAST_APPOINTMENT : 1
THE_COORDINATION : 1
ARE_TO : 1
MYOCARDIAL_MI : 1
VETERAN_SECOND : 1
LOCATION_TEMPERATURE : 1
NOTE_ANTIHISTAMINES : 1
OF_CERTAIN : 1
SATS_ABDOMEN : 1
MG_MG : 1
IS_BAND : 1
MEDICAL_PROVIDER : 1
CP_EKGNL : 1
ABOUT_OPTIONS : 1
BP_BY : 1
PREVIOUS_ADMISSIONS : 1
FOR_POSSIBLE : 1
CLOSED_EVEN : 2
MORE_MEN : 1
DURING_THE : 1
HAVE_TYPE : 1
YEAR_MALE : 1
ATRIAL_FIBRILLATION : 1
CARE_PATIENT : 1
MOUTH_ACTIVE : 5
TO_MANAGE : 1
ESSENTIALLY_NEGATIVE : 1
REVIEWED_DEPRESSION : 1
ACTION_FOR : 1
NODENTURES_BY : 1
DATE_SHAVE : 1
DC_DO : 1
WABLE_BRIEF : 1
RA_BRADEN : 1
FRACTURES_LARGE : 1
GOOD_AND : 1
IDEATION_PAIN : 1
DIRECTIVE_SOLUTION : 1
IF_IMPROVES : 1
OTHER_PERSON : 1
INTERVENTION_LEFT : 1
ASSIGNED_WORKER : 1
ADEQUATE_REVIEWED : 1
PROCESS_AND : 1
PLESSNESS_MG : 1
HE_LOST : 1
HS_THE : 1
VETERAN_HAS : 1
BY_THE : 3
SCALE_PVCS : 1
NOTE_EXPANDED : 1
ABOUT_COST : 1
REFERRAL_TO : 1
WEIGHT_OBSERVATIONS : 1
NOT_PSYCHI : 1
TO_TO : 8
TRANSPORTED_UPON : 1
AND_GROUPS : 1
CONCERNING_PAIN : 1
USE_ESCALATED : 1
CLINICIAN_SOAP : 1
TEAR_WRIST : 1
MEDICATIONS_SUSTAINED : 1
WAS_CALLED : 1
FOR_PATIENT : 1
CUT_AWAY : 1
SELECTING_TOOLS : 1
GU_ALLERGIES : 1
FOR_TO : 2
GOALS_DAILY : 1
COGNITION_ALERT : 1
NOTE_HEALTH : 1
PROCESS_NO : 1
CLINIC_TO : 1
OUTLINE_LIFESUSTAINING : 1
WM_WITH : 1
POOR_SECONDARY : 1
MONITORING_HIS : 1
INITIAL_EVAL : 1
IN_MENU : 1
ON_BIO : 1
BENEFITS_PROTECTIVE : 1
WITH_PT : 2
SELF_GASTROENTEROLOGY : 1
OUTCOME_MEDIASTINOSCOPY : 1
REQUESTING_FOR : 1
TID_PRN : 1
AGE_INDETERMINATE : 1
HANDOUTS_PRINTED : 1
IS_ALSO : 2
MEASURES_FOR : 1
SI_STATUS : 1
FOR_ASSISTED : 1
TELEMETRY_GLASGOW : 1
ADDENDUM_MOISTURE : 1
DISORDER_OF : 1
TEAM_MEETING : 1
AT_ALL : 1
ACTUAL_DISCHARGE : 1
CLEAR_DIMINISHED : 1
ENDING_AM : 2
THANKS_STATEMENT : 1
TEACHING_DEGREE : 1
TAKE_ACTIVE : 1
DATA_SKIN : 1
STL_DATE : 1
ALL_TIME : 1
AM_NO : 1
TOLD_COULD : 1
LUNGS_AT : 1
PRESENTED_PAIN : 1
OF_PRESENT : 1
TELEPHONE_NOTE : 1
LEVEL_SISTER : 1
TO_HIM : 1
REDUCE_RISK : 1
HAS_WEATHER : 1
COMPLAINT_WALKING : 1
COPD_EXACERBATION : 1
LEVEL_STATES : 2
INCLUDING_ING : 1
NO_TAKE : 1
FOR_NSG : 1
FAMILY_NO : 1
NEUROLOGIC_HE : 1
CARE_OF : 2
NOTE_EFFORT : 1
IN_CONTROLLING : 1
RELAXED_DROWSY : 1
NIGHT_HE : 1
SHE_STATED : 2
RN_LAVERNE : 1
SINCE_HE : 1
CLINICAL_MULTIPLE : 1
STRESSORS_SUCH : 1
SAYS_HE : 1
HISTORY_MYOCARDIAL : 1
AND_ASSESSMENT : 1
SURROGATE_APPLICABLE : 1
ULCERATION_PATIENT : 1
OR_LENS : 1
FOLLOWING_FIBRILLATION : 1
AGITATED_PROCEEDED : 1
REPORT_CONTACT : 1
DOES_DESIRE : 1
ROOM_DE : 1
SHE_HE : 1
TO_MEDS : 1
ADMISSION_DOES : 1
AT_LEAST : 1
CLEMENS_CHECK : 1
THAT_DOESNT : 1
UP_BATHROOM : 1
HISTORICAL_VISIT : 1
ON_NOT : 1
ABUSE_AND : 1
NOTE_HEALING : 1
COPAY_STATUS : 1
NEW_TO : 1
FIRST_VA : 1
CHIEF_DECREASED : 1
SEE_THIS : 1
FELT_WAS : 1
CHIEF_REASON : 1
GOOD_NURSING : 1
AND_PROVIDED : 1
BEEN_NEWLY : 1
AND_THEIR : 1
ACTIVE_HEART : 1
HE_LIKE : 1
DRINKING_IN : 1
MUCH_BETTER : 1
RECORD_ATTACHED : 1
GIVEN_ACCEPTING : 1
PAIN_EXUDATIVE : 1
REVIEWED_YOU : 1
FLORINEF_TEGRETOL : 1
ARRIVAL_SPEECH : 1
INFORMATION_VIS : 1
PO_THE : 1
IS_MALE : 1
DISORDER_HX : 1
CARCINOMA_TRK : 1
NOTES_AT : 1
NOT_RD : 1
ACTIVE_INCREASED : 1
AUTH_NURSING : 1
PT_MG : 2
QUIT_YEARS : 1
EITHER_OF : 1
PROPERTY_WILL : 1
TRIALS_ETC : 1
ACCIDENT_FEELS : 1
HAD_BM : 1
APPEARED_FAIRLY : 1
BASIS_ELBOW : 1
DOES_PAIN : 2
PATIENT_PROSTATE : 1
PRESCRIPTION_MEDICATIONS : 1
METH_AND : 1
AND_WITH : 4
DCD_WORK : 1
IS_DURING : 1
BIO_SOC : 1
SC_IF : 1
FLAT_DEPRESSED : 1
WITH_EXERTION : 1
ISSUE_IS : 1
TO_NOTE : 2
DIFFERENCE_WITH : 1
MEMBER_OTHER : 2
NOTED_NUTRITION : 1
TO_ADMISSION : 1
THE_HAS : 1
NO_PLAN : 1
AUTHOR_LSU : 1
CHECKS_RESTING : 1
MEDICATIONS_EXPIRATION : 2
RISK_ADMISSION : 1
LABILITY_IS : 1
URINE_SCANT : 1
INPATIENT_PREEXAM : 1
IN_OF : 1
THE_DAN : 1
OPTIONS_FAMILY : 1
AVOID_EXPOSURE : 1
BEEN_ACTIVE : 1
CARCINOMA_LBP : 1
ABUSE_DO : 1
WRIST_WITH : 1
WRITTEN_WITH : 1
MG_EC : 1
BEEN_ABLE : 1
CIRCULATING_PATIENT : 1
AFTER_CHANGED : 1
HAD_DECLINE : 1
VIEWED_SELECTING : 1
AT_PM : 1
CONTACTING_ABOUT : 1
SETTING_ENTERED : 1
LAST_ACTIVE : 1
OLD_MARRIED : 1
THE_IMAGE : 1
SERVICES_AND : 1
SS_ADVANCE : 1
ACTIVE_DDRIVE : 1
COMPLETELY_RES : 1
FOR_YOU : 1
ADDENDUM_CARCINOMA : 1
MENU_BAR : 1
SMOOTH_THEM : 1
ON_OXYMIZER : 1
DIVERTICULOSIS_CC : 1
SHE_BEIN : 1
FALL_UPON : 1
LAST_VISIT : 2
SESSION_WITH : 1
TO_HAVE : 1
RES_PER : 1
ON_AFTER : 1
EXTERNAL_FIXATURE : 1
SIMPLE_SUGARS : 1
NA_CITALOPRAM : 1
HOME_TO : 1
PRESCRIPTIVE_HYDROCORDONE : 1
REPLACE_THE : 1
WALKING_ACROSS : 1
AFTER_HAVING : 1
INLAW_BOTH : 1
DO_MUCH : 1
HAD_SOME : 1
HE_NOT : 2
DIFFERENT_USUAL : 1
TILL_NEXT : 1
DISCUSSED_WITB : 1
WITH_NS : 1
BUSY_THEY : 1
PE_PT : 1
REASON_CONTACT : 1
PROCEDURE_COMPLETELY : 1
PATIENT_TAKING : 1
SIGNIFICANT_AGENCY : 2
TO_OD : 1
FOR_OR : 1
METHADONE_FLAGYL : 2
MGS_FOR : 1
MEDICATION_MANAGEMENT : 1
CC_PLAN : 1
CM_RADIATION : 1
CLINIC_BE : 1
PATIENT_QUESTIONED : 1
LEFT_DOXEPIN : 1
WRIST_DOXEPIN : 1
MINUTE_CHECKS : 1
PROCEDURES_NONE : 1
LEVEL_UNAVAILABLE : 1
INTAKETO_DAILY : 1
CHECKS_IN : 1
TOE_ON : 1
ITEMS_AND : 1
ALSO_HE : 1
RECOMMENDED_LOCATION : 1
LEVEL_AWAKENING : 1
SUITE_PREEXAM : 1
PERSONAL_HISTORY : 1
TEAM_ENJOYED : 1
HE_ANGRY : 1
TEST_VOICES : 1
TO_POOR : 1
UPON_HIM : 1
ON_HIS : 1
MIN_SEDATION : 1
PNEUMOCOCCAL_HIS : 1
WEIGHT_APPEARANCE : 1
BIOPSY_RIGHT : 1
TO_APPROX : 1
RIB_DISCOMFORT : 1
TO_TAKE : 1
DATE_REASON : 1
ALSO_GROUP : 1
PAIN_OVER : 1
ALL_TO : 1
HEART_ENCOUNTER : 1
REFERENCE_NUTRITION : 1
WHAT_DOES : 1
SOME_FELT : 1
LEFT_WRIST : 2
BY_APICAL : 1
MONITORING_GAG : 1
HIS_BOSS : 1
STATUS_THE : 1
NUTRIONAL_SUPPLEMENTATION : 1
SNALL_IN : 1
AWAKE_ALERT : 1
NO_NEUROLOGIC : 1
COUGH_WITH : 1
PT_FOR : 1
THAT_HAS : 4
WE_TALKED : 1
RESULTS_POTENTIAL : 1
TRMT_OPTIONS : 1
ULTRAM_TABLET : 2
OF_TOBACCO : 1
SUPPER_DIRECTIVE : 1
MEDICAL_ON : 1
PATIENT_AMBULATORY : 1
HIM_IMPACT : 1
HISTORICAL_PT : 1
METHOD_VERBAL : 1
SHE_WILL : 1
SELECTED_ITEMS : 1
OXYGEN_VIA : 1
ASSESSMENT_PROCEDURES : 1
TO_SEE : 2
TREAT_STRETCHING : 1
AT_HOME : 1
DID_YOU : 1
BE_YOU : 1
TREATMENT_LISINOPRIL : 1
CARE_SEE : 1
OBTAIN_REFILLS : 1
REQUESTS_WAL : 2
BAR_WT : 1
WITH_GIRLFRIEND : 1
ADJUSTMENTS_TO : 1
AGENCY_AND : 1
MARRIED_VET : 1
LB_HAS : 1
PHONE_BASIS : 1
ADDENDUM_INFORMATION : 1
TO_MAKE : 1
MEDICATIONS_EXCLUDING : 1
ENJOYED_WITH : 1
TAB_EC : 1
WAS_RESPERIDONE : 1
LARGE_ON : 1
CONSENT_WAS : 1
ASSESS_THE : 1
THE_SIGNATURE : 1
STATUS_MARRIED : 1
DURATION_WEEKLY : 1
PRESCRIPTION_NOT : 1
INHL_PUFFS : 1
USES_EXCESSIVELY : 1
FACING_NUMEROUS : 1
EDUCATION_SELECT : 1
AND_BLOOD : 1
EXPIRATION_TRAPPED : 1
AS_HAVING : 1
ACCOMPLISH_IN : 1
SAFETY_SHIFT : 1
PERIOD_SERVICE : 1
FAMILY_SAYS : 1
FOR_MY : 1
TEMPERATURE_PHONE : 1
CCTV_MEMBER : 1
TELEPHONE_AGE : 1
PROCEEDED_TO : 1
CERTAINTY_TO : 1
LAB_DRAWN : 1
CARDIOVASCULAR_MODERATE : 1
FOR_WITH : 1
THINK_ID : 1
VISION_WEIGHT : 1
HERE_STATED : 1
ANY_OVERALL : 1
SCHEDULED_APPT : 2
WORK_NOTE : 2
STAFF_UP : 1
PLAN_QUIT : 1
EKSW_PREVENTIVE : 1
NKA_PLAN : 1
ADDENDUM_NOTIFY : 1
FOR_CHEWING : 1
OF_WRITER : 1
PSYCHIATRY_VISIT : 1
LOCAL_HE : 1
IT_PAIN : 1
WEIGHT_UNAVAILABLE : 1
VA_THAT : 1
MAY_BE : 2
SEPTEMBER_PROCED : 1
IS_SOURCE : 1
IS_LEVEL : 1
SATS_RA : 1
UP_WAS : 1
HAD_PROSTATE : 1
APRIL_THAT : 1
AFTER_PE : 1
LUNCH_PHYSICIAN : 1
WITH_DAN : 1
ACTIVE_OUTPATIENT : 5
NECK_HOME : 1
TRANSFER_LIQUID : 1
THE_DENIED : 1
MEDICINES_ARE : 1
ABLE_TO : 3
FAMILY_PROGRAM : 1
HISTORY_EXAM : 1
WALKIN_BASIS : 1
THAT_HIS : 1
OLD_CVAS : 1
WORK_WAS : 1
PER_REQUEST : 1
DATE_LAMICTAL : 1
BE_DETERMINED : 1
INJECTION_TAKING : 1
HEALTH_MANAGEMENT : 1
KEEP_THE : 1
WALKING_ROOM : 1
SUICIDAL_IDEATION : 2
WAS_MADE : 1
RATES_MEDICATIONS : 1
NURSING_ASSESS : 1
SATT_RECREATIONAL : 1
HX_STATES : 1
PRONE_TO : 1
TRAMADOL_THAT : 1
LISINOPRIL_ONE : 1
HOW_PAIN : 1
FEMALE_BACK : 1
LEFT_FOOT : 1
NOTICED_DIFFERENCE : 1
APPOINTMENT_WAS : 1
THE_FOOD : 1
KAREN_ASSISTANT : 1
GETTING_SO : 1
VET_TOOK : 1
PRESENT_ACTIVITY : 1
AT_HIGH : 1
OF_SKILLS : 1
SCREENING_PHQ : 1
MANY_SELFDISAPPOINTMENT : 1
TO_ALL : 1
DIET_BIPOLAR : 1
THAT_WILL : 1
STRUCTURED_SETTING : 1
WHO_HAD : 1
CORRECTLY_SITE : 1
ANTIHISTAMINES_NO : 2
AND_BP : 1
CLONAZEPAM_TID : 1
FOR_ER : 1
INFORMATION_REQUESTED : 1
TOOLS_IN : 1
IDENTIFYING_HOLD : 1
WITH_SHORTNESS : 1
AT_UNMH : 1
TREATMENT_THE : 1
AT_HS : 1
INLAW_HAVE : 1
PT_CALL : 1
GLARGINE_UNIT : 1
PSYCH_ADMIS : 1
DENIES_SOB : 2
SOME_IT : 1
NOT_USING : 1
EYE_SOCIAL : 1
OD_COMMITTED : 1
BUCKEYE_AZ : 1
VITALS_EFFORT : 1
NO_WITH : 1
HAVING_OF : 1
BE_AVOIDED : 1
PULSE_AS : 1
WAS_QUESTIONED : 1
VERDE_PHONE : 1
FOCUS_TO : 1
ON_SEPTEMBER : 1
MALE_ARRIVED : 1
ENDOSCOPY_INPATIENT : 1
NEGATIVE_AS : 1
EQUAL_LB : 1
ITCHY_OR : 1
JOINT_BE : 1
ORDER_AND : 1
WAS_OUR : 1
REHAB_DIAGNOSIS : 1
TO_HOME : 1
BY_SELECTING : 1
HIS_FOOT : 1
THE_CONTRACTOR : 1
TO_STATE : 1
AFFECTED_TWI : 1
AND_NON : 1
UNSUCCESSFUL_MASS : 1
GIVEN_IS : 1
AND_ALCOHOL : 1
DEMONSTRATE_THE : 1
DISORIENTED_IS : 1
BETTER_CONT : 1
AFFECT_ADLS : 1
TRANSFER_THE : 1
SUGGESTIVE_AGE : 1
ALONE_STATES : 1
THE_ON : 4
IS_COMPLETE : 1
ACTIVE_HEALTH : 1
MSW_WILL : 1
CONFUSED_DURING : 1
APPROACHING_PATIENT : 1
MILIEU_ACTIVITIES : 1
UD_PREOPERATIVE : 1
CONSULT_NON : 1
BECAUSE_IS : 1
LOST_LEADER : 1
DOB_PATIENTS : 1
BE_USEFUL : 1
WAS_OR : 1
OPIATES_GIVE : 1
MEDICATIONS_JUST : 1
SERVICE_VIETNAM : 1
TO_CLINICAL : 1
ASSESSMENT_ELECTRONICALLY : 1
LIMIT_FREE : 1
THE_MEASUREMENT : 1
ACCEPTING_RN : 1
VOIDING_COLORED : 1
HIM_EVALUATED : 1
ACTIVITY_MAY : 1
THROUGH_NO : 1
OVERTHECOUNTER_SIMPLE : 1
PERSON_PLACE : 1
CONFUSED_THE : 1
DISCOMFORT_TO : 1
ASSESSMENT_LEVEL : 1
EVALUATED_FOR : 1
IS_STILL : 1
TAKING_AND : 1
PT_DEMONSTRATE : 1
IRON_REPLACEMENT : 1
AT_GAUGE : 1
PATIENT_SPECIFY : 1
WAS_CONTACTED : 1
AND_THEY : 1
AM_IN : 1
SCALE_PHYSICIAN : 1
PT_THAT : 2
TERATOGENIC_OF : 1
ANTIHISTAMINES_PRESENTING : 1
TI_COPAY : 1
TIMES_NEEDED : 1
AND_ASSESS : 1
AGREEABLE_IS : 1
APPLY_TO : 1
DIET_PMH : 1
TIME_LAST : 1
ABOUT_EFFECTS : 1
HAPPENS_FINALLY : 1
HX_ALCOHOL : 1
PHONE_PATIENT : 1
THIS_HAD : 1
REVIEWED_WRITTEN : 1
AVF_SCHEDULE : 1
PATIENT_PAIN : 1
PAIN_CHRONIC : 1
PPD_NO : 1
NO_SHOW : 1
TRANSFERRING_BEDREST : 1
MGS_CHEWING : 1
REFLEX_PRESENT : 1
SOCIAL_WORKER : 3
SOC_ANY : 1
ONE_GUAIFENESIN : 1
MG_OUT : 1
FOR_SCHEDULED : 1
WOUND_BASE : 1
PHYSICAL_ASSESSMENT : 2
ASSISTING_TRANSFER : 1
PHYSICAL_OVER : 1
FOR_AMBULATION : 1
PCP_LAB : 1
ABDOMEN_SCALE : 1
DECREASED_URINATION : 1
TO_ADVERSE : 1
AND_FROM : 1
RECORD_IS : 1
VISIT_OF : 1
HE_SLIPPED : 1
VET_DC : 1
WAS_TO : 5
UPON_SHE : 1
CONSULT_OF : 1
FIXATURE_TOMORROW : 1
TOOK_CONNECTION : 1
PRESENTS_WITH : 1
IMPROVED_HAVING : 1
PROCEEDED_TAKE : 1
PRESENTED_PM : 1
PUFFS_ACTIVE : 1
WELL_NIGHT : 1
DIRECTED_COLONOSCOPY : 1
MG_TAKE : 5
FOR_IN : 1
BY_AT : 1
NOTE_PMHX : 1
OADDRESS_ISLE : 1
AT_PREVIOUS : 1
FROM_STAFF : 1
PROCEDURE_NODENTURES : 1
MG_OF : 1
VIA_THE : 1
ARRANGED_BE : 1
MINUTE_SCHOOL : 1
GLUCOSE_ORAL : 1
UPON_HAS : 1
HAVING_URINARY : 1
OR_INTENSITY : 1
HE_CURRENTLY : 1
OF_DISCUSSED : 1
EVALUATED_MAYO : 1
APOLOGIZED_TO : 1
FU_WITH : 1
BRONCHITIS_WITH : 1
REACTIONS_SULFA : 1
REDUCE_OD : 1
OTHER_AGENCY : 2
OF_MYOCARDIAL : 1
PATIENT_DOES : 4
FOSAMAX_MG : 2
WAS_CAR : 1
LABILITY_AND : 1
REFUSED_TO : 1
OTHER_ANTICOAGULATION : 1
OCCASION_THE : 1
EXERTION_BBS : 1
BEING_LEVEL : 1
OF_TELEPHONE : 1
VET_WAS : 3
HAS_SITTER : 1
THE_TAKING : 1
APPEARED_PT : 1
VISIT_HAS : 1
PLAN_FOR : 2
COMPLETE_ACETAMINOPHEN : 1
VITAL_FRACTURES : 1
ID_KNOW : 1
OMEPRAZOLE_MG : 1
AT_CM : 1
UPON_ADMISSION : 1
NS_AT : 1
EVERY_GIVEN : 1
USING_THE : 1
MM_MEDICINE : 1
MY_USUAL : 1
NOTE_TO : 1
ATTACHED_TO : 1
ASSESSMENT_IS : 1
ARE_UNREALISTIC : 1
REMAIN_THAT : 1
WILL_THE : 1
WISH_OUTLINE : 1
ABD_PAIN : 1
EC_PO : 1
GLUCOSE_LAST : 1
RECOMMENDED_PATIENT : 1
NEEDS_TO : 1
INCREASED_CURRENTLY : 1
MEMBER_TO : 1
BEFORE_ASSISTING : 1
TAKE_AS : 1
TO_BATHROOM : 1
AND_COMES : 1
AND_SUBSEQUENTLY : 1
FOR_SINCE : 1
OF_PROCEDURE : 2
CURRENT_VET : 1
CWT_CLEARANCE : 1
DOWN_DOB : 1
DID_HAVE : 1
THE_FOLLOWING : 8
NOTE_ASSUMED : 1
TO_RESTING : 1
TBI_WAS : 1
STATED_OF : 1
DISCLOSE_ANY : 1
SODIUM_FREQUENCY : 1
AND_IF : 1
PER_HIS : 1
FOOT_RAL : 1
CAULIFLOWER_OR : 1
NIGHT_NOT : 1
AMT_EATS : 1
DISCHARGED_THE : 1
SUD_PM : 1
NONOBSTRUCTING_UNDERLYING : 1
TABLET_MG : 2
ACTIVE_MG : 1
HEILIGENTHAL_HE : 1
COMPREHENSION_EDUCATION : 1
HIS_ACTIVE : 1
COLACE_TO : 1
TOBACCO_BP : 1
THERAPY_SESSION : 1
TABLET_AVOID : 1
LACERATION_ON : 1
OUT_STATES : 1
PC_NOTE : 1
PT_CALLING : 1
VETERAN_INPATIENT : 1
SEPTOPLASTY_HYPOTHYROID : 1
SAFETY_RESTING : 1
AND_FINICAL : 1
FACING_STRESSORS : 1
TIDWM_CURRENT : 1
OR_FUTURE : 1
ETC_WITHOUT : 1
BP_MEDICATION : 1
HERNIA_SC : 1
AND_DOESNT : 1
AS_FOR : 3
TO_AFFECTED : 1
IDENTIFIED_PUNCH : 1
THINGS_RUNNING : 1
PUFFS_BY : 1
APPROVAL_FOR : 1
NUMEROUS_SUCH : 1
PATIENT_CALL : 1
OWN_COVENIENCE : 1
IF_HIS : 1
TO_INHALER : 1
TAB_PO : 3
BOTTOM_HE : 1
LESS_THAN : 1
HERBAL_GLUCOSE : 1
OVER_REFUSED : 1
PAIN_LEVEL : 6
HIS_HEPATITIS : 1
EVEN_NONLABORED : 1
ANATOMICAL_LOCATION : 1
DO_TAKE : 1
PHYSICIAN_TEMPERATURE : 1
TEGRETOL_FOR : 1
STOP_CURRENT : 1
SYMPTOMS_NO : 1
CRUSTED_ON : 1
WHO_TO : 1
INTENT_THIS : 1
SERVICE_ERA : 1
OR_GROUP : 1
WHILE_IN : 1
SEE_ACCEPT : 1
LONGER_ICU : 1
WHICH_THE : 1
MEASUREMENT_BODY : 1
ON_YES : 1
STATES_ADEQUATE : 1
LEVEL_NOTED : 1
BEEN_ON : 1
FOR_FOLLOWING : 1
IDENTIFIED_PHYSICIAN : 1
JUDY_AT : 1
TO_ILLNESS : 1
SPEECH_FOCAL : 1
CLEARANCE_AT : 1
ACTIVE_PERSONAL : 1
CANCER_NO : 1
NOT_ALL : 1
DIAGNOSIS_DEBILITY : 1
QHS_PTSD : 2
WORK_UP : 1
AND_NO : 1
LIKE_AVOID : 1
EASILY_TO : 1
FOR_NOT : 1
CA_RADIATION : 1
YES_TRANSFERRING : 1
DUE_WOMENS : 1
THEIR_IN : 1
THIS_PROCEDURE : 1
NURSING_REASSESSMENT : 1
PROSTHESIS_THE : 1
CLINICAL_INFORMATION : 1
ABNORMAL_ALLERGIES : 1
IS_CONTINUES : 1
HIM_TO : 1
DEPRESSED_WAS : 1
THE_PER : 1
WAS_STERISTRIPPED : 1
IN_ERROR : 1
WILL_PICKED : 1
IS_OLD : 1
REQUESTS_OF : 1
CAN_TILL : 1
TIME_VET : 1
IN_PAIN : 1
NONVA_HERBAL : 1
RECEIVES_MEDICATIONS : 1
FAMILY_OTHER : 3
BIPOLAR_WHEELCHAIR : 1
NEEDS_BE : 1
FOR_THE : 2
WAS_AND : 2
FUNCTIONING_PHYSICIAN : 1
FROM_HAMOT : 1
SUSTAINED_ACTION : 1
EXTERNAL_RECORD : 1
CONTACT_WILL : 1
KG_REPOSITIONS : 1
SUICIDE_IMPRESSED : 1
DATE_BROKED : 1
AFFECT_FLAT : 1
PTSD_MET : 1
TO_ASSESS : 2
IN_TO : 5
UD_DIAGNOSIS : 1
ABOUT_MONTH : 1
MEMBER_IRWIN : 1
NO_CURRENT : 1
PAIN_ALREADY : 1
AGENCY_URGENT : 1
MANY_YEARS : 1
FRIEND_MASS : 1
HOMEBOUND_THE : 1
LIFE_LIKELY : 1
OMEPRAZOLE_EC : 1
ACCIDENT_IN : 1
MALE_SEEN : 1
PERIOD_OF : 1
BLOOD_IN : 1
TEMPLATE_REPORTED : 1
REACTIONS_REFILLS : 1
ORDER_REFILLS : 1
CONCURRENT_SIGNATURE : 1
CITALOPRAM_MG : 1
AGGRAVATED_HIS : 1
WAS_UNDER : 1
WAS_PROCEDURES : 1
CONTACT_THERAPY : 2
NOTE_RECURRENT : 1
OBSERVE_HIM : 1
THERAPY_REPORT : 1
XVETERAN_SIGNIFICANT : 2
MG_ULTRAM : 2
BOTH_ONE : 1
NECK_HAVE : 1
BIOPSY_VET : 1
DOES_LOSE : 1
COMPLAINT_AND : 1
ACTIVITIES_OF : 1
MG_TABLET : 4
THE_CAN : 1
ON_PSYCHO : 1
TIME_AM : 1
PROTECTIVE_ABSENT : 1
WILL_TO : 2
CARE_COMPLAINT : 1
IN_REQUESTS : 1
IS_HYDROCODONE : 1
SCHEDULED_NSG : 1
INSTRUCTIONS_WITH : 1
SEX_PATIENT : 1
UNDER_WERE : 1
ETC_IS : 1
VET_REASON : 1
MEDICATIONS_MIN : 1
AMA_PATIENT : 1
GASTROINTESTINAL_REVIEWED : 1
AND_DROWSY : 1
DETAILS_CRAVINGS : 1
ALCOHOL_AND : 2
MONITORED_MINUTE : 1
ACTIVE_ATRIUM : 1
DIRECTED_FOR : 1
BOWERMAN_PHYSICIAN : 1
ALLERGIES_TO : 1
HPI_PT : 1
MEDICATION_RX : 1
MULTIVITAMIN_TAB : 1
MOBILITY_NO : 1
SUPPORT_CLINICIAN : 1
UROLOGY_APICAL : 1
ARE_LISINOPRIL : 1
XYZZY_METHOD : 2
IDENTIFYING_INFO : 1
WAS_FINE : 1
SIGNIFICANT_ISSUES : 1
MUCH_CONT : 1
CAN_VIEWED : 1
REVIEW_MG : 1
HIS_PEERS : 1
EFFECTIVE_CLOTS : 1
WHY_WAS : 1
STAFF_AT : 1
AND_FEELING : 1
LAST_LABS : 1
PHYSICIAN_ASSISTANT : 1
DATE_OF : 2
PT_SELECT : 1
OF_SESSION : 1
SELFMONITORING_DRUG : 1
DOING_FINE : 1
WILL_BE : 2
IS_OPTION : 1
STIFFNESS_DENIES : 1
AND_THOUGHTS : 1
KERATOSIS_ICDCM : 1
RN_CLEMENS : 1
TRK_FACETOGENIC : 1
IN_MONITORING : 1
VITALS_DIMINISHED : 1
COMES_TO : 1
ANXIETY_PTSD : 1
PRESENT_PM : 1
PATIENT_STANDPOINT : 1
COMPLETE_SAFETY : 1
FOLLOWING_FACTOR : 1
MEDICATION_FEMALE : 1
FEELING_HEADACHES : 1
DIFFERENT_THAN : 1
DEPRESSION_NO : 1
INJURY_TO : 1
CURRENT_ADVANCE : 1
IS_HAS : 1
CARBAMAZEPINE_WAS : 1
ANXIETY_NEW : 1
RX_ROSUVASTATIN : 1
AND_PROCEDURES : 1
INCREASE_WITH : 1
ISLE_ST : 1
JUN_DATE : 1
YEAR_OF : 1
FIBRILLATION_COUMADIN : 1
WENT_TO : 2
HE_SEEMED : 1
IN_SO : 1
CHARETED_PRESSURE : 1
INFUSING_CC : 1
OTHER_COMPLAINTS : 1
HYPERTENSION_TO : 1
PRESSURE_RIS : 1
ALREADY_WHEN : 1
HAVE_YOUR : 1
RHONCHI_DCD : 1
NEEDED_SHORTNESS : 1
QUIT_ATTEMPTS : 1
PAIN_NEED : 1
IMPROVED_AT : 1
LOPC_DOESNT : 1
AS_DIRECTED : 2
WAS_RAL : 1
DISCHARGED_FROM : 1
PT_AS : 1
SI_CURRENT : 1
FROM_SOUTH : 1
TREATMENT_TIME : 1
HIGH_AT : 1
FOLLOWING_RISK : 1
WED_WALS : 2
FOR_PAIN : 1
AND_PSYCHOLOGICAL : 1
AS_VASELINE : 1
EDUCATION_MATERIALS : 1
NIGHT_SHIFT : 1
HOSPITAL_CHART : 1
FOR_REGULARITY : 1
CAN_IDENTIFY : 1
ML_UD : 1
MINUTES_APPT : 1
NAD_SUCRALAFATE : 1
VET_ADVISED : 1
ORAL_GM : 1
IN_BACK : 1
DATE_SHORT : 1
APPLY_PETROLEUM : 1
NSC_MALE : 1
THE_WILL : 1
HERBAL_MEDICATIONS : 1
BROUGHT_UP : 1
NUCLEAR_FOR : 1
ON_HE : 1
PERSON_AT : 1
OR_PULSE : 1
AND_DUE : 1
CONTACT_NOTE : 1
UP_VIDEO : 1
SMRS_ATYPICAL : 1
NONBLOODY_CLEAR : 1
DRUG_SMOKING : 1
HE_MEDICATION : 1
VISIT_OPD : 1
PROSTATE_SCREENING : 2
BY_NURSE : 2
LAVERNE_CLEMENS : 1
OTHER_URGENT : 1
MAIN_ISSUE : 1
SHOULDER_WITB : 1
HAS_HX : 1
EATS_ACTIVE : 1
CM_MEDICATIONS : 1
RAL_ONE : 1
NOTE_VITALS : 2
PHYSICAL_BP : 1
LIVING_LUNCH : 1
TREATMENT_COMPLETELY : 1
OVER_ALCOHOL : 1
PHYSICIAN_IN : 1
BOWEL_REGULARITY : 1
SULFA_ASSESSMENT : 1
PATIENT_RECORD : 1
AMBU_INPATIENT : 1
FOOD_ANY : 1
PRIMARY_DIAGNOSES : 1
THEIR_SUBSTANCE : 1
STATED_PC : 1
ORAL_INHL : 1
VIA_TLC : 1
SKIN_CARCINOMA : 1
LAST_HE : 2
SUICIDE_UPON : 1
TAKE_SIMVASTATIN : 1
DOES_PATIENT : 2
AND_DEPRESSED : 1
TIME_SATT : 1
PSYCH_YEAR : 1
THEM_AND : 1
PATIENT_COMPREHENSION : 1
HOW_COMPLETE : 1
QS_AVF : 1
PSYCHIATRY_STL : 1
SOFTNER_DAILY : 1
COCAINE_AND : 1
DISCHARGED_OF : 1
CONT_TO : 1
NOT_DRUG : 1
REPORT_FIBEROPTIC : 1
AWAY_AND : 1
VETERANS_WERE : 1
ACTIVE_BACLOFEN : 1
SUPPER_CONTRACTOR : 1
SATT_THERAPY : 1
HE_MILD : 1
APPT_TO : 1
EQUAL_WEIGHT : 1
ELEVATED_AT : 1
ONE_CONT : 1
ALERT_SUCRALAFATE : 1
SCAN_AMBULATORY : 1
OVERALL_WITH : 1
NO_REQUESTING : 1
PTSD_EKSW : 1
ORAL_EVALUATION : 1
EVALUATION_RIGHT : 1
WARM_AND : 1
PRESSURE_SORE : 2
TO_CT : 1
CALL_TLC : 1
GOES_THE : 1
BEIN_WHILE : 1
ABOUT_ISSUES : 1
IS_HEENT : 1
RESPIRATIONS_UNLABORED : 1
CHART_APPEARED : 1
EFFORT_PLACED : 1
FAMILY_OR : 1
PAIN_ON : 1
STATES_SLIPPED : 1
BATHROOM_ASSISTED : 1
TXC_CTRS : 1
INFLUENZA_VACCINE : 1
PRESENTED_AGITATED : 1
MARRIED_MALE : 1
BEEN_FOR : 1
WHAT_WOULD : 2
REQUIRES_PRESCRIPTION : 1
AND_KNEE : 1
PULSE_BP : 1
CHEEKS_FROWNING : 1
STATUS_RESPIRATIONS : 1
SUCH_MENTAL : 1
WT_MOVE : 1
AT_TREATMENT : 1
ABOUT_SAME : 1
CARDIOLOGY_HE : 1
GRADE_CERVICAL : 1
VETERAN_WAS : 2
TIME_NO : 1
CARBAMAZEPINE_LEVEL : 1
COMES_WITH : 1
TLC_HE : 1
THEIR_LONG : 1
TREATMENT_NONVA : 1
SERVICE_SERVICE : 1
MOIST_MET : 1
MENU_AND : 1
QUIT_BULGE : 1
MEDICATION_VET : 1
WAS_COMPLAINING : 1
COPAYMENTS_FROM : 1
DOESNT_TO : 1
OF_INSURANCE : 1
ORAL_LAST : 1
LEVEL_OF : 3
ON_LABORATORY : 1
AT_THE : 2
HE_WENT : 1
AMBULATORY_INDICATES : 1
HIM_THE : 1
THE_RECEIVES : 1
TIME_STATED : 1
ACTIVE_LONGER : 1
KG_PPP : 1
WHEN_THEY : 1
UNIT_ML : 1
CH_JUL : 1
ORAL_PRN : 1
ONE_OF : 2
VISIT_LABS : 1
IN_ER : 1
FOR_TERM : 1
THEMSELVES_THINGS : 1
PO_DAILY : 1
WITH_SUICIDAL : 1
CONTACT_LENS : 1
COPAYMENTS_HOSPITAL : 1
DISCONNECTED_PSOME : 1
VISIBLE_ON : 1
ALSO_WANT : 1
CURRENT_MEDICATIONS : 2
TO_LIFESUSTAINING : 1
STIMULATOR_HE : 1
VETERAN_APPEARED : 1
IS_TIRED : 1
REVIEWED_INSTRUCTIONS : 1
ON_ONE : 1
DAILY_PLEASE : 1
URINARY_HAVING : 1
WERE_DRINKING : 1
PT_IN : 1
PHYSICIAN_RECURRENT : 1
MG_TID : 2
REGARDING_PATIENT : 1
YES_DATA : 1
TO_VA : 1
RESULTS_FOR : 1
NO_ABOUT : 1
THE_BODY : 1
SHOWED_THIS : 1
TRANSFER_GLUCOSE : 1
PHYSICIAN_IS : 1
SIMPLE_AND : 1
PREVIOUS_VISIT : 1
TIME_CONTINUE : 1
AFTERCARE_PLAN : 1
AMBULATORY_CARE : 1
CEL_ACTION : 1
IF_SERVICE : 1
MEDICATION_FOR : 1
BIL_PULSES : 1
FOOT_THE : 1
RACING_MIND : 1
THE_SIGNS : 1
APPT_WITH : 1
CONSULT_MEDICATION : 1
DDRIVE_ASSOCIATE : 1
IS_NUMEROUS : 1
PT_HERE : 1
SEPOCT_ACTIVE : 1
RETENTION_THEY : 1
CAME_SD : 1
PSHX_ESSENTIAL : 1
NEW_PT : 1
WAS_FOR : 1
COMPLAINTS_HE : 1
TO_ACHES : 2
REFLEX_RESP : 1
FILLION_LABORATORY : 1
OBTAIN_MEDICATION : 1
EXAM_IN : 1
VISTA_IMAGING : 1
AREA_CHEEKS : 1
ACTIVE_AVOID : 1
LIMIT_HIS : 1
COMES_HIS : 1
REQUESTING_OF : 1
HEMATURIA_THE : 1
ELAVIL_NOT : 1
BUT_SATS : 1
MI_SUMMARY : 1
VET_ADMITTED : 1
MONTH_YOU : 1
HEALTH_COMMENT : 1
CHRONIC_MET : 1
AND_GOES : 2
UNLABORED_INPATIENT : 1
NURSING_MED : 1
SEP_NOTE : 1
MONITORED_ON : 1
POUNDS_DOES : 1
PT_PT : 2
REQUESTING_CONSULT : 1
TREATMENT_NO : 1
CLICKING_THE : 1
PLAN_MG : 1
VISIT_SCOPE : 1
BEEN_SHEDULED : 1
LAB_REVIEW : 1
PATIENT_ADDRESS : 1
NOT_THE : 3
APPETITE_IN : 1
NO_ADVANCE : 1
WARM_DRY : 1
PRESCRIPTIVE_MEDICATION : 1
DIET_FREQUENCY : 1
REMAINS_MONITORED : 1
MORE_GROUP : 1
THE_USE : 1
NOTE_VACCINE : 1
TELEPHONE_NUMBER : 1
NOTE_PHQ : 1
ABOUT_LIPIDS : 1
IN_REDUCE : 1
INCREASE_ACTIVE : 1
GROUP_GAIT : 1
LOSS_CONSCIOUSNESS : 1
ASPIRIN_EC : 1
NO_SARCASM : 1
EITHER_REHAB : 1
ACTIVITY_BE : 1
RESOLVED_DENIES : 1
NOT_LIMITED : 1
MASS_MR : 1
INHALE_PUFFS : 1
TO_DO : 3
SAFETY_NURSING : 1
FOR_YRS : 1
PT_ENCOURAGED : 1
DISEASE_DEPRESSION : 1
MANDY_MODALITIES : 1
ABSENT_BIL : 1
CDC_INFORMATION : 1
EFFORT_MODERATE : 1
OR_ANTERNATE : 1
STATES_WAIT : 1
ON_WAS : 1
FULL_DETAILS : 1
MANY_NUTRITION : 1
HR_IF : 1
HEALTH_MONITOR : 1
STATED_THE : 1
BLOOD_HIS : 1
ANY_OF : 1
PRINTED_PRESCRIPTION : 1
YEAR_ED : 1
PULS_OPHTHALMOLOGY : 1
DECISIONS_ABOUT : 1
BASED_ON : 1
FOR_PLACEMENT : 1
EVEN_AND : 1
SUSTAINED_MGS : 1
ALLERGIES_REPORT : 1
PACKET_DISSEMINATED : 1
HIM_PAST : 1
OXYGEN_USAGE : 1
FOR_PART : 1
PAIN_PROCEDURE : 1
REPORT_SINCE : 1
WHICH_NEW : 1
SOCIAL_NOTE : 2
EVERY_PATIENT : 1
AND_CAN : 1
TO_RN : 1
TO_SCAN : 1
IS_FEELING : 2
FILED_TRACH : 1
LIQUID_GM : 1
LIPIDS_OTHER : 1
PERSONS_PRESENT : 1
RES_HIS : 1
BE_UNTIL : 1
BP_PAIN : 1
IODOSORB_CLINICAL : 1
BEFORE_YESTER : 1
IRON_WIDEPRESSION : 1
CONVERSATION_HAS : 2
RETURNED_CLINIC : 1
WILL_NEED : 1
WILL_CUT : 1
LIP_SMACKING : 1
WERE_SHOULD : 1
BY_CLICKING : 1
TEMPERATURE_DOES : 1
HIS_REPORT : 1
ARE_HAVING : 1
RESP_INFORMED : 1
TELEPHONE_CONVERSATION : 1
MALE_RESTING : 1
LARGE_LACERATION : 1
OEF_OUTREACH : 1
PROGRESS_HIM : 1
DYSPNEA_WITH : 1
NO_ASPIRIN : 1
AN_NERVE : 1
TID_SEE : 1
MEDICATIONS_TECHNIQUES : 1
GUAIFENESIN_SIMPLE : 1
HAVING_LEAST : 1
AT_BASE : 1
THEMSELVES_WHEN : 1
AT_BACLOFEN : 1
TO_OBTAIN : 1
DICTATED_CONSULT : 1
BED_DM : 1
AO_GOOD : 1
STOOL_PASSAGE : 1
DOSE_PSYCHOSOCIAL : 1
CONCERNED_ABOUT : 1
KG_SITTER : 1
VA_CHIEF : 1
WHICH_SUFFERED : 1
MALE_VET : 1
PROBLEM_WEIGHT : 1
RETENTION_AFTER : 1
LOST_POUNDS : 1
PAIN_GOALWHAT : 1
AND_TALKED : 1
BACK_TIGHTNESS : 1
RECORDED_THIS : 2
HAVE_COME : 1
GIVEN_ON : 1
STATUS_PATIENT : 1
AND_GIVEN : 2
BEFORE_HAS : 1
INSURANCE_CARD : 1
BY_PROFESSIONAL : 1
THE_AND : 1
OWN_STORE : 1
QUIT_RIGHT : 1
IMPROVES_STOOL : 1
CM_SCANNED : 1
FOR_STATES : 1
USEFUL_CONTROLLING : 1
ONE_IN : 1
CLOT_IN : 1
DAILY_MEDICATION : 1
ER_HE : 1
OR_PT : 1
LEVEL_ACCEPTABLE : 1
HE_DURING : 1
ON_BASIS : 1
ETOH_ABUSE : 1
SSN_ADDRESS : 1
SOUNDS_PATIENT : 1
WEIGHT_DOWN : 1
EXEMPT_DATE : 1
VETERAN_THAT : 1
ABOUT_TRMT : 1
MEDICATION_RECONCILIATION : 2
TO_ON : 4
ESCALATED_USED : 1
NAME_SSN : 1
CARD_DISCUSSED : 1
WAL_MALEATE : 1
AND_RECENT : 1
NOTE_AND : 1
PRESENTING_COMPLAINT : 1
CALLER_EITHER : 1
CHEST_HEMOPTYSIS : 1
HAS_GROUP : 1
ADVISED_THAT : 1
COMMENT_STATES : 1
PSYCHI_GENERAL : 1
WITH_TO : 2
ARRIVED_AMBULATORY : 1
PAIN_VET : 1
AT_NIGHT : 1
EDUCATION_VETERAN : 1
TELEPHONE_OF : 1
ALCOHOL_ABUSE : 1
ONYCHOMYCOTIC_TOE : 1
STATES_FEELS : 1
ED_MEDICAL : 1
SI_PLAN : 1
ON_MINUTE : 1
THE_ATE : 1
CONSCIOUSNESS_LESS : 1
PAIN_THE : 3
PT_INTO : 1
DOSE_BEING : 1
OUTREACH_ENJOYED : 1
ON_STEPS : 1
IS_STOOL : 1
ALCOHOL_FAMILY : 1
TO_CLINIC : 4
TO_WHY : 1
ABSOLUTE_APPOINTMENT : 1
OUT_ALL : 1
CE_BEFORE : 1
CARES_PLESSNESS : 1
INTERESTED_PRESENTS : 1
FOLLOWING_ACTIVITIES : 1
JUST_REAL : 1
CAR_IN : 1
WITH_COLLINS : 1
DONE_LOCAL : 1
NOTE_REVIEWED : 1
NO_SPEECH : 1
FOR_REVIEW : 1
WAL_REFILL : 1
WAS_COPY : 1
THE_CONCURRENT : 1
TRYING_WM : 1
PT_SAFELY : 1
CONTINUE_TO : 2
AT_HR : 1
ASSISTED_PLESSNESS : 1
LTC_STATUS : 1
COMPLAINTS_OVERNIGHT : 1
VARIOUS_ISSUES : 1
HEIGHT_IN : 1
BM_YESTER : 1
LOWER_EDEMA : 1
IN_BED : 3
REPLACED_WITH : 1
CHRONIC_HEALTH : 1
SINCE_ACCIDENT : 1
LOW_BACK : 1
LOSE_INSTRUCTED : 1
NURSING_INTERVENTIONS : 2
WEIGHT_LOST : 1
PHYSICIAN_GROUP : 1
LAB_OMEPRAZOLE : 1
VET_THAT : 1
AT_AM : 4
CLINICAL_REMINDERS : 1
AND_REPORTED : 1
RUNNING_SMOOTH : 1
LACK_OF : 1
INEFFECTIVE_DEPRESSION : 1
SPOKE_PT : 1
VET_HE : 1
YOUR_CURRENT : 1
CM_VITAL : 1
FAXED_FAX : 1
IMPROVES_PASSAGE : 1
WAS_NEGATIVE : 1
HOLD_MG : 1
THEM_ASKED : 1
PREVIOUS_VERDE : 1
HE_IN : 2
HE_BEEN : 3
PCP_FOR : 1
AND_DURATION : 1
EYE_OTHER : 1
TOLERABLE_LAST : 1
NOTE_STAFF : 1
OF_IF : 1
HIGH_PM : 1
PROBLEMS_VERIFIED : 1
NOTED_ON : 1
IBURPROFEN_MG : 1
THOUGHTS_RATIONAL : 1
SIX_OR : 1
AND_HAD : 1
PAIN_AFFECT : 1
APPOINTMENTS_TIME : 1
REFERENCE_YOUR : 1
SHE_SERVICE : 1
SEEMED_TO : 1
ELAVIL_ALT : 1
RELAXED_AND : 1
PROGRESS_THE : 1
INCLUDES_AN : 1
STIMULATE_LONG : 1
EVALUATION_ACTIVE : 1
VERBAL_VIA : 1
PT_BEING : 1
ILINTACT_OLDER : 1
TREATMENT_PROCEDURE : 2
PO_MG : 1
PHYSICIAN_PER : 1
THIS_AND : 1
YOUR_STUDIES : 1
SO_HE : 1
WAS_HIGH : 2
TO_LIMIT : 1
GROUPS_TO : 1
PROSTATE_OR : 1
THAT_IS : 5
OF_ALCOHOL : 1
SCREENING_MEDICINES : 1
STATES_SINCE : 1
BOTHERING_HIM : 1
AMOUNT_TO : 1
ABOUT_VET : 1
PICKED_BY : 1
PSYCHIATRIC_HISTORY : 1
SIMVASTATIN_PRAVASTATIN : 1
HE_FEELS : 2
FOR_SUICIDE : 1
LIVES_URINE : 1
USE_SUPPORT : 1
ANY_TIME : 1
LBED_CHARETED : 1
WIDEPRESSION_PHQ : 1
NAME_COMPREHENSION : 1
RESPIRATIONS_EVEN : 2
SCALE_PREDICTING : 2
AVF_OF : 1
MEDICAL_PHYSICAL : 1
AO_WITH : 1
INCREASE_EXERTION : 1
COLOR_WEIGHT : 1
TECHNIQUES_SELFMONITORING : 1
VET_STATES : 1
BIPOLAR_HX : 1
PHQ_SCREEN : 1
ABILITY_FUNCTION : 1
TIME_LOCATION : 1
SAFELY_MONITORED : 1
NOW_COULD : 1
PSYCHOLOGICAL_NEURO : 1
ATTEMPT_AND : 1
DIAGNOSES_PAIN : 1
AS_INPATIENT : 1
APICAL_HEART : 1
EXHIBITED_LABILITY : 1
TOMORROW_AT : 1
ADEQUATE_WAS : 1
SETTINGS_ON : 1
COPY_OF : 1
ELEVATED_LIPIDS : 1
HE_ASKING : 1
STRUCTURED_LET : 1
TOO_TO : 1
LAST_INITIATED : 1
NO_DENIES : 1
OF_INDETERMINATE : 1
RHONCHI_PATIENT : 1
RECEIVED_CONTACT : 1
WITH_INSOMNIA : 1
SYSTEM_AFFECTED : 1
CHEST_PAIN : 2
PT_MAY : 1
NO_LIMITATION : 1
FOR_SHORTNESS : 1
AND_HE : 3
WITH_INFUSING : 1
SIMVASTATIN_NOT : 1
TRIED_TO : 1
THAT_IN : 1
PLACED_ON : 1
THERE_GRANULAR : 1
COMPUTER_IS : 1
RIS_OTHER : 1
NA_PLAN : 1
WELL_THIS : 1
AND_NONLABORED : 1
EXCLUDING_SUPPLIES : 1
BASIS_HE : 1
CH_BHCL : 1
METHOD_TEACHING : 1
DEC_TO : 1
THE_DISCOVERED : 1
WHEN_PAIN : 1
DEPRESSED_PT : 1
TO_EXAM : 1
ALCOHOL_THROUGH : 1
AS_TO : 2
THE_CARE : 1
IN_BY : 1
OPTOMETRY_CONSULT : 1
COPING_INEFFECTIVE : 1
STAFF_AGITATION : 1
WHEELCHAIR_MAY : 1
TRIAGE_PREVIOUS : 1
ACOS_AMBULATORY : 1
ASU_WITH : 1
WITHOUT_REVIEWED : 1
MULTIVITAMIN_CAP : 1
MEASURES_SAFETY : 1
TRACH_STOMA : 1
ADDENDUM_CALLER : 2
ULCER_PT : 1
RELATED_TO : 2
TO_WAYS : 1
QUIETLY_LBED : 1
PRESENT_OR : 1
INHL_INHALE : 1
TREATING_EXACERBATION : 1
LOW_CERVICAL : 1
DAILY_ACTIVE : 1
ACTIVITIES_TO : 1
ORDER_DISCHARGE : 1
NURSING_INPATIENT : 2
ANY_SIGNIFICANT : 1
NUMBER_CONVERSATION : 1
TO_PROVIDER : 1
SHOWED_WRITER : 1
BILATERAL_LOWER : 1
II_ASSESSMENT : 1
HEALTH_PT : 1
CURRENT_SIGNS : 1
WITH_ETOH : 1
YOU_INTAKE : 1
VET_ORIENTED : 1
NO_VIA : 1
APPOINTMENT_TO : 1
WAS_SEEN : 1
PROCEDURE_GUAFENESIN : 1
DISPOSITION_SELECTED : 1
DATA_WARM : 1
NAME_PHONE : 1
STRETCHING_ESP : 1
DOSE_MG : 1
MORE_THAN : 1
AREA_INCLUDING : 1
OD_RISK : 1
COMPUTER_THE : 1
IS_PRONE : 1
ACTIVE_ON : 1
SIGNS_SITUATION : 1
LONG_LEFT : 1
TROUBLE_PING : 1
PHYSICIAN_LED : 1
OF_VETERAN : 1
NEED_SHORT : 1
PRESCRIPTION_EXERCISE : 1
ERA_DEC : 1
FIRST_PHX : 1
EC_MG : 1
NOTE_DM : 1
ROOM_INFO : 1
OPTIONS_OF : 1
WOULD_PARK : 1
WORKER_NIGHT : 1
PSYCHI_MD : 1
NO_NO : 1
SCANNED_THERAPY : 1
LBP_PLEASE : 1
ANXIETY_REQUIRES : 1
WEAR_HPI : 1
THEY_NAME : 1
NURSING_ASSUMED : 1
MATERIALS_TO : 1
SMOKE_PPD : 1
RISK_STATUS : 1
SIX_MORE : 1
REVIEW_PER : 1
PATIENT_WHICH : 1
CHRONIC_WITH : 1
LSU_PHYSICIAN : 1
ALSO_LOOSING : 1
HAS_NKA : 1
POTENTIAL_INJURY : 1
BY_SELF : 1
MED_THAT : 1
MOUTH_HOURS : 1
LEFTSIDED_RECONCILIATION : 1
NO_CLEAR : 1
RESP_BP : 1
HIS_BACK : 1
MILIEU_AND : 1
TO_ER : 1
DECEMBER_PATIENT : 1
BRIEF_OF : 1
VIDEO_CCTV : 1
TO_FAIRLY : 1
THE_BAR : 1
TRS_CTRS : 1
RESULTS_AVAILBLE : 1
AND_MET : 1
ABUSE_QUIT : 1
PATIENT_TO : 3
DIAGNOSTIC_IMPRESSION : 1
THE_HOSPITAL : 1
HAD_GRADE : 1
MALE_OADDRESS : 1
FOR_ASSISTANCE : 1
RESPIRATION_THE : 1
FUTURE_DISCUSSED : 1
ABOUT_AND : 1
FOOT_ULCER : 2
AASU_INTERVENTION : 1
INFORMATION_SW : 1
PROGRAM_AND : 1
BE_NEED : 1
TO_BE : 8
HIS_TX : 1
ANATOMICAL_SEE : 1
COPING_DEPRESSION : 1
REVIEW_POSITIVE : 1
ONE_STAFF : 1
PTSD_COMES : 1
THE_RESULTS : 1
DENIED_COMPLICATIONS : 1
ALERT_HER : 1
TRK_LBP : 1
ADEQUATE_WRITTEN : 1
NONE_RECORDS : 1
ASSESSMENT_REQUIRED : 1
GIVEN_IF : 1
TOBACCO_PPD : 1
BAND_YES : 1
DISEASE_REVIEWED : 1
NEW_MEDICATION : 1
SKIN_CHIEF : 1
FEELS_UNREALISTIC : 1
ATYPIA_FOUR : 1
DICTATED_BOTTOM : 1
ON_OPTOMETRY : 1
FOR_MANY : 1
TO_NURSING : 2
VARDENAFIL_MG : 1
NOTED_IN : 1
SCREEN_DEPRESSION : 1
PLAN_WHAT : 2
WITH_BBS : 1
DAILY_USE : 1
REACTIONS_PENICILLIN : 1
BIOPSY_ADVISED : 1
WAS_WAS : 1
MG_PLAVIX : 1
WITH_AND : 2
PAST_QUIT : 1
REQUESTING_WAL : 1
PLACED_BACK : 1
YOUR_DIAGNOSIS : 1
PATIENT_ANY : 2
HIS_RESPONSE : 1
PROCESS_ATTEMPT : 1
AND_BEFORE : 1
AND_MG : 1
ON_PE : 1
ASSOCIATE_APPLY : 1
LAB_BUCKEYE : 1
SD_VETERAN : 1
WILL_OUT : 1
CHARETED_ULCER : 1
CULTURAL_NEED : 1
THE_VETERAN : 3
PROBLEMS_THE : 1
STATE_WORK : 1
STATED_FOR : 1
ABOUT_BILLS : 1
ASSESSMENT_SCALE : 1
THE_HE : 2
LENS_CORRECTION : 1
TO_WITH : 4
CONSULT_PROTECTOR : 1
DISSEMINATED_PREVIOUS : 1
WITH_THE : 5
IS_GRANULAR : 1
PER_PHYSICIAN : 1
CLEMENS_RN : 1
BACK_RIGHT : 1
YES_GAIT : 1
CAME_INTO : 1
HEALING_TELEMETRY : 1
GAOLS_LIFE : 1
ACCEPTABLE_NAME : 1
WALS_NEED : 2
ALLERGIC_RHINITIS : 1
ALONE_PT : 1
AVOID_ALCOHOL : 1
PM_INCLUDES : 1
OFFICE_FOR : 1
MULTIPLE_CVAS : 1
COULD_NOT : 1
MEDICATIONS_PATIENT : 2
QUIT_BROKED : 1
NOW_AND : 1
GROUP_WERE : 1
DEPRESSION_SUICIDAL : 1
MORNING_HAD : 1
FOR_OD : 1
ANY_WILL : 1
PROTECTIVE_SENSATION : 1
ERROR_PATIENT : 1
LOWER_AND : 1
FLAGYL_ASSESSMENT : 1
RECONCILIATION_CAREGIVER : 1
PRONE_ANGER : 1
LYING_SUPINE : 1
ON_AT : 2
ED_PT : 1
PATIENT_HOW : 1
PT_ALSO : 1
PO_HS : 1
GROUPS_WITH : 1
OF_ABUSE : 2
LP_LAST : 1
SELECT_ONE : 1
LIMITED_EXPECTANCY : 1
IS_REPLACE : 1
ACTION_PAST : 1
DCD_HAMOT : 1
THAT_TOOK : 1
THE_TYPE : 1
ALSO_ALCOHOL : 1
THE_THERAPY : 1
IS_TO : 7
NSG_FOR : 1
OF_RECENT : 1
TAB_NOT : 1
FLAGYL_ELAVIL : 2
AGGRAVATED_LOW : 1
TO_WHO : 1
REQUIRED_HELP : 1
ICDCM_DIAGNOSIS : 1
TIME_RECREATIONAL : 1
ONEHALF_TABLET : 1
OF_FIBEROPTIC : 1
WAS_OF : 1
FOR_INJURY : 1
OBSERVATION_UP : 1
COLOSTOMY_NO : 1
OF_JOB : 1
MULTIPLE_OLD : 1
IDENTIFIED_PROCTOFOAM : 1
ER_BY : 1
FACE_COMPLETELY : 1
VIA_AMBULATORY : 2
REQUESTING_FEE : 1
RIGHT_WITHOUT : 1
PERIORBITAL_AREA : 1
NOTE_SCALE : 1
FEELS_FINE : 1
APPROVED_RX : 1
APOLOGIZED_PAATIENT : 1
INPATIENT_AND : 1
DRIVING_ASSOCIATED : 1
OF_NOW : 1
MAKE_VETERAN : 1
BLUE_BAND : 1
ED_APPROPRIATE : 1
REACH_GAOLS : 1
PREOPERATIVE_PREOPERATIVE : 1
PLAN_WOULD : 2
SOCIAL_SUPPORT : 1
THE_MEDS : 1
ORIENTED_PERSON : 1
SPEECH_ADDENDUM : 1
SUN_EXPOSURE : 1
LEVEL_BY : 1
SERVICE_YES : 1
DEADLINES_HIS : 1
EXTREMITY_WITH : 1
THE_MEDICATION : 2
HERE_SHE : 1
GERD_CAD : 1
SUN_OR : 1
EVAL_TREAT : 1
BP_OTHER : 1
ASSESSMENT_WAS : 1
ADDENDUM_FEEDING : 1
GENERAL_MD : 1
IF_UPON : 1
HIS_TO : 1
THRU_EXAM : 1
WITH_JUDY : 1
PROPANOLOL_AND : 1
BE_LESS : 1
AT_EPIS : 1
NERVE_STIMULATOR : 1
WITH_MINIMAL : 1
BACK_ON : 1
FOR_CONTACT : 1
FOR_HIM : 1
USE_IMAGING : 1
PATIENT_TROUBLE : 1
SYMPTOMATIC_SPEECH : 1
PUPIL_SIZE : 1
THE_ENTRY : 1
PATIENT_NOT : 5
NO_COLACE : 1
EXTERNAL_CHANGED : 1
IT_BECAUSE : 1
MARRIED_HELP : 1
NOT_ANY : 1
THE_PTSD : 1
FLOW_OF : 1
IN_NAD : 1
TOOK_HIS : 1
BACK_UNIT : 1
MASS_TOO : 1
SMACKING_UPPER : 1
OFFICE_FOLLOW : 1
WHICH_HE : 1
OBSERVATIONS_ACCEPTABLE : 1
DUE_FAMILY : 1
IF_HE : 2
REFILL_PATIENT : 1
LOT_GIVEN : 1
BMS_COLOSTOMY : 1
PING_AT : 1
GOES_PERSONNEL : 1
DEPRESSION_WITH : 1
EXUDATIVE_NO : 1
REQUEST_WHEN : 1
ER_REPORTS : 1
TO_RECREATION : 1
EXPIRATION_FEELS : 1
PROVIDED_TO : 1
COLORED_URINE : 1
PATIENTS_AND : 1
CARE_ASSESS : 1
NOTE_OR : 1
BE_CUT : 1
STUDIES_DATE : 1
MAY_BM : 1
HAS_QUESTIONS : 1
ASSISTANT_WAS : 1
AND_RIGHT : 1
APPT_COLACE : 1
LOOSING_WEIGHT : 1
SECOND_BUT : 1
HAS_BEEN : 11
HOMEBOUND_STATUS : 1
AND_PROBLEMS : 1
YOU_WHAT : 1
THE_SAME : 1
URINARY_URINARY : 1
PT_WITH : 1
HEARING_AIDS : 1
DURATION_MINUTES : 1
NO_PROBLEMS : 1
LAB_AZ : 1
STATED_THAT : 3
CONSULT_ELBOW : 1
HAS_MORE : 1
FOR_FOLLOW : 1
LAB_COLONOSCOPY : 1
MENTAL_NOTE : 1
CONTACTED_TELEPHONE : 1
HYGIENE_COMBING : 1
ANTICANCER_SEPOCT : 1
HE_LEVEL : 1
ANTICOAGULATION_NO : 1
MODERATE_BACK : 1
LOWER_EXTREMITY : 1
FOR_DIS : 1
MEDS_SHE : 1
THRU_VA : 1
WITH_ABUSE : 1
AS_PATIENT : 1
LAWYER_HAS : 1
DENIES_PT : 1
JUN_WEIGHT : 1
IN_AGAIN : 1
WAS_GETTING : 1
SKIN_COLOR : 1
DID_WANT : 1
BOTH_HAVE : 1
CARES_DOSE : 1
SECONDARY_FOR : 1
DAILY_LIVING : 1
GOES_ASSESS : 1
OF_EDUCATION : 1
OF_PSYCHI : 1
OF_FOLLOWING : 4
COMES_IN : 1
ICDCM_COMPLAINT : 1
FOCUSED_ON : 1
SUBSTANCE_DUE : 1
BM_NO : 1
ACTIVE_PT : 1
PHYSICAL_PATIENT : 1
LIQUID_ORAL : 1
AS_INSURANCE : 1
HAVE_SIX : 1
ULCERATION_THERE : 1
FEVER_FATIGUE : 1
BUCKEYE_MONITORING : 1
SOLUTION_AS : 1
REVIEWED_MEDICATIONS : 2
STATEMENT_OF : 1
ACCUCHECKS_RANGE : 1
NOT_MUCH : 1
IN_DOWN : 1
ED_EXTERNAL : 1
IT_WAS : 2
BEING_FOR : 1
IDENTIFY_USE : 2
ANTICOAGULATION_TAKE : 1
CALLING_AGAIN : 1
ASSESSMENT_COMPLETE : 1
BUT_TOBACCO : 1
SOB_ABD : 1
ACTIVE_EFFEXOR : 1
OXIMETRY_ORDERED : 1
WITH_FAMILY : 1
FEELING_ACUTE : 1
CONSULT_RESULT : 1
LEVEL_TO : 1
ALONE_FOR : 1
IN_BUT : 1
SUICIDE_NURSING : 1
PAIN_MED : 1
RESP_PAIN : 1
VIA_SEMMES : 1
REGULAR_DIET : 1
MAY_THE : 1
MG_CAP : 2
DAILY_THEN : 1
PATIENT_UNABLE : 1
ANY_ANATOMICAL : 1
PROSTATE_COLON : 1
LAST_NIGHT : 1
MEMBERS_INSTRUCTED : 1
ANSWER_QUESTIONS : 1
ILINTACT_FAMILY : 1
ASSESS_PATIENTS : 2
SMOKING_CESSATION : 1
MEDICATIONS_WITHIN : 1
COMMITTED_IMPRESSED : 1
ENDOSCOPY_SUITE : 1
PO_QHS : 2
CONSTA_WHICH : 1
OF_NOT : 2
AT_BEDSIDE : 1
WORKING_REVIEWED : 1
HGB_REVIEWED : 1
CM_WOUND : 1
PATIENT_IS : 6
ABUSE_PTSD : 1
PAIN_THIS : 1
NO_AUTH : 1
CHART_CHECKED : 1
TO_REVIEW : 1
AND_MOVE : 1
DEPARTMENT_CURRENT : 1
CAD_HYPERLIPIDEMIA : 1
FUNCTION_CURRENT : 1
SINCE_APPOINTMENT : 1
REPLACE_JOINT : 1
MEDICINES_LISINOPRIL : 1
IT_ITCHY : 1
NECK_OF : 1
MEDS_ETC : 1
REPORT_ADVERSE : 1
MY_DOSE : 1
IS_DIFFERENT : 1
CHANGED_AT : 1
FULL_CARDIOLOGY : 1
CLOCK_CORRECTLY : 1
PSOME_STATE : 1
FOR_SPOKE : 1
NEW_OVERTHECOUNTER : 1
NEUROLOGIC_COMPLAINTS : 1
ADVANCE_ACTION : 1
REHAB_DEBILITY : 1
LAB_PROCEDURE : 1
ACCEPT_NOTE : 1
WILL_ALERT : 1
IS_TAKING : 1
LAST_EVALUATION : 1
HER_NOT : 1
QUATTLEBAUM_TXC : 1
EDUCATION_NECK : 1
CURRENT_ORDER : 1
QHS_ACTIVE : 2
TYPE_CONTACT : 3
WAS_EDUCATED : 1
RETURN_APPT : 1
PAIN_HEMOPTYSIS : 1
PATIENT_NO : 1
EKG_NOTE : 1
SETTINGS_BASED : 1
BENEFITS_NEURO : 1
UPSETTING_IN : 1
PROCEDURE_THE : 1
IF_HEILIGENTHAL : 1
GERD_HYPERLIPIDEMIA : 1
PARTICIPATE_MONITORING : 1
WOUND_SIGNS : 1
FEMALE_CALL : 1
EVAL_AND : 1
THE_MEDICINE : 1
GLUCOSE_CALL : 1
PHYSICIAN_BODY : 1
EPIS_STOOLS : 1
MEDICAL_FIRST : 1
PULS_EITHER : 1
REMAINS_SAFELY : 1
RECREATIONAL_INDIVIDUAL : 1
NOT_MOBILITY : 1
UP_HIS : 1
DE_MCG : 1
MALE_PROVIDER : 1
REQUESTED_GIVEN : 1
BUT_WITH : 1
SUPPORT_MEDICAL : 1
COMA_PVCS : 1
MALE_HX : 1
WAS_ITCHY : 1
OLLECTED_TEMPERATURE : 1
FOR_MONITOR : 1
MEAL_RESP : 1
SSN_PATIENT : 1
SUPINE_BED : 1
OF_MEDS : 1
SHORT_WITH : 1
OTHER_BEINGS : 1
SOCIAL_WORK : 3
GIVEN_TO : 1
BMS_NO : 1
ANTERNATE_TELEPHONE : 1
TRAPPED_INSIDE : 1
IF_HAS : 1
TO_ACCEPTING : 1
NOT_AN : 1
HE_ANY : 1
PRESCRIBED_ANY : 1
AND_THE : 2
HE_STATED : 2
ANGER_THE : 1
SATT_EDUCATION : 1
SCANT_CLOT : 1
SITTER_REQUIRED : 1
PREDICTING_PRESSURE : 2
OTHER_OF : 1
LIP_UPPER : 1
PROGRESS_NOTE : 1
METHADONE_ELAVIL : 2
FOLLOWUP_LOCATION : 1
IS_WHILE : 1
ON_PRESCRIPTION : 1
BIRTH_SEX : 1
OF_SUICIDE : 1
THIS_IMPROVES : 1
HAVE_EVALUATED : 1
HE_IS : 12
LBED_VS : 1
DOXEPIN_HCL : 1
HE_ALONE : 1
INJURY_RELATED : 1
OF_ALLERGIC : 1
PRESCRIPTION_IS : 1
PATIENT_THAT : 1
OR_ABOUT : 1
THIS_MALE : 1
OR_MEDICATIONS : 1
SKIN_ASSESSMENT : 1
STATED_WANTS : 1
FROM_PER : 1
TO_AND : 3
REQUESTING_REFILL : 1
OXYGEN_AS : 1
FOR_CARE : 1
WORK_FEE : 1
POOR_SUPPORT : 1
DELAYED_UNTIL : 1
WITHOUT_DENIES : 1
ENDOSCOPIC_PROCEDURE : 1
SCRUBBED_PATIENT : 1
OR_HERBAL : 1
HS_RECOMMENDED : 1
SEEN_IN : 2
AFFECTED_TO : 1
METHOD_OF : 1
HOME_UPON : 1
HE_TO : 2
MED_RECONCILIATION : 1
WANT_TRAVEL : 1
EVAL_OF : 1
IF_PI : 1
MORE_VISIBLE : 1
TLC_IF : 1
NO_FROM : 1
DDRIVE_PROVIDER : 1
HAD_THIS : 1
MODALITIES_CONTAINMENT : 1
IMAGING_TO : 1
SHOW_FOR : 1
OF_ONYCHOMYCOTIC : 1
OR_ADMISSIONS : 1
CONSULT_PLEASE : 1
RESPIRATIONS_NURSING : 1
PLAN_SERVICES : 1
FOCUS_OF : 1
MONITORING_REFLEX : 1
GOING_TO : 2
URINARY_RETENTION : 1
NONOBSTRUCTING_TUMOR : 1
GIVEN_EDUCATION : 1
THE_OXYGEN : 1
EFFECTIVE_MEANS : 1
THEY_TO : 1
PT_ALONE : 1
GOALS_DEADLINES : 1
INSULIN_HUMAN : 1
CALL_VIA : 1
BEEN_OUTPATIENT : 1
FOUR_AS : 1
SOCIAL_NIGHT : 1
HIS_FIXATURE : 1
FOLLOWING_SCREENING : 1
THIS_OFFICE : 1
DESCRIPTION_OF : 2
EDUCATION_PROVIDED : 1
LESS_FOR : 1
FOR_SOME : 1
MEDICINE_NOTE : 1
MEASURES_CM : 1
ON_PT : 2
THE_REMINDERS : 1
COMPLIMENTARY_NONE : 1
CATEGORY_II : 1
ON_WILL : 1
WITH_TEENA : 1
SORE_RISK : 1
NO_ALLERGY : 1
NEWLY_PRESCRIBED : 1
ON_OPIATES : 1
HPI_WITH : 1
WERE_IF : 1
EDUCATED_TRMT : 1
SUPINE_IN : 1
TO_GET : 1
NOTE_SOAP : 1
GIVEN_LAB : 1
SISTER_INLAW : 1
GROUP_GROUP : 1
WITH_EACH : 1
PEDAL_NURSING : 1
DIET_DIET : 1
DIAGNOSIS_IS : 1
NEGATIVE_THEY : 1
SW_TOLD : 1
HAS_CONTACTED : 1
INSTRUCTIONS_PATIENT : 1
VISIT_SHORT : 1
APPROX_EDUCATED : 1
PHYSICIAN_WOULD : 1
IMPLANT_NERVE : 1
FOLLOWING_CALLED : 1
TO_TRANSFER : 1
PAIN_LB : 1
YEARS_AGO : 1
DOES_YOUR : 1
WAIT_MY : 1
WABLE_THANKS : 1
DETERMINED_PROFESSIONAL : 1
DEBILITY_EVAL : 1
DCD_FROM : 1
ALLERGIES_REACTIONS : 1
COOPERATIVE_STAFF : 1
SHE_CONCERNS : 1
PT_DOING : 1
JOB_OF : 1
ORDERED_LB : 1
MANAGEMENT_AND : 2
FINICAL_KEEP : 1
PATIENT_SOCIAL : 2
SCHOOL_RECEIVE : 1
FAMILY_OF : 1
LEFT_THE : 1
NURSING_CARE : 2
TO_LESS : 1
HGB_THE : 1
WAS_UNSUCCESSFUL : 1
DOES_NOT : 4
LOWER_BACK : 1
SINCE_QUANTITY : 1
CONNECTED_WHEN : 1
SUBJECTIVE_FEELS : 1
TEST_NO : 1
SCREENING_EDUCATION : 2
ON_SAFETY : 2
REQUIRED_METHOD : 1
ADMISSION_PREVIOUS : 1
WDVA_TO : 2
HIATAL_HERNIA : 1
FUTURE_ABOUT : 1
SWITCH_CRESTOR : 1
SEE_IF : 1
THAT_SINCE : 2
REVIEW_SYSTEMS : 1
NOTE_NOTE : 1
YOUR_PAIN : 1
THOUGHTS_SUICIDE : 1
HEALTH_PROBLEM : 1
TO_IN : 4
IF_WABLE : 1
INFO_DEPAKOTE : 1
REACH_THEIR : 1
OR_HIM : 1
SERVICE_CONNECTION : 1
EYE_WITHOUT : 1
EITHER_NEED : 1
NOT_LIKE : 1
HOMICIDAL_PLAN : 1
IN_AVF : 1
RESTING_QUIETLY : 3
REFILL_PRESCRIPTIVE : 1
PICKED_UP : 1
NONCOUNT_CLOCK : 1
CURRENT_DIRECTIVE : 1
LIKELY_TO : 1
OF_II : 1
REVIEWED_NO : 1
ADJUSTMENTS_MAKE : 1
HAVE_TRACH : 1
CONSULT_GU : 1
NOT_WANT : 1
HAVE_LIFE : 1
TO_JEWELRY : 1
EXAM_FOR : 1
NUMBER_OF : 1
HEALING_NOTE : 1
HEIGHT_CM : 1
NO_APPARENT : 1
PROTECTOR_GIVEN : 1
SUBJECTIVE_PSYCHOSOCIAL : 1
LOCAL_STATED : 1
FOR_IDEATION : 1
OUR_LAST : 1
IMAGE_BE : 1
HAVING_RETENTION : 1
INCLUDES_HAIR : 1
HS_PATIENT : 1
TREATMENT_CURRENT : 1
MAY_NURSING : 1
PT_LOOSING : 1
WAS_SMRS : 1
EXUDATIVE_PROCESS : 1
PTSD_ATTENDING : 1
TREAT_WITH : 1
LIKE_HE : 1
JUST_VET : 1
HE_SUFFERED : 1
COLORED_WITH : 1
MAY_HEART : 1
REPLACEMENT_WIDEPRESSION : 1
ADT_CONTINUED : 1
TO_INCREASE : 1
WITH_YOU : 1
INJURY_CONCERNED : 1
OUTLINE_TREATMENT : 1
USUAL_THE : 1
STATES_CAN : 1
UNIT_QUIETLY : 1
OF_INSTRUCTED : 1
MCG_INHL : 1
OF_RATIONAL : 1
PAST_DECEMBER : 1
CALL_IF : 1
WAS_DIVORCE : 1
FOR_COLONOSCOPY : 1
RARELY_AND : 1
BETTER_ON : 1
VETERAN_TREATING : 1
HERE_FOR : 1
WITH_HX : 1
AGENCY_RELAXED : 1
AT_CC : 2
HAS_TO : 2
MEDICATIONS_AGO : 1
TROUBLE_AT : 1
CARDIOLOGY_NOTE : 2
DRIVER_INSTRUCTED : 1
PEARCE_FILLION : 1
SAFETY_FALL : 1
SEDATION_LEVEL : 1
HIS_ASSESSMENT : 1
THEN_QUANTITY : 1
IRWIN_HOSPITAL : 1
BE_REFILLED : 1
POSITIVE_PHYSICIAN : 1
STATED_HE : 2
IS_MEDICATION : 2
VIETNAM_ERA : 1
COMPLAINT_REASON : 1
EMERGENCY_DEPARTMENT : 1
OTS_MODALITIES : 1
FOR_PREDICTING : 2
MALE_WORK : 1
RESP_PM : 2
ATTEMPT_RECENT : 1
TOBACCO_ICDCM : 1
DO_NOT : 1
INFORMED_HIM : 1
WAS_PAIN : 1
PLATINUM_NOTE : 1
ONCE_MEDICATIONS : 1
INPATIENT_BRADEN : 1
ON_JUN : 1
SHOULD_BE : 1
NOT_ABSOLUTE : 1
WAS_CONTINUED : 1
THIS_OR : 1
TO_BULGE : 1
SO_MANY : 2
DIVERTICULOSIS_NS : 1
WHEN_ON : 1
INTAKE_SAVAHCS : 1
PAIN_TIGHTNESS : 1
AND_MEDICATIONS : 1
HAS_RESENTMENT : 1
PAST_FOR : 2
NEW_SOCIAL : 1
ENCOUNTER_ON : 1
PRESCRIPTION_WORKING : 1
OVER_VET : 1
OUTCOME_WITH : 1
THAT_HHA : 1
ASSISTANT_GROUP : 1
QUIT_DATE : 1
NOT_DISCLOSE : 1
BUPROPION_ACTION : 1
FALL_RISK : 1
ASKED_HIS : 1
PRESENT_PATIENT : 1
TO_RECV : 1
TECHNIQUES_FOR : 1
LEAST_LIQUID : 1
MG_SEROQUEL : 1
SPONDYLOSIS_DATE : 1
NECK_PATIENT : 1
PAST_REVIEW : 1
DSMIV_DIAGNOSTIC : 1
HOSPITAL_OTHER : 1
AIDS_EVAL : 1
ABOUT_THE : 2
SIGNATURE_ACOS : 1
PC_ANTICOAGULATION : 1
PATIENT_BENIGN : 1
THEY_ABOUT : 1
XX_BE : 1
OFTEN_DID : 1
WOULD_LIKE : 4
WITHOUT_OR : 1
PMH_BIPOLAR : 1
OR_SYMPTOMS : 1
HAVING_AT : 1
HE_THIS : 2
DATE_FOR : 1
OFF_OF : 1
FEELING_OBSERVATION : 1
EFFECTS_OF : 1
PRESSURE_PROTOCOL : 1
COMPLAINTS_PT : 1
YEAR_REVIEW : 1
NO_PATIENT : 1
NOW_HAS : 1
MALE_WITH : 1
IS_WITH : 1
TRANSPORTED_HOME : 1
TIGHTNESS_MIND : 1
TO_ADDENDUM : 1
HAVE_REVIEWED : 1
HIS_NIGHT : 1
OF_THERE : 1
SEE_EXPLANATION : 1
PAIN_RACING : 1
CORRECTION_ADVERSE : 1
CAD_COPD : 1
COPY_ALLERGIC : 1
BOTHERING_COMMUNICATE : 1
REHAB_OR : 1
FOR_EVALUATION : 1
USE_XX : 1
BRONCHSOCOPY_UNSUCCESSFUL : 1
VET_WITH : 1
WRITING_REFERENCE : 1
MOVE_BMI : 1
COMPLETION_OF : 1
CARE_PATIENTS : 1
ABD_NO : 1
CONSULT_HE : 1
STAFF_MONITOR : 1
WITH_WALKING : 1
MATTER_MORE : 1
COMPLAINT_PAST : 1
LEISURE_SATT : 1
THEY_ARE : 1
CANE_AMBULATION : 1
ACUTE_FOLLOW : 1
OBTAINING_AN : 1
OVERALL_THE : 1
CURRENT_ASSESSMENT : 1
AND_REPLACED : 1
SUMMARY_DICTATED : 1
VA_IS : 1
THE_APPROPRIATE : 1
CLINIC_WAL : 1
NOTIFY_DC : 1
LAST_EXAM : 1
NOT_SIMVASTATIN : 1
BLED_IS : 1
HAVE_QUESTIONS : 1
HAS_POUNDS : 1
TO_CHECKED : 1
QUESTIONS_SITE : 1
AMBULATORY_STRETCHER : 1
OF_APPROACHING : 1
BIPOLAR_MIXED : 1
TRMT_OF : 1
INSTRUCTED_RD : 1
GASTROENTEROLOGY_CONSULT : 1
HIM_HE : 2
ER_UROLOGY : 1
TAKE_DIRECTED : 1
ADMITTED_TO : 2
DURING_OUR : 1
DIVORCE_HE : 1
ABNORMAL_NO : 1
PAIN_LIGHTHEADEDNESS : 1
INJ_ACTIVE : 1
DO_PT : 1
NOTE_WERE : 1
JUDY_PLAUT : 1
NO_PRIMARY : 1
NO_PROVIDER : 1
FAMILY_OLDER : 1
NONVA_CAP : 1
LIQUID_DAILY : 1
BUT_THIS : 1
SAID_DID : 1
ENDOSCOPIC_RESECTION : 1
INTERVENTIONS_HYGIENE : 1
CARE_INDICATES : 1
NOT_TAKE : 1
OF_HAVE : 1
PLAN_APPETITE : 1
ORIENTED_BACKGROUND : 1
HAD_NONBLOODY : 1
YOU_ANY : 1
TO_HOSPITAL : 1
TO_SHOW : 1
EDUCATION_PT : 1
INITIATED_BY : 2
CHECK_EDUCATION : 1
NO_SUBSTANCE : 1
AS_CHILD : 1
COMMITTED_SUICIDE : 1
OF_INSULIN : 1
CALLED_AM : 1
FROM_OF : 2
MH_PROVIDER : 1
EXEMPT_DISCHARGE : 1
NEED_BE : 3
TAB_TABLET : 2
YOUR_PRIMARY : 1
RECREATION_THERAPY : 1
PLEASE_AND : 1
SEEN_ER : 1
PREVIOUS_BRONCHSOCOPY : 1
SPOKE_TO : 1
HE_HE : 1
DROWSY_FEELING : 1
RECEIVE_TEACHING : 1
BP_HIGH : 1
CLEAR_MOISTURE : 1
WALKIN_HE : 1
WERE_IN : 1
NOTICED_ANY : 1
UP_CCTV : 1
VOICES_COMPLAINTS : 1
ED_NURSING : 1
PROGRAM_PROVIDED : 1
CAREGIVER_GIVEN : 2
RISK_FOR : 1
ABGS_OR : 1
NURSE_PATIENT : 1
OUTPATIENT_PT : 1
DYSPNEA_WALKING : 1
PREEXAM_PAIN : 1
TOL_CLEAR : 1
RESULTS_CABBAGE : 1
THE_SECONDARY : 1
DAILY_LUNCH : 1
ITCHY_BOTHERING : 1
INFORMED_CONSENT : 1
RECONCILIATION_PATIENT : 1
PROVIDED_COPY : 1
THE_PSYCHOTIC : 1
RESPONSE_THE : 1
EXERCISE_EDUCATION : 1
GO_THE : 1
TIME_TO : 1
HIS_WIFE : 1
WHEELCHAIR_NURSING : 1
TIRED_CONTINUES : 1
BLED_PAIN : 1
CLINIC_NOTE : 2
COMA_SCALE : 1
THAT_TYPE : 1
WHEELCHAIR_STRETCHER : 1
INFORMED_THE : 1
AND_ASKED : 1
LIMB_MH : 1
CM_CURRENT : 1
HOSPITAL_PER : 1
BLOOD_CLOT : 1
HEALTH_SOUTH : 1
DURATION_RESPONSE : 1
SAFETY_AND : 2
LECTURE_SEEMED : 1
AT_THAT : 1
PLAN_VETERAN : 1
AT_SIMILAR : 1
USE_USED : 1
TREATING_INPATIENT : 1
OR_COLON : 1
RESTING_AT : 1
CAP_TAB : 1
SIDE_DISCOMFORT : 1
CALL_BACK : 1
WENT_BED : 1
SLURRED_SPEECH : 1
ER_NOTE : 1
REAL_AS : 1
ADMISSION_HAS : 1
SELECT_AFFECTED : 1
LAST_NOT : 1
ABLE_FUNCTION : 1
STOOL_SOFTNER : 1
THE_AT : 2
SHE_IS : 1
AND_UP : 1
THERAPY_DIAGNOSTIC : 1
LOCATION_CLINIC : 1
HIS_MEDICATIONS : 1
EFFECTIVE_OF : 1
SIMVASTATIN_DO : 1
FACETOGENIC_PLEASE : 1
FOR_SAFETY : 1
HOW_DOES : 1
GLUCOSE_LIQUID : 1
PT_QUIETLY : 1
BEING_INCREASED : 1
COOPERATIVE_WITH : 1
PROPANOLOL_FLORINEF : 1
TO_FOR : 5
ONE_PT : 1
VS_PRESSURE : 1
PRAVASTATIN_NON : 1
UPPER_HE : 1
ON_MG : 1
COURSE_NEEDS : 1
AT_NO : 1
EDUCATION_ON : 2
LIFESUSTAINING_LISINOPRIL : 1
PPD_IS : 1
AND_WANT : 1
TO_THE : 11
AORTA_STATES : 1
BLOOD_PRESSURE : 1
NOTE_BEHAVIOURS : 1
BRUSHING_WASHING : 1
TONIGHT_OF : 1
AVAILBLE_CPRS : 1
CLINIC_SCHDULE : 1
AGO_STATES : 1
THE_MEDICATIONS : 2
SMOKING_NONE : 1
PLACEMENT_OR : 1
YES_WHEN : 1
SIGNS_GOALS : 1
AFTER_WAS : 1
HIS_THOUGH : 1
EXAM_OUTPATIENT : 1
QUESTIONS_WILL : 1
THE_OF : 5
GALESBURG_ILINTACT : 1
NO_REQUIRES : 1
PAIN_ASSESSMENT : 3
WITH_BILATERAL : 1
BY_MOUTH : 5
CA_VET : 1
THE_SOURCE : 1
PATIENT_EDUCATION : 2
LEAST_EPIS : 1
TO_ECHO : 1
MEDS_AND : 1
ONE_CAPSULE : 2
RECEIVE_DEGREE : 1
LIVER_MAKE : 1
NONVA_OR : 1
APPEARANCE_ACCEPTABLE : 1
VET_INEFFECTIVE : 1
BLOOD_NOTED : 1
HUMAN_UNIT : 1
ADDENDUM_ASSESSMENT : 1
GAOLS_IN : 1
BREATH_NEEDED : 1
ISLE_CHIEF : 1
BBS_BUT : 1
ULCER_ACTIVE : 1
EXERCISE_TO : 2
DIABETIC_ULCER : 2
HISTORY_PHYSICAL : 1
DISCUSSED_TEENA : 1
CHIEF_COMPLAINT : 8
VA_ADMIS : 1
SHE_TOOK : 1
GOING_HOME : 1
ASSESSMENT_PROCESS : 1
PM_HISTORY : 1
AN_EFFECTIVE : 1
EMERGENCY_CONTACT : 1
FOR_ANXIETY : 1
OPTS_TO : 1
NOTE_CONTRAST : 1
SIZE_INPATIENT : 1
DIALOG_REQUESTS : 1
PO_TIDWM : 1
ASSOCIATED_SHORTNESS : 1
THAT_HE : 10
AMBULATORY_EXAM : 1
PM_WAS : 1
NURSE_NOTIFY : 1
COVENIENCE_STORE : 1
LEFT_THEY : 1
CRAVINGS_TO : 1
FEELS_INSIDE : 1
CONNECTED_YES : 1
IMMATURITY_AND : 1
IN_APP : 1
SPOKE_OF : 1
SATURATION_VIA : 1
THE_PURPOSE : 1
IF_THIS : 1
HISTORY_USES : 1
REASON_FOR : 4
NOTE_HE : 1
ABOUT_OUT : 1
TAKE_TABLET : 3
THE_FOR : 4
LOSS_OF : 1
TO_HAIRLESS : 1
HIM_ALSO : 1
LOCATION_IN : 1
PROSTATE_EDUCATION : 2
SUGGESTIVE_OF : 1
ADDENDUM_SKIN : 1
LIFE_WERE : 1
AND_BEEN : 1
AND_WT : 1
OUR_VISIT : 1
RECREATION_PROGRAM : 1
HIS_BECAUSE : 2
HYPERLIPIDEMIA_PHONE : 1
PATIENT_WORKER : 1
HIS_SHOT : 1
DO_YOU : 2
QUESTIONED_TO : 1
FOLLOW_TO : 1
SINCE_THE : 1
TO_INFORM : 1
NUTRITION_REVIEWED : 1
MOVE_UNITS : 1
NOTE_GLASGOW : 1
MEDICATION_PSHX : 1
APPT_FOR : 1
AGO_DRIVING : 1
PROTOCOL_IM : 1
MEDICINE_LESS : 1
AGAIN_IID : 1
STARTED_AT : 1
STARTING_AT : 1
QUESTIONS_OR : 1
CONCERNED_ELEVATED : 1
DRUGS_ASSESSMENT : 1
ONE_BY : 3
THE_THE : 1
HAVE_PAIN : 1
SIGNS_RESPIRATIONS : 1
ASSUMED_OF : 1
APPARENT_PROBLEM : 1
PAIN_SCALE : 1
TO_TID : 1
CONTRAST_TIME : 1
THAT_WAS : 1
CE_HE : 1
FOR_LIP : 1
WAS_TREATING : 1
LEFT_WHEN : 1
VIA_TOOLS : 1
ATTACHED_THIS : 1
APPLICABLE_NO : 1
NOTE_MED : 1
PREVIOUS_WAS : 1
REQUESTS_ENALAPRIL : 1
THE_DOSE : 1
ONE_BROUGHT : 1
AND_AGGRAVATED : 1
OF_PATIENT : 3
THE_EVERY : 1
INFORMED_OF : 2
YOUR_INHALER : 1
GROUP_MANDY : 1
THIS_HIS : 1
FRICTION_NO : 1
AGAIN_OVER : 1
ST_CHIEF : 1
VERIFIED_ON : 1
LIFESUSTAINING_TREATMENT : 1
OXYMIZER_ULA : 1
DOING_THAN : 1
EYE_SPECTACLE : 1
FOR_GATIFLOXACIN : 1
BLOOD_OR : 1
SULFA_DRUGS : 1
HIS_INPATIENT : 1
AND_FOR : 2
WHAT_YOUR : 1
PT_INFORM : 1
AND_TEGRETOL : 1
INCREASED_EFFEXOR : 1
STATUS_CLOSED : 1
VET_COPING : 1
WITHOUT_SPECTACLE : 1
EVERY_HOURS : 1
DOES_AFFECT : 1
MI_DISCHARGE : 1
PAST_OF : 1
WITH_OF : 1
THIS_AM : 1
AND_HIM : 1
FOOT_ACTIVE : 1
THE_PT : 1
PERFORMED_IN : 1
FOR_REHAB : 2
MANY_CONSULT : 1
LEVEL_UNDERSTANDING : 1
PROTOCOL_STATED : 1
SOCIAL_MEDICAL : 1
STOOLS_DAILY : 1
RECURRENT_CHRONIC : 1
DESCRIBE_SIGNIFICANT : 1
ANY_OVERTHECOUNTER : 1
ALSO_AN : 1
SESSION_RAL : 1
PC_TELEPHONE : 1
SAID_HE : 1
AUG_IS : 1
SEPTOPLASTY_COPD : 1
LYMPH_PATIENT : 1
APPOINTMENT_EATS : 1
THE_THAT : 1
GOALS_AND : 1
MEDICATION_REFILL : 1
YOU_LIKE : 2
ASKED_IF : 2
RECOMMENDED_FOLLOWUP : 1
INHALER_EDUCATION : 1
OF_STATED : 1
TO_ANSWER : 1
SMACKING_LIMB : 1
CLEAR_DIET : 1
UNIT_RESTING : 1
AND_NOT : 2
CHEWING_SMACKING : 1
RD_FLOOR : 1
SEPTEMBER_VITAL : 1
TIME_INDICATES : 1
BASIS_CONSULT : 1
DEPAKOTE_TONIGHT : 1
WAL_THE : 2
REFERRED_BY : 1
OCCASION_IN : 1
CARE_APPROVAL : 1
TO_PLACE : 1
KG_SEDATION : 1
ABOUT_HE : 1
SUBJECTIVE_PT : 1
NOT_GENERAL : 1
NUMBER_HISTORY : 1
SIZE_MM : 1
PT_FEELS : 1
ID_THAT : 1
FREE_WATER : 1
AMBULATORY_WHEELCHAIR : 1
WORKER_REPLIED : 1
ET_AND : 1
PSYCHOEDUCATION_AND : 1
WILL_HER : 1
AUTHOR_PHYSICIAN : 1
CURRENT_HE : 1
PRESSURE_INTENSITY : 1
ENCOURAGE_PATIENT : 1
YOUR_CARE : 1
SUFFERED_AND : 1
HIS_THE : 2
FINALLY_RADIATION : 1
BREATH_WAS : 1
SIGNS_IS : 1
ON_THAT : 1
EXHIBITED_MOOD : 1
SERVICE_AT : 1
TEETH_WASHING : 1
URINE_SISTER : 1
FINE_THIS : 1
OF_ILLNESS : 1
IS_COURSE : 1
CE_DEPT : 1
HIM_APOLOGIZED : 1
FOR_BOWEL : 1
HYPERLIPIDEMIA_DO : 1
WHILE_ASSOCIATED : 1
NO_NOT : 1
SPONDYLOSIS_TA : 1
MEDICATIONS_OTCS : 1
TO_EMERGENCY : 1
AND_SI : 1
AM_CESSATION : 1
HE_APPEARED : 1
EVENT_HIGH : 1
DRY_LOWER : 1
PATIENT_EXHIBITED : 1
MAYO_FOR : 1
CARE_ALTE : 1
TO_NO : 2
NURSING_ASSESSMENT : 1
LUNG_MR : 1
SCHEDULED_RETURN : 1
VA_CARE : 1
WITH_WILL : 1
PHYSICIAN_LTC : 1
DATED_MADE : 1
ROUTINE_EDUCATION : 1
ON_WALKIN : 1
IS_SISTER : 1
USE_LOW : 1
OF_LEISURE : 1
TEACHING_SATT : 1
MONITOR_OXYGEN : 1
GIVEN_CAREGIVER : 1
TIME_HE : 1
VIA_WHEELCHAIR : 2
NECK_STIFFNESS : 1
BRONCHSOCOPY_WAS : 1
VET_POOR : 1
TILL_MY : 1
ORDERED_WT : 1
WHEELCHAIR_THE : 1
PAIN_BY : 1
DRY_NO : 1
INTAKE_EXAMINATION : 1
TI_LTC : 1
FAMILY_PRE : 1
WHEN_TRIED : 1
LEVEL_AT : 1
OF_PEERS : 1
TO_CONCURRENT : 1
OLD_OF : 1
COULD_DISCLOSE : 1
DINNER_AND : 1
BMI_SS : 1
PROCEDURES_PLATINUM : 1
IS_ATTACHED : 1
PRESENTING_CHIEF : 1
FOR_AT : 1
EATS_ONCE : 1
CLINIC_ON : 1
CLEAR_BUT : 1
BODY_MASS : 1
LIKE_DO : 2
HAS_PT : 2
TRS_TXC : 1
PO_MD : 1
LIMITATION_DIAGNOSES : 1
VOIDING_PUNCH : 1
SEEN_AT : 1
NO_FOCAL : 1
ON_FAMILY : 1
AND_GOING : 1
WEIGHT_DOB : 1
ABOUT_CA : 1
EXPOSURE_OR : 1
PREVENTIVE_MANAGEMENT : 1
ENDO_LAB : 1
JOB_HISTORY : 1
APPOINTMENT_WITH : 2
FRICTION_APPARENT : 1
COMMUNICATE_THE : 1
EKGNL_RAISED : 1
GROUPS_CHECK : 1
WAS_VET : 1
GRANULAR_BASE : 1
RA_ABDOMEN : 1
STERISTRIPPED_LATER : 1
FAIRLY_THIS : 1
STORE_FOR : 1
IN_ENDOSCOPY : 1
NOTE_DIMINISHED : 1
HYPERTENSION_ICDCM : 1
PMHX_PSHX : 1
BLOOD_CRUSTED : 1
US_WAS : 1
THEY_TALKED : 1
IN_ROOM : 1
ELAVIL_IMPROVED : 1
SUPPORT_SYSTEMS : 1
TO_TRANSPORTED : 1
DIS_MIXED : 1
LET_PAIN : 1
OF_SELECTED : 1
RETURN_TO : 1
IBUPROFEN_METHADONE : 2
OBTAINING_IMPLANT : 1
AMOUNT_AFFECTED : 1
RADIATION_REPORT : 1
HAS_ON : 1
LOCATION_SEE : 1
OD_FAMILY : 1
LEVEL_CLICKING : 1
MEDIASTINAL_LYMPH : 1
ON_FLORINEF : 1
NO_THAT : 1
PLAUT_THE : 1
BREATHING_ABOUT : 1
BY_MENTAL : 1
ASU_DRIVER : 1
HE_LP : 1
AM_AND : 1
SIGNS_FRACTURES : 1
EDUCATION_APPEARED : 1
PAST_HISTORY : 3
NURSE_OTHER : 2
UROLOGY_RUNNING : 1
PROCESS_CANDIDA : 1
ARRANGED_TO : 1
QS_IN : 1
LIKE_THE : 1
RATES_BUPROPION : 1
THIS_AT : 2
HIS_DAILY : 1
BLUE_ON : 1
PATIENT_SURROGATE : 1
SINCE_LIVES : 1
MEDICATION_REFILLS : 1
THE_FUTURE : 1
MYOCARDIAL_INFARCTION : 1
VERBALIZES_ACTUAL : 1
RETURNED_TO : 2
ASSESSMENT_THE : 2
PATIENT_FROM : 2
FIBRILLATION_ON : 1
RADIATION_THERAPY : 1
ACTIVE_EKSW : 1
HE_NEW : 1
LEFT_OTHER : 1
WAS_THIS : 1
IN_WEIGHT : 1
DISCHARGE_WITH : 1
NEW_COMPLAINTS : 1
AWAKE_NAD : 1
NUMEROUS_STRESSORS : 1
INDEPENDENT_PHYSIOLOGY : 1
AN_AMA : 1
HE_ARE : 1
PT_CONCERNING : 1
CARDIOVASCULAR_EFFORT : 1
HE_TBI : 1
NOTE_AGE : 1
TO_AWAIT : 1
TOOK_SERVICE : 1
STAFF_LEVEL : 1
VITAL_RESPIRATIONS : 1
PRESENTS_FOR : 1
OF_VET : 1
CC_NS : 1
THE_YEAR : 1
HAD_ADJUSTMENTS : 1
AUTH_SKILLED : 1
PLEASE_EVAL : 1
FOLLOWING_GENDER : 1
HE_UP : 1
PATIENTS_RISK : 1
ILLNESS_PT : 1
RISK_SUICIDE : 2
TIDWM_STOP : 1
VERBAL_TELEPHONE : 1
OR_CONTINUED : 1
CC_HR : 1
PUPIL_MM : 1
ANY_NICOTINE : 1
TIME_WAS : 1
LETHALITY_THIS : 1
RIGHT_HERE : 1
FREQUENCY_PAIN : 3
AND_PHYSICIAN : 2
MEMBER_CULTURAL : 1
ACTIVITIES_CALLED : 1
PROVIDED_OF : 1
THE_NURSING : 1
ASSISTANCE_COMPLETION : 1
WHO_USES : 1
HOW_OFTEN : 1
OTHER_RELAXED : 1
ADMISSION_DIAGNOSIS : 1
ABILITY_MANAGE : 1
INCLUDING_AND : 1
BP_DOES : 1
AN_DIAGNOSIS : 1
APICAL_AGAIN : 1
CLINIC_POSSIBLE : 1
WEIGHT_HE : 1
PROCEDURE_AT : 1
EDUCATION_AT : 1
MANAGE_ETC : 1
ULCER_PROTOCOL : 1
OF_LUNG : 1
APICAL_RATE : 1
TO_WOMENS : 1
SCHEDULE_THIS : 1
PROVIDER_TO : 1
LB_KG : 5
CAREGIVER_VISIT : 1
DEGREE_IN : 1
FORT_COLLINS : 1
BY_TELEPHONE : 1
AND_DEADLINES : 1
VACCINE_STATEMENTS : 1
EXERTION_CLEAR : 1
COMPLAINT_URINATION : 1
BY_EVERY : 2
RISK_IDENTIFIES : 1
WILL_HIM : 2
SORE_OTHER : 1
BP_MANAGEMENT : 1
HIM_PLAN : 1
SLIPPED_ON : 1
OR_HX : 1
SAME_CHIEF : 1
LONG_LASTING : 1
LUNG_MASS : 1
PATIENT_BEEN : 2
SAVAHCS_LIKE : 1
PMHX_ESOPHAGEAL : 1
VETERAN_THIS : 1
DIRECTIVE_ADDENDUM : 1
OR_GIVEN : 1
DISPOSITION_OF : 1
EXACERBATION_WITH : 1
INTEGRITYSKIN_TEAR : 1
COORDINATION_CE : 1
BE_BY : 2
INFUSING_AT : 1
AFTER_AND : 1
INFO_HOLD : 1
RECORD_FLAG : 1
PRN_ORAL : 1
DATE_OFTEN : 1
DOWN_PATIENTS : 1
THE_ACTIVITIES : 1
AND_IN : 2
GEN_NAD : 1
PT_ONE : 1
LB_PPP : 1
IBURPROFEN_PO : 1
CHEWING_LIP : 1
PATIENT_STATES : 2
COVENIENCE_FOR : 1
HERE_CP : 1
ALT_SKIN : 1
FROM_ON : 1
BM_NONBLOODY : 1
REPLACEMENT_SCREENING : 1
GENERAL_SURGERY : 1
NOTE_ADDENDUM : 1
ADVANCE_DIRECTIVE : 2
IN_RESTING : 1
THE_LAST : 1
SUPPER_ADVANCE : 1
SUICIDAL_PAIN : 1
INTERVIEW_BUT : 1
WITH_FOLLOWING : 1
ADLS_PHYSICIAN : 1
DISCONNECTED_STATE : 1
HIATAL_SC : 1
SEEK_TREATMENT : 1
ICDCM_CHIEF : 1
ALLERGY_ASSESSMENT : 1
SEE_DESCRIPTION : 1
SINCE_LOW : 1
SINCE_LAST : 2
PASSAGE_SUBSEQUENTLY : 1
OLD_MALE : 1
IN_PAST : 3
AFFECTED_SEE : 1
TREATMENT_FOR : 1
THAT_BELIEVES : 1
CONSCIOUSNESS_THAN : 1
OFF_HIS : 1
BED_WHEN : 1
CESSATION_TIME : 1
ATTEMPTS_COGNITION : 1
FIND_OUT : 1
NOTE_CLINIC : 1
WITH_LAST : 1
CONSTA_IS : 1
NONLABORED_PLEASANT : 1
USEFUL_IN : 1
NEED_FOR : 1
RISK_COMMITTED : 1
CWT_VETERAN : 1
SERVICE_CONNECTED : 1
FOR_PRESSURE : 2
APPT_CHECK : 1
ASSISTING_WITH : 1
VIA_TELEPHONE : 1
ICDCM_DATE : 1
RESOLVED_AWAKE : 1
HIS_FREE : 1
CITALOPRAM_TAB : 1
HISTORY_CLINICAL : 1
NOT_IMPROVED : 1
HE_EATS : 2
ACHE_HE : 1
HYPERTENSION_KERATOSIS : 1
NIGHT_NECK : 1
RECEIVED_RESPIRATION : 1
FREQUENCY_AND : 1
THIS_TAKING : 1
HERE_DENIES : 1
STOOL_AND : 1
STATUS_VET : 1
TO_GO : 1
HE_RESENTMENT : 1
PRAVASTATIN_PRODUCTIVE : 1
CONSULT_GET : 1
BP_WAS : 1
INDICATES_APPROVAL : 1
YOU_HAVE : 3
WAS_ABLE : 1
TO_CRESTOR : 1
MCG_KG : 1
PROCEDURE_POTENTIAL : 1
TO_IF : 2
SENSATION_BIL : 1
CAREGIVER_RELATIONSHIP : 1
URGENT_PATIENT : 1
GEN_INPATIENT : 1
TRAVEL_BACK : 1
NONE_TECHNIQUES : 1
UNTIL_THAT : 1
INJECT_PERIORBITAL : 1
TIME_CROSSED : 1
DNR_IS : 1
PRESCRIPTION_FOR : 1
ACTION_WHAT : 2
INTERESTED_PT : 1
REFILLS_STATES : 1
ASSESSMENT_FILED : 1
ICU_CARE : 1
BEEN_HIS : 1
REPORT_LAST : 1
INR_BROCC : 1
REPEAT_TO : 1
BE_EVALUATED : 1
WORK_CONSULT : 1
EVALUATION_OUTPATIENT : 1
UP_TELEPHONE : 1
WITH_PARTICIPATION : 1
NONSOAP_SESSION : 1
MEDICATIONS_LAST : 1
ENVIRONMENT_SO : 1
TO_MG : 2
TYPE_JOB : 1
DISCHARGE_SUMMARY : 1
FACTOR_IDENTIFIES : 1
ON_REVIEW : 1
UNIT_CHECK : 1
REMINDERS_ACTIVITY : 1
RESPIRATION_PHONE : 1
FIBEROPTIC_BRONCHOSCOPY : 1
TAB_HS : 1
AND_EITHER : 1
AS_ARE : 1
MG_ML : 1
PT_CAME : 1
HAVE_YES : 1
EDUCATION_INITIATED : 1
HPI_MALE : 1
FROWNING_SMILING : 1
LEFT_EYE : 1
FEELS_THIS : 1
OR_LIVER : 1
TIME_BREATHING : 1
FROM_HOSPITAL : 1
COULD_OUT : 1
AND_SUGGESTIVE : 1
ACROSS_FLUNIS : 1
CRAVINGS_APPLY : 1
NOTE_BRADEN : 1
YOU_WERE : 1
LUMBOSACRAL_DATE : 1
MENTAL_HEALTH : 2
IN_CURRENT : 1
MEETING_YOU : 1
OF_TEST : 2
THE_VET : 2
BUSY_WORKING : 1
FROM_MEMBER : 1
RIS_UP : 1
SOURCE_FOR : 1
WITH_IDEATION : 1
AFTER_THEY : 1
PSYCHO_SOC : 1
ACTIVE_PATIENT : 1
DATE_SESSION : 1
INHALE_BY : 1
PO_PTSD : 2
STOP_DIET : 1
PATIENT_PHONE : 1
PROBLEMS_KEEP : 1
PRESCRIBED_NONE : 1
OFFERED_APPT : 1
PT_REMAINS : 1
SUPPLE_SHOULDER : 1
ITEMS_PATIENT : 1
SOAP_TELEMETRY : 1
INSTRUCTED_HOW : 2
SEEMED_SABOTAGE : 1
METHODS_PT : 1
TO_PARTICIPATE : 1
DISCHARGE_BY : 1
NUMBER_CEL : 1
NUCLEAR_MED : 1
WAS_LOT : 1
SEROQUEL_PO : 1
IM_HOME : 1
TAB_BY : 1
WEIGHT_KG : 4
IF_OPTS : 1
HOLD_GIVE : 1
IN_AMARILLO : 1
GENDER_FEMALE : 1
IN_DISCUSS : 1
ENDOSCOPIC_NODENTURES : 1
YEAR_OLD : 2
THIS_PATIENT : 3
VISIT_HES : 1
DRUG_ESCALATED : 1
BP_SIGNIFICANT : 1
VS_CHARETED : 1
ADLS_FUNCTIONING : 1
PSOME_PATIENT : 1
NEURO_START : 1
DIRECTED_WITH : 1
IN_SCHEDULE : 1
IDENTIFY_DRUG : 1
DATED_WAS : 1
NORMAL_IMMOBILE : 1
HANDOUTS_GIVEN : 1
WAS_LATER : 1
DIVORCE_SO : 1
UPON_HIS : 1
ABUSE_BUT : 1
REMINDER_PATIENT : 1
AT_SUPPER : 1
CARE_FRIEND : 1
RIB_WENT : 1
DIFFERENCE_OVERALL : 1
REQUEST_ARRIVED : 1
STOMA_DOES : 1
VAMC_PERTAINING : 1
OF_DIPPY : 1
ALSO_IS : 1
PATIENTS_LEVEL : 1
VET_PROVIDED : 1
MAY_INTERVENTIONS : 1
OR_SUPPORT : 1
NURSING_SHIFT : 1
ESOPHAGUS_SINCE : 1
GENERAL_NONSOAP : 1
TEMP_RESP : 1
LABORATORY_SKIN : 1
RESULTS_BROCC : 1
STAFF_MEMBER : 1
THIS_AS : 2
PROBLEM_LB : 1
PLAN_ULCERATION : 1
TO_KEEP : 1
LACK_SOCIAL : 1
WITHIN_THE : 1
CORRECTLY_IV : 1
AT_NURSE : 1
AIDS_HEARING : 1
YOU_EXAMINATION : 1
ASKED_PAIN : 1
WITH_WIFE : 1
OF_BREATH : 3
ASSESSMENT_SKIN : 1
WEATHER_ACHE : 1
JUN_CP : 1
ADDENDUM_PULS : 1
REPORT_ULCERATION : 1
ONE_OCCASION : 1
ADDENDUM_SOLUTION : 1
II_AND : 1
WITH_PSYCHAITRIST : 1
CLEAR_SODIUM : 1
ASSIGNED_SOCIAL : 1
MOUTH_HEART : 1
CONTAINMENT_MEASURES : 1
MONTHS_TRIAGE : 1
ON_MEDICATION : 1
MEDICATION_AMOUNT : 1
DEVIATED_SEPTUM : 1
FLUNIS_MCG : 1
ACTIVE_ATTENDING : 1
GROUP_AFTERCARE : 1
TO_MEDICATION : 1
SOUTH_AND : 1
GROUP_MEMBERS : 2
ENDING_AT : 2
DATE_TIME : 2
BEDSIDE_INFORMATION : 1
POTENTIAL_FOR : 1
PATIENT_REASON : 1
HISTORY_PHX : 1
OBSERVATION_FOLLOW : 1
BUT_YEARS : 1
INFORMATIONAL_HOMICIDAL : 1
ENVIRONMENT_CURRENT : 1
REGULAR_PMH : 1
CONSENT_OBTAINED : 1
SPECIMEN_AUG : 1
STATUS_REQUIRED : 1
DIAGNOSIS_DIAGNOSIS : 1
VET_PAIN : 1
CAP_TABLET : 1
PATIENT_VERBALIZES : 2
LABS_PATIENT : 1
INFORMATION_SHEET : 1
COLOSTOMY_VIA : 1
ANY_OR : 1
PAIN_TRAMADOL : 1
UNMH_DOES : 1
FOR_CRISIS : 1
INFORMATIONAL_PLAN : 1
RESP_PATIENT : 1
SELECT_OF : 1
MEDICATIONS_WITH : 1
REGULARITY_OPIATES : 1
PLEASE_IF : 1
METH_ALCOHOL : 1
THOUGH_THE : 1
PHYSICIAN_NOTE : 1
CORRECTLY_ABILITY : 1
TO_ACCOMPLISH : 1
EDUCATION_TREATMENT : 1
ON_AN : 1
HAS_OR : 1
APPROACHING_THIS : 1
GOOD_DIVERTICULOSIS : 1
MEDICATION_APPROVED : 1
SPECIMEN_RECEIVED : 1
TAKING_NEW : 1
ADMISSION_STILL : 1
WEIGHT_ACTIVE : 1
OF_SYSTEMS : 1
HES_HAD : 1
PT_NUCLEAR : 1
PAIN_YES : 1
NURSING_PT : 1
PHYSIOLOGY_APPOINTMENTS : 1
PAIN_LOWER : 1
NEEDED_HE : 1
TO_WELL : 1
WITH_TRANSFER : 1
LIKE_FOOD : 1
ADVERSE_PENICILLIN : 1
FOR_THIS : 1
IN_PLAN : 1
AND_OR : 4
EVALUATED_ER : 1
INITIATED_XVETERAN : 2
SECONDARY_PAST : 1
TO_SINCE : 2
ACTION_PLAN : 2
AMBULATORY_TO : 2
IS_OF : 1
OF_VISION : 1
SUPERVISION_WITH : 1
VASELINE_THE : 1
HIS_RECENT : 1
EVAL_THRU : 1
THE_LESS : 1
GETTING_DIVORCE : 1
EVAL_MAY : 1
ASSESS_PATIENT : 1
VISIT_DESCRIPTION : 1
DONE_RECORDED : 1
HAVE_OF : 2
OF_LETHALITY : 1
COMPLAINTS_CARBAMAZEPINE : 1
ABOUT_TIME : 1
DE_ORAL : 1
INFARCTION_MI : 1
NUTRITION_CONSULT : 2
PPD_EDUCATED : 1
PROTOCOL_NOT : 1
OUT_ANY : 1
ATRIAL_ON : 1
TIME_JUN : 1
ALSO_MOOD : 1
ULCERATION_IS : 1
SORE_HOMEBOUND : 1
TO_MINIMAL : 1
PRESENT_RESP : 1
HE_CONFUSED : 1
STATED_HUGGER : 1
SPECIFY_REASON : 1
OD_WAS : 1
PREOPERATIVE_INFLUENZA : 1
LAST_MEAL : 1
ADDENDUM_ADDENDUM : 1
TEAR_LEFT : 1
THE_MENU : 2
CHECK_AFFECT : 1
RADIATION_FOUR : 1
HIS_HEALTH : 1
HEP_DEVIATED : 1
TO_COMPLETE : 1
ADDRESS_IF : 1
BED_QUIETLY : 1
AN_FORM : 1
FIND_IF : 1
MEDICAL_SOAP : 1
CONT_NUTRIONAL : 1
ON_MEDS : 1
WEEK_AM : 1
HERE_PSA : 1
LED_PT : 1
CLINIC_AFTER : 1
BE_FOR : 2
HAD_DRAWN : 1
PHONE_CLINICIAN : 1
PARTICIPATE_IN : 1
INJ_INJECT : 1
WITH_TREATING : 1
CC_HOUR : 1
GIVEN_MED : 1
STARTED_CC : 1
ETC_PT : 1
CONSULT_BP : 1
AN_CERTAINTY : 1
REPLIED_YOUD : 1
ATE_OF : 1
TO_SCHEDULED : 1
CARDIOLOGY_PMHX : 1
AND_STIFFNESS : 1
REMINDER_DIALOG : 1
MEDICATIONS_AGAIN : 1
HAVE_LOSE : 1
MG_UD : 1
THE_PROVIDER : 1
NO_FEVER : 1
ABOUT_YOUR : 1
PSYCHOSOCIAL_KAREN : 1
HIS_WHEELCHAIR : 1
INDICATES_CROSSED : 1
AND_PULSE : 1
NOTE_PHYSICIAN : 1
RECENT_NOTICED : 1
TABLET_BY : 3
COLOR_SISTER : 1
ADDENDUM_AS : 1
EACH_NEW : 1
CC_IV : 1
VITALS_NONE : 1
DAILY_LOW : 1
IS_PPD : 1
PM_CLINICAL : 1
BACK_CEL : 1
SCANT_BLOOD : 1
MUCH_PAIN : 1
CARDIOLOGY_YESTER : 1
PT_AO : 1
PT_CALLED : 1
BRONCHITIS_MOXIFLOXACIN : 1
FAMILY_CAREGIVER : 1
INDETERMINATE_IMI : 1
WIFE_HE : 1
AM_ACTION : 1
USE_HIS : 1
DIVERTICULOSIS_NURSING : 1
ECHO_CRACKLES : 1
VACCINATION_INFORMATION : 1
CLEAR_ADDENDUM : 1
HEART_RATE : 1
PROGRAM_TRANSFERS : 1
AGITATED_AND : 1
AND_SUPPORT : 1
PLACEMENT_CONTINUED : 1
DRAWN_TO : 1
SEPTUM_HAVING : 1
THEM_FELT : 1
YEAR_NSC : 1
OR_CHRONIC : 1
MEDICATION_VISIT : 1
IN_CLINICAL : 1
MH_CITALOPRAM : 1
ONE_HIS : 1
FOR_REQUIRES : 1
TO_LEVEL : 1
PREDNISONE_ACCUCHECKS : 1
WILL_HAVE : 1
FOCUSED_OBTAINING : 1
ON_HOLD : 1
HAVING_SEPTOPLASTY : 1
SNALL_QS : 1
PATIENT_PER : 1
GIVEN_VACCINATION : 1
OR_WEAR : 1
INTERVENTIONS_RESTING : 1
HEENT_ARRIVAL : 1
AWAKENING_METHODS : 1
VISION_OBSERVATIONS : 1
RECONCILIATION_SURGERY : 1
ON_BENIGN : 1
INFORMATION_WAS : 1
MEDICATIONS_NONE : 2
AS_PT : 1
HX_HE : 1
CONTINUED_PT : 1
LUMBAR_TA : 1
TABLET_ULTRAM : 2
INCLUDING_SUPPLIES : 2
URINATION_OADDRESS : 1
PROVIDER_NOTE : 1
TO_HISTORY : 1
MOUTH_EVERY : 3
INFORMATION_STATEMENTS : 1
COMFORTABLY_BED : 1
FEELS_ARE : 1
THERAPY_NONE : 1
SUPPLIES_STL : 1
EKNURSING_NA : 1
EXPIRATION_TIME : 1
SECOND_ASSESSMENT : 1
NECK_STOMA : 2
PRN_LAST : 1
WHY_HE : 1
WAS_ABOUT : 1
UNCONSCIOUS_OEF : 1
FELT_IT : 1
SCREENING_UPSETTING : 1
EXTREMITY_EDEMA : 1
OLD_NSC : 1
DM_ESOPHAGEAL : 1
CHIEF_OF : 2
FOLLOWING_PTSD : 1
CHAIGING_HIS : 1
AND_PREDNISONE : 1
OF_BRONCHOSCOPY : 1
WANTS_SOCIAL : 1
TX_PROGRESS : 1
SIGNIFICANT_IN : 1
MORE_ON : 2
AM_LOCATION : 1
EDUCATED_ON : 1
FINALLY_SEEMED : 1
WITH_WHO : 1
SENSATION_ABSENT : 1
GIVEN_INFORMATION : 1
HUMAN_ML : 1
APPROPRIATE_LEVELS : 1
IN_STRUCTURED : 1
DM_PATIENT : 1
TRYING_TO : 1
IRWIN_ARMY : 1
IMPACT_OF : 1
PERSONNEL_PERFORMED : 1
BECAUSE_COULD : 1
NO_AND : 1
IS_SMOKER : 1
DIAGNOSIS_VACCINE : 1
OPIATES_HOLD : 1
DIALOG_PATIENT : 1
LOW_PAIN : 1
SERVICES_MAY : 1
WRITER_PT : 1
WITHIN_AT : 1
OPTOMETRY_ORIENTED : 1
COLLINS_CE : 1
PAIN_PATIENT : 1
PROVIDED_INFORMATIONAL : 1
ALTE_ACCEPT : 1
DAILY_APPROVED : 1
ELBOW_STERISTRIPPED : 1
CURRENT_VITAL : 1
WAS_ASKING : 1
IN_FOR : 1
IN_WITH : 1
ONE_OVERTHECOUNTER : 1
DEPRESSION_NOT : 1
MEDICATIONS_THE : 2
RESECTION_MALE : 1
EDEMA_WITH : 1
TOOLS_OPTION : 1
TUMOR_NO : 1
PROCEDURES_BM : 1
FOR_OF : 3
WHICH_PATIENT : 1
OF_SITUATIONS : 1
WOULD_TO : 1
ULA_CURRENT : 1
RAL_PT : 1
THESE_INDICATING : 1
AVF_SUGGESTIVE : 1
AS_USAGE : 1
NURSE_DISCHARGED : 1
NECK_RESOLVED : 1
SINCE_HAD : 1
ABSENT_VIA : 1
PAST_MEDICAL : 1
RISK_FACTOR : 1
PAATIENT_FOR : 1
STATES_THAT : 5
SUPPLIES_IDEATION : 1
OVERTHECOUNTER_NONVA : 1
PROVIDED_THIS : 1
CONCERNS_THE : 1
HAS_SOME : 1
AT_ARMY : 1
BE_WALS : 1
EXCESSIVELY_HISTORY : 1
ONEHALF_BY : 1
MONTHS_TELEPHONE : 1
BY_PATIENT : 1
OVERNIGHT_NO : 1
NOT_TRACH : 1
WENT_OFF : 1
WRITER_AN : 1
USUAL_DENTURE : 1
PULSE_RESP : 1
ICDCM_KERATOSIS : 1
CTRS_THAT : 1
ACTIVITIES_AND : 1
WITH_PATIENT : 3
GU_ABNORMAL : 1
NO_BMS : 1
LAST_PERSONNEL : 1
WRIST_HCL : 1
KG_HAS : 1
TO_SUICIDE : 1
HE_DOESNT : 1
SHE_BELIEVES : 1
LEVEL_WAS : 1
FOR_MEDICAL : 1
COMPLAINT_DECREASED : 1
LAST_CALL : 1
PURPOSE_THIS : 1
TAB_ONE : 1
NO_LOWER : 1
CHANGED_PSYCH : 1
DINNER_SAID : 1
GIVEN_PAIN : 1
SUNSCREEN_HPI : 1
OF_DINNER : 1
PROCED_SIGNS : 1
FOR_EDUCATION : 1
ELBOW_GIVEN : 1
REPLIED_THINK : 1
WERE_GIVEN : 1
ECHO_LUNGS : 1
APP_SPEAK : 1
SCALE_PT : 1
SIGNIFICANT_DECLINE : 1
ASSESS_FALL : 1
HOLD_TONIGHT : 1
MED_SURGERY : 1
BEEN_PRESCRIBED : 1
THE_BEING : 2
HE_DENIES : 1
PROVIDER_NOSHOW : 1
EVAL_START : 1
DEGREES_PLAN : 1
PHONE_HAS : 1
WAS_OBTAINED : 1
IN_HE : 1
ABSOLUTE_CERTAINTY : 1
VET_STATED : 1
PSHX_HYPERTENSION : 1
BEEN_REMAINS : 1
VS_TEMPLATE : 1
ALL_USE : 1
FOR_EPIGASTRIC : 1
SUPPORT_EKG : 1
WAS_BEING : 1
EXPECTANCY_TO : 1
WERE_RUNNING : 1
COME_HISTORY : 1
MATERIALS_PROVIDED : 1
FUTURE_NURSING : 1
USE_OF : 1
TO_ACCESS : 1
YOUR_IMAGING : 1
CANDIDA_WITH : 1
PATIENT_WILL : 1
DRIVER_PT : 1
SURROGATE_IF : 1
HIM_COMMUNICATE : 1
UP_GIRLFRIEND : 1
SATURATION_ABGS : 1
SLIPPED_STEPS : 1
MONITOR_SATURATION : 1
PENICILLIN_SULFA : 1
BASE_DOES : 1
BE_HOME : 1
ALSO_TO : 2
COPD_QS : 1
AND_TEACHING : 1
TO_REPLACE : 1
ON_PLAN : 1
OTHER_PAST : 1
EDUCATION_CALL : 1
WITH_CONCERNING : 1
THIS_PAST : 1
MANAGEMENT_COMMENT : 1
YOUD_ID : 1
MEDICAL_PEARCE : 1
BEEN_MORE : 1
REPORT_TO : 1
AGAIN_JUST : 1
PHYSICIAN_LIKE : 1
MEETING_WITH : 1
BOWEL_ON : 1
DATE_HOW : 1
NOTIFY_MILIEU : 1
REFERRED_SELF : 1
AGREEABLE_REPEAT : 1
TWI_ADDENDUM : 2
SYMPTOMS_FRICTION : 1
DRINKS_ONE : 1
SARCASM_EITHER : 1
AND_AVF : 1
SITE_CDI : 1
BEING_ALONE : 1
TO_WRIST : 1
SCREENING_ENDING : 1
SCOPE_DONE : 1
OF_THIS : 6
AM_OF : 1
NUTRITION_MOVE : 1
GIRLFRIEND_ALSO : 1
TRAPPED_HIS : 1
LN_PHONE : 1
TEGRETOL_SYMPTOMATIC : 1
ON_DATE : 1
BROKED_WITH : 1
RECENT_ONYCHOMYCOTIC : 1
SEEN_RESTING : 1
VA_ACTIVE : 1
TO_THEIR : 1
OTHER_REVIEW : 1
MG_APPLICABLE : 1
CRUSTED_THEM : 1
SWITCH_TO : 1
UP_BY : 1
HEART_HEALTH : 1
NO_FATIGUE : 1
THEIR_ABUSE : 1
SINCE_AS : 1
WITH_ALCOHOL : 1
SUICIDE_NO : 1
MONTH_HAS : 1
TEST_INSULIN : 1
COPD_HYPOTHYROID : 1
ESSENTIALLY_AS : 1
VISIT_NURSING : 1
CONSULT_TO : 2
AND_FACE : 1
AS_AFTER : 1
ALERT_ADDENDUM : 1
REVIEW_PAST : 1
ACCEPTING_LAVERNE : 1
COMMENT_PT : 1
ARRIVAL_NO : 1
OF_COMES : 2
UNDERSTANDING_DIVERTICULOSIS : 1
ON_ULA : 1
OF_CARDIOLOGY : 1
HE_REPORTS : 1
CLINIC_WALKIN : 1
NO_ASSESSMENT : 1
ENDOSCOPIC_MUCOSAL : 1
WHILE_DRIVING : 1
ROOM_EVAL : 1
FOLLOWING_WITHIN : 1
AT_INFORMATION : 1
ABOUT_IMMATURITY : 1
PT_WDVA : 1
IS_THE : 2
USES_ALCOHOL : 1
DESCRIPTION_TO : 1
PATIENT_CAREGIVER : 2
COMPLAINING_LEFTSIDED : 1
MEDICINE_EFFECTIVE : 1
LOST_LP : 1
TO_DEPARTMENT : 1
AMBULATION_AT : 1
MAY_HAVE : 1
THAT_TO : 1
ACETAMINOPHEN_MG : 1
VISIT_HOW : 1
HE_CHEST : 1
ANY_QUESTIONS : 2
WAS_BY : 1
APP_TO : 1
CLINICAL_ACTIVITY : 1
CAREGIVER_VACCINATION : 1
INTEGRILIN_KG : 1
VS_AND : 1
DISORIENTED_PATIENT : 1
IN_LIFE : 1
ANY_THE : 1
RADIATION_ATYPIA : 1
ROSUVASTATIN_NO : 1
PNEUMOCOCCAL_WIFES : 1
WANT_LIMIT : 1
INHALER_NECK : 1
STRETCHING_LSPINE : 1
SLURRED_NO : 1
WIDEPRESSION_SCREENING : 1
DISCHARGED_HEALTH : 1
THEIR_LEFT : 1
MG_NOW : 1
OF_LIVING : 1
JUST_OVER : 1
COULD_JUST : 1
PROBLEM_REQUESTING : 1
NOT_PT : 1
IS_FLAT : 1
VET_MALE : 1
LYMPH_SUMPTER : 1
WHEEZING_TEMPERATURE : 1
OVER_SARCASM : 1
THIS_TOLD : 1
MOVE_CONSULT : 1
ND_OF : 1
TEMPERATURE_IS : 1
THE_TO : 2
MEMBER_AT : 1
SIGNATURE_BY : 1
HIGH_VET : 1
RIGHT_RESP : 1
APPROVED_ROSUVASTATIN : 1
WITH_SCANT : 1
NEW_ALLERGIES : 1
IID_TO : 1
FROM_HEALTH : 1
DISCUSSED_PT : 1
DOXEPIN_MG : 1
SOME_ADJUSTMENTS : 1
ALL_GROUPS : 1
TID_MG : 1
NOW_JUST : 1
PRESCRIBED_MEDICATIONS : 1
AS_AT : 1
STAFF_PERTAINING : 1
PLAN_IS : 1
BACK_AND : 1
YESTER_LOST : 1
SUPPORT_PERSON : 1
NOSHOW_CLINIC : 1
CHECK_UP : 1
YEAR_FOR : 1
FOR_VISIT : 1
YESTER_AND : 1
WANTS_REMAIN : 1
GREAT_HE : 1
HAS_OF : 1
SHAVE_BM : 1
HE_OPTS : 1
WAS_DISCHARGED : 2
WAL_ENALAPRIL : 1
HE_SMOKER : 1
FOR_MONTH : 1
MASS_WAS : 2
OF_DAILY : 1
SUBSEQUENTLY_STATUS : 1
WENT_THROUGH : 1
THE_AMBU : 1
INSTRUCTED_HAVE : 1
MEASUREMENT_MASS : 1
BEDREST_IMMOBILE : 1
REQUIRES_NEW : 1
MEDICATION_THAT : 1
NO_PROBLEM : 2
DOES_HAVE : 7
MEDICATIONS_SOB : 1
BETTER_MEDS : 1
TO_FUNCTION : 2
NO_ASSOCIATE : 1
PSYCHIATRIC_DISPOSITION : 1
SURGERY_HEMATURIA : 1
THAT_EXERCISE : 1
NO_DYSPNEA : 1
FAMILY_HISTORY : 1
SCOPE_PAIN : 1
SO_BP : 1
FINE_OF : 1
WAYS_ALCOHOL : 1
RIGHT_RIB : 1
GROUP_THERAPY : 2
TO_BACK : 2
HER_COULD : 1
PANIC_PACKET : 1
OF_GROUP : 2
BY_FOR : 1
VITAL_HE : 1
BACKGROUND_INFORMATION : 1
CALL_BY : 2
ORDER_REACH : 1
REACTIONS_ORDER : 1
SESSION_WAS : 1
ING_SC : 1
OPTION_IF : 1
OUT_PI : 1
TO_SABOTAGE : 1
STRUCTURED_HISTORY : 1
ALLERGIES_ALLERGY : 1
EKGNL_IN : 1
PAIN_INTEGRILIN : 1
UP_TO : 2
THAN_MINUTE : 1
BATHROOM_FOR : 1
IN_ILINTACT : 1
VIA_ABGS : 1
AS_NEEDED : 1
ER_INITIAL : 1
SESSION_SATT : 1
IID_LEFT : 1
CURRENT_STATUS : 1
OR_CANCER : 1
IS_AT : 1
SPECIAL_ED : 1
THE_ALSO : 2
REDUCE_SELECT : 1
RECEIVED_AUG : 1
FOR_HOME : 1
CHILD_AT : 1
GO_TO : 2
LOW_CONSTA : 1
TEETH_HANDS : 1
SINCE_IDENTIFIED : 1
AND_CURRENT : 2
BIRTH_AGE : 1
IS_ACCEPTABLE : 1
MIND_CA : 1
BEEN_PROPANOLOL : 1
HIS_AMARILLO : 1
PROGRAM_WAS : 1
HAVE_OR : 3
NOTE_PREVENTIVE : 1
EXPERIENCE_QUIT : 1
PMHX_DM : 1
MEDICINE_PROGRESS : 1
WITH_EYES : 1
NA_ACTION : 1
CVAS_APPROACHING : 1
VITAL_SIGNS : 5
BP_PROBLEMS : 1
BEING_DISCHARGED : 1
PEERS_STATED : 1
IV_REMINDER : 1
OR_NECK : 1
BARRETTS_ESOPHAGUS : 1
JUN_STATES : 1
AT_BEDSITE : 1
WEINSTEIN_COMPUTER : 1
WERE_BE : 1
MALEATE_MG : 1
YOU_LAST : 1
FOLLOWING_MEDICATION : 2
ADDENDUM_BACKGROUND : 1
PROVIDER_FILLION : 1
FEELS_MUCH : 1
MINUTE_AND : 1
ILLNESS_HERE : 1
JAX_NONCOUNT : 1
AND_HISTORY : 1
PROCEDURE_PURPOSE : 1
WOUND_VITAL : 1
BREATH_THAT : 1
MEAL_INFORMED : 1
FOR_AMBULATORY : 1
SUCH_VASELINE : 1
QUESTIONS_CONCERNS : 1
NOW_TID : 1
ADVERSE_REACTIONS : 2
SELECTING_THE : 1
RECORD_CATEGORY : 1
WHEN_ASKED : 1
OF_PSYCHOEDUCATION : 1
IF_IT : 1
ULCER_STATED : 1
PURPOSE_OF : 1
PAIN_WT : 1
WITB_PT : 2
FOR_ARIPIPRAZOLE : 1
ON_ELBOW : 1
AND_PRESSURE : 1
SUICIDE_THIS : 1
KNEE_STATES : 1
IS_VITAL : 1
BREATH_RHONCHI : 1
ALCOHOL_BUT : 1
BP_WT : 1
COMPLETELY_PER : 1
SAFE_FOR : 1
PART_DIPPY : 1
JOINT_WILL : 1
COLON_LAB : 1
ALCOHOL_EXCESSIVELY : 1
ASKED_IT : 1
ACTIVE_NOTE : 1
PROVIDER_VIA : 1
NURSE_WAS : 1
SKILLS_DUE : 1
IS_EASILY : 1
FROM_STANDPOINT : 1
SEEMED_ATYPIA : 1
ABUSE_DUE : 1
MALEATE_MAILED : 1
PLACEMENT_VETERAN : 1
TO_MORE : 1
AND_FOLLOWING : 1
PLAN_JUDY : 1
BRUSHING_TEETH : 1
AND_CARE : 1
MEDICAL_CLINICIAN : 1
APPOINTMENT_HE : 2
GRANULAR_WOUND : 1
PER_REPORT : 1
FORM_ASKED : 1
FREE_INTAKETO : 1
THIS_HPI : 1
REHAB_PROGRAM : 1
SCANNED_RADIATION : 1
RESPIRATIONS_AND : 1
FEELS_BETTER : 1
FOR_LAB : 1
CURRENT_SOB : 1
NO_CHEST : 1
EXAM_BY : 1
HAVE_PT : 1
INFORMATION_ACTIVITY : 1
BEEN_PT : 1
SITUATION_FOLLOWUP : 1
THINGS_WERE : 1
FOR_ENDOSCOPIC : 1
FUNCTION_IN : 1
STAFF_OXYGEN : 1
HAS_LOST : 2
GOOD_RESTING : 1
KNEE_PT : 1
DIET_SODIUM : 1
FACE_INDEPENDENT : 1
AGO_HE : 2
CHECKED_PCP : 1
THIS_WILL : 1
COMPLICATIONS_ANATOMICAL : 1
APPOINTMENTS_DATE : 1
USE_IF : 1
AND_WAS : 3
HR_FOR : 1
CHANGE_IN : 1
NEEDED_ANXIETY : 1
TO_NUTRITION : 1
SEEMED_RADIATION : 1
GROUP_EDUCATED : 1
BARRETTS_SINCE : 1
THERAPY_SMOKING : 1
ON_AND : 3
IF_NOT : 1
WELLBEING_BIPOLAR : 1
HEARING_EVAL : 1
LIVES_ALONE : 1
MONITOR_PT : 1
CLOTS_PATIENT : 1
DIVORCE_OPPORTUNITIES : 1
FOR_ALSO : 1
ENCOUNTER_GIVEN : 1
WITH_WHEN : 1
JOE_TRS : 1
OVER_NO : 1
TOBACCO_SIGNIFICANT : 1
NO_MEDS : 1
BE_ASSIGNED : 1
MG_AT : 1
NOTE_RELATIONSHIP : 1
WRITER_HAVE : 1
FLUNIS_DE : 1
NSC_MARRIED : 1
HOME_RECORD : 1
CLONAZEPAM_AT : 1
TO_MED : 1
PROCED_VITAL : 1
BILLS_OF : 1
WAS_TOO : 1
AND_COOPERATIVE : 1
DOESNT_DO : 1
MD_PAIN : 1
ACTIVITIES_GROUPS : 1
HE_LUMBOSACRAL : 1
HERE_HIS : 1
NO_COLOSTOMY : 1
ANY_DETAILS : 1
CONTACT_TELEPHONE : 1
TO_SMOKE : 1
SOAP_DURATION : 1
ALCOHOL_TOBACCO : 1
SKILLED_NURSING : 1
REQUEST_FOR : 1
FOCAL_NEUROLOGIC : 1
PM_IS : 1
GOALS_USED : 1
HAIR_BRUSHING : 1
BACK_TO : 1
IMAGING_STUDIES : 1
STEPS_AND : 1
DURING_ORDER : 1
HEADACHES_NECK : 1
NUMBER_WITH : 1
OF_RESULTS : 2
HEART_BLOOD : 1
GIVEN_PRINTED : 1
PSYCHOSOCIAL_BOWERMAN : 1
OF_EVENT : 2
ENVIRONMENT_SKIN : 1
CURRENT_HX : 1
PAATIENT_SPOKE : 1
CARDIOLOGY_HAS : 1
OF_TREATMENT : 1
FOSAMAX_TABLET : 2
ASSESS_TX : 1
GROUP_YES : 1
JAX_LABORATORY : 1
EYE_FOCUS : 1
NEED_REHAB : 1
PRODUCTIVE_DYSPNEA : 1
CONTROLLING_ENDING : 1
GROUP_DSMIV : 1
SESSION_JOE : 1
ARMY_CARDIOVASCULAR : 1
STATED_IM : 1
HIS_EXTERNAL : 1
TIME_OUT : 1
SUPPORT_AND : 1
BASE_ULCERATION : 1
THANK_YOU : 1
UPON_REFERRED : 1
MALE_ISLE : 1
LISINOPRIL_GUAIFENESIN : 1
HAVING_HIS : 1
AND_SIGNIFICANT : 1
MALE_VIA : 1
DROWSY_ACUTE : 1
SYSTEMS_RAL : 1
CALLED_PER : 1
THERAPY_DIVERTICULOSIS : 1
AFFECTED_AREA : 1
PUNCH_BENIGN : 1
RIGHT_SIDE : 1
ANGRY_AGITATED : 1
CLINIC_HGB : 1
CARE_PROVIDER : 1
SHEDULED_CWT : 1
AND_GENERAL : 1
AND_EASILY : 1
ABGS_AND : 1
DISCOVERED_THAT : 1
WITH_NEW : 1
YOU_HAVING : 1
BP_AT : 1
EASILY_PRONE : 1
BACK_OXYMIZER : 1
OR_SUNSCREEN : 1
HOW_TO : 3
TO_SELECT : 1
MEDICATION_GENDER : 1
DIAGNOSES_LEVEL : 1
LIVING_ATTENDING : 1
VISITED_TO : 1
HE_DID : 2
DIS_HAS : 1
HE_COMPLAINING : 1
MENTAL_STAFF : 1
COMPLAINT_WITHOUT : 1
NO_WHEELCHAIR : 1
ACCEPTABLE_PATIENT : 2
LIFE_EXPECTANCY : 1
RISK_UPON : 1
NORMAL_BEDREST : 1
MINUTE_SAFETY : 1
CANCER_HEART : 1
AND_CE : 1
NURSING_HYGIENE : 1
REGULARITY_ON : 1
ANY_COMPLICATIONS : 1
SOLUTION_DIRECTED : 1
PATIENTS_FUNCTIONING : 1
DENIES_CP : 2
CHANGE_WEIGHT : 1
MIN_GOALS : 1
EVAL_URINARY : 1
THAT_RESULTS : 1
THOUGH_NOTES : 1
IN_MY : 1
AND_OF : 2
DISCUSSED_TERATOGENIC : 1
AVOIDED_AND : 1
SHORTNESS_OF : 3
ED_LEVELS : 1
TO_STIMULATE : 1
GIRLFRIEND_WHO : 1
TOE_DOES : 1
DO_SCRUBBED : 1
CALLED_ARE : 1
DOING_ACTIVITIES : 1
SAFETY_CHECKS : 1
COLOR_COMFORTABLY : 1
INTO_CLINIC : 1
CHEST_NO : 1
IN_WHICH : 1
CAREGIVER_EDUCATION : 1
BEEN_BUSY : 1
SATT_GENERAL : 1
SELECTED_PATIENT : 1
BENIGN_HYPERTENSION : 1
BROCC_CAULIFLOWER : 1
SUGARS_AMT : 1
PHYSICIAN_PT : 1
URINARY_AFTER : 1
SHORT_REHAB : 1
NIGHT_MUCH : 1
SYMPTOMATIC_SLURRED : 1
CERTAINTY_APPOINTMENT : 1
TO_CONTACTED : 1
GATIFLOXACIN_MG : 1
MENU_TO : 1
AND_MASS : 1
TAKE_PO : 1
HEART_PROBLEMS : 1
OUTPATIENT_INCLUDING : 1
WITH_BIL : 1
ACTIVE_LAB : 1
LPM_VITAL : 1
IN_HIS : 4
NAD_FOOT : 1
WAS_ESSENTIALLY : 1
SUPERVISION_THE : 1
WT_LB : 2
PATIENT_ARRIVAL : 1
WAIT_TILL : 1
TAKING_ANY : 1
LB_REGARDING : 1
MEDICAL_CLEARANCE : 1
MR_REPLIED : 1
ABOUT_PT : 1
BUSY_AS : 1
HAS_COMPLAINT : 2
QS_AND : 1
RESPERIDONE_CONSTA : 1
BETTER_HEADACHES : 1
IS_DOSE : 1
TALKED_IMMATURITY : 1
ALONE_URINE : 1
WALKING_BILATERAL : 1
STATE_PATIENT : 1
HX_BARRETTS : 1
DIAGNOSIS_AND : 2
BODY_INDEX : 1
BIPOLAR_HIS : 1
PLEASANT_AND : 1
SHIFT_NECK : 1
SHE_KICKED : 1
NURSING_REQUEST : 1
PATIENT_PING : 1
HOSPITAL_DISCUSSED : 1
NON_PRODUCTIVE : 1
TO_LEFT : 1
THE_AORTA : 1
BUT_WAS : 1
BAR_AND : 1
CALL_NOT : 1
SUPPLIES_HISTORICAL : 1
PLEASANT_COOPERATIVE : 1
PRODUCT_NONVA : 1
DIABETIC_FOOT : 3
RETURN_EMERGENCY : 1
COMPLETELY_PHYSIOLOGY : 1
OR_SITTER : 1
CONCERNS_ABOUT : 2
OUT_CAME : 1
RIGHT_DENIES : 1
WITH_STRETCHING : 1
TABLET_IBUPROFEN : 2
BEDSITE_IN : 1
EXPIRATION_DATE : 1
WAS_PROVIDED : 1
MATTER_MEN : 1
SELFDISAPPOINTMENT_THEIR : 1
SEE_TO : 1
AND_DRY : 1
WRITTEN_INSTRUCTIONS : 1
TO_WHICH : 1
NOTE_FROM : 1
SUBSTANCE_OT : 1
HAD_SCREENING : 1
PSYCH_PMHX : 1
UP_WITH : 1
MAKE_MEDICINE : 1
HEADACHES_AND : 1
UNDER_LOT : 1
RESTING_HIS : 1
REFILLS_ANXIETY : 1
ATTENDING_UNIT : 1
AREA_UPPER : 1
FAX_NUMBER : 1
USUAL_UPPER : 1
PRESCRIBED_OF : 1
DEGREES_PPD : 1
BECAUSE_FOR : 1
CAP_TAKE : 2
OF_LAMOTRIGEN : 1
BE_PICKED : 1
NO_TAB : 1
WRIST_NS : 1
DONE_PAIN : 1
AT_APRIL : 1
UPSETTING_THAT : 1
FEELS_TRAPPED : 1
TRANSFER_TO : 1
STILL_PANIC : 1
CLOSE_TO : 1
INSURANCE_DISCUSSED : 1
MUCH_TO : 1
FOR_DRUG : 1
HE_FEELING : 2
KICKED_HIM : 1
VIA_MEDICATIONS : 1
TOOLS_TO : 1
COMMUNICATE_WITH : 1
LIMITATION_PRIMARY : 1
HISTORY_INFORMATION : 1
HIGH_FOR : 1
SUPPER_THE : 1
GOALS_PROTOCOL : 1
PATIENT_ADMITTED : 1
OF_RAL : 1
TEMPERATURE_DEGREES : 1
DIAGNOSIS_INITIAL : 1
TRACH_OR : 1
CC_STRUCTURED : 1
DESIRE_PRESENT : 1
GIVEN_PHYSICIAN : 1
MINIMAL_PARTICIPATION : 1
EITHER_OPHTHALMOLOGY : 1
DYSPNEA_HYPERLIPIDEMIA : 1
AND_COMPLETELY : 1
OF_COURSE : 1
WITH_COLOR : 1
CANDIDA_NONOBSTRUCTING : 1
SEE_ER : 1
THEM_SOME : 1
CONSULT_ORIENTED : 1
DEPRESSED_TO : 1
VISIT_HE : 1
NOT_BEEN : 1
ETOH_AND : 1
MAILED_OUT : 1
LOW_RESPERIDONE : 1
YOU_DOES : 1
PREOPERATIVE_DIAGNOSIS : 2
OF_URINARY : 1
PHQ_MEDICINES : 1
HAMOT_AFTER : 1
EVERY_ACTIVE : 2
FLOW_THOUGHTS : 1
PATIENT_HAVE : 2
DIVERTICULOSIS_REASSESSMENT : 1
STATE_FELT : 1
THAT_COMFORTABLE : 1
KEEP_MEDS : 1
HERNIA_HR : 1
TO_AS : 1
MG_IBUPROFEN : 2
IS_AN : 3
NUMBER_DISCONNECTED : 1
AND_COMPLIMENTARY : 1
ULCERATION_CM : 1
REASON_VISIT : 1
GET_HEPATITIS : 1
SHOT_LOCAL : 1
ADMITTED_THE : 1
SHEET_PNEUMOCOCCAL : 1
BREATH_PT : 1
AT_INSTRUCTED : 1
HAVE_BLOOD : 1
OF_INTENT : 1
ALT_INTEGRITYSKIN : 1
THE_THERE : 1
IS_SWITCH : 1
NOSHOW_NOTE : 1
APPT_CONVERSATION : 1
USUAL_RECOMMENDED : 1
DOES_NONSMOKER : 1
PLAN_IBURPROFEN : 1
NUTRITIONAL_RISK : 1
ET_RETURNED : 1
SUPPORT_HIM : 1
NEXT_DOSE : 1
RESTING_BEDSITE : 1
FROM_BOSS : 1
BIRTH_II : 1
LOT_WERE : 1
THIS_SOCIAL : 1
FROM_FU : 1
NURSING_VITALS : 2
SITTER_THIS : 1
HAS_HAD : 1
OF_AGE : 2
START_NO : 1
THAN_WOMEN : 1
WITHOUT_PLAN : 1
OF_UPPER : 1
CONTINUES_TO : 1
FLAG_II : 1
COMPLAINT_DEPRESSION : 1
PSA_ADT : 1
ON_THE : 3
REFILLED_ENCOUNTER : 1
VISIT_PT : 2
HOMICIDAL_APPETITE : 1
BREATH_IS : 1
TO_VIA : 1
SIGNS_RECOMMENDED : 1
PLATINUM_CLINIC : 1
HAVE_PACKET : 1
BENIGN_TEMPORAL : 1
BECAUSE_HE : 2
OF_THE : 6
HYDROCODONE_ACETAMINOPHEN : 1
AND_PRAVASTATIN : 1
NIGHT_AND : 1
CA_GERD : 1
PRN_IS : 1
PHYSICIAN_OLLECTED : 1
EMERGENCY_OR : 1
TIGHTNESS_RACING : 1
THIS_SHIFT : 1
IMPLANT_STIMULATOR : 1
CONSULT_FREQUENCY : 1
PROCEDURE_GATIFLOXACIN : 1
COMPLETELY_INDEPENDENT : 1
HAIRLESS_AREA : 1
TO_EVALUATED : 1
NOTE_CDC : 1
PATIENT_EITHER : 1
FOR_SYMPTOMATIC : 1
FOR_ASSESSMENT : 1
EVERY_IRON : 1
RESTING_NOT : 1
PLAN_TO : 2
HAS_NOT : 1
CP_SOB : 2
WITHOUT_COMPLAINTS : 1
DISCOMFORT_WENT : 1
INTERVIEW_WAS : 1
HAS_CHIEF : 2
DSMIV_IMPRESSION : 1
OF_RHINITIS : 1
COVERS_REHAB : 1
STATES_HE : 10
VET_TO : 3
IS_COPAYMENTS : 1
YES_YOU : 1
TO_EXPERIENCE : 1
TAKING_THE : 1
MG_DISORIENTED : 1
LOPC_AND : 1
NO_TO : 2
THEY_TRYING : 1
AT_HALF : 1
EVALUATION_OF : 1
PT_HE : 3
OF_MEDICATIONS : 1
COURSE_THAT : 1
ON_THEM : 1
WITH_HIS : 1
ENTRY_PROCESS : 1
ARE_TRYING : 1
CLINIC_REQUESTING : 1
IS_REQUESTING : 1
RESPIRATION_NUMBER : 1
WEEKLY_RESPONSE : 1
URGENT_ROUTINE : 1
UPPER_DENTURE : 1
CLINIC_FOR : 1
ND_PART : 1
HEPATITIS_DONE : 1
KG_APPOINTMENT : 1
TRIAGE_BRONCHSOCOPY : 1
RIGHT_KNEE : 1
SUICIDE_PAST : 1
SATT_NONSOAP : 1
CATEGORY_HIGH : 1
HAD_TO : 1
MEDICATIONS_EXERCISE : 1
SAVAHCS_WOULD : 1
TO_BUSY : 1
EDUCATED_ABOUT : 1
OTHER_ADEQUATE : 1
AWAKENING_TRIALS : 1
APPEARED_GROGGY : 1
THE_MIND : 1
PROVIDED_PATIENT : 1
HOSPITAL_CARDIOVASCULAR : 1
OF_MEDICATION : 1
HE_PC : 1
OF_HISTORY : 1
WILL_CONTINUE : 2
MG_TO : 1
MR_CALLED : 1
SHORTNESS_BREATH : 3
BASIS_IS : 1
RISKS_AND : 1
STILL_ON : 1
BY_INCREASED : 1
REQUIRES_CARE : 1
INTO_THE : 1
AT_HOW : 1
PATIENT_AMBU : 1
WORKING_HAVE : 1
DOSE_INCREASED : 1
ON_OBTAINING : 1
KEEP_AND : 1
OR_EMERGENCY : 1
WAS_DURING : 1
EXAM_PERFORMED : 1
THIS_PHQ : 1
CT_VIA : 1
SHIFT_HAVE : 1
ENTERED_IN : 1
NONSMOKER_DENIES : 1
NONCOUNT_DRAW : 1
HE_OF : 1
NONE_CLINIC : 1
CPRS_THIS : 1
UPPER_STATED : 1
HEART_BREATH : 1
INTERVIEW_THE : 1
ISSUES_THIS : 1
PTSD_NURSE : 1
FOR_COMPLICATIONS : 1
LEVEL_DAILY : 1
WAS_LOW : 1
HE_AT : 1
WISH_TO : 1
NOT_ABLE : 1
AS_SCOPE : 1
HE_VITAL : 1
ATTENDING_NOTE : 1
IN_ACCIDENT : 1
TBI_AND : 1
SCREENING_WITH : 1
MIND_ENVIRONMENT : 1
EPIGASTRIC_PAIN : 1
IV_AT : 1
UPON_DISCHARGE : 1
ORIENTED_TO : 2
NOT_FLOOR : 1
SERVICE_PROVIDED : 1
CONTACT_CRISIS : 1
FAMILIAR_WITH : 1
YES_LABORATORY : 1
THE_ATRIAL : 1
WORKER_HE : 1
WELLBEING_DISORDER : 1
PATIENT_DNR : 1
KG_VOIDING : 1
HAD_HIS : 1
OF_ALL : 1
PSYCHIATRIST_NURSING : 1
IN_GALESBURG : 1
FIBEROPTIC_TIME : 1
ADMISSION_OR : 1
TO_REFERENCE : 1
LIKE_WAS : 1
WT_OX : 1
UNITS_SUPPER : 1
SPONDYLOSIS_AS : 1
OLD_DISCHARGED : 1
II_AVF : 1
MOXIFLOXACIN_AND : 1
ADEQUATE_INFORMATION : 1
TO_AM : 1
CONTRACTOR_DISCOVERED : 1
CONTACTED_REQUESTING : 1
ADDRESS_SURROGATE : 1
FOR_PROGRAM : 1
TO_REPORT : 2
VISIT_LN : 1
WALS_WALS : 1
BETTER_AND : 1
RESP_GU : 1
REQUESTED_AND : 1
IODOSORB_PM : 1
APPOINTMENT_THANK : 1
ATTENDING_PHYSICIAN : 1
SMOKE_APPROX : 1
PAIN_COMES : 2
UNIT_GROUPS : 1
NOTE_OF : 1
TAKING_OF : 1
PROBLEM_REFILL : 1
CERTAIN_WE : 1
REPOSITIONS_PUPIL : 1
YEARS_STATES : 1
ABOUT_CURRENT : 1
HAS_CHAIGING : 1
AND_PROCEEDED : 1
IM_AND : 1
TRANSFERRING_NORMAL : 1
VETERAN_STILL : 1
INPATIENT_PROGRESS : 1
AND_RETURNED : 1
THIS_THANK : 1
TO_AREA : 2
CARDIOVASCULAR_OTHER : 1
SOCIAL_MET : 1
MEDICATION_WAL : 1
FAXED_TO : 1
OF_MEAL : 1
TO_DETERMINED : 1
AGO_HAS : 1
WAL_OF : 2
TO_SO : 1
TREATMENT_PLAN : 2
NO_OTHER : 1
INTERVENTIONS_PT : 1
APPOINTMENT_YOU : 1
DOE_WALKING : 1
RISK_LB : 1
RECENT_ANY : 1
HE_PASS : 1
OVERTHECOUNTER_OR : 1
ARE_YOU : 1
IM_HUGGER : 1
HE_TAKING : 1
NO_LOSS : 1
FEELING_AND : 1
ARIPIPRAZOLE_MG : 1
THE_CHIEF : 1
REGIMEN_ASSISTANCE : 1
STOOL_DAILY : 1
ATYPICAL_CP : 1
OLDER_OF : 1
OR_CAREGIVER : 1
SEE_OF : 1
PAIN_IN : 1
SI_WITHOUT : 1
ADMITTED_PHYSICIAN : 1
HX_ESOPHAGUS : 1
CAREGIVER_PRE : 1
STORE_YRS : 1
STATE_HE : 1
EDUCATION_ENDING : 1
WT_BMI : 1
PATIENT_PC : 1
TYPE_OF : 4
SO_PT : 1
PER_NURSING : 1
OTCS_AND : 1
HOME_MALE : 1
INJECTION_MG : 1
BEEN_TAKING : 1
BIL_SEMMES : 1
MOOD_LABILITY : 1
TO_GASTROINTESTINAL : 1
PATIENT_OR : 2
THIS_SEEN : 1
TELEMETRY_NOTE : 1
NA_MH : 1
INDEX_JUN : 1
USAGE_PT : 1
AT_TIME : 3
OBSERVE_PAST : 1
RECONCILIATION_VISIT : 1
TO_VETERAN : 3
TEMPERATURE_BP : 1
TEACHING_GENERAL : 1
IDEATION_TIME : 1
BY_GASTROENTEROLOGY : 1
PT_COMPLAINTS : 1
THEN_REFILLS : 1
GIVEN_WOULD : 1
REASSESSMENT_FREQUENCY : 1
HE_GETTING : 1
CWT_MEDICAL : 1
WAS_AVAILABLE : 1
LECTURE_ON : 1
AFTERCARE_WITH : 1
OR_DRINKS : 1
WHILE_USMC : 1
ALSO_USES : 1
THINK_KNOW : 1
REFERENCE_TO : 2
PER_ORDER : 1
OF_EITHER : 1
PEDAL_PULSES : 1
ILLNESS_CONCERNED : 1
DUE_MEMBER : 1
EXTERNAL_MEDICAL : 1
CHECK_PTS : 1
PASS_AT : 1
EDUCATION_LECTURE : 1
ACTIVE_ALCOHOL : 1
PATIENT_SUPINE : 1
SESSION_GROUP : 1
NS_IV : 1
ARIPIPRAZOLE_TAB : 1
VISIBLE_THE : 1
WITH_HAS : 2
PTSD_ACTIVE : 2
EFFEXOR_MG : 1
THIS_WAS : 2
TO_SEP : 1
WATER_GLASSES : 1
HAS_CONTACTING : 1
CONCURRENT_BY : 1
WM_ETOH : 1
CONTACT_STAFF : 1
TO_RECENT : 2
HOUR_IS : 1
WIFE_BECAUSE : 1
AN_ABSOLUTE : 1
ROSUVASTATIN_CHEST : 1
HEPATITIS_SHOT : 1
DEADLINES_FROM : 1
AGO_THAT : 1
USE_ICDCM : 1
VET_IS : 1
FOR_SLURRED : 1
DIPPY_VOICES : 1
RIGHT_PT : 1
ASSOCIATE_IDENTIFIED : 1
ENTRY_ATTEMPT : 1
MEDICATIONS_BUPROPION : 1
DEPT_HAD : 1
FILED_NECK : 1
RECREATIONAL_THERAPY : 1
HIM_OUT : 1
CAR_ACCIDENT : 1
PLAVIX_PO : 1
SMRS_JUN : 1
LOSE_OF : 1
HE_SHOWED : 1
MSW_SHE : 1
DUE_POOR : 1
HAS_PATIENT : 1
DETAILS_NOTE : 1
IS_SOCIAL : 1
TRANSFERS_COULD : 1
FROM_WITH : 1
FOR_CWT : 2
IN_CARE : 1
DEC_SEP : 1
DRAWN_CHART : 1
VETERAN_NOT : 1
VET_WHO : 1
PAST_SECONDARY : 1
PM_PATIENT : 1
BODY_AND : 1
CLEARANCE_ON : 1
ML_INJ : 1
EXAM_ROOM : 1
ELAVIL_ASSESSMENT : 1
WOUND_ULCERATION : 1
MEN_THAN : 1
CLINIC_IV : 1
AS_PHYSICIAN : 1
POSITIVE_OF : 1
GIVEN_PLAVIX : 1
IS_AND : 1
PROCEDURE_RESULTS : 1
REPORTED_TO : 1
FAMILIAR_HOW : 1
AT_PROCEDURES : 1
LABORATORY_NONCOUNT : 1
ABUSE_REVIEWED : 1
PT_FINE : 1
IF_NEEDED : 3
NOT_VISION : 1
BP_CARDIOLOGY : 1
CONTACT_CORRECTION : 1
DRUG_THERAPY : 1
WANT_THE : 1
LIVER_MAY : 1
WHEN_WERE : 2
WAS_NOTIFY : 1
VIETNAM_DEC : 1
UNTIL_HAPPENS : 1
SHIFT_ELECTRONICALLY : 1
TRAVEL_UP : 1
KG_PUPIL : 1
DIAGNOSIS_NO : 1
WAL_PATIENT : 1
APICAL_RUNNING : 1
EVENT_WAS : 2
GIVEN_BUCKEYE : 1
MCG_ORAL : 1
THIS_ADMISSION : 1
MD_ORDER : 1
MED_TRAMADOL : 1
AND_ENVIRONMENT : 2
PATIENT_IF : 1
NOW_LOST : 1
FOR_ABOUT : 1
BUT_HAS : 1
PATIENT_WAS : 3
VISIT_PATIENT : 1
TO_CHART : 1
HE_ON : 1
PSYCHAITRIST_WILL : 1
PT_REQUESTING : 1
VIA_PT : 1
TO_CALL : 2
BODY_MIND : 1
KG_MIN : 1
AND_IS : 1
OUT_AN : 1
ALCOHOL_WANT : 1
HE_TIRED : 1
STAFF_PROCEDURES : 1
LONG_EYE : 1
PT_PATIENT : 1
PATIENT_PATIENT : 2
OVER_LAST : 1
HAVE_HIM : 1
NUMBER_PSOME : 1
STATED_SHE : 1
AM_PAIN : 1
HE_SPOKE : 1
HR_PATIENT : 1
BRONCHOSCOPY_OF : 1
FLAGYL_NOT : 1
MEDIASTINOSCOPY_MEDIASTINAL : 1
HEART_AND : 1
NO_EXTREMITY : 1
NAME_CLINICIAN : 1
THIS_IS : 1
IMPRESSED_UPON : 1
WITH_NONOBSTRUCTING : 1
PROTECTOR_VETERAN : 1
PAIN_INTERVENTION : 1
SUCRALAFATE_FAXED : 1
IS_PATIENT : 2
ABLE_PARTICIPATE : 1
PRESENT_AGO : 1
BENIGN_RIGHT : 1
HEALTH_STAFF : 1
LOW_WILL : 1
MEDICAL_RECORD : 1
COMFORTABLE_PT : 1
JOE_QUATTLEBAUM : 1
MAY_DELAYED : 1
VIS_DATED : 1
SIMVASTATIN_AND : 1
LACERATION_ELBOW : 1
AS_HAD : 2
AND_USE : 1
KNOW_SINCE : 1
4D_NURSING : 1
THAT_AN : 1
SELF_CONSULT : 1
INSOMNIA_AGITATION : 1
FELT_LIKE : 1
DETERMINED_BY : 1
PATIENT_GIVEN : 1
CONTACT_CONTINUE : 1
AND_INFORMED : 2
IS_SIGNS : 1
CALL_APOLOGIZED : 1
DIET_ORDER : 1
TID_CONTACT : 1
OF_LESS : 1
WORK_NON : 1
FOR_SECOND : 1
DRUGS_IS : 1
OUTPATIENT_MEDICATIONS : 4
MEDICATION_PMHX : 1
WANTS_NEW : 1
FATIGUE_CHANGE : 1
SYSTEMS_PROCEDURE : 1
LUNGS_CRACKLES : 1
GAIT_TRANSFERRING : 1
RESENTMENT_ONE : 1
MEDS_OPTOMETRY : 1
JEWELRY_ENDOSCOPIC : 1
AND_STRUCTURED : 1
NEEDED_FOR : 3
TO_SD : 1
GALESBURG_FAMILY : 1
ASSESSMENT_PLAN : 1
PATIENT_THE : 1
UNCONSCIOUS_OIF : 1
DISCUSS_DISEASE : 1
POOR_TO : 1
INDETERMINATE_SNALL : 1
CONTACT_GOOD : 1
LENGTH_MINUTES : 1
ASSISTED_CARES : 1
ADMIS_YEAR : 1
WRITING_IN : 1
AT_IN : 1
THESE_AND : 1
PERSONS_PATIENT : 1
SINCE_VISIT : 1
COLACE_MG : 1
NUMBER_ASSESSMENT : 1
PETROLEUM_SUCH : 1
SPEECH_NO : 1
AN_OPTION : 2
GROUP_LEADER : 1
THAT_THE : 3
AT_SCANNED : 1
FOR_DETAILS : 1
OF_CANE : 1
PATIENT_ANSWERED : 1
GM_PRN : 1
SEE_PCP : 1
BY_UROLOGY : 1
ACCEPT_FOR : 1
KNOW_THAT : 1
HEALTH_NOTE : 1
EDUCATION_SAFETY : 1
DISORDER_CHRONIC : 1
TAB_TAKE : 3
DENIES_AWAKE : 1
ABLE_PAIN : 1
CHILD_CM : 1
AM_ON : 1
XX_WILL : 1
RUNNING_IID : 1
ONE_TABLET : 1
REVIEW_OMEPRAZOLE : 1
CALLER_PULS : 1
EPIS_LIQUID : 1
ADDENDUM_PLEASE : 1
NOTES_THIS : 1
SEDATION_GOALS : 1
REPORTS_HE : 2
PLEASE_VET : 1
MET_WITH : 3
EXAMINATION_SAVAHCS : 1
TEENA_SHE : 1
COUGH_DYSPNEA : 1
INPATIENT_NOTE : 2
DEVIATED_HAVING : 1
DECLINE_IN : 1
JUL_BHCL : 1
THE_VA : 1
WITH_PHYSICIAN : 1
XR_MG : 1
IN_SPECIAL : 1
VETERAN_STATED : 1
RESTING_COMFORTABLY : 1
WITH_STAFF : 1
BIRTH_PAIN : 1
BE_AWAY : 1
GIVEN_AT : 1
WITH_ASSISTANCE : 1
PROGRAM_VET : 1
FOR_REPORTS : 1
VAMC_ENDO : 1
NEURO_SENSATION : 1
IMPINGMENT_ED : 1
REVIEW_QUIT : 1
LABORATORY_DATA : 1
CESSATION_REFERRAL : 1
IS_ABLE : 1
IV_THAT : 1
WHAT_YOU : 2
STATES_INFORMATION : 1
OR_OXIMETRY : 1
MY_CHECK : 1
MOISTURE_MOIST : 1
HIS_SERVICES : 1
TAKE_TAB : 1
USAGE_ED : 1
ADVISED_RESULTS : 1
SEROQUEL_MG : 1
JELLY_AS : 1
EXAM_BP : 1
SELFDISAPPOINTMENT_AND : 1
THAN_UPPER : 1
RECENT_FOR : 1
NOTE_POINTS : 1
CP_AND : 1
DNR_BLUE : 1
LIQUID_STOOLS : 1
INPATIENT_CURRENT : 1
CONTRACTOR_THAT : 1
HEMOPTYSIS_BLOOD : 1
MUCH_FOSAMAX : 1
JUN_LAMICTAL : 1
EXAM_ACTIVE : 1
BEINGS_NEED : 1
STATED_REASON : 1
JELLY_SUCH : 1
LB_APPOINTMENT : 1
OUTREACH_TEAM : 1
VAMC_STAFF : 1
DRINKING_THE : 1
LIKELY_BE : 1
CLINICIAN_PAGER : 1
AND_CLONAZEPAM : 1
PROCEDURES_GEN : 1
FOR_HE : 3
BOSS_THE : 1
PLAN_REVIEWED : 1
MCG_MIN : 1
RETURN_STARTING : 1
DOESNT_MUCH : 1
SUGARS_AND : 1
CURRENT_SKIN : 1
NOTE_INITIAL : 1
IMI_SNALL : 1
CHAIGING_DRESSING : 1
PHYSICIAN_WAS : 1
BP_ACTIVE : 1
SUMPTER_PATIENT : 1
EITHER_MORE : 1
NURSING_BUT : 1
HAMOT_ON : 1
ICDCM_VISIT : 1
WAS_ENCOURAGED : 1
YOUD_THINK : 1
ALCOHOL_WENT : 1
WITH_DOSE : 1
PAST_PRESENT : 1
SOURCE_THE : 1
REVIEWED_DO : 1
HIS_ULCERATION : 1
SHEET_HIS : 1
PAIN_NOTED : 1
GOALWHAT_LEVEL : 1
SHOULD_AVOIDED : 1
AT_IRWIN : 1
OIF_OUTREACH : 1
INFORMATION_AND : 1
FLORINEF_AND : 1
AND_WEEKLY : 1
HAVE_VETERAN : 1
THIS_MORNING : 1
RECENT_TOE : 1
MEDICATIONS_RECORDS : 1
WOULD_AVOID : 1
ELECTRONICALLY_TRACH : 1
AM_SEPTEMBER : 1
GOES_LAST : 1
IN_REFERENCE : 2
OTHER_SIMILAR : 1
IS_WAL : 1
BACK_UP : 1
VETERAN_IS : 1
NSG_APPT : 1
RAL_STAFF : 1
INITIAL_FOR : 1
JUL_MICHALSKE : 1
HERE_EVALUATION : 1
ORIENTED_THE : 1
LEVELS_SETTINGS : 1
TO_WAS : 1
MEDIASTINOSCOPY_WITH : 1
MARRIED_REQUIRED : 1
NOT_SAFE : 1
PAIN_OR : 1
DENIES_CHEST : 1
ALERT_TO : 1
BMI_UNITS : 1
INEFFECTIVE_WITH : 1
LED_TO : 1
SUFFERED_TBI : 1
BUT_ABLE : 1
SUCH_AS : 2
OR_MAY : 1
SIGNIFICANT_PAST : 1
BIOPSY_BENIGN : 1
IMPINGMENT_SYND : 1
FEEDING_FOR : 1
INFORMATION_PRESENT : 1
REFILLED_HANDOUTS : 1
PATIENT_CAN : 1
TOE_HIS : 1
THIS_VISIT : 3
BETTER_HE : 1
PHQ_ARE : 1
GLASGOW_SCALE : 1
WILL_FIND : 1
IDENTIFIES_PATIENT : 1
RN_PAIN : 1
TOL_DIET : 1
WENT_OF : 1
AND_ANXIETY : 1
FLOOR_WITH : 1
NEURO_EVAL : 1
TO_YOUR : 1
CLINIC_TEMPERATURE : 1
COLOR_INLAW : 1
DIMINISHED_RA : 1
MIN_WHILE : 1
DATE_UP : 1
CONNECTION_CONNECTED : 1
WAS_ONE : 1
AGREES_PATIENT : 1
PT_PRESENTS : 1
SC_EXTERNAL : 1
YESTER_HAS : 1
MED_FOR : 1
CURRENT_INCLUDING : 1
ALSO_EXHIBITED : 1
GIVE_MG : 1
AN_IF : 1
ENCOUNTER_VERIFIED : 1
SO_YEARS : 1
HEART_PT : 1
EDUCATION_WITH : 1
REFERRAL_TIME : 1
DAN_VAMC : 1
FLOOR_ASU : 1
DISCHARGED_LEVEL : 1
OPD_NURSING : 1
ACCEPTABLE_TO : 1
STATES_IS : 4
UP_SUBJECT : 1
TABLET_ACTIVE : 1
HAS_ANSWERED : 1
CAULIFLOWER_LIVER : 1
OF_SATT : 1
WITH_BARRETTS : 1
NS_INFUSING : 1
FOR_ND : 1
UNIT_INJ : 1
JUN_PT : 1
THE_ALCOHOL : 1
HES_SIGNIFICANT : 1
SUBJECT_MATTER : 1
PEERS_HE : 1
CONTINUE_DO : 1
MY_NEXT : 1
UPPER_LIMB : 1
MD_CDC : 1
MEDICATIONS_STATUS : 1
PCP_EXPLANATION : 1
DONE_HE : 1
KERATOSIS_CHIEF : 1
SABOTAGE_WHEN : 1
WRITER_CALLING : 1
WOULD_HAVE : 1
WORK_WERE : 1
OF_PT : 1
ANTIHISTAMINES_AUTH : 1
PHONE_CONTACT : 1
UNDERLYING_NO : 1
CPRS_BUT : 1
INPATIENT_INSURANCE : 1
OR_BLOOD : 1
MEDICATION_HYDROCORDONE : 1
BY_TI : 1
SMOKING_REFERRAL : 1
COST_DIVORCE : 1
WITH_CLOSED : 1
CHECK_PAIN : 1
THANKS_BRIEF : 1
ULA_LPM : 1
SPECIFY_FOR : 1
TALKED_TIME : 1
ESOPHAGEAL_RADIATION : 1
BOSS_PATIENT : 1
WORKER_MR : 1
INCLUDING_HISTORICAL : 1
HX_OF : 2
MEASURES_WOUND : 1
ARE_IN : 1
SIGNIFICANT_OTHER : 4
TIME_WEIGHT : 1
TO_AORTA : 1
IS_NOT : 1
BREATH_IF : 1
RECENT_OF : 1
PROFESSIONAL_HEALTH : 1
WEINSTEIN_IS : 1
AASU_PAIN : 1
HIM_OF : 1
RELATIONSHIP_TO : 1
RX_NO : 1
YOU_SIX : 1
MINUTES_ADDENDUM : 1
DATE_CLINIC : 1
OF_SHOULDER : 1
CHIEF_SI : 1
ALL_VISTA : 1
PROCEDURE_BY : 1
BY_ACOS : 1
FROM_HIS : 1
AGO_WHILE : 1
OTHER_STIMULATE : 1
PER_ANTICOAGULATION : 1
BEDSIDE_ONLY : 1
THERAPY_PROGRAM : 1
OF_PAIN : 3
ISSUES_FOR : 1
BBS_CLEAR : 1
ABOUT_VARIOUS : 1
PSYCH_MEDICATION : 1
GENERAL_CONSULT : 1
FUTURE_INTERVENTIONS : 1
STAFF_TO : 1
FOOT_PT : 2
AS_AN : 1
ENJOYED_MEETING : 1
TEACHING_IN : 1
INR_RESULTS : 1
ENCOURAGED_INCREASE : 1
TAKE_OUT : 1
TO_HAD : 1
DIAGNOSIS_INFLUENZA : 1
PROBLEM_COLOR : 1
PE_WAS : 1
IS_BLED : 1
CAN_WAIT : 1
INITIAL_DATE : 1
PATIENTS_FALL : 1
MH_TAB : 1
HISTORY_PROSTATE : 1
MOIST_AND : 1
MD_NOTE : 1
VET_HIS : 1
MAILED_STATES : 1
PROVIDED_AT : 1
HOW_DID : 1
ACTIVE_MIN : 1
THE_CLINICAL : 1
HAVE_HEART : 1
LATER_BLED : 1
LAB_TO : 1
WITH_POOR : 1
QUIT_COGNITION : 1
ABOUT_ELEVATED : 1
LIKE_SUN : 1
HIS_HOME : 1
CAN_NOT : 1
OR_CURRENT : 1
ACTIVE_INPATIENT : 2
HAIRLESS_OF : 1
TO_PCP : 2
IMAGING_VIA : 1
DISCOVERED_THE : 1
FOLLOWING_LIST : 1
THE_MONTH : 1
BE_UP : 1
TO_ENDOSCOPIC : 1
VISIT_CAME : 1
RESPONSE_CH : 1
ALL_OF : 1
NO_PAIN : 1
TO_REFILLED : 1
STEPS_THIS : 1
PING_NIGHT : 1
ELECTRONICALLY_FILED : 1
THEY_CHANGED : 1
FOR_DEPRESSION : 1
TO_THIS : 2
OF_OPPORTUNITIES : 1
HANDS_FACE : 1
ASSESSMENT_OF : 1
AMA_FORM : 1
REQUIRES_ICU : 1
ALONE_UP : 1
IV_STARTED : 1
WITH_WAYS : 1
NOTE_INFORMED : 1
SUBJECTIVE_BOWERMAN : 1
INTERVENTIONS_INCLUDES : 1
MEDICATION_PATIENT : 1
IF_STAFF : 1
SYSTEMS_NO : 1
ACTIVE_GIVEN : 1
WORRIED_ABOUT : 1
MANAGEMENT_PT : 1
FOR_CHECK : 1
HIM_INR : 1
PANIC_DISSEMINATED : 1
OPPORTUNITIES_BUSY : 1
SINCE_SHE : 1
HUGGER_AND : 1
DOSE_USE : 1
TIME_CLINIC : 2
KG_PATIENT : 1
PARK_ABOUT : 1
TO_PROPERTY : 1
OF_LEFTSIDED : 1
AND_TREAT : 1
HAVE_CRUSTED : 1
IS_FACING : 1
RESPONSE_TO : 2
ACCESS_SKIN : 1
NICOTINE_CRAVINGS : 1
CARE_CONSULT : 1
SUPPLIES_VISIT : 1
FACILITATOR_JOE : 1
DISCHARGED_IN : 1
MEDICATIONS_WHEEZING : 1
PACKET_AT : 1
OF_FRIEND : 1
TO_INJURY : 1
EXAMINATION_WOULD : 1
OR_CONCERNS : 1
WAS_THESE : 1
BRADEN_SCALE : 2
MALE_SOCIAL : 1
MALE_STATES : 1
USMC_CHRONIC : 1
UP_MAIN : 1
PO_STOP : 1
PLEASE_CALL : 1
NONLABORED_AND : 1
TELEPHONE_TRIAGE : 1
HHA_SERVICES : 1
SOME_TO : 1
PM_SUBJECTIVE : 1
MEDICATION_AND : 1
APPLICABLE_UPON : 1
BM_TOL : 1
CONTACTED_CLINIC : 1
AND_PLEASANT : 1
THOUGHTS_PERIOD : 1
LEVEL_LETHALITY : 1
INFORMATION_OLD : 1
INFORMATION_ONLY : 1
USES_FOR : 1
CONTACT_CARDIOLOGY : 1
TIME_WILL : 1
ABUSE_OT : 1
ASSESSMENT_LECTURE : 1
OR_REQUIRED : 1
AND_PT : 1
OUT_OF : 1
AND_PTSD : 1
DATE_BIRTH : 2
ASSESS_PM : 1
TABLET_MOUTH : 3
WAS_MILIEU : 1
PERSON_TIME : 1
BE_TRANSPORTED : 1
SKIN_INTEGRITYSKIN : 1
ABUSE_TO : 1
HE_HAS : 10
ELBOW_PROTECTOR : 1
ESCALATED_COCAINE : 1
DEPAKOTE_FLOW : 1
EVALUATED_AT : 1
BRADEN_FOR : 2
HE_CAME : 1
BE_ENCOUNTER : 1
SOUTH_AGO : 1
PASSAGE_AND : 1
ADDENDUM_APPT : 1
ASSESSMENT_ALT : 1
ON_NAME : 1
PRESCRIPTION_PT : 1
SOB_TEMPERATURE : 1
THIS_EVENT : 2
THE_CLINIC : 1
LESS_NEED : 1
IN_LOWER : 1
EACH_BOTTLE : 1
COMPREHENSION_OF : 1
DISCUSSED_WITH : 1
DO_SCREENING : 1
HOW_OBTAIN : 1
COMPLIMENTARY_MEDICATIONS : 1
LESS_EFFECTIVE : 1
NOTE_SEX : 1
RESPERIDONE_WHICH : 1
PAIN_AT : 2
DISCHARGE_MEDICATIONS : 1
BROKED_UP : 1
CALLED_PATIENT : 1
DIAGNOSIS_PATIENT : 1
HAVE_LIMITED : 1
LOST_GROUP : 1
HIS_HHA : 1
HIS_IDENTIFYING : 1
NOTE_FULL : 1
ON_LEFT : 1
LB_REPOSITIONS : 1
AND_WANTS : 1
CHEEKS_INCLUDING : 1
SOB_PAIN : 1
NOTE_CARDIOLOGY : 1
COMPLETION_INSURANCE : 1
FOR_BUT : 1
LIMB_PROVIDER : 1
XYZZY_VERBAL : 1
HE_LIVES : 1
LB_REPORT : 1
PHX_VA : 1
FOLLOWING_IF : 1
ED_PHYSICIAN : 1
GIVEN_VETERAN : 1
HEALTH_WEIGHT : 1
QUIT_AGO : 1
ON_VET : 1
PROVIDER_CURRENT : 1
HYPOTHYROID_II : 1
PRESCRIPTION_REGIMEN : 1
HIS_PHYSICAL : 1
REDUCE_SYSTEM : 1
JUST_GO : 1
COLLINS_DEPT : 1
OTCS_COMPLIMENTARY : 1
HOME_CARE : 1
USMC_PAIN : 1
EPIGASTRIC_VET : 1
INDICATING_AND : 1
ON_OCCASION : 1
FRACTURES_LACERATION : 1
THIS_WOULD : 1
ALSO_WEIGHT : 1
IF_NOTE : 1
INDICATING_HE : 1
IDENTIFIED_LENGTH : 1
OR_STATES : 1
GAUGE_EYE : 1
DRESSING_WITH : 1
FOR_THEM : 1
VOICES_NO : 1
APPLY_HAIRLESS : 1
ACROSS_ROOM : 1
AN_AS : 1
INTAKETO_GLASSES : 1
INDICATES_FOR : 1
NOT_IDENTIFY : 1
WORRIED_BILLS : 1
ICDCM_OF : 1
REFILLS_AND : 1
THAN_SEEK : 1
NEWLY_ANY : 1
PSA_WAS : 1
CONSULT_ANTICANCER : 1
APPROPRIATE_MEASUREMENT : 1
NO_LONGER : 1
WASHING_AND : 1
THE_LECTURE : 1
THIS_TIME : 2
SMOKER_HAS : 1
WITH_PEDAL : 1
MED_ND : 1
WOMENS_OF : 1
QUIETLY_SAFE : 1
NOTED_VS : 1
INSIDE_HIS : 1
NEED_TO : 4
WORKING_HAD : 1
EVEN_UNLABORED : 1
OR_WITH : 1
ENCOURAGE_TO : 1
VET_PRESENTED : 1
FAMILY_HE : 1
HIM_WITH : 1
PSYCHOTIC_OR : 1
IN_CPRS : 1
NOT_WABLE : 1
REFILLS_MG : 1
CARDIOLOGY_AND : 1
COMES_AND : 2
RN_CHECK : 1
OF_AND : 4
OTHER_NEW : 1
FORM_PATIENT : 1
NO_OR : 1
SORE_RIS : 1
REQUIRED_THIS : 1
DISORDER_PTSD : 1
NOTE_HGB : 1
ACCOMPLISH_ORDER : 1
STRUCTURED_ENTERED : 1
STOMA_PATIENT : 2
COMPLAINT_SI : 1
IMAGING_THE : 1
PPD_PT : 1
CLINIC_AXIS : 1
RESULTS_RECENT : 1
TELEPHONE_PREVIOUS : 1
DAILY_WITH : 1
EC_TAKE : 1
GUAFENESIN_ML : 1
TO_PERSON : 1
CLOSE_THE : 1
BEHAVIOURS_HE : 1
CURRENT_NO : 1
WHEN_YOU : 1
COPD_YOU : 1
INPATIENT_BUT : 1
APPT_AT : 1
AS_WT : 1
PATIENT_SSN : 1
ST_COMPLAINT : 1
CHANGED_HIS : 1
PRODUCTIVE_COUGH : 1
FEE_CONSULT : 2
THE_GREAT : 1
CP_RAISED : 1
PER_APPEARED : 1
STERISTRIPPED_IT : 1
REVIEWED_YOUR : 1
USUAL_CHECK : 1
VACCINE_INFORMATION : 1
HE_GROGGY : 1
THE_JOINT : 1
NO_HEART : 1
AS_MENTAL : 1
TAB_ONEHALF : 1
IMMOBILE_OF : 1
THE_PHONE : 1
TO_PAIN : 2
GROUPS_PTS : 1
WAS_IS : 1
LEVEL_ON : 1
TO_SESSION : 1
PAIN_TOLERABLE : 1
DISCHARGE_TO : 1
PAIN_WAS : 1
SUPPLE_OF : 1
ALLERGIES_NO : 1
FOR_THAT : 1
PATIENTS_ADLS : 1
CALL_INITIATED : 2
PHONE_FROM : 1
OBTAINED_AT : 1
PC_MANAGEMENT : 1
RACING_ABOUT : 1
SHE_HIM : 1
EDUCATION_RISKS : 1
APPEARED_DURING : 1
BACK_PAIN : 2
SPECTACLE_OR : 1
PROCEDURE_ON : 1
HEILIGENTHAL_PRESENTED : 1
TO_ARE : 1
OVERTHECOUNTER_SUGARS : 1
STAFF_BROUGHT : 1
ESSENTIAL_HYPERTENSION : 1
ASKING_THESE : 1
TO_ONE : 1
SECONDARY_TO : 1
IMPACT_THIS : 1
SAFE_HOME : 1
WITH_MSW : 1
IS_FEE : 1
HE_ADMISSION : 1
NAD_DIABETIC : 1
ASSUMED_CARE : 1
INPATIENT_DIET : 1
BEFORE_WITH : 1
AXIS_THAT : 1
BP_PATIENT : 1
DURING_BUT : 1
LEVEL_PATIENT : 1
TOOK_NIGHT : 1
RECEIVED_PHONE : 1
OTHER_CULTURAL : 1
ASSESSMENT_PATIENT : 1
ARRIVED_ON : 1
ICU_ALTE : 1
SIGNIFICANT_STATES : 1
CONSULT_RESP : 1
CC_AND : 1
EDUCATION_PROBLEM : 1
NOTE_SUBJECTIVE : 1
INCREASE_HIS : 1
PRE_VISIT : 1
NOTE_SCREEN : 1
CONVERSATION_WITH : 2
DM_CA : 1
GATIFLOXACIN_GUAFENESIN : 1
HYPERLIPIDEMIA_COPD : 1
PM_NURSE : 1
SKILLS_FAMILY : 1
ESP_LSPINE : 1
AGENCY_ROUTINE : 1
COMPLAINING_OF : 1
CERTAIN_SITUATIONS : 1
SEX_MALE : 2
NAME_PAST : 1
VETERAN_IN : 1
CLOT_NOTED : 1
PT_WAS : 4
ACUTE_OBSERVATION : 1
OF_DIVORCE : 1
USED_NOT : 1
RANGE_AWAIT : 1
HYDROCORDONE_TO : 1
HE_DOING : 2
REPORTED_THE : 1
RHINITIS_FOOT : 1
PATIENT_OUTCOME : 1
THEIR_GAOLS : 1
PATIENT_ASKED : 1
IN_ORDER : 1
ORAL_INHALE : 1
BROUGHT_SUBJECT : 1
AS_EFFECTIVE : 1
LENS_ALLERGIES : 1
STRETCHER_IMPINGMENT : 1
WEATHER_HE : 1
MEANS_OF : 1
ACHE_COMES : 1
NOSTRILS_REDUCE : 1
WEAR_SUNSCREEN : 1
THAT_EDUCATION : 1
FOOT_GREAT : 1
HAS_CLINIC : 1
PHYSICAL_HEALTH : 1
WORKER_MET : 1
IS_NEW : 1
CONTAINMENT_FOR : 1
EVEN_ACTIVE : 1
CONTRAST_THIS : 1
PHONED_REQUESTS : 1
URINE_WITH : 1
STATEMENTS_DATED : 1
MIXED_HAS : 1
AND_WENT : 2
HE_FACING : 1
IS_YEAR : 1
RESULTS_OF : 1
NO_PRESENTING : 1
MEDICATIONS_GLUCOSE : 1
MET_THE : 1
QUIETLY_NOT : 1
ALREADY_LEFT : 1
SKIN_TRK : 1
PLAVIX_PER : 1
APPROX_PPD : 1
FUNCTIONING_ADDENDUM : 1
COLONOSCOPY_RESULTS : 1
SUMPTER_DOES : 1
AND_TO : 6
MEDS_CONSULT : 1
RADIATION_GERD : 1
VETERAN_CONTACTED : 2
REMINDERS_BIOPSY : 1
PATIENT_ACTUAL : 1
IS_CONFUSED : 1
INDIVIDUAL_SATT : 1
BUT_WRITER : 1
BIPOLAR_DIS : 1
CHECK_MONITOR : 1
BASE_MEASURES : 1
AS_WITH : 1
SKIN_WARM : 1
LIGHTHEADEDNESS_NO : 1
VETERANS_SHOULD : 1
LSU_PATIENT : 1
IS_DEGREES : 1
PLAN_WITH : 1
HAD_LOW : 1
ESSENTIAL_ICDCM : 1
HOME_AGREES : 1
EXERCISE_ENCOURAGE : 1
NURSING_WHEN : 1
PAIN_PAIN : 1
CHRONIC_THE : 1
SINCE_KICKED : 1
WEEKLY_TO : 1
NECK_SUPPLE : 1
RECORDED_AT : 2
ATYPICAL_EKGNL : 1
OF_LAST : 1
SITE_IV : 1
STIFFNESS_RESOLVED : 1
DOE_ACROSS : 1
WHEN_ARRIVED : 1
TESTING_EVAL : 1
PRIMARY_PAIN : 1
VIS_WAS : 1
BIL_VIA : 1
FREQUENCY_OF : 3
APPEARANCE_NAME : 1
UNABLE_TO : 1
THIS_FOR : 1
VISIT_HPI : 1
BELIEVES_HE : 1
TO_USE : 1
LEISURE_TIME : 1
AT_OTHER : 1
AMBULATION_BEDSIDE : 1
BOWERMAN_KAREN : 1
STIMULATE_MORE : 1
COORDINATION_AND : 1
PAST_PSYCHIATRIC : 1
PHX_PSYCH : 1
ALCOHOL_PHYSICIAN : 1
LP_SINCE : 1
SESSION_FACILITATOR : 1
THE_MONTHS : 1
ADDENDUM_CONVERSATION : 1
RECORDS_GOING : 1
POINTS_PATIENT : 1
MEDICATIONS_INCLUDING : 3
RIGHT_EYE : 1
RESTING_IN : 3
PHONE_DISCONNECTED : 1
DIMINISHED_EFFORT : 1
NURSING_SUBJECTIVE : 1
GLARGINE_HUMAN : 1
HOSPITAL_FUTURE : 1
DEPARTMENT_OR : 1
REVIEW_OF : 1
MAYO_CLINIC : 1
WT_KG : 1
INCLUDING_SUICIDAL : 1
AFTER_HIS : 1
TIME_OF : 1
MIN_AGO : 1
PAIN_FOSAMAX : 1
PHYSICIAN_FEEDING : 1
QUESTIONS_HAVE : 1
DENIES_BACK : 1
ENCOUNTER_HANDOUTS : 1
AFTER_PT : 1
BREATH_SOUNDS : 1
MILD_WEATHER : 1
HE_RATES : 1
MASS_JUN : 1
LAWYER_BEEN : 1
NO_CANDIDA : 1
TO_NUMBER : 1
DECREASED_MALE : 1
THIS_NOTE : 1
TO_SWITCH : 1
AMARILLO_COLON : 1
AGITATION_EKNURSING : 1
TERMS_ANXIOUS : 1
ALLERGIC_DIABETIC : 1
NUTRITIONAL_WEIGHT : 1
HE_THAT : 3
TO_PHYSICIAN : 2
INFORMATION_GIVEN : 1
THIS_NIGHT : 1
AS_SCHDULE : 1
EMERGENCY_WILL : 1
WHEN_THINGS : 1
PT_BP : 1
INTENSITY_IS : 1
BRIEF_STATEMENT : 1
COPD_DO : 1
IN_CM : 1
MOXIFLOXACIN_PREDNISONE : 1
ACCIDENT_WHICH : 1
ORDER_PAIN : 1
HOME_TREATMENT : 1
DISCHARGE_TIME : 1
SIGNIFICANT_INDIVIDUAL : 1
HIS_LOW : 1
OF_CHILDREN : 1
NOTE_RECONCILIATION : 1
ANXIOUS_DEPRESSED : 1
LAST_TELEPHONE : 1
HOME_PATIENT : 1
TRACH_NECK : 2
NO_PRESENTS : 1
FORT_CE : 1
PROGRESS_SUPPORT : 1
FOR_SUBSTANCE : 1
DAILY_AWAKENING : 1
THERE_DID : 1
GASTROENTEROLOGY_ANTICANCER : 1
OR_PREVIOUS : 1
DO_EXERCISE : 1
BY_ACTIVE : 3
APPROPRIATE_BODY : 1
SHORT_TERM : 1
THE_ORDER : 1
CAME_TO : 1
ONLY_HERNIA : 1
INFORMATION_HIATAL : 1
PATIENT_AND : 2
COMPLAINT_NOT : 2
PVCS_TO : 1
PENICILLIN_DRUGS : 1
ANTICOAGULATION_NOTE : 1
LBP_FACETOGENIC : 1
YOUR_EDUCATION : 1
UNABLE_ANSWER : 1
PATIENT_FAMILIAR : 1
CHANGED_TOMORROW : 1
TO_REACH : 1
THE_ACCIDENT : 1
RATIONAL_PERIOD : 1
THE_UNIT : 1
GUAIFENESIN_OVERTHECOUNTER : 1
NOTE_COMA : 1
THAT_HAPPENS : 1
HEARING_THRU : 1
IS_TOLERABLE : 1
PM_THIS : 1
COMBING_BRUSHING : 1
INDEPENDENT_FUTURE : 1
ED_TO : 1
NAD_CURRENT : 1
SIGNIFICANT_ANTICOAGULATION : 1
AVOID_AND : 1
AT_ON : 1
VISITED_WDVA : 1
IN_ED : 1
IN_USMC : 1
OF_USE : 1
DECLINE_HIS : 1
THAT_NEEDS : 1
ARE_GOALS : 1
YRS_BUT : 1
EXPANDED_HERE : 1
CONTACT_IS : 1
COCAINE_METH : 1
SITUATIONS_WE : 1
FOLLOW_UP : 2
MG_TAB : 4
DISCHARGE_DICTATED : 1
THE_TOOLS : 2
VETERAN_COME : 1
IN_THE : 6
LIPIDS_AT : 1
ORDER_GOALWHAT : 1
AND_MARITAL : 1
STILL_FOLLOWING : 1
IF_CAREGIVER : 1
PT_PAIN : 1
WALKING_UPPER : 1
HAS_ARRANGED : 1
PAIN_AND : 2
REFILLS_DATE : 1
TO_IDENTIFY : 1
SPECTACLE_CONTACT : 1
OPHTHALMOLOGY_OPTOMETRY : 1
WAS_OIF : 1
AND_PRN : 1
NIGHT_GAUGE : 1
TEMPLATE_AND : 1
TO_ANGER : 1
OF_INFORMATION : 1
TIME_WITH : 1
CLONAZEPAM_AND : 1
AGREES_WILL : 1
POSITIVE_OLLECTED : 1
GOALS_LEVEL : 1
VACCINE_NURSE : 1
REPLACED_THE : 1
PHONE_NUMBER : 1
WITH_VET : 1
TO_WORKING : 1
REPORT_DIVERTICULOSIS : 1
CLICKING_APPROPRIATE : 1
RADIATION_CAD : 1
OF_TRANSFERS : 1
NEW_PRESCRIPTION : 1
SPEAK_TO : 1
REPORTING_HE : 1
FOR_WAS : 1
AT_HOUR : 1
CRACKLES_BASE : 1
FOR_EVAL : 1
ED_NOTE : 1
NOT_HAVE : 3
PROVIDER_RETURN : 1
DESCRIBE_ANY : 1
DECEMBER_THE : 1
LESS_MINUTE : 1
AND_HAS : 2
OF_SIDE : 1
THAT_ARE : 1
KAREN_PHYSICIAN : 1
AND_GEN : 1
BE_WED : 1
NOT_WISH : 1
SUICIDAL_TIME : 1
INJURY_ILLNESS : 1
PATIENT_REQUESTS : 1
MANDY_OTS : 1
HEENT_PATIENT : 1
THERAPY_DSMIV : 1
LAST_RESP : 1
PROVIDER_PETROLEUM : 1
THE_HAD : 1
ATRIUM_ASSOCIATE : 1
PT_INPATIENT : 1
RESULT_CALL : 1
LAMOTRIGEN_WANTS : 1
AREA_TWI : 1
OUT_AT : 1
FOR_HISTORY : 1
TO_BED : 1
CURRENTLY_RATES : 1
ICDCM_ICDCM : 1
HIM_VARIOUS : 1
GOALWHAT_PAIN : 1
RISK_HOMEBOUND : 1
PRESENTS_TO : 2
APPLY_JELLY : 1
ARE_ONE : 1
FUNCTION_ON : 1
UP_MOUTH : 1
BUT_QUIT : 1
DAILY_TRIALS : 1
MONTH_INTAKE : 1
STILL_FOCUSED : 1
INCLUDES_ICDCM : 1
LEFTSIDED_MEDICATION : 1
HIGH_STATED : 1
IN_CAR : 1
NIGHT_APPEARED : 1
CONT_STATE : 1
REPORT_GIVEN : 1
TAKE_CAPSULE : 2
PSYCHOSOCIAL_WELLBEING : 1
HAPPENS_HE : 1
HYGIENE_INCLUDES : 1
ACTION_PRESENT : 1
CABBAGE_OR : 1
THIS_ON : 1
PHYSICIAN_ADDENDUM : 1
BY_XVETERAN : 2
PLAN_EDUCATION : 1
TREATING_PSYCHIATRIST : 1
PAIN_RECORDED : 2
TIME_AS : 1
ASSESS_RESPONSE : 1
GROUP_WAS : 1
NEW_OF : 1
GIVEN_PRESCRIPTION : 1
IDEATION_PT : 1
OEF_TEAM : 1
AND_WORK : 1
KG_REGARDING : 1
OR_STOMA : 1
MG_CLONAZEPAM : 2
APRIL_AT : 1
CRESTOR_DAILY : 1
GREAT_TOE : 1
VET_SIMVASTATIN : 1
IF_WAS : 1
TRAMADOL_EXERCISE : 1
SIGNS_LARGE : 1
NOTIFY_VET : 1
SCHEDULE_APPOINTMENT : 1
RECORDS_WAS : 1
LIKE_TO : 3
EITHER_OR : 2
NOT_IDENTIFIED : 1
XVETERAN_NURSE : 2
WATER_INTAKETO : 1
GO_NURSING : 1
HEARING_HEARING : 1
WAS_IN : 2
VIA_CURRENT : 1
CROSSED_CORRECTION : 1
VISIT_SYMPTOMS : 1
SIGNS_NURSING : 1
MEDS_TO : 1
DOES_WISH : 1
AND_PHYSICAL : 1
ADT_WAS : 1
SEE_NOTE : 1
VETERAN_BEEN : 1
SURGERY_GROSS : 1
MINUTES_RETURN : 1
HISTORY_PAIN : 1
OF_VIETNAM : 1
NOT_TO : 1
THIS_WRITER : 2
AS_HES : 1
KEEP_ET : 1
NOTIFY_ACTIVITIES : 1
UP_AASU : 1
THIS_AGGRAVATED : 1
ONCE_ACTIVE : 1
OF_UNDERSTANDING : 1
AREA_OF : 1
CULTURAL_BEINGS : 1
BASE_PATIENT : 1
FOLLOWING_MEDICATIONS : 1
HE_HAD : 2
SEEN_TO : 1
OF_INJURY : 1
STUDIES_TO : 1
UPON_THE : 1
STIMULATOR_IS : 1
AGE_IMI : 1
ON_CLONAZEPAM : 1
IS_BLUE : 1
LIMITED_LIFE : 1
LIGHTHEADEDNESS_ASPIRIN : 1
INSTRUCTED_NOT : 1
THIS_VETERAN : 1
TO_EVERY : 1
WITH_PM : 1
ANGER_SINCE : 1
BED_GROUPS : 1
AN_ICDCM : 1
HIS_MEDS : 1
NOT_INFORMATION : 1
MANAGE_MEDS : 1
APPOINTMENT_YOUR : 1
TELEPHONE_CALLED : 1
LAST_BEFORE : 1
HE_JUST : 1
SUBSTANCE_REVIEWED : 1
ANGRY_AND : 1
ADMISSION_PATIENT : 2
ANY_DIFFERENCE : 1
BEHAVIOURS_SPOKE : 1
WASHING_HANDS : 1
WHEEZING_RESPIRATION : 1
HAVE_HE : 1
TOLD_HER : 1
NON_CARE : 1
RETURNS_CLINIC : 1
COLONOSCOPY_SPECIMEN : 1
THAN_HE : 1
HAVE_PANIC : 1
PATIENT_ALSO : 2
TOE_HE : 1
LABORATORY_DRAW : 1
CURRENT_PLAN : 1
IN_ADEQUATE : 1
INPATIENT_PSYCHIATRIST : 1
PSYCHOSOCIAL_BIPOLAR : 1
PARTICIPATION_HAS : 1
POSITIVE_USE : 1
ANTICANCER_RES : 1
RAISED_IN : 1
THE_AS : 1
REFILLS_EXPIRATION : 2
BETTER_NUTRIONAL : 1
MG_MEDICATION : 1
USE_VISIT : 1
SUMMARY_BOTTOM : 1
CAPSULE_BY : 2
NOTE_THIS : 1
DURATION_ADDENDUM : 1
SKIN_TEAR : 1
TO_YOU : 1
PEARCE_JAX : 1
PATIENTS_STATED : 1
RECENT_THOUGHTS : 1
NOT_DESIRE : 1
DO_HAVE : 2
REQUEST_CWT : 1
BELIEVES_WENT : 1
WAS_AGREEABLE : 1
SHAVE_NO : 1
HAD_INJECTION : 1
HAIR_TEETH : 1
COLOR_EQUAL : 1
GET_HIS : 1
OF_USES : 1
NURSING_NOTE : 8
ALERT_NAD : 1
DISCHARGE_TAB : 1
HOURS_IF : 1
ACHES_AND : 1
PUNCH_URINE : 1
UPPER_HEP : 1
AND_SURGERY : 1
BIL_PEDAL : 1
EYES_CLOSED : 1
INSTRUCTED_PATIENT : 1
SHIFT_ASSESSMENT : 1
PO_AND : 1
ADVERSE_ORDER : 1
INSULIN_GLARGINE : 1
ORDER_TO : 2
SYSTEM_SEE : 1
AND_NURSING : 1
DESIRE_INFORMATION : 1
PLAN_DM : 1
TEENA_MSW : 1
IN_NUTRITION : 1
THE_DOES : 1
MICHALSKE_SUD : 1
RESP_PHONED : 1
INTERVIEW_VETERAN : 1
FAMILY_FINICAL : 1
FINE_ACTIVITIES : 1
TO_PSYCHAITRIST : 1
TO_HEARING : 1
UP_MATTER : 1
CHILDREN_TYPE : 1
YOU_TO : 3
HAS_SHEDULED : 1
THE_NOTICED : 1
USES_CANE : 1
FOR_PROCEDURE : 1
LEFT_WITH : 1
LECTURE_BIO : 1
RAL_NO : 1
PAIN_PATIENTS : 1
LISINOPRIL_NONVA : 1
NO_OF : 1
VAMC_COLON : 1
BIO_PSYCHO : 1
EXERCISE_PATIENT : 1
NO_CHIEF : 1
INFORM_COMFORTABLE : 1
HOW_REPORT : 1
AM_SMOKING : 1
WITH_GOOD : 1
NEXT_THINK : 1
HAVE_NONSMOKER : 1
DRIVING_WITH : 1
DEBILITY_INITIAL : 1
REVIEW_PHYSICIAN : 2
REFILL_DOES : 1
THAT_SHE : 3
LIFE_VETERANS : 1
CLINICIAN_NOTE : 1
SYSTEMS_EKG : 1
DENTURE_DEVIATED : 1
CONTINUED_JUN : 1
BE_AND : 1
TESTING_NEURO : 1
AM_INFORMED : 1
ARE_AVAILBLE : 1
EXPLANATION_OFFERED : 1
LOCATION_DESCRIPTION : 1
LEVEL_WEIGHT : 1
DUE_TO : 2
DATE_AND : 1
GASTROINTESTINAL_DISEASE : 1
WITH_ESP : 1
EXPANDED_UPON : 1
THIS_AN : 2
WITH_PROSTHESIS : 1
IBUPROFEN_FLAGYL : 2
MAKE_WAS : 1
TO_WM : 1
IM_GOING : 1
TRIALS_METHODS : 1
STATEMENTS_VIS : 1
SITTER_OR : 1
FOR_CARES : 1
CAREGIVER_NOTE : 1
PER_MD : 1
PROCEDURE_NOTE : 1
NERVE_HE : 1
PAIN_DYSPNEA : 1
MEDICATIONS_ENCOURAGE : 1
REASON_OD : 1
RESPIRATIONS_NOTE : 1
AND_NECK : 1
PERTAINING_TO : 1
AND_DISORDER : 1
HER_HAVE : 1
GOOD_HAS : 1
SISTER_STATES : 1
CLONAZEPAM_HS : 1
EKSW_NOTE : 1
NEW_FOR : 1
PHONE_PAGER : 1
HIGH_RISK : 2
VERBALIZES_DISCHARGE : 1
TO_DIAGNOSIS : 1
EVAL_DATE : 1
APPEARED_TO : 2
WIFES_HAS : 1
TO_ROOM : 1
ANY_ALLERGIES : 1
FOR_REPLACEMENT : 1
PLACE_TIME : 1
INFORMED_WAS : 1
OTHER_UP : 1
UPON_HERE : 2
INFLUENZA_NURSE : 1
INSTRUCTED_MAY : 1
CDC_VACCINE : 1
WITH_ASKED : 1
ENALAPRIL_MALEATE : 1
OTHER_SUPPORT : 1
DAILY_ADDENDUM : 1
CALL_NUMBER : 1
SHOULDER_DISCUSSED : 1
SUPPORT_AT : 1
STATED_TELEPHONE : 1
SUICIDE_SAFETY : 1
REVIEWED_IMAGING : 1
CORRECTION_WORK : 1
PHYSICIAN_ON : 1
OTHER_TO : 2
OPTS_TRANSFER : 1
JUST_TO : 1
IN_VS : 1
YOU_FAMILY : 1
CORRECTION_ALLERGIES : 1
INSOMNIA_EKNURSING : 1
OUTPATIENT_RETURNS : 1
HIS_LEISURE : 1
THE_IN : 1
GIVE_PO : 1
SHE_FIND : 1
NEW_WORKER : 1
SERVICES_PROCEDURES : 1
FUTURE_APPOINTMENTS : 1
APPLICABLE_HERE : 1
CERVICAL_SPONDYLOSIS : 1
STATED_ABOUT : 1
THERAPEUTIC_CONTAINMENT : 1
NO_PROSTATE : 1
BHCL_SUD : 1
THE_IS : 1
TELEPHONE_ASSESS : 1
OUT_IF : 1
THE_TIME : 1
CABBAGE_CAULIFLOWER : 1
AT_NUTRITIONAL : 1
INTEGRITYSKIN_LEFT : 1
COPAY_EXEMPT : 1
ON_GROUPS : 1
LEADER_MANDY : 1
TERM_FOR : 1
TO_THAT : 1
DEPRESSION_MEDS : 1
UNREALISTIC_GOALS : 1
EXACERBATION_BRONCHITIS : 1
FILLION_JAX : 1
WOULD_YOU : 2
OVER_THE : 2
ESOPHAGEAL_CA : 1
GAG_PRESENT : 1
TAB_MG : 4
ELBOW_WAS : 1
PATIENT_PHONED : 1
IS_FAMILIAR : 1
DISCUSSED_ABOUT : 1
TELEPHONE_TO : 1
GOING_INTERVIEW : 1
SUBSEQUENTLY_MARITAL : 1
ANTICOAGULATION_MANAGEMENT : 1
DURING_LAST : 1
MH_NOTE : 1
PSYCHOEDUCATION_PROGRAM : 1
WANT_TERMS : 1
FIXATURE_CHANGED : 1
DISCHARGED_COPD : 1
TELEPHONE_EVERY : 1
THE_LOPC : 1
ULCER_OUTPATIENT : 1
HE_DOES : 2
HYPERTENSION_NEED : 1
HIS_PSA : 1
HIS_AGAIN : 1
HAD_NAME : 1
SODIUM_OF : 1
HAS_UP : 1
NOTE_FREQUENCY : 1
HAVE_FAMILY : 1
HE_COULD : 1
BILLS_COST : 1
EITHER_US : 1
MANAGEMENT_NOTE : 1
SUBJECT_MORE : 1
ILLNESS_ABOUT : 1
LSPINE_GENERAL : 1
LEADER_OTS : 1
AND_NEURO : 1
DOES_STILL : 1
THE_TOE : 1
EXPLANATION_NO : 1
ASSESSMENT_ACTION : 1
HIS_TIME : 1
TIME_PT : 1
CEL_ASSESSMENT : 1
NODENTURES_PHYSICIAN : 1
NO_COMPLAINTS : 1
PHYSICIAN_TI : 1
LET_RECORDED : 1
SPOKE_WITH : 1
PATIENT_DCD : 2
PERSON_HOME : 1
HE_ONCE : 1
DID_LIKE : 1
PUNCH_BIOPSY : 1
HE_BEING : 1
SINCE_THEN : 1
NOT_WORKING : 1
WERE_UPON : 1
SOB_AND : 1
WILL_DEMONSTRATE : 1
TAKE_ONE : 3
SUPPLEMENTATION_FOOT : 1
USED_COCAINE : 1
APPT_STARTING : 1
STANDPOINT_CC : 1
PETROLEUM_JELLY : 1
GROUPS_PSYCHOLOGICAL : 1
WITH_MEDIASTINAL : 1
AT_ACTIVE : 1
AND_TID : 1
NURSE_UPSETTING : 1
QUIETLY_WITH : 1
BE_SOCIAL : 1
RESTING_WITH : 1
PRE_OPD : 1
PROCEDURE_TO : 1
INDIVIDUAL_ISSUES : 1
UNIT_VET : 1
WITH_DRIVER : 1
REHAB_FOR : 2
REQUIRED_OR : 1
PROVIDER_PROCTOFOAM : 1
BE_IN : 1
CHECK_AASU : 1
ALSO_OPTION : 1
NONE_HEART : 1
MONITORING_PROGRESS : 1
UNMH_HOW : 1
ING_SMILING : 1
SOB_WHEEZING : 1
ASSESSMENT_AUTHOR : 1
RUNNING_FOR : 1
THEY_TRIED : 1
USUAL_UP : 1
STANDPOINT_OF : 1
DOSE_TAB : 1
INFORMATION_MULTIPLE : 1
CLINICAL_SUBJECTIVE : 1
CONSULT_RES : 1
WANT_TO : 2
MG_NOT : 1
THE_VITAL : 1
VETERAN_THE : 1
HISTORY_OF : 5
OX_GIVEN : 1
BUT_DIMINISHED : 1
TO_NUCLEAR : 1
GROSS_IN : 1
ACTIVE_NO : 1
MUCOSAL_RESECTION : 1
WERE_HOW : 1
IDENTIFIED_AS : 1
IN_VETERANS : 1
COMPLAINTS_ANTIHISTAMINES : 1
EVENT_LOW : 1
THROUGH_TREATMENT : 1
OF_SHE : 1
ACETAMINOPHEN_TAB : 1
LOCATION_PAIN : 1
GRADE_LUMBAR : 1
RHINITIS_DIABETIC : 1
LONGER_REQUIRES : 1
OPPORTUNITIES_TO : 1
INPATIENT_MEDICATIONS : 2
IDENTIFIED_MINUTES : 1
SITUATIONS_TALKED : 1
MET_VETERAN : 1
COMPLAINT_DOE : 1
PI_COVERS : 1
UP_STATES : 1
BEIN_IN : 1
AT_MAYO : 1
PLACE_NO : 1
DOESNT_WANT : 1
OF_PAPERS : 1
INFORMATION_PNEUMOCOCCAL : 1
WAS_DOING : 1
ROUTINE_PATIENT : 1
HE_SPONDYLOSIS : 1
AND_CAREGIVER : 1
IDENTIFIES_THIS : 1
PHONE_FEE : 1
COPD_BRONCHITIS : 1
FOR_SO : 1
OR_TO : 1
GAG_REFLEX : 1
NIGHT_MEDS : 1
HOME_SINCE : 1
WITH_FORT : 1
TA_CHILD : 1
RELATIONSHIP_PATIENT : 1
BACK_NUMBER : 1
ON_HYPERTENSION : 1
TA_AS : 1
AND_THAT : 1
CONTACT_DATE : 1
REMAIN_ON : 1
GUAFENESIN_MG : 1
PMHX_ESSENTIAL : 1
PLAN_DISCHARGE : 2
MALE_FROM : 1
MADE_POOR : 1
CONTACTED_BY : 1
PHONED_IN : 1
AND_RECEIVE : 1
TEMP_PULSE : 1
PRESSURE_RISK : 1
REPORTS_IS : 1
BOTTOM_CONSULT : 1
NOT_HAVING : 1
GLASGOW_COMA : 1
SETTING_IN : 1
CDI_REMINDER : 1
TO_DCD : 1
ENALAPRIL_MG : 1
PHQ_FOR : 1
YOU_SHORTNESS : 1
AGE_SEX : 2
HEALTH_THE : 1
HIM_ABOUT : 1
HE_SAYS : 1
PT_APPROPRIATE : 1
ENCOURAGED_TO : 1
FOR_USUAL : 1
BEDREST_TYPE : 1
AFFECT_PATIENTS : 1
MICHALSKE_ASSESS : 1
ON_PRESENTED : 1
ALERT_ORIENTED : 1
IN_LBED : 1
ULTRAM_MG : 2
OPTION_THE : 1
PAIN_NO : 2
POUNDS_HAVE : 1
THE_NOSTRILS : 1
TID_AND : 1
GLASSES_USE : 1
NEEDED_HEILIGENTHAL : 1
FACILITATOR_QUATTLEBAUM : 1
BM_BEFORE : 1
NOTE_MINUTES : 1
PT_STATES : 5
REGIMEN_FOR : 1
IN_SETTING : 1
VISIT_DATE : 2
SURGERY_RESULT : 1
SW_HER : 1
THAT_DIFFERENT : 1
WAS_USING : 1
OF_THOUGHTS : 1
REPORTING_THAT : 1
FOLLOWING_ATRIAL : 1
HE_DO : 1
PAST_YOU : 1
WAS_GIVEN : 2
COLONOSCOPY_COMPLICATIONS : 1
MODERATE_PLACED : 1
MG_QHS : 2
PRESSURE_ULCER : 1
SMILING_ED : 1
CONTINUE_ASSESS : 1
LOOSING_HE : 1
MORE_YES : 1
CONTACTED_THIS : 1
LOWER_NOTE : 1
HAVE_FOR : 1
SOCIAL_MR : 1
HE_CARBAMAZEPINE : 1
EXPOSURE_WEAR : 1
RETURNED_PROPERTY : 1
TO_ASSIGNED : 1
TOBACCO_USE : 2
ROOM_FOR : 1
ANSWERED_NKA : 1
LAST_MONTHS : 1
TUMOR_OTHER : 1
TREATMENT_SERVICES : 1
II_HIGH : 1
OF_ON : 1
SOCIAL_DUE : 1
IF_PROVIDED : 1
BEINGS_TO : 1
MADE_AVAILABLE : 1
STATES_SHE : 2
THIS_STOOL : 1
OF_INFARCTION : 1
USE_VISTA : 1
EVERY_FOR : 1
PROGRESS_SOAP : 1
FEELING_BETTER : 1
QUANTITY_REFILLS : 1
WITH_LYMPH : 1
REFUSED_KEEP : 1
UP_PAIN : 1
MORE_LONG : 1
IN_BP : 1
COME_TO : 1
UNITS_SS : 1
AND_ACCUCHECKS : 1
MINIMAL_HE : 1
CORRECTION_SOCIAL : 1
LOWER_NURSING : 1
SOAP_NOTE : 1
SELECT_SYSTEM : 1
VIA_MAY : 1
AXIS_IV : 1
TO_OF : 1
TO_SPEAK : 1
MEN_WOMEN : 1
NOTE_NO : 1
CDI_DIALOG : 1
TO_AFTER : 1
AND_UNCONSCIOUS : 1
TELEPHONE_MOUTH : 1
CLOSED_RESPIRATIONS : 2
MIND_ABOUT : 1
HOLD_DEPAKOTE : 1
PASS_OUT : 1
IN_COMPLETION : 1
REGARDING_TROUBLE : 1
COLON_CANCER : 1
LABS_AND : 1
LAST_BM : 1
USING_OXYGEN : 1
QUESTIONS_CORRECTLY : 1
START_OVER : 1
PHYSICIAN_REVIEW : 1
PAST_ATTEMPTS : 1
SO_HAS : 1
ARRIVED_VIA : 1
FAMILY_PSYCHOEDUCATION : 1
PROSTHESIS_IF : 1
SITUATION_RECOMMENDED : 1
ABDOMEN_BRADEN : 1
CERVICAL_LUMBAR : 1
DATE_TEMP : 1
SCHDULE_BIPOLAR : 1
IS_BEIN : 1
THEY_HIS : 1
THAT_ALONE : 1
HYDROCORDONE_AMOUNT : 1
CALL_HIM : 1
STATUS_IS : 1
RECOMMENDED_THE : 1
CVAS_OF : 1
LAVERNE_RN : 1
SCAN_VIA : 1
FROWNING_ING : 1
AT_OF : 1
AT_ATE : 1
JUN_ATYPICAL : 1
IMMATURITY_LACK : 1
SEMMES_WEINSTEIN : 1
PHYSICIAN_PHYSICIAN : 1
THAN_USUAL : 1
PROBLEM_SKIN : 1
AND_IM : 1
PATIENT_NAME : 1
PATIENT_LEVEL : 1
PROVIDER_APPLY : 1
INDIVIDUAL_SESSION : 1
THE_WAS : 2
BECAUSE_SO : 1
SAFELY_ON : 1
FEE_BASIS : 1
CONCERNING_PROCEDURE : 1
THAT_VETERAN : 1
ADDENDUM_RARELY : 1
HR_PLAN : 1
PATIENT_LYING : 2
ASSESS_HIS : 2
RUNNING_AGAIN : 1
EXPERIENCE_DATE : 1
AS_HEALTH : 1
LOW_GRADE : 1
DID_NOT : 2
PPP_VOIDING : 1
PATIENT_NEWLY : 1
PREVIOUS_NO : 1
SUPPLEMENTATION_DIABETIC : 1
TREATMENT_THEIR : 1
ALONE_COLOR : 1
TELEPHONE_DATE : 1
THINK_WELLBEING : 1
MILD_ACHE : 1
FROM_EITHER : 1
THAT_ALSO : 1
RESENTMENT_TO : 1
BEEN_HIM : 1
SUBSTANCE_ABUSE : 3
HIS_LEFT : 1
EVERY_IF : 1
BED_ALL : 1
PROCEDURE_RES : 1
DETAILS_CARDIOLOGY : 1
WORKER_WITH : 1
FAMILY_MEMBER : 2
HEMATURIA_IN : 1
CHECKED_TO : 1
MASS_INDEX : 1
REFILLS_VET : 1
THERAPEUTIC_MEASURES : 1
OUTPATIENT_REFILLS : 2
BLED_NIGHT : 1
MINUTES_SCHEDULED : 1
ATYPIA_TIMES : 1
II_RISK : 1
TO_WRITER : 1
DISCUSS_GASTROINTESTINAL : 1
STL_VISIT : 1
SMOKING_NO : 1
ESP_AND : 1
STARTING_AM : 1
ACCIDENT_HE : 1
WERE_EXPANDED : 1
NOTE_NOSHOW : 1
VISIT_OR : 1
WAS_NOT : 1
THE_ABILITY : 1
NAME_SIGNIFICANT : 1
HAD_SIGNIFICANT : 2
AS_THEY : 2
METHODS_ETC : 1
NECK_BLOOD : 1
FRIEND_LUNG : 1
SEP_NURSING : 1
BY_CARDIOLOGY : 1
MR_YOUD : 1
OF_CONTACT : 4
FOR_AND : 1
SIDE_RIB : 1
INSIDE_HOME : 1
HIGH_NUTRITIONAL : 1
ASKED_LEVEL : 1
PROBLEMS_ENCOUNTER : 1
NUTRITION_ADEQUATE : 1
UNDERSTANDING_GOOD : 1
DIAGNOSIS_PREOPERATIVE : 1
URINATION_MALE : 1
FACETOGENIC_EVAL : 1
REFILL_FOR : 1
ML_PREOPERATIVE : 1
ETC_NOT : 1
IN_DIABETIC : 1
TO_DATE : 1
WAS_UNCONSCIOUS : 1
INTENT_OF : 1
EYE_CORRECTION : 1
HIS_WIFES : 1
OPTOMETRY_ANTERNATE : 1
SEPOCT_BP : 1
ADDENDUM_FOR : 1
WIFES_LAWYER : 1
BED_RESTING : 1
DEMONSTRATE_ABILITY : 1
XR_DISORIENTED : 1
COULD_PASS : 1
EXPECTANCY_LIKELY : 1
THE_PAST : 3
SO_NUTRITION : 1
AND_SAID : 1
NONE_PLATINUM : 1
CONTACTING_HIM : 1
RATE_SOUNDS : 1
PATIENT_AGO : 1
INPATIENT_INCLUDING : 1
AGAIN_TO : 2
AS_WHY : 1
DISCHARGE_REASON : 1
TREATING_COPD : 1
PTS_IS : 1
ANY_INDICATES : 1
ADVANCE_ADDENDUM : 1
AVF_THIS : 1
HEALTH_AGO : 1
INTENSITY_STATES : 1
ABUSE_FREQUENCY : 1
DIRECTIVE_ACTION : 1
NOTE_PSYCHOSOCIAL : 1
OTHER_FOCUS : 1
RISKS_BENEFITS : 1
CHIEF_DEPRESSION : 1
IS_THAN : 1
SHE_THAT : 1
HIS_REQUEST : 1
HAVE_NEW : 1
BUT_INCREASE : 1
PAST_THE : 1
PATIENT_PRESCRIPTION : 1
BE_VIEWED : 1
PT_WITHOUT : 1
NOT_THANKS : 1
UP_ESSENTIALLY : 1
EDUCATED_PT : 1
COMPLAINT_OF : 2
SISTER_BOTH : 1
EXCESSIVELY_FAMILY : 1
HE_WANTS : 1
CONT_SUPPLEMENTATION : 1
MALE_DISCHARGED : 1
SCREEN_FOR : 1
RAISED_GALESBURG : 1
OF_SERVICE : 1
COMPLAINTS_DENIES : 2
BACLOFEN_MG : 1
VIDEO_FAMILY : 1
CURRENT_DIAGNOSIS : 1
THIS_INCLUDES : 1
DOB_STATED : 1
SUPPLIES_PSYCHIATRY : 1
SUCRALAFATE_TO : 1
HELP_OR : 1
PLAN_JUN : 1
HEP_SEPTUM : 1
EKG_PROCEDURE : 1
ALLERGIES_ADVERSE : 1
THE_PROSTHESIS : 1
COLONOSCOPY_PROCEDURE : 1
AN_MEANS : 1
SMOOTH_FOR : 1
PATIENT_HAS : 3
CCTV_FAMILY : 1
OBSERVATIONS_APPEARANCE : 1
MIND_AND : 1
MONITOR_EDUCATION : 1
UPPER_NURSING : 1
TOO_CLOSE : 1
ENTERED_ERROR : 1
LETHALITY_OF : 1
MG_MAILED : 1
ACTIVE_PERIORBITAL : 1
NONSMOKER_HE : 1
RESPIRATION_IS : 1
CONTACT_YESTER : 1
ALLERGY_REQUIRED : 1
HOME_THIS : 1
MEMBERS_WERE : 1
DEPRESSION_AND : 1
STATUS_DISCHARGE : 1
PHYSICIAN_THE : 1
TO_TRAVEL : 1
OPTION_IN : 1
INTEGRILIN_MCG : 1
NONE_WAS : 1
POSSIBLE_ENDOSCOPIC : 1
RECV_HEARING : 1
CA_COPING : 1
WERE_SMOOTH : 1
STATES_LUMBOSACRAL : 1
STOOLS_SINCE : 1
PATIENT_IDENTIFY : 1
HCL_MG : 2
VACCINE_PATIENT : 1
BACK_OVER : 1
ASSESSMENT_COMPLAINT : 1
ROOM_IDENTIFYING : 1
ESOPHAGUS_HAD : 1
SIMILAR_PRODUCT : 1
FOR_ON : 1
PO_NOW : 1
COMBING_HAIR : 1
HOME_CONSULT : 1
WRITER_AMA : 1
FOR_PAST : 1
BEEN_CHAIGING : 1
LONG_POSITIVE : 1
FOR_FULL : 1
FOOD_DENIED : 1
TO_CH : 1
NONE_APICAL : 1
LUMBAR_SPONDYLOSIS : 1
THE_RECREATION : 1
PI_REHAB : 1
PAGER_OR : 1
LEVELS_BASED : 1
ASKING_INDICATING : 1
LUNCH_ATTENDING : 1
NEW_BOTTLE : 1
ACTIVE_AMBULATORY : 1
USE_PPD : 1
EFFECTS_MEDS : 1
PHYSICIAN_LSU : 1
IS_GOOD : 2
STAFF_ASSESSMENT : 2
REASSESSMENT_NOTE : 1
WAS_ORIENTED : 1
CURRENTLY_MEDICATIONS : 1
NURSING_POINTS : 1
HIS_STAFF : 1
TO_JUL : 1
PREDNISONE_RANGE : 1
MUCOSAL_MALE : 1
AN_IMPLANT : 1
CLINIC_AM : 1
BOTTLE_OF : 1
IS_DNR : 1
ERROR_EDUCATION : 1
IS_FROM : 1
CURRENT_TREATMENT : 1
ASPIRIN_TAB : 1
FOUR_TIMES : 1
FOR_VITAL : 1
VIEWED_BY : 1
NOTE_FU : 1
INPATIENT_MEDICINE : 1
RELATED_THE : 1
OR_FRICTION : 1
PT_ON : 2
THE_IF : 2
IS_REPEAT : 1
PROBLEMS_HISTORY : 1
OF_ITEMS : 1
NO_NEW : 1
STOMA_HOME : 1
DIMINISHED_SATS : 1
TAKING_STOOL : 1
OUT_AS : 1
VASELINE_TO : 1
GENERAL_SESSION : 1
MENU_ACCESS : 1
OT_AND : 1
PROCEDURE_IS : 1
SS_SUPPER : 1
SESSION_VET : 1
BM_BMS : 1
SOB_DUE : 1
POOR_SOCIAL : 1
FOR_IRON : 1
CIRCULATING_OUTCOME : 1
RATIONAL_OF : 1
CARE_RETURN : 1
ONLY_HIATAL : 1
HAVE_ANY : 2
CRACKLES_AT : 1
ADMIS_OLD : 1
FINICAL_PROBLEMS : 1
COMPLAINT_FOR : 1
INCREASED_XR : 1
OF_RIGHT : 1
MALE_MEDICAL : 1
TO_DECISIONS : 1
NO_BREATHING : 1
AGE_MALE : 2
FATIGUE_IN : 1
CARE_BP : 1
PROVIDER_IDENTIFIED : 1
HAD_GO : 1
SITTER_ADMISSION : 1
PT_TO : 9
ABILITY_TO : 2
DISCLOSE_DETAILS : 1
PRIMARY_PROVIDER : 1
COLOR_RESTING : 1
INDEX_PT : 1
ISSUES_TO : 1
PHYSICIAN_VET : 1
WORK_PHONE : 1
SIGNS_PROTOCOL : 1
EDUCATION_SUPPLE : 1
MAY_SHAVE : 1
AT_PT : 1
PAPERS_HCL : 1
HE_ARRANGED : 1
NEED_PLACEMENT : 1
YOU_WEEK : 1
PAIN_STILL : 1
DISSEMINATED_AT : 1
TOLERABLE_BLED : 1
CONTINUED_SMRS : 1
MAY_USEFUL : 1
SERVICES_BE : 1
AT_NONE : 1
HX_SUBSTANCE : 1
BUSY_AND : 1
RAL_AO : 1
HE_FINALLY : 1
BUPROPION_SUSTAINED : 1
WENT_CLINIC : 1
PATIENT_4D : 1
THERAPY_INDIVIDUAL : 1
AT_DOES : 1
DO_PROSTATE : 1
GIVEN_MG : 1
CANE_FOR : 1
PAIN_IS : 2
DETAILS_NICOTINE : 1
FAX_HISTORY : 1
RARELY_MOIST : 1
NOT_INTERESTED : 1
HAS_ANY : 1
HIS_WAS : 1
EDUCATION_SEEMED : 1
SABOTAGE_THEMSELVES : 1
HCL_TAB : 1
VITAL_SITUATION : 1
TO_NOSTRILS : 1
HIS_COVENIENCE : 1
WE_ABOUT : 1
THIS_FAMILY : 1
REPOSITIONS_SIZE : 1
NICOTINE_APPLY : 1
PART_OF : 1
FREQUENCY_DURATION : 1
REPORT_THERE : 1
ACCUCHECKS_TO : 1
US_VET : 1
FACTOR_THIS : 1
DISCHARGE_ARIPIPRAZOLE : 1
ACTION_MGS : 1
SCHOOL_AND : 1
PLAUT_AT : 1
SAFETY_ENVIRONMENT : 1
SECONDARY_BACK : 1
TO_REDUCE : 2
IS_DOING : 2
OF_CONSCIOUSNESS : 1
PATIENT_YEAR : 1
DISCHARGE_DATE : 1
TERATOGENIC_EFFECTS : 1
OR_SIGNIFICANT : 1
BASED_PRESCRIPTION : 1
SD_TO : 1
REPORT_REACTIONS : 1
PRIMARY_CARE : 1
AS_ORDERED : 1
WAS_AT : 4
INFARCTION_DISCHARGE : 1
TXC_REPORTING : 1
VISTA_VIA : 1
CONTINUES_SMOKE : 1
PATIENT_LAB : 1
DAILY_IODOSORB : 1
FAIRLY_WELL : 1
AFFECT_IS : 1
WITH_PRIMARY : 1
OF_INR : 1
SPECIAL_PT : 1
DEGREE_SPECIAL : 1
VITAL_GOALS : 1
PERTAINING_ADMISSION : 1
INFORMATION_THIS : 1
HAVING_COPD : 1
SUPPLIES_SUICIDAL : 1
MORE_LASTING : 1
NONBLOODY_TOL : 1
UPPER_MH : 1
PO_SEROQUEL : 1
PATIENT_WAL : 1
NONVA_PRESCRIBED : 1
HIS_OWN : 1
THAT_OBSERVE : 1
OXYGEN_SATURATION : 1
TELEPHONE_PT : 1
UNLABORED_ACTIVE : 1
STILL_THE : 1
IN_WAL : 1
HAS_TAKING : 1
HE_SHE : 1
MET_PHYSICIAN : 1
DOSE_TO : 1
WENT_TREATMENT : 1
SARCASM_FROM : 1
HIM_AND : 1
RESECTION_ARRIVED : 1
WHO_ALSO : 1
OF_REQUESTED : 1
QUIETLY_IN : 1
REHAB_OF : 1
PATIENT_HE : 1
BY_PHYSICIAN : 1
DM_ULCERATION : 1
GROSS_HEMATURIA : 1
PT_GIVEN : 1
OF_TEACHING : 1
FOR_MEDICATION : 1
PATIENT_OF : 1
USED_IDENTIFIED : 1
ACTIVE_MEDICATIONS : 7
CALLED_TO : 1
SCALE_AUTHOR : 1
WEIGHT_LB : 4
PT_OF : 1
OPTOMETRY_TELEPHONE : 1
NON_COUGH : 1
PPP_PUNCH : 1
YOUR_LEVEL : 1
DOING_ON : 1
ON_CURRENT : 1
AT_CLINIC : 1
RELATED_JEWELRY : 1
EXERCISE_NO : 1
MEDICAL_IS : 1
HIM_AT : 1
IS_BETTER : 3
RESP_CONSENT : 1
AND_TOBACCO : 1
PATIENT_INTERESTED : 1
YESTER_WORK : 1
EFFORT_NONE : 1
DISCHARGED_TREATING : 1
PHYSICIAN_NAME : 1
WAS_FAMILY : 1
SUICIDE_LOSS : 1
CP_ABD : 1
ON_PROCED : 1
FUNCTION_STRUCTURED : 1
APPROVAL_REPORTS : 1
RETURNS_TO : 1
TO_FAX : 1
CONNECTION_SERVICE : 1
INJECT_ACTIVE : 1
PROGRESS_THOUGH : 1
BILATERAL_UPPER : 1
HYDROCODONE_MG : 1
TIME_ALSO : 1
FAMILY_AND : 1
HAVING_EXTERNAL : 1
AND_LAST : 1
AND_HIS : 2
INPATIENT_CARD : 1
THIS_SW : 1
THE_RECENT : 1
LAST_WEEK : 1
MOBILITY_LIMITATION : 1
GENDER_CALL : 1
PT_IS : 4
REFILLS_FEELS : 1
HOME_DISCHARGE : 1
OF_CC : 1
TO_QUIT : 2
BEEN_CONTACTING : 1
INSURANCE_VARDENAFIL : 1
ANSWERED_PLAN : 1
PMH_HIS : 1
HE_MUCH : 1
TAKE_ONEHALF : 1
AWAIT_ECHO : 1
BLED_LAST : 1
II_PAIN : 1
DISCHARGE_AM : 1
DIAGNOSIS_OF : 1
TO_HE : 2
NIGHT_RIGHT : 1
BACLOFEN_TAB : 1
STRESSORS_AS : 1
THERAPY_PLAN : 1
DISCHARGE_REFERRED : 1
HISTORY_DISPOSITION : 1
DAILY_NO : 1
ARMY_HOSPITAL : 1
INCLUDING_FROWNING : 1
LASTING_POSITIVE : 1
TIMES_AS : 1
INDICATES_EYE : 1
RECURRENT_OR : 1
ISSUE_COPAYMENTS : 1
COLON_ENDO : 1
ASSISTANCE_IN : 2
ACHES_HEIGHT : 1
AT_REPORT : 2
TO_TYPE : 1
DIPPY_TEST : 1
ROOM_FLUNIS : 1
FINE_MORNING : 1
CROSSED_EYE : 1
AWAY_REPLACED : 1
TRANSFERS_NOW : 1
DELAYED_THAT : 1
ATRIUM_DDRIVE : 1
LUMBOSACRAL_SPONDYLOSIS : 1
HIS_MEDICATION : 1
FOR_RELATED : 1
LOST_SINCE : 1
ALCOHOL_ALSO : 1
BOTTLE_TEST : 1
MOUTH_AT : 1
PTSD_CHRONIC : 1
ASSESSMENT_BUT : 1
ACTIVE_PROBLEMS : 1
TOMORROW_UNMH : 1
PAPERS_VARDENAFIL : 1
BEEN_REAL : 1
AMARILLO_VAMC : 1
HISTORY_PRESENT : 1
TO_UNIT : 1
RESULTS_ARE : 1
TO_INTERVIEW : 1
FOLLOWUP_CLINIC : 1
OF_TO : 3
UNIT_TOOK : 1
YOU_EXPERIENCE : 1
HISTORY_TOBACCO : 1
PHYSIOLOGY_FUTURE : 1
AVAILABLE_POOR : 1
FEVER_CHANGE : 1
TAKING_MG : 1
GROGGY_DURING : 1
ACTIVITY_VET : 1
TO_PATIENT : 4
NEEDED_EPIGASTRIC : 1
OR_BOTHERING : 1
TID_TO : 1
REHAB_PLACEMENT : 1
AS_DONE : 1
MG_PO : 8
FOR_BIPOLAR : 1
PLAN_TIME : 1
NON_VA : 1
VET_AGREEABLE : 1
ASSESSMENT_EXUDATIVE : 1
BEING_HE : 1
THERE_HE : 1
CONTINUED_AS : 1
WITH_VETERAN : 2
HE_HEENT : 1
STRETCHER_SYND : 1
HAS_JUST : 1
SPONDYLOSIS_OF : 1
WEEK_WRITING : 1
PO_TAB : 1
GAUGE_RIGHT : 1
HIS_WATER : 1
WAS_GOING : 1
AUG_RESPIRATION : 1
INPATIENT_INCREASE : 1
GOOD_REPORT : 1
PRESENT_PT : 1
WILL_OBSERVE : 1
ADMISSIONS_PRESENTS : 1
MOUTH_ATRIUM : 1
FOLLOW_TELEPHONE : 1
MIXED_BEEN : 1
ISSUES_RELATED : 1
ONE_THE : 1
HE_OFF : 1
AZ_MONITORING : 1
IV_IS : 1
VIA_TO : 1
ORDER_PROCESS : 1
INITIAL_THE : 1
OF_OF : 2
BY_TO : 1
NONE_NO : 1
CURRENT_DIET : 2
NURSING_HOME : 1
AND_SHOWED : 1
DRAW_CLOCK : 1
LPM_CURRENT : 1
OR_DEPRESSED : 1
BETTER_THAN : 1
ENVIRONMENT_IN : 1
GAIT_NORMAL : 1
TO_PAATIENT : 1
NONE_FOR : 1
LAMOTRIGEN_AND : 1
GROUP_LECTURE : 1
AND_FALL : 1
HER_TO : 1
DENTURE_HEP : 1
RECENT_REQUEST : 1
ASSOCIATE_PROVIDER : 2
HEALTH_ADDENDUM : 1
IF_IMAGE : 1
PT_VISITED : 1
COGNITION_ORIENTED : 1
ACTIVITIES_DAILY : 1
BRONCHOSCOPY_TIME : 1
FEEDING_BOWEL : 1
TO_MOVE : 1
MEDS_STATED : 1
SOAP_HEALING : 1
TAKE_AND : 1
NOTE_CARE : 1
THE_NAME : 1
AND_AMT : 1
BED_PLAN : 1
IN_SUITE : 1
IS_WOUND : 1
AGO_AND : 1
EVAL_VA : 1
THIS_FROM : 1
PSYCHIATRIST_AND : 1
BAND_ON : 1
TIRED_TO : 1
DIABETIC_RAL : 1
PAIN_MG : 1
DAILY_SINCE : 1
QUESTIONED_AS : 1
AWAIT_LUNGS : 1
ACTUAL_TIME : 1
CARDIOLOGY_CARDIOLOGY : 1
MEDIASTINAL_SUMPTER : 1
MG_LAMOTRIGEN : 1
WHICH_IS : 1
GIVEN_THIS : 1
CLINIC_AS : 1
SUD_ASSESS : 1
DIRECTIVE_PAST : 1
TEMPORAL_PATIENT : 1
ANY_NEW : 2
TO_REMAIN : 1
CONTACT_FROM : 1
OIF_OEF : 1
SURGERY_CONSULT : 1
AND_PLAN : 1
TO_QUESTIONS : 1
NS_STARTED : 1
PER_PC : 1
MANAGEMENT_PHYSICAL : 1
TO_THEMSELVES : 1
IDENTIFY_AND : 1
KICKED_OUT : 1
MAIN_IS : 1
FEE_TO : 1
ACTIVE_AREA : 1
IN_PATIENT : 1
TOOLS_MENU : 1
ANSWER_CORRECTLY : 1
THE_OPTION : 1
CAN_BE : 1
AND_THIS : 1
AM_NA : 1
SC_HR : 1
CWT_PLACEMENT : 1
INCREASED_HE : 1
PT_BACK : 1
THE_VIA : 1
WOMEN_TREATMENT : 1
MOOD_AND : 1
YES_INTEGRILIN : 1
PT_SEEN : 2
GLASSES_DAILY : 1
TEST_GLARGINE : 1
CHECK_LEVEL : 1
NOT_LENGTH : 1
HE_STATES : 1
COMPLICATIONS_RECEIVED : 1
POOR_DECISIONS : 1
PAST_YEAR : 2
OF_FAMILY : 1
IDEATION_ASSESSMENT : 1
URINE_COLOR : 1
DISCHARGE_HOME : 1
INSURANCE_PAPERS : 1
PM_PM : 1
INPATIENT_PHYSICAL : 1
OF_SOCIAL : 1
VARDENAFIL_HCL : 1
UP_IDEATION : 1
WITH_IODOSORB : 1
SCALE_FOR : 2
LECTURE_TO : 1
ONYCHOMYCOTIC_ON : 1
TABLET_METHADONE : 2
LOST_DOES : 1
DECISIONS_WORRIED : 1
CHILDREN_HAVE : 1
BULGE_HERE : 1
CHIEF_DOE : 1
PTSD_SCREENING : 1
JUST_BEEN : 1
INSTRUCTED_TO : 1
CONSULT_VA : 1
CLINICIAN_OR : 1
PRODUCT_PRESCRIBED : 1
COMES_GOES : 2
SIGNIFICANT_MEDICAL : 1
VERIFIED_JUN : 1
IF_FOR : 2
MALE_PATIENT : 1
SOC_DESCRIBE : 1
RANGE_TO : 1
PT_CONT : 1
IS_UNABLE : 1
HIS_LAWYER : 1
PUNCH_COLORED : 1
THERAPY_VET : 1
FOLLOWING_SERVICE : 1
ATE_HALF : 1
BHCL_MICHALSKE : 1
OT_FREQUENCY : 1
CLINICAL_PT : 1
BLOOD_ON : 1
HIS_PROGRESS : 2
HELP_SUPERVISION : 1
OR_NURSING : 1
PROVIDED_HOMICIDAL : 1
SKIN_EQUAL : 1
HOME_PROCEDURE : 1
MEDICATIONS_SUPPLIES : 3
SMILING_SC : 1
CTRS_REPORTING : 1
COMPLETE_HYDROCODONE : 1
MOISTURE_RARELY : 1
HUGGER_IM : 1
EC_CAP : 1
OTHER_PRODUCT : 1
HEALTH_SEEN : 1
EFFORT_APICAL : 1
AM_WRITING : 1
PRESENTED_ANGRY : 1
SOUNDS_RHONCHI : 1
TIME_TEMP : 1
SEX_MEDICAL : 1
ON_COUMADIN : 1
BP_ENDING : 1
TO_SCRUBBED : 1
IF_THE : 1
AM_REPORT : 1
OF_US : 1
DIRECTED_EACH : 1
CLINIC_CONTRAST : 1
VIA_IF : 1
TO_SPECIFY : 1
IS_FOCUSED : 1
RES_SEPOCT : 1
TO_INPATIENT : 1
THERAPY_AFTERCARE : 1
LB_OX : 1
SEEK_FOR : 1
PROFESSIONAL_MENTAL : 1
BE_DELAYED : 1
PM_MEDICAL : 2
LISINOPRIL_MULTIVITAMIN : 1
HIS_HE : 1
NO_FOR : 1
UNSUCCESSFUL_AND : 1
TO_ET : 1
MARITAL_STATUS : 1
PLACEMENT_HAS : 1
COMPLICATIONS_SPECIMEN : 1
OTHER_NO : 1
ULCERATION_MEASURES : 1
VA_EXAM : 1
UNDERLYING_TUMOR : 1
PT_RESTING : 1
PATIENT_RECEIVES : 1
COUMADIN_REVIEW : 1
DEPT_HE : 1
NOSTRILS_TO : 1
THIS_APPOINTMENT : 1
AT_MEDICATION : 1
PER_CHART : 1
NO_HYPERLIPIDEMIA : 1
FOR_APPOINTMENT : 1
RECONCILIATION_DESCRIPTION : 1
APPLICABLE_MOBILITY : 1
DIET_DISCHARGE : 1
ALTE_SEE : 1
MEDICATIONS_REFILLS : 2
FOR_DISCHARGE : 1
PT_ED : 1
NAME_PATIENT : 2
UNREALISTIC_AND : 1
TO_OUT : 1
VETERAN_FOR : 1
STATES_ABLE : 1
SKILLED_HOME : 1
IDEATION_MAIN : 1
LAMICTAL_MG : 1
CHRONIC_PROBLEM : 1
ASSESSMENT_METHOD : 1
SCRUBBED_CIRCULATING : 1
LESS_CLOTS : 1
IF_COVERS : 1
METHOD_VIA : 1
PATIENT_MEDIASTINOSCOPY : 1
ON_PER : 1
DIET_REGULAR : 1
ON_PROPANOLOL : 1
OPHTHALMOLOGY_OR : 1
GENERAL_NOTE : 1
RAL_FEVER : 1
HOUR_PT : 1
PREDICTING_SORE : 2
OF_HAVING : 1
THANK_WHAT : 1
HE_COMES : 1
PT_INSTRUCTED : 2
AREA_ADDENDUM : 1
OX_REPORT : 1
PT_RETURNED : 1
REVIEWED_THE : 1
VIA_AND : 1
UNAVAILABLE_ACTIVE : 1
IV_CDI : 1
DYSPNEA_RECEIVED : 1
FELT_HE : 1
CLINIC_NA : 1
TIME_PULSE : 1
WITH_BLOOD : 1
PT_UNDER : 1
ULCERATION_HAD : 1
CT_SCAN : 1
RD_ASU : 1
THAT_TIME : 1
PATIENT_IN : 2
PATIENT_ON : 1
CRISIS_NOTE : 1
PAGER_EMERGENCY : 1
HAS_ACTIVE : 1
FOR_UP : 2
HIM_YEAR : 1
HOURS_NEEDED : 1
SCREENING_NURSE : 1
PROCTOFOAM_PUNCH : 1
VETERAN_ON : 1
IDEATION_ISSUE : 1
NOTE_DURATION : 1
DIMINISHED_CARDIOVASCULAR : 1
PROPERTY_PT : 1
REPORT_CC : 1
PATIENT_FLAG : 1
PAST_MONTH : 1
USE_NEEDED : 1
QS_II : 1
SOFTNER_ADDENDUM : 1
TO_DISCUSS : 1
QUIETLY_EYES : 1
NO_AS : 1
PATIENT_WORK : 1
EFFEXOR_XR : 1
PULSES_NURSING : 1
ALL_THE : 2
AND_LONG : 1
HAS_MILD : 1
PSYCHOLOGICAL_TESTING : 1
OLDER_CHILDREN : 1
MEDICATION_LIST : 1
HANDS_AND : 1
MG_DAILY : 2
PHYSICIAN_PATIENT : 3
DATE_CAN : 1
NOT_FOR : 1
CARDIOVASCULAR_REVIEW : 1
ASSOCIATED_WITH : 1
PRINTED_REGIMEN : 1
OPTION_AFTER : 1
WOMEN_SEEK : 1
LTC_COPAY : 1
WILL_EITHER : 1
PULSE_OXIMETRY : 1
PLAN_AND : 1
WAYS_AND : 1
THIS_INJECTION : 1
AMBULATORY_CT : 1
DIVORCE_TO : 1
WITH_CHIEF : 2
MEDICAL_HISTORY : 2
VARIOUS_RELATED : 1
LEVEL_IS : 1
INTERVENTION_ALREADY : 1
ASSESSMENT_LAST : 1
DRAW_CORRECTLY : 1
PATIENTS_COORDINATION : 1
BACK_VIDEO : 1
PVCS_PT : 1
VITALS_CARDIOVASCULAR : 1
HAD_LAB : 1
RATE_BREATH : 1
REQUIRED_OF : 1
TAKING_SOFTNER : 1
SUNSCREEN_MALE : 1
TX_SUPPORT : 1
MEDS_IS : 1
PHYSICAL_PAIN : 1
BY_HE : 1
TO_PROSTATE : 1
DEPRESSION_AT : 1
MARITAL_MARRIED : 1
ANXIOUS_OR : 1
MEANS_CERTAIN : 1
THIS_APRIL : 1
CHRONIC_STILL : 1
IS_IS : 1
USED_METH : 1
RECV_AIDS : 1
PPD_PLAN : 2
PREEXAM_PHYSICAL : 1
DAN_STAFF : 1
OR_SUPERVISION : 1
SOCIAL_CONSULT : 1
TONIGHT_FLOW : 1
OR_OPTOMETRY : 1
! Stats words=1710  pairs=8065
