# Supplementary material for: Predicting the Risk of Suicide by Analyzing the Text of Clinical Notes
Source: PLoS One. 2014 Jan 28;9(1):e85733. doi: 10.1371/journal.pone.0085733 (PMC3904866; doi:10.1371/journal.pone.0085733)
Supplement: Appendix S3 — Machine Learning Libraries and Methods: This section is provided to enclose the open source (Apache License) classifier used for the building of the statistical models, specifically for the purposes of study reproducibility. A detailed account of these tools is intended for another publication. (ZIP) [file pone.0085733.s003.zip › Appendix3/ML_libs/Regression_testing/group3/grp3-pt-1004.xml]

<?xml version="1.0" encoding="ISO-8859-1" ?>
<records>
  <record>
    <group>3</group>
    <study_id>1004</study_id>
    <notes>
of care must be predicated by referral.
A letter was sent to the patient&quot;s current address requesting
PT CALLED TO CANCEL AND RESCHEDULE HIS DENTAL APPOINTMENT DUE TO TRANSPORTATION
comprehensive care. pt understands.
MEDICAL HISTORY:
"Preoperative Instruction Sheet"
outpt  surgery.  To have
Allergies:  DILTIAZEM
Patient seen, examined, and Anesthesia Pre-Op H&amp;P reviewed.
NO - Interval change(s) in Anesthesia Pre-Op H&amp;P since last seen.
Anesthesia Technique(s):
PAC(U) Admit Score:                     PAC(U) Discharge Score:
on Surgical Site Confirmed:  ING NOT REQUIRED FOR
Nursing Diagnosis:  Potential skin impairment related to positioning.
NEXT APPOINTMENT:  see attached
PATHOLOGY REPORT
Pain Score Due at OPT Visits:
Comment: no change
The patient is a -year-old   male who comes in postop circumcision doing
Length:  minutes.
BP: / (// :)
Chest: CTA BL
hyperpigmented border, there is loss of hair follicles and some areas of
DERM Meds:      Clobetasol oint
. Patient name:   ,
constipation/diarrhea, anuria, dysuria, hesitancy, urgency
--------------
Narrative:
Increase relapse prevention skills
components of CBT, MI, Supportive Therapy, and ACT.
Plan: continue with present treatment plan until further notice.
. NEPEC;
EtOH: previously, now sober
Vet to start group next week as he had conflicting appts. to  //
No use of substance
he has been sober since completing the Salvation Army ARC program in /.
CHIROPRACTIC CARE CONSULT
System Recommendation: - hours
Resp.: (// :)
. Tinnitus * (ICD--CM .)                       //  GEESEY,YVONNE L
"Pt reports multiple exposures to blasts from grenades, mortars, IEDs.  Though
down and has done this in the past.  agrees to no more than one beer if he takes
tennis elbow.  Her left epicondylar region will be injected
her tennis elbow forearm splint to be worn daily.  She will
Radiology History and Reason for Request
concentrate when she takes this medication.
nontender, nondistended.  Bowel sounds present.
$APHDR
Please see results in Vista Imaging and/or Stentor.
procedure well.
WAS ATTENDING PRESENT DURING ENTIRE CASE? Yes
COMPLICATIONS: No
[]Other:
PATPU UNSCHEDULED VISIT
If yes, packs per  :
Timing and setting appropriate to patient teaching: Yes
doctor to see inside of your colon.
Additional Instructions:
- - - - - - - - - - - - - - - - - - - - - - - - - - - - - - - - - - - - - - - -
[]Lipoma
members verbally concurred with stated patient&quot;s name, procedure,
. Little interest or pleasure in doing things
Advance Health Care Pl ing:
Patient was educated on the importance of reporting pain using a pain
amount of time spent "active" in Telecare Record Manager.)
taken OTC cold/flu meds, ccough syrup, with little relief.  Appt with PCP /.
. The patient HAS decision-making capacity.
full consent
Total chemical nail matrixectomy was discussed with the patient.  All
pcp pending
for pain
OPTOMETRY CONSULT (T)
BIFOCAL RX
II GTTS % TROPIC OU
diabetic.  Reports that he has cut the toenail so is not causing pain to , but
closed with stitches.
Missing Teeth: , , , , , , , , , , , , , , , ,
PC PTSD
Patient has % military service connected medical disability at this time.
Had Echocardiogram / which showed mild LVH.  EF -%
LTC Co-Pay Status: EXEMPT
injury; pelvis,   skin defect in the right lower quadrant overlying the bony
MED CHECK IN
about school and finances.  See note this date.
Place an "X" in the box if the factor is present:
. Supervising practitioner:
ADDENDUM
PAIN ASSESSMENT
COMMENTS:
patient seen in clinic for f/u with  physician  been doing ok.  Here for
===
Reaction: None
INFLUENZA IMMUNIZATION
Is there anything new that you want your provider to know about to ?
Patient Phone Number: ()-
_x__ constant      _X__
will be sent to Hanlin Shoe Repair for fabrication.
Before treatment session:
Dx: S/p L TKA
//. Pt is coming on Thurs  (//) at  am for pre-operative
Patient does not have a vehicle remaining on hospital g .
Pt is scheduled for joint replacement surgery and is here to  for education.
. Screening for unspecified Malignant Neoplasms  c-scope / divertic int
Preop Antibiotics given: Cefaz n gm
Anesthesia: gen
Respiratory rhythm: even and unlabored
Maintains intact skin
Call light is within reach and patient has been instructed on how to use.
RESPIRATORY SYSTEM:
Anticipated discharge date: -  s
Hyperglycemia
Skin Color:
HAS BEEN W/O HIS ANXIETY/PARKINSON&quot;S MEDS SINCE PRE OP. DAILY MEDS STARTED,
first name and who  physician but not his last name nor where he is.  Nursing
p tazine
REHAB-KINESIOTHERAPY
Breath Sounds: Decreased
Instruct patient/resident in medication time/dose, side effects and
Intensity of respirations: normal
NURSING-ACTIVITIES OF DAILY LIVING
O  %
Low Back Pain
PAST MEDICAL HISTORY:
No productive cough
Mentation: A&amp;OX.
Location: All Areas
home.
.   Objective: Patient will report No (zero) epis  of irritability daily
GAF:
another appointment. Per patients wishes, staples will be removed per pt wishes
Psychosocial:
ASSESSMENT
O-No symptoms/complaints during this call.
FORMOTEROL FUMARATE MCG INHL CAP
OBMT PROGRESS NOTE (T)
For your review
Duration of Complaint:
Positive Responses
Of note, pt was seen in OBMT in / for STI concern.  At that time, STI
history and findings of record, please see the claims folder.
Patient indicated flu vaccine was received previously here or at
//  HGB                 .        g/dL
Schedule patient for: [X] my clinic
dict #
Patient indicated NO to questionnaire of any barriers listed to
significant marital strife related to communication and wife&quot;s prescription
Wellbutrin
SSN: --
CASA GRANDE MH SOCIAL WORK CONSULT RESULT
NIACIN
Date: Mar ,
Food Allergies:  No
E: Mr.   is in routine observations. He is dresed in PJs &amp; robe with good
Discharged:   Ambulatory
GENERAL MENTAL HEALTH NOTE
outside the house.
CLINICAL REMINDER ACTIVITY
It is understood that mild problems include: redness, swelling, or
CBOC-URGENT CARE
Met w/pt. for  min. f/u MH appt. Continues to present w/improved mood and
GU:
Patient instructed in the use of a Pain Scale: YES
REASON FOR VISIT: see triage note
If "NO" response, please explain:
Unintentional weight loss of more than
PHYSICIAN
ADDENDUM
For the treatment of symptoms of mild to moderate dementia associated with
ANTICOAGULATION CLINIC FOLLOWUP NOTE
MEDICATION CHANGES: none
Goal INR range: .-.
PATIENT HERE TO  ALONE /  AMBULATORY
S-CHIEF COMPLAINT: PATIENT HERE FOR scheduled visit with labs.
----------------
If intake &gt; one year, then a new intake will need to be completed.)
"Slow down on my drinking"
Current Ideation?   No
( )Psychomotor Agitation        (x)Other: physician tendance:
( )Anger Management             (x)Motivation
Observations:
PT WAS SEEN FOR  MIN MEDICAL PSYCHOTHERAPY
OBJECTIVE:
Temp: . F [. C] (// :)
CC: vesting
Current Patient Medication List:
The supervising practitioner for this episode of care,  physician   ,
Patient has answered NKA
TIMES A   AS NEEDED FOR PAIN, TAKE WITH FOOD
IV FLUIDS
Hand Grip/Leg Movement to Commands: S=Strong  M=Moderate  W=Weak  A=Absent
OUTPUT:
doctor or nurse if you have a decreased appetite.  -  You should eat
Non-pharmacological therapy:
NEUROSURGERY OUTPT CLINIC NOTE
OBJECTIVE:
Comment: labs  non fasting
Conversation with  ,  V has a chief complaint of: &lt;not
Height:          . in [. cm] (// :)
as prescribed. He&quot;d been working extra hours at the grocery store for
ON:
Hyperlipidemia (ICD--CM .)         Hypertension, essential
LEARNER PREFERENCE
ADDENDUM
While waiting on ETSU call back will go ahead and fill the script and will
Spoke with Emily at ETSU lab.  She said that it diffinintly looks like there may
not be an issue for this problem.  Will go ahead and start supplementation at
Attending: McGowan, Judson
FROM ORAL INHALER FOUR TIMES A   IF NEEDED FOR
Medications, Nutrition, PT/Family responsibility
Phenobarb...Methadone was filled.
ROTATOR CUFF - REPAIR (ROTATOR CUFF REPAIR)
Risks, benefits, and alternatives discussed with patient who agrees to proceed
(on same    physician here)
Identified problem: OTHER UNSPECIFIED COUNSELING.
Pain Location: left chest
. GERD
Mr   is a  y/o wm ex smoker heavy  pks/  but quit  yrs ago.
PER DR.____hawse_____________.
Pain:
rules about leaving unit, meal times, medication times, nurse Manager,
-Other:
ABDOMINAL STATUS:
OUT.  PATIENT MAY BENEFIT FROM MUCOMYST.  THANKS
. Tendinitis *
. ARTHRITIS DJD
NURSING REASSESSMENT NOTE (T)
Additional Nursing Assessment Information: spo %
Respiratory Therapy Treatment Record
Saturation per Pulse Ox:% on Room Air
Skin Temperature
sputum has always been that color. Minimal shortness of breath, denies abdominal
Active problems - Computerized Problem List is the source for the following:
IMED INFORMED CONSENT
into a vein in the arm.  The bronchoscope is  rally inserted
ABDOMINAL STATUS:
Genitourinary:voiding without difficulty
)   ACETAMINOPHEN TAB  MG PO QHRS PRN for mild         ACTIVE
DEC ,  :
NURSING REASSESSMENT NOTE (T)
NUTRITIONAL STATUS:
ADDENDUM
disciplines were in attendance: Physician, Dietician, Social Worker, PM &amp; R
Respiratory Therapy Treatment Record
Hearing Status:
Weight:   lb [. kg] (// :)
shoulder with partial rotator cuff tear.
. Anatomical Location: LEFT SHOULDER
Author:  ,SARAH J
-------------------
compress/lid scrubs bid OU.
pain noted now for three  ...
SCARS  %  SC
LIMITED EXTENSION OF KNEE  %  SC
ADDENDUM
Educational needs met with this indvidual session involve medication
. Orchitis and epididymitis
levitra reordered.
CALL CENTER NOTE
Evaluation/Management Code: UNLISTED EVALUATION AND MANAGEMENT SERVICE ().
Impression:
Contact Phone Number: SAME.
PC CLERK NOTE (B)
Conversation with  ,   LIN has a chief complaint of: &lt;not
self-care.
[X][ ][ ]History of Alcohol or  physician pendence
he reports that the voices sound like "whispers"  that come from inside his
PER DIEM PROGRAM ADMISSION NOTE
. GERD * (ICD--CM .)                           //  SARAFIAN,FARJAD
Ta @
L       tr ns ou
[, , , ]
Attending Surgeon:    , M.D.
a laser to the drainage tissue within the eye to improve fluid flow
Additional reasons for discharge:
Voluntary admission. He had been at US VETS, stated to writer that he was hit in
[  ] Chains:
GOAL(S) ADDRESSED: Positive thinking for daily living, Positive activities for daily living,
Current GLA Prescribed Medications:
)   TRAVOPROS
Lab Data: n/a
LANGUAGE
Tubefeeding (any method):  No
Active Inpatient Medications                           Status
group was on accepting life on life&quot;s terms.  The vets talked of the following:  how their family did not
==============
Times, situations, feelings, symptoms or behaviors that may increase my risk of
[X]Relaxation such as  p breathing, imagery, progressive muscle relaxation,
PSYCHOLOGY PROGRESS NOTE
--&gt;Is the patient experiencing  ucinations or disorganized thought
. Nicotine Dependence                                //  BAGLEY,
[  ] Watch:
patient to call provider (left  physician sion).
Left a message for patient on his cell phone to check in about his missed
ALLERGIES: Patient has answered NKA
Collection DT       Spec  CHOL
SCHOOL FOOTBALL INJURY IN MY RIGHT KNEE BUT, MY LEFT KNEE IS WORSE.  I USE
PMH:
PLASMA     /     /           Reference
Wt:  lb [. kg] (// :)
Elevated Prostate Specific Antigen (PSA)Knee: arthralgia (ICD--CM .)
SUBJECTIVE:
PAIN SCALE: /.
says he doesn?t like the social worker there.  I advised him the social worker
Other Specified Housing or Economic // HEMP ,  L
anyone else. Along with seeking help for housing, he is asking for assistance
COMPLAINT:lbp for flare of chronic back problems
Other Specified Housing or Economic // HEMP ,  L
c/o Backpain is worst now in the lower back and often radiates down the left leg
=========================================================================
PAIN NON-VERBAL QUES:  ()None
View sc ed document from VISTA imaging
CARDIAC:  HTN[] Murmurs[] An [] Palpitations[] DOE[] Orthopnea[]
entry and insertion in Columbus
Fatigue-----X
Fluency (FAS/Categories), and selected subtests from the Wechsler Adult
is reporting chronic headaches, s p difficulty, and forgetfulness.  He
Weight: lb [. kg] (// :)
VIA NEBULIZER FOUR TIMES A   FOR SHORTNESS OF
staff.
impulsive acts with the patient in one to one interactions.
Patient became agitated while talking to staff.  Yelled, "I signed myself in
accepted voluntary hospitalization until he was denied the morphine he demanded
hairbrushes and a plastic sandwich bag. This made him very angry. He
NURSING NOTE
Has there been a FALL in the past  hours?
-
No.
Are restraints in use?
thoughts; monitored pain level; safety checks q mins;
updates to those problems are listed below:
P: Safety, PTSD, and chronic pain.
ADDENDUM
Has there been a FALL in the past  hours?
I:-Provided safe, structured environment, encouraged Vet to
suicide in groups and on the unit.  Group took a moment to discuss group safety
Has there been a FALL in the past  hours?
was given a neb tx, OD was called and patient added radiating pain in his neck,
because of COPD. Direct questioning revealed no increase in sputum purulence or
normalizing and no longer needs o. No acute pain issues. Possibly had a copd
mood.
states he is drinking well but having vomiting. cna heard pt wretching but then
:; ENCOURAGED VENTILATION OF FEELINGS AND THOUGHTS; SAFETY
contact  physician iscuss this further. Medically stable with no signs of
supply at home.)
*** When in crisis, or when I feel like harming myself or others, ***
DATE OF ADMISSION:  November ,
INHALE  PUFFS BY MOUTH FOUR TIMES A DA
visit he "passed out".  States his neighbor called  and he was
NURSING ADMISSION ASSESSMENT (T)
ADVERSE REACTION: NO
inability to eat s d foods without emesis.
For questions or notifications call -, -, - or -.
BRIEF SUMMARY OF REASON FOR ADMISSION:  This is a -year-old male
Pain:
appointment?
VITAL SIGNS:
Diagnostics:
Infusion rate:  wide open
Fax: -- reported that vet called to say "he is interested in another
even with different PCP. Vet would like to be re-evaluated, reports he was set
groomed, pleasant, friendly, appropriate.
Height:           in [. cm] (// :)
. Anatomical Location: rigth thyroid nodule
or infection) of a suspicious mass in the thyroid gland.
Medications: Local Lidocaine
Pain:  (// :)
Pain:  (// :)
Veteran cancelled Pt currently in cardiac clinic
Influenza Vaccination Questionnaire
Pulse:            (// :)
)   TABLET CUTTER USE TABLET CUTTER    AS DIRECTED **TO    ACTIVE
Active Non-VA Medications
injury.
Patient in clinic to  to p/u W-Pat for study to be done at home and
Note has been dictated.
Envelope provided for pt to mail card in for download in   .
ADDENDUM
portions, snack on crunchy fruits and vegetables (carrots, celery,
PREOPERATIVE DIAGNOSIS:
Provided information about this case to supervisor in face to face meeting.
HT: in [. cm] (// :)
obtaining batteries from the VA-Denver Distribution Center, and on
F/U of + Depression Screen:
INFORMATION PROVIDED
No chest pain or shortness of breath.
cholecalciferol  bid
reviewed va mh note/i will also not provide this prescription for pt  pt should
RENAL NP CLINIC NOTE
Ending at: // @ :: PM
Repeated attempts x to  to contact pt directly unsuccessful to relay above
ADDENDUM
minute visit providing transportation from medical appointment.
writer also left a message with staff at Birch  informing him of this
Veteran not seen for scheduled appointment due to:
attend group. As he is followed closely by MHICM staff and staff where he
Team/Clinic: Serious and Persistent Mental Illness (SPMI)
Veteran cancelled
One Veterans  physician p s, MN                           Nov ,
Leader(s): Sarah Krohn, MSW, LICSW (absent), Michelle  y, MS, CRC, CPRP &amp;
instructions provided and Veteran is able to repeat these
Asked him what it would be like to read more of the uplifting passages
minute weekly home visits for supportive therapy focusing on
stopped talking to him d/t an argument they had a couple months ago,
Current Diagnosis: Schizophrenia
raised his voice but did not use abusive or threatening language.
Reason for Visit: Med eval
monitor symptoms and provide mental health education as permitted.
ATROPINE SULFATE % OPH SOLN  DROPS IN UNDER THE TONGUE    ACTIVE
Medication Reconciliation
Reason for Visit: med eval
Patient/Family Response (Outcome):
Pre-Op Checklist
No
PRE-OP SURGERY STAFF NOTE
Neuro:  awake, alert, and oriented x
ucinations.  Provided support and reassurance as needed.  Veteran
minute weekly home visits for supportive therapy focusing on
PATIENT CONTACT NOTE
Clinic RN notified.
Subjective/Objective:
One Veterans  physician p s, MN                           Jun ,
Men
to go this time with the idea they would go with the veteran&quot;s idea the
Session:
He reported feeling "moderately well" to .  He continues to report
MHICM to maintain weekly visits to monitor and encourage stabilization
Denied difficulty or problems at this encounter. No significant change to
See summary note of //.
the past two  s.  He believes this choice is contrary to what God
Patient Phone Number: --
ADDENDUM
Mental Health clinic and reported that he was doing well, had no questions or
pleased with this and was able to accept that he has been progressing
concerns or questions.  It was, as always, nice to see you in the clinic
ADDITIONAL COMMENTS/INFORMATION:
ogoing leg swelling and scheduled surgery appt
Laboratory/radiology/procedures: Reviewed. pertinent findings.
Patient
Protocol(s) used: &lt;Not identified&gt;.
Conversation with  ,  JR has a chief complaint of: &lt;not identified&gt;.
Active Outpatient Medications                          Status
$TEXT
rtc prn
benign lesion &lt;cm
[ ] YES [x] NO Is the patient pregnant or breastfeeding?
[ ] Patient was referred to dietitian.
. Tried hard not to think about it or went out of your way to avoid
Comments:
Lungs CTA
EGD due in  (screen va s): will schedule in next visit (in  mo)
)   APAP /BUTALBITAL
.  Pain scale used:  Num  rating scale
S.
CC:" I need to get check for STD&quot;s
Cor: RRR
requested admission for Veteran.  SW faxed packet of information to VMC-W ER and
Patient came to clinic to  complaining of left testicular pain and that his
// :
I look for  to seeing you at your next visit.
FEB , @:   Clinic:   VASCULAR SURGERY/CALL FOR APPT
MINE RUN RD
&gt; lbs. in the past  months, no weight loss greater than  lbs.
)   CITALOPRAM HYDROBROMIDE MG TAB TAKE ONE-HALF TABLET  ACTIVE
Iron / tibc normal, but ferritin low, repeat in   month.
TIMES A   WITH MEAL . FOR DIABETES
AUG , @:   Clinic:     KSBURG/THAMMAIAH,K/CFA
Veterans Administration Medical Center electronic chart. The patient
Thank you
Post-procedure Diagnosis: same
the patient&quot;s identification and the procedure.  Local anesthetic was provided
- - - - - - - - - - - - - - - - - - - - - - - - - - - - - - - - - - - - - - - -
====================================
CURRENT TREATMENT: Oral medication
same. He believes his current medications are wo
refer back to pcp
INT CAROTID (DIST)      / &gt; %           /  -%
Name of  physician done - VA  wal
Medications:  Active Outpatient Medications (including Sup
Active Outpatient Medications (including Supplies):
S: PT. RETURNS FOR RE-EVAL. AND TEST RESULT.
Neurological:lost  lbs in last
TIMES A
Reviewed ordered tests:   Labs to .Neuropsyche test before next visit.
PREFERS TO LEARN BY: Print
HEENT:  Denies headache, dizziness, congestion
SISTER
vision, and wait until family member can provided supportive care.  The pt
years from now, I will look for  physician .  I ask how he feel about his
Patient&quot;s behavior indicates the lack of cognitive ability
Breath Sounds/Clear-Left
see health sumarry
Voids
Resident Care Plan
Resident Id:                              CP Review
time=t+ @, stop date  hours later;  Read in -
reg
EYE MEDICATIONS:
Unspecified open wound of eyeball  .    //   CHEN,PENG MD
His speech was coherent with no evidence of thought disorder.  His attitude was
PREDNISOLONE ACET % SUSP,OPH   DROP BOTH EYES QID         ACTIVE
Allergies: see posting
physical assistance limited to transfer
BOWEL ELIMINATION
Transfer: requires no assistance
BOWEL ELIMINATION
Urine color: yellow
PREDNISOLONE ACET % SUSP,OPH  DROP -   DROP
b. MEDICARE NUMBER
NUTRITION
MOBILITY
Allergies/ADR:Patient has answered NKDA
Abdomen: soft, nt, nd, BS+
RECOMMENDATIONS:
Care Involving Orthoptic Training  V.    //   MIMMS,  L
FREQUENT VERBAL
MENTAL STATUS
Number of hours active
Meanwhile, writter has gone to blind rehab and has spoken with Blind Rehab.
(-) Glaucoma
ADDENDUM
Personal hygiene: bed/sponge bath
ZZPATIENT CARE ADL NOTE
BLADDER
Ambulation: supervision, oversight, encouragement or cueing
RESIDENT NAME   ,   J
. Hispanic
This shift the patient used the toilet.
Consistency of stool: .
Alert
get good news from miami on /. He did not tell me what miami said on /
Oriented to person, place, time.
Number of bowel movements this shift: .
Affect was euthymic, appropriate to content
the outpatient setting. Thorough handwashing should follow removal of
Refused to take po ABT, states "the antibiotics does not works, infection comes
NURSING NOTE
MOBILITY
placed to Blind Rehab however,     was not available. Another call will be
BOWEL ELIMINATION
Feeding location: resident room.
Restorative Feeding Program: No
Weight Loss:
MOBILITY AND ACTIVITIES:
BOWEL ELIMINATION
This shift the patient used the toilet.
Oriented to person, place, time.
Number of bowel movements this shift: .
During this shift, patient was continent
Consistency of stool: soft.
Hip protectors in place:
Number of bowel movements this shift: .
X . Male
ZZPATIENT CARE ADL NOTE
Personal hygiene: shower
Assistance provided for this task: extensive assistance, resident helped but
use of his rational skills.  However, veteran may in the long run be at risk for
Home Telephone: --
MHC CLC PROGRESS NOTE
TIME OF THE   Evening   ,@:
Hip protectors in place: declined
Hip protectors in place: declined
Assistance provided for this task: requires no assistance.
Meal assistance: requires no assistance.
ZZPATIENT CARE ADL NOTE
Other personal care: shampoo
During this shift, patient was continent
During this shift, the patient has been observed smiling, laughing, talking to
MENTAL STATUS
ACTIVITIES OF DAILY LIVING
During this shift, the patient has been observed smiling, talking to others.
Assistance provided for this task: set up assistance
Urine color:
Oriented to person, place, time.
Urine color:
Amount of stool: medium.
Patient bathroom privileges
location:
BOWEL ELIMINATION
Activity:           = Walks Freguently
Score:
Secondary diagnosis:
Report new pain
During this shift, the patient has been observed talking to others.
Patient is continent.
Additional resource are    , Specialist who oversees Mr.  &quot;s
ACTIVITIES OF DAILY LIVING
The patient did not refus
Request for pass was signed and witnessed.
Hip protectors in place: declined
Breakfast  food % drinks %
Assistance provided for this task: set up assistance
Number of times resident was incontinent of urine this shift: .
OPHTHALMOLOGY NOTE
that his OS vision is gone except to light. Before, He was able to see hand
Allergies: see posting
Amount of stool: .
location: resident room
- N/A
. Social Security and Medicare Numbers
Number of bowel movements this shift: .
each month from :-:PM.
physician s
During this shift, the patient has been observed smiling, talking to others.
NURSING NOTE
BOWEL ELIMINATION
Amount of stool: .
ACTIVITIES OF DAILY LIVING
s/p gunshot wounds to the face with loss of vision.  Transferred to CLC on
Type:QUARTERLY
No staff required.
S owing Disorder: No
Personal hygiene: not applicable this shift
Amount of stool: .
During this shift, the patient has been observed talking to others, approaching
ZZPATIENT CARE ADL NOTE
Number of hours napping
NUTRITION
Meal assistance: limited assistance, physical help getting hand to mouth.
Personal hygiene: bed/sponge bath
Urine color:
Amount of stool: none.
physician s
Institute. He is requesting to be transported by limo as opposed to SMT van.
with loss of vision, then transferred to CLC on //. Pt had right eye
Weight Gain:
TIME OF THE   Evening Apr ,@:
physician s
Amount consumed:
Oriented to person, place, time.
Meal assistance: requires no assistance.
Ambulation: supervision, oversight, e
Lunch   food % drinks %
BOWEL ELIMINATION
Assistance provided for this task: requires no assistance.
Other personal care:
Other personal care:
Goal: Resident will participate in x weekly leisure programs to address
This writer call SW and left message on his Voice Mail to confirm BRC admission
TIME OF THE     Apr ,@:
Assistance provided for this task: requires no assistance.
Patient bathroom privileges
Extra fluid
Still talked about his losses but now is more optmostic stating "Life is not
TIME OF THE     Apr ,@:
Amount of stool: .
BOWEL ELIMINATION
Personal hygiene: shower
Urine color:
others.
MOD COVERAGE
S owing Disorder: No
Assistance provided for this task: not applicable this shift
help.  He was quite fascinated with the OCR in Visual Skills.  A notary was
T   . F [. C] (// :)       Pain  (// :)
Veteran will be accompanied by his sister and will not require an aid.
Consistency of stool: not applicable.
of low risk of falls.
year old MALE
accident, and perseverates on his situation.
Date: Tues
before leaving.  They said that they are from the State Attorney&quot;s Office.
are not going to operate now as they hope that some of the scar tissue will
going to give MS a try. when I went to pick him up for class. pt stated that he
"What is the most important pice of information you&quot;ve picked up in life so
Sessions Remaining: Assessment
PATIENT&quot;S
SISTER
BIRDGEWATER
Number of LS sessions to date:
Number of LS sessions remaining: To be determined
Distance VA:  without correction:OD:LP
to date and was seen by the Low Vision Optometrist on May ,  for a
Progress:
ADDENDUM
to the face and eyes on //.  Patient seen initially seen at Del
Task: OM walk and leather belt
Mr.   was provided training with the operation of the BRC laundry
Plan: Continue routes in hospital,
ADDENDUM
Task: OM Review LS Review
Progress: Discussed with veteran his lack of progress and motivation in O&amp;M.
May ,
linens were replaced by the undersigned and a clean bedspread was requested.
Session:
return call.
The veteran&quot;s medical record was reviewed. There were no concerns noted by
SWS BRC
It was voiced to Mr.   that one of the BRC&quot;s concerns was his safety
PATIENT&quot;S PREFERRENCE F
Sessions to date:
(Optical Character Reader) to allow the veteran to read printed materials, such
center the printed information on the sc er correctly and the ability to
SELF CARE:
Bladder:  Continent
Bladder training program:  No
Living skills training will be encouraged with the LLI, tactile timer, talking
recorder, and other requests as the veteran may voice until d/c date.
Number of LS sessions remaining:
Team members where also informed that the services from Heart to Heart will be
MSE:
Plan:  Visual Skills sessions will resume after the weekend.
Task:  Extreme Reader OCR
of the keypad of the OCR.
home where Mr.   will get a check and accompany Fernando to the
presented with several devices that had been issued and requested a review of
Orientation and mobility
Grooming:
BRC ORIENTATION AND MOBILITY SUMMARY
: Discussion
Veteran graduated through the following Units of the BRC
yo veteran with h/o legal blindness was enrolled to
accepted patient for admission to HBPC.
* *  WARNING  * * Sorting by drug class may not be accurate!
determine the drug class of some medications.
ACTIVE PROBLEMS:
COMPREHENSION:  Good
HBPC PSYCHOLOGY NOTE
and we had to walk - blocks back to the VA "to get a ride home."  This writer
OTHER TESTS:
=========================
[ ] Diabetes
Physician Name:DR HATFIELD
B-RECTAL ERYTHEMA BX
M  Right  + . + . x      /
CPT C : , , or
EVERY MORNING
For use by MD, ARNP or PA only.
HISTORY OF PRESENT ILLNESS:
responsive. Alert, oriented to person, place, and time.   physician roomed
the pharmacy.
"fibroids".
**************************************************************************
Schizophrenia, paranoid type
_____ . Patient lacks the cognitive ability to make decisions.
alcohol:none
He was here to  for  a medical appt w pcp, and told check in staff that he was
CLINICAL REMINDER ACTIVITY
He needs someone to manage his anxiety. He has been ge
said if she left he was going to the casino and he did.  Pt is also drinking at
ENT:     ( ) ear pain, ( ) hearing loss, ( ) vertigo, (  ) ear drainage
anxious.slight tremors of hands noted.
LORAZEPAM INJ
GENITOURINARY ASSESSMENT
Gender            : MALE
Pt denies any SI/HI T/I/P at this time.
Alcoh cs Anonymous
None. ()
Undersigned nursing staff was notified.
. Anxiety:  Ask "Do you feel nervous?"  Observation
D:      Vet s ping through most of this interval.
Axis V.   GAF:
Emotional barriers:
Motivation to learn:
T
AXIS II:   Deferred.
.  Nursing assessment and follow-up.
label
Ordered Inpatient Medication List as of: // :: AM
Home/Outpatient Medications not continued for inpatient use
Temporarily held due to patients condition
Variation:  What helps pain?
NURSING NOTE
Hospice               :
recently d/c from Psych unit. Chart and labs reviewed.
Period of Service : VIETNAM ERA
if requested, was given the number of the Organ Procurement
Data: Received pt in the   area amongst peers watching tel ion.
CITALOPRAM  MG TAB
Data: Patient is lying in bed awake at shift start. Patient is alert and
expertise/scope of providers, medication management, and problem-focused
appointments.
Although this is an open group, this group has a core of regularly attending
System Concern: Dehydration; Gastroenteritis
COINCIDES WITH DR HAEFNERS APPOINTMENT. THIS INFORMATION WAS WRITTEN ON A PHONE
Unit/Service: ab
Rated Dissabil    :   NO RATED DISABILITY
REASSESSMENT                 :
PSYCHIATRY ACUTE PLAN-SEVERE WITHDRAWAL
NURSING NOTE
Currently    -&gt;         : Patient has answered NKA
This patient was identified as a high risk patient, the post
TREATMENT FOR THEIR DRUG AND ALCOHOL DEPENDENCY.
Patient Education :
associated with fevers and cough productive of yellowish sputum for the last wk.
On Arrival Patient Was: Fire Rescue
Cover Sheet)
Pulse   (// :)
Dinner t  served.
Pulse Oximetry is:  percent and the patient is on oxygen
There is an alteration in comfort/pain.
Sensory Perception: = No Impairment
Referred to support group(s)
FEEDING:
URINARY ELIMINATION:
Implement per care plan
respiratory treatments help and he feels like he is able to bring up some
Site Status: Satisfactory (no redness, pain, swelling or discharge)
Pain:   (// :)
Active Inpatient Medications (including Supplies):
Pain:   (// :)
Effectiveness of Therapy: NO
Abscess over L shoulder has started draining  ly purulent material but
Rales in R base; no ronchi.
// :
Position of patient:  Seated Position
Pain:   (// :)
It is not expected that blood products will be used in this
at home up to  degrees F with associated c s.
ACTIVITIES:
position and locked.
Treatment
CITALOPRAM TAB  MG PO QAM                                 ACTIVE
Modality:  Nasal C ula
-QUETIAPINE TAB
Assessment/Plan
Complete bed bath
WOUND CARE:
Comments:  no respiratory distress or pain noticed
Arm band legible
Medications:
ALBUTEROL INHAL UNIT DOSE SOLN,INHL   ML VIAL INH ORAL     ACTIVE
Robitussin AC  teaspoonfulls Qhours PRN cough added to outpatient therapy x
ACETAMINOPHEN  MG CAPLET
IPRATROPIUM/ALBUTEROL INHALER   Sig: INHALE  PUFFS BY MOUTH FOUR TIMES A
NO
IMPAIRMENT AT TIME OF D/C    : endurance
Home Oxygen.
PULSE -           (// :)
&gt;&gt;&gt; Patient
Hep Lock placed into: Right antecubital. Angio Cath #:. Flushed with .NSS/
BLOOD PRESSURE - / (// :)
lights.
CONCERNING HIS FRIEND, ENCOURAGED OSAC GROUP COUNSELING,  HE WAS ENCOURAGE TO
poikilodermatous features.
TEMPERATURE -    . F [. C] (// :)
,   H -- is a  year old male vet presenting to Gen Surg
)   CETIRIZINE HCL  MG TAB TAKE ONE TABLET BY MOUTH      ACTIVE
. Condition or diagnosis: Umbilical hernia (a weakness in connective
C B C: N/A
No Medications Found
result in increased stress.
() To control his auditory and visual  ucinations
foundation for successful therapeutic outcomes.
BP /  P
team.
currently "hearing voices." Mr.   reported they are auditory
traumatic incident that occurred during his time in the military. Tertiary goal
PLAN. He has  re fill on the CLONAZEPAM. Last re fill --.will call his and
// at :am.
Veteran called and reported that he would not be able to attend psychotherapy
Modified Diagnostic Findings:
(D) Amalgam one surface permanen: (B)
Future scheduled appointment(s): SEP ,@:  DENTAL DR WING
(D) Periodontal scaling -teeth. Tooth: UL.
INFORMED CONSENT NOTE
FILE CLERK IN THE X-  FILM LIBRARY
.  LOCAL REACTIONS ARE COMMON AT THE SITE OF INJECTION (REDNESS AND
Elev&quot;d alkaline phos, ? etiol
The patient does not have any patches on the skin.
Overcoat (color) black
NO
Date of birth: MAR ,     Age:       Sex: MALE
================================================
NOT REQUIRED FOR THIS PATIENT
OXYGEN THERAPY
Turning:
Description/Amount/Number: normal
Responsive to obeys commands
NOT REQUIRED FOR THIS PATIENT
Bladder/Urination: Self
Elopement Risk Precautions in place.
Patient on B, Acute Psych justification for patient to continue (B-)
Pt is continent.
Weight:  . lb [. kg] (// :)
Ambulation: Self
acute status: Depression
Patient received Resting in bed
Mental Status:oriented to person and place
========================================================================
Most recent vitals entered into CPRS
Not applicable
"
chart, and avoid closing the case.
Veteran can be reached at --.
Does the patient have advance directives: NO
;   pt reevaluated by dr.parikh. Pt discharged home with NPH insulin
Moisture:           = Rarely Moist
contact ;
at
Bronx NY
CPRS, in "VISTA IMAGING DISPLAY."
MED RECONCILLIATION:  DONE,
tobacco products.
Homeless:NO
PAIN INTENSITY (Patient rates the pain.
Constitutional (fever, weight loss, etc): None
. Consent to Blood Products (if applicable):
Date of Birth:  DEC ,
in his leg, hip and knee. Pt states that he uses a cane to help his knee from
Level of Under
Provider: Ahn, S MD
Indication: SCREEN
Coronary stent within last  months  No  // Comments:
Reports daily compliance w/ meds; no adverse effects.  States that he is doing
decompensation since last visit w/  physician  .  Denies tearfulness, no
PREFERS TO LEARN BY: Demonstration
Full name and full social security number verified with patient at this time.
Preop antibiotics and/or fluids for irrigation checked (if applicable)
document can be accessed through Vista Imaging.
LEARNING BARRIERS: Select the item(s) that describe any barriers to
awake, alert, oriented x .  denies pain.  ambulatory.
================
PAST MEDICAL AND SURGICAL HISTORY;
ADDENDUM
Veteran is running low blood pressures, in the past we did not adjust veteran&quot;s
Other history of contraindications?
received the following document:
Outpatient Medications                                 Status
)   FLUVASTATIN NA MG
Initial Study LDL:LDL CALCULATION       PLASMA  (// :)
diet. Also recommended that he do his best to get in more activity every  .
)   ALBUTEROL MCG (CFC-F) D ORAL INHL INHALE  PUFFS  ACTIVE
an outside facility.
Pt admits to clenching teeth.  Pt was evaluated by the minnesota Head and Neck
PRIMARY CARE NONVA NOTE
)   FLUVASTATIN NA MG CAP TAKE ONE CAPSULE BY MOUTH AT   ACTIVE
Pulse:            (// :)
The patient states that they take some outside medications and/or herbals.
SW SOCIAL WORK PROGRESS NOTE
said in February he felt dizzy and ever since then the ringing in his
Other: Cheryl from Liberty Medical Supplies requesting authorization so that pt
is WNL and no deviations noted.  He is able to do the three knuckle stretch.
and are satisfactory unless otherwise noted.
Pupils dilated for imaging
ORIENTATION AND CONSCIOUSNESS: alert and attentive, oriented x
// :  UG MH PAKULA MD                         CANCELLED BY PATIENT
stream, hematuria), edema in extremities, myopathies. Reg BM&quot;s.
// :  UG MH PAKULA MD (Rm. UNION GROVE)
NURSING OPT
Assess fall risk on every outpt at the st clinic visit of the  .
Standard Outpatient Fall Precautions Implemented.
(-)Pulmonary Disease
) Patient encouraged to use his/her stronger side when possible.
NPO Since:  Apr ,@:
O Sat.- %
Has patient been diagnosed with Alzheimers/Dementia? - No
voices seem stronger for the last few months.
course from many, at the beginning he was more disorganized and cl y
Haldol by mouth doubled by AIT few wks ago
did client engage in groups/activities: actively
systems that are conducive to recovery lifestyle.
S.  , CSAC, CPS
give patient treaded socks.
S. Meskenas, MA, RNBC
[ ]W.R.A.P.  (/ min)
didactic and therapeutic groups designed to increase knowledge of mental
to this writer by the following clinicians as indicated below:
RT Note: Veteran participated in yoga session x  minutes: vet arrived late
[ ]Anger Control  (/ min)
Client signed into the   Treatment Center for the purpose of attending
S. Meskenas, MA, RNBC
P. Wooten, RT
Patient attended Nutrition   Treatment group
TREATMENT CENTER DAILY NOTE:
time out, engage the quiet, practice  p breathing and try to regain composure
didactic and therapeutic groups designed to increase knowledge of mental
[x]Thought for the
[x]ABC Group
[x]Weekenders  (/ min)
Veteran&quot;s response to the following offered groups has been reported
Participation Level/Participation Quality:  __x_Active/Eager     ___Variable
[x]OT Group  (/ min)
Patient is making Fair progress.
beginning treatment.  One member reported that he voluntarily left his house
your films.  I have placed a consult to our vascular department.
completed Acceptance and Commitment Therapy for PTSD, Cognitive Processing
Patient Phone: ()-
Program.  Will review.
H/HHA RN ASSESSMENT - SCANNED
Yes
)   SPLIT TABLETS PT IS CAPABLE OF SPLITTING TABLETS AS    ACTIVE
=========================================================================
edition date of //.
)   G TAMINE HYDROBROMIDE MG TAB TAKE ONE TABLET BY    ACTIVE
Tetanus Diptheria requires a provider order.
intact, affect - euthymic; mood- euthymic; no suicidal ideation expressed or
__________________________________________________________________________
At this visit, the health risks of obesity were reviewed and discussed
NURSING SPECIALTY CLINIC NOTE - T
PAST MEDICAL HISTORY:
Potential for alteration in gas exchange related to procedure/test
Indication: Evaluate ventricular function.
times per week if possible and that any increase in physical
Good
- TTE /: LV EF %, mild LVH, / AI, no thrombus, no PE.
Dental Category: -CLASS IV.  Treatment Status: Active.
- - - - - - - - - - - - - - - - - - - - - - - - - - - - - -
No Associate Provider Identified
Desire/Motivation to learn:  Accepting
TAP DAYTON TELE-NURSE TRIAGE NOTE
ADDENDUM
Patient Name:  ER,  E, DOB: //, Age:
NURSING PROGRESS NOTE
. Anatomical Location: Left
. Practitioner obtaining consent:  Knox,  L (PHYSICIAN)
DENTURES/PARTIALS
Pain Scale:   (// :)
Preop Skin Integ: WARM &amp; DRY            Preop Converse: RESPOND
SURGICAL POST OPERATIVE NOTE-T
INTERDISCIPLINARY PT HEALTH ED-T (PHE)
Social/economic factors:  No
available to answer questions.
[]Wheelchair
PATIENT CHECK OUT NOTE-T
D.  NO-SHOW education
PT INSTRUCTED TO CALL WITHIN -HRS BEFORE APPT TO CANCEL OR RESCHEDULE
Visit: S: May , @: ORAL &amp; MAX SURG.
closed with stitches.
your Primary Care Clinic.
Information provided
Alert, Oriented
Desire/Motivation to learn:  Accepting
ADDENDUM
plan:)advise patient to CONTINUE .MG ON THURS-FRI-SAT-SUN AND MG ON MON-
EYE OPTOMETRY COMP. EXAM NOTE-T
**********************OPTOMETRY COMPREHENSIVE EXAM************************
amputation injury, neuropathy, etc.)
.  What questions do you have about caring for yourself when you are at
year old MALE examined on // :
the ; others ranging to .  On glyburide.  Hemoglobin Ac discussed.
Non-VA Meds Last Documented On: Sep ,
pop.  Says he notices that his lower back was hurting more than normal.  Denies
( ) Appointment cancelled at patients request.
This review is based on the medication list below and patient interview.
INTERDISCIPLINARY PATIENT/FAMILY EDUCATION DOCUMENTATION RECORD
. PROLONG POSTTRAUM STRESS                          //  NAFZIGER,J
OUTPATIENT MEDICATION ADMINISTRATION
UA-reviewed; to  f/u with team at Wed scheduled appt.
DISPOSITION:
Blood Pressure: / (// :)
HOUSESHOES          TROUSERS
FOR ADL&quot;S.  CONTINENT OF BOWEL AND BLADDER.  BED IN LOW POSITION.  CALL LIGHT
PATIENT/FAMILY/GUARDIAN/SIGNIFICANT OTHER:
IDENTIFIED PATIENT LIMITATIONS:
============================================================================
Comment: perimacular exudate and hemes; pt was to be seen June
auscultation.
You have the following appointments scheduled:
Received BS log from vet as follows:
/
/.  Will hold off on referring readings to MD until we get additional
( ) Left message on machine/voice mail in regards to upcoming appointments.
Has chronic pain in lower back, right hip, right knee, both legs and feet.
ADDENDUM
Reason for Visit: three month fup appt. reminders on exit due to time
Vaccine administration:
instructions provided and Veteran is able to repeat these
Pain:             (// :)
TWICE A   **EXTERNAL USE ONLY**
Blood Pressure:  / (// :)
treatment plan is satisfactory and meets patient&quot;s pain goal.
there has been concern regarding his narc over use ?diversion.  pt states he
(patient)--
EMERGENCY DEPT (PART 3A) PHYSICIAN ASSESSMENT (S)
A/P: acute strain on the background of chronic damage- will rx diclofenac,
THIS CALL IS IN REGARDS TO:
Will send letter.
VERDICT CT
ADDENDUM
Rank: E-
and this may represent an indication for positive
Patient called and reported that he and wife had argument which led to p ce
DENTAL EXAM
PATIEN
// :  BLOOD      MPV                   .    fL         . -.
easy access to their  finances.  Pt reports that she has not worked at all
SMOKING CESSATION OUTPT NOTE
Attendance is required for continued participation in the program.
may not be protected and that he bl  himself for all the difficulties he has
getting a call for the DOM screening or if they have to drive up from Genoa City
MH OUTPT APRN MEDICATION MANAGEMENT NOTE [DT]
BP GOAL: No Hx of Hypertension
TWICE A   FOR   S, THEN TAKE TWO
New members introduced and group process reviewed.  The members
)   BUSPIRONE HCL MG TAB TAKE ONE TABLET BY MOUTH TWICE   ACTIVE
)   LEVOTHYROXINE NA (SYNTHROID) .MG TAB TAKE ONE        ACTIVE
LOCATION: Other
DIAGNOSIS        ICD--CM
B/P: /
FOR ANXIETY
Patient agreement: Yes
List:  Bilateral Ankle/Foot/calf/Toes
last fall
HISTORY OF PRESENT ILLNESS:    Pt. is  year old Army who served for  years
Pt sched in LPN clinic for derm photo of toenails. Consult submitted // but
CONSENT FOR USE OF PICTURE AND/OR VOICE (VA FORM -)
Enrolled in the anticoagulant clinic since: MAY ,
,  T()                     TABLET STRENGTH: MG
ATTENDS BRIEF PULL-ON MEDIUM                       ACTIVE
to indicated a  hour Mental Health Hold. It was explained to the patient
by: USER IMED
clothing and has lit the stair banister on fire.  The pt says that he has been
YES
Indication for Warfarin: Afib
Collection DT       Spec   INR
// : PLASM  . H
smiling and cooperative when approached. Patient also OOB for lunch. Independent
MH INPT PATIENT EDUCATION
Learner Response:
Are restraints in use?
E: Patient has been visible in the milieu this shift. He continues to carry a
Patient
Patient was present in the group.
Have met with pt and treatment team.  Chart reviewed and case discussed.  Please
Are restraints in use?
DOSE FOR THURS :  .  TABLETS  =  MG
.  Medications:
and it has been increasingly demanding/stressful on her to care for the pt.
the pt&quot;s wife put a lock on their cable.  The most recent behaviors include;
Active/Pending/Expired Meds
LAST INR: . (JUN ,@::)  COMMENT BY: ,KATHERINE E
BEDTIME .FOR CHO OL
Atypical Chest Pain . //  ,
OS:  /     PH   /
Optic Nerve:
If yes, was the medication taken within the last  hours?
Future Appointments:
*********************************************************************
System Concern: Pleuritis; Costochondritis
INITIAL VITAL SIGNS:
lasted
(BUN and CREAT measure kidney function)
Active Outpatient Medications                          Status
The patient was given the following educational material/s:
An opportunity to ask questions was provided.
conveys that his chronic pain adversely affects his moods and vice versus. He
MH SOCIAL WORK PROGRESS NOTE
Reconciled patient medication list:
CABINsome state
Facilitators: Worley
A   FOR STOOL SOFTENER
BEN PARsome state
Dear Mr. Mrs.  :
(D) Comp periodontal evaluation:
Time: minutes
this date. Several members discussed current family members medical problems
S:  Patients introduced themselves as there were many new faces in the group.
Ht:  in [. cm] (// :)
Wt: . lb [. kg] (// :)
season in Vietnam and being shelled by enemy artillery.  Other
Pain Assessment (controlled, stable, worse, etc):
Last fill://
BMI:
with his RN, R. Spencer, and the OT staff in my office.
Non-pharmacological therapy:
Affect: Ojective:sad
tremulas and anxcious.resident on call was notified.recived hydroxyzinemg as a
vitamin K supplementation
ucinations:
Progress note:
Call Type: DTN SYMPTOM .
Author: BLODGETT,CATHERINE D RN
Facility Appointed PCP: LACY,  J DO (ANCHORAGE PC I)
Comments: PT HAS N/S APPT TO  SHE&quot;S REQUESTING X-  RESULTS FROM ...
Caller Response: OTHER.
Respirations:  (// :)
Chief Complaint: Hip Injury
Assess for current substance use:
Ending at: // @ :: PM
amount of time spent "active" in Telecare Record Manager.)
The L spine X   showed Osteoarthritis in the L sp[ine with disc narrowing so
Temperature: . F [. C] (// :)
Respirations:  (// :)
Facility Appointed PCP: LACY,  J DO (ANCHORAGE PC I)
Xanax in Oct to cover her until mail supply arrived.  She has a chronic
Electronically Filed: //
BODY MASS INDEX
Height: . in [. cm] (// :)
identified&gt;.
Temperature: . F [. C] (// :)
Pulse:  (// :)
noticed any of the above symptoms. She seemed to understand and thanked me.
"special" radiology exam. ("Special" = M.R.I., C.T., Ultrasound, etc.)
Pulse:  (// :)
Patient has reported a pain score of  (// :).
Updated Medication Reconciliation Summary was given to the
Interventions for health promotion and disease prevention.
Pain Scale:  (// :)
No Associate Provider Identified
JUL , @::   .
INCIDENTALS         T-SHIRT
DOCTOR&quot;S NOTE - PSYCHIATRY
* Review past quit attempts-what helped, what
.  ASSISTED patient to quit:
C icothe VA Acute Psychiatry Building AB on October  due to
What questions or problems do you have with equipment? N/A
    </notes>
  </record>
</records>
