# Supplementary material for: Predicting the Risk of Suicide by Analyzing the Text of Clinical Notes
Source: PLoS One. 2014 Jan 28;9(1):e85733. doi: 10.1371/journal.pone.0085733 (PMC3904866; doi:10.1371/journal.pone.0085733)
Supplement: Appendix S3 — Machine Learning Libraries and Methods: This section is provided to enclose the open source (Apache License) classifier used for the building of the statistical models, specifically for the purposes of study reproducibility. A detailed account of these tools is intended for another publication. (ZIP) [file pone.0085733.s003.zip › Appendix3/ML_libs/Regression_testing/group3/grp3-pt-1012.xml]

<?xml version="1.0" encoding="ISO-8859-1" ?>
<records>
  <record>
    <group>3</group>
    <study_id>1012</study_id>
    <notes>
either for med f/u or ptsd appts,,dtr had baby and her husband is meth addict
LOCAL TITLE: URGENT CARE NOTE
)   FLUNIS DE .%
Dietary Instructions: No restrictions
Syst c:
the patient call in to schedule an appointment in the
ISSUES. HE CALLED AROUND AM ON NOVEMBER ,. hE IS RESCHEDULED TO COME TO
Allergies/Adverse Reactions: DILTIAZEM
health.
Visit: S:   , @: DENT HYGIENE BURDICK (A-).
full consent
The following medications were  wed until next PCP appt (/):
NURSING CLINIC VISIT
LIPOID METABOL DIS NOS
Patient denied
recurrent infection of the foreskin of his penis over the yr with findings of
Operation Disposition: PACU (RECOVERY ROOM)
Current pain level is  on a scale of .
Nursing Intervention(s): Apply grounding pad close to incision,
NURSING - PACU FLOWSHEET
level, post op orders.
Ice pack applied to surgical site no b ding noted.
IV patent, site clear.  Denies any c/o&quot;s. VSS
MAY , @:             .              /
pharmacies.
Ending at: // @ :: PM
Cardiovascular: RRR, (-) m
BP: / (// :)/
Chest: CTA BL
Patient states influenza vaccine was received elsewhere.
Date: November,   ? Exact date is un
()Exo
Continue treatment plan as outlined.
Evaluate crises in the areas of housing, medication refills, transportation
Vet reports having a dx for Depression NOS and takes Buproprion, reporting all
MENTAL HEALTH FAILED TO SHOW NOTE
Will ask PCP to f/u.
provide this service.  The veteran is not eligible for CH  due to the fact
Satisfactory
conditions noted below:
view the document.
S:  year-old MALE, is a f/u for HTN eval, at last visit on //, noted to
REC: Pt will increase propanolol to  hs and monitor his BP.
Patient is a  year old MALE here to  with Chief Complaint: Pt is here
Wt.:. lb [. kg] (// :)
PSYCHOLOGICAL ASSESSMENT C&amp;P REPORT
Date of Exam: September , ,               C-number:
Never
MEDICATION RECONCILIATION
precursor to melanoma, however).   physician ises that she be seen in
removal appointment.  Patient verbalizes understanding.
to this interview.  These limitations include reports of intentions to
B/P:   /
CLASS CONTENT:
MEDICAL RECORD |                   SURGICAL PATHOLOGY
Extr:  , difficult to palpate masses under skin on R t p area, R thigh,
If yes, packs per  :
SKIN/MUSCLE - MASS OR LUMP EXCISION (MASS OR LUMP EXCISION FROM
$TEXT
Vet agreed.  Note for ed to PCP.
Does the patient have any new allergies? No
condition, increased dyspnea, sore throat, low grade fever,
/.
. Patient name:   ,   R
)Patient Disposition:Home
MENTAL HEALTH PSYCHIATRIC CONSULT
explained new narcotic p cy
Patient Name:  ,   , DOB: //, Age:
qhx  s.  I explained to him that I was pl ing on starting final
the extracted tooth or teeth.
hx of heat stroke
Vitals:
Influenza Vaccine:
I returned a call to Mr.   at  leaving a voice mail message
Patient Phone Number: ()-
PRINTED    ENTERED
anxiety/depression.
Eligibility: SC LESS THAN %                          VERIFIED
than "achey joints"
hyperlipidemia
relieved with Tylenol. He is exercising frequently as well as walking
A consult is submitted - extended care service line - by provider
Temperature: . F [. C] (// :)
Pain Score:  (// :)
CLINICAL REMINDER ACTIVITY/PLAN OF CARE
Facility Appointed PCP: ZAHN,PRISCILLA E MD (BRONZE)
Patient Telephone Number: ()-
Patient does not drink alcohol.
ACCU-CHEK COMFORT CURVE TEST STRIP ()   Fill Date: OCT ,
represents no pain;  represents worst ima ble pain
Pain Assessment Outpatient:
During treatment session:
After treatment session:
Pain lower leg
. The patient HAS decision-making capacity.
covered.
Informed Consent
Friction:           = No Apparent Problem
A.  DISCUSS CONCEPT AND PURPOSE OF IV PCA THERAPY: for pain management
report effectiveness
Time Antibiotic started:
Patient is oriented to person, place, time.
Respirations:
After treatment session:
S:
Reviewed with RD
ADDENDUM
PALPABLE:
SCDs: n/a
Commands
Lung sounds: Clear
Location: All Areas
SaO:
MORSE FALL SCALE
FALL PREVENTION INTERVENTIONS
. Venous Insufficiency * (ICD--CM .)
DOING VERY WELL POST R ION R TKA. KNEE STABLE, FLEX TO , FULL EXTENSION.
Ambulatory assistive device: single point cane, quad cane
sec to pain in leg/knee. Affect was friendly. No SI/HI voiced. No delusions or
Medication not  wed at last visit.  wal request for ed to provider.
System Concern: Septic Arthritis Risk; Cellulitis; Acute Arthritis
problems or blood pressure issues.
Despite the discrepancy in his reports of alcohol consumption, veteran stated
business  s to be processed.  Pt. states that this not a problem.  Advised
from  physician F/U
ASSESSMENT:pain to  is /
CHEST: Clear to auscultation
Schedule     to return to clinic in   .
//  CHLORIDE           .        mm
Nortriptyline -- still on at low dose
He also complains of unsteadiness that has been getting slightly worse over the
Triage
presenting to the ER at this time. Pt denies use of ETOH or recreational
to provide your healthcare. We want to improve your health and well-being.
Organ/Tissue
social worker witnessed.
po BID or until ET controlled: (example: increase dose to mg BID, then mg AM
denies any new problems or side effects to medication. Good appetite, no
and how it can positively affect a person&quot;s life.  Also, the length of time involved in the outpt
what did they learn fromt that to , and for what are they grateful for to . Pt&quot;s were then invited
Mr.   is dressed in street clothes grooming is good. Pt slept  HRS last
tour. : to facilitate therapeutic relationship and encourage participation in
team on
participated appropriatly.
casual. He presented with a varied and congruent affect and improved mood. While
A. "It is a fact that n y everyone has, at some time, felt
When:  Feeling down and thoughts turn to SI.
Comment:Pt. lives w/ex wife who is supportive
Level of Understanding: Good
CLINICAL REMINDER ACTIVITY
Patient had pain inventory completed to .
Patient Name:   ,
Due to his difficulties w/social confidence explored what is currently
----------------------
repeat PT/INR in one week.
. Hypertension                                      //  BERNA, E
Benefits".  The form related to cognitive ability to manage one&quot;s own affairs of
Duration of Treatment:long term
.
Son and daughter-in-law are aware of diagnosis, decision regarding guardianship,
literatu
Recent change in your appetite?                     No
Degen disc dz-chronic back pain, Hyperlipidemia/glucose
beer until his wife&quot;s death, and since then is drinking a pack a night. He
.     Current mental status: Oriented x
FROM THE CRISIS)
Consultation/Liaison p
( )Tearful                      ( )Rapid Rate of Speech
Length of Session:  minutes
Number of patients attending session:
( ) y                        ( )Late
This  y/o,   FEMALE was seen to
AT BEDTIME FOR MOOD
-- Review MOVE! Questionnaire Summary below.-- Help veteran set between  and
No
hemoptysis, unexplained weight loss, abdominal pain, constipation or diarrhea,
Mr.   seen to  at the request of   AC Primary Care, Philomena
Yes
HPI and hospital course:
chronic low back pain, and stenosis worse at L- and -.  Pt. was evaluated
NEUROSURGERY TELEPHONE NOTE
,       --
-Patient in the correct position for procedure          Yes
NUR OUTPT CHECK-IN NOTE TEMPLATE
Pain:  - No pain
UROLOGY CASE MANAGER NOTE
Med Reconciliation for Home Meds (VA and Non VA Medications)
Vet will be contacted for scheduling.
_____T/H :pm PTSD Wt Reduction
Patient lives in Bonham but he would prefer to commute if treatments done here.
complications. Will mail him nilandron and appt to rtc in -   to begin
NUTRITIONAL STATUS:  See CPRS for weight.  No changes in nutritional plan
RADIATION ONCOLOGY THERAPIST NOTE
Pt presented to Gold Team wishing to see a psychiatrist as was
NAME:  ,
// @       BLOOD PRESSURE: /
HERE FOR ROUTINE FOLLOW-UP.
HISTORY OF PRESENT ILLNESS:
LEARNER ABILITIES
O:
CC: "I see  physician y month."
.Methadone  mg  RX: rd.   /     /    --
Pre-certification called for this admission (*-):
PRE-OPERATIVE CLINIC NURSING ASSESSMENT (T)
)   CITALOPRAM HYDROBROMIDE MG TAB TAKE ONE TABLET BY    ACTIVE
ADDENDUM
Surgeon: BARNES,  E               First Assist:  ,  RYAN
Arthroscopy L shldr, subacromial decompression,
,   LIN is assigned to Caller Area *MOUNTAIN HOME.
grinding is due to severiy of DJD
H&amp;P HISTORY &amp; PHYSICAL EXAM (B)
. Hypothyroidism *
Do you use street drugs? No
Time, Oriented to situation
Respiratory Therapy Treatment Record
Secretion Amount:
. Hypertension *
guafenesin, went to see patient and hes still coughing a lot with face turning
. Tremors *
Bowel sounds were found to be Normal
Respiratory Therapy Treatment Record
ANESTHESIOLOGY SCANNED NOTE (B)
PHYSICIAN DISCHARGE NOTE (B)
Patient discharge call information:
. hyponatremia (synd  of inappropriate antidiuretic hormone)
Do you have any religious preferences that would affect your
Physical limitations:
Icenhour R.Ph. for review.
Length:  minutes.
Identified problem: OTHER UNSPECIFIED COUNSELING.
POSTOPERATIVE DIAGNOSIS(ES):
range of motion.
Call Type: NARCOTIC REFILL.
report/procedure was received from an outside source and sc ed into the
report/procedure was received from an outside source and sc ed into the
ADDENDUM
per notes. He has been d/c from pulmonary clinic. No further indication for care
Obesity Screen BMI &gt; OR &gt;. HR:
. Variococele?
The following identifiers were used to verify this patient:  SSN. Other: same.
ADDENDUM
Misc  physician iewed
Meds: Reviewed and Reconciled on this visit, see below.
Ending at: // @ :: PM
Conversation with SPOUSE indicates that  ,   LIN has a
appears to be present in the body of the epididymis.
Impression:
. Pain in joint involving shoulder region
Report:
focal abnormalities or abnormal echotexture.  The right
ADDITIONAL COMMENTS/INFORMATION:
Caller Response: * REQUESTING MED  WAL.
Phone Number:
// Discharge Summary states:
[X] Veteran has a discharge plan from Haven II.
Blood Pressure: / (// :)
pt has no complaints but reports ongoing "voices" telling him that people are
the author and date of last update:
. Muscle Spasm (ICD--CM .)
--&gt;
[, , , , ]
HT:     in [. cm] (// :)
with a diagnosis of Depressive D/O, NOS and H/o PSD. He was alert and oriented X
Patient meets criteria? Axis I Clinical Disorder:
) Fluoxetine mg#
)   QUETIAPINE TAB  MG PO QHS(AT BEDTIME) pt on as      ACTIVE
Axis . Glaucoma
Admission DX: Depression NOS, Hx PSD
interdisciplinary team.
PLAN:   Group discussion.
________________________________________________________________
Times, situations, feelings, symptoms or behaviors that may increase my risk of
things.
Left a reminder message for patient regarding Mon &quot;s (Oct th) :
ADDENDUM
CELL:
Person Calling:
issues. He insists that he notified PT about the appointment and it was properly
PATIENT TRIPPED AND FELL A WEEK AGO ON LEFT KNEE.PAIN BETTER. MISSED PHYSICAL
Patient Phone Number:
Influenza Immunization Documentation:
change[]
staying with friends.
time.
issued, he voiced understanding.
ADDENDUM
d. Blast Primary:Yes
Other cognitive problems
The veteran presented to  in order to receive feedback from previous
S:   y/o with chronic back pain presents to new provider.  Pain continues,
came into as walkin stating he didn&quot;t know about the PCP appt yester . request
Mr.  ,
Naomi   , LCSW
back pain.  Patient can use tegaderm to help affix transdermal patch.
Issue Date: Oct ,        Provider: MEYER,  J
Upon interview on this date the patient reported that He
Please see my admission note of to  for details as to why pt required
ecchymosis and is very painful to touch.  Unable to move finger on exam.  Will
P - S p Note
regarding constipation.
Has there been a FALL in the past  hours?
P:-Chronic pain, Safety, PTSD.
hospitalized and after hospitalization.
No
usual. Patient telling jokes and interacting appropriately with staff and peers.
Urosevich&quot;s throat and watch him stumble around".
No.
No
Are restraints in use?
P: S ping patterns.
)   ALBUTEROL INHL,ORAL   PUFFS INHL ORAL QID PRN for     ACTIVE
No.
:; ENCOURAGED VENTILATION OF FEELINGS AND THOUGHTS; SAFETY
INTERVENTION: Staff provided q minute checks for safety/s p patterns.
assessment of functioning on discharge:
Serial number: ES
substance. Patient requests reinstatement of temazepam by his medical doctor.
ADDENDUM
Computerized Problem List is the source for the following:
Other belongings kept by the patient:   clothes, black coat
Patient arrived with the MEDICATION RECONCILIATION Questionnaire?
Are restraints in use?
Dec ,
for him.
Explained to pt that some particulars of his HCA will need to be discussed and
make sure he orders his medications  y, as he says he will run out of meds
My personal warning signs for increased risk for unsafe behaviors:
Future Appointments:
Plan: Continue Individual Therapy
Vet is excited to go to Bay Pines MST program.
immunosuppressive therapy; some hematologic disorders; and other
I am pleased he is doing well in this program. I will not prescribe narcotics
DISCONTINUED         // // ()
normal.
full consent
ID band on (legible). Yes
for definitive diagnosis.
CATHETERS
PATIENT EDUCATION:
Written
. Do not drive for  hours after your test, unless instructed
)   LAMOTRIGINE MG TAB  Qty:  for      ACTIVE       Issu:--
)   LAMOTRIGINE MG TAB TAKE ONE TABLET BY MOUTH AT      ACTIVE
Pulse:            (// :)
"Managing Your Pain" pamphlet given to patient.
This pt is on our f/u list for a colonoscopy in May, .  He will receive an
Non-VA SAW PALMETTO CAP/TAB  TAB MOUTH EVERY             ACTIVE
PATIENT HAS TAKEN MEDS TO
DYSMENORRHEA: sometimes
BREAST FEEDING:no
PRACTITIONER?
We also discussed how it must be frustrating to be feeling anxious about a m
Provided information about this case to supervisor in face to face meeting.
NURSING SPECIALTY CLINIC NOTE - T
Can Verbalize
Measurement DT    BP
Birmingham Veterans Affairs Medical Center
DR MASON
Disc:
Diabetic Retinopathy Surveillance Consult follow-up note
WEST CENTRAL MENTAL HEALTH CENTER
Call Type: FOLLOW UP CALL.
S p Apnea (ICD--CM .)           Fall accidental
Topic: Asking for Support--Talking to a Friend or Family Member About Things
Group Title: Cognitive Behavioral Social Skills Training (CBSST)
communication skills.  Answered veteran&quot;s questions regarding eye
Last TD exam:DISCUS //
Team/Clinic: Serious and Persistent Mental Illness (SPMI)
Patient identifies the following side effects:dro ng, dizziness
.            BLOOD        (// :)
Mr.   reports that he is not feeling suicidal like he had been in the past.
appearance and perhaps this is the actual roadblock for him.  Veteran
different from him and to try and keep an open-mind during the
ADDENDUM
ral: Awake, Pleasant, Cooperat
last session to inform other group members of his plans as a part of the group
. Increase socialization by engaging in conversation w/other
spontaneously bring up any delusional thoughts/fears. He was alert and atte
help at the beginning of group and as leader was explaining to him how to lace
MH MHICM-INTENSIVE CASE MANAGEMENT
ADDENDUM
Session:
Session:
started talking to him again at meal times.  Veteran admitted to being
and to provide supportive therapy, assess mental health needs,
Active problems - Computerized Problem List is the source for the following:
. DM II w/o Complications
PAIN INTENSITY (Patient rate the pain.   = no pain;  = worst pain)
Session:
UREA NITROGEN       PLASMA  (// :)
Pt is on  reg u /and nph o  units in am /and u reg/ u nph in pm.
PREOPERATIVE DIAGNOSIS:  Sebaceous cyst.
Specimens: R postoccipital mass
Void:  Voided  ml medium clear amber
Tobacco use: No
Patient called to report medical information to clinic RN.
denied any new concerns.  Conversation centered around how his
Geographic which he subscribes to.  Discussed veterans questions about
I filled out what I had.  Please ask them to fax another copy if needed.
Sincerely,
and are satisfactory unless otherwise noted.
Results of biopsy: Polyp - Adenoma.
See summary note following home visit on /.
Subjective/Objective:
Patient seen for x minutes for clozaril lab/med monitoring, education, and
MH MHICM-INTENSIVE CASE MANAGEMENT
ADDENDUM
Pain:             (// :)
Dear Mr.  :
MH NURSE CASE MANAGEMENT NOTE
His s p study report came back to .
PTSD
prep
Veteran.
MH MENTAL HEALTH TL
,  JR is assigned to Caller Area DORN VA MEDICAL CENTER.
Abd benign
MH MD NOTE
path pending
TH TOENAIL FOR MANY MONTHS, DENYING TRAUMA. SHE RELATES THE TOENAIL IS
LDL Cho ol: Date of Test: AUG ,@:    Result:    mg/dL
[X] Patient does not wish to be seen by a dietitian.
To s dateAPR ,
Reason for visit:medical f/u,  ual CBE/pap/pelvic Preventative Health
allergies:  BUPROPION, TOPIRAMATE, ASPIRIN
D: Mammogram Screening:
Maryland. The patient&quot;s husband (not her father) called the house and she
patient has sick call appt scheduled.
was evaluating for exposure to syphilis.
Nutrition Screen:
&gt; lbs. in the past  months, no weight loss greater than  lbs.
HTN
Arthritis
Cervical Radiculopathy (ICD--CM
BY MOUTH TWICE A   AS NEEDED FOR NECK AND BACK
PAIN. DO NOT TAKE MORE THAN  GRAMS PER   (
- - - - - - - - - - - - - - - - - - - - - - - - - - - - - - - - - - - - - - - -
INT CAROTID (MID)
Phone number:  --
Diabetes Complete Foot Exam:
A complete foot exam was completed at this encounter. Unless
for dental serives,if eligible patient will be contacted"
occur. No svhd/ p. Fatigue continues. Related to Cyclobenazaprine,  mg
This patient was screened for functional problems in the areas of
. Heart Murmurs                                    //  KEOMUAN,POON I
. Swelling of limb                                //  KEOMUAN,POON I
falling to s p more often
AS NEEDED
NURSING EXIT INTERVIEW
*  TIMEFRAME FOR COMPLETION: Immediate
himself".  His niece states that if he needs to she will fly down but is
ADDENDUM
BIRDGEWATER
TYPE(S) OF INSURANCE:
Intravenous therapy/Heparin lock:
Place patient/resident articles within easy reac
NUTRITION INPATIENT INITIAL EVALUATION
transferred to Bascom Palmer for surgical intervention. Veteran was transferred
very limited support system including his sister and a couple of friends in the
Patient refused his H eye drops and stated "I feel my eyes is full of those
OS:
Assistance provided for this task: requires no assistance.
Amount consumed:
Other personal care: oral care
The patient  fluid.
Grooming:
During this shift, the patient has been observed smiling, talking to others,
approaching others.
Personal hygiene: shower
Personal hygiene: bed/sponge bath
OS:     hm / ft                /      /            /
OS:  p
Allergies: see posting
(+) Trauma and (+) Surgery:  yo wm sent from WPBVA ER for eye exam to .
Feeding location: resident room.
Number of bowel movements this shift: .
Dinner          food %        drinks
ADDENDUM
Assistance provided for this task: set up, staff provided bedpan/commode.
)   LUBRICATING GEL JELLY,TOP   PACKET EXT BID To         ACTIVE
Active Inpatient Medications                           Status
MOBILITY
Assistance provided for this task: requires no assistance
No  - Does the patient have access to weapons?
. Facility Provider Number
pt. go to bathroom by him self,did not ask for assistance.
Personal hygiene: bed/sponge bath
During this shift, patient was continent
RECREATION THERAPY NOTE
modify as necessary when bacterial culture result available.  The finger
Urine color: yellow
Patient used urinal
NURSING NOTE
Met with veteran for  minutes on //. Veteran reported that he has seen
all contact with the patient. In the setting of hospitalization, a private
NUTRITION
TIME OF THE   Night   ,@:
Number of bowel movements this shift: .
Lunch
Patient bathroom privileges
TIME OF THE   Evening   ,@:
Assistance provided for this task: supervision, oversight, encouragement or
cueing.
Mobility:           = No Limitation
Meal assistance: supervision, oversight, encouragement or cueing.
Secondary Diagnosis
this would be a difficult transition for h
This shift the patient used the toilet.
Hip protectors in place: declined refused to wear.
navigate outside of CLC area to BROS.
Dinner  food % drinks %
Patient bathroom privileges
location: resident room
No staff required.
Meal assistance: requires no assistance.
Meal assistance: requires no assistance.
Pain scale:
Assistance provided for this task: physical help in part of bathing activity
BLADDER
Alert
Amount of stool: none.
physician s
Number of bowel movements this shift: .
ZZPATIENT CARE ADL NOTE
location: resident room
cueing.
Assistance provided for this task: requires no assistance
average build. Alert, oriented in all spheres. Speech was rel t and coherent.
Extr.: healed wounds on lt. hand, has pieces of metal imbeded in the lt. hand
Consistency of stool: not applicable.
a friend who
During this shift, patient was continent
case within the The State Attorney  rals Office, #--. Ms.
Dinner  food % drinks %
BLADDER
Oriented to person, place, time.
Hip protectors in place:
Amount of stool: .
Skin round done, this pt has no current skin breakdown noted at this time, will
TIME OF THE     Feb ,@:
Continue goal of participating in at least x weekly leisure programs
Assured veteran this provider will request physician to meet with him in regards
Transfer: requires no assistance
ZZECF PROGRESS NOTE
s/p gunshot wounds to the face with loss of vision.  Transferred to CLC on
ABRASION HAND
BOWEL ELIMINATION
Food preferences: No changes made except request sandwhich every noon.
CURRENT SKIN ASSESSMENT
Shampoo
BOWEL ELIMINATION
others, cursing.
Assistance provided for this task: supervision, oversight, encouragement or
TIME OF THE   Evening Mar ,@:
This shift the patient used the toilet.
Bed mobility: independent (easily turns and sits up without staff assistance)
Dinner  food % drinks %
TIME OF THE   Night Mar ,@:
Number of hours s ping
During this shift, the patient has been observed smiling, laughing, talking to
ZZPATIENT CARE ADL NOTE
location:
Number of hours s ping
EDUCATION - PATIENT/FAMILY
Ambulatory aid:
Environment of Care
SKIN PATCHES
Assistance provided for this task: requires no assistance.
location: resident room
Dinner  food % drinks %
During this shift, patient was continent
played the horn but he indicated at that time he had no interest in
Ambulation: supervision, oversight, encouragement or cueing
arranging a tour for the veteran.
MOBILITY
Assistance provided for this task: requires no assistance
Hip protectors in place: declined
reared in the Cath c  .  He is apprehensive about his admission to BRC
Personal hygiene: bed/sponge bath
TIME OF THE     May ,@:
others.
____Assist with Bathing  ____Hearing Impaired  ____Oxygen  ____Via N/C
Nutrition:          = Probably Inadequate
PLAN:
Patient perceives the current plan to be effective.
CLERK
Ambulation: supervision, oversight, encouragement or cueing
PATIENT VALUES INVENTORY:
Friction:           = No Apparent Problem
has always made safe choices and continues to do so. He feels that he will be
gait is steady, he was guided to the dining room for dinner by nursing staff,
Time of  :  Night
May ,
Mr.   stated that he is not interested in talking  s and that he only
Agent Cashier deposits.  Called Travel repeatedly, line busy..... will continue
Carcinoma, Basal Cell
Session:
Bladder:  Continent
Upper and lower-
`
The veteran&quot;s total number of hours has not been determined, therefore, no
Andre,Victim/Witness Coordinator, --), that Mr.   has a check
need more training with this gu
take a shower. Veteran is extremely angry and continuously uses profanity at a
SACCOCIA, CLAIRE
Prior to hospitalization, patient preferred to spend time with self, family.
Progress:  pt did not want to do anything in the afternoon he stated that he was
visit with the veteran, O&amp;M, and Living Skills instructor was discussed to
things, and initially resisted using ball tip, but later tried it.
Toileted program:  No
trailing and cane skills. Veteran was able to identify differences in textures
as his mail, bills, and magazines. The veteran demonstrating the ability to
FMH:  (-)DM
Interdisciplinary Team Meeting:
Number of sessions provided:
Number of LS sessions remaining:
Lower body
ELIMINATION
items to the laundry bag he had prepared and he cooperated with this request.
room. The veteran completed his weekly laundry with minimal verbal cuing to
Call from  ette Andre, Victim/Witness Coordinator, State Attorney&quot;s Office,
The veteran continued training regarding the Extreme Reader OCR (Optical
linens were replaced by the undersigned and a clean bedspread was requested.
NURSING NOTE
come to pick him up.  TC encouraged veteran to start going to his classes
the folding. He had to get sure to straight the bill as much as possible before
//
However, veteran does participate and enjoy outings during mobility lessons,
June ,
and asked if they would fax us that form. They would not.  They are sending us a
Beach, FL  as that is what they have listed as the VA address.
return to Plymouth, Mass, that he does not need Palm Tran, etc., etc.  SWer will
Veteran is mostly interest in listening to music when using the OCR.  Emphasis
Chore services (homemaker) in home
ADDENDUM
Progress: Veteran progressing in independence and motivation. Veteran now meets
got from Bascom Palmer will be filled and he needs to use it  times/  in his
Date and time of LS sessions: //    : AM &amp; : PM
turn the alarm on/off and turn the  ouncement on/off with modified
treatment of a therapeutic recreational experience. The veteran was able to use their socialization skills,
girlfriend have started to already distance themselves from him, and as he put
Dialysis (center based):  No
Physical assistance with bathing-NO
The veteran continued training regarding the Extreme Reader OCR (Optical
"checks on them."
VAMC- from //- to //
After being oriented about the topic the veteran will be able to
N/A
Session:
emotional and angry therefore writer left and allowed veteran time alone.
if additional info is required.
with that.  He said that Fernando said that from now on, he would be visitng him
Nutrition:          = Adequate
-   No Risk
Di
Call from veteran&quot;s sister (--)and said that Mr.   was asking
Care Involving Orthoptic Training (ICD--CM V.)
Unspecified open wound of eyeball (ICD--CM .)
does not have a "return" appointment.  Bascom Palmer says that Mr.   was
"nurse" accompanying him.  He said that "last time," the VA shuttle "left us,"
Swer attempted contact with Ms.  (--, xt. )at :pm
Writer reinforced veteran&quot;s efforts and discussed communication strategies with
(-) Glaucoma
Major Depressive Disorder, Single  .   //    ACE,DREW PHD
No
KNOXVILLE, TN
Period of Service: VIETNAM ERA
TIME OF ARRIVAL:
No barriers to learning identified
. Anatomical Location: See description of treatment/procedure.
Internal hemorrhoids
INTERDISCIPLINARY PT/FAM EDUCATION
- - - - - - - - - - - - - - - - - - - - - - - - - - - - - - - - - - - - - - - -
could be causing this.  Says diplopia occurs sporadically once or twice a month
[ ]  Month
)   DIVALPROEX MG HR (ER) SA TAB TAKE THREE TABLETS   ACTIVE
Diverticulosis of the sigmoid colon
CDI REMINDER DIALOG
)   POTASSIUM CHLORIDE MEQ SA TAB TAKE ONE TABLET BY     ACTIVE (S)
Active Outpatient Medications                          Status
SUICIDE PREVENTION COORDINATION
BEDTIME
Using other medications to treat adverse drug reactions
Telephone Note
via care providers&quot; progress notes.
,  Y is a  year old FEMALE.
Has patient received pain medication within  hours?
SLE
y/o WM here for f/u routine appt. He underwent Minimal invasive diskectomy
TELEPHONE NOTE
Palliative Care       :
Other:
E. Patient Past Leisure Interests:
states he needs glasses and he thinks they may be in his property in his pants
yo male with Alcohol Dependence, currently on detox protocol Ativan taper.
Focus:     Altered Mental Status/Withdrawl/Falls/Seizures
: p, r- b/p /
. Nausea and Vomiting:  Ask:  "Do you feel sick to your stomach?   Have you
vomited?"  Observation.
LIMITED TO: SCHIZOPHRENIA AND OTHER PSYCHOTIC DISORDERS, BIPOLAR DISORDER,
discharge. Group members were supportive of each other.
Medications from previous inpatient setting not continued
INHALE  PUFFS BY MOUTH  TIMES EVERY   AS NEEDED FOR SHORTNESS
AXIS V:    Global Assessment of Functioning:  .
THIAMINE TAB
MORNING FOR DEPRESSION
Skin Color:
at risk.
would like to engage in daily upon discharge from hospital before
to you?  Are you hearing things you know are not there?  Observa
Patient&quot;s strengths:
on file.  He/she has been provided with written information and
D: Patient received s ping in bed wearing hospital attire on midnight
===============================================
CONTACT WITHIN NORMAL LIMITS. " I AM GOING HOME TOMORROW. I AM READY. " MOOD OK,
CITALOPRAM  MG TAB
OF BREATH
written materials in     :
CITALOPRAM  MG TAB   Sig: TAKE ONE TABLET BY MOUTH EVERY MORNING FOR
Patient agreement: Yes
Torn, stained, or bloody underclothing
diary, Exercise &amp; Stretching, Guided imagery techniques, Distraction
medication box and
Data : Received pt AAO x in bed,appears sad,stating last night,I had difficulty
No:
PSYCHIATRY MULTIDISCIPLINARY TEAM NOTE AND CARE PLAN REVIEW
Axis IV. chronic substance use, poor coping
-P THAZINE INJ,SOLN
Listed Below are the medications that you will be taking at home
ALBUTEROL HFA INHALER
GENERAL NOTE
CAN REPEAT CYCLE WEEKLY FOR UP TO   .
yo with h/o Alcohol dependence and Bipolar Disorder by hx presented to ER
NURSING DISCHARGE
A:  DISCHARGE       :
A; CONFRONTED PATIENT ABOUT STAYING IN THE &quot;NEGATIVE&quot; OF NEEDING TO CONSCIOUSLY
SOCIAL WORK PROGRESS NOTE
ACETAMINOPHEN  MG CAPLET   Sig: TAKE TWO TABLETS BY MOUTH TWICE A   AS
Motivation to learn:
F; THE FOCUS OF THE GROUP IS ON DEALING WITH CURRENT STRESSORS IN
. Dermatophytosis of nail
Pulse   (// :)
-F C ACID MG TAB
Temporarily held due to patients condition
abdominal pain
Hygiene
Comment: he was oriented to phone and call light
Nursing Care Plan
ACTIVITIES:
None
Call bell and personal items at bedside
Pulse Oximetry:
D;He c/o shortness of breath and breathing treatment given
AZITHROMYCIN INJ INJ,PWDR AZITHROMYCIN  MG in DW     ACTIVE
Modality:  Nasal C ula
GROUP INTERVENTION           :
these needs, possible interventions and a preliminary discharge plan
Focus   :
Respiration:  (// :)
None
Self
N/A
RESPIRATORY PROGRESS NOTE/CRITICAL CARE NOTE
Febrile to . overnight without new localizing symptoms of infection.
Implement per care plan
Effectiveness of Therapy: YES
Comments:  patient alert in no respiratory distress.equipment changed &amp; dated
. Packed wound with iodoform / inch.
ADL FLOW SHEET
Advised to call staff as needed for assistance
N/A
Friction:           = No Apparent Problem
Comments:  pt denies any resp distress at this time
(L/MIN)(%)
Comment:
NUTRITION TYPE:
Safety awa ss.
Hypoxemia is corrected with supplemental oxygen LPM at rest:  %
Activity:           = Walks Frequently
Skin Temperature
FEEDING:
Nutrition:          = Excellent
ESTIMATED DURATION OF SERVICES:
Other equipment:
Ostomy care (not trach):  No
BASIC ACTIVITIES OF DAILY LIVING:  In the last   s, has the veteran
Hypoxemia is corrected with supplemental oxygen LPM during ambulation: mmHG;
TAKE  TABLET BY MOUTH EVERY DA
ONE QUETIAPINE MG TABLET FOR A TOTAL OF MG)
Problem List:
Procedures Performed:  Incision and drainage of back abscess by  ral
DC SUMMARY NOTE
&gt;&gt;&gt; One-to-One, Verbal, Written Material
FOR VITAMIN SUPPLEMENT
PSYCHIATRY TELEPHONE NOTE
Patient appears to have two patterns to his eruptiosn.  The eruption on his hips
the lasst   s with irregular BM. He stat he is not been havin a regular BM
since he was discharge.
FILL-IN)
_________Grade of reaction_____
use:
show lichenoid inflammation.  There is no   cytologic atypia.  There is
Meds: Reviewed
yo   male l/s on // here for f/u of long history of chronic
SUPPLEMENT
The full consent
Patient called to cancel to &quot;s appt. He will reschedule.
- Gender: FEMALE
Wounded? No
Treatment Goal(s):
individual therapy appointment. Veteran asked if he could discuss, over the
HISTORY OF PRESENT ILLNESS:
th individual therapy appointment due to his family visiting  . Veteran
CHIEF COMPLAINT:  I&quot;m hearing a lot of voices.
offered to him.
ADDITIONAL COMMENTS/INFORMATION:
unaware of and to notify him of his upcoming Ortho appt June ,.  Pt still
Clinic # T
Dental Examination:
Cavitron, hand scaled, and p shed full.
PREVENTIVE MEDICINE NOTE
MH HUD-VASH-NOTE
MEDICATION PATCHES
ER PROBLEM FOCUSED MOD COMPLEXITY (T)
that he/she had been feeling suicidal/thinking about suicide:
Previous attempts:
The patient responded NO to all  questions.
Active meds in the last   s:  ***  Outpa
EVERY
Patient identified as an ELOPEMENT RISK. [No]
Not applicable
POSITIONING
NA NOTE [NA NURSING ACTIVITY]
Soc. Sec. Diss
that argue and also speak badly about him.  He states that he has heard voices
Pulse:   (// :)
Oriented to oriented to person, place and time Alert and Responsive,
Not applicable
Bladder/Urination: Self
Elopement Risk Precautions in place.
B/P:  / (// :)
give with haldol
SCREEN FOR ALCOHOL (AUDIT-C)
DOING V WELL.LABS SHOW LDL /V HIGH.DOES NOT SMOKE/DRINK ETOH.
MH TELEPHONE CONTACT
*Remove all tobacco products from home and office settings;
YRS OLD MALE W/PMH OF;
Last pain score recorded:  (// :)
(A NEW FORM IS NEEDED FOR EACH LOCATION IDENTIFIED  OR GREATER)
Location of pain? back
ROS:
Aggravate
O:  Patient to clinic for scheduled treatment and received:
level at / prior to treatment.
// TRIGLYCERIDES      .H
Patient will perform skill safe and effectively
PT for knees
-  MODALITIES:  MHP x  mins, constant to the low back.
*  SELECT ALL WHO WERE EDUCATED: Patient
*  MUTUAL GOAL(S): Patient verbalizes understanding of instructions
INFORMED CONSENT
PATIENT IDENTIFICATION
NURSING DISCHARGE NOTE
MSE
Reason for Consult: "Veteran with polyarthralgia and bursitis."
swollen, painful olecranon bursa. Since then the patient reports flares
ADDENDUM
***SHAKE WELL***   (FOR IMMEDIATE RELIEF). REPLACES
Patient Name:  ,   , DOB: //, Age:
Medical History and Medications reviewed.
SIMVASTATIN, NIACIN, IBUPROFEN, MOXIFLOXACIN, DOXAZOSIN, TAMSULOSIN
EZETIMIBE MG TAB TAKE ONE TABLET BY MOUTH AT BEDTIME      ACTIVE
FLUVASTATIN NA MG CAP TAKE ONE CAPSULE BY MOUTH AT        ACTIVE
however he had a classified assignment and understands he may have a difficult
Primary Care Provider Call.
OD: /- OS: /
Dear Mr.  :
No fish oil in meds list.
PUPIL DILATION:
Finds extra dose of Seroquel mg very useful, somewhat sedating for a short
symptoms can be relieved by taking Tylenol. Verbal education done.
Vaccine Information Statement - Interim - Inactivated Influenza Vaccine
Age:
No
ADDENDUM
therapeutic range. To  he remains disjointed at times, and stares aroudn
Veteran attended and actively participated in the   Treatment
Not applicable
interactions/support systems that are conducive to recovery lifestyle.
Overall level of functi
of mental diagnosis, including the disease concept of addiction, develop
L. Hamlin, LMSW
to address maintenance and recovery of physical and mental wellness,
attending didactic and therapeutic groups designed to increase knowledge of
R. Baker, LCSW
P. Wooten, RT
didactic and therapeutic groups designed to increase knowledge of mental
TREATMENT CENTER DAILY NOTE:
systems that are conducive to recovery lifestyle.
GROUP ATTENDANCE (x=attended offered group):
outlined in individualized recovery plan.
[ ]Orientation Group   (/ min)
Visit: // :
interactions/support systems that are conducive to recovery lifestyle.
[x]Life Skills  (/ min)
Services and the note will be written by the Nutrition staff.
[x]Weekenders  (/ min)
needed to maintain recovery efforts, and promote social interactions/support
enjoy the group.  He was attentive during the session and provided positive
help group members c enge their stuck points in these areas.  Hypervigilance
final session of CPT for PTSD.  The Intimacy module was discussed in the group.
ASSESSMENT:
. Posttraumatic Stress D/O                          //  MUNSHI,ELIZABETH
Patient Phone: ()-
now it continues to ,in the present, from   Allard station manager. I have
TYPE OF CONTACT: PERSONAL
week - then re-evaluate.
THIS WORKER WAS PRESENTED WITH A COPY OF THIS VETERAN&quot;S MEDICAL POWER OF
Most recently recorded Blood Pressure:  / (// :)
Segment Width:
Special items:
Cornea: OD: Clear    OS: Clear
caregiver.  He now is using shower chair in bathtub and requires more assistance
INFLAMMATION
DSM IV MULTI-AXIAL DIAGNOSES
no medication changes, discontinuations, or additions to the patient&quot;s
) wrote down test results, how to take coumadin and f/u appt.
c.   tape on Nursing Kardex.
[]Crutches
Feb).
. What questions do you have about your medications?
Patient had outside PT/INR done.
percent of their ideal body weight.   The possible improvement in
Starting at: // @ :: PM
Location: Huntsville (cboc)
The following identifiers were used to verify this patient:  SSN.
PMH:
HPI:  ER,  E is a  y.o. here for routine visit.  PT HERE FOR RECHECK.
ADDENDUM
PAIN SCORE: (// :)
PHE adequately ve
ADDENDUM
Location: Huntsville (cboc)
HISTORY AND PHYSICAL COMPLETED:  [ ] YES [ ] NO
ANESTHESIOLOGY VISIT COMPLETED:  [ ] YES [ ] NO
PATIENT PREPARATION:
position.  He was administered  ral endotracheal anesthesia.  A
the scrotum down to the tunica va lis.  The spermatocele was
TIME PATIENT IN HOLDING:
Limited
Patient will not experience respiratory distress related to procedure and/or
(D) Periodontal maint procedures.  DX: (.).
Pl ed Procedures:
RUNNING LOW AT HOME.
Coumadin/INR:for afib goal is inr -
Temple length:
. Thyroid Diseases
WARFARIN NA MG TAB
Lab Result(s):
(D) Diagnostic casts.  DX: (.).
( ) Appointment information left with Sponsor.
DOCTOR&quot;S MEDICAL NOTE
TAKING IT.
INTERVENTIONS THAT MAKE PAIN BETTER:    Laying down, Medications
Afebrile, VSS.  VS entered into electronical chart.  To see  physician ease
Wife apparently gets some money for two grandchildren that are living
Medications listed have been reconciled and reviewed with the patient.
SEE DICTATED NOTE _x__
PRESCRIPTION MEDICATIONS per patient report:
[ ] Appointment information confirmed with family member.
BUT YET HIS SUGAR GETS HIGHER AND HIGHER. STATES HIS SUGARS WENT FROM  TO
MUCH EITHER.
STATES HE WAS IN GAINSVILLE FL AND WENT TO THE VA FOR UTI, AND WAS SENT TO
READ THE REPORT AND IT SAYS HE HAS A LOT OF SCAR TISSUE. STATES THEY WERE
PHYSICAL EXAM
Pertinant exam:
PRESENTING COMPLAINTS:
fistula) treat with iv antibiotics;to call  ral surgery for transfer &gt;HE
or the results of tests?
(X) Appointment information confirmed with family member.
cut this back to  mg tid.  He forgot readings but says he checks sugar daily
PAIN REASSESSMENT
result of his utox // was neg for oxycodone for which he&quot;s been prx of i-ii
Primary Care Provider Call.
History of Flu shot reactions?
referred patient to this writer.
not recall a specific injury.  No neurologic symptoms
Jaw pain: No
Identify Additional Signer - Clinic Nurse:  joyner
Current knowledge about health problems:
Future Appointments:
TELEHEALTHCARE (S)
ALLERGIC REACTION documented/charted.
vet is in process of divorcing her.  he has a home in ok. he needs to
Contacted patient/SO by phone.  DATE: Dec ,
ORIENTATION AND CONSCIOUSNESS: alert and attentive, oriented x
nervous breakdown".  Patient ruminating about his past situations with buying
and pt has a f/u appt with writer already scheduled for / at : (just prior
Alert, oriented. Neatly dressed and groomed. Anxious. Affect congruent. Intense
make decisions.  Despite multiple attempts to address goals,  ral direction
focus while his medication is taking effect.  Vet would need to go through CIU if
Colonoscopy screening refused by patient.
Lot#: x    Expiration Date: //
.DEPRESSION-PT IS DX WITH AN ADJUSTMENT DISORDER W/ DEPRESSION AND ANXIETY.HE
Pain Goa
lived there three years, and home had been paid for. Home is up for sale and
[]      Deferred
Group began with a brief introduction and review of group p cies/expectations.
Active Outpatient Medications (excluding Supplies):
although body odor was less noticeable than during previous encounters, was
capacity of services provided by VA. Vet is presently in midst of divorce
List:  (L) ankle swollen &amp; painful x  week; no accident, injury, or other
Active Outpatient Medications (excluding Supplies):
AT THIS FACILITY DURING CURRENT ADMISSION (Date)                    CODE
TELEPHONE TRIAGE NOTE [DT] TTN
was in the DOM for    (d/c //)for depression and he "walks on his
------------------------------------------------------------------------
PAIN:
Pain #:
overwhelmed.  Encouraged pt to  take his time and prioritize what needs to
immediately and she seems to  have a plan on how to proceed.  Pt asked
Patient was seen to  for  minutes  for treatment of the following
TEMPERATURE: . F (. C)
[X] Negative otherwise
ADDENDUM
CITALOPRAM HYDROBROMIDE MG TAB                   ACTIVE
Skin Color:
Vitals
Warfarin started on: DEC
)   DIPHENHYDRAMINE HCL MG CAP TAKE ONE CAPSULE BY       ACTIVE (S)
Height:  in [. cm] (// :)
disease.
NURSING ADMISSION ASSESSMENT (T)
Patient kept the following items: glasses.
To Whom:
given per MD&quot;s orders and PRNs given per pt&quot;s request and/or nursing judgment.
// : PLASM  . H
-
# PROBLEM: Inability to maintain Safety as evidenced by poor impulse control,
NURSING NOTE
breakfast.  He offered no complaints and no problems were noted.
MD&quot;s orders and PRN&quot;s given per pt&quot;s request and/or nursing judgment. One-on-
been incontinent to , which apparently is a problem at home per his wife. Pt
MEDICATIONS THIS EVENING. AFFECT IS FLAT.
NURSING NOTE
a mental health hold at  hours for danger to self and danger to others and
DATE /   /   /
Patient admitted with s/s of b ding: NO
E  APPEARED TO S P THROUGHOUT THE NIGHT WITHOUT ANY DIFFICULTIES.  NO
JOB#:
deterioration of cognitive abilities (dementia) and loss of acquired
Length of Treatment: LONG TERM
L          |            |       |
Location: DENVER
Length of Treatment: LONG TERM
Wednes , /
B): Demonstrate the ability to independently structure time
Intervention: A safe and therapeutic environment was provided for the veteran.
yo male with Fahr&quot;s disease and related cognitive deficits (specifically
Medical Illnesses:ACTIVE PROBLEM
Bipolar Disorder NOS * (ICD--CM  // OSUNSANYA,OLAWALE
OS: No
EMERGENCY DEPT (PART 1) NURSING TRIAGE (S)
Scheduled Appointments:
Left:  clear
Edema: absent
ESOPHAGEAL REFLUX
. ALCOH DEP NEC/NOS-UNSPEC
overwhelming--"it helps me just to talk to someone."  No previous attempts.
scheduled appointment.  He is followed for Major Depression which is service
states that his pain is / (best) to / (worst) in the lower back
Disorder and % SC for medical condition of cervical strain presents for
New cell phone number
The fluid may be sent for microscopic analysis.  Medication may be
RR:  (// :)
Patient was given .cc of Influenza Vaccine at this en
was asked to describe goals for the upcoming time between sessions, some of
)   CHOLESTYRAMINE GM/GM (LIGHT) ORAL PWD TAKE          ACTIVE
CBOC NP PROGRESS NOTE
hand"
Patient reports he is on coumadin which is prescribed by his non VA
. Surrogate (if applicable):
stating that his wife has had several falls in the last   or two and he is
Vietnam at that time his older brother was killed in Vietnam and patient had to
RR:  (// :)
mail-pt rec&quot;d #  tabs.
Pain agree:
Last fill://
Last fill://
received maximum benefit from inpatient treatment.  After discussing this with
months ago, which was    after he finished a drug rehab
The patient indicated that he/she is a lifetime non-user of
--Check LDH, US abd, liver and sp n with dopplers.
A:  Patient sat in the  room during this activity, but participated minimally.
detox. He had multiple similar admissions before.  His last drink was  beers
EtOH abuse
MH NURSE BEHAVIORAL RESTRAINT NOTE
PSYCHOLOGICAL
Eat a b ced diet that includes all five food groups: grains,
Comment:Within normal limits.
Protocol(s) used: &lt;Not identified&gt;.
Ending at: // @ :: PM
consideration.
,  A is assigned to Caller Area ANCHORAGE.
Evaluation/Management Code: UNLISTED EVALUATION AND MANAGEMENT SERVICE ().
Height: . in [. cm] (// :)
she needs to call in refill,    before running out.
witch last week and now you&quot;re all su -sweet.  I don&quot;t need this."  She then
Protocol(s) used: &lt;Not identified&gt;.
The patient&quot;s blood pressure is usually adequately controlled.  No
VistA Imaging - Sc ed Document
*** SC ED DOCUMENT ***
Call Type: DTN RX  WAL .
Identified problem: OTHER UNSPECIFIED COUNSELING.
chiropractor and accupuncture care.
Contact Phone Number: ()-.
PROBLEM: Veteran presented angry about previous  &quot;s interaction with
Veteran calmed after initial outburst. Talked about potential new  social
Starting at: // @ :: AM
Contact Phone Number: ()-.
identified&gt;.
ADDITIONAL COMMENTS/INFORMATION:
hours a night.  Denied any palpitations, thumping, skipping beats, racing
Call Type: DTN SYMPTOM .
Nurses note reviewed.
. Anatomical Location: Left knee
The ongoing pain is:
However still has it some.  Not constant but intermittent.  History of Fall and
Author: MACKIE,RYAN E
handicapped parking form filled out for patient.
Time out done prior to start of procedure.
EDUCATION TOPICS:
Blond haired, mod. obease and pleasent in presentation
HEALTH TECH/CMA NOTE
How has the pain changed since patient&quot;s last visit?
Alert and oriented to person, place, time, and situation.
    </notes>
  </record>
</records>
