# Supplementary material for: Predicting the Risk of Suicide by Analyzing the Text of Clinical Notes
Source: PLoS One. 2014 Jan 28;9(1):e85733. doi: 10.1371/journal.pone.0085733 (PMC3904866; doi:10.1371/journal.pone.0085733)
Supplement: Appendix S3 — Machine Learning Libraries and Methods: This section is provided to enclose the open source (Apache License) classifier used for the building of the statistical models, specifically for the purposes of study reproducibility. A detailed account of these tools is intended for another publication. (ZIP) [file pone.0085733.s003.zip › Appendix3/ML_libs/Regression_testing/group3/grp3-pt-1023.xml.txt]

Patient/care giver verbalized understanding of discharge instructions:
have eliminated people.  I am going to yell at the psychiatrist. He told me that
PC PATIENT SCREENING
/es/ BONNIE J HAGGERTY
return phone call on how to come off his Celexa safely. When I called him back
OS:+.+.x
Visit: S:   , @: DENT HYGIENE BURDICK (A-).
, , , , , , , , , , .
HPI: pt  is a  y/o wm with bph on flomax, who is uncircumcised with c/o of
SURGICAL HISTORY AND PHYSICAL
MOUTH EVERY  HOURS AS NEEDED FOR PAIN
LENGTH OF CASE: hrs
PREOP TELEPHONE CALL:
in surgery, including appropriate patient identification, prevention of surgical
ventrally and the excess skin was then off to the side and resected with
Nursing Intervention(s):  Review discharge instructions with
OOB with minimal assist.
Alopecia: refer to derm
Failed to show addendum:
. Have had any nightmares about it or thought about it when you did
LEGAL ISSUES
&lt;Bruchner Reflex&gt;:              (x)Ortho
with vet&quot;s transition to continuing care phase of treatment if necessary.
Veteran participated in group designed to address the above issues using
Appropriate for Medically Monitored Detox:
Employment:
in a sober house and he appears to be  ready    to return to tx. He
,  attended the // Job Club group at the Rainier
The treatment goals for this group are:
To &quot;s session focused on:
WA State Division of Vocational Rehabilitation
cravings.
-Improve interpersonal functioning in a sober setting.
stressors that could trigger a relapse.
flare-up severity -/, with prolonged sitting or driving his car. Not
SSN:  --
A: Air Conduction Testing:      []TDH- Headphones
KHz
NEUROLOGY F/U
strenous activities, and mental stress.
Recommended Follow-up location: Urgent care, VA
- skin erythema, back, worseni
Pulse: (// :)
frontal lobe contusion.  HA&quot;s are still constant with varying severity, presentl
)   NICOTINE MG GUM CHEW  PIECE IN MOUTH  AS NEEDED FOR  ACTIVE
canal stenosis or neural foraminal narrowing.
vaccine to be given.  Patient was counseled regarding the
important therapeutic focus in overweight patients, since it can
Labs:
to this interview.  These limitations include reports of intentions to
GYNECOLOGICAL HISTORY
SKIN - SKIN LESION EXCISION (SKIN LESION EXCISION)
[] Paper tape, [X] Adhesive tape,
incision line cleaned and new tegaderm re-applied. pt has appt on / for
[X] Patient will be called regarding this missed
Body Mass Index: .
All: silver silvadiazene, fluvastatin, amitriptyline
Signature Informed Consent for
[]BPH
Pre-procedure Pul
Patient declines advance he
Wt:     lb [. kg]
Funduscopic examination showed   disk. Coloration of the disk was felt
elimination of pain is not always possible but can be relieved.
Author:  ,SARAH A
Signature Informed Consent for
/ hcv ab (+), riba (+), pcr (-)
IRIS:OD NEVI, MOST PROMINENT @  O&quot;CLOCK  MM X  MM; (-) VASCULATURE/PUPIL
Missing Teeth: , , , , , , , , , , , , , , , ,
Chief Complaint: c/o lower jaw(tooth/gum) pain and right side of chin swollen
improvement
. Treatment/procedure: This procedure may involve reflecting a flap
Patient Name:  ,   , DOB: //, Age:
- - - - - - - - - - - - - - - - - - - - - - - - - - - - - -
with chemical burning of the nail roots.
Resp.: (// :)
yo male w/ hx of HTN and LVH
MED PATIENT EDUCATION
Height:   in [. cm] (// :)
MALE
He will be seeing Ms.   APRN for therapy/management. THis was approved by
return in  months. The patient was told to  that he would need to make an
Reassessment (Change in patient status/condition, inter  transfer, or
PREFERS TO LEARN BY:
Signature Informed Consent for
and slightly above the greater trochanter.  A  ga. . inch
Allergies: NORVASC, DILTIAZEM, SIMVASTATIN, PRAVASTATIN, TESTOSTERONE
Patient&quot;s next appointment: NO RECALL DATE
Patient&quot;s height:  in [. cm] (// :)
FIRST VISIT WITH BRONZE BLOCK FELLOW CLINIC. C/O FEELING EXTREMELY TIRED ON AND
DPT                    // ATLANTA VA
JUL , @::   .
Temperature: . F [. C] (// :)
//
Patient&quot;s next appointment: Sep ,  (MH)
Eligibility: SC LESS THAN %                          VERIFIED
ADDENDUM
Alert
heart- rrr, syst c murmur, no carotid bruit bilat
P: Discussed with  physician ical intervention for this problem.
REHAB-PHYSICAL THERAPY
A: +LLD (L shorter /")
--Upright standing, + L lat lean with shoe insert
Date of admission:   //
Total Knee Arthroplasty (TKA))
Contacted patient
remove dentures/jewelry-completed
. Left Total Knee Arthroplasty
. Obstructive S p Apnea   physician  /
Analgesics
COMPLICATIONS:
Pre Op Antibiotics
Respirations
Arousable on calling
RATE/RHYTHM:
Mental status: alert
take into account risks specific to the patient/resident
No adverse reaction to treatment
skilled nursing- visits for wound care
ORTHO ATTENDING: TEMP , VS STABLE. DRESSING REMOVED, WOUND CLEAN, MODERATE
Turning
For secondary diagnoses:
NEUROMUSCULAR STATUS:
. Manipulation of Knee Joint under  ral Anesthesia  left knee
Dialysis (center based):  No
In pm the pt was again seen for mobility training. He was mod (I) in
self
cleared of tripping hazards.
Location: All Areas
. Hyperglycemia * (ICD--CM .)
Medications:
Weight        :   lb [. kg] (// :)
+ wrist pain, within past  hours
up.
O:
Heent: mmm, supple neck, no LA, clear OP, no sinus tenderness
BEHAVIORAL HEALTH LAB (BHL) NOTE
medications that are expired or without further refills:
Patient Phone Number:
WT: . lb [. kg] (// :)
[] other clinic:
ADDENDUM
RX CLINICAL PHARMACY
==============================================================================
Neurology Attending
Is treatment to  related to workman&quot;s comp?  NO
plan at this time but states that he just doesn&quot;t    feel like going on.
ECS-GENERAL SOCIAL WORK NOTE
= Partially achieved, Tx continues
explosion in Vietnam, where he landed on his head. He shows a dent in his head
similar to that he has experienced on cho ol drugs in the past &amp; no meds
Appetite: Good
many of the newer anti-depressants and had to go back on the nortryptiline which
ADDENDUM
He has been found to have a bradycardia which may be due to propranolol.  After
hopefull again, theres a light at the end of the tunnel again. also glad he has
cloud has lifted at around ." Team noted that pt reports zero depression
There has been no increase in his tremors since the changes in his
stated that he has struggled with depression for at least  years and has tried
SI/HI/PARANOIA/HALUCINATIONS: Denies
now.
Reviewed his feelings/thoughts/insights into family of origin dynamics
physician  next week and will ID regarding increase in antidepressant
Mirtazapone.
was on propranolol for years and this helped but did not completely alleviate
,                  --       ,
PURPOSE OF VISIT: INITIAL APPOINTMENT
CHIEF COMPLAINT:New patient visit to Vineland clinic.
Veteran&quot;s wife died. veteran has moved from Florida
REASON FOR SELECTING THIS NON FORMULARY AGENT: has dementia that is stable on
PCMM Provider: BERNA,
ADDENDUM
Vet is tearful--he relates that he lost his wife of yrs wks
PAROXETINE HCL MG TAB TAKE ONE AND ONE-HALF TABLETS BY    ACTIVE
ADDENDUM
Family and other supports available at time of the event:
Past month:
FROM THE CRISIS)
PSYCHOSOCIAL HISTORY
high risk flag on this Veteran.
( )Anger Management             ( )Motivation
( )Guided Discussion            ( ) Other:
Have ordered arthritis panel, also ordered B/L hand XR&quot;s.
. Hyperlipidemia *
( )Self Care                    ( )Family Recovery
( )Dual Diagnosis               ( )Other:
INTENSIVE OUTPATIENT PROGRAM-GROUP THERAPY
Observations:
T:   . F [. C] (// :)
ADDENDUM
NUR OUTPT CHECK-IN NOTE TEMPLATE
Pulse Ox: %    //@::
Using therapeutic equivalents to treat the same illness
Vital signs: See CPRS
Pulse Oximeter:%
-Comments: to be  ed in holding area;
OR Support Personnel:
Has patient received pain medication within  hours?
Relaxation, Rest
Alert:Yes   Oriented:Yes    Responds Verbally:Yes   Moves to Command:Yes
=  Salty fish (sardines)
Date and time: Apr ,@:
an h/o CHF and has no calf tenderness.
Mr.   is a  y/o male who is s/p left L laminectomy on // for
Microscopic sections examined; description omitted.
DIAGNOSIS (Date Spec taken: Jun , )
return for your next visit.
Nurse Consultation Assessment / Education Note:
Patient lives in Bonham but he would prefer to commute if treatments done here.
SEX:  MALE
. Do you have a prior history of past attempts?
Pt presented to Gold Team wishing to see a psychiatrist as was
-------HISTORY OF CURRENT ILLNESS-------
The following identifiers were used to verify this patient:  DOB. SSN.
)   DILTIAZEM (IN ) MG SA CAP TAKE ONE CAPSULE BY    ACTIVE
Hypertension, essential                 Common Cold (ICD--CM .)
TO &quot;S VISIT:  Patient presented to clinic for scheduled visit. He is taking
AFFECT:  Bright
MOUTH DAILY FOR HEART/ BLOOD PRESSURE
Mr.   is a  yo WM with schizophrenia on clozapine and citalopram. He
EVERY MORNING AND TAKE  TABLETS AT BEDTIME
)   CITALOPRAM HYDROBROMIDE MG TAB TAKE ONE-HALF TABLET  ACTIVE
No
Past Smoker
Active Outpatient Medications                          Status
MOUTH EVERY MORNING FOR DEPRESSION
SHOULDER - ARTHROSCOPY (ARTHROSCOPY OF SHOULDER)
OSat: %
Where:LT SHOULDER
Facility Appointed PCP: HARDEN,DANE (RED)
phone. UDS and lipid panel scheduled for // at  with letter mailed to
MOUTH EVERY   FOR OSTEOPOROSIS
===============================
MOUTH EVERY   FOR OSTEOPOROSIS
Blood Pressure:
Sputum Color: None
Pt seen and eval with  physician reased confusion; wife called to assist by
Objectives were met.
Genitourinary:voiding without difficulty
History of MRSA, nares, //.
Neurological:Alert, Oriented to Person, Oriented to Place, Follows
Radial Pulse Right:Palpable Strong(+) Radial Pulse Left:Palpable
Medication: Vent n .ml, Atrovent .mg/.ml
Saturation per Pulse Ox:% on Room Air
Cough Effort: Non-Productive
All other types of sedation WITH preoperative visit/inpatient:
Pain:  (// :):  lower left chest
procedure, patient, position, site, and consent with procedure team
ADDENDUM
EDEMA:
HD#:
- Elevation of HOB
Patient discharge call information:
was patient\family responsibility.
. Syncope and collapse
Depression screen negative.
Comment: Good with aid
po qh and had a discharge script written for Methadone  mg po BID.  The
PC TELEPHONE CARE NOTE
HENT:   Tonsils are not edematous. No TMJ dysfunction. Normoglossia.
Patient Refuses referral.  After discussing the health risks of
No Associate Provider Identified
Is patient claustrophobic?
. Nevus, non-neoplastic
and Vardenafil meds.
left on answering machine with appt date and time.
saw him last. He is diabetic with peripheral neuropat
Author: SIMPSON,  F
Please mail.
No Associate Provider Identified
[X] Veteran is continent of bowel and bladder.
DEMOGRAPHICS
. Consent to Blood Products (if applicable):
glaucomatous changes OS &gt;&gt; OD
paralysis, no incontinence, no saddle anesthesia.  Feels like prior low back
)   HYDROCODON
Primary NOK:  ,                Relation: MOTHER
. He was pleasant and cooperative with assessment. His eye contact was poor and
process linear and goal oriented. He states he&quot;s been having paranoia and hasn&quot;t
been able to get his mind off what happened and lead up to his homelessness and
Address:  CENTURY BLVD APT
In the last   s, has the patient expressed difficulty with the
)   BRIMONIDINE SOLN,OPH   DROP BOTH EYES QH             ACTIVE
tel ion with peers. Pleasant upon approach, reported that he slept well, has
TOBACCO SCREENING AND COUNSELING
[ ]CANE/
Pt has been discharged to Exodus Lodge to wait out his   s.  Pt has no
CC: "My cap came off (#) and I tried gluing it back on, but then it
y.o M with hx of depression, prior substance abuse has homicidal
the author and date of last update:
"I&quot;m feeling homicidal and suicidal."
[  ] Intoxicating Beverages:
Mr.   was seen, examined, and discussed with the treatment team.
crowds. He reports that since group therapy he avoids many situations less,
increased self-knowledge and self confidence. When asked how he sees continued
the content of her note.
have a conflict with Mon s in the future. He plans to come in next Mon
of which (listed as  and  below) have been r ited in ima l exposure with
Kisha  s, MD
HCTZ /TRIAMTE  MG TAB TAKE / TABLET BY MOUTH       ACTIVE
NURSING OUTPT TRIAGE INTAKE NOTE
mineralization is within normal limits.  There are
Subjective:"I HAVE HAD PAIN IN MY KNEE FORS FOR  MONTHS.  I HAD AN OLD HIGH
PLASMA     /     /           Reference
Collection DT       Spec  UR pH
BARRIERS TO LEARNING:
P:   (// :)
Purple Team
"I FELL ON SOME WET GROUND A WEEK AGO BUT, MY KNEE IS OK NOW".
Call Type: PRESCRIPTION QUESTION.
Veteran was referred to this Social Worker to discuss housing issues.  Met with
Influenza Immunization Documentation:
EMERGENCY ROOM NOTE
Wellbutrin, although he&quot;s been on it for some time pt states, makes him feel
been not taking celexa for one month to determine extent of s i induced
CENTRAL ARKANSAS VETERANS HEALTH CARE SYSTEM
COMPLAINT: "my hearing is gone and my blood pressure is up"
No. No suicidal ideation.
suicidal and agrees to do so.
his father for awhile "I am  years old and I should be able to take care of
please note abnormal labs from April nd.
Left:
)   ASPIRIN MG TAB,EC TAKE ONE TABLET BY MOUTH EVERY     ACTIVE
R:  RTC PRN
Injury: //
PM&amp;R PHYSICAL THERAPY CONSULT NO-SHOW
)
Memory impairment
CC: back pain
results, resume PT.  no neuropathic symptoms.
) back pain: no relief with nsaids, trial of tramadol  Q x  month
request for a return call.
information and a request for a return call.
to monitor this very closely, and increase precautions if indicated.
VITAL SIGNS ON ADMISSION
B): Discuss thoughts with staff
Vet would benefit from being enrolled in a pain clinic.
posttraumatic stress disorder, substance abuse, and chronic pain who has been
No
order a portable hand x-  and follow-up results.
-
NURSING NOTE
in AM.
p-mid (here at a)
results. pt states he hasnt had a stool since admission to this unit. no c/o
E - In bed appears to be s ping at twice hourly safety  . Up to bathroom
benzos and have not seen any negative effect on s p thus far. Plan is for him
Has there been a FALL in the past  hours?
breakfast and lunch.  Has multiple complaints concerning his meal t s and his
No
and talking "Shit."
MH INPT GROUP THERAPY (B)
No
AFFECT CONTINUES TO BE FLAT/ANGRY, MOOD IS IRRITABLE AND SURLY BUT HAS BEEN SAFE
that is non-productive. Upon further questioning, the cough has been the same
MH INPT NURSING NOTE
Active Inpatient Medications                           Status
E ILIsome state
New SAFETY PLAN, created on NOV , :
MH INPT CASE MANAGER DISCHARGE NOTE (B)
of medication he received. Of note, fentanyl patch is currently expired on this
and all that." Vet would like to do phone conversations only. Suggested vet come
X-COVER NOTE
Comments:
the following nutrition related problems:
I have reviewed the inpatient and outpatient medications.  I find that
.  Private room.
PROVIDERS&quot; EMERGENCY ROOM WALK-IN VISIT NOTE
Respiration:  (// :)
Oriented to name, place, date, SS#
Size:g
ADDENDUM
di uptions or interferes with the delivery of health care, he or she
Vet became angry with this writer re: medication and Bay Pines. Discussed and
the pipe because he knew I&quot;d freak out, be put in the hospital."
Vet denies SI at this time, agree
fine, will wait to hear from this writer about Bay Pines, will come in or call
or
message for    , Travel Supervisor at Bay Pines -- x,
test one month ago.  DOE has been progessively worse over the past + years, and
normal.
Appointment Rescheduled: No
physician o advise clerks as to new appts
Influenza vaccine, .ml given in Left Deltoid.  Vaccine Manufacturer:
Type of Visit: Appointment Check In
Plan:   .  Patient warned about danger of driving with drowsiness.
breast examination to f/u as diercted .
PRACTITIONER?
O: Denies hospital stays, ER visits or medication changes.
**************************************************************************
BP:/ (// :)
Active problems - Computerized Problem List is the source for the following:
LIPID - NONE FOUND
It is time to call your Primary Care Provider for an appointment next
Vaccine lot number:
Na , k ., bicarb , Cr ., eGFR , Ca ., alb , phos ., ldl
Patient race:
f/u  months
Prednisone burst ordered by pcp/mailed
MH GROUP NOTE-PSYCHO-EDUCATION (BP)
out of sight,--out of mind" closed with a special p er blessing.
Current Diagnosis: Schizophrenia
treatment goals.
writer&quot;s encoruagement, stating "I don&quot;t have money" for transportation. He
Will see whether he attends group on Wednes . May need to discuss in more
Alcohol/drugs: denies   Herbal/OTC:denies
feelings and behaviors that could overwhelm us and prove deadly.  Developing a
overwhelmed by problems that you think there are no possible solutions and
Egg and/or Chicken Allergy?
concerns for safety.
. Homework assigned was for group members to practice their skills to keep a
Appearance: satisfactory
friends many years ago.  Veteran appeared more relaxed upon completion
ral: Alert, Pleasant, Cooperative
ADDENDUM
Anxiety Disorders: Anxiety Disorder NOS
use, i.e. reading the newspaper, looking at his Atlas, going for a
MH MHICM-INTENSIVE CASE MANAGEMENT
Problem # Thought Disorder-Met with veteran at Birch .  He reports
Medications:
. Obesity *
Teaching Strategy:
Demonstrate skill(s) safely and effectively.
. Surrogate (if applicable):
A:
Vital Signs:
sebaceous cyst
Specimens:  Cyst with overlying skin
Level of consciousness: Awake
Public Health Nurse/Home Care Nurse called with questions.
Weight:           lb [. kg] (// :)
MH MHICM-INTENSIVE CASE MANAGEMENT
and another Birch  resident to .  Veteran denied suicidal
Affect: appropriate
Birthdate:  JUL ,
Height:           in [. cm] (// :)
CITALOPRAM HYDROBROMIDE MG TAB TAKE ONE AND ONE-HALF      ACTIVE
MH MHICM-INTENSIVE CASE MANAGEMENT
significantly contributing to your feel
Men
Last TD exam://
Allergies:KERI ORI L LOTION, NIACIN
Veteran was on the telephone both  s, making calls to local  es asking
vet is considered to be at minimal risk for self harm.  It is likely that vet
Last TD exam://
To &quot;s CBC/diff:WBC  .  Neut:.%  ABS NEUT  .     BLOOD  (// :)
Current Diagnosis: Schizophrenia
Problem # Thought Disorder-Met with veteran at Birch .  His mood is "ok"
Contacted by NH w/ hyperglycemia - FSG  this afternoon.  M w/ DM,
No sliding-scale coverage
Influenza Vaccine/MPLS:
To &quot;s ABS NEUT  .     BLOOD  (// :)
dinner.  He reported enjoying their time together and plans to go out
Goal Hemoglobin AC: &lt; . (plasma glucose -)
activities but described them both as positive.  Veteran reported his
work at Salvation Army gives him "contentment."  Acknowledged veteran&quot;s
ADDITIONAL COMMENTS/INFORMATION:
Author: POWELL,BRAD  A
MEDICATIONS: Current profile reviewed
Patient can read.
Automation Clerk
Hyperglycemia * (ICD--CM .)
Unable to reach; voice mail box full
witnessing a recruit overdose-  non combat situations.
Review of Systems is negative/non applicable unless otherwise indicated:
Patient smokes tobacco.
TWICE DAILY TO PREVENT SEIZURES
can include stitches on the surface that may need to be removed in
THICKENED, BUT NOT PAINFUL.
Reference Range on Date of Test:  -
Active Outpatient Medications (excluding Supplies):
Comments:
// :
will come back at : to see P. Sykes, NP.
=========================================================================
- - - - - - - - - - - - - - - - - - - - - - - - - - - - - - - - - - - - - - - -
Diagnosis:
Pt. notes she is s ping better and staying busy.
DFE wnl, c/d: . R, . L, m/p nl
O: afebrile VSS
nml eye contact and speech
HYDROCHLOROTHIAZIDE MG TAB TAKE ONE TABLET BY MOUTH  ACTIVE
seeing you at your next visit.
MILLIGRAMS) FROM ALL SOURCES OF TYLENOL
dose.
(red blood cell count)
MAY , @:   Clinic:   GU/CALL FOR APPT
MH OP PSYCHOLOGY NOTE
. The patient HAS decision-making capacity.
the digestive tract.  This procedure may also be performed for
with the use of .% marcaine and % lidocaine. The genitalia were then prepped
DIABETES MELLITUS
----------------------DUPLEX CAROTID EXAMINATION----------------
related to cervical radiculpathy arsisng from cervical stenosis, the patitent
Dear Mr.  :
this.
Activity encouraged.
Dtr called with concerns about pt&quot;s recent behavior in the NH. He&quot;s continued to
by: HERMAN J REDDING
keflex mg qid. ortho consult requested- d/w PA Russell. d/w S oway MH
always had plans to do this if things got bad.  He staets that he is not
ADDENDUM
EYE MEDICATIONS:
PPD.
to IMC for continued complex medical care.  A complete SWS Assessment was
benefits of taking meds from MD but strongly refused.
OS:
(-) ARMD
Spoke to Bascom Palmer- pt&quot;s appt is // at ::pm.
NUTRITION
Amount of stool:  .
Number of hours awake
Extra fluids  given.
Number of hours s ping
Rash
PRESSURE ULCER PROTOCOL
PATIENT RESPONSE TO TREATMENT:
------------------------------------------------------------------------
review all issues related to the crime. SWS Team will continue to assist as
care fro this pt was trnasferred to me from dr. Nuchovich on //
Tobacco Use Disorder, Continuous  .
CLC Patriot Way to CLC Br  Way to , // for continued complex
see BP on Mon  and he is hopeful that he will regain his vision. At this point
Appearance: thin male dressed in hosp pjs; he is wearing bilateral eye patches
injections/OU.Patient was the victim of a unfortunate gunshot wound to the face
MHC CONSULT
Recommendations:
Hip protectors in place:
Lunch           food %       drinks %
VistA Imaging - Sc ed Document
Number of bowel movements this shift: .
PT returned from Miami appt at pm with new orders. MOD informed to rewrite
Patient is continent.
from hands and face, and needs to orthopedic for his contracted finger in left
physician s
NUTRITION
Personal hygiene: bed/sponge bath
Personal hygiene: shower
should be splinted.
get good news from miami on /. He did not tell me what miami said on /
Assistance provided for this task: supervision, oversight, encouragement or
Refused antibiotic this a.m.
Instructed to call for assist as
MOBILITY
During this shift, the patient has been observed talking to others.
Transfer: requires no
Veteran has an appointment at Palmer Eye Institute on // at :AM.
Dinner          food %       drinks %
Extra fluids were given.
Amount consumed:
ELIMINATION
Bowel management program:  No
ACTIVITIES OF DAILY LIVING
Use of non-skid slippers or gripper socks
During this shift, patient was continent
. Black, not of Hispanic origin
ECZEMA (%) Service Conn
the interview and staff; alert and ox
ZZPATIENT CARE ADL NOTE
Medicate as ordered,
Assistance provided for this task: requires no assistance.
Urine color:
location: resident room
ZZPATIENT CARE ADL NOTE
Transfer: supervision, oversight, encouragement or cueing
Patient bathroom privileges
Assistance provided for this task: supervision, oversight, encouragement or
During this shift, patient was continent
location:
Dysphagic Program: No
Orient to surroundings
Relieve pain
Report new pain
Client has no C/O pain at
Assistance provided for this task: set up assistance
S: This patient was seen and evaluated by me to . Case discussed with the
is blind his response "you gu
Oriented to person, place, time.
Number of bowel movements this shift: .
Alert
Bed mobility: independent (easily turns and sits up without staff assistance)
times to
Patient is incontinent.
physician s
Left message with B /Victim Practitioner for the CILO (Coalition for
Confused, requires reorientation, physical cues, verbal reminders
The patient did not refuse meal, fluid, snacks.
MENTAL STATUS
staff performed most of the activity.
Mr.   is a  y/o male who was initially admitted to C on //
Active Inpatient Medications                           Status
cueing
Unspecified open wound of eyeball  .    //   CHEN,PENG MD
FEE BASIS
ZZPATIENT CARE ADL NOTE
No
MENTAL STATUS
others.
Personal hygiene: bed/sponge bath
BOWEL ELIMINATION
Consistency of stool: .
No staff required.
During this shift, patient was continent
Don will attend this meeting with his wife Joan Thurs , //.
BOWEL ELIMINATION
Assistance provided for this task: requires no assistance.
Hip protectors in place:
Assistance provided for this task: supervision, oversight, encouragement or
Consistency of stool: .
Ambulation: requires no assistance
Meal assistance: requires no assistance.
BLADDER
of.
he would be at the home to welcome veteran to . This provider personally
ZZPATIENT CARE ADL NOTE
BOWEL ELIMINATION
Ambulation: requires no assistance
Patient is continent.
Breakfast  food % drinks %
Skin Color:
INTERVENTIONS
MENTAL STATUS
did report th
regarding his playing the trombone for his colleagues.
Tobacco Use Disorder, Continuous  .     //   SICHERER,BEVERLY C MD
TIME OF THE   Evening Apr ,@:
Hip protectors in place:
Dinner  food % drinks %
Consistency of stool: firm .
MOBILITY
Personal hygiene: bed/sponge bath
Amount of stool: .
Alert
veteran asking to display his autonomous walk to the smoking area.
No staff required.
physician ody
This shift the patient used the toilet.
Transfer: requires no assistance
Bed mobility
location: resident room
led to blindness. He has difficulty to accept his blindness condition. Social
DIAGNOSIS:         Gun shot wound to the eyes
Check out Date:    May ,
FBs/intraocular antibiotic injections/OU), depressed mood, keratoacanthoma (per
The patient did not refuse meal, fluid, snacks.
Patient is continent.
OTHER RISK FACTORS
Hip protectors in place: declined when approached,refused.
Amount of stool: none.
location:
Other personal care:
TIME OF THE   Night May ,@:
BOWEL ELIMINATION
May, .
disease.
FALL PREVENTION INTERVENTIONS
Orientation and mobility
(deposits) unless the person is standing in front of them ("like at a bank).
FEEDING
Elimination Method             BRP
reg
CURRENT APPETITE: Good
PERTINENT MEDICATIONS:
Buttons
will like to receive something that will help him to make checks. The veteran
Area of instruction: Personal Management     : PM
Secondary Next-of-Kin:
SISTER
SWS BRC
independent on route to dining area.
Sessions to date:
Task: LS/OM refreash
PATIENT EDUCATION/SOCIAL WORK
stated that it is getting easier.
ers on his cell phone and requested that this be done. Mr.   verbalized
Session Remaining:
Total sessions to date:
Session:  and
ADDENDUM
ADDENDUM
ADDENDUM
Participated in veteran&quot;s IDCP Meeting to .  Team members will accompany Mr.
SELF CARE:
Buttons
Hair
fixed notions about lifestyle and has a rigid set of behaviors that protect him
touch with the State Attorney&quot;s Office.
The perpetrators are in jail.  It is the investigators that have been "going
center the printed information on the sc er correctly and the ability to
purchase.
Kosher Meals, and Pureed Meals.  (All of these have specific p s.)
Sessions to date:
Session:
Character Reader) to allow the veteran to read printed materials, such
Time: : :
Sessions needed:
ADDENDUM
ADDENDUM
ADDENDUM
Sessions to date:
interest in learning route pl ing, cane skills, or other information in
Number of LS sessions to date:
. Identify / colors and detect light utilizing Colorino
SWS BRC
Zippers
Uses (bladder):  Toilet
Bowels:  Continent
Date and time of LS sessions: //    : AM &amp; : AM
Met with veteran for  minutes on //.  Veteran reported that he is doing
Additionally, Program Supervisor put in referral for Home Based Primary Care who
attorney was visiting with him.  This occurred; conferred with Acting Chief,
"Missing Patient Risk Assessment" criteria and has been
BASIC HYGIENE/BATHING/DRESSING AND GROOMING:
Benefits.
SWS BRC D/C NOTE
The patient was provided with educational packet including information on:
-) and let them know the arrangements for their brother- Heart To Heart
Veteran is alert and oriented x.  He am
HBPC PSYCHOLOGY NOTE
No wounds, pressure ulcers or other skin problems.
Food/Nutrition History (Patient Report)
where sustained a GSW with glass shattering into face &amp; eyes
Call from veteran&quot;s sister (--)and said that Mr.   was asking
Writer spoke with veteran about his feelings of hopelessness in relation to
HBPC PSYCHOLOGY NOTE
MSE:
strategies and encouraging progress.
Alert, oriented in all spheres.  Presenting with
adequately dressed and groomed appearance.  Speech is low volume
HBPC NUTRITION FOLLOW UP
Del  Medical Center and then transferred to Bascom Palmer Eye Institute for
Reason for Visit: F/U
// :  (.)[]
Intravenous therapy/Heparin lock:
choose to do other tests.  Your doctor may:
N/A  VOIDED?  AMOUNT:
Follow-up with  physician already scheduled appointment.
Ear Surgery: No history of ear surgery
$APHDR
[ ]  Months
Identified Learning Needs:
. H/O HYPOTHYROID
EVERY MORNING
Ht:
reports that  she stopped taking citalopram  for about   , because she did
appropriately. Speech with normal rate, rhythm, and volume. His mood is mild
Pending Outpatient Medications                         Status
EYE OPTOMETRY CONSULT RESULT
FUNDUS
. How many drinks containing alcohol did you have on a typical
Never
_____ . Patient is considered a danger to self or others.
cope with things as the time comes". Says he is "not going to let this get me
Pulse Ox:   (OCT ,@::)
tobacco:quit in
&gt;&gt;Blood Pressure: / (// :)
ADVANCE DIRECTIVE/ALLERGY/MEDS/SUBSTANCE USE:
IMED INFORMED CONSENT
I have met, examined, and evaluated the patient and I agree with the attached
Electronically Filed: //
go to a PCP in Little Rock.
she is "not use to" him and how "literal" he is, telling a story about a time he
GENITAL:  Discharge[] Lesions[]
SENT.
MENTAL HEALTH INPATIENT INITIAL INTAKE ASSESSMENT
Alcohol use: yes, last dri
Respite Care          :
Protestant            :  X
Physician Attending: CUEVAS
PHARMACY AB ADMISSION NOTE
:-:
MENTAL HEALTH SOCIAL WORK ASSESSMENT
Structure and goals of the group were discussed, and limits to confidentiality
-LORAZEPAM TAB
TAKE ONE TABLET BY MOUTH THREE TIMES A   FOR MUSCLE SPASMS
-patients rights and responsibilities regarding pain management, -post
TOBACCO USE:
limitation); LEFT wrist fracture during adolescence.
*** Please call the Scheduling Department at  () - ext.   to make
turning to drugs or alcohol, and rethinking problems.  Positive and negative
Admitting Diagnoses:
ADDENDUM
SUPPLEMENT
Home/Outpatient Medications not continued for inpatient use
MI/An : no
seeing things. Personal hygiene and grooming fair. Appetite is good. No physical
. Anxiety:  Ask "Do you feel nervous?"  Observation
location and behavior.Administered medication and v/s per protocol. Staff will
MHICM SCREENING NOTE
taking his psych. meds a few  s ago and feels he needs to re-start them, Pt.
feeling "manic,"
with the veteran.
provider&quot;s recent notes for additional information.
CATEGORY (IF APPLICABLE)
Axis V:   GAF:
Axis V:   GAF:
working". Discussed the benefits of abstaining from ETOH and compliancy with
he has no concerns to voice at this time. Patient denies any visual or auditory
TAKE  TABLET BY MOUTH EVERY   FOR VITAMIN SUPPLMENT
P          :
BP:  / (// :)
treatment considered.  Veteran may need residential treatment.  VOA housing is a
drug/alcohol relapse or mental deterioration that may cause a
Ht      in [. cm] (// :)
F:  Nursing Initial Assessment
intents or plans to harm self or other and A/V  ucinations. Pt signed
CHIEF COMPLAINT &amp; PRESENT ILLNESS:     etoh detox
Gender            : MALE
Obsolete
conversing with peers about the songs/artists, and tapping his feet
HENT Exam: Head: Atraumatic; Normocephalic; Eyes: PERRLA; EOMI; sclera
go outside to smoke. Thought process organized, goal directed,
remains on the unit during the tour. patient has order for Nicotine
DISCHARGE INSTRUCTIONS
The patient/guardian was informed about influenza, the vaccine and special
ACTION:         Urine collected and sent to MIVA for analysis. BAL negative.
interviewed, assessed and counseled by undersigned provider during a medical
SYSTEMS. THE GROUP FACILITATOR REFRAMED, REALITY ORIENTED,
your Access/Verify c . Now click on the Image you wish to view.
CITALOPRAM  MG TAB   Sig: TAKE ONE TABLET BY MOUTH EVERY MORNING FOR MOOD
SUPPLEMENT
GOAL(S):  GOAL DATE:  MONTH, Normal respirations, Lung sounds will be
TRACH CARE:
None
ML  infuse over  minutes IV QH
*IBW     :  lbs                  %IBW:%            BMI:.
Yes
Team Members:
PROBLEM: TRAVEL NEEDS
Patient Response: Tolerated well
Bcx (-) x  x  hours
ML  infuse over  minutes IV QH
Medications listed in CPRS  **
Time of Assessment:  Feb ,@:
Independent
Self
Oxygen Saturation (%) after treatment:
None
SAFETY PRECAUTIONS:
Pulse Oximetry:
Modality:  Nasal C ula
MOBILITY:
Yes
Treatments:   Volume Nebulizer
(L/MIN)(%)
Respiration:  (// :)
Adverse  physician :  No
Afebrile. +pain from absess site.
. Shoulder abscess: s/p I&amp;D by surgery; will consult CHN for home health help in
Time of Assessment:
Oxygen Saturation (%) after treatment:
L/MIN
Mobility:           = No Limitation
Objective:
Hypoxemia is corrected with supplemental oxygen LPM during ambulation: mmHG;
-Gait traning
TWO QUETIAPINE MG TABLETS FOR A TOTAL OF MG)
COPD/PNEUMONIA
intact, dry
Position of patient:
FAMILY EDUCATION           : N/A
LPM @ Hours of S p:
DERMATOLOGY PROGRESS NOTE
Yes_x___    No____
F; RECOVERY ISSUES
ABSTINENCE..I&quot;LL BE CELEBRATING A YEAR IN JUNE..HE PLANS TO RETURN TO TAMPA TO
ADDENDUM
Teaching Topic(s):
F C ACID MG TAB   Sig: TAKE ONE TABLET BY
NURSING OUTPATIENT NOTE
Please see the accompanying History and Physical for full information on
. Anatomical Location: umbilical
The patient verbalized understanding of these instructions.
Comment: pre-op instrucitons
RELATIONSHIP ISSUES AND HIS PLANS TO VISIT HIS DAUGHTER AND GRANDCHILDREN FOR
Patient is neither pregnant or lactating.
WOMEN&quot;S WELLNESS CLINIC
Va l cyst removal -
at greater risk.
P     PREVIOUS ATTEMPTS. Suicide risk is higher among people
Session Goals(s):
addressing the veteran&quot;s current present problems. Secondary goal of session
Tertiary goal of session centered on developing a strong rapport to establish
attend his next scheduled individual therapy appointment on // at pm.
TO SEE MD TO  FOR VF REVIEW AND F/U.
The undersigned called Mr.   and successfully contacted him to schedule
physician
levels (ICD--CM .)
Conversation with  ,    has a chief complaint of: &lt;not
Primary PCE Diagnosis: . (UNSP ACQUIRED ABSENCE TEETH).
Active Outpatient Medications (including Supplies):
Returned pt. telephone call for a refill on his Clonazepam.  Informed him this
Hip Pain (ICD--CM .)
MH HUD-VASH-NOTE
DIABETIC--finger stick results:
HPI-(-) Pt with h/o dm takes NPH  units daily in ER with request for
discharge: [x] Instructions were reviewed with and given to patient who
Received education on the following topics while in the emergency
OUTPATIENT MEDICATION RECONCILIATION ----------------------
No money.
Pulse: (// :)
NO BM THIS TOUR
BOWEL MOVEMENT
Weight:   lb [. kg] (// :)
African Am an Male,  year old
[] CURRENT PROBLEMS AND SYMPTOMS: (Summary of patient
Testing for MRSA brochure was given to the patient.
Weight:  . lb [. kg] (// :)
Ambulation: Self
Bowels: Self
PSYCH RN NOTE
ADDENDUM
agitation
Branden Scale Score: Not Applicable
Ht:     in [. cm] (// :)
*************************************************************** At time of
Eval: Positive result is unconfirmed and should not be used
application will be shared with the vet as soon as it reaches us.
voucher tomorrow, at  Livingston street. vet was invited to meet with this
. Mr.   stated that he is going to be there until the end of November.
coordinator of the program, Mr. Balkcom, and the vet will be updated with the
O/EXAM      AA O TIMES
Quantity:
Pt. reports s ping - hrs. per night.
with broken bones. Denies f/c/n/v/d. Does not eat much in the way of dairy
Learning Barriers/Preferences reviewed, remain the same.
Naproxen and Flexeril in the ED and was sent home.  He still states that his
symptoms is improved by lying and heat to left knee and hip.
Name:            ,  T,--
Procedure was explained to the patient.
mobilties.
states that he is active at his job and has also joined a yoga class once per
Learning Barriers/Preferences reviewed, remain the same.
*  SELECT ALL WHO WERE EDUCATED: Patient
Correct surgical site  ed by provider with patient involvement
asa x   s.  given discharge instructions.  discharge criteria met.
- - - - - - - - - - - - - - - - - - - - - - - - - - - - - - - - - - - - - - - -
. Tobacco abuse;   cigars - X per week
- Colonic mucosa
yo MALE veteran with diabetes, contacted in f/u of blood sugars, blood
stress.  Veteran thanked me for my time and call was terminated.
Name of Veteran:  ,
This note contains attached PRIMARY CARE sc ed document(s) received
Would like appt with PCP asap.
RTC, EP device,  year, cancel other EP device apts.
Patient contact
occured in a matter of seconds. Since this incident the ringing has been much
Medical History and Medications reviewed.
BEDTIME FOR CHO OL**DO NOT CONVERT-APPROVED /**
Dental Category: -CLASS VI.  Treatment Status: Active.
Primary PCE Diagnosis: . (TEMPOPORMAND JOINT DIS NOS).
FH: no skin ca
Further information if pain present:
AST/SGOT       PLASMA  (// :)
PAIN MANAGEMENT EDUCATION
s ping not too good on Seroquel mg QHS and decided to try mg QHS.
DATE/TIME         TEMP      PULSE     RESP      BP        PAIN
furniture)? No
)   DOCUSATE NA MG CAP TAKE ON
Veteran has been unable to keep Mental Health appointments for one or more
Haldol D (mg) IM given to  in left gluteal muscle. Next injection due
The patient has not consumed any alcohol in the past one year.  An
NURSING OPT
Demerol Dose IV: MG
HR -
Chief Complaint: "relapse"
Antibiotic Dose Route &amp; Time: na
better.  Went over the schedule with him and he agreed to show up tomorrow and
Participation Level/Participation Quality:  _x__Active/Eager    ___Variable
Not applicable
give patient treaded socks.
Sharon  , PST
interactions/support systems that are conducive to recovery lifestyle.
[x]ABC Group
Number of role-plays veteran participated in:
DTC PROGRAM CLINIC
interactions/support systems that are conducive to recovery lifestyle.
R. Baker, LCSW
[ ]Fitness Group  (/ min)
call to inner peace.  The session ended with   p er.
DTC PROGRAM CLINIC
Shirley Meskenas, RN
Veteran&quot;s response to the following offered groups has been reported
- @).
building endurance. This class is led by a certified yoga instructor. Yoga
systems that are conducive to recovery lifestyle.
Hope Group ( minutes) This group was facilitated by Chaplain Service
Veteran&quot;s response to the following offered groups has been reported
P. Wooten, RT
[ ]Nutrition
and flexibility poses as well as relaxation and cool down techniques.
Visit: // :
Length of time veteran spent in group:  minutes
Sex:MALE
Started smoking again in June-/ppd
Pt. last seen by PCP /.
labs prior.  Vet verbalized understanding.
go back  ier.  Restraining order by boss went into effect mid Feb. Legally
OBJECTIVE:
NECK: no bruits
PHARMACY MEDICATION EDUCATION NOTE
SIG: USE CUTTER AS DIRECTED  AS NEEDED
Active Outpatient Medications                          Status
H/HHA RN ASSESSMENT - SCANNED
Manifest:
HOMEMAKER/HOME HEALTH AIDE FOLLOW-UP
Starting at: // @ :: AM
BY MOUTH EVERY   FOR DEPRESSION
coumadin clinic. To  he denies palpitations, occasional skipped beats, no CP/
.  When is your next appointment?
The telephone care nurse.
Plan:  _x_ Continued group involvement as indicated by current mental
PHE adeq
Location: Huntsville (cboc)
and/or physical activity in the control of blood pressure.
RAL DATA:
[]Joint difficulties
(asthma, chronic bronchitis).
none
Identified problem: OTHER UNSPECIFIED COUNSELING.
Date:  UARY ,
Call Type: BHM RX  WAL.
Good
[]Post-op within - hours
Verifier E-Sig:/ES/  O PONTON
How does patient like to learn?  Listening, Reading
Meds, K. How/when to seek emergency treatment/follow-up
Temp:                  Pulse:          Pain:
involved in this treatment/procedure.
[x] Contract Established
. Surrogate (if applicable):
Comments:
SCHEDULED TIME OF SURGERY:
Explain:  NO PAIN
a: SUB THERAPUTIC FOR A FIB. PT HAD RESTARTED COUMADIN . AFTER SURGERY IN BVA.
RAL DATA:
AMBULATORY DEVICES:
PATIENT CHECK OUT NOTE
Visit: V: May , @: ORAL &amp; MAX SURG.
Date: MAY ,
.MG THUR-FRI-SUN AND MG OTHER   S A WEEK.
POC-INR   .           H  Aug , @:     (. - .)
Patient seen/examined by attending physician and discussed plan of care with
Lower Back
MEDICATION RECONCILIATION
team.
Patient has reported a pain score of  (// :).  Pain
Says  his sugar was    s ago but yester  was  around : p.m.
ADMINISTRATIVE NOTE
DRUG SCREEN (ROUTINE):No data available
Chief Complaint: Shoulder Pain (Unilateral)
BRA                 SHAVING KIT
MODE OF ARRIVAL: Ambulatory
bed and call light correctly. Resting quietly at this time with head of bed
. UTI/  ??? Entero Vesical Fistula/ Hx sujjestive of
PRESCRIBED PLAN OF CARE PATIENT STRENGTHS:
Braden Scale - For Predicting Pressure Sore Risk
No wounds, pressure ulcers or other skin problems.
OBJECTIVE:  Blood pressure was a little low at /.  Repeated by me it
medications, herbal products or supplements that you may be taking over the
counter or from other providers**
N. FLORIDA/S. GEORGIA VHS               NO KNOWN ALLERGIES
States he is still taking all meds, but that he is taking them at "different
// : OPTOMETRY  appointment(s).
Pain Reassessment/OUTPATIENT:
NORTH-FLORIDA.MED.VA.GOV                NO KNOWN ALLERGIES
ADMINISTRATIVE NOTE
ADDENDUM
Reason for Visit: three month fup appt. reminders on exit due to time
Not at all
Pain:             (// :)
DATE OF DICTATION:  //@
will only return to fl to see how job  et is if he then have job then will
Will ask ROI if this release is appropriate, and will have ROI contact J
Minneap s VAMC
Treatment Plan: take the diclofenac for inflammation, the cyclobenzaprine
B/P:    / (//
unsure if his wife is sexually active with other partners.  History of HSV on
)   DICLOFENAC NA MG EC TAB TAKE ONE TABLET BY MOUTH     ACTIVE
medication.
disabilities.
good about this. Living with Aunt- that not easy. Not going to get into another
THIS CALL IS IN REGARDS TO:
DENTAL EXAM
Veteran not satisfied with current pain management plan, and
// :  BLOOD      MCV                  .    fL           -
PO BOX
//  HGB            .        (- gm/dl)(hemoglobin)
Vet is somewhat reluctant to check into the DOM possibility but mother is
Patient declined influenza vaccine.
Thurs , //. Vet initially denied receiving appointment card (this was
//                       Nursing Note
- PMH: diabetes
Resting (B/P) - Intake Staff ONLY:
He rates the pain at /.
Duration of Complaint:  Months
I encouraged him to call me down the road if needed.
PC OUTPT STAFF F/U NOTE [T]
MH OUTPT NURSING NOTE [DT]
in Lake  va now.  History of SE with Lexapro and minimal effect from Cymbalta
PAIN screen
mother.  Pt&quot;s mother reported that pt  continues to talk a great deal and
Review of Systems: Denies any cardiopulmonary symptoms, no shortness of
)   BUPROPION MG SA TAB TAKE ONE TABLET BY MOUTH TWICE  ACTIVE
Document(s) attached are from: Other: Deaconess Hospital
Pain assessment (scale -)
,  F,  Sex: MALE,  Age:  presents to the clinic
CPRS by selecting Vista Imaging Display from the tools menus at the top
Weight:         . lb [. kg] (// :)
ADDENDUM
will try to fully supervise him at this time and has not yet made a decision
Last Formal Pain Assessment appointment:
mail-when due
NURSING ADMISSION ASSESSMENT
treatment): primarily followed by Neurology
Are restraints in use?
DOSE FOR WEDNES :     TABLETS  =  MG
// : PLASM  . H
Edit note. Veteran does not have a : companion.
BARRIERS TO LEARNING
GOALS AND INTERVENTIONS FOR ACTIVE PROBLEMS (BY PROBLEM #):
Tablet strength patient uses at home: MG
DOSE FOR TUES :       TABLETS  =  MG
[]Patient    []Family       Cultural &amp; religious practices
friendly and approachable, patient does not seek interactions with staff or
one time with staff for ventilation of feelings, thoughts and/or concerns.
Patient is seen by: Sue Carmody, OTR and Frantz  , COTA.
-
NURSING NOTE
Warfarin - Pharmacist Jeff Gold will need to come talk with your wife to
DSM-IV DIAGNOSIS:
Mr.   was discharged to  with outpatient medication regimen listed at the
Remember...if you can&quot;t make an appointment, all you have to do
RE : Spoke with Pam and she noted that Mr.   skipped a total of mg
Enrolled in the anticoagulant clinic since: MAY ,
RE : Spoke with wife, outside MD recommends stopping warfarin   s prior.
may change based on when you restart warfarin therapy.
f/u for M bilateral basal ganglia/cerebellar mineralization and significant
something on fire then walk around the house with it.  He will play with fire
Patient instructed that all medications will be administered by nursing
Activity:           = Walks Frequently
-   No Risk
OBJECTIVES: The patient will:
INTERVENTION-  A safe, controlled environment was maintained along with q
more details.  The pt&quot;s behaviors have not changed since his last admission.  He
MYALGIA
Resp:    (// :)
DEC , @:   Clinic:   ER (AM-PM)
OS   mmHg
ADDENDUM
after a nightmare. Has had this pain in the past, was never told it was related
Your chest pain is caused by gastroesophageal reflux
Disposition: home
I wanted to update you on your recent x :
also followup with your primary care physician.
Future Appointments:
)   SIMVASTATIN MG TAB TAKE O
flushed with warm water.  Large amount of impacted cerumen removed from
HEIGHT:  in [. cm)
acknowledged having thoughts of suicide.  Last seen by MH // (
monitoring. He was able to verbalize his ongoing frustrations that he attributes
Pain:  (// :)
SKIN EVERY   .STOP SMOKING.
Quality:   other:
S/O:  Met with this single  yo % service connected WM veteran who is here by
reporting that he is connected to the pain clinic and is using pain medications.
out and some he internalized. He is tolerating medication combination
them with continuing to cope with the symptoms of Posttraumatic Stress
Wt: . lb [. kg] (// :)
TIMES A   FOR ANXIETY
ONE-HALF TABLETS BY MOUTH EVERY   FOR DEPRESSION.
CLINICAL REMINDER ACTIVITY/PLAN OF CARE
stress management exercise.
PATIENT AGE:
. Anatomical Location: See description of treatment/procedure.
*** SC ED DOCUMENT ***
--------------------------------------------------------------------------
S:  Patients discussed reviewed the techniques which they used in the
who have finished the Group Based Exposure Therapy (GBET) program and
(D) Crown porcelain w/ h noble m:
- Follow-up with x- .
wanting to get "too close".  The role of isolation with PTSD was
Exposure Therapy (GBET) program. The goal of these groups
Active/Pending/Expired Meds
. Currrent areas of psycho-social distress:
Skin: Warm,  physician TESTINAL
hours to provide intervention in areas of concentration, organization of task
about his breathing pattern as he is trying to fall as p... s ow breaths
and judgement is fair..
have any withdrowal symptoms to .no nausia,vomiting,diarrhea,noted.no tremors
=  Frozen dinners
at D/C/.  Pt disheveled, mildly jaundiced, dysphoric, and in NAD.  A/O x .
VistA Imaging - Sc ed Document
yester . She reports to have experienced involuntary jerks of  legs and
Contact Phone Number: ...
control this veteran.
to see if it helps. She is worried about losing unemployment benefits in
Identified problem: OTHER UNSPECIFIED COUNSELING.
DEC , @::   .
Interventions for health promotion and disease prevention.
Electronically Filed: //
Ending at: // @ :: AM
Conversation with  ,  A has a chief complaint of: &lt;not
had this  kind of problem in past...I am in real need of the xanax and
have an intake.
Conversation with  ,  A has a chief complaint of: &lt;not
MEDICATION REFILL REQUEST
POLLEN
Nurses note reviewed.
*Assessment of understanding Good
Patient was asked about any consumption of alcohol
MHC TELEPHONE NOTE
Protocol(s) used: &lt;Not identified&gt;.
continues to have a lot of pain.  I have requested an ortho consult.
. Treatment/procedure: ASPIRATION AND/OR INJECTION OF JOINT, BURSA,
injections, such as hip joint injections, may require the use of
Weight: . lb [. kg] (// :)
Age:
Height: . in [. cm] (// :)
fluid removed.  The needles may be guided using x- , ultrasound, or
ASU SITE VERIFICATION
neck injury Dec. .  Not really vertigo.  More just ballance problem.  Occurs
Wt.:   . lb [. kg] (// :)
Patient received information about patient rights and
ADDENDUM
Is this a new pain?
BODY MASS INDEX
Interventions for health promotion and disease prevention.
CSL Biotherapies. Lot A Exp: June ,  Vaccine
NO CHILDREN
PATIENT&quot;S STRENGTHS
( ) Another Hospital
( ) Family
Confirm the patient knows when and whom to contact if symptoms deteriorate. Yes,
    
