# Supplementary material for: Predicting the Risk of Suicide by Analyzing the Text of Clinical Notes
Source: PLoS One. 2014 Jan 28;9(1):e85733. doi: 10.1371/journal.pone.0085733 (PMC3904866; doi:10.1371/journal.pone.0085733)
Supplement: Appendix S3 — Machine Learning Libraries and Methods: This section is provided to enclose the open source (Apache License) classifier used for the building of the statistical models, specifically for the purposes of study reproducibility. A detailed account of these tools is intended for another publication. (ZIP) [file pone.0085733.s003.zip › Appendix3/ML_libs/Regression_testing/group3/grp3-pt-1039.xml.txt]

Active Outpatient Medications (including Supplies):
pain in his legs if he walks too far, along the front of his legs. "I never take
a)   The patient should not receive the vaccination if there is a history
Dental Category: -CLASS VI.  Treatment Status: Inactive.
Cardio- No cp,sob,pnd,orthopnea,nocturia.
I can not scheduled the surgery untl I have the request.  AT that time I will
Within   s prior to surgery
with inhalation of an anesthetic (drug causing numbness) vapor.  The
--
Vs- .---/ sat-%
LOC PRIM OSTEOART-L/LEG
Goal/Outcome:  Patient is free from injury
CLINICAL REMINDER ACTIVITY:
UROLOGY CLINIC FOLLOW UP
OPERATIVE FINDINGS:
Identified problem: OTHER UNSPECIFIED COUNSELING.
UA
ASSESSMENT/PLAN (Discussed with patient):
RETURN TO CLINIC:  Months or sooner
---------------------------------------------------
outline of the  ral treatment they would be consenting
answered questions and/or concerns about the veteran&quot;s mental health
CPT code should be H
.  Referral to Prosthetics clinic for fitting for bilateral ulnar flotation
details.
while deployed. Did complete Physical Therapy rehab which did help for a short
Veteran SSN:
PC/MH INTEGRATED CARE TEAM CONSULT
Iraq from /-/.  Though no injury resulted in LOC, he suffered amnesia a
Patient is a  year old MALE here to  with Chief Complaint: med f/u
Place of Exam: VA Pacific Islands Health Care System
Pt reported that losing his job took away his major coping mechanism for
)   TRAMADOL HCL MG TAB TAKE ONE TABLET BY MOUTH FOUR    PENDING
. - .
months to recheck the site and, if necessary to treat it with liquid nitrogen
cancer.
COMPLICATIONS: No
SIZE OF LESION:cm
- - - - - - - - - - - - - - - - - - - - - - - - - - - - - - - - - - - - - - - -
MEDICAL RECORD |                   CYTOPATHOLOGY
This specimen has been analyzed by the ThinPrep Imaging System (Hologic
Medication reconciliation: no changes
and wants his appointment after the endoscopy has been completed, and the pt is
that we will call on the th to confirm time.
and provided with supplemental oxygen via nasal c ula. Vital signs
[] PATPU phone number left for call back
with  physician ned Consent: No
. Anatomical Location: right upper arm on back side, lower right
STUDENT/RESIDENT SURGEON:G. Vander Velde MD
- - - - - - - - - - - - - - - - - - - - - - - - - - - - - - - - - - - - - - - -
Objective:
Pulmonary Department.
tired or develop chest pain.
Pain level is greater than .
Surgeon:   F.  , DPM
. Condition or diagnosis: Severe or chronic pain.
ALL:
past and now has no problem with that toenail.
seen by dentist on mon  and placed on antibiotic with no
Medication requested: oxycodone/ace.....pick up tues  /
Discussed history, exam, assessment and plan with patient and resident, agree
with chemical burning of the nail roots.
but he thinks this is due to concern about his health and not his experience as
Impression based on images and information submitted:  Seborrheic dermatitis
affected areas for several minutes before rinsing away.  May alternate every -
noMed.
Temp.:. F [. C] (// :)
RATED DISABILITIES:
PATIENT EDUCATION INTERDISCIPLINARY RECORD
HIP ANTERIOR APPROACH - right
Findings:
Blood pressure: / (// :)
Influenza Vaccine
PAIN SCREENING ( - ):
PHYSICAL THERAPY TREATMENT PLAN CERTIFICATION
ORTHOTIC/PROSTHETIC LAB
REHAB-PHYSICAL THERAPY
S: Pain reportedly increased with walking, &gt;% decrease with
Patient instructed to do the following:
Diagnosis:           Loosening Left TKA
been completed. The patient  been
Computerized Problem List is the source for the following:
treatments were discussed with the patient as recorded on the
Weight:  lb [. kg] (// :)
COMPLICATIONS:
Foley
Patient is oriented to person, place, time.
Skin Color:
C/P, Skin, Nutritional Status, Medication Compliance
Treatment: Aerosol/Nebulizer
Pulse:
No productive cough
Anemia
NURSING-ACTIVITIES OF DAILY LIVING
FALL RISK ASSESSMENT
Head/neck strength (turns head right &amp; left against resistance)
Lung sounds: C
SaO:
Pressure ulcer wound care:  No
Eating (taking food by any method,
supine to sit and sit to stand. Pt needed assist for donning his
Breath Sounds: Clear
FEE BASIS-PHYSICAL THERAPY CONSULT
This is a sc ed FEE BASIS document.  Open Vista Imaging to view document.
oriented to: Person, Place, Time
ADDENDUM
He also is interested in trial of viagra. He has no trouble initiating erection,
Diagnoses: Alcohol, Chronic Dependence (Primary)
service in the call center for medication  wal. Patient is requesting
Met with veteran at his request as he was feeling a need to talk with someone.
better.
he has no other specific complaints.
The patient was examined and evaluated by me with the
necessary based upon my experience and expertise as certified by the
in -, and has    supply.  Will refill this via mail, and pt to contact
CURRENT VITALS:
//  CHO OL        .        mg/dL
//  HGB                 .        g/dL
APPOINTMENT CANCELLATION
Mr.   came by my office to  after his med mgmt appt and reports his
ral;
Neurologic:
FIRST TH
PPC PHARMACY
SSN: --
Kumet and he requested I become acquainted with them.
longstanding, non-parkinsonian. Agree with treatment modalities suggested.
SSN: --
TIME SEEN BY PHYSICIAN::
PSYCH NURSING NOTE
several meds as well as treatment through therapy.
anxiety.  Pt is working with B. Newton on these issues.
PRESENT PROBLEMS/CHIEF COMPLAINT: Last here approx  wks ago, then psych hosp x
GU:
scattered lesions of sebaceous hyperplasia
just wrote them off as he d
ADDRESS:
CASA GRANDEsome state
**********************************************
Veteran returned to New Jersey in June. The son in
Please call patient caregiver
)   G TAMINE HYDROBROMIDE MG TAB TAKE ONE TABLET BY    ACTIVE
BP:/ (// :)
(-) Trauma
Now double click on the TIU Title to view the document.
Current Allergies: PENICILLIN, PREDNISONE
--    son
(x  ) Cigarettes   (  )   Cigars   (  ) Smokeless Tobacco  (  ) Snuff
History of Abuse? Yes
note
Format:
( )No Distress                  (XX )Attentive
HISTORY
( )Transparencies
of need for signing: "Release of Information".
WILLING TO GET STARTED THIS WEEK.  I GAVE HIM A PRESCRIPTION FOR NEURONTIN TO
week on the GriefWork work . Gave a brief outline of the goals of
Provider: JENKINS,  L       Cost/Fill: $ .  Exp/Can Dt: //
Observations:
**KEY FINDINGS AND FURTHER RECOMMENDATIONS**
Active Problems:
This note is for  ,       --.
HISTORY OF PRESENT ILLNESS
Respiration:  (// :)
Mr.   called to  stating that he recently developed signficant swelling
not return to cl#  until Tues --. Pt knows he should report to the ER
UNIV PROT/TIME-OUT
a. Systematic:
hematuria, pain and the possibility of fever, c s in which
- PROSTATIC ADENOCARCINOMA, GLEASON GRADE  +  = ,
member at discharge or visit.
BP: / (// :)
R
beam of x- s that are directed to the tumor area in your body.  The
Radiation treatment details are documented in IMPAC.
NAME:  ,
assessment, in my clinical judgement the veteran&quot;s current risk
member at discharge or visit.
Active Inpatient and Outpatient Medications (including Supplies):
CURRENT RADIATION DOSE:  cGy
Patient&quot;s Current BMI is: *
man of short stature,
Common Cold (ICD--CM .)             SCHIZOPHRENIA NOS-UNSPEC
Patient here for scheduled PCP appointment. Client given educational handouts to
physician
Medication      ID# and description            Count     Last filled
PC TELEPHONE CARE NOTE
low level and slowly increase.  Will increase the dose base on labs in   .
*************************************************************
Pulse Ox:  (// :)
Wt: . lb [. kg] (// :)
Length:  minutes.
The doctor inserts an arthroscope (a scope through which a joint is
.  De rative joint disease, left shoulder with chondromalacia,
Operation Disposition: PACU (RECOVERY ROOM)
Level of Consciousness: alert, oriented
Date of procedure:OCT ,
Pain score is / or less with or without medication: Yes
Plan: Remove sutures &amp; applied steri-strips
Length:  minutes.
POSTOPERATIVE DIAGNOSIS(ES):
On arrival patient was: Ambulatory
)   CALCIUM MG/VITAMIN D  UNT TAB TAKE  TABLET BY   ACTIVE
This patient is admitted with the diagnosis of pneumonia, presumed
. Essential and other specified forms of tremor
Respiratory Therapy Treatment Record
Comments: PRN TX FOR COUGHING TO LOOSEN SECRETIONS
. Rosacea
Secretion Amount:
Oxygen provided by:Nasal c ula at liters/min
Sputum Color:
Please see VistA Imaging for sc ed Anesthesiology documents.
Discharge Date: Dec ,
TAKE ONE TABLET BY MOUTH ONCE APPROXIMATELY  MINUTES BEFORE SEXUAL ACTIVITY
Starting at: // @ :: PM
Author:  E,SAMMIE
PRESCRIPTION FOR METHADONE ENTERED // IS STILL PENDING AWAITING RECEIPT OF
Starting at: // @ :: PM
document can be accessed through Vista Imaging.
Author: DICKSON,JENNY
Medications:
.  DISCUSSED DIETARY OPTIONS AND NUT UTICALS, REVIEWED EXERCISE
Psych Review: Benign
sided.  The left testicle measures . x . by . cm.  A   x
No
Findings: Right testicle measures . x . by . cm with no
SCARS  %  SC
. Asthma, unspecified
Comments: Please refill
Mr. Moreland,
psychosis)
the following GPD epis  of care:
. GERD * (ICD--CM .)                           //  SARAFIAN,FARJAD
trav qhs ou
I       R/R OU, no NVI
full consent
Veteran tested positive for drugs/alcohol while in the program.
hospitalization?
) Brimonidine opth solution#
H Phone:
Dialysis (home-based):  No
required help or supervision with the following activities?
YES NO UNK
PSYCH INPATIENT RN NOTE
Latest pain score:  (// :)
. Lack of Housing                                    //   ,MARY T
[  ] Flammable Liquids:
[  ] Plastic Bags:
Weight:
dependence who has several previous admissions here in the past, usually for
schizoaffective disorder, major affective disorder, or severe post-
Admission DX: Homicidality, Antisocial personality
session to let us know why he missed. We talked about his expected ability to
MH TRP TELEPHONE NOTE
PC TELEPHONE NOTE
--------------------------------------------------------------------------
fri  due to, "missing  s". Stated it was not due to work performance
medication for several  . Stated he was working long hours at SVI and
Respiration:      (// :)
DEC ,   FLU, YRS
AGE:
Pt is followed for Major Depressive disorder, anxiety disorder NOS. PT reported
AGE:
changed but a new rx was NOT entered.
NUR TETANUS-DIPTHERIA (ADULT):
Takes Tylenol or Advil quite often because of headache, both meds seem to help
(to // chiropractor consult) from chiropractor here not being able to see
Pt was fitted with lumbar corset with removable metal stays.  Patient
c. Fall:No    Epis :
final report following testing. Following the interview, the veteran completed
This writer spoke with Mr.   via referral from  physician his writer
case management services or answer questions.
information and a request for a return call.
. It is recommended that participation in all aspects of health care plan is
while an inpatient, will continue with primary team&quot;s plan to use Fentanyl
their provider.
Pt continues to request PO pain medication. Per nursing, he is also now making
City and County Building, Room
I - Staff provided q minute checks for safety/s p patterns and patient was
Evaluation: Patient has been in bed during the morning.  He was changed from SP
MEDICATIONS GIVEN AS ORDERED. VETERAN PROVIDED WITH WHEELCHAIR AND EXTRA
MH INPT NURSING NOTE
no result yet. Abdomen not distended and soft when observed.
discuss his plan of care.  Reiterated to patient that he wouldn&quot;t be discharged
NURSING NOTE
Are restraints in use?
Ethnic/religious/cultural food preferences:none
:     Units    Ranges
-
Diagnosis: PTSD
symptoms. Patient refused to take most medications this evening and was upset
Pt denies any current or recent substance abuse - no cocaine, no heroin, no
want oxygen". no further c/o from pt. pt did not eat supper, refused all meds,
NURSING NOTE
DX: Axis I- Opioid dependence
New SAFETY PLAN, created on NOV , :
AXIS IV:  (X) Problems with Access to Health Care Services: Threatening Behavior
service connected Caucasian male with a history of post-traumatic
VITAL SIGNS:
Other: blood culture # @hrs
No - patient unable to participate due to refused
TREATMENT: nebulizer &amp; MDI
Pain behaviors mild, moderate, severe :
Has there been a FALL in the past  hours?
I: pt. with multiple epis  of emesis this shift with slight
"I&quot;m seriously hurting"
abdomen
Date of Admission: DEC , :
Pharmacist.  *Do not leave until you have seen the pharmacist.*
the outpatient medications are NOT complete.  Changes that I plan to
Alerted unit.
We reviewed the entire med regimen, discussing the new meds in
TAKE ONE TABLET BY MOUTH EVERY  HOURS FOR NAUSEA &amp;
VOMITING
or
Electronically Filed: //
MH TELEPHONE CONTACT (B)
Vet reports he is having trouble taking care of himself due to increased pain.
This writer called and left discreet message for vet to check in with him, call
fine, will wait to hear from this writer about Bay Pines, will come in or call
ADDENDUM
) Foreign-born individuals from high-prevalence countries (e.g.,
Treatment Provided: Telephone Contact
Travel at DVAMC has approved a taxi to pick him up at his house on May st at
had spoken with manager who said it was just a formality and he knew vet would
medications." Upon reviewing his Bay Pines progress notes, it does appear that
Provider: SALMERON,  A      Cost/Fill: $  .  Exp/Can Dt: //
affected area.  The doctor then passes a needle the skin into the
MEDICINE CLINIC NURSING NOTE
Pain is unchanged since last clinic visit; current pain
.cm right thyroid multinodular goiter under u.s.  Patient has
HEART - CARDIAC CATHETERIZATION (CARDIAC CATHETERIZATION)
FR sheath aspirated and removed. Pressure applied
MOUTH AT BEDTIME
Current Allergies: Patient has answered NKA
WEIGHT:  . lb [. kg] (// :)
NORTH TH Ssome state,
Your LDL (bad) cho ol is slightly high. Hyperlipidemia was noted.
TAKING  HOURS TO TRY TO GET BACHELORS. NEARING FINALS, DENIES FEELING
TO MAKE MORE OF PART OF ROUTINE. RELIEVED AFTER NEG BREAST TEST.  ENJOYED SEEING
MISCARRIAGE:no
PC-MEDICATION RECONCILIATION: MEDICATIONS HAVE BEEN RECONCILED THIS DATE
IS THIS NOTE BE COMPLETED BY A PHYSICIAN, PHYSICIAN ASSISTANT OR NURSE
.  What questions do you have about any tests performed to  or the
.  Who is your primary care provider/ subspecialty physician?
P:    (// :)
( ) Informational request to PCP; call back requested
Diabetic Retinopathy Surveillance Consult follow-up note
RESULTS from Diabetic Teleretinal Imaging consult:
the antibiotic neomycin, or any other component of shingles vaccine.
--
prednisone provided is for short course bursts and should not be continued for
. Continue with the "Asking for Support" module, focusing on asking for support
that Get in the Way of Achieving Your Goals
rel t information (provider n , phone numbers, etc.) during group.
Length:  minutes
Number in Group:
cancellation.
rel t examples during group discussions and sharing his completion of the
MH GROUP NOTE
Current Clozapine dose: mg qmorning and mg qbedtime
thoughts to . Briefly tearful when another veteran spoke of his brother&quot;
m
Pastoral visit with mental health pt who seemed to be much more lucid, less
not "I should commit myself to God."  Being that this is a familiar
O   is a  year old MALE with the following Chief complaint:
Frequency: Twice-weekly drop-in art group
he plans to go out to dinner with two of his friends this weekend.  He
Current Diagnosis: Schizophrenia
some insight that when he stays in bed he ruminates.  He stated, "if I
Current Diagnosis: Schizophrenia
Session:
"ok" and denied
Current Pain rating score:
Pt did admit to hearing a "low voice" this am before getting out of bed.  Said
MEDICINE PRE-OP EVALUATION NOTE
Anesthetist: HAVERLY,ANDRA J            Relief Anesth:
Neuro:  awake, alert, and oriented x
Pain score at worst:
from the "exhaustion this causes me."  He also verbalized fear of
family."  Reminded veteran that he has had this fear many times in the
on importance of adhering to consistant diet.  They will continue to monitor and
Reason for Visit: Med eval
Appearance: satisfactory, casual, appropriate for weather
MH MHICM-INTENSIVE CASE MANAGEMENT
Problem # Thought Disorder-Met with veteran at Birch .  He is sitting in
his Atlas and journaling.  Veteran reports feeling "good" to  and
. Sebaceous Cyst *
AUTHOR: QUACKENBUSH,  L  EXP COSIGNER:
Patient:   ,  O  Sex:  MALE  SSN:  --
. Myopia *
(x)Nurse&quot;s notes reviewed from to .
has been stable with no recent suicidal ideation.  He has a strong
reports that he has been going to his volunteer placement on a regular
Session:
Subjective/Objective:
messages he could use to convey his feelings to his friend.
treatment goals.
treatment goals.
self control during difficult situations.  Veteran reported plans to
Current Clozapine dose:  MG by mouth every morning and  MG by mouth every
Subjective/Objective:
dinner recently and had to end the evening abruptly d/t "demonic
ADDENDUM
MH MHICM-INTENSIVE CASE MANAGEMENT
Protective Factors: Veteran lives in a facility that provides  hour
fits with his interests.  Discussed other ways in which veteran has
ADDITIONAL COMMENTS/INFORMATION:
GAF Score:
and continued depression related to his medical conditi
Allergies/ADR:  Patient has answered NKA
CC: primary care follow up
Ext -e/c/c
Imp: . Hyperlipidemia with levels at goal
approximately  months ago.  The patient has recurring mass, left dorsal
)   ALBUTEROL MCG (CFC-F) D ORAL INHL INHALE  PUFFS  ACTIVE
she stopped taking this medication secondary to its side effect of making her
Diagnosis:  Situational depression w/anxiety
AXIS  II: No Diagnosis
Period of Service: POST-VIETNAM
//
, @:   Clinic:   NEUROSURGERY (F/U)
PRIMARY CARE CBOC/FRED LAB NOTIFICATION (S)
)   HYDROCODONE /ACETAMINOPHEN MG TAB TAKE  TABLET    ACTIVE
)  TRAMADOL HCL MG TAB TAKE TWO TABLETS BY MOUTH EVERY  ACTIVE
Injury to the anterior muscles of t
DENTAL DISORDER NOS
continue omeprazole for stomach protection.
. Surrogate (if applicable):
CP - ESOPHAGOGASTRODUODENOSCOPY (EGD)
Clarithromycin- mg twice a   for   s.
. Patient name:   ,
help , but not relieving the pain, pt has not had neurosurgery follow up since
agrees that he has not been depressed. "He jokes aro
. Diverticulosis                                  //  KEOMUAN,POON I
none
Other:
Non-VA F C ACID MG TAB MG MOUTH EVERY                 ACTIVE
PATIENT ED READINESS/GOALS/METHOD:
to take next dose;
MHC CONSULT
Problems     Short-Term Goals Approaches
got a new car and
reported to s p and eat well. He denied sx of anxiety or PTSD.
vision.
reg
ADD:
Active Inpatient Medications                           Status
Cognitive:
During this shift, the patient has been observed smiling, talking to others.
Shave self
Restorative Feeding Program: No
OD:  p
. Vigamox gtt OU qid.
SKIN PROBLEMS
Buttocks and Grion area with red beefyy rash.
. Black, not of Hispanic origin
a. Primary reason for assessment
s/p gunshot wounds to the face with loss of vision.  Transferred to CLC on
ZZPATIENT CARE ADL NOTE
PE:
NURSING NOTE
cueing, extensive assistance, resident helped but staff performed most of the
I approached the other resident and asked him if he is willing to speak to a
then transferred to Bascom Palmer Eye Institute for surgical intervention for
of life and its purpose that will reveal as time goes on; When asked he admits
During this shift, patient was continent
Personal hygiene: bed/sponge bath
Feeding location: resident room.
BOWEL ELIMINATION
BOWEL ELIMINATION
The patient did not refuse meal, fluid, snacks.
Met with veteran for  minutes on //. Veteran reported that he has seen
feeling hopeless have subsided.
Hip protectors in place: declined
No staff required.
TIME OF THE       ,@:
ZZPATIENT CARE ADL NOTE
Consistency of stool: .
BOWEL ELIMINATION
VIST - INPATIENT
at risk.
FALL PREVENTION INTERVENTIONS
safety measures maintained pt remains stable.
cueing
S PING PATTERN
directly.  State Attorney provided Mr.   with an update on the charges
area with staff assistance.
Consistency of stool: not applicable.
Vet reports his next scheduled appt with BP is / and he is hoping that
BOWEL ELIMINATION
BOWEL ELIMINATION
NUTRITION
X .  , not of Hispanic origin
a. SOCIAL SECURITY NUMBER
Amount of stool: .
Rated Disabilities:
Dysphagic Program: No
cm irregularly shaped purple to the right hand between thumb and
Amount consumed:
Consistency of stool: .
Dinner  food % drinks %
MOBILITY
Patient bathroom privileges
UROLOGY CONSULT
Military Hx:Period of Service: POST-KOREAN (MAY  to MAY )ARMY
Patient is continent.
outside restraunt. RT will continue to inform and provide support as
needed to upcoming leisur eprograms.
Amount consumed:
Dinner  food % drinks %
During this shift, the patient has been observed smiling, talking to others.
Keratoacanthoma, right lower leg - per biopsy /
MENTAL STATUS
Number of bowel movements this shift: .
BLADDER
physician s
Number of bowel movements this shift: .
During this shift, the patient has been observed smiling, laughing, talking to
Other personal care: shave, oral care
Number of bowel movements this shift: .
During this shift, patient was continent
Number of hours s ping
Report changes in degree or type of pain
During this shift, the patient has been observed talking to others.
Transportation consult was placed by this provider for veteran&quot;s appointment at
Number of bowel movements this shift: .
Amount consumed:
staff to advocate for client with blindness.
GEC PSYCHOLOGY NOTE
. Female
- N/A
or plan or intent;
pt go to the bathroom for his self.
Continued efforts to collaborate with B  remain active, in order to assist
BOWEL ELIMINATION
physician s
Amount consumed:
ACTIVITIES OF DAILY LIVING
location:
staff performed most of the activity.
Action: Comfort measures given. Encouragement offered. All nursing staff to
MENTAL STATUS
MUST BE PICKED UP BY :AM at the CLC for transport to Bascom Palmer Eye
by:   B King Jr.
No
Patient/Resident Education:
Apply make up/deodorant
others.
physician s
Breakfast  food % drinks %
The patient did not refuse meal.
BOWEL ELIMINATION
Patient bathroom privileges
Other personal care:
Transfer: requires no assistance
Consistency of stool: not applicable.
Number of hours active
Patient bathroom privileges
Hip protectors in place: declined when approached and asked becomes angry.
ZZSWS ECF
Number of hours active
FBs/intraocular antibiotic injections/OU), depressed mood, keratoacanthoma (per
Uses (bladder):  Urinal
Patient/Resident Education:
Amount consumed:
Assistance provided for this task: set up assistance
Consistency of stool: firm .
NUTRITION
BOWEL ELIMINATION
Meal assistance: supervision, oversight, encouragement or cueing.
Assistance provided for this task: requires no assistance.
Not applicable for this shift.
apartment, and only needs blind rehabilation in order to become independent with
ACTIVITIES OF DAILY LIVING
During this shift, patient was continent
Grooming:
Usual BM Pattern: NO COMPLAINTS
-   No Risk
Urine color:
Ambulation: requires no assistance
music where he will attend for a period then go out and smoke on patio
Consistency of stool: .
During this shift, patient was continent
Number of hours s ping
During this shift, the patient has been observed not talking with others,
staying away from others.
Patient is continent.
Urine color:
last year and now s/p PPV/lensectomy/removed FBs/intraocular antibiotic
will repeat labs
Patient bathroom privileges
BASIC HYGIENE/BATHING/DRESSING AND GROOMING:
Institute Universal Fall Precautions on All Patients/Residents
Report new pain
Hip protectors in place: declined when approached,refused.
BLADDER
location:
BP  / (// :)    HR   (// :)
Veteran is to return in one month.  There is some scar tissue that can be
TIMES/  PRN
everything packed the way I want them&gt; Pt. due for blood draw and refused Social
loudly voices that he wishes to go home to his condo. Over and over I stressed
None
(usually to the beach and/or to have a snack and smoke). Veteran stated that it
Socks-
Upper and lower-
ADDENDUM
veteran x, each time he declined mobility lessson, even after trying to
Reinforce and instruct as needs arise.
left him alone for awhile and returned later to see if he had changed his mind.
Secondary Emergency Contact:
Progress: Veteran reviewed route to smoking area. Veteran becoming more
repaired ruptured globes/OU.  He had s/p
Area of instruction: Personal Management     : PM
No
has been invited to participate in the meeting, as well as Acting VIST
ADDENDUM
help. pt also worked and talked about paying bills and money ID.
repaired ruptured globes/OU.  He had s/p PPV/lensectomy/removed
Sessions Remaining:
CD with his favorite musi
Mouth Care
locate/identify / of the operational keys with minimal verbal cuing and
for  minutes on //.  Veteran reported that blindness is a "horror show"
assistance. He was also able to locate the mode buttons, start/scan/ and pause
nursing in the veteran&quot;s chart and no concerns expressed by the team.
Sessions Remaining:
button with moderate assistance. Veteran then practiced changing m , deleting
//
center the printed information on the sc er correctly and the ability to
assistance. He was also able to locate the mode buttons, start/scan/ and pause
locate different commands and also worked on becoming familiar with the layout
to reach his home which is a four-plex, one story unit in a quiet, residential
interest in learning route pl ing, cane skills, or other information in
ADDENDUM
Task:  Extreme Reader OCR
Carolyn   and he was not seen for his second session because he was
Sessions Remaining:
Progress:  Veteran currently working with OCR  at a fair level with
Counseling session, there were sixteen members in attendance.
SWS BRC
Session:
English
Reinforce and instruct as needs arise.
continuing with Bascom Palmer.  I advised him to speak with his team leader and
physician
Nursing notes in the Veteran&quot;s chart and there were no concerns expressed by the
get pt to go for a smoke.
Number of LS sessions to date:
Stephanie Kilian-Mobility I
June th,
Parenteral feeding:  No
of the keypad of the OCR.
//
Progress:  Mr.   continue to make fair progress with using his OCR.
attorney was visiting with him.  This occurred; conferred with Acting Chief,
that he could "do everything."
Brush Teeth
FOLLOW-UP NEEDED; n/a
PATIENT READINESS TO LEARN; receptive/ready to learn
June th,
Date of Discharge/Graduation: Fri , June ,
. "I just want to go home. I&quot;ve done everything with a set routine for
ADDENDUM
I have reviewed these instructions and provided a
ADDENDUM
Medical conditions.  Routine clinic care is not feasible and  patient is at high
VA
Living situation: lives alone, condo
HBPC PHARMACY NOTE
-    stay) cost  $,; then he has had approximately - visits, each
Writer will follow up weekly with attention to developing and maintaining coping
Total minutes:
VA:             with            ph     without          ph       near    glare
(-) ARMD
(-) DM
Measurement DT    PAIN
Active Outpatient Medications (including Supplies):
Toileting
physician         Eating
hypnotic
narcotic
KNOXVILLE, TN
[ ] Patient Education Learning Barriers include:  NONE
N/A  VOIDED?  AMOUNT:
did //.Says he still has double vision and thinks his meds could be
)   DIVALPROEX MG HR (ER) SA TAB TAKE THREE TABLETS   ACTIVE
CPT C : , , or
MOUTH TWICE A
o  Discussed the importanc
the pharmacy.
BP: / (// :)
Patient observed to have or has reported/stated past or current neglect.
ALLERGIES:
PAIN:     (// :)
Chronic Obstructive Pulmonary Disea
__x___Patient is not considered to be a high-risk patient at this time.
Past social/family history
History of Present Illness:
. He visits to  about his bone cancer and his new treatments. He also thinks
pulse:
document can be accessed through Vista Imaging.
disease, infection, or abnormality, including cancer.
- - - - - - - - - - - - - - - - - - - - - - - - - - - - - - - - - - - - - - - -
hrs of a meal, nausea and vomiting at other times but always bloating and frothy
Electronically Filed: //
( ) anorexia
Obsolete
Pre/Post Surgery      :
Patient&quot;s strengths:
D:       Vet appears o be s ping at start of shift and throughout this
. Visual Disturbances:  Ask,  "Does the li
. Nausea and Vomiting:  Ask:  "Do you feel sick to your stomach?   Have you
IBUPROFEN  MG TAB
Axis II.  deferred
and emotionally. Scheduled to F/U with OSAC.  Pt encouraged to follow up with
MEDICATION COUNSELING DOCUMENTATION
A&amp;Ox, Emotional, directable.
rescue because he was complaining of having racing thoughts, not taking his
Computer  rated list of prescriptions and supplies available for patient
SUPPLEMENT
Sensory Perception: = No Impairment
Education Follow Up:
medications, and relapsing on ETOH. Pt. states he was recently dx. with BPD and
E. Patient Past Leisure Interests:
Nutrition:  COLEMAN
Pain assessment score (No pain, -, Worst):
Period of Service : VIETNAM ERA
and symptoms of withdrawal.
TAKE ONE TABLET BY MOUTH THREE TIMES A   FOR MUSCLE SPASMS
HYPERLIPIDIMIA/CORONARY ARTERIOSCLEROSIS/
.  Education Provided to    :  Patient
//  LDL CHO OL     .
What
DATA: Veteran attended a sixty minutes group session of the OSAC
ACETAMINOPHEN  MG CAPLET   Sig: TAKE TWO TABLETS BY MOUTH TWICE A   AS
Description: throbbing
HPI:  yo w/ h/o etoh dependence and bipolar d/o by hx  presents to ER via
Date Treatment Plan initiated:  Dec ,
Staff educate patient on illness, treatment needs (including
at :am to work on goals of: improve mood and affect and increase
LEVOTHYROXINE . MG TAB
REASON FOR ADMISSION: ETOH dependence, ETOH withdrawal. bipolar by hx
HENT Exam: Head: Atraumatic; Normocephalic; Eyes: PERRLA; EOMI; sclera
Age               :
SUICIDE PREVENTION COORDINATOR
ADDENDUM
documented evidence that patient has been compliant with substance abuse/mental
TAMPA TO SEE HIS DAUGHTER /-//. HE WILL LOOK AROUND THAT AREA FOR
NURSING NOTE
ACTION:   Urine collected and sent to MIVA for analysis. BAL negative  on
Time of arrival in Treatment Area-
disease.
&gt;&gt;&gt; Anxious, Depressed
spi ter, Oxygen as ordered, Up in wheelchair, Monitor pulse ox,
Patient on Oxygen
Arm band legible
Physician         :   physician tending
nurse        :  R.Alvarez
Ext: good pulses, warm and dry ext
Respiration:  (// :)
ADL FLOW SHEET
TUBES / DRAINS:
Fall
pain especially when lying on his back.
Measurement DT    POx
RAL ASSESSMENT  :Received pt in bed with Oxygen  in progress at  l/min
Independent
Other:
Patient Assessment:
still negative.
PSYCHOSOCIAL:
Advised to call staff as needed for assistance
well. Followed per respiratory therapist for breathing treatments
Motivation to learn:
Yes
If yes, ADR Report entered:
Bed in low position
Measurement DT    POx
Independent
Arm band legible
saturation.
L/MIN
Yes
SKIN REASSESSMENT VANOD
%
Pajamas / Gown
directed, Comfort measures, Identify contributing factors, Promote rest
Resp team on floor following up with treatment.  GAve pt several cups of hot
Elevated head of bed - degrees and increased o to /l./min.
Dysphagia diet:  No
SOURCE OF REFERRAL:
If yes, ADR Report entered:
Goals
While in the hospital you were treated for Pneumonia.
DRAINS          :
Patient Problem: Pain
ACTIVITIES TO PARTICIPATE
patient educated on proper use of Helios on demand oxygen delivery device,
mmHg
GOT AN OXYGEN MAKING MACHINE. HE STILL FEELS WEAK. HE REPORTS HE IS GETTING A
BLOOD PRESSURE - / (// :)
Using TAC ointment to lesions daily but has not noticed any improvement.
INFORMED CONSENT
AFTER COMING TO THE VA/ED INTOXICATED.HE REPORTED RELAPSING    PRIOR TO
F; RECOVERY ISSUES
DRAMA AND HELD HIS TONGUE, MOST OF THE TIME. HE LISTED ALL THE REASONS WHY HE
S:  y/o WM L/S // here for follow-up chronic dermatitis.  Biopsies
causing striae.  Pt says he tried phototherapy in the past without success.
&gt;&gt;&gt; Verbal
abdominal, lower back and groin region. Recently, he feels as if it is spreading
toxicology collection and breathalyzer.
Teaching Topic(s):
TO THE SKIN TWICE A   FOR   S FOR SKIN CARE
Attending Note: //
Glucose: N/A
Patient is neither pregnant or lactating.
No Medications Found
Mononessa BCP daily
levels (ICD--CM .)
Visit: S: Oct , @: Dental  physician Primary PCE Diagnosis: . (UNSP ACQUIRED ABSENCE TEETH).
therapy appointment (// @ pm) because his wife is ill and his primary
Diabetes Mellitus Type II or unspecifiedGERD
Dental Category: -CLASS IV.  Treatment Status: Active.
(D) Resin one surface-anterior: (F)
concentration.
The Undersigned met with Mr.     for an outpatient individual
() To control his auditory and visual  ucinations.
NURSING PREVENTATIVE MEDICINE/PATIENT EDUCATION
There is a   area of abnormal signal intensity in the
HPI: Patient here for IOP check, wants to know if he has cataracts or not.
GERD, Onset
This veteran agreed to work with the HUD-VASH program including working
The patient does not have any patches on the skin.
Skin Temperature
Date: //     Name:  ,  A      SSN: --
Pt is a  yo domiciled, employed AA male with past psych history of
schizoaffective disorder (per pt), alcohol dependence, cocaine abuse vs
Medication Education
Oriented to  Alert and Responsive
PSYCH RN NOTE
Urine noted to be Clear amber
Transfer:
Medicare A  -    B -
MRSA DOCUMENTATION AND EDUCATION
)   CITALOPRAM TAB  MG PO DAILY                          ACTIVE
=====================================================================
SKIN INTEGRITY
NOT REQUIRED FOR THIS PATIENT
RIC DISCHARGE ASSESSMENT:
Vascular Ulcer NO
presently mandated to go for treatment at the st  s rehab center as a
Never
October when his hearing was last evaluated.  After the cerumen was removed, a
the excessive amount that was removed, he likely was occluded in the left ear.
Patient Name:  ,    JR, DOB: //, Age:
DX: Insomnia; PTSD
ADDENDUM
Cumulative Usage         hrs.  mins.
)   FLUOXETI
Influenza immunization given in the Right arm.
. Informed consent was obtained at : PM on December , . The
. Practitioner obtaining consent:   s,Denis A MD (RESIDENT,
. Sup
PHYSICAL THERAPY INITIAL
Pacemaker                            No  // Comments:
delusional thought content elicited.  mood "good"; affect calm.  no a/v
s with Device Usage    s
Minimum Usage (  )    mins.
Dx: Low Back Pain w/ LLE radiating pain
-Mental status: AO X
restrictions:   Yes
COLONOSCOPY MODERATE SEDATION (COLONOSCOPY WITH MODERATE SEDATION)
good mood.  Denies any acute issues since last visit.  Denies tearfulness, no
=========================================================================
&lt;No Contact Phone Number Entered&gt;.
History of Flu shot reactions?
CLINICAL HISTORY
anger and is
)   EZETIMIBE MG TAB TAKE ONE TABLET BY MOUTH AT         ACTIVE
can successfully cope with it in the future if it arrises again.  Praised pt and
BMI:             .
that mg is the max dose of Fluvastatin. Contacted veteran and instructed him
LYMPHS:   .     (// :)   .     (// :)
NEUT:     .     (// :)   .     (
ADDENDUM
S: MALE presents to oral surgery clinic for delivery of bite splint
RESEARCH NOTE
VALSARTAN MG TA
Review Of Systems:
. Military - Yes He was in the Army from -. He was with security
aresol cans.
Instruction - x week.
resolved.  PMH includes DMII and cardiomyopathy.  He has a pacemaker.
. Keratitis,Superfic,Unsp
. Somatization Disorder
Date:
OD:  OS:
Image quality adequate
Clinical Reminder Activity
TEMPERATURE: . F (. C)
SUBJECTIVE:  y/o   male with PMH: HTN-to  at goal.
To , BS elevated at .
No outside MD&quot;s.
// @      .                      /
DATE/TIME         TEMP      PULSE     RESP      BP        PAIN
. Has the patient f  in the last  months? No
furniture)? No
. Over the past two  , how often have you been bothered by th
Race:BLACK OR AFRICAN AM AN
LEVEL OF CONSCIOUSNESS:  Fully Alert, Calm/Cooperative
Maxine Anderson, Chaplain Resident
didactic and therapeutic groups designed to increase knowledge of mental
How many times?  Were there any injuries?
Lywanda Bright, LMSW, CRADC
Date of Group: //
Participation Level/Participation Quality:  _x__Active/Eager     ___Variable
attending didactic and therapeutic groups designed to increase knowledge of
GROUP ATTENDANCE (x=attended offered group)
systems that are conducive to recovery lifestyle.
DTC PROGRAM CLINIC
[x]Thought for the
,   DALE signed into the   Treatment Center for the purpose
skills/tools needed to maintain recovery efforts, and promote social
Started smoking again in June-/ppd
ASSESSMENT:
lack of attendance, despite using FMLA. Will be expired. "The stress is
ADDENDUM
OBJECTIVE:
PHYSICAL EXAM:
)   G TAMINE HYDROBROMIDE MG TAB TAKE ONE TABLET BY    ACTIVE
MOUTH THREE TIMES A
OD: /                   OD: /
Outpatient setting - vaccine documentation
not want to?
Does the patient have a history of pressure risk ulcers? NO
arthritic joint pains especially in his right shoulder and right
BP: / (// :)
Patient&quot;s primary language spoken/understood is English.
Pneumovax:
DIAGNOSES AND PROBLEMS TREATED THIS VISIT:
Primary PCE Diagnosis: . (DENTAL DISORDER NOS).
Medication reconciliation not required at this encounter as there were
Supportive psychotherapy with medical evaluation and management.
VITAL SIGNS: T:. F [. C] (// :)
night then resume dose at Smg- Sat-Thurs and .mg every fri
Religious/cultural factors:
CHAMBER MEASUREMENTS   LEFT VENTRICULAR SEGMENTAL   MOTION ANALYSIS
sun  and
___ Smoking Cessation Referral
%, calcified aortic valve leaflets, grade / aortic
- HL, LDL
INR NOTE
Perio. PPT perio for  P LLQ. PMHx reviwed with pt,  carpule % lidocaine
WARFARIN NA *HIGH RISK* TAB  MG
not know of the different programs in his prescribed hearing aid. Pt will call
ER,  E is assigned to Caller Area HUNTSVILLE CBOC.
. If Yes, the patient is counseled to stop
. Essential Hypertension
.  What questions do you have about caring for yourself when you are at
Clinical History:
EDUCATION ASSESSMENT  (PHE)
ALLERGIES:NKA
Protocol(s) used: &lt;Not identified&gt;.
.  I  the assessment as follows:
P:
R:
V I T A L   S I G N S
NURSING Dx:
EXAM SHOWS HEALING EXT SOCKETS ,, W/O SOI, SWELLING, DRAINAGE.
PC APPOINTMENT REMINDER NOTE
EYE OPTOMETRY COMP. EXAM NOTE-T
. Anticoagulation
. Thyroid Diseases
Active Outpatient Medications
CVS:  S/S heard.  No murmurs.  Lungs:  No crepts, no rhonchi.
needed this dilated ASAP.  Patient says he gets urinary infections and was told
Notes indicate he was intending to see Mr. Barker in March or April when
Pain Reassessment
Weight: . lb [. kg] (// :)
HISTORY AND PHYSICAL
LEGAL DOCUMENTS:
Total Glasgow Coma Score:
No pat
RE S:
Patient has reported a pain score of  (// :).  Pain
PATIENT PLAN OF CARE:Continue current plan of care
.  Diabetes mellitus.
He is to follow-up with Cincinnati in -   in Urology clinic regarding
[-] Strabismus:
Nagging,  , Shooting, Throbbing
DD: //
Correctly states contact information.
is that i have strong suspicion in regards to his narcotic use and his
they&quot;re being sent to florida).
ADDENDUM
taking ii tab qh as i discuss with pt that likely is that he&quot;s having tolerance
Inactivated Influenza Vaccine (//)  U.S.C. �aa-.
screen for depression.
Pulse:            (// :)
is unsatisfactory and does not meet the patient&quot;s treatment goal.
studies within normal limits.  Right median sensory studies within normal
Patient contact
CHIEF COMPLAINT(S):
irritative urinary symptoms.  Notes he had unprotected sex   s  ier.
unsure if his wife is sexually active with other partners.  History of HSV on
HIV Ab negative.  Attempted to contact patient by phone to alert him of this
Provider:  STEFANIK,  J
Dear Mr.  :
Dates: /-/
DENTAL/ORAL - ALVEOPLASTY (ALVEOPLASTY)
social security number
DENTAL EMERGENCY EXAM
Missing Teeth: , , , , , , , , , , , , .
MH OUTPT SOCIAL WORK INDIVIDUAL THERAPY NOTE [DT]
Pt. was seen with his mother. Pt. was rather calm to , still chose to tell
Patient continues to be upset with divorce and financial issues, still
Vet presents for routine follow up of PVD, tobacco use d/o and adjustment
Clinical Reminder Activity
O Relationships Homework D: Define " " Exercise
RIGHT RX SHOE FITS FINE WITH INSOLE BUT LEFT SPLIT SIZE SHOE TOO NARROW. LENGTH
little more than an hour after this meeting.
- leg swelling, localized above the painful ankle
the cymbalta was equivocal.  Finally, his wife moved to Texas to  be
PAIN.
Positive Responses
diagnosis/diagnoses and problems: Depression, anxiety
LEVEL of SUPERVISION:      Author is attending.
Diagnosis: Atrial Fibrillation
Pulse Oximetry   (// :)
VITAL SIGNS:
V
CT Scan  Dec , @ :
have burn holes on them as do some things in her home.  She feels she c ot
C&amp;P CAPRI EXAMINATION
last INR perfect. Not sure why ACC didn&quot;t  w this? I did it ti
Age:
. fahrs disease  neurode rative disorder with calcium deposits, hereditary
Mr.   was placed on a  hour Mental Health
they decided he needed a safe place to be.
DOSE FOR SATUR :      TABLETS  =  MG
behaviors and for risk of falling.
I:  Observed pt. to be safe/free of overt discomfort. Monitored every
[]Patient    []Family       Problems with vision or hearing
after .  He voiced that he had slept well even though his roommate was in
extended periods in the milieu and has been exhibiting safe behaviors and has
PATIENT SEEN BY:Frantz   COTA and Sue Carmody OTR.
star the activity independently but was not able. Pt required verbal and
E  APPEARED TO S P THROUGHOUT THE NIGHT WITHOUT ANY DIFFICULTIES.  NO
Patient identification is confirmed by an accurate secured armband
COMMENT ENTERED BY ANTICOAGULANT CLINIC.
DATE OF COMMENT: AUG ,@:  COMMENT:hold /-/
This is a reminder that prior to your procedure on // you should hold (do
without incident bilaterally.  Otoscopy then revealed clear ear canals and
Kris A  son, MD
wife to , who gives all of his history.  She is extremely tearful throughout
# Refills:                   Quantity:
pt was not placed previously.  Previously t
Reason for admission: Bizarre/Concerning Behavior
PLAN: Non-acute care  Level
B/P:    / (// :)
*********************************************************************
OS: normal
CAUTION: THIS DRUG MAY INCREASE RISK FOR FALLS
CHIEF COMPLAINT(S):
Chest pain: No/Yes- ON YESTER , DENIES CP AT THIS TIME.
DISPOSITION:
x  does show acid reflux.  I hope you feel better on the omeprazole.  Please
Future Appointments:
Anxiety
Dysmetab c Synd  X
MH OP PSYCHIATRY ATTENDING NOTE
PAIN:
was seen by pmr on // and advised to-
RR:  (// :)
upset about it." Patient indicates he would like to have another medication
document can be accessed through Vista Imaging.
members who were having combat memories resurface after another patient in the group collapsed in
CHIEF COMPLAINT:
HEENT Exam:  Normocephalic;
VA CLINIC- Oak
tx rue due to increasing pain and weakness
- - - - - - - - - - - - - - - - - - - - - - - - - - - - - -
the moment at some point in the coming week. The two patients who
--------------------------------------------------------------------------
There are no changes in medications since last visit.
wanting to get "too close".  The role of isolation with PTSD was
THREE TIMES A   WITH FOOD OR MILK FOR
Inactive Outpatient Medications                        Status
==============================
Active Outpatient Medications                          Status
)   CARBAMIDE PEROXIDE .% OTIC SOLN INSTILL  DROPS      EXPIRED
)   HYDROXYZINE PAMOATE MG CAP TAKE ONE CAPSULE BY       ACTIVE
Nonspecific findings as above noted.  Kindly see above for more
Phone number:
Puls:  (// :)
Patient reports his energy and concentration are problem areas.
Comment:
HEMATOLOGY ONCOLOGY CONSULT RESULT
P. No further action
ascertained. He is complaining of not getting enough valium, and feels that he
MENTAL STATUS EXAMINATION;  See MH Hx MSE on //.  No significant change
. Social or demographic risk factors:
,      --
Patient denies allergy to thimerosal.
PAIN MED IF POSSIBLE.//AR//AR
and see if that helps
System Recommendation: - hours
Starting at: // @ :: PM
document.
Contact Phone Number: ()-.
she will not be able to sit all   to accomplish the training if she c ot get
Facility Appointed PCP: LACY,  J DO (ANCHORAGE PC I)
Blood Pressure: / (// :)
MEDICAL RECORDS TECHNICIAN
cut  her off of Xanax.  I did not. I had ordered her a    supply of
Blood Pressure: / (// :)
accidents because she coud not turn to see behind her.
Identified problem: OTHER UNSPECIFIED COUNSELING.
Has used  Klonopin tablets in last  months.
Height: . in [. cm] (// :)
Comment: Pt.encouraged to take meds as prescribed by providers, and
R axis -
Veteran states that this is a personal matter//rm
ADDENDUM
Author:  ,DIANE E
identified&gt;.
Sex:   FEMALE
Nurse&quot;s note reviewed.
knee. Denies past h/o left knee trauma or surgery. Constant left knee pain with
FH - Father- heart disease
sent for microscopic analysis.  Medication may be injected into the
. Surrogate (if applicable):
Patient has reported a pain score of  (// :).
BMI: BODY MASS INDEX
Nurses note reviewed.
Medication list reviewed with patient and reconciled.  Updated
ORTHOPEDIC PROVIDER NOTE
RESULTS
Author: MACKIE,RYAN E
VistA Imaging - Sc ed Document
ADDENDUM
HE HAS BEEN ABUSING ALCOHOL FOR LAST  YRS AND HAS BEEN IN DETOX
HE HAS BEEN ABUSING ALCOHOL FOR LAST  YRS AND HAS BEEN IN DETOX
HABITS:
Admitting Physician: RAMIREZ-FIGUEROA,JOSE
partial pack cig
THAT HE WANTED TO GO THROUGH THE PROGRAM FOR DETOX FROM ALCOHOL. HE VOICED THAT
Alert and oriented to person, place, time, and situation.
CAP                 SHOES
RISK ASSESSMENT (DANGER TO SELF AND OTHERS):
*INFLUENZA.:
    
