# Supplementary material for: Predicting the Risk of Suicide by Analyzing the Text of Clinical Notes
Source: PLoS One. 2014 Jan 28;9(1):e85733. doi: 10.1371/journal.pone.0085733 (PMC3904866; doi:10.1371/journal.pone.0085733)
Supplement: Appendix S3 — Machine Learning Libraries and Methods: This section is provided to enclose the open source (Apache License) classifier used for the building of the statistical models, specifically for the purposes of study reproducibility. A detailed account of these tools is intended for another publication. (ZIP) [file pone.0085733.s003.zip › Appendix3/ML_libs/Regression_testing/group3/grp3-pt-1045.xml.txt]

Active Outpatient Medications (including Supplies):
this. I have a lot of stress. I have been in the house for  years. I like it. I
Body Mass Index: Body Mass Index is .
correction              correction                va        va
d)   The influenza vaccine contains only noninfectious viruses, it c ot
f)   The possibility of Guillian-Barre synd  (self-limited and
JOINT PAIN-PELVIS  .                   //   P ,  J MD
Pain: /
(D) Dental prophylaxis adult.  DX: (.).
Gerd
NNV: verify pt is stable dentally, b/c pt is not eligible for any other
)   ALBUTEROL/IPRATROPIUM INH .GM INHALE  PUFFS BY
lab. Cbc, Diff, Protime, PTT, Basic Metab c Pane. Urine Collected
Patient denied
Within   s prior to surgery
INFORMED CONSENT IMED
CC: phymosis
Pt finally accepted this date and I promissed that I would call him tomorrow
Electronically Filed: //
post-op instructions for indicated surgical procedure,
- - - - - - - - - - - - - - - - - - - - - - - - - - - - - - - - - - - - - - - -
Weight: . lb [. kg] (// :)
Derm: No malar/butterfly rash
results were reviewed by  physician  approved the proposed treatment plan.
. Were constantly on guard, watchful, or easily startled?
ral: In NAD
Comment (optional) f/u with PCP
No
veteran that he is on the waiting list and people are slowly coming off the
enroll and attend on another  .
treatment options, a review of the patient&quot;s rights and responsibilities and an
that he is staying sober and that he has no urges to drink etoh.  He
. Hypertension: home BP &quot;s/&quot;s
support recovery as opposed to giving in to desire to use, sexual desires and
-Improve the patient&quot;s effectiveness in dealing with unexpected
stressors that could trigger a relapse.
The veteran&quot;s diagnoses treated by this group include:
in  ral.   Discussed accountability for reaction, responses and
Hz
d. Blast Quaternary:Yes
.  ral Med Exam                                   //  GEESEY,YVONNE L
No show letter mailed to pt. Pt advised  to call clinic to reschedule his appt.
S:  Veteran is a  year old, % SC, male veteran seen for  minutes.
unconscious for an unknown  period of time and fell to the ground sustaining a
-
She mentioned she stopped using Amitriptyline as well as
Per  physician nstructions (see his note dated //) patient informed of
to recheck the site.
[]Other:
RN PROCEDURE NOTE
[X] ID Band
Specimen (Received Oct ,  :):
You should receive a letter with the results of your pathology unless it
[]Contact not made.
Surgery/procedure: excision of lipomas
B/P:   /
COMMENTS:lipomas
- - - - - - - - - - - - - - - - - - - - - - - - - - - - - - - - - - - - - - - -
. AK
NAME:  ,  R
Pulse:
Ending at: // @ :: PM
Lungs bilateral wheezing sound.  Abdomen soft, nontender,
. Surrogate (if applicable):
of your toenail. Special chemicals may be used to dest  the growth
You, Tanya
app
appropriately when stimulated.    No
ID was verified using  unique identifiers. Yes
Pre-hospital Treatment:
(D) Intraoral periapical ea add. Tooth: .  DX: (.).
(D) Extraction erupted tooth/exr. Tooth: .  DX: (.).
Address:   MONTOYA
out of meds or in special circumstances)
preference for learning. Instruction was understood as evidenced by the
with chemical burning of the nail roots.
He has had exposure to blasts during his deployment.  One IED explosion resulted
No smoking.  Did smoke about / ppd x yrs, Quit /
pelvis.  Clinically appropriate ER visit.
Primary Care Check-In
No smoking
Total S/C %:
. Overweight (ICD--CM .)                       //  YOUNG,  J
[ ] YES [x] NO Unintentional weight loss of  lbs or more
PM&amp;R FOLLOW-UP NOTE
which have worked well. He got releif for .   with return of
Request for med  wal for ed to  physician so, note being for ed to Ms  , Purple Team SW
------------------------
This is not effected through g.team transfers (like the Primary Care ones).
subcutaneous tissues, a # gauge  inch spinal needle was placed under
DEC , @::   .
Not at all
Is patient an employee, volunteer, or student?
(current) Use of antiplatelet/Antithromboti
makes him s py.  He says he would rather receive the medication you choose
YES
GAF Score:
no polyps
. Hyperlipidemia * (ICD--CM .)
ORIENTATION: oriented to time, place, and person
Activity:           = Walks Occasionally
For secondary diagnoses:
inte
arm, passive range of motion left leg, active range of motion right leg
Activity: bedrest
The Advanced Directive Assessment has been reviewed and is negative for SW. Sw
Breath Sounds: Decreased
GEC REFERRAL CARE COORDINATION (ID CHILD)
GEC REFERRAL (ID PARENT)
Urine
No adverse reaction to treatment
SaO:
Activity order is
For secondary diagnoses:
Low Back Pain
Incision: L knee, dry.
. SENSORNEUR HEAR LOSS COMBIN
doing fine. pt is AAOX, labs reviewed. agree with residents plan
CAPILLARY REFILL:  Less than  seconds
No productive cough
Pulse:
Computerized Problem List is the source for the following:
Alert
ADDENDUM
with no relief. Pain level /.
CAPSULE VIA INHALER BY MOUTH TWICE A   . FOR
===============================
purposes in November of .  The veteran&quot;s C-file was available
Diarrhea, chronic * (ICD--CM . // MCADOO, NDA L
North Little Rock Eye Return to Clinic Letter:
remain in the waiting area for approximately  minutes after injection.
S:
necessary for medical and surgical disposition and treatment.  I concur
ADDENDUM
GENERAL MENTAL HEALTH NOTE
to pick or chew at site.
Pain assessment
Ekg was again done by Charge Nurse and showed Sinus Bradycardia  :Vent Rate
Feeding assistance required?  No
to be tried again on the Wellbutrin which apparently helped him the best
EVENING WRAP UP GROUP:Patient was given a  part questionaire as a tool to review their
all the cigarrette smoke there locally when he went to look into the possibility
pt was started on Remeron which he seemed to tolerate well.  He is also on
Met w/pt. for  min. f/u MH appt. Continues to present w/improved mood and
instructions provided.  Order was placed for occult blood x.
TELEPHONE NOTE
Pts medical hx includes;  hx of GERD
different parts of my body - and have had this for about  yrs." Typically
they do affect his energy level. Educated about alternative approaches out of
N. HENNESS RD #
LAST INTAKE UPDATE - NONE FOUND
Temp: . F [. C] (// :)
---------
and Rachael took care of veteran for six month
&lt;end insert&gt;
Case d/w  physician son for pt mitral  uloplasty ring in / is unclear.
PCMM Provider: BERNA,
ADDENDUM
If yes, how much have you gained? lbs
MHIS COMPREHENSIVE EVALUATION CONSULT
Access to Means to Carry Out Plan? Yes
. Pain in joint involving shoulder region
Vital Signs Post Injection: (only needed if complications)
(xx )Guided Discussion            ( ) Other:
INTENSIVE OUTPATIENT PROGRAM-GROUP THERAPY
Length of Session:  minutes
Provide veteran with
Depressive Disorder Nec
clinicians and importance of notifying both non and VA clinicians of any
)   SIMVASTATIN MG TAB TAKE ONE-HALF TABLET BY MO
The patient states the onset of pain was
HISTORY OF PRESENT ILLNESS
SPINE - LUMBAR DECOMPRESSION ( OR MULTI-LEVEL) (LUMBAR
Time in: Apr ,@:
midnight. ASA:
Mr.   is a  y/o male who is s/p left L laminectomy on // for
On a scale of - how do you rate your primary pain?
symptoms of neurogenic claudication. Postoperatively,  he was complaining of
Notification of abnormal prostate results received. Per below: Patient has f/u
Mr   comes in for followup of his biopsy....Path
Vet will be contacted for scheduling.
__x___M/W :am Backhab
RADIATION ONCOLOGY DOSIMETRY/PHYSICIST/SIMULATION NOTE
NAME:  ,
Radiation treatment details are documented in IMPAC.
such as Tylenol, cold medicine, vitamins, herbals, supplementals and/or
patient is taking new "Non-VA Meds", enter them as "Non-VA Meds" under
Pt stated he has been taking his casodex in excess of    prior to this
Radiation treatment details are documented in IMPAC.
RADIATION ONCOLOGY THERAPIST NOTE
For specifics, please contact Radiation Oncology Service.**
)   Non-VA OTHER MISCELLANEOUS                             ACTIVE
MCV                       .     fL          to         []
displays new watch and blue  s.
Common Cold (ICD--CM .)             SCHIZOPHRENIA NOS-UNSPEC
=========================================================================
Hyperlipidemia (ICD--CM .)         Hypertension, essential
Common Cold (ICD--CM .)             SCHIZOPHRENIA NOS-UNSPEC
Person(s) Instructed: Patient
LEARNER ABILITIES
S:patient is a  yo wm with history of ptsd and possible vascular dementia vs
Given the checked information from ETSU the UDS was confirmed and there was NO
BREATHING
impingement of shoulder
per postop instrx sheet
The following Anesthesia Technique was ADDED:
Voided:No  Amount:
SIDE RAILS UP X..CALL LIGHT WITHIN REACH..LT SHOULDER REMAINS IN
DISTRESS NOTED....FAMILY AT BEDSIDE.
Assisted to Bathroom: Yes at
Contact Phone Number:   .
Starting at: // @ :: AM
set him up for pc lab dec  when he sees dane there-
Reason: INFECTION
the past.
Pulse:
Respirations:
Problem:  Activity Intolerance
. CONSTIPATION, unspecified
Heart Sounds:REGULAR
Neurological:Alert, confused, trying to leave the facility
he had a fever of  and took Tylenol and the fever improved. He has pleuritic
ADDENDUM
Objectives were met.
Lungs: LEFT:Clear
-pulmonary following, patient for bronch to
Verifier E-Sig:/ES/Vinay JAIN
Resp:  (// :)
)   ALBUTEROL PRE-MIX SOLN,INHL  .ML NB RESP-QH WHILE   ACTIVE
Respiration:  (// :)
history and physical were reviewed.
Treatment: Side Arm Nebulizer
results noted. Less confusioni per wife over past   s.  Persistent cough
ADDENDUM
call you primary care provider.
Yes: But is due to return on the rd, Tues ,  hours for a
PHQ-
Pnuemonia without incident.  Labs reviewed and we went over several medications.
Contact Phone Number: SAME.
document can be accessed through Vista Imaging.
Starting at: // @ :: PM
Conversation with SPOUSE indicates that  ,   LIN has a chief
Chief Complaint: Testicular Pain
MEDICAL HISTORY
Protocol(s) used: &lt;Not identified&gt;.
Evaluation/Management Code: HC PRO PHONE CALL - MIN ().
Caller Response: *I ASSISTED PATIENT BY PHONE.
order.  Patient will also need a current lab for creatinine within   s of
Active Outpatient Medications (excluding Supplies):
This referral was discussed with  on .
presenting for physical
Post-Op Diagnosis: open-angle glaucoma OS
/ ph NI
. Adv Glaucoma OS&gt;OD, goal IOP low teens OU per  physician SLT // OS
[  ] Knife&lt;":
attempted to hurt himself.  No f/c/n/v/d/cp/sob.  No recent visual changes.
MHICM CRITERIA REVIEW
NURSING ASSESSMENT:  Vet was received a/o x with a neat and adequately groomed
Will patient require the following treatments after referral?
Tubefeeding (any method):  No
Clean and groomed.   physician ospital PJ.  Spontaneous and appropriate
Vet is alert and oriented x. Mood is superficially bright. Vet took his
PHARMACY DISCHARGE INSTRUCTIONS:
PSYCH INPATIENT RN NOTE
ASSESSMENT: Vet observed sitting quietly in the  room, watching movie on
.  SKIN INTEGRITY:
Dental Category: -PRIOR , EMERGENCY (OPT).  Treatment Status:
--&gt;Does the patient exhibit loss of temper such as extreme agitation,
Age:   GENDER: MALE   RACE: BLACK OR AFRICAN AM AN
[  ] Flammable Liquids:
. lb (
Thought process is linear.  Thought content:  Patient says that it is too  y
roommates stole money from him, forcing him to leave.  He felt very angry and
severe and persistent mental illness including schizophrenia,
next Mon  // to finish discussing his treatment plan.
) Entering burning oil fields when moving into Kuwait (patient reports this
my schedule at the time. Patient agreed to contact  physician was ready
RETURN VISIT:
PROBLEM LIST:
**WHEN YOU GO TO THE LAB on mar , --&gt;DO NOT EAT AFGER MIDNIGHT and
scheduled visit.
KNEE.  NO EDEMA NOR BRUISING NOTED LEFT KNEE.  MEDIAL KNEE TENDERNESS
This pt. was seen to  in the NLR Autolane Refraction Clinic.
ADDENDUM
ALLERGIES: DEBROX, INSECT STINGS, TORADOL
Alcohol Abuse . // WISEMAN,EVE J
COPD * (ICD--CM .) . // KUSHWAHA,NEELIMA N
PROVIDER:  physician
by: EMMA J SUMMONS
patient will need a f/u appointment with dr kaur
CR PREVENTIVE SCREEN
information about the topic
via non-VA PM&amp;RS request // by his PC-PA - which was submitted d/t response
ADDENDUM
Starting at: // @ :: PM
fluid collection in the posterior left internal capsule.
Mobility  normal
at : in order to discuss his pain/ headaches, meds, and care plan.
when you were drinking in the past year?  or
Patient Condition:
th at :pm.
Plan: Continue treatment per plan
station. A copy of the M- accompanied the patient and was dated Nov ,@
PATIENT STRENGTHS:
Interventions: monitor per SP protocol (line of sight)
ecchymosis and is very painful to touch.  Unable to move finger on exam.  Will
to his current laxative regimen. Have ordered magnesium citrate per his request.
firm abd, however. pt dc&quot;d off sp to  and decreased to aps. contines to not
MH INPT GROUP THERAPY (B)
regarding constipation.
P:-Chronic pain.
-
Are restraints in use?
Has there been a FALL in the past  hours?
NURSING NOTE
Ethnic/religious/cultural food preferences:none
NURSING NOTE
I: Patient provided with safe, structured and therapeutic environment. Offered
Di uptive Behavior Type: Patient to Staff, Property Destruction
Is client able to understand rel t information? Yes
PROBLEM: Safety, chronic pain
Has there been a FALL in the past  hours?
and   monitors.  Provide structure to decrease impulsive behavior and assist
discharge. Medically has many complaints but per OBMT notes is stable and
of November in the hospital here. I can&quot;t find a record of the # patches
RTC: Dec th at :
A/P: Medication not  wed by pharmacist because medication is a controlled
Patient kept the following items: wheelchair.
I: Pt has chronic pain, and is focused on it while here. He
Also attempted to teach pt about using spacers and Asmanex, he said
.  Reports of syncope.
=========================================================================
I spoke with: Patient (self)
MH TELEPHONE CONTACT (B)
Zimbleman, MH Services; Naomi   , LCSW; VA P ce officers.
The pt was cordial and cooperative.  The reason for the HCA was explained to pt.
nothing has changed re: Bay Pines, but vet may feel more overwhelmed at this
RTC Fri  May st at am
get it by Mon .  States he borrow&quot;d
Received message from vet&quot;s neighbor,  a Perkins -- stating there
Type of Visit: Appointment Check In
Respiration:      (// :)
Sonographer:  Ali Elmi
Height:
VSS.
VITALS (last observed) --
PLEASE ORDER BREAST ULTRASOUND
C. Montgomery VAMC
CONTRACEPTION USES:used the pills in the past and IUD removed August , None
PATHOLOGY REPORT
If psychotherapy was conducted what was the length of the session?
. How often did you have six or more drinks on one occasion in the
Record has been reviewed. Follow-up is needed.  Patient will be rescheduled for
R: (// :)
.  When is your next appointment?
Several  s
-
As ordered, administer .cc Trivalent Influenza Vaccine IM in the
from California to Colorado in .  States he has had multiple bad sun  in
Pulse:            (// :)
providers for assistance in identifying and managing symptoms that get in the
Barett has been informed that CBSST group will be cancelled on Wednes . The
Primary Care Call Center
Last  WBC&quot;s:
Nancy, from Birch  AL.  Returned team leader&quot;s call to schedule appt for pt.
working on a leather  et kit he started last week. He sought group leader&quot;s
INTERDISCIPLINARY TREATMENT PLAN
Age:  (DOB:JUL ,)
minute weekly home visits for supportive therapy focusing on
lie in bed and get a thought in my head I just can&quot;t get it out until I
Temperature:     . F [. C] (// :)
Patient identifies the following side effects:dro ng, dizziness.
Session:
See // note by this author.
that he felt he has done his part over the past several years to cope
Subjective/Objective:
minute weekly home visits for supportive therapy focusing on
specify any stressors or increased anxiety.  Veteran reports feeling
Weight: . lb [. kg] (// :)
by gen surg when it was acutely infected back in . Was seen last year b/c
physician ho agrees with the pl
. Myopia
. Consent to Blood Products (if applicable):
ADDENDUM
Pt is on  reg u /and nph o  units in am /and u reg/ u nph in pm.
NURSE INTRAOPERATIVE REPORT
Primary: Exc right sebaceous cyst occipital line
Time returned to unit:
Time:
BRIEF CLINICAL HISTORY:
PATIENT CONTACT NOTE
Public Health Nurse/Home Care Nurse called with questions.
the patients safety or well being.
Subjective/Objective:
- - - - - - - - - - - - - - - - - - - - - - - - - - - - - - - - - - - - - - - -
Chief complaint:  Pt reports for complete exam. PT denies any prbs or
feeling good.  Described
ADDENDUM
they are missing order for sodium floride oral cream and we have no order for
Birch  HCC
friends from his  .  They went to a married couple&quot;s home for
Dear Mr.  :
over a period of years, grow larger and/or even turn into a
tomorrow am. Will send another monitoring/lab schedule to care home.
Spent time coming up with a way that the veteran would know when he no
Assessment/Plan:
the demonic realm."  Veteran reported belief that his calls to  es
Current DM regimen:
normally".Walking on stairs I have a problem with the last few steps.
[ ]ingratiating  [ ]argumentative [ ]other:
MH INDIVIDUAL NOTE
Identified problem: OTHER UNSPECIFIED COUNSELING.
No
%. Total s p time  minutes. S p stage distribution revealed %
discussed with the patient."
=========================================================================
Presence of pain No
[X] Oral Hygiene:
wrist.
LDL Cho ol: Date of Test: AUG ,@:    Result:    mg/dL
first cousin.  She also reports migraine headaches in her family.
FEB ,
REASON FOR VISIT/COMPLAINT:  y/o black female. Here to  with c/o productive
)   ALBUTEROL MCG (CFC-F) D ORAL INHL INHALE  PUFFS  ACTIVE
DOB:JUN ,
[X] NO
patient?  No
.  Follow-up with Primary Care Provider?  Yes
also to kill her estranged husband and his girlfriend.  She was evaluated in the
Pt. returns, d/c&quot;d last night from Vista Hospital. "They changed my meds...He
I reviewed your lab results and they are negative.  I look for  to
MINE RUN RD
Scrotum ultrasound
Iron / tibc normal, but ferritin low, repeat in   month.
Dear Mr.  :
claims file was available and reviewed as were noted on the McGuire
COLON - COLONOSCOPY (COLONOSCOPY)
some state
TIA&quot;s.  He was treated with anticoagulants and the TIA&quot;s decreased and his condition
Carcinoma, Basal Cell (ICD--CM
Self
Best time to call:
Never
Normal sensation and circulation AND
he complains of pain in right lower jaw, says he pulled out  teeth with a
etc. There was concomitant incr. in anxiety with the delusions and s p had
though. No more muscle spasms. Will try to d/c this medicine and see how the pt.
Patient continues not being anxious. S ps - hours qhs. When he had become
S: PT. RETURNS FOR RE-EVAL. AND TEST RESULT.
- continue diuretic and titrate up as needed if edema redurs
*  TEACHING METHOD: One-to-one verbal discussion
I spoke to  . Father swung at another pt. In his own defense? We don&quot;t
She was much more hopeful and was thankful for all our help.
Miami VAMC states that they won&quot;t take him because he is cleared psychiatrically
Medicare
he will regain sight in one eye but at this time he c ot see.While at Bascom
I have discussed advanced directives with the patient,
no pain, flashes, or floaters...
Allergies: see posting
Purpose and use of assistive devices and mobility aids if needed
PPD.
provider to dc future orders.
initial results. Read in -H
Patient and family unable to actively participate in reconciliation
pharmacy records, progress notes, and other available data.
thanks
Primary Occupation:: retired postal worker +,taught school yrs
Client assessed motivational level as: Low
REASON FOR VISIT: Follow up
Hair
Bowels:  Continent
SCOPOLAMINE .% OPHT SOLN SOLN,OPH   DROP BOTH EYES QID  ACTIVE
This shift the patient used the toilet.
REASON FOR VISIT: Follow up
ALLERGIES:      see POSTINGS
This shift the patient used the .
No staff required.
BRIEF INSTRUCTION SUMMARY:
Note entered by error, does not belong to resident.
ZZPATIENT CARE ADL NOTE
away from others.
s/p gunshot wounds to the face with loss of vision.  Transferred to CLC on
ACTIVITIES OF DAILY LIVING
Ruptured globes/OU.
medical care. Veteran ori lly was transferred from Bascom-Palmer to WPB
It appears that veteran requires total assistance with his ADL&quot;s and IADL&quot;s
During this shift, the patient has been observed smiling, laughing, talking to
Active Inpatient Medications (including Supplies):
them to needlessly poke and prod him". SAys that he has stayed healthy and well
Dinner          food %
" I do not want to live if I am blind ,I just want them to put me to s p they
(-) other
BOWEL ELIMINATION
During this shift, patient was continent
MOBILITY
Tobacco Use Disorder, Continuous  .     //   SICHERER,BEVERLY C MD
BLADDER
Patient bathroom privileges
During this shift, patient was continent
Urine color:
MOBILITY
Number of bowel movements this shift: .
MOBILITY
Patient is continent.
Assistance provided for this task: two person assist.
Patient bathroom privileges
pain, and redness.
The patient did not refuse meal, fluid.
Number of bowel movements this shift: .
enhancement.  Veteran continues to decline Blind Rehab, because he wants to
Will follow
TIME OF THE       ,@:
ELIMINATION
Amount of stool: .
Rehabilitation where he can be within a supportive environment learning the
skills necessary to live independently.
Breakfast       food %        drinks %
Veteran went for a haircut to  and appeared at this providers office with his
accounts. He was assisted with call to PF prior to his going there to determine
ZZPATIENT CARE ADL NOTE
location: resident room
Meal assistance: set up, cutting meat and opening containers.
No staff required.
Bed mobility: independent (easily turns and sits up without staff assistance)
b. MEDICARE NUMBER  A
a. State Number  X AA
. Reasons for Assessment
ZZPATIENT CARE ADL NOTE
gunshot wound to the face and e
COPING MECHANISMS:
Ambulatory aid:
Urine color:
TIME OF THE   Evening   ,@:
Number of bowel movements this shift: .
Assistance provided for this task: set up assistance
Amount of stool: .
This shift the patient used the toilet.
Consistency of stool: .
Adjustment Disorder with depressed mood
Extra fluids  given.
)   LUBRICATING GEL JELLY,TOP   PACKET EXT BID To         ACTIVE
During this shift, the patient has been observed talking to others.
Other personal care: shampoo, oral care
NUTRITION
No staff required.
Amount of stool:  .
Meal assistance: set up, cutting meat and opening containers.
Bed mobility: independent (easily turns and sits up without staff assistance)
occidental medicine and religion and the perpetuation of Christian martyrdom in
. Hispanic
X .  , not of Hispanic origin
ZZPATIENT CARE ADL NOTE
cueing
location: resident room
Unspecified open wound of eyeball  .    //   CHEN,PENG MD
by Bascom Palmer eye institute in Miami. Apparently, veteran will have eye
Personal hygiene: bed/sponge bath
During this shift, patient was incontinent (wears disposable brief)
NUTRITION
//       /    /
MOBILITY
S PING PATTERN
Patient/Resident Education:
Uses (bladder):  Urinal
Bowels:  Continent
ZZPATIENT CARE ADL NOTE
Patient bathroom privileges
Extra fluids were given.
Amount consumed:
-Hyoseine(Scopalamine)   times daily right eye for
physician s
Number of hours s ping
Assistance provided for this task: requires no assistance.
Number of hours napping
Bed mobility: independent (easily turns and sits up without staff assistance)
BOWEL ELIMINATION
This shift the patient used the toilet.
described his skepticism to s Western medicine and disbelief; instead he
of.
Consistency of stool: not applicable.
NUTRITION
MOBILITY
Personal hygiene: showerpt has a shower
Snacks:
OTHER RISK FACTORS
Skin Temperature
Urine color: clear, yellow
retina, however;  and now he does not know if and when he will regain sight in
pt refused skin stated &quot;I don&quot;t any body touch me&quot;.
Cellulitis and abscess of finger  .    //   RANKINE,YANICK D ARNP
April ,
attending BRC program and wanting a tour.
Social worker   Bonfadini was informed of visit outcome and VIST suggested he
Amount of stool: .
Client frequently goes out to smoking patio and sits on the ground. Writer
The patient did not refuse snacks.
Other personal care: oral care
Patient is continent.
team. Patient tells me he is feeling better in brighter spirits.Says he is
location:
During this shift, patient was continent
none, no complaints of pain
During this shift, the patient has been observed talking to others.
Health Care Surrogate:Barbara A. Easthom, sister
Hip protectors in place:
or shortness of breath. He has right thigh boil, and PO and topical antibiotics
time.
Consistency of stool: not applicable.
BOWEL ELIMINATION
Admission date: //@:
INTERVENTIONS
antibiotics are not good for you.
Sessions needed:
ing, and going out for walks.  pt was also upset about the fact that CLC
Carcinoma, Basal Cell
is very difficult for him to cope not only with the blindness, but to not be in
stated that he "did not want to listen to all of their talking"."It&quot;s all
Clothing: With Patient
//
of Communicable  Diseases.   The following actions were
to  report these to the physician or nurses. .  Student was
Date and time of LS sessions: //  : AM &amp; : PM
Orientation and mobility
SACCOCIA,CLAIRE
BIRCH STREET
MASS
The veteran does feel comfortable with groups of people.
: Fri -
Writing skills
Progress:  pt worked on his OM to go to smoke. pt did good with little help. pt
The veteran&quot;s medical record was reviewed. There were no concerns noted by
ADDENDUM
Progress: Some, veteran was purposefully mislead on route, and he corrected me
antibiotic injections/OU. Patient was the victim of a unfortunate gunshot wound
Skills, .
stated he did not have any family member who would be able to participate in a
being sent to Psychologist that is part of the Team, to accompany Team and Mr.
Hair
room. The veteran completed his weekly laundry with minimal verbal cuing to
to do so far in your life; and how did you do it?"  One student told about
//
Total sessions to date:
as his mail, bills, and magazines. He demonstrated the ability to independently
The veteran continued training regarding the Extreme Reader OCR (Optical
Student completed shower with assistance of nursing assistant.
button with moderate assistance. Veteran continued practicing changing m , to
needs to set up "later," he says.
Area of Instruction:   Extreme Reader OCR
ADDENDUM
he could do it himself. He went up by himself, and did fine.
Orientation and mobility
Shave self
Legs &amp; Feet
Topic:  Safety- BRC,  Medical Center, Community, Home
Facilitator of Group: Susan Degolyer, Safety and Occupational Health
Area of instruction: None
Progress: Veteran progressing in independence and motivation. Veteran now meets
Sessions needed:
Number of LS sessions remaining:
Veteran was assisted with his laundry to . Veteran required some assistance to
instructor and set the dryer independently.
BRC TEAM COORDINATOR
but was very tired now and wished to remain in bed. This was reported to nursing
staff and morning bedrest for Mr.   was approved.
Wound care (other than pressure ulcer):  No
repaired ruptured globes/OU.  He had s/p
Total sessions to date:
MEDICAL HISTORY:
HBPC emergency contact information
ADDENDUM
Intravenous therapy/Heparin lock:
// - //   LOS:  Adm Dx: LEG BLIND,MRSA,CA-BASAL
Care Involving Orthoptic Training (ICD--CM V.) V.
someone to go with him in September.
needs help adjusting to lifestyle changes, including regulation of anxiety when
than
return call as soon as possible.
Writer will follow up in -   and provide solution focused, cognitive and
MSE:
Living situation: lives alone in condo
Food/Nutrition History (Patient Report)
(-) DM
Vitals Enter at: Sep , @::
Veteran acknowledged that depression was evident in his life before he lost his
MODE OF ARRIVAL (check one)  Ambulatory
TIME OF DISCHARGE:
Age:
MOUTH DAILY
CHRONIC INFLAMMATION, FOCAL CAPILLARY ECTASIA AND MUCOSAL HYPERPLASIA.
process, is logical ,organized and goal directed, thought content
Speech with normal rate, rhythm, and volume. His mood is euthymic, affect is
MH ATTENDING NOTE
Active Inpatient and Outpatient Medications (including Supplies):
appropriately. Speech with normal rate, rhythm, and volume. His mood is mild
,  Y
sees priv ophthal
OS -.  +. x         /
disc, ves, macula midp nl ou
"just staring in space and ocassionally finds a tear in his eye" . He was last
Influenza Immunization Documentation:
Description:
Pending Outpatient Medications                         Status
received the following iMedConsent document:
-bowel problems         [No]
GI-Colonoscopy Appointment Letter:
-IBUPROFEN  MG TAB
CHIEF COMPLAINT &amp; PRESENT ILLNESS:     See intial intake
Speech: Clear and Coherent
. Nausea and Vomiting:  Ask:  "Do you feel sick to your stomach?   Have you
. Paroxysmal Sweats:  Observation.
nighttime medications (including Seroquel  mg PO qbedtime, Ativan  mg PO per
seizure precautions.
-LOPERAMIDE CAP,ORAL
-BENZTROPINE TAB
QUETIAPINE  MG TAB
THIAMINE  MG TAB
Yes, Packs per  :
limitation); LEFT wrist fracture during adolescence.
take your medication (including over-the counter)? (If the answer is no/review
ier to . Pt. is presently irritable loud, was threatening ER staff but
Persistent N/V
treatment, keeping all appointments, taking medications as prescribed, and
Patient stated he
-LORAZEPAM TAB
Next of Kin       : CONTACT,PATIENT HAS NO EMERGENCY
Variation:
Yes,
kept apprised of clinical issues through ongoing supervision.
with BPD and he feels irritable, angry, pt reported he relapsed on ETOH after
Atypical Antipsychotics Monitoring:
sober enviornment due to the shared living arrangements with others vets in
toxicology collection and breathalyzer.
Veteran Name:   H
Activity:           = Walks Frequently
Turgor:  Within normal limits
your ski
//  WBC                  .
management of this case.
Subjective: Pt seen in his reoom this am with team.  He was as p and wearing
time. Denies S/H T/I/P at present time. Pt requests to be discharged without
patient/guardian had the opportunity to ask questions and expressed
TOBACCO USE:
with medications when returning home. Veteran informs he relapsed with ETOH and
Date of Birth               : JUN ,
and encourage continued mental health treatment.
Called pt for the second time at -- but received the voicemail system
SUICIDE PREVENTION COORDINATOR
Patient Education :
Teaching Topic(s):
IBUPROFEN  MG TAB   Sig: TAKE ONE TABLET BY MOUTH TWICE A   AS NEEDED FOR
RECOVERY PROCESS. THE GROUP DISCUSSED THE COPING SKILLS THEY NEEDED TO
SIGNATURE NOT REQUIRED
NICOTINE TRANSDERMAL PATCH PATCH
ns bolus given as ordered. Abdomen soft and non-distended and bowel-sounds (+).
oriented.
MOBILITY:
Teaching Topic(s):
(L/MIN)(%)
Yes
Oxygen Saturation (%) after treatment:
Respite Care          :
Catheter Type:  (AC)Angiocath
Mr.   is a  yo male with bipolar d/o, hypothyroidism, hx ETOH abuse,
Reason for restart: IV not patent
Oxygen Saturation (%) after treatment:
when coughing.
INFUSE OVER  MINUTES IV QH
Pulse Oximetry:
Comments:
Bedrest
BEHAVIOR:
Treatments:   Volume Nebulizer
RESPIRATORY PROGRESS NOTE/CRITICAL CARE NOTE
Treatments:   Volume Nebulizer
Continent
Patient Identification :  Name, Social Security Number
Time of Assessment:  Feb ,@:
Pulse:  (// :)
// :  [][]
- needs PFTs.
Watch TV
MEALS:
Independent
Respiration:  (// :)
Discharge Date:Feb ,
L/MIN
PATIENT/FAMILY EDUCATION
Position of patient:  Fowler
Treatment
ATTIRE:
Continent
A:  Gave pt nebulizer treatment with albuterol and ipratroprium as ordered.
Suctioning:  No
Yes
TWO QUETIAPINE MG TABLETS FOR A TOTAL OF MG)
hypothyroidism, and hyperlipidemia, who presented to the Emergency Room
&gt;&gt;&gt; Healthy Living Brochure, Patient Rights/Responsibility
. Supervising practitioner:  Rodriguez, tte L
Medications in VistA: (These may be edited to reflect what patient is
FOUR TIMES A   FOR BREATHING
THEM, HE HAD SPOKEN WITH VOA/ANTOINE BERNARD ABOUT THE POSSIBILITY OF
NURSING NOTE
DATA:     Vet was seen to  for  minutes supervised urine toxicology
DISCON
Teaching method used:
// :
ABG and Exercise Desat. results are located under Vista Imaging.
__x_I have seen and discussed the patient with my supervising practitioner,
ABSTINENCE. HE FOLLOWED THROUGH WITH DERMATOLOGY, AND WILL GO FOR LABS IN THE
Medication interactions
CHIEF COMPLAINT:
Age:
Disciplinary Actions:  none
Hip: arthralgia (pain on rotation, pain Pneumonia (ICD--CM .)
team.
unre
Ta: ,   (alpha right trial)
MH TELEPHONE CONTACT NOTE
Veteran called and stated that he would like to change individual therapy
Primary goal of session involved reformulating recovery oriented goals.
The undersigned contacted Mr.   to schedule next individual therapy
Mr.   arrived to his individual therapy session time. Veteran was
ADDITIONAL COMMENTS/INFORMATION:
Patient Name:  ,   , DOB: //, Age:
Learner Preference: Printed Material, Visual
************************************************************
MH HUD-VASH-NOTE
year old MALE
Socks (color)  pair,
)   CITALOPRAM TAB  MG PO DAILY                          ACTIVE
Ambulation: Self
BOWEL MOVEMENT
% taken at breakfast &amp; lunch
Not applicable
Temp:  . F [. C] (// :)
VA Pension:
justification for patient to continue (B-) acute status: depression,
Resp:   (// :)
Not applicable
Pulse: (// :)
Height:   in [. cm] (// :)
============================================================
Temp:  . F [. C] (// :)
Calm
POSITIONING
Pneumovax to be administered at time of discharge.
DISCHARGE MEDICATION RECONCILIATION NOTE
MEDICATION PATCHES
ANEMIA/MILD
Conversation with  ,    has a chief complaint of: &lt;not
zoloft
Patient Name:  ,    JR, DOB: //, Age:
(bronze star etc) from Iraq. Vet was very upset and angry about this. Vet
N: ID Screen / Influenza:
Influenza Immunization Given
-  MODALITIES:  TENS unit x  mins, constant to the low back.
-  MODALITIES:  MHP x  mins, constant to the low back.
*  TIMEFRAME FOR COMPLETION: Immediate
F/U Bilat knee pain, to  R&gt;L, will vary. Has been taking Flexeril which has
LEARNING ASSESSMENT:
Hypertension, essential
. Informed consent was obtained at : AM on March , . The
N: ID Screen / Influenza:
yr old patient coming to the clinic for follow up of his medical problems. He
TESTING    TWICE A   TO CHECK BLOOD SUGAR--USE
heart rate: - paced
Patient has concerns/questions.  Patient advised to discuss
CLINICAL HISTORY
to increase his dose of Fluvasatin to mg qhs.  We will check with him in
ADDENDUM
Outpatient Medications                                 Status
Name of Veteran:  ,
Type of Contact: Telephone
MCHC:     .     (// :)   .     (// :)
CC: Right side periauricular pain
His hearing in his right ear stopped, then returned.  Then, hearing in left ear
BEDTIME **APPROVED**
Medications:
Positive: high freq HL
questions about toenails - wonders if anything new can be done with
and in good spirits.  Has been feeling okay.  Does get frustrated that he has to
A/P:
S: R TMD onset /.  He states sx started when he had a sore throat on the R
Completed Care:
CC:Doing a lot better
O:
. AICD In Situ
CREATININE  .     PLASMA  (// :)
GLUCOSE    H   PLASMA  (// :)
IMAGE QUALITY ASSESSMENT:
SPEECH: normal rate/rhythm
SSN: --
Unscheduled visit ( )
potential adverse reactions associated with this immunization.
(-- @).
Assess fall risk on every outpt at the st clinic visit of the  .
CC/HPI:  yo BM returns to the eye clinic to monitor LTG suspect vs
) Ensure patient is wearing non-slip footwear. If necessary,
Total S/C %:
PRE:  Date/Time:  DATE/TIME: Apr ,@:
Vitals:
RR   -
. He says that when he came to the ER some months ago and was given
NURSING OPT
same as it was without the rx. Please advise pt to take both this and his
Total S/C %:
Unable to complete an entire assessment to  but introduced veteran to Ms.
RBC: .
MCH: .  L
affect.  He was attentive and actively participated in the session.
P. Wooten, RT
Groups facilitators/Staff: Pam Wooten, RT
[ ]n/a  [x]Addressed  [ ]Deferred
Veteran appeared to benefit from the structure and supportive milieu
Veteran attended and limitedly participated in the   Treatment Center.
socialization and learning skills, and community reintegration goals.
[x]Hopes &amp;  physician in)
needed to maintain recovery efforts, and promote social interactions/support
to this writer by the following clinicians as indicated below:
L. Bright, MSW, CRADC
C.  s, OTR/L
[ ]Orientation Group   (/ min)
Participation Level/Participation Quality:  _x__Active/Eager     ___Variable
Client signed into the   Treatment Center for the purpose of attending
[x]ABC Group
[ ]Hobby Group
) Ensure patient is wearing non-slip footwear. If necessary,
yo male comes as scheduled. Long history of schizophrneia. Interviewed with
// @                                   /
[x]ABC Group    (/ min)
Visit: // :
S. Meskenas, MA, RNBC
R. Baker, LCSW
Contact:  Minutes
. Anxiety Disorder *
PATIENT NAME:  ,            SSN #: --
was unable to work for a few  s last October.  Currently, he is not allowed
=========================================================================
Comments: Calls for assistance with refilling medications. Requested
.  Have you ever had a reaction (such as redness, swelling,
HOURS
Patient Phone Number: ()-
Chief of Staff for Beckley VAMC in
ALLERGIES AS DISPLAYED IN VISTA:
LDL
BY MOUTH EVERY   FOR DEPRESSION
Supportive psychotherapy with medical evaluation and management.
- - - - - - - - - - - - - - - - - - - - - - - - - - - - - -
(asthma, chronic bronchitis). PFTs in  showed no obstruction but restrictive
also use antiseptic mouth wash and bass technique brushing  times daily
RA      Normal                                    motion index: .
[]Crutches
Mild global hypokinesis.
Starting at: // @ :: PM
- - - - - - - - - - - - - - - - - - - - - - - - - - - - - -
Protocol(s) used: &lt;Not identified&gt;.
between to  and your next clinic visit
AMPULE) IN NEBULIZER BY MOUTH FOUR TIMES A
Spoke to pt and he is aware of appt for / and /.
None
diseased, not functional, or impacted.
Electronically Filed: //
ER,  E (--), yr old MALE
**************************************************************************
PATIENT ITEMS:
Sex:MALE Age: Ht: in [. cm] (// :)Wt: lb [. kg]
B/P:    / (// :)
Preop Skin Integ: WARM &amp; DRY            Preop Converse: RESPOND
-----------------------------------------------------------------
N. Safety/self-care (describe): GIVEN VERBAL AND WRITTEN INSTRUCTIONS
Coumadin/INR:for afib goal is inr -
SMOKER:  __xx_NO ___YES  IF YES ___ Literature given
.MG THUR-FRI-SUN AND MG OTHER   S A WEEK.
PRIMARY CARE ANNUAL SCREENING-T
Please contact your Primary Care Clinic on or around --Nov ,--.
appointment center at -- ext., or (long distance calls)
Can verbalize
. Osteoarthrosis involving the knee
. Depressive Disorder NEC
( ) Appointment information left with Sponsor.
( ) Appointment information left with
Patient apparently
Allergies/Adv:CYCLOBENZAPRINE
Legend: OPT = VA issued outpatient prescription, INP = VA issued inpatient
Placed call to veterans phone number to remind him/her of next   appointment.
WITH A STEADY GAIT. STATES HE HAS A TOUCH OF A COLD. STATES SUN  IT WAS IN HIS
PRIMARY PAIN LOCATION:
System Concern:   Risk for Septic Arthritis; Severe Shoulder Bursitis;
Shoulder
SIDE OF BODY: Right
Changing position
driving and lifting  while pulling for  and ice chest with content a couple
Plan discussed with and approved by supervising physician.
views right. Labs drawn. Discharge instructions given veteran voiced
[ ] Appointment rescheduled at patients request.
REASON FOR REQUEST: Diabetic Teleretinal Imaging for Diabetic Retinopathy
SECONDARY PAIN LOCATION:  Do you have pain in other locations?
Height:  in [. cm] (// :)
HEARING AID         TOBOGGAN
CLINICAL DATA BASE
upper back pain that radiates down to other areas in back and shoulder of "" on
PT. RESTING QUIETLY IN BED WITH EYES CLOSED.  ALERT AND ORIENTED X.  SKIN W/D.
is resolved.
/clinical condition ;he said they are  aware of this pt since
Initial Admitting Diagnosis:
Legal Documents:
Optometry
electronic record and discussed with the patient.  The Cincinnati VA
Legend: OPT = VA issued outpatient prescription, INP = VA issued inpatient order
( ) No phone number listed for veteran, or number has been disconnected.
ADDENDUM
time below  (fasting).  In p.m. ranged from -.  Says this high reading
got up in a.m.  Had HgAC drawn to .  He does say if he eats the wrong foods
ADMINISTRATIVE NOTE
injection by ER dr.
Respiration:      (// :)
Medications:
History of Guillain Barre Synd ?
Will ask ROI if this release is appropriate, and will have ROI contact J
staff or me at the following number: --.
Reason for Contact: RE:  MORPHINE TAB,SA  MG
Nausea/vomiting: No
Height:  in [. cm] (// :)
Visual impairment:  Yes, reading glasses
REVIEWED MEDICAL HX, SURGICAL HX AND PHARMACY PROFILE
BP/
to find a job his wife took money from joint investments and then moved all of
Spring Strsome state
They set up another phone call for tomorrow to continue to work on this.
program a chance and take care of himself. Referred him to his CM.
Respirations:
Right Forearm                           Right Forearm
(. ml injected)
Comments:
PPD/ANERGY PANEL READING [DT]
Induration (mm):
Social Support System:
to vet (vet actually initiated proceedings), move to Texas and begin selling
Urgent Care Appointment.
)   BUSPIRONE HCL MG TAB TAKE ONE TABLET BY MOUTH TWICE   ACTIVE
disorder
assessment of functioning , highest .
Pt was in DOM for depression and his issues are not resolved. Pt has an
Resting (B/P) - Intake Staff ONLY:
Tetanus/Diptheria/Acellular Pertussis Immunization Administered:
Medication
Please refer to the image(s) attached.  This can be accessed in CPRS by
wages.  He says that he is looking for another job and we discussed ways to
Pain Score:  (-)
ORTHOPEDIC SPECIALISTS.
ADDENDUM
A): Inform staff when tempted to act on impulsive
he "likes to flick his bick" and would burn with his lighter whenever he has the
___Patient    ___Family       Low desire or motivation to learn
To Whom:        [x]Patient    []Family Member    []Significant Other
EVALUATION-    was s ping at the beginning of the shift and slept until
ADDENDUM
BARRIERS TO LEARNING
E: Patient has been visible in the milieu this shift. He continues to carry a
No
// : PLASM  . H
MONITORED/ASSESSED BEHAVIOR AND MOOD.
Date of event: DEC
Warfarin - Pharmacist Jeff Gold will need to come talk with your wife to
de rative disorder causing mineralization and abnormalities to
Length of Treatment: LONG TERM
almost never eats  s at home). Patient had been stable on his previous
,  T()                     TABLET STRENGTH: MG
Patient:  ,  T ()
PHARM. ANTICOAGULANT VISIT
determined by inpatient team.
This is a reminder that prior to your procedure on // you should hold (do
Since last visit, Mr   has been doing worse at home.  He presents with his
Patient identification is confirmed by an accurate secured armband
NVI:
*********************************************************************
evaluated first.
Home (see physician discharge instructions).
System Concern: Pleuritis; Costochondritis
made for --@ : am with  physician
- chest pain, d
SpO: Lo default
CP over the last   . The first episode woke him up from s p but he
food.
I wanted to update you on your recent x :
)   SIMVASTATIN MG TAB TAKE O
Pt called this am within the hour of his appt to say he was not going to make
Pleased with results of olanzapine so far--he is taking  mg q hs. S ping
scheduled appt. He updates on his psychosocial stressors including exacerbation
Chief complaint: Chronic lower back pain
, is it a
Common Reactions to Trauma, Positive Coping Activities and Strategies, and
transferred to the ER. One member had a strong reaction to the code incident.  It brought back
S: . Patient was active in supporting other group members in group. A patient in the group had to leave
BMI: BODY MASS INDEX
NURSING OUTPT TRIAGE INTAKE NOTE
ALLERGIES: Patient has answered NKA
the moment at some point in the coming week. The two patients who
medication called adenosine to help evaluate the flow of blood to the
program had changed their lives and how they were different prior to that
Attempted telephone contact with patient to reschedule missed appointment.
MH TRP TELEPHONE NOTE
NURSING OUTPT TRIAGE INTAKE NOTE
SEP , @::   .
The patient verbalized an understanding of these instructions.
The following laboratory studies were completed during your recent visit
Requests  wal of:vicodin
beers (oz) daily for past  months. Pt state he does at times
NUR ADMISSION ASSESSMENT
Using therapeutic equivalents to treat the same illness
his feelings.
Patient states he was in N rehab program  yr and  months ago.
GENITOURINA
Judgment/insight: intact
On a scale of - how do you rate your primary pain?
and plan for the management of alcoh c hepatitis outlined in his note.  No
indication for steroid treatment at this time, but will follow closely.
MSE: Cooperative, fair hygiene and grooming, normal speech and motor, mood is
Patient has been provided with contact information for outpatient
in salt such as:
Sc ed document attached.
ACTIVE:CLONAZEPAM MG TAB
,  A is assigned to Caller Area ANCHORAGE.
. mg po bid prn # no refills for her.
stronger prn med for increased neck/shoulder pain.
Protocol(s) used: &lt;Not identified&gt;.
Contact Phone Number: ()-.
Call Type: DTN CLINICAL INFORMATION.
Facility Appointed PCP: LACY,  J DO (ANCHORAGE PC I)
Ending at: // @ :: PM
by: WENDY J LEVESQUE
Contact Phone Number: ()-.
RESULTS
Last BP is ##### / (// :)
NIGHT.SHE HAD NO DISCOMFORT IN HER RIGHT HIP AND LOW BACK.VET WAS WALKING
, @::   .
Conversation with  ,  A has a chief complaint of: &lt;not
ADDITIONAL COMMENTS/INFORMATION:
Klonopin / mg up to bid prn for increased anxiety.
Pulse:  (// :)
Contact Phone Number: ()-.
No Associate Provider Identified
Evaluation/Management Code: HC PRO PHONE CALL - MIN ().
Patient Phone Number: ()-
Documented Allergies/Adverse  physician s: RED DYES, PHENERGAN, THYROID,
Nurses note reviewed.
Name of provider  ing site:
*Assessment of learn
+ vertigo, episod
. Treatment/procedure: This procedure involves the injection of a
Site  ed by:
CHECKED PATIENT RESPONSES AGAINST:    ed Site
JUL , @::   .
POLLEN
min encounter for scheduled appt.
Temperature: . F [. C] (// :)
Temp.: . F [. C] (// :)
Conversation with  ,  A has a chief complaint of: &lt;not
Patient denies receiving any other vaccine within the past   s.
TOBACCO? Current user.      PDD
Patient was seen to   for treatment of the
* Get support from family, friends and co-workers
    
