# Supplementary material for: Predicting the Risk of Suicide by Analyzing the Text of Clinical Notes
Source: PLoS One. 2014 Jan 28;9(1):e85733. doi: 10.1371/journal.pone.0085733 (PMC3904866; doi:10.1371/journal.pone.0085733)
Supplement: Appendix S3 — Machine Learning Libraries and Methods: This section is provided to enclose the open source (Apache License) classifier used for the building of the statistical models, specifically for the purposes of study reproducibility. A detailed account of these tools is intended for another publication. (ZIP) [file pone.0085733.s003.zip › Appendix3/ML_libs/Regression_testing/group3/grp3-pt-1050.xml.txt]

Patient counseled on the risks of tobacco use and advised to stop
Pain Plan of Care:
/es/ BONNIE J HAGGERTY
ELIGIBILITY CLASS:     VI
, , , , , , , , , , .
Patient Phone:  --
Service: DENTAL
Medication:
Attending:  physician  have discussed the patient with my supervising practitioner,  physician  and he agrees with my assessment and plan.
DD:@
Patient alert and oriented x. Patient voiced no discomfort.
Pt&quot;s exercise tolerance is limited by skeletal / neurologic disease.
. Treatment/procedure: A circumcision involves the cutting and
HPI: pt  is a y/o wm with bph who is uncircumcised with c/o of
Anesthesia Consent
"Ensuring Correct Surgery"
Current pain level is  on a scale of .
Agree with prior assessment. Patient is without significant interval change.
DATE/TIME                      TEMP    PULSE  RESP   BP       PAIN
Patient Phone Number: --
yrs. In the past  month Size has not changed"
family hx of hair loss or skin disease.
. Hypertension: home bp -/-
uncontrolled HTN: will go to pharmacy to pick up meds to
-----------------------------------------------------------------------
called and left vm requesting a c/b to reschedule missed appt.
and no exclusion criteria and agreed to participate.
Discharge Type:Noncompliant
Additional Medical History: HTN
constipation/diarrhea, bloody stools, clay stools, anuria, dysuria, hesitancy,
Educate veterans regarding range of treatment options available on Team
Postive flick sign (shaking hand relieves symptoms), also symptoms releived by
Good progress
Met with veteran to complete intake,  and update in treatment pl ing.  Reports
African Am an/Native Am an NSC vet who meets criteria for Alcohol Dep, in
and how best to approach or respond to others who c enge you in a negative
Name:  ,
view the document.
d. Blast Type Details:
Wt.:. lb [. kg] (// :)
shooting back at enemies. He stated that the dream was so real, as if he was
Axis I: PTSD; Alcohol dependence; Pain Disorder with associated psychological
HO.
nontender, nondistended.  Bowel sounds present.
PREOPERATIVE DIAGNOSIS:
to recheck the site.
Contacted patient regarding:
- - - - - - - - - - - - - - - - - - - - - - - - - - - - - - - - - - - - - - - -
STATES THEY ARE SYMPTOMATIC -&gt; PRURITIC.
PMH: h/o colon CA, obesity, hyperlipidemia, HTN
GRAMS INTO VA  WEEKLY
Tolerating diet: Yes
[] PATPU phone number left for call back
% xyolcaine with epinephrine
Comment:
This specimen has been analyzed by the ThinPrep Imaging System (Hologic
Stated that she had UTI in the past and doesn&quot;t feel the same. Also c/o
CALL CENTER NOTE
Facility Appointed PCP:  I,PRASHANT G (GOLD)
temperature is ..
involved in this treatment/procedure.
Requesting accucheck strips.
of being overweight or obese, as well as the benefits of weight loss.
TAP-MEDICATION RENEWAL NOTE
YOWM
Y ANTERIOR CORTICAL/NS CHANGES OU
PRIMARY CARE TELEPHONE NOTE
tooth in question (#) during his prior visit with  physician  was on
A: Area of swelling around chin area was gone.  Palpation and percussion
ADDENDUM
Considerations for Learning (x )None, list if postive:
No
Trace MR/TR.  Was
Reason: Veteran has compensable SC disability.
) Selenium sulfide shampoo tiw.  Pt should allow lather to sit on scalp and
Sent to ER/Hospital by VA.   NO
PC/MH INTEGRATED CARE TEAM CONSULT
x with similar liquid intake. Pt also kept a BP log. BP avg -s/-s
ETOH: none  years
Ready to learn
Verbal
JOINT - INJECTION OF JOINT
with - cc&quot;s of lidocaine %.  A skin wheal was raised anterior
Function/work:
Patient was seen with the Resident I personally examined the patient and
A consult is submitted - extended care service line - by provider
for ed to provider
Other drugs: MULTI-VITAMINS, ASA, GARLIC TAB/OIL, S  OIL, FLAX OIL, CINNAMON
Patient&quot;s age:
by:   A SANDERS
Evaluation/Management Code: HC PRO PHONE CALL - MIN ().
*****************   SEE VISTA IMAGING FOR REPORT   ***************
age.  He was accompanied by his wife but she was not present during the
O: Patient was alert and oriented times three. Patient&quot;s mood dysthymic sec
The importance of exercise, weight control and diet were discussed
Instructed pt. on- setting date and time
identified&gt;.
abd soft nontender BS+
Shoe lift may assist improved gait
Shoe lift may assist improved gait
During treatment session:
S: Pain reportedly increased with walking, &gt;% decrease with
,  L;  years old, arrived on the unit , .
Total Knee Arthroplasty (TKA))
Expectations about knee replacement surgery.
NUTRITION-INTAKE
Patient presents to  for LEFT TKA R ION.
Pupils
Constricted
PCA FLOW SHEET
Commands
CARDIOVASCULAR SYSTEM:
documenting their decision regarding when decision-making capacity is at
Venous Insufficiency
Mentation: A&amp;OX.
ADDENDUM
O  %
HOME CARE SERVICE FUNDING:
VA
orders.
obesity
Lung sounds: C
Voiding: yes
INTEGRATED TEAM ROUNDS
CO:    . MMOL/L     (// :)
he is stable , oriented
Extremities: active range of motion left arm, active range of motion right
Lung sounds: Clear
Patient does not transfer independently and does require nursing
METHOD OF EATING
Location: All Areas
Breath Sounds:  Clear
REGULAR
D/C F/U CALL MADE AT THIS TIME: "To  has the been the worst I&quot;ve felt so far.
morning before noon.  Vet agreeable.
yourself or anyone else? NO
TELEPHONE-ORTHOPEDICS
Allergies: NKA,
Diagnoses: Major Depress., Recurrent (Primary), Alcohol Abuse-Unspec
he stated "I like the highs". He described spending $, on a stereo last
Diagnosis: ptsd, depression, anxiety
This patient has a pain level higher than his stated level of
Allergic asthma.
//  CHO OL        .        mg/dL
PROVIDER: physician
for his scheduled appt. He comes to  from work and without his wife stating he
Pt states, "My wife does not think that I am improving".  States that it has
he is more depressed recently (?? related to decrease in Wellbutrin).  I will
at request of  physician lained to vet and wife that I work closely with DR.
heart rate at . Reviewed his vitals record for past few yrs demonstrating HR
I would kill myself if I had the chance. **
Duration of pain:  few months
VOLUNTARY ADMISSION TO  WEST
(Nursing, Psychiatrist, Psychologist/Therapist, Social Services,
heart skipping a beat".
Klonopin ordered. States he&quot;s should be on Atenolol for tremors. Attended groups
Usual Weight:        % Usual Weight:
AGE:
want." Med adjustments are being made while pt remains in the h
:, group and milieu therapy
Was your hospital stay satisfactory? Yes
SC%: SC LESS THAN %
increase in muscle spasms, tho much less severe than flare-up /.
Pt was instructed in sun protection / avoidance
FOOD ALLERGIES:
patient/resident and/or family.
Pulse:  (// :)
hemorrhoids
was unable to get labwork done to  and patient will go to the Vineland VA on
Rachel   (daughter in law) and received voicemail to continue current dose
PREVIOUS MEDICAL/SURGICAL HISTORY:
Co-Morbid health problems?
ADDENDUM
( ) Steps/Spirituality        ( )Orientation
Format:
Number of patients attending session:
(x) Steps/Spirituality        ( )Orientation
(x)No Distress                  (x)Attentive
Psychiatry Follow-Up Note
OncWatch Diagnostic Colonoscopy:
Patient declines Influenza immunization.
Nicotine Dependence
Taking medications that have no apparent indication
AT BEDTIME FOR MOOD
INTERVENTIONS:
posterior part of his leg.  He says this is relieved when his stops and
DECOMPRESSION ( OR MULTI-LEVEL))
-Patient stated full name and social security number
Blood Return
History of Falling:    No history last  months
NURSING ASSISTANT ADL NOTE
of his bilate LE and denies a previous history of this. He has no known h/o CHF.
P:
)  TRUS findings:   hypoechoic area R base, included in R mid and lateral bx
Non-pharmacological therapy:
P:   (// :)
. The patient HAS decision-making capacity.
complications. Will mail him nilandron and appt to rtc in -   to begin
CURRENT RADIATION DOSE:  cGy
SEX:  MALE
ADDENDUM
For specifics, please contact Radiation Oncology Service.**
Collection sample: URINE-CLEAN CATCH   Collection date: Sep ,  :
RADIATION ONCOLOGY THERAPIST NOTE
**Radiation Oncology daily therapy administered.
=========================================================================
NURSE ACA FOLLOW UP VISIT  NOTE
Provider : BAKER,
)   CLOZAPINE (MYLAN) MG TAKE ONE TABLET BY MOUTH       ACTIVE
)   CLOZAPINE (MYLAN) MG TAKE ONE TABLET BY MOUTH       ACTIVE
BY MOUTH DAILY .TAKE WITH FOOD. FOR DEPRESSION
PERSON(S) INSTRUCTED:
exudate
reports that his mood is "real good" and that he is  rally very relaxed. Mr.
Y/O NEVER MARRIED SACKER   MALE
% PSYCHOSIS, SCHIZ RESIDUAL AND OTHER (SERVICE CONNECTED) WITH:
Hypokalemia (ICD--CM .)            Hyperglycemia (ICD--CM .)
treated with non narcotic modalities. pt needs to taper off his methadone as
this  with toxicology lab before  violation is posted
Conversation with  ,   LIN has a chief complaint of: &lt;not
Pulse Ox: (// :)
mini-open rotator cuff repair.
Barnes,
OSat: %
Educational needs met during this encounter:      Medications, PT/Family
Procedure: right shoulder arth
also, last uds //o neg for methadone
Patient seen &amp; discussed with  physician  concurs.
IMPAIRED HEARING  %  SC
Patient Race:
CT OF ___head w/o ___________
Objectives were met.
Saturation per Pulse Ox:% on Room Air
lungs ctab
Secretion color/characteristics:
(medication that induces a relaxed state) through a needle placed
. congestion, fevers- likely pneumonia with possible underlying malignancy  in
Procedure side/site verified with patient and record prior to sedation: Yes
Consent form states the name of, reason for, and the procedure to be performed:
and Q mins vital signs:
Secretion color/characteristics:
IV Access: intermittent IV, INT
Respiratory Therapy Treatment Record
/ (// :), (// :), (// :),. F
(OT,PT, KT), Chaplain.
To &quot;s documentation of learning characteristics and any barriers.
Pt is here for a hospital discharge summary and review of his recent pnuemonia.
These is a pain medicaiton issue in that he was on maintainance Methadone  mg
,   LIN is assigned to Caller Area *BRISTOL .
Length:  minutes.
Protocol(s) used: &lt;Not identified&gt;.
Weight:  lb [. kg] (// :)
Height:   in [. cm] (// :)
EYE - PROGRESS NOTE (B)
Protocol(s) used: &lt;Not identified&gt;.
CALL CENTER NOTE
ADDITIONAL COMMENTS/INFORMATION:
mm echogenic focus is seen in the anterior medial lateral left
Length:  minutes.
ADDENDUM
Call Type: NARCOTIC REFILL.
filled
. Diabetes *
Veteran met the following criteria for short transitional stay at
YES NO UNK
[ ][X][ ]La
Pt refused influenza immunization.
--&gt;
compliance c gtts.
-cont travatan qhs ou, cosopt bid ou, alphagan bid ou
. Adv Glaucoma OS&gt;OD, goal IOP low teens OU per  physician SLT // OS
L/L     wnl OU
PAIN :    (// :)
- vicodin for pain control
[  ] Chains:
=========================================================================
hospitalization?
Active Inpatient Medications                           Status
signs and grooming .He became agitated and explosive this morning due to not
MEDICATION/RX TURN-IN TO PHARMACY
NEXT OF KIN:
Mon  and play an active role.Will provide safe and therapeutic environment.
isolative. No interaction seen with peers or staff unless prompted. He is
=========================================================================
tel ion with peers. Pleasant upon approach, reported that he slept well, has
STRUCTURED LIVING SERVICES:
GERD
. Lack of Housing                                    //   ,MARY T
"I&quot;m feeling homicidal and suicidal."
P: Patient will return to baseline cognitive functioning or better by discharge
Provider phone patient to see how he was doing with the recent death of his
EVERY   FOR BLOOD PRESSURE OR SWELLING.
ABUSE/NEGLECT NURSE:
AND to leave voice mail messages on home and/or cellular phone regarding health
ANXIETY                                 OTHER AND UNSPEC. S P APNEA
UROLOGY CONSULT
BMI: BODY MASS INDEX
PULMONARY PROCEDURE CPAP CONSULT
child support and truck payment.  He is followed by MHC and taking Wilburton and
Author:  ,BETTY J
ALLERGIES:
You have been diagnosed with: SECOND DEGREE
*****Sc ed document attached to this note******
physician
IMMUNIZATIONS:
OCT   FLU, YRS
URINARY:  Polyuria[] Dysuria[] Hesitancy[] Urgency[] Hematuria[]
BP IS SLIGHTLY HIGH TO .FORGETS TO TAKE MEDS.HE HAS
RTC IN WALK IN CLINIC IN  WEEK FOR REEVALUATION OF BP.
PM&amp;R PHYSICAL THERAPY CONSULT RESPONSE
ADDENDUM
ADDENDUM
S/O:
Pt here at the request of  physician ation of insomnia.
year? Two to four times a month
He called his therapist  ier to , who was not able to see him, and
their safety.
P - S p Note
that he hit with a pencil to "stay away from me!" Otherwise he has been
possible adverse side effects.  Q  minute patient safety checks.  SP&quot;s.
narcotics will be given by the Denver VA.
NURSING NOTE
No.
feelings; monitored behavior and mood; monitored pain level and
NURSING NOTE
No.
GOAL: The patient will remain safe from self harm / harm to others while
his negativism emerged in the group discussion. In fact, he participated very
INTERVENTION: The Staff will:
tape.
upon inspection, no vomitus was found. states he had a good sized stool
PROCEDURES AND/OR OPERATIONS PERFORMED:  None.
on s p thus far. Plan is for him to be bezno free by the time he is
) "Passing out"- Patient states that he has epis  where feels
E: Pt rested for a little while, but awoke bent over in
ADVERSE REACTION: NO
No
abdomen
I.  Monitored patient for nausea &amp; vomiting.
I: Assess pt for nausea and give PRN and scheduled antinausea
I have reviewed the inpatient and outpatient medications.  I find that
patient home with O. Oxygen delivered at  and verified with Charge nurse,
Dedra.
BID SA morphine and responded well to it. He also had a an ultrasound to rule
. Do you have questions regarding your condition?
Dear Mr.  :
his request.
Vet reports that he is starting to go into withdrawal, made pills stretch until
Discussed this writer&quot;s role as support, but c ot provide information
Notified vet of admission to Bay Pines on May st, taxi to DIA, and necessity
Wants the Albuterol reordered as he has been on that regime
when initially denied narcotics. He has complied with his Health Care Contract
DVAMC Travel reported that they arranged for taxi and mailed vet his flight
thanked this writer for helping him. Vet sounded upbeat, laughed several times
correct procedure and correct site.
Pain is unchanged since last clinic visit; current pain
Allergies:
Reason for consult:  DOE, Abnormal stress test
Date:         -Oct-
Name of responsible caregiver/driver: Wife,
CARDIAC CATHETERIZATION CART PROCEDURE NOTE
Patient denies chest pain, shortness of breath, numbness/tingling to
Clean/ physician     Without Hematoma
Medications:
.  PSG to be scheduled if PAT negative or ambiguous.
expedited.  If any s piness continues with CPAP and nocturnal s p extension,
each  . Some healthier food choices are: lean meats, more fish &amp; poultry;
PLEASE ORDER BREAST ULTRASOUND
NORTH TH Ssome state,
STATES PAST MONTH HAS BEEN "REALLY GOOD".  WENT TO SEATTLE FOR PHOTOGRAPHY
MOTHER IN TEXAS RECENTLY.
TAKING  HOURS TO TRY TO GET BACHELORS.   PL ING TO TAKE FULL SCHEDULE
LMP:July ,
CONTRACEPTION USES:used the pills in the past and IUD removed August , None
S  FEMALE here for disability follow-up.
Medication reconciliation: As listed.
Was psychotherapy conducted?
Dear Ms.  SON,
,  W, (--) yo, RACE UNKNOWN
NURSING PROGRESS NOTE
( ) Informational request to clinic RN: call back requested
cholecalciferol  bid
tamsulosin
medical management outlined in my note and believes it is medically
continue flomax
STANDARD TITLE: DIABETOLOGY CONSULT
Pt is SC for physcial anomalies.  Pt has been seen in the past at the Pueblo
DAILY
CHAPLAIN-VISITATION NOTE
Pain:             (// :)
Topic: Asking for Support--Talking to your doctor &amp; others about getting support
thoughts, mostly by jumping in front of a train.  This is fairly high lethality
physician at VAMC.  Veteran reports feeling "better" to  vs two
. Of note, by the end of the phone conversation he sounded relieved stating,
Subjective/Objective:
desire to discontinue with CBSST group. Of note, he has been involved in CBSST
Current Diagnosis: Schizophrenia
Education: The veteran indicated a readiness to learn by choosing to attend
Problem # Thought Disorder-Met with veteran at Birch .  Veteran reports
ADDENDUM
help at the beginning of group and as leader was explaining to him how to lace
Temperature:     . F [. C] (// :)
Current Diagnosis: Schizophrenia
living independently.  He reported that his sister, Naomi
difficulties with symptoms.  Veteran reports spending time reading scripture
.            BLOOD        (// :)
and to provide supportive therapy, assess mental health needs,
. ANXIETY STATE NOS
Pt did admit to hearing a "low voice" this am before getting out of bed.  Said
value related words.  Veteran able to get half way through list before
. Cataract nos
. Presbyopia
INFORMED CONSENT/IMED
treatment/procedure.
Temperature:     . F [. C] (// :)
H&amp;P SURGICAL UPDATE
board and care
Procedure: Excision of R postoccipital sebaceous cyst
$TEXT
She states he was also seen standing by the elevator once with his arm raised
Patient Name:             Gender: M
Risk Assessment-is at low to moderate risk of suicide.  Has frequent suicidal
PATIENT CONTACT NOTE
Appearance: satisfactory
Thought Process: difficulty concentrating
has been stable with no recent suicidal ideation.  He has a strong
positive therapeutic relationship with his MH case manager.
visit with this writer d/t a scheduling conflict.  He was being seen at VAMC in
CHAPLAIN-VISITATION NOTE
Current Diagnosis: Schizophrenia
minute weekly home visits for supportive therapy focusing on
Subjective/Objective:
ral: Alert, Cooperative
of the week, which include going to  .  He denies difficulty with symptoms.
more often with him.  Acknowledged veteran&quot;s progress in his social
Falls Risk Screen
reading a   about    ill, says he was kind of an egomaniac.   Had
/
PATIENT AWARE OF APPT V/U.  APPT LETTER MAILED TO .
Reviewed NPO after midnight
POLYSOMNOGRAPHY REPORT (CONSULT)
Lungs clear
Patient Name:  ,   , DOB: //, Age:
PHYSICAL EXAMINATION:
ON THE DISTAL TIP, AND RELATES IT IS BURNING AND TINGLING IN NATURE, RELATING
IT IS MOST PAINFUL WITH STANDING AND WALKING FOR LONG PERIODS OF TIME;
in the past   s.
[ ] Patient was referred to dietitian.
N: PTSD:
first cousin.  She also reports migraine headaches in her family.
. hypertension
Compensated cirrhosis.
CLINICAL REMINDERS
to him. She is looking for  to the th when they will go to court and
O REFRACTION
)   ALBUTEROL MCG (CFC-F) D ORAL INHL INHALE  PUFFS  ACTIVE
ADDENDUM
Fitting/Adjustments: adjust new glasses
HYDROCHLOROTHIAZIDE MG TAB TAKE ONE TABLET BY MOUTH  ACTIVE
Future Appointments:
I wanted to update you on your recent lab results:
Findings:
The patient was given the following educational material/s:
OMEPRAZOLE MG EC CAP TAKE ONE CAPSULE BY MOUTH       ACTIVE
MAR ,
%-service-connected for posttraumatic stress disorder. The patient&quot;s
- - - - - - - - - - - - - - - - - - - - - - - - - - - - - - - - - - - - - - - -
DOPPLER SIGNALS:      RT PSV/EDV % STENOSIS / LT PSV/EDV % STENOSIS
---------------------------------------------
. Parkinson Disease * (ICD--CM .)            //  JOST,MARY BETH
of birth.  However, he was disoriented to time (thought it was afternoon), and
ANESTHESIA OPERATIVE RECORD (BASCOM PALMER EYE INSTITUTE) DATED //
s ping much.  appetite is ok.
Spoke w/  physician  length on plan of care-
Report new pain
Active Inpatient Medications (including Supplies):
SCOPOLAMINE .% OPHT SOLN SOLN,OPH   DROP BOTH EYES QID  ACTIVE
Treatment preferences as expressed by the patient are to be implemented.
Pneumococcal Vaccine (A):
(-) Glaucoma
NURSING NOTE
ideations, no psychotic features. Attention is good, insight is fair and
acknowledged understanding the plan.
VA:             with            ph     without          ph       near    glare
POHX:
then transferred to Bascom Palmer Eye Institute for surgical intervention for
Patient is continent.
ECP NURSING SUMMARY
Restorative Mobility Pro
Snacks:
Visit: S: Dec , @: DENT HYG CLC TUTTLE K-.
well as the pellets from the shotgun struck the patient in the head and hand.
Veteran denied symptoms of depression.  His mood and affect were unre able.
oversight, encouragement or cueing
SYSTEMIC MEDS: see profile
OTHER TESTS:
Number of bowel movements this shift: .
Feeding location: .
Number of bowel movements this shift: .
Bascom Palmer for surgical intervention. View completed SWS Assessment dated
contacting Ms.   was provided in addition to description to available
Other cognitive data: Veteran is alert and appropriate. He&quot;s blind, but aware of
ZZPATIENT CARE ADL NOTE
of S/P repaired ruptured globes/OU with poor vision and poor prognosis/OU.
CPRS and veteran is not enrolled in . (Blind rehabilitation Data Base). Ms.
Resident:    ,
Number of hours awake
&quot;I do not want to hurt my self" was his answered when asked if he had any
BLADDER
Meal assistance: supervision, oversight, encouragement or cueing.
Consistency of stool: soft.
REPORT NAME: MDS   PAPER
------------------------------------------------------------------------
. Female
. Signatures of Persons who Completed a Port
Amount of stool: .
RT assisted resident out to patio using elbow as guide to chair so he
Other personal care:
Amount of stool: .
NUTRITION
MOBILITY
Transfer: supervision, oversight, encouragement or cueing
TIME OF THE   Night Dec ,@:
Surgery consult initiated as well.
Homicidal Ideation: Negative.
monitor.
MENTAL STATUS
Number of bowel movements this shift: .
Bactrim, I will change medication to Bactrim DS  tab po Q hrs.
No staff required.
Feeding location: resident room.
Number of times resident was incontinent of urine this shift: .
physician       physician ody
Social Contacts
Extra fluids  given.
Gait/Transferring:
Bed mobility: independent (easily turns and sits up without staff
Conversation regarding transfer to blind rehabilitation took place. This
Patient is continent.
staff performed most of the activity.
BOWEL ELIMINATION
ZZPATIENT CARE ADL NOTE
TIME OF THE       ,@:
cueing
use of his rational skills.  However, veteran may in the long run be at risk for
Rated Disabilities:
ZZPATIENT CARE ADL NOTE
Number of bowel movements this shift: .
Amount of stool: .
Orient to surroundings
UROLOGY CONSULT
extending out of dorsum finger #, notified and viewed by Y Rankine ARNP,
removed same, measured approx .(cm)x.(cm)x.cm sliver, no b ding,
Other personal care:
Urine color:
Personal hygiene: bath/shower refused
Thought Disorder: Negative.
Active Inpatient Medications                           Status
Lunch   food % drinks
The patient did not refuse meal, fluid, snacks.
Number of bowel movements this shift: .
Number of bowel movements this shift: .
ZZPATIENT CARE ADL NOTE
PARTIAL ASSISTANCE:
Urine color: clear
Contacted Ana  s, Victim Advocate from the Victim Services Division of
#-- assists individuals with skills for living independently and, they
Dinner  food % drinks %
Breakfast  food % drinks %
Patient has order for hip protector while off the bed, staff offer to patient
ACTIVITIES OF DAILY LIVING
Hip protectors in place: declined refused to wear.
PMHX:
Meal assistance: requires no assistance.
discussed his morality and values on life/death.  Veteran feels discouraged,
. Am an Indian/Alaskan native
Psychos
BLADDER
ACTIVITIES OF DAILY LIVING
BLADDER
He also is requesting to speak to his physician at the CLC in concern to these
persistent
Previous pharmacy chart review: //
BOWEL ELIMINATION
for care on //. Pt is currently scheduled for vision surgery in Miami on
FEE BASIS
Unspecified open wound of eyeball  .    //   CHEN,PENG MD
at Miami. Reported to incoming staff to make sure patient ready for pick
No
Patient/Resident Education:
Restorative ADL - No
Meal assistance: set up, cutting meat and opening containers.
Urine color:
MOBILITY
Number of bowel movements this shift: .
Ambulation: requires no assistance
Consistency of stool: not applicable.
Meal assistance: set up, cutting meat and opening containers.
Assistance provided for this task: requires no assistance.
Urine color:
Speech:
of moderate risk for falls.
Skin Color:
Hip protectors in place:
BOWEL ELIMINATION
Urine color:
One staff required.
Urine color: clear, yellow
Consistency of stool: firm .
physician       physician ody
Uses (bowels):  Toilet
Color:  Normal for ethnic group
Number of hours active
During this shift, patient was continent
Assistance provided for this task: one person assist.
location: resident room
Alert
Consistency of stool: .
OTHER RISK FACTORS
This shift the patient used the toilet.
appears he is still "hanging on" to Bascom Palmer&quot;s prediction (before the
Lun
Swer contacted Bascom Palmer Eye Institute,  North West th Street, Miami,
The patient did not refuse snacks.
Electronically Filed: //
ZZPATIENT CARE ADL NOTE
yo veteran had gunshot wound to the face
Time of  :  Evening
and ate approx % of the food, after dinner he was guided back to his room
Team coordinator introduced self to veteran and also provided him with a tape
Put on socks and shoes
At the time of the : session, Mr.   stated that he needed to rest.
band leaders, particular     and "inside" stories of his relationship
ENVIRONMENTAL:
also demonstrated the ability to shut-down the machine with moderate instructor
Number of LS sessions remaining:
Shampoo
Hair
BRC NURSING
Plan: Assist veteran to address his needs and encourage him to be receptive to
ADDENDUM
operate the control panel in order to scan and read the printed information. The
Progress: pt did not want to work on his leather belt. pt stated that it was to
stated that he is good with his hands and was not interested in MS since it
Additional LS sessions requested:
successfully completed several phone calls without assistance.
Constipation:  No
learning skills in wpb, and transferring knowledge.
Time: : :
Character Reader) to allow the veteran to read printed materials, such
Progress: Veteran worked on route to smoking area. Veteran continues to resist
The veteran&quot;s medical record was reviewed. There were no concerns noted by
ADDENDUM
Social worker was very helpful and offered to assist Mr.   with his bank
will give it a try.
SELF CARE:
take Mr.   to Bascom-Palmer tomorrow, Thurs , June , .
The direct care staff (MD, RN, Rehabilitation) thinks the patient IS
ADDENDUM
Progress: Veteran at medical appt. no lesson.
Discussed some of t
Task:  Extreme Reader OCR
colors, determine direction of the light, and adjust the volume with minimal
verbal cuing and stated that he understood the procedure.
Task:  Extreme Reader OCR
Zippers
BRC MANUAL SKILLS ASSESSMENT
RECREATION/BRC GROUP NOTE
GERIATRIC DEPRESSION SCALE
The patient does not have any patches on the skin.
identifying HBPC SWer and asking that contact be made with Ms.   at above
Breakfast: OJ, crackers
Communication.
thoughts and feelings and break up the mono  of his life.
MSE:
the  p
Left   Plano Sph               /
IOP @ : p.m.
Patient states they quit using tobacco and have been tobacco free
. HAD C. SCOPE FOR POSITIVE FOBT
MOUTH DAILY
.  Name: Patricia Phone: -
SUBJECTIVE :   year-old FEMALE presents to DL MH clinic for medication
o  Discussed SMART goal setting and barriers to making lifestyle changes.
Alert, oriented to person, place, and time.   physician roomed appropriately.
return for your next visit.
Concurrent use of interacting medications
member at discharge or visit.
=========================================================================
chaplain will provide assistance if needed to complete the directive.
No delusions or  ucinations
_____ . Patient is at risk for elopement.
Age:  Gender: MALE    Race:
Stears notes he could arrange an apt if he feels he needs it. He declines and
L-Influenza Immunization:
Primary Care Clinic
At  : AM on April ,  , the patient (and/or surrogate)
Unspecified gastritis and gastroduo // TREECE,  L
Ellis,  a RN - contact number --
ALLERGIES: PENICILLIN, MEPERIDINE
Eyes:    ( ) visual changes, ( ) diploplia, ( ) eye pain, ( ) reddness
D-        y.o.   male received on vol. status to unit. V/S: /-
CHIEF COMPLAINT &amp; PRESENT ILLNESS:     See intial intake
Diagnosis:
Patient is pleasant upon approach, affect is appropriate to pleasant mood. Spoke
advised it lets staff know he is on falls precautions.
. Nausea and Vomiting:  Ask:  "Do you feel sick to your stomach?   Have you
your skin?"  Observation.
)   CITALOPRAM  MG TAB TAKE TWO TABLETS BY MOUTH EVERY   ACTIVE
F:  Behavior/Withdrawal/Fall
Not visible, but can be felt fingertip to fingertip. ()
they harsh?  Do they frighten you?  Are you hearing anything that is disturbing
CIWA ASSESSMENT
organized without observed delusional content. Insight and judgment were fair.
-QUETIAPINE  MG TAB
Obsolete
TAKE ONE TABLET BY MOUTH TWICE A   AS NEEDED FOR PAIN (TAKE WITH
PATIENT:
AXIS  :  Gastroesophageal reflux disease, Hypothyroidism,
EMERGENCY ROOM NOTE 001
to him they were making him "sick" and started drinking alcohol. This morning
LEVOTHYROXINE . MG TAB
Barriers to learning identified:
. Tactile Disturbances:  Ask, "Have you any itching, pins and needles
. Recreational therapy.
PATIENT:
inpatient acute psychiatric unit, to encourage follow up with provider by
Purpose:  The theme is maintaining abstinence from psychoactive substances,
ABUSE/NEGLECT SCREEN
There is an alteration in comfort/pain.
with blunted affect. Pt maintains fair eye contact. Pt denies S/H ideation
voluntarily for treatment and was assigned to bed # . Pt stated that
currently. no hi. no  ucinations. no obvious delusions.
Social History:     lives alone in apartment.
Medical Center?
informed that ativan is given to relieve anxiety and withdrawal symptom
. Tremor:  Arms extended and finger spread apart.  Observation.
physician  PODOFILOX .% TOPICAL SOLN  ML
Action:         This group we discussed issued of the need for meetings, groups,
A; REINFORCED HIS CHOICE TO DECLINE PARTIES WHERE THERE IS DRINKING SINCE HE IS
WHERE HIS EXPECTATIONS OF A SALES PERSON WERE NOT MET. AND HE BECAME
Comment: drink water
ADDENDUM
Patient Education :
THE GROUP.
. Acute alcoh c intoxication in alcoh sm, continuous drinking behavior
Unit/Service: cm
Duration: intermittent
&gt;&gt;&gt; Verbal
therapy with IV Ceftriaxone and Azithromycin for CAP; consider switch to PO if
Patient Problem: Fluid Volume Alteration
(L/MIN)(%)
Time of Treatment:
//  PT.TEMP            . H
INTERDISCIPLINARY DISCHARGE PLANNING NOTE
Time of Treatment:  Feb ,@:
If yes, ADR Report entered:
Respiration:  (// :)
L/MIN
Effectiveness of Therapy: NO
Appropriate
Breath Sounds: Crackles, Wheezes
BOWEL MOVEMENTS:
Treatment
I havediscussed the patient with my supervising practitioner,
Call bell and personal items at bedside
Pulse:  (// :)
Yes
Adverse  physician :  No
Patient Identification :  Name, Social Security Number
// :  [.][]
Appearance of site after
Pain: (scale /):/
O@  LPM with exercise of:  %
dressing changes once pt is discharged.
Nutrition:          = Excellent
No wounds, pressure ulcers or other skin problems.
at risk.
Comments:  proventil/atrovent
MEALS:
ADL FLOW SHEET
DRESSES:
GOAL(S):  GOAL DATE:  month, INTERVENTIONS:, Treatments as ordered,
MIAMI FLORIDA
// :  [][]
DISCHARGE SUMMARY
Will follow good safety precaution for functional activities. MET
LPM During Activity:
PAIN (-)       (// :)
c. with s p:
Yes - Patient is a current tobacco product user.  Patient was advised to quit.
WATCHING TV, DVD&quot;S AND LISTENING TO MUSIC. HE SET UP HIS CAMARA TO PHOTOGRAPH
BLOOD PRESSURE - / (// :)
Upper Back,which was examined by  physician d showing no oozing,erythema or any
psychotherapy
session with evaluation and management.
PATIENT HEIGHT -  in [. cm] (// :)
___I have discussed the patient with my supervisoring practitioner,
your Access/Verify c . Now click on the Image you wish to view.
Medications Active Outpatient Medications (including Supplies):
C-Sections X  - , ,
Marital Status: Married
Job in service:  engineer
(D) Resin one surface-anterior: (F)
Length of session - min
-Consider MRI if pain continues to r/o labral pathology.
-Pt agrees with above plan of care.
unre able and he displ
(D) Resin one surface-anterior: (F)
Mr.   arrived to his individual therapy session time
Length:  minutes.
The following identifiers were used to verif
There is a   area of abnormal signal intensity in the
consider MRI at that time to reassess lesion.  Pt understands and agrees with
Danger of harm to self
Patient ambulatory
NO
Diet Rx:  CAL
MEDICATION RECONCILIATION ON INPATIENT ADMISSION:
SAFETY PRECAUTIONS
vs dependence, substance induced psychotic disorder who self presented to the ER
having increasing difficulty with s p.  He is fearful of the voices and states
SKIN INTEGRITY
Resp:   (// :)
PAIN ASSESSMENT
Patient denies pain.
Branden Scale Score: Not Applicable
submit the required paperwork, and conduct the psychosocial assessment.
Patient&quot;s wrist band on and legible.: [Yes]
Dear Ms.  ,
years. Had two children, the family moved from Texas to NY. She did not like NY.
Bronx NY
patient stated that he felt the hearing in his left ear was worse than it was in
*Get support from
YRS OLD MALE W/PMH OF;
PROGRESS NOTE
Mentation:Oriented X
effectiveness: flexeril  mgs given po
knee and back pain from recent injury.
// :          H    L    comment
Nutrition:
Dx: Low Back Pain w/ LLE radiating pain
Visit number:  of
(per Endoscopy Prep Protocol)
=================================================================
GEMFIBROZIL MG TAB TAKE ONE TABLET BY MOUTH TWICE A    ACTIVE
pressures and life style changes for the Diabetes Collaborative Research
Initial Group Randomization Date://
Date: September ,
DIABETES CASE MANAGER NOTE
Initial Study LDL:LDL CALCULATION       PLASMA  (// :)
.  Await return call.
and dosages will be provided to Humana by the patient&quot;s outside physician.
office last Wed or Thurs.  He calls to  to see if PCP will submit referral to
TESTING    TWICE A   TO CHECK BLOOD SUGAR--USE
occured in a matter of seconds. Since this incident the ringing has been much
Completed Care:
Temp: . F [. C] (// :)
CAD W/OUT CABG
are both presumed conditions for AO exposure. Veteran served in Vietnam but was
ADDENDUM
FARIBAULT MN
Comment: Findings focal, fov unthreatened os.
No show has been rescheduled.
// :  UG MH PAKULA MD                         CANCELLED BY PATIENT
List:  Bilateral wrists
) Ensure patient is wearing non-slip footwear. If necessary,
PULSE OX:       Measurement DT    POx
Scheduled visit: ( )
No falls reported when questioned.
Age:
PATIENT HISTORY:   Age:     Sex:  MALE  Ht:   in [. cm] (//
therapeutic range. To  he remains disjointed at times, and stares aroudn
hearing voices than he was as the session went along. By the end of the
PRIMARY CARE ASSESSMENT
Walks some for exercise-occ aerobics. Still skates once/wk
Colonoscopy rescheduled for June
Veteran is well-known to the DTC staff.  Recently had stated that he would like
MCH: .  L
PLT: .
[x]Illness Management  (/ min)
Groups facilitators/Staff: Le  Hamlin, LMSW
Time of Group: : a.m.
S.  , CSAC, CPS
[x]Nutrition
This plan does not replace any other Mental Health Service treatment
SOCIAL WORK (ASSESSMENT)
Le  Hamlin, LMSW
[ ]W.R.A.P.  (/ min)
Veteran&quot;s response to the following offered groups has been reported
Veteran&quot;s response to the following offered groups has been reported
S. Meskenas, MA, RNBC
Unscheduled visit ( )
Fall Risk Screen Outpatient:
L. Bright, MSW, CRADC
L. Hamlin, LMSW
Haldol D (mg) IM given to  in right gluteal muscle. Next injection due
. Does the patient use any ambulatory aids (wheelchair, cane,  ,
no voiding complaints exc nocturia x
EAST INDIAN SCHOsome state    --
violating confidentiality. This occured -- at approximately .
PATIENT ADDRESS:
Noticed that his heartrate remains elevated.  Thinks it may be stress related.
VACCINATION TO .
Valid:  -- thru --
Social Work Services so that an appointment can be made with the
Active Outpatient Medications (including Supplies):
The patient was seen for a minimum of  minutes.
working on fixing his teeth and is at Tufts dental program and VA at
for treatment to address them.
. How often did you have six or more drinks on one occasion in the
Perform Audit-C
others in reducing anger and feeling more comfortable to express themselves in
injection of a   amount of a radioactive tracer to help evaluate
INTERVENTIONS:
GOALS:
[]Siderails
Facility Appointed PCP: ORTEGA,MARCO ANTONIO (HUNTSVILLE PRIMARY CARE)
MIX WITH ALCOHOL,
controlled and his ACei was titrated. He was not started on b-blocker b/c of
D.  NO-SHOW education
.  RN/LPN will provide pre and post procedure instructions and will be
. Informed consent was obtained at : AM on April , . The
. The patient HAS decision-making capacity.
The patient was then prepped and draped in the usual sterile fashion.
findings should say loculated left spermatocele
Barriers to learning:  None
For education topic(s), instruction evaluation:
Potential for increased anxiety related to knowledge deficit of procedure.
NURSING SPECIALTY CLINIC NOTE
[]Sight impairment
FUNCTIONAL SCREEN:
. Anticoagulation
.  Patient&quot;s condition at discharge (check out):
AMB CARE CLINIC NOTE
OH fair to poor with moderate plaque, light calculus. PD &lt;=mm  rally.
FORMOTEROL CAP,INHL  MCG
FALL RISK LEVEL:   -     Level One  (Low risk for fall or injury)
year old MALE examined on // :
Apparently plans to see Dave in March or April when he comes back from
plans to go to Florida VA if he has any issues with the ulcer.  He says
Medications listed have been reconciled and reviewed with the patient.
Foot
SIDE OF BODY: Both Sides
PATIENT REPORTS:No change in functional ability.
PATIENT PLAN OF CARE:Continue current plan of care
Says he will be going back to Florida before New Years.  He has had a
done which showed residual urine of  mL.  He has had a history of
DISPOSITION:
Aching,  , Throbbing
Moved from: CD
RECOMMENDATIONS:
Alphabetized list of outpatient Rx&quot;s, inpatient orders, remote and Non-VA meds
//
( ) PRE-REGISTRATION COMPLETED.
Pain Reassessment/OUTPATIENT:
QUALITY OF PRIMARY PAIN:
Specify Quality right-sore
sounds present, no bruit.  No suprapubic tenderness.
. Who are you to call if you have questions about your care?
No contact made
mg.  Will call next week to request refill of percocet.
. Popliteal Cyst *
Weight:          . lb [. kg] (// :)
Name of Veteran:  ARD,
on normal recruitment in C through T innervated muscles, except for a
VAMC in Minneap s since /, and under my direct care since /.  Mr.
-will fill &amp; mail morphine enough to cover until his appt with pcp //
Patient is being discharged home.
Scheduled Appointments:
Phone number:  --  (cell)
Perception: no abnormality found
DSM-IV PTSD Criteria C IS met
. Anatomical Location: removal of # upper right and # upper left
impacted.
---------------------------
pt stated he missed call from provider, requests a call back to  at --
patient this Fri , // in the AM and call patient.
Comment: Pt will have colonoscopy
BARRIER: Emotional
At a recent visit you completed a Health Screen Questionnaire.
vet is in process of divorcing her.  he has a home in ok. he needs to
Pertinent symptoms:  Saw the patient briefly for CIU.  y/o male, accompanied
Reason for Study: R/O PVD
is unsure what his attorney  has pl ed, etc.  Pt is tearful at times and
appreciative.
PAIN:
MH DOM 123 RTU NURSING NOTE [DT]** 4/09 LB
Patient reports pain to , will refer patient to clinician for
RAL INFORMATION
MH DRRTP NO SHOW FOR AN APPOINTMENT
understanding of difference between friends and acquaintances; gaining a better
- PMH: diabetes
List:  (L) ankle swollen &amp; painful x  week; no accident, injury, or other
DSHI Disposition Report
Pt&quot;s Mother called requesting that wound on pt&quot;s LT ankle be f/u on. Pt
PC OUTPT HEALTH TECH INTAKE NOTE [T/DT]
List:  left ankle
Patient here to see PCP.
positive at this point  because her other son will be visiting for the th
Medication
Patient had preventive health educ/handout "Your Key to Good Health" which
[X] Negative otherwise
Pt sched in LPN clinic for derm photo of toenails. Consult submitted // but
DERMATOLOGY CONSULT-SOAP
Allergies: NKA
ADDENDUM
Enrolled in the anticoagulant clinic since: MAY ,
This has now become a real safety issue for   and his family, and I feel that
DATE OF ONSET: //
NEUROLOGY FOLLOW UP CLINIC NOTE (B)
)   DIPHENHYDRAMINE HCL MG CAP TAKE ONE CAPSULE BY       ACTIVE (S)
Respiration:  (// :)
MENTAL HEALTH HOSPITAL ADMISSION NOTE
disease.
DOSE FOR WEDNES :     TABLETS  =  MG
// : PLASM  . H
Information Taught:Patient discussed mental illness and diet.
NURSING NOTE
No.
N       .-
YES
AND
AS S P PATTERNS AND ANY CHANGES IN MOOD AND BEHAVIOR.  MEDICATION RESPONSES
dose with next INR  wks - requesting on -.
INR Range: .-.
/-/. Restarting warfarin and possible   nox/heparin administration
determined by inpatient team.
COMMENT ENTERED BY ANTICOAGULANT CLINIC.
,  T()                     TABLET STRENGTH: MG
PHARM. ANTICOAGULANT VISIT
wife to , who gives all of his history.  She is extremely tearful throughout
wife to , who gives all of his history.  She is extremely tearful throughout
staff.
SKIN ASSESSMENT (D)
INTERVENTION-  A safe, controlled environment was maintained along with q
Patient Instructions:
OD: Clear
OS: Flat
no etoh or tobacco use.
year old patient presents in clinic as walk-in with the
Hemorrhoids
PATIENT&quot;S AGE:
then until yester  evening after he was done mowing the lawn and sat down
chest pain but pt says actually only  minutes, atypical, labs/x   negative,
AUG , @:   Clinic:   MHC/REILLY/MED-GROUP
ESOPHAGEAL REFLUX
ADDENDUM
B/P: /
Were you injured? NO
. It is not expected that an anesthesia practitioner will be
CLINICAL REMINDER ACTIVITY/PLAN OF CARE
is working on reducing his isolative behaviors by connecting with other
NEGA RN EVALUATION/EDUCAION
RR:  (// :)
Pl ed Procedures:
members introduced themselves to a social worker in training. Patients reported
mental health TRP intake note of //). Patient has  ral medical history
Reconciled patient medication list:
HPI: Pt with c/o congestion, cough previous pneumonia December. Rx with
Chemistries
HEART - ADENOSINE STRESS TEST (ADENOSINE STRESS TEST)
condition has worsened and she now requires  hour a   supervision. Patient
Albuterol, spiriva. Pt dx with le DVT on coumadin for previous TIa by PVT
--------------------------------------------------------------------------
Active and Recently Expired Outpatient Medications (including Supplies):
Last Formal Pain Assessment appointment:
Report:
. Do you have current thoughts about suicide or self harm?
d-pt admitted to n for evaluation,drink  -pak/  beer qd,last drink
On a scale of - how do you rate your primary pain?
his overall physical condition due to ETOH and cirrhosis.  He came in
Explain:DENIES AUDITORY OR VISUAL  UCINATIONS
Reason for Consult: HCV/ETOH cirrhosis
ALLERGIES:
Speech: normal (coherent)
symptoms and medicate as needed; assess mental status and/or behavior for
LFTs, cell counts and coags have been getting better with the abstinence from
Has patient received pain medication within  hours?
previously.
Treatment Coordinator: Melissa Fair
=  Salty fish (sardines)
-  Stop drinking alcohol beverages unless approved by ph
Attempted to notify patient by phone.
shoulder which got better with extra dose of klonopin. She  talked about
verified: Stated full name  Stated full Social Security Number
Conversation with  ,  A has a chief complaint of: &lt;not
PAIN MED IF POSSIBLE.//AR//AR
in the neck. Provider stated that would seem to be the cause of the pins/needles
to see if it helps. She is worried about losing unemployment benefits in
decreasing...I&quot;m  wondering if its the new muscle relaxant medication
ADDENDUM
to her right buttock and right hip. She fell in the parking lot a year ago
Length:  minutes.
Length:  minutes. (Call was suspended. This call length is the total amount
Appt scheduled for dec.
BMI: BODY MASS INDEX
Pulse:  (// :)
Temperature: . F [. C] (// :)
Patient Phone Number: ()-
Starting at: // @ :: PM
Veteran would like to speak with team  RN//rm
, @::   .
APR , @::   .
Respirations:  (// :)
Interventions for health promotion and disease prevention.
Age:
PMH - Obesity, depression, hyperlipidemia, hypothyroidism. GERD, COPD, Barrett&quot;s
INFORMED CONSENT
EDUCATION TOPICS:
Ht.:   . in [. cm] (// :)
How has the pain changed since patient&quot;s last visit?
No Primary Provider Identified (ANCHORAGE PC I)
ORTHOPEDIC PROVIDER NOTE
Vista Imaging contains a sc ed image of the report for this Non-VA
by:   A CHRISTENSEN
LEAD SC ING CLERK
ADDENDUM
Patient denies allergy to polymyxin.
TEMPERATURE: F [. C] (// :)
HISTORY:
none
NURSING NOTE
and time and judgement is okay.I reviewed his labs.
No significant issues reported by nursing staff or patient.  Detoxing well.
*Tobacco Counseling:
.  Alcohol dependence
What questions do you have regarding your condition?  None
_____ Consults
    
