# Supplementary material for: Predicting the Risk of Suicide by Analyzing the Text of Clinical Notes
Source: PLoS One. 2014 Jan 28;9(1):e85733. doi: 10.1371/journal.pone.0085733 (PMC3904866; doi:10.1371/journal.pone.0085733)
Supplement: Appendix S3 — Machine Learning Libraries and Methods: This section is provided to enclose the open source (Apache License) classifier used for the building of the statistical models, specifically for the purposes of study reproducibility. A detailed account of these tools is intended for another publication. (ZIP) [file pone.0085733.s003.zip › Appendix3/ML_libs/Regression_testing/group3/grp3-pt-1055.xml]

<?xml version="1.0" encoding="ISO-8859-1" ?>
<records>
  <record>
    <group>3</group>
    <study_id>1055</study_id>
    <notes>
either for med f/u or ptsd appts,,dtr had baby and her husband is meth addict
pains in my chest. They are worse then they have every be
OS: +.+.x   /
with OS, will soft reline lower denture, fee base restorative treatment and
Pt conceeds to save teeth and approves.
year old   MALE presents for
Visit: S: Feb , @: DENT PERIODON FERNANDEZ A-.
Dental Category: -CLASS VI.  Treatment Status: Inactive.
MS system-No  back pain radiating down the lower extremeties,numbness or
Using the head of the penis as a guide, the redundant foreskin is
Allergies: DILTIAZEM
full consent
with inhalation of an anesthetic (drug causing numbness) vapor.  The
urinary symptoms.
Anesthesia:  ral
UROLOGY CLINIC FOLLOW UP
NURSING - PACU FLOWSHEET
Other
Ending at: // @ :: PM
Length:  minutes.
Carol J. Kalina RN, Dermatology Surgical Nurse
development of treatment plan.
I asked him to rt my call to confirm.
Veteran participated in group designed to address the above issues using
Vital Signs:
DEMOGRAPHICS
Alcohol:
In remission
exacerbating factors, can happen when in bed, driving, sitting, or walking.
way.  Discussed accountability for reaction, responses and consequences.
consequences. Di
NEUROLOGY CONSULT
Frequency       Right Ear       Left Ear
ADDENDUM
. Memory loss secondary to TBI.
Gender:  y/o male
S:  Veteran is a  year old, % SC, male veteran seen for  minutes.
An assertive responding exercise was conducted using veteran&quot;s real-life example
min to  hours after each incident.  Since his discharge, he notes symptoms
Veteran&quot;s presenting Symptoms and complaints are:Insomnia: s ps  hours and
and going to the beach with his dogs. Veteran denied SI, HI, intent, or plan.
MH MD NOTE
you. How many drinks containing alcohol did you have on a typical
PROVIDER:  ,  M             CLINIC: PCT WOMEN&quot;S HEALTH,
Dear Veteran,
// :  SERUM      CALCIUM              .   mg/dL
ORTHOPEDIC NOTE
(Send a reminder letter ONE MONTH prior to the desired month.)
[] Tibia/Fibula,
NON-OR PROCEDURES
Resp:
Date of last PAP smear:Collected: //    Acc: CY-R
lumps on the lower back to each side of the spine.
All: silver silvadiazene, fluvastatin, amitriptyline
Your surgery is scheduled on Feb ,.
moved up.
[]Contact not made.
[]Latex       []Iodine
for follow up visit.  The patient mentioned she likes to
relation with activity.  Denied any shortness of breath or
(Send a reminder letter ONE MONTH prior to the desired month.)
Wt:     lb [. kg]
- - - - - - - - - - - - - - - - - - - - - - - - - - - - - - - - - - - - - - - -
. Consent to Blood Products (if applicable):
Total chemical nail matrixectomy was discussed with the patient.  All
and refill process.
Still on fluconozole
Visit: S: Sep , @: DENTAL PASCUZZI  WHAV.
P: Discussed findings with patient.  Patient put on C mycin mg
. It is not expected that an anesthesia practitioner
PLEASE EDIT IF INCORRECT
Signature Informed Consent for
ADDITIONAL COMMENTS/INFORMATION:
[ ] YES [ ] NO Is the patient pregnant or breastfeeding?
Patient on coumadine:    No
Nurses assessment of chief complaint/disposition:
ADDITIONAL COMMENTS/INFORMATION:
[X] Patient
fluoroscopic guidance (oblique, lateral and AP views) to a point inferior and
AHS Education Assessment:
SIGNATURE NOT REQUIRED
===
-----------------------------------------------------------
Nurses assessment of chief complaint/disposition:
PCC-NURSING INTAKE
h/o rt hydrocelectomy,h/o urinary incontinence,h/o b itis,bph,lumbar
- number to call for problems
The patient reports the duration of pain is &gt;  Months.
During treatment session:
information is correct. Unit orientation, including the location of
condition or save my life. I understand that my consent for use of
Appointment:
Risks, benefits, alternatives, and possible complications
equal strength
Output
REASON FOR VISIT
Services represented were Case Management, Social Work, Rehab, and
Incision: not assessed; ACE wrap, polar pak, and knee immobilizer in place.
Percent t  consumed: %
recurrent or chronic health problem.
SaO:
tarzadone
Level of sedation:
The patient is able to turn self and does not require nursing
The patient is able to turn self and does not require nursing
. Gait/Transferring: Impaired
Lung sounds: C
ONSET: --
. Hyperlipidemia * (ICD--CM .)
pt seen and exam , residents note reviewed.
Patient is alert and oriented. No signs or symptoms of di
Start Time: Apr ,@:
Acute Pain:
Patient/Family trained and independent in the use of the issued equipment.
time? YES
PAIN
Medication not  wed at last visit.  wal request for ed to provider.
EVERY  HOURS AS NEEDED FOR CONGESTION
looking at the information he provided on // vs to , it looks like he is
OBMT PROGRESS NOTE (T)
IBUPROFEN MG TAB
provider. Mail.
CURRENT PHONE NUMBER:
Active Problem
Date of Order:OCT  ,
Site:LT HIP
improvement in his nails since starting the oral Lamisil as
dict #
to continue to take his Tramadol and indomethacin for pain management, these
some assistance.
CURRENT VITALS:
S:  yo M with depression NOS, and anxiety d/o NOS.  Increased Wellbutrin at
first   in  yrs recently.  "The First Consul" which is about p tics.  Pt
Patient reports no abuse or neglect in the past year.
B. "It is also a fact that many people have had thoughts of ending
------------------------------------------------------------------
has several medical problems and mental status problems that lead him hopeless,
He slept a Total of /hrs during the night.
-----------------------------
states
ADDENDUM
agree with the treatment plan.
able to s p - hours for the past  nights with some grogginess in the
// @       .                   /
AS DISCUSSED IN TEAM MEETING, THE PATIENT&quot;S OBSERVED MOOD HAS BEEN:
Teledoc.
Discharge medications for this patient provided to W nursing staff to
writing their own "Fire  physician
After reviewing Mr.  &quot;s charts, it has become apparent that PTSD is a new
diagnosis for him.  During his initial interview, he talked about his "PTSD".
and is easily startled.  Unfortunately, he also has depression and an anxiety
Is there anything that you can think of that might have improved your hospital
P:  Home care instructions ice, OTC pain medication and appointment scheduled
information was discussed with the patient.  The patient was advised
PREVENTATIVE &amp; HEALTH MAINTENANCE
Will forego going to poker as much until more people return in the park
has used TAC .% in orobase?
Sc er
AMBULATORY/OUTPATIENT CARE TELEPHONE CONTACT
Allergies: NKA
requesting to pick up next  . Review of document notes it is a
O:  Mr.   is a well-groomed, well-nourished male.  He is calm and
VITAL SIGNS
PULSE:   (// :)
Non-VA FISH OIL MG ORAL CAP MG BY MOUTH TWICE       ACTIVE
including IOP versus outpatient, grief support and treatment etc. Veteran agreed
Patient&quot;s stated: Level of INTENT of this event was: Low
Last Pain Score:  (// :)
(x )No Distress                  ( )Attentive
( )Videotape                    (XX )Audiotape
( )Transparencies
BY MOUTH TWICE A   FOR PAIN
This medication list has been reviewed and given to patient and/or family
Pt given DYNA-HEX for showers x  pr
BY MOUTH TWICE A   FOR PAIN
bone and ligament compressing the nerve roots while not affecting the
Lab results in CPRS or on chart
Major Operations Performed:
NUR INPT DISCHARGE NOTE
NEUROSURGERY TELEPHONE NOTE
I placed an order for him to be seen by his PCP to  for this.  As I asked, he
upright than preop. He never got his methocarbamol prescription
. Condition or diagnosis: Suspected prostate cancer.
AMB CARE MD/DO NOTE
Ht:  . in (. cm)
via ROOM AIR
Radiology Metformin Reconciliation Note
abilities and to their apparent satisfaction.
INFORMED CONSENT
. Anatomical Location: Radiation Therapy To The Pelvis
x- s penetrate through the normal tissues to the tumor tissues,
Patient will be able to self-direct exercise prior to discharge from clinic.
times -.   He has  stools per  .  No b ding in urine or stools.
mood secondary to being diagnosed with cancer and losing his home to a
HEENT: NC AT PERLA
patient to do a walk in to mental health to  physician ic on //. Patient
The patient&quot;s medication profile at time of the clinic visit was:
Active Outpatient Medications                          Status
his medications; here for clozaril rx
LEARNER LIMITATIONS/BARRIERS
POTASSIUM                  .     mmol/L     . - .        []
Common Cold (ICD--CM .)             SCHIZOPHRENIA NOS-UNSPEC
A/P:
ON:
Pre-Operative Clinic Nursing Assessment:
Procedure:left shoulder arth
Age:   Sex: MALE
(If yes, personnel notified).
Date called: OCT ,
Vital Signs:
ID Armband on and
ACTIVITY:
ADDITIONAL COMMENTS/INFORMATION:
,   LIN is assigned to Caller Area *MOUNTAIN HOME.
BREATHING
. CONSTIPATION, unspecified
Objectives were met.
Intravenous Access:
. GERD
Respiratory Rate:
Skin Temperature
Color:  Normal for ethnic group
ADDENDUM
- plasma osmolality, urine osmolality, &amp; urine lytes pending
Character of stools
Confusion started on Thurs  of last wk. when he was discovered to have
Medication: Vent n .ml, Atrovent .mg/.ml
No Adverse Reactions noted.
Treatment: Side Arm Nebulizer
=========================================================================
Assessment   of Procedure:
CRNA PROGRESS NOTE
Discharge Date: Dec ,
Psychosocial Status of patient at time of discharge? stable
FEB ,@:  EYE BOHLMAN
Patient able to participate in ADLs:  Yes
Communication:
Identified problem: OTHER UNSPECIFIED COUNSELING.
HARD COPY. IF PATIENT IS STILL TO RECEIVE PLEASE FOR  HARD COPY TO PHARMACY
Identified problem: OTHER UNSPECIFIED COUNSELING.
.  Left shoulder partial rotator cuff tear and labral tear
just a local anesthetic (numbing medication) to alleviate any
Pt here for a f/u.
Chart reviewed. Pt with continued imporvement radiographically and clinically
Needs an updated pain agreement ordered.  UDS needs updated...pill count in
- abdominal swelling, worsening
DIABETES MELLITUS
Call Type: DIAGNOSTIC TEST RESULTS.
Meds: Reviewed and Reconciled on this visit, see below.
narcotic agreement was good. A copy was given to the patient.
side with a  mm echogenic focus which may represent
Filled request.  Pain agreement will need to be posted.  UDS is current.
epididymis measures . by . cm.  mm epididymal cyst is
EYE - HEALTH TECH NOTE
HPI: Patient returning for f/u of left shoulder. He
REQUEST FOR NARCOTIC RENEWAL (B)
Comment:For ed to PCP
Identified problem: OTHER UNSPECIFIED COUNSELING.
identified&gt;.
indicate that he specifically needed a dual dx. treatment program, but Harbor
Veteran met the following criteria for short transitional stay at
(esp.borderline,antisocial,narcissistic)
This patient continues to participate in the Bell Shelter per diem program. A
Post-Op Diagnosis: open-angle glaucoma OS
HVF /
- patient noncompliance with drops, ran out, says will be more compliance in
[  ]  s/Scissors/Razor:
and suicidal thoughts.  Pt was a resident with US Veterans and had an encounter
)   RANITIDINE TAB  MG PO BID for stomach.              ACTIVE
A:  Received veteran in the  room alert and oriented x, said he was involved
wait out the rest of his time.  Pt is actually waiting for his SSDI court case
"you&quot;re no good...".  s/h/i at this time, but endorses feelings of parania which
Dialysis (home-based):  No
COMMENTS:
pharmacy addendum note:
SUICIDE RISK FACTORS
Pt was in an altercation with a staff member who hit him.  He did not hit back
PRESENTING CHIEF COMPLAINT:
managment.
)   LORATADINE MG TAB TAKE ONE TABLET BY MOUTH EVERY     ACTIVE
======================================================================
FATHER MI AGE  Y &quot;S                Prolonged PTSD
CHIEF COMPLAINT:
P:   (// :)
MAR , @::   .
RECALL LETTER TO BE MAILED WHEN APPOINTMENT TO PRIMARY CARE IS DUE
veteran who reports he has been living out of his truck for most of the last
Difficulty lifting the arm.
have some problems with the new medication that he has started on
TEMP: . F [. C] (// :)
ORHTO IF NO RELIEF
He requested that I evaluate him for diasablity, and i directed him to the
// @       PULSE OXIMETRY:
Other Specified Housing or Economic // HEMP ,  L
* Vom
all the time". Aware  physician not in office to  but wants to see a
PAIN COMFORT GOAL:
ADDENDUM
you. How often did you have a drink containing alcohol in the past
phone call voice message from  physician self stated that he can see vet
to  vs tomorrow sometime between - or - (office is closed on
Social History:
Plan: A testing session has been scheduled for this veteran on // at .
has a history of repeat exposure to high-explosive blasts experienced during
Most recent x-  date:  --
ADDENDUM
to call to reschedule.
others. Staff will work with pt to s the least restrictive setting as his
ADDENDUM
Rausch,  RN in the left thigh (it did not penetrate the skin or
is appropriate and he feels he is being "treated like a dog".  He is very
Has there been a FALL in the past  hours?
MH INPT NURSING NOTE
NURSING NOTE
meds this a.m. but eventually returned to med room to get Fentanyl patch.
Primary Care physician note:
talked to me and no one is giving me my pain meds." Discussed percieved and
NURSING NOTE
IPU TREATMENT PLAN WEEKLY UPDATE
P: S ping patterns.
-
minute  .  No requests or c/o this shift.  Will continue to monitor
Are restraints in use?
Remains safe on unit.
his room the rest of the shift and has appeared to be as p. Out for breakfast
intimidating other pts. in the milieu. Did eat lunch to  in the DR after
prescribed.
NURSING NOTE
VETERAN.  CONTINUE TO MONITOR..
Pt with desat overnight assoc with fever and elavated cbc. Vitals are
states he is drinking well but having vomiting. cna heard pt wretching but then
Are restraints in use?
DX: Axis I- Opioid dependence
The Short-term certification dated // was terminated at the time of
Plan: Continue Individual Therapy
VITAL SIGNS:
Time specimen obtained:  Dec ,@:
E: Pt rested for a little while, but awoke bent over in
Comments:
RESIDENT SOAP NOTE (T)
WILDCATS - all areas MUST be completed for any reports of
Pt on N. DC to . Awaiting o for transport.
Mental Status
PROVIDERS&quot; EMERGENCY ROOM WALK-IN VISIT NOTE
discrepancies.
Height:  in [. cm] (// :)
ADDENDUM
taxi home arranged by AOD CDM
In accordance with VA ECHCS P cy -, Management of Di uptive Behavior,
Treatment Provided: Individual Psychotherapy
Still endorses chronic passive SI with no intent, agrees to keep self safe.
Seeking medical assistance for pain, keep therapy appointments wi
Diagnosis: MST, PTSD, borderline traits
Duration of visit:  min.
MH TELEPHONE CONTACT (B)
Wants the Albuterol reordered as he has been on that regime
has a order for his Albuterol inhaler
message for    , Travel Supervisor at Bay Pines -- x,
down for a bit then I&quot;ll call."
A "time out" was taken prior to the procedure to verify correct patient,
correct procedure and correct site.
Patient positioning was verified prior to procedure-supine
- - - - - - - - - - - - - - - - - - - - - - - - - - - - - - - - - - - - - - - -
History of Present Illness:
CORONARY ANGIOGRAPHY
Vital signs and site checks located on flowsheet.
Vital signs and site checks located on flowsheet.
O Sat:  (// :)
He clamis that his pulse is always in the &quot;s and &quot;s.
Reason for Visit: scheduled appt.
TABLETS**
H/O PTSD in remission,
PAIN:   (// :)
breast examination to f/u as diercted .
ENERGY IMPROVED.  MOTIVATION FAIR.  APPETITE FAIR.  NO THOUGHTS THAT LIFE IS
NOT WORTH LIVING, SI/HI.  NO HOPELESSNESS.
at this time
A PHQ- screen was performed. The score was  which is a negative
[ YES ]
Am an Cancer Society PAP SMEAR Recommendations:
starting to have sex
Make:  Interton
. Feeling tired or having little energy
PAIN SCORE:   (// :)
ADDENDUM
)   AMLODIPINE BESYLATE MG TAB TAKE ONE TABLET BY MOUTH  ACTIVE
Hearing loss                            Obesity
(ICD--CM .)
chief c/o: I have been taking fiber that has calcium in it. Could that be the
// CALCIUM                .
ADDITIONAL COMMENTS/INFORMATION:
Evaluation/Management Code: HC PRO PHONE CALL - MIN ().
BENIGN HYPERTENSION                     PROLONG POSTTRAUM STRESS
Problem # Thought Disorder-Met with veteran at Birch .  He is in bed but
Current Diagnosis: Schizophrenia
he attributes to having gotten out of bed  y to .  Talked about
Problem # Thought Disorder-Met with veteran at Birch .  He reports feeling
paranoid and talked about how he feels m,ore the strength and presence of Jesus.
No
veteran was open to reexamining his definition of what it takes to be a
Dear Mr.  :
Veteran not seen for scheduled appointment due to:
Problem # Thought Disorder-Met with veteran at his residence.  He states, "I
Appointment Rescheduled: No
Education: The veteran indicated a readiness to learn by choosing to attend
group. All group members were given an
Delusions: none verbalized
None
BMI:             .
Problem # Thought Disorder-Met with veteran at Birch .  He reported
Patient continues to be goal directed, working on identified goals
Current Clozapine dose: mg qmorning and mg qbedtime
goal setting and reported a desire to make some changes in his social
No
Void: Not applicable
Skin, right posterior neck, excision of cyst--
Public Health Nurse/Home Care Nurse called with questions.
ADDENDUM
last week.  Veteran continues to use his coping skills to deal with
Current Clozapine dose: mg qmorning and mg qbedtime
Procedure is on May , .
. Surrogate (if applicable):
Admit Type: Outpatient             Attending MD: Kamran Safdar MD
knows many interesting people with whom he would like to spend his
- - - - - - - - - - - - - - - - - - - - - - - - - - - - - - - - - - - - - - - -
BRIEF CLINICAL HISTORY:
CLONAZEPAM MG TAB TAKE ONE TABLET BY MOUTH TWO TIMES A     ACTIVE
they come as frequently as one hour intervals.  Says he was seen in ER for chest
complete. Pt did not bring "referral" back. pls call.
was having a
treatment goals.
resident use.  Veteran readily admitted that he has been using the
Risk Factors: Veteran is a   male with a diagnosis of a chronic mental
- Recommend FSG QID while initial sliding-scale in effect to aid titration.
TELEPHONE CARE NURSE TRIAGE
reading a   about    ill, says he was kind of an egomaniac.   Had
Patient Goal Setting:
a missionary friend of his whom the veteran believes is taking
Patient is a lifetime non-smoker or has no history of Tobacco use.
Ending at: // @ :: AM
=========================================================================
Chest/Heart:
PROCEDURE: The patient was studied in the usual fashion for
Ext -e/c/c
EVERY EVENING FOR CHO OL LOWERING
No pedal swelling
. Ongoing Nicotine dependence
[X] Oral Hygiene:
)   CARBAMAZEPINE MG TAB TAKE ONE TABLET BY MOUTH       ACTIVE
LR SURGICAL PATHOLOGY REPORT
)   ALBUTEROL MCG (CFC-F) D ORAL INHL INHALE  PUFFS  ACTIVE
[ ] YES
EGD due in  (screen va s): will schedule in next visit (in  mo)
________________________________________________________________________
she has been taking her medicines religiously but she is in the process of
From:   :   To:  :
)   APAP /BUTALBITAL /CAFF MG TAB TAKE  TABLET BY  ACTIVE
ED ATTENDING NOTE
CC: Pt has suicidal ideations, she has been hearing voices that tell her to
to  evening, and pt came to ED to fill her medications. Pt was discharged from
Provider : DIMASCIO- SON,NANCY
Provider : DIMASCIO- SON,NANCY
)   HYDROCODONE /ACETAMINOPHEN MG TAB TAKE  TABLET    ACTIVE
DENTAL DISORDER NOS
coming tomorrow.
TIMES A   WITH MEAL . FOR DIABETES
from there he was transferred to   Reed for surgery.  He is % service
of his posttraumatic stress disorder condition. The patient is currently
note.
*********************  CONFIDENTIAL ECHO SUMMARY   pg.  **********************
---------------------------- CEC - ECHOCARDIOGRAM ----------------------------
Tetanus, Diphtheria (Td) or Tetanus, Diphtheria, Pertussis (Tdap)
ROS:
Assesment and Recommendations:
with  being the best. Daughter Co n agrees that he has not really been
Non-VA ARIPIPRAZOLE MG TAB MG MOUTH AT BEDTIME           ACTIVE
transfer.  He will be discharged come to the ER for evaluation.  At that time we
FL
Gait/Transferring:
INTERIM CARE PLAN
SCOPOLAMINE .% OPHT SOLN SOLN,OPH   DROP BOTH EYES QID  ACTIVE
ADMISSION HISTORY AND PHYSICAL EXAM
S tary
EOMS:
FOHX:
physician s
Eye drops given as ordered, protective patches in place.  Resident assisted with
Mouth Care
Washing:
Dinner          food %        drinks %
PREDNISOLONE ACET % SUSP,OPH   DROP BOTH EYES QID         ACTIVE
initial results. Read in -H
Urine color: yellow
TIME OF THE   Night Dec ,@:
Personal hygiene: bed/sponge bath
Assistance provided for this task: requires no assistance.
physician s
S PING PATTERN
physician s
Score:
No change in previous interventions as listed below
Report new pain
LUBRICATING GEL JELLY,TOP   PACKET EXT BID To affected     ACTIVE
REPORT NAME: MDS   PAPER
care fro this pt was trnasferred to me from dr. Nuchovich on //
Ana  s #--, Victim Services Division Advocate from PBC Public
S: This patient was seen and evaluated to  by me for the first time.
Yes, he&quot;s blind so it&quot;s very unsafe to smoke without supervision.
Meal assistance:
Hip protectors in place:
Assistance provided for this task: supervision, oversight, encouragement or
Alert
cope with recent loss of vision. He has an appointment with Bascom Palmer in
MOBILITY
BLADDER
Adjustment Disorder with depressed .    //   BALDWIN,CAROL H
Breakfast       food %        drinks %
ZZPATIENT CARE ADL NOTE
Amount consumed:
BLADDER
Breakfast       food %       drinks %
BOWEL ELIMINATION
Oriented to person, place, time.
Number of bowel movements this shift: .
state if he has to live the rest of his life blind he would hope the doc end his
IC ALERT-MRSA
Personal hygiene: shower
pickup of veteran this morning between :-:AM.
ABRASION HAND  .                        //   RUSSELL,  J PA-C
Number of bowel movements this shift: .
CLC PHARMACY CHART REVIEW
Patient bathroom privileges
ECP NURSING SUMMARY
Phone calls
fingers of left hand with dry scab.
Thought process: goal directed and logical
Meal assistance: requires no assistance.
TIME OF THE       ,@:
This shift the patient used the toilet.
Dinner  food % drinks %
Meal assistance: set up, cutting meat and opening containers.
Speech: RRR
Amount of stool: .
Oriented to person, place, time.
Activities:
PAIN REASSESSMENT
Impaired
physician s
BOWEL ELIMINATION
enjoyed meal and socialized with a few residents during meal and smoking
BOWEL ELIMINATION
cueing.
Oriented to person, place, time.
During this shift, patient was continent
Other personal care: shampoo
PE:
Urine color:
Upper body
Use of non-skid slippers or gripper socks
Client has no C/O pain at
girlfriends" who reside locally and at present he is undecided which one to
Transfer: supervi
Oriented to person, place, time.
location: resident room
Lunch   food % drinks %
During this shift, the patient has been observed smiling, talking to others.
NURSING NOTE
ZZPATIENT CARE ADL NOTE
Amount of stool: none.
Patient bathroom privileges
Hip protectors in place:
MOBILITY
Number of hours active
Number of bowel movements this shift: .
This shift the patient used the toilet.
cueing.
Assistance provided for this task: set up assistance
agency. She used to work with the Lighthouse for the Blind.
MOBILITY
ZZECF PROGRESS NOTE
Lunch   food % drinks %
Patient bathroom privileges
Blindness,Open wound of eyeball, Adjustment d/o with depression
His main problem is vision loss, and hopefully his surgery will be successful
)Vigamox qid right eye.
Personal hygiene: not applicable this shift
This shift the patient used the toilet.
Patient bathroom privileges
This shift the patient used the toilet.
Urine color: yellow
Dinner  food % drinks %
pass
others, approaching others.
This shift the patient used the toilet.
Personal hygiene: not applicable this shift
manage to live independe
Urine color:
MOBILITY
Bed mobility: independent (easily turns and sits up without staff assistance)
Urine color:
Number of hours napping
TIME OF THE     Apr ,@:
Sensory Perception: = No Impairment
at risk.
Alert
physician s
BOWEL ELIMINATION
Bed mobility: independent (easily turns and sits up without staff assistance)
Amount consumed:
During this shift, patient was continent
would benefit from an ALF placement where he would receive assistance with his
ZZECF PROGRESS NOTE
Dinner  food % drinks %
ZZSWS ECF
appears that appointments with  physician not mad as requested.  Swer
Amount consumed:
Assistance provided for this task: requires no assistance.
Urine color: yellow
Consistency of stool: soft.
Moisture:           = Occasionally Moist
SKIN PROBLEMS
Alert
Hip protectors in place:
S PING PATTERN
During this shift, patient was continent
Consistency of stool: .
This shift the patient used the toilet.
NUTRITION
patient is afebrile, VS are stable I will give topical antibiotic ointment.  We
physician ody
Verbalizes.
retina detachment) that there would be considerable improvement.  If possible,
SWS   and Bonfadini met with veteran this morning to discuss transfer to
members.  veteran also has a appointment on Thurs  in Miami.  He also intends
Patient is continent.
Swer also confirmed with SMT veteran&quot;s transportation to his Miami appointment.
Veteran will be accompanied by his sister and will not require an aid.
TIME OF THE   Night May ,@:
BRC NURSING
Veteran is alert and oriented, appears very angry, and has stated that he does
S PING PATTERN
Initial assessment and orientation was began with the veteran and will continue
Primary Emergency Contact:
Sessions Remaining:
enable the veteran to receive information regarding having funds
Number of LS sessions provided:
Date: Wens
Problem:  Altered Coping Mechanisms within BRC student&quot;s family unit
to the face and eyes on //.  Patient seen initially seen at Del
The IDCP meeting for Mr.   was held on // at : p.m. Skill area
stated he did not have any family member who would be able to participate in a
ADDENDUM
would be beneficial to him; when presented with the calculator to , Mr.
on Tues , during the next LS session.
expressed her appreciation of the "work" of the BRC instructors. SWer will speak
Call from  ette Andre, Victim/Witness Coordinator, State Attorney&quot;s Office,
center the printed information on the sc er correctly and the ability to
adequately dressed and groomed appearance.  Speech is low volume
reinforcement to use previously taught O&amp;M skills.
to care for himself in a saf
on
sides of the bill if the machine could not sc ed the amount.
from one   to next. Although, writer has been working with veteran since May
assistance. He was also able to locate the mode buttons, start/scan/ and pause
rehabilitation. Veteran affect continues to be depressed regarding his vision
Date and time of LS sessions: //    : AM - : PM
Time: : :
Mr.   was not seen to  secondary to being on a home visit with living
June th,
BRC VISUAL SKILLS
Plan:  Veteran will be seen for LV tomorrow.
SIGNIFICANT OTHER ATTENDED CLASS AND PARTICIPATED:  No
COMPREHENSION:  Good
get pt to go for a smoke.
Team Members Present In Meeting
staff and morning bedrest for Mr.   was approved.
BRC LOW VISION SUMMARY
Mr.   for a "one time payment" from Victim&quot;s Compensation Program.  This
Total sessions to date:
Legs &amp; Feet
CURRENT MEDS:
ANTICIPATED GOAL ATTAINMENT; fair
Center, hospital travel, his home area, and restaurants.
Primary Emergency Contact:
ZZMINI MENTAL STATUS EXAM
smoking. This is an accomplishment that he has made social relationships and
Total sessions to date:
secondary dx:
VAMC  WPB Vist Coordinator, -- x  Mon -Fri , am
maintenance, and his ambulation within his home was adequate.
Heart-to-Heart would be arriving at his home each Fri  from pm-: pm to
Temp:  Warm
NURSING FALL RISK ASSESSMENT
Care Involving Orthoptic Training (ICD--CM V.) V.
WT   .       //
Ready to Learn (receptive)
appointment.  Called this morning: --- and was told that Mr.
SWS BRC
SWS BRC
veteran.
veteran upon her return.
increase his social activity, and he has some musician friends who will be
Alert,
(-) Glaucoma
_
For use by Ph.D.or LCSW
[ ] History of:
INTERDISCIPLINARY PT/FAM EDUCATION
Test Results:
M  Right  + . + . x      /
Active Outpatient Medications                          Status
)   METOPROLOL TARTRATE MG TAB TAKE ONE-HALF TABLET BY   ACTIVE
Reviewed and  wed all MH meds, a copy provided to pt.
Denies overt depression or suicidal ideation. Requesting individual therapy to
Military History:
has been mailed via the U.S. Postal Service on Aug ,.
EH conj nevus
CC: Needs refill of medications
Pain:   (// :)
__x___Patient is not considered to be a high-risk patient at this time.
PPH from my p
Pulse:  (// :)
shipment of  ZA batteries were ordered on //. They will be mailed
has hx migraine HA and has stopped sumatriptan since his C-spine surgery. In
. Patient name:   ,
PREOPERATIVE DIAGNOSIS:
L-SCHEDULE APPT GI-COLONOSCOPY/EGD:
"GI told me to come see you"
CARDIAC:  HTN[] Murmurs[] An [] Palpitations[] DOE[] Orthopnea[]
inventoried.
Patient is able to eat without teeth
R:  Pt conti
PSYCHIATRY MULTIDISCIPLINARY TEAM NOTE AND CARE PLAN REVIEW
Allergies and Adverse Reactions in VistA:
Patient does not desire Chaplain visitation   :
Patient&quot;s strengths:
Not visible, but can be felt fingertip to fingertip. ()
MULTIVITAMINS TAB
-DOXEPIN  MG CAP
*** Please call the Scheduling Department at  () - ext.   to make
Disorder about - months ago.  Stated that he "feels good one   and bad the
TAKE ONE TABLET BY MOUTH EVERY MORNING FOR DEPRESSION
AXIS V:    .
toxicology collection
you are doing. How are you feeling to . ( good ) My arm is hurting me, from
Discuss any special diet or activity restrictions.( discussed his diet)
Wt      lb [. kg] (// :)
A&amp;Ox, Emotional, directable.
)   F C ACID MG TAB TAKE ONE TABLET BY MOUTH EVERY    ACTIVE
Overall appearance is  clean.
*DIET        :REGULAR                             TF/PPN/TPN:
Goals: Patient will develop alternative coping skills to self-manage suicidal
Medical Center?
NURSING NOTE
IBUPROFEN  MG TAB
Gender            : MALE
Marital Status    : DIVORCED
D:  Receives Pt AAOX,calm and quiet with flat affect. personal appearance and
CLINICAL INSTITUTE WITHDRAWAL SCALE FOR ALCOHOL(CIWA-AR)
compliancy. Discussed the effects of ETOH with medications and Bipolar D/O. Pt.
TAKE ONE TABLET BY MOUTH EVERY   FOR VITAMIN SUPPLEMENT
FOOD)
Patient Info:
Eye contact:
the Quiet Room and discussed the management with the resident.  I reviewed
//  CHO OL        .
and the patient assessed including assessment of suicide risk. Based
medications as prescribed.
SUPPLEMENT
THAT HIS
+ headache
Veteran searched for contrabands, none found. Vet was given a red
Score:
disease.
Home/Outpatient Medications not continued for inpatient use
Vital signs monitored and recorded in CPRS.
F:                 BEHAVIOR
-LOPERAMIDE CAP,ORAL
asking to  go outside to smoke, physician does not want the patient
physician  NICOTINE TRANSDERMAL PATCH  MG. QTY.
Patient was seen before discharge from this admission to AB. Patient was
oriented - x
SOCIAL WORK DISCHARGE NOTE
Called pt for the second time at -- but received the voicemail system
A; REINFORCED HIS OSAC PARTICIPATION AND CONTINUED ABSTINENCE, DISCUSS  Y
group discussion.
ASSESS:  THE VETERAN EITHER LISTENED TO OTHERS IN THE GROUP, SELF DISCLOSED OR
F; RECOVERY ISSUES
NURSING NOTE
Other
NURSING NOTE
//
+ dyspnea, new or worsening
Patient&quot;s Chief Complaint :  Short of breath
Sputum sample collected and sent to LAB.
-NO KNOWN NON-VA MEDS MISCELLANEOUS
Patient is currently experiencing pain.
&gt;&gt;&gt; Verbal
Time of Assessment:  Feb ,@:
Patient Identification :  Name, Social Security Number
Modality:  Nasal C ula
Patient on Oxygen
Oxygen Saturation (%) after treatment:
If yes, ADR Report entered:
Yes
NURSING NOTE
None
Nursing Care Plan
Advised to call staff as needed for assistance
ARM BAND:
Patient on Oxygen
CEFTRIAXONE INJ,SOLN CEFTRIAXONE  GM in DW  ML         ACTIVE
GENERAL SURGERY INPATIENT NOTE
Motivation to learn:
Position of patient:  Seated Position
GENERAL SURGERY INPATIENT NOTE
Time of Assessment:  Feb ,@:
Yes
Respiration:  (// :)
If yes, ADR Report entered:  Not Applicable
Treatment
Patient seen bedside for PT evaluation.
by whom: MD at bedside for left shouder I&amp;D
During last  round
with no drainage
Adverse  physician :  No
The patient is on a regular diet.
Medications by injection:  No
Patient is NOT homebound
Respiration:  (// :)
RESULTS OF ARTERIAL BLOOD GASES OR PULSE OXIMETRY
PRESCRIPTION FOR HOME OXYGEN
Patient is MRSA Positive from nasal specimen on Feb , on CONTACT
.  Patient was provided wih a printed list of all current active outpatient
)   HYPOALLERGENIC PAPER TAPE XYDS APPLY  INCH TO THE  ACTIVE
)   LEVOTHYROXINE . MG TAB TAKE ONE TABLET BY MOUTH     ACTIVE
:  Wednes   Date://
ACTION:   Urine collected and sent to MIVA for analysis. BAL negative  on
&gt;&gt;&gt; Verbal
&gt;&gt;&gt; No barriers identified
PULSE -           (// :)
LIVER
The patient is scheduled for umbilical hernia, for open repair on // at
approx am.
NURSING NOTE
- Employment status: In between employment
is trying to keep everything afloat with job
ADDENDUM
The patient&quot;s medication profile at time of the clinic visit was:
contact information (e.g., -hour crisis line) and notified that he could use
PATIENT C/O:"I feel as though for the last - months I seems that I am looking
gtts: Alpha trial right eye since June
appointment to  due to a overlapping eye appointment. Veteran and the
Mr.   arrived to his individual therapy session time. Veteran was
Hip
The undersigned attempted to contact veteran on //, regarding scheduling
Mr.   arrived to his individual therapy session time. Veteran was
visting." Mr.   stated that the  iest he could schedule an individual
requested to speak to his PCP and was transferred to his PCP&quot;s nurse at x .
nonspecific, however in the right clinical setting these may well
Depression, NOS
ORTHOPEDIC SURGERY NOTE
Intervention/Disposition:  WIll notify Pcp Ninan of this.
Primary PCE Diagnosis: . (ACCRETIONS ON TEETH).
Trivalent Flu Shot Given (administered per Flu Vaccine Protocol)
Diabetes Mellitus Type II or unspecified, Onset
...Doing
Pending Outpatient Medications                         Status
:am   Evaluation by psych in progress.
The patient indicated that sometime in the last month--
O: Yom adm Dx:Depression
B/P:  / (// :)
Patient identified as an ELOPEMENT RISK. [No]
PAIN ASSESSMENT
INTERDISCIPLINARY PSYCH IP INITIAL PLAN (BP)
Patient&quot;s wrist band on and legible.: [Yes]
Oriented to oriented to person, place and time Alert and Responsive,
Most recent vitals entered into CPRS
BOWEL MOVEMENT
Height:   in [. cm] (// :)
B/P:  / (// :)
BOWELS:
application.
BOWEL MOVEMENT
//
Decided to study p tical science. Soon after, Mr.   got into a
Resp:   (// :)
ER PROBLEM FOCUSED MOD COMPLEXITY (T)
on  touching , no sob pt came by ems , pt reading new paper in room
---
Please note that the HUD-VASH team will be away at a conference from June ,
I would also remid you the next HUD VASH Group, on Fri , //, at :pm
HUD VASH Social Worker
PAIN SCORE:   (// :)
the excessive amount that was removed, he likely was occluded in the left ear.
Pt. denies any changes
R:    (// :)
CPRS by selecting Vista Imaging Display from the Tools Menu at the top of
MH PSYCHOTHERAPY NOTE TL
family/spouse
issues that are causing him distress. I have recommened that he not take classes
the one tablet daily was not helping.
How do you feel about taking
degree  years ago.  Pain is on the medial aspect of the knee with occasionaly
surgical implants?                                    NO
Provider: Ahn, S MD
Provider: Ahn, S MD
Previous endocarditis                No  // Comments:
On NSAIDS                            Yes // Comments:
-  MODALITIES:  MHP x  mins, constant to the low back.
Prosthetics heart valve: NO
/
Patient has concerns/questions.  Patient advised to discuss
. HYPERCHO OLEMIA
Name of Veteran:  ,
Completed Care:
His hearing in his right ear stopped, then returned.  Then, hearing in left ear
PRIMARY CARE NONVA NOTE
Over the Counter/Herbal Medications:
. HYPERTENSION
Discuss Treatment and Exam with  physician
RESEARCH NOTE
LID**CONTACT GARBAGE HAULER FOR PROPER DISPOSAL**
Identification verified by patient/family/caregiver stating his/her name
Constitutional.
Completed Care:
. Somatization Disorder
VISUAL ACUITY:
Exam Result: Abnormal
Pt. agreed to trial of Seroquel.
UG/MH/PAKULA
PC CBOC NURSE INTAKE NOTE [DT]
FUTURE APPOINTMENTS:
appropriate alerts have been automatically sent.
Pain Screen:
Called patient: Left message on answering machine.
(-)Blindness
Fall Risk Screen Outpatient:
Standard Outpatient Fall Precautions Implemented.
Veteran has been unable to keep Mental Health appointments for one or more
Vitals:
Follow-Up Appointment:  yes When?  May ,@:
EYES:
his injection, rather than wait until -- as had been discussed.  Ms.
Assess fall risk on every outpt at the st clinic visit of the  .
Groups facilitators/Staff: Le  Hamlin, LMSW
While in attendance, veteran engaged in interventions designed
Plan Completion Date:   JUN ,
ABC Group--( minutes)--attended
S. Meskenas, MA, RNBC
Date of Group: //
MEMPHIS Vet-CORE PRRC RECOVERY PLAN UPDATE
[x]-Step Group
S. Meskenas, MA, RNBC
Veteran attended and participated in the   Treatment Center.
This veteran attended an exercise program for stretching, strength and
C.  s, OTR/L
GROUP ATTENDANCE (x=attended offered group)
MENTAL HEALTH GROUP NOTE
LBP - He reports that he has been up all hours doing   trading, so he is quite
in the office.  Advised vet to make f/u primary care appt in  months, complete
are on the label. tried to call vet to leave a message but voicemail was not in
P.O.some state
Lids: OD: Normal OS: Normal
A PTSD screening test (PTSD Q) was negative (score=).
Score of Depression Screen
EVERY MORNING
cards.
Future Appointments -
Note  rated through Clinical Reminder:
.  Have you ever been told by a doctor that you have a medical
teething rings, pacifiers
BEDTIME WITH FOOD
HDL
has his teeth pulled. . Wife is depressed and he is worried about her.
Active Outpatient Medications (including Supplies):
DSM IV MULTI-AXIAL DIAGNOSES
pain-without motrin pain can be /.
Med reconcilliation done and updated list given to the pt
Neatly dressed, normal gait, oriented x, recent and remote memory grossly
CP. Denies CHF symptoms. Walks daily. He gets wheezing and SOB and uses his
DENTAL PROGRESS NOTE
I am the attending physician.
Dx: oropharyngeal candidiasis-asymptomatic
HEART - RADIONUCLIDE STRESS TESTS (RADIONUCLIDE STRESS TESTS)
.  RN will provide emotional support and reassurance as needed.
GOALS:
PATIENT CHECK OUT NOTE-T
NURSING SPECIALTY CLINIC NOTE
.  What questions do you have about any tests performed to  or the
No Associate Provider Identified
Ambulatory
his grand-kids. No chest pain. No orthopnea,pnd, le edema, palpitations,
PATIENT CHECK OUT NOTE
full consent
CHRONIC NARCOTIC TREATMENT CONTRACT.
surgery.
- Rheumatoid Arthritis
. Treatment/procedure: Removal of sperm-fluid cyst around
JEWELRY:           [x] N/A  DISPOSITION:
[ ]D. Impaired verbal communication related to preoperative
[]Cane
MENTAL STATUS:
NONE
between to  and your next clinic visit
[]  Provider informed of need for PM&amp;RS consult
[]   Other:
. OBESITY, UNSP
Date:JUNE ,
Date: JULT ,
MOMETASONE FUROATE MCG ORAL INH P
Caller Response: *OTHER.
, .
- - - - - - - - - - - - - - - - - - - - - - - - - - - - - -
( ) Phone was busy X. No other number listed
(X) Appointment verified with Veteran.
( ) Left message on answering machine/voice mail in regards to upcoming appts.
Contact made with veteran on this date, scheduled   team appointment
Allergy/Reaction: CYCLOBENZAPRINE
Non-VA Meds Last Documented On: Sep ,
OPT ASPIRIN MG EC TAB (Status = ACTIVE)
WILL REFER TO MD.
WITH A STEADY GAIT. STATES HE HAS A TOUCH OF A COLD. STATES SUN  IT WAS IN HIS
known to have diabetes mellitus.  There is no history of coronary artery
teaching/learning encounters under Patient Education Notes.  Enter
. CONSTIPATION, unspecified
GOING ON THE REPORT THAT THEY READ. STATES HE NEEDS TO SEE UROLOGY. STATES HE
---------------------------------------------------------
CELL PHONE, CHAPST
ADDENDUM
Eye Color:      Blue
Score obtained by patient verbalization of num al scale
ier to ; he stated that he  spoke with his attending  physician to
REQUESTED BY:susan
Score obtained by patient verbalization of num al scale
Pt refered to VA Cincinnati for corrective Surgery
/
( ) Currently in-patient within a V.A. facility.
resident, and I concur with the above assessment and plan.
was due to not eating correctly. Says he has had a reading as low as  when he
[ ] Currently in-patient within a non-V.A. facility or Nursing Home.
Asked veteran since he lives in Florida, why he hasn&quot;t transferred his
Pulse:            (// :)
states he.  c/o rt arm numbenss -x/d &amp; loss sensation to hand rt since
treatment plan is satisfactory and meets patient&quot;s pain goal.
sensory study is within normal limits.  EMG of the right arm shows no
Phone number verified as correct.  --
cervicis muscle.
Provider:  STEFANIK,  J
Genital Herpes.
.PTSD-  and SA- recent admit / to inpatient with Axis  diag of  Axis I:
Perception: no abnormality found
Items
ADDENDUM
(D) Extraction erupted tooth/exr. Tooth: .  DX: (.).
() PHONE E/M BY PHYS - MIN.  DX: (.).
Attitude: cooperative
I have spoken to patient.
PAIN MANAGEMENT EDUCATION
Told by healthcare provider that substance abuse may be contributing to
MH OUTPT PSYCHIATRY MEDICATION MANAGEMENT NOTE [DT]
PRESENTING CHIEF COMPLAINT: "I have issues with my wife"
away for  retire
ORIENTATION AND CONSCIOUSNESS: alert and attentive, oriented x
here. He is unsure of what to do. He reports that he is unsure if he should
ADDENDUM
Occupation:
[N/A]   Lacks knowledge of local resources
identified&gt;.
TELEPHONE TRIAGE NOTE [DT] TTN
MH DOM 123 RTU CASE MANAGER NOTE **032511 MF
. Personal History of P omyelitis (ICD--CM V.)
assessment of functioning , highest .
DSHI Disposition Report
Veteran SSN:
ADDENDUM
Patient declined influenza vaccine.
)   BUSPIRONE HCL MG TAB  Qty:  for     ACTIVE         --
Active Outpatient Medications (excluding Supplies):
)   CILOSTAZOL MG TAB TAKE ONE TABLET BY MOUTH TWICE A  ACTIVE
Nurse Recommendation: -
conversation, it came out that he wasn&quot;t feeling very well emotionally, and she
Patient was seen to  for  -  minutes for treatment of the following
Has no new complaints.
FUTURE. LEAVING ON VACATION FOR   . VET RELATES HE CAN WALK STRAIGHTER,
INCREASED DISTANCE AND HAS MUCH LESS PAIN AT PLANTAR CALLUS AREA.
THREE TIMES A
ATTENDING PHYSICIAN:  ,  DWIGHT
. How often did you have a drink containing alcohol in the past year?
. Little interest or pleasure in doing things?
Time Out:  Jun ,@:
He has been treated at the mental health clinic with fluoxetine and trazodone
PHARM. ANTICOAGULANT VISIT
banisters wandering into neighbor&quot;s homes. Urine and fecal incontinence. Not
and time.
not completed)
looking for cigarette butts.  And his incontinence has become a major issue for
-
prompted by staff. He admits to setting fires thr
YES
[]Patient    []Family       Physical limitations
and assistance. He was also offered prescribed monitor behavior and mood for
-
[]Demonstration
was admitted through our urgent care clinic on //, where he was placed on
: contact for assessment, reality testing, redirection and reassurance.
E AWAKE BRIEFLY BUT OTHERWISE APPEARED TO S P WITHOUT ANY DIFFICULTIES.  NO
verbal, audiovisual, class
Evaluation: Pt continues to have a permanent smile on his face that is
to wear street clothes. He talked to his wife on the phone
means available to start fires (such as us on the stove), wandering the
O       .-            |       |
INR Range: .-.
Lab Slip?
RE : Spoke with Pam and she noted that Mr.   skipped a total of mg
Will he be kept inpt after and will he require LMWH post  surgery. Spoke with
Patient will be having outside knee surgery on //. This plan was discussed
Dear  Mr  ,
LAST INR: . (SEP ,@::)  COMMENT BY: ,RYAN G
for psychiatric hospitalization by his Neurologist, who describes the reasons in
NO. The following supervisor was notified:    and   Lei
PHYSICAL EXAM
YES
to our service from past psych admission last June and currently followed by the
potentially adverse consequences.  Specifically has been lighting fires with his
CHIEF COMPLAINT(S):
questions.
Denies suicidality or psychosis. Denies recent alcohol or
Pulse:   (// :)
*********************************************************************
omeprazole to mg daily and consult PCP for follow-up.
Condition on discharge: satisfactory
Negative Responses
Pt was called and instructed to go to the ER to . He verbalized understanding.
EMERGENCY DEPT (PART ) NURSING TRIAGE:
PATIENT ADMITTED TO THE ER COMPLAINING OF CHEST PAIN,
CP over the last   . The first episode woke him up from s p but he
.  Moderate gastroesophageal reflux but no distal esophageal
pt requests ear exam to .
Dysmetab c Synd  X
pass information to pcp for possible consult to ENT.
a conference room for triage by one of the RNs.
S/O:  Met with this single  yo % service connected WM veteran who is here by
S/O:  Met with this  yo single % service connected WM veteran who is here by
HEP which has not helped his pain much.  Medications include tramadol
skin over right trochent  bursa cleaned in a sterile fashion.
RR:  (// :)
)   LORATADINE MG TAB TAKE ONE TABLET BY MOUTH EVERY     ACTIVE
group.  They discussed group rules and went out of the way to make the new group
Five members were present.
Visit Date:DEC ,
hand"
MH TRP FOLLOW UP GROUP THERAPY NOTE
S: Patient is a -year-old Caucasian male Vietnam combat veteran with history
to  (served on swift boat and PBR). Patient sustained significant
mental health TRP intake note of //). Patient has  ral medical history
to not having enough work credits. He receives % SC compensation, and he
Patient was a no show for to &quot;s clinic appointment.  Patient will be
if necessary through written correspondence.
condition has worsened and she now requires  hour a   supervision. Patient
blood clots in left leg, with procedures to place screens, now on  mg
--------------------------------------------------------------------------
a result.  He reports he has had problems with insomnia for the past
Pain Assessment (controlled, stable, worse, etc):
s supplied:
Pain Score:  (-)
MEDICAL CERTIFICATE 1010M
months ago, which was    after he finished a drug rehab
judgment the veteran&quot;s current risk potential for suicidal behavior is:
Eye contact: normal
VS;  , , , / .
GI MISCELLANEOUS NOTE
Primary Eligibility: NSC, VA PENSION
no c/o pain this evening.
reviewed with pt, good return understanding.  Denied SI/HI/perceptual
hx/o cirrhosis and portal HTN.
Left phone message for patient.
agreed to wait until scheduled refill time.  She denies any SHI intent or
Ori l call started at: OCT ,  @ : (Call was suspended)
Temperature: . F [. C] (// :)
Nurse Recommendation: - hours
Comment: Within normal limits.
,  A is assigned to Caller Area ANCHORAGE.
MHC MENTAL HEALTH NOTE
POLLEN
Patient Phone Number: ()-
NURSE COMMENTS
Blood Pressure: / (// :)
VET ATTENDED BACK CARE CLASS YESTER .VET CALLING BACK TO  TO SAY THE PROPER
document.
. How often did you have a drink containing alcohol in the past
identified&gt;.
Will leave for PCP to address later to  or tomorrow.  Can not tell from notes
Evaluation/Management Code: UNLISTED EVALUATION AND MANAGEMENT SERVICE ().
to bring disc and reports in to the clinic for sc ing. States she will be able
Weight: . lb [. kg] (// :)
No Associate Provider Identified
A Comprehensive Pain Assessment is needed for effective pain management.
Weight: . lb [. kg] (// :)
variant.  Informed her it looks safe to take the Elavil in low dose.  She is
leg.  pain goes all the way down to ankle.  Satur  could not walk.  Hurts much
Is this a new pain?
corticosteroid (medication used to relieve swelling and inflammation)
Medication list was reviewed with patient and reconciled.
side pain. and knee problems veteran uses a brace//rm
PMH - Obesity, depression,
Veteran calling for a handicap permit form. Apparently the last one filled out
Blood Pressure: / (// :)
Height:  in [. cm] (// :)
No Primary Provider Identified (ANCHORAGE PC I)
ADDENDUM
NURSING TRIAGE NOTE (B)
Cooperative &amp; pleasant.Will continue to offer support.
Honest
Affect full.
inpatient, and can be discharged to .
AXIS I: DX .  Alcohol dependence, binge type.
What questions do you have regarding your condition?  None
    </notes>
  </record>
</records>
