# Supplementary material for: Predicting the Risk of Suicide by Analyzing the Text of Clinical Notes
Source: PLoS One. 2014 Jan 28;9(1):e85733. doi: 10.1371/journal.pone.0085733 (PMC3904866; doi:10.1371/journal.pone.0085733)
Supplement: Appendix S3 — Machine Learning Libraries and Methods: This section is provided to enclose the open source (Apache License) classifier used for the building of the statistical models, specifically for the purposes of study reproducibility. A detailed account of these tools is intended for another publication. (ZIP) [file pone.0085733.s003.zip › Appendix3/ML_libs/Regression_testing/group3/grp3-pt-1060.xml.txt]

Patient is NOT diabetic.
Resp.:
LOCAL TITLE: MAS SCHEDULING REQUEST LETTER SENT
health.
relined lower denture with coesoft
Pt returns for reevaluation. He is in agreement for Circumcision. H/p serves to
Redundant foreskin and b itis
BRIEF OP NOTE
PLAN
PATHOLOGY REPORT
Contact Phone Number: SAME.
. Anatomical Location: scalp
Advance Directive Screening:
Patient indicates no risk factors for Hepatitis C at this encounter.
I had wanted to meet on // however the veteran disclosed that he will be
TELEPHONE CONTACT
Addictive disorder treated to :
Overall treatment progress:
Review expectations of treatment, including court ordered treatment
CPT CODE:  H
support recovery as opposed to giving in to desire to use, sexual desires and
Vet participated in continued discussion regarding confrontations with others
stressors that could trigger a relapse.
FOR SMOKING CESSATION
TAKE MORE THAN  TABLETS PER
Spoke with patient regarding the following results of his MRI:
coping skills for chronic pain, depressive and anxiety symptoms. Veteran
during the past weekend and found them helpful.
attending AA meetings at the VA this week. Veteran also reported to this writer
The PTSD Support Group met for the associated visit to  @ am for a
PACT NURSE ANNUAL SCREEN &amp; EDUCATION NOTE
=========================================================================
Medications reconciled with no changes.
PATPU NOTE
ADDENDUM
MARRIED FEMALE veteran.
[]Family to relay message to patient
[X] Procedure to be done
Bovie pad placement:
Question and answer session
- - - - - - - - - - - - - - - - - - - - - - - - - - - - - - - - - - - - - - - -
PATPU NOTE
[   ] Patient may be added to openings in later morning or late afternoon
Notified by:
back.  They have been growing in size, and have become increasingly painful and
You can expect to arrive / hour prior to your scheduled surgery.  Often
Testing appointment date/time:
Latex allergy: No
Yes
HPI: colorectal cancer screening
. Anatomical Location: See description of treatment/procedure.
RN ()- ext. or pager -.  After hours, call Triage
Assessment:
Denied any bladder/bowel complaint. .
Patient advised that she will not receieve a six month followup appointment from
[] Followup appt after MRI/CT/Rad special procedure
(Send a reminder letter ONE MONTH prior to the desired month.)
evidence of visual field defect and no evidence of any extinction.
amount of time spent "active" in Telecare Record Manager.)
Denied any bowel or bladder complaints.  Denied any nausea,
and th.
about time, place or person.      No
all patients receiving these medications.  Please review the agreement; your
OD
Y ANTERIOR CORTICAL/NS CHANGES OU
Completed Care:
DENTAL OUTPATIENT PROGRESS NOTE/PATIENT EDUCATION
INFORMED CONSENT
and the outside (medial) border of the left big toe nail perminantly
Wt.:. lb [. kg] (// :)
Temp.:. F [. C] (// :)
Other Injury Description:
Marital Status: NEVER MARRIED
and lost consciousness both times.  He was diagnosed with HTN in .
- give bp monitor
Attending Physician: inaba, robin
Smoking:
Review method of taking BP
Ordered by: IMURA,CAROLYN
S:  y/o male with h/o HTN and LVH here for  month f/u. Last visit //.
appt.
HIP ANTERIOR APPROACH - right
Patient on coumadine:    No
--------------------------------------------------------------------------------
THANK YOU.
area) close to the lumbar spine (between the ribs and pelvis)
INFLUENZA              // ATLANTA VA
DEC , @::   .
Patient does drink alcohol.
Sciatica (ICD--CM .)               Allergy (ICD--CM .)
TAP DAYTON TELE NURSE TRIAGE NOTE
Protocol(s) used: &lt;Not identified&gt;.
)   DOCUSATE NA MG CAP TAKE ONE CAPSULE BY MOUTH TWICE  ACTIVE
effects. He was just seen in the bronze clinic yester  and  there is no
NURSING OUTPT TRIAGE INTAKE NOTE
"I&quot;m reactive to stress and it is getting worse"
intervertebral displacement,hlip,hearing loss/hearing aids,chr venous
cleaning machine
SY HX:  (+) DM
ORTHOPEDICS OUTPATIENT-PHYSICIAN
SWELLING/EDEMA PERSISTS BILAT LEGS. OVERALL IMPROVED BUT STILL PAIN. BEGINS
. Parkinson&quot;s Synd
Impression: Extrapyramidal signs still improved Mirapex, plan to continue this.
P: F/u next wk, reassess
PRE OP H&amp;P (SURG DIP PARENT)
Diagnosis: Left knee pain/instability, s/p left tka
Pt is scheduled for joint replacement surgery and is here to  for education.
,   --  /--  -B
BRADEN SKIN RISK ASSESSMENT
Preop Antibiotics given: Cefaz n gm
There was no adverse occurrence.
Dyspnea or limited breathing
/
New syringe was started.
Provide adequate hydration and nutrition
Skin
Lab: PT/INR as directed by coumadin clinic
. Gait/Transferring: Impaired
R hydrocelectomy
Pain: / on pain scale.  Receiving percocet and prn morphine for pain.
physician ge: per nursing.  CDI Island dressing.
Breath Sounds: Clear
Urinary catheter care:  No
distress or pain.
In pm the pt was again seen for mobility training. He was mod (I) in
called patient regarding message received.  patient had questions about
Treatment Plan: Update
a single-point cane.  He is well aware of the quad
Equipment Issued:
Other:
Weight        :   lb [. kg] (// :)
knee surgery but he still has to rely on his cane a lot. The fact that the pt is
center for medication  wal. Patient is requesting  wal for the following
(  ) called pharmacy
TELEPHONE CONTACT NO ENCOUNTER REQUIRED
of thick yellow sputum.  Eating/drinking well, has been working.  No f/c/sweats.
appointment or a recall order within the next year.   wal request for ed
news and war movies and intermittent flashbacks, anxious NM&quot;s of fighting, gun
ADDENDUM
PULSE OX:
He has been treated in the past with topical anti als, as well as topical
The patient was examined and evaluated by me with the
Pt called to request wed appt- he goes to school on Mon and Tues and works Thur
ALLERGIES: METHOCARBAMOL, SULFABENZAMIDE/SULFACETAMIDE/SULFATHIAZOLE
ASSESSMENT:pain to  is /, reports that he is currently taking Tramadol
Patient seen for  minute session for supportive therapy and medication
ral;
Plays s leboard and volleyball and still is active. Advised him that  physician  on extended leave and requested I meet with him and his wife to get to
CASA GRANDE MH SOCIAL WORK CONSULT RESULT
How: Will also continue working with Psychiatrist to  being back on a
this facility tomorrow for an acute psychiatric hosptitalization.
ED NURSING
He was being weaned off his meds for depression. Had no meds for depression
CHIEF COMPLAINT:suicidal ideation
Advance health Care Pl ing: Advance Directive:
This reaction was either an erroneous entry or was found
transport @ . F.U.  physician pt  hrs last night without a hangover. No
Behaviors followed by Distress Tolerance Handout # - Crisis Survival Strategies (cont.) Distracting -
SCANNED INPATIENT DOCUMENTS
. "MAY WE ASK" SCREEN:
he reports having had a difficult weekend, he is no longer experiencing SI, and
B. "It is also a fact that many people have had thoughts of ending
SIMVASTATIN, FLUVASTATIN, ROSUVASTATIN, NIACIN, ZOLOFT MG TABLET
learned that they all have higher averages then him.  He is also older than the
PAGES:
encouraged more exercise in the gym at the park - which he usually enjoys. Is
" yo gentleman with at least  yr history of
--
Signed: // :
Return call from patient family who shows by repeat verbalization understanding
of provider instructions, and is transferred to cl al for scheduling for
Please call
CBC: CBC (NO DIFF) Coll. datWBC(/RBC(/HGB(/HCT() PLT(/
Side effects repor
// :
. Hyperlipidemia
SYSTEMIC MEDS:
Axis II: Deferred
VITAL SIGNS
Non-VA NIACINAMIDE MG TAB MG BY MOUTH                 ACTIVE
Xanax and says that he is taking - a   of this. He reports that he wants to
possible need for care before IOP Orientation on //.
None.
Collection DT     Specimen   Test Name          Result    Units     Ref Range
(x)Didactic                     (x)Process
Training Aids:
( )Written Material             ( )Power Point
. Family h/o Cancer of Prostate
INTENSIVE OUTPATIENT PROGRAM-GROUP THERAPY
( )Self Care                    ( )Family Recovery
was Veteran&quot;s first individual therapy session with this SW.
* Additional handouts suggested from MOVE! questionnaire
he has noticed more pain in his legs.  He says that this is significantly
Temperature: . F [. C] (// :)
Mr.   is a -year-old African Am an male with over a  year
NURSE INTRAOPERATIVE REPORT
Monitoring: routine
NUR INPT DAILY ASSESSMENT
Relaxation, Rest
Pupil:   Size: R:   L:   React: R:N   L:N
NUR VASCULAR ACCESS NOTE
Disp: Home
Kim, pls cancell Biopsy on Apr  and reschedule for June th if possible.
Neurosurgery on -- and consulted for a  .
-N  of Procedure team present for TIME-OUT:
Chief complaint:
Notification of abnormal prostate results received. Per below: Patient has f/u
. RIGHT PROSTATE (BX):
R:   (// :)
L
P:
_____T/H :pm PTSD Wt Reduction
For specifics, please contact Radiation Oncology Service.**
Pulse Ox: %    //@::
For specifics, please contact Radiation Oncology Service.**
ADDENDUM
Hypokalemia (ICD--CM .)            Hyperglycemia (ICD--CM .)
volume and inflection. Mood is euthymic. Affect is pleasant, reactive,
Next call in date November ,
POSITIVE: PHENOBARBITAL, VENLAFAXINE &amp; METAB TES, TRIAMTE
All scheduled  admissions MUST be precertified.
Date called: OCT ,
)   CITALOPRAM HYDROBROMIDE MG TAB TAKE ONE TABLET BY    ACTIVE
L shldr partial rotator cuff tear, labral tears,
ANESTHESIA/ANESTHETIST:
Reg
CALLBACK FOR SAME   SURGERY AND INVASIVE PROCEDURES
Call Type: MEDICATION  QUESTIONS.
Night Sweats                              N
-Educate patient on pursed lip breathing exercises
Time, Follows Verbal Commands
Heart Rate:
ADDENDUM
financial affairs. Has previously become more confused and agitated when
No change in previous interventi
Respirations: Respirations regular
IMED INFORMED CONSENT
inspected for bio-burden and proper working order, medical record and the
Respiratory Therapy Treatment Record
Genitourinary:
Other/comment:
Heart Rate:
sulf/trimeth mg/mg PO bid for   s
SWS will follow for continued discharge needs and support.
Pt has no c/o.P.exam lungs clear,discussed with Pulmonary stable to be d/c to
No questions
MENTAL HEALTH CONCERNS:
Obtained a BP cuff and taught him how to use the cuff, maintenance and care and
good bit and he felt like his chest was gettign congested again.  Ordered
adjusment of thyroid medication but he has been battling pneumonia.  She does
Diabetes
See VISTA Imaging for FEE sc ed report/procedure.  The attached
Facility Appointed PCP: HARDEN,DANE (BRISTOL CBOC)
Positive Responses
- abdominal swelling, worsening
obesity and offering a referral to MOVE or another weight loss program
WAS VETERAN INSTRUCTED TO FOLLOW A RESTRICTED OR SPECIAL DIET? Yes
IS VETERAN RESTRICTED IN ABILITY TO PERFORM STRENUOUS ACTIVITIES? No
Advised call back date will be   s after receiving medication.
Author: SELLS,ANGELA K
No
Weight:   lb [. kg] (// :)
complaint of: &lt;not identified&gt;.
Evaluation/Management Code: UNLISTED EVALUATION AND MANAGEMENT SERVICE ().
Length:  minutes.
Identified problem: OTHER UNSPECIFIED COUNSELING.
Medications:
indicate that he specifically needed a dual dx. treatment program, but Harbor
program
in [. cm] (// :)
I       R/R OU, see above, +RAPD OS
undilated to :
going to bio feedback at EEG Institute in  land  s.
Specimens: none
K       cl OU
C:D
CCT /
glaucomatous changes OS &gt;&gt; OD
for follow up. Veteran currently prescridbed fluoxetine mg, quetiapine mg
[  ] Knife&lt;":
of possible antisocial personality traits and history of suspected malingering
safety.  Safe and structured environment.  Round q minutes for safety.
Respirations even and unlabored.
adequately groomed and wearing hospital pajamas. He is able to make his needs
Latest pain score:  (// :)
Pulse:           (// :)
Visit: S: Sep , @: WLA-DENTAL (KIMURA).
[ x ]  et: brn  er
[  ] Jewelry (Ring, Necklace, Bracelet, Earring):
said that he hasn&quot;t been able to eat or s p and that things have been "rough"
He returns now, having recently been discharged from US Vets in Compton, a
MH TRP INDIVIDUAL PSYCHOTHERAPY NOTE
This Medication list was reviewed by the provider with the patient/family
thinks his "irritability is up"
Ht:  in [. cm] (// :)
Medication Reconciliation:
E MIMsome state
s/p R knee ligamental sprain in past now with L knee popping
tricompartmental osteoarthritic changes including moderat
PSA velosity (&gt;./yr). Father was diagnosed with ACP at age .
// : URINE .
verbalized an understanding of the information.
/es/   SULLIVAN
scheduled visit.
progra
medication for several  . Stated he was working long hours at SVI and
Has multiple concerns: pain in right forearm after lifting heavy object.
Pt is followed for Major Depressive disorder, anxiety disorder NOS. PT reported
COPD * (ICD--CM .) . // KUSHWAHA,NEELIMA N
I don&quot;t know for sure if he was fasting or not for his blood sugar.
VITALS:
out of his blood pressure medication fo one week now.Blood pressure to  is
DDD AND HAS SEEN N-S IN THE PAST AND DECIDED FOR CONSERVATIVE MANAGEMENT.HIS
patient seen stat
CR PREVENTIVE SCREEN
physician rital Status: NEVER MARRIED
neuropsychology testing. Performance across all cognitive domains assessed was
Date and time: // :
process. He also has outstanding consults for Chiropractic and Prosthetic that
you. How many drinks containing alcohol did you have on a typical
Weight: lb [. kg] (// :)
Active/Pending/Expired Meds
Pt. reports long hx of chronic pain.  To  reports that he has been
Other belongings kept by the patient:   see belongings sheet
In alerting pt of his MHH status, pt has requested a medication for s p. Am
medication. Have ordered a one-time dose of Ambien.
Social Work Intake Note:
with complaints of suicidal ideation secondary to pain.  Patient reports that he
Vet would benefit from being enrolled in a pain clinic.
. A mental health hold for behavior dangerous to self and others was placed
INTERDISCIPLINARY PSYCHIATRIC MASTER TREATMENT CARE PLAN
ideation prior to admission.
NURSING NOTE
NURSING NOTE
No
boundaries, med seeking per usual this shift. c/o constipation and pt req&quot;d mag
Evaluation: Patient presents with depressed and irritable affect. Continues to
pain. Observed sitting in bed, leaning for  head n y
NURSING NOTE
Are restraints in use?
Are restraints in use?
Has there been a FALL in the past  hours?
scan of lung. Impression:
his negativism emerged in the group discussion. In fact, he participated very
lengthy - patient talked about pursuing a relationship with a former ex of
Evaluation: Patient presents with irritable affect and has been in bed all  .
jumped out of bed quickly when staff needed to check his room on environmental
)   DIPHENHYDRAMINE CAP,ORAL  MG PO BEDTIME              ACTIVE
REMOVE OLD PATCH
ATTENDING PROGRESS NOTE
I saw and evaluated the patient.  Discussed with resident and agree with
let him near me again. He doesn&quot;t help me. I want a new doctor." Listened to vet
E ILIsome state
.  Medications: -  supply provided, except for fentanyl patch( should have
AXIS V:
DIAGNOSE(S): DSM IV MULTIAXIAL CLASSIFICATION
referred to in this note but in any event, those would be extra.
) "Passing out"- Patient states that he has epis  where feels
IV CATHETER(S)
BREATH SOUNDS: diminished
.  Patient must be off all antibiotics for  week, then
BRIEF SUMMARY OF REASON FOR ADMISSION:  This is a -year-old male
Ability to Perform Activities of Daily Living:
TAKEN.
Age:
rec pt to stop all illicit drugs.
OUTSIDE RECORDS SCANNED DOCUMENT (T)
Mail when due.
ADDENDUM
Diagnosis:MST, PTSD, borderline traits
Vet contacted this writer to determine if any progress had been made re: finding
ing Locator: OWP
reports that he died on //.  I contact the Denver Coroner&quot;s office to
. Patient name:   ISZESKI,
fellow with pt request.
heart and special x-  pictures are obtaine
full consent
Pain:  (// :)
Patient:  ISZESKI,     SSN:    DOB:  //  AGE:
chf and hyperlipidem
REQUESTING PROVIDER:
we should proceed with PSG and MSLT.
Discussed definition of pain &amp; options for management such as cold
NUR/PATIENT RELATED EVENT
PRACTITIONER?
[ YES ]
D.  NO-SHOW education
Shot given in right deltoid.
and only gets up on rare occasions.  He drinks a lot of coffee all   and in
be seen by a mental health professional who would be responsible for monitoring
Electronically Filed: //
Mr.   is a  yr old Caucasian male here for management of CKD. Cause of
Protocol(s) used: &lt;Not identified&gt;.
family and from this writer when needed.  Veteran seemed surprised by
Number in Group:
plays and feeling as though he is "always - sentences behind the rest
. Begin the "Communication" module, starting by discussing the benefits of
Your total cho ol was ; our goal is to keep this less than .  Your
Mental Status Exam
Motor: slowed
Patient identifies the following side effects:sedation, dro ng
Alcohol/drugs: denies   Herbal/OTC:denies
urinate.  Concern has been raised about whether or not he had a UTI.  Pt denies
Divalproex and Atropine.
attending   and talking with his siblings on the telephone.  He
minute weekly home visits for supportive therapy focusing on
veteran asked to talk about decision making.  He reports having
Veteran was given the opportunity to ask questions,
reinforcement.
wanting to move from Birch .  He reports that he would like to live
Patient seen for x minutes for clozaril lab/med monitoring, education, and
Name of Veteran:  ,  O
hearing voices
to . Pt was last seen -- for this in ENT
Medication Reconciliation
Nose:   Dorsum midline.
home visit.  Veteran reports having gone to a friends home for d
support.
WBC     .            BLOOD        (// :)
written on his referral form as well for PC clinic staff. Vet has multiple
Operating Room: OR
CMS:
Temp: . F [. C] (// :)
Current Pain rating score:
Mental Status Exam
Session:
ideation, paranoia, and perceptual disturbances.  Staff reported no
Primary Care Call Center
Patient called to report medical information to clinic RN.
. Myopia *
a
movements of forehead, eyebrows, periorbital area, cheeks. Include
Thanks.
Minneap s VAMC
Motor: slowed
appointment, asking providers to write down recommendations, asking questions
to  than last Thurs .  Veteran reported feeling "ok" and denied any
treatment goals.
veteran that as long as his looking at women passing by is not done in a
MHICM to maintain twice weekly visits to monitor and encourage stabilization
Problem # Thought Disorder-Met with veteran at Birch .  Veteran reported
reported taking a friend, who had recently lost his wife, out to
Type of Visit: Appointment Check In
Medications:
at Birch  Board and Care.  Follows with MH.  DM, on Insulin, AC is ., on
O
Affect: [x]normal ranged  [ ]mildly constricted  [ ]constricted
Patient presents with complaint of:  knee pain, R leg swelling; venous
Evaluation/Management Code: HC PRO PHONE CALL - MIN ().
Neuro:
It shows MILD S P APNEA.
neck the past  years. He is requesting and extension on his GI bill.
ra
No Associate Provider Identified
him this information.He was agreeable with this.
=========================================================================
EVERY MORNING
HPI: Pt d
Date: Oct ,       PATIENT MEDICATION INFORMATION               Page:
Elevated alt/ast
AXIS  II: No Diagnosis
O:
)  PROCHLORPERAZINE MALEATE
were going to take it from ther and notify the husband and the necessary steps.
needs f/u-cfa in  /
Denies history of STD.  Patient reports  epis  of unprotected sexual
to his chronic testalgia. labs results below.
Provider : DIMASCIO- SON,NANCY
Smoking? no
Time is Life Education:
An opportunity to ask questions was provided.
Functional Screen:
transportation, community agencies or Advanced Directives.
APR ,
head of the penis).
Informed consent was obtained, and the patient was taken back to the
A//:
THIS CALL IS IN REGARDS TO:
)   HYDROCODONE /ACETAMINOPHEN MG TAB TAKE  TABLET    ACTIVE
PRIMARY CARE CBOC/FRED LAB NOTIFICATION (S)
AS NEEDED
PATIENT ED TOPIC: Medication changes/review
HOURS
If Dtr does not get a return call, by Wed, she will call here at Aurora.
FEE BASIS
transfer.  He will be discharged come to the ER for evaluation.  At that time we
Reports limited vision in OD since trauma
RATED DISABILITIES (VA)
I have discussed advanced directives with the patient,
Pt reported to be at the VA Hospital for treatment related to his recent lost of
(either permanently or temporarily) to make appropriate
No Known Allergies
Oriented to own ability/knows own limitations
Institute Universal Fall Precautions on All Patients/Residents
ADMISSION HISTORY AND PHYSICAL EXAM
regain sight in
PROGNOSIS:  Fair.
medications. Pt reported to s p and eat well. He denied sx of anxiety or PTSD.
Patient was visited, pastoral care established, religious preference is Roman
Phone calls
PPD.
BOWEL ELIMINATION
Amount of stool: .
(-) CVA
(+) CA
The patient  snacks.
Current pressure ulcer assessment
Hip protectors in place: declined
BOWEL ELIMINATION
NURSING NOTE
Medical History:
more information and request for a . referral if appropriated.
Urine color: yellow
Urine color:
for safe transfer)
Meanwhile, writter has gone to blind rehab and has spoken with Blind Rehab.
others while in an intensive treatment setting?
Personal hygiene: bed/sponge bath
on the Unit Facilitator&quot;s board. yes
Extra fluids  given.
Personal hygiene: shower
ZZECF PROGRESS NOTE
color with his right eye, and he has felt hopeful and optimistic since his eye
Assistance provided for this task: supervision, oversight, encouragement or
MENTAL STATUS
physician s
Pt states he is upset he has to be here in this bed and friends are not around
Assistance provided for this task: requires no assistance.
BOWEL ELIMINATION
Number of bowel movements this shift: .
I went to see this patient and he was out to an appointment will see on
Pt returned from Miami appt at  and was escorted by a nursing assistant who
Hip protectors in place: declined
Amount consumed:
Normal/bed rest/immobile
Urine color: yellow
Extra fluids were not given.
ZZPATIENT CARE ADL NOTE
Consistency of stool: .
Personal hygiene: bed/sponge bath
Hip protectors in place: declined
Additional Education Information:
Patient bathroom privileges
Restorative ADL - No
Bladder:  Continent
Sensory Perception: = Slightly Limited
BLADDER
S PING PATTERN
Medication:
Legal blindness, as defined inARNP
Meal assistance: requires no assistance.
During this shift, patient was continent
MOBILITY
ACTIVITIES OF DAILY LIVING
This shift the patient used the toilet.
Assistance provided for this task: supervision, oversight, encouragement or
NUTRITION
directions re:
INTERVENTIONS
Consistency of stool: not applicable.
S: This patient was seen and evaluated by me to . Case discussed with the
states why aren&quot;t these drops working? States eyes are "sore". Continue to
Patient is continent.
Other personal care: shampoo
BLADDER
Lunch   food % drinks %
pt go to the bathroom for his self.
Consistency of stool: soft.
Breakfast  food % drinks %
During this shift, the patient has been observed smiling, talking to others.
Urine color: yellow
congestion does not occur, and in doing this constantly for - hours, he
TIME OF THE     Feb ,@:
Consistency of stool: .
Patient bathroom privileges
Quarterly Interdisciplinary Team Meeting:
CURRENT SKIN ASSESSMENT
Skin Color:
FALL PREVENTION INTERVENTIONS
MHC CLC PROGRESS NOTE
B  and Shiela from the Coalition for Independent Living will be arriving to
ZZSWS ECF
friends Don and Joan in the near future to discuss return home on a "trial
Hip protectors in place:
Not applicable for this shift.
During this shift, patient was continent
During this shift, the patient has been observed smiling, talking to others,
pacing.
task although resident performed.
Alert
Number of hours napping
During this shift, patient was continent
Previous pharmacy chart review: //
) Vigamox(Moxifloxacin)  times per   right eye for  wk.
Gait/Transferring:
Mental Status:
The patient does not have any patches on the skin.
SKIN PROBLEMS
Hip protectors in place:
Hip protectors in place:
ZZPATIENT CARE ADL NOTE
S PING PATTERN
ZZPATIENT CARE ADL NOTE
ACTIVITIES OF DAILY LIVING
Consistency of stool: .
Personal hygiene: bed/sponge bath
NUTRITION
This shift the patient used the toilet.
NUTRITION
Number of bowel movements this shift: .
Patient is continent.
ACTIVITIES OF DAILY LIVING
Patient bathroom privileges, used urinal
Amount consumed:
Alert
ZZPATIENT CARE ADL NOTE
During this shift, the patient has been observed not talking with others,
location: resident room
PROJECTED LENGTH OF STAY:   (s)
hoping to get good news from MIami on May th. He is scheduled to go to BR and
relaxed and more optomistic.
Breakfast  food % drinks %
physician       physician ody
physician ody
Medications that may increase risk of falls or of injury from falls:
Patient/Resident Education:
SWS BRC
desires this option because he wants it done "now."
During this shift, the patient has been observed smiling, laughing, talking to
Other personal care: shave, shampoo, hand/nail care, oral care
Transf
REASON FOR TRANSFER:
No
Continence                     BRP
None found
Blind Rehabilitation Program Consent
Children:
//
modified independence.
Sessions Seen:
BRC VISUAL SKILLS
Mr.  was admitted into the Blind Rehabilitation Center on May ,
two-hour evaluation.
Visual Limitations
Mouth Care
Writing skills
Plan: Continue reinforcing cane skills, routes meaningful to veteran.
Problem:  Altered Coping Mechanisms within BRC student&quot;s family unit
is adjusting to his stay on the unit.  Veteran stated, "they are teaching me
M er, attitude and behavior: cooperative   respectful
Number of LS sessions remaining:
Bed Mobility:  Self
BRC LIVING SKILLS
Number of LS sessions provided:
leaving for a month&quot;s vacation.  Don has been looking after Mr.  &quot;s mail,
blind rehabilitation. Veteran discussed alternatives for transportation, and
Wheels; however there is a wait list (--).  However, if a Senior is
ADDENDUM
BRC MANUAL SKILLS
he would prefer to rest and do his laundry tomorrow. Will follow up tomorrow.
Sessions to date:
Goal: The veteran will demonstrate the ability to use sighted guide.
Visual Limitations
will be discharged on Fri , June , .  He will be picked-up by
Additionally, SWer will contact  ette Andre, the Victim/Witness Coordinator
of the keypad of the OCR.
plans for Mr.  , date going home, who is picking him up, detailed
------------------------------
Veteran is alert and oriented x.  He am
No
operate the washer and dryer and operate the detergent dispenser.
to .
TYPE OF EDUCATION: individual
Eligibility criteria for Housebound benefits
MASS
Have you dropped many of your activities and interests? - YES
HYGIENE AND CLEANLINESS
Patient expresse
Care Partner Sheet
now d/t blindness ( sees only minimal light )
Call from veteran&quot;s sister (--)and said that Mr.   was asking
NONE
POX            //
appointment, but I don&quot;t know what it is."  When asked about transportation, Mr.
attempt.  His appetite and s p and interests are all good.
helplessness and hopelessness stronger than typical.
normal rate, coherent, and well organized.  Displaying n
(-) Cardiac
Patient has answered NKA
Combat: NO                             POW: NO
=========================
you. How often did you have a drink containing alcohol in the past
TOPIC/HANDOUT/COMMENTS:
equip
SOME POLPS REMOVED AND HAVE DIVERTICULOSIS. TELL ME ABOUT IT.
)   DIAZEPAM MG TAB TAKE ONE TABLET BY MOUTH THREE TIMES  ACTIVE
[ ] Booth
EVERY MORNING
)   HYDROCHLOROTHIAZIDE MG TAB TAKE ONE TABLET BY MOUTH  ACTIVE
Pulse:
provided a list of their active medications.
MEDICATION AND NOTIFY YOUR DOCTOR FOR ANY UNUSUAL
Education Methods:
EVERY EVENING TO LOWER CHO OL(STOP THIS
Patient instructed to remain in area for  minutes after injection.
problems. Reports to have some stressor, may have been responsible for her
Pt attended MOVE Goal Setting class //.
Alert, oriented to person, place, and time.   physician roomed appropriately.
"fibroids".
--------------------------------------------------------------------------
Rx= M  s.v.
() W/I optician
when you were drinking in the past year?
Patient weighed to .
MH OP PSYCHIATRY ATTENDING NOTE
Mental Status Examination:
Weight:  . lb [. kg] (// :)
Pulse Ox:    (OCT ,@::)
_____   Patient is medically unstable.
Past social/family history
ARRIVAL: Apr ,@:
respiration rate:
weight:
Click on Tools, click on Imaging,you may be required to log into Vista with
Allergies: LIVER(enter additional allergies via CPRS
:resting in bed in semifowlers position.
sweats
MI/An : no
. Nausea and Vomiting:  Ask:  "Do you feel sick to your stomach?   Have you
your skin?"  Observation.
:-:
FOR THE MHICM TEAM.
However, sitter stated he had this when she came in last evening prior to
Cognitive limitations:
-QUETIAPINE  MG TAB
Service Connected?: NSC, VA PENSION
D:  Pt denies SI, HI and AVH.  He is ready to be discharged tomorrow.  He is
OF BREATH
patient
PLEASE CALL NEUROLOGY FOR FOLLOW-UP APPOINTMENT
At the time of admission patient was started on alcohol detoxification protocol
TAKE ONE TABLET BY MOUTH THREE TIMES A   FOR MUSCLE SPASMS
Hyperlipidemia.
Special Mode Transportation provided. Discussed effects of ETOH both physically
ADDENDUM
will touch me or I will kill them"
rescue because he was complaining of having racing thoughts, not taking his
Medications
Education Follow Up:
Hyperlipedemia. Patient presented to ER last night for racing heart and was
. Awake,alert and oriented x, vsqh, detoxing safely
has a stable mood and is not experiencing suicidal/homicidal ideations
IBUPROFEN  MG TAB
&gt;&gt;&gt; Patient
THIAMINE  MG TAB
Pain management provided was:  effective
-patients rights and responsibilities regarding pain management, -post
PO QHS. Pt slowly reached his baseline level of functionng and met criteria for
Most recent lipid results:
He received feedback from the staff as well as other clients. His
HIM WITH ADMITTING TO LACK OF MEDICATION ADHERENCE, EXPLORED THAT HE WAS DOING
MR   DID NOT CANCEL AND DID NOT SHOW FOR SCHEDULED APPOINTMENT. HE HAS
NURSING INITIAL ASSESSMENT
Cause: headache
PATIENT/FAMILY EDUCATION
Diagnosis:  Axis I. etoh dependence, etoh withdrawal. bipolar by hx
Pharmacy:  Amigo
Action=Registered Nurse evaluated patient this evening.
PAST MEDICAL HISTORY: HTN, Hypothyroidism, Hyperlipidemia, GERD, Mycosis
APPLY   AMOUNT TO THE SKIN TWICE A   APPLY TO LESION TWICE DAILY
Rated Dissabil    :   NO RATED DISABILITY
yo with h/o Alcohol dependence and Bipolar Disorder by hx presented to ER
Yes, Packs per  :
Procedures Performed:
resting at home since I got out."
SPC note for //. Pt also followed through with OSAC  Nurse Jo   on
PSYCHIATRIC DIAGNOSIS: Alcohol dependence, Bipolar disorder
DETERIORATION.
TO A MEETING, ETC.    THE GROUP FACILITATOR REFRAMED, REALITY ORIENTED,
D; MR   KEPT HIS SCHEDULED APPOINTMENT. HE DID NOT ATTEND OSAC GROUP TO
Patient Education :
anything up"/sts feels like when he had pneumonia in the past-very
CC   : SOB
of SOB, sinus congestion, and HA.  He reports he went to St.  sburg for
Patient Problem: Pain
%
Adverse  physician :  No
// :  [.][]
Yes
PAIN                :
PROBLEM: TRAVEL NEEDS
Other:
L/MIN
BEHAVIOR:
Ambulatory
Independent
Respiration:  (// :)
Comment: headache
PSYCHOSOCIAL:
Patient on Oxygen
Time of Assessment:  Feb ,@:
Effectiveness of Therapy: YES
Objective:
at home up to  degrees F with associated c s.
ACTIVITIES:
TRACH CARE:
ROM active
Pulse Oximetry:
Adverse  physician :  No
Skin Color:
Pulse Oximetry:
Site Status: Satisfactory (no redness, pain, swelling or discharge)
Oxygen Desaturation Test (for Home Oxygen Usage):
Bed in low position
SUCTIONING:
Ambulatory
Comment: Relaxation techniques, Pain and activity, Physical Therapy
Skilled care in home
Address:  N.E ST APT
In Hospital &gt;   s
The patient lives with:
In the last   s, has the patient expressed difficulty with the
Treatments:   Volume Nebulizer
Hypoxemia is corrected with supplemental oxygen LPM during ambulation: mmHG;
Any questions call VA Care-line () - Mon  - Fri   AM to  PM
-  Take your antibiotics until they are finished.  Do not stop taking them
Nursing Care Plan
Will be I in HEP upon dc home.
&gt;&gt;&gt; Motivated
O@ LPM at rest:  %
The outside consult can be viewed in Vista Imaging.
Exercise
Hep Lock placed into: Right antecubital. Angio Cath #:. Flushed with .NSS/
Questions about the week of patch testing?
ABSTINENCE..I&quot;LL BE CELEBRATING A YEAR IN JUNE..HE PLANS TO RETURN TO TAMPA TO
OSAC INDIVIDUAL COUNSELING... MINUTES
year old male here for scheduled appointment. states will discuss his
F; RECOVERY ISSUES
OSAC PSYCHIATRIC FOLLOW UP PROGRESS NOTE
this patient.
WEIGHT. HE WILL BE HAVING SURGERY FOR HIS UMBICIAL HERNIA NEXT MONTH.
Served in combat? Yes
() Develop adaptive strategies for managing stress more effectively.
that
-Consider MRI if pain continues to r/o labral pathology.
Supervisor(s):  physician en, Ph.D.
MEDS:
appointment stating that he would not be able to attend therapy appointment
LAST HEMAGLOBIN Ac:
individual therapy appointment during telephone check-in.
psychiatrist,  physician // as a walk-in either before or after
(D) Resin one surface-anterior: (F)
PREVENTIVE MEDICINE NOTE
PAIN ASSESSMENT                  //
(D) Resin one surface-anterior: (F)
(D) Resin one surface-anterior: (F)
GERD, Onset
Hip: arthralgia (pain on rotation, pain in groin)
,  A,  y/o MALE arrived at :pm
MEDICATION PATCHES
Resp:   (// :)
)   GLUCOMETER  PRECISION-XTRA TEST STRIP USE STRIP FOR    ACTIVE
eyeglasses,  cellphone(LG)
)   CITALOPRAM TAB  MG PO DAILY                          ACTIVE
)   INSULIN NPH HUMAN INJ   UNITS SC INSAM               ACTIVE
up on the floor.  The patient denies having any current  ts for arrest.
NO BM THIS TOUR
SKIN INTEGRITY
Patient&quot;s wrist band on and legible.: [Yes]
Admitting Physician: DEGAETANO,NOAH
appointment at the HUD VASH, this morning.
agitation
Height:   in [. cm] (// :)
PAIN ASSESSMENT
Level of Care: Self
DRAINS/TUBES
SAFETY PRECAUTIONS
S P STATUS
DISCHARGE INSTRUCTIONS TO PATIENT: Type of Discharge: regular DISCHARGE
DISCHARGE MEDICATION RECONCILIATION NOTE
there were no clinical issues that needed to be resolved.
Respectfully,
Ht:     in [. cm] (// :)
Specimen: URINE.            CH
MH HUD-VASH-NOTE
voucher.
Please contact me at your  iest convenience. If you fail to
that have bothered him "for years." He first came to the VA clinic / and has
Ending at: // @ :: PM
PC ANNISTON CLINIC NOTE-T
anger. We discussed that anger styles are learned and discussed their family
ADDENDUM
s p, work, relationships, hobbies
numbness, bowel/bladder problems orlow back pain with radiation.
A:  Pt tolerated therapy with minmal difficulty. He felt some relief after the
Prosthetic heart valve               No  // Comments:
wide. This cyst may be a gangion cyst.
Dx coding: v.
Maximum Usage (  )    hrs.  mins.
***SHAKE WELL***   (FOR IMMEDIATE RELIEF). REPLACES
The patient states that they take some outside medications and/or herbals.
No
changes for the Diabetes Collaborative Research Study.
JVD:  no; no HJR or hepato
BY MOUTH FOUR TIMES A   AS NEEDED FOR BREATHING
(D) Comprehensve oral evaluation.  DX: (.).
Initial Group Randomization Date://
Dental Category: -CLASS VI.  Treatment Status:
DENTAL ORAL SURGERY PROGRESS NOTE
Visit: S: Jun , @: DENTAL ORAL SURG.
MEDICINE CLINIC NURSING NOTE
Comment: Father w/ Glauc//Keratitis, per &quot; Ophth note
- Kidney function
No fish oil in meds list.
PRESCRIPTION MEDICATION RENEWAL NOTE (MIW) [T]
Race:BLACK OR AFRICAN AM AN
(-)Diplopia
Allergies: Patient has answered NKA
BLOOD CULTURES/FIRST DOSE OF ANTIBIOTICS:
) Assess the patient&quot;s coordination and b ce before assisting
) Ensure patient is wearing non-slip footwear. If necessary,
Fall Risk Screen Outpatient:
) Patient encouraged to use his/her stronger side when possible.
MD PRE-PROCEDURE ASSESSMENT
Endoscopist: Claudio R. Tombazzi, M.D. Fellow: Sufiyan Chaudhry, MD.
Antibiotic Dose Route &amp; Time: na
Eligibility: SERVICE CONNECTED % to %             VERIFIED
L. Bright, MSW, CRADC
[x]Community Meeting  (/ min)
Re  Baker, LCSW
[ ]n/a  [x]Addressed  [ ]Deferred
Date://
*Leisure Education/ Life Skills ( minutes)
-Description of yourself during childhood (e.g., shy, outgoing, happy, s
L. Hamlin, LMSW
S.  , CSAC, CPS
[ ]Journaling/Walking    (/ min)
Veteran&quot;s response to the following offered groups has been reported
diagnosis, including the disease concept of addiction, develop skills/tools
didactic and therapeutic groups designed to increase knowledge of mental
was fully alert throughout the session and did not appear to be tired,
Veteran arrived on time and attempted all poses and stretches with no problems
R. Baker, LCSW
GROUP ATTENDANCE (x=attended offered group):
. Posttraumatic Stress D/O                          //  MUNSHI,ELIZABETH
Pt. states he is employee of Post Office. Currently not working d/t injury on
unbelievable." wakes up shaky. All the nightmares have to do with killing.
EXTREMITIES: no swellin
Yes
MEDICATION RECONCILIATION EDUCATION EXIT NOTE
)   LEVOTHYROXINE NA (SYNTHROID) .MG TAB TAKE ONE        ACTIVE (S)
ADDENDUM
Segment Width:
Type of vision:
OS:Size: React:
Clinical Reminder active from the date the Influenza Vaccination
No fever or c s.
devices/products?    No
MENTAL STATUS:  He is sitting, calm, cooperative.  Mood was euthymic
Active Outpatient Medications (including Supplies):
__ moral/spiritual issues
[]Dizziness/b ce problems
. What questions do you have about your medications?
with epin :, used,  P URQ,ULQ, LRQ done using cavitrone and HI,
Ending at: // @ :: AM
Length:  minutes.
No Associate Provider Identified
plan:)advise patient to continue same dose of coumadin .mg (.tab) th;fri;
VITAL SIGNS: T: F [. C] (// :)
[]Post-op within - hours
Phone Number:        see computer
BP: / HR:
procedure and interval changes must be documented immediately prior to
- Pneumonia
Preop Mood:       RELAXED               Preop Consc:    ALERT-ORIENTED
NURSING OR PRE-OP ASSESSMENT - T
:    /
Limited
Resumed Normal Activity:  Yes
PAIN SCORE: (// :)
SMOKER:  __xx_NO ___YES  IF YES ___ Literature given
scrotal swelling for  years.  It is painful.  He had an ultrasound
. Informed consent was obtained at : AM on May , . The
[]   Social Worker
. Polyarthralgia
SEE DR. ORTEGA AGAIN.
. Coin Lesion, Pulmonary *
. Posttraumatic Stress Disorder *
Identified problem: OTHER UNSPECIFIED COUNSELING.
ALBUTEROL MCG (CFC-F) D ORAL INHL
(X) Appointment information left with family member.
from the VA for his %.  Did talk about his getting a higher
additional comments about the patient/family education at the end of the
,CHRYSHANT
NURSING TRIAGE NOTE (B)
Cooperative
NATURE OF PRIMARY PAIN:
Date:
. PROLONG POSTTRAUM STRESS
CAP                 SHOES
heplock started to r hand with # angiocath. tol well. rocephin  gm iv started
Plan:   i.v. Rocephin
.  Urinary tract infection/question of vesicle fistula."
// per pt--agreed to prune juice at breakfast.
Color:  Normal for ethnic group
DIABETIC SURVEILLANCE ASSESSMENT:
auscultation.
Will send patient home with his new DM medication per medicine consultation
NOW FOR INFECTION.
)   FLUOXETINE HCL MG CAP TAKE ONE CAPSULE BY MOUTH      ACTIVE (S)
Medications listed have been reconciled and reviewed with the patient.
more glare when driving at night that has increased since last examination OU.
this patient by physcially examining the patient, discussing the results with the
( ) Currently in-patient within a V.A. facility.
SECONDARY PAIN LOCATION:  Do you have pain in other locations?
hx of chronic back pain with significant conflicting hx of his narcotic over the
-f/u ADS as schedule @
Other:
Medications:
Over the Counter/Herbal Medications:
Pulse:            (// :)  rechecked
Other: Patient calling requesting a  wal of TRAMADOL TAB  MG
takes morphine,  The company needs a letter stating that he is prescribed
Referred him to ROI as he states he has signed a release this past year.
EMERGENCY DEPT (PART 5) PROVIDER DISCHARGE INSTRUCTIONS (S)
*********************************************************************
Patient contacted and notified of the above note per  physician Verbalized
understanding and concurred with the plan.
PRIMARY CARE GPD LAB NOTIFICATION (S)
Elaborate treatment plan from  physician denied.  Veteran assigned to  physician or evaluation. Cat. IV.
HPI: Mr.   reports that these current symptoms have troubled him since the
Weaknesses include history of substance abuse and some
. Surrogate (if applicable):
PAIN INDEX:  PRE-OP: /                 BODY PAIN: /
Primary PCE Diagnosis: . (DENTAL CARIES EXT DENTINE).
(D) Dental panoramic film.  DX: (.).
Caller&quot;s relationship to veteran:
Caller&quot;s name if not the veteran:
Call Type: SYMPTOM.
Comment: Pt will have colonoscopy
MEDICAL HISTORY:
Dear  ,
ADDENDUM
or to get answers to specific questions, we were able to make little progress.
Flu Vaccine - PRIOR REFUSAL:
return to Oklahoma City or go to Texas to find his wife. He again reports
Current dx (per chart):
PAIN/LEARNING ASSESSMENT
w/copy of same.
Much of vet&quot;s attention appeared focused on determining how he can convince
. Depression, NEC
SUICIDE RISK SCREENING QUESTIONS Are you feeling hopeless about the
TOPICALLY TWICE A   AS NEEDED FOR INFECTION
Axis  :   P omyelitis, peripheral neuropathy, joint pain (ankle and
Mother would like the ankle "looked at" to assure she is giving it proper
Vet called to report increased urinary frequency up to  times in  hours
Chronic pain, controlled with current medication and/or treatment.
* Pt. rates pain (-):
that his wife will use  this against him in the divorce.  Discussed the
to stop this due to depression symptoms and difficulty talking with
trazodone at
An alcohol screening test (AUDIT-C) was negative (score=).
)Siblings [X]Brother X
Pt left clinic on // before derm photos were taken. Unable to reach pt by
ED NURSING ASSESSMENT:
er /:  dehydrated w/ unmasking of parkinsonian features; improved w/ IVF.
PHARM. ANTICOAGULANT VISIT
Warfarin started on: DEC
reports that she has not yet made a decision.  Reiterated her options (see note
wal for the following medications that are expired or without
PROVIDERS&quot; EMERGENCY ROOM WALK-IN VISIT NOTE
facial expression, smiling constantly, brought to ER by wife with progressive
is oriented to person, pla
his bic," and was setting things on fire (carpet, banister in house,
YES
PATIENT STRENGTHS:
// : PLASM  . H
Patient identification is confirmed by an accurate secured armband
Evaluation: Pt attended goals group and stated "I don&quot;t have a goal." Pt has not
PATIENT EDUCATION
NURSING NOTE
No
.-        |   |
any idea that he is being intrusive of others. Pt is pleasant with
DOSE FOR WEDNES :     TABLETS  =  MG
VENTURA Ssome state
PHARM. ANTICOAGULANT VISIT
Patient:  ,  T ()
RE : Requested donovan call south suburan for inr result / phone
Patient:  ,  T ()
will be determined by outside hospital  while inpatient. Wife will contact our
copy of his records. For now will increase the dose to mg/daily, which is the
To Whom It May Concern:
In addition to the fire problems, he continues to have problems with personal
Friction:           = No Apparent Problem
self-adjusting medications and by arranging medical
----------------------------------------------------
Has there been a FALL in the past  hours?
unsafe/inappropriate behavior related to his neurode rative condition.  He
Patient identification is confirmed by an accurate secured armband
MYALGIA
PATIENT&quot;S AGE:
)   CLONAZEPAM MG TAB TAKE ONE TABLET BY
Preventive Health Education Assessment:
Flu Shot -:
*********************************************************************
EMERGENCY DEPT (PART 1) NURSING TRIAGE (S)
M (PART ) NURSING TREATMENT
then until yester  evening after he was done mowing the lawn and sat down
)   OMEPRAZOLE MG EC CAP TAKE TWO CAPSULES BY MOUTH      ACTIVE
HEIGHT:  in [. cm)
PULSE:
Patient declined influenza vaccine.
Mental Health SECONDARY Provider: FRITTITTA,  M   PG#: x
HEIGHT:  in [. cm)
a conference room for triage by one of the RNs.
MH SOCIAL WORK PROGRESS NOTE
to pick up at the pharmacy window at the AVAMC.  He was grateful for this.  He
Active Outpatient Medications                          Status
y/o male Persian Gulf War Veteran with a  %SC diagnosis of Major Depressive
are essentially normal in appearance with the exception of mild loss of disk
conditions.
PATIENT IS:      alert
S: Patients spent some time introducing themselves to the new patients in the
find out what the problem is.  Group members revived with this therapist what
YES, listed below:
Objective:
ROM:rue wfl
if necessary through written correspondence.
CLINICAL REMINDER ACTIVITY/PLAN OF CARE
stable, and does not endorse current suicidal/homicidal
WITH FOOD OR MILK FOR PAIN/INFLAMMATION
BMI:
)   ALUM,MAG HYDROX/SIMETHICONE SUSP,ORAL  ML
A S p uneventful
WBC                       . L  K/cu mm           -              -Mar-
Comment:
projects.
Social;  Married/Divorced x  and no kids.  Last steady job
MH NURSE BEHAVIORAL RESTRAINT NOTE
months ago, which was    after he finished a drug rehab
night.No evidence of any withdrawal symptoms.
Eat a b ced diet that includes all five food groups: grains,
Patient no showed to to &quot;s appointment.
Trazodone in past and did not like it; does not want to try it again. She had
worth as partial fill.
MHC MENTAL HEALTH NOTE
Attempted to contact vet. No answer, message left, will try again tomorrow.
Comment:None psychotic
No Associate Provider Identified
Caller Response: OTHER.
####No --Pain is ongoing and has been reported before--
HTN OR DM BP &gt;/ (ANC):
In the   she asked about getting a pain med. We went back in the room and I
Evaluation/Management Code: UNLISTED EVALUATION AND MANAGEMENT SERVICE ().
Pain scale:  (// :)
Blood Pressure: / (// :)
Contact Phone Number:   .
Evaluation/Management Code: UNLISTED EVALUATION AND MANAGEMENT SERVICE ().
Comment: No psychosis observed.
Is this a new pain?
MAA
How has the pain changed since patient&quot;s last visit?
Ongoing pain is:  Chronic
Since last clinic visit left knee effusion has returned. No sustained relief
Site  ed by:
left knee.
responsibilities.
Duration of Complaint:
Message noted.
Medication list was reviewed with patient and reconciled.
Pulse:  (// :)
Patient has reported a pain score of  (// :).
by:   A CHRISTENSEN
The Afluria influenza virus vaccine - formula is latex and
Past History:
partial pack cig
Was seen by DR &amp; treatment team during the morning  . physician
C icothe VA to enter the detoxification program.  He has been
NURSING NOTE
Alert, oriented, cooperative. Detoxing without complications. Neat appearance.
This patient was screened with the high-risk criteria for consideration as
TEAM MEMBERS:
    
