# Supplementary material for: Predicting the Risk of Suicide by Analyzing the Text of Clinical Notes
Source: PLoS One. 2014 Jan 28;9(1):e85733. doi: 10.1371/journal.pone.0085733 (PMC3904866; doi:10.1371/journal.pone.0085733)
Supplement: Appendix S3 — Machine Learning Libraries and Methods: This section is provided to enclose the open source (Apache License) classifier used for the building of the statistical models, specifically for the purposes of study reproducibility. A detailed account of these tools is intended for another publication. (ZIP) [file pone.0085733.s003.zip › Appendix3/ML_libs/Regression_testing/group3/grp3-pt-1084.xml]

<?xml version="1.0" encoding="ISO-8859-1" ?>
<records>
  <record>
    <group>3</group>
    <study_id>1084</study_id>
    <notes>
problem." Sometimes arm pain comes with chest pain but more often by itself. Not
Height:  in [. cm] (// :)
Class:
Patient in Anes clinic to  for a pre-op w/ physician pparent distress noted. Patient is ambulatory for clinic appt.
incised (cut into) around and just behind the head of the penis.
Surgery  ed://
May ,
NURSE INTRAOPERATIVE REPORT
Patient does not smoke or chew tobacco.
identified&gt;.
. Informed consent was obtained at : PM on November , . The
Episodic
meet Kay Tanaka for psych care here at the VA. He is also ammenable to an
Left voicemail for vet introducing myself as a group facilitator and requesting
Alcohol Use &amp; PTSD w/ Cognitive Restructuring &amp; Experiential Acceptance" on -
Veteran participated in group designed to address the above issues using
provide this service.  The veteran is not eligible for CH  due to the fact
Other
Significant
going to write his resum
Complications: None. Patient tolerated well.
PTA*
A PTSD screening test (PTSD Q) was negative (score=).
Pt reports multiple exposures to blasts from grenades, mortars, IEDs while in
last three   and attributed these changes to his missing the scheduled
T-L: No disc abnormalities, spinal canal stenosis, or neuroforaminal
L-L: No disc abnormalities, spinal canal stenosis, or neuroforaminal
reported that he used the assertive communication skills with his girlfriend
Veteran will call in two   to reschedule f/u appt.
Pt reported that his PTSD symptoms have been worsening, after he was laid off
DAILY
or wound.  Tetanus causes serious, painful muscles spasms.
Pt was told: "If not clear in  to    may necessitate biopsy"
D:  //
[] Hip,
[] Ankle,
Patient has been placed on OA for March ,.
we will call her / with her arrival time.
Date Oct ,
GOAL: Learn about a colonoscopy, it&quot;s risks and benefits and the
Colonoscopy description
. LN X  WITH INSTRUCTIONS  LESIONS TREATED
Contacted patient regarding:
PATPU. Thank you
--------------------
If you have questions during business hours, please call:  ie Whipple,
SKIN/TISSUE - LIPOMA EXCISION (LIPOMA EXCISION)
Denied any bladder/bowel complaint. .
PATIENT NAME:                  ,
RECOMMEND: Please repeat.  SAL/CMC
PATHOLOGY REPORT
Onset of pain (when pain began):
&lt;No Contact Phone Number Entered&gt;.
TOE/TOENAIL - NAIL PLATE AVULSION WITH CHEMICAL MATRIXECTOMY (NAIL
. Informed consent was obtained at : AM on July , . The
. Consent to Blood Products (if applicable):
DJD, psychosis
VS:
neede. He was talkative and upbeat on the phone to .
methadone, oxycodone, percocet, morphine, codeine and hydrocodone.  Our goal is
DENTAL IMAGING CONSULT NOTE (WHAV)
Call-back number, if different from demographics:
Denies any drainage.  States he is afraid to cut it back due
June  to August .  He was served as a milatary p ce officer.  He
The patient was educated on the available weight management programs
Chief Complaint: No chief complaint
physician ipton ice tea
Patient is a  year old MALE here to  with Chief Complaint:  month
starting soon.  Hx of depression in high school.  No SI/HI.
. Dermatitis * (ICD--CM .)                      //  YOUNG,  J
PATIENT EDUCATION INTERDISCIPLINARY RECORD
READING LIMITATIONS:
. Patient name:   ,
Injection)
Reaction: None
PAIN INTENSITY:
LUMBAR SELECTIVE NERVE ROOT INJECTION
Hypertrophy (Benign) of Prostate withoutEncounter for Therapeutic  physician ring (ICD--CM V.)
Nurses assessment of chief complaint/disposition:
NURSING OUTPT TRIAGE INTAKE NOTE
COMMENTS:
S p Apnea (ICD--CM ./.)    Encounter for Aftercare of long Term
calcium deposits that the doctor has told me do not need to be treated.
about  years. Pt had L TKA in /, but has had problems with standing and
had duplex in / for edema no bloodclots but subcutaneous swelling in both
(+) patient stated previous doctor told him he had "calcium
Pain lower leg, abnormality of gait
A: +LLD (L shorter /")
//. Pt is coming on Thurs  (//) at  am for pre-operative
DIAGNOSIS: Loosening LEFT TKA
. Manipulation of Knee Joint under  ral Anesthesia  left knee
Activity: u
OR Support Personnel:
Color:  Normal for ethnic group
, Warm/ physician ns
CONSCIOUSNESS
Personal belongings are w
No productive cough
Occasionally drowsy, easy to arouse.
Parkinson&quot;s Synd
ADDENDUM
Shift Apr ,@:
Requested to come back to see pt with  physician  is trembling, knows his
Current diet RX: Regular
NAILBEDS:
else.
R hydrocelectomy
. Limb Related Movement Disorder   physician  /: PLM D/O
ARTHRITIS L KNEE, S/P L TKA
discharge instruction sheet for details.
Reasons for DC after  Noon:
supportive and don&quot;t constrict your leg. Reaffirmed next appt.
//. Left leg was found to be /" shorter than his right, and so this
Alert
Pt requesting pain medication, stating that  physician been refilling. Will
resolved. Advised pt. to have an appointment made to be seen by OBMT
He was stationed in Kuwait and Saudi Arabia during the Persian Gulf
S:
news and war movies and intermittent flashbacks, anxious NM&quot;s of fighting, gun
Mr.   did not show for a scheduled appointment on: // :, thought
Tachycardia, Sinus * (ICD--CM . // MCADOO, NDA L
Cardiac arrythmia? tachycardia
HEART:S S WNL, no (M) or (G)
RX CLINICAL PHARMACY
MDD, recurrent, in partial remission
take  No Doz to get here (driving) without falling as p.  Pt states that he
Location of pain:  muscles and joints
Patient denies pain (Pain level )
No loss or change in vision
CARE PLAN PROBLEMS IDENTIFIED ON ADMISSION: SUICIDE IDEATION
take care of his ex-wife and therefore allow him to suicide.
PCT: CASA GRANDE CBOC
Laboratory Data:
morning which has been decreasing in intensity. he reports no side effect of the
SOCIAL WORK PSYCHIATRIC SUMMARY
Interdisciplinary Treatment Plan UPDATE:  D/C is anticipated for Apr ,
His wife will pick him up at . Pt to be followed at CBOC by SW Newton-(he
YES: is patient&quot;s address current?
Any questions about your condition or treatment while in the hospital:
their lives." The following best describes how the patient feels right
Neurologic:
assertion w/associated exercises from Chap.  - Maintaining Relationships (CBT
No resolution of tiny AK lower lip, Derm had done liq nitro.
doesnt get more p nent at times, not intermittent, per pt
minimal actinic keratoses
Have you informed the pat
Medication:    [ x]Continue same medication schedule as before
Resp:  (// :)
Atrial fibrillation
Medications:Active Outpatient Medications (including Supplies):
Received a SS form with request of daughter in law Rachel for completion needs
PATIENT NAME:   ,
REASON FOR VISIT: Consult from BERNA, E for routine eye exam.  Pt has
A:
Pt is here to establish care thru va as he will
WHEN DO YOU HAVE PAIN, FOR HOW LONG, HOW OFTEN: constant
his H &amp; P and Intake/ASI.
Mr.   is a  year old   (not Hisp), widowed male NSC veteran. He lists
For how long?  months (since wife passed away)
No
ADDENDUM
( )Self Care                    ( )Family Recovery
( )Anger Management             (XX )Motivation
Observations:
AMB CARE VESTING NOTE
=========================================================================
Patient told information packet contains advance directive
)   HYDROCODONE /ACETAMINOPHEN MG TAB TAKE  TABLET    ACTIVE
possible lumbar - diskectomy
Blood Pressure: / (// :)
Blood Return
INFORMED CONSENT (SCANNED DOCUMENT)
This note is for  ,       --.
complaining of some numbness of the right buttock and thigh. He is walking more
symptoms of neurogenic claudication. Postoperatively,  he was complaining of
hematuria, pain and the possibility of fever, c s in which
Height:  in [. cm] (// :)
and L/ decompressions.  He states in the interval since his last clinic
DIAGNOSIS (Date Spec taken: Jun , )
Taking medications that have no apparent indication
Patient IS NOT on Metformin
Pt newly diagnosed with prostate cancer. Plans to undergo EBRT/adjuvant HAT for
RADIATION ONCOLOGY THERAPIST NOTE
Identify the benefits of aquatics as an option to increase wellness.
For specifics, please contact Radiation Oncology Service.**
Assessment:  Stable
For specifics, please contact Radiation Oncology Service.**
Depression:     PHQ- =  total, somewhat
**Radiation Oncology daily therapy administered.
RESTRICTED DRUG REQUEST
Radiation treatment details are documented in IMPAC.
For specifics, please contact Radiation Oncology Service.**
DOSIMETRY CHANGES FROM INITIAL PLAN: no changes
Provider : BAKER,
)   NIACIN (NIASPAN) MG SA TAB TAK
)   DILTIAZEM (IN ) MG SA CAP TAKE ONE CAPSULE BY    ACTIVE
)   CLOZAPINE (MYLAN) MG TAKE ONE TABLET BY MOUTH       ACTIVE
RFC: Apparent cyst at right ante dial aspect of neck that has grown in size
Any abnormal response would or could result in the need for a thyroid U/S study
ADDENDUM
Called to review the chart for broken pain contract.  Patient had a recent urine
Discharged Via: STRETCHER
DATE &amp; TIME:Oct ,
Pulse:  (// :)
Physician: barnes
Plan: Remove sutures &amp; applied steri-strips
,   LIN is assigned to Caller Area *MOUNTAIN HOME.
Patient Phone Number: --
Yes   and CT chest with and w/o contrast
*****************************************************************
no n,v,c,d. no palpitations. he was a chronic smoker, quit few years ago.
SKIN/BRADEN
. Hypertension *
Medication: Vent n .ml, Atrovent .mg/.ml
Sputum Color: None
. Hyponatremia-improving
Sputum Color: None
No Adverse Reactions noted.
Pulse: (// :)
Pt. agrees to procedure w. IV sedation
Lungs: LEFT:
Character of stools Normal
Additional Nursing Assessment Information: STOOL SUBMITTED FOR OB AND
HD#:
)   CALCIUM MG/VITAMIN D  UNT TAB TAKE  TABLET
Future Appointments -
. Hypertrop
ADDENDUM
Other: address.
Ending at: // @ :: PM
ADDITIONAL COMMENTS/INFORMATION:
EXAMINATION): Appears well groomed and oriented.
=========================
JOINTS
Length:  minutes.
. Brain aneurysm clip(s)
has reordered). Supply sufficient of Travatan, however Rx expires the st of
CHEST MUSCLE IMPAIRMENT  %  SC
Facility Appointed PCP: HARDEN,DANE (BRISTOL CBOC)
Caller:
Conversation with  ,   LIN has a chief complaint of: &lt;not
[X][ ][ ]History of Alcohol or  physician pendence
[ ][X][ ]New onset of severe mental disorder (e.g., st break
Veteran has a case manager.
trav qhs ou
/ ph NI
Respirations:
aam casually dressed
RN NOTE
"I feeling depressed and was feeling suicidal."
told to leave as well.  Pt upset because he had been doing well.
allowed back at US Vets and that transitional housing could be coordianated.
Pain:  (// :)
Marital Status: DIVORCED
he says are "continuously with me". In :
and trying hard to comply with the doctors so that he can get better.  He
breakfast.No behavioral problem at this time.
PLANS:  Vet will return to optimal level of function. Vet will remain safe
outpt, may acquiesce
IMPAIRED (describe):
unrestricted, ambulating steadily without support or ambulatory assistive aids.
Temperature:
He said he felt suicidal because that was his only real option because if he
attempted to call vet again.
MH TRP TELEPHONE NOTE
Collection DT       Spec UR. BLD
EDUCATION:
called now he states he was calling to schedule an appointment for a number of
RECALL LETTER TO BE MAILED WHEN APPOINTMENT TO PRIMARY CARE IS DUE
//  C ABINOIDS       NEG
AGE:
, , is here as a walk-in:
PCC WALK-IN NLR
LOCATION: E
identifiers, i.e. full name and the SSN number.)
clonidine .mg given po per order
VASCULAR LAB PROCEDURE RESULTS
cc: Patient here for routine appt.
Patient IS NOT experiencing any side effects from medication(s).
PM&amp;R PHYSICAL THERAPY CONSULT NO-SHOW
The veteran presented to  in order to complete neuropsychology testing
Neuropsychologist
Inpatient Physical Exam
does have a copy of the Mental Health Hold or his/her rights.
other hospitals or the street. His hx is significant for many instances of his
hospital.  physician es with need for a CCRC to discuss pt&quot;s inappropriate
Patient requested his hairbrush and a pencil which he was not given due to
brains out." Patient remains on SP precautions.
Has there been a FALL in the past  hours?
ecchymosis and is very painful to touch.  Unable to move finger on exam.  Will
pain. Observed sitting in bed, leaning for  head n y
-
No
patch later but he has not come to the med window to get it. He has been
PMH:major depression, chronic pain synd , hcv, ptsd
Has there been a FALL in the past  hours?
No
Process: Much open sharing about how painful it was to feel so distant from
intimidating other pts. in the milieu. Did eat lunch to  in the DR after
before pt discharges per VA P ce. Pt an escape risk if he txs to medicine as
described making those statements out of a sense of frustration. He made another
:; ENCOURAGED VENTILATION OF FEELINGS AND THOUGHTS; SAFETY
MH INPT DC INSTRUCTION
.  Diagnoses: PTSD, Opioid Dependence, Chronic Pain.
INHALE  PUFFS BY MOUTH FOUR TIMES A   AS NEEDED . FOR
Axis II:  Narcissistic borderline and antisocial personality traits
RTC: Dec th at :
VITAL SIGNS:
TERAZOSIN HCL MG CAP                              ACTIVE
. CHRONIC LBP, HX. OF LAMINECTOMY OF L-L AND L-L
Date placed:Dec ,
TEMP .
-
NUTRITION ADMISSION ASSESSMENT
I:
Treatments ( physician  physician resent, &amp; Beliefs):
DELIVERY METHOD: mouthpiece
Patient&quot;s Comfort Goal  :
ADMISSION DIAGNOSIS:  Chronic right upper quadrant abdominal pain
Pulse Ox: %
Treatments ( physician  physician resent, &amp; Beliefs):
TERAZOSIN HCL MG CAP                              ACTIVE
or
Medical Records.  Pt pledged to follow through on this himself.
Zimbleman, MH Services; Naomi   , LCSW; VA P ce officers.
further refills:
Vet reports being hopeless and shaking, worried about withdrawal. Discussed
Vet thanked this writer, will explore these contacts and call this writer back
Please let me know how I can get in touch with you or
medications that are expired or without further refills:
Veteran understands this, is confident he can maintain his behavior. Vet seems
obtain narcotics from the VA or Bay Pines for some time and has not reacted
) health care worker/volunteer      No
DVAMC Travel reported that they arranged for taxi and mailed vet his flight
Reviewed  physician  note. Will not  w narcotics.  physician discuss
full consent
. Surrogate (if applicable):
Prior to the procedure, the doctor may administer a local anesthetic
BRIEF CLINICAL HISTORY:
fellow with pt request.
MODERATE SEDATION - ANALGESIA (CONSCIOUS SEDATION) WITH ASA
Patient:  ISZESKI,     SSN:    DOB:  //  AGE:
Status: Elective
No
Pain:             (// :)
Nurse&quot;s notes reviewed from to .
chronic nature. His relative tachycardia is consistent with autonomic changes
Pending Outpatient Medications                         Status
SLEEP MEDICINE CONSULT
ALLERIGES REVIEWED-UNCHANGED
HEENT:  Ears-canals clear, TMs-good li
ENERGY IMPROVED.  MOTIVATION FAIR.  APPETITE FAIR.  NO THOUGHTS THAT LIFE IS
Was psychotherapy conducted?
NUR-DEPRESSION SCREENING:
SIGNIFICANT ISSUES/SYMPTOMS/PROBLEMS:
TREATMENT THIS VISIT: Supportive psychotherapy, Cognitive/behavioral
benefit as well.
Patient Refuses referral.  After discussing the health risks of
Conferred with  physician e will  w the above medications and have patient
Active Outpatient Medications                          Status
.Vit D deficiency.
Date:
The supervising attending responsible for this patient is  physician
Veteran contacted pharmacy service related to MH consult note of //.  He
INJECTION - ZOSTAVAX (SHINGLES) (T)
--
// CHLORIDE (Serum)     .
No action for now.
dizziness.
Current Diagnosis: Schizophrenia
COMMENTS: Mr.   actively participated in group to . He
Barett has been informed that CBSST group will be cancelled on Wednes . The
Session:
end the session and states, "I&quot;ll be alright, I just need to rest."
Writer reinforced him for recent progress he has been making, such as offering
in which the veteran could keep better track of his spending but he
O
WBC     .            BLOOD        (// :)
working on a leather  et kit he started last week. He sought group leader&quot;s
with "Nancy" who noted no new behavioral/sx concerns, says he likely forgot the
Obesity (ICD--CM .)               Tachycardia, Sinus
difficulty making simple decisions like what to wear in the morning.
Symptoms at baseline and manageable.
Vital Signs: Baseline, see LPN note
MH MHICM-INTENSIVE CASE MANAGEMENT
attacks from Satan; pt is going to try another method that, when the devil comes
conversation and stated understanding.
by gen surg when it was acutely infected back in . Was seen last year b/c
Neuro:  , CN - intact
. Obesity *
Other labs done to : multiple, seeing PC clinic
MEDICINE CLINIC NURSING NOTE
POTASSIUM  .  H   PLASMA  (// :)
NPO since midnight
ANESTHESIA REPORT
Operation Disposition: OUTPATIENT
Respirations:  (// :)
The PAC(U) Discharge Score field was changed
reports that he now has two friends at his Bible study group.  They are
stated, "I wanted to be admitted to the hospital, the VA is the only
ill that he describes as "very interesting."  He agrees
Name of Veteran:  ,  O
Complications:       No immediate complications
Mental Status Exam. Denies suicidal/homicidal ideation.
provider before changing into a hospital gown when that&quot;s part of an
NO SHOW/CANCELLATION CLINIC NOTE
Thought Process: difficulty concentrating
Mental Status Exam. Denies suicidal/homicidal ideation.
Problem # Thought Disorder-Met with veteran at Birch  residence on / &amp;
Any change from usual side effects:denies
GAMMA GTP
heard myself talking out loud."  Again attempted to reassure veteran by
normalizing this behavior, however, veteran was not convinced.  He
reported plans to continue this work and described it as "humbling."
Goal Hemoglobin AC: &lt; . (plasma glucose -)
yester  evening.  Veteran reported feeling "worn out" from these
P. Vet. will explore with billing repayment options, since he is SC. He was
Protocol(s) used: &lt;Not identified&gt;.
Brief Suicide Screen:
DVT.  Surgery consulted, discontinued.  Nothing to add per consult.
Abdomen:
Abd benign
TRIGLYCERIDE                H   mg/dL       -           []
Followup
- - - - - - - - - - - - - - - - - - - - - - - - - - - - - - - - - - - - - - - -
No
first cousin.  She also reports migraine headaches in her family.
NURSING OUTPATIENT PAIN SCREENING
Pt states that she has been having RUQ abdominal pain, constant, for several
get a divorce this year!" Pt. states that her husband&quot;s priorities "are not
Comments:
Orientation: Orien
MEDICATIONS
Medication: Potassium Chloride
were going to take it from ther and notify the husband and the necessary steps.
New weight and/or height measurement done during visit:
some state
I wanted to update you on your recent ultrasound results:
UNSPECIFIED DENTAL CARIES
Visual impairment:  No
infection.
PRIMARY CARE CBOC/FRED LAB NOTIFICATION (S)
For the procedure, the patient lies flat on his back and receives an
- - - - - - - - - - - - - - - - - - - - - - - - - - - - - - - - - - - - - - - -
O//:
HISTORY:F/U  ICA STENOSIS
Name of  physician n - VA  wal
Pain score is
Occlusion and Stenosis of Carotid A, s/p right carotid stent in /
DENTAL GENERAL
UA neg
Pt is a  y/o w/m/m vet with a history of depression which continues in
ADDENDUM
Medicare will only cover those increments
being managed by  physician
MH ATTENDING NOTE
SISTER
retained shrapnel in hand. Explained at length import labs for wbc and renal fxn
MISSING PATIENT RISK ASSESSMENT
Date/Time to Lobby:
ASSESSMENT:
SKIN PROBLEMS
MORSE FALL SCALE
WHAT RELIEVES THE PAIN:
Pneumococcal Vaccine (A):
None ordered
complete assessment.  Veteran&quot;s mood calmed stating that he was  oyed because
globes/OU.  he had s/p PPV/lensectomy/removed FBs/intraocular antibiotic
Resident continues to refuse his Citalopram stating "I don&quot;t need it".  C.
Assistance provided for this task: total dependence
Brush hair
OD:  p
ACTIVITIES OF DAILY LIVING
Patient is continent.
Called by nurse to evaluate patient, patient was found to be with red and
Right AKA
Abrasion/Laceration
Note entered by error, does not belong to resident.
total vision to his Lt eye and, probable % recove
Prior to meeting with veteran for assessment purposes, this provider met with
Amount of stool: .
MOBILITY
Problem )    Onset        Review       Resolve
NUTRITION
all these years cause he has no seen doctors. "I know when there is somthing
ABRASION HAND  .                        //   RUSSELL,  J PA-C
to memories of the event.
NUTRITION
vision, has pending appointment with BP //.
Patient is continent.
Number of hours awake
Amount consumed:
Surgery consult initiated as well.
During this shift, patient was continent
IC ALERT-MRSA
safety and comfort.
Assistance provided for this task: one person assist.
Meal assistance: set up, cutting meat and opening containers.
Ambulation: requires no assistance
Safety measures in place.
er on the dorsal side of the PIP joint this wound is definitely healing.
MOBILITY
CLC South unit to meet with veteran.
MENTAL STATUS
GEC PSYCHOLOGY NOTE
Patient is continent.
ELIMINATION
The pressure ulcer prevention protocol was not needed - patient is not
Consistency of stool: .
Ambulation: assistive
BOWEL ELIMINATION
followed by them at the CLC. He remains to be independent as per BROS. Veteran
Patient is continent.
Vet presented as clean, casually dressed and adequately groomed. Vet was  of
PATIENT HISTORY:
was wearing a   coat. He feels this is good news and they are optomistic at
During this shift, the patient has been observed smiling, talking to others.
Hip protectors in place: declined
gland or fore skin or meatus.
ZZPATIENT CARE ADL NOTE
MOBILITY
Oriented to person, place, time.
Consistency of stool: .
Urine color:
cueing.
Meal assistance: supervision, oversight, encouragement or cueing.
None/bedrest/nurse assist
a friend who
Other personal care: shampoo, oral care
is the assigned specialist who oversees the veteran&quot;s process as per Ms.
cueing
location: resident room
Assistance provided for this task: set up assistance
MHC CLC PROGRESS NOTE
Patient bathroom privileges
During this shift, patient was continent
Bed mobility: independent (easily turns and sits up without staff assistance)
afternoon. Client received instructions RE: Surgery per LPN.
MUST BE PICKED UP BY :AM at the CLC for transport to Bascom Palmer Eye
Adjustment Disorder with depressed .    //   BALDWIN,CAROL H
return back to Bascom Palmar in Miami tomorrow for f/u. SW Bonfadini has been
Extra fluids  given.
Bed mobility: independent (easily turns and sits up without staff assistance)
Active Problems:
cueing
TIME OF THE   Night Mar ,@:
ZZPATIENT CARE ADL NOTE
Urine color:
Transfer: requires no assistance
Patient bathroom privileges
Bed mobility: independent (easily turns and sits up without staff assistance)
Not applicable for this shift.
During this shift, patient was continent
Patient bathroom privileges
after verbalizing he would accept CILO assistance.
MOBILITY
Number of bowel movements this shift: .
MOBILITY
Number of hours awake
Dysphagic Program: No
Alert
Amount of stool: .
location: resident room
Personal hygiene: bed/sponge bath
Amount of stool: medium.
BLADDER
S PING PATTERN
Grooming:
Other personal care: shave, hand/nail care, oral care
Dinner  food % drinks %
Urine color: clear
ROOM NUMBER:
eye. Patient is scheduled to transfer to blind rehab unit on //.
location:
Urine color:
location:
BLADDER
physician ody
Skin Temperature
members.  veteran also has a appointment on Thurs  in Miami.  He also intends
A:  The teams from SWS, CLC and BRC have been  ply involved with this veteran
Attorney&quot;s office for victims rights.
assist
Place patient/resident articles within easy reac
NURSING ADMISSION ASSESSMENT
Time of  :  Evening
administer them himself.  Prednisolone and Genteal are both in the nightstand
introductory lesson with route to smoking area. Veteran talks about his
ETHNIC/CULTURAL/RELIGIOUS/PERSONAL FOOD PREFERENCES AND INTOLERANCES
Restorative Feeding Program: No
Veteran is alert and oriented, appears very
Constipation:  No
Electric razor-
very cohesive and volunteered to accompany one person downstairs to smoke, to
Participated in IDCP team meeting to discuss program for veteran and shared
realize/process that learning routes around the hospital are useful to him, to
Plan: Veteran will be able to negotiate safely in an environment and have the
ADDENDUM
Ms. Rohena-Lugo. A program completion date will be determined based upon
The veteran&quot;s medical record was reviewed. There were no concerns noted by
Mood- calm
(-)cance
ADDENDUM
stated that he is good with his hands and was not interested in MS since it
AUTODROP/EYE EASE DROP GUIDE:
Washing:
and once inside the elevator, counted down the buttons and pressed correctly for
//
NURSING NOTE
operate the control panel in order to scan and read the printed information. The
ADDENDUM
laundry in-between. The veteran voiced his usual objections to the need for
Sessions Seen:
Number of LS sessions provided:
his cane with little difficulty.
safe." Mr.   was referred to his TC to discuss his d/c date.
Total sessions to date:
form c/o Blind Rehab Center here, but they say they MUST send it to Riviera
needs to set up "later," he says.
Buttons
The Veteran&quot;s medical record was reviewed, there were no concerns noted by
: SAFETY EDUCATION
Marital Status: DIVORCED
The patient lives with:
METHOD OF EVALUATION:  Return Verbalization,  Patient Acknowledged.
ADDENDUM
skills.
Secondary Next-of-Kin:
POH:  (+)Trauma:  "He shot me through the windshield."
participate in a Family Program.
TYPE OF EDUCATION:  Group
verbalizes an understanding of their contents.
vision.  Veteran reported that it has been difficult at home, the loneliness
Medical Problems pertinent to nutrition:
SWS BRC
HBPC ADMISSION DATE: //
ADDENDUM
comparison of his disability with past ability.  Veteran also reported that he
him directly. Veteran agreed for this SWER to provide Ms.   with his
adequately dressed and groomed appearance.  Speech is low volume
things, employ new coping strategies as components of progress and improved
adequately dressed and groomed appearance.  Speech is low volume
) reports some double vision
ANXIETY STATE NOS
Does Patient have driver? Yes
ALLERGIES:
Contact Phone # for post procedure questions and/or problems:
Internal hemorrhoids
Patient was advised to wear hearing protection when exposed
Sex: MALE
FOLLOW-UP PATIENT:
/           /
management of repairs and how to order batteries and manufacturer&quot;s
TABLET BY MOUTH DAILY FOR THYROID
Age:   Sex: MALE  POW: NO
EXPIRED              // // ()
. HAD C. SCOPE FOR POSITIVE FOBT
Angioectasia in the transverse colon
nonde
,  Y     --
TRAZODONE HCL MG TAB              Sig: TAKE ONE TABLET BY MOUTH AT BEDTIME
has been mailed via the U.S. Postal Service on Aug ,.
() Telephone consultation
chaplain will provide assistance if needed to complete the directive.
allergies SULFA DRUGS, BACTRIM, PERCODAN TABLET, MACRODANTIN
AND DIRECTIONS
called at am as well as am no answer
)   BISACODYL MG EC TAB TAKE ONE TABLET BY MOUTH ONCE     PENDING
MHC GENERAL
ROS:
ENT             : denies hearing loss, tinnitus, vertigo, hoarseness, sore
Hypertension: no
depar  Veteran had one prior admission to the D program.
medication and v/s per protocol. Staff will continue to establish a trusting
MENTAL HEALTH RECREATION THERAPY ASSESSMENT
According to Charts: Admitting Diagnosis: ETOH DEP,BIPOLAR DO
Patient asked if he knew where he was, ha
able to verbalize problems
. Tactile Disturbances:  Ask, "Have you any itching, pins and needles
to you?  Are you hearing things you know are not there?  Observations.
MENTAL HEALTH SOCIAL WORK ASSESSMENT
Temporarily held due to patients condition
Gender            : MALE
PAIN       :
OBJECTIVE:
You were hospitalized from // to // and are being discharged to
MULTIVITAMIN TAB
ALBUTEROL HFA INHALER
PSYCHOLOGY EDUCATION NOTE
Do you have any other questions concerning your medication?NO
-NO KNOWN NON-VA MEDS MISCELLANEOUS
FOR VITAMIN SUPPLEMENT
Present behavior is anxious and time, place and person  oriented.
-   No Risk
*T.LYMPH COUNT                        :. THOUSAND
Provide psychoeducation on
.      Pt reported, "I can watch TV. I like to be i
Patient identifies the followi
safety, report and document changes. Environmental checks completed as per unit
===============================================
. Tremor:  Arms extended and finger spread apart.  Observation.
process is clearer ... Moreover, veteran reports increased appetite and
Home Phone        : () -
complaints.
. One new coping skill to anticipate suicidal urges: Pt reported that he will
THIAMINE  MG TAB
PO QHS. Pt slowly reached his baseline level of functionng and met criteria for
Weight:  lb [. kg] (// :)    BMI:
Most recent lipid results:
Since patient was discharged/or last seen for appointment has patient had any
NURSING GROUP NOTE
SUICIDE PREVENTION COORDINATOR
PAIN    (// :)
etOH:   Yes,   (he is an alcoh c)
Patient race/sex:  /Male
Description: throbbing
plan to drink himself to death, denies prior attempts, or active intent
NURSING NOTE
DRESSING        :
EDUCATION OF PATIENTS AND FAMILY
Comment: walk as tolerated
System Recommendation: Urgent
complaints at present time.
Allergies: LIVER(enter additional allergies via CPRS
-CITALOPRAM  MG TAB
Duration: intermittent
Adverse  physician :  No
RESPIRATORY PROGRESS NOTE/CRITICAL CARE NOTE
Position of patient:  Fowler
*DIAGNOSIS WITH NUTRITIONAL IMPLICATIONS     :Pneumonia
No Preference         :
Legionella, rapid flu negative
. P
Patient Teaching:  Notify nurse if redness at site, Notify nurse if swelling at
Yes
L/MIN
Action  :
Objective:
ALBUTEROL INHAL UNIT DOSE SOLN,INHL   ML VIAL INH ORAL     ACTIVE
ML  infuse over  minutes IV QH
Modality:  Nasal C ula
Catheter Size:   gauge
Saline Lock &gt;  hours: n/a
URINARY ELIMINATION:
Breath Sounds: Crackles, Wheezes
Effectiveness of Therapy: YES
DRAINS              :None
Oriented
Yes
Pain:   (// :)
Yes
Patient on Oxygen
he feels better.  He thinks the abscess on his back may have drained some very
Status Post:
HYGIENE:
N/A
saline lock # to RUE.  At a later time pt. awakens, productive cough noted
Ambulatory
Treatment
Treatments:   Volume Nebulizer
Time of Assessment:  Feb ,@:
Position of patient:  Fowler
Objective:
Comments:
BOWEL MOVEMENTS:
Braden Scale - For Predicting Pressure Sore Risk
Self
MOBILITY:
Person(s
Iunable to assess
any changes ***
// :  [][]
DC SUMMARY NOTE
Initial
Equipment: Portable Liquid
&gt;&gt;&gt; No barriers identified
FRIENDS, AND HOGAR CASE MANAGER,
OSAC PSYCHIATRIC FOLLOW UP PROGRESS NOTE
RESPIRATION -     (// :)
ACTION:   Urine collected and sent to MIVA for analysis. BAL negative  on
HE REPORTS CONTINUED ABSTINENCE AND MEDICATION ADHERENCE.
done in  showed a lichenoid dermatitis with features consistent with
mycosis  oides.  Patch testing in April  was negative.  Pt thinks that
FOR STOOL SOFTENER
NEW CASE MANAGER AND HAS TO MEET WEEKLY WITH HER. P
hypothyroidism (caution with Baxoretene) and hyperlipidemia (caution with
ADDENDUM
WEIGHT. HE WILL BE HAVING SURGERY FOR HIS UMBICIAL HERNIA NEXT MONTH.
ROUTINE LAB SCREENING TO
daughter
Occupation:postal worker
Dates of service:   , returned Iraq May
TIME OF SERVICE: - minutes
(D) Resin one surface-anterior: (F)
positive therapeutic outcomes.
A/P: F/u B/L hip pain s/p steriod IR injections
EYE CARE F/U PATIENT NOTE
telephone, issues that he is currently experiencing. Veteran reported that he is
AP pelvis
Veteran called and reported that he would not be able to attend psychotherapy
PAIN ASSESSMENT                  //
unaware of and to notify him of his upcoming Ortho appt June ,.  Pt still
Report:
Patient has no difficulty comprehending medical information.
ACTIVE PROBLEMS:
OCT ,@:  MH CMHP BAKER
barriers to communication. Teaching was adjusted to meet the specific
stamped envelope and was instructed to return the cards by mail in
Allergies/ADR: Patient has answered NKA VS: Wt:     lb [. kg]
The patient responded NO to all  questions.
Transfer: Self
Height:   in [. cm] (// :)
Occupation:  Computers
PATIENT HEALTH EDUCATION
S P STATUS
BOWEL MOVEMENT
Temp:  . F [. C] (// :)
Vascular Ulcer NO
HISTORY OF PRESENT ILLNESS
ER TRIAGE NOTE
Ht:     in [. cm] (// :)
breathing, coughing,  pressing on left side front below clacicle xd
Inactive Outpatient Medications                        Status
Veteran can be reached at --.
Date //
has been "having problems with parole". Vet stated that he had been drinking,
,    is assigned to Caller Area  ISTON CBOC.
Evaluation/Management Code: HC PRO PHONE CALL - MIN ().
for F/U.
Work hours is am to pm
Applicable health stressor(s):
[x]Intelligence                []Financial Stability
Percent of  s with Usage &gt;= hours    . %
BLOOD PRESSURE
What relieves the pain? none
)   ARTIFICIAL TEARS INSTILL  DROP  IN BOTH EYES  AS      ACTIVE (S)
RADIOLOGY NOTE
buckling. Pt states that he had therapy in the past with some improvement.
-  THERAPEUTIC EXERCISE:  Patient performed NuStep X min at workload
Total score:
Onset:
Provider: Ahn, S MD
Onset:
/
THREE TIMES A   FOR MUSCLE RELAXATION - TAKE AS NEEDED
occuring is, following first meal of the  , around lunch time, he gets
Called veteran in follow up of blood sugars, blood pressures and lifestyle
Veteran cancelled
if he could not tolerate the increased dose we would just have him go back to
Pt admits to clenching teeth.  Pt was evaluated by the minnesota Head and Neck
***SHAKE WELL***   (FOR IMMEDIATE RELIEF). REPLACES
MEDICINE CLINIC NURSING NOTE
MD notified of patient&quot;s pain assessment.
- - - - - - - - - - - - - - - - - - - - - - - - - - - - - -
Dental pain scale (-):
it has resolved- points to the th MT styloid process right foot,
CARDIOLOGY CONSULT
E/O: -No pain to palpation of myofascial muscles.
Date:
ADDENDUM
Pain #:
Vaccine Information Statement - Interim - Inactivated Influenza Vaccine
Called patient: Left message on answering machine.
Does patient have any suicidal/homicidal thoughts? - No
CONSCIOUS SEDATION
:)
NPO Since:  Apr ,@:
Other: codliver oil
Standard Outpatient Fall Precautions Implemented.
with veteran also.  We explained the changes in depth and how these changes will
GROUP ATTENDANCE (x=attended offered group)
GROUP ATTENDANCE (x=attended offered group):
[x]Bowling G (/ min
R. Baker, LCSW
systems that are conducive to recovery lifestyle.
Visit: // :
Date of Group: //
DTC PROGRAM CLINIC
P. Wooten, RT
Visit: // :
DTC PROGRAM CLINIC
didactic and therapeutic groups designed to increase knowledge of mental
Sex:MALE
Hopes and  physician tes)--attended
Methocarbamol and tylenol for pain to be picked up at the window.Explained to pt
OBJECTIVE:
Group Name: PCT Booster Group
PATIENT ADDRESS:
Patient Phone: ()-
email was shared with his boss. Vet s
terminated. I am under tremendous stress from   Horton (past supervisor) and
me. I am under tremendous stress I have and continue to see phsycologists ,
Short Leg: Left
mm
LUNGS: cta bilat, no wheeze
Ant. Chamber: OD:  p and quiet   OS:  p and quiet
PTSD Screen:
Not at all
DAILY
***********************************************************************
Evaluation/Management Code: HC PRO PHONE CALL - MIN ().
labs show mild increase in creatinine levels.Uses naproxen at bedtime.
One-on-One
to make ends meet with wife out of work on disability. . Worried about
assessment in the Progress Note section of the chart. The treatment plan
Patient Refuses referral.  After discussing the health risks of
Supportive psychotherapy with medical evaluation and management.
R: (// :)
. What questions do you have about your medications?
__ health concerns
The study is performed to help detect blockages in the coronary
ACTION PLAN:  What would you like to do
to improve your health?
plan:)advise patient to continue same dose of coumadin .mg (.tab) th;fri;
. Coin Lesion, Pulmonary *
HPI:  ER,  E is a  y.o. here for routine visit.  PT HERE FOR RECHECK.
.  When is your next appointment?
DESIGNATED DRIVER.
full consent
If yes, relationship:WIFE,Juanita
NURSING ASF RECOVERY/DISCHARGE NOTE-T
Date &amp; Time Rec&quot;d PACU:--@:
Potential for increased anxiety related to knowledge deficit of procedure.
instructions.
ASF Follow-up Survey Note
Incision is c/d,   area of opening that is very superficial.  He is putting
- - - - - - - - - - - - - - - - - - - - - - - - - - - - - -
the extracted tooth or teeth.
. Unspecified deficiency anemia
D RYLAND some state
VARDENAFIL HCL MG TAB
DENTAL PROGRESS NOTE
PMH:
. Hydrocele NEC
. Knee: arthralgia *
( ) Appointment verified with Veteran.
his grandkids or his wife&quot;s grandkids.  I am not sure how long they have
AGGRAVATING FACTORS:Per patient, these factors make the pain worse:
Medications listed have been reconciled and reviewed with the patient.
LENGTH OF CALL  MIN.
-                  BEFORE SUPPER
MEDICATION LIST
. Neoplasm of uncertain behavior of skin
I took some extra pain pills at noon, and it only calmed my pain down a
MODE OF ARRIVAL: Ambulatory
denies chest pain, fever, c s, nvd.
Chest
. G.U. Dept @ VA Cincinnati consulted
Special Considerations:
for breakthrough pains
recs.  He will follow up with Urology in Cincinnati in a few  .
sugar  at this time
MEDICATION LIST
( ) Appointment information confirmed with sponsor or Group Home.
[-]Glaucoma    [-]Blindness   [-]Retinal
SECONDARY PAIN LOCATION:  Do you have pain in other locations?
INFOPRO /JOB#//jgXMT
Date &amp; Time of Contact: Sep ,@:
Allergies:  Patient has answered NKA
taking ii tab qh as i discuss with pt that likely is that he&quot;s having tolerance
Other history of contraindications?
TEACHING STRATEGY:
TIME
chronic pain tolerating med ok per pt with inc morphine mg bid per pt has not
-low likelihood that pt is having withdrawal symptoms from percocet as
ROSEMONT STREET
Best time to call:  any time
Patient has questions about the Herpes Virus
financial, pain:  No
cocaine dependence
APR ,
with his  biological and  step children, and reports a
. Informed consent was obtained at : PM on August , . The
SICK/URGENT APPOINTMENT REQUEST:
W. National Ave.
his personnal issues of finances and divorce - unable to talk about anything
of bupropion for smoking cessation.  Had scheduled visits with  physician nd
Flu Vaccine - PRIOR REFUSAL:
Document type: Report (Other): labs and vascular studies
.S P APNEA
PAST QUITE A BIT AND FEELS EVEN MORE DEPRESSED.NO SUICIDE ATTEMPTS BUT HAS S/I
A-Depression
Please be informed that this patient&quot;s record may be partially
but quick to become tangential during discussion at hand and had difficulty
System Recommendation: - hours
to complete aftercare/DC plan.
. Depression, NEC
Sent no show letter to patient. DATE: --
The current order is for Tdap in place of Tetanus TD
OF DUB AND RX SHOES. RELATES T-STRAP ADDED BUT HAS ISSUES WITH BRACE
SCAN VA CONSENT FORM 10-3203
Current Phone Number: --
Pulse:           (// :)
Pain Score:  (-)
Lab drug:
citalopram
S:   year old   MALE.
Age:
CITALOPRAM HYDROBROMIDE MG TAB                   A
he is a risk for himself and others. Spouse stated that
increasingly unsafe.  Increased fire-seeking behavior, burn  s on clothing,
PHARM. ANTICOAG INPATIENT NOTE
Date of event: DEC
Inpatient warfarin doses received: NONE
___Patient    ___Family       Physical limitations
# PROBLEM: Inability to maintain Safety as evidenced by poor impulse control,
Patient identification is confirmed by an accurate secured armband
Are restraints in use?
Mental Health Division
L       .-            |   *   |
than dementia.  Does not meet criteria for hospitalization on psych  .  Has
Enrolled in the anticoagulant clinic since: MAY ,
INR Range: .-.
Location: DENVER
match with the PT they remember. She contact the south surbuban  clinic and
,  T()                     TABLET STRENGTH: MG
Will he be kept inpt after and will he require LMWH post  surgery. Spoke with
MALE veteran.
Braden Scale - For Predicting Pressure Sore Risk
Are restraints in use?
EVALUATION-   was s ping at the beginning of the shift.  He was not noted
// : PLASM  . H
floater in right eye
Home (see physician discharge instructions).
OU  with tropicamide % and phenylepherine .%
Ext Exam/Lids &amp; Lashes:
Patient requested  wal of omeprazole. States that he
MH OP PSYCHIATRY ATTENDING NOTE
has had atypical chest pain in the past with his anxiety.  He currently denies
Height: . in [. cm] (// :)
he
Atypical Chest Pain
)   CLONAZEPAM MG TAB TAKE ONE TABLET BY MOUTH TWICE A    ACTIVE
NKA
Medical Illnesses:ACTIVE PROBLEM
Says he&quot;s had SI off and on for years.  He thinks of various means of doing
much improved. Helping with anxiety and racing  thoughts. No negative SEs
concerns about medication compliance and/or illicit substance use, and
Active Outpatient Medications                          Status
FOUR TIMES A
particular values. Others will be reviewed in future group sessions. Each vet
s/p CVA
,  J JR
Posture:good
appointments with hygiene or  physician  of to .  Scheduled
--------------------------------------------------------------------------
. The patient HAS decision-making capacity.
ADDENDUM
PATIENT AGE:
season in Vietnam and being shelled by enemy artillery.  Other
Lab drug:
and CHF.  MH Hx to follow in am.
MENTAL HEALTH HISTORY
withdrawal from alcohol. Reports mild headaches only when he stops drinking.
minimize his medical condition associated with alcohol abuse.
HGB                      .    g
Explain:DENIES AUDITORY OR VISUAL  UCINATIONS
On a scale of - how do you rate your primary pain?
Stressors
D Patient as p in bed during  min observation  .  Pt. did not get up
inhibitory and liver toxic agents. No need for further work up or interventions
(within   s): (For Mental Health)
Conversation with  ,  A has a chief complaint of: &lt;not
Contact Phone Number: ()-.
Protocol(s) used: &lt;Not identified&gt;.
MHC MENTAL HEALTH NOTE
Caller Response: OTHER.
Veteran Name:   A
MEDICATION REFILL REQUEST
The following identifiers were used to verify this patient:  SSN.
Protocol(s) used: &lt;Not identified&gt;.
Call Type: DTN CLINICAL INFORMATION.
to get to PT due to busy schedule. Agrees to continue with home care using moist
Medications:  Medication question:  Veteran is having outpatient MRI //@
much more she can take to tolerate it?  She will be home until  noon to
Respirations:  (// :)
,  A is assigned to Caller Area ANCHORAGE.
Height: . in [. cm] (// :)
Height: . in [. cm] (// :)
emergency.//vm
*** SC ED DOCUMENT ***
Weight: . lb [. kg] (// :)
ORTHOPEDIC CONSULT
Interventions for health promotion and disease prevention.
Recommended Follow-up location: Physician office
Pain scale:  (// :)
POLLEN
Pulse:  (// :)
Vet called and wishes to have prn Clonazepam reordered with this having been
Patient counseled regarding the risks and benefits of the influenza
BLOOD PRESSURE:/ (// :)
PHQ-
. Alcohol Dependence
Information obtained from:
Patient wants to obtain and maintain sobriety
with deaths of wife,sister &amp; father over several years &amp; now lives with  y/o
since.  He has been working in construction most of the t
DENTURES,UPPER      SOCKS
now started to drink again and came here for help. Vet&quot;s hygiene is gooe and is
CO Status
_____ Yes:  referred to
    </notes>
  </record>
</records>
