# Supplementary material for: Predicting the Risk of Suicide by Analyzing the Text of Clinical Notes
Source: PLoS One. 2014 Jan 28;9(1):e85733. doi: 10.1371/journal.pone.0085733 (PMC3904866; doi:10.1371/journal.pone.0085733)
Supplement: Appendix S3 — Machine Learning Libraries and Methods: This section is provided to enclose the open source (Apache License) classifier used for the building of the statistical models, specifically for the purposes of study reproducibility. A detailed account of these tools is intended for another publication. (ZIP) [file pone.0085733.s003.zip › Appendix3/ML_libs/Regression_testing/group3/grp3-pt-1089.xml.txt]

Pain Screening Characteristics unchanged:  No
ADD:
Neuro: Sensorium grossly intact: vibratory,  /dull, light touch, SW.
F|FGM|
CC: none
Pain: /
Bph
For the procedure, the patient lies flat on his back and receives an
document can be accessed through Vista Imaging.
Completed and copy in chart
PRE-OPERATIVE REQUIREMENTS:
answer period followed whereby the p
Current Medications Doucumented  : yes
CARDIAC:
PLT:            (// :)         (// :)
PREOPERATIVE DIAGNOSIS
Anesthesia Technique(s):
Position for comfort
Procedure: circumcision
pt, copy of instuctions given to pt, pt verbalized understanding.
OPERATIVE FINDINGS:
to the patient. The patient was reminded to discard old lists and to
ADDITIONAL COMMENTS/INFORMATION:
yrs. In the past  month Size has not changed"
S: Scheduled DERM clinic appointment for f/u of lupus alopecia.
-----------------------------------------------------------------------
OPTOMETRY CONSULT REPORT
Pt last seen @ VAPSHCS Eye clinic:VISIT #
and make appropriate referrals
appt to go speak w/ a career counselor.
Not Applicable
Dependence
by discussing the purpose of the Job Club and the expected outcomes of the club.
-Improve the patient&quot;s effectiveness in dealing with unexpected
. Lumbar strain.
Gender:  y/o male
a level of /.  He has not taken any specific meds for the back pain but he
helpful.  He has gone through PT, pain management, acupuncture, chiropractor but
minute medication management and psychotherapy--  y/o MALE seen
. Hearing loss * (ICD--CM .)                    //  GEESEY,YVONNE L
factors and  ral medical
Performance measures and labs were reviewed.
An alcohol screening test (AUDIT-C) was negative (score=).
PACT PRIMARY CARE CONSULT
Outpatient Medications                                 Status
. pt given lab slips and directions to lab for blood draw to
EDUCATION
[] Shoulder,
.  SATISFACTORY FOR INTERPRETATION.
B/P:   /
[]Lipoma
[] Silk tape, [] Soap
Prep Solution: [X] Betadine [] Hibiclens
Laboratory: SIERRA NEVADA HCS                         Accession No. CY-R
Patient did not show for her scheduled appointment.
ADDENDUM
ADDENDUM
on lower back.  Mildly tender to palpation.  No skin changes.
ADDENDUM
PAST MEDICAL HISTORY:   Please refer to previous consultation note.
[X] ID Band
Assessment:
Does the patient have any new allergies? No
Ending at: // @ :: PM
be made in Dermatology  Advised to follow-up with his PCP for any dermatology
. Practitioner obtaining consent:   evato,  J
PCMM Team: FIRM A (WH)
CONJUNCTIVA:CLEAR OU
MENTAL HEALTH ATTENDING PROGRESS NOTE
Dental Category: -CLASS IV.  Treatment Status: Active.
could come in at ~:am and that as a triage patient he would have to
DENTAL/ORAL - EXTRACTION OF TOOTH (TEETH) (EXTRACTION OF TOOTH
The patient reports service in Operation Iraqi Freedom.
-Trouble falling or staying as p, s
seen in my primary care clinic for the first time to . Recently moved to HI
Primary Care Check-In
affected areas for several minutes before rinsing away.  May alternate every -
[X] Medical  [ ] Surgical   [ ] Behavioral Health
vomiting and no headaches.  cm stab wound noted to right lower quadrant/flank
for about a month for tx of anxiety in high school. He denies excessive ETOH
Duration:  N/A
Radiation: N/A
ADDENDUM
Contact Phone Number: SAME.
Yes
(current) Use of antiplatelet/Antithromboti
makes him s py.  He says he would rather receive the medication you choose
evaluation here.
Patient denies presence of a febrile illness.
Assessment: Patient was measured for left large titued knee brace due to
duplicate note; please delete. bkh
legs.
Ambulatory with leg braces
Rx time =mins
application shoe lift LLE.
Amb std cane encouraged, upright standing
. Obstructive S p Apnea   physician  /
. Obesity
Pl ed procedure: Left TKA r ion
Contacted patient
. Rectal B ding (ICD--CM .)
MENTAL STATUS: alert
OPERATIVE DIAGNOSIS:    Instability of left total knee arthroplasty with
LOOSENING, INSTABILITY L TKA
Procedure: r ion left tka
CONSCIOUSNESS
New syringe was started.
Infection Potential (Skin):
NEED IDENTIFIED:  Infection Potential (Skin)
Upper extremities no weakness
Knee Joint Replacement
Foley catheter: yes
tolerated very well. States much better with less pain than previous L
SaO:
CARDIOVASCULAR SYSTEM:
. Obstructive S p Apnea   physician  /
Pulse:
Medications by injection:  No
fair
NURSING-ACTIVITIES OF DAILY LIVING
Both top side rails are raised.
DIP NOTE-INTEGRATED TEAM ROUNDS (CHILD NOTE)
SENSORNEUR HEAR LOSS
. S/P Knee Joint Replacement
. Hypertrophy (Benign) of Prostate (ICD--CM .)
d/c summary faxed to HH agency
Target Date: - months.
Adverse Reactions: ___________________ ,
he stated "I like the highs". He described spending $, on a stereo last
. Please read each item carefully and select the correct answer for
A. TOE NAIL CLIPPINGS
stimulant, but hasn&quot;t filled bupropion since June . Last filled citalopram
in -, and has    supply.  Will refill this via mail, and pt to contact
taking it for    consecutively.  Otherwise, he has no
Pain Screening Results:
Left second message. Vet and wife may be away. Will wait for their call back.
y/o male with suicidal ideation to . patient denies    specific
Source of information: Patient
Describe valuables kept at bedside: See Valuables Inventory Form.
Admission Date: Mar ,
the ED at . Pt is here for SI with vague plan to drive a car into a  .
Pt attended and participated in "Evening Wrap-up" group , dealing with issues of success, opportunity for
Next Plan of Care due: Apr ,
and signed for all personal belongings. Medications and medication instructions
Date of Discharge: Apr ,
Anxiety DO NOS , PTSD
hospital? No
Depression -- Pt feels symptoms have improved since discharge.  States that he
Work .) He plans to continue attending group as he is able.
,
PC PROVIDER: SAUNDERS,LINDSAY C
AUG ,@:  - MSS NEURO RES DRAKE
No resolution of tiny AK lower lip, Derm had done liq nitro.
encouraged to make the appt.
last Gout attack,  month ago, adds Colchicine temporarily
If yes, how much have you lost?   lbs
MOUTH EVERY   FOR BLOOD PRESSURE
number to verify his identity since SSA will not accept patient&quot;s photo id from
ADDENDUM
SEP , @::   .
Vet is tearful--he relates that he lost his wife of yrs wks
Xanax and says that he is taking - a   of this. He reports that he wants to
including IOP versus outpatient, grief support and treatment etc. Veteran agreed
===================
Training Aids:
( )Transparencies
(x)No Distress                  (x)Attentive
(XX )On
Will have Vet informed of this.
HELP WITH ALCOHOL WITHDRAWAL SYMPTOMS AND HE IS ALSO ON OOMG OF DEPAKOTE FOR
no answer. SW left message and call back number. He is scheduled with the MHC
(XX )Relapse Prevention           ( )Trauma
Training Aids:
(x)On Time
Dear Patient
Patient:       - --
No
provider immediately.
limiting his function.  He used to be more active and currently tries to
Kidney/Urinary Hi PSA, GU Looking
document can be accessed through Vista Imaging.
and other documents.
EKG in CPRS (vista imaging) or on chart
.      Antisocial personality.
ST=Stridulous
to get vaccine next flu season.
we need to order aquatic therapy for pt to take place in Bonham
PREVENTIVE HEALTH SCREENING NOTE
No
The patient states th
base.  Twelve biopsies were performed. Pathologically a Gleason grade  (+)
Radiation treatment details are documented in IMPAC.
Therapist will develop an individual/group exercise program prescription and
Plan: Continue radiation therapy as previously ordered.  The patient was
Pt was scheduled for an evaluation with  physician n //.
Assessment:  Stable
// @       BLOOD PRESSURE: /
OBJECTIVE:
* BACTERIOLOGY FINAL REPORT =&gt; Sep ,    TECH CODE:
TAKE ONE TABLET BY MOUTH EVERY MORNING AND TAKE  TABLETS AT BEDTIME
identified&gt;.
Active Outpatient Medications                          Status
questions .
MOUTH DAILY FOR HEART/ BLOOD PRESSURE
MOUTH DAILY FOR HEART/ BLOOD PRESSURE
pcp visit.
Latest home B/P: no log
PERSON(S) INSTRUCTED:
)   HYDROCHLOROTHIAZIDE MG TAB TAKE ONE TABLET BY MOUTH  ACTIVE
Sex: MALE  Age:
.
is a break in a pain contract and the patient should be taken off of controlled
Wt: . lb [. kg] (// :)
ADDENDUM
Phenobarb...Methadone was filled.
(Rotator cuff repair with acromioplasty)
Wound Classification: CLEAN
,   LIN is assigned to Caller Area *MOUNTAIN HOME.
Patient temporarily disabled from date of surgery // - //
SERVICE CONNECTED % -
[  ]    EXPLAINED AND COMPLETED WITH NO CONTRAST
Patient Race:
. CONSTIPATION, unspecified
TUBERCULOSIS SCREENING:
Patient is independant and ambulatory.
Y/O, ,MALE PATIENT
RESPIRATORY STATUS:
Patient dietary intake status
Objective:
Genitourinary:
NUTRITIONAL STATUS:
HX:  INPT. on C-; Hypothyroidism; Asthma; HTN; syncope; bronchitis/lung
CRNA PROGRESS NOTE
Rate:
IV Access: INT
TONIGHT, EVEN WHEN UP AMB IN ROOM.
A Discharge Order has been entered.
)   CLONAZEPAM MG TAB TAKE ONE TABLET BY MOUTH THREE      ACTIVE
Patient Level of Consciousness: Alert
OR FREQ.  His call back on my ori l script was  uary ,  since they are
Author:  E,SAMMIE
fluoroscopy (re
Protocol(s) used: &lt;Not identified&gt;.
Medications:  Please mail. Thanks
PLAN:
--
Protocol(s) used: &lt;Not identified&gt;.
chief complaint of: &lt;not identified&gt;.
Report:
epididymis measures . by . cm.  mm epididymal cyst is
Impression:
Minimal to mild bilateral hydroceles noted.
Age:   Sex: MALE
The following identifiers were used to verify this patient:  DOB. SSN.
program by WLA VA Homeless Screening Center on //, but he did not follow up
Light felt that he needed a higher level of care and veteran declined to go to
[ ][X][ ]Age: or &lt;
Veteran has a case manager.
. Lack of Housing                                    //   ,MARY T
Patient was a no-show in this clinic (specify):
a behavior contract where any subsequent relapse will result in patient being
DFE /
/
[  ] Other:
NO
YES
INFORMATION OBTAINED FROM:
PLAN: A positive, calm, safe, and therapeutic milieu.
measures to help improve coping skills.
. Locality: Lives within    or  minutes driving time of
Patient meets criteria?
Active Inpatient Medications (excluding Supplies):
Subjective: Notable improvement in mood once learned that he would in d be
Address:  CENTURY BLVD APT
GEC REFERRAL CARE RECOMMENDATION (MD,NP,PA)
Urinary catheter care:  No
RN NOTE
I:  Medications were administered as ordered, and monitored every  minutes for
INTERVENTION/PT. RESPONSE:  Group discussion.
[X][ ][ ]Employment problems
Active Outpatient Medications             Refills      Expiration
ADDENDUM
VALUABLES (MAOD/Vault, Patient Funds/Effects, Unit)
ATTENDING PSYCHIATRY ADMIT NOTE
Patient meets criteria? Not yet assessed
Height:  in. Stated (consistent with appearance)
Assist patent to identify personal triggers and precipitation factors.  Assist
I:  Patient monitored q  minutes for comfort and safety.  Patient encouraged
Patient did not keep appointment, did not speak to patient, left message for
those in which he would be exposed to unpredictable loud noises or uncontrolled
MH TRP TELEPHONE NOTE
yester  and he has been struggling to process his feelings. Pt was at work and
MH TRP TELEPHONE NOTE
denies alcohol
E MIMsome state
Cho ol:
// : PLASM
// : PLASM . --&gt;&gt;FINE!
TO ELIMINATE KNEE PAIN.
E MIMsome state
CA         .       .     mg/dL   . - .
KNEE.  NO EDEMA NOR BRUISING NOTED LEFT KNEE.  MEDIAL KNEE TENDERNESS
RNP/APN
This writer met with Mr.   on // to continue following up with
PULSE OX:
help.
VITAL SIGNS:
PRIMARY CARE NURSING TRIAGE:  OUTPATIENT/WALK-IN STATUS
OCT ,   FLU, YRS
classes at his   (Lifesource). Pt has no desire to cause no harm to
ADDENDUM
VITALS:
/ in his right arm. Repeated blood pressure rt. Arm in mins later is
time.
cc: Patient here for routine appt.
Tobacco cessation medication and treatment modality for smoking
As has been noted,  physician ssed this patient with me, and I agree with
. Date and nature of injury: October
process. He also has outstanding consults for Chiropractic and Prosthetic that
OUTPATIENT CASE MANAGER: Naomi
fentanyl patches don&quot;t work for him anyway and that he needs to get
he can&quot;t get his  shit together and listen to me, I swear I&quot;ll get a gun
MH INPT SECLUSION NOTE
Informed by nursing that pt requests Combivent, which he receives as an
Evaluation: Patient has been in bed during the morning.  He was changed from SP
NURSING NOTE
P: PTSD, safety, and chronic pain.
NURSING NOTE
NURSING NOTE
AST          H    IU/L    to
Has there been a FALL in the past  hours?
No
him to get out of beds and get his medications.  He told me he would not take
No.
Has there been a FALL in the past  hours?
prescribed.
Problem: S p Note
NURSING NOTE
intimidating other pts. in the milieu. Did eat lunch to  in the DR after
although maintains behavioral control.  Will hold CCRC later this afternoon,
irritable, entitled. angry affect. went to bed and appeared to s p after
I:      ASSESS MOOD, BEHAVIOR AND SAFETY. ENCOURAGE APPROPRIATE VENTILATION AND
He denies any subjective shortness of breath, but does have cough intermittantly
CHECKS Q MINS.; MONITORED PAIN LEVEL, MOOD AND BEHAVIOR.
MH INPT DC INSTRUCTION
BREATHING. SHAKE WELL. SPACE EACH INHALATION  MINUTE
Warning Signs:
Outstanding warrant - Denver County (Failure to Appear,  physician     Paraphernalia)
stress disorder secondary to military sexual trauma, substance
WC Management ():   min.
discharged."
. Chronic Pain Synd   No benzos from VA per psychiatry (See DC note /)
ED NURSING ASSESSMENT:
I: Pt has chronic pain, and is focused on it while here. He
y/o male. Pt was diagnosis w/ Pneumonia. Pt "passed out" yester .
NURSING NOTE
and wonders why we can&quot;t give him more pain medications. Pt does have a pain
WILDCATS - all areas MUST be completed for any reports of pain
P: impaired nutrition r/t emesis
.  Perform  sets (set consist of nares and any open wound) of cultures   s
antibiotics for  week it is OK to discontinue precautions.  Please notify
PROGRAM TRANSFER COORDINATOR
POST DISCHARGE TELEPHONE CONTACT NOTE (D)
Skin Color: Jaundice
OUTSIDE RECORDS SCANNED DOCUMENT (T)
because of his illegal substance abuse. I have sent him a letter regarding this
re: progress.
vet has come out of house, seen this writer for therapy, but vet continued to
hesitate to contact me or reach
ADDENDUM
Plan: Continue treatment per plan
Submitted travel request for / (spoke with Travel over the phone to correct
will not be re-evaluated for pain medication, and will not, under any
document can be accessed through Vista Imaging.
ADDENDUM
in ultrasound.
normal.
. Treatment/procedure: CATHETERIZATION AND INTERVENTION
Pain:  (// :)
Saline lock placed: Yes
Temperature:     . F [. C] (// :)
MEDICINE CLINIC RESIDENT NOTE
This pt is on our f/u list for a colonoscopy in May, .  He will receive an
appearance of lesion, it was thought that there was a less than % chance that
APPEARS TO BE FUNCTIONING WELL AT HOME, WORK (PART TIME), AND SCHOOL.
with the provider and noting the patient&quot;s responsibility for keeping
//
some state,
regarding the female problem, except for the dysmenorrhea .She had her IUD
GYNECOLOGY INFORMATION ARE AS FOLLOWS:
PC-MEDICATION RECONCILIATION: MEDICATIONS HAVE BEEN RECONCILED THIS DATE
Dear Ms.  SON,
right in my left ear". Reports tinnitus to left ear mostly especially when
.  When is your next appointment?
R:    (// :)
PATIENT TOLERATED WELL.
Conferred with  physician e will  w the above medications and have patient
)   CHOLECALCIFEROL UNIT TAB TAKE  TABLETS BY MOUTH    ACTIVE
Active and Recently Expired Outpatient Medications (including Supplies):
alb: cr &lt;
RENAL ATTENDING NOTE
AUTHOR: OLAFSSON,HARALD E    EXP COSIGNER:
No Diabetic Retinopathy
Pending Outpatient Medications                         Status
Vadnal who have prescribed benzotropine, cyproheptadine, olanzapine,
Male erectile disorder                  Chronic Kidney Disease, Unspecified
Congestive Heart Failure                Essential and other specified forms of
BY MOUTH TWICE A
Protocol(s) used: &lt;Not identified&gt;.
ADDENDUM
that Get in the Way of Achieving Your Goals
Session:
that Get in the Way of Achieving Your Goals
. Homework assigned was to complete the Safety Plan.
Reason for Visit: med eval
Rx  wed and mailed.
. Practice using problem solving, communication, &amp; assertiveness skills to
Mr.   reports that he is not feeling suicidal like he had been in the past.
different from him and to try and keep an open-mind during the
standing
for safety based on recent contacts and dicussion with L. Barett. Will follow-up
he does not wear pajamas and does not want to call for assistance under those
treatment goals.
MH MHICM-INTENSIVE CASE MANAGEMENT
reported being "under pressure" and reports this has been going on most
Any change from usual side effects:no
Subjective/Objective:
Active Outpatient Medications (including Supplies):
Reason for Visit:
to pt&quot;s brother,  , who is a psychiatrist locally, about his meds, will
reviewed. Patient informed of alternatives, risks and benefits. Agree with
NUR NURSING PRE-OP NOTE
Preop Mood:       ANXIOUS               Preop Consc:    ALERT-ORIENTED
Blood Administered:  Units.
and social security number.
Le e of Birch  Care Home called . @  to report fall for pt to .  Pt
Current Diagnosis: Schizophrenia
MH NO SHOW NOTE
MH MHICM-INTENSIVE CASE MANAGEMENT
Birthdate:  JUL ,
ADDENDUM
Problem # Thought Disorder-Met with veteran at Birch .  He is lying in
hours. Application on //.
would avoid social and volunteer situations d/t his fear that
O
MH MHICM-INTENSIVE CASE MANAGEMENT
MH GROUP NOTE
seeing him in the building  ier this morning.  It is likely that vet f
not feel emotions like others.  Educated veteran on the
pressure."  R
Outreach: Spoke with staff at Veteran&quot;s care home that reported veteran was seen
History (within
HPI/ROS:Pt is a  y/o male who comes in for f/u on probs listed below.  Lives
Patient goal for Hemoglobin Ac is less than .
Comment:
stated he has been told by  doctors that pt need back surgery. Pt denied SI/HI.
this pt FT eligible
Depression
Veteran can write.
EVERY MORNING
DAILY FOR STOOL SOFTENER
approximately  months ago.  The patient has recurring mass, left dorsal
. Surrogate (if applicable):
cool compresses to LUL
TOPIC(S) for which education was provided:
No
Her family history is significant for brain aneurysm in her mother and her
$TEXT
myopia, presby
PMH: HepC Depresiion HTN Polysubstance abuse
AXIS  IV: severe - Pt going through divorce proceedings
Subjective:
Fitting/Adjustments: adjust new glasses
Subjective:
TWICE A
PRIMARY CARE NP NOTE
S:  Patient is here for sick call appt. with complaint of painful blisters on
I wanted to update you on your recent lab results:
RPR QUAL(VDRL SERUM)  Nonreactive
// :
MH OP PSYCHOLOGY NOTE
AMLODIPINE BESYLATE MG TAB TAKE ONE-HALF TABLET BY   ACTIVE
EBL: &lt; mL
PREPUCE
interested in starting more medication at this time, feels his sxs do not
thinking more disorganized than usual.
(Power of Attorney).  She brought him here from his nursing home
PDX sent to transfer coordinator at MVA.
risk of loss of function and progression infection discussed. Pt still
Patient:  ,           Age:     Sex: M
Patient Address:
Abrasion/Laceration
none
BRIEF INSTRUCTION SUMMARY:
BP  / (// :)    HR   (// :)
is considered ok
MAJOR DIAGNOSIS:
Skin Diseases .
Requesting Provider:   CHEN,PENG MD
assistance of BROS.
Active Problems
subsequently lose his eyesight in bilateral eyes from this injury.  He was
provide veteran with supportive therapy. Veteran is victim of gunshot to car
READ AND RECORD PPD MISCELLANEOUS  READ AND RECORD PPD EXT  ACTIVE
Assistance provided for this task: set up assistance, physical assistance
EYE TECHNICIAN SCREENING
correction              correction                va        va
Allergies: see posting
(-) DM
Transfer: requires no assistance
encouragement or cueing
Ana  s, Victim Advocate for the PBC Public Safety Dept. #--.
conjunction with recent traumatic event. All pertinent information related to
increase his risk in handling flammable products? yes
Resident Id:                              CP Review
Number of bowel movements this shift: .
anxiously awaiting.He states "all I need is time to heal my body". Again he
Urine color:
Number of hours s ping
ZZECF PROGRESS NOTE
(-) Blindness
cueing, one person assist.
During this shift, the patient has been observed talking to others, approaching
)D/C scopolamine
adaptive skills within his living situation to enable him to function more
Breakfast       food %       drinks %
a. Primary reason for assessment
Number of bowel movements this shift: .
TIME OF THE   Evening Dec ,@:
Personal hygiene: bed/sponge bath
Tobacco Use Disorder, Continuous  .     //   SICHERER,BEVERLY C MD
This shift the patient used the .
MEDICAL CLERK
Cellulitis and abscess of finger  .    //   RANKINE,YANICK D ARNP
Amount of stool: none.
ELIMINATION
Other
No
NURSING NOTE
This shift the patient used the toilet.
Patient refused all  medications. Patient states" Vigamox eye drops are the
BOWEL ELIMINATION
Section AA - Identification Information
ACTIVITIES OF DAILY LIVING
Patient is continent.
POH:  (+)Trauma:  "He shot me through the windshield."
ACCEPTABLE LEVEL OF PAIN:
no C/O pain
Alert
Patient is continent.
Bed mobility: independent (easily turns and sits up without staff assistance)
BOWEL ELIMINATION
Consistency of stool: constipated.
Extra fluids were given.
PE:
BOWEL ELIMINATION
NUTRITION
This shift the patient used the toilet.
S PING PATTERN
Discussed future discharge pl ing goals with veteran. Prior to this
Breakfast  food % drinks %
veteran stated that victim svs dept will pay for an ALF.
Other personal care: shave, shampoo, oral care
BOWEL ELIMINATION
ACTIVITIES OF DAILY LIVING
This shift the patient used the toilet.
BOWEL ELIMINATION
Extra fluids  given.
location: resident room
During this shift, patient was continent
Not applicable for this shift.
This shift the patient used the toilet.
Consistency of stool: .
Tobacco Use Disorder, Continuous  .     //   SICHERER,BEVERLY C MD
//   //       /    /
During this shift, the patient has been observed smiling, talking to others.
location: resident room
Other personal care: oral care
Patient is continent.
*Veteran must bill insurance companies first, remaining expenses will be
Amount of stool: .
During this shift, patient was continent
Veteran was redirected and reminded that due to the fact that he declined BROS,
Assistance provided for this task: supervision, oversight, encouragement or
MOBILITY
skills to individuals who are blind. She does not however teach cane travel but,
Don will attend this meeting with his wife Joan Thurs , //.
Amount of stool: .
ZZPATIENT CARE ADL NOTE
Amount of stool: .
Urine color:
NUTRITION
Ambulation: requires no assistance
believes a h stic t .  Specifically, he believes that Western medicine does
of.
on all services offered, stating, "this is my house and I can do it myself." At
Breakfast  food % drinks %
Consistency of stool: not applicable.
Ambulation: uses manual wheelchair
TIME OF THE     Apr ,@:
Personal hygiene: not applicable this shift
BLADDER
Patient is continent.
Hip protectors in place:
Extra fluids  given.
During this shift, patient was continent
BOWEL ELIMINATION
physician s
During this shift, patient was continent
Amount consumed:
Swer will assist with admission as indicated and appropriate.
Assistance provided for this task: requires no assistance
Extra fluids  given.
Number of hours active
Hip protectors in place:
co-morbidities.
BLADDER
Patient bathroom privileges
No staff required.
Hip protectors in place: declined
Breakfast  food % drinks %
Tobacco Use Disorder, Continuous  .     //   SICHERER,BEVERLY C MD
STATE:             VA
provide all the support possible for the veteran as he makes this transition.
Amount of stool: .
) Medications: Senna, Docusate, Hyp llose &amp; Prednisone eye gtts
Put on socks and shoes
Assistance provided for this task: supervision, oversight, encouragement or
Number of hours awake
Number of hours napping
TIMES/  PRN
not have pent-up anger at those who "blinded" him;  however, he takes his anger
Assistance provided for this task: set up assistance
BOWEL ELIMINATION
MOBILITY
loss. Veteran was initially evaluated at Del  Medical Center and then
Problem: Deficit r/t knowledge and administration of medication.
No wounds, pressure ulcers or other skin problems.
Pl ed Action: Improves skills and knowledge for adapting to low
dining room is expected in blind rehab.  I led him to the dining room using
refused to have his Blood Pressure taken. Refused to take his medication (an
Number of LS sessions provided:
Call-back from Patient Funds- there is NO record of Mr.   having any
stated that he "did not want to listen to all of their talking"."It&quot;s all
modified independence.
Plan: Continue Training with OCR.
Session:
refused. After long discussion and excuses, student final did take  a shower and
also demonstrated the ability to shut-down the machine with moderate instructor
ADDENDUM
is twice as difficult to learn about new, innovative devices that assist the
ADDENDUM
Total sessions to date:
Intervention:  Encourage Blind Rehab student to verbalize
ADDENDUM
LS Sessions Requested:
Estimated additional time from this date to complete to complete Manual
The PT has know goals.
Time: : :
on Tues , during the next LS session.
Buttons
home.
was looking for  to home visit scheduled for //.  Veteran added he hoped
behavior characterized by no a
Veteran able to identify drop off areas with long cane.
Number of sessions provided:
June ,
Time: : :
when smoking due to possibility o
Total sessions to date:
He walked around the block, he did not want instruction regarding veer
Orientation and mobility
Progress: Mr. Barrata practiced cane skills to Fisher House.
Orientation and mobility
Brush Teeth
Adaptive Devices:
take Mr.   to Bascom-Palmer tomorrow, Thurs , June , .
BRC OPTOMETRY
continue to provide therapeutic recreation support as needed.
June th,
Dialysis (center based):  No
Bathing (tub bath, shower, or sponge)-YES
detection button  ed with a locator dot. Mr.   was able to identify /
However, still exhibiting signs of n
that you can keep going long after you can&quot;t;" "I&quot;ve learned that we are
PATIENT PARTICIPATED IN QUESTION AND ANSWER PERIOD:  Yes
Stage command - /
been seen in various areas of the hospital going out with other veterans for
Writer went to see Mr.   who was in his room with Mr. Fernando from Heart
is being discharged home to  as pl ed
I have reviewed these instructions and provided a
are indep. with added care to carry out
HBPC INITIAL PHARMACY REVIEW
COMPREHENSION:  Good
development of environment and use of strategies to reduce stress.
state, as he has in the past, that he would starve himself.
out of her Office until Mon , August , .  Her Office will have her call
Yes
EYE1 CONSULT (BP)
PMHX:
Veteran acknowledged that depression was evident in his life before he lost his
*
=========================
year? Monthly or less
Active Inpatient and Outpatient Medications (including Supplies):
NUTRITION CLINIC CONSULT
MHC PSYCHOTHERAPY
IOP @ : p.m.
For use by MD, ARNP, or PA
ADDENDUM
no present SI, he has had thoughts of SI within the last  months and has a
services outside the VA, but would like to go ahead and get enrolled at the
VA. Pt requesting mammogram be scheduled // to coordinate with other
I am a staff physician who is providing care for this patient.
Education provided to veteran and/or family member/significant other
No
has been mailed via the U.S. Postal Service on Aug ,.
WEIGHT:  . lb [. kg] (// :)
BP:  / (// :)
Pain:   (// :)
Past social/family history
. Anxiety
ADDENDUM
Procedure: EGD/Colonoscopy
. Anatomical Location: See description of treatment/procedure.
Screening for Alcoh sm (ICD--CM  // MADDOX,D IE L
Pain score is greater than comfort goal.
* Strain all urine for  s.
MO
MR   DID NOT CANCEL AND DID NOT SHOW FOR SCHEDULED APPOINTMENT. LETTER
F C ACID TAB
-ALBUTEROL HFA INHALER
The patient does not have any patches on the skin.
I.  Advance Directives:
Period of Service : VIETNAM ERA
assurance.
q vitals for  minutes.  Call POD if BP &gt;/ or pulse greater than  or
MHC PROGRESS NOTE
ADDENDUM
PPI, No c,c,e, Skin: No rashes
Rated Dissabil    :   NO RATED DISABILITY
However, sitter stated he had this when she came in last evening prior to
&gt;&gt;&gt; Anxious, Irritable
encouraged to verbalize feelings to staff.Support and encouragement offered.
Home/Outpatient Medications not continued for Outpatient use
Home/Outpatient Medications not continued for Outpatient use
Family Hx: Mother: EtOH dependance
supination.
Discuss signs/symptoms of potential problems
ESI Level:  Level
MEDICATION RECONCILIATION ADMISSION
PHARMACY GENERAL NOTE
The patient does not have any spinal cord injury, paralysis or neurologic
&gt;&gt;&gt; Verbal
Duration:
R: Continue to encourage compliance with the treatment plan.
. Nausea and Vomiting:  Ask:  "Do you feel sick to your stomach?   Have you
LIVING SITUATION NOR ABLE TO PARTICIPATE IN NECESSARY TREATMENTS WITHOUT
I.  Advance Directives:
Rights and Responsibilities were reviewed with veteran.  He/She
appropriately with peers and staff memebers ... played cards, watched tel ion
===============================================
Current Outpatient Medication List as of: // :: PM
A:.Staff will continue to monitor pt routinely for location and behavior.Safety
Relationship      : NONE
stigma, narrow focus, and neglect of other important areas of life. Recovery was
suicidal or homicidal thought, intent, or plan.  Denies any type of
PSYCHIATRIC DIAGNOSIS: Alcohol dependence, Bipolar disorder
employ to promote self-control over smoking. Veteran was provided with
PULSE OX  (// :)
PSxH:   Surgery: none
Wound -location, type, description
No nausea and no vomiting. ()
OTHER                                 :
Chaplain:  Pierce
L
THE   FOCUSED ON HUMOR AS A FORM OF THEROPY. PATIENT WAS INSTRUCTED ON THE
.
Gender            : MALE
requests to leave as soon as possible. Veteran informs he will F/U with OSAC and
Active Outpatient Medications (including Supplies):
NURSING NOTE
This outside consult can be viewed in sc ed medical records.
NURSING GROUP NOTE
F C ACID MG TAB   Sig: TAKE ONE TABLET BY MOUTH EVERY   FOR VITAMIN
Cover Sheet)
Chief Complaint/Reason for Admission:  shortness of breath
NICOTINE TRANSDERMAL PATCH PATCH
Pain assessment score is .
URINARY ELIMINATION:
PAIN                :
DOES PATIENT HAVE A PRIMARY CARE PROVIDER AT THE VA? YES, Specify:
Procedure: Site Check, Restart, Removed
Other:
Advised to call staff as needed for assistance
None
LEVOTHYROXINE TAB
A/P:
Bed in low position
Patient Identification :  Name, Social Security Number
Respiration:  (// :)
Measurement DT    POx
HEPARIN INJ,SOLN  UNT/ML SQ QH FOR DVT PROPHYLAXIS    ACTIVE
Treatments:   Volume Nebulizer
Gait:    distance:  feet
O@  LPM with exercise of:  %
ATTENDING PHYSICIAN PROGRESS NOTE
//  PCO @            .
Motivation to learn:
Nursing Care Plan
Breath Sounds: Diminished
Independent
None
Modality:  Nasal C ula
O@  LPM with exercise of:  %
exertion. Will arrange home O with SW, continue bronchodilators (COPD
GOAL(S):  resolved
Teaching Topic(s):
SKIN THREE TIMES A   AS NEEDED FOR WOUND CARE
The outside consult can be viewed in Vista Imaging.
Active Outpatient Medications                          Status
)   IODOFORM GAUZE PACKING STRIP / INCH APPLY  GUAZE    ACTIVE
Patient&quot;s case reviewed and discussed with the resident immediately
Pain:
like to have removed.
Pt with Hx of Mycosis  oides (),and chronic Dermatitis of the lower
F/up Derm c
NURSING NOTE
PSYCHIATRY GENERAL NOTE
Motivation to learn:
&gt;&gt;&gt; Motivated
REMINDED HIM THAT A LETTER FROM VOA STATING HOGAR IS TRANSITIONAL HOUSING
PAIN. DO NOT EXCEED  PRESCRIBED DOSAGE.
SAT - %     (ROOM AIR)
Teaching Topic(s):
HE HAS BEEN RIDING HIS BICYCLE AND REDUCING HIS EATING. HE REPORTS LOSING SOME
No
Myofascial Pain Synd s (ICD--CM .Hip Pain (ICD--CM .)
Active Outpatient Medications (including Supplies):
(D) Resin one surface-anterior: (F)
Mr.   called and left a message stating that he was "sick" and could not
-RTC - months with Left hip pcx for reevaluation.
therapy appointment on // at pm. Mr.   was encouraged to practice
Veteran called and stated that he would not be able to attend individual therapy
Depression, NOS                         Schizophrenia, NOS, Chronic
MH INTERIM NOTE
Active Outpatient Medications                          Status
Identified problem: OTHER UNSPECIFIED COUNSELING.
,
Highest Comfort Level is
Myofascial Pain Synd s (ICD--CM .)
problems he can call the clinic or come to the clinic as a walkin.  Pt.
SEP ,@:  LAB FASTING
by: tizzano,  jr.
The patient does not have any patches on the skin.
EVERY   WITH STRIPS FOR TESTING BLOOD GLUCOSE
Currently on parole in mandated drug program.  Pt reports that he has  rally
Height:   in [. cm] (// :)
Inpatient Rehabilitation Education     N/A                    //
Resp:   (// :)
NA NOTE [NA NURSING ACTIVITY]
Admission Date: FEB , Admission Dx: SCHIZOAFFECTIVE DISORDER
that the last time they were this bad he eventually became "paralyzed" in fear.
worried about his parole but we contacted his PO and informed he is in
agitation
Oriented to oriented to person, place and time Alert and Responsive,
MH HUD-VASH-NOTE
*************************************************************** At time of
to know about the fate of his voucher.)
since tha
PATIENT CHECK OUT NOTE-T
The patient was informed of the risks and benefits of making impressions prior
Quantity:
night. Patient is advised to use as directed and will return in two
V-Influenza Immuni
Called veteran to set up an appointment left message for him to call on his
10-10M VA FORM TRIAGE
Date of Birth:  DEC ,
Telephone contact made to   in regards to
Colonoscopy exam. Patient was told that this appointment is necessary
S:  Pt rated pain at / to .
On NSAIDS                            Yes // Comments:
PATIENT ED TO
*  TIMEFRAME FOR COMPLETION: Immediate
Correct surgical site  ed by provider with patient involvement
NURSING DISCHARGE NOTE
N: ID Screen / Influenza:
,  T       MALE   yrs,
bp meds for the Diabetes Research Study because he was being followed closely by
. Nonspecific abnormal results of function study of thyroid
Does patient have latex allergy or sensitivity?
and shaking her foot.  He reported that he has never felt this angry
stress.  Veteran thanked me for my time and call was terminated.
Veteran cancelled
assistance with some anger issues.  Was very candid in talking about calling for
Blood Pressure:  / (// :) large cuff
BMI:             .
)   ACCU-CHEK COMFORT CV(GLUCOSE) TEST STRIP  STRIP FOR   ACTIVE
Veteran called Diabetes Case Manager to report that he could not tolerate the
Patient contact
Reason for Contact: Pt requests concerned that he is experiencing a side effect
Over the Counter/Herbal Medications:
is a  year old MALE with the following Chief complaint:
. Foot Pain
Date of Last Evaluation: // L
One Veterans  physician p s, MN                           Mar ,
MOUTH FOUR TIMES A   AS NEEDED FOR BREATHING ***SHAKE
Clinician who is requesting consult: Chaitanya Anand
Somatization Disorder                   HYPERTENSION
Visit: S: Jun , @: DENTAL ORAL SURG.
. HYPERCHO OLEMIA
DIABETIC TELERETINAL IMAGING CONSULT
Pt. agreed to trial of Seroquel.
ADDENDUM
in his ex sister in law basement. Lost everything including his medications.
) Patient encouraged to use his/her stronger side when possible.
Veteran has been unable to keep Mental Health appointments for one or more
intermittent numbness of the toes and fingers, shoulder/chest cramping which
Patient is a  yo presents stating he may have taken and extra lithium tablet
was fully alert through
walking up to - hrs most  s
MCV: .  L
RDW: .  H
the program and was not sure he could do it.  Mr.  s came in and talked
Client signed into the   Treatment Center for the purpose of attending
systems that are conducive to recovery lifestyle.
interests; encourage wellness through medication, educat
-Born and raised in: Memphis,TN
not liking him in MHC and in the   Treatmen Program."  He also expressed
VETERAN PRESENT?    [x]YES    [ ]NO
systems that are conducive to recovery lifestyle.
[ ]Health &amp; Wellness  (/ min)
Participation Level/Participation Quality:  _x__Active/Eager     ___Variable
Maxine Anderson, Chaplain Resident
Visit: // :
didactic and therapeutic groups designed to increase knowledge of mental
did client engage in groups/activities: appropriately
systems that are conducive to recovery lifestyle.
R. Baker, LCSW
Patient said his appt. was on yester , so to  he is unscheduled and received
this morning.  Next appt. in MHC-C in   , Aug.th.
[x]Hopes &amp;  physician in)
DTC PROGRAM CLINIC
Age:
TREATMENT CENTER DAILY NOTE:
continues to get Haldol injections every  wks
Spending more time with wife-she smokes
. Hypercho olemia *
ADDENDUM
Level of Understanding: Good
from Vietnam.
Chief Complaint:  Veteran seen to  to have paperwork completed, for US
SUBJECTIVE: Condition is getting Same
BACK/NECK PAIN:
Patient verbalized understanding.
MOUTH TWICE A   TO
Active Outpatient Medications (including Supplies):
glasses/contacts will be based upon the assessment by the optometrist):
MOUTH THREE TIMES A
DAILY
TWICE A   FOR MUSCLE RELAXATION
seen in October .  Patient says he is doing all right.  The son
their blood pressure reading.
Active Outpatient Medications                          Status
Cognitive/Memory
patient to review the advance directive.
Active Outpatient Medications (including Supplies):
Active Outpatient Medications                          Status
Col
// :  SERUM      PSA                  .    ng/mL         -
"        "       "        PSA, FREE            canc    ng/mL          -
Clinical impression :  _x_ stable  __ anxious  __ depressed  __ angry
Can Verbalize
Pl ed Procedures:
Patient Name:  ER,  E, DOB: //, Age:
CARDIOLOGY CLINIC NOTE
AND MG OTHER   S.
negative impact o
. AORTIC VALVE DISORDER
None
NURSING SPECIALTY CLINIC NOTE
Service: Unknown
How does patient like to learn?  Listening, Reading
NEXT WEEK FOR UDS.
PAIN CONTRACT-T
- Wart removal
.  RN/LPN will provide pre and post procedure instructions and will be
**************************************************************************
Complications: none
Physical/cognitive limitations:  No
OUTCOME/COMMENTS:DECREASED ANXIETY
None
results of any tests?
HE WAS ADVISED TO GO TO ER IF HE DEVELOPES HA OR FEELS BAD.
Frame name (&amp; company): H-
. Posttraumatic Stress Disorder *
.  When is your next appointment?
( ) Left message on answering machine  in regards to upcoming appts.
Patient apparently goes to Florida by himself for the winter, leaving
Allergy/Reaction: CYCLOBENZAPRINE
see progress notes
granulation tissue, slight area of  yellow in center. Epithelization around
for plan in future also.  Patient to provide blood sugar readings.  Exam
LENGTH OF CALL  MIN.
PHYSICAL EXAMINATION:  He is a fairly nourished and developed male in no
*****  REQUIRED  UAL PATIENT EDUCATION NOTE *****
SEE DICTATED NOTE _x__
gaol(s)  _x__ see dictated note
Patient agreement: Yes
BLOOD PRESSURE:/ (// :)
denies chest pain, fever, c s, nvd.
HAT                 THERMAL TOP
. DIABETES MELLI W/O COMP TYP I
Admitted to CD, alert and oriented x with complaints of right shoulder and
times to use the restroom during the night.  Call light in reach will continue
to monitor.
PMH:
-Dental:  Natural teeth
PT. RESTING QUIETLY IN BED WATCHING TEL ION.  ALERT AND ORIENTED X.  SKIN
PATIENT REPORTS OVERALL SATISFACTION WITH PAIN MANAGEMENT AS Good.
C.T. ABD/ PELVIS WITH
Active Outpatient Medications                          Status
( ) Appointment information confirmed with family member.
( ) No phone number listed for veteran, or number has been disconnected.
to schedule PCP appt.
He states he has been &quot;not taking them as prescribed and
Primary Care Call Center
OXYCODONE MG/ACETAMINOPHEN MG TAB
Influenza vaccine, .ml given in Left Deltoid.  Vaccine
Not at all
MEDICINE CLINIC STAFF NOTE
Outpatient Medications                                 Status
letter to roi.  pt requesting don&quot;t mail letter but have letter fax to his
ADDENDUM
AF VSS
Temp:   . F [. C] (// :)
TWICE A
Regular Meds:
Azithromycin g PO @ .
Speech: fluent
DSM-IV PTSD Criteria C IS met
REVIEWED MEDICAL HX, SURGICAL HX AND PHARMACY PROFILE
TELEHEALTHCARE (S)
Recommended Follow-up location: Clinic
out "at gunpoint" and he  still c ot believe this.  Pt reports that he
Tobacco
over and over, resisting redirection.  Mother&quot;s concerns are that vet&quot;s finances
interested.
Vet is living in Genoa City and travel will be a hardship on vets mother.
appreciative.
savings. He continually bl  himself for not doing things differently. He says
His mother reports that he has the option of living with his brother who will be
admits to past s/i, no attempts.  Pt. denies current   s/i. Pt. denies past or
Current allergy list reviewed with Patient, no new allergy/ADR reported.
B/P: /
[A]     Adjusment Disorder w/mixed anxiety and depressed mood
Finances:
Despite discussion of importance of monitoring grpoups, and vet&quot;s physical
Vet presented to writer @ : on // to report he would be discharging
ALLERGIES : CHLORAMPHENICOL
DSHI Disposition Report
extension. She stated he had been there
)   LEVOTHYROXINE NA (SYNTHROID) .MG TAB TAKE ONE        ACTIVE
he should do now.  Pt would like to  move to NC with his brother but has
PODIATRY OUTPT STAFF F/U NOTE [DT/T]
The following types of documents have been sc ed and are attached to
lower back, bilat wrists, bilat knees
of the screen.
diagnosis.  Currently mood is calm and pleasant.  No suicidal nor homocidal
CHIEF COMPLAINT:  "the medications don&quot;t work as well as they did before"
Diagnosis: Atrial Fibrillation
RISPERIDONE MG TAB                                ACTIVE
Results obtained:  Dec ,
NEUROLOGY FOLLOW UP CLINIC NOTE (B)
Patient called family to see him who states that he was s ling his gait (new
REVIEW OF MEDICAL RECORDS
A: w       DIPHENHYDRAMINE HCL MG CAP              A    --
cognitive and behavioral decline setting fire in the house, burning clothes/
SKIN PATCHES
*** SC ED DOCUMENT ***
unit.
Two previous psych and one neuro hospitalizations.  Followed by neuro.
the pt.  She is feeling the burden and stress of caring for her husband as well
-
_x__Patient    ___Family       No factors/No change
Method: []Verbal    [x]Handout     []Audiovisual    []Class
Are restraints in use?
gets depends from nursing staff and when he does have an accident (which this
and change himself. Pt took his medicine without issue h
-
PHARM. ANTICOAG INPATIENT NOTE
YES
Type of Discharge: Regular
Patient was discharged prior to participating in scheduled OT assessment on
Diagnosis: Atrial Fibrillation
Anticoagulant Clinic Re --Date/Time: JUL ,@:
over his child&quot;s head when his son is s ping.  He will also leave bed in the
Patient was admitted on Sep , at  via ambulation
Color:  Normal for ethnic group
No.
hospital.
No.
h/o atypical chest pain--is taking  mg ecasa daily.
that he has only - pills left. Would like to p/u
screen for depression.
COMMENTS: HL DCD intact.
lasted
You were seen and evaluated in the Emergency Department for: Chest Pain
Impression:
JUN , @:   Clinic:   GPC/IDA FOSTER/MD (F/U)
Caller&quot;s name if not the veteran:
were reviewed.
)   ACET
% service connected for this condition.  He is late for his appointment and is
----------------------------
A:  Major Depressive Disorder.  Medication compliant.  Good insight into his
Dear Mr.  ,
This is a results letter. You recently completed a  MRI of the cervical spine
PERIARTICULAR STRUCTURE
keep
combat, casualties, and feeling helpless.  All group members participated in supporting eachother to
V-INFLUENZA -:
coming to TRP and receiving treatment. All patients provided supportive
Facilitators: Butt, McVeigh
sign, ABC, and  p breathing to assist him. Patient was active participant in
P:   (// :)
BMI: BODY MASS INDEX
ral Appearance:  Well developed, well nourished patient
HEENT Exam:  Normocephalic;
Mundy Mill Road
question arthritis
DENTAL SUMMARY
(D) Extraction erupted tooth/exr:
heavy ETOH use. Feeling some relief with decreased ETOH.  Reports that he smokes
Last Formal Pain Assessment appointment:
Patient Age:         Patient Sex:  MALE
Weight . lb [. kg] (// :) Height  in [. cm]
Current Vital signs: Ht:  in [. cm] (// :)
No
Ascites (ICD--CM .)
Chest Movement: Symmetrical
discomfert.appetite good.no alcohol withdrawal symptoms noted.denies suicidal
followed by a big sigh.  I again tried to reassure him that this is normal as
Judgment/insight: intact
Social;  Married/Divorced x  and no kids.  Last steady job
and plan for the management of alcoh c hepatitis outlined in his note.  No
PSYCHOLOGICAL
PAIN ASSESSMENT
suicidal/homicidal ideation.
inhibitory and liver toxic agents. No need for further work up or interventions
*** SC ED DOCUMENT ***
IMMUNIZATION &amp;/OR SKIN TEST
NUR NURSING NOTE
Facility Appointed PCP: LACY,  J DO (ANCHORAGE PC I)
UNTIL TOMORROW, AFTER PROVIDER REVIEW&quot;S RESULTS. SHE WOULD LIKE A DIFFERENT
joint porcedure is done.
by: WENDY J LEVESQUE
Length:  minutes.
ongoing pain  acros
by: MARCIA G BELLO
last pap smear  wnl, mamms neg.
YESTER  AND TRIED THE TECHNIQUE OF SHORTENING HER STRIDE WHICH RELIEVED HER
No Associate Provider Identified
Caller Response: APPT NEXT WEEK.
Facility Appointed PCP: LACY,  J DO (ANCHORAGE PC I)
by:   M MORRISON
,  A is assigned to Caller Area ANCHORAGE.
Author: MACKIE,RYAN E
Identified problem: OTHER UNSPECIFIED COUNSELING.
A Comprehensive Pain Assessment is needed for effective pain management.
Comment: Pt. encouraged to talk with friends and family.
APR , @::   .
Contact Phone Number: ()-.
patient.
Temp.: . F [. C] (// :)
Starting at: // @ :: AM
P: Will alert  physician r any action he may  m appropriate for above
Phone contact attempted and failed to reach vet.
A Comprehensive Pain Assessment is needed for effective pain management.
gait, left knee swollen, moderate effusion, ROM --* while right is -*.
Pulse:  (// :)
Caller Response: APPT SAME  .
friend here and living with her at this time.
A Comprehensive Pain Assessment is needed for effective pain management.
TOBACCO, COPD, LIPIDS, HYPOTHYROID,DEPRESSION, REFLUX, BARRETTS, HTN, ETOH
Blood Pressure: / (// :)
Social History:
ALCOHOL? (+) Alcohol use &gt;/ . Past heavy drinker.
. Reiter&quot;s Synd  or Reactive Arthritis
Home with family/significant other.
Substance abuse/dependence
Goal:  Will be safely detoxed.
Vet participated in group and was oriented to the   rules.
following diagnosis/diagnoses and problems: Alcohol dependency
Patient wants to obtain and maintain sobriety
a. Discussed the following strategies with patient to
large amounts of beer on a daily basis for the last one week prior to
    
