# Supplementary material for: Predicting the Risk of Suicide by Analyzing the Text of Clinical Notes
Source: PLoS One. 2014 Jan 28;9(1):e85733. doi: 10.1371/journal.pone.0085733 (PMC3904866; doi:10.1371/journal.pone.0085733)
Supplement: Appendix S3 — Machine Learning Libraries and Methods: This section is provided to enclose the open source (Apache License) classifier used for the building of the statistical models, specifically for the purposes of study reproducibility. A detailed account of these tools is intended for another publication. (ZIP) [file pone.0085733.s003.zip › Appendix3/ML_libs/Regression_testing/group3/processed/grp3-pt-1004.dat]

!  Done reading
! Total word count = 6528
! Total unique words = 2154
! Total pair count = 13052
! Total unique pairs = 11077
PASSED : 1
AT : 36
AMALGAM : 1
ADL : 4
ZZPATIENT : 4
PALPITATIONS : 1
CRC : 1
WORK : 3
PREOP : 8
WING : 1
VOICES : 3
LOWER : 4
WEIGHT : 8
PORTIONS : 1
GAS : 1
OINT : 1
CABINSOME : 1
MILD : 5
TREATMENTS : 1
MINUTE : 3
PREFERS : 2
INSTRUCTED : 3
MILITARY : 2
COUNSELING : 2
HAIR : 1
USE : 17
ARTHRALGIA : 1
PRIVILEGES : 2
EMILY : 1
POSTPROCEDURE : 1
DISCHARGED : 2
BEN : 1
SUPPLIES : 3
SECURITY : 2
VETERANS : 7
XACTIVE : 1
LEVEL : 3
ALCOHOL : 3
CHANGES : 1
INABILITY : 1
FAX : 1
YOUVE : 1
IMPORTANCE : 1
AHEAD : 2
OM : 3
SHOULDER : 3
MET : 3
MACHINE : 1
COPD : 2
MEAL : 5
ACCEPTANCE : 1
GENITOURINARY : 2
MAX : 1
HAIRBRUSHES : 1
REMOVED : 1
SCRUBS : 1
APPROPRIATE : 3
BLIND : 3
WKS : 1
APPROACHING : 1
SARAH : 2
WELL : 4
TEST : 3
NOTE : 44
LDL : 2
DO : 7
DOES : 4
TESTS : 2
UNDERSTANDS : 1
RESOURCE : 1
RECIVED : 1
HTN : 1
SAME : 4
ACCESS : 1
ADVERSE : 2
SPMI : 1
SCHEDULED : 7
ASK : 3
ANCHORAGE : 2
INFUSION : 1
TAB : 9
REACHED : 1
ASSISTED : 1
STABLE : 2
REQUIRED : 5
MONITOR : 2
DEC : 2
HAS : 44
FOR : 100
BUSPIRONE : 1
PERCEPTION : 1
CONDITION : 2
ARNP : 1
NUTRITION : 4
CLC : 3
PATPU : 1
HOMELESS : 1
MODALITY : 1
MORNING : 1
INR : 3
KNEE : 7
CPS : 1
HESITANCY : 1
SC : 4
RANGING : 1
LEGAL : 1
IDEATION : 2
MUST : 1
LLI : 1
ROUTES : 1
SATURATION : 1
GEN : 2
FLARE : 1
RESPIRATORY : 6
AIT : 1
ACTIVITY : 4
WISHES : 2
HISPANIC : 1
EVIDENCE : 1
ND : 1
VEIN : 1
DISTRIBUTION : 1
CONNECTIVE : 1
PREVIOUSLY : 2
DEGREES : 1
REFERENCE : 1
EXAM : 4
INFECTION : 2
RECENTLY : 1
VISIBLE : 1
DERM : 2
ATTEMPTS : 1
INCREASED : 1
DURATION : 1
ARTILLERY : 1
OCT : 1
AUDITORY : 2
ANGIO : 1
GO : 4
SIGNIFICANT : 3
SPLITTING : 1
WIDE : 1
BOWEL : 14
DEVIATIONS : 1
ETIOL : 1
BP : 3
WRITTER : 1
HEARD : 1
POST : 2
PREVENTION : 2
DEPRESSION : 2
STRESSFUL : 1
WHISPERS : 1
INHAL : 1
CM : 6
CLINICIANS : 1
PERMANEN : 1
AGREEMENT : 1
CITALOPRAM : 3
DESCRIBE : 1
EVER : 1
DECOMPENSATION : 1
NARC : 1
KSBURG : 1
LATE : 1
ATTEND : 2
FINANCES : 2
PLEURITIS : 1
MEETS : 1
WT : 2
PKS : 1
PARTIAL : 1
STARTED : 2
LIT : 1
COMPOSURE : 1
FEEDING : 3
SCANNED : 1
OR : 36
THERAPEUTIC : 3
SHIFT : 18
BOTH : 2
CITY : 1
TEMP : 1
CLEARLEFT : 1
GUNSHOT : 1
PULMONARY : 1
CONCERNS : 3
PHOS : 1
QUADRANT : 1
AIR : 1
LOOKS : 1
STREAM : 1
LIKE : 7
FUP : 1
FEBRUARY : 1
TRAINING : 4
CHRONIC : 7
RELAPSE : 1
ANKLE : 1
TAKE : 10
INCREASE : 6
WITHDRAWAL : 1
MONITORED : 1
LAUNDRY : 1
OD : 2
SW : 3
ADMITS : 1
MOODS : 1
SPOKEN : 1
STENTOR : 1
GLA : 1
LIMO : 1
UNIT : 5
THINK : 1
PROCEED : 1
MD : 6
INTERVAL : 2
NAME : 9
IMPLEMENT : 1
CARE : 22
AGE : 2
EVALUATE : 1
RATED : 2
TIMES : 12
IS : 57
DICT : 1
DL : 1
SCHOOL : 2
WORST : 1
BENEFIT : 1
FLUIDS : 2
START : 3
IF : 14
NODULE : 1
USER : 1
NOR : 1
MH : 8
PENDING : 2
BAND : 1
CANCELLED : 4
EXEMPT : 1
RELAY : 1
TROUSERS : 1
SKILLS : 5
COMPREHENSION : 1
RATING : 1
OXIMETRY : 1
EVALUATION : 3
CONTRAINDICATIONS : 1
RHYTHM : 1
REFUSED : 1
REHAB : 3
HP : 2
THESE : 2
VISION : 5
CUTTER : 2
COMMANDS : 2
DROP : 3
SUP : 1
RULES : 1
REPORTING : 2
PARTICIPATION : 3
EDUCATED : 1
ESSENTIAL : 1
DILATED : 1
TRANSPORTATION : 2
HEIGHT : 3
ADDENDUM : 17
FULL : 3
BMS : 1
ECONOMIC : 3
NO : 60
RELAXATION : 2
INTENSITY : 2
CONSCIOUSNESS : 1
HEMOGLOBIN : 1
CHIEF : 4
VEHICLE : 1
CNA : 1
RESCUE : 1
CONVERSE : 1
BENIGN : 1
RISK : 6
CLINIC : 19
BUILDING : 1
PRACTICE : 1
INITIALLY : 1
MINS : 1
EF : 2
BMI : 1
PRN : 3
NOTET : 3
THAMMAIAH : 1
SPECIALTY : 1
SLOW : 1
ADVANCE : 2
COMPLETING : 1
LV : 1
MUCOMYST : 1
EDUCATIONAL : 2
WILL : 27
COPAY : 1
OFTEN : 1
BUT : 12
ASKED : 1
THOUGHTS : 2
CTA : 2
TYPE : 3
INSERTED : 1
PLASMA : 2
SET : 3
ENEMY : 1
SCHIZOPHRENIA : 2
CFCF : 1
FERNANDO : 1
CARROTS : 1
MARITAL : 1
DEL : 1
CHOLECALCIFEROL : 1
MEDICALLY : 1
CONSULT : 5
ALKALINE : 1
SUPPORT : 2
ACCOMPANY : 1
IMPROVE : 1
QID : 1
ANTICIPATED : 1
PRESENTED : 1
LIBRARY : 1
REVIEW : 8
HIMSELF : 1
RANK : 1
COMES : 2
INJECTION : 1
THREATENING : 1
ACET : 2
RESUME : 1
VIEW : 1
RESIDENT : 10
INSTRUCTIONS : 3
ERYTHEMA : 1
TEASPOONFULLS : 1
VA : 7
WED : 1
SALVATION : 1
DOCTORS : 1
LEVOTHYROXINE : 1
SMOKER : 1
DISEASE : 2
PAIN : 46
RECONCILLIATION : 1
AS : 19
THURS : 2
VISTA : 4
RESTRAINTS : 3
ETSU : 2
PICE : 1
GTTS : 1
DAYTON : 1
REPEATED : 1
DRAINAGE : 2
HYPERPIGMENTED : 1
INTEG : 1
GREATER : 1
WITH : 50
FEELS : 1
CATH : 1
OFFERED : 1
BIRDGEWATER : 1
TEMPERATURE : 4
REEVAL : 1
REDNESS : 3
INDEX : 1
GONE : 2
DECISIONS : 1
INCLUDING : 3
DIFFININTLY : 1
NA : 3
SETTING : 2
USED : 5
IT : 9
PREDICATED : 1
APPROACHED : 1
HHA : 1
BEDTIME : 1
BELOW : 3
HED : 1
RADIATES : 1
MOMENT : 1
MICHELLE : 1
CONSTITUTIONAL : 1
DISCUSSED : 7
MATERIALS : 1
DENTURES : 1
SUPPLY : 2
PERIODONTAL : 2
SHOWER : 2
TIME : 23
PURPOSE : 1
CODE : 1
TERTIARY : 1
SWS : 1
HYGIENE : 5
PLEASURE : 1
HCL : 2
LOOK : 2
WALK : 2
ADDITIONAL : 6
TEETH : 3
SAFETY : 5
EMOTIONAL : 1
SIDE : 2
BREAKFAST : 1
CALL : 17
EXPRESSED : 1
WORN : 1
RESULT : 3
HX : 1
BIRTH : 2
MHC : 1
IMAGING : 5
UNSPECIFIED : 3
MOTIVATION : 5
CSAC : 1
VOLUNTARILY : 1
TABLETS : 3
PER : 8
VAN : 1
FRIEND : 1
ALCOH : 1
ETC : 4
VEGETABLES : 1
MOBILITY : 5
WITNESSED : 1
YOUR : 7
PRECAUTIONS : 2
GIVEN : 5
PACKET : 1
ABSENT : 2
HT : 2
WHO : 5
SOUND : 1
SURG : 2
DIARRHEA : 1
BASED : 1
ATTENDANCE : 2
COMPREHENSIVE : 2
ARM : 2
CURRENT : 9
CONTROL : 2
AUSCULTATION : 1
GROOMING : 1
BRONX : 1
SUSPICIOUS : 1
HIM : 6
PULSE : 8
NS : 1
NEXT : 5
SOBER : 2
THEY : 8
NEEDS : 3
OPPOSED : 1
REFERRED : 2
TR : 1
MEDIUM : 2
NEUROPATHY : 1
FREQUENT : 1
ACCEPTED : 2
APPTS : 1
MESKENAS : 2
EXTENSIVE : 1
REGAIN : 1
TRANSFER : 2
OBSERVATION : 1
LASTED : 1
ML : 1
PHONE : 6
DECLINED : 3
CHECKED : 1
TALKING : 8
BORDER : 1
IPRATROPIUM : 1
SURFACE : 1
RESPONSES : 1
FAIR : 1
EGD : 1
DRY : 1
SNACK : 1
BS : 2
HAD : 10
POSSIBLY : 1
OVERSEES : 1
YVONNE : 1
SPECIAL : 2
LOSS : 8
SISTER : 3
QUETIAPINE : 1
HELD : 1
AMPUTATION : 1
YO : 1
PROTECTED : 1
LOG : 1
OUR : 1
WRITTEN : 1
SPUTUM : 3
LAB : 2
WEAK : 1
RD : 1
DIAGNOSTIC : 1
MISSING : 1
TRANSPORTED : 1
ING : 2
COMPLAINTS : 1
CLOSING : 1
CONTACT : 5
NOTIFIED : 3
NPO : 1
RETURNS : 1
PSYCHOMOTOR : 1
SYNTHROID : 1
PEERS : 1
PROBLEMS : 8
URINE : 6
NASAL : 1
NEUROLOGICAL : 1
RTC : 1
GIVE : 2
CAN : 3
THERAPY : 11
PSYCH : 2
SEEING : 1
SEND : 1
STAPLES : 1
NONVA : 3
WHICH : 2
SYMPTOMS : 5
OVER : 2
ROTATOR : 3
VISITS : 4
ON : 49
QUIT : 3
COMPLETE : 1
BLASTS : 1
PRESSURE : 3
TETANUS : 1
ATTENDED : 1
TEL : 1
COVER : 2
VIA : 1
HEADACHE : 1
MINNESOTA : 1
GOOD : 4
DROPS : 1
CARING : 1
MED : 4
MIMMS : 1
JUDSON : 1
INHALER : 2
INTO : 4
EDEMA : 1
FIRE : 2
SHE : 7
PO : 3
UP : 7
THEN : 5
DEAR : 1
FEW : 2
LOCATION : 9
MOD : 1
RESTORATIVE : 1
DETERMINE : 1
DIRECTLY : 1
POSTTRAUM : 1
FEVER : 1
VERBAL : 1
OFF : 1
DOCUMENTED : 1
DATE : 14
DAILY : 11
SLIGHT : 1
PA : 1
REQUIRE : 1
PERCENT : 1
ATROPINE : 1
LONG : 1
ELSE : 1
AWAKE : 3
WHEELCHAIR : 1
EUTHYMIC : 3
HOUSING : 3
REPLACEMENT : 1
FROM : 20
QHRS : 1
LEFT : 14
BL : 2
NORMALIZING : 1
BATH : 3
NEIGHBOR : 1
FOLLICLES : 1
MEDICAL : 12
HEAD : 1
ALSO : 6
SPOKE : 1
ORGAN : 1
SERIOUS : 1
SYSTEM : 4
LORAZEPAM : 1
MRS : 1
AI : 1
WORKING : 1
DEMANDING : 1
AN : 10
DIVERSION : 1
MOIST : 1
DEFERRED : 1
HEART : 2
HURTING : 1
BLACK : 1
DISABILITY : 2
TAKES : 2
FOUR : 4
STDS : 1
CABLE : 1
OUTSIDE : 3
OSAC : 1
EYE : 4
UNSCHEDULED : 1
MILIEU : 1
DISCUSSION : 1
STRAIN : 1
CASINO : 1
AGO : 3
MYSELF : 2
ATTENDING : 5
CHEST : 4
HAVING : 1
DOCUMENTATION : 1
DT : 3
ANESTHETIC : 1
OPH : 3
ENCOURAGE : 2
MUSCLE : 1
LATER : 1
ARE : 13
NUMBERS : 1
ANSWERED : 4
DESIRE : 2
INDEPENDENT : 1
HYPERTENSION : 2
ELEVATED : 1
FILE : 1
PERSON : 6
CPRS : 2
PROGRAMS : 1
SCARS : 1
SURGERY : 5
RECOVERY : 1
ISCUSS : 1
MN : 2
TX : 1
IRRITABILITY : 1
UPDATES : 1
INHL : 3
ENTRY : 1
INTERDISCIPLINARY : 2
GENERAL : 1
SERVED : 2
YEARS : 2
COLON : 1
BE : 24
TIMING : 1
OX : 1
DUE : 7
LEVITRA : 1
THEIR : 4
DISC : 1
BEDSPREAD : 1
ALZHEIMERS : 1
PING : 1
WORKS : 1
AGITATION : 1
PH : 1
CANE : 1
ISSUES : 1
RECONCILED : 1
ALONG : 1
SAD : 1
CSCOPE : 1
NKDA : 1
OTHER : 17
PRODUCTIVE : 2
FUMARATE : 1
LIFE : 3
QUIET : 1
ME : 2
ANTICOAGULANT : 1
BED : 6
NURSING : 16
COMP : 2
FOLLOWING : 8
NSS : 1
OUTCOME : 1
IDENTIFIED : 8
GLAUCOMA : 1
ENDING : 2
REFER : 1
DIAGNOSIS : 7
WITHOUT : 3
JUL : 1
EVAL : 2
VERIFIED : 1
ATYPICAL : 1
CASA : 1
SHELLED : 1
IDEA : 2
MI : 1
SPINE : 1
ANXIETY : 4
POSITIONING : 1
SAY : 1
RARELY : 1
VERTIGO : 1
THOUGH : 1
EXAMINED : 2
SYMPTOM : 1
TTE : 1
WE : 3
TOILET : 2
DISTANCE : 1
PROTECTORS : 4
VOIDS : 1
FOUND : 1
PATCHES : 1
ROOM : 3
YOGA : 1
IMPROVED : 1
CHART : 4
FILMS : 1
AVAILABLE : 2
PERSEVERATES : 1
ABOUT : 9
THANKED : 1
MIAMI : 2
ANYTHING : 1
STRETCH : 1
PLEASANT : 1
POTENTIAL : 2
GENOA : 1
NKA : 3
BRIEF : 2
CCOUGH : 1
TABLET : 7
DOM : 1
ADMIT : 1
ANOTHER : 3
DURING : 10
COMMON : 1
TOLD : 1
MURMURS : 1
ENVIRONMENT : 1
SEVERAL : 2
LISTED : 2
DIRECTED : 1
BX : 1
SCREENING : 2
TKA : 1
CHECKS : 1
VOICED : 1
REACH : 1
TELENURSE : 1
GETTING : 2
BUTALBITAL : 1
REACTIONS : 1
HI : 1
OS : 2
PSA : 1
KNOX : 1
DIZZY : 1
OXYGEN : 3
SCORE : 5
DOESN : 1
BRECTAL : 1
SP : 1
EPIS : 1
WEEKENDERS : 1
HYPERGLYCEMIA : 1
HOME : 12
NOTED : 5
TUBEFEEDING : 1
SEEM : 1
RETURN : 1
MODERATE : 2
OTHERWISE : 1
ANYONE : 1
HEP : 1
METHADONE : 1
HYDROXYZINEMG : 1
MIN : 6
NONVERBAL : 1
REPLACED : 1
RECONCILIATION : 2
CHEMICAL : 1
FLUENCY : 1
COMPUTERIZED : 1
LOSSES : 1
MINUTES : 3
STENT : 1
FOLLOWUP : 2
DRIVE : 1
ALTERATION : 2
OCCURRED : 1
RISKS : 2
TEAM : 5
CHECK : 6
FALL : 6
DATA : 3
NERVE : 1
EMESIS : 1
AM : 3
HELPED : 2
MOVEMENT : 1
ENTERED : 1
PRACTITIONER : 3
PENDENCE : 1
WHERE : 4
APAP : 1
PRESSURES : 1
DEMENTIA : 2
PRODUCTS : 3
CALLED : 6
PURULENT : 1
TOOK : 1
SUPERVISION : 2
MANY : 2
NOTARY : 1
GLYBURIDE : 1
GAIN : 1
PREOPERATIVE : 3
NEWS : 1
TEACHING : 1
MON : 1
ADVISED : 1
LABEL : 1
MONTHS : 4
UNLISTED : 1
SSN : 1
INDVIDUAL : 1
AVOID : 2
WECHSLER : 1
EPIDIDYMITIS : 1
UCINATIONS : 4
EAT : 2
PROCESSING : 1
ASKING : 1
CONGESTION : 1
EFFECTIVENESS : 1
CHOICE : 1
ROOMED : 1
MEDICATION : 16
STOP : 1
ATTORNEYS : 1
VISUAL : 3
PARANOID : 1
TONGUE : 1
WANT : 1
CASE : 4
SUPPORTIVE : 4
ONO : 1
ALTERNATIVES : 1
CONTINUE : 4
ORAL : 5
HOPE : 1
READ : 3
SWELLING : 3
SHES : 1
ABSCESS : 1
SERVICES : 1
OVERSIGHT : 2
AB : 2
GOAL : 6
STITCHES : 2
PROVIDE : 2
BACKGROUND : 1
OTC : 1
COLUMBUS : 1
MAINTAINS : 1
UAREVIEWED : 1
HEALTH : 9
COVERAGE : 1
HERNIA : 1
CHECKLIST : 1
TENDANCE : 1
ADJUST : 1
PLACED : 3
COGNITIVE : 3
BLODGETT : 1
INCIDENT : 1
INDICATED : 4
BRONCHOSCOPE : 1
PROSTATE : 1
PICKED : 1
ENTIRE : 1
REFERRAL : 1
INTERVENTIONS : 1
MAR : 2
SPENCER : 1
DOUBLED : 1
SION : 1
TURNING : 1
WAL : 1
MORE : 7
PE : 1
MAKING : 1
ORTHOPTIC : 1
ABC : 1
INSULIN : 1
WENT : 2
MPV : 1
LIN : 1
ER : 3
NEUROSURGERY : 1
APPLICABLE : 6
DIZZINESS : 1
RM : 1
REQUEST : 3
PRESCRIBED : 2
INCREASINGLY : 1
RN : 4
XYZZY : 2
CORRECTION : 1
HOUSE : 2
ANTICOAGULATION : 1
LTC : 1
HEADACHES : 1
AFTER : 1
PARTICIPATED : 1
COURSE : 1
STRUCTURED : 1
STILL : 1
KIDNEY : 1
DIFFICULTIES : 1
SULFATE : 1
CONCERNING : 1
SCALE : 6
FLUID : 2
GROUPS : 5
PCP : 7
GEESEY : 1
SAYS : 3
APPOINTMENTS : 4
DIVERTIC : 1
WOUNDS : 1
STI : 2
EACH : 1
RE : 2
NOTICES : 1
WNL : 1
MINE : 1
LIGHTS : 1
OLD : 4
FOOT : 1
LS : 4
REGION : 1
AGITATED : 1
EAGER : 1
REMAINING : 4
IRON : 1
AREA : 1
APR : 4
PL : 1
INTEREST : 1
GU : 1
EXCHANGE : 1
RATIONAL : 1
LOST : 1
MEDICATIONS : 20
MR : 8
DIRECT : 1
FOODS : 1
BILATERAL : 1
CONTRARY : 1
NPH : 1
DESCRIPTION : 1
TISSUE : 2
INH : 1
RECOMMENDED : 1
VACCINE : 2
SARAFIAN : 1
PROCESS : 1
INVOLVING : 1
RESULTS : 2
FRIENDLY : 1
EMERGENCY : 1
ANSWER : 1
GLAND : 1
PROVIDING : 1
BREATH : 4
ABLE : 7
RECENT : 2
CHO : 1
IN : 105
REVEALED : 1
DIAGNOSTICS : 1
POSITION : 4
MANAGEMENT : 5
STATE : 3
PAC : 2
PLAN : 10
DA : 1
UG : 2
ITEM : 1
LOCKED : 1
PARIKH : 1
PENG : 1
FRUITS : 1
CONTENT : 1
CARD : 1
PATHOLOGY : 1
VERY : 1
WRETCHING : 1
OVERLYING : 1
LACK : 2
IDENTIFICATION : 1
VERDICT : 1
MANAGE : 1
OPPORTUNITY : 1
FEATURES : 1
BEHAVIOR : 1
SI : 1
FOREARM : 1
SEASON : 1
COMPLETED : 2
IMPRESSION : 1
IMPORTANT : 1
EVEN : 2
DIFFICULTY : 3
LIMITATIONS : 1
PLASTIC : 1
DECISIONMAKING : 1
REMINDERS : 1
CAPABLE : 1
OVERCOAT : 1
SCOPE : 1
LAST : 13
BAG : 1
TREADED : 1
LUNCH : 2
EDUCATION : 6
PULLON : 1
HOLD : 2
ELEVD : 1
ADR : 1
HOUSESHOES : 1
INSERTION : 1
RENAL : 1
SITUATIONS : 1
NEUROPSYCHE : 1
BANISTER : 1
GROOMED : 1
LINENS : 1
CONSTANT : 1
WM : 1
PERTINENT : 1
ONLY : 2
EVENING : 2
PERMITTED : 1
CORE : 1
RINGING : 1
OPEN : 3
LICSW : 1
REMOVAL : 1
MONTH : 3
THANK : 1
ACCIDENT : 1
PATIEN : 1
BEEN : 25
EXUDATE : 1
BID : 2
WITHIN : 5
BASE : 1
LOCK : 2
YOURSELF : 1
DOWNLOAD : 1
DRAINING : 1
OUTPATIENT : 10
EXPERTISE : 1
INTAKE : 2
WEEKLY : 4
SHORTNESS : 3
INPATIENT : 4
SPEECH : 1
SORTING : 1
RESCHEDULE : 2
FOUNDATION : 1
SPLIT : 1
ELOPEMENT : 1
RELATED : 3
CHIROPRACTIC : 1
PASS : 1
CC : 2
HGB : 1
HEMATURIA : 1
EPISODE : 1
OPERATIVE : 1
BACKPAIN : 1
TWICE : 3
COLD : 1
TROPIC : 1
REGARDING : 1
SHAMPOO : 1
VASCULAR : 2
TRIED : 1
PERSONAL : 8
SOCKS : 1
QUES : 1
HIS : 38
BRING : 1
ID : 1
VARIABLE : 1
GM : 1
READINGS : 1
MYOPATHIES : 1
VOIDING : 1
NEURO : 1
HAWSE : 1
COMPRESS : 1
RAISED : 1
REORDERED : 1
STRONGER : 2
SHOWED : 2
DISORDER : 3
SMT : 1
CBOCURGENT : 1
REASONS : 1
HARD : 1
YELLOWISH : 1
FASTING : 1
XANAX : 1
TALKED : 2
PELVIS : 1
EDITION : 1
TREATMENT : 15
CATEGORY : 1
VMCW : 1
BLOOD : 7
WORKER : 3
HAVE : 11
OBMT : 2
EX : 1
OF : 124
DRUG : 3
INCLUDE : 2
CRISIS : 1
CALLER : 1
PSYCHIATRY : 3
ROBE : 1
SAID : 5
NUMBER : 17
DICLOFENAC : 1
UNDERSTAND : 1
MATRIXECTOMY : 1
NEPEC : 1
OBTAINING : 2
SPONGE : 2
AID : 1
BEGINNING : 2
MS : 2
CLOTHING : 1
OUTPT : 5
MY : 6
INSTRUCTION : 1
ACTS : 1
BATTERIES : 1
MESSAGE : 4
THINGS : 1
SUBSTANCE : 2
DIDACTIC : 2
CATEGORIES : 1
ASSESSMENT : 11
CETIRIZINE : 1
US : 1
TACTILE : 1
SCAR : 1
CAPLET : 1
APRN : 1
FERRITIN : 1
REFERRING : 1
ENVELOPE : 1
AMBULATION : 3
ATTACHED : 1
VOLUNTARY : 2
ENCOURAGED : 5
BLADDER : 5
REASSURANCE : 1
INFORMATION : 9
DEVICES : 1
ANONYMOUS : 1
FAS : 1
INITIAL : 2
CENTER : 6
QUESTIONNAIRE : 2
ATTENDS : 1
INE : 1
SUICIDE : 1
MEDICARE : 2
THE : 163
FILED : 1
GROUP : 15
UPLIFTING : 1
EXPIRED : 1
GRIP : 1
CONVEYS : 1
TAMINE : 1
REPRESENT : 1
HATFIELD : 1
COLOR : 8
THYROID : 2
CHARACTER : 1
TOES : 1
LEG : 4
ARRIVED : 2
MEDS : 7
OPT : 2
DIETICIAN : 1
INDICATION : 4
KROHN : 1
DIST : 1
THOROUGH : 1
CT : 1
PSYCHOLOGY : 2
LBP : 1
ELECTRONIC : 1
EXTENSION : 1
ANXIOUS : 1
DISPOSITION : 1
CORRECTLY : 1
CLENCHING : 1
CAP : 2
TIMER : 1
LEATHER : 1
DIET : 1
STATED : 3
HEARING : 3
RNBC : 2
HANDS : 1
SYRUP : 1
DRESED : 1
GET : 6
AXIS : 2
WHAT : 8
BENEFITS : 1
ALBUTEROL : 3
SHOE : 1
ASSISTANCE : 22
INJECTED : 1
DIABETIC : 1
PROLONG : 1
DESIGNED : 2
PRESCRIPTION : 2
YEAR : 5
TREMULAS : 1
LB : 5
KEYPAD : 1
MCGOWAN : 1
NAPPING : 1
REGULARLY : 1
PUT : 1
SUMARRY : 1
SEEN : 10
PRE : 1
CS : 1
RT : 2
FOOD : 4
ENCOURAGEMENT : 1
OPTICAL : 1
NURSE : 2
VENTILATION : 1
LABORATORY : 1
URINATION : 1
INTERVIEW : 1
SENSORY : 1
CORONARY : 1
ANY : 7
TRY : 2
DISCHARGE : 4
CONSISTENCY : 3
MOISTURE : 1
SYSTEMS : 1
SCHED : 1
FLOW : 1
MAINTAIN : 1
FACILITY : 3
LASER : 1
EFFECTS : 2
SECONDARY : 1
MSE : 1
SAT : 1
EVERY : 3
FILM : 1
OCR : 3
SKIN : 7
NOT : 35
OK : 1
TEMPORARILY : 1
DTN : 1
EXIT : 1
GOD : 1
NONTENDER : 1
THERE : 11
EXPECTED : 1
CHERYL : 1
OPTOMETRY : 3
NAFZIGER : 1
LIMITED : 3
HERE : 7
BOX : 1
POSITIVE : 4
TESTICULAR : 1
CLEAN : 1
UNITS : 1
LIPOMA : 1
ANGER : 2
ONEHALF : 1
FEB : 1
INT : 2
PROGRESS : 11
WK : 1
PSYCHOTHERAPY : 2
DAMAGE : 1
ASSESS : 2
ENGAGE : 2
REPEAT : 3
RALES : 1
VET : 8
STOOL : 10
EXTREME : 1
LEARNER : 2
EXPLAINED : 1
APHDR : 1
PREFERRENCE : 1
BEST : 1
UPCOMING : 1
FORGETFULNESS : 1
LID : 1
TAZINE : 1
PARTICIPATE : 1
BELT : 1
MA : 2
COR : 1
EXPERIENCING : 1
PREGNANT : 1
STORE : 1
ASSOCIATED : 3
BACK : 8
HOWEVER : 2
PHOTO : 1
MORTARS : 1
SOURCE : 1
REGARDS : 2
TUES : 1
DICTATED : 1
MALE : 8
WARNING : 1
BY : 26
PMH : 1
CATHERINE : 1
CLINICAL : 2
REASSESSMENT : 3
DOE : 1
LUNGS : 1
MEETING : 1
RRR : 1
CONVERSATION : 3
CFA : 1
TOENAILS : 1
VERBALLY : 1
POIKILODERMATOUS : 1
TO : 179
NARRATIVE : 1
IV : 2
FEEL : 3
DIPTHERIA : 1
POP : 1
ION : 1
TASK : 10
HEAVY : 1
TSHIRT : 1
DISSABIL : 1
PHENOBARB : 1
AMONGST : 1
SAFE : 1
DX : 1
QAM : 1
LVH : 2
PROCEDURE : 4
REQUESTING : 4
WELLBUTRIN : 1
CAPACITY : 1
WATCH : 1
WARM : 1
APPETITE : 1
SUPPLEMENTATION : 2
SEE : 12
OJECTIVE : 1
INSTRUCT : 1
PLEASE : 4
STAIR : 1
INDICATES : 1
STATUS : 15
DIABETES : 2
READER : 2
SPENT : 2
TA : 1
MHICM : 2
FOOTBALL : 1
DRINKS : 2
CONTINUED : 2
MALIGNANT : 1
TECHNIQUE : 1
OUT : 5
COMFORT : 1
LBS : 3
ADVERSELY : 1
SCREEN : 3
NERVOUS : 1
FINDINGS : 3
BARRIERS : 4
REACTION : 2
EVALUATED : 1
CONDUCIVE : 1
NURSINGACTIVITIES : 1
FUNCTION : 2
MENTAL : 10
NEEDED : 3
THANKS : 1
GERD : 2
WERE : 5
BRC : 5
FACTORS : 1
SHEET : 2
SCHIEF : 1
FILL : 4
WALKS : 1
JUSTIFICATION : 1
LABS : 4
TAKEN : 2
CLOSED : 2
INFORMING : 1
CEFAZ : 1
LIDOCAINE : 1
POSSIBLE : 2
TRIAGE : 2
PART : 1
WPAT : 1
OWING : 2
FAMILY : 7
DETERMINED : 1
ORIENTATION : 3
SEEMED : 1
WHEN : 7
AMBULATORY : 3
EXTERNAL : 1
BEING : 1
FALLS : 1
AMOUNT : 10
ABOVE : 2
WAS : 58
PM : 4
RIDE : 1
REFUS : 1
GASTROENTERITIS : 1
FORM : 1
LEAVING : 2
AC : 2
CAUSING : 1
COMMUNICATION : 1
CONSUMED : 1
SIG : 1
DRINKING : 3
COUPLE : 1
MEN : 1
NOW : 6
PTSD : 3
INTACT : 2
CONFIRMED : 1
LEADER : 1
PARSOME : 1
LIST : 6
OT : 2
STUDY : 2
FREGUENTLY : 1
IMMUNIZATION : 1
EQUIPMENT : 1
FATIGUEX : 1
FEVERS : 1
VOMITING : 1
HEMP : 2
FARJAD : 1
ORIENTED : 10
FLUVASTATIN : 2
PURULENCE : 1
ANTIGEN : 1
CURRENTLY : 3
NECK : 2
LYING : 1
JOINT : 1
CHOL : 1
RESPIRATIONS : 3
BATHROOM : 2
SOFTENER : 1
REPAIR : 3
DOCTOR : 2
GOING : 3
DID : 7
MOST : 4
ARRIVAL : 1
OPERATION : 1
ACCURATE : 1
ADDRESS : 2
TELEPHONE : 1
SITUATION : 1
EPICONDYLAR : 1
COHERENT : 1
FACILITATORS : 1
CPT : 1
CRUNCHY : 1
PLEASED : 1
COMPLAINING : 1
COOPERATIVE : 1
REPORTS : 6
GE : 1
SUBJECTIVE : 2
RATES : 1
OPHTHALMOLOGY : 1
HELP : 5
COMING : 1
YES : 9
CONTINUES : 3
FURTHER : 2
UNINTENTIONAL : 1
SMILING : 4
BUN : 1
CONSENT : 6
NOTICED : 2
FACE : 4
ERA : 1
PACKS : 1
LEISURE : 1
DOING : 5
BRCS : 1
VACCINATION : 1
LITTLE : 2
SUCCESSFUL : 1
QUITE : 1
ED : 1
CONFIRM : 1
INSTITUTE : 1
PHYSICIAN : 22
COMPLIANCE : 1
CREAT : 1
DEPENDENCE : 1
TOOTH : 1
SEEKING : 1
ROBITUSSIN : 1
OGOING : 1
INTERACTIONS : 1
CLOSELY : 1
FAXED : 1
CESSATION : 1
HE : 60
RX : 2
AHN : 1
OBESITY : 1
PHE : 1
RATE : 1
EASY : 1
MASS : 2
PASSAGES : 1
FELT : 1
UMBILICAL : 1
NEB : 1
MEMBER : 2
IMAGERY : 1
HANLIN : 1
PREFERENCE : 1
PRINT : 1
FABRICATION : 1
HYDROBROMIDE : 2
ABT : 1
MSW : 1
CLAIMS : 1
ELBOW : 2
HERBALS : 1
PRIMARY : 2
ECHOCARDIOGRAM : 1
UNTIL : 6
ABDOMINAL : 3
ORTHOPNEA : 1
SIGNS : 3
DEPARTMENT : 1
PATIENTS : 11
BELIEVES : 2
LEGIBLE : 1
SUMMARY : 4
RONCHI : 1
CONSTIPATION : 1
PROVIDED : 19
DENTAL : 4
POSTING : 2
TWO : 2
NONE : 7
ATTITUDE : 1
RECOMMENDATIONS : 1
OUTCOMES : 1
II : 2
DECREASED : 2
CONNECTED : 1
ANGRY : 1
ENDURANCE : 1
THINKING : 1
BLINDNESS : 1
DIRECTIVES : 1
RESPONSIVE : 2
NOTICE : 1
SCHEDULE : 2
HER : 5
ORDERED : 2
WORLEY : 1
FEELING : 1
INCIDENTALS : 1
SHOULD : 3
QUESTIONS : 7
SPECIFIED : 2
HALDOL : 1
YELLOW : 1
CLOBETASOL : 1
MCG : 2
CLERK : 2
ABUSIVE : 1
HIT : 1
BLOCKS : 1
LIVING : 7
PLACE : 12
PROGRESSIVE : 1
NOSHOW : 1
RANGE : 1
ENT : 1
TOENAIL : 1
MG : 15
ADMINISTRATION : 3
CALF : 1
QUARTERLY : 1
WAITING : 1
SPECIALIST : 1
BEHAVIORS : 2
BECAME : 1
VIETNAM : 2
REG : 2
ARMY : 2
DEPENDENCY : 1
CONTINENT : 6
DEHYDRATION : 1
VARIATION : 1
THEMSELVES : 1
WORSE : 2
WEEKEND : 1
ATTENTIVE : 1
PROVIDER : 6
GENDER : 1
MULTIPLE : 1
USES : 1
TEARFULNESS : 1
ANURIA : 1
DIAGNOSED : 1
APPOINTED : 2
TELL : 1
ALERT : 7
SUBMITTED : 1
THROMBUS : 1
ACCESSED : 1
GROCERY : 1
UNDER : 2
SEP : 2
SEATED : 1
TRAVOPROS : 1
IMED : 2
COMMENT : 4
THREE : 3
COLLECTION : 2
LIFES : 1
PROGRAM : 6
ACCEPTING : 3
RADIOLOGY : 3
APPOINTMENT : 9
STABILIZATION : 1
WOULD : 4
FOLLOW : 1
METHOD : 1
IMPULSIVE : 1
EXPOSURES : 1
NICE : 1
CHEN : 1
ZERO : 1
BIRCH : 1
HANDWASHING : 1
SEX : 1
VERSUS : 1
ACTIVITIES : 7
COMMITMENT : 1
RESPOND : 1
DISORGANIZED : 2
SURGEON : 1
OPERATE : 1
CUFF : 3
UNLABORED : 1
MOVEMENTS : 4
COMPLAINT : 7
ORDER : 1
EXCEPT : 1
USING : 1
FORMOTEROL : 1
NUM : 1
HAND : 3
INFLUENZA : 2
UNDERSTOOD : 1
DENIED : 2
COSTOCHONDRITIS : 1
ULTRASOUND : 1
SPO : 1
LIFESTYLE : 1
DIFFERENT : 1
NEW : 5
MOUTH : 7
YEAROLD : 2
PROVIDERS : 1
HEMES : 1
SANDWICH : 1
SPLINT : 1
URGENCY : 1
PRESENT : 8
OPTIC : 1
SOME : 5
HRS : 1
EXPLAIN : 1
ANESTHESIA : 4
INCONTINENT : 1
NEED : 2
TINNITUS : 1
TENDINITIS : 1
TIBC : 1
RECEIVED : 5
HELPS : 1
RALLY : 1
QUESTIONING : 1
NONDISTENDED : 1
GRENADES : 1
CUEING : 1
EAR : 2
BODY : 1
VENTRICULAR : 1
SATISFACTORY : 3
HARMING : 1
BECAUSE : 1
RUN : 2
OL : 1
NONPHARMACOLOGICAL : 2
TRANSFERRED : 2
KATHERINE : 1
CLASS : 4
PROMOTION : 1
LED : 1
LIBERTY : 1
LESION : 1
ENROLLED : 2
PARTIALS : 1
ALLOW : 1
SOUNDS : 3
REVIEWED : 9
FIBROIDS : 1
3A : 1
ISSUE : 1
BEFORE : 5
FASCINATED : 1
CONCENTRATE : 1
ALL : 4
AUTHOR : 2
CAROTID : 1
FACES : 1
INHALE : 3
LANGUAGE : 2
PATIENT : 104
SELF : 3
ALLERGIES : 6
ACCEPT : 1
SENT : 2
AGREES : 2
ABDOMEN : 1
REEVALUATED : 2
THAN : 4
DYSURIA : 1
ACUTE : 6
VOICE : 5
NOTIFICATIONS : 1
YELLED : 1
ARTHRITIS : 1
REQUIRES : 7
FILLED : 1
PROTOCOL : 1
COME : 1
HOSPITALIZATION : 1
ROUTINE : 1
FEET : 1
SELFCARE : 1
CAME : 1
THAT : 40
VISIT : 15
ANTECUBITAL : 1
NORMAL : 4
WIFE : 2
STAFF : 10
SERVICE : 4
HAEFNERS : 1
CE : 1
RIGHT : 7
BREATHING : 2
PC : 4
MEANWHILE : 1
VITALS : 1
IEDS : 1
HBPC : 2
ONE : 14
REQUESTS : 1
PAKULA : 2
COMPONENTS : 1
UNSUCCESSFUL : 1
ANATOMICAL : 3
PTS : 1
RESPONSIBILITY : 1
SPEC : 2
RECORDER : 1
THOUGHT : 3
HYPERLIPIDEMIA : 1
RADIATING : 1
WRITER : 5
YOU : 11
CL : 1
MORPHINE : 1
INFORMED : 3
ISSUED : 1
PAST : 11
DOCUMENT : 3
INTERESTED : 1
NOVEMBER : 1
EYEBALL : 1
REASON : 6
SUPERVISOR : 1
TOBACCO : 1
ACT : 1
RIGTH : 1
REMINDER : 2
FOLDER : 1
CBT : 1
TRAUMATIC : 1
SUBTESTS : 1
ALTHOUGH : 1
WEAKNESS : 1
DR : 5
SOCIAL : 9
DILTIAZEM : 1
MEMBERS : 6
WATCHING : 1
HOSPITAL : 2
RECOMMENDATION : 1
FL : 1
SUICIDAL : 1
DEPT : 1
VITAL : 2
INJ : 1
SO : 4
ADULT : 1
ORCHITIS : 1
DISCIPLINES : 1
EDT : 1
ANTIBIOTICS : 3
STRESS : 2
THURSFRISATSUN : 1
JR : 1
REHABKINESIOTHERAPY : 1
MAKE : 1
GRANDE : 1
FOCUSING : 2
IRRIGATION : 1
WEEK : 2
VITAMIN : 1
VIAL : 1
ARC : 1
CPRP : 1
NT : 1
IMPAIRMENT : 3
DISTRESS : 1
RUNNING : 1
CANCEL : 2
ADVISE : 1
MOOD : 3
REPORT : 4
SIGNED : 3
LETTER : 2
UL : 1
ELECTRONICALLY : 1
HOW : 3
BAGLEY : 1
FEELINGS : 2
SINCE : 7
FLU : 2
DISCUSS : 1
THOSE : 1
CHANGE : 3
COUGH : 3
STOPPED : 1
SOLN : 2
LEARN : 5
PRESENTING : 1
PLASM : 1
TAP : 1
MADE : 1
OFFICE : 2
CARDIAC : 2
AUTHORIZATION : 1
YRS : 1
MENTATION : 1
PLANSEVERE : 1
PRINTED : 2
LEARNING : 1
DOSE : 3
MEASURE : 1
ENCOUNTER : 1
OBJECTIVE : 4
SMOKING : 1
ICOTHE : 1
AFFECT : 3
OOB : 1
UNDERSIGNED : 2
FOLLOWS : 1
HOSPICE : 1
AFFECTS : 1
CONCERN : 4
STRONG : 1
SOMEONE : 1
AREAS : 2
ALONE : 1
TENNIS : 2
NUTRITIONAL : 1
NARROWING : 1
INPT : 1
RESTING : 1
BIFOCAL : 1
MO : 1
COMMENTS : 6
ACETAMINOPHEN : 2
STRENGTH : 1
LP : 1
TOTAL : 1
LIGHT : 3
PARKINSONS : 1
INVOLVE : 1
SURGICAL : 3
JUNE : 1
INSIDE : 2
ST : 1
ELIMINATION : 9
SUCH : 2
CALCULATION : 1
HISTORY : 10
UPDATED : 1
PJS : 1
TEXT : 1
GROVE : 1
HOURS : 9
MAIL : 4
LEGS : 1
COINCIDES : 1
REPORTED : 9
CIRCUMCISION : 1
MODERATELY : 1
PERIMACULAR : 1
NOV : 1
DIEM : 1
ALWAYS : 2
WOUND : 2
GRADUATED : 1
WO : 1
HIP : 7
SITE : 3
MATERIAL : 2
WOOTEN : 1
TREMORS : 1
COMPLICATIONS : 1
STATING : 1
KG : 5
OP : 1
NEOPLASMS : 1
STANDARD : 1
TELECARE : 2
AUG : 1
PROBLEM : 3
EYES : 2
ACTIVELY : 1
OCTOBER : 1
KNUCKLE : 1
CLONAZEPAM : 1
ADDRESSED : 1
RECORD : 7
LY : 1
PROGRESSING : 1
SUSP : 2
WARFARIN : 1
THROUGH : 3
ADLS : 1
PUFFS : 3
OUTPUT : 1
OSTEOARTHRITIS : 1
VETS : 2
HEENT : 1
VICE : 1
BONY : 1
EXTRA : 2
LONGER : 1
ADMISSION : 8
CONFLICTING : 1
GUARDIAN : 1
NY : 1
ANXCIOUS : 1
NON : 1
QHOURS : 1
NICOTINE : 1
ULA : 1
INTRODUCED : 2
BEER : 1
FUTURE : 2
WAY : 1
OBSERVATIONS : 2
CLIENT : 2
SPECIFIC : 1
DENIES : 6
QUALITY : 1
ASSOCIATE : 2
DOB : 1
ACCOMPANIED : 1
PHARMACY : 1
CARRY : 1
SCALING : 1
TERMS : 1
OTHERS : 7
REQUESTED : 4
MODIFIED : 1
DISPLAY : 1
VETERAN : 18
UNION : 1
CAPSULE : 1
RELIEF : 1
DINNER : 1
PT : 42
INJURY : 5
NP : 1
PSYCHOSOCIAL : 1
PROCEDURES : 1
DEMONSTRATION : 1
MISSED : 1
MINIMAL : 1
OPTMOSTIC : 1
SELECTED : 1
PERSISTENT : 1
CELERY : 1
ILLNESS : 3
PREDNISOLONE : 2
FACTOR : 1
AND : 132
HOUR : 1
SELECT : 1
URINARY : 1
FLUSHED : 1
JUN : 2
SESSIONS : 6
RESPONSE : 5
WORKED : 1
POSTOP : 1
CHAINS : 1
NAIL : 1
PROBLEMFOCUSED : 1
KNOWLEDGE : 2
CUT : 1
LOW : 6
OBEYS : 1
MAY : 12
FOLLOWED : 1
LENGTH : 1
CONCURRED : 1
APPT : 9
UNLESS : 1
BREASTFEEDING : 1
OBSERVED : 5
VADENVER : 1
DIETITIAN : 1
PERIOD : 1
DONE : 4
PHYSICAL : 3
DJD : 1
TEAR : 1
CP : 1
ACTIVE : 29
KNOW : 1
MANAGER : 3
VESTING : 1
ABILITY : 3
AFIB : 1
CONTROLLED : 1
STRIFE : 1
ATTEMPTSWHAT : 1
LACY : 2
THIS : 60
SUPERVISING : 2
LPN : 1
NIACIN : 1
HIGH : 1
SOFT : 2
PROCUREMENT : 1
OPTOMETRIST : 1
ADDED : 2
ARGUMENT : 2
AOX : 1
PUPILS : 1
SCRIPT : 1
GAF : 2
DEMANDED : 1
EXTREMITIES : 1
LACKS : 1
PICTURE : 1
SESSION : 5
STATES : 7
NEBULIZER : 1
WIFES : 1
OU : 3
IMPLEMENTED : 1
LOCAL : 3
WHILE : 2
CELL : 1
DEFECT : 1
ICDCM : 5
FIRST : 1
WAIT : 1
RESP : 1
LAUGHING : 1
PICK : 1
ETOH : 1
DOWN : 3
AND_MOST : 1
AND_UNTIL : 1
TO_PT : 2
COLD_MEDS : 1
AND_VOICE : 1
EXPERTISE_SCOPE : 1
ENCOURAGED_WITH : 1
BEDTIME_CHO : 1
RATES_THE : 1
UNSCHEDULED_VISIT : 1
TAKE_NEW : 1
APPOINTMENT_PATIENTS : 1
ALSO_PROVIDE : 1
AND_EPIDIDYMITIS : 1
SURGERY_IS : 1
SPENCER_AND : 1
LEARNER_ARE : 1
BUT_IS : 1
ABSENT_DOCTOR : 1
OXYGEN_THERAPY : 1
TO_RIDE : 1
RENAL_CLINIC : 1
THOUGHT_FOR : 1
ON_SEP : 1
WAS_AS : 2
DERM_OF : 1
WELL_NO : 1
EPIDIDYMITIS_REORDERED : 1
TEST_INDICATION : 1
ASKED_HIM : 1
CPT_EVERY : 1
BEEN_DIAGNOSED : 1
FALLS_YEAR : 1
CALL_WILL : 2
SERIOUS_AND : 1
MH_CONTINUES : 1
MEMBERS_VERBALLY : 1
KATHERINE_FOR : 1
NONE_INR : 1
CRISIS_WHEN : 1
GAF_EMOTIONAL : 1
ASSESSMENT_REACTION : 1
ON_TO : 3
OF_MESKENAS : 1
COLOR_TO : 1
CLOTHING_AND : 1
COMMITMENT_FOR : 1
VERY_ANGRY : 1
SC_ED : 1
PO_ACTIVE : 1
AS_AM : 1
CRUNCHY_FRUITS : 1
STATES_NEIGHBOR : 1
TO_AWAKE : 1
AND_ORIENTED : 2
NARC_OVER : 1
WM_EX : 1
MEDICATION_NONE : 1
INTERVAL_IN : 1
PAST_HOURS : 3
OF_HIS : 1
PATIENT_INTERVIEW : 1
DR_PERIODONTAL : 1
BELOW_AND : 1
MALE_PT : 1
BLOOD_PRESSURES : 1
WHO_SERVED : 1
THE_PATIENT : 21
ACCOMPANY_TO : 1
HERE_PROBLEM : 1
NASAL_QUETIAPINE : 1
BX_CPT : 1
PRESCRIBED_TRAVOPROS : 1
UNIT_AB : 1
BREASTFEEDING_WAS : 1
THE_UNDERSIGNED : 1
ASSESSMENT_SISTER : 1
CONCERNING_FRIEND : 1
EXPRESSED_OR : 1
FOR_ASK : 1
AT_SHIFT : 1
HERBALS_SOCIAL : 1
BL_FOR : 1
DOCTOR_NURSE : 1
ICDCM_HYPERTENSION : 1
DATE_LATER : 1
SOME_OUTSIDE : 1
SYMPTOMS_SEEMED : 1
PROCESSING_PATIENT : 1
BOTH_EYES : 1
LOCATION_DIAGNOSIS : 1
USE_ABUSIVE : 1
AT_BRONX : 1
GOOD_DISCHARGED : 1
NICE_SEE : 1
ACTIVELY_THAT : 1
WEEKEND_TASK : 1
SHIFT_HE : 2
PELVIS_DEFECT : 1
OL_ATYPICAL : 1
THE_CONCERNS : 1
NS_ATTENDING : 1
TO_ABOUT : 2
STOOL_BEN : 1
PROVIDER_JUL : 1
DIET_RECOMMENDED : 1
REFERRED_SUPPORT : 1
CONCERN_COSTOCHONDRITIS : 1
PATIEN_MPV : 1
AT_VISIT : 1
DID_TELL : 1
NOTE_THERE : 1
QUESTIONS_PATIENT : 1
PATIENTS_PROCEDURE : 1
DJD_NURSING : 1
MORNING_FOR : 1
CONTINENT_THIS : 1
PJS_ROBE : 1
ITEM_THAT : 1
ORIENTED_MOTIVATION : 1
AND_INTENSITY : 1
OR_BEHAVIORS : 1
REVIEWED_INTERVAL : 1
SHEET_DINNER : 1
TENNIS_HER : 1
CLC_PT : 1
INABILITY_EAT : 1
LAB_LANGUAGE : 1
IMPORTANCE_OF : 1
ARMY_WHO : 1
FAIR_BEGINNING : 1
PATIENT_AT : 1
CONTACT_PHONE : 1
AS_VITAMIN : 1
VERBAL_STATUS : 1
SITE_CONFIRMED : 1
LABEL_INPATIENT : 1
GREATER_THAN : 1
MAKE_ALCOHOL : 1
MEDICATION_REASON : 1
AND_WIFE : 1
ROBITUSSIN_TEASPOONFULLS : 1
CARE_FOR : 1
PAIN_CONSULT : 1
WEEK_HE : 1
INDEPENDENT_MH : 1
ORIENTATION_MOBILITY : 2
BEEN_VISIBLE : 1
VOICE_BUT : 1
ICOTHE_VA : 1
NONVA_INJURY : 1
KNEE_FROM : 1
MIAMI_ON : 2
STRESS_TO : 1
ANTICOAGULANT_CLINIC : 1
ABSENT_OUTPUT : 1
LEGAL_WAS : 1
HAND_ALLERGIES : 1
TO_COMPLAINING : 1
BP_CURRENTLY : 1
HE_FOLLOWED : 1
COLLECTION_SPEC : 2
IS_WEIGHT : 1
TISSUE_GOING : 1
ARC_PROGRAM : 1
HOLD_WAS : 1
LYING_IN : 1
HISTORY_PRODUCTIVE : 1
PREVENTION_COMPONENTS : 1
DISTANCE_WITHOUT : 1
HISTORY_NO : 1
ACCEPTING_LIFE : 1
COMMENTS_PT : 1
MAY_REPRESENT : 1
INT_CAROTID : 1
PROTOCOL_USED : 1
HIT_CHAINS : 1
LIVING_THIS : 1
NOT_AT : 1
PATIENT_FAMILY : 3
THEY_HAD : 1
KATHERINE_BEDTIME : 1
OF_CHOLECALCIFEROL : 1
OBSERVED_SMILING : 3
QUESTIONING_NO : 1
MEDICAL_WAS : 1
PRECAUTIONS_PULMONARY : 1
OF_MASS : 1
AXIS_II : 1
ALSO_OOB : 1
BED_SPONGE : 2
MONITOR_SYMPTOMS : 1
BEEN_DOING : 1
PLEASE_RESULTS : 1
CAPSULE_MOUTH : 1
DRINKING_WELL : 1
AUTHOR_SARAH : 1
REFUS_REQUEST : 1
VETERAN_VOICE : 1
VISIT_ORAL : 1
NY_CPRS : 1
THE_DRUG : 1
HE_FELT : 1
KIDNEY_ACTIVE : 1
HOME_WITH : 1
TO_GROUP : 4
MINUTES_THIS : 1
BE_REEVALUATED : 1
EUTHYMIC_MOOD : 1
CLOSING_THE : 1
NOTE_BOWEL : 1
INFORMATION_PROVIDED : 2
INITIAL_STUDY : 1
FOR_EPISODE : 1
IDENTIFIED_OUTPATIENT : 1
BEEN_AND : 1
CODE_UNLISTED : 1
STRONGER_SIDE : 1
TO_SUPPORT : 1
ANONYMOUS_NONE : 1
OF_REPORTING : 1
WAS_DISORGANIZED : 1
UNSUCCESSFUL_RELAY : 1
AS_EDITION : 1
DR_APPOINTMENT : 1
HAS_LIT : 1
IN_ABOUT : 2
ACUTE_WITHDRAWAL : 1
REPORTS_WAS : 1
OTHER_STATUS : 1
COOPERATIVE_APPROACHED : 1
IDENTIFIED_OTHER : 1
TALKED_ABOUT : 1
SETTING_HANDWASHING : 1
THE_LOCAL : 1
IF_APPLICABLE : 2
CLINIC_AND : 2
FOLLOWING_OF : 1
CHOL_SCHOOL : 1
THE_AREA : 1
MINNESOTA_AND : 1
FEEL_ABOUT : 1
SENT_TO : 2
MD_RM : 1
HIM_WHAT : 1
BLINDNESS_WAS : 1
INTERACTIONS_PATIENT : 1
ON_MACHINE : 1
THE_TOILET : 2
SCHED_IN : 1
FOR_THEIR : 1
PSYCHIATRY_REVIEW : 1
VISTA_AND : 1
MOTIVATION_OBSERVATIONS : 1
WITH_YOUR : 1
FACE_EYES : 1
CHERYL_LIBERTY : 1
OF_ACTIVE : 1
PAIN_THERE : 1
LIFE_IS : 1
EXAM_BLOOD : 1
SAFETY_CONTACT : 1
IN_EYE : 1
OF_BIRTH : 2
IMPLEMENT_CARE : 1
SECURITY_AND : 1
ADMISSION_VETERAN : 1
PRESENT_ILLNESS : 2
PAIN_THAT : 1
RADIATES_THE : 1
NOT_PAIN : 1
EVENING_PROTECTORS : 1
STABILIZATION_DIFFICULTY : 1
INFECTION_COMES : 1
ORDER_INTACT : 1
BRECTAL_BX : 1
VETS_TO : 1
OCTOBER_DUE : 1
FOLLOWS_WILL : 1
SUPPORTIVE_AND : 1
USER_IMED : 1
CATEGORY_IV : 1
NOTIFICATIONS_OR : 1
MEMBERS_PROBLEMS : 1
PASS_SIGNED : 1
PRODUCTS_IF : 1
SPLINT_TO : 1
GET_RIDE : 1
WAIT_FAMILY : 1
MANY_FACES : 1
AND_HIP : 1
TIME_SIDE : 1
NONVA_MEDICATIONS : 1
MY_KNEE : 2
CONNECTIVE_MEDICATIONS : 1
METHADONE_WAS : 1
DOSE_EFFECTS : 1
NEWS_MIAMI : 1
HIP_INJURY : 1
INJURY_ETC : 1
PROBLEM_WILL : 1
DESIRE_TO : 2
LOSSES_NOW : 1
OR_DISORGANIZED : 1
PLASMA_DIET : 1
HE_ABLE : 3
AND_ME : 1
CHECK_NOTET : 1
OUT_YOUR : 1
MENTAL_ACTIVITIES : 1
AS_OPPOSED : 1
KG_ELEVATED : 1
RISKS_OF : 1
MEDIUM_ACTIVE : 1
WE_DID : 1
IN_NO : 2
VETERANS_RECORD : 1
INDICATION_FOR : 2
AND_THERAPY : 1
PT_RETURNS : 1
ARE_TO : 1
NOR_HE : 1
VISIT_YES : 1
IN_PJS : 1
RECENTLY_PSYCH : 1
COLOR_OTHERS : 1
CONTINUED_INPATIENT : 1
OVER_USE : 1
APPOINTMENTS_RECEIVED : 1
RECOVERY_CSAC : 1
PROBLEMFOCUSED_APPOINTMENTS : 1
THIS_HELP : 1
BE_ISSUE : 1
LOCAL_ANESTHETIC : 1
EVALUATION_AND : 1
TO_MANAGE : 1
HOME_OUTPATIENT : 1
PLASMA_WT : 1
PT_WRETCHING : 1
DIEM_PROGRAM : 1
ENDING_PM : 2
UNDERSIGNED_STAFF : 1
THIS_EXTENSIVE : 1
IN_TELECARE : 2
ORIENTED_DESIRE : 1
STOOL_LOCATION : 1
CE_EXAM : 1
NO_OVER : 1
BE_REMOVED : 1
TREATMENT_IS : 1
QUITE_FASCINATED : 1
FOLLOWING_SCHEDULED : 1
AND_LIT : 1
CONCERN_PLEURITIS : 1
RENAL_NP : 1
MOST_RECENT : 2
OL_CHEST : 1
PAST_WAS : 1
TO_TO : 3
MESSAGE_PATIENT : 1
AND_GROUPS : 2
STATING_LIFE : 1
PATIENT_PROTOCOL : 1
DEFERRED_NURSING : 1
WAS_CALLED : 1
MRS_PERIODONTAL : 1
HELP_HIS : 1
RECIVED_HYDROXYZINEMG : 1
EYE_UNSPECIFIED : 1
FOR_PURPOSE : 1
PATIENTS_VARIATION : 1
NOTET_PT : 1
PT_CONTINENT : 1
UCINATIONS_FOR : 1
INFORMATION_ALERT : 1
AND_WHERE : 1
KG_IN : 1
DOCTOR_SEE : 1
WITH_PT : 1
IDENTIFIED_HIGH : 1
ABOUT_LOSSES : 1
BEEN_DICTATED : 1
BY_PARIKH : 1
LOCK_ON : 1
CONCERN_DEHYDRATION : 1
ABUSIVE_THREATENING : 1
PLAN_ADVISE : 1
MEDICATIONS_NOT : 1
AT_ALL : 1
MY_RISK : 1
TAKE_ACTIVE : 1
OF_NOVEMBER : 1
FROM_AS : 1
GOOD_FROM : 1
OBSERVATIONS_HE : 1
BACK_PAST : 1
THE_PHARMACY : 1
PREFERRENCE_SESSIONS : 1
SOCIAL_FACTORS : 1
PROVIDER_ORDER : 1
SCREEN_CORONARY : 1
TO_PERSONAL : 1
MONITOR_AND : 2
TO_HIM : 2
ANXCIOUS_ON : 1
ATTITUDE_PREDNISOLONE : 1
WERE_AND : 1
NO_RONCHI : 1
DEPENDENCE_BAGLEY : 1
OUTPT_NOTE : 2
ADVERSE_STATES : 1
CBOCURGENT_MET : 1
HELPED_WHAT : 1
UP_URINE : 1
LEARN_BY : 2
DINNER_SERVED : 1
FAMILY_NOT : 1
ATTENDANCE_REQUIRED : 1
PATIENT_HEP : 1
THROUGH_FOLLOWING : 1
COMMENT_KATHERINE : 1
THROUGH_OF : 1
PT_SHOULD : 2
MEAL_ASSISTANCE : 3
ABSENT_MICHELLE : 1
ATTACHED_REPORT : 1
HE_MH : 1
OF_PROVIDERS : 1
COPAY_STATUS : 1
RESTORATIVE_FEEDING : 1
SEE_THIS : 1
MEDICATIONS_LAB : 1
AND_OTHER : 1
STARTED_NAME : 1
WAS_COHERENT : 1
NOTE_EVALUATION : 1
EYE_MEDICATIONS : 1
PATIENT_USED : 3
TO_DENTAL : 1
TO_PICK : 1
ADDITIONAL_MESSAGE : 1
THE_PRACTITIONER : 1
CHOICE_IS : 1
MICHELLE_MS : 1
MOUTH_HYGIENE : 1
JOINT_SURGERY : 1
COGNITIVE_TO : 1
BACK_HIP : 1
HOME_OBJECTIVE : 1
OPT_VISITS : 1
OM_AND : 1
HAND_TO : 1
EYE_IMPROVE : 1
SERVED_YEARS : 1
IN_EXCHANGE : 1
PLASMA_ALSO : 1
CONTINENT_LB : 1
SPECIALTY_CLINIC : 1
AWAKE_AT : 1
RADIOLOGY_REVIEWED : 1
HISTORY_INSTRUCTION : 1
DA_HE : 1
TABLETS_MG : 1
REPORTED_THAT : 5
INTO_TREATMENT : 1
OUTPT_SURGERY : 1
HIS_MOODS : 1
MONTH_TIMES : 1
OUTPATIENT_THERAPY : 1
INFLUENZA_IS : 1
INCIDENTALS_DOCTORS : 1
REPAIR_FOR : 1
ACTIVITIES_ELIMINATION : 1
THOROUGH_SHOULD : 1
REPORTING_HEADACHES : 1
CHECKS_UPDATES : 1
ZZPATIENT_CARE : 4
PAST_AGREES : 1
THREATENING_LANGUAGE : 1
CARE_PHYSICIAN : 1
LVH_LTC : 1
SOBER_VET : 1
DATA_PT : 1
OR_SUMMARY : 1
CHART_AND : 3
CONTROL_AUDITORY : 1
COMES_NOTE : 1
BAG_THIS : 1
DX_PT : 1
TIME_HAD : 1
WHAT_QUESTIONS : 2
DAILY_GAF : 1
TOENAILS_SUBMITTED : 1
MONTH_FUP : 1
ACTIVE_ALLERGIES : 1
QUITE_WITH : 1
EXTENSIVE_ASSISTANCE : 1
IDENTIFIED_CONVERSATION : 1
EMESIS_FOR : 1
CETIRIZINE_MG : 1
SAFETY_PTSD : 1
AID_CONSISTENCY : 1
OPH_DROPS : 1
SEEN_JUNE : 1
ALTERATION_IN : 2
THINK_ABOUT : 1
THAT_VOLUNTARILY : 1
LAST_VISIT : 1
AN_ISSUE : 1
BEEN_CONCERN : 1
VISUAL_SKILLS : 2
WORN_SHE : 1
IN_THIS : 1
IDENTIFIED_PROBLEM : 1
MOODS_VICE : 1
HOME_TO : 1
INCLUDE_SWELLING : 1
PATIENT_HIS : 1
LIVING_CURRENT : 1
LAUGHING_TO : 1
ALERT_GOOD : 1
HE_NOT : 2
SAME_THE : 1
URGENCY_NARRATIVE : 1
AT_US : 1
WAL_MEDICATIONS : 1
BEEN_INSTRUCTED : 1
PROVIDER_KNOW : 1
MEDICATION_MANAGEMENT : 2
NOT_EXPECTED : 1
WERE_REPLACED : 1
ADDITIONAL_LEFT : 1
OUTPATIENT_PRECAUTIONS : 1
OBSERVATIONS_IS : 1
PRESENTING_GEN : 1
INTERESTED_ANOTHER : 1
MOUTH_TIMES : 2
DID_TIMES : 1
PERIODONTAL_TEETH : 1
DOSE_SOLN : 1
WORKER_RESPIRATORY : 1
SOLN_DROPS : 1
QUESTIONNAIRE_PULSE : 1
IMPULSIVE_ACTS : 1
BATH_URINE : 1
ON_HIS : 3
PATIENT_REPORTED : 1
WITHOUT_OD : 1
ATTORNEYS_ARE : 1
LONGER_NO : 1
IN_RIGHT : 2
LEFT_PHYSICIAN : 1
TWICE_THEN : 1
BATHROOM_PRIVILEGES : 2
SCALE_REASON : 1
OF_ORIENTATION : 1
RELATED_COMMUNICATION : 1
STATUS_THE : 1
DESIGNED_INCREASE : 2
FEEL_LIKE : 1
CESSATION_OUTPT : 1
FURTHER_MEDICALLY : 1
THIS_MADE : 1
THESE_TWICE : 1
PT_FOR : 2
THAT_HAS : 4
WHEN_WENT : 1
STATUS_TEXT : 1
IN_REGARDS : 2
ONE_IF : 1
OBJECTIVE_COMMENT : 1
WILL_CHECK : 1
RESTING_BED : 1
CARD_IN : 1
THE_CURRENT : 1
IRON_TIBC : 1
PATIENT_EMERGENCY : 1
PLACE_NUMBER : 3
COLOR_MINIMAL : 1
NUMBER_SAME : 1
PLAN_TREATMENTS : 1
AT_HOME : 3
3A_PHYSICIAN : 1
CONSENT_FOR : 1
GRENADES_IEDS : 1
EMERGENCY_PART : 1
CLINIC_OBJECTIVE : 1
CHOLECALCIFEROL_REVIEWED : 1
TO_MAKE : 1
COMP_PERIODONTAL : 1
CHECKED_APPLICABLE : 1
HIP_RIGHT : 1
NOTE_WE : 1
KEYPAD_THE : 1
BLODGETT_RN : 1
HAVING_VOMITING : 1
WAS_BE : 1
TO_SELF : 1
PAIN_HIS : 1
SNACK_CRUNCHY : 1
FOREARM_SPLINT : 1
NOTE_FLUVASTATIN : 1
FOR_WITH : 1
CURRENT_MEDICATION : 1
QUESTIONS_WAS : 2
TO_FOODS : 1
MAY_BE : 3
DESIGNED_TO : 2
THAT_USES : 1
IS_SOURCE : 1
NOT_LAST : 1
LAST_WK : 1
PAIN_USED : 1
MYOPATHIES_BMS : 1
COMMUNICATION_WIFES : 1
FROM_STATE : 1
HAD_NO : 1
NIACIN_DATE : 1
PATIENT_ALL : 1
ACTIVITIES_SYSTEMS : 1
ASSESS_RISK : 1
ALSO_DRINKING : 1
ANCHORAGE_COMMENTS : 1
THIS_MEDICALLY : 1
BE_DETERMINED : 1
SUICIDAL_IDEATION : 1
BRC_IT : 1
ADDRESS_WRITER : 1
OR_PHYSICIAN : 1
UNIT_TIMES : 1
PASSAGES_WEEKLY : 1
RESPIRATIONS_NURSINGACTIVITIES : 1
TEAM_CHART : 1
FOUR_NO : 1
DOSE_SIDE : 1
FOR_WHEN : 1
RADIATES_DOWN : 1
BS_LOG : 1
DEC_NURSING : 1
IN_ANESTHESIA : 1
REACHED_AT : 1
URINE_THIS : 1
USE_ENDING : 1
SYMPTOMS_COMPLAINTS : 1
LEFT_KNEE : 1
AUTHOR_CATHERINE : 1
OR_AT : 3
MEDICAL_PREOPERATIVE : 1
NOTE_GERD : 1
NOTE_BP : 1
UNTIL_DATE : 1
EAR_DRAINAGE : 1
THIS_YEAROLD : 1
OF_DERM : 1
DIAGNOSIS_FOR : 1
DRAINAGE_ANXIOUS : 1
ELSE_ALONG : 1
DISCHARGED_WITH : 1
DATA_IS : 1
RE_WILL : 1
AND_ANXCIOUS : 1
OF_THERAPY : 1
MORE_ACTIVITY : 1
FOR_YOUR : 1
PERSON_AND : 2
WHAT_IT : 1
HEALTH_PROMOTION : 1
YOUVE_PICKED : 1
TEMPERATURE_FACILITY : 1
ELOPEMENT_RISK : 1
TO_DRAINAGE : 1
FOR_SEEING : 1
CALL_FORMOTEROL : 1
ON_THERE : 1
PLACE_AND : 1
PAKULA_RM : 1
TEAM_CLINIC : 1
SIGNIFICANT_IDENTIFIED : 1
RUNNING_LOW : 1
AND_ALCOHOL : 1
HGB_SCHEDULE : 1
IDENTIFIED_JUL : 1
CATH_WITH : 1
RESULT_INCREASED : 1
NEWS_FROM : 1
TO_LIFESTYLE : 1
DT_SPEC : 2
AUTHOR_BLODGETT : 1
WALK_LEATHER : 1
TO_MEDICAL : 1
SESSION_TKA : 1
ACTIVE_ACTIVE : 1
SOME_MEDICATIONS : 2
FAXED_OF : 1
CONFLICTING_TO : 1
FILL_WITH : 1
RECOMMENDATIONS_CARE : 1
WE_TO : 1
SERVICE_VIETNAM : 1
WORN_DAILY : 1
REACH_AND : 1
NO_REPORTS : 1
PERSON_PLACE : 6
ANTICOAGULANT_SINCE : 1
THIS_INTERVAL : 1
ONE_LOCATION : 1
SKILLS_SESSIONS : 1
OS_PH : 1
HEARING_STATUS : 1
ON_THEIR : 1
DIAGNOSTICS_RATE : 1
SATISFACTORY_MEETS : 1
TO_ALERT : 1
OF_PROVIDER : 1
SUBJECTIVE_PAIN : 1
COMING_THURS : 1
LONG_RUN : 1
TO_QUESTIONNAIRE : 1
FUMARATE_INHL : 1
DECLINED_ASSISTANCE : 1
EVALUATE_FUNCTION : 1
THIS_HAD : 1
AND_MAINTAINS : 1
DAILY_NOTE : 1
ACTIVE_SEE : 1
DIAGNOSIS_SAME : 1
FLARE_OF : 1
IS_OPEN : 1
ANCHORAGE_PC : 2
INSERTION_COLUMBUS : 1
AWAKE_AND : 1
WITHDRAWAL_NOTE : 1
BY_STREAM : 1
NUTRITIONAL_ADDENDUM : 1
WELLBUTRIN_SSN : 1
VISIT_OF : 1
WAS_TO : 12
CURRENTLY_VOICES : 1
STAFF_REQUIRED : 1
BRING_SOME : 1
MEDICATIONS_AND : 2
HELP_GETTING : 1
PUFFS_ACTIVE : 1
NAFZIGER_OUTPATIENT : 1
FOR_IN : 2
NONE_TO : 1
TASK_ASSISTANCE : 1
YEARS_FROM : 1
VISIT_DENIES : 1
SIGNED_AND : 1
USE_PMH : 1
WAS_NEB : 1
LINENS_WERE : 1
AND_AREAS : 1
GETTING_CALL : 1
PATIENT_DOES : 2
THE_TASK : 1
MCG_CFCF : 1
EVAL_PATIENT : 1
NO_IMPAIRMENT : 2
SMT_VAN : 1
LID_SCRUBS : 1
PT_PTS : 1
INDEPENDENT_INPT : 1
AND_NUMBERS : 1
LABORATORY_RADIOLOGY : 1
HIS_AND : 4
BUT_THEN : 1
REQUESTING_BE : 1
THREE_SCARS : 1
PRESSURE_LIGHTS : 1
WILL_RESUME : 1
NAME_ER : 1
NEEDS_TO : 1
LOCATION_AREAS : 1
DIAGNOSIS_SKIN : 1
SAY_IS : 1
WEEKLY_VISITS : 3
RALES_IN : 1
MANAGER_ABDOMINAL : 1
WOOTEN_PATIENT : 1
STRONGER_FOR : 1
UNSPECIFIED_PAIN : 1
FEVER_WEIGHT : 1
PT_FROM : 1
PATIENTS_INTRODUCED : 1
WAY_TO : 1
CARE_NOTE : 5
OBJECTIVE_WILL : 1
ANURIA_DYSURIA : 1
DRUG_CLASS : 2
READ_PRINTED : 1
VERY_HE : 1
MEDICATIONS_INHAL : 1
NKA_THIS : 1
NEW_PAIN : 1
FACE_AND : 1
TO_UNDERSTAND : 1
RESULT_LOST : 1
WISHES_ASSESSMENT : 1
NOT_CAUSING : 1
ACTIVITY_IS : 1
AS_FOR : 1
VITAMIN_SUPPLEMENTATION : 1
STOP_HOURS : 1
ACUTE_ISSUES : 1
OT_GROUP : 1
PATIENTS_BIRDGEWATER : 1
SIGNS_LASTED : 1
PUFFS_BY : 2
INTEREST_PLEASURE : 1
HOUSE_FILMS : 1
PROVIDED_WITH : 1
TAB_PO : 2
PC_PTSD : 1
THE_WE : 1
PAIN_LEVEL : 1
ADDENDUM_MENTAL : 1
DOCTOR_TO : 1
HAVE_CONSULT : 1
SERVICE_ERA : 1
OR_AND : 1
RECONCILIATION_FOR : 1
APPT_ON : 1
YOUR_NEXT : 1
FROM_VADENVER : 1
THIS_FORMOTEROL : 1
NOW_WILL : 1
REGARDS_UPCOMING : 1
FAIR_PROGRESS : 1
HANLIN_REPAIR : 1
RADIOLOGY_EXAM : 1
BEEN_ON : 1
MORE_PHYSICIAN : 1
APR_SAT : 1
FEELS_HE : 1
AND_MEDICARE : 1
FOR_FOLLOWING : 1
PAIN_SENSORY : 1
DENIES_AMBULATORY : 1
NONE_IMMUNIZATION : 1
TRY_REGAIN : 1
SCORE_OF : 1
OF_RESPIRATIONS : 1
GUARDIAN_OTHER : 1
LIVING_WOUNDS : 1
TASK_REQUIRES : 3
LOSS_NONE : 1
NEUROPSYCHE_BEFORE : 1
ANYTHING_NEW : 1
PRODUCTS_BE : 1
CAME_CLINIC : 1
NON_FASTING : 1
NPH_INSULIN : 1
OR_BREASTFEEDING : 1
WORST_IN : 1
MEMBERS_HCL : 1
OR_OUT : 1
WILL_REMOVED : 1
TENNIS_FOREARM : 1
IS_OLD : 2
EAGER_OT : 1
IN_PAIN : 1
APPT_LABORATORY : 1
THIS_OF : 1
INSERTION_IN : 1
ABT_STATES : 1
FOR_THE : 9
PAIN_BUT : 1
DAILY_CURRENT : 1
VMCW_ER : 1
INDICATED_TO : 1
NEUROPATHY_ETC : 1
HAS_THIS : 1
MOBILITY_BRC : 1
TENNIS_ELBOW : 2
DOM_SCREENING : 1
WITH_JR : 1
THERAPY_ACETAMINOPHEN : 1
USE_CUTTER : 1
PT_APPT : 1
OF_SESSIONS : 3
CTA_EGD : 1
COMPLIANCE_NO : 1
WORKS_COMES : 1
COMPLAINTS_THIS : 1
PREOP_CONVERSE : 1
PTSD_COGNITIVE : 1
THE_BACK : 1
BE_JUNE : 1
OTHERS_PROVIDED : 1
THE_PROCEDURE : 1
IMAGING_BARRIERS : 1
THEN_INTAKE : 1
PERIOD_OF : 1
REQUESTED_FOR : 1
OF_UPLIFTING : 1
BLOOD_IN : 1
THE_FROM : 1
IMED_AND : 1
ACTIVITIES_OF : 3
MEDICAL_WRITER : 1
BELIEVES_THIS : 1
ORAL_ACTIVE : 1
WILL_TO : 2
THE_BRC : 2
THROUGH_VISTA : 1
PTS_PUT : 1
WAS_CONTINENT : 2
YELLOW_PREDNISOLONE : 1
AREAS_DERM : 1
WOULD_WITH : 1
SHOWED_LVH : 1
MAIL_SUPPLY : 1
FABRICATION_BEFORE : 1
LATE_CONTROL : 1
IN_PORTIONS : 1
SEE_THE : 1
NO_PE : 1
EVEN_DIFFERENT : 1
NOTE_RN : 1
BE_LIKE : 1
IN_IDENTIFIED : 1
CONTINENT_WEIGHT : 1
MR_IS : 2
ATTENDING_DURING : 1
POST_TREATMENT : 1
MG_DATA : 1
CONSULT_RECOMMENDATION : 1
DOWN_AND : 1
APPOINTMENTS_THIS : 1
ACCIDENT_PERSEVERATES : 1
THIS_BLADDER : 1
THE_AMONGST : 1
BAND_LEGIBLE : 1
AND_VETERAN : 2
DATE_OF : 6
HEARING_LOSS : 1
ACTIVE_NA : 1
OR_BRIEF : 1
AND_THOUGHTS : 1
PENG_MD : 1
CORRECTION_OD : 1
PICK_UP : 1
TOLD_IN : 1
CLINIC_THAMMAIAH : 1
BP_CTA : 1
MAY_TABLET : 1
PROGRAM_WEIGHT : 1
THAN_CITALOPRAM : 1
NURSING_CURRENTLY : 1
MAINTAINS_SKIN : 1
TO_TRIED : 1
ETC_QUESTIONS : 1
IMPROVE_FLUID : 1
MATERIALS_SUCH : 1
HAD_CONFLICTING : 1
WENT_TO : 1
SELFCARE_OF : 1
IN_SO : 1
FOR_MED : 2
MOUTH_BY : 1
REPORTS_MULTIPLE : 1
MIN_DIDACTIC : 1
SEE_HAND : 1
HI_AT : 1
EXPRESSED_AT : 1
SYSTEM_HOURS : 1
WITH_TREATMENT : 1
AS_DIRECTED : 1
CLC_PROGRESS : 1
SECURITY_NUMBER : 1
NO_CONCERNS : 1
ATYPICAL_PAIN : 1
SURGICAL_POST : 1
IS_MORE : 1
THOUGHT_HIS : 1
FOR_PAIN : 2
BUT_VOMITING : 1
TOBACCO_HOMELESS : 1
DR_PAIN : 1
MALIGNANT_CSCOPE : 1
CONTINUES_REPORT : 1
NEW_IN : 1
MANAGER_SPINE : 1
CARE_INVOLVING : 1
ON_HE : 1
YEAR_THEN : 1
FEBRUARY_HE : 1
QUESTIONS_PROVIDED : 1
UNTIL_GET : 1
BE_WORN : 1
OF_PHYSICIAN : 2
BE_ELIMINATION : 1
IDENTIFIED_INCIDENTALS : 1
STRESSFUL_HER : 1
USE_RESPIRATORY : 1
INDVIDUAL_INVOLVE : 1
LASTED_BUN : 1
FROM_TO : 1
MODALITY_ULA : 1
MEDICAL_PATIENTS : 1
WENT_PICK : 1
TO_VACCINE : 1
SIGNS_BUN : 1
OUTPT_MEDICATION : 1
REVIEWED_TESTS : 1
DATE_CHARACTER : 1
BOWEL_AMOUNT : 1
SAFETY_PATIENTS : 1
AT_YOUR : 1
DISORDER_ASSISTANCE : 1
VOLUNTARY_HE : 1
CONCERNS_WAS : 1
TO_SMT : 1
MH_WORK : 2
HERNIA_WEAKNESS : 1
LAST_DOCUMENTED : 1
IMPULSIVE_WITH : 1
THE_BRONCHOSCOPE : 1
SSN_CASA : 1
MAY_BENEFIT : 1
CHANGE_THE : 1
VARIABLE_OT : 1
NERVOUS_OBSERVATION : 1
DEAR_MRS : 1
THAT_COME : 1
WHAT_WOULD : 1
DISCIPLINES_IN : 1
ASSISTANCE_RESIDENT : 1
PROVIDING_TRANSPORTATION : 1
REHABKINESIOTHERAPY_BREATH : 1
ON_IMPORTANCE : 1
DESIRE_MOTIVATION : 2
OF_LS : 3
INJURY_SKIN : 1
FOLLOWING_OUTPATIENT : 1
USE_ONLY : 1
RESIDENT_SOCIAL : 1
FOR_THERAPY : 2
IMPAIRMENT_RELATED : 1
PURULENT_BUT : 1
HP_SINCE : 1
CLOSED_STITCHES : 2
AS_WILL : 1
AT_THE : 5
AGO_CURRENT : 1
ACCEPTING_TAP : 1
MAIL_CARD : 1
SPLIT_TABLETS : 1
FOR_TABLETS : 1
AND_SUMMARY : 1
FOR_DIABETES : 1
MR_PROVIDED : 1
ONE_OF : 1
VISIT_LABS : 1
RISK_FALLS : 1
WAS_INCONTINENT : 1
SEATED_POSITION : 1
NOT_REQUIRE : 1
NAME_WHERE : 1
SHIFT_OPHTHALMOLOGY : 1
CURRENT_MEDICATIONS : 1
NOTIFIED_OBJECTIVE : 1
HAS_APPT : 1
REQUESTED_REVIEW : 1
WITH_IDEA : 1
SPECIFIED_HOUSING : 2
OF_ABILITY : 1
TO_VA : 1
REFUS_FOR : 1
HAVE_EQUIPMENT : 1
ON_MAY : 1
CARD_FOR : 1
SAFETY_HAS : 1
ONE_TO : 1
INDICATION_CORONARY : 1
OUTPATIENT_NOT : 1
STITCHES_PRIMARY : 1
PERSONAL_GOAL : 1
TO_POSITIONING : 1
IN_VA : 1
NO_MEAL : 1
ID_REVIEW : 1
HOURS_PROVIDED : 1
DURING_SHIFT : 7
TO_POIKILODERMATOUS : 1
APPT_WITH : 1
THOUGH_AND : 1
HE_HERE : 1
ICDCM_SARAFIAN : 1
THEMSELVES_THERE : 1
COHERENT_WITH : 1
DOCUMENT_VISTA : 1
TA_NS : 1
YOU_SHOULD : 1
CLINIC_PROVIDED : 1
AXIS_DEFERRED : 1
AND_PROVIDE : 1
WAS_FOR : 1
TIME_NUMBER : 2
SMILING_TO : 2
VISTA_IMAGING : 4
ALLERGIES_SEE : 2
EXPLAINED_TO : 1
DO_THREE : 1
NURSING_WAS : 1
GIVEN_THE : 3
AT_TASK : 1
NOT_OF : 2
TO_FOLLOWING : 1
PULSE_ON : 1
CALCULATION_DIET : 1
GOAL_PLAN : 1
ACTIVITY_EVERY : 1
MAIL_TO : 1
PATIENT_DID : 1
ROBITUSSIN_AC : 1
BACK_THE : 1
ACCESSED_VISTA : 1
OSTEOARTHRITIS_THE : 1
PUT_ON : 1
TABLET_CUTTER : 2
SEATED_PAIN : 1
APR_PROVIDED : 1
NO_ABSCESS : 1
PT_REPORTS : 2
MIAMI_SAID : 1
ADDENDUM_DISCIPLINES : 1
WARM_DRY : 1
TRAINING_WITH : 1
PRN_LESION : 1
CONTACT_PHYSICIAN : 1
PATIENTS_THEMSELVES : 1
EDEMA_EXTREMITIES : 1
SPENCER_THE : 1
AND_CLOSING : 1
NO_PSYCHOMOTOR : 1
OPHTHALMOLOGY_NOTE : 1
CENTER_ELECTRONIC : 1
STATUS_GENITOURINARY : 1
ONE_REPORTED : 1
PRECAUTIONS_IN : 1
SIGNED_MYSELF : 1
ACTIVITIES_BOWEL : 1
INHALE_PUFFS : 3
HEALTH_OUTSIDE : 1
TO_DO : 1
OF_YOUVE : 1
BEFORE_THEY : 1
TEST_BEFORE : 1
YOU_ARE : 1
THEIR_FAMILY : 1
SENSORY_NO : 1
INTEG_WARM : 1
THE_ARMY : 1
STRETCH_ARE : 1
MANAGEMENT_CODE : 1
NO_SIGNIFICANT : 1
EUTHYMIC_EUTHYMIC : 1
BY_MINNESOTA : 1
HEALTH_SUMARRY : 1
IMAGERY_MUSCLE : 1
EACH_FROM : 1
DOWN_MY : 1
TESTICULAR_PAIN : 1
INFORMATION_OGOING : 1
WILL_DICLOFENAC : 1
BRING_UP : 1
HIS_AT : 1
WPAT_STUDY : 1
FILLED_ROTATOR : 1
NEPEC_PREVIOUSLY : 1
HAS_CORE : 1
ATTENDING_SURGEON : 1
FOR_CONTINENT : 1
ANY_PATCHES : 1
ARE_AUDITORY : 1
NSS_BLOOD : 1
TO_SUPERVISOR : 1
WRITTEN_ON : 1
RADIOLOGY_SPECIAL : 1
WAS_ENROLLED : 1
EXTENSION_KNEE : 1
NOW_THE : 1
TUBEFEEDING_METHOD : 1
SO_REMAINING : 1
OBTAINING_KNOX : 1
ACCEPTANCE_COMMITMENT : 1
HIS_HER : 1
ANTIBIOTICS_AND : 1
SURGERY_NOTE : 1
TASK_NO : 3
LEGS_AND : 1
CONCURRED_WITH : 1
BS_RECOMMENDATIONS : 1
NOTE_THAT : 1
THERAPY_AFFECT : 1
LEARN_ADDENDUM : 1
IS_OXYGEN : 1
LABS_NON : 1
GOAL_WILL : 1
RESPONSE_EXPLAIN : 1
ACTIVE_AN : 1
PREOPERATIVE_PATIENT : 1
DONE_WAL : 1
TIME_CS : 1
AWAKE_ORIENTED : 1
COMES_NURSING : 1
HAD_ARGUMENT : 1
GAIN_TIME : 1
LIVING_PATIENT : 1
HEALTH_AS : 1
AGO_DID : 1
GOD_PATIENT : 1
MEDICATION_RECONCILIATION : 2
TO_ON : 4
RESPIRATORY_DISTRESS : 1
QUESTIONS_YOU : 1
GERD_SARAFIAN : 1
CS_NONE : 1
THANKS_TENDINITIS : 1
BEDSPREAD_REQUESTED : 1
RESIDENT_PLAN : 1
TELENURSE_NOTE : 1
IN_ACTIVITY : 1
ADL_BLADDER : 1
FOR_UNSPECIFIED : 1
SHE_CHRONIC : 1
AND_WE : 1
OF_ATTENDING : 2
ATTENDANCE_DIETICIAN : 1
PAIN_TAKE : 1
MED_CHECK : 1
TENDANCE_MANAGEMENT : 1
NOTE_FILE : 1
PING_MOST : 1
LEFT_TESTICULAR : 1
NO_AMBULATION : 1
IS_ADDITIONAL : 1
CONCERNS_BY : 1
AT_LAB : 1
USE_TABLET : 1
AND_SHELLED : 1
MEETS_PATIENTS : 1
MORE_EVERY : 1
STATES_THE : 1
AND_SAFETY : 1
SARAH_LID : 1
DEVIATIONS_HE : 1
EYE_COMP : 1
TO_CARD : 1
RIGHT_WEIGHT : 1
TIMES_DA : 1
CHECK_ABOUT : 2
TETANUS_REQUIRES : 1
SCALE_NUM : 1
METHOD_NO : 1
DATE_ADMISSION : 1
NOTE_ICDCM : 1
OR_PROBLEMS : 2
JUSTIFICATION_FOR : 1
SAD_TREMULAS : 1
AREA_PEERS : 1
ORTHOPNEA_AND : 1
AT_AM : 2
THERE_MANY : 1
CLIENT_IN : 1
LACK_OF : 2
ANGER_MANAGEMENT : 1
CUFF_RISKS : 1
TEAM_HEARING : 1
DURING_ENTIRE : 1
PHONE_CHECK : 1
HE_BEEN : 5
FOCUSING_STOPPED : 1
CLINIC_DERM : 1
PCP_FOR : 1
EPIS_OF : 1
EF_LVH : 1
REG_UG : 1
DIST_OF : 1
APAP_PAIN : 1
LIST_CABINSOME : 1
LIST_OF : 1
GRADUATED_THROUGH : 1
WILL_INJECTED : 1
BREATH_DENIES : 1
HP_REVIEWED : 1
SKILLS_HOWEVER : 1
PLACE_OF : 1
THIS_AND : 1
HAS_RE : 1
PHYSICIAN_MN : 2
RIGTH_THYROID : 1
PRESENT_ENTIRE : 1
JR_CHIEF : 1
GLA_PRESCRIBED : 1
BEEN_ANXIETY : 1
MCGOWAN_FROM : 1
LYING_BED : 1
HER_UNTIL : 1
WITH_ANTICOAGULATION : 1
YELLED_SIGNED : 1
PATIENT_RESIDENT : 1
OFFICE_NOT : 1
ANY_METHOD : 1
CALL_HIS : 1
SHIFT_ZZPATIENT : 1
CNA_HEARD : 1
THIS_NONTENDER : 1
UL_INFORMED : 1
IS_CHRONIC : 1
TAKEN_THE : 1
SHIFT_HELP : 1
IN_OFFICE : 1
MAR_SEX : 1
OF_DONE : 1
WAS_ANXIETY : 1
CHEST_PAIN : 2
GET_MORE : 1
THE_TISSUE : 2
EXTENSION_OF : 1
SCORE_DIAGNOSIS : 1
TRAINING_MIMMS : 1
EXTERNAL_USE : 1
PARTICIPATION_LEVEL : 1
DICT_INDICATED : 1
INFORMATION_NO : 1
GERD_ICDCM : 1
GIVEN_NEB : 1
OFTEN_DOWN : 1
CHEST_GERD : 1
HIS_OVER : 1
ELSE_WITH : 1
ON_SC : 1
OF_DIRECT : 1
THE_TONGUE : 1
IT_DIFFININTLY : 1
RUN_LBS : 1
ENROLLED_TO : 1
AGO_CLIENT : 1
SEND_LETTER : 1
HERE_OR : 1
HIM_THIS : 1
IS_PRESENT : 1
SC_ADDENDUM : 1
MENTAL_FOR : 1
OPTOMETRY_CONSULT : 1
PER_WISHES : 2
IMPLEMENTED_PULMONARY : 1
APPOINTMENT_INFORMATION : 1
OTHER_UNSCHEDULED : 1
AND_FINANCES : 1
UNIT_AND : 1
CS_ANONYMOUS : 1
RATIONAL_SKILLS : 1
PENG_HIS : 1
QUARTERLY_STAFF : 1
THE_GROUP : 4
SEE_IN : 2
STATUS_OF : 2
TO_PROVIDER : 1
IS_CLOSELY : 1
PRESENTED_SEVERAL : 1
MISSING_PC : 1
WAS_SEEN : 3
LBS_THE : 1
JUN_BY : 1
CONSTANT_BE : 1
NOTE_DT : 1
DEMENTIA_NO : 1
EXPERTISE_OF : 1
MORE_THAN : 3
EAT_NONPHARMACOLOGICAL : 1
NA_MG : 3
BELIEVES_CURRENT : 1
INTERVIEW_PATIENT : 1
OUTSIDE_FACILITY : 1
NARRATIVE_RELAPSE : 1
OF_VETERAN : 1
TEMP_VESTING : 1
ADDENDUM_WHILE : 1
NOTARY_PAIN : 1
HANDS_NOTED : 1
IS_COMING : 1
TO_HANLIN : 1
DENIES_HEADACHE : 1
AND_PERSEVERATES : 1
MEDICAL_NO : 1
OR_RESCHEDULE : 1
COMPREHENSIVE_EXAM : 1
LUNGS_CTA : 1
DIFFERENT_PCP : 1
MS_WHEN : 1
INTO_IN : 1
HISTORY_POTENTIAL : 1
CLC_ON : 2
SEEING_AT : 1
ALBUTEROL_UNIT : 1
AUDITORY_TRAUMATIC : 1
HIS_BACK : 1
TO_ER : 1
DUE_WHAT : 1
FLUIDS_FOR : 1
FOR_ASSISTANCE : 1
INVOLVE_ORCHITIS : 1
ABOUT_AND : 1
AFFECT_MOOD : 1
UNTIL_NOTICE : 1
DOING_LENGTH : 1
TO_BE : 7
PERSONAL_CARE : 3
TA_TR : 1
FOOT_TOES : 1
HIS_DIEM : 1
IS_EX : 1
THE_EVENING : 2
VETERANS_PHYSICIAN : 2
THERAPY_DESCRIPTION : 1
PLAN_FURTHER : 1
PLACE_MEAL : 1
INTO_RIGHT : 1
WITHOUT_EMESIS : 1
FOR_REQUEST : 1
COMPREHENSIVE_PT : 1
HOURS_NUTRITION : 1
SAME_CLERK : 1
HE_CONFLICTING : 1
EMILY_ETSU : 1
TRAINING_WILL : 1
BLADDER_BLADDER : 1
NUMBER_MENTAL : 1
INCLUDING_PT : 1
CHEMICAL_NAIL : 1
COMPLAINT_HERE : 1
CLINIC_DICT : 1
CHECK_STDS : 1
AND_MG : 1
HAVE_FOLLOWING : 1
WAS_WELL : 1
THE_QUIET : 1
THE_VETERAN : 3
COMPLIANCE_MEDS : 1
LEVEL_QUALITY : 1
ARE_WHO : 1
PREVIOUSLY_NOW : 1
INHL_ML : 1
HAVE_REMAINING : 1
THE_HEALTH : 1
WE_HAD : 1
ADDENDUM_TASK : 1
WITH_THE : 8
BACK_RIGHT : 1
TAP_DAYTON : 1
THIS_EPISODE : 1
WELL_HE : 1
BREATH_CHOLECALCIFEROL : 1
COUGH_AOX : 1
IN_THINGS : 1
CURRENT_GLA : 1
HEALTH_CARE : 1
TO_ALLERGIES : 1
OVERCOAT_COLOR : 1
OF_IDENTIFIED : 1
TO_BLOOD : 1
HBPC_SORTING : 1
LOWER_AND : 1
ON_AT : 1
AT_ST : 1
BOWEL_MOVEMENTS : 4
ACTIVE_NONVA : 2
IS_TIME : 1
BY_LIMO : 1
OF_SOME : 1
TWICE_LEVOTHYROXINE : 1
ADLS_CONTINENT : 1
PT_UNSUCCESSFUL : 1
NP_CLINIC : 1
WHEN_LIKE : 1
COUGH_ADDED : 1
POSTPROCEDURE_SAME : 1
REMOVAL_OF : 1
ETOH_PREVIOUSLY : 1
OR_CALL : 1
ANTICOAGULATION_CLINIC : 1
RESPIRATORY_TREATMENTS : 1
SHEET_PULSE : 1
BE_DISTANCE : 1
ONEHALF_TABLET : 1
SHORTNESS_STAFF : 1
GIVE_TRY : 1
MR_WILL : 1
THAT_WHAT : 1
DROPS_IN : 1
ON_READINGS : 1
UNLESS_NOTED : 1
YES_DOCTOR : 1
CONSENT_TOTAL : 1
ORIENTED_PERSON : 6
IT_BE : 1
CE_DENTAL : 1
INDICATED_BELOW : 1
BUILDING_ON : 1
GROUP_AS : 1
MYSELF_ACCEPTED : 1
PAIN_PERCEPTION : 1
PT_YEARS : 1
LPN_FOR : 1
ARE_FROM : 1
CHECK_IN : 3
EPICONDYLAR_REGION : 1
FOUR_FOR : 1
OUTSIDE_PT : 1
READ_IN : 1
LOOK_PHYSICIAN : 1
VERDICT_CT : 1
READ_MATERIALS : 1
SHIFT_AMOUNT : 1
BP_NO : 1
QUADRANT_THE : 1
IF_HE : 1
FOR_DOM : 1
AMOUNT_STOOL : 6
INSERTED_ABDOMINAL : 1
DEPENDENCY_PATIENT : 1
TOILET_CONSISTENCY : 1
HOUSE_REMINDER : 1
NO_EPIS : 1
PARTICIPATION_IN : 1
DATE_FOOD : 1
HOME_WRITER : 1
MEDS_NO : 1
CALL_APPT : 1
HAS_BEEN : 21
SETTING_THOROUGH : 1
PAIN_NOTICED : 1
IN_CONNECTIVE : 1
UNSPECIFIED_COUNSELING : 1
LIMITED_OF : 1
GET_CHECK : 2
AT_BEGINNING : 1
HE_DEMANDED : 1
GIVEN_CEFAZ : 1
REQUIRES_PROVIDER : 1
ASSESSMENT_ONO : 1
MENTAL_NOTE : 1
DIARRHEA_ANURIA : 1
CARE_CONTINENT : 1
DEL_TASK : 1
SHOWER_ASSISTANCE : 1
OTHER_FROM : 1
CALL_AND : 2
ACTIVE_ASSOCIATE : 1
RRR_REQUESTED : 1
SELECTED_FROM : 1
ELBOW_FOREARM : 1
WORKING_EXTRA : 1
MODIFIED_FINDINGS : 1
INTENSITY_PATIENT : 1
SKIN_COLOR : 2
MINNESOTA_HEAD : 1
CANCELLED_CURRENTLY : 1
KNOW_ABOUT : 1
DIRECTED_ACTIVE : 1
PROGRESS_BEGINNING : 1
PH_NERVE : 1
FOR_MILD : 1
ALTHOUGH_THIS : 1
HOURS_NAPPING : 1
OF_FOLLOWING : 1
COMES_IN : 1
WAS_CONVEYS : 1
NURSING_HOSPICE : 1
WITH_NSS : 1
ANXIETY_HAS : 1
VISIT_PREFERS : 1
HAVE_VEHICLE : 1
HEENT_HEADACHE : 1
REQUESTING_TO : 1
BEFORE_LEAVING : 1
SUPERVISION_LUNCH : 1
LEARNER_ADDENDUM : 1
ACTIVE_IRON : 1
VERIFIED_PATIENT : 1
DENIES_ANY : 1
PROBLEM_UNSPECIFIED : 1
PRACTICE_AND : 1
CONSULT_RESULT : 1
TO_OR : 1
ML_VIAL : 1
DIFFICULTIES_HE : 1
DICTATED_PROVIDED : 1
TIME_ASSISTANCE : 1
SUPERVISING_ADDENDUM : 1
VISIT_PASSED : 1
MG_CAP : 1
MEAL_REQUIRES : 2
BUT_HAVING : 1
ANSWER_QUESTIONS : 1
HER_TENNIS : 1
GROUP_URINARY : 1
NOTED_DILATED : 1
VOICE_UNTIL : 1
NEIGHBOR_AND : 1
HYPERLIPIDEMIA_ICDCM : 1
HAS_DRAINING : 1
PAIN_SAFETY : 1
IRRITABILITY_DAILY : 1
FEELS_LIKE : 1
OF_NOT : 4
VEIN_THE : 1
DONE_HOME : 1
PATIENT_IS : 6
ADDENDUM_NEEDS : 1
PAIN_THIS : 1
WIDE_FAX : 1
ELIMINATION_COLOR : 1
PENDENCE_HE : 1
ALWAYS_BEEN : 1
SET_ASSISTANCE : 2
BE_THROUGH : 1
MED_MONITOR : 1
SOUND_LIKE : 1
TAKE_TWO : 1
FOUNDATION_FOR : 1
OF_COPD : 1
PSYCHOMOTOR_OTHER : 1
BEHAVIORS_MAY : 1
MD_WE : 1
PLAN_PATIENT : 1
LIT_THE : 1
UNTIL_SUPPLY : 1
TACTILE_TIMER : 1
CATEGORIES_AND : 1
SINCE_APR : 1
HANDWASHING_SHOULD : 1
PRINT_DENIES : 1
PATIENT_BECAME : 1
RESULTS_CALLER : 1
LEARNER_RESPONSE : 1
IN_BASE : 1
WARNING_SORTING : 1
HOURS_RESP : 1
SKIN_OVERCOAT : 1
COMMANDS_NOT : 1
MINUTES_VET : 1
MOBILITY_TO : 1
WAS_CURRENT : 1
EF_LTC : 1
IF_PACKS : 1
OF_WAY : 1
REQUESTED_GIVEN : 1
BUT_WITH : 1
BEEN_IN : 4
OF_RELAXATION : 1
INHALE_ACTIVE : 1
THIS_AXIS : 1
COMMON_AT : 1
CONTINUE_PRESENT : 1
INSTRUCTIONS_MEMBERS : 1
HEARING_VOICES : 1
THAMMAIAH_VETERANS : 1
INFLUENZA_QUESTIONNAIRE : 1
HE_HIT : 1
WHEN_NPO : 1
OF_MEDS : 1
DRUG_MAY : 1
APPOINTMENT_SEP : 1
FEET_REASON : 1
START_SUPPLEMENTATION : 1
CONTINUED_FOR : 1
AND_THE : 6
MEETS_PAIN : 1
PREDNISOLONE_ACET : 2
PROGRESS_NOTE : 7
REPEAT_PAIN : 1
PT_REEVALUATED : 1
TIMES_FOR : 1
MN_NOV : 1
PATIENT_THAT : 1
AND_START : 1
THIS_MALE : 1
AND_FOLLOWUP : 1
MHICM_MAINTAIN : 1
WHAT_PAIN : 1
MANAGEMENT_SERVICE : 1
GLYBURIDE_AC : 1
HOME_UP : 1
RNBC_RT : 1
IN_FILM : 1
DIST_NAME : 1
REQUESTING_RESULTS : 1
TELEPHONE_MHC : 1
ON_SAME : 1
PATIENTS_IDENTIFICATION : 1
HIS_KNEE : 1
LOSS_VERTIGO : 1
RECOMMENDATIONS_INVOLVING : 1
THAT_IT : 1
ISSUED_REQUESTED : 1
BLOOD_WILL : 1
CALL_SW : 1
HE_TO : 2
BARRIERS_SELECT : 1
STITCHES_MISSING : 1
HIS_PAIN : 1
THE_INTERVENTIONS : 1
THE_BRCS : 1
GOING_TO : 3
SCHOOL_FOOTBALL : 1
ZZPATIENT_ADL : 4
SPECIAL_RADIOLOGY : 1
BOWEL_FEEDING : 1
OFF_REFERRING : 1
MEDICAL_SURGICAL : 1
RNBC_WOOTEN : 1
CHAINS_GOAL : 1
DEVICES_HAD : 1
NONE_VIEW : 1
BARRIERS_TO : 3
SPEECH_COHERENT : 1
QUESTIONNAIRE_ANY : 1
ROUTINE_OBSERVATIONS : 1
VOICE_TO : 1
DOING_THINGS : 1
AI_THROMBUS : 1
PARIKH_DISCHARGED : 1
INTEG_DRY : 1
REACTION_INABILITY : 1
BY_USER : 1
AND_THANKED : 1
AND_REVIEW : 1
ON_PT : 2
OSAC_GROUP : 1
BE_ACCESSED : 1
ABOUT_UNIT : 1
DID_IS : 1
ON_OF : 1
RESIDENT_BUT : 1
NURSING_POTENTIAL : 1
CALL_PROVIDER : 1
RESPONSES_OF : 1
WITH_LLI : 1
PCP_WOULD : 1
FOR_THURS : 1
CLINIC_COMPLAINING : 1
TERMS_VETS : 1
FOR_THEN : 1
HE_NEEDS : 1
POIKILODERMATOUS_TEMPERATURE : 1
SEEKING_HELP : 1
GROUP_GROUP : 1
REQUESTED_RETURN : 1
OF_YEAR : 1
ELIMINATION_OF : 1
NOW_IS : 1
FEB_CLINIC : 1
LEVOTHYROXINE_NA : 1
THAT_SOME : 1
SIGNIFICANT_CHANGE : 1
HE_NURSING : 3
WITHIN_HRS : 1
PERCEPTION_NO : 1
INPATIENT_MEDICATION : 1
MONTH_PM : 1
TAKE_ABT : 1
HAS_WITH : 1
THEIR_THE : 1
REFER_BACK : 1
DISCUSSED_PATIENT : 1
VOLUNTARY_HOSPITALIZATION : 1
LOWER_BACK : 3
UP_DEGREES : 1
CM_IDENTIFIED : 1
WAS_HIS : 1
LIGHT_IS : 1
BLIND_GLAUCOMA : 1
NEURO_ALERT : 1
INSTRUCTIONS_AND : 2
GEN_RHYTHM : 1
HOSPITAL_TASK : 1
TREMORS_HANDS : 1
MOST_OF : 1
TEETH_UL : 1
THURS_MG : 1
TO_IN : 4
WITH_EMILY : 1
ER_CORRECTLY : 1
AND_MOBILITY : 2
MOST_IMPORTANT : 1
CONTINUE_MG : 1
PICKED_UP : 1
OPERATE_AS : 1
REPORTED_PAIN : 1
HE_ABOUT : 1
HIS_HIP : 1
WOULD_BE : 2
ANESTHESIA_HP : 2
WOUND_CARE : 1
NUMBER_OF : 11
WAS_EUTHYMIC : 1
UMBILICAL_HERNIA : 1
HYGIENE_URINE : 1
ANOTHER_APPOINTMENT : 1
HEIGHT_CM : 3
ADDENDUM_HAS : 1
FRIEND_ENCOURAGED : 1
NONPHARMACOLOGICAL_AFFECT : 1
SKILLS_WILL : 2
CHRONIC_ADDENDUM : 1
ADDENDUM_SNACK : 1
NODULE_INFECTION : 1
FLOW_REASONS : 1
WITH_DEMENTIA : 1
OUTSIDE_AND : 1
TOENAIL_IS : 1
ONE_PATIENT : 1
THAT_MILD : 1
HAS_CUT : 1
MANAGEMENT_DT : 1
THEY_THAT : 2
REVIEWED_DISCUSSED : 1
NOW_LOOK : 1
DIFFICULTY_AND : 1
RECORD_STATUS : 1
PT_COMING : 1
AND_OFTEN : 1
COMPUTERIZED_LIST : 1
IT_AS : 1
DURING_HIS : 1
DATE_SEVERAL : 1
OFFERED_HAS : 1
OF_RATIONAL : 1
MCG_INHL : 1
HAS_INCREASINGLY : 1
AN_PALPITATIONS : 1
PRN_FOR : 1
HYPERPIGMENTED_BORDER : 1
HERE_FOR : 4
MEMBERS_CURRENT : 1
TREATMENT_SESSION : 1
HELP_AND : 1
LOWER_WAS : 1
HAS_TO : 2
IMAGING_OR : 1
WITNESSED_PROTECTORS : 1
OF_COMPLAINT : 1
INJURY_IN : 2
SOFT_HIP : 1
SEEN_DEL : 1
SAME_PHYSICIAN : 1
ON_ETSU : 1
WAS_PAIN : 1
ACCEPTED_FOR : 1
ADDENDUM_HEALTH : 1
THEY_SAID : 1
SIG_INHALE : 1
BMI_HIS : 1
TEMPORARILY_DUE : 1
IN_PREOP : 1
IS_HERE : 1
BLOOD_PRODUCTS : 2
WHEN_APPROACHED : 1
SEEN_BY : 1
CONSTITUTIONAL_WEIGHT : 1
HEADACHES_DIFFICULTY : 1
ACCEPT_THAT : 1
MG_THURSFRISATSUN : 1
ACTIVE_CONDITION : 1
ISSUES_HAD : 1
IN_ARM : 1
ADDITIONAL_REASONS : 1
CAPACITY_CONSENT : 1
FOOD_IV : 1
GOAL_THERE : 1
HYPERPIGMENTED_THERE : 1
COMPLETE_BED : 1
MSW_LICSW : 1
STAFF_YELLED : 1
FOR_MALIGNANT : 1
ALL_HOME : 1
WEAKNESS_CONNECTIVE : 1
NO_PATIENT : 1
AND_SEEN : 1
SKIN_CALL : 1
AC_QHOURS : 1
ATTENDANCE_PHYSICIAN : 1
WILL_NO : 1
OPEN_OF : 1
INVOLVING_ORTHOPTIC : 1
GENERAL_MENTAL : 1
MAY_PROGRESS : 1
WO_BACK : 1
STRETCH_AND : 1
FORM_ENROLLED : 1
HAD_APPTS : 1
ABLE_SEE : 1
GOAL_RANGE : 1
BUT_MY : 1
REMOVED_PT : 1
EXTREME_OCR : 1
FALL_IN : 3
THEY_ARE : 2
PARKINSONS_SINCE : 1
LEAVING_SAID : 1
OS_OPTIC : 1
RESULT_NEUROLOGICAL : 1
SESSIONS_RESUME : 1
WAS_TRAINING : 1
BY_TETANUS : 1
OPT_FALL : 1
ERYTHEMA_BX : 1
PLANSEVERE_WITHDRAWAL : 1
WILL_ENCOURAGED : 1
CLINIC_ADDITIONAL : 1
PATIENT_ER : 1
TROPIC_OU : 1
PT_EVALUATED : 1
STRONG_WEAK : 1
ON_QUARTERLY : 1
NO_PROVIDER : 2
PROCEDURES_REVIEWED : 1
POSITIONING_NEXT : 1
VOLUNTARILY_HIS : 1
HIS_OTHER : 1
CORRECTION_LP : 1
RATIONAL_HOWEVER : 1
PAIN_QUES : 1
BARRIERS_AWAKE : 1
CHECKED_IF : 1
CIRCUMCISION_DOING : 1
THE_MED : 1
ADDENDUM_THERE : 1
LEISURE_PROGRAMS : 1
DAMAGE_RX : 1
PREOP_ANTIBIOTICS : 2
EDUCATION_PT : 1
TR_OU : 1
OUTPUT_DOCTOR : 1
TO_HEART : 1
BY_AS : 1
LAST_NOR : 1
GET_IN : 1
AND_WIFES : 1
HAND_GRIP : 1
ADDENDUM_WERE : 1
YOUR_PRIMARY : 1
ARE_TRAUMATIC : 1
ACT_CONTINUE : 1
LEARNER_PREFERENCE : 1
COMMENTS_SEEN : 1
HEMES_PT : 1
IN_CHIROPRACTIC : 1
DOSE_THURS : 1
FROM_GRENADES : 1
INCLUDING_ACTIVE : 1
AT_MCGOWAN : 1
PRESENT_PRACTITIONER : 1
NOTICED_ANY : 1
OF_SCREEN : 1
TIME_ADMINISTRATION : 1
FELT_AND : 1
ADDENDUM_OM : 1
THE_HEAD : 1
GOOD_PSYCHOLOGY : 1
REPEAT_IN : 1
PAST_HE : 1
OF_RECORD : 1
THE_MILIEU : 1
IN_GROUP : 2
NOTICES_HIS : 1
LB_ELEVATED : 1
SURFACE_FUTURE : 1
TENDANCE_ANGER : 1
THAT_DIFFININTLY : 1
STATUS_NO : 2
RELAXATION_AS : 1
INFORMED_CONSENT : 2
OBESITY_WERE : 1
RESPONSE_THE : 1
BLOOD_IF : 1
CURRENT_SUBSTANCE : 1
MIN_AND : 1
NEEDS_SOMEONE : 1
RATED_REASSESSMENT : 1
SHOULDER_AUTHOR : 1
UNDERSTANDS_HISTORY : 1
LIST_AS : 1
THE_KEYPAD : 1
OPERATIVE_NOTET : 1
SPLITTING_TABLETS : 1
INFORMED_THE : 1
OTHERS_NOTE : 1
NOW_MORE : 1
OPTOMETRY_COMP : 1
AT_THAT : 1
LIKE_READ : 1
BELOW_SAFETY : 1
LONGER_NEEDS : 1
SAFETY_THERE : 1
BAND_MEDICATIONS : 1
3A_ASSESSMENT : 1
BRC_PLAN : 1
LEFT_MESSAGE : 4
OF_ALERT : 1
BED_BATH : 3
CALL_BACK : 1
ALERT_AND : 3
DECISIONS_ALCOHOL : 1
WKS_DID : 1
VETERANS_HISTORY : 1
TASK_SET : 2
PATIENTS_CONDITION : 1
PT_MEDICAL : 1
HERE_AT : 1
WORLEY_FOR : 1
ALONG_WITH : 1
STRONGER_WHEN : 1
HIS_MEDICATIONS : 1
YVONNE_PT : 1
MYOPATHIES_REG : 1
TO_PRODUCTS : 1
FLU_WAS : 1
AN_GROUP : 1
ADL_OTHER : 1
FOLLOWING_DOCUMENT : 1
NOTE_ELIMINATION : 1
BLOCKS_BACK : 1
ABDOMEN_SOFT : 1
MG_MEDICATIONS : 1
PATIENT_MAY : 1
GROUP_HAVE : 1
PUPILS_FOR : 1
PARANOID_TYPE : 1
BLOOD_PRESSURE : 3
THE_ADULT : 1
DIVERTIC_INT : 1
HIP_PROTECTORS : 4
AND_BED : 1
CURRENT_USE : 1
REMAINING_TEAM : 1
ANGER_MIN : 1
AND_SATISFACTORY : 1
THE_OF : 10
OR_WENT : 1
PAIN_ASSESSMENT : 2
DISABILITY_PSYCHIATRY : 1
VET_LATE : 1
CLINICIANS_AS : 1
ADVERSE_EFFECTS : 1
CANE_TO : 1
TOENAIL_SO : 1
PATIENT_EDUCATION : 3
THE_SOURCE : 1
WAS_ROTATOR : 1
BLOOD_TREATMENT : 1
CLINIC_FOLLOWUP : 1
ONE_CAPSULE : 1
SUSP_DROP : 2
SISTER_WILL : 1
PCP_DO : 2
PAIN_WITH : 1
SHEET_OUTPT : 1
UPDATES_THOSE : 1
PROCEDURE_WELL : 1
CENTER_AND : 1
TEETH_PC : 1
CONSISTENCY_STOOL : 3
THE_WEEKEND : 1
MINS_UPDATES : 1
TO_MONITOR : 1
PT_HAS : 1
CHIEF_COMPLAINT : 4
MY_DICT : 1
MPV_EASY : 1
PAST_WE : 1
FOR_ANXIETY : 1
PART_PHYSICIAN : 1
TOBACCO_PRODUCTS : 1
VIA_FOUR : 1
SERVICE_MEDICAL : 1
ABILITY_BREATH : 1
NOTE_HAS : 2
OF_IMPULSIVE : 1
AND_INTERVIEW : 1
HOME_WHEN : 1
THAT_HE : 14
AT_PATIENTS : 1
WAS_QUITE : 1
TESTS_LABS : 1
RIGHT_OR : 1
PRESSURES_IN : 1
YOUR_ADDITIONAL : 1
SEVERAL_THAT : 1
WECHSLER_ADULT : 1
DISEASE_PATIENT : 1
FASCINATED_WITH : 1
PULSE_HEP : 1
GREATER_LBS : 1
ON_DEPRESSION : 1
DISPLAY_MED : 1
CAPABLE_SPLITTING : 1
TELECARE_MANAGER : 2
NOT_TIMES : 1
OF_CBT : 1
THE_FOR : 2
BEGINNING_TREATMENT : 1
WAS_PREDNISOLONE : 1
LOSS_OF : 4
ANATOMICAL_LEFT : 2
BELOW_PTSD : 1
REDNESS_OR : 1
AT_AMOUNT : 1
HOME_PULSE : 1
ENTIRE_CASE : 1
THIS_THE : 9
MOUTH_PERSONAL : 1
ARGUMENT_HAD : 1
BREATHING_PROGRESSIVE : 1
DO_YOU : 3
FAMILY_CAN : 1
SINCE_THE : 2
NOTE_HIS : 1
RN_APPOINTED : 1
WING_PERIODONTAL : 1
PT_HAD : 1
SAME_BELIEVES : 1
WHAT_GOD : 1
MAINTAIN_VISITS : 1
OPEN_FAX : 1
PENDING_PAIN : 1
OF_RISK : 1
IN_CRISIS : 1
MEDICAL_SUPPLIES : 1
STARTED_LY : 1
PLACE_PATIENT : 1
NONVA_NOTE : 1
QUESTIONS_OR : 3
NOT_WORKED : 1
APPLICABLE_CHART : 1
ONE_ACTIVE : 1
ONE_BY : 4
TO_PHONE : 1
PAIN_SCALE : 5
ACTIVE_PENDING : 1
THIS_OXYGEN : 1
NEUROLOGICAL_LBS : 1
VOICES_STRONGER : 1
ON_HYPERLIPIDEMIA : 1
MEDICATIONS_FLUVASTATIN : 1
VEGETABLES_CELERY : 1
DOWNLOAD_IN : 1
ACCEPTING_ON : 1
CARE_PT : 3
FROM_WILL : 1
ONO_SYMPTOMS : 1
EVALUATE_VENTRICULAR : 1
ALZHEIMERS_NO : 1
PATIENT_DECISIONMAKING : 1
FAMILY_DOCUMENTATION : 1
NONE_HE : 1
HAVE_DECREASED : 1
SUCH_CENTER : 1
LIST_STATE : 1
STENTOR_WELL : 1
KG_SHOULDER : 1
DOCTORS_PSYCHIATRY : 1
BEEN_WORKING : 1
PULSE_SERVED : 1
WITH_THIS : 2
CIRCUMCISION_LENGTH : 1
RINGING_HIS : 1
PATIENT_INITIALLY : 1
THE_PT : 3
FOR_INDEPENDENT : 1
EDUCATION_ASSOCIATED : 1
THERAPY_MG : 1
FEELINGS_SYMPTOMS : 1
ADMINISTRATION_PROVIDED : 1
SUP_OUTPATIENT : 1
PATIENT_BENEFIT : 1
INR_COMMENT : 1
PREGNANT_OR : 1
BEEN_INDICATION : 1
FROM_MORTARS : 1
DURING_CALL : 1
AND_CREAT : 1
MOBILITY_AND : 1
DESCRIBE_BARRIERS : 1
REQUIRE_AN : 1
THE_THAT : 1
TO_SHOE : 1
NOT_CONTINUED : 1
SUPPORTIVE_CARE : 1
TAKES_TENNIS : 1
JUSTIFICATION_PATIENT : 1
LANGUAGE_REASON : 1
ENTERED_INTO : 1
BLACK_DATE : 1
DIAGNOSTIC_AMALGAM : 1
TO_OTHERS : 4
HISPANIC_SHIFT : 1
INTAKE_NEED : 1
TO_ANSWER : 1
ARE_THE : 1
UCINATIONS_PROVIDED : 1
STARTED_FIRST : 1
PLASMA_REFERENCE : 1
CARE_THE : 2
HIS_FOR : 1
HOWEVER_MAY : 1
OUT_NOTET : 1
HOSPITALIZATION_UNTIL : 1
CORE_REGULARLY : 1
TABLETS_IS : 1
WAS_HERE : 1
POSITIVE_FOR : 2
WK_ON : 1
STATES_HIS : 1
WNL_AND : 1
AHN_INDICATION : 1
ENVIRONMENT_ENCOURAGED : 1
HE_QUITE : 1
SURGICAL_SITE : 1
IN_LAST : 1
THE_ASSISTANCE : 1
APPLICABLE_SHIFT : 2
TSHIRT_DOCTORS : 1
ENGAGE_IN : 1
DEPT_3A : 1
PT_FAMILY : 1
RESPIRATIONS_FACILITY : 1
DEAR_MR : 1
MODERATE_ABSENT : 1
LP_TO : 1
ENCOURAGED_OF : 1
MEDICATION_ORCHITIS : 1
FOUND_RESULT : 1
THAT_THEY : 2
SHIFT_AFFECT : 1
ELIMINATION_PERSONAL : 1
RESPIRATORY_SYSTEM : 1
INCLUDING_SUP : 1
GET_HOME : 1
DO_BEST : 1
IF_NO : 1
STUDY_TO : 1
ANGRY_HE : 1
OF_ILLNESS : 2
NOTE_NA : 1
WOUNDS_THE : 1
YOU_YOUR : 2
OF_HYDROBROMIDE : 1
STAFF_HE : 2
PERIODONTAL_SCALING : 1
PREOP_SINCE : 1
MD_SPEECH : 1
TO_NO : 2
NURSING_ASSESSMENT : 3
TECHNIQUE_PAC : 1
AS_BELOW : 1
EDUCATION_AS : 1
PERTINENT_FINDINGS : 1
NON_CONVERSATION : 1
WHAT_THE : 1
HAND_MOUTH : 1
DEMENTIA_VOICES : 1
PAST_TWO : 1
RESIDENT_CARE : 1
OTHER_TESTS : 1
PATIENTS_NAME : 1
AND_CASE : 1
FOR_STDS : 1
CAUSING_PAIN : 1
CARE_SYSTEM : 1
MEDIUM_PATIENT : 1
CLINIC_COMMENTS : 1
BODY_MASS : 1
ARRIVED_LATE : 1
ANXIETY_AGREEMENT : 1
NO_CHANGE : 3
SHOULDER_WITH : 1
NAME_WHO : 1
MEDS_SYRUP : 1
ALONE_SCHIEF : 1
ACCURATE_DETERMINE : 1
BID_PAIN : 1
HARD_NOT : 1
PATIENT_SEATED : 1
LABS_NEUROPSYCHE : 1
PSYCHOTHERAPY_TEMP : 1
FAMILY_MEDICAL : 1
INCLUDING_PAIN : 1
MOBILITY_ALLERGIES : 1
RIGHT_BUT : 1
OF_TOENAILS : 1
NURSING_BOWEL : 1
GET_GOOD : 1
STORE_FOR : 1
SCREEN_VA : 1
CTA_BL : 1
FINDINGS_ONE : 1
PATPU_VISIT : 1
TASK_EXTREME : 1
TO_TRANSPORTED : 1
ATTENDING_MA : 1
ARE_COMMON : 1
FELT_DIZZY : 1
HE_DOESN : 1
PM_THERAPY : 1
THAT_ONE : 1
TABLET_AS : 1
LEADER_KROHN : 1
WERE_NO : 1
HIS_MISSED : 1
PAST_HISTORY : 2
BY_KATHERINE : 1
WORKED_AT : 1
INTEREST_OR : 1
CASE_COMPLICATIONS : 1
OF_THOUGHT : 2
WARFARIN_COLLECTION : 1
MINUTES_ARRIVED : 1
THIS_AT : 1
HISTORY_REASON : 1
OUR_VASCULAR : 1
YELLOW_ACET : 1
INSIDE_PER : 1
THE_DIFFICULTIES : 1
ENCOUNTER_NO : 1
ALLERGIES_PATIENT : 3
NONVERBAL_NONE : 1
SUBTESTS_THE : 1
REPLACED_BY : 1
TENDINITIS_DJD : 1
FERRITIN_LOW : 1
EDEMA_IN : 1
CONSTANT_WILL : 1
THURS_TABLETS : 1
MHC_CLC : 1
FEET_ADDENDUM : 1
PATCHES_THE : 1
TO_BRING : 1
MONTH_FROM : 1
OTHER_PATPU : 1
IN_VOLUNTARY : 1
NOTIFIED_ASK : 1
INFECTION_NURSING : 1
ILLNESS_VETERAN : 1
MO_BUTALBITAL : 1
PHYSICAL_GOOD : 1
PROVIDED_THAT : 1
HE_ENCOURAGE : 1
DRINKS_BOWEL : 1
TIME_DOSE : 1
EGD_DUE : 1
TO_COMPOSURE : 1
WITH_MEAL : 1
BOWEL_PRESENT : 1
NOT_VETERANS : 1
AREAS_OF : 1
OUR_DEPARTMENT : 1
LEAVING_UNIT : 1
PUT_LOCK : 1
THIS_IN : 1
UNSUCCESSFUL_TO : 1
LUNCH_MH : 1
SULFATE_SOLN : 1
REEVALUATED_REPORTS : 1
ON_LIFES : 1
GROVE_NURSING : 1
REMAINING_TO : 1
TONGUE_ACTIVE : 1
HRS_BEFORE : 1
SOMEONE_MANAGE : 1
MED_IN : 1
IPRATROPIUM_ALBUTEROL : 1
WALKS_FREGUENTLY : 1
LEFT_AUTHOR : 1
PLASTIC_BAG : 1
CATHERINE_FACILITY : 1
DAILY_COMPLIANCE : 1
MAR_AGE : 1
PATIENT_BEEN : 8
BACK_PROBLEMS : 1
ADMISSION_OF : 1
GROCERY_FOR : 1
FROM_RESPONSE : 1
PULSE_IS : 1
DEMONSTRATION_FULL : 1
YOUR_DURATION : 1
THE_FILM : 1
POSITION_OF : 1
WITNESSED_HIP : 1
BLIND_AND : 1
IN_EVEN : 1
READ_OF : 1
HALDOL_MOUTH : 1
LEFT_ON : 2
AND_IN : 2
AHEAD_START : 1
PATIENT_STATES : 1
VETERAN_RUNNING : 1
HYGIENE_ASSISTANCE : 1
FROM_ON : 1
ARTILLERY_OTHER : 1
PT_CURRENTLY : 1
MEDICATIONS_ARE : 1
WHEN_ARE : 1
DOESN_THE : 1
TAKEN_WITHIN : 1
THE_LAST : 4
HOMELESS_PAIN : 1
DR_BRECTAL : 1
SMILING_TALKING : 3
BEEN_EXTRA : 1
YES_FOR : 2
KG_NEBULIZER : 1
PRIVILEGES_EXTRA : 1
NOT_CHART : 1
REGULARLY_SYSTEM : 1
BEEN_AT : 1
TREATMENT_FOR : 2
NAME_THIS : 1
NKA_TIMES : 1
GRANDE_SOCIAL : 1
FLARE_CHRONIC : 1
DOB_AGE : 1
OF_PAST : 1
HE_DENIED : 1
PREOP_SURGERY : 1
ROBE_GOOD : 1
SWELLING_SCHEDULED : 1
FOR_TELEPHONE : 1
MH_INPT : 1
PO_QAM : 1
HYPERTENSION_FOR : 1
PSYCHOTHERAPY_DIAGNOSTIC : 1
CARE_MET : 1
THE_IMPORTANT : 1
ZERO_EPIS : 1
WAS_ABLE : 2
THAT_INCREASE : 2
INPATIENT_USE : 1
TIME_SPENT : 2
GIVE_TREADED : 1
LDL_CALCULATION : 2
THEIR_DID : 1
EVERY_AT : 1
MAINTAIN_WEEKLY : 1
CONSTITUTIONAL_FEVER : 1
SEE_AMOUNT : 1
PRESCRIPTION_FOR : 1
BL_HIMSELF : 1
PICTURE_OR : 1
THE_LIBRARY : 1
NOT_REQUIRED : 3
ST_VISIT : 1
THYROID_OR : 1
NA_CAP : 1
TREATMENT_STATUS : 1
VOMITING_HEARD : 1
OS_VISION : 1
REHAB_GLAUCOMA : 1
INTENSITY_RESPIRATIONS : 1
ETSU_CALL : 1
PARSOME_STATE : 1
EXAM_NOTET : 1
FOLDER_INDICATED : 1
HE_CANE : 1
INSTRUCTED_ON : 1
SHIFT_MALE : 1
RECOMMENDED_HE : 1
LIGHTS_CONCERNING : 1
OF_FEELINGS : 1
NONE_INSTITUTE : 1
PHYSICIAN_VA : 1
WALK_AND : 1
PATIENT_PREGNANT : 1
RELAPSE_SKILLS : 1
PRN_COUGH : 1
RESCHEDULE_VISIT : 1
DILTIAZEM_PATIENT : 1
PATHOLOGY_PAIN : 1
WOULD_NOT : 1
THE_STORE : 1
THE_WORKER : 2
SCHIZOPHRENIA_RAISED : 1
AT_DL : 1
UNTIL_FURTHER : 1
INHALE_BY : 2
TO_FINANCES : 1
BAGLEY_WATCH : 1
DONE_TOBACCO : 1
GTTS_OU : 1
CFCF_ORAL : 1
TWO_NEW : 1
INSTRUCTED_HOW : 1
ALTERNATIVES_WITH : 1
WILL_GET : 1
IN_MYOPATHIES : 1
BEFORE_TO : 1
PATIENT_OUT : 1
WEIGHT_KG : 3
NOTE_REVIEW : 1
CORRECTLY_AND : 1
PAIN_OPTOMETRY : 1
LAST_JUN : 1
SERVICES_HEART : 1
MD_HIS : 1
PATIENTS_PAIN : 1
AUG_CLINIC : 1
THIS_PATIENT : 5
DEPRESSION_INFORMATION : 1
LLI_TACTILE : 1
SMILING_AND : 1
ELOPEMENT_PRECAUTIONS : 1
MEDICATION_THE : 1
AN_THE : 1
TO_VASCULAR : 1
RESIDENT_PARTICIPATE : 1
TABLETS_PT : 1
MIN_RESPONSE : 1
PROSTATE_SPECIFIC : 1
KG_PROSTATE : 1
BE_PLAN : 1
HER_LEFT : 1
WILL_WITH : 1
HAS_YES : 1
THEY_GO : 1
MIN_VETERANS : 1
AND_TEST : 1
DEMONSTRATION_NAME : 1
SCALE_SAYS : 1
NO_ZERO : 1
SYMPTOM_BLODGETT : 1
YEARS_PT : 1
TALKING_HIM : 1
CONTINUE_ON : 1
VETERAN_GRADUATED : 1
NONVA_MEDS : 1
PT_DISCHARGED : 1
PCP_PENDING : 1
DOING_MINUTES : 1
NURSING_PROGRESS : 1
MENTAL_THIS : 1
TIMING_SETTING : 1
OF_INJECTION : 1
SECURITY_MEDICARE : 1
ORIENTED_DENIES : 1
OF_BREATH : 2
INCREASE_KNOWLEDGE : 2
AN_CONSISTENCY : 1
HE_CONTINUES : 2
HT_IN : 2
WHERE_INFORMED : 1
AND_PRESCRIPTION : 1
SOCIAL_PM : 1
ON_PATIENT : 3
CONFIRMED_ING : 1
HEADACHE_CONGESTION : 1
NAME_NOR : 1
MILD_AI : 1
BILATERAL_FOOT : 1
FURTHER_STABLE : 1
CLERK_NOTE : 1
ENDING_AT : 2
CHIEF_HIP : 1
POTENTIAL_FOR : 1
PER_HAWSE : 1
NO_PATPU : 1
AND_RESULT : 1
AGITATED_WHILE : 1
JUL_TSHIRT : 1
SHOULDER_HAS : 1
BATHROOM_LOCATION : 1
ABOUT_LEAVING : 1
FASTING_CONVERSATION : 1
NOTE_CALL : 1
LIFE_ON : 1
CARE_CLINIC : 1
PERMANEN_SCHEDULED : 1
SETTING_APPROPRIATE : 1
SYSTEM_DISCHARGE : 1
SURGERY_CALL : 1
ADMITS_TO : 1
LABS_TO : 1
TONGUE_MEDICATION : 1
CLINIC_INFLUENZA : 1
PLEURITIS_COSTOCHONDRITIS : 1
CHART_THE : 1
FAS_CATEGORIES : 1
FEVERS_COUGH : 1
PATIENT_LIST : 2
SUBSTANCE_HAS : 1
IS_DRESED : 1
IT_OR : 1
ASSISTED_TO : 1
BRIEF_SUMMARY : 1
AND_PREVENTION : 1
ROTATOR_CUFF : 3
BE_SLOW : 1
PAIN_YES : 1
REASSURANCE_NEEDED : 1
PAIN_LOWER : 1
ATTENDED_NUTRITION : 1
THIS_SESSION : 1
EXCHANGE_RELATED : 1
APPOINTMENTS_SCHEDULED : 1
WILL_IN : 2
THE_AGREES : 1
HEAVY_BUT : 1
HEALTH_PHE : 1
SEP_DR : 1
CLINIC_MAY : 1
LEG_AND : 2
PMH_PLASMA : 1
PROVIDED_CONVEYS : 1
STATED_WRITER : 1
INTERDISCIPLINARY_FAMILY : 1
SHIFT_START : 1
DENIED_DIFFICULTY : 1
FUTURE_SCHEDULED : 1
OTHER_CARE : 3
DOING_ADVANCE : 1
HE_RE : 1
PULSE_CUTTER : 1
TAB_PLAN : 1
OF_CONTRAINDICATIONS : 1
MIN_IS : 1
WEEKLY_LEISURE : 1
RISK_PATIENT : 1
DENTAL_CATEGORY : 1
PL_PATIENT : 1
PROTOCOL_NOT : 1
BRONX_CPRS : 1
TO_TRANSPORTATION : 1
TO_REQUESTING : 1
FOOTBALL_INJURY : 1
CBOCURGENT_CARE : 1
UNLESS_OTHERWISE : 1
IDENTIFIED_WITH : 1
TERMS_THE : 1
NEEDS_WITH : 1
THIS_REQUIRES : 3
MILITARY_GOAL : 1
AIR_TEMPERATURE : 1
ARMY_SERVED : 1
WAS_SET : 1
DOWN_ON : 1
ADDED_PAIN : 1
RISK_RELAXATION : 1
UPLIFTING_PASSAGES : 1
BUT_ENCOURAGED : 1
OR_THEY : 1
RECEIVED_FOLLOWING : 1
NOT_GOING : 1
INTENSITY_RATES : 1
WHAT_ASSISTED : 1
AND_ON : 5
OWING_DISORDER : 2
LESION_YES : 1
TYPE_PATIENT : 1
PARTICIPATE_IN : 1
STDS_COR : 1
OR_STENTOR : 1
FOLLICLES_SOME : 1
TUBEFEEDING_ANY : 1
BY_DEMONSTRATION : 1
MIN_PATIENT : 1
DROP_NUMBER : 1
THIS_HOME : 1
SPECIFIC_PSA : 1
ARTHRITIS_NURSING : 1
ADMINISTRATION_TO : 1
REHAB_HAS : 1
MALE_NOT : 1
PROBLEM_OTHER : 1
ABDOMINAL_GENITOURINARY : 1
ARE_BELOW : 1
WRITTER_GONE : 1
ARNP_PA : 1
HE_NOTE : 1
YOUR_WAY : 1
HATFIELD_BRECTAL : 1
GONE_BLIND : 1
SIGNED_INTO : 1
POST_OPERATIVE : 1
PT_CALLED : 1
VERTIGO_EAR : 1
SISTER_VISION : 1
USE_HIS : 2
PATIENT_CONSTIPATION : 1
AGE_NURSING : 1
PERMANEN_FUTURE : 1
TO_CONTINUES : 1
WILL_RADIOLOGY : 1
SEE_PHYSICAL : 1
NORMAL_TO : 1
BENEFIT_FROM : 1
HOSPITALIZATION_HE : 1
INFORMATION_WAS : 1
STATE_ATTORNEYS : 1
SOBER_COMPLETING : 1
ALONG_SEEKING : 1
ATTENTIVE_UG : 1
RESPIRATORY_ANTICIPATED : 1
INCLUDING_SUPPLIES : 2
AFFECT_OJECTIVE : 1
HIM_FOR : 1
UNIT_MEAL : 1
RESIDENT_NAME : 1
PHYSICIAN_HERE : 1
TO_AVOID : 1
BENEFITS_AND : 1
MEDICATIONS_GROUP : 1
PROGRAM_NOT : 1
TO_WORN : 1
AT_HGB : 1
CLASS_OF : 1
PLACED_BLIND : 1
JUN_COMMENT : 1
MONTHS_AGO : 1
LOCAL_PAIN : 1
PATIENT_DIAGNOSED : 1
LOW_OF : 1
THEY_WOULD : 1
POSITION_LOCKED : 1
TEST_NEUROLOGICAL : 1
AIR_SKIN : 1
COVERAGE_DISORDER : 1
CLINIC_PAST : 1
CLINIC_SURGERY : 1
THIS_REPRESENT : 1
HERE_REACTION : 1
OR_CUEING : 1
TIMES_PER : 1
OVERLYING_BONY : 1
PHYSICIAN_SION : 1
OPTOMETRY_EXAM : 2
PAIN_PATIENT : 1
HE_CLINIC : 1
GLAUCOMA_PERSONAL : 1
IN_FOR : 3
MEDICATIONS_THE : 1
TABLETS_MEDICATIONS : 1
KEYPAD_OF : 1
THE_VISION : 1
KNEE_ARTHRALGIA : 1
ACCESS_TO : 1
SCALE_NEED : 1
FLUSHED_NSS : 1
MESSAGE_MACHINE : 1
VISIT_WITH : 1
WAS_REVIEWED : 1
MR_COMP : 1
RM_GROVE : 1
CFA_VETERANS : 1
AT_BIRCH : 1
PRESSURE_PLAN : 1
PROVIDED_THIS : 7
MSE_PLAN : 1
PHYSICIAN_AMOUNT : 1
BY_PATIENT : 1
AND_PATIENTS : 1
ANTIBIOTICS_OR : 1
BREATHING_IMAGERY : 1
AND_GROUP : 1
DEFERRED_ASSESSMENT : 1
CAN_ACCESSED : 1
COMMENT_NON : 1
MIN_CLIENT : 1
SAFETY_PREFERRENCE : 1
THE_FOLDER : 1
DO_ANCHORAGE : 2
FOR_MEDICAL : 2
WHO_OVERSEES : 1
FOODS_WITHOUT : 1
TAB_ONE : 4
NOT_SITUATIONS : 1
FINDINGS_PATIENT : 1
BUT_RALES : 1
LIPOMA_VERBALLY : 1
NONE_INFLUENZA : 1
ADMITS_CLENCHING : 1
ALERT_DESIRE : 1
RT_VETERAN : 1
MED_EVAL : 2
NO_ACTIVE : 1
PATIENT_STREAM : 1
REEVALUATED_HE : 1
IN_PROGRAM : 1
AT_VETERAN : 1
LIFE_SO : 1
AND_OT : 1
NOT_USE : 1
SURG_CLOSED : 1
SCAR_TISSUE : 1
IN_HE : 1
START_NEXT : 1
REVIEW_HHA : 1
OF_UPDATED : 1
ON_PSYCH : 1
OR_THIS : 1
CUFF_REPAIR : 2
USE_OF : 4
THE_BEGINNING : 1
NUTRITION_MOBILITY : 1
MSE_VISUAL : 1
PATIENT_WILL : 1
THAT_MAY : 1
SUBMITTED_CONSENT : 1
APR_HAS : 1
PULSE_NOTICED : 1
RESPONSE_ARE : 1
COLOR_YELLOW : 1
HE_SET : 1
TO_RELAY : 1
AND_SEE : 1
HOUSING_OR : 2
SCALE_ASSOCIATE : 1
SOCIAL_ECONOMIC : 1
THE_OT : 1
STOOL_ALERT : 1
TRIED_HARD : 1
REPORT_TO : 1
CONCENTRATE_SHE : 1
OD_LP : 1
AND_CARROTS : 1
SORTING_BY : 1
INITIAL_SIGNS : 1
THE_SALVATION : 1
UCINATIONS_OR : 1
ALCOH_ANONYMOUS : 1
AND_SURGICAL : 1
SPEECH_WAS : 1
CC_TO : 1
OLD_VET : 1
RIGTH_NODULE : 1
DYSURIA_HESITANCY : 1
ASSESSMENT_GENDER : 1
FOR_PREOPERATIVE : 1
CT_RANK : 1
HIS_BEHAVIOR : 1
OF_THIS : 3
FULL_CONSENT : 1
TRY_WENT : 1
PRN_ADDED : 1
TO_THEIR : 1
STORE_ON : 1
LIKE_MYSELF : 1
PREFERENCE_WHILE : 1
EVALUATED_BY : 1
AND_UCINATIONS : 2
IDENTIFIED_TEMPERATURE : 1
REVIEW_RN : 1
CHRONIC_ADVERSELY : 1
WITHIN_REACH : 1
MULTIPLE_TO : 1
RECEIVED_THE : 1
UP_SITE : 1
CONSULT_TO : 1
SUBSTANCE_ENDING : 1
HIS_AUDITORY : 1
MH_MD : 2
REVIEW_PAST : 1
MEDS_CCOUGH : 1
CLASS_TREATMENT : 1
SHAMPOO_DURING : 1
ASSISTANCE_OTHER : 1
IN_ADDENDUM : 2
HYDROXYZINEMG_AS : 1
OU_PAIN : 1
OTHER_RESPIRATIONS : 1
HE_REPORTS : 1
NO_THAN : 1
LUNCH_DRINKS : 1
WHILE_WAITING : 1
URGENCY_INCREASE : 1
IS_THE : 4
THAT_VET : 1
HIP_IN : 4
QID_ALLERGIES : 1
TRIAGE_ADDENDUM : 1
PT_BY : 1
OBSERVED_TO : 2
APPTS_TO : 1
ADDITIONAL_COMMENTS : 1
MAY_WERE : 1
ACETAMINOPHEN_MG : 2
ADDENDUM_PAIN : 1
LOW_REPEAT : 1
VMCW_AND : 1
WAS_BY : 2
SCALE_SKIN : 1
OTHERWISE_NOTED : 1
OBSERVATIONS_PT : 1
BREATH_CLEARLEFT : 1
PATIENT_INDICATED : 2
PRACTITIONER_THIS : 1
ANY_THE : 1
IN_LIFE : 1
HAD_QUESTIONS : 1
ADDENDUM_ADVISE : 1
ADVERSELY_AFFECTS : 1
IF_YES : 2
CLAIMS_FOLDER : 1
HIS_PER : 1
OF_LIVING : 4
PC_CLERK : 1
NOTE_ENDING : 1
BASED_THE : 1
STDS_RRR : 1
IS_SCHEDULED : 1
DOCUMENTED_SEP : 1
CRC_INSTRUCTIONS : 1
HIS_PATIENTS : 2
TEMPERATURE_IS : 1
ON_CALL : 2
MOUTH_DOUBLED : 1
PREVIOUSLY_SOBER : 1
LONG_BE : 1
THE_IMPORTANCE : 1
COLOR_HAS : 1
INCREASED_STRESS : 1
HELPS_NURSING : 1
REACTION_INFLUENZA : 1
ANURIA_HESITANCY : 1
FUMARATE_MCG : 1
FOLDER_PATIENT : 1
RADIATING_PAIN : 1
THE_SESSION : 1
NOVEMBER_INHALE : 1
CONSENT_KNOX : 1
ADJUST_OTHER : 1
CAN_PROVIDED : 1
PATIENTS_STAPLES : 1
OVER_DIVERSION : 1
DURING_THIS : 8
ON_ACCEPTING : 1
SUBTESTS_FROM : 1
MALE_CARE : 1
NARC_USE : 1
FOR_VISIT : 5
REPORTS_DAILY : 1
OUTCOMES_BP : 1
FOR_APPT : 2
KIDNEY_FUNCTION : 1
PLACED_CONSULT : 1
ONE_PERMANEN : 1
RADIOLOGY_PROCEDURES : 1
HI_THIS : 1
PAIN_HEARING : 1
DISCUSSION_VETERAN : 1
BACK_GO : 1
SIGNED_WITNESSED : 1
TRY_WHEN : 1
TO_KNOWLEDGE : 2
SCHEDULED_APPOINTMENT : 2
TREADED_MESKENAS : 1
MEAL_DIABETES : 1
NO_ASSOCIATE : 2
RECORD_REVIEWED : 1
UP_NUMBER : 1
CLINIC_VASCULAR : 1
JUDSON_ORAL : 1
DONE_THIS : 1
RESULTS_IN : 1
TAKE_FOOD : 1
EDT_PHE : 1
TEASPOONFULLS_QHOURS : 1
HEMATURIA_EDEMA : 1
FOR_CLASS : 1
IMED_CONSENT : 1
PROTECTORS_IN : 4
AND_PROBLEMFOCUSED : 1
ER_AND : 2
TO_FLUID : 1
PRACTICE_BREATHING : 1
MET_PT : 2
MEDS_INR : 1
FLU_MEDS : 1
ALSO_NOT : 1
UP_TO : 1
STOOL_NONE : 1
RECEIVED_HERE : 1
MEAL_LIMITED : 1
DIFFICULTY_FORGETFULNESS : 1
FEELINGS_AND : 1
MINE_RD : 1
HELP_HOUSING : 1
FOR_HOME : 1
HOME_NOTE : 1
TIMES_IMPAIRMENT : 1
HEART_TO : 1
NOTET_EDUCATION : 1
MADE_HIM : 1
CFA_ADMINISTRATION : 1
OBJECTIVE_LABS : 1
PARTICIPATION_THE : 1
OF_YELLOWISH : 1
NOW_THEY : 1
MESSAGE_HIS : 1
TO_PSYCHOTHERAPY : 1
DENIES_ACTIVE : 1
ARE_WO : 1
HOSPITAL_PT : 1
REACTION_NONE : 1
NUMBER_WILL : 1
ARM_LEGIBLE : 1
FACE_WITH : 1
ACTIVITIES_ACTIVELY : 1
GOAL_INR : 1
PHARMACY_FIBROIDS : 1
DISCUSSED_SPECIALTY : 1
AT_NY : 1
HERE_TO : 3
YOUR_HAVE : 1
AXIS_GAF : 1
ROOMED_THE : 1
ER_AGE : 1
SITE_STATUS : 1
PROVIDER_PHYSICIAN : 1
ON_HEMOGLOBIN : 1
AND_HISTORY : 1
TIMES_NURSE : 1
THE_STATES : 1
NOTIFIED_RECIVED : 1
THEN_TO : 1
PURPOSE_OF : 1
IT_NOT : 1
THERAPY_OUTPT : 1
KROHN_LICSW : 1
SCHOOL_FINANCES : 1
FLUIDS_HAND : 1
AS_ACTIVE : 1
TO_DIETITIAN : 1
TO_MHICM : 1
IV_STATUS : 1
KNEE_STATES : 1
THAN_LBS : 1
NO_FOUND : 1
PSA_KNEE : 1
PART_3A : 1
PROGRESSING_OR : 1
OTHERS_TO : 1
REQUESTS_THE : 1
OF_STOOL : 9
STENTOR_PROCEDURE : 1
SO_IS : 1
SURGICAL_OPERATIVE : 1
HAS_DICTATED : 1
OF_SELFCARE : 1
THAT_CHRONIC : 1
OR_NURSE : 1
PROBLEMS_COMPUTERIZED : 1
QUESTIONS_WHEELCHAIR : 1
COMPREHENSIVE_AMPUTATION : 1
TIME_STI : 1
ASKED_WHAT : 1
BEN_STATE : 1
DENIES_APPOINTMENT : 1
TO_MORE : 2
OF_HANDS : 1
NOT_REFUS : 1
NAME_PHYSICIAN : 1
UNDER_TONGUE : 1
FOLLOWING_INFORMED : 1
TO_REGAIN : 1
PT_SCHEDULED : 1
GO_WITH : 1
COLON_ADDITIONAL : 1
MG_QAM : 1
NO_CHEST : 1
IN_ANATOMICAL : 1
VETERAN_ABLE : 2
AT_PULSE : 1
TOILET_OF : 1
DAILY_STARTED : 1
SPONGE_BATH : 2
ICDCM_YVONNE : 1
FLUIDS_IRRIGATION : 1
THIS_WILL : 1
AND_MOTIVATION : 1
MISSING_TEETH : 1
PATIENTS_GOAL : 1
PER_PLAN : 1
MEANWHILE_HAS : 1
INFORMATION_LEG : 1
POSSIBLY_HAD : 1
ON_AND : 1
HIS_ANXIETY : 2
VOICED_MR : 1
THE_OFFERED : 1
ON_SITE : 1
FILLED_CUFF : 1
THAN_BEER : 1
NO_DISABILITY : 1
PATIENTS_INDICATES : 1
ABDOMINAL_PROBLEMS : 1
WRETCHING_BUT : 1
HE_WOULD : 1
VA_SCHEDULE : 1
BLOCKS_TO : 1
WITH_DEVICES : 1
DT_CHOL : 1
RATING_SCALE : 1
SURGEON_TO : 1
HAVE_PLACED : 1
RECORD_PROLONG : 1
PO_PRN : 1
MY_OFFICE : 1
AND_COOPERATIVE : 1
SHOULD_RENAL : 1
TRAINING_FREQUENT : 1
BATTERIES_THE : 1
OTHERS_OF : 1
COLOR_OF : 2
TO_PO : 1
FACTOR_IS : 1
BORDER_THERE : 1
CASE_SUPERVISOR : 1
TO_INTERACTIONS : 1
REQUEST_FOR : 1
CONSTIPATION_ANURIA : 1
BACK_TO : 2
PATIENT_FLU : 1
EFFECTS_INTENSITY : 1
HAD_MOOD : 1
NUMBER_WITH : 1
ALBUTEROL_INHAL : 1
FRUITS_VEGETABLES : 1
FOCUSING_PATIENT : 1
LEAVING_THEY : 1
TEMPERATURE_SPUTUM : 1
WORK_RESULT : 1
LEFT_HOUSE : 1
FEW_MONTHS : 1
HEMP_ANYONE : 1
DTN_SYMPTOM : 1
CONCERN_AT : 1
USE_PATIENT : 1
KNOX_DENTURES : 1
DISORGANIZED_THOUGHT : 1
AND_NOTE : 1
TO_APPROACHING : 1
IN_MORE : 1
GO_TIME : 1
BANISTER_ON : 1
TIME_OUT : 1
MYSELF_OTHERS : 1
ON_OUTPT : 1
PACKET_OF : 1
TR_NS : 1
MEDICATIONS_NUTRITION : 1
REVIEWED_PERTINENT : 1
LIKE_THERE : 1
AM_OUTPATIENT : 1
OP_MEDS : 1
QUIT_HELPED : 1
HBPC_PSYCHOLOGY : 1
TO_BOWEL : 1
BIFOCAL_II : 1
PROVIDER_MD : 1
ALCOHOL_HE : 1
THEN_TRANSFERRED : 1
ELIMINATION_SHIFT : 1
RATED_DISABILITY : 1
NKDA_ABDOMEN : 1
TELL_WHAT : 1
PATIENT_POSITION : 1
PATIENT_HEMATURIA : 1
HOW_TO : 1
NO_LIVING : 1
STAFF_WAS : 1
WORKER_PM : 1
IF_DOCUMENT : 1
MENTAL_STATUS : 3
RUN_BE : 1
VESTING_PATIENT : 1
INDICATION_POSITIVE : 1
THE_CLASS : 1
FINDINGS_PROTOCOL : 1
CHEST_MR : 1
FULL_SOCIAL : 1
REEVALUATED_DR : 1
TURNING_AMOUNT : 1
FOR_SUCCESSFUL : 1
NONE_SC : 1
REMINDERS_ON : 1
AND_WITNESSED : 1
NO_QUESTIONS : 1
SLIGHT_OF : 1
LB_VIA : 1
APPOINTMENT_PER : 1
FOLLOWING_AS : 1
AND_OF : 3
WAS_NURSING : 1
WAL_ACTIVE : 1
PERSEVERATES_ON : 1
SHORTNESS_OF : 3
LOW_RISK : 1
WILL_NOT : 2
IS_INSERTED : 1
PLACE_AN : 1
MEDICATIONS_ALBUTEROL : 1
AND_VICE : 1
DIAGNOSIS_HERNIA : 1
ETC_WHAT : 1
REGULARLY_ATTENDING : 1
EXPECTED_BLOOD : 1
ASSISTANCE_SUPERVISION : 1
HEADACHE_DIZZINESS : 1
SESSION_HE : 1
THERE_NOT : 1
RULES_LEAVING : 1
FARJAD_TA : 1
ADVISED_THE : 1
STOOL_OF : 1
FOLLOWING_GROUPS : 1
HOURS_APPOINTMENTS : 1
RALES_BASE : 1
COR_RRR : 1
SESSION_MINUTES : 1
NO_IS : 2
THREE_STRETCH : 1
TAKE_PO : 1
IS_SUPERVISING : 1
IN_HIS : 4
HAWSE_RULES : 1
RELATED_PROCEDURE : 1
MOTIVATION_LEARN : 3
NORMAL_NURSINGACTIVITIES : 1
INFORMATION_RESPIRATORY : 1
VARIATION_WHAT : 1
COMPLAINT_RESPONSES : 1
ATTEMPTSWHAT_HELPED : 1
SHELLED_BY : 1
MATRIXECTOMY_WAS : 1
ON_ACUTE : 1
HE_MORE : 1
RANGING_ON : 1
MINE_RUN : 1
IS_ON : 3
LIST_IS : 1
LEFT_SHOULDER : 1
HIGH_PATIENT : 1
DAILY_THE : 1
DIABETES_PHYSICIAN : 1
LICSW_MICHELLE : 1
RESPONSIVE_ORIENTED : 1
THE_RISKS : 1
EXTREMITIES_MYOPATHIES : 1
FOR_PHYSICIAN : 2
QAM_MODALITY : 1
ALL_PENDING : 1
SIDE_WHEN : 1
WAS_ATTENDING : 1
RECORDER_AND : 1
ND_RECOMMENDATIONS : 1
TEL_ION : 1
FACILITY_ADMITS : 1
NONDISTENDED_SOUNDS : 1
STI_AND : 1
DOWNLOAD_ADDENDUM : 1
ED_DOCUMENT : 1
LISTED_SAFETY : 1
THANKED_SPECIAL : 1
WITH_EVIDENCE : 1
VIEW_ED : 1
LB_AMBULATION : 1
HOW_HE : 1
DISTRESS_OR : 1
AND_SELECTED : 1
WAS_FIRE : 1
HE_FEELING : 1
SKILLS_NOTARY : 1
MEDICAL_REQUESTING : 1
ADJUST_VETERANS : 1
DAILY_SHE : 1
BEST_GET : 1
MAY_LINENS : 1
TIMES_SITUATIONS : 1
ENEMY_ARTILLERY : 1
CASA_MH : 1
KG_SEASON : 1
REPAIR_ROTATOR : 1
APPT_RUN : 1
APPOINTMENT_DUE : 2
REQUESTING_FROM : 1
MEDICATION_NURSE : 1
ORGAN_PROCUREMENT : 1
OP_DAILY : 1
ACCOMPANIED_BY : 1
SCHEDULE_FOR : 1
VISIT_HE : 1
WERE_NEW : 1
SWELLING_AND : 1
MAX_SURG : 1
AFFECT_WAS : 1
LIBERTY_SUPPLIES : 1
PRESENT_MOOD : 1
INTERVAL_CHANGE : 1
CLINIC_NOTIFIED : 1
IS_AN : 2
WEIGHT_LOSS : 4
PROCEED_ON : 1
BACK_HURTING : 1
VOIDS_RESIDENT : 1
GROUP_TREATMENT : 1
NOTE_MEDICAL : 1
TIME_ALCOH : 1
SCALE_CC : 1
AS_ATROPINE : 1
SKILLS_TRAINING : 1
ADDENDUM_PATIENT : 1
OF_TABLETS : 1
OUT_MAY : 1
PAIN_SHORTNESS : 1
VISIT_SEE : 1
POSTING_PHYSICAL : 1
PO_QHRS : 1
ACTIVE_MEDICATION : 1
CALL_IS : 2
THE_LONG : 1
EXTRA_AT : 1
QUES_NONE : 1
NEEDS_ACUTE : 1
DIVERSION_PT : 1
PHYSICIAN_DIETICIAN : 1
VACCINE_ADMINISTRATION : 1
NOTET_INTERDISCIPLINARY : 1
DISCUSSION_GRADUATED : 1
REVIEW_STOP : 1
TO_WPAT : 2
WILL_REVIEW : 1
BLADDER_BED : 1
UNTIL_MEMBER : 1
DIETICIAN_SOCIAL : 1
STUDY_BE : 1
ITEM_DESCRIBE : 1
OPHTHALMOLOGY_THAT : 1
CONTRARY_WHAT : 1
CLEAN_BEDSPREAD : 1
KG_SELF : 1
ADMISSION_TIME : 1
PSYCHIATRY_PAST : 1
STOOL_APPLICABLE : 1
PROGRAM_LIVING : 1
COMMENT_BY : 1
INCREASE_IN : 2
SHOWED_IN : 1
PRE_DAILY : 1
PATIENT_OOB : 1
THIS_SHIFT : 17
SOUNDS_INSTRUCT : 1
TO_HOUR : 1
EXEMPT_PELVIS : 1
RX_II : 1
AND_FINDINGS : 1
ORTHOPTIC_MIMMS : 1
TO_TEST : 2
ON_ARRIVAL : 1
HE_DRINKING : 1
DL_SCHEDULE : 1
DENIES_ABDOMINAL : 1
STENT_WITHIN : 1
DISCHARGE_HYPERGLYCEMIA : 1
HEALTH_EDT : 1
TINNITUS_GEESEY : 1
THEY_HOPE : 1
ROUTES_IN : 1
STATES_HE : 4
FEELINGS_THOUGHTS : 1
FIBROIDS_PARANOID : 1
FOLLOWUP_NOTE : 1
UPDATES_TO : 1
TREATMENT_SYMPTOMS : 1
NO_TO : 4
LIN_HAS : 1
MS_TRY : 1
TYPE_LACKS : 1
IS_IN : 5
INFORMATION_PICKED : 1
MENTAL_THOUGHT : 1
BELT_WAS : 1
REPORTED_FEELING : 1
ON_DID : 1
CLINIC_FOR : 2
FOR_BY : 1
KSBURG_THAMMAIAH : 1
PA_HISTORY : 1
HAD_TO : 1
FLUVASTATIN_NA : 2
ADDENDUM_IS : 1
OF_MEDICATION : 2
PLACE_BREAKFAST : 1
AID_OF : 1
IN_IN : 1
BY_STAFF : 1
STRUCTURED_ENVIRONMENT : 1
SOUNDS_PRESENT : 1
MEDS_DOCUMENTED : 1
WAS_DURING : 1
MALE_ACCIDENT : 1
IMPROVE_FLOW : 1
FOR_YEARS : 1
AND_VISUAL : 1
INTRODUCED_AND : 1
THEY_SOME : 1
MOUTH_CONDITION : 1
INFORMATION_ABOUT : 1
PROVIDED_NO : 1
TALKING_STAFF : 1
SHOWED_MILD : 1
HEALTH_RISKS : 1
BE_SENT : 1
EYES_QID : 1
AS_HOPE : 1
PATIENT_MEDICATION : 2
ANTIGEN_PSA : 1
FOOTBALL_IN : 1
AND_LEATHER : 1
PRESSURE_HOUSESHOES : 1
HOME_FOR : 2
MH_OUTPT : 1
IN_AND : 2
VERIFIED_WITH : 1
TO_REPORT : 1
MAIL_IN : 2
THE_PROGRAM : 1
ADMISSION_HE : 1
FUNCTION_PER : 1
WAS_RESCUE : 1
NARRATIVE_INCREASE : 1
HAS_PAIN : 2
HEAD_NECK : 1
PATIENT_CAME : 1
ATTENDS_PULLON : 1
IRON_NORMAL : 1
OUTPATIENT_THOROUGH : 1
THAT_BL : 1
PHONE_SERVICE : 1
SCREENING_FOR : 1
THE_FIBROIDS : 1
VISION_WAIT : 1
CANCELLED_AT : 1
ALSO_RECOMMENDED : 1
WATCHING_TEL : 1
TO_DETERMINED : 1
IN_FACE : 1
STATE_FACILITATORS : 1
TREATMENT_PLAN : 2
COMMUNICATION_AND : 1
MD_UNION : 1
SAFE_ENVIRONMENT : 1
PAIN_CANCELLED : 1
BACK_WAS : 1
CONSENT_INTO : 1
AT_REPEATED : 1
ABOVE_SHE : 1
ARGUMENT_WHICH : 1
DROP_BOTH : 1
CHECK_STAFF : 1
MOVEMENTS_THIS : 4
MAR_ALLERGIES : 1
ABLE_BRING : 1
MD_UNTIL : 1
ANGER_CONTROL : 1
TO_START : 1
CENTER_EVALUATION : 1
NOT_IN : 1
COLOR_AMOUNT : 2
PREOP_HP : 2
INFUSION_RATE : 1
RESIDENT_INCONTINENT : 1
SEE_OF : 1
MOD_OWING : 1
CHAINS_ADDRESSED : 1
PATIENTS_WISHES : 1
SPONGE_URINE : 1
OF_EYEBALL : 1
STOOL_SOFT : 1
VETS_STATED : 1
ASK_HE : 1
SKIN_IN : 1
TO_CE : 1
FLUENCY_CATEGORIES : 1
SO_PT : 1
PRESCRIPTION_SSN : 1
PLAN_COMPLETE : 1
SET_UP : 2
BUTALBITAL_SCALE : 1
MG_ATTENDS : 1
INJECTED_TENNIS : 1
INCREASE_OF : 2
EVERY_OUTPT : 1
PATIENT_OR : 1
CANCEL_AND : 1
AT_TIME : 5
THERE_NO : 1
ACT_PLAN : 1
FUTURE_SYSTEM : 1
OUTPATIENT_ADMINISTRATION : 1
NOW_AS : 1
PACKS_TIMING : 1
REACH_PATIENT : 1
HE_GETTING : 1
OBJECTIVE_CC : 1
ECONOMIC_HEMP : 2
BELOW_RT : 1
ANXIETY_DO : 1
AS_NICE : 1
GLYBURIDE_HEMOGLOBIN : 1
CONTACT_BRONX : 1
CASE_DISCUSSED : 1
YES_NO : 2
DA_VISIT : 1
NEB_OD : 1
SUMMARY_WAS : 1
NONVA_LAST : 1
ORAL_MAX : 1
ADDITIONAL_INSTRUCTIONS : 1
HIT_IN : 1
NORMALIZING_AND : 1
COMPOSURE_DIDACTIC : 1
TERTIARY_PLAN : 1
HANDWASHING_FOLLOW : 1
THIS_WAS : 3
GO_AHEAD : 2
CLONAZEPAM_LAST : 1
THOUGHT_DISORDER : 1
HOW_FAMILY : 1
AGO_DR : 1
SUPPLEMENTATION_PROGRESS : 1
SERVICE_CONTACT : 1
PICE_INFORMATION : 1
LEAVING_MEAL : 1
TO_BLOCKS : 1
ANSWERED_ABDOMEN : 1
PROCEDURE_LITTLE : 1
RECORD_PLEASE : 1
MESSAGE_STAFF : 1
ASSOCIATE_IDENTIFIED : 2
FROM_LEVEL : 1
PAIN_PAST : 2
FROM_VET : 1
NUTRITION_MEAL : 1
POSITIVE_CALLED : 1
VETERAN_WITH : 1
VENTILATION_FEELINGS : 1
ALSO_AT : 1
HAS_PATIENT : 1
EMERGENCY_DEPT : 1
REACTIONS_COMMON : 1
USE_BY : 1
SUPPLIES_RETURNS : 1
INJ_GENITOURINARY : 1
MEDICAL_PSYCHOTHERAPY : 1
CABLE_MOST : 1
UAREVIEWED_TO : 1
ACTIVITY_ALBUTEROL : 1
OXYGEN_PULSE : 1
POSITIVE_OF : 1
CANCELLED_ONE : 1
DO_PC : 2
PJS_WITH : 1
IF_NEEDED : 1
PLAN_ID : 1
HAS_ALWAYS : 1
OR_PLEASURE : 1
ANESTHETIC_WAS : 1
ADULT_IS : 1
ALBUTEROL_CFCF : 1
GM_ANESTHESIA : 1
USED_THE : 2
REQUEST_REVIEW : 1
STATUS_ORIENTED : 1
AND_SOME : 1
PROGRAM_CHIROPRACTIC : 1
ASSISTANCE_URINE : 1
TO_CALL : 2
THERE_ANYTHING : 1
AND_IS : 3
ACTIVE_TETANUS : 1
FOR_ORIENTATION : 1
NOTED_NOW : 1
ADDRESSED_POSITIVE : 1
RESPIRATORY_THERAPY : 2
OF_REGULARLY : 1
FEW_WKS : 1
PATIENT_PATIENT : 1
APPOINTMENT_ALSO : 1
WRITER_OTHER : 1
TO_SIGNIFICANT : 1
WEIGHT_OF : 1
HAVING_CNA : 1
THIS_IS : 5
HBPC_NOTE : 1
MEDICAL_RECORD : 1
WOUND_COMMENTS : 1
SHOULD_EAT : 1
AS_HAD : 1
OUTSIDE_HOUSE : 1
TABLET_USE : 1
VASCULAR_DEPARTMENT : 1
INFORMED_THAT : 1
GROUPS_ACTIVITIES : 1
OF_SCALE : 1
NOTE_IS : 2
WELL_BUT : 1
ABSCESS_SHOULDER : 1
AND_ANY : 1
OUTPATIENT_MEDICATIONS : 6
IN_CIRCUMCISION : 1
TRANSFER_ELIMINATION : 1
ASSISTANCE_PROVIDED : 7
FOR_REACTION : 1
RECONCILED_MEDICATION : 1
COMMENTS_CTA : 1
HER_CARE : 1
DEPT_PART : 1
THIS_BY : 1
NEEDED_FOR : 2
USE_OR : 1
EPIDIDYMITIS_LEVITRA : 1
ON_CELL : 1
ASSESSMENT_PLAN : 1
LOSS_VISION : 2
OTHERS_IS : 1
NO_EFFECTS : 1
TO_STATUS : 1
TASK_UP : 2
SPOKEN_WITH : 1
LENGTH_MINUTES : 1
CLOSED_WITH : 2
DATE_TAMINE : 1
SINCE_VISIT : 1
DIDACTIC_THERAPEUTIC : 2
ACET_SUSP : 2
MR_MRS : 1
TKA_PT : 1
CUTTER_TABLET : 1
MANAGE_HIS : 1
LIMO_OPPOSED : 1
THAT_THE : 2
OFFERED_GROUPS : 1
OPERATE_NOW : 1
PATIENT_ANSWERED : 4
SCREENING_UNSPECIFIED : 1
BRIEF_PULLON : 1
PER_PROGRAM : 1
TAB_PATIENT : 1
HEALTH_NOTE : 1
TAB_TAKE : 5
LEVEL_UNDER : 1
CALL_FUMARATE : 1
ONE_TABLET : 3
USED_THIS : 1
RECEIVED_LOG : 1
PATIENT_RADIATING : 1
UPCOMING_APPOINTMENTS : 1
MEDICATIONS_TEXT : 1
ADMINISTRATION_INSTRUCTIONS : 1
MET_WITH : 2
APPROPRIATE_TO : 2
HAEFNERS_THIS : 1
NURSING_DIAGNOSIS : 1
CESSATION_NOTE : 1
THE_VA : 1
BOWEL_ASSISTANCE : 1
MCG_CAP : 1
NOTE_PATIENT : 3
HISTORY_CONTRAINDICATIONS : 1
FILM_LIBRARY : 1
IS_THAT : 1
WITH_STAFF : 1
WITHIN_BEFORE : 1
OBMT_NOTE : 1
GROUPS_BEEN : 1
MONTHS_CURRENT : 1
PATIENT_PROGRAM : 1
AWAKE_SHIFT : 1
HELPS_PAIN : 1
RESCHEDULE_HIS : 1
REVIEW_QUIT : 1
CANCELLED_PATIENTS : 1
ARE_UNLESS : 1
TASK_READER : 1
IS_ABLE : 4
PULLON_ACTIVE : 1
VETERANS_TO : 1
LOWER_QUADRANT : 1
OF_SUSPICIOUS : 1
NOTE_NURSING : 1
OTHERS_MOD : 1
YOU_EAT : 1
WITHOUT_ACETAMINOPHEN : 1
GROUP_ON : 1
SURGICAL_ADDENDUM : 1
SO_SESSIONS : 1
WITH_PARTIAL : 1
ACTIVE_TIBC : 1
FOLLOWING_EDUCATIONAL : 1
INTAKE_YEAR : 1
PT_BUT : 1
VIETNAM_AND : 1
HAVE_DRIVE : 1
LOCATION_PRACTITIONER : 1
PACKET_INFORMATION : 1
PROGRAM_NOTE : 1
NO_USE : 1
LIGHT_FAMILY : 1
SAYS_NOTICES : 1
AND_DISCUSSED : 3
OTHER_PAIN : 1
MEMBER_PROVIDED : 1
INJURY_PATIENT : 1
PATIENT_THIS : 1
LETTER_SENT : 1
WORSE_USE : 1
MUCOMYST_THANKS : 1
FOR_HE : 1
RESUME_AFTER : 1
LBS_CITALOPRAM : 1
CELERY_PREOPERATIVE : 1
AN_FACILITY : 1
VETERAN_LACK : 1
WIFE_PUT : 1
PLACED_RIGHT : 1
PROCEDURE_WAS : 1
CLINIC_ENDING : 1
CONCERNING_HIS : 1
TO_VMCW : 1
AUSCULTATION_HAVE : 1
THE_SCAR : 1
TO_INTERVENTIONS : 1
WNL_NO : 1
APPLICABLE_CAN : 1
GEN_RESPIRATORY : 1
FOR_WARFARIN : 1
HEMES_WAS : 1
PSYCH_JUSTIFICATION : 1
PAIN_NOTED : 1
AND_DID : 1
IN_AREA : 1
ETIOL_PATIENT : 1
HISTORY_FOR : 1
OF_FALLS : 1
APPOINTMENTS_CONCERN : 1
ATTEND_PSYCHOTHERAPY : 1
EDUCATION_PERMITTED : 1
CHEN_MD : 1
HAVE_DILTIAZEM : 1
IN_PHYSICIAN : 1
QUESTIONS_DO : 1
ON_CONTACT : 1
ASSISTANCE_TO : 1
AMOUNT_OF : 8
CLINIC_SINCE : 1
ALERT_TO : 1
PAIN_OR : 2
PAIN_NONVERBAL : 1
CPRS_IN : 1
RESULT_IN : 1
YOU_POSTPROCEDURE : 1
THE_OTHERS : 1
HAD_BEEN : 2
ATTENDED_TREATMENT : 1
EDUCATIONAL_MATERIAL : 1
TIME_ECHOCARDIOGRAM : 1
USE_MONITORED : 1
PLAN_RESIDENT : 1
WENT_OF : 1
RESIDENT_RESTORATIVE : 1
DIZZINESS_SISTER : 1
TISSUE_THE : 1
OF_NO : 1
FOR_HOUSING : 1
HYPERGLYCEMIA_SKIN : 1
OF_CARE : 2
MINUTE_PROVIDING : 1
ALWAYS_TO : 1
ACCEPTANCE_AND : 1
MATRIXECTOMY_DISCUSSED : 1
ISSUE_FOR : 1
NOTE_CHANGES : 1
FOLLOWING_MATERIAL : 1
WHAT_OR : 1
SCHEDULED_DISPOSITION : 1
ION_CITALOPRAM : 1
LIBERTY_MEDICAL : 1
ACTIVE_OR : 1
OF_LOCATION : 1
EDUCATION_WITH : 1
NOTE_YOUR : 1
AND_PAIN : 1
ACTS_WITH : 1
STATES_IS : 1
THE_SO : 1
TABLET_ACTIVE : 2
ANESTHESIA_PREOP : 2
PT_PSYCHOSOCIAL : 1
EVEN_WITH : 1
INDICATION_VENTRICULAR : 1
FULL_NAME : 1
AND_HERE : 1
AIT_FEW : 1
HIMSELF_ALL : 1
ADDENDUM_NAME : 1
ALLOW_THE : 1
ILLNESS_ALERT : 1
CONSCIOUSNESS_AND : 1
BASE_RONCHI : 1
WILL_ACCOMPANIED : 1
WAS_THE : 4
NUM_SCALE : 1
NEW_WILL : 1
OR_INFECTION : 1
OF_SOFT : 1
AND_FERNANDO : 1
NOTICED_OF : 1
BY_ARTILLERY : 1
CALLER_RESPONSE : 1
ON_DRINKING : 1
ARE_IN : 3
OPTOMETRY_COMPREHENSIVE : 1
CURRENTLY_CARDIAC : 1
LITTLE_OR : 1
THREATENING_REASON : 1
AND_LEFT : 1
HIM_OF : 1
MEDICAL_OBJECTIVE : 1
THESE_ASKED : 1
PAIN_ARM : 1
BREATH_BID : 1
PRESENT_APHDR : 1
DRUG_AND : 1
VET_ARRIVED : 1
FROM_HIS : 1
PATIENT_PRESENT : 1
SLOW_DOWN : 1
CHRONIC_FILED : 1
SUPPLY_HOME : 1
CM_LOCATION : 1
BE_WITH : 1
PLEASED_THIS : 1
OF_BRC : 2
ON_ORIENTED : 1
URINARY_IMPLEMENT : 1
PATIENT_UCINATIONS : 1
FALL_IMPLEMENTED : 1
AT_NEXT : 1
PLACE_MOST : 1
CC_VESTING : 1
PROVIDER_DESIRE : 1
VOICES_SOUND : 1
CALLED_HE : 1
PAIN_IT : 1
WANT_YOUR : 1
ASSESSMENT_STABLE : 1
NO_PREFERS : 1
VOICE_DID : 1
OTHER_HOUSING : 2
VA_ENROLLED : 1
TO_BRC : 1
ANYONE_ALONG : 1
ANY_BARRIERS : 2
PAIN_CONTROLLED : 1
PROVIDED_VETERAN : 2
DECLINED_PROVIDED : 1
FOR_SEE : 1
LEFT_PAIN : 2
TO_REHAB : 2
HAVE_DIRECTIVES : 1
NOTE_NUTRITIONAL : 1
DIETICIAN_WORKER : 1
CALL_OR : 1
LS_SESSIONS : 3
WHEN_TAKES : 1
FRIEND_OSAC : 1
PSYCH_UNIT : 1
ACTIVE_INPATIENT : 2
TO_WHAT : 2
LOCATION_ROOM : 2
TO_PCP : 1
AND_MEASURE : 1
NOTICED_ARM : 1
WAS_WRITTEN : 1
RECEIVED_RESTING : 1
DIFFICULTIES_HAS : 1
PER_DIEM : 1
NO_AVAILABLE : 1
GOOD_LV : 1
NO_PAIN : 4
SELECT_ITEM : 1
TO_ADDRESS : 1
RETURN_THE : 1
TELEPHONE_CLC : 1
TO_THIS : 3
BLASTS_GRENADES : 1
INCREASE_RELAPSE : 1
COMP_EXAM : 1
HE_LEFT : 1
MEDICATION_ADMINISTRATION : 1
OCR_VISUAL : 1
PERSONAL_OTHER : 1
AND_ACT : 1
APRN_MANAGEMENT : 1
AND_PLACE : 1
NO_PROVIDED : 1
SCHOOL_INJURY : 1
ASSISTANCE_NUMBER : 1
HOURS_ARE : 1
AND_ADDED : 1
ORDERED_MEDICATION : 1
ETC_PULSE : 1
CHEST_OS : 1
HAS_CONCERN : 1
ALTHOUGH_IS : 1
THIS_GROUP : 1
HEART_WILL : 1
BENIGN_CM : 1
BACKPAIN_WORST : 1
DIRECTIVES_NO : 1
LIBRARY_REACTIONS : 1
RESPONSE_TO : 1
UP_CLASS : 1
SCANNED_YES : 1
HE_PATIENT : 1
ALLERGIES_POSTING : 2
TO_COMPLETED : 1
DAYTON_TRIAGE : 1
PUFFS_AN : 1
IMMUNIZATION_IS : 1
RUNNING_BLOOD : 1
SUPERVISING_PRACTITIONER : 2
TO_WILL : 2
SUPPORTIVE_THERAPY : 3
HEAVY_PKS : 1
YELLOWISH_FOR : 1
REVIEW_PROGRESS : 1
NO_INPATIENT : 1
BE_DETERMINE : 1
PLACED_INTO : 1
LS_REMAINING : 2
FOR_CHECKED : 1
ABILITY_SOUNDS : 1
HIS_APPOINTMENT : 1
REPORTING_USING : 1
MEDICATION_AND : 2
IS_LYING : 1
VETS_OF : 1
CPRS_APPLICABLE : 1
PARANOID_PATIENT : 1
ANSWERED_THIS : 1
PAC_ADMIT : 1
ELBOW_LEFT : 1
AND_PT : 2
STOPPED_TALKING : 1
IS_REGARDS : 1
TABLET_MOUTH : 2
BEHAVIOR_INDICATES : 1
VET_START : 1
INH_ACTIVE : 1
WHICH_LED : 1
UNDERSIGNED_AND : 1
HE_HAS : 7
GET_FOR : 1
IN_COLUMBUS : 1
PATIENT_URINATION : 1
VISIT_MO : 1
MN_MEN : 1
ACCEPTING_ADDENDUM : 1
ASSISTANCE_LBP : 1
PATIENTS_THIS : 1
IN_LOWER : 2
IN_AT : 1
DR_HATFIELD : 1
FOR_NURSING : 1
PATIENT_ADVANCE : 1
AVOID_COMMENTS : 1
FIRST_AND : 1
PHYSICIAN_ASK : 1
DEMANDING_ON : 1
THERE_HAS : 1
AND_ABLE : 1
DRINKS_ASSISTANCE : 1
ANOTHER_CALL : 1
FACE_LOSS : 1
VOICES_SEEM : 1
OF_DEC : 1
MEMBERS_ALSO : 1
AND_STENTOR : 1
PSA_ARTHRALGIA : 1
HAS_GE : 1
BOWEL_URINE : 1
TISSUE_WILL : 1
CALL_PATIENT : 1
ANTECUBITAL_ANGIO : 1
ELIMINATION_THIS : 1
NOT_SELFCARE : 1
BY_SWS : 1
OUTCOME_CHECKLIST : 1
TO_BLASTS : 1
PT_DENIES : 1
SCREENING_IF : 1
GOING_OPERATE : 1
HIS_SPEECH : 1
PROGRAM_WILL : 1
THERAPY_ABSCESS : 1
AND_REQUESTS : 1
THAT_PT : 1
LDL_PLASMA : 1
MODALITY_NASAL : 1
SERVED_FOR : 1
PROVIDED_FOR : 8
OF_SPUTUM : 1
THE_CENTER : 1
TO_CLC : 2
DIABETES_CLINIC : 1
AN_OPEN : 1
HAS_OBSERVED : 5
LIMO_AS : 1
CONTINENT_CONSISTENCY : 1
INCREASE_SPUTUM : 1
SUICIDE_IN : 1
TO_BEFORE : 1
PATIENT_LIMITATIONS : 1
IDEATION_EXPRESSED : 1
INSIDE_HIS : 1
VISIT_IN : 1
OR_WITH : 1
OF_NOTED : 1
BACK_OFTEN : 1
PROMOTION_DISEASE : 1
MILITARY_TERTIARY : 1
OF_OCR : 1
NO_OR : 1
OVERSIGHT_OR : 1
WITH_HAEFNERS : 1
IN_REG : 1
NOTED_PUPILS : 1
SOFT_NT : 1
TO_PERSON : 6
WHEN_YOU : 1
RESTORATIVE_PROGRAM : 1
AGO_DIAGNOSIS : 1
SEEMED_UNDERSTAND : 1
HIM_SOCIAL : 1
BEHAVIORS_ACTIVE : 1
COUGH_MENTATION : 1
PHYSICIAN_SOCIAL : 1
PSYCHOTHERAPY_MODIFIED : 1
ASSESS_FOR : 1
ANTIBIOTICS_NOT : 1
TAB_ONEHALF : 1
TO_CONDITION : 1
THE_RUN : 1
CONTROLLED_STABLE : 1
NOTARY_WAS : 1
TASK_WALK : 1
MOST_THIS : 1
ADULT_REPORTING : 1
THE_SOUND : 1
DURING_CASE : 1
TINNITUS_ICDCM : 1
IMPRESSION_CONTACT : 1
BACK_PAIN : 1
CALL_WITHIN : 1
AS_PERMITTED : 1
WO_REFER : 1
DATE_OPTICAL : 1
HOUSE_CLINICAL : 1
PROVIDED_CHEST : 1
URINE_OTHERS : 1
THE_HIP : 1
ORAL_SURG : 1
CM_YES : 1
TO_ONE : 1
CPRP_INSTRUCTIONS : 1
FACILITY_PCP : 2
HISPANIC_THIS : 1
DOCUMENT_MEDICATIONS : 1
MONITORED_LEVEL : 1
STOOL_SOFTENER : 1
MR_GET : 1
SCHEDULED_DUE : 1
ACTIVE_LOCATION : 1
AND_EXPERTISE : 1
NAIL_WAS : 1
FRUITS_AND : 1
OPTMOSTIC_STATING : 1
ASSESSMENT_PATIENT : 1
WPAT_FOR : 1
EAGER_VARIABLE : 1
SCALE_PREOP : 1
COMMENTS_LUNGS : 1
REQUESTING_PT : 1
VIAL_INH : 1
OR_PENDENCE : 1
TIMES_REVIEWED : 1
ADMINISTRATION_MEDICAL : 1
NOTE_PSYCHIATRY : 1
HAS_REPORTED : 2
SESSIONS_TO : 3
SHE_TO : 1
REASON_REQUEST : 1
AB_OCTOBER : 1
THERAPY_ON : 2
NEOPLASMS_CSCOPE : 1
WITH_FEVERS : 1
COMPLAINING_OF : 1
SEX_MALE : 1
NO_INCREASE : 1
GAF_BARRIERS : 1
FUNCTION_OUTPATIENT : 1
VETERAN_IN : 2
SCHEDULE_IN : 1
TREATMENT_ACTIVE : 1
HE_DOING : 2
PURULENCE_NORMALIZING : 1
STATUS_WEIGHT : 1
DIAGNOSIS_UMBILICAL : 1
TIMES_MANAGER : 1
DEPENDENCE_WATCH : 1
LOCAL_WAS : 1
CBT_SUPPORTIVE : 1
PERSONAL_SHAMPOO : 1
RESPOND_POST : 1
SCALING_TOOTH : 1
DEFECT_THE : 1
CLASS_PT : 1
MINUTE_VISIT : 1
OCR_OF : 1
ACTIVE_WRITTER : 1
CONVEYS_HIS : 1
IS_YEAR : 2
ALLERGIES_HAS : 1
REFERENCE_WT : 1
TIME_URINE : 1
MY_OF : 1
EYE_OPTOMETRY : 1
AND_TO : 1
BX_RIGHT : 1
COMMENT_CHANGE : 1
THE_PRINTED : 1
AND_INSERTION : 1
NOT_VEHICLE : 1
TEMPERATURE_HAS : 1
FALL_OF : 1
THE_CASINO : 1
FAMILY_RESPONSE : 1
CONFIRM_BRC : 1
IT_IS : 2
FULL_SECURITY : 1
ARGUMENT_LED : 1
ROOM_SOCIAL : 1
DOCUMENT_CAN : 1
HEALTH_CLINIC : 1
STITCHES_YOUR : 1
PAIN_PAIN : 2
EXAM_INJURY : 1
IN_ANTICOAGULANT : 1
WEEKLY_TO : 1
ACTIVE_THE : 1
ABDOMINAL_STATUS : 2
TO_ABOVE : 1
COMMON_THE : 1
INTACT_EUTHYMIC : 1
CONTINENT_RESOURCE : 1
TREATMENT_ONE : 1
BEFORE_HE : 1
BE_REACHED : 1
PERCENT_AND : 1
THIS_FOR : 1
LV_EF : 1
ACUTE_JUSTIFICATION : 1
TO_USE : 3
NAME_CONSTIPATION : 1
OD_CALLED : 1
RECEIVED_PREVIOUSLY : 1
PAIN_DURING : 1
OF_TIME : 2
ALCOHOL_PHYSICIAN : 1
PATIENT_NUTRITION : 1
BOWEL_AND : 1
CONTROL_HIS : 1
BOWEL_TRANSFER : 1
PATIENT_LEARNER : 1
YES_LIST : 1
WORKED_ALL : 1
SHOWED_OSTEOARTHRITIS : 1
MEDICATIONS_INCLUDING : 3
BOX_THE : 1
RIGHT_EYE : 1
DISORDER_ATTITUDE : 1
SEE_HEALTH : 1
IN_AWAKE : 1
PATIENT_BLADDER : 1
FINANCES_PT : 1
PAIN_GOAL : 1
COUNSELING_WAS : 1
EXCHANGE_TO : 1
TIME_OF : 7
ASSISTANCE_ZZPATIENT : 1
TRANSFER_BOWEL : 1
IN_MILITARY : 1
CONCERNS_HIS : 1
LEGIBLE_MEDICATIONS : 1
BREATH_SOUNDS : 2
SEEM_FOR : 1
STATUS_WAS : 1
PROBLEMS_INTRODUCED : 1
TO_NUMBER : 1
AND_CHRONIC : 1
TEAM_AT : 1
ATTENDING_MESKENAS : 1
MEDICATIONS_OPEN : 1
MEDICAL_DISABILITY : 1
QUESTIONNAIRE_TABLET : 1
ANKLE_FOOT : 1
IN_THOUGHTS : 1
RECENT_BEHAVIORS : 1
PC_IN : 1
AND_SPOKEN : 1
NO_ZZPATIENT : 1
THEN_ENCOURAGED : 1
NOTE_WAS : 1
QUIT_ATTEMPTSWHAT : 1
PATIENT_RECEIVED : 1
TO_ACCEPTED : 1
SELF_ELOPEMENT : 1
FEEL_OBSERVATION : 1
WAITING_ETSU : 1
STUDY_LDL : 2
SCHEDULE_NEXT : 1
SYMPTOM_AUTHOR : 1
ORIENTATION_AND : 3
PLAN_BED : 1
HOME_PATIENT : 1
NO_MEDICATIONS : 1
HAS_NKDA : 1
NO_WEIGHT : 2
FILL_THE : 2
VISION_TO : 1
WAS_NOTIFIED : 2
NO_NOTED : 2
SKIN_HAS : 1
AVOID_CLOSING : 1
PATIENT_COMMENT : 1
WITH_AT : 4
BY_ACTIVE : 2
ARM_THE : 1
IT_EXPLAINED : 1
COVER_HER : 1
SUPERVISOR_IN : 1
ACTIVELY_SYSTEMS : 1
STATE_MR : 1
RESUME_THE : 1
CAME_TO : 1
FOR_CONTINUED : 1
SHAMPOO_THIS : 1
PHONE_UNIT : 1
AMBULATORY_MENTAL : 1
LEFT_GERD : 1
COMFORT_PAIN : 1
HP_NO : 1
TRANSFERRED_CLC : 2
BOTH_AND : 1
BARRIERS_THE : 1
BORDER_IS : 1
SHIFT_NOTE : 1
COLOR_ORIENTED : 1
MEASURE_KIDNEY : 1
SAYS_THAT : 1
THE_GLAND : 1
INCREASINGLY_STRESSFUL : 1
SEE_POSTING : 2
REQUESTING_AUTHORIZATION : 1
ROTATOR_REPAIR : 2
HIS_NEIGHBOR : 1
APPOINTED_PCP : 2
TO_ATTEND : 2
NEW_DURING : 1
CSAC_GIVE : 1
ACUTE_PLANSEVERE : 1
OF_INFORMATION : 2
SCHEDULED_JOINT : 1
WHO_FOR : 1
VISION_AND : 1
YES_REASON : 1
BE_ACCURATE : 1
MY_DRINKING : 1
PARKINSONS_MEDS : 1
PHONE_NUMBER : 3
IS_FOLLOWED : 1
SCOPE_OF : 1
COPD_STATES : 1
SAME_HERE : 1
CLINICAL_REMINDER : 2
INJURY_PELVIS : 1
OF_HOURS : 2
YES_TABLETS : 1
FORMOTEROL_FUMARATE : 1
TO_GLYBURIDE : 1
ADDENDUM_HYGIENE : 1
DESCRIBE_ANY : 1
CURRENT_MEMBERS : 1
THAT_ARE : 2
INE_WITH : 1
GONE_TO : 2
MORTARS_IEDS : 1
NURSING_AND : 1
BEFORE_NEXT : 1
PER_TIMING : 1
BEGINNING_WAS : 1
TEETH_TOOTH : 1
PRODUCTS_NO : 1
REVIEWED_PERIOD : 1
UG_PAKULA : 2
PROBLEMS_YOU : 1
IN_DOSE : 1
REVIEW_BASED : 1
DEVICES_THAT : 1
CONFIRMED_NOT : 1
ORTHOPNEA_ENTRY : 1
DIRECTLY_TO : 1
FARJAD_TR : 1
WAS_PRESENT : 2
POP_HE : 1
ADMISSION_ADVERSE : 1
CENTER_PRINTED : 1
STATUS_OUT : 1
YEAR_NEW : 1
BOWEL_ELIMINATION : 8
ACTIVE_DEC : 1
CONTROL_MIN : 1
AND_COUGH : 1
NPO_SINCE : 1
ACTIVE_PULSE : 1
WELL_ATTENDING : 1
LEFT_REGION : 1
STATE_DEAR : 1
PROTECTED_AND : 1
HAD_COPD : 1
THE_SAYS : 1
TAKE_CAPSULE : 1
LBS_IN : 2
PORTIONS_SNACK : 1
MESSAGE_ON : 2
AND_LABS : 1
WEIGHT_TIME : 1
NKDA_SOFT : 1
TAB_DATA : 1
AND_FEET : 1
ALZHEIMERS_DEMENTIA : 1
NKA_PATIENT : 1
WITH_MISSING : 1
NURSINGACTIVITIES_OF : 1
HOME_MEDICATIONS : 1
CONSULT_NIACIN : 1
ED_FROM : 1
IF_WAS : 2
WITH_LOSS : 2
NEW_MEMBERS : 1
PERCEPTION_IMPAIRMENT : 1
NOT_IDENTIFIED : 2
INSTRUCTIONS_PROVIDED : 2
WAS_IN : 3
BUT_FERRITIN : 1
DISTRESS_PAIN : 1
ASK_DO : 1
AT_START : 1
HOUSING_ECONOMIC : 2
FOLLOWING_OFFERED : 1
OF_VIETNAM : 1
STABILIZATION_DENIED : 1
TO_RESPIRATORY : 1
LEARN_II : 1
REMINDERS_EXIT : 1
PAIN_AMOUNT : 1
NUMBER_HOURS : 2
THE_ITEM : 1
SELECT_THE : 1
TO_ICOTHE : 1
ARE_GOING : 1
VA_FORM : 1
NURSING_OPT : 1
SOBER_TO : 1
THIS_VETERAN : 1
NEPEC_ETOH : 1
SUPPLY_ARRIVED : 1
UNTIL_WE : 1
LIKE_WHISPERS : 1
BEGINNING_HE : 1
ACCIDENT_AND : 1
CASE_VETERAN : 1
MRS_COMP : 1
ON_HOW : 1
FROM_CALLER : 1
CPS_PATIENT : 1
PCP_TOLD : 1
EVALUATION_CODE : 1
CONDUCIVE_RECOVERY : 1
KNEE_IS : 1
TO_COVER : 1
BY_AIT : 1
MD_OR : 1
TESTS_DIABETES : 1
RESP_TINNITUS : 1
INTERVENTIONS_HEALTH : 1
IS_WORST : 1
IN_MILIEU : 1
INSULIN_MOISTURE : 1
DIZZINESS_CONGESTION : 1
DISEASE_ENCOURAGED : 1
SCORE_UPDATED : 1
MICHELLE_CRC : 1
THE_HAVE : 2
AND_HALDOL : 1
HIS_ENCOURAGED : 1
EVALUATION_MANAGEMENT : 2
HYGIENE_NOT : 1
NO_MR : 1
CONCERNS_QUESTIONS : 1
HELP_FOR : 1
LOCK_THEIR : 1
ONLY_BLOOD : 1
CAPSULE_BY : 1
NOTE_THIS : 1
DIFFICULTY_PROBLEMS : 1
NOT_BE : 4
SOUNDS_APHDR : 1
HIS_RN : 1
INT_PREOP : 1
BAG_MADE : 1
OCT_TO : 1
DO_HAVE : 2
CONDITION_DIAGNOSIS : 1
RESPONSIBILITY_METHADONE : 1
COMMENTS_INFORMATION : 1
FACILITATORS_FOR : 1
CHIROPRACTIC_CARE : 1
NURSING_NOTE : 8
EVENING_HIP : 1
TEARFULNESS_PREFERS : 1
THIS_DATE : 2
INFORMED_NOTE : 1
NO_MORE : 1
AND_PATIENT : 6
PAIN_PREOP : 1
BEEN_FALL : 3
PT_DIRECTLY : 1
ON_ICDCM : 1
THE_FEW : 1
HEAD_AND : 1
PHYSICIAN_ACUTE : 1
OR_PA : 1
VA_ACUTE : 1
SHES_REQUESTING : 1
TABLETS_ACTIVE : 1
GROUPS_DESIGNED : 2
THE_DOES : 2
WOUNDS_TO : 1
SAFE_STRUCTURED : 1
CAROTID_NAME : 1
INSERTED_STATUS : 1
OUTPT_AT : 1
NEXT_IN : 1
BATH_WOUND : 1
RESIDENT_ID : 1
AMOUNT_ORIENTED : 1
PAKULA_MD : 2
SURFACE_PERMANEN : 1
HE_HAIRBRUSHES : 1
GOOD_AMBULATORY : 1
VISIT_MED : 2
LEVEL_CHECKS : 1
RESPIRATIONS_NORMAL : 1
LEFT_WITH : 1
OUTPATIENT_ACETAMINOPHEN : 1
AMBULATORY_COMPLAINT : 1
ASSISTANCE_PERSONAL : 1
UNSPECIFIED_NEOPLASMS : 1
FOR_LAST : 2
BED_WOUND : 1
WITH_GOOD : 1
INHALER_FOUR : 1
PARTICIPATION_QUALITY : 1
ADMIT_SCORE : 1
HAS_DECISIONMAKING : 1
ANSWERED_COLLECTION : 1
RESTRAINTS_USE : 3
YES_THE : 1
CANCEL_OR : 1
TO_VAN : 1
BATTERIES_FROM : 1
THE_VADENVER : 1
PROGRESS_SAID : 1
CTA_DUE : 1
EDUCATION_RESPONSE : 1
OCCURRED_HIS : 1
JUN_MEN : 1
NOTED_INJ : 1
DUE_TO : 5
DATE_AND : 1
RESOURCE_SPECIALIST : 1
ONE_BEER : 1
WITHIN_LAST : 2
THE_MINNESOTA : 1
PAIN_ADVERSELY : 1
CATEGORIES_SELECTED : 1
OR_THREATENING : 1
OF_YOUR : 2
HIM_IT : 1
PATIENT_TEACHING : 1
GOING_THE : 1
LITTLE_INTEREST : 1
AND_NECK : 1
MEDICALLY_STABLE : 1
CONTINENT_TRAINING : 1
DATE_HYPERGLYCEMIA : 1
REVIEWED_THERE : 1
PA_ONLY : 1
HIM_UP : 1
AT_VISITS : 1
SYMPTOMS_DURING : 1
HAND_SEE : 1
LAST_FUTURE : 1
PHOS_ETIOL : 1
WHAT_MIAMI : 1
FOR_SUPPORTIVE : 2
ASSOCIATED_POSITION : 1
TO_UP : 2
SANDWICH_THIS : 1
OTHERS_NURSING : 1
PLACE_TIME : 5
FOR_REPLACEMENT : 1
USE_SUBSTANCE : 1
HAS_CALL : 1
HOUSESHOES_FOR : 1
DEMENTIA_WITH : 1
CELERY_DIAGNOSIS : 1
BLOOD_HOUSESHOES : 1
TIMES_MEAL : 1
LAUNDRY_PLAN : 1
RAISED_VOICE : 1
PROGRESSIVE_RELAXATION : 1
PAIN_FEVER : 1
BLADDER_TRAINING : 1
HAD_RIGHT : 1
FORMOTEROL_MCG : 1
BEEN_CONCERNS : 1
OF_PROGRESS : 1
TIME_PHYSICIAN : 1
USE_PT : 1
SAT_PATIENT : 1
OF_TESTICULAR : 1
THE_IN : 3
MUCOMYST_TENDINITIS : 1
TEAM_WED : 1
PRACTITIONER_OBTAINING : 1
HAD_ECHOCARDIOGRAM : 1
SO_RESPIRATIONS : 1
THROUGH_IMAGING : 1
PHE_SOCIAL : 1
DISABILITY_AT : 1
THE_IS : 4
UP_GENOA : 1
LV_MILD : 1
ALSO_FOR : 1
AMBULATION_ACUTE : 1
IV_FLUIDS : 1
SELFCARE_HISTORY : 1
CARE_UNDERSTANDS : 1
COPAY_EXEMPT : 1
HURTING_MORE : 1
OPH_DROP : 3
RESPONSE_PLEASE : 1
VETS_TALKED : 1
WORSE_ETC : 1
TO_THAT : 3
AND_BEING : 1
CONTENT_OUTPATIENT : 1
GASTROENTERITIS_WITH : 1
STRUCTURED_ENCOURAGED : 1
MILIEU_SHIFT : 1
REPAIR_CUFF : 1
FROM_THANKS : 1
METHOD_ACTIVE : 1
NOTED_FOR : 1
OTHER_CHERYL : 1
TIMES_FEELINGS : 1
MH_NOTE : 1
PT_AND : 1
MAY_FROM : 1
ASSESSMENT_COMMENTS : 1
PRACTITIONER_CONSENT : 1
SYRUP_LITTLE : 1
FOR_PTSD : 1
SISTER_NUMBER : 1
VERSUS_MH : 1
MOOD_NO : 1
SPECIAL_EXAM : 1
MANAGEMENT_NOTE : 1
OPH_BOTH : 1
LIVING_LOW : 1
GRIP_LEG : 1
PREVIOUSLY_OR : 1
NOT_ABUSIVE : 1
POSITIONING_APPOINTMENT : 1
CLOSELY_BY : 1
TO_CLOSED : 1
SPOKE_WITH : 1
EXAM_PATIEN : 1
ANESTHESIA_TECHNIQUE : 1
THE_DISTRIBUTION : 1
PROCUREMENT_DATA : 1
SINCE_THEN : 1
DISCHARGE_ACTIVE : 1
CARE_ADL : 4
DOCUMENT_OUTPATIENT : 1
PHYSICIAN_DONE : 1
SOME_ACTIVE : 1
POST_NOTET : 1
WAS_REMINDER : 1
PULMONARY_DISEASE : 1
PRE_OP : 1
STAFF_SIGNED : 1
SKIN_TEMPERATURE : 1
HYPERTENSION_LEARNER : 1
HIM_AN : 1
BE_IN : 1
VICE_HE : 1
ADR_HAS : 1
SAFETY_MINS : 1
RARELY_CONTACT : 1
COMMENT_PERIMACULAR : 1
ASSISTANCE_PHYSICAL : 1
YEAROLD_WHO : 1
PROBLEMS_LISTED : 1
DERM_PHOTO : 1
ASSESSMENT_YES : 1
ANTECUBITAL_CATH : 1
TX_WAS : 1
YES_TO : 1
HISTORY_OF : 4
WILL_HHA : 1
SATISFACTORY_NO : 1
ACTIVE_NO : 1
MEDS_OINT : 1
IDENTIFIED_AS : 1
TREATMENT_GROUP : 1
AMONGST_PEERS : 1
DAILY_WILL : 1
ACETAMINOPHEN_TAB : 1
IN_ATTENDANCE : 1
FROM_AT : 1
THAT_STI : 1
WITH_HELP : 1
THAT_HAD : 1
SALVATION_ARMY : 1
THE_STANDARD : 1
DEGREES_WITH : 1
XACTIVE_VARIABLE : 1
IV_HAND : 1
STILL_ABOUT : 1
AFIB_COLLECTION : 1
CITY_OUTPT : 1
LABS_FASTING : 1
STABLE_WORSE : 1
FALL_PRECAUTIONS : 1
UNDERSIGNED_CLEAN : 1
WAS_DOING : 1
HOME_VISITS : 2
PRINTED_ON : 1
USE_PAIN : 1
THE_KNUCKLE : 1
PHYSICIAN_ROOMED : 1
MEDICATION_CHANGES : 1
GO_THIS : 1
OF_POSITIVE : 1
WITH_EQUIPMENT : 1
QUESTIONS_PROBLEMS : 1
OF_PICTURE : 1
WAS_IDENTIFIED : 1
FOR_NUTRITION : 1
CALL_FOR : 2
PROGRESSIVE_MUSCLE : 1
THE_MORPHINE : 1
CLINIC_SERIOUS : 1
EVAL_MONITOR : 1
TEAM_SERIOUS : 1
REQUESTED_SESSION : 1
REVIEW_DURATION : 1
FOR_VOLUNTARY : 1
SEEN_SCHEDULED : 1
AMOUNT_CONSUMED : 1
LAST_BMI : 1
LIT_STAIR : 1
AGE_SEX : 1
NONE_UNDERSIGNED : 1
PROBLEMS_PATIENTS : 1
ADMISSION_ASSESSMENT : 1
ENTRY_AND : 1
WEEKENDERS_VETERANS : 1
ALERT_ORIENTED : 4
TYPE_QUARTERLY : 1
PRESENTING_TO : 1
HOMELESS_NO : 1
BUTALBITAL_PAIN : 1
REFERRED_DIETITIAN : 1
WEIGHT_ETC : 1
SPECIFIC_ANTIGEN : 1
DEHYDRATION_GASTROENTERITIS : 1
KROHN_MSW : 1
FINANCES_REPORTS : 1
HT_CM : 2
BOWEL_PERSONAL : 1
PERMITTED_SULFATE : 1
COPD_QUESTIONING : 1
VA_WITHOUT : 1
WOUND_OF : 1
SCANNED_SPLIT : 1
MED_RECONCILLIATION : 1
SUICIDE_GROUPS : 1
HISTORY_FINDINGS : 1
ASSESS_CURRENT : 1
ENROLLED_ACCEPTED : 1
ANSWERED_NKA : 3
COGNITIVE_PATIENT : 1
BRC_AND : 1
THE_ATTORNEYS : 1
IN_OCT : 1
OTHERWISE_PUPILS : 1
IN_USE : 4
INCIDENTALS_TSHIRT : 1
LIFE_SESSIONS : 1
TAZINE_BREATH : 1
ADVERSE_NO : 1
PATIENT_FIRE : 1
USE_PLASMA : 1
ANESTHESIA_PAC : 1
WAS_DENIED : 1
ID_CP : 1
STRESSFUL_ON : 1
PARTIALS_PAIN : 1
PER_PATIENTS : 1
SPEC_INR : 1
ASSOCIATED_FEVERS : 1
FROM_PSYCH : 1
FLU_VACCINE : 1
THE_EDUCATIONAL : 1
PENDENCE_REPORTS : 1
PATIENT_YEAROLD : 1
POIKILODERMATOUS_FEATURES : 1
PICE_OF : 1
CITALOPRAM_HYDROBROMIDE : 1
TO_MARITAL : 1
TRAVOPROS_DATA : 1
HEARD_PT : 1
AC_TEASPOONFULLS : 1
REFUSED_TAKE : 1
TRY_TO : 1
TRANSPORTED_LIMO : 1
IMAGING_AND : 2
PAIN_ABOUT : 1
NOTE_NO : 1
THE_SYMPTOMS : 1
NOTE_AMBULATION : 1
BE_BOWEL : 1
EAT_WITHOUT : 1
LAST_NAME : 1
OINT_PATIENT : 1
ATTEND_MODIFIED : 1
CREAT_MEASURE : 1
AND_IT : 1
BUT_LOW : 1
FACTOR_PRESENT : 1
OUT_THE : 1
TO_ASK : 1
ENTERED_CPRS : 1
SIGNIFICANT_TO : 1
INDEX_HEIGHT : 1
NOTE_OUTSIDE : 1
KNEE_WORSE : 1
APPLICABLE_DATE : 1
ON_FIRE : 1
MH_PATIENT : 1
ND_BS : 1
ELIMINATION_PER : 1
WITH_STITCHES : 2
NA_SYNTHROID : 1
REHABKINESIOTHERAPY_SOUNDS : 1
CONNECTED_DISABILITY : 1
READER_ALLOW : 1
ACTIVE_NURSING : 1
HIS_OS : 1
DIABETES_NAME : 1
STATUS_RTC : 1
BY_PRINT : 1
AT_OF : 1
PROGRESS_TIME : 1
INSTRUCTED_IN : 1
GRANDE_MH : 1
OSTEOARTHRITIS_IN : 1
OR_LANGUAGE : 1
RT_ATTENDED : 1
PATIENT_NAME : 2
EXPOSURES_TO : 1
NOTE_PT : 1
SPLINT_BE : 1
ASK_WAS : 1
DID_NOT : 5
SARAH_MSW : 1
SHE_LEFT : 1
THEY_COUPLE : 1
OF_SPLITTING : 1
FOOD_FLUIDS : 1
TREATMENT_THEIR : 1
IS_REQUIRED : 1
ANY_LISTED : 1
AND_RADIATES : 1
BE_ACCOMPANIED : 1
GEN_SURG : 1
REPORTS_EXPOSURES : 1
INSIDE_YOUR : 1
NT_ND : 1
FAMILY_MEMBER : 1
MAKING_PROGRESS : 1
DAILY_POSITIVE : 1
LPN_CLINIC : 1
WITH_DR : 1
TEAM_CURRENTLY : 1
LIVING_THE : 1
TO_PATIENTS : 2
AMPUTATION_INJURY : 1
FEVERS_AND : 1
BED_IN : 1
STOOL_NOT : 1
URINE_SHIFT : 1
TO_WRITER : 2
CLERK_IN : 1
THE_ABILITY : 2
OUTPATIENT_SETTING : 1
EXPLAIN_UNINTENTIONAL : 1
ASSESSMENT_SPO : 1
PEERS_WATCHING : 1
AS_THEY : 1
INDICATED_MENTAL : 1
CM_AS : 1
HAS_ELECTRONICALLY : 1
INSTRUCTED_CALL : 1
NO_NEEDS : 1
DISSABIL_RATED : 1
PAC_DISCHARGE : 1
OUT_NOSHOW : 1
HYGIENE_APPLICABLE : 1
PRACTITIONER_PAIN : 1
SAID_IF : 1
APPLICABLE_OF : 2
BE_ABLE : 1
MEDICATIONS_SUP : 1
VETERAN_MINUTE : 1
SUPPLEMENTATION_UCINATIONS : 1
QHRS_FOR : 1
CHRONIC_IN : 1
ON_FOR : 1
WITH_ACTIVITIES : 1
WELL_TO : 1
MATERIALS_CENTER : 1
MOTIVATION_PT : 1
ULA_TAB : 1
WOOTEN_RT : 1
MINUTE_HOME : 2
ADDENDUM_FOR : 2
UNTIL_MAIL : 1
NO_REEVALUATED : 1
HIS_SITUATION : 1
INPATIENT_INCLUDING : 1
SITE_SATISFACTORY : 1
ADL_NUMBER : 1
STRONG_MODERATE : 1
USE_SYSTEM : 1
VOICE_FORM : 1
RISKS_BENEFITS : 1
RX_THIS : 1
SHE_THAT : 1
HELP_WAS : 1
DOWN_LEFT : 1
GROUP_NEXT : 1
RN_SUBJECTIVE : 1
RIGHT_ANTECUBITAL : 1
PATIENT_REFERRED : 1
DECREASED_APPETITE : 1
PROVIDERS_MANAGEMENT : 1
SISTER_AND : 2
TREATMENT_UNTIL : 1
ONE_VETERANS : 2
MOTIVATION_TO : 3
PM_RESPIRATORY : 1
IN_TIME : 1
THURS_AT : 1
CURRENTLY_HAS : 1
BEEN_REPORTED : 1
ONEHALF_ACTIVE : 1
CURRENT_DIAGNOSIS : 1
IS_INTERESTED : 1
ON_HER : 1
CALL_NOTE : 1
PLACE_URINE : 1
INDICATED_HOUR : 1
TO_INDICATED : 1
RESPONSE_RESPIRATIONS : 1
OGOING_SWELLING : 1
FROM_UNIT : 1
ATROPINE_OPH : 1
AS_IMAGERY : 1
PLAN_ROUTES : 1
LACKS_THE : 1
PHYSICAL_ASSISTANCE : 1
TEETH_PTSD : 1
PATIENT_HAS : 14
FOR_MINE : 1
GENOA_CITY : 1
OXYGEN_TURNING : 1
MEDICATIONS_ACTIVE : 2
LVH_EF : 1
WAS_APPROPRIATE : 1
THE_PASSAGES : 1
PATIENT_BY : 1
AGE_PROGRESS : 1
OTHER_UNSPECIFIED : 1
SELF_RISK : 1
FAMILY_OUTCOME : 1
HOME_THIS : 1
MENTAL_EDUCATION : 1
MS_CRC : 1
PHYSICIAN_THE : 1
THURS_AM : 1
CBT_MI : 1
OF_MI : 1
LEFT_PRACTITIONER : 1
COMMITMENT_THERAPY : 1
MEN_GO : 1
AND_MENTAL : 2
HCL_MG : 2
LITTLE_APPT : 1
OF_FOR : 1
UCINATIONS_PROGRESS : 1
THIS_NO : 1
FOR_ON : 2
INHALER_SIG : 1
THAT_PRODUCTS : 1
UMBILICAL_WEAKNESS : 1
OR_WHEN : 1
FURTHER_NOTICE : 1
TO_MD : 1
HIS_HOUSE : 1
PENDING_MEDS : 1
BE_RISK : 1
HELPED_BUT : 1
PROGRAM_NO : 2
AND_ADDENDUM : 1
FOOT_CALF : 1
EYEBALL_PENG : 1
PCP_INT : 1
STAFF_OWING : 1
BUSPIRONE_HCL : 1
FACE_FACE : 1
BY_MD : 1
EXPERIENCING_OR : 1
THAT_CONDUCIVE : 1
REASSESSMENT_NOTE : 2
CASA_GRANDE : 1
PROBLEMS_OTHER : 1
ECHOCARDIOGRAM_SHOWED : 1
HAVE_CARING : 1
CURRENT_TREATMENT : 1
RTC_PRN : 1
FOUR_TIMES : 4
AND_ANESTHESIA : 1
AMONGST_WATCHING : 1
AFFECTS_HIS : 1
OBEYS_NOT : 1
SAID_THEY : 1
NICOTINE_BAGLEY : 1
EVENING_APR : 1
PUFFS_MOUTH : 2
SPO_THERAPY : 1
CLASS_MAY : 1
SERVICE_IMPRESSION : 1
FOR_COGNITIVE : 1
TO_THERAPY : 1
ALERT_DENIES : 1
BENEFITS_ALTERNATIVES : 1
WEEKLY_PROGRAMS : 1
PRINTED_INFORMATION : 1
ACTIVE_DATE : 1
HAVE_ANY : 1
THIS_AFFECT : 1
ASSESSMENT_ADVERSE : 1
COMPLAINT_FOR : 1
TO_DECISIONS : 1
DECREASED_PATIENT : 1
INSTRUCTION_SHEET : 1
ENDURANCE_OXYGEN : 1
WITH_SIGNS : 1
PERIMACULAR_AND : 1
AGE_MALE : 1
COUPLE_MONTHS : 1
PHYSICIAN_BUT : 1
PROVIDER_IDENTIFIED : 2
AT_WED : 1
ABILITY_TO : 2
PRINT_HEENT : 1
NOTED_IS : 1
FOUND_IN : 1
PLAN_RESPIRATORY : 1
RESCUE_SHEET : 1
BREAKFAST_FOOD : 1
LIGHT_WITHIN : 1
TESTICULAR_AND : 1
LETTER_CT : 1
CURRENT_ORAL : 1
HISTORY_AND : 2
PROVIDED_SAFE : 1
DIAGNOSIS_REPORT : 1
OUTPT_CLINIC : 1
WEEK_AS : 1
SHIFT_CONTINUES : 1
MG_CAPLET : 1
SYSTEMS_ARE : 1
FACILITATORS_WORLEY : 1
CONTRAINDICATIONS_RECEIVED : 1
ENCOURAGED_THE : 1
NOTE_ADDITIONAL : 1
ADDENDUM_PORTIONS : 1
THERAPEUTIC_DESIGNED : 2
OPERATION_THE : 1
HRS_APPT : 1
BEFORE_SESSION : 1
REVIEW_DISCUSSED : 1
TEAM_REVIEWED : 1
LOSS_MORE : 1
ATTEND_AS : 1
FOR_SW : 1
MILD_DEC : 1
ABOUT_PATIENTS : 1
PERSISTENT_ILLNESS : 1
RARELY_MOIST : 1
LEARN_AXIS : 1
DOUBLED_AIT : 1
LOCATION_THYROID : 1
ME_WHAT : 1
ON_AIR : 1
RANGE_PATIENT : 1
BIRDGEWATER_NUMBER : 1
SCHOOL_AND : 1
IS_DOING : 1
FOLLOWING_UNITS : 1
MOVEMENT_COMMANDS : 1
HE_LB : 1
HOME_AND : 1
EYEBALL_CHEN : 1
TAKE_WITH : 1
TO_BUT : 1
LP_DATE : 1
DRESED_IN : 1
TREATMENT_SATURATION : 1
KNEE_MY : 1
DISPOSITION_PRESSURE : 1
VISITS_TO : 1
INFORMATION_THIS : 1
SERIOUS_PERSISTENT : 1
OTHER_REQUESTS : 1
USED_TOILET : 2
MEDICATION_NOTE : 1
ABOUT_CASE : 1
DRINKING_AT : 1
MINIMAL_OF : 1
JUN_TO : 1
ASSISTED_PATIENT : 1
SC_CORRECTLY : 1
OOB_FOR : 1
FOR_DERM : 1
RECENT_ENTERED : 1
THERAPY_TURNING : 1
WAS_MEDICATION : 1
PARTICIPATION_PARTICIPATION : 1
BL_BORDER : 1
ADVERSELY_HIS : 1
HEMP_BACKPAIN : 1
RESIDENT_CALL : 1
SPUTUM_ALWAYS : 1
TO_TEAM : 1
IS_CAUSING : 1
THROUGH_MOST : 1
USED_IDENTIFIED : 1
CALLED_TO : 2
OXIMETRY_IS : 1
FALL_THE : 3
YOGA_MINUTES : 1
HAS_GONE : 1
SLOW_ON : 1
RM_UNION : 1
HEP_LOCK : 1
OTHER_IDENTIFIED : 1
HOUSING_IS : 1
PREVENTION_SKILLS : 1
HIS_CHERYL : 1
INCREASINGLY_DEMANDING : 1
CURRENTLY_PATIENT : 1
TASK_EXTENSIVE : 1
FOR_CONCERN : 1
PUPILS_DILATED : 1
SCRUBS_BID : 1
ON_POP : 1
TREATMENT_TAB : 1
BY_UNDERSIGNED : 1
LOWER_OVERLYING : 1
LIVING_ACTIVITIES : 1
ALONE_AMBULATORY : 1
PICKED_IN : 1
THE_DID : 1
GROUP_SAFETY : 1
HIM_VERY : 1
MHICM_TO : 1
THIS_FURTHER : 1
CALL_BE : 1
PT_IS : 7
DRINKING_ENT : 1
MR_ONE : 1
RECOMMENDATION_HOURS : 1
AGREES_PROCEED : 1
UNINTENTIONAL_LOSS : 1
HEALTH_PL : 1
MR_THEY : 1
URINARY_ELIMINATION : 1
PREFERENCE_ADDENDUM : 1
CURRENT_FAMILY : 1
TO_COMMENTS : 1
METHADONE_FILLED : 1
INDVIDUAL_SESSION : 1
ABOUT_THIS : 1
DIFFICULTY_ACETAMINOPHEN : 1
TREATMENT_HEARING : 1
UP_FROM : 1
ADR_PATIENT : 1
ON_VOICE : 2
OVERSIGHT_FOOD : 1
ALWAYS_NICE : 1
TO_HE : 2
CM_WT : 1
BREATH_DECREASED : 1
PROGRAM_REVIEW : 1
TO_HAND : 1
HEMP_IS : 1
HELPED_ASSISTED : 1
ALTERATION_COMFORT : 1
INR_PLASM : 1
MG_INITIAL : 1
TIMES_AS : 1
INHL_OBMT : 1
LITTLE_RELIEF : 1
PSYCHOSOCIAL_ASSESSMENT : 1
ATTEMPTS_TO : 2
AUTHOR_COMPRESS : 1
WILL_MSE : 1
BY_IMED : 1
SENT_HANLIN : 1
TIME_HISTORY : 1
EF_MILD : 1
YOUR_FILMS : 1
OBSERVED_LAUGHING : 1
DOING_HAD : 1
DIFFICULTY_OR : 1
PREDNISOLONE_SUSP : 2
MUST_BE : 1
CM_OBTAINING : 1
MEDS_LAST : 2
FINANCES_NOTE : 1
GOING_GIVE : 1
ASSISTANCE_ASSISTANCE : 2
ASK_HOW : 1
HAVE_ALLERGIES : 1
VA_CORRECTION : 1
SHOWER_COLOR : 1
CHANGE_PATIENT : 1
DONE_PRODUCTS : 1
INFLUENZA_VACCINATION : 1
MOUTH_AT : 1
SO_NOT : 1
IN_POSITION : 1
ACUTE_STATUS : 1
HELP_HAND : 1
ACTIVE_PROBLEMS : 2
POSITION_LIGHT : 1
STATE_WORLEY : 1
ROUTINE_HE : 1
THE_IDEA : 2
PRIVILEGES_FLUID : 1
ATTENDING_CONCERN : 1
ONLY_PRESSURE : 1
PROCUREMENT_RECEIVED : 1
OF_TO : 4
THERE_MAY : 1
UNIT_TOOK : 1
SCHEDULED_FOR : 1
NOTE_PERSONAL : 2
AND_MAY : 1
CLEARLEFT_HEALTH : 1
COMMENTS_NO : 1
PSYCHOTHERAPY_OBJECTIVE : 1
SUP_ACTIVE : 1
SEE_YOU : 1
BEN_PARSOME : 1
TEAR_ANATOMICAL : 1
PREOP_SKIN : 1
CONTRARY_TO : 1
SINCE_SEEN : 1
NEED_GET : 1
IMAGING_MED : 1
WITH_VETERAN : 1
DISCUSSED_NONVA : 1
PAIN_MEDICAL : 1
IN_VIETNAM : 1
UPCOMING_HAS : 1
REVIEWED_FINDINGS : 1
ARGUMENT_THEY : 1
AND_STAFF : 1
OTHER_AS : 1
POTENTIAL_IMPAIRMENT : 1
CURRENT_PATIENT : 1
WAS_GOING : 1
IT_WOULD : 1
OR_UMBILICAL : 1
PRESENT_PT : 1
PROVIDED_AND : 3
IDEATION_NO : 1
CELL_PHONE : 1
WAS_SAFETY : 1
AGO_PER : 1
SEEN_EXAMINED : 1
INCONTINENT_URINE : 1
REPORTED_THEY : 1
OF_OF : 1
PULSE_THE : 1
ANXIOUS_TREMORS : 1
CANCEL_RESCHEDULE : 2
BEDTIME_FOR : 1
CHECKLIST_NO : 1
IF_INTAKE : 1
MAY_INCREASE : 1
CUT_THE : 1
SAID_SHE : 1
BRC_TIME : 1
BUT_DID : 1
HIP_AND : 1
SIG_PUFFS : 1
QUIT_YRS : 1
SINCE_MAY : 1
ACUTE_ON : 1
AND_STABILIZATION : 1
STABLE_ETC : 1
ERYTHEMA_RIGHT : 1
QUIT_ICOTHE : 1
MENTAL_ILLNESS : 1
STITCHES_TEETH : 1
THEIR_CABLE : 1
DIDACTIC_AND : 2
BIRCH_HIM : 1
DOCUMENTATION_RECORD : 1
MEMBERS_DISCUSSED : 1
UG_MH : 2
HOME_IN : 1
THEY_AUDITORY : 1
SPECIAL_ETC : 1
II_DEFERRED : 1
LIST_SUPERVISING : 1
BUILDING_AB : 1
AND_DONE : 1
NONVA_FLUVASTATIN : 1
TENDINITIS_ARTHRITIS : 1
SUPPORT_FEEDING : 1
BE_PER : 1
PREOPERATIVE_DOES : 1
REGION_WILL : 1
STAFF_STAFF : 1
CAN_BE : 2
OBJECTIVE_TEMP : 1
CHEST_BL : 1
APPT_SHES : 1
ENT_EAR : 1
ON_CABLE : 1
SHELLED_ENEMY : 1
AND_THIS : 1
UNTIL_NUMBER : 1
TOENAILS_CONSULT : 1
LORAZEPAM_INJ : 1
WERE_CONCERNS : 1
ORAL_INHALER : 1
FLUID_FLOW : 1
YRS_AGO : 1
TREATMENTS_AND : 1
MOOD_AND : 1
BMS_UG : 1
MEAL_TIMES : 1
ME_SPECIAL : 1
APRN_MEDICATION : 1
PROVIDED_ORIENTED : 1
SEEN_CLINIC : 1
POSSIBLE_AND : 1
GIVEN_NUMBER : 1
TEXT_RTC : 1
URINE_COLOR : 5
CNA_PT : 1
SCHED_LPN : 1
QUETIAPINE_ASSESSMENT : 1
EUTHYMIC_SUICIDAL : 1
LS_REVIEW : 1
AND_ALTERNATIVES : 1
EVALUATION_TIME : 1
APPLICABLE_AND : 1
GIVEN_FOLLOWING : 1
POSSIBLE_NPO : 1
CUFF_ROTATOR : 1
IN_THAT : 1
THE_SCRIPT : 1
ICOTHE_ACUTE : 1
HOME_OXYGEN : 1
NOTED_LORAZEPAM : 1
LIMITATIONS_COMMENT : 1
THAT_MINIMAL : 1
OFFICE_NONPHARMACOLOGICAL : 1
NURSING_CLINIC : 1
SUMARRY_RESIDENT : 1
BY_MHICM : 1
STOOL_GET : 1
CHECK_FOR : 1
PAIN_AMBULATORY : 1
PT_UNDERSTANDS : 1
MESSAGE_FOR : 1
START_GROUP : 1
ARE_CONDUCIVE : 1
IF_FOR : 1
INFORMED_INTO : 1
GROUP_IN : 1
HIS_STRONGER : 1
LOCATION_RESIDENT : 2
AND_MESSAGE : 1
POSSIBLE_SINCE : 1
MEDICATIONS_SUPPLIES : 2
WAS_VOICED : 1
COLOR_SHORTNESS : 1
PTSD_AND : 1
ACTIVE_COMPUTERIZED : 1
FOLLOWS_HOLD : 1
PLEASURE_DOING : 1
MOISTURE_RARELY : 1
SEASON_VIETNAM : 1
YES_INDICATION : 1
VISITS_SUPPORTIVE : 2
WITH_DISCHARGED : 1
IMAGING_ORIENTATION : 1
FROM_MIAMI : 1
THIS_TO : 1
THE_CONSISTENCY : 1
PT_ADMITS : 1
BRC_ORIENTATION : 1
WITH_OPERATION : 1
NOTE_THE : 3
IF_THE : 1
FULL_AND : 1
ASSISTANCE_HELPED : 1
HISTORY_VETERAN : 1
VA_NOTE : 1
UNION_GROVE : 1
SOLN_ML : 1
HIS_HE : 1
PRINTED_MATERIALS : 1
NUMBERS_OF : 1
CLOBETASOL_PATIENT : 1
PREOP_RESPOND : 1
HAVE_PATCHES : 1
VIETNAM_BEING : 1
PT_WISHES : 1
LIST_ANKLE : 1
PARIKH_PT : 1
THE_ORIENTED : 1
TIMES_IF : 1
ON_ROOM : 1
LAST_SEEN : 1
TOES_FALL : 1
FOR_DISCHARGE : 1
HAVE_WITH : 2
BRC_WAS : 1
MINIMAL_SHORTNESS : 1
REPLACEMENT_SURGERY : 1
HOWEVER_VETERAN : 1
WITH_SEVERAL : 1
VET_AS : 1
OF_OBESITY : 1
EPISODE_OF : 1
BY_LETTER : 1
LB_SEASON : 1
THERAPY_PTSD : 1
DISEASE_PAIN : 1
LEISURE_TO : 1
WAS_SENT : 1
THEIR_AND : 1
TO_GOD : 1
RELAXATION_SUCH : 1
SIGNED_IN : 1
GROOMING_BRC : 1
NO_SURGERY : 1
DUE_OPT : 1
PRESENTED_WITH : 1
REFERRAL_LETTER : 1
HEALTH_IT : 1
RT_NOTE : 1
PATIENT_THANK : 1
WITH_BLOOD : 1
FRIENDLY_HEIGHT : 1
MR_WM : 1
EXEMPT_INJURY : 1
REQUESTING_CALLED : 1
HAD_ISSUED : 1
IEDS_THOUGH : 1
PATIENT_IN : 5
OTHER_CHIEF : 1
APPT_REMINDERS : 1
US_STATED : 1
MOOD_EUTHYMIC : 1
SESSIONS_WILL : 1
RECORD_WAS : 1
MEDICATIONS_LIDOCAINE : 1
VISIT_EVAL : 2
HAS_GETTING : 1
PAIN_NURSING : 1
MAIL_ARRIVED : 1
DECISIONMAKING_FULL : 1
USE_HELD : 1
DISCUSSED_MEDS : 1
NOTE_PARTICIPATED : 1
DURATION_OF : 1
CALL_WAS : 1
TEACHING_DOCTOR : 1
OTHERS_DATE : 1
RECONCILIATION_SUMMARY : 1
GIVE_PATIENT : 1
SMOKING_OUTPT : 1
NOT_FOR : 5
SESSION_CALL : 1
ALL_AREAS : 1
STAPLES_BE : 1
AN_OUTSIDE : 1
ALL_DIFFICULTIES : 1
PULSE_OXIMETRY : 1
HELD_TO : 1
QUARTERLY_NO : 1
PATIENT_YOU : 1
THE_SITE : 1
CM_ANATOMICAL : 1
THE_SC : 1
DT_BP : 1
MEDICAL_HISTORY : 3
STAFF_MY : 1
DISORDER_PERSONAL : 1
AOX_ALL : 1
OF_MUST : 1
REEVAL_AND : 1
OR_CBOCURGENT : 1
RELIEF_WITH : 1
WITH_IV : 1
REPORTED_PARTICIPATION : 1
OR_FOR : 1
ABT_THE : 1
OXYGEN_PATIENT : 1
LABS_INTAKE : 1
FIRE_COVER : 1
DIAGNOSTICS_INFUSION : 1
LIST_BILATERAL : 1
COLOR_BLACK : 1
FOR_CHO : 1
INHL_VIAL : 1
MOOD_HE : 1
SOCIAL_CONSULT : 1
DENIES_DIZZINESS : 1
WILL_BOWEL : 1
DIABETIC_REPORTS : 1
SENT_THE : 1
CHECK_ACCOMPANY : 1
MINUTES_CHEST : 1
AFFECT_SAD : 1
PRESENT_SUPERVISING : 1
OR_VISIT : 1
DENTAL_APPOINTMENT : 1
PROGRAM_ADMISSION : 1
DECREASED_INSTRUCT : 1
SEASON_IN : 1
LOCATION_OTHER : 1
AND_SOCIAL : 1
TO_THINK : 1
THE_TREATMENT : 3
SHOULD_NONPHARMACOLOGICAL : 1
COMPLAINT_LBP : 1
VOICE_MAIL : 2
USE_BLOOD : 1
UCINATIONS_NOTE : 1
NOTE_LOCATION : 1
THERE_IS : 2
TIMES_WITH : 1
REVIEW_REVIEW : 1
LEARN_ACCEPTING : 2
ANOTHER_PER : 1
CHART_LABS : 1
THE_RINGING : 1
THE_VOICES : 1
NAME_DR : 1
SHIFT_PATIENT : 10
LEVEL_PARTICIPATION : 1
LOCAL_LIDOCAINE : 1
RECORD_SATURATION : 1
MASS_IN : 1
PTSD_PATIENT : 1
ASSISTANCE_REQUIRES : 2
KG_WITH : 1
CLENCHING_TEETH : 1
STENT_LAST : 1
CANCELLED_VETERANS : 1
NODULE_OR : 1
SOUNDS_SEE : 1
INPATIENT_STATUS : 1
FOR_CURRENT : 1
WITH_NARROWING : 1
DO_THE : 1
SCARS_SC : 1
LISTED_TO : 1
THE_ACTIVE : 1
BY_LOW : 1
PAIN_INTENSITY : 1
MEDICATIONS_RESULT : 1
PCP_VET : 1
UP_ASSISTANCE : 2
ACCEPTING_PLAN : 1
OXIMETRY_PERCENT : 1
HOUSE_YOUR : 1
ULTRASOUND_ETC : 1
DIAGNOSIS_ICDCM : 1
THOUGHT_NICOTINE : 1
UPDATED_RECONCILIATION : 1
VADENVER_DISTRIBUTION : 1
OF_THEN : 1
POSTOP_CIRCUMCISION : 1
YES_PER : 1
COMPLAINT_PATIENT : 1
CAPABLE_OF : 1
WHEN_POSSIBLE : 1
OR_EVERY : 1
TO_HIS : 4
ADMISSION_HBPC : 1
NEEDED_VETERAN : 1
RESPIRATIONS_APPOINTED : 1
MALE_ZZPATIENT : 1
WERE_REVIEWED : 1
AT_THIS : 5
SKIN_LIGHT : 1
PAIN_LOCATION : 1
HERE_IDENTIFIED : 1
TO_SEEING : 1
ASSOCIATED_ACTIVITIES : 1
BAGLEY_PATIENT : 1
URINE_YELLOW : 1
CALL_IN : 1
AS_IS : 1
NOT_ACTIVE : 1
RECORD_TAKEN : 1
OR_IN : 1
OK_FOR : 1
INJURY_MY : 1
PATIENT_ONE : 1
IMAGING_LEARNING : 1
TIMES_WEEK : 1
SINCE_COMPLETING : 1
HE_WAS : 12
WITH_PATIENTS : 1
AND_SINCE : 1
ORDERED_TESTS : 1
TAKES_ELBOW : 1
ATTORNEYS_OFFICE : 1
REPORTS_THAT : 3
OF_SEATED : 1
ON_EXIT : 1
THE_BANISTER : 1
IS_GONE : 1
CENTER_CHART : 1
PATIENT_MY : 1
NOVEMBER_PUFFS : 1
VITAL_LASTED : 1
WRETCHING_THEN : 1
SAME_HE : 1
GET_NEWS : 1
PULMONARY_PATIENT : 1
GLAND_MEDICATIONS : 1
OUTPATIENT_STATUS : 3
VISIT_THREE : 1
HERNIA_IN : 1
NOT_TIME : 1
SLIGHT_TREMORS : 1
THE_PATIENTS : 2
SEND_VERDICT : 1
DOUBLED_BY : 1
WORLEY_STOOL : 1
ABDOMEN_NT : 1
OF_TAMINE : 1
DISORGANIZED_AND : 1
DOCUMENT_BE : 1
INCLUDE_PENDING : 1
BREATHING_AND : 1
NEUROPATHY_WHAT : 1
BEEN_ENVELOPE : 1
HE_WEIGHT : 1
CONGESTION_VISION : 1
OR_NOTIFICATIONS : 1
ADDRESS_PT : 1
TREADED_SOCKS : 1
ADDENDUM_PLAN : 1
HEMOGLOBIN_AC : 1
OF_KNEE : 1
LEARN_TAP : 1
THE_ARM : 1
NOT_APPLICABLE : 4
NOW_IN : 1
NEEDED_MINUTE : 1
TIME_THIS : 1
TAZINE_REHABKINESIOTHERAPY : 1
NO_QUESTIONNAIRE : 1
LIKE_HARMING : 1
CUTTER_AS : 1
STATUS_EXEMPT : 1
VETERAN_TO : 1
USE_PICTURE : 1
SHE_SAID : 1
RECORD_HEARING : 1
CARDIAC_MURMURS : 1
AHEAD_AND : 2
PM_REPEATED : 1
IF_AND : 1
MENTAL_TO : 1
AOX_LOCATION : 1
LACY_ANCHORAGE : 2
IS_DECOMPENSATION : 1
GTTS_TROPIC : 1
AND_TEAM : 1
WHISPERS_COME : 1
VISITS_COMMENT : 1
VISIT_HEALTH : 1
BUT_OF : 1
ARTILLERY_PAIN : 1
HAND_LEG : 1
WILL_PARTICIPATE : 1
DILATED_FOR : 1
INFECTION_SUSPICIOUS : 1
CM_BATTERIES : 1
REVIEWED_AND : 2
PATIENT_YES : 2
ON_PHONE : 1
PAIN_DUE : 1
PAC_SCORE : 2
INFORMING_OF : 1
THIS_CALL : 3
RATED_DISSABIL : 1
DATE_MAR : 1
AUDITORY_AND : 1
SWELLING_OR : 2
IS_WM : 1
RECORD_PER : 1
ADDITIONAL_LIPOMA : 1
BIRTH_IN : 1
BUT_LEFT : 1
OF_HOME : 2
NO_EVIDENCE : 1
DOM_OR : 1
CAP_ONE : 1
RANK_AND : 1
RALLY_ABDOMINAL : 1
REHAB_ADDENDUM : 1
OLD_WHO : 1
APPT_PCP : 2
PROBLEM_IS : 1
THE_PRESENTED : 1
SERVED_OXIMETRY : 1
THE_SKIN : 1
ACTIVE_OTHER : 1
IN_PHYSICAL : 1
SERVICES_FROM : 1
OK_HERE : 1
LOOKS_THERE : 1
BLIND_HOWEVER : 1
VITALS_INTO : 1
AGITATION_PHYSICIAN : 1
SCRIPT_AND : 1
OF_UNDER : 1
AND_PRODUCTIVE : 1
DID_USE : 1
ON_UNIT : 2
ANXIETY_MEDS : 1
STOOL_PHYSICIAN : 1
EVALUATION_MINUTES : 1
OF_SUBSTANCE : 1
NOTE_FOR : 1
AND_FILL : 1
WAS_VETERAN : 1
RANGING_TO : 1
OM_REVIEW : 1
TO_DONE : 1
THAT_COLOR : 1
MEAL_FOR : 1
SCAR_WILL : 1
UP_FOR : 1
APPOINTMENT_ATTACHED : 1
COMMENTS_REPORTS : 1
MY_CURRENT : 1
SAT_HAS : 1
IN_OM : 1
MEDICATION_DOSE : 1
THE_TOENAIL : 1
BUT_NOW : 1
RN_NOTIFIED : 1
THE_OUTPATIENT : 2
OTHERS_COVERAGE : 1
PICK_HIM : 1
OTHER_COUNSELING : 1
HISTORY_ADDENDUM : 1
TO_CONTACT : 2
SAID_IT : 1
OINT_NAME : 1
TIME_ENDURANCE : 1
PAIN_LOSS : 1
WITHIN_AND : 1
HIS_DATE : 1
EXTERNAL_ONLY : 1
AREAS_OBJECTIVE : 1
BACK_OTHER : 1
RECIVED_AS : 1
PROVIDING_FROM : 1
DX_TKA : 1
ASSISTANCE_FOR : 7
EXUDATE_AND : 1
SET_GROOMED : 1
MORPHINE_HE : 1
DL_PATIENT : 1
ACTS_THE : 1
VACCINATION_PULSE : 1
VACCINE_WAS : 1
VENTRICULAR_TIMES : 1
SW_AND : 1
PROBLEM_LIST : 1
NONE_CONSENT : 1
SURG_WITH : 1
WHERE_MR : 1
THERAPEUTIC_GROUPS : 2
WRITER_CALL : 1
STATUS_LB : 1
DENIES_PAIN : 1
INJECTION_REDNESS : 1
APHDR_PLEASE : 1
HIMSELF_FOR : 1
WHEELCHAIR_PATIENT : 1
MONTHS_COURSE : 1
NPO_APR : 1
AND_BOWEL : 1
SPOKE_EMILY : 1
MALE_PAIN : 1
ALTERATION_GAS : 1
LOOK_FOR : 2
PT_RENAL : 1
MR_WAS : 1
IT_HAS : 1
PLASM_AND : 1
BOWEL_THIS : 5
AT_SMOKING : 1
AFFECTS_MOODS : 1
INR_RANGE : 1
CURRENT_SCHIZOPHRENIA : 1
CLINICIANS_INDICATED : 1
NKA_AS : 1
INPT_PATIENT : 1
BELOW_PATIENT : 1
HOSPITAL_IS : 1
IDENTIFIED_MOTIVATION : 1
CRC_CPRP : 1
LAST_ON : 2
FURTHER_NEPEC : 1
AND_DEPENDENCY : 1
IPRATROPIUM_INHALER : 1
VACCINE_RECEIVED : 1
BATHROOM_EXTRA : 1
CALL_DTN : 1
PURULENCE_OR : 1
ASSISTANCE_LIMITED : 2
YEAR_MALE : 3
CARE_PATIENT : 1
MOUTH_ACTIVE : 3
FEEDING_RESIDENT : 1
PATIENT_CALLED : 1
AND_HERBALS : 1
NEUROSURGERY_OUTPT : 1
QID_ACTIVE : 1
SINCE_TABLET : 1
REFERENCE_LB : 1
TAP_TELENURSE : 1
AN_AID : 1
CARRY_PATIENT : 2
TIBC_BUT : 1
BP_CHEST : 1
SOBER_SINCE : 1
WITH_FOR : 1
RUN_AT : 1
MIMMS_FREQUENT : 1
BY_THE : 4
LINENS_REPLACED : 1
MANAGER_THE : 1
MET_THIS : 1
THAMMAIAH_CFA : 1
REMAINING_BE : 1
MG_BRIEF : 1
DROP_EYES : 1
FOR_PATIENT : 7
TALKED_OF : 1
EMESIS_QUESTIONS : 1
FOR_TO : 5
BE_HER : 1
WAS_ENCOURAGE : 1
PSYCH_FOR : 1
EYE_WEIGHT : 1
CLINIC_TO : 3
URINE_AMOUNT : 2
PLAN_UNTIL : 1
MEDICARE_NUMBERS : 1
SCORE_SURGICAL : 1
IS_ANYTHING : 1
FERNANDO_TO : 1
TO_FACE : 3
BY_HIS : 1
HE_TAKES : 1
BOTH_QID : 1
DOING_SINCE : 1
QUESTIONING_REVEALED : 1
INT_DIST : 1
PHONE_CONSTANT : 1
ASSISTANCE_ELIMINATION : 1
IS_ALSO : 1
THE_APPOINTMENTS : 1
SEEN_SEEN : 1
IT_UNDERSTOOD : 1
LIMITED_PHYSICAL : 1
ASSISTANCE_CARE : 1
DATE_NUMBER : 2
ABOVE_SYMPTOMS : 1
WITH_DISC : 1
EXAM_SPECIAL : 1
BEEN_SINCE : 1
LIFESTYLE_CSAC : 1
CONTACT_CLINIC : 1
ON_EVERY : 1
WHO_BUT : 1
UNTIL_FAMILY : 1
MEDIUM_TO : 1
CARROTS_CELERY : 1
OF_PRESENT : 2
DATA_RECEIVED : 1
POP_SAYS : 1
WEEK_POSSIBLE : 1
BRECTAL_ERYTHEMA : 1
HIS_DENTAL : 1
PM_OF : 1
PLAN_SATISFACTORY : 1
REASON_ADMISSION : 1
PSYCHOSOCIAL_ONO : 1
MAR_FOOD : 1
TIMES_NO : 1
OPPOSED_SMT : 1
FOR_THREE : 2
NORMAL_APPOINTMENT : 1
SIGNIFICANT_MARITAL : 1
FILED_BODY : 1
STAFF_WHERE : 1
SMOKER_HEAVY : 1
OR_FLUIDS : 1
EMILY_AT : 1
THAT_SERVICES : 1
MIN_SIGNED : 1
ELIMINATION_LOCATION : 1
PCP_LACY : 2
SAYS_HE : 3
IS_WORSE : 1
SHE_HE : 1
DRAINAGE_SLIGHT : 1
IN_THYROID : 1
IDEA_SESSION : 1
LIKE_IS : 1
NO_ACUTE : 1
INFECTION_OF : 1
SIGNIFICANT_STRIFE : 1
IN_OBSERVATIONS : 1
LAST_REVIEWED : 1
VARIABLE_GROUP : 1
BEEN_YES : 1
LABS_IF : 1
AMBULATORY_GENERAL : 1
MG_MON : 1
HE_LIKE : 2
DOCUMENT_FROM : 1
FROM_IMAGING : 1
NEUROLOGICAL_LOST : 1
OF_KEYPAD : 1
CORONARY_STENT : 1
YES_BILATERAL : 1
ANY_IN : 1
IS_MALE : 2
CALCULATION_PLASMA : 1
SCHIEF_COMPLAINT : 1
SUBSTANCE_HE : 1
PKS_BUT : 1
PROVIDE_HEALTH : 1
DOSE_INHL : 1
PLEASE_ARE : 1
CRISIS_OR : 1
PRESENT_RESPONSIVE : 1
CUTTER_USE : 1
FOR_TAKE : 2
PATIENT_INSTRUCTED : 1
PAIN_SCORE : 2
THERAPY_ACT : 1
ATTENDING_LASER : 1
DOWN_THE : 1
CLERK_THE : 1
PATIENT_USER : 1
REDNESS_ELEVD : 1
THE_HAS : 6
SUPERVISOR_FACE : 1
CONDITION_OR : 1
HAS_WORKED : 1
AT_WHEN : 1
SUPPLEMENTATION_ATTENDING : 1
COMPLAINTS_DURING : 1
ACTIVITY_HE : 1
ORIENTED_PAIN : 1
OF_WERE : 1
IN_OTHER : 1
TAB_ASSESSMENT : 1
OR_DATE : 1
VET_CALLED : 1
NOTE_PAST : 1
AT_PM : 2
TO_CONTROL : 1
IN_LEG : 1
PERMITTED_ATROPINE : 1
ANSWERED_NKDA : 1
PAST_NO : 2
EXPIRED_LAST : 1
DIPTHERIA_PROVIDER : 1
AN_DOE : 1
THAT_DO : 1
BACK_WILL : 1
TO_HAVE : 1
MHC_PROGRESS : 1
TO_MODERATE : 1
PER_OX : 1
DECLINED_FOOD : 1
THE_SETTING : 1
THE_OVERCOAT : 1
VETERAN_PARTICIPATED : 1
WITHIN_MONTHS : 1
PHYSICIAN_TEARFULNESS : 1
MI_SUPPORTIVE : 1
OF_SUPPLY : 1
WHAT_DO : 1
APR_ASSISTANCE : 1
DO_FEEL : 1
HAS_CHRONIC : 2
NO_INTENSITY : 1
REQUESTED_ADMISSION : 1
RESIDENT_ON : 1
VA_MEDICATIONS : 1
HIS_OF : 1
LICSW_ABSENT : 1
RESP_ICDCM : 1
FOR_OR : 1
BED_AT : 1
LETTER_WAS : 1
RESPONSE_OTHER : 1
ON_GLYBURIDE : 1
AND_LEVITRA : 1
VETERAN_READ : 1
NASAL_ULA : 1
REVIEWED_VA : 1
EASY_ACCESS : 1
WIFES_PRESCRIPTION : 1
THE_ABC : 1
AC_DISCUSSED : 1
ORIENTED_PROVIDED : 1
ANY_NO : 1
PASSED_OUT : 1
TO_TAKE : 1
ON_OTHERS : 1
ABDOMINAL_ACTIVE : 1
CONTACT_PT : 1
SKIN_INTEG : 1
PAIN_APPOINTMENT : 1
PHYSICIAN_DOING : 1
RTC_BENIGN : 1
BELOW_NOTE : 1
THAT_BLOOD : 1
GROUP_MOMENT : 1
EYE_GAIN : 1
DEMANDING_STRESSFUL : 1
PREOP_AND : 1
ARE_NOT : 1
TABLET_STRENGTH : 1
HOURS_SAFE : 1
FROM_GENOA : 1
CLINIC_VISIT : 1
OR_FEEL : 1
BIRCH_INFORMING : 1
AWAKE_ALERT : 2
LIST_BELOW : 1
MORPHINE_DEMANDED : 1
THYROID_GLAND : 1
MORE_NORMAL : 1
AIT_WKS : 1
AM_HOME : 1
THE_PTS : 1
THROMBUS_NO : 1
PO_ABT : 1
AFFECT_EUTHYMIC : 2
SUBSTANCE_USE : 1
SYNTHROID_MG : 1
POSTTRAUM_NAFZIGER : 1
DRIVE_FROM : 1
QUESTIONNAIRE_OF : 1
SHE_WILL : 1
EXAM_OPTOMETRY : 1
YOU_DIAGNOSIS : 1
ALBUTEROL_MCG : 1
RESULTS_VISTA : 1
TO_SEE : 4
TALKING_RECORDER : 1
ULTRASOUND_PULSE : 1
AND_ACCOMPANY : 1
HBPC_WARNING : 1
ROOM_FEEDING : 1
INTRODUCED_AS : 1
REGARDS_WILL : 1
BY_FEW : 1
OR_CARE : 1
SW_FAXED : 1
TIME_MEAL : 1
REQUEST_THIS : 1
HIS_YOUR : 1
INHL_PUFFS : 1
CONSCIOUSNESS_ALERT : 1
PHYSICIAN_HE : 2
MODERATELY_TO : 1
DAILY_ANOTHER : 1
GROCERY_STORE : 1
TEST_NEXT : 1
PERIOD_SERVICE : 1
FOR_MY : 1
NURSING_INFORMATION : 1
TRAINING_THE : 1
DROP_MEDICARE : 2
IS_CONTRARY : 1
FOR_DIAGNOSIS : 1
THAN_ADDENDUM : 1
SCHEDULED_APPT : 2
PHYSICIAN_HOW : 1
AT_RISK : 1
THIS_REVIEW : 1
WORK_NOTE : 2
LOOK_TO : 1
TRAINING_PROGRAM : 1
DISEASE_PREVENTION : 1
RISK_HOME : 1
MEMBERS_WHERE : 1
SPUTUM_THE : 1
PROGRESS_CALL : 1
FOR_REEVAL : 1
REPAIR_BENEFITS : 1
FOUR_DA : 1
ECHOCARDIOGRAM_WHICH : 1
NOT_INFECTION : 1
PAST_TO : 1
CSCOPE_DIVERTIC : 1
ACTIVE_OUTPATIENT : 4
RESPIRATORY_OR : 1
HE_CUT : 1
ABLE_TO : 7
DATA_PATIENT : 1
EXPLAIN_WEIGHT : 1
THAT_HIS : 4
ELECTRONIC_CHART : 1
FAMILY_GUARDIAN : 1
ASSISTANCE_BOWEL : 1
THROUGH_THE : 1
INFORMATION_TO : 1
SAYS_DOESN : 1
OF_ACTIVITIES : 1
CONCERNS_NOTED : 1
NURSING_ASSESS : 1
LEATHER_BELT : 1
ETC_CONSENT : 1
SOCKS_MA : 1
SEEN_OBMT : 1
MUST_PREDICATED : 1
OPPOSED_TO : 1
WING_SCALING : 1
DENIES_NO : 1
TIMES_TIMES : 1
COHERENT_NO : 1
CARE_MUST : 1
HE_INTERESTED : 1
CONCURRED_STATED : 1
ORDER_AFFECT : 1
ALKALINE_PHOS : 1
TO_CHECK : 2
FAMILY_MEMBERS : 1
INTERDISCIPLINARY_PT : 1
ELBOW_HER : 1
SOCIAL_THERE : 1
TIMES_ORDERED : 1
OF_REFUSED : 1
REVEALED_NO : 1
THIS_HIM : 1
PREOP_STAFF : 1
FOR_BEFORE : 1
CUEING_RESIDENT : 1
XYZZY_CARE : 1
DOES_WORKS : 1
ANXIETY_PATIENT : 1
DISCIPLINES_WERE : 1
ENCOURAGED_VENTILATION : 1
BE_COMPLETED : 1
SI_AT : 1
ADVISED_HIM : 1
CELL_TO : 1
DISCUSSED_FAMILY : 1
REASSESSMENT_ADDITIONAL : 1
AND_ENCOURAGE : 1
PHYSICIAN_DURING : 1
WEEKEND_EXTREME : 1
THE_SHOWED : 1
COMES_POSTOP : 1
PARTIAL_ROTATOR : 1
HOME_WHERE : 1
PARTIALS_SCALE : 1
HOPE_SOME : 1
FEELING_MODERATELY : 1
COLD_FLU : 1
PRESENT_THE : 1
TEAM_MEMBERS : 1
ACUTE_DEPRESSION : 1
HEALTH_HOLD : 1
PHYSICIAN_DENTURES : 1
INT_ANTIBIOTICS : 1
SUPPLY_SHE : 1
ALERT_EXPERTISE : 1
HANLIN_SHOE : 1
UNION_NURSING : 1
TREATMENT_TEAM : 1
NEW_INTRODUCED : 1
REMAINING_ON : 1
ALCOHOL_PATIENT : 1
TWICE_ACTIVE : 1
GENOA_MH : 1
SINCE_OP : 1
IF_YOU : 1
BID_REVIEWED : 1
PROGRESS_DISCUSSED : 1
BEHAVIORS_THAT : 1
HER_ELBOW : 1
FEEDING_ELIMINATION : 1
HIP_KNEE : 2
FOR_CLINIC : 1
RESIDENT_HELPED : 1
SKIN_DEFECT : 1
THE_WK : 1
SIDE_POSSIBLE : 1
INABILITY_TO : 1
LIMITED_TRANSFER : 1
ADDENDUM_RANK : 1
IN_UNDER : 1
HE_EMERGENCY : 1
ASSESSMENT_SYMPTOMS : 1
NOTE_BEEN : 1
TIMES_SHORTNESS : 1
IS_ROUTINE : 1
HIS_SAFETY : 1
LOG_FROM : 1
IT_BEEN : 1
DAMAGE_WILL : 1
AND_ARE : 1
CENTER_ON : 1
CANE_HELP : 1
AN_FOR : 2
PT_THAT : 4
TIMES_NEEDED : 2
LASER_THE : 1
START_AT : 1
TO_REPEAT : 2
FEEL_HARMING : 1
CALF_TOES : 1
ACCOMPANY_FERNANDO : 1
LEARN_DEMONSTRATION : 1
ARRIVED_HAS : 1
LIFESTYLE_CPS : 1
SOCIAL_WORKER : 3
FATIGUEX_FAS : 1
FOR_SCHEDULED : 2
DUE_SCREEN : 1
ASSISTANCE_MEAL : 1
INSULIN_RARELY : 1
OBMT_PROGRESS : 1
HOLD_ON : 1
GAS_RELATED : 1
NORMAL_RESPONSIVE : 1
MA_RNBC : 2
CONTINENT_BOWEL : 1
PLANSEVERE_NURSING : 1
MG_TAKE : 6
BY_AT : 1
IF_HAVE : 2
READER_OF : 1
LAST_FILL : 2
CLASS_SOME : 1
PATIENT_BATHROOM : 2
INFORMATION_THE : 1
OU_NOTED : 1
AND_LOCKED : 1
ALLERGIES_MR : 1
OBSERVATIONS_WAS : 1
ON_LIFE : 1
WORKER_THERE : 1
REFUSED_TO : 1
UP_LIFE : 1
SURGERY_AND : 1
FILL_BMI : 1
NO_ARE : 1
AT_AND : 1
WORKING_HOURS : 1
MORE_OPTMOSTIC : 1
PHE_ECONOMIC : 1
TO_BLIND : 2
VOMITING_CNA : 1
FOR_FABRICATION : 1
WHO_AGREES : 1
UNIT_SOLN : 1
BEEN_THAT : 1
POST_FOR : 1
SYNTHROID_TAB : 1
HIS_PARKINSONS : 1
PATIENT_IDENTIFIED : 1
SYSTEM_CONCERN : 2
DIAGNOSIS_SCHIZOPHRENIA : 1
HAD_WHICH : 2
BIRDGEWATER_OF : 1
NEXT_SEE : 1
TO_MOUTH : 1
TESTS_PHYSICIAN : 1
ACUTE_BUILDING : 1
ONLY_HISTORY : 1
THE_FOLLOWING : 8
WAIT_UNTIL : 1
LEFT_HE : 1
HURTING_THAN : 1
RN_ASSESSMENT : 1
FOR_COMPLAINT : 1
REPORT_MHICM : 1
COSTOCHONDRITIS_INITIAL : 1
TABLET_MG : 1
TEST_EVALUATE : 1
MESKENAS_RNBC : 2
REFERRAL_WAS : 1
SWS_BRC : 1
TIMER_TALKING : 1
WITH_IF : 1
FOR_IRRIGATION : 1
NONDISTENDED_BOWEL : 1
VOICES_REPORTED : 1
OUT_STATES : 1
TO_SURG : 1
PC_NOTE : 1
AUDITORY_INCIDENT : 1
RAISED_HIS : 1
OF_TIMES : 1
MOST_PICE : 1
FOLLOWING_APPOINTMENTS : 1
PROVIDER_LEFT : 1
NOTE_OUT : 1
WHEN_CRISIS : 1
DISABILITY_THIS : 1
AND_SPOKE : 1
ICDCM_PAIN : 1
FROM_VISTA : 1
REHAB_HOWEVER : 1
HIS_LOOK : 1
BACKPAIN_IS : 1
LEFT_HIS : 1
PRIMARY_CLINIC : 1
MEDICATIONS_PT : 1
CHOICE_CONTRARY : 1
COLOR_MOD : 1
EDUCATIONAL_MET : 1
SHIFT_WAS : 3
PATIENT_CALL : 1
SMILING_LAUGHING : 1
SHE_RADIOLOGY : 1
OR_HEMP : 2
FEW_COURSE : 1
UCINATIONS_DISORGANIZED : 1
NOT_THINK : 1
ANATOMICAL_LOCATION : 3
WAS_THERE : 1
WHO_TO : 1
DRINKS_ELIMINATION : 1
EXIT_TO : 1
UNIT_CHART : 1
OPTICAL_CHARACTER : 1
GENITOURINARY_ASSESSMENT : 1
IS_CONTINENT : 2
CONVERSE_SURGICAL : 1
IS_WELL : 1
RESCUE_COVER : 1
HIS_RATIONAL : 1
EYES_ON : 1
USE_TEMPORARILY : 1
DT_INR : 1
THINKING_FOR : 1
AND_NO : 2
PROVIDED_ALERT : 1
EFFECTS_STATES : 1
WHEN_PATIENT : 1
ONE_SURFACE : 1
YOU_THE : 2
INTERDISCIPLINARY_HEALTH : 1
TO_OUR : 1
NURSING_REASSESSMENT : 2
LB_SHOULDER : 1
HEART_HEART : 1
HYPERTENSION_ESSENTIAL : 1
SOLN_INHL : 1
CUFF_ANATOMICAL : 1
AND_VEGETABLES : 1
ANTICIPATED_DISCHARGE : 1
USED_RATING : 1
REPEATED_ATTEMPTS : 1
SEEN_ANESTHESIA : 1
WAS_AND : 2
ENROLLED_IN : 1
EYES_PATIENT : 1
COMPLETED_SLOW : 1
IN_YOGA : 1
ON_SKIN : 1
THOUGHTS_SAFETY : 1
CHANGE_SEE : 1
GETTING_HAND : 1
LOG_VET : 1
IN_TO : 6
IS_REACH : 1
FOR_VETERAN : 1
DAILY_GUNSHOT : 1
PATIENT_POST : 1
AVAILABLE_ANSWER : 1
OF_SUCH : 1
RESPIRATIONS_COMPLAINT : 1
OUTPATIENT_FALL : 1
SETTING_TO : 1
NERVOUS_VET : 1
ORIENTATION_CONSCIOUSNESS : 1
MORE_STATING : 1
TIMES_WAS : 1
AND_CL : 1
REVIEWED_MH : 1
THE_PROCUREMENT : 1
SUPPORTIVE_FOCUSING : 2
CITALOPRAM_MG : 3
DIAGNOSIS_POTENTIAL : 1
BOWEL_ACTIVITY : 1
TO_ALONE : 1
THOUGHTS_CONTACT : 1
ABOUT_IT : 1
WHISPERS_THAT : 1
ER_PATIENT : 1
AND_PROCEDURE : 1
INITIAL_VITAL : 1
OPEN_REPORTED : 1
SUMMARY_NOTE : 1
FOLLOWED_BY : 1
DISORGANIZED_NICOTINE : 1
CALL_LIGHT : 2
BLADDER_AMBULATION : 1
AM_FOR : 1
EASY_TO : 1
FALL_ON : 1
REMAINING_HOSPITAL : 1
ENCOURAGED_OSAC : 1
YOURSELF_YOU : 1
IN_ROBE : 1
XANAX_IN : 1
TO_BY : 2
REMINDER_ACTIVITY : 2
WHEN_SHE : 1
ORCHITIS_AND : 1
GOOD_HBPC : 1
SUSP_OPH : 2
INSTITUTE_IS : 1
ON_REFERRING : 1
SURGERY_LABORATORY : 1
COMPOSURE_AND : 1
VETERANS_IDEA : 1
PROTECTED_THAT : 1
OF_ORGAN : 1
REQUESTED_OF : 1
DEMANDED_AND : 1
CP_TIME : 1
HTN_AN : 1
STAFF_AT : 1
EDUCATION_RECORD : 1
ADDENDUM_VISIT : 1
REVIEWED_WERE : 1
HAEFNERS_APPOINTMENT : 1
MEMBERS_INTRODUCED : 1
CHRONIC_PAIN : 3
ELEVATED_SPECIFIC : 1
SOFTENER_PARSOME : 1
WILL_BE : 8
CALL_BRIEF : 1
EMOTIONAL_BARRIERS : 1
ACCURATE_THE : 1
PAIN_RULES : 1
LIKE_MAY : 1
OUT_ENGAGE : 1
KNEE_LEVEL : 1
ANY_SI : 1
ELIMINATION_ASSISTANCE : 1
ISSUED_AND : 1
CONFLICTING_APPTS : 1
THE_VETERANS : 2
RESCHEDULE_MAY : 1
NOTE_RECENTLY : 1
MOOD_STATES : 1
STOOL_BOWEL : 1
YES_COMPLICATIONS : 1
ENTRY_INSERTION : 1
POSSIBLY_COPD : 1
SALVATION_ARC : 1
SESSION_REPORTED : 1
THOUGH_DOWN : 1
TO_PROCEDURE : 1
HAS_SPOKEN : 1
LOCATION_SHOULDER : 1
INDICATED_FLU : 1
THE_LAUNDRY : 1
CLASS_NOT : 1
APPROPRIATE_CONTENT : 1
PT_CAPABLE : 1
MOBILITY_PLACED : 1
THE_TWO : 1
PLAN_VISUAL : 1
GROUP_WEEKENDERS : 1
AND_APPOINTMENTS : 1
TO_CARE : 2
ERA_REQUESTED : 1
IN_BACK : 1
SHE_TAKES : 1
HTN_MURMURS : 1
SCHEDULED_VISIT : 1
PATIENT_PCP : 1
TO_CARRY : 1
CONTACT_NOTE : 1
OF_NONE : 1
LACK_COGNITIVE : 1
DISCHARGE_SCORE : 1
INHALER_INHALE : 1
DISCHARGED_AMBULATORY : 1
VEIN_IN : 1
VASCULAR_COMPLETED : 1
DENTAL_DUE : 1
NOTE_ANATOMICAL : 1
IN_VISTA : 2
LANGUAGE_ANY : 1
INPATIENT_TEMPORARILY : 1
THE_UNITS : 1
TRIED_NOT : 1
CASE_TO : 1
AB_ON : 1
INJECTION_AND : 1
AND_THERAPEUTIC : 2
ORAL_INHL : 1
SYSTEM_RECOMMENDATION : 1
THERAPY_AND : 1
RECONCILLIATION_DONE : 1
MURMURS_AN : 1
DOES_PATIENT : 1
ANATOMICAL_RIGTH : 1
TASK_NOT : 1
THURSFRISATSUN_AND : 1
AND_ATTENTIVE : 1
VISIT_IF : 1
OM_LINENS : 1
OF_STAFF : 1
THIS_ENCOUNTER : 1
NOTE_DATE : 1
OR_ECONOMIC : 2
APPT_CONTINUES : 1
APPT_TO : 3
CHECKS_MINS : 1
MONTH_WITH : 1
CALL_CENTER : 1
BY_BEDTIME : 1
MANAGER_OTHER : 1
DR_HAWSE : 1
DEC_HIS : 1
ANGER_MOTIVATION : 1
THEMSELVES_AS : 1
MENTAL_HOLD : 1
PATIENT_FOR : 3
AND_KNEE : 1
VISIT_TO : 1
THE_ANTIBIOTICS : 1
ACTIVE_LEVOTHYROXINE : 1
ADDENDUM_PERSONAL : 1
AND_GU : 1
GRIP_MOVEMENT : 1
WRITER_ALSO : 1
BEING_SHELLED : 1
DIAGNOSIS_INFORMATION : 1
THE_VETS : 1
NO_IN : 1
FOR_DOWNLOAD : 1
ADL_PERSONAL : 1
LEVEL_OF : 1
ANXIOUS_SLIGHT : 1
ELEVATED_PROSTATE : 1
HIM_THE : 1
NICE_TO : 1
ENT_PAIN : 1
UNDERSIGNED_NURSING : 1
ADVANCE_CARE : 1
FOR_STI : 1
MINS_TO : 1
THEIR_PT : 1
PERSONAL_NOT : 1
ONE_MEMBER : 1
IF_DATE : 1
DUE_TRANSPORTATION : 1
NO_SUICIDAL : 1
THE_DRAINAGE : 1
ROBE_WITH : 1
MEDIUM_BATHROOM : 1
NAPPING_NUTRITION : 1
MS_CPRP : 1
THEN_VENTILATION : 1
GASTROENTERITIS_COINCIDES : 1
BEEN_PARTICIPATION : 1
ADMINISTRATION_UAREVIEWED : 1
PHONE_PROGRAM : 1
LIVING_BACK : 1
BY_BRC : 1
PT_IN : 3
WILL_CALL : 1
GROUP_COUNSELING : 1
ANXIETY_ASK : 1
PATIENT_TREADED : 1
ABOVE_ADDENDUM : 1
WAS_FILLED : 1
THAT_CALLED : 1
PROVIDED_SUPPORT : 1
TALKED_THE : 1
CLENCHING_PT : 1
WRITER_THAT : 1
NAME_AND : 2
MENTAL_ORIENTED : 1
TOES_LAST : 1
IMAGING_HTN : 1
PROVIDE_THIS : 1
MD_ARNP : 1
DIABETES_AUG : 1
TIME_MINUTES : 1
MEDICATION_TIMES : 1
MYSELF_IN : 1
NOTE_ATTENDANCE : 1
TO_RECOVERY : 1
WAS_EVALUATED : 1
IN_ACTIVITIES : 1
BRC_ADMISSION : 1
PM_ATTEMPTS : 1
ALL_SMOKING : 1
TKA_IS : 1
HESITANCY_URGENCY : 1
TO_AXIS : 1
IF_SHE : 1
ABLE_ATTEND : 1
REEVALUATED_BY : 1
LAST_FALL : 1
IS_USE : 1
TO_DEGREES : 1
PT_PT : 1
SHE_HAS : 2
MEDICATION_UAREVIEWED : 1
RESCHEDULE_DENTAL : 1
PATIENT_HERE : 2
WELL_HAVING : 1
OUTPT_ATTENDANCE : 1
ELIMINATION_URINE : 1
FOLLICLES_AND : 1
FOR_HEALTH : 1
HE_HIS : 2
GEESEY_YVONNE : 1
IS_FAIR : 1
ARRIVAL_PATIENT : 1
SMOKER_PKS : 1
IEDS_DOWN : 1
IF_FACTOR : 1
THE_USE : 1
APPOINTMENT_THIS : 1
SUMMARY_GIVEN : 1
OF_ABOVE : 1
ELIMINATION_REQUIRES : 1
PHYSICIAN_INSTITUTE : 1
OF_DISORDER : 1
BUSPIRONE_MG : 1
WHAT_IS : 1
DENTAL_WING : 1
FROM_INSIDE : 1
TALKING_OTHERS : 4
DTN_AUTHOR : 1
DICLOFENAC_THIS : 1
ANOTHER_WILL : 1
PH_OPTIC : 1
PHYSICIAN_FOR : 1
HOURS_FUTURE : 1
LIPOMA_MEMBERS : 1
THE_SUPERVISING : 1
SOME_OF : 2
ON_WAS : 1
WAS_RECIVED : 1
DEPRESSION_SCREEN : 1
NT_BS : 1
BIRTH_MAR : 1
THE_CASE : 1
SCALE_USED : 1
ANY_OF : 1
BASED_ON : 1
PAIN_ISSUES : 1
SCREEN_PROVIDED : 1
THIS_ALCOH : 1
EVEN_AND : 1
SEEN_THE : 1
THYROID_MEDICATIONS : 1
IDEA_THEY : 1
INTERVAL_AXIS : 1
AT_SITE : 1
WORKER_OTHER : 1
MEDS_SINCE : 1
DISABILITY_REASSESSMENT : 1
HIS_CHRONIC : 1
IDENTIFIED_LIMITATIONS : 1
MEDICATIONS_TRAVOPROS : 1
INVOLVING_TRAINING : 1
HE_REPORTED : 1
UNITS_OF : 1
WOUND_EYEBALL : 1
CHO_OL : 1
APPOINTMENTS_HAS : 1
CONVERSATION_HAS : 1
SHOULDER_SARAH : 1
THE_ER : 1
WILL_NEED : 1
INTERACTIONS_BECAME : 1
AND_RESIDENT : 1
VETERAN_ONE : 1
AT_YEAR : 1
CURRENT_IDEATION : 1
EDUCATIONAL_NEEDS : 1
OPTIC_NERVE : 1
POSITION_AND : 1
ACETAMINOPHEN_CAPLET : 1
FAMILY_SIGNIFICANT : 1
SECONDARY_REPORT : 1
REQUESTED_WAS : 1
FOR_POSITIVE : 1
THE_WITH : 2
ACUTE_PSYCH : 1
THOUGHTS_MONITORED : 1
CONDITION_VARIATION : 1
PHYSICAL_HELP : 1
MEDICATIONS_WO : 1
THE_PRACTICE : 1
NS_OU : 1
BE_REPORTS : 1
MEDICATION_NONDISTENDED : 1
MONITORED_PAIN : 1
GONE_EXCEPT : 1
GOAL_RESIDENT : 1
MALE_VET : 1
HIS_ALLERGIES : 1
TO_OPERATE : 1
STATUS_PATIENT : 3
BEFORE_TREATMENT : 1
MEDICATION_NONTENDER : 1
THE_AND : 4
STABLE_NO : 1
EXAMINED_AND : 1
SYMPTOMS_MILD : 1
DID_ENGAGE : 1
AUTHORIZATION_THAT : 1
EXPOSURES_BLASTS : 1
JUNE_YOU : 1
OLD_EXAMINED : 1
WITHOUT_DIFFICULTY : 1
ADVISE_TO : 1
ADDENDUM_WAITING : 1
ULA_QUETIAPINE : 1
PASS_WAS : 1
NKA_COLLECTION : 1
CASE_YES : 1
NOTE_AND : 1
THE_RANGING : 1
MSW_ABSENT : 1
SYMPTOMS_OR : 1
ACCEPTED_VOLUNTARY : 1
IT_VOICED : 1
SCHIZOPHRENIA_TYPE : 1
STAIR_ON : 1
PEERS_TEL : 1
DUE_PATIENTS : 1
THIS_PREOP : 1
OPTOMETRIST_MAY : 1
EDUCATION_INSTRUCTED : 1
WAS_HIT : 1
FIRE_THE : 1
STRENGTH_MG : 1
PCP_THE : 1
SION_LEFT : 1
WHICH_TO : 1
ADDRESS_REQUESTING : 1
APPETITE_SHOULD : 1
GU_PATIENT : 1
FOR_PROBLEM : 1
KG_VIA : 1
OBSERVATION_PING : 1
ON_THURSFRISATSUN : 1
TO_CLINIC : 1
THE_WIFE : 1
HOW_USE : 1
THIS_PROBLEM : 1
INTRODUCED_THEMSELVES : 1
PT_SCHED : 1
NOTE_SAID : 1
OF_RECEIVED : 1
PER_IF : 1
TOOK_MOMENT : 1
THE_FACE : 2
OTHERS_ZZPATIENT : 1
TEAR_LOCATION : 1
THINKING_DAILY : 1
FIRST_NAME : 1
NEEDS_NO : 1
CALL_TYPE : 1
REQUIRE_AID : 1
FOR_REVIEW : 1
USING_AMOUNT : 1
NO_VOICES : 1
LTC_STATUS : 1
BE_PROTECTED : 1
HEIGHT_IN : 3
THE_DOCUMENT : 1
SUMMARY_VETERAN : 1
MANAGEMENT_PROBLEMFOCUSED : 1
TREATMENT_TREATMENT : 1
SUBJECTIVE_SCALE : 1
IN_BED : 2
APPOINTMENTS_CHRONIC : 1
IDEATION_PSYCHOMOTOR : 1
NONVERBAL_QUES : 1
OF_HEIGHT : 1
AND_GROOMING : 1
WITH_BLINDNESS : 1
RESPIRATORY_EVEN : 1
LOW_BACK : 1
CT_ADDENDUM : 1
FEVER_LOSS : 1
HOURS_READ : 1
AND_REPORTED : 3
LAST_RE : 1
CARROTS_PREOPERATIVE : 1
HOLD_OFF : 1
KSBURG_CFA : 1
TO_OUTPATIENT : 1
DIPTHERIA_REQUIRES : 1
HELPED_USE : 1
HE_DRESED : 1
WHICH_MILD : 1
HAS_SOBER : 1
CALLED_SAY : 1
TO_IMPROVE : 1
WAS_REFERRED : 1
AND_HAD : 2
UNSPECIFIED_MALIGNANT : 1
PLACE_IN : 1
SEEMED_TO : 1
PHONE_SAME : 1
BID_VA : 1
VISITS_NO : 1
THIS_INDVIDUAL : 1
THE_HT : 1
MINUTES_DATE : 1
ABC_GROUP : 1
SKILLS_OF : 1
SHIFT_OF : 1
NOT_HIS : 1
NOTE_IN : 1
TO_UNTIL : 1
GROUPS_TO : 2
LOCKED_CITALOPRAM : 1
NO_THROMBUS : 1
THAT_IS : 2
THE_HOUSE : 1
OF_ALCOHOL : 1
LOSSES_BUT : 1
FOLLOWUP_MEDICATION : 1
HE_FEELS : 1
YOU_WANT : 1
ENEMY_OTHER : 1
CONTINUE_WITH : 1
TO_THESE : 2
CONCERN_HIS : 1
DRINKING_CURRENT : 1
THAT_VOICES : 1
DENIED_THE : 1
TEMPERATURE_YEAR : 1
LEFT_EPICONDYLAR : 1
WEEK_IF : 1
SYSTEMS_THAT : 1
MORE_THE : 1
PENDING_FOR : 1
HE_ASKING : 1
PM_PHYSICIAN : 1
CARE_COMMENTS : 1
BY_FOLLOWING : 1
PROVIDED_INFORMATION : 1
INHL_CAP : 1
CONTINUE_PT : 1
ACTIVE_EDITION : 1
FROM_ORAL : 1
NOTE_ALSO : 1
THURSFRISATSUN_MG : 1
AT_GROCERY : 1
NOTIFIED_SUBJECTIVE : 1
FOR_SHORTNESS : 1
AND_HE : 5
CARDIAC_HTN : 1
CONTINUED_IN : 1
REMOVED_PER : 1
VETERANS_MEDICAL : 2
GROUPS_HAS : 1
AMBULATORY_SCHIEF : 1
RISKS_OBESITY : 1
SURGICAL_CONFIRMED : 1
WAS_ADMISSION : 1
EFFECTIVENESS_THERAPY : 1
IN_CARDIAC : 1
PMH_REFERENCE : 1
AS_TO : 2
THE_THEY : 1
NUTRITION_GROUP : 1
NO_SEEM : 1
DATE_PLACE : 1
NEXT_AS : 1
RELATED_TO : 3
COMPLICATIONS_OTHER : 1
INHL_INHALE : 1
COLOR_PREDNISOLONE : 1
HELP_HE : 2
APPOINTMENTS_ALTHOUGH : 1
FOR_IMAGING : 1
REDNESS_SWELLING : 2
VISIBLE_IN : 1
IDEATION_OR : 1
MORE_AND : 1
BELIEVES_CHOICE : 1
RECORD_THE : 1
TIME_ANTIBIOTICS : 1
NURSE_YOU : 1
ISSUES_POSSIBLY : 1
DONE_VA : 1
SEEING_YOU : 1
YOUR_REVIEW : 1
READER_TO : 1
BMS_MH : 1
PHYSICIAN_PENDENCE : 1
AMBULATION_SUPERVISION : 2
OF_HYPERTENSION : 1
THIS_MAY : 1
KNEE_BUT : 1
SWELLING_DISCHARGE : 1
APPOINTMENT_TO : 2
PERIODONTAL_EVALUATION : 1
GERD_MR : 1
ICDCM_SUBJECTIVE : 1
OCR_THE : 1
IDENTIFICATION_THE : 1
THE_CLAIMS : 1
SATURATION_PER : 1
GOAL_POSITIVE : 1
PROGRAM_IN : 1
COME_FROM : 1
SUMMARY_DISCUSSION : 1
UNLABORED_MAINTAINS : 1
MAINTAINS_INTACT : 1
MG_ON : 2
HGB_DL : 1
FLOW_ADDITIONAL : 1
EMOTIONAL_MOTIVATION : 1
STI_CONCERN : 1
NOTICED_BAND : 1
NO_NO : 1
AND_AS : 1
RALLY_INSERTED : 1
OT_MIN : 1
HIS_NARC : 1
HAS_NKA : 3
SEEM_STRONGER : 1
PHARMACY_SCHIZOPHRENIA : 1
LOW_IN : 1
IS_RALLY : 1
SPONGE_ZZPATIENT : 1
MAX_CLOSED : 1
BEER_IF : 1
BRIEF_OF : 1
PATIENT_TO : 7
IN_FEBRUARY : 1
SYRUP_WITH : 1
BOTH_LEGS : 1
PATIENT_CONTACT : 1
SEE_SUMMARY : 1
ABOUT_MISSED : 1
PRODUCTS_WILL : 1
SHES_RESULTS : 1
ICDCM_FOR : 1
COMPRESS_LID : 1
YOU_IN : 1
PAST_ATTEMPTSWHAT : 1
ORDERED_INPATIENT : 1
NO_POSITION : 1
IN_CHAINS : 1
NORMAL_FERRITIN : 1
DATE_WAS : 1
HOSPICE_RECENTLY : 1
WILL_AHEAD : 2
AS_WERE : 1
SHE_NOT : 1
PAIN_OF : 3
CCOUGH_WITH : 1
RESPIRATIONS_CHIEF : 1
INVOLVE_MEDICATION : 1
ASKING_ASSISTANCE : 1
TO_NURSING : 1
HE_REQUESTING : 1
SO_THAT : 1
HAS_SERVICE : 1
SPUTUM_OR : 1
TRANSPORTATION_MEDICAL : 1
EDUCATION_LEARNER : 1
INTRODUCED_GROUP : 1
SAID_FEBRUARY : 1
PROCESS_REVIEWED : 1
WITH_AND : 3
AS_HED : 1
TIME_ACTIVE : 2
PAST_QUIT : 1
ADMIT_PAC : 1
LENGTH_BP : 1
MEDICATION_SAME : 1
SEEN_AUSCULTATION : 1
BEEN_COLOR : 1
THE_HE : 4
TO_WITH : 2
TO_UPCOMING : 1
REASONS_DISCHARGE : 1
REPORT_SCORE : 1
LASER_TO : 1
BASE_NO : 1
PAIN_ADDENDUM : 1
NEB_TX : 1
VET_WOULD : 1
PAIN_VETERAN : 3
CHIROPRACTIC_CONSULT : 1
IT_LOOKS : 1
THANKED_ME : 1
NO_PT : 1
OUTPUT_OR : 1
BATH_ZZPATIENT : 1
NOTET_OPTOMETRY : 1
CLINIC_WITH : 1
SPO_RESPIRATORY : 1
ARRIVED_ANGER : 1
FOR_SCARS : 1
MEDICATIONS_PATIENT : 1
RESIDENT_HISPANIC : 1
AN_THEY : 1
NONTENDER_NONDISTENDED : 1
OF_OR : 1
MALE_APPOINTMENT : 1
ISCUSS_THIS : 1
EYES_ACTIVE : 1
ROOM_SECURITY : 1
OTC_FLU : 1
IMAGING_DISPLAY : 1
IMAGERY_PROGRESSIVE : 1
CONSENT_VEIN : 1
PT_ALSO : 1
VISIT_THE : 2
YOURSELF_WHEN : 1
SCALE_NO : 1
TO_PRESENT : 1
SEP_SAYS : 1
FOR_PROGRESS : 1
GROUP_HT : 1
IS_TO : 7
ASSESSMENT_AND : 1
IN_POSTOP : 1
OBTAINING_FROM : 1
RECONCILIATION_WAS : 1
AUSCULTATION_YOU : 1
ESSENTIAL_LEARNER : 1
SHOULDER_PARTIAL : 1
ANSWER_WHEELCHAIR : 1
SIGNED_THE : 1
SCOPE_PROVIDERS : 1
IS_BASED : 1
PROGRESS_TO : 1
WAS_OF : 1
SEE_CLAIMS : 1
DENTAL_EXAM : 1
BY_HEENT : 1
BONY_MED : 1
SOFTENER_BEN : 1
CONTINUES_CARRY : 1
AND_DISEASE : 1
HE_VOLUNTARILY : 1
BEEN_ISSUED : 1
DURATION_COMPLAINT : 1
POSITIVE_THINKING : 1
SCHEDULED_SEP : 1
PTSD_PROCESSING : 1
CHEMICAL_MATRIXECTOMY : 1
VENTRICULAR_FUNCTION : 1
RINGING_IN : 1
ABOVE_MINUTE : 1
GOAL_NO : 1
ELIMINATION_TRANSFER : 1
INDICATED_RT : 1
PATIEN_BLOOD : 1
CLINIC_VACCINATION : 1
TRAUMATIC_THAT : 1
BARRIERS_LISTED : 1
TO_CASINO : 1
INCLUDE_ACTIVE : 1
THE_MEDICATION : 2
ON_OXYGEN : 1
DEPENDENCY_EDUCATION : 1
AGREEMENT_YES : 1
MODERATE_WEAK : 1
POSTOP_DOING : 1
FROM_PM : 1
GROVE_OPT : 1
LIKE_BE : 1
PAIN_NOW : 1
DICLOFENAC_CALL : 1
HIS_TO : 1
GAF_APPOINTMENT : 1
INTO_VEIN : 1
NEBULIZER_FOUR : 1
RATE_WIDE : 1
CONCERN_THAT : 1
COMPLETING_SALVATION : 1
THE_LEFT : 1
IMPAIRMENT_TO : 2
GROUPS_ACTIVELY : 1
DATE_BEFORE : 1
PATIENT_NOT : 3
PAST_PROVIDED : 1
NOT_ANY : 1
TO_AN : 1
ABLE_DO : 1
PHOTO_OF : 1
SHOULDER_STARTED : 1
OR_ONLY : 1
PLACE_RECENT : 1
BOWEL_BLADDER : 1
TROPIC_DIABETIC : 1
AT_INFORMING : 1
WAS_CONSISTENCY : 1
INTACT_SKIN : 1
INTERVAL_GAF : 1
REQUEST_WHEN : 1
OR_THOUGHT : 1
WORK_PROGRESS : 2
PC_COMMENTS : 1
PATIENTS_AND : 1
RESIDENT_ROOM : 2
CALL_LEFT : 1
INTACT_AFFECT : 1
OR_NORMALIZING : 1
WAS_ACET : 1
PAIN_NOTE : 1
PROBLEMS_COMPREHENSION : 1
AS_HIGH : 1
RECENT_INCLUDE : 1
REMAINING_ASSESSMENT : 1
MEMBERS_CONCURRED : 1
JOINT_REPLACEMENT : 1
STATED_THAT : 1
THE_TERTIARY : 1
SUBJECTIVE_ONE : 1
UNLISTED_EVALUATION : 1
FEB_VASCULAR : 1
HIS_LACK : 1
NOSHOW_PT : 1
EPIS_IRRITABILITY : 1
CALLED_CANCEL : 1
HOURS_MEANWHILE : 1
COMPREHENSION_HBPC : 1
CREAT_KIDNEY : 1
THE_PAIN : 1
OPTOMETRIST_ON : 1
HED_BEEN : 1
ANESTHESIA_GEN : 1
NOT_PROTECTED : 1
NAME_DIARRHEA : 1
OR_VA : 1
NO_PREOP : 1
DISTRIBUTION_AND : 1
MEMBER_CAN : 1
DAILY_LIVING : 6
PATIENT_REPORT : 1
NOTE_RECONCILED : 1
HAS_CAPACITY : 1
DEL_OM : 1
WILL_LETTER : 1
STRESS_NAFZIGER : 1
LIKE_SOCIAL : 1
ADVANCE_NO : 1
PASSAGES_MINUTE : 1
FLUENCY_FAS : 1
ILLNESS_SPMI : 1
BANISTER_FIRE : 1
IMED_CLOTHING : 1
INSTRUCTIONS_LIPOMA : 1
NORMALIZING_NO : 1
PROVIDED_ABOUT : 1
SKIN_RELATED : 1
ATTEMPTSWHAT_WHAT : 1
HAVE_THE : 1
EXIT_DUE : 1
IT_WAS : 3
TRANSFER_REQUIRES : 1
NOSHOW_EDUCATION : 1
BRCS_WAS : 1
ASSESSMENT_COMPLETE : 1
SHIFT_THE : 7
REGARDS_TO : 2
NUMBER_ADDENDUM : 1
TO_EDUCATION : 1
VISIT_TRIAGE : 1
PROGRESS_ANATOMICAL : 1
ADDITIONAL_FOR : 1
IS_LOSS : 1
NO_STAFF : 1
RX_GTTS : 1
SURGEON_LASER : 1
CAN_REACHED : 1
PROBLEMS_INCLUDE : 1
MAY_THE : 1
THE_CONSTITUTIONAL : 1
PRODUCTS_APPLICABLE : 1
AND_SCOPE : 1
MEDICATIONS_CONTINUED : 1
LOSS_EAR : 1
CLC_NOTE : 1
REPRESENT_AN : 1
INFORMING_HIM : 1
FOR_LUNCH : 1
IS_LOW : 1
SMOKING_CESSATION : 1
GROOMED_FRIENDLY : 1
WHERE_TEAM : 1
OCR_IN : 1
RATE_OPEN : 1
MAY_MY : 1
HAS_THERE : 3
OCTOBER_TO : 1
CONVERSE_RESPOND : 1
STOOL_HIP : 1
BACKGROUND_OF : 1
IN_ROUTINE : 1
EXTREME_READER : 1
THAN_PHYSICIAN : 1
WILL_HIS : 1
NUTRITION_ASSISTANCE : 1
NECK_OF : 1
THE_CLONAZEPAM : 1
FROM_MUCOMYST : 1
AS_ALWAYS : 1
PAIN_SAYS : 1
AVAILABLE_ANOTHER : 1
PT_HOME : 1
ADVANCE_DIRECTIVES : 1
NERVE_IF : 1
WAS_EDUCATED : 1
TOOK_TO : 1
STILL_TALKED : 1
PATIENT_NO : 1
ARE_RESTRAINTS : 3
TO_REEVALUATED : 1
USES_TO : 1
VASCULAR_SURGERY : 1
BE_INJECTED : 1
AGITATION_OTHER : 1
NOTE_PLACED : 1
ARMY_PROGRAM : 1
WIFE_HAD : 1
LEARN_PRINT : 1
MOBILITY_ADR : 1
MOOD_GU : 1
ACTIVITIES_FOR : 1
FOR_INPATIENT : 1
SIGNS_SUPPLY : 1
ASSESSMENT_FOLLOWUP : 1
TEMPERATURE_RESPIRATIONS : 1
MCGOWAN_JUDSON : 1
TRAINING_NO : 1
ERA_IF : 1
ENCOURAGED_GROUP : 1
HIS_ATTITUDE : 1
RECOMMENDATION_RESP : 1
TIME_VACCINE : 1
TTE_LV : 1
SEE_INSIDE : 1
VOICE_DATE : 1
SERVICE_RATED : 1
SKILLS_COMPONENTS : 1
CORONARY_WITHIN : 1
IN_COMFORT : 1
THE_INFORMATION : 1
SOCIAL_WORK : 3
GIVEN_TO : 1
PL_ING : 1
ANOTHER_EVEN : 1
TO_ACCEPTING : 2
NOT_AN : 2
TIBC_NORMAL : 1
STRAIN_THE : 1
INCREASE_PHYSICAL : 1
ACTIVE_TELECARE : 2
OTHER_OF : 1
CLASS_STATED : 1
OCT_COVER : 1
MESKENAS_MA : 2
ETSU_SHE : 1
HE_IS : 11
FOR_ACTIVE : 1
SOCIAL_PROGRESS : 2
SATURATION_PULSE : 1
OF_DURING : 1
TO_SEEN : 1
BY_CLASS : 1
VICE_VERSUS : 1
SCALE_HE : 1
OCCURRED_DURING : 1
ANYONE_ELSE : 1
USE_HAS : 1
MARITAL_RELATED : 1
SWS_IT : 1
AVOID_THE : 1
BLADDER_PROGRAM : 1
WILL_OFF : 1
TO_AND : 6
OF_BARRIERS : 1
WARM_PREOP : 1
THOUGHT_THE : 1
COMMENTS_DAILY : 1
TO_CONTENT : 1
LAST_HISTORY : 1
SKILLS_VETERAN : 1
UP_IN : 1
SIDE_EFFECTS : 1
SEEN_IN : 2
ISSUE_THIS : 1
REPEAT_MONTH : 1
STANDARD_OUTPATIENT : 1
THE_THIS : 1
STRENGTH_ATTENDS : 1
ANTICOAGULATION_FOLLOWUP : 1
REQUEST_CONCENTRATE : 1
LISTED_BELOW : 1
EXPERIENCING_UCINATIONS : 1
IS_NOW : 1
WRITER_SW : 1
COUNSELING_HE : 1
NECK_PRIMARY : 1
NURSING_ADMISSION : 1
NEUROSURGERY_CLINIC : 1
XYZZY_OF : 2
THEY_TO : 1
HOURS_THE : 1
THE_LIST : 1
AND_PRIMARY : 1
MIN_MEDICAL : 1
CSAC_CPS : 1
TRANSPORTED_BY : 1
NO_RESPONSE : 1
ABDOMINAL_OUT : 1
OF_CHEN : 1
IS_TAZINE : 1
CHEST_CTA : 1
RESIDENT_CP : 1
EVIDENCE_OF : 1
TEL_CITALOPRAM : 1
QHRS_PRN : 1
ATTENDS_BRIEF : 1
MACHINE_MAIL : 1
VOICES_LIKE : 1
DATA_LANGUAGE : 1
POTENTIAL_ALTERATION : 1
COMMENT_LABS : 1
NOT_ANOTHER : 1
DRINKING_IDEATION : 1
HE_DIZZY : 1
MONTH_APPT : 1
HARMING_MYSELF : 1
TREATMENT_MEMBER : 1
HP_LAST : 1
TO_GET : 3
EXTRA_STILL : 1
IN_MONTH : 1
EVAL_SYMPTOMS : 1
OUT_HIS : 1
WAS_GROOMED : 1
THE_SPINE : 1
CANCELLED_PATIENT : 1
WHERE_WILL : 1
CONTINUES_PRESENT : 1
VA_WAL : 1
PRESSURES_THE : 1
IMED_INFORMED : 1
INDEX_IN : 1
USE_AT : 1
SYSTEM_PLEURITIS : 1
TO_TRANSFER : 1
ORIENTED_UCINATIONS : 1
MONTHS_NO : 2
LAB_DATA : 1
PLEASE_THE : 1
FOR_STOOL : 1
USE_DOSE : 1
ANY_TO : 1
MANAGEMENT_AND : 1
STARTED_DRAINING : 1
DOES_NOT : 3
BECAUSE_COPD : 1
AND_PROCESS : 1
PCP_CAROTID : 1
FINDINGS_AMALGAM : 1
PROGRAM_MAY : 1
WAS_DISCUSSED : 1
LIMITED_ASSISTANCE : 1
ME_RADIOLOGY : 1
GOOD_TTE : 1
ON_DUE : 2
LIVING_TRAINING : 1
ROOM_SKIN : 1
IS_NURSING : 1
APPLICABLE_THIS : 2
SUSPICIOUS_MASS : 1
FROM_PHYSICIAN : 1
BREATHING_TRY : 1
STATUS_INJURY : 1
THE_SOCIAL : 2
MD_INDICATION : 1
COMPLAINT_INJURY : 1
TOOTH_INFORMED : 1
SESSIONS_REMAINING : 3
OGOING_LEG : 1
GROUP_CENTER : 1
REVIEWED_NO : 1
MEDICATIONS_OR : 1
MEDICATION_TAKEN : 1
IN_CLINIC : 5
MORTARS_THOUGH : 1
PAST_DID : 1
MIN_PSYCHOTHERAPY : 1
SURGERY_APPT : 1
PAST_AND : 1
TYPE_NO : 1
PHYSICIAN_JUN : 1
YOU_WITH : 1
OR_DO : 1
TREATMENT_CENTER : 2
OPEN_WOUND : 1
FOLLOWUP_ORDERED : 1
LIKE_HE : 1
SPUTUM_FOR : 1
MASS_HEIGHT : 1
SHIFT_THIS : 1
CALLER_OTHER : 1
FASTING_WITH : 1
VENTILATION_OF : 1
TO_INCREASE : 2
TREATMENT_DAILY : 1
PREOP_CHECKLIST : 1
WK_ARRIVAL : 1
THESE_HIM : 1
WITH_STATED : 1
LABS_PERIOD : 1
MEDICAL_POTENTIAL : 1
VETERAN_WILL : 1
RN_SPENCER : 1
YOUR_COLON : 1
ELIMINATION_PROVIDED : 1
RONCHI_OF : 1
CONSENT_USE : 1
WILL_REPORT : 1
LAUGHING_TALKING : 1
ORGAN_DATA : 1
HOME_TELEPHONE : 1
STATED_HE : 1
VIETNAM_ERA : 1
LAST_TIMES : 1
PROVIDER_AHN : 1
SUPPLIES_PT : 1
CHART_REVIEWED : 1
ALLERGIES_ADR : 1
CONSUMED_TO : 1
CORRECTLY_THE : 1
THERE_ADVISED : 1
CHRONIC_DAMAGE : 1
FEELINGS_OR : 1
FOR_CONCENTRATE : 1
COUPLE_AGO : 1
TO_HBPC : 1
CONDUCIVE_TO : 1
PHONE_TO : 1
STOOL_DURING : 1
CHRONIC_DIFFICULTY : 1
MANAGEMENT_OBSERVATIONS : 1
GLAND_LOCAL : 1
REQUIRED_NURSING : 1
NO_SKILLS : 1
ETC_FILL : 1
PLEASURE_IN : 1
GM_GEN : 1
ADMISSION_GERD : 1
FALL_RISK : 1
ASSISTANCE_HELP : 1
CALLED_AND : 4
MEDS_PRE : 1
ADLS_OF : 1
HIS_LAST : 1
HARD_TO : 1
AVOID_LUNGS : 1
AS_BREATHING : 1
ENGAGE_THE : 1
ARE_SATISFACTORY : 1
MISSED_PATIENT : 1
PHYSICAL_GETTING : 1
LOCK_INTO : 1
EXAMINED_ANESTHESIA : 1
WOULD_LIKE : 2
PREVENTION_SCALE : 1
PATIENT_NOTE : 1
HE_THIS : 1
DATE_HOURS : 1
LIBRARY_LOCAL : 1
DISCUSSED_CURRENT : 1
APPROPRIATE_PATIENT : 1
OPT_ASSESS : 1
ISCUSS_FURTHER : 1
BLADDER_IN : 1
ATTENDING_SYSTEM : 1
VETERAN_HIS : 1
WITH_BEEN : 1
NOTICE_NEPEC : 1
MORNING_USE : 1
REPORTS_COMPLIANCE : 1
GROUP_HAS : 2
REVIEW_ORIENTATION : 1
STAIR_BANISTER : 1
WITH_INSULIN : 1
REMAINING_PATIENTS : 1
FILM_LOCAL : 1
MEMBERS_AND : 1
WALK_BLOCKS : 1
SEE_ATTACHED : 1
OBSERVATION_VET : 1
FOR_TREATMENT : 1
FOOD_ALLERGIES : 1
DOING_OK : 1
CLOBETASOL_OINT : 1
IS_ALTERATION : 1
OF_ADMISSION : 1
IS_EXPECTED : 1
RE_ON : 1
OPTIC_IF : 1
LY_MATERIAL : 1
LIMITED_EXTENSION : 1
WORSE_LAST : 1
NO_SIGNS : 1
PROBLEMS_DO : 1
PROVIDED_TREATMENT : 1
RIGHT_LOWER : 1
OBESITY_REVIEWED : 1
SUPPLEMENTATION_AT : 1
EXAM_AMPUTATION : 1
WIDE_OPEN : 1
NUMBER_VERIFIED : 1
APAP_BUTALBITAL : 1
ARE_AT : 2
DRINKS_PROVIDED : 1
TO_AMBULATORY : 1
SESSION_DX : 1
THREE_SC : 1
ADDENDUM_EDUCATIONAL : 1
MD_CANCELLED : 1
APPLICABLE_DOCUMENT : 1
CEFAZ_GM : 1
PATIENTS_REQUEST : 1
EDUCATED_THE : 1
OR_OTHERS : 1
WITH_TEAM : 1
PARTICIPATED_YOGA : 1
REPAIR_FABRICATION : 1
APPT_RADIOLOGY : 1
FROM_OF : 1
LOCATION_ALL : 1
YES_PACKS : 1
OU_SURGEON : 1
HERE_SCHEDULED : 1
REGARDING_NARC : 1
PREOPERATIVE_PROVIDED : 1
NEED_BE : 1
EXUDATE_HEMES : 1
TECHNIQUE_ADMIT : 1
SUICIDAL_EXPRESSED : 1
LEATHER_MR : 1
ON_HAD : 1
OR_HERBALS : 1
THAN_NORMAL : 1
WERE_IN : 1
WITH_ROTATOR : 1
GLA_MEDICATIONS : 1
IN_INCREASED : 1
THE_ALL : 1
HAS_MILITARY : 1
RISK_FOR : 1
PATIENT_ADDED : 1
WITHOUT_CORRECTION : 1
PROBLEMS_REDNESS : 1
HISTORY_ALCOHOL : 1
CLINIC_INFORMATION : 1
HOURS_AT : 1
NOTED_SWS : 1
IV_TREATMENT : 1
ADDENDUM_VETERAN : 1
THE_RIGHT : 1
THIS_TASK : 7
IMPLEMENT_PER : 1
GO_THE : 1
ANXIETY_HE : 1
STRIFE_RELATED : 1
CLINIC_NOTE : 4
LEG_SWELLING : 1
OUTPT_TO : 1
WILL_SCHEDULE : 1
VET_LIKE : 1
SPENT_ACTIVE : 2
PATIENTS_SESSIONS : 1
ON_FRUITS : 1
SUPPLIES_PAIN : 1
DROPS_UNDER : 1
DEPARTMENT_ACCEPTANCE : 1
NUMBER_THE : 1
POSTING_AMOUNT : 1
SAFETY_AND : 1
HAS_PROGRESSING : 1
OFTEN_RADIATES : 1
AND_SUBTESTS : 1
BE_AT : 3
PERSEVERATES_HIS : 1
NEW_INTAKE : 1
ON_MON : 1
ACCESSED_THROUGH : 1
TIME_IN : 1
EXAMINED_THE : 1
THEN_TWO : 1
RIGHT_ANGIO : 1
CARE_NONVA : 1
OR_PROCEDURE : 1
REQUESTING_SO : 1
TIME_ENGAGE : 1
GENITOURINARY_VOIDING : 1
IN_LOW : 1
MILD_MODERATE : 1
HIP_ASSESS : 1
APPOINTMENT_SIGNS : 1
EVERY_MCG : 1
IS_ASKING : 1
THE_MEDICAL : 1
TO_FOR : 4
INSTRUCTION_OUTPT : 1
CARE_BLADDER : 1
UNIT_SERVICE : 1
FOR_ADLS : 1
CHANGES_NONE : 1
HAD_COUPLE : 1
PROBLEM_GO : 1
CALL_HRS : 1
TO_THE : 13
PER_DR : 1
WAS_ALWAYS : 1
ADMISSION_FOR : 1
DID_ADJUST : 1
ETC_PATIENT : 1
PATIENT_SOCKS : 1
STATUS_ACTIVE : 1
MEMBER_REPORTED : 1
ALWAYS_THAT : 1
CONSISTENCY_OF : 3
BLODGETT_CATHERINE : 1
WE_NOT : 1
IDENTIFIED_PATIENT : 1
THE_LLI : 1
BY_MOUTH : 6
ASSESSMENT_MALE : 1
BMI_WITH : 1
BRC_LAUNDRY : 1
ION_MG : 1
ELIMINATION_HYGIENE : 1
PATIENT_ENCOURAGED : 1
OR_SW : 1
PLACED_TO : 2
TO_IMPROVED : 1
ADDENDUM_ASSESSMENT : 1
LUNGS_EGD : 1
IMPRESSION_PHONE : 1
POSTING_ASSISTANCE : 1
DIETITIAN_TRIED : 1
THE_EXPERIENCING : 1
OVERSIGHT_ENCOURAGEMENT : 1
CHERYL_FROM : 1
ADMISSION_NOTE : 1
COUNSELING_PAIN : 1
LEFT_FOR : 1
TRANSPORTATION_COMPREHENSIVE : 1
HE_FEEL : 1
MENTAL_SPMI : 1
PAIN_SWELLING : 1
ELIMINATION_FEEDING : 1
ADDED_OUTPATIENT : 1
BY_SISTER : 1
VETERAN_FAXED : 1
KNUCKLE_AND : 1
YOU_NERVOUS : 1
COMMENT_EXUDATE : 1
FILL_ON : 1
THE_PURPOSE : 1
WITH_REHAB : 1
ALL_PCP : 1
ATTITUDE_WAS : 1
TEETH_WAS : 1
AMALGAM_SURFACE : 1
ADDENDUM_AND : 1
CHANGES_GOAL : 1
REASON_FOR : 6
THAT_DURING : 1
MATERIAL_AN : 1
TASK_OM : 2
TAKE_TABLET : 4
FAS_AND : 1
AND_AT : 1
THE_FACTOR : 1
ACTIVE_COMPREHENSION : 1
OLD_ARMY : 1
INFUSION_WIDE : 1
WITH_ASSOCIATED : 1
NOT_THAT : 1
THE_THREE : 1
TEXT_PRN : 1
THE_PREGNANT : 1
ENGAGE_GROUPS : 1
OR_PATIENT : 1
HIS_BECAUSE : 1
ALSO_MESSAGE : 1
INTO_CPRS : 1
FL_ACCESS : 1
AS_THE : 1
CENTER_NOTE : 2
MILD_LVH : 2
OPTMOSTIC_LIFE : 1
BUT_CONSENT : 1
SEEN_FOR : 2
FLUID_ADDITIONAL : 1
SANDWICH_BAG : 1
IN_ANOTHER : 1
CONCENTRATE_WHEN : 1
ACTIVE_IN : 2
ANTIGEN_KNEE : 1
SSN_GRANDE : 1
AND_MANAGEMENT : 1
LID_BID : 1
TO_STAFF : 1
THE_THE : 2
OPPORTUNITY_TO : 1
THAT_WAS : 3
OR_SHORTNESS : 1
TIMER_RECORDER : 1
AND_AM : 1
OT_IN : 1
DIFFININTLY_LIKE : 1
CM_TEMPERATURE : 1
OPERATIVE_INTERDISCIPLINARY : 1
REFER_TO : 1
INR_JUN : 1
NOTE_MOBILITY : 1
RESIDENT_IN : 1
RONCHI_POSITION : 1
LEARNING_SELECT : 1
OF_PATIENT : 1
BEFORE_VISIT : 1
PRESSURE_TREATMENT : 1
MUSCLE_RELAXATION : 1
AND_FORGETFULNESS : 1
HOLD_IT : 1
PULSE_DINNER : 1
TOTAL_NAIL : 1
EXAMINED_ON : 1
AND_FOR : 1
NEXT_VISIT : 3
NEXT_PREFERS : 1
FOR_TASK : 7
CLIENT_INTO : 1
BREAKFAST_DRINKS : 1
SAID_THAT : 2
LIFES_THE : 1
QUALITY_EAGER : 1
WITH_OF : 2
TAKEN_COLD : 1
THERE_NEW : 1
RELAY_ADDENDUM : 1
SCREEN_STENT : 1
ATYPICAL_CHEST : 1
VISITS_FOR : 2
BY_ARNP : 1
MANAGE_ANXIETY : 1
NOTET_COMPREHENSIVE : 1
SYMPTOMS_AND : 1
VERDICT_ADDENDUM : 1
VETERAN_PT : 1
MALE_REQUIRED : 1
FOR_PROMOTION : 1
TELENURSE_TRIAGE : 1
IRRIGATION_IF : 1
AND_HEMES : 1
GO_AND : 2
LAST_HOURS : 1
YOU_ABOUT : 1
THREE_MONTH : 1
UNDER_THE : 1
SKIN_SPUTUM : 1
MG_AND : 1
RECORD_SEE : 1
AND_NOT : 1
ACCEPTED_PATIENT : 1
STAFF_NOTE : 1
OUTPATIENT_MEDICATION : 1
FREGUENTLY_SCORE : 1
PALPITATIONS_ORTHOPNEA : 1
TO_PLACE : 5
COMPLAINT_HIP : 1
PARSOME_DEAR : 1
WHERE_ALSO : 1
SPECIFIED_OR : 2
OTHER_ASSESSMENT : 1
OCR_WHERE : 1
PSYCHOLOGY_PROGRESS : 1
ROOM_RESTORATIVE : 1
UNITS_THE : 1
MG_QHRS : 1
TEMPORARILY_HELD : 1
IS_PERCENT : 1
SOUNDS_CLEARLEFT : 1
YVONNE_REPORTS : 1
YOUR_CARE : 1
PATIENT_AGREES : 1
AND_PREOP : 1
MINUTES_BP : 1
TRIAGE_NOTE : 2
FORGETFULNESS_WEIGHT : 1
DOE_ENTRY : 1
SET_PLEASANT : 1
HISTORY_PREOPERATIVE : 1
INTACT_CALL : 1
BEFORE_WAS : 1
ATTACHED_PATHOLOGY : 1
AHN_MD : 1
IN_ACCEPTED : 1
MEDICAL_APPOINTMENT : 1
OVERSIGHT_LUNCH : 1
UNDER_PROVIDER : 1
HAVE_ADVANCE : 1
ATROPINE_SULFATE : 1
BLADDER_SUPERVISION : 1
TO_COMPREHENSIVE : 1
SEEKING_FOR : 1
NP_NOTE : 1
WARFARIN_AFIB : 1
WHEN_TO : 1
DR_PARIKH : 1
IDENTIFIED_DESIRE : 1
PATPU_UNSCHEDULED : 1
NPH_MOISTURE : 1
HER_EPICONDYLAR : 1
CARE_BE : 1
COGNITIVE_ABILITY : 2
BEDSPREAD_WAS : 1
THE_THYROID : 1
HOURS_LATER : 1
HEARING_MR : 1
HE_BELIEVES : 2
PLASM_SMILING : 1
SHOE_FOR : 1
WHO_IN : 1
THANK_POSTPROCEDURE : 1
ETSU_LAB : 1
WITH_RELIEF : 1
STAFF_IMPULSIVE : 1
LIFES_TERMS : 1
VISIT_TRANSPORTATION : 1
BY_TWICE : 1
TOTAL_CHEMICAL : 1
WAS_ACCEPTING : 1
FOR_QUESTIONS : 1
CONSENT_CHEMICAL : 1
SEEN_AT : 1
WRITER_BY : 1
TO_TEACHING : 1
NEUROPSYCHE_TEST : 1
BECAME_WHILE : 1
SENSORY_PERCEPTION : 1
ETSU_BACK : 1
RESPIRATORY_TREATMENT : 2
ASSESSMENT_CONTROLLED : 1
AI_NO : 1
SITUATION_TUES : 1
AS_PRESCRIBED : 1
ONE_ONE : 1
PORTIONS_ON : 1
TREATMENT_RECORD : 2
ONE_PHYSICIAN : 2
NOTE_CURRENTLY : 1
ORIENTED_MH : 1
AND_EVER : 1
AND_LABEL : 1
IMPAIRMENT_REFERRED : 1
VIETNAM_IF : 1
MY_CLINIC : 1
WHEN_IN : 1
VETERAN_AND : 1
REGION_BE : 1
BUT_YRS : 1
WORSE_PMH : 1
BEER_HE : 1
MR_IN : 1
SITE_ING : 1
LEFT_IS : 1
INPATIENT_LIST : 1
INCIDENT_THAT : 1
ACTIVE_DIPTHERIA : 1
DISORGANIZED_CL : 1
NO_RESPIRATORY : 1
COPD_DIRECT : 1
TASK_APPLICABLE : 1
MEDICATION_BELOW : 1
NURSE_OTHER : 1
AND_BEDSPREAD : 1
LIKE_THE : 1
NONE_NURSING : 1
STATUS_SATISFACTORY : 1
ANYTHING_THAT : 1
EXTENSIVE_RESIDENT : 1
MG_IPRATROPIUM : 1
NOT_ME : 1
MATERIAL_RALES : 1
ETIOL_THE : 1
THE_ANTICOAGULANT : 1
WEIGHT_GAIN : 1
ON_STOPPED : 1
THEN_THE : 1
THIS_OPHTHALMOLOGY : 1
VOIDING_WITHOUT : 1
MOIST_AT : 1
COUGH_TO : 1
IMPORTANT_OF : 1
ARTHRALGIA_SUBJECTIVE : 1
WISHES_STAPLES : 1
REPORTED_MODERATELY : 1
THE_YO : 1
NUMBER_NUTRITION : 1
SPLITTING_AS : 1
UNDERSTAND_THANKED : 1
OF_DEPRESSION : 1
CONSUMED_ORIENTED : 1
KNEE_ADDENDUM : 1
DICT_PATIENT : 1
EUTHYMIC_APPROPRIATE : 1
INDICATES_THE : 1
ILLNESS_PT : 1
SARAFIAN_TA : 1
PAIN_TO : 1
MEDICATION_SUMMARY : 1
BIRTH_DEC : 1
STREAM_EDEMA : 1
TAKES_MEDICATION : 1
NOV_SARAH : 1
MH_APRN : 1
AND_PHYSICIAN : 2
REMINDER_IT : 1
APPT_AND : 1
MEMBERS_BUSPIRONE : 1
IN_GROUPS : 2
RRR_ADMISSION : 1
EDUCATION_FOR : 1
ESSENTIAL_PREFERENCE : 1
FILL_SCRIPT : 1
DEFECT_IN : 1
OF_CHRONIC : 2
HE_TEAM : 1
PHONE_ADDENDUM : 1
OF_FOLLICLES : 1
KNOWLEDGE_OF : 2
CONSENT_TO : 1
VIAL_ORAL : 1
PHOTO_TOENAILS : 1
STAPLES_WILL : 1
ING_NOT : 1
PROVIDER_TO : 1
LB_KG : 5
IN_FATIGUEX : 1
RIGHT_RIGHT : 1
TIME_PREOP : 1
TO_APPOINTMENTS : 1
NURSING_REHABKINESIOTHERAPY : 1
WITH_RN : 1
PRODUCTS_HOMELESS : 1
SCORE_AT : 1
REPORTED_SCORE : 1
STOOL_PATIENT : 1
FOR_SOFTENER : 1
IS_RUNNING : 1
WITHIN_EYE : 1
FACES_IN : 1
SITE_OF : 1
RECOVERY_LIFESTYLE : 1
BE_BY : 3
PURPOSE_ATTENDING : 1
LOSS_GREATER : 1
REACTIONS_ARE : 1
MEDICATION_TIME : 1
TO_ASSISTANCE : 1
BEFORE_APPT : 1
RD_IN : 1
PATIENTS_SISTER : 1
DIAGNOSED_WITH : 1
EPISODE_CARE : 1
DETERMINE_DRUG : 1
MIN_MH : 1
ORAL_SAME : 1
ALCOH_CS : 1
NOTE_ADDENDUM : 1
DEHYDRATION_COINCIDES : 1
AT_SCHEDULED : 1
VETERAN_WEEKLY : 1
THOSE_PROBLEMS : 1
TO_CONFIRM : 1
RIDE_HOME : 1
TIMING_AND : 1
HOSPITAL_ADDENDUM : 1
HAS_VISIBLE : 1
IN_DOING : 1
MI_THERAPY : 1
TO_SHES : 1
NOTIFIED_ANXIETY : 1
INCLUDE_REDNESS : 1
NOTICE_ETOH : 1
SINCE_LAST : 2
IN_PAST : 6
SOCIAL_OTHER : 1
OLD_MALE : 3
RATED_NO : 1
DISCHARGE_ON : 1
OOB_LUNCH : 1
MON_OPTOMETRY : 1
SO_TEMPERATURE : 1
NOTE_CLINIC : 1
SELF_BLADDER : 1
ABOUT_TO : 1
AT_REQUEST : 1
IN_SPUTUM : 1
SUBMITTED_BUT : 1
HAS_INSTRUCTED : 1
REPORTING_PAIN : 1
UNINTENTIONAL_WEIGHT : 1
REPEAT_ASKED : 1
SERVICE_CONNECTED : 1
ARE_YEAR : 1
NAME_LITTLE : 1
PRESENT_IN : 1
DIRECTED_TO : 1
OM_LS : 1
THERAPY_TREATMENT : 2
ORAL_MEDICATION : 1
THE_SERVICES : 1
PRIVILEGES_BOWEL : 1
INTERVIEW_INTERDISCIPLINARY : 1
GENDER_PT : 1
FACES_THE : 1
CITALOPRAM_TAB : 2
ABOUT_PATIENT : 1
REG_EYE : 1
SCHEDULED_BS : 1
AT_EAR : 1
TO_GO : 1
BLOOD_MPV : 1
YOU_HAVE : 4
BE_SEEN : 1
ACTIVITY_WALKS : 1
PATIENT_OXYGEN : 1
SARAH_COMPRESS : 1
BATH_COLOR : 1
RECEIVED_PT : 1
UPDATED_MEDICATION : 1
RESPONSIVE_OBEYS : 1
BEEN_HIS : 1
REVIEW_LS : 1
CALL_VETERANS : 1
LOCATION_ELIMINATION : 1
WORK_CONSULT : 1
SHE_THIS : 1
SPINE_OSTEOARTHRITIS : 1
PRESENT_PLAN : 1
PE_CATEGORY : 1
URINATION_SELF : 1
II_TROPIC : 1
PROVIDED_CURRENT : 1
AND_VERSUS : 1
TO_MG : 1
DISCHARGED_HOME : 1
CONTINENT_DURING : 1
BED_LOW : 1
VISIT_PHYSICIAN : 1
MIAMI_HE : 1
CODE_EVALUATION : 1
RELAXATION_PROGRESS : 1
OBTAINING_BATTERIES : 1
MEDS_STARTED : 1
HERE_ALONE : 1
NO_THE : 2
CARE_OTHER : 1
PAIN_CONSTITUTIONAL : 1
LEG_TO : 1
MENTAL_HEALTH : 4
CURRENT_ARE : 1
HHA_ASSESSMENT : 1
OUTSIDE_MEDICATIONS : 1
FOLLOWED_CLOSELY : 1
SEX_NOT : 1
SOURCE_FOR : 1
DIETITIAN_HARD : 1
CLOSING_CASE : 1
SEE_RESULTS : 1
VOLUNTARY_ADMISSION : 1
FINANCES_SEE : 1
COMMANDS_STRONG : 1
IN_SESSION : 1
CONSULT_RX : 1
MAY_NOT : 3
OF_SCAR : 1
MILD_EF : 1
DESCRIPTION_AMOUNT : 1
PATIENT_PHONE : 3
ST_CLINIC : 1
OUTPT_THE : 1
WHEELCHAIR_CHECK : 1
PHYSICIAN_BEEN : 1
NOTE_NEURO : 1
LATE_ANGER : 1
GROUP_WEEK : 1
NOTIFICATIONS_CALL : 1
TO_PROCEED : 1
NOTE_TYPE : 1
CONVERSATION_LIN : 1
YEAR_OLD : 4
REASSESSMENT_PSYCHIATRY : 1
WILL_REQUIRE : 1
MEDICARE_NUTRITION : 1
OF_NAPPING : 1
PRESSURE_CONCERNING : 1
HAWSE_PAIN : 1
NAME_PROCEDURE : 1
RESTRAINTS_IN : 3
FOOD_BOWEL : 1
MOTIVATION_OM : 1
WEAKNESS_IN : 1
AS_SUPPLEMENTATION : 1
HAVE_APPETITE : 1
INCREASE_MY : 1
ABOUT_OR : 1
LAB_SAID : 1
STRAIN_ON : 1
IS_FOR : 3
VACCINE_INSTRUCTIONS : 1
ME_MIAMI : 1
THE_AMOUNT : 1
WISHES_WILL : 1
EDUCATION_DOCUMENTATION : 1
EVAL_FAMILY : 1
CLINIC_PATIENT : 1
PHYSICIAN_HAS : 1
WILL_SENT : 1
CLONAZEPAM_RE : 1
SOCKS_MESKENAS : 1
DURING_TIME : 1
CANCELLED_BY : 1
NURSING_TAZINE : 1
THE_CLINICIANS : 1
MATERIAL_BUT : 1
CASINO_AND : 1
APPOINTMENTS_SYSTEM : 1
MEETING_HT : 1
FROM_WECHSLER : 1
EX_SMOKER : 1
AMBULATORY_PAST : 1
WITHIN_THE : 2
WAITING_ON : 1
PT_HEALTH : 1
HIS_CURRENT : 1
DOB_NURSING : 1
WAY_AVOID : 1
AS_RISK : 1
REPORTING_CHRONIC : 1
OU_REPORTS : 1
LIFE_LIFES : 1
LEADER_SARAH : 1
CONTROLLED_WORSE : 1
CABINSOME_FACILITATORS : 1
THAT_YOU : 1
MEDICAL_AT : 1
POSITION_CALL : 1
ON_MEDICATION : 1
DISCUSSED_VETERAN : 1
PING_THROUGH : 1
LOOKS_LIKE : 1
BRIEF_MEDIUM : 1
FASCINATED_THE : 1
MEASURE_FUNCTION : 1
INTERESTED_IN : 1
PROGRESS_MOTIVATION : 1
VERTIGO_DRAINAGE : 1
HAIRBRUSHES_AND : 1
COR_REQUESTED : 1
ICDCM_ESSENTIAL : 1
HIS_LOWER : 1
XANAX_OCT : 1
BY_DOUBLED : 1
STOP_DATE : 1
FRIENDLY_APPROPRIATE : 1
ELIMINATION_IMPLEMENT : 1
QHOURS_PRN : 1
RISK_OF : 2
SURGICAL_HISTORY : 1
CURRENTLY_HEARING : 1
OBJECTIVE_VETERANS : 1
REQUIRES_ORDER : 1
BE_MSE : 1
OTHERS_RANGING : 1
THAT_OS : 1
SELF_ACUTE : 1
COMPREHENSIVE_CARE : 1
REACTION_NO : 1
PREVENTION_PAIN : 1
REDNESS_PAIN : 1
DECOMPENSATION_LAST : 1
SUPPLY_AT : 1
ADDENDUM_REASON : 1
MEAL_MEDICATION : 1
CABLE_THE : 1
REPAIR_RISKS : 1
NO_BOWEL : 1
CABINSOME_STATE : 1
PENDING_EXPIRED : 1
WED_SCHEDULED : 1
ENVELOPE_FOR : 1
FL_EASY : 1
ALLERGIES_DILTIAZEM : 1
THREE_KNUCKLE : 1
LOCATION_CHEST : 1
TALKING_AND : 1
BLADDER_SELF : 1
ICDCM_ANXIETY : 1
THEN_RINGING : 1
MANAGER_TAKEN : 1
FOR_THIS : 12
BY_DRUG : 1
AND_OR : 4
REPORTS_SHE : 1
WITH_DIFFERENT : 1
DRUG_ALCOHOL : 1
OF_URINE : 1
NOTE_BLADDER : 1
LEGS_FEET : 1
FOLLOW_REMOVAL : 1
IS_OF : 2
OF_VISION : 2
WAS_SESSION : 1
INSTRUCTED_THE : 1
DISPLAY_RECONCILLIATION : 1
ANTIBIOTICS_CEFAZ : 1
SEE_PATHOLOGY : 1
BECAUSE_OF : 1
OF_HE : 1
AMOUNT_NUMBER : 1
MY_LEFT : 1
WAS_PREVIOUSLY : 1
HIS_MAIL : 1
SEVERAL_DISCUSSED : 1
OU_ATTENDING : 1
MORE_ONE : 1
PATIENT_CONTINUE : 2
GROUP_MET : 1
CLINIC_OF : 1
CONTRAINDICATIONS_THE : 1
CARE_DURING : 1
PREDICATED_BY : 1
OD_WAS : 1
NOTET_NOSHOW : 1
DOWN_HAS : 1
CATHERINE_RN : 1
NAIL_MATRIXECTOMY : 1
INDICATION_WARFARIN : 1
TO_COMMANDS : 2
SERVED_PULSE : 1
AT_ATTENDING : 1
HOW_FEEL : 1
MILD_PROBLEMS : 1
SC_DOCUMENT : 1
RATES_PAIN : 1
IS_OPTMOSTIC : 1
CURRENTLY_IN : 1
OVER_HAS : 1
TEASPOONFULLS_PRN : 1
THESE_PAIN : 1
POSITION_PAIN : 1
LOCATION_LEFT : 3
PROSTATE_ANTIGEN : 1
FEEDING_PROGRAM : 1
WKS_AGO : 1
POTENTIAL_SKIN : 1
HE_CLINICAL : 1
MA_MIN : 1
HAD_AT : 1
FIRE_RESCUE : 1
TREATMENT_OF : 1
THE_BUSPIRONE : 1
YOUVE_UP : 1
REPORTED_VET : 1
SCRUBS_OU : 1
COUGH_OF : 1
BEEN_INCREASINGLY : 1
SITUATIONS_FEELINGS : 1
PLACE_DECLINED : 3
TABLET_BY : 3
THEY_HAVE : 1
SHIFT_EACH : 1
PROBLEMS_THIS : 1
DAILY_LOW : 1
TIME_STOP : 1
IN_WEEKLY : 1
LBS_HYDROBROMIDE : 1
PATIENT_SEEN : 3
DENIES_CANCELLED : 1
CHOL_FOOTBALL : 1
MORE_DISORGANIZED : 1
LOSS_HAIR : 1
BEHAVIORS_INCLUDE : 1
DAILY_TIME : 1
TEETH_PT : 1
MH_SOCIAL : 2
YOUR_PROVIDER : 1
HE_AND : 1
EYE_TO : 1
MEDICATIONS_OUTPATIENT : 1
THE_ST : 1
OR_MORNING : 1
QUESTIONS_NOTIFICATIONS : 1
COVER_UNTIL : 1
STOOL_THIS : 1
IF_RESPONSE : 1
AVAILABLE_CALL : 1
TO_ACTIVE : 2
IN_PURULENCE : 1
TO_INSIDE : 1
SOCIAL_AND : 1
DOCTORS_NOTE : 1
COSTOCHONDRITIS_VITAL : 1
FLUSHED_WITH : 1
DIRECT_QUESTIONING : 1
FROM_MEDICAL : 2
THOROUGH_HANDWASHING : 1
REACHED_DOES : 1
TOLD_CHECK : 1
MEDICATION_HE : 1
RECONCILIATION_REASON : 1
PHYSICAL_TTE : 1
SOUNDS_DECREASED : 1
THE_STATE : 1
MR_REPORTED : 1
HIS_LEG : 1
CHIEF_OF : 3
CHARACTER_TO : 1
LEVOTHYROXINE_SYNTHROID : 1
THE_COGNITIVE : 1
DISTANCE_VA : 1
THERAPEUTIC_OUTCOMES : 1
DID_REFUS : 1
EACH_MONTH : 1
GOAL_HE : 1
EDUCATED_ON : 1
AUTHORIZATION_SO : 1
DISC_SO : 1
WITH_WHO : 1
AGREEMENT_LIST : 1
ADMISSION_NOVEMBER : 1
INJURY_NEUROPATHY : 1
COMPLAINING_LEFT : 1
ABC_WEEKENDERS : 1
CHECK_OUT : 1
OUTCOMES_TEAM : 1
LOW_PAIN : 1
ELECTRONICALLY_BODY : 1
MOST_VITALS : 1
REASONS_FOR : 1
OF_REASON : 1
PROBLEMS_AT : 1
PT_YEAR : 1
BLACK_NO : 1
AREAS_HOME : 1
ALCOHOL_DEPENDENCY : 1
FOR_OF : 3
PRESCRIPTION_WELLBUTRIN : 1
AND_BLADDER : 1
WOULD_TO : 1
SPENT_IN : 2
PREGNANT_BREASTFEEDING : 1
PAIN_HAS : 1
SHOULD_REMOVAL : 1
TO_WARNING : 1
GUARDIAN_SIGNIFICANT : 1
PAST_MEDICAL : 3
ENCOURAGE_POIKILODERMATOUS : 1
STATES_THAT : 3
PHYSICIAN_ANGER : 1
ONE_YEAR : 1
PAIN_COMMENTS : 1
AND_SCHEDULED : 1
HAIR_AND : 1
ENCOURAGEMENT_OR : 1
OFFICE_THERAPY : 1
ATTENDING_MCGOWAN : 1
HIS_NAME : 1
ACTIVITIES_AND : 1
WITH_PATIENT : 4
DUE_IN : 1
COURSE_FROM : 1
COMMENTS_OGOING : 1
APPROACHED_ALSO : 1
DOCUMENTATION_PROLONG : 1
TO_SUICIDE : 1
WATCHING_ION : 1
UNDERSTANDS_MEDICAL : 1
WHEN_FEEL : 1
LEG_MOVEMENT : 1
THE_BACKGROUND : 1
FOR_EDUCATION : 1
FOR_ABC : 1
REGAIN_DIDACTIC : 1
PHONE_WILL : 1
STAFF_ACTS : 1
CATEGORY_CLASS : 1
NO_DENTAL : 1
ASSESS_FALL : 1
FEEDING_NO : 1
REGARDING_HIS : 1
VISION_GONE : 1
FOR_AFIB : 1
INITIALLY_AT : 1
DISSABIL_NO : 1
IN_TIMES : 2
SC_ER : 1
TREATMENT_DX : 1
OPEN_GROUP : 1
AND_APPROPRIATE : 1
CUEING_NAME : 1
RESIDENT_WAS : 1
FAMILY_RESPONSIBILITY : 1
THE_LOW : 1
MEDICATIONS_INJURY : 1
TO_INT : 1
BECAME_AGITATED : 1
SHOULD_FOLLOW : 1
CARING_YOURSELF : 1
MOODS_AND : 1
BEHAVIOR_THE : 1
OUTCOME_PREOP : 1
IN_OR : 1
PT_MIN : 1
AND_CHECK : 1
OF_DENIES : 1
PRECAUTIONS_PLACE : 1
DEMENTIA_ASSOCIATED : 1
MOST_BEHAVIORS : 1
LBP_FLARE : 1
IMMUNIZATION_THERE : 1
PROVIDED_PT : 1
MR_ACTIVITIES : 1
FOOD_NO : 1
PROGRESS_IS : 1
CONSULT_BIFOCAL : 1
APPT_DISPOSITION : 1
STABLE_WITH : 1
NOT_PROVIDE : 1
PAIN_VITAL : 1
REFERRED_TO : 2
USED_IN : 1
TO_WITHIN : 1
AMBULATION_SELF : 1
TREMULAS_AND : 1
CALF_LAST : 1
ARM_BAND : 1
PROCESS_THE : 1
DETERMINED_VA : 1
PE_DENTAL : 1
IF_REQUESTED : 1
WAS_MORE : 2
AND_SETTING : 1
WITH_NO : 2
HOUR_HEALTH : 1
BOX_IF : 1
RESPONSE_RESTRAINTS : 1
FEW_AGO : 1
THE_UPLIFTING : 1
NOT_THIS : 3
HYDROBROMIDE_MG : 2
WERE_ATTENDANCE : 1
BLADDER_URINATION : 1
INH_ORAL : 1
CONVEYS_THAT : 1
ACTIVE_EXPIRED : 1
OF_TRANSFERRED : 1
ABLE_ACCEPT : 1
ANESTHESIA_RESPIRATORY : 1
THAT_WOULD : 1
KNEE_BOTH : 1
ATTENDING_JUDSON : 1
SUPPLIES_EFFECTIVENESS : 1
COLUMBUS_FLUENCY : 1
FOLLOWING_IMED : 1
PROGRAMS_ADDRESS : 1
ASSESSMENT_PATIENTS : 1
DAYTON_TELENURSE : 1
WILL_SPOKE : 1
SINCE_SAT : 1
TOILET_ORIENTED : 1
YOU_AT : 2
NEXT_APPOINTMENT : 1
MEDICARE_NUMBER : 2
APPLICABLE_LOW : 1
ORAL_FOUR : 1
HAD_WALK : 1
STATUS_NUMBER : 1
THE_HOURS : 4
IDEA_THE : 1
MY_RIGHT : 1
MASS_THE : 1
ON_HOSPITAL : 1
OTHERS_ASSISTANCE : 1
CLINICAL_ACTIVITY : 2
TASK_REVIEW : 1
OF_MORE : 1
PHYSICIAN_LEFT : 1
DENTAL_CLASS : 1
OF_TWICE : 1
STREAM_HEMATURIA : 1
BP_GOAL : 1
PLEASE_EXPLAIN : 1
INHAL_DOSE : 1
DIZZY_AND : 1
OF_MOVEMENTS : 4
LIN_CHIEF : 1
THE_TO : 4
ALERT_ATTENTIVE : 1
OJECTIVE_SAD : 1
MEDICATION_CABINSOME : 1
POSITION_PATIENT : 1
AND_TIME : 1
RECORD_MANAGER : 2
HE_BL : 1
AM_CALLED : 1
UNDER_AHN : 1
PRESCRIBED_MEDICATIONS : 1
THERAPY_RECORD : 2
PLAN_IS : 1
NAME_FULL : 1
LBS_LAST : 1
BACK_AND : 1
SAID_ORIENTED : 1
FROM_APPOINTMENT : 1
MAY_MAX : 1
LOST_LBS : 1
RN_AND : 1
COMPRESS_SCRUBS : 1
MO_APAP : 1
TISSUE_WITHIN : 1
VETERAN_CANCELLED : 2
VEHICLE_REMAINING : 1
IN_GOOD : 1
HEMOGLOBIN_DISCUSSED : 1
HAS_OF : 1
DEPARTMENT_COMPLETED : 1
PATCHES_ON : 1
STRIFE_TO : 1
NO_HYGIENE : 1
IN_ONE : 1
COUGH_PRODUCTIVE : 1
TO_LIGHT : 1
OF_DAILY : 5
COMPONENTS_OF : 1
PROVIDED_SUPPORTIVE : 1
LEFT_CHEST : 1
HOWEVER_WAS : 1
OTHER_DIAGNOSIS : 1
MADE_VERY : 1
CONSULT_BUT : 1
BACKGROUND_CHRONIC : 1
AND_TRY : 1
HEMP_ELSE : 1
TWO_MEMBERS : 1
DOES_HAVE : 2
FUTURE_APPOINTMENT : 1
DOCTOR_OR : 1
ABOUT_FOR : 1
SKIN_IMPAIRMENT : 1
IF_ONE : 1
SATISFACTORY_OTHERWISE : 1
NO_ADVERSE : 1
TYPE_SYMPTOM : 1
LIST_AND : 1
SECONDARY_DIAGNOSIS : 1
RETURNS_FOR : 1
MENTAL_CLINIC : 1
ON_TYPE : 1
DATE_MEMBERS : 1
PREFERRENCE_TO : 1
CAPLET_ALBUTEROL : 1
RUN_RD : 1
DILATED_IMAGING : 1
PHYSICIAN_NOT : 1
REQUIRED_DISORDER : 1
HOUR_MENTAL : 1
SOFT_PROTECTORS : 1
PATIENT_CHECK : 1
VARIATION_HELPS : 1
GE_SAID : 1
USING_PAIN : 1
THE_SP : 1
ACTIVE_ROBITUSSIN : 1
PHYSICIAN_CONSUMED : 1
CEFAZ_ANESTHESIA : 1
EGD_IN : 1
NOTE_AWAKE : 1
TO_PRINTED : 1
AS_NEEDED : 2
SAY_HE : 1
PATIENT_RATES : 1
THIS_SET : 2
LOCAL_ARE : 1
SEEN_INITIALLY : 1
IMPLEMENTED_DISEASE : 1
PATIENT_INTERDISCIPLINARY : 1
ABSCESS_OVER : 1
STATED_NAME : 1
THAT_OF : 2
THIS_AMOUNT : 1
IDENTIFICATION_AND : 1
PICTURE_AND : 1
USE_FOR : 1
OTHER_HISTORY : 1
BRONCHOSCOPE_RALLY : 1
ACUTE_PSYCHIATRY : 1
AND_PLASTIC : 1
BIRTH_AGE : 1
OTHERS_APPROACHING : 1
TO_DEMENTIA : 1
TO_NOW : 1
EVERY_MORNING : 1
FOR_PT : 6
MHICM_STAFF : 1
LIMITED_TO : 1
ASSESSMENT_SCANNED : 1
COME_INSIDE : 1
SUPERVISION_OVERSIGHT : 2
OF_EVENING : 2
WITHDRAWAL_NURSING : 1
CC_NEED : 1
DID_PT : 1
SUPPORTIVE_THE : 1
VITAL_SIGNS : 2
HEARING_WEIGHT : 1
RETURN_CALL : 1
NOW_SOBER : 1
QUES_VIEW : 1
NONE_PHYSICIAN : 1
ENVIRONMENT_VET : 1
GU_INSTRUCTED : 1
LEGAL_BLINDNESS : 1
OVER_SHOULDER : 1
CENTER_DAILY : 1
APPOINTMENT_SEE : 1
HOURS_TINNITUS : 1
EXPIRED_MEDS : 1
CONDITION_WHAT : 1
PATIENT_QUIT : 1
MALIGNANT_NEOPLASMS : 1
THE_GROCERY : 1
AND_WHO : 1
FIRE_PT : 1
DENTURES_PAIN : 1
RISK_ON : 1
HYPERGLYCEMIA_COLOR : 1
TO_LEARN : 5
PHYSICIAN_DR : 1
NOTE_MANAGEMENT : 1
AND_REASON : 1
AMOUNT_NORMAL : 1
COLLECTION_DT : 2
PAKULA_CANCELLED : 1
NOTE_STATUS : 1
MENTAL_NUMBER : 1
LEVITRA_REORDERED : 1
YOUR_TO : 2
ASSESSMENT_INFORMATION : 1
SURGERY_STAFF : 1
TIMES_VISIT : 1
COOPERATIVE_WHEN : 1
HEALTH_AND : 2
LIGHT_BEFORE : 1
OPERATION_OF : 1
SINCE_PRE : 1
CALL_NOTIFIED : 1
PAIN_EXTERNAL : 1
PATIENT_NUMBER : 2
EDITION_DATE : 1
PT_RIGHT : 1
EXPLAINED_THE : 1
FOR_ADMISSION : 2
CONSULT_SYSTEM : 1
CTA_HYPERPIGMENTED : 1
WERE_BY : 1
UNTIL_HE : 1
NEEDS_MET : 1
FOR_PARTICIPATION : 1
HEART_BE : 1
ANTIBIOTICS_DOES : 1
KNEE_PT : 1
JR_HAS : 1
BUT_USE : 1
RIGHT_HIP : 1
STOOL_ACTIVITIES : 1
OR_DIAGNOSIS : 1
CAPACITY_FULL : 1
INPT_EDUCATION : 1
AND_WAS : 3
CHANGE_IN : 1
VADENVER_CENTER : 1
BE_DAILY : 1
ASK_QUESTIONS : 1
PRODUCTIVE_MENTATION : 1
AN_ARGUMENT : 1
PATIENT_GUARDIAN : 1
MAY_STRENGTH : 1
APPETITE_YOU : 1
GIVEN_GM : 1
COMMENTS_PATIENT : 1
PO_STATES : 1
COMPLETED_DOWN : 1
PROGRESSING_CONCERNS : 1
OF_SYMPTOMS : 1
UNSPECIFIED_WOUND : 1
WE_GET : 1
LESION_CM : 1
VERBAL_MENTAL : 1
NOTED_BY : 1
PKS_QUIT : 1
RELAXATION_PSYCHOLOGY : 1
SURG_CETIRIZINE : 1
REVEALED_INCREASE : 1
IN_VISIT : 1
BE_ENCOURAGED : 1
THE_STAIR : 1
PATIENT_EXAMINED : 1
VERSUS_HE : 1
MD_BY : 1
CAP_PROGRESS : 1
PT_MULTIPLE : 1
SUPPORT_REASSURANCE : 1
PLEASANT_APPROPRIATE : 1
THE_DOM : 1
PM_DURING : 1
MEDICATIONS_FOUND : 1
HIS_FRIEND : 1
PREDICATED_REFERRAL : 1
ETOH_NOW : 1
OF_MEDIUM : 1
SCHEDULED_RECEIVED : 1
REPORTED_LEVEL : 1
ALL_CESSATION : 1
APHDR_SEE : 1
AGITATED_TALKING : 1
APPROACHING_ZZPATIENT : 1
LEFT_WAS : 1
THE_HOME : 1
APPT_MINE : 1
CAUSING_TO : 1
TO_MAIL : 1
NOTE_CONVERSATION : 1
WELL_HAD : 1
QUESTIONS_PLEASED : 1
SUPPORT_AND : 1
THANK_YOU : 1
LOW_CALL : 1
ADDENDUM_THE : 2
PROGRESS_TREATMENT : 1
INJ_ASSESSMENT : 1
HER_STRONGER : 1
ALCOHOL_NONE : 1
LOW_BLOOD : 1
ABOUT_CARING : 1
PAIN_OS : 1
NO_HX : 1
MA_WOOTEN : 1
YO_VETERAN : 1
TURNING_DESCRIPTION : 1
RX_DICLOFENAC : 1
WITH_NPH : 1
REORDERED_CALL : 1
PACKS_PER : 1
ORTHOPTIC_TRAINING : 1
BLIND_REHAB : 3
OR_DISCHARGE : 1
OTHER_PERSONAL : 3
POSTING_OF : 1
FEEL_NERVOUS : 1
SAID_ON : 1
HE_DID : 2
VISION_OPTOMETRIST : 1
ADDITIONAL_NURSING : 1
FOR_YOURSELF : 1
CUT_TOENAIL : 1
SHIFT_DURING : 1
OTHERS_PATIENT : 1
IS_ALERT : 1
NO_RESTRAINTS : 1
THIS_PLACE : 1
INTO_ANTECUBITAL : 1
ORCHITIS_EPIDIDYMITIS : 1
PROLONG_POSTTRAUM : 1
IN_MY : 2
LIFE_NOT : 1
GROUP_TOOK : 1
REQUIRES_ASSISTANCE : 6
WRITTER_HAS : 1
ILLNESS_RESPONSIVE : 1
DISCHARGED_GENERAL : 1
STOPPED_TO : 1
TRANSPORTATION_CARE : 1
SAFETY_CHECKS : 1
ON_TALKING : 1
TIMES_MEDICATION : 1
INJURY_FOR : 1
SATISFACTORY_AND : 1
FROM_INHALER : 1
CONSULT_SUBMITTED : 1
FOLLOWING_CLINICIANS : 1
OF_MENTAL : 2
MARITAL_STRIFE : 1
ALERT_GET : 1
OUTPATIENT_INCLUDING : 2
FACTORS_AVAILABLE : 1
BATH_CARE : 2
ADDITIONAL_ARE : 1
SARAFIAN_FARJAD : 1
WT_LB : 2
ATTENTIVE_ORIENTED : 1
THIS_CASE : 1
WRITER_TESTS : 1
CARE_NO : 1
ALBUTEROL_INHALER : 1
HAS_COMPLAINT : 3
AMALGAM_ONE : 1
INSTRUCT_RESIDENT : 1
STRONGER_THE : 1
HAD_MONTHS : 1
BODY_INDEX : 1
OF_BRCS : 1
CHECK_AND : 1
BS_FROM : 1
BLASTS_FROM : 1
HATFIELD_ERYTHEMA : 1
PREFERS_LEARN : 2
TO_GIVE : 1
THOUGHTS_PAIN : 1
RESPONSE_OUTCOME : 1
LEFT_SION : 1
PSYCH_CHART : 1
STATES_THEY : 1
PAIN_AFFECTS : 1
AXIS_EMOTIONAL : 1
MISSED_ALLERGIES : 1
HOW_THEIR : 1
IN_AS : 1
WAS_PROVIDED : 3
VACCINATION_QUESTIONNAIRE : 1
THE_LOWER : 2
BE_AN : 1
PATIENT_ATTENDED : 1
GOAL_HX : 1
OF_BACK : 1
THEIR_DRUG : 1
HEADACHES_AND : 1
NOTE_AT : 1
REVIEWED_CASE : 1
RANGE_HERE : 1
REQUIRED_FOR : 4
TEMP_CC : 1
DATA_TUBEFEEDING : 1
PERSONAL_HYGIENE : 5
CAP_TAKE : 1
PERCENT_THE : 1
THE_TAKEN : 1
LIVING_SKILLS : 1
ADMISSION_INHALE : 1
PRESCRIBED_HED : 1
IMPORTANT_PICE : 1
ANXCIOUS_RESIDENT : 1
RESPIRATORY_RHYTHM : 1
SOME_STATUS : 1
LAUNDRY_CONTINUE : 1
PERSISTENT_MENTAL : 1
DIAGNOSIS_NEW : 1
FOR_ALTERATION : 1
OR_THAT : 1
PRINTED_SUCH : 1
FOR_DRUG : 1
POSITIVE_RESPONSES : 1
LIMITATIONS_PERIMACULAR : 1
READ_REG : 1
TO_MAINTAIN : 1
PHYSICIAN_DENIES : 1
ABILITY_MAKE : 1
PROCEDURES_PERTINENT : 1
VERBALLY_WITH : 1
NOT_CONVERSATION : 1
INFORMATION_SPO : 1
BUT_NOT : 2
RANK_THIS : 1
DIVERTIC_PREOP : 1
DENIED_OR : 1
STATUS_FLUVASTATIN : 1
HOPE_THAT : 1
CHRONIC_PROBLEMS : 1
CONTACT_ISCUSS : 1
IDEA_WOULD : 1
PATIENT_AGITATED : 1
PREOPERATIVE_DIAGNOSIS : 1
PASSED_STATES : 1
MED_DONE : 1
EPICONDYLAR_WILL : 1
IN_APAP : 1
SUPPORT_GROUP : 1
TRANSPORTATION_FROM : 1
CHEST_OR : 1
PATIENT_HAVE : 1
BOWEL_SOUNDS : 1
PC_PT : 1
NOTE_MEDICATION : 1
VIEW_SC : 1
LASTED_AND : 1
CONCERN_REGARDING : 1
REASON_VISIT : 4
REPORT_PAIN : 2
PC_PATIENT : 1
FOR_SCREENING : 1
SOUND_WHISPERS : 1
NUTRITION_ALLERGIES : 1
GOD_PHONE : 1
WILL_GOING : 1
REMAINING_MEMBERS : 1
HAS_THE : 2
LETTER_VERDICT : 1
SIDE_AND : 1
BUT_FOR : 1
MAY_UNTIL : 1
TWO_HE : 1
MANAGEMENT_IMPRESSION : 1
TUES_LEAVING : 1
TABLETS_AS : 1
TWICE_FOR : 1
ONE_INTERACTIONS : 1
WITHOUT_FOR : 1
INTAKE_WILL : 1
MEDS_ADVERSE : 1
CONTINUES_TO : 3
SATISFACTORY_REDNESS : 1
READ_MORE : 1
SP_WITH : 1
NUMBER_LS : 3
WITH_SEEKING : 1
ON_THE : 9
SW_PACKET : 1
INTERVENTIONS_FOR : 1
GOAL_HAS : 1
BEEN_DEMANDING : 1
SUPPLIES_AUTHORIZATION : 1
ETC_LAST : 1
RHYTHM_AND : 1
EVENING_PHYSICIAN : 1
MED_PATIENT : 1
COVER_PULSE : 1
INFORMATION_ON : 1
TO_HELP : 1
ELIMINATION_ACTIVITY : 1
THIS_SEVERAL : 1
RELAPSE_PREVENTION : 1
OF_THE : 16
IN_LEISURE : 1
FOR_MEDICATIONS : 1
LAST_ANESTHESIA : 1
OM_WALK : 1
ONE_THEN : 1
OU_DIABETIC : 1
ENGAGE_QUIET : 1
RESULT_NIACIN : 1
ELIMINATION_AMOUNT : 1
IS_MOST : 1
NURSING_MOBILITY : 1
TAMINE_MG : 1
MOIST_CONTACT : 1
START_IS : 1
LIVING_POSITIVE : 1
REPORTED_HE : 4
TRANSFER_NO : 1
INHALER_TIMES : 1
TO_NEUROPSYCHE : 1
TIME_DATE : 1
WAS_FASCINATED : 1
HAS_NOT : 1
ROTATOR_TEAR : 1
CPRP_PROVIDED : 1
SYMPTOMS_PROVIDE : 1
BEST_TO : 1
AFIB_DT : 1
NUMBER_TIMES : 1
HAS_CHIEF : 3
ON_CRUNCHY : 1
TO_NEXT : 1
EAR_ANXIOUS : 1
PC_XANAX : 1
EXCEPT_LIGHT : 1
RN_FACILITY : 1
VET_TO : 4
AND_REVIEWED : 1
WITH_BLIND : 1
CLOTHING_HAS : 1
DIET_ALSO : 1
GROUPS_AND : 1
BENIGN_LESION : 1
MANY_NEW : 1
VERBALLY_CONCURRED : 1
ARTHRITIS_DJD : 1
MAKING_FAIR : 1
MEDICATIONS_UNSPECIFIED : 1
PT_HE : 1
OF_MEDICATIONS : 1
IS_WITHIN : 1
CARE_GOAL : 1
STAFF_IN : 1
EUTHYMIC_NO : 1
LIGHT_HE : 1
AND_TREATMENT : 2
FAX_THAT : 1
WITH_HIS : 2
MALE_PRESENTING : 1
REPORT_ZERO : 1
COLON_INSTRUCTIONS : 1
IS_REQUESTING : 1
ACCEPTING_DAYTON : 1
MEDICAL_PCP : 1
SPECIALIST_OVERSEES : 1
LBP_FOR : 1
MODERATE_DEMENTIA : 1
PROCEED_SAME : 1
SCHEDULED_SURGERY : 1
CURRENT_REQUESTING : 1
PARTICIPATION_XACTIVE : 1
RIGHT_KNEE : 2
MEDICALLY_WITH : 1
LOW_VISION : 1
THAN_ONE : 1
ACET_OPH : 2
PRECAUTIONS_IMPLEMENTED : 1
SHORTNESS_BREATH : 2
RISKS_AND : 1
THAT_TAKE : 1
INTO_THE : 1
CARE_PL : 1
ATTENDANCE_IS : 1
HYPERLIPIDEMIA_HYPERTENSION : 1
THIS_PRESCRIPTION : 1
AUG_KSBURG : 1
PATIENT_DEPT : 1
TWICE_EXTERNAL : 1
IN_NECK : 1
LEARNING_BARRIERS : 1
AND_CONSCIOUSNESS : 1
BLADDER_CONTINENT : 1
VA_PSYCHIATRY : 1
GLAUCOMA_ADDENDUM : 1
YOU_DECREASED : 1
OR_QUESTIONS : 1
CONCERN_GASTROENTERITIS : 1
RNBC_DIDACTIC : 1
THINK_IT : 1
VA_WILL : 1
NOT_ABLE : 1
RELATED_POSITIONING : 1
NOTE_NUMBER : 1
RE_FILL : 2
LIDOCAINE_PAIN : 2
ORIENTED_TO : 6
CHOLECALCIFEROL_BID : 1
WHERE_HE : 2
PATIENT_WHO : 1
ANY_ON : 1
THAN_DENIES : 1
RESPONSES_NOTE : 1
COMPLETED_AND : 1
CHART_AVOID : 1
AMPUTATION_NEUROPATHY : 1
THAT_BEEN : 1
BED_AWAKE : 1
DUE_ATTEND : 1
URINATION_ELOPEMENT : 1
CONTINENT_OF : 2
NO_REFERRED : 1
ANGIO_CATH : 1
DIAGNOSTIC_FINDINGS : 1
FEEDING_LOCATION : 1
APPT_BLOOD : 1
COMPLETE_BATH : 1
UNTIL_WAS : 1
GENITOURINARY_GENDER : 1
PULSE_OX : 1
CCOUGH_SYRUP : 1
NOTE_OF : 3
THAT_FROM : 1
DR_PT : 1
ACTIVE_INDICATED : 1
SCHIZOPHRENIA_HIS : 1
PM_AMOUNT : 1
TAKE_OUTSIDE : 1
ADMISSION_HAD : 1
LIGHTS_HIS : 1
DESCRIPTION_NUMBER : 1
CAROTID_DIST : 1
NUTRITION_FAMILY : 1
ENVELOPE_PROVIDED : 1
RECEIVED_BS : 1
IN_STRESS : 1
NUMBER_MOBILITY : 1
VISTA_CARDIAC : 1
NEXT_FEB : 1
THEY_TAKE : 1
NO_OTHER : 2
CHRONIC_HEADACHES : 1
COMPLICATIONS_NO : 1
FROM_LIBERTY : 1
CHANGE_TO : 1
HAS_HIS : 1
CONTENT_THE : 1
NUTRITION_TREATMENT : 1
SUPPLIES_REQUESTING : 1
TRAINING_BE : 1
ENCOURAGE_STABILIZATION : 1
LEFT_OBTAINING : 1
ACTIVITY_NEEDS : 1
NO_LOSS : 2
DEMANDED_HAIRBRUSHES : 1
DR_WING : 1
VISIT_PROVIDING : 1
WM_SMOKER : 1
PAIN_IN : 2
DEGREES_ASSOCIATED : 1
VOICE_IN : 1
DRAINAGE_TISSUE : 1
QUADRANT_OVERLYING : 1
UCINATIONS_FOUNDATION : 1
SP_INE : 1
YEAROLD_MALE : 2
LABEL_ORDERED : 1
PROGRESS_ADDENDUM : 1
AN_INDICATION : 1
BEEN_GE : 1
IN_OBMT : 1
HESITANCY_NARRATIVE : 1
BEEN_SAID : 1
HARMING_OR : 1
AND_SANDWICH : 1
GET_AND : 1
PROCEDURE_INTEREST : 1
PROCESSING_PHONE : 1
HELP_KNEE : 1
SCALE_YES : 1
THERAPY_FOR : 1
WAS_AVAILABLE : 1
SOME_SITE : 1
WHAT_SAID : 1
UP_SOME : 1
PSYCHOMOTOR_AGITATION : 1
EVER_THEN : 1
SITUATIONS_SYMPTOMS : 1
INHAL_UNIT : 1
AN_OPPORTUNITY : 1
PROVIDED_TRAINING : 1
FERNANDO_THE : 1
TO_SEND : 1
VISIBLE_THE : 1
WITH_HAS : 3
VETERAN_CALLED : 1
PALPITATIONS_DOE : 1
HYGIENE_SHOWER : 2
IN_WT : 1
PATIENTS_CURRENT : 1
RELAY_ABOVE : 1
TAKEN_OTC : 1
REASSESSMENT_NUTRITIONAL : 1
WELLBUTRIN_CASA : 1
SESSIONS_DATE : 2
HOURS_GIVEN : 1
PRESENT_DURING : 1
NEOPLASMS_DIVERTIC : 1
ASSOCIATED_ANTICOAGULATION : 1
WAS_HURTING : 1
PRIVILEGES_LOCATION : 1
BRC_YO : 1
EVALUATED_THE : 1
LOCATION_RIGTH : 1
STAFF_THAT : 1
WIFE_LOCK : 1
CUTTER_DIRECTED : 1
RISK_PRECAUTIONS : 1
BEGINNING_ONE : 1
DJD_REASSESSMENT : 1
RADIOLOGY_AND : 1
ELIMINATION_WALKS : 1
RIGHT_BOTH : 1
VETERANS_RESPONSE : 1
TREATMENTS_HELP : 1
IN_CARE : 1
IS_THERE : 1
VETERAN_NOT : 1
FOCUSING_ON : 2
IN_SCREEN : 1
DIFFICULTY_TAB : 1
FAX_REPORTED : 1
IS_AND : 4
OF_INTERVAL : 1
AND_REASSURANCE : 1
YES_WAS : 1
MEDS_CLOBETASOL : 1
PROCEDURE_ANESTHETIC : 1
FLU_CCOUGH : 1
VISION_ON : 1
OF_BOWEL : 6
BELT_MR : 1
INFORMATION_WRITTEN : 1
MCG_ORAL : 1
TO_GEN : 1
LS_TO : 1
DT_GOAL : 1
VAN_LOSS : 1
CLC_TYPE : 1
WHILE_TO : 1
DOESN_LIKE : 1
AT_ETSU : 1
GERD_IS : 1
PATIENT_WAS : 9
READINGS_MD : 1
OBSERVED_TALKING : 4
DONE_IN : 1
LACKS_COGNITIVE : 1
ELEVD_ALKALINE : 1
GOAL_ADDRESSED : 1
PREOP_NO : 1
TEMPERATURE_NOTICED : 1
MORE_OF : 1
RADIOLOGY_HISTORY : 1
PERSONAL_BED : 2
MAY_ORAL : 1
BY_ENEMY : 1
DISCUSSED_PLEASE : 1
YELLED_MYSELF : 1
PROBLEMS_PROBLEM : 1
YO_WITH : 1
FLUID_TALKED : 1
LOWER_RIGHT : 1
TO_READ : 2
ENTIRE_YES : 1
READER_OCR : 1
IS_PATIENT : 2
PER_WEEK : 1
DAILY_MEDS : 2
BACK_PCP : 1
ORAL_ROBITUSSIN : 1
OJECTIVE_TREMULAS : 1
PATIENT_GIVEN : 1
LEGIBLE_ALBUTEROL : 1
VA_TO : 1
BREATH_ABDOMINAL : 1
OM_MAY : 1
STATUS_NA : 1
TO_YELLED : 1
HE_WIFE : 1
SUMARRY_VOIDS : 1
DROP_DROP : 1
AT_FOR : 2
TEST_RESULT : 1
NO_REDNESS : 1
DIARRHEA_DYSURIA : 1
WITH_INDVIDUAL : 1
WAS_ON : 3
AB_DISSABIL : 1
THE_LEG : 1
WITH_ALZHEIMERS : 1
PATIENT_THE : 5
CASE_CAN : 1
DISCHARGE_ADMISSION : 1
OTC_COLD : 1
PATHOLOGY_REPORT : 1
CONTINENT_ADDITIONAL : 1
FROM_NOW : 1
DOES_THE : 1
PLEASE_RESTRAINTS : 1
NORMAL_DENIES : 1
RESPOND_SURGICAL : 1
CLEARLEFT_SEE : 1
MODIFIED_DIAGNOSTIC : 1
UNDERSTOOD_MILD : 1
ANY_INCREASE : 1
DETERMINED_DISTANCE : 1
AND_ABILITY : 1
HOSPICE_FROM : 1
REPORTS_HE : 2
NOV_LEADER : 1
PSYCHIATRY_PLANSEVERE : 1
OBMT_IN : 1
TO_MS : 1
THE_MILITARY : 1
HIS_IN : 1
ARM_BRONCHOSCOPE : 1
WITH_PHYSICIAN : 1
TO_PROBLEMS : 1
WALKS_SCORE : 1
APPROACHING_CARE : 1
SKILLS_WAS : 1
STATES_ANTIBIOTICS : 1
OF_DAMAGE : 1
PATIENT_CLINIC : 1
SYMPTOMS_BEHAVIORS : 1
LOW_POSITION : 1
CPRS_VISTA : 1
NOT_SEEN : 1
BENEFIT_MUCOMYST : 1
FEATURES_IS : 1
AS_THERE : 1
EFFECTIVENESS_OF : 1
OPT_COMMENT : 1
CONSULT_OUR : 1
QAM_ACTIVE : 1
INTERDISCIPLINARY_PATIENT : 1
DIRECTLY_UNSUCCESSFUL : 1
PRESCRIBED_BEEN : 1
PCP_AND : 1
REQUEST_PASS : 1
SOMEONE_TO : 1
MOISTURE_MOIST : 1
HEARING_VERTIGO : 1
NEW_FACES : 1
ADMISSION_TO : 1
BY_DR : 1
NEXT_WEEK : 1
PHYSICIAN_ASSESSMENT : 1
FILED_MASS : 1
FUNCTION_TIMES : 1
CPS_GIVE : 1
PAIN_LEFT : 1
COMING_ON : 1
OBEYS_COMMANDS : 1
IN_NEXT : 1
DATE_SKIN : 1
FILL_CALL : 1
FILE_CLERK : 1
GAF_ANOTHER : 1
LORAZEPAM_GENITOURINARY : 1
COMPLAINT_POSITIVE : 1
VET_SUICIDE : 1
VETERAN_THROUGH : 1
ARMY_ARC : 1
TO_SUMMARY : 1
CHARACTER_READER : 1
THAT_AND : 1
OTHER_SPECIFIED : 2
THIS_MEDICATION : 1
GROOMING_ORIENTATION : 1
MONTHS_FROM : 1
TO_CANCEL : 2
TO_CLENCHING : 1
FOR_COR : 1
DRESED_PJS : 1
WITH_LEGAL : 1
RECENTLY_FROM : 1
SESSION_RETURN : 1
BED_STATUS : 1
RECORD_POSTTRAUM : 1
SPEC_CHOL : 1
NURSINGACTIVITIES_DAILY : 1
SOURCE_THE : 1
CLERK_CONVERSATION : 1
RESIDENT_WILL : 1
UNLISTED_AND : 1
PRACTITIONER_FOR : 1
BEEN_US : 1
SW_WORK : 1
AND_TOLD : 1
NONE_GOAL : 1
CC_CURRENT : 1
OTHER_DIABETES : 1
PROBLEMS_ARE : 1
ASSISTANCE_NO : 2
TEAM_WHERE : 1
VA_GET : 1
RESULTS_FROM : 1
VETERAN_IS : 3
COPD_MOOD : 1
MOUTH_TWICE : 1
CHECKLIST_PREOP : 1
OTHER_PATIENT : 1
LIVING_GLA : 1
THIS_HE : 1
DECLINED_PROTECTORS : 1
NAME_HATFIELD : 1
HEP_PLACED : 1
LED_TO : 1
TELECARE_RECORD : 2
SUCH_AS : 1
HIS_NECK : 1
INDICATED_NO : 1
PHENOBARB_WAS : 1
FOLLOWING_HOW : 1
THIS_VISIT : 1
MN_LEADER : 1
SARAH_KROHN : 1
NUTRITIONAL_STATUS : 1
CUFF_TEAR : 1
REHAB_AND : 1
MOUTH_FOUR : 2
SYMPTOMS_OF : 1
PHYSICIAN_ISCUSS : 1
TREATMENT_CHART : 1
THE_OPERATION : 1
MALE_COMES : 1
NECK_CARE : 1
DEVIATIONS_NOTED : 1
REEVAL_TEST : 1
MANAGEMENT_MOTIVATION : 1
BID_OU : 1
PAIN_WILL : 1
MOTIVATION_IN : 1
FOR_MIN : 2
THEN_NEW : 1
IS_REPORTING : 1
HAS_ANSWERED : 4
APPOINTED_LACY : 2
MET_FOR : 1
SPMI_VETERAN : 1
REG_BMS : 1
DICTATED_ENVELOPE : 1
THAT_LOWER : 1
FREQUENT_MENTAL : 1
DIVERSION_STATES : 1
COMPLETING_THE : 1
BUN_CREAT : 1
SCORE_PAC : 1
PROCEDURE_INDICATION : 1
EXAM_ULTRASOUND : 1
TOILET_TO : 1
FEELING_WELL : 1
LANGUAGE_TUBEFEEDING : 1
MEDICATIONS_STATUS : 4
ANKLE_CALF : 1
EDUCATION_SCREENING : 1
OF_PT : 1
GUNSHOT_TO : 1
FAMILY_DID : 1
WITH_PCP : 2
DRAINING_PURULENT : 1
DIFFININTLY_LOOKS : 1
IN_NUMBER : 1
HEALTH_VOIDS : 1
PAIN_EFFECTIVENESS : 1
ARE_LISTED : 1
WITH_VETERANS : 1
CONTINUE_IN : 1
TACTILE_TALKING : 1
DISC_NARROWING : 1
HX_OF : 1
PT_EDT : 1
SIGNIFICANT_OTHER : 1
HERBALS_SW : 1
IS_NOT : 3
HIS_SISTER : 1
NOTE_CLERK : 1
NUM_RATING : 1
TO_MR : 1
SATISFACTORY_UNLESS : 1
THE_NUMBER : 1
PSYCHOLOGY_NOTE : 2
II_NURSING : 1
ABSENT_MS : 1
MON_EYE : 1
WITH_LABS : 1
APPT_CANCEL : 1
WITH_LIN : 1
OUT_PATIENT : 1
OF_PAIN : 2
PROVIDER_INTACT : 1
AND_EYES : 1
NOT_ADJUST : 1
PATIENT_RESPONSE : 1
VISIT_FEB : 1
DECLINED_BREAKFAST : 1
COINCIDES_DR : 1
PATIENT_THERAPY : 1
SPOKEN_BLIND : 1
QUIET_PRACTICE : 1
VETERANS_OTHER : 1
SECURITY_VERIFIED : 1
MULTIPLE_EXPOSURES : 1
PERIMACULAR_EXUDATE : 1
PT_SAYS : 1
OF_COLON : 1
PLACE_ON : 1
IN_MAY : 1
ANGRY_NURSING : 1
DIAGNOSIS_RAISED : 1
CALL_THE : 2
CONNECTED_MEDICAL : 1
HYGIENE_BED : 2
ADDENDUM_TO : 1
HOME_NPH : 1
ANTICIPATED_DATE : 1
SPUTUM_HAS : 1
ACTIVE_MODALITY : 1
THE_CLINICAL : 1
SUBJECTIVE_OBJECTIVE : 1
IMPAIRMENT_AT : 1
PROBLEMS_SPECIFIED : 1
QUIET_BREATHING : 1
STATING_IS : 1
WEIGHT_GREATER : 1
AFTER_WEEKEND : 1
PLAN_CONTINUE : 2
RD_LBS : 1
FUNCTION_ACTIVE : 1
TWO_BELIEVES : 1
MIMMS_VERBAL : 1
INITIALLY_SEEN : 1
NOW_THREE : 1
WISHES_PSYCHOSOCIAL : 1
RESPIRATORY_HELP : 1
THE_INE : 1
IN_VISUAL : 1
USER_CLOTHING : 1
BY_FULL : 1
THE_THANK : 1
IF_TAKES : 1
NO_INTERVAL : 1
ACCESS_THEIR : 1
HAS_STARTED : 1
FROM_THE : 3
ELECTRONICALLY_FILED : 1
HYDROXYZINEMG_VITAMIN : 1
PATIENTS_BEHAVIOR : 1
IDENTIFIED_PULSE : 1
HE_SOCIAL : 1
AMBULATION_OVERSIGHT : 2
POSITIVE_PATIENT : 1
BEEN_PROGRESSING : 1
GROUPS_ON : 1
IS_YEAROLD : 2
SPMI_CANCELLED : 1
AM_PREOPERATIVE : 1
VETERANS_THE : 1
STAFF_BIRCH : 1
BELIEVES_HIS : 1
FOR_STUDY : 1
ADDITIONAL_ASSESSMENT : 1
ACTIVE_RECONCILIATION : 1
OTHER_ABDOMINAL : 1
NEEDED_MEDICATIONS : 1
CLINIC_RN : 1
WILL_USED : 1
QUIT_VA : 1
TREMULAS_ANXCIOUS : 1
WITH_CLINIC : 1
MAY_FOR : 1
AVAILABLE_TO : 1
REMINDER_HE : 1
PROGRAMS_TO : 1
GROOMED_PLEASANT : 1
MONTHS_COMMENTS : 1
ADVANCE_HEALTH : 1
CARE_CONSULT : 1
PROGRESS_AND : 1
YRS_PER : 1
INFLUENZA_IMMUNIZATION : 1
RIGHT_CPT : 1
TO_FEATURES : 1
DRINKING_BUT : 1
GEESEY_PT : 1
YEAR_ARMY : 1
ATTENDING_PRESENT : 1
POSTPROCEDURE_DIAGNOSIS : 1
COMMANDS_REQUIRED : 1
IS_MAKING : 1
FABRICATION_TREATMENT : 1
REGAIN_COMPOSURE : 1
OX_ON : 1
FINDINGS_RECORD : 1
THEY_FROM : 1
OPH_SOLN : 1
PLASTIC_SANDWICH : 1
HIS_BEST : 1
ETC_NONE : 1
PATIENT_ASSOCIATED : 1
ECONOMIC_BACKPAIN : 1
VETERANS_MN : 2
VISTA_LEARNING : 1
PATIENT_RESTING : 1
COINCIDES_WITH : 1
SITUATION_DATE : 1
CONTACT_AT : 1
PTS_WIFE : 1
COLOR_BEEN : 1
IN_HOSPITAL : 1
NO_AGITATION : 1
SW_SOCIAL : 1
HYPERTENSION_TWICE : 1
OUT_OF : 1
DATE_BIRTH : 2
WAS_EXPLAINED : 1
PERSON_TIME : 4
MAY_VOICE : 1
BE_TRANSPORTED : 1
SUCCESSFUL_THERAPEUTIC : 1
IN_LPN : 1
PRIMARY_NONVA : 1
DECOMPENSATION_SINCE : 1
MYSELF_OR : 1
THE_USED : 2
INTO_NOT : 1
PHENOBARB_METHADONE : 1
ACTIVITY_FREGUENTLY : 1
PRESCRIPTION_PT : 1
MILIEU_THIS : 1
THE_CLINIC : 3
IF_THEY : 1
DISCUSSED_WITH : 3
THEN_TAKE : 1
ROUTES_HOSPITAL : 1
DEPRESSION_RECEIVED : 1
ADVISE_PATIENT : 1
CALLED_PATIENT : 1
BED_MENTAL : 1
SCREEN_INFORMATION : 1
REMOVAL_REFUSED : 1
STI_HISTORY : 1
TO_WEEKLY : 1
OCR_HOME : 1
ENCOURAGED_VET : 1
WHERE_IS : 1
QUIT_AGO : 1
WIFES_WELLBUTRIN : 1
NUMBER_RESPONSIVE : 1
HANDS_LORAZEPAM : 1
WHO_COMES : 1
PCP_PATIENT : 1
REFERRING_TO : 1
MESSAGE_WITH : 1
ON_THURS : 1
USE_HER : 1
LAST_PHYSICIAN : 1
VA_MH : 1
GOOD_NEWS : 1
CENTER_THE : 2
FORGETFULNESS_HE : 1
LEFT_LEG : 1
STOOL_RESIDENT : 1
FOOD_ASSISTANCE : 1
AHEAD_FILL : 1
AT_DEL : 1
NO_LONGER : 1
EXPECTED_THAT : 1
CATH_FLUSHED : 1
CPRS_NOT : 1
MEDICATIONS_IT : 1
NO_IDEATION : 1
THIS_TIME : 4
BEEN_OBSERVED : 5
MR_OF : 1
ROOMED_PHARMACY : 1
TREATMENT_MEDICATION : 1
CAPLET_IPRATROPIUM : 1
EVEN_UNLABORED : 1
NEED_TO : 2
ENCOURAGE_TO : 1
VETERAN_LEGAL : 1
PHYSICIAN_THIS : 2
BY_FOUR : 2
OR_PAIN : 2
OF_AND : 5
CASE_PLEASE : 1
BLOOD_FL : 1
TO_KNOW : 1
AND_BELT : 1
REQUIRED_THIS : 2
ENCOURAGED_USE : 1
SEEN_AND : 1
AND_AVOID : 1
SEE_TRIAGE : 1
NONPHARMACOLOGICAL_NEUROSURGERY : 1
PERSONAL_SHOWER : 2
PHYSICIAN_NOV : 1
TO_TIME : 1
ECONOMIC_FACTORS : 1
SC_EDUCATIONAL : 1
SORTING_DRUG : 1
OF_COGNITIVE : 1
AT_ENT : 1
BARRIERS_MOTIVATION : 1
CHRONIC_BACK : 1
CURRENT_NO : 1
ACTIVITY_IT : 1
ACTIVITIES_POSITION : 1
BUT_CLOSED : 1
PRODUCTIVE_COUGH : 1
GRADUATED_THE : 1
AND_COMMITMENT : 1
HYGIENE_SPONGE : 2
TO_EAT : 1
ON_MY : 1
LVH_AI : 1
INCIDENT_OCCURRED : 1
PULLON_MEDIUM : 1
PT_STATED : 1
ILLNESS_IS : 1
TO_DRIVE : 1
FOR_AUG : 1
CARE_ING : 1
ALLERGIES_NO : 1
ALBUTEROL_SIG : 1
REPORT_NEW : 1
SAID_IN : 1
MEDICAL_PROBLEMS : 1
GETTING_FOR : 1
WEAK_ABSENT : 1
OUTPT_APRN : 1
OR_OF : 2
TETANUS_DIPTHERIA : 1
MANY_THE : 1
SEP_POP : 1
MOVEMENT_TO : 1
CP_REVIEW : 1
IN_STAFF : 1
GETTING_TO : 1
OFF_ON : 1
PT_WNL : 1
REQUIRES_NO : 6
PULSE_HAS : 1
SPECIAL_ULTRASOUND : 1
NUMBER_CONSTANT : 1
ADDITIONAL_RESOURCE : 1
VISIT_MONTH : 1
DILTIAZEM_SEEN : 1
LATER_READ : 1
HIS_SKILLS : 1
AND_REQUESTED : 1
INE_DISC : 1
COMMENTS_HAS : 1
ADDRESS_THIS : 1
ON_BACKGROUND : 1
SCORE_ON : 1
MILD_TO : 1
TABLET_IRON : 1
ENCOURAGEMENT_CUEING : 1
CONVERSATION_WITH : 3
ELBOW_SPLINT : 1
TRANSFERRED_TO : 2
FILMS_HAVE : 1
MOD_COVERAGE : 1
COMPUTERIZED_PROBLEM : 1
ING_WAS : 1
RNBC_MIN : 1
PREOPERATIVE_SHEET : 1
WEEKENDERS_MIN : 1
KNOWLEDGE_MENTAL : 2
ENCOUNTER_SIGNIFICANT : 1
MG_STUDY : 1
SULFATE_OPH : 1
HE_WHAT : 1
PT_WAS : 4
DIAGNOSIS_PROVIDED : 1
SCREENING_OR : 1
SUPERVISING_FOR : 1
USED_NOT : 1
FILL_WILL : 1
LED_CE : 1
DUE_TIME : 1
APPTS_NO : 1
RESULT_DATE : 1
ORAL_INHALE : 1
ACTIVE_AC : 1
VEHICLE_ON : 1
HE_HIMSELF : 1
WORKER_ADVISED : 1
TREMORS_OF : 1
FLUVASTATIN_MG : 2
PRESSURE_TROUSERS : 1
SCHEDULED_WITH : 1
THIS_DURING : 1
ARE_SPECIALIST : 1
VOLUNTARY_UNTIL : 1
THAT_OCCURRED : 1
HAIR_FOLLICLES : 1
UNSPECIFIED_OPEN : 1
ASSESSMENT_STRAIN : 1
IN_SKILLS : 1
INR_PATIENT : 1
TEARFULNESS_NO : 1
SELF_CARE : 1
SCHIZOPHRENIA_PARANOID : 1
ARNP_OR : 1
FEBRUARY_FELT : 1
VISION_IS : 1
CALLED_REPORTED : 2
LIGHT_PATIENT : 1
GAS_EXCHANGE : 1
APR_PHYSICIAN : 1
THERE_FALL : 3
EX_HEAVY : 1
CLINIC_REPORTED : 1
OR_RESIDENT : 1
SKIN_WARM : 1
CONSTIPATION_DIARRHEA : 1
PLAN_WITH : 1
NO_AT : 1
IMPORTANCE_REPORTING : 1
OF_HAIR : 1
STRESS_CONTROL : 1
FALLS_OLD : 1
NEURO_AWAKE : 1
ADMINISTRATION_CENTER : 1
TESTS_TO : 1
NUTRITION_PT : 1
ANXIETY_PARKINSONS : 1
UL_CONSENT : 1
PLEASE_UNINTENTIONAL : 1
DRY_CONVERSE : 1
NOTE_TIME : 2
OF_MILD : 1
SCALING_TEETH : 1
VIA_NEBULIZER : 1
CONSENT_NOTE : 1
IN_MO : 1
SHOWER_PROVIDED : 1
SEE_ALLERGIES : 1
WATCH_TO : 1
ADMISSION_THIS : 1
NIACIN_MAR : 1
TELL_ME : 1
WEIGHT_MOBILITY : 1
OTHER_PHYSICIAN : 1
BREASTFEEDING_PATIENT : 1
OPTOMETRY_BIFOCAL : 1
UPLIFTING_MINUTE : 1
MOVEMENTS_SHIFT : 4
TRIAGE_IF : 1
JUDSON_FROM : 1
AS_HE : 2
FOR_JOINT : 1
VISION_TRANSFERRED : 2
WILL_HISTORY : 1
THE_MONTHS : 1
HAVE_ABOUT : 1
PATIENT_ALERT : 1
HIS_CELL : 1
RESTING_IN : 1
PRESENT_PLEASE : 1
DETERMINE_THE : 1
NEIGHBOR_CALLED : 1
RT_PATIENT : 1
UNIT_DOSE : 1
REVIEW_OF : 2
APPROPRIATE_HEIGHT : 1
WT_KG : 2
BLINDNESS_ENROLLED : 1
PER_PULSE : 1
CLASS_IV : 1
WRITTEN_PHONE : 1
COGNITIVE_PROCESSING : 1
MOBILITY_GROOMING : 1
HYDROBROMIDE_TAB : 2
HIM_ANGRY : 1
AND_WILL : 2
VOICES_MR : 1
RULES_ABOUT : 1
GROUP_HE : 2
WRITER_LEFT : 1
ALTERNATIVES_DISCUSSED : 1
DONE_AT : 1
NO_REQUIRED : 1
HE_THAT : 2
GRENADES_MORTARS : 1
WELL_WAS : 1
YEAROLD_PAIN : 1
ACCEPT_HE : 1
PATIENTS_PREFERRENCE : 1
NURSE_MANAGER : 1
LANGUAGE_FOR : 1
DAILY_DURING : 1
PATIENT_LACKS : 1
IRRIGATION_CHECKED : 1
NOT_HEIGHT : 1
RECOMMENDED_THAT : 1
PLAN_SKILLS : 1
HER_SIDE : 1
IN_CM : 5
WHILE_TALKING : 1
TO_HER : 1
STATUS_ADDENDUM : 1
OTHER_TENDANCE : 1
NOT_REQUEST : 1
MONITOR_ENCOURAGE : 1
ARRIVED_SHE : 1
AND_DEVIATIONS : 1
ICDCM_FARJAD : 1
LEVEL_SAFETY : 1
FOR_SUBSTANCE : 1
THAT_DESCRIBE : 1
IN_DOWNLOAD : 1
ZERO_OF : 1
NOTIFIED_HYDROXYZINEMG : 1
TTE_EF : 1
MANAGEMENT_UNLISTED : 1
DRUG_OF : 1
USE_MD : 1
GET_ADDITIONAL : 1
BUT_HIS : 1
FLUIDS_GRIP : 1
CONTINUED_PARTICIPATION : 1
AND_FLUIDS : 1
PATIENT_AND : 1
SPEC_SCHOOL : 1
COMPLAINT_NOT : 3
OPPORTUNITY_ASK : 1
REPORTS_THE : 1
WAS_SIGNED : 1
THERE_AN : 1
SITE_INJECTION : 1
THE_UNIT : 1
IF_POSSIBLE : 1
VET_FOLLOWS : 1
PLACE_ASSISTANCE : 1
BEEN_OK : 1
OLD_ACCIDENT : 1
WED_APPT : 1
GIVEN_TX : 1
TO_STRONG : 1
PRODUCTIVE_YELLOWISH : 1
COLOR_NO : 1
PREOPERATIVE_INSTRUCTION : 1
MG_TAB : 6
IN_THE : 24
NUMBER_PC : 1
NOTE_VETERAN : 1
VETERAN_CAN : 1
RECONCILED_PATIENT : 1
INR_SMILING : 1
UNIT_GROUP : 1
WEAK_OUTPUT : 1
PAIN_AND : 1
FERRITIN_REPEAT : 1
RISK_THE : 1
DENIES_SI : 1
CPT_OR : 1
SPLIT_PT : 1
WAS_WITH : 2
LOSS_ETC : 1
TIME_WITH : 1
FUP_REMINDERS : 1
HELD_DUE : 1
REPLACED_THE : 1
NOTE_OTHER : 1
OF_RESIDENT : 1
YEARS_NOW : 1
LOCKED_TREATMENT : 1
SMT_WITH : 1
OF_LOW : 1
WITH_LITTLE : 1
ANOTHER_WITH : 1
CARE_ORTHOPTIC : 1
NOTE_IF : 1
MANY_AT : 1
FOR_WAS : 1
NURSING_STAFF : 1
FOR_PHOTO : 1
FOREARM_TO : 1
PRACTITIONER_ADDENDUM : 1
NOT_HAVE : 2
GIVE_MS : 1
APPOINTMENT_AT : 1
YES_SPLIT : 1
AND_HAS : 6
DECISIONS_NONE : 1
ING_REQUIRED : 1
BEEN_SOBER : 1
LOCAL_REACTIONS : 1
QUESTIONS_IT : 1
WOULD_GO : 1
MPV_FL : 1
NOTE_OBJECTIVE : 1
ASSISTANCE_BATHROOM : 1
OD_TO : 1
PERIODONTAL_TIME : 1
RECEIVED_IN : 2
ENROLLED_THE : 1
EAT_THERAPY : 1
PROTECTORS_PLACE : 4
MINUTE_WEEKLY : 2
INDICATED_VACCINE : 1
ON_PHYSICIAN : 1
BUT_QUIT : 1
CHART_PATIENT : 1
DISORDER_NO : 2
LIST_THE : 2
YOGA_SESSION : 1
ADDITIONAL_INFORMATION : 1
PELVIS_SKIN : 1
MAKE_DECISIONS : 1
SHEET_SURGERY : 1
LACY_DO : 2
PHYSICIAN_ADDENDUM : 1
ARRIVAL_WAS : 1
YEARS_SCHED : 1
GROUP_WAS : 1
FROM_HEART : 1
FROM_MANY : 1
SELECTED_SUBTESTS : 1
WITH_FOOD : 1
HALDOL_BY : 1
PAIN_ACTIVE : 1
FOR_PASS : 1
REPEATED_TO : 1
DENIED_MORPHINE : 1
BE_TO : 3
CONFIRM_ADMISSION : 1
THE_YEARS : 1
KG_AMBULATION : 1
FACE_HT : 1
MATERIAL_OPPORTUNITY : 1
PERTINENT_PATIENT : 1
COMP_EVALUATION : 1
IN_DECLINED : 3
PARTICIPATED_IN : 1
INTENSITY_OF : 1
LIKE_TO : 2
VAN_WITH : 1
WILL_FOR : 1
SEE_NOTE : 3
FIBROIDS_SCHIZOPHRENIA : 1
MEDICAL_APPT : 1
ACTIVE_OUTSIDE : 1
ANGIO_FLUSHED : 1
NOT_AVAILABLE : 1
DRAINING_LY : 1
CONNECTIVE_NO : 1
IN_OBTAINING : 1
WALK_BACK : 1
NO_DATE : 1
NOT_TO : 2
THIS_WRITER : 3
TO_TEETH : 1
PLEASE_SEE : 2
HE_NOTICES : 1
PROGRESS_FOR : 1
STI_AT : 1
SOCIAL_SECURITY : 2
HE_OUT : 1
HE_HAD : 2
ANTIBIOTICS_GIVEN : 1
DEC_REASSESSMENT : 1
VITALS_ENTERED : 1
DISCUSS_SAFETY : 1
PTSD_HAS : 1
ON_CLONAZEPAM : 1
PSYCHIATRY_ACUTE : 1
THERE_LOSS : 1
PLEASANT_FRIENDLY : 1
TYPE_DTN : 1
DIABETIC_THAT : 1
INCREASE_RISK : 1
UAREVIEWED_WITH : 1
SCREEN_WILL : 1
AT_ENCOUNTER : 1
SUCH_BREATHING : 1
TO_MENTAL : 1
TREATMENT_ORAL : 1
REFERRING_READINGS : 1
OUTSIDE_THE : 1
VISIT_CLINIC : 1
CETIRIZINE_HCL : 1
ON_OCTOBER : 1
DUE_AT : 1
NOTE_WILL : 1
THE_APR : 3
PATIENT_ALSO : 1
PLEURITIS_INITIAL : 1
POSITION_IT : 1
CLIENT_SIGNED : 1
RATING_CC : 1
HE_GOING : 1
PLAN_HAS : 1
AN_IN : 2
CARE_SHAMPOO : 1
CLOSELY_MHICM : 1
IN_SP : 1
CRUNCHY_AND : 1
FOR_OPTOMETRY : 1
HOWEVER_NOT : 1
TO_YOU : 2
ORDERED_LABS : 1
IRRITABILITY_GAF : 1
PATIENT_CONTINENT : 3
ARC_IN : 1
SHOWER_URINE : 1
EAR_PAIN : 1
EXTRA_HOURS : 1
CITY_MH : 1
TAKE_SOME : 1
START_PATIENT : 1
GET_LEFT : 1
CANCELLED_PT : 1
NORMAL_OF : 1
INDICATES_LACK : 1
LIVING_GUNSHOT : 1
PROBLEMS_GOOD : 1
AND_SURGERY : 1
THE_BOX : 1
SURGERY_HAVE : 1
ACCOMPANIED_HIS : 1
THERAPY_NO : 1
AND_NURSING : 1
MILITARY_CONNECTED : 1
FEEDING_URINARY : 1
THIS_EACH : 1
YOUR_VISIT : 1
IF_LEFT : 1
CONTACT_DIRECTLY : 1
DECISIONMAKING_CAPACITY : 1
APPROPRIATE_IN : 1
TREATMENT_CITALOPRAM : 1
HEARD_WRETCHING : 1
PATIENT_MILITARY : 1
VISIT_MAY : 1
GROUP_THIS : 1
CHEN_PENG : 1
USES_CANE : 1
OF_AM : 1
FEATURES_TEMPERATURE : 1
REVIEW_IS : 1
BE_PREDICATED : 1
WITH_OCR : 1
AS_VETERAN : 2
JUL_INCIDENTALS : 1
THE_TALKED : 1
WE_ADDITIONAL : 1
TO_FROM : 1
NO_OF : 5
MEDICAL_CENTER : 1
CL_BY : 1
WILL_SEND : 1
NICOTINE_DEPENDENCE : 1
TO_PRESENTED : 1
COMPLETED_ACCEPTANCE : 1
IS_CAPABLE : 1
SION_MESSAGE : 1
MD_SCREEN : 1
ONLY_OF : 1
DEPRESSION_PATIENT : 1
RESPONSIBILITY_PHENOBARB : 1
MOBILITY_DISCUSSION : 1
THAT_SHE : 1
HIS_BUT : 2
MEDICATION_WITHIN : 1
BE_AND : 1
AMBULATORY_MEDICAL : 1
PARTIAL_CUFF : 1
THE_OCR : 2
STANDARD_FALL : 1
ENDURANCE_HOME : 1
THIS_AN : 1
SESSIONS_TEAM : 1
COMMENT_NO : 1
FREGUENTLY_SECONDARY : 1
HER_MAIL : 1
ADMISSION_IS : 1
EXCEPT_TO : 1
DENTURES_PARTIALS : 1
BUT_IN : 1
INDICATION_EVALUATE : 1
OBTAINING_CONSENT : 1
ELEVD_PHOS : 1
HOUSESHOES_TROUSERS : 1
TIMES_RESIDENT : 1
DID_CLIENT : 1
LOCATION_BOWEL : 1
OF_NORMAL : 1
HIGH_RISK : 1
TROUSERS_ADLS : 1
WANT_PROVIDER : 1
THE_MOST : 2
WAS_CLINICAL : 1
FOUNDATION_SUCCESSFUL : 1
OF_STANDARD : 1
GAIN_OF : 1
EVERY_ALBUTEROL : 1
IN_STI : 1
IN_MENTAL : 1
FREQUENT_VERBAL : 1
PATIENT_ACUTE : 1
HED_WORKING : 1
HX_HYPERTENSION : 1
DIFFERENT_VET : 1
COMMENTS_RESPIRATORY : 1
RESPONSE_PREOP : 1
PROBLEMFOCUSED_ALTHOUGH : 1
REVIEWED_MEMBERS : 1
LAST_FEW : 1
COUNSELING_LOCATION : 1
OF_IRRITABILITY : 1
UNDERSTOOD_THAT : 1
DISCUSSED_ARE : 1
NO_INABILITY : 1
NAPPING_MEAL : 1
HIS_PHONE : 1
LS_PROGRESS : 1
AB_RATED : 1
FUTURE_APPOINTMENTS : 1
VESTING_CURRENT : 1
AGREES_NO : 1
SUPERVISION_ENCOURAGEMENT : 1
AT_OLD : 1
SURGERY_TO : 1
CSCOPE_INT : 1
ALCOHOL_OR : 1
LIVING_DURING : 1
AND_WHEN : 1
DISCUSSED_NURSING : 1
SESSIONS_ASSESSMENT : 1
REDNESS_AND : 1
MOBILITY_SUMMARY : 1
PHYSICIAN_IDENTIFIED : 1
APPOINTMENT_CANCELLED : 1
FATIGUEX_FLUENCY : 1
INFORMATION_VMCW : 1
LOW_PRESSURES : 1
PT_ANY : 1
TAB_MG : 2
SEE_SUMARRY : 1
AND_SUPPLEMENTATION : 1
PLEASED_WITH : 1
WARNING_BY : 1
REG_MEDICATIONS : 1
NAME_OF : 1
CLIENT_ENGAGE : 1
MOMENT_DISCUSS : 1
CLEAN_WAS : 1
CENTER_FOR : 1
MILITARY_SERVICE : 1
IN_BOX : 1
WHICH_SHOWED : 1
LOST_IN : 1
DISCHARGE_VOLUNTARY : 1
IDENTIFIED_ACTIVE : 1
PT_TREATMENT : 1
INFORMATION_YOUVE : 1
WHILE_ON : 1
HIS_TIME : 1
HE_SOMEONE : 1
CLINIC_KSBURG : 1
PATIENT_AGREEMENT : 1
NO_COUGH : 1
SEEN_MIN : 1
APPOINTMENT_DENTAL : 1
JUNE_AUSCULTATION : 1
CHRONIC_ELECTRONICALLY : 1
TAKE_ONE : 5
FACILITY_APPOINTED : 2
AT_ACTIVE : 1
NOTE_WITH : 1
MEANWHILE_WRITTER : 1
INITIAL_LDL : 1
LOSS_AND : 1
HE_TENNIS : 1
WAS_REQUESTED : 1
RIDE_THIS : 1
TO_OPTICAL : 1
TO_ALLOW : 1
PATIENT_LOCK : 1
KNEE_LEGS : 1
KNOW_TO : 1
OF_AT : 1
THE_HOW : 1
WHO_PHYSICIAN : 1
ANESTHETIC_PROVIDED : 1
APPOINTMENT_WRITER : 1
AS_FOLLOWS : 1
HAS_DONE : 1
NOTED_HE : 1
INCONTINENT_OF : 1
LEVITRA_CALL : 1
MN_JUN : 1
STAFF_AND : 1
WENT_OUT : 1
HAIRBRUSHES_PLASTIC : 1
DOING_WELL : 1
AN_ALTERATION : 1
VETERAN_SEEN : 1
KNUCKLE_STRETCH : 1
LOCK_PLACED : 1
COMP_NOTET : 1
VETERAN_SW : 1
STRESS_OUTPATIENT : 1
IN_GAS : 1
INPATIENT_MEDICATIONS : 2
FAMILY_EDUCATION : 1
VISTA_DISPLAY : 1
SOME_THE : 1
DECREASED_YOU : 1
ON_SURGICAL : 1
FOR_THERAPEUTIC : 1
SUSPICIOUS_IN : 1
NUMBER_NORMAL : 1
CFCF_INHL : 1
ANONYMOUS_UNDERSIGNED : 1
OF_ENDURANCE : 1
GROUP_MIN : 2
THE_IMED : 1
OBMT_FOR : 1
NUMBER_BOWEL : 4
DR_HAEFNERS : 1
WERE_MANY : 1
AND_THAT : 6
RHYTHM_EVEN : 1
TO_THOSE : 1
REQUIRED_CONTINUED : 1
FALL_HISTORY : 1
OR_NOTICED : 1
EVER_SINCE : 1
ANCHORAGE_XANAX : 1
RELIEF_APPT : 1
NOW_FOR : 1
THE_STAFF : 1
PLACE_HIP : 1
RISK_EVERY : 1
CARE_INFORMATION : 1
II_GTTS : 1
CURRENT_ADDRESS : 1
TAKES_THIS : 1
DIEM_ADMISSION : 1
HOURS_ACTIVE : 1
THE_BONY : 1
ENCOURAGED_TO : 2
SESSION_MEDICATION : 1
CAP_OBMT : 1
PAIN_NO : 1
PATIENT_EDUCATED : 1
PATIENT_ADMISSION : 1
PLAN_HE : 1
TUES_BEFORE : 1
RISK_IN : 1
PT_STATES : 2
ACCEPTED_HOSPITALIZATION : 1
TO_COMMUNICATION : 1
TRAVOPROS_LAB : 1
THE_ABOVE : 1
GENITOURINARY_WITHOUT : 1
HE_DO : 1
WAS_GIVEN : 4
THERAPY_OJECTIVE : 1
OFFICE_ARE : 1
TX_OD : 1
ADDED_TO : 1
ASSISTANCE_PATIENT : 1
VISUAL_UCINATIONS : 1
WILL_LOOK : 1
FROM_CITY : 1
PRESENT_IMPROVED : 1
LAST_MONTHS : 2
ASSISTANCE_OF : 1
DRIVE_UP : 1
APPROACHED_PATIENT : 1
LVH_NO : 1
VETERANS_ADMINISTRATION : 1
GUNSHOT_WOUNDS : 1
NKA_DT : 1
NARROWING_SO : 1
TO_CONTINUE : 2
AND_CAME : 1
WORKER_SPECIFIED : 1
PER_AND : 1
NA_INITIAL : 1
ML_INH : 1
EVERY_FOR : 1
GROUP_REVIEWED : 1
SOCIAL_NUMBER : 1
PREOP_INTEG : 1
POSTTRAUM_STRESS : 1
SEVERAL_MEMBERS : 1
PURULENT_MATERIAL : 1
CONSENT_FILE : 1
THYROID_NODULE : 1
MACHINE_VOICE : 1
FOLLOW_OF : 1
TO_OF : 2
PHYSICIAN_TENDANCE : 1
BRONX_NY : 1
OXYGEN_THERE : 1
QUALITY_XACTIVE : 1
OBJECTIVE_PATIENT : 1
OF_NOTE : 1
NURSING_SPECIALTY : 1
CARING_FOR : 1
OF_ANY : 1
UCINATIONS_SUPPORT : 1
LEG_PAIN : 1
ASSISTANCE_AMBULATION : 1
NOTICES_THAT : 1
ABILITY_SELF : 1
SPINE_SHOWED : 1
ACTIVE_TO : 1
THREE_FUP : 1
DISCUSSED_THE : 1
PAIN_INPATIENT : 1
AS_INDICATED : 1
MEETING_IN : 1
OT_STAFF : 1
NAME_HISPANIC : 1
ADDED_RADIATING : 1
LLI_TIMER : 1
HE_PT : 1
ELECTRONIC_THE : 1
IS_WNL : 1
THIS_NOT : 2
THE_ADDITIONAL : 1
VET_THROUGH : 1
PHOS_THE : 1
NO_RATED : 1
DRY_PREOP : 1
FOR_DAILY : 2
NOR_WHERE : 1
AND_FEELS : 1
OVERSEES_MR : 1
OVERSEES_ACTIVITIES : 1
PARTICIPATE_WEEKLY : 1
LUNCH_FOOD : 1
MURMURS_PALPITATIONS : 1
NSS_PRESSURE : 1
OBJECTIVE_ONE : 1
ARE_REFER : 1
THE_WAS : 1
HEALTH_OF : 1
LISTED_SIGNIFICANT : 1
NURSE_IF : 1
IN_MEDICATION : 1
MODERATE_ASSOCIATED : 1
PATIENT_LYING : 1
THERE_HIM : 1
KNEE_ICDCM : 1
DISCHARGE_PAIN : 1
OTHER_ICDCM : 1
AND_ALKALINE : 1
AND_MEETS : 1
PROVIDE_MENTAL : 1
STATED_TO : 1
ADVERSE_REACTION : 1
AT_OPT : 1
BP_TEAM : 1
AND_FULL : 1
BILATERAL_ANKLE : 1
HEMATURIA_IN : 1
CONGESTION_SISTER : 1
ASSISTANCE_COMPLAINT : 1
LEG_NONVERBAL : 1
MASS_INDEX : 1
GROUP_FEEDING : 1
NOT_ACCURATE : 1
AND_UNLABORED : 1
SUCCESSFUL_OUTCOMES : 1
WILL_ALSO : 1
NARROWING_TEMPERATURE : 1
OPTICAL_READER : 1
WAS_NOT : 1
AC_NONVA : 1
VITAMIN_UCINATIONS : 1
URINE_ORIENTED : 1
PHYSICIAN_PARTIALS : 1
OF_THAN : 1
UNSCHEDULED_IF : 1
NOTE_COMMENT : 1
DEC_IN : 1
INCREASE_PREVENTION : 1
HAVE_MET : 1
KNOX_PHYSICIAN : 1
FILE_IN : 1
FOR_AND : 1
THE_LACK : 1
BE_USED : 1
INJURY_ASSESS : 1
OF_SC : 1
CARE_PLAN : 2
SHE_SEEMED : 1
ALSO_LEFT : 1
PREOP_REVIEWED : 1
DISCUSS_GROUP : 1
MUSCLE_PSYCHOLOGY : 1
RADIATING_IN : 1
QUETIAPINE_TAB : 1
DERM_CLOBETASOL : 1
VISUAL_NOTARY : 1
CORE_OF : 1
THINGS_ADVANCE : 1
OR_HGB : 1
AND_WAIT : 1
TO_DATE : 3
MENTATION_AOX : 1
NEEDED_PAIN : 1
PROGRESS_WITH : 1
DIRECTIVES_PT : 1
NO_DEVIATIONS : 1
THE_PAST : 7
PSYCHOLOGY_AND : 1
VOIDING_DIFFICULTY : 1
OX_ROOM : 1
MONTHS_WEIGHT : 1
PHYSICAL_LIMITED : 1
SCHIEF_PATIENT : 1
VET_PRESENTING : 1
DOCUMENTED_ON : 1
DENTAL_PATIEN : 1
VASCULAR_CALL : 1
FOR_OL : 1
AND_ALERT : 1
SOFT_ND : 1
FOOD_DRINKS : 2
SAME_PC : 1
VITAL_DIAGNOSTICS : 1
THAT_LOOK : 1
NO_ASSISTANCE : 7
DRAINAGE_WITHIN : 1
COMPLAINT_OF : 3
CONVERSATION_JR : 1
EDITION_OF : 1
SAD_AND : 1
SHIFT_MONTH : 1
INTAKE_ONE : 1
ORIENTED_UG : 1
AN_TO : 1
UNLABORED_INTACT : 1
EXTREMITIES_REG : 1
THIS_OTHER : 1
AT_UP : 1
MEDS_FIRST : 1
OF_SERVICE : 1
FACE_MEETING : 1
WORKS_INFECTION : 1
IS_UNDERSTOOD : 1
INSIDE_OF : 1
AND_PERSISTENT : 1
TIME_COLOR : 1
HIS_FROM : 1
DISTRIBUTION_CENTER : 1
BE_DONE : 1
COGNITIVE_BREATH : 1
CARE_RESIDENT : 2
IN_LONG : 1
TO_WALK : 1
FINDINGS_OF : 1
SI_HI : 1
PSYCHIATRY_BUILDING : 1
PULSE_ANY : 1
WILL_HOLD : 1
NEBULIZER_TIMES : 1
SCORE_DUE : 1
DENTAL_DR : 1
CARDIAC_INFLUENZA : 1
NOTE_HOSPICE : 1
SPECIALTY_NOTE : 1
STATUS_VOIDING : 1
FOR_HYPERLIPIDEMIA : 1
SOME_AREAS : 1
GROUP_PROCESS : 1
ECONOMIC_ANYONE : 1
ON_TERMS : 1
AMOUNT_TIME : 2
ON_SITUATION : 1
ACUTE_STRAIN : 1
GENERAL_HEALTH : 1
NONE_WAS : 1
DISPOSITION_BLOOD : 1
THE_ORGAN : 1
STATED_PATIENTS : 1
REVIEWED_ORDERED : 1
HIS_SPENCER : 1
OF_REDNESS : 1
MEDICAL_ELECTRONIC : 1
MHICM_AND : 1
REPLACEMENT_AND : 1
ENCOURAGE_DENIED : 1
DIZZY_EVER : 1
DENIES_TEARFULNESS : 1
PAIN_POSSIBLY : 1
POSITIVE_ACTIVITIES : 1
AND_LONGER : 1
PATIENT_EXPERIENCING : 1
PREVIOUSLY_HERE : 1
SHOULD_NP : 1
WILL_AFTER : 1
EUTHYMIC_TO : 1
SCRIPT_WILL : 1
NOT_TELL : 1
ON_SEEN : 1
OF_LEFT : 1
XACTIVE_EAGER : 1
DOING_DECOMPENSATION : 1
DIRECT_REVEALED : 1
TIME_THE : 6
HOME_MHC : 1
BEEN_SMILING : 3
HAVE_TO : 1
INSTITUTE_HE : 1
UNDERSTAND_AND : 1
WEEKLY_HOME : 2
ARTHRALGIA_ICDCM : 1
NOT_WORKS : 1
COVER_SHEET : 1
THE_EYE : 1
IMPROVED_MOOD : 1
INDICATION_SCREEN : 1
WATCH_PATIENT : 1
ER_DOB : 1
THE_IF : 1
AND_ACTIVITIES : 1
COMFORT_SENSORY : 1
VISITS_MONITOR : 1
IN_GOAL : 1
SERVICE_AB : 1
SWELLING_CBOCURGENT : 1
SESSION_VET : 1
OR_IT : 1
SNACK_ON : 1
SCARS_LIMITED : 1
SYSTEM_DEHYDRATION : 1
AGREES_TO : 2
TERTIARY_GOAL : 1
HEENT_DENIES : 1
HIS_LOSSES : 1
WIFE_ARGUMENT : 1
HOURS_WAS : 1
WHO_MR : 1
ECONOMIC_NO : 1
MEDICATION_AS : 1
PT_TO : 5
IMPAIRMENT_TIME : 1
TWICE_USE : 1
CHRONIC_WILL : 1
ASSISTANCE_COLOR : 1
BUN_AND : 1
WHAT_PATIENT : 2
REPORTED_ARE : 1
MILD_ACTIVE : 1
OR_IF : 2
NEW_YOU : 1
DISORDER_HIS : 1
THERAPY_FOCUSING : 2
MH_PAKULA : 2
MEN_TO : 1
DECLINED_HIP : 1
MAIL_CONFIRM : 1
FUP_APPT : 1
WITH_PRESENT : 1
NOTE_HYGIENE : 1
THERAPEUTIC_BP : 1
RECENT_VITALS : 1
CURRENT_PRESCRIBED : 1
ABLE_REPEAT : 2
FOODS_EMESIS : 1
NY_IN : 1
BRC_VETERAN : 1
LATER_IN : 1
PREOP_GIVEN : 1
AT_DOES : 1
PAIN_IS : 1
FOR_LIVING : 2
THIS_WITH : 1
ATTEND_GROUP : 1
HIS_WAS : 2
TEACHING_YES : 1
SEEN_TECHNIQUE : 1
RESPONSIVE_TO : 1
PER_PT : 1
HCL_TAB : 2
MAY_IN : 1
PRESENT_TREATMENT : 1
THERE_BEEN : 4
THE_WECHSLER : 1
EAT_FOODS : 1
IS_DRINKING : 2
DISCHARGE_DATE : 1
TOOTH_UL : 1
THOUGHT_DEPENDENCE : 1
ACUTE_PAIN : 1
PRIMARY_CARE : 2
CM_PRESCRIBED : 1
OSAC_COUNSELING : 1
HIS_VOICE : 2
DO_HIS : 1
WILL_GO : 2
HIS_VISION : 1
THE_POST : 1
WHAT_HELPS : 1
EF_COPAY : 1
AND_SERVICE : 1
PULSE_PATIENT : 3
OWING_NO : 2
GROUP_PATIENT : 1
THAT_PROBLEMS : 1
PT_RESPONSIBILITY : 1
MILD_INCLUDE : 1
LDL_LDL : 1
MALE_DENIES : 1
TALKING_TO : 7
LY_PURULENT : 1
VOLUNTARILY_LEFT : 1
REQUESTS_AS : 1
SW_LEFT : 1
DIAGNOSIS_THE : 1
DATE_AN : 1
ABOUT_SCHOOL : 1
READINGS_TO : 1
YOU_FEEL : 1
DINNER_PULSE : 1
SPEC_PLASM : 1
ACTIVE_MEDICATIONS : 7
WEIGHT_LB : 3
SCORE_DISCHARGE : 1
ONO_COMPLAINTS : 1
ACTIVE_NASAL : 1
ASK_YOU : 1
PROMOTION_AND : 1
HHA_RN : 1
PROCEDURE_LOCAL : 1
STOOL_MEDIUM : 1
CARE_RESPIRATORY : 1
REHAB_WAS : 1
NO_COMMENTS : 1
OF_PLEASE : 1
FOR_MH : 1
IT_WENT : 1
COMMANDS_MODERATE : 1
PHYSICIAN_NAME : 1
AM_VETERAN : 1
OVERLYING_THE : 1
WRITER_HE : 1
BEEN_REGARDING : 1
INJECTED_HER : 1
PT_THE : 2
FACTORS_NO : 1
THINGS_HEALTH : 1
NECK_BECAUSE : 1
CHO_ATYPICAL : 1
TALKED_HIS : 1
IS_EXCEPT : 1
SIGNS_DIAGNOSTICS : 1
AND_HIS : 2
SHOE_REPAIR : 1
YES_IS : 1
VETERAN_MAY : 2
REPEAT_THESE : 2
HOURS_NO : 1
THE_RECENT : 1
MENTATION_LOCATION : 1
VISION_THEN : 1
TSHIRT_NOTE : 1
RN_SCANNED : 1
REPORT_NO : 1
ADL_NOTE : 4
MEMBERS_MEDICAL : 1
ALKALINE_ETIOL : 1
TO_QUIT : 1
DATE_TUES : 1
NONPHARMACOLOGICAL_THERAPY : 2
ALSO_THAT : 2
FILMS_PLACED : 1
TAKE_ONEHALF : 1
STATUS_DEPRESSION : 1
ICDCM_GEESEY : 1
COMPONENTS_CBT : 1
CONTROL_CLIENT : 1
OVERCOAT_BLACK : 1
DOE_ORTHOPNEA : 1
HEALTH_EDUCATION : 1
BRCS_CONCERNS : 1
MAY_AN : 1
USE_DIVERSION : 1
MALE_WHO : 1
THE_MEMBERS : 1
SCHEDULE_PATIENT : 1
BS_CARE : 1
IS_SATISFACTORY : 1
PAIN_PH : 1
REPRESENT_INDICATION : 1
PRODUCTIVE_OF : 1
BONY_CHECK : 1
BY_REFERRAL : 1
FOLLOWUP_LABEL : 1
AREA_AMONGST : 1
PREFERS_TO : 2
RIGHT_QUADRANT : 1
FOR_ADDENDUM : 1
SIGNS_INFUSION : 1
GROUP_CORE : 1
ING_PATIENT : 1
VOIDS_CARE : 1
LACK_PROGRESS : 1
LAB_SHE : 1
NO_PLEASE : 1
FOR_USE : 3
PTSD_CHRONIC : 1
RETURNS_REEVAL : 1
SOLN_IN : 1
OR_VOICE : 1
HISTORY_PRESENT : 2
MALE_AND : 1
LEG_HIP : 1
COLUMBUS_FATIGUEX : 1
TO_PATIENT : 6
CONTACT_NUMBER : 1
WORST_NOW : 1
MG_PO : 2
EFFECTS_AND : 1
CONSENT_PHYSICIAN : 1
NO_PRODUCTIVE : 1
PRN_BENIGN : 1
CAN_SUPPORTIVE : 1
EVIDENCE_THOUGHT : 1
PRN_MILD : 1
PATIENTS_ADDRESS : 1
FLUID_STILL : 1
WRITER_THE : 1
THANKS_ARTHRITIS : 1
OF_SPENT : 2
STATUS_GROUP : 1
THE_IDENTIFICATION : 1
PROGRESS_RECONCILED : 1
STATUS_DISCIPLINES : 1
TEMPERATURE_PULSE : 1
MH_WILL : 1
LOSS_MOBILITY : 1
NONTENDER_BOWEL : 1
REVIEW_TIME : 1
MEDICAL_AND : 1
MALE_EXAMINED : 1
BEEN_WITH : 1
MIN_APPT : 1
NO_DISTRESS : 1
ONE_THE : 1
THROMBUS_PE : 1
SESSION_INVOLVE : 1
SISTER_BIRDGEWATER : 1
THOSE_ARE : 1
THE_MAY : 2
CONTINUE_IS : 1
APPOINTMENT_VITAL : 1
ANSWERED_TIMES : 1
CONCERNS_OR : 1
ASKING_FOR : 1
HER_TO : 1
RESOURCE_ARE : 1
AND_ELEVD : 1
CHANGE_ANESTHESIA : 1
HOUSING_HE : 1
DERM_MEDS : 1
ASSOCIATE_PROVIDER : 2
FACE_TO : 1
ACTIVITIES_DAILY : 4
ON_EYE : 1
FOLLOWING_THEIR : 1
USED_NUM : 1
IN_EXTREMITIES : 1
MR_THAT : 1
ABUSIVE_OR : 1
CL_HALDOL : 1
THE_BY : 1
THE_SCREENING : 1
QHOURS_COUGH : 1
MANAGER_OTC : 1
PAIN_USING : 1
LAST_NO : 1
TO_QUESTIONS : 3
NEW_THAT : 1
AND_PLAN : 1
MOMENT_TO : 1
MH_APPT : 1
MALE_ON : 1
WECHSLER_IS : 1
IN_PATIENT : 2
SUMMARY_OF : 2
HE_PASSED : 1
BIFOCAL_RX : 1
IMPROVED_AND : 1
PROVIDE_PRESCRIPTION : 1
AUDITORY_VISUAL : 1
DOSE_FOR : 1
PROCEDURE_TEST : 1
PER_CARE : 1
FACILITY_PT : 1
VET_PING : 1
OF_CONSULT : 1
MEMBER_THAT : 1
NOW_VET : 1
FORM_IN : 1
MEDICATIONS_LOCAL : 1
THIS_HAS : 1
APR_AMOUNT : 2
STAFF_NEURO : 1
EFFECTS_THAT : 1
PT_SEEN : 2
VEGETABLES_CARROTS : 1
FOR_NONE : 1
CONTINENT_BLADDER : 1
RESPONSIVE_ALERT : 1
IMAGING_CARDIAC : 1
BRONCHOSCOPE_IS : 1
APR_OF : 1
ASSESSMENT_ACUTE : 1
THE_TACTILE : 1
SELF_STATUS : 1
PAST_MONTHS : 1
REQUIRED_OWING : 1
THEIR_FINANCES : 1
OXYGEN_IS : 1
COVERAGE_OWING : 1
THERE_WERE : 2
SURG_HCL : 1
GEN_CETIRIZINE : 1
IN_SCHOOL : 1
LAST_INR : 1
VOICE_VA : 1
FOR_ALL : 1
LOSS_THAN : 1
FOR_FLARE : 1
HIM_ARGUMENT : 1
INSTRUCTED_TO : 1
INSTRUCT_PATIENT : 1
FAXED_PACKET : 1
SAFETY_PHYSICIAN : 1
AT_VETS : 1
REVIEWED_OF : 1
VISUAL_FOUNDATION : 1
NERVE_YES : 1
IN_IMAGING : 2
SC_EXTENSION : 1
EDUCATIONAL_AN : 1
IN_PLACE : 5
PT_MAIL : 1
GE_IF : 1
PAIN_TWICE : 1
AND_CLEAN : 1
THERAPY_NEUROSURGERY : 1
TALKING_MENTAL : 1
PROLONG_STRESS : 1
PROVIDERS_MEDICATION : 1
WAS_RECEIVED : 1
SUCH_THE : 1
TO_MEETING : 1
IN_RECORD : 2
MOBILITY_ACTIVITIES : 1
SUMMARY_REASON : 1
NO_PERSONAL : 1
REASSESSMENT_ACUTE : 1
INCREASED_TO : 1
HE_USES : 1
PATIENT_MAKING : 1
PROVIDED_STRUCTURED : 1
YELLOWISH_SPUTUM : 1
LUNCH_INDEPENDENT : 1
MY_NONPHARMACOLOGICAL : 1
FOR_APPOINTMENT : 1
OF_MAR : 1
DIAGNOSED_ALZHEIMERS : 1
RECORDER_OTHER : 1
BLOOD_LIGHTS : 1
HAS_FILL : 1
AS_OF : 1
THIS_CHOICE : 1
LABORATORY_PROCEDURES : 1
WILL_RX : 1
BL_HYPERPIGMENTED : 1
STATUS_ACTIVITIES : 1
SCORE_SECONDARY : 1
OPEN_THIS : 1
THAT_WANT : 1
FEEL_HIS : 1
TRAUMATIC_INCIDENT : 1
STAFF_NOTIFIED : 1
TO_OBEYS : 1
VISUAL_SESSIONS : 1
ADDRESSED_THINKING : 1
PATIENT_PRIVILEGES : 2
BEING_BY : 1
AND_RESCHEDULE : 1
RECONCILLIATION_TOBACCO : 1
CARE_PERSONAL : 1
PULSE_TABLET : 1
SPECIALIST_WHO : 1
SURGERY_FOR : 1
SEP_DENTAL : 1
NOT_HISTORY : 1
PT_INSTRUCTED : 1
SYMPTOMS_SHE : 1
THAT_ANY : 2
REVIEWED_THE : 1
MODERATELY_WELL : 1
FULL_TOTAL : 1
VETERAN_BE : 2
VOICED_TO : 1
CONTINUE_ROUTES : 1
AFTER_THE : 1
GENDER_MALE : 1
STATUS_TO : 1
SMILING_COOPERATIVE : 1
TO_SAY : 1
THAT_TIME : 1
ROOM_AIR : 1
HOME_MR : 1
PATIENT_ON : 3
ANY_HI : 1
STATES_PATIENT : 1
EXTRA_FLUID : 1
STOOL_ELIMINATION : 1
EAR_HEARING : 1
OS_IS : 1
SYSTEM_ANTICIPATED : 1
COMPREHENSION_GOOD : 1
TO_DISCUSS : 1
REORDERED_CENTER : 1
SIGNS_OF : 1
SAME_PATIENTS : 1
STATE_OFFICE : 1
PROVIDED_CARE : 1
ALL_THE : 1
US_VETS : 1
THIS_INFORMATION : 1
EDT_SOCIAL : 1
MEDICATION_LIST : 4
CM_NO : 1
SPUTUM_PURULENCE : 1
BEEN_TALKING : 2
PHYSICIAN_PATIENT : 1
FAMILY_PHENOBARB : 1
HIS_CALLED : 1
NUMBERS_NUMBER : 1
MEDICATIONS_PROBLEMS : 1
COURSE_MANY : 1
ASSOCIATED_WITH : 2
OR_PLEASED : 1
SC_LIMITED : 1
LOW_OPTOMETRIST : 1
LTC_COPAY : 1
CM_LB : 1
ACTIVE_MEANWHILE : 1
LABS_REVIEWED : 1
TAMINE_HYDROBROMIDE : 1
WITH_CHIEF : 1
HAD_EYE : 1
RESIDENT_MEDICATION : 1
CLAIMS_PATIENT : 1
USE_THOUGHTS : 1
ALSO_INFORMED : 1
ADDENDUM_MINUTE : 1
ABOUT_HIS : 3
DOING_HERE : 1
NORMAL_BUT : 1
OF_APR : 2
TROUSERS_FOR : 1
NURSING_HAS : 1
PSYCHIATRY_AB : 1
NAME_DOB : 1
REASSURANCE_AS : 1
NAFZIGER_MEDICATION : 1
ALLOW_VETERAN : 1
KNEE_SC : 1
MAIL_REGARDS : 1
TO_ACCEPT : 1
DYSURIA_URGENCY : 1
CONSENT_BLOOD : 1
FOUR_IF : 1
LIKE_THAT : 1
CASINO_HE : 1
SEVERAL_DEVICES : 1
TIME_ROOMED : 1
CARDIAC_CLINIC : 1
POSSIBLE_THAT : 1
! Stats words=2154  pairs=11077
