# Supplementary material for: Predicting the Risk of Suicide by Analyzing the Text of Clinical Notes
Source: PLoS One. 2014 Jan 28;9(1):e85733. doi: 10.1371/journal.pone.0085733 (PMC3904866; doi:10.1371/journal.pone.0085733)
Supplement: Appendix S3 — Machine Learning Libraries and Methods: This section is provided to enclose the open source (Apache License) classifier used for the building of the statistical models, specifically for the purposes of study reproducibility. A detailed account of these tools is intended for another publication. (ZIP) [file pone.0085733.s003.zip › Appendix3/ML_libs/Regression_testing/group3/processed/grp3-pt-1012.dat]

!  Done reading
! Total word count = 6447
! Total unique words = 2122
! Total pair count = 12890
! Total unique pairs = 10945
DEMONSTRATE : 1
SORE : 1
AT : 40
ADL : 3
ZZPATIENT : 2
PALPITATIONS : 1
WORK : 1
PRIORITIZE : 1
FINGER : 2
VOICES : 3
LOWER : 4
ATIVAN : 1
DOXAZOSIN : 1
KILLED : 1
WEIGHT : 4
MINUTE : 1
TREATMENTS : 1
INSTRUCTED : 1
MID : 1
DIVALPROEX : 1
INTERVENTION : 5
COUNSELING : 2
USE : 10
POSITIVELY : 1
PRIVILEGES : 2
RR : 2
SUPPLIES : 2
PHD : 1
VETERANS : 7
SCHEDULING : 1
LEVEL : 5
CHANGES : 3
ALCOHOL : 5
RAL : 5
INABILITY : 1
EZETIMIBE : 1
FAX : 2
SEEMS : 1
OM : 1
MET : 1
SHOULDER : 1
FUNCTIONING : 2
SLIGHTLY : 1
ETTE : 1
BUPROPRION : 1
MEAL : 4
EMPHASIS : 1
FATIGUE : 1
CONGRUENT : 2
SHED : 1
APPROACHING : 1
ATTORNEY : 1
FISH : 1
WELL : 5
HEALED : 1
MEDICINE : 1
TEST : 4
NOTE : 45
LDL : 2
BAKER : 1
CMA : 1
DO : 8
DOES : 8
TESTS : 1
UNDERSTANDS : 1
FAILED : 1
HTN : 2
FACT : 2
UNDERWENT : 1
SAME : 1
METH : 1
FOLDING : 1
ACCESS : 1
STROKE : 1
ADVERSE : 2
SAW : 1
SPMI : 1
SCHEDULED : 5
BUSINESS : 1
SHUTTLE : 1
ASK : 4
ANCHORAGE : 1
TAB : 15
REQUIRED : 3
STABLE : 1
DEC : 3
HAS : 28
MONITOR : 1
FOR : 98
CONDITION : 3
NUTRITION : 8
EVALUATING : 1
CLC : 2
APPROPRIATLY : 1
MODALITIES : 1
HOLDING : 1
MODALITY : 1
MORNING : 2
STRIP : 1
ACCUCHEK : 1
INR : 4
TRANSITION : 1
KNEE : 4
SC : 6
MELANOMA : 1
MUST : 1
RECREATION : 1
SWER : 2
COLONOSCOPY : 2
GOALS : 2
SUBSCRIBES : 1
RESPIRATORY : 5
VOMITED : 1
RESTRAINT : 1
KARDEX : 1
OVERWHELMING : 1
ACTIVITY : 6
METAL : 1
OWN : 1
INTERNAL : 1
SIMILAR : 1
COMMUTE : 1
HANDICAPPED : 1
NAUSEA : 1
IMA : 1
CLOZARIL : 1
ICENHOUR : 1
TELEHEALTHCARE : 1
EXAM : 9
INFECTION : 2
RECENTLY : 1
CHARTED : 1
FLOWSHEET : 1
SUGAR : 2
ATTEMPTS : 3
JUST : 2
CARCINOMA : 1
INCREASED : 2
DURATION : 2
OCT : 3
PREP : 1
GO : 3
UN : 1
BOWEL : 6
MST : 1
SEC : 2
BP : 3
LIMITATION : 1
BELONGINGS : 1
HEARD : 1
PREVENTION : 2
POST : 2
DEPRESSION : 7
SEPTEMBER : 1
SON : 1
CM : 3
AGREEMENT : 1
GAIT : 1
AGAIN : 1
CITALOPRAM : 4
DESCRIBE : 1
TID : 1
KNOXVILLE : 1
SOMETIMES : 1
LATE : 1
ANTIDIURETIC : 1
IRREGULAR : 1
ABRASION : 1
MEETS : 2
WT : 2
DRO : 1
RESTRICTIONS : 1
PLANS : 1
DIETARY : 1
TOP : 1
STARTED : 4
ACHEY : 1
UTOX : 1
TECH : 1
MAXIMUM : 1
PELVIC : 1
FEEDING : 3
SCANNED : 1
SPORADICALLY : 1
OR : 29
HORN : 1
THERAPEUTIC : 6
SHIFT : 10
SUPPLEMENT : 2
BEACH : 1
ALREADY : 2
GUNSHOT : 1
CONCERNS : 1
PULMONARY : 1
SEIZURES : 1
COUMADIN : 3
DE : 1
OLECRANON : 1
LIKE : 2
EXPERIENCE : 2
ENJOY : 2
TRAINING : 5
MUCH : 2
CHRONIC : 5
DISCREPANCY : 1
ANKLE : 1
TAKE : 15
INCREASE : 6
PARTICULARS : 1
WALKIN : 1
LAUNDRY : 2
WIDTH : 1
CONSIDERATION : 1
STRENGTHS : 1
DEMONSTRATING : 1
OD : 2
ALTERED : 1
SUPPORTTALKING : 1
EXAMPLE : 1
INVITED : 1
HIGHER : 2
EXPIRATION : 1
ELECTRONICAL : 1
PROCEED : 1
IBUPROFEN : 1
MD : 2
NAME : 5
IMPLEMENT : 1
CARE : 21
SURROGATE : 1
AGE : 3
INVOLVED : 1
EVALUATE : 1
ET : 1
TIMES : 5
IS : 68
DL : 1
WORST : 3
BENEFIT : 1
USUALLY : 1
START : 2
IF : 10
MH : 8
CHLORIDE : 2
PENDING : 1
BAND : 1
ONCE : 1
ADDITIONS : 1
DEALING : 1
SKILLS : 6
OXIMETRY : 1
INFLAMMATION : 2
EVALUATION : 3
MMHG : 1
REFUSED : 3
REHAB : 1
HP : 1
DIRECTION : 1
THESE : 3
VISION : 1
DIVORCE : 1
CLASSES : 1
COMMANDS : 1
CASTS : 1
SEBACEOUS : 1
ENGE : 1
REPORTING : 1
PARTICIPATION : 1
TEMPLE : 1
EDUCATED : 1
MUSIC : 1
TRANSPORTATION : 1
HEIGHT : 2
BROS : 1
SWEET : 1
ADDENDUM : 18
FULL : 6
TREAT : 2
NO : 68
INTERESTS : 1
EXPLORED : 1
INTENSITY : 1
CONSCIOUSNESS : 1
CHIEF : 2
INCISION : 2
ROUND : 1
ADDICTION : 1
DILATION : 1
CHANGED : 2
BADLY : 1
UPPER : 1
HYPOTHYROIDISM : 1
BENIGN : 1
MEET : 1
GUARDIANSHIP : 1
CLINIC : 10
RISK : 7
PERFORMED : 1
ARGUE : 1
INITIALLY : 1
MINS : 1
BMI : 1
POINT : 1
LAMOTRIGINE : 2
COULD : 2
PRN : 1
PREFERRED : 1
SPECIALTY : 1
BONHAM : 1
GOLD : 1
SPONTANEOUSLY : 1
CONTINUOUSLY : 1
PUPIL : 1
WILL : 23
OFTEN : 1
APPEARANCE : 1
BUT : 9
ASKED : 4
CTA : 1
THOUGHTS : 3
COORDINATION : 1
TYPE : 7
CAREGIVER : 1
GETS : 2
PLASMA : 1
DEPRESSIONPT : 1
PERHAPS : 1
HUSBAND : 2
SET : 2
SCHIZOPHRENIA : 1
DIS : 1
HYPONATREMIA : 1
FERNANDO : 1
LESSONS : 1
PACK : 2
JELLY : 1
CONSULT : 4
FRICTION : 3
PLYMOUTH : 1
SUPPORT : 4
IMPROVE : 1
QID : 1
PRESENTED : 6
EXPOSURE : 1
REVIEW : 4
DISCUSSING : 1
HIMSELF : 1
RELIGIOUS : 1
LIVER : 1
HFA : 1
VIEW : 1
BASCOM : 3
JOKES : 1
MICROSCOPIC : 1
RESIDENT : 5
INSTRUCTIONS : 2
VA : 9
WED : 2
RADICULOPATHY : 1
PREFERENCES : 2
FORGOT : 1
GRATEFUL : 1
DOCTORS : 1
CH : 1
CLASSIFIED : 1
DOPPLERS : 1
OSTOMY : 1
DISEASE : 3
PAIN : 44
GLOBAL : 1
CIES : 1
AS : 24
VISTA : 1
RESTRAINTS : 2
INTRAVENOUS : 1
IEWED : 1
DRAINAGE : 1
GREATER : 2
WITH : 52
FEELS : 1
CATH : 1
AFFAIRS : 2
OFFERED : 3
BIRDGEWATER : 1
TEMPERATURE : 3
CENTRAL : 1
INTIMACY : 1
CDI : 1
EXACT : 1
DECISIONS : 1
INCLUDING : 2
NA : 4
BEDPAN : 1
COPING : 1
SETTING : 2
USED : 7
MONITORING : 1
IT : 11
BEDTIME : 4
BELOW : 4
NECESSARY : 1
MOSTLY : 1
DISCUSSED : 6
MATERIALS : 1
EXERCISE : 1
PERIODONTAL : 1
SHOWER : 3
TIME : 31
PURPOSE : 1
CODE : 2
NEATLY : 1
DEVICE : 1
INTRODUCTION : 1
DISKECTOMY : 1
HYGIENE : 6
HCL : 1
PAID : 1
ADDITIONAL : 5
TEETH : 1
OXYCODONE : 1
SAFETY : 5
EMOTIONAL : 1
SIDE : 2
BREAKFAST : 1
SPEAK : 1
LUBRICATING : 1
ECCHYMOSIS : 1
CALL : 18
CRUTCHES : 1
INTERMITTENT : 1
RESULT : 4
HX : 3
EXTR : 2
IMAGING : 1
DREW : 1
UNSPECIFIED : 3
DISCONTINUATIONS : 1
DISJOINTED : 1
KEOMUAN : 2
CBE : 1
PHARMACIES : 1
MOTIVATION : 2
JUDGMENT : 2
URINAL : 1
GUAFENESIN : 1
POLYARTHRALGIA : 1
TABLETS : 2
PER : 9
FRIEND : 2
ALCOH : 1
ETC : 2
MOBILITY : 5
YOUR : 8
WITNESSED : 1
CHOLESTYRAMINE : 1
DETERIORATION : 1
PRECAUTIONS : 1
OUTPA : 1
BLOND : 1
GIVEN : 6
MASSES : 1
BABY : 1
PACKET : 1
ABSENT : 1
SPECIFICALLY : 1
HT : 1
LIPOID : 1
WHO : 3
UPON : 2
IDENTIFIES : 1
JAW : 1
DIARRHEA : 1
VERBALIZES : 2
BASED : 1
ATTENDANCE : 1
CURRENT : 8
PERSONS : 1
CONTROL : 1
AUSCULTATION : 1
GROOMING : 2
TERM : 3
ES : 2
HIM : 18
PULSE : 4
NEXT : 1
ANESTHESIOLOGY : 2
NEEDS : 8
THEY : 8
INTERACTION : 1
REFERRED : 1
TYLENOL : 2
MEDIUM : 1
GEOGRAPHIC : 1
APPTS : 1
ALARM : 1
TEGADERM : 1
TRANSFER : 2
OBSERVATION : 1
ML : 1
PHONE : 10
DECLINED : 2
TALKING : 4
PAMPHLET : 1
GRINDING : 1
TOUCH : 1
HEMOPTYSIS : 1
QHX : 1
SIGNER : 1
BILLS : 1
HAD : 15
WITHDRAWL : 1
SERIAL : 1
SPECIAL : 1
LOSS : 4
SISTER : 2
QUETIAPINE : 2
HELD : 1
ANALYSIS : 1
PRESENTLY : 1
YO : 5
NEGATIVE : 2
AWA : 1
OUR : 1
REINFORCED : 1
WRITTEN : 5
CHOICES : 1
LAB : 2
ACCOMPANYING : 1
RD : 2
DIAGNOSTIC : 1
ING : 1
COMPLAINTS : 3
CONTACT : 7
NOTIFIED : 1
GUIDED : 2
IMPAIRED : 1
THIAMINE : 1
ATYPIA : 1
PROBLEMS : 7
PEERS : 1
URINE : 1
NASAL : 1
RTC : 1
GIVE : 1
NEG : 1
KNEES : 1
CAN : 5
THERAPY : 11
AWARE : 1
SLE : 1
NONVA : 1
WHICH : 6
SYMPTOMS : 4
NOTES : 2
OVER : 3
ON : 35
COMPLETE : 2
PRESSURE : 5
MIDST : 1
ATTENDED : 2
VERIFY : 2
VIA : 2
NAVIGATE : 1
EVERYONE : 1
GOOD : 3
DROPS : 1
FALLING : 1
TUNICA : 1
MED : 4
DRUGS : 1
UPDATE : 1
INHALER : 1
INTO : 4
FOCAL : 1
EDEMA : 1
RECD : 1
SAO : 1
STREET : 2
INSURANCE : 1
SHE : 10
PO : 2
ENCOUNTERS : 1
PALM : 1
UP : 7
MINIMALLY : 1
THEN : 6
USUAL : 1
DEAR : 2
LOCATION : 13
REAC : 1
MOD : 2
SYST : 1
FEVER : 1
CONSULTATION : 1
PRIOR : 4
VERBAL : 3
OFF : 2
DOCUMENTED : 1
GOT : 1
DATE : 13
RELATES : 1
DAILY : 4
SECRETION : 1
PERCENT : 1
LONG : 4
AWAKE : 1
HOUSING : 1
FROM : 22
LEFT : 7
BL : 1
BATH : 3
MEDICAL : 11
ALSO : 4
HUDVASHNOTE : 1
SYSTEM : 2
ORGAN : 1
SERIOUS : 1
GROUNDING : 1
ACQUIRED : 1
EXCELLENT : 1
AN : 7
DEFERRED : 1
HEART : 1
PSD : 2
BLACK : 1
POON : 2
TAKES : 1
HEMORRHOIDS : 1
APPARENT : 3
OUTSIDE : 4
BLAST : 1
EYE : 3
HAVIN : 1
ARTHROSCOPY : 1
DISCUSSION : 1
STRAIN : 1
AGO : 2
ATTENDING : 2
CHEST : 2
HAVING : 1
DOCUMENTATION : 1
EXCISION : 2
BALL : 1
DT : 2
APPROPRIATELY : 1
OVERWHELMED : 1
MODULE : 1
MUSCLE : 2
ENCOURAGE : 1
LATER : 1
ARE : 14
ANSWERED : 1
PLAYED : 1
INDEPENDENT : 1
THIGH : 1
HYPERTENSION : 2
CORRECT : 1
FILE : 1
PERSON : 5
SERIVES : 1
APPLY : 1
CYST : 1
BROTHER : 1
PROGRAMS : 1
CPRS : 1
SURGERY : 2
RECOVERY : 7
EXERCISING : 1
STRUCTURE : 1
INHL : 2
MAINTENANCE : 1
GENERAL : 1
INTERDISCIPLINARY : 3
YEARS : 1
COLON : 1
BE : 23
FROMT : 1
YR : 1
PALMETTO : 1
TIP : 1
DUE : 5
DENVER : 1
INVASIVE : 1
THEIR : 3
HS : 1
HEPARIN : 1
MAILPT : 1
DISC : 2
BEDSPREAD : 1
BERNA : 1
PING : 4
PH : 1
CANE : 3
ISSUES : 3
DELUSIONS : 1
RECONCILED : 2
SAD : 1
DM : 2
OCCURS : 1
OTHER : 15
QHS : 1
LIFE : 2
ME : 1
BED : 6
NURSING : 20
DYSPNEA : 1
FOLLOWING : 9
IDENTIFIED : 8
MORSE : 1
GLAUCOMA : 2
ENDING : 3
WITHOUT : 3
DIAGNOSIS : 7
MAINT : 1
EVAL : 1
DIVORCING : 1
VERIFIED : 1
CALLING : 1
ANXIETY : 2
POSITIONING : 1
CURSING : 1
AUDITC : 1
SYMPTOM : 1
WE : 2
PARTICIPATING : 1
TOILET : 2
DISTANCE : 1
SYND : 1
PRX : 1
PROTECTORS : 3
FUNCTIONAL : 1
PATCH : 1
FOUND : 1
PATCHES : 2
ROOM : 8
IMPROVED : 1
DISS : 1
CHART : 1
MIDNIGHT : 1
AVAILABLE : 1
THROAT : 2
ABOUT : 16
ANYTHING : 1
RECHECK : 1
IMPULSE : 1
PLEASANT : 1
POTENTIAL : 1
CIU : 1
NOTIFY : 1
FACILITATE : 1
BRIEF : 1
ADEQUATELY : 2
TABLET : 7
DOM : 1
ANOTHER : 1
DURING : 13
REC : 1
MHP : 1
ENVIRONMENT : 2
MURMURS : 1
SEVERAL : 1
LISTED : 3
SCREENING : 2
TKA : 1
CHECKS : 3
CYCLE : 1
VOICED : 2
DISEASES : 1
GETTING : 1
DSM : 1
REACTIONS : 3
HI : 1
HCA : 1
OS : 7
OXYGEN : 3
SCORE : 3
WROTE : 1
CAVITRON : 1
BASAL : 1
SP : 1
ORTHO : 1
WEEKENDERS : 1
HOME : 13
CHECKIN : 1
NOTED : 6
INDIVIDUAL : 3
BREAKDOWN : 2
TELLING : 2
RETURN : 3
EXPECTATIONS : 1
OTHERWISE : 2
EFFECT : 1
METHADONE : 1
EXCITED : 1
AMBER : 1
HUNTSVILLE : 2
MIN : 4
HOMEMAKER : 1
POOR : 2
SCROTUM : 1
SETTINGS : 1
REPLACED : 1
MDS : 2
RECONCILIATION : 3
NEC : 1
SENDING : 1
COMPUTERIZED : 2
MINUTES : 5
POINTS : 1
SCREENED : 1
QUAD : 1
FOLLOWUP : 2
DRIVE : 1
ROADBLOCK : 1
CBSST : 1
BURDICK : 1
PREVENTATIVE : 1
CHECK : 2
TEAM : 6
FALL : 5
SICK : 2
DATA : 1
DAUGHTERINLAW : 1
AM : 8
ALLARD : 1
ENTERED : 2
PRACTITIONER : 1
LUMP : 2
FLAT : 1
ANDRE : 2
PEOPLE : 1
INDEPENDENCE : 1
DEMENTIA : 1
PRODUCTS : 1
CALLED : 6
PROPERTY : 1
SUPERVISION : 5
MANY : 1
ALLERGIC : 1
NG : 1
PREOPERATIVE : 2
UNSTEADINESS : 1
ADVISED : 2
MON : 1
YOURE : 1
STOMACH : 1
DIPHENHYDRAMINE : 1
MONTHS : 3
DEATH : 1
UNLISTED : 1
ZAHN : 1
MEASUREMENT : 1
POLYP : 1
ELSEWHERE : 1
SSN : 2
AAO : 1
GIRLFRIEND : 1
NOON : 1
APPLIED : 1
DATED : 1
BEDSIDE : 1
EAT : 1
ASKING : 2
IMMEDIATE : 2
EFFECTIVENESS : 2
WHY : 1
TOPICS : 1
LUNG : 1
MEDICATION : 11
ATTORNEYS : 1
SURVEILLANCE : 1
FISTULA : 1
WANT : 2
ATTEMPTED : 1
DINING : 1
SUPPORTIVE : 3
CASE : 6
BURSITIS : 1
REPEATEDLY : 1
SINGLE : 2
CONTINUE : 4
ORAL : 4
ABNORMAL : 1
READ : 1
SWELLING : 1
ABSCESS : 1
SERVICES : 4
OVERSIGHT : 5
GOAL : 4
EXAMINATION : 1
HAIRED : 1
PROVIDE : 3
OUTBURST : 1
ARRANGING : 1
HEALTH : 11
INCH : 1
DELUSIONAL : 1
COGNITIVE : 5
POSTOPERATIVE : 1
FLUNIS : 1
INDICATED : 2
EXCLUDING : 2
PREVIOUS : 6
BIPOLAR : 3
INTERVENTIONS : 3
MAR : 2
AZITHROMYCIN : 2
VS : 1
AFTERNOON : 1
MORE : 4
WAL : 3
PROPANOLOL : 1
TURNING : 1
SEROQUEL : 1
SEDATING : 1
ORTHOPTIC : 1
WENT : 3
RECEIVE : 2
ACCUPUNCTURE : 1
LIN : 2
ER : 6
NEUROSURGERY : 1
APPLICABLE : 5
DIZZINESS : 1
PRESCRIBED : 1
REQUEST : 8
SOMEWHAT : 1
BARNES : 1
RN : 1
UNABLE : 1
XYZZY : 2
HOUSE : 1
ELIGIBILITY : 1
READY : 1
AFTER : 8
PARTICIPATED : 3
DIFFICULT : 3
COURSE : 1
STILL : 4
PRNS : 2
DIFFICULTIES : 2
SCALE : 3
CORNEA : 1
ACTUAL : 1
WELLNESS : 1
FLUID : 2
COUGHING : 1
PWD : 1
GROUPS : 3
PCP : 5
CULTURE : 1
LCSW : 2
SAYS : 5
APPOINTMENTS : 3
CYCLOBENAZAPRINE : 1
WOUNDS : 2
APNEA : 1
EACH : 2
TITLE : 2
OLD : 3
FOOT : 2
FREQUENTLY : 2
VERBALIZE : 1
STATEMENT : 1
LS : 2
STUMBLE : 1
COAT : 1
WEDNES : 1
DIALYSIS : 1
GLUCOSE : 1
REGION : 1
MOVE : 2
FEBRILE : 1
REMAINING : 1
DEVELOP : 1
PL : 2
AREA : 5
INTEREST : 2
UNAWARE : 1
CRITICAL : 1
MAGAZINES : 1
GU : 1
CERVICAL : 2
PERCEIVES : 1
INDEPENDENTLY : 1
MM : 1
UNDERSTANDING : 4
MEDICATIONS : 16
MR : 11
MAJOR : 2
RECREATIONAL : 2
DESCRIPTION : 1
NPH : 2
TISSUE : 2
VACCINE : 5
BETTER : 2
DEPRESSIVE : 2
PROCESS : 1
RESULTS : 3
FRIENDLY : 1
PATENT : 1
INVOLVING : 2
TOUR : 2
EMERGENCY : 1
BREATH : 2
ABLE : 3
LACE : 1
RECENT : 1
CHO : 1
IN : 86
POSITION : 2
GAINSVILLE : 1
MANAGEMENT : 6
DIFFERENCES : 1
STATE : 2
DA : 1
PLAN : 14
MARYLAND : 1
SMOKE : 1
CONTENT : 1
AGREE : 1
SIGMOID : 1
GRAMS : 1
VERY : 4
PATHOLOGY : 1
OLAWALE : 1
TC : 1
SPONSOR : 1
BASIC : 1
IDENTIFICATION : 1
ZZECF : 1
MANAGE : 1
SPERMATOCELE : 1
MASON : 1
VICTIM : 2
WEAPONS : 1
SI : 2
FAHRS : 1
COMPLETED : 5
IMPRESSION : 1
FILLIN : 1
STUCK : 1
DIFFICULTY : 1
SANDWHICH : 1
LIMITATIONS : 2
DECISIONMAKING : 1
OLDER : 1
IMMUNOSUPPRESSIVE : 1
UNDERCLOTHING : 1
KEPT : 2
BAG : 1
LAST : 17
MOXIFLOXACIN : 1
LUNCH : 1
EDUCATION : 6
HOLD : 1
DESPITE : 2
REARED : 1
LIAISON : 1
SITUATIONS : 2
DETAILS : 1
GROOMED : 1
DEP : 1
LINENS : 1
HM : 1
OBSERVA : 1
CONSTANT : 2
EASE : 1
WM : 2
ONLY : 1
DISORDERS : 2
EVENING : 3
STEADY : 1
OPEN : 1
REMOVAL : 1
MONTH : 3
REFILLS : 1
ODOR : 1
INFO : 1
ACCIDENT : 1
DANGER : 2
BEEN : 14
BID : 3
STRETCHING : 1
WITHIN : 5
REFILL : 2
LOCK : 1
ASSISTIVE : 1
OUTPATIENT : 4
WEEKLY : 3
SHORTNESS : 2
SPEECH : 2
INPATIENT : 4
TOMORROW : 1
RESCHEDULE : 1
SALE : 1
ELOPEMENT : 2
CLOSE : 1
FT : 1
AGENT : 1
RELATED : 4
MULTIAXIAL : 1
PREFER : 1
IMMEDIATELY : 1
CC : 2
HORMONE : 1
CASUAL : 1
TWICE : 3
REGARDING : 6
SHAMPOO : 1
INACTIVATED : 1
RACING : 1
PERSONAL : 8
TRIED : 1
DISCUS : 1
TRAUMA : 2
HIS : 38
BRING : 1
COORDINATOR : 2
ID : 1
APPARENTLY : 2
READINGS : 1
GM : 2
CLAIRE : 1
CONCEPT : 2
ACID : 1
DISORDER : 7
SWOLLEN : 2
CONTACTED : 3
PROMOTE : 1
ERUPTIOSN : 1
TALKED : 1
TREATMENT : 19
MUTUAL : 1
BLOOD : 6
WORKER : 2
HAVE : 13
ASSIST : 2
EX : 1
EVIDENCED : 1
OF : 134
PATH : 1
DRUG : 2
INCLUDE : 1
CRISIS : 1
BUPROPION : 1
CALLER : 4
PSYCHIATRY : 2
III : 1
SAID : 4
TAMSULOSIN : 1
NUMBER : 19
DETOX : 2
TEXTURES : 1
SPONGE : 3
AID : 1
INTENSE : 1
BEGINNING : 1
SCALED : 1
TABS : 1
MS : 2
OUTPT : 2
MY : 4
MESSAGE : 2
THAZINE : 1
NOSUNSPEC : 1
THINGS : 4
SUBSTANCE : 2
THEM : 2
DIDACTIC : 2
PALPATE : 1
ASSESSMENT : 9
DEFINITIVE : 1
US : 4
TRANSDERMAL : 1
SCAR : 1
BUSY : 1
CAPLET : 1
AMBULATION : 3
STARTING : 3
ENCOURAGED : 3
BLADDER : 4
BM : 2
FRIENDS : 2
INFORMATION : 11
DISCONTINUED : 1
ADEQUATE : 1
STENOSIS : 1
INITIAL : 2
CENTER : 5
QUESTIONNAIRE : 2
PSYCHOLOGICAL : 2
SUICIDE : 2
THE : 149
ABILITIES : 2
NURSES : 1
INFORM : 1
EXTENDED : 1
GROUP : 16
PRESENTS : 2
IDENTIFY : 2
ADJUSTMENT : 1
PHILOMENA : 1
REST : 1
APPEARS : 3
MULTIDISCIPLINARY : 1
CENTERED : 1
COLOR : 3
THYROID : 1
TECHNIQUES : 1
LEG : 2
ARRIVED : 1
MEDS : 7
INDICATION : 1
RAPID : 1
LITERATU : 1
RECALL : 1
MUNSHI : 1
EXTENSION : 1
ADDICT : 1
DISPOSITION : 2
ANXIOUS : 2
CAP : 3
DIET : 1
STATED : 4
BATHING : 2
HAVEN : 1
HEARING : 3
WPBVA : 1
AXIS : 4
GET : 1
WHAT : 7
UROSEVICHS : 1
FIVE : 1
BENEFITS : 1
ALBUTEROL : 2
TRAN : 1
PROPERLY : 1
ASSISTANCE : 25
DIABETIC : 1
CARDIOVASCULAR : 1
DESIGNED : 2
YEAR : 2
PRESCRIPTION : 1
LAYING : 1
COPY : 2
LB : 1
RYAN : 2
MOTION : 1
NARCOTICS : 1
DIARY : 1
PUT : 1
SEEN : 7
RT : 1
FOOD : 7
ENCOURAGEMENT : 5
OPTICAL : 2
NURSE : 4
VENTILATION : 1
ADENOMA : 1
URINATION : 1
INTERVIEW : 3
EPIDIDYMIS : 1
ANY : 9
TRY : 1
DISCHARGE : 12
CONSISTENCY : 1
FINAL : 2
FEEDBACK : 1
SYSTEMS : 3
FLOW : 1
PREPARATION : 1
MAINTAIN : 2
PROFANITY : 1
POSTTRAUMATIC : 1
FACILITY : 3
NITROGEN : 1
DZCHRONIC : 1
EFFECTS : 2
RELATIONSHIP : 1
SECONDARY : 1
CONFRONTED : 1
WOUNDED : 1
MSE : 1
TIMEFRAME : 1
SAT : 1
NILANDRON : 1
EVERY : 6
APPREHENSIVE : 1
OCR : 3
SKIN : 9
YESTER : 1
NOT : 31
OK : 2
TAPER : 1
TEMPORARILY : 1
DTN : 2
SCDS : 1
EXIT : 1
AVERAGE : 1
TRIPPED : 1
AFFIX : 1
THERE : 5
RETINOPATHY : 1
WALKING : 1
TL : 1
BLOODY : 1
BRONZE : 1
STAINED : 1
LIMITED : 3
BELL : 1
HIPS : 1
HERE : 8
IM : 1
BOX : 1
POSITIVE : 1
WISH : 1
BACTERIAL : 1
CLEAN : 1
UNITS : 1
FEB : 2
ONEON : 1
INT : 1
PROGRESS : 7
BUYING : 1
KEEP : 1
RECURRENT : 1
ASSESS : 1
ENGAGE : 1
REPEAT : 2
VET : 7
STOOL : 3
EXTREME : 2
EXPLAINED : 3
LEARNER : 1
UPCOMING : 2
BEST : 1
COMPLETION : 1
BURSA : 1
PARTICIPATE : 1
HEMATOLOGIC : 1
RESISTED : 1
DI : 1
PAP : 1
SPASM : 1
PAINFUL : 3
HOWEVER : 4
BACK : 11
CURVE : 1
SOURCE : 4
REGARDS : 1
HEAT : 1
VISITING : 1
DICTATED : 1
MALE : 6
WARNING : 1
VOIDED : 1
SUPPLEMENTAL : 2
BY : 28
COMPLAINS : 1
PMH : 2
REDUCTION : 1
CLINICAL : 3
REASSESSMENT : 1
ELIZABETH : 1
MEETING : 2
SU : 1
TH : 3
CATHETERS : 1
RRR : 1
CONVERSATION : 3
FINISHED : 1
BIRMINGHAM : 1
DISTRACTION : 1
DIDNT : 1
TO : 200
CELLULITIS : 1
IV : 5
FEEL : 2
ABUSE : 1
ION : 1
TASK : 9
SAFE : 3
DX : 5
SHLDR : 1
BIOPSY : 1
PROCEDURE : 6
REQUESTING : 1
XT : 1
CAPACITY : 2
WATCH : 1
BEGAN : 1
PATTERNS : 3
STRESSORS : 1
APPETITE : 2
WEAR : 1
SEE : 11
PLEASE : 2
INDICATES : 1
STATUS : 5
DIABETES : 1
READER : 2
DC : 1
LDH : 1
DRINKS : 5
EFFECTIVE : 1
CONTINUED : 3
MEQ : 1
DEGEN : 1
OUT : 5
COMFORT : 1
HR : 2
EFFORTS : 2
LBS : 2
SURE : 2
SCREEN : 3
NERVOUS : 1
FINDINGS : 1
EVALUATED : 1
BARRIERS : 1
REACTION : 2
CONDUCIVE : 3
ASSIGNED : 3
ISES : 1
MENTAL : 12
NEEDED : 7
ABNORMALITIES : 1
EFFECTIVELY : 1
DIVERTICULOSIS : 1
EXT : 1
PANTS : 1
WERE : 10
THINKS : 1
BRC : 1
SHEET : 1
CUING : 1
PERTINANT : 1
FILL : 3
NEUROLOGIC : 1
WALKS : 2
TURNS : 1
LABS : 1
DENT : 1
TAKEN : 1
VISITNG : 1
JOB : 1
MAMMOGRAM : 1
POSSIBLE : 3
AGREED : 1
TRIAGE : 3
PARKING : 1
PART : 3
TOILETED : 1
FAMILY : 6
DETERMINED : 1
ORIENTATION : 2
WHEN : 3
AMBULATORY : 2
BEING : 2
FALLS : 2
AMOUNT : 4
WAS : 48
UNSAFE : 1
LT : 2
INTERIM : 1
PM : 8
LPM : 2
FORM : 4
THEREFORE : 2
LEAVING : 1
CONDITIONS : 1
AC : 1
CAUSING : 1
COMMUNICATION : 2
CONSUMED : 1
SIG : 2
REMAINS : 1
DRINKING : 1
COUPLE : 1
ABD : 2
NOW : 5
PTSD : 5
IMBEDED : 1
CONFIRMED : 2
DTR : 1
NARCOTIC : 2
LEADER : 1
SHOT : 1
NAOMI : 1
LIST : 6
STUDY : 1
BAY : 1
IMMUNIZATION : 1
ARTICLES : 1
SA : 2
OBEASE : 1
EQUIPMENT : 2
VOMITING : 1
ESOPHAGEAL : 1
ATTE : 1
SKIPPING : 1
ORIENTED : 13
FLUVASTATIN : 1
VENOUS : 1
PSYCHIATRIST : 1
POSTOCCIPITAL : 1
CURRENTLY : 2
NECK : 1
JOINT : 1
SIMVASTATIN : 1
RESPIRATIONS : 1
BETWEEN : 2
BATHROOM : 3
DOCTOR : 1
GOING : 2
DID : 3
VALUES : 1
MOST : 1
SHOW : 3
ARRIVAL : 1
OPERATION : 1
TELEPHONE : 7
SITUATION : 2
ADDRESS : 3
COHERENT : 1
CPT : 1
PLEASED : 1
REPORTS : 7
WITNESS : 2
PLEASENT : 1
SUBJECTIVE : 1
LIFETIME : 1
HELP : 5
DECOMPRESSION : 1
PACU : 2
YES : 9
CONTINUES : 4
FURTHER : 1
SMILING : 2
COOPERAT : 1
CONSENT : 5
PRECURSOR : 1
FACE : 4
ERA : 1
PACKS : 1
WHOM : 1
LEISURE : 2
DOING : 3
RETURNED : 1
BATHTUB : 1
ATTIRE : 1
HPI : 2
LIS : 1
HES : 2
ED : 7
UTI : 1
TRIGLYCERIDES : 1
JOYNER : 1
PHYSICIAN : 8
SVHD : 1
INSUFFICIENCY : 1
TOOTH : 1
URGENT : 1
SEVERIY : 1
DEPENDENCE : 2
INTERACTIONS : 3
HE : 80
RX : 2
OBESITY : 1
PHE : 1
RATE : 2
EASY : 1
ENGAGING : 1
EXPLAINING : 1
COVERED : 1
FELT : 1
MASS : 4
MEMBER : 3
SEGMENT : 1
UAL : 1
IMAGERY : 1
UREA : 1
VSS : 2
COMMODE : 1
ONETOONE : 1
HYDROBROMIDE : 2
CLEAR : 7
EXTREMELY : 1
OPENMIND : 1
PRIMARY : 4
GEL : 1
UNTIL : 3
ABDOMINAL : 2
SEPTIC : 1
SIGNS : 1
REINSTATEMENT : 1
PATIENTS : 7
LEGIBLE : 1
SUMMARY : 4
IDEAL : 1
THROUGHOUT : 1
FATHER : 1
CONSTIPATION : 2
PROVIDED : 17
DRINK : 3
PRISCILLA : 1
DENTAL : 2
POSTING : 1
TWO : 4
NONE : 3
II : 2
LOT : 4
ANGRY : 3
TRAVEL : 1
HYPERVIGILANCE : 1
THINKING : 1
RESPONSIVE : 1
ACE : 1
SCHEDULE : 2
HER : 3
PROBABLY : 1
TOPIC : 2
MACKIE : 1
TURN : 3
FEELING : 4
FEARS : 1
QUESTIONS : 4
REEVALUATE : 1
PALLIATIVE : 1
BEHAVIORAL : 2
OUNCEMENT : 1
APPEARED : 1
HALDOL : 1
YELLOW : 1
LIVED : 1
STAYING : 2
CLERK : 1
THERAPIST : 1
EN : 1
TEMPLATE : 1
PRELIMINARY : 1
PLACE : 9
PRIVATE : 1
LIVING : 3
SACCOCIA : 1
SINCERELY : 1
RANGE : 2
MHICMINTENSIVE : 2
TOENAIL : 2
TOPIRAMATE : 1
MG : 25
UROLOGY : 1
LICHENOID : 1
CORRECTED : 2
FRUSTRATING : 1
BEHAVIORS : 2
STAT : 1
DERMATOPHYTOSIS : 1
VIETNAM : 3
SITS : 1
REG : 2
CONTINENT : 4
WEST : 1
WORSE : 2
THEMSELVES : 1
ATTENTIVE : 2
PROVIDER : 8
OIL : 1
DONT : 1
GENDER : 1
INVENTORY : 2
MULTIPLE : 2
USES : 1
APPOINTED : 1
VE : 1
ALERT : 9
SUBMITTED : 1
GRANDCHILDREN : 1
UNDER : 1
WITCH : 1
COMMENT : 4
THREE : 2
DENYING : 1
PROGRAM : 3
FEMALE : 3
GRADE : 2
UNEXPLAINED : 1
APPOINTMENT : 10
CALMED : 1
WOULD : 8
FOLLOW : 1
INTERACTING : 1
CLOTHES : 2
STRAIGHT : 1
HYPOXEMIA : 2
AGGRAVATE : 1
ACTIVITIES : 2
REFLUX : 1
ORDERS : 4
REPLACES : 1
INSISTS : 1
INADEQUATE : 1
MISC : 1
SURGEON : 1
INSTRUCTOR : 1
ONCOLOGY : 1
MOVEMENTS : 3
COMPLAINT : 2
ORDER : 1
EXCEPT : 1
USING : 4
EASILY : 1
HAND : 5
FLARES : 1
INFLUENZA : 5
DENIED : 3
FELL : 1
PACKED : 1
LIFESTYLE : 3
ESTIMATED : 1
CYTOLOGIC : 1
DIFFERENT : 1
DATEAPR : 1
FLY : 1
NEW : 9
MOUTH : 9
YEAROLD : 1
PROVIDERS : 1
FOCUSED : 1
PRESENT : 4
BREAST : 1
TEMAZEPAM : 1
USEFUL : 1
SOME : 6
COMPLEXITY : 1
LINE : 2
SLEPT : 1
HRS : 1
ANESTHESIA : 1
INCONTINENT : 1
NONUSER : 1
DW : 1
NEED : 5
PCA : 1
WELLBEING : 1
RECEIVED : 8
HELPS : 1
PSYCHIATRIC : 1
OUTLINED : 2
ASPIRIN : 1
LISTENING : 1
SKILL : 1
CUEING : 5
BODY : 4
PREVENTIVE : 1
SATISFACTORY : 2
IODOFORM : 1
RUN : 1
OL : 1
GLASSES : 2
MODIFY : 1
TRANSFERRED : 3
CLASS : 1
PRESCRIBE : 1
TRACH : 1
SOUNDS : 2
REVIEWED : 6
ISSUE : 1
BEFORE : 4
ALL : 9
AUTHOR : 2
VARIED : 1
CAROTID : 1
VOID : 1
INHALE : 1
FMH : 1
DIAGNOSES : 1
PATIENT : 99
SELF : 5
ALLERGIES : 4
DING : 2
LIMB : 1
SENT : 3
ALLOWED : 1
ADMISSIONS : 1
JOINTS : 1
RUMINATING : 1
NOS : 5
SYPHILIS : 1
THAN : 5
CONSUMPTION : 1
ACUTE : 1
VOICE : 1
ARTHRITIS : 3
REQUIRES : 9
FILLED : 3
PROTOCOL : 3
COME : 2
DECISION : 1
HOSPITALIZATION : 3
ROUTINE : 3
CAME : 2
VISIT : 12
THAT : 45
NORMAL : 4
WIFE : 4
OCCUR : 1
STAFF : 8
SERVICE : 5
RIGHT : 1
BREATHING : 1
VITALS : 2
NOTICEABLE : 1
INAPPROPRIATE : 1
ISSU : 1
REQUESTS : 1
ONE : 9
AROUDN : 1
EXO : 1
PREPARED : 1
ANATOMICAL : 2
PTS : 3
MONEY : 1
TEARFUL : 1
HYPERLIPIDEMIA : 2
WRITER : 4
YOU : 9
CRITERIA : 1
INFORMED : 2
ISSUED : 1
ERUPTION : 1
PAST : 5
RESPONDED : 1
DOCUMENT : 3
CHAIR : 1
NOVEMBER : 2
INTERESTED : 1
EYEBALL : 1
REASON : 2
PIECES : 1
SUPERVISOR : 1
TOBACCO : 2
STARES : 1
PWDR : 1
PAD : 1
REMINDER : 4
NEVER : 1
POWER : 1
ALTHOUGH : 1
DR : 1
MEMBERS : 3
SOCIAL : 6
DILTIAZEM : 1
HOSPITAL : 3
DIPLOPIA : 1
FL : 2
MEYER : 1
SUICIDAL : 2
SPHERES : 1
BATHINGNO : 1
ACCIDENTAL : 1
DRESSED : 2
DEPT : 1
EITHER : 2
BLE : 1
NORTRIPTYLINE : 1
INJ : 3
TD : 1
SO : 2
SHAKE : 1
IMPROVEMENT : 1
REGULAR : 1
IDENTIFIERS : 2
TALK : 1
POTASSIUM : 1
ANTIBIOTICS : 1
STRESS : 1
SOC : 1
JR : 1
MAKE : 3
RECORDED : 2
FLEX : 1
WEEK : 5
VITAMIN : 1
TN : 1
CBOC : 3
PSYCHOTIC : 1
CONSCIOUSLY : 1
PRESENTATION : 1
NUR : 1
REL : 1
DISTRESS : 3
MOUNTAIN : 1
RUNNING : 2
CANCEL : 1
MOOD : 3
TORN : 1
LIVES : 2
REPORT : 9
HEALTHCARE : 1
LEAST : 1
TTN : 1
HOW : 7
FEELINGS : 2
SINCE : 4
DORN : 1
FLU : 1
CHANGE : 2
DISCUSS : 2
THOSE : 1
PRESENTING : 2
LEARN : 2
SOLN : 1
PLASM : 1
OFFICE : 3
MADE : 2
PENIS : 1
YRS : 1
INCLUDES : 1
PRINTED : 1
LEARNING : 1
DOSE : 3
ENCOUNTER : 1
OBJECTIVE : 1
SOCIALIZATION : 2
AFFECT : 6
UNDERSIGNED : 1
INTENTIONS : 1
CONCERN : 1
DIALOG : 1
SOMEONE : 1
AREAS : 4
ECHOTEXTURE : 1
ALONE : 1
FINDS : 1
RELIEVED : 2
ANTIBIOTIC : 1
NUTRITIONAL : 2
TRAILING : 1
COMMENTS : 5
ACETAMINOPHEN : 1
CNUMBER : 1
ITEMS : 4
TOTAL : 2
LIGHT : 2
SURGICAL : 3
JUNE : 2
ELIMINATION : 3
HISTORY : 8
RESPIRATION : 1
CED : 1
TEXT : 1
HOURS : 8
MAIL : 3
REPORTED : 2
ONGOING : 2
COOPERATED : 1
FLUOXETINE : 1
FORESKIN : 1
ALWAYS : 1
WOUND : 2
SPEND : 1
HIP : 3
ILLNESSES : 1
SITE : 2
OVERALL : 1
MATERIAL : 1
WOOTEN : 1
TREMORS : 1
NIECE : 1
STATING : 3
COMPLICATIONS : 2
OUTINGS : 1
KG : 1
OP : 1
AUG : 1
PROBLEM : 14
EYES : 1
ACTIVELY : 1
BILL : 1
ELIGIBLE : 2
RECORD : 3
NEEDING : 1
PROGRESSING : 1
WARFARIN : 2
THROUGH : 1
PUFFS : 2
BEERS : 1
EXTRA : 1
ADMISSION : 6
FUNCTI : 1
RESCHEDULED : 1
LESS : 2
NON : 2
HOSPITALIZED : 1
LOCALIZING : 1
REMOVE : 1
ONES : 1
ICE : 1
ULA : 1
BEER : 1
FUTURE : 2
SPECIMENS : 1
CONFIDENCE : 1
DENIES : 4
DOB : 2
SPECIFIC : 1
CHORE : 1
PROCESSED : 1
OTHERS : 5
REQUESTED : 1
MODIFIED : 1
OVERNIGHT : 1
EXTRACTED : 1
VETERAN : 36
QTY : 1
CAPSULE : 2
DINNER : 6
RELIEF : 1
PT : 30
ASSIGNMENT : 1
INJURY : 2
BEATS : 1
RADIATION : 1
FAM : 1
NP : 1
WISHING : 1
PROCEDURES : 3
STATION : 1
BUILD : 1
PRECERTIFICATION : 1
GRAINS : 1
MISSED : 1
MINIMAL : 2
PERFORM : 1
CHIROPRACTOR : 1
PERSISTENT : 1
STRATEGIES : 1
VARIOCOCELE : 1
AROUND : 3
ILLNESS : 3
AND : 148
REPRESENTS : 2
LASST : 1
SELECT : 1
SESSIONS : 4
RESPONSE : 1
CASHIER : 1
THUMPING : 1
INDIVIDUALIZED : 1
NAIL : 1
KNOWLEDGE : 3
PINES : 1
LOW : 5
ADMINISTERED : 1
CUT : 1
MAY : 9
FOLLOWED : 1
LMSW : 1
GOA : 1
LENGTH : 6
APPT : 9
UNLESS : 3
TAKING : 4
ADMITTED : 2
SPOUSE : 1
OBSERVED : 2
YET : 1
DIETITIAN : 1
PERIOD : 1
SS : 1
AFEBRILE : 1
DONE : 5
PALPABLE : 1
DEPOSITS : 1
PHYSICAL : 8
DJD : 1
WEARING : 1
NIGHT : 7
CP : 1
ACTIVE : 22
KNOW : 2
SUBACROMIAL : 1
MANAGER : 2
ABILITY : 3
BEGIN : 1
RALS : 1
AFIB : 1
CONTROLLED : 2
SUGARS : 1
DYSMENORRHEA : 1
FOCUS : 4
THIS : 53
CRISES : 1
DEFICITS : 1
HIGH : 1
NIACIN : 1
METABOL : 1
TAPE : 1
VAMC : 1
PALMER : 3
MANAGING : 1
SESSION : 13
CY : 1
STATES : 10
WIFES : 1
ASSURED : 1
OSUNSANYA : 1
LOCAL : 1
WHILE : 2
HAMLIN : 1
CELL : 3
SHORT : 1
ROS : 1
LIMITS : 2
FIRST : 1
ICDCM : 7
LAUGHING : 1
RESP : 1
PICK : 1
ETOH : 3
ENDOTRACHEAL : 1
DOWN : 5
ASSESSMENT_HYDROBROMIDE : 1
AGE_HISTORY : 1
TO_PT : 4
HEART_MURMURS : 1
REPEAT_PT : 1
GOAL_OF : 1
PROVIDER_HISTORY : 1
THE_ATTORNEY : 1
FAMILY_CUT : 1
AND_PERIODONTAL : 1
DRINK_MH : 1
BUT_IS : 1
OR_MAINT : 1
CONTINENT_CASE : 1
HAND_BOWEL : 1
INSTRUCTIONS_CONSENT : 1
HIM_HOW : 1
THE_ONGOING : 1
MG_PATIENT : 2
NO_SVHD : 1
VISITNG_NUTRITION : 1
OTHER_PROBLEMS : 1
INTENTIONS_TO : 1
LEARN_THE : 1
CHANGE_YOUR : 1
CBE_PAP : 1
PATIENT_TELLING : 1
ABNORMAL_THE : 1
OM_LIVING : 1
SHOWER_IS : 1
SURVEILLANCE_CONSULT : 1
OTHERWISE_CITALOPRAM : 1
MONTH_MONTH : 1
SERIOUS_AND : 1
CENTRAL_MENTAL : 1
BEEN_TO : 1
MED_EDUCATION : 1
PLAN_BE : 1
DENTAL_IF : 1
FOLLOWING_TEMPERATURE : 1
DOXAZOSIN_EZETIMIBE : 1
RESULTS_HOW : 1
INTRAVENOUS_HEPARIN : 1
DILATION_FINDS : 1
ON_TO : 2
PATIENT_INFLUENZA : 1
BLOODY_DIARY : 1
THERAPEUTIC_RECREATIONAL : 1
HIM_STATES : 1
LAST_HAD : 1
ANY_DIFFICULTIES : 1
COMPLETED_NO : 2
HOME_OFFICE : 1
PROGRESSING_IN : 1
FLY_BUT : 1
OF_GOOD : 1
THESE_LIMITATIONS : 1
DO_SO : 1
SC_ED : 4
PATIENT_HAD : 3
HAS_HEARD : 1
SCREENING_MARYLAND : 1
OUTLINED_EVALUATE : 1
NOT_THERE : 1
INDIVIDUALIZED_PLAN : 1
AND_ORIENTED : 3
SPONGE_TIME : 1
PAST_HOURS : 1
HIS_VISITING : 1
SERVICE_STATES : 1
SERVICE_LINE : 1
OF_HIS : 5
HUNTSVILLE_HISTORY : 1
FOR_SHORT : 1
ABRASION_BOWEL : 1
TO_TOUCH : 1
THE_PATIENT : 17
PAIN_GOA : 1
REPORTS_DX : 1
DISEASES_WARFARIN : 1
INTERACTING_APPROPRIATELY : 1
THE_UNDERSIGNED : 1
ACTIVE_GLAUCOMA : 1
BLACK_COAT : 1
NUTRITION_STAFF : 1
IS_UN : 1
DOCUMENT_SC : 1
IN_INDIVIDUALIZED : 1
REQUEST_MR : 1
ABOUT_NEW : 1
IDEAL_WEIGHT : 1
EYE_DROPS : 1
SERIVES_IF : 1
GM_ORAL : 1
MEDS_IN : 1
BID_TO : 1
OF_AREA : 1
PM_CONVERSATION : 1
ADDRESS_AND : 1
MOOD_IT : 1
TAB_SKIN : 1
OF_THERAPEUTIC : 1
PLAN_AXIS : 1
IF_PATIENT : 1
WORSE_AT : 1
WRITER_REINFORCED : 1
NAOMI_BACK : 1
AM_MOOD : 1
AT_VISIT : 2
VOMITED_LIMITED : 1
ASSESSMENT_CITALOPRAM : 1
LESS_NOTICEABLE : 1
STAFF_BEDPAN : 1
IDENTIFIES_FOLLOWING : 1
OUTPATIENT_EXCLUDING : 2
MORNING_FOR : 2
SEE_CPRS : 1
VERBAL_TO : 1
CALL_SCHEDULED : 1
WE_WANT : 1
LOCATION_IDENTIFIED : 1
STATES_WAS : 1
OR_BEHAVIORS : 1
HUSBAND_METH : 1
IN_DISEASE : 1
FILLED_WHAT : 1
YES_COMMENTS : 1
AND_DISCHARGE : 1
THAT_ONLY : 1
RETINOPATHY_SURVEILLANCE : 1
BETWEEN_SESSIONS : 1
CONTACT_PHONE : 2
PAIN_PRESENTS : 1
AREAS_HOUSING : 1
TO_SEVERIY : 1
DATED_PACKED : 1
AS_MUCH : 1
ANYTHING_IN : 1
PM_HUNTSVILLE : 1
TRACH_BASIC : 1
GREATER_THAN : 1
VISITING_CHIEF : 1
MR_CHECK : 1
PATIENT_RATE : 1
DATE_ORIENTATION : 1
REARED_THE : 1
PRESENTING_THE : 1
WIFE_HAS : 1
AS_MOTIVATION : 1
SETTING_CONTINUED : 1
HIS_BROTHER : 1
ADDENDUM_NOTES : 1
REQUESTING_MED : 1
PATIENTS_ATTENDING : 1
NOTED_REC : 1
HE_FOLLOWED : 1
INFORMATION_NIGHT : 1
RISK_LIKE : 1
GEOGRAPHIC_HE : 1
FOR_NO : 2
WERE_NOTED : 1
MAINTENANCE_RECOVERY : 1
CBSST_COMMUNICATION : 1
HCL_CAP : 1
USE_NO : 1
BIPOLAR_DISCHARGE : 1
BEING_ORIENTED : 1
WITH_CURRENT : 1
BE_CONTACTED : 2
CHART_TO : 1
COMMENTS_PT : 1
PROTOCOL_USED : 2
INT_CAROTID : 1
MY_ADMISSION : 1
CURRENTLY_REPEAT : 1
NOT_AT : 1
SKIN_ON : 1
IT_ME : 1
PATIENT_FAMILY : 1
CHEST_TO : 1
CONSULT_FOLLOWUP : 1
OR_OTHER : 1
FORESKIN_OF : 1
STENOSIS_AT : 1
MIDST_DIVORCE : 1
FORM_TO : 1
OBSERVED_SMILING : 2
RECOVERY_ROOM : 1
CARE_ORAL : 1
MANY_DENYING : 1
BELOW_VETERAN : 1
UP_YO : 1
PATENT_CLEAR : 1
ANXIOUS_CONGRUENT : 1
PREPARED_AND : 1
ADL_LOCATION : 2
BED_SPONGE : 3
TELLING_JOKES : 1
OBESITY_SCREEN : 1
CAPSULE_MOUTH : 1
SITE_NO : 1
POSSIBLE_IN : 1
FILE_SHE : 1
TRANSDERMAL_ISSUE : 1
BERNA_BENEFITS : 1
RANGE_MOTION : 1
AFTER_TREATMENT : 2
MH_CONTACT : 1
ON_AREA : 1
AND_RESPONSIVE : 1
EXPECTATIONS_ACTIVE : 1
HELP_MEMBERS : 1
CAPACITY_SERVICES : 1
BE_THIS : 1
TIMES_AND : 1
WITH_SUPPLEMENTAL : 2
CODE_UNLISTED : 1
BEEN_AND : 1
DOES_PARTICIPATE : 1
RESPIRATORY_PROGRESS : 1
PINES_MST : 1
DIARY_EXERCISE : 1
EFFORTS_DISCUSSED : 1
IDENTIFIED_OTHER : 2
TALKED_ABOUT : 1
ACTIVITY_PARTICIPATED : 1
TIMES_VETERAN : 1
PATIENTS_NOT : 1
DATE_DEPRESSIONPT : 1
YES_ANESTHESIOLOGY : 1
THIS_DIPLOPIA : 1
IF_APPLICABLE : 1
CLINIC_AND : 1
IS_LDL : 1
FOR_BEHAVIORS : 1
OF_TEMAZEPAM : 1
INITIAL_TALKED : 1
RECONCILIATION_TO : 1
SENT_TO : 1
EVAL_LAST : 1
OF_ABILITIES : 1
THE_TOILET : 2
UNITS_IN : 1
SHOWER_IN : 1
PROTOCOL_ATIVAN : 1
DIVORCE_LIST : 1
OS_MAY : 1
HELP_GROUP : 1
AN_SAW : 1
ALCOH_DEP : 1
TD_EXAM : 1
TURN_SI : 1
AND_REG : 1
PLEASANT_COOPERAT : 1
SEE_PATIENT : 1
STRETCHING_IMAGERY : 1
ALSO_LENGTH : 1
PT_WILL : 1
PUT_DIALYSIS : 1
CHAIR_IN : 1
PREVENTATIVE_ALLERGIES : 1
MR_STATED : 1
ROOM_CUEING : 1
CAROTID_PHONE : 1
AGE_QHX : 1
HOW_HAS : 1
IMPLEMENT_CARE : 1
AS_AS : 2
TO_NOTIFY : 1
PRESENT_ILLNESS : 2
NOT_RETURN : 1
VETERAN_NOW : 1
TALK_SOMEONE : 1
BASAL_SESSION : 1
ERA_TIME : 1
CLINIC_NO : 1
CELL_BLADDER : 1
EXERCISE_GUIDED : 1
FORM_RELATED : 1
NUMBER_ADDITIONAL : 1
NEED_PALM : 1
HOURS_EDUCATION : 1
REQUEST_OR : 2
RECONCILIATION_ARE : 1
SESSIONS_OF : 1
CONDITION_OF : 1
LEARNER_ABILITIES : 1
UPPER_LOWER : 1
CONTACT_MS : 1
WED_LAST : 1
MORE_OFTEN : 1
THREE_TABLETS : 1
BETWEEN_NO : 1
REPORT_OF : 1
OUT_DONE : 1
PHYSICAL_EXAM : 2
PACK_NIGHT : 1
MURMURS_KEOMUAN : 1
SAW_CAP : 1
EXT_BID : 1
BE_DISCUSSED : 1
HE_PRESENTED : 1
BELL_PERSONAL : 1
SKIN_NOTED : 1
IN_NO : 1
REACTIONS_PATIENT : 1
WITH_ANTIBIOTICS : 1
INDICATION_FOR : 1
STATUS_MOBILITY : 1
VISIT_YES : 1
ARE_TO : 3
PSYCHOTIC_DISORDERS : 1
ASKED_THEY : 1
SPEND_TIME : 1
IS_CYTOLOGIC : 1
POOR_THAZINE : 1
NO_SYMPTOMS : 1
TO_TREAT : 1
IN_MM : 1
HAVE_TYPE : 1
ARRANGING_TOUR : 1
OF_LENGTH : 2
QUESTIONS_MEDS : 1
FOR_OXYCODONE : 1
LOCATION_OR : 1
EVALUATION_AND : 1
LAB_RESULT : 1
TO_MANAGE : 1
DRUGS_TIME : 1
CLEAR_ALL : 1
CUEING_TOUR : 1
VALUES_FRICTION : 1
SUBACROMIAL_DECOMPRESSION : 1
STRATEGIES_GLAUCOMA : 1
LIAISON_RAPID : 1
AFTER_HE : 1
ENDING_PM : 3
URINAL_NOTE : 1
LISTENING_TO : 1
LIFESTYLE_LEVEL : 1
ACID_TAB : 1
ADEQUATELY_NO : 1
CURRENT_KNOWLEDGE : 1
PRESSURE_DESPITE : 1
WEEK_BERNA : 1
ANY_VSS : 1
VETERAN_HAS : 1
DYSPNEA_SORE : 1
OR_TWO : 1
CBOC_AND : 1
MESSAGE_PATIENT : 2
TO_TO : 6
AND_GROUPS : 2
SITE_DENIES : 1
DISTANCE_THEMSELVES : 1
OLD_PMH : 1
PAIN_SINCE : 1
EXAM_WILL : 1
YR_WITH : 1
PATIENT_REFUSED : 1
FOLLOWUP_WEST : 1
SELF_PROGRESS : 2
HAND_CONSISTENCY : 1
ARE_LIVING : 1
MUST_FRUSTRATING : 1
WAL_NUMBER : 1
UNLESS_FOR : 1
GIVEN_PTS : 2
ENTERED_ELECTRONICAL : 1
PRESSURE_HERE : 1
TOPICS_BLOND : 1
WIFE_PT : 1
MY_RISK : 1
TAKE_CBOC : 1
TAKE_ACTIVE : 1
PATIENT_WITH : 2
WAL_FOR : 1
TELEPHONE_NOTE : 5
EXAMINATION_CAVITRON : 1
HE_SEE : 1
ATTENDED_GROUP : 1
TO_PERSONAL : 1
TO_HIM : 6
ACTIVE_COLOR : 1
YES_OUTPT : 1
FAM_COULD : 1
OUTPT_NOTE : 1
MIN_COMMENT : 1
NOTE_ED : 1
ENCOUNTERS_CAPACITY : 1
HIM_AS : 1
REQUEST_SANDWHICH : 1
SESSION_PAIN : 1
MUSCLE_ICDCM : 1
NIGHT_HE : 1
AMBER_USE : 1
EFFECTIVE_CLERK : 1
APPROPRIATELY_STAFF : 1
ANY_DISTRESS : 1
NEW_IS : 1
ALCOHOL_COMFORT : 1
HEARING_IMPAIRED : 1
AT_LEAST : 1
MEAL_ASSISTANCE : 3
HYPOTHYROIDISM_YOU : 1
ICDCM_NOT : 1
BARNES_ASSIST : 1
TEETH_HX : 1
BUT_ADDENDUM : 1
AND_OTHER : 2
WILL_VETERAN : 1
ACCIDENTAL_TOPIC : 1
WIFE_GETS : 1
PER_MDS : 1
RECOVERY_EFFORTS : 1
PATIENT_USED : 3
QUAD_CANE : 1
TO_PICK : 1
NOTE_PSYCHOLOGICAL : 1
PERSONS_ALSO : 1
DOPPLERS_PATIENT : 1
WALKS_ON : 1
PLAN_OUTLINED : 1
INT_MID : 1
PCP_TO : 1
COGNITIVE_TO : 1
INJ_LISTED : 1
OM_AND : 1
DISORDER_HX : 1
HE_UNDERSTANDING : 1
THE_ROADBLOCK : 1
DOPPLERS_SAT : 1
ABNORMALITIES_ABNORMAL : 1
STATED_BUSINESS : 1
FILL_DATE : 1
SPECIALTY_CLINIC : 1
NOW_CONTINUES : 1
THE_FACT : 1
ACTIVITY_PLAN : 1
REPORTED_THAT : 2
MOVE_SUMMARY : 1
THEN_INVITED : 1
AND_CANE : 1
GETS_AND : 1
FULL_OF : 1
PRESCRIPTION_MEDICATIONS : 1
ARTHRITIS_RADICULOPATHY : 1
DISCUSS_OVER : 1
TO_NOTE : 1
ADMISSION_PREOPERATIVE : 1
SUICIDE_ATTEMPTS : 1
NEXT_APPT : 1
ZZPATIENT_CARE : 2
ODOR_LESS : 1
TO_PLAN : 1
WERE_PATIENT : 1
WORST_PAIN : 1
DATA_PT : 1
DIVORCING_HER : 1
TIME_HAD : 1
WHAT_QUESTIONS : 1
PAIN_LAYING : 1
HE_MINIMAL : 1
CALLED_TRAVEL : 1
SCALE_PROVIDED : 1
WHO_IS : 1
RR_RECD : 1
ADDENDUM_CELL : 1
AND_STARES : 1
SAFETY_PTSD : 1
DECISION_REGARDING : 1
ON_FILE : 1
LAST_VISIT : 3
NIGHT_ANY : 2
RECEIVED_DATE : 1
IN_THIS : 1
IDENTIFIED_PROBLEM : 2
LEVEL_OP : 1
ALL_SPHERES : 1
HAD_AND : 2
POSITIVELY_AFFECT : 1
NOTE_MH : 1
US_SWER : 1
PATIENT_HIS : 1
PLANS_PART : 1
LAUGHING_TO : 1
CONCEPT_AND : 1
VOICES_PULSE : 1
FINISHED_DRUG : 1
HE_NOT : 4
EXCITED_TO : 1
ACTIVITY_HAD : 1
AND_RESISTED : 1
ABUSE_NURSE : 1
JAW_PAIN : 1
WERE_REPLACED : 1
ASSISTANCE_AMOUNT : 1
METAL_IMBEDED : 1
DISCONTINUED_FULL : 1
MINUTE_CHECKS : 1
FALL_PREVENTION : 1
THAZINE_INJ : 1
MOUTH_TIMES : 1
THE_READER : 2
IN_PM : 1
FOLLOWING_HOME : 1
NOT_OBSERVA : 1
VA_LEFT : 1
ANESTHESIOLOGY_NOTE : 1
ELECTRONICAL_CHART : 1
NOVEMBER_IS : 1
WEST_MENTAL : 1
ON_HIS : 2
PATIENT_REPORTED : 1
TREATMENT_PATIENT : 1
THEIR_SOCIALIZATION : 1
SERVICES_HOMEMAKER : 1
PREVIOUS_SETTING : 1
FIVE_GROUPS : 1
ALCOHOL_DOING : 1
SOME_FELT : 1
DIFFICULT_PRIMARY : 1
VERBAL_MATERIAL : 1
LIVED_THERE : 1
BATHROOM_PRIVILEGES : 2
BUYING_PT : 1
THYROID_WARFARIN : 1
TIMES_IN : 1
IN_THESE : 1
DESIGNED_INCREASE : 2
EASILY_TURNS : 1
PAIN_OUTPATIENT : 1
SELF_DANGER : 1
PT_FOR : 2
THAT_HAS : 6
IN_REGARDS : 1
WITH_IN : 1
HAIRED_MOD : 1
PT_AAO : 1
AND_LOWER : 1
BOWEL_FOOD : 1
TEETH_OF : 1
THE_BAG : 1
VETERAN_MINUTES : 1
REQUEST_ED : 1
PROGRESS_GUNSHOT : 1
HOW_IT : 2
TECH_CMA : 1
THE_CURRENT : 1
TELLING_HIM : 1
PROVIDE_HEALTHCARE : 1
AND_NEEDS : 1
STUMBLE_NO : 1
APPLY_GROUNDING : 1
WITH_DING : 1
DISCHARGE_FILLIN : 1
NO_WE : 1
AT_HOME : 3
RECOVERY_OF : 1
UNTIL_PCP : 1
REVIEWED_ANATOMICAL : 1
EMERGENCY_PART : 1
THEREFORE_WRITER : 1
MEDICATIONS_EXCLUDING : 2
COME_ALLERGIES : 1
STATES_HAS : 1
EMOTIONAL_ANGRY : 1
RAL_DIRECTION : 1
PROVIDER_OD : 1
WHEN_FEELING : 1
CHRONIC_SUPPLEMENT : 1
OSTOMY_CARE : 1
LCSW_BACK : 1
TO_DATEAPR : 1
AND_THEREFORE : 1
ASSISTANCE_BATHINGNO : 1
HER_HE : 1
TO_SELF : 1
OIL_IN : 1
RANGE_HE : 1
PSYCHIATRIC_EXPLAINED : 1
NOTE_FOLLOWING : 1
TO_SI : 1
HANDICAPPED_FORM : 1
NOTIFY_HIM : 1
OF_WRITTEN : 1
TO_LEARNING : 1
DIETITIAN_TO : 1
WILL_SKILL : 1
MAY_BE : 3
VETERAN_SET : 1
VERY_WELL : 1
REPORT_EFFECTIVENESS : 1
REQUIRES_MORE : 1
DESIGNED_TO : 2
IN_AFTERNOON : 1
MEDICAL_ADDENDUM : 1
REPORTS_VOICES : 1
IS_SOURCE : 2
ALARM_OFF : 1
CALL_AS : 1
REACTIONS_HEALTH : 1
HAD_NO : 2
ABOUT_APPOINTMENT : 1
USED_VERIFY : 2
HISTORY_EXAM : 1
PER_REQUEST : 2
SU_DONT : 1
NUR_CHECKIN : 1
TO_IS : 1
SURGERY_TRANSFER : 1
DIPLOPIA_OCCURS : 1
TWO_TO : 1
INPATIENT_NOT : 1
STARTED_PATIENT : 1
ENJOY_GROUP : 1
PAIN_RESULT : 1
AND_COMPLETED : 1
SCROTUM_DOWN : 1
RECHECK_PAIN : 1
ADDENDUM_PROBLEM : 1
THERAPY_PAIN : 1
DENVER_OF : 1
WAS_NOTICEABLE : 1
ITEMS_TO : 2
ANSWERED_VETERANS : 1
ADDENDUM_SESSION : 2
GOLD_WISHING : 1
TO_ALL : 1
THAT_WILL : 2
HAVE_PLAN : 1
DISEASE_OF : 1
AFTER_YOUR : 1
FLUNIS_DIETARY : 1
KARDEX_CRUTCHES : 1
LEFT_KNEE : 2
AND_VOMITING : 1
IS_LIFETIME : 1
AND_ANXIOUS : 1
TAKING_AT : 1
HAS_NEED : 1
WEEK_AGO : 1
ING_ON : 1
PRIOR_ORIENTED : 1
HE_COOPERATED : 1
HEARD_VOICES : 1
PATIENTS_LAST : 1
OF_MAY : 2
EFFECTS_NG : 1
AND_SHE : 2
OF_THERAPY : 1
PERFORM_SKILL : 1
OF_UNSTEADINESS : 1
MORNING_PATIENT : 1
PERSON_AND : 1
ELOPEMENT_RISK : 2
TO_PALMER : 1
SHOW_WILL : 1
USING_OTHER : 1
RISK_CALL : 1
DANGER_OTHERS : 1
USING_OCR : 1
PREFERENCES_CHANGES : 1
PATIENT_UNDERSTANDING : 2
VACCINE_AGE : 1
FEB_GOAL : 1
PLACE_AND : 2
AT_LOCATION : 1
TEAM_CLINIC : 1
WEST_CENTRAL : 1
AND_NON : 1
APPLICABLE_POSITIONING : 1
NOVEMBER_EXACT : 1
DEMONSTRATE_THE : 1
RUNNING_LOW : 1
PATIENT_MON : 1
AS_BEFORE : 1
THROAT_AND : 1
USING_SHOWER : 1
ABOUT_STAYING : 1
TO_LIFESTYLE : 3
BODY_OF : 1
BEDTIME_ACTIVE : 1
DOSE_SEROQUEL : 1
TO_MEDICAL : 1
NUMBER_DOES : 1
MENTAL_FAILED : 1
OF_LDH : 1
ASKED_TO : 1
ACTIVE_ACTIVE : 2
HE_HOME : 1
POSTOPERATIVE_DIAGNOSIS : 1
WE_TO : 1
NO_OIL : 1
SERVICE_VIETNAM : 1
AND_STATES : 1
VETERANS_NUMBER : 1
ENVIRONMENT_OF : 1
IF_SINCERELY : 1
DAILY_IN : 1
IV_ANTIBIOTICS : 1
DECOMPRESSION_IS : 1
OR_DIARRHEA : 1
PERSON_PLACE : 4
HEAT_STROKE : 1
IS_STILL : 1
NITROGEN_PLASMA : 1
PEERS_UROSEVICHS : 1
HIM_AGAIN : 1
REGARDING_LAST : 1
ALL_WHO : 1
SCALE_FALL : 1
PATIENT_SEE : 1
LIMITATION_MEAL : 1
ASKED_PATIENT : 1
CY_PATIENT : 1
INDICATION_CARE : 1
SITUATION_THERAPY : 1
VET_AGREED : 1
PATIENT_PAIN : 2
DOCUMENT_ED : 1
DAILY_NOTE : 1
ADENOMA_SUMMARY : 1
LIGHT_PWD : 1
RALS_MS : 1
OF_FUNCTIONING : 2
VA_AND : 1
DEFINITIVE_CATHETERS : 1
EXAM_NOTE : 1
APPROPRIATELY_WITH : 1
AWARE_DIAGNOSIS : 1
HYPOTHYROIDISM_DO : 1
REVIEWED_LOCATION : 1
TO_LOW : 1
NO_DISC : 1
MINIMAL_VERBAL : 1
OF_DEPRESSIVE : 1
OF_CHECK : 1
WAS_TO : 10
WERE_FOUND : 1
STAFF_REQUIRED : 1
TREATMENT_AS : 1
MEDICAL_ABD : 1
HE_KNOW : 1
PROGRESS_HAND : 1
CYTOLOGIC_ATYPIA : 1
PT_ECCHYMOSIS : 1
HAD_MULTIPLE : 1
NUMBER_PRINTED : 1
FOR_IN : 1
YES_STAINED : 1
HIS_REPORTS : 1
NOTE_CRITICAL : 1
MG_OF : 1
BID_OR : 1
CONSTANT_INTERMITTENT : 1
LINENS_WERE : 1
PATIENT_DOES : 2
CAPSULE_ACTIVE : 1
AZITHROMYCIN_INJ : 2
AGENT_CASHIER : 1
TELLING_THAT : 1
ENTERED_DEPRESSION : 1
ASKED_DESCRIBE : 1
USING_THE : 1
NOTE_TO : 3
AGO_ON : 1
DEMENTIA_AND : 1
APPOINTMENTS_ALLERGIC : 1
HIS_AND : 3
ON_DISCHARGE : 1
TERM_AND : 1
LIVING_MEDICATIONS : 1
COGNITIVE_BEHAVIORAL : 1
FALL_FALL : 1
UN_EXO : 1
CLASS_CONTENT : 1
NOTES_HE : 1
POSTING_AND : 1
NEEDS_TO : 5
TO_BATHROOM : 1
LOCATION_AREAS : 1
OF_PROCEDURE : 2
OF_CLC : 1
OF_OPERATION : 1
EXPLAINING_TO : 1
COHERENT_EXTR : 1
DEPENDENCE_AND : 1
REVIEW_GROUP : 1
CUEING_PATIENT : 1
NOTE_BREAKFAST : 1
LOCAL_TITLE : 1
CARE_NOTE : 4
BE_CAUSING : 1
IN_WEARING : 1
CODE_TRIAGE : 1
THAN_THAN : 1
TO_SUPPORTIVE : 1
TEST_FILL : 1
AT_LEAVING : 1
FINDINGS_OPERATION : 1
NEW_PAIN : 1
AND_SHED : 1
ADVERSE_DRUG : 1
OFF_WITH : 1
FAMILY_AID : 1
PACU_RECOVERY : 1
SIDE_DRO : 1
HEMATOLOGIC_AND : 1
IS_BEEN : 1
GROOMED_ANXIOUS : 1
STRUCTURE_INTERVENTION : 1
AS_FOR : 3
TWO_GRANDCHILDREN : 1
REMOVAL_PATIENT : 1
MASSES_SKIN : 1
HIGH_NOT : 1
EDUCATION_DO : 1
PUFFS_BY : 1
ON_SCALE : 1
MG_DW : 1
OF_THIAMINE : 1
LUMP_FROM : 1
PROVIDED_WITH : 1
XT_AT : 1
TAB_PO : 1
PAIN_LEVEL : 1
TRACH_NO : 1
NEW_PROBLEMS : 1
GOALS_RAL : 1
HOW_TAKE : 1
OR_AND : 1
SERVICE_ERA : 1
RECONCILIATION_FOR : 1
TERM_WEDNES : 1
HOSPITALIZATION_PREFERRED : 1
NO_TREATMENT : 1
GLASSES_TO : 1
APPT_ON : 1
OF_ETOH : 1
RUMINATING_ABOUT : 1
FEELS_HE : 1
FOR_FOLLOWING : 2
IDEAL_BODY : 1
TASK_OVERSIGHT : 2
CARDIOVASCULAR_RRR : 1
SPECIFIC_INJURY : 1
TASK_REQUIRES : 5
BLOND_MOD : 1
PM_WRITER : 1
VENOUS_ICDCM : 1
INR_ONE : 1
SAYS_HAS : 1
INTERNAL_HEMORRHOIDS : 1
HIS_WEEKLY : 1
TEMPERATURE_SCORE : 1
VISIT_COMPLETED : 1
HIM_TO : 3
SEE_MONTH : 1
WORST_IN : 1
TAKE_VETERAN : 1
NO_BUT : 1
THE_PER : 1
WARNING_FOR : 1
ASSIST_ARTHROSCOPY : 1
BEEN_SUICIDAL : 1
REQUESTS_OF : 1
IS_OLD : 2
RESISTED_BALL : 1
AND_MOOD : 1
TITLE_COGNITIVE : 1
HIM_TC : 1
TIME_ARRIVAL : 1
ANTIBIOTIC_STARTED : 1
FOR_THE : 6
FOLLOWUP_OF : 1
ASSIST_BATHING : 1
NUTRITION_LBS : 1
FOR_AUDITC : 1
VETERAN_PARTICIPATE : 1
COMPLETION_HIMSELF : 1
WITH_INCH : 1
PT_APPT : 1
ROUTINE_FOLLOWUP : 1
DENIED_INFECTION : 1
OF_SESSIONS : 3
BOWEL_OTHERS : 1
PATIENT_TAKEN : 1
BREATHING_GIVEN : 1
DOCTOR_COMPUTERIZED : 1
EXERCISING_AS : 1
NO_CURRENT : 1
MADE_SAFE : 1
CONCERN_ARTHRITIS : 1
WOULD_THEY : 1
DONE_TO : 1
TRIAGE_APPOINTMENTS : 1
THE_BACK : 2
THE_PROCEDURE : 1
BEDTIME_FLUVASTATIN : 1
CONSTANT_THE : 1
NUMBER_ES : 1
PERIOD_OF : 1
INITIAL_OUTBURST : 1
SOCIAL_STARTING : 1
THE_FROM : 1
SUPPORTTALKING_FRIEND : 1
ON_LEGIBLE : 1
ACTIVITIES_OF : 1
HE_WILL : 4
ATTEMPTS_SCHEDULED : 1
OF_MY : 1
REVIEW_LENGTH : 1
DISS_THAT : 1
CURVE_TEST : 1
WILL_TO : 1
CHLORIDE_MEQ : 1
ABOUT_GROUP : 1
WAS_CONTINENT : 3
WAS_TIME : 1
ASKING_CARE : 1
ACTIVE_HEIGHT : 1
ER_THIS : 1
TO_DIFFERENCES : 1
ASSISTANCE_AVERAGE : 1
OR_EFFECTS : 1
HALDOL_SCREEN : 1
MR_IS : 1
WITH_HALDOL : 1
PROBLEM_COMMENTS : 1
RECORD_SECRETION : 1
DOWN_AND : 1
HAVE_TWO : 1
BUPROPRION_ALL : 1
CHAIR_BATHTUB : 1
ADDRESS_RAL : 1
PERTINANT_EXAM : 1
BAND_LEGIBLE : 1
INTRODUCTION_REVIEW : 1
AND_VETERAN : 2
DATE_OF : 3
VET_WILL : 1
OF_SESSION : 1
AND_ITEMS : 1
THE_AREAS : 2
ACTIVE_NA : 1
AT_TIMES : 2
HERE_ROUTINE : 3
AND_THOUGHTS : 2
PICK_UP : 1
RR_PATIENT : 1
USE_DEC : 1
BP_CTA : 1
PATIENT_MUTUAL : 1
PHONE_CALL : 1
NIACIN_IBUPROFEN : 1
FOR_SKIN : 1
GOLD_TEAM : 1
COMPLAINT_HEARING : 1
CARE_PROGRESS : 1
PROBLEM_FROM : 1
IS_ELIGIBLE : 1
APNEA_ICDCM : 1
HM_OS : 1
WENT_TO : 3
VISIT_METABOL : 1
TO_BAY : 1
HEALTH_WELLBEING : 1
FOR_MED : 1
VETERAN_COMPLAINT : 1
APPOINTMENTS_TELEHEALTHCARE : 1
HEARING_LOT : 1
DINNER_FOOD : 5
MEDICATIONS_HAVE : 1
HAVE_YOUR : 1
AND_MHICMINTENSIVE : 1
DISCUSSED_COMMUNICATION : 1
AND_STILL : 1
WITH_TREATMENT : 1
WITH_DIAGNOSIS : 1
CURRENTLY_DETOX : 1
JUST_ALERT : 1
PT_AS : 1
CLINIC_NURSE : 1
KNEES_MODALITIES : 1
RESPONDED_NO : 1
CHECKS_ON : 1
FOR_PAIN : 1
CASUAL_PRESENTED : 1
UPDATE_SPASM : 1
LIGHT_ORAL : 1
RECOVERY_LIFE : 1
START_PROCEDURE : 1
CARE_INVOLVING : 1
THE_WILL : 2
ON_HE : 3
SO_BY : 1
TABLETS_MOUTH : 1
PRELIMINARY_DISCHARGE : 1
THROUGHOUT_NIGHT : 1
RACING_TYPE : 1
THERAPIST_PT : 1
CURSING_PROVIDED : 1
UNDERCLOTHING_DIARY : 1
BATH_HM : 1
MG_THEN : 1
STREET_CLOTHES : 1
PAIN_SESSION : 1
RELIEVED_BY : 1
MADE_CHOICES : 1
IN_AMOUNT : 1
MEETING_OF : 1
FROM_TO : 2
MY_NOTE : 1
MODALITY_ULA : 1
REPLACES_PATIENT : 1
FEEL_MY : 1
CLEAR_LOCATION : 1
PATIENTS_WROTE : 1
WILL_CARCINOMA : 1
ARE_MEDICATIONS : 2
IMMUNIZATION_CHANGE : 1
WEEK_ACCIDENT : 1
DISTANCE_FROM : 1
BEERS_ABUSE : 1
SUICIDE_COORDINATION : 1
ADMISSIONS_HIS : 1
ROUND_THIS : 1
BLOOD_MR : 1
OFF_MODIFIED : 1
BELOW_AT : 1
WHOM_PER : 1
ALL_FIVE : 1
PROCESS_OF : 1
TO_DETAILS : 1
REPORTING_ALL : 1
LOCATION_LENGTH : 1
TREATMENT_AZITHROMYCIN : 1
OF_FEB : 1
SIGNER_CLINIC : 1
MON_OCT : 1
TO_APPARENTLY : 1
ASSISTANCE_RESIDENT : 1
ICE_APPLIED : 1
INTERDISCIPLINARY_TEAM : 2
AN_ADJUSTMENT : 1
HAVE_PATTERNS : 1
BACK_ROS : 1
OF_LS : 2
PULSE_YOUR : 1
NILANDRON_AND : 1
MONITOR_HIS : 1
LEFT_REMINDER : 1
STARTED_TALKING : 1
VETERAN_EXTREMELY : 1
PAIN_PAMPHLET : 1
SHUTTLE_US : 1
DIARRHEA_MR : 1
ISSUES_CALLED : 1
AT_THE : 2
YOUR_NO : 1
COMMANDS_LUNG : 1
REASON_CONSULT : 1
TO_TWO : 1
COMPLAINTS_FISTULA : 1
INFORMED_FRICTION : 1
ORAL_PRN : 1
PT_ASKED : 1
NOT_DETERMINED : 1
DC_NOTE : 1
SCORE_CLINICAL : 1
BELOW_VIEW : 1
LIVING_INSTRUCTOR : 1
VERBAL_EDUCATION : 1
IMPROVE_YOUR : 1
HAS_APPT : 1
ASSESSMENT_TO : 1
FOCUS_WHILE : 1
TO_VA : 1
THE_BODY : 1
PART_TRIAGE : 1
UPCOMING_BETWEEN : 1
ADDITIONAL_CLINIC : 1
HIM_IN : 1
TEMPLATE_NO : 1
NO_BASIC : 1
TRANSITION_FOR : 1
CONTINUES_RELATED : 1
PROVIDERS_PROGRESS : 1
DING_NOTED : 1
NO_MEAL : 2
DEPOSITS_CALLED : 1
DURING_SHIFT : 5
US_THAT : 1
APPT_WITH : 1
VA_SURROGATE : 1
WAL_REQUEST : 1
PT_HERE : 2
COVERED_INFORMED : 1
MODIFY_NECESSARY : 1
THEN_USED : 1
WAS_FOR : 4
AND_PROVIDE : 1
PROCEDURE_AND : 1
SMILING_TO : 1
OPTICAL_ON : 1
VISTA_IMAGING : 1
ALLERGIES_SEE : 1
TO_NUTRITIONAL : 1
THAZINE_SOLN : 1
EXPLAINED_TO : 2
CONTENT_RECORD : 1
TO_LAUNDRY : 1
CELL_SESSION : 1
ONLY_AGENT : 1
AFTER_DISCUSSING : 1
NOT_BLADDER : 1
THE_EXTREME : 2
YOUR_TEST : 1
PRECERTIFICATION_FOR : 1
CARE_PHONE : 1
THE_RELATED : 1
BY_RAL : 1
COGNITIVE_DEMENTIA : 1
PRELIMINARY_PLAN : 1
THE_DOWN : 1
NOT_THE : 1
TRAINING_WITH : 1
THIS_SSN : 2
BUSY_CONTINUE : 1
SCREEN_LBS : 1
PT_PRESENTED : 1
EVENING_MAR : 1
NO_JOB : 1
PALPITATIONS_SKIPPING : 1
CHECK_US : 1
PRECAUTIONS_IN : 1
INHALE_PUFFS : 1
OBSERVATION_TO : 1
CHRONIC_SUBSTANCE : 1
TO_DO : 2
CURRENT_ABOUT : 1
FREQUENTLY_WELL : 1
YOU_ARE : 2
DO_USE : 1
ENTERED_ANXIETY : 1
IS_ORIENTED : 1
DORN_VA : 1
DISCONTINUED_NORMAL : 1
VALUES_INVENTORY : 1
ONCE_TWICE : 1
DAUGHTERINLAW_AWARE : 1
UNSTEADINESS_HAS : 1
TEXT_AGREED : 1
HAVEN_BLOOD : 1
HELPS_JUST : 1
STRENGTHS_ON : 1
MANAGEMENT_CODE : 1
ADDENDUM_SHAKE : 1
EITHER_HE : 1
ABOUT_INFORMATION : 1
MINUTE_FOR : 1
TOOTH_OR : 1
STILL_AT : 1
OF_AUG : 1
IS_CLEAR : 1
TO_RN : 1
EVERY_PATIENT : 2
THE_REPORT : 2
CONTACT_WITHIN : 1
IS_FEELING : 1
MAINT_PROCEDURES : 1
INTERVIEW_FOR : 1
INCREASE_TO : 2
LAST_DRINK : 1
FMH_INTERDISCIPLINARY : 1
BRING_UP : 1
NURSING_ACTIVITY : 1
SKIN_ROUND : 1
THE_CONTINUED : 2
HE_DISCUSS : 1
RECONCILED_AND : 1
TASK_SUPERVISION : 2
DA_ONE : 1
TIME_PRIORITIZE : 1
QUESTIONS_ACTIVE : 1
OD_DEAR : 1
COLOR_WARFARIN : 1
THE_EPIDIDYMIS : 1
DROPS_AND : 1
DONE_HERE : 1
TO_SUPERVISOR : 1
LEAVING_VOICE : 1
FOR_REGARDING : 1
OR_JUDGMENT : 2
RECD_PAIN : 1
PLAN_HOW : 1
TRAUMA_AND : 1
PLAN_GROUP : 2
OR_SIDE : 1
DAILY_PAIN : 1
TASK_NO : 5
EVALUATE_IN : 1
BY_HIM : 1
THEM_VAMC : 1
SIDE_TO : 1
WRITER_AND : 1
ROADBLOCK_HIM : 1
MUCH_POSSIBLE : 1
THIAMINE_MORNING : 1
PATCH_ISSUE : 1
NOTE_THAT : 1
AND_GIVEN : 2
IS_ADEQUATELY : 1
CENTER_NO : 1
DISCHARGE_MSE : 1
WITHIN_EASY : 1
IS_FREQUENTLY : 1
RX_WAL : 1
CONDITIONS_BELOW : 1
AND_PARTICIPATED : 1
CONTINUE_TREATMENT : 1
TREATMENT_TRIGLYCERIDES : 1
MADE_REQUEST : 1
OF_VACCINE : 1
OTHER_SAME : 1
MSE_REASON : 1
BEEN_PRX : 1
THE_OM : 1
MEDICATION_RECONCILIATION : 2
TO_ON : 1
STILL_CLINIC : 1
IMA_PAIN : 1
MUTUAL_GOAL : 1
RESPIRATORY_DISTRESS : 2
QUESTIONS_YOU : 1
THE_LASST : 1
TRANSDERMAL_PATCH : 1
NO_PREVIOUS : 1
BEDSPREAD_REQUESTED : 1
CELLULITIS_ARTHRITIS : 1
WHO_THIS : 1
PATIENT_HES : 1
BACK_SELECT : 1
MOUTH_DA : 1
HE_SUBSCRIBES : 1
CONDITION_ABDOMINAL : 1
GROUP_INCREASE : 1
OF_ATTENDING : 1
IN_ON : 1
WRITTEN_IN : 1
MR_LEAVING : 1
GRAMS_PER : 1
PLAN_DISCUSSION : 1
CM_DIAGNOSIS : 1
OVERWHELMING_HELPS : 1
OR_ECHOTEXTURE : 1
DONE_PRIOR : 1
SET_BETWEEN : 1
AND_SAFETY : 1
PRESENTED_VARIED : 1
NOTE_REVIEWED : 1
WAS_CAPACITY : 1
ADDENDUM_MISC : 1
GAINSVILLE_FL : 1
DELUSIONAL_FEARS : 1
HIS_PATIENT : 1
SENT_READ : 1
OF_FRIENDS : 1
PRESCRIPTION_PER : 1
THINKING_SUICIDE : 1
PING_PATTERNS : 1
STAFF_MINUTE : 1
MEDICAL_CONDITION : 1
HOME_AM : 1
FULL_ID : 1
PHONE_NOW : 1
PROBLEM_BIPOLAR : 1
CHART_SEE : 1
BEERS_ETOH : 1
GROUP_CIES : 1
OR_BLOODY : 1
NEEDS_ACTIVE : 1
AT_AM : 1
HUDVASHNOTE_MEDICATION : 1
ABOUT_PROVIDED : 1
FEB_WHAT : 1
PULSE_HE : 1
JUNE_PT : 1
OVER_TRIAGE : 1
CLEAR_TOBACCO : 1
INTERACTION_WITH : 1
STARTED_TO : 2
PROBLEMS_FUTURE : 1
HE_BEEN : 2
MY_EYES : 1
HAND_AND : 1
PERSON_CALLING : 1
VITAMIN_PSYCHIATRY : 1
LIMITED_SCHIZOPHRENIA : 1
NOTE_MODIFY : 1
PAIN_MANAGEMENT : 1
OFFERED_OUTLINED : 1
WEARING_ATTIRE : 1
EDUCATION_COULD : 1
TREATMENT_PROCEDURE : 1
PLACE_OF : 1
DOWN_THOUGHTS : 1
DOWN_MEDICATIONS : 1
SO_HE : 1
OF_HOUSING : 1
DISORDERS_BIPOLAR : 1
ENJOY_OUTINGS : 1
PRESENT_TH : 1
DOCTORS_MEDICAL : 1
DATED_WOUND : 1
COLONOSCOPY_MAY : 1
BUT_LATER : 1
DINING_FOR : 1
NECK_BACK : 1
WORSE_THE : 1
PATIENT_RESIDENT : 1
SHIFT_ZZPATIENT : 1
LIGHT_NURSING : 1
FL_AS : 1
SKIN_BREAKDOWN : 1
ICDCM_MOUTH : 1
SAT_THE : 1
APPARENTLY_SOME : 1
CAREGIVER_NOW : 1
SHEET_TO : 1
EN_ASKED : 1
NEW_CONVERSATION : 1
ER_EYE : 1
OTHERWISE_ADDENDUM : 1
COPY_OF : 1
CONSULTATION_TEARFUL : 1
DRINKS_THIS : 1
NUTRITION_OF : 1
COMMENT_TYPE : 1
PRX_OF : 1
CENTERED_HOW : 1
CAN_CYCLE : 1
RESULTS_TESTS : 1
SUGARS_FROM : 1
LIST_DILATION : 1
HIS_OVER : 1
WELL_THIS : 1
AXIS_GLOBAL : 1
SPEND_WITH : 1
CHRONIC_USE : 1
CHIROPRACTOR_ACCUPUNCTURE : 1
NURSING_SOC : 1
IN_DAILY : 1
BEFORE_RUNNING : 1
REAC_INPATIENT : 1
HAD_SIMILAR : 1
ABSENT_ESOPHAGEAL : 1
AND_DATA : 1
TRANSFER_OR : 1
KEOMUAN_POON : 2
APPT_SCHEDULED : 1
ADDENDUM_LOCATION : 1
INTEREST_AMBULATION : 1
SESSION_TALKING : 1
APPOINTMENT_INFORMATION : 3
WAS_LESS : 1
AGREED_NOTE : 1
SKILLS_MIN : 1
CENTER_BASED : 1
PATIENT_DICTATED : 1
OF_ABSCESS : 1
THE_GROUP : 4
STATION_HAVE : 1
INTERVENTIONS_INSUFFICIENCY : 1
LATE_FEMALE : 1
FOR_ANALYSIS : 1
TO_PROVIDER : 2
RECEIVED_AT : 1
HIGHER_HIS : 1
SKIN_AREA : 1
FOR_EXPLAINED : 1
DEPRESSIVE_AND : 1
SOCIALIZATION_BY : 1
WAS_SEEN : 2
PULMONARY_CLINIC : 1
LBS_THE : 1
NOTE_DT : 1
DOSE_MG : 1
MORE_THAN : 1
THE_POSITION : 1
MAINTAIN_EFFORTS : 1
NA_MG : 2
PHONE_AND : 1
METAL_IN : 1
ONEON_INCONTINENT : 1
ADDENDUM_BARNES : 1
LIMITS_AM : 1
DESCRIBE_FOR : 1
ALREADY_THEMSELVES : 1
EXPLAINED_HIM : 1
OS_FT : 1
SESSION_AFTER : 1
AT_CONSIDERATION : 1
STATUS_WITHDRAWL : 1
HE_SHORTNESS : 1
NUTRITION_NO : 1
DONE_VACCINE : 1
THE_AFTERNOON : 1
PREFERENCES_THAT : 1
CLC_ON : 1
HE_ATTENTIVE : 1
EFFECTIVELY_PT : 1
NARCOTIC_PATIENT : 1
TO_REC : 1
SS_IS : 1
DELUSIONS_MEDICATION : 1
III_PRIMARY : 1
REGION_REPORT : 1
HIS_UPCOMING : 1
CBOC_FOLLOWING : 1
CONTINUED_PUFFS : 1
TO_ER : 2
WITH_STRESSORS : 1
FOR_ASSISTANCE : 2
VETERAN_AFTER : 1
IN_LT : 1
DEC_ORIENTATION : 1
APPT_REQUEST : 1
TO_BE : 7
CONGRUENT_INTENSE : 1
TREATMENT_INTERNAL : 1
PERSONAL_CARE : 1
OF_THINGS : 1
THE_RESULTS : 1
WITH_VARIED : 1
ATTENDED_OFFERED : 1
ASKED_HE : 1
THE_EVENING : 2
DONE_PT : 1
CRISES_IN : 1
TO_THROUGH : 1
OK_CITALOPRAM : 1
RESTRAINT_NOTE : 1
THEY_PHYSICAL : 1
DENTAL_EXAMINATION : 1
FOR_MANY : 1
XYZZY_EITHER : 2
TO_IMMEDIATELY : 1
PRIMARY_OTHER : 1
INJURY_NEUROLOGIC : 1
IS_HTN : 1
NEEDED_NURSING : 1
KNEES_MHP : 1
OR_PTSD : 1
WILL_OUT : 1
LAST_SCORE : 1
THE_VETERAN : 12
AZITHROMYCIN_IN : 1
PROBLEMS_THE : 2
FL_THAT : 1
REPEAT_INR : 1
DIRECTION_WHILE : 1
NOTE_BE : 1
APPEARS_SAD : 1
HERE_COMPLICATIONS : 1
EXPOSURE_SYPHILIS : 1
FLUOXETINE_MG : 1
MINUTES_NUMBER : 1
MEDICATIONS_WERE : 1
SOLN_BELOW : 1
NO_INJURY : 1
WITH_THE : 5
PSD_HE : 1
WAS_HE : 1
WILL_PERFORM : 1
WT_PATIENT : 1
AND_ANGRY : 1
TO_TRY : 1
WAS_GAINSVILLE : 1
POST_ION : 1
ANY_THOUGHTS : 1
HIM_AROUND : 1
AGREE_FILL : 1
AM_READY : 1
SYST_PATIENT : 1
TO_ALLERGIES : 1
SEEN_REMOVAL : 1
MEDS_MY : 1
LOT_FACE : 1
TO_AUSCULTATION : 1
ON_AT : 1
BOWEL_MOVEMENTS : 3
DIFFERENCES_TEXTURES : 1
AAO_BED : 1
HCA_WILL : 1
CBOC_PROGRESS : 1
ELSEWHERE_DATE : 1
TIME_OLDER : 1
THEN_MR : 1
PROVIDED_HELP : 1
THIS_DINNER : 1
BIPOLAR_NOS : 1
REGULAR_SINCE : 1
MG_IN : 1
HAS_DISCHARGE : 1
FOR_DINNER : 1
BP_IS : 1
ADEQUATELY_ADDENDUM : 1
IN_PREOPERATIVE : 1
OTHER_COGNITIVE : 1
WELLNESS_ATTENDING : 1
NOT_ENDING : 1
THAT_WHAT : 1
STRUCTURE_TIME : 1
CARE_SERVICE : 1
SO_PHONE : 1
STATES_THIS : 1
COMPLEXITY_THAT : 1
UNLESS_NOTED : 1
SCANNED_NOTE : 1
THIS_WORKER : 1
NURSING_JUDGMENT : 2
ILLNESS_LEARNER : 1
MED_OR : 1
GOALS_THE : 1
ORIENTED_PERSON : 4
IT_BE : 1
MALE_FOR : 1
STATES_VACCINE : 1
BLOND_HAIRED : 1
CRITERIA_AXIS : 1
INCLUDING_THE : 1
FOR_INTERVENTION : 1
GROUP_AS : 1
HERE_WT : 1
NO_MADE : 1
NO_DETERIORATION : 1
INFORMATION_STATEMENT : 1
LABS_SHOW : 1
WITH_MINIMAL : 1
ISSUES_DESPITE : 1
OUTSIDE_PT : 1
CC_SEE : 1
OPTICAL_CHECKS : 1
AT_DOSE : 1
TO_BEDTIME : 1
PHYSICAL_PERTINANT : 1
OF_EACH : 1
NURSING_APPLY : 1
SAFETY_AWA : 1
QUESTIONS_FILLED : 1
PAIN_IDENTIFY : 1
CHANGES_OR : 1
ONCOLOGY_NOTE : 1
DOCUMENT_TYPE : 1
TAKES_BUPROPRION : 1
NURSING_MENTAL : 1
IF_HE : 2
DISCUSSED_IT : 1
MELANOMA_PHYSICIAN : 1
ACHEY_JOINTS : 1
AMOUNT_STOOL : 2
SUICIDAL_LIKE : 1
HIS_GEOGRAPHIC : 1
TO_PLYMOUTH : 1
STREET_NO : 1
SUPPLIES_ALTHOUGH : 1
INVOLVING_SHOULDER : 1
THEY_SENDING : 1
HIM_NILANDRON : 1
PARTICIPATION_IN : 1
CALL_APPT : 1
HAS_BEEN : 7
MASS_LUMP : 2
FULL_THE : 1
THE_ACTUAL : 1
TO_HS : 1
NO_PROBLEMS : 1
LOWER_VETERANS : 1
UNSPECIFIED_COUNSELING : 2
PROCEDURES_PERFORMED : 1
COULD_DISCUSS : 1
PEERS_THROAT : 1
AT_BEGINNING : 1
ABILITIES_CC : 1
ENVIRONMENT_PROVIDED : 1
SHIFT_LUNCH : 1
THE_NOT : 1
NO_PHYSICAL : 1
SURGEON_FIRST : 1
THEN_PROTOCOL : 1
OTHER_FROM : 1
CALL_AND : 1
WILL_RECEIVE : 1
SPERMATOCELE_TIME : 1
SHIFT_CARE : 1
MASON_DIABETIC : 1
WITH_MONTHS : 1
IS_RESCHEDULED : 1
CRITICAL_NOTE : 1
SKIN_COLOR : 2
INTENSITY_PATIENT : 1
KNOW_ABOUT : 1
DID_WANT : 1
HTN_EVAL : 1
YRS_OLD : 1
CURRENT_IN : 1
DAILY_REASSESSMENT : 1
OF_FOLLOWING : 1
BELOW_ENDING : 1
FOR_IS : 1
LEARN_THAT : 1
THE_REQUEST : 1
GROUP_TITLE : 1
PHYSICAL_PATIENT : 1
TWO_THAT : 1
PARKING_FORM : 1
REPORT_APPOINTMENT : 1
OR_RECREATIONAL : 1
CONDITION_CERVICAL : 1
INVASIVE_TELEPHONE : 1
BEGAN_BRIEF : 1
TO_MUCH : 1
NO_ORIENTED : 1
PROBLEM_UNSPECIFIED : 2
DENIES_ANY : 3
WITH_FAMILY : 3
ASSISTIVE_SINGLE : 1
TO_OR : 1
EVIDENCED_POOR : 1
PATIENT_WRITTEN : 1
MG_CAP : 2
MEAL_REQUIRES : 2
AFFAIRS_OF : 1
DROPS_STATED : 1
DRESSED_STREET : 1
FISH_IN : 1
VERBALIZES_TO : 1
SESSIONS_PM : 1
PROGRESS_CRITICAL : 1
INTERVENTION_PROVIDED : 1
OF_ADDICTION : 1
PREVENTION_INTERVENTIONS : 1
HAD_ASK : 1
AT_BEDTIME : 3
RAL_AWAKE : 1
CLEAR_ABSENT : 1
IN_CATH : 1
ED_PROVIDER : 1
PING_IN : 1
IS_WT : 1
REPORT_CAME : 1
BE_IS : 1
PAIN_SAFETY : 1
OF_NOT : 1
OUTBURST_TALKED : 1
REVIEWED_NIACIN : 1
PATIENT_IS : 2
CONSULT_IS : 1
DEVICE_SINGLE : 1
EVENING_ASSISTANCE : 1
INVASIVE_DISKECTOMY : 1
TIME_IF : 1
THIS_PROVIDER : 1
PSYCHIATRIST_AS : 1
HELP_TRANSDERMAL : 1
TAKE_TWO : 1
UTOX_WAS : 1
COMMENT_WAS : 1
THERAPY_NOTE : 1
CARE_NOT : 1
BEHAVIORS_MAY : 1
TO_OVERNIGHT : 1
PLAN_PATIENT : 1
HAD_SEVERAL : 1
OUTINGS_MOBILITY : 1
HAND_PIECES : 1
NURSING_SCHEDULED : 1
HAND_PATIENT : 1
PL_ON : 1
AND_CONGRUENT : 1
TYPE_CONTACT : 1
PLAN_RADIATION : 1
WITHIN_NORMAL : 2
PM_RRR : 1
AND_WALKS : 1
INTEREST_IN : 2
CONTACTED_OCCUR : 1
SUPPORT_SYSTEM : 1
IF_PACKS : 1
SIG_TWO : 1
STAINED_OR : 1
APPLICABLE_WHO : 1
EVALUATING_EXPOSURE : 1
FOR_MONTHS : 1
NEGATIVE_ADDENDUM : 1
TOTAL_NUMBER : 1
WHICH_BEEN : 1
BEEN_IN : 2
HIS_UTOX : 1
IN_TRANSFER : 1
MR_NAOMI : 1
REGION_FOCAL : 1
RECONCILED_THIS : 1
PROCEED_PT : 1
BLAST_YES : 1
GRADE_REACTION : 1
MATERIALS_CITALOPRAM : 1
OF_MEDS : 1
COUNSELING_DIAGNOSIS : 1
ET_CONTROLLED : 1
OF_INSTRUCTIONS : 1
TO_PALPATE : 1
DOCUMENT_CALL : 1
AND_THE : 4
RAL_DC : 1
MED_MONITORING : 1
SCREENING_BY : 1
PROGRESS_NOTE : 4
FREQUENTLY_TEMPERATURE : 1
CBSST_SKILLS : 1
STENOSIS_WORSE : 1
BACK_ABSCESS : 1
STATUS_PREVENTION : 1
REPORT_ABNORMALITIES : 1
IDENTIFICATION_DISCHARGE : 1
LOCATION_NUMBER : 1
PATIENT_THAT : 2
BLOOD_SEGMENT : 1
ES_SUBSTANCE : 1
MOD_THAT : 1
MANAGEMENT_SERVICE : 1
FOR_CARE : 1
HOME_UP : 1
HALDOL_FOR : 1
STAFF_MIN : 1
AUDITC_DOING : 1
MAY_PHARMACIES : 1
LAUNDRY_MINIMAL : 1
HE_TO : 5
SUPPLEMENTAL_OXYGEN : 2
ASSESSMENT_SHAMPOO : 1
REINFORCED_VETERANS : 1
HIS_PAIN : 3
NURSING_KARDEX : 1
DURING_MMHG : 1
PHARMACIES_ENDING : 1
PING_EDUCATION : 1
BEEN_FROM : 1
FOCUS_OF : 1
IN_INDEPENDENCE : 1
GOING_TO : 1
HAS_LOT : 1
CANE_SKILLS : 1
OR_ABNORMAL : 1
PREVIOUS_ENCOUNTERS : 1
ZZPATIENT_ADL : 2
NUTRITION_INPATIENT : 1
IN_BODY : 1
ICDCM_DOES : 1
UNDERSTANDING_CLINICAL : 1
MEDICAL_SURGICAL : 1
BEDTIME_MOOD : 1
BY_IMPULSE : 1
TAKEN_MEDS : 1
LIVER_AND : 1
BARRIERS_TO : 1
DISC_DIABETIC : 1
FALL_AND : 1
VISIT_ALERT : 1
DESCRIPTION_OF : 1
MAY_OTHERS : 1
MEDS_DYSMENORRHEA : 1
LIVING_LISTED : 1
AND_REVIEW : 1
FALL_ACCIDENTAL : 1
OPENMIND_DURING : 1
SLIGHTLY_OVER : 1
SAYS_DIPLOPIA : 1
PRIOR_HOSPITALIZATION : 1
TALKED_POTENTIAL : 1
ON_WILL : 1
ON_OF : 1
WANT_IMPROVE : 1
CONCEPT_ADDICTION : 1
TO_SAFETY : 1
MEDICATION_GOOD : 1
DISCUSSING_THIS : 1
CNUMBER_MEDICATION : 1
RESIDENT_NUMBER : 1
ALSO_SPEAK : 1
ACTIVITY_SOC : 1
GRATEFUL_TO : 1
TWO_TABLETS : 1
STAFF_NEEDED : 1
MH_MENTAL : 1
DIFFICULTIES_JOB : 1
HE_NEEDS : 4
HE_PREFER : 1
VETERANS_AND : 2
MINIMAL_INVASIVE : 1
HX_TO : 1
ATTEMPTED_CONTACT : 1
NOTE_IT : 1
NOW_IS : 1
OR_GREATER : 1
THAT_SOME : 1
CARE_SCREEN : 1
RD_CALLED : 1
HAD_PT : 1
FEVER_PATIENT : 1
US_ABD : 1
GRADE_FEVER : 1
THOUGHTS_TO : 1
NURSE_HIM : 1
VETERAN_DIFFERENT : 1
RECORD_SURGICAL : 1
WORST_IMA : 1
NAVIGATE_OUTSIDE : 1
JOB_OF : 1
HAS_WITH : 1
TO_CHIEF : 1
MASS_THAT : 1
LEFT_THE : 1
FOLLOWING_ITEMS : 1
PATIENTS_HUSBAND : 1
LOWER_BACK : 1
COOPERAT_LAST : 1
HYPOXEMIA_CORRECTED : 2
FILE_HE : 1
PT_EDUCATION : 1
ID_BAND : 1
EXTR_TO : 1
TELEPHONE_PATIENT : 3
SERVICE_THE : 1
LIMITATION_ASSISTANCE : 1
VIETNAM_PATIENT : 1
MED_PHONE : 1
APPEARANCE_PERHAPS : 1
DISORDER_GROUP : 1
TO_IN : 9
CALL_BELL : 1
VET_NOTE : 1
THAT_THIS : 1
INTERESTS_STATES : 1
BEHAVIORS_APPOINTMENTS : 1
PATIENT_URINAL : 1
WOULD_BE : 2
ITEMS_GLASSES : 1
PRIORITIZE_WHAT : 1
NURSING_ONEON : 1
FOLLOWING_OTHER : 1
NUMBER_OF : 9
POST_ORDERS : 1
INTERVIEW_THIS : 1
HEIGHT_CM : 2
WITH_TURNING : 1
NO_APPARENT : 3
PART_BATHING : 1
SURE_HE : 1
TIME_AFTER : 1
ACTIVE_HAS : 1
REGARDING_HAS : 1
NUTRITION_TYPE : 1
ACID_MG : 1
FACILITY_DURING : 1
OK_HE : 1
SCALED_SHED : 1
PRIMARY_YES : 1
WEDNES_THE : 1
FOR_SYMPTOMS : 1
SYMPTOM_NURSES : 1
TOENAIL_IS : 1
OUTSIDE_AND : 2
ACTIVE_BIPOLAR : 1
OF_MINUTES : 1
COPY_IF : 1
ASSISTANCE_SCALE : 1
EPIDIDYMIS_IMPRESSION : 1
WATCH_STUMBLE : 1
HOW_MUST : 1
COMPUTERIZED_LIST : 2
APPOINTED_ZAHN : 1
ONETOONE_VERBAL : 1
SOUNDS_FOUND : 1
ALL_SPEECH : 1
PAP_PELVIC : 1
UP_WITHOUT : 1
TEAM_PARTICIPATED : 1
MAILPT_RECD : 1
STATING_LAST : 1
AND_HES : 1
APPLICABLE_URINATION : 1
MHICMINTENSIVE_CASE : 2
TO_DOES : 1
CONSULT_WITH : 1
FOR_COLONOSCOPY : 1
PRN_FOR : 1
LENGTH_OF : 4
VISIT_MEDICAL : 1
FOLDING_HAD : 1
HERE_FOR : 5
GROUP_DISCUSSION : 1
TREATMENT_SESSION : 3
WOULD_VISITNG : 1
TO_OFTEN : 1
HAS_TO : 1
PATIENT_ORIENTED : 1
ADL_SHEET : 1
ASK_THEM : 1
NIACIN_MOXIFLOXACIN : 1
MH_TELEPHONE : 1
OR_HR : 1
MORE_GRAMS : 1
BY_VET : 1
NO_PREPARATION : 1
READY_OK : 1
RECORD_PATHOLOGY : 1
THE_PLAN : 1
ROUTINE_HISTORY : 1
HCA_NEED : 1
PHONE_DISCHARGE : 1
HOUSING_MEDICATION : 1
HIS_IS : 2
ANESTHESIA_THE : 1
CONCERNS_CONVERSATION : 1
SCREEN_IN : 1
BP_BIRMINGHAM : 1
THIS_PROGRAM : 1
EXO_TREATMENT : 1
BATH_OS : 1
HAD_PAID : 1
TEMPORARILY_DUE : 1
FISTULA_WITH : 1
IS_HERE : 2
BY_PROVIDER : 1
IMPROVEMENT_IN : 1
SEEN_BY : 1
BENEFITS_THE : 1
PATIENT_NOW : 1
MEETS_GOT : 1
REGARDS_REQUIRES : 1
OTHER_AM : 1
CORNEA_CLEAR : 1
DEGEN_DZCHRONIC : 1
ABOUT_THE : 3
IS_EFFECT : 1
TWICE_MOTIVATION : 1
DIAGNOSIS_CATHETERS : 1
BACK_AGGRAVATE : 1
RATE_OF : 1
NO_PATIENT : 3
RISK_CELLULITIS : 1
PALMER_FOR : 1
NOT_POSITIONING : 1
PLAN_REVIEW : 1
OPEN_OF : 1
INVOLVING_ORTHOPTIC : 1
TO_EITHER : 1
TO_COMMUTE : 1
TEAM_PLAN : 1
THERAPY_HEMATOLOGIC : 1
HE_GUIDED : 1
FROM_HAVEN : 1
APPROACHING_OTHERS : 1
UNSTEADINESS_THAT : 1
MEAL_VETERAN : 1
INTERVENTION_STAFF : 1
SUMMARY_BELOW : 1
ON_AS : 1
SPECIFICALLY_MEDICAL : 1
TO_EXTENSION : 1
EXTREME_OCR : 2
FALL_IN : 1
LITERATU_CHANGE : 1
THEY_ARE : 1
STATUS_FALLS : 1
ORDERS_ICE : 1
AUSCULTATION_SCHEDULE : 1
MEDICATIONS_VET : 1
THE_FOCUS : 1
CYCLE_WEEKLY : 1
SESSION_CPT : 1
DRUG_REACTIONS : 1
RUMINATING_HIS : 1
GIVE_HALDOL : 1
SURGERY_YO : 1
OF_HCA : 1
AT_PER : 1
ADJUSTMENT_DEPRESSION : 1
INR_FOR : 1
CLEAR_TO : 1
PT_EVALUATED : 1
ADMITTED_TO : 1
OLDER_WAS : 1
CUEING_VALUES : 1
SERIAL_NUMBER : 1
BAG_HAD : 1
NPH_PM : 1
SIGNS_INCREASED : 1
INDEPENDENTLY_STRUCTURE : 1
AC_CARE : 1
GO_THROUGH : 1
PER_PATIENT : 1
PLEASENT_IN : 1
BE_ANXIOUS : 1
PROCEDURE_YES : 1
EXIT_INTERVIEW : 1
LEISURE_PROGRAMS : 1
YOU_ANY : 1
FROM_VETERANS : 1
NONE_BELL : 1
FIRST_RYAN : 1
TELEPHONE_VIA : 1
AS_AXIS : 1
PLAN_EFFECTIVENESS : 1
THIS_PHYSICAL : 1
INJURY_OR : 1
FEEL_SICK : 1
CHLORIDE_SA : 1
SVHD_FATIGUE : 1
PAINFUL_NO : 1
AT_WRITER : 1
RECREATION_THERAPY : 1
LOSS_ACQUIRED : 1
THERAPY_ASSESS : 1
ATTENDING_SESSION : 1
HE_OR : 1
DRAINAGE_OF : 1
SPEECH_REL : 1
HE_HE : 2
ACTIVE_LAMOTRIGINE : 1
APPEARS_STATING : 1
TO_WORST : 1
INDICATED_AT : 1
USE_STREET : 1
PATIENT_CRITERIA : 1
PHYSICAL_WITH : 1
WITH_COMPLAINT : 1
IN_GROUP : 1
DETAILS_TO : 1
IM_LOT : 1
RYAN_SHLDR : 1
PROGRAM_TRAILING : 1
WERE_WED : 1
SCAR_STATES : 1
HE_UNDERWENT : 1
DSM_IV : 1
BUPROPRION_REPORTING : 1
INFORMED_CONSENT : 2
INAPPROPRIATE_HORMONE : 1
INTENSE_MAKE : 1
ON_NURSING : 1
COUMADIN_WHICH : 1
BASAL_CELL : 1
MIN_AND : 1
HIS_WIFE : 2
FOCUS_MENTAL : 1
NURSE_BEHAVIORAL : 1
VOICED_UNDERSTANDING : 1
UROLOGY_CASE : 1
AND_YOURE : 1
CONTACT_PERSONAL : 1
DOES_AND : 1
DINNER_NURSING : 1
ERUPTIOSN_ERUPTION : 1
CBOC_NP : 1
AND_ASKED : 1
THE_INDICATED : 1
VETERANS_ABOUT : 1
BRIEF_AND : 1
LUBRICATING_GEL : 1
PARTICIPATING_AT : 1
AT_THAT : 2
CYST_POSTOCCIPITAL : 1
NOTIFIED_PT : 1
PAST_WITH : 1
PROCESS_DIVORCING : 1
CAP_TAB : 2
OF_IN : 2
PATIENT_TIME : 1
STUDY_REPORT : 1
GUIDED_TO : 1
LEFT_MESSAGE : 1
BED_BATH : 3
OF_DECISION : 1
ALERT_AND : 5
NOTE_VERBALIZE : 1
PACKS_SKIN : 1
TASK_SET : 1
PATIENTS_CONDITION : 1
THAT_ALL : 1
INJ_PWDR : 2
HIS_MEDICATIONS : 1
IT_FACT : 1
FOR_SAFETY : 1
PREVENTIVE_NOTE : 1
ORAL_CARE : 1
UPDATE_MUSCLE : 1
CONSTANT_TO : 1
BLOOD_PRESSURE : 5
DONE_OF : 1
PROGRESS_DID : 1
ALERT_AMOUNT : 1
AND_COURSE : 1
ALL_CONTACT : 1
VACCINE_NO : 1
PAIN_UREA : 1
HIP_PROTECTORS : 3
TRY_AND : 1
PHONE_THE : 1
DIVORCE_ANKLE : 1
TO_FAMILY : 1
BUT_SAYS : 1
NEEDS_GLASSES : 1
ISSUES_HE : 2
DISORDER_BY : 1
AND_SATISFACTORY : 1
THE_OF : 12
PAIN_ASSESSMENT : 2
CANE_TO : 1
PATIENT_EDUCATION : 1
THE_SOURCE : 2
DA_QUETIAPINE : 1
NOS_PATIENT : 1
ONE_CAPSULE : 2
THOSE_ASSISTANCE : 1
MEDS_AND : 2
FLOW_ADVISED : 1
NOTE_DE : 1
DEFICITS_SPECIFICALLY : 1
GROUP_COGNITIVE : 1
THAN_ACHEY : 1
IN_AM : 1
SHAMPOO_ELIMINATION : 1
WRITTEN_INFORMATION : 1
UPPER_AND : 1
CONSISTENCY_STOOL : 1
MENTAL_PSYCHIATRIC : 1
WOULD_FAX : 1
UREA_PLASMA : 1
WIFE_WHO : 1
BM_STAT : 1
PT_HAS : 3
HISTORY_PHYSICAL : 2
LEG_KNEE : 1
OS_NO : 1
CHIEF_COMPLAINT : 2
UNSAFE_FUTURE : 1
PRNS_GIVEN : 2
ENJOY_THE : 1
QHX_TO : 1
YES_NUR : 1
SIGMOID_CDI : 1
QUESTIONNAIRE_ARE : 1
NUMBER_FLUID : 1
TOBACCO_PRODUCTS : 1
OF_INTRAVENOUS : 1
NOTE_HAS : 1
WHOM_GIVEN : 1
HE_RESCHEDULE : 1
STATING_NIGHT : 1
OF_INAPPROPRIATE : 1
TURN_THE : 2
THAT_HE : 15
DEPENDENCE_BIPOLAR : 1
PHONE_DATE : 1
NO_INTEREST : 1
VETERAN_HYPOXEMIA : 1
HAD_PLEASE : 1
ALONE_ADDITIONAL : 1
HOSPITALIZATION_PATIENT : 1
THERAPY_IS : 1
PAIN_GLUCOSE : 1
OTHER_DISORDERS : 1
HIS_PLANS : 1
MG_HR : 1
HEALED_WOUNDS : 1
GREATER_LBS : 1
AREA_THIGH : 1
SOCIALIZATION_SKILLS : 1
AGE_EXPLAINED : 1
DISPOSITION_HOME : 1
AND_PARTICIPATION : 1
THE_FOR : 4
OVERNIGHT_WITHOUT : 1
PROCEDURES_INCISION : 1
LOSS_OF : 2
PENDING_TH : 1
ANATOMICAL_LEFT : 1
BMI_HR : 1
THE_PCP : 1
APPT_UNDERWENT : 1
VACCINE_STATEMENT : 1
THIS_THE : 7
BLADDER_ORIENTED : 1
NEEDED_NECK : 1
ONETOONE_WRITTEN : 1
HE_THEY : 1
ADDENDUM_DEAR : 1
DO_YOU : 4
NOTE_CENTRAL : 1
SINCE_THE : 1
FINGER_ON : 1
DEPRESSIVE_NOS : 1
MAY_MR : 1
NOTE_HIS : 1
SERVICES_EQUIPMENT : 1
DISCUSS_AND : 1
DOWN_RESULTS : 1
HIM_REGARDS : 1
TEMPERATURE_NEGATIVE : 1
SUICIDAL_ABOUT : 1
AM_CONTACT : 1
SUMMARY_STATES : 1
NOT_SPECIFIC : 1
PT_FAM : 1
TO_DM : 1
SACCOCIA_CLAIRE : 1
DIS_NOS : 1
FOOD_PATIENT : 1
DOCUMENTED_CHARTED : 1
PLACE_PATIENT : 1
OTHERS_WITH : 1
DONT_NEED : 1
REVIEW_IV : 1
DRINKS_OF : 1
EXPERIENCE_DISTRESS : 1
OF_ICDCM : 1
FEEDBACK_PREVIOUS : 1
EFFECTS_TO : 1
APPLICABLE_STATING : 1
ONE_BY : 7
TO_PHONE : 1
STRATEGIES_WITH : 1
APPARENT_PROBLEM : 3
PAIN_SCALE : 1
AS_PART : 1
ANXIOUS_AFFECT : 1
TO_TID : 1
USING_BALL : 1
INTERVIEW_TIMEFRAME : 1
GROOMED_AFFECT : 1
ASSISTANCE_HIP : 1
CLEAR_OS : 1
DIABETIC_SURVEILLANCE : 1
TYLENOL_EDUCATION : 1
DW_ACTIVE : 1
INCLUDING_SISTER : 1
PREVIOUS_WAS : 1
NOTE_MED : 1
HE_GOA : 1
MS_DINNER : 1
ABSENT_REFLUX : 1
PATIENT_AS : 1
REPORT_MEDICAL : 1
FRICTION_NO : 3
PATIENT_DECISIONMAKING : 1
FROM_AN : 2
WAS_ELSEWHERE : 1
PAIN_MISSED : 1
THERAPY_COMMENTS : 1
AND_TURN : 2
SETTINGS_YRS : 1
ON_PROTOCOL : 1
VA_THE : 1
DISORDER_SINGLE : 1
HEALTH_PSYCHIATRIC : 1
THOUGHTS_HE : 1
POSITIVELY_PERSONS : 1
CORRECTED_SUPPLEMENTAL : 2
WITH_THIS : 2
APPOINTMENTS_CLEAR : 1
REMINDER_POTASSIUM : 1
FEELINGS_SYMPTOMS : 1
OP_ICE : 1
WHICH_SERVICE : 1
THE_AUTHOR : 1
GROOMING_THIS : 1
NOT_FEELING : 1
USING_CHAIR : 1
LAST_THE : 2
BID_ACTIVE : 1
FOLLOWING_EFFECTS : 1
THE_THAT : 1
ANESTHESIOLOGY_VISIT : 1
NOT_CONTINUED : 1
RELIEVED_WITH : 1
ENTERED_INTO : 1
FOOT_WAS : 1
ASKED_IF : 2
OF_VETERANS : 1
TO_OTHERS : 2
ARE_THE : 2
AND_TAKES : 1
WIFE_IS : 1
METHADONE_RX : 1
IMBEDED_THE : 1
THEM_FROM : 1
CARE_THE : 1
STUMBLE_AROUND : 1
ADDICTION_HAMLIN : 1
THROUGH_CIU : 1
PATIENT_EXPIRATION : 1
STATES_HIS : 2
CASTS_DX : 1
BAY_PINES : 1
OCR_CHECKS : 1
SURGICAL_SITE : 1
STATED_MY : 1
FOR_GOAL : 1
NOT_RESPIRATORY : 1
IN_LAST : 3
STUDY_CAME : 1
DATE_OCT : 2
TO_RETURN : 1
INCISION_NURSING : 1
WITHOUT_ASSISTANCE : 1
THE_ASSISTANCE : 1
COLONOSCOPY_SCREENING : 1
PLAN_ACTIVITIES : 1
PHYSICAL_LIMITATIONS : 1
OTHER_ADDENDUM : 1
SEE_EASE : 1
ENGAGE_IN : 1
CASHIER_CALLED : 1
THE_REFUSED : 1
WITHIN_SLE : 1
INTERVENTIONS_AND : 1
DEAR_MR : 2
LAST_OUTPA : 1
INCH_FLOW : 1
ENCOURAGED_OF : 1
THAT_THEY : 1
HIS_THE : 3
DIFFICULT_FOR : 1
FALLING_MORE : 1
SCHEDULE_TO : 1
CIU_COLONOSCOPY : 1
PING_DURING : 1
CONSENT_FOLLOWING : 1
PATIENT_ARTICLES : 1
WAS_PATIENT : 2
SINCERELY_AND : 1
FROM_STATION : 1
OF_ILLNESS : 2
PROCEDURE_INTERNAL : 1
TRIAGE_SCHEDULED : 1
NOTE_NA : 1
WOUNDS_THE : 1
PROGRESS_ACETAMINOPHEN : 1
RN_ANY : 1
CONSTIPATION_OR : 1
VOICE_MESSAGE : 1
BETTER_LAYING : 1
BE_GAIT : 1
LISTED_AS : 1
CANE_QUAD : 1
INDIVIDUALIZED_RECOVERY : 1
CALL_MR : 1
TO_NO : 1
SUPPORT_INCLUDING : 1
NURSING_ASSESSMENT : 2
THE_SATISFACTORY : 1
REGARDING_CONSTIPATION : 1
ON_ACTIVE : 1
IN_LISTENING : 1
OF_INFLUENZA : 1
TIME_HE : 2
TO_HOW : 1
PROCEDURE_NUR : 1
VETERAN_DOES : 1
LEG_AFFECT : 1
LEVEL_AT : 1
IS_TEMPLE : 1
HE_REMAINS : 1
TOUR_THE : 1
ARTHRITIS_RISK : 1
NEW_CY : 1
IDENTIFIED_ENDING : 1
TO_ORIENTED : 1
SC_INTO : 2
FMH_DM : 1
CAN_RELIEVED : 1
THINGS_YOU : 1
PRX_III : 1
TO_SYPHILIS : 1
TID_FORGOT : 1
EYE_LAST : 1
RELATES_TOENAIL : 1
AND_HIGHER : 1
IT_INTERVENTIONS : 1
HIS_HCA : 1
THROAT_WATCH : 1
THERE_MEDS : 1
SELF_RESPIRATORY : 1
TRIAGE_TO : 1
ADDENDUM_TYPE : 1
BENIGN_MD : 1
SURGICAL_VETERAN : 1
SP_DOPPLERS : 1
HAS_SICK : 1
HOURS_CHRONIC : 1
WAS_CC : 1
CTA_BL : 1
REC_PT : 1
NOS_PSD : 2
MEDICINE_MH : 1
SURGICAL_EXTR : 1
OSUNSANYA_OLAWALE : 1
MEDICATIONS_REVIEWED : 1
PHYSICAL_IN : 1
WITH_AGO : 1
LOCATION_SEE : 1
DEPRESSION_HX : 1
SIMILAR_ADMISSIONS : 1
SOCIAL_TRAINING : 1
LINE_WILL : 1
ANDRE_WITNESS : 2
AM_AND : 1
USE_PING : 1
ACCOMPANYING_HE : 1
NOS_DENIED : 1
BEEN_SLIGHTLY : 1
AGO_WHICH : 1
PERFORMED_INCISION : 1
CALL_HYPONATREMIA : 1
NEUROSURGERY_TELEPHONE : 1
RYAN_PARKING : 1
ALREADY_DISTANCE : 1
CUEING_SECONDARY : 1
WATCH_HIM : 1
AFTER_ORIENTED : 1
RETURNED_TO : 1
FORM_NEEDED : 1
LIFESTYLE_ATTENDANCE : 1
SIG_ONE : 1
REPLACED_BY : 1
USES_PROFANITY : 1
LIFESTYLE_GROUP : 1
AID_ENVIRONMENT : 1
ED_INTO : 2
CONTACT_THE : 1
DENVER_LENGTH : 1
THEMSELVES_FROM : 1
FOLLOWING_SIDE : 1
RISK_DI : 1
TO_TUNICA : 1
VITAMIN_SUPPLEMENT : 1
MOST_RECENTLY : 1
MG_BID : 1
LIFETIME_NONUSER : 1
PARTICIPATED_MINIMALLY : 1
CLEAR_AUSCULTATION : 1
CLEAR_HE : 1
CARE_LINE : 1
ASSIGNMENT_UNDERSTANDS : 1
AT_ACTIVITY : 1
FEEL_EYES : 1
TO_BASCOM : 1
FOR_YES : 1
AREAS_OF : 2
WITH_GU : 1
TOILET_BED : 1
CRITERIA_CLINICAL : 1
HAD_PREPARED : 1
TO_SITE : 1
THAT_IF : 1
PATIENT_DUE : 1
VARIED_CONGRUENT : 1
SOMEWHAT_FOR : 1
CAN_POSITIVELY : 1
IN_CONVERSATION : 1
WAS_FRIENDLY : 1
SELF_DID : 1
WILL_IS : 1
LBS_HTN : 1
WRITTEN_MATERIALS : 1
TABS_PAIN : 1
SCREEN_ALCOHOL : 1
FOR_AS : 1
OUTPA_PATIENT : 1
BY_EVERY : 2
THE_CONSULTATION : 1
WILL_HIM : 1
DONE_INFORMATION : 1
UNDERSTANDING_OF : 1
MEDICAL_INFORMATION : 1
DOES_DRINK : 1
PRIOR_START : 1
PATIENT_BEEN : 2
ADMISSION_OF : 1
FOR_MANAGEMENT : 1
MR_LCSW : 1
WITH_BACK : 1
ABOUT_PAST : 1
REFILL_REPORT : 1
DYSMENORRHEA_BREAST : 1
THROUGH_IF : 1
AND_IN : 1
AND_SAYS : 1
ICDCM_FALL : 1
PATIENT_STATES : 1
WITHOUT_STAFF : 1
MAR_THIS : 1
FROM_ON : 1
STREET_DRUGS : 1
SINCE_WAS : 1
LENGTH_IDENTIFIED : 1
ARE_SENDING : 1
THE_LAST : 3
BIRMINGHAM_VETERANS : 1
HIPS_THE : 1
DIAGNOSTIC_CASTS : 1
SMILING_TALKING : 2
LIVES_WIFE : 1
YES_FOR : 1
PROMOTE_SOCIAL : 1
BEST_WORST : 1
ER_FOR : 1
FROM_MUCH : 1
SEE_DESCRIPTION : 1
WITH_OXYGEN : 2
IS_REG : 1
IN_MIDST : 1
EXCISION_OR : 1
OF_TISSUE : 1
DOB_AGE : 2
ATTIRE_ON : 1
PRESENTLY_MIDST : 1
DEATH_AND : 1
FOR_TWO : 1
STRETCHING_GUIDED : 1
OR_VARIOCOCELE : 1
ASSISTANCE_INFLAMMATION : 1
SESSION_CONTINENT : 1
LITERATU_RECENT : 1
PREFERRED_TO : 1
MANAGE_OWN : 1
CATHETERS_EDUCATION : 1
PTS_AND : 2
WAS_ABLE : 2
THAT_INCREASE : 1
NEW_OR : 1
VISIT_AND : 1
WEIGHT_POSSIBLE : 1
DOCUMENTATION_STAYING : 1
READ_REPORT : 1
CANE_VETERAN : 1
ABOUT_TOPIC : 1
PLEASANT_LAST : 1
ROADBLOCK_FOR : 1
MACKIE_HANDICAPPED : 1
FOR_SALE : 1
MOTION_CALL : 1
COUNSELING_CHIROPRACTOR : 1
APPLICABLE_THAT : 1
IEWED_REVIEWED : 1
PENDING_TOENAIL : 1
USE_ETOH : 1
IN_YOUR : 1
NOT_WED : 1
IS_NO : 1
NA_CAP : 1
ADEQUATELY_CONTROLLED : 1
PATIENT_APPEARS : 1
CASTS_APPOINTMENT : 1
AZITHROMYCIN_MG : 1
DISKECTOMY_TELEPHONE : 1
DISCHARGE_SUMMARY : 1
PREVENTION_COORDINATION : 1
REMINDER_FOR : 1
TISSUE_WORKER : 1
LAUNDRY_WITH : 1
CATHETERS_PATIENT : 1
AND_KEEP : 1
CONTINUES_IN : 1
FROM_HOSPITAL : 1
TO_EMOTIONAL : 1
BELONGINGS_KEPT : 1
HYPERLIPIDEMIA_GLUCOSE : 1
CONSENT_IDENTIFICATION : 1
OF_FEELINGS : 1
NOTE_ASK : 1
ACTIVITY_BUT : 1
VETERAN_IF : 1
HE_VISIT : 1
IMPROVEMENT_STARTING : 1
MAXIMUM_FROM : 1
VA_RETURN : 1
WOULD_NOT : 1
REVIEWED_YO : 1
NILANDRON_APPT : 1
NOTE_AS : 1
ACTIVE_PATIENT : 1
INHALE_BY : 1
PHYSICAL_HYPOTHYROIDISM : 1
COMPLAINTS_AND : 1
BURSITIS_SWOLLEN : 1
PROBLEMS_NOTED : 1
INVENTORY_TO : 1
YO_WM : 1
CALLING_HE : 1
WROTE_TEST : 1
HEALTH_ALLERGIES : 1
TIME_BETWEEN : 1
EXTRA_OF : 1
PATIENT_RECURRENT : 1
PATIENT_OUT : 1
BEFORE_TO : 1
COMPLETED_THIS : 1
GLASSES_AND : 1
ER_FOCUSED : 1
NUMBER_SUMMARY : 1
WELL_IN : 1
HE_PUT : 1
NORMAL_AM : 1
ACTIVE_DIVERTICULOSIS : 1
LISTED_HAVE : 1
THIS_PATIENT : 6
CONTINUE_INDIVIDUAL : 1
CHARTED_VET : 1
STEADY_WAS : 1
DATE_DEC : 1
IN_SCHEDULE : 1
ELOPEMENT_PRECAUTIONS : 1
FALLS_IN : 1
CALLER_REQUESTING : 1
ADMITTED_BEING : 1
REMINDER_PATIENT : 1
PALMER_WILL : 1
DTN_NURSES : 1
SOMETIMES_BREAST : 1
HYPERVIGILANCE_FINAL : 1
BY_TIMES : 1
LIMITATIONS_REPORTS : 1
OTHER_OSTOMY : 1
DISCHARGE_HOSPITAL : 1
COMMENTS_DENIES : 1
TAPER_FOCUS : 1
WILL_OF : 1
LOSS_ABDOMINAL : 1
THE_HYPOXEMIA : 1
TALKING_HIM : 1
DEVELOP_LMSW : 1
WHAT_TO : 1
CARE_OBESITY : 1
LAST_TOUR : 1
MANAGEMENT_ADDENDUM : 2
CENTER_CALL : 1
FOR_OBESITY : 1
WAS_ETOH : 1
ABOUT_PREVIOUS : 2
SSN_SAME : 1
NO_ACCIDENT : 1
OF_BREATH : 2
INCREASE_KNOWLEDGE : 2
TOILETED_NO : 1
THESE_NEEDS : 1
LIMITS_GOING : 1
HT_IN : 1
TAKE_COUMADIN : 1
BE_FILLED : 1
SOC_DISS : 1
SI_COMMENT : 1
CHEST_CLEAR : 1
MAIL_BILLS : 1
MMHG_TAKE : 1
ENDING_AT : 3
REPEATEDLY_BUSY : 1
OF_UTOX : 1
PLASMA_IS : 1
WERE_OF : 1
DIVORCING_HE : 1
LIMITED_WILL : 1
BATHROOM_LOCATION : 1
AGGRAVATE_PATIENT : 1
AND_WELLNESS : 1
RECURRENT_INFECTION : 1
ACTIVE_CBOC : 1
PATIENT_VERBALIZES : 2
MEDICAL_OF : 2
HOWEVER_ISES : 1
DIAGNOSIS_DECISION : 1
VICTIM_WITNESS : 2
BLAST_PRIMARY : 1
MOOD_WHILE : 1
ES_OF : 1
COMMENT_NUTRITION : 1
VOMITING_ASK : 1
TAB_TEMPORARILY : 1
PREPARED_HE : 1
PATIENT_FLUID : 1
THEN_REEVALUATE : 1
NAME_AGE : 2
RESULT_DIAGNOSTIC : 1
FALL_AUTHOR : 1
THERE_YEARS : 1
PHYSICIAN_NOTE : 1
TREATMENT_LONG : 3
DIVALPROEX_HR : 1
EXCELLENT_DURATION : 1
LIFESTYLE_SKILLS : 1
PALMETTO_TAB : 1
POTENTIAL_NEW : 1
IF_WOULD : 1
INCREASE_DOSE : 1
BEACH_FL : 1
MEDICATIONS_AS : 1
ASSESSMENT_REPORT : 1
CRISIS_CONSULTATION : 1
TAB_LAB : 1
INDEPENDENCE_MOTIVATION : 1
PAIN_LOWER : 1
DIALOG_POTASSIUM : 1
MMHG_TABLET : 1
GEOGRAPHIC_WHICH : 1
TO_CHEST : 1
YO_MALE : 3
AS_THAT : 1
AS_NURSING : 1
ASSISTANCE_HYGIENE : 1
READINGS_BUT : 1
IN_PLAN : 1
SHOW_INFLAMMATION : 1
WITH_TIME : 1
CONVERSATION_AROUND : 1
WELL_SHOW : 1
POSSIBLE_BEFORE : 1
OTHER_CARE : 1
FACT_EVERYONE : 1
CONTACT_REMOVE : 1
FAMILY_PT : 1
WEEKLY_LEISURE : 1
THE_ITEMS : 1
HAVE_OF : 1
ACTIVE_HOWEVER : 1
INCLUDE_OF : 1
PROTOCOL_NOT : 2
DURING_LESSONS : 1
SO_FEELS : 1
UNLESS_OTHERWISE : 1
SWER_VETERAN : 1
PRISCILLA_BRONZE : 1
THIS_REQUIRES : 5
DIFFICULT_PALPATE : 1
OWN_AFFAIRS : 1
ACCUPUNCTURE_CARE : 1
OCR_EMPHASIS : 1
STAFF_ASSISTANCE : 1
DENYING_SHE : 1
AFTER_THIS : 1
YOUR_PATIENT : 1
STRESS_ELIZABETH : 1
GRAINS_COMMENT : 1
OF_IV : 1
PARTICIPATE_ENJOY : 1
DIETITIAN_DATEAPR : 1
DOM_FOR : 2
CRUTCHES_FEB : 1
MHP_MINS : 1
DISCHARGE_NUMBER : 1
MEDS_YO : 1
AND_ON : 1
STOMACH_YOU : 1
HES_PRX : 1
INVOLVED_THE : 1
ONGOING_TELLING : 1
IMPROVED_WHILE : 1
WHICH_SUBSCRIBES : 1
REACTIONS_NOTE : 1
PARTICIPATING_IN : 1
ALERT_OF : 1
MUCH_AS : 1
FUNCTIONING_DISCHARGE : 1
ABOUT_YOUR : 1
HOWEVER_HAD : 1
AND_EXTR : 1
PROBLEM_OTHER : 2
IN_STARTING : 1
AREAS_SAO : 1
OR_ET : 1
NOTE_PHYSICIAN : 1
MIN_SERVICES : 1
MEDICAL_UAL : 1
OF_NURSING : 1
HYGIENE_FULL : 1
FULL_EXTENSION : 1
INHL_ORAL : 2
TESTS_INFORMATION : 1
AT_WOULD : 1
AAO_IN : 1
SOMEONE_NO : 1
HOSPITAL_CHRONIC : 1
OS_CLEAR : 1
BEEN_FEELING : 1
MAINTENANCE_AND : 1
DOCTOR_ADDENDUM : 1
CALLED_AROUND : 1
IBUPROFEN_DOXAZOSIN : 1
ADMISSION_CLINIC : 1
OFFICE_MS : 1
OPERATION_PACU : 1
ACTIVITIES_NONE : 1
RESULT_THE : 1
LEADER_EXPLAINING : 1
TIMES_ADMITTED : 1
BENEFIT_FROM : 1
STATE_ATTORNEYS : 1
HI_NO : 1
ADDENDUM_SCORE : 1
SESSION_NUMBER : 1
NO_FISH : 1
MOUTH_EVERY : 4
LIN_APPEARS : 1
CORRECT_FOR : 1
NOTE_REPEAT : 1
OR_MOBILITY : 1
BEING_AND : 1
OUTPATIENT_TREATMENT : 1
DOES_NEED : 1
DECISION_GUARDIANSHIP : 1
CALLER_DORN : 1
PM_PTSD : 1
RISK_THINGS : 1
PROGRAM_NOT : 1
MONTHS_AGO : 1
IEWED_MEDS : 1
ISSU_MG : 1
BEGINNING_GROUP : 1
THE_REPORTS : 1
THEY_WOULD : 2
UAL_CBE : 1
THIS_VETERANS : 1
INPATIENT_INITIAL : 1
CH_DUE : 1
STRAIGHT_THE : 1
MID_NUMBER : 1
LAST_SESSION : 1
FOR_WHAT : 1
CP_REPORT : 1
PRACTITIONER_WE : 1
OR_CUEING : 4
SAO_FALL : 1
UNTIL_NEXT : 1
DTR_BABY : 1
PLANS_AS : 1
MEDICATIONS_PREVIOUS : 1
PAIN_PATIENT : 2
PATIENTS_BLOOD : 1
ABRASION_HAND : 1
LOT_EXPIRATION : 1
OUTSIDE_OF : 1
EITHER_MED : 1
AGE_ADDENDUM : 1
VARIOCOCELE_FOLLOWING : 1
THEIR_POINTS : 1
AS_WAS : 2
THERAPY_VETERAN : 1
ACCESS_TO : 1
VISIT_WITH : 1
TO_MAINTENANCE : 1
THAN_HTN : 1
COMMENT_NORMAL : 1
TRAINING_THIS : 1
RECORD_AMOUNT : 1
CONDITION_INCREASED : 1
HOURS_YOUR : 1
PROVIDED_THIS : 9
HAS_SOME : 2
VERY_PAINFUL : 1
DURING_SESSION : 2
BY_PATIENT : 2
RATE_PAIN : 1
ONGOING_PAIN : 1
DOCUMENTED_VET : 1
SIGMOID_COLON : 1
AND_GROUP : 1
ADENOMA_SEE : 1
LICHENOID_INFLAMMATION : 1
AWAKE_PLEASANT : 1
PEOPLE_THE : 1
LCSW_PAIN : 1
SITUATIONS_BUYING : 1
THIS_MONTHS : 1
STEADY_HE : 1
FEEDING_PRACTITIONER : 1
PTSD_VETERAN : 1
PATIENT_REPORTS : 2
IN_PROPERTY : 1
FOR_MEDICAL : 2
WERE_UNTIL : 1
TAB_ONE : 4
INAPPROPRIATE_ANTIDIURETIC : 1
DO_DRIVE : 1
SPECIAL_ITEMS : 1
EXCELLENT_ESTIMATED : 1
AT_SOME : 1
VETERAN_TRAINING : 2
OF_MURMURS : 1
ON_OFF : 2
MENTAL_TREATMENT : 1
MG_DENIES : 1
REPORT_AND : 1
ACTIVE_OF : 1
IN_PROGRAM : 1
LOT_VOICES : 1
BEER_UNTIL : 1
SCAR_TISSUE : 1
IT_TOILETED : 1
DO_ANYTHING : 1
DSM_MULTIAXIAL : 1
IN_HE : 2
PT_HRS : 1
RECORD_SCANNED : 1
EXPECTATIONS_OUTPATIENT : 1
INCH_ADL : 1
KG_ASSESSMENT : 1
SEC_DISS : 1
EQUIPMENT_CHANGED : 1
DC_SUMMARY : 1
GROUP_AND : 1
USE_OF : 1
HES_BEEN : 1
TISSUE_SOCIAL : 1
THE_BEGINNING : 1
SURROGATE_IF : 1
PATIENT_WILL : 3
THAT_MAY : 1
STOOL_SKIN : 1
TYLENOL_VERBAL : 1
NOTE_REGARDING : 1
SHOW_LDL : 1
IT_THAT : 1
COLOR_YELLOW : 1
FOR_RISK : 1
LCSW_RT : 1
IS_PAINFUL : 1
IN_BONHAM : 1
INFORMATION_INTERIM : 1
APPT_WILL : 1
OTHER_PAST : 1
PROBLEM_CONCEPT : 1
PCP_DOES : 1
WOUND_WITH : 1
FACILITY_PROVIDER : 1
ROOM_DURING : 1
SEE_FOR : 1
CONCERN_SEPTIC : 1
PHYSICIAN_MEET : 1
ATTORNEY_OFFICE : 1
SKILLS_INSTRUCTOR : 1
DISCUSSED_QUESTIONS : 1
PATTERNS_INHL : 1
MINIMAL_CUING : 1
HE_ALSO : 1
PER_HE : 1
SPEECH_WAS : 1
RISK_ACUTE : 1
WILL_GENDER : 1
OPTICAL_LINENS : 1
ANGRY_THEREFORE : 1
NOS_ICDCM : 1
MULTIDISCIPLINARY_TEAM : 1
OLD_HAS : 1
STATUS_ASSISTANCE : 1
WAS_COMPLETED : 1
OF_THIS : 1
EVALUATE_CRISES : 1
PAIN_CASE : 1
DRINK_ACCUCHEK : 1
FULL_CONSENT : 3
QHS_BEDTIME : 1
PATIENT_BLACK : 1
BEDSIDE_OXIMETRY : 1
TO_THEIR : 1
PMH_LAST : 1
DIAGNOSTIC_DX : 1
OF_PARTICIPATING : 1
NO_FATIGUE : 1
STATES_NEEDS : 1
BODY_ELIMINATION : 1
LPM_DURING : 1
PT_REQUIRED : 1
MULTIPLE_TO : 1
IS_SUBMITTED : 1
CLINIC_FURTHER : 1
THERAPY_YES : 1
MH_MD : 1
TO_PROCESSED : 1
PROVIDED_NUMBER : 1
LOWER_LEG : 1
COMMENT_PT : 1
TAB_FOR : 2
NONVA_SAW : 1
IN_ADDENDUM : 1
TOENAIL_FOR : 1
HPI_ER : 1
NO_LOCATION : 1
THAT_EVERYONE : 1
IS_THE : 3
GROUP_IS : 1
AND_PERSONAL : 1
SIG_TAKE : 2
HIP_IN : 3
THE_CRISIS : 1
COMPLICATIONS_INTENSITY : 1
POINTS_THESE : 1
TO_COGNITIVE : 1
ADDITIONAL_COMMENTS : 3
PROPERLY_TRIPPED : 1
ACETAMINOPHEN_MG : 1
THAT_TO : 1
ADDENDUM_PAIN : 2
TAPE_ON : 1
DEPRESSION_SKIN : 1
NEEDS_INTERVENTIONS : 1
OTHERWISE_NOTED : 1
PATIENT_INDICATED : 1
PHYSICAL_YES : 1
AVAILABLE_FINGER : 1
DECISIONMAKING_COVERED : 1
SATISFACTORY_CONDITIONS : 1
RECEIVE_FEEDBACK : 1
PERSONS_LIFE : 1
WM_SENT : 1
LOWER_DISORDER : 1
IF_YES : 1
FEEDING_EXCELLENT : 1
FALLING_TO : 1
OF_LIVING : 1
AMBULATORY_DEVICE : 1
PREPARATION_POSITION : 1
IS_FLAT : 1
IN_HOME : 1
HIM_PEOPLE : 1
ACCUCHEK_CURVE : 1
OTHER_PLEASED : 1
BREATH_BREATHING : 1
OR_TWICE : 1
COMPLETED_YES : 2
DEC_DIPHENHYDRAMINE : 1
MY_WARNING : 1
TOILETED_PROGRAM : 1
THE_OTHER : 1
THE_SESSION : 1
THOUGHTS_TURN : 1
DURING_THIS : 6
THAT_PARTICULARS : 1
FOR_VISIT : 2
VE_LOCATION : 1
FOR_APPT : 1
MOTIVATION_VETERAN : 1
TORN_OR : 1
WITHDRAWL_SEIZURES : 1
PAID_FOR : 1
SKIN_AT : 1
AND_BREATHING : 1
IS_DRESSED : 1
IN_OUTPT : 1
ENDOTRACHEAL_THE : 1
TEST_INSTRUCTED : 1
TO_KNOWLEDGE : 2
SCHEDULED_APPOINTMENT : 1
TAKE_SHOWER : 1
ENGE_STUCK : 1
THREE_AND : 1
REVIEW_MOVE : 1
EQUIPMENT_CARE : 1
DONE_THIS : 1
PATCHES_PROBLEM : 1
GETS_MONEY : 1
REPORTS_ADDENDUM : 1
NURSE_ACCOMPANYING : 1
PROTECTORS_IN : 3
APPOINTMENTS_LEFT : 1
OUTPT_DID : 1
WORST_SESSION : 1
THE_DINING : 1
INADEQUATE_PLAN : 1
INDEPENDENT_EASILY : 1
OXYGEN_AT : 1
THEY_FOR : 1
SITS_UP : 1
WHAT_HAD : 1
PER_MUSCLE : 1
DISEASE_NURSING : 1
GUIDED_TECHNIQUES : 1
AFEBRILE_VSS : 1
SUPPLEMENT_FULL : 1
UP_TO : 1
STOOL_NONE : 1
SVHD_CONTINUES : 1
UNDERSTANDING_TO : 1
INFORMATION_HOURS : 1
VETERAN_ASSISTANCE : 1
CURRENT_LEVEL : 1
CHOICES_CONTINUES : 1
FEELINGS_AND : 1
RETURN_BASCOM : 1
HOURS_WM : 1
PERSONAL_ORAL : 1
PAIN_CONTINUES : 1
HOW_LACE : 1
OR_ARRANGING : 1
FOR_HOME : 2
IS_REVIEWED : 1
OUTPT_WHAT : 1
PROPANOLOL_HS : 1
PRESENTATION_HEALTH : 1
DOWN_TO : 1
OR_LOCATION : 1
PRECURSOR_MELANOMA : 1
DENIES_NEW : 1
MAR_SHIFT : 1
EFFECTIVENESS_ANTIBIOTIC : 1
HIM_DIFFERENT : 1
RECEIVED_LEVEL : 1
PHYSICIAN_MEDS : 1
RESIDENT_WITHIN : 1
USE_TO : 1
PARTICIPATION_TEAM : 1
THIS_MIN : 1
HEALTH_BUPROPION : 1
DESPITE_ATTEMPTS : 1
CUEING_ARRANGING : 1
OF_NEEDING : 1
PHYSICIAN_DISCHARGE : 1
RISK_NOT : 1
FACE_WITH : 1
GOOD_SLEPT : 1
IN_DOM : 1
GOAL_INR : 1
STATING_THAT : 1
OFFERED_TO : 1
ON_VETERAN : 1
HERE_TO : 1
YOUR_HAVE : 1
DERMATOPHYTOSIS_OF : 1
CUEING_PROVIDED : 1
FOLLOWED_MAJOR : 1
LEAST_LEISURE : 1
EXAM_FEEDING : 1
NOW_YOURE : 1
SKIN_VITALS : 1
TO_NAME : 1
ADVERSE_REACTIONS : 2
LIFE_MIN : 1
ILLNESS_PATIENT : 1
WOUNDS_ON : 1
MR_AT : 1
PROCEDURE_EDUCATION : 1
YES_COGNITIVE : 1
JOB_DETERIORATION : 1
AMBULATION_MMHG : 1
RECEIVED_MEDICATION : 1
PURPOSE_OF : 1
IT_NOT : 1
SUBACROMIAL_LIN : 1
COMPLETED_TO : 1
FOR_ALCOHOL : 1
AS_ACTIVE : 1
HEALTHCARE_WE : 1
PLAN_ONCOLOGY : 1
THAN_LBS : 1
THE_SIDE : 1
VETERAN_DEMONSTRATING : 1
FEMALE_HAS : 1
AUG_MG : 1
SIMVASTATIN_IBUPROFEN : 1
SKILL_AND : 1
RISK_WOULD : 1
RUNNING_AT : 1
OF_STOOL : 3
ADDENDUM_AWAKE : 1
IMPROVE_HEALTH : 1
WILL_ABLE : 1
THE_COMPLETED : 1
PROBLEMS_COMPUTERIZED : 1
ILLNESSES_PROBLEM : 1
RAL_SURGERY : 1
ISSUES_THE : 1
UROLOGY_MANAGER : 1
POSTOCCIPITAL_VOID : 1
DANGER_SELF : 1
LENGTH_TREATMENT : 2
ATTENDING_DIDACTIC : 1
PERHAPS_THIS : 1
TO_MORE : 1
THE_ISSUES : 1
PRIVILEGES_RESIDENT : 1
REPORT_DATE : 1
ACTIVE_MEDS : 1
FOR_LAB : 1
ACTIVE_ADDENDUM : 1
SCORE_ADEQUATELY : 1
RECORD_ANESTHESIOLOGY : 1
VETERAN_ABLE : 2
AT_PULSE : 2
FILL_LAST : 1
SPONGE_BATH : 3
APPARENTLY_PROBLEM : 1
TO_SYSTEM : 1
LDL_CHO : 1
THIS_WILL : 3
AND_MOTIVATION : 1
THERAPY_DUE : 1
PER_PLAN : 1
FOCUS_THE : 1
ON_AND : 2
AT_LOW : 1
SPORADICALLY_OR : 1
DENIES_OS : 1
AS_NECESSARY : 1
FOR_CELL : 1
SEEN_DIETITIAN : 1
POOR_CONTROL : 1
HE_WOULD : 2
PATIENT_REINSTATEMENT : 1
NEW_CELL : 1
SICK_TO : 1
SUPPORTIVE_ASSESS : 1
MIDNIGHT_WITHIN : 1
RAL_FOR : 1
HOWEVER_DOES : 1
THAT_INCLUDES : 1
EDUCATION_MH : 1
CAN_VERBALIZE : 1
SPOUSE_THAT : 1
VACCINE_AT : 1
BRING_ANY : 1
WAS_NEG : 1
BACK_MG : 1
NPH_UNITS : 1
PT_THIS : 1
DESPITE_DISCREPANCY : 1
HOURS_DENIED : 1
SEBACEOUS_CYST : 1
ET_EXAMPLE : 1
CASE_SUPERVISOR : 1
BREATH_AND : 1
TUNICA_LIS : 1
REQUEST_FOR : 1
PM_IS : 1
EVAL_AT : 1
FILLIN_OF : 1
BACK_TO : 2
HAS_CHECK : 1
ZZECF_PROGRESS : 1
CRITICAL_CARE : 1
NO_AVERAGE : 1
PT_NO : 2
VETERANS_TOTAL : 1
IS_ABOUT : 1
HOSPITALIZATION_NUTRITION : 1
PER_INT : 1
DTN_SYMPTOM : 1
SC_MEDICAL : 1
PROGRAM_THERAPY : 1
SEE_ENDING : 1
HE_SEEN : 1
STATUS_FROM : 1
AND_NOTE : 1
USE_PATIENT : 1
EFFORTS_PROMOTE : 1
TO_APPROACHING : 1
MANAGER_HAVE : 1
SEEMS_HAVE : 1
SEE_DICTATED : 1
TIME_TIME : 1
SYPHILIS_NUTRITION : 1
PACU_ROOM : 1
TIME_OUT : 1
HE_CURRENT : 1
BATHINGNO_THE : 1
EXAMINATION_HAND : 1
NO_MEDICATION : 1
PAIN_STENOSIS : 1
PROGRESS_PROGRESSING : 1
HOUSE_SHE : 1
AND_BUPROPRION : 1
CARE_PROVIDER : 2
USE_POOR : 1
PATIENT_POSITION : 1
GROUP_ENGE : 1
TO_SHE : 1
DESPITE_THE : 1
HOW_TO : 3
CLASS_MEDICAL : 1
BACK_ALL : 1
OL_DATE : 1
BED_HOSPITAL : 1
MENTAL_STATUS : 2
DESCRIBE_GOALS : 1
RELATES_THE : 1
IN_HOLDING : 1
EXAM_FOOT : 1
SEC_TO : 1
INDICATES_THAT : 1
ALERT_ATTE : 1
UAL_PAP : 1
LAST_OR : 1
ACCIDENT_OR : 1
COORDINATION_USING : 1
MAR_OF : 1
FOCUSED_MOD : 1
TEXTURES_AS : 1
WAS_NURSING : 1
AND_OF : 8
SHORTNESS_OF : 1
WILL_NOT : 2
DIFFICULTY_PSYCHIATRY : 1
IF_TREATMENTS : 1
PERFORM_SAFE : 1
FOR_GRANDCHILDREN : 1
EDUCATION_FAMILY : 1
WITH_SPOUSE : 1
ASSISTANCE_SUPERVISION : 1
AFTER_SESSION : 2
OXIMETRY_HE : 1
DISORDER_DISCHARGE : 1
KEPT_THE : 2
INFO_REQUIRED : 1
PHYSICIAN_OF : 1
THE_EMPHASIS : 1
CONSENT_BAND : 1
ORDERS_PRNS : 2
SESSION_MINUTES : 1
MENTAL_WITHDRAWL : 1
REACTION_SHOW : 1
PROBLEM_HAS : 1
DURING_CURRENT : 1
PM_REINFORCED : 1
IN_HIS : 4
VOID_ML : 1
NOTED_BELOW : 1
STARTED_DEC : 1
OF_APPOINTMENT : 1
REPORTING_MENTAL : 1
TO_MH : 1
CLINIC_DENIED : 1
WAS_KILLED : 1
FOOD_GRAINS : 1
RELATED_PROCEDURE : 1
MOTIVATION_LEARN : 1
REVIEWED_WITH : 2
ETOH_RECREATIONAL : 1
CONTINENT_THERAPY : 1
TRIGLYCERIDES_WILL : 1
DEATH_SINCE : 1
HEPARIN_LOCK : 1
IS_ON : 5
LIST_IS : 2
PAIN_PHE : 1
ABDOMINAL_CONSTIPATION : 1
MAY_SENT : 1
OTHER_GROUP : 1
REGARDING_MON : 1
THE_COLON : 1
FROM_ETTE : 1
FOUND_TO : 1
INCREASED_FOR : 1
CARE_FEBRILE : 1
EXPIRATION_DATE : 1
AND_SENT : 1
CELL_NUMBER : 1
ORIENTATION_MIN : 1
AS_CONSULT : 1
TO_WHICH : 1
FOR_DUE : 1
THE_FINGER : 1
SHLDR_DECOMPRESSION : 1
TO_LACE : 1
ADVISED_CALL : 1
AS_POSSIBLE : 1
SAFETY_AS : 1
NUTRITIONAL_RADIATION : 1
HOME_IS : 2
GUARDIANSHIP_LITERATU : 1
ATTE_HELP : 1
ATIVAN_TAPER : 1
MHICMINTENSIVE_MANAGEMENT : 2
DEPRESSIONPT_IS : 1
REQUEST_AC : 1
ETTE_VICTIM : 1
GOOD_PT : 1
ED_DOCUMENT : 2
TO_DINNER : 1
PROVIDERS_NOTES : 1
ASSESSMENT_BOWEL : 1
ACTIVE_PROBLEM : 1
OBSERVATION_LIMITED : 1
NURSE_CASE : 1
ONEON_BEEN : 1
REQUESTED_NURSING : 1
SUMMARY_FOLLOWING : 1
ER_TAB : 1
RESULT_MG : 1
ENCOURAGE_PARTICIPATION : 1
PATIENT_ADMITTED : 1
INFECTION_IMPLEMENT : 1
OPENMIND_THE : 1
PAID_HOME : 1
STATEMENT_INACTIVATED : 1
TIMES_SITUATIONS : 1
APPOINTMENT_DUE : 1
SYSTEM_HIS : 1
RECEIVE_FROM : 1
PTSD_THE : 1
GROUP_OUTLINED : 1
SWEET_NEED : 1
NOT_BEEN : 2
CHIROPRACTOR_AND : 1
VIEW_DOCUMENT : 1
SEPTIC_ARTHRITIS : 1
AFFECT_WAS : 1
SOURCE_AND : 2
GETS_HIGHER : 1
HAS_IN : 1
ISSUE_OCT : 1
EN_WAS : 1
WEIGHT_LOSS : 2
DREW_NO : 1
TEMAZEPAM_BY : 1
IN_PANTS : 1
SKILLS_TRAINING : 1
RECEIVED_PING : 1
SLIGHTLY_WORSE : 1
MEDICATIONS_LISTED : 1
RADICULOPATHY_ICDCM : 1
STAYING_WITH : 1
ANY_OS : 1
BELOW_HELP : 1
FLAT_NURSING : 1
VISIT_SEE : 1
FEBRILE_OVERNIGHT : 1
THE_MODULE : 1
LIVING_IN : 1
CLAIRE_TO : 1
EVERYONE_HAS : 1
KILLED_VIETNAM : 1
DEP_NOSUNSPEC : 1
GU_TAKE : 1
MICROSCOPIC_ANALYSIS : 1
OFFICE_SETTINGS : 1
AS_LEADER : 1
RALS_OFFICE : 1
LIFETIME_OF : 1
CONSTANT_BUT : 1
VSS_MAY : 1
VETERAN_PROVIDER : 1
VISIT_PT : 1
THROAT_GRADE : 1
SKILLS_ANSWERED : 1
DIAGNOSIS_CYST : 1
THE_ADDENDUM : 2
SUBSCRIBES_TO : 1
CLEAN_BEDSPREAD : 1
INADEQUATE_PATIENT : 1
REFILLS_TRANSPORTATION : 1
COMMENTS_UNAWARE : 1
BUT_HISTORY : 1
STOOL_APPLICABLE : 1
LIMB_KEOMUAN : 1
LINE_BY : 1
PM_TURN : 1
MEDS_PUPIL : 1
BEEN_DETERMINED : 1
TL_IS : 1
THIS_SHIFT : 10
PACKET_EXT : 1
FELT_FEELING : 1
PLAN_TO : 1
ON_THIS : 2
SUPPORTIVE_LEVEL : 1
DISEASE_RELATED : 1
SURE_ORDERS : 1
FILL_FILL : 1
IN_APPOINTMENT : 1
ASSESSMENT_CP : 1
PATTERNS_TO : 1
STAFF_TIME : 1
PTSD_APPTS : 1
IMMEDIATE_HIMSELF : 1
DETERIORATION_COGNITIVE : 1
STATES_HE : 3
FEELINGS_THOUGHTS : 1
CUEING_NO : 1
RECEIVE_AN : 1
FOLLOWUP_NOTE : 1
OF_MG : 2
BEATS_RACING : 1
NO_TO : 3
LIN_HAS : 1
NOTE_WEST : 1
STARTED_IS : 1
SHOW_HIGH : 1
IS_IN : 3
BEHAVIORAL_NOTE : 1
NO_WORST : 1
HE_MENTAL : 1
AND_ENJOY : 1
NP_PROGRESS : 1
ANY_RESP : 1
DENIES_RESP : 1
APPT_WAS : 1
NIGHT_DIFFICULTY : 1
THIS_SAYS : 1
FOR_WEIGHT : 1
CLINIC_FOR : 1
READY_MOOD : 1
FOR_BY : 1
DIPHENHYDRAMINE_HCL : 1
CONVERSATION_SPONTANEOUSLY : 1
HAD_TO : 2
PCP_APPT : 2
FLUVASTATIN_NA : 1
FINISHED_REHAB : 1
OF_HISTORY : 1
OF_MEDICATION : 1
AID_OF : 1
STILL_ON : 1
BY_STAFF : 1
HEALTHCARE_WANT : 1
DRUG_THE : 1
WROTE_DOWN : 1
AND_ASK : 1
WAS_DURING : 1
VETERAN_MENTAL : 1
ANTIBIOTIC_PATIENT : 1
APPOINTMENT_IT : 1
DISORDER_FLUOXETINE : 1
REST_ACTIVITY : 1
WITH_CHRONIC : 1
HOME_HIS : 1
HELP_AT : 1
MG_FOR : 1
INFORMATION_ABOUT : 1
REG_IN : 1
AS_BY : 1
INCONTINENT_TO : 1
SESSION_EMOTIONAL : 1
GO_CIU : 1
PROBLEMS_VETERAN : 1
SEE_MY : 1
BE_SENT : 1
PARKING_FILLED : 1
ALLERGIES_TOPIRAMATE : 1
INTO_AS : 1
ADDRESS_GOALS : 1
HTN_AT : 1
CALLING_ISSUES : 1
BALL_TIP : 1
IN_AND : 5
INSTRUCTOR_WAS : 1
SAID_FROM : 1
LOW_HOME : 1
TO_REPORT : 1
IN_ALL : 1
SELF_NOT : 1
FOR_NOS : 1
CONFIDENCE_EXPLORED : 1
RELIEVED_TYLENOL : 1
HAS_PAIN : 1
PSYCHIATRIC_CONSULT : 1
LOT_OF : 2
INTERMITTENT_OF : 1
ORIENTED_DRESSED : 1
WALKING_IS : 1
TO_AREA : 3
TREMORS_BOWEL : 1
TN_PERIOD : 1
CARE_PHILOMENA : 1
IN_FACE : 1
TO_SO : 1
TREATMENT_PLAN : 1
SLE_HERE : 1
MULTIPLE_ADMISSIONS : 1
SHE_THE : 1
HELP_VETERAN : 1
DURATION_SERVICES : 1
HAND_REPORTS : 1
CURRENT_TO : 1
THAT_LIN : 1
ON_LIST : 1
WEEK_NOW : 1
BELONGINGS_BY : 1
HOME_COUMADIN : 1
HFA_INHALER : 1
PENIS_OVER : 1
MOVEMENTS_THIS : 3
RUN_OF : 1
INTRAVENOUS_THERAPY : 1
TO_START : 2
NOT_IN : 1
CANE_CANE : 1
QTY_FOR : 1
EYE_EXAM : 1
SEE_OF : 1
HAMLIN_TO : 1
OF_EYEBALL : 1
CONTINUE_CARCINOMA : 1
FOR_CLOZARIL : 1
ALSO_DISCUSSED : 1
HE_RESCHEDULED : 1
DIAGNOSIS_THIS : 1
SAYS_OCCURS : 1
GAIT_STEADY : 1
SET_UP : 1
WAS_ADMINISTERED : 1
HYPERTENSION_BERNA : 1
INTO_ADDENDUM : 1
INCREASE_OF : 2
EDUCATION_DONE : 1
TO_IDENTIFIED : 1
GROUP_ATTENDANCE : 1
BE_OCCUR : 1
REPORT_FOCAL : 1
CLC_AREA : 1
RECOVERY_CURRENT : 1
THINKS_THEY : 1
AT_TIME : 6
THERE_NO : 1
CHARTED_IS : 1
INTERVENTIONS_THAT : 1
IV_SUBSTANCE : 1
HE_PREPARED : 1
DISCUSSION_SITUATIONS : 1
AND_RECEIVED : 3
INSTRUCTIONS_NO : 1
VA_IF : 1
SITS_WITHOUT : 1
CONFIDENCE_WHAT : 1
YES_NO : 2
TOENAIL_MANY : 1
ACTIVE_ENCOURAGED : 1
HOSPITALIZATION_PRIVATE : 1
MR_SEEN : 1
PHD_KNOXVILLE : 1
AT_CLAIRE : 1
MEETS_CRITERIA : 1
THIS_WAS : 4
FROM_BEFORE : 1
SHE_PATIENT : 1
SERVICES_OTHER : 1
MR_NO : 1
FOR_COMPLETION : 1
VOMITING_DO : 1
REVIEWED_MALE : 1
SUGAR_GETS : 1
MAGAZINES_VETERAN : 1
PREVIOUS_ATTEMPTS : 2
REMINDER_PLAN : 1
COORDINATION_BEDTIME : 1
VET_IS : 3
INTERVENTION_THESE : 1
TO_SOMETIMES : 1
DANGER_TO : 2
FROM_VET : 1
VETERAN_WITH : 1
TELEHEALTHCARE_REACTION : 1
VENTILATION_FEELINGS : 1
GIVEN_INJ : 1
HOLDING_LIMITED : 1
WITH_BM : 1
THAN_PREVIOUS : 1
HAS_PATIENT : 1
EMERGENCY_DEPT : 1
FROM_WITH : 1
AFTER_FINISHED : 1
CHOLESTYRAMINE_GM : 2
PATIENT_TRIPPED : 1
THAN_JOINTS : 1
FEELS_THAT : 1
FOR_EYE : 1
CONTINUE_THERAPY : 1
OLECRANON_SINCE : 1
GREATER_OF : 1
NEEDED_EACH : 1
PURPOSE_IV : 1
RYAN_HANDICAPPED : 1
EXACT_DATE : 1
SAME_MISC : 1
APPOINTMENT_THE : 1
KNOWLEDGE_ABOUT : 1
IF_NEEDED : 1
HAS_ALWAYS : 1
SATISFACTORY_NOTED : 1
WITHOUT_NEW : 1
USED_URINAL : 1
BIOPSY_ADENOMA : 1
INSISTS_HE : 1
MODIFIED_OF : 1
IS_PROBLEM : 1
THIS_ADMISSION : 1
FRUSTRATING_BE : 1
USED_THE : 2
MEDICATION_NOT : 1
BEFORE_OUT : 1
LOCATION_HUNTSVILLE : 2
NEW_PHONE : 1
HUSBAND_IS : 1
STATUS_ORIENTED : 1
HE_ON : 2
BODY_WAS : 1
TO_CALL : 4
AND_IS : 2
RATE_SPEECH : 1
RESPIRATORY_THERAPY : 2
PATIENT_PATIENT : 1
HAVEN_II : 1
THE_HUSBAND : 1
THREE_YEARS : 1
PAINFUL_BURSA : 1
EITHER_FOR : 1
DISORDER_MG : 1
VETERAN_BUSINESS : 1
THIS_IS : 2
COUGHING_WITH : 1
BLOOD_PT : 1
DEC_FOR : 1
LIST_PERFORMED : 1
CODE_TELEPHONE : 1
MEDICAL_RECORD : 1
PHYSICIAN_EASE : 1
MON_TH : 1
PATTERNS_OF : 1
OF_IDEAL : 1
MR_NURSE : 2
THIS_FACILITY : 1
REINFORCED_EFFORTS : 1
TRIPPED_FELL : 1
BE_PRESENT : 1
GOALS_DIRECTION : 1
STARES_AROUDN : 1
WAS_AFTER : 1
CALL_FOLLOW : 1
PINES_PROGRAM : 1
GOOD_CLINICAL : 1
OUTPATIENT_MEDICATIONS : 3
BATHING_HEARING : 1
THE_HISTORY : 1
HEMORRHOIDS_PT : 1
ASSISTANCE_PROVIDED : 9
VITALS_VACCINE : 1
DEPT_PART : 1
EXCISION_MASS : 1
DTN_RX : 1
NEEDED_FOR : 4
GAIT_IS : 1
TO_BID : 1
THE_INTIMACY : 1
STATES_WERE : 1
LOSS_VISION : 1
EASE_APPARENTLY : 1
ATTENTIVE_DURING : 1
DRINK_ETOH : 1
SLEPT_HRS : 1
SOME_CHOLESTYRAMINE : 1
INSTRUCTIONS_INFORMED : 1
TASK_UP : 1
LENGTH_MINUTES : 1
ELECTRONICAL_TO : 1
WITCH_WEEK : 1
MEDICATION_WED : 1
SERVICE_IN : 1
DIDACTIC_THERAPEUTIC : 2
ADMISSION_DEPRESSION : 1
OD_CLEAR : 1
MURMURS_POON : 1
FOR_DETAILS : 1
BED_SAD : 1
SYST_THE : 1
MORE_WITH : 1
TAB_TAKE : 6
DRESSED_IN : 1
HIS_WILL : 1
PROVIDER_MEYER : 1
PRN_ACTIVE : 1
SAW_PALMETTO : 1
THAN_PER : 1
ONE_TABLET : 5
CONTACTED_SCHEDULING : 1
NEG_FOR : 1
CONTACT_ALL : 1
FACE_TREMORS : 1
CHOICES_AND : 1
EYES_FULL : 1
MAKE_BETTER : 1
MET_WITH : 1
INSUFFICIENCY_DOING : 1
RESPIRATION_NONE : 1
THAT_NOT : 1
GOOD_NO : 1
ICDCM_BY : 1
LONG_TERM : 3
THE_VA : 4
BRONZE_PATIENT : 1
USUALLY_CONTROLLED : 1
THE_OR : 1
NOTE_PATIENT : 4
VETERAN_STATED : 1
IS_THAT : 1
DEPRESSION_NOS : 2
NONVA_PALMETTO : 1
EITHER_STATES : 1
RETURN_APPOINTMENT : 1
WITH_STAFF : 1
ROUND_DONE : 1
THERAPEUTIC_TO : 1
UPON_FROM : 1
DATE_LAST : 1
CURRENT_MENTAL : 1
REMAINING_BODY : 1
MAKE_HE : 1
JOYNER_CURRENT : 1
ARE_UNLESS : 1
EDUCATION_BLOND : 1
PREVIOUS_SCHEDULED : 1
COOPERATED_THIS : 1
NOTE_NURSING : 1
GRAMS_INT : 1
DM_II : 1
PM_WITH : 1
GROUP_ON : 1
SEROQUEL_MG : 1
YET_SUGAR : 1
EDUCATED_MUTUAL : 1
THE_MAR : 2
NEEDED_TO : 1
PARTICIPATE_AND : 1
IN_NUTRITIONAL : 1
PATIENT_PAST : 1
VIETNAM_AND : 1
PM_CARDIOVASCULAR : 1
FEVER_NAME : 1
LDL_DOES : 1
AND_DISCUSSED : 1
OR_PERIODONTAL : 1
POSSIBLE_INTERVENTIONS : 1
NEVER_MEDICATION : 1
TAKING_IT : 1
INFLUENZA_RETURNED : 1
PATIENT_THIS : 2
AND_EFFECTIVELY : 1
THEREFORE_NO : 1
OVER_YR : 1
VIETNAM_AT : 1
HAD_OUTSIDE : 1
AND_ACTIVELY : 1
FOR_HE : 1
FROM_SISTER : 1
PSYCHOLOGICAL_CED : 1
CALL_TO : 2
HYPERVIGILANCE_SESSION : 1
MIDNIGHT_CONTACT : 1
CURRENT_SKIN : 2
ASSISTANCE_PROTECTORS : 1
INVITED_MR : 1
THE_ASSESSMENT : 1
PROCEDURE_WAS : 2
EFFECT_VET : 1
EDUCATED_PATIENT : 1
IS_PT : 1
DI_CALL : 1
COMMENTS_ALERT : 1
TEST_RESULTS : 1
AND_DANGER : 1
INFORMATION_AND : 1
PHE_VE : 1
AROUND_HOW : 1
CULTURE_RESULT : 1
NO_DING : 1
DIAGNOSES_NO : 1
MATERIAL_VITAMIN : 1
STILL_LOT : 1
WRITTEN_DO : 1
MEMBERS_HIS : 1
QUESTIONS_DO : 1
ON_CONTACT : 1
NOW_MEETS : 1
HYGIENE_BURDICK : 1
THIS_THEN : 1
AMOUNT_OF : 2
CALLER_MOUNTAIN : 1
LAST_AND : 1
OF_SERVICES : 2
IN_DEC : 1
ORIENTED_THE : 2
REAC_NUTRITION : 1
PAIN_NOT : 1
VIA_PROVIDERS : 1
TIMES_HIS : 1
PAIN_OR : 1
DAILY_UPON : 1
ORAL_PUFFS : 1
SUBMITTED_CARE : 1
MEDS_REVIEWED : 2
IT_TIMES : 1
VETERAN_MALE : 1
TRANSFERRED_BASCOM : 1
NORMAL_FULL : 1
RESULT_AVAILABLE : 1
REMOVAL_APPOINTMENT : 1
THE_OTHERS : 1
SYSTEM_SEPTIC : 1
PHYSICIAN_IEWED : 1
HAD_BEEN : 3
ALCOHOL_CONSUMPTION : 1
TAB_QTY : 1
HE_NO : 2
SITE_CLEAR : 1
AND_ANXIETY : 1
OF_HEART : 1
WITNESSED_BID : 1
OF_NO : 2
PATIENTS_STRENGTHS : 1
OF_CARE : 2
MEMBER_CUT : 1
DZCHRONIC_PAIN : 1
EXTRA_DOSE : 1
MED_FOR : 1
ALL_ACTIVE : 1
PHYSICIAN_PAIN : 1
MEMBERS_THEIR : 1
QID_FOR : 1
INFORMATION_SYND : 1
AND_PAIN : 1
IT_POSITIVELY : 1
USUAL_TELLING : 1
SHOWER_CHAIR : 1
AVAILABLE_THE : 1
MEDICATIONS_PER : 1
WELL_ION : 1
LIS_THE : 1
DISCHARGE_FROM : 2
ADDENDUM_COMPUTERIZED : 1
TABLET_ACTIVE : 2
STOMACH_HAVE : 1
OR_APPTS : 1
HIM_VETERAN : 1
RESP_AT : 1
MOSTLY_IN : 1
CONSUMPTION_STATED : 1
CLINIC_SCHEDULED : 1
PREFER_COMMUTE : 1
HE_PLEASE : 1
PHONE_IDENTIFIED : 1
WAS_SCREENED : 1
CONSCIOUSNESS_AND : 1
COMPLEXITY_HE : 1
JOKES_AND : 1
BREAKFAST_OFFERED : 1
ERUPTION_ON : 1
ONE_QUETIAPINE : 1
WAS_THE : 1
OR_BLOOD : 1
TO_RECEIVE : 1
IS_VERY : 1
HOME_TOMORROW : 1
NONE_SELF : 1
ADMISSION_DX : 1
IS_EXTENDED : 1
PRESENTED_ER : 1
TAMSULOSIN_MG : 1
TWO_BY : 1
TECH_NOTE : 1
DISCUSSED_TO : 1
ESTIMATED_DURATION : 1
CALLER_RESPONSE : 1
ARE_IN : 2
INDICATES_LIN : 1
RESULTS_BIOPSY : 1
ALWAYS_SAFE : 1
TREATMENT_THERAPEUTIC : 1
USED_NURSING : 1
SHOT_REACTIONS : 1
THE_APPEARANCE : 1
BODY_ITEMS : 1
RAL_PLEASANT : 1
HIM_OF : 1
POST_OP : 1
CONGRUENT_AND : 1
CAVITRON_HAND : 1
YOUR_UNLESS : 1
LIMITED_PATIENT : 1
THINGS_TITLE : 1
TO_CALLER : 3
PERIODONTAL_MAINT : 1
HYGIENE_HE : 1
BONHAM_BUT : 1
ICDCM_IN : 1
BEDTIME_ON : 1
SOCIAL_CONFIDENCE : 1
REPORTS_ONGOING : 1
ICDCM_OLAWALE : 1
DOB_QHX : 1
RECONCILIATION_QUESTIONNAIRE : 1
NA_NOTE : 1
PERFORMED_AND : 1
IS_USUALLY : 1
THEY_BE : 1
MANAGEMENT_HEIGHT : 1
FOR_PTS : 1
ABD_LIVER : 1
TO_BRC : 1
AM_ANY : 1
RESISTED_USING : 1
WAS_REL : 1
PLEASED_IS : 1
MD_NOTE : 1
LEFT_PAIN : 1
OF_SEPTEMBER : 1
ENGE_THEIR : 1
SOC_SEC : 1
LS_SESSIONS : 2
FOCUS_RESPIRATION : 1
TRAN_ETC : 2
ACTIVE_INPATIENT : 2
AND_AFTER : 1
LOCATION_ROOM : 4
TO_PCP : 1
NURSING_TIME : 1
NEEDS_CONTACTED : 1
TO_MEET : 1
FOR_MOOD : 1
LOW_HE : 1
NO_SYST : 1
PAIN_CONSTIPATION : 1
CHECKS_THEM : 1
ATTORNEY_RALS : 1
TISSUE_THEY : 1
ONE_MG : 1
ABILITIES_SEE : 1
TERM_DENVER : 1
NO_PAIN : 4
TO_ADDRESS : 2
OL_OF : 1
TO_THIS : 6
TO_SPEND : 1
ASSESSMENT_OF : 2
INTIMACY_MODULE : 1
WERE_EXAM : 1
HIS_BILLS : 1
AT_HOWEVER : 1
BE_CLERK : 1
SCHIZOPHRENIA_OTHER : 1
OFTEN_AS : 1
IS_UP : 1
IS_FACT : 1
BEEN_GETTING : 1
FILLED_HE : 1
PATIENT_VALUES : 1
NO_IMAGING : 1
SERVICE_THAT : 1
KNOXVILLE_PERIOD : 1
HAND_SCALED : 1
ALLERGIES_POSTING : 1
CH_TO : 1
IN_NEGATIVE : 1
PLAN_NONE : 1
TO_WILL : 1
DISTRACTION_MEDICATION : 1
TABLET_FOR : 1
SUPPORTIVE_THERAPY : 1
TO_STRAIGHT : 1
IMPULSE_CONTROL : 1
PM_LOCATION : 1
QUETIAPINE_TABLET : 1
GROUP_BEGAN : 1
PSYCHIATRY_TEAM : 1
INFLUENZA_AGE : 1
VERY_USEFUL : 1
DISPOSITION_MENTAL : 1
THESE_HYPERVIGILANCE : 1
ANY_PREFERENCES : 1
FOLLOWING_DM : 1
MG_HE : 1
TELEPHONE_TRIAGE : 1
IN_SHE : 1
LS_REMAINING : 1
MAY_STATED : 1
HAS_ALL : 1
MEDICATION_AND : 1
DURING_AMBULATION : 1
ABSCESS_RAL : 1
NAUSEA_AND : 1
ALCOHOL_AUDITC : 1
HAS_CURRENT : 1
FOOT_COMPLETE : 1
KNOW_ARE : 1
ON_HERE : 1
ROOM_THE : 1
CHECKS_DAILY : 1
NOTES_IS : 1
SUPPORT_THAT : 2
AMBER_TOBACCO : 1
ACTIVE_HE : 1
TIME_WILL : 1
COUMADIN_AND : 1
LAST_TD : 1
SCALE_ASSISTANCE : 1
AND_PT : 3
SHE_RELATES : 1
TABLET_MOUTH : 4
ABLE_SESSION : 1
PROVIDER_CONCERN : 1
TURNING_TREMORS : 1
COMPLAINTS_REPORTS : 1
SITUATION_RESPIRATORY : 1
UNDERSIGNED_AND : 1
EYE_AND : 1
REACTIONS_TELEPHONE : 1
HOURS_DURING : 1
HE_HAS : 6
TTN_IN : 1
PULSE_TO : 1
IS_EXERCISING : 1
SPECIAL_CORNEA : 1
AT_JUST : 1
ATTEMPTED_WITH : 1
HE_RECEIVE : 1
DEPRESSIVE_SINGLE : 1
TEST_AUG : 1
ACTIVITY_ALERT : 1
CENTER_BENIGN : 1
TAB_EVERY : 1
TAKE_TIME : 1
EXTREMELY_AND : 1
IN_LOWER : 1
CAPACITY_INFORMED : 1
RT_AND : 1
BRC_PERSONAL : 1
IN_AT : 2
RELATIONSHIP_ENCOURAGE : 1
SAFE_AND : 3
TO_HOSPITALIZATION : 1
DIAGNOSIS_PATIENT : 1
ORDER_RECEIVE : 1
MEDS_LIST : 1
WITNESS_STATE : 1
HAVIN_REGULAR : 1
ON_LEFT : 1
NURSE_CURRENT : 1
DRINKS_ASSISTANCE : 1
TO_MUSIC : 1
PLASM_PROBLEM : 1
IS_STEADY : 1
FACE_LOSS : 1
QUESTIONNAIRE_BELOW : 1
HE_NOTIFIED : 1
SSN_HPI : 1
OF_OFFERED : 1
COLON_REMINDER : 1
BROTHER_KILLED : 1
INSISTS_THAT : 1
CALLER_ANCHORAGE : 1
DEGEN_DISC : 1
PT_DENIES : 2
REARED_IN : 1
RESULT_OF : 1
THE_APPOINTMENT : 1
CONFRONTED_ABOUT : 1
TEST_STRIP : 1
TRAUMA_SHE : 1
AND_SITUATION : 1
PROGRAM_WILL : 1
MODALITY_NASAL : 1
PROVIDED_FOR : 10
TIME_PATIENT : 1
TO_CLC : 1
HAS_OBSERVED : 2
THE_FORESKIN : 1
JUST_TALK : 1
IN_TEXTURES : 1
HE_DIALYSIS : 1
HYPONATREMIA_SYND : 1
SESSION_OF : 1
WORST_BLE : 1
SINGLE_POINT : 1
DISCHARGE_CONFRONTED : 2
HPI_AND : 1
OF_LONG : 4
MAINTAIN_AS : 1
NO_OR : 1
OVERSIGHT_OR : 5
AFFIX_PATCH : 1
MAY_WILL : 1
MDS_ORDERS : 2
AMBULATORY_ASSISTIVE : 1
TO_TRIGLYCERIDES : 1
UNITS_AM : 1
ARTHROSCOPY_SHLDR : 1
EXCLUDING_ALTHOUGH : 1
TO_PERSON : 4
ODOR_WAS : 1
MINUTES_TREATMENT : 1
FALL_TOPIC : 1
HOME_ADDENDUM : 1
PROVIDED_POSITIVE : 1
MOBILITY_INDEPENDENT : 1
UNTIL_CONTROLLED : 1
SINCE_PATIENTS : 1
STILL_HAS : 1
VACCINE_INFORMATION : 1
TO_REASON : 1
PERSONAL_WARNING : 1
TO_CONDITION : 1
LEVEL_ON : 1
DIS_PATIENT : 1
TO_SESSION : 1
ROS_PATIENT : 1
ARE_US : 1
FOR_NEW : 1
GO_BATHROOM : 1
ANY_DELUSIONAL : 1
ASSISTANCE_BUILD : 1
BM_HE : 2
CTA_PATIENT : 1
BACK_PAIN : 5
TO_ARE : 1
BEFORE_LAST : 1
MEDICATION_PATCHES : 1
BY_DIETITIAN : 1
THE_HIP : 1
TIME_VA : 1
TREATMENTS_HERE : 1
ACTIVE_AXIS : 1
GLASSES_HE : 1
FACILITY_PCP : 1
TO_DESCRIBE : 1
MEDICATIONS_THIS : 1
BUSY_WILL : 1
APPLIED_TO : 1
PACKED_WITH : 1
DISCUSSED_AND : 1
HIS_GETS : 1
UNDERCLOTHING_EXERCISE : 1
ASSESSMENT_PATIENT : 1
TIMEFRAME_COMPLETION : 1
OF_INFORMED : 1
OF_SKIN : 2
ION_KNEE : 1
CAUSING_SAYS : 1
INFORMATION_UNAWARE : 1
PRESENTED_ABOUT : 1
PL_PROCEDURES : 1
TRAINING_UNSPECIFIED : 1
UNTIL_ET : 1
SHE_TO : 2
DOWN_TEST : 1
TEAM_ON : 1
TREATMENT_DISCUSSING : 1
RANGE_OF : 1
TREATMENT_AND : 1
VETERAN_FROM : 1
HIS_HAS : 1
VIETNAM_TIME : 1
VETERAN_IN : 1
OF_DIVORCE : 1
VITALS_WARFARIN : 1
CONSUMED_PERSONAL : 1
ON_OBJECTIVE : 1
GLAUCOMA_DX : 1
HE_DOING : 1
OF_KEOMUAN : 1
APPTS_HAD : 1
DURING_ADMISSION : 1
NOTE_FEBRILE : 1
NORTRIPTYLINE_STILL : 1
LAMOTRIGINE_MG : 2
NOTE_CAN : 2
PREFER_TO : 1
LIN_ASSIGNED : 1
WAS_GUIDED : 1
NIGHT_MAY : 1
CLOSE_INCISION : 1
CONTACT_WITH : 2
IDENTIFIERS_USED : 2
NOS_HX : 1
AND_WENT : 1
EXAM_DO : 1
IN_CHLORIDE : 1
INFLUENZA_WAS : 1
COGNITIVE_SOCIAL : 1
IS_YEAR : 2
TO_LOCATION : 1
TO_SURGICAL : 1
PER_PTS : 2
STAINED_BLOODY : 1
VISTA_SC : 1
PRESCRIBED_HIS : 1
MY_OF : 1
NEEDS_SHE : 1
AND_TO : 8
OR_TIME : 1
KNOWLEDGE_BAKER : 1
POOR_COPING : 1
MORSE_FALL : 1
NURSE_RESTRAINT : 1
FILLIN_GRADE : 1
PAIN_MEDICATION : 1
PSYCHOTIC_BIPOLAR : 1
USE_THEIR : 1
PROBLEM_VETERAN : 1
DELUSIONAL_THOUGHTS : 1
IT_IS : 1
PAIN_PAIN : 5
CHRONIC_THE : 1
TRIED_IT : 1
AREA_VA : 1
LISTENING_MUSIC : 1
OF_LAST : 2
MEMBER_THIS : 1
UN_CONTINUE : 1
CONSENT_THE : 1
CONTINUES_DO : 1
UNABLE_TO : 1
OFTEN_NEEDED : 1
TO_USE : 2
RECALL_INJURY : 1
AND_MAGAZINES : 1
THEY_GRATEFUL : 1
WIFE_APPARENTLY : 1
LEISURE_INTERESTS : 1
INTO_CHART : 1
ON_WITH : 2
MEDICATIONS_TO : 1
POWER_MOST : 1
ELOPEMENT_NO : 1
OF_TIME : 1
TAKEN_TO : 1
CBOC_THE : 1
PLAN_ON : 1
REPRESENTS_WORST : 1
MANAGEMENT_SESSION : 1
TC_VETERAN : 1
TIME_OF : 9
USE_PATTERNS : 1
INTRODUCTION_AND : 1
HOME_BEEN : 1
NOTICEABLE_THAN : 1
MOVE_FINGER : 1
ONGOING_IS : 1
FURTHER_INDICATION : 1
INFECTION_PER : 1
EDUCATION_BE : 1
SHOW_NOTE : 1
AND_INITIALLY : 1
WAS_VERY : 1
PART_THE : 1
THEIR_BODY : 1
LIPOID_METABOL : 1
TO_PHYSICIAN : 1
ACCIDENTAL_ASKING : 1
NOVEMBER_HE : 1
REQUIRED_AND : 1
PATIENT_RECEIVED : 2
SELF_ELOPEMENT : 1
FUNCTIONING_ON : 1
ORIENTATION_AND : 1
SENDING_US : 1
LEAST_WEEKLY : 1
DIRECTION_FOCUS : 1
THEY_NOT : 1
TRAINING_CBSST : 1
YR_FINDINGS : 1
BLOODY_UNDERCLOTHING : 1
ROUTINE_APPT : 1
MALE_HERE : 2
AREA_BROS : 1
SAFE_EFFECTIVELY : 1
NO_WEIGHT : 1
NEW_STARTING : 1
VISION_TO : 1
AREA_HOME : 1
SEPTEMBER_CNUMBER : 1
FEMALE_NO : 1
NAVIGATE_OF : 1
NO_NOTED : 1
PROVIDED_VA : 1
BARRIERS_LEARNING : 1
OR_ACTIVE : 1
NOTES_YEAR : 1
OCT_REPRESENTS : 1
ADMINISTERED_RAL : 1
BY_ACTIVE : 4
THIS_SEE : 1
NOT_FATHER : 1
HP_PHYSICAL : 1
ELIZABETH_PATIENT : 1
NOTE_MG : 1
SUPERVISOR_IN : 1
AM_NOVEMBER : 1
NOW_GOT : 1
MDS_AND : 2
CAME_TO : 1
RESPIRATIONS_TREATMENT : 1
NONE_NUMBER : 1
PATIENT_HOME : 1
OCT_ADDENDUM : 1
MEDICATIONS_AFEBRILE : 1
ALSO_COMPLAINS : 1
MH_MHICMINTENSIVE : 2
TRANSFERRED_CLC : 1
SEE_ADMISSION : 1
SAYS_THAT : 1
ED_TO : 2
ADDENDUM_PHYSICIAN : 1
SEE_POSTING : 1
COMFORT_TEST : 1
HIS_HIPS : 1
IMMEDIATELY_AND : 1
LIVES_BONHAM : 1
PROBLEM_PRESENTED : 1
APPOINTED_PCP : 1
WITNESS_THAT : 1
DICTATED_PRESCRIPTION : 1
RD_ADDENDUM : 1
HIS_DIFFICULTIES : 1
ED_PROCEDURES : 1
WHAT_THEY : 3
KNEE_BETTER : 1
FIVE_FOOD : 1
WILL_PRESCRIBE : 1
BACK_DISORDER : 1
UPCOMING_ORTHO : 1
CENTER_ABD : 1
THESE_INCLUDE : 1
NUMBER_PATIENTS : 1
HEALTH_DENT : 1
IS_FOLLOWED : 1
OF_TESTS : 1
PHONE_NUMBER : 7
NUTRITION_INADEQUATE : 1
KILLED_IN : 1
CLINICAL_REMINDER : 2
OF_HOURS : 3
INR_PERCENT : 1
CLEAR_AMBER : 1
FOR_KNEES : 1
SKILLS_CBSST : 1
APPOINTMENT_CONFIRMED : 2
CAPLET_TAKE : 1
READER_OPTICAL : 2
THAT_ARE : 5
TABLETS_BY : 1
PROVIDE_SERVICE : 1
NEED_SHE : 1
THAN_VERIFIED : 1
AND_ACCUPUNCTURE : 1
SOCIALIZATION_ENGAGING : 1
SUPPLEMENT_TELEPHONE : 1
CONTINENT_THE : 1
TREATMENT_GOAL : 1
EXCEPT_REQUEST : 1
MORE_INFLAMMATION : 1
CALL_OD : 1
PH_FOR : 1
BOWEL_ELIMINATION : 2
TAPE_NURSING : 1
SURGICAL_INTERVENTION : 1
DISCHARGE_STATES : 1
ACTIVE_PULSE : 1
ALARM_ON : 1
THEY_WERE : 1
CURSING_ASSISTANCE : 1
PAIN_HYPERLIPIDEMIA : 1
TAKE_CAPSULE : 2
LBS_IN : 1
FLOW_SHEET : 1
AS_PUT : 1
PRIVILEGES_TIME : 1
INFLAMMATION_IS : 1
PAIN_RECORDED : 1
TEARFUL_RAPID : 1
INTO_ELECTRONICAL : 1
GOING_TOMORROW : 1
UNTIL_WIFES : 1
REHAB_PATIENT : 1
UNABLE_MOVE : 1
MACKIE_RYAN : 1
WEEK_THEN : 1
ANGRY_WRITER : 1
WITH_LOSS : 1
ADDENDUM_PERSON : 1
AN_DURING : 1
SHIFT_DINNER : 1
EXPLORED_IS : 1
NOT_IDENTIFIED : 2
REFILL_PROCEDURE : 1
WAS_IN : 4
OF_FUNCTI : 1
NOTE_RESIDENT : 1
NOTED_TO : 1
LISTED_THE : 1
IS_ANGRY : 1
AT_WEEKLY : 1
NO_DEGEN : 1
THE_PRESENTING : 1
AND_PHYSICAL : 1
ASK_DO : 1
CLASSIFIED_AND : 1
OF_VIETNAM : 1
PROVIDED_COMMODE : 1
WISH_BE : 1
TO_RESPIRATORY : 1
MEDICATION_TRANSPORTATION : 1
NURSING_INTERVENTION : 1
FOR_JUST : 1
WISHING_TO : 1
SKILLS_SERVICES : 1
DISCHARGE_INFORMATION : 1
RECOVERY_PLAN : 1
SEEN_TO : 3
YEARS_HOME : 1
NUMBER_HOURS : 3
AFFECT_FRIENDLY : 1
HAND_OF : 1
ON_HOW : 1
EVALUATION_CODE : 1
IV_MULTIAXIAL : 1
CONDUCIVE_RECOVERY : 3
SPECIMENS_POSTOCCIPITAL : 1
ADMISSION_PATIENT : 1
ANGRY_AND : 1
OBJECTIVE_SEEN : 1
IS_STATES : 1
NUTRITION_WEEKENDERS : 1
WIFE_MEDICATIONS : 1
NARCOTIC_REFILL : 1
FOLDING_HE : 1
THEN_PATIENT : 1
CONSTIPATION_HAS : 1
AND_AFFECT : 1
PATIENT_IDENTIFIES : 1
THINGS_KNOW : 1
PATIENT_TELEPHONE : 1
CURRENT_PLAN : 1
THE_HAVE : 2
CP_DATE : 1
WHILE_MEDICATION : 1
BELL_AND : 1
ON_STARTING : 1
EVALUATION_MANAGEMENT : 2
COMPLICATIONS_WILL : 1
OVERWHELMED_ENCOURAGED : 1
THE_APPT : 1
CAPSULE_BY : 2
WHEN_USING : 1
PIECES_METAL : 1
PALMER_BE : 1
ROOM_OF : 1
DO_HAVE : 2
UP_SALE : 1
COMMENTS_INFORMATION : 3
ARTHRITIS_CELLULITIS : 1
ATTENDANCE_OFFERED : 1
NURSING_NOTE : 5
INFORMATION_WITH : 3
NOTE_CONSTIPATION : 1
LIS_SPERMATOCELE : 1
THIS_DATE : 1
AND_PATIENT : 5
BEEN_FALL : 1
THERE_OBSERVA : 1
TO_COUMADIN : 1
VETERAN_DISCHARGE : 1
LAB_MED : 1
ANKLE_PAINFUL : 1
TRAILING_AND : 1
TABLETS_ACTIVE : 1
PATIENT_SO : 1
GROUPS_DESIGNED : 2
WOUNDS_TO : 1
BERNA_THE : 1
NOW_USING : 1
SENT_FROM : 1
CM_WITH : 1
HEARING_OF : 1
COLOR_VITALS : 1
EVERYONE_AT : 1
TAB_HELD : 1
ANY_RELIGIOUS : 1
YOUR_LIMITATIONS : 1
FOR_PROCEDURE : 1
PATIENT_LEISURE : 1
PTSD_DTR : 1
HR_ER : 1
SKIN_DONE : 1
LIVED_THREE : 1
LEFT_WITH : 1
MODALITIES_MINS : 1
ASSISTANCE_PERSONAL : 1
VERBAL_CUING : 1
CHANGES_DISCONTINUATIONS : 1
IMPRESSION_PAIN : 1
PT_MEDICATIONS : 1
PATIENT_ARRIVED : 1
OFFERED_GROUP : 1
DISCHARGE_SERIAL : 1
CLINIC_JOYNER : 1
DISCREPANCY_IN : 1
SOME_DISORDERS : 1
VS_ENTERED : 1
HAS_DECISIONMAKING : 1
RESTRAINTS_USE : 2
LENGTH_TIME : 1
HE_AROUND : 1
HIS_WHICH : 1
LUNG_CLEAR : 1
INFORMATION_PATIENT : 1
DUE_TO : 5
DATE_AND : 1
AVERAGE_ALERT : 1
WALKING_CONSULT : 1
AND_USES : 1
ORDERS_AND : 2
INFORMED_PATIENT : 1
REQUEST_THE : 1
MANAGING_PAIN : 1
PROGRAMS_ASSURED : 1
HELP_THE : 1
ADEQUATE_RISK : 1
LEG_THE : 1
TERM_DEMONSTRATE : 1
MAKE_PAIN : 1
VISIT_NOTED : 1
NEW_FORM : 1
APPOINTMENT_VERBALIZES : 1
VS_INTO : 1
OR_MEDICATION : 1
DURING_ENCOUNTERS : 1
HOME_INR : 1
OUT_WITCH : 1
BUT_INTERMITTENT : 1
AND_WATCH : 1
SHAKE_WELL : 1
HIM_UP : 1
SHED_FULL : 1
WEEKLY_UP : 1
WAS_BEERS : 1
ANY_ALLERGIES : 1
PREPARATION_HE : 1
PLACE_TIME : 4
HAS_CALL : 1
KEPT_BY : 1
PROVIDER_CALL : 2
REQUIRED_WITH : 1
PAIN_INVENTORY : 1
ADDENDUM_PALPABLE : 1
REQUIRED_THAT : 1
GROUPS_COMMENT : 1
YOUR_HEALTHCARE : 1
TAKING_TYLENOL : 1
VET_REPORTS : 1
DUE_THE : 1
AND_GROOMED : 1
JUST_TO : 1
AS_EVIDENCED : 1
DISCHARGE_MEMBERS : 1
THE_IN : 2
PT_GO : 1
PCA_THERAPY : 1
DISORDERS_OTHER : 1
MADE_EXCEPT : 1
VA_NON : 1
DISCUSSING_WITH : 1
DINNER_DRINKS : 5
LOWER_BODY : 1
THE_IS : 3
TIME_COMMENT : 1
CONTINUOUSLY_USES : 1
REQUEST_TO : 1
SUBSTANCE_REQUESTS : 1
THE_TIME : 1
VETERANS_REGARDING : 1
AROUND_AM : 1
CONTACTED_PATIENT : 1
FAM_EDUCATION : 1
ETTE_ANDRE : 1
PALM_TRAN : 1
TO_THAT : 2
ANESTHESIOLOGY_COMPLETED : 1
CUEING_DIAGNOSIS : 1
HAD_FEELING : 1
WOULD_NEED : 1
PRESSURE_SEGMENT : 1
OVER_THE : 3
FOLLOWING_NEGATIVE : 1
VISIT_WAL : 1
OXYGEN_NUTRITION : 1
TIMES_FEELINGS : 1
TH_CELL : 1
ADDENDUM_CITALOPRAM : 1
RUN_OUT : 1
AT_REST : 1
MH_NOTE : 1
LIMITATIONS_INCLUDE : 1
NOTE_PAIN : 1
HISTORY_FLU : 1
WITCH_LAST : 1
ASSESSMENT_DURING : 1
INTENTIONS_CLASS : 1
SAD_STATING : 1
FOR_PTSD : 1
FORESKIN_HIS : 1
AUTHOR_AND : 1
HE_COULD : 1
IF_INFO : 1
BUT_PARTICIPATED : 1
PROBLEM_AT : 1
VETERAN_BETWEEN : 1
MANAGEMENT_NOTE : 1
NIGHT_CURRENT : 1
QUESTIONS_EYE : 1
ALCOHOL_CURRENTLY : 1
REFUSED_EYE : 1
HOME_GRINDING : 1
IN_REFILL : 1
SINCE_THEN : 2
CARE_ADL : 2
WEAR_NAVIGATE : 1
USE_SHOW : 1
INCREASE_PROPANOLOL : 1
OS_HM : 1
FEELING_ABOUT : 1
METH_LOCAL : 1
WAS_PROPERLY : 1
TO_STOMACH : 1
PLAN_CARE : 1
IF_COULD : 1
EXTRACTED_OR : 1
SKIN_TEMPERATURE : 1
HIS_MEDICAL : 1
WOULD_DIFFICULT : 1
HES_COUGHING : 1
BE_IN : 3
CIU_IF : 1
ORIENTED_FROM : 1
DEVELOP_HAMLIN : 1
SHE_THEN : 1
QHS_AT : 1
WANT_TO : 2
WAS_ASKED : 1
OF_DIVORCING : 1
TURN_OUNCEMENT : 1
GU_SHOWER : 1
HISTORY_OF : 5
TURNS_AND : 1
JOKES_INTERACTING : 1
ES_RANGE : 1
ACTIVE_NO : 1
IDENTIFIED_AS : 1
YES_TORN : 1
WILL_PROPANOLOL : 1
TRIAGE_DT : 1
UP_TC : 1
AND_VA : 1
ALL_SAO : 1
HORN_BUT : 1
ADDRESS_RETURN : 1
THE_DISEASE : 1
ABSCESS_BY : 1
EXPIRATION_DEPRESSIONPT : 1
MET_VETERAN : 1
DERMATOPHYTOSIS_NAIL : 1
REPORT_IT : 1
PAST_SITUATIONS : 1
SOCIAL_EXPLORED : 1
BREAKDOWN_AT : 1
TO_CYCLOBENAZAPRINE : 1
UNDERSIGNED_CLEAN : 1
BETTER_MISSED : 1
ACCOMPANYING_HIM : 1
CALLED_REPORT : 1
BAG_HE : 1
DOCUMENTATION_CHANGE : 1
ALLERGIC_DOCUMENTED : 1
MEDICATION_CHANGES : 1
APPLICABLE_INTERACTIONS : 1
HAVE_VOMITED : 1
DEPRESSION_IS : 1
MONTH_MG : 2
TO_PTS : 1
PAIN_JOINT : 1
ACTIVITY_FREQUENTLY : 1
ED_PCP : 1
CLINIC_SERIOUS : 1
CHRONIC_LOW : 1
TEAM_SERIOUS : 1
LEARNER_CC : 1
ASSISTIVE_DEVICE : 1
PROVIDER_PAIN : 2
NO_FURTHER : 1
REPORTS_IS : 1
SKILL_SAFE : 1
AMOUNT_CONSUMED : 1
ASPIRIN_SCREENING : 1
WITH_MODIFIED : 1
URGENT_NOTE : 1
HE_VIETNAM : 1
STATING_DIDNT : 1
RECEIVE_NONVA : 1
MEASUREMENT_BP : 1
CONFIRMED_FAMILY : 2
ISSUED_HE : 1
REGARDS_TRANSFER : 1
EXTENDED_CARE : 1
NONE_RESPIRATORY : 1
ARRIVED_WITH : 1
ADMISSION_ASSESSMENT : 1
APPARENT_COMMENTS : 1
ALERT_ORIENTED : 4
MEQ_TAB : 1
TIP_BUT : 1
ELIGIBLE_WILL : 1
WERE_INVITED : 1
PRESENTING_TO : 1
ANKLE_SWOLLEN : 1
PALPATE_UNDER : 1
DRUG_REHAB : 1
STATES_SUGARS : 1
UNDERSTANDS_MAY : 1
HAS_AT : 1
MISSED_PHYSICAL : 1
MG_QHS : 1
NEATLY_AND : 1
HT_CM : 1
WOUND_OF : 1
COMMUNICATION_SKILLS : 1
ROOM_FOR : 1
HI_VOICED : 1
NOT_NARCOTICS : 1
PT_DONE : 1
EVIDENCED_BY : 1
MUCH_STATES : 1
DIVERTICULOSIS_THE : 1
VETERAN_ANGRY : 1
THEN_AM : 1
AND_WORSE : 1
PROCEED_ASKED : 1
IN_USE : 2
INSTRUCTIONS_RESTRICTIONS : 1
PRIVATE_TIME : 1
WITH_WRITTEN : 1
AXIS_CHRONIC : 1
REFUSED_PATIENT : 1
THEIR_SKILLS : 1
SAO_MORSE : 1
CITALOPRAM_HYDROBROMIDE : 2
AXIS_IV : 1
CDI_DIALOG : 1
NEEDS_AND : 1
TO_AFTER : 1
THIS_ZZPATIENT : 1
APPOINTMENTS_CONTINUE : 1
WHAT_NEEDS : 1
MH_HEALTH : 1
MEQ_SA : 1
AND_IT : 3
PAIN_BETTER : 2
LESS_VERIFIED : 1
INFORMATION_CLINIC : 1
PATIENT_NURSING : 1
READ_THE : 1
AMBULATORY_ENVIRONMENT : 1
MEYER_INTERVIEW : 1
NUTRITION_ESTIMATED : 1
CLOZARIL_LAB : 1
APPT_HE : 2
SUPPLEMENT_THE : 1
INTERVENTION_SAFE : 1
PROVIDED_MINUTE : 1
TAB_THREE : 1
WAS_NURSE : 1
DO_HE : 1
DIABETES_COMPLETE : 1
PROVIDER_TEMPERATURE : 1
BY_HEIGHT : 1
NUMBER_SESSIONS : 1
PATIENT_NAME : 4
SAID_MR : 1
SCORE_NEW : 1
REGARDING_GUARDIANSHIP : 1
ANGRY_ABOUT : 1
DEALING_WITH : 1
SA_TAB : 2
PATIENT_CLOTHES : 1
NOTE_PT : 1
COMMODE_LUBRICATING : 1
VETERAN_TRANSFERRED : 1
SAFETY_STAFF : 1
DID_NOT : 2
BE_HIS : 1
AGREED_FOR : 1
PATIENT_REGARDING : 1
REEVALUATE_THIS : 1
IS_REQUIRED : 1
SOMETIMES_FEEDING : 1
THE_IMPROVEMENT : 1
FALLS_NAUSEA : 1
TO_GOOD : 1
ONCE_OR : 1
CUEING_ASSISTANCE : 1
PROBLEMS_APPOINTMENTS : 1
SET_AND : 1
FAMILY_MEMBER : 3
YOU_OBSERVATION : 1
LIVING_THE : 1
TO_PATIENTS : 2
TO_CLASSES : 1
VENOUS_INSUFFICIENCY : 1
EXAM_SEPTEMBER : 1
POSTTRAUMATIC_STRESS : 1
STOOL_NOT : 1
REMAINS_AT : 1
TO_WRITER : 1
REGARDING_THE : 2
STARTING_AM : 1
HOME_PROGRESS : 1
NEC_OVERWHELMING : 1
THE_ABILITY : 2
MAINT_DX : 1
OF_REACTION : 1
GLASSES_WHOM : 1
WEEKLY_FOR : 1
ABLE_USE : 1
NUMBER_PATIENT : 1
INPATIENT_EVALUATION : 1
INCISION_PACU : 1
MOVE_ON : 1
PROPERTY_IN : 1
PMH_ER : 1
GLUCOSE_BEER : 1
MD_BRONZE : 1
WITH_MEMBER : 2
APPEARS_TO : 2
OF_CONTACT : 1
BE_ABLE : 1
NUTRITION_ADEQUATE : 1
ON_FOR : 1
ASSISTANCE_DSM : 1
PATIENT_IDENTIFICATION : 1
NO_RISK : 1
ELIMINATION_FOOD : 1
OF_POLYP : 1
HIS_WIFES : 1
WOOTEN_RT : 1
DEMONSTRATE_ABILITY : 1
BE_PT : 1
PAST_APPEARANCE : 1
EXCISION_TEXT : 1
OUTSIDE_SOURCE : 2
SETTING_HOSPITALIZATION : 1
OLD_FEMALE : 1
OF_UPDATE : 1
VERY_TO : 1
AS_WHY : 1
NOT_PALM : 1
VOIDED_MEDIUM : 1
TWICE_NEEDED : 1
CHANGED_PATIENTS : 1
ALLERGIES_CONDITION : 1
TL_JR : 1
AND_OFFICE : 1
REGARDING_EXTREME : 2
IDENTIFIED_ANATOMICAL : 1
SUBMITTED_EXTENDED : 1
PALPATE_MASSES : 1
SHOULDER_REGION : 1
SEROQUEL_VERY : 1
WILL_RESCHEDULE : 1
SERVICES_BY : 1
ELIZABETH_PHONE : 1
BE_HIM : 1
SISTER_AND : 2
YOU_VOMITED : 1
IS_VIETNAM : 1
HAVE_RECONCILED : 1
MOTIVATION_TO : 1
INFORM_GROUP : 1
GRANDCHILDREN_THAT : 1
NAUSEA_VOMITING : 1
CENTERED_AROUND : 1
DENIES_USE : 1
POSITIONING_NOTE : 1
IN_APPEARS : 1
IS_INTERESTED : 1
HIGH_DOES : 1
DATE_NOVEMBER : 1
THERAPY_HEPARIN : 1
PHYSICAL_ASSISTANCE : 1
SPEECH_LENGTH : 1
PATIENT_HAS : 5
LIMITED_SUPPORT : 1
EXAM_PRESENTING : 1
GOAL_IS : 1
NOTED_RESULTS : 1
DOSE_HE : 1
FOR_HOURS : 1
NEEDED_SINCERELY : 1
PROBLEMS_SIDE : 1
PATIENT_BY : 1
NOT_NEED : 1
OTHER_UNSPECIFIED : 2
SELF_RISK : 1
DX_DEPRESSION : 2
MEMBERS_WERE : 1
USUAL_PATIENT : 1
KNEE_STABLE : 1
LEVEL_FUNCTI : 1
WAL_IDENTIFIED : 1
PMH_OF : 1
AND_ALLOWED : 1
PLEASE_ASK : 1
CONDITION_DYSPNEA : 1
AND_MENTAL : 2
HCL_MG : 1
OF_FOR : 2
WITH_INFORMATION : 1
PATIENT_GROOMING : 1
CURRENT_PAIN : 1
USEFUL_SOMEWHAT : 1
FOR_ON : 1
RUNNING_OUT : 1
FOR_CONSULT : 1
THAT_BE : 1
AS_WHEN : 1
HE_WALKS : 1
LOW_FEVER : 1
PROBLEM_PT : 1
TIME_DENIES : 1
HAS_NO : 2
PROGRAM_NO : 1
TC_ENCOURAGED : 1
PATIENT_DENIED : 1
THE_SPERMATOCELE : 1
IS_GOOD : 1
DISORDER_ACE : 1
FOR_PROBLEMS : 1
FACE_FACE : 1
HAS_PLAN : 1
THAT_CONDUCIVE : 3
TO_MAILPT : 1
SHOWER_PERSONAL : 1
IS_REPEAT : 1
UP_ENCOURAGED : 1
HISTORY_MEDICATIONS : 1
WILL_REGARDING : 1
PUFFS_MOUTH : 1
MOBILITY_LESSONS : 1
OTHER_PSYCHOTIC : 1
PHONE_DEC : 1
THE_NOTE : 1
WEEKLY_PROGRAMS : 1
TAB_ACTIVE : 1
STRESS_MUNSHI : 1
THIS_AFFECT : 1
INPATIENT_SETTING : 1
IN_SPHERES : 1
HAVE_ANY : 2
HIS_DRINK : 1
NUMBER_IDENTIFIED : 1
COUNSELING_POSTOPERATIVE : 1
EXERCISING_FREQUENTLY : 1
TO_WITHOUT : 1
FROM_INPATIENT : 2
SPMI_IDENTIFIES : 1
ABILITIES_AND : 1
EASILY_AND : 1
ABILITY_TO : 3
PRIMARY_PROVIDER : 2
WHO_EDUCATED : 1
IN_DW : 1
VETERAN_CONTINUED : 2
VERY_LIMITED : 1
FORM_OUT : 1
NOT_CONSTANT : 1
HISTORY_AND : 2
CBE_PELVIC : 1
AT_PT : 2
MAIL_NILANDRON : 1
DICTATED_NOTE : 1
MG_CAPLET : 1
SYSTEMS_ARE : 3
ADEQUATELY_VE : 1
MAMMOGRAM_MARYLAND : 1
THERAPEUTIC_DESIGNED : 2
IMPAIRED_VIA : 1
PATIENT_RUMINATING : 1
RD_PALPABLE : 1
OCR_LINENS : 1
THE_SCROTUM : 1
SHORT_CAN : 1
CAVITRON_SCALED : 1
BABY_AND : 1
WITH_BATHINGNO : 1
PERSISTENT_ILLNESS : 1
NOT_INTERESTED : 1
PRESCRIBE_NARCOTICS : 1
SOME_PARTICULARS : 1
STRAIN_FOR : 1
SYMPTOMS_PAIN : 1
FOR_FOLLOWUP : 1
NUMBER_IMMUNIZATION : 1
SLE_WM : 1
IS_DOING : 1
IRREGULAR_BM : 1
PATIENT_YEAR : 1
ON_VISIT : 1
HOME_AND : 1
GRATEFUL_FOR : 1
WELLBEING_TISSUE : 1
TO_FRIEND : 1
WAS_AT : 1
PTSD_REDUCTION : 1
EXPLAINED_NARCOTIC : 1
JUDGMENT_ONEON : 1
THUMPING_BEATS : 1
WELLNESS_DIDACTIC : 1
PAIN_DO : 1
HEAT_VITALS : 1
INFORMATION_THIS : 1
SERIOUS_PERSISTENT : 1
ALERT_NO : 1
USED_TOILET : 2
HEALTH_CMA : 1
ALERT_RESPONSIVE : 1
ABOUT_CASE : 1
TO_BEING : 2
APPLICABLE_BLADDER : 1
EXPLAINED_NEW : 1
PT_SOME : 1
THE_BUT : 1
LOW_DOSE : 1
HE_SHE : 3
STATES_INFLUENZA : 1
TO_RR : 1
TO_BROS : 1
MANAGER_NOTE : 1
DOSE_TO : 1
OLAWALE_OS : 1
IF_NEEDS : 1
REG_AND : 1
DOWN_BUT : 1
THE_SEE : 1
CONDITION_PAIN : 1
POSITION_FOR : 1
PATIENT_HE : 1
FINAL_SESSION : 1
IF_COLONOSCOPY : 1
DEALING_CURRENT : 1
ENJOY_DURING : 1
NOT_PRESCRIBE : 1
TO_TEAM : 1
OF_AC : 1
USED_IDENTIFIED : 2
CALLED_TO : 2
DEC_AND : 1
ERUPTION_HIS : 1
FALL_THE : 1
TO_GOALS : 2
AFIB_IS : 1
AS_SAYS : 1
ARTICLES_EASY : 1
WILL_FLY : 1
OF_SPEECH : 1
NO_ANESTHESIOLOGY : 1
LEISURE_ASSURED : 1
HAD_IN : 1
PING_BED : 1
FOR_RELIEF : 1
HER_IS : 1
RESIDENT_ARTICLES : 1
SS_HYPOXEMIA : 1
HOME_ON : 1
THE_YEAROLD : 1
PRIOR_TO : 3
HELP_SET : 1
GUIDED_THE : 1
FOLLOWING_IDENTIFIERS : 2
WILL_PCP : 1
BY_UNDERSIGNED : 1
DISORDER_NOS : 1
SEE_PHYSICIAN : 2
MEDICAL_ILLNESSES : 1
INACTIVATED_INFLUENZA : 1
TIME_HIS : 1
MOBILITY_LIMITATION : 1
PIECES_OF : 1
PT_IS : 3
AS_WALKIN : 1
SYMPTOMS_INFECTION : 1
CED_DIET : 1
ABOUT_THIS : 1
TO_IT : 1
TIME_RESPIRATIONS : 1
SUPPORTTALKING_TO : 1
MATERIAL_FOR : 1
DIAGNOSIS_OF : 1
ICDCM_UNSPECIFIED : 1
APPT_WRITER : 1
SCALED_AND : 1
TO_HE : 2
SYMPTOMS_BE : 1
DM_COMPLICATIONS : 1
FOR_MICROSCOPIC : 1
MM_NORTRIPTYLINE : 1
WRITER_RECALL : 1
DEVICE_POINT : 1
APPTS_DTR : 1
TIMES_AS : 1
DRINKING_PACK : 1
PRESCRIBE_DISCONTINUED : 1
TRANSITION_THIS : 1
ATTEMPTS_TO : 1
VERBAL_WRITTEN : 1
STATE_ATTORNEY : 1
NOTED_PATENT : 1
CALL_INFORMATION : 1
OBSERVED_LAUGHING : 1
LIST_COLONOSCOPY : 1
MUSIC_WHEN : 1
MUST_BE : 1
ASSISTANCE_ASSISTANCE : 1
PRESSURE_FOR : 1
AT_HOURS : 1
CALL_RAL : 1
AMOUNT_GUAFENESIN : 1
MOUTH_AT : 3
AND_DATE : 2
ACTIVE_PROBLEMS : 1
TAKING_EFFECT : 1
ROUTINE_HE : 1
GIVEN_PATIENT : 1
IMMEDIATE_REPLACES : 1
TO_INTERVIEW : 1
FRIENDS_ISSUED : 1
OF_TO : 4
SCHEDULED_FOR : 1
DID_ASK : 1
PROVIDE_YOUR : 1
MR_TO : 1
MEDICATIONS_VSS : 1
AND_APPT : 2
PAD_CLOSE : 1
DRESSED_AND : 1
IN_MG : 1
TO_FMH : 1
PLEASE_MY : 1
WIDTH_ITEMS : 1
PROBABLY_INADEQUATE : 1
CONTINUE_GOAL : 1
UP_PROVIDED : 1
ITEMS_THE : 1
MAY_HE : 1
INPATIENT_AFTER : 1
FEEL_TO : 1
WITH_VETERAN : 3
MAY_DIFFICULT : 1
IN_VIETNAM : 1
DISEASE_CONCEPT : 1
ORAL_QID : 1
BED_MOBILITY : 1
FOLLOW_CALL : 1
NEED_TRAINING : 1
DISORDER_DEPRESSION : 1
ROOM_ASSISTANCE : 1
NOT_INTERACTIONS : 1
WRITER_SCHEDULED : 1
CELL_PHONE : 1
ORIENTED_PHONE : 1
WHO_SUPPORTIVE : 1
SUICIDAL_THINKING : 1
AND_PLEASENT : 1
NASAL_GROUP : 1
STARTING_PM : 1
MARYLAND_PATIENTS : 1
OF_OF : 2
ABNORMALITIES_OR : 1
WERE_SUPPORTIVE : 1
ADMITTED_WITH : 1
BEDTIME_FOR : 1
UNDER_ON : 1
MAY_INCREASE : 1
FEELING_ANXIOUS : 1
ABOUT_INTERACTION : 1
THE_ADDRESS : 1
APPROPRIATLY_CASUAL : 1
REPRESENTS_NO : 1
AND_COGNITIVE : 1
TO_MOVE : 1
NOTE_CARE : 4
FOOD_PREFERENCES : 1
MASS_VOID : 1
INSURANCE_INTRAVENOUS : 1
DORN_MEDICAL : 1
DIAGNOSIS_REGARDING : 1
MENTAL_ILLNESS : 1
BAND_ON : 1
BE_FEELING : 1
BE_TAKING : 1
TELEPHONE_PALLIATIVE : 1
UNEXPLAINED_LOSS : 1
PRACTITIONER_ALSO : 1
VET_EXCITED : 1
DIDACTIC_AND : 2
INFORMATION_OF : 1
PRECURSOR_TO : 1
HOME_IN : 1
TREATMENT_TERM : 3
THAT_FERNANDO : 1
ASSURED_VETERAN : 1
COMPLICATIONS_MAIL : 1
SESSION_LOWER : 1
CAN_BE : 1
CHEST_BL : 1
GROUPS_GRAINS : 1
AND_THIS : 1
CONSUMED_OTHER : 1
MEETING_NURSING : 1
DEP_NEC : 1
IT_PROGRAM : 1
SIMILAR_BEFORE : 1
FINAL_EXTRACTED : 1
DEPRESSION_SC : 1
NIGHT_OF : 1
DATE_UN : 1
MEAL_TIMES : 1
WARFARIN_NA : 1
BATHING_IMPAIRED : 1
POSSIBLE_AND : 1
WILL_DOWN : 1
MALE_FAHRS : 1
AND_AN : 1
REQUEST_NAOMI : 1
HE_STATES : 1
URINE_COLOR : 1
PACK_APPLIED : 1
TOUR_TO : 1
TIME_SESSIONS : 1
NIGHT_NUMBER : 2
VITALS_STARTED : 1
SAYS_MR : 1
WT_REDUCTION : 1
SECRETION_HYPERTENSION : 1
COUMADIN_APPT : 1
WITH_POLYARTHRALGIA : 1
PM_DIAGNOSIS : 1
IS_CHEST : 1
REVIEWED_SIMVASTATIN : 1
AND_NPH : 2
WAS_ATTENTIVE : 1
FOR_PM : 1
NURSING_CLINIC : 2
REINSTATEMENT_OF : 1
FOOD_TIME : 1
MOOD_MOVE : 1
MESSAGE_FOR : 1
RETINOPATHY_CONSULT : 1
BEING_TO : 1
ARE_CONDUCIVE : 3
ANGRY_CONTINUOUSLY : 1
RANGE_TO : 1
CHANGES_MADE : 1
KNOWLEDGE_HEALTH : 1
INVENTORY_COMPLETED : 1
MAGAZINES_THE : 1
EASY_NUTRITION : 1
GROUP_IN : 1
LOCATION_RESIDENT : 4
LAST_WAS : 1
BUILD_ALERT : 1
MEDICATIONS_SUPPLIES : 2
COMPLAINT_IM : 1
PTSD_AND : 1
ACTIVE_COMPUTERIZED : 1
IS_HOWEVER : 1
PROCEDURES_LOW : 1
TO_VERIFY : 2
VIETNAM_THAT : 1
HIS_EYE : 1
SUPPORTIVE_OF : 2
THIS_SHE : 1
RESCHEDULED_COME : 1
THIS_TO : 2
OF_METAL : 1
ON_COUMADIN : 1
REL_COHERENT : 1
AND_HOW : 1
HOW_CAN : 1
CONCEPT_OF : 1
PULSE_ACID : 1
SCHEDULE_AN : 1
BUT_YET : 1
STARES_VETERAN : 1
DIPHENHYDRAMINE_MG : 1
BE_RELIEVED : 1
WELL_LABS : 1
VERBALIZE_MEASUREMENT : 1
IMMUNOSUPPRESSIVE_THERAPY : 1
ENCOURAGED_VETERAN : 1
LIST_ANKLE : 1
CM_DISEASE : 1
HAVE_RELIGIOUS : 1
POSITION_HE : 1
PERCEIVES_CURRENT : 1
GRANDCHILDREN_ARE : 1
SWER_CONTACT : 1
SHOT_REFERRED : 1
INVOLVED_IN : 1
NOTE_DISCHARGE : 2
NAME_PATIENT : 1
WEEK_NO : 1
PAIN_HYGIENE : 1
PAIN_WORST : 2
TREATMENT_AFTER : 2
HOWEVER_VETERAN : 1
FELT_WHEN : 1
REQUESTED_NOTE : 1
GENERAL_NOTE : 1
PULSE_ORIENTED : 1
RESIDENT_NO : 1
WAS_FROM : 2
IS_MEDS : 1
OBEASE_PLEASENT : 1
MONTHS_WHICH : 1
WAS_SENT : 1
POON_TO : 1
DISCHARGE_NOTE : 2
NERVOUS_BREAKDOWN : 1
DYSMENORRHEA_SOMETIMES : 1
EXTRACTED_TOOTH : 1
YO_SENT : 1
COGNITIVE_THE : 1
PRESENTED_WITH : 2
SUPPLIES_THIS : 1
OS_SEE : 1
THE_YR : 1
NO_GOAL : 1
MS_XT : 1
TIME_INTERVENTION : 1
PATIENT_IN : 7
HEALTH_JR : 1
CASE_ADDENDUM : 2
FOR_UP : 1
SACCOCIA_PRIOR : 1
ATTEMPTS_APPOINTMENT : 1
RECORDED_BLOOD : 1
REQUESTS_REINSTATEMENT : 1
NO_VISTA : 1
CAN_REPEAT : 1
HAVE_YOU : 1
PERSONAL_THEN : 1
MSE_FOR : 1
HAS_GETTING : 1
BATHROOM_BY : 1
FOOD_ADDENDUM : 1
REVIEW_QUESTIONNAIRE : 1
IT_CONTINUES : 1
OUNCEMENT_ON : 1
START_TO : 1
DURATION_OF : 2
MEDICATIONS_TREAT : 1
OF_BATHING : 1
OTHERS_DATE : 1
DURATION_TREATMENT : 1
WITH_FINDINGS : 1
ALERT_NEATLY : 1
PROBLEMS_WERE : 1
NOT_FOR : 3
ASSESSMENT_POSTTRAUMATIC : 1
SEIZURES_NAUSEA : 1
ALL_AREAS : 1
NOW_HE : 1
ON_HIPS : 1
AN_OUTSIDE : 2
USING_TIP : 1
CIES_ACTIVE : 1
PULSE_OXIMETRY : 1
HELD_TO : 1
ACCUCHEK_COMFORT : 1
MEDICAL_HISTORY : 1
DT_BP : 1
WITH_DOCTORS : 1
US_LIVER : 1
DISCREPANCY_HIS : 1
HAD_FALLS : 1
NOVEMBER_DATE : 1
WITH_IV : 1
BEHAVIORAL_RESTRAINT : 1
APPROPRIATLY_HE : 1
HOSPITALIZED_AND : 1
FOCUSED_COMPLEXITY : 1
CARE_CARE : 1
PT_KNEES : 1
VET_IN : 1
RESPONDED_TO : 1
ADDITIONAL_SIGNER : 1
INITIAL_TRANSFERRED : 1
THOUGHTS_INTERVENTION : 1
HORN_HE : 1
OBEASE_AND : 1
CLAIRE_PRIOR : 1
SHED_PREVENTIVE : 1
VAMC_FROM : 1
BLACK_PATIENT : 1
ARE_OF : 1
NO_KNOXVILLE : 1
PER_SKIN : 1
TO_FEEDBACK : 1
SCORE_RECORDED : 1
REEVALUATE_WORKER : 1
AND_SOCIAL : 1
THE_TREATMENT : 1
VOICE_MAIL : 1
TO_GOING : 1
ARGUE_ALSO : 1
WHAT_CURRENTLY : 1
MOUNTAIN_HOME : 1
NOTE_LOCATION : 2
HEALTH_CALL : 1
BOX_AND : 1
THERE_IS : 2
ROUTINE_PT : 1
PHONE_INFLUENZA : 1
LOCK_PLACE : 1
POTASSIUM_CHLORIDE : 1
WAS_PL : 1
SHIFT_PATIENT : 8
APPT_JUNE : 1
YEARS_AND : 1
BUILD_ORIENTED : 1
THIS_BE : 1
RESULT_CASTS : 1
POLYP_ADENOMA : 1
ASSISTANCE_REQUIRES : 2
CALL_FROM : 2
POTASSIUM_MEQ : 1
WITH_IODOFORM : 1
ATTENDED_AND : 1
MEASUREMENT_DT : 1
IMMEDIATELY_SHE : 1
INPATIENT_STATUS : 1
TO_ADDITIONAL : 1
REVIEW_AXIS : 1
ANCHORAGE_MANAGEMENT : 1
THE_OUTPT : 1
VETERAN_ADMITTED : 1
PROVIDER_NUMBER : 1
FOR_FOR : 4
TAB_SIG : 1
VACCINE_THIS : 1
PAIN_INTENSITY : 1
IS_PROCESS : 1
BACK_PTSD : 1
OFFERED_NO : 1
KEPT_FOLLOWING : 1
WITH_FAHRS : 1
PAIN_BACK : 1
THAT_NOTIFIED : 1
TASK_PHYSICAL : 1
APPEARANCE_AND : 1
PT_LIVES : 1
YES_PER : 1
TO_HIS : 5
HAS_PIECES : 1
DESCRIPTION_TREATMENT : 1
BILL_AS : 1
SC_THAN : 1
PTS_WERE : 1
WEEK_HYPERTENSION : 1
MEMBERS_OF : 1
MEET_WITH : 1
AT_THIS : 6
AND_DAUGHTERINLAW : 1
AMOUNT_HYPERTENSION : 1
PROCESSED_PT : 1
WERE_THEN : 1
FATHER_THE : 1
INFORMATION_CALLER : 1
PT_NOT : 1
NEUROLOGIC_JAW : 1
URINE_YELLOW : 1
CALL_IN : 2
AS_IS : 1
HAVE_ON : 1
QUESTIONNAIRE_SUMMARY : 1
GROUNDING_CLOSE : 1
STATE_RALS : 1
CAN_MEASUREMENT : 1
WOUNDS_LT : 1
IN_TALKING : 1
WEARING_HOSPITAL : 1
OFFERED_COMPLAINTS : 1
TITLE_CARE : 1
SCHEDULED_LEFT : 1
COMMUTE_TREATMENTS : 1
WITH_REQUEST : 1
SET_STAFF : 1
VOMITED_OBSERVATION : 1
MG_QUETIAPINE : 1
GENERAL_CAN : 1
OR_RESULTS : 1
BY_TEMPERATURE : 1
THEM_TO : 1
WITNESSED_PO : 1
HE_WAS : 9
SAFE_THERAPEUTIC : 1
AND_SINCE : 1
TO_MASSES : 1
HE_INSISTS : 1
DENIED_ANY : 2
POSTOPERATIVE_ES : 1
UP_STAFF : 2
SPOUSE_INDICATES : 1
MORNING_DEPRESSION : 1
ATTORNEYS_OFFICE : 1
WITH_SCREEN : 1
REPORTS_THAT : 1
WEEK_AND : 1
ANY_PALPITATIONS : 1
UNDERSTANDING_INSTRUCTIONS : 1
THE_TOTAL : 1
ER_SA : 1
EXTR_WOUNDS : 1
USING_MEDICATIONS : 1
AND_CALL : 1
OF_THAT : 1
OUTPATIENT_STATUS : 1
EVERY_NEEDED : 1
MEMBER_THINGS : 1
WAS_RECREATION : 1
THE_PATIENTS : 3
VARIED_AND : 1
MG_ACTIVE : 1
ISSUES_INSISTS : 1
ADDENDUM_PROGRESS : 1
XYZZY_FOR : 1
FOR_ED : 2
IS_EXCITED : 1
BILL_MUCH : 1
BEEN_OF : 1
WE_ALSO : 1
SHE_BE : 1
OTHER_MEDICATIONS : 2
NOTE_MENTAL : 1
AND_INTERACTING : 1
WM_FOR : 1
COMMODE_GEL : 1
ELIMINATION_OTHERS : 1
RELATED_COGNITIVE : 2
MASS_OR : 2
LATER_IT : 1
BIPOLAR_DISORDER : 3
ML_MEDIUM : 1
THAT_AFFECT : 1
MEDICATION_BOX : 1
IS_ADDENDUM : 1
NOT_APPLICABLE : 4
NERVOUS_PATIENT : 1
VETERAN_TO : 3
ABOUT_HEALTH : 1
TO_WEAPONS : 1
TITLE_URGENT : 1
BUT_TRIED : 1
TO_GIVEN : 1
AS_STATING : 1
NO_VISIT : 1
CED_THAT : 1
GLOBAL_OF : 1
THEN_MG : 1
BL_STATES : 1
UROSEVICHS_THROAT : 1
IN_CORRECT : 1
FISH_OIL : 1
TO_ENGAGE : 1
ANXIOUS_ABOUT : 1
BREAST_FEEDING : 1
IS_COUMADIN : 1
REVIEWED_AND : 1
VISITING_VETERAN : 1
ARRIVED_THE : 1
PATIENT_YES : 1
LASST_IRREGULAR : 1
RR_WAS : 1
HEALTH_NEEDS : 1
WITH_DOPPLERS : 1
CALL_APNEA : 1
ABILITIES_DEMENTIA : 1
CALLED_THIS : 1
CALL_STAFF : 1
DE_DIETARY : 1
ON_PAIN : 1
CAP_ONE : 2
AS_NAME : 1
INTERVENTIONS_MAKE : 1
THE_PRESENTED : 1
PROBLEM_IS : 2
NEEDS_POSSIBLE : 1
ABOUT_SUICIDE : 1
VETERAN_PROGRESSING : 1
SOME_NOT : 1
MH_CASE : 3
PHYSICAL_COMPLETED : 1
THE_TOPIC : 1
WITH_TYLENOL : 1
STUCK_POINTS : 1
PATH_TH : 1
KNOXVILLE_TN : 1
IN_BEGIN : 1
LDL_HIGH : 1
VOICED_DELUSIONS : 1
CONTROLLED_VISTA : 1
HERE_OF : 1
SESSION_PROVIDED : 1
FALLS_THE : 1
TIME_STARTED : 1
REASSESSMENT_RESULT : 1
ARE_THERE : 1
STOOL_PHYSICIAN : 1
WEIGHT_NO : 1
SCHIZOPHRENIA_AND : 1
NOTE_FOR : 1
OBSERVA_PATIENTS : 1
NORMAL_PROTOCOL : 1
LOCALIZING_OF : 1
ANCHORAGE_EVALUATION : 1
DISPOSITION_RECOVERY : 1
AND_IMPROVED : 1
EQUIPMENT_OSTOMY : 1
RAL_FOCUS : 1
WILL_MAIL : 1
SUPPORT_THE : 1
UP_FOR : 1
BID_UNTIL : 1
SESSION_STARTED : 2
VERY_POST : 1
EASY_REAC : 1
WITH_CALMED : 1
HOSPITALIZATION_USUAL : 1
ASSISTANCE_FRICTION : 1
HEMOPTYSIS_UNEXPLAINED : 1
ASSISTANCE_DINNER : 1
WILL_NOTE : 1
TYPE_AWA : 1
THE_TOENAIL : 1
FATHER_CALLED : 1
MOBILITY_JUNE : 1
VETERANS_EFFORTS : 1
DISTRESS_TO : 1
MALE_IS : 1
HERE_WILL : 1
BACK_PATIENT : 1
STATING_HE : 1
WANT_DO : 1
OTHERS_OTHERS : 1
PICK_HIM : 1
OVERNIGHT_NEW : 1
OTHER_COUNSELING : 2
FRUSTRATING_TO : 1
GROUP_WITH : 1
NEVER_RECONCILIATION : 1
ACUTE_PROBLEMS : 1
FAX_ANOTHER : 1
POLYP_SEE : 1
FREQUENTLY_SKIN : 1
PARTICIPATED_CASUAL : 1
SOCIAL_SKILLS : 1
YOUR_WE : 1
MEDICATION_MAY : 1
IN_ACTIVE : 1
HOSPITAL_ON : 1
BASIC_OF : 1
PULMONARY_NO : 1
NOON_SKIN : 1
HIS_DATE : 1
DISCUSSED_HOW : 1
TURN_ALARM : 1
FLY_DOWN : 1
RAPID_OF : 1
NOTE_TEMPLATE : 1
DIETARY_INSTRUCTIONS : 1
EVERY_IDENTIFIED : 1
TEMPERATURE_PAIN : 1
ASSISTANCE_FOR : 9
SUBSTANCE_POOR : 1
RECEIVED_AAO : 1
KARDEX_FEB : 1
HE_HAVE : 1
OS_DEAR : 1
DISEASE_AND : 1
DL_PATIENT : 1
VACCINE_WAS : 1
LAB_MONITORING : 1
FOOD_GROUPS : 1
DISCONTINUATIONS_ADDITIONS : 1
AFTER_HOSPITALIZATION : 1
PROBLEM_LIST : 3
NOT_ADVISED : 1
ICDCM_OSUNSANYA : 1
WITH_XT : 1
THERAPEUTIC_GROUPS : 2
MEDICATIONS_WILL : 1
EFFECTIVE_AMBULATION : 1
SINCERELY_ARE : 1
MEDICAL_DR : 1
TEMPLATE_PAIN : 1
PSD_WAS : 1
WITH_ALREADY : 1
AT_ALBUTEROL : 1
OBSERVA_STRENGTHS : 1
INTERVENTION_GROUNDING : 1
MR_WAS : 2
THE_RECONCILIATION : 1
BOWEL_THIS : 3
LAYING_MEDICATIONS : 1
BAKER_WOOTEN : 1
FALLS_SEIZURES : 1
FULL_MEDICINE : 1
PSYCHOLOGICAL_ASSESSMENT : 1
NO_DEPT : 1
SERVICES_PROVIDED : 1
LAST_ON : 1
SAFETY_INTERVENTION : 1
PALMER_SURGICAL : 1
VACCINE_RECEIVED : 1
PAIN_LAST : 1
DURING_THE : 2
CALL_DTN : 2
DIFFICULT_CARE : 1
INITIALLY_USING : 1
YEAR_MALE : 1
MEDICATION_BE : 1
PROCESSED_STATES : 1
CARE_PATIENT : 2
ETOH_MH : 2
NEUROSURGERY_NOTE : 1
MOUTH_ACTIVE : 3
REQUEST_OF : 1
FEEDING_RESIDENT : 1
PATIENT_CALLED : 2
AT_LAST : 2
PAINFUL_WEEK : 1
HIS_LAUNDRY : 1
RAL_ANESTHESIA : 1
FOLLOWING_VISIT : 1
CONSULT_NEW : 1
CONTINUES_CAME : 1
NOT_FRIEND : 1
FOR_TRANSFER : 1
WOUNDED_TREATMENT : 1
SEC_PAIN : 1
BP_CHEST : 1
SYPHILIS_SCREEN : 1
WITH_FOR : 1
NOT_PROBLEM : 1
HEARD_PULSE : 1
BL_PATIENT : 1
FOLLOWING_II : 1
BY_THE : 3
LINENS_REPLACED : 1
AT_PRIOR : 2
DOES_SMOKE : 1
CURRENTLY_PT : 1
HE_GLASSES : 1
HE_DRUG : 1
CALL_OF : 1
PACK_HE : 1
SPEECH_OF : 1
HIMSELF_NIECE : 1
AGO_WAS : 1
DISORDER_AND : 2
FOR_PATIENT : 3
MG_QTY : 1
APPLICABLE_SUPPORT : 1
SUBJECTIVE_PATIENT : 1
SAID_LAST : 1
NURSING_CRUTCHES : 1
AND_BIPOLAR : 1
FOR_TO : 7
SUMMARY_HELP : 1
PAST_INTERESTS : 1
BY_DC : 1
NOTE_HEALTH : 1
THE_MOBILITY : 1
OF_III : 1
MINUTES_IDENTIFIED : 1
DIPLOPIA_SPORADICALLY : 1
WITH_FACE : 1
BY_HIS : 2
MST_PROGRAM : 1
TO_FACE : 2
REPEAT_CYCLE : 1
NO_INDICATION : 1
IS_WHAT : 1
OF_IMBEDED : 1
PAIN_LIVED : 1
PTS_THEN : 1
MEDICATION_ER : 1
LUBRICATING_JELLY : 1
METABOL_NOS : 1
NO_HIP : 1
DIALOG_CHLORIDE : 1
CONTROLLED_EXAMPLE : 1
TEAM_MEETING : 1
IN_WEEK : 1
TYPE_RX : 1
HOSPITALIZATION_NO : 1
ASKED_WAS : 1
VISIT_ON : 2
BEER_HIS : 1
FINAL_THE : 1
MALE_PMH : 1
PAIN_LEG : 2
OF_PRESENT : 2
DATA_RECEIVED : 1
LEAVING_MAIL : 1
EXPOSURE_TO : 1
UREA_NITROGEN : 1
ER_IS : 1
FOOT_EXAM : 2
PCP_PRISCILLA : 1
OF_PROVIDED : 2
FOR_AGREEMENT : 1
NOT_MORE : 1
HYPONATREMIA_OF : 1
SETTING_NOT : 1
VA_UTI : 1
ITEMS_BEDSIDE : 1
SINCE_HE : 1
FOR_PERSONAL : 1
ROOM_NO : 1
BREAKDOWN_RUMINATING : 1
SAYS_HE : 3
OTHER_SPONTANEOUSLY : 1
SURROGATE_APPLICABLE : 1
MASS_HE : 1
BREATHING_TREATMENT : 1
NUMBER_INFLUENZA : 1
INFECTION_OF : 1
OF_CERVICAL : 1
IN_INVOLVING : 1
ASSISTANCE_PROGRESS : 1
CARE_YES : 1
TRAVEL_LINE : 1
AND_PROVIDED : 1
DISCUSSED_IN : 1
TYLENOL_IS : 1
NOT_DRIVE : 1
WEIGHT_CHANGES : 1
HERE_RECHECK : 1
STROKE_INFLUENZA : 1
WEAPONS_PROVIDER : 1
PHONE_IT : 1
INR_DONE : 1
BEFORE_YOU : 1
ORTHO_JUNE : 1
DIAGNOSES_MEDICATION : 1
USED_TO : 2
THE_CONTINUE : 1
PRESENTLY_IN : 1
MORSE_SCALE : 1
SKILLS_GIRLFRIEND : 1
BY_POOR : 1
PROFANITY_AT : 1
HOME_ALBUTEROL : 1
VISIT_LIPOID : 1
NUTRITION_PROBABLY : 1
WITH_BUYING : 1
DURING_ADDENDUM : 1
PLACE_RESIDENT : 1
TO_WHOM : 1
EXAM_WAS : 1
WELL_AS : 1
RECEIVED_FROM : 2
AND_WITH : 2
VE_ADDENDUM : 1
PAIN_SCORE : 3
THE_TUNICA : 1
ED_THE : 2
BELOW_THE : 2
HOW_THE : 1
DOWN_THE : 1
EVALUATION_TO : 1
CONSENT_FRICTION : 1
NOTED_OF : 1
THE_HAS : 4
PATIENT_SCREENED : 1
SUPERVISOR_FACE : 1
PROBLEM_HOME : 1
IN_OF : 4
ICDCM_OPEN : 1
OF_DISPOSITION : 1
VOIDED_ML : 1
BASCOM_FOR : 1
OTHERS_CURSING : 1
FAMILY_AMBULATORY : 1
IS_USING : 1
FROM_CRISIS : 1
TRANSFERRED_VERY : 1
AND_HUSBAND : 1
IT_PROPERLY : 1
TRAUMA_RELATES : 1
REACTION_USE : 1
IN_OTHER : 1
ALLARD_MANAGER : 1
AT_PM : 5
IN_KNEE : 1
THIS_MEDICAL : 1
FOR_IMMEDIATE : 2
IN_LEG : 1
GO_BAY : 1
PAST_NO : 1
SERVICES_AND : 1
CHLORIDE_MM : 1
PER_NOTES : 1
ROUTINE_VISIT : 1
ALSO_HOW : 1
EX_WHO : 1
PCP_ZAHN : 1
SESSION_WITH : 1
PAIN_PTSD : 1
TO_HAVE : 2
FLOWSHEET_POST : 1
IS_CHO : 1
REACTION_CHARTED : 1
ORIENTED_ABOUT : 1
HUNTSVILLE_THE : 1
MONTH_METHADONE : 1
HIM_DID : 1
THE_SETTING : 1
MG_SIG : 2
PCP_YESTER : 1
YESTER_REQUEST : 1
AGENT_DEPOSITS : 1
TAKE_BY : 1
WHAT_DO : 1
DO_FEEL : 1
SEEN_CONTACT : 1
MONEY_TWO : 1
SHORTNESS_AXIS : 1
APPETITE_DEGEN : 1
DENYING_TRAUMA : 1
MOXIFLOXACIN_DOXAZOSIN : 1
HIS_OF : 1
VA_MEDICATIONS : 1
GROUP_TIMES : 1
DRESSED_GROOMED : 1
FOR_OR : 1
AND_WHAT : 2
CONTROL_NURSING : 1
MEDICATIONS_SIMVASTATIN : 1
SHORTNESS_GLOBAL : 1
ABLE_IDENTIFY : 1
NASAL_ULA : 1
YOU_BE : 1
AS_WALKING : 1
ADDENDUM_PRIMARY : 1
MG_AM : 1
PATIENT_STAYING : 1
BROS_DINNER : 1
POLYARTHRALGIA_BURSITIS : 1
MD_PATIENT : 1
ANY_NO : 1
IN_LIMITED : 1
TO_TAKE : 2
IODOFORM_INCH : 1
WHILE_IT : 1
COUGHING_LOT : 1
TO_TREATMENT : 1
THIGH_YES : 1
ALSO_THE : 1
ARE_NOT : 1
BLOOD_HERE : 1
CLINIC_VISIT : 1
NURSE_MANAGEMENT : 1
NO_NEUROLOGIC : 1
AM_HOME : 1
AND_LEADER : 1
TASK_HELP : 1
SUBSTANCE_USE : 1
ICENHOUR_PH : 1
PATIENT_AMBULATORY : 1
SHE_WILL : 1
OXYGEN_VIA : 1
COMMANDS_SOUNDS : 1
QTY_ACTIVE : 1
THERE_THREE : 1
TO_SEE : 3
PRINTED_ENTERED : 1
PREVENTION_VENOUS : 1
FEELING_LIKE : 1
TEMPLE_THYROID : 1
APPLY_PAD : 1
PATTERNS_ASSESSMENT : 1
AND_POSITIVE : 1
THE_SHUTTLE : 1
OF_UPCOMING : 1
INHL_PUFFS : 1
CONSCIOUSNESS_ALERT : 1
LIVER_SP : 1
PERIOD_SERVICE : 1
SHOW_LICHENOID : 1
TRAINING_THE : 2
SHE_SEEMS : 1
DID_LEARN : 1
OUTLINED_INDIVIDUALIZED : 1
FOR_DIAGNOSIS : 1
JUNE_AND : 1
IS_MOSTLY : 1
AGE_MEDICAL : 1
FROM_AFTER : 1
DISTRESS_CHANGED : 1
MINS_CONSTANT : 1
AT_RISK : 1
WORK_NOTE : 1
HE_EXERCISING : 1
DM_INTERDISCIPLINARY : 1
PUPIL_FINDS : 1
OS_VSS : 1
ADDITIONAL_INFO : 1
DECISIONS_MULTIPLE : 1
VETERAN_COMPLETED : 1
PATIENT_MEETS : 1
AM_HE : 1
PROCEDURE_HEMORRHOIDS : 1
IS_LEVEL : 1
POON_FALLING : 1
GLUCOSE_UNTIL : 1
ACTIVE_OUTPATIENT : 4
LESSONS_JUNE : 1
DEPOSITS_TRAVEL : 1
ABLE_TO : 3
PWD_ACTIVE : 1
FOR_MODALITIES : 1
THAT_HIS : 3
ANY_THUMPING : 1
THAT_WIFE : 1
INFORMATION_TO : 1
SIMVASTATIN_NIACIN : 1
NOTED_VIEW : 1
THAT_NOW : 1
ACCIDENT_INJURY : 1
MEDICAL_TO : 1
AN_RISK : 1
CC_OF : 1
GLOBAL_ASSESSMENT : 1
INCREASE_BY : 1
INTERDISCIPLINARY_PT : 1
YOU_SICK : 1
ABUSE_MH : 1
CONTACTED_FOR : 1
COMPLETION_IMMEDIATE : 1
UNDERSTANDING_BLAST : 1
CONTINUED_INHALE : 1
PROTOCOL_TAPER : 1
ADMISSIONS_BEFORE : 1
TOPIRAMATE_MAMMOGRAM : 1
AWA_HYPOXEMIA : 1
ENCOURAGED_VENTILATION : 1
TREATMENT_THE : 1
PATIENT_PERCEIVES : 1
NOS_AND : 2
PUFFS_INHL : 1
AND_ENCOURAGE : 1
ANXIETY_ELIGIBILITY : 1
TELLING_AND : 1
DIABETIC_RETINOPATHY : 1
SURE_TO : 1
PRESENT_THE : 1
AND_UNDERSTANDS : 1
ADVISED_PHYSICIAN : 1
FRIENDS_TIME : 1
HEALTH_HOLD : 1
DING_NO : 1
BID_MG : 1
IN_UPON : 1
CERVICAL_PRESENTS : 1
GRINDING_DUE : 1
LOWER_THE : 2
ADMISSION_BRC : 1
THE_ON : 3
CALMED_AFTER : 1
BEHAVIORS_THAT : 1
TO_PTSD : 1
NOTE_TTN : 1
NOTE_HAND : 1
AXIS_ASSESSMENT : 1
TIME_DONE : 1
COGNITIVE_PROBLEMS : 1
HIS_YO : 1
DRAINAGE_BACK : 1
INABILITY_TO : 1
NO_MULTIDISCIPLINARY : 1
OUTLINED_CRISES : 1
NUMBER_SUBSTANCE : 1
DENIES_OF : 1
PSYCHIATRY_MULTIDISCIPLINARY : 1
AND_ARE : 2
SC_LESS : 1
VETERANS_QUESTIONS : 2
IDENTIFIED_GREATER : 1
SEDATING_SHORT : 1
PATIENT_ACCESS : 1
ARTHRITIS_OR : 1
ARRANGING_FOR : 1
PT_THAT : 2
TO_MELANOMA : 1
JUNE_ASKED : 1
HAS_COMPLAINTS : 1
TREATMENT_SECRETION : 1
COVERED_CONSENT : 1
INVENTORY_NO : 1
DOING_VERY : 1
IS_ASSIGNED : 3
TABLET_TOTAL : 1
PSYCHIATRY_NOTE : 1
HE_RUN : 1
CMA_NOTE : 1
LEFT_US : 1
SOCIAL_WORKER : 1
CLOZARIL_MED : 1
MEETS_AXIS : 1
FOR_SCHEDULED : 1
INDIVIDUAL_APPOINTMENT : 2
NAME_DISPOSITION : 1
INTERVENTION_WAS : 1
ASSISTANCE_MEAL : 1
SCHEDULED_EVALUATING : 1
EFFECTS_MEDICATION : 1
OF_RECENTLY : 1
TO_ADVERSE : 2
TIME_PROTECTORS : 1
WAS_FILLIN : 1
VOICES_ORIENTED : 1
GRAINS_WITHIN : 1
THAN_GRAMS : 1
DRIVE_FOR : 1
PLAYED_HORN : 1
WAS_CARE : 1
MG_TAKE : 5
OR_SECONDARY : 1
DETERIORATION_OF : 1
BY_AT : 3
VETERAN_ALONE : 1
LAST_FILL : 2
FOR_SUPPORTTALKING : 1
ORDERS_PACK : 1
NOTE_MEDICATIONS : 1
PATIENT_BATHROOM : 2
CALL_ICDCM : 1
BREATH_WRITTEN : 1
HIS_PAST : 1
NEEDS_PROBLEMS : 1
APPEARS_HAVE : 1
WITH_DISEASE : 1
HIS_PENIS : 1
AUTHOR_RYAN : 1
POLYARTHRALGIA_AND : 1
REFUSED_TO : 1
CAME_AS : 1
TO_UNABLE : 1
NUTRITION_SAFETY : 1
HE_COMPLAINS : 1
NO_ARE : 2
AT_AND : 2
MENTAL_DIAGNOSIS : 1
VIA_NUTRITION : 1
SCHEDULED_APPOINTMENTS : 1
HX_INTERDISCIPLINARY : 1
CONSCIOUSLY_WORK : 1
ON_SUBJECTIVE : 1
NOTE_STUDY : 1
MULTIPLE_ATTEMPTS : 1
LEARNING_IDENTIFIED : 1
PATIENT_IDENTIFIED : 1
SYSTEM_CONCERN : 1
PATIENT_KEPT : 1
BIRDGEWATER_OF : 1
OCCUR_NO : 1
BE_WRITTEN : 1
ON_FINAL : 1
ACTIVE_SURGEON : 1
NEED_MORE : 1
SKIPPING_RACING : 1
HIS_SUGARS : 1
THE_FOLLOWING : 8
THE_CLOTHES : 1
BY_IN : 1
IDENTIFY_ADDITIONAL : 1
IS_EXTREMELY : 1
PER_HIS : 1
AND_IF : 1
MINUTES_ON : 1
THE_ERUPTION : 1
AROUDN_VETERAN : 1
INITIALLY_RESISTED : 1
ALL_QUESTIONS : 1
DOCUMENT_MALE : 1
HER_FATHER : 1
PROGRAM_IMMUNOSUPPRESSIVE : 1
ENCOUNTER_FOR : 1
GOAL_PATIENT : 1
FLEX_TO : 1
WM_FROM : 1
PM_THE : 1
BATHINGNO_VETERAN : 1
NEED_THIS : 1
WITH_HEARING : 1
PARTICULARS_OF : 1
NO_CHANGES : 3
ABOUT_THINGS : 1
CHANGES_EXCEPT : 1
HE_FINISHED : 1
DEFICITS_MEDICAL : 1
SHAMPOO_BOWEL : 1
YES_PATIENT : 2
DX_WITH : 1
OTHERS_ASSIST : 1
WHICH_HES : 1
LENGTH_THYROID : 1
SHIFT_WAS : 3
IN_MEDS : 1
PATIENT_CALL : 2
CONGRUENT_AFFECT : 1
SMILING_LAUGHING : 1
WITHIN_HOURS : 1
THESE_POSSIBLE : 1
DRINK_ALCOHOL : 1
KNEE_WAS : 1
LESS_THAN : 2
TKA_STABLE : 1
THEM_FAX : 1
ANATOMICAL_LOCATION : 2
DO_TAKE : 1
BODY_WEIGHT : 1
AND_LEVEL : 1
NOTED_ORDERS : 1
AND_BURSITIS : 1
PAMPHLET_TO : 1
ATTEMPTS_PATIENT : 1
PREVENTION_BEDTIME : 1
ON_YES : 1
IS_WELL : 1
ARTHRITIS_CERVICAL : 1
EXTR_HEALED : 1
ASK_ASSISTANCE : 1
FINAL_OF : 1
PAINFUL_OLECRANON : 1
ORIENTED_ORIENTED : 1
PACU_FLOWSHEET : 1
WILL_REQUEST : 1
TO_DISTANCE : 1
HIS_CLASSES : 1
NEGATIVE_OTHERWISE : 1
AND_NO : 2
AWA_SS : 1
DATE_IS : 2
JUDGMENT_PLASM : 1
OF_INFECTION : 1
VA_CENTER : 1
AM_TURN : 1
WORKER_PRESENTED : 1
BUT_HE : 3
WITHDRAWL_FALLS : 1
WITHOUT_DIFFICULTIES : 1
INJURY_NO : 1
GOA_LIVED : 1
WAS_AND : 3
DISTRESS_AT : 1
RESCHEDULE_GENDER : 1
CELLULITIS_ACUTE : 1
WOOTEN_DIDACTIC : 1
IN_CITALOPRAM : 1
AND_ORGAN : 1
GOAL_THERAPY : 1
DATE_PATIENT : 2
AFFECT_FLAT : 1
THOUGHTS_SAFETY : 1
IN_TO : 5
BEDTIME_USING : 1
TRAILING_CANE : 1
LEFT_SWER : 1
FOR_VETERAN : 4
APPROACHING_PERSONAL : 1
THE_DEMONSTRATING : 1
HOURS_PING : 2
WORSE_AND : 1
ORIENTATION_CONSCIOUSNESS : 1
DEPENDENCE_ON : 1
BETWEEN_AND : 1
MINUTES_CLOZARIL : 1
MODIFY_AS : 1
HIS_PROPERTY : 1
CITALOPRAM_MG : 4
WELL_WALKING : 1
UNDERSTANDING_ADDENDUM : 1
FOCUS_HIS : 1
MG_TABLET : 1
GM_LIGHT : 2
PLAN_ORIENTATION : 1
SEE_PSYCHIATRIST : 1
SUMMARY_NOTE : 2
RESPONSE_REQUESTING : 1
IMAGING_ED : 1
PTSD_INTIMACY : 1
DIETARY_NO : 1
FOR_INCREASED : 1
CALL_LIGHT : 1
COUNSELING_AND : 1
ADDENDUM_HUNTSVILLE : 1
INFORMATION_HYPONATREMIA : 1
NO_ADDENDUM : 1
ALCOHOL_AND : 1
WISHING_SEE : 1
SISTER_SAID : 1
TREATMENT_PAIN : 1
OCT_TH : 1
TO_BY : 1
REMINDER_ACTIVITY : 2
MOBILITY_NO : 1
ORIENTED_PATIENT : 1
OTHER_KEPT : 1
DOCUMENT_YEAROLD : 1
CLINIC_ASSESSMENT : 1
INCLUDES_ALL : 1
SOUNDS_LOCATION : 1
OFFICE_DINNER : 1
AFFECT_AND : 1
VOID_VOIDED : 1
NUMBER_COMPLETE : 1
AM_GOING : 1
OF_PROBLEM : 1
GETS_SOME : 1
RISK_UNSAFE : 1
UTI_WAS : 1
BUSINESS_BE : 1
ORIENTED_NEATLY : 1
KEEP_OPENMIND : 1
AND_REQUIRES : 1
CHRONIC_PAIN : 2
FUTURE_TELEHEALTHCARE : 1
MULTIDISCIPLINARY_NOTE : 1
GUAFENESIN_TO : 1
WILL_BE : 7
BILLS_AND : 1
ALERT_IN : 2
THEN_THIS : 1
AUDITC_WELL : 1
GRINDING_IS : 1
AND_MAKE : 1
SELF_AND : 1
PROPERLY_PATIENT : 1
BETTER_PHYSICAL : 1
ADDENDUM_RAL : 1
THE_VETERANS : 1
MR_MH : 1
TECHNIQUES_MEDICATION : 1
OS_MR : 1
NEEDED_SHORTNESS : 1
PHYSICIAN_METHADONE : 1
THROUGHOUT_THE : 1
ASK_PCP : 1
GIRLFRIEND_STARTED : 1
TO_PROCEDURE : 1
WAS_RAL : 1
THE_LAUNDRY : 1
PAIN_AGREE : 1
LOCATION_OF : 2
SAD_LAST : 1
THE_DISCREPANCY : 1
AGAIN_MEAL : 1
REGARDING_OCT : 1
TO_CARE : 1
WITHOUT_LOCALIZING : 1
DATE_EXACT : 1
CPT_FOR : 1
RECENT_CHANGE : 1
CYCLOBENAZAPRINE_MG : 1
OF_NONE : 1
IV_SITE : 1
ADDICT_TITLE : 1
JUNE_STILL : 1
HE_THE : 1
AS_HIS : 1
ONE_HYPERTENSION : 1
CONSIDERATION_IS : 1
CAROTID_MID : 1
NOTE_ANATOMICAL : 1
RECENT_IN : 1
LIAISON_TEARFUL : 1
CASE_TO : 1
NOW_ON : 1
THE_OUTPA : 1
AND_THERAPEUTIC : 3
ORAL_INHL : 1
ACE_DREW : 1
DOES_PATIENT : 2
VITALS_INFLUENZA : 1
AND_ATTENTIVE : 1
SPONSOR_MEDICAL : 1
TRANSFERRED_LIMITED : 1
CHECK_MORE : 1
THIS_ENCOUNTER : 1
HOWEVER_HE : 1
RETURNED_CALL : 1
LIMITS_USED : 1
NUMBER_VETERAN : 1
APPT_TO : 1
TIME_ORIENTED : 1
LIMITED_SYSTEM : 1
HIS_ORTHO : 1
AT_TO : 1
LEVEL_PRIOR : 1
SAYS_CHECKS : 1
IS_THEY : 1
MENTAL_HOLD : 1
INFLUENZA_VACCINE : 4
BEEN_FOR : 1
PATIENT_FOR : 1
TOOTH_TEETH : 1
VETERAN_WAS : 3
APPT_CLINIC : 1
PEOPLE_ARE : 1
REDUCTION_LIVES : 1
PLAN_OF : 2
LAST_UPDATE : 1
SESSION_LATE : 1
NO_IN : 2
NO_ZZECF : 1
OF_INSURANCE : 1
INTERDISCIPLINARY_MEETING : 1
THIS_REQUEST : 1
LEVEL_OF : 2
TO_DYSMENORRHEA : 1
INCISION_AND : 1
INTO_WALKIN : 1
NOTE_TAKING : 1
HIS_BP : 1
MINS_TO : 1
WRITTEN_FOR : 1
PRESENT_LEARNER : 1
TALKING_ZZPATIENT : 1
MEDICAL_TAKING : 1
MIN_NEEDED : 1
TO_SITUATION : 1
TO_CONSCIOUSLY : 1
STAT_HE : 1
ED_SC : 1
RECEIVED_AN : 2
AGGRAVATE_TO : 1
APPARENT_DISCUSS : 1
AS_WELL : 1
THE_IMPRESSION : 1
PATHOLOGY_EXTR : 1
PLACE_GIVE : 1
FOR_ARE : 1
FROMT_THAT : 1
OF_NAIL : 1
PT_IN : 2
MG_TID : 1
INFORMATION_LEFT : 1
MONITORING_AND : 1
RESCHEDULE_FEMALE : 1
CLOTHES_BLACK : 1
AS_ELOPEMENT : 1
SOME_CONSTANT : 1
PAIN_CLINICAL : 1
SUBSTANCE_PATIENT : 1
CENTRAL_HEALTH : 1
NO_ATTEMPTS : 1
PLAN_RESPIRATION : 1
ALL_HEALTH : 1
AND_ATTE : 1
INTERDISCIPLINARY_PLAN : 1
BEGAN_WITH : 1
COURSE_CHRONIC : 1
ES_PATIENT : 1
ENGAGE_DAILY : 1
OXYCODONE_FOR : 1
IMAGERY_TECHNIQUES : 1
BEING_ABOUT : 1
ALWAYS_MADE : 1
MENTAL_ORIENTED : 1
SURGERY_WM : 1
MONITORING_EDUCATION : 1
PROVIDE_THIS : 1
DRINKS_ORIENTED : 1
GLAUCOMA_DEPRESSIVE : 1
YOUR_APPETITE : 1
LOT_SCAR : 1
AFFECT_LIFE : 1
TO_RECOVERY : 4
CRISIS_LIAISON : 1
WAS_EVALUATED : 1
AND_ED : 2
COPING_THAZINE : 1
DIFFICULTY_NO : 1
IS_METH : 1
CELL_CALLING : 1
PELVIC_PREVENTATIVE : 1
GRADE_OF : 1
HUDVASHNOTE_PATCHES : 1
MULTIAXIAL_NO : 1
MED_WAL : 1
PROGRESS_NOTES : 1
SINCE_IS : 1
ALTHOUGH_ODOR : 1
MANAGER_TYPE : 1
DIAGNOSIS_INCLUDING : 1
SHORT_SYMPTOMS : 1
STILL_COUGHING : 1
NEW_CONCERNS : 1
MASON_DISC : 1
SHE_HAS : 2
HISTORY_CHRONIC : 1
IF_SCREENING : 1
WELL_FOR : 1
HE_HIS : 1
WAL_PHONE : 1
ANOTHER_COPY : 1
FILL_RECEIVED : 1
MED_PTSD : 1
BATHROOM_TIME : 1
SALE_DEFERRED : 1
ABOUT_PCP : 1
TELEPHONE_NUMBER : 1
IDENTIFY_IN : 1
ICENHOUR_FOR : 1
APPT_NURSING : 1
DISJOINTED_AT : 1
WHAT_IS : 1
TALKING_OTHERS : 1
COMMUNICATION_STRATEGIES : 1
COPY_NEEDED : 1
REQUEST_EVERY : 1
CYST_SPECIMENS : 1
SOME_OF : 2
AFIB_GOAL : 1
ABDOMINAL_HYGIENE : 1
PULSE_MG : 1
ON_WOULD : 1
OF_PCA : 1
AT_CARDIOVASCULAR : 1
WITH_ADJUSTMENT : 1
ANESTHESIA_SCROTUM : 1
HIM_COMMENTS : 1
INVOLVING_TRAINING : 1
THIS_TAKE : 1
IF_DONE : 1
ARE_AWARE : 1
SKIN_MASS : 1
WOUND_EYEBALL : 1
CHO_OL : 1
AND_MORE : 1
EVALUATED_NEUROSURGERY : 1
HIM_SELF : 1
THE_ER : 1
WILL_NEED : 1
TAB_MOUTH : 2
PCA_FOR : 1
CONTROL_NOTE : 1
HIS_REPORT : 1
PATIENT_SICK : 1
NITROGEN_PT : 1
HE_THINKS : 1
ATYPIA_THERE : 1
AN_OPENMIND : 1
TAKES_REPORTING : 1
ACETAMINOPHEN_CAPLET : 1
FROM_OUTSIDE : 2
PING_ALBUTEROL : 1
DIET_INCLUDES : 1
OP_ORDERS : 1
TO_ABILITY : 1
CATH_IS : 1
COGNITIVE_DEFICITS : 1
ON_SERIAL : 1
THE_WITH : 3
CALL_REFILL : 1
NIECE_STATES : 1
FOOD_DURING : 1
PHYSICAL_HELP : 1
COMPLAINS_UNSTEADINESS : 1
RESP_DISTRESS : 1
HOURS_SLE : 1
RECOVERY_GROUP : 1
FOR_UNSAFE : 1
IMMUNIZATION_DOCUMENTATION : 1
YOU_YOU : 1
PREP_MH : 1
PHARMACIES_AT : 1
SPMI_PATIENT : 1
DISTRESS_RELATED : 1
PSYCHIATRY_TELEPHONE : 1
PRESENTING_COMPLAINTS : 1
THE_AND : 6
LEADER_WAS : 1
THE_PRESENT : 1
IN_DATE : 1
AND_YO : 1
GOAL_INDIVIDUAL : 1
MANAGE_ONES : 1
ON_MIDNIGHT : 1
ALBUTEROL_INHL : 1
ETOH_ABUSE : 1
PREVIOUS_CHRONIC : 1
EXCITED_GO : 1
VETERAN_THAT : 1
IS_SHOWER : 1
DATE_TELEPHONE : 1
HOSPITALIZED_AFTER : 1
NOTE_AND : 1
IN_BATHTUB : 1
FOR_LONG : 1
SYMPTOMS_OR : 1
COAT_PATIENT : 1
SMOKE_DRINK : 1
WM_HERE : 1
MONTHS_TRAUMA : 1
DUE_PATIENTS : 1
URINAL_NURSING : 1
TEAM_WISHING : 1
PHONE_PRINTED : 1
PCP_THE : 1
FILLED_OUT : 2
ETC_WILL : 1
AN_ELOPEMENT : 1
GET_TO : 1
PALMETTO_CAP : 1
ANTIBIOTICS_TO : 1
TO_CLINIC : 3
SESSION_NITROGEN : 1
TO_WHY : 1
THIS_PROBLEM : 1
PROVIDER_REQUEST : 1
DISCHARGE_GROUP : 1
WHEN_CULTURE : 1
ROOM_STAFF : 1
TOPIRAMATE_ASPIRIN : 1
THE_FACE : 1
THINKING_ABOUT : 1
FINDS_EXTRA : 1
TO_RTC : 1
BATHTUB_AND : 1
BAKER_LCSW : 1
CALL_TYPE : 4
CENTER_TYPE : 1
FOR_REVIEW : 2
USE_COPING : 1
ADDENDUM_SCDS : 1
IN_REMOVAL : 1
PLAN_FOCUS : 1
LAST_HAS : 1
HEIGHT_IN : 2
VET_NEED : 1
THE_DOCUMENT : 1
SUMMARY_VETERAN : 1
IN_BED : 2
MASS_VOIDED : 1
MAJOR_DISORDER : 1
LOW_BACK : 2
THE_WITHOUT : 1
HAVE_PRIMARY : 1
BEGIN_NUTRITIONAL : 1
RELATED_CYCLOBENAZAPRINE : 1
UNLESS_INSTRUCTED : 1
HE_IN : 1
MOD_COMPLEXITY : 1
CHRONIC_SAFETY : 1
HIM_NUTRITION : 1
AND_HAD : 2
TO_IMPROVE : 1
PRESENT_ALLARD : 1
INFORMATION_RESPONSE : 1
APPOINTMENT_PATIENT : 1
THE_IDENTIFIERS : 2
NO_IDENTIFY : 1
SOCIAL_WITNESSED : 1
SKIN_FEEDING : 1
DING_IV : 1
LIMB_POON : 1
OF_MOTION : 1
INFLUENZA_DOCUMENTATION : 1
RESTRICTIONS_THE : 1
NOTE_IN : 1
FOR_SHIFT : 1
GROUPS_TO : 2
THAT_IS : 3
THE_HOUSE : 1
OF_ALCOHOL : 1
ELIGIBLE_PATIENT : 1
HE_FEELS : 1
FINGER_URINE : 1
THE_FEB : 1
REVIEWED_RD : 1
IS_SERVICE : 1
ICE_PACK : 1
CHIEF_IM : 1
NO_ANDRE : 1
BUPROPION_ASPIRIN : 1
SYSTEMS_THAT : 3
NO_ALL : 1
DURING_TREATMENT : 1
PROVIDED_INFORMATION : 1
IN_PART : 1
MINUTES_PROBLEM : 1
DIAGNOSIS_RANGE : 1
MEMBERS_ENGE : 1
BE_DIFFICULT : 1
NO_EMERGENCY : 1
HE_DISJOINTED : 1
NO_LIMITATION : 1
FOR_SHORTNESS : 1
MONTHS_DENYING : 1
ANTIDIURETIC_DO : 1
AND_HE : 10
IN_SUPERVISION : 1
BM_SINCE : 1
PREFERENCES_NO : 1
THEY_LISTED : 1
VETERANS_MEDICAL : 2
AT_COUMADIN : 1
SESSIONS_AM : 1
MULTIAXIAL_DIAGNOSES : 1
EXCLUDING_SUPPLIES : 2
FOR_AFTER : 1
FORM_WOULD : 1
OFFICE_VETERAN : 1
HEARING_OXYGEN : 1
ASSISTANCE_CONSUMED : 1
EFFECTIVENESS_THERAPY : 1
CM_NEEDS : 1
MASSES_UNDER : 1
AS_TO : 2
DZCHRONIC_BACK : 1
OUT_HAD : 1
PTS_REQUEST : 2
ARTICLES_WITHIN : 1
RECREATIONAL_THE : 1
CLASSIFIED_ASSIGNMENT : 1
IN_FL : 1
AXIS_ADMISSION : 1
IT_MUST : 1
SESSION_BLADDER : 1
NO_DOES : 1
DRINKS_DURING : 1
RECREATIONAL_PROVIDE : 1
SCREENING_THE : 1
FEB_CONTINUE : 1
RELATED_TO : 3
SORE_LOW : 1
TRANSPORTATION_REPORTS : 1
TEXT_VET : 1
FAX_US : 1
OF_ACQUIRED : 1
OTHERS_AND : 1
MEMBER_YET : 1
EX_WIFE : 1
AMBULATION_SUPERVISION : 2
APPREHENSIVE_HIS : 1
FATIGUE_CONTINUES : 1
DILATION_EXTRA : 1
SELECT_ALL : 1
RADIATION_ONCOLOGY : 1
APPOINTMENT_TO : 1
BABY_HER : 1
ALLOWED_TIME : 1
ILLNESS_INDIVIDUAL : 1
DT_TTN : 1
MS_FOOD : 1
SCORE_REMINDER : 1
MH_MEDICATION : 1
PAIN_CAME : 1
AS_VA : 1
PLAN_FROM : 1
LIMITS_PROTOCOL : 1
LABS_LDL : 1
CLERK_SUPERVISION : 1
RECOVERY_ORIENTATION : 1
HE_LOT : 1
COLONOSCOPY_IN : 1
HAMLIN_LMSW : 1
SESSION_REVIEWED : 1
CONCERNS_CENTERED : 1
HE_DISCHARGE : 1
TWICE_MONTH : 2
NO_NO : 2
AND_AS : 2
SCREEN_OR : 1
ANXIETY_PAIN : 1
OF_IMPLEMENT : 1
THEN_DRINKING : 1
INCLUDE_REPORTS : 1
POSITIONING_NA : 1
HIM_ADDITIONAL : 1
COGNITIVE_SPECIFICALLY : 1
OXIMETRY_SHORTNESS : 1
OCCURS_SPORADICALLY : 1
HIS_WENT : 1
RECREATIONAL_TO : 1
BY_SELF : 1
DIFFICULT_TRANSITION : 1
POSTOCCIPITAL_MASS : 1
QHX_EXPLAINED : 1
PATIENT_TO : 7
HER_CALLED : 1
SEE_SUMMARY : 1
TEAM_TO : 1
NOW_ALL : 1
HEALTH_TO : 1
OUTSIDE_CLC : 1
EVENING_THIS : 1
ANATOMICAL_SEE : 1
AND_LIGHT : 1
CORNEA_OD : 1
NEEDING_TO : 1
YOUR_PHYSICAL : 1
MEETING_SPECIALTY : 1
INTERIM_INACTIVATED : 1
SCHEDULED_WAS : 1
TO_NURSING : 2
KEEP_AN : 1
MALE_TO : 1
GOAL_PARTICIPATING : 1
WITH_AND : 4
REQUESTING_WAL : 1
TREATMENT_GIVEN : 1
LPM_AMBULATION : 1
ATTEMPTS_THE : 1
AFFECT_CONGRUENT : 1
SOMEWHAT_SEDATING : 1
CONSENT_PATIENT : 2
PATIENT_ANY : 1
ANOTHER_IF : 1
FIRST_ASSIST : 1
BEATS_CALL : 1
LATER_TRIED : 1
SWOLLEN_WEEK : 1
PHILOMENA_HPI : 1
AFTER_BEING : 1
EXAM_CNUMBER : 1
HAS_SEEN : 1
YES_OTHER : 1
PAIN_CAN : 1
ETC_ETC : 1
AND_SWOLLEN : 1
ALONE_IF : 1
THE_HE : 5
TO_WITH : 3
AFFIX_TRANSDERMAL : 1
SIGNS_FOR : 1
GOING_HIS : 1
SPECIMENS_MASS : 1
DIFFICULT_TO : 1
EXAMPLE_INCREASE : 1
INTERVIEW_THESE : 1
PAIN_COMMENT : 1
CAME_INTO : 1
PERCEIVES_THE : 1
OF_LIST : 1
VET_WOULD : 1
PT_INCREASE : 1
BACK_PRESENTS : 1
GIVEN_MDS : 1
MAIL_MESSAGE : 1
AFFECT_IMPROVED : 1
MEDICATIONS_PATIENT : 2
HOSPITAL_BEFORE : 1
OF_OR : 1
WAS_TRANSFERRED : 1
INTERVENTIONS_VENOUS : 1
DRUGS_NO : 1
GROUP_WERE : 1
ECHOTEXTURE_RIGHT : 1
OF_BY : 1
ANDRE_VICTIM : 2
NOTE_HOW : 1
THAT_PAIN : 2
NURSING_INTERVIEW : 1
WITH_WRITER : 1
DINNER_BY : 1
TOPIC_VETERAN : 1
VERIFIED_ACHEY : 1
OF_INVOLVED : 1
GROUP_EXPECTATIONS : 1
OIL_MEDS : 1
HIS_STUDY : 1
VISIT_THE : 1
BE_EFFECTIVE : 1
FERNANDO_SAID : 1
TO_PRESENT : 1
RECREATION_NOTE : 1
THE_CATH : 1
RATE_THE : 1
THIS_GU : 1
IS_TO : 8
APPOINTMENT_LEFT : 1
CAPLET_SIG : 1
PREOPERATIVE_CLINIC : 1
ELIGIBLE_CH : 1
PRINTED_ANXIETY : 1
REVIEW_MINUTES : 1
PRIORITIZE_NEEDS : 1
RECEIVED_PAIN : 1
WAS_OF : 1
COMMENT_WITHIN : 1
OLD_HERE : 1
GIVEN_PER : 3
EXERCISE_STRETCHING : 1
ABDOMINAL_PAIN : 2
LIFESTYLE_OVERALL : 1
SPONGE_OS : 1
HOURS_NOT : 1
MAJOR_DEPRESSIVE : 1
PAIN_COMPLETED : 1
SOCIAL_SUPPORT : 1
MENTAL_CENTER : 2
BLOOD_REPORTS : 1
LIST_PROCEDURES : 1
IN_GAINSVILLE : 1
WHAT_PLEASE : 1
AT_EN : 1
PLAN_HAVEN : 1
OUTBURST_ABOUT : 1
THE_MEDICATION : 1
IRREGULAR_HE : 1
AGREEMENT_YES : 1
REPEATEDLY_LINE : 1
SINGLE_ACE : 1
ORAL_THE : 1
CONSUMPTION_VETERAN : 1
HIS_TO : 1
KNEE_FLEX : 1
SEEMS_TO : 1
PROGRAMS_VETERAN : 1
CALMED_INITIAL : 1
TALK_TO : 1
FOR_HIM : 2
FACILITY_CURRENT : 1
REFUSED_BY : 1
BODY_ODOR : 1
PROMOTE_INTERACTIONS : 1
PATIENT_NOT : 3
BIPOLAR_BY : 1
REFLUX_DEP : 1
TRAINING_REGARDING : 2
SAT_IN : 1
FROM_CLINIC : 1
SHE_PROTOCOL : 1
TO_AN : 1
HORMONE_DO : 1
DURING_ACTIVITY : 1
WHICH_HE : 1
WAS_BLOOD : 1
PSYCHIATRIST_WAS : 1
SHE_BEEN : 2
WORK_PROGRESS : 1
CALLED_THE : 1
HIS_PANTS : 1
ELSEWHERE_NOVEMBER : 1
RESIDENT_ROOM : 4
YOURE_SU : 1
AND_PROBLEMS : 1
MAY_ENDING : 1
CHANGE_STAYING : 1
SERVICES_IN : 1
STATED_THAT : 2
LAST_RECEIVED : 1
VARIOCOCELE_THE : 1
NUMBER_DISCHARGE : 1
UNLISTED_EVALUATION : 1
SUPPLIES_BODY : 1
YOURE_ALL : 1
INJURY_OTHER : 1
MOUNTAIN_GRINDING : 1
FRIEND_FAMILY : 1
CALLED_CANCEL : 1
BASIC_ACTIVITIES : 1
THE_PAIN : 3
MOVE_QUESTIONNAIRE : 1
SOURCE_SC : 2
BALL_BUT : 1
GEL_JELLY : 1
HAS_FROM : 1
ATTENTIVE_THE : 1
CATH_HE : 1
STAT_IS : 1
DAILY_LIVING : 1
OF_EDUCATION : 1
PATIENT_REPORT : 1
PATIENTS_ON : 1
COMMUNICATION_ANSWERED : 1
HAS_CAPACITY : 1
BY_LOT : 1
EXCISION_FROM : 1
MM_STILL : 1
MUSCLE_SPASM : 1
NA_NURSING : 1
HEALTH_FAILED : 1
OF_SIGMOID : 1
PAIN_REASSESSMENT : 1
EXTREMELY_ANGRY : 1
HERE_WITH : 1
RECORDED_NEW : 1
NO_HEMOPTYSIS : 1
ILLNESS_SPMI : 1
FL_AND : 1
PROVIDED_ABOUT : 1
TO_FACT : 1
PLASM_INABILITY : 1
IT_WAS : 1
TRANSFER_REQUIRES : 1
SHIFT_THE : 4
MODIFIED_TREATMENT : 1
NOT_SUICIDAL : 1
PAIN_UROLOGY : 1
GOA_THERE : 1
NO_STAFF : 1
WILL_PHYSICIAN : 1
IN_BUT : 1
THIS_BACK : 1
FL_WENT : 1
DISTRESS_EQUIPMENT : 1
PAIN_DEAR : 1
LAST_NIGHT : 1
PROCEDURES_PL : 1
RISK_NO : 1
WILL_FILLED : 1
CLC_ABRASION : 1
NUMBER_DIABETES : 1
IN_TEAM : 1
THE_DM : 1
PO_QHS : 1
MAY_MY : 1
HAS_THERE : 1
AT_BEDSIDE : 1
ETOH_OR : 1
DISCHARGE_FOCUS : 1
EXTREME_READER : 2
SHE_NEEDS : 1
ALSO_OF : 1
AND_OUTINGS : 1
SEIZURES_AND : 1
AFEBRILE_VS : 1
DIAGNOSIS_ES : 1
RECHECK_ADDENDUM : 1
HOUSE_AND : 1
EXIT_TIMEFRAME : 1
WE_DISCUSSED : 1
IMPULSE_NURSING : 1
VACCINE_RETURNED : 1
PAD_TO : 1
IS_TAKING : 1
APPT_RTC : 1
OVERALL_OF : 1
UNAWARE_AND : 1
CAREGIVER_HE : 1
DENIED_RECURRENT : 1
ARE_RESTRAINTS : 2
PATIENT_NO : 1
FRIENDLY_NO : 1
EXCEPT_SANDWHICH : 1
PLAYED_THE : 1
ASSISTANCE_OVERSIGHT : 1
INSUFFICIENCY_ICDCM : 1
WIFE_HAD : 1
WEAR_OUTSIDE : 1
BASCOM_SAYS : 1
AFTERNOON_STATED : 1
CONTINENT_PLAYED : 1
FEMALE_WOUNDED : 1
RAPID_RATE : 1
BURDICK_FULL : 1
HE_BE : 2
ADMISSION_CODE : 1
LACE_MH : 1
ON_HAND : 2
JUDGMENT_BEEN : 1
SAFETY_PATTERNS : 1
ABOUT_HIM : 1
DENIED_PALPITATIONS : 1
HE_READINGS : 1
FOLLOWING_WERE : 3
PERSONAL_SIGNS : 1
HE_ORIENTED : 1
SESSIONS_LOWER : 1
MISC_IEWED : 1
SOCIAL_WORK : 1
PL_ING : 1
GIVEN_TO : 1
STILL_DENTAL : 1
AND_DRAINAGE : 1
RESPIRATORY_EQUIPMENT : 1
HE_STATED : 1
FOR_WHICH : 1
INDEPENDENCE_AND : 1
TRAINING_COMMUNICATION : 1
APPEARS_BE : 1
COLOR_RISK : 1
MIDST_OF : 1
MINUTES_VETERAN : 1
NO_HOW : 1
HE_IS : 12
FOR_ACTIVE : 2
MEDICATIONS_SUICIDE : 1
SOCIAL_PROGRESS : 1
WITHIN_LIMITS : 2
IV_TO : 1
THIS_INTERVIEW : 1
IT_HE : 1
RECOVERY_AND : 1
TO_SEEN : 1
ANTIBIOTICS_CALL : 1
ADDENDUM_THERAPEUTIC : 1
CLEAR_DENIES : 1
SKIN_ASSESSMENT : 1
SITE_DING : 1
DX_FOR : 1
TO_AND : 11
FOLLOWED_FOR : 1
DISEASE_ADMISSION : 1
TO_CONTENT : 1
HE_AGENT : 1
SKILLS_VETERAN : 1
SIDE_EFFECTS : 2
SEEN_IN : 1
HM_FT : 1
AND_AUTHOR : 1
MED_RECONCILIATION : 1
BILLS_MAGAZINES : 1
INSTRUCTED_LAMOTRIGINE : 1
PROBLEM_TO : 1
ORIENTATION_GROUP : 1
COURSE_LOW : 1
LISTED_BELOW : 1
SYND_OF : 1
HIM_ADEQUATE : 1
LOW_AT : 1
NURSING_ADMISSION : 1
FRIEND_OR : 1
SEC_THAT : 1
STRESSORS_IN : 1
DEPRESSIONPT_DX : 1
OR_PRESSURE : 1
CARE_PATCHES : 1
NURSING_PACU : 1
TAMSULOSIN_EZETIMIBE : 1
CHEST_CTA : 1
AM_PM : 1
HIS_FAMILY : 1
IN_JOINT : 1
NURSING_PLAN : 1
MEDICINE_NOTE : 1
MEDICATION_APPETITE : 1
HAVE_LISTED : 1
PRESENTED_COPY : 1
MEDICATION_QUESTIONNAIRE : 1
START_GOING : 1
PERSON_ISSUES : 1
ENGAGING_IN : 1
REL_AND : 1
IN_REPORTS : 1
MENTAL_TL : 1
COOPERATED_WITH : 1
PALLIATIVE_OTHER : 1
TO_GET : 1
PM_WT : 1
PATTERNS_HIS : 1
PRESCRIBED_BY : 1
THIS_ACTIVITY : 1
HYPERLIPIDEMIA_WITH : 1
RESPONSIVE_NOT : 1
AND_SP : 1
TYLENOL_HE : 1
OF_PENIS : 1
WRITTEN_THE : 1
PT_INR : 2
TAKING_VERBAL : 1
III_CARE : 1
MONTHS_NO : 1
ALLERGIES_REACTIONS : 1
SHOWER_HYGIENE : 1
TO_YO : 1
SUPPLEMENTAL_LPM : 2
ACUTE_ARTHRITIS : 1
NURSING_CARE : 1
MENTAL_ATTENDING : 1
DOES_NOT : 5
THINGS_REMINDER : 1
OF_CIES : 1
FOCUS_NONE : 1
OUNCEMENT_OFF : 1
PWD_TAKE : 1
WAS_DISCUSSED : 2
BE_PROCESSED : 1
DEPRESSION_WHICH : 1
MEDICATIONS_HAD : 1
AFTERNOON_HE : 1
BE_PATIENT : 1
ASSIGNMENT_AND : 1
WOUND_IODOFORM : 1
ECCHYMOSIS_AND : 1
LAST_ALERT : 1
MAJOR_WHICH : 1
ILLNESSES_ACTIVE : 1
LIST_PUPIL : 1
IS_PRESCRIBED : 1
THESE_AREAS : 1
FOR_FRICTION : 1
YOUR_PAIN : 1
IS_NURSING : 1
FROM_PHYSICIAN : 1
ASSISTANCE_LOCATION : 1
PRIVATE_NUTRITION : 1
SOCIALIZATION_GIRLFRIEND : 1
CYCLE_FOR : 1
QUESTIONNAIRE_RESTRAINTS : 1
KEOMUAN_SWELLING : 1
TEMPERATURE_FEEDING : 1
LOCATION_CBOC : 2
FRIENDS_THE : 1
FLU_REACTIONS : 1
THIS_PT : 3
PAIN_MR : 1
OTHER_EQUIPMENT : 1
SESSIONS_REMAINING : 1
INTERIM_INFLUENZA : 1
HAS_SEVERAL : 1
AND_WEEK : 1
BEDTIME_OTHER : 1
LIKE_ENGAGE : 1
CM_NURSING : 1
NARCOTIC_CY : 1
DX_NOS : 1
ANSWERED_QUESTIONS : 1
NOT_WANT : 1
CONTINUE_OF : 1
UTI_AND : 1
PROCEDURE_OR : 1
THYROID_DISEASES : 1
PROBLEM_PROCEDURES : 1
THE_HAND : 1
NOTE_VIA : 1
PATIENT_PT : 1
THAT_DOES : 1
PAST_AND : 1
JR_IS : 1
TO_FACILITY : 1
FULL_PREVENTIVE : 1
THIS_BUT : 1
ADDENDUM_PER : 1
NIECE_THAT : 1
TREAT_WITH : 1
TREATMENT_CENTER : 1
OPEN_WOUND : 1
LIKE_HE : 1
ALBUTEROL_ORAL : 1
DIDNT_KNOW : 1
OTHERWISE_RESULTS : 1
OUTSIDE_INR : 1
HOW_GEOGRAPHIC : 1
NA_TAB : 1
NOT_THEY : 1
WORSE_OVER : 1
INTERVENTION_NEEDS : 1
VENTILATION_OF : 1
TO_INCREASE : 2
NOT_ELIGIBLE : 1
REPRESENTS_IMA : 1
TREATMENT_DAILY : 1
BONHAM_HE : 1
TIMEFRAME_FOR : 1
NO_ATYPIA : 1
ORAL_PWD : 1
PACKET_BID : 1
VERBAL_DONE : 1
CALLER_AREA : 3
VETERAN_WILL : 1
STARTING_THE : 1
WEEK_ON : 1
ON_PARTICIPATED : 1
ON_DETOX : 1
ZAHN_PRISCILLA : 1
OCR_OPTICAL : 2
EACH_OTHER : 1
CONSULT_VETERAN : 1
LAUGHING_TALKING : 1
INITIAL_EVALUATION : 1
STATED_HE : 2
VIETNAM_ERA : 1
HAS_APPEARS : 1
HAVING_FOR : 1
SWER_WILL : 1
ARE_HEARING : 1
FOR_TOTAL : 1
IDENTIFIED_ADDITIONAL : 1
HOSPITAL_COURSE : 1
DO_NOT : 2
FEELINGS_OR : 1
ALSO_BADLY : 1
LENGTH_SESSION : 1
AND_PERHAPS : 1
AND_MEDICATIONS : 1
WENT_SEE : 1
NEW_SOCIAL : 1
NOTE_APPEARS : 1
NO_DELUSIONS : 1
CONDUCIVE_TO : 3
HEMOPTYSIS_WEIGHT : 1
LDL_OL : 1
OR_ADDITIONS : 1
HERE_LB : 1
ROOM_VETERAN : 1
MANAGEMENT_EFFECTIVENESS : 1
BEEN_THE : 1
MOTIVATION_NOW : 1
PROGRESS_VETERAN : 1
HIS_LAST : 1
WERE_PHYSICAL : 1
DX_ED : 1
THE_HORN : 1
PRESENTATION_TECH : 1
ARE_SATISFACTORY : 1
MISSED_PATIENT : 1
TOPIC_FOR : 1
IMAGERY_DISTRACTION : 1
LIFE_SKILLS : 1
NURSES_REVIEWED : 1
FROM_TREATMENT : 1
WOULD_LIKE : 1
IV_PCA : 1
HELPS_ME : 1
TO_THERAPEUTIC : 1
CLERK_AMBULATION : 1
MALE_WITH : 2
IS_WITH : 4
EPIDIDYMIS_PAIN : 1
GROUP_THESE : 1
ADDRESS_MAINTENANCE : 1
VETERAN_HIS : 1
HE_VOICED : 1
TN_OF : 1
LDH_ABD : 1
TAKE_HIS : 1
INJ_AZITHROMYCIN : 1
EAT_CED : 1
PRESENT_FROM : 1
OTHER_BRING : 1
POSITIVE_HELP : 1
WHAT_HAVE : 1
FOR_TREATMENT : 2
ELIMINATION_ITEMS : 1
AND_FEEL : 1
WPBVA_FOR : 1
RECALL_SPECIFIC : 1
YEAR_FEMALE : 1
PATIENT_INVENTORY : 1
THE_ROOM : 2
UP_APNEA : 1
TEAM_NUMBER : 1
CURRENT_ASSESSMENT : 1
DISCHARGE_GRADE : 1
VA_IS : 1
OF_PERSONAL : 1
PUPIL_DILATION : 1
LAST_EXAM : 1
RECREATIONAL_EXPERIENCE : 1
INR_TEMPLE : 1
WOULD_AFFECT : 1
SERVICE_HEIGHT : 1
OTHER_OUTPATIENT : 1
MODULE_DISCUSSED : 1
GREATER_LOCATION : 1
HIM_HE : 2
SCREENED_FUNCTIONAL : 1
CONTENT_MEDICAL : 1
HPI_HOSPITAL : 1
ANALYSIS_MEDICATION : 1
NOTED_IV : 1
MD_PATH : 1
TECHNIQUES_DISTRACTION : 1
TREAT_DRUG : 1
WRITER_ALREADY : 1
ON_KNEE : 1
LUNG_SOUNDS : 1
NEGATIVE_OF : 1
INJ_SOLN : 1
NOT_TAKE : 1
LEFT_ALLOWED : 1
TO_SHOW : 1
OF_INTERVENTION : 1
LOCATION_ALL : 1
YES_PACKS : 1
CALLED_AM : 1
REMINDER_MESSAGE : 1
VISIT_BELOW : 1
SHEET_ADVISED : 1
HRS_TOUR : 1
NEED_BE : 1
TYPE_INSURANCE : 1
PROBABLY_PLAN : 1
SCHEDULED_AT : 1
SEE_AND : 1
USE_TIMES : 1
LIFE_ALSO : 1
HAND_ELIMINATION : 1
WHY_PT : 1
WALKIN_HE : 1
MAINTAIN_SAFETY : 1
TO_FACILITATE : 1
TO_SCHIZOPHRENIA : 1
WAL_PROBLEM : 1
OR_THE : 1
RISK_FOR : 1
BEEN_PAID : 1
FILLED_FOR : 1
WITHOUT_ANY : 1
NOT_SMOKE : 1
NOTE_FLUNIS : 1
NOTE_PRESENTED : 1
AND_HOSPITALIZATION : 1
FROM_AND : 3
TAKING_VET : 1
RRR_CHEST : 1
AT_MEAL : 1
BEDTIME_PT : 1
BEGINNING_OF : 1
NOS_TAKES : 1
FUNCTI_OF : 1
FOUND_BE : 1
ADDENDUM_VETERAN : 1
THE_RIGHT : 1
REMOVE_TOBACCO : 1
THIS_TASK : 9
INTERESTS_HE : 1
ONES_AFFAIRS : 1
NOTE_PENDING : 1
IMPLEMENT_PER : 1
NG_DIZZINESS : 1
ANXIETY_HE : 1
TIME_TO : 1
WILL_RUN : 1
CLINIC_NOTE : 1
NON_MEDICATIONS : 1
THAT_PLEASE : 1
ADEQUATE_NO : 1
LB_PSYCHOLOGICAL : 1
PTSD_PREP : 1
NURSING_MET : 1
DOSE_OF : 1
DONE_PERCENT : 1
WITH_HE : 2
MEAL_SUPERVISION : 1
EDUCATION_WRITTEN : 1
BEACH_AS : 1
NUMBER_THE : 1
BE_AT : 1
ANY_CONCERNS : 1
WILL_TAKING : 1
DID_THEY : 1
ERA_OF : 1
CONTACT_WEEK : 1
TEGADERM_HELP : 1
AND_BACK : 1
APPT_TAPE : 1
TIME_IN : 2
BOX_DATA : 1
HEALTH_CONSULT : 1
MOXIFLOXACIN_TAMSULOSIN : 1
PAST_LEISURE : 1
USE_DRUGS : 1
SESSION_UREA : 1
SHE_IS : 1
THE_AT : 1
DATE_THE : 1
AND_UP : 1
DIFFICULTIES_CONFIDENCE : 1
FOR_RECHECK : 1
PRESENTING_FISTULA : 1
TO_FOR : 4
TIME_SELF : 1
HE_ALERT : 2
IMPAIRED_OXYGEN : 1
NONUSER_CHECK : 1
PATIENT_DISPOSITION : 1
TO_THE : 15
YES_HPI : 1
REPORT_TIME : 1
FOR_PATTERNS : 1
BREAST_NO : 1
TO_COME : 1
THE_MEDICATIONS : 2
CONSISTENCY_OF : 1
COMPLAINTS_BUT : 1
BY_MOUTH : 8
NEEDED_AND : 1
QUETIAPINE_MG : 2
HE_INDICATED : 1
STATEMENT_INTERIM : 1
TO_TALK : 1
THE_CALL : 1
MUCH_EITHER : 1
YET_HIS : 1
PT_TAKE : 1
THROAT_LOW : 1
MG_PROBLEM : 1
OVERSIGHT_ENCOURAGEMENT : 5
ADMISSION_NOTE : 1
GOING_HOME : 1
HEMATOLOGIC_DISORDERS : 1
NO_USUAL : 1
THERAPEUTIC_ENVIRONMENT : 1
MENTAL_SPMI : 1
COMPLETE_FOOT : 2
HER_HAS : 1
AND_THEN : 1
CONTINENT_AND : 1
GET_SURE : 1
DOING_IN : 1
THE_CONCEPT : 1
REGULAR_BM : 1
BLADDER_AMOUNT : 1
HYGIENE_COMMENT : 1
HAVIN_BM : 1
HYPERTENSION_BENEFITS : 1
THE_ALARM : 1
AND_RECONCILED : 1
ENGAGING_CONVERSATION : 1
REASON_FOR : 2
NOTE_HE : 1
UNDER_SKIN : 1
TAKE_TABLET : 6
ABOUT_OUT : 1
RECENTLY_RECORDED : 1
HIS_STATES : 1
TO_WHEN : 1
OS_ASSISTANCE : 1
VOICES_TELLING : 1
PROBLEM_ADVISED : 1
TRIED_TOILETED : 1
HAD_GET : 1
ELIGIBLE_FOR : 1
GROUP_ATTENDED : 1
GUAFENESIN_WENT : 1
FOR_UPCOMING : 1
FALL_SCALE : 1
NEC_NOSUNSPEC : 1
OR_PATIENT : 1
LAUNDRY_BAG : 1
HIGHER_STATES : 1
AM_PLEASED : 1
AS_THE : 1
CENTER_NOTE : 1
TO_INFORM : 1
STARTED_ALREADY : 1
ANYTHING_THE : 1
JUST_PRIOR : 1
FLARES_SHAKE : 1
DIVERTICULOSIS_OF : 1
TH_FOR : 1
SEEN_FOR : 2
PH_REVIEW : 1
PERHAPS_IS : 1
REPORTS_FLARES : 1
PLEASED_HE : 1
ACTIVE_IN : 2
PAIN_BEST : 1
AND_MANAGEMENT : 1
STARTING_AT : 2
ADDRESS_TO : 1
FOR_NECK : 1
NO_BARRIERS : 1
TO_STAFF : 1
ADDICT_LOCAL : 1
THE_THE : 2
LAYING_DOWN : 1
MOST_RECORDED : 1
HEART_KEOMUAN : 1
TOENAIL_LDL : 1
THAT_WAS : 4
AND_AM : 1
WHO_DURING : 1
WITH_RD : 1
SISTER_COUPLE : 1
HAD_RR : 1
DISJOINTED_TIMES : 1
REQUIRED_ASSISTANCE : 1
IODOFORM_ADL : 1
SOLN_LISTED : 1
NUR_OUTPT : 1
AUSCULTATION_TO : 1
HAD_DIFFICULTY : 1
RELATED_DEFICITS : 1
TAB_TAB : 1
XT_PM : 1
EXAM_EXAM : 1
HEALTH_AT : 1
AND_FOR : 2
FOR_TASK : 9
TEARFUL_RATE : 1
MICROSCOPIC_MEDICATION : 1
HAVE_APPOINTMENT : 1
FROM_II : 1
SAID_THAT : 4
WITH_OF : 5
THE_FOLDING : 1
SPORADICALLY_ONCE : 1
BY_NURSING : 1
AND_HIM : 1
COMMUNICATION_WITH : 1
INTERACTING_WITH : 1
DISTRESS_THIS : 1
EVALUATING_FOR : 1
BEEN_PROVIDED : 1
NAOMI_LCSW : 1
THERAPY_MODIFY : 1
LEVEL_UNDERSTANDING : 1
TIMES_STARES : 1
TRAVEL_REPEATEDLY : 1
TUNICA_VA : 1
BREAKDOWN_NOTED : 1
MALE_OF : 1
REMAINS_DISJOINTED : 1
PER_ORDERS : 1
MANAGER_MED : 1
PALMER_THAT : 1
TO_VETERANS : 1
VA_ADDRESS : 1
YOU_ABOUT : 1
ON_DIPHENHYDRAMINE : 1
TEMPERATURE_NUTRITION : 1
LINE_BUSY : 1
YELLOW_PATIENT : 1
WARFARIN_MG : 1
PTSD_HOSPITALIZED : 1
AND_NOT : 1
HPI_IS : 1
DTR_HAD : 1
TO_PLACE : 4
ABOUT_HE : 1
AT_VOICE : 1
CHORE_SERVICES : 1
FACT_CONDITIONS : 1
DEMONSTRATING_ABILITY : 1
ADMITTED_OF : 1
VOICES_OFFERED : 1
PERCENT_OF : 1
TEMPORARILY_HELD : 1
ADMINISTERED_ENDOTRACHEAL : 1
PREOPERATIVE_SEBACEOUS : 1
TYPE_REFILL : 1
FEELING_THINKING : 1
CARE_CALL : 2
PTSD_WT : 1
BARNES_FIRST : 1
COMPLETED_WEEKLY : 1
TIP_LATER : 1
BREATH_MATERIALS : 1
TRIAGE_NOTE : 1
HOSPITAL_TO : 1
INTEREST_LISTENING : 1
IDENTIFICATION_NURSING : 1
UP_CALL : 1
PT_EX : 1
DISORDER_SC : 1
FAHRS_DISEASE : 1
NO_NOT : 1
APPARENTLY_IS : 1
PING_THIS : 1
AND_COHERENT : 1
MINIMALLY_HE : 1
SANDWHICH_EVERY : 1
APPOINTMENT_PALMER : 1
NP_NOTE : 1
DILTIAZEM_HEALTH : 1
SMOKE_ETOH : 1
TEMAZEPAM_HIS : 1
FOR_DEFINITIVE : 1
APPARENTLY_GETS : 1
SEGMENT_WIDTH : 1
NURSE_JOYNER : 1
TO_ANYTHING : 1
DEC_HCL : 1
COGNITIVE_ABILITY : 1
COMPLAINS_OF : 1
BEDSPREAD_WAS : 1
TO_SURE : 1
YES_DEFINITIVE : 1
CHECKIN_NOTE : 1
ANALYSIS_MAY : 1
APPOINTMENTS_PLAN : 1
DEPRESSION_ELIGIBILITY : 1
OUT_FOR : 1
ENDOTRACHEAL_ANESTHESIA : 1
FOR_AT : 1
AUTHOR_DATE : 1
BY_TWICE : 2
DIFFERENT_FROM : 1
MOOD_OK : 1
PATIENT_PREPARATION : 1
OCT_NO : 1
INDEPENDENTLY_TIME : 1
SEEN_AT : 2
CULTURE_AVAILABLE : 1
THOSE_OS : 1
NA_NA : 1
RESPIRATORY_TREATMENT : 2
NURSING_CITALOPRAM : 1
AND_HOME : 1
OF_STROKE : 1
COMPLAINT_IS : 1
FRICTION_APPARENT : 3
TREATMENT_RECORD : 2
CALL_NARCOTIC : 1
REACTION_DOCUMENTED : 1
SEVERAL_FALLS : 1
APPOINTMENT_BASCOM : 1
SWOLLEN_PAINFUL : 2
ROOM_NUMBER : 1
VETERAN_AND : 2
IN_ROOM : 1
NOS_OSUNSANYA : 1
SUPPORT_SYSTEMS : 2
JOINT_SHOULDER : 1
WEDNES_DEMONSTRATE : 1
DISC_BACK : 1
RETURN_TO : 2
MAIL_HIM : 1
DISCUSSED_VETERANS : 1
TIME_SITUATION : 1
EVENING_PROVIDED : 1
VETERAN_ASKED : 1
SCDS_COMMANDS : 1
THE_TRIAGE : 1
FROM_ER : 1
SUGAR_DAILY : 1
CURVE_STRIP : 1
EACH_IDENTIFIED : 1
LPM_AT : 1
OFFICE_YRS : 1
DENT_HYGIENE : 1
NO_RESPIRATORY : 1
IN_RECOVERY : 1
PULSE_MANAGING : 1
TORN_STAINED : 1
MEDIUM_AMBER : 1
AND_BEDSPREAD : 1
ATTENTIVE_NERVOUS : 1
VIEW_THE : 1
IS_SCALE : 1
ADDITIONAL_IS : 1
PERSONAL_ITEMS : 1
ADDITIONS_THE : 1
THEN_THE : 1
CASE_NOTE : 2
MEDICATION_REFILLS : 1
IBUPROFEN_MOXIFLOXACIN : 1
MEDS_THE : 1
THE_YO : 1
OF_PULSE : 1
UNEXPLAINED_WEIGHT : 1
PATIENT_OTHER : 1
MUNSHI_ELIZABETH : 1
PROVIDE_THERAPY : 1
DECLINED_IN : 1
PRESENTS_FOR : 1
VISIT_INTERACTIONS : 1
THIS_FEMALE : 1
TOUR_FOR : 1
FAMILY_VETERAN : 1
STREET_GROOMING : 1
ORDERS_MEDICATIONS : 1
INFLUENZA_AT : 1
THIS_SUPERVISION : 2
CHECKS_FOR : 1
PAIN_TO : 2
ACTIVE_SKIN : 1
NORMAL_LIMITS : 2
FLU_SHOT : 1
MEDICATIONS_MOBILITY : 1
YOU_WILL : 1
EVALUATION_TRANSFERRED : 1
FOR_LENGTH : 1
HE_DIDNT : 1
THEY_MAY : 1
NOSUNSPEC_OVERWHELMING : 1
TRY_KEEP : 1
PROVIDED_OF : 1
OF_CHRONIC : 1
ABILITY_MANAGE : 1
COUMADIN_IS : 1
PAINFUL_TOUCH : 1
FOR_UTI : 1
KNOWLEDGE_OF : 2
SAME_ADDENDUM : 1
HAS_PROVIDED : 1
TAKE_THREE : 1
FILL_OCT : 1
WAS_CASE : 1
ELIMINATION_CURSING : 1
STATION_MANAGER : 1
MAR_NUMBER : 1
WITHIN_REAC : 1
LB_KG : 1
ADDENDUM_SURGEON : 1
ENCOUNTERS_WAS : 1
OS_ALLERGIES : 1
MEMBERS_SUPPORTIVE : 1
WAS_PRESENTED : 1
ALCOHOL_ACCUCHEK : 1
GOOD_REMINDER : 1
SESSIONS_SOME : 1
PATIENTS_ABDOMINAL : 1
OR_HX : 1
UNSPECIFIED_CHIROPRACTOR : 1
DX_APPOINTMENT : 1
VETERAN_THIS : 1
FOR_MEDS : 1
TISSUE_STATES : 1
REFILL_RUNNING : 1
AND_AROUDN : 1
RECOVERY_LIFESTYLE : 3
NO_PSYCHIATRY : 1
BE_BY : 3
RECONCILIATION_HOME : 1
LOSS_GREATER : 1
COUPLE_FRIENDS : 1
BACK_BY : 1
EAT_DIET : 1
NURSING_COME : 1
LOCALIZING_SYMPTOMS : 1
JOINT_INVOLVING : 1
SEEN_MINUTES : 1
ADDITIONS_TO : 1
INTERVENTION_VETERAN : 1
PLAN_INDIVIDUAL : 1
HOURS_NIGHT : 1
OF_ARRIVAL : 1
ORTHOPTIC_ICDCM : 1
CERVICAL_STRAIN : 1
LIN_IS : 1
LAST_TWO : 1
NPH_IN : 2
NAME_PRESSURE : 1
OPTICAL_WERE : 1
LISTED_ARE : 1
OF_THOSE : 1
FEB_QUESTIONS : 1
THEN_IS : 1
ICDCM_DOING : 1
PROBLEM_ALWAYS : 1
BP_VETERANS : 1
RN_DENIED : 1
SUMMARY_ONETOONE : 1
SINCE_LAST : 1
HIS_PT : 1
PCP_NURSING : 1
OLD_MALE : 2
IN_PAST : 3
OLECRANON_BURSA : 1
FINGER_EXAM : 1
STOOL_ROUND : 1
CHECKIN_TEMPLATE : 1
PATCH_DATE : 1
CASE_MANAGEMENT : 3
VETERAN_ATTENDED : 1
OF_HEAT : 1
MUSIC_USING : 1
AT_REQUEST : 1
NOTIFIED_ABOUT : 1
REQUIRED_ECCHYMOSIS : 1
DISCUSSED_MAKE : 1
THIS_LUNCH : 1
OUR_FOR : 1
MG_RD : 1
HISTORY_FALL : 1
RECOVERY_PHYSICAL : 1
PRESENT_IN : 1
TD_DISCUS : 1
EXCLUDING_AT : 1
INFLAMMATION_DSM : 1
JAW_NO : 1
THERAPY_TREATMENT : 2
HIS_SOCIAL : 1
WITH_MEDICATION : 1
CHANGED_DATED : 1
CITALOPRAM_TAB : 2
DR_DISC : 1
WRITER_VETERANS : 1
ATTENDANCE_ATTENDED : 1
THEREFORE_LEFT : 1
FORGOT_BUT : 1
IF_ADDITIONAL : 1
PLEASENT_PRESENTATION : 1
FAMILY_VISITING : 1
TO_GO : 2
TOP_PACKET : 1
APPLICABLE_NA : 1
RT_DIDACTIC : 1
ROOM_PAIN : 1
YOU_HAVE : 2
BE_SEEN : 2
PSD_INTERDISCIPLINARY : 1
ACTIVITY_WALKS : 1
CONTINUE_BASAL : 1
TO_IF : 1
HAVE_ACCESS : 1
IT_SOME : 1
CONSENT_NO : 1
BELOW_ARE : 1
FLOWSHEET_LEVEL : 1
UPON_ON : 1
POSTTRAUMATIC_MUNSHI : 1
RECEIVED_PT : 1
THERAPEUTIC_WAS : 1
PLASMA_PT : 1
DRINKING_NIGHT : 1
DO_IN : 1
REFLUX_ALCOH : 1
SAID_FERNANDO : 1
CALL_VETERANS : 1
WITH_FRIENDS : 1
URINATION_SELF : 1
TELEPHONE_CONTACT : 1
OTHER_MEMBERS : 1
TO_AFFIX : 1
TAKING_HOME : 1
WERE_EDUCATED : 1
TO_MG : 3
BOWEL_WERE : 1
DIFFERENCES_IN : 1
VETERAN_CHIEF : 1
NOTE_COME : 1
NUTRITIONAL_SEE : 1
NOW_IT : 1
CODE_EVALUATION : 1
DJD_HP : 1
NO_THE : 1
CARE_OTHER : 1
CIES_EXPECTATIONS : 1
TOPICS_HAIRED : 1
FOCUS_ALTERED : 1
INHL_QID : 1
MUNSHI_PATIENT : 1
BUT_MINIMALLY : 1
MY_IS : 1
PATIENT_OUTSIDE : 1
MENTAL_HEALTH : 6
SSN_PMH : 1
MEDICATIONS_EVENING : 1
TEST_HOW : 1
IS_PACK : 1
OF_TEST : 1
PALMER_SAYS : 1
MG_THIS : 1
THE_INCREASE : 1
SOURCE_FOR : 2
ON_LT : 1
OXYGEN_LPM : 2
WILL_ASK : 1
HIMSELF_HIS : 1
BASCOM_WILL : 1
CENTER_MASON : 1
OF_SCAR : 1
PATIENT_PHONE : 3
DIZZINESS_MR : 1
CALL_NURSING : 1
HOURS_PAIN : 1
TO_DINING : 1
ABOUT_IN : 1
LIGHT_CARE : 1
TO_PROCEED : 1
AN_DISORDER : 1
BY_ENGAGING : 1
GENDER_FEMALE : 1
MUSCLE_MASS : 1
YEAR_OLD : 2
SEE_TRAUMA : 1
KNOW_THE : 1
COAT_ARRIVED : 1
CURRENT_BREAKDOWN : 1
WERE_USED : 2
BE_RESPIRATORY : 1
RESTRAINTS_IN : 2
DRINKS_ADDENDUM : 1
THE_RESPONDED : 1
BROS_FOOD : 1
INCREASE_MY : 1
THAT_PL : 1
AND_RELATED : 1
EVENING_AFFECT : 1
ENCOURAGED_PT : 1
POSITION_PROCEDURE : 1
IS_FOR : 5
TO_NEW : 1
PATIENT_DOB : 2
RADIATION_THERAPIST : 1
OCT_MEYER : 1
BACTERIAL_RESULT : 1
AREA_DORN : 1
HIS_SITUATIONS : 1
ADMISSION_DATE : 1
MODULE_WAS : 1
INTERACTIONS_SUPPORT : 3
MANAGEMENT_PAIN : 1
MATERIALS_IN : 1
CONTINENT_RECREATION : 1
APPOINTMENT_IS : 1
PANTS_MALE : 1
CPRS_FOR : 1
TELEPHONE_REMOVE : 1
HE_STAT : 1
WITHIN_THE : 2
LEARNING_ANATOMICAL : 1
CARE_ACTIVITIES : 1
THE_CONSENT : 1
PATIENT_FLARES : 1
NO_UROLOGY : 1
NEG_OXYCODONE : 1
THAT_YOU : 1
OF_EXAM : 1
PWDR_AZITHROMYCIN : 1
PO_OR : 1
CONTROLLED_NO : 1
DETERMINED_NO : 1
MR_HAS : 1
RX_PRECERTIFICATION : 1
TO_MEDICATION : 1
GROUP_MEMBERS : 3
NOTICEABLE_DURING : 1
DATE_TIME : 1
LIST_SWOLLEN : 1
MR_DRESSED : 1
PRESENTED_IN : 1
INTERESTED_IN : 1
SUPPORT_ENJOY : 1
SKILLS_VETERANS : 1
APPOINTMENT_AND : 1
ANXIETY_DEPRESSION : 1
RISK_OF : 1
ADDENDUM_BIRDGEWATER : 1
BODY_THE : 2
VERY_SUPPORT : 1
DEFERRED_GROUP : 1
PAIN_ROS : 1
SHLDR_SUBACROMIAL : 1
THE_WROTE : 1
TERM_SON : 1
IDENTIFIED_OR : 1
WIFES_AND : 1
EVALUATED_TELEPHONE : 1
FERNANDO_THAT : 1
INFECTION_THE : 1
SCREEN_BMI : 1
UNSAFE_BEHAVIORS : 1
NO_HI : 1
ON_OUR : 1
HOLDING_PATIENT : 1
BEGIN_STATUS : 1
CANCEL_APPT : 1
OUTPATIENT_DURING : 1
CARE_TRACH : 1
MEMBER_BUT : 1
OCT_PROVIDER : 1
EDEMA_ABSENT : 1
PRESENTED_GOLD : 1
TALKING_AND : 1
BLADDER_SELF : 1
MORE_TRAINING : 1
BY_NUTRITION : 1
CHECKS_SAFETY : 1
FOR_THIS : 11
AND_OR : 3
IS_OF : 1
LT_HAND : 2
OF_VISION : 1
PROPERTY_HIS : 1
SYMPTOMS_CAN : 1
STATING_HIS : 1
PATIENT_PMH : 1
HTN_CERVICAL : 1
PHYSICIAN_THAT : 1
OS_PROVIDED : 1
ABILITY_FMH : 1
HIS_MAIL : 1
VETERAN_POLYARTHRALGIA : 1
VETERAN_PRESENTED : 2
PROFANITY_SACCOCIA : 1
PERSONAL_AT : 1
SAFETY_EVIDENCED : 1
NOTES_HAS : 1
OR_FAMILY : 1
CONTROLLED_INCREASE : 1
EVERY_DA : 1
NO_CYTOLOGIC : 1
WOULD_PREFER : 1
OF_STRAIN : 1
TREATMENT_REVIEWED : 1
COLON_CDI : 1
OF_FALL : 1
FUNCTIONAL_IN : 1
NO_DI : 1
MEDICATIONS_WED : 1
LOWER_ELIMINATION : 1
SC_FOR : 1
SC_DOCUMENT : 2
THE_REPORTED : 1
DIAGNOSIS_SEBACEOUS : 1
EMOTIONAL_AND : 1
THAT_ARGUE : 1
VA_MEDICAL : 1
BE_FOR : 2
PROCEDURE_RECEIVED : 2
NUMBER_ENTERED : 1
METH_ADDICT : 1
WHAT_ARE : 1
NAIL_PULSE : 1
LOCATION_LEFT : 1
REMINDER_DIALOG : 1
ANGRY_PREVIOUS : 1
VA_VET : 2
HIPS_LASST : 1
RYAN_ARTHROSCOPY : 1
REPORTS_ALCOHOL : 1
AND_PURPOSE : 1
TREATMENT_OF : 2
WHILE_HIS : 1
DETOX_HE : 1
ALL_WERE : 1
AS_MAIL : 1
REACTIONS_DILTIAZEM : 1
NECESSARY_BACTERIAL : 1
VISIT_SUBJECTIVE : 1
SITUATIONS_FEELINGS : 1
PLACE_DECLINED : 2
TABLET_BY : 6
FOR_DENTAL : 1
THEY_HAVE : 1
OF_YES : 1
SCHEDULE_RETURN : 1
OR_UNDERCLOTHING : 1
LIKE_HAD : 1
PLEASE_THEM : 1
WAS_NEUROSURGERY : 1
NOTE_ONETOONE : 1
LIFE_THE : 1
PATIENT_SEEN : 2
RESPIRATORY_RELATED : 1
PARTICIPATED_THE : 1
PLAN_PERCEIVES : 1
LAST_MUSCLE : 1
TO_GOLD : 1
VETERAN_START : 1
LDH_US : 1
INSTRUCTOR_DISCUSSED : 1
CALL_SURGERY : 1
NEEDED_MAINTAIN : 1
EYE_TO : 1
DIFFICULTIES_SOCIAL : 1
TREATMENT_NOT : 1
STILL_IT : 1
REACTIONS_REFERRED : 1
VOICED_ADDENDUM : 1
TO_ACTIVE : 2
WITH_AN : 1
DOCTORS_NOTE : 1
ASSESSMENT_FUNCTIONING : 2
DISCHARGE_CALL : 1
BUYING_AND : 1
IMPRESSION_IN : 1
VIA_CARE : 1
LASST_WITH : 1
VISIT_DENT : 1
AN_APPOINTMENT : 1
DM_TEAM : 1
WITH_MAJOR : 1
ECCHYMOSIS_IS : 1
TIME_WHEN : 1
SUICIDE_PREVENTION : 1
ETC_SWER : 2
NIGHT_WITHOUT : 1
SICK_APPT : 1
OS_EMERGENCY : 1
WITH_DEPENDENCE : 2
AND_SEEMS : 1
THE_STATE : 2
RESULT_HIS : 1
CONSENT_ID : 1
BASCOM_PALMER : 3
BEEN_RECONCILED : 1
PAIN_ASSISTANCE : 1
AN_SOURCE : 2
DISCUSSION_TIMES : 1
TREATMENTS_DONE : 1
OFF_AND : 1
VETERANS_POWER : 1
EXAM_DISCUS : 1
DISCUSS_CONCEPT : 1
NO_AND : 3
IMAGING_SC : 1
OF_DEVELOP : 1
LOW_PAIN : 1
PACU_LEVEL : 1
AT_CONVERSATION : 1
FORM_FILLED : 1
MEDICATION_IS : 1
LEVEL_POST : 1
PHYSICIAN_WIFE : 1
FOR_VITAMIN : 1
NUTRITION_TIME : 1
WAS_ASKING : 1
MEDICATIONS_FROM : 1
RESULTS_TO : 1
IN_WITH : 1
NEEDS_CALL : 1
LISTED_BEEN : 1
IS_HE : 1
BEEN_PULMONARY : 1
FOR_OF : 3
WOULD_TO : 3
ACCESS_WEAPONS : 1
UP_DELUSIONAL : 1
PREVENTIVE_MEDICINE : 1
AND_COUPLE : 1
OF_HAS : 1
LS_AM : 1
DISCUS_CLINIC : 1
PMH_HPI : 1
HE_HEARD : 1
PHYSICIAN_ISES : 1
STATES_THAT : 4
SOCIAL_AT : 1
ELIMINATION_TO : 1
LIVES_IN : 1
START_OF : 1
ER_PROBLEM : 1
ENCOURAGEMENT_OR : 5
HOME_VA : 1
DRINKS_PATIENT : 1
NOT_TRACH : 1
SELECT_WHO : 1
SIGNER_NURSE : 1
MEDICAL_POWER : 1
WITH_PATIENT : 3
POSSIBLE_HOWEVER : 1
IS_DEALING : 1
APPETITE_AND : 1
DEPRESSION_COLOR : 1
WERE_TO : 3
HTN_ARTHRITIS : 1
USE_IT : 1
FILL_MAXIMUM : 1
FT_OS : 1
ALCOH_NEC : 1
IS_BEST : 1
MIN_NUTRITION : 1
FEELING_SUICIDAL : 2
ANY_PROBLEMS : 1
WITH_GLAUCOMA : 1
OVERALL_LEVEL : 1
NO_ACTIVITIES : 1
INCREASED_DYSPNEA : 1
TO_AGAIN : 1
DIDNT_ABOUT : 1
FEEDING_NO : 1
THEY_FROMT : 1
FROM_WPBVA : 1
CASUAL_HE : 1
AGREEMENT_TORN : 1
FOR_AFIB : 1
CONVERSATION_CENTERED : 1
AMBULATION_TAKE : 1
COMMUTE_IF : 1
ER_AT : 1
LBS_ARTHRITIS : 1
MALE_ALCOHOL : 1
LUMP_MASS : 1
RESULT_DL : 1
PARTICULARS_HIS : 1
IN_CLOTHES : 1
IMMUNOSUPPRESSIVE_SOME : 1
ARE_GRATEFUL : 1
FULL_PATIENT : 1
THE_LOW : 1
UNLESS_DENTAL : 1
IDENTIFY_SIGNER : 1
CHANGED_SINCE : 1
BLADDER_TO : 1
INCLUDES_FIVE : 1
TWO_AND : 1
PATIENT_GOAL : 1
QUAD_SEC : 1
PACKED_WOUND : 1
THE_BILL : 1
LOSS_PAIN : 1
PATENT_SITE : 1
CANE_SEC : 1
EYEBALL_DOES : 1
PRECAUTIONS_PLACE : 1
WITH_BRIEF : 1
EXTENSION_ASSISTIVE : 1
COLONOSCOPY_REFUSED : 1
ABILITY_INDEPENDENTLY : 1
POST_TKA : 1
THE_DURING : 1
MEDICATION_DISCONTINUATIONS : 1
IS_APPREHENSIVE : 1
ORIENTED_MEETS : 1
INVITED_IS : 1
SESSION_TREATMENT : 1
FOOD_NO : 1
CLASSES_FOLDING : 1
SI_PT : 1
PROGRESS_IS : 1
VERIFIED_THAN : 1
REFERRED_TO : 1
POSTING_TRAUMA : 1
OF_HOSPITALIZATION : 1
CHIEF_PT : 1
INTERMITTENT_HISTORY : 1
THE_WHAT : 1
ON_DATE : 1
PHONE_DIABETES : 1
ICDCM_ACCIDENTAL : 1
USE_SOCIALIZATION : 1
MEDICAL_NOTE : 1
EXT_TO : 1
MAY_ASSIST : 1
MOOD_CITALOPRAM : 1
MOD_OBEASE : 1
THE_BED : 1
HYDROBROMIDE_MG : 2
WITH_ALCOHOL : 2
BLADDER_URINATION : 1
SCREENED_FOR : 1
LOCATION_DENVER : 1
PREFERENCES_WOULD : 1
OF_TRANSFERRED : 1
AMBULATORY_AID : 1
FINGER_COLOR : 1
ARRIVAL_NO : 1
IN_OK : 1
GUARDIANSHIP_RECENT : 1
URGENT_CARE : 1
FRIEND_WHO : 1
WITH_BATHING : 1
THAT_WOULD : 1
SHE_LIFETIME : 1
PALPITATIONS_THUMPING : 1
SAFETY_SS : 1
NO_CONDITION : 1
SHOULDER_REPORT : 1
SINGLE_DREW : 1
THINGS_INITIALLY : 1
TREAT_ADVERSE : 1
NUMBER_PT : 1
RESPIRATION_SELF : 1
EZETIMIBE_TAB : 1
HIM_SAID : 1
MAY_HAVE : 1
BY_HX : 1
TWO_PATTERNS : 1
WAS_EVALUATING : 1
VERY_SOMEWHAT : 1
AXIS_CLINICAL : 1
THE_HOURS : 1
RR_MAILPT : 1
OTHERS_ASSISTANCE : 1
CLINICAL_ACTIVITY : 2
IS_BIRDGEWATER : 1
SCORE_PHE : 1
AND_NOTIFY : 1
UROSEVICHS_AND : 1
THINGS_AND : 1
NIGHT_DENIED : 1
TYPE_NARCOTIC : 1
EDUCATION_AND : 1
PATIENT_LIVES : 1
CASHIER_DEPOSITS : 1
OF_MOVEMENTS : 3
COMPLAINT_PT : 1
ASSISTANCE_DOES : 1
NOTE_WOUNDS : 1
THE_TO : 2
ALERT_ATTENTIVE : 1
EXAMPLE_DOSE : 1
TRIAGE_PRESENTING : 1
OF_PHYSICAL : 1
OF_SEROQUEL : 1
USEFUL_SEDATING : 1
IS_NEEDED : 1
FLUID_GROOMING : 1
AM_REG : 1
ALCOHOL_VETERAN : 1
AND_TIME : 2
ADVISED_FROM : 1
NEW_ALLERGIES : 1
INFORMATION_CONFIRMED : 2
SPASM_HT : 1
THERAPY_RECORD : 2
DEAR_MH : 1
BACK_AND : 2
DRINK_BEERS : 1
INR_IN : 1
OF_NIGHT : 3
AND_TAPE : 1
HAS_OF : 2
BMI_OR : 1
ADDICTION_DEVELOP : 1
IN_ONE : 1
PT_DID : 1
WALKS_SKIN : 1
HOMEMAKER_IN : 1
SWOLLEN_OLECRANON : 1
OF_DAILY : 1
CAPACITY_OF : 1
REST_WALKS : 1
WHY_REQUIRED : 1
OD_OS : 2
NO_PROBLEM : 3
VETERAN_YO : 1
ACQUIRED_OF : 1
AND_TRY : 1
DOES_HAVE : 1
WED_NEXT : 1
CAME_BACK : 1
SESSION_THIS : 1
SATISFACTORY_OTHERWISE : 1
NOTE_HOME : 1
TYPE_SYMPTOM : 1
TOILET_MOBILITY : 1
OF_GROUP : 4
SECONDARY_DIAGNOSIS : 1
YO_ALCOHOL : 1
SKIN_SHAMPOO : 1
WORST_THE : 1
FACILITY_NUMBER : 1
APPEARED_THROUGHOUT : 1
ALREADY_FOR : 1
RELATIONSHIP_AND : 1
UPCOMING_APPT : 1
MH_BEHAVIORAL : 1
HEALTH_TECH : 1
RESIDENT_CUEING : 1
FOR_CONDITION : 1
YESTER_MR : 1
THEMSELVES_HIM : 1
WELL_IMMEDIATE : 1
AS_NEEDED : 4
CURRENT_STATUS : 1
CLEAR_EDEMA : 1
IS_AT : 2
THIS_SET : 1
BROTHER_WAS : 1
SESSIONS_NUMBER : 1
RECENTLY_BLOOD : 1
EMPHASIS_CHORE : 1
THE_NO : 1
GO_TO : 2
PAIN_REPRESENTS : 1
USE_FOR : 1
IS_ADDICT : 1
HE_SAID : 2
OF_OS : 1
CHO_DATE : 1
OTHERS_APPROACHING : 1
EVERY_MORNING : 1
WILL_AN : 1
DOB_MEDICAL : 1
TO_PREP : 1
LIMITED_TO : 1
NURSING_VISIT : 1
SUPERVISION_OVERSIGHT : 5
COORDINATOR_MR : 1
EDUCATION_VACCINE : 1
OF_EVENING : 2
AFFAIRS_CENTER : 1
OS_CAREGIVER : 1
IN_TREATMENT : 1
AND_PEERS : 1
STATUS_SUICIDE : 1
CORRECTED_WITH : 2
THE_UPCOMING : 1
AND_APPROPRIATELY : 1
NONE_PHYSICIAN : 1
HIS_NON : 1
CENTER_DAILY : 1
WHEN_DOWN : 1
NO_APPLICABLE : 1
STABLE_FLEX : 1
ON_THIGH : 1
ATTE_AT : 1
EXACT_IS : 1
HEPARIN_PLACE : 1
BRC_HYGIENE : 1
BREAKFAST_HE : 1
ALLERGIC_REACTION : 1
ED_RUNNING : 1
DENIED_NEW : 1
CENTER_DR : 1
BY_TAKING : 1
HIS_DOCTOR : 1
ER_HERE : 1
MAKE_DESPITE : 1
ID_ON : 1
DATE_CODE : 1
PRIOR_ALERT : 1
INTERVENTION_AND : 1
TO_LEARN : 1
WOUNDED_NO : 1
PRNS_PER : 2
APNEA_FALL : 1
AND_VERY : 1
THAT_MAKE : 1
ENCOURAGEMENT_TIME : 1
EVERY_AS : 1
FROM_PREVIOUS : 2
PENIS_THE : 1
COLOR_AT : 1
EXAM_PERTINANT : 1
PREVENTATIVE_HEALTH : 1
SURGICAL_NO : 1
NO_UNEXPLAINED : 1
PRESSURE_IS : 1
FROM_PULMONARY : 1
BATHROOM_HIM : 1
COULD_OVER : 1
SUICIDE_PREVIOUS : 1
TO_PSYCHIATRIST : 1
CERVICAL_RADICULOPATHY : 1
MONTH_DIVALPROEX : 2
HEALTH_AND : 1
PATIENT_NUMBER : 3
AND_CARE : 2
APPOINTMENT_HE : 1
PER_REPORT : 1
AND_MACKIE : 1
OUTPT_CHECKIN : 1
DISCUSS_THE : 1
FOR_ADMISSION : 1
WERE_BY : 1
MIN_VISIT : 1
SORE_THROAT : 1
CRISES_THE : 1
PHYSICAL_ICENHOUR : 1
SENDING_BEACH : 1
MOBILITY_PROVIDED : 2
EYES_IS : 1
THE_OUNCEMENT : 1
AND_WAS : 3
CHANGE_IN : 1
TO_NUTRITION : 1
WORKER_WITNESSED : 1
CONTINENT_UPPER : 1
AFTER_OUTBURST : 1
PAP_PREVENTATIVE : 1
WITH_VERBAL : 1
NEEDING_CONSCIOUSLY : 1
DETOX_ATIVAN : 1
COMMENTS_PATIENT : 1
TIME_HIP : 1
FEMALE_WAS : 1
ABOUT_MEDICATIONS : 1
UNSPECIFIED_WOUND : 1
PATIENT_LOT : 1
BE_NORMAL : 1
LONG_HISTORY : 1
FLUNIS_DE : 1
COLOR_PATIENT : 1
HAIRED_OBEASE : 1
HAD_ASSIGNMENT : 1
DW_MODALITY : 1
HEALTH_VISIT : 1
SERIAL_ES : 1
PT_USE : 1
MINIMALLY_DETOX : 1
EXAM_TEAM : 1
SESSION_AND : 2
HIGHER_AND : 1
THE_DOM : 1
TH_THERAPY : 1
FLEX_FULL : 1
NOT_NO : 1
AGAIN_AT : 1
BLE_PAIN : 2
STATES_VETERAN : 1
PATIENT_BE : 1
UNDERWENT_MINIMAL : 1
WHO_WERE : 1
FILLED_AND : 1
OF_TREATMENT : 5
AND_MONITOR : 1
LUNCH_BATHROOM : 1
MORE_ASSISTANCE : 1
CONSIDERATION_ASSIGNED : 1
OUT_MEDS : 1
HAD_INVENTORY : 1
CAUSING_THIS : 1
EXAM_HYPOTHYROIDISM : 1
TO_APPT : 1
KNEE_ONGOING : 1
CLEAR_CLEAR : 1
HEALTH_TL : 1
WENT_FROM : 1
ABD_AND : 1
INTENSITY_RATE : 1
GROOMING_IS : 1
PREP_VETERAN : 1
WOULD_YOUR : 1
MEDICAL_CBE : 1
CONTINENT_WITHIN : 1
NOTED_AT : 1
SPECIFIC_NO : 1
DISCONTINUATIONS_OR : 1
VIA_PROBABLY : 1
WAS_ACCOMPANYING : 1
ISSUED_VOICED : 1
FOCAL_OR : 1
HAD_BABY : 1
AND_CONTINUOUSLY : 1
BEFORE_VETERAN : 1
WILL_WRITTEN : 1
PACKS_PER : 1
ORTHOPTIC_TRAINING : 1
HIS_OLDER : 1
FOR_FUNCTIONAL : 1
CLINIC_DENTAL : 1
OTHER_PERSONAL : 1
TO_FINGER : 1
FROM_HIM : 2
DOXAZOSIN_TAMSULOSIN : 1
WAS_ING : 1
PHYSICAL_AND : 1
DISCUSSED_THINGS : 1
HIS_SUGAR : 1
HIS_ERUPTIOSN : 1
ANTIDIURETIC_HORMONE : 1
IDENTIFIES_THE : 1
WIFES_DEATH : 1
NO_RESTRAINTS : 1
ELIGIBILITY_SC : 1
PLACE_REARED : 1
SERVICE_BY : 1
RESIDENT_DINNER : 1
COMMENT_LIVES : 1
MIN_INTERACTIONS : 1
ALL_FOOD : 1
WARNING_SIGNS : 1
OF_INTENTIONS : 1
REQUIRES_ASSISTANCE : 9
CAPACITY_COVERED : 1
MEDIUM_CLEAR : 1
BED_WEARING : 1
IS_DUE : 1
OR_MONTH : 1
FEEDBACK_FROM : 1
AREAS_MORSE : 1
CONSULT_SUBMITTED : 1
TO_SOMEONE : 1
WITH_INTRODUCTION : 1
FOLLOWING_GLASSES : 1
CRUTCHES_WHAT : 1
BACK_HYPERLIPIDEMIA : 1
TID_HE : 1
OF_MENTAL : 2
PROGRESSING_INDEPENDENCE : 1
TO_CONTACTED : 1
FOR_EACH : 1
REFERRED_PATIENT : 1
NEEDED_ASSISTANCE : 1
WT_LB : 1
DESPITE_MULTIPLE : 1
ATTENTIVE_ORIENTED : 1
THIS_CASE : 1
RACING_CALL : 1
DRINKS_BATHROOM : 1
ALBUTEROL_INHALER : 1
TO_FULL : 1
MST_IMMUNOSUPPRESSIVE : 1
EXTR_DIFFICULT : 1
EYE_TD : 1
IT_TO : 1
AS_OUTLINED : 1
YRS_MALE : 1
RESTRICTIONS_SYST : 1
LCSW_WOOTEN : 1
PATIENT_PING : 1
FINDS_DOSE : 1
WITH_IRREGULAR : 1
CALLED_REPEATEDLY : 1
TREMORS_SOUNDS : 1
STATES_THEY : 1
COPY_THIS : 1
COMPLICATIONS_PAIN : 1
STAFF_PROVIDED : 2
VISIT_SUPPORT : 1
FREQUENTLY_AS : 1
IN_AS : 1
VA_FOR : 1
WAS_PROVIDED : 1
THE_LOWER : 1
COMPLAINTS_NO : 1
PT_SLEPT : 1
TEMPLE_LENGTH : 1
ML_CLEAR : 1
RECURRENT_OF : 1
NAME_DUE : 1
PALPABLE_SCDS : 1
SHE_FLY : 1
FACILITATE_RELATIONSHIP : 1
BLOOD_ISSUES : 1
SESSIONS_PROVIDED : 1
WHEN_BACTERIAL : 1
OF_BACK : 2
DETAILS_AS : 1
OF_DURATION : 1
ULA_GROUP : 1
PERSONAL_HYGIENE : 4
ULA_INTERVENTION : 1
CAP_TAKE : 2
HAS_MEDS : 1
NO_RESTRICTIONS : 1
THEREFORE_ANDRE : 1
LIVING_SKILLS : 1
INCLUDING_DISEASE : 1
HOUSING_REFILLS : 1
DOING_LABS : 1
FEEDING_NUTRITION : 1
ION_TKA : 1
NUMBER_PROBLEM : 1
POSITION_WAS : 1
CLOSE_TO : 1
PERSISTENT_MENTAL : 1
DEFINITIVE_DIAGNOSIS : 1
PROVIDED_BEDPAN : 1
HER_HUSBAND : 1
GROUP_OF : 1
PRIMARY_PHILOMENA : 1
BID_THEN : 1
PACK_TO : 1
OR_THAT : 1
BEEN_INCONTINENT : 1
OF_MOST : 1
HIM_EXPLAINED : 1
TO_MAINTAIN : 2
PATIENT_PERFORM : 1
ERUPTIOSN_THE : 1
ESOPHAGEAL_REFLUX : 1
PRODUCTS_HOME : 1
IN_RESPIRATORY : 1
TOTAL_MG : 1
BE_VISITNG : 1
PREOPERATIVE_DIAGNOSIS : 1
NURSES_NOTE : 1
NO_APPEARED : 1
NAME_TO : 1
ACHEY_HYPERLIPIDEMIA : 1
THOUGHTS_FEARS : 1
ALL_SU : 1
TO_EFFECTIVE : 1
AGREE_LAST : 1
EVERY_ACTIVE : 1
PATIENT_HAVE : 2
TRAUMA_SURGERY : 1
THUMPING_SKIPPING : 1
BOWEL_SOUNDS : 1
REFILL_BEFORE : 1
CUEING_MOBILITY : 1
THE_LT : 1
TO_INDEPENDENTLY : 1
REASON_VISIT : 1
REPLACES_NAME : 1
AXIS_DISORDER : 1
DX_AN : 1
HELP_AFFIX : 1
DIABETES_FOOT : 1
HAS_THE : 2
HOME_HAD : 1
DETERMINED_THEREFORE : 1
HE_SUGAR : 1
TO_BEGIN : 1
TWO_HE : 1
EMPHASIS_SERVICES : 1
WENT_THE : 1
WILL_EXPERIENCE : 1
LAST_TO : 2
CELL_PERSON : 1
COMMENTS_CALLER : 1
WILL_TIME : 1
HAS_HAD : 1
SENT_MICROSCOPIC : 1
CONSTIPATION_THERE : 1
HE_FORGOT : 1
CONTINUES_TO : 3
SP_WITH : 1
NUMBER_LS : 1
FOR_SERIVES : 1
DISCUSSED_STRATEGIES : 1
TO_HELP : 1
APPLICABLE_FRIEND : 1
TOBACCO_FROM : 1
REVIEWED_RECONCILED : 1
OF_THE : 12
IS_INTEREST : 1
FAILED_TO : 1
MONITOR_BP : 1
BEEN_HAVIN : 1
HS_AND : 1
PLACE_AMOUNT : 1
VET_PRESENTLY : 1
REPORTED_HE : 2
TRANSFER_NO : 1
II_PRESSURE : 1
TEGADERM_TO : 1
PLYMOUTH_THAT : 1
FAHRS_AND : 1
SPHERES_SPEECH : 1
DURING_MOBILITY : 1
IDENTIFIED_THE : 1
PELVIC_HEALTH : 1
HAS_NOT : 1
STARTED_ON : 1
BEST_TO : 1
LPM_REST : 1
PWDR_MG : 1
NOTE_HUDVASHNOTE : 1
CONVERSATION_SPOUSE : 1
ACTIVE_FLUVASTATIN : 1
AND_REVIEWED : 2
MORE_AS : 1
PARTICIPATED_APPROPRIATLY : 1
HAVE_AS : 1
DJD_HISTORY : 1
INFO_IS : 1
ORIENTED_SITUATION : 1
RIGHT_ADDITIONAL : 1
TO_PINES : 1
CASE_THE : 1
FAMILY_BUT : 1
AND_TREATMENT : 1
NG_BLOOD : 1
ON_THEM : 1
FAX_THAT : 1
OF_LCSW : 1
STRIP_FILL : 1
OUT_WHAT : 1
THE_SIGMOID : 1
ACTIVITY_OF : 1
FURTHER_FOR : 1
PSD_TEAM : 1
MENTAL_INCLUDING : 1
OFFICE_THE : 1
WILL_CONTINUE : 1
ATYPIA_IS : 1
SHORTNESS_BREATH : 1
DYSPNEA_THROAT : 1
COMPLETED_HIS : 1
INTO_THE : 2
MEDS_VA : 1
QUESTIONS_REGARDING : 1
RESPIRATIONS_AFTER : 1
AVERAGE_BUILD : 1
HYPERLIPIDEMIA_RELIEVED : 1
TAKE_MORE : 1
TELEHEALTHCARE_ALLERGIC : 1
AND_CONSCIOUSNESS : 1
BLADDER_CONTINENT : 1
YOU_THINGS : 1
HE_OF : 1
SEBACEOUS_SPECIMENS : 1
YOUR_HEALTH : 1
HE_AT : 1
ENVIRONMENT_WAS : 1
WISH_TO : 1
THEIR_IDEAL : 1
DIALYSIS_BASED : 1
STAFF_OF : 1
NOTE_NUMBER : 1
OVER_HISTORY : 1
RECEIVED_MAXIMUM : 1
UPON_DISCHARGE : 1
MEDICATIONS_THAT : 1
ORIENTED_TO : 7
VOICED_NO : 1
EZETIMIBE_MG : 1
INCONTINENT_WHICH : 1
GOT_BASCOM : 1
FISTULA_TREAT : 1
BATH_OF : 1
THAT_BEEN : 1
HAS_VOICES : 1
DECISIONS_DESPITE : 1
URINATION_ELOPEMENT : 1
EVERY_NOON : 1
PRIOR_TREATMENT : 1
MR_REPORTS : 1
TOUCH_UNABLE : 1
FEEDING_LOCATION : 1
HX_HEAT : 1
CHLORIDE_NORTRIPTYLINE : 1
HOW_HIS : 1
REPORT_BACK : 1
LOT_WITH : 1
NOTE_OF : 1
THERAPIST_NOTE : 1
OR_LUMP : 2
RECEIVED_BENEFIT : 1
THAT_FROM : 1
AREA_MOUNTAIN : 1
WARFARIN_STARTED : 1
NAME_BLOOD : 1
CAN_USE : 1
LAST_LAST : 1
LESSONS_AND : 1
FOR_AXIS : 1
TOUR_FACILITATE : 1
HOME_HEALTH : 1
CURRENTLY_ON : 1
BY_PHONE : 1
VERBALIZES_OF : 1
EQUIPMENT_DATED : 1
SOME_HEMATOLOGIC : 1
TIME_ISSUED : 1
TO_COMMENT : 1
TIME_ALONE : 1
CC_INFLUENZA : 1
APPT_YESTER : 1
AND_HELP : 1
ENCOUNTER_UNLESS : 1
IS_INR : 1
BASED_NO : 1
ALLERGIES_BUPROPION : 1
ON_APPROPRIATLY : 1
NONUSER_OF : 1
TABS_AGREE : 1
PATCHES_ER : 1
POSITIVE_GROUP : 1
HIGHER_HIGHER : 1
ARE_YOU : 1
TAB_OF : 1
THE_NEGATIVE : 1
NOTE_EAT : 1
HOURS_DANGER : 1
NURSING_PLASM : 1
FEELING_AND : 1
RRR_BP : 1
NO_LOSS : 1
FATIGUE_RELATED : 1
THINGS_GROUP : 1
COUPLE_OF : 1
VA_SHUTTLE : 1
PAIN_IN : 2
TIME_ALERT : 1
SHIFT_FOOD : 1
AND_COOPERATED : 1
AREA_TO : 1
UTOX_NEG : 1
POINT_CANE : 1
YEAROLD_MALE : 1
PATHOLOGY_DIFFICULT : 1
BEFORE_HOWEVER : 1
TYPE_OF : 2
AT_FACILITY : 1
PROBLEM_INABILITY : 1
CALLED_FOR : 1
STAYING_FRIENDS : 1
CC_PHYSICIAN : 1
USE_TEGADERM : 1
EYEBALL_ICDCM : 1
AND_NOW : 1
FRIENDLY_SI : 1
EFFECTIVENESS_TIME : 1
BETWEEN_SOME : 1
HE_ORDERS : 1
INTERVIEW_LIMITATIONS : 1
THERAPY_FOR : 1
EXAM_COMPLAINTS : 1
SETTINGS_OLD : 1
NOTE_GUNSHOT : 1
OCR_CHORE : 1
NO_PRACTITIONER : 1
ATTENDED_ACTIVELY : 1
VETERAN_MOBILITY : 1
SITUATIONS_SYMPTOMS : 1
THERAPEUTIC_RANGE : 1
ALL_PRODUCTS : 1
IS_CURRENTLY : 1
ADJUSTMENT_DISORDER : 1
BURSITIS_PAINFUL : 1
VISIT_UAL : 1
DOWN_AFEBRILE : 1
IS_ACTUAL : 1
HOME_HFA : 1
HRS_LAST : 1
DISCHARGE_PLAN : 2
PUT_CENTER : 1
IDENTIFIED_COMMENTS : 1
HOME_PER : 1
TITLE_BEHAVIORAL : 1
OFF_TURN : 1
HYGIENE_SHOWER : 1
APPETITE_NO : 2
THERAPY_MENTAL : 1
FEMALE_SEEN : 1
DENTAL_CAVITRON : 1
OF_LIMB : 1
SCHEDULING_PTSD : 1
EACH_MEDICATIONS : 1
OF_FORESKIN : 1
PRIVILEGES_LOCATION : 1
OF_DING : 1
VETERAN_CALMED : 1
PM_CONSIDERATION : 1
IT_CAN : 1
NO_VICTIM : 1
ANESTHESIOLOGY_SCANNED : 1
CLASSES_THE : 1
RISK_PRECAUTIONS : 1
EVERY_ONE : 1
AM_DENIES : 1
VETERAN_NOT : 1
OF_GM : 1
CONTACTED_SO : 1
DECLINED_TO : 1
AROUND_NO : 2
VAMC_TO : 1
MAMMOGRAM_SCREENING : 1
MEDICAL_ACTIVE : 1
NURSING_TRIAGE : 1
ESOPHAGEAL_ALCOH : 1
HIM_WAS : 1
CBOC_HISTORY : 1
COMPLETED_AT : 1
DIARRHEA_SEEN : 1
IS_OUR : 1
PROVIDER_CONTINUES : 1
US_ATTEMPTED : 1
OK_MG : 1
VOICES_TO : 1
WHICH_APPARENTLY : 1
INFLAMMATION_IV : 1
OF_BOWEL : 3
SLEPT_LAST : 1
PER_WIFE : 1
WEEKLY_WITH : 1
AND_LOSS : 1
HE_ONLY : 1
AND_ENVIRONMENT : 1
DATE_TEST : 1
MR_FISH : 1
KNEE_AFFECT : 1
ALTHOUGH_BODY : 1
OF_DJD : 1
PATIENT_WAS : 6
HAVE_DIFFICULT : 1
ALL_WITH : 1
HEALTH_PROBLEMS : 1
OBSERVED_TALKING : 1
CONDITIONS_NOTED : 1
AROUND_HIS : 1
FAILED_SHOW : 1
ABOUT_POTENTIAL : 1
PT_PATIENT : 1
PERSONAL_BED : 3
MARYLAND_THE : 1
OF_PRIMARY : 2
MEDICATIONS_HE : 1
TO_STRUCTURE : 1
PROBLEMS_PROBLEM : 1
YO_WITH : 3
ITEMS_CORNEA : 1
APPREHENSIVE_ABOUT : 1
TO_SOCIAL : 1
TO_READ : 1
BAY_MST : 1
READER_OCR : 2
AT_SACCOCIA : 1
LIMITATIONS_ICENHOUR : 1
PANTS_YO : 1
ACTIVITY_PATIENT : 1
FROM_HOME : 1
VETERAN_MEETS : 1
SKIN_PATCHES : 1
HYPERTENSION_WENT : 1
PATIENT_GIVEN : 1
AND_PROMOTE : 1
LEGIBLE_YES : 1
LAST_EVERY : 1
FUNCTIONING_THIAMINE : 1
INHALER_GENERAL : 1
RESCHEDULED_TO : 1
UNDERSTANDING_THIS : 1
AREA_ANCHORAGE : 1
AT_FOR : 2
TEST_RESULT : 1
PROBLEMS_OR : 2
ARTHROSCOPY_SUBACROMIAL : 1
DEPRESSION_HE : 1
FULL_AMBULATORY : 1
BY_DATE : 1
THERAPY_SOME : 1
DONE_COMPLICATIONS : 1
PATIENT_THE : 8
ICDCM_HT : 1
PROBLEMS_IN : 1
HOWEVER_STILL : 1
PRECERTIFICATION_CALLED : 1
INJ_INJ : 1
AND_HOSPITAL : 1
FROM_NOW : 1
DOES_THE : 2
LAST_PAIN : 1
KNEE_THE : 1
INTERACTIONS_ENJOY : 1
FLUID_BE : 1
TRIPPED_AND : 1
HIM_THAT : 2
SCALE_OF : 1
DONT_THIS : 1
RAL_ENDOTRACHEAL : 1
WRITTEN_NOT : 1
AM_ON : 1
ASSIGNED_TO : 3
LONG_LOCATION : 1
PSYCHOLOGICAL_EAT : 1
OF_BAKER : 1
HAD_PAIN : 1
POON_SWELLING : 1
REPORTS_HE : 2
PL_ED : 1
NA_ACTIVITY : 1
CONFIRMED_WITH : 2
TAB_RESULT : 1
PRESSURE_USUALLY : 1
EXPLAINING_HIM : 1
HIS_IN : 1
NEGATIVE_NEEDING : 1
SENT_FOR : 1
IN_PROCESS : 1
WALKS_HIS : 1
SKILLS_WAS : 2
PATIENT_CLINIC : 1
SYMPTOMS_BEHAVIORS : 1
PREVIOUS_INTERACTION : 1
NOT_ASK : 1
REQUEST_AND : 2
EFFECTIVENESS_OF : 1
SCANNED_PHYSICIAN : 1
CALL_ETTE : 1
RUNNING_WITCH : 1
GOOD_APPETITE : 1
GROOMING_DURING : 1
LEFT_EDEMA : 1
AFTER_INITIAL : 1
THE_CORRECT : 1
NOTE_ACETAMINOPHEN : 1
LMSW_ADDRESS : 1
NORMAL_CONSENT : 1
MEDICATION_TAKING : 1
ECHOTEXTURE_THE : 1
ITEMS_AT : 1
YES_AND : 1
FOR_CH : 1
NOTE_REASON : 1
NOT_HAVIN : 1
NOTIFY_OF : 1
ADMISSION_TO : 1
ALBUTEROL_HFA : 1
EXPERIENCE_THE : 1
HAD_INTEREST : 1
HE_NOW : 1
VERIFY_THIS : 2
PHYSICIAN_ASSESSMENT : 1
HEMORRHOIDS_INTERDISCIPLINARY : 1
BEEN_REGULAR : 1
GIVE_WITH : 1
NEEDED_EXIT : 1
AREAS_HEART : 1
GRADE_PATIENT : 1
HEALED_ON : 1
INABILITY_MAINTAIN : 1
SI_VOICED : 1
HANDICAPPED_PARKING : 1
RTC_IN : 1
THAT_AND : 2
SPEAK_ABOUT : 1
BACTERIAL_CULTURE : 1
TO_CANCEL : 1
DATE_ADMITTED : 1
PCP_PROVIDE : 1
AXIS_GLAUCOMA : 1
YEAROLD_IS : 1
DEPENDENCE_CURRENTLY : 1
PLACE_RESPIRATIONS : 1
EDUCATION_PATIENT : 1
THIS_EVENING : 1
AFFECT_YOUR : 1
SKIN_MUSCLE : 1
WPBVA_ER : 1
SOURCE_THE : 2
PATIENTS_SESSION : 1
UNDERWENT_INVASIVE : 1
UNLISTED_AND : 1
FUTURE_PLAN : 1
TAB_BREATH : 1
PM_PREOPERATIVE : 1
SOUNDS_WERE : 1
DISKECTOMY_NOTE : 1
ASSISTANCE_NO : 4
MID_PHONE : 1
HOW_PROCEED : 1
IN_STREET : 1
VETERAN_IS : 4
TAKE_TABLETS : 2
MOUTH_TWICE : 2
OTHER_PATIENT : 1
NOTED_MDS : 1
SWEET_DONT : 1
TOMORROW_READY : 1
BEEN_THEREFORE : 1
HE_CALLED : 1
OF_SUPPLEMENT : 1
PATIENT_CAN : 1
THIS_VISIT : 1
THERAPEUTIC_AND : 1
NUTRITIONAL_STATUS : 1
AREA_IF : 1
PAIN_OVERWHELMED : 2
CONSULT_EXPLAINED : 1
STAFF_DINNER : 1
SYMPTOMS_OF : 1
TO_YOUR : 3
PATIENT_JOKES : 1
SHAKE_FOR : 1
IS_FULL : 1
PROVIDER_UPON : 1
HOURS_AFTER : 1
INDEPENDENT_TURNS : 1
TREATMENT_INDIVIDUAL : 1
VETERAN_TIME : 1
VERIFY_PATIENT : 2
PREFERRED_SPEND : 1
MEET_HIM : 1
PROVIDE_SUPPORTIVE : 1
USE_LICHENOID : 1
ME_TO : 1
OWN_OF : 1
HAVING_DX : 1
TO_DISCUSSED : 2
INHALER_NOTE : 1
WHAT_DID : 1
NUTRITION_EXCELLENT : 1
FOLLOWUP_HISTORY : 1
FORM_THEY : 1
SPASM_ICDCM : 1
BED_APPEARS : 1
ASSESS_HEALTH : 1
MEDICATIONS_STATUS : 2
WAS_ALERT : 2
PATCHES_PROVIDED : 1
RETURN_CLINIC : 1
GUNSHOT_TO : 1
STAFF_AS : 1
TOILET_PROTECTORS : 1
DRINKS_BLADDER : 1
PLACE_WITH : 1
WIDTH_SPECIAL : 1
AND_MH : 1
SEPTEMBER_NEVER : 1
HE_CLASSIFIED : 1
THINGS_LEFT : 1
HX_OF : 1
SELF_FAMILY : 1
HAS_TAKEN : 1
POWER_OF : 1
OUT_LAST : 1
CALL_HISTORY : 1
IS_NOT : 4
ACTIVE_NP : 1
ALLARD_STATION : 1
AUTHOR_MACKIE : 1
NOON_CURRENT : 1
HIS_SISTER : 1
OUTLINED_IN : 1
TRAINING_ICDCM : 1
OF_CPT : 1
OF_HER : 1
BEHAVIORS_FUTURE : 1
TO_MR : 1
PATIENTS_DOWN : 1
FOR_HTN : 1
SATISFACTORY_UNLESS : 1
THE_NUMBER : 1
HE_PAIN : 1
AND_PRIORITIZE : 1
OR_EXCISION : 2
WAS_PLAYED : 1
PROBLEM_MOD : 1
AFTER_TEST : 1
STAFF_MEAL : 1
WELLBEING_ORGAN : 1
OUT_PATIENT : 1
OF_PAIN : 2
POINTS_IN : 1
SCHEDULING_PM : 1
VERBALIZES_UNDERSTANDING : 2
DECLINED_REFUSED : 1
TO_ZZPATIENT : 1
AS_AN : 1
CLINIC_CHLORIDE : 1
INTENSE_DECISIONS : 1
ONCOLOGY_THERAPIST : 1
EXTENSION_AMBULATORY : 1
MESSAGE_PHONE : 1
WEIGHT_THE : 1
IN_MAY : 1
HYGIENE_BED : 3
PATCHES_ASSISTANCE : 1
REMAINING_LOWER : 1
ACTIVE_MODALITY : 1
SUBJECTIVE_OBJECTIVE : 1
OK_NEEDS : 1
PRESSURE_WIDTH : 1
RX_IDENTIFIED : 1
WEIGHT_GREATER : 1
PLAN_CONTINUE : 1
PO_AT : 1
GOAL_VERBALIZES : 1
CAN_TEGADERM : 1
SECRETION_AMOUNT : 1
INR_AFIB : 1
ACTIVE_MANAGING : 1
WAS_NAME : 1
AND_PRNS : 2
AND_STENOSIS : 1
IS_CORRECTED : 2
DX_INFORMATION : 1
COULD_BE : 1
SKILLS_HAVE : 1
KNOW_NOT : 1
POOR_IMPULSE : 1
REPORT_INFORMATION : 2
AND_SURE : 1
FROM_THE : 1
INFLAMMATION_THERE : 1
FOR_DEPRESSION : 5
RELIEF_PATIENT : 1
MG_VERY : 1
SPONSOR_DOCTORS : 1
CONTINUES_INTO : 1
SCHEDULED_HE : 1
AMBULATION_OVERSIGHT : 2
BATH_DURING : 1
HR_SA : 1
STABLE_TO : 1
PROVIDED_BY : 1
CLINIC_RN : 1
INTERESTED_TALKING : 1
PATIENT_USE : 1
TO_WEAR : 1
BADLY_HIM : 1
HEALTH_CENTER : 1
EDUCATION_TOPICS : 1
ACTIVELY_PARTICIPATED : 1
ARE_AUTHOR : 1
PERTINANT_PRESENTING : 1
TO_NORMAL : 1
OTHER_BELONGINGS : 1
MAY_RR : 1
LEFT_SPONSOR : 1
AFFECT_PHYSICAL : 1
PALM_ETC : 1
DISS_ARGUE : 1
TREAT_IV : 1
INFLUENZA_IMMUNIZATION : 1
IF_ELIGIBLE : 1
CY_NAME : 1
CONTINUED_TRAINING : 2
DOWN_IS : 1
TIME_LS : 1
AWAKE_COOPERAT : 1
GROUP_SOCIALIZATION : 1
TURN_TO : 1
TO_AT : 3
BED_INDEPENDENT : 1
OF_RECREATIONAL : 1
TO_WERE : 1
HE_APPREHENSIVE : 1
THAT_SAID : 2
REC_WILL : 1
HYPOXEMIA_IS : 2
WRITTEN_MATERIAL : 1
IN_DERMATOPHYTOSIS : 1
ASSESSMENT_PAIN : 1
FROM_ASSESSMENT : 1
GROOMING_GOOD : 1
CHANGES_NUTRITIONAL : 1
NOTE_SYSTEMS : 1
AGO_LEFT : 1
OBESITY_BMI : 1
LENGTH_DISEASES : 1
OUT_OF : 1
FOR_ROUTINE : 3
AND_DEFERRED : 1
THIS_PREOPERATIVE : 1
YOUR_PAMPHLET : 1
TREATMENT_RECEIVED : 1
PERSON_TIME : 3
FACE_TURNING : 1
AND_UROSEVICHS : 1
NEW_SYMPTOMS : 1
TO_FEEDING : 1
ONES_OWN : 1
WRITER_NOT : 1
THEIR_STUCK : 1
MOBILITY_ASSISTANCE : 2
THE_USED : 2
MANAGEMENT_HIS : 1
ALREADY_SCHEDULED : 1
TO_REMAINS : 1
PREOPERATIVE_NURSING : 1
ORGAN_TISSUE : 1
YOUR_AND : 1
IF_THEY : 1
MELANOMA_HOWEVER : 1
TEAM_NOTE : 1
TESTS_APPOINTMENT : 1
INTIMACY_WAS : 1
APPLIED_SURGICAL : 1
NURSING_EXIT : 1
STAYING_IN : 1
NO_TIME : 1
HAS_VETERAN : 1
NO_SI : 1
CORRECT_POSITION : 1
SOME_MONEY : 1
PERCENT_THEIR : 1
FULL_THOSE : 1
LACE_MHICMINTENSIVE : 1
DIAGNOSIS_DEPRESSIVE : 1
RD_PRECERTIFICATION : 1
PATIENT_PREFERRED : 1
IV_CHRONIC : 1
CYTOLOGIC_THERE : 1
TWICE_AS : 2
MG_TEMPORARILY : 1
FUNCTIONING_TAB : 1
II_COMPLICATIONS : 1
SPHERES_WAS : 1
CARCINOMA_CELL : 1
DISCHARGE_PATIENT : 2
BRIEF_INTRODUCTION : 1
ROS_AGGRAVATE : 1
THIS_WOULD : 1
KEOMUAN_FALLING : 1
IDENTIFY_DIFFERENCES : 1
METABOL_DIS : 1
PROPANOLOL_TO : 1
CARE_APPOINTED : 1
DISC_DZCHRONIC : 1
OFFERED_HIM : 1
TALKING_THAT : 1
THIS_TIME : 3
BEEN_OBSERVED : 2
ROOM_FOOD : 1
UNDERSTANDS_HE : 1
IN_ISSUES : 1
NEED_TO : 2
CONTACT_NORMAL : 1
FROM_TEXT : 1
PATIENTS_PRESSURE : 1
OF_AND : 6
PUFFS_ORAL : 1
AND_LIVING : 1
DRO_NG : 1
HAS_RECEIVED : 1
SU_SWEET : 1
PERSONAL_SHOWER : 1
REQUEST_ROOM : 1
CARE_EFFECTIVENESS : 1
PAIN_GIVEN : 1
TO_TIME : 1
OF_COGNITIVE : 1
TYPE_FOLLOW : 1
LINE_PROVIDER : 1
RESPIRATORY_NOTE : 1
CHRONIC_BACK : 2
PATIENT_SSN : 2
ALLOWED_VETERAN : 1
MAIL_AND : 1
MEDICATION_HOURS : 1
THIAMINE_TAB : 1
HYGIENE_SPONGE : 3
REGARDING_EYE : 1
RAL_SUMMARY : 1
TO_PAIN : 1
FROM_ALLARD : 1
THAN_DURING : 1
BY_PRESENTED : 1
ARGUE_AND : 1
MEDICATIONS_YOU : 1
BATHING_BLADDER : 1
ALLERGIES_NO : 1
SEVERAL_IN : 1
FOR_LOCATION : 1
SITUATIONS_WITH : 1
PROVIDER_SYSTEM : 1
BUT_WOULD : 1
SAYS_WILL : 1
TABLETS_DIVERTICULOSIS : 1
VACCINE_CALL : 1
FACILITATE_THERAPEUTIC : 1
HOWEVER_HAS : 1
JELLY_TOP : 1
INVENTORY_FRICTION : 1
REGARDING_LITERATU : 1
OR_OF : 1
HAVE_RETURN : 1
AUG_RESULT : 1
AND_SKILLS : 2
ROOM_CURRENT : 1
SUPPLEMENT_PSYCHIATRY : 1
IS_PRESENTLY : 1
LUNCH_PATIENT : 1
FOR_SURGICAL : 1
GLAUCOMA_MAJOR : 1
WEEK_REEVALUATE : 1
NURSING_FLOWSHEET : 1
BP_PATIENT : 1
REQUIRES_NO : 8
JR_ASSIGNED : 1
GROUNDING_PAD : 1
ARRIVAL_BARRIERS : 1
YOUR_STOMACH : 1
PERSONAL_WEEK : 1
ON_REG : 1
CERVICAL_ICDCM : 1
NIGHT_MAR : 1
ENCOURAGEMENT_CUEING : 4
CONVERSATION_WITH : 1
CONSCIOUSLY_SOCIAL : 1
FUNCTI_MENTAL : 1
PHE_ADEQUATELY : 1
POON_OF : 1
TRANSFERRED_TO : 2
TIME_INVOLVED : 1
IN_AREAS : 3
ASKING_INVOLVING : 1
MOSTLY_INTEREST : 1
COMPUTERIZED_PROBLEM : 2
HOURS_FOR : 1
WEEKENDERS_MIN : 1
KNOWLEDGE_MENTAL : 1
TIME_ANTIBIOTIC : 1
PRESENTED_TO : 3
ELIMINATION_PREFERENCES : 1
DENT_BURDICK : 1
TO_ALREADY : 1
TO_THROUGHOUT : 1
PT_WAS : 1
NO_WERE : 1
AWARE_OF : 1
OF_CALL : 1
USED_NOT : 2
MUTUAL_PATIENT : 1
HE_CHECKS : 1
IN_ORDER : 1
TAPER_ALTERED : 1
OF_PRIVATE : 1
FOCAL_ABNORMALITIES : 1
TOPIC_ASKING : 1
IMMEDIATE_HIS : 1
FLUVASTATIN_MG : 1
THERAPEUTIC_RELATIONSHIP : 1
MISC_PHYSICIAN : 1
THIS_DURING : 1
UNSPECIFIED_OPEN : 1
MENTAL_WELLNESS : 1
FOOD_BLADDER : 1
CASE_WITHIN : 1
THERAPEUTIC_EXPERIENCE : 1
RESULTS_OF : 2
ORIENTED_IN : 1
DIFFICULTIES_NO : 1
WALKS_FREQUENTLY : 1
MEDICATION_PRECURSOR : 1
WITH_COPY : 1
SENT_WPBVA : 1
THE_LENGTH : 1
SURVEILLANCE_FOLLOWUP : 1
FROM_ANDRE : 1
PROVIDED_WRITTEN : 1
THERE_FALL : 1
NEW_NARCOTIC : 1
CONSTIPATION_DIARRHEA : 1
ASSISTANCE_FOOD : 1
TAB_MORNING : 1
CASE_MANAGER : 1
TOILET_HIP : 1
THAT_LAST : 1
GM_GM : 1
PATIENT_ABOUT : 2
AFFECT_INTENSE : 1
ORTHO_APPT : 1
INSURANCE_THERAPY : 1
ALTERED_MENTAL : 1
VISIT_REQUEST : 1
MINUTES_OF : 1
TRANSFER_HE : 1
UNSPECIFIED_POSTOPERATIVE : 1
RECORDED_PRESSURE : 1
FELL_AGO : 1
HX_PRESENTED : 1
GAINSVILLE_AND : 1
FLUID_MAY : 1
ASSESSMENT_STRESS : 1
TREATMENT_APPLICABLE : 1
LOCK_PATIENT : 1
NIGHT_MR : 1
RECOVERY_OVERALL : 1
MOVEMENTS_SHIFT : 3
AS_HE : 2
VISION_TRANSFERRED : 1
NEW_NO : 1
THE_MONTHS : 1
REPORT_PROCEDURE : 2
BIOPSY_POLYP : 1
HAVE_ABOUT : 1
PATIENT_ALERT : 1
ON_LOW : 1
RECEIVED_ELSEWHERE : 1
BY_NON : 1
LIFESTYLE_LIFE : 1
HIS_DROPS : 1
REVIEW_OF : 1
LOW_SELECT : 1
ONGOING_VOICES : 1
DISORDERS_AND : 1
WT_KG : 1
BE_TRANSITION : 1
ISES_SHE : 1
FUNCTIONAL_PROBLEMS : 1
EFFECTS_DRO : 1
CHECK_NEED : 1
NUMBER_GO : 1
RECD_TABS : 1
HYDROBROMIDE_TAB : 2
EFFORTS_AND : 2
AT_CONTACT : 1
EXPLAINED_PT : 1
HOME_OK : 1
INPATIENT_TREATMENT : 1
THE_TOOTH : 1
BASED_PHYSICAL : 1
GROUP_HE : 1
WRITER_LEFT : 1
CONSULTATION_LIAISON : 1
WELL_POST : 1
BUT_INDICATED : 1
GIVEN_CC : 1
NO_REQUIRED : 1
HE_THAT : 6
SICK_YOUR : 1
SUGARS_WENT : 1
REPORTS_OF : 2
HE_WITH : 2
TO_MASS : 1
SUPPLIES_AT : 1
IN_CM : 3
DT_BIRMINGHAM : 1
NOTED_THIS : 1
ED_CALL : 1
HE_MAY : 1
PSYCHOLOGICAL_CP : 1
PAMPHLET_GIVEN : 1
NOTE_RECONCILIATION : 1
INTERNAL_INTERDISCIPLINARY : 1
INTERACTION_VETERAN : 1
DR_MASON : 1
OF_VOICES : 1
ASK_FOR : 1
ATIVAN_FOCUS : 1
PHYSICIAN_MONTH : 1
HOLD_AT : 1
BETTER_DOWN : 1
MANAGEMENT_UNLISTED : 1
GIVEN_AZITHROMYCIN : 1
OSUNSANYA_OS : 1
FLUOXETINE_QUETIAPINE : 1
BUT_HIS : 1
LIVES_EX : 1
ASSIGNED_CALLER : 3
DRINKS_TIME : 1
VA_LIS : 1
BLADDER_UPPER : 1
CARE_CONTACT : 1
PATIENT_AND : 2
OR_UNTIL : 1
DISC_RETINOPATHY : 1
RECONCILED_REVIEWED : 1
INCREASED_RISK : 1
SAFETY_HOSPITALIZED : 1
ORGAN_SOCIAL : 1
RADICULOPATHY_BY : 1
INFORM_OTHER : 1
CM_SHE : 1
BUT_ONGOING : 1
THE_CHANGED : 1
PROCEDURES_RUNNING : 1
APPT_PT : 1
PREVIOUS_THE : 1
ADDENDUM_RANGE : 1
STATUS_CPRS : 1
CLINIC_CAN : 1
DEAR_NO : 1
LEG_PATIENT : 1
ABOUT_ADMISSION : 1
CLOTHES_COAT : 1
TO_ANOTHER : 1
OF_USE : 1
AND_PSYCHOTIC : 1
CHECKS_SUGAR : 1
ISES_THAT : 1
FOLLOW_UP : 1
MG_TAB : 10
FEBRILE_TO : 1
IN_THE : 24
REASSESSMENT_OF : 1
OF_SHOT : 1
WITH_MS : 1
PAIN_AND : 1
MH_NURSE : 2
TO_IDENTIFY : 1
LEFT_CLEAR : 1
LT_CONSISTENCY : 1
MENTAL_NEEDS : 1
DELUSIONS_OR : 1
WAS_WITH : 2
DIFFERENT_HIM : 1
CHORE_HOMEMAKER : 1
ADVERSE_DILTIAZEM : 1
ME_JUST : 1
TIME_WITH : 1
TIME_FELT : 1
SHE_SEEN : 1
CARDIOVASCULAR_BP : 1
INDICATED_THAT : 2
HELD_DUE : 1
REPLACED_THE : 1
SURGEON_BARNES : 1
CARE_ORTHOPTIC : 1
ON_ABRASION : 1
SEPTIC_RISK : 1
ASSURED_THIS : 1
NURSING_STAFF : 1
FOR_EVAL : 1
IN_PRESENTATION : 1
NOTE_MET : 1
NOT_HAVE : 1
TERM_LOCATION : 1
CYCLOBENAZAPRINE_THIS : 1
AND_PSD : 1
AND_HAS : 1
HIS_VA : 1
MIN_TO : 1
NOT_WISH : 1
PATIENT_REQUESTS : 1
THAT_FORM : 1
DETOX_HAD : 1
INDICATED_HE : 1
WRITTEN_AND : 1
ON_WHICH : 1
GIVEN_OF : 1
HAND_HAS : 1
BUT_REPORTS : 1
MINUTES_FOR : 2
WHICH_PRESCRIBED : 1
ANXIOUS_PROVIDED : 1
AFFAIRS_DURATION : 1
RECEIVED_IN : 1
STRAIN_PRESENTS : 1
PROTECTORS_PLACE : 3
DREW_PHD : 1
PRESENTS_TO : 1
IMA_BLE : 1
VETERANS_AFFAIRS : 1
AND_SPEAK : 1
LIST_THE : 2
PHYSICIAN_TO : 1
NO_ADDITIONAL : 1
AGE_NO : 1
TKA_KNEE : 1
INVOLVING_REGION : 1
TOTAL_OF : 2
MEYER_UPON : 1
ADDITIONAL_INFORMATION : 3
MAKE_DECISIONS : 1
ASK_TO : 2
FOR_DANGER : 1
GROUP_WAS : 1
TH_ADDENDUM : 1
THAT_PEOPLE : 1
TO_NAVIGATE : 1
CMA_HOW : 1
ACTIVITY_SEC : 1
INTO_REPORT : 1
THE_EXTRACTED : 1
NONE_CALL : 1
OR_MEMBER : 1
BY_MEDICAL : 1
SCDS_LUNG : 1
BE_TO : 2
IN_GIVE : 1
PLYMOUTH_MASS : 1
IN_DECLINED : 2
BENEFIT_INPATIENT : 1
PARTICIPATED_IN : 1
SCHEDULE_APPOINTMENT : 1
SYSTEM_INCLUDING : 1
LIKE_TO : 1
SECONDARY_THIS : 1
CARCINOMA_BASAL : 1
RECORDED_FORM : 1
MEDS_TO : 1
HEALTH_ACTIVE : 1
DOES_WISH : 1
EXAM_TO : 1
SCREENING_REFUSED : 1
SEE_NOTE : 2
AND_UNITS : 1
THIS_WRITER : 1
NOT_TO : 2
NECESSARY_WHEN : 1
PLEASE_SEE : 1
COMPLETE_EXAM : 2
OF_UNDERSTANDING : 1
HIS_ADMISSION : 1
MANAGING_YOUR : 1
HE_HAD : 7
FOLLOWING_MEDICATIONS : 1
BEFORE_HIS : 1
MG_DL : 1
WHICH_AFTER : 1
DEMENTIA_LOSS : 1
JOYNER_KNOWLEDGE : 1
CLEAR_CAREGIVER : 1
TYPE_DTN : 2
ATTENDING_LATE : 1
INCREASE_RISK : 1
MG_LIST : 1
AT_ENCOUNTER : 1
STUCK_IN : 1
LUMP_EXCISION : 2
AND_SETTINGS : 1
SOME_FOR : 1
SYMPTOM_NOTE : 1
HIS_DEATH : 1
HOMEMAKER_HOME : 1
NEEDS_USE : 1
LOCATION_KNEE : 1
VOICES_HIM : 1
ADDENDUM_PROVIDED : 1
EXPERIENCE_VETERAN : 1
PRESSURE_PT : 1
NOTE_WILL : 2
MR_ASKING : 1
NOTE_PRESCRIPTION : 1
PAIN_REPORT : 1
AN_IN : 1
BE_RR : 1
TRANSPORTATION_VET : 1
THE_AS : 1
SPEAK_BADLY : 1
BADLY_ABOUT : 1
NO_CALLED : 1
TO_YOU : 1
NEEDS_IMMEDIATELY : 1
EVENING_IS : 1
ASPIRIN_MAMMOGRAM : 1
PATIENT_CONTINENT : 3
PHYSICAL_PHONE : 1
TO_CLASS : 1
PROVIDER_PT : 1
ACTUAL_FOR : 1
BACK_DO : 1
WITNESS_COORDINATOR : 2
DECOMPRESSION_LIN : 1
CAN_AFFECT : 1
NECK_AND : 1
AND_SURGERY : 1
LONG_OF : 1
SHE_HAD : 1
MEMBER_ABOUT : 1
AND_SC : 3
ORDER_TO : 1
AND_NURSING : 2
LIST_FOR : 1
AROUDN_ATTENDED : 1
JUDGMENT_PROBLEM : 1
INACTIVATED_VACCINE : 1
SURGICAL_PATHOLOGY : 1
DECISIONMAKING_CAPACITY : 1
ADDENDUM_WELL : 1
NO_ENCOURAGED : 1
COMFORT_CURVE : 1
OUTINGS_DURING : 1
STRAIGHT_BILL : 1
NO_REPRESENTS : 1
ASSISTANCE_ZZECF : 1
PING_PATIENT : 1
HEARING_YOU : 1
DEPT_NURSING : 1
OPERATION_DISPOSITION : 1
OF_ACTIVITY : 1
LEGIBLE_FOR : 1
OCCURS_ONCE : 1
SEEN_ALL : 1
TO_FROM : 1
MEDICAL_CENTER : 2
WORKER_WAS : 1
TREATMENT_ANESTHESIOLOGY : 1
HR_VARIOCOCELE : 1
EXTENDED_SERVICE : 1
POINT_QUAD : 1
STROKE_VITALS : 1
FROMT_TO : 1
ISSUE_DATE : 1
CLINICAL_FLUOXETINE : 1
SPERMATOCELE_WAS : 1
THAT_SHE : 3
HOSPITAL_ATTIRE : 1
TEAM_GROUP : 1
OF_CONSUMPTION : 1
AMOUNT_OTHER : 1
AFTER_NO : 1
MEDICATION_WITHIN : 1
COGNITIVE_ABILITIES : 1
BE_AND : 2
LEARN_FROMT : 1
THIGH_IF : 1
BRONZE_TELEPHONE : 1
DINING_ROOM : 1
LOCATION_DESCRIPTION : 1
CUING_CALL : 1
THE_OCR : 1
DISTRACTION_BOX : 1
MY_PERSONAL : 1
DIALYSIS_CENTER : 1
IN_PING : 1
TURNING_BOWEL : 1
MOBILITY_EASILY : 1
HP_HISTORY : 1
DE_INSTRUCTIONS : 1
ATTORNEYS_THE : 1
PATTERNS_ALBUTEROL : 1
OXYGEN_DURING : 1
GETTING_SLIGHTLY : 1
IS_SUPPORTIVE : 1
FROM_PALMER : 1
BEDPAN_LUBRICATING : 1
HX_PSD : 1
SOMEONE_PREVIOUS : 1
THE_POSSIBLE : 1
ACE_PHD : 1
WAS_NO : 1
AND_DISORDER : 1
REHAB_THE : 1
HORMONE_YOU : 1
NEUROLOGIC_SYMPTOMS : 1
APPEARED_TO : 1
LT_HAS : 1
MOUTH_AS : 2
CHANGED_PACKED : 1
CLINIC_NURSING : 1
SSN_OTHER : 1
OF_DIAGNOSIS : 2
CALL_OS : 1
CARE_FACILITY : 1
FOR_EXAM : 1
SANDWHICH_NOON : 1
BLOOD_IS : 1
RECONCILIATION_PRECURSOR : 1
OF_PING : 2
OTHER_TO : 1
DATE_REPRESENTS : 1
SERVICES_THE : 1
HAD_CLASSIFIED : 1
OCCUR_SVHD : 1
FLAT_NOTE : 1
PRESENTS_NEW : 2
LONG_WEDNES : 1
TH_TOENAIL : 1
FUTURE_APPOINTMENTS : 2
COULD_CAUSING : 1
SUPERVISION_ENCOURAGEMENT : 5
GROUP_POSTTRAUMATIC : 1
WOULD_US : 1
MG_LAB : 1
PERIODONTAL_PROCEDURES : 1
AND_CONTINUES : 1
SCHEDULED_AND : 1
DATE_EXAM : 1
IMMEDIATE_RELIEF : 1
ASSIST_WITH : 1
BATHING_ACTIVITY : 1
SKIN_ASSISTANCE : 1
ROOM_DINNER : 2
DIAGNOSIS_WOULD : 1
MOD_AND : 1
PAIN_ENCOURAGED : 1
COUMADIN_FOR : 1
PROCEDURES_DX : 1
IT_HELPS : 1
ICDCM_VERY : 1
NOT_DRINK : 2
NOT_ARE : 1
MONEY_FOR : 1
MG_ER : 1
PT_ANY : 1
TAB_MG : 1
CONTACTED_NO : 1
COORDINATOR_ATTORNEYS : 1
PRODUCTS_FROM : 1
CARE_REVIEW : 1
THE_FULL : 1
HE_DOES : 1
NUTRITION_INITIAL : 1
REQUIRED_MEAL : 1
CLEAN_WAS : 1
LAST_WAL : 1
NOTE_MSE : 1
DUE_HIS : 2
PHYSICAL_MENTAL : 1
TIME_NIGHT : 1
INR_LENGTH : 1
CONGRUENT_MAKE : 1
PATIENT_SAT : 1
DISPOSITION_PACU : 1
VETERAN_MH : 1
HIS_TIME : 1
TIME_PT : 1
HIS_AS : 2
SEE_BELOW : 1
MANY_MONTHS : 1
SWELLING_OF : 1
NO_COMPLAINTS : 2
PATIENT_AGREEMENT : 1
TIME_MIN : 1
BE_FRUSTRATING : 1
FEELING_DOWN : 1
EFFECTIVELY_FOR : 1
ON_DEALING : 1
RTC_TO : 1
GETTING_WORSE : 1
TAKE_ONE : 7
AND_ALSO : 1
OR_NOT : 1
SWER_ATTEMPTED : 1
FEARS_WAS : 1
SESSION_TO : 1
WITH_INDICATES : 1
FACILITY_APPOINTED : 1
AT_ACTIVE : 3
ZAHN_MD : 1
COORDINATOR_STATE : 1
NOTE_WITH : 1
PATIENTS_VISIT : 1
WAS_REQUESTED : 1
FRIENDS_IN : 1
RESPONSE_MED : 1
PRISCILLA_MD : 1
ZZECF_NOTE : 1
INTERVENTION_APPLY : 1
CLINIC_IN : 1
REPORT_WAS : 2
APPARENT_HAS : 1
BY_ADDENDUM : 1
DX_PL : 1
ACTIVE_ISSU : 1
VETERAN_THE : 1
MAJOR_DEPRESSION : 1
HUNTSVILLE_CBOC : 2
STAFF_AND : 1
PALLIATIVE_CARE : 1
SOUNDS_CLEAR : 1
ADDENDUM_ASSISTANCE : 1
TH_INDIVIDUAL : 1
DOING_WELL : 3
DL_DOES : 1
CONSENT_CALLED : 1
LOCATION_PAIN : 1
SEVERIY_DJD : 1
ENVIRONMENT_CARE : 1
VSS_ENTERED : 1
COMMENTS_HOURS : 1
INPATIENT_MEDICATIONS : 1
GUIDED_IMAGERY : 1
NOT_ALCOHOL : 1
ATTENDING_AND : 1
RECONCILED_ON : 1
PHONE_PROBLEM : 1
KG_PSYCHOLOGICAL : 1
PATIENT_RESPONDED : 1
GIRLFRIEND_HAVE : 1
MAINTAIN_RECOVERY : 1
RELIEF_REPLACES : 1
WILL_INCREASE : 1
CURRENT_STRESSORS : 1
GROUP_MIN : 1
TO_ONES : 1
SUGAR_HIGHER : 1
RETURN_PLYMOUTH : 1
TEST_UNLESS : 1
OR_TO : 2
NUMBER_BOWEL : 3
AND_WELLBEING : 1
NO_TRAILING : 1
SCALE_PREVENTION : 1
COORDINATOR_THAT : 1
THIS_UNLESS : 1
YOUR_MEDICATIONS : 1
AND_THAT : 2
SUPPORTIVE_EACH : 1
THE_BLOOD : 1
WILL_CONTACTED : 2
STRENGTHS_FILE : 1
YO_ON : 1
BENIGN_MH : 1
AND_COMMUNICATION : 1
HAS_HOME : 1
SOCIAL_INTERACTIONS : 1
CLINICAL_DISORDER : 1
EVERY_CURRENT : 1
SA_TAKE : 2
HAVE_STARTED : 1
THE_STAFF : 1
PLACE_HIP : 1
FOR_HES : 1
USES_AT : 1
NO_TN : 1
CDI_REMINDER : 1
NEW_LOCALIZING : 1
NOSUNSPEC_IT : 1
REPEAT_WEEKLY : 1
OF_CHOLESTYRAMINE : 1
BIRDGEWATER_TYPE : 1
HE_SAYS : 1
ENCOURAGED_TO : 2
ASSISTANCE_PAIN : 1
DIZZINESS_BLOOD : 1
UNTIL_HIS : 1
IDENTIFIED_PATIENTS : 1
PAIN_NO : 3
ASSISTANCE_WITH : 1
NO_THERAPEUTIC : 1
RISK_IN : 1
PT_STATES : 1
ADVISED_TO : 1
IN_SETTING : 1
IV_THERAPY : 1
PATH_PENDING : 1
WAS_GIVEN : 1
DT_WAS : 1
THEY_LEARN : 1
GROUP_VISIT : 1
FACE_NURSING : 1
FROM_BASCOM : 1
TYPE_SAFETY : 1
HUSBAND_NOT : 1
TOBACCO_USE : 1
AS_EVALUATE : 1
OF_PATIENTS : 1
OF_ON : 1
READINGS_SAYS : 1
SEVERIY_OF : 1
PROBLEMS_BLOOD : 1
GUNSHOT_WOUNDS : 1
ER_DISCHARGE : 1
TO_THINGS : 1
MEETS_FROM : 1
FOR_TIME : 1
CONSULT_NOTE : 1
HIM_STUMBLE : 1
EVERY_FOR : 1
OTHERS_PERSONAL : 1
MOOD_REVIEW : 1
DAILY_SYSTEMS : 1
TO_HOWEVER : 1
PROBLEM_FOCUSED : 1
ALL_TOBACCO : 1
EXPERIENCE_RESPIRATORY : 1
MUSCLE_OR : 1
COME_TO : 2
MG_USEFUL : 1
DI_FROM : 1
ACTIVELY_IN : 1
JOINTS_RELIEVED : 1
SEGMENT_SPECIAL : 1
OF_THEIR : 1
TYPE_UP : 1
TO_OF : 2
TAKING_INTERVENTIONS : 1
NARCOTICS_DISCONTINUED : 1
DATEAPR_FOR : 1
ASSESSMENT_KEPT : 1
AND_HEMOPTYSIS : 1
INTERVIEW_ON : 1
OBJECTIVE_PATIENT : 1
NEATLY_DRESSED : 1
NURSING_SPECIALTY : 1
VERBALIZE_DT : 1
SEDATING_FOR : 1
EASE_WIFE : 1
SICK_CALL : 1
CUING_TO : 1
REMOVE_ALL : 1
ABD_MH : 1
DISCUSSED_THE : 1
HE_OFFERED : 1
VETERAN_MOSTLY : 1
OVERWHELMING_IT : 1
PRESSURE_HAS : 1
ADDENDUM_HYDROBROMIDE : 1
ATTIRE_MIDNIGHT : 1
MOUTH_BEDTIME : 1
DAILY_DISCHARGE : 1
EACH_LOCATION : 1
TO_PROVIDE : 3
WAS_DISCHARGE : 1
HE_PT : 1
LICHENOID_THERE : 1
THIS_NOT : 2
SERIVES_ELIGIBLE : 1
REFUSED_WEAR : 1
OF_OTHER : 2
THE_ADDITIONAL : 1
PAINFUL_TO : 1
SUGAR_PAIN : 1
LIMITATIONS_PH : 1
REG_NPH : 2
NIGHT_HAD : 1
THIS_ROOM : 1
TO_ERUPTIOSN : 1
THE_WAS : 2
PT_CLINIC : 1
HEALTH_FUTURE : 1
RELIGIOUS_THAT : 1
PATIENT_HOLDING : 1
LOW_GRADE : 1
REQUEST_PHYSICIAN : 1
DOSE_ALSO : 1
OLAWALE_NO : 1
LAMOTRIGINE_TAB : 2
STATED_TO : 1
NO_SKIN : 1
PT_STILL : 1
ACTUAL_ROADBLOCK : 1
THERAPY_LOCK : 1
SCROTUM_TO : 1
BURDICK_CONSENT : 1
AND_FULL : 1
SALE_AND : 1
DISCUS_TEAM : 1
GOALS_FOR : 1
PLACE_REFUSED : 1
AREAS_HYPERVIGILANCE : 1
PAIN_HOWEVER : 1
WHICH_WAS : 1
TO_MINUTES : 1
US_BEACH : 1
ABNORMAL_ECHOTEXTURE : 1
REFILLS_VET : 1
HIS_NIECE : 1
THAT_MR : 3
IN_LEAST : 1
WAS_VISIT : 1
CUT_THIS : 1
STAFF_PEERS : 1
DISEASES_NA : 1
YELLOW_USED : 1
WITH_SELF : 1
FOR_ISSU : 1
INDIVIDUAL_VET : 1
TEXTURES_HIS : 1
HE_ADMINISTERED : 1
TOP_EXT : 1
FRIEND_DURING : 1
PAIN_WITHIN : 1
DURING_PREVIOUS : 1
PATIENT_APPOINTMENT : 1
NOTE_PATH : 1
ORDERS_HIS : 1
FOR_AND : 4
NORMAL_RESPIRATORY : 1
CARE_PLAN : 3
UNDERSTANDING_GOOD : 1
NOT_HER : 1
GROUP_ASSESSMENT : 1
QUETIAPINE_TAB : 1
NEW_PROVIDER : 1
ASSESSMENT_OUTPATIENT : 1
SUBSCRIBES_DISCUSSED : 1
IT_SAYS : 1
PROCEDURE_TOPICS : 1
REFUSED_HIS : 1
TOBACCO_NO : 1
FORM_IS : 1
THE_PAST : 3
AND_SAID : 1
MONTHS_WEIGHT : 1
GROUP_INTERVENTION : 1
WERE_MDS : 1
DEFERRED_BEGAN : 1
COHERENT_HEALED : 1
VISIT_HYGIENE : 1
PO_BID : 1
OXYCODONE_WHICH : 1
OTHERS_HYGIENE : 1
LEFT_AND : 1
HAVE_NEW : 1
IMBEDED_IN : 1
TURNS_SITS : 1
AND_ALERT : 2
FOOD_DRINKS : 5
AND_PRELIMINARY : 1
FELL_WEEK : 1
HOLD_HOURS : 1
NO_ASSISTANCE : 9
IF_STATING : 1
VETERAN_OM : 1
THREE_ACTIVE : 1
SCREEN_FOR : 1
OF_SERVICE : 1
FACE_MEETING : 1
PRESSURE_ISSUES : 1
WEEKLY_LAUNDRY : 1
AND_PERSISTENT : 1
ON_NOTED : 1
BEDPAN_COMMODE : 1
TIME_AND : 3
PATIENT_DISCHARGE : 1
THERAPY_APPOINTMENT : 2
MULTIPLE_SIMILAR : 1
ING_STARTING : 1
ACQUIRED_LENGTH : 1
SWELLING_LIMB : 1
NEED_TRAN : 1
PROVIDED_CHECKS : 1
PRIVILEGES_OF : 1
DEPRESSION_ANXIETY : 1
ALLERGIES_ADVERSE : 1
FINDINGS_OF : 1
SI_HI : 1
TOUCH_TO : 1
LEISURE_STATES : 1
TOPIC_THE : 1
DEPRESSIVE_DISORDER : 1
BEHAVIORAL_SOCIAL : 1
SPECIALTY_NOTE : 1
PHYSICIAN_NUMBER : 1
UPCOMING_TIME : 1
HOWEVER_PHYSICIAN : 1
BURSA_THEN : 1
WITH_HIM : 1
VETERANS_SISTER : 1
BATH_TIME : 1
UPON_INTERVIEW : 1
WITH_ADDENDUM : 1
NORTRIPTYLINE_ON : 1
DEPRESSION_AND : 3
HS_MONITOR : 1
ETOH_TELEPHONE : 1
DATEAPR_REASON : 1
ADDENDUM_BLAST : 1
PREVIOUS_INPATIENT : 1
EXPLORED_WHAT : 1
DETOX_PROTOCOL : 1
SAFETY_ASSESSMENT : 1
TO_FEELING : 1
VET_HAVING : 1
THEY_FAX : 1
GEL_TOP : 1
IDENTIFIED_LOCATION : 1
THINKS_MAY : 1
MANAGEMENT_REPORT : 1
REPORTS_INTENTIONS : 1
CLOTHES_GROOMING : 1
DISORDER_ICDCM : 1
ADL_FLOW : 1
OF_LEFT : 1
PARTICIPATED_DETOX : 1
QID_PRN : 1
CURRENT_ADMISSION : 1
ISSU_LAMOTRIGINE : 1
BEEN_SMILING : 2
TIME_THE : 7
HAVE_TO : 2
MOTION_TYPE : 1
IN_APPETITE : 1
WAS_ORIENTED : 1
ON_VAMC : 1
TIMES_EVERY : 1
FOR_SCHEDULING : 1
AREA_EVALUATION : 1
OUR_LIST : 1
STATES_IF : 1
CONTINUED_REGARDING : 2
INCISION_DRAINAGE : 1
LAB_DIAGNOSTIC : 1
WRITTEN_BY : 1
IMPROVED_MOOD : 1
ER_NURSING : 1
PT_ON : 3
ACTIVITIES_CALL : 1
RELIEVED_TAKING : 1
INCLUDING_HIS : 1
OLDER_BROTHER : 1
CUT_BACK : 1
ORIENTED_BREAKDOWN : 1
OF_NOS : 1
ATTEMPTS_ADDRESS : 1
MAKE_SURE : 1
FOR_MINUTES : 3
REPORTS_HAVING : 1
NO_INCREASED : 1
HUSBAND_HER : 1
ALTERED_STATUS : 1
ASSIST_RYAN : 1
CLINIC_LIPOID : 1
WITH_THAT : 1
WEIGHT_ABDOMINAL : 1
DEC_HIM : 1
PT_TO : 3
LONG_SON : 1
PROGRESS_PT : 1
INTERACTIONS_SYSTEMS : 2
OF_FACILITY : 1
BUPROPION_TOPIRAMATE : 1
WHILE_IS : 1
NEXT_PCP : 1
MAILPT_TABS : 1
TO_SCHEDULE : 2
HYPERLIPIDEMIA_BEER : 1
REINSTATEMENT_TEMAZEPAM : 1
NUTRITIONAL_PLAN : 1
NAIL_ACID : 1
PROVIDER_WILL : 1
TO_OTHER : 1
FOLLOWING_BELONGINGS : 1
STRESSORS_DERMATOPHYTOSIS : 1
IS_EXO : 1
TO_DIFFICULTIES : 1
OF_HP : 1
STRIP_DATE : 1
PAIN_IS : 4
THIS_WITH : 1
FOR_EXPOSURE : 1
HIS_WAS : 1
DENTAL_SERIVES : 1
ALCOHOL_DEPENDENCE : 2
DATE_PROVIDER : 1
THIS_THESE : 1
CHECK_LDH : 1
MAY_IN : 1
THERE_BEEN : 1
PART_OF : 2
AND_THINKS : 1
SCHEDULED_TREATMENT : 1
IS_DRINKING : 1
UNAWARE_OF : 1
SCALE_NURSING : 1
MH_HUDVASHNOTE : 1
HES_STILL : 1
UNLESS_LAMOTRIGINE : 1
NOTE_VERBAL : 1
FACT_THAT : 1
PRIMARY_CARE : 3
ON_REPORTED : 1
SKIPPING_BEATS : 1
HAS_MADE : 1
OF_FLU : 1
LAST_TIME : 1
NOT_INHALE : 1
AM_PHONE : 1
BY_TYLENOL : 1
CONTINUOUSLY_PROFANITY : 1
SHUTTLE_LEFT : 1
AFFECT_IS : 1
TEAM_AND : 1
AND_SERVICE : 1
POTENTIAL_SOCIAL : 1
TOMORROW_AM : 1
YOU_USE : 1
ROOM_THIS : 1
CLOTHES_IS : 1
HR_THE : 1
ORIENTED_ALL : 1
OSTOMY_NOT : 1
PREVIOUS_WITH : 2
FT_ALLERGIES : 1
IS_BY : 1
TALKING_TO : 3
GENDER_WOUNDED : 1
DIAGNOSIS_THE : 1
DRIVE_HOURS : 1
HIM_AND : 3
CNUMBER_NEVER : 1
OF_BIOPSY : 1
APPOINTMENT_ASKED : 1
JOINTS_HYPERLIPIDEMIA : 1
LATE_THIS : 1
YOU_FEEL : 1
US_FL : 1
SETTING_OF : 1
TO_ORDER : 1
DISCHARGE_DISCHARGE : 1
NORMAL_THERAPY : 1
ACTIVE_MEDICATIONS : 4
ACTIVE_NASAL : 1
SON_DAUGHTERINLAW : 1
REDUCTION_PATIENT : 1
ORAL_TAKE : 1
ALL_MENTAL : 1
ASK_YOU : 1
OR_MR : 1
OF_EPIDIDYMIS : 1
OF_ANTIDIURETIC : 1
MAXIMUM_BENEFIT : 1
PLAN_AS : 1
POSSIBLE_IMPROVEMENT : 1
HIM_AT : 1
THE_URINE : 1
IN_HEALTH : 1
BEHAVIORAL_SKILLS : 1
NOTE_PALLIATIVE : 1
DRUG_TELEPHONE : 1
THIS_SERVICE : 1
PT_THE : 1
FAMILY_PROGRESS : 1
ARTHRITIS_PROBLEMS : 1
TO_FAX : 1
ABOUT_PROBLEMS : 1
MHP_CONSTANT : 1
ASKING_SUPPORTTALKING : 1
IN_AMBULATION : 1
AND_HIS : 1
BLADDER_ALERT : 1
LAST_WEEK : 1
HOURS_HAS : 1
LOCAL_URGENT : 1
APPOINTMENT_IN : 1
ADL_NOTE : 2
RIGHT_COMMENTS : 1
DAUGHTERINLAW_ARE : 1
NOT_EXPERIENCE : 1
ITEMS_OD : 1
PAIN_CHANGED : 1
IV_PATENT : 1
II_PAIN : 1
SESSION_INFORM : 1
OR_TEETH : 1
VSS_VS : 1
LMSW_TO : 1
SHOWER_VETERAN : 1
EFFECT_WOULD : 1
WED_UNTIL : 1
DIVALPROEX_MG : 1
METHADONE_MG : 1
CALLED_HOUSE : 1
OTHER_ACTIVE : 1
ABD_BENIGN : 1
THE_FLUID : 2
ON_KARDEX : 1
WED_AT : 1
VICTIM_COORDINATOR : 2
PROVIDED_THE : 1
ILLNESS_ABILITIES : 1
ENCOURAGE_IN : 1
GOT_FROM : 1
CONTINUE_PLAN : 1
JELLY_PACKET : 1
FOR_ADDENDUM : 1
COMMENT_HE : 1
HIS_MEDICATION : 1
PHILOMENA_YES : 1
KNEE_PAIN : 1
SUICIDAL_HE : 1
COMPLETED_PATIENT : 1
NEED_GO : 1
FALL_INTERVENTIONS : 1
FAX_COPY : 1
US_FORM : 1
ON_EXAM : 1
HISTORY_PRESENT : 2
BIRMINGHAM_AFFAIRS : 1
DEMONSTRATING_THE : 1
ORIENTED_NERVOUS : 1
THE_RAL : 1
ALL_SWEET : 1
TO_PATIENT : 5
NUTRITION_SCREEN : 1
CONTACT_NUMBER : 2
MG_RX : 1
CARE_FLUNIS : 1
MG_PO : 1
WEEKENDERS_NEEDED : 1
NON_VA : 2
BURSA_SINCE : 1
ACCUPUNCTURE_CONTACT : 1
NURSING_BREAKFAST : 1
PROBLEM_DISORDER : 1
CLINIC_EXAMINATION : 1
CONFRONTED_PATIENT : 1
DIET_THAT : 1
AND_RECOVERY : 1
LIPOID_DIS : 1
DIARY_STRETCHING : 1
FOR_MAJOR : 1
IDENTIFIERS_WERE : 2
MEDICAL_AND : 1
BEEN_WITH : 1
HOME_VISIT : 1
NO_DISTRESS : 1
NOT_BUT : 1
STAYING_THE : 1
ON_DEC : 1
DING_APPEARED : 1
YOU_STREET : 1
AROUND_ON : 1
MEDICAL_DOCTOR : 1
THE_MAY : 2
THE_FORM : 1
BY_TO : 1
WALKIN_STATING : 1
ASKING_FOR : 1
FLUID_DURING : 1
WITH_SPONSOR : 1
FACE_TO : 1
INSTRUCTED_MG : 1
AFFAIRS_MEDICAL : 1
ACTIVITIES_DAILY : 1
NURSING_DISCHARGE : 3
TAKE_AND : 1
HE_MULTIPLE : 1
IM_HEARING : 1
USUALLY_ADEQUATELY : 1
CONCEPT_PURPOSE : 1
DISORDERS_DISORDER : 1
INDIVIDUAL_THERAPY : 3
MR_THAT : 2
AND_STATED : 1
ASSESS_MENTAL : 1
SPONTANEOUSLY_UP : 1
BREAKDOWN_PATIENT : 1
AREAS_FINAL : 1
WHICH_IS : 3
PHD_NO : 1
HIM_HIS : 1
INTERVENTIONS_PRELIMINARY : 1
ANY_NEW : 3
SYND_INAPPROPRIATE : 1
REPRESENTS_PAIN : 1
AND_PLAN : 1
TO_QUESTIONS : 1
ILLNESS_TH : 1
MALE_ON : 1
TIME_SAFE : 1
SON_AND : 1
IN_PATIENT : 1
COPING_INJ : 1
EXAM_COMPLETED : 1
TEMPERATURE_OTHERWISE : 1
SPECIFICALLY_ILLNESSES : 1
ONE_WEEK : 1
AFFECT_PERSONS : 1
VSS_PHARMACIES : 1
PER_CARE : 1
LAUNDRY_HE : 1
NARCOTIC_REPORT : 1
YOU_KNOW : 1
GLAUCOMA_ADMISSION : 1
FEARS_HE : 1
THIS_HAS : 1
IS_DX : 1
ONLY_CASHIER : 1
EXO_CONTINUE : 1
BENEFITS_FORM : 1
AC_PRIMARY : 1
UP_ANY : 1
AND_SITS : 1
ELIGIBILITY_LESS : 1
VISITNG_HIM : 1
CPT_PTSD : 1
PROBLEM_DISCUSS : 1
RELIGIOUS_PREFERENCES : 1
COME_PICK : 1
TO_RAL : 1
SOME_TIME : 1
PT_ABOUT : 1
PAST_MONTHS : 1
THIS_EN : 1
PART_NURSING : 1
HEARING_THINGS : 1
FOR_SUPPLEMENT : 1
LOSS_THAN : 1
MOUTH_MORNING : 1
IDENTIFIED_AT : 1
TTN_WAS : 1
CHANGES_IN : 1
OUT_PRIOR : 1
SINGLE_CANE : 1
PER_CAROTID : 1
INCREASE_SOCIALIZATION : 1
SAFE_CHOICES : 1
EDEMA_ESOPHAGEAL : 1
BATH_THIS : 1
THERAPY_VET : 1
STARTING_FINAL : 1
RESPONSIVE_APPLICABLE : 1
OR_NURSING : 2
OVERWHELMED_PT : 1
STATUS_SEE : 1
HELP_PART : 1
VETERAN_REPORTED : 1
CURRENT_DATE : 1
RX_RD : 1
IN_PLACE : 4
WILL_GAIT : 1
HELP_IN : 1
AND_CLEAN : 1
BY_VA : 1
COOPERAT_SESSION : 1
CLEAR_ANY : 1
PRESENTED_ANGRY : 1
DRINK_WAS : 1
WHEN_THE : 1
IDENTIFIED_AN : 1
WAS_RECEIVED : 3
MINIMAL_DISKECTOMY : 1
HFA_GENERAL : 1
TO_MEETING : 1
NON_SURROGATE : 1
NO_VENTILATION : 1
HAVE_BEEN : 1
MODALITIES_MHP : 1
YOU_HEARING : 1
BEDSIDE_PULSE : 1
HYPERTENSION_GUAFENESIN : 1
WARFARIN_ON : 1
CONVERSATION_OTHER : 1
HYGIENE_PERSONAL : 1
ON_NOVEMBER : 1
INCREASED_SORE : 1
PALPABLE_COMMANDS : 1
ACTIVITY_BLADDER : 1
SERVICE_VETERAN : 1
NOT_RECALL : 1
APPOINTMENT_VETERAN : 1
COMPLAINTS_TREAT : 1
IN_LIST : 1
AS_OF : 1
VETERAN_FOR : 1
THERE_PATIENTS : 1
SEE_AS : 1
VET_BE : 1
THE_TEMPERATURE : 1
SYMPTOMS_JAW : 1
NARCOTICS_NORMAL : 1
FACT_SATISFACTORY : 1
THAT_LIVING : 1
SPONTANEOUSLY_BRING : 1
DRO_DIZZINESS : 1
PATIENT_PRIVILEGES : 2
ESTIMATED_OF : 1
SURGERY_FOR : 1
COUMADIN_INR : 1
IN_PRESENT : 1
AN_NONVA : 1
HAS_IT : 1
PAST_CHRONIC : 1
AND_HER : 1
QUESTIONS_ABOUT : 1
VISIT_HERE : 1
WAS_EXPLAINING : 1
REVIEWED_THE : 1
OF_PLANS : 1
WORKER_PO : 1
VETERAN_BE : 1
ABOUT_FILLED : 1
IT_IN : 1
THAT_TIME : 3
CARE_PROVIDERS : 1
OUTPA_EVERY : 1
FAMILY_ABOUT : 1
EXAM_COMPLETE : 1
NO_AMOUNT : 1
HOME_MEDS : 1
AND_FELL : 1
WEAPONS_FACILITY : 1
INTERDISCIPLINARY_FAM : 1
CANCEL_TO : 1
TRIGLYCERIDES_PATIENT : 1
MEDS_PERSONAL : 1
STATE_OFFICE : 1
HOME_MENTAL : 1
FORGOT_READINGS : 1
IS_NONUSER : 1
CPRS_WEIGHT : 1
CLC_TO : 1
MEETING_NUMBER : 1
STATED_FEEL : 1
THE_NIGHT : 3
STAFF_WEEKENDERS : 1
BATHTUB_REQUIRES : 1
DILTIAZEM_VISIT : 1
IN_BEFORE : 1
LOT_DATE : 1
SPONGE_DURING : 1
LEARN_FOCUS : 1
TO_INCISION : 1
IV_DIAGNOSES : 1
WITH_CHIEF : 1
RESTRAINT_PSYCHOLOGICAL : 1
LEVEL_IS : 1
FEMALE_PATIENT : 1
ABOUT_HIS : 2
MS_AT : 1
II_BLOOD : 1
MAIL_PATIENT : 1
FLARES_ADDENDUM : 1
DUE_SEVERIY : 1
NAME_DOB : 2
DECLINED_REARED : 1
CHANGE_WITH : 1
CARE_SKIN : 1
SESSION_SESSION : 1
ARE_THEY : 1
BUSINESS_TO : 1
SURE_STRAIGHT : 1
THE_NUTRITION : 1
TAKE_THAN : 1
DTN_WAL : 1
! Stats words=2122  pairs=10945
