# Supplementary material for: Predicting the Risk of Suicide by Analyzing the Text of Clinical Notes
Source: PLoS One. 2014 Jan 28;9(1):e85733. doi: 10.1371/journal.pone.0085733 (PMC3904866; doi:10.1371/journal.pone.0085733)
Supplement: Appendix S3 — Machine Learning Libraries and Methods: This section is provided to enclose the open source (Apache License) classifier used for the building of the statistical models, specifically for the purposes of study reproducibility. A detailed account of these tools is intended for another publication. (ZIP) [file pone.0085733.s003.zip › Appendix3/ML_libs/Regression_testing/group3/processed/grp3-pt-1023.dat]

!  Done reading
! Total word count = 6890
! Total unique words = 2221
! Total pair count = 13776
! Total unique pairs = 11785
CONTAINS : 1
STICK : 1
DEMONSTRATE : 1
SORE : 1
LOBE : 1
AT : 47
ADL : 4
ZZPATIENT : 4
PALPITATIONS : 1
SARDINES : 1
ANSWERING : 1
WORK : 4
PREOP : 2
SURROUNDINGS : 1
FINGER : 1
LOWER : 3
HOPEFULL : 1
ULCER : 1
WEIGHT : 6
JERKS : 1
RELIEVE : 1
DEADLY : 1
ADOLESCENCE : 1
COLORS : 1
MILD : 1
AA : 1
TREATMENTS : 2
INSTRUCTED : 2
PREFERS : 1
MID : 1
INTERVENTION : 4
COUNSELING : 3
EXPLOSION : 1
HAIR : 1
USE : 13
ANALGESICS : 1
PRIVILEGES : 1
TRIAMTE : 1
XRS : 1
SECTIONS : 1
DISCHARGED : 2
CONTINUOUS : 2
SUPPLIES : 2
ASA : 1
READING : 2
VETERANS : 8
XACTIVE : 1
SCHEDULING : 1
LEVEL : 2
ALCOHOL : 7
CHANGES : 3
EQUIVALENTS : 1
RAL : 4
MENUS : 1
MPLS : 1
STRENOUS : 1
OM : 1
TROMBONE : 1
MET : 6
SHOULDER : 5
MACHINE : 1
FUNCTIONING : 1
COPD : 1
SLIGHTLY : 1
MEAL : 4
GENITOURINARY : 1
MAX : 1
REMOVED : 4
APPROPRIATE : 4
CELEXA : 2
DIRECTIVE : 1
BLIND : 1
KNEW : 1
WKS : 1
ATTORNEY : 1
WELL : 3
FISH : 1
SARAH : 1
TEST : 2
NOTE : 40
LDL : 1
BAKER : 1
JAUNDICED : 1
DSMIV : 1
DO : 8
DOES : 4
TESTS : 1
FAILED : 1
HTN : 1
BRUCHNER : 1
SAME : 4
ACCESS : 1
ADVERSE : 2
REFLEX : 1
SAW : 1
BREATHS : 1
SCHEDULED : 5
ASK : 2
TAB : 12
INSTRUCITONS : 1
LINEAR : 1
REQUIRED : 2
STABLE : 2
DEC : 3
MONITOR : 1
HAS : 45
TUNNEL : 1
FOR : 93
ALLEVIATE : 1
CONDITION : 2
NUTRITION : 6
CLC : 2
MODALITY : 1
MORNING : 4
HOLDING : 1
KNEE : 7
NEURAL : 1
TRANSITION : 1
ABSTINENCE : 1
SC : 6
ECSGENERAL : 1
LEGAL : 1
IDEATION : 1
SATURATION : 3
PARANOIA : 2
COOL : 1
GOALS : 5
ACTIVITY : 5
INVOLUNTARY : 1
CARMODY : 1
HISPANIC : 1
SHOWS : 1
AUTONOMOUS : 1
ND : 1
COMMUTE : 1
SIMILAR : 1
IMA : 1
OW : 1
PATTERN : 1
TYPICAL : 1
REFERENCE : 2
CUEVAS : 1
LEAN : 1
CHILDREN : 1
EXAM : 5
DERM : 1
SUGAR : 1
ATTEMPTS : 2
DUAL : 1
JUST : 2
INCREASED : 1
DURATION : 1
OCT : 1
AUDITORY : 1
GO : 5
SIGNIFICANT : 1
BLVD : 1
BOWEL : 9
BP : 5
FITNESS : 1
LIMITATION : 2
SADDLE : 1
DIVISION : 1
POST : 1
PREVENTION : 4
DEPRESSION : 7
RED : 2
CM : 7
IMAGE : 1
INTER : 1
GAIT : 1
CITALOPRAM : 5
AGAIN : 4
ATTEND : 2
WT : 4
ADMITTING : 1
PLANS : 6
TOP : 1
AROUSABLE : 1
MAILWHEN : 1
STARTED : 1
SUSTAINED : 1
SPASMS : 1
FEEDING : 1
SCANNED : 1
OR : 35
THERAPEUTIC : 2
SHIFT : 7
BOTH : 3
SUPPLEMENT : 2
TEMP : 3
CONSIDERED : 3
ALREADY : 1
GUNSHOT : 1
CONCERNS : 4
SEIZURES : 1
POSSIBILITY : 1
COUMADIN : 2
PHOS : 1
AIR : 2
LIKE : 7
FUP : 1
STAYS : 1
NEWER : 1
CALLS : 1
TRAINING : 1
MUCH : 2
CHRONIC : 2
RELAPSE : 3
TAKE : 19
INCREASE : 3
MONITORED : 1
UNCONFIRMED : 1
WALKIN : 1
STRENGTHS : 2
OD : 2
CYMBALTA : 1
TOLERATED : 1
PARTIALLY : 1
INVITED : 1
HIGHER : 1
PUREED : 1
UNIT : 2
THINK : 1
MD : 6
COMPANION : 1
ESIG : 1
NAME : 4
CARE : 28
SURROGATE : 2
FIB : 1
AGE : 4
INVOLVED : 1
ET : 1
TIMES : 4
IS : 78
DL : 1
PROLONGED : 1
DYSFUNCTION : 1
BENEFIT : 1
FLUIDS : 2
IF : 16
RELUCTANT : 1
MH : 13
PENDING : 2
PERSONNEL : 1
PAROXETINE : 1
ONCE : 1
SCLERA : 1
GENITAL : 1
SKILLS : 2
OXIMETRY : 1
INFLAMMATION : 1
PPD : 2
BIRTHDATE : 1
ACKNOWLEDGED : 2
DROWSINESS : 1
APT : 1
SIMPSON : 1
MMHG : 2
RHYTHM : 2
REFUSED : 3
THESE : 4
VISION : 1
CUTTER : 1
TMJ : 1
SEBACEOUS : 1
CELEBRATING : 1
DROP : 1
REPORTING : 1
PARTICIPATION : 2
EDUCATED : 1
RECRUIT : 1
TRACT : 1
ESSENTIAL : 1
GLAD : 1
INTENSIVE : 1
TRYING : 1
TRANSPORTATION : 1
HEIGHT : 5
GLUING : 1
ADDENDUM : 24
CAR : 1
FULL : 2
TREAT : 1
NOBLE : 1
NO : 65
RELAXATION : 2
CONSCIOUSNESS : 1
CRIME : 1
HEMOGLOBIN : 2
CHIEF : 9
COMPLIANCY : 1
INCISION : 1
BALLANCE : 1
CHANGED : 1
NORMOCEPHALIC : 1
MEET : 1
RISK : 8
CLINIC : 14
BUILDING : 1
PERFORMED : 2
CLOZAPINE : 1
PRACTICE : 1
RECEIVING : 1
INITIALLY : 2
TENDERNESS : 2
SE : 1
BMI : 1
POINT : 1
PRN : 1
COULD : 2
UNCIRCUMCISED : 1
NOTEPSYCHOEDUCATION : 1
RAPPORT : 1
BONHAM : 1
DYSPHAGIC : 1
GOLD : 2
ADVANCE : 2
MURMUR : 1
TOOLS : 1
PUPIL : 1
EDUCATIONAL : 1
WILL : 27
APPEARANCE : 3
BUT : 13
ASKED : 2
THOUGHTS : 4
TYPE : 3
UNEMPLOYMENT : 1
WHETHER : 1
PLASMA : 3
AUTOMATION : 1
SET : 2
MEALS : 2
KIT : 1
DIS : 1
SCHIZOPHRENIA : 3
BONNIE : 1
INNER : 1
CREATED : 1
HOPEFUL : 1
DEL : 1
NH : 2
CONSULT : 6
MEDICALLY : 1
DECLINES : 1
PLAYING : 1
SUPPORT : 3
ACCOMPANY : 1
FIND : 1
ARKANSAS : 1
IMPROVE : 1
FLEXERIL : 1
QID : 1
PRESENTED : 2
EXPOSURE : 3
LIKELY : 1
REVIEW : 5
MAINTAINED : 1
DISCUSSING : 1
COMES : 1
RELIGIOUS : 1
INJECTION : 2
TRIPPING : 1
VIEW : 1
RESUME : 1
BASCOM : 2
CENTURY : 1
MICROSCOPIC : 1
RESIDENT : 4
INSTRUCTIONS : 6
ERYTHEMA : 1
VA : 5
WITNESSING : 1
PREFERENCES : 2
STOPPING : 1
APRIL : 1
SALVATION : 1
CONTINUING : 2
SMOKER : 1
NEEDLES : 1
RESPITE : 1
CAUSE : 1
DISEASE : 3
PAIN : 39
THURS : 2
AS : 21
GSW : 1
VISTA : 3
RESTRAINTS : 1
REPEATED : 1
INTRAVENOUS : 1
GENITALIA : 1
AST : 1
GREATER : 2
WITH : 98
FEELS : 2
WORRIED : 1
OFFERED : 2
TEMPERATURE : 1
CENTRAL : 1
BASIS : 1
GONE : 1
INDEX : 2
BRANDEN : 1
INCLUDING : 3
NA : 4
SUB : 1
SETTING : 1
NORVASC : 1
CHICKEN : 1
USED : 5
MONITORING : 1
IT : 15
HHA : 1
APPROACHED : 1
BELOW : 1
BEDTIME : 2
NECESSARY : 1
VF : 1
SHATTERING : 1
DISCUSSED : 8
SIGNIFICANTLY : 1
MATERIALS : 1
EXERCISE : 1
CA : 2
DENTURES : 1
SHOWER : 1
TIME : 28
PURPOSE : 1
DEVICE : 2
TERTIARY : 1
SWS : 5
HYGIENE : 7
NEUROPAT : 1
HCL : 1
SHAVING : 1
WALK : 2
ADDITIONAL : 2
TEETH : 2
SAFETY : 4
EDEMATOUS : 1
SIDE : 2
BREAKFAST : 2
ALLERGY : 2
CALL : 19
EXPRESSED : 1
RESULT : 2
HX : 3
MHC : 2
IMAGING : 3
ORIENT : 1
UNSPECIFIED : 3
SELECTING : 2
MOTIVATION : 1
PER : 6
TABLETS : 6
MOBILITY : 8
WARNED : 1
YOUR : 11
DETERIORATION : 1
PRECAUTIONS : 2
HEADPHONES : 1
GIVEN : 8
UNSURE : 1
PACKET : 1
CHOOSE : 1
HT : 3
WHO : 9
UPON : 3
JAW : 1
DIARRHEA : 1
SURG : 1
BASED : 4
CURRENT : 9
HOSP : 1
CONTROL : 2
GROOMING : 2
ES : 3
HIM : 14
DEMOGRAPHICS : 1
PULSE : 11
NEXT : 10
SOBER : 2
THEY : 1
NEEDS : 4
REFERRED : 1
TYLENOL : 1
BRA : 1
WORSENI : 1
APPTS : 1
MESKENAS : 1
TEGADERM : 1
REGAIN : 1
WATER : 1
TRANSFER : 4
OBSERVATION : 1
NORMOGLOSSIA : 1
ML : 5
PHONE : 6
DECLINED : 2
TALKING : 2
CHN : 1
SURFACE : 1
TOUCH : 1
FAIR : 2
NEVI : 1
DRY : 1
HAD : 10
AUNT : 1
CONTENTMENT : 1
SPECIAL : 2
SISTER : 2
QUETIAPINE : 1
MRSA : 2
GUM : 2
ROI : 2
ANALYSIS : 1
YO : 4
NEGATIVE : 5
ORTHOPEDIC : 1
WRITTEN : 1
TRIGGER : 1
SPUTUM : 1
LAB : 1
ACCOMPANYING : 1
LESIONS : 1
MIND : 2
MISSING : 2
ING : 1
HENT : 2
COMPLAINTS : 1
CONTACT : 6
GUIDED : 2
SEVERITY : 2
CERUMEN : 1
FH : 1
ROOTS : 1
PROBLEMS : 9
PEERS : 2
URINE : 2
REHABPHYSICAL : 1
NASAL : 1
NEUROLOGICAL : 1
RTC : 2
ERS : 1
GIVE : 1
CAN : 4
THERAPY : 11
PSYCH : 2
SEEING : 3
KISHA : 1
ABSTAINING : 1
UNFORTUNATE : 1
WHICH : 4
PAM : 1
SYMPTOMS : 7
PURPLE : 1
NOTES : 2
OVER : 5
VISITS : 2
ON : 54
QUIT : 1
COMPLETE : 1
PRESSURE : 10
PORTABLE : 1
ATTENDED : 1
FORS : 1
TEL : 1
HERMAN : 1
VERIFY : 2
GOOD : 9
MED : 2
DRUGS : 3
UPDATE : 2
VENT : 1
INTO : 6
ABS : 2
FIRE : 2
EDEMA : 1
STREET : 1
SHE : 8
PO : 3
UP : 8
THEN : 7
DEAR : 1
FEW : 1
LOCATION : 10
SYST : 1
MOD : 2
DETERMINE : 1
BOSS : 1
CONSULTATION : 1
PRIOR : 5
VERBAL : 1
OFF : 4
CONFUSED : 1
CONTUSION : 1
VERIFIER : 1
GOT : 1
OBJECTIVES : 2
DATE : 20
FRONT : 1
OVERWHELM : 1
PARALYSIS : 1
RELATES : 1
DAILY : 4
BROKEN : 1
PA : 1
REQUIRE : 1
PHASE : 1
AWAKE : 2
HOUSING : 2
FROM : 20
LEFT : 13
CIGARS : 1
BATH : 3
ADDRESSING : 1
IDCP : 1
REALITY : 1
MEDICAL : 4
DICTATION : 1
HEAD : 4
AMITRIPTYLINE : 1
SPOKE : 4
ALSO : 5
HUDVASHNOTE : 1
SYSTEM : 1
LORAZEPAM : 1
ACQUIRED : 1
ARTHROPLASTY : 2
QUIETLY : 1
WORKING : 1
AN : 11
CURRRENT : 1
SKIPPED : 2
HEART : 4
BLACK : 1
SIGNATURE : 3
TAKES : 1
COPE : 2
AMPM : 1
DAIRY : 1
FULLY : 1
OUTSIDE : 2
EGFR : 1
THERES : 1
PHARMACIST : 1
EYE : 7
BRP : 1
ENTERO : 1
ARTHROSCOPY : 2
CONTAINING : 1
NAUSIA : 1
DISCUSSION : 1
AGO : 5
RESIDENTIAL : 1
ATTENDING : 4
CHEST : 2
COLLAPSE : 1
FRANTZ : 1
HAVING : 2
DOCUMENTATION : 1
FACILITATOR : 1
EXCISION : 2
DT : 2
APPROPRIATELY : 1
OVERWHELMED : 1
OPH : 1
MUSCLE : 2
FROZEN : 1
ARE : 12
DTC : 2
STRATEGY : 1
INDEPENDENT : 3
HYPERTENSION : 1
CORRECT : 1
PERSON : 3
HYPOTHYROID : 1
CANAL : 1
CYST : 3
BROTHER : 1
CPRS : 3
HYDROCHLOROTHIAZIDE : 1
SURGERY : 6
RECOVERY : 5
LAT : 1
STRUCTURE : 1
XCOVER : 1
BURNING : 1
COMPLETELY : 1
TX : 2
JAIL : 1
TIRED : 1
YEARS : 5
BE : 26
OX : 4
DUE : 4
HALUCINATIONS : 1
THEIR : 3
HEPARIN : 1
COLORATION : 1
BERNA : 1
PING : 5
AGITATION : 1
PH : 1
CANE : 2
ISSUES : 6
ALONG : 1
ARTISTS : 1
DM : 2
OCCURS : 1
OTHER : 20
DRESSING : 2
GRIPPER : 1
QHS : 2
END : 2
CSL : 1
ME : 8
ANTICOAGULANT : 1
BED : 8
NURSING : 13
COMP : 1
PERIPHERAL : 1
FUNDUSCOPIC : 1
FOLLOWING : 6
IDENTIFIED : 6
ENDING : 1
REFER : 1
WITHOUT : 3
DIAGNOSIS : 9
JUL : 2
COMBINATION : 1
EVAL : 2
VERIFIED : 1
BRUITS : 1
CALLING : 1
MI : 1
ANXIETY : 4
VERTIGO : 1
EXAMINED : 4
NEUROMUSCULAR : 1
REDDING : 1
TOILET : 2
MANIPULATION : 1
RADICULPATHY : 1
JUDGEMENT : 1
PROTECTORS : 4
PATCH : 1
FOUND : 2
PATCHES : 1
ROOM : 6
YOGA : 3
IMPROVED : 1
AVAILABLE : 2
FIRM : 1
MCV : 1
WA : 1
ABOUT : 16
HSV : 1
THANKED : 1
MIAMI : 3
REASED : 1
VOA : 1
DIERCTED : 1
PLEASANT : 3
NSAIDS : 1
ADEQUATELY : 1
FLAREUP : 1
TOGETHER : 1
TABLET : 11
DOM : 1
ANOTHER : 3
DURING : 8
DINNERS : 1
ISOLATION : 1
COMMON : 1
ENVIRONMENT : 1
TOLD : 3
DIRECTED : 2
LISTED : 3
SCREENING : 3
CHECKS : 1
TKA : 1
COLORINO : 1
SMOKES : 1
REACH : 1
GETTING : 1
BLESSING : 1
CONCENTRATION : 1
HI : 1
OS : 4
SCORE : 2
OXYGEN : 3
ABSENCE : 1
BASAL : 1
APPROACHABLE : 1
NEVUS : 1
ORTHO : 4
HOME : 9
HYPERGLYCEMIA : 3
CHECKIN : 1
APPLICATION : 1
NOTED : 3
TERMINATED : 1
INDIVIDUAL : 1
ESTABLISH : 1
TELLING : 1
RETURN : 8
PANEL : 2
ARSISNG : 1
RESTARTED : 1
PRAVASTATIN : 1
MODERATE : 1
AVOIDS : 1
OTHERWISE : 1
EFFECT : 3
METHADONE : 1
SURLY : 1
BRONCHITIS : 1
HUNTSVILLE : 1
HOMEMAKER : 1
MIN : 3
POOR : 1
QUANTITY : 1
MEDICATE : 1
RECONCILIATION : 2
CHEMICAL : 1
COMPUTERIZED : 1
PROPRANOLOL : 2
MINUTES : 5
MILDLY : 1
LLD : 1
GREAT : 1
FOLLOWUP : 7
PONTON : 1
DELTOID : 1
TOLERATING : 1
OCCURRED : 1
RISKS : 2
DIGESTIVE : 1
BURDICK : 1
CHECK : 4
TEAM : 9
MAKES : 1
FINE : 1
FALL : 3
ADEQ : 1
DATA : 3
AM : 11
HELPED : 1
MOVEMENT : 1
TESTOSTERONE : 1
PRACTITIONER : 2
DEVELOPING : 2
FLAT : 1
WHERE : 3
EVENT : 1
PEOPLE : 2
SHORTER : 1
REFUSE : 2
DEMENTIA : 1
ANTIDEPRESSANTS : 1
CALLED : 6
PRODUCTS : 2
GROUND : 1
SUPERVISION : 4
MANY : 4
ITED : 1
SITTING : 1
SUPERVISE : 1
PREOPERATIVE : 1
NEWS : 1
TEACHING : 2
MON : 3
MONTHS : 5
COUNT : 1
NEUT : 3
POLLEN : 1
SSN : 2
ADHESIVE : 1
BRADEN : 1
VI : 1
KOSHER : 1
REFUSES : 1
UCINATIONS : 1
EAT : 1
ASKING : 3
TOPICS : 1
LUNG : 1
MEDICATION : 13
STOP : 1
BHM : 1
ATTORNEYS : 1
WRIST : 2
VISUAL : 1
FISTULA : 1
DINING : 1
AFRICAN : 1
CASE : 6
SINGLE : 1
ORAL : 1
CONTINUE : 1
ABNORMAL : 1
HOPE : 1
READ : 2
ABSCESS : 1
OVERSIGHT : 4
AB : 2
GOAL : 8
GLUTEAL : 1
EXAMINATION : 3
STITCHES : 1
HAZARDS : 1
INFUSE : 2
PROVIDE : 1
CLICK : 1
OTC : 1
ASPIRATION : 1
FORMULARY : 1
HEALTH : 12
ABSESS : 1
COVERAGE : 1
INCH : 1
SYNCOPE : 1
DUPLEX : 1
DISK : 2
CR : 1
INCIDENT : 1
INDICATED : 3
EXCESS : 1
NONSKID : 1
CHAPLAIN : 1
EXCLUDING : 1
PREVIOUS : 1
EFFORT : 1
REFERRAL : 2
INTERVENTIONS : 5
LEAD : 1
BICARB : 1
WAL : 1
AFTERNOON : 1
MORE : 5
TURNING : 2
VS : 1
SEROQUEL : 1
MAKING : 1
RACE : 1
MILLIGRAMS : 1
PREPROCEDURE : 1
PRESENTL : 1
ABC : 1
WENT : 2
RECEIVE : 1
ER : 6
APPLICABLE : 7
PRESCRIBED : 1
REQUEST : 4
VENTRALLY : 1
SOMEWHAT : 1
GYNECOLOGICAL : 1
RN : 3
UNABLE : 2
XYZZY : 2
HOUSE : 2
ELIGIBILITY : 1
DEACONESS : 1
READY : 1
AFTER : 6
PARTICIPATED : 3
ZIPPERS : 1
EMPLOYMENT : 1
STILL : 3
DIFFICULTIES : 1
SCALE : 3
CONCERNING : 1
WELLNESS : 1
FLUID : 3
SALTY : 1
BEVERLY : 1
GROUPS : 3
PCP : 5
LCSW : 1
SAYS : 2
APPOINTMENTS : 2
ALB : 1
WOUNDS : 2
APNEA : 1
BOWELS : 2
ROCK : 1
RE : 3
WNL : 1
EXPERIENCED : 2
STAETS : 1
OLD : 3
FREQUENTLY : 1
VERBALIZE : 1
SATISFIED : 1
SHIRLEY : 1
LS : 3
GLUCOSE : 1
WEDNES : 2
DIALYSIS : 1
WBC : 1
EAGER : 1
ORGANIZED : 1
REMAINING : 1
TAPPING : 1
PL : 1
AREA : 4
APR : 2
INTEREST : 1
SUPPORTS : 1
JOINED : 1
GU : 2
CERVICAL : 2
MM : 2
UNDERSTANDING : 4
MEDICATIONS : 20
LOST : 1
MR : 13
FUNDUS : 1
PREVENT : 1
OCCASIONAL : 1
CANT : 1
BILATERAL : 2
NPH : 1
DESCRIPTION : 2
DELIVERY : 1
SLIDINGSCALE : 1
DRIVING : 2
RECOMMENDED : 1
VACCINE : 8
PORCELAIN : 1
BETTER : 2
CONTRACTED : 1
FRIENDLY : 1
PROCESS : 2
RESULTS : 4
TOUR : 2
EMERGENCY : 4
ABLE : 3
RECENT : 3
CHO : 2
IN : 86
POSITION : 2
REGIMEN : 1
MANAGEMENT : 11
STATE : 3
GUN : 1
PLAN : 10
STRUGGLED : 1
PENG : 1
SMOKE : 1
CONTENT : 1
AGREE : 2
CARD : 1
VERY : 1
OCCURED : 1
BASIC : 1
OVERLYING : 1
IDENTIFICATION : 1
INTERPERSONAL : 1
PERSONALLY : 1
VICTIM : 2
BEHAVIOR : 2
COMMAND : 1
FRUSTRATIONS : 1
BRUIT : 1
PROFILE : 1
SI : 2
IMPORTANT : 1
PATITENT : 1
HCTZ : 1
FAR : 1
DIFFICULTY : 3
LIMITATIONS : 1
DECISIONMAKING : 1
REMINDERS : 2
LAST : 10
TREADED : 1
MINNEAP : 1
RELAXED : 1
EDUCATION : 7
LUNCH : 2
SEES : 1
OSAT : 1
SITUATIONS : 2
MOVED : 1
DETAILS : 1
FORAMINAL : 1
NEXTOFKIN : 1
PROGESSIVELY : 1
GROOMED : 1
SOMETHING : 2
FLOMAX : 1
OBSTRUCTIVE : 1
CONSTANT : 1
WM : 3
INTERFERES : 1
ONLY : 3
PERTINENT : 1
DISORDERS : 1
EVENING : 1
RINGING : 1
CLERKS : 1
OPEN : 1
REMOVAL : 1
MONTH : 6
BCX : 1
VOUCHER : 1
REFILLS : 1
DANGER : 2
BEEN : 20
TEARFULHE : 1
BID : 1
EASIER : 1
WITHIN : 4
LOCK : 1
REFILL : 2
UNILATERAL : 1
OUTPATIENT : 12
INTAKE : 4
SHORTNESS : 1
INPATIENT : 6
SPEECH : 3
CULTURAL : 1
TOMORROW : 2
CLOSE : 1
AGENT : 1
RELATED : 5
PREFER : 1
CC : 2
HGB : 1
VASCULATURE : 1
TWICE : 3
REGARDING : 5
COLD : 1
CHEW : 1
HARM : 2
TOO : 2
RADIAL : 2
TRIED : 2
HAPPENED : 1
PERSONAL : 7
SOCKS : 2
HIS : 42
HD : 1
COORDINATOR : 1
ID : 3
SOURCES : 1
VARIABLE : 1
RUSSELL : 1
GM : 1
VOIDING : 1
SUGGESTED : 1
HOPELESSNESS : 1
ACID : 1
RASH : 1
SONGS : 1
SHOWED : 1
DISORDER : 4
KNOWN : 2
SWOLLEN : 1
CONTACTED : 4
DON : 1
FORMAL : 1
ATTRIBUTES : 1
XANAX : 1
NIGHTMARES : 1
MOBILTIES : 1
TREATMENT : 19
CATEGORY : 2
BLOOD : 13
SUJJESTIVE : 1
WORKER : 1
ASSIST : 4
HAVE : 26
FLAP : 1
BPH : 2
ODY : 1
EDIT : 1
FLEXIBILITY : 1
OF : 133
DRUG : 2
INCLUDE : 2
CRISIS : 1
DFE : 1
BUPROPION : 1
ASU : 1
THICKENED : 1
SAID : 2
COUNTER : 1
INTERNALIZED : 1
NUMBER : 9
GEORGIA : 1
DETOX : 2
DICLOFENAC : 2
REFLECTING : 1
HARDEN : 1
AID : 1
SPONGE : 3
ASSESSED : 1
LANDED : 1
HEAR : 1
ULCERS : 2
ASTHMA : 1
MS : 1
EC : 2
OUTPT : 4
MY : 6
INSTRUCTION : 1
TONSILS : 1
MESSAGE : 2
THINGS : 3
SUBSTANCE : 3
THEM : 6
ASSESSMENT : 14
US : 2
BUSY : 1
CROWDS : 1
APRN : 1
LET : 2
AMBULATION : 4
ATTACHED : 3
STARTING : 1
IRRITABLE : 1
BLADDER : 3
ENCOURAGED : 2
BM : 1
AWHILE : 1
FRIENDS : 1
INFORMATION : 10
DEVICES : 1
PERPETRATORS : 1
STENOSIS : 2
INITIAL : 3
ILL : 1
DANE : 1
CENTER : 3
RESPONDS : 1
APTS : 1
ATTENDS : 1
SUICIDE : 2
THE : 148
NURSES : 1
EOMI : 1
FILED : 2
BAL : 1
EXP : 1
PRESENTS : 1
GROUP : 17
IDENTIFY : 1
FELLOW : 1
REST : 1
SECONDS : 1
APPEARS : 2
KERATOACANTHOMA : 1
EXPIRED : 3
PEACE : 1
CENTERED : 1
INTRAOCULAR : 1
COLLECTED : 1
COLOR : 3
CHARACTER : 1
TECHNIQUES : 2
MEDS : 8
OPT : 1
SLIPPERS : 1
LODGE : 1
PSYCHOLOGY : 3
RECALL : 1
DISPOSITION : 1
WANTING : 1
CORRECTLY : 2
CAP : 3
LA : 1
UNSP : 1
ENDED : 1
STATED : 3
BATHING : 1
SILVADIAZENE : 1
HEARING : 1
HANDS : 1
GET : 5
AXIS : 2
WHAT : 2
BENEFITS : 4
SHOE : 1
ASSISTANCE : 15
DIABETIC : 1
MELLITUS : 1
UPTIONS : 1
PLAY : 1
DESIGNED : 1
PRESCRIPTION : 1
YEAR : 4
BEVERAGES : 1
LB : 10
HERBAL : 2
GLAUCOMATOUS : 1
PUT : 2
JOAN : 1
INSIGHTS : 1
PRE : 1
SEEN : 9
RT : 1
MAILED : 2
FOOD : 5
ENCOURAGEMENT : 4
NURSE : 4
VENTILATION : 1
UDS : 1
INTERVIEW : 2
INJECTIONS : 4
POWELL : 1
ANY : 7
GIVES : 1
TRY : 2
DISCHARGE : 10
KHZ : 1
SAFELY : 2
CONSISTENCY : 3
SYSTEMS : 6
QH : 4
CHIN : 1
POSTTRAUMATIC : 2
FACILITY : 1
HASNT : 2
CLEARED : 1
GBET : 2
RELATIONSHIP : 1
SECONDARY : 3
MSE : 1
IMPACTED : 1
EVERY : 12
VOLUME : 3
SKIN : 12
CONDUCTION : 1
YESTER : 2
NOT : 35
OK : 2
PROMINENT : 1
FRACTURE : 1
NOK : 1
EXIT : 1
THERE : 5
ORGANIZATION : 1
PERRLA : 1
OPTOMETRY : 2
BRONZE : 1
PURCHASE : 1
HERE : 3
FLAG : 1
IM : 2
BOX : 2
COTA : 1
LITERAL : 1
POSITIVE : 3
SUPPLEMENTS : 1
WISH : 1
SHARON : 1
CLEAN : 1
UNITS : 1
DYSPHORIC : 1
ONEHALF : 4
ANGER : 1
FEB : 2
PROGRESS : 2
WRITERS : 1
KEEP : 2
OWAY : 1
FIXED : 1
ANTIDEPRESSANT : 1
VET : 14
STOOL : 7
EXPLAINED : 1
APHDR : 1
MOTHER : 4
COMPLETION : 1
WELCOME : 1
MANIC : 1
BURSA : 1
CONFLICT : 1
DI : 1
AIDE : 1
PMID : 1
PREGNANT : 1
INVESTIGATORS : 1
PAINFUL : 1
BACK : 10
TESTINAL : 1
SOURCE : 1
REGARDS : 1
TUES : 1
VISITING : 1
HEAT : 1
MALE : 11
KEFLEX : 1
VOIDED : 1
SUPPLEMENTAL : 1
BY : 40
PMH : 1
CLINICAL : 2
PROTESTANT : 1
RELATION : 2
BENZOS : 1
REAL : 1
KNOWS : 1
REASSESSMENT : 2
GANGLIA : 1
DOE : 1
LARGE : 1
BHL : 1
MEETING : 2
PREPPED : 1
TH : 1
RRR : 1
CONVERSATION : 3
FINISHED : 1
TRNASFERRED : 1
VERBALLY : 1
TO : 187
PNEUMONIA : 1
FEEL : 4
IV : 3
ABUSE : 3
ION : 1
TASK : 8
COUNSELED : 2
ADMINISTRATIVE : 2
SAFE : 2
LVH : 1
PROCEDURE : 9
STORY : 1
INSERT : 1
WARM : 2
WELLBUTRIN : 1
CAPACITY : 1
STRESSORS : 1
APPETITE : 3
PRIMARILY : 1
REAPPLIED : 1
SEE : 10
ACTING : 1
SUCCESSFULLY : 1
PLEASE : 4
CBC : 1
STATUS : 12
DIABETES : 3
READER : 1
MHICM : 1
SPENT : 1
DRINKS : 5
NAD : 1
CONTINUED : 6
TESTING : 2
OUT : 8
HR : 1
LIFTED : 1
CEREBELLAR : 1
LBS : 1
LEVELS : 1
TDH : 1
SCREEN : 3
NERVOUS : 1
REACTION : 1
REHABILITATION : 1
BARRIERS : 4
EVALUATED : 2
CONDUCIVE : 3
ASSIGNED : 1
MENTAL : 10
NEEDED : 5
CLEANED : 1
EFFECTIVELY : 1
EXT : 1
WERE : 7
FACTORS : 1
BRC : 3
DETERIORATE : 1
ALOPECIA : 1
RESPONSIBILITIES : 1
WALKS : 1
TURNS : 1
LABS : 3
JOB : 4
DENT : 2
TAKEN : 1
CLOSED : 1
POSSIBLE : 2
LIDOCAINE : 1
AGREED : 1
FENTANYL : 1
INDUCED : 1
TRIAGE : 1
OVERWEIGHT : 1
NML : 1
FAMILY : 7
BAD : 1
ORIENTATION : 1
MATTER : 1
WHEN : 8
AMBULATORY : 2
BEING : 1
NIGHTMARE : 1
LOSING : 1
ABOVE : 2
AMOUNT : 6
WAS : 45
LT : 1
PM : 5
LPM : 2
ORI : 1
HOMEWORK : 1
MOVES : 1
AC : 1
WANTED : 1
CONSUMED : 2
SIG : 3
REMAINS : 1
NARES : 1
MEN : 1
BANK : 1
NOW : 4
PTSD : 1
SPLINTED : 1
INTACT : 1
ACCOUNT : 1
DTR : 1
CYCLOBENZAPRINE : 1
PROTECT : 1
PROGRAMGROUP : 1
SHOT : 1
LIST : 1
SIZE : 1
BAY : 3
IMMUNIZATION : 1
CONVERSING : 1
PARTNERS : 1
ENCORUAGEMENT : 1
SA : 2
COLONIC : 1
INTENTS : 1
VOMITING : 1
ORIENTED : 9
FLUVASTATIN : 1
PSYCHIATRIST : 2
CURRENTLY : 1
NECK : 3
FRONTAL : 1
LYING : 1
JOINT : 5
SIMVASTATIN : 2
RESPIRATIONS : 2
PCMM : 1
BATHROOM : 2
DOCTOR : 1
GOING : 7
SEDATION : 1
DID : 8
MOST : 2
ESTABLISHED : 1
VINELAND : 1
HAGGERTY : 1
SHOW : 2
ARRIVAL : 1
PCE : 2
ROAD : 1
TELEPHONE : 6
ADDRESS : 2
DISORDERMET : 2
SUPPLMENT : 1
ELIMINATED : 1
VERIFICATION : 1
COOPERATIVE : 2
REPORTS : 7
RATES : 1
SUBJECTIVE : 1
LEXAPRO : 1
MYALGIA : 1
HELP : 2
CONTINUES : 4
YES : 8
FURTHER : 3
CONSENT : 6
CHF : 1
FACE : 3
NOTIONS : 1
WHOM : 1
RETURNED : 2
DOING : 1
GASTROESOPHAGEAL : 1
CONFUSION : 1
LACTATING : 1
HPI : 2
LITTLE : 2
ECZEMA : 1
HES : 3
CONFIRM : 1
ED : 7
UTI : 1
INSTITUTE : 2
PHYSICIAN : 15
DAUGHTER : 1
NORTRYPTILINE : 1
TOOTH : 1
URGENT : 1
PAPER : 1
CLOSELY : 1
INTERACTIONS : 3
HE : 67
NEWSPAPER : 1
RX : 2
SILVER : 1
OVERDOSE : 1
WET : 1
OBESITY : 1
PHE : 1
RATE : 2
EASY : 1
CUES : 1
BLOCK : 1
FELT : 1
MASS : 2
FRO : 1
UMBILICAL : 1
JEWELRYCOMPLETED : 1
VSS : 1
UPRIGHT : 1
HYDROBROMIDE : 2
CLEAR : 1
PREDICTING : 1
EXTREMELY : 1
CROWN : 1
PRIMARY : 7
PST : 1
UNTIL : 1
CILO : 1
NORTHFLORIDA : 1
SIGNS : 3
SOLUTIONS : 1
ENJOYING : 1
DEPARTMENT : 1
ATLANTA : 1
ACTION : 1
EXODUS : 1
PATIENTS : 7
SUMMARY : 1
KIND : 1
FATHER : 1
PROVIDED : 7
IBW : 2
DENTAL : 2
SUPPLE : 1
NEUROLOGY : 3
TWO : 1
NONE : 6
RECOMMENDATIONS : 1
CONNECTED : 2
LOT : 3
COLLEAGUES : 1
ANGRY : 2
TRAVEL : 2
RIBA : 1
ENDURANCE : 1
BLINDNESS : 2
OBSOLETE : 1
SCHEDULE : 2
HER : 1
ORDERED : 4
TOPIC : 1
FEELING : 3
SHOULD : 3
QUESTIONS : 1
BEHAVIORAL : 1
APPEARED : 1
HALDOL : 1
DIFF : 1
STAYING : 1
REACHES : 1
CLERK : 1
COALITION : 1
ROUTE : 3
TEMPLATE : 1
CAUSED : 1
PLACE : 7
PRIVATE : 1
LIVING : 2
DPT : 1
NOSHOW : 1
IER : 1
RANGE : 1
EP : 2
MHICMINTENSIVE : 3
DEAL : 1
MG : 29
RETHINKING : 1
BUTTONS : 2
CALF : 1
CORRECTED : 1
PATRIOT : 1
BEHAVIORS : 3
BECAME : 1
FREAK : 1
VIETNAM : 1
SITS : 1
REG : 1
ARMY : 1
CONTINENT : 8
ATRAUMATIC : 1
NUCHOVICH : 1
OXIMETER : 1
WORSE : 1
PROVIDER : 7
DONT : 1
BVA : 1
CERTIFIED : 1
GENDER : 1
MULTIPLE : 1
USES : 2
VOCATIONAL : 1
PUBLIC : 1
APPOINTED : 1
OMITTED : 1
TELL : 1
ALERT : 10
IMC : 1
SHARED : 1
GRANDCHILDREN : 1
UNDER : 1
SEP : 1
IMED : 1
LIVINGSTON : 1
OTR : 1
COMMENT : 2
FSG : 1
THREE : 2
COLLECTION : 1
PROGRAM : 8
APPOINTMENT : 14
WOULD : 6
SUE : 1
FOLLOW : 1
RESTART : 2
FACILITATED : 1
METHOD : 1
PIECE : 1
HYPOXEMIA : 1
HOMICIDAL : 2
CHEN : 1
POCINR : 1
ZERO : 1
BIRCH : 3
DRI : 1
SEX : 3
REFLUX : 1
ACTIVITIES : 3
LIPID : 2
ORDERS : 1
INSTRUCTOR : 1
RESTRAINING : 1
MIRTAZAPONE : 1
MOVEMENTS : 2
COMPLAINT : 10
RAINIER : 1
ORDER : 3
YELL : 1
NL : 1
USING : 4
SEEK : 2
REALLY : 1
CLOUD : 1
EASILY : 1
HAND : 2
SEXUALLY : 1
INFLUENZA : 5
DENIED : 2
ULTRASOUND : 1
SHIT : 1
FELL : 1
SNACKS : 2
LIFESTYLE : 4
FURNITURE : 1
DIFFERENT : 1
NEW : 7
MOUTH : 16
FOCUSED : 1
PROVIDERS : 3
ENCOURAGING : 1
DECIDED : 1
NEUROPATHIC : 1
PRESENT : 3
BREAST : 1
SOME : 3
LINE : 1
SLEPT : 1
HRS : 2
HOMELESSNESS : 1
DETECT : 1
EXPLAIN : 1
ANESTHESIA : 2
INCONTINENT : 1
NEED : 6
TRIAL : 1
ADDITIONALLY : 1
RECEIVED : 5
HELPS : 1
INCONTINENCE : 1
APPROACH : 1
QUESTIONING : 1
ASAP : 1
ASPIRIN : 1
ROLEPLAYS : 1
SKILL : 1
LISTENING : 1
CUEING : 2
EAR : 2
BODY : 2
SATISFACTORY : 1
DOCUSATE : 1
YESX : 1
GIVER : 1
BECAUSE : 2
OL : 2
TRANSFERRED : 1
SIGHT : 1
REMAIN : 2
CLASS : 3
MINERALIZATION : 2
PROMOTION : 2
LED : 2
GA : 1
BROCHURE : 1
NONPRODUCTIVE : 2
POSES : 1
LESION : 2
TRACH : 1
BRIGHT : 1
ENROLLED : 2
ALLOW : 1
INTOXICATING : 1
SOUNDS : 1
REVIEWED : 9
VESICAL : 1
AMONG : 1
ALL : 13
AUTHOR : 4
CAROTID : 2
ELEVATION : 1
CLAUSTROPHOBIC : 1
REFRAMED : 1
CONTRACT : 1
RIGID : 1
TAMPA : 1
DIAGNOSES : 2
SELF : 10
PATIENT : 83
ALLERGIES : 4
ACCEPT : 1
SENT : 3
INVOLVEMENT : 2
HYDROCODON : 1
AGREES : 1
NOS : 2
ARRANGEMENTS : 1
THAN : 1
CONSUMPTION : 1
VOICE : 2
UARY : 1
MEMORY : 1
BRADYCARDIA : 1
ARTHRITIS : 1
REQUIRES : 8
THUS : 1
PROTOCOL : 3
PRACTICES : 1
COME : 6
FEE : 1
DECISION : 1
ROUTINE : 1
LOOKING : 1
INTERVIEWED : 1
ACHIEVED : 1
FEET : 1
CAME : 1
VISIT : 16
THAT : 44
NORMAL : 4
WIFE : 7
STAFF : 11
DEPRESSED : 1
SERVICE : 3
RIGHT : 2
BREATHING : 1
PC : 3
JEFF : 1
BALKCOM : 1
LEGALLY : 1
UR : 1
HBPC : 3
ATROVENT : 1
ONE : 15
CONFIDENTIALITY : 1
PMR : 1
LAKE : 1
FBS : 1
ANATOMICAL : 2
MONEY : 2
PTS : 4
RESPONSIBILITY : 1
SPEC : 2
THOUGHT : 4
HYPERLIPIDEMIA : 1
WRITER : 3
YOU : 13
HCV : 1
DOESNT : 1
EGG : 1
CRITERIA : 2
INFORMED : 7
PAST : 10
DOCUMENT : 5
EYEBALL : 1
NOVEMBER : 1
REASON : 3
DISABILITIES : 1
SUPERVISOR : 2
TOBACCO : 7
REMINDER : 1
ROLE : 1
NEVER : 2
BURST : 1
ALTHOUGH : 1
DR : 1
SOCIAL : 5
DILTIAZEM : 2
MEMBERS : 3
HOSPITAL : 4
FL : 2
SUICIDAL : 4
GLASS : 1
SPHERES : 1
DRESSED : 2
VITAL : 3
SO : 1
TD : 2
IMPROVEMENT : 1
REWRITE : 1
TALK : 2
IDENTIFIERS : 1
WITHDROWAL : 1
MODE : 1
ANTIBIOTICS : 1
STRESS : 5
NONNEOPLASTIC : 1
MAKE : 4
WEEK : 4
VITAMIN : 1
CBOC : 1
APPROVED : 1
NEITHER : 1
NUR : 1
DISTRESS : 1
IMPAIRMENT : 1
ATLAS : 1
CANCEL : 1
ADVISE : 1
MOOD : 5
LIVES : 1
REPORT : 3
GOV : 1
LETTER : 1
LEAST : 1
SIGNED : 1
ELECTRONICALLY : 2
HOW : 7
CARDIOPULMONARY : 1
FEELINGS : 4
SINCE : 7
CRAVINGS : 1
DESCRIBED : 1
WOMENS : 1
DISCUSS : 3
COUGH : 2
CHANGE : 2
STOPPED : 1
THERAPUTIC : 1
HOURLY : 1
SOLN : 1
LEARN : 2
PRESENTING : 1
PIPE : 1
PLASM : 1
MADE : 1
OFFICE : 1
VARYING : 1
ARMD : 1
YRS : 1
LEARNING : 6
VERBALIZED : 4
PRINTED : 2
CLUB : 1
WORKMANS : 1
DOSE : 5
OBJECTIVE : 3
SMOKING : 3
MUCOSA : 1
AFFECT : 3
OOB : 1
UNDERSIGNED : 2
FOLLOWS : 1
PREDNISONE : 1
LOTION : 1
DYNAMICS : 1
RELEASE : 1
INTENTIONS : 1
ORIGIN : 2
BRIMONIDINE : 1
STRONG : 2
MANUFACTURER : 1
AREAS : 3
RELIEVED : 1
ANTIBIOTIC : 3
TRAMADOL : 1
BRAD : 1
NARROWING : 1
MANIFEST : 1
INPT : 3
RESTING : 2
COMMENTS : 5
STRENGTH : 1
UTILIZING : 1
TOTAL : 5
LIGHT : 3
INVOLVE : 1
SURGICAL : 3
SINUS : 1
JUNE : 3
ELIMINATION : 7
SYKES : 1
SUCH : 2
HISTORY : 12
UPDATED : 1
MARCAINE : 1
RESPIRATION : 2
PJS : 1
HOURS : 10
MAIL : 2
LEGS : 1
NAPROXEN : 1
REPORTED : 8
TRANING : 1
THURFRISUN : 1
ONGOING : 1
STRONGLY : 1
TEMPOPORMAND : 1
CONFERRED : 1
NOV : 1
ALWAYS : 2
BILAT : 1
WOUND : 5
HIP : 7
SITE : 4
STANDING : 2
DIABETICFINGER : 1
WOOTEN : 1
TREMORS : 2
COMPLICATIONS : 1
STATING : 1
KG : 10
OP : 3
REFREASH : 1
PCR : 1
AUG : 1
EYES : 4
PROBLEM : 10
CLONAZEPAM : 1
CONVERTAPPROVED : 1
SICHERER : 1
WARFARIN : 3
VETS : 1
HEENT : 1
RECOMMENDS : 1
EXTRA : 2
ADMISSION : 6
COMPLEX : 2
GUARDIAN : 1
RESCHEDULED : 1
LESS : 2
NON : 3
NICOTINE : 2
REMOVE : 1
MMM : 1
MIVA : 1
ULA : 1
FUTURE : 2
SPECIMENS : 1
BONES : 1
WAY : 3
PUL : 1
OBSERVATIONS : 1
ICAL : 1
CONFIDENCE : 1
CLIENT : 1
ASSOCIATE : 2
DENIES : 9
DOB : 2
SPECIFIC : 2
QUALITY : 2
PHARMACY : 3
DISHEVELED : 1
OTHERS : 3
REQUESTED : 3
OSTEOPOROSIS : 2
DISPLAY : 2
VETERAN : 32
CAPSULE : 1
RELIEF : 1
DINNER : 3
PT : 23
INJURY : 2
BEATS : 1
KERI : 1
NP : 1
WISHING : 1
PSYCHOSOCIAL : 2
CONTRIBUTING : 1
LAMINECTOMY : 1
SOON : 1
SKILLED : 1
IRIS : 1
MISSED : 1
MINIMAL : 3
STRATEGIES : 1
COMBAT : 1
AROUND : 3
ILLNESS : 3
AND : 159
SELECT : 1
FLUSHED : 1
JUN : 1
SESSIONS : 7
RESPONSE : 5
POSTOP : 1
NAIL : 1
LOW : 3
PINES : 3
ADMINISTERED : 2
FOLLOWED : 1
MAY : 19
BR : 1
VARDENAFIL : 1
DERMATOLOGY : 1
SELFKNOWLEDGE : 1
LENGTH : 2
APPT : 7
TAKING : 8
UNLESS : 2
ADMITTED : 1
YET : 1
OBSERVED : 1
PROVE : 1
SS : 1
BIOTHERAPIES : 1
AFEBRILE : 2
DONE : 2
PALPABLE : 2
DEPOSITS : 1
PHYSICAL : 6
WEARING : 1
NIGHT : 2
SGOT : 1
CP : 1
ACTIVE : 23
RESECTED : 1
TROCHANTER : 1
CONVERSATIONS : 1
KNOW : 1
CONN : 1
MANAGER : 1
ABILITY : 1
CONTROLLED : 1
SUGARS : 1
FOCUS : 1
OCLOCK : 1
THIS : 64
HIGH : 2
NIACIN : 1
REMEMBER : 1
TAPE : 2
VHS : 1
VAMC : 1
PALMER : 3
HOB : 1
SCRIPT : 1
GAF : 2
DIED : 1
RIGHTS : 2
SESSION : 8
STATES : 7
THIN : 1
REORIENTATION : 1
NEBULIZER : 1
EXTENT : 1
OU : 2
LOCAL : 1
WHILE : 1
QUESTION : 1
CELL : 2
ILISOME : 1
DEMEROL : 1
FLORIDA : 2
LIMITS : 2
WAIT : 2
FIRST : 1
ICDCM : 5
TYPES : 1
RESP : 3
ETOH : 2
DOWN : 2
WANTING_GET : 1
ORDERS_INFORMED : 1
PATIENT_INFORMATION : 1
EXAM_HEAD : 1
WAS_NOTE : 1
BLOOD_HE : 1
GOAL_OF : 3
FOR_BROTHER : 1
MEDICATIONS_PPD : 1
INTER_TRANSFER : 1
VETERAN_ASKING : 1
WHERE_SHOULDER : 1
AB_ADMISSION : 1
RATES_THE : 1
REPORTED_RT : 1
BEDTIME_CHO : 1
BUT_IS : 1
CURRENT_AND : 1
OF_DRIVING : 1
HI_PARANOIA : 1
ON_SEROQUEL : 1
DOES_EAT : 1
CARE_HE : 1
ADDENDUM_OUTPT : 1
EAGER_NOT : 1
SCREEN_ROUTINE : 1
PUT_THE : 1
USE_READING : 1
RELAPSE_MENTAL : 1
HIM_HOW : 1
MG_PATIENT : 1
OF_DISCHARGE : 1
TOLERATED_WELL : 1
BEEN_IT : 1
BREATHS_JUDGEMENT : 1
OTHER_PROBLEMS : 2
INTENTIONS_TO : 1
KG_OTHER : 1
ED_YESTER : 1
TO_ESTABLISH : 1
ATTENDING_TEMP : 1
KG_EXAMINATION : 1
BEEN_TO : 4
MED_EDUCATION : 1
NOT_TAKING : 1
LEARNING_AND : 1
THE_BENEFITS : 1
THIS_UNIT : 1
INTRAVENOUS_HEPARIN : 1
DOCUMENT_OF : 1
EXAM_ALLERGIES : 1
PATIENT_INFLUENZA : 1
SWS_ASSESSMENT : 1
ON_TO : 2
STREET_WAS : 1
CURRENTLY_EXPIRED : 1
CALLED_BACK : 1
GRIPPER_DURING : 1
DO_THIS : 1
SECTIONS_DESCRIPTION : 1
OF_GOOD : 1
DISCHARGE_THE : 1
THESE_LIMITATIONS : 1
OVER_IV : 2
SC_ED : 4
DO_SO : 1
USE_THE : 1
DIAGNOSIS_PROBLEM : 1
LET_KNOW : 1
AND_ORIENTED : 2
HOURS_VERIFIER : 1
ACTIVE_PAST : 1
PAST_HOURS : 2
APRIL_LEFT : 1
INVESTIGATORS_HAVE : 1
HEALTH_HE : 1
RECRUIT_NON : 1
THE_PATIENT : 18
BRA_KIT : 1
PATIENT_VERBALIZED : 1
PREVENTION_CSL : 1
THE_UNDERSIGNED : 1
THIS_BODY : 1
ACCEPT_BLINDNESS : 1
PCP_PRIOR : 1
FOR_PREPROCEDURE : 1
CLINIC_MESKENAS : 1
VERBAL_THE : 1
NOV_MH : 1
ULTRASOUND_ASU : 1
FILED_AT : 1
GLAUCOMATOUS_CHANGES : 1
ROLEPLAYS_VETERAN : 1
BOTH_EYES : 1
HEAD_SHOWS : 1
INFORMATION_POWELL : 1
COULD_TRIGGER : 1
REQUESTED_THAT : 1
CERTIFIED_INSTRUCTOR : 1
SEVERITY_NICOTINE : 1
WORRIED_LOSING : 1
ROOM_COUGH : 1
PATIENT_STATUS : 1
SURGERY_BVA : 1
AND_MINIMAL : 1
PLAN_BLOOD : 1
CONTACT_SPEECH : 1
OUT_SIGHT : 1
DID_TELL : 1
PROFILE_PATIENT : 1
MINUTES_QH : 2
BATH_ELIMINATION : 1
HAVE_EXPERIENCED : 1
OUTPATIENT_EXCLUDING : 1
MORNING_FOR : 2
DIAGNOSIS_SHOT : 1
SEE_CPRS : 1
ENJOYING_THEIR : 1
SKIPPED_TOTAL : 1
NO_OBJECTIVES : 1
PAIN_UNILATERAL : 1
INSTITUTE_ON : 1
PULSE_RIGHT : 1
ARE_SUBJECTIVE : 1
AND_DISCHARGE : 1
HEALTH_NURSE : 1
PATIENT_AT : 1
HE_PLANS : 2
CONTACT_PHONE : 1
APPTS_VACCINE : 1
INJECTIONS_SUCH : 1
SUICIDAL_APPROPRIATE : 1
REFUSED_AMOUNT : 1
ACCEPT_HIS : 1
LAST_IM : 1
HAD_PLANS : 1
STENOSIS_OR : 1
SITE_AND : 1
APPETITE_GOOD : 3
CARE_FOR : 1
VETERAN_DIABETES : 1
PUT_IN : 2
INFLAMMATION_THE : 1
ORIENTATION_MOBILITY : 1
TOLERATING_MEDICATION : 1
MIAMI_ON : 2
ANTICOAGULANT_CLINIC : 1
RECOVERY_BAKER : 1
REMAINING_SESSIONS : 1
QHS_DECIDED : 1
COLLECTION_SPEC : 1
INCREASED_SELFKNOWLEDGE : 1
STOOL_FIRM : 1
PREVENTION_ELECTRONICALLY : 1
ACCESS_VERIFY : 1
PHYSICIAN_ALREADY : 1
ADDENDUM_UPTIONS : 1
CONTACT_WAS : 1
WITH_CURRENT : 1
PROTOCOL_USED : 1
BHL_MEDICATIONS : 1
THERAPY_LLD : 1
HAVE_COMPANION : 1
LIFESTYLE_HOPE : 1
WHEN_IS : 1
PAIN_ICDCM : 1
MEDS_SUBSTANCE : 1
NOT_AT : 1
PATIENT_FAMILY : 3
MY_CAME : 1
OR_OTHER : 5
COLOR_INTERVENTIONS : 1
TREATMENT_MIN : 1
IS_RELATES : 1
SCHIZOPHRENIA_THOUGHT : 1
STRESS_DISORDER : 1
BY_MONITORING : 1
SEP_MH : 1
AT_MINIMAL : 1
HIS_GOING : 1
MORE_RELAXED : 1
NEEDS_EVERY : 1
ENDED_ER : 1
AN_OPT : 1
OF_HTN : 1
WITH_OR : 1
BAD_STAETS : 1
HSV_ON : 1
WITH_EDUCATIONAL : 1
FROM_ND : 1
CHO_DO : 1
HOW_DRINKS : 1
VETERAN_AREA : 1
IS_RELUCTANT : 1
VISION_THIS : 1
VICTIM_UNFORTUNATE : 1
BED_SPONGE : 3
BEEN_NO : 2
PRIMARY_RELATION : 1
CONTINENT_NOT : 1
IM_TO : 1
PRESSURE_OR : 2
AREA_STAFF : 1
MEDICATION_COMBINATION : 1
REHABPHYSICAL_THERAPY : 1
AND_BENEFITS : 1
AUTHOR_SARAH : 1
INDICATED_BY : 1
WARNED_DANGER : 1
FOOD_EXTRA : 1
VISIT_ORAL : 1
OR_WITHOUT : 1
AFTER_TREATMENT : 2
IF_GOT : 1
TO_RESTART : 1
CASE_DISCHARGE : 1
THE_DIGESTIVE : 1
MINUTES_THIS : 1
CA_PHOS : 1
NOTE_BOWEL : 1
IS_TRYING : 1
TEAM_NOTED : 1
ARRANGEMENTS_THEIR : 1
OW_AND : 1
WITH_SUPPLEMENTAL : 1
NUTRITION_HYGIENE : 1
IT_HX : 1
WITH_DIABETES : 1
APPT_PM : 1
GOOD_ABOUT : 1
AROUND_NOTE : 1
WORKER_DISCUSS : 1
WAL_GOOD : 1
MET_AND : 1
LAT_WITH : 1
BP_ON : 1
IDENTIFIED_OTHER : 2
LB_OTHER : 1
OFF_HAPPENED : 1
ATLANTA_JUL : 1
DOM_BUT : 1
POSTTRAUMATIC_DISORDER : 1
VACCINE_NUMBER : 1
IF_APPLICABLE : 4
CLINIC_AND : 1
PROCEDURE_ED : 1
FOLLOWED_NEUROLOGY : 1
THE_AREA : 2
IF_GLAUCOMATOUS : 1
SENT_TO : 1
THE_TOILET : 1
ON_MACHINE : 1
UNITS_IN : 1
FOR_THEIR : 1
BRC_NOTE : 1
MH_NURSING : 2
ALERT_YES : 1
YOUR_ALSO : 1
DATE_UARY : 1
ORTHOPEDIC_HIS : 1
THOUGHT_ABOUT : 1
FOCUS_OVERWEIGHT : 1
TRAMADOL_REQUEST : 1
WITH_YOUR : 2
CARE_STRESS : 1
HR_COMPLAINT : 1
TD_EXAM : 2
FACE_EYES : 1
WEEK_AUG : 1
OF_ACTIVE : 1
ASKING_VET : 1
RECEIVED_NOTE : 1
LAB_NOTE : 1
SELF_CLEARED : 1
BP_OUT : 1
ACTIVE_DOCUMENT : 1
TIME_VETERAN : 1
ISOLATION_WITH : 1
MR_STATED : 1
TO_WAIT : 1
BE_REGARDING : 1
AS_AS : 3
PRESENT_ILLNESS : 1
CBOC_OR : 1
GO_OUTSIDE : 1
MONITOR_THIS : 1
RESPIRATIONS_LUNG : 1
WILL_MHICM : 1
VETS_TO : 1
CARE_GIVER : 1
NEWER_ANTIDEPRESSANTS : 1
DONE_MR : 1
MAY_RE : 1
CONSENT_PROCEDURE : 1
REFERRAL_HOME : 1
PRODUCTS_IF : 1
COMPLETELY_PURPOSE : 1
AND_ONEHALF : 2
AND_HIP : 1
ABSTINENCE_BE : 1
COPE_THINGS : 1
MY_KNEE : 2
DIRECTED_ON : 1
NUTRITION_AMOUNT : 1
COMPLAINT_JAW : 1
NEWS_MIAMI : 1
TO_CONFIDENTIALITY : 1
VF_AND : 1
HIP_ICDCM : 1
TEGADERM_REAPPLIED : 1
HE_ABLE : 1
DOWN_TECHNIQUES : 1
POSSIBLE_BUT : 1
NP_PT : 1
TOPICS_IN : 1
OS_PARALYSIS : 1
RISKS_OF : 1
CRITERIA_TOBACCO : 1
DUPLEX_CAROTID : 1
HOPEFULL_THERES : 1
YOUR_RECENT : 1
AND_INTERVENTIONS : 1
CONTROL_VETERAN : 1
AMITRIPTYLINE_SIGNATURE : 1
DIAGNOSIS_MR : 1
MONTHS_PREDNISONE : 1
REQUESTED_PA : 1
MAY_ELIMINATION : 1
THERAPY_BILATERAL : 1
OF_ASSOCIATE : 1
ADOLESCENCE_PLEASE : 1
PLACE_SS : 1
PAST_BREAKFAST : 1
ARE_TO : 4
EXAMINED_DESCRIPTION : 1
IN_PJS : 1
HISPANIC_ORIGIN : 1
HAS_MULTIPLE : 1
TECHNIQUES_VISIT : 1
HD_OF : 1
NO_SYMPTOMS : 1
TO_TREAT : 1
BLOOD_VETERAN : 1
THE_DICLOFENAC : 1
CONTINUED_INPATIENT : 1
SEIZURES_INCLUDE : 1
LOBE_HAS : 1
AREAS_PSYCHOSOCIAL : 1
OF_AMBULATION : 1
PLASMA_ACTIVITIES : 1
OFF_THE : 1
STANDING_FRONT : 1
HOME_OUTPATIENT : 1
AND_AGREED : 1
ETOH_DETOX : 1
OTHER_CLINIC : 1
ANALGESICS_PRE : 1
WAS_FELT : 1
NO_ANXIETY : 1
CARD_THIS : 1
GO_ON : 1
HE_WELL : 1
STOOL_LOCATION : 1
TOLERATING_COMBINATION : 1
ACID_TAB : 1
SESSION_GOALS : 1
DIRECTED_REMAINS : 1
BE_REMOVED : 1
STATUS_PRIMARY : 1
DISORDERMET_VETERAN : 2
ECSGENERAL_WORK : 1
HE_LOST : 1
KG_MH : 1
MR_TOTAL : 1
GROUP_NUMBER : 1
VETERAN_HAS : 3
HALUCINATIONS_NOW : 1
CALLED_REGARDING : 1
CBOC_AND : 1
PAST_WAS : 1
OF_WKS : 1
MAY_ALSO : 1
LB_WRIST : 1
TO_TO : 5
BE_PERFORMED : 1
MOBILITY_LOCATION : 1
ATTEND_MEETING : 1
PARANOIA_HASNT : 1
OFF_TO : 1
OF_HEALTH : 1
EXAMINATION_SHOWED : 1
EXPIRED_CURRRENT : 1
TRACT_THIS : 1
BERNA_VET : 1
HISTORY_RISK : 1
STRESSORS_COULD : 1
REACTION_TO : 1
REFERENCE_DT : 1
ACTIVE_FAMILY : 1
PM_NUTRITION : 1
CROWDS_HE : 1
OMITTED_DATE : 1
PPD_TO : 1
EFFECT_ON : 1
FLAG_ON : 1
GOING_ON : 1
SATISFIED_WITH : 1
SCHEDULE_LEVELS : 1
TO_GYNECOLOGICAL : 1
ACCOMPANYING_AND : 1
CRIME_SWS : 1
ARSISNG_FROM : 1
DATE_PATIENTS : 1
OUT_PUT : 1
PHARMACY_NEUROLOGY : 1
MEDICATIONS_NOT : 1
AT_ALL : 1
ENDING_AM : 1
PROVIDER_BERNA : 1
ES_ASKING : 1
OF_NOVEMBER : 1
HER_NOTE : 1
GOOD_FROM : 1
INJECTIONS_OU : 2
TELEPHONE_NOTE : 2
HE_SEE : 1
TO_HIM : 1
ME_PULSE : 1
THEM_WITH : 1
INTRAOCULAR_ANTIBIOTIC : 1
WERE_AND : 1
OUTPT_NOTE : 3
IS_LAMINECTOMY : 1
SHOULDER_ABSCESS : 1
LOST_WIFE : 1
REVIEWED_BEDTIME : 1
LEARN_BY : 1
HAVE_HAD : 2
HOUSING_MET : 1
IN_MONTHS : 1
APPLICABLE_OTHERWISE : 1
DICTATION_ONLY : 1
PATITENT_MR : 1
HYPERGLYCEMIA_FSG : 1
PT_PING : 1
COMMENT_PREOP : 1
AT_LEAST : 1
MEAL_ASSISTANCE : 1
COULD_RELAPSE : 1
INCIDENT_THE : 1
AN_SEEING : 1
ADDENDUM_MEDICATIONS : 1
DISCHARGE_SENT : 1
OR_MESSAGE : 1
MANAGEMENT_EXERCISE : 1
AND_OTHER : 2
MIN_ADVERSE : 1
DRUGS_IN : 1
JOINT_MAY : 1
EYE_MEDICATIONS : 1
LEFT_PALPABLE : 1
LBS_IBW : 1
PATIENT_USED : 1
TO_DENTAL : 1
AT_SEE : 1
FROZEN_AT : 1
SURG_DATE : 1
UNDERSTANDING_GO : 1
MG_GUM : 1
RECENT_NOTES : 1
PO_THE : 1
COMPLAINT_SHOULDER : 1
REQUIRED_DURING : 1
HOPEFUL_HE : 1
FOR_MG : 1
PROCEDURE_PROCEDURE : 1
PO_HGB : 1
ACTIVITY_PLAN : 1
AMPM_OS : 1
TABLETS_MG : 2
REPORTED_THAT : 3
AND_CANE : 1
NOTE_PROTOCOL : 1
TEETH_COMPLAINT : 1
NURSING_ACTIVE : 1
OUTPATIENT_THERAPY : 1
RESPIRATIONS_ON : 1
FINISHED_THE : 1
WITH_REASED : 1
ALOPECIA_TO : 1
CAN_AUTOMATION : 1
NO_PLAN : 1
SYSTEM_COMPLAINT : 1
TO_DSMIV : 1
EDIT_NOTE : 1
MG_TABLETS : 1
AS_TIME : 1
ZZPATIENT_CARE : 4
FOLLOWUP_YOUR : 1
PROVIDER_PERSONALLY : 1
CHIN_IMPROVEMENT : 1
WERE_PATIENT : 1
DURING_TOUR : 1
CARE_PHYSICIAN : 2
APPETITE_PERTINENT : 1
REMOVED_IN : 1
MY_HEARING : 1
DISCUSSED_PHYSICIAN : 1
MG_SATURATION : 1
FEET_HENT : 1
BEEN_ABLE : 1
BPH_ON : 1
EXT_MAKE : 1
KEFLEX_QID : 1
PPD_LAST : 1
AND_OX : 1
MONTH_FUP : 1
MEDS_LEFT : 1
WHO_IS : 3
DISCUSS_ISSUES : 1
PC_OUTPT : 1
HYGIENE_HPI : 1
UNDER_ANESTHESIA : 1
MOTHER_HE : 1
VET_XCOVER : 1
IN_THIS : 1
IDENTIFIED_PROBLEM : 2
BLOOD_CURRENT : 1
RX_GOOD : 1
ALL_SPHERES : 1
GROUND_WEEK : 1
PATIENT_SITE : 1
TO_BRADYCARDIA : 1
HOME_TO : 2
NOTE_MH : 1
SITUATIONS_REVIEW : 1
IS_GOING : 2
ASAP_EP : 1
PRESCRIPTION_VETERAN : 1
CONTENT_OF : 1
HEADPHONES_NEUROLOGY : 1
PROBLEMS_SYMPTOMS : 1
WITH_OUTPATIENT : 1
HE_NOT : 3
VISITING_HIM : 1
PRESENTS_THE : 1
SESSION_ENDED : 1
TO_CERVICAL : 1
HOW_JOB : 1
INITIALLY_RECEIVING : 1
ATTEND_THIS : 1
TO_ME : 2
FALL_PREVENTION : 1
THEN_AROUND : 1
LODGE_TO : 1
MOUTH_TIMES : 1
IN_PM : 1
OBJECTIVE_HYPOXEMIA : 1
RECOMMENDED_LOCATION : 1
IS_CONSIDERED : 2
DROWSINESS_BREAST : 1
AS_IT : 1
ON_HIS : 3
PATIENT_REPORTED : 1
LIVING_USE : 1
WERE_MET : 1
LITTLE_ROCK : 1
SYST_MURMUR : 1
LEFT_PHYSICIAN : 1
CONFUSED_REORIENTATION : 1
GOOD_POSTOP : 1
LEFT_WRIST : 1
ADDRESSING_VETERANS : 1
KG_HEIGHT : 1
ASSESSMENT_INDEPENDENT : 1
PREPPED_MELLITUS : 1
SKIN_CA : 1
BATHROOM_PRIVILEGES : 1
HAS_HOMICIDAL : 1
MEDS_HOW : 1
MG_ORTHO : 1
FEEL_LIKE : 1
USE_IMED : 1
EASILY_TURNS : 1
PAIN_OUTPATIENT : 1
IN_THICKENED : 1
PHYSICIAN_TESTINAL : 1
AM_WITH : 2
PURPLE_FELL : 1
RELATION_MOTHER : 1
THAT_HAS : 2
MOBILITY_TREATMENTS : 1
PTS_REPORTED : 1
IN_REGARDS : 1
WITH_IN : 1
NONE_INFUSE : 1
TO_CBC : 1
CAME_AND : 1
VETERAN_MINUTES : 1
DFE_NL : 1
THE_CURRENT : 1
AND_NEEDS : 1
PLACE_NUMBER : 1
AT_HOME : 2
CONSENT_FOR : 3
YOUR_CHEST : 1
BOTH_QH : 1
FORAMINAL_NARROWING : 1
IS_NEITHER : 1
TO_MAKE : 3
OBJECTIVES_THE : 1
MEDICATIONS_EXCLUDING : 1
PATIENT_CARE : 1
PROGRAM_INTERACTIONS : 1
RHYTHM_VOLUME : 1
PNEUMONIA_INTACT : 1
BASCOM_EYE : 1
HYPERLIPIDEMIA_CARE : 1
FITNESS_MIN : 1
FACE_MHC : 1
AND_LEAD : 1
SYSTEMS_GROUP : 1
TO_SELF : 2
SPEC_TAKEN : 1
PARALYSIS_NO : 1
PAIN_HIS : 1
RE_SPOKE : 2
CALLED_MR : 1
FOR_WITH : 2
UP_TOMORROW : 1
FROM_ALL : 1
NOT_ALWAYS : 1
EOMI_GO : 1
THAT_LOST : 1
HAD_NIGHTMARES : 1
WORK_AT : 1
AT_BY : 2
TO_THERE : 1
TO_LEARNING : 2
MAY_BE : 4
FREQUENTLY_NO : 1
SEE_PULSE : 1
STRENGTH_USES : 1
DESIGNED_TO : 1
PUPIL_TEETH : 1
IS_SOURCE : 1
LEFT_PROCEDURE : 1
RAINIER_THE : 1
CAPACITY_DIGESTIVE : 1
OBESITY_STRATEGY : 1
VOLUME_NUTRITION : 1
WITH_ADEQUATELY : 1
SOLN_OPH : 1
USED_VERIFY : 1
TRIAL_TRAMADOL : 1
PREPROCEDURE_PUL : 1
VARIABLE_NOT : 1
TO_IS : 1
NUR_CHECKIN : 1
SUICIDAL_IDEATION : 1
REGARDING_PAIN : 1
MH_ALWAYS : 1
AND_PHONE : 1
CM_FLUID : 1
DPT_VA : 1
HOSP_PJS : 1
BY_INFORMED : 1
GOLD_WISHING : 1
AND_DECIDED : 1
THAT_WILL : 2
THESE_GROUPS : 1
FEELINGS_OF : 1
SCHEDULE_PHYSICIAN : 1
AND_INJECTION : 1
HTN_AND : 1
LEFT_KNEE : 3
HISTORY_REPORT : 1
ANESTHESIA_FEELS : 1
CLOSED_SPECIAL : 1
TAKING_AT : 1
ORDERED_XRS : 1
WEEK_AGO : 1
AVAILABLE_AT : 1
CONSULT_TREATMENT : 1
MOTHER_REPORTED : 1
THE_MH : 1
PHYSICIAN_ICAL : 1
TREATMENT_CROWDS : 1
RADIAL_RIGHT : 1
AND_FAIR : 1
PT_CALL : 1
HAVE_FINISHED : 1
BEVERLY_TIME : 1
DISCHARGED_WITH : 1
OVER_COUNTER : 1
AND_SHE : 1
BATH_BOWEL : 1
JERKS_LEGS : 1
RED_PHONE : 1
FOR_YOUR : 1
HAVING_OF : 1
HEALTH_PROMOTION : 2
STRESS_LB : 1
PREPPED_DIABETES : 1
ORTHO_ATTENDING : 1
TO_PALMER : 2
DEC_CLINIC : 1
OF_UNFORTUNATE : 1
ON_PM : 1
PATIENT_UNDERSTANDING : 1
HIM_ACKNOWLEDGED : 1
KHZ_STRENOUS : 1
HAVE_INTAKE : 1
WRIST_WITHIN : 1
OF_BURSA : 1
ABOUT_BAY : 1
ADDENDUM_HEART : 1
ABUSE_CHRONIC : 1
NURSING_DEMEROL : 1
LEFT_GLUTEAL : 1
HEALTH_INPATIENT : 1
NEWS_FROM : 1
TO_LIFESTYLE : 3
DT_SPEC : 1
UPDATE_YOU : 1
NOBLE_FOLLOWUP : 1
AM_MALE : 1
AMOUNT_IMPACTED : 1
REFRAMED_ORIENTED : 1
ABSTAINING_ETOH : 1
RE_WITH : 2
TO_APPEARANCE : 1
NARROWING_TO : 1
FLOMAX_IS : 1
DRUGS_OR : 1
TAKING_PSYCH : 1
MIND_WHAT : 1
KNOWS_AND : 1
DAILY_IN : 1
DISORDER_ABUSE : 1
DISCUSS_HOUSING : 1
THE_KNOWS : 1
PLAYING_TROMBONE : 1
PERSON_PLACE : 1
DISCUSS_MORE : 1
ANTICOAGULANT_SINCE : 1
ATTEND_HIS : 1
MON_WHICH : 1
IS_STILL : 1
CONTRACT_ESTABLISHED : 1
VITAMIN_BP : 1
READING_MEDS : 1
MIND_WITH : 1
SUSTAINED_GSW : 1
LEVEL_CONSCIOUSNESS : 1
ALL_WHO : 1
AM_IN : 1
OF_LIKE : 1
THEIR_TOGETHER : 1
LISTED_AND : 1
MANAGEMENT_WAS : 1
INJURY_DEC : 1
OS_ADDENDUM : 1
SOCIAL_ASSESSMENT : 1
TREATMENT_MOBILITY : 1
PATIENT_PAIN : 1
ADVERSE_TO : 1
ENCORUAGEMENT_STATING : 1
AND_DEPOSITS : 1
REFREASH_EDUCATION : 1
ANXIETY_ANXIETY : 1
APPROPRIATELY_WITH : 1
REQUESTED_AN : 1
THE_REMEMBER : 1
DIAGNOSIS_DATE : 1
VISIT_OF : 1
HAVE_ITED : 1
HIS_PATTERN : 1
WAS_LOCATION : 1
WAS_TO : 8
ME_IT : 1
STAFF_REQUIRED : 2
SKIN_PROBLEMS : 2
WANTING_TO : 1
MEDICATIONS_AND : 1
PULSE_FRONTAL : 1
HOW_SEES : 1
SAME_NAPROXEN : 1
NOTE_AGITATION : 1
THAT_SKIPPED : 1
CARE_OR : 1
DEVICES_PATIENT : 1
CONSULT_PA : 1
PRACTICE_THEIR : 1
SELF_BOWELS : 1
OTHER_FACTORS : 1
REFUSE_FLUID : 2
ET_IF : 1
FOLLOWUP_URGENT : 1
GOOD_OF : 1
PATIENT_DOES : 1
OR_GRIPPER : 1
CAPSULE_ACTIVE : 1
NOTE_LIVES : 1
ERYTHEMA_WORSENI : 1
ACTIVITY_THE : 1
PATRIOT_WAY : 1
WAY_CLC : 1
PLAN_FOR : 1
EFFECT_CYMBALTA : 1
OF_SECONDS : 1
BROKEN_DENIES : 1
SAFETY_PRECAUTIONS : 1
HIS_AND : 5
BUT_THEN : 1
SMOKING_QUALITY : 1
DRINKS_FLUIDS : 1
NOTE_ALTHOUGH : 1
PHYSICIAN_SCHEDULED : 1
MANAGEMENT_CONTRIBUTING : 1
NEEDS_TO : 2
SEXUALLY_WITH : 1
TO_BATHROOM : 1
LOCATION_AREAS : 1
OUTPATIENT_RECONCILIATION : 1
HEAR_FROM : 1
OF_PROCEDURE : 1
GOV_NO : 1
IT_MEDICATIONS : 1
COMMENTS_COME : 1
INJECTIONS_REQUIRE : 1
NOW_CLICK : 1
PT_FROM : 1
WAY_TO : 2
CUEING_PATIENT : 1
COMBAT_SITUATIONS : 1
LDL_RACE : 1
CARE_NOTE : 5
DILTIAZEM_PRAVASTATIN : 1
TECHNIQUES_LENGTH : 1
DISCHARGE_WERE : 1
GET_MIND : 1
PHONE_CONTROL : 1
MY_AND : 1
THE_NEWSPAPER : 1
PATIENTS_ANOTHER : 1
DOSE_TUES : 1
REVIEWED_INPATIENT : 1
READ_PRINTED : 1
APPLICABLE_UNLESS : 1
PROVIDERS_EMERGENCY : 1
PORTABLE_AND : 1
NEW_PAIN : 2
NO_ALLERGIES : 2
THEIR_BROTHER : 1
EYE_WAS : 1
FACE_AND : 1
ALL_SILVADIAZENE : 1
HEARING_IS : 1
ACTIVITY_IS : 1
TAKE_AT : 1
CONTRACT_SURROGATE : 1
AS_FOR : 2
HIS_FRUSTRATIONS : 1
NURSING_DT : 1
SMOKING_IN : 1
LAB_BHL : 1
PLAN_TAKE : 1
IF_HIS : 1
PROVIDED_WITH : 1
WHO_HAS : 1
TX_HE : 1
ITED_IMA : 1
ELIMINATION_METHOD : 1
SEX_STARTED : 1
IS_HIS : 1
OR_AND : 2
ARE_SESSION : 1
CONTROL_BLOOD : 1
YOUR_NEXT : 3
APPT_ON : 2
YES_TEAM : 1
INVOLUNTARY_JERKS : 1
THINGS_THE : 1
PATIENT_WARNED : 1
BEEN_ON : 1
VETERAN_OF : 1
REQUESTED_RUSSELL : 1
GIVEN_DISCHARGE : 1
FEELS_HE : 1
STENOSIS_THE : 1
FOR_FOLLOWING : 1
INSERT_DATE : 1
PATIENT_WHERE : 1
ABOVE_GREATER : 1
TASK_OVERSIGHT : 3
SCORE_OF : 1
SENT_MENTAL : 1
CHANGES_OD : 1
IS_YO : 1
TASK_REQUIRES : 2
VISIT_RESPIRATION : 1
GOAL_DATE : 2
MEDICATIONS_ILISOME : 1
SURGERY_NO : 2
SURGERY_INCLUDING : 1
TELEPHONE_PROTOCOL : 1
NOT_USED : 1
SIGNS_ON : 1
STAFF_MH : 1
FINGER_IN : 1
HIM_TO : 3
TAKE_VETERAN : 1
TAKE_ACCOUNT : 1
IN_PAIN : 1
THIS_OF : 1
ON_YOU : 1
CONTACTED_OF : 1
FOR_THE : 4
IMPAIRMENT_BACK : 1
DISCUSSING_THE : 1
USED_WILL : 1
INSTRUCTIONS_PREOP : 1
AND_MCV : 1
HAS_THIS : 1
WHO_BEEN : 1
ICDCM_MEDICATIONS : 1
USE_CUTTER : 1
PT_APPT : 1
MHC_NOTE : 1
THREE_FOR : 1
OF_SESSIONS : 2
IN_LEARNING : 1
THE_BRIMONIDINE : 1
NOTE_PULSE : 1
OF_INITIAL : 1
MANY_YEARS : 1
TABLETS_AT : 1
PAPER_TAPE : 1
LOSING_BENEFITS : 1
SEE_ACCOMPANYING : 1
LOCATION_PERSONAL : 1
THE_CPRS : 1
VSS_EYE : 1
WORK_STATED : 1
ACTIVITIES_OF : 1
TIME_HIM : 1
HE_WILL : 4
WILL_TO : 5
ONLY_RETURN : 1
GYNECOLOGICAL_SKIN : 1
HOSP_HE : 1
CONTINENT_WILL : 1
WAS_CONTINENT : 3
ASKING_TO : 1
ALSO_ORDERED : 1
IN_ROUTE : 1
PATIENT_HEIGHT : 1
SEE_THE : 1
UNDERSIGNED_CALLED : 1
TIME_STAFF : 1
SOMEWHAT_TO : 1
COMPLETE_SWS : 1
IN_IDENTIFIED : 1
MR_IS : 3
MED_VA : 1
CONFIDENTIALITY_TAB : 1
AFEBRILE_FROM : 1
RE_AND : 1
OR_ANTIBIOTIC : 1
ANY_CARDIOPULMONARY : 1
AUDITORY_TAKE : 1
YOU_WISH : 1
HAS_AN : 1
HEAD_TO : 1
ES_HAGGERTY : 1
DATE_OF : 4
VET_WILL : 1
HAS_BASIC : 1
ROUTINE_NO : 1
OF_SESSION : 2
ORGANIZED_DIRECTED : 1
FLAREUP_WITH : 1
MINERALIZATION_IS : 1
LAST_ADMISSION : 1
ASSESSMENT_OR : 1
PENG_MD : 1
TO_HARM : 1
REFERENCE_ON : 1
AS_NEW : 1
ORIENTED_AM : 1
PHONE_CALL : 1
MINIMAL_FOR : 1
PROVIDERS_ROOM : 1
GOLD_TEAM : 1
COMPLAINT_HEARING : 1
MATERIALS_SUCH : 1
IN_SA : 1
SELF_OF : 1
CALL_ON : 1
SUGAR_AGO : 1
AXIS_WORKING : 1
WRITTEN_METHADONE : 1
GOOD_WITHIN : 1
COLORINO_SWS : 1
ACKNOWLEDGED_HAVING : 1
DINNER_FOOD : 2
FOOD_VISTA : 1
DISCHARGE_OF : 1
ACHIEVED_CONTINUES : 1
WITH_TREATMENT : 1
BECAUSE_SHE : 1
AS_DIRECTED : 1
ON_WET : 1
LIFESTYLE_LCSW : 1
NO_CONCERNS : 1
MEDICATION_BP : 1
ADEQ_LOCATION : 1
FOR_PAIN : 1
HIS_MIND : 1
CAPACITY_THE : 1
ASSIST_OBJECTIVES : 1
THE_ROOTS : 1
ORIENT_SURROUNDINGS : 1
CLASS_ONCE : 1
SEEN_NEGATIVE : 1
THE_WILL : 2
CONTINUED_THE : 1
ON_HE : 1
TABLETS_MOUTH : 1
WILL_TRY : 1
HAS_SET : 1
URGENT_VA : 1
FOR_SELECTING : 1
KEEP_APPEARANCE : 1
GOOD_AID : 1
APRN_THERAPY : 1
AFTER_AGAIN : 1
DEPOSITS_THE : 1
AGE_CHEMICAL : 1
WHICH_USED : 1
TO_DIERCTED : 1
UP_MMM : 1
HOURS_INFUSE : 1
MODALITY_ULA : 1
INTERFERES_WITH : 1
YES_RESPONDS : 1
READY_RETURN : 1
LLD_SHORTER : 1
PAIN_OUT : 1
OR_DURING : 1
LAST_HE : 2
IS_LED : 1
ANY_VISUAL : 1
YES_VERBALLY : 1
HE_HES : 1
ABOUT_LIFESTYLE : 1
DATE_CHARACTER : 1
END_NOVEMBER : 1
ACCESS_NOW : 1
AT_YOUR : 1
BLOOD_MR : 1
PROPRANOLOL_AFTER : 1
EDEMATOUS_TMJ : 1
COMPLIANCY_HE : 1
CHICKEN_CONCERNS : 1
PRESSURE_WAS : 1
DURING_MEDICAL : 1
EYE_CONTACT : 2
THE_EXCESS : 1
OF_FEB : 1
VISION_AT : 1
NERVOUS_OBSERVATION : 1
CHEST_PROCEDURE : 1
AND_LET : 1
PULSE_BP : 1
WELL_TOBACCO : 1
OF_LS : 2
THERAPEUTIC_IN : 1
STAFF_MOST : 1
NEGATIVE_INTERVIEWED : 1
ROI_MINNEAP : 1
FOR_THERAPY : 1
TIMES_QUANTITY : 1
ION_WITH : 1
AT_THE : 6
TO_LET : 1
GROUP_INVOLVEMENT : 1
ABOUT_FEELINGS : 1
FOR_TABLETS : 2
AND_SUMMARY : 1
PL_CANE : 1
TO_SOMETHING : 1
THAT_STOPPED : 1
BEEN_FOUND : 1
IN_ER : 1
DRINKS_ALCOHOL : 1
WITH_PREOPERATIVE : 1
COLOR_LOCATION : 1
FIXED_ABOUT : 1
TREATMENT_FOLLOWED : 1
VETERAN_APPEARED : 1
AND_APR : 1
HAS_APPT : 1
PAIN_MEDICATIONS : 1
INDUCED_ARKANSAS : 1
VESICAL_FISTULA : 1
AND_INCREASE : 1
ON_MAY : 1
ONE_TO : 1
QH_HAD : 1
OUTPATIENT_NOT : 1
IT_WILL : 1
RED_BLOOD : 1
RESPONSE_YOU : 1
SIGNATURE_INFORMED : 3
IN_VA : 1
IS_ACTIVE : 2
NO_MEAL : 1
INSTRUCTIONS_REVIEWED : 1
DURING_SHIFT : 4
OLD_HIGH : 1
NAME_VETERAN : 1
PERFORMED_WITH : 1
FEEL_BEEN : 1
APPT_WITH : 1
AND_STRESS : 1
PRIOR_VERBALIZED : 1
DIABETES_MELLITUS : 1
VERBALIZED_GO : 1
SINGLE_YO : 1
BLOOD_RAL : 1
SGOT_PLASMA : 1
WAS_FOR : 1
PROCEDURE_AND : 1
TIME_NUMBER : 1
EMERGENCY_WALKIN : 1
PATIENT_USES : 1
HIM_FEEL : 1
VISTA_IMAGING : 3
EXPLAINED_TO : 1
GIVEN_THE : 1
PERSONAL_TIME : 1
FAMILY_SYNCOPE : 1
PHYSICIAN_NEXT : 1
NOT_OF : 1
AFTER_DISCUSSING : 1
INVOLUNTARY_OF : 1
CATEGORY_VI : 1
DATE_HEIGHT : 1
TO_FOLLOWING : 2
PULSE_ON : 1
AS_OW : 1
AROUND_ADMINISTRATIVE : 1
PATIENT_DID : 2
MONITORING_WAS : 1
CONTACT_VAMC : 1
BACK_THE : 1
THAT_EASY : 1
TOTAL_ARTHROPLASTY : 2
PT_REPORTS : 2
MIAMI_SAID : 1
MEMBERS_TO : 1
AGE_WITH : 1
WAS_VICTIM : 1
RESPONSE_TOLERATED : 1
ABUSE_PER : 1
THINGS_HYGIENE : 1
RESTART_WARFARIN : 1
AT_DURATION : 1
PT_PRESENTED : 1
EMERGENCY_OUTPATIENT : 1
VETERAN_ALERT : 1
MEMBERS_TRAVEL : 1
DIABETES_CONTACTED : 1
APPLICABLE_COMMENTS : 1
NEXT_INDIVIDUAL : 1
TO_DO : 5
FOR_BECAUSE : 1
NOTE_PATCH : 1
TIME_AN : 1
NEVI_PROMINENT : 1
LB_TIMES : 1
DYNAMICS_PHYSICIAN : 1
MOUTH_NEEDED : 1
WITH_IS : 1
BEEN_BUILDING : 1
NONE_ML : 1
SEDATION_WITH : 1
PATIENTS_NEXT : 2
ALWAYS_BUT : 1
LITTLE_SHE : 1
CONFERRED_ACTING : 1
ANSWERING_WITH : 1
WITH_DTC : 1
DANGER_OF : 1
COLORATION_THE : 1
SOCIAL_NOTE : 1
APPETITE_IS : 1
RETURN_TX : 1
PHONE_REQUESTED : 1
STATUS_ALERT : 1
ORTHO_TEMP : 1
OPT_DOSE : 1
RELAPSE_DOSE : 1
NURSING_ACTIVITY : 1
WAS_HISTORY : 1
ODY_SHIFT : 1
CONCERNS_TO : 1
HIS_AT : 2
PARTNERS_OF : 1
PRESSURE_ULCERS : 2
PHYSICIAN_CUEVAS : 1
TASK_SUPERVISION : 3
INDEX_FOR : 1
THEM_AT : 2
THIS_GET : 1
HAVE_ELIMINATED : 1
DM_SLIDINGSCALE : 1
DONE_HERE : 1
BUT_STATES : 1
OF_UTI : 1
BASIS_CARE : 1
CLINIC_AMPM : 1
VERIFIER_ES : 1
THIS_LIVING : 1
PLANS_VISIT : 1
THE_AA : 1
REG_CURRENT : 1
REGAIN_HIS : 1
DIABETIC_WITH : 1
THIS_AGREE : 1
PLAN_GROUP : 1
TO_NOT : 1
TASK_NO : 2
PATIENT_ASA : 1
LEGS_AND : 1
WITH_USE : 1
HEALTH_BHL : 1
STATUS_HHA : 1
NOTE_THAT : 1
DL_VET : 1
AND_GIVEN : 1
THERAPY_AFFECT : 1
MOVED_FROM : 1
BAD_HE : 1
TRAVEL_AT : 1
CENTER_NO : 1
TO_RADICULPATHY : 1
RX_WAL : 1
IS_PREGNANT : 1
DM_TAKES : 1
TABLET_NURSING : 1
IN_PROBLEM : 1
COUNT_CLINIC : 1
GO_IER : 1
REGARDS_DENTAL : 1
BE_ADMINISTERED : 1
STRENGTHS_SCALE : 1
INFORMED_INFLUENZA : 1
MEDICATION_RECONCILIATION : 2
TO_ON : 1
AGREE_THE : 1
MEDICATION_TEAM : 1
RESECTED_WITH : 1
NAD_VISTA : 1
EXTREMELY_ON : 1
MR_CARE : 1
PULSE_MODALITY : 1
CPRS_PULSE : 1
VAMC_PLAN : 1
NO_NEUROPATHIC : 1
FLEXERIL_THE : 1
AMBULATORY_PATIENT : 1
COALITION_CONFUSED : 1
HOMELESSNESS_ADDRESS : 1
LIPID_FOUND : 1
JOB_ET : 1
IS_WEARING : 1
ARTHROPLASTY_APNEA : 1
CARE_WHO : 1
UNDERSTANDING_PATIENT : 1
DIAGNOSIS_PT : 1
PATRIOT_TO : 1
TO_CHECKS : 1
STRENGTH_PATIENT : 1
NOTE_REVIEWED : 1
PT_SIGNED : 1
WIFE_TO : 2
OR_SUPPLEMENTS : 1
REHABILITATION_CRAVINGS : 1
BATH_HYGIENE : 1
CONTINUE_TO : 1
PLACE_LUNCH : 1
PM_PT : 1
DATE_ADMISSION : 1
REAPPLIED_HAS : 1
ARE_EDEMATOUS : 1
CARE_SC : 1
AT_AM : 3
JUNE_PT : 1
OTC_DENIES : 1
TREATMENT_WRITERS : 1
TREATMENT_VOA : 1
ASKED_HOW : 1
ANGER_MANAGEMENT : 1
CHIEF_NEW : 1
MACHINE_APPT : 1
MACHINE_WITH : 1
HE_BEEN : 1
RASH_ULCER : 1
NOTE_SIG : 1
KG_AM : 1
THE_NH : 1
STRENGTHS_HOSPITAL : 1
IF_COMMENTS : 1
CONSIDERED_VETERAN : 1
HAND_AND : 1
SIGNIFICANT_SOMETHING : 1
ALL_RELATED : 1
MOOD_IRRITABLE : 1
PAIN_MANAGEMENT : 3
NORMAL_RHYTHM : 1
RELAPSE_ANTIBIOTIC : 1
SALTY_SARDINES : 1
SEEN_MOBILITY : 1
HOMICIDAL_SUICIDAL : 1
IRIS_OD : 1
TREATMENT_PROCEDURE : 4
ML_ATROVENT : 1
THIS_AND : 2
MEDICATIONS_PROFILE : 1
DEAL_REVIEW : 1
OSTEOPOROSIS_PRESSURE : 1
FISTULA_SUJJESTIVE : 1
ONLY_VET : 1
VACCINE_LOT : 1
EQUIVALENTS_TREAT : 1
WORSE_THE : 1
PT_NOTES : 1
PATIENT_RESIDENT : 1
HARM_OR : 1
VACCINE_THURS : 1
SGOT_PAIN : 1
IS_IMPROVED : 1
STRUGGLED_WITH : 1
VOA_IS : 1
APPT_DATE : 1
WORSENI_FRONTAL : 1
COUNT_MAY : 1
TELLING_STORY : 1
SPONGE_AMOUNT : 1
FRANTZ_COTA : 1
PROBLEMS_POSITIVE : 1
RADIAL_PULSE : 2
OBSTRUCTIVE_PHYSICIAN : 1
MOTHER_MOTHER : 1
CONTACT_SYMPTOMS : 1
VACCINE_CHILDREN : 1
CHEST_PAIN : 1
NUTRITION_OF : 1
PROCEDURE_MAY : 2
PROCEDURE_ALSO : 1
RISK_FACTORS : 1
SATISFIED_CURRENT : 1
PT_DISHEVELED : 1
PARTICIPATION_LEVEL : 1
ND_ASPIRIN : 1
DOING_PROGRAM : 1
OTHER_POCINR : 1
AND_VET : 1
NO_INCONTINENCE : 1
DENIES_STAYS : 1
PLACE_RADIAL : 1
OTHER_MET : 1
ON_SC : 1
IN_MATTER : 1
MEDICATION_REQUEST : 1
TO_TOO : 1
NOT_SEEK : 1
THE_TUNNEL : 1
OL_DRUGS : 1
TO_EXAM : 1
LIFESTYLE_ABC : 1
THE_CARE : 1
HIM_THIS : 3
NO_BM : 1
ESTABLISH_ATTEND : 1
TRANSFER_OR : 1
OPTOMETRY_CONSULT : 1
UPRIGHT_LAT : 1
MAY_REFLECTING : 1
IS_IF : 1
ADMISSION_MYALGIA : 1
ABOUT_RECENT : 1
ATTEND_NEXT : 1
YES_SALTY : 1
BY_HERMAN : 1
WAS_HOME : 1
TEAM_EDEMA : 1
CENTER_BASED : 1
PLEASANT_ADDENDUM : 1
DIFFICULTY_THE : 1
THE_GROUP : 3
MEDICATION_ML : 1
CHN_FOR : 1
FOR_ANALYSIS : 1
TO_PROVIDER : 1
STATUS_OF : 1
THE_TRACT : 1
REQUIRES_PHYSICAL : 1
YEARS_OLD : 1
NEUROMUSCULAR_STATUS : 1
BP_FURNITURE : 1
WAS_SEEN : 3
NOTE_DT : 1
DOSE_MG : 1
FAMILY_ORIGIN : 1
WHO_EDUCATION : 1
NA_MG : 2
HAVE_WITHDROWAL : 1
PHONE_AND : 2
CONFERRED_WITH : 1
BY_REFLUX : 1
OF_VETERAN : 3
PSYCHOLOGY_THE : 1
PEERS_UPON : 1
SHOULD_NOT : 1
QUALITY_MET : 1
NORTRYPTILINE_ADDENDUM : 1
COMPLAINT_ENCOURAGED : 1
LANDED_HIS : 1
ALL_DATE : 1
CSL_BIOTHERAPIES : 1
HE_AGREED : 1
EXAMINATION_RELATED : 1
TREATMENTS_VOLUME : 1
NO_URINE : 1
DEAR_THIS : 1
HAVE_PRIOR : 1
SEEING_AT : 1
AND_BUSY : 1
HE_DENT : 1
CARE_ML : 1
APPEARANCE_SPEECH : 1
FURTHER_IF : 1
PATITENT_DEAR : 1
VERBALIZED_UNDERSTANDING : 3
NOT_COMPANION : 1
ADMISSION_KNEE : 1
PULSE_BM : 1
MOUTH_HOURS : 1
NO_CLEAR : 1
QUANTITY_PT : 1
PHYSICAL_FULL : 1
PULSE_LEFT : 1
STATED_IT : 1
TOPIC_MG : 1
THE_HOSPITAL : 1
WILL_MR : 1
APTS_CONTACT : 1
INTERVENTION_IN : 1
ABOUT_AND : 1
PROGRAM_AND : 1
AT_STREET : 1
VITAL_ON : 1
SESSION_GOAL : 1
ITED_IN : 1
ISSUES_HIS : 1
TO_BE : 8
THIS_MISSED : 1
PERSONAL_CARE : 1
REPORT_REGARDING : 1
ADMINISTRATIVE_DRUG : 1
MEDS_FEW : 1
RESULT_FUNDUS : 1
ASKED_HE : 1
LINEAR_AND : 1
STRUCTURE_GOALS : 1
EGG_AND : 1
STICK_RESULTS : 1
SKIPPED_BEATS : 1
QHS_DATE : 1
THE_EVENING : 1
THE_ARE : 1
BILATERAL_EYE : 1
WILL_ONLY : 1
MIND_OFF : 1
SURGERY_APPROPRIATE : 1
AND_COMPLIANCY : 1
WRITERS_STATING : 1
BEDTIME_CITALOPRAM : 1
MOUTH_FOR : 6
CONFUSION_WIFE : 1
CLINIC_FEELING : 1
TIRED_AND : 1
OTHER_YOUR : 1
OR_REFUSED : 1
INTO_DOM : 1
ROOM_WELLBUTRIN : 1
MAKE_REASSESSMENT : 1
LACTATING_WELLNESS : 1
COLORS_AND : 1
THE_TEAM : 1
DATE_CALL : 1
ALWAYS_HAD : 1
HIS_RESPONSE : 1
AND_MG : 1
CIGARS_PER : 1
THE_VETERAN : 3
LEVEL_QUALITY : 1
WILL_ID : 1
VETERAN_MOVED : 1
LABS_FROM : 1
ASSESSMENT_SCALE : 1
CRITERIA_MET : 1
LORAZEPAM_TAB : 1
THE_HEALTH : 1
WITH_THE : 11
HENT_HEAD : 1
TO_TRY : 1
FEB_INDEPENDENT : 1
DIARRHEA_NO : 1
APT_IN : 1
HOME_WELCOME : 1
ENCOURAGEMENT_CONSISTENCY : 1
NAME_PLACE : 1
EXTENT_OF : 1
HEALTH_FOLLOWUP : 1
FRO_THIS : 1
CONTROLLED_ENVIRONMENT : 1
NH_CONTINUED : 1
HEALTH_CARE : 2
TAKE_FLUSHED : 1
AN_REASSESSMENT : 1
TIRED_ON : 1
LIMITATION_LEFT : 1
YET_DECISION : 1
RECALL_PATIENTS : 1
OF_HAZARDS : 1
SHE_NOTED : 1
MEDICATION_PER : 1
TO_BLOOD : 1
ELIMINATION_CONSISTENCY : 1
BUT_REFUSED : 1
WHEN_SEEK : 1
EMERGENCY_TREATMENT : 1
ON_AT : 2
BOWEL_MOVEMENTS : 2
BY_IT : 1
NEBULIZER_MIN : 1
TABLETS_PLASM : 1
TWICE_SAFETY : 1
PAIN_MASS : 1
IS_TIME : 1
BIRCH_TO : 1
BMI_TEAM : 1
AGENT_HAS : 1
PROBLEM_REHABPHYSICAL : 1
MIN_NO : 1
RECOMMENDS_WARFARIN : 1
COMPLIANCY_WITH : 1
INCH_NORVASC : 1
PT_RESTARTED : 1
HARM_IT : 1
SAME_VITAL : 1
DIAGNOSES_ADDENDUM : 1
REVIEW_INSTRUCTIONS : 1
MG_IN : 1
TO_WHO : 1
OR_CALL : 1
IS_NONPRODUCTIVE : 1
GIVER_VERBALIZED : 1
SUPPLEMENT_OUTPATIENT : 1
RESPONSE_TREATMENT : 1
RINGING_BEEN : 1
WHICH_ADDENDUM : 1
EDUCATION_WORK : 1
ONEHALF_TABLET : 1
MENTAL_PHE : 1
WERE_DISCUSSED : 1
LIFESTYLE_BAKER : 1
EVERY_DEPRESSION : 2
TELEPHONE_IN : 1
MOBILTIES_STATES : 1
EXPLOSION_VIETNAM : 1
SIGNIFICANT_ON : 1
SELECTING_IMAGING : 1
SHE_VET : 1
THIS_WORKER : 1
PLANS_DO : 1
IS_UPON : 1
GOALS_THE : 2
ORIENTED_PERSON : 2
NEBULIZER_RESPIRATION : 1
SYMPTOMS_YES : 1
BLOOD_DINNER : 1
PHOS_PATIENT : 1
FELL_ON : 1
EXCISION_SKIN : 1
PERTINENT_MEDICATIONS : 1
IMC_FOR : 1
MR_THIS : 1
SINCE_GROUP : 1
REPORTED_PT : 1
GROUP_AS : 1
FOOD_CONSISTENCY : 1
HAS_CALF : 1
BUPROPION_SA : 1
ARE_FROM : 1
CHECK_IN : 1
SADDLE_ANESTHESIA : 1
ABOUT_LIVING : 1
WITH_MINIMAL : 1
BACK_ON : 2
CC_PAIN : 1
AWHILE_AM : 1
PAM_SHE : 1
PURCHASE_MEALS : 1
UPTIONS_INTERFERES : 1
PLAN_CREATED : 1
READ_MATERIALS : 1
PATIENT_OCCURED : 1
ADMITTING_ADDENDUM : 1
RESIDENT_LED : 1
BATHING_DRESSING : 1
TOOTH_PAIN : 1
IF_HE : 1
LOOKING_HIS : 1
SYSTEMS_THE : 1
AMOUNT_STOOL : 3
INJECTIONS_AS : 1
ON_DEVELOPING : 1
CONTACT_IN : 1
NOTE_CONTAINS : 1
PROCEDURE_ASPIRATION : 1
CALL_APPT : 1
HIP_NAME : 1
FOR_REFILL : 1
HAS_BEEN : 14
SOCKS_PST : 1
NEUROLOGY_IS : 1
COME_XCOVER : 1
CONTROLLED_WAS : 1
UNSPECIFIED_COUNSELING : 2
THE_SMOKING : 1
LEFT_FRACTURE : 1
MANY_DRINKS : 1
ASSESSMENT_CRITERIA : 1
SHE_REPORTS : 1
WENT_EFFECT : 1
NO_PHYSICAL : 1
BURDICK_HPI : 1
PROVIDER_FOR : 1
SAFETY_PLAN : 1
OOB_MINIMAL : 1
CALL_AND : 1
FOR_MRSA : 1
OF_CENTERED : 1
INITIALLY_DENIED : 1
PAST_AM : 1
IDENTIFICATION_OF : 1
REFILL_POLLEN : 1
SKIN_COLOR : 1
BEING_ENROLLED : 1
WIFE_MD : 1
JUNE_PLANS : 1
CLEARED_TRIPPING : 1
STOOL_SINCE : 1
WITH_ON : 2
TOLD_THAT : 2
FOR_IS : 1
GIVER_UNDERSTANDING : 1
FOCUSED_ON : 1
WITH_OTHER : 1
MEDS_GOOD : 1
CLONAZEPAM_HIM : 1
LEAN_SHOE : 1
MENTAL_OTHERS : 1
EVERY_SMOKING : 1
WITH_ACTING : 1
SOME_WET : 1
NOT_MUCH : 1
NUTRITION_HISTORY : 1
RIGHTS_RESPONSIBILITIES : 1
OBSOLETE_CONVERSING : 1
APPROPRIATE_MEDICALLY : 1
EFFORT_NONPRODUCTIVE : 1
PROBLEM_UNSPECIFIED : 2
DENIES_ANY : 2
ATTENDS_GROUP : 1
CONSULT_RESULT : 1
AT_POINT : 1
TO_OR : 2
MEDICATION_EDUCATION : 1
HE_ATTENDED : 1
MG_CAP : 2
MEAL_REQUIRES : 1
KNOWN_ALLERGIES : 2
GO_GOAL : 1
PREVENTION_INTERVENTIONS : 1
AT_BEDTIME : 1
RECOVERY_HOPE : 1
ORIENTED_YOUR : 1
ED_PROVIDER : 1
FACE_NEEDS : 1
OF_NOT : 3
ML_INFUSE : 2
FEELS_LIKE : 1
PATIENT_IS : 7
PRECAUTIONS_INDICATED : 1
AT_WITH : 2
DIFFICULTIES_ASTHMA : 1
RETURN_INFORMATION : 1
HE_MANY : 1
INCREASE_ANTIDEPRESSANT : 1
THEIR_HEART : 1
THIS_PROVIDER : 1
AND_ATLANTA : 1
TO_REVIEW : 1
PSYCHIATRIST_AS : 1
SET_ASSISTANCE : 1
ISSUES_WITH : 1
PATIENTS_DISCUSSED : 1
PATIENT_INVOLVEMENT : 1
OF_COPD : 1
AFFECT_CONTINUES : 1
PLAN_PATIENT : 1
NICOTINE_DISCHARGE : 1
THIS_ABOUT : 1
NEUROLOGY_ATTENDING : 1
BACK_RESULTS : 1
WHERE_GSW : 1
WITHIN_NORMAL : 1
OX_CARE : 1
PT_WM : 1
BARRIERS_REVIEWED : 2
WHO_RECEIVED : 1
LB_PATIENT : 1
INTEREST_IN : 1
SELF_CONFIDENCE : 1
IS_CONNECTED : 1
NOTED_MR : 1
NOT_MEAL : 2
CUES_REMINDERS : 1
CHANGES_BP : 1
LISTED_IN : 1
THAT_HIM : 1
NEXT_SCHEDULED : 1
FURTHER_PATIENT : 1
FOR_MONTHS : 1
NO_ADVISE : 1
ILLNESS_SIGNS : 1
BEEN_IN : 2
FBS_INTRAOCULAR : 1
ACTIVITIES_DESCRIBED : 1
PANEL_ALSO : 1
RETURN_TAMPA : 1
LB_AFRICAN : 1
EAR_SURGERY : 2
OF_MEDS : 1
SPLINTED_GOOD : 1
APPOINTMENT_SEP : 1
OF_INSTRUCTIONS : 2
MAY_CHANGE : 1
CONTINUED_FOR : 1
AND_THE : 7
HAVE_CHANGED : 1
LYING_AND : 1
IS_DRUG : 1
PMR_THERAPY : 1
HOURS_AND : 1
PROGRESS_YESX : 1
PROGRESS_NOTE : 1
PROTECT_TOUCH : 1
VISIT_MILLIGRAMS : 1
NEXTOFKIN_SISTER : 1
INTO_MID : 1
TIMES_FOR : 2
INFORMATION_IN : 1
COMPLAINT_ANTIBIOTIC : 1
LAST_DRI : 1
WARNED_ABOUT : 1
PATIENT_THAT : 1
OR_ABOUT : 1
AND_FOLLOWUP : 1
NO_KNOWN : 2
MONTH_RESPIRATIONS : 1
KHZ_NEUROLOGY : 1
HAVE_REQUESTED : 1
ELIMINATION_BOWEL : 1
APPROPRIATE_WILL : 1
TO_EXODUS : 1
FOR_CARE : 1
SUICIDE_IS : 1
VETERAN_MORE : 1
PRIMARY_DIAGNOSIS : 2
SUPPLIES_WILL : 1
RESULTS_NURSING : 1
VS_STABLE : 1
PONTON_DOES : 1
THAT_IT : 1
BLINDNESS_SOCIAL : 1
HE_TO : 5
SUPPLEMENTAL_OXYGEN : 1
IN_STATUS : 1
NOT_YET : 1
ADMINISTRATIVE_NOTE : 2
TOO_ON : 1
BE_UPDATED : 1
CONTINENT_DON : 1
GOAL_AC : 1
WAS_FACILITATED : 1
ORIGIN_PHYSICIAN : 1
DURING_MMHG : 1
CC_BACK : 1
MRSA_WAS : 1
DRINKS_IMAGING : 1
GOING_TO : 4
CANE_SKILLS : 1
ZZPATIENT_ADL : 4
OF_PLAN : 1
BARRIERS_TO : 2
OF_POSTTRAUMATIC : 1
MUSCLE_SPASMS : 1
PAIN_EDUCATION : 1
DESCRIPTION_OF : 1
APPLICABLE_GAF : 1
KNEE_FORS : 1
CENTRAL_VETERANS : 1
IN_EXPOSURE : 1
AND_REVIEW : 1
FOR_SOME : 1
THIS_CLOSELY : 1
HIM_OS : 1
EFFECT_MID : 1
REASSESSMENT_OUTPATIENT : 1
ORI_NIACIN : 1
ABNORMAL_LABS : 1
HAS_CONCERNS : 1
MEDICATIONS_IN : 1
CONSCIOUSNESS_PUBLIC : 1
TYPE_PRESCRIPTION : 1
ON_OF : 1
OF_GUNSHOT : 1
COMPLEX_CARE : 1
MEDICATION_GOOD : 1
DESCRIBED_THEM : 1
JEWELRYCOMPLETED_TOTAL : 1
ADMISSION_DISCUSS : 1
DT_IN : 1
IS_LEFT : 1
THAT_GROUP : 1
VACCINE_MPLS : 1
PULSE_OXIMETER : 1
OVER_MINUTES : 2
HE_NEEDS : 1
HE_PREFER : 1
VETERANS_AND : 1
CONSTANT_VARYING : 1
TO_PROPRANOLOL : 1
FULL_RECRUIT : 1
ADDRESS_BLVD : 1
ELIMINATION_OF : 2
PCE_DIAGNOSIS : 2
TABLET_NO : 1
MG_CHIEF : 1
STAFF_FOR : 1
MCV_PO : 1
INSTRUCTIONS_PATIENT : 1
PT_TRNASFERRED : 1
AM_BY : 1
WHICH_MAY : 1
AM_PMID : 1
NOT_REFERENCE : 1
LOWER_LEFT : 1
PATIENT_DENTURES : 1
NECK_LA : 1
OF_SUGARS : 1
HAS_WITH : 1
INTAKE_ONLY : 1
MOUTH_THREE : 1
HAS_TOBACCO : 1
RACE_MONTHS : 1
EXPOSURE_KISHA : 1
FAMILY_OF : 1
CERVICAL_STENOSIS : 1
OBSERVATION_AND : 1
BANK_FEEDING : 1
LOWER_BACK : 1
FOLLOWUP_RESULTS : 1
CONSIDERED_BE : 1
HYPOXEMIA_CORRECTED : 1
EYES_CALL : 1
NA_EC : 1
MANAGEMENT_PING : 1
AROUND_TEAM : 1
SERVICE_THE : 1
MOST_OF : 1
OTHER_HOSPITAL : 1
SITTING_DRIVING : 1
ANTIDEPRESSANT_WAS : 1
THOUGHTS_SUICIDE : 1
ENROLLED_PAIN : 1
OF_HSV : 1
EGFR_CA : 1
TO_IN : 4
ER_CORRECTLY : 1
DEPRESSION_SHOULDER : 1
MG_CHEW : 1
AND_MOBILITY : 1
RESTING_QUIETLY : 1
BILATERAL_BASAL : 1
OBSERVATIONS_ADDENDUM : 1
HIGHER_PEOPLE : 1
THAT_THIS : 1
CLINIC_ER : 1
SHOWER_SHOULD : 1
REPORTED_PAIN : 1
RISK_HIGHER : 1
WAS_INVITED : 1
CP_IS : 1
WOULD_BE : 1
BUSY_DFE : 1
FALL_OW : 1
NUMBER_OF : 6
PAST_ACTIVE : 1
WOUND_CARE : 1
HEIGHT_CM : 5
PH_BARRIERS : 1
ADDENDUM_HAS : 1
YRS_WKS : 1
SOON_AS : 1
VETERAN_RECENT : 1
CALL_BHM : 1
ACID_MG : 1
HEALTH_WORK : 1
TO_REWRITE : 1
NEGATIVE_EFFECT : 1
AND_SPEECH : 1
NO_APPETITE : 1
STAFF_ONLY : 1
PROCEDURE_POSITION : 1
WITH_MR : 1
IS_EXPIRED : 1
WITH_PLEASANT : 1
COMPUTERIZED_LIST : 1
GM_HEMOGLOBIN : 1
UP_WITHOUT : 1
OF_NUMBER : 1
MHICMINTENSIVE_CASE : 3
PTSD_WAS : 1
MOUTH_MEDICATION : 1
DIRECTED_NEEDED : 1
OFFERED_HAS : 2
USING_FOR : 1
REFLEX_WITH : 1
EXAM_KERI : 1
DIED_HAS : 1
LENGTH_OF : 2
DOCUSATE_NA : 1
OPTOMETRY_RESULT : 1
SUICIDAL_BEVERAGES : 1
HAS_TO : 1
VETERANS_CURRENT : 1
IN_GLUTEAL : 1
STOPPING_PRIOR : 1
OF_COMPLAINT : 1
MM_PUPIL : 1
PAIN_FROM : 1
IS_MEDICATION : 1
MENTAL_ALERT : 1
AVAILABLE_TIME : 1
REPORTED_BUILDING : 1
ELIMINATED_AM : 1
MANIPULATION_KNEE : 1
ON_CLOZAPINE : 1
TO_PING : 1
OCCASIONAL_BEATS : 1
INFORMED_HIM : 1
PROLONGED_OR : 1
GROUPS_PENDING : 1
WHO_WAS : 2
VF_REVIEW : 1
COMBINATION_WITH : 1
CM_HAVING : 1
HIS_IS : 4
SHOULD_BE : 3
MAY_BASED : 1
ORIENTED_ACCESS : 1
CYST_AT : 1
IMPROVEMENT_PROCEDURE : 1
WELLBUTRIN_ALTHOUGH : 1
AND_APPEARANCE : 1
HOME_WANTED : 1
ICDCM_CONVERSATION : 1
AND_ABOVE : 1
PLAN_AT : 1
IS_HERE : 1
ILLNESS_ETOH : 1
UR_BARRIERS : 1
FOR_BROCHURE : 1
BY_PROVIDER : 2
BLOOD_PRODUCTS : 1
SKIN_INTERVENTIONS : 1
NO_SINUS : 1
SEEN_BY : 4
WHEN_APPROACHED : 1
WITH_DRESSED : 1
AND_EVALUATED : 2
OVER_PAST : 1
CLINIC_VA : 1
MON_AND : 1
DATA_AMBULATORY : 1
ALL_ISSUES : 1
IN_MON : 1
UNSP_ACQUIRED : 1
ABOUT_THE : 2
IV_HR : 1
CARD_WAS : 1
VISIT_LENGTH : 1
UMBILICAL_THE : 1
IT_BACK : 1
JOB_CLUB : 1
MOOD_SUPPLEMENT : 1
STATUS_PERFORMED : 1
PRESSURE_COLOR : 1
NO_PATIENT : 1
COUGH_BEEN : 1
IDENTIFIED_CONTINUES : 1
MEDICATION_BAY : 1
DEMOGRAPHICS_TO : 1
VETERAN_THANKED : 1
HE_ID : 1
INTENSIVE_OUTPATIENT : 1
THE_SOLN : 1
PATIENT_NEVUS : 1
OPEN_OF : 1
IS_PING : 1
INTAKE_NOTE : 1
TO_COMMUTE : 1
RECALL_DATE : 1
SKIN_STOP : 1
THOUGHT_PROCESS : 1
COMMENTS_AUTHOR : 1
PATIENTS_IN : 1
AND_SOMETHING : 1
SHE_TAKING : 1
NOTE_PARTIALLY : 1
DIAGNOSIS_NOTES : 1
TO_EXPERIENCED : 1
GOAL_SESSION : 2
DRY_OF : 1
AND_RESECTED : 1
HIS_INFORMED : 1
TO_PRACTICE : 1
ALLERGIES_ORI : 1
SUE_OTR : 1
OF_WEIGHT : 1
THIS_CONFERRED : 1
TYLENOL_DOSE : 1
FOR_BPH : 1
BUT_MY : 1
MANUFACTURER_OF : 1
MESSAGE_TRAVEL : 1
MINERALIZATION_AND : 1
RECOMMENDATIONS_HIP : 1
FALL_IN : 1
NAIL_ROOTS : 1
CEREBELLAR_AND : 1
OF_ATTEMPTS : 1
ME_FROM : 1
OX_ZZPATIENT : 1
MEDICATIONS_OBESITY : 1
CHECK_INTO : 1
JUST_FEEL : 1
BY_REDDING : 1
STABLE_DRESSING : 1
LEVELS_CONVERSATION : 1
WELL_HAS : 1
ADMITTED_TO : 1
PARALYSIS_INCONTINENCE : 1
IT_RELATED : 1
BASAL_GANGLIA : 1
SIG_CUTTER : 1
HOW_MANY : 1
NEW_INFLUENZA : 1
STATES_BEEN : 1
NO_PROVIDER : 2
DETOX_GENDER : 1
AND_RESPONSIBILITIES : 1
PER_PATIENT : 1
ADDENDUM_THIS : 1
PTS_MOTHER : 1
SESSIONS_NEEDED : 1
ALSO_GLAD : 1
INTRAOCULAR_INJECTIONS : 1
REFLECTING_FLAP : 1
FROM_VETERANS : 1
BASED_IN : 1
REFERRAL_AFTER : 1
OBJECTIVES_MET : 1
VETERANS_MEETING : 1
ON_BUT : 1
TO_HEART : 1
HI_HALUCINATIONS : 1
DICLOFENAC_FOR : 1
EXERCISE_AGE : 1
ALCOHOL_USE : 1
CAROTID_RELATED : 1
OSTEOPOROSIS_EVERY : 1
HIS_FEET : 1
SE_LEXAPRO : 1
LOCATION_AND : 1
SHATTERING_INTO : 1
NO_HISTORY : 1
COMPLEX_BP : 1
YOUR_PRIMARY : 2
THE_ENDED : 1
WORK_THAT : 1
INITIAL_ASSESSMENT : 2
HE_OR : 1
HE_HE : 1
ON_PROVIDER : 1
STAFF_OR : 1
ELIMINATION_DISEASE : 1
RELATED_HAVE : 1
IN_GROUP : 2
SOUNDS_WILL : 1
BACK_AT : 1
TX_ATTENDED : 1
THAT_SYMPTOMS : 1
BUT_STRONGLY : 1
AUG_PATIENT : 1
INFORMED_CONSENT : 4
RECONCILIATION_PATIENT : 1
ID_BY : 1
LAST_RESPITE : 1
RESPONSE_THE : 2
COLORATION_OF : 1
TO_PEACE : 1
NORMOCEPHALIC_PERRLA : 1
COMMENTS_FOLLOWING : 1
BLOOD_IF : 1
HIS_WIFE : 3
PHE_ADEQ : 1
DEVICE_YEAR : 1
SEIZURES_CAN : 1
PEERS_THE : 1
PAIN_POST : 1
EXPRESSED_WITH : 1
SAME_AND : 1
ISSUES_ILL : 1
ANESTHESIA_KNEE : 1
LIDOCAINE_GENITALIA : 1
CHECK_THE : 1
PRODUCTS_OR : 1
TIME_COMES : 1
AN_NEXT : 1
BRC_INDEPENDENT : 1
IN_HOUSE : 1
FORS_FOR : 1
FOR_CANAL : 1
RESTING_AT : 1
AND_DPT : 1
SE_WITH : 1
OF_IN : 2
ACTIVITIES_MENTAL : 1
NOTE_USE : 1
LEFT_MESSAGE : 1
OF_ALERT : 1
BED_BATH : 3
JERKS_OF : 1
ALERT_AND : 2
APPOINTMENT_NO : 2
AND_CONCERNS : 1
JEWELRYCOMPLETED_LEFT : 1
TASK_SET : 1
HERE_AT : 1
DEACONESS_PAIN : 1
FOR_METHADONE : 1
ALONG_WITH : 1
SMOKER_OUTPATIENT : 1
THAT_ALL : 1
ALCOHOL_YOU : 1
BEHAVIOR_IN : 1
FOR_SAFETY : 1
COLLAPSE_DEPRESSION : 1
TO_PRODUCTS : 1
OUT_NOTE : 1
REPORTED_WORK : 1
PERIPHERAL_AUTHOR : 1
DISPLAY_HIS : 1
COOPERATIVE_WITH : 1
DIAGNOSIS_JOINT : 1
NOTE_ELIMINATION : 1
CONSUMED_ELIMINATION : 1
CANE_HAS : 1
TREMORS_SINCE : 1
FAMILY_DUAL : 1
WEDNES_MAY : 1
YEAR_OTHER : 1
CONTACT_MINNEAP : 1
MONITORED_EMPLOYMENT : 1
PATTERN_HE : 1
WAIT_TO : 1
SARAH_SIGNATURE : 1
ABOUT_LOSING : 1
WELL_BCX : 1
DOM_POSSIBILITY : 1
BLOOD_PRESSURE : 6
IS_APPROPRIATE : 1
ALL_BUT : 1
VACCINE_NO : 1
HIP_PROTECTORS : 4
WITH_INFLUENZA : 1
NO_CP : 1
ANTIDEPRESSANT_MIRTAZAPONE : 1
EXAM_ATRAUMATIC : 1
HOURS_AWAKE : 1
STRESS_VETERAN : 1
CAN_STITCHES : 1
TO_PREVENT : 1
THE_OF : 13
PAIN_ASSESSMENT : 2
NO_DATA : 1
MR_YO : 1
EGG_OR : 1
THE_SOURCE : 1
PATIENT_EDUCATION : 3
APPEARANCE_MALE : 1
GLAD_HAS : 1
DAILY_FOR : 1
PHONE_WT : 1
MEDICATION_LISTED : 1
OD_PARALYSIS : 1
AM_DINNER : 1
DROWSINESS_EXAMINATION : 1
USE_LEFT : 1
ONE_CAPSULE : 1
NOT_CONVERTAPPROVED : 1
IN_CALL : 1
COLOR_PT : 1
AN_AT : 1
RETURN_PHONE : 1
IN_AM : 2
AT_GREATER : 1
CENTER_AND : 1
NOTE_MEDICATE : 1
PAIN_RELIEF : 1
CONSISTENCY_STOOL : 3
MALE_YEAR : 1
APPTS_INFLUENZA : 1
TO_MONITOR : 1
PREOPERATIVE_VISIT : 1
SENT_MIVA : 1
MEDICATIONS_EYE : 1
PT_HAS : 3
HISTORY_PHYSICAL : 2
PHYSICIAN_ANALGESICS : 1
THANKED_FOR : 1
TONSILS_NOT : 1
CHIEF_COMPLAINT : 8
CHANGES_ACTIVE : 1
TECHNIQUES_THEY : 1
MALE_HE : 1
FOR_ANXIETY : 1
GENITALIA_WERE : 1
NEURAL_FORAMINAL : 1
HIM_BEEN : 1
SS_ADDENDUM : 1
INVOLVE_FLAP : 1
NO_FROZEN : 1
THAT_HE : 14
ED_PATIENTS : 1
HAVE_SPECIFIC : 1
EDUCATION_HEIGHT : 1
GSW_WITH : 1
LOW_HBPC : 1
NL_VSS : 1
HIS_PLANS : 1
LIGHT_THE : 1
MG_HR : 1
IF_THIS : 1
FACILITATED_CHAPLAIN : 1
DRINKS_VISTA : 1
TO_OFF : 1
PATIENT_RACE : 1
IMPROVE_FUNCTIONING : 1
DISPOSITION_HOME : 1
AND_PARTICIPATION : 1
PAIN_INVOLVED : 1
THE_FOR : 4
INSTRUCTIONS_COMMENT : 1
POSSIBILITY_MOTHER : 1
KNEE_OK : 1
MD_HCTZ : 1
AND_BEEN : 2
THIS_THE : 3
WAS_TOLD : 2
MR_MALE : 2
FOR_BASAL : 1
AND_SUCCESSFULLY : 1
DO_YOU : 2
FROM_HANDS : 1
VET_DENIED : 1
HE_STILL : 2
UPON_FURTHER : 1
LESION_EXCISION : 2
HENT_TONSILS : 1
THE_ANTIDEPRESSANTS : 1
SINCE_THE : 1
REALITY_ORIENTED : 1
NOTE_HIS : 1
WORKING_DISCUSSED : 1
PT_HAD : 1
BY_CHAPLAIN : 1
THIS_NURSING : 1
DIS_NOS : 1
INSTRUCTIONS_CRITERIA : 1
WHO_HERE : 1
DOCUMENT_ATTACHED : 1
OUT_PT : 1
LA_OP : 1
ANOTHER_FAMILY : 1
OTHERS_WITH : 1
CRAVINGS_INTERPERSONAL : 1
DRINKS_OF : 1
SAYS_HIS : 1
CONTINUOUS_SICHERER : 1
ATTENDING_PHARMACY : 1
TREATMENT_CONSIDERED : 1
ONE_BY : 8
ATTENDING_VS : 1
TO_PHONE : 1
ANY_CONSUMPTION : 1
SURROUNDINGS_RELIEVE : 1
HERBAL_DENIES : 1
PAIN_SCALE : 1
SNACKS_PATIENT : 1
ACTIVE_PENDING : 1
INTERNALIZED_IS : 1
BACK_HYDROCODON : 1
ASSISTANCE_HIP : 1
ADMINISTERED_BY : 1
CROWN_NOBLE : 1
METHOD_REG : 1
GLUCOSE_BUT : 1
HOMELESSNESS_AND : 1
HEMOGLOBIN_VET : 1
ABS_BLOOD : 2
DOCUMENT_YESTER : 1
GET_ME : 1
IMAGE_YOU : 1
CURRRENT_AREAS : 1
EXPIRED_THIS : 1
MOBILITY_THIS : 1
OF_AWAKE : 2
PATIENT_DECISIONMAKING : 1
IS_PENDING : 1
COLD_ICDCM : 1
IT_WHEN : 1
FOR_SECONDARY : 1
SHOWER_BE : 1
PAIN_WHO : 1
SAFETY_TO : 1
UPON_RAL : 1
CENTER_THEN : 1
VET_DENIES : 1
BEEN_GOING : 1
PAST_IN : 1
MUCH_HISTORY : 1
REVIEWED_REMAIN : 2
EVERY_HOURS : 1
MENTAL_DID : 1
HAS_UNABLE : 1
TO_NEUT : 1
INJECTIONS_MAY : 1
AND_USING : 1
JOINED_YOGA : 1
AGITATION_BRANDEN : 1
CORRECTED_SUPPLEMENTAL : 1
STATUS_EYE : 1
ACTIVE_MH : 1
NP_DIAGNOSIS : 1
WITH_THIS : 4
DONE_SEX : 1
THE_PT : 1
PAIN_BODY : 1
SECONDARY_NEXTOFKIN : 1
THAT_NONPRODUCTIVE : 1
OTHER_SKIN : 2
ML_GIVEN : 1
THE_AUTHOR : 1
PREGNANT_OR : 1
PLEASE_MAIL : 1
DEPRESSED_KERATOACANTHOMA : 1
TREATMENT_ASPIRATION : 1
PC_TELEPHONE : 1
DISK_WAS : 1
REPORTS_OBESITY : 1
LAST_THE : 1
ROOM_VISIT : 1
WITH_VISIT : 1
THE_THAT : 2
NOT_CONTINUED : 1
ABLE_VERBALIZE : 1
NEXT_THE : 1
WHEN_AND : 1
LOCK_CHOOSE : 1
TO_OTHERS : 1
INITIALLY_TO : 1
WIFE_IS : 1
STATUS_TAKE : 1
TEAM_HE : 1
HAVE_BRADYCARDIA : 1
PLASMA_REFERENCE : 1
WILL_INTERVENTION : 1
HIS_FOR : 1
INDEX_SILVER : 1
HE_REGAIN : 1
MONITORING_HE : 1
TO_LODGE : 1
PORCELAIN_FOLLOWUP : 1
ON_NEVER : 1
STATES_HIS : 1
BAY_PINES : 3
SURGICAL_SITE : 1
DETERIORATION_MAY : 1
HOURS_ESIG : 1
SAFETY_CREATED : 1
IN_LAST : 1
TO_RETURN : 2
REMOVED_THE : 1
WITHOUT_ASSISTANCE : 1
HOMEWORK_WAS : 1
ALERT_RRR : 1
YOU_DID : 1
OF_COORDINATOR : 1
REMINDERS_PATIENT : 1
OTHER_ADDENDUM : 1
NUTRITION_AND : 1
THESE_COMMENT : 1
TABLETS_BEDTIME : 1
CRISIS_HISTORY : 1
SINCE_HIS : 1
INTERVENTIONS_AND : 1
DEAR_MR : 1
TEACHING_DEMONSTRATE : 1
HAIR_FIXED : 1
NSAIDS_OF : 1
WITH_KISHA : 1
HIS_THE : 1
QH_IBW : 1
ING_SKILLS : 1
COMPLAINT_LOWER : 1
CASE_SIGNIFICANTLY : 1
DIFFICULTY_TO : 1
VET_UNDERSTANDING : 1
PAIN_MH : 1
APPROVED_RETURN : 1
WAS_PATIENT : 1
OF_ILLNESS : 1
WHO_LEFT : 1
XCOVER_NOTE : 1
YOU_YOUR : 2
ADMISSION_THOUGHTS : 1
TIME_APR : 1
CHF_AND : 1
ACTIVE_BY : 1
SPENT_GROUP : 1
STAFF_HE : 1
LISTED_AS : 1
COMP_PLAN : 1
TO_NO : 1
DEPOSITS_UNLESS : 1
PHONE_UDS : 1
NURSING_ASSESSMENT : 2
INSTRUCTIONS_ELIMINATED : 1
AS_BELOW : 1
WITH_VETS : 1
TO_HEAR : 1
CPRS_BY : 1
BATHROOM_BENZOS : 1
FLAP_PATIENT : 1
YO_CONNECTED : 1
MUSCLE_INJECTION : 1
ON_ACTIVE : 1
HEART_VETERAN : 1
SCHIZOPHRENIA_PROBLEM : 1
TIME_HE : 1
EMERGENCY_FOLLOWUP : 1
ACKNOWLEDGED_ADDITIONAL : 1
TO_HOW : 1
MHICM_NOTE : 1
RATE_AND : 1
IN_ASSISTANCE : 1
VETERAN_DOES : 1
PROBLEMS_NUTRITION : 1
METHADONE_PO : 1
MAY_REQUIRE : 1
REQUESTED_ORTHO : 1
OTHER_TESTS : 1
DETERMINE_OF : 1
APPROPRIATE_JUL : 1
CARE_SYSTEM : 1
HIS_MOOD : 2
TO_ORIENTED : 1
BODY_MASS : 2
MINIMAL_EFFECT : 1
CAN_RELIEVED : 1
PMH_RESTING : 1
GROUP_EXPOSURE : 1
FURNITURE_NO : 1
FELLOW_CLINIC : 1
TO_BLINDNESS : 1
PCP_DANE : 1
SUPPORTS_AT : 1
HOW_COME : 1
ABS_NEUT : 2
STRONG_RADIAL : 1
GET_GOOD : 1
ANGRY_IS : 1
IN_WHERE : 1
MADE_LAST : 1
PSYCH_MEDS : 1
NURSING_OUTPATIENT : 1
HAVE_SEEN : 1
BVA_DATA : 1
MEDICATIONS_REVIEWED : 1
RIGHT_PALPABLE : 1
AGO_FEELS : 1
TOBACCO_TWICE : 1
BEEN_DISCHARGED : 1
AND_COUNSELING : 1
ON_SOCIAL : 1
PHYSICAL_IN : 1
LOCATION_SEE : 1
TEMPERATURE_PATIENTS : 1
THOUGHTS_AND : 1
DOE_BEEN : 1
POOR_PROCESS : 1
BY_MENTAL : 1
NOV_INPT : 1
RECEIVED_WOULD : 1
FOR_DIAGNOSES : 1
FOR_NEXT : 1
FOR_WILL : 1
ADMITTED_ON : 1
DISABILITIES_GOOD : 1
IDEATION_AND : 1
GUM_PAIN : 1
WHO_INITIALLY : 1
HOURS_BREAKFAST : 1
DIABETES_DUPLEX : 1
OF_LEGS : 1
AT_AROUND : 1
ULA_MOBILITY : 1
SIG_ONE : 2
INTOXICATING_MR : 1
LIFESTYLE_GROUP : 2
GLUING_BACK : 1
BRUCHNER_REFLEX : 1
THE_NEEDLES : 1
THE_SELECT : 1
IS_NON : 1
MONTH_FROM : 1
PULSE_PALPABLE : 2
DL_HEMOGLOBIN : 1
PREVENT_CAN : 1
OF_JOINT : 2
SEVERITY_PRESENTL : 1
TIMES_ANXIETY : 1
THE_GOAL : 1
NOW_CALL : 1
THE_PATITENT : 1
MG_BID : 1
SIGNATURE_CONSENT : 3
SAFETY_PULSE : 1
TEST_ONE : 1
MH_ELIGIBILITY : 1
SURGERY_EXPLAIN : 1
WOULD_AT : 1
DESCRIPTION_DIAGNOSIS : 1
TRIPPING_HAZARDS : 1
STAFF_ALERT : 1
STOOL_MOBILITY : 1
TO_BASCOM : 2
GLAUCOMATOUS_OS : 1
AREAS_OF : 2
SOME_INTERNALIZED : 1
ABLE_GET : 1
INVOLVE_REFLECTING : 1
LIKE_ON : 1
THIS_IN : 1
THE_RESIDENT : 1
EMERGENCY_MEDICATION : 1
NEVUS_AND : 1
MINNEAP_VAMC : 1
ALCOHOL_THE : 1
HASNT_HAD : 1
ISSUES_USING : 1
HOME_BASED : 1
PCR_OD : 1
ED_RECEIVED : 1
FOR_AS : 1
CURRENT_REVIEWED : 1
AUNT_NOT : 1
MH_DIABETICFINGER : 1
BY_EVERY : 5
TABLETS_TOTAL : 1
WILL_HIM : 1
UNDERSTANDING_OF : 2
NOT_ADDENDUM : 1
UPON_COMPLETION : 1
IMA_WITH : 1
PATIENT_BEEN : 1
AUTHOR_SIGNATURE : 1
OUTPT_NURSING : 1
AFEBRILE_NML : 1
THERAPY_NOSHOW : 1
FOR_MANAGEMENT : 1
WITH_BACK : 1
PATIENT_BRADEN : 1
PLACE_DATE : 1
POSITION_OF : 1
DEAL_AND : 1
JAW_TOOTH : 1
ADHESIVE_INCISION : 1
NO_NAUSIA : 1
MONTH_THE : 1
AND_IN : 2
LEFT_ON : 2
WITH_VICTIM : 1
PATIENT_STATES : 1
WITHOUT_STAFF : 1
ORDERED_ASSISTANCE : 1
NOTE_ACTIVE : 1
MANIPULATION_OF : 1
FROM_ON : 1
FORMULARY_HAS : 1
DISCUSSED_PLAN : 1
ALLERGY_FOR : 1
MEDICATIONS_ARE : 1
CONDITION_SOCIAL : 1
ADVANCE_DIRECTIVE : 1
THE_LAST : 1
SUCH_SESSIONS : 1
HOLDING_OR : 1
ROAD_NEEDED : 1
STARTED_AGAIN : 1
MOD_TO : 1
BLADDER_DEMOGRAPHICS : 1
TO_BENZOS : 1
SEEK_TREATMENT : 1
SEE_DESCRIPTION : 1
THE_WEIGHT : 2
PRESENT_SECONDARY : 1
WITH_OXYGEN : 1
OMITTED_DIAGNOSIS : 1
WHERE_SUSTAINED : 1
TREATMENT_FOR : 1
PROPRANOLOL_FOR : 1
OFF_HIS : 1
APPT_IS : 1
ON_HAS : 1
FEW_AND : 1
THESE_SPECIFIC : 1
ROUTE_DINING : 1
OF_PAST : 1
DOB_AGE : 1
COLONIC_MUCOSA : 1
FOR_PRESSURE : 1
AND_PROVE : 1
ASSESSMENT_APPOINTMENT : 1
MH_INPT : 3
ACTIVE_RTC : 1
UNCONFIRMED_AND : 1
ETOH_GENDER : 1
OF_PSYCHOSOCIAL : 1
BURSA_INJECTIONS : 1
CONTRIBUTING_YOUR : 1
RELEASE_IS : 1
PLASMA_COLLECTION : 1
CLEANED_NEW : 1
IN_HEAD : 1
THE_IMPORTANT : 1
WAS_ABLE : 1
PC_STAFF : 1
GROUP_BASED : 1
US_TOMORROW : 1
ABOUT_RIGHTS : 1
LAST_BY : 2
INPATIENT_USE : 1
GIVEN_AMOUNT : 1
TIME_SPENT : 1
DON_ATTEND : 1
GIVE_TREADED : 1
SECONDS_SINCE : 1
MI_AN : 1
JOB_AND : 1
SOCIAL_DIAGNOSIS : 1
SHARON_PST : 1
USE_AN : 1
GOAL_ORIENTED : 1
VETERANS_COMMENTS : 1
BANK_ELIMINATION : 1
FEB_OBJECTIVE : 1
ANXIETY_ONEHALF : 1
TEST_ACTIVE : 1
THIS_MR : 1
COMBAT_REVIEW : 1
WIFE_DSMIV : 1
IS_NO : 2
NA_CAP : 1
COLLEAGUES_TOBACCO : 1
TREATMENT_STATUS : 1
THIS_ARE : 1
NONE_SAFETY : 1
DIAGNOSES_STATUS : 1
COMP_NO : 1
BY_GASTROESOPHAGEAL : 1
NEXT_NURSE : 1
CONTINUES_IN : 1
TO_SKILLED : 1
WHETHER_HE : 1
STARTED_SMOKING : 1
SELF_HARM : 1
QID_ORTHO : 1
PATIENT_PREVENTION : 1
OF_FEELINGS : 1
INTERVIEW_AND : 1
HIS_SIMILAR : 1
DEPRESSION_NEGATIVE : 1
CONTRACTED_IN : 1
MEMBERS_PRACTICE : 1
SAFELY_AND : 1
THE_VET : 3
DID_ISSUES : 1
DRY_POSITION : 1
BOWELS_CONTINENT : 1
HISTORY_SE : 1
GROOMED_SPEECH : 1
CELEXA_WHEN : 1
PHYSICIAN_AFEBRILE : 1
TESTS_DOCTOR : 1
NOTE_AS : 1
STOOL_VETERAN : 1
KNEE_HIP : 1
DATE_SESSION : 2
SOURCES_OF : 1
COMPLAINTS_CONCERNING : 1
YELL_THE : 1
USES_TOILET : 1
ERS_ON : 1
VETERANS_HEALTH : 1
TO_MIVA : 1
YO_WM : 1
ALERT_HEART : 1
FROM_PROVIDERS : 1
DEACONESS_HOSPITAL : 1
TREATMENT_REVIEW : 1
ATTEMPTS_PRESENTED : 1
PAIN_BRA : 1
MANY_AGO : 1
PING_PRESSURE : 1
ARE_CONSTANT : 1
SPHERES_WITH : 1
REFUSES_AFTER : 1
PATIENT_OUT : 1
WEIGHT_KG : 6
WORK_STRUCTURE : 1
CORRECTLY_AND : 1
OF_VENTRALLY : 1
OF_VOCATIONAL : 1
MH_HAD : 1
PLACE_WHEN : 1
THIS_PATIENT : 6
WITH_WARM : 1
MENUS_THE : 1
ABILITY_PURCHASE : 1
PRESSURE_DIRECTIVE : 1
LOTION_NIACIN : 1
BEEN_HAVING : 1
OS_VISIT : 1
THE_GENITALIA : 1
SHOULD_SPLINTED : 1
TO_UPDATE : 1
SLIGHTLY_THE : 1
LIMITATIONS_REPORTS : 1
WILL_WITH : 1
DENIES_NOW : 1
PLAN_THIS : 1
EXPERIENCED_JERKS : 1
CROWN_PORCELAIN : 1
MENTAL_STRESS : 1
SHE_STOPPED : 1
WILL_RETURN : 1
DATA_JOINT : 1
SUGARS_STRESS : 1
RESTRAINING_BY : 1
PRIOR_BACK : 1
VIEW_CITALOPRAM : 1
OR_SUPPORT : 1
LITERAL_IS : 1
PATIENT_STRENGTHS : 1
DISORDER_CONTINUOUS : 2
AGREE_FINE : 1
EDUCATED_CORRECT : 1
EYES_PERRLA : 1
PCP_RTC : 1
ED_NUMBER : 1
BY_MH : 1
DO_CONVERSATIONS : 1
WITH_WIFE : 3
HISTORY_HIGH : 1
ORIGIN_ECZEMA : 1
ASA_GIVEN : 1
HT_IN : 2
MEMBERS_WILL : 1
NO_PRESSURE : 2
MASS_INTERVENTIONS : 1
FRIENDLY_AND : 1
ON_PATIENT : 1
UNLESS_THE : 1
APPOINTMENTS_FOR : 1
TO_HOUSING : 1
AND_SAW : 1
RHYTHM_STATUS : 1
WEEK_POCINR : 1
BLACK_NOT : 1
DEPRESSION_SUBSTANCE : 1
AWAKE_EXTRA : 1
ENDING_AT : 1
IN_WAY : 1
NEGATIVE_GOOD : 1
HERMAN_REDDING : 1
AND_JUDGEMENT : 1
CALL_PRIMARY : 1
GROUP_FACILITATOR : 1
OF_EAR : 1
HALDOL_IM : 1
REORIENTATION_PHYSICAL : 1
ACCOUNT_RISKS : 1
APNEA_ANALGESICS : 1
SET_BEHAVIORS : 1
TREATMENT_ALL : 1
MMHG_TRANING : 1
OD_NEVI : 1
JUN_RETURN : 1
AT_EXT : 1
VOCATIONAL_REHABILITATION : 1
BY_WERE : 1
SECONDARY_OF : 1
PALPABLE_MEDICATION : 1
TO_SIDE : 1
INPATIENT_LOWER : 1
LABS_TO : 1
SIGNS_SEBACEOUS : 1
DANE_PHONE : 1
BLOOD_WAS : 1
WELL_HOURS : 1
NAME_AGE : 1
SUBSTANCE_HAS : 1
TO_READY : 1
NOT_MEDICATION : 1
IT_OR : 1
ASSESSED_COUNSELED : 1
APPOINTMENT_REASSESSMENT : 1
INTENTIONS_GYNECOLOGICAL : 1
THERAPY_SHORTER : 1
ME_CASE : 1
STATUS_REPORT : 1
ADMINISTERED_AND : 1
AND_PREVENTION : 2
ET_IS : 1
FEELINGS_INSIGHTS : 1
HIS_SYMPTOMS : 1
MEDS_FROM : 1
BED_CALL : 1
PAIN_LOWER : 1
MONEY_PULSE : 1
YO_MALE : 2
WILL_IN : 1
GOING_CENTER : 1
COUNTER_OR : 1
ARTHRITIS_ALSO : 1
NOT_MADE : 1
BLOOD_COUNT : 1
IN_PLAN : 1
DENT_IN : 1
PUREED_ALL : 1
CLINIC_MAY : 1
THAT_PROTECT : 1
ADL_NO : 1
ARMD_TO : 1
OTHER_CARE : 1
ALL_MEDICATIONS : 1
ORTHO_REQUESTED : 1
PLACE_DINNER : 1
MONTH_DOE : 1
MANAGEMENT_GUIDED : 1
GROUPS_ACTIVE : 1
OF_DOSE : 1
HAVE_OF : 1
DENTAL_CATEGORY : 1
ABOUT_TIME : 1
INCLUDE_OF : 1
PROTOCOL_NOT : 1
NO_TALKING : 1
LARGE_AMOUNT : 1
IS_EASIER : 1
UNLESS_OTHERWISE : 1
THIS_REQUIRES : 2
ADDENDUM_ADDENDUM : 6
PT_TELEPHONE : 1
TO_TAMPA : 1
NEXT_INJECTION : 1
IV_IBW : 1
OTHER_DEVICE : 1
STAFF_ASSISTANCE : 1
CENTERED_DEVELOPING : 1
OF_WHICH : 1
HE_WEARING : 1
SCHEDULED_THERAPY : 1
NOT_GOING : 2
IN_FRONT : 1
OR_DRIVING : 1
CYCLOBENZAPRINE_IF : 1
RAPPORT_ESTABLISH : 1
NOTE_MAY : 1
NO_SEEING : 1
REMAIN_SAME : 2
NUTRITION_UP : 1
WOUNDS_ULCERS : 2
INFORMATION_NUMBER : 1
JUL_HEIGHT : 1
ON_STRONG : 1
PANEL_FOR : 1
HEAD_NORMOCEPHALIC : 1
CARE_SWS : 1
PREVIOUS_SUICIDE : 1
SPASMS_RIGHTS : 1
ACTIVITY_MR : 1
LIMITS_ARE : 1
SETTING_STRESSORS : 1
PINES_DISCUSSED : 1
THE_WERE : 2
AFRICAN_AM : 1
PROBLEM_OTHER : 2
BE_THE : 1
ALERT_BED : 1
RETURNED_MIAMI : 1
ARE_OTHER : 1
THEN_DIABETES : 1
ALERT_INTO : 1
VISIT_INITIAL : 1
THE_COALITION : 1
NURSING_IN : 1
SEEING_MS : 1
EDUCATION_HOURS : 1
NONPRODUCTIVE_OTHER : 1
SUICIDE_SEEN : 1
DATA_AVAILABLE : 1
NEW_REAPPLIED : 1
CALL_INNER : 1
IN_JAIL : 1
MOD_SELF : 1
ABSTAINING_FROM : 1
EYES_FROM : 1
FOR_HEART : 1
SELF_SATURATION : 1
FOR_REQUIRES : 1
SOBER_STRESSORS : 1
POSSIBILITY_BUT : 1
WILL_HAVE : 1
TAKING_FROM : 1
NURSE_PLAN : 1
VA_NOW : 1
BENEFIT_FROM : 1
STATE_ATTORNEYS : 1
INFORMATION_WAS : 1
TOILET_REQUIRES : 1
INCLUDING_SUPPLIES : 1
BASED_THERAPY : 1
PREVENTION_BIOTHERAPIES : 1
TO_HISTORY : 1
MOUTH_EVERY : 9
WAS_ABOUT : 2
COTA_NOTE : 1
MH_GROUP : 2
HOW_WHEN : 1
EVERY_VITAMIN : 1
HIGH_FLAG : 1
RECOVERY_ABC : 1
HEALTH_SOCIAL : 1
SINCE_THIS : 1
AND_NEW : 1
MAY_GU : 1
ELIMINATION_PAIN : 1
THE_CRIME : 1
BEEN_ITED : 1
STATE_OF : 1
COUNSELED_THE : 1
TEMP_STABLE : 1
INPATIENT_INITIAL : 1
INSIGHTS_FAMILY : 1
STILL_TAKING : 1
HAD_KIND : 1
TOOLS_MENUS : 1
PERSONNEL_PATIENT : 1
TRYING_TO : 1
ACTIVE_MHICMINTENSIVE : 1
DESIGNED_ADDRESS : 1
BACK_RESTRAINING : 1
OR_CUEING : 1
TIME_NEEDED : 1
ORDERED_PANEL : 1
ULCER_PATIENT : 1
GOING_LET : 1
HOSPITAL_FAMILY : 1
VET_VERBALIZED : 1
HOUSE_HE : 1
DATA_DIFFICULTIES : 1
MEDICATIONS_HERBAL : 1
AN_OLD : 1
THURFRISUN_AND : 1
RESPONSE_GU : 1
SELFKNOWLEDGE_AND : 1
IN_FOR : 1
PAIN_POSTTRAUMATIC : 1
SAID_ASSISTANCE : 1
SELECTING_NON : 1
AS_WAS : 1
TAKE_CARE : 1
STAFF_TIMES : 1
PM_SEE : 1
VISIT_WITH : 1
RELATES_HE : 1
AT_BIRCH : 2
SHOULDER_OSAT : 1
PROVIDED_THIS : 6
KISHA_MD : 1
RECEIVED_OF : 1
AT_ARMY : 1
CHOOSE_DO : 1
CARE_WITH : 1
PATIENT_RIGHTS : 1
LEXAPRO_MINIMAL : 1
KNOWN_STATES : 1
HEART_PRESSURE : 1
COMPLAINT_RELAPSE : 1
PULSE_RESP : 1
MY_TIME : 1
HE_RECEIVED : 1
ASSESSMENT_INTENTS : 1
CLC_PATRIOT : 1
VENTRALLY_AND : 1
MEDICATIONS_CURRENT : 1
STRENOUS_AND : 1
PLAN_THE : 1
YEAR_NURSING : 1
KIND_PROBLEM : 1
TO_RE : 1
THE_INVESTIGATORS : 1
TREATMENT_CONTRACT : 1
TAB_ONE : 6
FROM_BUT : 1
STOOL_NO : 1
PROCEDURE_INVOLVE : 1
AT_TEAM : 1
TAKING_AFFECT : 1
SCHEDULED_OF : 1
NOT_PAINFUL : 1
GUN_WOUND : 1
ONE_MONTH : 2
WERE_GIVEN : 1
PSYCH_NOTE : 1
AN_MALE : 1
PCP_MAILED : 1
PATIENT_CONDITION : 1
PROVIDER_VETERAN : 1
INVITED_MEET : 1
AGO_YESTER : 1
IN_PROGRAM : 1
TO_VISIT : 2
BEHAVIOR_MEDICATION : 1
TO_TX : 1
NOT_USE : 1
WITH_IMMUNIZATION : 1
HE_MYALGIA : 1
PO_QH : 1
IN_HE : 1
WHOM_TO : 1
MHC_RECOMMENDATIONS : 1
SYSTEMS_DENIES : 1
HIS_SAFELY : 1
THOUGHTS_INSIGHTS : 1
CLC_BR : 1
TOBACCO_IN : 1
OR_THIS : 1
LEGS_CONTACT : 1
USE_OF : 3
HES_BEEN : 2
WITNESSING_RECRUIT : 1
NORVASC_DILTIAZEM : 1
APPOINTMENT_MH : 1
COMMENTS_SCHEDULED : 1
DECLINED_WHEN : 1
THAT_MAY : 3
SURROGATE_IF : 2
PATIENT_WILL : 2
WAS_GROUP : 1
MAILED_GROUP : 1
HAS_RIGID : 1
SALVATION_GIVES : 1
IN_BONHAM : 1
AND_VARDENAFIL : 1
HEALTH_HELP : 1
UPTIONS_OR : 1
MOBILITY_RESIDENT : 1
STOOL_ALERT : 1
US_AND : 1
SS_SIZE : 1
PRIOR_HISTORY : 1
EDUCATION_SOCIAL : 1
TO_ASSIST : 2
HERE_REPORTING : 1
DOSE_BLOOD : 1
SPECIAL_BLESSING : 1
MAY_GUIDED : 1
SCHIZOPHRENIA_ON : 1
COMPLICATIONS_PRE : 1
MILDLY_JAUNDICED : 1
PROVIDER_IS : 1
THE_SCHEDULING : 1
AROUND_THE : 1
PALPITATIONS_OCCASIONAL : 1
OF_THIS : 1
REQUEST_NURSES : 1
SIZE_DI : 1
WERE_GENITOURINARY : 1
ANTIBIOTIC_INSTRUCTED : 1
PROBLEMS_THAT : 1
HERBAL_PRODUCTS : 1
MORE_DETAILS : 1
TO_TASK : 1
BELOW_BEEN : 1
TO_THEIR : 1
EXPERIENCED_ON : 1
AND_UCINATIONS : 1
EVALUATED_BY : 1
TDH_KHZ : 1
TAB_FLUSHED : 1
CLOSE_ROLE : 1
LPM_DURING : 1
RESPIRATION_ADVERSE : 1
DISEASE_ELECTRONICALLY : 1
HIS_OFF : 1
ASSESSMENT_USE : 1
STRESSORS_THAT : 1
IF_VETERAN : 1
ADVERSE_PHYSICIAN : 1
CLASS_TREATMENT : 1
SINGLE_SERVICE : 1
RETHINKING_PROBLEMS : 1
CONVERSATIONS_SUGGESTED : 1
YESTER_WAS : 1
AND_CONFIDENCE : 1
HE_REPORTS : 2
CLINIC_CYST : 1
NEUROPATHIC_BACK : 1
LUNCH_DRINKS : 1
MH_NOTEPSYCHOEDUCATION : 1
AN_ORTHO : 1
CARDIOPULMONARY_NO : 1
EYE_CONSULT : 1
OUTPT_INTAKE : 1
IS_THE : 2
THAT_VET : 2
LINEAR_GOAL : 1
SIG_TAKE : 2
HIP_IN : 4
THE_CRISIS : 1
OBSERVED_TO : 1
LINE_CLEANED : 1
GUN_SHOT : 1
ADDITIONAL_COMMENTS : 1
OX_OCT : 1
WERE_WITH : 1
CERVICAL_ARSISNG : 1
SHOWED_COLORATION : 1
INTO_FACE : 1
NOT_NOT : 1
WAS_BY : 2
RESPIRATION_PHYSICIAN : 1
FEELINGS_BEHAVIORS : 1
LOWER_JAW : 1
INDEPENDENT_SELF : 1
LAST_FORMAL : 1
TELEPHONE_NURSE : 1
OTHER_UCINATIONS : 1
OF_LIVING : 1
NUTRITION_PROBLEMS : 1
PT_CONTINUES : 1
TOBACCO_SCREENING : 1
COUMADIN_CLINIC : 1
MANAGEMENT_EDUCATION : 1
HAVE_CONFLICT : 1
DEC_REALLY : 1
DIAGNOSES_SUPPLEMENT : 1
UNABLE_KEEP : 1
HAS_FOUND : 1
REFILL_HIS : 1
THEM_KNOW : 1
THE_PERSON : 1
AM_AN : 1
CLOUD_LIFTED : 1
AUG_SEEN : 1
HAVE_NOT : 2
HIM_CALL : 1
CALLS_TO : 1
PRIMARILY_BY : 1
DEVICE_PATIENT : 1
CONDUCTION_TDH : 1
ASSIST_BY : 1
MEDICAL_SYSTEMS : 1
FL_SEE : 1
ACTIVITIES_BUT : 1
USING_EQUIVALENTS : 1
THE_SESSION : 1
TOBACCO_QUIT : 1
TEMPERATURE_NEXT : 1
DURING_THIS : 4
HE_WT : 1
THIS_PAIN : 3
CONTENTMENT_ACKNOWLEDGED : 1
FOR_VISIT : 3
THIS_YO : 1
TIME_HEAD : 1
MAKING_CALLS : 1
FOR_APPT : 1
SMOKING_OTHER : 1
MD_TO : 1
IMPROVED_BY : 1
THE_SONGS : 1
FOR_MONTH : 1
DTC_CLINIC : 2
TRIAGE_INTAKE : 1
THEM_PT : 1
HAS_CLOUD : 1
PATIENT_SCREENING : 1
PROVIDE_IN : 1
ECZEMA_CONN : 1
ADDENDUM_TOPIC : 1
WITH_WAS : 1
ON_OL : 1
BASAL_CEREBELLAR : 1
NO_MENTAL : 1
SCHEDULED_APPOINTMENT : 1
DOES_SEEK : 1
AND_BEHAVIORS : 1
TRAINING_HE : 1
MAIL_NO : 1
GUM_PIECE : 1
NO_ASSOCIATE : 2
PROGRESS_ALERT : 1
GROUND_AGO : 1
STRATEGIES_AND : 1
NOTES_FOR : 1
NONNEOPLASTIC_AND : 1
MOTHER_WAS : 1
IMED_CONSENT : 1
PROTECTORS_IN : 4
NOT_HT : 1
YEARS_NORMAL : 1
ER_AND : 1
ACTIVE_AT : 1
INDEPENDENT_EASILY : 1
THE_DEAR : 1
MAY_AMOUNT : 1
SITS_UP : 1
PHYSICIAN_DISCUSSED : 1
WAS_THERAPY : 1
PHOS_LDL : 1
TROCHANTER_INCH : 1
AFEBRILE_VSS : 1
BVA_RAL : 1
IBW_YES : 1
STOOL_NONE : 1
ASSISTANCE_IS : 1
UP_TO : 2
DISORDER_SUBSTANCE : 1
THIS_HELPED : 1
STRENGTHS_BRADEN : 1
FEELINGS_AND : 2
THREE_TIMES : 1
APPROPRIATE_BIRTHDATE : 1
CONNECTED_VETERAN : 1
PAIN_LENGTH : 1
FOR_HOME : 2
ATTRIBUTES_PAIN : 1
PAIN_RIGHT : 1
PM_NEXTOFKIN : 1
DISTRESS_WARM : 1
TOTAL_TO : 1
HOPELESSNESS_IN : 1
ADDENDUM_HOME : 1
HEART_TO : 1
CASE_WITH : 1
DRUGS_THE : 1
SNACKS_STATUS : 1
OF_STRESS : 2
DISORDERS_ANXIETY : 1
CLOZAPINE_AND : 1
THIS_ME : 1
PHYSICIAN_CONFUSION : 1
NEW_MOD : 1
MEDICAL_CARE : 1
STATES_HES : 1
KG_PAIN : 1
USE_TO : 1
RELAPSE_SEVERITY : 1
THIS_ALL : 1
ASSESSMENT_ALCOHOL : 1
WITH_OOB : 1
OUTPT_TRIAGE : 1
GOALS_INTERVENTIONS : 1
BP_PROBLEMS : 1
EYES_CHECK : 1
COLLAPSE_SCREEN : 1
GOAL_THESE : 1
CONDUCTION_TESTING : 1
ON_VETERAN : 3
DIFFICULTIES_CHRONIC : 1
AXIS_GAF : 2
ME_MEDICATIONS : 1
STATUS_CUEING : 1
HEART_RRR : 1
AM_CONVERSATION : 1
PER_NIGHT : 1
SPUTUM_NONE : 1
OCT_QUIT : 1
THEN_TO : 2
CONDITION_TRANSFER : 1
TO_NAME : 1
BE_OVER : 1
TEAM_PROBLEM : 1
THIS_MEETING : 1
USING_THERAPEUTIC : 1
SIMILAR_TO : 1
OR_INTERFERES : 1
AMBULATION_MMHG : 1
RECEIVED_MEDICATION : 1
IF_IT : 1
STAFF_WOULD : 1
MEET_THIS : 1
PURPOSE_OF : 1
THIS_RE : 1
BHL_NOTE : 1
SCHEDULE_WITH : 1
SKIN_ERYTHEMA : 1
ACTIVE_YOU : 1
IDENTIFICATION_PREVENTION : 1
AS_ACTIVE : 1
ON_YOUR : 1
NOS_NO : 1
PTS_BEHAVIOR : 1
COORDINATOR_OF : 1
THIS_INCIDENT : 1
ATTEMPTS_PT : 1
THE_SIDE : 1
WITH_ASSIST : 1
ARTHROSCOPY_SHOULDER : 1
LIGHT_COLORINO : 1
NAUSIA_VOMITING : 1
SKILL_AND : 1
HAVE_BARRIERS : 1
OF_STOOL : 6
WISH_VIEW : 1
APPOINTMENT_VACCINE : 1
DFE_WNL : 1
NEW_TEGADERM : 1
ALL_PRESENTING : 1
PROBLEMS_COMPUTERIZED : 1
DESCRIPTION_OMITTED : 1
FOR_WOUND : 1
BE_PING : 1
DOWN_ROAD : 1
DANGER_SELF : 1
WANTED_UPDATE : 1
PROGRAM_SHIRLEY : 1
THE_ISSUES : 1
OUTPATIENT_MED : 1
ILL_CELEBRATING : 1
TUES_TABLETS : 1
MET_GENITOURINARY : 1
SURFACE_MAY : 1
WKS_PAROXETINE : 1
VETERANS_DIED : 1
VA_NO : 1
ACTIVE_ADDENDUM : 1
THAT_TRIGGER : 1
SPONGE_BATH : 3
YOUR_MEN : 1
HOPE_GROUP : 1
HE_MEDICATIONS : 1
SOON_IT : 1
MISSING_TEETH : 1
USE_WEIGHT : 1
ON_AND : 5
COUNSELING_INTERVENTIONS : 1
THE_OFFERED : 2
ACKNOWLEDGED_VETERANS : 1
OVERLYING_LEVEL : 1
MISSING_PATIENT : 1
NEVER_TOLD : 1
HE_WOULD : 3
TESTINAL_HOURS : 1
SOCIAL_STATED : 1
NO_MEDS : 1
AFTER_HOPEFULL : 1
BE_MR : 1
FOR_MOBILITY : 1
KG_TIMES : 1
DIFFERENT_APPOINTMENT : 1
BE_APPLICATION : 1
OK_CALL : 1
SYMPTOMS_TO : 1
BEEN_MEDICAL : 1
IM_HOMICIDAL : 1
NO_RELIEF : 1
YOGA_THAT : 1
NPH_UNITS : 1
AND_COOPERATIVE : 1
HOURS_RASH : 1
HIS_WORK : 1
SHOW_ADDENDUM : 1
DISCUSSED_LIMITS : 1
DEPRESSION_CLINIC : 1
TO_SMOKE : 1
TYPICAL_NEVER : 1
MALE_PRESENTS : 1
SEBACEOUS_CYST : 1
REQUEST_FOR : 3
REMINDERS_THE : 1
BACK_TO : 1
CLINIC_EXTREMELY : 1
CURRENT_GOOD : 1
NOT_GIVE : 1
HEART_BLOOD : 1
CYST_WITH : 1
HEAR_THIS : 1
SCHIZOPHRENIA_TREATMENT : 1
PT_NO : 2
FINGER_LEFT : 1
CLEANED_AND : 1
IS_ABOUT : 1
HAS_ORDER : 1
ORIENTED_YES : 1
HEMOGLOBIN_IS : 1
TOUCH_THE : 1
NURSE_ASSESSMENT : 1
SCHEDULING_DEPARTMENT : 1
IN_MORE : 1
SIGNS_ADMISSION : 1
SYMPTOMS_DETERIORATE : 1
DISCUSS_IN : 1
LOCATION_BEHAVIOR : 1
IN_MALE : 1
ASU_VERIFICATION : 1
IS_NEXT : 1
BRIGHT_MOUTH : 1
GBET_AND : 1
ASPIRATION_AND : 1
CONSULT_PROCEDURE : 1
NEUROMUSCULAR_MANIPULATION : 1
HBPC_PSYCHOLOGY : 2
TEMP_PAIN : 1
THEN_TRANSFERRED : 1
AND_SIDE : 1
TOTAL_SESSIONS : 1
TO_ABS : 1
CARE_PROVIDER : 1
TELL_WHAT : 1
OVERWHELM_US : 1
OTHERWISE_PATIENT : 1
PATIENT_POSITION : 1
NEW_APPTS : 1
BETTER_WENT : 1
SAME_ILLNESS : 1
WITH_NEW : 1
TIME_SAYS : 1
HOW_TO : 2
INDEPENDENT_OXYGEN : 1
MENTAL_STATUS : 4
MENTAL_STAFF : 1
ON_AM : 1
IN_HOLDING : 1
SOURCES_TYLENOL : 1
GLASS_INTO : 1
PONTON_HOW : 1
PSYCHIATRIST_TOLD : 1
THESE_HAVE : 1
REMINDERS_ON : 1
HIS_ONGOING : 1
OCCURRED_WITH : 1
ADDRESSING_THE : 1
SLIDINGSCALE_COVERAGE : 1
WAS_NURSING : 1
CONSIDERED_DANGER : 1
PUBLIC_NURSE : 1
AND_OF : 4
PINES_WILL : 1
SHORTNESS_OF : 1
STATE_DIVISION : 1
DISHEVELED_MILDLY : 1
MANAGEMENT_NO : 1
PAIN_EVERY : 1
IF_TREATMENTS : 1
HIM_HIP : 1
HISTORY_PATIENT : 1
SINCE_RE : 1
FOR_RETURN : 2
HE_NEED : 1
DATE_SPEC : 1
CONTINUING_TO : 1
STOOL_OF : 1
CREATED_NOV : 1
FOLLOWING_GROUPS : 2
REVIEW_AND : 1
THEM_LIKE : 1
RECENT_ALSO : 1
NOT_EAT : 1
PATTERN_AS : 1
IN_HIS : 3
ACTIVE_TEL : 1
PERSONALLY_ZZPATIENT : 1
AND_CROWN : 1
OF_APPOINTMENT : 1
AND_PROGRESS : 1
WITH_PO : 1
APPROACH_THAT : 1
IS_UNCONFIRMED : 1
VARDENAFIL_MEDS : 1
ASSIGNED_FOR : 1
SIGNIFICANTLY_TO : 1
SI_THIS : 1
REVIEWED_WITH : 1
RECEIVE_THAT : 1
OF_DISK : 1
WITH_PROLONGED : 1
SCREEN_PTS : 1
PLEASANT_AND : 1
INFLUENZA_THE : 1
HEPARIN_LOCK : 1
LIST_IS : 1
IS_ON : 1
REGARDING_MISSED : 1
IM_FEELING : 1
TWICE_DOCUMENT : 1
BUT_WAS : 1
GIVEN_CONSUMED : 1
FOUND_TO : 1
MUCOSA_YO : 1
COUNSELED_BY : 1
YEARS_VETERAN : 1
AND_SENT : 2
THE_RISKS : 1
SEE_TO : 1
RISK_CRITERIA : 1
FOR_ADDITIONAL : 1
MEALS_PUREED : 1
DECLINED_APPROACHED : 1
ADDENDUM_NUR : 1
ON_STATE : 1
PRESCRIBED_OF : 1
WITH_RATE : 1
OF_CURRENT : 1
TEL_ION : 1
AMONG_PEOPLE : 1
MHICMINTENSIVE_MANAGEMENT : 3
MALE_YOU : 1
TOMORROW_PARTICIPATION : 1
IN_DTC : 1
ED_DOCUMENT : 4
GOLD_WILL : 1
FACILITATOR_REFRAMED : 1
PROVIDERS_NOTES : 1
SLIPPERS_GRIPPER : 1
STRUGGLED_DEPRESSION : 1
RESULTS_HPI : 1
LB_AMBULATION : 1
ALCOHOL_DID : 1
OVERDOSE_COMBAT : 1
HOW_HE : 2
ALLERGY_SUBSTANCE : 1
AMBULATORY_DEVICES : 1
ON_ADMISSION : 1
FISTULA_HX : 1
OF_TERTIARY : 1
ANTIBIOTIC_ROUTE : 1
NO_TENDERNESS : 2
HEALTH_HOME : 1
GO_OUT : 1
WITH_PTSD : 1
THE_BLIND : 1
THE_NORTRYPTILINE : 1
ICAL_INTERVENTION : 1
APPOINTMENT_DUE : 1
MINIMAL_FROM : 1
RIGID_SET : 1
NOTEPSYCHOEDUCATION_BP : 1
AND_ID : 1
AND_TALKING : 1
SURFACE_THAT : 1
RELAXED_UPON : 1
BELOW_HAVE : 1
ETOH_AND : 1
VISIT_HE : 1
BENEFITS_IN : 1
CONTINUED_INVOLVEMENT : 1
ANXIETY_DISORDERS : 1
ABSESS_SHOULDER : 1
ING_CANE : 1
CLOUD_HAS : 1
MAX_SURG : 1
MAILED_MOUTH : 1
NURSING_FOR : 1
ATTENDING_IS : 1
CHIEF_SHOULDER : 1
TRANSPORTATION_HE : 1
FOR_COUMADIN : 1
TIMES_PT : 1
WOULD_FROM : 1
THIS_CLASS : 1
TO_AS : 3
HIS_DAUGHTER : 1
CLUB_AT : 1
VERTIGO_MORE : 1
IT_THOUGHT : 1
FOR_VENTILATION : 1
SEEING_THINGS : 1
NOTE_USED : 1
SHOULDER_ID : 1
MEDICATIONS_LISTED : 1
BE_AUTHOR : 1
OUT_MAY : 1
DISCUSS_THOUGHTS : 1
FOR_TUES : 1
DEVICE_APTS : 1
THIS_SOCIAL : 1
CALL_IS : 1
ACTIVE_MEDICATION : 1
SUBJECTIVE_HAD : 1
FOLLOW_DEL : 1
RAL_LEFT : 1
COME_HIS : 1
OFF_WHAT : 1
ON_FAR : 1
OF_SAYS : 1
FORAMINAL_VACCINE : 1
NOT_DENTAL : 1
APT_THE : 1
USES_BLADDER : 1
ENCOURAGEMENT_DURING : 1
OUTPT_STAFF : 1
ORIENTED_STATES : 1
TAKE_DICLOFENAC : 1
ONEHALF_TABLETS : 2
OCCURED_MATTER : 1
MOBILTIES_THAT : 1
HIM_TOUCH : 1
PLANS_GO : 1
AGAIN_THERES : 1
THE_PIPE : 1
KG_SELF : 1
THE_LOOKING : 1
INCREASE_IN : 2
INNER_PEACE : 1
DYSPHORIC_AND : 1
IT_YOU : 1
HIS_CONTRACTED : 1
THIS_SHIFT : 7
LEAD_UP : 1
EXCISION_TAPE : 1
PCE_UNSP : 1
ASSIGNED_WAS : 1
ULTRASOUND_OR : 1
BREATHS_AND : 1
VETERAN_AT : 2
DENIES_NOT : 1
SETTING_THAT : 1
ON_THIS : 2
PREPROCEDURE_PATIENT : 1
HIM_LAST : 1
ABOUT_SONGS : 1
PA_RUSSELL : 1
LIKE_WITH : 1
STATES_HE : 4
RESP_DEC : 1
CELL_COUNT : 1
GOAL_HEMOGLOBIN : 1
OLD_AND : 1
FEELINGS_THOUGHTS : 2
BCX_ML : 1
BASIS_ZZPATIENT : 1
INTAKE_MINERALIZATION : 1
WITH_GIVEN : 1
TAKING_THE : 1
OF_MG : 3
NO_TO : 2
NO_PHARMACY : 1
ENCOURAGEMENT_REFUSED : 1
RATE_MENTAL : 1
BLVD_APT : 1
CONCERNS_PTS : 1
MAY_INVOLVE : 1
IS_IN : 2
AT_MG : 1
WITH_MD : 1
GLUTEAL_MUSCLE : 1
AWAKE_FLUIDS : 1
BOSS_INTO : 1
DETECT_UTILIZING : 1
OLD_PROBLEMS : 1
FRANTZ_NURSING : 1
EXAM_AA : 1
CANT_AN : 1
FOR_MEDICALLY : 1
AMBULATION_NO : 2
ON_DID : 1
CLINIC_FOR : 1
SCREENING_NOTE : 1
COLONIC_YO : 1
DURING_ADOLESCENCE : 1
EASIER_ON : 1
YOU_ORIENTED : 1
VETERAN_WHO : 1
SMOKE_PROCESS : 1
HAD_TO : 2
AT_TOP : 1
ADDENDUM_IS : 2
OF_HISTORY : 1
OF_MEDICATION : 2
TOO_GOOD : 1
OLD_SHOULD : 1
WALK_AROUND : 1
CONTENTMENT_VETERANS : 1
PUT_REFERRAL : 1
ASTHMA_BRONCHITIS : 1
BUT_BE : 1
PHYSICIAN_NUTRITION : 1
HCTZ_MG : 1
MENTAL_APPOINTMENTS : 1
SURGICAL_VENTRALLY : 1
RELAXATION_ALERT : 1
FOR_NICOTINE : 1
EXCLUDING_COMMENTS : 1
ON_SURFACE : 1
WITH_NURSING : 1
VISIT_INTRAVENOUS : 1
BEEN_BASIC : 1
BACK_PULSE : 1
EDUCATION_NOT : 1
COME_AT : 1
TEMPOPORMAND_DIS : 1
WAS_LOW : 1
BRP_REG : 1
FOR_YEARS : 1
MG_FOR : 2
STRESS_WT : 1
INFORMATION_ABOUT : 1
NOTE_DRUG : 1
AS_BY : 1
STOPPING_WARFARIN : 1
MUSCLE_PATIENTS : 1
HEALTH_RISKS : 1
CERUMEN_REMOVED : 1
PATIENT_COUNSELED : 1
PRIVILEGES_ASSISTANCE : 1
THEN_WITH : 1
THAT_STABLE : 1
AID_PO : 1
HE_PLEASANT : 1
FOR_CALL : 2
MH_OUTPT : 1
OM_REFREASH : 1
ROLE_ISOLATION : 1
MAY_DUE : 1
THE_PROGRAM : 1
ANALYSIS_BAL : 1
ADMISSION_HE : 1
STENOSIS_NEURAL : 1
COMMENT_WITH : 1
IN_ALL : 1
PUBLIC_HEALTH : 1
HAS_PAIN : 2
OF_HAD : 1
COMPANION_TO : 1
FULLY_HIM : 1
SEROQUEL_QHS : 1
LOT_OF : 1
CONSUMED_ALCOHOL : 1
STATUS_STATE : 1
FULLY_SUPERVISE : 1
TO_AREA : 1
THAT_COULD : 2
WHEN_WHOM : 1
YOU_MAY : 1
VISITS_WOUND : 1
PROVIDER_AN : 1
NORMAL_RESCHEDULED : 1
CENTERED_ON : 1
AGO_HAS : 1
TREATMENT_PLAN : 1
TO_SO : 1
SAFE_ENVIRONMENT : 1
APPOINTMENT_YOU : 1
BOX_FULL : 1
NON_UNLESS : 1
AT_REPEATED : 1
MEN_LAST : 1
MONTHS_ENCOURAGED : 1
MAY_INTRAOCULAR : 1
DROP_BOTH : 1
PSYCHOSOCIAL_DISTRESS : 1
NEITHER_PREGNANT : 1
MOVEMENTS_THIS : 2
TOBACCO_AND : 1
PLANS_RETURN : 1
YOU_WARFARIN : 1
INTRAVENOUS_THERAPY : 1
HENT_EXAM : 1
ELEVATION_HOB : 1
WILL_TRACH : 1
RELATED_WORKMANS : 1
PTS_APPT : 1
REASSESSMENT_CHANGE : 1
SEE_OF : 1
CA_ALB : 1
NORMAL_LUNG : 1
OF_EYEBALL : 1
NOS_READING : 1
SHOT_WOUND : 1
ZIPPERS_BLADDER : 1
MCV_FL : 1
PRIMARY_PCE : 2
DISPLAY_AUTONOMOUS : 1
DT_LAKE : 1
INSTITUTE_FOR : 1
SET_UP : 1
AST_PLASMA : 1
ANY_NEGATIVE : 1
SOUNDS_BE : 1
DENTAL_VETERAN : 1
TO_VINELAND : 1
NIGHT_BOWEL : 1
EXPOSURE_GBET : 2
AT_TIME : 7
THERE_NO : 1
TO_VETERAN : 3
FOLLOWING_NONE : 1
FOR_ONEHALF : 1
NEWSPAPER_AT : 1
CONSUMED_ANY : 1
ANXIETY_DO : 1
IDENTIFIED_IS : 2
AFTER_NIGHTMARE : 1
CASE_DISCUSSED : 1
TO_VIEW : 1
SITS_WITHOUT : 1
HE_TOLERATING : 1
EXAMINED_ATTENDING : 1
PRESCRIBED_PLAN : 1
MR_SEEN : 1
THE_FACILITATOR : 1
OF_AMBULATORY : 1
DIAGNOSIS_GUN : 1
ORAL_MAX : 1
PHYSICIAN_CLERKS : 1
RESPONSIBILITIES_REGARDING : 1
WHICH_AS : 1
RESIDENTIAL_TREATMENT : 1
THIS_WAS : 5
MOVES_TO : 1
WOUND_CLEAN : 1
AGO_DOE : 1
SELF_SELF : 1
NUMBER_CONTROL : 1
NEEDLES_MAY : 1
THE_ILLNESS : 1
ADMINISTRATIVE_ADDENDUM : 1
NEVI_MOST : 1
NOT_PRIMARY : 1
REMINDER_PLAN : 1
PREVIOUS_ATTEMPTS : 1
LIFTED_AROUND : 1
PREVENT_SEIZURES : 1
VET_IS : 3
FSG_THIS : 1
COME_WITH : 1
ASSOCIATE_IDENTIFIED : 2
DANGER_TO : 1
PAIN_PAST : 1
VETERAN_WITH : 1
CONTUSION_ARE : 1
VENTILATION_FEELINGS : 1
WITH_SHATTERING : 1
USE_AS : 1
INITIALLY_ADMITTED : 1
HAS_PATIENT : 2
PATIENT_CULTURAL : 1
RESIDENTIAL_VOA : 1
SPOKE_BASCOM : 1
TO_SEEK : 1
AND_GRANDCHILDREN : 1
OF_IS : 2
AN_CONSULT : 1
MINIMAL_ALOPECIA : 1
OPT_DEMEROL : 1
HYDROCHLOROTHIAZIDE_TAB : 1
ER_PROGRAM : 1
COLLECTED_AND : 1
WITH_SKIN : 1
APPOINTMENT_THE : 1
IF_NEEDED : 1
DRUG_SCREEN : 1
TAKES_NPH : 1
AT_PINES : 1
IMPROVE_INTERPERSONAL : 1
KNOWS_WHEN : 1
TH_HIS : 1
NEEDS_RESPONSE : 1
APPLICABLE_AXIS : 1
USED_THE : 2
PRACTICES_FRIENDLY : 1
FOR_ABOUT : 1
LOCATION_HUNTSVILLE : 1
AND_SOME : 1
VISIT_PATIENT : 1
HE_ON : 1
AND_CONTACT : 1
ASSISTANCE_URINE : 1
FUNCTIONING_SOBER : 1
TO_CALL : 3
MEDICATIONS_BEDTIME : 1
AND_IS : 4
BENZOS_HAVE : 1
PINES_TEST : 1
RISK_HIP : 1
COMPLETE_ASSESSMENT : 1
CHECK_DATE : 1
TOUR_PATIENT : 1
WRIST_DURING : 1
VACCINE_BE : 1
FLAG_THIS : 1
VINELAND_VETERANS : 1
THIS_IS : 3
SHIT_MH : 1
DEC_FOR : 1
AND_PLANS : 2
HBPC_NOTE : 2
DEC_ER : 1
INFLUENZA_THURS : 1
GEORGIA_VHS : 1
AND_FLEXIBILITY : 1
TO_FEEL : 1
GUIDED_ULTRASOUND : 1
PHYSICAL_CONSULT : 1
FOR_AM : 1
BEEN_HYGIENE : 1
MR_ACTIVITY : 1
NOTE_IS : 1
HOURS_OF : 1
OUTPATIENT_MEDICATIONS : 7
VA_GOV : 1
THE_HISTORY : 1
PROVIDERS_RECENT : 1
NICOTINE_GUM : 1
OF_MHC : 1
ASSISTANCE_PROVIDED : 6
SHOE_INSERT : 1
OF_BED : 1
THIS_STATED : 1
INTERNALIZED_HE : 1
HERE_RESULTS : 1
RATE_RHYTHM : 2
NEEDED_FOR : 2
ON_CELL : 1
BARRIERS_PREFERENCES : 2
DIED_VETERAN : 1
PRESSURE_LITTLE : 1
TASK_UP : 1
CLOSED_WITH : 1
THURS_VET : 1
DEPRESSION_THERE : 1
FLORIDA_VHS : 1
IN_LITTLE : 1
OFFERED_GROUPS : 2
GOOD_MEDICATIONS : 1
CONTACTED_IN : 1
FROM_MD : 1
TAB_TAKE : 12
DRESSED_IN : 1
DOCUMENT_PATIENTS : 1
ONE_TABLET : 7
SYST_NO : 1
JOAN_BOWEL : 1
STAFF_PERFORMED : 1
PHE_LOCATION : 1
PHYSICAL_MOUTH : 1
TREATMENT_NONE : 1
PHYSICAL_VERBAL : 1
TAPE_ADHESIVE : 1
MET_WITH : 3
THAT_NOT : 1
GOOD_NO : 1
CM_VISIT : 1
BOWEL_ASSISTANCE : 1
THE_OR : 1
NOTE_PATIENT : 3
IS_THAT : 2
TH_REGARDING : 1
WITH_STAFF : 3
IS_UNCIRCUMCISED : 1
THERAPEUTIC_TO : 1
DATE_LAST : 1
GROUPS_BEEN : 2
RECOVERY_ISSUES : 1
SHAVING_KIT : 1
CURRENT_MENTAL : 1
BICARB_CR : 1
BRIMONIDINE_OPH : 1
PAST_ONE : 1
OTHERS_TRANSFER : 1
INDEPENDENT_ROUTE : 1
THE_ARTISTS : 1
INDICATED_SMOKES : 1
VETERANS_TO : 2
ANALGESICS_COMPLICATIONS : 1
BETTER_OVER : 1
PM_WITH : 1
RECEIVING_APPOINTMENT : 1
SCREEN_NO : 1
GROUP_ON : 1
PEOPLE_GOALS : 1
WITH_TRANSITION : 1
STATES_MAKES : 1
SEROQUEL_MG : 1
MONEY_TRANSPORTATION : 1
MG_GIVEN : 1
RECENT_FOR : 1
INPT_MANAGER : 1
MG_ENROLLED : 1
PACKET_INFORMATION : 1
NON_COMBAT : 1
MET_ABUSE : 1
HAS_STILL : 1
AND_DISCUSSED : 2
STATES_HIM : 1
MANAGEMENT_PLAN : 1
INTERVENTION_REVIEW : 1
GOALS_THIS : 1
AND_EFFECTIVELY : 1
EVAL_PHYSICIAN : 1
IF_NECESSARY : 1
OVERWEIGHT_SINCE : 1
FROM_SISTER : 1
FOR_HE : 1
DRESSED_HOSP : 1
TRAMADOL_MONTH : 1
CALL_TO : 2
ASSISTANCE_PROTECTORS : 1
CLINIC_STRESS : 1
BP_ACTIVE : 1
ADDENDUM_FAMILY : 1
BIRCH_RESIDENT : 1
PROCEDURE_WAS : 1
CAUSE_HT : 1
CONCERNING_HIS : 1
ICDCM_VISIT : 1
CONFLICT_MON : 1
OR_PREFERS : 1
EDUCATED_PATIENT : 1
IS_NEGATIVE : 1
SINCE_CAN : 1
CLINIC_POSTTRAUMATIC : 1
THIS_BOWEL : 1
AND_LUNCH : 1
CHILDREN_PATIENTS : 1
NOT_EYE : 1
IN_AREA : 1
INFORMATION_AND : 2
RESPIRATIONS_SOUNDS : 1
ARMY_HIM : 1
REPORTS_PING : 1
MG_FAMILY : 1
NEXT_LOT : 1
BUT_BEEN : 1
MATERIALS_TIME : 1
CHEN_MD : 1
IN_PHYSICIAN : 1
DURING_SYSTEMS : 1
PSYCH_RN : 1
ASSISTANCE_TO : 1
HYGIENE_BURDICK : 1
EC_ONE : 1
AMOUNT_OF : 4
WITH_AID : 1
CLINIC_SINCE : 1
HISTORY_MRSA : 1
PAIN_NOT : 1
OL_IN : 1
REASED_CONFUSION : 1
TRANSPORTATION_WILL : 1
ACTIVE_PCE : 1
ALERT_TO : 1
ALERT_TAKE : 1
TRANSFERRED_BASCOM : 1
SUCCESSFULLY_HIM : 1
BRANDEN_SCALE : 1
LIMITS_TO : 1
WAY_FOR : 1
MALE_WILL : 1
COME_OR : 1
DIAGNOSIS_SPEC : 1
HE_NO : 1
GUM_AND : 1
BEEN_SAFE : 1
NIGHTMARE_HAS : 1
OF_NO : 2
PATIENTS_STRENGTHS : 1
OF_CARE : 4
ADDENDUM_HE : 1
PRACTITIONER_HOSPITAL : 1
NOSHOW_MEMORY : 1
OK_BY : 1
ADDENDUM_WILL : 1
MEDICATIONS_HHA : 1
DONT_HAVE : 1
HOME_MG : 1
DONE_VERBALIZED : 1
PING_BETTER : 1
DISHEVELED_JAUNDICED : 1
OBJECTIVES_PATIENT : 1
MR_SESSION : 1
PARTICIPATED_GROUP : 1
MD_FOR : 1
AND_PAIN : 1
TABLETS_FOR : 1
AROUSABLE_CALLING : 1
NEEDED_ADDENDUM : 2
HYDROCHLOROTHIAZIDE_MG : 1
ID_OUT : 1
FILED_ENDING : 1
STATES_IS : 1
OR_MENTAL : 1
GEORGIA_NO : 1
TABLET_ACTIVE : 1
TAKING_FOR : 2
VARYING_PRESENTL : 1
FOCUS_IN : 1
MAY_NEED : 3
PREFER_COMMUTE : 1
CLINIC_SCHEDULED : 1
NEVER_IS : 1
ALLOW_THE : 1
MOOD_KERATOACANTHOMA : 1
GROUP_SEX : 1
BEHAVIORS_HAVE : 1
NO_AFFECT : 1
TO_RECEIVE : 1
WAS_THE : 2
NUMBER_NA : 1
ADMISSION_TOTAL : 1
THUS_PLAN : 1
BLIND_RESPONSE : 1
OTR_AND : 1
INCONTINENT_PHYSICIAN : 1
MAKE_CHECKS : 1
NEED_COME : 1
ISSUES_BRUCHNER : 1
STANDING_IN : 1
IN_DESIGNED : 1
TRY_QHS : 1
NEXT_MILLIGRAMS : 1
DEMENTIA_THAT : 1
ARE_IN : 2
NEUROPAT_AUTHOR : 1
DIFF_NEUT : 1
AT_DIFFERENT : 1
YOUR_WIFE : 1
RAL_PLEASANT : 1
FL_PO : 1
TIME_NA : 1
YESTER_REPORTS : 1
APPROACHED_AMOUNT : 1
STRONG_RAPPORT : 1
OF_SHOULDER : 1
HT_REPORTS : 1
NO_CAROTID : 1
TAKEN_RETURN : 1
FOLLOWING_TOPICS : 1
LEVELS_ICDCM : 1
STATES_HASNT : 1
BONHAM_BUT : 1
BE_WITH : 2
ON_DISCUSS : 1
HAVING_THOUGHTS : 1
DENIES_REVIEWED : 1
IF_HELPS : 1
ANTIBIOTIC_DOSE : 1
AT_NEXT : 1
ROUTE_PL : 1
PATIENT_PRESENTED : 1
BURDICK_PT : 1
REFERRED_THIS : 1
CONSULT_RECOMMENDATIONS : 1
TO_TURNING : 1
ACCOMPANY_MR : 1
JAIL_IT : 1
DENT_HIS : 1
HUDVASHNOTE_DIABETICFINGER : 1
ADVANCE_HE : 1
NO_SLIDINGSCALE : 1
SHIRLEY_MESKENAS : 1
ATTACHED_FROM : 1
YOU_GU : 1
CALL_OR : 1
BE_MINIMAL : 1
MH_SC : 1
LS_SESSIONS : 2
PINES_COME : 1
BOWELS_DATE : 1
BOWEL_CONSISTENCY : 1
OF_MRSA : 1
COPD_PNEUMONIA : 1
ACTIVE_INPATIENT : 2
CHILDREN_STRENGTHS : 1
HIS_COLLEAGUES : 1
LOCATION_ROOM : 2
TO_PCP : 1
TO_MEET : 1
FOR_MOOD : 1
MAIL_FULL : 1
OBSERVATION_LOCATION : 1
VISIT_PAIN : 1
FILED_TO : 1
DYSFUNCTION_PATIENT : 1
NO_AVAILABLE : 1
NO_PAIN : 3
TO_ADDRESS : 1
REQUEST_POLLEN : 1
TO_THIS : 8
ASSESSMENT_OF : 1
HAS_SI : 1
STATUS_EVERY : 1
XRS_SELF : 1
DISCHARGED_TO : 2
IS_UP : 1
ONCE_LEARNING : 1
STATUS_OPTOMETRY : 1
PATIENTS_RIGHTS : 1
FEEL_MEN : 1
GUARDIAN_WAS : 1
CONTACT_POOR : 1
KG_PATIENT : 1
IN_CONTROL : 1
PROCEDURE_SC : 1
TWICE_TO : 1
THIS_GROUP : 2
HAS_CC : 1
MAILWHEN_DUE : 1
SARDINES_DATE : 1
RESPONSE_TO : 3
REDDING_MG : 1
HELP_TO : 1
SEE_SYKES : 1
TRACH_NONE : 1
AND_PUREED : 1
SHIFT_ALERT : 1
PROGRAM_SUPERVISOR : 1
OR_CONCERNS : 1
OR_ASU : 1
MORE_DRUGS : 1
REHABILITATION_IMPROVE : 1
TOLD_TO : 1
ADEQUATELY_AND : 1
OF_HRS : 1
NEURAL_NARROWING : 1
GET_INTO : 1
EVENT_PAST : 1
GREATER_TROCHANTER : 1
CC_CAP : 1
WITH_DELIVERY : 1
SKIPPED_NO : 1
TEMPOPORMAND_JOINT : 1
MEDICATION_REGIMEN : 1
AND_STAYING : 1
STORY_ABOUT : 1
MEDICATION_AND : 2
DURING_AMBULATION : 1
ADEQ_HUNTSVILLE : 1
VETERAN_CONTINENT : 1
BREAST_TO : 1
REMAINING_TOTAL : 1
AT_PROVIDED : 1
TIME_AGREE : 1
ND_LEFT : 1
ON_THUS : 1
NOTES_IS : 1
SUPPORT_THAT : 2
CILO_FOR : 1
LAST_TD : 2
PIECE_IN : 1
AND_PT : 1
IS_REGARDS : 1
WOOTEN_NUTRITION : 1
APPLICABLE_CHANGES : 1
TABLET_MOUTH : 8
BREATHING_AS : 1
CONTINUED_SEE : 1
FLUID_THE : 1
UNEMPLOYMENT_BENEFITS : 1
ASKING_IS : 1
CHECKS_THE : 1
BILAT_DISCUSSED : 1
VICTIM_PRACTITIONER : 1
EYE_AND : 1
HE_HAS : 6
BRADEN_FOR : 1
ADL_TRANSFER : 1
FUNDUSCOPIC_SHOWED : 1
VETS_TRANSITION : 1
IS_STANDING : 1
CAN_READ : 1
WM_BPH : 1
MORNING_AND : 1
CONTINUOUS_BEVERLY : 1
TELEPHONE_MAKING : 1
REGARDING_INCREASE : 1
ONE_MORE : 1
HAIR_NOTIONS : 1
RT_AND : 1
IN_AT : 1
SEEING_APRN : 1
PATIENT_ADVANCE : 1
PAIN_AT : 2
THOUGHT_DISORDERMET : 2
MRSA_NARES : 1
THERE_HAS : 1
RESP_YO : 1
OTHERWISE_INDICATED : 1
PURCHASE_KOSHER : 1
AA_TIMES : 1
WILL_SEE : 1
ANOTHER_CALL : 1
MMHG_AFTER : 1
INDUCED_CENTRAL : 1
FLUIDS_NUMBER : 1
PARTIALLY_TX : 1
PATCHES_OU : 1
HAVE_DO : 1
DEPRESSION_REMINDER : 1
PER_WITH : 1
OXIMETRY_NASAL : 1
CALL_SCHEDULING : 1
DISK_COLORATION : 1
WOULD_BENEFIT : 1
MR_VERBALIZED : 1
CERVICAL_RADICULPATHY : 1
DETERIORATE_YES : 1
PRESENT_SGOT : 1
PJS_HE : 1
CRIME_TEAM : 1
KG_MHICMINTENSIVE : 1
THAT_PT : 2
MODALITY_NASAL : 1
MAY_FALL : 1
PROVIDED_FOR : 6
LANDED_ON : 1
TIME_PATIENT : 1
TO_CLC : 1
STAFF_VENTILATION : 1
NOW_OF : 1
HAS_OBSERVED : 1
HOUSING_ISSUES : 1
INDICATED_CURRENT : 1
WAS_ALONG : 1
WITH_STATE : 1
CONTINUED_COMPLEX : 2
ADDENDUM_BRANDEN : 1
DRUGS_ALCOHOL : 1
SMOKER_ACTIVE : 1
SOCIAL_GUN : 1
CARE_PLEASE : 1
HIS_HOMELESSNESS : 1
OF_OSAT : 1
BLESSING_CURRENT : 1
NOTE_WELLBUTRIN : 1
SINCE_IT : 1
OR_WITH : 1
YOUR_APPOINTMENT : 1
RESPONSIBILITIES_PAIN : 1
PROMOTION_DISEASE : 2
DISCHARGE_LESIONS : 1
INCLUDE_ON : 1
NONNEOPLASTIC_VARDENAFIL : 1
THERAPY_GBET : 2
OVERSIGHT_OR : 4
ASSESSMENT_OXYGEN : 1
PRACTICE_SKILLS : 1
PPD_PT : 1
ON_CHO : 1
NEGATIVE_COMMENT : 1
TOMORROW_LIVINGSTON : 1
IS_SOMEWHAT : 1
CLOSE_THE : 1
TO_PERSON : 2
NEXT_OF : 1
POST_TOBACCO : 1
VERIFIED_ADDENDUM : 1
WHEN_YOU : 2
REGIMEN_LISTED : 1
STILL_ALL : 1
GOAL_REMAINS : 1
CONCERNING_MEAL : 1
NSAIDS_TRIAL : 1
MOBILITY_INDEPENDENT : 1
IS_ALCOHOL : 1
ADL_BOWEL : 1
AVAILABLE_COMPLAINT : 1
ILL_BE : 1
PHARMACY_ADMISSION : 1
IS_MILD : 1
INVOLVEMENT_INDICATED : 1
EDUCATION_IN : 1
TAB_ONEHALF : 1
WHEN_DID : 1
TO_SESSION : 3
ABOUT_OF : 1
AND_THEM : 1
TREAT_THE : 1
PAIN_SCREEN : 1
SARDINES_AND : 1
TESTING_FOR : 1
VISITS_MEDICATION : 1
AND_COOL : 1
TAPE_INCISION : 1
MEDS_AREAS : 1
MODE_OF : 1
CELEXA_ONE : 1
BACK_PAIN : 2
CARE_VERBALIZED : 1
STITCHES_THE : 1
DIABETICFINGER_STICK : 1
PSYCHOLOGY_NO : 1
BLOCK_FELLOW : 1
ORDER_BY : 1
OR_HIS : 1
MEMORY_IMPAIRMENT : 1
EXPIRED_ON : 1
CHANGE_ON : 1
ORAL_SURG : 1
TREATMENTS_HERE : 1
FACILITY_PCP : 1
MOOD_PER : 1
NOTIONS_ABOUT : 1
TREATMENT_SKILLED : 1
THE_PC : 1
DISCUSSED_AND : 2
TRNASFERRED_TO : 1
IMPROVEMENT_TREATMENT : 1
ATROVENT_ML : 1
GUNSHOT_WOUND : 1
PLAYING_THE : 1
QH_LBS : 1
KIT_OF : 1
SKILLS_OR : 1
DEADLY_OVERWHELMED : 1
APPOINTMENT_CARD : 1
EAGER_VARIABLE : 1
ILISOME_STATE : 1
PROLONGED_SITTING : 1
EXTRA_GIVEN : 1
CYMBALTA_SCREEN : 1
ADL_MEDICATE : 1
SHIFT_RETURNED : 1
QHS_AND : 1
INCREASE_HIS : 1
SEEK_WITH : 1
ASSESSMENT_MAILWHEN : 1
OF_ASSESSMENT : 2
RECOVERY_DIAGNOSIS : 1
NOTED_THAT : 2
HAS_REPORTED : 3
POSTOP_WITHIN : 1
SESSIONS_TO : 5
COOL_TECHNIQUES : 1
CHECKS_VETERAN : 1
SHE_TO : 1
DOB_WITH : 1
TEAM_ON : 1
THERAPY_ON : 1
OR_ALCOHOL : 1
BREAST_EXAMINATION : 1
REFER_DERM : 1
DIAGNOSIS_INTENSIVE : 1
BY_ACTIVITY : 1
BED_AND : 1
DTR_WITH : 1
IN_SURGERY : 1
ARTISTS_AND : 1
PCMM_PROVIDER : 1
NO_INCREASE : 1
SEX_MALE : 3
INCREASE_PRECAUTIONS : 1
VETERAN_IN : 3
HIS_HAS : 1
HAVE_INVOLUNTARY : 1
WAS_AGO : 1
TREATMENT_ACTIVE : 1
NURSING_PMH : 1
HE_DOING : 1
UPON_APPROACH : 1
ARRANGEMENTS_FOR : 1
HES_CONTINUED : 1
PREFER_TO : 1
HAD_ANY : 1
LOTION_VETERAN : 1
IS_NEW : 1
ACKNOWLEDGED_THOUGHTS : 1
ROOTS_RESP : 1
INPT_CASE : 1
BLVD_IN : 1
EAT_MUCH : 1
UCINATIONS_PT : 1
NIGHT_MAY : 1
IDENTIFIERS_USED : 1
WITH_PACKET : 1
IN_MIRTAZAPONE : 1
NONE_PROBLEM : 1
AT_BAY : 1
LESS_SELFKNOWLEDGE : 1
MM_MM : 1
HERMAN_KEFLEX : 1
DUE_PATIENT : 1
RELIEVED_AUTHOR : 1
DEL_MEDICAL : 1
DIAGNOSIS_TEMPOPORMAND : 1
VISTA_SC : 2
EYE_OPTOMETRY : 1
AND_TO : 10
OR_TIME : 1
APPROACHABLE_PATIENT : 1
BY_TABLET : 1
HIS_STATED : 1
THE_PRINTED : 1
COMMAND_YES : 1
WIFE_DIED : 1
LESION_SKIN : 1
TOP_WEIGHT : 1
PAIN_MEDICATION : 1
ARRIVAL_AMBULATORY : 1
ASA_DISCHARGE : 1
AND_ADDRESS : 1
IT_IS : 4
ADDENDUM_EDEMA : 1
ANY_ABOUT : 1
DATE_SIZE : 1
PATIENT_CLAUSTROPHOBIC : 1
IN_ANTICOAGULANT : 1
EXP_VACCINE : 1
INTO_ACCOUNT : 1
TRIED_IT : 1
OF_LAST : 2
RELAXATION_COOL : 1
VERBALIZE_HIS : 1
MEDICATIONS_FIND : 1
OR_INFORMATION : 1
UNABLE_TO : 2
RANGE_DATE : 1
VISIT_BRONZE : 1
SEEN_EVAL : 1
SESSION_TERTIARY : 1
FOR_SUPPLMENT : 1
HOURS_HEENT : 1
RESTING_STAFF : 1
HEAT_LEFT : 1
DETAILS_THE : 1
EXAM_TIMES : 1
MEDICATIONS_TO : 1
MELLITUS_CAROTID : 1
OF_TIME : 1
QUIETLY_THIS : 1
BOWEL_AND : 1
CA_INFORMATION : 1
MARCAINE_LIDOCAINE : 1
MEDICATIONS_INCLUDING : 1
PLAN_ON : 1
OF_DAIRY : 1
TRANING_TWO : 1
TIME_OF : 9
DYNAMICS_NEXT : 1
CUEING_OPEN : 1
BRANDEN_SCORE : 1
DRUGS_DENIES : 1
VACCINE_SPECIAL : 1
PREVENTION_ORIENTATION : 1
IV_QH : 2
AND_CHRONIC : 1
CONSENT_HAVE : 1
REST_YES : 1
WAS_MOD : 1
IN_IMA : 1
WANTED_TO : 1
PERSON_STANDING : 1
THE_CILO : 1
CATEGORY_IF : 1
UPON_REPORTED : 1
TO_PHYSICIAN : 1
BE_TRACH : 1
BEHAVIORS_NOT : 1
DO_IF : 1
PATIENT_RECEIVED : 3
CC_MY : 1
FEEL_OBSERVATION : 1
VISIT_APPOINTMENT : 2
MORNING_REPORTS : 1
ID_INCREASE : 1
ORIENTATION_AND : 1
NOT_WITH : 1
CELEXA_FOR : 1
ES_HOW : 1
HIS_FEELINGS : 2
MHC_TELEPHONE : 1
PHYSICAL_FOR : 1
COMES_SAYS : 1
BARRIERS_LEARNING : 2
WITH_AT : 2
HE_CONNECTED : 1
BY_ACTIVE : 5
DATA_CHIEF : 1
DRIVING_HIS : 1
SUPERVISOR_IN : 1
FAMILY_THE : 1
HYPOTHYROID_MORNING : 1
THICKENED_BUT : 1
MD_OF : 1
FOR_CONTINUED : 2
THE_PSYCHOSOCIAL : 1
POCINR_AUG : 1
MH_MHICMINTENSIVE : 3
VISIT_DAUGHTER : 1
HIS_TREMORS : 1
OF_BLOOD : 2
MEMBERS_PROBLEM : 1
INSTITUTE_AT : 1
PATIENT_AGREE : 1
BATH_AMOUNT : 1
BAY_WILL : 1
IN_ED : 1
MEDICATIONS_CUEING : 1
TURNING_SECONDARY : 1
CHANGES_OS : 1
THE_TOOLS : 1
MEDICATIONS_LB : 1
LIVES_BONHAM : 1
BY_OBJECTIVES : 1
NOTE_STRATEGIES : 1
APPOINTED_PCP : 1
GET_ANOTHER : 1
FROM_ENROLLED : 1
TO_ATTEND : 1
ORDERED_PCP : 1
DRESSING_REMOVED : 1
CYMBALTA_PAIN : 1
MMHG_ADDENDUM : 1
VET_LAST : 1
VACCINE_ML : 1
PATIENT_DECLINES : 1
SOCIAL_TO : 1
INTAKE_CONVERSATION : 1
JUL_PATIENTS : 1
RINGING_HAS : 1
DOSE_WEDNES : 1
THESE_INCLUDE : 1
YEARS_THIS : 1
EXPRESSED_DIFFICULTY : 1
SEE_HE : 1
TERMINATED_NAME : 1
PHONE_NUMBER : 2
MOOD_MILD : 1
ADDENDUM_PARTICIPATED : 2
CLINICAL_REMINDER : 1
THE_DISK : 1
REPORTING_HE : 1
CONSULT_REQUESTED : 1
FAMILY_RECOVERY : 1
TO_DERM : 1
NECK_BRUITS : 1
OF_PRIOR : 1
RESPONSE_WELL : 1
OF_HOURS : 2
HAS_HAS : 1
CENTRAL_ARKANSAS : 1
SEEN_ANY : 1
OF_HISPANIC : 1
THAT_ARE : 4
TABLETS_BY : 2
ALLERGIES_KERI : 1
LIKE_APPT : 1
NH_HES : 1
NO_RECALL : 1
GROUP_TO : 3
THAN_VERIFIED : 1
FACTORS_PROTECTORS : 1
WEDNES_MG : 1
PROBLEMS_YOU : 1
TESTING_TDH : 1
PRESSURE_UP : 1
IN_DOSE : 1
LAT_LEAN : 1
PH_TO : 1
SYMPTOMS_SUMMARY : 1
WET_WEEK : 1
BCX_HOURS : 1
TREADED_SHARON : 1
TO_CONTINUED : 1
CENTER_PRINTED : 1
DENIES_HOSPITAL : 1
REVIEWED_HIS : 1
WAS_PROPRANOLOL : 1
PATIENT_INCONTINENT : 1
UNFORTUNATE_GUNSHOT : 1
BOWEL_ELIMINATION : 4
FH_SKIN : 1
LENGTH_CASE : 1
LVH_PATIENT : 1
COUNSELED_UNDERSIGNED : 1
ED_IN : 1
PHARMACIST_JEFF : 1
THE_NAPROXEN : 1
YEARS_HAS : 1
TAKE_CAPSULE : 1
REPORTS_DEPRESSION : 1
TO_CASE : 1
PROBLEMS_SECONDARY : 1
FOR_REASON : 1
ENCOURAGED_CALLED : 1
HOME_MEDICATIONS : 1
IN_NEED : 1
FRIENDS_YEARS : 1
CHEMICAL_OF : 1
HAVE_ARTHRITIS : 1
DIGESTIVE_TRACT : 1
NOT_IDENTIFIED : 1
WAS_IN : 1
CARE_ATTENDING : 1
WHEN_HOW : 1
LISTED_THE : 1
AND_PHYSICAL : 3
USE_INFORMED : 1
ASK_DO : 1
VISIT_CHECK : 1
WITH_BROKEN : 1
FOLLOWING_OFFERED : 2
INTO_FAMILY : 1
REMINDERS_EXIT : 1
NURSING_INTERVENTION : 1
FAMILY_RELIGIOUS : 1
HEART_SYST : 1
CARE_PHASE : 1
WISHING_TO : 1
HE_HBPC : 1
AREA_OF : 1
HARDEN_DANE : 1
SCREENING_ES : 1
DISCHARGE_INFORMATION : 1
NUMBER_HOURS : 2
MONTHS_BURST : 1
OF_TRIPPING : 1
THURS_INITIALLY : 1
YESX_RECOVERY : 1
COMMAND_SALTY : 1
NURSING_OPT : 1
TAKE_ON : 1
VISIT_INPATIENT : 1
THIS_VETERAN : 2
TO_EVERY : 1
NO_HAS : 1
PINES_AND : 1
ON_HOW : 1
GAF_GAF : 1
MOD_INFORMED : 1
CONDUCIVE_RECOVERY : 3
HOPELESSNESS_RELATION : 1
KNEE_IS : 1
CONCERNS_VOICE : 1
HE_JUST : 1
AGAIN_SEEN : 1
CONTINENT_HANDS : 1
ELIMINATION_MANAGEMENT : 1
PMID_HERE : 1
BHM_RX : 1
INTERVENTIONS_HEALTH : 2
OCCURRED_CONFERRED : 1
NEXT_NO : 1
HAS_EXPERIENCED : 1
QUESTION_WAS : 1
TALK_DEAL : 1
ALCOHOL_RETHINKING : 1
THE_HAVE : 1
TEAM_CROWDS : 1
REFILL_ON : 1
AND_TABLETS : 2
STATUS_CONDITION : 1
REMAIN_THE : 2
CAPSULE_BY : 1
HAD_RESTARTED : 1
NOT_BE : 1
INFUSE_MINUTES : 2
CONDITION_DIAGNOSIS : 1
DO_HAVE : 1
COMMENTS_INFORMATION : 1
WHEN_YOUR : 1
RIGID_OF : 1
HOURS_PROVIDE : 1
MR_AND : 2
TAPPING_HIS : 1
BE_PUT : 1
INTERVENTION_THIS : 1
OF_REHABILITATION : 1
GET_HIS : 1
NURSING_NOTE : 6
EVENING_HIP : 1
ES_VET : 1
APR_AN : 1
POLLEN_NURSES : 1
AND_PATIENT : 1
DICLOFENAC_INFLAMMATION : 1
MONITOR_VERY : 1
BEEN_FALL : 1
OR_PHYSICAL : 1
NOVEMBER_OF : 1
NA_CR : 1
PO_AND : 1
THEIR_TIME : 1
AUTONOMOUS_WALK : 1
HX_HTN : 1
TABLETS_ACTIVE : 1
PAIN_PRESENT : 1
NEED_MAKE : 1
CYCLOBENZAPRINE_UNSURE : 1
THIS_TREATMENT : 1
FEELS_PRIOR : 1
IN_SELF : 1
YOU_TO : 2
BE_DUE : 1
AT_OPTOMETRY : 1
SENT_HOME : 1
NOT_COMPLETELY : 1
LEFT_WITH : 1
THE_ONE : 1
NEEDS_PATIENT : 1
IDENTIFY_COLORS : 1
NO_MY : 1
ACTIVE_WITH : 1
CAUSE_IN : 1
CONVERSING_PEERS : 1
CANE_PT : 1
TIMES_PATIENT : 1
OR_FORAMINAL : 1
DRIVING_WITH : 1
PARTICIPATION_QUALITY : 1
CITALOPRAM_EVERY : 1
AT_PSYCHIATRIST : 1
ICDCM_WITH : 1
RESTRAINTS_USE : 1
HAS_DECISIONMAKING : 1
LENGTH_TIME : 1
PAROXETINE_HCL : 1
INFORMATION_PATIENT : 2
DUE_TO : 2
DATE_AND : 4
DENTURES_LEFT : 1
GSW_GLASS : 1
CAUSED_BY : 1
DENIES_VISUAL : 1
NO_SMOKER : 1
HOSPITAL_VET : 1
GOING_THE : 1
SPEECH_IS : 1
OR_MEDICATION : 1
TALKING_SHIT : 1
DEPRESSION_CLINICAL : 1
VETERANS_IDCP : 1
RISK_WOUNDS : 1
ACTIVITY_DTR : 1
COALITION_FOR : 1
REPORTS_MEDICATIONS : 1
LACTATING_WOMENS : 1
TO_DIAGNOSIS : 1
CARE_HAIR : 1
WHAT_MIAMI : 1
TO_UP : 1
PROGESSIVELY_WORSE : 1
ALLERGY_CONCERNS : 1
PLACE_TIME : 1
LISTENING_MEDS : 1
CLONAZEPAM_INFORMED : 1
BASED_EXPOSURE : 1
MIAMI_AT : 1
THEN_WALK : 1
SET_OF : 1
DOESNT_LIKE : 1
UNSPECIFIED_DATE : 1
CONTINENT_LOCATION : 1
TWICE_DAILY : 1
AND_SHOULD : 2
DUE_THE : 1
CALL_YOUR : 1
AND_GROOMED : 1
OF_PROGRESS : 1
THE_IN : 1
AFFECT_BRIGHT : 1
DINNER_DRINKS : 2
CALL_HOW : 1
THE_IS : 2
ORDERED_PROVIDED : 1
TX_CONTINUES : 1
SMOKING_AGAIN : 1
HEALTH_IN : 1
THE_TIME : 1
ON_LET : 1
CONVERTAPPROVED_CATEGORY : 1
PERSON_TO : 1
THE_TOP : 1
GIVES_HIM : 1
MANY_OF : 1
SCORE_PAIN : 1
CONTACTED_PATIENT : 1
SHOULDER_UNILATERAL : 1
MOTHER_IS : 1
OF_DYNAMICS : 1
OPH_DROP : 1
SHAVING_MODE : 1
THIS_FORMULARY : 1
TO_THAT : 2
BE_GUIDED : 1
PREOP_INSTRUCITONS : 1
QH_LISTED : 1
INSTRUCITONS_RELATIONSHIP : 1
SERVICE_WM : 1
WOULD_NEED : 1
COUMADIN_SURGERY : 1
SITE_BY : 1
OVER_THE : 3
COMPLAINT_MY : 1
MANIC_WITH : 1
HOURS_TO : 1
STOP_QUALITY : 1
KERATOACANTHOMA_THE : 1
FOUND_IS : 1
LIMITATIONS_INCLUDE : 1
PT_AND : 1
TREATMENTS_NEBULIZER : 1
THE_MHC : 1
WITH_QUESTIONS : 1
ZERO_THERE : 1
JUST_DOESNT : 1
CELEXA_SAFELY : 1
NOT_REALLY : 1
MEDS_CURRRENT : 1
IBW_LBS : 1
BASED_PRIMARY : 1
AUTHOR_AND : 1
DIABETES_RESTING : 1
JUST_PROBLEM : 1
AND_INTOXICATING : 1
USE_NONSKID : 1
BE_GIVEN : 1
NUTRITION_RELATED : 1
OPH_BOTH : 1
AGO_BUT : 2
DAILY_PREVENT : 1
DISK_FELT : 1
DUPLEX_EXAMINATION : 1
AND_EVAL : 1
HUDVASHNOTE_STICK : 1
GANGLIA_CEREBELLAR : 1
SPOKE_WITH : 3
GREAT_DEAL : 1
ER_WITH : 1
LIGHT_AT : 1
CARE_ADL : 4
WITHIN_PAST : 1
DATE_TAKEN : 1
CHECK_PLAN : 1
AND_NEGATIVE : 1
PRE_OP : 1
PLAN_CARE : 3
BLOOD_STRESS : 1
UTI_ENTERO : 1
FEEL_LAST : 1
MALE_WAS : 1
SIGNS_SEE : 1
REASED_WIFE : 1
BE_IN : 3
INTERVENTION_FOR : 1
CLEARED_OF : 1
COUGH_HAS : 1
DI_UPTIONS : 1
AND_SYMPTOMS : 1
AT_FEEDING : 1
SATURATION_TREATMENT : 2
WAS_ASKED : 1
DIRECTED_AS : 1
YES_TO : 1
HISTORY_OF : 6
OF_WILL : 1
FEELS_NEEDS : 1
JUNE_VACCINE : 1
PROVIDE_INTERVENTION : 1
TURNS_AND : 1
ACTIVE_NO : 1
IN_VETERANS : 1
ISOLATION_PTSD : 1
INDEX_INTERVENTIONS : 1
APPROACHABLE_DOES : 1
AND_NORMAL : 1
SIG_USE : 1
STENOSIS_PATITENT : 1
SALVATION_ARMY : 1
AND_PANEL : 1
SINUS_TENDERNESS : 1
ABSCESS_BY : 1
XACTIVE_VARIABLE : 1
MET_VETERAN : 1
VISIT_VINELAND : 1
AT_DISHEVELED : 1
GOLD_NEED : 1
OTR_FRANTZ : 1
DINING_AREA : 1
MH_HE : 1
TRIAMTE_MG : 1
SICHERER_BEVERLY : 1
PRINTED_ON : 1
MEDICATION_CHANGES : 1
SUE_CARMODY : 1
IN_SOBER : 2
OF_POSITIVE : 1
FUNDUS_MANY : 1
SPEECH_HYDROCHLOROTHIAZIDE : 1
TRNASFERRED_ME : 1
NO_BRUITS : 1
LEFT_ASPIRIN : 1
BRONZE_BLOCK : 1
ACTIVITY_FREQUENTLY : 1
CALL_FOR : 3
OF_VISIT : 2
THE_WHO : 1
TURNING_DRUGS : 1
STATUS_UNSPECIFIED : 1
PRESSURE_RISK : 1
RISK_ASSESSMENT : 1
AMOUNT_CONSUMED : 1
ALL_WILL : 1
RISK_SELF : 1
PROBLEMS_AND : 2
BM_TOUR : 1
TREATMENT_THIS : 1
ADMISSION_ASSESSMENT : 1
CM_CITALOPRAM : 1
ALERT_ORIENTED : 4
DR_ON : 1
YOU_THINK : 1
MPLS_TO : 1
UPDATE_IM : 1
FRUSTRATIONS_HE : 1
PLASM_NOTE : 1
PRIOR_SUBSTANCE : 1
DSMIV_MR : 1
HOUSE_WITH : 1
STAYING_BUSY : 1
HELP_TIME : 1
AND_BE : 1
STATUS_ILISOME : 1
POSTTRAUMATIC_WT : 1
ALLERGIES_NOTE : 1
HAS_AT : 1
CONTINENT_FOOD : 1
MG_QHS : 2
PRESSURE_ULCER : 1
HT_CM : 2
OF_ENROLLED : 1
WOUND_OF : 1
LOW_VOLUME : 1
TRANSFER_OVERSIGHT : 1
HOMEMAKER_HEALTH : 1
DISCUSSED_BENEFITS : 1
PATIENT_VISIT : 1
ATTENDING_CUEVAS : 1
CONTINENT_RISK : 1
THE_ATTORNEYS : 1
COMMENTS_TIME : 1
HIP_PAIN : 1
HOME_AIDE : 1
FLORIDA_FOR : 1
IN_USE : 1
NONSKID_SLIPPERS : 1
BECAME_ANGRY : 1
ADVERSE_NO : 1
TO_DIFF : 1
MONTH_REQUEST : 1
PAIN_MOTHER : 1
AT_TWICE : 1
OVERWHELM_AND : 1
AND_PROTOCOL : 1
SHE_BECAME : 1
INTO_THIS : 1
MAKE_TURNING : 1
THEIR_SKILLS : 1
RESPONDS_YES : 1
ANTIBIOTICS_AROUSABLE : 1
TROCHANTER_GA : 1
PSYCHIATRIST_HE : 1
NOTE_VISIT : 1
NEVER_PATIENT : 1
DENTURES_JEWELRYCOMPLETED : 1
CITALOPRAM_HYDROBROMIDE : 2
TREATMENT_NECESSARY : 1
PREOP_TELEPHONE : 1
TEAM_PATIENT : 1
TRY_TO : 1
NOTE_NO : 3
THE_SYMPTOMS : 1
TO_AFTER : 1
LIKE_AT : 1
HIS_PLAYING : 1
UTILIZING_COLORINO : 1
GOALS_OF : 1
IS_BREAKFAST : 1
LESS_VERIFIED : 1
QUALITY_OTHER : 1
SINCE_THERAPY : 1
AND_BUT : 1
PLACE_PROVIDED : 1
CONTRACTED_FINGER : 1
PAST_ATTEMPTS : 1
FOR_SHOULDER : 1
INTERVENTION_SAFE : 1
IF_THINGS : 1
ON_FIRE : 1
FEELINGS_HOPELESSNESS : 1
EXCESS_WAS : 1
THERES_AT : 1
APPOINTED_HARDEN : 1
READER_ALLOW : 1
ACTIVE_NURSING : 1
SELECTING_VISTA : 1
OF_DICTATION : 1
PSYCHOLOGY_MSE : 1
HAS_DEMENTIA : 1
CONTINUES_HAVE : 1
PNEUMONIA_DRY : 1
DRESSING_GROOMING : 1
AT_OF : 3
BOTH_AS : 1
DRESSING_WOUND : 1
PATIENT_NAME : 1
SAID_MR : 1
FEE_BASIS : 1
SA_TAB : 1
OD_NO : 1
FOLLOWUP_PHYSICIAN : 1
DID_NOT : 4
DUE_ADMISSION : 1
TYPICAL_PATIENT : 1
MONTHS_PATIENT : 1
ON_ECSGENERAL : 1
WILL_SAFE : 1
STATING_HAVE : 1
RUSSELL_OWAY : 1
RAL_ALERT : 1
EYE_PPD : 1
HE_DIABETIC : 1
OF_TRAMADOL : 1
ON_NA : 1
BY_THAT : 2
GO_PCP : 1
POSTTRAUMATIC_STRESS : 2
APPEARANCE_IS : 1
WORKMANS_COMP : 1
REGARDING_THE : 1
STARTING_AM : 1
WALKS_NO : 1
THE_ABILITY : 1
QUESTIONING_COUGH : 1
PRESENT_AST : 1
INSTRUCTED_CALL : 1
MANAGEMENT_PROGRAM : 1
APPEARS_TO : 2
PERSONNEL_HAS : 1
TENDERNESS_MR : 1
HOSPITAL_ER : 1
URINE_LOCATION : 1
MEETING_HIS : 1
BE_ABLE : 1
DAUGHTER_GRANDCHILDREN : 1
VET_TEARFULHE : 1
FOR_CILO : 1
ON_FOR : 4
WILL_ATTEND : 1
PATIENT_IDENTIFICATION : 1
BUSY_WNL : 1
THE_MOBILTIES : 1
NURSING_OUTPT : 1
NO_RISK : 1
MADE_DECISION : 1
ASSESSMENT_SATURATION : 1
LOWER_MEDICATION : 1
WOOTEN_RT : 1
AGAIN_LIGHT : 1
ADDENDUM_FOR : 1
PAINFUL_REFERENCE : 1
XANAX_HAVE : 1
PRESCRIPTION_QUESTION : 1
OF_UPDATE : 1
SHIFT_PT : 1
PTS_BEHAVIORS : 1
COMPANION_BARRIERS : 1
PTS_IS : 1
ATTENDS_ON : 1
ALLEVIATE_OF : 1
PATIENT_TOLERATED : 1
RESTART_PT : 1
SHE_THAT : 1
AND_MEALS : 1
MD_STOPPING : 1
SELF_BUTTONS : 1
DRIVING_CAR : 1
CASE_HRS : 1
ENCOURAGING_ALERT : 1
THAT_THINK : 1
FORMULARY_AGENT : 1
SISTER_AND : 1
PATIENT_GIVER : 1
DERM_TO : 1
DIAGNOSIS_UNSP : 1
CARE_FAMILY : 1
VERBALIZE_ONGOING : 1
IN_TIME : 2
ABOUT_BECAUSE : 1
KG_CLINIC : 1
CONTINUING_PHASE : 1
BEEN_REPORTED : 2
CURRENT_DIAGNOSIS : 2
WA_DIVISION : 1
ONEHALF_ACTIVE : 2
MY_CAP : 1
IN_APPEARS : 1
WORKING_THE : 1
BE_FLAT : 1
STATE_NEW : 1
THERAPY_HEPARIN : 1
SESSION_FOCUSED : 1
EDUCATION_LPM : 1
PATIENT_HAS : 5
DATA_DEVICES : 1
PENDING_OUTPATIENT : 1
VERTIGO_JUST : 1
FOR_SPASMS : 1
IN_STATED : 1
OTHER_UNSPECIFIED : 2
SUJJESTIVE_OF : 1
OF_BUPROPION : 1
MRSA_BROCHURE : 1
FAIR_IS : 1
DIRECTIVE_MEDS : 1
OF_INDUCED : 1
THE_ROAD : 1
OCCASIONAL_SKIPPED : 1
THEN_WILL : 2
THOUGHT_ORGANIZED : 1
ASSIST_ALOPECIA : 1
AND_MENTAL : 1
HCL_MG : 1
THIS_NO : 1
CURRENT_PAIN : 1
UNTIL_THE : 1
GROUP_DISCUSSED : 1
NOTE_DOES : 1
FOR_ON : 2
THAT_BE : 1
STRONGLY_REFUSED : 1
MENTAL_INPATIENT : 1
OUTPATIENT_NOTE : 1
FOR_FULL : 1
AND_DEMOGRAPHICS : 1
SYMPTOMS_SHORTNESS : 1
TREATMENT_VETERAN : 1
TO_MD : 1
GREATER_PREVIOUS : 1
TIME_DENIES : 1
LET_THEM : 1
TO_VOICE : 2
PENDING_MEDS : 1
HAS_NO : 6
PROGRAM_NO : 2
HELPED_BUT : 1
AND_ADDENDUM : 3
HALUCINATIONS_DENIES : 1
VENTRALLY_THE : 1
LIMITATION_WRIST : 1
MURMUR_CAROTID : 1
EYEBALL_PENG : 1
HGB_GM : 1
IS_GOOD : 1
WITH_BREAST : 1
FOR_PROBLEMS : 1
ISSUES_REFLEX : 1
THAT_CONDUCIVE : 3
HEALTH_FOR : 1
CONFIRM_THE : 1
QUIETLY_AT : 1
RTC_PRN : 1
UNDERSTANDING_BACK : 1
BUTTONS_HAIR : 1
ASPIRIN_TAB : 1
CLIENT_NO : 1
FLUIDS_WERE : 1
RELATED_THE : 1
BALLANCE_PROBLEM : 1
AREA_OR : 1
WILL_CONSULT : 1
PERFORMED_OF : 1
HISTORY_MEDICATIONS : 1
SHOT_TO : 1
CELEBRATING_IN : 1
WILL_REGARDING : 1
JUN_FOR : 1
BENEFITS_BRC : 1
EVENING_APR : 1
BE_YEAR : 1
ORDERS_MOD : 1
RECOVERY_ABSTINENCE : 1
PRINTED_INFORMATION : 1
THURFRISUN_MG : 1
THAT_JUST : 1
DEPRESSION_COUMADIN : 1
HEALTH_INITIAL : 1
YES_LAST : 1
IN_SPHERES : 1
HAVE_ANY : 2
APPOINTMENTS_MG : 1
UNTIL_END : 1
DEVICES_CHECK : 1
VOCATIONAL_CRAVINGS : 1
SOLUTIONS_EGG : 1
CONTINENT_BLACK : 1
EDUCATION_SIG : 1
SYSTEM_MY : 1
VIETNAM_HE : 1
GA_ALLERGIES : 1
PROVIDER_IDENTIFIED : 2
HAD_GO : 1
AND_TAKE : 1
AND_COLLAPSE : 1
LESIONS_SENT : 1
EASILY_AND : 1
NO_LA : 1
ABILITY_TO : 1
PRIMARY_PROVIDER : 1
SUPERVISOR_PUT : 1
RECENT_BEHAVIOR : 1
VETERAN_NOTE : 1
PAIN_SKIN : 1
WHO_EDUCATED : 1
OF_EVAL : 1
MICROSCOPIC_SECTIONS : 1
BREAKFAST_FOOD : 1
ON_FLOMAX : 1
CONTINENT_OTHER : 1
HISTORY_AND : 3
CASE_AND : 1
HAS_STRUGGLED : 1
AT_PT : 2
PHYSICAL_CUES : 1
CREATED_ON : 1
SYSTEMS_ARE : 3
CONTACT_OCCURED : 1
NOK_MOTHER : 1
SEEN_EVALUATED : 1
PLASM_EDIT : 1
KERATOACANTHOMA_PER : 1
ICDCM_WEIGHT : 1
TEACHING_TOPIC : 1
APPT_OP : 1
TYPES_OF : 1
WHO_HAVE : 1
BY_HYPERTENSION : 1
YOGA_YOGA : 1
CARE_NONE : 1
RIBA_PCR : 1
FORS_MONTHS : 1
KG_FOR : 1
LS_OM : 1
PROGRAM_GOAL : 1
PLEASANT_APPROACH : 1
IN_PRESSURE : 1
ME_WHAT : 1
ON_AIR : 1
DINNERS_PT : 1
COVERAGE_VACCINE : 1
SYMPTOMS_PAIN : 1
OL_DO : 1
BOWEL_PROGRAM : 1
IS_DOING : 1
OF_CONSCIOUSNESS : 1
VIEW_MG : 1
SIDE_CHIN : 1
FOR_AWHILE : 1
LOST_HIS : 1
HE_LB : 1
PHARMACY_EDUCATION : 1
HIS_JOAN : 1
ABOUT_CONSUMPTION : 1
DEL_CENTER : 1
EYEBALL_CHEN : 1
AS_ORDERED : 1
PROTOCOL_RESPONSE : 1
TAKE_WITH : 1
FINE_WAIT : 1
CONVERTAPPROVED_DENTAL : 1
WITH_PRIMARY : 1
WEEK_WILL : 1
FRONTAL_CONTUSION : 1
ME_OX : 1
PHYSICAL_ASK : 1
RX_PHARMACY : 1
HIS_CONTACT : 1
USED_TOILET : 1
BRUCHNER_ORTHO : 1
MEDICATION_NOTE : 1
GOOD_SEROQUEL : 1
THERE_SUBJECTIVE : 1
ESIG_ES : 1
OXYGEN_SATURATION : 2
SC_CORRECTLY : 1
BLOOD_MCV : 1
CALLING_RHYTHM : 1
THIS_APPROVED : 1
SPECIFIC_TO : 2
PARTICIPATION_PARTICIPATION : 1
HE_SHE : 1
HIM_OCCURRED : 1
USING_OR : 1
THE_CALLED : 1
MANAGER_NOTE : 1
JOINT_DIFFICULTIES : 1
GREATER_GA : 1
ABOUT_WHEN : 1
RESULTS_STATES : 1
BY_PHYSICIAN : 1
BLOOD_CELL : 1
TO_TEAM : 2
USED_IDENTIFIED : 1
MR_DISCHARGED : 1
CALLED_TO : 1
FALL_THE : 1
TO_GOALS : 1
DOSE_ROUTE : 1
WITH_SCHIZOPHRENIA : 1
CONSENT_AND : 1
HAD_IN : 1
HOUSING_IS : 1
ARMD_SPOKE : 1
IS_BETTER : 1
VHS_NO : 1
PT_MAKES : 1
ILISOME_NEW : 1
RECEIVED_EDUCATION : 1
WAS_FAMILY : 1
TO_FOLLOWS : 1
ICDCM_MH : 1
LABS_PRIOR : 1
IS_PAIN : 1
FOLLOWING_IDENTIFIERS : 1
SADDLE_FEELS : 1
PEOPLE_GOING : 1
BY_UNDERSIGNED : 1
BIOTHERAPIES_EXP : 1
QH_TEL : 1
DISORDER_NOS : 1
GBET_PROGRAM : 2
TALK_GREAT : 1
OU_MOOD : 1
THE_DID : 2
APPLICABLE_SCHEDULED : 1
STAETS_THAT : 1
NARES_ALERT : 1
LEARNING_TEAM : 1
AND_MED : 1
MOBILITY_LIMITATION : 1
PT_IS : 1
WITH_ASAP : 1
LEFT_MG : 1
RTC_DEVICE : 1
ADMINISTERED_NURSING : 1
ALLEVIATE_PURPOSE : 1
BED_LOCATION : 1
OFF_TRIED : 1
ABOUT_THIS : 1
RELATED_PROBLEMS : 1
AMOUNT_FOLLOWUP : 1
AND_ENCOURAGING : 1
RTC_EP : 1
THE_BASED : 1
HERBAL_OTC : 1
MORNING_TAKE : 1
PROBLEMS_REVIEWED : 1
ELIMINATION_MAY : 1
AUTOMATION_CLERK : 1
TO_HE : 5
FOR_MICROSCOPIC : 1
WITH_LEXAPRO : 1
ADDENDUM_SUPPLEMENT : 1
BAL_INTERVIEWED : 1
DRI_CARE : 1
PATIENT_SURGICAL : 1
IT_TIME : 1
AND_POSES : 1
ADDITIONAL_CATEGORY : 1
CALL_INFORMATION : 2
STATE_SAFETY : 1
EASY_NOT : 1
REPORTED_ENDURANCE : 1
SOMETHING_ON : 1
RUSSELL_MH : 1
HAZARDS_LOCATION : 1
ASSISTANCE_ASSISTANCE : 1
PEACE_THE : 1
CHANGE_PATIENT : 1
VARIABLE_APPLICABLE : 1
NORTHFLORIDA_VA : 1
AND_DATE : 1
ACTIVE_PROBLEMS : 2
PARANOIA_HALUCINATIONS : 1
WAS_EXPOSURE : 1
GIVEN_PATIENT : 2
BLADDER_HE : 1
TO_INTERVIEW : 1
OF_TO : 1
LOCK_TO : 1
WILL_SEEING : 1
OUT_AND : 1
WHO_ATTORNEY : 1
SSN_CONDUCTION : 1
SCHEDULED_FOR : 1
ASKING_WRITER : 1
OFFICE_PERPETRATORS : 1
REASON_SELECTING : 1
ORDERED_BY : 1
DRESSED_AND : 1
OXIMETER_COMMENTS : 1
IN_MG : 1
THAT_PATIENT : 1
BE_ANGRY : 1
EXP_JUNE : 1
GOAL_GOAL : 1
ON_SOME : 1
STAFF_PHYSICIAN : 1
WITH_VETERAN : 5
RELATED_CHEST : 1
IN_VIETNAM : 1
VISITING_WITH : 1
BED_MOBILITY : 2
MEMORY_CC : 1
AND_STAFF : 1
MD_FEE : 1
COUNSELING_CANE : 1
SO_HIS : 1
INTERVENTION_DISCHARGE : 1
CONTINUED_GROUP : 1
INCLUDE_STITCHES : 1
BE_ED : 1
SUPERVISE_AT : 1
NO_THINGS : 1
NOT_INTERACTIONS : 1
LEXAPRO_AND : 1
CELL_PHONE : 1
MOTHER_PTS : 1
HYPERGLYCEMIA_MEDICATIONS : 1
AFFECT_MOUTH : 1
SEEN_EXAMINED : 2
DESCRIBED_BOTH : 1
CPRS_OXIMETER : 1
EP_APTS : 1
CHEMICAL_BURNING : 1
CITALOPRAM_FOR : 1
REMOVED_NEEDLES : 1
TO_INTERVENTION : 1
ENTERO_FISTULA : 1
BEDTIME_FOR : 1
BAKER_FITNESS : 1
ABNORMAL_FROM : 1
CLICK_ON : 1
BLINDNESS_HE : 1
NONPRODUCTIVE_UPON : 1
RECEIVED_ABOUT : 1
BUT_DID : 1
CONSULT_HIP : 1
AND_CHICKEN : 1
IN_LEFT : 3
AIR_CONDUCTION : 1
SINCE_MAY : 1
APPOINTMENT_MAILWHEN : 1
WAS_WRITER : 1
LEAST_YEARS : 1
HEAT_TO : 1
FLEXERIL_IN : 1
FOR_BILATERAL : 1
ON_DPT : 1
ATTACHED_ARE : 1
DENIES_CARDIOPULMONARY : 1
POWELL_MEDICATIONS : 1
VASCULATURE_MISSING : 1
MALE_DRESSED : 1
ADVISE_CLERKS : 1
BE_TAKING : 1
ROI_CONTACT : 1
MR_SUCCESSFULLY : 1
NEW_VISIT : 1
HOURS_AS : 1
THERAPEUTIC_FOCUS : 1
NOT_SSN : 1
THE_GOALS : 1
PATIENT_MOBILTIES : 1
OF_FIRM : 1
COUNTER_FROM : 1
THE_YOU : 1
GROUP_REFRAMED : 1
RESTARTED_COUMADIN : 1
ISSUES_AND : 1
AREA_SESSIONS : 1
FISH_SARDINES : 1
ENCOURAGING_PROGRESS : 1
WAS_PLEASANT : 1
TOLD_IT : 1
REMOVE_JEWELRYCOMPLETED : 1
NONE_IDENTIFIED : 1
IS_PHYSICIAN : 1
TEACHING_STRATEGY : 1
CAN_BE : 1
YOU_THERE : 1
AND_THIS : 1
COPD_INTACT : 1
INSTRUCTION_MANAGEMENT : 1
WM_WHO : 1
BEVERLY_MD : 1
LIPID_SCHEDULED : 1
GIVEN_NUMBER : 1
POSSIBLE_AND : 1
AND_AN : 1
ADEQUATELY_DRESSED : 1
UCINATIONS_SIGNED : 1
MAY_TO : 2
PAST_YEAR : 1
IF_PAIN : 1
ORTHO_VETS : 1
HE_STATES : 2
OF_FAMILY : 1
URINE_COLOR : 1
THE_ED : 1
COOL_DOWN : 1
TIME_SESSIONS : 1
AUTHOR_BRAD : 1
ABOVE_THE : 1
FOR_VF : 1
SCALE_FOR : 1
LOCATION_UMBILICAL : 1
DEPRESSION_FOR : 1
VETERAN_ME : 1
NEUROLOGY_ARE : 1
BHM_WAL : 1
ME_DOWN : 1
MESSAGE_FOR : 1
DIFFICULTY_OF : 1
AND_BEHAVIOR : 1
ARE_CONDUCIVE : 3
ASSISTANCE_TIMES : 1
TWO_MG : 1
NOT_SATISFIED : 1
HIP_JOINT : 1
PIECE_MOUTH : 1
GLASS_SHATTERING : 1
LOCATION_RESIDENT : 2
MH_PSYCHOLOGY : 1
MEDICATIONS_SUPPLIES : 2
ACTIVE_COMPUTERIZED : 1
MUCH_IN : 1
SKILLS_KEEP : 1
DID_TH : 1
MEDS_MD : 1
TO_VERIFY : 1
HIS_EYE : 1
FROM_MIAMI : 2
THIS_TO : 2
WILL_WAIT : 1
SSN_IN : 1
NOK_RELATION : 1
MAY_MG : 1
SURGERY_WILL : 1
DOCUMENTATION_ROOM : 1
AND_HOW : 1
CLINIC_GU : 1
LINE_AND : 1
NOTE_THE : 3
CONTINUED_TO : 1
AFTER_IN : 1
MARCAINE_AND : 1
SHOWED_DISK : 1
REPORTS_HAVE : 1
ROUTE_NA : 1
ASKED_ABOUT : 1
UNCIRCUMCISED_OF : 1
HIS_HE : 1
BY_ARE : 1
BROCHURE_GIVEN : 1
NO_TREMORS : 1
OR_WOMENS : 1
OF_CERUMEN : 1
PRINTED_MATERIALS : 1
OUTPATIENT_PLEASE : 1
OCLOCK_MM : 2
OF_EXPLAIN : 1
DECLINED_INFLUENZA : 1
MOBILITY_TRAINING : 1
NOTES_SHE : 1
BE_RELIEVED : 1
OTHER_PROVIDERS : 1
LEAST_AND : 1
AND_SUICIDAL : 1
COMPLICATIONS_OP : 1
ON_MICROSCOPIC : 1
ON_ROOM : 1
SELFKNOWLEDGE_SELF : 1
LAST_SEEN : 2
SELF_WHEN : 1
CONN_THE : 1
REFILLS_PHONE : 1
DELIVERY_HEALTH : 1
INVOLVED_IN : 1
FOR_DISCHARGE : 2
HAVE_WITH : 1
PHYSICAL_ANXIETY : 1
BASIC_BATHING : 1
BERNA_ADDENDUM : 1
THAT_PRIVATE : 1
AUTOMATION_HYPERGLYCEMIA : 1
DOCUMENT_ARE : 1
REDDING_KEFLEX : 1
CONCERNS_SAFETY : 1
VET_AS : 1
SUPERVISOR_AT : 1
NUTRITION_FLEXIBILITY : 1
SPHERES_PRESENTING : 1
PREDICTING_SORE : 1
DISPLAY_THE : 1
UNCONFIRMED_SHOULD : 1
THE_EXAM : 1
RESIDENT_NO : 1
MIAMI_APPT : 1
PATCH_IS : 1
FROM_HEIGHT : 1
CONTINUED_MEDICAL : 1
WAS_SENT : 1
DISCHARGE_NOTE : 1
OVERDOSE_NON : 1
HEENT_SUPPLE : 1
EFFECTIVELY_SURROGATE : 1
COMPLETELY_ALLEVIATE : 1
IF_WIFE : 1
TELEPHONE_FOR : 1
POSES_WELL : 1
VACCINE_AND : 1
EXTREMELY_TIRED : 1
FROM_PAIN : 1
PEOPLE_SESSION : 1
SUCH_TIME : 1
OTHER_FLORIDA : 1
TEARFULHE_RELATES : 1
MEDICATIONS_OUT : 1
TIME_PULSE : 1
NOT_REFUSE : 2
PHYSICIAN_FUTURE : 1
SUICIDE_RISK : 1
WEARING_EYE : 1
LABS_THIS : 1
INTO_RISKS : 1
AS_FRO : 1
MALE_IN : 1
PATIENT_IN : 1
PROVIDER_MEDICAL : 1
APPT_REMINDERS : 1
HOURS_NEEDED : 1
STRENOUS_ACTIVITIES : 1
VETERAN_ON : 1
DENIES_HERBAL : 1
FOR_HOMEWORK : 1
GOOD_MANY : 1
CLINIC_HE : 1
WITH_NEUROPAT : 1
WITH_BRIMONIDINE : 1
ANY_ALCOHOL : 1
PACKET_INCLUDING : 1
AGAIN_GLAD : 1
THEIR_TO : 1
DURATION_OF : 1
WITH_WANTING : 1
CALL_WAS : 2
GIVE_PATIENT : 1
OTHER_RISK : 1
NOT_FOR : 1
PROGRAM_PUT : 1
NOSHOW_IMPAIRMENT : 1
HE_ACTIVE : 1
FACE_CALL : 1
EXPLOSION_IN : 1
JUNE_HE : 1
ALL_AREAS : 1
OTHER_AVAILABLE : 1
THE_SCHEDULE : 1
PULSE_OXIMETRY : 1
REFUSED_OF : 1
THE_SC : 1
MEDICAL_HISTORY : 1
TO_YES : 1
SPEC_UR : 1
BEEN_UNABLE : 1
NEEDS_RESTART : 1
TOILET_TRANSFER : 1
NUMBER_BICARB : 1
DIVISION_OF : 1
WAS_INITIALLY : 1
RELIEF_WITH : 1
AND_HAVE : 4
BUILDING_THIS : 1
REACH_MAIL : 1
OBESITY_TEACHING : 1
OR_FOR : 1
SINCE_TO : 1
TALK_WITH : 1
PUL_PATIENT : 1
DEPRESSION_AT : 1
DETOX_IN : 1
DISCUSSION_OTHER : 1
FOR_CHO : 1
SMOKES_TWICE : 1
MD_TIME : 1
PHYSICIAN_APPOINTMENTS : 1
WEDNES_TABLETS : 1
IS_THIS : 1
RESTING_INTAKE : 1
ACQUIRED_ABSENCE : 1
BENEFITS_OF : 2
EDUCATIONAL_INCLUDING : 1
HISTORY_HSV : 1
HARM_SELF : 1
ASSESSMENT_TREATMENT : 1
LOWER_CHEST : 1
ORTHO_TREATMENT : 1
COMMENTS_THE : 1
LOCATION_OTHER : 1
THE_TREATMENT : 2
VOICE_MAIL : 1
VERBALIZED_OF : 2
EMPLOYMENT_IN : 1
PING_HRS : 1
BEATS_NO : 1
INTO_EYES : 1
HIS_PSYCH : 1
GUARDIAN_INFORMED : 1
VINELAND_CLINIC : 1
THE_RINGING : 1
NOTE_OUTPT : 1
LIKELY_VET : 1
SHIFT_PATIENT : 5
LEVEL_PARTICIPATION : 1
YOGA_CLASS : 1
RISK_IS : 1
YEARS_AND : 4
THIS_BE : 1
HYPERGLYCEMIA_ICDCM : 2
ASSISTANCE_REQUIRES : 1
PATIENT_ANATOMICAL : 1
CALL_FROM : 1
LOCATION_URGENT : 1
HYPOTHYROID_EVERY : 1
GAIT_TWO : 1
VA_JUL : 1
INPATIENT_STATUS : 2
SEE_MD : 1
ORIENTED_RESPONDS : 1
DTR_CALLED : 1
GROUP_WEDNES : 1
HOME_HE : 1
FOR_FOR : 1
OFF_CELEXA : 1
TAB_SIG : 2
SELF_PSYCH : 1
UP_ASSISTANCE : 1
NECESSARY_PARTICIPATED : 1
KG_ADDENDUM : 1
MEAL_SNACKS : 2
SURG_MAY : 1
THE_TOPICS : 1
ENDURANCE_CLASS : 1
THINGS_GOT : 1
VETERAN_DENIED : 1
COMPLAINT_PATIENT : 1
DESCRIPTION_TREATMENT : 1
TO_HIS : 6
GOOD_PHYSICAL : 1
UARY_TYPE : 1
INVOLVEMENT_AS : 1
IV_MEDICATIONS : 1
WITH_DM : 1
BR_WAY : 1
TREATMENT_PRIMARILY : 1
SC_THAN : 1
MEET_WITH : 1
CORRECTLY_RESTING : 1
HIS_SCHEDULED : 1
WERE_REVIEWED : 1
IN_FLUID : 1
AT_THIS : 6
FOLLOWUP_PULSE : 1
TOUR_BOWEL : 1
TAKING_THEM : 1
AM_MOUTH : 1
ORTHO_WITH : 1
WERE_THEN : 1
PATIENT_WEIGHT : 1
AMOUNT_ELIMINATION : 1
AS_IS : 1
CALL_IN : 2
HISPANIC_ECZEMA : 1
FLORIDA_GEORGIA : 1
HAVE_ON : 1
CLINIC_IS : 1
SPOKE_PAM : 1
MANAGEMENT_PROBLEM : 1
MAKE_THE : 1
SELF_OTHERS : 1
HAS_FOR : 1
PLANS_COME : 1
SLEPT_WELL : 1
CONN_INTERVIEW : 1
HAS_CONSUMED : 1
COMMUTE_TREATMENTS : 1
WITH_REQUEST : 1
VITAMIN_SUPPLMENT : 1
AM_FOOD : 1
BRIGHT_DAILY : 1
TREATMENT_GOALS : 2
DRUGS_HERBAL : 1
HE_WAS : 3
PATIENT_DENIES : 1
PLEASE_ABNORMAL : 1
UP_STAFF : 1
TO_WELCOME : 1
MORNING_DEPRESSION : 1
HOSPITAL_DENIES : 1
ATTORNEYS_OFFICE : 1
DOSE_IV : 1
DRUG_ROUTINE : 1
PROGRAM_CLINIC : 2
REPORTS_THAT : 2
WEEK_AND : 1
BUT_DESCRIBED : 1
ON_EXIT : 1
IS_GONE : 1
MEMBERS_ACCOMPANY : 1
PCP_IN : 1
PLAY_FIRE : 1
RELATED_CERVICAL : 1
DATE_MG : 1
USING_MEDICATIONS : 1
RISKS_SPECIFIC : 1
MEETING_TO : 1
THIS_APPEARANCE : 1
TRY_MG : 1
GET_NEWS : 1
AND_CALL : 2
RTC_INJURY : 1
OF_THAT : 1
OUTPATIENT_STATUS : 3
VISIT_THREE : 1
STATUS_INTER : 1
VENT_ATROVENT : 1
BY_PCP : 2
OF_ORIGIN : 2
TIME_CALL : 2
PROBLEM_NEEDS : 1
YOGA_ONCE : 1
PHYSICAL_EVERY : 1
TO_YELL : 1
NOTE_MENTAL : 2
RESTART_THEM : 1
MONTH_FOR : 1
AUNT_THAT : 1
IN_ROCK : 1
AFTER_SURGERY : 1
SYMPTOMS_IS : 1
LESIONS_MENTAL : 1
TREADED_SOCKS : 1
BROKEN_BONES : 1
MY_FORS : 1
OF_KNEE : 1
REPORTS_ZERO : 1
AND_AGREES : 1
HEMOGLOBIN_AC : 1
SAFETY_HOMEWORK : 1
FOR_HIS : 2
NEED_TREATMENT : 1
IS_ADDENDUM : 1
RESPITE_CARE : 1
NOT_APPLICABLE : 2
SELECTING_THIS : 1
EP_YEAR : 1
NA_BICARB : 1
CUTTER_AS : 1
WITH_LETTER : 1
YES_TREATMENTS : 1
VETERAN_SPENT : 1
OU_PATIENT : 1
BIRCH_REPORTS : 1
VETERAN_TO : 4
GENITAL_DISCHARGE : 1
CURRENT_APPETITE : 1
DR_NUCHOVICH : 1
STRESS_MANAGEMENT : 1
RELIGIOUS_FRIENDLY : 1
TO_GIVEN : 1
PANEL_SCHEDULED : 1
DINING_SESSIONS : 1
MONTHS_HIM : 1
LOW_HYDROCODON : 1
PAPER_ADHESIVE : 1
FLAREUP_SEVERITY : 1
DATE_MAY : 2
DELTOID_VACCINE : 1
OUT_SOME : 1
WITH_IT : 1
SUPPLIES_COMMENTS : 1
FRACTURE_DURING : 1
APRN_FOR : 1
IT_FOR : 1
FUNDUS_HOW : 1
DSMIV_DIAGNOSIS : 1
DISABILITIES_ABOUT : 1
MOST_OCLOCK : 1
HIM_BACK : 1
SHORTER_UPRIGHT : 1
BID_THE : 1
REVIEWED_AND : 1
THIS_CALL : 1
PC_SCREENING : 1
APPLICABLE_PATIENT : 1
IDCP_TO : 1
WILL_SHARED : 1
IS_WM : 2
CALLED_THIS : 1
BIRTHDATE_JUL : 1
IF_CANT : 1
PULSE_INVOLVED : 1
WKS_HCL : 1
CAP_ONE : 1
ADDENDUM_IN : 1
NOT_EASY : 1
SYSTEMS_ANY : 1
APPT_PCP : 1
CLASS_PER : 1
THE_SKIN : 1
PROBLEM_IS : 1
IF_AXIS : 1
IMPORTANT_FOCUS : 1
NOTE_WARFARIN : 1
WITH_BRONZE : 1
HISTORY_CURRENT : 1
AND_NOTED : 1
ACTIVE_OTHER : 1
MH_CASE : 4
MHC_CONSULT : 1
TO_FAILED : 1
BATH_PERSONAL : 1
HIS_YOU : 1
ROAD_IF : 1
SIDE_RESECTED : 1
ACTIVE_PRN : 1
AND_SURLY : 1
PERTINENT_BUTTONS : 1
PROBLEMS_HAVE : 1
ON_UNIT : 1
EXODUS_LODGE : 1
WILL_THIS : 1
LIFESTYLE_HAS : 1
INVOLVEMENT_GIVEN : 1
ORDERED_HAND : 1
AFEBRILE_PAIN : 1
VARYING_SEVERITY : 1
RIGHT_OF : 1
REQUIRED_PHYSICIAN : 1
ADDENDUM_SESSIONS : 2
IN_RAL : 1
PUPIL_MISSING : 1
TIME_STATES : 2
LOT_JUNE : 1
MI_NO : 1
NICOTINE_MG : 1
NOTE_RESPIRATION : 1
HIS_CLONAZEPAM : 1
SPEC_PH : 1
REORIENTATION_CUES : 1
SEE_HOW : 1
ANXIETY_DISORDER : 1
HX_DEPRESSION : 1
INCREASED_AND : 1
HE_SEES : 1
WITHOUT_REFILLS : 1
ABUSE_HOMICIDAL : 1
CONSCIOUSNESS_AWAKE : 1
ACTING_MISSING : 1
AGE_LOCATION : 1
NOTE_HAVE : 1
MALE_IS : 1
WARFARIN_THERAPY : 1
THE_OUTPATIENT : 1
OTHER_COUNSELING : 2
SELF_RN : 1
OF_CLOSED : 1
TO_CONTACT : 1
REASSESSMENT_IN : 1
THAT_ATTRIBUTES : 1
IN_MINUTES : 1
RETURN_FOR : 1
ACCOUNT_SPECIFIC : 1
BY_HYPERGLYCEMIA : 1
REVIEW_ALL : 1
ADDENDUM_TRY : 1
AVOIDS_MANY : 1
NOTE_TEMPLATE : 1
CLEAR_OP : 1
ASSISTANCE_FOR : 6
USE_LIMITATION : 1
THOUGHTS_OF : 1
OR_MORE : 1
PAIN_AST : 1
DEVELOPING_OVERWHELMED : 1
RIGHTS_ADDENDUM : 1
HE_HAVE : 1
WAS_ADMITTED : 1
SWS_WILL : 1
STATUS_PERSONAL : 1
VETERANS_CARE : 1
TEAM_ADDENDUM : 1
UNIT_NO : 1
PROBLEM_LIST : 1
PRESENT_PROBLEMS : 1
PRESENTL_MG : 1
FOR_ONE : 2
NOTED_TREMORS : 1
PST_INTERACTIONS : 1
PATIENT_CORRECT : 1
MID_LEGALLY : 1
RISK_PREVIOUS : 1
ORDER_FOR : 1
TO_THOUGHT : 1
SOMETHING_FIRE : 1
RE_MEDICATION : 1
PROVE_DEADLY : 1
MEDICATIONS_WILL : 2
AT_RAINIER : 1
OVERWEIGHT_PATIENTS : 1
OU_WAS : 1
THESE_ACTIVE : 1
MH_MONITORING : 1
APR_PROTECTORS : 1
EVAL_RESULT : 1
SHORTNESS_BUPROPION : 1
HAGGERTY_PHONE : 1
DENIES_AND : 1
LYING_HEAT : 1
UNILATERAL_SHAVING : 1
WITH_ALREADY : 1
MAY_SPOKE : 1
MR_WAS : 3
IN_FUTURE : 1
INPATIENT_OUTPATIENT : 1
BOWEL_THIS : 2
NO_RECOVERY : 1
MMM_NECK : 1
WILL_SCREENING : 1
REASSESSMENT_NORTHFLORIDA : 1
MUCH_MEDICAL : 1
CURRENT_SCHIZOPHRENIA : 2
INTO_EFFECT : 1
DRINKS_CONTAINING : 1
VETERAN_ANGER : 1
WERE_AMOUNT : 1
MINUTES_MALE : 1
COPE_THE : 1
HEALTH_APPOINTMENTS : 1
OX_THERAPEUTIC : 1
BENEFITS_SWS : 1
THEN_HAVE : 1
GENDER_OBSOLETE : 1
ADDRESS_CENTURY : 1
REPORTED_HIS : 1
DURING_THE : 1
SURGERY_MONTHS : 1
CLINICAL_NEUROLOGY : 1
HYGIENE_DRESSING : 1
ASK_ROI : 1
CARE_PATIENT : 1
ADDENDUM_VET : 1
FEET_EXAM : 1
MOUTH_ACTIVE : 5
CLIENT_HAS : 1
OF_SURGICAL : 2
PHASE_OF : 1
RAL_ANESTHESIA : 1
ONCE_PER : 1
WITH_WITH : 1
WITH_FIRE : 1
INFORMATION_REQUEST : 1
NOTE_HENT : 1
LIVING_OF : 1
CHOOSE_TO : 1
GOOD_THIS : 1
PHYSICAL_ACTIVITY : 1
WITH_FOR : 4
SATURATION_AFTER : 2
COMPLAINT_ILLNESS : 1
PROCESS_AND : 1
INDEPENDENT_ON : 1
HAS_THAT : 1
MET_THIS : 1
PMR_PHYSICAL : 1
CONTINENT_DYSPHAGIC : 1
DROP_EYES : 1
TABLETS_PATIENT : 1
WHERE_LT : 1
DIFFICULTY_WITH : 1
FOR_PATIENT : 2
NONE_PRECAUTIONS : 1
TYLENOL_RED : 1
LOOKING_AT : 1
NOTE_HEALTH : 1
CLINIC_TO : 1
ALSO_WITH : 1
PRESENTL_NICOTINE : 1
HE_MORNING : 1
WM_WITH : 2
ABUSE_CIGARS : 1
SOME_GROUND : 1
OF_CENTRAL : 1
AT_RESULTS : 1
MR_SELF : 1
DELTOID_MANUFACTURER : 1
TO_FACE : 1
FOR_MONITORED : 1
RELIEVE_REPORT : 1
ORDER_PORTABLE : 1
OTC_FEELINGS : 1
PSYCHOSOCIAL_HISTORY : 1
MASS_ALL : 1
SCALE_NOT : 1
NO_HIP : 1
OF_PRESCRIBED : 1
NOTE_AM : 1
DETERIORATION_THAT : 1
STOOL_AMBULATION : 1
TYPE_RX : 1
LEFT_DIALYSIS : 1
NOTE_SUPERVISION : 1
PROGRAM_MR : 1
BEEN_CENTER : 1
NO_REACTION : 1
PATIENT_DIFFICULTY : 1
CAUSED_GASTROESOPHAGEAL : 1
THEM_AS : 1
OF_TAKING : 1
ER_CURRENT : 1
ROCK_IS : 1
GOOD_WITH : 1
TURNING_TO : 1
NEUT_BLOOD : 2
AT_END : 1
FOR_THREE : 1
PT_DM : 1
NORMAL_APPOINTMENT : 1
ANTIBIOTIC_THIS : 1
GRANDCHILDREN_PATIENT : 1
AT_HE : 1
HOLDING_AREA : 1
THE_SWS : 1
CARE_OF : 3
AWAKE_PUBLIC : 1
NO_CHILDREN : 1
WHICH_LISTED : 1
PROMINENT_OCLOCK : 1
CONTINUES_EXPLOSION : 1
POSITION_SITE : 1
PLEASANT_UPON : 1
SAYS_HE : 1
HCV_RIBA : 1
SURROGATE_APPLICABLE : 2
ALSO_FOLLOWUP : 1
CURRENT_THE : 1
BRIMONIDINE_SOLN : 1
YESX_NO : 1
HELPED_DID : 1
UP_BATHROOM : 1
YOU_ON : 2
HAZARDS_ALL : 1
HIS_FINGER : 1
ABUSE_AND : 1
TOOLS_AT : 1
NOTE_ASSESSMENT : 1
BUT_IT : 1
FRONT_OF : 1
BLINDNESS_HAS : 1
CITALOPRAM_ABOUT : 1
RESP_CLINIC : 1
SUGGESTED_COME : 1
SCREENING_AND : 1
MANUFACTURER_TYPE : 1
PRIVILEGES_PROVIDED : 1
WAS_NEVER : 1
PRIMARY_SC : 1
PHYSICIAN_ICDCM : 1
MY_PRESSURE : 1
AND_ACTION : 1
DISK_OF : 1
ANY_IN : 1
THERE_UNTIL : 1
SHOWS_DENT : 1
IS_MALE : 2
USED_TO : 1
CHN_HOME : 1
FOOD_SKIN : 1
STAFF_DURING : 1
SURGERY_IN : 1
MONTH_DETERMINE : 1
CONTENT_HER : 1
MET_EXAMINED : 1
MILLIGRAMS_ALL : 1
STILL_THAT : 1
NPH_DAILY : 1
TEGADERM_PT : 1
PAST_MEDS : 1
HIS_FATHER : 1
BP_MON : 1
THE_WHICH : 2
LA_CLEAR : 1
MANAGEMENT_SECONDARY : 1
PATIENT_INSTRUCTED : 1
WELL_AS : 1
AND_WITH : 7
AFTER_HAS : 1
PAIN_SCORE : 1
FACILITATOR_REALITY : 1
DOWN_THE : 1
TOBACCO_DISORDER : 2
INFORMATION_CATEGORY : 1
HEAD_BED : 1
THE_HAS : 6
SUPPLEMENTS_YOU : 1
REFUSES_REFERRAL : 1
THOUGHTS_STAFF : 1
RECOMMENDS_STOPPING : 1
THE_COUGH : 1
FEELING_EXTREMELY : 1
TRIED_GLUING : 1
CALL_PRESCRIPTION : 1
IN_OF : 6
LOWER_TOOTH : 1
MOOD_GOAL : 1
DID_REFUSE : 2
IS_USING : 1
SUB_FOR : 1
IN_FIRST : 1
FROM_CRISIS : 1
FIRE_THEN : 1
IS_STABLE : 1
INTER_OR : 1
ON_PROVIDED : 1
COMBINATION_THEM : 1
MG_EC : 2
IMC_CONTINUED : 1
USE_MI : 1
IN_KNEE : 1
AT_PM : 3
BR_TO : 1
PAST_NO : 1
APPEARANCE_FRIENDS : 1
THE_IMAGE : 1
REFUSED_ANTIBIOTIC : 1
OF_MONTHS : 1
LIVINGSTON_STREET : 1
NEUROPAT_SIMPSON : 1
AB_PCR : 1
OUT_VISIT : 1
DINNER_HE : 1
SESSION_WITH : 1
TO_HAVE : 3
CURRENT_ILLNESS : 1
OVERWHELMED_BY : 1
ACTIVE_HYPERTENSION : 1
PER_OX : 1
MG_SIG : 2
DISEASE_FALL : 1
VETERAN_PARTICIPATED : 2
REVIEWED_FEELINGS : 1
TAKE_BY : 2
APPEARED_RELAXED : 1
THE_EYES : 1
DO_FEEL : 1
OR_DETERIORATION : 1
USE_LAST : 1
DILTIAZEM_SIMVASTATIN : 1
HIS_OF : 2
FUNDUSCOPIC_EXAMINATION : 1
DUAL_OTHER : 1
FOR_OR : 1
FRONT_THEM : 1
DRESSED_GROOMED : 1
TUNNEL_ALSO : 1
PSYCH_FEW : 1
DOESNT_FEEL : 1
MAY_BOWEL : 1
CONTAINING_DID : 1
VETERAN_READ : 1
MID_FEB : 1
KNEE_UNDER : 1
PRESENT_ETOH : 1
NASAL_ULA : 1
YOU_BE : 1
OR_OR : 1
PLAN_CONTINUED : 1
ALSO_HE : 1
IS_NORMAL : 1
BLOOD_DIAGNOSIS : 1
SHE_APPROPRIATELY : 1
ROI_IF : 1
HYPERTENSION_COMMON : 1
ADVISE_AS : 1
ILLNESS_VITAL : 1
ASSESSMENT_UNDERSTANDING : 1
JUDGEMENT_IS : 1
UNDER_RAL : 1
CLERK_ICDCM : 1
YOU_RESTART : 1
DIABETIC_PERIPHERAL : 1
WBC_ABS : 1
MENTAL_RECOMMENDED : 1
LOCATION_PROGRAM : 1
TO_TAKE : 1
BEEN_PROGESSIVELY : 1
RESULTS_RESUME : 1
SUCCESSFULLY_CONTACTED : 1
PAIN_APPOINTMENT : 1
TO_TREATMENT : 2
FIRE_INSTRUCTED : 1
NOTE_PHARMACIST : 1
ARE_NOT : 1
BRONCHITIS_NONE : 1
TABLET_STRENGTH : 1
REMOVED_THICKENED : 1
CONTACT_AND : 1
ORI_LOTION : 1
PRIMARY_PHYSICIAN : 1
CONTAINS_ATTACHED : 1
ALSO_YOGA : 1
THE_PTS : 1
ANXIETY_TABLETS : 1
CALF_MR : 1
SPEECH_NORMAL : 1
LOBE_CONTUSION : 1
MISSING_CHIEF : 1
GOALS_ENCORUAGEMENT : 1
SUBSTANCE_USE : 1
GIVEN_IN : 2
CHIEF_PRESENT : 1
TO_SEE : 5
OR_TAKE : 1
THE_END : 2
DID_YOU : 1
PROBLEM_WT : 1
DISCHARGE_HAVE : 1
SUICIDE_LAST : 1
SIGNS_CPRS : 1
WITNESSING_OVERDOSE : 1
NO_ISSUES : 1
TAB_EC : 1
OF_ABSTAINING : 1
WITH_EXAM : 1
AND_BLOOD : 2
HAS_APPOINTMENT : 1
FOR_MY : 1
WAS_OFF : 1
NOT_SINCE : 1
HALDOL_MG : 1
PALMER_INSTITUTE : 2
THAN_ADDENDUM : 1
LEGAL_ISSUES : 1
BLOCK_CLINIC : 1
AT_RISK : 2
WORK_NOTE : 1
PATIENT_EXPRESSED : 1
BOWEL_WEIGHT : 1
HES_HAVING : 1
NOT_POSSIBLE : 1
DISEASE_PREVENTION : 3
OF_TASK : 1
REMOVAL_AT : 1
CLERKS_AS : 1
GRIPPER_SOCKS : 1
STRONG_TO : 1
UPDATE_ON : 1
CP_WHEN : 1
AT_SALVATION : 1
NUTRITION_PERSONAL : 1
HE_TRYING : 1
OTHER_EP : 1
JAUNDICED_AND : 1
ASAP_RTC : 1
HOSPITAL_PAIN : 1
HERE_SEX : 1
PAST_SMOKER : 1
FROM_APPT : 1
ACTIVE_OUTPATIENT : 4
SYMPTOMS_IMPROVED : 1
ADDENDUM_CLINICAL : 1
MANIFEST_HOME : 1
THIS_NEW : 1
ABLE_TO : 3
THIS_DONE : 1
THAT_HIS : 1
TO_COPE : 1
HISTORY_SKIN : 2
PURPLE_TEAM : 1
BY_CERTIFIED : 1
RELAXED_COMPLETION : 1
DISCHARGE_WRITTEN : 1
EXPLAIN_PAIN : 1
BLOOD_SPUTUM : 1
WITHIN_VERIFIER : 1
DECIDED_TO : 1
RECOMMENDATIONS_PROTECTORS : 1
ON_RECENT : 1
THURS_BOWEL : 1
BATHING_AND : 1
FLUSHED_WARM : 1
TO_CHECK : 1
GOOD_ON : 1
BASED_WHEN : 1
KEFLEX_MG : 1
BY_WITH : 1
DID_COMPLETELY : 1
JEFF_WILL : 1
EDEMA_HD : 1
CONTACTED_HIM : 1
NOT_CHANGED : 1
END_OF : 2
XYZZY_CARE : 1
NOTE_YESX : 1
PRIOR_OF : 1
IMMUNIZATION_EMERGENCY : 1
AND_BAY : 1
DRUG_RELAPSE : 1
NAD_IMAGING : 1
SKILLS_TO : 1
TRANSFER_PREFERS : 1
RECONCILIATION_NO : 1
OF_SEDATION : 1
FACE_CONSULT : 1
AFFECT_BIRTHDATE : 1
CONTINUING_COPE : 1
SI_AT : 1
MAY_FBS : 1
WIFE_SEXUALLY : 1
EYE_INJECTIONS : 1
WITH_PRACTITIONER : 1
AND_HEAT : 1
HOURS_UP : 1
AND_EFFECT : 1
NO_WITH : 1
BLACK_OF : 1
PARTICIPATED_DTC : 1
ROUTE_ING : 1
TEAM_MEMBERS : 2
SCALE_SEX : 1
AM_REAL : 1
UPDATED_THE : 1
FIRM_PERSONAL : 1
BED_UTI : 1
INCONTINENCE_SADDLE : 1
ACTIVITY_ENCOURAGED : 1
BY_SELECTING : 1
DIS_FH : 1
TREATMENT_TEAM : 1
PALMER_PTS : 1
RT_NUTRITION : 1
DOB_SSN : 1
MILD_OUTPATIENT : 1
THIS_SINGLE : 1
WITH_SEVERITY : 1
TWICE_ACTIVE : 1
BLOOD_ADVANCE : 1
TO_RELIEVE : 1
GOAL_DIRECTED : 1
IF_YOU : 1
TO_INNER : 1
BEHAVIORS_THAT : 2
GAF_AXIS : 1
FEEDING_ELIMINATION : 1
BACK_VISIT : 1
UNDERSIGNED_DURING : 1
OR_COPE : 1
POST_USE : 1
MANAGEMENT_ANOTHER : 1
COOPERATIVE_ADDENDUM : 1
CHEST_PATIENT : 1
REWRITE_IS : 1
AT_CITALOPRAM : 1
MALE_SMOKING : 1
THIS_NON : 1
VETERAN_BIRCH : 2
WITH_HEAD : 1
VISIT_NOTE : 1
CRITERIA_HAS : 1
LEARN_SIGNATURE : 1
SC_LESS : 1
HIS_SINCE : 1
ACTIVE_SEEING : 1
VETERAN_AN : 1
UNITS_DAILY : 1
GENITALIA_THEN : 1
ABOUT_INFLUENZA : 1
ARMY_GIVES : 1
AVAILABLE_CHIEF : 1
PJS_IS : 1
HAS_COMPLAINTS : 1
PAIN_RESULTS : 1
TO_EXTENT : 1
YO_SERVICE : 1
DEMONSTRATE_SKILL : 1
FLOMAX_WHO : 1
ALL_TYPES : 1
PHONE_ONLY : 1
WITH_BLOCK : 1
VOICE_AT : 1
SOCIAL_WORKER : 1
ADDENDUM_AGITATION : 1
THIN_DRESSED : 1
THAT_MEDICATIONS : 1
BPH_PUL : 1
FOR_SCHEDULED : 1
INDIVIDUAL_APPOINTMENT : 1
SHORTER_STANDING : 1
ASSISTANCE_MEAL : 1
SILVER_SILVADIAZENE : 1
GROOMING_BENEFITS : 1
AM_AM : 1
DATE_NORMAL : 1
CALLING_RATE : 1
NONE_PT : 1
NORMOCEPHALIC_EYES : 1
TREATMENT_SAFETY : 1
PROTECT_HIM : 1
OF_SLIPPERS : 1
TO_COMP : 1
CONTINENT_BOWEL : 1
ON_LOCATION : 1
MG_TAKE : 7
AROUND_NOTED : 1
RETURNED_PT : 1
NONE_SEEN : 1
NEUROPATHIC_SYMPTOMS : 1
OUTSIDE_TO : 1
CONSULTATION_ASSESSMENT : 1
MANAGEMENT_SIGNIFICANTLY : 1
NOTE_MEDICATIONS : 1
PATIENT_BATHROOM : 1
REFERRAL_FOR : 1
INFORMATION_THE : 1
MINIMAL_ASSIST : 1
AN_HIGH : 1
EVERY_STOP : 1
NON_FORMULARY : 1
ALL_PAIN : 1
VET_WAS : 1
THE_CONTENT : 1
NECK_DEC : 1
TEST_OUTPATIENT : 1
NOW_HIS : 1
THE_TROCHANTER : 1
YES_DRI : 1
HIM_HAS : 1
ALLERGIES_ADMINISTRATIVE : 1
HYDROCODON_NOK : 1
BEEN_THAT : 1
KG_RECEIVED : 1
ADDENDUM_DI : 1
NAPROXEN_FLEXERIL : 1
ON_TOBACCO : 1
SWS_ZIPPERS : 1
JUNE_PPD : 1
IN_CLEARED : 1
DIAGNOSIS_SCHIZOPHRENIA : 2
NON_AGENT : 1
ESTABLISHED_SURROGATE : 1
WILL_BACK : 1
TOPICS_WHILE : 1
ES_BONNIE : 1
TO_MOUTH : 1
THE_FOLLOWING : 6
DID_HAVE : 1
BY_IN : 1
CUEING_BATHROOM : 1
THERAPY_AVOIDS : 1
RN_ASSESSMENT : 1
STAFF_WILL : 1
MINUTES_ON : 1
DEPRESSION_PRIOR : 1
SWS_BRC : 3
SHOULDER_PAIN : 1
MANY_SITUATIONS : 1
REQUESTED_THIS : 1
MILD_PENDING : 1
ASSESSMENT_NOTE : 1
NIGHT_BROKEN : 1
MOTHER_PATIENT : 1
PM_THE : 1
CHIEF_LOWER : 1
MOUTH_DAILY : 1
FAIR_ANY : 1
SIGNED_COMPLAINT : 1
WITH_BURNING : 1
BUT_THAT : 2
TONSILS_ARE : 1
AN_AND : 1
DISCHARGE_INSTRUCTIONS : 5
INPT_GROUP : 1
NEW_CLIENT : 1
MEDICATIONS_MOUTH : 1
COMMENTS_WILL : 1
PALMER_EYE : 2
FOR_AB : 1
WITH_SITTING : 1
SESSION_ON : 2
WAS_AGAIN : 1
SHIFT_WAS : 3
AGE_PRESENTS : 1
WITHIN_HOURS : 3
PATIENT_CALL : 1
NO_TMJ : 1
CERVICAL_THE : 1
PLASMA_GLUCOSE : 1
LESS_THAN : 1
WARM_PHYSICIAN : 1
PULSE_LOBE : 1
SURGERY_HISTORY : 1
OUTSIDE_MD : 1
ANATOMICAL_LOCATION : 2
PROCEDURE_ADDENDUM : 1
ASPIRIN_MG : 1
SYMPTOMS_NO : 2
AND_LEVEL : 1
UP_NO : 2
WHILE_IN : 1
ANY_WITHDROWAL : 1
YES_MOVES : 1
EXIT_TO : 1
IS_CONTINENT : 4
MEDICATIONS_PRODUCTS : 1
MMHG_GAIT : 1
BIRCH_MOOD : 1
NON_APPLICABLE : 1
NOT_ALL : 1
STABLE_ON : 1
NEED_RESIDENTIAL : 1
COPE_WITH : 2
HISTORY_EAR : 1
COMMENT_INSTRUCITONS : 1
AND_NO : 2
ABOVE_ISSUES : 1
LEARNING_PURPLE : 1
COVERAGE_INFLUENZA : 1
ESTABLISH_HIS : 1
THIS_PROCEDURE : 3
AND_TRANSFERRED : 1
REMOVED_FROM : 1
BUPROPION_MG : 1
NEWSPAPER_LOOKING : 1
HEART_HEART : 1
STOOL_NUMBER : 1
HYPERTENSION_ESSENTIAL : 1
HE_STAETS : 1
CPRS_OF : 1
FOR_SLIGHTLY : 1
REMOVAL_GREATER : 1
PAIN_CLINIC : 2
FAMILY_OTHER : 1
BUT_HE : 2
COMPLAINT_NEW : 1
OCCURED_IN : 1
WAS_AND : 3
ENROLLED_IN : 2
DENIES_OTC : 1
OF_NARES : 1
PATIENT_MONTHS : 1
CARMODY_AND : 1
FURTHER_REFILLS : 1
REMAINS_THE : 1
NARES_NEUROLOGICAL : 1
ABOUT_PINES : 1
IN_CITALOPRAM : 1
HE_ATTENDS : 1
TO_VF : 1
MOOD_IS : 3
MANAGEMENT_PM : 1
NO_PATIENTS : 1
DATE_FBS : 1
IN_TO : 2
NOBLE_WITH : 1
RIGHTS_AND : 2
AUTHOR_POWELL : 1
LEFT_ANSWERING : 1
THINK_ARE : 1
HOURS_PING : 1
MON_OF : 1
VS_DRESSING : 1
CITALOPRAM_MG : 3
FEEDING_METHOD : 1
CORRECT_SITE : 1
PRIVATE_ROOM : 1
NOVEMBER_COORDINATOR : 1
AROUSABLE_ON : 1
DRIVING_DROWSINESS : 1
HE_GROUP : 1
ABOUT_IT : 2
OBJECTIVE_IS : 1
GASTROESOPHAGEAL_DISPOSITION : 1
HOME_NURSE : 1
WITH_INTERVENTION : 1
CARE_RECOVERY : 1
AND_CITALOPRAM : 1
FOR_BAL : 1
SEE_PSYCHIATRIST : 1
HOURS_EXTRA : 1
INSTRUCTIONS_WITH : 1
CARE_COMPLAINT : 1
FOLLOWED_BY : 1
IMAGING_ED : 2
FH_NO : 1
CALL_LIGHT : 1
TO_COMMAND : 1
BECAME_WITH : 1
HARM_IS : 1
OP_PSYCHOLOGY : 1
ATTACHED_CARE : 1
PROTESTANT_ATTENDING : 1
DOB_DILTIAZEM : 1
ALCOHOL_AND : 1
SO_FATHER : 1
WISHING_SEE : 1
ARE_HAVE : 1
THE_SURFACE : 1
MOBILITY_DEPOSITS : 1
UNSURE_HIS : 1
LIVINGSTON_VET : 1
HPI_PT : 2
SISTER_SAID : 1
CHANGES_HIS : 1
HIS_WALK : 1
FAR_IS : 1
AM_MET : 2
TO_BY : 3
REMINDER_ACTIVITY : 1
MOBILITY_NO : 1
OF_PROBLEM : 1
BOSS_WENT : 1
AM_GOING : 1
HAVE_HISTORY : 1
BOTH_POSITIVE : 1
DENIES_DOES : 1
SOMETHING_WILL : 1
OF_PRESSURE : 1
AFTER_NONE : 1
SITE_NECK : 1
HERBAL_OR : 1
HOME_PRIMARY : 1
PROVIDER_DURING : 1
WARM_LARGE : 1
CHRONIC_PAIN : 1
WILL_BE : 6
ADDENDUM_HAVE : 1
DICLOFENAC_MG : 1
COLOR_MENTAL : 1
ALERT_IN : 1
PATCHES_INJECTIONS : 1
THE_PERPETRATORS : 1
MONTH_TO : 1
STREET_VET : 1
IS_WORRIED : 1
BOWEL_MOVEMENT : 1
OS_OD : 1
LOCATION_DYSPHAGIC : 1
IS_TREATMENT : 1
MY_BLOOD : 1
VETERAN_MANAGEMENT : 1
AS_POSITIVE : 1
SITUATIONS_INCREASED : 1
STAYS_ER : 1
ELIMINATION_ASSISTANCE : 1
THE_VETERANS : 1
THE_CONTROL : 1
VERBALIZED_SESSION : 1
MESSAGE_VICTIM : 1
ROUTE_TIME : 1
SPECIAL_ER : 1
MS_FOR : 1
SOMETHING_THAT : 1
PROGRAM_ORIENT : 1
JOB_HAS : 1
REST_ALERT : 1
WITH_SURGICAL : 1
NEVUS_NONNEOPLASTIC : 1
PRN_PMR : 1
BRC_ON : 1
BENEFITS_ABSTAINING : 1
THERAPEUTIC_EQUIVALENTS : 1
GLUING_IT : 1
POSSIBLE_CAN : 1
BE_READY : 1
TO_CARE : 2
TOUR_MOVEMENT : 1
ALCOHOL_RELAPSE : 1
SYMPTOMS_POSTTRAUMATIC : 1
DIFF_WBC : 1
SCHEDULED_VISIT : 1
POINT_THIN : 1
ADDRESS_THE : 1
OF_NONE : 1
JOB_WILL : 1
ANOTHER_THIS : 1
HASNT_ABLE : 1
HE_THE : 2
TEMP_VS : 1
AND_LINEAR : 1
VOICE_BOX : 1
PRESENTING_WITH : 1
OF_TYLENOL : 1
NOT_CONSUMED : 1
DISORDERMET_WITH : 2
MINERALIZATION_SIGNIFICANT : 1
IN_VISTA : 1
RECENT_IN : 1
TO_ED : 1
TAKING_CITALOPRAM : 1
ER_REQUEST : 1
COME_TALK : 1
NOW_ON : 1
WILL_COME : 2
WILL_CALLED : 1
DOES_PATIENT : 1
ALSO_PERFORMED : 1
BY_AND : 1
SAFELY_EFFECTIVELY : 1
ALTHOUGH_HES : 1
CLASS_LED : 1
FEEL_GOING : 1
MAILED_TO : 1
SURROUNDINGS_PAIN : 1
SESSION_CENTERED : 1
FOR_INTRAVENOUS : 1
BE_USING : 1
WALKIN_NOTE : 1
SENT_HE : 1
NO_OBJECTIVE : 1
AT_TO : 3
BACK_BUT : 1
COMPLETION_ALERT : 1
PRESSURE_SORE : 1
ANGER_MOTIVATION : 1
THE_ELECTRONICALLY : 1
PHYSICIAN_LEVELS : 1
MAIL_ASSOCIATE : 1
HCTZ_TRIAMTE : 1
ATTORNEY_WAS : 1
INFLUENZA_VACCINE : 4
PATIENT_FOR : 1
CONFIDENTIALITY_LORAZEPAM : 1
SELF_OTHER : 1
VISIT_TO : 1
SKIN_LEVEL : 1
ONE_WITH : 1
VETERAN_WAS : 2
WHEN_REFUSED : 1
UNSPECIFIED_DEC : 1
PLAN_OF : 3
LAST_UPDATE : 1
NO_IN : 3
OM_PATIENT : 1
THE_DEPARTMENT : 1
STAYS_VISITS : 1
LEVEL_OF : 1
COLLEAGUES_USE : 1
JOINT_ASTHMA : 1
REFILL_REQUEST : 1
FOR_CLINICAL : 1
TOGETHER_AND : 1
NOTE_TAKING : 1
COORDINATOR_THE : 1
ATTACHED_ELECTRONICALLY : 1
UNLESS_PERSON : 1
WRITTEN_FOR : 1
OF_SINCE : 1
XYZZY_PATIENT : 2
NO_SUICIDAL : 2
ADVANCE_ALLERGY : 1
IMPAIRMENT_CC : 1
BLOOD_SUGARS : 1
HOSPITAL_CONFIRM : 1
IS_THEM : 1
AS_WELL : 1
DI_OR : 1
LIMITATION_HYPOXEMIA : 1
FOLLOWING_NUTRITION : 1
CONCERNS_IS : 1
OF_NAIL : 1
FOLLOWUP_STARTING : 1
NAIL_RESP : 1
AM_OLD : 1
ANXIETY_ASK : 1
PATIENT_TREADED : 1
GREATER_RISK : 1
KNEE_FOR : 1
HEAD_SIMILAR : 1
INSTRUCTED_ALL : 1
ALCOHOL_TELEPHONE : 1
WALK_TO : 1
LEARNING_PREFERENCES : 2
PATIENT_PROVIDED : 1
FOLLOWS_RADIAL : 1
PLACE_FOOD : 2
YES_ORIENTED : 1
PEERS_ABOUT : 1
SCANNED_MANIFEST : 1
WITH_THINGS : 1
WITH_CONCERNS : 1
MONTHS_IDENTIFIED : 1
OR_LACTATING : 1
DEPRESSION_HAS : 1
CHEST_IS : 1
INDICATED_PATIENT : 1
MISSED_BODY : 1
TO_RECOVERY : 3
AND_SHIT : 1
NON_SITUATIONS : 1
ASSESSMENT_FEB : 1
POSITIVE_IS : 1
PAIN_CLIENT : 1
THOUGHT_IT : 1
TRIED_SI : 1
NONE_FOUND : 1
ALONG_MORE : 1
CONSIDERED_TO : 2
INCLUDING_APPROPRIATE : 1
GANGLIA_MINERALIZATION : 1
THE_VACCINE : 1
GOALS_ADDRESSING : 1
HOW_LITERAL : 1
HAVE_ROI : 1
IS_USE : 1
OF_SIGHT : 1
SESSION_CHARACTER : 1
INTERVENTION_AREAS : 1
SEEK_INTERACTIONS : 1
SKIN_SKIN : 1
HE_HIS : 1
FOR_HEALTH : 3
IS_FAIR : 1
VERIFICATION_INJURY : 1
SHOW_UP : 1
DENIES_PALPITATIONS : 1
BOWEL_AMBULATION : 1
NEUROLOGY_ACTIVITIES : 1
THE_USE : 2
VOLUME_MIN : 1
APPOINTMENT_THIS : 1
DERM_FAILED : 1
IDENTIFIED_LEARNING : 1
MEDS_WHEN : 1
LUNCH_HAS : 1
ELIMINATION_REQUIRES : 1
CARE_CALLED : 1
HE_RESP : 1
SAME_SELECT : 1
TALKING_OTHERS : 1
BIOTHERAPIES_LOT : 1
BEVERAGES_WAS : 1
TRAVEL_NEEDS : 1
ARE_EXPIRED : 1
SWS_NOTE : 1
CYST_SPECIMENS : 1
MUCOSA_MALE : 1
BRADYCARDIA_WHICH : 1
IBW_IBW : 1
WITH_OVERLYING : 1
NAME_WAS : 1
BATHROOM_AND : 1
GOOD_PERTINENT : 1
DEPRESSION_SCREEN : 1
ANY_OF : 1
DEVICE_CANCEL : 1
SCREEN_COMMENT : 1
MET_INFLUENZA : 1
BASED_ON : 1
RELIEVE_PAIN : 1
INITIAL_CHIEF : 1
INTACT_POSITION : 1
AND_MY : 1
TREATMENT_TAKE : 1
IS_HIM : 1
HE_REPORTED : 1
IF_DONE : 1
STABLE_PCMM : 1
BP_PAIN : 1
BE_UNTIL : 1
WOUND_EYEBALL : 1
VETERANS_WIFE : 1
CHO_OL : 2
CONVERSATION_HAS : 3
NORMOGLOSSIA_REFUSES : 1
THE_ER : 1
WILL_NEED : 1
ABOUT_UNEMPLOYMENT : 1
THE_POSSIBILITY : 1
FEE_ZZPATIENT : 1
APHDR_IDENTIFIED : 1
IT_REACHES : 1
NOTE_PLEASE : 1
VET_TD : 1
SUPERVISE_HIM : 1
POSITION_AND : 1
CYST_OVERLYING : 1
BALKCOM_AND : 1
FL_BOX : 1
ME_PC : 1
THE_WITH : 2
ADMITTING_DIAGNOSES : 1
CALL_REFILL : 1
HIM_MAKE : 1
STICK_HPI : 1
PROVIDERS_GEORGIA : 1
NOT_AIR : 1
VETERAN_NEED : 1
MALE_DO : 1
RELATION_HE : 1
MANIC_THE : 1
INTERPERSONAL_IN : 1
IMMUNIZATION_DOCUMENTATION : 1
WIFE_OF : 1
TO_SURROUNDINGS : 1
NA_WENT : 1
PHASE_TREATMENT : 1
TOTAL_KNEE : 2
OTHER_IN : 1
SONGS_AND : 1
ATTENDED_JOB : 1
THE_AND : 8
IN_BVA : 1
CASE_PREOP : 1
EXAMINED_AND : 2
SPEECH_MG : 1
POSSIBLE_SOLUTIONS : 1
OR_AUDITORY : 1
HEAD_ATRAUMATIC : 1
REFUSED_THIS : 1
WITHOUT_DIFFICULTY : 1
VETERAN_THAT : 1
PAIN_REQUESTED : 1
YEAR_IN : 1
TYPE_VISIT : 1
HUNTSVILLE_AND : 1
PARTIALLY_ACHIEVED : 1
THUS_FAR : 1
APPOINTMENT_RESCHEDULED : 1
LEARNING_NEEDS : 1
TERTIARY_OF : 1
WITH_TO : 2
NUMBER_LB : 1
EVERY_HT : 1
IN_BLOOD : 2
COUGH_NONPRODUCTIVE : 1
TEAM_WISHING : 1
PAIN_NEW : 1
REHABPHYSICAL_LLD : 1
PAIN_THE : 1
FOR_PROBLEM : 1
PATIENT_TOBACCO : 1
BLIND_HIS : 1
CHRONIC_WHO : 1
APPLICATION_BE : 1
ACTIVE_STENOSIS : 1
ANGRY_WITH : 1
TO_PSYCHOLOGY : 1
PROBLEM_PAST : 1
TO_CLINIC : 3
ON_RATE : 1
THIS_PROBLEM : 1
REVIEWED_PATIENT : 1
INSTRUCTIONS_THE : 1
THE_FACE : 1
CUEING_UNSPECIFIED : 1
BAKER_LCSW : 1
CALL_TYPE : 2
PHONE_CONVERSATIONS : 1
FOR_REVIEW : 1
SILVADIAZENE_FLUVASTATIN : 1
ARTHROSCOPY_ARTHROSCOPY : 1
AGE_IN : 1
INTOXICATING_BEVERAGES : 1
LAST_HAS : 1
VISITS_OR : 1
HEIGHT_IN : 5
ME_THAT : 1
HIS_THAT : 1
ROUTINE_DATA : 1
SUICIDAL_AGREES : 1
IN_BED : 1
SUMMARY_PATIENT : 1
AND_GROOMING : 2
INSERT_OF : 1
LOW_BACK : 1
NO_CC : 1
MELLITUS_DUPLEX : 1
LEFT_NUTRITION : 1
ACTIVE_ION : 1
WORK_PARTIALLY : 1
PCE_TEMPOPORMAND : 1
PORCELAIN_NOBLE : 1
IN_HOSP : 1
INFORMATION_PAIN : 1
MEDICATE_AS : 1
TO_OUTPATIENT : 1
FULL_WITNESSING : 1
PRACTICES_AND : 1
PROCEDURE_THIS : 1
OF_IF : 1
HAD_DISCHARGE : 1
GBET_THE : 1
RRR_MURMUR : 1
UPON_QUESTIONING : 1
FOR_TRANSPORTATION : 1
NOTES_ADDITIONAL : 1
AND_HAD : 2
WAS_REFERRED : 1
WRIST_FRACTURE : 1
FUTURE_SIMVASTATIN : 1
CALL_CORRECTLY : 1
THE_IDENTIFIERS : 1
FOR_BASED : 1
REGARDING_IN : 1
SLEPT_HAS : 1
LIKELY_THAT : 1
ABC_GROUP : 1
INFLUENZA_DOCUMENTATION : 1
RESIDENT_VETERAN : 1
THE_MR : 2
NOTE_IN : 2
THE_HOUSE : 1
THAT_IS : 9
OF_ALCOHOL : 1
INTENTS_PLANS : 1
AGREES_DO : 1
IF_PRESENT : 1
ALCOHOL_YES : 1
SIMVASTATIN_PRAVASTATIN : 1
TO_HERMAN : 1
ASSIST_AS : 2
MOBILITY_PERSONAL : 1
SUPPLEMENT_HOME : 1
OF_HOB : 1
SCALE_PREDICTING : 1
AND_TRIED : 2
AND_LITERAL : 1
PROCESS_LINEAR : 1
FOR_MUSCLE : 1
OF_TUNNEL : 1
THE_CHANGES : 1
SA_CAP : 1
PROBLEMS_OBJECTIVE : 1
ED_BY : 1
NEW_PLAN : 1
TOMORROW_AT : 1
INFLAMMATION_CYCLOBENZAPRINE : 1
INTERVIEWED_ASSESSED : 1
HIS_CONDITION : 1
MORE_THE : 1
SYSTEMS_THAT : 3
EDUCATIONAL_PACKET : 1
DEMEROL_IV : 1
HAVE_THEN : 1
AND_NAME : 1
SCHEDULED_INDIVIDUAL : 1
BUT_KNEE : 1
POCINR_PATIENT : 1
SYNCOPE_COLLAPSE : 1
NOTE_MINERALIZATION : 1
LB_MH : 1
NO_LIMITATION : 1
STATUS_MANIPULATION : 1
AND_HE : 7
COMMON_ICDCM : 1
MG_PLASM : 1
ARSISNG_CERVICAL : 1
INFORMED_REWRITE : 1
GROUPS_HAS : 2
WERE_PREPPED : 1
SESSIONS_AM : 2
TREATMENT_SC : 1
WOUND_ORTHO : 1
AND_SELF : 1
EXCLUDING_SUPPLIES : 1
APPOINTMENT_PAIN : 1
CAN_TO : 1
HEENT_MMM : 1
RESPIRATIONS_AROUSABLE : 1
DEMENTIA_IS : 1
FROM_STENOSIS : 1
MOD_IN : 1
NO_ORIENT : 1
AS_TO : 1
THE_CYCLOBENZAPRINE : 1
HE_STRUGGLED : 1
HES_TO : 1
BEDTIME_HYDROBROMIDE : 1
WITH_SINGLE : 1
REPEATED_BY : 1
TEETH_ACTIVE : 1
THAT_REPORTS : 1
RELATED_TO : 3
HOMICIDAL_THE : 1
PHYSICIAN_NO : 1
VSS_NML : 1
BEEN_ORDER : 1
AND_OUTPATIENT : 1
FOR_ASSIST : 1
HAPPENED_LEAD : 1
STOPPED_CITALOPRAM : 1
SEEING_YOU : 1
READER_TO : 1
AMONG_SESSION : 1
THIS_MAY : 2
BOTH_CALLS : 1
SELECT_ALL : 1
SCHEDULED_EAR : 1
EYES_QH : 1
WHILE_THE : 1
MAILWHEN_NURSING : 1
ALB_PHOS : 1
SUBSTANCE_IMED : 1
SATURATION_PER : 1
IN_TREMORS : 1
RESPIRATION_ORIENTED : 1
GOALS_WRITERS : 1
ED_AND : 1
INTAKE_ALCOHOL : 1
FOR_INFLAMMATION : 1
ASSISTANCE_BED : 1
SITTING_OR : 1
HE_DISCHARGE : 1
HGB_DL : 1
IN_REFERRAL : 1
RECEIVED_LIKE : 1
UDS_AND : 1
PA_OWAY : 1
TREATMENT_HOUSING : 1
WILL_WILL : 1
NO_NO : 2
INCLUDE_REPORTS : 1
OR_SHE : 1
SCHIZOPHRENIA_GOALS : 1
REWRITE_PATIENT : 1
TEST_MONTH : 1
SARAH_INFORMED : 1
THEM_DIFFERENT : 1
NEW_BODY : 1
EMERGENCY_ROOM : 2
RESP_BP : 1
ED_HOLDING : 1
CLERKS_TO : 1
PT_NEUROPATHIC : 1
VERBALIZED_REMAINING : 1
PATIENT_TO : 4
DOCUSATE_MG : 1
PATIENT_CONTACT : 1
DIERCTED_PRACTITIONER : 1
CLOZAPINE_CITALOPRAM : 1
FOR_FIB : 1
APPOINTMENT_EAR : 1
ADMISSION_MENTAL : 1
TEAM_TO : 1
SYMPTOMS_BACK : 1
IS_GETTING : 1
ANATOMICAL_SEE : 1
TASK_ABOUT : 1
AND_LIGHT : 2
RELATION_HBPC : 1
PM_NEW : 1
GAF_WORKING : 1
ONLY_HE : 1
ACTIVE_ESSENTIAL : 1
SKIN_EVERY : 1
SLIPPERS_OR : 1
NO_PM : 1
PAIN_OF : 3
SHE_NOT : 1
USE_CONTINUOUS : 2
BILATERAL_PATCHES : 1
TWO_QUETIAPINE : 1
ANSWERING_MACHINE : 1
SAFETY_UP : 1
PAM_AND : 1
DAILY_USE : 1
CM_INITIAL : 1
WITH_AND : 4
LOT_NA : 1
WIFE_YRS : 1
OVERWHELMED_PROBLEMS : 1
LPM_AMBULATION : 1
LEFT_MUSCLE : 1
PATIENT_ANY : 1
REVIEWED_CAN : 1
ASSESSMENT_BENEFITS : 1
TAKE_INTO : 1
TALK_YOUR : 1
IT_HERBAL : 1
WEEK_BUT : 1
RECENT_FOLLOWUP : 1
EXAMINATION_AS : 1
IN_PMID : 1
BY_CARMODY : 1
THE_HE : 2
TO_WITH : 3
SHARED_THE : 1
OLD_CURRENT : 1
ABOUT_PTS : 1
WALKIN_VISIT : 1
INTERVIEW_THESE : 1
APHDR_MONTHS : 1
UNDERSIGNED_MR : 1
LIFESTYLE_AND : 1
VET_WOULD : 2
THANKED_ME : 1
AND_ALL : 1
EXCESS_SKIN : 1
FBS_ANTIBIOTIC : 1
COUNSELING_DEC : 1
FUNCTIONING_IN : 1
AS_SOON : 1
IF_VITAL : 2
MD_RECOMMENDS : 1
MEAL_AND : 1
ACCOMPANY_SELF : 1
GROUP_WERE : 1
PRESENTED_CLINIC : 1
AREA_NO : 1
KNEE_CENTER : 1
OSTEOPOROSIS_MOUTH : 1
COMPLEX_MEDICAL : 1
WAS_BENEFITS : 1
WRITER_WITH : 1
EYES_ACTIVE : 1
FELLOW_FEELING : 1
OF_WITH : 5
BREAKFAST_LUNCH : 1
MILLIGRAMS_FROM : 1
WAS_EXAMINED : 1
REGARDING_MANAGEMENT : 1
WITH_WRITER : 1
IMAGING_DISPLAY : 1
TOUCH_WITH : 1
SKIN_EXCISION : 2
SONGS_ARTISTS : 1
NO_PAST : 1
SEE_JOB : 1
RESUME_PT : 1
OL_NOT : 1
CONSTANT_WITH : 1
IS_TO : 6
ASSESSMENT_AND : 2
NUTRITION_FOLLOW : 1
TYPE_BHM : 1
NORTRYPTILINE_WHICH : 1
NONSKID_OR : 1
WILL_ACCOMPANY : 1
CORRECT_SURGICAL : 1
HBPC_NUTRITION : 1
RECEIVED_PAIN : 1
WAS_OF : 2
DENTAL_EXAM : 1
BE_CELEBRATING : 1
AT_PALMER : 1
AND_DISEASE : 2
CLUB_GROUP : 1
DURATION_COMPLAINT : 1
THE_ROLE : 1
INPATIENT_AND : 1
INVOLVEMENT_ASA : 1
WITH_CHEMICAL : 1
BY_SUE : 1
DISCHARGE_SCRIPT : 1
OTHER_TYPES : 1
MOUTH_SEEING : 1
IF_DETERIORATE : 1
WITH_WATER : 1
FOR_HARM : 1
SCLERA_GO : 1
SWOLLEN_TREATMENT : 1
DAIRY_LEARNING : 1
ASSESSMENT_WAS : 1
HIS_TO : 1
IS_OTHER : 1
EYES_OUT : 1
TESTOSTERONE_NEXT : 1
FOR_HIM : 1
OF_MARCAINE : 1
PATIENT_NOT : 4
BONNIE_HAGGERTY : 1
CONTAINS_PRIMARY : 1
QUANTITY_REPORTS : 1
NOT_ANY : 2
MONTHS_LEARNING : 1
IN_NAD : 1
WAS_TRNASFERRED : 1
WILL_ADMINISTERED : 1
TO_AN : 1
PRN_INJURY : 1
WHICH_HE : 1
DISCUSSION_HAVE : 1
BOWEL_BLADDER : 1
PING_AT : 1
JUL_IN : 1
HIP_INJECTIONS : 1
CHF_HAS : 1
PSYCHIATRIST_WAS : 1
VA_ERYTHEMA : 1
OR_THOUGHT : 1
MORE_MG : 1
CONTINENT_FROM : 1
PATIENTS_AND : 1
RESIDENT_ROOM : 2
FOLLOWUP_TEMP : 1
PINES_ONE : 1
AND_RIGHT : 1
BEHAVIORS_COULD : 1
INSTRUCTION_PERSONAL : 1
TRIGGER_FLAREUP : 1
KEEP_SATISFACTORY : 1
RETURN_YOUR : 1
AND_PROBLEMS : 1
THE_SAME : 4
ID_SURGERY : 1
NEGATIVE_NON : 1
PT_WITH : 1
MIVA_ANALYSIS : 1
MD_BASIS : 1
EYES_EOMI : 1
PERSON_IS : 1
STATED_THAT : 3
VERIFIED_ALERT : 1
WITH_CONTINUING : 1
OTHER_WEEK : 1
PLASMA_MANAGEMENT : 1
ONLY_SUGGESTED : 1
SCREENING_BONNIE : 1
PRESSURE_SPUTUM : 1
TO_APPTS : 1
VOLUME_HBPC : 1
THE_PAIN : 2
WIFE_THURS : 1
ADVANCE_WT : 1
ISSUES_MET : 1
RESPONDS_VERBALLY : 1
RISKS_NO : 1
REPEATED_ME : 1
WITH_DETAILS : 1
HAS_FROM : 1
USE_DISORDER : 2
HAS_DIFFICULTY : 1
DENIED_RECEIVING : 1
JOINT_NOS : 1
TO_KOSHER : 1
EXPLAIN_NO : 1
DAILY_LIVING : 1
PATIENT_REPORT : 1
HAS_CAPACITY : 1
ARKANSAS_VETERANS : 1
DO_TESTS : 1
PAIN_REASSESSMENT : 1
TUES_MG : 1
EFFECT_FROM : 1
HE_HASNT : 1
WAS_APPROVED : 1
REQUEST_DISCHARGE : 1
HAVE_THE : 2
EXIT_DUE : 1
SITUATIONS_OF : 1
IN_NURSING : 1
PAST_YEARS : 1
LEARNING_HYPOTHYROID : 1
IT_WAS : 1
WET_GROUND : 1
TRANSFER_REQUIRES : 2
TO_DENIES : 1
EXAMINATION_DISK : 1
DOCTOR_MAY : 1
ON_ANATOMICAL : 1
FLEXIBILITY_AS : 1
SHIFT_THE : 2
REGARDS_TO : 1
HX_SUJJESTIVE : 1
INJECTION_THE : 1
INTERPERSONAL_FUNCTIONING : 1
STANDING_LAT : 1
HIP_PROCEDURE : 1
ICAL_FOR : 1
NO_STAFF : 2
IN_BUT : 2
RESP_PAIN : 1
AGO_APPEARED : 1
THE_TROMBONE : 1
MAY_THE : 1
ASSESSMENT_MANIFEST : 1
OUTPATIENT_REGIMEN : 1
BOX_GM : 1
NEITHER_OR : 1
PRODUCTS_APPLICABLE : 1
MEDICATIONS_CONTINUED : 1
GET_PULSE : 1
TESTS_YOUR : 1
ROLE_OF : 1
IN_PATIENTS : 1
IS_LOW : 1
QH_MEDICATIONS : 1
RISK_NO : 1
VOLUME_NEBULIZER : 1
MALE_CONVERSING : 1
SPEC_JUN : 1
SATISFACTORY_MANY : 1
BILAT_WITH : 1
FOR_SECTIONS : 1
HAS_THERE : 1
FOR_WEDNES : 1
FOLLOWING_LIPID : 1
DATE_COLORS : 1
WEDNES_NEED : 1
NERVOUS_LOCATION : 1
LEARN_LISTENING : 1
INTENTS_OR : 1
RED_CELL : 1
MS_APRN : 1
PROGRESS_ORIENTED : 1
ASSESSMENT_EDUCATION : 1
NO_ORDER : 1
PROBLEM_IN : 1
INTO_ANOTHER : 1
BY_WENT : 1
CAP_CAME : 1
WILL_HIS : 1
WRIST_PAIN : 1
HOUSE_AND : 1
QH_ACTIVE : 1
SISTER_BRC : 1
YO_HX : 1
DIRECTIVE_ALLERGY : 1
TAKING_OVER : 1
PAIN_SAYS : 1
INFORMED_FOR : 3
FROM_NUCHOVICH : 1
FEEL_NOT : 1
BIRTHDATE_HEIGHT : 1
RELATION_TO : 1
IS_TAKING : 3
SNACKS_MENTAL : 1
NEEDS_HYPOTHYROID : 1
MISSED_MASS : 1
ORIGIN_SERVICE : 1
ARE_RESTRAINTS : 1
PATIENT_NO : 1
THE_NAIL : 1
NOTE_SEE : 1
DEMONSTRATE_SAFELY : 1
AS_DIERCTED : 1
AT_HOURLY : 1
ALL_VET : 1
CANCEL_OTHER : 1
HOMICIDAL_AUTHOR : 1
RN_VETERANS : 1
ATLANTA_VA : 1
FOR_INPATIENT : 1
NOW_TYPE : 1
DINNERS_AT : 1
HE_BE : 2
BLINDNESS_CONDITION : 1
UP_HIS : 1
NOTE_TONSILS : 1
CRITERIA_AND : 1
PHYSICIAN_WEEK : 1
MALE_HX : 1
MALE_OBSOLETE : 1
STORY_TIME : 1
FOLLOWING_WERE : 1
DAILY_HEART : 1
THE_INFORMATION : 1
SOCIAL_WORK : 3
GIVEN_TO : 3
WAS_COUNSELED : 1
PL_ING : 1
THIS_RELEASE : 1
OF_SURGERY : 2
AIR_EFFORT : 1
BRAD_CURRENT : 1
ARTISTS_TAPPING : 1
ON_THEN : 2
TO_SYKES : 1
CONNECTED_WM : 1
HE_ME : 1
APPLICABLE_HT : 1
APPEARS_BE : 2
DATE_IN : 1
PREDICTING_PRESSURE : 1
CALL_ME : 1
OTHER_OF : 1
ORTHO_CONSULT : 2
APPOINTMENT_COMPLAINT : 1
FOLLOWUP_LOCATION : 1
CURRENT_MANAGEMENT : 1
MEAL_HIS : 1
OF_SUICIDE : 1
MINUTES_VETERAN : 1
HE_IS : 15
PROGESSIVELY_OVER : 1
FOR_ACTIVE : 2
EXAMINATION_TO : 2
RN_RESPONSE : 1
AGENT_DEMENTIA : 1
SATURATION_PULSE : 1
WITHIN_LIMITS : 1
GOT_BAD : 1
PATIENT_KNOWS : 1
THIS_INTERVIEW : 1
MG_QID : 1
IT_HE : 1
SUPERVISOR_BAY : 1
LS_REFREASH : 1
EXTENT_INDUCED : 1
COLD_TO : 1
THIS_IF : 1
AND_REQUEST : 1
WBC_NEUT : 1
PAIN_CAUSED : 1
NOT_GOOD : 1
TO_AND : 1
PATIENT_REFERRAL : 1
ROOM_ZZPATIENT : 1
SCHIZOPHRENIA_CLOZAPINE : 1
PROBLEM_THERAPY : 1
HOB_DISCHARGE : 1
HERE_BY : 1
NO_BED : 2
HAD_THIS : 2
RAL_JOINT : 1
EDUCATION_PING : 1
AND_EGG : 1
OK_CONTACTED : 1
AND_LVH : 1
INSIGHTS_INTO : 1
THEM_BOTH : 1
LOW_AT : 1
MED_GOV : 1
WITH_INVOLVEMENT : 1
IS_NOW : 1
NURSING_ADMISSION : 1
DISCUSSED_OF : 1
DECLINES_HE : 1
ALLERGY_MEDS : 1
FEELING_TIRED : 1
SUICIDAL_INTOXICATING : 1
STATUS_STAFF : 1
ANTIDEPRESSANTS_HAD : 1
NO_MONEY : 1
KNEE_OBSTRUCTIVE : 1
AGE_ANATOMICAL : 1
OF_CHEN : 1
WILL_REGAIN : 1
WEEK_COLONIC : 1
VA_CYST : 1
OBJECTIVES_WERE : 1
LET_THIS : 1
ASSESSMENT_STRUCTURE : 1
LET_GET : 1
ASSISTANCE_THIS : 1
THEN_OFF : 1
SORE_RISK : 1
SURGICAL_ED : 1
HPI_WITH : 1
MONTH_APPT : 1
EXTRA_FLUIDS : 2
SIGHT_OUT : 1
TRACH_CARE : 1
NOT_CONTINUES : 1
TO_GET : 3
HIS_HENT : 1
BUT_MOTHER : 1
OUT_HIS : 1
SPUTUM_COLOR : 1
VI_TREATMENT : 1
PRIVATE_PROVIDERS : 1
THIS_ACTIVITY : 1
AROUND_HOUSE : 1
OR_PLANS : 1
IMED_INFORMED : 1
PHYSICIAN_HOURS : 1
HOME_HELP : 1
ACCOMPANYING_HISTORY : 1
TREATMENT_NURSING : 1
YEARS_AGO : 1
TO_TRANSFER : 1
WAY_OF : 1
WAS_AROUND : 1
WRITER_MEDICATION : 1
WAS_INFORMED : 1
PLEASE_THE : 2
SUPPLEMENTAL_LPM : 1
USE_DOSE : 1
MANAGEMENT_AND : 2
OF_HOPELESSNESS : 1
PATIENT_SOCIAL : 1
RELUCTANT_TO : 1
DOES_NOT : 3
NEGATIVE_ON : 1
TREMORS_THE : 1
AND_PROCESS : 1
SEEING_PERSONAL : 1
SUPPLE_NO : 1
BY_PROBLEM : 1
DYSPHAGIC_NO : 1
AGE_TO : 1
INCISION_LINE : 1
LIPID_PANEL : 1
FOLLOWING_RELATED : 1
BE_PATIENT : 1
FROM_DEACONESS : 1
PIPE_BECAUSE : 1
CM_HE : 1
SEE_IF : 1
ONGOING_FRUSTRATIONS : 1
ON_DUE : 1
FIRE_PATIENT : 1
GROUP_ARE : 1
THAT_SINCE : 1
REVIEW_SYSTEMS : 2
YOUR_PAIN : 1
ANESTHESIA_LIKE : 1
OR_FROM : 1
WAS_TERMINATED : 1
PRAVASTATIN_PATIENTS : 1
GOING_GET : 1
LOCATION_CBOC : 1
SURGICAL_AND : 2
THIS_PT : 2
THIS_REHABPHYSICAL : 1
ECSGENERAL_SOCIAL : 1
PERPETRATORS_IN : 1
PATIENT_WHEN : 1
FAIR_HAVE : 1
MOTIVATION_GUIDED : 1
ALERT_ASKING : 1
CM_NURSING : 1
MALE_VETERAN : 1
POSITIVE_NEGATIVE : 1
LEGALLY_NECK : 1
HRS_PER : 1
RN_NOTE : 1
AND_GOAL : 1
IER_RESTRAINING : 1
PREFERENCES_REVIEWED : 2
THE_ATTACHED : 1
IN_CLINIC : 1
OLD_PLASMA : 1
SHIFT_BED : 1
CILO_COALITION : 1
WNL_AFEBRILE : 1
WITH_PAIN : 1
SITE_ABSCESS : 1
PAST_AND : 1
EXAMINED_OMITTED : 1
THIS_BUT : 2
MAIL_BOX : 1
RETURN_MONTHS : 1
OPEN_WOUND : 1
NOT_EDEMATOUS : 1
SPOKE_VETERAN : 1
OUTSIDE_RECOMMENDS : 1
HEAD_OF : 1
BP_TREATMENT : 1
WORSE_OVER : 1
COUNSELED_REGARDING : 1
HE_THEN : 1
INCONTINENCE_NO : 1
VENTILATION_OF : 1
IF_RELEASE : 1
NONE_IT : 1
STRESS_RECOMMENDED : 1
BONHAM_HE : 1
THERAPY_ADDENDUM : 1
ARTHROPLASTY_CONTACTED : 1
HYPERGLYCEMIA_THIS : 1
WITH_DROWSINESS : 1
TMJ_NORMOGLOSSIA : 1
VASCULATURE_PUPIL : 1
TIME_BETTER : 1
ABLE_TAKE : 1
WITH_HX : 1
ELIMINATION_PROVIDED : 1
ALL_THESE : 1
CONTRIBUTING_TO : 1
HE_SLEPT : 1
STATED_HE : 2
SUPPLIES_PT : 1
REGARDING_PLAYING : 1
FOR_TOTAL : 1
FOR_PREDICTING : 1
HIGH_REFERENCE : 1
CORRECTLY_THE : 1
DO_NOT : 1
EFFECT_FEB : 1
POSTOP_HOURS : 1
DATE_IDENTIFY : 1
COULD_OVERWHELM : 1
URINE_COLLECTED : 1
IN_PPD : 1
NEUROLOGICAL_ALERT : 1
AND_MEDICATIONS : 2
TO_HBPC : 1
BID_PC : 1
RECONCILIATION_MONEY : 1
IS_BLIND : 1
CONDUCIVE_TO : 3
PULSE_COMMENTS : 1
RAINIER_TREATMENT : 1
RECOVERY_DUAL : 1
DEPRESSED_MOOD : 1
BROCHURE_WAS : 1
ML_PER : 1
WAS_MAINTAINED : 1
BEEN_THE : 1
CM_MALE : 1
REGARDING_THIS : 1
CALLED_AND : 1
SAME_INPT : 1
NONE_OTHER : 1
THINGS_BAD : 1
OPTOMETRY_APPOINTMENT : 1
HAVE_CONTACT : 1
HIS_LAST : 1
PROCEDURE_ESTABLISHED : 1
PRE_ANTIBIOTICS : 1
CONFUSED_REQUIRES : 1
REMAINS_ON : 1
NO_VETERAN : 1
NURSES_REVIEWED : 1
NOT_REFILL : 1
NEXT_DUE : 1
WOULD_LIKE : 2
TELEPHONE_CALL : 2
MAY_RESIDENTIAL : 1
COLORINO_BRC : 1
DRINKS_SKIN : 1
GET_TOO : 1
PRESSURE_PROTOCOL : 1
MALE_WITH : 1
LESION_PAPER : 1
IS_WITH : 4
ML_IN : 1
APPROPRIATE_PATIENT : 1
TO_ADDENDUM : 2
FEB_SELF : 1
RELIEF_NSAIDS : 1
HAVE_REVIEWED : 1
DID_REPORT : 1
VETERAN_HIS : 2
EXPIRED_WITHOUT : 1
BOWEL_MANAGEMENT : 1
PATIENTS_SINCE : 1
QUETIAPINE_TABLETS : 1
FROM_BEING : 1
TOLD_WAS : 1
HE_APPEARS : 1
REAL_NEED : 1
AN_CHF : 1
BENEFITS_TAKING : 1
DEC_NOT : 1
PROCEDURE_CONTRACT : 1
VA_SKIN : 1
SINCE_ADMISSION : 1
PROBLEM_OCCURS : 1
WITH_DATE : 1
KNEW_FREAK : 1
AGAIN_JUNE : 1
VOUCHER_TOMORROW : 1
BACK_MEDICATION : 1
OF_ADMISSION : 1
STOOL_STAFF : 1
CAP_ON : 1
WEEK_MUCOSA : 1
KIT_MODE : 1
NIACIN_WAS : 1
AND_ZZPATIENT : 1
FAMILY_CONFIRM : 1
DECLINES_ADVANCE : 1
OF_PERSONAL : 1
OF_MIND : 1
LAST_EXAM : 2
RECRUIT_OVERDOSE : 1
MET_TOBACCO : 1
ATTRIBUTES_SKIN : 1
ROOM_CARE : 1
POWELL_BRAD : 1
EOMI_SCLERA : 1
OTHER_OUTPATIENT : 1
HIM_HE : 2
WITH_CONTACTED : 1
ADDENDUM_EYE : 1
AND_TEGADERM : 1
DON_WILL : 1
MINUTES_SEX : 1
SPECIFIC_THE : 1
HAS_YET : 1
IS_LIKELY : 1
LUNG_SOUNDS : 1
SUGARS_BLOOD : 1
OR_OTHERS : 1
OF_HAVE : 2
MOVEMENT_WEIGHT : 1
WITH_TEAM : 1
TO_SHOW : 2
MESKENAS_VETERANS : 1
EFFORT_ALL : 1
LOCATION_ALL : 1
HE_MOD : 1
NEED_BE : 1
IN_IT : 1
SCHEDULED_AT : 1
TAB_TABLET : 1
TO_ES : 1
NEGATIVE_APPLICABLE : 1
SPOKE_TO : 1
MORE_ALCOHOL : 1
MALE_AGE : 1
OF_CASE : 1
WAY_DAIRY : 1
CARDIOPULMONARY_SYMPTOMS : 1
PREVENTION_SURGICAL : 1
IT_US : 1
INFORMED_THIS : 1
ABOVE_USING : 1
RISK_FOR : 1
KOSHER_MEALS : 1
OR_VET : 1
FUTURE_HE : 1
FROM_AND : 2
BROTHER_TO : 1
IDEATION_SUICIDAL : 1
MOBILITY_DURING : 1
JOINED_CLASS : 1
AND_TAPPING : 1
REALLY_MORE : 1
MAY_HT : 1
DTC_PROGRAM : 2
PULSE_NO : 1
TOO_THE : 1
NOW_HISTORY : 1
THIS_TASK : 6
MILDLY_DYSPHORIC : 1
TIME_TO : 1
RESULTS_NOTE : 1
IN_REAL : 1
FOLLOWUP_AT : 1
VET_LIKE : 1
PRECAUTIONS_IF : 1
WITH_HE : 2
ARE_STILL : 1
NO_NA : 1
PARTICIPATED_VETERANS : 1
EVALUATED_PATIENT : 1
RESCHEDULED_PHYSICIAN : 1
MEDICATIONS_BUTTONS : 1
MEDICATIONS_BE : 1
CITALOPRAM_HE : 1
CRISIS_PSYCHOSOCIAL : 1
WIFE_JOAN : 1
BE_AT : 3
MENTAL_ADEQ : 1
TD_TO : 1
EXPERIENCED_INVOLUNTARY : 1
ON_MON : 1
COLORS_DETECT : 1
BILATERAL_GANGLIA : 1
ASTHMA_CHRONIC : 1
REPORTED_WOOTEN : 1
ANTIBIOTICS_RESPIRATIONS : 1
RESPONSIBILITY_SYNCOPE : 1
ARKANSAS_HEALTH : 1
BATHROOM_ASSISTANCE : 1
SESSION_ADDRESSING : 1
CAROTID_BRUIT : 1
IF_INDICATED : 1
CALL_MESSAGE : 1
WITH_ATTACHED : 1
TO_DRUGS : 1
DOCUMENT_DISCUSSED : 1
TIME_SAW : 1
NL_AFEBRILE : 1
IN_DINNER : 1
TO_HOMELESSNESS : 1
WAL_POSTOP : 1
THE_AT : 1
SHE_IS : 3
AND_UP : 2
YOUR_ACCESS : 1
GENITOURINARY_VOIDING : 1
PTSD_EXPOSURE : 1
HOW_DOES : 1
SIGHT_OF : 1
BUTTONS_WILL : 1
NUCHOVICH_ON : 1
NASAL_MOBILITY : 1
KNEE_DIALYSIS : 1
TO_FOR : 7
ON_MG : 1
STAYING_DFE : 1
EDUCATION_ON : 1
ORTHOPEDIC_FOR : 1
RELAXATION_AND : 1
ON_ANSWERING : 1
VA_REMOVAL : 1
WITH_PAM : 1
TO_THE : 15
NURSE_CONTINUED : 1
SHE_WORRIED : 1
TO_COME : 3
PATIENT_SOCKS : 1
WIFE_OUTSIDE : 1
STATUS_ACTIVE : 1
CONSISTENCY_OF : 3
NEGATIVE_ASSESSED : 1
IDENTIFIED_PATIENT : 1
DIGESTIVE_THIS : 1
INJECTIONS_DEPRESSED : 1
BY_MOUTH : 10
PAST_PT : 1
SELF_IT : 1
AMPM_MMHG : 1
GLAD_HE : 1
MOVED_FLORIDA : 1
QUETIAPINE_MG : 1
MANAGER_DISCHARGE : 1
YES_FISH : 1
MG_PNEUMONIA : 1
TO_TALK : 2
AND_CONSENT : 1
ASU_SITE : 1
BASED_CARE : 1
YEAR_CANCEL : 1
ASPIRATION_OR : 1
IMAGING_FROM : 1
TRANSFER_SUPERVISION : 1
SAYS_SUGAR : 1
SINCE_CHANGES : 1
TELEPHONE_BOTH : 1
OVERSIGHT_ENCOURAGEMENT : 4
PROVIDER_ZZPATIENT : 1
IS_INVESTIGATORS : 1
MG_IM : 1
SEP_ELIGIBILITY : 1
ASSISTANCE_MOBILITY : 1
ADMISSION_NOTE : 1
ER_DTC : 1
ALERT_PLEASANT : 1
ATROVENT_MG : 1
SOCKS_THIS : 1
AND_COUNSELED : 1
AN_CONVERSATION : 1
AND_THEN : 1
MONTH_NORMAL : 1
FULL_INFORMATION : 1
CONTINENT_AND : 1
JOINT_RAL : 1
GOOD_PATIENT : 1
BRONCHITIS_IDENTIFIED : 1
YOU_NERVOUS : 1
ADDENDUM_AND : 1
MIN_MOBILITY : 1
MG_WEEK : 1
REASON_FOR : 3
WAS_DON : 1
TASK_OM : 1
OX_TOBACCO : 1
TAKE_TABLET : 10
THE_CLUB : 1
UNFORTUNATE_WOUND : 1
AND_VOLUME : 1
OR_PATIENT : 2
USING_APPROPRIATE : 1
TIME_TOGETHER : 1
MULTIPLE_CONCERNING : 1
AS_THE : 1
GROUP_MINUTES : 2
DRESSING_AND : 1
HAVE_EXAMINED : 1
NARROWING_VACCINE : 1
TAPPING_FEET : 1
CAN_LABS : 1
SAFE_THAT : 1
OWAY_ALWAYS : 1
NO_SUB : 1
APPT_FOR : 1
SEEN_FOR : 1
HIGHER_AMONG : 1
DIAGNOSES_NEUROMUSCULAR : 1
INITIAL_APPOINTMENT : 1
CARMODY_OTR : 1
HERE_MALE : 1
RECEIVE_SOMETHING : 1
STARTING_AT : 1
COUMADIN_AFTER : 1
RAPPORT_TO : 1
MINIMAL_RISK : 1
THE_THE : 1
DANE_RED : 1
HAVE_PAIN : 1
INJECTION_DUE : 1
OUT_BE : 1
TO_FALL : 1
ENCORUAGEMENT_DONT : 1
THAT_WAS : 1
SAFE_IS : 1
QUESTION_VETERAN : 1
EXAMINED_EVALUATED : 1
SCLERA_OUTSIDE : 1
FINISHED_GROUP : 1
FAMILY_CULTURAL : 1
NECESSARY_VETERAN : 1
PROGRAM_CROWN : 1
REFER_TO : 1
SCRIPT_FOR : 1
HRS_TELEPHONE : 1
LBS_BMI : 1
NUR_OUTPT : 1
POOR_AND : 1
TRAVEL_PATIENT : 1
HE_LANDED : 1
PT_CHIEF : 1
INTERVIEWED_AND : 1
IS_CAUSED : 1
OF_PATIENT : 4
AREAS_ICDCM : 1
ALERT_VETERAN : 1
CPRS_SELECTING : 1
CERTIFIED_YOGA : 1
ON_MH : 1
SKIN_OF : 1
PARANOIA_DENIES : 1
IDENTIFIED_VETERAN : 1
IS_PM : 1
SLIGHTLY_ABOVE : 1
AND_FOR : 4
ARE_POSSIBLE : 1
NEXT_VISIT : 2
APPROACH_REPORTED : 1
AGO_VETERAN : 1
OF_FROM : 1
AND_HYDROCHLOROTHIAZIDE : 1
JUST_BALLANCE : 1
DOCUMENT_WOULD : 1
FOR_TASK : 6
MEDICATIONS_TEACHING : 1
BREAKFAST_DRINKS : 1
NO_CA : 1
SAID_THAT : 1
QUALITY_EAGER : 1
WOMENS_CLINIC : 1
WITH_OF : 3
QUESTIONS_LB : 1
BY_NURSING : 2
WITH_WEIGHT : 1
CHEW_PIECE : 1
RELUCTANT_CHECK : 1
TIME_SURGERY : 1
VISITS_FOR : 1
CONSULT_MEMORY : 1
CONTROL_OF : 1
DISPOSITION_WANTED : 1
NURSING_REVIEW : 1
NO_PORTABLE : 1
AIDE_STARTING : 1
MALE_OF : 1
FOOD_NUTRITION : 1
TO_NAUSIA : 1
AT_LIVINGSTON : 1
FOR_PROMOTION : 2
PING_TOO : 1
THERAPY_OBSERVATIONS : 1
GOALS_AND : 1
LAKE_VA : 1
MEDICATION_REFILL : 1
HIS_AUTONOMOUS : 1
SCALE_MALE : 1
THREE_MONTH : 1
RECOMMENDED_FOLLOWUP : 1
INJECTION_OF : 1
CONNECTED_THE : 1
JAW_GUM : 1
FITNESS_GROUP : 1
THE_HES : 1
MG_AND : 2
MAKING_TO : 1
EDIT_VETERAN : 1
AND_NOT : 3
COULD_US : 1
HPI_IS : 1
PT_FEELING : 1
UNILATERAL_BRA : 1
CARE_ATTORNEY : 1
STAFF_NOTE : 1
OUTPATIENT_MEDICATION : 2
RESPONSIBILITY_AND : 1
FSG_AFTERNOON : 1
OTHER_AND : 1
TO_PLACE : 3
ABOUT_HE : 1
FENTANYL_IS : 1
ID_FREAK : 1
AMBULATORY_AND : 1
PLANS_HARM : 1
AREAS_HYPERGLYCEMIA : 1
OP_NO : 1
PATIENT_ASSESSMENT : 1
AND_REGARDING : 1
ON_USE : 1
YOUR_CARE : 2
PERSON_ORIENTED : 1
WORK_SALVATION : 1
HE_ENJOYING : 1
TRIAGE_NOTE : 1
PAST_NEVER : 1
RESPIRATION_TO : 1
RECEIVED_ON : 1
LCSW_GROUP : 1
BLOOD_BLOOD : 1
ARTHROPLASTY_OBSTRUCTIVE : 1
ANOTHER_HOSPITAL : 1
TO_EMERGENCY : 1
EVENT_MONTH : 1
APPOINTMENT_PALMER : 1
UNABLE_REACH : 1
COMPLAINT_PAIN : 1
ATTACHED_FILED : 1
WHEN_TO : 1
POLLEN_NOTE : 1
BENEFIT_BEING : 1
NH_HYPERGLYCEMIA : 1
SIMVASTATIN_MG : 1
PEACE_SESSION : 1
GOING_FOR : 1
ODY_THIS : 1
YES_VOLUME : 1
PROGRAM_ACTIVITIES : 1
COLLECTED_SENT : 1
AMBULATION_GAIT : 1
RESULT_UNCONFIRMED : 1
ASSESSMENT_HIS : 1
CHECKIN_NOTE : 1
ATTEMPTS_SUICIDE : 1
REVIEW_THE : 1
SKIN_OBJECTIVE : 1
GROUP_AT : 1
THAT_CAUSE : 1
DOES_LIKE : 1
AC_PLASMA : 1
FOR_AT : 2
AUTHOR_DATE : 1
INPT_NOTE : 1
AND_CONTACTED : 1
RESUME_NO : 1
NURSE_WITH : 1
BY_TWICE : 1
DID_APPROPRIATELY : 1
CATEGORY_APPLICABLE : 1
CSL_LOT : 1
MOOD_OK : 1
LIKE_DO : 1
INTEREST_LEARNING : 1
ON_ROUTE : 1
AS_ASSISTANCE : 1
TO_TEACHING : 1
TO_FOCUSED : 1
STRONGLY_OS : 1
HE_CLOUD : 1
EVAL_WITH : 1
WILL_ROI : 2
HIM_THERE : 1
PROPRANOLOL_HOPEFULL : 1
TAKING_CELEXA : 1
NH_FSG : 1
NOTE_INPATIENT : 1
CLINIC_WIFE : 1
FORMAL_ASSESSMENT : 1
OUT_MIND : 1
OTHER_PARTNERS : 1
HOPEFUL_THAT : 1
BY_YOGA : 1
CALLED_HIM : 1
HAS_TRIED : 1
ARE_OR : 1
WORSENI_PULSE : 1
LEFT_VACCINE : 1
AFTERNOON_NO : 1
OR_ACTIVITY : 1
SUPPORT_SYSTEMS : 2
JOAN_THURS : 1
GAIT_TRANING : 1
TREATMENT_IF : 1
RETURN_TO : 4
HAS_ON : 2
ADDITIONALLY_PROGRAM : 1
IS_DIABETIC : 1
WRITER_ABOUT : 1
OR_CHANGES : 1
MIN_RESPIRATION : 1
HD_ELEVATION : 1
DENT_HYGIENE : 1
AND_DEADLY : 1
NEUT_DINNER : 1
ALCOHOL_DENIES : 1
REMOVE_DENTURES : 1
CUES_VERBAL : 1
VET_BENEFIT : 1
OF_ISOLATION : 1
NOT_ME : 1
THE_ANTICOAGULANT : 1
THE_FUTURE : 1
ANTIBIOTIC_INJECTIONS : 1
VOIDING_WITHOUT : 1
VOLUME_HIS : 1
OTHER_HAVE : 1
FISH_DATE : 1
NOW_REVIEWED : 1
THE_INTERVIEW : 1
DISCHARGE_WITH : 1
UPDATE_FEELING : 1
THE_UNSURE : 1
OF_ABOUT : 1
OF_DEPRESSION : 1
BACK_NO : 1
ORDER_NICOTINE : 1
TALKING_MH : 1
TEAM_FELL : 1
READ_AUTOMATION : 1
THIS_SUPERVISION : 3
PROTOCOL_WILL : 1
TO_FULLY : 1
NORMAL_LIMITS : 1
FOR_LENGTH : 1
CONTINENT_BREAKFAST : 1
APPT_AND : 1
RESIDENT_ZZPATIENT : 1
FOR_TRAVEL : 1
WORKMANS_NO : 1
OBSTRUCTIVE_APNEA : 1
UNIT_DURING : 1
SEX_AGE : 1
SEX_DO : 1
NONE_LOCATION : 1
RELATIONSHIP_ISSUES : 1
SHATTERING_FACE : 1
ROI_THIS : 1
CONSENT_TO : 1
NEUROLOGICAL_ORIENTED : 1
RESIDENT_ADVERSE : 1
ULCER_PROTOCOL : 1
REALITY_YOUR : 1
WHICH_BE : 1
LB_KG : 10
PROBLEMS_BY : 1
CBC_DIFF : 1
MAILED_MH : 1
PROVIDER_WITH : 1
ONE_ONEHALF : 2
PERSONALLY_CARE : 1
NEXT_MON : 1
REPORTED_SCORE : 1
TASK_LS : 1
STABLE_REMOVED : 1
VETERAN_THIS : 2
DIAGNOSIS_OTHER : 1
CONSULT_CHN : 1
AREAS_CONCENTRATION : 1
WENT_INTO : 1
RECOVERY_LIFESTYLE : 3
BE_BY : 1
YOU_PRIOR : 1
PROBLEM_STRENGTH : 1
OXYGEN_AFTER : 2
ON_IMAGE : 1
OF_ARRIVAL : 1
ON_HEAD : 1
THE_WAY : 1
NOTE_ADDENDUM : 2
PRIMARY_WHO : 1
TO_KNEE : 1
OF_TESTING : 1
NIACIN_VETERAN : 1
THE_TOUR : 1
VERIFY_CLICK : 1
ILLNESS_THE : 1
BLADDER_TOILET : 1
SIZE_ADDENDUM : 1
CARE_BUTTONS : 1
HOW_ET : 1
UNDERSTANDING_DISCHARGE : 1
REFLUX_HOME : 1
VISUAL_OR : 1
BENZOS_AND : 1
ARE_JAIL : 1
APPLICABLE_IN : 1
SINCE_LAST : 1
HIS_PT : 1
IN_PAST : 5
HIS_MEAL : 1
CHECKIN_TEMPLATE : 1
EVERY_AND : 1
CASE_MANAGEMENT : 3
ORIENTED_PLACE : 1
CONTINUOUS_CLC : 1
CONTACT_IF : 1
STAETS_HE : 1
SERVICE_CONNECTED : 1
SAME_MH : 1
GOT_HE : 1
OF_NONSKID : 1
SEVERITY_PROLONGED : 1
THIS_POINT : 1
ROLEPLAYS_PARTICIPATED : 1
OS_DENT : 1
WITH_MEDICATION : 1
CLINIC_SUPPORT : 1
WHO_UNCIRCUMCISED : 1
FAR_PLAN : 1
CITALOPRAM_TAB : 1
ABOUT_PATIENT : 1
ME_FOR : 1
LAMINECTOMY_FOR : 1
NORVASC_SIMVASTATIN : 1
SKIN_FURTHER : 1
TO_GO : 2
WOUND_MODERATE : 1
ACTIVE_ATTACHED : 1
ACQUIRED_TEETH : 1
YOU_HAVE : 3
NEED_THE : 1
SPONGE_BOWEL : 1
IS_VOLUME : 1
ACTIVITY_WALKS : 1
MM_VASCULATURE : 2
TO_IF : 3
IT_SOME : 1
DIABETES_INTAKE : 1
STAFF_MHICM : 1
XANAX_AND : 1
BURST_ORDERED : 1
PAST_UP : 1
HE_PLAY : 1
AM_TO : 1
CALL_VETERANS : 1
INSTRUCTIONS_DISCHARGE : 1
HYGIENE_GROOMING : 1
CR_CA : 1
WELLBUTRIN_HES : 1
ML_OVER : 2
POSES_AS : 1
THE_RAINIER : 1
ON_WA : 1
TO_MG : 1
WERE_EDUCATED : 1
NURSE_HOME : 1
BE_CARE : 1
FIRST_VISIT : 1
MG_ML : 1
TO_WORKMANS : 1
ADOLESCENCE_CALL : 1
UMBILICAL_PATIENT : 1
MIAMI_HE : 1
TAKING_ALL : 1
THE_AGAIN : 1
NO_POSSIBLE : 1
BENEFITS_IDENTIFIED : 1
WILL_CHN : 1
ARTHROSCOPY_OF : 2
BLADDER_OF : 1
LED_BLINDNESS : 1
OF_THESE : 3
TO_LOT : 1
INSTRUCTOR_SYSTEMS : 1
AND_HELPED : 1
MY_IS : 2
MENTAL_HEALTH : 3
HHA_ASSESSMENT : 1
BEEN_MUCH : 1
RESCHEDULED_NO : 1
OF_TEST : 1
HAS_ARE : 1
MODERATE_TURNING : 1
SOURCE_FOR : 1
AUDITORY_TABLET : 1
INJECTION_JOINT : 1
OXYGEN_LPM : 1
WILL_ASK : 2
OCCURS_WT : 1
INTERACTIONS_WITH : 1
CLEAN_TURNING : 1
RISK_OBJECTIVES : 1
PATIENT_PHONE : 1
AND_LIDOCAINE : 1
PROCEDURE_EXPLAINED : 1
AND_PINES : 1
DRINKS_COLOR : 1
TO_DETERMINE : 1
THE_XANAX : 1
MIVA_FOR : 1
COUMADIN_TO : 1
FLUID_SNACKS : 2
STATUS_DID : 1
TO_DINING : 1
NUMBER_ROLEPLAYS : 1
PROGRAMGROUP_THERAPY : 1
TIMES_MUSCLE : 1
CONSUMPTION_OF : 1
LETTER_MAILED : 1
YEAR_OLD : 1
PROBLEM_TRAVEL : 1
ASSIST_REFER : 1
KNOW_THE : 1
WERE_USED : 1
PATIENT_ES : 1
DT_UR : 1
RESTRAINTS_IN : 1
NAME_PROCEDURE : 1
UARY_CALL : 1
INFORMED_ABOUT : 1
ABOUT_OR : 1
WITH_MAILED : 1
IS_FOR : 1
TO_NEW : 1
GROUP_THE : 1
PATIENT_DOB : 2
ME_MIAMI : 1
THE_LIPID : 1
SEE_IT : 1
INJECTIONS_PATIENT : 1
IT_GETTING : 1
AT_HIS : 3
BY_REPORTING : 1
SIDE_OF : 1
SKIN_THEN : 1
INTERACTIONS_SUPPORT : 2
HELPS_SHE : 1
OTHERS_COPE : 1
TEMP_RESP : 1
MOBILITY_HE : 1
TO_KEEP : 2
AT_JOB : 1
LIMITS_CONFIDENTIALITY : 1
VITAL_SEE : 1
OK_NOW : 1
PCP_LABS : 1
FLUVASTATIN_AMITRIPTYLINE : 1
NORMAL_RATE : 1
LIKE_BANK : 1
INFUSE_OVER : 2
PUREED_MEALS : 1
OF_LISTED : 1
PATIENTS_IT : 1
CPRS_TIME : 1
VETERANS_PRESENT : 1
THAT_YOU : 2
UNEMPLOYMENT_IN : 1
GM_DL : 1
THAT_NEED : 1
REACHES_US : 1
AMBULATION_BOWELS : 1
CALL_TERMINATED : 1
FULL_ON : 1
GROUP_MEMBERS : 1
DATE_TIME : 4
OBSOLETE_WITH : 1
WITH_MON : 1
DECISION_FORMAL : 1
LAST_IS : 1
AB_RIBA : 1
NO_PHYSICIAN : 1
EAR_APHDR : 1
CARE_THIS : 1
GETTING_ERS : 1
FOR_INFORMATION : 2
COMPLAINTS_HIS : 1
ADDENDUM_HAD : 1
SURGICAL_HISTORY : 1
TO_BR : 1
ANY_OR : 1
REQUIRE_USE : 1
HCV_AB : 1
SUPPLEMENT_GOAL : 2
EXPIRED_OR : 1
HAD_SCRIPT : 1
ID_REGARDING : 1
SCREENING_TAKING : 1
BOWELS_SELF : 1
USE_HIM : 1
ADDENDUM_REASON : 1
COMES_HE : 1
GOING_MH : 1
AM_YEARS : 1
DYSPHORIC_IN : 1
PER_COLONIC : 1
PUL_DECLINES : 1
PHYSICIAN_ATTENDING : 1
HEALTH_SYSTEM : 1
FLUVASTATIN_SIGNATURE : 1
BE_SEEING : 1
PENDING_EXPIRED : 1
OF_SYSTEMS : 2
THE_COMES : 1
ROUTE_TO : 1
AFTER_MIN : 1
ALLERGIES_DILTIAZEM : 1
HYDROCODON_PRIMARY : 1
PRESENTED_GOLD : 1
CASE_PROBLEM : 1
INFORMED_HAVE : 1
IBW_BMI : 1
FLUID_MENTAL : 1
AN_NURSING : 1
EMERGENCY_NOTE : 1
DAUGHTER_AND : 1
FOR_THIS : 9
AND_OR : 4
UP_THIS : 1
REPORTS_SHE : 1
DRUG_ALCOHOL : 1
LED_BY : 1
APPLICABLE_GLAUCOMATOUS : 1
REPORTS_TO : 1
BE_SHARED : 1
SECONDARY_GOAL : 1
NIGHTMARES_IT : 1
IS_OF : 1
HAD_SINCE : 1
ALL_YOU : 1
ASSIST_MOBILITY : 1
NECK_NO : 2
INITIAL_INTENTS : 1
HAVING_AND : 1
ANOTHER_BIRCH : 1
OF_HE : 2
NOTED_NO : 1
ME_THE : 1
SYNCOPE_AND : 1
FRO_PT : 1
JOB_IS : 1
MG_DOSE : 1
REFERENCE_COLLECTION : 1
KNEE_AND : 1
BEEN_NOT : 1
AT_DINNER : 1
WOULD_PREFER : 1
AID_QH : 1
HOW_PATIENT : 1
THE_DELIVERY : 1
VERIFIER_ESIG : 1
BEEN_WOOTEN : 1
PSYCHOSOCIAL_HIGH : 1
SPASMS_PATIENTS : 1
THEM_FEELING : 1
FROM_DR : 1
PALPITATIONS_SKIPPED : 1
GLUCOSE_ACTIVITIES : 1
SIMILAR_THAT : 1
TESTING_MRSA : 1
SC_DOCUMENT : 4
RATES_PAIN : 1
BE_FOR : 1
ARTHROPLASTY_TKA : 1
BACK_WORSENI : 1
RED_UDS : 1
SEEN_PCP : 1
AS_HISTORY : 1
BRA_SHAVING : 1
IMPACTED_REMOVED : 1
OR_SOCKS : 1
ROOM_WALKIN : 1
DERMATOLOGY_NOTE : 1
VET_SI : 1
THE_BOTH : 1
KG_AFRICAN : 1
BY_PROBLEMS : 1
HE_AVOIDS : 1
FOR_INSTRUCTIONS : 1
ALL_WERE : 1
EXAMINED_DISCUSSED : 1
FELT_OF : 1
PLACE_DECLINED : 1
NEGATIVE_DIAGNOSES : 1
TABLET_BY : 9
DUAL_DIAGNOSIS : 1
IN_MOUTH : 1
WITH_SYMPTOMS : 1
UNIT_THE : 1
OR_SKIN : 2
DURING_PLEASE : 1
CHECK_NOTE : 1
TAKING_HIS : 1
MAY_CAUSE : 1
SILVADIAZENE_AMITRIPTYLINE : 1
INCLUDING_INFORMATION : 1
PATIENT_SEEN : 3
OF_SE : 1
TO_GOLD : 1
TAKE_THE : 1
CALL_SURGERY : 1
WILL_WHETHER : 1
ENTERO_VESICAL : 1
TENDERNESS_BEHAVIORAL : 1
ALL_THAT : 1
SOBER_AND : 1
DATE_INTEREST : 1
BURSA_SUCH : 1
OF_OUT : 1
TO_SEIZURES : 1
WOMENS_WELLNESS : 1
HIS_NO : 1
BURNING_OF : 1
BRUIT_BILAT : 1
TO_ACTIVE : 1
WITH_PEERS : 2
PTS_RECENT : 1
LEFT_DELTOID : 1
FLUSHED_WITH : 1
DISCHARGE_CALL : 1
HAVE_JOB : 1
AND_ADMINISTERED : 1
VISIT_DENT : 1
AN_APPOINTMENT : 3
ALB_LDL : 1
CONTINUE_ASSIST : 1
THEN_JOB : 1
ATLAS_GOING : 1
INNER_THE : 1
PURPOSE_VISIT : 1
ADDENDUM_DISORDERS : 1
VERBALLY_MOVES : 1
LT_FACILITY : 1
MEDICATION_HE : 1
GASTROESOPHAGEAL_REFLUX : 1
REPORTED_ENJOYING : 1
APPOINTMENT_SURGERY : 1
NEEDED_ACTIVE : 2
EXPOSURE_THERAPY : 2
RELAXATION_REST : 1
OF_NEWER : 1
AGREE_WITH : 1
CLICK_THE : 1
HRS_NIGHT : 1
THE_STATE : 1
TYPES_SEDATION : 1
BASCOM_PALMER : 2
CHIEF_OF : 3
CHARACTER_TO : 1
EVALUATED_ME : 1
NOS_FH : 1
PAIN_ASSISTANCE : 1
EYE_INSTITUTE : 2
HAS_SAFE : 1
GOAL_HE : 1
TESTING_HEADPHONES : 1
THIS_CONTAINS : 1
SERVICE_RESPONSE : 1
INTERVENTIONS_MENTAL : 1
ROOM_PROVIDERS : 1
SEDATION_PREOPERATIVE : 1
TREATMENTS_DONE : 1
OFF_AND : 1
MAY_THURFRISUN : 1
ORGANIZED_GOAL : 1
THIS_TOUR : 1
CHECK_OUT : 2
NO_AND : 1
OP_ANTIBIOTICS : 1
IMAGING_SC : 2
AM_HBPC : 1
LITERAL_HE : 1
HIS_CAR : 1
PCP_ASAP : 1
THERAPY_THIS : 1
AT_CONVERSATION : 1
APRIL_ND : 1
ON_PCMM : 1
MANY_CONTAINING : 1
FOR_VITAMIN : 1
SOMEWHAT_RELUCTANT : 1
WAS_ASKING : 1
IN_WITH : 1
MEDICATION_VENT : 1
IS_HE : 1
IF_THEN : 1
FOR_OF : 2
AND_BLADDER : 1
WOULD_TO : 3
NUMBER_THIS : 1
ABSENCE_ACTIVE : 1
PROFILE_REVIEWED : 1
SPENT_IN : 1
PROVE_DEVELOPING : 1
PAIN_HAS : 2
DOCUMENT_SHE : 1
LS_AM : 1
RX_CLINICAL : 1
INTERFERES_THE : 1
HE_SHOWS : 1
GET_CLOSE : 1
PATCH_CURRENTLY : 1
ONE_YEAR : 1
STATES_THAT : 3
AND_BELOW : 1
NEED_DISCUSS : 1
LIVES_IN : 1
PRACTITIONER_DENIES : 1
ONEHALF_BY : 2
OBJECTIVE_BLOOD : 1
ENCOURAGEMENT_OR : 4
PRESSURE_MR : 1
THIS_THINGS : 1
SESSION_READER : 1
SELECT_WHO : 1
OX_USING : 1
CLOSELY_AND : 1
ACTIVITIES_AND : 1
WITH_PATIENT : 2
SEE_ON : 1
RELATED_YOUR : 1
PHYSICIAN_COMPLICATIONS : 1
OOB_WITH : 1
HE_DOESNT : 1
WERE_TO : 1
THAT_HELP : 1
SOBER_HOUSE : 1
HIS_BLINDNESS : 1
SISTER_SWS : 1
ASSISTANCE_BLADDER : 1
OF_CONCENTRATION : 1
AND_DEPRESSION : 1
EVERY_OSTEOPOROSIS : 2
RN_ADDENDUM : 1
NO_ACTIVITIES : 1
INFLUENZA_ML : 1
THIS_PERSONALLY : 1
HELPS_IS : 1
ADDENDUM_ANXIETY : 1
CATEGORY_CLASS : 1
NEUROLOGY_STRENOUS : 1
THEM_THE : 1
NO_AFEBRILE : 1
SESSION_TOTAL : 1
TOBACCO_CIGARS : 1
REGARDING_HIS : 1
WALK_THE : 2
IN_ACKNOWLEDGED : 1
HE_DENIES : 1
IF_SYMPTOMS : 1
ON_WHEN : 1
SC_ER : 1
COMMUTE_IF : 1
CONSULT_FOR : 1
DIERCTED_DENIES : 1
WITH_GLASS : 1
IS_AFFECT : 1
HE_EVERY : 1
HE_ATTRIBUTES : 1
REMOVED_WOUND : 1
OSAT_LT : 1
TO_LOCAL : 1
FAMILY_RESPONSIBILITY : 1
PING_NOT : 1
CHANGED_SINCE : 1
HOME_DOSE : 1
SECONDARY_NEUROMUSCULAR : 1
VISIT_CONSULTATION : 1
LOT_EXP : 1
HE_KNEW : 1
BEHAVIOR_THE : 1
STRENGTHS_ANOTHER : 1
IN_OR : 1
BURNING_THE : 1
PREOP_RELATIONSHIP : 1
AND_RETHINKING : 1
OF_DENIES : 1
FOR_AN : 1
MG_EDIT : 1
MEETING_WITH : 1
HIS_NOT : 1
HYPERGLYCEMIA_UNABLE : 1
IS_ADDITIONALLY : 1
MEDS_THAT : 1
KNEW_ID : 1
JUDGEMENT_FAIR : 1
HE_HOPEFUL : 1
TO_MEMBERS : 1
THE_DURING : 1
TOGETHER_PLANS : 1
CULTURAL_RELIGIOUS : 1
DILTIAZEM_MG : 1
THE_TECHNIQUES : 1
RELIEVED_SARAH : 1
EXAM_NOT : 1
REFERRED_TO : 1
SUGGESTED_VET : 1
USED_IN : 1
SUICIDAL_SUICIDAL : 1
AMBULATION_SELF : 1
AND_CENTURY : 1
IDENTIFIED_TO : 1
DECISION_LAST : 1
ON_DATE : 1
RELAPSE_OR : 1
EXT_TO : 1
NML_CONTACT : 1
FEW_AGO : 1
AS_BREATHS : 1
NOT_THIS : 1
OS_MMHG : 1
HYDROBROMIDE_MG : 2
FIB_HAD : 1
INCONTINENT_LEFT : 1
SIMPSON_PLEASE : 1
IN_LUNCH : 1
HAS_MUCH : 1
SPECIMENS_CYST : 1
ACTIVE_EXPIRED : 1
REAPPLIED_PT : 1
AND_FACE : 1
OF_OXYGEN : 1
APPROPRIATE_AND : 1
KG_WRIST : 1
STRATEGIES_ENCOURAGING : 1
URGENT_CARE : 1
THAT_WOULD : 2
NEED_OF : 1
DEPRESSION_ARTHROSCOPY : 1
DUE_NURSING : 1
PER_BARRIERS : 1
COUNSELING_PT : 1
GONE_MY : 1
WAIT_HEAR : 1
INCREASE_IF : 1
PROCEDURE_PATIENT : 1
FIB_PT : 1
YOU_AT : 1
EAR_NO : 1
SICHERER_MD : 1
NEXT_APPOINTMENT : 3
WAS_POOR : 1
PULSE_OCT : 1
ALERT_OX : 1
WITHIN_RELAXATION : 1
NAPROXEN_AND : 1
AND_BIRCH : 1
THE_HOURS : 1
BRONZE_FELLOW : 1
VETERAN_ABOUT : 1
CLINICAL_ACTIVITY : 1
NO_SOLUTIONS : 1
AND_DOWN : 1
CYST_REMOVAL : 1
PHYSICIAN_LEFT : 1
DENTAL_CLASS : 1
THERAPY_HE : 1
REGIMEN_AT : 1
IS_TELLING : 1
PATIENT_LIVES : 1
OF_MOVEMENTS : 2
CM_AT : 1
OUT_HEMOGLOBIN : 1
ANALYSIS_NEGATIVE : 1
NOTE_WOUNDS : 1
THE_TO : 3
OTHER_DEACONESS : 1
SI_PARANOIA : 1
PROBLEMS_FOOD : 1
THEN_PREPPED : 1
IS_HAVE : 1
PATIENTS_HEIGHT : 1
WELCOME_TO : 1
POSITION_PATIENT : 1
PENDING_MEDICATIONS : 1
AND_TIME : 3
PATIENT_LIKE : 1
RAL_AMBULATORY : 1
RESTARTED_AFTER : 1
IRIS_NEVI : 1
SEE_BP : 1
OU_DEPRESSED : 1
ALSO_HAND : 1
IN_RELATION : 1
PLAN_IS : 1
WITH_PERIPHERAL : 1
PATIENT_NEITHER : 1
ONE_AND : 2
MAY_MAX : 1
BY_SERVICE : 1
COME_IN : 2
FEELING_MANIC : 1
OF_NIGHT : 1
DISCHARGE_MET : 1
WAS_DISCHARGED : 1
OF_DAILY : 1
TOILET_CONTINENT : 1
FROM_WRITER : 1
LEFT_CHEST : 1
DETERMINE_EXTENT : 1
DOES_HAVE : 1
PAIN_MY : 1
VISIT_NURSE : 1
CARE_PROTESTANT : 1
INFORMATION_ANATOMICAL : 1
SKIN_FOOD : 1
NO_ADVERSE : 1
ROOTS_YO : 1
LB_AGE : 1
OBJECTIVE_PRESSURE : 1
GROUP_THERAPY : 2
TO_BACK : 1
MAKE_AN : 2
AFTERNOON_DM : 1
OF_GROUP : 1
NOTE_DIABETES : 1
INTAKE_WITH : 1
IN_ANTIDEPRESSANT : 1
MODERATE_FOR : 1
THURS_ELIMINATION : 1
MOTIVATION_DISCUSSION : 1
ABSESS_SITE : 1
HAGGERTY_RETURN : 1
ANTIDEPRESSANTS_AND : 1
DATE_SS : 1
RELATIONSHIP_AND : 1
PATIENT_RESPONSIBILITY : 1
IS_WHO : 2
CANE_OR : 1
PATIENT_CHECK : 1
COMMON_COLD : 1
ASSESSMENT_EYE : 1
USING_PAIN : 1
HEALTH_AIDE : 1
LABS_APRIL : 1
HIS_CELEXA : 1
LISTENING_READING : 1
SECONDS_THIS : 1
TO_PRINTED : 1
AS_NEEDED : 3
MAY_VOIDED : 1
OUTPATIENT_NORTHFLORIDA : 1
WENT_OVER : 1
MIRTAZAPONE_ON : 1
VET_INITIALLY : 1
IS_AT : 2
THIS_SET : 1
EYE_ON : 1
HOURS_ML : 1
THE_NO : 1
LOCATION_THE : 1
AN_INTAKE : 1
SHE_PING : 1
GO_TO : 2
SOME_HE : 1
CHAPLAIN_SERVICE : 1
USE_FOR : 1
OTHER_HISTORY : 1
ABOUT_SHE : 1
PALMER_APPT : 1
EFFECTIVELY_IF : 1
EVERY_MORNING : 4
REPORT_SUSTAINED : 1
FOR_PT : 1
APPOINTMENT_RECALL : 1
THINK_THERE : 1
HOUSING_DRUG : 1
WRITERS_ENCORUAGEMENT : 1
HE_TELLING : 1
OF_DISTRESS : 1
WAS_RELATED : 1
ENDURANCE_THIS : 1
SORE_NO : 1
ASSESSMENT_SCANNED : 1
FOUND_HAVE : 1
SUPERVISION_OVERSIGHT : 4
TREAT_SAME : 1
OF_EVENING : 1
MEDICAL_COMPLETE : 1
THE_GUARDIAN : 1
MEDICATION_THEM : 1
VITAL_SIGNS : 3
UNSURE_IF : 1
DICTATION_WILL : 1
RETURN_CALL : 3
STOOL_REQUIRES : 1
CARE_LOWER : 1
IN_TREATMENT : 1
WITH_ORDERS : 1
ME_MY : 1
NOTE_ORIENTED : 1
CORRECTED_WITH : 1
INTAKE_STAFF : 1
ESIG_PONTON : 1
PAIN_FURNITURE : 1
FAMILY_LPM : 1
CRAVINGS_IMPROVE : 1
HAVE_SESSIONS : 1
TO_DISPLAY : 1
PALPABLE_RADIAL : 1
MONEY_NO : 1
EXPIRED_MEDS : 1
SHOULDER_WHERE : 1
CARE_MANAGEMENT : 1
SCHEDULING_AT : 1
USED_APPLICATION : 1
WHEN_ASKED : 1
RISK_ON : 1
SYSTEMS_NEGATIVE : 1
LIFTED_AT : 1
IRRITABLE_SURLY : 1
HAVE_TYPICAL : 1
RISKS_TO : 1
ASSIST_CARE : 1
MANY_LESS : 1
LOT_NUMBER : 1
TO_LEARN : 2
HYGIENE_BATHING : 1
WRITER_BAY : 1
YES_YES : 1
CARE_COMPLETE : 1
DEMOGRAPHICS_CONSENT : 1
EVERY_AS : 1
FURTHER_INFORMATION : 1
COLLECTION_DT : 1
VISIT_FROM : 1
MOUTH_NURSING : 1
OTHER_INFORMATION : 1
DIFFERENT_OPTOMETRY : 1
SEEK_EMERGENCY : 1
FOR_LEAST : 1
AND_HASNT : 1
YOUR_TO : 1
PRESSURE_IS : 2
KNOW_ARRANGEMENTS : 1
TO_PSYCHIATRIST : 1
ON_IT : 1
HEALTH_AND : 2
TWICE_HOURLY : 1
DEPARTMENT_AT : 1
AT_NUTRITION : 1
TO_INTEREST : 1
PATIENT_NUMBER : 1
IS_TEARFULHE : 1
TO_ORTHOPEDIC : 1
PT_LAST : 1
REFLECTING_PATIENT : 1
OF_BEHAVIORS : 1
HES_ON : 1
THAT_HAVE : 1
EXPLAINED_THE : 1
KISHA_HCTZ : 1
OUTPT_CHECKIN : 1
SWS_WAS : 1
IER_ORDER : 1
TRIAL_OF : 1
BOWEL_MAY : 1
ADDENDUM_TEACHING : 1
FURNITURE_DOCUSATE : 1
IMA_EXPOSURE : 1
VETERAN_SUICIDAL : 1
AND_WAS : 2
CHANGE_IN : 1
LEGALLY_OBJECTIVE : 1
UNDERSIGNED_PROVIDER : 1
HAS_MOVED : 1
AIDE_FOLLOWUP : 1
CONTUSION_HAS : 1
PATIENT_GUARDIAN : 1
STRESS_THANKED : 1
CLERK_HYPERGLYCEMIA : 1
FRIENDLY_APPROACHABLE : 1
UNSPECIFIED_WOUND : 1
NOT_VERTIGO : 1
DUE_PROPRANOLOL : 1
FIRM_MOBILITY : 1
CR_EGFR : 1
FOLLOWUP_WITH : 3
IF_PC : 1
VI_STATUS : 1
CONTINUED_BY : 1
WAS_VISITING : 1
PATIENT_EXAMINED : 1
SKIN_PHYSICIAN : 1
DYSFUNCTION_NORMOGLOSSIA : 1
WITH_SPECIAL : 1
SESSION_AND : 1
NOT_HAD : 1
ALSO_JOINED : 1
CONTACTED_TO : 1
THE_DOM : 1
SINUS_BEHAVIORAL : 1
SKILLED_NURSING : 1
THE_MENUS : 1
STRATEGY_DEMONSTRATE : 1
NOT_NO : 1
SCRIPT_WRITTEN : 1
LVH_MED : 1
BE_SPLINTED : 1
OCCURS_LB : 1
READING_THE : 1
MEETING_TEAM : 1
PERIPHERAL_NEUROPAT : 1
OF_EVENT : 1
PATIENT_BE : 1
WHO_WERE : 1
WELLNESS_VA : 1
OF_TREATMENT : 2
PMID_AT : 1
WAS_BLACK : 1
THE_HOME : 1
JUNE_NO : 1
MORE_JUST : 1
ONLY_TO : 1
FROM_CYMBALTA : 1
ATTEMPTS_RISK : 1
LIMITATION_OBJECTIVE : 1
ON_CALLING : 1
ON_ASSISTANCE : 1
SUGAR_WAS : 1
AND_SIGNIFICANT : 1
NO_WOUNDS : 2
ALOPECIA_REFER : 1
SHOW_HAVE : 1
RIGHT_SIDE : 1
REFLEX_ORTHO : 1
AND_SPECIAL : 1
REMEMBER_IF : 1
YO_VETERAN : 1
PT_BEEN : 1
HE_GENITAL : 1
NIGHT_WITH : 1
EXODUS_TO : 1
VOMITING_NOTED : 1
OTHER_PERSONAL : 1
FEEL_NERVOUS : 1
DECIDED_TRY : 1
SAID_ON : 1
HE_DID : 1
NEW_ORDERS : 1
INTERVENTIONS_ORIENTATION : 1
HIS_SUGAR : 1
THE_JOB : 1
IS_ALERT : 1
ELIGIBILITY_SC : 1
IT_LABS : 1
DENIED_SUICIDAL : 1
IN_MY : 1
NORTHFLORIDA_MED : 1
OF_INTENTIONS : 1
REQUIRES_ASSISTANCE : 6
ON_NORTRYPTILINE : 1
URINE_AND : 1
PRODUCTS_SUPPLEMENTS : 1
LEARN_READING : 1
PROPRANOLOL_YEARS : 1
JOINT_DIS : 1
WARM_WATER : 1
CROWDS_REPORTS : 1
ONE_TIME : 1
EXCISION_PAPER : 1
PER_LEARNING : 1
PRIOR_ABUSE : 1
OP_SINUS : 1
OUTPATIENT_INCLUDING : 1
MIRTAZAPONE_WAS : 1
LEAD_TO : 1
CAR_SSN : 1
BRAD_MEDICATIONS : 1
WT_LB : 4
HOURS_RELAXATION : 1
VIETNAM_WHERE : 1
HARDEN_RED : 1
PATIENT_TOLD : 1
HAS_COMPLAINT : 3
HE_AM : 1
BECAUSE_DID : 1
NO_CONTINUES : 1
THE_TRANSFER : 1
ML_MG : 1
CHIN_SWOLLEN : 1
RECONCILIATION_TEAM : 1
VISIT_PRESENTED : 1
CLEAN_MODERATE : 1
AFFECT_TO : 1
BODY_INDEX : 2
CLASS_VI : 1
PREFERS_LEARN : 1
LIKE_GOING : 1
OXIMETRY_MODALITY : 1
ELEVATION_OF : 1
ALL_SILVER : 1
LLD_UPRIGHT : 1
AS_DURING : 1
ROOM_NOTE : 1
TO_LEFT : 2
MORE_HALDOL : 1
PLEASANT_COOPERATIVE : 2
CHO_DRUGS : 1
CONCERNS_ABOUT : 1
IN_AS : 1
RISK_ATTEMPTS : 1
WAS_PROVIDED : 1
APPOINTMENT_NEXT : 1
ON_TELEPHONE : 1
FOR_TRAINING : 1
SOCKS_SHARON : 1
GUIDED_OTHER : 1
SHE_DID : 1
OF_SWOLLEN : 1
SUPPLMENT_BP : 1
DECLINED_VACCINE : 1
SOME_PT : 1
PERSONAL_HYGIENE : 5
CAP_TAKE : 2
THEM_CONTINUING : 1
LED_CERTIFIED : 1
WIFE_CALLED : 1
PHARMACY_MEDICATION : 1
TOP_LB : 1
BECAUSE_KNEW : 1
PATIENT_DECLINED : 1
BOWELS_PSYCH : 1
PRIOR_CHANGE : 1
REG_APPETITE : 1
GROUP_NOTEPSYCHOEDUCATION : 1
APPT_MH : 1
PRAVASTATIN_TESTOSTERONE : 1
CONTROL_THIS : 1
GROUP_OF : 1
OR_THAT : 1
PPD_IMC : 1
PRINTED_SUCH : 1
ACTION_COLLECTED : 1
INSTRUCTOR_YOGA : 1
SELF_OXYGEN : 1
FLUID_REMOVED : 1
TRIPPING_LOCATION : 1
ELIMINATION_AMBULATION : 1
THIS_HIP : 1
COMMENT_GOOD : 1
MEALS_ALL : 1
ON_FOLLOWING : 1
RHYTHM_MENTAL : 1
BUT_NOT : 2
PTS_HAVE : 1
ER_VISITS : 1
TOTAL_MG : 2
CAROTID_EXAMINATION : 1
PROVIDED_EDUCATIONAL : 1
HAVE_PEOPLE : 1
NURSES_NOTE : 1
NURSE_CONSULTATION : 1
EASY_GOING : 1
BM_THIS : 1
FOLLOWS_PULSE : 1
READ_CLERK : 1
EVERY_ACTIVE : 1
MON_HE : 1
NOTE_MEDICATION : 1
OF_TOTAL : 1
REPORT_PAIN : 1
REASON_VISIT : 2
PC_PATIENT : 1
CALL_DOWN : 1
COME_OFF : 1
MONTHS_THE : 1
PALPABLE_VENT : 1
HAS_THE : 3
APPLICABLE_SIGNS : 1
SIDE_AND : 1
EXAMINED_BY : 1
PLACE_FOLLOWS : 1
NICOTINE_INSTRUCTIONS : 1
TABLET_PATIENT : 1
CONTAINING_ALCOHOL : 1
FRUSTRATIONS_THAT : 1
WENT_THE : 1
COLOR_RESIDENT : 1
BP_OF : 1
HAS_HAD : 1
CONTINUES_TO : 3
GU_CALL : 1
MEDICALLY_MONITORED : 1
NUMBER_LS : 1
IS_SEXUALLY : 1
SCALE_SCORE : 1
FOR_COMPLEX : 2
SHARON_INTERACTIONS : 1
VET_SOON : 1
MENTAL_SOCIAL : 1
ON_THE : 7
INTERVENTIONS_FOR : 3
RHYTHM_AND : 1
GIVEN_INSTRUCTIONS : 1
MED_PATIENT : 1
BEHAVIORAL_LAB : 1
BLADDER_BOWELS : 1
ARTHRITIS_PANEL : 1
INFORMATION_ON : 3
GROOMING_FAIR : 1
BECAUSE_HE : 1
BURST_BY : 1
OF_THE : 11
ELIMINATED_PEOPLE : 1
FRIENDS_MANY : 1
FAILED_TO : 1
TAPE_TAPE : 1
SCREEN_MOTHER : 1
KNOWN_ADMINISTRATIVE : 1
PROBLEMS_GOAL : 1
DONT_MONEY : 1
CAROTID_BILAT : 1
ONEHALF_MH : 1
PHONE_ON : 1
REPORTED_HE : 2
TRANSFER_NO : 2
WOUNDS_PRESSURE : 2
SUPPORT_HAS : 1
DIFFICULTY_HISTORY : 1
IS_SEEN : 1
ENDED_WITH : 1
HAS_NOT : 2
ILLNESS_FOLLOWING : 1
MORE_UPON : 1
FREAK_BE : 1
PHARMACY_AB : 1
DEADLY_DEVELOPING : 1
STAFF_ONE : 1
CANCEL_EP : 1
HAS_CHIEF : 3
VET_CONSIDERED : 1
BMI_YES : 1
SATISFACTORY_FRIENDS : 1
AND_REVIEWED : 1
MEDS_AGO : 1
MURMUR_NO : 1
HE_DIFFICULTY : 1
WILL_HELP : 1
BRC_THE : 1
FLAP_NAME : 1
REQUIRES_REORIENTATION : 1
PT_HE : 1
BE_GET : 1
IS_WITHIN : 1
READY_TO : 1
GREAT_AND : 1
WITH_HIS : 2
LPM_OF : 1
ANY_NIGHTMARES : 1
YRS_PAROXETINE : 1
APPROACHED_REFUSED : 1
ONE_AGO : 1
SCANNED_HOMEMAKER : 1
SOLUTIONS_AND : 1
WOULD_APPT : 1
ACTIVITY_OF : 1
STATUS_RN : 1
FRONTAL_LOBE : 1
ALREADY_APPOINTMENT : 1
TO_EYES : 1
TREATMENT_RELATED : 1
PARTICIPATION_XACTIVE : 1
KERI_ORI : 1
DOWN_VISIT : 1
EGFR_ALB : 1
PATIENT_REMOVE : 1
THAT_OVERWHELM : 1
LIGHT_UTILIZING : 1
OF_LEARNING : 1
OFFICE_THE : 1
WILL_CONTINUE : 1
SPECIFIC_SESSIONS : 1
BP_CONSIDERED : 1
RETURNED_TELEPHONE : 1
FROM_SOURCES : 1
INTO_THE : 1
HR_CHIEF : 1
PAIN_SUB : 1
EXAM_CBC : 1
BUTTONS_FIXED : 1
ANY_EFFECT : 1
LEARNING_BARRIERS : 2
WITHOUT_FURTHER : 1
APPETITE_MANY : 1
ROOM_TO : 1
TESTOSTERONE_PATIENTS : 1
WITH_ABOUT : 3
HE_OF : 1
SEBACEOUS_SPECIMENS : 1
ENVIRONMENT_WAS : 1
WISH_TO : 1
DIALYSIS_BASED : 1
FINE_WILL : 1
CENTURY_BLVD : 1
MISSING_RISK : 1
BOTH_MAKING : 1
ABSCESS_ID : 1
MEDICATIONS_THAT : 2
ORIENTED_TO : 4
WHERE_HE : 1
PATIENT_WHO : 1
GOV_KNOWN : 1
FLUID_PATIENT : 1
SHARED_WITH : 1
INCLUDING_ON : 1
LEARNING_ROUTE : 1
MEDICATION_RECEIVED : 1
BE_THERE : 1
SAFELY_WHEN : 1
NEEDED_OUTPT : 1
BATH_OF : 1
OF_THEM : 1
THAT_BEEN : 1
DOING_ADDITIONALLY : 1
MEALS_OF : 1
CONTINENT_OF : 1
HASNT_STOOL : 1
TELEPHONE_CARE : 2
BETTER_AND : 1
SAFELY_CALLED : 1
FIXED_NOTIONS : 1
FROZEN_DINNERS : 1
ATTENDING_PHYSICIAN : 1
SUPPLE_NECK : 1
UP_AND : 1
PULSE_OX : 3
NOTE_OF : 1
WITHOUT_HISTORY : 1
ACTIVITY_IN : 1
NURSING_VISITS : 1
GU_TO : 1
MENTAL_THAT : 1
PM_AMOUNT : 1
PATIENTS_APPOINTMENT : 2
AGO_MY : 1
US_PROVE : 1
NURSE_CARE : 1
HOME_HEALTH : 2
CURRENTLY_ON : 1
SUPPORTS_AVAILABLE : 1
TRIED_HI : 1
ACTIVE_CANAL : 1
JAIL_IS : 1
TAKING_BRIGHT : 1
INTERVENTIONS_ACTIVE : 1
AND_ACTIVE : 1
REQUIRES_VETERAN : 1
MANIFEST_HOMEMAKER : 1
BASED_NO : 1
SEEN_SUE : 1
RECEIVED_INFORMATION : 1
BUT_PAINFUL : 1
JOINT_INJECTIONS : 2
STRESS_SUBSTANCE : 1
ATTENDED_THE : 1
INCLUDING_RETURNED : 1
PROTOCOL_STAFF : 1
THAT_CONTINUES : 1
HE_TAKING : 2
PANEL_ORDERED : 1
FEELING_AND : 1
WOUND_THE : 2
LESS_INCREASED : 1
WITH_AS : 1
YES_MEMBERS : 1
VHS_KNOWN : 1
PAIN_IN : 3
DO_RE : 1
FRACTURE_ADOLESCENCE : 1
AREA_TO : 1
NOTEPSYCHOEDUCATION_OUT : 1
GAF_DISCUSSED : 1
VERBAL_REMINDERS : 1
OUTPATIENT_PROGRAMGROUP : 1
TYPE_OF : 1
PROVIDER_PATIENT : 1
ME_DR : 1
AND_NAD : 1
AND_FLEXERIL : 1
VET_INVITED : 1
DOCUMENT_NUMBER : 1
LORAZEPAM_TAKE : 1
BEEN_TAKING : 1
THE_ACTIVITY : 1
STOP_SMOKING : 1
FROM_FLORIDA : 1
OUTSIDE_SMOKE : 1
SHOWS_IN : 1
REPORTS_SINCE : 1
INTERVIEW_LIMITATIONS : 1
THERAPY_FOR : 1
NA_BETTER : 1
THE_PSYCHIATRIST : 1
PATIENT_LB : 1
HIGH_PLASMA : 1
WHAT_SAID : 1
REFUSE_MEAL : 2
HE_INTERNALIZED : 1
POSITIVE_AND : 1
OF_IMPACTED : 1
IS_CURRENTLY : 1
PHYSICAL_THERAPY : 1
TX_EXPLOSION : 1
FREAK_OUT : 1
WITH_BONES : 1
NO_PULSE : 1
WITH_HAS : 4
TUNNEL_AGAIN : 1
EMPLOYMENT_SOBER : 1
DOSE_RED : 1
HYGIENE_SHOWER : 1
AXIS_AXIS : 1
MATTER_SECONDS : 1
LITTLE_LOW : 1
CONFLICT_WITH : 1
SIMPSON_MAIL : 1
THE_ARRANGEMENTS : 1
CLINIC_VETERANS : 1
ES_PONTON : 1
SESSIONS_DATE : 5
ONGOING_THAT : 1
HAS_PROGESSIVELY : 1
IMPROVED_LYING : 1
WHAT_AND : 1
HEARING_GONE : 1
ICDCM_TO : 2
EVALUATED_THE : 1
SIMVASTATIN_TAB : 1
IT_CAN : 1
CUTTER_DIRECTED : 1
HEALTH_LAB : 1
NEXTOFKIN_SWS : 1
PRESSURE_RAL : 1
VETERANS_RESPONSE : 2
VETERAN_NOT : 2
BONES_DOES : 1
ANGRY_THIS : 1
SUPPORT_PERSONNEL : 1
JOB_THEN : 1
IT_LIKELY : 1
PROTESTANT_PHYSICIAN : 1
IS_AND : 5
NURSING_TRIAGE : 1
MUSCLE_NEXT : 1
VISUAL_AUDITORY : 1
COMMENTS_TO : 1
CONSENT_HCV : 1
HISTORY_PAST : 1
MANAGEMENT_THOUGHT : 1
DIARRHEA_NOTED : 1
SESSION_REMAINING : 1
TREMORS_DINNERS : 1
SUPPLEMENTS_THAT : 1
AUTHOR_PLEASE : 1
SESSIONS_ADDENDUM : 1
SKIN_WAS : 1
OF_BOWEL : 3
OVERLYING_SKIN : 1
ISSUES_APPROPRIATE : 1
PER_PROTOCOL : 1
LS_TO : 1
ALLERGIES_HE : 1
DATE_TEST : 1
VOICE_THIS : 1
MALE_STARTED : 1
SPOKE_WIFE : 1
BUT_HAS : 1
PATIENT_WAS : 10
ALCOHOL_MHC : 1
BY_OUTPATIENT : 1
PT_SHE : 1
OBSERVED_TALKING : 1
FAILED_SHOW : 1
WITH_ASSESSMENT : 1
EXPERIENCED_CHO : 1
FOR_COLLEAGUES : 1
PULSE_USING : 1
CURRENT_PHE : 1
PERSONAL_BED : 3
MAY_ORAL : 1
OF_PRIMARY : 1
DENIED_APPOINTMENT : 1
THAT_EXPIRED : 1
BY_NH : 1
YO_WITH : 1
PROBLEMS_PROBLEM : 2
TO_SOCIAL : 1
TKA_CONTACTED : 1
CHEW_IN : 1
DECISIONMAKING_THE : 1
PMH_DIABETES : 1
REVIEWED_FOR : 1
USING_ULTRASOUND : 1
HSV_DICLOFENAC : 1
SILVER_FLUVASTATIN : 1
TO_READ : 1
SITE_CONSENT : 1
EP_DEVICE : 2
NO_SADDLE : 1
IS_PATIENT : 2
PRIMARY_NOK : 1
OF_INSTRUCTION : 1
PCP_LITTLE : 1
PER_WEEK : 1
MEDS_APPETITE : 1
SUPPLMENT_TREATMENT : 1
REACTION_TREATMENT : 1
CANT_MAKE : 1
KNEE_ARTHROPLASTY : 2
MEDICATION_DISABILITIES : 1
REFLUX_DISPOSITION : 1
SEVERITY_WITH : 1
BY_LYING : 1
AS_JOINT : 1
WITH_PROCEDURE : 1
CLAUSTROPHOBIC_NONNEOPLASTIC : 1
PM_TO : 1
VISIT_IS : 1
VOMITING_DIARRHEA : 1
OR_INJECTION : 1
DIAGNOSIS_ACQUIRED : 1
WAS_ON : 2
NEW_SAFETY : 1
PHYSICIAN_PERSONAL : 1
IT_SHE : 1
DID_SPEECH : 1
BY_SIGNATURE : 1
THERAPUTIC_FOR : 1
HE_CONTINUED : 1
FOR_BLOOD : 2
AND_SURROGATE : 1
PATIENT_THE : 2
NO_BLADDER : 1
LAST_PAIN : 1
HAD_STOOL : 1
DM_NPH : 1
OF_CHIN : 1
AGITATION_SCALE : 1
ML_SATURATION : 1
OF_GROUPS : 1
IN_WHO : 1
STITCHES_ON : 1
ALWAYS_POSSIBLE : 1
VERIFICATION_NECK : 1
CONTINUES_TALK : 1
AN_NO : 1
EDEMA_ELEVATION : 1
SMOKING_AREA : 1
PLAY_WITH : 1
TOMORROW_AND : 1
YELL_AT : 1
AND_ABILITY : 1
HAD_PAIN : 2
PAIN_DURATION : 1
INTO_OF : 1
COMPLAINT_MONTHS : 1
PERPETRATORS_ARE : 1
KG_FUNDUSCOPIC : 1
VERY_CLOSELY : 1
EXPOSURE_WITH : 1
WITH_PHYSICIAN : 3
THEN_IT : 1
AND_LIPID : 1
NOT_SEEN : 1
AS_AND : 2
PHYSICIAN_MESSAGE : 1
AIR_TESTING : 1
TOBACCO_LIMITATION : 1
OTHER_SUPPORTS : 1
IS_CONTACTED : 1
ACTIVE_DISABILITIES : 1
APPOINTMENT_ON : 1
IN_IDCP : 1
AREA_SUPPORT : 1
GROUP_CALL : 1
REGAIN_VISION : 1
BE_MS : 1
RASH_PRESSURE : 1
BRADYCARDIA_MAY : 1
DIAGNOSIS_WAS : 1
AT_YEARS : 1
SENT_HEALTH : 1
PHARMACY_ATTENDING : 1
NOTE_REASON : 1
ADMISSION_TO : 1
INJURY_PHYSICAL : 1
NEXT_WEEK : 1
GETTING_EASIER : 1
DETOX_MALE : 1
VERIFY_THIS : 1
SWS_INDEPENDENT : 1
MAKES_FEEL : 1
TEAM_CONTINUE : 1
PAIN_LEFT : 1
MINUTES_IV : 2
SYKES_NP : 1
IN_NEXT : 1
DAIRY_BARRIERS : 1
CONFIDENCE_ASKED : 1
GU_ORIENTED : 1
BRUITS_PHARMACY : 1
TROMBONE_HIS : 1
CHARACTER_READER : 1
MAX_DATE : 1
FLAT_MOOD : 1
MEDS_BUT : 1
XRS_HYPERLIPIDEMIA : 1
CONSUMED_BOWEL : 1
PULSE_PAIN : 1
EDUCATION_PATIENT : 1
NOT_CELEXA : 1
CENTURY_APT : 1
DISORDER_USE : 1
GRANDCHILDREN_FOR : 1
SOURCE_THE : 1
ON_PROPRANOLOL : 1
PRACTITIONER_FOR : 1
AIR_COUGH : 1
ALCOHOL_IN : 1
INSTRUCTED_THAT : 1
INTENSIVE_PROGRAMGROUP : 1
LIKE_LEARN : 1
ASSISTANCE_NO : 1
WHICH_THEY : 1
OR_ALLERGY : 1
ALL_HYPERGLYCEMIA : 1
PARTNERS_HISTORY : 1
VETERAN_IS : 3
TAKE_TABLETS : 1
GIVEN_LEFT : 1
MOUTH_TWICE : 1
WILL_LIKE : 1
TO_GREAT : 1
OR_FURTHER : 1
AS_HIP : 1
APPLICABLE_GIVE : 1
PREDNISONE_ORDERED : 1
PCP_MH : 1
REACH_VOICE : 1
LED_TO : 1
LEFT_LAMINECTOMY : 1
NONPRODUCTIVE_FURTHER : 1
SUCH_AS : 1
MEDICATIONS_WEIGHT : 1
MANAGEMENT_THIS : 1
TRIAMTE_TAB : 1
FOUND_IT : 1
ACHIEVED_TX : 1
CONCERNS_FOR : 1
PATIENT_CAN : 1
CALLED_ASSIST : 1
YOU_MAKE : 1
THE_NEWER : 1
HIM_CONTENTMENT : 1
DISORDER_CLC : 1
ERS_HIS : 1
MINNEAP_TREATMENT : 1
SYMPTOMS_OF : 2
TO_YOUR : 2
EXAM_VETERAN : 1
WAS_THEN : 1
INCLUDING_PATIENT : 1
INDEPENDENT_TURNS : 1
VARDENAFIL_LEFT : 1
DENIES_FEELINGS : 1
INTAKE_ASSESSMENT : 1
DANGER_DRIVING : 1
MIN_CALL : 1
CLINIC_INTERACTIONS : 1
BY_ME : 2
BROTHER_HEART : 1
DATE_DICTATION : 1
MANAGEMENT_MOTIVATION : 1
VERIFY_PATIENT : 1
KERI_LOTION : 1
TMJ_DYSFUNCTION : 1
WITH_SHOE : 1
AN_CHANGE : 1
CARE_FRO : 1
ABSENCE_TEETH : 1
TOLD_ME : 1
LIKE_LOW : 1
ME_TO : 1
RETURN_IN : 1
STILL_WITH : 1
INCIDENT_RINGING : 1
DERMATOLOGY_PROGRESS : 1
WITH_TRIAL : 1
COMPLEX_SEE : 1
TO_DISCUSSED : 1
FROM_TOOLS : 1
THERAPUTIC_FIB : 1
SUBSTANCE_AND : 1
INPATIENT_INTAKE : 1
FEB_LEGALLY : 1
DISCUSSED_REVIEWED : 1
BED_APPEARS : 1
PRIOR_VET : 1
CONFUSION_CALLED : 1
MEDICATIONS_STATUS : 5
LOT_PAIN : 1
UNIT_IN : 1
DISCHARGED_EXODUS : 1
TAPE_LINE : 1
AND_SLIGHTLY : 1
SPECIAL_ACTION : 1
GUNSHOT_TO : 1
ENVIRONMENT_MAINTAINED : 1
WITH_PCP : 1
MEALS_AND : 1
NOTE_FENTANYL : 1
ATTENDING_TREATMENT : 1
HIS_HEAD : 2
IN_NUMBER : 1
WHO_FINISHED : 1
UTI_VESICAL : 1
UNDERSTANDING_THESE : 1
ADDENDUM_ALERT : 1
IS_DECLINED : 1
ELECTRONICALLY_ENDING : 1
HX_OF : 3
MEAL_FLUID : 2
SCHEDULE_HIM : 1
MEDICATION_NO : 1
LB_FUNDUSCOPIC : 1
VET_SOMEWHAT : 1
FOR_HAS : 1
SELF_FAMILY : 1
CARE_NURSE : 2
LOCATION_CARE : 1
VA_HISTORY : 1
OS_SPOKE : 1
OF_DERMATOLOGY : 1
INJURY_PMR : 1
SMOKES_TOBACCO : 1
IS_NOT : 4
SCREENING_COUNSELING : 1
CHICKEN_ALLERGY : 1
ION_PEERS : 1
PORTABLE_HAND : 1
ROOM_EMERGENCY : 1
OF_HER : 1
HE_PAIN : 1
OF_ROLEPLAYS : 1
BPH_PREPROCEDURE : 1
PSYCHOLOGY_NOTE : 3
CALLED_CONCERNS : 1
DISPLAY_FROM : 1
VET_ANGRY : 1
GUIDED_DISCUSSION : 1
GROUP_BP : 1
ELIMINATION_BRP : 1
GROUP_DESIGNED : 1
ORGANIZATION_OF : 1
DAILY_TO : 1
THERAPY_PROGRAM : 2
OF_PAIN : 3
PING_RASH : 1
MANAGEMENT_POST : 1
INFORMATION_IF : 2
CM_TIME : 1
SSN_DILTIAZEM : 1
APPOINTMENT_CHIEF : 1
PATIENT_RESPONSE : 2
IMPACTED_CERUMEN : 1
LDL_PATIENT : 1
INCH_ALLERGIES : 1
COUGH_EFFORT : 1
LIPID_NONE : 1
NO_WHEN : 1
HAS_ALSO : 1
CALF_TENDERNESS : 1
PT_AGAIN : 1
NEUT_ABS : 1
CALL_THE : 1
HYGIENE_BED : 3
ADDENDUM_TO : 1
DELIVERY_OF : 1
REMOVED_HEIGHT : 1
FOR_OSTEOPOROSIS : 2
PRESENTING_ADEQUATELY : 1
SCHEDULED_TIME : 1
HAVE_AN : 2
FROM_IN : 1
HIS_NEXT : 1
HAD_COUMADIN : 1
BUT_CAN : 1
WITH_LOWER : 1
HOURLY_SAFETY : 1
THOUGHTS_WITH : 1
PATIENT_ORDER : 1
NOT_HISPANIC : 1
WAS_NAME : 1
CARE_TIME : 1
INFLUENZA_MPLS : 1
MHICM_SCREENING : 1
IS_CORRECTED : 1
VETERAN_REFERRED : 1
AND_MEDS : 1
APPLICATION_WILL : 1
MEDICAL_THE : 1
CONTINUED_CONTENT : 1
WHEN_RESTART : 1
SNACKS_IS : 1
WITH_TAKES : 1
ALL_OF : 2
FROM_THE : 2
FOR_MEMBERS : 1
ELECTRONICALLY_FILED : 2
FOR_DEPRESSION : 3
WATER_LARGE : 1
LETTER_TO : 1
PROGRAM_THE : 1
DATE_MONTH : 1
CELEBRATING_YEAR : 1
VERBALLY_YES : 1
HANDS_FACE : 1
MICROSCOPIC_EXAMINED : 1
THE_VICTIM : 1
RRR_SYST : 1
PREOPERATIVE_INPATIENT : 1
SCHEDULED_HE : 1
TIME_GENITAL : 1
TYPE_QUESTION : 1
WA_STATE : 1
SOBER_SETTING : 1
WORRIED_ABOUT : 1
COUNSELING_DATE : 1
NEUT_CURRENT : 1
WITH_PARTNERS : 1
DRINKS_CONSISTENCY : 1
FATHER_AWHILE : 1
JUL_TEMPERATURE : 1
MD_BUT : 1
AC_GLUCOSE : 1
SITUATIONS_LESS : 1
MOBILITY_UNLESS : 1
INFLUENZA_IMMUNIZATION : 1
UNCIRCUMCISED_WITH : 1
WARFARIN_FOR : 1
WRITER_RE : 1
THE_PROVIDERS : 1
TIME_LS : 1
BRADEN_SCALE : 1
ORDER_BOSS : 1
OXIMETER_TO : 1
PREOP_CALL : 1
LUNG_WILL : 1
ROCK_SHE : 1
STAFF_VET : 1
SINCE_INCIDENT : 1
INDICATED_VITAL : 1
METHOD_BRP : 1
IT_THE : 1
OX_ON : 1
TO_AT : 3
PLEASE_CALL : 1
BED_INDEPENDENT : 1
SEES_THE : 1
QUIT_BLOOD : 1
MMM_SUPPLE : 1
CURRRENT_OF : 1
RECEIVING_CARD : 1
FOR_CONTRACTED : 1
HYPOXEMIA_IS : 1
SITE_ED : 1
OCT_TOBACCO : 1
WITH_OUTSIDE : 1
HAND_XRS : 1
HAD_OLD : 1
IN_INCLUDING : 1
END_THE : 1
HTN_LVH : 1
ASSESSED_AND : 1
IN_HOSPITAL : 1
OUT_OF : 2
SIMVASTATIN_TESTOSTERONE : 1
WAS_EXPLAINED : 1
PERSON_TIME : 1
CARE_STRENGTHS : 1
CALL_MONITOR : 1
NONPRODUCTIVE_ALL : 1
APPOINTMENTS_ONE : 1
BACK_OS : 1
PATIENT_RISK : 1
DISCUSSING_HEALTH : 1
THE_USED : 1
THE_INPATIENT : 1
BEING_IN : 1
KOSHER_AND : 1
ALREADY_SCHEDULED : 1
SUBJECTIVE_HAVE : 1
NURSING_INITIAL : 1
THEY_IN : 1
THE_CLINIC : 3
READING_NEWSPAPER : 1
DISCUSSED_WITH : 3
SWOLLEN_IMPROVEMENT : 1
NOTE_CONFLICT : 1
THOUGHTS_INTO : 1
THIS_AFTERNOON : 1
CLOSELY_INCREASE : 1
INSTITUTE_REASON : 1
ESSENTIAL_COMMON : 1
VETERAN_SEE : 1
TO_DENIED : 1
DO_CONVERTAPPROVED : 1
HE_TOLD : 1
BACK_PRIMARY : 1
MD_TRIAMTE : 1
EXCISION_LESION : 1
INVITED_TO : 1
OF_WOULD : 1
SKILLS_OTHER : 1
HAVE_LOT : 1
BASIC_HYGIENE : 1
SOLN_DROP : 1
WARFARIN_PHARMACIST : 1
JOB_GROUP : 1
HOME_CARE : 1
MESSAGE_WITH : 1
THAT_PC : 1
AND_RIGID : 1
GOOD_NEWS : 1
CENTER_THE : 1
THIS_OCCURRED : 1
JAUNDICED_DYSPHORIC : 1
RISK_FLAG : 1
HOPE_MINUTES : 1
TURNING_FOR : 1
NO_IDEATION : 1
THIS_TIME : 5
IN_NH : 1
BEEN_OBSERVED : 1
INTERVIEW_STAFF : 1
ATTORNEY_VISITING : 1
COMPLAINT_PRESENT : 1
SAYS_IS : 1
LEGAL_BRUCHNER : 1
NEED_TO : 4
AS_PRACTITIONER : 1
GROOMING_SWS : 1
AS_REACHES : 1
HIM_WITH : 1
BRC_ZIPPERS : 1
IN_CPRS : 1
PHYSICIAN_THIS : 1
OF_AND : 4
GOOD_WAS : 1
BLOOD_FL : 1
IRRITABLE_AND : 1
THOUGHT_WITH : 2
REQUIRED_THIS : 1
SEEN_AND : 3
HAS_RECEIVED : 1
ARE_NO : 1
PERSONAL_SHOWER : 1
TO_TIME : 1
BEHAVIORS_PROTECT : 1
IN_JUNE : 2
PREVENTION_OF : 1
LEAN_WITH : 1
BY_VISTA : 1
EC_TAKE : 2
PLEASE_NOTE : 1
PLANS_TO : 6
AND_WHOM : 1
CONSENT_WITH : 1
TRAINING_WAS : 1
IS_IRRITABLE : 1
PATIENT_SSN : 1
ANXIETY_NOS : 1
APPT_AT : 2
YEAR_JUNE : 1
CHANGED_HIS : 1
MEDICATION_HOURS : 1
MEDS_ON : 1
YEAR_AN : 1
ON_DICLOFENAC : 1
HYGIENE_SPONGE : 3
OR_SITE : 1
TO_PAIN : 1
PRIMARILY_FOLLOWED : 1
MG_DATE : 1
MATTER_OF : 1
LITTLE_AT : 1
NOTE_ABNORMAL : 1
BUT_WOULD : 1
PROCESS_ORGANIZED : 1
ORIGIN_DYNAMICS : 1
REPORT_NEW : 1
VISIT_THERAPY : 1
SOCKS_DURING : 1
THIS_DM : 1
TOBACCO_DAILY : 1
OR_OF : 2
VACCINE_TYPE : 1
MANY_THE : 1
REVIEWED_ASSESSMENT : 1
DOCUMENTATION_EMERGENCY : 1
CUEVAS_PHARMACY : 1
SUJJESTIVE_PRESCRIBED : 1
CAN_INCLUDE : 1
TROMBONE_FOR : 1
WHERE_LANDED : 1
FOR_SUPERVISOR : 1
REQUIRES_NO : 7
WRITER_SPOKE : 1
VISIT_MONTH : 1
AND_REQUESTED : 1
ON_INPATIENT : 1
PST_SUPPORT : 1
BREAKFAST_AND : 1
FACTORS_HIP : 1
MEN_TD : 1
NOTE_SCREEN : 1
ENCOURAGEMENT_CUEING : 1
CONVERSATION_WITH : 3
BY_RETURN : 1
TRANSFERRED_TO : 1
INPATIENT_PAIN : 1
CELL_AND : 1
IN_AREAS : 1
RESPITE_PROTESTANT : 1
COMPUTERIZED_PROBLEM : 1
EVAL_POSITIVE : 1
WEARING_BILATERAL : 1
ACTING_CHIEF : 1
TIME_ASSESSMENT : 2
RESECTED_NURSING : 1
PRESENTED_TO : 2
DENT_BURDICK : 1
PREDNISONE_BURST : 1
VICTIM_FOR : 1
REFRAMED_REALITY : 1
BACK_IER : 1
PT_WAS : 2
DRINKS_EXTRA : 1
LEARNING_GOALS : 1
HAS_JOINED : 1
ALCOHOL_DRUGS : 1
DEPARTMENT_EXT : 1
PERRLA_EOMI : 1
USED_NOT : 1
BAL_NEGATIVE : 1
DUE_TIME : 1
TERMINATED_OF : 1
AND_PIPE : 1
DEMEROL_DOSE : 1
TIME_EVAL : 1
FLUIDS_GIVEN : 2
DID_LEGAL : 1
PATIENT_ASKED : 1
MSE_STRATEGIES : 1
JOINT_UNDER : 1
PIPE_HE : 1
EYE_PATCHES : 1
CONFIRM_PATIENT : 1
PERFORMED_FOR : 1
AGE_HEIGHT : 1
TEETH_CHIEF : 1
NEW_PATIENT : 1
LODGE_WAIT : 1
UNSPECIFIED_OPEN : 1
AGREED_TO : 1
MINERALIZATION_WITHIN : 1
SELF_CARE : 2
INTERVENTIONS_STATUS : 1
ED_WAS : 1
CLAUSTROPHOBIC_NEVUS : 1
ORIENTED_IN : 1
WALKS_FREQUENTLY : 1
STATING_DONT : 1
DEC_INTERVENTIONS : 1
BEEN_INCREASE : 1
SUPPLIES_RETURNED : 1
RACE_PREDNISONE : 1
SITE_VERIFICATION : 1
IS_BILATERAL : 1
ADDENDUM_RX : 1
SECONDARY_DIAGNOSES : 1
THERE_FALL : 1
VERY_AND : 1
SKIN_WARM : 1
MAINTAINED_ALONG : 1
KNEE_TKA : 1
APPOINTMENT_ALL : 1
INVESTIGATORS_THAT : 1
NO_AT : 2
CASE_MANAGER : 1
PROCEDURE_TEAM : 1
YOUR_DOCTOR : 1
TIME_NOT : 1
REPORTS_HRS : 1
THAT_LAST : 1
BY_MAILED : 1
PATIENT_ABOUT : 1
FROM_ETOH : 1
MESKENAS_RN : 1
CURRENT_PROBLEMS : 2
WHOM_CONTACT : 1
SUSTAINED_WITH : 1
AM_HERE : 1
NEUT_NEUT : 1
SCORE_NOT : 1
LISTED_AT : 1
TOUR_HAS : 1
FLORIDA_REASON : 1
RESULT_HOW : 1
CONSULT_NOSHOW : 1
ADMISSION_THIS : 1
UNLESS_INDICATED : 1
TELL_ME : 1
THOUGHTS_OR : 1
HAPPENED_AND : 1
AS_MOBILITY : 1
MOVEMENTS_SHIFT : 2
AS_HE : 1
ALL_HAVE : 1
DO_PHONE : 1
REFUSED_OS : 1
HIS_CELL : 1
BY_WILL : 1
RESTRAINING_ORDER : 1
ZERO_DEPRESSION : 1
REVIEW_OF : 2
WM_VETERAN : 1
GUM_CHEW : 1
WT_KG : 4
SURLY_HAS : 1
PER_PULSE : 1
STATUS_MOUTH : 1
LIGHT_RESTING : 1
HE_RATES : 1
KIND_OF : 1
HYDROBROMIDE_TAB : 2
SPEECH_WITH : 1
TREATMENT_TEMP : 1
AND_WILL : 2
CLINIC_RX : 1
THIS_ENCOURAGED : 1
FOR_GROUP : 2
GROUP_HE : 1
THIS_NOTE : 1
NUTRITION_PATIENT : 1
CIGARS_WEEK : 1
BRUIT_DISCUSSED : 1
THERE_THE : 1
NO_REQUIRED : 2
HE_THAT : 2
QHS_TIME : 1
REPORTS_OF : 1
AT_ATLAS : 1
ASK_IF : 1
PERSONAL_PM : 1
OS_ARMD : 1
VACCINE_MANUFACTURER : 1
IN_CM : 7
EDEMATOUS_NO : 1
ON_WEDNES : 1
BED_ENTERO : 1
BREATHING_PATTERN : 1
BUT_YESTER : 1
BUT_THEM : 1
GENITAL_LESIONS : 1
CONTINUES_BE : 1
ATRAUMATIC_NORMOCEPHALIC : 1
NO_VOMITING : 1
CONCERNS_PATIENT : 1
PROBLEM_THOUGHT : 2
OF_LB : 1
FOR_HAD : 1
HOSPITAL_STAYS : 1
THE_THERAPEUTIC : 1
NAUSIA_DIARRHEA : 1
DISEASE_CSL : 1
WAS_ADMINISTRATIVE : 1
NUCHOVICH_TOBACCO : 1
CANAL_STENOSIS : 1
ENJOYING_TIME : 1
ENCOURAGED_HIM : 1
COMPLAINT_NOT : 3
AMOUNT_WITH : 1
PATIENT_AND : 2
NIGHTMARE_HAD : 1
TO_REACH : 1
THEY_USED : 1
FROM_REASON : 1
PRACTITIONER_THE : 1
QUESTIONING_THE : 1
THE_UNIT : 1
VISIT_HIS : 1
CLC_WAY : 2
BRC_USES : 1
SCORE_APPLICABLE : 1
HEMOGLOBIN_PLASMA : 1
MG_THURFRISUN : 1
SYKES_DIAGNOSIS : 1
PLACE_ASSISTANCE : 1
RELIGIOUS_PRACTICES : 1
TO_PURCHASE : 1
RETURN_FL : 1
FENTANYL_PATCH : 1
OP_NOTE : 1
VACCINE_VET : 1
BEVERAGES_MR : 1
AND_APPEARS : 1
MG_TAB : 11
SERVICE_CONN : 1
FOLLOW_UP : 1
IN_THE : 16
ABSTINENCE_ILL : 1
HOB_PATIENT : 1
ZIPPERS_USES : 1
NOTE_VETERAN : 1
PAIN_AND : 2
ER_BLESSING : 1
RISK_THE : 1
LCSW_FITNESS : 1
DENIES_SI : 1
TO_IDENTIFY : 1
INSTRUCTIONS_HAVE : 1
LT_SHOULDER : 1
CLINIC_BY : 1
WAS_WITH : 2
COLOR_NONE : 1
CONDITION_INTER : 1
TRYING_FALL : 1
DIVISION_VOCATIONAL : 1
TIME_WITH : 2
FUP_REMINDERS : 1
APPOINTMENT_CHECK : 1
REVIEWED_TECHNIQUES : 1
TEL_WITH : 1
PAST_FROM : 1
GOING_ECSGENERAL : 1
IS_TOLERATING : 1
PHYSICIAN_ADVISE : 1
WITH_VET : 2
WAIT_HIS : 1
NORMAL_THERE : 1
FOR_SELF : 1
CAME_OFF : 1
PATIENT_CONSIDERED : 1
TDH_HEADPHONES : 1
HAND_FOLLOWUP : 1
STILL_CONSTANT : 1
TIME_BUT : 1
NOT_HAVE : 1
TRANSITION_CONTINUING : 1
APPOINTMENT_AT : 2
BY_NEUROLOGY : 1
AND_HAS : 7
COMMENTS_BE : 1
THE_EXPRESSED : 1
MIN_TO : 1
LIKE_RECEIVE : 1
SPEECH_LOW : 1
NOT_PCE : 1
STATUS_OTHERS : 1
EYE_FOR : 1
INPATIENT_MI : 1
TO_CRIME : 1
REAL_OF : 1
FEELING_WITH : 1
GIVEN_OF : 1
AND_ADMITTING : 1
SCREEN_NEGATIVE : 1
WITH_ER : 2
INDEX_ALL : 1
FIND_THAT : 1
RESULTS_PT : 3
CONTACTED_NH : 1
OUTPATIENT_FIND : 1
ENROLLED_THE : 1
PROTECTORS_PLACE : 4
NUMBER_WT : 1
PRESENTS_TO : 1
IT_ON : 1
TEETH_OUTPATIENT : 1
ULCERS_OTHER : 2
LIST_THE : 1
ORDER_HAND : 1
ACTIVE_HIS : 1
TOTAL_OF : 2
SMOKE_THOUGHT : 1
DEVELOPING_STRONG : 1
ADDITIONAL_INFORMATION : 2
AND_PRECAUTIONS : 1
NEEDS_ORTHOPEDIC : 1
REPORT_TH : 1
REACHES_VOUCHER : 1
GROUP_WAS : 1
HEADPHONES_KHZ : 1
AS_CARE : 1
HOMEWORK_ASSIGNED : 1
EFFECT_THUS : 1
STOOL_ADMISSION : 1
DOE_HAS : 1
PRESSURE_DATA : 1
BRUITS_MEDICATION : 1
LAKE_NOW : 1
TEAM_THAT : 1
DILTIAZEM_IN : 1
BE_TO : 3
KG_AMBULATION : 1
THE_YEARS : 1
IN_DECLINED : 1
PARTICIPATED_IN : 3
LIKE_TO : 3
PATIENTS_REVIEWED : 1
MH_OP : 1
HAS_DISCHARGED : 1
THE_CHECK : 1
PHYSICIAN_AND : 1
PATIENT_AGE : 1
CONTINENT_DATE : 1
EXAM_TO : 1
VETERAN_BEEN : 1
ADDENDUM_AFTER : 1
CA_FURTHER : 1
REFUSED_ARMD : 1
REVIEW_ISSUES : 1
THINGS_PERSONAL : 1
PT_MILDLY : 1
AND_GOALS : 1
NO_DATE : 1
VACCINE_GIVEN : 1
THIS_WRITER : 2
FIRST_WITH : 1
NOT_TO : 3
BIRCH_HE : 1
PAIN_ABSESS : 1
PLEASE_SEE : 1
OF_UNDERSTANDING : 1
HIS_ADMISSION : 1
HE_HAD : 1
VOLUME_MOOD : 1
HAD_AN : 1
AN_YEAR : 1
THIS_ANGER : 1
POSITIVE_RESULT : 1
ON_CLONAZEPAM : 1
ATLAS_FOR : 1
HAVE_GOING : 1
SEXUALLY_ACTIVE : 1
AMITRIPTYLINE_INFORMED : 1
JOINT_BURSA : 1
PREGNANT_LACTATING : 1
IS_DANGER : 1
HIS_MEDS : 1
AFRICAN_AN : 1
TO_MENTAL : 1
SESSION_ADDENDUM : 1
PRESSURE_ADVANCE : 1
HOMEMAKER_HOME : 1
PLEASE_NO : 1
PER_THE : 1
THE_APR : 1
OF_PROGRAM : 1
MR_ASKING : 1
HE_GOING : 1
AT_ASSISTANCE : 1
PAIN_REPORT : 1
FATHER_FOR : 1
TOOTH_GUM : 1
CHAPLAIN_VETERANS : 1
KEEP_MENTAL : 1
THE_AS : 1
TEMPLATE_OX : 1
PROCESS_GOAL : 1
FOOD_HISTORY : 1
STRUCTURE_AND : 1
CONNECTED_TO : 1
CALLED_QUESTIONS : 1
DOCUMENT_RECEIVED : 1
PM_SECONDARY : 1
TO_YOU : 1
SEES_CONTINUED : 1
IS_YOUR : 1
IV_MG : 1
PATIENT_CONTINENT : 6
CM_ACKNOWLEDGED : 1
TASK_HIS : 1
AGREED_SHOW : 1
MULTIPLE_COMPLAINTS : 1
FROM_CERVICAL : 1
THE_VERBALIZED : 1
FELT_ELIMINATION : 1
GROUP_NO : 1
LISTED_CPRS : 1
TOPIC_ACID : 1
WITH_ICAL : 1
INTERVENTION_CONTROLLED : 1
AND_RESULTS : 1
KNEE_JOINT : 1
THERAPY_NO : 1
FL_TO : 1
KEEP_HEALTH : 1
SKIN_BACK : 1
YOUR_VISIT : 2
PAINFUL_RANGE : 1
DECISIONMAKING_CAPACITY : 1
FAIR_APPETITE : 1
SERVICE_VETERANS : 1
ILLNESS_DETOX : 1
ON_TYPICAL : 1
TRANING_QUETIAPINE : 1
CONCENTRATION_OF : 1
KG_WILL : 1
VISIT_MAY : 1
GROUP_THIS : 1
CHEN_PENG : 1
OR_CHICKEN : 1
FOR_CONFUSED : 1
INTERACTIONS_STAFF : 1
SURLY_BUT : 1
AS_VETERAN : 1
GROOMED_APPEARANCE : 1
POSITIVE_VETERAN : 1
GO_BACK : 2
OF_ACTIVITY : 1
HOME_STILL : 1
FOLLOWUP_WANTING : 1
BY_SURGERY : 1
TO_FROM : 2
CARE_HENT : 1
NO_OF : 3
MEDICAL_CENTER : 1
THESE_INSTRUCTIONS : 1
EXERCISE_PATIENT : 1
HEAD_HE : 1
WHETHER_ATTENDS : 1
THAT_SHE : 1
ORGANIZATION_TASK : 1
SURGERY_APHDR : 1
ETOH_COMPLIANCY : 1
AND_GLUING : 1
LOSING_UNEMPLOYMENT : 1
MEDICATION_WITHIN : 1
LOCATION_DESCRIPTION : 1
PHARMACIST_GOLD : 1
MODE_ARRIVAL : 1
LIMITS_THERE : 1
DIALYSIS_CENTER : 1
FREQUENTLY_RISK : 1
THE_BECAUSE : 1
CM_HYDROBROMIDE : 1
SEEN_MH : 1
MOBILITY_EASILY : 1
DETECT_LIGHT : 1
ATTORNEYS_THE : 1
OXYGEN_DURING : 1
LEFT_MEDICATION : 1
VETERAN_SATISFIED : 1
IM_GIVEN : 1
WARFARIN_PRIOR : 1
TO_INTO : 2
TOLERATED_BCX : 1
TO_FLAT : 1
HER_HAVE : 1
LIDOCAINE_THE : 1
OF_XANAX : 1
IS_AMONG : 1
OUT_GOAL : 1
AWHILE_YEARS : 1
HIGH_RISK : 1
AND_APPROACHABLE : 1
YOUR_MAY : 1
MOUTH_AS : 1
TEACHING_ACID : 1
GROUP_FACILITATED : 1
PROBLEM_TABLET : 1
SAFETY_ASSIGNED : 1
THE_ACCOMPANYING : 1
DO_OTHER : 1
UPRIGHT_STANDING : 1
ALSO_BE : 1
VA_TEMPERATURE : 1
COOPERATIVE_ASSESSMENT : 1
CONSULTATION_EDUCATION : 1
AMBULATORY_BED : 1
MYALGIA_DEC : 1
BALKCOM_THE : 1
BLOOD_IS : 1
YOUR_FEEL : 1
BEHAVIOR_ADMINISTERED : 1
CULTURAL_PRACTICES : 1
OF_PING : 1
STRESS_EXERCISE : 1
UTILIZING_SWS : 1
TO_REMOVED : 1
ANTIBIOTIC_OU : 1
ERYTHEMA_BACK : 1
CHIEF_MISSING : 1
HIS_PHONE : 1
APPEARANCE_SATISFACTORY : 1
FUTURE_APPOINTMENTS : 1
INSTRUCITONS_ISSUES : 1
SHIT_INPT : 1
SUPERVISION_ENCOURAGEMENT : 4
DISTRESS_SKIN : 1
AND_COTA : 1
PHYSICIAN_REASED : 1
YOU_LEGAL : 1
AT_PAIN : 1
FROM_APRIL : 1
ALCOHOL_OR : 1
VOUCHER_AT : 1
THIS_VERY : 1
ONLY_RATES : 1
CARE_VA : 1
USES_HOME : 1
SPECIAL_URINE : 1
AND_AGREE : 1
ADDRESS_ABOVE : 1
INFORMED_TO : 1
VOA_HOUSING : 1
NEVER_IT : 1
SKILLED_VISITS : 1
KG_AGE : 1
IT_HELPS : 1
ALWAYS_PLANS : 1
MYALGIA_RESP : 1
WILL_PLAY : 1
ESTABLISHED_IF : 1
MONEY_FOR : 1
HOMICIDAL_AND : 1
SUCH_HIP : 1
ARRIVAL_BED : 1
TIMES_TO : 1
BED_TO : 1
SHIRLEY_RN : 1
VACCINE_TO : 2
IN_OVERWEIGHT : 1
ULA_YES : 1
NAME_OF : 1
FUTURE_PLANS : 1
PROGRAMGROUP_OBSERVATIONS : 1
MORNING_HT : 1
APPROPRIATE_FOR : 1
AT_LETTER : 1
NOTE_MSE : 1
EAT_IN : 1
AGAIN_IN : 1
RETURNED_FROM : 1
AND_DETECT : 1
TIME_PT : 1
NIGHTMARES_ABOUT : 1
CLINICAL_PHARMACY : 1
ALERT_MOBILITY : 1
PREFERENCES_REMAIN : 2
SUICIDAL_AFFECT : 1
AA_QUANTITY : 1
HYGIENE_SHOULD : 1
INJURY_NOT : 1
TAKE_ONE : 10
MIND_CLOSED : 1
AND_ALSO : 1
OR_NEURAL : 1
PROTOCOL_PATIENT : 1
FACILITY_APPOINTED : 1
EDUCATION_NOTE : 2
COME_NEXT : 1
THE_GREATER : 1
FOLLOWING_WHILE : 1
DOCTOR_VOIDED : 1
EASIER_ERS : 1
WITH_DEPRESSION : 1
AND_ANOTHER : 1
GOING_YELL : 1
USE_MARCAINE : 1
TO_ALLOW : 1
WARM_TESTINAL : 1
SEE_NP : 1
TEMPLATE_PULSE : 1
NO_ANESTHESIA : 1
BY_ADDENDUM : 1
LOCAL_ASKING : 1
ON_NOV : 1
IMPORTANT_THERAPEUTIC : 1
IMAGE_WISH : 1
RESULT_IS : 1
MR_SKIPPED : 1
HUNTSVILLE_CBOC : 1
STAFF_AND : 1
QUIT_IN : 1
NOS_USE : 1
INPATIENT_MEDICATIONS : 2
APPROPRIATELY_SPEECH : 1
VISTA_DISPLAY : 1
FAMILY_EDUCATION : 1
ATTENDING_AND : 1
THE_BEHAVIORS : 1
PROVIDER_ADDENDUM : 1
WARFARIN_JEFF : 1
TREATMENT_TO : 1
ASKED_ANY : 1
BUTTONS_LIKE : 1
DIABETICFINGER_RESULTS : 1
UP_MEDICAL : 1
GROUP_MIN : 1
APPEARED_MORE : 1
OR_TO : 2
NUMBER_BOWEL : 2
GROOMING_APPETITE : 1
THE_COUNTER : 1
AND_UNDERSIGNED : 1
APPOINTMENTS_SIMVASTATIN : 1
AND_THAT : 4
WORKER_TO : 1
IN_ALCOHOL : 1
UDS_LIPID : 1
DRI_RESPITE : 1
OP_RESPIRATIONS : 1
IS_HIGHER : 1
CONTACTED_BY : 1
SA_TAKE : 2
TEMP_PULSE : 2
BONES_DENIES : 1
OTHER_INTENSIVE : 1
DICLOFENAC_NA : 1
USES_AT : 1
PARANOIA_AND : 1
MG_COPD : 1
OR_PERSONNEL : 1
ENCOURAGED_TO : 1
PAIN_DATE : 1
SKILL_SAFELY : 1
YOGA_INSTRUCTOR : 1
SHOULDER_APPOINTED : 1
RADICULPATHY_ARSISNG : 1
HOSPITAL_ASSESSMENT : 1
TEARFULHE_THAT : 1
DYSPHAGIC_PROGRAM : 1
NAME_DATE : 1
BIRCH_HIS : 1
PAIN_NO : 2
EQUIVALENTS_TO : 1
APPLICABLE_VITAL : 1
AND_BY : 2
BY_LABS : 1
PT_STATES : 2
SAME_ALL : 1
IN_SETTING : 1
PER_STAFF : 1
OF_THOUGHTS : 1
REPORTING_THAT : 1
CONSENT_BPH : 1
BEEN_WORSE : 1
TREATMENT_FOLLOWUP : 1
GENITOURINARY_WITHOUT : 1
THE_ABOVE : 1
WHAT_HAPPENED : 1
TO_RELATED : 1
WAS_GIVEN : 1
IS_STORY : 1
ADDENDUM_HD : 1
PALPABLE_STRONG : 1
VERIFY_NOW : 1
FURTHER_QUESTIONING : 1
ASSISTANCE_PATIENT : 2
MOST_THE : 1
HAVE_FOR : 1
ALTHOUGH_BEEN : 1
TOBACCO_USE : 3
ASSISTANCE_OF : 1
TOILET_BOWELS : 1
OF_ON : 1
TENDERNESS_HEALTH : 1
NO_STATUS : 1
PROBLEMS_BLOOD : 1
ADHESIVE_TAPE : 1
VETERANS_ADDITIONAL : 1
WNL_NL : 1
HE_PALPITATIONS : 1
MG_OTHER : 1
FROM_ABSESS : 1
DISCUSS_WITH : 1
SHOULD_ABLE : 1
FOR_TIME : 2
INPT_THERAPY : 1
EVERY_FOR : 7
CELL_MAY : 1
WHEN_CALLED : 1
OTHERS_PERSONAL : 1
AMBULATION_REQUIRES : 2
EDUCATION_THE : 1
ECZEMA_SERVICE : 1
NOTIONS_LIFESTYLE : 1
REGARDING_IMPORTANT : 1
MOBILITY_YES : 1
RELEASE_APPROPRIATE : 1
TRIGGER_RELAPSE : 1
HBPC_FOLLOW : 1
AGAIN_ALSO : 1
MAKES_HIM : 1
PEERS_PLEASANT : 1
HOURLY_UP : 1
LUNCH_MULTIPLE : 1
PHYSICIAN_ODY : 1
OUT_DATE : 1
CONSUMPTION_ALCOHOL : 1
QUALITY_XACTIVE : 1
OF_NOTE : 3
APNEA_PHYSICIAN : 1
BASCOM_PTS : 1
PLAN_WARNED : 1
INFORMATION_AUTHOR : 1
ADDITIONALLY_SUPERVISOR : 1
DIABETES_IN : 1
MEDICATE_ORDERED : 1
HIS_JOB : 1
THREE_FUP : 1
DISCUSSED_THE : 5
NML_EYE : 1
ACTIVE_OUTPT : 1
AS_INDICATED : 1
WITH_NORMAL : 1
FOR_HCV : 1
RESTART_THERAPY : 1
TO_PROVIDE : 1
STILL_STATES : 1
OR_HALDOL : 1
DATE_TEMP : 1
MENUS_AT : 1
TRACT_PROCEDURE : 1
VICTIM_OF : 1
PC_CARE : 1
ROOM_LED : 1
REQUEST_RETURN : 2
TRANSITION_TO : 1
MONTH_AGO : 1
IS_INCONTINENT : 1
AND_FEELS : 1
SHOULDER_ARTHROSCOPY : 2
LUNCH_FOOD : 1
AT_BANK : 1
UP_DEL : 1
NO_CALF : 1
AND_APPOINTMENT : 1
LB_ADDENDUM : 1
BY_ATTENDING : 1
THE_WAS : 5
HEALTH_OF : 1
FOLLOWUP_NURSING : 1
MET_VOIDING : 1
COOPERATIVE_ANXIETY : 1
UR_PH : 1
NORMAL_RESPIRATIONS : 1
NO_DOCUSATE : 1
BEEN_PARANOIA : 1
AWAKE_HEALTH : 1
LIVING_WITH : 1
WIFE_VETERAN : 1
CONVERSING_WITH : 1
NOTE_COMMENTS : 1
ORIENT_TO : 1
YESTER_AROUND : 1
QH_AND : 1
REPORT_WHERE : 1
TO_THEM : 1
NO_SKIN : 1
REFERRAL_DISCUSSING : 1
ADVERSE_REACTION : 1
ASSESSMENT_SEX : 1
NEEDED_OUTPATIENT : 1
GIVES_CONTENTMENT : 1
THERAPY_LOCK : 1
SUBSTANCE_ABUSE : 2
STOPPED_TAKING : 1
CEREBELLAR_MINERALIZATION : 1
ER_OS : 1
DAILY_ER : 1
GOALS_FOR : 1
ANOTHER_RESIDENT : 1
POINT_APPEARANCE : 1
TO_VERBALIZE : 1
HAS_SCREENING : 1
MASS_INDEX : 2
MANAGEMENT_PATIENT : 1
THAT_MR : 2
APPOINTMENT_TELEPHONE : 1
SMOKING_NO : 1
INTACT_DRY : 1
ORIENTED_HE : 2
DIFFICULTY_ACCEPT : 1
NOTE_PMH : 1
WITH_BPH : 1
BOX_WITNESSING : 1
LEFT_TOTAL : 1
THIN_MALE : 1
PO_BOX : 1
PAIN_WITHIN : 2
HAVE_MET : 1
HOUSE_IT : 1
ELECTRONICALLY_GO : 1
CYST_CYST : 1
BE_USED : 1
FOR_AND : 2
CARE_PLAN : 1
MOVEMENT_LB : 1
UNDERSTANDING_GOOD : 1
FLEXIBILITY_POSES : 1
ALERT_COOPERATIVE : 1
HT_THAT : 1
ENCOURAGED_DTR : 1
NOT_ALLEVIATE : 1
TO_DATE : 5
ANESTHESIA_LEFT : 1
GUIDED_USING : 1
VENT_ML : 1
MAY_DISEASE : 1
MAKE_APPOINTMENT : 1
NEEDED_PAIN : 1
PHYSICIAN_INTERVENTION : 1
HIS_THOUGHTS : 1
THE_PAST : 6
GLUTEAL_NEXT : 1
VOIDING_DIFFICULTY : 1
AND_SAID : 1
OX_ROOM : 1
HEPARIN_CHOOSE : 1
NEEDLES_BE : 1
WAIT_OUT : 1
SALTY_FISH : 1
NO_COVERAGE : 1
PATIENT_READ : 1
THERE_ARE : 2
BOX_HGB : 1
BUILDING_ENDURANCE : 1
HAND_HYPERLIPIDEMIA : 1
CARE_ED : 1
VISIT_HYGIENE : 1
DETAILS_PTS : 1
PO_BID : 1
LEFT_AND : 1
OTHERS_HYGIENE : 1
LIVING_AUNT : 1
FOR_OL : 1
PREVENTION_FILED : 1
NEXT_AND : 1
AND_ALERT : 1
TURNS_SITS : 1
NEXT_VACCINE : 1
FOOD_DRINKS : 4
TO_CONTINUING : 1
PATIENT_REFUSES : 1
SYSTEMS_IS : 1
COTA_NURSING : 1
TD_ALLERGIES : 1
NO_ASSISTANCE : 6
COMPLAINT_OF : 3
RADIAL_LEFT : 1
ONE_OR : 1
HASNT_BEEN : 1
HE_EXPERIENCED : 1
AFFECT_APPROPRIATE : 1
INPT_NURSING : 1
PEOPLE_AM : 1
THAT_ROOM : 1
SWS_TEAM : 1
TIME_AND : 3
PT_ZERO : 1
THERAPY_APPOINTMENT : 1
PATIENT_DISCHARGE : 1
BE_DONE : 1
NOT_TOO : 1
SHOULDER_FACILITY : 1
SI_HI : 1
NURSING_WALKS : 1
TO_PURPLE : 1
IT_WITH : 1
CM_REMOVED : 1
AND_LIMITS : 1
OPTOMETRY_PAIN : 1
WILL_UPDATED : 1
TOO_CLOSE : 1
CARE_FUTURE : 1
MSE_AND : 1
MORE_BALLANCE : 1
WITH_HIM : 2
VETERANS_SISTER : 1
CLINIC_CPRS : 1
CONTINUOUS_PATRIOT : 1
AND_PER : 1
WITHDROWAL_TO : 1
TIME_AT : 1
IDENTIFIED_NEEDS : 1
VETERAN_PROVIDERS : 1
TESTINAL_TO : 1
BACK_RECONCILIATION : 1
WAS_YOUR : 1
PATIENT_TESTING : 1
SECTIONS_EXAMINED : 1
UP_HEENT : 1
MOST_PROMINENT : 1
POSITIVE_REPORTED : 1
MALE_OLD : 1
THIS_INSTRUCTED : 1
CALL_ASSIST : 1
GOAL_MONTH : 1
FORMAL_PAIN : 1
THIS_KIND : 1
TIME_HAS : 1
NOT_TELL : 1
REPORTS_INTENTIONS : 1
RAL_DATA : 2
XACTIVE_EAGER : 1
HENT_ARE : 1
MEDICALLY_DETOX : 1
WITH_APPT : 1
NO_SHORTNESS : 1
NOTE_ATTACHED : 1
TIME_THE : 3
HAVE_TO : 1
TAMPA_TO : 1
USE_YES : 1
WITH_INSERT : 1
FIRE_WALK : 1
ALL_OTHER : 1
IS_FROM : 1
ORDERED_ARTHRITIS : 1
LEARNING_PL : 1
MONTHS_AN : 1
CARE_ORTHO : 1
AGAIN_FOR : 1
CLEAR_NO : 1
THE_IF : 2
ABOUT_DANGER : 1
SAW_LAST : 1
RELATES_THAT : 1
HYGIENE_AND : 1
OSTEOPOROSIS_BLOOD : 1
HELP_HIM : 1
OTHER_ORDERED : 1
SPLINTED_GET : 1
OR_CONSISTENCY : 1
WITH_AUNT : 1
FOR_MINUTES : 1
HAVING_PARANOIA : 1
OBJECTIVE_NO : 1
TERTIARY_GOAL : 1
AGREES_TO : 1
HIS_BREATHING : 1
REMEMBER_YOU : 1
CHRONIC_BRONCHITIS : 1
PING_PER : 1
NO_THIS : 1
INITIAL_INTAKE : 1
WITH_THAT : 1
SITE_SHOULDER : 1
SKIPPED_OF : 1
TO_LISTENING : 1
CAR_NOT : 1
PT_TO : 2
MINUTES_GROUP : 1
TOBACCO_ABUSE : 1
BRP_CURRENT : 1
INTERACTIONS_SYSTEMS : 2
ASSISTANCE_COLOR : 1
ISSUES_TO : 1
IN_EMERGENCY : 1
TO_SCHEDULE : 1
MANAGEMENT_TOBACCO : 1
LIGHT_CORRECTLY : 1
MON_IN : 1
FUP_APPT : 1
GOING_BE : 1
HEART_IS : 1
MD_STRONGLY : 1
MRSA_NEUROLOGICAL : 1
MENTAL_DETERIORATION : 1
AUTONOMOUS_TO : 1
READING_HOW : 1
TO_OTHER : 1
TAKE_OF : 1
OTHER_WITH : 1
PAIN_IS : 2
RANGE_ON : 1
RIBA_IRIS : 1
THIS_WITH : 3
LAMINECTOMY_ON : 1
HIS_WAS : 1
THIS_THESE : 1
HCL_TAB : 1
FROM_OTHER : 2
ALLERGIES_NORVASC : 1
THERE_BEEN : 2
FEELING_HOMICIDAL : 1
VOIDED_AMOUNT : 1
MH_HUDVASHNOTE : 1
DO_SPOKE : 1
ANATOMICAL_UMBILICAL : 1
OWAY_MH : 1
THAT_SLEPT : 1
PRIMARY_CARE : 4
ON_REPORTED : 1
BONNIE_RETURN : 1
BY_THREE : 1
SPECIMENS_WITH : 1
DO_HIS : 1
WOUND_TO : 2
ADMINISTERED_MEDICATION : 1
SIGNED_CHIEF : 1
REQUIRE_THE : 1
REFREASH_PATIENT : 1
OF_FENTANYL : 1
HIS_VISION : 1
CONFIDENCE_WHEN : 1
WHEN_HIM : 1
PROVIDERS_FLORIDA : 1
PSYCHOSOCIAL_SKIN : 1
AN_ALL : 1
CLINIC_ADDENDUM : 1
ALL_MEDS : 1
SAFE_CONTROLLED : 1
DM_NO : 1
ICDCM_UNABLE : 1
NEXT_SEP : 1
WELCOME_VETERAN : 1
ORIENTED_ALL : 1
WELLNESS_CLINIC : 1
IS_BY : 5
CLASS_IS : 1
TALKING_TO : 1
XCOVER_COMMENTS : 1
ICDCM_HUDVASHNOTE : 1
OSAT_WHERE : 1
ULCERS_OR : 2
HIM_AND : 2
FIND_PRIVATE : 1
HIM_SCHEDULE : 1
DISORDER_SICHERER : 1
RELAPSE_FLAREUP : 1
BICARB_EGFR : 1
YOU_FEEL : 1
CLINIC_CALL : 1
ABOUT_ANY : 1
CHIEF_PATIENT : 1
BAY_TEST : 1
DISCHARGE_DISCHARGE : 1
MON_THE : 1
ACTIVE_MEDICATIONS : 6
WEIGHT_LB : 6
FACILITATED_BY : 1
FLAT_ANGRY : 1
ASK_YOU : 1
CM_FIRST : 1
PERFORMED_MOST : 1
PROMOTION_AND : 2
HHA_RN : 1
HIM_AT : 1
FOR_MHICMINTENSIVE : 1
OF_PLEASE : 1
FOR_MH : 2
BEATS_CP : 1
CURRENT_PRESENT : 1
CALLS_LOCAL : 1
EVERY_RTC : 1
TO_FL : 1
MAINTAINED_WITH : 1
THIS_DOB : 1
YOUR_VERIFY : 1
NECK_INJURY : 1
SECONDARY_SISTER : 1
YEAR_CURRENT : 1
CONVERSATIONS_ONLY : 1
FURTHER_THE : 1
FAMILY_AND : 1
WARFARIN_MAY : 1
ALLERGIES_STATES : 1
LOW_REPEATED : 1
AND_HIS : 4
VETERAN_MAY : 1
ANGRY_MOOD : 1
MEDS_USE : 1
YOGA_SYSTEMS : 1
APPOINTMENT_IN : 1
RN_SCANNED : 1
ORIENTED_NAME : 1
ADL_NOTE : 4
DIAGNOSIS_TREATMENT : 1
DPT_ATLANTA : 1
LPM_HOURS : 1
IN_LAKE : 1
TAKE_ONEHALF : 1
JEFF_GOLD : 1
CURRENT_PROFILE : 1
PAIN_PLAN : 1
CONTACTED_REMOVE : 1
ACTIVE_PRIMARY : 1
COME_BACK : 1
MAY_TAKING : 1
GYNECOLOGICAL_HISTORY : 1
METHADONE_MG : 1
REFERENCE_RANGE : 1
TAMPA_ADDENDUM : 1
COME_NOTE : 1
GONE_AND : 1
IS_HOPEFUL : 1
MALE_WHO : 2
WM_SCHIZOPHRENIA : 1
APPROVED_BY : 1
PT_MANIC : 1
ADDENDUM_NIGHTMARE : 1
INCISION_CLEANED : 1
LOCAL_ES : 1
CBC_WBC : 1
BETTER_STAYING : 1
REQUIRED_ODY : 1
SUB_THERAPUTIC : 1
OBJECTIVE_NECK : 1
WITH_NSAIDS : 1
PREFERS_TO : 1
SLIDINGSCALE_INFLUENZA : 1
ABOUT_BREATHING : 1
ALL_SOURCES : 1
RADICULPATHY_FROM : 1
VAMC_TREATMENT : 1
FOR_USE : 1
ATTACHED_PRIMARY : 1
AS_RELAXATION : 1
HIS_ATLAS : 1
FALL_INTERVENTIONS : 1
YOU_CANT : 1
AND_FRANTZ : 1
RESIDENT_TO : 1
WITH_VARYING : 1
TO_UNIT : 1
TAKING_MEDS : 2
DATE_TASK : 1
INDICATED_SIGNS : 1
WELL_RELAXATION : 1
TO_PATIENT : 7
CONTACT_NUMBER : 1
MG_PO : 1
SSN_AIR : 1
ESSENTIAL_COLD : 1
NOTE_TRANSFER : 1
SEE_WHETHER : 1
NEGATIVE_ADMITTING : 1
WATER_AMOUNT : 1
AUTHOR_SIMPSON : 1
EXTRA_WERE : 1
PCR_IRIS : 1
REFILLS_PATIENT : 1
AVOIDS_SITUATIONS : 1
FALL_AS : 1
PATIENT_SMOKES : 1
IDENTIFIERS_WERE : 1
MEDICAL_AND : 2
PATIENT_INTERVENTION : 1
LIKE_PRIOR : 1
QUESTIONS_WEIGHT : 1
ISSUES_RELATED : 1
DENIES_OCCASIONAL : 1
COUNSELING_UARY : 1
INSTRUCTIONS_WERE : 1
PRECAUTIONS_OXIMETRY : 1
THE_MAY : 2
BY_TO : 1
AST_SGOT : 1
VESICAL_HX : 1
PAROXETINE_MG : 1
PAIN_RESUME : 1
SHOW_TOMORROW : 1
ASSOCIATE_PROVIDER : 2
CONSENT_MET : 1
NOTED_PT : 1
CERUMEN_FROM : 1
SELF_OR : 2
CORRECTLY_QUIETLY : 1
CALLED_WITH : 2
ACTIVITIES_DAILY : 1
THINGS_AS : 1
CHRONIC_NONE : 1
SUICIDAL_AND : 1
TAKE_AND : 2
ER_OR : 1
MONTHS_HAD : 1
SIGNS_CYST : 1
WITH_MORE : 1
ANY_SYMPTOMS : 2
DISORDERS_DISORDER : 1
WAS_LITTLE : 1
ONE_AN : 1
AGO_AND : 1
INDIVIDUAL_THERAPY : 1
MR_THAT : 1
AGREE_WILL : 1
DENIED_AFFECT : 1
AM_PSYCHOLOGY : 1
INVOLVED_THIS : 1
LABS_VET : 1
HIS_TOBACCO : 1
SPONGE_PERSONAL : 1
SKIN_LESION : 3
SURGERY_CONSULT : 1
AND_PLAN : 1
AT_REMEMBER : 1
NEEDED_PC : 1
PRIOR_LOW : 1
TELLING_ABOUT : 1
NEUROLOGY_RESTRAINTS : 1
AB_NOTE : 1
MOTHER_THAT : 1
PLASMA_PAIN : 1
MOVES_COMMAND : 1
IDENTIFY_AND : 1
CHANGE_BASED : 1
IN_PATIENT : 2
SUMMARY_OF : 1
REMOVED_CLEAN : 1
CONSULT_FUNDUS : 1
DOSE_FOR : 2
OW_BREATHS : 1
STRESS_FOLLOWUP : 1
UPDATED_WITH : 1
VET_BECAME : 1
DETOX_EMPLOYMENT : 1
GU_FOR : 1
APTS_PATIENT : 1
WAS_ELIMINATION : 1
PT_SEEN : 2
GA_INCH : 1
RESP_MALE : 1
THICKENED_NOT : 1
SIGNIFICANTLY_CONTRIBUTING : 1
AND_SITS : 1
ELIGIBILITY_LESS : 1
AND_AND : 2
IS_OK : 2
PRIOR_MAY : 1
PERRLA_SCLERA : 1
REALLY_VERTIGO : 1
HYPERLIPIDEMIA_SELF : 1
AREA_INSTRUCTION : 1
SOME_TIME : 1
UNSP_ABSENCE : 1
HAVE_ORDERED : 1
BPH_FLOMAX : 1
PENG_FEE : 1
FROM_THIS : 1
BEHAVIORAL_HEALTH : 1
TO_CITALOPRAM : 1
PING_TWICE : 1
FOR_SUPPLEMENT : 1
TRY_FULLY : 1
PERSONAL_MANAGEMENT : 1
VOIDED_FOLLOWUP : 1
MOUTH_MORNING : 2
INSTRUCTED_TO : 1
OR_ONE : 1
WAS_REGARDING : 1
NEWER_AND : 1
CHANGES_IN : 1
NO_DYSFUNCTION : 1
FOCUSED_WA : 1
TO_SUPERVISE : 1
PCMM_BERNA : 1
REVIEWED_OF : 1
DENIES_AT : 1
PRECAUTIONS_PULSE : 1
THE_TELEPHONE : 3
ACTION_URINE : 1
VETERAN_REPORTED : 2
WITHDROWAL_SYMPTOMS : 1
INSTRUCTIONS_OOB : 1
CONCENTRATION_ORGANIZATION : 1
CUEVAS_AB : 1
IN_PLACE : 4
RETHINKING_POSITIVE : 1
HOPEFULL_AGAIN : 1
HELP_IN : 1
VITAL_SEBACEOUS : 1
ADMISSION_TREATMENT : 1
OD_MOST : 1
TECHNIQUES_WHICH : 1
STANDING_LEAN : 1
THERES_LIGHT : 1
IS_ALWAYS : 1
AT_EYE : 1
TIME_TEMP : 1
APPROPRIATE_IDENTIFICATION : 1
ABUSE_HAS : 1
WORK_ASSESSMENT : 1
SHOE_DATE : 1
APR_CHF : 1
CONSIDERED_MAY : 1
BALLANCE_OCCURS : 1
DISCHARGE_CRITERIA : 1
STRONG_PULSE : 1
MAKE_TO : 1
GIVEN_WAS : 1
HAVE_BEEN : 2
OTHERS_REQUIRES : 1
PAIN_HAVE : 1
APR_HIP : 1
DOSE_TIME : 1
VET_COME : 1
TEAM_WILL : 2
FOR_APPOINTMENT : 1
FELL_SOME : 1
TO_SMOKING : 1
ASKING_DISPLAY : 1
PROMINENT_MM : 1
TO_OUT : 2
VETERAN_FOR : 1
SAW_HIM : 1
IS_CLAUSTROPHOBIC : 1
AND_MOUTH : 1
VET_BE : 1
SEE_AS : 1
US_VOUCHER : 1
MUCH_THE : 1
MAY_CLINIC : 1
HAVE_MONEY : 1
COMPLETION_RAL : 1
TO_LORAZEPAM : 1
CAP_OFF : 1
QID_CONSULT : 1
ISSUES_ABSTINENCE : 1
DEVELOPING_BY : 1
PATIENT_PRIVILEGES : 1
HOURS_DERMATOLOGY : 1
PROBLEM_DISORDERMET : 2
AND_PORCELAIN : 1
NO_BRUIT : 1
OBSERVATIONS_NUR : 1
BLESSING_DIAGNOSIS : 1
IN_DELTOID : 1
NOTE_LABS : 1
PT_RETURNED : 1
OF_MONTH : 1
MONITORED_DETOX : 1
REVIEWED_THE : 4
PERSONAL_AND : 1
NURSE_CALLED : 1
FROM_SITE : 1
YESTER_SHE : 1
AFTER_THE : 1
GENDER_MALE : 1
PAIN_THERAPUTIC : 1
ROOM_AIR : 1
YET_MADE : 1
PROGRAM_BALKCOM : 1
ER_AMPM : 1
REPORTED_THEIR : 1
NOTE_ACHIEVED : 1
OF_YRS : 1
PING_AND : 1
ATRAUMATIC_EYES : 1
PAST_MONTH : 1
NURSING_WARFARIN : 1
BE_CALLED : 1
THE_EVENT : 1
MPLS_ABS : 1
TREMORS_FROZEN : 1
TO_DISCUSS : 2
MG_SA : 2
CHIEF_RELAPSE : 1
STATE_OFFICE : 1
STRATEGY_SKILL : 1
NORMOGLOSSIA_PATIENT : 1
PCP_HARDEN : 1
IDCP_MEETING : 1
ABC_NUMBER : 1
HANDS_AND : 1
THE_NIGHT : 1
FOR_MOUTH : 1
BEEN_TALKING : 1
EC_TAB : 1
BEEN_SAME : 1
DEVELOPING_RAPPORT : 1
TKA_PATIENT : 1
OF_ORGANIZATION : 1
TAKES_UNITS : 1
MOBILITY_HYGIENE : 1
MORNING_MOOD : 1
TEAM_HAS : 1
THE_EMERGENCY : 1
PLAN_AND : 1
BAY_DISCUSSED : 1
TO_IMC : 1
HRS_PREOP : 1
TRAVEL_SUPERVISOR : 1
ASSESSMENT_PRIMARILY : 1
WAS_BUT : 1
WITH_CHIEF : 4
BY_BOSS : 1
ON_WHO : 1
ABOUT_HIS : 2
DATE_LS : 1
OVER_SCHEDULE : 1
TAKEN_JUN : 1
NAME_DOB : 1
HAVE_WHICH : 1
AND_SUPPORTS : 1
DINNER_REPORTED : 1
BLADDER_CONSENT : 1
ALLOW_VETERAN : 1
MR_BALKCOM : 1
THERAPY_CONSULT : 1
HOURS_REST : 1
CONTINUING_CARE : 1
TO_ACCEPT : 1
BY_CURRENT : 1
CLINIC_SHIRLEY : 1
TIME_FINE : 1
THIS_ALERT : 1
FILED_GO : 1
LARGE_OF : 1
TENDERNESS_IS : 1
CANAL_OR : 1
CARE_SKIN : 1
CONSENT_BLOOD : 1
RIGHT_STRONG : 1
THERAPY_MANAGEMENT : 1
THE_NUTRITION : 1
REVIEW_DISCHARGE : 1
HAS_LIFTED : 1
ASKING_SPOKE : 1
APPEARANCE_THIN : 1
AND_EXCESS : 1
! Stats words=2221  pairs=11785
