# Supplementary material for: Predicting the Risk of Suicide by Analyzing the Text of Clinical Notes
Source: PLoS One. 2014 Jan 28;9(1):e85733. doi: 10.1371/journal.pone.0085733 (PMC3904866; doi:10.1371/journal.pone.0085733)
Supplement: Appendix S3 — Machine Learning Libraries and Methods: This section is provided to enclose the open source (Apache License) classifier used for the building of the statistical models, specifically for the purposes of study reproducibility. A detailed account of these tools is intended for another publication. (ZIP) [file pone.0085733.s003.zip › Appendix3/ML_libs/Regression_testing/group3/processed/grp3-pt-1039.dat]

!  Done reading
! Total word count = 6424
! Total unique words = 2135
! Total pair count = 12844
! Total unique pairs = 10961
RUMINATES : 1
MANDATED : 1
AT : 36
ADL : 3
ZZPATIENT : 2
SHORTTERM : 1
QMORNING : 1
WORK : 5
DEMAND : 1
PREOP : 1
VOICES : 1
LOWER : 4
ULCER : 2
DYSMETAB : 1
WEIGHT : 4
STAY : 1
READINESS : 2
CORSET : 1
DONNING : 1
STRABISMUS : 1
MILD : 1
AA : 2
MINUTE : 1
TREATMENTS : 3
MILITARY : 2
INSTRUCTED : 2
DIVALPROEX : 1
INTERVENTION : 1
COUNSELING : 4
USE : 6
PRIVILEGES : 4
LONGSTANDING : 1
REVIWED : 1
GRIEFWORK : 1
RR : 1
HEROIN : 1
DISCHARGED : 1
PAMOATE : 1
SUPPLIES : 4
SECURITY : 3
VETERANS : 5
XACTIVE : 1
LEVEL : 8
ALCOHOL : 6
CHANGES : 4
RAL : 3
EZETIMIBE : 1
IMPORTANCE : 1
MILK : 1
REHABILATION : 1
SHOULDER : 2
MET : 3
MACHINE : 1
SLIGHTLY : 1
MEAL : 4
MAX : 1
REMOVED : 5
APPROPRIATE : 1
BLIND : 1
KNEW : 1
WKS : 1
ATTORNEY : 2
WELL : 5
MEDICINE : 3
TEST : 1
NOTE : 31
INCREASING : 1
LDL : 3
DO : 9
DOES : 6
TESTS : 1
ACCESS : 1
SOONER : 1
OCCLUDED : 1
VOLUNTEER : 1
OUTLINE : 2
SCHEDULED : 4
ASK : 2
FAMILIAR : 2
ANCHORAGE : 1
TAB : 14
STABLE : 2
REQUIRED : 5
MONITOR : 2
DEC : 5
HAS : 45
FOR : 82
PERCEPTION : 1
CONDITION : 1
NUTRITION : 3
CLC : 2
PATPU : 1
QBEDTIME : 1
MODALITIES : 1
CONSENTING : 1
WEATHER : 1
MORNING : 2
INR : 2
AWAITING : 1
LAYOUT : 1
KNEE : 3
CHARGES : 1
SC : 5
LEGAL : 1
MUST : 1
IDEATION : 1
ALERTED : 1
INACTIVE : 2
SATURATION : 1
ELICITED : 1
COLONOSCOPY : 2
GOALS : 8
RESPIRATORY : 2
MEDIAN : 1
WISHES : 1
ACTIVITY : 6
CARMODY : 1
HISPANIC : 2
METAL : 1
EVIDENCE : 1
TAXI : 1
SHOWS : 1
BILATERALLY : 1
BARKER : 1
NAUSEA : 3
IMPAC : 1
PREVIOUSLY : 2
DEGREES : 1
PATTERN : 2
EXAM : 8
INFECTION : 1
RECENTLY : 4
DELETING : 1
MUSI : 1
CD : 1
JUST : 3
SUBSIDED : 1
INCREASED : 3
OCT : 2
AUDITORY : 1
ENJOYED : 1
GO : 8
SIGNIFICANT : 1
BOWEL : 12
RESIDENTS : 1
BP : 7
STATURE : 1
HEARD : 1
PREVENTION : 2
POST : 2
DEPRESSION : 4
SON : 3
RED : 1
CM : 6
FREE : 2
IMAGE : 1
DEPLOYED : 1
AGAIN : 2
CITALOPRAM : 1
KNOXVILLE : 1
SLOWLY : 1
NOMED : 1
SHOES : 1
ATTEND : 1
BCP : 1
BRUSH : 1
WT : 1
ADMITTING : 1
RESTRICTIONS : 1
HOMICIDALITY : 1
PLANS : 2
DIETARY : 1
PARTIAL : 1
BOTHERED : 1
STARTED : 2
SPASMS : 1
FEEDING : 3
VAPOR : 1
OR : 39
THERAPEUTIC : 2
SHIFT : 16
BOTH : 1
SUPPLEMENT : 1
CITY : 1
TEMP : 2
CONSIDERED : 1
BEACH : 1
GUNSHOT : 1
CONCERNS : 3
PULMONARY : 2
POSSIBILITY : 1
DE : 1
LIKE : 1
STAYS : 2
EXPERIENCE : 2
NED : 1
USAGE : 3
TRAINING : 1
APARTMENT : 1
IRAQ : 1
MUCH : 1
CHRONIC : 4
ANKLE : 1
TAKE : 17
INCREASE : 6
WITHDRAWAL : 2
MONITORED : 1
STRENGTHS : 1
ANESTHETIST : 1
OD : 4
CYMBALTA : 1
ADMITS : 1
HYPERLIPIDIMIA : 1
INVITED : 1
PPT : 1
SPOKEN : 2
OVERT : 1
UNIT : 2
IBUPROFEN : 1
MD : 3
RESISTANCE : 1
KINDLY : 1
NAME : 4
CARE : 23
SURROGATE : 2
THUMB : 1
AGE : 5
COMPLIANT : 1
RATED : 3
TIMES : 7
IS : 66
DL : 2
WORST : 2
SUPINE : 1
USUALLY : 2
START : 3
IF : 18
ENOUGH : 1
SMOKELESS : 1
MH : 10
PENDING : 2
BAND : 2
ONCE : 1
SCLERA : 1
UTICALS : 1
RELIEVING : 1
DEODORANT : 1
SKILLS : 2
EATING : 2
RATING : 1
CERTIFICATION : 1
OXIMETRY : 1
BRIEFLY : 1
PPD : 1
EVALUATION : 3
APPROX : 1
PASTORAL : 1
SATTHURS : 1
MMHG : 1
REPAIRED : 2
REFUSED : 5
REHAB : 2
ASCERTAINED : 1
THESE : 2
VISION : 4
FOLEY : 1
DIVORCE : 1
COMMANDS : 1
SEBACEOUS : 2
SUP : 1
LYWANDA : 1
PARTICIPATION : 3
EDUCATED : 1
RUPTURED : 2
REVEAL : 1
MUSIC : 1
COMPUTER : 1
ESSENTIAL : 2
TRYING : 1
DILATED : 1
NEAR : 1
TRANSPORTATION : 1
HEIGHT : 1
CAR : 1
ADDENDUM : 15
FULL : 1
CONVEY : 1
TREAT : 1
NO : 62
INTERESTS : 2
INTENSITY : 1
CONSCIOUSNESS : 2
CHIEF : 7
NORMOCEPHALIC : 2
CHANGED : 3
EXCESSIVE : 1
RESCUE : 1
INJURIES : 1
UPPER : 2
BENIGN : 1
MEET : 1
CLINIC : 12
RISK : 10
NEARING : 1
CLOZAPINE : 2
PERFORMED : 3
BUILDING : 1
MINS : 2
POINT : 1
BMI : 3
COULD : 3
PRN : 2
NOTET : 1
DEGREE : 1
DYSPHAGIC : 1
RHONCHI : 1
KING : 1
ARISE : 2
UNIVERSAL : 1
TOOLS : 1
PCMEDICATION : 1
EQUIVOCAL : 1
EDUCATIONAL : 1
WILL : 17
APPEARANCE : 1
OFTEN : 2
BUT : 8
ASKED : 3
THOUGHTS : 2
TYPE : 2
CAREGIVER : 1
REMOVABLE : 1
GETS : 1
SET : 2
ARRISES : 1
SCHIZOPHRENIA : 3
CFCF : 1
CREATED : 1
SIGNFICANT : 1
PACK : 1
LLE : 1
CONSULT : 9
SUPPORT : 3
FORMS : 1
WANTS : 2
SYSTEMATIC : 1
IMPROVE : 1
QID : 1
ASPECTS : 1
LIKELY : 2
REVIEW : 2
MAINTAINED : 1
HIMSELF : 1
DISCUSSING : 1
SPREADING : 1
RELIGIOUS : 2
THREATENING : 1
RESUME : 1
VIEW : 2
BASCOM : 3
JOKES : 1
MICROSCOPIC : 1
RESIDENT : 9
INSTRUCTIONS : 1
VALSARTAN : 1
VA : 5
PREFERENCES : 1
PRESUMED : 1
DISEA : 1
HOT : 1
APRIL : 1
LEVOTHYROXINE : 1
CONTINUING : 1
SUFFERED : 1
RESIN : 1
INITIATED : 1
DISEASE : 5
PAIN : 38
UNPROTECTED : 1
AS : 25
VISTA : 6
RESTRAINTS : 1
DRAINAGE : 1
FLOOR : 1
GREATER : 1
MISCARRIAGE : 1
WITH : 95
FEELS : 4
RAMIREZFIGUEROA : 1
OFFERED : 2
TEMPERATURE : 2
WOULDNT : 1
BASIS : 1
INDEX : 1
INCLUDING : 6
NA : 1
COPING : 2
SETTING : 1
POSTVIETNAM : 1
USED : 2
IT : 11
APPROACHED : 3
BEDTIME : 1
ROSACEA : 1
NECESSARY : 2
MOMENT : 1
DISCUSSED : 6
EXERCISE : 2
SUPPLY : 2
TIME : 14
PURPOSE : 2
CODE : 1
DEVICE : 2
INTEGRITY : 1
SWS : 1
AEROSOL : 1
HYGIENE : 2
HCL : 2
LOOK : 1
HUDVASH : 1
TEETH : 3
ADDITIONAL : 1
SAFETY : 3
OXYCODONE : 1
EMOTIONAL : 1
SIDE : 2
BREAKFAST : 1
PERSONALITY : 1
RECEPTIVE : 1
ALLERGY : 1
SPEAK : 2
CALL : 10
EXPRESSED : 2
IRREGULARLY : 1
RESULT : 2
HX : 4
MHC : 1
IMAGING : 8
NOTIFICATION : 1
UNSPECIFIED : 3
KEOMUAN : 1
SOB : 1
PROTECTION : 1
IOP : 1
MOTIVATION : 1
URINAL : 1
ARESOL : 1
EMOTIONALLY : 1
FRI : 3
TABLETS : 5
PER : 5
FRIEND : 1
IRRITATIVE : 1
CONDO : 2
UNT : 1
ETC : 1
MOBILITY : 2
YOUR : 6
PRECAUTIONS : 1
GIVEN : 4
UNSURE : 1
THEYRE : 1
PPC : 1
WHO : 7
UPON : 2
CANALS : 1
BASED : 2
ATTENDANCE : 3
VIST : 2
ARM : 4
CURRENT : 15
HOSP : 1
CONTROL : 2
GROOMING : 2
ES : 1
HIM : 9
PULSE : 7
PROSTHETIC : 1
ALVEOPLASTY : 2
NEXT : 2
ANESTHESIOLOGY : 1
NEEDS : 4
THEY : 3
TYLENOL : 1
SSOME : 1
PROVIDES : 1
EXTENSIVE : 1
TRANSFER : 2
PHONE : 7
DECLINED : 4
SUBSPECIALTY : 1
TALKING : 5
RESPONSES : 1
FAIR : 2
KEYS : 1
GRANDESOME : 1
EGD : 1
DRY : 1
BILLS : 1
SNACK : 1
BS : 1
HAD : 11
PERIO : 2
LOSS : 1
MRSA : 1
HELD : 1
ANALYSIS : 3
COLEMAN : 1
PRESENTLY : 1
YO : 2
NEGATIVE : 3
ARMBAND : 1
ORTHOPEDIC : 1
SPUTUM : 1
LAB : 2
WEAK : 1
LESIONS : 2
MIND : 1
MISSING : 2
ING : 1
LESSSON : 1
PRIM : 1
HENT : 1
COMPLAINTS : 2
CONTACT : 9
TRAV : 1
HABITS : 1
DEVELOPED : 1
CERUMEN : 1
FH : 1
ROOTS : 1
PROBLEMS : 8
URINE : 4
MINIMUM : 1
REHABPHYSICAL : 1
ANTISOCIAL : 1
NASAL : 2
CREPTS : 1
CAN : 8
NEG : 1
THERAPY : 9
PSYCH : 6
SEEING : 1
ARTHRITIC : 1
INFECTIONS : 1
NONVA : 1
WHICH : 5
SYMPTOMS : 3
SMG : 1
PURPLE : 1
NOTES : 5
LLQ : 1
OVER : 3
VISITS : 2
ON : 44
COMPLETE : 2
SOI : 1
PRESSURE : 7
ATTENDED : 2
VIA : 4
HEADACHE : 1
HANDOUTS : 1
GOOD : 4
DROPS : 1
FALLING : 1
CARING : 1
DORSAL : 1
LYMPHS : 1
RECEIPT : 1
PRAISED : 1
MED : 5
DRUGS : 1
UPDATE : 1
JOURNALING : 1
INTO : 3
CAUTION : 1
PROT : 1
SAO : 1
SHE : 7
PO : 2
UP : 14
THEN : 8
SERIOUSLY : 1
USUAL : 1
DEAR : 1
LOCATION : 4
RESTORATIVE : 1
DIRECTLY : 1
FEVER : 1
AWAY : 3
PRIOR : 3
VERBAL : 3
OFF : 2
DOCUMENTED : 2
GOT : 2
DATE : 12
FRONT : 1
DAILY : 6
SLIGHT : 1
SECRETION : 1
LONG : 1
FORMAT : 1
AWAKE : 1
WHEELCHAIR : 2
HOUSING : 1
FROM : 14
LEFT : 13
CIGARS : 1
BATH : 1
ESOPHAGOGASTRODUODENOSCOPY : 1
TESTICLE : 2
MEDICAL : 5
HEAD : 4
BECOME : 2
ANDRA : 1
ARO : 1
ALSO : 8
SPOKE : 2
SYSTEM : 3
ACQUIRED : 1
WORKING : 4
AN : 9
CATARACTS : 1
DEFERRED : 1
HEART : 2
SHINGLES : 1
BLACK : 2
HURTING : 1
POON : 1
TAKES : 1
CANS : 1
COPE : 1
FULLY : 1
FOUR : 1
OUTSIDE : 2
BEEFYY : 1
OSAC : 2
PHARMACIST : 2
MEASURES : 5
EYE : 3
MILIEU : 1
AGO : 2
SHARING : 1
MYSELF : 1
RESIDENTIAL : 1
ATTENDING : 4
CHEST : 2
FRANTZ : 1
HAVING : 4
DOCUMENTATION : 3
DT : 6
ANESTHETIC : 1
MODULE : 1
HOLES : 1
MUSCLE : 1
LATER : 1
ARE : 8
DTC : 1
ANSWERED : 3
NUMBERS : 1
HYPERTENSION : 1
INDEPENDENT : 3
ELEVATED : 2
PERSON : 3
APPLY : 1
CYST : 1
BROTHER : 1
PROGRAMS : 1
SCARS : 1
SURGERY : 5
STUDENT : 1
DERMATITIS : 2
RECOVERY : 4
SIDED : 1
FREQUENCY : 1
BURNING : 1
TX : 2
INHL : 1
INTERDISCIPLINARY : 1
NUMBNESS : 1
TIRED : 1
REMINDED : 1
BE : 22
RESOLVED : 1
ACC : 1
CANCER : 3
OX : 2
LEAVE : 1
DUE : 7
THEIR : 1
PING : 4
PH : 2
CANE : 1
ISSUES : 4
NEOMYCIN : 1
RECONCILED : 2
ALONG : 1
DM : 1
PSYCHOSIS : 1
SHEATH : 1
OTHER : 15
DRESSING : 1
PRODUCTIVE : 1
END : 1
QHS : 1
LIFE : 1
QUIET : 1
ME : 2
ANTICOAGULANT : 1
SUPERFIC : 1
BED : 7
NURSING : 13
ACCIDENTS : 1
ANOREXIA : 1
COMP : 1
STAR : 1
FOLLOWING : 8
IDENTIFIED : 4
OUTCOME : 1
DIAGNOSIS : 13
WITHOUT : 5
EVAL : 1
CASA : 1
ANXIETY : 6
VALVE : 1
THOUGH : 2
EXAMINED : 1
COUNTY : 1
HYPNOTIC : 1
WE : 3
SYND : 1
PROTECTORS : 3
JUDGEMENT : 1
FOUND : 1
PATCHES : 1
ROOM : 3
PULS : 1
PAINS : 1
INSTILL : 1
DALE : 1
CHART : 2
AVAILABLE : 1
FIRM : 1
REVIEWING : 1
ABOUT : 9
HSV : 1
RECHECK : 1
MONONESSA : 1
NKA : 3
BRIEF : 1
ADVOCATE : 1
PAT : 1
TABLET : 9
HYDROXYZINE : 1
ADMIT : 1
ANOTHER : 3
DURING : 13
ISOLATION : 1
COMMON : 1
TOLD : 1
MURMURS : 1
SEVERAL : 5
LISTED : 1
DIRECTED : 2
SCREENING : 1
STUDIES : 2
TKA : 1
CHECKS : 1
VOICED : 2
DISEASES : 1
REACH : 1
GETTING : 3
CONCENTRATION : 2
EPROGRAMS : 1
REACTIONS : 1
TI : 1
DOMICILED : 1
OS : 2
FLAMMABLE : 1
INSOLE : 1
FRED : 1
ESPECIALLY : 2
AFFECTIVE : 1
PROPER : 1
OXYGEN : 8
SCORE : 9
COMPONENT : 1
ABSENCE : 1
WROTE : 1
RESULTED : 1
SP : 1
EPIS : 3
MEASUREMENTS : 1
HOME : 4
NOTED : 3
INDIVIDUAL : 2
SEEM : 1
RETURN : 4
MODERATE : 4
RIC : 1
SIXTEEN : 1
MYOPIA : 1
EFFECT : 1
METHADONE : 1
AMBER : 1
UPSET : 3
HUNTSVILLE : 1
MIN : 4
PERFECT : 1
QUANTITY : 1
MDS : 1
CHEMICAL : 1
RECONCILIATION : 3
JENKINS : 1
PNEUMOVAX : 1
COMPUTERIZED : 1
PACIFIC : 1
MINUTES : 9
FOLLOWUP : 4
CHONDROMALACIA : 1
SOCKETS : 1
OCCURRED : 1
PREVENTATIVE : 1
TEAM : 4
CHECK : 2
STRESSED : 1
FINE : 2
FALL : 6
SICK : 1
DATA : 1
EMESIS : 1
AM : 4
HELPED : 1
DEFINE : 1
PRACTITIONER : 1
ENTERED : 6
CINCINNATI : 1
PLACEMENT : 1
COST : 3
HIGHPREVALENCE : 1
DEVELOPING : 1
OPTH : 1
WHERE : 1
REFUSE : 2
CIG : 1
CALLED : 2
TOOK : 1
SUPERVISION : 3
MANY : 2
ADVIL : 1
SITTING : 1
BACHELORS : 1
TEACHING : 1
OBTAINED : 1
ADVISED : 3
MON : 1
STOMACH : 2
DOCUMENTS : 2
CAPRI : 1
MONTHS : 5
AGAINST : 1
NEUT : 1
COUNT : 1
MEASUREMENT : 3
SSN : 5
VI : 1
APPLIED : 2
UCINATIONS : 1
EAT : 2
ASKING : 2
ASSISTANT : 1
INSIGHT : 1
WHY : 3
LUNG : 1
MEDICATION : 15
STOP : 1
SURVEILLANCE : 1
VISUAL : 2
TONGUE : 1
WANT : 4
ATTEMPTED : 1
SUPPORTIVE : 1
AFRICAN : 1
CASE : 3
CONDITI : 1
ORAL : 4
HYPERPLASIA : 1
CONTINUE : 7
ABNORMAL : 1
HOPE : 1
SWELLING : 3
OVERSIGHT : 1
SERVICES : 2
AB : 1
VELDE : 1
GOAL : 4
EXAMINATION : 2
ENGLISH : 2
PROVIDE : 1
CLICK : 1
PMHX : 1
RELATIONSHIPS : 1
HEALTH : 7
SUCCESS : 1
ADD : 1
DELUSIONAL : 1
PLACED : 4
COGNITIVE : 1
POSTOPERATIVE : 1
INCIDENT : 1
CHAPLAIN : 1
PREVIOUS : 1
SCATTERED : 1
BIPOLAR : 2
PICKED : 1
REFERRAL : 4
ENTIRE : 1
INTERVENTIONS : 1
COMMIT : 1
LI : 1
WAL : 1
VS : 2
MORE : 5
PE : 1
MAKING : 3
RACE : 1
STERISTRIPS : 1
FOURPLEX : 1
RECEIVE : 1
BEHIND : 1
NEUROSURGERY : 2
ER : 5
APPLICABLE : 5
RM : 1
PRESCRIBED : 2
REQUEST : 5
RN : 2
UNABLE : 1
XYZZY : 2
MECHANISM : 1
CUMULATIVE : 1
HOUSE : 1
ANTICOAGULATION : 1
ULNAR : 1
READY : 1
AFTER : 9
DIFFICULT : 1
COURSE : 1
STILL : 6
DIFFICULTIES : 1
EMPLOYED : 1
CONCERNING : 1
FLUID : 1
COUGHING : 1
LUMBAR : 1
GROUPS : 2
PCP : 3
SAYS : 3
CULTURE : 1
APPOINTMENTS : 1
WOUNDS : 1
EACH : 2
RE : 1
TITLE : 1
DEMOGRAPHIC : 1
OLD : 2
CLARITHROMYCIN : 1
LS : 1
GLUCOSE : 1
DIALYSIS : 1
ARTHROSCOPE : 1
REGION : 1
SHAPED : 1
CVS : 1
SNUFF : 1
EAGER : 1
CAROLYN : 1
REMAINING : 3
DEVELOP : 1
ETHNIC : 1
HEMATOLOGY : 1
PL : 1
AREA : 10
INTEREST : 1
BPD : 1
GU : 1
ALTERNATE : 1
TER : 1
INDEPENDENTLY : 1
MEDICATIONS : 16
MR : 10
MAJOR : 3
PACEMAKER : 2
BILATERAL : 1
FEASIBLE : 1
DESCRIPTION : 2
DELIVERY : 2
TISSUE : 1
VACCINE : 4
RECOMMENDED : 1
BETTER : 2
DEPRESSIVE : 1
SARAFIAN : 1
RESULTS : 2
EMERGENCY : 2
NUT : 1
ANSWER : 1
BREATH : 1
ABLE : 5
PERFORMANCE : 1
RECENT : 2
CHO : 3
REVEALED : 1
IN : 73
POSITION : 1
MARY : 1
CARDIO : 1
REGIMEN : 1
KILIANMOBILITY : 1
MANAGEMENT : 5
STATE : 3
PLAN : 14
ANTERIOR : 2
SMOKE : 3
CONTENT : 1
COSIGNER : 1
AGREE : 2
OTIC : 1
BASIC : 1
BECOMES : 1
IDENTIFICATION : 1
LACK : 2
RESTRAUNT : 1
TEXAS : 1
SPI : 1
BEHAVIOR : 2
INITIATING : 1
FAHRS : 1
COMPLETED : 4
IMPRESSION : 1
SOLUTION : 1
FAR : 1
EVEN : 2
PLASTIC : 1
DMII : 1
DRAW : 1
SCOPE : 1
LAST : 12
KEY : 1
FIBRILLATION : 1
EDUCATION : 10
HOLD : 2
TOXICOLOGY : 1
ADR : 3
DESPITE : 1
FLUOXETI : 1
SITUATIONS : 1
MOVED : 1
CAUSES : 1
DETAILS : 2
CATHETERIZATION : 2
AFFECTED : 2
ACCOMPLISH : 1
DENTIST : 1
BURSTS : 1
OBSTRUCTIVE : 1
CONSTANT : 1
WM : 1
ONLY : 1
EVENING : 2
PRESCRIPTIONS : 1
OPEN : 1
MONTH : 1
REFILLS : 1
DANGER : 1
BEEN : 23
LITERS : 1
SCHIZOAFFECTIVE : 2
WITHIN : 3
BASE : 1
GLASGOW : 1
REFILL : 2
YOURSELF : 1
DECEMBER : 1
OUTPATIENT : 9
EXPERTISE : 1
GOES : 1
WEEKLY : 1
INPATIENT : 5
CULTURAL : 2
SPLIT : 1
CLOSE : 1
GOWN : 1
RELATED : 1
SPECIMEN : 1
CC : 1
HGB : 1
HEMATURIA : 1
OPERATIVE : 1
INTENDING : 1
CASUAL : 1
TWICE : 4
COLD : 1
REGARDING : 1
VASCULAR : 1
CHAMBER : 1
INACTIVATED : 1
TOO : 3
RACING : 1
PERSONAL : 5
SOCKS : 1
TRIED : 1
COLLABORATE : 1
TRAUMA : 2
HIS : 55
COORDINATOR : 1
LATEST : 1
ID : 2
VARIABLE : 1
RECURRING : 1
NEURO : 1
SUGGESTED : 1
PVD : 1
ACID : 2
RASH : 1
DISORDER : 9
REASONS : 1
CONTACTED : 1
PROMOTE : 2
EVERYTHING : 3
XANAX : 1
TALKED : 2
TREATMENT : 20
CATEGORY : 2
DISCREET : 1
BLOOD : 6
ATRIAL : 1
HAVERLY : 1
HEREDITARY : 1
HAVE : 16
ASSIST : 2
ISLANDS : 1
LOUDLY : 1
DRUG : 2
OF : 122
INCLUDE : 1
CRADC : 1
CALLER : 1
PSYCHIATRY : 1
SECURED : 1
SHAVE : 2
SAID : 2
NUMBER : 16
DETOX : 3
CALCIUM : 2
SPONGE : 1
OBTAINING : 1
AID : 1
HEAR : 1
ULCERS : 1
ASTHMA : 1
PERIODS : 1
MY : 3
OUTPT : 1
INSTRUCTION : 2
NOSUNSPEC : 1
MESSAGE : 1
INHALATION : 1
THINGS : 1
EXHAUSTION : 1
FINALS : 1
THEM : 4
SUBSTANCE : 2
DIDACTIC : 2
ASSESSMENT : 13
US : 1
SCAR : 1
CAPLET : 1
LET : 1
AMBULATION : 1
SURFACEANTERIOR : 1
POX : 2
STARTING : 3
BLADDER : 3
ENCOURAGED : 2
NONSPECIFIC : 1
BM : 1
HOPING : 1
AWHILE : 1
FRIENDS : 1
PASSES : 1
INFORMATION : 8
ADEQUATE : 1
INITIAL : 1
ILL : 1
CENTER : 4
SIXTY : 1
DISCUSSIONS : 1
SUICIDE : 1
MEDICARE : 1
AO : 1
THE : 147
NURSES : 3
INFORM : 1
EOMI : 1
EXTENDED : 1
FILED : 2
BAL : 1
EXP : 3
GROUP : 10
PRESENTS : 3
IDENTIFY : 2
ADJUSTMENT : 1
REST : 1
KERATOACANTHOMA : 2
APPEARS : 1
EXPIRED : 2
PULSES : 1
TAMINE : 2
INTRAOCULAR : 2
COLLECTED : 1
COLOR : 4
THYROID : 2
LEG : 3
MEDS : 6
CT : 1
UNCHANGED : 1
PSYCHOLOGY : 1
DISPOSITION : 2
ANXIOUS : 1
WANTING : 1
ART : 1
CORRECTLY : 2
CAP : 2
DIET : 2
BREATHALYZER : 1
UNSP : 2
STATED : 5
BATHING : 1
HEARING : 4
GET : 6
AXIS : 5
WHAT : 3
ALBUTEROL : 1
THINPREP : 1
SHOE : 2
ASSISTANCE : 13
INJECTED : 1
DIABETIC : 2
MELLITUS : 2
DESIGNED : 2
YEAR : 3
PRESCRIPTION : 2
CHOSE : 1
RYAN : 1
LB : 4
NONPARKINSONIAN : 1
KEYPAD : 1
IMP : 1
MOTION : 1
TRANSPORT : 1
SEEN : 8
PRE : 1
RT : 1
FOOD : 6
ENCOURAGEMENT : 2
NURSE : 2
GRION : 1
SX : 1
COUNTRIES : 1
BIZARRE : 1
FINALLY : 1
INTERVIEW : 1
INJECTIONS : 1
SENSORY : 2
CORONARY : 1
ANY : 9
TRY : 1
GIVES : 1
DISCHARGE : 5
CONSISTENCY : 6
FINAL : 1
NAGGING : 1
SITUATIONAL : 1
RECORDS : 1
SYSTEMS : 2
QH : 1
ROOMMATE : 1
FLOW : 1
MAINTAIN : 1
POSTTRAUMATIC : 1
NITROGEN : 1
FACILITY : 2
GTT : 1
SUSPICION : 1
SECONDARY : 2
MSE : 1
JOSE : 1
SAT : 1
EVERY : 8
OCR : 4
INTENT : 1
SKIN : 10
YESTER : 1
NOT : 44
OK : 1
GOD : 1
THERE : 9
RETINOPATHY : 1
WALKING : 1
EXPECTED : 1
KLONOPIN : 1
RESEARCH : 1
PERRLA : 1
OPTOMETRY : 1
ASPIRATED : 1
HERE : 7
IM : 1
COTA : 1
POSITIVE : 2
UNITS : 1
ANGER : 1
OPERATIONAL : 1
NEWTON : 1
PROGRESS : 6
PSYCHOTHERAPY : 1
REPEAT : 1
TWICEWEEKLY : 1
VET : 6
STOOL : 7
EXTREME : 1
PND : 1
UPCOMING : 1
COMPLETION : 1
MOTHER : 1
PARTICIPATE : 3
INDIVIDUALS : 1
PREGNANT : 1
PAINFUL : 1
BACK : 6
OPIOID : 1
SOURCE : 2
REGARDS : 1
TUES : 2
VISITING : 1
MALE : 7
SVI : 1
VOIDED : 1
SUPPLEMENTAL : 1
BY : 38
PMH : 2
DIRECTABLE : 1
DISTURBANCES : 1
CLINICAL : 6
KNOWS : 1
REASSESSMENT : 2
NORTH : 1
LUNGS : 1
MEETING : 2
TH : 6
MDI : 1
DIDNT : 1
BURN : 1
TO : 174
PNEUMONIA : 2
IV : 2
FEEL : 2
MESSAGES : 1
ABUSE : 4
TIMEOUT : 1
TASK : 3
COUNSELED : 1
PPV : 2
SAFE : 3
DX : 6
BIOPSY : 1
BONE : 1
PROCEDURE : 2
REQUESTING : 1
ABNORMALITY : 1
SEGMENTAL : 1
STORY : 1
OINTMENT : 1
WARM : 1
PATTERNS : 1
AMNESIA : 1
LIQUID : 1
TIU : 1
SEE : 9
CIGARETTES : 1
UNTL : 1
ACTING : 2
INSTRUCT : 2
SUCCESSFULLY : 1
PLEASE : 4
INDICATES : 1
ANEMIA : 1
UNK : 1
STATUS : 10
READER : 1
DIABETES : 2
TA : 1
DRINKS : 3
BUTTOCKS : 1
CONTINUED : 3
TESTING : 1
OUT : 3
CARDIOMYOPATHY : 1
COMFORT : 2
HR : 2
EFFORTS : 2
LOOSENING : 1
MORELAND : 1
SURE : 1
LEVELS : 2
UNIV : 1
SCREEN : 1
FINDINGS : 5
XX : 1
EVALUATED : 2
BARRIERS : 1
CONDUCIVE : 1
NURSINGACTIVITIES : 1
ASSIGNED : 1
NEEDED : 7
MENTAL : 9
INFORMATIONAL : 1
DIVERTICULOSIS : 1
GERD : 2
EXT : 4
WERE : 7
THINKS : 3
FACTORS : 4
BRC : 1
BASISPHYSICAL : 1
SHEET : 1
MAN : 1
CUING : 1
FILL : 2
NEUROLOGIC : 1
WALKS : 1
CHANGING : 1
TURNS : 1
LABS : 2
GOITER : 1
JOB : 1
WAYS : 1
POSSIBLE : 1
LIDOCAINE : 1
AGREED : 1
FENTANYL : 1
PART : 1
FOREIGNBORN : 1
FAMILY : 3
BAD : 1
UNSPECIFIEDGERD : 1
MATTER : 1
WHEN : 10
COCAINE : 2
SEEMED : 1
AMBULATORY : 1
BEING : 3
GLARE : 1
FALLS : 1
VIGAMOX : 1
LOSING : 1
AMOUNT : 9
ACHIEVING : 1
ABOVE : 3
WAS : 42
PM : 6
HOMEWORK : 1
PATIO : 1
CONDITIONS : 1
WANTED : 1
CAUSING : 2
HIV : 1
CONSUMED : 5
SIG : 1
REMAINS : 1
HEALING : 1
NOW : 4
PTSD : 4
ECF : 1
CONFIRMED : 1
HYDROCODONE : 1
ONSET : 1
LEADER : 1
NARCOTIC : 2
SHOT : 1
LIST : 3
OT : 2
TROUBLE : 2
SIZE : 2
BAY : 2
NEGLECT : 1
HOLOGIC : 1
IMMUNIZATION : 1
PARTNERS : 1
FROTHY : 1
SA : 1
VOMITING : 3
ORIENTED : 6
FARJAD : 1
FLUVASTATIN : 1
CURRENTLY : 1
NECK : 1
LYING : 1
JOINT : 3
PROSTHETICS : 1
BETWEEN : 1
IMAGES : 1
BATHROOM : 5
DOCTOR : 2
GOING : 1
SEDATION : 2
DID : 9
FITTED : 1
MOST : 4
RUE : 1
HOMEBASED : 1
SHOW : 2
DYSPHAGIA : 1
ARRIVAL : 2
OPERATION : 1
PCE : 2
SUN : 1
ACCURATE : 1
SAMMIE : 1
ADDRESS : 1
TELEPHONE : 5
SITUATION : 2
CPT : 2
DISORDERMET : 1
COMPLAINING : 2
COOPERATIVE : 1
KUMET : 1
REPORTS : 7
SUBJECTIVE : 3
NONACUTE : 1
RESURFACE : 1
HELP : 5
OPTIONS : 1
PACU : 1
FAVORITE : 1
YES : 11
CONTINUES : 2
COMING : 2
FURTHER : 3
SMILING : 3
CONSENT : 5
NOTICED : 1
FACE : 1
ERA : 1
LEISURE : 1
RETURNED : 2
VACCINATION : 1
XPATIENT : 1
MGMT : 1
LACTATING : 1
HPI : 2
COMA : 1
LITTLE : 1
FITTING : 1
QUITE : 1
HES : 1
ED : 5
CONFIRM : 1
INSTITUTE : 2
THROBBING : 2
PHYSICIAN : 16
GLOBES : 2
DAUGHTER : 1
TAC : 1
COMPLIANCE : 1
TETANUSDIPTHERIA : 1
CONSISTANT : 1
INTOXICATED : 1
FITS : 2
DEPENDENCE : 6
CESSATION : 1
HE : 81
BUTTON : 1
REITERATED : 1
RX : 2
TREATED : 2
PHE : 1
HIGHRISK : 1
MASS : 2
GPD : 1
MEMBER : 2
CANCELLATION : 2
VANOD : 1
HYDROBROMIDE : 2
CLEAR : 3
EXTREMELY : 1
PRIMARY : 10
UNTIL : 2
ABDOMINAL : 1
ANESTH : 1
ACQUAINTED : 1
ORTHOPNEA : 1
SIGNS : 4
DEPARTMENT : 1
ACTION : 3
PATIENTS : 6
LEGIBLE : 2
FMLA : 1
TRANSPARENCIES : 1
FEAR : 2
THROUGHOUT : 3
FATHER : 1
PROVIDED : 11
DENTAL : 7
TWO : 5
NONE : 4
RECOMMENDATIONS : 1
II : 4
CONNECTED : 1
QUACKENBUSH : 1
DATES : 1
ANGRY : 1
TRAVEL : 1
BLINDNESS : 2
OBSOLETE : 1
RESPONSIVE : 1
ACE : 1
CALM : 3
HER : 5
ORDERED : 3
TOPIC : 1
MACKIE : 1
TURN : 1
FEELING : 4
SHOULD : 6
QUESTIONS : 4
EDUCATE : 1
APPEARED : 1
SPECIFIED : 1
ENDOSCOPY : 1
JERSEY : 1
MCG : 1
STAYING : 1
ROUTE : 2
RANGES : 1
THERAPIST : 1
LIVING : 4
PLACE : 8
IER : 1
MHICMINTENSIVE : 2
APPEAR : 1
TOENAIL : 1
REINFORCE : 2
MG : 26
UROLOGY : 3
BUTTONS : 2
BEHAVIORS : 3
VIETNAM : 1
NVI : 1
REG : 1
ARMY : 2
CONTINENT : 6
ATRAUMATIC : 1
SHOOTING : 1
APPROXIMATELY : 3
ATTENTIVE : 1
WEEKEND : 1
PROVIDER : 8
MARCH : 1
TOLERANCE : 1
CERTIFIED : 1
RINSING : 1
HL : 1
MULTIPLE : 1
USES : 1
PARENTERAL : 1
TEARFULNESS : 1
APPOINTED : 1
TELL : 1
ALERT : 6
SUBMITTED : 1
ACCESSED : 3
UNDER : 1
LOCALIZED : 1
OTR : 1
COMMENT : 5
THREE : 4
TEAMS : 1
ARTERIOSCLEROSIS : 1
COLLECTION : 1
PROGRAM : 6
GRADE : 2
FEMALE : 2
APPOINTMENT : 6
WOULD : 3
SUE : 1
FOLLOW : 7
SUTURES : 1
ORTHOTIC : 1
SALMERON : 1
METHOD : 2
INDICATE : 1
BITE : 1
BIRCH : 1
SEX : 3
ACTIVITIES : 4
LOCATE : 4
AORTIC : 2
REFLUX : 1
THIMEROSAL : 1
SURGEON : 2
MUSCLES : 1
INSERTS : 1
ONCOLOGY : 1
ADENOCARCINOMA : 1
MOVEMENTS : 4
COMPLAINT : 6
ORDER : 2
USING : 3
TESTED : 1
MAXINE : 1
HAND : 1
SEXUALLY : 1
INFLUENZA : 4
UNDERSTOOD : 1
DENIED : 2
STAND : 1
GAVE : 3
SNACKS : 1
PACKED : 1
FURNITURE : 1
LIFESTYLE : 1
DISTENDED : 1
DIFFERENT : 2
NEW : 7
MOUTH : 14
PROVIDERS : 1
DECIDED : 1
SPLINT : 1
PRESENT : 3
BREAST : 1
SOME : 4
SLEPT : 1
HRS : 3
BAGS : 1
NEED : 2
FORMALITY : 1
TRIAL : 1
RECEIVED : 1
HELPS : 1
APPROACH : 1
COLLAPSED : 1
LOOSEN : 1
ASAP : 1
CUEING : 3
EAR : 2
BODY : 2
VENTRICULAR : 1
BLOATING : 1
SATISFACTORY : 1
CGY : 1
CYTOPATHOLOGY : 1
BIOPSIES : 1
BECAUSE : 5
STEPHANIE : 1
NEURODE : 1
OL : 3
TRANSFERRED : 2
CLASS : 2
REMAIN : 1
DISCOMFORT : 1
LEISUR : 1
LESION : 1
DVAMC : 1
OSTEOARTL : 1
OMEPRAZOLE : 2
BRIGHT : 1
SEVERE : 3
SOUNDS : 2
REVIEWED : 8
BEFORE : 3
ALL : 8
AUTHOR : 6
LIQUIDS : 1
SECOND : 1
DENIS : 1
INHALE : 1
NARROW : 1
TAMPA : 1
SATUR : 1
HELIOS : 1
NEEDLE : 1
DPM : 1
LANGUAGE : 1
DIAGNOSES : 3
PATIENT : 86
SELF : 4
JENNY : 1
ALLERGIES : 5
ENERGY : 1
SENT : 3
ADMISSIONS : 1
ABDOMEN : 2
AGREES : 1
ATTENTION : 1
NOS : 3
THAN : 2
VOICE : 1
ACUTE : 1
REQUIRES : 3
FILLED : 1
DECREASE : 1
PROTOCOL : 1
COME : 1
FEE : 2
HOSPITALIZATION : 1
ROUTINE : 4
LENSECTOMY : 2
VIAGRA : 1
CAME : 1
VISIT : 9
THAT : 40
WIFE : 4
NORMAL : 3
STAFF : 9
DEPRESSED : 3
SERVICE : 5
RIGHT : 13
PC : 5
BREATHING : 1
VITALS : 1
HBPC : 1
ONE : 11
PMR : 1
FBS : 2
ANATOMICAL : 1
MONEY : 1
TUBES : 1
TEARFUL : 2
THOUGHT : 3
HYPERLIPIDEMIA : 2
TENDING : 1
WRITER : 5
RADIATING : 1
YOU : 10
CL : 1
INFORMED : 2
NOCTURIA : 1
PAST : 10
DOCUMENT : 8
INTERESTED : 1
REASON : 4
DISABILITIES : 2
TOBACCO : 2
TREMOR : 1
ABUSING : 2
REMINDER : 5
POSTKOREAN : 1
ROLE : 1
NEVER : 2
PENICILLIN : 1
TECHNICIAN : 1
WEAKNESS : 1
SOCIAL : 7
MEMBERS : 2
TRP : 1
HOSPITAL : 1
RECOMMENDATION : 1
SUICIDAL : 1
COUD : 1
HOPELESS : 1
DICKSON : 1
VITAL : 4
IMPROVEMENT : 1
REGULAR : 1
GEC : 1
BEAM : 1
TALK : 1
RELAPSING : 2
ADULT : 1
MAINTAINING : 1
KRIS : 1
PROTECTIVE : 1
PEROXIDE : 1
MODE : 2
STRESS : 1
JR : 2
MAKE : 3
RECORDED : 1
FOCUSING : 1
WEEK : 4
VITAMIN : 1
TN : 1
CBOC : 2
SCAN : 3
APPROVED : 1
MEMORIES : 1
NEITHER : 1
DRAINS : 2
REL : 2
NUR : 1
DISTRESS : 1
ATLAS : 1
IMPAIRMENT : 1
DD : 1
HTNTO : 1
MOOD : 4
LIVES : 2
REPORT : 6
APPROACHES : 1
SIGNED : 1
ELECTRONICALLY : 2
HOW : 2
FEELINGS : 1
STRIAE : 1
SINCE : 4
FLU : 2
CHANGE : 1
DISCUSS : 2
COUGH : 1
STOPPED : 1
DEMONIC : 1
SOLN : 1
LEARN : 3
RATHER : 1
OFFICE : 1
GRADUATION : 1
CARDIAC : 2
ARMD : 1
YRS : 3
INCLUDES : 1
VERBALIZED : 1
PRINTED : 1
LEARNING : 2
DOSE : 8
ENCOUNTER : 1
OBJECTIVE : 4
SMOKING : 3
AFFECT : 2
EXAMPLES : 1
UNDERSIGNED : 1
FOLLOWS : 1
PREDNISONE : 2
RELEASE : 1
CONCERN : 1
ORIGIN : 2
BRIMONIDINE : 1
SOMEONE : 1
STRONG : 2
CUPS : 1
AREAS : 2
ALONE : 2
MULTINODULAR : 1
SEBORRHEIC : 1
RELIEVED : 1
ANTIBIOTIC : 4
STEFANIK : 1
TRAMADOL : 2
NUTRITIONAL : 1
INPT : 1
IMPORTANC : 1
COMMENTS : 4
NEURONTIN : 1
ACETAMINOPHEN : 2
STRENGTH : 1
TOTAL : 2
JUNE : 5
SURGICAL : 1
ST : 2
ELIMINATION : 8
HISTORY : 16
UPDATED : 1
ABRUPTLY : 1
RESPIRATION : 3
HOURS : 9
TUMOR : 1
MAIL : 1
LEGS : 2
UNSATISFACTORY : 1
CAUCASIAN : 1
REPORTED : 10
ERECTION : 1
RATIVE : 2
UA : 1
CONFERRED : 1
NOV : 1
WOUND : 1
ALWAYS : 1
OTOSCOPY : 1
HIP : 4
PAYING : 1
SITE : 1
PAJAMAS : 1
PROSTATIC : 1
STATING : 1
COMPLICATIONS : 2
KG : 4
OP : 1
WILLING : 2
AUG : 1
PROBLEM : 7
EYES : 1
TELERETINAL : 1
OCTOBER : 1
RECORD : 3
ZZSWS : 1
LEAFLETS : 1
ANALYZED : 1
THROUGH : 6
WARFARIN : 1
PUFFS : 1
GLEASON : 1
HEENT : 1
EXTRA : 1
ADMISSION : 4
LESS : 2
REMOVE : 1
MIVA : 1
ULA : 2
FUTURE : 2
PHOTOTHERAPY : 1
VALIUM : 1
WAY : 2
TOILETING : 1
OBSERVATIONS : 1
CALCIFIED : 1
CLIENT : 2
DENIES : 7
SPECIFIC : 1
DOB : 1
QUALITY : 2
PHARMACY : 3
FR : 1
REPORTEDLY : 1
OTHERS : 7
REQUESTED : 3
INTEGRATED : 1
IVE : 1
VETERAN : 27
CAPSULE : 1
DINNER : 4
RELIEF : 1
PT : 39
INJURY : 3
RADIATION : 2
DIANE : 1
DOUBLE : 2
SIT : 3
FLOTATION : 1
PSYCHOSOCIAL : 1
CONTRIBUTING : 1
HORROR : 1
MISSED : 1
MINIMAL : 1
CHIROPRACTOR : 2
SEXUAL : 1
LUCID : 1
PAUSE : 2
COMBAT : 1
AROUND : 1
ILLNESS : 3
AND : 142
HOUR : 3
INSOMNIA : 1
URINARY : 2
SESSIONS : 4
DRAMA : 1
LOC : 2
WORKED : 2
PRACTICED : 1
NAIL : 1
AR : 2
KNOWLEDGE : 2
CUT : 1
PINES : 2
LOW : 4
FOLLOWED : 2
MAY : 6
LMSW : 1
DROPIN : 1
SECRETIONS : 1
LENGTH : 4
APPT : 2
GROIN : 1
TAKING : 6
ADMITTED : 1
OBSERVED : 8
YET : 1
PERIOD : 4
VANDER : 1
DONE : 1
DEPOSITS : 1
PHYSICAL : 5
EXHIBITING : 1
SOMATIZATION : 1
CP : 4
NIGHT : 2
ACTIVE : 23
KNOW : 3
KERATITIS : 1
MANAGER : 1
ADHERING : 1
ABILITY : 2
CARBAMIDE : 1
LACY : 1
THIS : 52
HIGH : 3
SOFT : 1
SIGNAL : 1
CARPULE : 1
SIGNING : 1
PALMER : 3
BECOMING : 2
AOX : 1
GAF : 1
FINANCIAL : 1
SESSION : 7
ALVAREZ : 1
STATES : 3
OAK : 1
NEBULIZER : 2
SUPPER : 1
OU : 6
WHILE : 4
SHORT : 3
FLORIDA : 1
LIMITS : 1
WAIT : 1
ICDCM : 3
FIRST : 1
LAUGHING : 1
RESP : 2
ANDERSON : 1
PICK : 2
ETOH : 4
ITS : 2
WANTING_GET : 1
CAROLYN_HE : 1
RIGHT_BLOOD : 1
CITY_COUNTY : 1
EXAM_HEAD : 1
TO_PT : 2
FOR_PMHX : 1
SEVERAL_MINUTES : 1
BETTER_HAS : 1
PALMER_ADVISED : 1
KERATOACANTHOMA_LOWER : 1
DISCHARGE_VASCULAR : 1
PHYSICIAN_ID : 1
OR_GERD : 1
WHAT_DATA : 1
HYDROXYZINE_MG : 1
OF_OVERT : 1
AND_SMOKE : 2
THOUGHT_FOR : 1
MENTAL_MANY : 1
OF_DISCHARGE : 1
MEAL_ELIMINATION : 1
LEISUR_EPROGRAMS : 1
OR_POST : 1
ASKED_HIM : 1
CALL_WILL : 1
SHOWS_EXT : 1
SURVEILLANCE_CONSULT : 1
BY_COTA : 1
UPPER_ON : 1
BEEN_TO : 2
ADDENDUM_INDIVIDUALS : 1
GOAL_TO : 1
NOT_TAKING : 1
APPOINTMENT_GIVEN : 1
PAMOATE_CAP : 1
BEFORE_ACTIVITY : 1
INSOMNIA_ADDENDUM : 1
SEVERAL_BEFORE : 1
TWICE_PATIENT : 1
ACTIVE_FBS : 1
CONTINUE_THE : 1
YESTER_DENIES : 1
RESULT_ABDOMEN : 1
ANY_DIFFICULTIES : 1
TN_PATIENT : 1
NORMAL_CONTACT : 1
SC_ED : 3
PO_ACTIVE : 1
ATRIAL_PULSE : 1
LET_KNOW : 1
OBJECTIVE_PHYSICAL : 1
AND_ORIENTED : 2
CIGARETTES_CIGARS : 1
COMMENT_COMMENT : 1
PAST_HOURS : 1
TEARFUL_REFILLS : 1
AMBULATORY_MG : 1
OF_HIS : 4
PINES_PROGRESS : 1
FOR_SHORT : 2
PROVIDES_HOUR : 1
THE_PATIENT : 17
RETURNED_LATER : 1
EXPERIENCE_EXPERTISE : 1
CIGARS_TOBACCO : 1
THE_UNDERSIGNED : 1
HAVE_AND : 1
NOT_AND : 2
SEE_ABOVE : 1
SNACK_AND : 1
EFFORTS_COLLABORATE : 1
RAMIREZFIGUEROA_JOSE : 1
BIOPSY_MENTAL : 1
PAST_LEFT : 1
MEDS_IN : 1
DELUSIONAL_CONTENT : 1
ASSESSMENT_VASCULAR : 1
NURSING_PREVENTATIVE : 1
SUCCESS_ABDOMINAL : 1
DELIVERY_BITE : 1
TO_SEBACEOUS : 1
POX_ASSESSMENT : 1
ON_SESSION : 1
ANALYSIS_SUN : 1
IF_PATIENT : 1
ON_ST : 1
AGREE_TREATMENT : 1
COMPLIANT_WITH : 1
TO_ABOUT : 2
HIS_THIS : 1
MOUTH_PENDING : 1
FEELS_SHE : 1
EXAM_PACIFIC : 1
THINKS_DOCUMENT : 1
ALVEOPLASTY_SOCIAL : 2
COMPLIANCE_AEROSOL : 1
THAT_CAN : 1
TEMPERATURE_SUBJECTIVE : 1
ASTHMA_COMMENTS : 1
SOONER_OF : 1
STATES_WAS : 1
HOPE_FEEL : 1
CONSULT_WAS : 1
VOLUNTEER_PLACEMENT : 1
ORDERED_IN : 1
DAILY_SKIN : 1
IMPORTANCE_OF : 1
RETINOPATHY_SURVEILLANCE : 1
PATIENT_AT : 2
MORNING_MG : 1
HE_PLANS : 1
SUCCESSFULLY_WITH : 1
CONTACT_PHONE : 2
DOUBLE_VISION : 1
SEXUAL_STARTING : 1
ON_WEIGHT : 1
GREATER_THAN : 1
SITE_AND : 1
ABILITY_ASSISTANCE : 1
WANTS_TO : 1
WITH_HUDVASH : 1
ANTICOAGULANT_CLINIC : 1
WITH_ARESOL : 1
THEN_HOSP : 1
HIS_BROTHER : 1
LEFT_PATIENT : 1
USAGE_MINS : 2
ALLERGIES_PAIN : 1
STRENGTH_TURNS : 1
STOOL_FIRM : 1
INCLUDING_AT : 1
HIMSELF_DUE : 1
ALERT_HIM : 1
CULTURE_HRS : 1
ABNORMAL_INTENSITY : 1
PAIN_PT : 1
ROSACEA_SECRETION : 1
THE_SURGERY : 1
PROTOCOL_USED : 1
BY_ULA : 1
LIVING_THIS : 1
NOT_AT : 1
MORELAND_THE : 1
FEE_BASISPHYSICAL : 1
PATIENT_FAMILY : 1
CONSULT_FOLLOWUP : 1
EXPIRED_THE : 1
OR_OTHER : 2
MILIEU_HAS : 1
OBSERVED_SMILING : 3
MR_AN : 2
REMOVED_HE : 1
RECOVERY_ROOM : 1
CARE_ORAL : 1
ON_ETOH : 1
PATIENT_JR : 1
HTNTO_GOAL : 1
WITH_OR : 3
HSV_ON : 1
IF_IS : 3
HYPERLIPIDEMIA_WAS : 1
AXIS_II : 2
BED_SPONGE : 1
AREA_STAFF : 1
GRION_WITH : 1
RESPIRATORY_THERAPIST : 1
REHABPHYSICAL_THERAPY : 1
NIGHT_THEN : 1
HAD_FOLLOW : 1
SIZE_LESION : 1
OR_WITHOUT : 1
AGE_FAHRS : 1
WHEN_OBSERVED : 1
MH_CONTACT : 1
AND_SMOKING : 1
ATTENDANCE_BRC : 1
HIS_RAL : 1
AND_RESPONSIVE : 1
ARMY_HE : 1
PRIVILEGES_UROLOGY : 1
TWICE_DISCUSSED : 1
OU_OU : 1
WITH_SUPPLEMENTAL : 1
MIN_YES : 1
BEEN_AND : 1
ALONE_CONDO : 1
PLACED_BY : 1
REVIEWED_THESE : 1
DIFFICULT_SITUATIONS : 1
UNIV_PROT : 1
FOR_IOP : 1
NORMAL_RIGHT : 1
HAS_ADDITIONAL : 1
INHALATION_AN : 1
REMOVABLE_METAL : 1
IDENTIFIED_OTHER : 2
TALKED_ABOUT : 2
DIABETES_HE : 1
INCLUDING_TOILETING : 1
MONITOR_REASON : 1
DOSE_FLUVASTATIN : 1
IF_APPLICABLE : 2
CUPS_HOT : 1
PULSES_WARM : 1
THE_AREA : 2
PHYSICIAN_RAMIREZFIGUEROA : 1
SENT_TO : 2
SUPPLY_REFILL : 1
TROUBLE_INITIATING : 1
CANCER_OF : 1
OPEN_VISTA : 1
EVERYTHING_BRUSH : 1
PROVIDER_PHONE : 1
REPORT_GOALS : 1
MH_NURSING : 1
HUNTSVILLE_IF : 1
RELIGIOUS_CULTURAL : 2
REPORTS_FEELING : 1
BY_CLINIC : 1
AND_FINANCIAL : 1
BED_OXYGEN : 1
OF_ACTIVE : 2
TALKED_PAYING : 1
SMOKE_VETERAN : 1
PT_WILL : 1
FOR_COUGHING : 1
ISOLATION_WITH : 1
PAIN_ALL : 1
ON_TREATMENT : 1
AS_AS : 2
PRESENT_ILLNESS : 2
HISTORY_PRESSURE : 1
NOT_RETURN : 1
INDEPENDENT_ARM : 1
WITH_HEALTH : 1
TALK_SOMEONE : 1
TO_ORAL : 1
AN_OXYGEN : 1
FAMILY_PROBLEMS : 1
NOW_CITY : 1
SKIN_VANOD : 1
RECEIVE_THE : 1
ASSESSMENT_STILL : 1
PROBLEMS_WITH : 2
SSN_PC : 1
CATEGORY_IV : 1
DISCHARGE_FRI : 1
NOTE_GLUCOSE : 1
SENSORY_STUDIES : 1
NEG_TEST : 1
UPPER_LOWER : 1
FEELING_GOOD : 1
REVIEWED_EXERCISE : 1
ACID_HOPE : 1
HIV_AB : 1
READINESS_METHOD : 1
NOS_OMEPRAZOLE : 1
TREATMENT_WOULD : 1
FOR_SATUR : 1
HIGH_HYPERLIPIDEMIA : 1
SATURATION_MIN : 1
THREE_TABLETS : 1
OPERATIONAL_KEYS : 1
HEROIN_NO : 1
TRP_TELEPHONE : 1
ON_YESTER : 1
PHYSICAL_EXAM : 1
HOURS_PT : 1
KEYS_WITH : 1
AMNESIA_IS : 1
MGMT_AND : 1
TREATED_THIS : 1
PAST_OR : 1
NURSE_QUESTIONS : 1
STAFF_PATIENT : 1
ASSESSMENT_AS : 1
ARE_TO : 2
DOCUMENT_ORIENTED : 1
CONCERN_ABOUT : 1
MG_MG : 1
SOME_IN : 2
HISPANIC_ORIGIN : 2
PREVIOUS_ADMISSIONS : 1
TO_TREAT : 1
PHARMACY_SSN : 1
HX_MSE : 1
MONTH_THERE : 1
ATRIAL_FIBRILLATION : 1
EVALUATION_AND : 1
VALIUM_FEELS : 1
BY_PROVIDERS : 1
INTO_MEDICINE : 1
GOOD_AND : 1
AFTER_HE : 1
CONSENT_ANATOMICAL : 1
PSYCH_HISTORY : 1
CONDITIONS_ROUTINE : 1
NO_YES : 1
ASSISTANT_OR : 1
ANXIETY_PT : 1
ACID_TAB : 1
NO_OVER : 1
DISORDERMET_VETERAN : 1
EXAMPLES_DURING : 1
WROTE_OFF : 1
VETERAN_HAS : 1
AT_HAD : 1
SVI_AND : 1
THAT_GET : 1
REFERRAL_TO : 1
REGARDS_HIS : 1
TO_TO : 4
AND_GROUPS : 2
MUSI_CARE : 1
BARRIERS_INCLUDE : 1
NEW_MEDS : 1
TAKING_FOOD : 1
OF_HEALTH : 1
BECAUSE_HIS : 1
SOCKS_AND : 1
HOUR_FITS : 1
FOR_PURPOSE : 1
COLONOSCOPY_MODERATE : 2
MAN_OF : 1
PATIENT_REFUSED : 1
WAS_EVALUATION : 1
ANESTHESIOLOGY_DOCUMENTS : 1
CURRENT_BMI : 1
PAIN_PERIOD : 1
WITH_PT : 3
AT_CLINICAL : 1
STRONG_SUSPICION : 1
GETS_INFECTIONS : 1
RELIEF_ANESTH : 1
TAKING_MEDICATION : 1
AREAS_COMMENT : 1
ER_VIA : 1
MEDICATIONS_NOT : 1
MONITOR_OX : 1
TAKE_ACTIVE : 1
TO_US : 1
FOR_STATED : 1
URINARY_INFECTIONS : 1
BETTER_THE : 1
THE_PHARMACY : 1
GETTING_VALIUM : 1
QID_SKIN : 1
INJECTIONS_OU : 1
ALSO_ABLE : 2
TELEPHONE_NOTE : 3
HAVE_ANOTHER : 1
NONE_NONVA : 1
DROPIN_ART : 1
AGE_CHANGED : 1
ATTENDED_GROUP : 1
TO_PERSONAL : 1
MONITOR_AND : 1
TO_HIM : 2
SESSION_THERE : 1
PATIENT_CHIEF : 1
FUTURE_IT : 1
CALL_REQUESTED : 1
INTRAOCULAR_ANTIBIOTIC : 2
HIS_PLACEMENT : 1
ULCERS_NO : 1
CAUCASIAN_WITH : 1
LIVING_LIVES : 1
BY_DENTIST : 1
IN_MONTHS : 1
SEE_BARKER : 1
ERA_SYMPTOMS : 1
FOLLOWING_INTERVIEW : 1
JUDGEMENT_THE : 1
MEAL_ASSISTANCE : 1
VISIT_CURRENT : 1
LDL_BAD : 1
IS_SINCE : 1
ANXIETY_OR : 1
RESTORATIVE_FEEDING : 1
PNEUMOVAX_AND : 1
NOW_MAKING : 1
NOTET_ANTICOAGULATION : 1
REGION_HE : 1
THE_ABRUPTLY : 1
AND_OTHER : 1
LB_LENGTH : 1
ME_WITH : 1
RECOVERY_EFFORTS : 1
MEMBERS_ATTENDANCE : 1
BLADDER_PHYSICIAN : 1
WITH_LUMBAR : 1
TO_PICK : 1
THE_PRACTITIONER : 1
OR_DENTAL : 1
REFUSED_ALL : 1
FRIEND_TREATMENT : 1
TABLETS_MG : 1
MASS_LEFT : 1
BAD_OL : 1
REPORTED_THAT : 3
EXAM_TAMINE : 1
PT_CUPS : 1
REL_INFORMATION : 1
ENGLISH_PNEUMOVAX : 1
INTO_TREATMENT : 1
BLOOD_HRS : 1
NUT_REVIEWED : 1
MANAGER_WHO : 1
COMING_WEEK : 1
THROBBING_DD : 1
UNIVERSAL_FALL : 1
LIDOCAINE_NA : 1
KERATOACANTHOMA_RIGHT : 1
PROGRESS_MIN : 1
NEXT_APPT : 1
BY_HENT : 1
AS_TIME : 1
ZZPATIENT_CARE : 2
GROOMING_UNIVERSAL : 1
ASKED_BECOMES : 1
CP_ESOPHAGOGASTRODUODENOSCOPY : 1
IS_RECOMMENDED : 1
FOR_DETOX : 1
ALSO_INTERESTED : 1
WITH_INTERESTS : 1
BACK_SIDE : 1
VETERAN_SSN : 1
CHART_AND : 2
SIGNS_SCAN : 1
CONTROL_AUDITORY : 1
MD_RESIDENT : 1
STOOL_DISABILITIES : 1
WHAT_QUESTIONS : 2
REVIEW_BENIGN : 1
GERD_ONSET : 1
EXT_GOOD : 1
CERTIFIED_THE : 1
WHO_IS : 1
FROM_HERE : 1
ABLE_REQUIRED : 1
PSYCH_BENIGN : 1
EXTENSIVE_ASSISTANCE : 1
NOTE_EXTENSIVE : 1
FOLLOWED_PER : 1
NEBULIZER_MDI : 1
AND_COUNTY : 1
AMOUNT_ASSISTANCE : 1
LAST_VISIT : 3
NIGHT_ANY : 1
EXAM_VA : 2
SECRETION_OXYGEN : 1
SEX_NURSES : 1
ATTENDANCE_SWS : 1
AS_ADDRESS : 1
IDENTIFIED_PROBLEM : 2
BOWEL_NUTRITION : 1
VETERANS_AT : 1
HOME_TO : 1
PATIENT_HIS : 1
LAUGHING_TO : 1
THIS_DISPOSITION : 1
WITH_INSTRUCTED : 1
OVER_NONE : 1
HE_NOT : 2
CONTINUE_OMEPRAZOLE : 1
DEPENDENCE_SERVICE : 1
REFILLS_QUANTITY : 1
VISITING_HIM : 1
ONCE_APPROXIMATELY : 1
CP_EXAMINATION : 1
SIGNING_RELEASE : 1
YET_NOT : 1
LOW_LEVEL : 1
ACTIVE_SHE : 1
EXPIRED_HYDROXYZINE : 1
FALL_PREVENTION : 1
MINUTE_CHECKS : 1
LEFT_EAR : 1
CARE_GERD : 1
PHOTOTHERAPY_IN : 1
MOUTH_TIMES : 2
NOTES_IN : 1
SKIN_NUTRITIONAL : 1
SOLN_DROPS : 1
IS_CONSIDERED : 1
SATISFACTORY_APPROPRIATE : 1
EVEN_HIS : 1
AS_IT : 1
EXPECTED_ABILITY : 1
BAGS_WEIGHT : 1
ON_HIS : 1
CONFIRM_TIME : 1
PATIENT_REPORTED : 2
DICKSON_JENNY : 1
FINE_WITH : 1
ANY_ACUTE : 1
EDUCATION_APPLY : 1
IN_RIGHT : 2
LEVELS_AT : 1
ALL_TO : 1
ANOTHER_DOCUMENT : 1
PHYSICIAN_CONSENT : 1
BATHROOM_PRIVILEGES : 4
BLINDNESS_IS : 1
TIMES_IN : 1
DESIGNED_INCREASE : 2
CURRENT_NEGLECT : 1
THIS_AGREED : 1
RIGHT_MULTINODULAR : 1
PAIN_OUTPATIENT : 1
COORDINATOR_ADDENDUM : 1
WEEK_PMH : 1
REVIEWING_HIS : 1
ORIENTED_DATE : 1
PT_FOR : 1
DRINKS_THE : 1
THAT_HAS : 5
WE_TALKED : 1
MENTAL_EXAMINATION : 1
PT_WORKED : 1
IN_REGARDS : 1
WITH_IN : 3
AND_LOWER : 1
AOX_DIRECTABLE : 1
PNEUMONIA_PATIENT : 1
EXHIBITING_BEHAVIORS : 1
ANTISOCIAL_SESSION : 1
VETERAN_MINUTES : 1
STERISTRIPS_MINUTES : 1
THE_CURRENT : 2
AND_NEEDS : 1
KERATOACANTHOMA_USES : 1
MET_MR : 1
COMPLIANT_SUBSTANCE : 1
COMPLAINT_CHEST : 1
PSYCH_HOSP : 1
IS_NEITHER : 1
NOT_WHY : 1
TO_MAKE : 2
FEELING_MAKE : 1
JOURNALING_VETERAN : 1
DID_HAD : 1
ULA_SIGNS : 1
CONSENT_WAS : 1
TOXICOLOGY_AND : 1
CM_RECORD : 1
BASCOM_EYE : 2
EXERCISE_RIGHT : 1
KEYPAD_THE : 1
HIS_MOVED : 1
TO_SELF : 1
NUMBER_PULS : 1
PM_HAS : 1
PAIN_HIS : 1
ARMD_MEASUREMENT : 1
FOR_WITH : 2
PULSE_CAN : 1
MAY_BE : 1
BE_ANSWERED : 1
SIT_AND : 1
CARE_LOW : 1
DESIGNED_TO : 2
GOT_CAR : 1
DIALYSIS_NO : 1
PAIN_ESPECIALLY : 1
EVERYTHING_SET : 1
IS_SOURCE : 1
GOALS_GOT : 1
THYROID_ACTIVE : 1
AWHILE_AND : 1
ACTIVE_AND : 1
AGE_DX : 1
UA_PLAN : 1
GERD_THIS : 1
CALL_AS : 1
HISTORY_EXAM : 1
ASSESSMENT_FOLLOWS : 1
OT_CAPRI : 1
KNEE_TRAUMA : 1
FAHRS_NEURODE : 1
SUICIDAL_IDEATION : 1
FOUR_PENDING : 1
LENSECTOMY_SESSIONS : 1
GOD_BEING : 1
NEG_BREAST : 1
COST_FILL : 2
MANAGEMENT_PROTECTIVE : 1
NOT_PLACED : 1
ASSESSMENT_IN : 1
THERAPY_PAIN : 1
IER_IF : 1
FOR_WHEN : 1
THE_INSERTS : 1
ASSESSMENT_NO : 1
MATTER_RM : 1
REPORTS_GOOD : 1
YES_UNK : 1
ACTIVITIES_PARTICIPATE : 1
CALL_ADDENDUM : 1
TO_ALL : 1
TO_FOLLOW : 1
THAT_WILL : 3
THE_ANTIBIOTIC : 1
AUTHOR_IDENTIFIED : 1
SHOULD_HOLD : 1
LEFT_KNEE : 2
AND_VOMITING : 2
OFF_HE : 1
THE_MH : 1
TO_WORK : 3
OUTSIDE_MDS : 1
CHANGED_NEW : 1
THE_WORK : 1
RECENTLY_AND : 1
PT_CALL : 1
SIZE_SHOE : 1
VISITS_ABOUT : 1
DEVICE_GOT : 1
AND_SON : 1
CONSUMED_FOOD : 1
FOLLOWUP_CINCINNATI : 1
NURSES_NOTES : 1
FROM_EXHAUSTION : 1
TO_PALMER : 2
MR_DATES : 1
COMPONENT_OF : 1
CLINIC_CURRENT : 1
HE_SAFE : 1
AND_AREA : 1
IS_MAX : 1
USING_OCR : 1
HEALTH_THEY : 1
BATHROOM_HIP : 1
COUD_TURN : 1
PLACE_AND : 1
ABOUT_BAY : 1
ATTEND_PERIOD : 1
ZZSWS_ECF : 1
REPORTEDLY_WITH : 1
FOR_TRANSPORT : 1
UCINATIONS_NURSING : 1
TO_LIFESTYLE : 1
HYPERTENSION_WHAT : 1
OR_RISK : 1
FRI_DUE : 1
TO_MEDICAL : 1
CHONDROMALACIA_OPERATION : 1
STAR_THE : 1
OF_POSTKOREAN : 1
WHEN_STAYS : 1
WAS_OCCLUDED : 1
INR_NOT : 1
GROUP_COLLAPSED : 1
POSTOPERATIVE_DIAGNOSIS : 1
SERVICE_VIETNAM : 1
ESOPHAGOGASTRODUODENOSCOPY_CLARITHROMYCIN : 1
ORTHOTIC_PROSTHETIC : 1
PH_WITHOUT : 1
GLOBES_OU : 2
ARE_CLINICAL : 1
PERSON_PLACE : 3
VISIT_PRIMARY : 1
IS_STILL : 1
VAPOR_THE : 1
PT_AGE : 1
PHYSICIAN_NOTES : 1
LOW_MEASUREMENT : 1
LEVEL_CONSCIOUSNESS : 2
THE_REASONS : 1
THE_SHOULD : 1
DEPRESSED_TER : 1
THE_MET : 1
FLOTATION_DETAILS : 1
NOTE_KNEE : 1
TO_ALERT : 2
OF_PROVIDER : 2
HIS_FRIENDS : 1
PATIENT_PAIN : 1
AND_COPING : 1
PROGRAM_OD : 1
LOC_OSTEOARTL : 1
ARRIVAL_IN : 1
NOTED_HOURS : 1
GO_SMOKE : 1
CHART_NO : 1
MEDICAL_RECORDS : 1
WITH_TEAMS : 1
ANCHORAGE_PC : 1
AWAKE_AND : 1
PATIENT_SAYS : 1
GOOD_WARM : 1
COLLABORATE_REMAIN : 1
TO_LOW : 1
MINIMAL_VERBAL : 1
WAS_TO : 1
ADMISSION_BIZARRE : 1
STAFF_REQUIRED : 1
FH_FATHER : 1
SKIN_PROBLEMS : 1
TEST_SEEING : 1
WANTING_TO : 1
MEDICATIONS_AND : 1
ENJOYED_SEEING : 1
USED_KLONOPIN : 1
PUFFS_ACTIVE : 1
PVD_TOBACCO : 1
NONE_TO : 1
ACTIVE_TRAMADOL : 1
NEUROLOGIC_FIRST : 1
RESULTS_DIABETIC : 1
YES_NOTE : 1
VISIT_DENIES : 1
ASK_THE : 1
REFUSE_FLUID : 1
DEPRESSED_HE : 1
FINALS_FEELING : 1
STABLE_PING : 1
PATIENT_DOES : 1
PSYCH_GU : 1
CAPSULE_ACTIVE : 1
POSTTRAUMATIC_SIGNS : 1
APPROX_AGO : 1
KLONOPIN_TABLETS : 1
THE_MEETING : 1
MCG_CFCF : 1
ARESOL_INSTRUCTION : 1
DIAGNOSIS_OR : 1
NO_IMPAIRMENT : 1
GETTING_OF : 1
DIALYSIS_HOMEBASED : 1
SMOKE_ON : 1
WAS_REMOVED : 2
DIET_SOURCE : 1
LEARN_TH : 1
OF_DESPITE : 1
HIS_AND : 4
WILL_THE : 1
FREE_OVERT : 1
PER_RESPIRATORY : 1
NOTES_HE : 2
ADJUSTMENT_REMINDER : 1
OBTAINED_PM : 1
DYSPHAGIA_NO : 1
BP_PATIENTS : 1
AMBER_TRANSFER : 1
HAD_PPV : 1
OF_OBSERVED : 1
ELEVATED_OF : 1
TAKE_AS : 1
SEXUALLY_WITH : 1
TO_BATHROOM : 1
TO_RIGHT : 1
NARCOTIC_USE : 1
AREA_DISEASE : 1
ABUSE_TAMPA : 1
HEAR_FROM : 1
GAVE_BRIEF : 1
OF_PROCEDURE : 1
COMA_SCORE : 1
NOW_CLICK : 1
AS_RECORDED : 1
DEPENDENCE_AND : 1
INCLUDE_NONE : 1
CARE_NOTE : 4
TOOLS_NEEDED : 1
MY_AND : 1
THIS_DILATED : 1
NOTE_COST : 1
GROOMING_BM : 1
ARTHROSCOPE_SCOPE : 1
HOLD_DO : 1
NEW_PAIN : 1
GTT_QID : 1
PLACE_TO : 1
AND_REGION : 1
PACU_RECOVERY : 1
AS_FOR : 1
PHYSICIAN_NED : 1
ACUTE_ISSUES : 1
MD_SUP : 1
ENOUGH_AND : 1
SMOKING_IN : 1
NONE_UNITS : 1
TO_CONVEY : 1
NOT_BEING : 1
ABOVE_NOTED : 1
IF_HIS : 1
TIME_ON : 1
PROVIDED_WITH : 3
WHO_HAS : 1
TAB_PO : 1
ENGLISH_REINFORCE : 1
MHC_PROBLEMS : 1
PAIN_LEVEL : 2
SUBSIDED_PROTECTORS : 1
BP_PRIMARY : 1
BAND_PHYSICIAN : 1
SERVICE_ERA : 1
GET_STARTED : 1
SUPINE_TO : 1
COMPLETED_THE : 2
FAIR_PROGRESS : 1
RISK_COLOR : 1
AO_RESTRICTIONS : 1
BOWEL_PATIENT : 1
VETERAN_OF : 1
FEELS_HE : 2
IT_JUST : 1
FOR_FOLLOWING : 1
VISIT_BEAM : 1
MILITARY_PERIOD : 1
AFTER_TO : 2
SCORE_OF : 3
NEWTON_THESE : 1
IS_YO : 1
CALCIUM_HEREDITARY : 1
TASK_REQUIRES : 1
WERE_FOR : 1
CHANGES_DEGREE : 1
DENIES_ACUTE : 1
UNITS_DIAGNOSIS : 1
IN_HPI : 1
HIM_TO : 1
COUNTRIES_TREATMENT : 1
COLLECTION_BREATHALYZER : 1
IS_OLD : 2
HOURS_FBS : 1
RETURN_ONE : 1
TIME_ARRIVAL : 1
UPCOMING_EPROGRAMS : 1
EVERY_SUBJECTIVE : 1
ON_YOU : 1
AND_REFUSED : 1
DISCUSSING_THE : 1
FOR_THE : 3
HAS_PACEMAKER : 1
HEALTH_CODE : 1
SHARING_HIS : 1
LIMITS_RIGHT : 1
AND_EMOTIONALLY : 1
CATARACTS_OR : 1
HAS_THIS : 1
PREVIOUS_HERE : 1
TESTS_PERFORMED : 1
WITH_SEDATION : 1
INTERVENTIONS_MEASURES : 1
THREE_FOR : 1
OF_SESSIONS : 1
IN_LEARNING : 1
OUTSIDE_RT : 1
ASCERTAINED_IS : 1
MR_BY : 1
BEEN_BY : 2
MAY_EVERY : 1
TIMES_THE : 1
PERIOD_OF : 3
THE_FROM : 1
RECOMMENDATIONS_PROBLEMS : 1
TRIED_IN : 1
MOUTH_DISCUSSED : 1
ACTIVITIES_OF : 2
OF_PART : 1
HE_WILL : 2
CLEAR_CANALS : 1
STATUS_AO : 1
BOTH_SEEM : 1
OPTIONS_NUT : 1
CHIEF_IRRITATIVE : 1
WILL_TO : 3
THE_ENDOSCOPY : 1
CAP_SHOES : 1
COPING_MINUTES : 1
ACTIVE_NONSPECIFIC : 1
THROUGH_VISTA : 3
WAS_CONTINENT : 4
SEEN_PHYSICIAN : 1
ALCOHOL_CHRONIC : 1
FROM_WAS : 1
NO_RESIDENT : 1
IN_ROUTE : 1
CANCELLATION_EXAMPLES : 1
ON_TIU : 1
FEE_THERAPY : 1
CONTINUE_INFORM : 1
NOTE_COMPLETED : 1
SCHEDULED_TO : 1
HAS_STABLE : 1
NAME_HELP : 1
LACK_HOUSING : 1
EPIS_CARE : 1
TOO_FAR : 1
EMOTIONAL_RESCUE : 1
GOALS_TO : 1
RX_WAS : 1
STILL_AWAITING : 1
THIS_BLADDER : 1
ST_AT : 1
BAND_LEGIBLE : 2
OSAC_ACETAMINOPHEN : 1
AND_VETERAN : 3
HE_HAVING : 1
DATE_OF : 5
DEPRESSION_AXIS : 1
SON_CIGARETTES : 1
OF_CM : 1
DETOX_FROM : 1
AT_TIMES : 1
DISORDER_PER : 1
AWAY_MAY : 1
FROM_ALCOHOL : 1
USE_ADJUSTMENT : 1
PICK_UP : 2
ANXIETY_PTSD : 1
DETAILS_DEPLOYED : 1
FOR_SKIN : 2
UP_MEDICATION : 1
VA_INTOXICATED : 1
YEAR_NOW : 1
FOR_MED : 1
CALL_ON : 1
PHARMACIST_OUTPATIENT : 1
SIZE_OF : 1
WELL_EVEN : 1
LOWER_PER : 1
VETERANS_MENTAL : 1
DINNER_FOOD : 2
BS_AT : 1
MEDICATIONS_HAVE : 1
SYSTEM_HOURS : 1
THE_REHAB : 1
PC_REMINDER : 1
HIGHRISK_PATIENT : 1
WITH_DIAGNOSIS : 1
WITH_TREATMENT : 2
BECAUSE_SHE : 1
SECURITY_NUMBER : 2
ME_HE : 1
PROGRESS_CONTINUE : 1
NO_CONCERNS : 2
WEAKNESS_MOMENT : 1
HIS_MIND : 1
KNEE_OR : 1
THE_ROOTS : 1
SYMPTOMS_REFUSED : 1
NEW_IN : 2
THEY_CONTINUE : 1
FOOD_BY : 1
ANOTHER_IN : 1
GOOD_CALM : 1
PT_DEPENDENCE : 1
HIS_MED : 1
TABLETS_MOUTH : 2
CONCERNS_EXPRESSED : 2
THROUGHOUT_NIGHT : 1
ADEQUATE_CLINICAL : 1
AREA_ABNORMAL : 1
RECOMMENDED_PARTICIPATION : 1
DYSMETAB_SYND : 1
GIVEN_ORDERED : 1
FROM_TO : 1
EXAMINATION_LAST : 1
GOWN_COMFORT : 1
OTOSCOPY_THEN : 1
FOOD_ANY : 1
REFUSED_SOCIAL : 1
IS_LESS : 1
DEVELOP_PAIN : 1
IS_OUTSIDE : 1
NO_EXPRESSED : 2
TENDING_ALVAREZ : 1
EVENING_DEMONIC : 1
ELEVATED_AT : 1
FOLLOWED_RESPIRATORY : 1
WHO_HAVING : 1
TESTED_POSITIVE : 1
STEFANIK_DEAR : 1
COLOR_SEE : 1
CONTACT_REPORTS : 1
OR_RECENT : 1
LEARNING_INCLUDE : 1
HAVE_HIP : 1
ASSISTANCE_RESIDENT : 1
PULSE_BP : 1
ON_IMPORTANCE : 1
OF_LS : 1
STAFF_MOST : 2
IN_CANCELLATION : 1
INDIVIDUALS_FROM : 1
THE_MODE : 2
IMPRESSION_BASED : 1
WAS_COMPLAINING : 1
TREMOR_RESPIRATORY : 1
SHOW_ACID : 1
BY_ANTICOAGULANT : 1
AT_THE : 2
TO_LET : 1
FOR_TABLETS : 1
PL_CANE : 1
WITHOUT_MEDICATION : 1
THAT_SYSTEM : 1
ALLERGIES_PROTOCOL : 1
AFTER_TRYING : 1
RISK_FALLS : 1
PING_CHANGES : 1
RISK_FALLING : 1
PO_DAILY : 1
DO_WITHOUT : 1
PROBLEMS_BUTTOCKS : 1
HOLES_ON : 1
ENGLISH_DIAGNOSES : 1
REVIEWED_INSTRUCTIONS : 1
MINUTES_WITH : 1
ASSESSMENT_TO : 1
EXPERTISE_AS : 1
FROM_MEDICATIONS : 1
ABOVE_FOR : 1
TO_VA : 1
AND_INCREASE : 2
ON_MAY : 1
NO_OUTSIDE : 1
JUST_WANT : 1
FRI_TO : 1
TREATED_PNEUMONIA : 1
TO_ESSENTIAL : 1
LEFT_CALL : 1
WRITER_FOLLOW : 1
AND_ONLY : 1
MEDICATION_FOR : 1
ACTIVITY_CLINIC : 1
IS_ACTIVE : 1
INVITED_PARTICIPATE : 1
NOTE_CURRENT : 1
WITH_RETURN : 1
DURING_SHIFT : 9
TAKING_BY : 1
APPT_WITH : 1
HE_HERE : 1
LACK_ATTENDANCE : 1
ICDCM_SARAFIAN : 1
DIABETES_MELLITUS : 2
VALIUM_AND : 1
APPROACHES_GOT : 1
COULD_DIVALPROEX : 1
DOCUMENT_VISTA : 1
YOU_SHOULD : 1
MONITOR_PULSE : 1
AXIS_DEFERRED : 1
AND_PROVIDE : 1
NOS_REPORTED : 1
UP_OTHERS : 1
SMILING_TO : 2
DONNING_BREATH : 1
ALL_ACCOMPLISH : 1
VISTA_IMAGING : 6
FRIENDS_WEEKEND : 1
AGAIN_PT : 1
CONVEY_HIS : 1
SEVERE_CHRONIC : 1
GIVEN_THE : 1
WITH_NEWTON : 1
DID_TO : 1
HIS_ENERGY : 1
NOT_OF : 3
AREA_RED : 1
SHOULD_DO : 1
CATEGORY_VI : 1
APPROACHED_ASKED : 1
IBUPROFEN_TAB : 1
MODE_START : 2
PATIENT_DID : 2
LEGS_HE : 1
CLARITHROMYCIN_MG : 1
ACCESSED_VISTA : 3
MOUTH_LOCATE : 1
GO_HOME : 2
UPSET_PT : 1
NOT_THE : 5
WARM_DRY : 1
WEEK_THE : 2
ILL_HIS : 1
WHEN_HE : 2
STRESSED_USUALLY : 1
NOT_KNOW : 1
AR_SEE : 1
LONGSTANDING_AGREE : 1
DATE_OS : 1
FOUND_BCP : 1
MEDICATION_DOCUMENT : 1
CHOSE_TELL : 1
CVS_HEARD : 1
NEEDED_DILATED : 1
SUPPORTIVE_WITH : 1
INHALE_PUFFS : 1
TO_DO : 1
FOR_YRS : 2
MOBILITY_LESSSON : 1
ACHIEVING_GOALS : 1
YOU_ARE : 1
PT_ENCOURAGED : 2
IS_ORIENTED : 1
APPROACH_RIGHT : 1
CAN_OBSERVATIONS : 1
WITH_IS : 1
SEDATION_WITH : 1
METAL_STAYS : 1
SENSORY_NO : 1
HAS_COMPLETED : 1
CONFERRED_ACTING : 1
EXTRA_MH : 1
VIGAMOX_GTT : 1
THE_ARMY : 1
CALLED_LEFT : 1
NO_SIGNIFICANT : 1
CURRENT_RISK : 1
SERVICES_THREATENING : 1
MINUTE_FOR : 1
OF_AUG : 1
EVERY_PATIENT : 2
AND_KRIS : 1
SEEMED_BE : 1
CERTIFICATION_ORTHOTIC : 1
USAGE_HRS : 1
MMHG_GOT : 1
REGIMEN_DISCUSSING : 1
PHYSICIAN_TENDING : 2
PARTNERS_OF : 1
PRESSURE_ULCERS : 1
THE_PAINFUL : 1
PRN_EVERYTHING : 1
RESIDENT_BOWEL : 1
WHEN_HIS : 1
CARDIOMYOPATHY_HE : 1
ENTERED_NUR : 1
UPSET_ABOUT : 1
ANY_PATCHES : 1
MUCH_LUCID : 1
NKA_LB : 1
URINE_NOTED : 1
NOT_NUMBER : 1
LIST_PRESCRIPTIONS : 1
WEEKEND_HE : 1
RETURN_IT : 1
NORMAL_PATIENT : 1
EDUCATION_BARRIERS : 1
CLINIC_DELIVERY : 1
ANXIETY_IS : 1
AN_INDIVIDUAL : 1
ASSIST_ELIMINATION : 1
TASK_NO : 1
HURTING_DATE : 1
OS_CAUTION : 1
KILIANMOBILITY_JUNE : 1
WRITER_AND : 1
AND_TALKED : 1
FACTORS_VETERAN : 1
ANTISOCIAL_PERSONALITY : 1
TIME_DECLINED : 1
WITH_EPIS : 1
OF_PARTICIPATION : 1
VETERAN_CURRENTLY : 1
COPING_MECHANISM : 1
TRAVEL_AT : 1
SEGMENTAL_MOTION : 1
ON_LABS : 1
HAS_TAXI : 1
CANS_INSTRUCTION : 1
IS_PREGNANT : 1
DUE_INCREASING : 1
TELL_PATIENT : 1
OF_VACCINE : 1
METAL_PATIENT : 1
TECHNICIAN_HER : 1
STRESSED_NONE : 1
YES_ON : 1
NURSING_MEDICINE : 1
MEDICATION_RECONCILIATION : 2
TO_ON : 3
NAME_SSN : 1
QUESTIONS_YOU : 2
GERD_SARAFIAN : 1
WERE_PSYCHOTHERAPY : 1
LB_COMPLICATIONS : 1
DOMICILED_AA : 1
PLASTIC_BAGS : 1
WAS_DX : 1
PAUSE_DIFFERENT : 1
EXT_SOCKETS : 1
IN_MONITOR : 1
BEHAVIOR_SERVICE : 1
CONCENTRATION_ARE : 1
REQUEST_HE : 1
HERE_BEING : 1
IN_ON : 1
ACTIVE_SUCCESSFULLY : 1
ASSESSMENT_ULCER : 1
PRIMARY_REASON : 1
DOMICILED_EMPLOYED : 1
RECHECK_THE : 1
DAILY_ICDCM : 1
CLINIC_DATE : 1
SESSION_OBJECTIVE : 1
CARE_LEVEL : 1
PLACE_EXAM : 1
ACTIVITY_SUBJECTIVE : 1
COMMENTS_REFILL : 1
ADDRESS_CASA : 1
CONCERNS_BY : 2
IF_CURRENT : 1
WERE_ANY : 1
CURRENT_CLOZAPINE : 2
DX_ANTISOCIAL : 1
PT_SEVERAL : 1
FOR_MORE : 1
QUIET_INTEREST : 1
RESULTS_MACKIE : 1
NOTE_REVIEWED : 2
WIFE_TO : 2
EYE_COMP : 1
CLINICAL_HISTORY : 2
IS_REMINDER : 1
WEAK_REPORTS : 1
OF_FRIENDS : 1
EMESIS_SHIFT : 1
CINCINNATI_IN : 2
REPORTED_STATED : 1
CONTINUE_TO : 3
STAFF_MINUTE : 1
PULMONARY_DEPARTMENT : 1
DATE_ADMISSION : 1
FOLLOWING_THE : 1
AS_NEVER : 1
START_SHIFT : 1
PREVIOUSLY_PREVIOUSLY : 1
CONSULT_CHIROPRACTOR : 1
FOLLOWUP_CHRONIC : 1
MAXINE_ANDERSON : 1
BUILDING_ROOM : 1
FAIR_WITH : 2
VA_CLINIC : 1
THINKS_PULSE : 1
DISCUSSED_WAYS : 1
DISORDER_MEDICATION : 1
AT_AM : 1
DO_LEAVE : 1
LACK_OF : 2
VET_HE : 1
SUCCESSFULLY_COPE : 1
RACING_THOUGHTS : 1
HE_BEEN : 3
CONSULT_SHORTTERM : 1
EPIS_OF : 2
CAUTION_THIS : 1
AND_NECESSARY : 1
FULL_VETERAN : 1
CONTINENT_URINE : 1
NEW_HE : 1
REACTIONS_HISTORY : 1
RADIATION_DOSE : 1
LIST_OF : 1
MAKING_DIAGNOSIS : 1
VITALS_CHO : 1
LAST_APPROX : 1
AXIS_STATES : 1
TREATMENT_AREA : 1
PROBLEM_WITH : 1
PLACE_OF : 1
CAN_COPE : 1
THIS_AND : 1
FOLLOW_EXT : 1
OF_HOUSING : 1
BACK_REQUESTED : 1
NAME_PT : 1
DEFERRED_AND : 1
MINS_LOW : 1
FOR_SIGNING : 1
URINE_TO : 1
BOTH_MEDS : 1
COPE_IT : 1
STATED_CURRENT : 1
PATIENT_RESIDENT : 3
ANY_METHOD : 1
BIPOLAR_HX : 2
AUTHOR_EXP : 1
DEPRESSION_TO : 1
IT_PATIENT : 1
KG_HISTORY : 1
OSAC_PT : 1
DOCUMENT_ADDENDUM : 1
FEE_DOCUMENT : 1
THINGS_HER : 1
FRANTZ_COTA : 1
PHONE_ETC : 1
CONTINENT_USUAL : 1
OTHERS_AWAY : 1
ER_DATE : 1
DRINKS_THIS : 1
NUTRITION_OF : 1
CHEST_PAIN : 3
ASK_DOES : 1
RISK_FACTORS : 1
SITUATIONS_REPORTED : 1
ADMISSION_DEC : 1
NEGLECT_PAIN : 1
PARTICIPATION_LEVEL : 1
CARDIAC_CARDIAC : 1
GERD_ICDCM : 1
HIS_OVER : 1
WITH_MEDICAL : 1
TH_PPC : 1
VACCINATION_IF : 1
ALL_PAST : 1
ON_SC : 1
AMBER_MEDICARE : 1
SHEET_DRAINS : 1
TO_TOO : 1
DX_BACK : 1
FAMILIAR_YEAR : 1
PRIVILEGES_HYGIENE : 1
ED_FEE : 1
WHEN_PAIN : 1
ADMITS_DURING : 1
BACK_LLE : 1
HIM_THIS : 2
THE_CARE : 1
DX_BPD : 1
KEOMUAN_POON : 1
PROGRAM_DETOX : 1
IMP_WITH : 1
PLASTIC_WEIGHT : 1
TO_CONDO : 1
SECURITY_DENTAL : 1
MG_TA : 1
DAILY_ACTIVE : 1
ACTIVITIES_TO : 1
THE_GROUP : 2
REQUEST_PAIN : 1
FOR_ANALYSIS : 2
STATUS_OF : 1
DEPRESSION_PULSE : 1
LOW_AND : 1
HEALTH_PT : 1
WAS_SEEN : 3
LAST_PC : 1
FOR_NAUSEA : 1
NOTE_DT : 1
PHYSICIAN_OR : 1
DOSE_MG : 2
NUTRITIONAL_MEDICATION : 1
MORE_THAN : 1
WHEN_VETERAN : 1
MAINTAIN_EFFORTS : 1
DEMAND_DELIVERY : 1
CONFERRED_WITH : 1
ALONE_AWHILE : 1
TROUBLE_ERECTION : 1
ESPECIALLY_HIS : 1
COMPLAINT_TWICEWEEKLY : 1
SHOULD_NOT : 2
GOT_AN : 1
FAMILY_REMINDED : 1
HAVE_HOLES : 1
REITERATED_TO : 1
ERECTION_DIAGNOSES : 1
THE_BASE : 1
NEEDS_AT : 1
AREA_FOR : 1
ADDENDUM_MH : 1
VET_CHECK : 1
SHORT_STATURE : 1
NO_URINE : 1
ASSISTANCE_APPLICABLE : 1
HE_CASA : 1
AND_EAT : 1
CURRENTLY_WITH : 1
CLC_ON : 1
BEEN_DEPRESSED : 1
APPOINTMENT_CANCELLATION : 1
VIA_TREATMENT : 1
SIXTEEN_MEMBERS : 1
TO_HIGHRISK : 1
IN_MEDICATIONS : 1
COCAINE_VS : 1
MOUTH_HOURS : 1
PREVENTATIVE_PATIENT : 1
COUNSELING_SESSION : 1
HIS_BACK : 1
TO_ER : 2
QUANTITY_PT : 1
FOR_WEATHER : 1
ANKLE_THE : 1
HELP_PT : 1
ICDCM_NOSUNSPEC : 1
STATED_IT : 2
SCORE_PT : 1
FR_SHEATH : 1
THE_HOSPITAL : 1
FOR_ASSISTANCE : 1
LOUDLY_VOICES : 1
TO_BE : 7
PERSONAL_CARE : 2
ATTENDED_OFFERED : 1
ASKED_HE : 1
THIS_VIA : 1
THE_EVENING : 1
HELP_NOT : 1
THE_FRONT : 1
CARE_EATING : 1
TO_THROUGH : 1
OD_IMAGE : 1
FOLLOWS_DX : 1
SCREEN_DEPRESSION : 1
TABLET_TRAMADOL : 1
AM_LEVEL : 1
MEASURES_MAINTAINED : 1
LIMITS_MEDIAN : 1
BACHELORS_FINALS : 1
HOMICIDALITY_PERSONALITY : 1
ORTHOTIC_LAB : 1
THE_TEAM : 1
IDENTIFIED_FEMALE : 1
COMPLAINT_HERE : 1
BEEN_INVITED : 1
MONITORED_EVERY : 1
AND_MG : 3
MANDATED_TO : 1
OR_PTSD : 1
DISORDER_DISORDER : 1
THE_VETERAN : 1
LEVEL_QUALITY : 1
VET_FOR : 1
NOTE_BE : 1
PMR_ON : 1
AND_BREATHALYZER : 1
MINUTES_NUMBER : 1
RESUME_DOSE : 1
ANY_ISSUES : 1
LEGIBLE_PHYSICIAN : 2
OF_HOW : 1
RADIATION_CGY : 1
ADDENDUM_TASK : 1
NO_INJURY : 1
WITH_THE : 8
WAS_HE : 1
MORE_RUPTURED : 1
STAFF_ADVOCATE : 1
FOLLOWING_UP : 1
HENT_HEAD : 1
TO_TRY : 1
HIS_SELF : 1
NEUROSURGERY_CARE : 1
VISIT_WANTING : 1
NAGGING_THROBBING : 1
AND_BMI : 1
EPROGRAMS_AMOUNT : 1
INTENSITY_THE : 1
WELL_HE : 1
GOALS_IMPROVE : 1
NO_RIGHT : 1
DEVELOPING_AND : 1
HEALTH_CARE : 3
OP_ATTENDING : 1
HIS_MOST : 1
TO_BEHIND : 1
SOCIAL_STARTED : 1
RIGHT_TESTICLE : 1
ACQUAINTED_WITH : 1
MEDICATION_PER : 1
HYPERLIPIDIMIA_ARTERIOSCLEROSIS : 1
AN_WILL : 1
LOWER_AND : 1
OF_HELIOS : 1
AT_ST : 1
BOWEL_MOVEMENTS : 4
EXTENDED_PERIODS : 1
LONGSTANDING_NONPARKINSONIAN : 1
TAB_NOT : 1
IV_PROBLEMS : 1
TO_WHO : 1
OR_CALL : 1
WILLING_TO : 2
DERMATITIS_BIOPSIES : 1
REQUIRED_HELP : 1
BP_IS : 1
WERE_DISCUSSED : 1
AT_APPROXIMATELY : 1
IF_CP : 1
STATES_THIS : 1
STATUS_RESTRICTIONS : 1
MEDICATIONS_RELAPSING : 1
COUNSELING_AOX : 1
VOICE_AM : 1
AND_AMOUNT : 1
PROBLEMS_CHIEF : 1
SINCE_CLINIC : 1
THE_MEDS : 1
ORIENTED_PERSON : 3
CUEING_EXTENSIVE : 1
LIQUID_CANCER : 1
COMPLIANCE_TREATMENT : 1
AMOUNT_DINNER : 1
STATE_RETURNED : 1
BIZARRE_CONCERNING : 1
INCLUDING_THE : 1
TO_MAY : 1
FOR_INTERVENTION : 1
DRAINS_PATIENT : 1
CHECK_IN : 1
WITH_MINIMAL : 1
ALTERNATE_NOMED : 1
UNITS_RANGES : 1
PLAN_CREATED : 1
STRESS_IS : 1
NEW_CAR : 1
RADIATION_DETAILS : 1
SHIFT_AMOUNT : 1
IN_PROSTATIC : 1
TALKING_WITH : 1
AND_COUNT : 1
OUT_TO : 1
TOOK_HIS : 1
BATHING_DRESSING : 1
OF_MAKING : 1
MONTHS_TO : 1
IF_HE : 4
OXYGEN_NO : 1
PAIN_IF : 1
CHIEF_LAST : 1
AMOUNT_STOOL : 1
WAS_UPSET : 1
HOLOGIC_MEDICATION : 1
ARE_PROBLEM : 1
SETTING_VACCINE : 1
ADDENDUM_AUTHOR : 1
DEPRESSION_LEVEL : 1
WHICH_FOURPLEX : 1
TALKING_OTHER : 1
HAVING_COMBAT : 1
HOLD_WITHOUT : 1
SOCKETS_SOI : 1
PRAISED_PT : 1
ETOH_PT : 1
UA_ASSESSMENT : 1
NO_EPIS : 1
ESSENTIAL_WHAT : 1
PARTICIPATION_IN : 1
JUST_WROTE : 1
APPLICABLE_CP : 1
FROM_SP : 1
OF_NAUSEA : 1
PHYSICAL_TREATMENT : 1
HAS_BEEN : 19
NEGATIVE_TO : 1
ANXIOUS_SPI : 1
MAN_SHORT : 1
KNEW_WOULD : 1
NEEDS_ARISE : 2
FOUR_MONTHS : 1
THE_UNIV : 1
UNSPECIFIED_COUNSELING : 2
FOR_FOLLOW : 1
TO_INCREASED : 1
NITROGEN_COMPLICATIONS : 1
OF_WITHDRAWAL : 1
TO_CHOSE : 1
OXYGEN_BAND : 1
LIFESTYLE_DTC : 1
PROVIDER_FOR : 1
WITH_LEVELS : 1
SAFETY_PLAN : 1
STEPHANIE_KILIANMOBILITY : 1
WILL_EXPIRED : 1
OFFERED_SYSTEMS : 1
ARM_CONSENT : 1
CONDO_OVER : 1
WANTS_KNOW : 1
LIVING_FALL : 1
KING_JR : 1
BATHROOM_UROLOGY : 1
FOLEY_IS : 1
DENIES_TO : 2
SKIN_COLOR : 1
QUITE_OFTEN : 1
NO_RECENT : 1
HOLD_IS : 1
WITH_ON : 1
NOT_ORDERED : 1
HAS_COMMENTS : 1
LEG_GOAL : 1
BM_NO : 1
THE_REQUEST : 1
WITH_OTHER : 1
MORE_LESS : 1
WITH_ACTING : 1
CD_WITH : 1
OBSTRUCTIVE_PULMONARY : 1
BY_THIS : 2
MAY_ALTERNATE : 1
ASSISTANCE_NOT : 1
CODE_BE : 1
TO_MUCH : 1
VIGAMOX_OU : 1
USING_OINTMENT : 1
TEMP_RATED : 1
DOCUMENT_ALLERGIES : 1
GRADE_AORTIC : 1
WAS_GROOMING : 1
MORE_REPAIRED : 1
INTERVENTIONS_SAFETY : 1
DENIES_ANY : 2
PROBLEM_UNSPECIFIED : 2
CONSULT_RESULT : 1
STABLE_CUEING : 1
VIST_INPATIENT : 1
AT_POINT : 1
TO_OR : 2
ALONE_FOR : 1
FINDINGS_AND : 1
MEDICATION_EDUCATION : 1
MG_CAP : 1
OR_WHO : 1
NOTE_EYE : 1
ACTIVE_ORDER : 1
ANALYZED_BY : 1
HE_RELAPSING : 1
PREVENTION_INTERVENTIONS : 1
ANSWER_QUESTIONS : 1
SEE_THAT : 1
AT_BEDTIME : 1
PURPLE_TO : 1
PROTECTIVE_FACTORS : 1
CAREGIVER_TAMINE : 1
AUTHOR_SAMMIE : 1
THIS_CAUSES : 1
OF_NOT : 3
PATIENT_IS : 11
CONSULT_IS : 1
EXPERIENCE_IMPRESSION : 1
PAIN_THIS : 2
THIS_PROVIDER : 2
EXAMINATION_INR : 1
SET_ASSISTANCE : 1
NO_RESULTED : 1
BE_THROUGH : 3
TAKE_TWO : 2
DISCREET_MESSAGE : 1
KNOW_OF : 1
THERAPY_NOTE : 1
CARE_NOT : 1
PLAN_PATIENT : 1
PAMOATE_MG : 1
BED_DEGREES : 1
THIS_ABOUT : 1
ON_HOUR : 1
PATIENTS_WHO : 1
HELD_HIS : 1
IN_WHEELCHAIR : 1
WITHIN_NORMAL : 2
BLINDNESS_PSYCHOLOGY : 1
MEDICAL_CONDITIONS : 1
OBJECTIVE_DEPARTMENT : 1
PURPOSE_SKILLS : 1
MONTHS_FURNITURE : 1
INTEREST_IN : 1
ENTERED_STILL : 1
NOT_MEAL : 2
BP_NOW : 1
STOPPED_THIS : 1
INCREASE_FOR : 1
SIG_TWO : 1
MILK_INACTIVE : 1
NEXT_SCHEDULED : 1
KNOW_IF : 1
BEEN_IN : 4
FBS_INTRAOCULAR : 2
EDUCATION_FOLLOW : 1
SECOND_BECAUSE : 1
INHALE_ACTIVE : 1
RECONCILED_THIS : 1
NEW_HIP : 1
ENCOUNTER_AS : 1
HIS_INTERESTS : 1
DRUG_MAY : 1
SHOULD_TO : 1
LI_NAUSEA : 1
ELIMINATION_BATHROOM : 1
INACTIVE_MEDICATIONS : 1
TH_OF : 1
CONTINUED_FOR : 1
AND_THE : 4
EXHAUSTION_THIS : 1
FMLA_WILL : 1
KUMET_HE : 1
IS_WHILE : 1
REFERRAL_CALCIFIED : 1
OBSERVATIONS_FINDINGS : 1
TIMES_FOR : 1
SERVICE_CLINIC : 1
INFORMATION_IN : 1
SAFE_FREE : 1
BMI_MASS : 1
PROVIDERS_AXIS : 1
PATIENT_THAT : 1
OR_ABOUT : 1
NO_ARTHRITIC : 1
ANTICOAGULANT_DATE : 1
SEE_HER : 1
INFORM_PROVIDE : 1
IMAGES_AND : 1
ELIMINATION_BOWEL : 2
REGARDING_NAGGING : 1
FOR_CARE : 1
VETERAN_PC : 1
VETERAN_MORE : 1
BE_SAFE : 1
PRIMARY_DIAGNOSIS : 2
HIS_MGMT : 1
EVERY_FRI : 1
DRINKS_MOBILITY : 1
SEEING_MISCARRIAGE : 1
THAT_IT : 1
GROOMING_USUAL : 1
ADENOCARCINOMA_GLEASON : 1
HTNTO_AT : 1
HE_TO : 5
SUPPLEMENTAL_OXYGEN : 1
THIS_APARTMENT : 1
ETC_GROUP : 1
COUNSELING_UA : 1
PULMONARY_TIRED : 1
DONNING_HIS : 1
NO_FROM : 1
LEISURE_NUTRITION : 1
MEDS_WELL : 1
APPOINTMENT_PM : 1
TROUBLE_TAKING : 1
GOING_TO : 1
CANE_SKILLS : 1
ZZPATIENT_ADL : 2
IN_BODY : 1
MEDICATION_REVIEWED : 1
TO_TEXAS : 1
USAGE_MINIMUM : 1
AT_HOUSE : 1
SCHIZOAFFECTIVE_PER : 1
AND_MAINTAINING : 1
OF_POSTTRAUMATIC : 1
GETS_URINARY : 1
DIAGNOSIS_LOOSENING : 1
MUSCLE_SPASMS : 1
QUANTITY_WAS : 1
EDUCATIONAL_HANDOUTS : 1
SITUATION_LIVES : 1
OU_NVI : 1
SYMPTOMS_PATIENT : 1
ON_PT : 1
BE_ACCESSED : 3
GROUP_LEVEL : 1
FOLLOWING_LOOSENING : 1
PRAISED_AND : 1
ON_OF : 3
ABDOMEN_DATE : 1
ALL_PATIENTS : 1
RESIDENT_BUT : 1
THAT_PARTICIPATION : 1
HE_UNPROTECTED : 1
RECENTLY_FEELS : 1
CT_DEC : 1
PERFECT_NOT : 1
INDEPENDENT_BAND : 1
TWO_TABLETS : 2
STAFF_NEEDED : 1
FOR_THEN : 1
BY_CM : 2
PLAN_REMOVE : 1
VETERANS_AND : 2
HX_TO : 1
SUBSTANCE_NO : 1
RESIDENT_APPLY : 1
PCE_DIAGNOSIS : 2
GOALS_PROVIDER : 1
ATTEMPTED_CONTACT : 1
GOD_THAT : 1
HIGHRISK_AT : 1
BP_VETERAN : 1
IT_ARRISES : 1
WHEELCHAIR_AND : 1
REFERRAL_PHYSICIAN : 1
AT_FAIR : 1
HE_AMNESIA : 1
THERE_SUPPORTIVE : 1
SYSTEMATIC_PAIN : 1
EAR_PATIENT : 1
SERVICE_MAY : 1
THOUGHTS_TO : 1
SIGNIFICANT_CHANGE : 1
NURSING_ARE : 1
AREA_BECOMING : 1
ELIMINATION_NUTRITION : 1
PERCEPTION_NO : 1
AND_JOURNALING : 1
MOUTH_THREE : 2
PRESENT_HE : 1
TO_CHIEF : 1
MEDICATION_DOCUMENTATION : 1
TOILETING_EATING : 1
HAD_CHANGED : 1
CANALS_AND : 1
CURRENT_OF : 1
DISCUSSED_PATIENT : 1
GU_LESIONS : 1
LOWER_BACK : 1
FOLLOWUP_RESULTS : 1
THIS_STEFANIK : 1
MG_KNOW : 1
CONSIDERED_BE : 1
THAT_ELIMINATION : 1
INSTRUCTIONS_AND : 1
NEURO_ALERT : 1
COUNSELING_HAS : 1
ABOUT_BONE : 1
HOSP_SCATTERED : 1
SERVICE_THE : 1
STUDENT_RESIDENT : 1
MOST_OF : 3
CONSUMED_DINNER : 1
WHY_MISSED : 1
NASAL_VITAL : 1
ASPECTS_OF : 1
EGD_MG : 1
BECOMES_ZZSWS : 1
TEAM_LEADER : 1
OF_HSV : 1
TO_IN : 3
ER_CORRECTLY : 1
MDS_DATE : 1
HERE_IN : 1
OAK_RUE : 1
STATUS_MUST : 1
DO_BRUSH : 1
THAT_THIS : 2
PICKED_UP : 1
WITH_EVALUATION : 1
WORK_THE : 1
REPORTED_PAIN : 2
HIS_ROOMMATE : 1
ANTERIOR_MUSCLES : 1
WOULD_BE : 1
WAS_PT : 1
EMERGENCY_EXAM : 1
AXIS_NO : 1
HEARING_LAST : 1
NUMBER_OF : 10
WOUND_CARE : 1
PASSES_THE : 1
HEIGHT_CM : 1
ADDENDUM_HAS : 1
HOUSE_MAY : 1
CONTENT_ELICITED : 1
LAST_AFTER : 1
THE_HOSPITALIZATION : 1
WORK_INDIVIDUAL : 1
ACID_MG : 1
SOME_TISSUE : 1
DEPARTMENT_TIRED : 1
CONTINUED_RELATED : 1
NO_DIAGNOSIS : 1
ANTERIOR_APPROACH : 1
NURSING_DX : 2
WITH_MR : 2
SUSPICION_REGARDS : 1
HIS_PASTORAL : 1
MEMBERS_IN : 1
HE_SUFFERED : 1
AMOUNT_THAT : 1
WE_REVIEWED : 1
AFFECTIVE_DISORDER : 1
EXTREMELY_THROUGHOUT : 1
COMPUTERIZED_LIST : 1
WITH_LAYOUT : 1
DEPRESSIVE_ANXIETY : 1
PATIENT_FREE : 1
JOINT_ESPECIALLY : 1
UP_EXT : 1
TO_DOES : 1
MHICMINTENSIVE_CASE : 2
PTSD_WAS : 1
FINDINGS_AS : 1
BETTER_ON : 1
PROVIDER_DEAR : 1
OTHER_WAYS : 1
MINUTES_IN : 1
PRN_FOR : 1
THIS_IT : 1
HERE_FOR : 3
HEENT_EXAM : 1
PATIENT_ORIENTED : 1
ADL_SHEET : 1
VETERANS_CURRENT : 1
AGE_PT : 1
SUPPER_ALL : 1
AN_MAKING : 1
RIGHT_THYROID : 1
POST_DX : 1
TO_STEPHANIE : 1
MH_TELEPHONE : 2
NARCOTIC_TN : 1
INJURY_IN : 1
WHEN_LYING : 1
TIME_PAST : 1
PURPOSE_THAT : 1
COMPLAINT_IRRITATIVE : 1
UNSATISFACTORY_AND : 1
IN_PERIODS : 1
SATUR_MG : 1
HIS_IS : 2
SHOULD_BE : 2
DISCUSS_PLAN : 1
STAYING_FROM : 1
NO_RECONCILIATION : 1
MONONESSA_BCP : 1
WHEN_ON : 1
SPEAK_WITH : 1
RESULT_NO : 1
ISSUES_SINCE : 1
INSTITUTE_FALL : 1
AT_AUTHOR : 1
TOLERANCE_INACTIVATED : 1
BY_PROVIDER : 1
WALKING_WITH : 1
RIGHT_SHOE : 1
WHEN_APPROACHED : 2
EXP_COSIGNER : 1
SEEN_BY : 4
RESIDENT_SURGEON : 1
COMPLETED_WRITER : 1
OVER_PAST : 1
AND_EVALUATED : 1
ARMY_IS : 1
MON_AND : 1
EVEN_TRYING : 1
ACCESS_HEALTH : 1
HEARD_NO : 1
UNSP_ACQUIRED : 1
ABOUT_THE : 1
FOR_VOMITING : 1
BEEN_BOTHERED : 1
ED_INTOXICATED : 1
NOT_COMMIT : 1
VITALS_OL : 1
AID_WILL : 1
ON_ZZPATIENT : 1
NO_PATIENT : 3
NOW_HAS : 1
AND_SLOWLY : 1
THE_SESSIONS : 1
CYST_AUTHOR : 1
NOTE_RESULTS : 2
STAYS_PATIENT : 1
HIS_FAVORITE : 1
TO_ANTERIOR : 1
SCHIZOPHRENIA_SESSION : 1
THIS_RIC : 1
LOCATE_THE : 2
SHE_TAKING : 1
THE_EAR : 1
PT_CONTACT : 1
REHAB_CENTER : 1
PROVIDED_TELEPHONE : 1
ABLE_SEE : 1
LIFESTYLE_PROGRAM : 1
ORIENTED_ALERT : 1
SUE_OTR : 1
PAJAMAS_DIRECTED : 1
THIS_CONFERRED : 1
SIGNAL_INTENSITY : 1
TWICE_THE : 1
ON_AS : 1
EXTREME_OCR : 1
FALL_IN : 1
NAIL_ROOTS : 1
HEROIN_WANT : 1
TIME_GOES : 1
EXAM_ANTICOAGULATION : 1
STATED_IF : 1
LEVEL_NORMAL : 1
MIN_COLOR : 1
FOR_MODULE : 1
WILL_REVEAL : 1
MEDICATION_TO : 1
LOC_PRIM : 1
DISCUSS_HIS : 1
BY_PMR : 1
HOW_MANY : 1
GO_THROUGH : 1
IF_OT : 1
VERBAL_LOWER : 1
SMOKE_STATED : 1
WITHOUT_INCIDENT : 1
SC_UNSPECIFIED : 1
WHEELCHAIR_MONITOR : 1
INTRAOCULAR_INJECTIONS : 1
THE_MED : 1
SHAVE_ORAL : 1
SURGEON_VELDE : 1
HIS_SOUNDS : 1
ABOVE_KINDLY : 1
NOT_SHOULD : 1
ACTIVITY_UROLOGY : 1
STARTED_THIS : 1
FIBRILLATION_OXIMETRY : 1
CLIENT_GIVEN : 1
CARE_REITERATED : 1
APPROXIMATELY_EACH : 1
ED_READINESS : 1
GET_IN : 1
FEEL_SICK : 1
AND_EXTRA : 1
THUMB_AND : 1
YOUR_PRIMARY : 1
PPD_LACK : 1
DISEASES_ACTIVE : 1
HE_HE : 2
HELP_ALSO : 1
RECORD_COMMENTS : 1
IF_HAD : 1
INFORMATION_SCORE : 1
NOTICED_ANY : 1
WAYS_WHICH : 1
NEARING_DENIES : 1
WITH_COMPLAINT : 1
THE_MILIEU : 1
ACTIVITY_RELATIONSHIPS : 1
IN_GROUP : 2
MG_REASON : 1
DISEA_XPATIENT : 1
PACEMAKER_SUPERFIC : 1
PRIVILEGES_HIP : 1
OTHER_SPECIFIC : 1
MANY_TIMES : 2
INFORMED_CONSENT : 2
PERIO_PPT : 1
LITERS_MIN : 1
OF_CONTACTED : 1
DISCREET_FOR : 1
PO_PAIN : 1
TO_SNACK : 1
MG_QBEDTIME : 1
VITAMIN_UNT : 1
NORMOCEPHALIC_PERRLA : 1
HIS_EXPECTED : 1
SNUFF_OF : 1
DOCUMENT_OPEN : 1
PULS_PATIENT : 1
HIS_WIFE : 3
TREATMENT_MODALITIES : 1
MENTAL_HOW : 1
THE_KEYPAD : 1
AND_ASKED : 2
TOTAL_GLASGOW : 1
DEPENDENCE_WHO : 1
NO_IRREGULARLY : 1
OPTOMETRY_COMP : 1
PLACED_THIS : 1
AT_THAT : 1
BLOOD_USING : 1
USING_WILL : 1
RX_FITS : 1
OF_IN : 2
WORK_WITH : 1
LEFT_MESSAGE : 1
BED_BATH : 1
CALL_BACK : 2
OF_ALERT : 1
ALERT_AND : 3
AFTER_BREAST : 1
NUMBER_IN : 1
AND_CONCERNS : 2
TASK_SET : 1
VIA_ULA : 1
CALM_MAXINE : 1
ROSACEA_AMOUNT : 1
FOR_METHADONE : 1
WHO_ALL : 1
RESIDENT_WITH : 1
AND_RECOMMENDATIONS : 1
DELETING_THE : 1
CL_UNTIL : 1
PATIENT_LDL : 1
FOR_SAFETY : 1
LAST_EVALUATED : 1
FILL_EXP : 2
PHYSICAL_INITIAL : 1
GOOD_MOOD : 1
ORAL_CARE : 1
THAT_WOULDNT : 1
WORST_FROM : 1
CONFIRMED_BY : 1
IN_UROLOGY : 2
AT_NO : 1
WAIT_TO : 1
SMOKELESS_TOBACCO : 1
TO_CHIROPRACTOR : 1
REFERRAL_PROSTHETICS : 1
THROUGH_JOINT : 1
MILD_SEVERE : 1
BLOOD_PRESSURE : 4
HIP_PROTECTORS : 3
PEROXIDE_SOLN : 1
NO_CP : 1
EXAM_ATRAUMATIC : 1
AND_ELECTRONICALLY : 1
TAB_II : 1
THE_OF : 7
RUE_TO : 1
PAIN_ASSESSMENT : 1
DO_EVERYTHING : 1
HE_WISHES : 1
DISCUSSED_HISTORY : 1
IMAGING_VIEW : 1
DUE_BLOOD : 1
THE_SOURCE : 1
PATIENT_EDUCATION : 5
COMA_NO : 1
HIS_COMPUTER : 1
NOTE_STAY : 1
SAFE_BEHAVIORS : 1
ONE_CAPSULE : 1
SYSTEM_PT : 1
PAIN_WITH : 1
PCP_DO : 1
IN_CALL : 3
IS_ADMITTED : 1
ENTERED_OF : 1
FOLLOWING_TESTING : 1
UPPER_AND : 1
CONSISTENCY_STOOL : 6
NAUSEA_OR : 1
THE_UNTL : 1
TO_MONITOR : 1
SENT_MIVA : 1
ID_AND : 1
WIFE_WHO : 1
PT_YO : 1
HISTORY_PHYSICAL : 1
PT_HAS : 1
CHIEF_COMPLAINT : 6
TO_MISSING : 1
HE_IF : 1
AREA_DOCTOR : 1
EMERGENCY_CONTACT : 1
IN_SWS : 1
SHOULDER_CHONDROMALACIA : 1
THE_INDEPENDENTLY : 1
STATUS_DURING : 1
PARTICIPATE_DUE : 1
THAT_HE : 12
DEPENDENCE_BIPOLAR : 1
REPORTED_PAST : 1
ALVEOPLASTY_SECURITY : 1
SOCIAL_VOICES : 1
LONG_AT : 1
IS_DIAGNOSIS : 1
SPOKE_OF : 1
TREATMENT_INITIATED : 1
STAYS_BED : 1
UNDER_PATIENT : 1
WANT_THEM : 1
TO_BACHELORS : 1
MG_HR : 1
UP_OF : 1
OF_TAKE : 1
PAIN_RADIATING : 1
FAR_THE : 1
IS_SOME : 1
THE_FOR : 5
JERSEY_IN : 1
HPI_YO : 1
LOSS_OF : 1
LAB_HYDROCODONE : 1
THOUGHT_CONTENT : 1
POST_ADMISSION : 1
AND_BEEN : 3
ALSO_ON : 1
ADVOCATE_FOR : 1
THIS_THE : 5
WAS_TOLD : 1
UPON_EXPERIENCE : 1
DO_YOU : 3
WHEN_REASSESSMENT : 1
WITH_CARPULE : 1
HE_STILL : 2
CP_EGD : 1
SCORE_AND : 1
DESCRIPTION_HPI : 1
OF_RISK : 1
SET_FOR : 1
SPEAK_HIS : 1
PINES_NOTES : 1
AEROSOL_NEBULIZER : 1
GLEASON_MEMBER : 1
IT_APPEAR : 1
QUESTIONS_OR : 1
TUBES_DRAINS : 1
FRI_JUNE : 1
METHOD_TAKE : 1
NEGATIVE_PSYCHOSOCIAL : 1
TIMES_THERE : 1
ONE_BY : 8
MILITARY_HE : 1
COMFORT_MEASURES : 2
MOVED_TEXAS : 1
STILL_PSYCHOSOCIAL : 1
CARE_TEAM : 1
TO_TUMOR : 1
BRIGHT_LMSW : 1
DIABETIC_SURVEILLANCE : 1
CALL_CAREGIVER : 1
RM_AUTHOR : 1
CARE_PT : 1
ASCERTAINED_HE : 1
DT_KEY : 1
CHIEF_CHEST : 1
FROM_CHIROPRACTOR : 1
PATIENT_AS : 1
NEEDED_UPCOMING : 1
IS_PENDING : 1
COLD_ICDCM : 1
MENTAL_CPT : 1
WAY_THEM : 1
INTERESTS_OTHER : 1
DIABETIC_IMAGING : 1
PRIMARY_FOR : 1
ALERTED_UNIT : 1
PACIFIC_HEALTH : 1
EAGER_ATTENDING : 1
BEEN_GOING : 1
POSTKOREAN_MAY : 1
EVERY_HOURS : 1
CALL_WITH : 1
OTHERS_CONSULT : 1
NOT_CHANGES : 1
SOME_THINGS : 1
THIS_AM : 1
BECOME_ACQUAINTED : 1
WITH_THIS : 1
THE_PT : 3
YOU_MG : 1
SEEN_PHARMACIST : 1
FOR_NOTE : 1
DAILY_LEVELS : 1
HE_WORKING : 1
PREGNANT_OR : 1
DEPRESSED_KERATOACANTHOMA : 1
PC_TELEPHONE : 2
ADDENDUM_PRESENTS : 1
ABUSE_VS : 1
EDUCATION_LEARNING : 1
NOT_CONTINUED : 1
TUBES_FALL : 1
WHEN_AND : 1
ASKED_IF : 1
AT_GOAL : 2
DENIES_PAST : 1
TO_OTHERS : 3
OF_ABNORMAL : 1
WIFE_IS : 2
PRIVILEGES_PROTECTORS : 1
RESPONSIVE_RN : 1
ATTENDING_GLUCOSE : 1
BILATERAL_ULNAR : 1
ASPIRATED_REMOVED : 1
AORTIC_HL : 1
OCTOBER_HIS : 1
HOPE_YOU : 1
POSITIVE_FOR : 1
BAY_PINES : 2
OX_WT : 1
SAFETY_CREATED : 1
IN_LAST : 2
TO_RETURN : 1
ITS_EFFECT : 1
REPORTEDLY_INCREASED : 1
REMOVED_THE : 1
THIS_DUE : 1
FROM_INJURY : 1
IMPRESSION_ON : 1
LIFE_ITS : 1
DATA_ATTENDED : 1
AREA_CBOC : 1
BATH_FEEDING : 1
ONSET_VETERAN : 1
ELIMINATION_ELIMINATION : 2
FEMALE_NOTE : 1
FINDINGS_RIGHT : 1
SCAR_THAT : 1
KINDLY_SEE : 1
DEAR_MR : 1
TREATMENT_AEROSOL : 1
OR_DEMOGRAPHIC : 1
ING_SKILLS : 1
INTOXICATED_HE : 1
AND_TREATED : 1
PING_DURING : 1
ELEVATED_NO : 1
SUPERFIC_SOMATIZATION : 1
LEVEL_GREATER : 1
DENIES_FEELING : 1
WAS_PATIENT : 1
CLINIC_MONTHS : 1
ORIENTED_OF : 1
OF_ILLNESS : 2
WOUNDS_THE : 1
ATLAS_JOURNALING : 1
TAXI_TO : 1
MEASURES_CONTRIBUTING : 1
TREATMENT_THERAPY : 1
AM_GETTING : 1
RATHER_CALM : 1
NECK_TURNS : 1
LOCATION_BP : 1
HAS_VISION : 1
TO_HEAR : 1
SOLUTION_PHONE : 1
TEETH_FOLLOWUP : 1
WHO_SEEMED : 1
CHANGE_SOCIAL : 1
AND_UTICALS : 1
TIME_HE : 3
MILK_FOR : 1
THERE_ANY : 1
SHOW_HE : 1
PAST_TWO : 1
ADMITS_THIS : 1
OMEPRAZOLE_FOR : 1
WAS_RECENTLY : 1
OF_ROUTINE : 1
TEAM_FLOOR : 1
IS_ED : 1
DIFFICULTIES_PATIENT : 1
DINNER_AND : 1
EXAMINATION_MH : 1
TO_DYSPHAGIA : 1
CARE_SYSTEM : 1
RELIEVED_NEG : 1
BODY_MASS : 1
NO_CHANGE : 1
REQUIRED_TIME : 1
SHOULDER_WITH : 1
BECAUSE_COUD : 1
ALSO_FEAR : 1
FURNITURE_NO : 1
MANDATED_GO : 1
SPOKE_MR : 1
WITH_FATHER : 1
INCLUDING_PAIN : 1
CHIEF_FREQUENCY : 1
NOMED_RATED : 1
ABNORMAL_SIGNAL : 1
AORTIC_LDL : 1
COMPLAINT_PLACE : 1
HISPANIC_SOCIAL : 1
HAVE_SEEN : 1
INCLUDING_WORKING : 1
AGREED_WORK : 1
SOCIAL_LOUDLY : 1
TASK_EXTREME : 1
ESPECIALLY_IN : 1
ROUTINE_RELIEVED : 1
CAUSES_ME : 1
LENGTH_NUMBER : 1
SUPPLEMENTAL_VIA : 1
TEETH_MH : 1
TO_SKIN : 1
ETHNIC_CULTURAL : 1
DOES_SHOW : 1
WITHDRAWAL_ONE : 1
WERE_NO : 1
PREDNISONE_CIGARETTES : 1
PAST_HISTORY : 1
GROOMING_INSTITUTE : 1
EDUCATION_CITALOPRAM : 1
OR_INTENT : 1
RACE_OR : 1
SHIFT_AND : 2
DEMONIC_MH : 1
OF_LEGS : 1
VIAGRA_HE : 1
EXAM_HEALING : 1
TO_BECOME : 1
DEC_ONE : 1
ALLERGIES_PATIENT : 2
RETURNED_TO : 2
LOOSENING_LEFT : 1
IN_HAS : 1
LMSW_CRADC : 1
HYPNOTIC_KNOXVILLE : 1
SHOT_CLINICAL : 1
LESSSON_AFTER : 1
ADDENDUM_EACH : 1
GO_TREATMENT : 1
SOB_PND : 1
PATCHES_THE : 1
SHE_CP : 1
PE_NURSING : 1
EMESIS_THIS : 1
NOSUNSPEC_HERE : 1
EXPIRED_STRESS : 1
TREATMENT_CERTIFICATION : 1
ADDENDUM_OBJECTIVE : 1
MON_PLACED : 1
MATTER_ADDENDUM : 1
AFFECTED_FOR : 1
PULMONARY_DISEA : 1
ARISE_LEFT : 1
SHOES_ASSESSMENT : 1
MIN_DYSPHAGIA : 1
TROUBLE_CARE : 1
THAT_SOCKS : 1
TO_JUNE : 1
WEEK_TWO : 1
TREATMENT_ARE : 1
DISABILITIES_EDUCATION : 1
ON_IMAGES : 1
HIS_ABILITY : 1
FARJAD_QHS : 1
ASPIRATED_AND : 1
TO_BASCOM : 2
NURSING_NOTES : 1
PAYING_BILLS : 1
THE_RESIDENT : 1
POINT_THE : 1
HAD_VISITS : 1
MOUTH_APPROXIMATELY : 1
VISIT_PCE : 1
HUDVASH_INCLUDING : 1
SNACK_SMOKE : 1
SERIOUSLY_ABDOMEN : 1
CHANGE_OR : 1
INPATIENT_RISK : 1
PCE_DENTAL : 1
HIS_SHOULDER : 1
ULA_AT : 1
TH_DATE : 1
GET_THIS : 1
REST_RESP : 1
CARE_IDENTIFY : 1
THIS_PERSONAL : 1
HE_DIAGNOSIS : 1
MG_VITAMIN : 1
PM_DECEMBER : 1
THE_WEEK : 1
LIKELY_OCCLUDED : 1
BY_EVERY : 4
INCREASING_AND : 1
FOR_WELL : 1
ROOM_PROVIDED : 1
PATIENT_BEEN : 8
BP_TRAUMA : 1
MAKE_MORE : 1
PULSE_IS : 1
AA_WITH : 1
OU_HE : 2
TO_CONSULT : 1
LABS_IN : 1
OCT_SCORE : 1
ENERGY_CONCENTRATION : 1
FILED_TELEPHONE : 1
MAY_MAY : 1
SHE_FEELS : 1
WITH_GEC : 1
COLEMAN_PAIN : 1
ALLERGIES_NKA : 1
UP_DISCUSSED : 1
WHO_YOUR : 1
NOTE_ANESTHETIST : 1
MEDICATIONS_ARE : 1
IBUPROFEN_MG : 1
WHEN_ARE : 1
THE_LAST : 1
BEING_THIS : 1
INDICATES_WOULD : 1
OPERATIVE_FINDINGS : 1
GIVES_OF : 1
RECENTLY_HE : 1
APPROACHED_THE : 1
SMILING_TALKING : 3
EVERYTHING_WITH : 1
HE_STRONG : 1
STARTED_AGAIN : 1
PROMOTE_SOCIAL : 1
NOCTURIA_NOT : 1
PASTORAL_WITH : 1
INDICATES_HE : 1
THE_WEIGHT : 1
STOOL_RATED : 1
WITH_OXYGEN : 2
DISCUSSED_IMPORTANC : 1
TREATMENT_FOR : 1
SOCKS_UPPER : 1
DIDNT_DID : 1
BUT_BLOATING : 1
GOALS_GOALS : 1
UNT_TAB : 1
NARCOTIC_KNOXVILLE : 1
PROCEDURE_YOU : 1
DOB_AGE : 1
BE_FREE : 1
HE_DENIED : 1
CYTOPATHOLOGY_THIS : 1
STATUS_OUTPATIENT : 1
AND_WELL : 1
NO_XX : 1
DX_EXAM : 1
MH_INPT : 1
PPV_REMOVED : 2
SYSTEM_HOLOGIC : 1
UNCHANGED_LAST : 1
THE_THEN : 1
TOENAIL_BY : 1
LISTED_ALL : 1
FACTORS_MEASUREMENTS : 1
WAS_ABLE : 3
ON_ARM : 1
ID_DESCRIPTION : 1
IMAGING_WHO : 1
IMAGING_MEMBERS : 1
NOS_RECONCILIATION : 1
PRESCRIPTION_FOR : 2
NOTES_DOES : 1
LOW_VOICE : 1
FENTANYL_THEIR : 1
NOT_REQUIRED : 2
IN_YOUR : 1
CAME_MY : 1
HE_AREA : 1
SELF_EFFORTS : 1
MEDICATIONS_LAST : 1
TREATMENT_STATUS : 2
PRIM_LEG : 1
MAKING_AND : 1
THE_EXCESSIVE : 1
DID_SAYS : 1
EXAM_NOTET : 1
DISCHARGE_DEC : 1
STARTED_SMOKING : 1
DAILY_FALL : 1
DOCUMENTS_DATE : 1
NEURONTIN_TO : 1
DRAW_REFUSED : 1
CM_RIGHT : 1
NOTE_LATEST : 1
CANALS_KRIS : 1
OR_ASSISTANCE : 1
ACTIVITY_BUT : 1
FLUOXETI_INFLUENZA : 1
YOU_WERE : 1
RIGHT_RESIDENT : 1
SIGNIFICANT_SOCIAL : 1
DOCUMENTED_IMPAC : 1
WHICH_HELP : 1
AO_YES : 1
SSN_MYOPIA : 1
ACTIVE_PATIENT : 3
SSN_SEEN : 1
AS_THROUGH : 1
HAVE_HAS : 1
LB_NORTH : 1
CAPRI_EXAMINATION : 1
WITH_CORSET : 1
TO_SURGERY : 2
VETERANS_HEALTH : 1
TO_MIVA : 1
UP_AT : 1
EVIDENCE_PATIENT : 1
CFCF_ORAL : 1
MANAGER_SAID : 1
BREATHALYZER_TOPIC : 1
NURSING_TO : 1
ANATOMICAL_RIGHT : 1
CANCELLATION_MR : 1
HX_HENT : 1
ACTIVITIES_NO : 1
PAT_PATIENT : 1
IM_SERIOUSLY : 1
CALM_TO : 1
ABDOMEN_DISTENDED : 1
REMINDER_RELATIONSHIPS : 1
WEIGHT_KG : 3
CORRECTLY_AND : 1
COMPLETED_THIS : 1
FEELINGS_HIS : 1
NOT_NUR : 1
AS_DO : 1
HAVE_IBUPROFEN : 1
ABDOMINAL_LOWER : 1
PLACE_WHEN : 2
DIAGNOSES_AND : 2
THIS_PATIENT : 6
SEBACEOUS_HYPERPLASIA : 1
OP_PSYCHIATRY : 1
DX_PTSD : 1
AND_LEGAL : 1
DATE_DEC : 1
CARE_SUBSPECIALTY : 1
VETERAN_POSITIVE : 1
PRODUCTIVE_ANEMIA : 1
REPEAT_PATIENT : 1
UPON_HIS : 1
SEE_WAS : 1
ANTERIOR_OF : 1
HIGHPREVALENCE_TREATMENT : 1
HISTORY_POSTTRAUMATIC : 1
WILL_WITH : 1
VETERAN_STATES : 1
EXPECTED_TO : 1
OR_ABNORMALITY : 1
SHE_STOPPED : 1
NOT_NOTICED : 1
DELIVERY_DEVICE : 1
QUESTIONS_AND : 2
FINDINGS_ABOVE : 1
LEFT_SIZE : 1
WITH_HISTORY : 1
ADDENDUM_REVIEWED : 1
MODERATE_GOOD : 1
EYES_PERRLA : 1
STUDIES_WITHIN : 2
OFF_XANAX : 1
THE_ANKLE : 1
THE_ANTERIOR : 1
INCREASE_KNOWLEDGE : 2
DAILY_BUT : 1
STUDENT_SURGEON : 1
THAT_STRONG : 1
POSSIBLE_AR : 2
WAY_ACHIEVING : 1
CARE_HIMSELF : 1
MEDS_COULD : 1
WOULD_MEDICATIONS : 1
ON_PATIENT : 1
DILATED_ASAP : 1
INSTRUCTED_HIM : 1
EVAL_APPEARANCE : 1
ON_GRIEFWORK : 1
PROVIDER_JENKINS : 1
BLACK_NOT : 1
IN_WAY : 1
OUTLINE_OF : 2
DOSE_BASE : 1
LAST_PERFECT : 1
REVIEWED_KNEE : 1
NURSING_IS : 1
ASSISTANCE_CONSISTENCY : 3
BEACH_OR : 1
LACTATING_NO : 1
LABS_PATIENT : 1
KG_AND : 1
AND_LEVOTHYROXINE : 1
THE_DIFFERENT : 1
PSYCHOLOGY_FEMALE : 1
TO_SIDE : 1
OF_GOALS : 1
VOMITING_ASK : 1
MELLITUS_II : 1
TETANUSDIPTHERIA_ADULT : 1
THAT_PRIOR : 1
WAS_WORKING : 1
MECHANISM_TRAMADOL : 1
EXT_PULSES : 1
TO_ACCOMPLISH : 1
CONSENTING_ANSWERED : 1
NOTED_KINDLY : 1
DIVALPROEX_HR : 1
LEARN_READY : 1
HAS_OR : 1
ACTIVITY_COMFORT : 1
NEURODE_RATIVE : 1
INCREASE_DOSE : 1
MEDICATIONS_AS : 1
LUMBAR_WITH : 1
WORKING_WITH : 2
PAIN_YES : 1
INFORMATION_THAT : 1
DROPIN_GROUP : 1
WILL_IN : 1
AS_NURSING : 1
BREAST_TEST : 1
DT_PAIN : 1
ALONE_HBPC : 1
ANEMIA_OF : 1
MODULE_ON : 1
EXAM_TEETH : 1
US_KNOW : 1
ROUTINE_CLINIC : 1
CAME_BY : 1
SCATTERED_OF : 1
ON_ILLNESS : 1
LLE_PAIN : 1
RESTRAUNT_RT : 1
OTHER_CARE : 2
PATIENT_SHOULD : 1
AXIS_VETERAN : 1
RISK_PATIENT : 1
MUCH_MORE : 1
CALCIFIED_AORTIC : 1
HAVE_OF : 1
COLLECTION_AND : 1
DENTAL_CATEGORY : 2
DEGREES_INCREASED : 1
PROTOCOL_NOT : 1
PACIFIC_ISLANDS : 1
UNTIL_YOU : 1
TO_TRANSPORTATION : 1
PT_CARPULE : 1
METHADONE_ENTERED : 1
PROGRESS_REVIEWED : 1
THIS_REQUIRES : 1
PM_ON : 1
MEETING_WELL : 1
BUT_SPLIT : 1
STAFF_ASSISTANCE : 1
AFTER_THIS : 1
BUT_STAFF : 1
BASISPHYSICAL_CONSULT : 1
WITHIN_PRIOR : 1
READINESS_LEARN : 1
RX_NOT : 1
DATE_OD : 1
HOURS_SVI : 1
AND_ON : 3
OTIC_SOLN : 1
STOMACH_YOU : 1
MIN_SPUTUM : 1
CUPS_OF : 1
PARTICIPATE_IN : 1
IF_ARRISES : 1
THE_TREATMENTS : 1
PHARMACY_PATIENT : 1
COUNSELING_THERE : 1
THE_IMAGING : 1
HAS_COMPLIANT : 1
ALERT_OF : 1
HEAD_NORMOCEPHALIC : 1
PAIN_SCREENING : 1
COUGHING_LOOSEN : 1
OL_DL : 1
PLAN_NONACUTE : 1
AFRICAN_AM : 1
BEDTIME_ALLERGIES : 1
PROTECTION_IF : 1
PROBLEM_OTHER : 2
HIS_MOTHER : 1
BEEN_COMPLETED : 2
BE_THE : 1
INPATIENT_AT : 1
AMOUNT_WAS : 1
SLOWLY_WILL : 1
SIGNED_INTO : 1
PER_THERAPIST : 1
DISORDER_OR : 1
NURSING_IN : 2
LENSECTOMY_REMOVED : 2
CHECK_TO : 1
COUNT_LAST : 1
DT_AFFECTED : 1
USE_HIS : 1
ON_PATIO : 1
GOAL_APPROXIMATELY : 1
ATTENTIVE_HISTORY : 1
SCARS_ASTHMA : 1
CATHETERIZATION_CATHETERIZATION : 1
ADDENDUM_FOREIGNBORN : 1
OR_CHRONIC : 1
SEE_MR : 1
NEEDS_CONTINUING : 1
OF_BOTH : 1
IN_CLINICAL : 1
OPERATION_PACU : 1
HAS_DOUBLE : 1
TAKING_II : 1
PHARMACY_NOTE : 1
ETOH_STATES : 1
TOO_ALONG : 1
PING_DIRECTLY : 1
INCLUDING_SUPPLIES : 3
HIM_FOR : 2
MOUTH_EVERY : 5
REMOVE_SUTURES : 1
ONE_CONCENTRATION : 1
PROMOTE_STARTED : 1
FIRST_PPC : 1
MH_GROUP : 1
MONTHS_AGO : 1
NOTICED_IMPROVEMENT : 1
WOULDNT_DISCHARGED : 1
WITHOUT_BILATERALLY : 1
AND_NEW : 1
RESIN_SURFACEANTERIOR : 1
DEGREES_AND : 1
THEY_WOULD : 1
CONSUMED_OF : 2
NONE_AMOUNT : 1
THE_NAUSEA : 1
FEELS_OT : 1
TELEPHONE_PC : 1
LEGAL_DOCUMENTS : 1
CUT_HER : 1
MOOD_AFFECT : 2
OTR_STAR : 1
NO_RE : 1
IT_UPPER : 1
TRYING_TO : 1
PLACE_ADDENDUM : 1
TUES_KNOWS : 1
MANAGEMENT_OR : 1
EVALUATION_PATIENT : 1
OR_CUEING : 1
CARE_IS : 2
COUD_NOT : 1
OR_DEVELOP : 1
SCOPE_THROUGH : 1
UROLOGY_CLINIC : 2
ALL_AND : 1
ENTERED_IS : 1
OPTOMETRY_EXAM : 1
PAIN_PATIENT : 1
PT_KNOWS : 1
QH_AS : 1
INITIATING_ERECTION : 1
DT_INDEPENDENT : 1
EVENING_WAS : 1
HISPANIC_PRIMARY : 1
MEDICAL_CYTOPATHOLOGY : 1
AR_AR : 1
REGARDING_STRABISMUS : 1
AS_WAS : 1
BOTHERED_BY : 1
KEYPAD_OF : 1
DEPENDENCE_PRIMARY : 1
MED_MGMT : 1
ACCESS_TO : 1
VISIT_WITH : 1
TREATMENT_GAVE : 1
DISEASE_INFECTION : 1
SHOULDER_AND : 1
MORE_PART : 1
NO_MANDATED : 1
AT_BIRCH : 1
PROVIDED_THIS : 2
CONCERNS_THE : 1
CLINIC_CARE : 1
PT_FITTED : 1
TELL_CONTINUES : 1
PHYSICIAN_AMOUNT : 1
PULSE_RESP : 1
ANXIETY_AXIS : 1
HER_OF : 2
AMOUNT_PROVIDED : 1
LUCID_LESS : 1
INCIDENT_BILATERALLY : 1
PT_LIKELY : 1
CAN_ACCESSED : 3
SATURATION_YES : 1
ARMD_DM : 1
OPERATIONAL_WITH : 1
DO_ANCHORAGE : 1
PATIENT_REPORTS : 1
VETERAN_ADDITIONAL : 1
DENIED_PAIN : 1
TO_VOLUNTEER : 1
AND_SEBACEOUS : 1
TAB_ONE : 4
OFFERED_NURSING : 1
OF_DINNER : 1
COPING_FOR : 1
AT_SOME : 1
ONE_MONTH : 1
MED_EVAL : 1
PSYCH_NOTE : 2
POON_NONE : 1
ACTIVITY_ACTION : 1
BASED_UPON : 1
KNEE_WITH : 1
IN_PROGRAM : 1
STORY_UNIT : 1
SCAR_TISSUE : 1
WAS_OBTAINED : 1
IN_HE : 3
SCREENING_THERAPY : 1
BMI_IS : 1
SEEM_TO : 1
PHYSICIAN_FOOD : 1
WITH_PH : 1
GROUP_AND : 1
USE_OF : 1
OUTSIDE_RESTRAUNT : 1
CESSATION_CALCIFIED : 1
DECLINED_WHEN : 2
SURROGATE_IF : 2
HAS_RECURRING : 1
ALCOHOL_LAST : 2
FOR_RISK : 1
AR_AND : 2
ANALYSIS_AND : 1
STRONG_IN : 1
AND_TEACHING : 1
AND_SEE : 1
ASSISTANT_NURSE : 1
DESCRIPTION_THROBBING : 1
PREVENTATIVE_MEDICINE : 1
DISEASE_OR : 1
SHAVE_RESTORATIVE : 1
SEE_FOR : 1
BREATHING_TREATMENTS : 1
REPORT_TO : 1
SPASMS_CORONARY : 1
REPORTED_AND : 1
NEARING_FINALS : 1
OF_AUTHOR : 1
MINIMAL_CUING : 1
HE_ALSO : 6
ADULT_TYLENOL : 1
PER_HE : 1
TO_ASSIST : 1
ATTEMPTED_TO : 1
DIABETES_TYPE : 1
FRONT_HIS : 1
OTHER_TIMES : 1
HISTORY_EDUCATION : 1
OF_OCT : 1
REMAINING_VETERAN : 1
CHANGES_THAT : 1
OF_THIS : 2
FULL_CONSENT : 1
BEEN_ALCOHOL : 2
THE_COMING : 1
TO_BS : 1
WAS_CHANGED : 1
AND_UCINATIONS : 1
EVALUATED_BY : 1
VALSARTAN_TA : 1
CLOSE_ROLE : 1
PT_REQUIRED : 1
SAT_LOC : 1
IN_PROGRESS : 1
DX_OPIOID : 1
FAMILIAR_IS : 1
TIME_SOCIAL : 1
MEDIAN_SENSORY : 1
HRS_FLUOXETI : 1
ADDENDUM_CONDITIONS : 1
HIS_AUDITORY : 1
PROSTATIC_GLEASON : 1
COMMENT_PT : 1
TAB_FOR : 1
LOWER_LEG : 1
AOX_EMOTIONAL : 1
CLASS_TREATMENT : 2
USED_TABLETS : 1
IN_ADDENDUM : 1
OF_WILLING : 1
PT_ADMIT : 1
HE_REPORTS : 1
NOT_ENTERED : 1
PRIMARY_SERVICE : 1
GIVEN_ENCOURAGEMENT : 1
NO_LOCATION : 1
AND_EZETIMIBE : 1
IS_THE : 2
SIG_TAKE : 1
HIP_IN : 3
APARTMENT_AND : 1
OBSERVED_TO : 3
XYZZY_OUTPATIENT : 1
PATIENT_CAREGIVER : 1
WITH_FH : 1
ADDITIONAL_COMMENTS : 1
RADIATING_MENTAL : 1
WERE_WITH : 1
LEVEL_OS : 1
ACETAMINOPHEN_MG : 2
THAT_TO : 2
WAS_BY : 2
YES_YESTER : 1
AND_PAUSE : 2
ED_ADDENDUM : 1
SAID_WAS : 1
MINS_FLUOXETI : 1
IF_YES : 3
REACH_HOME : 1
BE_MG : 1
OF_LIVING : 3
FROM_DIABETIC : 1
PT_CONTINUES : 1
BAY_PROGRESS : 1
NOT_PT : 1
YES_PLAN : 1
LEAVE_YOU : 1
COLLAPSED_IN : 1
IN_HOME : 1
MEMBER_AT : 2
THE_IMPORTANCE : 1
OR_TWICE : 1
AM_AN : 1
HIM_CALL : 1
MACKIE_VISTA : 1
SIXTY_MINUTES : 1
ELECTRONICALLY_ANOREXIA : 1
THE_OTHER : 1
PART_ROUTINE : 1
RADIATING_PAIN : 1
DURING_DIFFICULT : 1
POSITION_MEASUREMENT : 1
DURING_THIS : 9
CLINIC_FITTING : 1
SHOES_RISK : 1
FOR_VISIT : 1
UNIVERSAL_PRECAUTIONS : 1
LYMPHS_NEUT : 1
MD_TO : 1
PURPOSE_WILL : 1
SOUNDS_PRESSURE : 1
DATE_TREATMENT : 1
FROTHY_FILED : 1
SCORE_CONTINUED : 1
DTC_CLINIC : 1
PRE_POST : 1
THEM_PT : 1
QHS_OU : 2
NOT_SUPPER : 1
WITH_WAS : 1
INTEGRITY_REQUIRED : 1
TO_KNOWLEDGE : 2
TO_DIET : 1
AUTHOR_JENNY : 1
SCHEDULED_APPOINTMENT : 1
IS_SHOW : 1
BUT_PERFORMED : 1
NONSPECIFIC_AS : 1
TO_STARTED : 1
FIRST_TH : 1
ROOTS_BUT : 1
SEEN_DENTIST : 1
FAMILY_HISTORY : 2
BODY_RADIATION : 1
HAVING_TOLERANCE : 1
LOCATION_RIGHT : 1
CHIEF_HEENT : 1
EXCESSIVE_THAT : 1
MOTHER_WAS : 1
KERATITIS_UNSP : 1
HAS_INVITED : 1
PROTECTORS_IN : 3
ER_AND : 1
THERE_SIXTEEN : 1
TRANSFER_MEDICARE : 1
RECORD_PRN : 1
SSOME_YOUR : 1
PERIO_PERIO : 1
IDEATION_HE : 1
THIS_BEFORE : 1
EXAM_NORMOCEPHALIC : 1
DECIDED_NEEDED : 1
STAFF_MENTAL : 1
NOTE_RESTRAINTS : 1
HAD_OF : 1
LOCATION_PERFORMED : 1
ADDENDUM_DIANE : 1
VANDER_MD : 1
THREE_TIMES : 3
WITH_VISION : 1
SEVERAL_MEDS : 1
SITTING_IN : 1
LEAFLETS_GRADE : 1
BACK_LOWER : 1
PAIN_RIGHT : 1
JOURNALING_REPORTS : 1
CATARACTS_NOT : 1
SHORTTERM_GOALS : 1
RELATIONSHIPS_HOMEWORK : 1
REGULAR_SUBJECTIVE : 1
THIS_ME : 1
RIGHT_LEFT : 1
SET_ROUTINE : 1
HAVE_OR : 1
USE_TO : 1
IN_MARCH : 1
RECORDS_CUT : 1
GOAL_MONTHS : 1
PRIMARY_FOLLOW : 1
NUMBER_WILL : 1
FATHER_DISEASE : 1
ARM_LEGIBLE : 2
CLIENT_WITH : 1
FACE_WITH : 1
TYLENOL_ADVIL : 1
MOMENT_SOME : 1
HEREDITARY_MR : 1
COOPERATIVE_ANDERSON : 1
LESIONS_BUT : 1
INCREASE_THE : 1
STATING_THAT : 1
ON_VETERAN : 2
HERE_TO : 1
YOUR_HAVE : 1
RYAN_IMAGING : 1
CUEING_PROVIDED : 1
HABITS_ADMITTING : 1
PROVIDER_PHYSICIAN : 1
TIMES_WERE : 1
TAKE_NEXT : 1
FOLLOWED_MAJOR : 1
HPI_ETOH : 1
THEN_TO : 1
ON_NO : 1
THIS_MEETING : 1
HE_JOKES : 1
TO_ITS : 1
WITH_DECREASE : 1
AMOUNT_STAFF : 1
REMAINING_CD : 1
CALCIUM_MG : 1
PLAN_WHILE : 1
SCAN_DEC : 1
IF_IT : 2
IT_NOT : 1
FOR_ALCOHOL : 1
MILITARY_HX : 1
SHE_GET : 1
IV_STATUS : 1
PHONE_HOMEBASED : 1
NO_FOUND : 1
NUTRITION_ELIMINATION : 1
REFUSED_LOUDLY : 1
INFORMATION_PHONE : 1
ARTHRITIC_PAINS : 1
TAC_TO : 1
DATA_VETERAN : 1
JUNE_SON : 1
INTO_SURROGATE : 1
AND_WEAKNESS : 1
PSYCHOTHERAPY_MEDICAL : 1
OF_STOOL : 7
PROBLEMS_COMPLAINT : 1
GOALS_WHILE : 1
HIS_BREATH : 1
YOUR_BAD : 1
SUBMITTED_SEBORRHEIC : 1
THE_COMPLETED : 1
NOS_CONTINUE : 1
SOCIAL_INDIVIDUAL : 1
OR_NURSE : 1
BE_PING : 1
SCHIZOAFFECTIVE_DISORDER : 2
TIMEOUT_HEMATURIA : 1
DANGER_SELF : 1
ATTENDING_DIDACTIC : 1
INDEPENDENTLY_WAS : 1
PAINS_IN : 1
UPPER_ARM : 1
TO_MORE : 1
RESPIRATION_FLU : 1
RATIVE_WITH : 1
HELP_CHIROPRACTOR : 1
ILLNESS_RESPIRATION : 1
HER_PROBLEM : 1
INFECTIONS_AND : 1
OINTMENT_LESIONS : 1
CHANGING_DELETING : 1
WITH_OSAC : 1
UNTL_THE : 1
OCCLUDED_IN : 1
SPONGE_BATH : 1
ANY_COMPONENT : 1
ESPECIALLY_LYING : 1
THE_MENTAL : 1
COUNT_FILLED : 1
LDL_CHO : 2
RINSING_AWAY : 1
PERFORMANCE_MEDICATION : 1
ACTIVITY_HOMEWORK : 1
MISSING_TEETH : 1
IS_WORKING : 1
PATIENTS_GOAL : 1
GOOD_DENIES : 1
AND_BUILDING : 1
ARTERIOSCLEROSIS_EDUCATION : 1
TX_RUE : 1
TO_CURRENT : 2
LYWANDA_LMSW : 1
ON_AND : 3
INCLUDING_CANCER : 1
HIS_MEASUREMENT : 1
ABRUPTLY_DEMONIC : 1
CHO_IS : 1
CM_PT : 1
LIVES_ALONE : 1
DEPRESSED_SPI : 1
DECLINED_MOBILITY : 1
CONCENTRATION_PROBLEM : 1
NEEDS_BLIND : 1
WITH_CALCIUM : 1
GROUP_SESSION : 1
HE_WOULD : 1
SICK_TO : 1
SHAVE_CARE : 1
PRIMARY_MELLITUS : 1
RESPONSES_DIAGNOSES : 1
IN_NAME : 1
DENIS_MD : 1
SIDED_LEFT : 1
SIZE_TOO : 1
REVIWED_WITH : 1
CLINICAL_EDUCATION : 1
VACCINE_NOT : 1
MY_OFFICE : 1
INCLUDES_DMII : 1
TABLETS_CPT : 1
FOR_INACTIVE : 1
VANOD_GOWN : 1
OF_ZZPATIENT : 1
CONTINENT_NUMBER : 2
TO_PO : 1
LEGS_NEVER : 1
MALE_PRESENTS : 1
SEBACEOUS_CYST : 1
REQUEST_FOR : 1
SLIGHTLY_HYPERLIPIDEMIA : 1
NAGGING_SHOOTING : 1
THE_PROGRESS : 1
MR_BARKER : 1
THEN_PSYCH : 1
PROBLEMS_ACCESS : 1
HEAR_THIS : 1
II_OR : 1
FACTORS_PATIENT : 1
TOO_NARROW : 1
PT_FOLLOWED : 1
CLC_TRANSPORT : 1
DE_RATIVE : 1
AND_CARDIOMYOPATHY : 1
CHECK_WITH : 1
FUTURE_IF : 1
HANDOUTS_PHYSICIAN : 1
HE_SEEN : 1
JUNE_ASSESSMENT : 1
EFFORTS_PROMOTE : 1
MODERATE_COLONOSCOPY : 1
HE_ADDRESS : 1
AT_WORST : 1
SEEING_NO : 1
FREQUENCY_TWICEWEEKLY : 1
PACU_ROOM : 1
HE_CURRENT : 1
PATIENT_REQUESTING : 1
NO_MEDICATION : 1
PULSE_PRODUCTIVE : 1
TO_BOWEL : 1
GOOD_PULSES : 1
ALCOHOL_HE : 1
THEN_TRANSFERRED : 1
AFFECTED_AREA : 1
ASSISTANCE_FOLLOWED : 1
CARE_PROVIDER : 1
SOME_INSIGHT : 1
HOMEWORK_DEFINE : 1
HERE_APPROX : 1
RECOVERY_LEVEL : 1
CLINIC_STRABISMUS : 1
ASSIST_BOWEL : 1
APPLICABLE_FOR : 1
AS_THROBBING : 1
HAS_PREVIOUS : 1
MENTAL_STATUS : 4
HE_COMPLAINING : 2
DECREASE_WITH : 1
IN_OX : 1
PAYING_AND : 1
TO_STOP : 1
AS_TREATMENT : 1
FOR_SUPPORT : 2
FROM_TELERETINAL : 1
OCCURRED_WITH : 1
PE_NOTE : 1
OF_PRESUMED : 1
DURING_GROUP : 2
AND_OF : 1
PINES_WILL : 1
WILL_NOT : 1
FINALLY_HIS : 1
START_AND : 2
MANAGEMENT_NO : 1
OR_TYPE : 1
OF_DENTAL : 1
OF_ANESTHETIC : 1
CHEST_NO : 1
IN_WHICH : 2
ARRIVAL_TREATMENT : 1
ANXIETY_SYND : 1
SECRETIONS_SECRETION : 1
ASSISTANCE_SUPERVISION : 1
FOR_RETURN : 1
YET_ABDOMEN : 1
SESSION_HE : 1
PCMEDICATION_RECONCILIATION : 1
ON_SIDE : 1
COMPLETION_THE : 1
PHYSICIAN_OF : 1
CREATED_NOV : 1
STILL_PRESENTS : 1
MONONESSA_DAILY : 1
ORIENTED_SCORE : 1
HIS_ATTORNEY : 1
LOOSENING_TKA : 1
NOT_EAT : 1
CP_AT : 1
IN_HIS : 4
SEVERAL_HE : 1
LABS_BATHROOM : 1
WITH_TOENAIL : 1
WILL_ER : 1
STATUS_MEDICATION : 1
TO_MH : 1
TO_ADVOCATE : 1
CONCERNING_PLAN : 1
REVIEWED_WITH : 1
MOTIVATION_LEARN : 1
BEEN_PROBLEM : 1
NO_CONTACT : 2
PRIVILEGES_OTHER : 1
SURGEON_DPM : 1
SESSIONS_CD : 1
AS_NOTED : 1
FREE_INJURY : 1
LIST_IS : 1
REQUEST_AS : 1
LEFT_SHOULDER : 1
BUT_WAS : 1
TO_BEACH : 1
BEAM_OF : 1
DEC_YRS : 1
USE_RELIGIOUS : 1
NUT_UTICALS : 1
NONACUTE_CARE : 1
WAL_IS : 1
AND_DENIED : 1
BY_OFFICE : 1
AND_SENT : 1
NOTE_FROM : 1
MAX_OF : 1
CULTURAL_CHAMBER : 1
ULCERS_ARTHRITIC : 1
DECLINED_APPROACHED : 2
SHAPED_PURPLE : 1
RESP_ON : 1
TKA_COMPLETED : 1
ADVISED_CALL : 1
DIETARY_AND : 1
AFFECTED_THE : 1
HOME_IS : 1
PRESCRIPTION_NEURONTIN : 1
THE_WANT : 1
MHICMINTENSIVE_MANAGEMENT : 2
BEAM_THAT : 1
KG_LENGTH : 1
ED_DOCUMENT : 1
IS_ILL : 1
GIVEN_AS : 1
MAKING_HE : 1
TO_DINNER : 1
OF_HYPERPLASIA : 1
OUT_SMOKE : 1
THE_NEW : 1
KEYS_MINIMAL : 1
OF_SIGNAL : 1
RATHER_TO : 1
BECOMING_FAMILIAR : 1
SSN_MH : 1
HE_FEELING : 1
DISEASE_ANXIOUS : 1
ER_TAB : 1
BE_HIGHRISK : 1
PATIENT_ADMITTED : 1
RELIEF_NEURO : 1
TREAT_IT : 1
GO_OUT : 2
FOOD_OR : 1
WITH_PTSD : 1
IN_TAKE : 1
DT_POX : 2
COTA_SUE : 1
AND_ID : 1
EMERGENCY_PROGRESS : 1
NO_PSYCH : 1
RECONCILIATION_NOT : 1
UNDERSTOOD_IS : 1
ETOH_AND : 1
NOT_BEEN : 1
ACTION_COMFORT : 1
VIEW_DOCUMENT : 2
ING_CANE : 1
PHYSICIAN_MEDICATION : 1
PROGRESS_IT : 1
HAS_IN : 3
TEST_ENJOYED : 1
AM_THE : 1
HIS_DAUGHTER : 1
IS_AN : 1
BECOMING_REPAIRED : 1
PULSE_VITAL : 1
RAL_NEUROLOGIC : 1
CREPTS_RHONCHI : 1
VISIT_ACTIVE : 1
MISSING_STATED : 1
ADMITTED_THE : 1
QBEDTIME_TO : 1
NOTE_AUTHOR : 1
DURING_SITUATIONS : 1
SON_MD : 1
PT_BED : 1
AXIS_DEPENDENCE : 1
ASAP_SAYS : 1
NEXT_DOSE : 1
DECREASE_PATIENT : 1
SURE_WHY : 1
JR_DOB : 1
CALL_IS : 2
MICROSCOPIC_ANALYSIS : 1
THERAPY_PM : 1
CONTINUING_BASCOM : 1
MUST_PICKED : 1
THE_GPD : 1
CHARGES_WITH : 1
SAFETY_MEASURES : 1
ADDENDUM_PT : 1
SEBORRHEIC_AFFECTED : 1
USES_BLADDER : 1
TO_VIA : 1
PROBLEMS_ANXIETY : 1
PLANS_GO : 1
WITH_ACCESS : 1
PMH_HTNTO : 1
AT_DOCUMENT : 2
VASCULAR_ULCER : 1
WAS_PERSONAL : 1
RECONCILIATION_HAVE : 1
OF_ATTENDANCE : 2
PACKED_THE : 1
STOOL_APPLICABLE : 2
RELIGIOUS_FOOD : 1
COMMENT_BY : 1
STEFANIK_MR : 1
XPATIENT_NOT : 1
NOT_RECEIVE : 1
THIS_SHIFT : 15
POINT_IN : 1
TEAM_REMAINING : 1
ATTEND_FOR : 1
OR_UNSPECIFIEDGERD : 1
PCE_UNSP : 1
AT_VA : 1
EXAMPLES_GROUP : 1
CLEAR_TRANSFER : 1
UNSPECIFIED_COMMENTS : 1
VETERAN_AT : 2
FIRM_NUTRITION : 1
PLAN_TO : 2
ON_ARRIVAL : 1
PULSE_UNSATISFACTORY : 1
PERIO_LLQ : 1
POX_RAL : 1
DROPS_EXPIRED : 1
GU_SCATTERED : 1
STAFF_TIME : 1
VIA_FROM : 1
STATES_HE : 1
OF_STARTING : 1
YES_FORMAT : 1
HYPERPLASIA_WROTE : 1
ECF_OF : 1
FOLLOWUP_NOTE : 1
SHOOTING_THROBBING : 1
NUTRITION_COLEMAN : 1
OR_REPORTED : 1
REHABPHYSICAL_PAIN : 1
ITS_SIDE : 1
IS_IN : 2
WHO_THERE : 1
NO_WORST : 1
THIS_MAIL : 1
HE_MENTAL : 1
THEYRE_BEING : 1
AMBULATION_NO : 1
DEC_HAVE : 1
ERA_AND : 1
CLINIC_FOR : 3
DISEASE_NEURODE : 1
WITH_THEM : 1
RECENTLY_DEVELOPED : 1
YO_DOMICILED : 1
OF_HEADACHE : 1
HAD_TO : 1
ALSO_MAKING : 1
MAY_RISK : 1
FEMALE_NURSES : 1
OF_HISTORY : 1
HRS_PATIENT : 1
IN_IN : 1
BUTTON_MODERATE : 1
LEFT_MEASURES : 1
ADMISSION_PHARMACIST : 1
HEREDITARY_WAS : 1
AND_ASK : 1
ALERT_DATE : 1
TAKING_COMPUTER : 1
THAT_WE : 1
CONTACT_BY : 1
INPATIENT_WILL : 1
YO_EMPLOYED : 1
THOUGH_ROOMMATE : 1
AS_IMPRESSION : 1
AND_VISUAL : 1
IS_AREA : 1
HOME_HIS : 1
CHONDROMALACIA_DISPOSITION : 1
SITUATION_CAP : 1
MG_FOR : 1
TREATMENT_TELEPHONE : 1
NO_ON : 1
AS_BY : 2
WHO_SEVERAL : 1
CONSISTANT_DIET : 1
HAVING_INACTIVATED : 1
HAD_HIS : 1
CERUMEN_REMOVED : 1
PATIENT_COUNSELED : 1
SECURITY_CANS : 1
THE_SON : 1
VS_EDUCATION : 1
FOR_CALL : 2
MH_OUTPT : 1
IN_AND : 1
ROLE_ISOLATION : 1
BLOOD_CULTURE : 1
PERIOD_GO : 1
ANALYSIS_BAL : 1
HEALTH_NOT : 1
THE_PROGRAM : 3
IN_ALL : 1
IN_ETHNIC : 1
ACTIVE_STOPPED : 1
OCR_CAROLYN : 1
ECF_NUMBER : 1
HAS_PAIN : 2
EXTREMELY_TEARFUL : 1
HIS_CANCER : 1
DINNER_TWO : 1
HEAD_NECK : 1
HIS_PRESCRIBED : 1
TO_AREA : 2
AUTHOR_ATTENDING : 1
THAT_COULD : 1
THERAPY_WHICH : 1
MEDICATION_WAL : 1
OF_MEAL : 1
SECURED_COMMENT : 1
OF_REITERATED : 1
TREATMENT_PLAN : 2
VOMITING_ELECTRONICALLY : 1
CONSULT_NO : 1
WILL_REPEAT : 1
EACH_WRITER : 1
NEGATIVE_TIME : 1
VETERANS_RISK : 1
BRUSH_FOLLOWUP : 1
BEEN_BED : 1
THERE_AREA : 1
NEITHER_PREGNANT : 1
OUTCOME_PATIENT : 1
TOBACCO_AND : 1
MOVEMENTS_THIS : 4
NEXT_MHC : 1
OCR_AND : 1
HENT_EXAM : 1
NO_FINDINGS : 1
XPATIENT_IS : 1
NEEDED_READINESS : 1
RATING_SCORE : 1
EVENING_AND : 1
INR_PERFECT : 1
COMPLETE_CHANGES : 1
DISCUSSING_NEW : 1
PROBLEM_COMMENT : 1
PHARMACIST_NOT : 1
OFFERED_ALL : 1
HISTORY_DENTAL : 1
DEGREE_OR : 1
REPORT_THE : 1
PMR_AND : 1
PRIMARY_PCE : 2
MASS_NURSES : 1
INSTITUTE_FOR : 1
SET_UP : 1
PER_NURSING : 1
VISITS_WRITER : 1
DISTURBANCES_ASK : 1
MEDICATIONS_SINCE : 1
INCREASE_OF : 2
ILL_AND : 1
MG_HGB : 1
GROUP_ATTENDANCE : 1
VETERAN_PRACTICED : 1
THE_APPROACHED : 1
NUMBNESS_VAPOR : 1
MEDICINE_PREOP : 1
AT_TIME : 3
THERE_NO : 2
BLIND_IN : 1
ADDENDUM_MHICMINTENSIVE : 1
HE_GETTING : 1
HAVE_BURN : 1
IN_COMMENT : 1
WITH_PMH : 1
STILL_PENDING : 1
TURN_SEE : 1
TO_VIEW : 2
PER_MENTAL : 1
YES_NO : 1
WEEK_GAVE : 1
AND_INFORMATION : 1
THINKS_IS : 1
SEX_UNSURE : 1
DENIES_LEFT : 1
LEFT_ALONE : 1
CGY_PATIENTS : 1
VACCINE_DOCUMENTATION : 1
MOMENT_AT : 1
NOT_SURE : 1
REVIEWED_ENTIRE : 1
STRIAE_PT : 1
PERIO_FOR : 1
APARTMENT_ONLY : 1
DEMAND_OXYGEN : 1
VOMITING_DO : 1
SYSTEM_MEDICATION : 1
FORMS_OF : 1
RECORD_HIP : 1
FEELING_HOPELESS : 1
YRS_AND : 2
ARM_ON : 1
CONDITI_ALLERGIES : 1
CHO_MG : 1
DANGER_TO : 1
PAIN_PAST : 1
VETERAN_WITH : 1
HAD_LENSECTOMY : 1
WAS_NEED : 1
HAS_PATIENT : 2
LMSW_DATE : 1
DISCUSSIONS_AND : 1
PROCEDURE_PAIN : 1
FEELS_THAT : 1
MEDICINE_EDUCATION : 1
IS_WILLING : 1
IMAGE_ADEQUATE : 1
NED_NO : 1
ALLERGIES_CHRONIC : 1
BILATERAL_FLOTATION : 1
SUPINE_SIT : 1
COLLECTED_AND : 1
AUTHOR_QUACKENBUSH : 1
NVI_CONSENT : 1
HEALING_SOCKETS : 1
WORK_ON : 1
APPOINTMENT_THE : 1
DOCUMENTS_GLASGOW : 1
DO_PC : 1
MINUTES_RINSING : 1
VOMITING_OR : 1
YRS_HAS : 2
ALSO_WORKED : 2
DISCHARGE_ASSESSMENT : 1
REPORT_CHANGES : 1
RECONCILIATION_CHANGES : 1
THAT_WHEN : 1
ALBUTEROL_CFCF : 1
WAL_PATIENT : 1
OF_DID : 1
MEDICATION_NOT : 1
NURSE_EXT : 1
IF_DIAGNOSIS : 1
BEFORE_OUT : 1
BASE_ON : 1
CAR_REPORTED : 1
ASSESSMENT_NEGATIVE : 1
TO_SAFE : 1
ABRUPTLY_ADDENDUM : 1
RECONCILIATION_MEDICATIONS : 1
TO_CALL : 2
AND_IS : 3
DEPLOYED_COMPLETE : 1
RESPIRATORY_THERAPY : 1
REL_DURING : 1
INSIGHT_THAT : 1
PCP_APPOINTMENT : 1
BMI_THAT : 1
VIAGRA_HAS : 1
THIS_IS : 8
HIS_CASE : 1
YOU_IBUPROFEN : 1
HBPC_NOTE : 1
HIM_PRESCRIPTION : 1
ORAL_NUMBER : 1
SATTHURS_AND : 1
MEDICAL_RECORD : 1
FOR_DRAW : 1
ORDERED_UP : 1
MODERATE_ASSISTANCE : 1
THERAPY_PT : 1
NOTE_IS : 2
ON_IN : 1
HAS_CARDIAC : 1
HE_ALL : 1
OUTPATIENT_MEDICATIONS : 7
DISTRESS_XX : 1
TAB_TWO : 1
THE_INTO : 1
AN_AFTER : 1
ASSISTANCE_PROVIDED : 2
OF_BED : 2
TO_ALERTED : 1
RISK_AT : 1
ASSESSMENT_RECEIVED : 1
NEEDED_FOR : 2
MED_PLACE : 1
ANESTH_AWAKE : 1
MODULE_FOCUSING : 1
HAD_APPROXIMATELY : 1
TO_UPSET : 2
IS_EZETIMIBE : 1
LOSS_VISION : 1
ASSESSMENT_PLAN : 2
INDEPENDENT_OTHER : 1
OTHERS_IS : 1
OF_MARY : 1
CARE_FRED : 1
TO_STATUS : 1
TASK_UP : 1
LENGTH_MINUTES : 3
SPOKEN_WITH : 1
SINCE_VISIT : 2
THESE_AND : 1
UP_AGREES : 1
DIDACTIC_THERAPEUTIC : 2
SERVICE_IN : 1
TRANSPORT_TO : 1
RESIDENT_AND : 2
MURMURS_LUNGS : 1
WRITER_WILL : 1
DID_HELP : 1
PATIENT_ANSWERED : 2
GET_APPOINTED : 1
ADHERING_CONSISTANT : 1
WALKS_FAR : 1
TAB_TAKE : 8
HE_TRIED : 1
PAIN_ACTIVITIES : 1
WITH_PALMER : 1
DONE_EVERYTHING : 1
ONE_TABLET : 7
WITH_ATTENTION : 1
STAFF_PERFORMED : 2
IMMUNIZATION_GIVEN : 1
AORTIC_VALVE : 1
IM_HURTING : 1
HE_INTENDING : 1
MET_WITH : 3
EXT_SOI : 1
THE_VA : 1
HE_SHOULD : 1
NOTE_PATIENT : 1
ABOUT_PAYING : 1
AND_SUPPLY : 1
AFTER_VOICED : 1
VETERAN_STATED : 1
ANESTHETIST_HAVERLY : 1
IS_THAT : 6
OR_MILK : 1
WITH_STAFF : 1
COMPLAINTS_THE : 1
INFLUENZA_GIVEN : 1
AT_SVI : 1
ILLNESS_MR : 1
HE_WM : 1
LOWER_VETERAN : 1
RECOVERY_ISSUES : 1
OF_SUPERVISION : 1
HAS_REPORTS : 1
TASK_READER : 1
STATES_INFORMATION : 1
NOTE_NURSING : 1
CARDIAC_CATHETERIZATION : 2
TO_OSAC : 1
BOWEL_MEAL : 1
TO_FOLLOWUP : 1
ETOH_WITHDRAWAL : 1
FLOTATION_WHILE : 1
CONSULT_PLACED : 1
NEEDLE_THE : 1
NO_CREPTS : 1
GRADE_AT : 1
SOMATIZATION_DATE : 1
NEEDED_TO : 2
WILLING_GET : 1
PATIENT_PAST : 1
VIETNAM_AND : 1
COULD_DO : 1
TETANUSDIPTHERIA_TAKES : 1
MANY_WERE : 1
PAIN_WRITER : 1
UP_DEODORANT : 1
SALMERON_FILL : 1
PATIENT_THIS : 1
INDEPENDENT_ACTIVITIES : 1
MINUTES_DIAGNOSIS : 1
SPREADING_TOXICOLOGY : 1
IF_NECESSARY : 1
DETOX_HAS : 1
OF_AN : 1
MH_INTEGRATED : 1
EXHIBITING_SAFE : 1
DALE_INTO : 1
IMAGING_AUTHOR : 1
LOCALIZED_ABOVE : 1
CBOC_FRED : 1
GOALS_SELF : 1
THE_ASSESSMENT : 1
THAT_AREA : 1
ICDCM_VISIT : 1
THIS_FEAR : 1
PO_MEDICATION : 1
TYPE_PAIN : 1
APPROACHES_NEW : 1
ABUSE_COCAINE : 1
GROIN_RECENTLY : 1
PT_REPORTED : 2
IN_AREA : 1
INFORMATION_AND : 1
WAS_CALM : 1
DIFFERENT_IN : 1
WELL_ACTING : 1
ANOTHER_PATIENT : 1
POX_ARM : 1
CARE_DIABETES : 1
ALLERGY_TO : 1
PSYCHOTHERAPY_WITH : 1
QUESTIONS_DO : 2
PSYCH_RN : 2
INTENDING_TO : 1
AMOUNT_OF : 1
LAST_AND : 3
AND_DEC : 1
AUTHOR_PRESCRIPTION : 1
PRIVILEGES_CONSULT : 1
TRANSFERRED_BASCOM : 1
MR_PSYCHOSIS : 1
WITH_RED : 1
MULTIPLE_EPIS : 1
COME_OR : 1
BETTER_HE : 1
THIS_SPECIMEN : 1
NONVA_ACID : 1
LAB_REHABPHYSICAL : 1
INTERVENTION_OF : 1
HE_NO : 2
BEEN_SAFE : 1
AS_DISCUSS : 1
TIME_SKIN : 1
IN_COMING : 1
PATIENTS_STRENGTHS : 1
FOLLOWING_DIAGNOSIS : 1
HIMSELF_TO : 1
OF_CARE : 5
ADDENDUM_HE : 2
SERVICE_POSTVIETNAM : 1
CHANGES_AND : 1
ABNORMALITY_INCLUDING : 1
THERE_INJURIES : 1
LOUDLY_THAT : 1
NAME_BUT : 1
JOINT_DISEASE : 1
CP_CAPRI : 1
ACTIVE_OR : 1
CHANGES_MEDICATIONS : 1
AND_PAIN : 1
HIS_SECONDARY : 1
YES_MODERATE : 1
SUBSPECIALTY_INFORMATIONAL : 1
SESSION_THE : 1
CONSUMED_ASSISTANCE : 1
PARTICIPATE_TO : 1
VACCINE_AA : 1
CORRECTLY_CONTACT : 1
TABLET_ACTIVE : 4
BURSTS_SHOULD : 1
TO_BRIEFLY : 1
STOMACH_HAVE : 1
SUPPORT_NEEDED : 1
CHAPLAIN_DIDACTIC : 1
AREAS_HEMATOLOGY : 1
NOTES_REVIEWED : 1
REQUESTING_WITH : 1
COMING_THE : 2
PHONE_SHE : 1
MH_MSE : 1
OBSOLETE_PRE : 1
MOOD_KERATOACANTHOMA : 1
HAD_AREA : 1
HIV_NEGATIVE : 1
BUTTONS_START : 2
WAS_THE : 2
OXIMETRY_SIGNS : 1
MG_BY : 2
RECENT_ABUSE : 1
SMOKING_REFERRAL : 1
SEVERE_OR : 1
RATIVE_JOINT : 1
CALLER_HUNTSVILLE : 1
ADMISSION_DX : 1
KEY_FINDINGS : 1
THAT_WANTED : 1
TWO_BY : 2
AT_LITERS : 1
PRESSURE_INFLUENZA : 1
WOUND_NO : 1
DID_COMPLETE : 1
BECOME_INDEPENDENT : 1
NO_COCAINE : 1
ARE_IN : 2
NO_HEROIN : 1
ARMBAND_ENTERED : 1
SHORT_COMMON : 1
ATTENDED_MINUTES : 1
AND_LEFT : 1
SHOT_REACTIONS : 1
CURRENT_CM : 1
ABLE_PT : 1
HIM_OF : 1
DRAMA_AND : 1
AT_CLC : 1
OCTOBER_WHEN : 1
FOR_STOMACH : 1
ALSO_THINKS : 1
FROM_HIS : 1
LEVELS_ICDCM : 1
TO_CALLER : 1
NOT_SCHEDULED : 1
BE_WITH : 1
HAVING_THOUGHTS : 1
WITH_INHALATION : 1
IF_HELPS : 1
NEEDLE_SKIN : 1
HEARING_VOICE : 1
LOCATE_MODE : 2
MOOD_GOOD : 1
ROUTE_PL : 1
IOP_CHECK : 1
RESIDENTIAL_INTEREST : 1
THEY_BE : 1
SUBSTANCE_MENTAL : 1
AT_SATTHURS : 1
YES_REASSESSMENT : 1
TIME_DOES : 1
RED_RASH : 1
CARDIAC_FR : 1
PAIN_HIP : 1
VET_HIS : 1
HAS_TROUBLE : 1
INR_NOTE : 1
LEFT_PAIN : 1
ALCOHOL_COCAINE : 1
CHRONIC_DERMATITIS : 1
RESIDENTS_NEW : 1
SITUATIONAL_DEPRESSION : 1
JENKINS_COST : 1
IN_QUIET : 1
HOSPITALIZATION_BRIMONIDINE : 1
DO_FOLLOWING : 1
CLINIC_FOLLOW : 1
INITIAL_NO : 1
LS_SESSIONS : 1
PINES_COME : 1
OR_CURRENT : 1
CAN_NOT : 1
ACTIVE_INPATIENT : 2
COMFORT_GIVEN : 1
PT_ASSIST : 1
LOCATION_ROOM : 1
SCAN_PAUSE : 2
TO_PCP : 1
THEM_DUE : 1
GLUCOSE_IS : 1
APPROACHED_BLADDER : 1
FRANTZ_AND : 1
CENTER_MEDICATION : 1
VISIT_PAIN : 1
WAS_JUST : 1
NO_PAIN : 1
OR_HAS : 1
OF_BITE : 1
AS_ABOVE : 1
ASSESSMENT_OF : 1
COMP_EXAM : 1
COUNSELING_USED : 1
OR_FILED : 1
PAIN_UNCHANGED : 1
MDI_BEHAVIORS : 1
HER_IDENTIFIED : 1
MEDICATION_PATIENT : 1
TREATMENTS_HE : 1
REFERRAL_FROM : 1
FOR_CHECK : 1
FLUOXETI_IMMUNIZATION : 1
NO_CM : 1
NO_NEEDED : 1
SIXTY_GROUP : 1
HELP_TO : 1
PATIENT_ED : 1
SEGMENTAL_ANALYSIS : 1
OVER_AND : 1
PER_USES : 1
TAB_REASON : 1
OR_CONCERNS : 1
SSN_AND : 1
CURRENT_RATING : 1
WEEK_RESOLVED : 1
DORSAL_ALBUTEROL : 1
COMPLETE_THERAPY : 1
REASONS_HE : 1
MINUTES_SESSION : 1
WORKING_NEWTON : 1
SOME_POINT : 1
FITTED_WITH : 1
PER_BLADDER : 1
HIS_APPOINTMENT : 1
MEDICATION_AND : 1
GLASGOW_SCORE : 1
FOOD_THE : 1
FEAR_TIMES : 1
NAUSEA_AND : 2
IT_AGE : 1
PROMOTE_REST : 1
SUPPORT_THAT : 1
TIME_WILL : 1
DEPRESSED_JOKES : 1
REFLUX_YOU : 1
REQUESTED_DIABETIC : 1
SITE_IF : 1
AND_PT : 2
COMPLAINT_EXAM : 1
TABLET_MOUTH : 5
MAINTAINING_COPING : 1
SHOE_TOO : 1
CURRENT_MEMBER : 1
MED_POSSIBLE : 1
FOR_HCL : 1
BOWEL_PHYSICIAN : 1
HOURS_DURING : 1
HE_HAS : 13
OR_NO : 1
MG_MOUTH : 3
CIGARS_SMOKELESS : 1
BE_POSITIVE : 1
VA_SITUATION : 1
HAS_APPROXIMATELY : 1
MORNING_AND : 1
PROGRAM_CM : 1
DID_HE : 1
ADMIT_HEARING : 1
DEAR_DATES : 1
FMLA_BE : 1
IN_AT : 1
FOR_NURSING : 1
THE_ASKING : 1
THOUGHT_DISORDERMET : 1
PAIN_AT : 1
SAFE_AND : 1
RISK_URINE : 1
ADVOCATE_CLIENT : 1
OF_SPLINT : 1
AND_WANTS : 1
THAT_PLAN : 1
DOES_ACID : 1
SOURCE_REFERRAL : 1
FACE_LOSS : 1
WITHDRAWAL_BIPOLAR : 1
OF_DEC : 1
COMMANDS_ALSO : 1
AT_OUTSIDE : 1
NO_PAT : 1
CALL_PATIENT : 1
EDUCATION_INTERDISCIPLINARY : 1
THE_STRESS : 1
DETAILS_ARE : 1
PT_DENIES : 1
CGY_CURRENT : 1
AND_SITUATION : 1
DD_CORRECTLY : 1
CLINIC_THOUGHT : 1
WITH_MODERATE : 2
TAKING_THIS : 1
LIKE_HAVE : 1
PROVIDED_FOR : 3
TO_CLC : 1
THE_CENTER : 2
AS_ACTING : 1
HAS_OBSERVED : 5
VETERAN_RETURNED : 1
BROTHER_PASTORAL : 1
COUGHING_TO : 1
II_DIAGNOSIS : 1
INFECTIONS_WAS : 1
SESSION_OF : 1
DRUGS_ALCOHOL : 1
GAVE_PT : 1
PPV_LENSECTOMY : 2
COMMENTS_DELUSIONAL : 1
WEATHER_MHICMINTENSIVE : 1
OR_WITH : 2
SOB_ORTHOPNEA : 1
OF_OCR : 1
INSTITUTE_SURGICAL : 1
NOTE_NOTED : 1
OL_WHAT : 1
OVERSIGHT_OR : 1
IMAGING_THE : 1
LOCALIZED_THE : 1
DOCUMENTS_DISCHARGE : 1
PREOP_NOTE : 1
CLOSE_THE : 1
DIAGNOSIS_DIAGNOSES : 1
TO_PERSON : 3
WHEN_YOU : 1
RISK_FALL : 1
RESTORATIVE_PROGRAM : 1
ON_AXIS : 1
PROBLEM_PAIN : 1
INSOLE_LEFT : 1
DOCUMENTATION_EMOTIONAL : 1
CASUAL_FOR : 1
STILL_HAS : 1
PAUSE_IN : 1
PTSD_REG : 1
PATIENTS_PRIMARY : 1
CANCELLATION_CAME : 1
LESIONS_SEBACEOUS : 1
MOST_THIS : 1
PRACTICED_CHANGING : 1
WILLING_SPEAK : 1
OF_EMESIS : 1
HOUSE_ON : 1
THROBBING_HPI : 1
BACK_PAIN : 1
PROCEDURE_ON : 1
NAME_IN : 1
HOLD_THIS : 1
PHYSICIAN_BREAKFAST : 1
SECONDARY_TO : 1
PLAN_ORTHOTIC : 1
FACILITY_PCP : 1
MOOD_PER : 1
IN_ATLAS : 1
MEDICATIONS_THIS : 1
TREATMENTS_DISCUSSED : 1
CAUCASIAN_MALE : 1
VOICED_HE : 1
NEVER_WHEN : 1
AND_EXT : 1
REMAINING_PROGRESS : 1
RELIGIOUS_FACTORS : 1
BPD_AND : 1
BEEN_HE : 1
CONTACT_CURRENT : 1
AND_EXPERTISE : 1
VAPOR_VS : 1
SUPERVISION_AUTHOR : 1
SKILLS_OR : 1
SUPPLY_OF : 1
EAGER_VARIABLE : 1
BE_DIVALPROEX : 1
DECLINED_NO : 1
THROUGHOUT_QUANTITY : 1
CONCENTRATION_UNDERSIGNED : 1
HAS_REPORTED : 3
SESSIONS_TO : 1
TEAM_ON : 1
PVD_USE : 1
BILATERALLY_THEN : 1
BED_AND : 1
COMPLAINING_OF : 2
BLADDER_NUMBER : 1
SUFFERED_AMNESIA : 1
SEX_MALE : 1
DOCUMENTATION_NOT : 1
COUNTY_ROOM : 1
OLD_WITH : 1
BEACH_AND : 1
VETERAN_IN : 1
IMAGING_SYSTEM : 1
DIETARY_OPTIONS : 1
RESCUE_BECAUSE : 1
PRIMARY_CBOC : 1
APPEAR_PROVIDER : 1
AT_HISTORY : 1
TREATMENT_ACTIVE : 1
BATHROOM_HIS : 1
NOTES_HAD : 1
CHANGING_CENTER : 1
NOTE_PPT : 1
EXPRESSED_BY : 2
HE_PHOTOTHERAPY : 1
TELERETINAL_CONSULT : 1
DISCOMFORT_EVERY : 1
OTHERS_PHYSICIAN : 1
RESIDENTS_REPORT : 1
PRESENTS_ROUTINE : 1
STILL_NEGATIVE : 1
REASON_ASSESSMENT : 1
FILLED_PC : 1
CONSENT_TESTED : 1
ADDENDUM_ALSO : 1
CULTURE_NO : 1
BLOOD_INFLUENZA : 1
IS_YEAR : 2
PARTICIPATE_PATIENT : 1
IMAGING_FOR : 1
FOLLOWING_GPD : 1
PACEMAKER_KERATITIS : 1
UNPROTECTED_IER : 1
ALLERGIES_HAS : 1
VISTA_SC : 1
VS_LOC : 1
EYE_OPTOMETRY : 1
UNSP_DISORDER : 1
AND_TO : 10
HISTORY_IS : 1
THE_PRINTED : 1
VACCINE_PAIN : 1
SAFETY_MAINTAINED : 1
OR_AM : 1
PAIN_MEDICATION : 1
TAKE_DOSE : 1
CURRENT_IS : 1
CLEAR_BASISPHYSICAL : 1
USE_THEIR : 1
DUE_WORK : 1
AND_AVAILABLE : 1
IT_IS : 2
BATHROOM_BASIC : 1
BLADDER_LOCATION : 1
TH_SSOME : 1
DECLINED_LESSSON : 1
OFFICE_AFTER : 1
PAST_NOW : 1
DOCUMENT_CAN : 3
THEY_HE : 1
PAIN_PAIN : 1
ABDOMEN_OF : 1
DEC_EDUCATE : 1
SKIN_INTO : 1
PARTICIPATE_EDUCATED : 1
MEETING_LEG : 1
OR_INFORMATION : 1
UNABLE_TO : 1
KINDLY_ABOVE : 1
TOBACCO_HISTORY : 1
PAIN_WEAKNESS : 1
THIS_FOR : 1
SUPPLIES_TOILETING : 1
ENDOSCOPY_HAS : 1
TO_USE : 1
NEAR_GLARE : 1
NOTES_THE : 1
COORDINATOR_DOCUMENTED : 1
AT_OTHER : 1
LEISURE_INTERESTS : 1
ON_WITH : 1
FOLLOWING_EPIS : 1
PAIN_DURING : 1
OF_TIME : 1
CONTROL_HIS : 1
MEDICATIONS_INCLUDING : 3
PLAN_ON : 1
SIT_ALL : 1
ADDENDUM_EXTREME : 1
AFTER_HIS : 1
TIME_OF : 2
IN_TASK : 1
NOS_MEDICATION : 1
BED_DURING : 1
PPC_PHARMACY : 1
HUDVASH_PROGRAM : 1
BREATH_SOUNDS : 1
OF_BMI : 1
CLINIC_UP : 1
NOT_ONSET : 1
LEFT_SPLIT : 1
WANTED_TO : 1
RISK_MG : 1
TO_PHYSICIAN : 1
WISHES_GO : 1
REQUIRED_AND : 1
NOTE_WAS : 1
ABSENCE_THERAPY : 1
WITH_PAST : 1
NOTE_FRI : 1
QUALITY_ADEQUATE : 1
WERE_HAVING : 1
THAT_REMOVED : 1
IS_ENGLISH : 1
CULTURAL_PREFERENCES : 1
SUPPLEMENT_SENSORY : 1
THE_MAX : 1
NOT_WITH : 1
SURGERY_UNTL : 1
QMORNING_MG : 1
NO_MEDICATIONS : 1
HIS_FEELINGS : 1
MALE_HERE : 1
CHECK_WANTS : 1
AND_RESPIRATION : 1
THREE_OD : 1
MEDICAL_ROUTINE : 1
VISION_TO : 1
FOR_FROM : 1
RUE_DUE : 1
OR_ACTIVE : 1
WITH_AT : 4
BY_ACTIVE : 4
SPOKEN_MANAGER : 1
CAUSING_STRIAE : 1
NOTE_MG : 1
LYWANDA_BRIGHT : 1
UP_MEDICATIONS : 1
MONTHS_IN : 1
MH_MHICMINTENSIVE : 2
XX_HISTORY : 1
TRANSFERRED_CLC : 1
IT_RECOMMENDED : 1
MYSELF_TO : 1
PROVIDER_RESULTS : 1
DRAINAGE_PC : 1
PAIN_FH : 1
OF_BLOOD : 1
THROUGHOUT_REFILLS : 1
WILL_PRIOR : 1
TITLE_VIEW : 1
BAY_WILL : 1
DEPENDENCE_HAS : 1
OF_DEGREES : 1
BUTTONS_SCAN : 2
PHE_NKA : 1
CONTACT_IS : 1
THIMEROSAL_PAIN : 1
CONSISTANT_THEY : 1
APPOINTED_PCP : 1
HYPERPLASIA_JUST : 1
FOR_BACK : 1
FOOD_MOBILITY : 1
APPT_REPORTS : 1
PC_INTEGRATED : 1
UPDATED_PROVIDER : 1
OF_INFORMATION : 1
WAS_EXTENDED : 1
PROVIDED_MEDICAL : 1
CM_IRREGULARLY : 1
VISION_AND : 1
SEE_HE : 1
PAT_RE : 1
PHONE_NUMBER : 4
IS_FOLLOWED : 1
PREFERENCES_UNITS : 1
PROGRAMS_IN : 1
WITH_FAVORITE : 1
CLINICAL_REMINDER : 3
PAIN_STATUS : 1
SPEAK_TO : 1
CYST_QUACKENBUSH : 1
CONTACT_VITALS : 1
IDENTIFIED_SEX : 1
EATING_NARCOTIC : 1
MORE_AN : 1
SPUTUM_PLEASE : 1
OF_HOURS : 4
FITTING_BILATERAL : 1
CLEAR_AMBER : 1
CAPLET_TAKE : 1
MY_TO : 1
HIS_LEGS : 2
UNSPECIFIED_UA : 1
DECEMBER_THE : 1
BACHELORS_NEARING : 1
OF_HISPANIC : 2
THAT_ARE : 2
RATED_DISABILITIES : 2
TABLETS_BY : 2
JOINT_IS : 1
BY_NASAL : 1
IF_WALKS : 1
DENTAL_ORAL : 1
SERVICE_POSTKOREAN : 1
REFILL_THIS : 1
FOR_HISTORY : 1
TREATMENT_GOAL : 1
LATER_TO : 1
PRESSURE_TAC : 1
NECESSARY_TO : 1
CONTINUE_PRIMARY : 1
CENTER_PRINTED : 1
ILLNESS_NEEDS : 1
BOWEL_ELIMINATION : 8
SEVERAL_STATED : 1
INJURY_RESULTED : 1
SURGICAL_INTERVENTION : 1
LEVELS_GOAL : 1
GOALS_APPROACHES : 1
ER_ASSIGNED : 1
TAKE_CAPSULE : 1
AT_INDEPENDENT : 1
FLOW_SHEET : 1
HEALTH_DECIDED : 1
ANDERSON_CHAPLAIN : 1
VIA_DATE : 1
REQUESTED_BECOME : 1
RESIDENT_ASKED : 1
NURSINGACTIVITIES_OF : 1
MACKIE_RYAN : 1
POSITIVE_DIAGNOSIS : 1
CHEMICAL_OF : 1
THINPREP_SYSTEM : 1
USUAL_PATTERN : 1
AND_SUE : 1
WITH_LOSS : 1
PM_DOCUMENT : 2
FR_ASPIRATED : 1
MEDIAN_STUDIES : 1
PERCEPTION_IMPAIRMENT : 1
BY_JR : 1
GIVES_ALL : 1
NOT_IDENTIFIED : 1
INSTRUCTIONS_PROVIDED : 1
WAS_IN : 3
FRED_LAB : 1
NOTED_TO : 1
CARE_ATTENDING : 1
LISTED_THE : 1
AND_PHYSICAL : 1
REHAB_WHICH : 1
SCLERA_AGE : 1
ASK_DO : 1
PATIENT_TAMINE : 1
BEING_ABLE : 1
AT_START : 1
OD_OUTPATIENT : 2
OF_VIETNAM : 1
DIRECTLY_STATE : 1
POSTVIETNAM_NEUROSURGERY : 1
AREA_OF : 2
FOR_WAL : 1
ITS_PURPOSE : 1
PROBLEMS_DEPRESSION : 1
ESSENTIAL_AND : 1
NUMBER_HOURS : 4
SIGNING_OF : 1
DEMOGRAPHIC_RISK : 1
GET_FACILITY : 1
ARO_KEOMUAN : 1
MEDICAL_ALLERGIES : 1
PCP_CALL : 1
SUN_SMOKING : 1
VISIT_INPATIENT : 1
THIS_VETERAN : 1
LESS_OR : 1
GROUP_NOTE : 1
NO_HAS : 1
SUGGESTED_SSN : 1
ON_DENIES : 1
PT_LIDOCAINE : 1
CONDUCIVE_RECOVERY : 1
DESPITE_USING : 1
RESPIRATION_ADL : 1
SAMMIE_PRESCRIPTION : 1
OCCURRED_CONFERRED : 1
IN_MILIEU : 1
ORDERED_VETERAN : 1
AND_AFFECT : 1
GROUP_LENGTH : 1
JUNE_DATE : 1
TRAINING_SHE : 1
CURRENT_PLAN : 1
THE_HAVE : 1
RESIN_ONE : 1
AT_HAS : 1
EVALUATION_MANAGEMENT : 1
TREATMENT_AT : 1
THIS_FAMILIAR : 1
REHAB_DID : 1
HELP_FOR : 1
RECONCILED_ORTHOPEDIC : 1
CAPSULE_BY : 1
HRS_MINS : 1
ROOM_OF : 1
PAIN_CM : 1
NOT_BE : 2
PROPER_USE : 1
CONDITION_DIAGNOSIS : 1
DO_HAVE : 2
ANKLE_CYMBALTA : 1
COMMENTS_INFORMATION : 1
ATTENDANCE_OFFERED : 1
APPLIED_MOUTH : 1
APPOINTMENTS_ANXIETY : 1
NURSING_NOTE : 7
SUPPLIES_CURRENT : 1
THIS_DATE : 1
DENIED_CURRENT : 1
WAS_SESSIONS : 1
REFILL_MR : 1
AND_PATIENT : 4
THYROID_MULTINODULAR : 1
BITE_SPLINT : 1
BEEN_FALL : 1
TO_LESIONS : 1
ORIGIN_SECURITY : 1
THE_ACTION : 1
TWICEWEEKLY_DROPIN : 1
ACTIVITY_AT : 1
NURSING_HE : 1
HOURS_WITH : 1
TABLETS_ACTIVE : 1
WITH_PSYCH : 1
OR_AFTER : 1
GROUPS_DESIGNED : 2
THE_DOES : 1
WOUNDS_TO : 1
PATIENTS_LANGUAGE : 1
IRAQ_THOUGH : 1
CM_WITH : 1
HISTORY_SHE : 1
MENTAL_THEY : 1
ABUSE_NOTE : 1
INPATIENT_RN : 1
ULCER_PRESENTLY : 1
FOR_FITTING : 1
CALCIUM_DEPOSITS : 1
BEHAVIORS_AND : 2
NOTE_CUEING : 1
GIVEN_HANDOUTS : 1
VISIT_MED : 1
YO_DEPENDENCE : 1
MEDICATION_SEVERAL : 1
ON_ASKING : 1
REPORT_ENTERED : 2
PATIENT_LEISURE : 1
OUTPT_SOCIAL : 1
HR_ER : 1
ON_THESE : 1
LEFT_WITH : 1
PATIENTS_RESIDENTS : 1
WAS_CALCIUM : 1
DENIES_CURRENT : 1
VERBAL_CUING : 1
HAS_USED : 1
ACTIVE_WITH : 1
CARPULE_LIDOCAINE : 1
ERECTION_ALCOHOL : 1
FOR_LAST : 2
OFFERED_GROUP : 1
IMPROVE_MOOD : 1
APPLICABLE_VET : 1
PATIENT_THERE : 1
LAST_HERE : 1
LOOSEN_ROSACEA : 1
MANAGEMENT_VITAL : 1
PARTICIPATION_QUALITY : 1
BOWEL_THE : 1
FINDINGS_IDENTIFIED : 1
LOSING_HIS : 1
ORTHOPEDIC_NOTE : 1
IRREGULARLY_PURPLE : 1
RESTRAINTS_USE : 1
YES_THE : 1
HYPERLIPIDEMIA_LEVELS : 1
HIS_WHICH : 1
AREA_VETERAN : 1
SCAN_AND : 2
DUE_TO : 6
FULLY_ALERT : 1
DO_SOME : 1
EXP_CAN : 2
PICK_TUES : 1
GET_BACHELORS : 1
OF_YOUR : 1
OF_SHORT : 1
EXPERIENCE_AS : 1
BUT_THINKS : 1
OR_MEDICATION : 1
OF_FULLY : 1
NEVER_THE : 1
ABLE_LOCATE : 2
RHONCHI_NEEDED : 1
OMEPRAZOLE_PLEASE : 1
INITIATING_DIAGNOSES : 1
HIM_UP : 1
ORIGIN_SOCIAL : 1
TO_UP : 1
TO_COLLABORATE : 1
AND_FURTHER : 1
HIS_TOOK : 1
OPTH_PHONE : 1
PLACE_TIME : 3
II_QH : 1
CLINICAL_THE : 1
PHYSICIAN_NURSE : 1
FEELING_TO : 3
BY_FRANTZ : 1
SC_ASTHMA : 1
APPLY_UP : 1
UNK_INPATIENT : 1
TRP_NOTE : 1
CORONARY_EDUCATION : 1
REPORT_FOLLOWING : 1
TEAMS_PLAN : 1
TO_LOCATE : 2
REPAIRED_RUPTURED : 2
VET_REPORTS : 2
AND_SHOULD : 1
REGULAR_SESSION : 1
JUST_TO : 1
II_UNSPECIFIEDGERD : 1
BUILDING_STAFF : 1
THE_IN : 3
WEAKNESS_THE : 1
PT_GO : 2
PRACTITIONER_OBTAINING : 1
BCP_DAILY : 1
TONGUE_OF : 1
DINNER_DRINKS : 2
SPLINT_NOTE : 1
THROUGH_IMAGING : 3
THE_IS : 4
ORDERED_PROVIDED : 1
HAD_ORDERED : 1
LEFT_AGAINST : 1
REQUEST_TO : 1
SMOKING_AGAIN : 1
THE_TIME : 1
TO_REINFORCE : 1
SCORE_PAIN : 2
AND_BECOMES : 1
INCIDENT_OTOSCOPY : 1
STAND_NEEDED : 1
HER_HOME : 1
EXAM_ASSESSMENT : 1
TO_THAT : 2
PATIENT_RECORDED : 1
DATE_DISCHARGE : 1
OVER_THE : 1
OF_FEVER : 1
MODALITIES_SSN : 1
VISION_THINKS : 1
HOURS_TO : 1
IS_FAMILIAR : 1
NO_INITIATING : 1
EDUCATE_ON : 1
CYTOPATHOLOGY_SPECIMEN : 1
MH_NOTE : 1
PT_AND : 1
NOTE_PAIN : 3
HISTORY_FLU : 1
DOSE_QMORNING : 1
PATIENT_SUPPLEMENT : 1
PT_SEEMED : 1
APPROX_WKS : 1
PND_NOCTURIA : 1
PRACTITIONER_CONSENT : 1
AND_PLACED : 1
RIGHT_RX : 1
RESP_TEAM : 1
HE_COULD : 2
TO_STAND : 1
CONFIRM_AND : 1
RIGHT_SHOULDER : 1
TRIAL_VIAGRA : 1
ROUTINE_AFTER : 1
HELPED_STAFF : 1
GIVEN_EDUCATIONAL : 1
OF_GETTING : 1
HIS_DIABETES : 1
RISK_MEMBER : 1
ALVAREZ_EXT : 1
BREATHING_MOTIVATION : 1
TEAM_SESSIONS : 1
SPOKE_WITH : 1
OF_DUE : 1
CARE_ADL : 2
VANOD_PAJAMAS : 1
THAT_SALMERON : 1
TABLETS_IN : 1
HAS_STATED : 1
TO_STOMACH : 1
PREDNISONE_PROVIDED : 1
PLAN_CARE : 4
SHE_COUD : 1
INSTRUCTED_LYMPHS : 1
WAS_TIMES : 1
SKIN_TEMPERATURE : 2
HIS_MEDICAL : 1
BILATERALLY_OTOSCOPY : 1
UP_WEEKLY : 1
ON_ALL : 1
REG_ACTIVE : 1
ADR_HAS : 1
INTERVENTION_FOR : 1
PRE_SURGERY : 1
TIRED_OR : 1
BARKER_MARCH : 1
AND_SYMPTOMS : 1
PHONE_DIALYSIS : 1
OF_DISCOMFORT : 1
AN_ON : 1
MG_NOT : 1
TO_ISSUES : 1
WANT_TO : 2
HISTORY_OF : 10
TESTING_THE : 1
BY_TH : 1
MEDICATION_SECONDARY : 1
ISSUES_STILL : 1
REQUEST_PCP : 1
ACID_REFLUX : 1
IN_VETERANS : 2
IF_TO : 1
SHAPED_TO : 1
ISOLATION_PTSD : 1
ACETAMINOPHEN_TAB : 1
IN_ATTENDANCE : 1
DISCHARGE_GRADUATION : 1
INTEGRATED_TEAM : 1
REQUESTED_OXYCODONE : 1
THAT_HAD : 1
THEM_DO : 1
XACTIVE_VARIABLE : 1
IMPROVEMENT_CONSENT : 1
ALL_STAFF : 1
EGD_CLARITHROMYCIN : 1
MET_VETERAN : 2
CENTER_AS : 1
EDUCATIONAL_TO : 1
THE_GET : 1
PLACE_NO : 1
PMH_AT : 1
AND_ABOUT : 1
FALL_PRECAUTIONS : 1
NOT_ENOUGH : 1
PRINTED_ON : 1
SUE_CARMODY : 1
FACTORS_PROMOTE : 1
PCP_CLIENT : 1
DEPRESSION_IS : 1
CLINIC_OR : 1
AND_GRION : 1
HIS_COMPLETION : 1
THAT_HOUR : 1
CALL_FOR : 1
THE_WHO : 1
FRI_JUST : 1
SHOOTING_DD : 1
EXP_PATIENT : 1
NO_FURTHER : 2
PRESSURE_RISK : 1
REPORTS_IS : 2
RISK_ASSESSMENT : 2
ADEQUATE_REMINDER : 1
AMOUNT_CONSUMED : 5
ANALYZED_THE : 1
SEX_SSN : 1
LANGUAGE_UNDERSTOOD : 1
ALWAYS_BLOATING : 1
DIAGNOSIS_SITUATIONAL : 1
MR_CAME : 1
PROBLEMS_AND : 1
YOUR_PROCEDURE : 1
FOR_DALE : 1
TURNS_RIGHT : 1
EDUCATION_AMOUNT : 1
ALERT_ORIENTED : 3
AS_ON : 1
TUMOR_AREA : 1
MECHANISM_FOR : 1
NOT_CONSIDERED : 1
PRESENT_CHIEF : 1
COURSE_BURSTS : 1
INDEX_NOTE : 1
WEIGHT_DEPENDENCE : 1
TO_TRANSFERRED : 1
INDEX_NURSES : 1
THROUGH_WHICH : 1
HEART_CARDIAC : 1
COMMENT_HEMATOLOGY : 1
DATE_COMMENT : 1
FACTORS_DENIES : 1
SYMPTOMS_NOTES : 1
PRESSURE_ULCER : 1
FOR_FALLS : 1
VERBAL_AND : 2
OF_REMINDED : 1
ADDRESS_GRANDESOME : 1
STATE_PROVIDED : 1
ON_ADVISED : 1
ANSWERED_NKA : 2
TO_STATING : 1
IN_USE : 1
SUPPORT_AS : 1
AS_SOME : 1
ENCOURAGEMENT_OFFERED : 1
XYZZY_ACTIVE : 2
EDUCATION_TO : 2
LUNGS_NO : 1
COLOR_PLEASE : 1
NEW_WAS : 1
SURGEON_CONDITION : 1
DECEMBER_PRACTITIONER : 1
ASKED_ANGRY : 1
TO_INCREASING : 1
NECESSARY_BASED : 1
SKIN_STATUS : 1
IMPORTANC_THE : 1
PATIENT_ILLNESS : 1
CONTINENT_PERSONAL : 1
ELIMINATION_INPATIENT : 1
REFUSED_TAKE : 1
COMMENTS_PLEASE : 1
AXIS_IV : 1
NO_TROUBLE : 1
TRY_TO : 1
NOT_NEUROSURGERY : 1
STATE_YOUR : 1
ADDENDUM_CUMULATIVE : 1
NOTE_NO : 2
TO_AFTER : 1
PATTERN_DIRECTLY : 1
AGO_PSYCH : 1
SELF_FEEDING : 1
IS_URINE : 1
GOALS_OF : 2
RISK_HEAD : 1
HX_PRESENTS : 1
PC_PRESSURE : 1
RAL_TREATMENT : 1
MEDICATION_COMPLIANCE : 1
THE_ZZPATIENT : 1
INCREASE_MG : 1
SELF_CONTROL : 1
PROVIDED_MINUTE : 1
TAB_THREE : 1
REQUESTING_MET : 1
PROSTATIC_ADENOCARCINOMA : 1
NO_CONSISTENCY : 1
ATTENTIVE_TRANSPARENCIES : 1
RT_CONTINUE : 1
OUTPATIENT_ARE : 1
AND_INSTRUCT : 2
ARO_DIVERTICULOSIS : 1
OR_SURGERY : 1
RE_HAS : 1
DRESSING_GROOMING : 1
BY_AM : 1
AT_OF : 2
CONSCIOUSNESS_FULLY : 1
OF_OSAC : 1
IS_NOTE : 1
PACK_CIG : 1
BASIS_OPEN : 1
TYPE_II : 1
COMMENTS_GAF : 1
PATIENT_NAME : 2
RECENTLY_DX : 1
FEE_BASIS : 1
NEUROLOGIC_TH : 1
IT_SOCKS : 1
SA_TAB : 1
APPOINTMENT_CLIENT : 1
HIS_PINES : 1
NOTE_PT : 1
DECLINED_STAFF : 1
COMPLAINTS_RISK : 1
PRIOR_YOUR : 1
PRESCRIBED_AID : 1
APPOINTMENT_REMINDER : 1
DID_NOT : 4
NEUT_MALE : 1
GRADUATION_JUNE : 1
DT_PT : 1
AREA_HUNTSVILLE : 1
IS_TROUBLE : 1
GOALS_IN : 1
ITS_THAT : 1
CUEING_ASSISTANCE : 2
TRANSPARENCIES_OF : 1
ACTION_ASCERTAINED : 1
OR_HAVE : 1
ON_FLOOR : 1
LIDOCAINE_WARFARIN : 1
BED_IN : 1
STOOL_NOT : 2
GOOD_TO : 1
CIGARETTES_SMOKELESS : 1
COMMENT_THIS : 1
ULCER_WOUND : 1
HAS_GOING : 1
MEASUREMENT_PAIN : 1
DISCUSS_PT : 1
OUTPATIENT_SETTING : 1
THE_ABILITY : 1
THEY_WILL : 1
IN_TRIAL : 1
OF_ELEVATED : 1
MEDICINE_CLINIC : 1
NUMBER_PATIENT : 1
MORELAND_PSYCHOSIS : 1
INFORMED_AFTER : 1
IDEATION_HAS : 1
APPLICABLE_OF : 1
PT_WHO : 1
BE_ABLE : 1
CONSENT_DENIS : 1
ON_FOR : 1
PATIENT_IDENTIFICATION : 1
AA_MALE : 1
MUSCLE_HYPERLIPIDIMIA : 1
WILL_ATTEND : 1
WITH_ACTIVITIES : 1
PATIENT_RIC : 1
NO_RISK : 1
ADMISSION_ETOH : 1
ALCOHOL_WHILE : 1
HIS_NEUROLOGIC : 1
RESURFACE_AFTER : 1
PROVIDED_NASAL : 1
ACCURATE_ARMBAND : 1
NO_HELP : 1
OU_QID : 1
MEAL_BOWEL : 1
COMPLAINT_FREQUENCY : 1
BEEN_ABUSING : 2
SCHIZOPHRENIA_OK : 1
DEODORANT_PHYSICIAN : 1
PALMER_BY : 1
IS_THAN : 1
SLIGHT_IM : 1
ABOUT_VETERANS : 1
FINDINGS_PROBLEM : 1
EXT_HYPERLIPIDEMIA : 1
HIS_EXPERIENCE : 1
PENDING_RECEIPT : 1
OF_SAID : 1
MG_THOUGHTS : 1
NOTE_OPTOMETRY : 1
NO_UNABLE : 1
DIAGNOSIS_UNSP : 1
ASSISTANCE_WAS : 2
THEN_OUT : 1
QUITE_BECAUSE : 1
HAVE_RECONCILED : 1
MOTIVATION_TO : 1
AFFECTIVE_OR : 1
OD_OD : 1
MIN_SKIN : 1
DM_DT : 1
OXYGEN_MAKING : 1
NAUSEA_VOMITING : 3
CURRENT_DIAGNOSIS : 2
IS_INTERESTED : 1
REASONS_WHY : 1
PROVIDED_CONTACT : 1
WORKING_THE : 1
HELP_OR : 1
AGREE_CHEMICAL : 1
CONSENT_MD : 1
FALL_PAIN : 1
ON_FAMILIAR : 1
PATIENT_HAS : 13
DISCUSSED_OPTIONS : 1
MEDICATIONS_ACTIVE : 1
THE_LB : 1
OMEPRAZOLE_FUTURE : 1
FOR_SPASMS : 1
PT_DUE : 1
BEHAVIORS_FOR : 1
PATIENT_BY : 2
OTHER_UNSPECIFIED : 2
SEVERE_THERE : 1
RATIVE_DISEASE : 1
PRESSURE_RECORDS : 1
INSTILL_DROPS : 1
THE_OBTAINING : 1
MEMBERS_WERE : 1
BEHAVIOR_NONACUTE : 1
AREA_IN : 1
OR_PLAN : 1
INACTIVE_OUTPATIENT : 1
OF_FOR : 1
HCL_MG : 2
DISORDER_CALCIUM : 1
CURRENT_PAIN : 2
FOR_ON : 2
THAT_BE : 1
NOW_PPV : 1
TREMOR_THERAPY : 1
METHOD_SUPINE : 1
AWAITING_RECEIPT : 1
OR_WHEN : 1
SUBMITTED_DERMATITIS : 1
UNSPECIFIEDGERD_CATEGORY : 1
HE_WALKS : 1
NEBULIZER_PAIN : 1
USING_FMLA : 1
THIMEROSAL_MED : 1
ANXIETY_OF : 1
HIS_HOUSE : 1
ACTIVE_FINDINGS : 1
HAS_NO : 3
TO_THIMEROSAL : 1
HELPED_BUT : 1
PROGRAM_NO : 2
SHORT_COURSE : 1
INTENDING_SEE : 1
AND_ADDENDUM : 2
TH_RACE : 1
DOSE_MHC : 1
WHICH_DID : 1
FOR_ULNAR : 1
CHRONIC_BIOPSIES : 1
BE_EXPIRED : 1
RIGHT_STUDENT : 1
PSYCH_REVIEW : 1
ADDENDUM_HELP : 1
THAT_CONDUCIVE : 1
APPEARS_PING : 1
OXYGEN_BY : 1
OTHERS_RIGHT : 1
HAVE_CARING : 1
SUSPICION_IN : 1
REMAINS_CUEING : 1
ORAL_SURGERY : 1
PERFORMED_OF : 2
LEGS_IF : 1
HEALTH_PLAN : 1
SAID_MEDICINE : 1
PAIN_INCREASED : 1
PRINTED_INFORMATION : 1
EOMI_AGE : 1
MR_DENTAL : 1
DRY_RESPIRATION : 1
HAVE_ANY : 2
ANCHORAGE_BLOOD : 1
THE_BUTTONS : 2
THE_VS : 1
APPLICABLE_HAS : 1
ABILITY_TO : 2
PRIMARY_PROVIDER : 1
QUACKENBUSH_EXP : 1
AND_UPSET : 1
BREAKFAST_FOOD : 1
HISTORY_AND : 2
COUNTRIES_PROVIDED : 1
NOTE_PERIO : 1
MD_PULMONARY : 1
MG_CAPLET : 1
CREATED_ON : 1
ACTIVE_MOUTH : 1
SYSTEMS_ARE : 1
OF_ANXIETY : 1
IMAGING_INFECTION : 1
LEARN_RECEPTIVE : 1
THERAPEUTIC_DESIGNED : 2
CONCENTRATION_THE : 1
KERATOACANTHOMA_PER : 1
CANCER_HIS : 1
MEASURES_GIVEN : 1
TEACHING_TOPIC : 1
FOURPLEX_ONE : 1
NOTE_DX : 1
HE_STAYS : 1
CHRONIC_ALL : 1
THAT_PROVIDER : 1
THIS_LEG : 1
USE_AND : 2
PRECAUTIONS_ON : 1
AND_SUBMITTED : 1
WE_ABOUT : 1
AND_CAP : 1
AXIS_OPIOID : 1
UNABLE_PARTICIPATE : 1
SKIN_DATE : 1
FOR_FOLLOWUP : 1
NO_FINAL : 1
PARTIAL_PACK : 1
OF_CONSCIOUSNESS : 2
FOR_AWHILE : 1
PATIENT_YEAR : 1
WHICH_VETERAN : 1
JR_PATIENT : 1
TO_FRIEND : 1
AS_ORDERED : 2
WAS_AT : 1
FINE_WAIT : 1
MMHG_AN : 1
COUNSELING_DOCUMENTATION : 1
APRIL_PAIN : 1
WITH_PRIMARY : 1
ONCOLOGY_RESULT : 1
GOAL_BS : 1
VISITS_TO : 1
FOOD_MILK : 1
HEALTH_SERVICES : 1
THREATENING_SERVICE : 1
VETERAN_INSTRUCTED : 1
REASSESSMENT_VANOD : 1
AS_GOES : 1
ALERT_RESPONSIVE : 1
TO_BEING : 1
CAREGIVER_HYDROBROMIDE : 1
HIS_NARCOTIC : 1
FEELING_HAVE : 1
DAILY_HAS : 1
TREATMENT_THROUGH : 1
NUMBNESS_THE : 1
SC_CORRECTLY : 1
EACH_TIME : 1
COMPLICATIONS_SIZE : 1
PARTICIPATION_PARTICIPATION : 1
PROVIDER_NUMBERS : 1
HIM_OCCURRED : 1
IDENTIFY_OF : 1
TO_RR : 1
WILL_UP : 1
ASSISTANCE_WELL : 1
MG_AXIS : 1
FITS_FINE : 1
TO_TRP : 1
RECORD_THIS : 1
PATIENT_HE : 3
BY_PHYSICIAN : 3
WIFE_MOVED : 1
SUPERVISION_IS : 1
ADHERING_TO : 1
ULA_VITAL : 1
DOCTOR_PASSES : 1
USED_IDENTIFIED : 1
CALLED_TO : 1
ANGER_AND : 1
FALL_THE : 1
PHYSICIAN_INFORMATIONAL : 1
AREA_ANXIOUS : 1
MODALITIES_SUGGESTED : 1
DATE_PROCEDURE : 1
WITH_SESSION : 1
INFORMATION_SEBORRHEIC : 1
ANY_INFORMED : 1
PCMEDICATION_MEDICATIONS : 1
PRIOR_TO : 3
WAS_ENTERED : 1
ASSESSMENT_PHE : 1
FURTHER_ACTION : 1
AMOUNT_ACTIVITIES : 1
DISORDER_NOS : 3
CONTRIBUTING_FACTORS : 1
OU_MOOD : 1
THE_DID : 2
INACTIVATED_INFLUENZA : 1
OR_ADVIL : 1
OBTAINING_DENIS : 1
MALE_THE : 1
FEMALE_OR : 1
OR_AFRICAN : 1
PT_IS : 4
RECOMMENDATION_HOURS : 1
PH_NEAR : 1
PMH_DMII : 1
WORK_GAVE : 1
RE_PATIENT : 1
TO_IT : 1
MR_MORELAND : 1
ADR_PATIENT : 1
BURN_HOLES : 1
VOICES_THAT : 1
THE_BASED : 1
DIAGNOSIS_OF : 2
CLIENT_BLINDNESS : 1
TO_HE : 1
FORMS_TREMOR : 1
FOR_MICROSCOPIC : 1
PATIENT_SENSORY : 1
SUP_THERAPY : 1
UPDATE_THE : 1
THERAPY_PLAN : 1
ADDENDUM_DOCUMENTED : 1
WHILE_INPATIENT : 1
STATE_ATTORNEY : 1
FROM_PT : 2
FLU_AGE : 1
BENIGN_SIDED : 1
PREVIOUSLY_FOR : 1
OBSERVED_LAUGHING : 1
THE_PHARMACIST : 1
MUST_BE : 1
SUTURES_APPLIED : 1
PROCEDURE_OCT : 1
MOUTH_AT : 2
LYING_HIS : 1
UP_CONSISTENCY : 1
NO_PHONE : 1
WHEN_HEARING : 1
IN_POSITION : 1
ACTIVE_PROBLEMS : 1
SEDATION_MOOD : 1
OU_NO : 2
ANTIBIOTIC_OR : 1
RELATIONSHIPS_DEFINE : 1
HEMATURIA_AND : 1
OF_TO : 1
OUT_AND : 1
AUTHOR_IS : 1
DOSE_SMG : 1
MR_TO : 2
OF_GRADUATION : 1
IMPORTANCE_ADHERING : 1
BIOPSIES_CAUSING : 1
EVALUATED_AFTER : 1
MINUTES_POSTOPERATIVE : 1
THAT_PATIENT : 1
ANSWERED_AND : 1
RECEIPT_OF : 1
CBOC_YES : 1
FEEL_TO : 1
WITH_VETERAN : 3
NO_RESULT : 1
VISITING_WITH : 1
AND_INFLUENZA : 1
STUDIES_NORMAL : 2
INDIVIDUAL_TO : 1
LESION_MEDICAL : 1
USUALLY_TO : 1
ONLY_NEEDS : 1
CURRENT_PATIENT : 1
SHIFT_PHYSICIAN : 1
PRESENT_RESPIRATION : 1
TH_TO : 1
MONTHS_SOONER : 1
VITAL_NIGHT : 1
LEVOTHYROXINE_TAB : 1
AND_EVERY : 1
HISTORY_ABUSE : 1
MODERATE_HAS : 1
OK_DENIED : 1
CARBAMIDE_PEROXIDE : 1
THAT_RECENTLY : 1
PNEUMOVAX_DIAGNOSES : 1
STARTING_PM : 3
OPTIONS_AND : 1
ANTERIOR_RIGHT : 1
ALVAREZ_GOOD : 1
RT_WILL : 1
DIAGNOSIS_SEVERE : 1
CHEMICAL_BURNING : 1
TO_PROSTHETICS : 1
OF_OF : 1
WERE_SUPPORTIVE : 1
VIST_AT : 1
ADMITTED_WITH : 1
SEVERE_ADMISSION : 1
BOWEL_VIST : 1
MAY_INCREASE : 1
DISPOSITION_SHOW : 1
HIS_HEARING : 2
GROUP_THAT : 1
INCREASED_PAIN : 1
CLICK_ON : 1
SURGERY_STRENGTHS : 1
VETERAN_PLANS : 1
EFFECT_OF : 1
IN_HIM : 1
DROPS_HYDROXYZINE : 1
IN_LEFT : 1
ASSESSMENT_LACK : 1
FOOD_PREFERENCES : 1
FOR_BILATERAL : 1
SESSION_WERE : 1
DX_SHOWS : 1
OR_SOONER : 1
RECHECK_SITE : 1
FRIEND_GOALS : 1
DIDACTIC_AND : 2
THE_GOALS : 1
NOW_LENSECTOMY : 1
II_DEFERRED : 1
OF_FIRM : 1
MURMURS_NO : 1
THE_YOU : 1
AND_POSSIBILITY : 1
REVIEWED_LIST : 1
ISSUES_AND : 1
FRI_RELIGIOUS : 1
STATUS_COGNITIVE : 1
PROSTHETICS_FOR : 1
STORY_IN : 1
NO_SC : 1
WHICH_JOINT : 1
CAN_BE : 4
COLLAPSED_CHIEF : 1
USES_URINAL : 1
AND_THIS : 1
PRIMARY_DIABETES : 1
THE_VACCINATION : 1
CANCER_AND : 1
PT_RATHER : 1
WERE_CONCERNS : 1
CHO_WHAT : 1
IS_UNCHANGED : 1
ASSESSMENT_DISCUSSED : 1
MOST_MEDICATIONS : 1
MOOD_AND : 1
GRADUATION_FRI : 1
INSTRUCTION_MANAGEMENT : 1
BLADDER_URINAL : 1
RECOMMENDATION_STARTING : 1
WARFARIN_NA : 1
HIS_USE : 1
RECONCILED_UPDATED : 1
CAUSING_VAPOR : 1
MAY_TO : 1
OF_FAMILY : 1
ACTIVE_THIS : 2
URINE_COLOR : 2
THE_ED : 1
TO_GIVES : 1
EXPIRED_PAMOATE : 1
INDEPENDENT_WITH : 1
UNDERSIGNED_WITH : 1
ABOVE_THE : 1
IS_HOPING : 1
MAKING_CITY : 1
EXCESSIVE_AMOUNT : 1
TO_THEN : 1
TO_BEEN : 1
IN_THAT : 1
DISORDER_PT : 2
SCHIZOPHRENIA_INSIGHT : 1
RATING_PT : 1
AXIS_PROBLEMS : 1
PROGRESS_MR : 1
BEING_TO : 2
MESSAGE_FOR : 1
RETINOPATHY_CONSULT : 1
ARE_CONDUCIVE : 1
OF_SEBACEOUS : 1
PLACE_BE : 1
IS_DENTAL : 1
DIFFERENT_PROGRAMS : 1
MDS_TIME : 1
UPON_REVIEWING : 1
VISUAL_DISTURBANCES : 1
HIS_MAJOR : 1
GROUP_IN : 1
LOCATION_RESIDENT : 1
ABUSE_YES : 1
HELP_SUPERVISION : 1
REMOVED_PRESSURE : 1
WILL_LABS : 1
MEDICATIONS_SUPPLIES : 3
FREE_OF : 1
HIS_ON : 1
SYMPTOMS_WITHDRAWAL : 1
DIRECTED_THE : 1
DL_APPOINTMENT : 1
WILL_WAIT : 1
AS_CERTIFIED : 1
BMI_MG : 1
IF_THE : 1
CURRENTLY_WORKING : 1
WITH_OPERATION : 1
CONTINUED_TO : 1
ASSISTANCE_HELPED : 1
APPOINTMENT_BECAUSE : 1
NECESSARY_UPON : 1
COMMENTS_PRN : 1
REVIEW_SIDED : 1
CARE_TO : 1
SSN_NURSES : 1
HIS_HE : 1
CARE_SHAVE : 1
NAME_ASSESSMENT : 1
HAVE_PATCHES : 1
BS_ELEVATED : 1
WORK_BRIEF : 1
HIS_SESSION : 1
CALM_WITH : 1
ORDER_ASSIST : 1
AFFECT_CALM : 1
DEPENDENCE_ETOH : 1
OR_APRIL : 1
PAST_FAMILY : 1
PT_BMI : 1
BARKER_IN : 1
PAIN_WORST : 1
VETERAN_FEELING : 1
UPSET_WITH : 1
BASIC_BATHING : 1
MORNING_HE : 1
DISEASE_FOR : 1
XANAX_DID : 1
OF_HAVING : 1
WAS_FROM : 1
MONEY_ID : 1
SEEN_PMR : 1
TO_GOD : 1
THE_CHART : 2
IF_WIFE : 1
APPLICABLE_NUMBER : 1
VIA_AND : 1
UP_AM : 1
TIME_PULSE : 1
CONTACT_VETERAN : 1
NOT_REFUSE : 2
CT_SCAN : 1
ELICITED_GOOD : 1
PATIENT_IN : 2
EVIDENCE_THAT : 1
TELERETINAL_IMAGING : 1
OUTPATIENT_VACCINE : 1
ETOH_DEPENDENCE : 2
THOUGHTS_NOT : 1
VISIT_EVAL : 1
RIGHT_AGAINST : 1
HIS_RATED : 1
HAVE_YOU : 2
AND_MINUTES : 1
FILED_ANOREXIA : 1
TELEPHONE_VET : 1
VISION_HEARING : 1
STOOL_DINNER : 1
THE_OMEPRAZOLE : 1
OS_IMAGE : 1
YOUR_REL : 1
SUPPLIES_FOR : 1
AND_SPECIFIED : 1
SUFFERED_PATIENT : 1
OF_OPERATIONAL : 1
MG_DAILY : 1
IMPORTANC_PHARMACY : 1
MALE_SSN : 1
NOT_FOR : 3
TAKE_MEDS : 1
TRANSFER_MRSA : 1
SWELLING_NOT : 1
HORROR_ASSISTANCE : 1
TREATMENT_SELF : 1
PATIENT_PLAN : 1
PULSE_OXIMETRY : 1
SARAFIAN_TRAV : 1
RESIDENT_DIDACTIC : 1
WITH_MOTHER : 1
THE_SITE : 1
THE_SC : 1
ADMISSIONS_HERE : 1
TO_YES : 1
APPT_BP : 1
CHAMBER_LEFT : 1
WITH_MANAGER : 1
CURRENT_PENICILLIN : 1
JR_AGE : 1
SWS_SESSION : 1
CAN_DT : 2
VELDE_OBJECTIVE : 1
RUMINATES_STATED : 1
OR_FOR : 1
ADENOCARCINOMA_GRADE : 1
QUACKENBUSH_COSIGNER : 1
TALK_WITH : 1
TIME_SEEN : 1
THAT_ALERT : 1
CONTINUE_CURRENT : 1
PLEASE_MR : 1
SINCE_THAT : 1
IS_IS : 1
ON_DECEMBER : 1
BECAUSE_WAS : 2
HER_SUPPLY : 1
ON_MENTAL : 1
BIRCH_IS : 1
BY_MY : 1
IS_THIS : 1
DRUG_CAUSING : 1
PAIN_WEIGHT : 1
THERAPIST_FOR : 1
SHOULDER_RIGHT : 1
OF_BROTHER : 1
ACQUIRED_ABSENCE : 1
ADDENDUM_USAGE : 1
HISTORY_HSV : 1
ACTIVE_THREE : 1
TX_FOR : 1
CONTINENT_OUTSIDE : 1
FOLLOW_WEEKLY : 1
OU_HAD : 2
TO_ELEVATED : 1
AREA_NURSING : 1
OFTEN_HAVE : 1
DIAGNOSES_PROBLEMS : 2
OR_VISIT : 2
MD_OBJECTIVE : 1
AND_SOCIAL : 2
THE_TREATMENT : 4
SEEN_HIS : 2
BACK_DIABETIC : 1
VERBALIZED_OF : 1
FLUVASTATIN_VETERAN : 1
TAKING_CARE : 1
THERE_IS : 3
TIMES_WITH : 1
MG_IS : 1
BUTTOCKS_GRION : 1
SHIFT_PATIENT : 9
LEVEL_PARTICIPATION : 1
AWAY_HIS : 1
WEEKEND_CURRENT : 1
PULSE_WT : 1
VETERAN_REVIEWED : 1
THIS_BE : 1
REPORT_BED : 1
PTSD_PATIENT : 1
MEASUREMENT_DT : 3
OUT_BED : 1
INPATIENT_STATUS : 1
DO_THE : 1
HEAD_RIGHT : 1
SCARS_SC : 1
HYPERLIPIDIMIA_CORONARY : 1
INCREASED_WALKING : 1
DX_INSOMNIA : 1
VELDE_MD : 1
SPECIFIED_FORMS : 1
SSN_IS : 1
BED_HE : 1
RELATED_HIS : 1
FOR_FOR : 2
FROM_PATIENT : 1
UP_ASSISTANCE : 1
REMOVED_APPLIED : 1
MEAL_SNACKS : 1
HEMATOLOGY_ONCOLOGY : 1
INCLUDE_VOIDED : 1
WROTE_THEM : 1
DOSE_PATIENTS : 1
WITHOUT_YES : 1
YOU_BETTER : 1
TO_HIS : 11
TREATMENT_PROVIDED : 1
UNTL_HAVE : 1
REFLUX_HOPE : 1
NEVER_OCTOBER : 1
STILL_CHOSE : 1
THE_LI : 1
HIS_SCHEDULED : 1
HIS_PRIMARY : 1
AT_THIS : 3
HIS_COPING : 1
HE_ARO : 1
FOURPLEX_STORY : 1
AREAS_SEVERAL : 1
PT_NOT : 3
PRESCRIBED_HEARING : 1
HER_SHE : 1
MILITARY_YES : 1
REFUSED_BLADDER : 1
CLINIC_IS : 1
FOR_PULSE : 1
MANAGEMENT_PROBLEM : 1
SELF_OTHERS : 1
SLEPT_WELL : 1
WITH_DIVORCE : 1
BEEN_DETOX : 2
JOINT_PAINS : 1
BE_CONSENTING : 1
PRESENTLY_MANDATED : 1
PAST_WITHOUT : 1
DUE_REFUSED : 1
DATE_GROUP : 1
TREATMENT_GOALS : 2
HE_WAS : 13
ANESTHESIOLOGY_DISCHARGE : 1
PATIENT_DENIES : 1
MANAGEMENT_FACTORS : 1
HE_LIKELY : 1
PATIENT_FALL : 1
AMOUNT_SAYS : 1
EAT_WELL : 1
POSTOPERATIVE_ES : 1
MANY_IN : 1
MISSING_IT : 1
BE_NURSING : 1
FLOOR_FOLLOWING : 1
PLAN_INTENT : 1
PROGRAM_CLINIC : 1
REPORTS_THAT : 1
PROVIDED_SUPPLEMENTAL : 1
SHOULD_MYSELF : 1
MARY_FLAMMABLE : 1
ER_SA : 1
REL_EXAMPLES : 1
PHYSICIAN_EATING : 1
HERE_NOT : 1
INJECTED_INTO : 1
OF_THAT : 1
OUTPATIENT_STATUS : 2
AND_PSYCH : 1
THE_PATIENTS : 2
TYLENOL_OR : 1
OF_ORIGIN : 2
CAN_TIMES : 1
TITLE_TO : 1
FOR_ED : 1
REVEAL_TIME : 1
MONTHS_RECHECK : 1
MG_UNT : 1
DOCUMENT_BE : 3
AWHILE_RETURNED : 1
AND_DOES : 1
WM_FOR : 1
FAIR_LEVEL : 1
HIS_TONGUE : 1
WITH_WITHOUT : 2
INFORMATION_ADDENDUM : 1
WITH_IM : 1
PROGRESS_CURRENTLY : 1
FOR_HIS : 3
VA_ED : 1
IS_ADDENDUM : 1
BED_WITH : 1
THE_ARM : 1
NOT_DUE : 1
NOT_APPLICABLE : 3
VETERAN_TO : 3
ABOUT_HEALTH : 1
REFUSED_TREATMENT : 1
ANOREXIA_OBSOLETE : 1
YESTER_CP : 1
OL_DATA : 1
IRRITATIVE_SYMPTOMS : 1
FAVORITE_MOUTH : 1
REPORT_IN : 1
CARE_OS : 1
HOMEBASED_REQUIRED : 1
MENTAL_TO : 1
WITH_IT : 1
LACY_ANCHORAGE : 1
PHYSICIAN_HIS : 1
ADMISSION_DEPENDENCE : 1
FLOW_TUBES : 1
DETOX_ALCOHOL : 1
EACH_HE : 1
ATLAS_AND : 1
OXYGEN_DELIVERY : 1
APPLICABLE_PATIENT : 1
AUDITORY_AND : 1
CAROLYN_AND : 1
PATIENT_RETURN : 1
IS_MATTER : 1
CALL_STAFF : 1
NEEDED_PATIENT : 1
NO_DELUSIONAL : 1
LENGTH_LITTLE : 1
OF_BODY : 1
BUT_LEFT : 1
CAP_ONE : 1
HAS_MASS : 1
PROBLEM_IS : 1
THE_SKIN : 4
ACTIVE_OTHER : 1
MH_CASE : 2
MHC_CONSULT : 1
HIM_LYMPHS : 1
REMINDER_TEMPERATURE : 1
SSN_KUMET : 1
DIAGNOSIS_SYMPTOMS : 1
FROM_OTHERS : 1
ARE_DOCUMENTED : 1
KNOXVILLE_TN : 1
PROTECTION_SURROGATE : 1
RELAPSING_ETOH : 1
LEG_BIOPSY : 1
OUTPATIENT_TO : 1
WILL_THIS : 1
DEVELOPING_MAINTAINING : 1
CONSUMED_STAFF : 1
WERE_TREATED : 1
NOTE_FOR : 1
WAS_SECURITY : 1
DISPOSITION_RECOVERY : 1
UNDER_HAS : 1
WHICH_HAS : 1
RIC_ASSESSMENT : 1
TEARFUL_THROUGHOUT : 1
ANXIETY_DISORDER : 1
TO_FAIR : 1
CRADC_DATE : 1
PSYCHOSIS_THE : 1
THIS_DID : 1
WOULD_CONSENTING : 1
OBSERVED_NOT : 1
SAYS_STILL : 1
NORMAL_THIS : 1
ABDOMEN_NOT : 1
SCREENING_PHYSICAL : 1
THE_OUTPATIENT : 1
STATING_HE : 1
KEOMUAN_NONE : 1
PICK_HIM : 1
HX_ON : 1
OTHER_COUNSELING : 2
EXHAUSTION_CAUSES : 1
OVER_OVER : 1
TO_CONTACT : 2
CARE_THREATENING : 1
SAID_IT : 1
IN_LOC : 1
CHRONIC_OBSTRUCTIVE : 1
IN_PRESCRIBED : 1
THAN_DPM : 1
INTENT_GO : 1
PRESCRIPTIONS_AND : 1
MEDICATION_MAY : 1
DEPOSITS_HEREDITARY : 1
COMPLAINT_URINARY : 1
OUTCOME_IS : 1
WITH_SOMEONE : 1
FOR_PROTECTION : 1
PAIN_PER : 1
PRESSURE_MOUTH : 1
SYSTEMS_YES : 1
ATTENTION_TO : 1
ASSISTANCE_FOR : 2
HAD_HER : 1
LENGTH_POSTOPERATIVE : 1
AGO_PATIENT : 1
OTHERS_KERATOACANTHOMA : 1
CASA_GRANDESOME : 1
TEETH_THERAPY : 1
STILL_VET : 1
CONTROL_DIFFICULT : 1
THE_PROGRAMS : 1
PROBLEM_LIST : 1
PRESENT_PROBLEMS : 1
FOR_CHRONIC : 1
REMINDER_THAT : 1
ARMBAND_COMMENT : 1
APPROACH_FINDINGS : 1
AGE_BUT : 1
MR_WITH : 1
BEEN_ANALYZED : 1
PHYSICAL_LEGAL : 1
FILED_MH : 1
THERAPEUTIC_GROUPS : 2
KG_COMPLICATIONS : 1
INDICATE_HE : 1
DISCHARGED_NURSING : 1
REQUESTED_ACQUAINTED : 1
OFTEN_YOU : 1
MR_WAS : 1
TO_END : 1
SELF_RESTORATIVE : 1
IN_FUTURE : 1
RATED_OF : 1
DURING_MORNING : 1
INPATIENT_OUTPATIENT : 1
AND_CONTINUED : 1
BOWEL_THIS : 4
TO_DAILY : 1
IN_HER : 1
LOWER_ADDENDUM : 1
TIME_DISPOSITION : 1
CURRENT_SCHIZOPHRENIA : 2
MED_OF : 1
JR_NO : 1
DIAGNOSES_ALCOHOL : 1
AFTER_ENDOSCOPY : 1
CLINIC_TX : 1
ABOVE_PAINFUL : 1
OXYGEN_DEVICE : 1
WITH_BUT : 1
DURING_THE : 1
SEE_VISTA : 1
HYGIENE_DRESSING : 1
YEAR_MALE : 2
MEDICATION_BE : 1
MOUTH_ACTIVE : 3
ON_GOALS : 1
NOTED_BE : 1
FEEDING_RESIDENT : 1
ATTENDING_ATRIAL : 1
DEPENDENCE_NEW : 1
INFORMATION_REQUEST : 1
DISEASE_SENT : 1
WITH_FOR : 2
INDEPENDENTLY_BUT : 1
CIG_THAT : 1
PENDING_TO : 1
KERATITIS_SUPERFIC : 1
REPORTS_HIS : 3
CM_FINDINGS : 1
CASE_PROTECTIVE : 1
JUNE_WANT : 1
BY_THE : 4
STARTED_WEEK : 1
HAS_FEELING : 1
UNT_TAKE : 1
CUT_OFF : 1
NO_LUNGS : 1
ELECTRONICALLY_MH : 1
FOR_PATIENT : 3
NEOMYCIN_OR : 1
ACTIVITIES_YES : 1
SEVERE_HAS : 1
AND_BIPOLAR : 1
REPORTED_LOSING : 1
FOR_TO : 4
PAST_INTERESTS : 1
AID_PT : 1
WITHIN_TO : 1
ACCOMPLISH_TRAINING : 1
BACK_PHYSICIAN : 1
ULA_LITERS : 1
TO_FACE : 1
DOES_LI : 1
OBJECTIVE_EXAM : 1
RESEARCH_NOTE : 1
EQUIVOCAL_FINALLY : 1
IS_ALSO : 1
HAS_NOTICED : 1
NONACUTE_LEVEL : 1
HIS_SECOND : 1
RIGHT_INFORMED : 1
KG_TH : 1
MALE_HISTORY : 1
GAVE_OUTLINE : 1
FROM_NO : 1
LOW_THIS : 1
CARE_CBOC : 1
EDUCATION_IS : 1
DISPOSITION_DOES : 1
DUE_MISSING : 1
PARENTERAL_NO : 1
MALE_PMH : 1
GIVEN_OFFERED : 1
DIAGNOSIS_PTSD : 1
LESSSON_EVEN : 1
PSYCHIATRY_ATTENDING : 1
THEM_AS : 2
OF_PRESENT : 2
APPOINTMENT_AFTER : 1
QUALITY_CLINICAL : 1
REVIEWED_PSYCH : 1
REASON_ADMISSION : 2
ETOH_ETOH : 1
SON_PLEASE : 1
ER_IS : 1
IMPAC_ASSESSMENT : 1
AT_HE : 1
OPERATIVE_IDENTIFIED : 1
CLEAR_FEE : 1
VA_PH : 1
CARE_OF : 2
HISTORY_ANGER : 1
PCP_LACY : 1
SAYS_HE : 3
SURROGATE_APPLICABLE : 2
TO_MEDS : 1
HE_SITTING : 1
DIAGNOSIS_DEPRESSION : 1
YES_REMOVE : 1
UNSATISFACTORY_DOES : 1
INHALATION_OF : 1
PUFFS_SHE : 1
IDENTIFY_THE : 1
CONTRIBUTING_PROMOTE : 1
ANGRY_ECF : 1
GOALS_METHOD : 1
NURSING_ACTION : 1
FRONT_OF : 1
AND_PROVIDED : 2
REMINDED_VETERAN : 1
THUMB_AMOUNT : 1
ONCE_MINUTES : 1
HE_LIKE : 1
FATHER_HEART : 1
VITAL_OTHER : 1
RESPIRATION_FLOW : 1
PM_CONTACT : 1
PM_AUTHOR : 1
OF_KEYPAD : 1
REMOVED_REMAINING : 1
BUT_RELIEVING : 1
OF_VIAGRA : 1
VISUAL_ASK : 1
PURPOSE_TOOLS : 1
GET_PT : 1
SIXTEEN_IN : 1
GO_IVE : 1
HE_WE : 1
HIP_ANTERIOR : 1
HRS_NO : 1
SOME_SCAR : 1
SMOKE_OF : 1
BE_UPSET : 1
THE_SIGNED : 1
PATIENT_INSTRUCTED : 1
WELL_AS : 2
SURGICAL_FOR : 1
AND_WITH : 2
PAIN_SCORE : 7
FOR_OUTPATIENT : 2
HAND_THUMB : 1
THROUGHOUT_VISUAL : 1
SURGERY_WITH : 1
FOR_CONTINUE : 1
URINAL_PATIENT : 1
STOOL_NUTRITION : 1
HEAD_BED : 1
THE_HAS : 7
CONDITION_OR : 1
CLIENT_EDUCATIONAL : 1
SEVERE_POST : 1
FURTHER_FROM : 1
APPOINTMENTS_DYSMETAB : 1
IN_OF : 1
INPATIENT_CONTINUE : 1
APPROVED_TAXI : 1
DID_REFUSE : 2
TO_REFUSED : 1
MEDICAL_TECHNICIAN : 1
ORIENTED_PAIN : 1
ANOTHER_SPOKE : 1
HAVING_TROUBLE : 1
HIS_BEING : 1
AT_PM : 4
TO_CONTROL : 1
OR_SUBSTANCE : 1
VOIDED_DID : 1
HOME_IVE : 1
EVERY_INJURY : 1
GROIN_REGION : 1
NOT_DISTENDED : 1
AGO_THE : 1
TO_HAVE : 3
BY_BP : 1
HANDOUTS_TO : 1
COULD_USE : 1
MG_SIG : 1
CHIROPRACTOR_FROM : 1
TO_FENTANYL : 1
CREPTS_NO : 1
TAKE_BY : 1
OF_REFERRAL : 1
FILLED_TELEPHONE : 1
WHAT_DO : 2
DO_FEEL : 1
HIS_OF : 2
AND_SIT : 1
NASAL_ULA : 2
OR_OR : 1
ACTING_THAT : 1
HEART_CATHETERIZATION : 1
MOTHER_PT : 1
QBEDTIME_THOUGHTS : 1
KEY_AND : 1
REACH_HIS : 1
PLAN_INITIATED : 1
OXYGEN_PROGRESS : 1
REPORTED_PRIOR : 1
ASAP_PATIENT : 1
CARDIO_NO : 1
ANY_NO : 1
TO_TAKE : 3
UROLOGY_FOLLOW : 1
LONG_HOURS : 1
TO_TREATMENT : 1
VISIT_BP : 1
REHABILATION_ORDER : 1
TEXAS_TO : 1
AND_OTHERS : 1
ARE_NOT : 1
ELEVATED_HEAD : 1
THE_TUMOR : 1
CLINIC_VISIT : 1
INJECTED_THE : 1
UTICALS_REVIEWED : 1
VISION_OR : 1
AWAKE_ALERT : 1
OF_TOBACCO : 1
AN_ARTHROSCOPE : 1
MISCARRIAGE_PCMEDICATION : 1
VISION_ADD : 1
SHIFT_CONSUMED : 1
FINALLY_WIFE : 1
GIVEN_IN : 1
SPECIFIC_COMPLAINTS : 1
BEHAVIOR_PLAN : 1
COMMENT_AUG : 1
PATIENT_AMBULATORY : 1
SHE_WILL : 1
OXYGEN_VIA : 1
IDENTIFY_FACTORS : 1
CL_TUES : 1
TO_SEE : 5
ALBUTEROL_MCG : 1
LAST_YEAR : 1
NONVA_MG : 1
DIAGNOSIS_PERIOD : 1
PACK_THAT : 1
STAFF_EDUCATE : 1
WHEELCHAIR_PULSE : 1
OFF_AS : 1
BECAUSE_HEADACHE : 1
PATIENT_RECURRING : 1
INHL_PUFFS : 1
OBSERVED_PT : 1
CONSCIOUSNESS_ALERT : 2
YOU_BEEN : 1
PERIOD_SERVICE : 3
SHOULD_COMMIT : 1
MAKE_OF : 1
PALMER_INSTITUTE : 1
NEUROSURGERY_FOLLOW : 1
SCHEDULED_APPT : 1
AT_RISK : 1
ACQUAINTED_THEM : 1
HES_HAVING : 1
UP_IMP : 1
SPI_OXYGEN : 1
PHARMACY_KUMET : 1
CONNECTED_MALE : 1
SEDATION_COLONOSCOPY : 1
UPDATE_ON : 1
MALE_PAST : 1
WHAT_VETERAN : 1
VETERAN_COMPLETED : 1
FROM_HIGHPREVALENCE : 1
TOPIC_TO : 1
MED_APPEARANCE : 1
BP_OBSERVED : 1
PROVIDERS_AND : 1
ACTIVE_OUTPATIENT : 4
ARRISES_AGAIN : 1
COPING_TOTAL : 1
ATTENDING_PAIN : 1
ABLE_TO : 4
THAT_HIS : 1
EVERY_TEMP : 1
BMI_MAN : 1
EVERYTHING_PACKED : 1
THROUGH_THE : 1
EVENING_ABRUPTLY : 1
SKIN_TWICE : 1
INFORMATION_TO : 1
CALM_NO : 1
CHANGES_WANTS : 1
ATTORNEY_PROVIDED : 1
NKA_PRIMARY : 1
DISORDER_AFFECTIVE : 1
HR_IS : 1
DENIES_NO : 1
ON_BACK : 2
HER_SITUATIONAL : 1
FLAMMABLE_LIQUIDS : 1
BATHING_AND : 1
PHARMACIST_THE : 1
TO_CHECK : 1
BEEFYY_RASH : 1
SCORE_NO : 2
BITE_RESEARCH : 1
AT_HIGH : 1
WITH_BP : 1
YOU_SICK : 1
BY_WITH : 2
TAXI_PICK : 1
RIGHT_MEASURES : 1
PTSD_VISION : 1
PHONE_NUMBERS : 1
AND_BP : 1
NO_VIGAMOX : 1
VETERAN_PROVIDED : 1
RIGHT_ARM : 2
RECONCILIATION_NO : 1
DIRECTLY_ATTORNEY : 1
TREATMENT_THE : 1
BE_COMPLETED : 1
ADVISED_HIM : 1
ROOMMATE_IN : 1
WIFE_SEXUALLY : 1
CERTIFICATION_PROSTHETIC : 1
DEPENDENCE_WITHDRAWAL : 1
HISTORY_TRANSPARENCIES : 1
INFORMATION_IS : 1
BP_AND : 1
FOREIGNBORN_FROM : 1
BACK_DT : 1
NO_WITH : 2
BLACK_OF : 1
ROUTE_ING : 1
DIABETIC_RETINOPATHY : 1
NOTE_PE : 1
FITS_HIS : 1
REPORTED_BLINDNESS : 1
BRUSH_TEETH : 1
THAT_HELPS : 1
EDUCATION_TAB : 1
HIM_IF : 1
TO_HOME : 2
THROBBING_YO : 1
SPONGE_FEEDING : 1
EXT_RESPIRATION : 1
SOFT_WHEN : 1
SHOE_FITS : 1
DOUBLE_ON : 1
THE_ON : 1
WAS_INTENDING : 1
INR_PERIO : 1
RESIDENT_HELPED : 1
ATTENDED_SIXTY : 1
SCLERA_SUICIDE : 1
CONTACTED_AND : 1
LEVELS_VISIT : 1
EVERY_FAMILY : 1
CONSULT_PROBLEMS : 1
VETERAN_BIRCH : 1
ALL_HIS : 1
AND_ARE : 1
SCHIZOPHRENIA_PATIENT : 1
LENGTH_THE : 1
ALL_RESIDENTS : 1
TO_STATED : 1
WITH_SCARS : 1
DISEASE_RATIVE : 1
PT_THAT : 3
CURRENT_CHO : 1
HSV_HIV : 1
BLOATING_FROTHY : 1
STAYING_AWAY : 1
PSYCHIATRY_NOTE : 1
IS_ASSIGNED : 1
PERSONAL_SHAVE : 1
COMPLAINT_MED : 1
APPLY_MAKE : 1
WITH_SUBSTANCE : 1
PAIN_CHRONIC : 1
BACK_GROIN : 1
PHYSICIAN_PRIMARY : 1
FOR_SCHEDULED : 1
STATED_WAS : 2
SIT_STAND : 1
AND_KNEW : 1
LATER_SEE : 1
MELLITUS_HE : 1
REPORTED_PLANS : 1
STILL_DOUBLE : 1
REMOVED_FBS : 1
NORMOCEPHALIC_EYES : 1
HOME_SHE : 1
LUNG_SAO : 1
VISIT_OCT : 1
SECURITY_ARESOL : 1
VOLUNTEER_ON : 1
MG_TAKE : 7
MEMBER_DISCHARGE : 2
IN_EXTENDED : 1
NEUROSURGERY_PRIMARY : 1
BY_AT : 2
ADR_REPORT : 2
THE_NECESSARY : 1
PATIENT_BATHROOM : 4
SUPPORT_FOCUSING : 1
INFORMATION_THE : 1
CONDO_AND : 1
ST_CENTER : 1
CD_HIS : 1
AUTHOR_RYAN : 1
BASED_MY : 1
REFUSED_TO : 1
SESSIONS_PROGRESS : 1
CONSULT_THIS : 1
BE_MORE : 1
AT_AND : 1
THE_TESTICLE : 1
UP_SINCE : 1
DEVELOPED_SWELLING : 1
WORKING_HOURS : 1
NO_ACTION : 1
PATIENT_CONTINUES : 1
GAVE_SEVERAL : 1
OF_FALLING : 1
FITTING_FOR : 1
PASTORAL_VISIT : 1
STATED_PAST : 1
IS_COMPLAINING : 1
PTSD_CUMULATIVE : 1
JUNE_PPD : 1
DISTENDED_SOFT : 1
DIAGNOSIS_SCHIZOPHRENIA : 2
KG_MINUTES : 1
SECRETIONS_ROSACEA : 1
TO_REQUEST : 1
TO_PERFORMANCE : 1
HE_AS : 1
PMHX_WITH : 1
THE_FOLLOWING : 5
BY_IN : 1
UNIT_QUIET : 1
IS_EXTREMELY : 1
AND_IF : 2
POSITIVE_DRUGS : 1
MINUTES_ON : 2
EATING_FOOD : 1
MAKING_HER : 1
IMPROVE_AND : 1
SWS_BRC : 1
BY_PRESENTS : 1
RECENT_SUICIDAL : 1
BY_ACCURATE : 1
CALM_STILL : 1
URINAL_RESIDENT : 1
FLUVASTATIN_CONTACTED : 1
GOAL_PATIENT : 1
PC_NOTE : 1
INTERESTS_COLEMAN : 1
SEE_DAUGHTER : 1
COMPLAINT_HEENT : 1
APPROACHED_AND : 1
WITH_BURNING : 1
EDUCATE_PATIENT : 1
NO_CHANGES : 2
ACHIEVING_YOUR : 1
ONE_UNIT : 1
DRAMA_HELD : 1
YES_PATIENT : 1
WITH_NECESSARY : 1
PALMER_EYE : 2
SAFE_TO : 1
DX_WITH : 1
VISTA_DISEASE : 1
SHIFT_WAS : 4
SMILING_LAUGHING : 1
DIFFERENT_AND : 1
DIANE_SEX : 1
FEEL_ON : 1
DIAGNOSIS_LEFT : 1
JOKES_ARO : 1
TEACHING_TO : 1
ANATOMICAL_LOCATION : 1
SUCCESS_VERBAL : 1
REPORTS_RAL : 1
WHO_TO : 1
WHILE_IN : 2
WANT_PT : 1
INSIGHT_WHEN : 1
MAINTAINED_PT : 1
IS_CONTINENT : 2
VISITS_EACH : 1
EXAM_SHOWS : 1
NUMBER_GROUP : 1
DEC_STAFF : 1
PLACED_ANTIBIOTIC : 1
BLINDNESS_GEC : 1
IS_DE : 1
EYE_BY : 1
NEGATIVE_ADVISED : 1
FALLS_COMPLAINT : 1
ROUTINE_FOLLOW : 1
DT_ACTIVE : 1
CANCER_NO : 1
IS_FEASIBLE : 1
FOLLOW_SINCE : 1
COPE_WITH : 1
CAUSING_NUMBNESS : 1
CONTENT_MOOD : 1
AND_NO : 1
DATE_IS : 1
TEMPERATURE_DATE : 1
DETAILS_WHILE : 1
OF_PNEUMONIA : 1
BEHAVIOR_CONNECTED : 1
BUT_HE : 1
WITHOUT_DIFFICULTIES : 1
DMII_AND : 1
COCAINE_HEROIN : 1
WAS_AND : 1
WOULD_UPON : 1
CHANGES_PLAN : 1
RESOLVED_PMH : 1
AND_SOFT : 1
THEIR_PROVIDER : 1
COLD_SCHIZOPHRENIA : 1
APPROXIMATELY_VISITS : 1
ABOUT_PINES : 1
ON_SKIN : 1
TO_CL : 1
MANAGEMENT_PM : 1
END_EVENING : 1
HAS_OTHER : 1
IN_TO : 3
READINESS_GOALS : 1
HIGH_VA : 1
FOR_VETERAN : 1
WITH_METAL : 1
HOURS_PING : 2
DIET_WILL : 1
REVIWED_PT : 1
FOREIGNBORN_INDIVIDUALS : 1
BETWEEN_AND : 1
ANY_IMPROVEMENT : 1
MG_BEHAVIORS : 1
CITALOPRAM_MG : 1
ABOUT_IT : 1
ON_AB : 1
TREATMENTS_ALSO : 1
CURRENT_RECENT : 1
AND_CITALOPRAM : 1
WHY_DIDNT : 1
IN_ARMY : 1
HABITS_PHYSICIAN : 1
FOR_BAL : 1
IMAGING_ED : 1
MEDICATION_YES : 1
PLACED_HOUR : 1
HOW_TIMES : 1
FORMALITY_AND : 1
OT_CP : 1
FALL_ON : 1
HELPS_SYSTEM : 1
OF_DIABETES : 1
YOURSELF_YOU : 1
UNSURE_HIS : 1
THE_DALE : 1
REMINDER_ACTIVITY : 3
DISEA_IS : 1
MED_REGIMEN : 1
IVE_DONE : 1
ARMY_FROM : 1
AFFECT_AND : 1
HAVE_HISTORY : 1
LOC_HE : 1
NO_OD : 1
ALSO_NOW : 1
PHYSICIAN_HYPNOTIC : 1
THROBBING_CORRECTLY : 1
INJURY_REMINDER : 1
WANT_OXYGEN : 1
WAS_ALSO : 2
OF_PRESSURE : 2
EDUCATION_RECORD : 1
REQUESTED_RETINOPATHY : 1
SAYS_GETS : 1
TEXAS_BE : 1
PHYSICIAN_ASSISTANT : 2
CHRONIC_PAIN : 1
DISCUSSED_EXAM : 1
PREVIOUSLY_REASON : 2
WILL_BE : 2
RELEASE_INFORMATION : 1
ADDENDUM_HAVE : 1
BILLS_AND : 1
AND_REPORTS : 1
SMOKELESS_SNUFF : 1
SHIFT_APARTMENT : 1
THREE_WITH : 1
TOBACCO_SNUFF : 1
REVIEWED_DENIES : 1
DIFFICULT_VETERAN : 1
SPECIMEN_BEEN : 1
THIS_WEEK : 1
PHONE_PULS : 1
CALCIFIED_VALVE : 1
COLOR_NUTRITIONAL : 1
AT_OR : 2
LENSECTOMY_FBS : 1
PATIENTS_THERE : 1
JUST_AND : 1
INJURY_TO : 1
REMAINS_STABLE : 1
AB_NEGATIVE : 1
SHARING_COMPLETION : 1
TO_RECEPTIVE : 1
URINE_AMBULATION : 1
INSTRUCTION_RESOLVED : 1
SELF_AND : 1
ELIMINATION_ASSISTANCE : 1
THE_VETERANS : 4
ACTION_MEASURES : 1
HER_OFF : 1
SHEET_TUBES : 1
OTHER_COMPLAINTS : 1
HE_WOULDNT : 1
SURGERY_PATIENTS : 1
STOOL_BOWEL : 1
DISTURBANCES_DOES : 1
THROUGHOUT_THE : 1
TO_PROCEDURE : 1
VOMITING_OTHER : 1
CALL_FINE : 1
UPDATED_ORTHOPEDIC : 1
TH_CONFIRM : 1
OF_VITAL : 1
UNK_PSYCH : 1
SHORTTERM_APPROACHES : 1
THE_TWO : 2
FALL_NO : 1
SOME_THAT : 1
TO_LOOSEN : 1
HURTING_ABDOMEN : 1
EDUCATION_THERE : 1
WORK_THERAPY : 1
URINARY_SYMPTOMS : 1
TO_CARE : 1
PERSONALITY_TO : 1
USAGE_USAGE : 1
HEARING_PT : 1
DATE_NAME : 1
ENOUGH_VALIUM : 1
POSTVIETNAM_CLINIC : 1
SIGNAL_IN : 1
PROGRAM_HOSPITALIZATION : 1
AS_IF : 1
SUPPLIES_AVAILABLE : 1
DISORDERMET_WITH : 1
NORMOCEPHALIC_CLINIC : 1
OF_MILITARY : 1
AWAY_ALTERNATE : 1
DOSE_CGY : 1
PHARMACY_BP : 1
MISCARRIAGE_NO : 1
BETWEEN_THUMB : 1
WILL_COME : 1
AND_THERAPEUTIC : 2
HIS_AFTER : 1
ORAL_INHL : 1
SYSTEM_RECOMMENDATION : 1
LIKELY_IS : 1
DOES_PATIENT : 1
CALL_IT : 1
BY_AND : 1
MIN_DIET : 1
NOT_RELIEVING : 1
OF_RACING : 1
IS_SC : 1
THIS_ENCOUNTER : 1
HPI_PATIENT : 1
CALL_CENTER : 1
BACK_MEASUREMENT : 1
AT_TO : 2
WARM_AND : 1
SLIGHTLY_HIGH : 1
ADJUSTMENT_CLINICAL : 1
VETERAN_HE : 1
NOTES_FROM : 1
REFILLS_PT : 1
JOKES_DIVERTICULOSIS : 1
ASSIST_FOR : 1
ATTORNEY_WAS : 1
INFLUENZA_VACCINE : 2
PATPU_NUMBER : 1
PATIENT_FOR : 2
JUDGEMENT_VETERANS : 1
AUTHOR_DIANE : 1
VISIT_TO : 1
BP_BEAM : 1
WAS_LONG : 1
WHEN_REFUSED : 1
THE_THINPREP : 1
EMERGENCY_MISSING : 1
PLAN_OF : 3
NO_IN : 1
LEVEL_OF : 3
IS_RETURN : 1
TWO_OFTEN : 1
AND_WERE : 1
PULMONARY_XPATIENT : 1
BENIGN_THE : 1
MENTAL_TAMPA : 1
THEIR_PT : 1
INCREASE_WILL : 1
NO_SUICIDAL : 1
BE_TIMES : 1
TO_WEEK : 1
THAT_WISHES : 1
RX_SHOE : 1
SYSTEMS_MILITARY : 1
ROUTINE_ADDENDUM : 1
RELIEVED_AFTER : 1
NO_FURNITURE : 1
AS_WELL : 2
ADVISED_RR : 1
HIS_MUSI : 1
OF_NAIL : 1
AND_QBEDTIME : 1
ISSUES_VET : 1
WILL_CALL : 2
ANOREXIA_PRE : 1
PT_IN : 1
SC_FEE : 1
WHEN_DISCUSS : 1
INSOLE_BUT : 1
FORMAT_DISTRESS : 1
REMINDER_NOTE : 1
HOURS_STARTING : 1
FH_HEART : 1
COMPLICATIONS_PATIENT : 1
SIGNFICANT_SWELLING : 1
CLEAR_EAR : 1
DIRECTABLE_BECAUSE : 1
HPI_HERE : 1
OR_LACTATING : 1
STRESS_ADDENDUM : 1
INCLUDING_CURRENT : 1
QUIET_RESIDENTIAL : 1
USUALLY_SCHIZOAFFECTIVE : 1
TO_RECOVERY : 3
WAS_EVALUATED : 1
SURGERY_LEFT : 1
IDENTIFICATION_CONFIRMED : 1
CONSIDERED_TO : 1
COLOR_LAST : 1
IF_SHE : 1
RIGHT_UPPER : 1
PROGRESS_NOTES : 1
LOCATE_OF : 1
DIAGNOSIS_FIBRILLATION : 1
STRABISMUS_SHOOTING : 1
CUING_FOR : 1
ACTIVE_CPT : 1
ACTIVE_INJURY : 1
HEARING_AID : 1
BUT_RX : 1
THEN_HAS : 1
BY_ONCE : 1
ADDENDUM_EVIDENCE : 1
IN_SINCE : 1
PT_PT : 1
WILL_AS : 1
SKIN_SKIN : 2
PATIENT_HERE : 2
ELIMINATION_MEAL : 1
NURSE_WHAT : 1
EXAMINATION_SEE : 1
SVI_RESPIRATION : 1
NO_PERIOD : 1
NOTE_LOW : 1
RESIDENT_EDUCATION : 2
ACE_PICK : 1
VS_SAT : 1
PAIN_BEHAVIORS : 1
ARRIVAL_PATIENT : 1
SWELLING_RETURN : 1
FOR_VET : 1
POX_INDEPENDENT : 1
SPLIT_SHOE : 1
HIS_WRITER : 1
PHONE_LEFT : 1
OF_DISORDER : 2
OF_IMPROVE : 1
TO_DUE : 1
POST_SURGERY : 1
ON_SHOULD : 1
TAKE_PATIENT : 1
TALKING_OTHERS : 4
COST_THEN : 1
SEE_IMAGING : 1
RESUME_AT : 1
ANDRA_RELIEF : 1
TOILETING_PHYSICIAN : 1
IT_TI : 1
CARE_CURRENT : 1
YOU_HOLD : 1
GTT_OU : 1
OCR_FAIR : 1
YOUR_ON : 1
BASED_ON : 1
SEEN_THE : 1
BY_NONSPECIFIC : 1
TUES_DISCUSSED : 1
PROVIDED_WHEELCHAIR : 1
VACCINE_SCREENING : 1
INTERESTS_NUTRITION : 1
HE_REPORTED : 1
BP_PAIN : 1
TEETH_OUTPT : 1
ALONG_FRONT : 1
ARTHROSCOPE_THROUGH : 1
CHO_OL : 3
THE_ER : 2
TAB_MOUTH : 1
LEFT_TRAUMA : 1
MR_VIA : 1
COURSE_AND : 1
OK_AND : 1
MEDICATIONS_HEARD : 1
AND_RESIDENT : 1
DIRECTED_MEASURES : 1
HGB_APPOINTMENT : 1
THE_POSSIBILITY : 1
PATIENT_ALLERGY : 1
HE_THINKS : 2
FITTED_LUMBAR : 1
YOU_SEEN : 1
GEC_PSYCHOLOGY : 1
NO_MURMURS : 1
ACETAMINOPHEN_CAPLET : 1
IS_BLOOD : 1
II_NO : 1
AM_AT : 1
COMPUTER_RATED : 1
DEPOSITS_MR : 1
PLANS_CURRENT : 1
DD_STATES : 1
THE_WITH : 1
FOR_LLQ : 1
ST_HAD : 1
WELL_THOUGH : 1
II_TAB : 1
FOOD_DURING : 1
CONSENT_COMING : 1
VISIT_DENTAL : 1
NOTE_ARE : 1
ADDENDUM_MEDICAL : 1
SIGNS_PATPU : 1
SP_MEDICATIONS : 1
DEPENDENCE_ABUSE : 1
THE_MUSCLES : 1
REPORTED_AGE : 1
FROM_HAS : 1
ADMISSION_CONCERNING : 1
TWO_OF : 1
IMAGING_DICKSON : 1
FEELS_WEAK : 1
IS_TOXICOLOGY : 1
OTHER_IN : 2
EPIS_REPORT : 1
AFTER_NEG : 1
SEEN_HOPELESS : 1
THE_AND : 4
STABLE_NO : 1
AVAILABLE_FOR : 1
EXAMINED_AND : 1
WAS_FEELING : 1
URINARY_NOTES : 1
PROVIDE_AS : 1
OR_PT : 1
HEAD_ATRAUMATIC : 1
DE_JOINT : 1
HE_DURING : 1
SKIN_INTEGRITY : 1
PROVIDER_SALMERON : 1
VERBAL_ABDOMINAL : 1
NEEDED_PLACE : 1
REVEALED_EAR : 1
FOR_DRUGS : 1
VETERAN_THAT : 5
WAS_AMBULATORY : 1
LAST_CLINIC : 1
INITIATED_STAFF : 1
WAS_FITTED : 1
ISSUES_PRESENT : 1
FINE_INSOLE : 1
AND_VITAL : 1
CATHETERIZATION_CARDIAC : 1
DEVICE_USAGE : 1
STATES_CONTACT : 1
WANTED_GO : 1
WM_HERE : 1
LOSING_JOB : 1
CALL_ER : 1
WITH_TO : 2
REMOVABLE_STAYS : 1
VA_ISLANDS : 1
ARM_BACK : 1
PROGRAM_WORKING : 1
OPTH_SOLUTION : 1
PAIN_THE : 2
THE_DOCTOR : 2
MENTAL_MUST : 1
GET_TO : 1
CHIEF_MED : 1
THYROID_GOITER : 1
LYMPHS_ADDENDUM : 1
GAVE_PRESCRIPTION : 1
ETHNIC_RELIGIOUS : 1
TO_CLINIC : 2
REVIEWED_PATIENT : 1
ROOM_STAFF : 1
THE_FACE : 1
FOLLOWING_ACTIVITIES : 1
SCHIZOPHRENIA_NOSUNSPEC : 1
JOSE_PACK : 1
SERVICES_ANSWER : 1
NOTE_MEDS : 1
IMPAIRMENT_EDUCATION : 1
HIS_THEYRE : 1
HEIGHT_IN : 1
AN_UPDATE : 1
AND_STRESSED : 1
HE_CATARACTS : 1
LEGIBLE_MIN : 1
THE_DOCUMENT : 1
RASH_NOT : 1
PATIENTS_REPORT : 1
IN_BED : 3
TREATMENT_TREATMENT : 1
MAJOR_DISORDER : 2
AND_GROOMING : 1
OUTPATIENT_INDIVIDUAL : 1
WITH_BLINDNESS : 1
LOW_BACK : 1
THE_WITHOUT : 2
PEROXIDE_OTIC : 1
AS_OCTOBER : 1
UNDERSIGNED_MET : 1
AND_REPORTED : 1
REMINDED_THAT : 1
ASTHMA_UNSPECIFIED : 1
HE_IN : 2
WRITER_CALLED : 1
OF_IF : 1
VISTA_AUTHOR : 1
AND_HAD : 1
CUEING_PATTERN : 1
PAIN_MENTAL : 1
FOR_DEPRESSIVE : 1
SEEMED_TO : 1
LIKELY_THAT : 1
AGAINST_RESISTANCE : 1
GROUP_PLANS : 1
BECOMING_MORE : 1
NOT_HIS : 2
FOR_SHIFT : 1
GROUPS_TO : 2
TO_UNTIL : 1
AS_UP : 1
STATUS_INACTIVE : 1
THAT_IS : 5
MUSIC_HE : 1
BREATHALYZER_TEACHING : 1
PICKED_BY : 1
HR_VETERAN : 1
POSTTRAUMATIC_VITAL : 1
HE_FEELS : 2
ON_HIV : 1
COULD_TO : 1
PLAN_SUTURES : 1
CONTINUE_WITH : 2
CONCERN_HIS : 1
FOR_MUSCLE : 1
HOURS_NAUSEA : 1
HIS_NEW : 1
FALLS_CHIEF : 1
NEW_PLAN : 1
UPSET_IT : 1
THAT_HES : 1
SYSTEMS_THAT : 1
CLOZAPINE_MG : 2
GOES_ON : 1
SELF_CONTINUED : 1
NAME_JR : 1
ENTERED_GOALS : 1
MYSELF_GOD : 1
DRUG_NUMBNESS : 1
AND_HE : 5
COMMON_ICDCM : 1
IS_SCAR : 1
THAT_IN : 2
PLACED_ON : 2
LOOSEN_SECRETIONS : 1
CARE_TRANSFER : 1
ENTIRE_REGIMEN : 1
SUPERFIC_UNSP : 1
RECORDS_TECHNICIAN : 1
IT_DOES : 1
VETERAN_AGREED : 1
CPT_CODE : 1
SUPPLIES_IN : 1
RESULT_YET : 1
HEAD_LEFT : 1
OR_BP : 1
ACTIVE_ED : 1
REQUESTED_ACE : 1
DOCUMENT_CONTACT : 1
CHRONIC_PRIMARY : 1
CONSENTING_QUESTIONS : 1
AS_TO : 1
TI_AGE : 1
MEASUREMENT_POX : 2
NUMBERS_ETC : 1
DRINKS_DURING : 1
RELATED_TO : 1
PHYSICAL_REHAB : 1
PASSES_NEEDLE : 1
INHL_INHALE : 1
GOALS_CONTROL : 1
VETERANS_APPOINTMENT : 1
AND_OUTPATIENT : 1
TEARFUL_ANOTHER : 1
REVEAL_AS : 1
DEVELOPED_SIGNFICANT : 1
WAS_PLACED : 3
PROVIDED_MR : 1
RAL_ASSESSMENT : 1
THIS_MAY : 1
IT_SPREADING : 1
LEFT_VENTRICULAR : 1
WHILE_THE : 2
AND_INCREASED : 1
DID_TI : 1
FEEDING_OF : 1
RETURNED_NEW : 1
PCP_BACK : 1
INDEPENDENT_PATIENT : 1
HGB_DL : 1
PND_ORTHOPNEA : 1
ADMISSION_HOMICIDALITY : 1
AND_AS : 3
NO_NO : 6
BASED_IMAGES : 1
RECEPTIVE_TO : 1
OCR_WAS : 1
HOT_ELEVATED : 1
GET_NEARING : 1
ACC_THIS : 1
CARE_MELLITUS : 1
DENTIST_ON : 1
KG_NORTH : 1
HEARING_HE : 1
HAS_NKA : 2
DIVORCE_AND : 1
TREATMENTS_WERE : 1
HEENT_NORMOCEPHALIC : 1
THE_TH : 1
THIS_DISTURBANCES : 1
IS_SHORT : 1
RESP_BP : 1
MILIEU_AND : 1
BRIEF_OF : 1
SPOKEN_UNDERSTOOD : 1
PATIENT_TO : 7
PSYCH_INPATIENT : 1
PATIENT_CONTACT : 1
HYDROXYZINE_PAMOATE : 1
MAY_ST : 1
TWO_WHO : 1
SYSTEMATIC_HEMATURIA : 1
MEETING_SWELLING : 1
IS_GETTING : 1
APPROACHED_OTHER : 1
WHICH_ADENOCARCINOMA : 1
BREATH_CLEAR : 1
NONSPECIFIC_FINDINGS : 1
RECURRING_LEFT : 1
AS_WERE : 1
SHE_NOT : 2
PAIN_OF : 2
RESCUE_HE : 1
THE_TWICE : 1
HE_URINARY : 1
CORONARY_ARTERIOSCLEROSIS : 1
PAIN_MILD : 1
MALE_TO : 2
WITH_AND : 5
THE_CERUMEN : 1
ASSISTANCE_MUSIC : 1
MEDS_TAKE : 1
LEVEL_COUNSELING : 1
HORROR_SHOW : 1
PC_BLOOD : 1
NARCOTIC_AND : 1
VERBALIZED_FEAR : 1
PRIVILEGES_PERSONAL : 1
TO_STILL : 1
OD_SETTING : 1
HAS_SEEN : 2
THEYRE_SENT : 1
CHOSE_TO : 1
GOWN_DIRECTED : 1
UROLOGY_REGARDING : 1
RESIDENT_AGREE : 1
ABOUT_BILLS : 1
FREE_FROM : 1
THE_HE : 2
TO_WITH : 9
AN_ANESTHETIC : 1
CUEING_PING : 1
DID_FOR : 1
FOCUSING_ASKING : 1
TO_UPCOMING : 1
VA_OAK : 1
GOING_HIS : 1
CONNECTED_CAUCASIAN : 1
MESSAGES_HE : 1
TREATMENTS_MOTIVATION : 1
VET_WOULD : 1
OF_TREMOR : 1
IN_DURING : 1
PAINFUL_ANKLE : 1
PAST_KNEE : 1
OTOSCOPY_REVEALED : 1
FBS_ANTIBIOTIC : 2
IRAQ_FROM : 1
LUCID_NOT : 1
FACTORS_REST : 1
FOR_GUNSHOT : 1
MEAL_AND : 1
OF_OR : 1
USE_HELIOS : 1
PTSD_THREE : 1
ADDENDUM_II : 1
WRITER_WITH : 1
OF_WITH : 1
WRITER_MANAGEMENT : 1
DIAGNOSIS_PNEUMONIA : 1
NEURONTIN_WEEK : 1
WAS_EXAMINED : 1
MEDS_NURSING : 1
DOCUMENTATION_EDUCATION : 1
MANAGEMENT_SERVICES : 1
INFECTION_ABNORMALITY : 1
PT_ALSO : 1
VITAL_CT : 1
ADDENDUM_PHYSICAL : 1
OF_ABUSE : 1
MARCH_APRIL : 1
RISK_PREVENTION : 1
YOURSELF_WHEN : 1
LEARN_JUNE : 1
SHOULD_REFERRAL : 1
SECURITY_AMOUNT : 1
STATUS_RESIN : 1
IS_TO : 7
ASSESSMENT_AND : 1
SAT_PRIM : 1
DONE_WITH : 1
CAPLET_SIG : 1
SIGNED_THE : 1
JOB_AWAY : 1
SEBACEOUS_JUST : 1
TIMES_EVERYTHING : 1
ALVEOPLASTY_ALVEOPLASTY : 1
SOMEONE_BETTER : 1
WAS_OF : 1
DENTAL_EXAM : 1
OLD_HERE : 1
FINAL_FOLLOWING : 1
DRAINAGE_APPOINTMENT : 1
ARE_AREAS : 1
HE_MISSED : 1
MAJOR_DEPRESSIVE : 1
THE_ROLE : 1
ACTIVE_INTRAOCULAR : 1
REVIEWING_BAY : 1
INPATIENT_AND : 1
DIDNT_THIS : 1
AT_CAN : 1
UNSPECIFIED_HAS : 1
FILL_CAN : 2
HEAD_STRENGTH : 1
WITH_CHEMICAL : 1
HELPS_RECOMMENDATION : 1
HEALING_EXT : 1
SIGNS_BLOOD : 1
FOR_RELEASE : 1
ON_OXYGEN : 2
RESIDENT_SUP : 1
IT_LIQUID : 1
TEMPERATURE_NAME : 1
COSIGNER_SEX : 1
HIS_TO : 1
SHE_EXTREMELY : 1
DIRECTABLE_RESCUE : 1
PLAN_DEC : 1
REACTIONS_CLINICAL : 1
DEC_BURN : 1
THE_LEFT : 2
TREATMENT_STUDIES : 1
PATIENT_NOT : 4
WITHOUT_PH : 1
BIPOLAR_BY : 2
LLQ_PMHX : 1
VACCINE_PREDNISONE : 1
DIAGNOSIS_SOME : 1
OBJECTIVE_HE : 1
WITH_HTNTO : 1
NOT_ANY : 2
HIS_NEVER : 1
COMPLAINING_HAVING : 1
ASKED_ADMITS : 1
ABUSE_NO : 1
EAT_HE : 1
SEXUAL_ACTIVITY : 1
OBJECTIVE_DINNER : 1
PING_AT : 1
ALSO_PULSE : 1
LEFT_DORSAL : 1
MRSA_AND : 1
PROVIDED_TO : 1
AROUND_AREA : 1
POSSIBILITY_FEVER : 1
RESIDENT_ROOM : 1
NOTE_OR : 1
AND_RIGHT : 1
PSYCH_NURSING : 1
INSTRUCTION_PERSONAL : 1
PROBLEMS_TREATED : 1
BIZARRE_BEHAVIOR : 1
MARY_LIQUIDS : 1
OSAC_ENCOURAGED : 1
THE_SKILLS : 1
AND_PROBLEMS : 2
PT_WITH : 1
IOP_WANTS : 1
HOPING_BOWEL : 1
MIVA_ANALYSIS : 1
COMPLAINTS_PATIENT : 1
EYES_EOMI : 1
STATED_THAT : 1
SHIFT_SLIGHT : 1
VA_PACIFIC : 1
ASSESSMENT_DANGER : 1
BRIEFLY_TEARFUL : 1
INCLUDES_AND : 1
THEM_NONPARKINSONIAN : 1
INSTRUCT_AS : 2
MED_DISCUSSING : 1
DISORDER_ANXIETY : 1
GOITER_PATIENT : 1
DENTAL_DISORDER : 2
NORMAL_CAUTION : 1
THE_PAIN : 1
REITERATED_PATIENT : 1
IMP_HYPERLIPIDEMIA : 1
WITH_ABUSE : 1
HIP_APPROACH : 1
TIME_PROVIDED : 1
REVIEWED_ROUTE : 1
GOAL_WITHIN : 1
DURING_DISCUSSIONS : 1
DAILY_LIVING : 3
REPORT_TESTING : 1
PERFECT_SURE : 1
ASSESSMENT_ALLERGIES : 1
PAIN_REASSESSMENT : 1
HERE_WITH : 1
SENT_FLORIDA : 1
OTHER_FORMS : 1
FREQUENCY_DROPIN : 1
DENIED_SX : 1
TOTAL_COMA : 1
HAVE_THE : 2
TH_STATE : 1
IT_WAS : 2
TRANSFER_REQUIRES : 1
STILL_TO : 1
SHIFT_THE : 5
REGARDS_TO : 1
MSE_ON : 1
OR_ANSWER : 1
OF_NEED : 1
TOTAL_MINUTES : 1
RECOVERY_DRAMA : 1
MULTINODULAR_UNDER : 1
NO_STAFF : 1
PAIN_MED : 1
RESP_PAIN : 1
COMING_TO : 1
MEAL_NAUSEA : 1
VITAMIN_TAB : 1
NEITHER_OR : 1
LESS_SHOULD : 1
PATIENT_UNABLE : 1
MOTION_ANALYSIS : 1
BLOATING_AND : 1
PRESSURE_MEDICAL : 1
PATIO_OF : 1
NIGHT_RESUME : 1
ROLE_OF : 1
THOUGH_HIS : 1
MEDICATION_COUNSELING : 1
SMOKING_CESSATION : 1
BEFORE_SEXUAL : 1
REASSESSMENT_WEIGHT : 1
RISK_NO : 1
PNEUMONIA_ESSENTIAL : 1
HOPING_THAT : 1
PATIENT_MALE : 1
RED_BEEFYY : 1
REMAIN_ACTIVE : 1
HAS_THERE : 1
HIS_IF : 1
FINANCIAL_ISSUES : 1
OF_ARE : 1
CANCELLATION_REL : 1
EXTREME_READER : 1
THIS_SECONDARY : 1
BIOPSIES_STRIAE : 1
RELAPSING_PRIOR : 1
FOR_DELIVERY : 1
IN_COMPLAINT : 1
DIAGNOSIS_ES : 1
ON_REGULAR : 1
MEASURES_PT : 1
MEDICAL_EVALUATION : 1
ENCOUNTER_THERE : 1
PAST_USUALLY : 1
PAIN_WHEN : 1
NUTRITION_NOT : 1
VETERAN_REPORTS : 1
PERSONAL_RM : 1
THE_NAIL : 1
PATIENT_NO : 1
ARE_RESTRAINTS : 1
IV_WITH : 1
BE_INJECTED : 1
OTIC_INSTILL : 1
IS_FOURPLEX : 1
HE_REPORT : 1
ASSISTANCE_OVERSIGHT : 1
TEMP_DISABILITIES : 1
DENIED_OF : 1
NO_SPECIFIC : 1
THE_MEDICINE : 1
NKA_PROTOCOL : 1
BURSTS_AND : 1
HE_BE : 1
PATTERNS_AND : 1
UP_HIS : 1
NOTIFICATION_ACETAMINOPHEN : 1
MINUTES_SEXUAL : 1
EAR_CANALS : 1
FINDINGS_FURTHER : 1
SAFETY_PATTERNS : 1
USUALLY_FOR : 1
DAUGHTER_WILL : 1
CONSUMED_ACTIVITIES : 1
HE_WANTED : 1
NEWTON_ON : 1
LAYOUT_REACH : 1
FOLLOWING_WERE : 1
ANGRY_ZZSWS : 1
THE_INFORMATION : 1
SOCIAL_WORK : 1
HOSPITAL_YOU : 1
PL_ING : 1
TN_EDUCATION : 1
IF_HAS : 1
HE_STATED : 1
SUBJECTIVE_MALE : 1
APPEARS_BE : 1
OTHER_OF : 1
ACTIVE_RESIN : 1
YOUR_BODY : 1
TO_CLEAR : 1
OF_CONTINUE : 1
INFORMATION_SUBMITTED : 1
MINUTES_VETERAN : 2
ENCOURAGEMENT_ALL : 1
HE_IS : 9
WITHIN_LIMITS : 1
ANY_CURRENT : 1
APPEARANCE_CASUAL : 1
WELL_DENIED : 1
CAP_RISK : 1
OF_DURING : 2
SEEN_WITH : 1
USING_TAC : 1
RECOVERY_AND : 1
HAS_STRONG : 1
BEFORE_AWAY : 1
AND_REQUEST : 1
PHARMACIST_DO : 1
PT_STABLE : 1
DISCOMFORT_MONITORED : 1
TO_AND : 9
OXYGEN_AS : 1
THOUGHT_THE : 1
FOLLOWED_FOR : 1
ANTIBIOTIC_REPEAT : 1
DUE_FOR : 1
YES_IF : 1
UP_IN : 1
MINUTES_BEFORE : 2
NEUROSURGERY_UP : 1
OF_POSTVIETNAM : 1
DETAILS_DOCUMENTED : 1
OF_SHINGLES : 1
THE_THIS : 1
HAD_THIS : 1
HE_USE : 1
IMAGING_TO : 1
PHYSICIAN_NURSING : 2
FENTANYL_PROVIDER : 1
IDENTIFICATION_IS : 1
IS_NOW : 1
AN_DRUG : 1
CHRONIC_PULMONARY : 1
AND_PRIMARY : 1
APPROXIMATELY_AGO : 1
SUPPLY_BLOOD : 1
DIAGNOSIS_ATRIAL : 1
DOSE_BY : 1
EDUCATION_PROVIDED : 1
MEASURES_CM : 2
THE_LAYOUT : 1
ANDERSON_RESIDENT : 1
CAN_SCHEDULED : 1
FACILITY_THAT : 1
THOUGH_NO : 1
CHIEF_HE : 1
OFTEN_BECAUSE : 1
FAR_ALONG : 1
EXP_DT : 2
VACCINATION_THERE : 1
BEEN_COMPLIANT : 1
ANY_PERFORMED : 1
TO_GET : 3
INJURIES_LYWANDA : 1
IN_MONTH : 1
CALCIUM_VITAMIN : 1
MEMBERS_WHO : 1
SPUTUM_COLOR : 1
PRESCRIBED_BY : 1
VI_TREATMENT : 1
GLARE_ARMD : 1
WHERE_WILL : 1
HYPERLIPIDEMIA_WITH : 1
SEEN_FRANTZ : 1
LESS_WITH : 1
PHE_ALLERGIES : 1
WAY_OF : 1
MONTHS_NO : 1
ADVIL_OFTEN : 1
BEDTIME_CURRENT : 1
DOES_NOT : 2
DATE_THIS : 1
NEGATIVE_ON : 1
RIGHT_BP : 1
GROUP_PARTICIPATION : 1
BY_ON : 2
PT_NEEDED : 1
CHANGED_SP : 1
NOTIFICATION_HYDROCODONE : 1
PT_ALCOHOL : 1
PRIMARY_IN : 1
DYSPHAGIC_NO : 1
NO_YET : 1
BE_PATIENT : 1
CONTACT_INFORMATION : 1
DICKSON_MEDICATIONS : 1
OCR_MR : 1
AN_INPATIENT : 1
SEE_IF : 2
TRANSPORTATION_WAS : 1
EAT_REFUSED : 1
REVIEW_SYSTEMS : 1
GRIEFWORK_GAVE : 1
MINUTES_THE : 1
APPLICABLE_THIS : 1
IMPAIRMENT_FOLLOW : 1
FROM_PHYSICIAN : 1
DT_RAL : 1
TA_OF : 1
FLU_REACTIONS : 1
NARROW_LENGTH : 1
TEMPERATURE_MALE : 1
SESSIONS_REMAINING : 3
HAS_SEVERAL : 1
ANSWERED_QUESTIONS : 1
NOT_WANT : 1
RN_NOTE : 2
SEE_PT : 1
IN_CLINIC : 1
CLOZAPINE_DOSE : 2
THYROID_DISEASES : 1
FEAR_MANY : 1
THE_HAND : 1
VETERAN_BECOMING : 1
PAST_AND : 1
ROOM_ELIMINATION : 1
NOT_UNTIL : 1
ON_CARE : 1
OSAC_MG : 1
TREATMENT_CENTER : 1
TREAT_WITH : 1
COGNITIVE_DURING : 1
RESIDENT_PHYSICAL : 1
LEFT_BEEN : 1
MISSED_TALKED : 1
CONSENT_VETERAN : 1
HEAD_OF : 1
ANESTH_NEURO : 1
SHIFT_THIS : 2
CBOC_IF : 1
BATH_LOCATION : 1
ICDCM_OCT : 1
DMII_CARDIOMYOPATHY : 1
TO_INCREASE : 2
WHILE_DEPLOYED : 1
HOURS_TRY : 1
WERE_COMBAT : 1
CARE_CONTINUE : 1
MOOD_DENIES : 1
SATUR_TABLETS : 1
CALLER_AREA : 1
NOTE_FORMAT : 1
MOTION_SUN : 1
ARM_INFORMED : 1
THE_PLEASE : 1
ASSISTANCE_VETERAN : 1
MEDICINE_EVALUATION : 1
WEEK_ON : 1
REL_PROVIDER : 1
TO_TEARFUL : 1
SCORE_BMI : 1
NOTE_RESULT : 1
SUICIDE_COORDINATOR : 1
ON_OMEPRAZOLE : 1
LAUGHING_TALKING : 1
HE_SLEPT : 1
STATED_HE : 1
VIETNAM_ERA : 1
HE_TOO : 1
WELL_FOLLOWED : 1
BY_THINPREP : 1
BLADDER_PATIENT : 1
PROSTHETIC_LAB : 1
ALLERGIES_ADR : 1
CONSUMED_TO : 1
CLC_ZZPATIENT : 1
CALL_FOREIGNBORN : 1
PROVIDER_SUBSPECIALTY : 1
CORRECTLY_THE : 1
IN_DETOX : 2
DO_NOT : 1
KNOWLEDGE_GROUP : 1
IT_AGAIN : 1
IN_MEETING : 1
BLINDNESS_HORROR : 1
URINE_COLLECTED : 1
IN_PPD : 1
CLINICAL_ANGER : 1
BE_DISCHARGED : 1
IS_HIGH : 2
AND_MEDICATIONS : 1
PAST_FOR : 1
HL_INR : 1
PHONE_TO : 1
CONDUCIVE_TO : 1
STOOL_DURING : 1
DEPRESSED_MOOD : 1
OF_PRESCRIPTIONS : 1
LDL_OL : 1
MAY_PATIENT : 1
WITHOUT_NEAR : 1
FALL_RISK : 1
BEEN_THE : 1
SIDE_EFFECT : 1
VACCINE_PROVIDED : 1
THEY_DECIDED : 1
CALLED_AND : 1
NONE_OTHER : 1
PROGRESS_VETERAN : 2
SESSION_ENGLISH : 1
FOLLOWING_FOLLOWING : 1
SPASMS_HYPERLIPIDIMIA : 1
SHOE_NARROW : 1
SKILLS_TOOLS : 1
WILL_ON : 1
NURSES_REVIEWED : 3
DATES_DENTAL : 1
WOULD_LIKE : 1
GROUP_CURRENT : 1
AREA_YOUR : 1
HE_THIS : 1
OFF_OF : 1
GET_TOO : 1
MALE_WITH : 4
PATIENT_SEX : 1
IS_WITH : 2
KRIS_MD : 1
IS_HES : 1
TO_ADDENDUM : 1
PHYSICIAN_PSYCH : 1
HAVE_REVIEWED : 1
MIN_OTHER : 1
VETERAN_HIS : 1
HE_VOICED : 2
EDUCATION_CONSUMED : 1
PARENTERAL_FEEDING : 1
CONSTANT_KNEE : 1
SIT_TO : 2
WORKING_PATIENT : 1
BLOOD_ACCIDENTS : 1
TAKING_TO : 1
COMPLETION_OF : 1
ANY_TESTS : 1
OU_SKIN : 1
DEPENDENCE_COCAINE : 1
TO_NARCOTIC : 1
FOR_TREATMENT : 1
WITH_WALKING : 1
ULNAR_DETAILS : 1
DATE_STEPHANIE : 1
NARROW_LITTLE : 1
AGAIN_JUNE : 1
OF_ADMISSION : 1
VET_MEDICATIONS : 1
PRESCRIBED_PROVIDERS : 1
HEALTH_WHO : 1
DIET_THEY : 1
CLC_FOR : 1
DYSMETAB_MH : 1
OFTEN_OF : 1
OF_PERSONAL : 1
VIST_ADDENDUM : 1
TRAUMA_DOUBLE : 1
PAIN_PROTECTORS : 1
HAS_APPROVED : 1
PAIN_RESPONSES : 1
AMOUNT_DID : 1
VIST_HELP : 1
STRENGTHS_VET : 1
EOMI_SCLERA : 1
RIGHT_LOWER : 1
THEM_OFF : 1
HIM_HE : 1
REMAIN_IN : 1
SUPPLIES_PHYSICIAN : 1
ALLERGY_THIMEROSAL : 1
ANALYSIS_MEDICATION : 1
ARE_AT : 1
SPECIFIC_THE : 1
USE_CONVEY : 1
SCATTERED_LESIONS : 1
SITUATION_ALONE : 1
LUNG_SOUNDS : 1
UNCHANGED_SINCE : 1
WITH_TEAM : 1
SWELLING_LOCALIZED : 1
MED_IF : 1
HOMEBASED_NO : 1
MAINTAINED_REMAINS : 1
MENTAL_AO : 1
HERE_SCHEDULED : 1
SUN_AND : 1
ALLERGIES_PENICILLIN : 1
MORE_NUMBER : 1
TAB_TABLET : 2
NO_PRESENTLY : 1
FULLY_CALM : 1
LEFT_RESISTANCE : 1
ASSESSMENT_WOUNDS : 1
SOCKETS_SWELLING : 1
LUMBAR_CORSET : 1
PNEUMONIA_DRAINS : 1
LUNGS_CREPTS : 1
THE_ENTIRE : 1
RISK_FOR : 1
OR_THE : 1
WITHOUT_ANY : 1
WORKED_ON : 1
RELAPSING_TO : 1
MINS_INFLUENZA : 1
RECOMMENDATIONS_ACTIVE : 1
HOURS_AT : 2
IV_TREATMENT : 1
WHO_GIVES : 1
ADDENDUM_VETERAN : 1
DTC_PROGRAM : 1
PULSE_NO : 1
THE_RIGHT : 2
TOO_THE : 1
THAN_AN : 1
THIS_TASK : 2
ARTHRITIC_JOINT : 1
VIA_NASAL : 1
TOXICOLOGY_COLLECTION : 1
OSTEOARTL_LEG : 1
GO_THE : 2
CLINIC_NOTE : 1
UROLOGY_MILITARY : 1
LEG_SWELLING : 1
DOSE_OF : 1
CONTINUE_FOR : 1
SUPPORT_MODULE : 1
IN_IMPAC : 1
MEAL_SUPERVISION : 1
SUPPLIES_PAIN : 1
TWICE_DESCRIPTION : 1
PRESENTS_ER : 1
SUTURES_STERISTRIPS : 1
SPOKEN_IS : 1
CALM_COOPERATIVE : 1
SAFETY_AND : 1
BE_AT : 1
TESTICLE_MEASURES : 2
ON_MON : 1
ACCESSED_THROUGH : 3
HAS_PROBLEM : 1
EAT_SUPPER : 1
COMPLAINT_LAST : 1
AM_WORK : 1
FOR_BREATHING : 1
PAST_LEISURE : 1
CHIROPRACTOR_HERE : 1
ARISE_WITH : 1
SHE_IS : 1
THE_AT : 2
LEARN_IF : 1
IN_LOW : 1
MILD_MODERATE : 1
TRAINING_IF : 1
NOTET_THYROID : 1
IS_SLIGHTLY : 1
ANSWERED_CC : 1
WEEKLY_ATTENTION : 1
TO_FOR : 4
ALSO_AND : 1
CLINIC_REGARDING : 1
STATE_LDL : 1
HIS_CONTINUED : 1
HAS_KLONOPIN : 1
DEC_DO : 1
TO_THE : 19
RUPTURED_OU : 2
CARMODY_STAR : 1
HISTORY_ASSESSMENT : 2
FOR_PATTERNS : 1
SWELLING_ABOVE : 1
INITIAL_PACEMAKER : 1
TX_DUE : 1
THE_MEDICATIONS : 1
STATUS_ACTIVE : 2
ACCIDENTS_SHE : 1
CONSISTENCY_OF : 6
SHINGLES_PREDNISONE : 1
TISSUE_THAT : 1
PENICILLIN_PREDNISONE : 1
YRS_PT : 1
INJECTIONS_DEPRESSED : 1
PULSE_DOCUMENT : 1
BY_MOUTH : 10
RESOLVED_INCLUDES : 1
PAST_PT : 1
PATTERN_STATE : 1
REVIEWED_TO : 2
TO_TALK : 1
THE_CALL : 1
VA_LIVING : 1
MEDICATION_PLAN : 1
OVERSIGHT_ENCOURAGEMENT : 1
HE_LISTED : 1
ONSET_THIS : 1
MOBILITY_EVEN : 1
INCREASE_INCREASE : 1
WITH_NITROGEN : 1
CHIROPRACTOR_CONSULT : 1
IS_MAN : 1
LEFT_FOR : 1
IS_FOLLOWUP : 1
FROM_CLINICAL : 1
BEHAVIORS_MILD : 1
LEADER_PHYSICIAN : 1
TRY_GET : 1
THAT_REVEAL : 1
OCCLUDED_THE : 1
SEVERAL_CUPS : 1
HERE_THE : 1
PSYCH_OF : 1
LIQUIDS_BAGS : 1
IS_CONFIRMED : 1
THE_PURPOSE : 1
HIS_VOLUNTEER : 1
HE_ATTEND : 1
AND_RECONCILED : 1
REASON_FOR : 4
FOLLOWING_CHIEF : 1
TAKE_TABLET : 9
AND_AT : 1
CASUAL_APPROPRIATE : 1
STERISTRIPS_LENGTH : 1
TRAV_OU : 1
REFUSED_LOCATION : 1
NOT_TURN : 1
THE_HUDVASH : 1
GROUP_ATTENDED : 1
PATIENT_EVALUATION : 1
NOS_PT : 1
ABILITY_MH : 1
PM_SAMMIE : 1
THROUGH_PROGRAM : 1
ONLY_BLIND : 1
WITH_CINCINNATI : 1
WILL_REFILL : 1
MEASUREMENTS_VENTRICULAR : 1
RECONCILED_DATE : 1
ID_REPAIRED : 1
PLACED_PREVIOUSLY : 2
GROUP_MINUTES : 1
DRESSING_AND : 1
REQUEST_THAT : 1
TO_INFORM : 1
SESSION_OK : 1
PSYCHOSIS_FOLLOWING : 1
IF_THAT : 1
TH_FEEDING : 1
DINNER_WITH : 1
RECONCILIATION_REQUIRED : 1
SEEN_FOR : 1
JUNE_PARENTERAL : 1
MAX_DOSE : 1
JUNE_JUST : 1
TH_BLACK : 1
ACTIVE_IN : 1
CIG_HE : 1
CARMODY_OTR : 1
AND_MANAGEMENT : 1
STARTING_AT : 3
REGIMEN_THE : 1
HELIOS_DEMAND : 1
METHOD_TO : 2
TO_STAFF : 1
THE_THE : 4
IDENTIFIED_ASSESSMENT : 1
NEW_JERSEY : 1
FOLLOWING_YES : 1
RAMIREZFIGUEROA_PARTIAL : 1
COMMENT_HOLD : 1
THAT_WAS : 1
COUGH_NURSINGACTIVITIES : 1
EXAMINED_EVALUATED : 1
ED_GOALS : 1
YES_SKIN : 1
THE_DOSE : 2
CM_MEDICAL : 1
OF_PATIENT : 1
RESULTED_IN : 1
THERAPY_PACEMAKER : 1
OSTEOARTL_GOAL : 1
HIM_NEUT : 1
AND_FOR : 4
STOOL_FOOD : 1
WHEN_ANOTHER : 1
ON_ASKED : 1
REFERRAL_AORTIC : 1
SKIN_THE : 1
FOR_TASK : 2
BREAKFAST_DRINKS : 1
MICROSCOPIC_MEDICATION : 1
NOMED_TEMP : 1
QUALITY_EAGER : 1
NO_TAKING : 1
WITH_OF : 5
DOCUMENTS_TOTAL : 1
AND_HIM : 2
ROOM_BOWEL : 1
HIS_CONDO : 1
NOV_AXIS : 1
RESULTED_LOC : 1
MINIMUM_MINS : 1
HERE_WKS : 1
NUMBERS_DURING : 1
MINS_DX : 1
AS_ARISE : 2
ASSISTANCE_HE : 2
OTHERS_INFLUENZA : 1
GO_AND : 1
YOU_ABOUT : 2
HE_DEVELOPED : 1
NUTRITION_BOWEL : 1
BP_HR : 1
FOR_SMOKE : 1
UNIT_WE : 1
TWO_PATIENTS : 1
MG_AND : 2
LEVOTHYROXINE_MG : 1
AND_NOT : 3
BLOOD_DRAW : 1
PM_BECAUSE : 1
SCORE_IS : 1
OTHER_AND : 1
TO_PLACE : 3
FEASIBLE_PATIENT : 1
NUMBER_HISTORY : 1
DIAGNOSES_CHRONIC : 1
STATUS_CARBAMIDE : 1
SPI_TER : 1
OTHER_ASSESSMENT : 1
INDICATE_WAS : 1
VOICED_THAT : 2
CASE_SERVICES : 1
DISEASE_LEFT : 1
PATIENT_ASSESSMENT : 1
ON_USE : 1
PAJAMAS_GOWN : 1
YOUR_CARE : 1
MR_REFERRAL : 1
EDUCATION_UP : 1
DIET_NO : 1
EVALUATION_ANESTHETIST : 1
VETERAN_ROUTE : 1
CLINIC_PRIMARY : 1
OCT_PAIN : 1
MH_CARE : 1
DISCUSSIONS_SHARING : 1
OXYGEN_IN : 1
SESSION_SUBJECTIVE : 1
READY_LEARN : 1
FOR_HAVE : 1
LIQUIDS_PLASTIC : 1
MEDS_PRESCRIBED : 1
TOOK_AWAY : 1
ABUSE_MEDICATION : 1
FAHRS_DISEASE : 1
NEED_SIGNING : 1
OF_HIMSELF : 1
NO_NOT : 1
PING_THIS : 1
SKIN_REASSESSMENT : 1
FEMALE_PLAN : 1
WITH_BETTER : 1
NORTH_SSOME : 1
COMPLAINT_PAIN : 1
NO_SCARS : 1
STATUS_CARDIO : 1
OR_WHAT : 1
IMPROVEMENT_INFORMED : 1
RESPIRATION_MR : 1
THEN_NEEDLE : 1
CURRENT_VITALS : 1
PATTERN_COMPLAINTS : 1
DORSAL_MCG : 1
WISHES_TO : 1
COLLECTED_SENT : 1
OXYGEN_PROVIDED : 1
TO_CLOZAPINE : 1
BURN_ON : 1
BOWEL_BOWEL : 2
HAVING_MEMORIES : 1
HE_GETS : 1
PATIO_CONSISTENCY : 1
PRECAUTIONS_ALL : 1
ANALYSIS_MAY : 1
RATED_LIST : 1
EVEN_THOUGH : 1
REPAIRED_GLOBES : 2
PARTICIPATION_ALL : 1
PACKED_WAY : 1
OBJECTIVE_RECENTLY : 1
LIVING_LOCATION : 1
FOR_AT : 1
INPT_NOTE : 1
PTSD_ADDENDUM : 1
BY_TWICE : 1
MORE_LUCID : 1
SECOND_SESSION : 1
INTEREST_LEARNING : 1
AS_DESCRIPTION : 1
CONTACT_TRAVEL : 1
SENSORY_PERCEPTION : 1
TI_FAHRS : 1
RESPIRATORY_TREATMENT : 1
RESTRICTIONS_YES : 1
AS_PRESCRIBED : 1
AT_CURRENT : 1
TUES_PT : 1
TREATMENT_RECORD : 1
RATED_DYSPHAGIC : 1
WITH_NED : 1
IF_ADR : 2
OTHER_PARTNERS : 1
WITH_STAYING : 1
SURGERY_CLINIC : 1
LOWER_STUDENT : 1
VETERAN_AND : 1
COMPLETE_THAT : 1
REMINDER_EYE : 1
RETURN_TO : 2
MR_IN : 1
TIME_SITUATION : 1
FAVORITE_MUSI : 1
BOTHERED_TH : 1
WRITER_ABOUT : 1
LEFT_HIM : 1
USUAL_BM : 1
SSN_TIME : 1
LET_US : 1
OF_ISOLATION : 1
EXTENSIVE_RESIDENT : 1
NOTE_LEVEL : 1
TOTAL_VA : 1
VIEW_THE : 1
THE_FUTURE : 1
ANTIBIOTIC_INJECTIONS : 1
OT_FACILITY : 1
TOLD_INDICATE : 1
THE_INTERVIEW : 1
VETERAN_THEN : 1
MR_FOR : 1
FIBRILLATION_PULSE : 1
PURPLE_THE : 1
TO_INDEPENDENT : 1
EVERYTHING_THE : 1
HAS_ABUSING : 2
NEED_TALK : 1
WITH_CALL : 1
AREA_THE : 1
ENCOURAGED_FOLLOW : 1
PRESENTS_FOR : 1
FAMILY_VETERAN : 1
PT_BE : 1
CHECKS_FOR : 1
IMAGE_QUALITY : 1
PAIN_TO : 1
DINNER_RECENTLY : 1
ACTIVE_SKIN : 1
NORMAL_LIMITS : 1
FOR_DISORDER : 1
WERE_THERE : 1
FLU_SHOT : 1
TELEPHONE_FRI : 1
CITY_AND : 1
AND_PHYSICIAN : 1
INDIVIDUAL_CONTROL : 1
APPT_AND : 1
SCAN_HAVE : 1
UP_PVD : 1
HOW_OFTEN : 1
HAD_END : 1
QH_DISCUSS : 1
MAJOR_MECHANISM : 1
SPECIMEN_HAS : 1
KNOWLEDGE_OF : 2
TAKE_THREE : 1
ON_DEMAND : 1
PATIENT_COMPUTERIZED : 1
RIGHT_HAND : 1
HE_LOOK : 1
TAB_QH : 1
TIU_TITLE : 1
DOUBLE_AND : 1
SMOKING_VETERAN : 1
LB_KG : 4
CONSULT_FROM : 2
HAVERLY_RELIEF : 1
CONCERNING_BEHAVIOR : 1
ACCOMPLISH_THE : 1
IMAGES_INFORMATION : 1
ALSO_VERBALIZED : 1
NOTE_CONSISTENCY : 1
ALWAYS_AND : 1
RECEPTIVE_READY : 1
SUBJECTIVE_MESSAGES : 1
SCORE_AT : 1
REPORTED_SCORE : 2
QUESTIONS_INFORMATION : 1
VETERAN_THIS : 1
PM_HIS : 1
VITAL_PATPU : 1
PERSONAL_TRANSFER : 1
RECOVERY_LIFESTYLE : 1
REFERRAL_YES : 1
ANXIETY_LEVEL : 1
BE_BY : 1
ANY_INJURIES : 1
IS_UNSATISFACTORY : 1
TO_ASSISTANCE : 1
WARFARIN_HIGH : 1
THE_ACTIVITIES : 1
SCHEDULED_PCP : 1
OF_ARRIVAL : 1
CONSENT_AFTER : 1
DERMATITIS_AREAS : 1
OF_RATED : 1
THE_WAY : 2
PROT_TIMEOUT : 1
TO_CONFIRM : 1
SPEAK_THEN : 1
ARE_DIRECTED : 1
INACTIVE_NO : 1
MEDS_BE : 1
WITH_FOLLOWING : 2
LAST_DENIES : 1
CONSULT_HX : 1
APPROXIMATELY_BEFORE : 1
ARISE_HIM : 1
AND_THROUGHOUT : 1
HIS_PT : 1
SINCE_LAST : 3
TREATMENT_SUGGESTED : 1
OLD_MALE : 2
IN_PAST : 3
EVERY_AND : 1
PATIENT_PROBLEM : 1
CASE_MANAGEMENT : 3
RESTRAUNT_WILL : 1
EXPRESSED_THE : 2
VETERAN_ATTENDED : 1
AT_REQUEST : 1
BEFORE_RINSING : 1
LEVEL_AND : 1
OS_QUALITY : 1
NEED_FOR : 1
VETERANS_CHART : 2
SERVICE_CONNECTED : 1
DIRECTED_TO : 1
HIS_BAY : 1
LANGUAGE_SPOKEN : 1
IS_PERSONAL : 1
THERAPY_TREATMENT : 2
WITH_MEDICATION : 2
RELEASE_OF : 1
PLAN_OR : 1
CITALOPRAM_TAB : 1
MASS_DORSAL : 1
ABOUT_PATIENT : 1
ATTENDANCE_ATTENDED : 1
DISCHARGE_VISIT : 2
EDUCATED_PROPER : 1
ACTIVE_TRAUMA : 1
TO_GO : 6
IS_COUNSELED : 1
NURSING_SEVERAL : 1
OUT_DINNER : 1
UP_TUES : 1
YOU_HAVE : 3
ACQUIRED_TEETH : 1
ONE_SURFACEANTERIOR : 1
HOSPITALIZATION_OPTH : 1
TO_IF : 2
PLEASE_APPOINTMENTS : 1
PPD_ASSESSMENT : 1
PATIENT_OXYGEN : 1
IS_PRIMARY : 1
ABNORMALITY_CANCER : 1
CONSENT_NO : 1
KG_FOLEY : 1
CENTER_NEVER : 1
RECEIVED_PT : 1
NOTE_AXIS : 1
NECK_STRENGTH : 1
AM_TO : 1
EVERY_RELIGIOUS : 1
SECURED_ARMBAND : 1
AFTER_CERUMEN : 1
TIMES_ALWAYS : 1
DOCUMENTED_EVIDENCE : 1
TELEPHONE_CONTACT : 2
WAS_LAST : 1
WITH_BPD : 1
IS_OBJECTIVE : 1
AND_RELAPSING : 1
SHIFT_BLADDER : 1
BED_LOW : 1
TO_DOSE : 1
AUG_COMMENT : 1
ST_REHAB : 1
RESIDENT_AMOUNT : 1
NO_THE : 2
NO_DEVICE : 1
CM_THYROID : 1
MENTAL_HEALTH : 3
AWAY_FROM : 1
MEDICATIONS_EVENING : 1
DID_IT : 1
UNTIL_TUES : 1
ANY_SUPINE : 1
SHOWS_HEALING : 1
SOURCE_FOR : 1
TABLETS_BEHAVIORS : 1
PATIENT_RECONCILED : 1
PROVIDER_VETERANS : 1
OTHERS_SHAVE : 1
PATIENT_PHONE : 1
PT_REMAINS : 1
PROVIDED_ADDENDUM : 1
ULCER_CARE : 1
PATPU_PHONE : 1
HAVE_SUBSIDED : 1
TO_PARTICIPATE : 3
MIVA_FOR : 1
FLUID_SNACKS : 1
SOMEONE_HE : 1
SOONER_OUTLINE : 1
MORNING_WAS : 1
TIMES_MUSCLE : 1
ATTENDING_DIAGNOSIS : 1
PLACE_SKIN : 1
YEAR_OLD : 2
KNOW_THE : 1
SEVERAL_PREVIOUS : 1
COSIGNER_PATIENT : 1
TAKING_TAB : 1
NONE_USUALLY : 1
RESTRAINTS_IN : 1
OBSTRUCTIVE_DISEA : 1
DISEASE_DEPRESSED : 1
SIT_SIT : 1
NORMOCEPHALIC_VA : 1
IS_FOR : 3
TO_NEW : 1
MYOPIA_NURSES : 1
BY_NO : 1
FINAL_REPORT : 1
URINE_LAST : 1
THE_AMOUNT : 1
FOR_PNEUMONIA : 1
WIFE_ILL : 1
SSOME_STATE : 1
RESPONSES_DIAGNOSIS : 1
AT_HIS : 2
OR_QUITE : 1
PLAN_ALERTED : 1
LIFE_AND : 1
HAVE_THESE : 1
LEFT_ALBUTEROL : 1
ADL_CONSISTENCY : 1
ALSO_IS : 1
HEALTH_CPT : 1
WHO_IT : 1
SIDE_OF : 1
HOLES_THEM : 1
TUES_HISTORY : 1
MEDICATIONS_DIETARY : 1
MH_PSYCHIATRY : 1
RELAPSING_ON : 1
TEMP_RESP : 1
INCLUDING_HRS : 1
THAT_BOWEL : 1
THIS_AS : 1
ATTORNEY_MR : 1
ELIMINATION_NOT : 1
GETTING_BLOOD : 1
IN_CHIEF : 1
WELL_TREATMENT : 1
MYOPIA_NOTES : 1
TEARFUL_WHEN : 1
THIS_DRUG : 1
BRIMONIDINE_SOLUTION : 1
IS_ONE : 1
JOINT_LEFT : 1
THE_DIAGNOSIS : 2
II_AND : 1
TO_TELL : 1
OF_EXAM : 1
NO_EDUCATION : 1
OTHERS_TRANSPORTATION : 1
TA_REVIEW : 1
TAKING_HOURS : 1
JENNY_DISCUSSED : 1
IS_TEARFUL : 1
TO_MEDICATION : 1
HERE_IOP : 1
SUPPORTIVE_PSYCHOTHERAPY : 1
GOOD_AFFECT : 1
THAT_HAVING : 1
DATE_TIME : 1
THAT_FOR : 1
TO_RECHECK : 1
ACTIVITY_STARTING : 1
CHRONIC_DEPENDENCE : 1
LESIONS_DAILY : 1
INTERESTED_IN : 1
PER_ALCOHOL : 1
CONSENT_OBTAINED : 1
PAUSE_LOCATE : 1
TO_MONTHS : 1
RISK_OF : 1
ANY_OR : 1
COST_HE : 1
TOENAIL_SEEN : 1
BODY_THE : 1
URINARY_AND : 1
ONCOLOGY_CONSULT : 1
SHOULD_RECEIVE : 1
DX_AXIS : 1
FEELS_IF : 1
COST_EXP : 2
FAMILY_WITH : 1
CAN_SUCCESSFULLY : 1
HOSP_GU : 1
THAT_TOENAIL : 1
OR_ELECTRONICALLY : 1
LEG_PER : 1
DOCUMENT_TO : 1
VETERAN_TESTED : 1
MEETING_AS : 1
CONTINUING_WITH : 1
HEALTH_SYSTEM : 1
MISSING_MH : 1
OF_SYSTEMS : 1
BIOPSY_STATUS : 1
INJURY_CLINICAL : 1
ROUTE_TO : 1
CASE_PROBLEM : 1
WITHOUT_VERBAL : 1
FOR_PCP : 1
KNOW_HE : 2
OINTMENT_TO : 1
THEM_LONGSTANDING : 1
INTOXICATED_REPORTED : 1
LATEST_SCORE : 1
HE_SX : 1
EATING_HYPNOTIC : 1
IN_DEGREE : 1
PATIENT_LEARNING : 1
THERE_HISTORY : 1
CHECKS_SAFETY : 1
FOR_THIS : 4
AND_OR : 2
AT_LEVEL : 1
IS_OF : 3
WORKED_TALKED : 1
OF_VISION : 1
SUPERVISION_WITH : 1
WORKING_LONG : 1
UCINATIONS_PREVENTATIVE : 1
FOR_VETERANS : 1
MEDICATION_CAN : 1
NO_RHONCHI : 1
BECAUSE_OF : 1
HRS_OF : 1
HE_PACEMAKER : 1
OF_HE : 1
FROM_THOUGH : 1
MR_PLACED : 1
ME_THE : 1
MAIL_PT : 1
IN_VETERAN : 1
TRANSPORTATION_CONSULT : 1
EXT_IMP : 1
CLINIC_OF : 1
BEEN_NOT : 1
CHAMBER_MEASUREMENTS : 1
BECOME_WITH : 2
HELP_SHORT : 1
REHABILATION_IN : 1
THESE_PRESENT : 1
NKA_WEIGHT : 1
HIS_HEALTH : 1
LITTLE_MORE : 1
SHEATH_ASPIRATED : 1
LOOK_THAT : 1
EPROGRAMS_CONSUMED : 1
OF_LIFE : 1
OF_JENKINS : 1
WAS_NOTES : 1
WITH_MENTAL : 1
SC_DOCUMENT : 1
HOSPITAL_WERE : 1
BE_FOR : 2
ISSUES_LAST : 1
FURTHER_ASCERTAINED : 1
NUMBER_ENTERED : 1
OPIOID_DEPENDENCE : 1
PROVIDED_IS : 1
NO_PCMEDICATION : 1
RECORD_CYTOPATHOLOGY : 1
ADMITTING_RAMIREZFIGUEROA : 1
AND_LATER : 1
FEEDING_PROGRAM : 1
WKS_AGO : 1
LAST_FILLED : 1
HE_DECLINED : 1
AND_PURPOSE : 1
DIAGNOSIS_DISORDER : 1
LEAFLETS_AORTIC : 1
REPORTED_RELAPSING : 1
DETOX_HE : 1
PLACE_DECLINED : 3
TABLET_BY : 8
BAL_ON : 1
OF_YES : 1
PROBLEMS_THIS : 2
ELIMINATION_PATIENT : 2
MEDICATIONS_DISCUSSED : 1
COCAINE_NO : 1
METHADONE_IS : 1
TAKING_HIS : 1
ADMIT_TO : 1
GOT_NEW : 1
PATIENT_SEEN : 1
BREAST_ENJOYED : 1
THAT_LIKELY : 1
RECENTLY_WITH : 1
MEDICARE_DOCUMENTATION : 1
TAKE_THE : 1
DUE_INCREASED : 1
PROBLEMS_SHORTTERM : 1
MODE_BUTTONS : 2
MH_SOCIAL : 1
DID_ADMIT : 1
AND_SUPPORT : 1
NEEDED_MAINTAIN : 1
CANS_WEEK : 1
RATED_PATIENT : 1
LAST_YRS : 2
COLONOSCOPY_SEDATION : 1
OTHERS_SELF : 1
PREDNISONE_SON : 1
DISCUSSED_OTHER : 1
THE_ST : 1
GOES_WHEN : 1
STOOL_THIS : 1
AT_MIN : 2
TO_FLORIDA : 1
BURNING_OF : 1
ANTIBIOTIC_WILL : 1
SUBJECTIVE_WITH : 1
INITIATED_DEC : 1
STOMACH_PROTECTION : 1
WITH_AN : 1
BE_CONTINUED : 1
NEEDED_ASSIST : 1
STAYS_IN : 1
PROVIDER_NOTE : 1
PHYSICAL_DOCUMENTS : 1
SUICIDE_PREVENTION : 1
LAST_HEIGHT : 1
WITHOUT_SUCCESS : 1
NIGHT_WITHOUT : 1
WHY_HE : 2
DEC_TAKE : 1
CLICK_THE : 1
AGREE_WITH : 2
SHORT_VETERAN : 1
MEET_THE : 1
THE_TIU : 1
HAS_CATARACTS : 1
BASCOM_PALMER : 3
PMH_INCLUDES : 1
EXPERIENCE_AND : 1
EVALUATED_ME : 1
BEEN_RECONCILED : 1
EYE_INSTITUTE : 1
EDUCATED_ON : 1
WITH_WHO : 1
WEATHER_MH : 1
WANT_DOES : 1
MUSCLES_DENTAL : 1
AGAINST_LUNG : 1
THAT_PROVIDES : 1
WEAK_HE : 1
REFUSED_NEBULIZER : 1
CARE_SERVICES : 1
NONE_VOIDED : 1
SHINGLES_VACCINE : 1
BEHIND_HER : 1
NO_AND : 1
IMAGING_SC : 2
ATTENDANCE_USING : 1
LOW_PAIN : 1
LITERS_SPUTUM : 1
THERAPY_THIS : 1
TX_COUGHING : 1
DISORDER_DATE : 1
IN_WITH : 2
HOUSING_MARY : 1
VET_PRESENTS : 1
LIVING_RISK : 1
IS_HE : 1
FOR_OF : 4
CATHETERIZATION_SHEATH : 1
USING_HIS : 1
DIANE_IDENTIFIED : 1
WOULD_TO : 1
PROBLEMS_NOTE : 1
FOLLOWING_TREATMENTS : 1
PAIN_HAS : 2
OF_MH : 1
KUMET_AND : 1
EXERCISE_REVIEW : 1
CANCER_HRS : 1
BEHAVIORS_MODERATE : 1
GET_CLOSE : 1
PROTECTIVE_VETERAN : 1
SEE_BEHIND : 1
INTENT_PT : 1
STATES_THAT : 1
AFTER_MEETING : 1
OBSERVED_HAVE : 1
PHYSICIAN_REQUEST : 1
LIVES_IN : 1
AND_SCHEDULED : 1
PERFORMANCE_FOR : 1
IS_HORROR : 1
START_OF : 1
ULNAR_FLOTATION : 1
ENCOURAGEMENT_OR : 1
EXERCISE_RX : 1
IN_PULSE : 1
IS_GREATER : 1
DRINKS_PATIENT : 2
CONSCIOUSNESS_ORIENTED : 1
STRIAE_SAYS : 1
COLLABORATE_WITH : 1
PRESSURE_ACCIDENTS : 1
LOCATE_DIFFERENT : 1
WITH_PATIENT : 5
PROT_SYSTEMATIC : 1
OXYGEN_FURTHER : 1
SAO_ULCER : 1
DISABILITIES_DYSPHAGIC : 1
NUR_TETANUSDIPTHERIA : 1
BPD_PATIENT : 1
WITH_SLIGHT : 1
BED_SAID : 1
PAIN_LLE : 1
SKILLS_NEEDED : 1
THE_CYMBALTA : 1
AND_DEPRESSION : 2
DENTAL_NOS : 2
SSN_PT : 1
HAVE_MEDICATION : 1
SCORE_LACK : 1
CATEGORY_CLASS : 2
FEEDING_NO : 2
OR_MOUTH : 1
EVALUATION_HAS : 1
MEDICINE_NURSING : 1
SP_GIVEN : 1
ON_WHEN : 1
SC_ER : 1
DPM_OR : 1
CONTACTED_VETERAN : 1
SHEATH_AND : 1
TESTED_FOR : 1
FOUND_MONONESSA : 1
ANTICOAGULATION_DISEASES : 1
VARIABLE_ATTENDING : 1
TYPE_OR : 1
HIGH_LIVING : 1
MINIMUM_USAGE : 1
CONTACT_PROGRESS : 1
LLE_RADIATING : 1
PROSTHETIC_REHABPHYSICAL : 1
ALSO_TO : 2
SIDED_THE : 1
THIS_PAST : 1
CARING_YOURSELF : 1
WAS_TAKING : 1
HE_KNEW : 1
IN_OR : 3
BURNING_THE : 1
VOICES_HE : 1
REMOVED_SESSIONS : 1
AN_LEVEL : 1
FOR_AN : 1
REQUIRED_VERBAL : 1
YES_HE : 1
DOCUMENTATION_WANT : 1
YEAR_AND : 1
DOCUMENTATION_AND : 1
SCHEDULED_THE : 1
INTEGRATED_CARE : 1
MODERATE_SEVERE : 1
SERVICE_CAUCASIAN : 1
NUMBER_SHE : 1
RETURN_CL : 1
SHE_OT : 2
STABLE_WITH : 1
SAID_PREOP : 1
WANT_GO : 1
UNTIL_HAVE : 1
ARM_BAND : 2
SOLUTION_DIALYSIS : 1
BE_INTO : 1
NOTED_SEE : 1
CARPULE_WARFARIN : 1
UP_BY : 1
SAYS_TRIED : 1
WITH_NO : 3
HOUR_HEALTH : 1
MACHINE_HE : 1
STATUS_BE : 1
HYDROBROMIDE_MG : 2
NEBULIZER_PULSE : 1
MEDICATIONS_COGNITIVE : 1
OAK_TX : 1
NORTH_TH : 1
TAKE_MEDICATIONS : 1
OF_TRANSFERRED : 1
TH_PHARMACY : 1
REFILL_VIA : 1
ANGER_IS : 1
HIGH_WAS : 1
NO_UNK : 1
CONTINENT_RESTRAUNT : 1
REQUIRED_AT : 1
RACE_BLACK : 1
PING_START : 1
AA_SCREEN : 1
THIS_CALLED : 1
TRIED_PHOTOTHERAPY : 1
NOW_NO : 1
WAIT_HEAR : 1
HOT_HEAD : 1
HOME_WHICH : 1
VIEW_ORIENTED : 1
YOU_AT : 1
RADIATION_TREATMENT : 1
EZETIMIBE_TAB : 1
CASA_STATE : 1
STATUS_NUMBER : 1
HIS_TREATMENT : 1
BY_HX : 2
THE_HOURS : 1
VOICED_ALERT : 1
PRIM_OSTEOARTL : 1
BEEN_EXHIBITING : 1
CYMBALTA_WAS : 1
CLINICAL_ACTIVITY : 3
HIS_HISTORY : 1
SURGERY_INHALATION : 1
HISTORY_CATEGORY : 1
DENTAL_CLASS : 2
NOTE_DUE : 1
WHILE_AN : 1
LOCATE_IDENTIFY : 1
CURRENT_ALLERGIES : 3
PALMER_HIM : 1
OF_MOVEMENTS : 4
WITHIN_PATIENT : 1
ANALYSIS_NEGATIVE : 1
ON_PROPER : 1
LEAVE_UNTIL : 1
THE_TO : 3
EAR_AND : 1
WITH_CHONDROMALACIA : 1
SYND_MH : 1
NUMBER_EMERGENCY : 1
BE_AMBER : 1
CONSUMED_CONSISTENCY : 1
OXYGEN_MACHINE : 1
IS_HAVE : 1
LEVEL_SLOWLY : 1
IS_HISTORY : 2
COLOR_REQUIRES : 1
USE_ETHNIC : 1
CURRENT_OR : 1
OU_DEPRESSED : 1
THERAPY_RECORD : 1
PLAN_IS : 1
WHY_WM : 1
LESS_NOT : 1
PATIENT_NEITHER : 1
BACK_AND : 1
SHIFT_THROUGHOUT : 1
THE_SURROGATE : 1
COME_IN : 1
EMPLOYED_MALE : 1
CRADC_OF : 1
LIVING_SITUATION : 1
VISION_REG : 1
TRAV_QHS : 1
SYND_OP : 1
SECONDARY_ITS : 1
PATCHES_ON : 1
MUSI_MOUTH : 1
IN_ONE : 2
PT_DID : 3
ESOPHAGOGASTRODUODENOSCOPY_EGD : 1
HEARING_LOW : 1
MAJOR_AFFECTIVE : 1
OF_DAILY : 3
MEDICATION_NURSING : 1
ACE_UP : 1
FROM_WRITER : 1
OD_OS : 1
PAST_HOW : 1
NO_PROBLEM : 1
LYING_ON : 1
DOES_HAVE : 1
ABOUT_FOR : 1
MEDICATIONS_CARBAMIDE : 1
HIGH_TAB : 1
CAR_AND : 1
OF_HOT : 1
SURE_ACC : 1
OF_GROUP : 2
BECOMING_WITH : 1
SKIN_BUTTOCKS : 1
ENTERED_WHILE : 1
GAF_SCORE : 1
WORKING_OCR : 1
DOSE_AT : 1
WORST_THE : 1
APPEARED_THROUGHOUT : 1
HOUR_MENTAL : 1
CANE_OR : 1
INCREASE_LEVOTHYROXINE : 1
COMMON_COLD : 1
PHARMACY_STAY : 1
HOW_HAVE : 1
THE_TITLE : 1
NOT_GERD : 1
REVIEWED_MEDICATION : 1
WALKS_TOO : 1
PHYSICIAN_CONSUMED : 1
PAUSE_NURSING : 1
SCHIZOPHRENIA_SOME : 1
FOR_BIZARRE : 1
BATHROOM_FOR : 1
HIS_DISCUSSED : 1
AS_NEEDED : 2
RESPIRATORY_FOR : 1
THIS_SET : 1
IS_AT : 1
LAST_WANTING : 1
HAND_BETWEEN : 1
PATIENT_INTERDISCIPLINARY : 1
CHIROPRACTOR_NOT : 1
AFTER_ANOTHER : 1
OL_MG : 1
FINANCIAL_STILL : 1
GO_TO : 3
THERAPY_REHAB : 1
ORDER_BECOME : 1
MEDICARE_MRSA : 1
THIS_AMOUNT : 1
OTHER_HISTORY : 1
AND_CURRENT : 1
MELLITUS_TYPE : 1
EVERY_MORNING : 1
WANTS_HIS : 1
HOLOGIC_RECONCILIATION : 1
SUPPORT_GET : 1
DISORDER_WITH : 1
THOUGHTS_BRIEFLY : 1
BASIS_DOCUMENT : 1
GAF_AND : 1
SEE_MH : 1
SUPERVISION_OVERSIGHT : 1
BUTTON_WITH : 1
INFLUENZA_PAIN : 1
VITAL_SIGNS : 4
STRONG_THAT : 1
UNSURE_IF : 1
RETURN_CALL : 1
DESCRIPTION_COUNT : 1
CONTINUED_CONTINUE : 1
BP_HAS : 1
IN_TREATMENT : 1
RISK_TAB : 1
YOUR_THE : 1
OTHER_BUT : 1
DM_MEASUREMENT : 1
IS_MET : 1
SUPPLEMENT_PERCEPTION : 1
ADMITTING_PHYSICIAN : 1
TAC_OINTMENT : 1
TIMES_OD : 2
NITROGEN_CANCER : 1
WHEN_ASKED : 1
OCT_PHYSICIAN : 1
BECAUSE_WIFE : 1
MIND_EMERGENCY : 1
SCORE_DID : 1
RANGES_DIAGNOSIS : 1
HIS_LEADER : 1
FALLING_PT : 1
INSTRUCTED_DO : 1
OCR_ATTORNEY : 1
NONE_RANGES : 1
TO_LEARN : 3
AND_PRESSURE : 1
GRANDESOME_VETERAN : 1
AFFECTED_AREAS : 1
ON_SIGNIFICANT : 1
HYGIENE_BATHING : 1
WRITER_BAY : 1
ISLANDS_HEALTH : 1
YES_YES : 1
OXYGEN_ORDERED : 1
AN_SCOPE : 1
CARBAMIDE_OTIC : 1
WAS_FINALLY : 1
PREOP_EVALUATION : 1
AND_REASON : 1
CERUMEN_WAS : 1
VISTA_MEMBERS : 1
JUST_FORMALITY : 1
OTHER_INFORMATION : 1
YES_COLONOSCOPY : 1
MENTAL_NUMBER : 1
AWAY_OTHERS : 1
AND_LOCATE : 1
THEN_DOSE : 1
REG_ADD : 1
HEALTH_AND : 1
DISCHARGED_NOTE : 1
WORK_PERFORMANCE : 1
VENTRICULAR_SEGMENTAL : 1
MEASURES_ENCOURAGEMENT : 1
SHOW_ASSISTANCE : 1
THAT_HAVE : 1
ONE_THERE : 1
RELIEVING_PAIN : 1
VALSARTAN_MG : 1
FOR_ADMISSION : 2
TIME_ADDENDUM : 1
TRIAL_OF : 1
WITH_COUNSELING : 2
FOOD_NONE : 1
MIN_INDEPENDENT : 1
JUNE_TH : 2
PATIENT_READINESS : 2
PROVIDER_STEFANIK : 1
OR_DIAGNOSIS : 1
REMOVED_EXCESSIVE : 1
FITS_WITH : 2
DILATED_PATIENT : 1
GLOBES_HE : 2
AND_WAS : 4
AND_CESSATION : 1
DIAGNOSIS_SESSION : 1
REHAB_AS : 1
PMHX_REVIWED : 1
DURING_LENGTH : 1
CONDO_PHARMACY : 1
PAIN_SEEN : 1
CLARITHROMYCIN_TWICE : 1
WITH_VERBAL : 1
SKIN_ATTENDING : 1
DYSPHAGIA_DIET : 1
MEMORIES_RESURFACE : 1
DENIS_RESIDENT : 1
PRESSURE_VACCINE : 1
WILL_FOLLOW : 1
LESION_CM : 1
FOLLOWUP_WITH : 1
RIGHT_LEG : 1
TIME_LISTED : 1
BRIMONIDINE_OPTH : 1
WITH_BEEFYY : 1
THINKS_MEDS : 1
VI_STATUS : 1
WAS_VISITING : 1
HYPNOTIC_NARCOTIC : 1
PATIENT_EXAMINED : 1
STATUS_PEROXIDE : 1
PT_MULTIPLE : 1
SESSION_AND : 1
SETTING_DOCUMENTATION : 1
AMBULATORY_CALCIUM : 1
NOT_HAD : 2
HOUR_THIS : 1
POSTKOREAN_TO : 1
PLAN_USE : 1
MH_HX : 1
WAS_FORMALITY : 1
MEDICATIONS_FOUND : 1
HAVE_SUSPICION : 1
HIS_FRIEND : 1
HE_STATUS : 1
SUBJECTIVE_DINNER : 1
OX_LB : 1
DATE_SSN : 1
WHO_WERE : 1
THOUGH_INJURY : 1
CONTINUES_REQUEST : 1
YOUR_LDL : 1
IDENTIFY_CONTRIBUTING : 1
SIGNS_OTHER : 1
PT_VERBAL : 1
MONITORED_PATIENT : 1
KNOWS_HE : 1
LIST_WITH : 1
ADD_INPATIENT : 1
FURTHER_PT : 1
THOUGHTS_TAKING : 1
REPORTS_ENERGY : 1
COTA_AND : 1
ANY_OTHER : 1
COMBAT_RESURFACE : 1
HEARING_AFTER : 1
ABOUT_CARING : 1
VET_APPEARS : 1
ISSUES_DRAMA : 1
BY_ANY : 1
BY_TEAM : 1
STATED_OR : 1
OCR_AT : 1
NEW_TREATMENTS : 1
OTHER_PERSONAL : 2
FRI_CULTURAL : 1
ORIGIN_REASON : 1
FOR_YOURSELF : 1
SERVICES_OR : 1
ANSWERED_WEIGHT : 1
ENTERED_TETANUSDIPTHERIA : 1
SHIFT_DURING : 2
NO_MUSIC : 1
OTHERS_PATIENT : 1
OF_RELIEVED : 1
HE_WILLING : 1
MANAGEMENT_SIGNS : 1
DENIES_CP : 1
BONE_CANCER : 1
NURSE_ALVAREZ : 1
AND_APPEARED : 1
HOUSING_FLAMMABLE : 1
MRSA_DOCUMENTATION : 1
IN_MY : 1
RN_URINE : 1
FLAMMABLE_PLASTIC : 1
REQUIRES_ASSISTANCE : 3
URINE_AND : 1
COMPLAINING_NOT : 1
PLAN_DISCUSSED : 1
SAFE_PLACE : 1
SENSORY_WITHIN : 1
OR_SEVERE : 2
IS_DUE : 1
THEN_PASSES : 1
NKA_CC : 1
WITH_DEPOSITS : 1
BUT_NEW : 1
OF_MENTAL : 1
OF_FLUVASTATIN : 1
DRY_EXT : 1
FALL_ASSESSMENT : 1
OUTPATIENT_INCLUDING : 3
SARAFIAN_FARJAD : 1
NEEDED_ASSISTANCE : 1
SUPERVISION_THE : 1
THIS_SC : 1
WT_LB : 1
ED_HE : 1
TO_HEALTH : 1
DID_PHYSICAL : 1
CARE_NO : 1
REPORTED_CHANGED : 1
DIAGNOSIS_ON : 1
TAKE_MOST : 1
SOI_SWELLING : 1
THE_IMPORTANC : 1
DIAGNOSIS_AND : 1
BODY_INDEX : 1
CLASS_VI : 1
PRESUMED_AND : 1
TREATMENT_INCLUDING : 1
HE_MOBILITY : 1
THAT_MENTAL : 1
RIGHT_AND : 1
YOU_BOTHERED : 1
HOPELESS_HAVE : 1
OL_SLIGHTLY : 1
IT_INDICATES : 1
STAFF_PROVIDED : 1
CONTINUED_EFFORTS : 1
CONCERNS_ABOUT : 1
MUSCLES_OF : 1
ORDERED_HER : 1
HAD_NEUROSURGERY : 1
AND_DRY : 1
COMPLAINTS_NO : 1
UP_WITH : 3
COGNITIVE_THIS : 1
HAS_EXHIBITING : 1
NEEDS_INCLUDING : 1
REQUIRED_FOR : 1
EXT_ADL : 1
DEFINE_EXERCISE : 1
DISEASE_SHOULDER : 1
PERSONAL_HYGIENE : 1
CAP_TAKE : 1
SHAVE_SELF : 1
SOCIAL_DEMOGRAPHIC : 1
BE_PICKED : 1
EACH_WILL : 1
OVERT_DISCOMFORT : 1
NO_WANT : 1
THESE_ISSUES : 1
CC_PRIMARY : 1
LOCATE_COMMANDS : 1
MEDICATION_ID : 1
WITH_SECURITY : 1
FACTORS_CHAMBER : 1
GROUP_OF : 1
ACTION_COLLECTED : 1
POSITIVE_RESPONSES : 1
TOOLS_TO : 1
TELEPHONE_TRAVEL : 1
GLUCOSE_PATIENT : 1
STRONG_REPORTS : 1
TO_MAINTAIN : 1
OF_RAL : 1
MEDICINE_PATIENT : 1
ON_FOLLOWING : 1
NO_REQUESTED : 1
EDUCATION_ASSESSMENT : 1
ANY_LYWANDA : 1
WOULDNT_BE : 1
BUT_NOT : 3
HAD_SPOKEN : 1
BED_MEDICINE : 1
MG_THE : 1
EVERY_OBJECTIVE : 1
NURSES_NOTE : 2
EXPERTISE_CERTIFIED : 1
TRAUMA_SURGERY : 1
PATIENT_HAVE : 1
EVERY_ACTIVE : 2
PAST_PSYCH : 1
WANT_NO : 1
NOTE_MEDICATION : 1
NO_FULL : 1
REASON_VISIT : 1
REPORT_PAIN : 1
MONTHS_THE : 1
DOCUMENTATION_AOX : 1
RM_ADDENDUM : 1
HAS_THE : 1
HE_SESSIONS : 1
ANEMIA_NURSINGACTIVITIES : 1
YO_ETOH : 1
THE_USUALLY : 1
SYSTEM_REPORTED : 1
EMPLOYED_AA : 1
PROGRAM_THOUGHT : 1
WAS_RATHER : 1
PERFORMED_OR : 1
BP_OF : 1
TWICE_FOR : 3
HAVING_RACING : 1
SENT_MICROSCOPIC : 1
HAS_HAD : 3
CONTROL_DURING : 1
CONTINUES_TO : 2
VISTA_FOR : 1
REGION_RECENTLY : 1
FEAR_FAMILY : 1
RECURRING_MASS : 1
NUMBER_LS : 1
IS_SEXUALLY : 1
NOTED_TAKING : 1
YES_REPORT : 2
WEIGHT_WHO : 1
PT_WORKING : 1
KNOXVILLE_PATIENT : 1
EMOTIONAL_DIRECTABLE : 1
RISK_ULCERS : 1
OTHERS_STAYING : 1
STAFF_CONSISTENCY : 1
ACTING_VIST : 1
ON_THE : 9
AND_INSTITUTE : 1
IN_RESIDENTIAL : 1
ANOTHER_MEDICATION : 1
HE_RECENTLY : 2
AND_ITS : 1
INFORMATION_ON : 1
TO_HELP : 1
BECAUSE_HE : 2
OF_THE : 13
HYDROCODONE_ACETAMINOPHEN : 1
NEVER_TAKE : 1
RELIEVING_THE : 1
ELIMINATION_AMOUNT : 1
UTICALS_EXERCISE : 1
TAMINE_MG : 2
REPORTED_HE : 1
NOTES_INDICATE : 1
TRANSFER_NO : 1
LI_AND : 1
FOR_ASSESSMENT : 1
ORAL_ALVEOPLASTY : 2
IDENTIFIED_THE : 1
HAS_NOT : 3
NOT_MEET : 1
ANXIETY_II : 1
CP_SOB : 1
FRED_NOTIFICATION : 1
TO_NEXT : 1
MELLITUS_IS : 1
MODERATE_VETERAN : 1
VET_TO : 1
DISORDER_CONTINUE : 1
OCR_PROGRESS : 1
ENTERED_BY : 1
REPORTS_NEXT : 1
TO_MOST : 1
AGE_IS : 1
FOLEY_PATIENT : 1
AND_GROIN : 1
COMMENT_ONCOLOGY : 1
PLEASE_REFILL : 1
PT_HE : 3
COLOR_AMBULATION : 1
READY_TO : 1
ON_THEM : 1
WITH_HIS : 5
CONTACT_CHIEF : 1
THEN_PRACTICED : 1
IS_REQUESTING : 1
FLOOR_UP : 1
UROLOGY_CONSULT : 1
CARE_UP : 1
APPROACHED_REFUSED : 1
DALE_SIGNED : 1
REMAINING_BUTTON : 1
FOLLOWS_NURSING : 1
MONTH_IS : 1
SCHEDULED_SURGERY : 1
FOR_CLIENT : 1
ACTIVE_INTEGRITY : 1
PARTICIPATION_XACTIVE : 1
PREVENTION_COORDINATOR : 1
NOV_IV : 1
DEVELOP_CHEST : 1
OF_APPROACHED : 1
GOT_OXYGEN : 1
PROVIDED_PATIENT : 1
AT_SPOKEN : 1
WILL_CONTINUE : 3
MR_CALLED : 1
ARMY_PATIENT : 1
INTO_THE : 3
ESPECIALLY_WHEN : 1
HAS_KERATITIS : 1
NO_OXYGEN : 1
GPD_OF : 1
OBSERVATIONS_KEY : 1
IMAGING_HOLOGIC : 1
AS_NEEDS : 2
TO_LDL : 1
NO_IDENTIFICATION : 1
WAS_NOTED : 1
LEARNING_BARRIERS : 1
SEEM_HELP : 1
TREATMENT_THEY : 1
ENTERED_IN : 1
RATIVE_DISORDER : 1
COMPONENT_SHINGLES : 1
OR_QUESTIONS : 1
ACTIVE_BP : 1
ISLANDS_CARE : 1
HRS_MEAL : 1
INTERVIEW_THE : 1
LOOK_AROUND : 1
NOT_ABLE : 3
ATTENDING_NOTE : 2
THINPREP_IMAGING : 1
STILL_WEAK : 1
FINE_WILL : 1
JOINT_DE : 1
ORIENTED_TO : 4
WHERE_HE : 1
FAMILIAR_WITH : 1
ANY_ON : 1
COLOR_SKIN : 1
CONTINENT_HYGIENE : 1
DELETING_CENTER : 1
NOTE_FEMALE : 1
LEARNING_ROUTE : 1
SOCIAL_OR : 1
EZETIMIBE_MG : 1
BRIEF_OUTLINE : 1
COMPLETED_AND : 1
STRABISMUS_NAGGING : 1
AGE_INSOMNIA : 1
APPLICABLE_REPORTS : 1
NEOMYCIN_ANY : 1
CONTINENT_OF : 2
OXYGEN_NASAL : 1
TELEPHONE_CARE : 1
INTRAOCULAR_WILL : 1
READER_CAROLYN : 1
DESPITE_FMLA : 1
PATTERNS_PATIENT : 1
FEEDING_LOCATION : 1
ZZSWS_NUMBER : 1
DL_CANCELLATION : 1
IN_HABITS : 1
UP_AND : 1
MEMORIES_AFTER : 1
MD_WIFE : 1
PULSE_OX : 2
TAKING_OF : 1
NOTE_OF : 1
RECENTLY_SIGNFICANT : 1
LEGIBLE_SATURATION : 1
THE_ACETAMINOPHEN : 1
AND_RETURNED : 1
AFTER_COMING : 1
LDL_NOTE : 1
THIS_ASAP : 1
BAND_SATURATION : 1
AND_OVER : 1
BY_PHONE : 1
GROUP_REL : 1
PREVENTION_SAFETY : 1
SHOW_REFLUX : 1
MACHINE_STILL : 1
NO_OTHER : 1
COMPLICATIONS_NO : 1
COMPLETED_PHYSICIAN : 1
ROUTINE_CARE : 1
THINKS_HIS : 1
SELF_DURING : 1
AFFECT_INCREASE : 1
FIRM_BOWEL : 1
SHIFT_WITH : 1
NO_NVI : 1
TO_SECRETIONS : 1
THE_CHIEF : 1
THE_KEYS : 1
BEFORE_GETTING : 1
PLACEMENT_ON : 1
PAIN_IN : 1
AVAILABLE_PATIENT : 1
HEADACHE_BOTH : 1
PARTIAL_CIG : 1
INFORM_AND : 1
SESSION_LET : 1
FLORIDA_ADDENDUM : 1
TIME_BY : 1
TYPE_OF : 1
NURSING_CUEING : 1
DOSE_SATUR : 1
THE_ACTIVITY : 2
FOR_TRAMADOL : 1
PHYSICIAN_PCE : 1
LESIONS_OF : 1
MEDICATIONS_MONONESSA : 1
TIRED_DEVELOP : 1
HAD_WELL : 1
THERAPY_DT : 1
PATIENT_STILL : 1
LABS_PULSE : 1
SCOPE_WHICH : 1
AND_NOW : 2
WITH_USING : 1
CPT_SHOULD : 1
AND_THEYRE : 1
REFUSE_MEAL : 2
DIRECTED_COMFORT : 1
PHYSICAL_THERAPY : 3
PULS_REPORTS : 1
SLIGHT_SERIOUSLY : 1
SKIN_CARE : 1
ADD_ACTIVE : 1
RECORD_ANTERIOR : 1
PATIENTS_CURRENT : 1
STAY_COST : 1
ORTHOPNEA_CAN : 1
SESSIONS_DATE : 1
ASSESSMENT_NECK : 1
DT_OBSERVATIONS : 1
FINDINGS_PRESSURE : 1
EVALUATED_THE : 1
ADVIL_QUITE : 1
OF_SCHIZOAFFECTIVE : 1
PHONE_ENTERED : 1
FOR_SEVERAL : 2
AMOUNT_OXYGEN : 1
HOMICIDALITY_ANTISOCIAL : 1
FEELINGS_TO : 1
ACTIVE_ONE : 1
TO_ARMY : 1
FOCUSING_ON : 1
REPORTED_TO : 2
IS_AND : 3
WORKED_BECOMING : 1
CONTINUED_DEPRESSION : 1
REFUSE_BOWEL : 1
ART_GROUP : 1
PROVIDER_CONTINUES : 1
NOT_GETTING : 1
YES_WAS : 1
MANAGEMENT_THOUGHT : 1
NONPARKINSONIAN_AGREE : 1
BUT_ALWAYS : 1
DL_HGB : 1
OF_BOWEL : 5
MCG_ORAL : 1
WEEKLY_WITH : 1
ASKING_SUPPORT : 2
LS_TO : 1
SEVERAL_OF : 1
VOICE_THIS : 1
PROGRESS_AT : 1
RACING_NOT : 1
PATIENT_WAS : 7
BUT_HAS : 1
ESSENTIAL_OTHER : 1
PATIENTS_VET : 1
REMOVED_INTRAOCULAR : 1
OBSERVED_TALKING : 4
REMINDER_UROLOGY : 1
STATURE_COLD : 1
MG_TWICE : 1
QMORNING_AND : 1
MORE_OF : 1
PERSONAL_BED : 1
NEURODE_DISORDER : 1
THEN_CHANGING : 1
BEEN_COMPUTERIZED : 1
LOWER_RIGHT : 1
NO_SOURCE : 1
NO_BEEN : 1
READER_OCR : 1
PHONE_ALERT : 1
OF_INSTRUCTION : 1
SOUNDS_FEE : 1
ENTIRE_MED : 1
FOLLOW_WITH : 1
FOR_LIFE : 1
DEGREE_TYPE : 1
AND_PROMOTE : 1
INSERTS_AN : 1
FOR_SECOND : 1
NOT_TALKING : 1
GRANDESOME_STATE : 1
FOR_ETOH : 1
DENTAL_ALVEOPLASTY : 1
DIAGNOSIS_ACQUIRED : 1
WAS_ON : 1
NEW_SAFETY : 1
DEVICE_MMHG : 1
PATIENT_THE : 2
FOR_BLOOD : 1
IS_SITTING : 1
ANSWER_INFORMATION : 1
DOES_THE : 2
HE_RUMINATES : 1
DETOX_HABITS : 1
BE_PAIN : 1
VANDER_VELDE : 1
NOTE_ACTION : 1
RESISTANCE_SOUNDS : 1
ABUSE_MENTAL : 1
CONSTANT_LEFT : 1
LLQ_REVIWED : 1
TENDING_NURSE : 1
EQUIVOCAL_HIS : 1
CULTURAL_FACTORS : 1
TAKES_OR : 1
SMOKING_AREA : 1
HAD_SEX : 1
ASSIGNED_TO : 1
PROVIDE_SUPPORT : 1
AN_SECURED : 1
AND_ABILITY : 1
AB_ATTEMPTED : 1
REPORTS_HE : 3
LIST_REVIEWED : 1
STATUS_EXAMINATION : 1
DOCUMENTED_THAT : 1
INPATIENT_NOTE : 1
UNIV_TIMEOUT : 1
JENKINS_FILL : 1
VIA_MAIL : 1
ULCER_NO : 1
THAT_DIRECTED : 1
WITH_PHYSICIAN : 1
SENT_FOR : 1
MENTAL_PT : 1
AUTHOR_DICKSON : 1
LOW_POSITION : 1
BLACK_OR : 1
NOTE_TELEPHONE : 1
NOT_SEEN : 1
WE_THE : 1
GETTING_PRESSURE : 1
AS_THERE : 1
WITH_ASSISTANCE : 2
PROSTHETICS_CLINIC : 1
CARE_REQUIRES : 1
TRAMADOL_HCL : 2
WITH_UPDATE : 1
NOT_FEASIBLE : 1
CESSATION_REFERRAL : 1
REFERRAL_IF : 1
AND_SUPPLIES : 1
ATTENTION_DEVELOPING : 1
THE_SAT : 1
LEADER_AND : 1
PERIODS_THE : 1
LEFT_SEGMENTAL : 1
AROUND_THAT : 1
IN_LEGS : 1
FORMAT_NO : 1
TREATMENT_NEEDS : 1
DRAINS_PROBLEM : 1
CONTACT_VET : 1
DOCUMENT_PHONE : 1
PAIN_REPORTEDLY : 1
REVIEWED_FROM : 1
CUING_AND : 1
START_SCAN : 2
WAS_THREE : 1
OUTSIDE_DATE : 1
ACUTE_SINCE : 1
AS_VIST : 1
THE_COLLAPSED : 1
HAS_ANALYZED : 1
ARESOL_CANS : 1
THAT_AND : 1
OTHER_SPECIFIED : 1
THIS_MEDICATION : 1
IS_HAVING : 1
MAY_AT : 1
FURTHER_RECOMMENDATIONS : 1
PLEASE_FUTURE : 1
FOLLOWUP_DERMATITIS : 1
SOCIAL_HISTORY : 1
FOLLOWING_WITH : 1
MAY_ARMY : 1
YES_ADR : 2
THIS_EVENING : 1
TOLD_NOTES : 1
NURSINGACTIVITIES_DAILY : 1
WILL_WITHIN : 1
SOURCE_THE : 1
LIVES_FACILITY : 1
CYMBALTA_EQUIVOCAL : 1
CLINICAL_JUDGEMENT : 1
AND_TOLD : 1
NUMBER_AMOUNT : 1
ALCOHOL_IN : 1
UP_OPERATIVE : 1
SON_CIGARS : 1
RESULTS_FROM : 1
BY_KING : 1
PARTNERS_HISTORY : 1
TAKE_TABLETS : 3
TO_LEISUR : 1
VETERAN_IS : 1
NEEDED_THIS : 1
WITH_MULTIPLE : 1
SINCE_AGREES : 1
INSTITUTE_UNIVERSAL : 1
MOUTH_TWICE : 2
DID_EAT : 1
OTHER_PATIENT : 1
OVER_STRESSED : 1
THIS_HE : 1
HIS_RIGHT : 1
AN_OF : 1
LIVES_CONDO : 1
THE_GRIEFWORK : 1
SOI_DRAINAGE : 1
MEASURES_BY : 2
LACTATING_MEDICATIONS : 1
WRITER_CASE : 1
THIS_VISIT : 1
NUTRITIONAL_STATUS : 1
PAIN_OBSTRUCTIVE : 1
IN_ASPECTS : 1
FOR_DRAINS : 1
MOUTH_FOUR : 1
SYMPTOMS_OF : 1
MEDS_NOTE : 1
TO_YOUR : 2
OTR_THE : 1
DOES_MEET : 1
USAGE_DX : 1
CARDIO_CP : 1
SHOULD_REPORT : 1
LATEST_PAIN : 1
BEHIND_IDENTIFIED : 1
TREATMENT_COMMENTS : 1
BY_ME : 1
HISTORY_HISTORY : 1
DEPENDENCE_SAFETY : 1
VETERAN_TIME : 1
PROGRESS_USING : 1
NUR_ADULT : 1
DOCTOR_THEN : 1
VACCINE_SCREEN : 1
ABSENCE_TEETH : 1
DVAMC_APPROVED : 1
THE_RADIATION : 1
ON_BECOMING : 1
RETURN_IN : 1
THIS_WEEKEND : 1
HAS_ANSWERED : 2
APPOINTED_LACY : 1
NEEDED_SAFE : 1
INSTILL_EXPIRED : 1
LAYOUT_TO : 1
GO_FOR : 2
RHONCHI_THIS : 1
REMOVE_APPLIED : 1
HE_HOPING : 1
AT_SMG : 1
ABLE_SIT : 1
MEDICATIONS_STATUS : 3
MOUTH_SUBJECTIVE : 1
COLONOSCOPY_WITH : 1
US_WHY : 1
UNIT_IN : 1
RETURN_CLINIC : 1
ES_ARRIVAL : 1
PRIMARY_TEAMS : 1
IF_AR : 1
LEFT_DISCREET : 1
GUNSHOT_TO : 1
ED_ANESTHESIOLOGY : 1
STAFF_AS : 1
INACTIVE_CARDIO : 1
AND_MH : 1
FOR_TREATMENTS : 1
BE_MUCH : 1
AND_THERE : 1
COMPLETED_BY : 1
VIA_REFERRAL : 1
FAMILIAR_THE : 1
ELICITED_MOOD : 1
HX_OF : 1
MEAL_FLUID : 1
MEDICATION_NO : 1
SIGNS_PHONE : 1
CURRENT_RADIATION : 1
IMPAC_NAME : 1
EVAL_SATISFACTORY : 1
PROBLEM_THAT : 1
DT_AREA : 1
FOLLOWUP_NEEDED : 1
IS_NOT : 2
AUTHOR_MACKIE : 1
CVS_NO : 1
HAS_HEART : 1
TO_MR : 1
OF_HER : 1
AFFECT_NO : 1
PENICILLIN_SON : 1
IS_MG : 1
MODERATE_SEDATION : 2
PSYCHOLOGY_NOTE : 1
CORSET_REMOVABLE : 1
FLUID_MET : 1
COLOR_YEAR : 1
WITH_MODALITIES : 1
REQUEST_AT : 1
SURGERY_CONSTANT : 1
KNEE_PAST : 1
CONTINUE_MAKE : 1
INFORMATION_WILLING : 1
POSITION_DT : 1
OR_CONSTANT : 1
OF_PAIN : 2
BEEN_STABLE : 1
ALONG_THE : 1
STAFF_TO : 2
COMMIT_MYSELF : 1
AFTER_PATIENT : 1
ACTIVE_CAN : 1
SEE_HX : 1
EVERYTHING_TEETH : 1
STILL_FEELS : 1
GOITER_UNDER : 1
GLEASON_GRADE : 1
DEPLOYED_DID : 1
ARISE_CONTINUING : 1
FEASIBLE_AND : 1
SIGNS_THEN : 1
PT_SAYS : 1
PAST_SUCCESS : 1
HAVE_STRONG : 1
MED_APPT : 1
OF_LESION : 1
CALL_THE : 1
HYGIENE_BED : 1
COUNSELED_STOP : 1
DELIVERY_OF : 1
LOCATION_STAFF : 1
DOB_DX : 1
AND_NUT : 1
SUBJECTIVE_OBJECTIVE : 2
AT_NUMBER : 1
SECONDARY_EMERGENCY : 1
PM_CAN : 1
TO_DEVELOPING : 1
HIS_NEXT : 1
CHANGED_FROM : 1
HX_EXAM : 1
NOT_HISPANIC : 2
ASSESSMENT_GUNSHOT : 1
ENGLISH_AND : 1
SECRETION_AMOUNT : 1
HIS_HOME : 1
OT_GET : 1
PAIN_RATING : 1
BASCOM_ADVISED : 1
VENTRICULAR_MOTION : 1
DISABILITIES_PATIENT : 1
BE_UP : 1
NUMBER_LEFT : 1
COULD_BE : 1
BED_RUMINATES : 1
DATE_PLAN : 1
ALL_OF : 2
FROM_THE : 1
ELECTRONICALLY_FILED : 2
LEVEL_WITH : 1
FOR_DEPRESSION : 1
TRAUMA_OR : 1
HIS_OCR : 1
RECENT_SUBSTANCE : 1
STOP_ESSENTIAL : 1
SEX_FEMALE : 1
PERIOD_THEN : 1
THE_OSAC : 1
AND_FROTHY : 1
NURSING_EXAM : 1
WAS_DUE : 1
HER_DIAGNOSIS : 1
HR_SA : 1
COCAINE_ABUSE : 1
SON_WIFE : 1
HAVE_SNACK : 1
RESTRICTIONS_COLONOSCOPY : 1
PROVIDED_BY : 1
DISORDER_SEVERE : 1
DRAW_AND : 1
WITH_PARTNERS : 1
WERE_SIXTEEN : 1
BRIGHT_CRADC : 1
PROBLEMS_GOALS : 1
THIS_SPOKE : 1
ADDENDUM_MALE : 1
CARE_CONSULT : 1
JOSE_PARTIAL : 1
INFLUENZA_IMMUNIZATION : 1
DEFINE_RIGHT : 1
DEVICE_MINIMUM : 1
SHOE_FINE : 1
NOTE_VALSARTAN : 1
AND_REMOVED : 1
PSYCHOSOCIAL_TO : 1
SOMATIZATION_DISORDER : 1
OD_VIGAMOX : 1
LIKELY_WAS : 1
ADR_ENTERED : 2
TURN_TO : 1
IT_THE : 1
PLEASE_CALL : 1
SOUNDS_SAO : 1
OX_ON : 1
OTHER_ACID : 1
GOALS_TREATMENT : 1
AT_FROM : 1
HIS_BONE : 1
RIGHT_MEDIAN : 1
SC_ANESTHESIOLOGY : 1
TO_CONSISTANT : 1
TIU_TO : 1
RESPIRATION_CALLED : 1
AGE_DISEASE : 1
ALL_ASPECTS : 1
ASSESSMENT_SCORE : 1
DOCTOR_AN : 1
END_THE : 1
CONTACT_AT : 1
OBSOLETE_POST : 1
MEET_PATIENTS : 1
IN_HOSPITAL : 1
FOR_ROUTINE : 1
OUT_OF : 1
DESCRIPTION_LAST : 1
TREATED_FOR : 1
PERSON_TIME : 3
NKA_USED : 1
BED_THE : 1
LIQUID_NITROGEN : 1
OXIMETRY_VITAL : 1
WAS_NUMBER : 2
AND_PPV : 1
OUTLINE_THE : 2
OPIOID_NEW : 1
APPROXIMATELY_MINUTES : 1
OVERT_MONITORED : 1
RUPTURED_GLOBES : 2
REASSESSMENT_PAJAMAS : 1
THE_CLINIC : 1
NO_JOINT : 1
OFFICE_TO : 1
DISCUSSED_WITH : 2
THEN_REVEALED : 1
EDUCATION_ORIENTED : 1
EATING_TAKING : 1
PATIENTS_TREATMENT : 1
COMPUTER_LIST : 1
DECIDED_HE : 1
PATIENT_OBSERVED : 1
EVEN_AFTER : 1
NEGATIVE_ATTEMPTED : 1
INVITED_TO : 1
MEASUREMENTS_LEFT : 1
TWICE_AS : 1
SKILLS_OTHER : 1
TRANSPORT_BASCOM : 1
TABLETS_LAST : 1
ON_TIME : 1
RESISTANCE_LUNG : 1
BASIC_HYGIENE : 1
PC_APPOINTMENT : 1
ALERT_CALM : 1
WEEK_HIM : 1
PRESCRIPTIONS_SUPPLIES : 1
ENDOSCOPY_BEEN : 1
AGREES_HE : 1
EDUCATION_MAKE : 1
ED_DOCUMENTS : 1
UP_TREATMENT : 1
HAD_SLEPT : 1
CENTER_THE : 2
MEDICATION_TREATMENT : 1
THIS_OCCURRED : 1
IMAGING_CONSULT : 1
AND_INSTRUCTED : 1
WITH_LIQUID : 1
THIS_TIME : 2
NEUT_ADDENDUM : 1
BEEN_OBSERVED : 5
ACCURATE_SECURED : 1
RESEARCH_VALSARTAN : 1
COULD_EVERYTHING : 1
ATTORNEY_VISITING : 1
CHART_THERE : 1
NEED_TO : 1
CPT_MOUTH : 1
ILLNESS_TREATMENT : 1
CP_THIS : 1
BY_FOUR : 1
OR_PAIN : 1
DOSE_ON : 1
OF_AND : 3
FROM_HE : 2
AGREES_THAT : 1
THOUGHT_WITH : 1
REQUIRED_THIS : 2
TO_KNOW : 1
FOR_NUMBER : 1
AMNESIA_PATIENT : 1
ARE_NO : 1
AND_EDUCATION : 1
TO_TIME : 1
IN_JUNE : 2
BLOOD_AND : 1
REMAINING_WITH : 2
PLANS_TO : 2
FOLLOWING_COMPLAINT : 1
STAYS_FALL : 1
SAMMIE_FOR : 1
ANXIETY_NOS : 1
VETERAN_EACH : 1
CHANGED_HIS : 1
PRODUCTIVE_COUGH : 1
MAIL_AND : 1
HAD_WITH : 1
HYGIENE_SPONGE : 1
TO_EAT : 1
MH_TRP : 1
MEDS_SEEM : 1
SHORT_SSN : 1
TO_PAIN : 4
OMEPRAZOLE_STOMACH : 1
GRION_AREA : 1
ON_CHARGES : 1
PAIN_WAS : 1
ASSESSMENT_MY : 1
LOC_SUFFERED : 1
THE_EXHAUSTION : 1
FOR_THAT : 1
SURFACEANTERIOR_CONCENTRATION : 1
ED_BASIS : 1
HE_NEEDED : 1
REPORT_NEW : 1
THERAPY_INITIAL : 1
OBTAINED_AT : 1
PC_MH : 1
OTHER_RESIDENT : 1
FOR_NAME : 1
LIVING_STAFF : 1
SCORE_PAT : 1
UPON_MY : 1
NO_EATING : 1
INJURY_THE : 1
ARE_CHANGES : 1
ESSENTIAL_HYPERTENSION : 1
OR_OF : 1
OF_COMMENT : 1
RESIDENT_VANDER : 1
LEFT_TKA : 1
GOALS_INFORMATION : 1
ROOM_LEVEL : 1
TIMES_FOOD : 1
ANOTHER_VETERAN : 1
HE_CHANGED : 2
HOUR_AFTER : 1
SUBSIDED_HIP : 1
WORK_GOALS : 1
DAUGHTER_HE : 1
IS_PNEUMOVAX : 1
FOR_SURGICAL : 1
ARE_COMPLETE : 1
WRITER_SPOKE : 1
TREATMENT_DETAILS : 1
REQUIRES_NO : 3
BP_PATIENT : 1
TEETH_APPOINTMENT : 1
HIM_ALONE : 1
ASPECTS_HEALTH : 1
STATUS_COMPLIANCE : 1
REMOVED_LIKELY : 1
AND_REQUESTED : 1
YOUR_STOMACH : 1
OF_RESPIRATORY : 1
AGO_THEN : 1
ENCOURAGEMENT_CUEING : 1
TIME_WITHIN : 1
MESSAGES_COULD : 1
TRANSFERRED_TO : 2
RAL_RECEIVED : 1
WE_WILL : 1
AUG_HOLD : 1
COMPUTERIZED_PROBLEM : 1
ACTING_CHIEF : 1
BE_CLEAR : 1
HOURS_FOR : 1
KNOWLEDGE_MENTAL : 1
RECEIVE_VACCINATION : 1
OD_GTT : 1
TO_THROUGHOUT : 1
PT_WAS : 4
AND_CONCENTRATION : 1
PERRLA_EOMI : 1
USED_NOT : 1
BAL_NEGATIVE : 1
ARRISES_PRAISED : 1
ORAL_INHALE : 1
IN_ORDER : 2
VETERAN_WORKING : 1
ASSISTANCE_THEN : 1
OX_PATIENT : 1
DOCUMENTED_IN : 1
NOTE_PC : 1
YOUR_GOALS : 1
THEN_RESUME : 1
HISTORY_SCHIZOAFFECTIVE : 1
CC_CARE : 1
THE_BEACH : 1
INTERESTED_TRIAL : 1
SCHEDULED_WITH : 2
PROBLEM_AREAS : 1
THIS_DURING : 2
DRUGS_WHILE : 1
MINUTES_DOCTOR : 1
OF_VA : 1
MEASURES_IDENTIFY : 1
AGREED_TO : 1
TEARFULNESS_NO : 2
REQUEST_PO : 1
HEARING_WAS : 1
DIFFICULTIES_NO : 1
SESSION_BECAUSE : 1
AND_ISSUES : 1
FEELING_NEED : 1
OTHERS_BREAKFAST : 1
REINFORCE_INSTRUCT : 2
THAT_SEEN : 1
SURVEILLANCE_FOLLOWUP : 1
TRAUMA_NOW : 1
UNDERSTOOD_ENGLISH : 1
MEDICAL_CONDITI : 1
THERE_FALL : 1
ORTHOPNEA_NOCTURIA : 1
BY_AN : 1
AS_WITH : 1
IN_FACILITY : 1
PLAN_WITH : 2
SOCIAL_SMOKING : 1
NEURO_AWAKE : 1
TAMPA_SEE : 1
TESTS_TO : 1
VOMITING_AT : 1
MG_EVERY : 2
MUSIC_WHERE : 1
WITH_RECENT : 1
AN_OUTPATIENT : 1
PULSES_AND : 1
SERVICES_BEHAVIOR : 1
OF_ADHERING : 1
NURSING_THE : 1
LEG_OUTCOME : 1
KNOWS_SHOULD : 1
PROGRAM_FOR : 1
OXYCODONE_PICK : 1
MOVEMENTS_SHIFT : 4
AS_HE : 2
PATIENT_HELP : 1
VISION_TRANSFERRED : 1
FALL_EPIS : 1
THE_MONTHS : 1
HAVE_ABOUT : 2
KING_NO : 1
THE_BP : 1
PRIVILEGES_BASIC : 1
RYAN_VISTA : 1
HAVE_REQUEST : 1
EFFECT_MAKING : 1
REVIEW_OF : 1
DEPARTMENT_OR : 1
TO_SHAVE : 1
WT_KG : 1
ATTENDANCE_DESPITE : 1
PRN_TX : 1
CLASS_IV : 1
CATHETERIZATION_FR : 1
THE_BATHROOM : 1
WITH_TWO : 1
HYDROBROMIDE_TAB : 2
EFFORTS_AND : 1
THIS_PRIMARY : 1
INTERDISCIPLINARY_RECORD : 1
FURTHER_ACTIVE : 1
PATIENT_PROBLEMS : 1
GROUP_HE : 1
HAS_WILL : 1
THIS_NOTE : 2
TWO_HIS : 1
ARTERIOSCLEROSIS_PROVIDED : 1
BEING_SENT : 1
WITH_BASCOM : 1
GETTING_OUT : 1
NO_REQUIRED : 2
HE_THAT : 2
SICK_YOUR : 1
CULTURAL_FOOD : 1
ROUTINE_UP : 1
HE_WITH : 1
DAILY_DURING : 1
PERSONAL_PM : 1
PROGRAM_INCLUDING : 1
RECOMMENDED_THAT : 1
OBSERVED_HIS : 1
IN_CM : 1
INDIVIDUAL_NOTE : 1
SITUATION_SHOES : 1
SOCIAL_FAMILY : 1
AND_CYST : 1
POST_PATIENTS : 1
ANXIOUS_DEPRESSED : 1
CURRENT_DOSE : 3
ICDCM_FARJAD : 1
CONTINUES_BE : 1
ANTICOAGULATION_THYROID : 1
NAIL_BUT : 1
DEFERRED_EMOTIONALLY : 1
FALL_ESPECIALLY : 1
THINGS_IN : 1
ATRAUMATIC_NORMOCEPHALIC : 1
PROBLEM_THOUGHT : 1
RASH_BLACK : 1
UNIT_REVIEWED : 1
BY_RACE : 1
HAD_UNPROTECTED : 1
SIGNFICANT_NOT : 1
PRESSURE_WOUND : 1
BILLS_MONEY : 1
ASSIGNED_CALLER : 1
HL_LDL : 1
TWICEWEEKLY_ART : 1
DUE_CONCERN : 1
SUPPLIES_RADIATION : 1
PATIENT_AND : 2
HE_VISITS : 1
VS_MEDICATION : 1
AN_HOUR : 1
LEISUR_AMOUNT : 1
TO_REACH : 1
ORDERED_SUPPLY : 1
DX_LOW : 1
SKIN_NOT : 1
AND_UPDATED : 1
CONTACT_PATIENT : 1
ACTIVE_BATHROOM : 1
IF_POSSIBLE : 1
NOT_PREVIOUSLY : 1
PH_PH : 1
DRUG_INCREASE : 1
COMMENT_ENTERED : 1
AND_WORKED : 1
AT_ON : 1
TEAMS_TO : 1
TER_OXYGEN : 1
SUP_PHYSICAL : 1
TO_ANOTHER : 1
SESSION_REINFORCE : 1
ALL_NURSING : 2
SMG_SATTHURS : 1
AND_DISCREET : 1
FOLLOW_UP : 7
MG_TAB : 9
CUMULATIVE_HRS : 1
IN_THE : 21
ADDENDUM_TAKING : 1
THE_NEOMYCIN : 1
LB_HISTORY : 1
OF_SHOT : 1
TESTICLE_BY : 2
ABOVE_MORE : 1
PAIN_AND : 2
CLINIC_OAK : 1
ANXIETY_DYSMETAB : 1
DISEASES_OUTPATIENT : 1
ABUSING_FOR : 2
CPT_OR : 1
COMMENT_ENCOURAGED : 1
WAS_WITH : 4
INCLUDING_AM : 1
PHYSICIAN_JOSE : 1
CARE_NUMBER : 1
NOT_COMPLETE : 1
TO_MIN : 1
INCREASED_MIN : 1
DELIVERY_MMHG : 1
SERIOUSLY_HURTING : 1
BE_PRN : 1
AND_CARMODY : 1
RANGES_PTSD : 1
RESPIRATION_DEC : 1
EXERCISE_PSYCH : 1
BASISPHYSICAL_THERAPY : 1
FUTURE_ANXIETY : 1
COMFORT_IDENTIFY : 1
PPT_PERIO : 1
SNACKS_MET : 1
THAT_LOSING : 1
HERE_FOLLOWUP : 1
OR_ADDENDUM : 1
DPM_CONDITION : 1
MOVED_TO : 1
LEVEL_SUPERVISION : 1
PRIMARY_LANGUAGE : 1
THE_WHY : 1
HOME_DONE : 1
FOR_SELF : 1
NURSING_STAFF : 1
VERBAL_APPEARED : 1
AS_BASED : 1
TEAM_CONSULT : 1
NOT_HAVE : 1
APPOINTMENT_AT : 1
AND_HAS : 6
RIGHT_FINDINGS : 1
OF_GERD : 1
IF_THERE : 1
ALTERNATE_EVERY : 1
PING_PATTERN : 1
IER_UNSURE : 1
ELIMINATION_VIST : 1
REST_TEAM : 1
EYE_FOR : 1
EXTRA_INPT : 1
LDL_INR : 1
DENTAL_PRIMARY : 1
OF_PVD : 1
MOOD_ANY : 1
VISIT_TEARFULNESS : 1
RECEIVED_IN : 1
PROTECTORS_PLACE : 3
PRESENTS_TO : 2
ACCIDENTS_BECAUSE : 1
PAINS_ESPECIALLY : 1
BROTHER_VISIT : 1
REASSESSMENT_LB : 1
MEDS_AS : 2
GRIEFWORK_WORK : 1
MAKE_UP : 1
OF_MOOD : 1
LIST_THE : 1
DERMATITIS_AFFECTED : 1
ADDITIONAL_INFORMATION : 1
ENERGY_AND : 1
SATISFACTORY_CASUAL : 1
KNEE_DENIES : 1
LACY_DO : 1
MOBILITY_BATHROOM : 1
CARE_LOCATE : 1
ARRIVAL_WAS : 1
OTHER_BLOOD : 1
RIGHT_BETWEEN : 1
RISK_DANGER : 1
WITH_FOOD : 1
PAIN_ACTIVE : 1
PAST_SOCIAL : 1
WORST_OF : 1
SEEN_FEELING : 1
BCP_LEVELS : 1
BE_TO : 2
ETOH_BIPOLAR : 1
BY_GET : 1
ORAL_CLINIC : 1
FOR_PERIOD : 1
WAY_WANT : 1
TREATMENT_DISEASE : 1
DVAMC_HAS : 1
IN_DECLINED : 3
LIKE_TO : 1
MH_OP : 1
DISORDER_OD : 1
WILL_FOR : 1
ADMISSIONS_IN : 1
MOUTH_ONCE : 1
CONSULT_IRAQ : 1
AT_FALL : 1
GETTING_ENOUGH : 1
MEDS_TO : 1
ACTIVITY_TEMPERATURE : 1
FEELS_AS : 1
INTEGRITY_NOT : 1
ANTIBIOTIC_WITH : 1
WAS_EQUIVOCAL : 1
IN_PLEASE : 1
THIS_WRITER : 3
NOT_TO : 5
YOU_TREATED : 1
BIRCH_HE : 1
PLEASE_SEE : 1
SOCIAL_SECURITY : 2
HE_HAD : 7
ANDRA_ANESTH : 1
MG_DL : 1
SIGNS_CT : 1
NONPARKINSONIAN_WITH : 1
AREA_WITH : 2
FLORIDA_TAKING : 1
WHO_ARE : 1
SEXUALLY_ACTIVE : 1
DISABILITIES_PROGRAM : 1
PREGNANT_LACTATING : 1
INCREASE_RISK : 1
STRENGTHS_APPEARS : 1
ORTHOPEDIC_PROVIDER : 1
HIS_MEDS : 1
SHE_SHE : 1
AT_ENCOUNTER : 1
AFRICAN_AN : 1
APPROVED_TO : 1
TO_MENTAL : 1
VISIT_MENTAL : 1
SHORT_BURSTS : 1
AND_HELD : 1
ROUTINE_FOR : 1
CHAPLAIN_RESIDENT : 1
MAKE_PROGRESS : 1
MEDICATIONS_CVS : 1
PRESCRIPTION_METHADONE : 1
DEMONIC_ADDENDUM : 1
GROUP_CANCELLATION : 1
THE_AS : 3
BUTTOCKS_AND : 1
RESURFACE_ANOTHER : 1
RECORDED_ON : 1
ABOUT_TESTS : 1
CERTIFIED_BY : 1
WKS_THEN : 1
BONE_AND : 1
IS_YOUR : 1
PATIENT_CONTINENT : 6
DENIES_ALLERGY : 1
PROVIDER_PT : 1
SEVERAL_AS : 1
RESIDENTIAL_IN : 1
ADULT_TAKES : 1
PERIODS_IN : 1
LENGTH_MORE : 1
DENTAL_EMERGENCY : 1
SURGERY_HAVE : 1
HAD_FEAR : 1
ORDER_TO : 2
AND_NURSING : 2
CALLED_STATING : 1
COMMENTS_TX : 1
STATE_VETERAN : 1
INTERVIEW_VETERAN : 1
GOAL_OUTCOME : 1
OR_HEARING : 1
FLU_YRS : 1
INACTIVATED_VACCINE : 1
MDI_PAIN : 1
FEVER_IN : 1
PROVIDES_FITS : 1
TO_HEARING : 1
PREVENTION_ADDENDUM : 1
AWAY_MAJOR : 1
MISSED_WE : 1
UPSET_DIVORCE : 1
HE_REQUESTED : 1
LOCATION_UPPER : 1
RECEIPT_STARTING : 1
MAKING_MACHINE : 1
OF_DIFFERENT : 1
WITH_OCR : 1
AS_VETERAN : 1
MEDICATION_OXYCODONE : 1
NA_HIGH : 1
KILIANMOBILITY_TH : 1
GAVE_HIM : 1
OPERATION_DISPOSITION : 1
OF_ACTIVITY : 1
ANTIBIOTIC_NO : 1
RIC_DISCHARGE : 1
TOO_LENGTH : 1
TO_FROM : 1
NO_OF : 3
WITH_ACTIVE : 1
JUNE_THE : 1
APPLIED_AT : 1
THESE_INSTRUCTIONS : 1
BE_REFERRAL : 1
DISCUSSED_DIETARY : 1
CAUSING_PT : 1
THE_OCR : 1
LEARN_YES : 1
TECHNICIAN_CUT : 1
ART_HE : 1
CODE_SHOULD : 1
PACEMAKER_NO : 1
WITH_REMOVABLE : 1
IS_SPREADING : 1
OBTAINING_CONSENT : 1
OF_XANAX : 1
APPOINTMENT_NUMBER : 1
HIGH_RISK : 1
RECOVERY_DTC : 1
SX_ANXIETY : 1
APPEARED_TO : 1
STRENGTH_HEAD : 1
MOUTH_AS : 1
CLINIC_NURSING : 1
RECENTLY_HAD : 1
INFORMED_WAS : 1
HIS_CONDITI : 1
HIS_PLAN : 1
XX_ATTENTIVE : 1
EDUCATION_PHE : 1
OUTPATIENT_CVS : 1
AFTER_MED : 1
HX_PERIOD : 1
OF_PING : 2
HEADACHE_MEDS : 1
DETOX_ADMITTING : 1
ANTIBIOTIC_OU : 1
WERE_MEMBERS : 1
SWELLING_PC : 1
COOPERATIVE_MAXINE : 1
APPEARANCE_SATISFACTORY : 1
FUTURE_APPOINTMENTS : 1
DIVERTICULOSIS_KEOMUAN : 1
ID_RUPTURED : 1
DENTIST_MON : 1
SUPERVISION_ENCOURAGEMENT : 1
LEG_LOCALIZED : 1
TREATMENTS_TO : 1
AN_ACCURATE : 1
MEDICATION_REQUESTED : 1
LIVING_DURING : 1
AND_WHEN : 1
CARE_FOLLOW : 1
ENTERED_BED : 1
AND_AGREE : 1
MAXINE_CHAPLAIN : 1
THE_OPERATIONAL : 1
INJURIES_BRIGHT : 1
FOR_SCHIZOAFFECTIVE : 1
FROTHY_ELECTRONICALLY : 1
MG_ER : 1
PT_ANY : 1
IMAGING_DISEASE : 1
TAB_MG : 3
INFORMATIONAL_REQUEST : 1
EAR_NAME : 1
PRIOR_RECOVERY : 1
WITH_INSOLE : 1
TIMES_BUT : 1
APPLIED_STERISTRIPS : 1
DOSE_CONSULT : 1
SIDE_LOWER : 1
RIGHT_SENSORY : 1
CENTER_FOR : 2
FROM_COUNTRIES : 1
APPROPRIATE_FOR : 1
AGAIN_IN : 1
STAND_PT : 1
THROUGH_ANXIETY : 1
DISPOSITION_PACU : 1
HEARD_MURMURS : 1
WITH_SET : 1
HIS_AS : 2
NO_COMPLAINTS : 1
ASSESSMENT_PT : 1
NO_COUGH : 1
THEN_HE : 1
PAIN_LACK : 1
TAKE_ONE : 8
AND_ALSO : 1
NOW_DOUBLE : 1
OR_NOT : 1
FACILITY_APPOINTED : 1
SESSION_TO : 1
STAR_ACTIVITY : 1
AT_ACTIVE : 1
CONDITI_ADR : 1
CARE_ICDCM : 1
SUBSPECIALTY_PHYSICIAN : 1
SPLIT_SIZE : 1
HEMATURIA_PAIN : 1
REQUIRED_OR : 1
SNUFF_HISTORY : 1
VARIABLE_DIDACTIC : 1
FINDINGS_BLOOD : 1
INFLUENZA_AA : 1
PERSONALITY_SESSION : 1
OF_AT : 1
JUST_THEM : 1
OR_ANY : 1
CONSUMED_PROVIDED : 1
AS_FOLLOWS : 1
THIS_MANY : 1
DISORDER_MAJOR : 1
ON_NOV : 1
EXAM_MISSING : 1
HUNTSVILLE_CBOC : 1
SOUNDS_CLEAR : 1
HELIOS_ON : 1
INDIVIDUALS_HIGHPREVALENCE : 1
ENTERED_ANTICOAGULANT : 1
MALE_MYOPIA : 1
COMP_NOTET : 1
FINALS_DENIES : 1
SUPPER_REFUSED : 1
NVI_FULL : 1
NEW_AND : 1
MR_CONTINUE : 1
INPATIENT_MEDICATIONS : 1
WITH_GAVE : 1
ATTENDING_AND : 1
OBSERVED_DISCUSS : 1
ENCOURAGED_TAKE : 1
ROOTS_HE : 1
CFCF_INHL : 1
XANAX_NOT : 1
MAINTAIN_RECOVERY : 1
WILL_INCREASE : 1
THAN_HOUR : 1
LEGS_TAKE : 1
OR_TO : 1
EPIS_EMESIS : 1
JOB_TOOK : 1
NUMBER_BOWEL : 4
ANTIBIOTIC_NEOMYCIN : 1
AND_THAT : 2
WHILE_DID : 1
COMMIT_TO : 1
CHARGES_AREA : 1
NECESSARY_TREAT : 1
MOUTH_CARE : 1
AND_CLINICAL : 1
WITH_ASKING : 1
OTHER_NONVA : 1
SA_TAKE : 1
TEMP_PULSE : 1
MY_JUDGEMENT : 1
GLASGOW_COMA : 1
HES_TOLERANCE : 1
HOURS_ACTIVE : 2
RIGHT_PATIENTS : 1
OL_IS : 1
ENCOURAGED_TO : 2
AMOUNT_CONSISTENCY : 1
DYSPHAGIC_PROGRAM : 1
THE_CLC : 1
PAIN_NO : 1
DEC_FLU : 1
PATIENT_EDUCATED : 1
REFUSED_MEDS : 1
AND_BY : 3
SITUATIONAL_ANXIETY : 1
AND_CONSUMED : 1
ADVISED_TO : 3
PT_STATES : 1
AND_ADJUSTMENT : 1
OR_LESS : 1
WITH_OTHERS : 1
HE_DO : 1
DT_WAS : 1
PAINFUL_THE : 1
MEDICATIONS_UPON : 1
NOTE_CLOZAPINE : 1
MOST_THE : 3
SX_OF : 1
VISUAL_UCINATIONS : 1
WILL_LOOK : 1
TOBACCO_USE : 1
LAST_MONTHS : 2
ASSISTANCE_OF : 3
LOCATION_HR : 1
TO_JERSEY : 1
FORMALITY_HE : 1
OF_ON : 2
PHYSICIAN_WRITER : 1
NURSING_NO : 1
MSE_NO : 1
GUNSHOT_WOUNDS : 1
TO_KERATOACANTHOMA : 1
FOR_COURSE : 1
OS_NORMAL : 1
DX_HOMICIDALITY : 1
CORRECTLY_STATES : 1
HIM_FINE : 1
INFORMATION_GAF : 1
DISCUSS_WITH : 1
CONSULT_NOTE : 1
EMOTIONALLY_TO : 1
EVERY_FOR : 1
FARJAD_TRAV : 1
CONDO_HBPC : 1
AMBULATION_REQUIRES : 1
PRIMARY_PLAN : 1
BARRIERS_NONE : 1
APPOINTMENT_NOTE : 1
SOCIAL_NUMBER : 2
MG_REVIEW : 1
MAKE_FAIR : 1
DISTENDED_AND : 1
PLEASE_VISTA : 1
DL_DL : 1
APPLICABLE_ESOPHAGOGASTRODUODENOSCOPY : 1
AEROSOL_PULSE : 1
OR_INCLUDING : 1
FOR_ENTERED : 1
FOLLOW_OF : 1
EVALUATION_NOTE : 1
TO_SPEAK : 2
TREATED_VISIT : 1
NOT_VET : 1
PAST_CURRENT : 1
SMOKE_NUMBER : 1
QUALITY_XACTIVE : 1
TRANSPARENCIES_NEED : 1
RESULT_FURTHER : 1
CARING_FOR : 1
COLEMAN_ASSESSMENT : 1
JENNY_MEDICATIONS : 1
NOTE_URINE : 2
GOAL_STUDIES : 1
PROGRAM_BRIMONIDINE : 1
SCHIZOAFFECTIVE_MAJOR : 1
ACTIVE_TO : 1
THOUGHT_ELICITED : 1
HIS_JOB : 1
DISCUSSED_THE : 2
WHO_SAID : 1
STOP_HYPERTENSION : 1
LEFT_TESTICLE : 1
ROUTE_SMOKING : 1
BLADDER_BP : 1
VALVE_LEAFLETS : 1
MOUTH_BEDTIME : 1
DATE_TEMP : 1
APPOINTMENT_MR : 1
DO_INCIDENT : 1
LAB_NOTIFICATION : 1
PC_CARE : 1
REQUEST_RETURN : 1
AND_FEELS : 1
ACTION_HE : 1
HE_VERBALIZED : 1
CONDITIONS_CLINIC : 1
IS_ATTENDING : 1
PHYSICIAN_PHYSICIAN : 2
PAIN_PHYSICAL : 1
COUGH_ANEMIA : 1
THE_WAS : 3
HOURS_REPORT : 1
HAS_SUPPLY : 1
OXYCODONE_ACE : 1
SPECIFIED_OF : 1
QID_PROBLEMS : 1
PRESSURE_BECAUSE : 1
PM_NO : 1
FALLING_OBSERVED : 1
SITUATIONS_VETERAN : 1
VISTA_TO : 1
NO_MDS : 1
SLOWLY_INCREASE : 1
YRS_AGE : 1
GPD_EPIS : 1
HELP_BUT : 1
SUBSTANCE_ABUSE : 2
STOPPED_TAKING : 1
UNSP_SOMATIZATION : 1
LAB_THERAPY : 1
BATHROOM_OTHER : 1
SEDATION_GOOD : 1
RESPONSIVE_PSYCH : 1
PLACEMENT_REGULAR : 1
MASS_INDEX : 1
OPEN_IMAGING : 1
COMPLICATIONS_FOLEY : 1
TAB_AS : 1
EFFORTS_TO : 1
WAS_NOT : 5
SMG_AND : 1
SEBORRHEIC_DERMATITIS : 1
COMBAT_MEMORIES : 1
CUMULATIVE_USAGE : 1
APPEAR_THAT : 1
THAN_SURGEON : 1
OBJECTIVE_PULMONARY : 1
ACTIVE_HCL : 1
AND_DESCRIPTION : 1
CHANGED_BUT : 1
EVERY_NOMED : 1
WHEELCHAIR_EXTRA : 1
OR_OUTLINE : 1
ANESTHETIC_DRUG : 1
BY_PSYCH : 1
FOR_AND : 1
BRC_SESSION : 1
OR_VISION : 1
DEODORANT_OTHERS : 1
PRIOR_SURGERY : 1
NUTRITION_PAIN : 1
OCT_DENTAL : 1
BMI_BODY : 1
CARE_PLAN : 1
SNACKS_WITH : 1
PROBLEM_ACTIVITIES : 1
GROUP_SYSTEMS : 1
HIS_TREATMENTS : 1
ALERT_COOPERATIVE : 1
DOCUMENT_CURRENT : 1
DIVERTICULOSIS_POON : 1
DATE_TAKE : 1
COUNSELED_TO : 1
RUMINATES_HE : 1
TO_DATE : 1
WE_CALL : 1
VASCULAR_NO : 1
ENTERED_HISTORY : 1
PROGRESS_WITH : 1
THE_PAST : 4
PROGRAMS_HIS : 1
ER_PROT : 1
THIS_VISUAL : 1
BEEFYY_BLACK : 1
THERE_ARE : 1
APPLIED_LENGTH : 1
NOTE_HAVERLY : 1
TOLERANCE_INFLUENZA : 1
REPEAT_LABS : 1
FOLLOWUP_PATIENT : 1
HIGHPREVALENCE_COUNTRIES : 1
RECENT_IDEATION : 1
HIS_REQUEST : 1
DIFFERENT_COMMANDS : 1
ABOUT_EXPECTED : 1
FOOD_DRINKS : 3
CM_COMMENT : 1
HIS_COULD : 1
COMPLETE_PHYSICAL : 1
ELIMINATION_THE : 1
PATIENT_HEART : 1
NO_ASSISTANCE : 3
ME_ALSO : 1
SMOKE_PATIO : 1
OUTPT_WORK : 1
THREE_ACTIVE : 1
SEX_IER : 1
VETERAN_SPOKE : 1
SCREEN_FOR : 1
COMMENTS_THOUGHT : 1
OF_SERVICE : 3
BEHAVIORS_HAS : 1
LITTLE_THAN : 1
INPT_NURSING : 1
TIME_COLOR : 1
TIME_AND : 2
DOES_APPEAR : 1
PATIENT_DISCHARGE : 1
THERAPY_APPOINTMENT : 1
GREATER_SURGEON : 1
PROVIDED_CHECKS : 1
SON_IN : 1
DEPRESSION_ANXIETY : 2
NOT_LEAVE : 1
ETC_DURING : 1
IT_WITH : 1
FOR_PHONE : 1
CONTACT_COMPLAINT : 1
PROVIDER_COST : 2
NOTE_SEVERAL : 1
PPC_SSN : 1
ABUSING_ALCOHOL : 2
DEPRESSIVE_DISORDER : 1
CHIEF_THAT : 1
TOPIC_THE : 1
BECOMES_ANGRY : 1
PERSONAL_MATTER : 1
TOO_CLOSE : 1
PHYSICIAN_NUMBER : 1
COMMANDS_AND : 1
UNPROTECTED_SEX : 1
TO_DOCUMENT : 1
WITH_HIM : 2
LEGAL_TOTAL : 1
THE_CHARGES : 1
ACTIVITY_INDEPENDENTLY : 1
WITH_VIA : 1
BASE_LABS : 1
APRIL_WHEN : 1
VETERAN_LIVES : 1
IVE_EVERYTHING : 1
FOLLOW_OPERATIVE : 1
DRAINS_PAIN : 1
ROOMMATE_WAS : 1
DENIES_TEARFULNESS : 1
PENDING_MONTHS : 1
UPCOMING_LEISUR : 1
ANESTHETIST_ANDRA : 1
OXYGEN_ARM : 1
ADL_FLOW : 1
XACTIVE_EAGER : 1
NED_CONSENT : 1
BACK_WITH : 1
MAKE_DEODORANT : 1
FEEL_BETTER : 1
BEEN_SMILING : 3
TIME_THE : 1
TAMPA_TO : 1
CAN_AFFECTED : 1
SPREADING_COLLECTION : 1
PARTICIPATE_THE : 1
SEE_HIS : 1
INSTRUCTION_WEEK : 1
PROPER_OF : 1
NURSING_PAIN : 1
IS_FROM : 1
LEARNING_PL : 1
AM_BEFORE : 1
FACILITY_PROVIDES : 1
CONVEY_FEELINGS : 1
ON_TH : 1
THE_IF : 4
FOR_DONNING : 1
THROUGH_THERAPY : 1
TONGUE_MOST : 1
DO_THINGS : 1
SUGGESTED_TIME : 1
IRRITATIVE_URINARY : 1
FOR_MINUTES : 3
NA_RISK : 1
OF_ACHIEVING : 1
HYPERLIPIDEMIA_NOTED : 1
PATIENTS_BMI : 1
WITH_THAT : 2
DOCUMENT_HE : 1
CARDIOMYOPATHY_HAS : 1
WORK_MEDICATION : 1
MONTHS_OR : 1
WITH_REMAIN : 1
WITH_ROUTINE : 1
NOT_DEPRESSED : 1
INSOMNIA_PTSD : 1
GRADE_MEMBER : 1
CBOC_LAB : 1
PT_TO : 7
MINUTES_GROUP : 1
FINDINGS_TESTICLE : 1
BLACK_AFRICAN : 1
THE_HPI : 1
FOR_NEURONTIN : 1
PRESSURE_USING : 1
TRYING_REINFORCE : 1
ALCOHOL_VOICED : 1
MEDICATION_ORIENTED : 1
STATURE_COMMON : 1
KNEW_VET : 1
MEDICATIONS_GIVEN : 1
AND_PAST : 1
AA_FOR : 1
COUNSELING_ASSESSMENT : 1
FEVER_WHICH : 1
MOBILITY_PATIENT : 1
BLOOD_MEDICAL : 1
NEEDS_REHABILATION : 1
TO_OTHER : 1
SIDE_RIGHT : 1
FURNITURE_OVER : 1
USUALLY_THE : 1
SKIN_FOR : 1
PRIMARY_SPOKEN : 1
PAIN_IS : 3
THIS_WITH : 1
HIS_WAS : 2
ALCOHOL_DEPENDENCE : 2
KRIS_SON : 1
NEW_RX : 1
EYE_KING : 1
HCL_TAB : 2
VISUAL_NURSING : 1
PER_PT : 1
VA_WITH : 1
HIS_TEAM : 1
NEGLECT_ALLERGIES : 1
UPSET_DENIES : 1
REMINDER_PRIOR : 1
THERE_BEEN : 1
TIMEOUT_SYSTEMATIC : 1
THE_MOMENT : 1
PART_OF : 1
INTERESTS_DISCUSSED : 1
AND_THINKS : 1
UP_WHEELCHAIR : 1
VOIDED_AMOUNT : 1
FEAR_OF : 1
ALCOHOL_FOR : 2
DISCHARGE_DATE : 1
INSTRUCT_NEEDS : 2
AND_SHARING : 1
ACTING_ADDENDUM : 1
PRIMARY_CARE : 3
ON_REPORTED : 2
BY_THREE : 1
TREATMENT_PT : 1
ONE_STORY : 1
OF_FLU : 1
TWO_HOW : 1
BAGS_DEPENDENCE : 1
BY_METHOD : 1
TEAM_AND : 1
ES_ON : 1
ADL_PE : 1
WITH_LONGSTANDING : 1
EMOTIONALLY_SCHEDULED : 1
SPOKE_HIS : 1
SALMERON_COST : 1
PULSE_PATIENT : 1
THERAPY_ANXIETY : 1
ALL_MEDS : 1
BEING_THAT : 1
ORIGIN_PRIMARY : 1
HIS_SHE : 1
IS_BY : 1
DOUBLE_CLICK : 1
TALKING_TO : 4
RAL_THEY : 1
TEETH_NEEDED : 1
HELD_TONGUE : 1
PRESENTLY_TO : 1
SAO_PRESSURE : 1
ASSIST_DONNING : 1
TO_CONCERN : 1
PERFORMED_TO : 1
YOU_FEEL : 2
RR_UPSET : 1
ABOUT_ANY : 1
ANESTHETIC_CAUSING : 1
STEPHANIE_JUNE : 1
ILLNESS_VISITS : 1
HAVING_TAKING : 1
CONTINENT_COLOR : 1
PATIENT_OF : 1
FOR_MEDICATION : 1
ACTIVE_MEDICATIONS : 5
WEIGHT_LB : 3
THEN_GO : 1
BM_PATTERN : 1
ASK_YOU : 1
TREATMENT_INACTIVE : 1
PERFORMED_MOST : 2
HAVERLY_ANDRA : 1
NO_ANATOMICAL : 1
TRAMADOL_MG : 2
HIM_AT : 1
NO_SIZE : 1
JERSEY_JUNE : 1
USE_FENTANYL : 1
NO_COMMENTS : 1
WANTS_APPOINTMENT : 1
FOR_MH : 1
THEN_CLEAR : 1
EXTENDED_IN : 1
MEDICATIONS_BEEN : 1
IS_DOMICILED : 1
PRESSURE_APPLIED : 1
WITHDRAWAL_TAKE : 1
HEART_SENT : 1
ER_UNIV : 1
TUMOR_IN : 1
HYDROCODONE_MG : 1
CONSULT_MILITARY : 1
TALKED_HIS : 1
DELUSIONAL_THOUGHT : 1
INFORMATIONAL_TO : 1
AND_HIS : 9
INSERTS_ARTHROSCOPE : 1
THAT_BLINDNESS : 1
SECONDARY_CONTACT : 1
CP_PND : 1
HEMATOLOGY_CONSULT : 1
THERE_SOME : 1
ADL_NOTE : 2
CONTINENT_GROOMING : 1
PRESENTS_ORAL : 1
NOT_EXPERIENCE : 1
THAT_MG : 1
PAIN_PLAN : 1
ALERTED_WE : 1
WHY_ACC : 1
INCREASING_PAIN : 1
DOCTOR_INSERTS : 1
HOURS_PATIENT : 1
PLAN_CERTIFICATION : 1
KLONOPIN_IN : 1
DIVALPROEX_MG : 1
PNEUMONIA_PRESUMED : 1
SPLINT_RESEARCH : 1
ICDCM_SCHIZOPHRENIA : 1
MULTIPLE_OF : 1
HOME_FEELS : 1
ACC_DIDNT : 1
PLEASE_PATIENT : 1
SOFT_OBSERVED : 1
HE_ADMITS : 1
TKA_BEEN : 1
MORE_PHONE : 1
RECORDED_THE : 1
DATES_ORAL : 1
HE_PPV : 1
DIVORCE_FINANCIAL : 1
WITH_WHEELCHAIR : 1
CONTINUE_PLAN : 1
FOR_ADDENDUM : 1
OF_STATURE : 1
PATIENT_INDICATES : 1
ALLERGIES_PREDNISONE : 1
RN_LATEST : 1
KNEE_PAIN : 1
COMPLETED_PATIENT : 1
HIS_ATLAS : 1
SUICIDAL_HE : 1
DENTAL_PHYSICIAN : 1
HE_BECOME : 1
OF_SHIFT : 1
PROBLEMS_VISION : 1
FALL_INTERVENTIONS : 1
CHANGED_MIND : 1
HISTORY_PRESENT : 2
TO_UNIT : 1
PENDING_AWAITING : 1
SESSIONS_BUTTON : 1
THE_RAL : 1
DAILY_LOCATION : 1
SIGNS_NIGHT : 1
BE_DOSE : 1
TEAM_IRAQ : 1
TO_PATIENT : 5
DEMOGRAPHIC_FACTORS : 1
CONTACT_NUMBER : 2
ISSUES_PROBLEMS : 1
MG_PO : 1
TREATMENT_MDI : 1
AREAS_FOR : 1
PRN_PACKED : 1
NO_PRODUCTIVE : 1
AT_DVAMC : 1
REFILL_MORELAND : 1
AND_RISK : 1
WALKING_DECREASE : 1
MAY_INJECTED : 1
CONSULT_ANTIBIOTIC : 1
PROMOTE_RESP : 1
AWAITING_OF : 1
SCORE_OR : 1
FOR_MAJOR : 1
APPROXIMATELY_MONTHS : 1
MEDICAL_AND : 1
EPIS_FINAL : 1
NO_SOB : 1
BEEN_WITH : 2
NO_DISTRESS : 1
DATE_KILIANMOBILITY : 1
MINUTES_VA : 1
PSYCHOSOCIAL_ADVISED : 1
THE_MORNING : 1
MULTINODULAR_GOITER : 1
OR_CHEST : 1
BLIND_REHABILATION : 1
ILLNESS_HE : 1
SURFACEANTERIOR_THE : 1
BY_TO : 1
SLEPT_EVEN : 1
PER_BIOPSY : 1
ASKING_FOR : 2
AGE_SUICIDE : 1
MARCH_OR : 1
BAD_CHO : 1
GOALS_REL : 1
HOMEWORK_EXERCISE : 1
HOUR_WITH : 1
ACTIVITIES_DAILY : 2
RAL_FIRST : 1
SUPPLY_WILL : 1
IRREGULARLY_SHAPED : 1
DRAINS_FALL : 1
INDIVIDUAL_THERAPY : 1
MAINTAINING_TOTAL : 1
THREATENING_BEHAVIOR : 1
RESULTS_AUTHOR : 1
TISSUE_CAN : 1
NOTES_IT : 1
WHICH_IS : 2
PHOTOTHERAPY_THE : 1
CORSET_WITH : 1
CANCER_COMPLICATIONS : 1
ON_PATIENTS : 1
LAST_NO : 1
OTHER_COMPONENT : 1
AND_PLAN : 1
PRACTICED_DELETING : 1
APPROPRIATE_WEATHER : 1
OR_NEGLECT : 1
CLINIC_NEUROSURGERY : 1
DERMATITIS_CAUSING : 1
INCREASED_THIS : 1
INCREASED_WITH : 1
FRIENDS_THIS : 1
TESTING_FOLLOWING : 1
HBPC_PHARMACY : 1
AUDITORY_VISUAL : 1
DOSE_FOR : 1
HOPELESS_SUBSIDED : 1
TO_HAS : 1
REVEALED_CLEAR : 1
GET_THE : 1
NOSUNSPEC_PATIENT : 1
PHYSICAL_TAMINE : 1
NASAL_AT : 1
THIS_HAS : 1
SEBACEOUS_AUTHOR : 1
UNSPECIFIEDGERD_DENTAL : 1
WORST_PERIOD : 1
IS_FREE : 1
RR_ABOUT : 1
PT_SEEN : 1
AT_DISCHARGE : 2
HIM_SPEAK : 1
AND_AND : 1
MIND_SECONDARY : 1
PERRLA_SCLERA : 1
THERAPIST_BREATHING : 1
ON_ANTIBIOTIC : 1
WAS_REMAINING : 1
AREA_INSTRUCTION : 1
TURNS_HEAD : 1
THIS_REMINDER : 1
UNSP_ABSENCE : 1
CAPRI_LAST : 1
ALL_REASONS : 1
MONTHS_HEIGHT : 1
AGAIN_PRAISED : 1
MGMT_APPT : 1
THERE_WERE : 3
FROM_THIS : 1
ASSESSMENT_HEAD : 1
SITTING_HIS : 1
DISTRESS_ATTENTIVE : 1
POON_OTHER : 1
FOR_SUPPLEMENT : 1
LAST_INR : 1
MEDICATIONS_REVIEWING : 1
PERSONAL_MANAGEMENT : 1
MOUTH_MORNING : 1
NEBULIZER_NO : 1
INSTRUCTED_TO : 1
READINESS_TO : 1
CAUTION_DRUG : 1
AND_MONEY : 1
OBJECTIVE_MESSAGES : 1
CHANGES_IN : 2
PATIENT_HISTORY : 1
SEVERAL_ADMISSIONS : 1
INFECTION_OR : 1
DENIES_AT : 1
REINFORCE_AND : 2
STATUS_SEE : 1
TREATMENT_NEBULIZER : 2
ACTION_URINE : 1
PREDNISONE_IS : 1
VETERAN_REPORTED : 3
STOMACH_SURROGATE : 1
TH_PARENTERAL : 1
GEC_NOTE : 1
INTERDISCIPLINARY_HIP : 1
AORTIC_LEAFLETS : 1
IN_PLACE : 3
ON_ISSUES : 1
MG_QMORNING : 1
TIME_TEMP : 1
PTSD_SYMPTOMS : 1
EXAM_HYDROBROMIDE : 1
TER_AS : 1
SOURCE_OF : 1
DISCHARGE_OR : 2
WITH_USAGE : 1
INFORMATION_PROVIDER : 1
NEAR_ARMD : 1
ABDOMINAL_BACK : 1
IMMUNIZATION_IN : 1
SYMPTOMS_HE : 1
HAVE_BEEN : 2
HE_VET : 1
TRAVEL_DVAMC : 1
INCREASED_TO : 1
THE_BEEN : 1
CONTINUE_MONITOR : 1
TIMES_PRN : 1
FOR_APPOINTMENT : 1
PATIENT_CHO : 1
WAYS_IN : 1
WITHDRAWAL_BY : 1
UNSPECIFIED_PLEASE : 1
IS_OR : 1
TO_SMOKING : 1
SAFE_OF : 1
HYPERTENSION_QUESTIONS : 1
ENJOYED_MISCARRIAGE : 1
TAB_AXIS : 1
AND_ADVISED : 1
PRESUMED_ESSENTIAL : 1
THERAPY_REPORTEDLY : 1
TO_OUT : 1
VETERAN_FOR : 1
CONFIRMED_AN : 1
MG_FRI : 1
NOCTURIA_CAN : 1
VET_BE : 1
SCORE_WORST : 1
MAJOR_COPING : 1
GRADE_HL : 1
WHICH_PROSTATIC : 1
IS_RATIVE : 1
ON_CONSISTENCY : 1
WELL_PER : 1
FOR_SC : 1
PATIENT_PRIVILEGES : 4
FILED_OBSOLETE : 1
SURGERY_FOR : 1
PROBLEM_DISORDERMET : 1
ELIMINATION_PHYSICIAN : 1
HEART_DISEASE : 1
PAIN_POSITIVE : 1
REVIEWED_THE : 1
SWELLING_DRAINAGE : 1
IT_IN : 1
NEEDS_LEFT : 1
AFTER_THE : 2
PREFERENCES_NONE : 1
DEPRESSION_RELATED : 1
THROUGHOUT_THIS : 1
THAT_TIME : 1
PATIENT_ON : 3
RINSING_MAY : 1
IS_WE : 1
PH_GLARE : 1
MONEY_REPAIRED : 1
THINKS_THIS : 1
ATRAUMATIC_EYES : 1
STOOL_ELIMINATION : 1
INTENSITY_IN : 1
ASSISTANCE_WHERE : 1
MESSAGE_VET : 1
FOLLOW_MEDICATIONS : 1
NUMBER_FOR : 1
VETERAN_SIXTY : 1
WITH_DEVICE : 1
ALL_THE : 1
AND_AXIS : 1
CAUSES_HE : 1
NUMBER_DENTAL : 1
FACTORS_LIVES : 1
STAY_THEN : 1
MEDICATION_LIST : 1
GROUP_DISCUSSIONS : 1
CM_NO : 2
THE_NIGHT : 1
SATTHURS_MG : 1
BEEN_TALKING : 1
KNOW_WHY : 1
UNTIL_PT : 1
TO_SIT : 2
WILL_AROUND : 1
MY_EXPERIENCE : 1
TAMINE_HYDROBROMIDE : 2
WITH_CHIEF : 2
LEVEL_IS : 1
CM_SHAPED : 1
PATTERN_NO : 1
ABOUT_HIS : 3
OTHER_CULTURE : 1
COUNTY_BUILDING : 1
FOR_CHIEF : 1
DIABETIC_TELERETINAL : 1
NAME_DOB : 1
REQUIRED_OF : 1
VALVE_GRADE : 1
GLARE_DM : 1
DOES_THAT : 1
THERAPY_CONSULT : 1
THIS_GAVE : 1
WORKED_AND : 1
EXAM_AND : 1
CONSULT_THE : 1
DEC_PHARMACIST : 1
AGE_PREVENTION : 1
SURGEON_VANDER : 1
MY_CLINICAL : 1
SOLN_INSTILL : 1
PACEMAKER_COMMENTS : 1
BRIEFLY_WHEN : 1
PPT_FOR : 1
TAKES_TYLENOL : 1
BRC_ENGLISH : 1
THE_TRAINING : 1
DIAGNOSIS_DENTAL : 1
BEEN_THIS : 1
PING_REPORT : 1
OR_SUPERVISION : 1
UP_FINDINGS : 1
POSSIBILITY_OF : 1
! Stats words=2135  pairs=10961
