# Supplementary material for: Predicting the Risk of Suicide by Analyzing the Text of Clinical Notes
Source: PLoS One. 2014 Jan 28;9(1):e85733. doi: 10.1371/journal.pone.0085733 (PMC3904866; doi:10.1371/journal.pone.0085733)
Supplement: Appendix S3 — Machine Learning Libraries and Methods: This section is provided to enclose the open source (Apache License) classifier used for the building of the statistical models, specifically for the purposes of study reproducibility. A detailed account of these tools is intended for another publication. (ZIP) [file pone.0085733.s003.zip › Appendix3/ML_libs/Regression_testing/group3/processed/grp3-pt-1045.dat]

!  Done reading
! Total word count = 6616
! Total unique words = 2199
! Total pair count = 13228
! Total unique pairs = 11356
ESTRANGED : 1
CONTAINS : 1
SORE : 1
AT : 36
ADL : 5
ZZPATIENT : 5
WORK : 2
PREOP : 2
CUTTING : 2
FINGER : 2
LOWER : 2
ATIVAN : 1
ULCER : 1
ASMANEX : 1
WEIGHT : 3
ADOLESCENCE : 1
MILD : 3
AA : 1
MINUTE : 2
TREATMENTS : 3
INSTRUCTED : 1
COUNSELING : 1
EXPLOSION : 1
HAIR : 2
USE : 7
ARTHRALGIA : 1
PRIVILEGES : 3
MEANS : 1
RR : 1
DISCHARGED : 1
CONTINUOUS : 1
SPINAL : 1
SUPPLIES : 4
SECURITY : 1
ASA : 1
READING : 3
VETERANS : 4
XACTIVE : 1
SCHEDULING : 1
LEVEL : 4
ALCOHOL : 1
CHANGES : 2
EQUIVALENTS : 1
RAL : 3
HENNESS : 1
IMPORTANCE : 1
OM : 1
SHOULDER : 7
MET : 2
FUNCTIONING : 1
COPD : 1
MEAL : 3
REMOVED : 1
CHANCE : 1
APPROPRIATE : 3
STAIRS : 1
STARING : 1
BLIND : 3
DIRECTIVE : 1
MALAR : 1
WELL : 5
PHARM : 1
MEDICINE : 4
TEST : 2
NOTE : 32
LDL : 2
BAKER : 1
MISCELLANEOUS : 1
DO : 12
DOES : 7
FACT : 1
SAME : 3
ACCESS : 1
ADVERSE : 3
VOLUNTEER : 1
SCHEDULED : 4
ASK : 3
STEPS : 1
ANCHORAGE : 2
RETURNING : 1
TAB : 12
VARY : 1
LINEAR : 1
ASSISTED : 4
REQUIRED : 6
STABLE : 3
MONITOR : 2
DEC : 4
HAS : 39
FOR : 94
BUSPIRONE : 1
ARNP : 1
CONDITION : 3
NUTRITION : 4
FIELDS : 1
CLC : 2
QBEDTIME : 1
PERIAPICAL : 1
MODALITIES : 2
MORNING : 1
KILL : 1
INR : 2
BONFADINI : 1
KNEE : 6
ABSTINENCE : 1
SC : 2
LEGAL : 1
FRUSTRATED : 1
DECLINE : 1
SATURATION : 2
GEN : 1
COLONOSCOPY : 2
PROTIME : 1
GOALS : 2
RESPIRATORY : 1
SIMULATION : 1
ACTIVITY : 5
HISPANIC : 2
OWN : 1
INTERNAL : 1
BELIEF : 1
DISTRIBUTION : 1
NAUSEA : 2
IMPAC : 2
PROPOSED : 1
PATTERN : 1
ANTICOAGULANTS : 1
EXAM : 3
INFECTION : 1
VISIBLE : 1
DERM : 1
REINTEGRATION : 1
CD : 1
SWEATS : 1
CARCINOMA : 2
JUST : 3
INCREASED : 3
LTG : 1
WRITING : 1
AICD : 1
OCT : 1
GO : 4
SIGNIFICANT : 1
BOWEL : 8
RESIDENTS : 1
BP : 3
LIMITATION : 1
PREVENTION : 1
POST : 1
DEPRESSION : 4
SEPTEMBER : 1
SON : 1
RED : 1
CM : 5
SENSORNEUR : 1
CLINICIANS : 3
IMAGE : 2
GAIT : 1
CITALOPRAM : 1
AGAIN : 2
DESCRIBE : 1
SLOWLY : 1
EVER : 1
ATTEND : 1
PLEURITIS : 1
ELMI : 1
WT : 1
MEETS : 1
ADMITTING : 1
DRO : 1
CIGARRETTE : 1
TOP : 1
ACUTELY : 1
STARTED : 3
ACTUALLY : 1
SPASMS : 1
FEEDING : 1
OR : 23
THERAPEUTIC : 2
SHIFT : 16
BOTH : 3
TEMP : 4
GUNSHOT : 3
CONCERNS : 2
PULMONARY : 1
AAOX : 1
POSSIBILITY : 3
COUMADIN : 1
DE : 1
LIKE : 3
CALLS : 3
TRAINING : 2
PS : 1
UNKNOWN : 1
IRAQ : 1
MUCH : 2
RACHAEL : 1
MCH : 1
CHRONIC : 7
RELAPSE : 1
TAKE : 8
INCREASE : 1
MONITORED : 1
CHEMICALS : 1
LAUNDRY : 2
STRENGTHS : 1
OD : 1
SW : 3
GUILLAIN : 1
SPOKEN : 1
ANTITHROMBOTI : 1
AMPULE : 1
PCPA : 1
UNIT : 2
MOTOR : 1
IBUPROFEN : 2
MD : 3
ESIG : 1
NAME : 9
CARE : 30
SURROGATE : 2
OLANZAPINE : 1
AGE : 7
EVALUATE : 1
INVOLVED : 1
DISCIPLINARY : 1
KUWAIT : 1
ET : 1
FOWLER : 1
TIMES : 5
IS : 61
SCHOOL : 1
DL : 1
BENEFIT : 1
OCCULT : 1
FLUIDS : 2
INDURATION : 1
GUARD : 1
IF : 16
USER : 1
NOR : 1
MH : 9
PENDING : 1
CANCELLED : 1
BAND : 1
EMPLOYEE : 1
SKILLS : 5
DEALING : 1
ENTERING : 1
OXIMETRY : 1
TIAS : 2
LOCATED : 1
PSYCHOLOGIST : 1
LIVE : 2
INFLAMMATION : 1
EVALUATION : 5
PPD : 3
ACKNOWLEDGED : 1
RHYTHM : 3
REPAIRED : 1
REFUSED : 1
REHAB : 2
THESE : 3
VISION : 1
PHYMOSIS : 1
OCASSIONALLY : 1
SEBACEOUS : 1
DROP : 1
PARTICIPATION : 2
KIN : 1
HOPES : 1
RUPTURED : 2
EDUCATED : 1
ESSENTIAL : 2
INTENSIVE : 1
TRYING : 1
PRESENCE : 1
MARRIED : 1
HEIGHT : 4
DRYER : 1
ADDENDUM : 16
TREAT : 1
SOUGHT : 1
EMMA : 1
NO : 46
ADMINISTER : 1
CHIEF : 10
INCISION : 1
CHANGED : 3
PNUEMONIA : 1
BACKHAB : 1
UPPER : 1
CONVERSE : 1
HYPOTHYROIDISM : 2
RISK : 3
CLINIC : 8
RECEIVING : 1
HIGHEST : 1
MINS : 2
TENDERNESS : 1
CIRCUMSTANCES : 1
POINT : 1
BMI : 1
POSTOPERATIVELY : 1
PRN : 3
COULD : 2
GOLD : 1
WILL : 21
WRAP : 1
OFTEN : 1
BUT : 13
COORDINATION : 1
TYPE : 5
NONSLIP : 2
TV : 1
LIKES : 1
SPECIFICS : 1
PLASMA : 2
INP : 2
SPACERS : 1
HUSBAND : 1
HEALTHY : 2
SET : 7
MEALS : 1
DESTRUCTION : 1
KIT : 1
SCHIZOPHRENIA : 3
CFCF : 1
WISEMAN : 1
HOPEFUL : 1
JELLY : 1
MEDICALLY : 1
CONSULT : 1
SUPPORT : 4
ACCOMPANY : 1
OPTIONAL : 1
FIND : 2
WANTS : 1
IMPROVE : 1
FLEXERIL : 1
QID : 1
PRESENTED : 1
EXPOSURE : 1
REVIEW : 4
DISCUSSING : 1
HIMSELF : 4
COMES : 2
RELIGIOUS : 1
INJECTION : 4
THREATENING : 1
BROUGHT : 1
BASCOM : 2
RESIDENT : 4
TEENS : 1
INSTRUCTIONS : 7
VA : 10
WED : 1
PREFERENCES : 1
SPONTANEOUS : 1
APRIL : 1
MACULA : 1
SMOKER : 1
INITIATED : 1
RESPITE : 1
PAIN : 30
GLOBAL : 1
AS : 26
VISTA : 5
RESTRAINTS : 1
ETSU : 1
INTRAVENOUS : 1
INTEG : 1
WITH : 75
FEELS : 1
OFFERED : 1
TEMPERATURE : 3
REDNESS : 2
REEVAL : 1
INDEX : 4
INCLUDING : 8
COPING : 3
USED : 10
MONITORING : 2
IT : 15
ENROLL : 1
BEDTIME : 1
BELOW : 3
IMEDCONSENT : 1
NECESSARY : 4
CLINICALLY : 1
RADIATES : 1
MOMENT : 1
DISCUSSED : 9
EATS : 2
EXERCISE : 1
SHOWER : 2
TIME : 25
PURPOSE : 2
CODE : 3
INTEGRITY : 1
INTRAORAL : 1
HYGIENE : 4
HCL : 1
PARTS : 1
LOOK : 2
SCOPALAMINE : 1
BORROWD : 1
ADDITIONAL : 2
ACTIONS : 2
TEETH : 1
SAFETY : 5
SIDE : 5
BREAKFAST : 2
LUBRICATING : 1
ECCHYMOSIS : 1
CALL : 14
CRUTCHES : 1
EXPRESSED : 1
RESULT : 2
HX : 5
BIRTH : 1
CLAUDICATION : 1
IMAGING : 3
CASODEX : 1
UNSPECIFIED : 3
NOTIFICATION : 1
SOB : 1
IOP : 1
MOTIVATION : 2
JUDGMENT : 1
URINAL : 1
FRI : 2
TABLETS : 1
PER : 11
ECTASIA : 1
CONFUSIONI : 1
CONDO : 1
ALCOH : 1
ETC : 2
MOBILITY : 13
OPHT : 1
YOUR : 16
PRECAUTIONS : 1
GIVEN : 10
SUSAN : 1
PACKET : 1
CHOOSE : 1
HT : 1
COLORADO : 1
WHO : 4
SOUND : 1
IDENTIFIES : 1
JAW : 1
BRONCH : 1
SURG : 1
DIARRHEA : 1
IPRATROPRIUM : 1
VIST : 1
COMPREHENSIVE : 1
CURRENT : 5
ARM : 2
GROOMING : 1
TEMPTED : 1
TERM : 1
ES : 2
HIM : 14
MIDP : 1
HO : 1
PULSE : 8
NS : 1
NEXT : 6
SOBER : 2
NEEDS : 3
THEY : 11
DESAT : 1
OPPOSED : 1
REFERRED : 1
TYLENOL : 2
FLORIDE : 1
ACCEPTED : 1
MESKENAS : 1
REGAIN : 2
OBSERVATION : 1
ML : 2
PHONE : 13
TALKING : 4
CHECKED : 2
IPRATROPIUM : 1
RESPONSES : 2
TOUCH : 3
FAIR : 1
DRY : 2
BILLS : 1
HAD : 17
ANNUAL : 1
PMRS : 1
YVONNE : 1
SPECIAL : 2
LOSS : 4
SISTER : 1
QUETIAPINE : 2
PASSIVE : 1
MRSA : 1
ROI : 2
MCHC : 1
PF : 1
PRESENTLY : 1
YO : 4
NEGATIVE : 2
ARMBAND : 1
OUR : 1
ORTHOPEDIC : 1
WRITTEN : 1
TRIGGER : 1
TOOL : 1
LAB : 6
RD : 3
MISSING : 1
ING : 2
COMPLAINTS : 2
CONTACT : 20
DENTALLY : 1
RETURNS : 3
GUIDED : 1
THIAMINE : 1
ROOTS : 1
PROBLEMS : 2
URINE : 6
BELONG : 1
NEUROLOGICAL : 1
RTC : 2
CAN : 5
THERAPY : 8
PSYCH : 1
TEACH : 1
SEND : 1
AWARE : 2
NONVA : 4
UNFORTUNATE : 1
WHICH : 5
PAM : 1
SYMPTOMS : 2
PURPLE : 1
SUGARUSE : 1
NOTES : 2
LOUD : 1
OVER : 6
VISITS : 2
ON : 40
QUIT : 1
COMPLETE : 2
BLASTS : 1
PRESSURE : 1
TETANUS : 1
ATTENDED : 1
SUPPLEMENTALS : 1
VERIFY : 1
VIA : 2
UPTIVE : 1
GOOD : 4
MED : 3
UPDATE : 2
VENT : 1
INHALER : 1
INTO : 4
FOCAL : 1
ALPHA : 1
EDEMA : 2
SEIZURE : 1
STREET : 1
SAO : 1
FLOATERS : 1
PO : 5
SHE : 6
UP : 21
REFORMULATING : 1
SELLING : 1
THEN : 3
DEAR : 2
LOCATION : 5
FEW : 2
BECKLEY : 1
DETERMINE : 1
FEVER : 2
AWAY : 1
PRIOR : 6
VERBAL : 3
OFF : 2
DOCUMENTED : 3
CONFUSED : 1
GOT : 2
OBJECTIVES : 1
VERIFIER : 1
DATE : 11
WHENEVER : 1
ANTIPSYCHOTICS : 1
DAILY : 6
REQUIRE : 1
LONG : 3
WHEELCHAIR : 1
EUTHYMIC : 1
VINAY : 1
FROM : 15
LEFT : 9
BATH : 1
NEIGHBOR : 1
MEDICAL : 10
HEAD : 1
BECOME : 1
DEFENSE : 1
AMITRIPTYLINE : 1
GROW : 1
ALSO : 7
SPOKE : 3
HUDVASHNOTE : 1
SYSTEM : 4
LORAZEPAM : 1
SONOGRAPHER : 1
WORKING : 1
QUIETLY : 2
AN : 8
DEFERRED : 1
HEART : 2
SIGNATURE : 1
BLACK : 2
COPE : 2
NSTRUCTIONS : 1
FOUR : 2
BRIGHTER : 1
BLAST : 1
PHARMACIST : 2
PERIAURICULAR : 1
RODRIGUEZ : 1
EYE : 7
UNSCHEDULED : 1
MILIEU : 2
DISCUSSION : 2
AGO : 2
URGES : 1
ATTENDING : 3
CHEST : 2
BARRE : 1
DOCUMENTATION : 1
FACILITATOR : 1
EXCISION : 1
DT : 1
MCGUIRE : 1
APPROPRIATELY : 2
OVERWHELMED : 1
OPH : 1
ENCOURAGE : 1
MUSCLE : 1
HC : 2
LATER : 1
ARE : 10
ANSWERED : 1
DESIRE : 2
THIGH : 1
INDEPENDENT : 4
HYPERTENSION : 3
FILE : 1
WOKE : 1
PERSON : 3
MISLEAD : 1
CYST : 1
CPRS : 1
SURGERY : 2
RECOVERY : 4
STUDENT : 4
ROOMMATES : 1
LOS : 1
STRUCTURE : 2
BURNING : 2
OFFICERS : 1
UPDATES : 1
INHL : 2
MOVING : 1
MARTYRDOM : 1
INTERDISCIPLINARY : 1
ACCOUNTABILITY : 1
GENERAL : 1
TIRED : 1
SELFLIMITED : 1
YEARS : 3
COLON : 1
LARGER : 1
WRONG : 1
BE : 14
RESOLVED : 2
PANE : 1
YR : 3
DISPLAYS : 1
FLASHES : 1
LEAVE : 3
DUE : 2
HS : 1
THEIR : 3
XXNO : 1
HEPARIN : 1
DISC : 1
SUSTAINING : 1
CONCUR : 1
SKI : 1
TAUGHT : 1
BERNA : 1
KNIFE : 1
PING : 4
AGITATION : 1
PH : 1
OCCIDENTAL : 1
ISSUES : 2
DELUSIONS : 1
DM : 2
OTHER : 18
PRODUCTIVE : 2
QHS : 2
END : 1
LIFE : 2
ME : 5
ANTICOAGULANT : 1
REDURS : 1
BED : 7
NURSING : 9
STAR : 1
FOLLOWING : 11
OUTCOME : 1
IDENTIFIED : 5
GLAUCOMA : 2
ENDING : 2
REFER : 1
WITHOUT : 6
DIAGNOSIS : 2
JUL : 2
ANTIPLATELET : 1
UNIQUE : 1
HYOSEINE : 1
NANCY : 1
VERIFIED : 1
ATYPICAL : 1
ANXIETY : 5
SPINE : 1
SAY : 2
POSITIONING : 1
VERTIGO : 1
THOUGH : 1
TTE : 1
WE : 5
TOILET : 3
SPECIALISTS : 1
DISTANCE : 1
SUSPECT : 1
PULLED : 1
SYND : 2
PROTECTORS : 1
FUNCTIONAL : 1
PATCH : 2
FOUND : 1
ROOM : 5
PATCHES : 2
IMPROVED : 2
ABG : 1
AVAILABLE : 3
MIDNIGHT : 2
FIRM : 1
THROAT : 1
NNV : 1
ABOUT : 10
MCV : 1
ANYTHING : 1
MIAMI : 2
RECHECK : 1
VOA : 1
POTENTIAL : 1
YOUNG : 1
NKA : 1
BRIEF : 3
ADEQUATELY : 1
VICODIN : 1
TABLET : 4
DOM : 1
ANOTHER : 5
DURING : 10
MHP : 1
COMMON : 3
TOLD : 1
ENVIRONMENT : 2
SEVERAL : 3
LISTED : 1
DIRECTED : 1
ALI : 1
STUDIES : 1
VOICED : 1
HURT : 1
DISEASES : 1
PREHOSPITAL : 1
ERUPTED : 1
REACH : 1
REACTIONS : 2
HCA : 1
OS : 4
SUPERFICIALLY : 1
FLAMMABLE : 1
OPHTHAL : 1
BOLUS : 1
OXYGEN : 2
SCORE : 2
BASAL : 2
ULOPLASTY : 1
RESULTED : 1
FINISH : 1
SP : 2
PRACTICING : 1
HOME : 11
CHECKIN : 1
NLR : 1
NOTED : 5
INDIVIDUAL : 4
TUBEFEEDING : 1
RETURN : 5
PANEL : 1
MODERATE : 1
MYOPIA : 1
POSTINGS : 1
REFRACTION : 1
BRONCHITIS : 1
UPSET : 2
RELAPSED : 2
MIN : 8
SCROTUM : 1
RECONCILIATION : 2
CHEMICAL : 1
PNEUMOVAX : 1
NEC : 2
COMPUTERIZED : 1
MINUTES : 7
TENS : 1
APPRISED : 1
FOLLOWUP : 4
CBSST : 1
INFORMS : 1
CHECK : 4
MAKES : 1
TEAM : 10
FINE : 2
FALL : 3
SICK : 1
DATA : 3
AM : 12
RETINA : 1
HELPED : 1
MOVEMENT : 1
PRACTITIONER : 2
ENTERED : 1
OCCASION : 1
CINCINNATI : 1
WHERE : 1
EVENT : 1
PEOPLE : 2
EA : 1
INDEPENDENCE : 1
REFUSE : 2
DEMENTIA : 1
CALLED : 5
PRODUCTS : 1
MONTOYA : 1
GROUND : 2
TOOK : 4
PROPERTY : 1
SUPERVISION : 1
MANY : 1
SITTING : 1
NG : 1
TEACHING : 4
OBTAINED : 1
ADVISED : 2
MON : 2
DOCUMENTS : 1
STOMACH : 1
MONTHS : 3
AGAINST : 1
POLLEN : 1
SSN : 2
GIRLFRIEND : 1
ANGIOCATH : 1
DATED : 2
BEDSIDE : 1
EAT : 1
ASSISTANT : 1
INSIGHT : 1
IMMEDIATE : 1
LIPOMAS : 2
EFFECTIVENESS : 1
VES : 1
MEDICATION : 9
PROCEEDINGS : 1
WRIST : 2
VISUAL : 3
WANT : 3
ATTEMPTED : 3
SUPPORTIVE : 5
CASE : 2
AFRICAN : 1
BURSITIS : 1
HYPERPLASIA : 1
ORAL : 6
CONTINUE : 4
ABNORMAL : 1
SWELLING : 1
READ : 1
ADM : 1
ABSCESS : 1
SERVICES : 1
GOAL : 4
INFUSE : 1
PROVIDE : 3
HEALTH : 5
ADD : 1
INCH : 1
PLACED : 3
SYNCOPE : 1
COGNITIVE : 1
PHYSICIST : 1
EDITED : 1
CR : 1
INDICATED : 2
INCIDENT : 2
EXCESS : 1
PROSTATE : 1
EXCLUDING : 1
PREVIOUS : 1
BIPOLAR : 1
ENTIRE : 1
REFERRAL : 4
INTERVENTIONS : 2
PY : 1
MAR : 1
LOPERAMIDE : 1
WAL : 2
MORE : 5
VS : 2
SEROQUEL : 1
RACE : 1
ORTHOPTIC : 1
ABC : 2
WENT : 5
TOPICAL : 1
RECEIVE : 2
LIN : 1
ER : 6
APPLICABLE : 6
DIZZINESS : 1
PRESCRIBED : 1
REQUEST : 5
RN : 2
UNABLE : 4
XYZZY : 2
CORRECTION : 2
AUGUST : 1
HOUSE : 1
TRIVALENT : 1
HEADACHES : 2
AFTER : 5
ALTERNATIVE : 1
READY : 1
PARTICIPATED : 2
DIFFICULT : 1
STRUCTURED : 1
SUPERVISED : 1
SCALE : 2
SITU : 1
OPENING : 2
FLUID : 2
COUGHING : 1
VOICEMAIL : 1
LUMBAR : 2
BEVERLY : 1
GROUPS : 2
BRUSHING : 1
PCP : 2
XI : 1
SAYS : 9
GEESEY : 1
LCSW : 2
APPOINTMENTS : 1
WOUNDS : 1
BOWELS : 2
ROCK : 1
RE : 2
MINE : 1
OLD : 4
SPRING : 1
FREQUENTLY : 2
VERBALIZE : 1
GROWTH : 1
LS : 2
GLUCOSE : 1
WEDNES : 1
VIEWS : 1
REGION : 1
WBC : 1
MOVE : 2
EAGER : 1
ORGANIZED : 1
REMAINING : 1
RBC : 1
IRON : 1
ETHNIC : 1
PL : 1
AREA : 4
APR : 2
BPD : 1
CRITICAL : 1
MAGAZINES : 1
MM : 1
INDEPENDENTLY : 3
UNDERSTANDING : 1
LOST : 1
MEDICATIONS : 14
LOCALLY : 1
MR : 10
FOODS : 1
CANT : 2
BILATERAL : 1
QUESTIONAIRE : 1
DESCRIPTION : 1
NPH : 2
DRIVING : 1
INH : 1
VACCINE : 3
BETTER : 2
DEPRESSIVE : 2
PATENT : 1
RESULTS : 9
INVOLVING : 3
PROCESS : 3
TOUR : 1
EMERGENCY : 4
SALT : 1
ANSWER : 1
BREATH : 2
ABLE : 2
RECENT : 3
CHO : 1
REVEALED : 1
IN : 100
POSITION : 2
REGIMEN : 2
MANAGEMENT : 5
STATE : 4
PLAN : 11
INTOLERANCE : 1
PENG : 1
MITRAL : 1
SMOKE : 3
CONTENT : 3
AGREE : 1
PULLING : 1
WEARS : 1
PATHOLOGY : 2
VERY : 5
CHARGE : 1
SPONSOR : 1
BASIC : 1
IDENTIFICATION : 2
STRSOME : 1
OPPORTUNITY : 1
TEXAS : 1
VICTIM : 1
INTRAOPERATIVE : 1
BEHAVIOR : 4
PROFILE : 1
POSTAL : 1
TOLERATE : 1
MEDIAL : 1
FOREARM : 2
COMPLETED : 4
SOLUTION : 1
FAR : 1
EVEN : 1
TEMPER : 1
ACCOUNTS : 1
KEPT : 2
LAST : 12
EXR : 1
COWORKERS : 1
LUNCH : 1
EDUCATION : 3
HOLD : 1
TOXICOLOGY : 2
KAUR : 1
SEES : 2
GENITOURINA : 1
OCCUPATIONAL : 1
BENZTROPINE : 1
MOVED : 1
DETAILS : 2
GROOMED : 2
ZIMBLEMAN : 1
BOWELSOUNDS : 1
UNCLEAR : 1
DISPLAYED : 1
CONSTANT : 2
WM : 1
ONLY : 4
GIVING : 1
EVENING : 2
STEADY : 1
PURPOSEFULLY : 1
OPEN : 1
MONTH : 2
REFILLS : 1
BEEN : 17
BID : 3
NIGHTTIME : 1
INFECTED : 1
WITHIN : 7
BASE : 1
REFILL : 1
LOCK : 1
BASCOMPALMER : 1
ASSISTIVE : 1
OUTPATIENT : 9
GOES : 1
INTAKE : 5
WEEKLY : 3
EXHIBIT : 1
SHORTNESS : 1
INPATIENT : 6
SPEECH : 5
CULTURAL : 1
LO : 1
TOMORROW : 3
OKAY : 1
RESCHEDULE : 2
SPECIMEN : 1
TANYA : 1
CC : 5
EPISODE : 1
TWICE : 4
ERROR : 1
COLD : 4
REGARDING : 2
CHEW : 1
SHAMPOO : 1
VASCULAR : 1
TOO : 1
TRIED : 1
PERSONAL : 4
SOCKS : 1
RETIRED : 1
IDENTIFYING : 1
TRAUMA : 1
HIS : 50
COORDINATOR : 2
ID : 6
APPARENTLY : 3
VARIABLE : 1
GM : 1
INVESTMENTS : 1
PAROXYSMAL : 1
CLAIRE : 1
SUGGESTED : 1
STRONGER : 1
RASH : 1
SHOWED : 2
DISORDER : 7
TORADOL : 1
PERKINS : 1
CONTACTED : 2
REASONS : 1
PROMOTE : 1
NEELIMA : 1
FASTING : 1
PELVIS : 1
EFFECTED : 1
TREATMENT : 24
CATEGORY : 1
BLOOD : 4
WORKER : 2
HAVE : 17
ASSIST : 2
OBMT : 1
LOGICAL : 1
PROPHYLAXIS : 1
EVIDENCED : 1
AUTOLANE : 1
OF : 131
PATH : 1
INCLUDE : 1
REFILLING : 1
OVERTHE : 1
CRADC : 1
CALLER : 2
EXC : 1
SECURED : 1
SHAVE : 1
SAID : 2
COUNTER : 1
EPISOD : 1
NUMBER : 20
UNDERSTAND : 1
WAGES : 1
ASSESSED : 2
AID : 2
SPONGE : 1
MECHANISMS : 1
BEGINNING : 1
HEAR : 1
ASTHMA : 1
MS : 2
CLOTHING : 1
MY : 5
OUTPT : 3
INSTRUCTION : 4
NOSUNSPEC : 2
MESSAGE : 1
DOSIMETRY : 1
THEM : 4
ASSESSMENT : 13
TRANSDERMAL : 1
NOTIFYING : 1
FERRITIN : 1
FLUVASATIN : 1
AMBULATION : 1
ATTACHED : 2
PARENT : 1
ENTER : 2
STARTING : 4
IRRITABLE : 2
BLADDER : 2
BM : 1
POKE : 1
LIFTING : 1
FRIENDS : 2
INFORMATION : 10
DEVICES : 1
INITIAL : 2
DANE : 1
CENTER : 5
INGRATIATING : 1
MEDICARE : 2
SUICIDE : 1
THE : 166
ABILITIES : 1
INFORM : 1
NURSES : 2
FILED : 2
INSTEAD : 1
PRESENTS : 1
GROUP : 14
ADVANCED : 2
ADJUSTMENT : 1
SECONDS : 1
APPEARS : 1
WATCHFUL : 1
COLLECTED : 1
COLOR : 4
THYROID : 1
HOBBY : 1
DISEASED : 1
LEG : 3
ARRIVED : 1
MEDS : 5
OPT : 4
INDICATION : 1
QUATERNARY : 1
INCR : 1
CONTAINERS : 2
ELECTRONIC : 1
STAYED : 1
DISPOSITION : 1
ANXIOUS : 1
WANTING : 1
OCCUPATION : 1
CAP : 1
FLICK : 1
LEATHER : 1
BREATHALYZER : 1
STATED : 6
CAPILLARY : 2
XM : 1
HEARING : 3
LEADERS : 2
RNBC : 1
DISCON : 1
GET : 6
WHAT : 2
RA : 1
ALBUTEROL : 4
ASSISTANCE : 17
IADLS : 1
DIABETIC : 2
INJECTED : 1
EVIDENT : 1
PDD : 1
YEAR : 4
PRESCRIPTION : 2
COPY : 1
CREAM : 1
STAGE : 1
TOBOGGAN : 1
LB : 4
NAPPING : 1
MOTION : 3
RANKINE : 1
PUT : 1
SEEN : 7
PRE : 1
RT : 2
COMBIN : 1
MAILED : 1
FOOD : 5
OSTEOARTHROSIS : 1
OPTICAL : 1
NURSE : 4
SX : 1
LABORATORY : 1
FINALLY : 1
UDS : 1
OSPITAL : 1
FREQ : 1
INJECTIONS : 1
ANY : 8
TRY : 1
DISCHARGE : 8
CONSISTENCY : 3
TISSUES : 1
RECORDS : 1
QH : 1
FLOW : 1
MAINTAIN : 1
FACILITY : 2
EFFECTS : 1
CLEARED : 1
SECONDARY : 3
PLEURITIC : 1
MULTILEVEL : 1
MSE : 2
IMPACTED : 1
TIMEFRAME : 1
VOLUME : 4
EVERY : 2
RESTRICTIVE : 1
SHOWERPT : 1
OCR : 2
SKIN : 5
NOT : 35
DTN : 1
FRACTURE : 1
NONTENDER : 1
THERE : 9
RETINOPATHY : 1
WALKING : 2
KLONOPIN : 1
OPTOMETRY : 1
BRONZE : 1
HERE : 3
IM : 1
TESTICULAR : 1
POSITIVE : 2
CLEAN : 1
UNITS : 1
CONCOMITANT : 1
CITRATE : 1
ONEHALF : 1
TRANSFERS : 1
FEB : 3
CONDUCTED : 1
BARBARA : 1
PROGRESS : 5
RELIGION : 1
LIMITEDLY : 1
PSYCHOTHERAPY : 2
DCD : 1
MOVIE : 1
ASSESS : 1
REPEAT : 1
VET : 12
EXTREME : 3
STOOL : 7
LEARNER : 2
EXPLAINED : 1
BEST : 2
COMPLETION : 1
PARTICIPATE : 2
DI : 1
YANICK : 1
MA : 1
PAINFUL : 1
ASSOCIATED : 1
BACK : 9
HOWEVER : 2
SOURCE : 1
TUES : 1
MALE : 8
VOIDED : 1
RANGED : 1
BY : 30
COMPLAINS : 1
CLINICAL : 6
NORTH : 1
LUNGS : 2
TH : 2
CONVERSATION : 4
BASS : 1
TOENAILS : 1
BURN : 1
TO : 184
CELLULITIS : 1
PNEUMONIA : 1
FEEL : 3
IV : 2
DIPTHERIA : 1
ABUSE : 2
TASK : 3
ADMINISTRATIVE : 1
SAFE : 1
DX : 4
BIOPSY : 1
PROCEDURE : 6
INSERT : 1
WELLBUTRIN : 1
WATCH : 2
WARM : 1
STRESSORS : 3
DEFAULT : 1
SEE : 8
LOCATIONS : 1
CBC : 1
PLEASE : 5
ANTISEPTIC : 1
INDICATES : 1
ANEMIA : 1
STATUS : 4
RING : 1
LLY : 1
BRUISING : 1
READER : 2
MHICM : 1
SPENT : 1
DC : 1
TA : 1
DRINKS : 2
NAD : 1
CONTINUED : 3
TECHNIQUE : 2
TESTING : 1
OUT : 7
MUCOSAL : 1
EFFORTS : 1
LBS : 2
SPIRITS : 2
VIRUSES : 1
DEST : 1
SCREEN : 3
BARRIERS : 1
REACTION : 4
XX : 1
EVALUATED : 2
REHABILITATION : 1
ASSIGNED : 1
MENTAL : 3
NEEDED : 9
THANKS : 1
ABNORMALITIES : 1
GERD : 2
NEAT : 1
EXT : 2
WERE : 11
FACTORS : 1
BRC : 3
REGULATION : 1
SHEET : 1
CUING : 1
RESPONSIBILITIES : 1
ROTATION : 1
WALKS : 3
CHANGING : 2
TURNS : 3
JUSTIFICATION : 1
LABS : 4
TAKEN : 1
JOB : 2
CLOSED : 1
WAYS : 1
POSSIBLE : 2
TYPICALLY : 1
AGREED : 1
TRIAGE : 2
OVERWEIGHT : 1
PART : 3
DETERMINED : 1
FAMILY : 8
BAD : 1
ORIENTATION : 4
SEEMED : 1
WHEN : 17
DYES : 1
AMBULATORY : 2
PACED : 1
BEING : 4
CREATININE : 2
OBSTRUCTION : 1
AMOUNT : 6
WAS : 67
LT : 1
RESPQH : 1
PM : 8
ORI : 1
PATIO : 1
AC : 1
WANTED : 1
CAUSING : 1
UNEXPECTED : 1
GAUGE : 1
CONSUMED : 1
SIG : 1
REMAINS : 1
DRINKING : 1
COUPLE : 1
ABD : 1
NOW : 3
PTSD : 1
SCHIZOPHRNEIA : 1
INTACT : 1
CONFIRMED : 2
ONSET : 2
CYCLOBENZAPRINE : 1
EXACERBATION : 1
PROGRAMGROUP : 1
NAOMI : 1
LIST : 3
OT : 2
INTE : 1
DEMONSTRATED : 1
BAY : 1
IMMUNIZATION : 4
SA : 1
VOMITING : 2
OCCASIONALLY : 1
UNCONSCIOUS : 1
ORIENTED : 5
CURRENTLY : 1
NECK : 1
MCADOO : 1
JOINT : 3
SIMVASTATIN : 2
RESPIRATIONS : 2
PCMM : 1
BETWEEN : 1
BATHROOM : 4
GOING : 3
DID : 9
SHOW : 1
ARRIVAL : 1
ACCURATE : 1
SUN : 2
TELEPHONE : 6
ADDRESS : 1
SITUATION : 1
PRIV : 1
COHERENT : 1
FACILITATORS : 1
PLEASED : 1
COMPLAINING : 1
COOPERATIVE : 2
REPORTS : 5
SCREENINGT : 1
SUBJECTIVE : 3
HELP : 4
OPTIONS : 1
DECOMPRESSION : 1
SUCTIONING : 1
CONTINUES : 4
COMING : 4
YES : 17
COUSIN : 1
UNINTENTIONAL : 1
SMILING : 1
CONSENT : 3
FACE : 2
WHOM : 1
CONTINES : 1
PACKS : 1
SCOPOLAMINE : 1
DOING : 3
RETURNED : 3
ATTIRE : 1
LITTLE : 2
HPI : 1
ED : 5
CONTRACEPTION : 1
INSTITUTE : 1
PHYSICIAN : 16
GLOBES : 2
URGENT : 1
TOOTH : 3
AIDS : 1
CLOSELY : 1
INTERACTIONS : 2
HE : 87
BUTTON : 1
CALIFORNIA : 1
RX : 1
NORMALLY : 1
TREATED : 2
RATE : 7
MASS : 4
FELT : 2
ZOLOFT : 1
MEMBER : 3
PREFERENCE : 2
VSS : 1
ONETOONE : 1
ADJUSTING : 1
CLEAR : 3
MSW : 1
HERBALS : 1
CLAIMS : 1
PRIMARY : 13
MOTIVATIONAL : 1
GEL : 1
UNTIL : 2
SIGNS : 1
SEPTIC : 1
SUBCUTANEOUS : 1
PATIENTS : 5
SUMMARY : 1
DESIRES : 1
FATHER : 1
CONSTIPATION : 2
PROVIDED : 6
DRINK : 1
WESTERN : 1
DENTAL : 2
POSTING : 1
TWO : 3
NONE : 7
COUPLES : 1
CFILE : 1
SUMMONS : 1
DECREASED : 3
LOT : 2
ANGRY : 3
BLINDNESS : 1
DIRECTIVES : 1
SCHEDULE : 4
CALM : 1
HER : 5
ORDERED : 4
TOPIC : 4
JAIN : 1
REFLECT : 1
FEELING : 4
TURN : 1
SHOULD : 2
QUESTIONS : 4
COMMUNICABLE : 1
APPEARED : 2
YELLOW : 1
DIFF : 1
MCG : 1
STAYING : 1
ROUTE : 1
THERAPIST : 1
LITERATURE : 1
PLACE : 2
LIVING : 4
PROD : 1
SACCOCIA : 1
POLYPS : 1
IER : 1
RANGE : 2
COMFORTABLE : 1
TURGOR : 1
TOENAIL : 1
MG : 22
WAITING : 2
CORRECTED : 1
APS : 1
WENDY : 1
SITS : 4
NVI : 1
REG : 2
CONTINENT : 9
CONSTANTLY : 1
VARIATION : 1
SODIUM : 1
SPACE : 1
WORSE : 1
APPROXIMATELY : 1
ATTENTIVE : 1
PROVIDER : 7
OIL : 1
MARCH : 1
DONT : 2
RAILS : 1
GENDER : 1
HL : 1
MULTIPLE : 1
USES : 2
INSECT : 1
PUBLIC : 1
MIGRAINE : 1
WISHED : 1
APPOINTED : 1
KEEPING : 1
ALERT : 4
SUBMITTED : 1
GICOLONOSCOPY : 1
SHARED : 1
ACCESSED : 2
UNDER : 3
SEP : 2
IMED : 1
COMMENT : 1
OTR : 1
HYPOKINESIS : 1
COLLECTION : 2
FEMALE : 1
PROGRAM : 4
APPOINTMENT : 11
WOULD : 6
DISBELIEF : 1
FOLLOW : 6
RESTART : 1
OPENANGLE : 1
METHOD : 3
IMPULSIVE : 2
WHEEZING : 1
CHEN : 1
WONT : 1
BIRCH : 3
SEX : 1
ACTIVITIES : 2
ORDERS : 1
RESPOND : 1
WBCS : 1
INSTRUCTOR : 1
REMERON : 1
ONCOLOGY : 3
MOVEMENTS : 3
COMPLAINT : 9
ORDER : 8
NL : 1
USING : 4
CHILD : 1
EASILY : 4
INFLUENZA : 6
UNDERSTOOD : 1
DENIED : 1
PROMISSED : 1
COSTOCHONDRITIS : 1
SPO : 1
EXTRACTION : 1
ULTRASOUND : 2
FELL : 1
GAVE : 1
SNACKS : 2
LIFESTYLE : 1
DIFFERENT : 2
NEW : 3
MOUTH : 7
FOCUSED : 2
PROVIDERS : 2
HEPATITIS : 1
INTIAL : 1
PRESENT : 4
BREAST : 1
CHRISTIAN : 1
SOME : 5
LINE : 2
SLEPT : 1
WPB : 1
MONITORS : 1
PAIR : 1
ANESTHESIA : 1
INCONTINENT : 1
NEED : 3
INSTRX : 1
TRIAL : 1
TIBC : 1
RECEIVED : 6
ALMOST : 1
BUTTERFLY : 1
OUTLINED : 1
NONDISTENDED : 1
CUEING : 1
EAR : 2
FARHE : 1
BODY : 6
PREVENTIVE : 1
UNRE : 1
BECAUSE : 3
EVE : 1
RUN : 1
OL : 1
GLASSES : 1
TRANSFERRED : 3
SIGHT : 3
ADV : 2
REMAIN : 2
MINERALIZATION : 1
LEGEND : 2
PHENERGAN : 1
STARTLED : 1
DISCOMFORT : 1
BROCHURE : 1
BRIGHT : 2
PRBS : 1
SEVERE : 2
PERPETUATION : 1
SOUNDS : 2
REVIEWED : 11
BEFORE : 1
ALL : 7
AUTHOR : 1
LIQUIDS : 1
SECOND : 1
INHALE : 2
FORCING : 1
NEEDLE : 1
DIAGNOSES : 3
SELF : 4
PATIENT : 96
ALLERGIES : 7
ENERGY : 1
SENT : 1
ALLOWED : 1
DISPOSABLE : 1
ABDOMEN : 2
AGREES : 1
ARRANGEMENTS : 1
THAN : 3
ACUTE : 1
BRADYCARDIA : 1
SENSATION : 1
ARTHRITIS : 1
KUSHWAHA : 1
REQUIRES : 2
DECREASE : 1
PROTOCOL : 4
COME : 1
TELLS : 1
PERTUSSIS : 1
LOOKING : 1
INTERVIEWED : 1
FEET : 1
CAME : 1
SELFCARE : 1
VISIT : 15
THAT : 26
ADENOSINE : 1
NORMAL : 9
WIFE : 3
TMD : 1
STAFF : 14
DEPRESSED : 1
CE : 1
SERVICE : 1
RIGHT : 13
PC : 2
BREATHING : 2
VITALS : 3
JEFF : 1
HBPC : 1
ONE : 8
AL : 1
REQUESTS : 2
PENSION : 1
PMR : 1
MONEY : 2
PTS : 1
RESPONSIBILITY : 1
THOUGHT : 4
HYPERLIPIDEMIA : 3
WRITER : 3
BICK : 1
YOU : 18
DEBROX : 1
MORPHINE : 1
CRITERIA : 1
INFORMED : 5
ISSUED : 4
PAST : 9
DOCUMENT : 3
NOVEMBER : 2
EYEBALL : 1
REASON : 8
POSTERIOR : 1
TOBACCO : 3
INVOLVES : 1
ACT : 1
REMINDER : 1
NEVER : 2
PREMIX : 1
SIX : 2
AFGER : 1
DR : 2
MEMBERS : 1
WATCHING : 1
SOCIAL : 4
TRP : 1
HOSPITAL : 2
FL : 1
MENTIONED : 1
VITAL : 1
SO : 3
REGULAR : 1
GEC : 2
PSYCHIATRICALLY : 1
TALK : 1
IDENTIFIERS : 1
ADULT : 1
MODE : 1
LIGHTER : 1
ANTIBIOTICS : 2
GAINED : 1
STRESS : 1
SPECIFY : 1
EASTHOM : 1
JR : 1
MAKE : 1
FOCUSING : 2
WEEK : 3
APPROVED : 4
PJ : 1
ENHANCEMENT : 1
NUR : 1
REL : 1
ENSURE : 2
DISTRESS : 1
IMPAIRMENT : 1
EKG : 1
ADVISE : 1
MOOD : 7
MONTGOMERY : 1
GUILLIANBARRE : 1
LIVES : 2
REPORT : 4
APPROACHES : 1
LETTER : 4
SIGNED : 1
ELECTRONICALLY : 2
HOW : 7
PHQ : 1
FEELINGS : 1
SINCE : 2
DESCRIBED : 2
DISCUSS : 2
STOPPED : 2
COUGH : 2
CHANGE : 1
REALM : 1
DEMONIC : 1
LEARN : 2
PRESENTING : 1
SOLN : 3
PLASM : 1
RATHER : 1
MADE : 2
OFFICE : 1
IUD : 1
YRS : 3
INCLUDES : 1
SKEPTICISM : 1
VERBALIZED : 1
LEARNING : 5
HAIRCUT : 1
PRINTED : 1
DOSE : 1
ENCOUNTER : 1
OBJECTIVE : 2
BERNARD : 1
SMOKING : 3
SOCIALIZATION : 1
AFFECT : 3
UNDERSIGNED : 1
WASH : 1
IMPINGEMENT : 1
BOIL : 1
RELEASE : 1
CONCERN : 2
ORIGIN : 1
STRONG : 1
SOMEONE : 1
AREAS : 1
ALONE : 1
FINDS : 1
REOOM : 1
ANTIBIOTIC : 1
INPT : 1
RESTING : 2
MO : 1
COMMENTS : 6
STRENGTH : 1
NEEDLESSLY : 1
ITEMS : 2
TOTAL : 8
LIGHT : 1
PAINPELVIS : 1
SURGICAL : 3
SINUS : 1
ST : 2
LIE : 1
ELIMINATION : 4
SUCH : 4
HISTORY : 10
RESPIRATION : 4
HOURS : 7
ANTOINE : 1
MAIL : 1
LEGS : 1
BARETT : 1
REPORTED : 3
THURFRISUN : 1
RATIVE : 1
ONGOING : 1
REMIND : 1
PFTS : 2
PURPOSES : 1
NOV : 2
PILLS : 1
HCC : 1
WOUND : 4
BILAT : 1
DEGOLYER : 1
HIP : 3
NOTHING : 1
MEAT : 2
SITE : 5
MATERIAL : 1
WOOTEN : 2
COMPLICATIONS : 1
STATING : 1
KG : 3
HGAC : 1
AUG : 1
PROBLEM : 6
ACTIVELY : 2
EYES : 2
OCTOBER : 1
TELERETINAL : 1
CLONAZEPAM : 1
ADDRESSED : 1
BLUE : 1
RECORD : 4
ELIGIBLE : 1
IED : 1
PROGRESSING : 1
SICHERER : 1
WARFARIN : 1
THROUGH : 4
ADLS : 1
PUFFS : 2
BEERS : 1
STEROID : 1
METAB : 1
VETS : 2
MHIS : 1
ENVIORNMENT : 1
EXTRA : 2
ADMISSION : 2
GUARDIAN : 1
RESCHEDULED : 2
SUPPORTING : 1
LESS : 2
NON : 1
NICOTINE : 1
ONES : 1
INTRODUCED : 1
ICE : 1
DIURETIC : 1
FUTURE : 1
ANERGY : 1
WAY : 1
CIRCULATION : 1
CLIENT : 4
ASSOCIATE : 1
DOB : 4
DENIES : 3
QUALITY : 2
ACCOMPANIED : 1
PHARMACY : 3
CARRY : 2
OTHERS : 4
DRAWN : 2
REQUESTED : 1
LEVESQUE : 1
VETERAN : 33
CAPSULE : 2
RELIEF : 1
DINNER : 1
PT : 43
NB : 1
RADIATION : 5
PSYCHOSOCIAL : 1
STATION : 1
LAMINECTOMY : 1
SWUNG : 1
SOON : 1
CATHETER : 1
RELEIF : 1
STOLE : 1
MISSED : 1
NI : 1
MINIMAL : 1
SEXUAL : 1
STRATEGIES : 1
PERSISTENT : 3
AROUND : 1
ILLNESS : 4
THANKFUL : 1
AND : 173
WONDERS : 1
HOUR : 1
MAGNESIUM : 1
LISTEN : 1
PTT : 1
JUN : 2
SESSIONS : 6
RESPONSE : 2
OCCIPITAL : 1
COMMUNITY : 2
ACELLULAR : 1
SLT : 1
WORKED : 2
POSTOP : 3
FOOTWEAR : 2
VITAMINS : 1
NAIL : 1
PINES : 1
LOW : 8
ADMINISTERED : 2
MAY : 4
FOLLOWED : 1
DISCONNECTED : 1
DERMATOLOGY : 1
PRO : 2
LENGTH : 3
ARGUMENTATIVE : 1
APPT : 7
TAKING : 5
UNLESS : 1
SPOUSE : 1
OBSERVED : 5
OZ : 1
LAXATIVE : 1
PERIOD : 2
NEUROGENIC : 1
DONE : 3
PHYSICAL : 2
WEARING : 3
CP : 2
NIGHT : 2
TEAR : 1
ACTIVE : 14
NONINFECTIOUS : 1
KNOW : 2
ABILITY : 1
BEDREST : 3
NDA : 1
BEGIN : 1
AFIB : 1
CONTROLLED : 1
TITRATE : 1
CABASAL : 1
LACY : 1
STINGS : 1
THIS : 48
SUPERVISING : 3
AK : 1
HIGH : 2
SOFT : 2
APP : 1
VAMC : 3
ADDED : 1
PALMER : 1
GAF : 1
DEPLOYMENT : 1
CORDIAL : 1
RIGHTS : 2
MANAGING : 1
SESSION : 6
STATES : 8
STIMULATED : 1
NEBULIZER : 5
OU : 5
WHILE : 4
CELL : 2
LIMITS : 1
ICDCM : 10
FIRST : 3
RESP : 2
HZ : 1
LAUGHING : 1
PICK : 1
ETOH : 4
ITS : 1
DOWN : 1
JOB_WIFE : 1
AND_UNTIL : 1
AK_PULSE : 1
TO_PT : 7
OPENING_BED : 1
BLUE_COMMON : 1
GOAL_OF : 1
HISPANIC_ZZPATIENT : 1
AN_RESTING : 1
TA_ALPHA : 1
COMING_UP : 1
MY_SUPERVISING : 1
OF_LBS : 1
UNSCHEDULED_VISIT : 1
HE_DANE : 1
THE_EPISODE : 1
CONTINENT_NONE : 1
BUT_IS : 1
SPECIAL_PREFERENCE : 1
CC_PT : 1
USE_DESIRES : 1
DECREASED_TO : 1
WBC_OF : 1
AND_DISBELIEF : 1
MG_PATIENT : 1
OF_DISCHARGE : 3
WAS_AS : 2
KAUR_PREVENTIVE : 1
ABOUT_TYPICALLY : 1
CONSUMED_SCOPALAMINE : 1
RETURN_AS : 1
LEARNING_PATIENT : 1
DECREASE_BEHAVIOR : 1
SAY_IF : 1
UNRE_ALPHA : 1
CHANGE_THERAPY : 1
LIE_BED : 1
PATIENT_INTERVENTIONS : 1
MH_CONTINUES : 1
PRESCRIBED_AND : 1
THE_TUES : 1
TOTAL_WITH : 1
LEARNING_AND : 1
INTRAVENOUS_HEPARIN : 1
SESSIONS_ING : 1
FLUID_IN : 1
EXAM_YVONNE : 1
OTHERS_HEALTH : 1
STOPPED_RETURNED : 1
PHYSICIAN_NURSES : 1
VERY_ANGRY : 1
PROGRESSING_IN : 1
SC_ED : 1
OVER_IV : 1
PATIENT_HAD : 2
DO_SO : 1
PO_ACTIVE : 1
PATH_VET : 1
VISTA_HOSPITAL : 1
NOTE_PROVIDED : 1
CARE_APPOINTMENT : 1
AND_ORIENTED : 3
THE_KNEE : 1
FRIENDS_AND : 1
PAST_HOURS : 2
NORMAL_SPEECH : 1
OF_HIS : 3
EXT_OR : 1
RT_ADDRESSED : 1
ACTUALLY_PROCEEDINGS : 1
YOUR_CLINIC : 1
TO_TOUCH : 1
THE_PATIENT : 20
LIKE_PRIMARY : 1
SECOND_TIME : 1
THE_SUPPORT : 1
PATIENT_VERBALIZED : 1
TO_BMI : 1
RECEIVING_ANY : 1
THE_UNDERSIGNED : 1
IPRATROPRIUM_ORDERED : 1
DESCRIBED_SKEPTICISM : 1
HAVE_AND : 1
NUTRITION_STAFF : 1
RESPIRATION_ALI : 1
VOICED_RESCHEDULED : 1
CHRONIC_INFLAMMATION : 1
BID_TO : 1
ICDCM_HYPERTENSION : 1
MEDS_IN : 1
LEFT_PULMONARY : 1
IT_ACUTELY : 1
PM_CONVERSATION : 1
BOTH_EYES : 1
PFTS_WATCH : 1
BOWEL_PROBLEMS : 1
COULD_TRIGGER : 1
REFERRAL_CARE : 1
ML_INJECTED : 1
FOLLOWING_ACTIONS : 1
VINAY_RESP : 1
SHIFT_HE : 1
WORSE_AT : 1
HIS_THIS : 1
ONLY_IF : 1
CONCERN_COSTOCHONDRITIS : 1
THE_BEST : 1
HYPOKINESIS_AT : 1
MINUTES_QH : 1
SYSTEM_VET : 1
ARE_NEGATIVE : 1
QUESTIONS_PATIENT : 1
IDENTIFIES_FOLLOWING : 1
OUTPATIENT_EXCLUDING : 1
MORNING_FOR : 1
VERBAL_TO : 1
RETURN_ON : 1
FOCUSED_AND : 1
IF_ADDENDUM : 1
STATES_WAS : 1
IF_XX : 1
RNBC_LCSW : 1
NURSING_ETHNIC : 1
TERM_NEVER : 1
PROPOSED_PLAN : 1
AND_DISCHARGE : 1
ORDERED_SUCTIONING : 1
IMPORTANCE_OF : 1
COGNITIVE_MSE : 1
HEALTH_NURSE : 1
CONTACT_PHONE : 5
EXCESS_PRIOR : 1
ING_ASSESSMENT : 1
RELIGION_THE : 1
TO_POKE : 1
SUBMITTED_ADDENDUM : 1
YOUR_LAB : 1
UNEXPECTED_STRESSORS : 1
WEEK_HE : 1
WANTS_TO : 1
ORIENTATION_MOBILITY : 2
INDIVIDUAL_MR : 1
MEDICAL_VETERAN : 1
BEEN_VISIBLE : 1
COLOR_NUMBER : 1
DISTRESS_FAMILY : 1
STREET_MASS : 1
LEFT_PATIENT : 1
SKI_MANAGEMENT : 1
CONTINUED_PRACTICING : 1
URINE_TOXICOLOGY : 1
PL_MYOPIA : 1
HE_FOLLOWED : 1
IS_MH : 1
PERPETUATION_CHRISTIAN : 1
CM_IMPAIRMENT : 1
ENROLL_AND : 1
ASSESSED_BEHAVIOR : 1
WERE_NOTED : 1
COPE_SUBJECTIVE : 1
DISTANCE_CALLS : 1
APPROVED_MEDICATIONS : 1
CONTACT_WAS : 1
BE_CONTACTED : 1
ADDENDUM_GENERAL : 1
PROTOCOL_USED : 3
MEDIAL_TENDERNESS : 1
OLANZAPINE_FARHE : 1
WHEN_IS : 1
PAIN_ICDCM : 1
STATUS_RESP : 1
AND_CORRECTED : 1
MARRIED_COUPLES : 1
LOSS_TEMPER : 1
NOT_AT : 1
HISTORY_TO : 1
WHEN_IT : 1
CHIEF_CHIEF : 1
ARRIVED_TO : 1
PATIENT_FAMILY : 4
EVALUATE_THE : 1
THE_BLINDNESS : 1
SYND_AND : 1
NOT_BOWEL : 1
RECORD_BEEN : 1
HIS_GOING : 1
OBSERVED_SMILING : 1
CONTINUE_PER : 1
TREATED_ANTICOAGULANTS : 1
THE_TOBACCO : 1
GROOMING_SPEECH : 1
CARE_ORAL : 2
ON_ETOH : 1
HIM_BEST : 1
PATIENT_JR : 1
MEDICAL_WAS : 1
BUT_THE : 1
PAST_IUD : 1
CONTINUE_STATUS : 1
VICTIM_UNFORTUNATE : 1
ADL_LOCATION : 1
MOBILITY_SACCOCIA : 1
EVENING_OF : 1
BED_SPONGE : 1
ADDENDUM_STAFF : 1
BEEN_DOING : 1
NNV_PT : 1
THERE_DETERMINE : 1
THE_LAB : 1
NOTE_RADIATION : 1
RESULTS_WERE : 1
CLONAZEPAM_MG : 1
MORE_DRINKS : 1
NONVA_MISCELLANEOUS : 1
RANGE_MOTION : 2
WAS_REPORTED : 1
OCT_YOU : 1
VET_SCREEN : 1
AFTER_TREATMENT : 2
THE_GROUND : 2
PULSE_PFTS : 1
MH_CONTACT : 2
HE_FELT : 2
CALLED_PT : 1
PROPERTY_DESTRUCTION : 1
MEALS_RESPIRATION : 1
SAFETY_OR : 1
ESIG_VINAY : 1
EATS_AT : 1
LONG_DISTANCE : 1
IS_LABS : 1
TOOK_FROM : 1
TOPICAL_ANTIBIOTICS : 1
AND_FOCUSED : 1
MIN_YES : 1
AND_IADLS : 1
LCSW_VA : 1
BEEN_AND : 1
ALONE_CONDO : 1
RESPIRATORY_PROGRESS : 1
CONSTIPATION_CHRONIC : 1
GLOBAL_HYPOKINESIS : 1
RETURN_PROBLEM : 1
INPATIENT_TEAM : 1
VET_VERY : 1
INDICATED_BRIGHT : 1
IDENTIFIED_OTHER : 1
READING_GOT : 1
VISTA_STARTING : 1
IF_APPLICABLE : 2
PATIENT_ITEMS : 1
HE_SPOKEN : 1
MANAGEMENT_ASTHMA : 1
AT_SEP : 1
TOOK_CARE : 1
THE_AREA : 1
PRESENT_TIME : 1
SENT_TO : 1
CANT_RECORD : 1
THEM_PUT : 1
IDENTIFIERS_YES : 1
INDICATION_STEROID : 1
PLACE_OR : 1
AND_WOULD : 1
THE_TOILET : 3
MONITORING_LAB : 1
UNITS_IN : 1
FLUID_NUMBER : 1
RELIGIOUS_CULTURAL : 1
REPORTS_FEELING : 1
WITH_YOUR : 1
MITRAL_ULOPLASTY : 1
OF_ACTIVE : 1
HISTORY_INCREASE : 1
EDUCATION_USES : 1
AND_REG : 1
PAIN_THERE : 1
OF_LIPOMAS : 1
OTHER_PRIMARY : 1
UNDER_IMAGING : 1
TIME_VETERAN : 1
IN_EYE : 2
AND_PAINPELVIS : 1
ON_TREATMENT : 1
OF_BIRTH : 1
AS_AS : 2
PRESENT_ILLNESS : 2
LOW_VET : 1
PAIN_THAT : 1
WELL_SUBJECTIVE : 1
VETERAN_NOW : 1
WAS_CONCOMITANT : 1
PAIN_PROPHYLAXIS : 1
LIFESTYLE_CHANGES : 1
HYGIENE_LDL : 1
IS_AAOX : 1
AGITATION_GENDER : 1
INFLUENZA_INFLUENZA : 1
RECEIVE_THE : 1
BRADYCARDIA_RATE : 1
THEY_WONT : 1
ICDCM_TEAM : 1
JUST_CANT : 1
LEARNER_ABILITIES : 1
FEELING_GOOD : 1
PRODUCTS_IF : 1
ABSCESS_FINGER : 1
RESIDENT_MEAL : 1
EVENING_UP : 1
ON_PRESENTING : 1
VET_WALKING : 1
PHYSICIAN_RIGHT : 1
ALBUTEROL_IPRATROPRIUM : 1
QHS_WHEN : 1
THE_HOUR : 1
HE_LOCATION : 1
OTHER_RN : 1
TRP_TELEPHONE : 1
CONTAINERS_BED : 1
DESIRE_TO : 1
MR_PERIOD : 1
WONDERS_ANYTHING : 1
EXT_BID : 1
TAB_SA : 1
FIRST_SHE : 1
AS_OPPOSED : 1
SOUNDS_REGULAR : 1
TOOTH_EXTRACTION : 1
AND_STRATEGIES : 1
ASSIST_BATHROOM : 1
SPACERS_ASMANEX : 1
CONTENT_PLAN : 1
TREATED_THIS : 1
PAST_OR : 1
IN_NO : 1
REQUEST_BY : 1
YOUR_RECENT : 2
VETERANS_RECORD : 1
INDICATION_FOR : 1
PT_RETURNS : 2
ISSUES_ARE : 1
KLONOPIN_UP : 1
SOME_IN : 1
HISPANIC_ORIGIN : 1
HAS_MULTIPLE : 1
MIAMI_STATES : 1
TO_TREAT : 1
TRYING_LEAVE : 1
HUDVASHNOTE_OLD : 1
PT_REFUSED : 1
ENVIRONMENT_DI : 1
FEELINGS_PATIENT : 1
EVALUATION_AND : 1
OFF_THE : 1
HIS_ISSUES : 1
SX_WHEN : 1
ACTIVITY_CONSTIPATION : 1
WITH_MEDICATIONS : 2
PULMONARY_FOLLOWING : 1
SCHOOL_CLIENT : 1
ENDING_PM : 2
NO_YES : 1
IMMUNIZATION_MEDICATION : 1
VISIT_COMPLAINT : 1
ABOUT_PPD : 1
NO_HEIGHT : 1
WAS_PART : 1
PLEASED_RESULTS : 1
IMPAC_SUCH : 1
HE_LOST : 1
CONCERN_PLEURITIS : 1
CELL_VERY : 1
APPLICABLE_PT : 1
MS_PURPLE : 1
THAT_GET : 1
TO_TO : 8
NEBULIZER_PATIENT : 1
OFF_TO : 1
NEW_MEDS : 1
MY_BODY : 1
EXAM_WILL : 1
OD_IOP : 1
FOR_PURPOSE : 1
PROBLEMS_TESTING : 1
CONSTIPATION_UNSPECIFIED : 1
OUT_HENNESS : 1
STRESSORS_COULD : 1
TO_FATHER : 1
DECLINE_BLIND : 1
PAM_WOOTEN : 1
SOME_STATE : 1
MANAGEMENT_CHRONIC : 1
REACTION_TO : 2
TO_MARRIED : 1
INFORMED_VISIT : 1
DATA_THANKS : 1
PPD_TO : 1
NAOMI_VA : 1
WAS_BREATHING : 1
EXTREME_AGE : 1
PT_USING : 1
VERY_DIFFICULT : 1
YELLOW_HOWEVER : 1
DISORDER_OF : 1
VERIFIED_UNIQUE : 1
WEEK_PRIMARY : 1
POSSIBLE_WRITER : 1
AT_ALL : 1
ORDER_PHONE : 1
PROVIDER_BERNA : 1
DR_MEDICATIONS : 1
WPB_IT : 1
OF_NOVEMBER : 1
MOVE_TO : 1
EDEMA_BRUISING : 1
INJECTION_NEEDED : 1
PATIENT_WITH : 2
DATED_NOV : 1
WAL_FOR : 1
BASCOMPALMER_WPB : 1
INJECTIONS_OU : 1
TELEPHONE_NOTE : 3
HE_SEE : 1
TO_HIM : 1
PROGRAM_WANTING : 1
IS_LAMINECTOMY : 1
STRESS_BEEN : 1
WAS_DATE : 1
NONDISTENDED_AND : 1
LIVING_LIVES : 1
AIDS_IF : 1
WITH_GROUPS : 1
LBS_COMPREHENSIVE : 1
GROW_AND : 1
HAVE_HAD : 1
SA_NAUSEA : 1
AMBULATORY_URINE : 1
SEIZURE_LOPERAMIDE : 1
APP_APPROPRIATELY : 1
MEAL_ASSISTANCE : 2
COULD_RELAPSE : 1
ADDENDUM_MEDICATIONS : 1
IN_FAMILY : 1
DOES_IF : 1
SESSION_REFORMULATING : 1
TO_ADMINISTERED : 1
SEE_THIS : 1
RECORD_HAS : 1
AND_OTHER : 2
HAVE_ADVANCED : 1
CARRY_PLAN : 1
KG_NO : 1
RECOVERY_EFFORTS : 1
ACELLULAR_IMMUNIZATION : 1
PATIENT_USED : 4
DRINKING_IN : 1
TO_PICK : 1
BID_NO : 1
YES_PAIN : 1
ICE_CHEST : 1
IF_PSYCHOTHERAPY : 1
TYLENOL_MEDICINE : 1
ORIENTED_GOALS : 1
IDENTIFIED_CONTACT : 1
AID_CLINICAL : 1
PROCEDURE_PROCEDURE : 1
NOT_PATENT : 1
ER_SOME : 1
THE_FACT : 1
PACED_HAS : 1
REPORTS_HEADACHES : 1
REPORTED_THAT : 1
UNDERSTOOD_EVIDENCED : 1
OF_BARRE : 1
REL_INFORMATION : 1
INTO_TREATMENT : 1
VISUAL_MH : 1
PROBLEMS_NO : 1
ASSESSMENT_HYPERTENSION : 1
IS_DURING : 1
KEPT_OF : 1
OUTPATIENT_THERAPY : 1
COMING_WEEK : 1
CLEARED_MEDICARE : 1
NO_PLAN : 1
PROTIME_PTT : 1
DIABETIC_SECONDARY : 1
MG_TABLETS : 1
ZZPATIENT_CARE : 5
BRONZE_ETC : 1
CONTINENT_PROVIDED : 1
TRIAL_MH : 1
SEE_INTAKE : 1
BACK_IN : 1
PHYSICIAN_HO : 1
SUMMARY_ENTERED : 1
MISCELLANEOUS_ACTIVE : 1
IS_LINEAR : 1
WHO_IS : 1
HIM_SAYS : 1
JUL_MIN : 1
FOR_YOU : 1
LAST_VISIT : 1
ADEQUATELY_GROOMED : 1
ABNORMAL_PROSTATE : 1
BLOOD_NOTE : 1
ULTRASOUND_IRON : 1
STRONG_REACTION : 1
ON_AFTER : 1
IN_THIS : 1
TEMPERATURE_COLOR : 1
IDENTIFIED_PROBLEM : 1
DOB_MINUTE : 1
LAUGHING_TO : 1
PRESCRIBED_PATIENT : 1
HE_NOT : 5
RATE_PRIMARY : 2
OTHER_IPRATROPIUM : 1
PATIENT_TAKING : 1
CONTACT_HAS : 1
STRESSORS_OR : 1
RIGHT_LABS : 1
YES_BUT : 1
ASSISTANCE_AMOUNT : 1
MH_ATTENDING : 1
TO_ME : 1
REFILLS_HER : 1
HUDVASHNOTE_YEAR : 1
LEFT_EAR : 1
TREATMENTS_REFERRAL : 1
MOUTH_TIMES : 1
WORKER_SCHOOL : 1
THE_READER : 1
WITH_CHEST : 1
IN_PM : 1
PHYSICIAN_SLT : 1
FACILITATORS_PAM : 1
HOW_THEY : 1
BERNARD_ABOUT : 1
VIA_NONVA : 1
HELP_VAMC : 1
AS_IT : 1
AND_ABSCESS : 1
PERPETUATION_OF : 1
ON_HIS : 3
UP_PATIENT : 1
WERE_MET : 1
WHOM_FAMILY : 1
LITTLE_ROCK : 1
WHICH_HAVE : 1
COMPLAINT_DISCIPLINARY : 1
DAILY_INFLAMMATION : 1
AND_CLINICIANS : 1
IN_RIGHT : 3
MEDICAL_HX : 2
EXT_LONG : 1
LEFT_WRIST : 1
FIND_RECORD : 1
FOR_SPECIFICS : 1
STEADY_GAIT : 1
BATHROOM_PRIVILEGES : 3
THIGH_BOIL : 1
PTSD_POSSIBLE : 1
IN_THESE : 1
LAST_PLEASE : 1
STATUS_THE : 2
DRAWN_INSTRUCTIONS : 1
OBSERVATION_MEDICATIONS : 1
EASILY_TURNS : 3
CLEAR_AND : 1
NOTE_WHICH : 1
AM_WITH : 2
BUT_RECEIVED : 1
SEEN_DISCUSSED : 1
TIME_BELOW : 1
PT_FOR : 4
THAT_HAS : 4
NOW_WISHED : 1
PT_WORKED : 1
WILL_APPOINTMENT : 1
PRO_PHONE : 2
WHEN_WENT : 1
WITH_IN : 3
HAD_BAD : 1
SURGERY_INFORMED : 1
WILL_CHECK : 1
IT_HIMSELF : 1
AN_ENTIRE : 1
METHOD_VERBAL : 1
DEFERRED_APPEARED : 1
RESP_APPLICABLE : 1
IRON_TIBC : 1
HEALTHY_WELL : 1
NUMBER_SAME : 1
AT_HOME : 2
PATIENT_APPARENTLY : 1
REQUESTS_WAL : 1
INVOLVING_THE : 1
TO_MAKE : 1
IMPULSIVE_AND : 1
MEDICATIONS_EXCLUDING : 1
STATES_HAS : 2
VINAY_JAIN : 1
DISORDER_ASSESSMENT : 1
RHYTHM_VOLUME : 2
CONSENT_WAS : 1
TOXICOLOGY_AND : 1
BASCOM_EYE : 1
THIS_TWO : 1
ABDOMEN_NONTENDER : 1
BLINDNESS_TO : 1
POLYPS_HYPERLIPIDEMIA : 1
VERBAL_SPOKE : 1
REPORTED_NURSING : 1
PAIN_HIS : 1
RIGHT_DRAWN : 1
TASK_PERSON : 1
LEFT_ACTIVE : 1
PROFILE_BP : 1
FOR_WITH : 3
HE_UPDATES : 1
WITH_APPOINTMENT : 1
AND_TIAS : 1
PATENT_SATURATION : 1
OF_ING : 1
CONTINENT_TEAM : 1
DISCON_METHOD : 1
INDEX_CORRECTION : 1
AT_BY : 1
TO_LEARNING : 1
MD_DENTAL : 1
MAY_BE : 2
IN_DEALING : 1
IS_SOURCE : 1
NUMBER_DOCUMENT : 1
PAIN_USED : 1
ACTIVE_AND : 1
MUCOSAL_PROCESS : 1
TOUCH_OF : 1
AND_HYPERPLASIA : 1
SHOWED_BRADYCARDIA : 1
CALL_AS : 1
HAD_NO : 2
SOLN_OPH : 2
ASSESS_RISK : 1
LOT_BETTER : 1
FELL_TO : 1
INPATIENT_PLACED : 1
LBS_MHIS : 1
SITE_RN : 1
URINE_CLEAR : 1
PER_REQUEST : 1
HIS_EAR : 1
TO_IS : 1
DISCUSSING_TREATMENT : 1
WENT_FOR : 1
STUDENT_DATE : 1
BACK_TIMEFRAME : 1
MCADOO_NDA : 1
SLOWLY_OFF : 1
TEMP_CALM : 1
CONTRACEPTION_USES : 1
BAND_SPECIMEN : 1
CARE_THAN : 1
FOR_WHEN : 1
RADIATES_DOWN : 1
SHOWED_NO : 1
BEST_WRAP : 1
VET_TOOK : 1
TO_ALL : 1
TO_FOLLOW : 1
TREATMENT_ENTERING : 1
SHOULD_HOLD : 1
LEFT_KNEE : 1
HISTORY_REPORT : 1
ENVIORNMENT_TO : 1
AND_VOMITING : 1
OR_AT : 2
DATE_EVENT : 1
SUSAN_DEGOLYER : 1
TO_WORK : 2
UNSCHEDULED_POTENTIAL : 1
ITEMS_SEX : 1
ORIENTED_TIME : 1
TOLD_TOTAL : 1
PRACTITIONER_RODRIGUEZ : 1
EFFECTS_NG : 1
GERD_NNV : 1
THIS_MEDICINE : 1
MCADOO_NORTH : 1
HE_TREATED : 1
WONT_HIM : 1
EKG_AGAIN : 1
TECHNIQUE_TIMES : 1
CBC_PROTIME : 1
OF_UNFORTUNATE : 1
LETTER_IN : 1
MOBILITY_SELF : 1
TAKING_CASODEX : 1
PLACE_AND : 1
FOWLER_ATTIRE : 1
MOTION_LEFT : 1
AND_POSSIBLE : 1
BATHROOM_DURING : 1
TO_LIFESTYLE : 1
UPDATE_YOU : 1
SOME_WAS : 1
TO_DRINK : 1
HE_IRRITABLE : 1
TO_MEDICAL : 1
INTE_ARM : 1
VETERANS_CFILE : 1
TO_ONSET : 1
MY_SCHEDULE : 1
THE_PRESENCE : 1
DATE_MEDICAL : 1
DATE_AS : 1
HE_HOME : 1
TO_CLINICAL : 1
VETERANS_NUMBER : 1
AFTER_RESPITE : 1
THIS_ASSESS : 1
STRUCTURED_AND : 1
GLOBES_OU : 2
COMBIN_FINE : 1
ED_CHECKED : 1
VISIT_PRIMARY : 1
SECONDS_NO : 1
FOR_INDICATED : 1
TEMPER_SUCH : 1
DOES_TIMES : 1
CAPSULE_VIA : 1
ANTIBIOTICS_TIME : 1
OPT_TREATMENT : 1
OS_PH : 1
AND_DATED : 1
IT_WITHOUT : 1
IN_ANXIETY : 1
LOW_FOR : 1
REPORT_EXC : 1
INSTRUCTIONS_ORDER : 1
OF_PROVIDER : 1
STATED_DID : 1
AND_OUT : 1
LABORATORY_WERE : 1
FACILITATORS_STAFF : 1
AND_COPING : 1
PATIENT_PAIN : 1
ADVERSE_TO : 1
OVERWEIGHT_ICDCM : 1
OF_FUNCTIONING : 1
MACULA_MIDP : 1
GO_SMOKE : 1
GOALS_UNDERSIGNED : 1
ANCHORAGE_PC : 1
SEES_OPHTHAL : 1
SX_STARTED : 1
APPROPRIATELY_WITH : 1
VACCINE_ONLY : 1
FUNCTIONING_HIGHEST : 1
VISIT_OF : 1
TO_LOW : 2
PATIENT_SAYS : 1
CONTINUES_DECLINE : 1
MINIMAL_VERBAL : 1
OF_CHECK : 1
WAS_TO : 6
INJECTION_SITE : 1
STAFF_REQUIRED : 3
AM_JUST : 1
WAITING_LIST : 1
PHENERGAN_THYROID : 1
PUFFS_ACTIVE : 1
TV_INDEPENDENT : 1
HAD_MULTIPLE : 1
FOR_IN : 4
CLAIRE_STREET : 1
IS_TEAM : 1
WILL_PATIENT : 1
HE_ASSISTED : 1
TWICE_PURPOSES : 1
NOTE_CRITICAL : 1
BE_STATED : 1
FOR_BRONCH : 1
THEY_AFFECT : 1
LIVES_HOW : 1
OTHER_FACTORS : 1
DOSIMETRY_SIMULATION : 1
RT_DEFERRED : 1
REFUSE_FLUID : 1
TO_EVALUATE : 1
PATIENT_FOLLOWUP : 1
TOOK_OF : 1
NEVER_AT : 1
WIFE_TOOK : 1
OCCASION_THE : 1
MCG_CFCF : 1
WERE_LUNGS : 1
ACTIVITY_THE : 1
INCREASED_NECK : 1
OF_TELEPHONE : 1
PLAN_FOR : 1
INTERVENTIONS_ARE : 1
BORROWD_MESSAGE : 1
DOCUMENTED_ALLERGIES : 1
PART_OVER : 1
PULSE_PROVIDERS : 1
NOTE_TO : 1
NEED_APPOINTMENT : 1
HIS_AND : 2
COPD_KUSHWAHA : 1
OR_EVEN : 1
THE_WRONG : 1
OF_COMMUNICABLE : 1
WE_SHE : 1
BEGINNING_THE : 1
SUBMITTED_RESPONSE : 1
NEEDS_TO : 1
POSTING_AND : 1
PHYSICIAN_VIEWS : 1
TO_BATHROOM : 1
CLINIC_MONITOR : 1
WAS_ACTIVE : 1
FOLLOWING_AFTER : 1
DEMENTIA_GIVEN : 1
WAYS_TO : 1
WEEKLY_VISITS : 2
MEDICATION_CONTROLLED : 1
CONTACT_ADDENDUM : 1
PLEASE_PT : 1
IT_CONTACT : 1
CARE_NOTE : 6
FEB_NEEDS : 1
MY_AND : 1
STATES_SX : 1
MEETS_NEEDED : 1
STAFF_PROPERTY : 1
ONLY_THE : 1
ACTIVE_MG : 1
SEVERAL_MEDICATIONS : 1
ETC_FROM : 1
HOLD_DO : 1
THERAPY_SESSION : 1
THEN_ALL : 1
LOWER_SAYS : 1
EYE_WAS : 1
SIDE_DRO : 1
CURRENTLY_IS : 1
FACE_AND : 1
INFORMS_HE : 1
TO_UNDERSTAND : 1
ACTIVITY_IS : 1
AS_FOR : 1
TO_CHANGE : 1
NOT_BEING : 1
TREATMENT_ARM : 1
ON_SCALE : 2
PUFFS_BY : 1
ETOH_DATE : 1
INJECTION_ER : 1
PROVIDED_WITH : 2
DISORDER_PATIENT : 1
AM_WITHIN : 1
SUPPORTIVE_VETERAN : 1
TAB_PO : 1
ICDCM_SOMEONE : 1
WITHOUT_GUARDIAN : 1
LAST_WBCS : 1
AND_VISIT : 1
OR_PMR : 1
THOUGH_MORE : 1
SUPERVISING_VIEWS : 1
PAIN_LEVEL : 1
CONTINUED_HEALTH : 1
ADDENDUM_MENTAL : 1
UNIT_TIME : 1
SAYS_WHEN : 1
ROOM_MOVIE : 1
ADDED_NO : 1
ZOLOFT_PATIENT : 1
APPOINTMENT_IBUPROFEN : 1
ETOH_AFTER : 1
OTHER_THAN : 1
CHIEF_TESTICULAR : 1
PROPHYLAXIS_ADULT : 1
YOUR_NEXT : 2
IN_PT : 2
NUMBER_DOCUMENTED : 1
AND_EXPRESSED : 1
HAS_SNACKS : 1
BEEN_ON : 1
VETERAN_OF : 1
FOR_FOLLOWING : 1
UNIT_MINS : 1
PART_AS : 1
PRACTITIONER_HE : 1
ROOMMATES_MONEY : 1
YOU_TANYA : 1
PT_STATE : 1
IS_YO : 2
YES_READING : 1
TASK_REQUIRES : 1
ED_JUL : 1
ATTIRE_CONTINENT : 1
HIS_WEEKLY : 1
CHANGED_MY : 1
CLINICAL_INFORMATION : 1
RECORD_DISCUSSED : 1
ANYTHING_NEW : 1
INTIAL_INTAKE : 1
HIM_TO : 3
AAOX_REVIEWED : 1
IS_CLINICAL : 1
NO_BUT : 1
TAB_YES : 1
ANOTHER_JOB : 1
COLLECTION_BREATHALYZER : 1
REQUESTS_OF : 1
IS_OLD : 1
MEDICALLY_MANY : 1
TO_TRAUMA : 1
AND_MOOD : 3
MAY_MORE : 1
REACTIONS_TRAUMA : 1
TURGOR_WITHIN : 1
NI_ADV : 1
ON_YOU : 1
FOR_THE : 5
INVOLVED_RECOVERY : 1
FOLLOWUP_OF : 1
YOU_LBS : 1
INCLUDES_HX : 1
TO_INFORMED : 1
MRSA_CARE : 1
MITRAL_RING : 1
OF_SESSIONS : 2
DOING_PT : 1
PHYSICIAN_APPROVED : 1
EDUCATED_ALTERNATIVE : 1
LOT_STRESS : 1
WAS_DONE : 1
LEG_MRSA : 1
VETERAN_FEEL : 1
PREOP_CONVERSE : 1
THE_BACK : 2
IV_PULSE : 1
LEARN_VERTIGO : 1
CONSTANT_THE : 2
MEAT_AND : 2
XM_BACKHAB : 1
PERIOD_OF : 2
EYE_HE : 1
THE_FROM : 1
WAS_UNDER : 1
LIKES_TO : 1
SCHIZOPHRENIA_HYPERLIPIDEMIA : 1
BIRTH_AND : 1
ACTIVITIES_OF : 1
HE_WILL : 2
OF_MY : 1
KG_BY : 1
LIFTING_PULLING : 1
WILL_TO : 3
LTG_SUSPECT : 1
FACILITATOR_OF : 1
SCORE_SPECIALISTS : 1
BE_SUPPORTIVE : 1
THROUGH_VISTA : 1
WAS_CONTINENT : 3
WOULD_WITH : 1
NEEDLESSLY_POKE : 1
THIS_INCLUDE : 1
SEE_THE : 1
SUGARUSE_RATE : 1
PROVIDE_WITH : 1
WHEN_THAN : 1
ILLNESS_HIS : 1
GENDER_RACE : 1
MR_IS : 2
INITIATED_PROCEEDINGS : 1
LIFE_HE : 1
REHAB_HE : 1
SITU_PLASMA : 1
NO_SMOKING : 2
CARRY_PLASM : 1
TAB_ASSIGNED : 1
ST_AT : 1
DONE_CHARGE : 1
HAS_AN : 1
MIN_OXYGEN : 1
TELEPHONE_ZIMBLEMAN : 1
AND_VETERAN : 2
FAMILY_TO : 1
DATE_OF : 3
VET_WILL : 1
SHOULDER_SHOULDER : 1
THAT_CALL : 1
CAP_ORAL : 1
RATIVE_CAUSING : 1
OF_SESSION : 3
LUMBAR_TIME : 1
AT_TIMES : 1
THAT_DEPRESSION : 1
DIFFICULT_HIM : 1
PENG_MD : 1
ALLERGIES_ADV : 1
THERE_LOCALLY : 1
FOR_PNUEMONIA : 1
SOBER_ENVIORNMENT : 1
PHONE_CALL : 4
NAME_PULSE : 1
TO_TRIED : 1
THE_SCREEN : 1
IS_ELIGIBLE : 1
RT_GROUPS : 1
LEARNING_SKILLS : 2
INCISION_KNEE : 1
APPOINTMENT_LETTER : 1
WENT_TO : 2
FOR_MED : 1
DINNER_FOOD : 1
MEDICATIONS_HAVE : 1
CE_THE : 1
THERE_REASON : 1
ABOUT_SESSIONS : 1
PLAN_ENTERING : 1
MR_APPROVED : 1
OR_BEING : 1
SECURITY_NUMBER : 1
ME_HE : 1
GAUGE_SPINAL : 1
NO_CONCERNS : 1
INSTRUCTOR_SET : 1
THE_ROOTS : 1
BY_AUTHOR : 1
PROGRAM_YR : 1
CARE_INVOLVING : 1
ANOTHER_LAB : 1
ON_MAR : 1
ANOTHER_IN : 1
ON_HE : 1
WRONG_ADMINISTRATIVE : 1
PHQ_PNUEMONIA : 1
WILL_TRY : 1
RNBC_BAKER : 1
WORK_FOR : 1
SEVERAL_YEARS : 1
FUTURE_ORDERS : 1
BRIEF_HISTORY : 1
BY_NURSE : 1
ACTUALLY_INITIATED : 1
AGE_DISCIPLINARY : 1
THE_ONSET : 1
GIVEN_ORDERED : 1
FROM_TO : 2
GROUP_HAD : 1
AFGER_MIDNIGHT : 1
READY_RETURN : 1
SHOULD_LETTER : 1
NOT_FUNCTIONAL : 1
WHO_PRESENTED : 1
WHENEVER_HE : 1
LAST_HE : 1
MONTH_INSERT : 1
NOT_CONTACT : 1
SECOND_AT : 1
REGAIN_SIGHT : 2
BEDREST_ADVANCED : 1
IN_SEEN : 1
CONFUSIONI_WIFE : 1
EXAM_PT : 1
MEDICATIONS_RECEIVED : 1
CLAUDICATION_POSTOPERATIVELY : 1
NSTRUCTIONS_SEE : 1
STATE_SET : 1
HE_LIKES : 1
CLIENT_FREQUENTLY : 1
SPACERS_AND : 1
KLONOPIN_MG : 1
OF_CONSISTENCY : 1
PM_AND : 1
REMOVED_AUGUST : 1
WHEN_COUGHING : 1
ADDENDUM_IF : 1
SP_LINE : 1
OF_FEB : 1
AGAINST_SITE : 1
PHARMACIST_BECAUSE : 1
PAIN_ON : 1
PAIN_FLASHES : 1
IS_CLIENT : 1
ADDENDUM_ALLERGIES : 1
DESIRE_MOTIVATION : 1
MO_THE : 1
STARTED_WHEN : 1
OF_LS : 2
SHOWED_OBSTRUCTION : 1
FOCUSED_IT : 1
JUST_IN : 1
HYPERTENSION_BP : 1
SKILLS_PROGRESS : 1
YRS_ASSESSED : 1
FOR_THERAPY : 2
HIMSELF_AND : 1
POSITIVE_COPING : 1
WAS_COMPLAINING : 1
BEDREST_THE : 1
AT_THE : 4
HE_WENT : 2
OVER_MEDICATIONS : 1
HAD_LEAVE : 1
WAS_INCONTINENT : 1
CR_PREVENTIVE : 1
SKEPTICISM_TO : 1
NUTRITION_PING : 1
POSTERIOR_INTERNAL : 1
PO_DAILY : 1
IRAQ_WAS : 1
SUPERFICIALLY_BRIGHT : 1
ASSESSMENT_EKG : 1
HE_HYPERTENSION : 1
VETERAN_APPEARED : 1
THE_MANAGEMENT : 1
RIGHT_FOREARM : 2
LAB_DIFF : 1
ASSESSMENT_TO : 1
IN_IS : 1
WERE_DRINKING : 1
BY_CHECKED : 1
HERE_HE : 1
HIM_IN : 2
JUST_WANT : 1
YEARS_TO : 1
WRITER_FOLLOW : 1
ADVISE_PT : 1
SYNCOPE_WITH : 1
THE_SHARED : 1
WITH_RETURN : 1
RIGHT_ML : 1
DURING_SHIFT : 7
NAME_VETERAN : 1
RESP_PREMIX : 1
MEDICATION_INCLUDING : 1
VENT_FEEDING : 1
DRIVING_AND : 1
INSTRUCTIONS_VETERAN : 1
SUCTIONING_NO : 1
NEEDS_HELP : 1
YOU_SHOULD : 2
CRITERIA_REVIEW : 1
AND_PROVIDE : 2
WAS_FOR : 2
SUPPORT_RECOVERY : 1
MISSED_MH : 1
CINCINNATI_VA : 1
CENTER_WBCS : 1
ILLNESS_LUMBAR : 1
FOR_JOB : 1
VISTA_IMAGING : 2
ALLERGIES_SEE : 2
EXPLAINED_TO : 1
GIVEN_THE : 1
ON_WATCHFUL : 1
CHANGES_MHICM : 1
HIS_ENERGY : 1
NOT_OF : 1
SHOULD_DO : 1
THE_EXTREME : 1
SEP_PATIENT : 1
TWICE_DISORDER : 1
IBUPROFEN_TAB : 2
ALCOH_OUTLINED : 1
URGENT_APPOINTMENT : 1
PATIENT_DID : 2
INTO_TOMORROW : 1
NO_WAS : 1
PNEUMONIA_TEAM : 1
PING_THE : 1
ACCESSED_VISTA : 1
ABUSE_FOR : 1
PRESENTED_THE : 1
AND_PERPETUATION : 1
STEROID_AT : 1
IN_SITU : 1
PT_REPORTS : 1
INH_INHALE : 1
WAS_VICTIM : 1
LIPOMAS_AK : 1
WARM_DRY : 1
FRUSTRATED_HE : 1
PLAN_REFILL : 1
WEEK_THE : 1
CONTACT_PHYSICIAN : 1
INDURATION_SOCIAL : 1
DISEASES_FOLLOWING : 1
WHEN_HE : 7
IPRATROPIUM_GM : 1
AM_MARCH : 1
ASSESSMENT_USING : 1
NOTE_PATCHES : 1
NOT_KNOW : 1
CLAIMS_FILE : 1
ACTIVELY_PARTICIPATE : 1
ORDERED_MAGNESIUM : 1
DAILY_EYE : 1
AS_LOW : 1
OT_THE : 1
SUPPORTIVE_WITH : 1
NEXT_INDIVIDUAL : 1
INHALE_PUFFS : 2
TO_DO : 2
STEPS_ARGUMENTATIVE : 1
CREATININE_OF : 1
FOR_YRS : 1
VIA_PMRS : 1
VES_MACULA : 1
GOOD_YOU : 1
NEEDLE_WAS : 1
TOILET_REASON : 1
SHOW_LETTER : 1
CATEGORY_PRIOR : 1
ELIGIBLE_ANY : 1
FROM_SAYS : 1
PAIN_MEDS : 1
IDENTIFICATION_SOCIAL : 1
INTEG_WARM : 1
MANAGEMENT_CODE : 2
TO_RATIVE : 1
FOLLOWED_THROUGH : 1
FOR_DIABETIC : 2
TENS_MINS : 1
OF_AUG : 1
AND_MSE : 1
OT_POSSIBILITY : 1
IS_FEELING : 1
PROCEEDINGS_MOVE : 1
SPOKEN_VOA : 1
NORMAL_YOUR : 1
TESTICULAR_PAIN : 1
BY_INPATIENT : 1
DISCHARGE_MEDICALLY : 1
GET_IT : 2
SUBCUTANEOUS_TISSUES : 1
WAS_HISTORY : 1
TO_TOLERATE : 1
CLINIC_RESCHEDULE : 1
THE_CONTINUED : 1
SHEET_FOLLOWING : 1
MONEY_JOINT : 1
YES_KEPT : 1
VS_GIVEN : 1
AND_MOTOR : 1
OTHER_ELIMINATION : 1
UPSET_ABOUT : 1
RESPIRATION_SONOGRAPHER : 1
GUILLAIN_BARRE : 1
PM_INTRAOPERATIVE : 1
VERIFIER_ES : 1
THE_ALERT : 1
YOU_DO : 1
YRS_QUIT : 1
ADL_PATIENT : 1
APPOINTMENT_TRP : 1
TUBEFEEDING_METHOD : 1
OF_SPRING : 1
IRAQ_VET : 1
RASH_WERE : 1
COMMENTS_BEHAVIOR : 1
TASK_NO : 1
TO_NOT : 4
VERBALIZE_INVOLVING : 1
RATE_PACED : 1
AND_REDNESS : 1
AND_GIVEN : 1
SPECIALISTS_ADDENDUM : 1
RX_ADVISE : 1
TAUGHT_SCHOOL : 1
INTAKE_CLEAR : 1
INVOLVES_THE : 1
NO_IER : 1
ALI_ELMI : 1
SPINAL_WAS : 1
AND_PARTICIPATED : 2
CONTINUE_TREATMENT : 1
PRODUCTIVE_PULSE : 1
PLEASE_ORDER : 1
GET_THOUGHT : 1
UPTIVE_TYPE : 1
NUMBER_TYPE : 1
LIVING_PATIENT : 1
THROAT_THE : 1
BE_ADMINISTERED : 1
THE_BARETT : 1
THE_DECREASED : 1
COLONOSCOPY_SOME : 2
THERE_OF : 1
WORSE_HOME : 1
MEDICATION_RECONCILIATION : 1
WBCS_FROM : 1
TO_ON : 4
NAME_SSN : 1
TRANSDERMAL_PATCH : 2
THAN_SECONDS : 1
IF_EATS : 1
VENT_RATE : 1
VISTA_XI : 1
CHECK_ONE : 1
PC_LAB : 1
DRAWN_DISCHARGE : 1
PLEURITIC_OBJECTIVES : 1
COUGH_CALL : 1
AND_WE : 3
OF_ATTENDING : 1
AFFECT_MH : 1
IS_WEARING : 2
BY_BECAUSE : 1
RECHECK_THE : 1
ALCOHOL_ABUSE : 1
PM_WENDY : 1
REPORT_VITALS : 1
ON_MCGUIRE : 1
TO_PRODUCTIVE : 1
CONCERNS_BY : 1
MILD_GLOBAL : 1
OXIMETRY_BEDREST : 1
FOLLOWING_PATIENT : 1
NOTE_VOLUME : 1
CONTAINERS_STAFF : 1
REVIEWED_SIDE : 1
FAMILY_UNABLE : 1
SEE_BY : 1
STATES_THE : 1
GUILLAIN_SYND : 1
STRENGTH_PATIENT : 1
REQUEST_MED : 1
FIRST_COUSIN : 1
RT_FACILITATORS : 1
IN_SPACE : 1
TIME_FELL : 1
THANKS_PRIMARY : 1
NOTE_REVIEWED : 1
WIFE_TO : 1
FOR_FEW : 1
TEAM_LIKE : 1
HIS_PATIENT : 2
CLINICAL_HISTORY : 2
IS_REMINDER : 1
OR_MOTIVATION : 1
EDUCATION_OF : 1
CONTINUE_TO : 1
METHOD_NO : 1
QUALITY_ASSESSMENT : 1
UPSET_AND : 1
TAB_COMPLAINT : 1
THAN_CALL : 1
JUSTIFICATION_FOR : 1
IN_TOXICOLOGY : 1
FLORIDE_CREAM : 1
TO_NOTHING : 1
VA_ISSUED : 4
DOING_AT : 1
SELFCARE_DESCRIBE : 1
DISCUSSED_WAYS : 1
WITH_LAUNDRY : 1
OF_TALKING : 1
AT_AM : 3
CHOOSE_GAF : 1
SPOKE_PT : 1
ANTICOAGULANTS_THE : 1
HE_BEEN : 1
INSECT_STINGS : 1
DONE_BY : 1
NOTED_ON : 1
LETTER_WITH : 1
HX_SURGICAL : 1
BRONZE_STAR : 1
REQUIRED_BED : 1
SIX_OR : 1
SOB_RECENT : 1
CONTINENT_URINE : 1
INSTRX_SHEET : 1
NOTE_CALLED : 1
ENTER_AT : 1
SPENT_COMING : 1
PROBLEM_WITH : 1
NORMAL_RHYTHM : 3
TREATMENT_RESPITE : 1
TREATMENT_PROCEDURE : 1
INCIDENT_REVIEWED : 1
PROBLEM_INTOLERANCE : 1
THIS_AND : 3
HAS_RE : 1
SUPPLIES_SPEECH : 1
WHILE_AT : 1
CARE_ON : 1
LEGEND_VA : 2
THIS_VET : 1
AND_PERSON : 1
PHARMACY_PROFILE : 1
EQUIVALENTS_TREAT : 1
INFECTED_BACK : 1
BLOOD_TELEPHONE : 1
INCLUDING_NEXT : 1
PATIENT_RESIDENT : 1
ANY_METHOD : 1
SAYS_WOULD : 1
PROVIDE_STRUCTURE : 1
WRONG_FOODS : 1
BIPOLAR_HX : 1
HYGIENE_WRIST : 1
OU_PHYSICIAN : 1
NOTE_BEING : 1
STAFF_WOOTEN : 1
DISCUSSING_HIS : 1
THIS_WITHIN : 1
OF_ANTITHROMBOTI : 1
NAME_ENDING : 1
ASSISTED_BATHROOM : 1
COPY_OF : 1
BECAUSE_WANTS : 1
PROCESS_IS : 2
NOTHING_CHANGED : 1
OUT_SMOKING : 1
CHEST_PAIN : 1
COMMON_REACTIONS : 1
SUPERVISING_ABSTINENCE : 1
WIFE_DE : 1
RISK_FACTORS : 1
WENT_LOOK : 1
COLD_MEDICINE : 1
ARE_RESOLVED : 1
PARTICIPATION_LEVEL : 1
TREATMENT_OPTIONS : 1
IS_DIFFICULT : 1
AND_VET : 1
HIS_OVER : 1
LIKE_IT : 1
WITH_MEDICAL : 1
FOLLOWUP_IS : 1
LIST_YOU : 1
HE_THROUGH : 1
GLOBES_MEDICAL : 1
TANYA_APP : 1
LEVESQUE_CONTACT : 1
KIT_HE : 1
WAYS_PAIN : 1
THE_CARE : 3
IN_BY : 2
DISORDER_NEC : 2
APPOINTMENT_INFORMATION : 2
DEMENTIA_VS : 1
DAILY_ACTIVE : 1
MONITORING_SCHEDULE : 1
THE_GROUP : 2
SUCH_EXTREME : 1
ATTEND_ANOTHER : 1
TO_SIGNATURE : 1
STATUS_OF : 1
ANTICOAGULANTS_AND : 1
PLAN_CAPILLARY : 1
ON_ET : 1
SPRING_STRSOME : 1
WITH_ETOH : 1
AM_BLIND : 1
ATTENDING_GROUP : 1
WAS_SEEN : 4
NEC_CLINICIANS : 1
PHYSICIAN_OR : 1
TO_COUPLES : 1
MAINTAIN_EFFORTS : 1
OCCIPITAL_LINE : 1
RESULTED_SMOKING : 1
SAO_ORDER : 1
CASE_SON : 1
OF_VETERAN : 2
BRC_TEAM : 1
COMPLETED_CARE : 1
THEN_HEARING : 1
SWEATS_OBSERVATION : 1
ANTICOAGULANT_DETERMINED : 1
NAME_WALKS : 1
ORDER_PATIENT : 1
THIS_PROVIDERS : 1
WAS_DOM : 1
AM_SET : 1
IDENTIFICATION_NAME : 1
AREA_FOR : 1
NUTRITION_NO : 1
WHEN_RETURN : 1
TREATMENTS_VOLUME : 2
PRIMARY_LOCATION : 1
CLC_ON : 1
HE_ATTENTIVE : 1
SIX_MORE : 1
HIS_NOTE : 2
KIN_PATIENT : 1
VERBALIZED_UNDERSTANDING : 1
TO_ER : 2
HELP_PT : 1
ICDCM_NOSUNSPEC : 2
EXR_TOOTH : 1
TOPIC_MG : 1
FOR_WALKS : 1
DECLINE_REHAB : 1
WITH_STRESSORS : 1
CONDO_FOOD : 1
WAS_INFECTED : 1
THE_HOSPITAL : 1
OM_TO : 1
SHOULDER_PER : 1
FOR_ASSISTANCE : 2
PROGRAM_AND : 3
INTO_PATIENT : 1
VIA_BY : 1
TO_BE : 4
CONTACT_MH : 1
PERSONAL_CARE : 2
ATTENDING_ACTIVE : 1
THE_RESULTS : 1
TO_REMIND : 1
THE_EVENING : 2
SINCE_INITIAL : 1
OKAY_GET : 1
SESSION_INVOLVED : 1
TO_MEANS : 1
FOR_REQUEST : 1
ER_STAFF : 1
SINUS_BRADYCARDIA : 1
MD_BASCOM : 1
MOUTH_FOR : 2
TIRED_AND : 1
PHARM_VISIT : 1
IT_APPEARS : 1
POSTOP_SHEET : 1
BEVERLY_BLADDER : 1
REVIEWED_WE : 1
ALLERGIES_DISPLAYED : 1
THE_TEAM : 1
MASS_VETERAN : 1
WENDY_LEVESQUE : 1
HEPARIN_LOS : 1
MHIS_EVALUATION : 1
AND_MG : 1
OF_ANTIPLATELET : 1
NEEDLE_PLACED : 1
THE_VETERAN : 4
REQUIRED_NO : 1
LEVEL_QUALITY : 1
NOV_CENTER : 1
AND_BREATHALYZER : 1
MALE_RACE : 1
MH_SERVICES : 1
INHL_ML : 1
INVESTMENTS_AND : 1
OF_HOW : 2
THE_ANESTHESIA : 1
LORAZEPAM_TAB : 1
WITH_THE : 9
MILD_HYPOKINESIS : 1
MG_PER : 1
DO_HIMSELF : 1
SODIUM_ORAL : 1
PER_PHYSICIAN : 2
AND_ANGRY : 1
LIMITS_SKI : 1
WELL_HE : 2
GLUCOSE_IMAGE : 1
SUN_WAS : 1
CONTINUE_ACUTE : 1
HEALTH_CARE : 1
MIAMI_VETERAN : 1
INTERDISCIPLINARY_TREATMENT : 1
REACTIONS_WITH : 1
ACTIVE_AMBULATION : 1
NOW_AND : 1
LIMITATION_LEFT : 1
APPEARED_THIS : 1
TO_REFLECT : 1
TO_BLOOD : 2
AMOUNT_RAILS : 1
NO_ID : 1
THE_IMEDCONSENT : 1
EMERGENCY_TREATMENT : 1
OF_SCHIZOPHRNEIA : 1
AT_ST : 1
CORRECTED_ME : 1
BOWEL_MOVEMENTS : 3
SITS_THE : 1
NAME_SECURITY : 1
DEPRESSED_EXTRA : 1
SIMULATION_NOTE : 1
ON_SPECIFY : 1
YR_MONTHS : 1
USING_SPACERS : 1
POST_INJECTION : 1
TO_CHANGES : 1
BP_IS : 1
BROCHURE_PATIENT : 1
ONEHALF_TABLET : 1
RANGED_SAYS : 1
NECK_PAIN : 1
PREFERENCE_MATERIAL : 1
EVERY_DEPRESSION : 1
WITH_CONTACT : 1
DOES_BELONG : 1
HIS_HEADACHES : 1
MODALITIES_UNIT : 1
GOALS_THE : 1
ADL_CUEING : 1
WITH_LIGHTER : 1
MEDICATIONS_REQUESTED : 1
INDICATED_BELOW : 1
SMOKE_THERE : 1
BODY_HAVE : 1
ONES_SUBCUTANEOUS : 1
WHO_MEDICATION : 1
MOBILITY_NUMBER : 1
BEDREST_MR : 1
HAVE_PERSONAL : 1
PULSE_COMPUTERIZED : 1
CHECK_IN : 1
ASA_MR : 1
AND_COWORKERS : 1
NAPPING_MOBILITY : 1
CELL_ICDCM : 1
CARE_CHECKIN : 1
WITH_MINIMAL : 1
FOUR_FOR : 1
READ_IN : 1
BACK_FOR : 1
RADIATION_DETAILS : 2
INCISION_DRY : 1
SESSION_PROVIDE : 1
OF_HEPATITIS : 1
OUT_TO : 1
TOOK_HIS : 1
MM_SOCIAL : 1
STATES_SUN : 1
ONCOLOGY_NOTE : 1
TEACH_PT : 1
IF_HE : 1
APR_VITALS : 1
WAS_UPSET : 2
AMOUNT_STOOL : 4
LAST_IMMUNIZATION : 1
ORI_LLY : 1
DOSIMETRY_PHYSICIST : 1
NOTE_AWAY : 1
RTC_MAY : 1
TOILET_CONSISTENCY : 1
LEG_ACTIVE : 1
INVOLVING_SHOULDER : 1
VET_RECEIVED : 1
SOME_VETERAN : 1
CONTENT_SPEECH : 1
PURPLE_SW : 1
HAS_BEEN : 15
SW_SW : 1
PERTUSSIS_ADMINISTERED : 1
OR_CHEW : 1
OF_ABC : 1
UNSPECIFIED_COUNSELING : 1
JOINT_INVESTMENTS : 1
ADDENDUM_COULD : 1
DEMONSTRATED_ABILITY : 1
FOR_FOLLOW : 3
CLIENT_ASSESSED : 1
AT_BEGINNING : 1
LEFT_FRACTURE : 1
SHE_REPORTS : 1
MENTAL_NOTE : 1
RBC_MCH : 1
NECESSARY_PRE : 1
TREATMENT_INTRAORAL : 1
SHOWER_ASSISTANCE : 1
RECEIVED_NEAT : 1
VISIT_KNEE : 1
EASTHOM_SISTER : 1
DIAGNOSIS_GLAUCOMA : 1
ACCOUNTS_HE : 1
ASSISTANCE_INSTRUCTOR : 1
CRITICAL_NOTE : 1
STOPPED_THEN : 1
RAILS_UP : 1
DID_WANT : 1
SAME_CAN : 1
REPORTS_MIGRAINE : 1
ISSUED_OUTPATIENT : 2
LAST_OCTOBER : 1
NO_RECENT : 1
RECEIVED_MESSAGE : 1
WITH_ON : 1
FOLLOWED_WITH : 1
HOURS_NAPPING : 1
IMPROVE_THE : 1
COMES_IN : 1
FOR_IS : 1
YOUNG_YES : 1
FOCUSED_ON : 1
OF_MEDICAL : 1
TAKE_HIM : 1
HAVE_WORKED : 1
VARIATION_YES : 1
STAFF_PERSISTENT : 1
APPOINTMENT_HCL : 1
CONDITION_TH : 1
BY_THIS : 2
HAD_HGAC : 1
DEBROX_STINGS : 1
BOIL_AND : 1
ACTIVITY_BEDREST : 1
NUTRITION_HISTORY : 1
RIGHTS_RESPONSIBILITIES : 1
APPT_TEMP : 1
FOR_HER : 1
UNCLEAR_PROVIDER : 1
TEAM_TRANSFERS : 1
MESSAGE_FROM : 1
LISTEN_TO : 1
PROBLEM_UNSPECIFIED : 1
DENIES_ANY : 2
OCCULT_BLOOD : 1
FILE_WAS : 1
DIAGNOSES_BACK : 1
PC_ENDING : 1
AT_POINT : 1
TO_OR : 1
RECONCILIATION_MEDICATION : 1
WAY_THAT : 1
WITH_STRUCTURED : 1
TAKE_CALLED : 1
FILED_INSTRUCTIONS : 1
KEEPING_ALL : 1
COGNITIVE_AND : 1
SESSIONS_PM : 1
WAS_RESPONSE : 1
PROGRESS_CRITICAL : 1
FINISH_DISCUSSING : 1
RESPIRATION_HISTORY : 2
NO_NOR : 1
NUMBER_REASONS : 1
CARE_TYPE : 1
TOUR_SOCIAL : 1
HYPERLIPIDEMIA_ICDCM : 2
OF_NOT : 5
FAMILY_LOW : 1
PATIENT_IS : 8
MEDICATION_CALLED : 1
ON_REMERON : 1
PAIN_THIS : 1
LEVEL_AS : 1
RESULTS_YOUR : 1
TO_REVIEW : 1
TO_CM : 1
SET_ASSISTANCE : 1
BE_THROUGH : 1
NURSE_AND : 1
TO_ATTEMPTED : 1
ALSO_ABOUT : 1
CREATININE_WITHIN : 1
DID_ORIENTATION : 1
LEVEL_CAPSULE : 1
THIS_ABOUT : 1
BIRCH_FRIENDS : 1
ADLS_AND : 1
FLEXERIL_HAS : 1
NONE_TEMP : 1
PATIENTS_WHO : 1
TYPE_CONTACT : 1
WITHIN_NORMAL : 1
MORPHINE_SA : 1
AS_REDNESS : 1
PRIVILEGES_DURING : 1
EMPLOYEE_OR : 1
MONITORING_ENVIORNMENT : 1
LUMBAR_DECOMPRESSION : 1
NOT_MEAL : 1
HX_AND : 1
SUPPORT_SYSTEM : 1
FOCAL_CAPILLARY : 1
AND_EVEN : 1
REQUEST_ABD : 1
PRIOR_EMERGENCY : 1
FOR_MONTHS : 1
RESPIRATION_DISCHARGE : 1
THIS_READING : 1
DE_DISORDER : 1
KNOW_IF : 1
WATCH_BLUE : 1
BEEN_IN : 4
HAD_FEVER : 1
INHALE_ACTIVE : 1
LEVEL_ABOUT : 1
ADENOSINE_HELP : 1
GAIT_STATES : 1
IF_LITERATURE : 1
JAW_SAYS : 1
BLAST_YES : 1
OF_MEDS : 1
INFORMATION_FROM : 1
PROVIDE_TO : 1
FRIENDS_HIS : 1
OF_INSTRUCTIONS : 1
QUESTIONAIRE_AS : 1
RING_IN : 1
SIGNS_POST : 1
GROUPS_STAFF : 1
MORNING_BEDREST : 1
AND_THE : 8
WAS_ER : 1
HOURS_AND : 1
AND_THOUGHT : 1
PROGRESS_NOTE : 1
DR_KAUR : 1
CELLULITIS_AND : 1
GIVEN_AND : 1
TIMES_FOR : 1
UP_ANOTHER : 1
BMI_MASS : 1
PATIENT_THAT : 1
MIDP_OU : 1
TO_FLICK : 1
CHARGE_NURSE : 1
PING_ASSISTANCE : 1
APS_TO : 1
APPROPRIATE_WILL : 1
HEIGHT_VSS : 1
ON_OM : 1
THE_FEVER : 1
OS_VES : 1
THAT_IT : 1
HEART_SOUNDS : 1
LAUNDRY_MINIMAL : 1
AND_AIDS : 1
HE_TO : 7
LOGICAL_ORGANIZED : 1
YO_RETURNS : 1
SUMMONS_WILL : 1
GROUP_ENSURE : 1
RESPONSE_PATIENT : 1
HIS_PAIN : 2
ADMINISTRATIVE_NOTE : 1
IN_INDEPENDENCE : 1
PHYSICIAN_EMMA : 1
GOING_TO : 2
ZZPATIENT_ADL : 5
MEDICAL_SURGICAL : 2
TO_TEXAS : 1
BARRIERS_TO : 1
TO_AREAS : 1
MUSCLE_SPASMS : 1
CONCUR_GENERAL : 1
THIS_OFFICE : 1
TO_ACT : 1
ON_OR : 1
INTEG_DRY : 1
CFILE_AVAILABLE : 1
SITUATION_LIVES : 1
ON_PT : 2
HAS_CONCERNS : 1
REDNESS_THE : 1
BE_ACCESSED : 2
MEDICATIONS_IN : 1
SLOWLY_COMING : 1
OCCASIONALLY_SECONDARY : 1
RESIDENTS_PLAN : 1
ON_WILL : 1
ON_OF : 3
OF_GUNSHOT : 1
MEDICINE_DISBELIEF : 1
AFTER_NECESSARY : 1
HOURS_PHONE : 1
PATCHES_ANEMIA : 1
RD_HOURS : 1
BACKHAB_RADIATION : 1
IS_LEFT : 1
THAT_GROUP : 1
ADDENDUM_THERAPY : 1
OVER_MINUTES : 1
AL_RETURNED : 1
FOCAL_ECTASIA : 1
GROUP_GROUP : 1
HAD_TOTAL : 1
ELIMINATION_OF : 1
ATTEMPTED_CONTACT : 1
MG_CHIEF : 1
COSTOCHONDRITIS_MADE : 1
RAL_IN : 1
STAFF_FOR : 1
FOLLOWING_NUMBER : 1
PRACTICING_TO : 1
HAD_PT : 1
OTHER_WAS : 1
RIGHT_POSITION : 1
BREAKFAST_NOT : 1
INTAKE_ONLY : 1
SEE_WHILE : 1
THEIR_THE : 1
IN_HISPANIC : 1
HAD_CHANGED : 1
DISCUSSED_PATIENT : 1
CURRENT_OF : 1
CARRY_OUT : 1
PRESENCE_OF : 1
FOLLOWING_ITEMS : 1
LOWER_BACK : 1
DELUSIONS_AND : 1
LIMITEDLY_IN : 1
WAS_HIS : 1
CARE_DOING : 1
COPING_MECHANISMS : 1
BACK_MODALITIES : 1
BLIND_CABASAL : 1
VA_OUTPATIENT : 2
ET_KIT : 1
ID_BAND : 1
HE_CLEARED : 1
PATIENT_LOSS : 1
MONTOYA_OUT : 1
CODE_IT : 1
FLUID_COLLECTION : 1
INDIVIDUAL_PRIMARY : 1
PATIENT_LOW : 1
TO_IN : 5
UNIT_CONSTANT : 1
AND_MOBILITY : 3
REFORMULATING_ORIENTED : 1
RESTING_QUIETLY : 1
HERE_FIND : 1
UNEXPECTED_THAT : 1
YO_COMES : 1
WITH_EVALUATION : 1
CLEAR_COHERENT : 1
WOULD_BE : 1
AS_IN : 1
WOUND_CARE : 1
NUMBER_OF : 8
HEIGHT_CM : 3
WRIST_CHO : 1
SOON_AS : 1
MONTHS_STATE : 1
UP_WAY : 1
ULOPLASTY_RING : 1
POSITIVE_HIGH : 1
REINTEGRATION_GOALS : 1
WEDNES_THE : 1
AN_UNKNOWN : 1
STAFF_ONLY : 1
TRIED_AGAIN : 1
SOCIALIZATION_LEARNING : 1
IN_PROVIDERS : 1
OF_MINUTES : 1
MEMBERS_IN : 1
BEING_ANXIOUS : 1
NIGHT_SHE : 1
COMPUTERIZED_LIST : 1
ABD_HOWEVER : 1
MONTH_END : 1
AS_REASON : 1
ONETOONE_VERBAL : 1
INDEPENDENTLY_BREAKFAST : 1
HE_CONSISTENCY : 1
UP_WITHOUT : 3
DURING_HIS : 1
TO_DOES : 1
CFILE_WAS : 1
PRN_FOR : 2
LENGTH_OF : 3
PRIMARY_OF : 1
BM_TO : 1
YES_GIVEN : 1
HAS_TO : 1
ARNP_APRIL : 1
THE_SMOKE : 1
OBSTRUCTION_BUT : 1
SURGERY_PROCEDURE : 1
SEPTEMBER_HELP : 1
SCHIZOPHRENIA_PERSON : 1
INTERACTIONS_TO : 1
MH_TELEPHONE : 3
AC_MR : 1
PATIENT_COMMUNICABLE : 1
UP_AMOUNT : 1
BY_SUPERVISING : 1
ALL_SPRING : 1
ADV_OS : 1
ACTIVE_CLONAZEPAM : 1
ETOH_REASON : 1
HIS_IS : 2
YES_CONTACT : 1
THIS_PROGRAM : 1
RECENT_VISIT : 1
MISSED_APPOINTMENT : 1
ONLY_DIPTHERIA : 1
ANCHORAGE_ENDING : 1
BLOOD_PRODUCTS : 1
CHANGES_CRITERIA : 1
WALKING_WITH : 1
OVER_PAST : 2
EYE_BUT : 1
SCHEDULED_KNEE : 1
LB_PREOP : 1
EVALUATION_WAS : 1
XXNO_YES : 1
BREATHING_HE : 1
ABOUT_THE : 3
HAVE_EYE : 1
DISCUSSION_INTENSIVE : 1
NUR_ADMISSION : 1
IT_BACK : 1
HE_RELAPSED : 2
SPECIALISTS_INFORM : 1
GROUP_INCLUDE : 1
NO_PATIENT : 1
ABOUT_USING : 1
BEGIN_SELLING : 1
MOUTH_AND : 1
INTENSIVE_OUTPATIENT : 1
OPEN_OF : 1
INVOLVING_ORTHOPTIC : 1
GENERAL_MENTAL : 1
INTAKE_NOTE : 2
THOUGHT_PROCESS : 1
PATIENTS_IN : 1
YEAR_SC : 1
FLUID_OF : 1
SEEMED_TOLERATE : 1
AVAILABLE_THANKS : 1
UNLESS_CONTACT : 1
GOAL_SESSION : 1
RANKINE_ARNP : 1
EYE_PERSONAL : 1
SELFLIMITED_JOINT : 1
CURRENTLY_HE : 1
OPTICAL_STUDENT : 1
USE_ANTIPLATELET : 1
ALL_CIGARRETTE : 1
NEW_BE : 1
OF_VICODIN : 1
MINERALIZATION_AND : 1
EXTREME_OCR : 2
FALL_IN : 2
NAIL_ROOTS : 1
THEY_ARE : 3
FLUVASATIN_TO : 1
ROUTE_HE : 1
FOR_WORKING : 1
BEHAVIOR_ASSIST : 1
RESCHEDULED_PATIENTS : 1
NEBULIZER_TREATMENT : 1
MH_NAOMI : 1
CONDITION_HE : 1
HIM_ADDENDUM : 1
EMMA_PATIENT : 1
DEC_WHEN : 1
DISCUSS_HIS : 1
BLACK_HERE : 1
IN_NLR : 1
INR_FOR : 1
IUD_REMOVED : 1
KNEE_DISORDER : 1
BRIEF_CLINICAL : 1
LIST_WHEN : 1
NPH_PM : 1
PENSION_JUSTIFICATION : 1
GOOD_SPIRITS : 1
NO_PROVIDER : 1
AND_RESPONSIBILITIES : 1
DISPLAYS_WATCH : 1
PER_PATIENT : 1
SESSIONS_NEEDED : 2
RECENT_REQUESTS : 1
WITHOUT_INCIDENT : 1
RANGED_FROM : 1
NONTENDER_SURROGATE : 1
DEVICES_AND : 1
OBJECTIVES_MET : 1
WASH_BASS : 1
WITH_MY : 1
ONE_IED : 1
DEC_AT : 2
PANE_COLLECTED : 1
GET_IN : 2
FEEL_SICK : 1
ADDENDUM_WERE : 1
WHEN_NO : 2
NOV_STRENGTHS : 1
MOVED_ALL : 1
YOUR_PRIMARY : 3
LOW_OR : 1
LEARNER_PREFERENCE : 1
PHYSICIAN_READY : 1
HE_HE : 2
PATIENT_RESCHEDULE : 1
LIVING_BROCHURE : 1
BIRCH_HCC : 1
PHYSICIAN_CHEST : 1
READING_GLASSES : 1
STAFF_OR : 1
MAY_EDITED : 1
FIND_HIS : 1
COPING_ACTIVITIES : 1
REPEAT_IN : 1
THE_MILIEU : 1
IN_GROUP : 2
HIM_BECAUSE : 1
NEEDED_PPD : 1
BEHAVIOR_MOOD : 1
MONTH_MR : 1
TRAUMA_COPING : 1
REQUIRES_TOTAL : 1
PRESENTS_HIS : 1
MET_LEFT : 1
BRONCHITIS_IN : 1
ONLY_NEEDED : 1
MEDICATION_PLEASE : 1
LINE_TIME : 1
AND_COMMON : 1
INFORMED_CONSENT : 2
EASILY_STARTLED : 1
REFILLING_REQUESTED : 1
LOW_REASON : 1
REVIEWED_FOLLOWUP : 1
MG_QBEDTIME : 1
MEDICATION_REFER : 1
ENSURE_IS : 2
BASAL_CELL : 2
BLOOD_IF : 1
HIS_WIFE : 1
SEE_AT : 1
SAYS_PULLED : 1
ENHANCEMENT_CONTINUES : 1
SPOKE_FATHER : 1
IF_OF : 1
REQUESTS_TO : 1
IS_LOGICAL : 1
RESPIRATIONS_FOREARM : 1
WITH_ABC : 1
STIMULATED_NO : 1
DISPLAYED_VISTA : 1
VITALS_LAST : 1
TO_LEAVE : 3
AID_URINE : 1
TYPICALLY_THEY : 1
LUBRICATING_GEL : 1
HIM_LEAVE : 1
THOUGHT_SPEECH : 1
NURSING_ASSISTANT : 1
NOTE_SPECIFICS : 1
DID_SMOKE : 1
IN_HOUSE : 1
GET_THAT : 1
MANAGING_THAT : 1
DISORDER_APPOINTMENT : 1
OF_IN : 2
IMAGING_HAVE : 1
HOSPITAL_HERE : 1
BED_BATH : 1
NEELIMA_PHYSICIAN : 1
ALERT_AND : 2
HAD_THEIR : 1
TASK_SET : 1
DEPLOYMENT_ONE : 1
TO_NEEDS : 1
HIS_IDENTIFICATION : 1
NOTIFYING_BOTH : 1
SCROTUM_ULTRASOUND : 1
YRS_TYPICALLY : 1
TO_PRODUCTS : 1
WAS_SUBMITTED : 1
PT_QUIETLY : 1
LOCATION_DO : 1
SWELLING_HOURS : 1
POSTOPERATIVELY_WAS : 1
FOLLOWING_DOCUMENT : 1
ACCOMPANIED_THE : 1
TREATMENT_CONCUR : 1
ORAL_CARE : 2
CONFIRMED_BY : 1
APPOINTMENTS_MEDICATIONS : 1
BIRCH_RETURNED : 1
REASON_THE : 2
DATE_MIN : 1
ABDOMEN_SOFT : 2
OPPOSED_GIVING : 1
ML_RESPQH : 1
CONSTANT_TO : 2
IS_APPROPRIATE : 1
RESPONSIBILITY_PRACTITIONER : 1
JAIN_ALBUTEROL : 1
REMERON_HE : 1
HIP_PROTECTORS : 1
ADVANCED_ASSESSMENT : 1
VACCINE_IN : 1
NO_CP : 1
IM_THE : 1
CURRENT_USE : 1
CURRENT_DM : 1
AS_MEDS : 1
THE_OF : 13
SCROTUM_IRON : 1
PAIN_ASSESSMENT : 1
MR_YO : 1
CLINICIANS_AS : 1
PATIENT_EDUCATION : 3
THE_SOURCE : 1
DAILY_FOR : 1
EVENING_NUMBER : 1
KNOW_AND : 1
MEDS_AND : 1
PCP_DO : 1
OS_KNIFE : 1
SELFCARE_GIVEN : 1
ACCOUNTABILITY_REACTION : 1
IN_AM : 1
CENTER_AND : 1
COLD_SUN : 1
MISCELLANEOUS_MCV : 1
CONSISTENCY_STOOL : 3
GUNSHOT_SKILLS : 1
CARE_VETERAN : 2
THE_FLOW : 1
TO_MONITOR : 1
ARE_LOCATED : 1
DURING_TAKE : 1
PT_CHRONIC : 1
PT_HAS : 3
HISTORY_PHYSICAL : 1
CHIEF_COMPLAINT : 9
CHECKED_FROM : 1
FEELS_ANGRY : 1
ANY_BODY : 1
THE_CC : 1
EMERGENCY_CONTACT : 1
FOR_ANXIETY : 1
THE_INDEPENDENTLY : 1
PHYSICIST_NOTE : 1
CONTACT_NOT : 1
THAT_HE : 10
AT_PATIENTS : 1
EUTHYMIC_AFFECT : 1
LOUD_WAS : 1
GOES_OUT : 1
TIAS_DECREASED : 1
WANT_THEM : 1
NOTE_PUBLIC : 1
IF_THIS : 1
UP_OF : 1
WALKS_PT : 1
HAS_ADDENDUM : 1
VET_ACTUALLY : 2
PATIENT_STATED : 1
STUDENT_TOLD : 1
OPTOMETRY_ELECTRONIC : 1
THE_FOR : 4
HPI_YO : 1
LOSS_OF : 3
THOUGHT_CONTENT : 2
ATTEND_ON : 1
TRAUMA_POSITIVE : 1
NAME_PROVIDER : 1
RD_SCROTUM : 1
NOTE_PICK : 1
NEBULIZER_PROGRESS : 1
ALSO_ON : 1
UPDATE_NONE : 1
MACULA_NL : 1
THIS_THE : 7
SCHEDULE_APPT : 1
READING_DT : 1
HE_THEY : 1
MONTGOMERY_CONTRACEPTION : 1
MR_MALE : 1
PROGRAM_CHANGED : 1
DO_YOU : 4
ORIENTED_MOOD : 1
FINGER_ON : 1
BE_TRIED : 1
QBEDTIME_ATIVAN : 1
RUN_SCROTUM : 1
BRIGHT_TOOK : 1
RIGHT_STOPPED : 1
SACCOCIA_CLAIRE : 1
AC_ANGIOCATH : 1
TEAM_IS : 1
DOCUMENT_ATTACHED : 1
BLOOD_HEART : 1
ANGRY_REPORTED : 1
MADE_FOR : 1
DISCONNECTED_ADDENDUM : 1
FOR_PHYSICAL : 1
TOPIC_SAFETY : 1
CONTINUOUS_SICHERER : 1
ETSU_UDS : 1
GIVEN_THURFRISUN : 1
VOLUME_RESPIRATORY : 1
CIGARRETTE_THERE : 1
ONE_BY : 2
BEDREST_FOR : 1
TO_PHONE : 1
FOR_HCC : 1
ANXIETY_PULSE : 1
CARE_WHEN : 1
OS_DISC : 1
MANAGEMENT_HC : 2
INSECT_TORADOL : 1
BEHAVIOR_TREATMENTS : 1
VETERAN_BELIEF : 1
AT_RTC : 1
ICE_WITH : 1
MR_FILE : 1
ATTACHED_THIS : 1
DRINK_HE : 1
DISPLAYED_IN : 1
HE_GOT : 1
MIN_MESKENAS : 1
MILD_SEES : 1
INFORMED_OF : 2
TOMORROW_ELECTRONICALLY : 1
ARM_PASSIVE : 1
ITEMS_WHEELCHAIR : 1
COLD_ICDCM : 2
FOR_SECONDARY : 2
CHEW_SITE : 1
GROUP_LEADERS : 1
ISSUED_PLACED : 1
OF_OUTPATIENT : 1
DIABETIC_IMAGING : 1
ACTIVE_MCV : 1
VA_THE : 2
REPORTS_SYNCOPE : 1
DIAGNOSIS_LEGAL : 1
THIS_AM : 2
WITH_THIS : 1
FAIR_AND : 1
THE_PT : 4
OT_WHILE : 1
LEGS_TOPIC : 1
BAY_BUT : 1
HOBBY_ENSURE : 1
PFTS_IN : 1
PROTIME_BASIC : 1
HIS_MODE : 1
COMPLETE_PT : 1
THE_FACILITY : 1
NAIL_HE : 1
AND_LIFTING : 1
VIEWS_LABS : 1
LAST_THE : 1
ORTHOPEDIC_ADDENDUM : 1
KIN_CONTACT : 1
BID_ACTIVE : 1
NURSE_REPORT : 1
PLAN_STATION : 1
FOLLOWING_EFFECTS : 1
JUST_GET : 1
THE_THAT : 1
JUSTIFICATION_PATIENT : 1
BY_GEN : 1
MEDICATIONS_OF : 1
LAB_WHEN : 1
TO_OTHERS : 2
OF_VETERANS : 1
IV_NOT : 1
OF_ABNORMAL : 1
INJECTED_COMMENTS : 1
INCLUDING_OVERTHE : 1
INSTRUCTION_PROGRESS : 1
PHYSICIAN_SON : 1
TEAM_HE : 1
HE_REGAIN : 2
VETS_PERKINS : 1
BAY_PINES : 1
BENZTROPINE_QUETIAPINE : 1
MOBILITY_PATTERN : 1
OCCASION_IN : 1
PATIENT_ABILITIES : 1
DEGOLYER_SAFETY : 1
FOR_GOAL : 1
TO_RETURN : 1
SKIN_RESOLVED : 1
SUBJECTIVE_PT : 1
WITHOUT_ASSISTANCE : 3
INJECTION_FOR : 1
COMMENTS_KLONOPIN : 1
PAIN_DENTAL : 1
APPROVED_PROPOSED : 1
FOR_UNCONSCIOUS : 1
WITH_DISORDER : 1
HEPATITIS_IN : 1
IMED_CC : 1
BUT_OBMT : 1
VISTA_BY : 1
SESSION_VETERAN : 1
PERKINS_THERE : 1
DEAR_MR : 2
CONTINENT_TOBACCO : 1
THAT_THEY : 1
DIFFICULT_FOR : 1
GIVING_IN : 1
COMPLAINT_LOWER : 1
SCHEDULE_TO : 1
ARGUMENTATIVE_MH : 1
ACTIVE_SUPPORTING : 1
VISIT_UP : 2
NAPPING_BED : 1
SOON_POSSIBLE : 1
OF_ILLNESS : 1
WHO_LEFT : 1
FEB_PATIENT : 1
WOUNDS_THE : 1
TIME_APR : 2
YOU_YOUR : 3
THEN_THEN : 1
GICOLONOSCOPY_APPOINTMENT : 1
RAILS_CALL : 1
DISCHARGE_FEB : 1
TO_NO : 1
NURSING_ASSESSMENT : 1
AS_BELOW : 1
WITH_VETS : 1
CPRS_BY : 1
REACTION_AS : 1
NONSLIP_FOOTWEAR : 2
ID_VERIFIED : 1
BM_RETURNS : 1
USED_ABG : 1
ORAL_CREAM : 1
REGARDING_CONSTIPATION : 1
TIME_HE : 1
GROUP_SUSAN : 1
WHAT_THE : 1
INFORMATION_MG : 1
RATE_AND : 2
RETURNS_CD : 1
BRADYCARDIA_VENT : 1
BEEN_REVIEWED : 2
VETERAN_DOES : 1
RESIDENT_CARE : 1
BED_GET : 1
RR_HE : 1
TASK_TWO : 1
DECREASE_IMPULSIVE : 1
FILED_ER : 1
GEESEY_NO : 1
CLINIC_ON : 1
HIS_MOOD : 2
HER_NEXT : 1
CONTINENT_OPHT : 1
PC_DEC : 1
BODY_MASS : 3
AGAIN_THE : 1
EPISOD_PROCEDURE : 1
PRESENTLY_IRRITABLE : 1
BIRCH_STREET : 1
CORRECTION_VA : 3
CARE_SURROGATE : 1
MY_HEAD : 1
AFFECT_HIS : 1
SCHIZOPHRENIA_NEXT : 1
TO_SET : 1
APPOINTMENT_WITH : 2
ANCHORAGE_PO : 1
USED_AND : 1
OCASSIONALLY_FINDS : 1
SUCTIONING_YES : 1
MIAMI_APPARENTLY : 1
CONDUCTED_WAS : 1
HAVE_SEEN : 1
CHRONIC_ARE : 1
TEAM_WAS : 1
ABOUT_ALTERNATIVE : 1
FOREARM_FOREARM : 1
PHARMACY_PROGRESS : 1
NO_THAT : 1
ETHNIC_CULTURAL : 1
FOR_DIAGNOSES : 2
BRONCH_TO : 1
WERE_NO : 1
AM_AND : 1
RECOVERY_THE : 1
RACE_OR : 1
TELEPHONE_CC : 1
CC_PHYMOSIS : 1
SHIFT_AND : 1
LETTER_IBUPROFEN : 1
DO_WANT : 1
HAS_PLEURITIC : 1
PAIN_ARE : 1
ALLERGIES_PATIENT : 1
ON_ACTIVITIES : 1
RETURNED_TO : 1
YOU_GO : 1
ASSESSMENT_THE : 1
IN_HAS : 1
EYES_ALERT : 1
SIG_ONE : 1
FOLLOWING_STUDIES : 1
USE_WITH : 1
FERRITIN_LOW : 1
MOBILITY_IS : 1
ONCOLOGY_DOSIMETRY : 1
ABUSE_EVE : 1
MAILED_PT : 1
IMPINGEMENT_SHOULDER : 1
ADDENDUM_TIME : 1
SERVICE_OTHER : 1
MEDICAL_COMMUNITY : 1
FOLLOWING_SIDE : 1
TRIVALENT_VACCINE : 1
ADD_TOOTH : 1
TALKING_ITS : 1
DISEASED_NOT : 1
SYND_WILL : 1
RELAPSED_ETOH : 2
MG_BID : 1
DESAT_ARE : 1
POTENTIAL_REACTIONS : 1
BLOOD_SUGARUSE : 1
WEEK_TWO : 1
GROUPS_FACILITATORS : 1
TREATMENT_ARE : 2
URINE_NO : 1
STRESSORS_EXACERBATION : 1
CONDUCTED_WHAT : 1
SYSTEM_RISK : 1
CANCELLED_ON : 1
WAS_THREATENING : 1
IN_RECONCILIATION : 1
LIQUIDS_LB : 1
POINT_THE : 1
CASE_PT : 1
IS_TOO : 1
NEXT_WITH : 1
TIMES_DAILY : 2
DATE_DATE : 1
QUATERNARY_YES : 1
IN_SUCH : 2
PULSE_AT : 1
DERM_NO : 1
RISK_SEPTIC : 1
SHOULDER_SIDE : 1
GLASSES_MEDICAL : 1
THE_WEEK : 1
BY_EVERY : 1
TABLETS_TOTAL : 1
BENZTROPINE_TAB : 1
UNDERSTANDING_OF : 1
VETERAN_MS : 1
NEEDED_NUMBER : 1
ANOTHER_PT : 1
PATIENT_BEEN : 6
ON_GUARD : 1
AFTER_REFERRAL : 1
TOOL_REVIEW : 1
ONE_HAD : 1
CLOSED_AND : 1
FOR_MANAGEMENT : 1
OU_HE : 1
AN_ASSESSMENT : 1
LABS_IN : 1
POSITION_OF : 1
EVIDENT_HIS : 1
IN_STATES : 1
INCLUDING_SCHIZOPHRENIA : 1
AND_IN : 1
LEFT_ON : 1
CLINICIANS_ANY : 1
PATIENT_STATES : 2
NOTE_ACTIVE : 1
WITHOUT_STAFF : 3
MISLEAD_ON : 1
INTERACTIONS_CHIEF : 1
RESULTS_LOCATED : 1
IBUPROFEN_MG : 2
EXACERBATION_COMPLAINT : 1
THE_LAST : 2
SMILING_TALKING : 1
ICDCM_MCADOO : 1
YES_IN : 1
PROMOTE_SOCIAL : 1
RETURNED_UNIT : 1
VAMC_IN : 1
ALL_HELP : 1
MG_PING : 1
PRIVILEGES_EXTRA : 1
STAFF_BED : 1
FOR_LABS : 1
IS_REG : 1
TREATMENT_FOR : 1
BREATHING_OF : 1
APPT_IS : 1
PLACE_PERSON : 1
AREAS_BACK : 1
PROCEDURE_YOU : 1
CHRISTIAN_MARTYRDOM : 1
DOB_AGE : 2
VOA_BERNARD : 1
BLOOD_TO : 1
VETERAN_CONTINUES : 1
DISORDER_CLINICIANS : 1
AND_WELL : 1
ID_URINE : 1
UP_BID : 1
MH_INPT : 1
REALM_VETERAN : 1
IADLS_DURING : 1
YOUR_SPECIAL : 1
PATIENT_FOUR : 1
NON_AND : 1
LIMITS_YOUR : 1
HE_EATS : 1
DOB_BRONZE : 1
SMOKING_OVERWEIGHT : 1
REFRACTION_CLINIC : 1
ILLNESS_INCLUDING : 1
RELEASE_IS : 1
SKEPTICISM_WESTERN : 1
IN_HEAD : 1
CP_THE : 1
PCP_VETERAN : 1
EAT_MIDNIGHT : 1
GIVEN_AMOUNT : 1
THAT_REQUIRES : 1
LEARN_TO : 1
VISIT_AND : 1
JOB_AND : 1
EVERY_AT : 1
TISSUES_GAUGE : 1
SWUNG_ANOTHER : 1
ABOUT_TOPIC : 1
RECENT_MG : 1
HERBALS_AND : 1
ASSESSMENT_ZZPATIENT : 1
MINUTES_URINE : 1
APPROPRIATELY_WHEN : 1
STEADY_STATES : 1
NOT_REQUIRED : 1
IN_YOUR : 1
WHOM_PATIENT : 1
NOT_WED : 1
ID_SPECIMEN : 1
ST_VISIT : 1
IS_NO : 1
HE_AREA : 1
BLINDNESS_BUT : 1
EXR_DX : 1
TREATMENT_STATUS : 1
TEMP_RACHAEL : 1
PER_OBMT : 1
GOAL_LOW : 1
ATTENDED_LIMITEDLY : 1
TOPIC_MIN : 1
MENTIONED_STOPPED : 1
VARIABLE_CLIENT : 1
SEVERE_PERSISTENT : 1
LAUNDRY_WITH : 1
FOR_PURPOSES : 1
ADMITTING_LEGAL : 1
CONTAINS_NONINFECTIOUS : 1
HOW_YOU : 3
SUPPORTING_GROUP : 1
CM_RIGHT : 1
WEARING_FOOTWEAR : 2
PERIAPICAL_ADD : 1
FROM_HOSPITAL : 1
SPACE_OCASSIONALLY : 1
IDENTIFIED_EVALUATION : 2
YOU_WERE : 1
MIN_CALLER : 1
DENTAL_ADULT : 1
APPROACHES_OUT : 1
OR_ME : 1
PER_SLT : 1
DOCUMENTED_IMPAC : 2
TOUR_WORKER : 1
BOWELS_CONTINENT : 2
PRESCRIPTION_INP : 2
APR_RR : 1
MEDICATIONS_PRESCRIBED : 1
KNOW_WHEN : 1
SCORE_POLYPS : 1
OF_FINGER : 1
ULTRASOUND_TIBC : 1
OF_TOOK : 1
INHALE_BY : 1
HIS_REOOM : 1
LEADERS_CALL : 1
TO_SURGERY : 1
RA_MOTION : 1
YO_WM : 1
CFCF_ORAL : 1
TREATMENT_REVIEW : 1
REDURS_METHOD : 1
THE_UDS : 1
SPEECH_RATE : 1
SKI_WBC : 1
ROOTS_HAS : 1
RIGHTS_RESPONSIBILITY : 1
WEIGHT_KG : 2
SIGHT_AND : 1
TEMP_WITH : 1
WITH_ADLS : 1
GOT_IN : 1
IN_HGAC : 1
GIVEN_GEL : 1
THIS_PATIENT : 4
ENCOUNTER_SCHEDULED : 1
HX_ABUSE : 1
CBSST_WILL : 1
DELUSIONS_HAD : 1
ASSISTANCE_REQUIRED : 1
CHANGING_TO : 1
NECESSARY_MEDICAL : 1
MIN_RESPONSE : 1
TO_UPDATE : 1
BASCOM_HAVE : 1
RIGHT_TRIAL : 1
VERBALIZE_OSTEOARTHROSIS : 1
MILD_WITH : 1
WILL_WITH : 1
STAFF_AMOUNT : 1
STAYING_SOBER : 1
BREAST_ULTRASOUND : 1
WORKING_LEATHER : 1
SHE_STOPPED : 1
TREATMENT_WERE : 1
CONTINENT_ASSISTANCE : 1
AND_TEST : 1
QUESTIONS_AND : 1
OCCUPATIONAL_HEALTH : 1
NO_POLYPS : 1
TITRATE_AS : 1
NONVA_MEDS : 2
PATIENT_STRENGTHS : 1
YR_OLD : 2
DISORDER_CONTINUOUS : 1
WITH_HISTORY : 1
PROCEDURE_EXCISION : 1
INHALER_BY : 1
WITH_WIFE : 1
RESCHEDULE_MISSED : 1
OF_BREATH : 1
BRIGHT_VET : 1
HE_CONTINUES : 1
HT_IN : 1
THERAPY_ARRIVED : 1
AROUND_APPOINTMENT : 1
ONE_OCCASION : 1
CARE_HIMSELF : 1
INCIDENT_BROUGHT : 1
CALL_TOMORROW : 2
EASTHOM_HIP : 1
NOTED_CONFUSIONI : 1
MAIL_BILLS : 1
OUTLINED_HIS : 1
ENDING_AT : 2
MOVEMENT_AT : 1
WASH_AND : 1
DESCRIPTION_OUTPATIENT : 1
RETURNS_THE : 1
CALL_PRIMARY : 1
AND_RESULT : 1
ATTACHED_CLONAZEPAM : 1
BELONG_TO : 1
YOUR_WBC : 1
CORDIAL_AND : 1
LEARNER_PATIENT : 1
SEND_ANOTHER : 1
AND_MONTHS : 1
CARE_CLINIC : 1
TREATMENT_ALL : 1
TEMPERATURE_PATIENT : 1
THE_ADVANCED : 1
AT_EXT : 1
HOME_TIME : 1
RATE_PATIENT : 1
RELIEF_LEVEL : 1
DOCUMENTS_OPTOMETRY : 1
FAMILY_AT : 1
PLEURITIS_COSTOCHONDRITIS : 1
VOMITING_ASK : 1
HIS_CARCINOMA : 1
BY_PHARMACIST : 1
LEARNER_PRINTED : 1
THAT_PRIOR : 1
SELF_TIME : 1
NAME_AGE : 1
HELPED_HIM : 1
NEEDS_PFTS : 1
REQUESTED_YOU : 1
TREATMENT_LONG : 1
APPLICABLE_HEIGHT : 1
PHYSICIAN_NOTE : 1
DONT_BODY : 1
CALL_SOON : 1
ASSISTED_TO : 1
CONTACT_YOUR : 1
OF_MARTYRDOM : 1
BRIEF_SUMMARY : 1
TAKING_NEW : 1
MEDICINE_VITAMINS : 1
WESTERN_AND : 1
INCREASE_DOSE : 1
MEDICATIONS_AS : 1
INDEPENDENCE_MOTIVATION : 1
PT_NOTHING : 1
VISIT_MESKENAS : 1
FIELDS_WHEN : 1
YO_MALE : 2
HAS_SHOWER : 1
TIME_UP : 1
VOIDED_NO : 1
EUTHYMIC_IS : 1
SNACKS_PERSONAL : 1
NOT_MADE : 1
RESULTED_NO : 1
ASMANEX_SAID : 1
PINES_VET : 1
OF_DEVICES : 1
WAS_CONFIRMED : 1
IN_LOCATIONS : 1
IMPINGEMENT_OF : 1
MSE_COOPERATIVE : 1
NOVEMBER_THE : 2
ROTATION_PNEUMONIA : 1
OTHER_CARE : 2
ORIGIN_ZZPATIENT : 1
DENIES_RECEIVING : 1
ALL_PATIENT : 1
MUCH_MORE : 1
OPT_VA : 2
THE_ITEMS : 1
COLLECTION_AND : 1
DENTAL_CATEGORY : 1
HAVE_OF : 1
PROTOCOL_NOT : 3
IMPROVE_PATIENTS : 1
INDEPENDENTLY_VETERAN : 1
SUPPLIES_TO : 1
THE_GROWTH : 1
SECURITY_TIME : 1
FOLLOWING_TECHNIQUE : 1
THIS_RADIATION : 1
THIS_REQUIRES : 1
CARE_ORI : 1
ADDENDUM_DEBROX : 1
SAME_AS : 1
TO_COMPLETE : 1
OCASSIONALLY_TEAR : 1
STAFF_ASSISTANCE : 3
SUGARUSE_HEART : 1
RECEIVED_FOLLOWING : 1
ADDENDUM_AT : 1
PRIMARY_CHECKIN : 1
NOT_GOING : 1
DEAR_CLAIMS : 1
OLD_SC : 1
WITHIN_PRIOR : 1
INCLUDING_THIS : 1
DOM_FOR : 1
MHP_MINS : 1
ABUSE_REASON : 1
AND_ON : 2
CHEMICALS_BE : 1
STOMACH_YOU : 1
PARTICIPATE_IN : 2
TYPE_PATIENT : 1
THE_TREATMENTS : 1
IMMUNIZATION_MODALITIES : 1
TUBEFEEDING_ANY : 1
WITHIN_ACTIVE : 1
INCLUDING_APPROPRIATELY : 1
PT_STARTED : 1
MIN_PATIENT : 2
FEEDING_REQUIRED : 1
INSTRUCTED_LEARNER : 1
SELLING_CARE : 1
SOMEONE_GO : 1
CHANGING_NEEDS : 1
UNDERSIGNED_CONTACTED : 1
AFRICAN_AM : 1
PROBLEM_OTHER : 1
HAS_INFORMED : 1
CHRONIC_LOWER : 1
ESSENTIAL_INFORMED : 1
AND_DISPOSITION : 1
DEMONIC_VETERAN : 1
MEDICINE_AND : 3
OF_NURSING : 2
RELEIF_WITH : 1
SIGNED_INTO : 1
PT_CALLED : 1
AMITRIPTYLINE_AS : 1
BEEN_FEELING : 1
ITS_ALL : 1
LDL_BY : 1
HEART_RATE : 1
PHONE_STARTING : 1
OF_BOTH : 1
LEVEL_EDUCATED : 1
ABNORMAL_RESULTS : 1
WILL_HAVE : 2
REQUEST_REASON : 1
BENEFIT_FROM : 1
ADDENDUM_SOME : 1
INSTRUCTIONS_CONCERN : 1
INCLUDING_SUPPLIES : 3
FUNCTIONING_PT : 1
HIM_FOR : 1
MOUTH_EVERY : 1
ISSUES_THROUGH : 1
RESPONSIBILITIES_AND : 1
RESPITE_CATHETER : 1
NB_RESPQH : 1
ANTISEPTIC_WASH : 1
THE_SECOND : 1
HISPANIC_OF : 1
HCA_WAS : 1
IS_COMMON : 1
AND_THOUGH : 1
MH_GROUP : 1
MONTHS_AGO : 2
HOWEVER_NOW : 1
NECESSARY_FOR : 1
APR_ASA : 1
MULTIPLE_BAD : 1
MORE_ON : 1
TIME_CLINICAL : 1
LEGAL_DOCUMENTS : 1
NO_PLASM : 1
LOGICAL_AND : 1
PRIVILEGES_THIS : 1
SMOKE_ABOUT : 1
PY_HE : 1
UP_GROUP : 1
TRYING_TO : 1
HEADACHES_IN : 1
MENTIONED_SHE : 1
OKAY_DOES : 1
CARE_IS : 1
EA_ADD : 1
PLAN_AGE : 1
DISCHARGE_PSYCH : 1
PATHOLOGY_IF : 1
REVIEW_TO : 1
THURFRISUN_AND : 1
DEFAULT_OVER : 1
OTHER_MH : 1
WHO_BE : 1
IN_FOR : 2
PERSISTENT_TREATMENT : 1
PHYMOSIS_FINALLY : 1
CARE_ANNUAL : 1
AS_WAS : 1
WOULD_CALL : 1
TAKE_CARE : 1
AND_PROMISSED : 1
ACCESS_TO : 1
AT_PRESENT : 1
IMAGE_ATTACHED : 1
WAS_REVIEWED : 1
NOTE_DATA : 1
CHRISTIAN_IN : 1
AS_ADMINISTER : 1
WERE_DIFFERENT : 1
SPASMS_WILL : 1
DEPRESSION_EVIDENT : 1
TO_BOTH : 1
PROVIDED_THIS : 3
AND_ASMANEX : 1
VERY_PAINFUL : 1
MORE_AT : 1
ILLNESS_SPINE : 1
USING_AMITRIPTYLINE : 1
BY_PATIENT : 1
PATIENT_RIGHTS : 1
FEELING_LB : 1
XXNO_IF : 1
LESS_PER : 1
DENTAL_PRIOR : 1
BICK_AND : 1
ES_CURRENT : 1
HER_OF : 1
FAMILY_BEDSIDE : 1
HE_RECEIVED : 1
DR_CR : 1
APPT_TEMPERATURE : 1
WITH_PRODUCTIVE : 1
CAN_ACCESSED : 2
AND_SUGGESTED : 1
PLAN_THE : 2
GIVEN_VOICED : 1
QUESTIONS_THE : 1
HE_PULLED : 1
DO_ANCHORAGE : 1
FOR_MEDICAL : 1
PATIENT_REPORTS : 1
VETERAN_ADDITIONAL : 1
NO_VARIATION : 1
TAB_ONE : 1
THREATENING_STAFF : 1
FROM_BUT : 1
CYCLOBENZAPRINE_OPT : 1
CRUTCHES_GLOBAL : 1
HE_TWICE : 1
UP_BUT : 1
THIS_CHANCE : 1
AT_SOME : 1
VETERAN_TRAINING : 1
MULTILEVEL_LUMBAR : 1
RECOVERY_GOALS : 1
WERE_GIVEN : 1
FOR_OUR : 1
DECREASED_APS : 1
MENTAL_TREATMENT : 1
HIM_ELECTRONICALLY : 1
PATIENT_CONDITION : 1
PACKS_LIMITATION : 1
IS_DENTALLY : 1
NUMBER_ALLERGIES : 1
ACTIVE_OF : 1
IN_PROGRAM : 1
REINTEGRATION_HOPES : 1
AT_VETERAN : 1
YOU_YES : 1
IT_MASS : 1
NO_LETTER : 1
WITH_IMMUNIZATION : 1
ADLS_IADLS : 1
PATIENT_PRESENCE : 1
OF_COMMENTS : 1
WAS_OBTAINED : 1
AT_ASSISTED : 1
IN_HE : 1
WOOTEN_ADDRESSED : 1
CONSTIPATION_PAIN : 1
NAME_RADIATION : 1
NDA_LITTLE : 1
THAN_RETURN : 1
IN_PROVIDE : 1
USE_OF : 2
LEFT_BEDTIME : 1
APPOINTMENT_MH : 1
THE_BEGINNING : 1
NUTRITION_MOBILITY : 2
FINE_AND : 1
SURROGATE_IF : 1
PATIENT_WILL : 3
REPORT_PRIMARY : 1
AND_BLUE : 1
BATHROOM_YES : 1
OF_ELIMINATION : 1
BURNING_OIL : 1
COLOR_YELLOW : 1
IT_THAT : 1
IS_PAINFUL : 1
FOOD_DO : 1
AND_SEE : 1
SCHIZOPHRNEIA_WITH : 1
CLEARED_PSYCHIATRICALLY : 1
DEST_GROWTH : 1
OF_CLAUDICATION : 1
NOT_SURGERY : 1
STOLE_MONEY : 1
COUNSELING_TOTAL : 1
WALKS_FOR : 1
HERBALS_SUPPLEMENTALS : 1
FROM_INVESTMENTS : 1
REPORT_TO : 1
LARGER_OR : 1
YR_MALE : 1
TEXAS_AND : 1
GIVEN_OPT : 1
SHE_EVALUATED : 1
MINIMAL_CUING : 1
HE_ALSO : 2
HE_LAST : 2
MORE_HOPEFUL : 1
DRINKS_ONE : 1
AND_SURGICAL : 1
ATTEMPTED_TO : 2
NEEDED_EDEMA : 1
SITU_CREATININE : 1
NO_DID : 1
APPLICABLE_PULSE : 1
UPDATE_FOUND : 1
REMAINING_VETERAN : 1
OF_THIS : 3
RATHER_THE : 1
DEGOLYER_AND : 1
IS_STAYING : 1
ONCOLOGY_PHYSICIST : 1
DEFENSE_WE : 1
STINGS_TORADOL : 1
STOOL_REHABILITATION : 1
PAST_SEVERAL : 1
TO_THEIR : 1
DM_VITALS : 1
VET_ALERT : 1
THE_COMING : 1
XI_SEEN : 1
SOCKS_PAIR : 1
WITHIN_REACH : 1
ELECTRONICALLY_ER : 1
ASSISTED_WITH : 2
FOR_HAIRCUT : 1
FELT_VERY : 1
NOT_DENIES : 1
RECEIVED_THE : 2
HEALTHY_AND : 1
CONSULT_TO : 1
NO_MALAR : 1
MCHC_RIGHT : 1
FROM_BASCOMPALMER : 1
STRESSORS_THAT : 1
YOU_SWEATS : 1
HBPC_EMERGENCY : 1
ALERT_ADDENDUM : 1
ADVERSE_PHYSICIAN : 1
ESSENTIAL_CONSENT : 1
TEMPTED_TO : 1
IN_ADDENDUM : 1
VISIT_CARE : 1
FOR_CREATININE : 1
CR_SCREEN : 1
HE_REPORTS : 1
NO_ASSESSMENT : 1
SON_FOR : 1
MON_FINISH : 1
COMPREHENSIVE_CONSULT : 1
OUTPT_INTAKE : 2
MEDICATIONS_CONTACT : 1
IS_THE : 2
MOOD_DATE : 1
NURSE_SHOWED : 1
SIG_TAKE : 1
HIP_IN : 1
COMMENTS_ANERGY : 1
OBSERVED_TO : 2
XYZZY_OUTPATIENT : 1
INCR_ANXIETY : 1
ADDITIONAL_COMMENTS : 2
APPOINTMENT_STEADY : 1
THAT_TO : 1
LOW_REPEAT : 1
OR_IMPACTED : 1
FAMILY_DESIRE : 1
ATTENDING_BRC : 1
IN_LIFE : 2
LOWER_JAW : 1
RESPONSES_AND : 1
ALLERGIES_INSECT : 1
BENEFIT_THE : 1
MADE_AM : 1
IF_YES : 2
OF_LIVING : 1
NONE_NOTE : 1
THAT_FELT : 1
PT_CONTINUES : 1
NOT_PT : 1
OD_GOAL : 1
CARE_CATHETER : 1
OTHERS_OTHER : 1
LAXATIVE_HAVE : 1
CAPSULE_INHALER : 1
AM_AN : 1
USE_ANTISEPTIC : 1
GUILLIANBARRE_SYND : 1
OF_ASSISTIVE : 1
CALLS_TO : 1
HAS_ASSESSMENT : 1
THE_OTHER : 1
USING_EQUIVALENTS : 1
TREATMENT_WITH : 1
THE_SESSION : 2
DURING_THIS : 7
DEALING_UNEXPECTED : 1
FOR_VISIT : 3
MHICM_CRITERIA : 1
FOR_APPT : 1
MOTIVATION_VETERAN : 1
ADMINISTERED_AT : 1
THEM_NONVA : 1
MON_STATES : 1
ON_PSYCHOSOCIAL : 1
PAIN_HEARING : 1
FOR_MONTH : 1
TRIAGE_INTAKE : 2
DATE_APR : 1
MOBILITY_TOBACCO : 1
MEDS_ENTER : 1
COMMENTS_CALLS : 1
HOPES_PHYSICIAN : 1
INTAKE_NONE : 1
OR_LUMBAR : 1
NO_ASSOCIATE : 1
RECORD_REVIEWED : 1
TOOK_AND : 1
OVERWHELMED_AT : 1
RIGHT_JAW : 1
ON_PROGRAM : 1
BASS_TECHNIQUE : 1
VARIABLE_SIGNED : 1
STUDENT_SHOWER : 1
RESULTS_IN : 1
THE_AUTOLANE : 1
SITS_ON : 1
VISTA_THEY : 1
STRATEGIES_AND : 1
YES_MED : 1
PROTECTORS_IN : 1
JOINT_PAINPELVIS : 1
HX_INCLUDES : 1
HELP_EVALUATE : 1
EDEMA_TEACHING : 1
THE_TIAS : 1
INDEPENDENT_EASILY : 3
MET_PT : 1
AND_PO : 1
POSSIBLE_WILL : 1
SITS_UP : 3
PATIENT_MEMBER : 1
UP_TO : 1
ANXIETY_WITH : 1
HAD_OF : 1
PT_CD : 1
OF_VERTIGO : 1
MINE_RD : 1
PERSONAL_ORAL : 1
AND_MECHANISMS : 1
INSTRUCTIONS_INDICATED : 1
SPINAL_NEEDLE : 1
TECHNIQUE_BRUSHING : 1
SITTING_IN : 1
LIQUIDS_THOUGHT : 1
PAIN_RIGHT : 1
WOUND_SKILLS : 1
SEEN_LAST : 1
COUGH_PULSE : 1
TOTAL_TO : 3
VES_MIDP : 1
HER_RIGHT : 1
IER_PT : 1
BY_ORDER : 1
DOWN_TO : 1
FUNCTIONAL_IMPACTED : 1
OF_STRESS : 1
LIMITEDLY_PARTICIPATED : 1
MEDICAL_CARE : 1
FEW_INGRATIATING : 1
HAVE_OR : 1
IN_NURSE : 1
HIS_LIGHTER : 1
PHYSICIAN_DISCHARGE : 1
OUTPT_TRIAGE : 2
SCREEN_INFLUENZA : 3
FACE_WITH : 1
MOMENT_SOME : 1
IN_DOM : 1
GOAL_INR : 1
ALL_IS : 1
WORKER_TAUGHT : 1
CLOSED_ALERT : 1
PATIENT_EMPLOYEE : 1
HERE_TO : 1
SOUNDS_NEUROLOGICAL : 1
YOUR_HAVE : 1
TIAS_AND : 1
OF_HYPOTHYROIDISM : 1
PROVIDER_PHYSICIAN : 1
BEHAVIOR_AND : 2
THE_STATES : 1
OPENING_NO : 1
PROGRAMGROUP_LENGTH : 1
HOME_VETERAN : 1
ADVERSE_REACTIONS : 1
AT_BREAKFAST : 1
USING_THERAPEUTIC : 1
CM_TEMP : 1
HIMSELF_REFERRED : 1
PURPOSE_OF : 1
OUT_TEETH : 1
IT_NOT : 1
RESTRICTIVE_ALSO : 1
AND_BLAST : 1
SIGNIFICANT_EVALUATION : 1
IPRATROPIUM_INH : 1
ON_YOUR : 1
COLOR_PAIR : 1
ROUTE_AND : 1
THE_SIDE : 1
EFFECTIVENESS_IN : 1
AUG_MG : 1
DOING_WORSE : 1
ADV_CYCLOBENZAPRINE : 1
PSYCHOTHERAPY_MEDICAL : 1
OF_STOOL : 7
OTHERS_VETS : 1
YELLOW_RETINA : 1
FROM_THEY : 1
LOW_MODALITIES : 1
COLLECTED_PATIENT : 1
IF_COMPLICATIONS : 1
SO_IS : 1
THE_COMPLETED : 2
SPECIFICS_PLEASE : 1
BEEN_DISCONNECTED : 1
WANTED_UPDATE : 1
LENGTH_TREATMENT : 1
OF_GUILLIANBARRE : 1
HEALTHY_LIVING : 1
CPRS_WAGES : 1
LOOK_THE : 1
GO_WITH : 1
CONCUR_ADDENDUM : 1
FOR_LAB : 1
CHECKED_PATIENT : 1
THERAPY_GOAL : 1
LITTLE_PT : 1
THAT_TRIGGER : 1
PRACTITIONER_TTE : 1
TOILET_OF : 1
WATCH_AND : 1
SPONGE_BATH : 1
STUDENT_USE : 1
THEY_NEEDED : 1
USE_ASSISTIVE : 1
LDL_CHO : 1
IN_SALT : 1
WRAP_GROUP : 1
AND_MOTIVATION : 1
OF_DISEASES : 1
ACELLULAR_PERTUSSIS : 1
PER_PLAN : 1
PLACED_OCCULT : 1
PER_INSTRX : 1
TO_CURRENT : 2
ON_AND : 2
PY_SAYS : 1
LIVES_ALONE : 1
IN_REFUSED : 1
ACTIVITY_OCCASIONALLY : 1
IMPAC_RADIATION : 1
NO_REVIEW : 1
HE_WOULD : 2
SICK_TO : 1
BP_RECOVERY : 1
CAN_VERBALIZE : 1
NUMBER_RESULTS : 1
TEMPTED_ACT : 1
SPOUSE_THAT : 1
PO_PRN : 1
TOOTH_DX : 2
TREATMENT_SOCIALIZATION : 1
NO_RELIEF : 1
NPH_UNITS : 1
AND_COOPERATIVE : 1
PT_THIS : 1
NEXT_THERAPY : 1
MD_PAIN : 1
PHYSICIAN_NEEDED : 1
HEART_REGULAR : 1
NEELIMA_PROVIDER : 1
PATIENT_CINCINNATI : 1
TO_SMOKE : 1
COLOR_OF : 1
SORE_ON : 1
SEBACEOUS_CYST : 1
PM_PLAN : 1
REQUEST_FOR : 2
SUPPORTIVE_MILIEU : 1
THE_WOULD : 1
OCCIDENTAL_MEDICINE : 1
IF_ANYTHING : 1
PTS_HX : 1
COPING_AND : 1
CRITICAL_CARE : 1
YR_AND : 1
ASSESSMENT_THERAPEUTIC : 1
PRIOR_THAT : 1
ML_COMMENTS : 1
THEY_BOWEL : 1
MOVING_KUWAIT : 1
DE_RATIVE : 1
CHECK_WITH : 1
NUMBER_ASSOCIATE : 1
VICODIN_OZ : 1
STAFF_BECKLEY : 1
NVI_EVALUATED : 1
EFFORTS_PROMOTE : 1
YOUR_LIFE : 1
CP_OVER : 1
TIME_TIME : 1
HAS_MANY : 1
ON_OUTPT : 1
IS_NEXT : 1
ONSET_OF : 1
NKA_THE : 1
SESSIONS_VETERAN : 1
EXTRACTION_TOOTH : 1
PROGRESS_PROGRESSING : 1
MEDICAL_PROTOCOL : 1
KG_DERM : 1
ELIMINATION_SHIFT : 1
PSYCHOTHERAPY_CONDUCTED : 1
TOTAL_SESSIONS : 2
CARE_PROVIDER : 2
SAME_ILLNESS : 1
ANGIOCATH_IS : 1
PERIAURICULAR_PAIN : 1
SHOULDER_PROTOCOL : 1
RELAPSED_ON : 1
OL_DATE : 1
SURGICAL_DISPOSITION : 1
CABASAL_CARE : 1
BUT_WILL : 1
HE_COMPLAINING : 1
HCC_FRIENDS : 1
INDICATES_THAT : 1
DIURETIC_AND : 1
BELOW_IN : 1
WAS_ACUTELY : 1
FOLLOWING_AS : 1
WAS_NURSING : 1
PUBLIC_NURSE : 1
AND_OF : 7
YRS_PELVIS : 1
NEUROGENIC_POSTOPERATIVELY : 1
SHORTNESS_OF : 1
OBSERVED_QUIETLY : 1
HISTORY_PATIENT : 2
CC_TRIVALENT : 1
OF_HENNESS : 1
INFORMATION_FOR : 1
WITH_SPOUSE : 1
FOR_RETURN : 1
AND_BASS : 1
GOT_RELEIF : 1
BEING_OBJECTIVE : 1
YOUR_PATHOLOGY : 1
POSTOP_OPENANGLE : 1
ALCOHOL_WISEMAN : 1
KEPT_THE : 1
COMMUNITY_HOME : 1
VOLUNTEER_OR : 1
PHYSICIAN_OF : 1
DID_ABOUT : 1
CALIFORNIA_COLORADO : 1
BEING_SUBJECTIVE : 1
STOLE_FROM : 1
FEELING_OKAY : 1
THAN_ULCER : 1
REVIEWED_BY : 1
SESSION_MINUTES : 1
PATIENT_DM : 1
NOT_EAT : 1
CLOTHING_PATIENT : 1
LATER_SAYS : 1
IN_HIS : 7
HOURS_WHEN : 1
NEW_WATCH : 1
HISTORY_PROTOCOL : 1
SIDE_ARM : 1
OF_APPOINTMENT : 2
TO_MH : 1
SET_DRYER : 1
VETERAN_REQUIRED : 1
AN_LIQUIDS : 1
HAS_TOUCH : 1
AND_RACHAEL : 1
ADULT_GERD : 1
OF_APPT : 2
POSTAL_TAUGHT : 1
LEAVE_HE : 1
TOTAL_UNABLE : 1
THIS_HIGH : 1
TO_FUTURE : 1
DISBELIEF_INSTEAD : 1
MOTIVATION_LEARN : 1
BIRCH_MASS : 1
REVIEWED_WITH : 1
VARY_BEEN : 1
RADIATION_DOSIMETRY : 1
ASSISTANCE_MEDICARE : 1
THE_DRYER : 1
WITH_COUPLE : 1
AT_HAVE : 1
AS_NOTED : 1
HEPARIN_LOCK : 1
MINE_RUN : 1
IS_ON : 4
LIST_IS : 1
OTHER_GROUP : 1
CARE_TREATMENTS : 1
THIS_ENHANCEMENT : 1
BUT_WAS : 1
MAGAZINES_HE : 1
THE_COLON : 1
GIVEN_CONSUMED : 1
AND_GO : 1
AND_LEARNING : 1
ON_ANY : 1
SOLN_SOLN : 1
AND_DURING : 1
REASON_RESTART : 1
DESIRES_AND : 1
ORIENTATION_MIN : 1
WRITTEN_INSTRUCTIONS : 1
NOTE_FROM : 1
THE_INJECTION : 1
YVONNE_SHOW : 1
TO_INDIVIDUAL : 2
NO_VISUAL : 1
FOR_PHYSICIAN : 1
MM_SUPPORT : 1
AS_POSSIBLE : 1
THAT_PART : 1
ADVISED_CALL : 1
OF_PATHOLOGY : 1
PINES_BUT : 1
SELF_MH : 1
WITH_SAFE : 1
WITH_RATE : 2
ALL_OUR : 1
LOCATED_VISTA : 1
SESSION_OFTEN : 1
RTC_FRI : 1
ED_DOCUMENT : 1
OR_NUMBER : 1
GIVEN_AS : 1
IN_BEING : 1
WAGES_SAYS : 1
HAD_SUCH : 1
ETOH_ATYPICAL : 1
GOLD_WILL : 1
RIGHT_EAR : 1
LEARNING_INSTRUCTION : 1
SEE_PURPOSE : 1
BUT_VET : 1
TOOTH_ADDRESS : 1
TOBOGGAN_DATA : 1
AND_ICE : 1
PT_AN : 1
HE_FEELING : 1
REQUIRED_BRIEF : 1
ORDER_DISCUSS : 1
GUILLIANBARRE_SELFLIMITED : 1
INTE_PASSIVE : 1
PLACED_FOR : 1
RESULT_MG : 1
TIME_BRIEF : 1
HEALTH_HOME : 1
BREATHALYZER_VETERAN : 1
CLINICAL_HE : 1
ID_PARENT : 1
DISCHARGE_AGE : 1
HAD_EXPOSURE : 1
NEEDS_WATCH : 1
CONVERSE_SAFETY : 1
TO_DECREASE : 1
ETOH_AND : 1
SCHEDULE_FOR : 1
WAS_TIRED : 1
VA_INPATIENT : 2
ALLOWED_COMMENTS : 1
ORGANIZED_AND : 1
CONTINUE_WORK : 1
SHIFT_ASSISTANCE : 1
SCHIZOPHRNEIA_INTERVIEWED : 1
OTHER_DATA : 1
PATIENT_MH : 1
SEPTIC_ARTHRITIS : 1
AFFECT_WAS : 1
CALM_POSITIONING : 1
PRESENT_MOOD : 1
AM_THE : 1
MONITORED_ASSESSED : 1
OR_CONDITION : 1
LIPOMAS_LIPOMAS : 1
IN_COLLECTION : 1
STARTLED_RAL : 1
TO_AS : 1
NORMAL_AND : 2
WEIGHT_LOSS : 1
IS_AN : 1
BODY_TOUCH : 1
NOTE_MEDICAL : 1
YOUR_INCLUDING : 1
TAKE_PT : 1
ROI_STAFF : 1
STOOL_WHERE : 1
SIGNATURE_NOT : 1
NEEDED_COMPLICATIONS : 1
NOVEMBER_IN : 1
TIME_REQUESTS : 1
MSW_OTR : 1
PATIENT_TREATMENT : 1
ADJUSTMENT_WITH : 1
JR_DOB : 1
BEGIN_URGENT : 1
SECONDARY_LOW : 1
ALBUTEROL_INH : 1
WORK_FEW : 1
TO_WPB : 1
ADDENDUM_PT : 1
USES_BLADDER : 1
FLAMMABLE_LB : 1
VET_MAY : 1
MG_YES : 1
COMPLETED_DURING : 1
THE_EXHIBIT : 1
CONTINENT_CARE : 1
TECHNIQUE_WAS : 1
STOOL_APPLICABLE : 2
RELIGIOUS_FOOD : 1
TEETH_WITH : 1
THIS_FRI : 1
DX_EXTRACTION : 1
EMERGENCY_VARIATION : 1
PRECAUTIONS_LOPERAMIDE : 1
WANTS_WILL : 1
THIS_SHIFT : 15
POINT_IN : 1
LUMBAR_OR : 1
ANXIOUS_PS : 1
ONES_TISSUES : 1
ICDCM_YES : 1
LABS_THE : 1
PACKET_EXT : 1
HIS_CM : 1
ON_THIS : 1
ARE_UNDER : 1
DESCRIBED_THEY : 1
INSTRUCTIONS_INR : 1
MINUTES_ANXIETY : 1
FEEL_MORE : 1
THE_CALIFORNIA : 1
AM_GET : 1
TRANSFERS_THE : 1
STATES_HE : 4
OTHER_LOCATIONS : 1
WHEN_GO : 1
CANCELLED_WEDNES : 1
WAS_PURPOSEFULLY : 1
FOLLOWUP_NOTE : 1
OF_MG : 1
HAVE_DISCUSSED : 1
ANY_PRBS : 1
NO_TO : 2
LIN_HAS : 1
SIMULATION_NAME : 1
HIP_LOW : 1
FRIENDS_FROM : 1
PATIO_SITS : 1
TAB_CHIEF : 1
CLIENT_MOTIVATIONAL : 1
LOCALLY_WHEN : 1
OR_GOOD : 1
CLINIC_FOR : 1
PILLS_THE : 1
DURING_ADOLESCENCE : 1
IRRITABLE_LOUD : 1
DIRECTED_CONTENT : 1
INJECTION_NECESSARY : 1
CONSULT_ACCESS : 1
SEXUAL_AND : 1
HAD_TO : 2
ADDENDUM_IS : 1
ER_DR : 1
BUTTON_MODERATE : 1
DATED_PATIENT : 2
ASTHMA_BRONCHITIS : 1
AND_ASK : 1
TISSUES_INCH : 1
COUPLES_HOME : 1
BURSITIS_SHOULDER : 1
EYE_IN : 1
APPOINTMENT_AS : 1
ANTIPSYCHOTICS_SOBER : 1
PRIVILEGES_AND : 1
IF_ANSWER : 1
HAD_REACTION : 2
UPDATES_ON : 1
HIS_DATED : 1
FOR_YEARS : 1
HE_RATHER : 1
CURRENT_FOR : 1
MG_FOR : 1
DISEASED_FUNCTIONAL : 1
BIRTH_JUN : 1
INFORMATION_ABOUT : 1
PATIENT_WEARING : 2
SCALE_HOW : 2
PHYSICIAN_OS : 1
REG_IN : 1
AS_BY : 1
ALERT_WITH : 1
INSTRUCTION_UNDERSTOOD : 1
ARTHRALGIA_ON : 1
CALL_NEVER : 1
EYES_QID : 1
PERIOD_YEARS : 1
MOTION_LEG : 2
CARE_COORDINATION : 1
ADMISSION_USING : 1
CONDITION_SAID : 1
HOME_FOR : 3
CONTACTED_MR : 1
IN_AND : 8
HISTORY_CONTACT : 1
THYROID_NOTE : 1
LTG_VS : 1
LOOKING_FOR : 1
SA_MG : 1
DISPOSITION_TREATMENT : 1
TO_REPORT : 1
THE_PROGRAM : 1
WITH_GAIT : 1
WELL_GOT : 1
COMMENT_WITH : 1
LCSW_CE : 1
PUBLIC_HEALTH : 1
VETERAN_WOULD : 1
INTACT_ON : 1
HAS_PAIN : 1
TEMP_VA : 1
TYPE_ANGIOCATH : 1
PAIN_ORAL : 1
OTHERS_GUNSHOT : 1
AT_BUT : 1
LOT_OF : 1
PRESENTING_FOR : 1
IRON_NORMAL : 1
TO_AREA : 1
THAT_COULD : 1
INCONTINENT_DISPOSABLE : 1
SLEPT_UNTIL : 1
DOES_COMFORTABLE : 1
TMD_HE : 1
IS_BRIGHT : 1
FLOW_BLOOD : 1
OF_MEAL : 1
UNIQUE_YES : 1
TO_SO : 2
TREATMENT_PLAN : 4
CHIEF_STAFF : 1
DID_WITH : 1
WOULD_KNOW : 1
LARGER_AND : 1
ON_COMPLETED : 1
HE_STAYING : 1
VASCULAR_VS : 1
IT_STUDENT : 1
BACK_WAS : 3
THAT_LIN : 1
PRIV_OS : 1
AND_SACCOCIA : 1
DROP_BOTH : 1
VISIT_OUTCOME : 1
WAS_WOUND : 1
REFUSED_SKIN : 1
MOVEMENTS_THIS : 3
RETURN_OF : 1
VITAMINS_HERBALS : 1
INTRAVENOUS_THERAPY : 1
SODIUM_FLORIDE : 1
ASSESSED_MOTIVATIONAL : 1
NOT_IN : 1
HER_FEB : 1
HOME_SPENT : 1
OF_EYEBALL : 1
YOUR_TOENAIL : 1
UNDER_NOT : 1
MA_BAKER : 1
STATUS_NAME : 1
OPTIONAL_PCP : 1
ASSESSMENT_LEARN : 1
MCV_FL : 1
DC_FUTURE : 1
BACKHAB_ONCOLOGY : 1
NUMBER_AT : 1
EAT_AFGER : 1
BACK_VET : 1
TO_POSITIVE : 1
SET_UP : 6
TOO_ROOMMATES : 1
RESULTS_LAST : 1
LEATHER_ET : 1
ABSTINENCE_FOLLOWED : 1
ON_HAVE : 1
EVERY_OUTPT : 1
HAS_DISCONNECTED : 1
STATION_COPY : 1
PROCESS_GROUP : 1
AT_TIME : 5
ATYPICAL_MONITORING : 1
THERE_NO : 2
SONOGRAPHER_ALI : 1
TO_VETERAN : 1
BROUGHT_PATIENT : 1
IMEDCONSENT_BOWEL : 1
LONG_CALLS : 1
ER_MEMBER : 1
INTRODUCED_TO : 1
IN_COMMENT : 1
IMEDCONSENT_DOCUMENT : 1
PATIENT_ACTIVE : 1
IN_SPIRITS : 2
NUMBER_STATE : 1
THAT_CLC : 1
SITS_WITHOUT : 3
HOUSE_FOR : 1
YES_NO : 1
LEG_BEDREST : 1
QUIT_CLINICALLY : 1
EXAM_GEESEY : 1
HC_PRO : 2
YOU_SESSIONS : 1
PT_SINCE : 1
THIS_WAS : 3
OF_ALCOH : 1
MOMENT_AT : 1
DENTAL_PROPHYLAXIS : 1
ALBUTEROL_AND : 1
COMPLAINT_BLACK : 1
BLIND_MRSA : 1
CONTACT_STAFF : 1
PHYSICIST_SIMULATION : 1
THE_ILLNESS : 1
FOR_COMPLETION : 1
VOMITING_DO : 1
WAS_VOIDED : 1
ANERGY_READING : 1
WITH_DELUSIONS : 1
TO_MEDICINE : 2
INSTRUCTIONS_SYSTEM : 1
INFLAMMATION_CAPILLARY : 1
THE_DIAGNOSES : 1
VET_IS : 1
ASSOCIATE_IDENTIFIED : 1
COME_WITH : 1
NEBULIZER_CONTINENT : 1
ANXIETY_THAN : 1
FROM_VET : 1
REVEALED_WITH : 1
VETERAN_WITH : 1
THE_RECORD : 1
TO_DISPLAYS : 1
THE_ACCOMPANIED : 1
WERE_TREATMENT : 1
HAS_PATIENT : 1
BODY_AND : 1
NURSING_SAME : 1
STAIRS_HAVE : 1
WORK_ON : 1
DISCHARGE_GIVEN : 1
DO_PC : 1
PRIMARY_RIGHT : 1
IF_NEEDED : 1
APPT_UPDATES : 1
THAT_WHEN : 1
UPTIVE_BEHAVIOR : 1
YES_GLASSES : 1
SPOKE_PATIENT : 1
AND_COMMUNITY : 1
ACCESSED_IN : 1
ALBUTEROL_CFCF : 1
LOCATED_UNDER : 1
MEDICATION_NOT : 1
USED_THE : 5
ADDENDUM_STARTING : 1
PRN_INCREASED : 1
MOTION_RIGHT : 1
FOR_ABOUT : 1
NOTE_VET : 2
HE_ON : 3
TOTAL_TIME : 1
FEELS_IRRITABLE : 1
PAIN_PNEUMONIA : 1
TO_CALL : 2
AND_IS : 4
ACTIVE_DISORDER : 1
CC_DOING : 1
CARE_SCREENINGT : 1
WRIST_DURING : 1
ARE_GOOD : 1
WEIGHT_OF : 1
THIS_IS : 3
GET_BY : 1
IN_IDENTIFYING : 1
MEDICAL_RECORD : 1
AND_ATTEND : 1
RETINA_HOWEVER : 1
FOODS_NOTE : 1
IS_THOUGHT : 1
DETERMINED_BY : 1
BREAST_MONTGOMERY : 1
RECONCILIATION_NOTE : 1
LAB_CBC : 1
MODERATE_ASSISTANCE : 1
INFORMED_THAT : 1
FOR_AM : 1
ON_IN : 1
LISTED_VETERAN : 1
IS_PSYCHIATRICALLY : 1
HELP_ADJUSTING : 1
WAS_REHAB : 1
BP_TO : 1
OUTPATIENT_MEDICATIONS : 5
HE_CAN : 1
PCP_NO : 1
ASSISTANCE_PROVIDED : 3
FOR_REACTION : 1
WORKING_ON : 1
THIS_BY : 1
RATE_RHYTHM : 3
WITH_NEAT : 1
NEEDED_FOR : 1
TO_BID : 1
MOTION_CRUTCHES : 1
REQUESTS_BE : 1
MY_HE : 1
PO_TOPICAL : 1
BOWEL_DURING : 1
LOSS_VISION : 1
ASSESSMENT_PLAN : 1
DRINK_ETOH : 1
CALLS_VERBALIZE : 1
SPOKEN_WITH : 1
TASK_UP : 1
AT_IN : 1
SINCE_VISIT : 1
HYPOTHYROIDISM_HX : 1
BY_GROUP : 1
OF_SYNCOPE : 1
INDEPENDENTLY_FOOD : 1
MEDICATION_WED : 1
MG_NAUSEA : 1
ADDRESS_OUT : 1
APPLICABLE_VA : 1
ALSO_REPORTS : 1
WRITER_WILL : 1
IN_APPARENTLY : 1
THAT_THE : 1
EMPLOYEE_VOLUNTEER : 1
PATIENT_ANSWERED : 1
NLR_AUTOLANE : 1
NEEDS_SET : 1
HEALTH_NOTE : 1
BEFORE_LOST : 1
TAB_TAKE : 4
SONOGRAPHER_ELMI : 1
CARE_CC : 1
ONE_TABLET : 2
CONTACTED_SCHEDULING : 1
IMMUNIZATION_GIVEN : 1
HCC_FROM : 1
TO_RBC : 1
OTHER_BOWEL : 1
PROD_HIM : 1
LOCATIONS_HEIGHT : 1
NEUROGENIC_CLAUDICATION : 1
LONG_TERM : 1
WHAT_WAS : 1
THE_VA : 1
OF_JUN : 1
THE_OR : 1
LINE_OF : 1
NOTE_PATIENT : 4
GEC_CARE : 1
IN_SPECIAL : 1
IS_THAT : 1
INFLUENZA_GIVEN : 1
SIX_MONTH : 1
THERAPEUTIC_TO : 1
FOLLOWING_LABORATORY : 1
NUMBER_CALL : 1
WAS_NONE : 1
NOT_THROUGH : 1
SO_NOTE : 1
MONITORS_STRUCTURE : 1
RESCHEDULE_HIS : 1
FEB_MIN : 1
OUT_TEMPERATURE : 1
OCTOBER_CURRENTLY : 1
CONTINUES_BEING : 1
IS_ABLE : 1
THESE_MAY : 1
RACHAEL_CARE : 1
NOTE_NURSING : 1
ACTIVE_RANGE : 1
ABOUT_POSSIBILITY : 1
PLACE_SHORTNESS : 1
PM_WITH : 1
REPORT_IF : 1
ID_GEC : 1
DOCUMENTATION_DESCRIPTION : 1
RAL_ACCOUNTABILITY : 1
CASE_PHYSICIAN : 1
SEROQUEL_MG : 1
FOR_INSTRUCTION : 1
CODE_PRO : 2
NEEDED_TO : 2
INH_GM : 1
TOENAILS_IF : 1
MOVIE_ON : 1
EDITED_REFLECT : 1
RESTART_IV : 1
COULD_DO : 1
HE_PLEURITIC : 1
SP_PROTOCOL : 1
AND_DISCUSSED : 3
PRESENT_SPINE : 1
VIST_HE : 1
ON_MARCH : 1
PATIENT_THIS : 1
SPONTANEOUS_AND : 1
UNDERSTAND_INFORMATION : 1
IF_NECESSARY : 2
INSTRUCTIONS_GIVEN : 1
DRINKING_THE : 1
IN_NEBULIZER : 1
AND_ACTIVELY : 1
NOT_RESOLVED : 1
PT_REQUESTS : 1
ANNUAL_PLEASE : 1
HOSPITAL_CHANGED : 1
CALL_TO : 4
DATE_ANTIBIOTICS : 1
SHE_MUCH : 1
MONTHS_AND : 1
EXERCISE_RESULTS : 1
FACTORS_SKIN : 1
SENSORNEUR_LOSS : 1
PERSISTENT_COUGH : 1
SPECIAL_CIRCUMSTANCES : 1
HOME_SUPPORT : 1
DATE_FEB : 1
WORKED_HIS : 1
IS_NEGATIVE : 1
HC_PHONE : 2
HEADACHES_HER : 1
PT_REPORTED : 1
HOLD_SINCE : 1
ASSISTANCE_HIS : 1
END_INSERT : 1
AND_DID : 2
AND_MR : 1
CALL_YOU : 1
CHECKED_RESPONSES : 1
THE_CHEMICAL : 1
COLLECTION_IN : 1
REVIEWED_IS : 2
THIS_HAVE : 1
PSYCHOTHERAPY_WITH : 1
DEPRESSION_WAS : 1
PRIMARY_SYMPTOMS : 1
CHEN_MD : 1
NOW_MEETS : 1
ASSISTANCE_TO : 1
PSYCH_RN : 1
LORAZEPAM_NEXT : 1
AMOUNT_OF : 4
ORIENTED_THE : 1
SCHEDULED_TEMPERATURE : 1
PAIN_OR : 1
MCGUIRE_COLONOSCOPY : 1
DISCHARGE_HAS : 1
MEDS_REVIEWED : 1
HEARING_IN : 2
THAT_DID : 1
BROUGHT_BACK : 1
HAD_BEEN : 1
TECHNIQUE_ADDED : 1
VISIT_DETERMINED : 1
HE_NO : 2
SUPPLIES_REFERRAL : 1
IN_COMING : 1
OF_NO : 1
MED_EXAM : 1
SHE_ALSO : 1
ONCOLOGY_SERVICE : 1
THE_DISCUSSED : 1
ADDENDUM_HE : 1
NUMBER_NO : 1
DISTANCE_CAN : 1
STRATEGIES_TRANSFERRED : 1
CELLULITIS_ABSCESS : 1
MED_FOR : 2
PHYSICIAN_PAIN : 1
VOICEMAIL_SYSTEM : 1
FEELING_WEIGHT : 1
BICK_WOULD : 1
ANTOINE_ABOUT : 1
TABLETS_FOR : 1
TYPE_CLINICAL : 1
CALIFORNIA_TO : 1
SEES_DANE : 1
STOMACH_HAVE : 1
PATIENT_EXHIBIT : 1
TOMORROW_WILL : 1
BY_EMMA : 1
HE_TAB : 1
COMING_THE : 3
ENERGY_LEVEL : 1
BACK_SHOULDER : 1
DI_BEHAVIOR : 1
COMPLETE_ENTIRE : 1
IS_VERY : 2
WAS_THE : 3
CONFIRMED_THERE : 1
YES_SAFETY : 1
RE_TAB : 1
MOUTH_CHRONIC : 1
NEED_COME : 1
IS_ALLOWED : 1
MOOD_EXTRA : 1
TENDERNESS_THIS : 1
WISEMAN_COPD : 1
DISCUSSED_TO : 1
FINE_ORIENTATION : 1
ARE_IN : 3
CALLER_RESPONSE : 1
ALL_TAKING : 1
TO_FINISH : 1
INDICATES_LIN : 1
KNEE_KNEE : 1
CONSENT_IMED : 1
TEACH_ABOUT : 1
INDEX_NURSING : 1
CONTINES_TO : 1
YOUR_WIFE : 1
HIM_OF : 1
APPROPRIATE_VET : 1
INTOLERANCE_UNSPECIFIED : 1
SOLUTION_FOCUSED : 1
GIVING_TO : 1
YOUR_UNLESS : 1
OF_SHOULDER : 1
TELLS_ME : 1
NLR_REFRACTION : 1
TENS_UNIT : 1
FROM_HIS : 1
ORAL_NUTRITION : 1
TO_CALLER : 1
BE_WITH : 1
ADDENDUM_INFORM : 1
WHEN_INTO : 1
ACUTELY_BACK : 1
DATE_INTERVENTIONS : 1
PANEL_READING : 1
PAIN_IT : 1
TOPIC_VIA : 1
SSN_UNSCHEDULED : 1
OU_MEDICAL : 1
VET_INITIATED : 1
ACCESS_MEANS : 1
DRYER_INDEPENDENTLY : 1
YRS_THEY : 1
AGE_JUL : 1
CALLS_FOR : 1
VET_HIS : 1
NOT_AFGER : 1
OPTICAL_COMPLETED : 1
HOURS_MONITORS : 1
HOW_DID : 2
PER_STATION : 1
LEATHER_KIT : 1
NO_MUSCLE : 1
ON_RESTING : 1
CLINIC_FOLLOW : 1
LS_SESSIONS : 2
OFFICERS_PT : 1
EDEMA_REDURS : 1
TIAS_HE : 1
LAB_TO : 1
INDEX_BODY : 1
SUGGESTED_HE : 1
ACTIVE_INPATIENT : 2
OR_CURRENT : 1
TO_WHAT : 1
MCH_AFFECT : 1
SELFLIMITED_AND : 1
COORDINATION_CHILD : 1
LOCATION_ROOM : 2
WAS_ADDITIONAL : 1
LEARNING_THE : 1
ANY_MG : 1
ADJUSTING_LIFESTYLE : 1
WERE_REPORT : 1
REPORTS_FOR : 1
LEAVE_BODY : 1
OR_HAS : 1
NO_PAIN : 2
OL_OF : 1
HER_HIP : 1
RETURN_THE : 1
FEET_TOPIC : 1
ETC_WAS : 1
TO_THIS : 3
IMPULSIVE_LIKES : 1
ASSESSMENT_OF : 2
CONDITION_CARCINOMA : 1
SOCIAL_BONFADINI : 1
HIS_BILLS : 1
ABOUT_TOENAILS : 1
TO_ETOH : 1
DOING_LOT : 1
USES_THE : 1
ASSISTANCE_NUMBER : 2
PATIENTS_RIGHTS : 1
POSSIBILITY_GUILLIANBARRE : 1
REACH_LT : 1
BY_SURG : 1
TWICE_TO : 1
THIS_GROUP : 1
BOWEL_ADMISSION : 1
TO_PROPERTY : 1
AND_CONTAINERS : 2
TREATMENT_COUGHING : 1
COMES_SCHEDULED : 1
HELP_TO : 1
ANESTHESIA_WAS : 1
NOT_OXYGEN : 1
ALLERGIES_POSTING : 1
WAS_MOBILITY : 1
CONTACT_ZIMBLEMAN : 1
SUPERVISING_PRACTITIONER : 2
TO_WILL : 2
NO_MONITORED : 1
SUPPORTIVE_THERAPY : 2
CONTINUE_AND : 1
COULD_IT : 1
WHILE_HE : 1
SOME_POINT : 1
HYPERPLASIA_IS : 1
LS_REMAINING : 1
SOME_TO : 1
STATE_TIAS : 1
STATED_HAS : 1
BY_CHARGE : 1
NAUSEA_AND : 1
MARRIED_HOME : 1
RELIGION_AND : 1
AFTER_WHEN : 1
ROOM_THE : 1
MARCH_THE : 1
FOLLOW_TIME : 1
NOTES_IS : 1
APPEARS_THAT : 1
TIME_WILL : 1
ORIENTED_TEACHING : 1
LABS_DISCHARGE : 1
ANTICOAGULANT_VISIT : 1
MADE_SURGERY : 1
ED_SITE : 1
TABLET_MOUTH : 2
LAB_AND : 1
STOPPED_AMITRIPTYLINE : 1
INJECTION_ONLY : 1
AGAIN_DONE : 1
THEY_WENT : 1
HE_HAS : 11
IM_IN : 1
STABLE_HIS : 1
ASSISTANCE_OCCIDENTAL : 1
TEST_AUG : 1
BID_FOR : 1
CONTINUOUS_BEVERLY : 1
RECEIVED_YOU : 1
DECREASED_REFERRAL : 1
IN_LOWER : 1
TERM_ALMOST : 1
ALSO_UPSET : 1
SELF_TELEPHONE : 1
OCR_STUDENT : 1
RIGHT_MH : 1
SAFE_AND : 1
THIS_ID : 1
UNRE_TA : 1
ROOM_LIVING : 1
INFORMS_RELAPSED : 1
CONFUSIONI_PER : 1
SHIFT_MOBILITY : 1
MOBILITY_AIDS : 1
SPASMS_TRY : 1
ANOTHER_CALL : 1
FACE_LOSS : 1
OF_DEC : 1
SCHEDULING_XM : 1
GET_FROM : 1
GIVEN_VETERAN : 1
DIRECTED_THOUGHT : 1
CALL_PATIENT : 1
LOT_AICD : 1
CALLER_ANCHORAGE : 1
WAS_WITHOUT : 1
ELIMINATION_THIS : 2
THERAPY_TIME : 1
TO_BLASTS : 1
DETAILS_ARE : 2
OCCIDENTAL_AND : 1
PT_DENIES : 1
TREATMENT_CALLED : 1
CLINICIANS_IMPORTANCE : 1
LIFTING_WHILE : 1
CARE_ONES : 1
LITERATURE_MG : 1
WITH_MODERATE : 1
TAKE_YOUR : 1
BURN_WITH : 1
FOR_THEM : 1
PROVIDED_FOR : 3
ASSISTED_HIS : 1
THE_CENTER : 2
TO_CLC : 1
TIME_PATIENT : 1
HAS_OBSERVED : 3
PER_NSTRUCTIONS : 1
OSTEOARTHROSIS_THE : 1
MORE_FOLLOWUP : 1
GAVE_PT : 1
REFERRAL_ANY : 1
DIAGNOSES_BY : 1
HE_TOUCH : 1
OF_LONG : 1
EXCLUDING_THIS : 1
VISIT_IN : 1
TO_ESIG : 1
YOUR_APPOINTMENT : 1
INPATIENT_THIS : 1
SUPERVISING_RODRIGUEZ : 1
REGIMEN_HAVE : 1
SOUGHT_GROUP : 1
ASSISTANT_WITH : 1
BUT_VETERAN : 1
MEDIAL_KNEE : 1
IMAGE_ASSESSMENT : 1
ONLY_TETANUS : 1
THROUGH_TEAM : 1
SESSION_HOW : 1
COMPLETION_BILAT : 1
UNITS_AM : 1
FOR_PLEASE : 1
RED_PHENERGAN : 1
NEXT_OF : 1
WHEN_YOU : 2
FINDS_TEAR : 1
BLASTS_DURING : 1
CONSTANTLY_GUARD : 1
SESSION_TIME : 1
THE_FOODS : 1
ACTIVE_DURING : 1
MOBILITY_INDEPENDENT : 3
HAD_FOR : 1
WOUND_STATED : 1
IS_MILD : 1
ANTIBIOTICS_NOT : 1
BELOW_HAS : 1
TAB_ONEHALF : 1
INTAKE_SEP : 1
SIDE_PERIAURICULAR : 1
BREATH_HAS : 1
TREAT_THE : 1
BECKLEY_VAMC : 1
ADVANCED_WITH : 1
READ_PATIENT : 1
AMBULATION_BOWEL : 1
MODE_OF : 1
BACK_PAIN : 3
PER_SP : 1
PROCEDURE_ON : 1
CALL_WITHIN : 1
RESPONSE_ADDENDUM : 1
LOOKING_ANOTHER : 1
HIS_ONE : 1
BONFADINI_INFORMED : 1
MEDICATION_PATCHES : 1
CONTACT_ONCOLOGY : 1
OBJECTIVE_COMPLAINT : 1
CLINICAL_DATA : 1
SPINE_DECOMPRESSION : 1
FACILITY_PCP : 1
GAIT_HE : 1
POST_ONLY : 1
PING_APPT : 1
DISCUSSED_AND : 1
ASSISTIVE_DEVICES : 1
GUNSHOT_WOUND : 2
BPD_AND : 1
GIVEN_LUBRICATING : 1
PANEL_DT : 1
TIMEFRAME_COMPLETION : 1
STAFF_BOWEL : 1
FOLLOW_MSE : 1
EAGER_VARIABLE : 1
FOR_MITRAL : 1
TANYA_APPROPRIATELY : 1
SIDE_UP : 1
BUT_TO : 1
EXTRA_GIVEN : 1
CHECKED_INFORMATION : 1
HE_FEVER : 1
IMAGE_THIS : 1
TRIGGER_THE : 1
PAIN_RADIATES : 1
INCREASE_HIS : 1
OF_ASSESSMENT : 1
SESSIONS_TO : 2
REASON_REQUEST : 1
INDEX_CRUTCHES : 1
SET_CUTTING : 2
THERAPY_ON : 2
REFER_THE : 1
NOV_APPOINTMENT : 1
RANGE_OF : 2
ABILITIES_IS : 1
DIRECTIVES_WITH : 1
CONTACT_FOR : 1
FREQUENTLY_OUT : 1
BED_AND : 1
COMPLAINING_OF : 1
SEX_MALE : 1
PCMM_PROVIDER : 1
VETERAN_IN : 1
WAS_ASSISTED : 2
BASS_BRUSHING : 1
INDEPENDENTLY_BRC : 1
JOINT_MD : 1
FOR_BECKLEY : 1
NDA_NORTH : 1
TRANSFERRED_BASCOMPALMER : 1
WITHIN_OF : 1
PRESCRIPTION_VA : 2
CRUTCHES_MILD : 1
LEG_RANGE : 1
IS_NEW : 1
DESIRE_OR : 1
PERSONAL_SHAMPOO : 1
REFERRED_HIM : 1
CONTACT_WITH : 1
SEVERAL_TO : 1
AND_WENT : 1
IS_YEAR : 1
IMAGING_FOR : 1
ON_ON : 1
BAND_RECEIVED : 1
SAFETY_SELFCARE : 1
STAFF_PAM : 1
ORAL_TAB : 1
ALLERGIES_HAS : 1
AND_TO : 5
AGO_JUDGMENT : 1
BRIEF_INSTRUCTION : 1
BRC_COORDINATOR : 1
OR_AM : 1
EPISOD_TREATMENT : 1
NONE_REPORT : 1
STRONGER_PRN : 1
AND_AVAILABLE : 1
IT_IS : 1
UNLESS_IT : 1
BATHROOM_AT : 1
LOCATION_CONCERN : 1
DOCUMENT_CAN : 1
DO_SINCE : 1
DATA_UPPER : 1
THE_POSTERIOR : 1
OF_HIGHEST : 1
STAFF_WHEN : 1
STEPS_INGRATIATING : 1
BEFORE_HE : 1
SELF_BOWEL : 1
PRIMARY_PAIN : 3
UNABLE_TO : 4
THIS_FOR : 1
TO_USE : 1
AND_MAGAZINES : 1
HEIGHT_VITALS : 1
RESTING_STAFF : 1
IN_LDL : 1
PAIN_DURING : 1
IMAGING_XI : 1
OF_TIME : 1
PATIENT_LEARNER : 1
PATIENT_ALLERGIES : 1
MEDICATIONS_INCLUDING : 4
RIGHT_EYE : 1
WITH_WAY : 1
REMAINING_WAS : 1
RECENT_SIMVASTATIN : 1
PSYCHIATRICALLY_MEDICARE : 1
CONSENT_CC : 1
TIME_OF : 7
BREATH_SOUNDS : 1
MOVE_FINGER : 1
APPARENTLY_HIM : 1
CLINIC_REMAIN : 1
IV_QH : 1
IS_SECONDARY : 1
SEE_POSTINGS : 1
WITH_REFILLING : 1
PHONE_MIN : 2
WAS_VERY : 2
PART_THE : 2
WANTED_TO : 1
SELLING_URGENT : 1
DRIVING_LIFTING : 1
PEOPLE_FRI : 1
TO_PHYSICIAN : 3
TO_LENGTH : 1
SUPPORTING_OTHER : 1
TO_MINE : 1
THERE_TYPE : 1
RESP_ALBUTEROL : 1
VISIT_APPOINTMENT : 1
TO_JOB : 1
RISK_SKIN : 1
CULTURAL_PREFERENCES : 1
SCHEDULE_NEXT : 1
ORIENTATION_AND : 2
TEMPERATURE_CONVERSATION : 1
NOT_WITH : 1
IN_BRIGHTER : 1
ULTRASOUND_VAMC : 1
HOME_PATIENT : 1
HIS_FEELINGS : 1
COORDINATOR_WAS : 1
UNDER_STATED : 1
REMOVED_NONE : 1
NO_WEIGHT : 1
VISION_TO : 1
INSTRUCTIONS_COUMADIN : 1
NO_NOTED : 1
BARRIERS_LEARNING : 1
DONE_HIS : 1
URINE_TIME : 1
MEAT_OPENING : 2
DISCUSS_PAIN : 1
MEDICAL_HE : 1
CAME_TO : 1
DOCUMENT_ACTIVE : 1
ON_GROUND : 1
REGULAR_ALERT : 1
AFTER_ATYPICAL : 1
BID_PRN : 2
IMMUNIZATION_FALL : 1
SURG_WHEN : 1
ST_AM : 1
FOLLOWING_ADDENDUM : 1
WAS_UNABLE : 1
TRANSFERRED_CLC : 1
FOR_UNKNOWN : 1
EXPRESSED_USE : 1
BOTH_AND : 2
SAFETY_OCCUPATIONAL : 1
IMPAC_ONCOLOGY : 1
OF_BLOOD : 1
DAILY_RUPTURED : 1
ED_TO : 2
SAYS_THAT : 4
SEE_POSTING : 1
VETERAN_KNOW : 1
MAGNESIUM_CITRATE : 1
PERSON_ACTIVITY : 1
DISCHARGE_SYSTEM : 1
APPOINTED_PCP : 1
IS_CORRECTION : 2
SUPPLEMENTALS_OR : 1
STAR_ETC : 1
LUNGS_LEFT : 1
AND_LOW : 1
RIGHT_THIGH : 1
DISCUSSED_ACCOUNTABILITY : 1
READING_UP : 1
INTRODUCED_VETERAN : 1
NOSUNSPEC_PERSON : 1
AUGUST_NONE : 1
AND_NEXT : 1
WERE_CONSTANTLY : 1
CONTINUED_CHANGING : 1
ROOM_HEALTHY : 1
VETS_IN : 1
WALKS_OCCASIONALLY : 1
IN_POSTERIOR : 1
RETURNS_LAST : 1
BURNING_FIELDS : 1
PM_COLLECTION : 1
TOLD_ABOUT : 1
GROUPS_PEOPLE : 1
AND_NONDISTENDED : 1
PHONE_NUMBER : 9
INTAKE_ALLERGIES : 1
AT_FOLLOWING : 1
ANXIETY_REPORTS : 1
MOOD_MILD : 1
MR_COMES : 1
THROUGH_ONGOING : 1
OF_PRIOR : 1
BRC_MEDICAL : 1
LINEAR_THOUGHT : 1
DEC_WARFARIN : 1
OF_HOURS : 2
FLOATERS_ALLERGIES : 1
EVALUATION_CONSULT : 1
PRN_REFILLS : 1
THERAPY_LENGTH : 1
OF_HISPANIC : 1
READER_OPTICAL : 1
NAD_COMMENT : 1
HE_TESTING : 1
GENITOURINA_INSIGHT : 1
NURSING_AND : 1
LBS_MORE : 1
GROUP_TO : 1
SW_IS : 1
EVALUATE_FLOW : 1
BILAT_KNEE : 1
VISIT_REQUESTS : 1
THE_CONTACTED : 1
YEARS_LARGER : 1
ANOTHER_PHONE : 1
VA_OF : 1
UNSPECIFIED_HEART : 1
FAMILY_FRIENDS : 1
APRIL_ATTENDING : 1
LAXATIVE_REGIMEN : 1
AM_PHYSICIAN : 1
NECESSARY_TO : 1
MOOD_PATIENT : 1
UNFORTUNATE_GUNSHOT : 1
PATIENT_INCONTINENT : 1
BOWEL_ELIMINATION : 3
STRUCTURE_DECREASE : 1
SYMPTOMS_GET : 1
HISTORY_EMERGENCY : 1
PHARMACIST_JEFF : 1
COOPERATIVE_HYGIENE : 1
THEY_WERE : 1
SPIRITS_HE : 1
OF_SUSAN : 1
WISHED_REMAIN : 1
IS_ORGANIZED : 1
NEBULIZER_NOTED : 1
ANTIBIOTICS_CONSISTENCY : 1
THE_PULSE : 1
THIAMINE_MG : 1
PROGRAM_CHANCE : 1
GEC_REFERRAL : 2
TIME_CONSISTENCY : 1
UNABLE_MOVE : 1
INCLUDING_OF : 1
WITH_STEADY : 1
ADULT_DX : 1
LIFESTYLE_INCLUDING : 1
FOLLOW_ALLERGIES : 1
CHEMICAL_OF : 1
IF_WAS : 1
WPB_APPEARS : 1
AND_ANTIBIOTICS : 1
WITH_LOSS : 1
AND_PROD : 1
ALBUTEROL_IPRATROPIUM : 1
INSTRUCTIONS_PROVIDED : 1
NOT_IDENTIFIED : 3
UP_MEAT : 2
WAS_IN : 6
NOTE_RESIDENT : 1
INITIATED_MOVE : 1
THIS_INVOLVES : 1
BUT_FERRITIN : 1
AND_PHYSICAL : 1
ASK_DO : 1
VISIT_CHECK : 1
LIVE_IF : 1
ACCESSED_CPRS : 1
FRI_SKILLS : 1
HURT_HIMSELF : 1
STABLE_DENTALLY : 1
GROUP_REGARDING : 1
AREA_OF : 2
FOR_WAL : 1
ORDER_NO : 1
BELIEF_HIS : 1
IN_RADIATION : 1
DL_COUSIN : 1
SEEN_TO : 3
NUMBER_HOURS : 2
IT_OT : 1
ADDENDUM_OBJECTIVES : 1
NURSING_OPT : 1
CLINIC_AMPULE : 1
LINE_RETURNED : 1
TO_SAO : 1
APPROVED_WOUND : 1
ORI_WAS : 1
TEAM_ACCOMPANY : 1
EVALUATION_CODE : 2
COORDINATOR_PATIENT : 1
IMPULSIVE_HE : 1
ANGRY_AND : 1
FACE_COPING : 1
BLAST_QUATERNARY : 1
THE_OPPORTUNITY : 1
IN_MILIEU : 1
COMPLAINTS_OF : 1
PATIENT_IDENTIFIES : 1
CALLER_ASSISTED : 1
WHEN_HAD : 2
COMING_OFF : 1
TREATMENT_AT : 1
BOWELS_SCOPOLAMINE : 1
REMAIN_THE : 1
EVALUATION_MANAGEMENT : 3
FOWLER_TREATMENT : 1
NEC_INFORMATION : 1
CONCERNS_QUESTIONS : 1
ARE_MISSING : 1
NOTE_THIS : 1
ACCEPTED_DATE : 1
STUDIES_COMPLETED : 1
SUCH_TYLENOL : 1
DOCUMENT_BOWEL : 1
HAIR_CONTINENT : 1
YEARS_GROW : 1
REQUIRED_TO : 1
NOT_BE : 1
VOMITING_HEIGHT : 1
TO_LIVE : 2
DO_HAVE : 1
INFUSE_MINUTES : 1
NECESSARY_LIVE : 1
DOM_DEPRESSION : 1
COMMENTS_INFORMATION : 2
SUN_PULSE : 1
BE_CANCELLED : 1
WHEN_YOUR : 1
FOODS_ADMINISTRATIVE : 1
OF_REHABILITATION : 1
PNUEMONIA_INCIDENT : 1
NURSING_NOTE : 3
DINNER_DO : 1
INFORMATION_WITH : 2
BUT_TREATMENT : 1
THIS_DATE : 1
NO_MORE : 1
MANAGEMENT_OF : 2
PROVIDE_VETERAN : 1
FOR_RESPONSES : 1
AND_PATIENT : 2
BEEN_FALL : 2
LAB_DEC : 1
THE_FEW : 1
PLAN_PAIN : 1
NOVEMBER_OF : 1
PO_AND : 1
CLINIC_LETTER : 1
ANGIOCATH_MR : 1
THE_DOES : 1
SYND_SELFLIMITED : 1
WOUNDS_TO : 1
THIS_TREATMENT : 1
SAFE_STRUCTURED : 1
TIRED_NOW : 1
INPATIENT_RN : 1
AT_PATIENT : 1
OUTPT_AT : 1
NOTE_CUEING : 1
LONG_ALMOST : 1
WHO_WOULD : 1
YOU_TO : 1
ALLERGIES_DEBROX : 1
HAVE_PAROXYSMAL : 1
DO_FAR : 1
MORE_SPASMS : 1
THEY_MY : 1
LEFT_WITH : 2
BELOW_BRIGHT : 1
THE_ONE : 1
PATIENTS_SAFETY : 1
MODALITIES_MINS : 1
VERBAL_CUING : 1
INP_ISSUED : 2
NEXT_CLINIC : 1
FOR_LAST : 1
SET_LATER : 1
OR_SPECIAL : 1
OF_LEARN : 1
IN_HEARING : 1
IN_OUTPATIENT : 1
AS_WEARING : 1
PROVIDER_DC : 1
HAVE_THIS : 1
WHEN_SEES : 1
PARTICIPATION_QUALITY : 1
SMOKE_DID : 1
WITH_ETC : 1
LOSS_DOING : 1
RESTRAINTS_USE : 1
BE_RESCHEDULED : 1
VET_VET : 1
THE_ACTIONS : 1
STRESSORS_INCLUDING : 1
HIS_WHICH : 1
INFORMATION_PATIENT : 1
DUE_TO : 2
DATE_AND : 2
REGIMEN_NORMALLY : 1
OF_PER : 1
GROOMED_OSPITAL : 1
HELP_THE : 2
VIA_INHALER : 1
NUMBER_REASON : 1
OF_YOUR : 2
PROCEDURE_NOTE : 1
DONE_AND : 1
CANT_IT : 1
PATIENT_TEACHING : 1
THE_PL : 1
TEMP_POSITIONING : 1
OPHTHAL_DISC : 1
REVIEWED_THERE : 1
ALLOWED_CALLS : 1
INDEPENDENT_RESPIRATION : 1
PT_NEBULIZER : 1
HIM_UP : 2
HIS_THERAPY : 1
FOR_SUPPORTIVE : 3
TO_UP : 1
HIS_TOOK : 1
DIURETIC_TITRATE : 1
TYPE_TO : 1
IN_DEAR : 1
IS_SHE : 1
MH_YEAR : 1
QUIT_PELVIS : 1
OF_ASSISTANT : 1
TRP_NOTE : 1
HBPC_CONTACT : 1
REPAIRED_RUPTURED : 1
WANT_LIVE : 1
HYPERPLASIA_PROCESS : 1
DUE_THE : 1
UNTIL_TEMPERATURE : 1
ABOUT_WONDERS : 1
PM_LUNGS : 1
AND_GROOMED : 2
WITH_PLAN : 1
AS_EVIDENCED : 1
THE_DIRECTIVE : 1
ANY_ALBUTEROL : 1
BOWELS_ZZPATIENT : 1
THE_IN : 1
INCREASED_ANXIETY : 2
INCLUDING_SEROQUEL : 1
PERSON_PATIENT : 2
MEAL_NUMBER : 1
WHICH_WORKED : 1
SSN_VISIT : 1
THROUGH_IMAGING : 1
THE_IS : 1
MARTYRDOM_IN : 1
LEARN_WHOM : 1
PLAN_WHEN : 1
RECENT_VISUAL : 1
THE_TIME : 2
WITH_CARE : 1
INFORMED_IMED : 1
CHARGE_AND : 1
FOR_HCA : 1
OPH_DROP : 1
USE_MEDICATIONS : 1
TO_THAT : 2
PTT_BASIC : 1
HOWEVER_PT : 1
SITE_BY : 1
MILIEU_SHIFT : 1
TEAM_COORDINATOR : 1
OVER_THE : 2
YEAR_PATIENT : 1
OR_STUDENT : 2
EMMA_SUMMONS : 1
VISIT_WAL : 1
ANTITHROMBOTI_HIM : 1
TAB_PT : 1
TIME_AGREED : 1
AND_PHARMACY : 1
CM_VISUAL : 1
GUARDIAN_HAD : 1
MH_NOTE : 2
ACTIVITIES_STRATEGIES : 1
PT_AND : 1
TREATMENTS_NEBULIZER : 2
WITH_QUESTIONS : 1
TH_AT : 2
TTE_MEDICATIONS : 1
HAVE_FAMILY : 1
TIME_COMING : 1
HE_COULD : 1
ARE_COMING : 1
HOPEFUL_WAS : 1
OPH_BOTH : 1
PAIN_EKG : 1
QH_OXIMETRY : 1
ALSO_MET : 1
MOVING_INTO : 1
PREVIOUS_TABLET : 1
STATES_STARTED : 1
DISCUSSED_FOR : 1
ESTRANGED_HUSBAND : 1
OUT_WALKS : 1
SPOKE_WITH : 1
ANESTHESIA_TECHNIQUE : 1
CHIEF_AGE : 1
THROUGH_DERMATOLOGY : 1
COMPLETED_YOUR : 1
CARE_ADL : 5
IT_HERE : 1
CONDITION_BASAL : 1
WITHIN_PAST : 1
INDICATED_SURGICAL : 1
AMPULE_IN : 1
SURROGATE_BARBARA : 1
REVIEWED_PHYSICIAN : 1
DEFAULT_CP : 1
PFTS_TV : 1
AND_NEGATIVE : 1
TO_STOMACH : 1
TYPE_AC : 1
SKIN_TEMPERATURE : 1
POSTOP_INSTRUCTIONS : 1
HIS_MEDICAL : 1
SUSPECT_VS : 1
THESE_THE : 2
BE_IN : 2
MOTIVATIONAL_LEVEL : 1
DATE_PROMISSED : 1
CAPILLARY_REFILL : 1
BEEN_FLEXERIL : 1
PATHOLOGY_IT : 1
THE_DESCRIBED : 1
DECREASED_AND : 1
AND_SYMPTOMS : 1
CORDIAL_COOPERATIVE : 1
WHILE_BASCOM : 1
COMMENT_OPTIONAL : 1
SATURATION_TREATMENT : 2
WANT_TO : 3
TREATMENTS_AFTER : 1
WITH_DEPRESSED : 1
YES_TO : 1
SUBJECTIVE_MINUTE : 1
HISTORY_OF : 4
HZ_QUATERNARY : 1
TURNS_AND : 3
OVER_PERSISTENT : 1
COMMUNITY_REINTEGRATION : 1
EAR_THEN : 1
TOMORROW_CONTINUE : 1
AND_VA : 1
AND_NORMAL : 1
WITH_HELP : 1
XACTIVE_VARIABLE : 1
IN_MIAMI : 1
SEBACEOUS_OCCIPITAL : 1
HIGH_HL : 1
TEACHING_USED : 1
GOLD_NEED : 1
CONTAINERS_NO : 1
THE_GET : 1
IT_TOO : 1
AND_ABOUT : 1
MEDICATION_CHIEF : 1
ULCER_REPAIRED : 1
SECONDS_PRODUCTIVE : 1
EDUCATION_TOPIC : 1
SICHERER_BEVERLY : 1
SEVERE_BURSITIS : 1
HOME_VISITS : 2
PROVIDERS_WITH : 1
REACTION_THE : 1
CHIEF_CHRONIC : 1
CLIENT_ABLE : 1
PSYCHOTHERAPY_WAS : 1
CLINIC_OR : 1
STATED_DONT : 1
OF_RECHECK : 1
PAIN_JOINT : 1
CALL_FOR : 1
ACTIVITY_FREQUENTLY : 1
OF_VISIT : 2
STABLE_AND : 1
APPARENTLY_ADV : 1
OU_STARING : 1
TO_TEACH : 1
STATE_THEY : 1
PLASMA_PLASMA : 1
FL_DISPLAYS : 1
AMOUNT_CONSUMED : 1
DESIRE_USE : 1
WENT_SEVERAL : 1
PER_SEIZURE : 1
DM_ENTER : 1
HE_YOUR : 1
YOUR_PROCEDURE : 1
NOTED_LEFT : 1
TREATMENT_THIS : 2
ADMISSION_ASSESSMENT : 1
AND_CONCUR : 1
MG_WE : 1
ALERT_ORIENTED : 2
ER_BUT : 1
WAL_VICODIN : 1
IN_NOTE : 1
ACCOUNTS_WAS : 1
ABUSE_WISEMAN : 1
VITALS_ENTER : 1
GROUND_WRITER : 1
MG_QHS : 1
PRESSURE_ULCER : 1
HT_CM : 1
WOUND_OF : 1
METHOD_ONETOONE : 1
VERBAL_AND : 1
SHOWERPT_HAS : 1
IF_HOW : 1
ANSWERED_NKA : 1
MASS_NURSING : 1
THEM_HE : 1
EVIDENCED_BY : 1
BRC_AND : 1
HIP_PAIN : 1
HOME_BP : 1
IN_USE : 1
SUPPORT_AS : 1
XYZZY_ACTIVE : 2
COMING_WITH : 1
PAIN_HEADACHES : 1
OUT_YES : 1
APPROVED_THE : 1
QID_THIS : 1
ONE_AMBULATORY : 1
SUPPORT_FROM : 1
WE_NO : 1
TEAM_PATIENT : 1
TRY_TO : 1
BARETT_BEEN : 1
NOTE_NO : 1
ADDRESS_MONTOYA : 1
TO_INSTRUCTOR : 1
DERMATOLOGY_WILL : 1
CUTTING_AND : 2
DO_RATE : 2
CURRENT_LAXATIVE : 1
THOUGHT_MY : 1
BUT_LOW : 1
TO_ASK : 1
LABS_AND : 1
MEANS_CARRY : 1
APPT_HE : 1
ANTISEPTIC_MOUTH : 1
IRRITABLE_ANGRY : 1
PARTICIPATE_BEING : 1
PROTOCOL_OF : 1
AT_NUR : 1
HOURS_QHS : 1
CLAIMS_WAS : 1
TIAS_WAS : 1
BETTER_AICD : 1
CARE_HOME : 1
PULSE_PROBLEM : 2
CALL_HIM : 1
VETERAN_SOME : 1
AT_OF : 1
KNEE_NO : 1
ORIENTED_SKIN : 1
AND_VIST : 1
IN_BARETT : 1
SAID_OF : 1
PATIENT_NAME : 4
ANGRY_ABOUT : 1
BREATHING_THEM : 1
RECEIVE_WITH : 1
DEALING_WITH : 1
CARE_SUBCUTANEOUS : 1
REVIEWED_MEDICAL : 1
PRIOR_YOUR : 1
RIGHT_BOIL : 1
DID_NOT : 4
HOW_WERE : 1
SAFETY_PAIN : 1
STAFF_TEMPTED : 1
IS_SOBER : 1
ASSESSMENT_HAS : 1
HAVE_IN : 2
INCLUDE_RAL : 1
GEN_SURG : 1
OF_CLINICAL : 1
FAMILY_MEMBER : 2
IER_TO : 1
HE_STAYED : 1
WITH_DR : 1
ARE_LOOK : 1
NEGATIVE_SW : 1
MORE_PMR : 1
STOOL_NOT : 2
LO_CP : 1
TO_BENEFIT : 1
TO_WRITER : 1
REGARDING_THE : 1
SMOKING_SMOKE : 1
STARTING_AM : 1
SHOWER_OTHER : 1
COUSIN_SHE : 1
THE_ABILITY : 1
THE_STRUCTURE : 1
RESP_NOT : 1
HIMSELF_NO : 1
TOOK_MONEY : 1
UPSET_THE : 1
PAIN_OTHER : 1
ETC_THERE : 1
MOVE_ON : 1
OF_CONTACT : 2
HISTORY_USED : 1
APPLICABLE_OF : 1
CASODEX_IN : 1
BE_ABLE : 1
WOULD_BURN : 1
SERVICES_LCSW : 1
ON_FOR : 2
PATIENT_IDENTIFICATION : 2
YES_QUETIAPINE : 1
TO_LAB : 1
GIVEN_TENS : 1
NURSING_OUTPT : 2
TEAR_HIS : 1
EDUCATION_BLADDER : 1
REFILL_LESS : 1
LEAVE_THE : 1
KNEE_DRY : 1
NEC_APPOINTMENT : 1
WOOTEN_RT : 2
EXHIBIT_LOSS : 1
MINUTE_HOME : 2
REACTIONS_TO : 1
ORIENTATION_TO : 1
ACCURATE_ARMBAND : 1
MR_OVER : 1
RECEIVED_PER : 1
COPY_THE : 1
INPATIENT_INCLUDING : 1
VERY_TO : 1
PRIMARY_GOAL : 1
VETERAN_REQUIRES : 1
ABSTINENCE_HE : 1
TWICE_NEEDED : 1
QUESTIONS_TOENAILS : 1
URGES_DRINK : 1
ALSO_MIGRAINE : 1
REGARDING_EXTREME : 1
THEY_AWARE : 1
INCLUDING_CHIEF : 1
PLASMA_QUALITY : 1
SHOULDER_REGION : 1
ACCOMPANIED_PATIENT : 1
SHOULDER_VITAL : 1
DI_UPTIVE : 1
INFORMED_CBSST : 1
SOUND_SOFT : 1
NOSUNSPEC_INSTRUCTED : 1
HE_WANTS : 1
AND_SUPPORTIVE : 1
TIMES_BREATHING : 1
SKIN_DENTAL : 1
BOIL_PO : 1
UPPER_PAIN : 1
MOTIVATION_TO : 1
SET_THE : 1
NOT_EFFECTED : 1
NAUSEA_VOMITING : 2
ABNORMALITIES_TO : 1
PROVIDED_CONTACT : 1
THERAPY_HEPARIN : 1
PATIENT_PHARM : 1
BRIGHTER_SPIRITS : 1
BILATERAL_SOUND : 1
PATIENT_HAS : 9
GOAL_IS : 1
THE_INTERACTIONS : 1
APRIL_BRC : 1
FOR_MINE : 1
PENDING_OUTPATIENT : 1
PROSTATE_RECEIVED : 1
BEDSIDE_ASSISTED : 1
CATEGORY_EMERGENCY : 1
RECEIVE_LETTER : 1
PATIENT_BY : 1
IN_STATED : 1
OTHER_UNSPECIFIED : 1
JUN_PATIENT : 1
ELIMINATION_DURING : 1
PHYSICIAN_THE : 1
TEENS_PER : 1
LOSS_LBS : 1
CYST_LINE : 1
AND_MENTAL : 1
HCL_MG : 1
OF_FOR : 4
WITH_INFORMATION : 1
ALLERGIES_CYCLOBENZAPRINE : 1
GROUP_DISCUSSED : 1
QHS_HE : 1
FOR_ON : 1
RING_IS : 1
STATES_BORROWD : 1
FOR_PAST : 1
PHONE_FOR : 1
DOWN_OTHER : 1
TIME_DENIES : 1
THE_RD : 1
HAS_NO : 2
APP_WHEN : 1
PATIENT_DENIED : 1
YES_SATURATION : 1
SUPPLIES_APPROPRIATELY : 1
LIMITATION_WRIST : 1
LABORATORY_STUDIES : 1
KEPT_APPRISED : 1
TO_PROGRAM : 1
EYEBALL_PENG : 1
BUSPIRONE_HCL : 1
HYOSEINE_SCOPALAMINE : 1
MONTHS_GENITOURINA : 1
BLADDER_BATHROOM : 1
HIS_BIOPSY : 1
STAFF_MEDICARE : 1
ZOLOFT_NAME : 1
WANTING_TOUR : 1
HPI_BM : 1
OF_YEARS : 1
WENT_BY : 1
IN_NEEDED : 1
FOUR_TIMES : 2
WHICH_LEARNING : 1
FLUIDS_WERE : 1
CHECK_AMBULATORY : 1
INSTRUCTION_EXTREME : 1
REHAB_BECAUSE : 1
SAID_THEY : 1
BLOOD_THE : 1
SEVERAL_ORDERED : 1
ADDENDUM_BELOW : 1
PREHOSPITAL_TREATMENT : 1
OFF_SP : 1
WHO_CALLED : 1
WITHOUT_THE : 1
FEVER_HE : 1
THURFRISUN_MG : 1
REVIEWED_LAB : 1
HEALTH_SURROGATE : 1
HAVE_ANY : 1
CHECKIN_SMOKING : 1
ASSESSMENT_CARE : 1
OF_RIGHT : 2
BIOPSY_PATH : 1
AGE_MALE : 1
SMOKING_AND : 1
PROVIDER_IDENTIFIED : 1
UNTIL_ADDENDUM : 1
LIGHTER_HE : 1
AND_TAKE : 1
AT_IS : 1
EASILY_AND : 3
ABILITY_TO : 1
ERROR_DOES : 1
PRIMARY_PROVIDER : 2
SESSION_WOOTEN : 1
NOTES_STABLE : 1
VETERAN_CONTINUED : 2
IN_DISTRESS : 1
CHANGING_DRIVING : 1
BREAKFAST_FOOD : 1
OUT_WITH : 1
LIGHT_WITHIN : 1
IN_REHAB : 1
CONTACT_RE : 1
IS_CONTROLLED : 1
HISTORY_AND : 1
PROVIDERS_FOR : 1
PROVIDED_SAFE : 1
AT_PT : 1
LOOK_INTO : 1
NL_JUST : 1
SHIFT_CONTINUES : 1
FLEXERIL_WHICH : 1
ANGRY_PT : 1
NEED_LAB : 1
OF_ANXIETY : 1
OTR_GROUP : 1
THEM_HAD : 1
HAS_REVIEWED : 2
INTERACTIONS_COMPLAINT : 1
CONTENT_COUPLE : 1
TEACHING_TOPIC : 2
VERBAL_DISCUSSION : 1
GIVEN_MG : 1
FOR_SW : 2
PROVIDERS_OFFICE : 1
PERSISTENT_ILLNESS : 1
INSTEAD_HE : 1
HIS_THEY : 1
SAME_HIS : 1
POSTERIOR_LEFT : 1
HIS_GIRLFRIEND : 1
FOR_FOLLOWUP : 1
LIGHTER_WHENEVER : 1
THE_INFLUENZA : 1
BE_EDITED : 1
INSTRUCTIONS_INPATIENT : 1
REQUEST_TELERETINAL : 1
LOST_HIS : 1
WITH_ANTOINE : 1
MUCH_HAVE : 1
MORE_OVERWHELMED : 1
EVALUATED_HOME : 1
EYEBALL_CHEN : 1
AS_ORDERED : 3
VAMC_ALLERGIES : 1
WAS_AT : 2
TREATMENT_CARE : 1
POKE_AND : 1
SIGHT_ECCHYMOSIS : 1
YOU_NEEDED : 1
AND_BEGIN : 1
USE_THERE : 1
NOT_ZOLOFT : 1
SUPPLIES_HAVE : 1
TO_BUT : 1
MONITOR_LTG : 1
SON_PT : 1
WITH_PRIMARY : 1
MOVED_OF : 1
PAIN_DO : 1
HAS_CHANGED : 1
APPROACHES_OF : 1
THE_NLR : 1
RESPONSES_ED : 1
STRESS_HAVE : 1
USED_TOILET : 3
MEDICATION_NOTE : 1
PATHOLOGY_UNLESS : 1
HIS_OWN : 1
ESIG_ES : 1
OXYGEN_SATURATION : 2
ASSISTED_PATIENT : 1
PT_INITIAL : 1
THE_BUT : 1
PARTICIPATION_PARTICIPATION : 1
CALL_SCHEDULE : 1
RECEIVED_VOICEMAIL : 1
HAS_TAKING : 2
VETERANS_DIAGNOSES : 1
PATIENT_FOWLER : 1
WILL_UP : 1
PATIO_AND : 1
REG_AND : 1
IS_ROOMMATES : 1
ATYPICAL_ANTIPSYCHOTICS : 1
PATIENT_HE : 2
CHRONIC_FOCAL : 1
COMPLAINS_PAIN : 1
BY_PHYSICIAN : 2
TO_TEAM : 1
OR_FLOATERS : 1
USED_IDENTIFIED : 3
CALLED_TO : 1
RETURNED_HEARING : 1
FALL_THE : 2
AFIB_IS : 1
REOOM_THIS : 1
COMPLAINT_FEMALE : 1
INJECTED_PPD : 1
AUTOLANE_CLINIC : 1
IN_TEMP : 1
HAVE_EVER : 1
IS_BETTER : 1
WIFE_MONEY : 1
BY_LAB : 1
GOAL_IOP : 1
LINE_SIGHT : 1
AND_TOBACCO : 1
SCHIZOPHRENIA_MON : 1
PRIOR_TO : 5
CONTACT_RADIATION : 1
STATION_OF : 1
OBJECTIVE_CHIEF : 1
PATIENT_AN : 2
UP_CUTTING : 2
SUBCUTANEOUS_GAUGE : 1
SEE_PHYSICIAN : 1
VETERAN_VOICED : 1
THE_DID : 2
YES_HOW : 1
FAIR_HYGIENE : 1
CIRCUMSTANCES_FOR : 1
FOR_OCCULT : 1
MINUTES_DISTRIBUTION : 1
POSITIONING_PNEUMOVAX : 1
OR_AFRICAN : 1
THE_CINCINNATI : 1
FOLLOW_CLOSELY : 1
PT_IS : 5
IOP_LOW : 1
PNEUMONIA_ICDCM : 1
UNINTENTIONAL_LOSS : 1
OVER_SEVERAL : 1
OF_CC : 1
ABOUT_THIS : 1
AS_WRITER : 1
LINEAR_CONTENT : 1
UP_FROM : 1
PER_LIMITATION : 1
MEDS_HE : 1
XI_HAVE : 1
TO_IT : 1
WAS_MUCH : 1
ONSET_STATES : 1
TO_HE : 3
CM_WT : 1
BREATH_DECREASED : 1
DO_EAT : 1
SISTER_PROTECTORS : 1
TREATED_WITH : 1
DRY_HEAR : 1
BELOW_FASTING : 1
MH_INDIVIDUAL : 1
WITH_UNEXPECTED : 1
FOREARM_ML : 1
VERBAL_WRITTEN : 1
URINE_DISCON : 1
MASS_BODY : 1
OBSERVED_LAUGHING : 1
VISTA_THESE : 1
MOTION_INDEX : 1
NEXT_TO : 1
MAKE_PLEASED : 1
ASSESSMENT_BUT : 1
AND_DATE : 2
NO_PHONE : 1
ACUTE_STATUS : 1
CONTINENT_ZZPATIENT : 1
CREATININE_PLASMA : 1
UNKNOWN_OF : 1
VERY_NOW : 1
AND_WEARING : 1
AFTER_INJECTION : 1
FROM_ETSU : 1
WAS_EVIDENT : 1
OF_TO : 4
TO_WESTERN : 1
HENNESS_RD : 1
MR_TO : 2
NO_CLEAN : 1
IN_CREATININE : 1
PREOP_SKIN : 1
TELERETINAL_FOR : 1
MONITOR_SUSPECT : 1
FEEL_TO : 1
AM_WILL : 1
PAIN_MEDICAL : 1
EVER_REACTION : 1
BED_MOBILITY : 3
CREAM_WE : 1
DESCRIBED_HIS : 1
NORMALLY_WALKING : 1
PLAN_DEMONIC : 1
WAS_GOING : 1
ROOM_ASSISTANCE : 1
THE_FAMILY : 1
RESULT_DIURETIC : 1
RESPONSE_ASSISTED : 1
WITH_DEPRESSIVE : 1
THE_WELLBUTRIN : 1
WITH_ACCOUNTS : 1
PRESENT_PT : 1
CENTER_LAST : 1
ADVERSE_RED : 1
ASSISTED_BY : 1
STARTING_PM : 3
NUMBER_LISTED : 1
FINGER_YANICK : 1
CHEMICAL_BURNING : 1
OF_OF : 2
STABLE_PT : 1
NONE_NO : 1
VERY_UPSET : 1
SAFETY_BRC : 1
THOUGHT_IN : 1
LOPERAMIDE_CAP : 1
HIS_HEARING : 1
VISIT_BLACK : 1
AND_FINDS : 1
TEAM_TA : 1
IS_REVIEW : 1
PLASM_ASSESSED : 1
HIP_AND : 1
TO_MOVE : 1
IN_LEFT : 1
NOTE_CARE : 1
PATIENTS_MEDICATION : 1
FOOD_PREFERENCES : 1
ORAL_WRIST : 1
MENTAL_ILLNESS : 1
ROI_CONTACT : 1
RECHECK_SITE : 1
OF_CLIENT : 1
HAVE_MAGNESIUM : 1
TO_REMAIN : 1
TREATMENT_TERM : 1
DOCUMENTED_ADVERSE : 1
YEAR_PHYSICIAN : 1
LIKE_CHANGE : 1
TA_RIGHT : 1
FEELING_IN : 1
SOUND_ABDOMEN : 1
THE_YOU : 2
PLAN_TREATMENT : 1
DATA_VET : 1
LIVE_AM : 1
CAN_BE : 4
IS_TIMES : 1
USES_URINAL : 1
CANT_GET : 1
AT_PROTOCOL : 1
WERE_CONCERNS : 1
KG_SKIN : 1
MILIEU_VETERAN : 1
ADV_LEGEND : 1
PAIN_LO : 1
MR_BEEN : 1
MOOD_AND : 1
BLADDER_URINAL : 1
BEVERLY_MD : 1
TABLET_MO : 1
FEVER_OF : 1
DENIED_WITHIN : 1
COORDINATOR_EDUCATION : 1
AND_AN : 1
NOT_ANXIOUS : 1
SHE_USING : 1
HE_STATES : 1
PAST_YEAR : 1
ACTIVE_THIS : 2
URINE_COLOR : 3
CONTACT_MORPHINE : 1
BEEN_OKAY : 1
LB_PROCESS : 1
ALL_APPOINTMENTS : 1
PCPA_WHICH : 1
PLASMA_IMAGE : 1
EXC_RIGHT : 1
YES_TREATMENT : 1
POSTAL_WORKER : 1
HIGHEST_WAS : 1
NEW_CAN : 1
RECORDS_PROGRESS : 1
ABC_MIN : 1
IN_THAT : 1
HIMSELF_CP : 1
AND_NPH : 2
ASSISTANCE_IDENTIFYING : 1
WAS_ATTENTIVE : 1
OUR_MIAMI : 1
ISSUED_ORDER : 1
VETERAN_ACTIVITY : 1
BEING_TO : 1
TWO_MG : 1
LOCATION_RESIDENT : 2
AND_COMPLAINS : 1
GROUP_IN : 3
MEDICATIONS_SUPPLIES : 4
PTSD_AND : 1
INFLUENZA_IM : 1
STABLE_OF : 1
NEXT_KIN : 1
APPLICABLE_BOWEL : 1
CONSTIPATION_HEART : 1
IDENTIFYING_AND : 1
HIS_EYE : 1
VISITS_SUPPORTIVE : 2
IS_LOOKING : 1
THE_CODE : 1
TREATMENT_WHEN : 1
THE_CONSISTENCY : 1
DOCUMENTATION_PENDING : 1
AND_HOW : 3
ALERT_TRYING : 1
NOTE_THE : 1
IF_THE : 1
ELMI_HEIGHT : 1
COUNTER_THE : 1
PULSE_ENDING : 1
TO_INPATIENT : 1
EXHIBIT_OF : 1
RECEIVED_OCT : 1
HIS_HE : 2
SOLN_ML : 1
EDUCATION_POSITION : 1
PT_RESTING : 1
PREOP_RESPOND : 1
PATCH_NS : 2
NO_HYPERLIPIDEMIA : 1
SURGICAL_HX : 1
FEB_REASON : 1
OZ_DAILY : 1
RANKINE_YANICK : 1
BY_APPROVED : 1
ASSISTANCE_REFILLING : 1
HAVE_WITH : 1
WHEN_RETURNING : 1
DENIED_PRIOR : 1
PHENERGAN_NURSES : 1
VETERAN_FEELING : 1
BERNA_ADDENDUM : 1
TOPIC_YES : 1
THIS_REFERRAL : 1
WAS_PING : 1
NUMBER_TIME : 1
NEVER_NORMAL : 1
STARTED_LAST : 1
GIVEN_CHECKED : 1
WAS_FROM : 1
ORDERED_CITRATE : 1
RESULTS_AND : 1
STATING_TYPE : 1
DENIES_PRBS : 1
WHEN_WAS : 1
DIFF_PROTIME : 1
THEIR_AND : 1
PAIN_REDNESS : 1
DAILY_CHRONIC : 1
CD_LAST : 1
FARHE_TAKING : 1
FOUND_TEMP : 1
SUPPLIES_THIS : 2
CONTACT_VETERAN : 1
NOT_REFUSE : 2
IUD_AUGUST : 1
REFRACTION_ADDENDUM : 1
RELAPSE_THE : 1
MEDICATIONS_HIGH : 1
RESULTS_PER : 1
PATIENT_IN : 1
FOR_UP : 1
MOOD_EUTHYMIC : 1
RECORD_WAS : 1
TELERETINAL_IMAGING : 1
COMPLAINT_REPORTS : 1
HAVE_YOU : 3
TAB_PACKS : 1
BE_WITHIN : 1
NIGHTTIME_MEDICATIONS : 1
METAB_URINE : 1
MG_DAILY : 1
OTHER_RISK : 1
NOT_FOR : 2
LAB_CREATININE : 1
KUSHWAHA_NEELIMA : 1
TIME_FASTING : 1
COORDINATOR_BUT : 1
NOW_HE : 1
OTHER_AVAILABLE : 1
SHOULDER_ON : 1
TRIAL_TELEPHONE : 1
PULSE_OXIMETRY : 1
COOPERATIVE_THE : 1
POSTING_PURPOSE : 1
THE_SITE : 1
DO_IT : 2
AND_OPENING : 2
TO_YES : 1
MEDICAL_HISTORY : 2
OF_SITE : 1
ADOLESCENCE_TAKE : 1
MEDICAL_INCLUDES : 1
RA_NORMAL : 1
EATS_THE : 1
JR_AGE : 1
HAIRCUT_AND : 1
NOTE_PTS : 1
PER_POSTOP : 1
REEVAL_AND : 1
PMRS_BY : 1
AND_HAVE : 3
ANTIBIOTICS_ARE : 1
TEENS_OU : 1
TALK_WITH : 1
OPENING_CONTAINERS : 2
ACTIONS_NONE : 1
CARE_CARE : 1
OU_CARE : 1
DISCUSSION_OTHER : 1
PLEASE_BREAST : 1
WITH_VOA : 1
ETOH_HE : 1
THERE_WHEN : 1
CALLED_ADENOSINE : 1
ERUPTED_EXR : 1
SOCIAL_SYSTEM : 1
RESPIRATION_MEDICATIONS : 1
BURSITIS_SIDE : 1
TOBACCO_CURRENT : 1
THERAPIST_FOR : 1
RESTING_INTAKE : 1
PAIN_KNEE : 1
YOU_DRINKING : 1
REVEALED_DISCUSSED : 1
DECREASED_HIS : 1
WITH_RESIDENTS : 1
REVIEWED_AS : 1
AGO_GENITOURINA : 1
ARE_OF : 1
OU_HAD : 1
DRINKS_ON : 1
INCR_IN : 1
AND_SOCIAL : 1
EYE_RETURN : 1
THE_TREATMENT : 3
SEEN_HIS : 1
TO_GOING : 1
GOOD_FOR : 1
RESPIRATIONS_ACTIVITY : 1
NOTE_LOCATION : 2
SPECIAL_MAY : 1
BACK_MHP : 1
SPEECH_CLEAR : 1
MG_IS : 1
CD_NIGHT : 1
NOTE_OUTPT : 1
SHIFT_PATIENT : 12
LEVEL_PARTICIPATION : 1
ADJUSTING_TO : 1
RN_PROCEDURE : 1
THIS_BE : 1
NEBULIZER_MOUTH : 1
PRIOR_HIS : 1
ATTENDED_AND : 1
TEAM_BUT : 1
IED_EXPLOSION : 1
GAINED_LBS : 1
OCCUPATION_RETIRED : 1
CAME_THE : 1
HOME_HE : 1
TAB_SIG : 1
FROM_STRUCTURE : 1
CONTINENT_PT : 1
UP_ASSISTANCE : 1
PAIN_PROTOCOL : 1
HOME_DEAR : 1
TOXICOLOGY_TEACHING : 1
KEPT_FOLLOWING : 1
WED_PHARMACIST : 1
TOMORROW_TO : 1
DENIES_PRESENT : 1
HX_ETOH : 1
YES_PER : 1
TO_HIS : 8
VAMC_STATES : 1
FAMILY_FEB : 1
ING_GOING : 1
POSITIVE_FREQ : 1
TOTAL_ICDCM : 1
KUSHWAHA_PROVIDER : 1
HIS_PRIMARY : 1
WERE_REVIEWED : 2
AT_THIS : 4
PAIN_LOCATION : 2
THERE_INFECTION : 1
PT_NOT : 1
TEAM_UNRE : 1
OR_IN : 1
AND_BEDREST : 1
TWO_ASSIST : 1
PATIENT_MR : 1
THEM_TO : 2
HE_WAS : 8
PATIENT_DENIES : 1
CHRONIC_PFTS : 1
CRITERIA_NURSING : 1
UP_STAFF : 3
TAKING_HS : 1
SPOUSE_INDICATES : 1
OF_NOTIFYING : 1
CONTACT_MINUTES : 1
HIS_TOTAL : 1
ARM_RESULTS : 1
MALE_ITEMS : 1
BUT_MAY : 1
PATIENT_MY : 1
FOR_TOMORROW : 1
ASMANEX_HE : 1
FEMALE_HERE : 1
SO_FARHE : 1
PULMONARY_PATIENT : 1
OUTPATIENT_STATUS : 2
THE_PATIENTS : 4
OBJECTIVE_WEEKLY : 1
TO_DE : 1
SIX_END : 1
MIAMI_VAMC : 1
HAIRCUT_TO : 1
OF_ORIGIN : 1
OF_REQUEST : 1
ADDENDUM_PROGRESS : 1
LB_DERM : 1
FOR_ED : 2
TIME_CALL : 1
PROGRESS_SOME : 1
DOCUMENT_BE : 1
TO_PSYCHOLOGIST : 1
PO_PER : 1
TO_LETTER : 1
PSYCHOLOGIST_IS : 1
MG_HYPOTHYROIDISM : 1
INFORMATION_ADDENDUM : 1
COMES_FOR : 1
HEART_PACED : 1
RETIRED_POSTAL : 1
OF_NEXT : 1
BED_WITH : 1
RESPITE_CARE : 1
NOT_APPLICABLE : 4
OBTAINED_AM : 1
FINE_IS : 1
OU_PATIENT : 1
VETERAN_TO : 3
WHILE_FOR : 1
GROOMING_NORMAL : 1
UP_SEE : 1
MALE_AS : 1
CLINICALLY_ER : 1
ED_ATTACHED : 1
WHILE_HERE : 1
MONITORED_BEHAVIOR : 1
NOT_BELONG : 1
ON_PREVIOUS : 1
YVONNE_NO : 1
ACKNOWLEDGED_DEPRESSION : 1
IF_AND : 1
FRACTURE_DURING : 1
LACY_ANCHORAGE : 1
PT_OFF : 1
ARTHRITIS_SHOULDER : 1
THREATENING_ER : 1
TREATMENT_ALBUTEROL : 1
YEARS_IT : 1
OLD_SOCKS : 1
THE_PHYSICIAN : 1
HAS_COMES : 1
REVIEWED_AND : 2
CARE_SPENT : 1
RESULTS_LESS : 1
CLINICAL_TO : 1
TYPICALLY_DO : 1
IS_WM : 1
CALLED_THIS : 1
FELT_HAS : 1
RD_ULTRASOUND : 1
TUES_HOURS : 1
NEEDED_PATIENT : 1
ON_PAIN : 1
OF_BODY : 2
HIS_WHENEVER : 1
SSN_WAS : 1
PROBLEM_IS : 1
CASE_SUBJECTIVE : 1
VETERAN_PROGRESSING : 1
DIPTHERIA_PERTUSSIS : 1
SURGERY_EXCISION : 1
BODY_CHANGING : 1
DETERMINE_ZZPATIENT : 1
REGION_SIGNS : 1
THE_TOPIC : 1
THIS_RTC : 1
FROM_OTHERS : 1
IT_ONE : 1
NSTRUCTIONS_HIS : 1
RECOVERY_AS : 1
ARE_DOCUMENTED : 2
PHONE_CHIEF : 1
ARTHRALGIA_PAIN : 1
TO_LISTEN : 1
CIRCULATION_HE : 1
MG_FIRST : 1
YEARS_COPE : 1
YES_APPRISED : 1
EDEMA_NOR : 1
FEVER_IMPROVED : 1
NOTE_FOR : 2
VOA_ANTOINE : 1
IN_RAL : 1
WHICH_HAS : 1
VERIFIED_USING : 1
DOES_FRUSTRATED : 1
HOBBY_GROUP : 1
TESTING_TWICE : 1
HX_GERD : 1
UP_FOR : 1
AND_INSTEAD : 1
ADMINISTERED_PLEASE : 1
ANXIETY_DISORDER : 1
SEE_HOW : 1
CALL_PF : 1
CELL_IS : 1
HE_SEES : 1
HE_PRESENTS : 1
VIEWS_RIGHT : 1
NOTE_HAVE : 1
DIFFERENT_PARTS : 1
THE_SYSTEM : 1
ALSO_USE : 1
BACK_PATIENT : 1
MALE_IS : 1
HOURS_NURSING : 1
NEIGHBOR_STATING : 1
OTHER_COUNSELING : 1
TO_CONTACT : 1
TO_HURT : 1
REQUIRED_NICOTINE : 1
REVIEW_ALL : 1
DOING_BETTER : 1
FOR_SCALE : 1
INTEGRITY_CATEGORY : 1
VERTIGO_TREATMENT : 1
SUPPORTIVE_ENVIRONMENT : 1
MINUTES_UNCONSCIOUS : 1
CUEING_LOCATION : 1
WEDNES_PRIMARY : 1
ASSISTANCE_FOR : 3
YANICK_ARNP : 1
OR_MORE : 2
SOME_AGO : 1
NOT_INPT : 1
HYOSEINE_TIMES : 1
BACK_INCISION : 1
EXPLOSION_NO : 1
OVER_OF : 1
HAS_EMERGENCY : 1
COLOR_CITALOPRAM : 1
IF_YO : 1
ADDRESSED_VETERAN : 1
COMPLETED_CC : 1
PROBLEM_LIST : 2
FIRST_HOME : 1
PRESENTLY_LOUD : 1
REMINDER_THAT : 1
NEW_NONVA : 1
ORDER_BREAST : 1
MEDICATIONS_NAME : 1
UP_HIMSELF : 1
ORDER_FOR : 3
TEMPERATURE_URINE : 1
HOUSE_YEARS : 1
SEP_VETERAN : 1
SCREEN_ABOUT : 1
DIPTHERIA_ACELLULAR : 1
THE_ENROLL : 1
AND_RELIGION : 1
CARE_ID : 1
PROVIDER_BY : 1
OU_WAS : 1
FELT_ANGRY : 1
MILIEU_ATTENDED : 1
TOPIC_BRC : 1
WM_HISTORY : 1
BELONG_RESIDENT : 1
COPING_THEY : 1
WATCHING_ON : 1
SOUGHT_LEADERS : 1
LOOK_FOR : 1
ANY_MEMBER : 1
OFTEN_YOU : 1
MR_WAS : 1
INPATIENT_OUTPATIENT : 1
TEMPERATURE_TEMP : 1
ARMBAND_EVALUATED : 1
BOWEL_THIS : 4
ME_IS : 1
AND_CONTINUED : 1
LAST_MR : 1
FILED_POSTOP : 1
DIFFERENT_PRIOR : 1
MULTILEVEL_TIME : 1
CAUSING_AND : 1
IN_HER : 2
PROGRESS_WORKED : 1
ENCOURAGE_CONTINUED : 1
ATTEMPTED_TEACH : 1
IF_PPD : 1
CLINICIANS_INDICATED : 1
MAGAZINES_DEMONSTRATED : 1
LOCATION_SYSTEM : 1
BELOW_PATIENT : 1
SCHEDULE_AT : 1
WERE_AMOUNT : 1
INTERVIEWED_ABC : 1
APPRISED_CLINICAL : 1
SC_MALE : 1
BATHROOM_EXTRA : 1
PATIENT_TELLS : 1
PER_BELOW : 1
PULLED_TEETH : 1
CALL_DTN : 1
AGAIN_BY : 1
YEAR_MALE : 1
AFTER_ANTIPSYCHOTICS : 1
ASK_ROI : 1
CARE_PATIENT : 1
MOUTH_ACTIVE : 1
YR_PATIENT : 1
PATIENT_REQUIRE : 1
BY_MON : 1
HIS_LAUNDRY : 2
LEFT_CAPSULE : 1
QID_ACTIVE : 1
TIBC_BUT : 1
SKILLS_NECESSARY : 1
CLINICIANS_OF : 1
LESS_CONFUSIONI : 1
MONTGOMERY_VAMC : 1
CC_YO : 1
ORDER_BIRCH : 1
AWARE_APPT : 1
CE_OFFICERS : 1
SUSAN_SAFETY : 1
SATURATION_AFTER : 2
COMPLAINT_ILLNESS : 1
DISCHARGE_RECONCILIATION : 1
JUN_NO : 1
BY_THE : 3
HAS_FEELING : 1
STARTED_WEEK : 1
PROCEEDINGS_TO : 1
OR_STARTLED : 1
AT_LUNGS : 1
DROP_EYES : 1
AND_CHEST : 1
COMPLAINT_CHRONIC : 1
AGO_WAS : 1
FOR_PATIENT : 1
TEETH_ETC : 1
SPINE_LUMBAR : 1
WITH_APPARENTLY : 1
OBSERVED_PLEASE : 1
FOR_TO : 8
APPOINTMENT_DR : 1
EXAM_DENIES : 1
DID_DO : 1
FOR_XM : 1
NOTE_HEALTH : 1
CLINIC_TO : 2
WITHIN_TO : 1
NO_APPOINTMENT : 1
WM_WITH : 1
THERAPEUTIC_OFFERED : 1
TURN_INTO : 1
BY_HIS : 1
TO_FACE : 2
WITH_PL : 1
NIGHT_VISTA : 1
NO_INDICATION : 1
BEDTIME_MEDICATIONS : 1
PRIMARY_AND : 1
BOTH_QID : 1
ON_WAITING : 1
DOB_NO : 1
ASSISTANCE_ELIMINATION : 1
IS_ALSO : 1
LUBRICATING_JELLY : 1
AND_BOWELSOUNDS : 1
SPRING_STATE : 1
GENITOURINA_JUDGMENT : 1
INPATIENT_CALL : 1
BLACK_FEMALE : 1
LOPERAMIDE_ORAL : 1
VETERAN_PRACTICING : 1
DOES_KNOW : 1
LCSW_MINUTES : 1
ON_EVERY : 1
NO_REACTION : 1
VERIFY_IS : 1
VACCINE_THE : 1
OF_PRESENT : 1
THEM_AS : 1
NOT_COMMENTS : 2
EXPOSURE_TO : 1
TYLENOL_COLD : 1
GOOD_WITH : 1
HEADACHES_MEDS : 1
MG_PHARM : 1
FACILITY_HAD : 1
MAR_DO : 1
AT_HE : 1
CHEST_WITH : 1
CARE_OF : 2
CONFUSED_TO : 1
THE_VOICEMAIL : 1
FOR_PROCESS : 1
PCP_LACY : 1
SAYS_HE : 5
SURROGATE_APPLICABLE : 1
YES_PREHOSPITAL : 1
RE_PINES : 1
YOU_ON : 1
IN_INVOLVING : 1
TOILET_HIS : 1
COUPLE_PLAN : 1
CARE_YES : 2
FOR_LIKE : 1
NOTE_ASSESSMENT : 1
AND_PROVIDED : 1
DESCRIBED_ADDENDUM : 1
HE_LIKE : 1
NEEDED_SIGNATURE : 1
FOR_RE : 1
FOOTWEAR_IF : 2
OLD_COMING : 1
RASH_RESULTS : 1
APPARENTLY_WILL : 1
SPENT_TIME : 1
AGE_LEARNER : 1
MYOPIA_TO : 1
ILLNESS_SEE : 1
IS_MALE : 2
PAINPELVIS_MD : 1
USED_TO : 1
CONTINENT_GAVE : 1
FEELING_DOES : 1
WATCH_MEALS : 1
CIGARRETTE_SMOKE : 1
REDURS_TEACHING : 1
AND_SHOULDER : 1
MADE_PROCEDURE : 1
YES_UNINTENTIONAL : 1
LOW_OU : 1
OF_PEOPLE : 1
WORK_THIS : 1
IDENTIFIED_MANAGEMENT : 2
METHOD_CLEAN : 1
THE_WHICH : 1
TO_WHOM : 1
WAS_COMMENTS : 1
WELL_AS : 1
RECEIVED_FROM : 1
HAD_STRONG : 1
AND_WITH : 1
PAIN_SCORE : 1
THANKFUL_FOR : 1
FOR_OUTPATIENT : 1
APPOINTMENT_CENTER : 1
ROOM_UNSPECIFIED : 1
TO_IMAGE : 1
HOW_THE : 1
MEMBER_OTHER : 1
PAIN_SYSTEM : 1
TOBACCO_DISORDER : 1
NOT_PATIENT : 2
THE_HAS : 5
DEPRESSION_HIS : 1
HELP_MIAMI : 1
ON_DO : 1
ASSESSMENT_OBSERVED : 1
SSN_UNABLE : 1
TEAM_TELLS : 1
WHEN_CAME : 1
IN_OF : 2
HYPOTHYROIDISM_ETOH : 1
PURPOSE_AND : 1
DID_REFUSE : 2
SOFT_NONDISTENDED : 1
EXCESS_OF : 1
MOTOR_IS : 1
IS_STABLE : 2
DESCRIPTION_PENDING : 1
BEDREST_TREATMENTS : 1
PPD_PROVIDER : 1
OUT_PLAN : 1
IN_OTHER : 2
AT_PM : 6
FOR_IMMEDIATE : 1
CM_RESPIRATIONS : 1
THE_IMAGE : 1
HUSBAND_HIS : 1
INTRAORAL_PERIAPICAL : 1
WE_WENT : 1
PER_NOTES : 1
INCLUDING_COUNTER : 1
YO_BM : 1
JOB_HIS : 1
HCA_EXPLAINED : 1
SEP_ACKNOWLEDGED : 1
PHONE_NO : 1
PAST_RESPIRATIONS : 1
INFORMATION_YES : 1
UNTIL_BARRIERS : 1
AGITATION_AGE : 1
WIFE_OVER : 1
LUNGS_BILATERAL : 1
MG_SIG : 1
PRINTED_VISUAL : 1
NEBULIZER_RESPIRATORY : 1
INJECTION_BY : 1
DO_FEEL : 1
SMOKE_LOCALLY : 1
HAS_CHRONIC : 1
CONTINENT_SCOPOLAMINE : 1
REASON_CONTACT : 1
NORMAL_IN : 1
USING_AND : 1
IDENTIFYING_MANAGING : 1
FOCUSED_COGNITIVE : 1
HIS_OF : 2
FOR_OR : 1
LAB_MAR : 1
SEVERAL_CONTACT : 1
VERY_FOR : 1
VICODIN_BEERS : 1
AGE_MOUTH : 1
THE_PILLS : 1
DATE_HISTORY : 1
EXPRESSED_TOBACCO : 1
PRESENT_SEE : 1
IN_SENT : 1
MEDS_THEM : 1
ROI_IF : 1
HYPERTENSION_COMMON : 1
SIDE_PAIN : 1
WHEN_INFUSE : 1
MD_PATIENT : 1
ANY_NO : 1
TO_TAKE : 1
PRODUCTIVE_MCG : 1
STOOL_SHIFT : 1
TRIED_ON : 1
COMMENTS_FOR : 1
SKIN_INTEG : 1
TO_TREATMENT : 2
ADENOSINE_TO : 1
BY_STATES : 1
CC_RIGHT : 1
DISORDER_NAME : 1
DISEASES_THE : 1
ARE_NOT : 2
WENDY_CONTACT : 1
DYES_PHENERGAN : 1
TABLET_STRENGTH : 1
CLINIC_VISIT : 2
POSSIBLE_DEMENTIA : 1
PULSE_HEIGHT : 1
CHILD_GEC : 1
FELL_THE : 1
SPEECH_NORMAL : 3
LOW_TIMEFRAME : 1
HIS_CASODEX : 1
BOWEL_TAKEN : 1
SIGNATURE_REQUIRED : 1
EFFECTED_THROUGH : 1
CHIEF_PRESENT : 1
MR_SCHEDULE : 1
LAST_YEAR : 1
ALBUTEROL_MCG : 1
ER_ONE : 1
WITHOUT_RX : 1
DID_YOU : 2
DEMONSTRATED_THE : 1
HEALTH_CALLED : 1
ATTEMPTED_HURT : 1
ASSIST_PATIENT : 1
DM_NORMALLY : 1
TREATMENT_ACTIVITY : 1
CONFUSED_TRYING : 1
OIL_FIELDS : 1
WHILE_RESPIRATION : 1
ADMITTING_DIAGNOSIS : 1
CRADC_ORIENTATION : 1
AS_ABDOMEN : 1
INHL_PUFFS : 1
ABOUT_FACT : 1
SPACE_AND : 1
NONINFECTIOUS_IT : 1
HAS_THIGH : 1
FREQ_HL : 1
TRAINING_THE : 1
NONINFECTIOUS_VIRUSES : 1
INTEGRITY_DENTAL : 1
PALMER_INSTITUTE : 1
DECOMPRESSION_OR : 1
SCHEDULED_APPT : 2
TOOTH_EXR : 1
NS_BOLUS : 1
MINS_CONSTANT : 2
LOOK_TO : 1
PM_CONTINUE : 1
SHIFT_ENHANCEMENT : 1
WHEN_STIMULATED : 1
EVEN_INTO : 1
STRONG_TO : 1
NONVA_ENTER : 1
FOR_REEVAL : 1
UPDATE_ON : 1
DIAGNOSIS_DOCUMENTS : 1
HAS_EXPOSURE : 1
NOTE_RELIGIOUS : 1
NUTRITION_PERSONAL : 1
NOT_PULSE : 1
VETERAN_COMPLETED : 1
OBSERVATION_NIGHTTIME : 1
AND_NONE : 1
ACTIVE_OUTPATIENT : 2
MED_INCREASED : 1
ABLE_TO : 2
VITALS_HE : 1
TO_VET : 2
THAT_HIS : 1
ACT_ON : 1
TO_COPE : 2
ASSISTANCE_BOWEL : 1
AS_DISPLAYED : 1
PURPLE_TEAM : 1
CONCERNS_NOTED : 1
EATS_WRONG : 1
PERSON_ASSIST : 1
DECREASED_GEC : 1
OBMT_IS : 1
OPPOSED_TO : 1
OF_FLUVASATIN : 1
NS_GIVEN : 1
CLAUDICATION_HE : 1
TO_THEY : 1
ON_RECENT : 1
TYLENOL_AND : 1
FLAMMABLE_LIQUIDS : 1
TO_CHECK : 1
SCORE_NO : 1
PLAN_COPY : 1
OBJECTIVE_MINUTE : 1
MISSING_FOR : 1
YOU_SICK : 1
BY_WITH : 1
CONTACTED_FOR : 1
DISCUSSION_SPOKE : 1
JEFF_WILL : 1
DC_ORDERS : 1
CUEING_RESIDENT : 1
RESULTS_THEY : 1
COMPLETION_IMMEDIATE : 1
ANXIETY_PATIENT : 1
SKILLS_TO : 1
YEAR_HO : 1
OUTPATIENT_PRESCRIPTION : 2
TREATMENT_THE : 1
LAST_INTAKE : 1
NEVER_EATS : 1
HE_BORROWD : 1
PRIVILEGES_PAIN : 1
MRSA_CABASAL : 1
AND_ENCOURAGE : 1
RAL_DISCUSSED : 1
NO_WITH : 1
UNABLE_ACTIVELY : 1
DIABETIC_RETINOPATHY : 1
HOME_SEE : 1
ACTIVITY_INTOLERANCE : 1
ACUTE_DEPRESSION : 1
POLYPS_ICDCM : 1
RESPIRATION_DATE : 1
SEVERE_SHOULDER : 1
NOTE_DATED : 1
KIT_STARTED : 1
PRACTITIONER_ABSTINENCE : 1
TO_HOME : 1
AM_FLAMMABLE : 1
TWICE_ACTIVE : 1
SERVICE_NONVA : 1
GLAUCOMA_OS : 2
INCONTINENT_WEARS : 1
REPORTED_BELIEF : 1
GOAL_DIRECTED : 1
HOME_FACILITATOR : 1
NVI_FIRST : 1
NO_REPAIRED : 1
THE_ON : 1
MHICM_REVIEW : 1
VETERAN_WENT : 1
THE_RIGHTS : 1
BE_WITHOUT : 1
SPECIFY_STRESSORS : 1
BECAUSE_IS : 2
WAS_NOV : 1
SHAMPOO_CARE : 1
EMERGENCY_HEALTHY : 1
BUTTERFLY_RASH : 1
GOOD_DESCRIBED : 1
REACTION_RESPONSES : 1
ANY_FAMILY : 1
SHOULDER_OF : 2
DOES_FEEL : 1
AND_ARE : 2
DISCHARGED_PATIENT : 1
LENGTH_THE : 1
INSTITUTE_IN : 1
COMMUNITY_FACILITATOR : 1
AND_THEY : 2
HAS_COMPLAINTS : 1
SHOW_MAILED : 1
CONSTANTLY_ON : 1
NOTHING_HAS : 1
IS_ASSIGNED : 1
PHONE_PATIENT : 1
NO_SHOW : 1
AS_NONVA : 1
CONTRACEPTION_USED : 1
PROCEDURE_WEIGHT : 1
LIPOMAS_COMMENTS : 1
SOCIAL_WORKER : 1
AGREES_WITH : 1
FOR_SCHEDULED : 1
FOR_LEARNING : 1
UP_PC : 1
ON_ANOTHER : 1
PULSE_RESPIRATIONS : 1
RE_MORPHINE : 1
PELVIS_APPROPRIATE : 1
AND_GIRLFRIEND : 1
IRRITABLE_PT : 1
SOFT_NONTENDER : 1
NOT_NICOTINE : 1
FINISH_HIS : 1
TOTAL_ASSISTANCE : 1
MA_RNBC : 1
FIRM_HOWEVER : 1
AND_AGO : 1
PRESENTS_WITH : 1
NORMAL_MOTION : 1
CONTINENT_PATIENT : 2
MG_TAKE : 3
TENDERNESS_PT : 1
ADL_AWAY : 1
NO_ORAL : 1
NOT_ADDITIONAL : 1
THE_NECESSARY : 1
LIST_PEOPLE : 1
THIS_LOT : 1
MET_LUNGS : 1
OSPITAL_PJ : 1
MEDICATIONS_SEROQUEL : 1
FOR_SUPERVISED : 1
GOOD_ADDENDUM : 1
PATIENT_BATHROOM : 3
TEACHING_IBUPROFEN : 1
INFORMATION_THE : 1
EVE_ICDCM : 1
LEADERS_INTERDISCIPLINARY : 1
HOSPITAL_CANT : 1
INDIVIDUAL_IDENTIFIED : 1
WAS_MISLEAD : 1
GEC_ID : 1
TO_UNABLE : 1
VET_WAS : 4
HE_COMPLAINS : 1
ADDENDUM_WITH : 1
VISIT_HAS : 1
INSTITUTE_MIAMI : 1
APPOINTMENT_SEVERAL : 1
AT_FLUID : 1
PROBLEM_CHRONIC : 1
IN_NOT : 1
THAT_CARCINOMA : 1
PATIENT_CONTINUES : 1
TO_BLIND : 1
OF_SPOKE : 1
BEEN_THAT : 1
SYSTEM_CONCERN : 2
RBC_AFFECT : 1
HIS_LIFE : 1
WOOTEN_GROUPS : 1
PATIENT_INFORMED : 1
PATIENT_KEPT : 1
AND_APPROVED : 1
USE_MOUTH : 1
CAN_DONE : 1
HE_AS : 1
HIS_ADLS : 1
THE_FOLLOWING : 10
DID_HAVE : 2
NONE_PROGRESS : 1
AK_NAME : 1
RN_ASSESSMENT : 1
FOR_COMPLAINT : 1
SOCKS_COLOR : 1
PER_HIS : 1
STRONGER_MED : 1
ICDCM_UNRE : 1
TEAR_IN : 1
LEG_ACTIVITY : 1
TABLET_MG : 1
STUDENT_CURRENT : 1
MESKENAS_RNBC : 1
REFERRAL_WAS : 1
SHOULDER_PAIN : 1
MOTIVATIONAL_AS : 1
BY_ACCURATE : 1
ENCOUNTER_FOR : 1
OUT_UNTIL : 1
PLEASE_RADIATION : 1
MOUTH_DAILY : 1
COMPLICATIONS_XX : 1
BOWELSOUNDS_MOBILITY : 1
NOTE_INJECTION : 1
PRODUCTIVE_ALBUTEROL : 1
WITH_BURNING : 1
HEARING_HIS : 1
COMPLAINT_TESTICULAR : 1
FROM_VISTA : 1
LOCATION_DURING : 1
DISCHARGE_INSTRUCTIONS : 3
INPT_GROUP : 1
DOSE_FLUVASATIN : 1
RESPIRATIONS_PROBLEM : 1
PRIMARY_CLINIC : 1
PALMER_EYE : 1
WAS_AGAIN : 1
CALL_MIN : 2
SHIFT_WAS : 4
SMILING_LAUGHING : 1
ABC_HOBBY : 1
PLASMA_GLUCOSE : 1
LESS_THAN : 1
LIGHT_REACH : 1
FOLLOWING_REASON : 1
EAR_BEDTIME : 1
IT_OUT : 1
DEFENSE_DONT : 1
WAS_THERE : 1
INTRAOPERATIVE_PRIMARY : 1
WHO_TO : 1
HE_SAY : 1
NEGATIVE_FOR : 2
PEOPLE_WRITING : 1
FOCUSING_LIE : 1
HIGH_GOT : 1
EPISODE_WOKE : 1
LEFT_INTERNAL : 1
IS_CONTINENT : 2
DOCUMENT_PROBLEMS : 1
MOTOR_MOOD : 1
TH_MEDICATION : 1
HIM_HER : 1
APPLICABLE_TEMP : 1
NOT_ALL : 1
STABLE_ON : 1
FEW_LAST : 1
THIS_PROCEDURE : 1
AND_TRANSFERRED : 1
TO_VARY : 1
PRIMARY_CALL : 1
DENTALLY_IS : 1
SHAVE_LEGS : 1
ALLERGIES_PHYSICIAN : 1
RATHER_RECEIVE : 1
DISORDER_MINERALIZATION : 1
HYPERTENSION_ESSENTIAL : 2
WILL_CLOSELY : 1
PERIOD_TIME : 1
SOLN_INHL : 1
MAGNESIUM_PER : 1
OFFERED_UPTIVE : 1
DTN_INFORMATION : 1
TELEPHONE_NURSING : 1
CHANGED_THEIR : 1
UNDERSTAND_REL : 1
DURING_RECENT : 1
BUT_HE : 1
WAS_AND : 6
RADIATION_SERVICE : 1
COLD_SCHIZOPHRENIA : 2
WILL_CANCELLED : 1
ON_SKIN : 1
ON_AROUND : 1
PHYSICAL_WERE : 1
MOOD_IS : 4
NUMBER_NUMBER : 1
APPARENTLY_ALLERGIES : 1
SCHEDULED_LONG : 1
IN_TO : 3
BRUISING_NOTED : 1
BACK_THAT : 1
RIGHTS_AND : 1
MEDICINE_SEE : 1
QHS_WILL : 1
ROTATION_PAIN : 1
ETOH_HYPERTENSION : 1
FOR_VETERAN : 1
OF_SUCH : 1
INGRATIATING_ARGUMENTATIVE : 1
HOURS_PING : 1
YES_RAL : 1
BE_AGAIN : 1
COMPLAINTS_PER : 1
INTRAOPERATIVE_REPORT : 1
BETWEEN_AND : 1
MEDICATION_ANEMIA : 1
MALE_SEEN : 1
TORADOL_ALCOHOL : 1
CITALOPRAM_MG : 1
SPECIAL_CHEMICALS : 1
THE_PATCHES : 1
SUPPORTIVE_FOCUSING : 2
INTACT_SCALE : 1
OFFICE_HIS : 1
CYCLOBENZAPRINE_LEGEND : 1
STRUCTURE_SUPPORTIVE : 1
BIOPSY_VET : 1
SAID_REPORTS : 1
HE_GROUP : 1
APPEARED_BENEFIT : 1
HOME_NURSE : 1
GOING_MAKE : 1
PHONE_LISTED : 1
CLEAN_AND : 1
BRONCH_VERIFIER : 1
RD_LAST : 1
RIGHT_CYST : 1
ASSESSED_LEVEL : 1
CAP_BENZTROPINE : 1
INFORMATION_ETSU : 1
PARTICIPATE_RECONCILIATION : 1
SUMMARY_NOTE : 1
CELL_SELF : 1
MSW_CRADC : 1
UNCONSCIOUS_FOR : 1
FOR_INCREASED : 2
CALL_LIGHT : 1
FOLLOWING_WHEELCHAIR : 1
WHEN_TEMPTED : 1
AND_ASTHMA : 1
THEIR_TALKING : 1
BRUSHING_DAILY : 1
FALL_ON : 1
LO_DEFAULT : 1
BIRCH_AL : 1
RESIDENT_USES : 1
WAS_DATED : 1
IN_ALLERGIES : 1
OF_PATCHES : 1
THE_WAITING : 2
VETERAN_YEAR : 1
ACTIONS_TO : 1
WAS_ALSO : 1
WITH_APPROVED : 1
REVIEWED_WERE : 2
CHRONIC_PAIN : 3
ALLERGIES_POSTINGS : 1
DOING_FINE : 1
WILL_BE : 3
BILLS_AND : 1
GROUP_BE : 1
CAPILLARY_ECTASIA : 1
WHEELCHAIR_HAS : 1
VOICED_APPOINTMENT : 1
REDNESS_HOURS : 1
HAS_URGES : 1
SKILLS_THEY : 1
AT_OR : 1
THE_SUSTAINING : 1
AND_TOUR : 1
BOWEL_MOVEMENT : 1
NANCY_BIRCH : 1
OS_OD : 1
SMOKE_PT : 1
IS_HAS : 1
OF_GROW : 1
SMOKER_YES : 1
GAINED_MHIS : 1
SITTING_QUIETLY : 1
THE_EFFECTIVENESS : 1
ON_ROTATION : 1
POSTOP_INSTRX : 1
HE_SEEMED : 1
NECESSARY_TOTAL : 1
THE_VETERANS : 3
OUR_HELP : 1
HAVE_PROBLEM : 1
EATS_HOME : 1
IN_HAD : 1
UP_ALLERGIES : 1
ON_IMPULSIVE : 1
TO_PROCEDURE : 1
OBSTRUCTION_RESTRICTIVE : 1
EVIDENT_IN : 1
THERAPEUTIC_EQUIVALENTS : 1
ANGRY_SEVERE : 1
PHONE_DOCUMENTED : 1
THE_TWO : 1
HIM_HIM : 1
RESPIRATIONS_RIGHT : 1
BUT_INTRODUCED : 1
CAPSULE_MOBILITY : 1
CAPILLARY_AND : 1
TO_CARE : 1
IN_BACK : 1
ARRANGEMENTS_OTHERS : 1
ANEMIA_CONVERSATION : 1
SCHEDULED_VISIT : 1
OTHER_VACCINE : 1
TO_MISSED : 1
TO_CARRY : 2
CONTACT_NOTE : 2
OF_NONE : 1
HE_THE : 3
AS_HIS : 1
ABOUT_APPROACHES : 1
HEAD_JUST : 1
AS_IF : 1
IT_COMMON : 1
LEARNING_ASSESSMENT : 1
AND_GET : 1
PT_HIS : 1
REHABILITATION_WHERE : 1
IN_APR : 1
PHYSICIAN_IN : 1
PM_ORIENTATION : 1
IN_VISTA : 2
ONE_STUDENT : 1
PHARMACY_BP : 1
CAN_OSTEOARTHROSIS : 1
COME_TALK : 1
STATING_THERE : 1
AND_THERAPEUTIC : 1
ORAL_INHL : 1
STARTED_HE : 1
ROCK_EYE : 1
STAYED_HEALTHY : 1
DOES_PATIENT : 1
NO_GICOLONOSCOPY : 1
BY_AND : 1
POLLEN_MIN : 1
MAILED_TO : 1
EMERGENCY_INFORMATION : 1
STRENGTHS_MONITOR : 1
OF_STAFF : 1
DISCIPLINARY_NONE : 1
APPT_CONTINUES : 1
APPT_TO : 2
CALL_CENTER : 1
ABLE_UNDERSTAND : 1
CENTER_AT : 1
BRUSHING_TIMES : 1
VETERAN_HE : 2
INFLUENZA_VACCINE : 2
CLINICALLY_APPROPRIATE : 1
PATIENT_FOR : 1
BEERS_DAILY : 1
PROVIDER_YES : 2
ABOUT_TOTAL : 1
PRE_DATE : 1
PH_ADV : 1
COSTOCHONDRITIS_FOR : 1
VETERAN_WAS : 3
WAS_WALKING : 1
MS_TEAM : 1
PEOPLE_ARE : 1
LAST_UPDATE : 1
NO_IN : 2
BY_CBC : 1
AND_WERE : 1
OTHER_WITHIN : 1
HIM_THE : 1
BEING_ED : 1
AND_JOINT : 1
MINS_TO : 2
MOVIE_SKIN : 1
ONE_MEMBER : 1
PHYSICIAN_DYES : 1
WRAP_UP : 1
NOTED_FAMILY : 1
STOOL_ADJUSTMENT : 1
WAS_TREATED : 1
TO_EYE : 1
AS_WELL : 1
INTERVENTIONS_PER : 1
ON_ONE : 1
RETURN_REQUEST : 1
HE_VERY : 1
OF_NAIL : 1
PPD_QUIT : 1
PT_IN : 3
INFORMATION_LEFT : 2
DEAR_OVER : 1
YRS_CLIENT : 1
THE_ID : 1
ONLY_VIRUSES : 1
WALKING_CONVERSATION : 1
SHE_WAS : 2
AFGER_AND : 1
VOICEMAIL_SUICIDE : 1
EVENT_DEC : 1
SERVICES_NAOMI : 1
UP_NEEDED : 1
INTERDISCIPLINARY_PLAN : 1
QHS_WE : 1
YOU_RATE : 2
PATIENT_PROVIDED : 1
RECORDS_NOTES : 1
FACTORS_TEMPERATURE : 1
NORMAL_INDEX : 1
MIGRAINE_HEADACHES : 1
RTC_DEC : 1
GOAL_THOUGHT : 1
SITE_POLLEN : 1
TIME_MINUTES : 1
TO_RECOVERY : 1
WAS_EVALUATED : 1
ASSESSMENT_FEB : 1
ECTASIA_AND : 1
CLEAR_YELLOW : 1
POTENTIAL_ADVERSE : 1
WAS_CORDIAL : 1
HYPOTHYROIDISM_AND : 1
ABG_AND : 1
IDENTIFICATION_CONFIRMED : 1
NONE_FOUND : 1
PROVIDER_SITE : 1
THE_VACCINE : 1
PREMIX_INHL : 1
SKILLS_STATED : 1
MED_WAL : 1
PROGRESS_NOTES : 1
HAVE_ROI : 1
GOALS_PHYSICIAN : 1
IN_EAR : 1
WELLBUTRIN_APPARENTLY : 1
PULSE_CONTACT : 1
ADMINISTER_TRIVALENT : 1
HEARING_AID : 1
OF_SIGHT : 1
PT_PT : 1
VETERANS_WAS : 1
PREFERENCES_NURSING : 1
RESIDENT_EDUCATION : 1
HE_HIS : 1
GEESEY_YVONNE : 1
RESOLVED_PT : 1
TEAM_MR : 1
SO_BEING : 1
INTERVENTIONS_MONITOR : 1
PRIMARY_ANNUAL : 1
INFLUENZA_OLD : 1
CARE_CALLED : 1
VETERAN_INFORMS : 1
BUSPIRONE_MG : 1
WHAT_IS : 1
MOUTH_WASH : 1
STRSOME_THEY : 1
ON_SHOULD : 1
SECONDARY_LOCATION : 1
PREFERENCE_LEARNING : 1
TALKING_OTHERS : 2
VIRUSES_OT : 1
PHYSICIAN_FOR : 1
DOES_AT : 1
USED_PILLS : 1
PARENT_URINE : 1
NAME_WAS : 1
YOU_HOLD : 1
AFIB_GOAL : 1
PACED_PATIENT : 1
VIST_SUGGESTED : 1
TITRATE_UP : 1
OF_CHRISTIAN : 1
YOUR_ON : 1
YES_TWO : 1
LOWER_PAIN : 1
AT_SITE : 1
NONE_VETERAN : 1
INVOLVING_TRAINING : 1
APPROVED_SUPERVISING : 1
ARE_AWARE : 1
APPROXIMATELY_AFTER : 1
SHOWED_SINUS : 1
DISCUSSED_COPING : 1
COLONOSCOPY_COLONOSCOPY : 1
WOUND_EYEBALL : 1
CHO_OL : 1
THE_ER : 2
CONVERSATION_HAS : 3
HOURS_ASSISTANCE : 1
WILL_NEED : 3
MO_PATIENT : 1
TO_NEEDLESSLY : 1
STUDENT_COMPLETED : 1
USED_DEST : 1
THE_POSSIBILITY : 3
TEMPERATURE_IDENTIFIES : 1
AND_TOOK : 2
YOU_GAINED : 1
POSITION_AND : 1
FAMILY_SIGNIFICANT : 1
IMAGING_STARTING : 1
CURRENT_REGIMEN : 2
ERROR_NOT : 1
FILE_AVAILABLE : 1
THE_WITH : 3
VISTA_LDL : 1
FRI_WRITING : 1
PHONE_ORDER : 1
GICOLONOSCOPY_LETTER : 1
LEARNING_WAS : 1
TO_APS : 1
CONCOMITANT_IN : 1
SOME_ASSISTANCE : 1
CLINICAL_ISSUES : 1
FIRM_ABD : 1
CONTACT_MADE : 1
REFORMULATING_RECOVERY : 1
AROUND_NOV : 1
IMMUNIZATION_DOCUMENTATION : 1
BODY_RIGHT : 1
PJ_SPONTANEOUS : 1
FIELDS_MOVING : 1
FOR_APPROXIMATELY : 1
DT_MM : 1
SHIFT_SLEPT : 1
OTHER_IN : 1
WAS_INCR : 1
CABASAL_INVOLVING : 1
EDITED_TO : 1
THE_AND : 7
CLINICAL_THROUGH : 1
PC_AT : 1
ONE_IN : 1
YEARS_LIKE : 1
SYSTEM_TO : 1
GO_HIM : 1
UP_LIGHT : 1
SKILLS_PT : 1
SKIN_INTEGRITY : 1
APPT_SAY : 1
ETOH_ABUSE : 1
ADVISE_TO : 1
VETERAN_THAT : 2
RETURN_VISIT : 1
BED_THIS : 1
TO_RESCHEDULE : 2
TYPE_VISIT : 1
PLEASE_CONTACT : 2
INFORMATION_FACILITY : 1
PROCEDURE_LB : 1
APPOINTMENT_RESCHEDULED : 1
COMPLAINT_AGE : 1
AND_WISHED : 1
OTHERS_WOUNDS : 1
ALERT_CONFUSED : 1
WITH_TO : 2
FOR_FLORIDE : 1
HERE_CANT : 1
SACCOCIA_BIRCH : 1
DOCUMENTS_ELECTRONIC : 1
STRENGTH_MG : 1
SPONTANEOUS_APPROPRIATE : 1
DEPRESSIVE_NEC : 2
INCLUDING_REGULATION : 1
MEDICATIONS_POSITIVE : 1
ETHNIC_RELIGIOUS : 1
MISLEAD_ROUTE : 1
CHECK_BLOOD : 1
TO_CLINIC : 3
SHOWER_SNACKS : 1
INSTRUCTIONS_THE : 1
REFERRAL_PARENT : 1
OF_ZOLOFT : 1
IMMEDIATE_KNEE : 1
THE_FACE : 2
CONFIRMED_AND : 1
SHOWERPT_SHOWER : 1
STATUS_RECEIVED : 1
BAKER_LCSW : 1
CALL_TYPE : 1
SCHIZOPHRENIA_NOSUNSPEC : 2
PAST_PERSISTENT : 1
THE_MYOPIA : 1
AGE_IN : 1
DUE_RETURN : 1
HOWEVER_DCD : 1
HISTORY_PTSD : 1
OR_TURN : 1
THE_DELUSIONS : 1
HEIGHT_IN : 3
THE_PROPOSED : 1
PTS_MEDICAL : 1
PULSE_IN : 1
IN_BED : 3
LIVE_BREAKFAST : 1
TAKE_THIS : 1
AND_GROOMING : 1
THYROID_NURSES : 1
ER_YR : 1
WITH_BLINDNESS : 1
LOW_BACK : 4
ASA_IS : 1
PROFILE_TO : 1
ICDCM_ORIENTATION : 1
HIS_PATH : 1
RELIEF_PAIN : 1
WEARING_TIME : 1
FOR_VAMC : 1
HE_IN : 1
PROCEDURE_THIS : 1
FOUND_AND : 1
DOB_JUN : 1
AND_HAD : 2
MASS_IS : 1
WRIST_FRACTURE : 1
SEEMED_TO : 1
IS_CLEARED : 1
OF_WHEN : 1
PHONE_SAME : 1
IF_AM : 1
RECONCILIATION_PHARMACY : 1
FIRST_SEE : 1
ABC_GROUP : 2
OF_MOTION : 2
INFLUENZA_DOCUMENTATION : 1
MANY_COMPLAINTS : 1
THE_HOUSE : 1
THAT_IS : 5
AND_SKIN : 1
ABOUT_VET : 1
HE_FEELS : 1
REFUSE_SNACKS : 1
HS_SCHEDULED : 1
MOBILITY_PERSONAL : 1
ROOM_MEAL : 1
ULOPLASTY_IN : 1
AGE_DOB : 1
AUTOLANE_REFRACTION : 1
NURSING_BUTTON : 1
MALE_BLACK : 1
TO_THESE : 1
PROCESS_LINEAR : 1
NEED_CURRENT : 1
ED_BY : 1
WITH_KAUR : 1
AREA_APPROXIMATELY : 1
INSERT_CASE : 1
HOURS_PHQ : 1
ES_VINAY : 1
PURPOSEFULLY_MISLEAD : 1
RD_INTAKE : 1
HIS_CONDITION : 1
OF_DO : 2
HAS_DOING : 1
BY_FOLLOWING : 1
THROUGH_WITH : 1
OF_RD : 1
NAME_JR : 1
AND_ASSIST : 1
STAIRS_PROBLEM : 1
NO_EMERGENCY : 1
STRUCTURE_TO : 1
DAILY_RA : 1
AND_HE : 9
COMMON_ICDCM : 2
STAFF_OCCIDENTAL : 1
CINCINNATI_LEGEND : 1
HYPERLIPIDEMIA_WHO : 1
WITH_CONTENT : 1
VETERANS_MEDICAL : 1
ADOLESCENCE_YOUR : 1
ALMOST_EATS : 1
THAT_IN : 1
ATTENDING_ABC : 1
SAYS_THIS : 1
SESSIONS_AM : 1
ADDENDUM_BARRIERS : 1
MEDICARE_STATE : 1
FOLLOWUP_PRIMARY : 1
FEEL_COMFORTABLE : 1
EXCLUDING_SUPPLIES : 1
SKIN_DONT : 1
THE_HERE : 1
OTHER_EVALUATION : 1
DISPOSABLE_NUTRITION : 1
AND_PROFILE : 1
THERE_WAS : 2
AND_NOVEMBER : 1
OF_ED : 1
AS_TO : 2
REHAB_YR : 1
ANEMIA_MILD : 1
OCCULT_TELEPHONE : 1
CHANGES_REGULATION : 1
HE_SORE : 1
PATCHES_RTC : 1
BETTER_BRIGHTER : 1
KNEE_EDEMA : 1
SHIFT_PROVIDED : 1
INHL_INHALE : 1
THE_REASON : 2
NOSUNSPEC_HYPERLIPIDEMIA : 1
AND_OUTPATIENT : 1
REDNESS_SWELLING : 1
PLAN_YOU : 1
VISIBLE_IN : 1
RECENT_CHANGES : 1
MORE_AND : 1
RECORD_THE : 1
ANXIETY_WHEN : 1
WATCHFUL_OR : 1
WAS_PLACED : 2
AN_FLAMMABLE : 1
RADIATION_ONCOLOGY : 3
STEROID_TREATMENT : 1
PLEURITIC_ADDENDUM : 1
MALE_SOCKS : 1
MIN_ENCOUNTER : 1
ARTHRITIS_SEVERE : 1
INSTRUCTOR_AND : 1
CAN_WITHIN : 1
POLLEN_ENCOUNTER : 1
CONDITION_AT : 1
MEDICARE_WILL : 1
MUCH_YOU : 1
SECONDARY_INTE : 1
NEXT_SEVERAL : 1
PHYSICIAN_INSTRUCTIONS : 1
NONVA_REQUEST : 1
COMMUNICABLE_DISEASES : 1
OPTIONS_OF : 1
NO_NO : 1
AND_AS : 2
ELIMINATION_ADMISSION : 1
RESULTS_READ : 1
IN_MIDNIGHT : 1
DISCUSSED_DIRECTIVES : 1
MS_MCH : 1
NO_DISCOMFORT : 1
WILL_RESCHEDULED : 1
SCOPALAMINE_DAILY : 1
CRADC_OTR : 1
SMOKE_PPD : 1
RIGHT_SEBACEOUS : 1
ALL_CLOTHING : 1
REFERRAL_DISCUSSED : 1
MEMBER_WOULD : 1
HAS_NKA : 1
HIS_WENT : 1
ORAL_AND : 1
LOW_IN : 1
ANTIPLATELET_ANTITHROMBOTI : 1
EMERGENCY_ROOM : 1
VETERAN_SIX : 1
CURRENT_LAB : 1
TO_SCORE : 1
HL_ABOUT : 1
PATIENT_TO : 6
JUL_WEEKLY : 1
HE_DONE : 1
PSYCH_INPATIENT : 1
EVEN_TURN : 1
RECORD_AND : 1
REQUIRE_FOLLOWING : 1
PATIENT_CONTACT : 1
PART_QUESTIONAIRE : 1
MAY_ST : 1
DID_FINE : 1
TWO_WHO : 1
IED_RESULTED : 1
INSTRUCTION_READER : 1
INTOLERANCE_CONSTIPATION : 1
TEAM_TO : 1
DISCON_TEACHING : 1
HEALTH_TO : 1
RODRIGUEZ_TTE : 1
TIME_RETURNED : 1
NORMAL_FERRITIN : 1
CONSUMED_HYOSEINE : 1
LETTER_MG : 1
TOPIC_NONVA : 1
AS_WERE : 1
PAIN_OF : 1
DONT_ANY : 1
USE_CONTINUOUS : 1
TO_NURSING : 1
TWO_QUETIAPINE : 1
REACTIONS_ASSOCIATED : 1
VA_VA : 1
WITH_AND : 8
OF_BEERS : 1
WATCH_TV : 1
HIM_TOMORROW : 1
FEW_STEPS : 1
SAFETY_DESCRIBE : 1
TALK_YOUR : 1
DIAGNOSES_ARM : 1
ME_ANTIBIOTIC : 1
NUMBER_TO : 1
CREAM_AND : 1
DATA_BASE : 1
THE_HE : 1
IN_CONDO : 1
TO_WITH : 2
FOLLOWING_ANESTHESIA : 1
HAD_SESSIONS : 1
TALKING_ACTIVE : 1
TREATED_BY : 1
UNDERSIGNED_MR : 1
RESTRICTIVE_USE : 1
MILD_PRIV : 1
CP_NO : 1
MY_PRACTITIONER : 1
RESCHEDULED_AT : 1
ORDER_WILL : 1
AS_SOON : 1
OF_OR : 2
WAS_TRANSFERRED : 1
SWUNG_AT : 1
THEY_DIFFERENT : 1
WITH_RESULTS : 2
IF_REDURS : 1
MOBILITY_CLAIRE : 1
TIMES_RA : 1
EYES_ACTIVE : 1
BREAKFAST_LUNCH : 1
BLASTS_HIS : 1
OF_PROSTATE : 1
TREATMENT_KEEPING : 1
OF_INVOLVED : 1
REMERON_WHICH : 1
PT_ALSO : 1
WIFE_PAST : 1
VACCINE_IM : 1
REGIMEN_WALKING : 1
VISIT_THE : 1
TO_PRESENT : 1
HAVE_ORDER : 1
AND_MORNING : 1
ADEQUATELY_WILL : 1
CONTINUED_MENTAL : 1
IS_TO : 2
STAGE_REVEALED : 1
STOOL_CLIENT : 1
CONTACT_MCHC : 1
PULLED_OUT : 1
SKILLS_COMMUNITY : 1
PELVIS_CLINICALLY : 1
APPOINTMENT_LEFT : 2
DONE_WITH : 1
SIGNED_THE : 1
TOENAILS_WONDERS : 1
ADDENDUM_YOU : 1
PO_ATIVAN : 1
VITAL_POST : 1
WAS_OF : 3
AND_MONITORS : 1
FINDS_IN : 1
DEC_HE : 1
MG_HS : 1
CONTINUES_CARRY : 1
LEGAL_OPTOMETRY : 1
HOME_PRESENTS : 1
ICDCM_NDA : 1
GROUND_SHE : 1
INPATIENT_AND : 1
KG_PREOP : 1
ATTENTIVE_AND : 1
DATED_INFORMED : 1
WITH_CHEMICAL : 1
SOCIAL_SUPPORT : 2
IS_SUPERFICIALLY : 1
JOB_WE : 1
THE_MEDICATION : 2
HIS_ARE : 1
CALLED_STATED : 1
SWEATS_NIGHTTIME : 1
ASSESSMENT_WAS : 2
HIS_TO : 5
ON_INTEGRITY : 1
FOR_CONTACT : 1
WE_DONT : 1
PROMISSED_WOULD : 1
FOR_HIM : 1
RECOVERY_PROCESS : 1
LEARNING_HYPERTENSION : 1
THE_LEFT : 1
WRITER_PATIENT : 1
PROMOTE_INTERACTIONS : 1
PATIENT_NOT : 3
HOW_MUCH : 1
TRAINING_REGARDING : 1
FLOW_OF : 1
NOT_ANY : 1
EVALUATED_FIRST : 1
IN_NAD : 1
NO_FLASHES : 1
DEMONIC_REALM : 1
TO_AN : 1
REPORTS_THIS : 1
WHICH_HE : 1
AS_COLD : 1
OCR_ADDENDUM : 1
OFFICE_WITH : 1
PING_AT : 1
WHERE_CAN : 1
CHEST_SPO : 1
TOOTH_TOOTH : 1
STINGS_ALCOHOL : 1
PATIENTS_AND : 1
HIGHEST_PT : 1
RESIDENT_ROOM : 2
PDD_WAS : 1
HAS_QUESTIONS : 1
INSERT_PHYSICIAN : 1
LAST_INFLUENZA : 1
CASODEX_EXCESS : 1
THE_SKILLS : 2
COMMENTS_AK : 1
THIS_REPORTED : 1
THE_SAME : 1
ISSUED_INPATIENT : 2
SCOPOLAMINE_SOLN : 1
FROM_FORCING : 1
MOBILITY_AT : 1
MEDICINE_RELIGION : 1
VA_CE : 1
THE_DEMONIC : 1
UP_HAIR : 1
STATED_THAT : 2
ANOTHER_AND : 1
TIME_OT : 1
HAVE_GAINED : 1
NONVA_OTHER : 1
OTHER_WEEK : 1
VETS_NEIGHBOR : 1
AUTHOR_HE : 1
FAR_IN : 1
ENTERING_OIL : 1
GEL_JELLY : 1
SURG_IT : 1
END_CASE : 1
USE_DISORDER : 1
SURGICAL_WEIGHT : 1
MINUTES_AFTER : 1
DAILY_LIVING : 1
ATTACHED_ACTIVE : 1
PATIENT_REPORT : 1
THAN_NO : 1
HOURS_BED : 1
MODALITIES_TENS : 1
REACH_SHOULDER : 1
HAVE_SIX : 1
AREA_MG : 1
GIVEN_MODALITIES : 1
AGE_GENDER : 1
HERE_WITH : 1
BARETT_HAS : 1
BRONCHITIS_PFTS : 1
WAS_APPROVED : 1
PAST_YEARS : 1
IT_WAS : 3
BEING_FOR : 1
RE_BAY : 1
BEDSIDE_TO : 1
SHIFT_THE : 7
TOTAL_MINUTES : 1
IF_EDEMA : 1
EYE_AT : 1
NO_STAFF : 3
COMING_TO : 1
LLY_TRANSFERRED : 1
SMOKING_DID : 1
PRODUCTS_APPLICABLE : 1
OIL_WHEN : 1
MEMBER_HAD : 1
LAST_NIGHT : 1
OTHER_PRESSURE : 1
VOLUME_NEBULIZER : 2
OWN_WE : 1
GERD_VERIFY : 1
HAS_THERE : 2
AT_BEDSIDE : 1
CONVERSE_RESPOND : 1
OUTPATIENT_INP : 2
EXTREME_READER : 2
NO_ORDER : 1
WILL_HIS : 1
TO_SUBJECTIVE : 1
TIMES_ADMISSION : 1
MOBILITY_OF : 1
HIS_BICK : 1
TAKE_BECAUSE : 1
REGULATION_ANXIETY : 1
BEHAVIOR_VOLUME : 1
KNEE_DEPRESSIVE : 1
CHRONIC_HAS : 1
PATIENTS_OR : 1
MONTHS_PT : 1
MEDICAL_EVALUATION : 1
WE_DISCUSSED : 1
REVIEWED_NAME : 1
HOUR_HIS : 1
TEAM_SW : 1
IS_TAKING : 2
CHANGED_RE : 1
VETERAN_REPORTS : 1
EXACERBATION_CHIEF : 1
VA_PENSION : 1
THE_NAIL : 1
ARE_RESTRAINTS : 1
PATIENT_NO : 3
VACCINE_CONTAINS : 1
PROCEDURE_THE : 1
THAT_CBSST : 1
HIS_INDIVIDUAL : 1
NORTH_ROCK : 1
BREATHALYZER_NAME : 1
INCREASED_VETERAN : 1
HE_BE : 1
UP_HIS : 1
ONE_TOLD : 1
SINCE_ADMITTING : 1
SPIRITS_HAS : 1
LLY_WAS : 1
HE_WANTED : 1
FOLLOWING_WERE : 1
SENSATION_CIRCULATION : 1
THE_INFORMATION : 1
PSYCHOLOGIST_THAT : 1
MR_ROOM : 1
IS_EUTHYMIC : 1
THIS_RELEASE : 1
INDEPENDENCE_AND : 1
TIBC_NORMAL : 1
DISTRIBUTION_DISCUSSED : 1
HE_ME : 1
MESKENAS_MA : 1
MINUTES_VETERAN : 1
HE_IS : 9
KILL_ESTRANGED : 1
AND_SHAVE : 1
WITHIN_LIMITS : 1
OF_DURING : 1
IT_HE : 1
PRESENTING_PHYSICAL : 1
AT_NOT : 1
COPING_AMBULATORY : 1
RECOVERY_AND : 1
COPD_ICDCM : 1
WAS_STARTED : 1
NO_REFILLS : 1
BY_SUMMONS : 1
OF_COLD : 1
ASSESSMENT_ESSENTIAL : 1
FOLLOWUP_WHICH : 1
CBSST_GROUP : 1
USE_HAS : 1
PARTS_MY : 1
PT_STABLE : 1
TO_AND : 6
NOT_GOOD : 1
RELAPSED_WITH : 1
WARM_PREOP : 1
WANTING_SOCIAL : 1
PERSON_INSTRUCTED : 1
YES_IF : 1
EVALUATION_ACCESS : 1
ASSISTANCE_SET : 2
UP_IN : 2
SEEN_IN : 2
SIDE_EFFECTS : 1
ICDCM_BEST : 1
REPEAT_MONTH : 1
DIARRHEA_CHRONIC : 1
REQUIRED_MOBILITY : 1
HIS_PSYCHOSOCIAL : 1
DETAILS_DOCUMENTED : 2
BLUE_COLD : 1
BILLS_MAGAZINES : 1
THE_THIS : 1
HAD_THIS : 1
OPT_STATUS : 1
ORIENTATION_GROUP : 1
SCOPOLAMINE_OPHT : 1
NOTE_SEP : 1
REVIEW_NURSING : 1
IDENTIFICATION_IS : 1
ADDED_VOIDED : 1
PROVIDE_SOLUTION : 1
NOT_IF : 1
GROOMED_PHYSICIAN : 1
BY_WENDY : 1
FOR_PC : 1
REPORTS_COMPLETE : 1
THEY_TO : 2
THE_LIST : 1
OF_STATES : 1
PAROXYSMAL_SWEATS : 1
MEDICATION_YOU : 1
TIMES_RIGHT : 1
MIDNIGHT_MR : 1
VET_SITTING : 1
OF_CHEN : 1
WILL_REGAIN : 2
AM_PM : 1
IN_JOINT : 1
LIVING_RUPTURED : 1
TO_DISCUSSING : 1
NICOTINE_TRANSDERMAL : 1
OBJECTIVES_WERE : 1
IT_BROUGHT : 1
THOUGH_NO : 1
COMMUNITY_GOALS : 1
AGREE_RESIDENTS : 1
FLOATERS_SEE : 1
SUPPORT_TO : 2
TV_MEALS : 1
EXTRA_FLUIDS : 2
HO_WITH : 1
LOW_DESIRE : 1
VISUAL_HUDVASHNOTE : 1
IN_MONTH : 1
KG_GEN : 1
SUBJECTIVE_SEEN : 1
COMPLAINING_NOTIFICATION : 1
SAYS_HIGH : 1
CONTINUES_PRESENT : 1
AMBULATORY_TIME : 1
UPSET_ANGRY : 1
SYSTEM_PLEURITIS : 1
STIMULATED_ID : 1
UP_AS : 1
INTAKE_UPDATE : 1
IMPROVED_HAS : 1
LAST_CURRENTLY : 1
STOOL_MEAL : 1
IN_SONOGRAPHER : 1
WAS_INFORMED : 1
REFILLS_FOR : 1
CLEAR_RETINA : 1
UNABLE_WORK : 1
ADMISSION_INTERVENTIONS : 1
DOES_NOT : 2
CYST_OCCIPITAL : 1
OF_KIN : 1
GROUP_PARTICIPATION : 1
RATE_SSN : 1
PT_ACCEPTED : 1
WAS_DIARRHEA : 1
COLOR_TIME : 1
WAS_DISCUSSED : 1
PING_PROVIDED : 1
CONTINES_NOT : 1
IMPROVED_HE : 1
TEXAS_BEGIN : 1
PSYCHOSOCIAL_INCLUDING : 1
ECCHYMOSIS_AND : 1
MIN_LEVEL : 1
CONTACT_INFORMATION : 2
LEAVE_BMI : 1
WALKING_STAIRS : 1
IMPACTED_FILED : 1
YOUR_PAIN : 2
ENHANCEMENT_VETERAN : 1
INSTRUCTIONS_PSYCH : 1
INSTRUCTION_NOTE : 1
SPO_DEFAULT : 1
APPEARED_AT : 1
SURGICAL_AND : 2
THE_SHIFT : 1
THIS_PT : 2
SUSTAINING_MENTIONED : 1
COMPLETED_SHOWER : 1
SESSIONS_REMAINING : 1
FLUIDS_LUBRICATING : 1
PHQ_WITHOUT : 1
EXTREME_AGITATION : 1
NKA_MOMENT : 1
MALE_VETERAN : 1
NOT_WANT : 2
RN_NOTE : 2
AND_GOAL : 1
THE_ATTACHED : 1
OR_ANXIETY : 1
ALBUTEROL_SOLN : 1
DISCUSSED_ON : 1
VISIT_FOLLOW : 2
SHE_NO : 1
BOWELSOUNDS_ORIENTED : 1
KAUR_CR : 1
PAST_AND : 2
THIS_BUT : 1
BUT_FOOD : 1
LEARNING_HAS : 1
TREATMENT_CENTER : 2
XX_DISCUSSION : 1
OPEN_WOUND : 1
APPARENTLY_HELPED : 1
OF_GUILLAIN : 1
ML_NB : 1
UP_BOWELS : 1
ERUPTED_TOOTH : 1
ACCOMPANY_TEAM : 1
OR_AROUND : 1
FROM_JOINT : 1
OR_LONG : 1
MIN_PHONE : 1
IS_UNCLEAR : 1
ASSISTANCE_CONTINUED : 1
IF_RELEASE : 1
TO_INCREASE : 1
NOT_ELIGIBLE : 1
TIMEFRAME_FOR : 1
COMPREHENSIVE_EVALUATION : 1
ECTASIA_MUCOSAL : 1
PACKET_BID : 1
DISBELIEF_HE : 1
CALLER_AREA : 1
IT_WHILE : 1
ITEMS_MALE : 1
NEEDED_IF : 2
ARRIVAL_CHECK : 1
AND_MOVED : 1
THE_PLEASE : 1
ASSISTANCE_VETERAN : 1
CLEAN_GROOMED : 1
VETERAN_WILL : 1
LEARN_EPISOD : 1
ASSISTED_CALL : 1
DO_LAST : 1
BRIEF_NUTRITION : 1
PARENT_NO : 1
OCR_OPTICAL : 1
OVER_PERIOD : 1
SUICIDE_COORDINATOR : 1
ADDENDUM_INTRAVENOUS : 1
LAUGHING_TALKING : 1
PO_SEIZURE : 1
THEIR_LIVES : 1
STATED_HE : 5
IT_BODY : 1
AND_TOTAL : 1
AMBULATORY_OF : 1
BLADDER_PATIENT : 1
FOR_TOTAL : 1
HIS_PROBLEMS : 1
OPTIONAL_WITH : 1
INCH_NEEDLE : 1
FOOTWEAR_NECESSARY : 2
DO_NOT : 2
INCH_SPINAL : 1
AVAILABLE_DIARRHEA : 1
LENGTH_SESSION : 1
OF_WAS : 1
SOBER_THAT : 1
URINE_COLLECTED : 1
CHECK_SUGARUSE : 1
NEUROLOGICAL_ALERT : 1
VOLUNTEER_STUDENT : 1
TEAM_LEADERS : 1
BE_DISCHARGED : 1
IMAGING_DIABETIC : 1
AND_MEDICATIONS : 1
ALL_THEIR : 1
PHONE_TO : 1
PULSE_COMMENTS : 1
RODRIGUEZ_MEDICATIONS : 1
MY_AT : 1
DEPRESSED_MOOD : 1
ASSESSMENT_NORMAL : 1
COORDINATION_ID : 1
LDL_OL : 1
AND_SELLING : 1
READING_REVIEWED : 1
OF_PTSD : 1
ONLY_WITH : 1
THAT_WONT : 1
COPE_NOT : 1
ROOM_VETERAN : 1
FALL_RISK : 1
BEEN_THE : 1
MOTIVATION_NOW : 1
CALLED_AND : 1
PROGRESS_VETERAN : 2
HAVE_CONTACT : 1
SHOULDER_BURSITIS : 1
PARTS_OF : 1
SKIN_IS : 1
IDENTIFIED_BETWEEN : 1
TO_CONTINES : 1
FAMILY_WHO : 1
ANTIPSYCHOTICS_MONITORING : 1
NO_VETERAN : 1
NURSES_REVIEWED : 1
OFTEN_DID : 1
WOULD_LIKE : 1
AND_PEOPLE : 1
PATIENT_NOTE : 1
PATIENT_SEX : 1
MALE_WITH : 1
IF_BLIND : 1
ON_LIE : 1
VETERAN_HIS : 1
BY_LEVESQUE : 1
HAS_RIGHT : 1
IN_WAS : 1
BLIND_BECAUSE : 1
QUETIAPINE_TABLETS : 1
IN_SUPPORTING : 1
PURPOSE_USE : 1
GIVEN_QUESTIONAIRE : 1
IT_BY : 1
DRINKS_VETERAN : 1
DEC_NOT : 1
COPE_ONLY : 1
FOR_TREATMENT : 2
BEERS_OZ : 1
RESULTS_NOTED : 1
INITIAL_ADMITTING : 1
SOLUTION_COGNITIVE : 1
OBSERVED_ORDER : 1
IN_WAITING : 1
ASSISTANCE_NURSING : 1
BEEN_INFORMED : 1
HEPATITIS_OUTLINED : 1
REVIEWED_AGREE : 1
TIMES_SPOKE : 1
THE_ROOM : 2
IRRITABLE_WAS : 1
OF_SO : 1
COMMENTS_BEDREST : 1
TIME_STAGE : 1
DEFERRED_VETERAN : 1
TREATMENT_ATTIRE : 1
CLOSELY_MSE : 1
SHAMPOO_ORAL : 1
RIGHT_LOWER : 1
OTHER_OUTPATIENT : 1
HIM_HE : 2
PHYSICAL_REVIEWED : 1
REMAIN_IN : 2
PT_GOOD : 1
IN_DISCUSSED : 1
PROBLEM_SAFETY : 1
PNEUMOVAX_BE : 1
MSE_LIVING : 1
NEIGHBOR_PERKINS : 1
BUT_THIS : 1
YOU_APP : 1
SITUATION_ALONE : 1
ONETOONE_DISCUSSION : 1
HYPOTHYROIDISM_HYPERLIPIDEMIA : 1
OTHER_MISCELLANEOUS : 1
PATIENTS_REQUEST : 1
RETURNED_TEAM : 1
OF_HAVE : 1
REQUIRED_TRANSDERMAL : 1
WITH_TEAM : 1
DATA_PRIMARY : 1
ADM_LEG : 1
AND_IMPROVE : 1
SAFETY_WELL : 1
ORDERED_SOFT : 1
CALLED_AM : 1
YES_PACKS : 1
SEEN_YEAR : 1
NANCY_FROM : 1
RHYTHM_SSN : 1
ORIENTED_IS : 2
NUMBER_STARTING : 1
REQUIRED_INSTRUCTION : 1
BEEN_FOLLOWUP : 1
TO_ES : 1
SPOKE_TO : 2
MY_MEDS : 1
MALE_AGE : 1
OF_CASE : 1
IS_RESOLVED : 1
WERE_IN : 1
MEALS_INDEPENDENT : 1
AND_YOUR : 1
MEMBER_STRONG : 1
TREATMENT_SAO : 1
INDICATED_PROCEDURE : 1
RESCHEDULE_APPT : 1
RISK_FOR : 1
WORKED_ON : 1
AND_ADEQUATELY : 1
CHANGED_BAY : 1
BEGINNING_OF : 1
YOU_HAD : 1
INVOLVED_REFORMULATING : 1
VETERAN_NUMBER : 1
THIS_TASK : 3
TOXICOLOGY_COLLECTION : 1
NG_DIZZINESS : 1
GO_THE : 1
TIME_TO : 2
VARIATION_KEPT : 1
LISTEN_ALL : 1
WHILE_ACTIVE : 1
MEDS_UNDER : 1
INTAKE_SPEECH : 1
DOSE_OF : 1
IN_IMPAC : 2
WITH_HE : 1
WEEK_SOUGHT : 1
SW_THIS : 1
REPORTS_MY : 1
BIPOLAR_HYPOTHYROIDISM : 1
YOU_PAIN : 1
RECEIVE_MEDICATION : 1
WITH_ANTICOAGULANTS : 1
SAFETY_AND : 1
BE_AT : 1
BONFADINI_WAS : 1
MARCH_ID : 1
FLASHES_OR : 1
ACCESSED_THROUGH : 1
ASTHMA_CHRONIC : 1
AND_BACK : 1
TIME_IN : 1
FACILITY_HE : 1
FOR_BREATHING : 1
BOLUS_AS : 1
THE_AT : 1
GROUND_SUSTAINING : 1
TRIVALENT_INFLUENZA : 1
FROM_BIRCH : 1
AND_UP : 4
TO_DC : 1
THE_MEDICAL : 1
TO_FOR : 3
STOOL_FREQUENTLY : 1
ALSO_CURRENT : 1
OCR_HE : 1
IN_SHOWED : 1
PLEASE_REFER : 1
ACTIVITY_ORDER : 1
OT_SEE : 1
SELF_BEST : 1
TO_THE : 22
RETINOPATHY_SECONDARY : 1
CONTACT_ANXIETY : 1
JUDGMENT_INTACT : 1
RUPTURED_OU : 2
TO_COME : 1
ADDENDUM_THEY : 1
POSSIBILITY_WAS : 1
BECAUSE_MEDICATION : 1
WORKER_BONFADINI : 1
PULSE_PHONE : 1
CONSISTENCY_OF : 3
COMPLAINTS_BUT : 1
HER_PRN : 1
BUT_PER : 1
COHERENT_NAUSEA : 1
MOOD_INSTRUCTIONS : 1
PT_MITRAL : 1
BY_MOUTH : 5
HIM_COPE : 1
PAST_PT : 1
KILL_HER : 1
HIS_UNABLE : 1
NEEDED_AND : 1
PTT_METAB : 1
QUETIAPINE_MG : 2
SIGHT_ONE : 1
PLACED_TO : 1
BEST_EVENING : 1
TO_TALK : 1
TO_IMPROVED : 1
FLASHES_FLOATERS : 1
PLEASE_TO : 1
UNCLEAR_PCMM : 1
REGIMEN_ORDERED : 1
PT_TAKE : 1
NOTE_WOUND : 1
WAGES_HE : 1
GROUPS_OF : 1
RESPOND_SELFCARE : 1
DISCOMFORT_IN : 1
THERAPEUTIC_ENVIRONMENT : 1
AND_SET : 1
SCHEDULE_INDIVIDUAL : 1
BATHROOM_PAIN : 1
TO_APPEARED : 1
SEIZURE_PRECAUTIONS : 1
AND_THEN : 1
THIS_SUBJECTIVE : 1
THERE_TO : 1
APPLICABLE_ADDENDUM : 1
SNACKS_RISK : 1
IDENTIFIERS_PREHOSPITAL : 1
JUDGMENT_INSIGHT : 1
METHOD_USED : 1
TIME_PLACE : 1
IS_CONFIRMED : 1
SUPPORT_THIS : 1
THE_PURPOSE : 1
AGAINST_ED : 1
RESPONSES_AGAINST : 1
MG_WEEK : 1
REASON_FOR : 7
TAKE_TABLET : 3
WHICH_HELPED : 1
AND_AT : 1
MAY_FEEL : 1
UNFORTUNATE_WOUND : 1
PRIMARY_EXC : 1
USING_IDENTIFIERS : 1
AND_VOLUME : 2
ELIGIBLE_FOR : 1
MEETS_SESSIONS : 1
RESIDENT_UNSPECIFIED : 1
LIVING_ARRANGEMENTS : 1
ORDERS_RESULTS : 1
IF_TOTAL : 1
OR_PATIENT : 2
TO_DESIRE : 1
ADDENDUM_NO : 1
QUATERNARY_RAL : 1
NAME_SOCIAL : 1
MEDICARE_HE : 1
SPEECH_MOTOR : 1
AGE_DAILY : 1
RESOLVED_CLINICAL : 1
NI_GLAUCOMA : 1
THE_LABORATORY : 1
ORAL_HYGIENE : 1
NAME_ACTIVITY : 1
CLONAZEPAM_TAB : 1
APPT_FOR : 2
SEEN_FOR : 3
INCLUDING_THEM : 1
VISUAL_MHICM : 1
ACTIVE_IN : 1
NOT_BY : 1
EAR_APPROVED : 1
AND_MANAGEMENT : 1
STARTING_AT : 4
FOR_NECK : 1
TO_STAFF : 2
ALI_HEIGHT : 1
THE_THE : 3
HAVE_PAIN : 1
ONGOING_WITH : 1
OPPORTUNITY_TO : 1
MULTIPLE_SUN : 1
AGE_BRONZE : 1
FINALLY_THIS : 1
OR_SHORTNESS : 1
THAT_WAS : 1
NO_FOLLOWUP : 1
VETERAN_APPOINTMENT : 1
BUT_PERSISTENT : 1
TELEPHONE_WITH : 1
PATTERN_RESIDENT : 1
REFER_TO : 1
AVAILABLE_CHRONIC : 1
REQUIRED_ASSISTANCE : 1
IN_RANGED : 1
AND_IUD : 1
AL_TEAM : 1
OF_PATIENT : 2
RACHAEL_TOOK : 1
REFUSED_STATED : 1
THIS_HIS : 1
WELLBUTRIN_WHICH : 1
AND_HEALTH : 1
AND_FOR : 1
NEXT_VISIT : 1
YOU_IT : 1
BORROWD_RECEIVED : 1
FOR_TASK : 3
CLIENT_INTO : 1
BREAKFAST_DRINKS : 1
QUALITY_EAGER : 1
WITH_OF : 7
IMED_PHYMOSIS : 1
AND_HIM : 1
THAT_CALLS : 1
BEEN_PROVIDED : 1
NAOMI_LCSW : 1
VISITS_FOR : 2
DYES_THYROID : 1
XM_AM : 1
FOOD_NUTRITION : 1
BEHAVIOR_PATIENT : 1
AMPULE_NEBULIZER : 1
RAL_EXAM : 1
PAIN_CAPSULE : 1
TO_VETERANS : 1
INJECTION_OF : 1
OPHTHAL_OS : 1
TWO_PATIENTS : 1
MG_AND : 2
ACTIVE_ASSESSMENT : 1
AICD_SITU : 1
ORDER_SODIUM : 1
BAD_IN : 1
IMMUNIZATION_DESCRIPTION : 1
THE_WOOTEN : 1
WAS_LENGTH : 1
PRIMARY_RETIRED : 1
TO_PLACE : 1
DAILY_NORMAL : 1
PROVIDER_EVALUATION : 1
COUNTER_IF : 1
ADMINISTRATIVE_INJECTION : 1
CM_CALM : 1
DISCUSS_HISTORY : 1
AMOUNT_SIDE : 1
WONT_TAKE : 1
PRACTICING_CHANGING : 1
OTHER_HEIGHT : 1
TO_SHARED : 1
YOUR_CARE : 1
CARE_CALL : 1
ME_CELLULITIS : 1
COMPLETED_WEEKLY : 1
REPORT_DM : 1
TRIAGE_NOTE : 2
FORCING_HIM : 1
ASSISTANCE_UP : 2
PROTOCOL_LINE : 1
UP_CALL : 1
AGE_HT : 1
TO_NEVER : 1
OF_HIMSELF : 1
OPT_AS : 1
REL_YES : 1
AND_COHERENT : 1
VETERANS_PHONE : 1
YOUR_RESULTS : 1
TO_EMERGENCY : 1
GROOMED_PATIENT : 1
COMPLAINT_PAIN : 1
GOALS_HOPES : 1
WHEN_TO : 1
MEDICATION_INTERACTIONS : 1
SIMVASTATIN_MG : 2
GOING_FOR : 1
AM_BACKHAB : 1
DIFFERENT_OF : 1
EAR_STOPPED : 1
ATTACHED_CAN : 1
COMPLAINS_OF : 1
TEAM_CALL : 1
DISCHARGE_MOUTH : 1
PATIENT_WITHIN : 1
REVIEW_THE : 1
NONTENDER_IF : 1
ZIMBLEMAN_SERVICES : 1
WELL_DINNER : 1
REPAIRED_GLOBES : 1
PATIENT_CONCERNS : 1
AN_VOLUNTEER : 1
WESTERN_MEDICINE : 1
OUT_FOR : 1
WOULD_ABLE : 1
THROUGH_SUPERVISION : 1
YOUR_SIMVASTATIN : 1
REMIND_HER : 1
AM_SEND : 1
POSTINGS_SHIFT : 1
IDENTIFIED_PHONE : 1
WITH_RELIEF : 1
ACCOUNTABILITY_FOR : 1
NURSE_WITH : 1
CUTTING_MEAT : 2
SITE_JUL : 1
HAD_SORE : 1
BY_TWICE : 3
ON_ROUTE : 1
WRITER_BY : 1
AND_GOING : 1
SPONSOR_INFORMATION : 1
DM_REGIMEN : 1
TO_RESIDENT : 1
WILL_ROI : 2
AN_THAT : 1
PASSIVE_OF : 1
AMOUNT_HYOSEINE : 1
AS_PRESCRIBED : 1
ALSO_KILL : 1
BY_WAGES : 1
NOTE_INPATIENT : 1
LOCALLY_HE : 1
PRN_MED : 1
ON_LEATHER : 1
BETWEEN_TO : 1
NEEDED_WILL : 1
VAMC_THAT : 1
VETERAN_AND : 2
BASCOMPALMER_TO : 1
PLAN_CONSTANTLY : 1
IN_ROOM : 1
JOINT_SHOULDER : 1
INSTEAD_OF : 1
RATE_ASSISTANCE : 1
RETURN_TO : 1
THE_IMPROVED : 1
NONE_COMPLAINTS : 1
ILLNESS_FEELINGS : 1
AND_SOLUTION : 1
MR_IN : 1
LEVESQUE_PHONE : 1
OBSERVED_SITTING : 1
HIS_BEFORE : 1
NOT_SNACKS : 1
TO_SEXUAL : 1
MS_RBC : 1
PRIOR_OPT : 1
ME_AND : 1
MILD_CONVERSATION : 1
MOOD_OF : 1
INFLUENZA_CONTAINS : 1
LIKE_THE : 1
NONE_NURSING : 1
REVIEWED_HX : 1
AS_LONG : 1
MR_CLAIMS : 1
HOUR_OF : 1
AND_REINTEGRATION : 1
HIS_PHARMACY : 1
ANTIBIOTIC_INJECTIONS : 1
INVOLVING_KNEE : 1
VOLUME_HIS : 2
ANY_VACCINE : 1
RESPONSIBILITY_SUPERVISING : 1
DISCONNECTED_TIME : 1
FEW_OCTOBER : 1
REVIEW_IER : 1
THIS_CAN : 1
TREATMENT_PERIAPICAL : 1
WITHOUT_PATIENT : 1
NONE_ARTHRALGIA : 1
THE_FIRST : 1
MUSCLE_WILL : 1
REACTION_AND : 1
WITH_CALL : 1
XX_GUIDED : 1
MOBILITY_TOPIC : 1
THE_YEAR : 1
OPT_SAME : 1
THIS_MOBILITY : 1
HE_UP : 1
VISIT_PROBLEM : 1
PLEASE_ADVISE : 1
ON_RD : 1
IMAGE_QUALITY : 1
PAIN_TO : 1
HAD_THROAT : 1
GROUND_THE : 1
TIME_WAS : 1
UP_HE : 1
NORMAL_LIMITS : 1
AND_PHYSICIAN : 1
APPT_AND : 1
RESIDENT_ZZPATIENT : 1
HOW_OFTEN : 1
SEX_AGE : 1
NUMBER_REMIND : 1
PAINFUL_TOUCH : 1
HAS_PROVIDED : 1
ROI_THIS : 1
CONSENT_TO : 1
TO_PRIOR : 1
DEPLOYMENT_IED : 1
WAS_UNDERSTOOD : 1
BROCHURE_RIGHTS : 1
BREATH_HE : 1
MG_VOMITING : 1
FOOD_TO : 1
COLORADO_STATES : 1
DENTALLY_PT : 1
IMAGING_AT : 1
ON_MET : 1
LAST_OBSERVED : 1
LB_KG : 3
PROVIDER_TO : 1
RIGHT_RIGHT : 1
LIE_IN : 1
SWELLING_PATIENT : 1
HIS_DISCHARGE : 1
CBC_DIFF : 1
PATIENT_COMING : 1
NEXT_MON : 1
ADDRESSED_DEFERRED : 1
DIAGNOSIS_OPENANGLE : 1
WITHIN_SUPPORTIVE : 1
PRESENCE_PAIN : 1
AS_AGITATION : 1
PATIENT_ANTICOAGULANT : 1
SITE_OF : 1
FINGER_RANKINE : 1
BASAL_IS : 1
TUES_FOR : 1
TAB_IS : 1
PURPOSE_ATTENDING : 1
CONTACT_OR : 1
LOW_TEENS : 1
NONVA_PMRS : 1
MEDICATIONS_WHEN : 1
TAKING_FLEXERIL : 1
PREVIOUS_STRENGTH : 1
JOINT_INVOLVING : 1
SEEN_MINUTES : 1
OXYGEN_AFTER : 2
OF_ARRIVAL : 1
PCPA_WAS : 1
USED_NO : 1
ORTHOPTIC_ICDCM : 1
TOOK_TYLENOL : 1
NOTIFICATION_OF : 1
MIN_MH : 1
INCIDENT_LABS : 1
NPH_IN : 2
COLOR_CLEAR : 1
BUT_FOLLOW : 1
CATHETER_TYPE : 1
ME_INJECTIONS : 1
ACCOMPANY_AND : 1
VSS_VITALS : 1
HAS_VISIBLE : 1
SINCE_LAST : 1
OLD_MALE : 3
IN_PAST : 4
THIS_MY : 1
GLASSES_REVIEWED : 1
GLAUCOMA_OD : 1
FINGER_EXAM : 1
STRESSORS_INCREASED : 1
NORTH_LITTLE : 1
WITH_LAST : 1
VETERAN_ATTENDED : 1
AT_REQUEST : 1
WAS_CONVERSATION : 1
LAST_STEPS : 1
UNINTENTIONAL_WEIGHT : 1
CHANGED_LIVES : 1
AM_ORIENTATION : 1
LAST_NANCY : 1
PPD_YRS : 1
BED_EYES : 1
HEARING_TOBOGGAN : 1
UNKNOWN_PERIOD : 1
CITALOPRAM_TAB : 1
PERKINS_STATING : 1
LAMINECTOMY_FOR : 1
LEADERS_TREATMENT : 1
MR_ARRIVED : 1
SAYS_IT : 1
HAD_STABLE : 1
TOP_PACKET : 1
TO_GO : 2
YOU_HAVE : 2
ACTIVITY_WALKS : 2
QUESTIONS_ADVISED : 1
TO_IF : 1
CONCERN_RISK : 1
GLOBAL_STARTING : 1
SUPERFICIALLY_VET : 1
NOTIFICATION_ABNORMAL : 1
UNIT_BRIEF : 1
QBEDTIME_MG : 1
CALL_VETERANS : 1
BEEN_HIS : 1
SECURED_ARMBAND : 1
HYGIENE_GROOMING : 1
ARM_NEBULIZER : 1
TELEPHONE_CONTACT : 3
MR_HAIR : 1
WAS_LAST : 2
WITH_BPD : 1
OTHER_MEMBERS : 1
CONTENT_WITH : 1
TO_MG : 1
NURSE_HOME : 1
REACTION_SUCH : 1
IN_DESIRE : 1
BUT_ALSO : 1
LITERATURE_GIVEN : 1
LOUD_THREATENING : 1
TOTAL_OVERWEIGHT : 1
CONTENT_SAYS : 1
TO_VERIFIER : 1
CARE_OTHER : 1
OF_THESE : 1
RETURNED_LEADERS : 1
MENTAL_HEALTH : 2
FINE_PT : 1
AWAY_FROM : 1
NEBULIZER_BY : 1
ABILITIES_PATIENT : 1
OF_TEST : 1
SOURCE_FOR : 1
USES_USED : 1
NO_TOTAL : 2
WILL_ASK : 1
FLORIDE_ORAL : 1
IN_SESSION : 1
BE_ON : 1
RESPQH_WHILE : 1
PATIENT_PHONE : 3
ST_CLINIC : 1
OUTPT_THE : 1
SHE_MENTIONED : 1
AND_FEVER : 1
SUSTAINING_SHE : 1
ID_INFLUENZA : 2
ROCK_RETURN : 1
TAKING_NONVA : 1
TO_DETERMINE : 1
TO_PARTICIPATE : 2
RECOVERY_OPPOSED : 1
SEROQUEL_PO : 1
SMOKING_TOTAL : 1
PROGRAMGROUP_THERAPY : 1
VETERAN_NAME : 1
ORAL_PATIENT : 1
LISTED_FOR : 1
LETTER_MAILED : 1
YEAR_OLD : 2
TOILET_DESCRIBED : 1
WILL_REQUIRE : 1
MEDS_CARE : 1
NOT_NUTRITION : 1
OF_NAPPING : 1
NOV_PATIENT : 1
RESTRAINTS_IN : 1
GIRLFRIEND_WAS : 1
HAIR_BOWELS : 1
INCIDENT_IT : 1
INCREASED_PULSE : 1
APPOINTMENT_BUSPIRONE : 1
IS_FOR : 3
TO_NEW : 1
PATIENT_DOB : 1
RADIATION_THERAPIST : 1
GROUP_THE : 1
WERE_PRIOR : 1
THE_AMOUNT : 1
AND_MILIEU : 1
POSTOP_DIAGNOSIS : 1
COHERENT_AND : 1
HIS_CALLS : 1
UNDER_DEC : 1
INJECTIONS_PATIENT : 1
LIFE_AND : 1
YOUNG_NO : 1
ASSESSMENT_SPEECH : 1
CONTINUE_DIURETIC : 1
OTHER_AREAS : 1
NOTE_ALLERGIES : 1
SIDE_OF : 1
THE_CLINICIANS : 1
ANY_STRESSORS : 1
INTERACTIONS_SUPPORT : 1
ADMISSION_DATE : 1
REQUEST_HIS : 1
DIZZINESS_SEE : 1
TO_HIMSELF : 1
LABS_AGREE : 1
RESULTS_REVIEWED : 1
KNEE_MEDIAL : 1
SW_BREATH : 2
IN_NOVEMBER : 1
DID_GOOD : 1
WITHIN_THE : 2
INTRAORAL_EA : 1
IMMUNIZATION_ADMINISTERED : 1
FOR_ICE : 1
AT_SET : 1
HIS_CURRENT : 1
NORMAL_RATE : 3
IMPAIRMENT_READING : 1
OTHER_ALBUTEROL : 1
INFUSE_OVER : 1
INVESTMENTS_THEN : 1
AND_DINNER : 1
REMIND_HIM : 1
ORIENTATION_ORIENTED : 1
FOLLOWING_IMEDCONSENT : 1
TTE_IN : 1
MR_HAS : 1
GROUP_MEMBERS : 1
SUPPORTIVE_PSYCHOTHERAPY : 1
MATERIAL_VISUAL : 1
PLAN_WERE : 1
DATE_TIME : 3
TO_RECHECK : 1
INTO_AM : 1
LAST_IS : 1
DANE_THERE : 1
BETTER_IN : 2
STATUS_DOES : 1
PATIENT_AGREED : 1
PATTERN_PATIENT : 1
HAVE_WELL : 1
HE_TOTAL : 1
AND_MANAGING : 1
CONSENT_OBTAINED : 1
ICDCM_ESSENTIAL : 1
MOVEMENT_TAKEN : 1
WEARING_DENIES : 1
LIKES_FLICK : 1
ANY_OR : 2
AND_VASCULAR : 1
MINUTES_INJECTION : 1
GLUCOSE_PLASMA : 1
HEALTHY_BROCHURE : 1
SITE_PAIN : 1
SHOULD_RECEIVE : 1
RESPIRATION_AND : 1
SESSION_NOTE : 1
CLC_ACTIVITIES : 1
THEM_NEEDLESSLY : 1
ISSUES_ONGOING : 1
OF_NOTIFICATION : 1
TOENAIL_SPECIAL : 1
CLOSELY_COOPERATIVE : 1
PAIN_SYMPTOMS : 1
AT_BASCOM : 1
THEN_IN : 1
ACCEPTED_THIS : 1
ABSCESS_OF : 1
THE_WRITER : 1
THEN_MOVED : 1
OR_ELECTRONICALLY : 1
PROD_SAYS : 1
NONE_NOT : 1
MEDS_OR : 1
INFECTION_THE : 1
VAMC_CONTRACEPTION : 1
COUGH_ADDENDUM : 1
PPD_ANERGY : 1
PULLING_FOR : 1
SPECIMEN_RECEIVED : 1
DISORDER_DEPRESSED : 1
PLAN_DOB : 1
CALM_PNEUMOVAX : 1
IPRATROPRIUM_AS : 1
CHILD_REFERRAL : 1
CONTINUES_NOT : 1
SCHEDULE_THE : 1
HIS_PCPA : 1
SPIRITS_SAYS : 1
AID_TOBOGGAN : 1
SESSION_SEE : 1
TO_WELL : 1
SEES_THERE : 1
KNOW_HE : 1
NECESSARY_YO : 1
SUMMONS_PATIENT : 1
TYLENOL_THE : 1
HE_SX : 1
APPARENTLY_VETERAN : 1
VET_SEEN : 1
FOR_THIS : 3
AND_OR : 2
HOSPITAL_THEY : 1
SAFETY_CHRONIC : 1
THIS_ASSISTANCE : 1
LEGS_FEET : 1
IS_OF : 2
OF_VISION : 1
MONITOR_SP : 1
SUPERVISION_WITH : 1
UNCONSCIOUS_AN : 1
PATCHES_MILD : 1
QH_PULSE : 1
SYND_ASK : 1
OCCIPITAL_TIME : 1
THE_ELIMINATION : 1
WHEN_MOVING : 1
OF_HE : 1
NURSE_INTRAOPERATIVE : 1
HIS_MAIL : 1
OTHERS_CARE : 1
ME_THE : 1
INPATIENT_NO : 1
PROBLEM_THE : 1
SYSTEM_SUICIDE : 1
AND_EXERCISE : 1
ENTERING_BURNING : 1
PM_FLUID : 1
PATIENT_CONTINUE : 1
CLINIC_OF : 1
VETS_TOXICOLOGY : 1
EYE_HYGIENE : 1
LB_THOUGHT : 1
MON_TO : 1
STATED_LORAZEPAM : 1
VERIFIER_ESIG : 1
NAME_TREATMENT : 1
COLORADO_IN : 1
RETURNED_THEN : 1
VETERAN_DEPRESSIVE : 1
INCLUDING_MG : 1
OPENANGLE_GLAUCOMA : 1
DCD_OFF : 1
INR_XXNO : 1
PATIENT_STAFF : 1
VETERAN_ORI : 1
ULTRASOUND_MONTGOMERY : 1
SC_DOCUMENT : 1
UPPER_BACK : 1
PATIENT_SELF : 1
NG_SESSION : 1
BE_FOR : 2
HAD_DRAWN : 1
GIVEN_PART : 1
REFLECT_PATIENT : 1
OR_INCREASED : 1
UDS_CONFIRMED : 1
BAKER_CONTACT : 1
DO_ONE : 1
TREATMENT_OF : 1
AND_UNABLE : 1
BARBARA_SISTER : 1
IS_SEES : 1
AS_MAIL : 1
TABLET_BY : 3
VISIT_AMPULE : 1
MCHC_CC : 1
ET_HE : 1
TRANSFERS_LIKE : 1
NEBULIZER_RESULTS : 1
DX_ERUPTED : 1
CONTAINS_ONLY : 1
VA_OFFICERS : 1
TOLERATE_HE : 1
TAKING_HIS : 1
FOR_ANY : 1
THE_PERPETUATION : 1
SHARED_ARRANGEMENTS : 1
HGAC_TO : 1
PATIENT_SEEN : 1
HENNESS_LAST : 1
NURSES_WAS : 1
PARTICIPATED_THE : 2
OLD_PATIENT : 2
NEEDED_MAINTAIN : 1
DRAWN_TO : 1
EYE_TO : 2
RECORD_OF : 1
MEDICATIONS_PHONE : 1
HX_HX : 2
THE_ST : 1
SOBER_AND : 1
STOOL_THIS : 1
PHYSICIAN_RED : 1
HIS_NO : 1
BURNING_OF : 1
TO_ACTIVE : 2
PSYCHIATRICALLY_HE : 1
DURING_YOUR : 1
ASSESSMENT_FUNCTIONING : 1
DEVICES_MOBILITY : 1
BED_WAS : 1
CLIENT_TO : 1
ECCHYMOSIS_IS : 1
PATIENT_NEED : 1
LCSW_CONTACT : 1
WAITING_AND : 1
EMERGENCY_YES : 1
HYPERLIPIDEMIA_ORIENTATION : 1
SUICIDE_PREVENTION : 1
CLINICIANS_AND : 1
ENTER_THEM : 1
SENT_PSYCHOLOGIST : 1
GAUGE_INCH : 1
OPTIONS_REVIEW : 1
AGREE_WITH : 1
SOUNDS_DECREASED : 1
SUPERVISED_URINE : 1
REDNESS_PATIENT : 1
ME_AT : 1
YES_MUCH : 1
PRECAUTIONS_CAP : 1
SIDE_NEBULIZER : 1
BASCOM_PALMER : 1
CHIEF_OF : 4
SCHEDULED_HISTORY : 1
GIVEN_NURSING : 1
OVERWHELMED_THIS : 1
EYE_INSTITUTE : 1
GOING_THERE : 1
ENTER_AS : 1
OF_GET : 1
MEDICALLY_HAS : 1
PROPHYLAXIS_DX : 1
ORGANIZED_GOAL : 1
PHARMACY_INSTRUCTIONS : 1
PAM_RT : 1
NO_AND : 1
DISCHARGED_WITHOUT : 1
IS_SMOKER : 1
NOTE_ID : 1
OUTPATIENT_SALT : 1
INR_SMOKER : 1
TO_PATIO : 1
CENTER_COMMUNITY : 1
LOW_PAIN : 1
SITE_OTHER : 1
AND_WRITTEN : 1
ORIGIN_CARE : 1
AT_CONVERSATION : 1
BECOME_PT : 1
MEDICATIONS_HISTORY : 1
DEPRESSION_RESP : 1
MEDICATION_IS : 1
REASONS_FOR : 1
HAIR_THE : 1
PT_SKIN : 1
APPEARS_VETERAN : 1
JUL_MINUTE : 1
PROBLEMS_HE : 1
DEPRESSION_NOT : 1
IN_WITH : 3
PLACED_DEC : 1
WILL_ANOTHER : 1
FOR_OF : 3
WOULD_TO : 1
PAIN_HAS : 1
FOLLOWING_TREATMENTS : 1
LS_AM : 1
HOW_DO : 2
AT_ANOTHER : 1
CARE_CENTER : 1
HIS_VETERAN : 1
BEDREST_BEHAVIOR : 1
KNEE_SENSORNEUR : 1
WORKED_HE : 1
ANNUAL_SCREENINGT : 1
STATES_THAT : 1
MEMBER_WHO : 1
LIVES_IN : 1
AND_SCHEDULED : 1
ONEHALF_BY : 1
SUPPORTIVE_LEARNING : 1
ENTIRE_ASSESSMENT : 1
IN_PULSE : 1
READY_VISIT : 1
FEELINGS_STATES : 1
ACTIVITIES_AND : 1
WITH_PATIENT : 8
FOR_ANOTHER : 1
IMMUNIZATION_ASSESS : 1
ABD_PT : 1
WERE_TO : 1
NEEDED_PROVIDER : 1
INCREASED_SHOULDER : 1
SKILLS_NEEDED : 1
WANT_LISTEN : 1
SUPERVISION_BPD : 1
PHARMACIST_MEDICATION : 1
TAB_THIAMINE : 1
BY_BASCOM : 1
REASONS_ASSESSMENT : 1
VSS_LAST : 1
AT_PLAN : 1
ASSESS_FALL : 1
IMPORTANCE_NOTIFYING : 1
FOR_AFIB : 1
NB_WHILE : 1
GM_INHALE : 1
GERD_PARTS : 1
TO_TMD : 1
OF_ADJUSTMENT : 1
NIGHTTIME_INCLUDING : 1
STUDIES_WERE : 1
VETERAN_PURPOSEFULLY : 1
AND_APPROPRIATE : 1
RESULT_DL : 1
OS_ATTEMPTED : 1
IS_AFFECT : 1
GAVE_NEBULIZER : 1
POSTINGS_THIS : 1
CHANCE_TAKE : 1
THE_LOW : 2
GAF_NO : 1
ALSO_TO : 2
CONTACT_PUBLIC : 1
DISC_MACULA : 1
TO_PUT : 1
RESULTS_OLANZAPINE : 1
ORDER_WAS : 1
THE_CIGARRETTE : 1
OR_NURSES : 1
STUDENT_WAS : 1
PT_MIN : 1
BURNING_THE : 1
IN_OR : 1
NONVA_UNDER : 1
PREMIX_SOLN : 1
FOR_IV : 1
FOR_AN : 1
THEY_DO : 1
OFF_ENROLL : 1
FROM_GUNSHOT : 1
NEEDS_ADJUSTING : 1
FACT_CLC : 1
ABILITY_INDEPENDENTLY : 1
IF_WHEN : 1
BASIC_PANE : 1
TO_REQUIRED : 1
GET_OUT : 1
REFERRED_TO : 1
NEGATIVE_LOOK : 1
CHIEF_PT : 1
AMBULATION_SELF : 1
HE_ATTEMPTED : 1
ANTIPLATELET_MAKES : 1
IDENTIFIED_TO : 1
PROCESS_THE : 1
EASILY_RAL : 1
SUPPLIES_THEM : 1
WOULD_WHEN : 1
WAS_MORE : 1
ATTEMPTED_TELEPHONE : 1
UP_BY : 1
WITH_NO : 2
EXT_TO : 1
TEACHING_METHOD : 2
AS_PER : 1
NOT_EVALUATION : 1
INSIGHT_INTACT : 1
BY_PCPA : 1
OF_TRANSFERRED : 1
APPROPRIATE_AND : 1
AMBULATORY_AID : 1
PNEUMOVAX_TO : 1
ON_WHILE : 1
URGENT_CARE : 1
HISTORY_GUILLAIN : 1
COUGH_COMPUTERIZED : 1
THAT_WOULD : 2
RACE_BLACK : 1
FOCUSING_SPECIFY : 1
PHYSICAL_DIAGNOSIS : 1
SP_AND : 1
RESULTS_RECEIVED : 1
RADIATION_TREATMENT : 2
TOTAL_DATE : 1
SICHERER_MD : 1
NEXT_APPOINTMENT : 2
MEDICARE_NUMBER : 1
PUFFS_DOB : 1
VAMC_USES : 1
HIS_TREATMENT : 1
HIMSELF_WENT : 1
PROGRAM_HAD : 1
THE_HOURS : 2
LIVE_INDEPENDENTLY : 1
ALTERNATIVE_OUT : 1
TOPIC_IBUPROFEN : 1
MASS_THE : 1
LEGEND_OPT : 2
LOS_DX : 1
TH_PM : 1
DX_BLIND : 1
IS_NONSLIP : 2
FREQUENTLY_TURGOR : 1
FIRST_EPISODE : 1
OF_MOVEMENTS : 3
COMPLAINT_PT : 1
LIN_CHIEF : 1
PATH_WILL : 1
THE_TO : 3
HIMSELF_HE : 1
NORMAL_SENSATION : 1
AND_HYPERLIPIDEMIA : 1
IS_NEEDED : 1
GROUP_INTERDISCIPLINARY : 1
AM_REG : 1
PENDING_MEDICATIONS : 1
POSITION_PATIENT : 1
AND_TIME : 2
NURSING_DATA : 1
REFLECT_WHAT : 1
VIRUSES_IT : 1
CREATININE_GLUCOSE : 1
WERE_COMPLETED : 1
SUSPECT_ENSURE : 1
TRANSFERRED_THE : 1
CAUSING_MINERALIZATION : 1
HOWEVER_AND : 1
BACK_AND : 1
INFORMATION_INTRAVENOUS : 1
ACTIVE_FL : 1
VISUAL_YES : 1
FOR_RETINOPATHY : 1
WEARS_BRIEF : 1
WAL_ED : 1
IN_GOOD : 1
LIVING_SITUATION : 1
HAS_OF : 1
NO_HYGIENE : 1
IN_ONE : 1
PT_DID : 1
MOVE_TEXAS : 1
THAT_RADIATES : 1
OF_DAILY : 1
DOB_JUL : 1
THAT_ATTEMPTED : 1
VA_OPT : 1
CONTROLLED_PATIENT : 1
TOUCH_CELLULITIS : 1
OXIMETRY_COMMENTS : 1
AGE_ACTIONS : 1
DOES_GET : 1
WELL_FOOD : 1
HE_FOOD : 1
UNIQUE_IDENTIFIERS : 1
HAD_DISCOMFORT : 1
ADDENDUM_CALL : 1
NO_ADVERSE : 1
IN_NOTED : 1
SIGHT_IN : 2
AND_DISEASED : 1
GROUP_THERAPY : 1
STAFF_DESTRUCTION : 1
LIST_AND : 1
OF_GROUP : 1
RETURNS_FOR : 1
HL_QUESTIONS : 1
GAF_SCORE : 1
IN_NEEDS : 1
HISTORY_HBPC : 1
SHOULDER_IN : 1
RUN_RD : 1
THE_INCIDENT : 1
SYSTEM_PREVENTION : 1
VISIT_BY : 1
SUCH_REDNESS : 1
USER_PDD : 1
PATIENT_RESPONSIBILITY : 1
IS_WHO : 1
PROBLEM_WHEN : 1
COMMON_COLD : 2
STOOL_ASSISTANCE : 1
NONE_PATHOLOGY : 1
ADV_GLAUCOMA : 1
HOW_HAVE : 1
HE_ASSESSMENT : 1
SYNCOPE_SPOKE : 1
HAS_RESTING : 1
AT_GET : 1
YOU_RECEIVE : 1
AS_NEEDED : 2
SAY_HE : 2
WENT_OVER : 1
THIS_SET : 1
SESSIONS_NUMBER : 1
COMES_AS : 1
QUESTIONAIRE_TOOL : 1
THE_NO : 2
ORDERS_INITIAL : 1
ATIVAN_PO : 1
INSTRUCTIONS_FOR : 1
FOR_ZZPATIENT : 1
AN_INTAKE : 1
GO_TO : 2
NO_BUTTERFLY : 1
RIGHT_CHANGING : 1
ONGOING_SUPERVISION : 1
HE_SAID : 2
STAFF_ME : 1
OPTOMETRY_RECORD : 1
FOR_SEPTIC : 1
CHO_DATE : 1
FOR_PT : 3
HEAR_LOSS : 1
AND_DIRECTED : 1
DERM_MALAR : 1
DISORDER_WITH : 1
WITH_EYES : 1
DIRECTIVES_THE : 1
TREAT_SAME : 1
OF_EVENING : 1
IADLS_THIS : 1
SPECIMEN_OCT : 1
BUTTON_WITH : 1
FROM_AL : 1
VITAL_SIGNS : 1
PAINPELVIS_PAIN : 1
THROUGH_TRANSFERS : 1
RETURN_CALL : 1
OVERWEIGHT_YOUNG : 1
HIS_PART : 1
IN_TREATMENT : 1
INTAKE_STAFF : 1
LIVING_GLOBES : 1
LAST_FROM : 1
PROBLEMS_GICOLONOSCOPY : 1
AND_SEVERE : 1
AND_WANTING : 1
AND_WHO : 1
IS_ASSISTANCE : 1
RISK_ON : 1
VET_ID : 1
SHOWER_WITH : 1
INSTRUCTION_NONE : 1
MEDICATIONS_RETURNING : 1
ONSET_HE : 1
AM_HIM : 1
TO_LEARN : 1
PROVIDER_ING : 1
AND_VERY : 1
YES_YES : 1
VITALS_RR : 1
FAR_YOUR : 1
ARE_SLOWLY : 1
HIS_STRESSORS : 1
PER_PRECAUTIONS : 1
ACKNOWLEDGED_THAT : 1
REFERRAL_TUBEFEEDING : 1
MONEY_FROM : 2
JUL_POLLEN : 1
THEY_UP : 1
TWICE_CHECK : 1
YOUR_TO : 1
AWAY_OTHERS : 1
NEEDED_ING : 1
DISTRESS_NOTED : 1
NECK_SHOULDER : 1
ON_IT : 1
MALE_BIPOLAR : 1
MOOD_SUPERFICIALLY : 1
PHARMACY_DISCHARGE : 1
PATIENT_NUMBER : 2
AND_CARE : 2
WAITING_FOR : 1
HAS_STAYED : 1
INFORMATION_OUTPATIENT : 1
REHAB_PROGRAM : 1
PERSON_WALKS : 1
FOOD_NONE : 1
WERE_BY : 1
MIN_VISIT : 1
SORE_THROAT : 1
CHANGES_INCLUDING : 1
HIP_ARTHRALGIA : 1
YOU_CHOOSE : 1
RIGHT_HIP : 1
WBCS_NANCY : 1
HOME_PHYSICIAN : 1
AT_RECEIVED : 1
WALKING_ON : 1
NO_URGES : 1
GLOBES_HE : 1
SUPPORT_FAMILY : 1
COMMON_TO : 1
AND_WAS : 4
ASK_QUESTIONS : 1
CAPSULE_NORMAL : 1
YOU_PRIMARY : 1
CLIENT_GOES : 1
AND_TECHNIQUE : 1
ED_MS : 1
WITH_VERBAL : 1
PATIENT_GUARDIAN : 1
TO_REL : 1
BOTH_NON : 1
NEEDED_OF : 1
COMMENTS_PATIENT : 1
NOTE_IDENTIFIED : 1
CM_AID : 1
WITH_WHEN : 1
PH_NI : 1
WILL_FOLLOW : 3
FOR_BIRCH : 1
UNSPECIFIED_WOUND : 1
OTHER_PROCEDURE : 1
BECOME_RETURNS : 1
FRI_MAY : 1
LONG_HISTORY : 1
NOTED_BY : 1
BECKLEY_IN : 1
TO_DEST : 1
RIGHT_LEG : 1
FOLLOWUP_WITH : 1
MD_BY : 1
CONTACT_TELEPHONE : 1
BILAT_PAIN : 1
CONTACTED_TO : 1
NEBULIZER_WITH : 1
CHRONIC_ICDCM : 1
GROW_LARGER : 1
ICDCM_KUSHWAHA : 1
ANXIETY_CONTACT : 1
VOLUME_CONTINENT : 1
THE_MCGUIRE : 1
ICDCM_YOUNG : 1
RECEIVING_OTHER : 1
NOTED_THE : 1
OF_EVENT : 1
PATIENT_BE : 1
TOUCH_ME : 1
ORDERED_ADMINISTER : 1
OF_TREATMENT : 1
OUT_MEDS : 1
SMOKER_XXNO : 1
TO_APPT : 1
POSSIBLE_VASCULAR : 1
VETERAN_ASSISTED : 1
DISCIPLINARY_ACTIONS : 1
DISCUSS_CLINICAL : 1
FOR_STRONGER : 1
HER_STRONGER : 1
NOTED_AT : 1
HAS_MR : 1
HOME_OF : 1
ENVIRONMENT_THE : 1
RIGHT_SIDE : 1
ANY_OTHER : 2
GIVEN_VERBAL : 1
HIS_SKEPTICISM : 1
ADVANCED_DIRECTIVES : 1
BLIND_REHAB : 1
ORTHOPTIC_TRAINING : 1
PACKS_PER : 1
BY_TEAM : 1
STARTED_REMERON : 1
PUT_TO : 1
FRI_ST : 1
OTHER_PERSONAL : 2
TO_FINGER : 1
FROM_HIM : 1
HE_DID : 2
COMMENTS_PPD : 1
OR_EASILY : 1
PRN_NO : 1
FASTING_IN : 1
AND_IPRATROPRIUM : 1
VISIT_MR : 1
NOTED_KNEE : 1
IS_ALERT : 1
IDENTIFIES_THE : 1
WATCHING_MOVIE : 1
OF_OUTCOME : 1
VET_FEEL : 1
CHEW_AT : 1
BEING_PS : 1
HOW_PT : 1
AND_APPEARED : 1
BUT_VERY : 1
HYPOKINESIS_STARTING : 1
IN_MY : 1
REQUIRES_ASSISTANCE : 2
NO_BE : 1
DISTRIBUTION_REVEALED : 1
PLAN_DISCUSSED : 1
THE_PRIMARY : 2
POSITIONING_TO : 1
MONITORING_SOBER : 1
SUBJECTIVE_CHIEF : 1
IS_DUE : 1
WAITING_AREA : 1
SUCH_SC : 1
CLEAR_PULMONARY : 1
FOLLOWING_CLINICIANS : 1
SENSORNEUR_HEAR : 1
PROGRESSING_INDEPENDENCE : 1
ONE_TIME : 1
THEY_SET : 1
LOSS_COMBIN : 1
OLANZAPINE_SO : 1
TO_INTRODUCED : 1
OUTPATIENT_INCLUDING : 2
OF_TEMPER : 1
WT_LB : 1
LEFT_MEDIAL : 1
THIS_CASE : 1
TO_HEALTH : 1
VA_JUSTIFICATION : 1
CARE_NO : 2
PREFERENCE_PRINTED : 1
AND_TOPICAL : 1
HAS_COMPLAINT : 3
COMBIN_DOING : 1
NO_EDEMA : 1
STATES_IT : 1
KUWAIT_PATIENT : 1
REFILLING_MEDICATIONS : 1
BODY_INDEX : 3
TO_LOOK : 1
OCCUPATIONAL_AREA : 1
FOR_COMPLETE : 1
RIGHT_AND : 1
STARING_SPACE : 1
STATES_THEY : 1
IN_AS : 1
SOB_NO : 1
HER_ESTRANGED : 1
PAST_COUGH : 1
PICK_CHEW : 1
ARE_ORDER : 1
STUDENT_ABOUT : 1
PT_DCD : 1
DRYER_BRC : 1
GOING_OUT : 1
SISTER_HIP : 1
UP_WITH : 1
PERTUSSIS_IMMUNIZATION : 1
HEADACHES_AND : 1
PAROXYSMAL_OBSERVATION : 1
PM_USED : 1
MEDICATION_CHOOSE : 1
RELEIF_FOR : 1
ANTOINE_BERNARD : 1
GUIDED_OTHER : 1
NL_OU : 1
PERSONAL_HYGIENE : 2
SHAVE_SELF : 1
CAPILLARY_LESS : 1
VETERAN_LLY : 1
YOU_PAROXYSMAL : 1
FOR_DEAR : 1
PLAN_BURNING : 1
PERSISTENT_MENTAL : 1
SIGHT_PT : 1
HIM_SEPTEMBER : 1
HER_HUSBAND : 1
DRINKS_WENT : 1
AN_UNDERSTANDING : 1
TO_MAINTAIN : 1
ANYTHING_CAN : 1
CENTER_EXT : 1
SCHEDULING_AM : 1
COLD_STATES : 1
ARMBAND_NVI : 1
IOP_TEENS : 1
THERAPY_MR : 1
THE_RTC : 1
OPT_ISSUED : 2
BUT_NOT : 1
LOCATION_THIS : 1
TOTAL_MG : 1
IN_CIRCUMSTANCES : 1
PM_BILATERAL : 1
OF_SYND : 1
HAD_SPOKEN : 1
PM_BY : 1
NURSES_NOTE : 1
DESTRUCTION_CLIENT : 1
NOTIFYING_NON : 1
PHYSICIAN_SEE : 1
ALLERGIES_AS : 1
MON_HE : 1
NOTE_MEDICATION : 1
WITH_BIPOLAR : 1
BOTH_THIS : 1
TO_INDEPENDENTLY : 2
AND_OCCUPATIONAL : 1
FOREARM_INJECTED : 1
REASON_VISIT : 3
STAFF_MORNING : 1
TREATMENT_ADDENDUM : 1
NOR_BRUISING : 1
HAS_THE : 1
WAS_CONDUCTED : 1
PT_ADVISED : 2
HOME_HAD : 1
MONITOR_PER : 1
NOTES_AND : 1
AGREES_THE : 1
STRSOME_STATE : 1
ENVIRONMENT_LEARNING : 1
INFORMATION_KLONOPIN : 1
BP_FIND : 1
TWICE_FOR : 1
PUT_ME : 1
WILL_TIME : 1
FROM_IRAQ : 1
IN_RESPIRATION : 1
HAS_HAD : 2
OF_AGE : 1
PANE_URINE : 1
OSPITAL_SPONTANEOUS : 1
CONTINUES_TO : 3
NUMBER_LS : 1
PT_WORKING : 1
APPROPRIATE_IS : 1
CLEAR_FOLLOWING : 1
COUGHING_INFUSE : 1
RATE_YOUR : 2
ON_THE : 8
ONE_EYE : 1
SOBER_DUE : 1
AND_DESAT : 1
AGE_STAR : 1
ORIENTED_MOBILITY : 1
RHYTHM_AND : 2
APPROPRIATE_VISIT : 1
SEES_PRIV : 1
JUST_STARING : 1
BLADDER_BOWELS : 1
TO_HELP : 1
BECAUSE_HE : 2
VISIT_POTENTIAL : 1
AND_CIRCULATION : 1
FROM_FRIENDS : 1
OF_THE : 12
BACK_IS : 1
PHYSICAL_POSTOP : 1
THANKS_OCCUPATION : 1
RESPONSIBILITIES_AN : 1
ELIMINATION_AMOUNT : 1
ADVANCED_DIRECTIVE : 1
SAFETY_MEDICAL : 1
APPLICABLE_YOUR : 1
REPORTED_HE : 1
TIME_DATE : 1
HIM_FORCING : 1
FOR_ASSESSMENT : 1
WOKE_HIM : 1
MCGUIRE_COLON : 1
OS_GOAL : 1
STARTED_ON : 1
HISPANIC_NOT : 1
EPISODE_HIM : 1
BEST_TO : 1
CP_SOB : 1
HAS_CHIEF : 5
TO_NEXT : 1
IN_PRIMARY : 1
CONVERSATION_SPOUSE : 1
MODERATE_VETERAN : 1
AND_REVIEWED : 1
ENTERED_BY : 1
MECHANISMS_AMBULATORY : 1
BASIC_METAB : 1
SOFT_SURROGATE : 1
PHARMACY_RECORDS : 1
SEND_MONITORING : 1
RESPQH_ACTIVE : 1
PT_HE : 4
AS_SUCTIONING : 1
SO_FAR : 1
TALKING_ALL : 1
MANY_BUT : 1
AND_TREATMENT : 1
TURN_TOMORROW : 1
APPROPRIATELY_STIMULATED : 1
TREATMENT_AGE : 1
SKIN_URINE : 1
ASK_AND : 1
WITH_HIS : 5
SOCIALIZATION_AND : 1
CALL_CLINIC : 1
ENERGY_EDUCATED : 1
AGAIN_ON : 1
INSTRX_THE : 1
MEDICATION_ADENOSINE : 1
DETERMINED_INPATIENT : 1
WHILE_PULLING : 1
SEE_INTIAL : 1
STAYING_AND : 1
MENTAL_INCLUDING : 1
PARTICIPATION_XACTIVE : 1
PREVENTION_COORDINATOR : 1
TIMES_NUR : 1
PLAN_YES : 1
EDUCATED_ABOUT : 1
TOILET_FOR : 1
SMOKING_PATIO : 1
MG_TO : 1
CC_LOT : 1
SHORTNESS_BREATH : 1
WE_WAYS : 1
PAIN_INCISION : 1
COMPLETED_HIS : 1
INTO_THE : 2
SURGICAL_PROCEDURE : 1
DISCUSSION_TO : 1
INFLAMMATION_FOCAL : 1
HYPERLIPIDEMIA_HYPERTENSION : 1
VISUAL_IMPAIRMENT : 1
RETURNING_HOME : 1
RATIVE_DISORDER : 1
HE_OF : 3
HE_AT : 1
VISTA_MAY : 1
ATTENDING_NOTE : 1
COMMENTS_LIPOMAS : 1
PROCESS_LOGICAL : 1
FRIENDS_COWORKERS : 1
ELMI_VSS : 1
VERIFY_PT : 1
THIS_AUTHOR : 1
ORIENTED_TO : 1
IN_PHARMACY : 1
WHERE_HE : 1
FLICK_BICK : 1
THEIR_ALL : 1
THERAPY_REGARDING : 1
COLD_VITAMINS : 1
BASCOM_DISCUSSED : 1
EVENING_WRAP : 1
VERTIGO_EPISOD : 1
THE_RX : 1
MINUTES_SUPERVISED : 1
CALL_NORMAL : 1
GET_SUPPORT : 1
AS_SWELLING : 1
SW_SOUNDS : 1
TOUCH_UNABLE : 1
MEMBERS_GROUP : 1
HOPEFUL_AND : 1
ENSURE_PATIENT : 2
UP_AND : 1
CHANGING_POSITION : 1
HAS_HEALTHY : 1
THERAPIST_NOTE : 1
AMITRIPTYLINE_WELL : 1
HEAR_COMBIN : 1
NOTE_INDICATION : 1
COOPERATIVE_FAIR : 1
NURSE_CARE : 1
MEDICATIONS_VISTA : 1
INDEX_MILD : 1
MAR_NOT : 1
LETTER_THE : 1
FOR_RECOVERY : 1
BY_PHONE : 1
WAL_OF : 1
THE_SEVERAL : 1
NOTE_TREATMENTS : 1
INFORMATION_PROBLEM : 1
CC_INFLUENZA : 1
TESTICULAR_MEDICAL : 1
THEY_TAKE : 1
TO_LTG : 1
TO_CODE : 1
IS_INR : 1
ANOTHER_MONITORING : 1
GO_LABS : 1
HAS_HIS : 1
INSTRUCTION_WAS : 1
TAB_OF : 1
WOUND_THE : 1
PLACED_CALL : 1
MORPHINE_TAB : 1
AT_PHONE : 1
ON_STAIRS : 1
PAIN_IN : 3
HE_REVIEWED : 1
AND_TITRATE : 1
CARRY_NO : 1
HELPED_THE : 1
FRACTURE_ADOLESCENCE : 1
CC_HPI : 1
TRANSFERRED_FROM : 1
PATCHES_DEC : 1
STATE_HE : 2
OUTPATIENT_PROGRAMGROUP : 1
CLINICAL_FACILITY : 1
TYPE_OF : 2
CALLED_FOR : 1
BEEN_TAKING : 2
STAGE_DISTRIBUTION : 1
FEELING_DESCRIBED : 1
SET_ANOTHER : 1
NONE_HIP : 1
AIDS_NEEDED : 1
WHEEZING_ABDOMEN : 1
QUIETLY_THE : 1
AND_NOW : 1
APPLICABLE_NUTRITION : 1
VITAMINS_SUPPLEMENTALS : 1
PAIR_TAB : 1
MAY_USED : 1
GROUP_WILL : 1
WAS_AVAILABLE : 2
INDEPENDENTLY_THE : 1
OR_DRINKS : 1
REFUSE_MEAL : 1
PATIENT_BRONCH : 1
FATHER_SWUNG : 1
NOTE_GUNSHOT : 1
RIGHT_PERIAURICULAR : 1
STATE_NUMBER : 1
ADJUSTMENT_DISORDER : 1
OF_RANKINE : 1
MALAR_BUTTERFLY : 1
VISIBLE_THE : 1
WITH_HAS : 3
FASTING_RANGED : 1
VETERAN_CALLED : 1
WRITTEN_COUMADIN : 1
BARRE_WILL : 1
IN_WT : 1
WAY_THE : 1
ELECTRONIC_RECORD : 1
QUESTIONS_EXPRESSED : 1
SESSIONS_DATE : 2
PEOPLE_SLOWLY : 1
THERAPY_CONSTIPATION : 1
NO_NUMBER : 2
AVAILABLE_AND : 1
ADMINISTERED_TIME : 1
EVALUATED_THE : 1
ICDCM_TO : 1
HIM_FROM : 1
SIMVASTATIN_TAB : 2
ONLY_NONINFECTIOUS : 1
ORDER_IS : 1
MIN_PARTICIPATION : 1
EXCISION_OF : 1
INTIAL_SPEECH : 1
CIRCULATION_AND : 1
VISIT_MA : 1
INFORMATION_APPOINTED : 1
FEVER_AND : 1
OR_IS : 1
ANGRY_THIS : 1
MESSAGE_VETS : 1
FOCUSING_ON : 2
PS_QHS : 1
TO_KILL : 1
PF_TO : 1
ITS_CLOTHING : 1
MG_UP : 1
AS_PHYSICIAN : 1
NURSING_TRIAGE : 2
IS_AND : 3
REPORTED_TO : 1
NUMBER_HAS : 1
ELECTRONICALLY_POSTOP : 1
QUESTIONS_PATIENTS : 1
UNSPECIFIED_SOUNDS : 1
OF_ACCOMPANIED : 1
PATIENTS_EFFECTIVENESS : 1
WAS_ADDED : 1
WHEN_WERE : 1
TEMP_AND : 1
LIPOMAS_NAME : 1
TURGOR_NORMAL : 1
VA_INFLUENZA : 1
NOTES_OTHER : 1
SLT_OS : 1
WHICH_APPARENTLY : 1
OF_BOWEL : 3
CHECKIN_NO : 1
PER_WIFE : 1
PER_PROTOCOL : 1
MCG_ORAL : 1
WEEKLY_WITH : 1
THE_COPING : 1
HAS_LEARNING : 1
RESCHEDULED_WHEN : 1
AND_ENVIRONMENT : 1
DATE_TEST : 1
STRUCTURED_THERAPEUTIC : 1
PATIENT_WAS : 9
VISUAL_CHANGES : 1
ALL_WITH : 1
OBSERVED_TALKING : 2
PROVIDED_WAS : 1
ACTIONS_WERE : 1
LBS_OR : 1
NO_TWO : 1
PHYMOSIS_PT : 1
DEPRESSION_PSYCHOTHERAPY : 1
SECONDARY_PAIN : 1
OVER_LAST : 1
PT_PATIENT : 1
PERSONAL_BED : 1
NOTE_PROBLEM : 1
YO_WITH : 2
NOTE_BATHROOM : 1
READER_OCR : 2
ME_THEY : 1
WERE_DURING : 1
IS_PATIENT : 4
ABLE_PARTICIPATE : 1
OF_INSTRUCTION : 2
PRIV_OPHTHAL : 1
INTERVIEWED_WITH : 1
THE_RETURNS : 1
MCV_TO : 1
AND_USE : 1
VETERAN_MEETS : 1
DECOMPRESSION_MULTILEVEL : 1
REACTION_TREATMENT : 1
AWARE_THIS : 1
DESTRUCTION_IS : 1
AND_PROMOTE : 1
PATIENT_GIVEN : 1
SPIRITS_BEEN : 1
PROCEDURE_ID : 1
COMFORTABLE_WITH : 1
OF_NEUROGENIC : 1
SLT_KNIFE : 1
FOR_SECOND : 1
GM_PUFFS : 1
THEIR_ITS : 1
AREA_ANCHORAGE : 1
PMR_FOLLOWUP : 1
TEST_RESULT : 2
MOBILITY_USE : 1
NO_RUPTURED : 1
TEMPER_AS : 1
LUNGS_WHEEZING : 1
WAS_ON : 1
ACTIVE_SHIFT : 1
BY_PROGRESS : 1
DRAWN_HE : 1
CC_SIDE : 1
ARNP_ATTENDING : 1
ER_PRIMARY : 1
NURSES_STUDENT : 1
PATIENT_THE : 11
FOR_BLOOD : 1
MUCH_HOPEFUL : 1
ALMOST_NEVER : 1
STAYED_AND : 1
REPORT_THESE : 1
LAUNDRY_VETERAN : 1
PATHOLOGY_REPORT : 1
OF_FRI : 1
DOES_THE : 1
HIM_THAT : 1
SCALE_OF : 2
IMPAC_AS : 1
THOUGHT_PATIENT : 1
AM_ON : 1
ASSIGNED_TO : 1
NONSLIP_IF : 2
AN_SECURED : 1
INHALER_MOUTH : 1
OF_TEAM : 1
ABOUT_SPACERS : 1
PENSION_FOR : 1
TOENAIL_CHEMICALS : 1
THAT_TELEPHONE : 1
AT_PROVIDERS : 1
KNIFE_ATTEMPTED : 1
INPATIENT_NOTE : 1
TO_MS : 2
PENG_BY : 1
TOBACCO_WITH : 1
INHL_NB : 1
NECESSARY_MALE : 1
ULCER_NO : 1
HIS_IN : 2
WITH_PHYSICIAN : 1
ADDENDUM_YES : 1
EXPLOSION_RESULTED : 1
BLACK_OR : 1
AS_AND : 2
BREATHING_IMPINGEMENT : 1
WITH_ASSISTANCE : 2
WONDERS_IF : 1
OCT_SHOULD : 1
ADVERSE_ASSOCIATED : 1
WOKE_UP : 1
EXC_SEBACEOUS : 1
PURPOSES_IN : 1
SOMEONE_TO : 1
WHICH_SEEMED : 1
GET_FRUSTRATED : 1
BY_DR : 1
MOBILITY_NORMAL : 1
DIRECTIVE_HAS : 1
OS_NI : 1
UNDER_PT : 1
MINUTES_IV : 1
TIME_DISCHARGE : 2
HZ_BLAST : 1
COPING_SKILLS : 1
TAKING_WHICH : 1
WE_CHECK : 1
STATE_DOES : 1
BELOW_MSW : 1
HIS_FIRM : 1
NOSUNSPEC_ICDCM : 1
PERSONAL_SHOWERPT : 1
MAY_AT : 1
PHYSICIAN_WAS : 1
SCHEDULE_CARE : 1
WILL_HAS : 1
PHYSICIAN_OSPITAL : 1
ES_JAIN : 1
SALT_SUCH : 1
SOURCE_THE : 1
PRO_CALL : 2
VETERAN_TOTAL : 1
ACTIVE_DOB : 1
ARRANGEMENTS_WITH : 1
PAIN_HISTORY : 2
INTENSIVE_PROGRAMGROUP : 1
POSSIBILITY_NURSING : 1
THE_CHECKED : 1
ANSWERED_THE : 1
OR_ALLERGIES : 1
RECEIVED_WITH : 1
ICDCM_ORIENTED : 1
OR_MULTILEVEL : 1
ASSISTANCE_NO : 1
DL_FIRST : 1
EVER_HAD : 1
VETERAN_IS : 1
MOUTH_TWICE : 3
DISCHARGE_MEDICATION : 2
THIS_HE : 2
HIS_RIGHT : 1
ORDER_PLACED : 1
LEFT_LAMINECTOMY : 1
OTHERS_IN : 1
AN_OF : 1
SUCH_AS : 4
PROVIDER_BUT : 1
VS_ENSURE : 1
MANAGEMENT_THIS : 1
OF_TOENAIL : 1
MEAL_SET : 2
HGAC_DRAWN : 1
HE_STARTED : 1
FOLLOW_HAIR : 1
POSSIBILITY_PT : 1
MOUTH_FOUR : 1
SYMPTOMS_OF : 1
HYGIENE_HAS : 1
TO_YOUR : 3
NEVER_SENSATION : 1
ADM_DX : 1
ACT_IMPULSIVE : 1
MALE_COMES : 1
INDEPENDENT_TURNS : 3
REEVAL_TEST : 1
PAIN_WILL : 1
AND_INSTRUCTIONS : 2
ENTIRE_TO : 1
FOR_MIN : 1
WRITING_SKILLS : 1
PATIENT_ADVISED : 1
ME_TO : 1
HAS_ANSWERED : 1
APPOINTED_LACY : 1
MET_FOR : 1
NEEDLESSLY_AND : 1
LUMBAR_IN : 1
IS_PCMM : 1
DX_GERD : 1
GO_FOR : 1
TMD_ONSET : 1
HS_PING : 1
STOPPED_USING : 1
MEDICATIONS_STATUS : 2
RETURN_CLINIC : 1
OF_PT : 2
GUNSHOT_TO : 2
EAGER_CLIENT : 1
WITH_PCP : 1
WITH_CLOSED : 1
UNDERSTANDING_THESE : 1
PLEASE_YOUR : 1
ETSU_THE : 1
KNIFE_TO : 1
ENCOURAGE_MENTAL : 1
AND_THERE : 1
ASSIST_DISCHARGE : 1
JAW_HE : 1
HIS_RESPIRATIONS : 1
HX_OF : 1
IS_IT : 1
FROM_NEIGHBOR : 1
MEAL_FLUID : 1
NOT_MH : 1
METAB_PANE : 1
ILLNESS_SCHIZOPHRENIA : 1
LITTLE_EYE : 1
CARE_NURSE : 1
FORCING_TO : 1
IS_NIGHT : 1
SIGNIFICANT_OTHER : 1
COLLECTED_DENIED : 1
TREATMENT_PER : 1
EXTRACTION_ERUPTED : 1
FOLLOWUP_NEEDED : 1
IS_NOT : 3
OUTLINED_IN : 1
TRAINING_ICDCM : 1
TO_RADIATION : 1
YOU_SIX : 1
THE_NUMBER : 2
IS_MG : 1
PROSTATE_RESULTS : 1
ES_DM : 1
DISCOMFORT_HER : 1
GUIDED_DISCUSSION : 1
MORE_MUSCLE : 1
CONTINENT_IDENTIFICATION : 1
OR_NOV : 1
OF_PAIN : 4
BEEN_STABLE : 1
VACCINE_WITHIN : 1
THE_HCA : 1
RD_TUES : 1
DX_MONTOYA : 1
WAS_WHAT : 1
PATIENTS_REASON : 1
RECONCILIATION_RECORDS : 1
TO_ZZPATIENT : 2
TEST_CONTINUE : 1
YOUR_SKI : 1
INTERVENTIONS_ANTIBIOTICS : 1
PROPOSED_TREATMENT : 1
HAD_THOUGH : 1
SINUS_VENT : 1
FREQ_QUESTIONS : 1
ID_WAS : 1
ONCOLOGY_THERAPIST : 1
PT_CORDIAL : 1
ADDENDUM_TO : 1
TO_GROUND : 1
HYGIENE_BED : 1
WE_OVER : 1
SUBJECTIVE_OBJECTIVE : 2
USING_AS : 1
ACUTELY_INFECTED : 1
TRY_THIS : 1
DATE_HIS : 1
NURSING_VET : 1
PLAN_CONTINUE : 1
JUN_AND : 1
NOT_HISPANIC : 1
INR_AFIB : 1
DIARRHEA_ICDCM : 1
ARGUMENTATIVE_OTHER : 1
IN_VISUAL : 1
ADD_DX : 1
ASSESSMENT_BEEN : 1
SKIN_STATED : 1
CARE_BARBARA : 1
TELEPHONE_MCHC : 1
ALL_OF : 2
FROM_THE : 2
ELECTRONICALLY_FILED : 2
FOR_DEPRESSION : 2
INFLUENZA_YR : 1
THEY_CHANGED : 1
COLOR_MOBILITY : 1
LETTER_TO : 1
THE_VICTIM : 1
SCHEDULED_HE : 1
CARE_BUSPIRONE : 1
DT_INDURATION : 1
THE_DEPRESSIVE : 1
HYGIENE_SHOWERPT : 1
BATH_DURING : 1
SPECIFY_ANY : 1
FOR_POSTOP : 1
SPECIFICS_CONTACT : 1
ACTIVELY_PARTICIPATED : 1
BRIGHT_CRADC : 1
ASSOCIATED_THIS : 1
COLLECTION_THE : 1
APR_MIDNIGHT : 1
ANOTHER_OPTIONS : 1
ADMINISTER_CC : 1
CHANCE_AND : 1
FREQUENTLY_WITHIN : 1
TOOK_PHARMACY : 1
BRIEF_MOBILITY : 1
LEFT_SPONSOR : 1
PROGRESS_AND : 1
INFLUENZA_IMMUNIZATION : 3
LOCK_LOS : 1
MEDICINE_HERBALS : 1
CONTINUED_TRAINING : 1
PREFERENCE_FOR : 1
WELL_IS : 1
VASCULAR_DEMENTIA : 1
APPROPRIATE_ER : 1
TIME_LS : 1
AND_REMOVED : 1
HE_RIGHT : 1
JAIN_RESP : 1
IT_THE : 1
ALPHA_RIGHT : 1
CLAIRE_BIRCH : 1
DETERMINE_CARE : 1
BED_INDEPENDENT : 3
REPORTED_RELAPSED : 1
UNABLE_COMPLETE : 1
SITE_ED : 1
AVAILABLE_DATA : 1
WITHIN_HOUR : 1
REASON_INFECTION : 1
ICDCM_SELF : 1
YES_LITERATURE : 1
ASSESSED_AND : 1
REVIEW_THEIR : 1
HE_CORRECTED : 1
IN_HOSPITAL : 1
OUT_OF : 2
DATE_BIRTH : 1
NOTED_LESS : 1
SCREENINGT_PLEASE : 1
WAS_EXPLAINED : 1
ORDERED_ABDOMEN : 1
SESSION_RT : 1
MONEY_HIM : 1
NOTE_BAND : 1
LIFE_HOW : 1
HE_CAME : 1
THE_USED : 4
ZIMBLEMAN_MH : 1
UNTIL_PATIENT : 1
CONDO_NUTRITION : 1
APPROXIMATELY_MINUTES : 1
APPRISED_OF : 1
ROOMMATES_STOLE : 1
RUPTURED_GLOBES : 2
MILIEU_THIS : 1
PATIENT_AGAINST : 1
THE_CLINIC : 3
GUARD_OR : 1
PROCEDURE_INVOLVES : 1
BY_ER : 1
YOUR_AND : 1
SEP_THE : 1
CONTINENT_NO : 1
DISCUSSED_WITH : 4
WENT_HAIRCUT : 1
NEEDED_RECOVERY : 1
SCREEN_INFORMATION : 1
BLIND_JUST : 1
NO_TIME : 1
ANSWER_NO : 1
ESSENTIAL_COMMON : 1
TEMP_CONVERSATION : 1
SELF_FEET : 1
PROPERTY_IS : 1
HYPERTENSION_HOME : 1
INDEPENDENTLY_TEAM : 1
FROM_FAMILY : 1
MSE_FAIR : 1
LEVEL_LOW : 1
READER_ADDENDUM : 1
MOBILITY_SHAVE : 1
ASSIST_MEDICALLY : 1
ED_PHYSICIAN : 1
YES_OXYGEN : 1
TWICE_AS : 1
ANXIETY_VETERAN : 1
WILL_VARY : 1
HAVE_LOT : 1
CARCINOMA_CELL : 2
SOLN_DROP : 1
WARFARIN_PHARMACIST : 1
HOME_CARE : 1
IS_PART : 1
PT_PRESENTLY : 1
ON_OCCASION : 1
LAST_PHYSICIAN : 1
CONCOMITANT_INCR : 1
AFFECT_HE : 1
PHYSICIAN_NSTRUCTIONS : 1
CENTER_THE : 1
LEFT_LEG : 1
PT_ULOPLASTY : 1
DEBROX_INSECT : 1
ER_OLD : 1
LEAVE_FACILITY : 1
YES_SCORE : 1
AND_DECREASED : 1
STAR_FROM : 1
ITEMS_PT : 1
ABOUT_YRS : 2
THIS_TIME : 2
NUMBER_BEEN : 1
HIGH_FREQ : 1
FLUVASATIN_MG : 1
DIAGNOSES_LOW : 1
BEEN_OBSERVED : 3
ACCURATE_SECURED : 1
WILL_SIGHT : 2
ALSO_NEED : 1
COMPLAINT_PRESENT : 1
HUSBAND_AND : 1
SAYS_IS : 1
NEED_TO : 1
IMMEDIATE_BILAT : 1
IN_CPRS : 1
NOTE_NAME : 2
KEEPING_APPOINTMENTS : 1
BY_FOUR : 1
CLC_BASAL : 1
OF_AND : 3
FROM_HE : 1
AND_LIVING : 1
FOR_NUMBER : 1
THIGH_AND : 1
SEEN_AND : 1
PILLS_IN : 1
DRO_NG : 1
NOT_TEMP : 1
TO_TIME : 2
ORAL_BENZTROPINE : 1
RESPIRATORY_NOTE : 1
FEEL_OVERWHELMED : 1
CHRONIC_BACK : 1
ER_VISIT : 1
PAST_NURSING : 1
PATIENT_SSN : 1
IS_IRRITABLE : 1
PRODUCTIVE_COUGH : 1
MAIL_AND : 1
THIAMINE_TAB : 1
HAD_WITH : 1
IN_REOOM : 1
HYGIENE_SPONGE : 1
MINUTES_DISORDER : 1
REVIEWED_YOUR : 1
MH_TRP : 1
REMAINS_DISTRESS : 1
NO_SIDE : 1
TO_PAIN : 1
COUSIN_ALSO : 1
PT_STATED : 1
SAME_DOCUMENT : 1
PAIR_CITALOPRAM : 1
PAIN_WAS : 1
RESCHEDULED_FOR : 1
SCHOOL_YRS : 1
LOCATION_YOU : 1
HIS_DEFENSE : 1
FROM_VETS : 1
OBTAINED_AT : 1
BRIGHT_MSW : 1
REGARDING_CHRONIC : 1
MEDICAL_PROBLEMS : 1
TOBACCO_USER : 1
TO_FIND : 1
JELLY_TOP : 1
OR_OF : 1
AND_SKILLS : 1
ALPHA_TRIAL : 1
AUG_RESULT : 1
TETANUS_DIPTHERIA : 1
EFFECTED_TEAM : 1
RIGHTS_SUPERVISING : 1
PS_HOURS : 1
DONT_SHE : 1
IS_PRESENTLY : 1
AS_TYLENOL : 1
AS_ED : 1
FOR_SURGICAL : 1
ADVISED_DISCUSS : 1
TREATMENT_DETAILS : 2
REQUIRES_NO : 1
ELIMINATION_DATE : 1
URINE_PATIENT : 1
CALL_LAST : 1
YOUR_STOMACH : 1
URINAL_BOWELS : 1
PAIN_ORTHOPEDIC : 1
PERIAPICAL_EA : 1
SUN_IN : 1
THE_SOME : 1
ON_REG : 1
ER_MONTHS : 1
RESIDENTS_CAPILLARY : 1
CONVERSATION_WITH : 4
FEB_FOR : 1
PMR_NOTE : 1
TRANSFERRED_TO : 2
WE_WILL : 1
PRIMARY_OCCUPATION : 1
SP_TO : 1
COMPUTERIZED_PROBLEM : 1
MIDNIGHT_ASA : 1
PM_NURSE : 1
HIS_PREVIOUS : 1
PREVENTIVE_SCREEN : 1
HIMSELF_DID : 1
TIME_ASSESSMENT : 1
FROM_CALIFORNIA : 1
HOURS_FOR : 1
PO_QBEDTIME : 1
PRESENTED_TO : 1
PT_WAS : 5
AWARE_OF : 2
REPORT_PSYCHOTHERAPY : 1
FINALLY_ACCEPTED : 1
USED_NOT : 3
TELLS_HE : 1
RX_PLEASE : 1
INTO_KUWAIT : 1
FLUIDS_GIVEN : 2
BP_NIGHT : 1
IN_ORDER : 1
FOR_WITHIN : 1
DIRECTIVE_ASSESSMENT : 1
ORAL_INHALE : 1
AND_WHILE : 1
TIME_VITALS : 1
HIS_LAXATIVE : 1
FIND_JOB : 1
DOCUMENTED_IN : 2
LEG_BLIND : 1
CHEST_CONTENT : 1
SAY_WAS : 1
MECHANISMS_AID : 1
UNSPECIFIED_OPEN : 1
AGREED_TO : 1
OSTEOARTHROSIS_INVOLVING : 1
SOME_TIAS : 1
INGRATIATING_OTHER : 1
FOLLOW_IN : 1
RESULTS_OF : 2
CHRONIC_AND : 1
WALKS_FREQUENTLY : 1
PROVIDERS_ASSISTANCE : 1
OU_PER : 1
WHENEVER_HAS : 1
AND_ISSUES : 1
TOPICAL_TIME : 1
INFORM_WHEN : 1
AND_HAIR : 1
LAST_BP : 1
THE_LENGTH : 1
OUTCOME_VIST : 1
NAD_OPTIONAL : 1
CONTROLLED_KEPT : 1
SEPTEMBER_NEEDS : 1
INPATIENT_ORDER : 1
OBMT_NOTES : 1
SECONDARY_DIAGNOSES : 2
GIRLFRIEND_SHE : 1
THERE_FALL : 2
MIDNIGHT_AND : 1
DEC_TH : 1
KNEE_THIS : 1
VERY_AND : 2
BY_AN : 1
SKIN_WARM : 1
MOBILITY_IF : 1
HIS_OM : 1
PLAN_WITH : 1
MAKES_PY : 1
IN_FOLLOWUP : 1
YANICK_APRIL : 1
ENVIORNMENT_DUE : 1
VISIT_LIST : 1
DANE_REASON : 1
OF_STRSOME : 1
AND_ACTIVITY : 1
BRC_CENTER : 1
RADIATES_TO : 1
YES_GAF : 1
RESULTS_BP : 1
LABS_DRAWN : 1
DOB_LEARNER : 1
DRY_CONVERSE : 1
ENROLL_ATTEND : 1
LIFE_BEFORE : 1
AM_IT : 1
USER_PATIENT : 1
LAUNDRY_TO : 1
DISORDER_CAUSING : 1
ILLNESS_INTIAL : 1
KNEE_TENDERNESS : 1
IN_SEPTEMBER : 1
MOVEMENTS_SHIFT : 3
WOULD_RATHER : 1
FOR_SODIUM : 1
VISION_TRANSFERRED : 1
RED_DYES : 1
BLIND_WANT : 1
RESTING_IN : 1
BUT_RESTRICTIVE : 1
REFERRAL_ID : 1
LEADERS_TO : 1
CONTINENT_MOBILITY : 1
PF_PRIOR : 1
BURN_HIS : 1
REVIEW_OF : 1
TRAINING_SOMEONE : 1
WT_KG : 1
WELL_BEING : 1
ANOTHER_TREATMENT : 1
EFFECTS_DRO : 1
SKILLS_AND : 1
REMAIN_BED : 1
MANAGING_SYMPTOMS : 1
HE_LOOKING : 1
SPEECH_WITH : 2
WITH_DERMATOLOGY : 1
EFFORTS_AND : 1
AND_WILL : 2
EXPLAINED_PT : 1
AT_CONTACT : 1
IF_NEW : 1
AND_IMPORTANCE : 1
INTERNAL_CAPSULE : 1
LIKE_BODY : 1
DR_RESPIRATION : 1
NUTRITION_PATIENT : 1
REQUEST_FIRM : 1
MIGRAINE_IN : 1
BEING_SENT : 1
CLINICAL_BASE : 1
FOR_SIX : 1
NO_REQUIRED : 3
HE_THAT : 2
SICK_YOUR : 1
CULTURAL_FOOD : 1
FOOD_NOT : 1
REPORTS_OF : 1
ASK_IF : 1
HE_WITH : 2
NUMBER_LAST : 1
AND_NAUSEA : 1
WHEN_HOME : 1
CARE_NUTRITION : 1
IN_CM : 4
INDIVIDUAL_NOTE : 1
INCLUDING_EXACERBATION : 1
HOPES_IN : 1
TO_HER : 1
OF_REFERRED : 1
ON_WEDNES : 1
RETURNING_VETERAN : 1
INVOLVES_INJECTION : 1
FARHE_IS : 1
RESULT_CONTINUE : 1
OVERTHE_IF : 1
ORDERED_NO : 1
PHONE_RESULTS : 1
SHOULDER_REMAINS : 1
CONCERNS_PATIENT : 1
COUNSELING_NO : 1
DESCRIBE_VERBAL : 1
PFTS_SHOWED : 1
ACTIVE_RESPIRATION : 1
IS_AWARE : 1
HURT_NO : 1
ASSIGNED_CALLER : 1
CENTER_SOCIALIZATION : 1
TEMP_PENSION : 1
LETTER_REMAIN : 1
WITH_GROUP : 1
PLEURITIS_MADE : 1
COMPLAINT_NOT : 3
PATIENT_AND : 2
HIS_ACCOUNTS : 1
OPPORTUNITY_ASK : 1
HE_DEMONSTRATED : 1
LDL_MOUTH : 1
STAFF_BRIEF : 1
SAYS_AREA : 1
MINUTES_PROVIDE : 1
CONTACT_PATIENT : 2
REFILL_THAN : 1
APPT_PT : 1
NOTE_BY : 3
MG_THURFRISUN : 1
WITH_THERE : 1
SEXUAL_DESIRES : 1
AT_ON : 1
ASSESSMENT_PULSE : 1
FEEDING_ASSISTANCE : 1
LUNCH_APPLICABLE : 1
ALONE_IN : 1
BARBARA_EASTHOM : 1
MG_TAB : 8
FOLLOW_UP : 4
IN_THE : 20
SPONSOR_APPOINTMENT : 1
GERD_DIFFERENT : 1
NOTE_VETERAN : 1
SIDE_RAILS : 1
PAIN_AND : 3
ROOM_OPEN : 1
HIM_PY : 1
MIN_FAMILY : 1
FERRITIN_REPEAT : 1
TREATMENT_DOES : 1
LEFT_CLEAR : 1
PATIENT_RESPONSES : 1
BY_PALMER : 1
LT_SHOULDER : 1
WAS_WITH : 5
ARM_RANGE : 1
NEED_WITH : 1
MD_BLADDER : 1
CLINICAL_PATIENT : 1
LB_BY : 1
APPOINTMENT_CHECK : 1
GROUP_DEGOLYER : 1
DAILY_PAST : 1
FOR_MR : 2
NUR_ASSESSMENT : 1
WITH_LITTLE : 1
CARE_ORTHOPTIC : 1
FOR_WAS : 1
NURSING_STAFF : 1
PROVIDE_FOCUSED : 1
MSE_SITUATION : 1
TOBOGGAN_CLINICAL : 1
TIME_BUT : 2
NOT_HAVE : 1
WED_BY : 1
APPOINTMENT_AT : 2
TWO_PERSON : 1
OF_GERD : 1
PING_PATTERN : 1
REFUSE_OTHER : 1
EYE_FOR : 1
OR_WELL : 1
THE_HAD : 2
ON_WHICH : 1
TAKE_MEDICATION : 1
PRIOR_THIS : 1
MINUTES_FOR : 1
WITH_HYPOTHYROIDISM : 1
REGULATION_OF : 1
PROTECTORS_PLACE : 1
MINUTE_WEEKLY : 2
REQUIRED_SOME : 1
ADDENDUM_ARE : 1
YES_ALSO : 1
LIST_THE : 1
EKG_WAS : 1
REALM_REPORTED : 1
INVOLVING_REGION : 1
TOTAL_OF : 1
OF_INTERVIEWED : 1
ADDITIONAL_INFORMATION : 2
PNUEMONIA_WITHOUT : 1
LACY_DO : 1
AM_RADIATION : 1
INSIGHT_ON : 1
GROUP_WAS : 1
CITRATE_HIS : 1
OR_DISTANCE : 1
WORKED_WELL : 1
BE_TO : 3
DIFF_PTT : 1
HE_RELEIF : 1
WAS_THANKFUL : 1
PAST_TOBACCO : 1
DIAGNOSES_TREATED : 1
JUN_ENCOURAGE : 1
ANY_SIMVASTATIN : 1
LOCATIONS_IN : 1
PARTICIPATED_IN : 2
LIKE_TO : 1
WILL_FOR : 1
DX_ADDRESS : 1
CARCINOMA_BASAL : 2
AID_COLOR : 1
LESS_SECONDS : 1
COMPLICATIONS_GUIDED : 1
TESTING_TO : 1
EXAM_TO : 1
SEE_NOTE : 2
RAL_NAD : 1
CORRECTED_ANTIBIOTIC : 1
AND_UNITS : 1
THIS_WRITER : 1
NOT_TO : 4
COMPLETE_EXAM : 1
SOCIAL_SECURITY : 1
FOR_ARTHRITIS : 1
BUTTERFLY_RESULTS : 1
HE_HAD : 7
HE_OUT : 1
VOLUME_MOOD : 2
HISTORY_SCHIZOPHRNEIA : 1
VA_CLINICIANS : 1
EMERGENCY_OPT : 1
MG_DL : 1
GUARDIAN_THE : 1
THERE_CONCOMITANT : 1
MOBILITY_TEACHING : 1
TO_DECREASED : 1
TYPE_DTN : 1
CHECK_HIM : 1
SYMPTOMS_THAT : 1
INFECTION_PAST : 1
CHRONIC_MCADOO : 1
ING_AND : 1
SENSATION_AND : 1
SHE_SHE : 1
AFRICAN_AN : 1
AND_SINUS : 1
DONT_WAS : 1
POSTOP_FOR : 1
WHEN_WILL : 1
ALBUTEROL_PREMIX : 1
POSITION_DRIVING : 1
TELEPHONE_PTS : 1
RATE_FEEDING : 1
SHOULDER_POSTOP : 1
PATIENT_ALSO : 1
THE_REALM : 1
OVERTHE_COUNTER : 1
FRUSTRATED_THAT : 1
PAIN_RESTRAINTS : 1
ANSWER_IS : 1
CLIENT_SIGNED : 1
EVIDENCED_THE : 1
STOOL_DISORDER : 1
CARE_SHAMPOO : 1
AVAILABLE_REVIEWED : 1
INTO_POSSIBILITY : 1
TAKEN_AT : 1
FOOD_HISTORY : 1
STRUCTURE_AND : 1
MONITORS_PROVIDE : 1
INSTRUCTIONS_FOLLOWING : 1
NOTE_ETHNIC : 1
CALLED_QUESTIONS : 1
FOR_STEROID : 1
EDUCATION_TEACHING : 1
CURRENT_PDD : 1
TO_YOU : 1
ANY_TOUCH : 1
RECEIVED_BELOW : 1
CLC_CARCINOMA : 1
CATHETER_AC : 1
BEHAVIOR_TYPE : 1
IS_YOUR : 1
PATIENT_CONTINENT : 5
GROUP_HOBBY : 1
AN_EMPLOYEE : 1
SEVERAL_AS : 1
VET_OBSERVED : 1
POKE_PROD : 1
THE_VERBALIZED : 1
FAMILY_REASON : 1
YOU_EVER : 1
SURGERY_CONSENT : 1
ENTER_SEP : 1
LONG_OF : 1
EYES_CLOSED : 1
CALLS_CAN : 1
BASAL_ICDCM : 1
SHE_HAD : 1
AT_ORDER : 1
AN_PERIOD : 1
INSTRUCTED_PATIENT : 1
ORDER_TO : 1
PATIENT_ME : 1
FL_TO : 1
AFFECT_ENERGY : 1
OPHT_SOLN : 2
CANT_FIND : 1
PRIVILEGES_FLUIDS : 1
SUN_IT : 1
YOUR_VISIT : 1
CHEMICALS_MAY : 1
INDURATION_MM : 1
COPE_OBJECTIVE : 1
ATTENTIVE_ACTIVELY : 1
CHEN_PENG : 1
NOTE_ENTERED : 1
SUGGESTED_AMOUNT : 1
PULSE_FOR : 1
NEAT_AND : 1
OF_DIFFERENT : 1
DISPOSABLE_BRIEF : 1
PING_PATIENT : 1
VARY_HAS : 1
SNACKS_OTHER : 2
TO_FROM : 1
THE_SAFETY : 1
NO_OF : 1
MEDICAL_CENTER : 1
THROAT_ON : 1
WORKER_WAS : 1
THESE_INSTRUCTIONS : 1
DESAT_RESULTS : 1
WILL_SEND : 1
PERSISTENT_ADDENDUM : 1
HIS_TABLET : 1
ACTIVE_HISTORY : 1
ID_SCREEN : 2
NONE_DISEASED : 1
ASSISTANCE_MEDICINE : 1
OPENANGLE_OS : 1
INFORM_STAFF : 1
PHARMACIST_GOLD : 1
FREQUENTLY_GOES : 1
MODE_ARRIVAL : 1
MANAGEMENT_ALCOH : 1
SOUNDS_GEC : 1
MOBILITY_EASILY : 3
BY_HIMSELF : 1
EFFECTIVENESS_DEALING : 1
CLINICAL_CONDITION : 1
DIAGNOSES_INTE : 1
OF_TYPE : 1
TO_INTO : 1
WHEELCHAIR_PT : 1
DESCRIBE_GIVEN : 1
WAS_NO : 1
GOOD_HAS : 1
DURING_DEPLOYMENT : 1
TO_PRN : 1
SET_HIM : 1
QUIETLY_BED : 1
APPEARED_TO : 1
HER_FAMILY : 1
NNV_VERIFY : 1
MOUTH_AS : 1
INDEX_MASS : 1
INFORMED_WAS : 1
HIS_PLAN : 1
FOR_EXAM : 1
CODE_HC : 2
NO_IMPINGEMENT : 1
IS_LOCATION : 1
THIS_THAT : 1
WAS_RETURN : 1
COMPLETE_AN : 1
AND_GOOD : 1
NOTED_ADDENDUM : 1
NONDISTENDED_BOWELSOUNDS : 1
FEMALE_TO : 1
CHANGED_MEDS : 1
CONCERN_FOR : 1
HOURS_NOTE : 1
OF_PING : 1
LAST_FEW : 1
ANTIBIOTIC_OU : 1
MIN_FOR : 1
BRUISING_LEFT : 1
PURPOSEFULLY_ON : 1
TAB_NEXT : 1
PM_PROTOCOL : 1
FEET_SAFETY : 1
WAS_INFLUENZA : 1
COUPLES_FOR : 1
AN_ACCURATE : 1
HAD_OPPORTUNITY : 1
MAKE_WITH : 1
AUGUST_PATHOLOGY : 1
AT_PAIN : 1
PRBS_FEELING : 1
GOOD_LITTLE : 1
LOS_ADM : 1
POSTOPERATIVELY_HE : 1
DO_AFFECT : 1
AS_TOOL : 1
SCORE_ORTHOPEDIC : 1
IS_EFFECTED : 1
SUPERVISING_PHYSICIAN : 1
AGE_PREFERENCE : 1
AND_WHEN : 1
YES_AT : 1
THIS_SINCE : 1
RECOVERY_ORIENTED : 1
WALKS_TURGOR : 1
INDEX_IS : 1
STRENGTHS_INTERVENTIONS : 1
FOR_OTHER : 1
UDS_WAS : 1
INFORMED_TO : 1
COUMADIN_FOR : 1
ROOM_WATCHING : 1
OU_JUST : 1
QUALITY_SPEECH : 1
PSYCHOSOCIAL_STRESSORS : 1
PT_ANY : 1
WITH_MOOD : 1
TAB_MG : 4
GUARD_WATCHFUL : 1
ENVIRONMENT_OFFERED : 1
SAYS_OF : 1
PLEASED_WITH : 1
FEB_PULSE : 1
TOXICOLOGY_DISCON : 1
TIMES_TO : 1
STARING_IN : 1
PRINTED_MATERIAL : 1
HE_DOES : 3
NAME_OF : 2
UPDATES_HIS : 1
DISCUSSED_ADVANCED : 1
CENTER_FOR : 1
PT_TREATMENT : 1
PATIENT_YO : 1
PLASM_MONITORED : 1
TIME_PT : 1
NO_COMPLAINTS : 1
IN_FOOD : 1
NO_COUGH : 1
BP_SUPPORT : 1
LAST_FIRST : 1
MEDICATION_OVERTHE : 1
TAKE_ONE : 2
CHECK_RESPIRATION : 1
FATHER_AT : 1
RESOLVED_CONDITION : 1
FACILITY_APPOINTED : 1
WITH_INDICATES : 1
FILED_YR : 1
CODE_INCIDENT : 1
NOT_ONLY : 1
WILL_EYE : 1
VISIT_NO : 1
JUST_THEM : 1
TEACHING_ONETOONE : 1
THE_HOW : 1
TO_COLORADO : 1
COOPERATIVE_REASON : 1
NOT_ALLOWED : 1
ALSO_ANTISEPTIC : 1
TOO_STOLE : 1
HAS_DONE : 1
BY_ADDENDUM : 1
NAUSEA_NO : 1
MIDP_NL : 1
GROWTH_YOU : 1
ING_SITE : 1
THE_CFILE : 1
STAFF_AND : 1
PREVENTIVE_INFORMATION : 1
MALE_HT : 1
TO_PF : 1
VETERAN_SEEN : 1
IN_OWN : 1
WOULD_HIM : 1
INFECTED_IN : 1
TAKING_AS : 1
NEW_AND : 1
ESTRANGED_AND : 1
INPATIENT_MEDICATIONS : 1
TAKING_MEDICATIONS : 1
HE_AMOUNT : 1
APPROPRIATELY_SPEECH : 1
EVE_COPD : 1
FAMILY_EDUCATION : 1
PROVIDER_ADDENDUM : 1
RETINA_AND : 1
WARFARIN_JEFF : 1
ROOTS_HE : 1
CFCF_INHL : 1
MAINTAIN_RECOVERY : 1
THERAPY_PRIMARY : 1
GROUP_MIN : 2
PJ_AND : 1
INITIAL_DIAGNOSIS : 1
OR_TO : 1
NUMBER_BOWEL : 3
FIND_OF : 1
TREATMENT_SIDE : 1
AND_THAT : 4
WILL_CONTACTED : 1
PHYSICIAN_PJ : 1
ELECTRONIC_AND : 1
DX_NNV : 1
REMAINS_IN : 1
DRY_SENSORNEUR : 1
IS_FOUR : 1
SOCIAL_INTERACTIONS : 1
LAB_ON : 1
MY_JUST : 1
INCLUDE_IN : 1
WE_HAVE : 1
HE_OT : 1
OTHER_INTENSIVE : 1
THE_STAFF : 1
RISK_EVERY : 1
MOBILITY_PING : 1
RELAPSE_VETERANS : 1
SAO_ACTIVITY : 1
WOUND_OTHER : 1
FOR_RESTART : 1
OF_ECCHYMOSIS : 1
HE_SAYS : 4
VERBALIZED_AN : 1
OFFERED_DI : 1
SIGNS_INJECTION : 1
BODY_ME : 1
DX_LEG : 1
STREET_THE : 1
ISSUES_NOT : 1
PAIN_NO : 1
ASSISTANCE_WITH : 2
EQUIVALENTS_TO : 1
AND_BY : 1
ADVISED_TO : 2
HYPERTENSION_INFORMED : 1
RTC_TH : 1
COMFORTABLE_GROUPS : 1
WAS_USING : 1
ANXIOUS_HOURS : 1
BEEN_WORSE : 1
DAILY_RIGHT : 1
WITH_OTHERS : 1
WAS_GIVEN : 2
HE_DO : 1
GROUP_VISIT : 1
HERE_ALSO : 1
VETERAN_OR : 1
INCLUDES_OF : 1
TO_ACTIVELY : 1
PULSE_NEEDS : 1
TOBACCO_USE : 2
PRESENT_IMPROVED : 1
AND_THANKFUL : 1
ASSISTANCE_OF : 3
OF_PATIENTS : 1
BARRE_SYND : 1
OF_ON : 1
ALSO_ATTEMPTED : 1
HX_PHARMACY : 1
THEN_RETURNED : 1
THIS_IMMUNIZATION : 1
GUNSHOT_WOUNDS : 1
SEE_DISCHARGE : 1
TO_CONTINUE : 2
THIS_SCHEDULE : 1
MG_OTHER : 1
BEST_TIME : 1
VITALS_OBSERVED : 1
DCD_SP : 1
EVERY_FOR : 1
INPT_THERAPY : 1
FEELING_BETTER : 1
NOR_NOTED : 1
AAOX_LABS : 1
OTHERS_PERSONAL : 1
ONE_EXPLOSION : 1
FOREARM_RIGHT : 1
SOCIAL_NUMBER : 1
PREOP_INTEG : 1
RELEASE_APPROPRIATE : 1
TRIGGER_RELAPSE : 1
AND_CONDITION : 1
NOW_SESSIONS : 1
MAKES_HIM : 1
ACTIVELY_IN : 2
FOLLOW_OF : 2
TO_OF : 2
OF_THEIR : 1
SUPERVISED_TOXICOLOGY : 1
PAST_CURRENT : 1
AGREED_CONTACT : 1
QUALITY_XACTIVE : 1
RIGHT_ACTIVITY : 1
OF_NOTE : 1
MED_GEESEY : 1
FLICK_HIS : 1
EXCISION_LIPOMAS : 1
OF_ANY : 1
BOWEL_NO : 1
ETC_IRAQ : 1
NOW_DOES : 1
CUING_TO : 2
PT_AAOX : 1
CHOOSE_YES : 1
DISCUSSED_THE : 4
IMPAIRMENT_YES : 1
AS_INDICATED : 1
TO_PLEASED : 1
AREAS_IN : 1
WITH_NORMAL : 2
FAMILY_POSITION : 1
BAD_SUN : 1
VICTIM_OF : 1
NOT_OR : 1
THIS_NOT : 1
ON_WELLBUTRIN : 1
PAINFUL_TO : 1
LAB_FOR : 1
MONTH_DEAR : 1
DRY_PREOP : 1
REG_NPH : 2
AND_FEELS : 1
AFTER_TUBEFEEDING : 1
NIGHT_HAD : 1
IS_ATTENDING : 1
CURRENT_USER : 1
INDIVIDUAL_SESSION : 1
THE_WAS : 3
USING_UNIQUE : 1
METHOD_ABG : 1
HEALTH_OF : 1
MEANS_TO : 1
THAT_VETERAN : 2
WALKS_WAS : 1
IN_MEDICATION : 1
PASSIVE_RANGE : 1
LIVING_WITH : 1
ORDER_ULTRASOUND : 1
THEY_OTHER : 1
ABG_EXERCISE : 1
SECURED_NVI : 1
ADVERSE_REACTION : 1
TORADOL_ABUSE : 1
STATE_AA : 1
THERAPY_OF : 1
THERAPY_LOCK : 1
YES_PROBLEM : 1
TREATMENT_CONTINENT : 1
MISSING_ORDER : 1
OTR_ORIENTATION : 1
PATCH_BOLUS : 1
DIFFERENT_TO : 1
BEEN_ADDENDUM : 1
WHICH_WAS : 1
TO_MINUTES : 1
MASS_INDEX : 3
IMPULSIVE_BEHAVIOR : 1
REVIEW_ASSESSMENT : 1
FACILITATOR_GROUP : 1
WILL_ALSO : 1
WAS_NOT : 1
HIMSELF_HIM : 1
REFERRAL_COORDINATION : 1
PERSISTENT_KEEPING : 1
WITH_SELF : 1
OCCASIONALLY_FOR : 1
WAS_URINE : 1
PATCH_PATCH : 1
TOP_EXT : 1
PRIMARY_ONES : 1
IN_EXCESS : 1
LATER_HE : 1
AN_HE : 1
HIS_THERE : 1
AND_OCASSIONALLY : 1
CONTAINERS_MOBILITY : 1
BE_USED : 1
FOR_AND : 5
PRIOR_SURGERY : 1
BMI_BODY : 1
CARE_PLAN : 1
INITIAL_RESULTS : 1
CALLS_ASSISTANCE : 1
PROCEDURE_OF : 1
TOUCH_COLD : 1
QUETIAPINE_TAB : 1
ATTIRE_GAVE : 1
MHIS_COMPREHENSIVE : 1
TO_DATE : 2
ALTERNATIVE_APPROACHES : 1
AND_MUCOSAL : 1
HAS_TMD : 1
SPEECH_AND : 2
HEARING_LEFT : 1
THE_PAST : 7
TOLERATE_WELL : 1
PL_CONSENT : 1
NEUROLOGICAL_CONFUSED : 1
SHARED_LIVING : 1
SAME_IT : 1
TAUGHT_YRS : 1
PO_BID : 1
PLACED_UNDER : 1
HIS_REQUEST : 1
URGES_TO : 1
INSTRUCTION_SUMMARY : 1
TURNS_SITS : 3
TO_IMPULSIVE : 1
FOOD_DRINKS : 1
VITALS_AT : 1
DOES_SAY : 1
NO_ASSISTANCE : 1
COMPLAINT_OF : 3
HIS_LEVEL : 1
WENT_MARRIED : 1
LAB_SCHEDULE : 1
NO_UNINTENTIONAL : 1
COLONOSCOPY_STATE : 1
WEEKLY_LAUNDRY : 1
AND_PERSISTENT : 1
TIME_AND : 2
MCH_HE : 1
BE_DONE : 1
INTERNAL_MOBILITY : 1
VS_THE : 1
ALLERGIES_ADVERSE : 1
PREVENTION_PATIENT : 1
HEAD_CANT : 1
AND_FAMILY : 1
FOR_SESSIONS : 1
TO_PURPLE : 1
TOUCH_TO : 1
HIS_DEPLOYMENT : 1
NIGHT_FROM : 1
THEY_NEGATIVE : 1
TO_SWUNG : 1
USE_SEXUAL : 1
FOR_PHQ : 1
DEPRESSIVE_DISORDER : 2
PHYSICIAN_NUMBER : 1
OM_GO : 1
ENTERED_ERROR : 1
PRESSURE_NO : 1
WITH_HIM : 2
FOOD_WANTED : 1
EVALUATION_PING : 1
LOCK_ADM : 1
TEACHING_MIN : 1
DEPRESSION_AND : 1
TIME_AT : 2
GENERAL_HEALTH : 1
WEEK_CARE : 1
REQUESTED_HAVE : 1
SUPPLEMENTALS_AND : 1
NURSING_PATIENT : 1
ER_RESPIRATION : 1
PURPOSES_NOVEMBER : 1
POSITIVE_ACTIVITIES : 1
OTHER_INDIVIDUAL : 1
GEL_TOP : 1
ANXIETY_THE : 1
THAN_PRESSURE : 1
OF_LEFT : 1
XACTIVE_EAGER : 1
PT_VETERANS : 1
EXERCISE_DESAT : 1
DONE_PART : 1
WITH_ALBUTEROL : 2
BEEN_SMILING : 1
TIME_THE : 2
AA_REASONS : 1
IMPACTED_ELECTRONICALLY : 1
OF_SIMVASTATIN : 1
EYE_PHYSICIAN : 1
MONTOYA_OF : 1
DIZZINESS_SESSION : 1
WEEKLY_HOME : 2
SEVERE_AND : 1
SEE_HIS : 1
FOR_SCHEDULING : 1
GOES_TO : 1
CONTINUED_REGARDING : 1
ANERGY_PANEL : 1
EVALUATED_IN : 1
TETANUS_ACELLULAR : 1
NUMBER_AA : 1
ATIVAN_MG : 1
THE_EYE : 1
IMPROVED_MOOD : 1
PT_ON : 3
MEDS_PT : 1
SC_VETERAN : 1
NO_OBSTRUCTION : 1
WAS_WEARS : 1
AND_HZ : 1
HYGIENE_AND : 1
DISPOSITION_AND : 1
EA_TOOTH : 1
DEST_THE : 1
SHEET_THE : 1
HIS_APPT : 2
RESPOND_SAFETY : 1
CLOTHING_WITH : 1
FOR_MINUTES : 3
HAD_THE : 1
HO_AGREES : 1
WENT_UP : 1
YEAR_OR : 1
TO_DISCHARGED : 1
ARRIVAL_ONE : 1
DERMATOLOGY_AND : 1
CHRONIC_BRONCHITIS : 1
WITH_THAT : 1
THESE_TO : 1
NO_BREATHING : 1
REOOM_AM : 1
PULLING_AND : 1
SLEPT_ADDENDUM : 1
PT_TO : 3
MYOPIA_CONSENT : 1
COMPLAINTS_PAIN : 1
PROGRESS_PT : 1
THE_HPI : 1
BLACK_AFRICAN : 1
PAIN_ROTATION : 1
FOLLOWING_FOR : 1
WHAT_PATIENT : 1
TO_SCHEDULE : 2
PDD_PATIENT : 1
SCREEN_YR : 1
THERAPY_FOCUSING : 2
STAFF_BUT : 1
DISC_VES : 1
INFORMATION_NAME : 1
AA_FOR : 1
ADDENDUM_OUTPATIENT : 1
REQUEST_DIABETIC : 1
ANCHORAGE_MG : 1
HIS_DOSE : 1
REHABILITATION_HE : 1
NORMAL_AT : 1
COMMUNICABLE_THE : 1
MOBILITY_PATIENT : 1
PING_SCHEDULED : 1
UNDERSTOOD_AS : 1
CIRCUMSTANCES_PREFERENCE : 1
TO_OTHER : 3
TAKE_OF : 1
HOME_INFORMS : 1
BUT_DUE : 1
OF_FOWLER : 1
PAIN_IS : 2
WAS_READY : 1
TOOL_TO : 1
THIS_WITH : 1
LAMINECTOMY_ON : 1
HCL_TAB : 1
MATERIAL_MH : 1
CALLS_ES : 1
NOT_BETWEEN : 1
WRITING_PROGRESS : 1
REMINDER_PRIOR : 1
THERE_BEEN : 2
THE_MOMENT : 1
PART_OF : 1
OZ_FOR : 1
PHARM_ANTICOAGULANT : 1
VOIDED_AMOUNT : 1
EVENT_WARFARIN : 1
MH_HUDVASHNOTE : 1
GLAUCOMA_PH : 1
REVIEWED_TREATMENT : 1
DISCHARGE_DATE : 1
PRIMARY_CARE : 7
FACT_THAT : 1
HEALTH_AREA : 1
TREATMENT_PT : 1
IT_REACTIONS : 1
ACTIONS_HIP : 1
ADMINISTERED_MEDICATION : 1
VA_LEGEND : 1
DO_HIS : 1
WOUND_TO : 1
REQUIRE_THE : 1
TOMORROW_FILED : 1
WILL_GO : 1
AND_SLEPT : 1
TEAM_AND : 1
AFFECT_IS : 1
IT_MON : 1
WHEEZING_SOUND : 1
BILATERAL_WHEEZING : 1
CLINIC_ADDENDUM : 1
ONCOLOGY_NONVA : 1
TOMORROW_AM : 1
CALL_CALLER : 1
GROUP_PATIENT : 3
IN_UNCLEAR : 1
AUTHOR_THAT : 1
AS_SCHEDULED : 1
TO_QHS : 1
AND_ABNORMALITIES : 1
INP_VA : 2
HIS_SHE : 1
PHYSICIAN_BY : 1
IS_BY : 1
TALKING_TO : 3
ATTENDING_PROGRAM : 1
MINUTES_STAGE : 1
APPLICABLE_ELIMINATION : 1
QUIETLY_IN : 2
OF_BIOPSY : 1
DISORDER_SICHERER : 1
YOU_FEEL : 1
ASSISTANT_BUTTON : 1
THE_LIVING : 1
HAIR_ROOM : 1
VETERAN_TYPE : 1
CONTINENT_COLOR : 1
HYPERLIPIDEMIA_PRESENTED : 1
PATIENT_OF : 3
DISCHARGE_DISCHARGE : 1
TAKEN_BREAKFAST : 1
ACTIVE_MEDICATIONS : 3
LUNGS_CLEAR : 1
WEIGHT_LB : 2
MARTYRDOM_HISPANIC : 1
ASK_YOU : 1
RESCHEDULE_APPOINTMENT : 1
IN_FROM : 2
OCCUPATION_POSTAL : 1
BASE_BACK : 1
ALCOH_HEPATITIS : 1
FOR_MH : 1
BPD_HE : 1
PROVIDER_ALSO : 1
ADL_GUNSHOT : 1
ISSUED_PRESCRIPTION : 2
OFFICERS_THE : 1
OF_OLANZAPINE : 1
KNEE_TO : 1
PT_THE : 2
RETURNS_TO : 1
SITE_ASSESSMENT : 2
MHP_CONSTANT : 1
WITHOUT_LABS : 1
PAST_PULSE : 1
OR_FEELING : 1
WBC_MANAGEMENT : 1
FAMILY_AND : 1
DTN_CLINICAL : 1
RETINOPATHY_PAIN : 1
AND_HIS : 6
RETIRED_WORKER : 1
COMPLETED_WITH : 1
PATIENT_RECEIVING : 1
YES_IS : 1
MOOD_FLUIDS : 1
TO_ACCOMPANY : 1
BY_ERROR : 1
LAST_WEEK : 1
APPOINTMENT_IN : 1
REGULAR_NEUROLOGICAL : 1
ADL_NOTE : 5
LIVES_AND : 1
NORMALLY_ON : 1
HE_AWARE : 1
PROMISSED_THAT : 1
BY_MO : 1
SHIFT_VETERAN : 1
VETERAN_HAVE : 1
UNDER_VISTA : 1
STATUS_DEPRESSION : 1
TAKE_ONEHALF : 1
URINAL_CONTINENT : 1
JEFF_GOLD : 1
NEAT_ADEQUATELY : 1
PAIN_PLAN : 1
AND_TYLENOL : 1
EXPOSURE_BLASTS : 1
IV_PATENT : 1
PRE_TIME : 1
ID_CHILD : 1
CLINIC_ALLERGIES : 1
CONTACT_PRIMARY : 1
HOURS_PATIENT : 1
APS_CONTINES : 1
VETERAN_ACKNOWLEDGED : 1
FOLLOWUP_HIS : 1
INDEPENDENT_DISCHARGE : 1
OTHER_ACTIVE : 1
ICDCM_SCHIZOPHRENIA : 2
MALE_WHO : 1
ARRIVED_HIS : 1
ASSISTANCE_IN : 1
BUT_AT : 1
APPROVED_BY : 1
VISIT_ADVERSE : 1
BRIGHTER_SAYS : 1
APPT_VETERAN : 1
OCTOBER_HE : 1
JELLY_PACKET : 1
SYMPTOMS_NEUROGENIC : 1
AND_LIMITEDLY : 1
ANTITHROMBOTI_MAKES : 1
KNEE_PAIN : 1
RETURNS_REEVAL : 1
OF_SHIFT : 1
WITH_PRESENTING : 1
HE_BECOME : 1
STATED_ANY : 1
ON_EXAM : 1
BERNA_IF : 1
HISTORY_PRESENT : 1
WEARS_DISPOSABLE : 1
AS_SC : 1
TO_UNIT : 1
RESULTS_ARE : 1
BASE_UPPER : 1
TAKING_MG : 1
AT_LUNCH : 1
WATCHFUL_EASILY : 1
OUTPATIENT_IN : 1
TO_PATIENT : 2
RR_SAYS : 1
SOME_MONTHS : 1
CONTACT_NUMBER : 5
ASSISTIVE_AND : 1
UP_LATER : 1
MG_PO : 4
OF_ADDITIONAL : 1
ESSENTIAL_COLD : 1
NO_PRODUCTIVE : 1
THOUGHT_IS : 1
NON_VA : 1
TO_DURING : 2
STARTLED_IN : 1
WRITER_THE : 2
EYE_CLINIC : 1
EXTRA_WERE : 1
BELIEF_THAT : 1
RIGHT_FOR : 1
ACTIVE_JUN : 1
MEDICAL_AND : 2
NO_SOB : 1
BEEN_WITH : 1
MALAR_RASH : 1
MIN_APPT : 1
PUFFS_LAB : 1
TEAM_THIS : 2
STATES_ONSET : 1
WHICH_SUBMITTED : 1
RAL_MED : 1
TO_DECLINE : 1
AND_SHOWED : 1
MIDNIGHT_SCHEDULED : 1
ONE_BUT : 1
THAT_DOWN : 1
WITH_SPONSOR : 1
HEALTH_TREATMENT : 1
ASSOCIATE_PROVIDER : 1
PREHOSPITAL_INTRAORAL : 1
THEY_MISSING : 1
SEPTIC_SEVERE : 1
CONTENT_PATIENT : 1
CALLED_WITH : 1
ACTIVITIES_DAILY : 1
NICOTINE_PATCH : 1
WISHED_TO : 1
SOFT_AND : 1
REGAIN_IN : 2
GEN_WHEN : 1
AGO_AND : 1
WOULD_RECEIVE : 1
INDIVIDUAL_THERAPY : 3
PHYSICIAN_SO : 1
AND_STATED : 2
LUNCH_NOT : 1
HIM_HIS : 1
URINE_MOBILITY : 1
LITTLE_HELP : 1
AND_PLAN : 2
TO_QUESTIONS : 1
PER_LEFT : 1
WAS_VERIFIED : 1
MH_APPT : 1
SKILLS_HE : 1
PROVIDED_ORDER : 1
LOST_MODE : 1
IN_PATIENT : 2
DESIRES_IMPROVE : 1
IMPROVED_AND : 1
COUPLE_DISCUSSED : 1
SURROGATE_EASTHOM : 1
GET_THE : 1
LT_REMAINS : 1
SPO_LO : 1
PAIN_SPO : 1
DAILY_AMBULATION : 1
ACTIVE_SELF : 1
FOUR_SPOKE : 1
THE_VIA : 1
URINE_ADVERSE : 1
KUWAIT_REPORTS : 1
TAKE_BOTH : 1
PT_SEEN : 2
HAD_BECOME : 1
FOR_NONE : 1
WITHIN_LT : 1
AND_SITS : 4
VERY_TIRED : 1
AICD_IN : 1
AND_AND : 7
UP_HAD : 1
PATIENT_TH : 1
LEVEL_VIA : 1
GOT_UP : 1
ASSESSMENT_VET : 2
FEEL_WITH : 1
RHYTHM_UNSCHEDULED : 1
ORDERED_CC : 1
AREA_INSTRUCTION : 2
THIS_REMINDER : 1
NUMBER_CHIEF : 1
PT_ABOUT : 1
HAVE_ORDERED : 1
PAST_MONTHS : 1
UP_PHONE : 1
SELF_MOVEMENT : 1
PT_FINALLY : 1
STAFF_TETANUS : 1
NEC_AND : 1
THERE_WERE : 1
FROM_THIS : 1
FUNCTIONAL_OR : 1
CORRECTION_CORRECTION : 1
FOLLOWING_ALERT : 1
SIDE_BODY : 1
FOR_ALL : 1
PPD_PANEL : 1
TOTAL_PRE : 1
THE_ANSWER : 1
MALE_PATIENT : 1
WISEMAN_EVE : 1
PCMM_BERNA : 1
REVIEWED_OF : 1
BEDTIME_APPROVED : 1
ABDOMEN_AND : 1
UNSPECIFIED_NO : 1
BATH_THIS : 1
DENIES_AT : 1
SELF_LEGS : 1
APPROVED_POSITIVE : 1
VETERAN_REPORTED : 1
MALE_COLOR : 1
COLON_COLONOSCOPY : 2
APPROVED_CARE : 1
WERE_ON : 2
IN_PLACE : 1
MEMBER_SIGNIFICANT : 1
JOINT_AND : 1
TAB_QUETIAPINE : 1
THE_WATCHING : 1
WAS_RECEIVED : 1
GROWTH_TANYA : 1
PERIAURICULAR_HIS : 1
IS_FOCUSED : 1
IN_RECORD : 1
NO_FOR : 3
HAVE_BEEN : 1
MODALITIES_MHP : 1
WITHIN_ENVIRONMENT : 1
HIGH_READING : 1
INITIAL_READ : 1
AT_MEDICATION : 1
PER_OVER : 1
PICK_OR : 1
BERNARD_THE : 1
TO_ACUTE : 1
APPLICABLE_MOBILITY : 1
VS_PATIENT : 1
THANKFUL_ALL : 1
TO_SMOKING : 1
PMRS_REQUEST : 1
VETERAN_FOR : 3
TO_OUT : 1
HAVE_NO : 1
CONFIRMED_AN : 1
PROBLEM_ACTIVITY : 1
AND_FINE : 1
AM_TEAM : 1
RESTART_NOT : 1
VET_BE : 1
READING_INDURATION : 1
SAID_ARE : 1
LAB_RESULTS : 1
WELL_PER : 1
WEARING_NONSLIP : 2
DRO_DIZZINESS : 1
PATIENT_PRIVILEGES : 3
OF_EXTREME : 1
COUMADIN_INR : 1
COUGHING_OVER : 1
INDEX_OUTPT : 1
IT_UNTIL : 1
QUESTIONS_ABOUT : 1
OUTCOME_AND : 1
NURSE_CALLED : 1
IT_IN : 1
ONSET_PAIN : 1
FELT_HE : 1
RESPONSES_HZ : 1
GENDER_MALE : 1
PREFERENCES_NONE : 1
PRBS_OR : 1
TO_SAY : 1
RESPONSE_STARTING : 1
CITRATE_PER : 1
PATENT_OXYGEN : 1
ICDCM_NEELIMA : 1
NO_AMOUNT : 1
DEPRESSION_SUPPORTIVE : 1
BRC_PROGRAM : 1
AND_FELL : 1
AND_BURN : 1
REGION_VITAL : 1
PHYSICIAN_AGREES : 1
MINERALIZATION_ABNORMALITIES : 1
TO_DISCUSS : 2
BY_DOES : 1
NUMBER_FOR : 2
ALL_THE : 1
DATA_WAS : 1
REPORTS_WEIGHT : 1
APPOINTMENTS_TAKING : 1
BEEN_TALKING : 2
MEDICAL_HBPC : 1
RESOLVED_HAS : 1
HE_LORAZEPAM : 1
SPONGE_DURING : 1
ASSOCIATED_WITH : 1
GROOMED_WILL : 1
VETERANS_TREATED : 1
SCREENINGT_CONTACT : 1
MOBILITY_HYGIENE : 1
BOLUS_GIVEN : 1
THE_EMERGENCY : 1
CM_LB : 1
CHANGE_INDIVIDUAL : 1
TO_RUN : 1
SO_IN : 1
OF_ISSUES : 1
LABS_REVIEWED : 2
CM_HEARING : 1
VOMITING_NO : 1
WITH_CHIEF : 3
FOOD_VETERAN : 1
SALT_AS : 1
YOUR_MEDICATION : 1
THESE_BE : 1
DISPLAYS_NEW : 1
FIRST_WOKE : 1
NORMAL_BUT : 1
OWN_DEFENSE : 1
FUTURE_INITIAL : 1
ORTHOPEDIC_SPECIALISTS : 1
DIABETIC_TELERETINAL : 1
GOT_FOR : 1
TO_GIVING : 1
NAME_DOB : 2
LEAVE_FELT : 1
REQUIRED_OF : 1
REQUIRED_AMOUNT : 1
YOU_CARE : 1
BY_HE : 1
DEC_PHARMACIST : 1
MG_THIAMINE : 1
WITH_SUPERVISING : 1
CONSENT_BLOOD : 1
ABNORMALITIES_LENGTH : 1
HE_SOUGHT : 1
AS_EXTREME : 1
CENTER_HOME : 1
WRIST_LDL : 1
MUCOSAL_HYPERPLASIA : 1
SCOPALAMINE_TIMES : 1
POSSIBILITY_OF : 2
! Stats words=2199  pairs=11356
