# Supplementary material for: Predicting the Risk of Suicide by Analyzing the Text of Clinical Notes
Source: PLoS One. 2014 Jan 28;9(1):e85733. doi: 10.1371/journal.pone.0085733 (PMC3904866; doi:10.1371/journal.pone.0085733)
Supplement: Appendix S3 — Machine Learning Libraries and Methods: This section is provided to enclose the open source (Apache License) classifier used for the building of the statistical models, specifically for the purposes of study reproducibility. A detailed account of these tools is intended for another publication. (ZIP) [file pone.0085733.s003.zip › Appendix3/ML_libs/Regression_testing/group3/processed/grp3-pt-1050.dat]

!  Done reading
! Total word count = 6385
! Total unique words = 2165
! Total pair count = 12766
! Total unique pairs = 11094
CONTAINS : 1
AT : 38
ZZPATIENT : 5
ADL : 8
SARDINES : 1
WORK : 6
CUTTING : 3
SURROUNDINGS : 1
VOICES : 2
FINGER : 2
ULCER : 1
ATIVAN : 1
WEIGHT : 6
READINESS : 1
STAY : 3
RELIEVE : 1
COLORS : 1
PLANNING : 1
TREATMENTS : 1
NECESSITY : 1
MINUTE : 2
INSTRUCTED : 3
MID : 1
INTERVENTION : 4
COUNSELING : 1
HAIR : 2
USE : 5
SIZED : 1
GEMFIBROZIL : 1
RR : 1
DISCHARGED : 2
CONTINUOUS : 1
SUPPLIES : 4
SECURITY : 3
ASA : 1
SMART : 1
READING : 2
VETERANS : 5
SCHEDULING : 1
LEVEL : 6
CHANGES : 6
ALCOHOL : 7
RAL : 3
IMPORTANCE : 1
TUFTS : 1
CHARACTERISTICS : 3
STRUCK : 1
SHOULDER : 2
MET : 7
MACHINE : 1
FUNCTIONING : 1
COPD : 1
SLIGHTLY : 1
MEAL : 5
REMOVED : 2
VIOLATION : 1
CHANCE : 1
APPROPRIATE : 3
SUBSTANCES : 1
DIRECTIVE : 1
BLIND : 3
WKS : 1
ATTORNEY : 1
FISH : 2
WELL : 6
PHARM : 1
TEST : 3
NOTE : 42
INCREASING : 1
ISOLATIVE : 2
LDL : 2
BAKER : 1
DSMIV : 1
DO : 7
DOES : 6
TESTS : 1
UNDERSTANDS : 1
ARRANGE : 1
FACT : 1
HTN : 3
SAME : 2
RENEWAL : 1
ACCESS : 2
ADVERSE : 3
SAW : 1
SCHEDULED : 7
ASK : 2
MEASURED : 1
STEPS : 2
ANCHORAGE : 1
TAB : 7
REQUIRED : 3
ASSISTED : 1
STABLE : 2
MONITOR : 1
DEC : 3
HAS : 38
FOR : 81
PERCEPTION : 1
ARNP : 1
CONDITION : 5
NUTRITION : 4
MOWING : 1
EDV : 2
CLC : 2
PATPU : 1
MODALITIES : 1
KILL : 1
MORNING : 3
INR : 2
AMB : 1
KNEE : 3
ABSTINENCE : 2
CPS : 1
HESITANCY : 2
SC : 8
HEARTRATE : 1
DECLINE : 1
IDEATION : 3
RECREATION : 1
SATURATION : 1
SWER : 2
COLONOSCOPY : 3
GOALS : 1
CORTICAL : 1
PRURITIC : 1
RESPIRATORY : 1
PINS : 2
001 : 1
ACTIVITY : 3
TAXI : 2
LABRAL : 1
SIMILAR : 1
PRECAUTION : 1
NAUSEA : 3
PREVIOUSLY : 1
THO : 1
LEAN : 1
CHILDREN : 1
RECENTLY : 4
VISIBLE : 1
DERM : 1
CD : 1
INCREASED : 2
NSC : 1
DURATION : 2
WELLKNOWN : 1
OCT : 2
AUDITORY : 1
PREP : 1
GO : 5
SIGNIFICANT : 2
BOWEL : 12
SEC : 1
BP : 6
DIVISION : 1
PREVENTION : 1
POST : 1
SEPTEMBER : 1
DEPRESSION : 5
BARRIER : 1
SON : 2
PRESBYOPIA : 1
CM : 8
FREE : 2
IMAGE : 2
CITALOPRAM : 1
GAIT : 3
BREAK : 1
SHOES : 1
CONSULTSOAP : 1
ATTEND : 1
CAMARA : 1
MEATS : 1
MEETS : 1
WT : 1
MEPERIDINE : 1
MORALITY : 1
PLANS : 2
PARTIAL : 1
STARTED : 2
HANDOUT : 1
ACTUALLY : 1
LIFT : 2
SPASMS : 1
TECH : 1
FEEDING : 2
OR : 30
THERAPEUTIC : 3
SHIFT : 10
BOTH : 3
DYSTHYMIC : 1
TEMP : 3
GUNSHOT : 1
CONCERNS : 1
PULMONARY : 1
COUMADIN : 1
AIR : 1
LIKE : 4
WONDERING : 1
CALLS : 2
TRAINING : 1
UNKNOWN : 1
APARTMENT : 1
MUCH : 3
TIW : 1
MCH : 1
ANKLE : 3
TAKE : 13
INCREASE : 1
WITHDRAWAL : 3
MONITORED : 3
WALKIN : 1
DEMONSTRATING : 1
OD : 2
SUPPORTTALKING : 1
HEALTHIER : 1
LATERAL : 2
HIGHER : 1
CONSIDER : 3
DEFICIT : 1
UNIT : 4
THINK : 1
MD : 3
INTERVAL : 1
NAME : 11
CARE : 29
MGS : 1
SURROGATE : 1
DISCOURAGED : 1
AGE : 9
EVALUATE : 1
INVOLVED : 2
RATED : 1
TIMES : 6
IS : 72
DL : 2
WORST : 1
WRISTS : 1
FLUIDS : 1
IF : 18
ENOUGH : 1
USER : 1
MH : 6
CANCELLED : 1
BAND : 2
VIOLATING : 1
ONCE : 3
SKILLS : 4
EATING : 1
PSYCHOLOGIST : 1
BRIEFLY : 1
EVALUATION : 5
APPROX : 2
ACKNOWLEDGED : 2
APT : 1
INSPECTION : 1
REPAIRED : 1
REFUSED : 3
HP : 1
DIRECTION : 1
THESE : 2
VISION : 2
PREREGISTRATION : 1
SALES : 1
PASSING : 1
CONSTRICTED : 1
COMMANDS : 1
SEBACEOUS : 1
VALUE : 1
ENGE : 1
DROP : 1
KIN : 1
RUPTURED : 1
MUSIC : 1
NEAR : 1
HEIGHT : 2
MARRIED : 2
ADDENDUM : 18
FULL : 4
NO : 52
INTENSITY : 1
CHIEF : 3
CHANGED : 2
PNUEMONIA : 1
UPPER : 3
HYPOTHYROIDISM : 2
RISK : 11
CLINIC : 13
PERFORMED : 3
CLOZAPINE : 2
EGOMANIAC : 1
INITIALLY : 1
MINS : 1
TENDERNESS : 1
SCALP : 1
RELAXANT : 1
POINT : 1
BMI : 2
COULD : 1
PRN : 1
UNCIRCUMCISED : 1
DIA : 1
SPECIALTY : 1
DEGREE : 1
GOLD : 1
STORIES : 1
FRIGHTEN : 1
EDUCATIONAL : 2
WILL : 25
OFTEN : 2
APPEARANCE : 2
BUT : 8
SCHOSOME : 1
ASKED : 1
THOUGHTS : 3
DS : 1
TYPE : 3
UNEMPLOYMENT : 1
CAREGIVER : 1
NONSLIP : 1
TV : 1
SPECIFICS : 1
PLASMA : 1
SET : 3
MEALS : 1
SCHIZOPHRENIA : 3
BONNIE : 1
CFCF : 1
MARITAL : 1
INJURED : 1
LLE : 1
CHOLECALCIFEROL : 1
MEDICALLY : 1
CONSULT : 12
DECLINES : 2
ACA : 1
SUPPORT : 4
FIND : 1
WANTS : 1
FLEXERIL : 1
MEDICAITON : 1
QID : 1
PRESENTED : 1
EXPOSURE : 1
REVIEW : 2
LIKELY : 1
MAINTAINED : 1
COMES : 2
INJECTION : 3
REEVALUATION : 1
VIEW : 3
BASCOM : 5
RESIDENT : 8
CONTACTS : 1
TEENS : 1
INSTRUCTIONS : 2
OOZING : 1
ERYTHEMA : 1
VA : 8
REASSESS : 1
WED : 1
PREFERENCES : 1
PRESUMED : 1
APRIL : 3
BENT : 1
LEVOTHYROXINE : 1
RESIN : 2
NEEDLES : 2
INITIATED : 1
CAUSE : 1
PAIN : 37
DISEASE : 6
ANOMALIES : 1
THURS : 2
AS : 18
VISTA : 2
GTTS : 1
WITH : 80
PSV : 2
FEELS : 3
WORRIED : 1
OFFERED : 3
CHAPLAINVISITATION : 2
TEMPERATURE : 5
BASIS : 1
INDEX : 2
GONE : 1
BRANDEN : 1
INCLUDING : 4
FOBT : 1
SETTING : 2
USED : 5
IT : 15
BEDTIME : 1
NECESSARY : 1
SUBMIT : 2
MOSTLY : 1
DSHI : 1
DISCUSSED : 10
MATERIALS : 1
CA : 1
EXERCISE : 3
SHOWER : 1
TIME : 19
PURPOSE : 1
CODE : 1
INTEGRITY : 1
SWS : 1
DRIVER : 1
HYGIENE : 1
HCL : 1
TEETH : 1
WALK : 1
ADDITIONAL : 3
SAFETY : 5
EMOTIONAL : 1
SIDE : 3
TRUS : 1
BREAKFAST : 2
DRRTP : 1
RECEPTIVE : 1
ALLERGY : 1
PAK : 1
SPEAK : 2
CALL : 16
EXPRESSED : 1
MALIGNANCY : 1
INTERMITTENT : 2
HX : 1
BIRTH : 1
MHC : 2
FOV : 1
IMAGING : 3
ORIENT : 1
UNSPECIFIED : 2
DISJOINTED : 1
PROTECTION : 1
TREECE : 1
IOP : 2
CSAC : 1
JUDGMENT : 1
ARD : 1
VOLUNTARILY : 1
FRI : 1
TABLETS : 2
PER : 3
ALCOH : 2
GASTRODUO : 1
ETC : 1
MOBILITY : 4
OPHT : 1
YOUR : 12
PRECAUTIONS : 2
VOMITUS : 1
GIVEN : 6
UNSURE : 1
HT : 2
WHO : 9
UPON : 3
ANA : 1
DIARRHEA : 1
ATENOLOL : 1
CURRENT : 10
ARM : 2
PERSONS : 1
CONTROL : 3
GROOMING : 1
BRONX : 1
HIM : 11
ES : 1
RESPONSIBLE : 1
HO : 1
PULSE : 7
NS : 1
NEXT : 5
NEEDS : 6
THEY : 8
INTERACTION : 1
REFERRED : 1
TR : 1
FREQUENT : 1
SSOME : 1
MESKENAS : 1
SLIVER : 1
WATER : 1
TRANSFER : 3
OBSERVATION : 2
ML : 2
PHONE : 12
DECLINED : 1
EXPEDITED : 1
RESPONSES : 1
PD : 1
FAIR : 5
OH : 1
SELENIUM : 1
HAD : 13
BS : 1
SOUNDED : 2
LOSS : 2
SISTER : 1
QUETIAPINE : 1
POLYMYXIN : 1
YO : 2
NEGATIVE : 6
LOG : 1
REINFORCED : 1
ORTHOPEDIC : 1
VALID : 1
CHOICES : 1
NEGATIVISM : 1
LAB : 2
DIAGNOSTIC : 1
ING : 3
COMPLAINTS : 1
CONTACT : 6
NOTIFIED : 2
NPO : 1
GUIDED : 1
IMPAIRED : 1
COURT : 1
PROBLEMS : 2
PEERS : 2
URINE : 8
MINIMUM : 1
RTC : 2
GIVE : 2
CAN : 2
NEG : 1
THERAPY : 11
CONNECTING : 1
STOPS : 1
AWARE : 2
NONVA : 2
WHICH : 5
SYMPTOMS : 7
SUGARUSE : 1
NOTES : 1
UNDERLYING : 1
OVER : 1
ROTATOR : 1
VISITS : 1
ON : 46
QUIT : 2
COMPLETE : 2
PRESSURE : 3
ATTENDED : 1
TEL : 1
APART : 1
09 : 1
ECP : 1
COVER : 1
VERIFY : 1
GOOD : 8
EXTENDING : 1
FALLING : 1
FLAX : 1
CCS : 1
DRUGS : 1
MED : 2
UPDATE : 3
INTO : 2
FOCAL : 1
STREET : 1
PO : 3
SHE : 12
UP : 9
THEN : 3
USUAL : 3
DEAR : 3
LOCATION : 5
FEW : 2
RESTORATIVE : 2
DETERMINE : 1
LETHALITY : 1
AWAY : 1
PRIOR : 3
VERBAL : 3
OFF : 2
GOT : 1
OBJECTIVES : 1
DATE : 8
FRONT : 1
RELATES : 1
DAILY : 6
EXPRESS : 1
LFTS : 1
REQUIRE : 1
SECRETION : 2
NOX : 1
LONG : 2
FORMAT : 1
ELSE : 1
AWAKE : 1
WHEELCHAIR : 1
HOUSING : 1
REPLACEMENT : 1
FROM : 13
LEFT : 10
BATH : 1
MEDICAL : 7
HEAD : 2
BECOME : 1
DVDS : 1
SPOKE : 2
ALSO : 10
SYSTEM : 2
DEPRESS : 1
KT : 1
ARTHROPLASTY : 1
FINGERTIP : 2
BETTY : 1
WORKING : 2
EXCELLENT : 1
PALMERS : 1
AN : 11
HEART : 3
RANDOMIZATION : 1
DISABILITY : 2
NEGA : 1
FOUR : 1
HEMORRHOIDS : 2
APPARENT : 1
OUTSIDE : 1
BLAST : 1
DRESSES : 1
EYE : 6
UNSCHEDULED : 1
POPLITEAL : 1
MILIEU : 1
HANGING : 1
DISCUSSION : 1
AGO : 1
MYSELF : 1
ATTENDING : 2
CHEST : 2
HAVING : 1
DOCUMENTATION : 1
FEARFUL : 1
SIGNALS : 1
EXCISION : 1
DT : 3
ORTEGA : 1
APPROPRIATELY : 1
OPH : 1
ENCOURAGE : 2
HC : 1
MUSCLE : 3
ARE : 7
DTC : 1
ANSWERED : 1
DESIRE : 1
INDEPENDENT : 1
HYPERTENSION : 2
ELEVATED : 1
CORRECT : 3
PERSON : 4
CYST : 2
CPRS : 1
HYDROCHLOROTHIAZIDE : 1
SURGERY : 4
SPREAD : 1
HAVEDISCUSSED : 1
MN : 1
BURNING : 1
INHL : 2
INTERDISCIPLINARY : 1
EXCLUSION : 1
SERVED : 1
NUMBNESS : 1
YEARS : 4
COLON : 1
BE : 19
NOCTURNAL : 1
OX : 3
LEAVE : 1
TIP : 1
DUE : 3
THEIR : 2
DENVER : 1
HEPARIN : 1
TAUGHT : 1
PING : 1
PH : 3
CANE : 1
ISSUES : 2
DELUSIONS : 2
RECONCILED : 2
ALONG : 2
PSYCHOSIS : 1
OTHER : 13
DRESSING : 1
CTAB : 1
END : 2
QHS : 1
LIFE : 3
ME : 1
ANTICOAGULANT : 3
BED : 4
NURSING : 14
RXS : 1
FOLLOWING : 5
IDENTIFIED : 5
GLAUCOMA : 2
REFER : 1
DIAGNOSIS : 6
WITHOUT : 7
DIVORCING : 1
VERIFIED : 3
ATYPICAL : 1
ANXIETY : 5
INDUCES : 1
SAY : 1
EXAMINED : 3
AUDITC : 1
SYMPTOM : 1
WE : 1
TOILET : 2
CONCURS : 1
JUDGEMENT : 1
PROTECTORS : 2
FUNCTIONAL : 3
FOUND : 2
PATCHES : 1
ROOM : 5
IMPROVED : 2
ADDITION : 1
ELEVATOR : 1
CHART : 1
SIDERAILS : 1
MIDNIGHT : 1
AVAILABLE : 2
FIRM : 1
DORSUM : 1
ABOUT : 7
THANKED : 1
ANYTHING : 1
MIAMI : 4
EMERGED : 1
RECHECK : 1
STRETCH : 1
PLEASANT : 3
CIU : 1
POTENTIAL : 1
NOTIFY : 1
NKA : 2
ADVOCATE : 1
MULTIVITAMINS : 1
FLAREUP : 1
VICODIN : 1
PAT : 1
TABLET : 6
DOM : 1
ADMIT : 1
DURING : 6
TRAIN : 1
ENVIRONMENT : 2
SEVERAL : 2
LISTED : 2
BX : 1
HUMANA : 1
TKA : 2
CHECKS : 1
HURT : 1
VOICED : 1
COMORBID : 1
GETTING : 3
HI : 1
OS : 4
BBLOCKER : 1
TRACE : 1
SCORE : 1
OXYGEN : 1
BASELINE : 1
EPIS : 1
HOME : 7
HYPERGLYCEMIA : 1
NOTED : 1
INDIVIDUAL : 1
SEEM : 1
RETURN : 4
PANEL : 1
TURNIN : 1
MODERATE : 4
EXPECTATIONS : 2
OTHERWISE : 2
ANYONE : 1
REFRACTION : 1
FLIGHT : 1
URINECLEAN : 1
METHADONE : 3
HUNTSVILLE : 1
MIN : 6
POOR : 3
CONTACTING : 1
MEDICATE : 1
MDS : 1
RECONCILIATION : 2
MINUTES : 7
AVOIDANCE : 1
TINGLING : 2
FOLLOWUP : 2
SIDES : 1
TOLERATING : 1
ALTERATION : 2
CBSST : 2
RISKS : 1
CHECK : 2
TEAM : 6
FALL : 4
SICK : 2
DATA : 2
AM : 8
ENTERED : 2
PRACTITIONER : 4
OCCASION : 1
FLAT : 1
PINESS : 1
WHERE : 3
LE : 4
PRESSURES : 1
REFUSE : 2
CALLED : 3
TOOK : 1
SUPERVISION : 3
ALLERGIC : 1
BACHELORS : 1
PREOPERATIVE : 1
OBTAINED : 1
ADVISED : 3
MON : 1
STOMACH : 1
DIPHENHYDRAMINE : 1
MONTHS : 2
DEATH : 2
RULE : 1
LESSON : 1
PALPATION : 1
MEASUREMENT : 1
NOON : 1
VI : 1
BEDSIDE : 1
UCINATIONS : 3
DATED : 2
ASKING : 2
CONGESTION : 2
ASSISTANT : 1
EFFECTIVENESS : 2
INSIGHT : 2
DIABETOLOGY : 1
TOPICS : 1
CHOICE : 1
RESTED : 1
ROOMED : 1
LUNG : 2
MEDICATION : 12
STOP : 2
WRIST : 1
VISUAL : 2
WANT : 3
ATTEMPTED : 1
CASE : 2
SUPPORTIVE : 2
AFRICAN : 1
ORAL : 1
CONTINUE : 3
ABNORMAL : 2
SPIRIVA : 1
READ : 2
SWELLING : 2
OVERSIGHT : 3
SERVICES : 4
GOAL : 5
GLUTEAL : 1
EXAMINATION : 1
PLT : 1
CLICK : 1
PROVIDE : 5
PMHX : 1
WHEAL : 1
FARIBAULT : 1
MAINTAINS : 1
HEALTH : 12
DELUSIONAL : 1
ADJUST : 2
PLACED : 1
STOOLS : 2
COGNITIVE : 2
IDEATIONS : 1
INCIDENT : 1
INDICATED : 1
LAWN : 1
CHAPLAIN : 2
PREVIOUS : 5
YOWM : 1
REFERRAL : 1
INTERVENTIONS : 4
MAR : 1
LEAD : 1
AZITHROMYCIN : 1
AFTERNOON : 1
VS : 2
MORE : 5
MAKING : 2
RACE : 3
MARCO : 1
WENT : 2
TOPICAL : 1
LIN : 2
ER : 2
APPLICABLE : 2
CABG : 1
RM : 1
REQUEST : 5
BARNES : 1
RN : 6
UNABLE : 1
XYZZY : 2
AUGUST : 1
ELIGIBILITY : 1
ANTICOAGULATION : 1
HEADACHES : 1
HYG : 1
AFTER : 4
READY : 2
PARTICIPATED : 1
ZIPPERS : 1
STRUCTURED : 1
CSECTIONS : 1
STILL : 2
TRACER : 1
DIFFICULTIES : 1
WORSENED : 1
SCALE : 5
OBESE : 1
OPENING : 2
FLUID : 2
SALTY : 1
VOICEMAIL : 1
PHOTOGRAPHY : 1
GROUPS : 5
PCP : 5
SAYS : 5
APPOINTMENTS : 2
WOUNDS : 1
APNEA : 1
BOWELS : 1
EACH : 1
SYMPTOMATIC : 1
TITLE : 1
WNL : 1
HARSH : 1
OLD : 4
TIA : 1
FOOT : 1
CLINICIAN : 1
LS : 2
WEDNES : 1
AGITATED : 1
ORGANIZED : 1
REMAINING : 1
ETHNIC : 1
APR : 1
AREA : 6
PL : 4
GUIDE : 1
SCHIZ : 1
INDEPENDENTLY : 3
MM : 2
UNDERSTANDING : 2
RATIONAL : 1
MEDICATIONS : 13
PNEUMOCOCCAL : 1
MR : 8
INDIAN : 2
DIRECT : 2
MAJOR : 1
RECREATIONAL : 1
BILATERAL : 1
DESCRIPTION : 1
CRACKLES : 1
VACCINE : 1
QD : 1
BETTER : 5
RESULTS : 1
PROCESS : 2
EMERGENCY : 1
BREATH : 3
ONCWATCH : 1
LACE : 1
ABLE : 4
RECENT : 6
CHO : 1
AVG : 1
PARKINSON : 1
IN : 79
MARY : 2
MANAGEMENT : 4
STATE : 4
ECHOGENIC : 1
ENVIRONMENTAL : 1
PLAN : 11
UG : 1
ANTERIOR : 3
PENG : 1
CONTENT : 1
AGREE : 1
GRAMS : 1
PATHOLOGY : 1
VERY : 3
FUNDING : 1
OCCURED : 2
CHARGE : 1
IDENTIFICATION : 1
LACK : 1
ASSESSMENTIS : 1
SPERMATOCELE : 1
PERSONALLY : 1
VICTIM : 2
TEXAS : 2
FEATURES : 1
BEHAVIOR : 5
BRUIT : 1
PROFILE : 1
MEDIAL : 1
COMPLETED : 6
FAR : 2
SM : 1
DIFFICULTY : 3
NONCOMPLIANT : 1
DECISIONMAKING : 3
REMINDERS : 1
SCOPE : 1
DISORIENTED : 1
KEPT : 1
LAST : 8
KEY : 1
MINNEAP : 1
RELAXED : 2
LUNCH : 1
EDUCATION : 6
TOXICOLOGY : 1
SUSPENDED : 1
ADR : 1
PERCUSSION : 1
ACQUAINTANCES : 1
TITRATED : 1
TRUCK : 1
OSAT : 1
MOVED : 2
DETAILS : 1
CATHETERIZATION : 1
MINIOPEN : 1
FLOMAX : 1
DEP : 1
SPS : 1
WM : 1
ONLY : 1
PERTINENT : 1
EVENING : 2
RINGING : 1
OPEN : 1
PROVENTIL : 1
REMOVAL : 1
MONTH : 4
SACKER : 1
ACCIDENT : 1
DANGER : 1
BEEN : 16
EXUDATE : 1
BID : 4
UNCONTROLLED : 1
WITHIN : 1
BASE : 2
REFILL : 2
YOURSELF : 1
BASCOMPALMER : 1
DECEMBER : 1
OUTPATIENT : 7
INTAKE : 5
WEEKLY : 2
SHORTNESS : 1
INPATIENT : 8
SPEECH : 2
CATARACT : 1
OKAY : 1
TOMORROW : 1
RESCHEDULE : 1
AWAIT : 1
JUMPING : 1
ELOPEMENT : 1
RELATED : 4
COSOPT : 1
SPECIMEN : 1
SPH : 1
HEMATURIA : 1
OPERATIVE : 1
WHEEZES : 1
TWICE : 3
REGARDING : 7
SHAMPOO : 2
HARM : 4
EDUC : 1
RESIDUAL : 2
PERSONAL : 4
SOCKS : 1
IDENTIFYING : 1
HIS : 50
COORDINATOR : 2
DOSAGES : 1
APPARENTLY : 1
VOIDING : 2
RAISED : 2
PVD : 1
REORDERED : 1
DISORDER : 4
KNOWN : 1
SHOWED : 1
SWOLLEN : 1
CONTACTED : 3
EAST : 1
RELATING : 1
FORMAL : 1
JULY : 1
FORGETS : 1
TALKED : 1
TREATMENT : 15
ARTH : 1
BLOOD : 5
SCRIPTURE : 1
WORKER : 2
HAVE : 17
ASSIST : 5
BPH : 1
ODY : 2
OF : 137
INCLUDE : 1
VIEWED : 1
CRADC : 1
CALLER : 1
EXC : 1
PSYCHIATRY : 1
TRAVATAN : 1
SUPERVISORING : 1
TAMSULOSIN : 1
SAID : 1
NUMBER : 21
BEGINNING : 1
ULCERS : 1
ASTHMA : 1
PERIODS : 1
MS : 6
EC : 1
MY : 8
PODOFILOX : 1
OUTPT : 1
INSTRUCTION : 1
BLUNTED : 1
XYOLCAINE : 1
SUBSTANCE : 1
THEM : 1
ASSESSMENT : 11
TACTILE : 1
ARMS : 1
AMBULATION : 1
SURFACEANTERIOR : 2
ACCUCHECK : 1
ATTACHED : 1
VOLUNTARY : 1
POX : 1
STARTING : 2
CONSULTS : 1
BLADDER : 3
FRIENDS : 1
INFORMATION : 5
STENOSIS : 2
INITIAL : 2
ILL : 1
CENTER : 3
QUESTIONNAIRE : 1
UPBEAT : 1
PSYCHOLOGICAL : 1
SUICIDE : 2
AO : 1
THE : 140
EXTENDED : 2
FILED : 1
PRESENTS : 3
GROUP : 10
REST : 1
SECONDS : 1
APPEARS : 1
EXPIRED : 1
COLOR : 10
CHARACTER : 1
POSTIVE : 2
ARRIVED : 2
LEG : 1
MEDS : 4
INDICATION : 1
CT : 1
UNSPEC : 1
HEMATOMA : 1
UNCHANGED : 1
CONTAINERS : 2
EXTENSION : 1
DISPOSITION : 2
ADJUSTMENTS : 2
CAP : 4
DIET : 4
FLICK : 1
LA : 1
LEATHER : 1
VOL : 1
STATED : 16
HEARING : 5
LEADERS : 1
RNBC : 1
HANDS : 1
AXIS : 2
GET : 4
WHAT : 2
SKELETAL : 1
REMOTE : 1
BENEFITS : 2
ALBUTEROL : 3
THINPREP : 1
SHOE : 2
ASSISTANCE : 12
RESIST : 1
CARDIOVASCULAR : 1
PLAY : 1
YEAR : 4
BEVERAGES : 1
LB : 4
MOTION : 2
NARCOTICS : 2
RANKINE : 1
REDDNESS : 1
ITCHING : 1
PUT : 1
SEEN : 8
PRE : 1
SHAKING : 1
RT : 2
FOOD : 7
MAILED : 2
ENCOURAGEMENT : 3
EPINEPHRINE : 1
LAW : 1
NURSE : 3
UDS : 1
MELISSA : 1
LAINED : 1
GIVES : 2
ANY : 10
TRY : 2
DISCHARGE : 7
CONSISTENCY : 4
PAYMENT : 1
SCHED : 1
DRAPED : 1
PERCOCET : 1
FLOW : 2
CHIN : 1
POSTTRAUMATIC : 1
FACILITY : 2
EFFECTS : 1
RELATIONSHIP : 2
MULTILEVEL : 1
MSE : 1
IMPACTED : 1
LATHER : 1
OFFER : 1
SAT : 1
NILANDRON : 1
EVERY : 2
VOLUME : 2
ENEMIES : 1
OCR : 2
SKIN : 8
YESTER : 1
NOT : 25
OK : 2
COMPENSABLE : 1
TAPER : 1
NONTENDER : 2
THERE : 4
EXPECTED : 1
WALKING : 2
KLONOPIN : 2
RESEARCH : 1
BLOODY : 1
LIMITED : 1
BELL : 1
HERE : 4
IM : 3
POSITIVE : 3
WISH : 1
CLEAN : 1
ANGER : 1
FEB : 1
CONDUCTED : 1
INT : 1
PROGRESS : 8
WK : 1
WRITERS : 1
COMPLIED : 1
RECURRENT : 1
PSYCHOTHERAPY : 2
ASSESS : 3
VET : 8
STOOL : 8
EXTREME : 2
BEST : 1
MOTHER : 2
ALPHABETIZED : 1
PARTICIPATE : 1
CONFLICT : 1
INDIVIDUALS : 1
BELT : 1
MA : 1
PAINFUL : 2
ASSOCIATED : 1
CHOOSING : 1
BACK : 10
PENCIL : 1
HOWEVER : 2
SANDERS : 1
SEATTLE : 1
PHOTO : 1
STEARS : 1
VISITING : 1
MALE : 8
BY : 40
PMH : 4
STERILE : 1
DISTURBANCES : 1
CLINICAL : 2
REAL : 3
HYPOECHOIC : 1
REASSESSMENT : 1
DOE : 1
NORTH : 2
CELLULAR : 1
LUNGS : 2
OBVIOUS : 1
CINNAMON : 1
PREPPED : 1
TH : 4
CONVERSATION : 4
TELEPHONEORTHOPEDICS : 1
STEREO : 1
COMPENSATED : 1
TOENAILS : 1
CEFTRIAXONE : 1
TO : 178
LINFLUENZA : 1
PNEUMONIA : 2
FEEL : 3
IV : 3
MESSAGES : 1
ABUSE : 2
DVT : 1
ION : 2
ROUNDS : 1
TASK : 4
VERIF : 1
CHRISTENSEN : 1
COUNSELED : 1
POSTED : 1
SAFE : 3
DX : 2
PROCEDURE : 13
REQUESTING : 5
OJ : 1
ABNORMALITY : 1
WELLBUTRIN : 1
CAPACITY : 3
PORT : 1
PATTERNS : 1
APPETITE : 1
WEAR : 1
LIQUID : 1
SEE : 9
LUN : 1
SULFIDE : 1
SUCCESSFULLY : 1
PLEASE : 2
UNK : 1
STATUS : 6
ATION : 1
DIABETES : 4
READER : 3
DRINKS : 4
IMPROVING : 1
TESTING : 1
OUT : 6
HR : 1
COMFORT : 1
CONT : 1
PRODUCT : 1
SURE : 1
BOARD : 1
SCREEN : 5
FINDINGS : 4
BARRIERS : 4
REACTION : 1
REHABILITATION : 3
FUNCTION : 1
SIGN : 1
ASSIGNED : 2
INFORMATIONAL : 1
MENTAL : 7
NEEDED : 4
GERD : 2
AMBIGUOUS : 1
WERE : 9
THINKS : 2
FACTORS : 1
BRC : 3
SHEET : 2
CUING : 1
COLLABORATIVE : 1
FILL : 1
NEUROLOGIC : 1
RADIOACTIVE : 1
WALKS : 1
TURNS : 1
LABS : 2
DENT : 1
JOB : 1
INCOMING : 1
REILLY : 1
LIDOCAINE : 1
POSSIBLE : 4
HELPFUL : 1
AGREED : 1
INDUCED : 1
NATURE : 1
OVERWEIGHT : 1
HELPING : 1
PARKING : 1
PART : 1
DETERMINED : 1
FAMILY : 6
ORIENTATION : 2
MATTER : 1
WHEN : 7
LOCULATED : 1
AMBULATORY : 2
BEING : 4
FALLS : 4
GLARE : 1
LOSING : 1
RELEIVED : 1
AMOUNT : 5
ABOVE : 2
WAS : 50
LT : 2
ASSISTS : 1
PM : 1
LPM : 2
FORM : 1
PATIO : 1
CONDITIONS : 1
WANTED : 1
COMMUNICATION : 1
REMAINS : 3
DRINKING : 4
BANK : 1
ABD : 1
NOW : 3
PTSD : 4
DISPL : 1
ONSET : 1
NARCOTIC : 2
LEADER : 1
RECRUITMENT : 1
NAOMI : 1
LIST : 7
PARTIES : 1
INCLUDED : 1
OT : 2
SIZE : 1
STUDY : 2
DEMONSTRATED : 1
NEGLECT : 2
BAY : 1
POLYURIA : 1
HOLOGIC : 1
IMMUNIZATION : 3
SA : 1
FEVERS : 1
VOMITING : 2
ESOPHAGEAL : 1
ORIENTED : 5
SKIPPING : 1
VENOUS : 1
PSYCHIATRIST : 1
POSTOCCIPITAL : 1
CURRENTLY : 2
FASHION : 1
NECK : 1
JOINT : 2
DIFFERENCE : 1
RESPIRATIONS : 1
PREDICTION : 1
BETWEEN : 1
REPAIR : 1
DOCTOR : 1
SEDATION : 1
GOING : 2
DISTAL : 1
DID : 6
VALUES : 1
MOST : 2
VINELAND : 1
HAGGERTY : 1
SHOW : 2
RTU : 1
SUN : 1
TELEPHONE : 1
ADDRESS : 3
COHERENT : 1
FACILITATORS : 1
DISORDERMET : 1
GAINING : 1
COOPERATIVE : 1
REPORTS : 9
SUBJECTIVE : 3
SAMPLE : 1
HELP : 2
OPTIONS : 1
DECOMPRESSION : 1
YES : 10
CONTINUES : 3
COUSIN : 1
CONSENT : 5
NOTICED : 1
CHF : 1
FACE : 1
SCOPOLAMINE : 1
DOING : 1
PATRICIA : 1
GASTROESOPHAGEAL : 1
VACCINATION : 1
RACHEL : 1
HPI : 2
LITTLE : 1
FITTING : 1
HES : 2
ED : 5
UTI : 1
CONTRACEPTION : 1
INSTITUTE : 3
THROBBING : 1
PHYSICIAN : 22
GLOBES : 1
DAUGHTER : 1
COMPLIANCE : 1
INSUFFICIENCY : 1
TOOTH : 1
DEPENDENCE : 4
AIDS : 1
CLOSELY : 1
PAPER : 1
HE : 75
DREAM : 1
RX : 3
PLANO : 1
TREATED : 1
OBESITY : 3
RATE : 2
MANUAL : 1
EXPLAINING : 1
FELT : 3
MASS : 2
MEMBER : 1
MIX : 1
CATCH : 1
DETOXING : 1
MEETINGS : 1
MONO : 1
MEDGROUP : 1
DIPLOPLIA : 1
CLEAR : 6
EXTREMELY : 2
MSW : 1
ELBOW : 1
PRIMARY : 8
ENSURING : 1
UNTIL : 3
SIGNS : 2
HALF : 1
ACTION : 1
PATIENTS : 10
BELIEVES : 1
LEGIBLE : 1
SUMMARY : 3
THROUGHOUT : 2
KIND : 1
CONSTIPATION : 2
PROVIDED : 5
DRINK : 3
DENTAL : 2
NEUROLOGY : 1
TWO : 4
LMP : 1
NONE : 7
SIGNATURES : 1
RECOMMENDATIONS : 1
LOT : 1
CONNECTED : 1
TRAVEL : 1
OBSOLETE : 1
PHOTOGRAPH : 1
INNERVATED : 1
SCHEDULE : 1
HER : 4
ORDERED : 2
TOPIC : 2
FEELING : 3
SHOULD : 3
QUESTIONS : 3
EDUCATE : 1
ENDOSCOPY : 1
HALDOL : 1
YELLOW : 1
MCG : 2
CLERK : 1
ROUTE : 1
HIT : 1
THERAPIST : 3
LIVING : 5
PLACE : 4
CART : 1
DOPPLER : 1
DPT : 1
IER : 1
NOSHOW : 1
CHEMISTRIES : 1
RANGE : 5
COMFORTABLE : 1
MG : 15
TRANSFERRING : 2
ADMINISTRATION : 1
UROLOGY : 2
UNTHREATENED : 1
MAINTAINANCE : 1
BEHAVIORS : 1
BECAME : 2
VIETNAM : 1
COUNTS : 1
SITS : 1
CONTINENT : 3
MMOL : 1
WEST : 2
SHOOTING : 1
WORSE : 1
THEMSELVES : 2
APPROXIMATELY : 1
ATTENTIVE : 1
PROVIDER : 10
OIL : 3
MARCH : 1
QUESTIONED : 1
TOLERANCE : 1
GENDER : 2
USES : 2
DIAGNOSED : 1
ANURIA : 1
PROTECTOR : 1
MIGRAINE : 1
APPOINTED : 2
ALERT : 6
SUBMITTED : 2
SUPRAPUBIC : 1
SEP : 1
UNDER : 1
IMED : 1
ACEI : 1
COMMENT : 6
THREE : 1
COLLECTION : 2
POHX : 1
FEMALE : 3
PROGRAM : 1
PAPERWORK : 1
APPOINTMENT : 3
WOULD : 4
CLAY : 1
FOLLOW : 4
INTERACTING : 1
METHOD : 1
HOMICIDAL : 2
CHEN : 1
BIRCH : 1
DEDRA : 1
SEX : 2
ACTIVITIES : 3
REFLUX : 2
ORDERS : 2
RESPOND : 1
INSTRUCTOR : 1
MUSCLES : 1
OPERATE : 1
ONCOLOGY : 3
CUFF : 1
MOVEMENTS : 8
COMPLAINT : 3
ORDER : 3
EXCEPT : 1
USING : 2
CHILD : 1
FORMOTEROL : 1
REALLY : 1
EASILY : 1
HAND : 2
TAPMEDICATION : 1
INFLUENZA : 2
UNDERSTOOD : 1
DENIED : 2
SERVICECONNECTED : 1
ULTRASOUND : 2
FELL : 1
SNACKS : 3
LIFESTYLE : 1
ARRANGED : 1
HIGHS : 1
DISTURBING : 1
NEW : 4
MOUTH : 9
YEAROLD : 1
INTIAL : 1
URGENCY : 1
PRESENT : 4
BREAST : 1
SOME : 3
LINE : 1
SLEPT : 1
WPB : 1
HRS : 1
SPENDING : 2
EXPLAIN : 1
ANESTHESIA : 3
INCONTINENT : 1
NEED : 1
PCA : 1
CAL : 1
RECEIVED : 3
HELPS : 1
PSYCHIATRIC : 1
BARRETTS : 1
RALLY : 2
APPROACH : 3
HYPOKALEMIA : 1
NONDISTENDED : 1
OUTLINED : 1
LISTENING : 1
CUEING : 4
EAR : 1
BODY : 3
PREVENTIVE : 1
SATISFACTORY : 2
CGY : 1
UNRE : 2
CAD : 1
BECAUSE : 1
RUN : 1
NONPHARMACOLOGICAL : 1
OL : 1
GLASSES : 1
TRANSFERRED : 1
REMAIN : 1
ADV : 1
CLASS : 1
SIGHT : 1
LAUGHED : 1
PROMOTION : 1
DELIVERED : 1
DISCOMFORT : 1
ALPHAGAN : 1
STYLE : 1
AEROBICS : 1
LESION : 1
DVAMC : 1
OMEPRAZOLE : 1
BRIGHT : 1
ENROLLED : 2
SEVERE : 1
ALLOW : 2
SOUNDS : 6
REVIEWED : 6
ISSUE : 2
BEFORE : 6
ALL : 3
AUTHOR : 1
SECOND : 1
CONTRACT : 1
INHALE : 1
DAVE : 1
BETH : 1
NEEDLE : 1
DIAGNOSES : 1
SELF : 7
PATIENT : 97
ALLERGIES : 7
DING : 1
SENT : 1
ABDOMEN : 1
AGREES : 3
SHOWING : 1
ATTENTION : 1
NOS : 2
THAN : 5
DYSURIA : 2
RELIEVES : 1
VOICE : 2
ACUTE : 2
OPERATIONS : 1
REQUIRES : 4
FILLED : 1
THUS : 1
PROTOCOL : 3
DECREASE : 2
FEE : 1
DECISION : 1
HOSPITALIZATION : 1
LOOKING : 1
EDUCAION : 1
CAME : 1
VISIT : 13
THAT : 35
ADENOSINE : 2
PHYSCIAL : 1
WIFE : 7
NORMAL : 3
STAFF : 14
DEPRESSED : 1
SERVICE : 8
RIGHT : 6
PC : 3
VITALS : 1
PROMPTED : 1
SYSTEMIC : 1
HBPC : 1
ONE : 13
ATROVENT : 1
PAKULA : 1
AROUDN : 1
CONFIDENTIALITY : 1
REQUESTS : 1
PMR : 1
ANATOMICAL : 1
PTS : 3
THOUGHT : 4
TEARFUL : 3
HYPERLIPIDEMIA : 2
WRITER : 2
RADIATING : 1
COAGS : 1
YOU : 18
HCV : 1
MORPHINE : 2
CRITERIA : 4
DOESNT : 1
DOCUMENTING : 1
CRACKERS : 1
INFORMED : 4
NOCTURIA : 1
ISSUED : 1
RESPONDED : 1
PAST : 7
DOCUMENT : 2
CHAIR : 1
EYEBALL : 1
INTERESTED : 1
REASON : 5
ABUSEUNSPEC : 1
POSTERIOR : 1
DISABILITIES : 1
ENGINEER : 1
TOBACCO : 6
STARES : 1
INVOLVES : 1
TREMOR : 1
REMINDER : 1
ROLE : 2
NEVER : 1
SIX : 1
MYLAN : 2
AGREEABLE : 1
CIRRHOSIS : 3
PENICILLIN : 1
DR : 1
PLAQUE : 1
MEMBERS : 1
SOCIAL : 11
WATCHING : 1
TRP : 1
HOSPITAL : 4
SUICIDAL : 3
ANTONIO : 1
SHUTDOWN : 1
VITAL : 1
GARLIC : 1
SO : 4
REGULAR : 1
REPLACE : 1
IDENTIFIERS : 1
MAINTAINING : 1
WORDS : 1
STRESS : 5
SPECIFY : 1
LABWORK : 1
MAKE : 1
FOCUSING : 1
WEEK : 4
JOST : 1
SCAN : 1
PSYCHOTIC : 2
APPROVED : 1
SHOTGUN : 1
APPRECIATIVE : 1
ANTINAUSEA : 1
ENSURE : 1
DISTRESS : 1
THRU : 1
IMPAIRMENT : 1
DD : 1
ELLIS : 1
MOOD : 7
THEME : 1
LIVES : 1
REPORT : 8
GERIATRIC : 1
LETTER : 1
ELECTRONICALLY : 1
TRANSITIONAL : 1
SPIRITUALITY : 2
HOW : 6
POULTRY : 1
BEAT : 1
FEELINGS : 2
SINCE : 8
FLU : 1
DESCRIBED : 1
COUGH : 1
CHANGE : 3
LEARN : 2
SOLN : 3
CPAP : 2
PLASM : 1
MADE : 6
OFFICE : 1
ACHING : 1
CARDIAC : 1
IUD : 1
YRS : 4
MENTATION : 2
BACTRIM : 2
LEARNING : 5
PRINTED : 2
DOSE : 5
ENCOUNTER : 1
AWOKE : 1
OBJECTIVE : 2
SMOKING : 1
AFFECT : 3
MRI : 2
NUTRITIONINTAKE : 1
EXPLOSIVE : 1
ALASKAN : 1
CONCERN : 1
STRONG : 1
AREAS : 1
ALONE : 1
RELIEVED : 2
PARTICULAR : 1
COMMENTS : 2
STRENGTH : 1
ITEMS : 1
TOTAL : 2
LIGHT : 2
SURGICAL : 4
JUNE : 2
INSIDE : 1
CONDUCT : 1
ST : 1
ELIMINATION : 3
SUCH : 1
CALCULATION : 1
HISTORY : 12
RESPIRATION : 2
TEXT : 1
HOURS : 4
MAIL : 3
PVT : 1
REPORTED : 9
CIRCUMCISION : 1
PROGNOSIS : 1
INTOXICATION : 1
PILLS : 2
WOUND : 3
VM : 1
HIP : 4
MEAT : 2
SITE : 4
OVERALL : 1
MATERIAL : 1
STANDING : 2
POLYSOMNOGRAPHY : 1
TREMORS : 1
COMPLICATIONS : 1
STATING : 2
KG : 3
STANDARD : 1
AUG : 1
PROBLEM : 2
EYES : 2
RECORD : 5
PSG : 1
CIWA : 1
WARFARIN : 1
THROUGH : 3
ANALYZED : 1
PRASHANT : 1
PUFFS : 1
EXTRA : 2
ADMISSION : 4
RESCHEDULED : 2
BUTTOCK : 1
NY : 3
LESS : 2
NON : 1
NICOTINE : 1
PUEBLO : 1
INTRODUCED : 2
BEER : 1
STRIPS : 1
CALCULUS : 1
FUTURE : 1
TUTTLE : 1
WAY : 1
REGIME : 1
DISCONTINUE : 1
DENIES : 7
DOB : 1
QUALITY : 2
ACCOMPANIED : 2
PHARMACY : 3
REPORTEDLY : 1
OTHERS : 4
REQUESTED : 2
DECREASING : 1
INTEGRATED : 2
IVE : 1
VETERAN : 25
CAPSULE : 2
DINNER : 2
PT : 36
INJURY : 3
RADIATION : 4
SIT : 1
PROCEDURES : 2
PSYCHOSOCIAL : 1
RIGHTSORE : 1
PSYCHOACTIVE : 1
MISSED : 2
MINIMAL : 1
PERFORM : 1
PERSISTENT : 1
WILBURTON : 1
AROUND : 1
ILLNESS : 3
BRISTOL : 1
AND : 155
HOUR : 1
INSOMNIA : 1
URINARY : 1
SESSIONS : 2
RESPONSE : 3
SLT : 1
CONCURRENT : 1
WORKED : 1
FOOTWEAR : 1
CHAINS : 1
BEZNO : 1
ATE : 1
AR : 2
KNOWLEDGE : 2
PINES : 1
LOW : 5
ADMINISTERED : 1
FOLLOWED : 1
MAY : 6
LMSW : 3
FIXING : 1
RESTARTING : 1
DERMATOLOGY : 1
LENGTH : 8
PRO : 2
PSYCHOS : 1
APPT : 8
UNLESS : 2
TAKING : 3
ADMITTED : 1
CONSIDERATIONS : 1
OBSERVED : 1
DIETITIAN : 1
DONE : 3
PHYSICAL : 3
WEARING : 1
BILATE : 1
NIGHT : 1
ACTIVE : 19
KNOW : 1
CONCENTRATING : 1
MANAGER : 2
ABILITY : 2
FAIRLY : 1
BEGIN : 1
123 : 1
CO : 1
CONTROLLED : 2
PELLETS : 1
FOCUS : 1
THIS : 38
SUPERVISING : 2
LPN : 2
HIGH : 2
TAPE : 2
SOFT : 2
SIGNAL : 1
NATIVE : 2
VAMC : 3
PALMER : 4
LETS : 1
EXERCISEOCC : 1
PUPILS : 1
AOX : 1
REDUCING : 2
IMMUNIZATIONS : 1
EXTREMITIES : 1
SWITCH : 1
SESSION : 7
SKATES : 1
STATES : 11
GASTRITIS : 1
OU : 8
IMPLEMENTED : 1
WHILE : 4
HAMLIN : 3
QUESTION : 1
SHORT : 1
CELL : 2
FLORIDA : 3
ICDCM : 3
FIRST : 1
RESP : 2
PICK : 2
ETOH : 4
ITS : 1
DOWN : 1
AGE_HISTORY : 1
TO_PT : 1
CONTACT_DENIES : 1
CONTINENT_ECP : 1
AND_MINS : 1
REGIME_WHEN : 1
MY_SUPERVISING : 2
UNSCHEDULED_VISIT : 1
WAS_RAISED : 1
EXCLUSION_AND : 1
HEART_ADENOSINE : 1
THERAPY_INPATIENT : 1
CARE_HE : 1
OSAT_EDUCATIONAL : 1
LEFT_LENGTH : 1
ABOVE_PLAN : 1
HIM_HOW : 1
DIET_CAL : 1
HERE_DISABILITY : 1
WAS_AS : 1
DERM_OF : 1
PHARMACY_PICK : 1
OTHER_PROBLEMS : 1
DOWN_PAIN : 1
PHYSICIAN_SHOWING : 1
BEEN_DIAGNOSED : 1
VA_ON : 1
COMPLIANCE_GTTS : 1
WITH_YES : 1
SCOPE_FOR : 1
BEFORE_CATARACT : 1
UP_THE : 1
LEARNING_AND : 1
THE_BENEFITS : 1
KNOWN_TRUS : 1
OTHER_WILL : 1
ISSUED_THE : 1
ON_TO : 2
SWS_ASSESSMENT : 1
NARCOTICS_HE : 1
PATIENT_INFLUENZA : 1
PREOPERATIVE_TO : 1
PICK_MEDS : 1
STEPS_ORIENTATION : 2
OF_BILATE : 1
PATIENT_HAD : 1
SC_ED : 2
PLACE_BOWEL : 1
SHEET_COMMANDS : 1
MADE_MS : 1
AND_ORIENTED : 2
AND_HPI : 1
FRIENDS_AND : 1
CONTAINERS_URINE : 1
OF_HIS : 10
SERVICE_LINE : 1
FOR_SHORT : 1
THE_PATIENT : 24
AT_DENTAL : 1
UNK_LA : 1
SCHOSOME_VIOLATING : 1
NOT_AND : 1
VETERAN_FEELS : 1
PROCEDURE_ACCUCHECK : 1
AND_CIRRHOSIS : 1
THE_CUTTING : 1
CONFLICT_WAS : 1
YES_AS : 1
THROUGHOUT_WIFE : 1
DELUSIONAL_CONTENT : 1
EVALUATION_FOR : 1
BOTH_EYES : 1
REFER_PATIENT : 1
DISORDER_THE : 1
SUMMARY_MOBILITY : 1
WORRIED_LOSING : 1
IF_PATIENT : 1
ON_ST : 1
ABOVE_OJ : 1
AT_VISIT : 1
PATIENT_CURRENT : 1
FAMILY_HEMORRHOIDS : 1
DETAILS_LB : 1
BECAME_DRINK : 1
WHEAL_RAISED : 1
MONTH_HE : 1
EVALUATE_GOALS : 1
CONSENT_CORRECT : 1
LIVING_GERD : 1
EXTENDED_AND : 1
REVIEWED_VITALS : 1
AGO_MINUTES : 1
TINGLING_IN : 1
STATES_WAS : 1
NOW_REAL : 1
AOX_HOME : 1
DISTURBANCES_HAVE : 1
WEST_STREET : 1
IMPORTANCE_OF : 1
PROBLEMS_RISK : 1
DIVISION_ASSISTS : 1
RISK_SCREEN : 2
MORNING_MG : 1
PATIENT_AT : 1
NONE_FEMALE : 1
OPERATIONS_PERFORMED : 1
LABWORK_TO : 1
TEMPERATURE_HISTORY : 1
CHAINS_HOSPITALIZATION : 1
SOUNDS_WHEEZES : 1
YOUR_LAB : 1
NOT_WEIGHT : 1
ADJUST_GLASSES : 1
AND_WIFE : 1
RECREATION_GROUP : 1
WITH_PRIOR : 1
ON_PLANS : 1
COLOR_NUMBER : 1
PROFILE_OTHER : 1
EDUC_HANDOUT : 1
MIAMI_ON : 1
ANTICOAGULANT_CLINIC : 2
THEME_IS : 1
DISTRESS_PSYCHIATRY : 1
WITH_UNDERLYING : 1
LEFT_PATIENT : 1
RECENTLY_STATED : 1
PATIENTS_ATTENDING : 1
GIVEN_GAIT : 1
HE_FOLLOWED : 1
STOOL_FIRM : 1
PROGRESS_HIS : 1
INSTRUCTIONS_CLEAR : 1
ACCESS_VERIFY : 1
FOR_NO : 1
HYPOKALEMIA_HYPERGLYCEMIA : 1
HCL_CAP : 1
RACE_NURSING : 1
ABNORMAL_INTENSITY : 1
PAIN_PT : 1
SHOW_AN : 1
PROTOCOL_USED : 2
DISABILITY_FOLLOWUP : 1
HAD_ULTRASOUND : 1
WEEKLY_TOLERATING : 1
PLACED_CONGESTION : 1
FEEL_THAT : 1
ARRIVED_TO : 1
OR_OTHER : 2
INSIGHT_AND : 1
STRESS_DISORDER : 1
ADDENDUM_HERE : 1
CAME_EXPLAIN : 1
MEDICAL_WAS : 1
CLOSELY_DR : 1
PAST_IUD : 1
WITH_OR : 1
VIOLATING_CONFIDENTIALITY : 1
BUT_AWOKE : 1
REPORTED_VETERANS : 1
IM_TO : 1
PRESSURE_OR : 2
LPN_WILL : 1
CAPSULE_MOUTH : 1
NOTE_RADIATION : 1
TIME_LENGTH : 1
PRURITIC_COLON : 1
MORE_DRINKS : 1
RANGE_MOTION : 2
READING_ABOUT : 1
APPOINTMENT_BE : 1
SCHEDULED_HAVE : 1
HE_FELT : 1
HOME_WITH : 1
BEHAVIORS_CONNECTING : 1
ON_AREA : 1
TIME_CHARACTER : 1
FROM_ME : 1
INDEPENDENTLY_THEY : 1
INITIAL_STUDY : 1
TO_PHOTOGRAPH : 1
TIMES_AND : 2
BEEN_AND : 1
INR_REQUESTING : 1
LOW_MODERATE : 1
RESIST_THE : 1
IN_MEDICAL : 1
RESIDUAL_URINE : 1
MET_AND : 1
RELATED_WORDS : 1
INPATIENT_TEAM : 1
THAT_ARRANGED : 1
REAL_ISSUE : 1
EXPRESS_THEMSELVES : 1
TALKED_ABOUT : 1
MS_SINCE : 1
PREVENTIVE_HEALTH : 1
FOLLOW_GOOD : 1
DRINK_BEER : 1
POSTTRAUMATIC_DISORDER : 1
EXTENDING_OUT : 1
CHAIR_HE : 1
WITHDRAWAL_NOT : 1
HIS_ENVIRONMENTAL : 1
SMART_SETTING : 1
SENT_TO : 1
APPROACH_AFFECT : 1
WAS_HELPFUL : 1
PROVIDER_PHONE : 1
THE_TOILET : 1
SCHED_IN : 1
BRC_NOTE : 1
BRC_SKILLS : 1
ON_METHADONE : 1
FLUID_NUMBER : 1
PAIN_BRANDEN : 1
REPORTS_FEELING : 1
OF_REPORT : 2
BY_CLINIC : 1
MOVEMENTS_TREATMENT : 1
LMSW_HALDOL : 1
SUPPORT_OT : 1
MALE_RECEIVED : 1
OF_ACTIVE : 1
NOCTURNAL_EACH : 1
PROVIDE_INFORMATION : 1
PT_WILL : 1
MY_CARE : 1
TREMOR_EXTENDED : 1
LIST_OUTPATIENT : 1
CLINIC_AT : 1
PROCEDURE_HP : 1
IN_EYE : 1
OF_WORKING : 1
MR_STATED : 1
HOW_HAS : 1
UNDERSTANDS_AND : 1
OF_BIRTH : 1
RALLY_RELAXED : 1
AS_AS : 1
TO_NOTIFY : 1
PRESENT_ILLNESS : 1
NOT_PAIN : 1
VETERAN_HAD : 1
WITH_HEALTH : 1
LIFESTYLE_CHANGES : 1
SALES_WERE : 1
REST_LEADERS : 1
WHICH_GOT : 1
AT_YES : 1
HE_AXIS : 1
SCHEDULED_DEC : 1
CUEING_OF : 3
AND_HIP : 1
TO_PALMERS : 1
NOTE_DEPRESSION : 1
MORE_OFTEN : 1
FOUR_MONTH : 1
NY_STATED : 1
COMPENSABLE_SC : 1
OTHER_RN : 1
DESIRE_TO : 1
SAYS_LISTED : 1
FIRST_SHE : 1
TOPICS_IN : 1
SOUNDS_REGULAR : 1
RISKS_OF : 1
BELL_PERSONAL : 1
INDEX_TEMPERATURE : 1
DISCHARGE_NONCOMPLIANT : 1
PAK_QD : 1
HEARTRATE_REMAINS : 1
YOUR_RECENT : 1
STAFF_PATIENT : 1
VERIFIED_STATED : 1
VETERANS_RECORD : 1
RECONCILIATION_INPATIENT : 1
NURSE_BID : 1
AND_THERAPY : 1
IN_PERFORM : 1
SUICIDE_SELF : 1
ARE_TO : 2
STREET_MIAMI : 1
ON_REGIME : 1
URINE_ML : 1
REVIEW_ELIMINATION : 1
SHOW_BEEN : 1
SPREAD_APART : 1
PT_REFUSED : 1
JOST_BETH : 1
DIAGNOSTIC_PATIENT : 1
EVALUATION_AND : 1
OFF_THE : 1
SESSION_ALONG : 1
FACTORS_THIS : 1
AND_AGREED : 1
DEPRESSION_HYPERLIPIDEMIA : 1
FIXING_HIS : 1
WKS_REQUESTING : 1
VETERAN_ADDENDUM : 1
IS_PASSING : 1
FUNCTIONAL_ACTIVITIES : 1
TO_COURT : 1
GOOD_AND : 1
AFTER_HE : 2
TO_RULE : 1
UNDER_MY : 1
VETERAN_GUNSHOT : 1
NO_YES : 1
LISTENING_TO : 1
HE_WELL : 1
LA_REFUSED : 1
NEW_ACTIVE : 1
AND_WITHDRAWAL : 1
HUMANA_BY : 1
DISORDERMET_VETERAN : 1
DIET_NOTE : 1
PNUEMONIA_IS : 1
SAFE_FROM : 1
RECENTLY_RELATED : 1
GROUP_NUMBER : 1
ONCE_COLONOSCOPY : 1
VETERAN_HAS : 1
CONSIDER_MRI : 2
BY_JUMPING : 1
AND_WILBURTON : 1
REFERRAL_TO : 1
PAST_WAS : 1
HE_PARTICIPATED : 1
TO_TO : 7
FROM_CD : 1
BE_PERFORMED : 1
OLD_PMH : 1
PAIN_SINCE : 1
ACTIVE_MENTAL : 1
SOCKS_AND : 1
FOR_DISABILITY : 1
OD_IOP : 1
IS_TOBACCO : 1
CCS_LIDOCAINE : 1
YEAR_TWO : 1
UCINATIONS_FOR : 1
FUNCTION_WORK : 1
KG_IN : 1
AVAILABLE_COGNITIVE : 1
SYSTEMIC_SEE : 1
TREATED_NON : 1
OVERALL_CONDITION : 1
HIS_THERAPIST : 1
TURNIN_TO : 1
WILL_PROVIDE : 3
VET_AND : 1
STATED_SOCIAL : 1
ANTERIOR_NS : 1
SPOKE_ADVISED : 1
ORTEGA_MARCO : 1
PLACED_FEVERS : 1
TEMP_DISCHARGE : 1
MIN_TIME : 1
GROUP_ACUTE : 1
IF_CONTINUES : 1
IF_PULSE : 1
OR_EXPEDITED : 1
MY_ASSESSMENT : 1
HTN_CONSTIPATION : 1
PRIMARY_TELEPHONE : 1
ALCOHOL_DEP : 1
TRAINING_PATIENTS : 1
HEMATURIA_IS : 1
PATIENT_WITH : 4
BETTER_THE : 1
SYMPTOMATIC_PMH : 1
TELEPHONE_NOTE : 1
TO_HIM : 4
CALL_REQUESTED : 1
NEXT_WKS : 1
DATE_RADIATION : 1
PHONE_CALLS : 1
YEAROLD_PRESENTS : 1
LEARN_BY : 1
SESSION_PAIN : 1
OKAY_HIS : 1
TAUGHT_PATIENT : 1
MOOD_MONITORED : 1
CALL_LENGTH : 1
URINE_SPEECH : 1
NO_BREATH : 1
TREATMENT_PREFERENCES : 1
PO_KNEE : 1
PHYSICIAN_PODOFILOX : 1
LOSS_TAPMEDICATION : 1
FROM_PLANS : 1
PT_SHOULD : 1
MEDS_PREREGISTRATION : 1
MEAL_ASSISTANCE : 4
CONTACTING_MS : 1
INCIDENT_THE : 1
VISIT_CURRENT : 1
RX_WITH : 1
LMP_CONTRACEPTION : 1
IN_FAMILY : 1
IS_SINCE : 2
ACTIVE_PREFERENCES : 1
BUT_ADDENDUM : 1
AND_OTHER : 1
FOR_MALE : 1
MORALITY_AND : 1
AND_THEIR : 1
PATIENT_USED : 1
RECONCILIATION_AS : 1
TO_PICK : 1
GERD_COPD : 1
EDUCATIONAL_OMEPRAZOLE : 1
OX_ROTATOR : 1
PAST_FEW : 1
NEEDS_TAPER : 1
STATES_WIFE : 1
MDS_FEMALE : 1
CONVERSATION_TRANSFER : 1
FROM_HARM : 1
IF_POSTIVE : 1
COHERENT_SYMPTOMS : 1
SPECIALTY_CLINIC : 1
SHOES_THE : 1
SELF_HIS : 1
ACTIVITY_PLAN : 1
TABLETS_MG : 1
HIM_SOUNDED : 1
REPORTS_HEADACHES : 1
REPORTED_THAT : 3
SCREEN_OUTPATIENT : 1
NOTE_PROTOCOL : 1
TO_NOTE : 1
ETOH_YEARS : 1
SIDERAILS_FACILITY : 1
ZZPATIENT_CARE : 5
PLAY_AN : 1
BUT_PROVIDE : 1
CONTINENT_PROVIDED : 1
SEE_INTAKE : 1
DISCUSSED_PHYSICIAN : 1
WHEELCHAIR_NO : 1
SEE_PROFILE : 1
DIVORCING_HER : 1
WHAT_QUESTIONS : 1
TOENAILS_SUBMITTED : 1
WITH_SIMILAR : 1
WHO_IS : 1
GROUP_MILIEU : 1
WITH_SUPERVISORING : 1
PC_OUTPT : 1
WALK_IN : 1
AND_STARES : 1
BACHELORS_PL : 1
SESSION_WENT : 1
DECISION_REGARDING : 1
ALTERATION_IN : 1
LAST_VISIT : 2
LENGTH_PROTOCOL : 1
ASSISTANCE_IF : 1
IN_THIS : 1
ADJUSTMENTS_NEW : 1
AN_HAD : 1
AM_NSC : 1
IN_FACT : 1
ATIVAN_IS : 1
THANKED_THIS : 1
STOOL_ASSISTED : 1
HE_NOT : 1
COLOR_MEDICATION : 1
RATE_PRIMARY : 1
KNOWLEDGE_DEFICIT : 1
ABUSE_NURSE : 1
DECREASE_WELLBUTRIN : 1
NOT_EXPECTED : 1
SUBMIT_TO : 1
OCT_FLU : 1
DRIVER_WIFE : 1
FOLLOW_SAFETY : 1
CAUSE_THE : 1
LEFT_EAR : 1
PHYSICIAN_SLT : 1
IMAGE_OF : 1
MINUTES_FOLLOWING : 1
PRIOR_ASSESSMENT : 1
OX_DT : 1
MDS_PAPER : 1
TO_POOR : 1
ON_HIS : 3
WERE_MET : 2
MSE_LEFT : 1
GAINING_BETTER : 1
IN_RIGHT : 1
UNSPEC_APNEA : 1
FOR_SPECIFICS : 1
KG_HEIGHT : 1
VETERAN_SERVED : 1
SESSION_EVALUATION : 1
DISEASE_JOST : 1
NURSING_SUMMARY : 1
EASILY_TURNS : 1
MUSCLE_RELAXANT : 1
PAIN_OUTPATIENT : 1
INFORMED_ATIVAN : 1
SEEN_DISCUSSED : 1
AIDS_WHEELCHAIR : 1
DRINKS_THE : 1
PT_FOR : 2
THAT_HAS : 2
PATIENTS_THEN : 1
PRO_PHONE : 1
BE_VISITING : 1
BEEN_FREE : 1
SHOWER_THOUGHT : 1
THIS_FEEDING : 1
JUDGEMENT_OKAY : 1
ABNORMAL_STRESS : 1
REAL_SAFETY : 1
SPS_NARCOTICS : 1
FALLS_COLOR : 1
CHECK_AMB : 1
ARTHROPLASTY_EXPECTATIONS : 1
CHRISTENSEN_SC : 1
RESPONSES_WITH : 1
HAD_PREVENTIVE : 1
SHE_LOOKING : 1
MONO_OF : 1
RECONCILIATION_ON : 1
IMPROVED_SHOE : 1
TO_MAKE : 1
CALLED_HIS : 1
ANXIETY_STATE : 1
ON_SETTING : 1
ILLNESS_MIN : 1
CONSENT_WAS : 1
REQUESTED_COMPLETED : 1
BASCOM_EYE : 3
TEAM_RN : 1
REGARDING_RANGE : 1
FOR_DEC : 1
HER_HE : 1
CIRRHOSIS_CLINICAL : 1
REPORTED_NURSING : 1
SCHEDULED_NO : 1
TO_SELF : 1
TEMPERATURE_PHONE : 1
PAIN_HIS : 1
RANGE_HE : 1
NEEDED_MENTAL : 1
TASK_PERSON : 1
LEFT_ACTIVE : 1
MAY_THIS : 1
THOUGHTS_FEELINGS : 1
WITH_INSTRUCTOR : 1
TIMES_CORRECT : 1
WEST_PSYCHIATRIST : 1
STRENGTH_PHARM : 1
PERSONS_WHO : 1
POSITIVE_AT : 1
STAY_AWAY : 1
TO_THERE : 1
TO_LEARNING : 2
SM_CONTINUOUS : 1
SESSION_CONSIDER : 1
MAY_BE : 1
DIFFICULTIES_SYMPTOMS : 1
REGARDING_WHEN : 1
SEDATION_CONSENT : 1
WAS_PREPPED : 1
ACTIVE_AND : 2
PAIN_VISIT : 1
SKILLS_RECREATION : 1
FLAT_NO : 1
HEART_BEAT : 1
SHIFT_REQUIRES : 1
SOLN_OPH : 2
ED_OF : 1
AND_ASSIGNED : 1
RECOMMENDATIONS_LIST : 1
URINE_CLEAR : 2
HIS_EAR : 1
NOT_MET : 1
SUICIDAL_IDEATION : 1
WOULD_SEEM : 1
TO_NY : 1
RX_MEDICATION : 1
TWO_TO : 1
NONTENDER_SHOE : 1
CONTRACEPTION_USES : 1
DISCHARGE_TYPE : 1
HAIR_NURSING : 1
AND_APPROX : 1
YES_UNK : 1
HIM_SHE : 1
BBLOCKER_OF : 1
AT_MIAMI : 1
INCREASING_WITH : 1
ON_STATUS : 1
TO_FOLLOW : 1
URINE_THIS : 1
REQUIRED_URINE : 1
AND_VOMITING : 1
INCREASE_MUSCLE : 1
TO_WORK : 2
NO_VOIDING : 1
MARRIED_JOB : 1
CO_HE : 1
ACTIVITY_WITH : 1
MYSELF_IF : 1
PATIENTS_LAST : 1
VET_ADMISSION : 1
DATA_IS : 1
AND_SHE : 1
OF_THERAPY : 1
OF_CUEING : 1
CLEAR_PATIENT : 2
FOR_YOUR : 1
PERSON_AND : 1
HEALTH_PROMOTION : 1
CIRRHOSIS_REMINDERS : 1
TH_PATIENT : 1
INTO_WITHDRAWAL : 1
TO_PALMER : 1
CLINIC_CURRENT : 1
PNEUMONIA_WITH : 1
THAN_INCREASE : 1
HIM_ACKNOWLEDGED : 1
UNABLE_GET : 1
PD_RALLY : 1
CONSTRICTED_PCA : 1
PLACE_AND : 1
LIST_POSTIVE : 1
ERYTHEMA_ANY : 1
BARRETTS_CONSENT : 1
AN_ULTRASOUND : 1
MOTION_LEFT : 1
REPORTEDLY_WITH : 1
DISCOMFORT_EXERCISE : 1
AND_POSSIBLE : 1
ASK_HAVE : 1
TO_LIFESTYLE : 1
UPDATE_YOU : 1
DISPOSITION_ACHING : 1
HE_HOME : 1
AND_STATES : 1
PH_WITHOUT : 1
INDUCED_DISORDER : 1
GLOBES_OU : 1
SEE_POSITIVE : 1
ACTIVE_PRESSURES : 1
PERSON_PLACE : 1
VISIT_PRIMARY : 1
ANTICOAGULANT_SINCE : 1
CSAC_NUTRITION : 1
IS_STILL : 1
TAKING_AND : 1
STOP_ALCOHOL : 1
PATIENT_SEE : 1
RELIEVE_AND : 1
LOW_FOR : 1
TAKING_WILBURTON : 1
THE_DISCUSSION : 1
FACILITATORS_STAFF : 1
LONG_RUN : 1
HIS_PNUEMONIA : 1
SOCIAL_ASSESSMENT : 1
AND_EXPLOSIVE : 1
PATIENT_PAIN : 4
DAILY_NOTE : 1
SPIRITUALITY_NO : 1
STATED_MISSED : 1
SCREEN_READING : 1
ANCHORAGE_PC : 1
REMOVED_MEASURED : 1
REDUCING_ISOLATIVE : 1
VISIT_OF : 1
TO_LOW : 1
LEAN_MORE : 1
MINIMAL_VERBAL : 1
WAS_TO : 7
MARY_OF : 1
STOOLS_STOOLS : 1
STAFF_REQUIRED : 2
SKIN_PROBLEMS : 1
SHE_NOW : 1
TAB_HRS : 1
TREATMENT_AS : 1
FOOD_CHOICES : 1
SKILLS_LIVING : 1
SAME_APPROX : 1
PUFFS_ACTIVE : 1
FOR_TREMORS : 1
FOR_IN : 1
WILL_PATIENT : 1
HAND_SYMPTOMS : 1
PHYSICAL_CONDITION : 1
LENGTH_CALL : 1
FREQUENT_PATIENT : 1
MOTHER_TEXAS : 1
ABUSE_NEGLECT : 2
OTHER_FACTORS : 1
VOICED_DISCOMFORT : 1
REFUSE_FLUID : 1
BE_PNEUMOCOCCAL : 1
BURNING_AND : 1
PT_IDEATION : 1
ANY_PINESS : 1
TO_EVALUATE : 1
DURING_ENCOUNTER : 1
PATIENT_DOES : 2
ALONG_PATIENT : 1
CAPSULE_ACTIVE : 1
COLLABORATIVE_INITIAL : 1
RECENT_PNUEMONIA : 1
OCCASION_THE : 1
REPORTED_QUESTIONED : 1
THE_TASK : 1
MCG_CFCF : 1
DIAGNOSIS_MINUTE : 1
NOT_TRANSFER : 1
PLAN_FOR : 1
GETTING_OF : 1
THROUGHOUT_TO : 1
ADMISSION_WEST : 1
CAPACITY_IS : 1
OF_SECONDS : 1
OMEPRAZOLE_MG : 1
CM_DURATION : 1
SAFETY_PRECAUTIONS : 1
NOTE_TO : 1
YESTER_EVENING : 1
EDUCAION_PL : 1
HIS_AND : 7
PH_ATTEMPTED : 1
POLYURIA_HESITANCY : 1
NOTES_HE : 1
NEEDS_TO : 2
TO_RIGHT : 2
TRUCK_HE : 1
LOCATION_AREAS : 1
TYPE_NONCOMPLIANT : 1
ITS_NEW : 1
OF_PROCEDURE : 1
PROVIDER_DRUGS : 1
WEEKLY_VISITS : 1
NOW_CLICK : 1
EXPLAINING_TO : 1
CM_HAVE : 1
OBESITY_DEPRESSION : 1
CARE_NOTE : 7
MY_AND : 2
ANURIA_DYSURIA : 1
ALBUTEROL_SPIRIVA : 1
TO_SUPPORTIVE : 1
REQUESTS_BACK : 1
CD_ALPHABETIZED : 1
REVIEWED_INPATIENT : 1
NOTE_DIAGNOSTIC : 1
THEMSELVES_INJECTION : 1
READ_PRINTED : 2
THERAPY_SESSION : 1
DISCUSSION_IN : 1
SITE_VERIFIED : 1
NEW_PAIN : 1
IS_MEDICALLY : 1
SHIFT_AMBULATION : 1
CHIN_WAS : 1
NO_ALLERGIES : 1
PSYCHOTHERAPY_DEAR : 1
DRINK_PAK : 1
CONTINENT_NURSING : 1
NEEDLES_THERAPY : 1
NEEDS_STATE : 1
CONTROL_DIET : 1
AS_FOR : 1
NURSING_DT : 1
IN_HOW : 2
AT_ENEMIES : 1
ON_SCALE : 2
IMPACTED_PT : 1
RECORD_PRIOR : 1
COLON_CA : 1
FOR_HIP : 1
SIZED_PROCEDURES : 1
PROVIDED_WITH : 1
TAB_PO : 1
HAS_COMPLIED : 1
SHAKING_RELIEVES : 1
SKILLS_FOR : 1
ON_PRECAUTIONS : 1
LIKE_SPEAK : 1
IF_FEELS : 1
PAIN_LEVEL : 3
PATIENT_SPIRIVA : 1
AND_EXPIRED : 1
IS_HIS : 1
PRESENT_PREOPERATIVE : 1
IS_WHERE : 1
ASSISTED_OUT : 1
TIME_ABD : 1
PROCESS_CONCENTRATING : 1
09_LB : 1
YOUR_NEXT : 1
YES_TEAM : 1
UNLESS_APPROVED : 1
ENDOSCOPY_PROTOCOL : 1
BEEN_ON : 1
TO_WORKER : 1
INTERMITTENT_THERAPY : 1
FEELS_HE : 1
DISABILITIES_CARE : 1
REAL_GOOD : 1
COOPERATIVE_OF : 1
DIA_AND : 1
EXUDATE_THAT : 1
SUBMITTED_DERMATOLOGY : 1
QUIT_USING : 1
TASK_REQUIRES : 1
MOVED_CD : 1
GOAL_DATE : 2
PAT_NEGATIVE : 1
INPATIENT_PSYCHIATRIC : 1
LEVEL_NURSING : 1
INTIAL_INTAKE : 1
VISIT_COMPLETED : 1
HIM_TO : 3
PHYSICIAN_ATION : 1
IN_PAIN : 1
PT_TEARFUL : 1
AND_MOOD : 1
PAIN_BUT : 1
PINES_ON : 1
FOR_THE : 4
INDICATED_TO : 1
WIFE_DOES : 1
ENDOSCOPY_PREP : 1
UCINATIONS_OBVIOUS : 1
IS_NUTRITION : 1
OF_SESSIONS : 1
INCLUDING_SCOPOLAMINE : 1
DISEASE_ICDCM : 1
BEEN_BY : 1
PT_KEPT : 1
WAS_DONE : 1
DONE_TO : 1
HIS_ARM : 1
LOSING_BENEFITS : 1
THE_PROCEDURE : 2
MENTAL_AND : 2
ADDRESS_HIS : 1
MEAT_AND : 2
SEVERE_THAN : 1
OCR_COLORS : 1
SOFT_REPORT : 1
BEFORE_VIOLATION : 1
THE_FROM : 2
ON_LEGIBLE : 1
REFLUX_HYPOTHYROIDISM : 1
ACTIVITIES_OF : 2
RM_APR : 1
HE_WILL : 1
RESPIRATIONS_INTERVENTIONS : 1
INTERVENTIONS_SIDERAILS : 1
INDIAN_SCHOSOME : 1
PLT_MANAGEMENT : 1
WILL_TO : 4
LOOKING_TO : 1
MORE_COMFORTABLE : 1
LIGHT_CALCULUS : 1
WAS_CONTINENT : 1
HAVING_DIFFICULTY : 1
WITH_PROVIDER : 1
NO_RESIDENT : 1
PSYCHIATRIST_THERAPIST : 1
PATIENT_HEIGHT : 1
CHART_BOWEL : 1
GEMFIBROZIL_MG : 1
HAS_STABLE : 1
HEPARIN_DETERMINED : 1
HYPERLIPIDEMIA_HTN : 1
LACK_HOUSING : 1
GENDER_RACE : 1
STATED_FULL : 3
MADE_WHILE : 1
AND_SECURITY : 1
GOT_WITH : 1
SPECIFY_RIGHTSORE : 1
TRANSFER_BLIND : 1
SETTING_BARRIERS : 1
CARE_URINE : 1
STENOSIS_PARKINSON : 1
SIGNIFICANT_ISSUES : 1
POLYURIA_DYSURIA : 1
RECEPTIVE_ADDENDUM : 1
ENROLLED_BLIND : 1
POX_VISIT : 1
YOU_WISH : 1
PALPATION_PERCUSSION : 1
REILLY_MEDGROUP : 1
AND_FEELING : 1
ES_HAGGERTY : 1
DATE_OF : 1
AND_VETERAN : 2
LENGTH_ADDENDUM : 1
COAGS_BEEN : 1
THAT_INDUCES : 1
OF_SESSION : 2
AND_ITEMS : 1
BOWELS_COLOR : 1
OTHERWISE_HE : 1
THEN_AND : 1
PATIENT_AWARE : 1
HAD_THAT : 1
AND_WITHOUT : 1
AT_TIMES : 2
FRIENDS_ACQUAINTANCES : 1
ACTIVE_WITHDRAWAL : 1
PENG_MD : 1
THIS_SCHEDULING : 1
UNLESS_HE : 1
PICK_UP : 1
FOR_HELPING : 1
COMES_TO : 1
HE_AGITATED : 1
PROCEDURE_SPECIALTY : 1
THE_OUTSIDE : 1
AND_RECREATIONAL : 1
PHONE_CALL : 1
DISORDER_ASSOCIATED : 1
FOR_SKIN : 1
INTERVENTION_PATIENT : 1
NUMBNESS_TINGLING : 1
BETTER_PMH : 1
WEIGHT_CONTROL : 1
WALKING_FOR : 1
MATERIALS_SUCH : 1
LEARNING_SKILLS : 1
TO_PERTINENT : 1
WENT_TO : 1
TO_BAY : 1
LIVING_HE : 2
MOUTH_BY : 1
ANTINAUSEA_REVIEWED : 1
BY_PATIENTS : 1
PATIENTS_AT : 1
AND_STYLE : 1
DINNER_FOOD : 1
MEDICATIONS_HAVE : 2
IS_CIWA : 1
HAVE_YOUR : 2
YEAROLD_FEMALE : 1
THERAPY_RESPONSE : 1
RELIEVED_WHEN : 1
ME_HE : 1
SECURITY_NUMBER : 3
NO_CONCERNS : 1
TOPICAL_SOLN : 1
IN_CHAPLAINVISITATION : 1
FOR_PAIN : 2
IS_MORE : 1
ALSO_CALL : 1
TEST_ADENOSINE : 1
UNTHREATENED_NO : 1
SNACKS_FILED : 1
SCREEN_PATIENTS : 1
CAPACITY_THE : 1
FASHION_FINDINGS : 1
AWAIT_RETURN : 1
ORIENT_SURROUNDINGS : 1
ATIVAN_GIVEN : 1
MG_PROVIDER : 1
HISTORY_NURSING : 1
BEAT_KLONOPIN : 1
SCALE_PATIENT : 1
THE_WILL : 2
LMSW_MIN : 1
OR_PULSE : 1
WILL_AT : 1
TABLETS_MOUTH : 1
WPB_TRANSFERRING : 1
AGE_WAS : 1
COMORBID_PROBLEMS : 1
JOINT_CCS : 1
MEALS_FLOW : 1
MODERATE_LIGHT : 1
APRIL_HE : 1
AREA_ABNORMAL : 1
OF_PHYSICIAN : 2
RELATIONSHIP_WITH : 1
DISEASE_TREATMENT : 1
ARE_BE : 1
FOR_MINIMUM : 1
AFFECT_MAINTAINS : 1
HTN_GO : 1
FROM_TO : 2
MY_NOTE : 1
WHO_PRESENTED : 1
DIET_PATPU : 1
PT_HAVE : 1
UTI_IN : 1
IS_WHEN : 1
SELF_DPT : 1
PHYSICIAN_OCT : 1
WEEK_ACCIDENT : 1
ROOMED_RETURN : 1
TREMORS_GROUPS : 1
DISCHARGE_WILL : 1
SIMILAR_LIQUID : 1
MET_FOLLOWING : 1
PULSE_HEMORRHOIDS : 1
ACCESS_NOW : 1
COSOPT_BID : 1
PROCEDURE_CORRECT : 1
EYE_CONTACT : 1
RESIDENT_ALERT : 1
PROCESS_OF : 1
REMOVED_AUGUST : 1
SEDATION_YES : 1
OF_FEB : 1
ABDOMEN_MONITORED : 1
ALLERGIC_ASTHMA : 1
DIABETES_ANKLE : 1
AND_NOCTURNAL : 1
MARRIED_MALE : 1
OF_CHANGES : 1
WELL_TOBACCO : 1
PULSE_BP : 1
ADDENDUM_EDUCATION : 1
OF_LS : 1
STAFF_MOST : 1
INTAKE_ALSO : 1
NILANDRON_AND : 1
HYPERTENSION_BP : 1
PAIN_MALE : 1
FOR_THERAPY : 1
WORSENED_AND : 1
FAIR_ACKNOWLEDGED : 1
NOTE_BELIEVES : 1
BY_ANTICOAGULANT : 1
MR_HIS : 2
ION_WITH : 1
AT_THE : 5
OF_WEEK : 1
YOUR_NO : 1
REASON_CONSULT : 2
FOR_TABLETS : 1
AND_DISPL : 1
FOR_DIABETES : 1
TO_TWO : 1
LIST_LEFT : 1
SURGICAL_COMORBID : 1
OBSOLETE_TAKE : 1
RISK_FALLS : 1
WAS_INCONTINENT : 1
HISTORY_HEALTH : 1
NEGATIVE_VIEW : 1
GO_FLORIDA : 1
HAMLIN_MIN : 1
SATISFACTORY_PROCESS : 1
SIGHT_FUNCTIONAL : 1
EXPOSURE_SERVED : 1
PATHOLOGY_AGREES : 1
ASSESSMENT_RECREATION : 1
PATIENT_VOICED : 1
TO_VA : 1
ON_MAY : 1
ACKNOWLEDGED_THE : 1
APPOINTMENTS_NUMBER : 1
LEFT_CALL : 1
YEARS_TO : 1
OF_PINS : 1
DVT_ON : 1
DIRECTIVE_NO : 1
UPDATE_AND : 1
MORE_DEPRESSED : 1
NO_MEAL : 1
NOTE_CURRENT : 1
APPOINTMENT_UNDERSTANDING : 1
OCR_BRC : 1
DURING_SHIFT : 1
NAME_VETERAN : 1
ISSUES_BY : 1
APPT_WITH : 1
DISORDER_ACTIVE : 1
PT_HERE : 2
OTHERWISE_SCHED : 1
CHAPLAIN_WILL : 1
FACE_TIME : 1
BARRIER_AT : 1
WAS_FOR : 1
AND_PROVIDE : 1
RECEIVED_VOL : 1
PROCEDURE_AND : 2
VICTIM_FROM : 1
DOCUMENTATION_OF : 1
THE_CONVERSATION : 1
VISTA_IMAGING : 2
SUSPENDED_THIS : 1
ALASKAN_PSYCHOS : 1
BENT_OVER : 1
RESPIRATION_MIN : 1
GIVEN_THE : 2
DID_TO : 1
ACHING_THROBBING : 1
RESEARCH_INITIAL : 1
REHABILITATION_BASE : 1
TO_FOLLOWING : 2
PERSON_NOT : 1
PULSE_ON : 1
UNCONTROLLED_WILL : 1
REQUESTED_CHOLECALCIFEROL : 1
APT_IF : 1
PATIENT_DID : 2
PAIN_RECENT : 1
NO_WAS : 1
MINNEAP_SINCE : 1
TOTAL_ARTHROPLASTY : 1
PUT_ON : 1
SUICIDE_FREQUENT : 1
PRESENTED_THE : 1
MEATS_MORE : 1
PATIENT_ADDRESS : 1
FOLLOW_CLINIC : 1
CONDUCT_THE : 1
FALLS_SKIN : 1
STATES_HAD : 1
COPD_BARRETTS : 1
WHEN_HE : 1
VETERAN_ALERT : 1
EXTENSION_SOME : 1
NAME_MDS : 1
PARKING_LOT : 1
SOCIAL_HEART : 1
INTRODUCED_SELF : 1
INHALE_PUFFS : 1
TO_DO : 1
CURRENT_ABOUT : 1
YOU_ARE : 1
RACE_NOTES : 1
COUNSELING_ALCOHOL : 1
IS_ORIENTED : 1
INTERDISCIPLINARY_PLANNING : 1
INDEPENDENTLY_DOES : 1
REPORTS_AFRICAN : 1
WITH_IS : 1
SYMPTOMS_VETERAN : 1
WAS_FARIBAULT : 1
UNSPEC_UROLOGY : 1
FINDINGS_FOCAL : 1
MA_UNSCHEDULED : 1
IDENTIFICATION_SOCIAL : 1
PATIENT_ALBUTEROL : 1
PTSD_DEPENDENCE : 1
NICOTINE_TAKING : 1
MANAGEMENT_CODE : 1
CALLED_LEFT : 1
NO_SIGNIFICANT : 1
WITH_PUT : 1
DANGER_OF : 1
MON_PLAY : 1
HAVE_GETTING : 1
TO_RN : 1
THE_REPORT : 1
TO_SCAN : 1
APPETITE_IS : 1
TEAM_POSTIVE : 1
TO_LABWORK : 1
LAST_DRINK : 1
BY_INPATIENT : 1
PSYCHOTIC_FEATURES : 1
APPEARANCE_OF : 1
FOR_LFTS : 1
EFFECTIVENESS_MGS : 1
GROUP_RANDOMIZATION : 1
HIS_AT : 1
PRESSURE_ULCERS : 1
RECONCILED_AND : 1
HAND_DENIED : 1
WHEN_HIS : 1
TO_PATHOLOGY : 1
SICK_AND : 1
ON_BASCOM : 1
ANY_PATCHES : 1
BAKER_CLOZAPINE : 1
EXERCISE_WEIGHT : 1
HAS_COMPENSABLE : 1
THE_DURATION : 1
AREA_BRISTOL : 1
NUMBNESS_TO : 1
SEEN_MINIMUM : 1
DT_LEFT : 1
RIGHTSORE_PRESENT : 1
OCCURED_APPROXIMATELY : 1
WHICH_INCLUDE : 1
TOBACCO_HAD : 1
CARE_WORKING : 1
LESS_SEVERE : 1
BAKER_MYLAN : 1
TASK_NO : 1
TO_NOT : 1
FINGERTIP_THEY : 1
ENGE_IN : 1
LUNGS_SECRETION : 1
BE_BEZNO : 1
HOSPITAL_SATISFACTORY : 1
VINELAND_VA : 1
NOTE_THAT : 1
MOVED_FROM : 2
HYPOECHOIC_BASE : 1
TREATMENT_REQUESTING : 1
DENTAL_MEDICATION : 1
DEPENDENCE_TAKING : 1
MINUTES_CALL : 2
EXC_NOCTURIA : 1
INVOLVES_THE : 1
ANY_AIDS : 1
DRINKS_BREAKFAST : 1
ON_BASIS : 1
PLEASE_ORDER : 1
IN_BLIND : 1
PCP_AT : 1
INTERMITTENT_INT : 1
PATIENT_WITHOUT : 1
MEDICATION_RECONCILIATION : 2
TO_ON : 2
GO_WITHDRAWAL : 1
BLIND_AWARE : 1
PSG_TO : 1
NOTE_HCL : 1
QUESTIONS_YOU : 1
FEATURES_ATTENTION : 1
WITHOUT_MEDICATIONS : 1
AVOIDANCE_ALLERGIES : 1
PERIODS_TIME : 1
BEHAVIOR_SERVICE : 1
ON_FIXING : 1
SPIRITUALITY_FORMAT : 1
IN_ON : 1
ACTIVE_ROLE : 1
OF_ATTENDING : 1
PAIN_TAKE : 1
IF_PCP : 1
HIS_NEEDS : 1
EDUCATION_VETERAN : 1
IS_WEARING : 1
RECHECK_THE : 1
CALLED_REQUESTING : 1
SAMPLE_URINECLEAN : 1
OF_CAREGIVER : 1
GUIDED_BACK : 1
FALLS_SCREEN : 1
CARDIOVASCULAR_DOCUMENTING : 1
CONCERNS_BY : 1
TUTTLE_AS : 1
THINKS_THE : 1
INSIGHT_IS : 1
AS_BUT : 1
AND_SAFETY : 1
STATES_THE : 1
FIRST_COUSIN : 1
NO_FEELINGS : 1
WIFE_TO : 2
SAFETY_NOTE : 1
FOR_FEW : 1
PAST_DOESNT : 1
AREA_INCLUDED : 1
PALMERS_PREDICTION : 1
STATE_CONFIDENTIALITY : 1
ACTIVITIES_LPM : 1
JUDGMENT_FAIR : 1
ORGANIZED_OBSERVED : 1
COMPLETE_INTAKE : 1
IS_MEDICAITON : 1
DURING_PAIN : 1
MADE_THIS : 1
MOOD_PAIN : 1
DEAR_YEARS : 1
AT_AM : 2
CALL_XYOLCAINE : 1
LACK_OF : 1
DIFFERENCE_BETWEEN : 1
XYOLCAINE_WITH : 1
UP_CAMARA : 1
DISCONTINUE_CBSST : 1
DIET_YES : 1
DL_MH : 1
INTERACTION_WITH : 1
PHYSICAL_ON : 1
HIM_VET : 1
BOWELS_TOILET : 1
MACHINE_WITH : 1
HE_BEEN : 3
CLINIC_DERM : 1
HANDOUT_YOUR : 1
OFF_METHADONE : 1
OF_ENDOSCOPY : 1
TIME_READER : 1
OF_HEAD : 1
WILL_CLINICAL : 1
SIX_OR : 1
NEW_HE : 1
MAR_FOR : 1
RADIATION_DOSE : 1
LIST_OF : 1
EXTENDED_FINGER : 1
OF_INSOMNIA : 1
ARE_MEATS : 1
SKILLS_HOWEVER : 1
SALTY_SARDINES : 1
AN_ROLE : 1
CARE_CAD : 1
WATCHING_DVDS : 1
WAS_AFTERNOON : 1
HOMICIDAL_SUICIDAL : 1
TREATMENT_PROCEDURE : 3
UNK_PT : 1
DENTAL_PROGRAM : 1
SO_HE : 1
OF_HOUSING : 1
BACK_REQUESTED : 1
DIFFICULTY_CONCENTRATING : 1
WITH_CONGESTION : 1
CARE_ON : 1
LABS_NEGATIVE : 1
GOOD_PRECAUTION : 1
GAIT_BED : 1
CARE_BONNIE : 1
PATIENT_RESIDENT : 2
SHIFT_ZZPATIENT : 1
OU_PHYSICIAN : 1
OF_INDIVIDUALS : 1
BX_NONPHARMACOLOGICAL : 1
HARM_TO : 3
THAT_HIT : 1
EAR_WAS : 1
LEFT_IMPACTED : 1
HARM_ADMITTED : 1
AGE_EXAMINATION : 1
HIS_CAMARA : 1
CHEST_PAIN : 2
HIS_ISOLATIVE : 1
ONCE_IS : 1
RISK_FACTORS : 1
BY_NEUROLOGIC : 1
VI_PHONE : 1
TOMORROW_JUNE : 1
THIS_PLAN : 1
TREATMENT_OPTIONS : 1
FAIR_FISH : 1
TAB_TO : 1
AND_EXTENSION : 1
AND_VET : 1
NURSING_OF : 1
BASE_INCLUDED : 1
EXERCISE_IS : 1
TREECE_RN : 1
IN_MATTER : 1
PAT_OR : 1
PRESENT_BRUIT : 1
DX_BACK : 1
WENT_ALONG : 1
HIP_WHILE : 1
DIA_NECESSITY : 1
WONDERING_ITS : 1
GO_INTO : 1
HIS_METHADONE : 1
BACK_LLE : 1
THE_CARE : 2
APRIL_PATIENT : 1
APPT_SCHEDULED : 1
TEARFUL_AT : 1
HE_RESIN : 1
STOP_PLAN : 1
PHYSICIAN_VAMC : 1
DISCHARGE_PHONE : 1
RATIONAL_SKILLS : 1
THAT_CONTACT : 1
THE_GROUP : 3
MULTILEVEL_PATIENT : 1
NUMBER_CONVERSATION : 1
SEE_IN : 1
STATUS_OF : 1
TO_PROVIDER : 1
HIGHER_HIS : 1
IMPAIRMENT_FUNCTIONAL : 1
ADDENDUM_SOCIAL : 1
YEARS_OLD : 1
MMOL_IS : 1
COMFORTABLE_EXPRESS : 1
PRACTITIONER_CALL : 1
REMINDERS_HIM : 1
LATERAL_LENGTH : 1
WAS_SEEN : 4
GOOD_SAFETY : 1
SULFIDE_SHAMPOO : 1
COULD_AN : 1
FOR_NAUSEA : 2
NOTIFY_BY : 1
NOTE_DT : 2
NAME_PHONE : 1
RECORD_PALMER : 1
TIME_THOUGHT : 1
FAIRLY_LETHALITY : 1
PSYCHIATRIC_TO : 1
RECURRENT_PRIMARY : 1
OF_VETERAN : 1
COMPLETED_CARE : 1
DISABILITY_MEDICATION : 1
SPECIFY_QUALITY : 1
PEERS_UPON : 1
TO_REASSESS : 1
DISPOSITION_REPORT : 1
DISORIENTED_TIME : 1
RISK_RATED : 1
WITH_PLAQUE : 1
IDENTIFICATION_NAME : 1
MEDICAL_NO : 1
EDUCATE_VETERANS : 1
NUTRITION_NO : 1
OUT_ARE : 1
WARFARIN_AND : 1
WAS_INTERESTED : 1
NO_URINE : 1
DESIRE_DISCONTINUE : 1
DERMATOLOGY_ALLERGIES : 1
OR_INJURY : 1
SIX_MORE : 1
THOUGHTS_MOSTLY : 1
MANUAL_ASSESSMENT : 1
INTO_WEEKLY : 1
CM_RANGE : 1
IN_SIDE : 1
FEELS_PT : 1
TO_ER : 2
ILL_HE : 1
STATED_IT : 1
CM_DISCUSSED : 1
BETTY_YOU : 1
OR_ELSE : 1
PROGRAM_AND : 1
CARE_TEMP : 1
OU_BID : 2
TO_BE : 6
DUE_DOES : 1
PERSONAL_CARE : 2
ONE_STAFF : 1
ASKED_HE : 1
MOOD_INTERVENTIONS : 1
TOBACCO_FREE : 1
SARDINES_DRINKING : 1
THE_ARE : 1
MONTHS_ADMISSION : 1
CLERK_ADDENDUM : 1
PHARM_VISIT : 1
CHILDREN_FAMILY : 1
LEARNING_TACTILE : 1
CONTINUES_LABRAL : 1
PATIENT_WELL : 1
THE_DEC : 1
WRITER_HELPING : 1
PREVIOUS_PHARMACY : 1
NEEDLE_PLACED : 1
THE_VETERAN : 2
PHARMACY_CHART : 1
CENTER_THAT : 1
INFLUENZA_COMPLIANCE : 1
MALE_RACE : 1
ANY_ISSUES : 1
CRITERIA_MET : 1
TELEPHONEORTHOPEDICS_ALLERGIES : 1
OF_HOW : 1
GET_DONE : 1
RADIATION_CGY : 1
THO_LESS : 1
NO_INJURY : 1
WITH_THE : 7
WAS_HE : 1
PROVIDED_IN : 1
AND_UPPER : 1
PER_PHYSICIAN : 1
TO_TRY : 1
POOR_MODERATE : 1
INTOXICATION_ALCOH : 1
UCINATIONS_REASON : 1
TREATMENT_TEMPERATURE : 1
ALLERGIES_MEPERIDINE : 1
INTENSITY_THE : 1
NURSING_IDEATIONS : 1
THERAPY_WAS : 1
LAUGHED_TIMES : 1
IS_DISCHARGED : 2
CONTROLLED_ENVIRONMENT : 1
HEALTH_CARE : 1
PERSON_EXUDATE : 1
SSOME_STATES : 1
INTERDISCIPLINARY_DISCHARGE : 1
HEALTH_INTAKE : 2
THE_FOOT : 1
YES_MS : 1
WILL_COLONOSCOPY : 1
TO_BLOOD : 2
SUICIDAL_PATIENT : 2
ITCHING_AND : 1
PULSE_MINIOPEN : 1
VOL_STATUS : 1
BOWEL_MOVEMENTS : 8
LT_PSV : 1
TABLETS_PLASM : 1
NAME_SECURITY : 1
OIL_CINNAMON : 1
THERAPEUTIC_ISOLATIVE : 1
VERBAL_THERAPY : 1
MEDICATION_RESPONSES : 1
UPDATE_BOARD : 1
IDEATION_FOR : 1
HAD_STATED : 1
BE_ATENOLOL : 1
BETTER_TO : 1
REMOVAL_OF : 1
FOR_PREVIOUS : 1
PRESSURES_AND : 1
TO_WHO : 4
APPOINTMENT_DO : 1
RINGING_BEEN : 1
BLAST_DETAILS : 1
APART_OBSERVATION : 1
BP_IS : 1
ECHOGENIC_IS : 1
GIVE_TRY : 1
WERE_DISCUSSED : 1
OTHER_COGNITIVE : 1
CURRENTLY_FOR : 1
TRAVEL_THAT : 1
YEARS_HAD : 1
WHILE_OFF : 1
ALSO_RELEIVED : 1
MR_WILL : 1
AWARE_ZZPATIENT : 1
DISCUSSED_ILLNESS : 1
AT_APPROXIMATELY : 1
CARE_SERVICE : 2
VOICE_AM : 1
HYPOTHYROIDISM_GERD : 1
REFUSED_DISORDER : 1
AND_NEEDLES : 1
IS_UPON : 1
SINCE_CLINIC : 1
ORIENTED_PERSON : 1
IT_BE : 1
MALE_FOR : 1
FAMILY_FROM : 1
SEATTLE_FOR : 1
DOCUMENT_BLAST : 1
PINS_TO : 1
INCLUDING_THE : 1
FOR_INTERVENTION : 2
DENIES_IDEATION : 1
GROUP_AS : 1
NO_MADE : 1
FREE_THE : 1
LUNG_VOIDING : 1
LINFLUENZA_IMMUNIZATION : 1
MOBILITY_NUMBER : 1
PMH_PROGRESS : 1
LPN_FOR : 1
VOLUME_WITH : 1
MISSED_AND : 1
INPATIENT_REMOTE : 1
WITH_MINIMAL : 1
TO_ACTIVITIES : 1
MEDGROUP_ESOPHAGEAL : 1
READ_MATERIALS : 1
OR_UCINATIONS : 2
SHIFT_AMOUNT : 1
OUT_TO : 1
ONCOLOGY_NOTE : 1
DOCUMENT_TYPE : 1
IF_HE : 4
EAR_WORSE : 1
TO_PHARMACY : 2
COLOR_CHARACTERISTICS : 2
TEAM_CO : 1
PAIN_IF : 1
AMOUNT_STOOL : 3
DENT_HYG : 1
SOLN_ACTION : 1
SOCIAL_CONTACTS : 1
SKATES_ONCE : 1
HIM_NILANDRON : 1
LOSS_OR : 1
CONSIDER_TO : 1
RN_CONTACT : 1
DIRECTION_OF : 1
EMOTIONAL_AT : 1
DISTAL_AND : 1
HAS_BEEN : 12
DENIED_NARCOTICS : 1
PAIN_TOPIC : 1
IN_ADVERSE : 1
AMB_CARE : 1
CONTROLLED_WAS : 1
DEMONSTRATED_ABILITY : 1
MONITORED_FOR : 1
BILATERAL_ENSURE : 1
SKIN_OBSERVATION : 1
AT_BEGINNING : 1
THE_PARKING : 1
SHE_REPORTS : 1
DING_OTHER : 1
CURRENT_PRODUCT : 1
CHANGES_EYE : 1
NEAR_POHX : 1
THE_MONO : 1
PROVIDER_FOR : 2
HO_NONDISTENDED : 1
PATIENT_BILATERAL : 1
ING_REPORTS : 1
OBESITY_LUNG : 1
CALL_AND : 2
DENIED_HE : 1
SHIFT_CARE : 1
SPENDING_STEREO : 1
YEARS_TWO : 1
INITIALLY_DENIED : 1
RAL_INFORMATION : 1
AND_GAINING : 1
DENIES_TO : 1
SKIN_COLOR : 1
TO_PROBLEM : 1
PULMONARY_CPAP : 1
BOWEL_ZZPATIENT : 1
DID_WANT : 1
REPORTS_MIGRAINE : 1
YRS_OLD : 1
NO_RECENT : 1
TO_LABRAL : 1
FOR_IS : 1
THE_REQUEST : 1
WITH_OTHER : 1
HURT_MY : 1
OTHERS_HIS : 1
SIGNS_AND : 1
CENTER_ADDITIONAL : 1
THE_COLLABORATIVE : 1
COMPLETED_SWS : 1
AND_UNSPEC : 1
NORMAL_SYMPTOMS : 1
SURROGATE_GASTRITIS : 1
RESIDUAL_OTHER : 1
DAUGHTER_LAW : 1
REQUESTING_TO : 2
ALCOH_IN : 1
INFORMATION_NOTIFIED : 1
INTEGRITY_PAIN : 1
VERIFIED_PATIENT : 1
DAILY_NAME : 1
ONCOLOGY_COLLECTION : 1
AT_POINT : 1
TO_OR : 1
CSECTIONS_MARITAL : 1
DEC_SURGERY : 1
RN_CALL : 1
CM_HOW : 1
SINCE_AND : 1
DIETITIAN_FIRST : 1
MG_CAP : 2
MEAL_REQUIRES : 1
ANALYZED_BY : 1
BRC_NURSING : 1
MOWING_LAWN : 1
NEUROLOGY_FOLLOW : 1
AWOKE_BENT : 1
REASON_AND : 1
AT_BEDTIME : 1
HIS_WHEN : 1
WORDS_ABLE : 1
ED_PROVIDER : 1
CARE_PROCEDURE : 1
OF_NOT : 3
TIMES_APPRECIATIVE : 1
WALKS_SOME : 1
PSYCHIATRIC_UNIT : 1
TO_TH : 1
TOILET_APPEARS : 1
PATIENT_IS : 9
CONSULT_IS : 2
SUPPLIES_MARITAL : 1
THEY_DINNER : 1
SYSTEM_THEIR : 1
ELIMINATION_COLOR : 1
ISSUES_WITH : 1
NURSE_AND : 1
TAKE_TWO : 1
HE_RALLY : 1
PLAN_PATIENT : 1
LEARNING_IN : 1
MOSTLY_BY : 1
LE_LMSW : 2
HBPC_SWER : 1
AND_RESPONDED : 1
RELAXED_STATE : 1
PT_WM : 1
BACK_PLANS : 1
BOTH_CONDITIONS : 1
LB_PATIENT : 1
NOT_MEAL : 2
BY_MHC : 1
JUNE_VETERAN : 1
ORIENTED_ACTIVE : 1
REGARDING_CONDITION : 2
IS_INSIGHT : 1
WEAR_MEAL : 1
BE_RELATED : 1
BEEN_IN : 2
EXERCISE_TOLERANCE : 1
NOT_MED : 1
INHALE_ACTIVE : 1
HEARING_VOICES : 1
WAS_PALPATION : 1
TO_REVIEWED : 1
CONSULT_ABNORMAL : 1
HE_HIT : 1
LEFT_MINUTES : 1
ANY_PINS : 1
INTO_MADE : 1
GROUPS_STAFF : 1
HARSH_THEY : 1
REEVALUATION_OF : 1
HE_ANY : 2
AND_THE : 4
NATIVE_AM : 1
PMR_THERAPY : 1
PROGRESS_NOTE : 3
ASSESSMENT_HAMLIN : 1
FLORIDA_SUMMARY : 1
CURRENTLY_SCHEDULED : 1
NARCOTIC_FILLED : 1
NEEDED_REST : 1
OR_HARM : 1
AGE_PHYSICAL : 1
LOCATION_NUMBER : 1
BMI_MASS : 2
OF_ALLERGIC : 1
PATIENT_THAT : 2
SWER_ASKING : 1
NO_KNOWN : 1
AS_GUIDE : 1
CHARGE_NURSE : 1
ULTRASOUND_TH : 1
RADIOACTIVE_TO : 1
FOR_PROTECTOR : 1
FOR_CARE : 1
AND_LEGIBLE : 1
PRACTITIONER_PHYSICIAN : 1
ABOUT_REPLACEMENT : 1
THAT_IT : 2
MET_ANATOMICAL : 1
METHOD_OF : 1
NUMBER_PERCEPTION : 1
HE_TO : 4
SYMPTOM_TREMOR : 1
PROVIDE_NOTIFIED : 1
WNL_OU : 1
RESULTS_FINDINGS : 1
GOING_TO : 2
TO_IMPLEMENTED : 1
ZZPATIENT_ADL : 5
PATIENT_OD : 1
ADVOCATE_FROM : 1
MEDICAL_SURGICAL : 1
BEDTIME_MOOD : 1
BARRIERS_TO : 3
ON_STEREO : 1
SPEECH_COHERENT : 1
ACTIVITY_BOWEL : 1
MODERATE_INSTRUCTOR : 1
FAMILY_PULSE : 1
MUSCLE_SPASMS : 1
NONE_HERE : 1
IN_ENGINEER : 1
RISK_THIS : 1
AND_REVIEW : 1
FOR_INTERVENTIONS : 1
ON_PT : 2
RACHEL_DAUGHTER : 1
HYPERLIPIDEMIA_HYPOTHYROIDISM : 1
REASSESSMENT_OUTPATIENT : 1
FORM_STATES : 1
ON_OF : 5
UP_MEDS : 1
REFLUX_WERE : 1
PT_INFLUENZA : 1
CALL_PROVIDER : 1
MESSAGES_HOME : 1
RESIDENT_NUMBER : 2
INDEX_PROCEDURE : 1
PROCEDURES_MEMBERS : 1
CONSIDER_SWITCH : 1
TWO_TABLETS : 1
HE_NEEDS : 2
TO_EVALUATION : 1
OF_YEAR : 1
SHE_FELL : 1
GROUP_WE : 1
ANYTHING_IS : 1
DIAGNOSIS_IS : 1
ON_PTS : 1
SIT_ON : 1
SIGNIFICANT_CHANGE : 1
MARCO_HUNTSVILLE : 1
PERCEPTION_NO : 1
NOTE_OH : 1
LIFE_CHANGES : 1
WEST_TH : 1
HAS_WITH : 1
TO_CHIEF : 1
HEALTH_CONTRACT : 1
AGREE_PRIOR : 1
ROOM_COORDINATOR : 1
FAMILY_OF : 1
CURRENT_OF : 1
JULY_CONTRACEPTION : 1
DISCUSSED_PATIENT : 2
SKELETAL_DISEASE : 1
ELLIS_RN : 1
OK_SPOKE : 1
ARRANGED_FOR : 1
HIGH_FORGETS : 1
WAS_HIS : 1
RAL_HISTORY : 1
INSTRUCTIONS_AND : 1
SCHIZOPHRENIA_THE : 1
AND_YES : 1
CHECKS_SPS : 1
UCINATIONS_IS : 1
DYSTHYMIC_THE : 1
HIM_THEIR : 1
ALCOHOL_BEVERAGES : 1
NOS_PRESBYOPIA : 1
MOST_OF : 1
RELATED_DECREASE : 1
DISABILITY_SELENIUM : 1
BACTRIM_TAB : 1
PRO_SNACKS : 1
THOUGHTS_SUICIDE : 1
PL_ETC : 1
ORIENTED_EXTREMITIES : 1
WOULD_MCH : 1
TO_IN : 3
CALL_BELL : 1
FALLING_HISTORY : 1
WITH_EVALUATION : 1
NS_CHANGES : 1
TEMPERATURE_NONE : 1
PT_TEMP : 1
CIRRHOSIS_CAME : 1
APARTMENT_CENTER : 1
RESPONSIBLE_CAREGIVER : 1
TO_DIA : 1
WITHDRAWAL_PILLS : 1
HEALTHIER_CHOICES : 1
NUMBER_OF : 14
TALKED_VERIFIED : 1
HEIGHT_CM : 2
NO_APPARENT : 1
WIFE_CATHETERIZATION : 1
OK_HE : 1
DELUSIONS_UCINATIONS : 1
LIFT_ASSIST : 2
INDICATION_AT : 1
INSTRUCTOR_NUMBER : 1
OF_MINUTES : 1
SAFE_SELF : 1
IS_INVOLVED : 1
CHANGES_MOOD : 1
WITH_PLEASANT : 1
EXTREMELY_THROUGHOUT : 2
PROVIDED_HUMANA : 1
OTHER_DISPOSITION : 1
FILLED_VETERAN : 1
UP_WITHOUT : 1
BECOME_REAL : 1
DURING_HIS : 1
AND_HES : 1
SATISFACTORY_THOUGHT : 1
OFFERED_HAS : 2
OF_RATIONAL : 1
CONSULT_WITH : 1
CALL_IF : 1
WRISTS_ENSURE : 1
YEARS_ARRIVED : 1
LENGTH_OF : 1
HIT_PENCIL : 1
HERE_FOR : 2
GROUP_DISCUSSION : 1
TREATMENT_SESSION : 1
PREVIOUSLY_TREATMENT : 1
ANOMALIES_PT : 1
ADL_SHEET : 1
IN_GLUTEAL : 1
WITH_DEGREE : 1
HOMICIDAL_IDEATION : 1
MEETINGS_REINFORCED : 1
HYPERTENSION_CIRRHOSIS : 1
PAIN_FROM : 1
HELPFUL_AND : 1
LIST_CATARACT : 1
AND_BARRIERS : 2
IV_INT : 1
SURFACEANTERIOR_LENGTH : 1
HAS_ISSUES : 1
GTTS_CONT : 1
OR_PERFORMED : 1
ADV_OS : 1
THE_PLAN : 1
WHO_WAS : 1
FOUND_PTSD : 1
THAN_IT : 1
HIS_IS : 1
SHOULD_BE : 1
BLADDER_ACTIVITIES : 1
RECENT_VISIT : 1
INDEPENDENTLY_REPORTED : 1
PER_PREP : 1
SPEAK_WITH : 1
ACCOMPANIED_FOR : 1
IN_SUN : 1
IS_HERE : 1
BY_PROVIDER : 2
IS_OKAY : 1
WALKING_WITH : 1
SEEN_BY : 1
STRONG_THERAPEUTIC : 1
NUMBER_PENICILLIN : 1
MON_AND : 1
HOUR_PATIENT : 1
AXIS_GASTROESOPHAGEAL : 1
BY_LEAD : 1
MEDS_SEE : 1
PATIENT_GENDER : 1
REMAIN_SAFE : 1
OF_BEING : 1
ENGINEER_ONE : 1
FREE_HAD : 1
FOR_VOMITING : 1
HOLOGIC_STATED : 1
GAIT_TREATMENT : 1
MALE_REASON : 1
HE_DISORIENTED : 1
FOBT_MOUTH : 1
HEMATOMA_PSG : 1
NO_PATIENT : 2
DOSE_KLONOPIN : 1
CHILDREN_THE : 1
DEPRESS_PRIMARY : 1
AND_LISTENING : 1
PALMER_FOR : 1
ALONE_APARTMENT : 1
OPEN_OF : 1
WAS_SO : 1
INTAKE_NOTE : 2
THOUGHT_PROCESS : 1
RELAXANT_MEDICATION : 1
HE_GUIDED : 1
DEDRA_SA : 1
FOR_EVALUATION : 1
SIDE_VERIFIED : 1
ORIENTED_FLEXERIL : 1
RANKINE_ARNP : 1
ABLE_SEE : 1
INDIAN_ALASKAN : 1
TREATMENT_HAVEDISCUSSED : 1
INTERVENTION_STAFF : 1
GROUP_DATE : 1
OUT_DORSUM : 1
MEDICATION_BACTRIM : 1
TIME_IT : 1
SWELLING_NEGLECT : 1
OF_WEIGHT : 2
SIGNAL_INTENSITY : 1
STANDARD_TITLE : 1
NUMBER_BLOOD : 1
EXTREME_OCR : 2
AVAILABLE_ON : 1
NOTE_ONCOLOGY : 1
THEY_ARE : 1
THAN_PT : 1
APART_PHYSICIAN : 1
REPAIR_OSAT : 1
ECHOGENIC_FOCUS : 1
TREATMENT_SOCIAL : 1
ANSWERED_WHEN : 1
HEMORRHOIDS_UNABLE : 1
MEDICATION_TO : 2
MAINTAINING_ABSTINENCE : 1
IUD_REMOVED : 1
WELL_HAS : 1
INPATIENT_COMMENT : 1
ADMITTED_TO : 1
THE_REORDERED : 1
NO_PRIMARY : 1
NO_PROVIDER : 1
COGNITIVE_DATA : 1
PTS_MOTHER : 1
OR_DETOXING : 1
SWER_BASCOM : 1
RATIONAL_HOWEVER : 1
YOU_ANY : 1
TO_HOSPITAL : 1
OBJECTIVES_MET : 1
LB_SHOOTING : 1
NEEDS_ANXIETY : 1
COMMANDS_CARDIOVASCULAR : 1
HEMATURIA_BP : 1
WITH_MY : 4
FALL_INJURY : 1
INJURY_OR : 1
FEEL_SICK : 1
ANESTHESIA_RECORD : 1
ADDENDUM_WERE : 1
PAINFUL_NO : 1
NO_HISTORY : 1
YOUR_PRIMARY : 1
IF_NEGATIVE : 1
NOTE_MENTATION : 1
THERAPY_ASSESS : 1
ATTENDING_SESSION : 1
HE_HE : 1
LOG_BP : 1
VIEW_MEDICATIONS : 1
WITHOUT_INTERVAL : 1
DRINKING_BEVERAGES : 1
STAFF_OR : 1
IF_HAD : 2
LAW_AND : 1
DOE_ABNORMAL : 1
SURE_PATIENT : 1
TO_NPO : 1
THE_HEAD : 1
IN_GROUP : 2
BEHAVIOR_MOOD : 1
OTHERS_WHO : 1
BACK_AT : 2
INFORMED_CONSENT : 3
MG_OBSOLETE : 1
RESPONSE_THE : 2
SCALP_AND : 1
ENSURE_IS : 1
MEDICATION_DISCUSSED : 1
BACHELORS_ING : 1
PT_RESTED : 1
MALE_ADDENDUM : 1
HAMLIN_HALDOL : 1
HIS_WIFE : 2
MILIEU_WAS : 1
PALMERS_BEFORE : 1
NURSING_ASSIST : 1
LA_PT : 1
DIFFICULTY_HE : 1
PAIN_CONTROL : 1
EACH_HEALTHIER : 1
TO_LEAVE : 1
THE_INDICATED : 1
CPAP_CHILD : 1
SOCIAL_SERVICES : 2
AT_THAT : 1
NURSING_ASSISTANT : 1
PLAN_VETERAN : 1
EATING_ALL : 1
POSSIBLE_UNDERLYING : 1
THE_DEATH : 1
PROCESS_DIVORCING : 1
NO_TRACE : 1
EXCEPT_FOR : 1
OF_IN : 1
PROCEDURE_BE : 1
SURROUNDINGS_CONSULT : 1
BRC_PLAN : 1
WORK_WITH : 1
MIN_MRI : 1
GUIDED_TO : 1
CALL_BACK : 3
EDUCATION_RN : 1
AT_REPORTED : 1
ALERT_AND : 3
PATIENTS_PHYSICIAN : 1
NUMBER_IN : 1
PATIENTS_CONDITION : 1
HERE_AT : 1
BELIEVES_IS : 1
FOR_METHADONE : 1
VOIDING_YES : 1
ALONG_WITH : 1
WHO_ALL : 2
COMPLAINTS_NOCTURIA : 1
SEVERAL_TIMES : 1
PORT_OF : 1
NAUSEA_GIVE : 1
MD_RN : 1
ANTICOAGULATION_CONDITION : 1
DT_LIST : 1
SUMMARY_WILL : 1
IMPACTED_STATED : 1
AT_NO : 1
AND_IDENTIFIED : 1
HCV_ETOH : 1
ABOUT_LOSING : 1
BEEN_TOBACCO : 1
PCP_IS : 1
COMPLETED_PAIN : 1
BLOOD_PRESSURE : 2
PROGRESS_DID : 1
ANESTHESIA_OPERATIVE : 1
IS_APPROPRIATE : 1
HIP_PROTECTORS : 2
IS_FALLS : 1
BRUIT_NO : 1
AFTER_WAS : 1
BUT_SAYS : 1
UROLOGY_EXTENDING : 1
HOURS_AWAKE : 1
WERE_ABLE : 1
SAID_RELATED : 1
VET_SOUNDED : 1
THE_OF : 11
PAIN_ASSESSMENT : 2
ADVERSE_EFFECTS : 1
PATIENT_EDUCATION : 2
PROVIDER_OTHER : 1
ONE_CAPSULE : 2
PRESSURES_LIFE : 1
PAIN_WITH : 4
DOPPLER_RT : 1
HTN_INTO : 1
NONCOMPLIANT_ADDITIONAL : 1
IN_AM : 1
UPPER_AND : 1
CONSISTENCY_STOOL : 4
IN_CONCERN : 1
WIFE_WHO : 2
OIL_OIL : 2
ALCOHOL_UNLESS : 1
SCRIPTURE_AND : 1
AVOIDANCE_FOOD : 1
HIP_PROTECTOR : 1
PT_HAS : 1
OS_NO : 2
CHIEF_COMPLAINT : 3
BED_STATED : 1
OBJECTIVE_TO : 1
TO_APPROACH : 1
FOR_ANXIETY : 1
WHEN_AGE : 1
SUMMARY_FOLLOW : 1
NOTE_HAS : 1
SC_PHYSCIAL : 1
THAT_HE : 11
TRANSITIONAL_AT : 1
LIKE_NY : 1
PMH_CA : 1
AND_BELIEVES : 1
FLAREUP_WAS : 1
NURSING_PSYCHOLOGIST : 1
BECOME_SAFETY : 1
ADVISED_IT : 1
TO_BACHELORS : 1
SEEN_PEERS : 1
MS_HAD : 1
SUGARUSE_OCCURED : 1
TO_OFF : 1
PATIENT_RACE : 1
PATIENT_STATED : 2
PAIN_RADIATING : 1
CONTROL_CHAINS : 1
BIRTH_HOWEVER : 1
THE_FOR : 2
BEFORE_THE : 1
REPORT_PTS : 1
DECREASING_WONDERING : 1
CLINIC_SIGHT : 1
READER_ZIPPERS : 1
AND_BEEN : 1
THIS_THE : 2
DO_YOU : 5
DIRECT_STAFF : 1
WRITER_CONFLICT : 1
NUTRITION_TRANSFER : 1
IN_INNERVATED : 1
HE_STILL : 1
NOTE_HIS : 1
OF_RISK : 1
APPARENTLY_TO : 1
DOCUMENT_ATTACHED : 1
PATIENTS_DYSTHYMIC : 1
FOOD_PATIENT : 2
ARMS_AND : 1
CYST_SHE : 1
SPEAK_HIS : 1
CABG_ARE : 1
DVT_COUMADIN : 1
PLACE_PATIENT : 1
TWICE_PRESSURES : 1
FALL_NOT : 1
ONE_BY : 7
WAS_MOWING : 1
MANAGEMENT_HC : 1
BAND_AND : 1
PAIN_SCALE : 2
MOVED_TEXAS : 1
CARE_TEAM : 1
OPTIONS_ON : 1
OBSERVATION_CITALOPRAM : 1
SUCH_VETERAN : 1
STATED_CURRENTLY : 1
CLEAR_OS : 1
HUNTSVILLE_CARE : 1
WITH_ABOVE : 1
ATTACHED_THIS : 1
CHANGE_TIME : 1
09_PATIENT : 1
IS_TUFTS : 1
MONITOR_MENTAL : 1
LOSS_SKIN : 1
MUCH_CARE : 1
RETURN_BASELINE : 1
PRESUMED_CONDITIONS : 1
IMAGE_YOU : 1
PROVIDE_ASSISTANCE : 1
CARE_PT : 1
OF_AWAKE : 1
CHEMISTRIES_HEART : 1
PATIENT_DECISIONMAKING : 2
NSC_WHO : 1
OF_OUTPATIENT : 1
COLOR_IV : 1
CCS_OF : 1
SCREEN_THERE : 1
THAT_DISTURBING : 1
THIS_AM : 1
INSTRUCTED_REPORTS : 1
WITH_THIS : 1
CPAP_NOCTURNAL : 1
THE_PT : 1
PARTIAL_ASSISTANCE : 1
FAIR_AND : 1
UNCONTROLLED_HTN : 1
FROM_OLD : 1
OTHER_SKIN : 1
RX_CAL : 1
ALSO_AN : 1
TO_PERSISTENT : 1
BARRIER_EMOTIONAL : 1
PERCUSSION_CONSIDERATIONS : 1
PHONE_WHICH : 1
ASKED_IF : 1
TO_OTHERS : 2
OF_ABNORMAL : 1
THEMSELVES_IN : 1
TAPE_INSPECTION : 1
MUSCLE_THO : 1
HIS_FOR : 1
HOWEVER_MAY : 1
CONSULT_DOE : 1
COLONOSCOPY_PATIENT : 1
REDUCING_AND : 1
BAY_PINES : 1
RECENTLY_TAKING : 1
OCCASION_IN : 1
DATE_OCT : 1
REPAIR_BARNES : 1
REPORTEDLY_INCREASED : 1
FROM_INJURY : 1
WITHOUT_ASSISTANCE : 1
THIS_DUE : 1
SCHIZOPHRENIA_INDEPENDENTLY : 1
VETERANS_PROGRESS : 1
SAFETY_SPS : 1
ALSO_CENTER : 1
CONT_TRAVATAN : 1
PT_FAMILY : 1
SCALE_WITH : 1
DEAR_MR : 1
OF_ARD : 1
THAT_THEY : 1
THAT_MOOD : 1
IV_AND : 1
SERVICE_SAMPLE : 1
SAYS_ONLY : 1
TAPE_UPON : 1
RN_THINKS : 1
AND_FEELINGS : 1
CONSENT_EDUCATION : 1
PAIN_MH : 1
IF_NO : 1
FIRM_PHYSICIAN : 2
DECREASE_IN : 1
WEIGHT_WANT : 1
OTHERS_REDUCING : 1
ACCOMPANIED_REASON : 1
SECOND_SC : 1
YOU_YOUR : 3
IN_CBSST : 1
BP_BP : 1
REFLUX_DISEASE : 1
WILL_MEDICATION : 1
ACTIVE_BY : 1
TAXI_TO : 1
STAFF_HE : 1
IDENTIFIED_TACTILE : 1
SIZE_HAS : 1
AM_GETTING : 1
RNBC_VISIT : 1
BAY_ON : 1
MORNING_LEVOTHYROXINE : 1
CRITERIA_IS : 1
CONSIDER_AT : 1
BRC_GROUP : 1
STERILE_FASHION : 1
HAD_WOUND : 1
MEDICAITON_IN : 1
DVAMC_TRAVEL : 1
MINIOPEN_CUFF : 1
MUSCLE_INJECTION : 1
NONSLIP_FOOTWEAR : 1
YO_HAD : 1
SOME_HEALTHIER : 1
TIME_HE : 1
SHOWED_URINE : 1
NECESSARY_OX : 1
HE_IT : 1
TO_HOW : 2
PHONE_CONVERSATION : 1
SCREEN_BRIGHT : 1
SPEECH_MODERATE : 1
HE_REMAINS : 1
COLOR_HIP : 1
OTHER_TESTS : 1
NOCTURIA_EAST : 1
DETERMINE_OF : 1
HIS_MOOD : 2
TO_REFILL : 1
BODY_MASS : 2
NO_CHANGE : 1
BEST_APPROACH : 1
CONNECTED_WITH : 1
METHADONE_THIS : 1
AND_VALUES : 1
IN_SM : 1
POSTOCCIPITAL_CYST : 1
THROUGHOUT_SKIN : 1
VALUES_ON : 1
INDICATION_BEDTIME : 1
HOURS_TREATMENT : 1
COSOPT_OU : 1
CAD_CABG : 1
PHONE_YEAROLD : 1
ABNORMAL_SIGNAL : 1
DOCTOR_OTHERS : 1
ADDENDUM_TYPE : 1
CAD_OUT : 1
ABOUT_STATED : 1
OF_TOENAILS : 1
PMH_OBESITY : 1
MADE_WITH : 2
BURNING_TINGLING : 1
NO_VOMITUS : 1
TASK_EXTREME : 2
EXTENDING_OF : 1
SENT_ER : 1
MEPERIDINE_EYES : 1
FAIR_EYE : 1
YOUR_OTHERS : 1
GETTING_THOUGHTS : 1
THOUGHTS_AND : 1
DECISION_WHEN : 1
MADE_WILL : 1
VA_AT : 1
FOR_NEXT : 1
WERE_NO : 1
AM_AND : 1
YO_UNKNOWN : 1
THOUGHT_NEGATIVE : 1
WHILE_NEGATIVISM : 1
MAKING_CHANGES : 1
DRINKS_FOOD : 1
NO_LEARNING : 1
THIS_AT : 1
DO_WANT : 1
EYE_PROGRESS : 1
TEAM_ROUNDS : 1
KLONOPIN_STATES : 1
ETHNIC_NUMBER : 1
ALLERGIES_PATIENT : 1
ASSESSMENT_INTERVENTION : 1
PROCEDURE_CIRCUMCISION : 1
OU_AND : 1
ON_IS : 1
MEDICATIONS_FAMILY : 1
DVDS_LISTENING : 1
PATCHES_THE : 1
THE_NEEDLES : 1
STAFF_MAKE : 1
MENTAL_TRP : 1
OF_JOINT : 1
SKILLS_IN : 1
CONSULT_BODY : 1
RISK_SUICIDE : 1
JUNE_DIRECT : 1
BLOOD_SUGARUSE : 1
GROUPS_FACILITATORS : 1
EXUDATE_REPORTS : 1
CHILD_SUPPORT : 1
CARE_LINE : 1
MEDICATIONS_PSG : 1
ADVISED_STOP : 1
MONTHS_NURSING : 1
APPOINTMENTS_PHONE : 1
HISTORY_LAST : 1
BOWEL_PRESENT : 1
ASSESSMENTIS_AT : 1
STOOL_MOBILITY : 1
TO_BASCOM : 2
PENG_AT : 1
ABLE_GET : 1
SURROGATE_UNSPECIFIED : 1
WITH_COMMENT : 1
TO_PERFORMED : 1
SELF_WAS : 1
THIS_IN : 1
THE_RESIDENT : 1
SIGNS_COLOR : 1
WHEN_INITIALLY : 1
OF_MIN : 1
PREPPED_DRAPED : 1
LAST_PTSD : 1
TREATMENTS_AS : 1
FOOD_AFTER : 1
DATE_DATE : 1
OF_RXS : 1
MIN_OF : 2
THE_WEEK : 1
IF_WILL : 1
BY_EVERY : 1
ORIENTATION_FORMAT : 1
SUSPENDED_CALL : 1
WILL_HIM : 1
MIAMI_FLORIDA : 1
THE_NECK : 1
UNDERSTANDING_OF : 1
DAVE_IN : 1
SYMPTOMS_DEPRESSION : 1
TO_REFER : 1
TRANSFERRING_BED : 1
ABOVE_BREAKFAST : 1
VALUE_RELATED : 1
CONNECTING_OTHER : 1
ICDCM_HYPERGLYCEMIA : 1
THAT_SEEM : 1
THIS_AMBULATION : 1
LAINED_TO : 1
IN_BOWEL : 1
CAP_CONSIDER : 1
AND_IN : 3
PATIENT_STATES : 3
WILBURTON_AND : 1
IMMUNIZATION_CARE : 1
WITHOUT_STAFF : 1
ALLERGIES_NKA : 2
PT_CURRENTLY : 1
LAST_NEG : 1
GIVES_OF : 2
KNOW_IS : 1
TOBACCO_ALCOHOL : 1
QUALITY_OF : 1
WORKER_VERY : 1
HE_STRONG : 1
AND_CHANGES : 1
OF_CHARACTERISTICS : 1
NPO_MIDNIGHT : 1
VAMC_IN : 2
SIGNS_GROOMING : 1
LOCATION_REMOVAL : 1
NO_FALLS : 1
WITH_OXYGEN : 1
TREATMENT_PL : 1
ONCE_WITH : 1
THAT_CLOSELY : 1
OFF_HIS : 1
DISCUSSED_MENTAL : 1
SOME_EXERCISEOCC : 1
DOB_AGE : 1
BE_FREE : 1
FOR_PRESSURE : 1
WITH_HYPOKALEMIA : 1
VETERAN_CONTINUES : 1
BLOOD_TO : 1
AND_WELL : 1
ASSESSMENT_APPOINTMENT : 1
CHANGE_DATE : 1
THAT_CURRENTLY : 1
VOLUNTARY_TO : 1
SYSTEM_HOLOGIC : 1
CLEAR_ANA : 1
ANOMALIES_HAS : 1
RISK_OUTPATIENT : 1
KNOWLEDGE_TIME : 1
UNCHANGED_LAST : 1
SCALE_AGREE : 1
TOLERANCE_LIMITED : 1
COLLABORATIVE_RESEARCH : 1
STOOL_AND : 1
IN_HEAD : 1
CONDITION_HAS : 1
STAFF_HAD : 1
RELATING_IS : 1
WAS_ABLE : 1
HAD_SCOPE : 1
UNTIL_THIS : 1
LATERAL_BX : 1
SECONDS_SINCE : 1
LDL_CALCULATION : 2
ENOUGH_TO : 1
OF_DIFFERENCE : 1
NEED_MEETINGS : 1
PATIENTS_BAND : 1
PERCUSSION_ADDENDUM : 1
DRESSING_CHANGES : 1
LOW_VOICE : 1
ATTENTION_GOOD : 1
NOT_VISIBLE : 1
ORDERS_LUNG : 1
CONFIDENTIALITY_OCCURED : 1
ULTRASOUND_TO : 1
GOAL_LOW : 1
DISCHARGE_SUMMARY : 2
TEETH_IS : 1
DENIES_BRANDEN : 1
CATARACT_PRESBYOPIA : 1
SA_MORPHINE : 1
HOW_YOU : 1
SELF_HARM : 3
INSTRUCTED_ON : 1
WEARING_FOOTWEAR : 1
FEB_YES : 1
IN_MS : 1
FLAREUP_PT : 1
ABSTINENCE_FROM : 2
ASKING_THAT : 1
PER_SLT : 1
LT_EDV : 1
NILANDRON_APPT : 1
OF_FINGER : 1
AGITATED_EXPLOSIVE : 1
RECENTLY_TO : 1
ABOUT_KNEE : 1
WRIST_BAND : 1
TO_INTAKE : 1
USES_TOILET : 1
CFCF_ORAL : 1
GERD_BARRETTS : 1
MINIMUM_MINUTES : 1
HISTORY_CONSTIPATION : 1
EXTRA_OF : 1
PROCEDURES_INTRODUCED : 1
WORK_WITHOUT : 1
DRINK_ON : 1
WAS_TITRATED : 1
SPOKE_PHYSICIAN : 1
WEIGHT_KG : 2
NEEDS_ENCOURAGE : 1
CONTACTED_VICTIM : 1
MEDICATE_NEEDED : 1
SERVICES_HEART : 1
AUG_CLINIC : 1
HEMORRHOIDS_AGE : 1
VISIT_WIFE : 1
LAW_RECEIVED : 1
LISTED_HAVE : 1
THIS_PATIENT : 3
LITTLE_WHILE : 1
RIGHT_LUNG : 1
NOTE_IDEATIONS : 1
UNIT_KNEE : 1
NONPHARMACOLOGICAL_THE : 1
REEVALUATION_BP : 1
SITE_WITH : 1
WORKING_FIXING : 1
MIN_RESPONSE : 1
TO_UPDATE : 1
TEETH_AND : 1
BREAST_ULTRASOUND : 1
EYES_CHANGES : 1
THEY_GO : 1
MIN_VETERANS : 1
WILL_RETURN : 1
CONTINENT_ASSISTANCE : 1
DIET_NURSING : 1
ATTENTION_IS : 1
PT_SC : 1
PRIOR_WITH : 1
NONVA_MEDS : 1
PT_DISCHARGED : 1
MIAMI_TO : 1
AND_OPERATIVE : 1
ANTERIOR_CORTICAL : 1
INSOMNIA_TWO : 1
NURSING_PROGRESS : 1
DIRECTION_THE : 1
INPATIENT_SAFETY : 1
FLICK_SIGN : 1
PROCEDURE_EXCISION : 1
CONTACTS_FLUIDS : 1
NO_ACCIDENT : 1
THE_ANTERIOR : 1
OF_BREATH : 1
RESCHEDULE_MISSED : 1
HT_IN : 2
ONE_OCCASION : 1
POSSIBLE_AR : 2
NO_PRESSURE : 1
HIS_MORALITY : 1
HP_SURGICAL : 1
CRADC_HAMLIN : 1
PROVIDER_VISTA : 1
SCALP_SENT : 1
BIRCH_VETERAN : 1
DIABETES_RESEARCH : 1
POTENTIAL_FOR : 1
HARM_DPT : 1
AND_JUDGEMENT : 1
DIVORCING_HE : 1
HALDOL_IM : 1
WITHOUT_SIGNIFICANT : 1
ASSISTANCE_CONSISTENCY : 1
BEEN_UG : 1
ANTINAUSEA_HAVE : 1
CARE_CLINIC : 2
TEMPERATURE_PATIENT : 1
MOVEMENTS_HAVEDISCUSSED : 1
ISSUED_OF : 1
PSG_BE : 1
EMOTIONAL_RECENT : 1
IN_NATURE : 1
COMMENT_NUTRITION : 1
VOMITING_ASK : 1
NOT_REPLACE : 1
PATIENT_LIST : 2
PATIENT_FLUID : 1
TEST_HAS : 1
NAME_AGE : 1
PILLS_STRETCH : 1
NOT_MEDICATION : 1
NURSE_ACA : 1
IS_WITHOUT : 1
STENOSIS_DISEASE : 1
THREE_MOOD : 1
WHICH_RESIDUAL : 1
MANAGER_WITH : 1
AND_PREVENTION : 1
ROTATOR_CUFF : 1
ASSESSMENT_REPORT : 1
NOTE_YO : 1
PAIN_YES : 1
NURSING_PSYCHIATRIST : 1
SPASMS_THO : 1
IT_ADDITIONAL : 1
INSTITUTE_WEST : 1
LEFT_SPH : 1
TO_BASCOMPALMER : 1
AND_WALKING : 1
CONSENT_STATES : 1
CELL_COUNTS : 1
CLINIC_MAY : 1
ADL_NO : 1
URINE_ONE : 1
IN_QUESTION : 1
PROVIDER_REQUESTS : 1
LLE_PAIN : 1
TRANSITIONAL_STAY : 1
HIS_RECENT : 1
DEPRESSION_PERSON : 1
TACTILE_ASK : 1
ADDITIONAL_MEDICAL : 1
OTHER_CARE : 2
THROUGH_INNERVATED : 1
CONSULT_CHILD : 1
ENEMIES_HE : 1
PROTOCOL_NOT : 2
SIGN_SHAKING : 1
CORRECT_CURRENT : 1
VERY_THE : 1
MM_RALLY : 1
SIGNATURES_OF : 1
CENTER_INFORMED : 1
THIS_REQUIRES : 1
INTERVENTIONS_PART : 1
ADDENDUM_ADDENDUM : 1
DAUGHTER_IN : 1
CALLED_THAT : 1
ON_INR : 1
HAS_MEDICAL : 1
NEXT_INJECTION : 1
RESP_ASSESSMENT : 1
TO_COMPLETE : 2
SPERMATOCELE_TO : 1
OF_MON : 1
STATE_VIOLATING : 1
ADDENDUM_AT : 1
FOLLOWING_CRITERIA : 1
CM_CM : 3
UNDERSTANDING_THE : 1
READINESS_LEARN : 1
IN_FRONT : 1
LEADERS_PARTICULAR : 1
AND_ON : 1
RATE_REVIEWED : 1
NECK_STATED : 1
WOUNDS_ULCERS : 1
STOMACH_YOU : 1
TWO_FOUR : 1
PLANS_SEE : 1
STATES_QUIT : 1
ETC_PT : 1
MODERATE_NUMBER : 1
MOUTH_NAME : 1
DEAR_SON : 1
SURGERY_CURRENT : 1
ASSIGNED_BED : 1
THE_IMAGING : 1
NOW_REQUIRES : 1
HAS_RESCHEDULED : 1
ALERT_OF : 2
THE_PROVIDER : 1
BEEN_MESKENAS : 1
THIS_PHYSICIAN : 2
ORDERED_HES : 1
NONVA_CHRISTENSEN : 1
THE_ALBUTEROL : 1
OL_DL : 1
CONDITION_WORSENED : 1
ABOUT_YOUR : 1
ZIPPERS_MANUAL : 1
EXCEPT_VAMC : 1
AFRICAN_AM : 1
IS_VENOUS : 1
COVER_HIS : 1
WHEEZES_MOVEMENTS : 1
BED_OFFER : 1
BEEN_COMPLETED : 1
NOTE_PHYSICIAN : 1
BE_THE : 1
PALPATION_AND : 1
SAYS_ACTUALLY : 1
WITH_AXIS : 1
REPORT_FOR : 1
DIAGNOSES_MAJOR : 1
OF_NURSING : 1
CONCURRENT_OF : 1
COMPLETED_AMOUNT : 1
PARTICIPATE_DISCHARGE : 1
MORNING_BEFORE : 1
THE_HEMORRHOIDS : 1
TOBACCO_YEAR : 1
PRESBYOPIA_CONSENT : 1
HIS_CARE : 1
USE_HIS : 1
HEART_RATE : 1
PHONE_STARTING : 1
TEMP_CAD : 1
ASSIST_TO : 1
EDUCATION_RESTORATIVE : 1
IMMUNIZATION_PRIMARY : 1
SKIN_INTERVENTION : 1
OF_BOTH : 1
SPH_IOP : 1
BOWEL_TREATMENT : 1
WILL_HAVE : 1
FOR_ETHNIC : 1
ABSTINENCE_HAS : 1
NORTH_WEST : 1
AND_ANTINAUSEA : 1
CLAY_ANURIA : 1
LEADER_EXPLAINING : 1
RECENT_RESULTS : 1
YOUR_STAY : 1
HI_NO : 1
SOUNDS_VOIDING : 1
STYLE_FOR : 1
SERVICE_RESIN : 1
INCLUDING_SUPPLIES : 4
COMMENT_WATER : 1
MOUTH_EVERY : 1
MIN_EFFECTIVENESS : 1
PHONE_DENTAL : 1
IER_WHO : 1
TAKE_SCHEDULE : 1
VIEWED_RANKINE : 1
THEY_MAKING : 1
RESCHEDULED_JUNE : 1
123_NURSING : 1
CONSIDERATIONS_FOR : 1
MOTHER_REQUESTING : 1
BEGINNING_GROUP : 1
SINCE_THIS : 2
BIRTH_HE : 1
RESIN_SURFACEANTERIOR : 2
HEALTH_OTHER : 1
CARE_SAYS : 1
MORE_ON : 1
COUNSELED_THE : 1
WILL_REMAIN : 1
VERY_HELPFUL : 1
WITH_NEGA : 1
SO_REAL : 1
FLAT_ETOH : 1
MOOD_AFFECT : 1
RESTED_FOR : 1
TIME_EVENING : 1
PSV_EDV : 2
HEADACHES_IN : 1
OR_CUEING : 3
CARE_IS : 1
PLT_ILLNESS : 1
TO_BAND : 1
ACTUALLY_ONLY : 1
AMBULATORY_DIET : 1
THERAPY_APPROPRIATE : 1
PAIN_PATIENT : 2
KG_OF : 1
IN_FOR : 1
CARE_MR : 2
LETS_STAFF : 1
TEAM_INTRODUCED : 1
AR_AR : 1
AS_WAS : 2
MUSCLES_EXCEPT : 1
VISIT_WITH : 2
WAS_REVIEWED : 1
THIS_WE : 1
CPRS_AND : 1
OU_COSOPT : 1
DENIES_AUDITORY : 1
ALCOHOL_WHAT : 1
HAD_UTI : 1
ODY_USES : 1
OBJECTIVE_RAL : 1
AT_BIRCH : 1
BE_REMINDER : 1
PROVIDED_THIS : 2
EXERCISE_DRESSING : 1
HE_WHERE : 1
DURING_SESSION : 1
CARE_WITH : 1
FINDINGS_AREA : 1
BY_PATIENT : 2
BREATH_NUMBNESS : 1
SUICIDAL_WILL : 1
EXERCISE_OF : 1
PULSE_RESP : 1
ARMS_EXTENDED : 1
BREATH_TINGLING : 1
WANTS_THE : 1
LENGTH_IS : 1
OBSOLETE_ONE : 1
PATIENT_REPORTS : 2
PLASMA_RETURN : 1
PREFERENCES_AS : 1
TAB_ONE : 2
ABOUT_SAYS : 1
REQUESTED_SUCCESSFULLY : 1
OR_UNSPECIFIED : 1
FINDINGS_PATIENT : 1
HELPING_VET : 1
FITTING_ADJUST : 1
ACA_UP : 1
NO_MH : 1
PAYMENT_IS : 1
TRAINING_REPORTED : 1
NUMBER_ALLERGIES : 1
ACTIVE_OF : 2
AT_VETERAN : 3
BEHAVIOR_MEDICATION : 1
PCP_ORTEGA : 1
WAS_OBTAINED : 1
IN_HE : 3
ATTENTIVE_PSYCHIATRY : 1
OUTSIDE_OFFICE : 1
SEEM_TO : 1
SURFACEANTERIOR_ARRIVED : 1
MAJOR_RECURRENT : 1
WITH_PH : 1
GROUP_AND : 2
CUFF_REPAIR : 1
WITH_BY : 1
USE_OF : 2
WAS_SUSPENDED : 1
NUTRITION_MOBILITY : 1
THE_BEGINNING : 1
HEMATOMA_MEDICATIONS : 1
PATIENT_WILL : 3
VICTIM_DIVISION : 1
CONTRACT_TRAVEL : 1
HIS_WITH : 1
REORDERED_AS : 1
PULSE_MEASUREMENT : 1
HE_SET : 1
COLOR_YELLOW : 1
INSIGHT_FAIR : 1
EYES_VISUAL : 1
IS_PAINFUL : 1
ATTORNEY_PL : 1
EYE_PAIN : 1
NURSING_OR : 1
ROOM_TEAM : 1
OF_TRAIN : 1
MARY_IM : 1
NARCOTICS_WILL : 1
WALKS_FOR : 1
KILL_IF : 1
OPERATIONS_NONE : 1
ACCUCHECK_OF : 1
SURGICAL_BOARD : 1
THRU_SOCIAL : 1
MINIMAL_CUING : 1
HE_ALSO : 3
TO_ASSIST : 1
DISORIENTED_TO : 1
DRINKS_ONE : 1
ATTEMPTED_TO : 1
CONSULT_OUT : 1
DYSURIA_HESITANCY : 2
ACTUALLY_MINUTES : 1
OF_THIS : 3
WELLKNOWN_TO : 1
NEEDLES_TO : 1
INDIVIDUALS_SKILLS : 1
THO_MUCH : 1
CHARACTERISTICS_MEDICATION : 1
HEART_AT : 1
AT_REVIEWED : 1
HOSPITAL_NOTE : 1
CHAINS_ACTIVE : 1
SWITCH_TO : 1
CUEING_SYSTEMIC : 1
PERSONS_COMPLETED : 1
TO_VS : 1
REPORTED_MENTAL : 1
STYLE_CHANGES : 1
REQUEST_REPORTS : 1
HANDOUT_KEY : 1
LISTED_WAS : 1
AND_LEAVE : 1
LPM_DURING : 1
DRESSES_GOAL : 2
MONTH_HAS : 2
AT_VENOUS : 1
VERY_RELAXED : 1
STOOLS_CLAY : 1
HAS_BECOME : 1
IS_SUBMITTED : 1
YOUR_NONE : 1
MH_MD : 1
GROUPS_USUAL : 1
COMMENT_PT : 1
ADVERSE_PHYSICIAN : 1
NEUROLOGIC_TREATMENT : 1
APPROPRIATE_HES : 1
NECESSITY_WANTS : 1
COLOR_HYGIENE : 1
OU_PAIN : 1
PT_ADMIT : 1
AND_VOICEMAIL : 1
HEMORRHOIDS_WAS : 1
CALCULUS_PD : 1
TREATMENTS_ORDERED : 1
LUNCH_DRINKS : 1
BY_SKELETAL : 1
CHF_TRUS : 1
IS_THE : 1
AND_PERSONAL : 1
HIP_IN : 2
TO_COGNITIVE : 1
RECORD_BASCOM : 1
ADDITIONAL_COMMENTS : 1
STRIPS_BEING : 1
REALLY_WENT : 1
THAT_TO : 1
PHYSCIAL_PT : 1
TAPE_ON : 1
ALL_BREATH : 1
NUMBER_APPEARANCE : 1
WAS_BY : 2
BY_SHOWING : 1
COLONOSCOPY_DECLINES : 1
SUBMIT_REFERRAL : 1
NO_SEEN : 1
GERD_LACK : 1
REQUESTING_THAT : 1
TO_PARTIES : 1
EPINEPHRINE_COMMENT : 1
LAST_FORMAL : 1
EXPLOSIVE_MORNING : 1
NEGA_RN : 1
IF_YES : 1
NONE_NOTE : 1
OF_LIVING : 2
THAT_FELT : 1
AFFECT_PT : 1
IS_SCHEDULED : 1
HOSPITAL_BY : 1
FLAX_OIL : 1
OD_GOAL : 1
CBSST_CURRENT : 1
SAFETY_VS : 1
TEMPERATURE_IS : 1
MEMBER_AT : 1
LONG_BE : 1
ORIENTED_EFFECTIVENESS : 1
THE_IMPORTANCE : 1
AM_AN : 3
BEHAVIOR_UNIT : 1
WAS_THAN : 1
ANURIA_HESITANCY : 1
CALLS_TO : 2
DISCUSSED_PT : 1
HYPERLIPIDEMIA_GRAMS : 1
RADIATING_PAIN : 1
THE_SESSION : 2
PATIENT_BRIEFLY : 1
DURING_THIS : 2
EXPEDITED_IF : 1
VOICES_AND : 1
SKIN_AT : 1
COLLECTION_DATE : 1
BETTER_WITH : 2
INCLUDE_TO : 1
DEPRESS_RECURRENT : 1
PRE_POST : 1
QHS_OU : 1
STATUS_LUNCH : 1
CSECTIONS_STATUS : 1
LS_REQUESTED : 1
WITH_WAS : 1
LETS_KNOW : 1
BEHAVIOR_FOR : 1
PATIENT_PREVENTIVE : 1
TO_KNOWLEDGE : 1
STATES_SKIN : 1
TOILET_NORMAL : 1
RECORD_REVIEWED : 1
OR_SWELLING : 1
PO_NO : 1
ON_FEE : 1
TAKE_FOOD : 1
ACTIVE_SERVICECONNECTED : 1
SUPERVISION_PATIENT : 1
BY_FOR : 1
HYPOTHYROIDISM_COPD : 1
REPORTS_ADDENDUM : 1
BRIEFLY_FOR : 1
PROTECTORS_IN : 2
TO_DISCONTINUE : 1
IM_WONDERING : 1
PLANO_SPH : 1
AND_ASKING : 1
HELP_EVALUATE : 1
IN_FUNCTIONAL : 1
INDEPENDENT_EASILY : 1
RECENTLY_HOURS : 1
BACK_FLORIDA : 1
OXYGEN_AT : 1
THEY_FOR : 1
IDEATION_HE : 1
THIS_BEFORE : 1
ARTH_ALSO : 1
SITS_UP : 1
ADDENDUM_FARIBAULT : 1
ATTEND_THOUGHT : 1
PHYSICIAN_DISCUSSED : 1
ALLERGIES_RESIDENT : 1
RN_EDUCAION : 1
UP_TO : 1
SHUTDOWN_THE : 1
HAD_OF : 1
CURRENT_LEVEL : 1
FEELINGS_AND : 1
PAIN_CONTINUES : 1
WITH_VISION : 1
HOW_LACE : 1
CELLULAR_REGARDING : 1
IS_REVIEWED : 1
DIPLOPLIA_EYE : 1
THE_PELLETS : 1
ADDENDUM_HOME : 1
HER_RIGHT : 1
WITH_OLD : 1
LEVEL_ALLERGIC : 1
CEFTRIAXONE_AZITHROMYCIN : 1
STATES_HES : 1
OF_ONSET : 1
PATIENT_GASTROESOPHAGEAL : 1
HAVE_OR : 1
DISCOURAGED_AN : 1
THROUGH_MUSCLES : 1
NOTIFIED_VET : 1
IN_MARCH : 1
KNOWN_CHF : 1
WAS_ADDENDUM : 1
SESSION_STEPS : 1
FOR_JUNE : 1
TO_DOCTOR : 1
PSYCHOACTIVE_ABUSE : 1
STAFF_REGARDING : 1
OFFERED_TO : 1
HERE_TO : 1
INTERVENTIONS_AS : 1
YOUR_HAVE : 1
JUMPING_IN : 1
REQUIRED_COLOR : 1
PROVIDER_PHYSICIAN : 1
SANDERS_MANAGEMENT : 1
OVERALL_PHYSICAL : 1
BEHAVIOR_AND : 1
WHERE_HIS : 1
THEN_TO : 1
NOT_INDEPENDENTLY : 1
OT_INFORMATION : 1
AT_BREAKFAST : 1
WITH_DECREASE : 1
DOCUMENTATION_LEARNING : 1
SAFETY_PRECAUTION : 1
PATIENT_FULL : 1
RECEIVED_MEDICATION : 1
SEVERAL_PHONE : 1
IF_IT : 1
SIGNIFICANT_INTERVAL : 1
IT_NOT : 1
FOR_ALCOHOL : 1
THERE_DRINKING : 1
DT_LB : 1
TO_DIETITIAN : 1
LB_NAME : 1
ON_YOUR : 1
NO_FOUND : 1
THIS_INCIDENT : 1
DATA_VETERAN : 1
CIU_ACCOMPANIED : 1
DRINKING_THIS : 1
ORDER_HIP : 1
HISTORY_COMORBID : 1
OF_STOOL : 7
LEGIBLE_DEAR : 1
WISH_VIEW : 1
IMPAIRED_SC : 1
RESIDENT_OUT : 1
SLIGHTLY_TO : 1
ULTRASOUND_RULE : 1
SEE_HIM : 1
SPECIFICS_PLEASE : 1
ISSUES_THE : 1
ORDERED_FLORIDA : 1
DREAM_SO : 1
WANTED_UPDATE : 1
ACCESS_IV : 1
UNIT_COMPLAINT : 1
REPLACE_OTHER : 1
ANY_AMBULATORY : 1
SYMPTOMS_MORE : 1
MODERATE_PLAQUE : 1
ACTIVE_ADDENDUM : 1
VA_NO : 1
THE_ACUTE : 1
VETERAN_ABLE : 1
AT_PULSE : 1
ANKLE_PATIENT : 1
SURFACEANTERIOR_OF : 1
HE_MEDICATIONS : 1
IS_WORKING : 1
AND_VERIFIED : 1
NUTRITIONINTAKE_PATIENT : 1
PTSD_DEPRESSION : 1
CONGESTION_FEVERS : 1
CHARGE_DEDRA : 1
COGNITIVE_VETERAN : 1
WAS_FOUND : 1
TO_CURRENT : 2
HARSH_DO : 1
ON_AND : 4
SINCE_UNDER : 1
AT_LOW : 1
THE_OFFERED : 2
ACKNOWLEDGED_VETERANS : 1
BOARD_CARE : 1
LIVES_ALONE : 1
SHOE_MAY : 2
INVOLVED_CBSST : 1
FOR_CELL : 1
IF_ITS : 1
INDUCED_PSYCHOTIC : 1
HE_WOULD : 1
DIET_RX : 1
SICK_TO : 1
AFTER_PAIN : 1
SUPPORTIVE_ASSESS : 1
IT_STAFF : 1
IN_NAME : 1
HOSPITAL_DISCHARGE : 1
IM_HOMICIDAL : 1
FORMAT_OF : 1
RALLY_VERY : 1
APPT_COMES : 1
OF_ZZPATIENT : 1
REMOVAL_UPPER : 1
COLOR_OF : 1
TO_PO : 1
MS_IT : 1
OF_DORSUM : 1
SEBACEOUS_CYST : 1
PC_ORTHOPEDIC : 1
CIWA_ORGANIZED : 1
ON_VOL : 1
BACK_TO : 3
OFF_BED : 1
NUMBER_WITH : 1
THE_PROGRESS : 1
NO_APPROPRIATE : 1
NO_DISCUSSED : 2
BEING_MADE : 1
IS_ABOUT : 1
HAS_ORDER : 1
THIS_BASCOM : 1
PENCIL_TO : 1
FEW_MONTHS : 1
STAFF_UNLESS : 1
CONSENT_TOPICS : 1
MALE_ACCOMPANIED : 1
COMFORT_WITH : 1
HAVE_TOBACCO : 1
SECURITY_CONVERSATION : 1
MATERIALS_PROGRESS : 1
AND_NOTE : 1
ARE_SYMPTOMATIC : 1
MOBILITY_SUPERVISION : 1
STAY_AT : 1
CHANGES_FOR : 1
OTHERWISE_HAS : 1
MGS_PO : 1
PROGNOSIS_CPRS : 1
WERE_INJURED : 1
THEN_TRANSFERRED : 1
ALCOHOL_HE : 1
VOIDING_COMPLAINTS : 1
DENIES_VOLUNTARILY : 1
PSYCHOTHERAPY_CONDUCTED : 1
DATED_CONTACTING : 1
FOR_STRESS : 1
TO_SHE : 2
HOW_TO : 2
ASSESSMENT_CONTACTING : 1
WANT_WORK : 1
MENTAL_STATUS : 2
RUN_BE : 1
TO_DESCRIPTION : 1
DECREASE_WITH : 1
ON_PC : 1
FULL_SOCIAL : 1
APPOINTMENTS_TO : 1
TO_STOP : 1
WAS_REAL : 1
DATE_SEP : 1
RELAXED_NEVER : 1
LAST_OR : 1
ACCIDENT_OR : 1
SEC_IMPORTANCE : 1
IMPORTANCE_EXERCISE : 1
TAXI_AND : 1
AND_OF : 1
REPORTS_TIME : 1
SHORTNESS_OF : 1
LOW_RISK : 1
CARE_STAFF : 1
MEDICATION_ATTENDING : 1
HISTORY_PATIENT : 1
ALSO_SYMPTOMS : 1
ASSISTANCE_SUPERVISION : 1
HISTORY_FALLING : 1
HEARING_PATIENT : 1
HOUR_SUPERVISION : 1
SUBJECTIVE_RAL : 1
PHYSICIAN_OF : 1
FOLLOWING_GROUPS : 2
THE_HEARING : 1
SCREEN_IS : 1
TRP_INTAKE : 1
BELT_STATED : 1
NO_CRITERIA : 1
MINUTES_USED : 1
HIS_ATTORNEY : 1
NO_IS : 1
REVIEW_BOWEL : 1
EVALUATE_INTERVENTIONS : 1
IN_HIS : 2
TO_MH : 1
APPROACH_THAT : 1
OF_APPT : 2
ENVIRONMENT_ISOLATIVE : 1
FOOD_ARE : 1
SAT_DOWN : 1
SUBSTANCE_INDUCED : 1
REPORT_HE : 1
ASSISTANT_NOTE : 1
REVIEWED_WITH : 1
FROM_RECOMMENDATIONS : 1
NO_CONTACT : 1
DENIES_HISTORY : 1
TOPICAL_ML : 1
BED_VALUE : 1
APPARENT_INDICATION : 1
HE_MORE : 1
PSYCHOSIS_RESIDUAL : 1
HYPOTHYROIDISM_ROOM : 1
IS_ON : 3
IM_FEELING : 1
SUPPORT_TRUCK : 1
BUT_WAS : 2
NO_INTERACTION : 1
PAIN_ALLERGIES : 1
HOME_APPOINTMENTS : 1
CHARACTERISTICS_ACCESS : 1
THE_PERFORM : 1
SOLN_SOLN : 1
PTS_ANKLE : 1
AND_SENT : 1
REPORTS_HELP : 1
THE_RISKS : 1
TOPIC_INSTRUCTION : 1
WHO_CRITERIA : 1
STARES_HEARING : 1
MH_MANAGER : 1
ON_NORMAL : 1
TO_INDIVIDUAL : 1
APPROACH_IS : 1
NECK_PROVIDER : 1
OUT_CARE : 1
DECLINES_AND : 1
STAFF_RN : 1
ALCOH_INTOXICATION : 1
TO_LACE : 1
TEST_DATE : 1
MONITOR_STATUS : 1
NEGATIVE_MONITOR : 1
TEL_ION : 1
DIFFERENCE_FRIENDS : 1
NPO_AFTER : 1
ENVIRONMENTAL_ALSO : 1
NONDISTENDED_SOUNDS : 1
TAB_OBSOLETE : 1
ED_DOCUMENT : 1
ETHNIC_GROUP : 1
HEALTH_ADMISSION : 1
TRANSFER_TO : 1
PRIMARY_SPECIFY : 1
THE_NEW : 1
OF_SIGNAL : 1
BY_GOOD : 1
HOW_HE : 1
STAFF_SKIN : 1
BLOODY_STOOLS : 1
ON_ADMISSION : 1
NO_TENDERNESS : 1
DT_POX : 1
SITE_AFTER : 1
CONSULT_INITIATED : 1
TO_DECREASE : 1
BEING_SEEN : 1
GET_HALF : 1
ACCOMPANIED_BY : 1
BID_SA : 1
ETOH_AND : 1
BENEFITS_IN : 1
HIS_ACEI : 1
THURS_HE : 1
SC_DISABILITY : 1
NIGHT_DEC : 1
OTHER_DATA : 1
ELEVATOR_WITH : 1
VIEW_DOCUMENT : 1
ON_RACHEL : 1
SUPPLIES_OPHT : 1
COMPENSATED_CLINICAL : 1
AT_INSUFFICIENCY : 1
HAS_IN : 2
POSTIVE_FLICK : 1
GO_PHARMACY : 1
INTERVAL_CHANGE : 1
JOB_IN : 1
IS_AN : 1
DISCUSSED_MORALITY : 1
WEIGHT_LOSS : 1
AVAILABLE_TEAM : 1
ROLE_WILL : 1
BETTY_ALLERGIES : 1
SYMPTOMS_ALSO : 1
WIFE_THAT : 1
TO_TEMPERATURE : 2
HE_UNDERSTOOD : 1
MS_SON : 1
ADDENDUM_PATIENT : 2
NOTE_USED : 1
MEDICATIONS_LISTED : 1
NAME_REASON : 1
OF_LOSS : 2
PAIN_SHORTNESS : 1
RACE_CT : 1
NAME_STATED : 1
CUFF_BARNES : 1
DISEASE_HYPERTENSION : 1
IF_ANY : 1
CALL_IS : 1
THE_LONG : 1
TO_THRU : 1
AS_LEADER : 1
WIFE_WORK : 1
OF_WHO : 1
ON_FAR : 1
OF_SAYS : 1
ADDENDUM_PT : 2
GOOD_HIS : 1
CHAPLAINVISITATION_PAIN : 1
APPOINTMENT_OF : 1
IS_ION : 1
BLOOD_OCCURED : 1
AND_TINGLING : 1
BECAUSE_OTHER : 1
OCCURED_MATTER : 1
UNRE_AND : 1
PLANS_GO : 1
AEROBICS_SKATES : 1
RN_NUMBER : 1
STOOL_APPLICABLE : 1
PURPOSE_THE : 1
LINE_BY : 1
HEALTHIER_FOOD : 1
COMMENT_BY : 1
INCREASE_IN : 1
THIS_FRI : 1
WAS_ANSWERED : 1
SWITCH_PO : 1
THIS_SHIFT : 10
IT_BURNING : 1
ADDENDUM_CARE : 1
ON_APRIL : 2
THEY_QUIT : 1
AT_VAMC : 2
DOE_STRESS : 1
STEARS_HE : 1
NUTRITION_DX : 1
VETERAN_AT : 2
DISCUSSED_THIS : 1
PREDICTION_BEFORE : 1
NOTE_REQUEST : 1
REPORTS_AM : 1
CHANGES_ALERT : 1
SUN_PROTECTION : 1
ONCOLOGY_DAILY : 1
BEING_AT : 1
STATES_HE : 3
AT_RECENT : 1
FALLS_WHEN : 1
HAND_RELIEVES : 1
STRUCTURED_LIVING : 1
SAY_LEFT : 1
YRS_IN : 1
FOLLOWUP_NOTE : 1
HAVE_DISCUSSED : 2
LIN_HAS : 1
PATIO_USING : 1
PREVIOUS_TIA : 1
IS_IN : 3
MEDICATION_INDUCES : 1
PAIN_OVERALL : 1
LOCULATED_SPERMATOCELE : 1
GLUTEAL_MUSCLE : 1
RIGHTSORE_SOUNDS : 1
PMHX_ASSISTANCE : 1
YOURSELF_OR : 1
CPAP_CONSULT : 1
THAT_WOUND : 1
ELBOW_GUIDE : 1
BLUNTED_PT : 1
RESPONSIBLE_DRIVER : 1
OT_PT : 1
AMBULATION_NO : 1
CLINIC_FOR : 2
NOW_BECOME : 1
NOTE_FEELINGS : 1
DIFFICULTIES_WITH : 1
PILLS_THE : 1
YOU_ANYTHING : 1
ANESTHESIA_ENSURING : 1
DIPHENHYDRAMINE_HCL : 1
IN_WILL : 1
POX_SCHEDULED : 1
INCLUDE_GOING : 1
OF_HISTORY : 2
IN_IN : 2
STILL_ON : 1
BY_STAFF : 1
DISCUSSION_FACT : 1
BUT_BE : 1
AM_CALL : 1
AND_ASK : 1
SOUNDS_PRESENT : 2
AREA_BASE : 1
LAB_VIOLATION : 1
FOR_WHILE : 1
DISTURBING_ASSESSMENT : 1
THAT_HEARTRATE : 1
NUMBER_CELL : 1
IS_AREA : 1
HELP_AT : 1
HEALTH_TRP : 1
EXCELLENT_WOUNDS : 1
REQUIRE_METHOD : 1
THE_AM : 1
PATIENT_WEARING : 1
SCALE_HOW : 1
THE_BOWEL : 1
PHYSICIAN_OS : 1
MY_WAS : 1
AS_BY : 1
TAPMEDICATION_RENEWAL : 1
OBESE_WELL : 1
PROCEDURES_AND : 1
ONE_MR : 1
HIS_EVERY : 1
EYES_QID : 1
PATIENT_COUNSELED : 1
PATIENT_MEDICATION : 1
THESE_PREVIOUS : 1
CLAY_STOOLS : 1
FOR_CALL : 1
HAIR_BRC : 1
BEEN_RESCHEDULED : 1
HOME_FOR : 1
FRIGHTEN_ARE : 1
IN_AND : 5
EXPECTATIONS_SALES : 1
MUSCLES_FOR : 1
VERIFIED_WITH : 2
CARDIOVASCULAR_SYSTEM : 1
FROM_WORK : 1
LOOKING_FOR : 1
ARNP_SAME : 1
ER_HOSPITAL : 1
NOTE_APPEARANCE : 1
VETERAN_WOULD : 1
HUNTSVILLE_PRIMARY : 1
HEARTRATE_ELEVATED : 1
PAIN_NUMBER : 1
PAPERWORK_AND : 1
HAS_PAIN : 2
EXTREMELY_TEARFUL : 2
IS_PLEASANT : 1
YOU_ITCHING : 1
BATH_SHOWER : 1
SEP_ONCOLOGY : 1
IS_TEL : 1
PELLETS_FROM : 1
DAILY_ADMINISTERED : 1
ALLOW_LATHER : 1
TO_AREA : 2
IN_CONSIDER : 1
RISK_READING : 1
PHONE_SERVICE : 1
HR_KILL : 1
NEGA_EVALUATION : 1
DURING_PRIOR : 1
BEDSIDE_YES : 1
THERAPY_NURSE : 1
BY_DISCHARGE : 1
KNOWLEDGE_CHARACTER : 1
OTHERWISE_PT : 1
STATUS_JOB : 1
COMMUNICATION_AND : 1
TO_SO : 1
TR_WAS : 1
MHC_REILLY : 1
SAFE_ENVIRONMENT : 1
PREREGISTRATION_PAIN : 1
FINDINGS_FOV : 1
INTEGRATED_ROUNDS : 1
VETERAN_COMPENSABLE : 1
BACK_WAS : 1
BLIND_TOOK : 1
THERE_AREA : 1
DROP_BOTH : 1
VIEW_COMPLETED : 1
HESITANCY_EDUCATE : 1
MOVEMENTS_THIS : 7
TOBACCO_AND : 2
RETURN_OF : 1
TH_WHEN : 1
WHILE_BUT : 1
NOT_IN : 2
PAIN_ASKING : 1
COLONOSCOPY_RESCHEDULED : 1
EVENING_AND : 1
RESIDENT_INCONTINENT : 1
NOTE_REPAIRED : 1
ADMINISTRATION_DETERMINED : 1
OF_EYEBALL : 1
STOOL_SOFT : 1
EXPOSURE_VETERAN : 1
CUEING_USE : 1
OLD_ARRIVED : 1
DEP_AND : 1
RECORD_FOR : 1
REHABILITATION_THINKS : 1
NUMBER_AT : 1
FELT_HEARING : 1
INSTITUTE_FOR : 1
SET_UP : 3
DISTURBANCES_ASK : 1
TO_IDENTIFIED : 1
REGARDING_ANXIETY : 1
PATIENT_OR : 1
TO_VINELAND : 1
ALSO_KEPT : 1
ONLY_ATYPICAL : 1
AT_TIME : 3
THERE_NO : 1
ARE_MADE : 1
TO_VETERAN : 1
HEALTH_QUESTIONNAIRE : 1
TREATMENT_FEB : 1
VISION_SURGERY : 1
LEFT_BARRIERS : 1
DRINKING_BEHAVIOR : 1
ELSE_TELEPHONEORTHOPEDICS : 1
AND_RECEIVED : 1
INTRODUCED_TO : 2
ANY_BLADDER : 1
LE_DENIES : 1
VA_IF : 1
TO_VIEW : 1
SITS_WITHOUT : 1
PRIMARY_ABUSEUNSPEC : 1
YES_NO : 1
THE_DENVER : 1
BP_ETOH : 1
SITE_CONTACTED : 1
ARM_ACTIVE : 1
HC_PRO : 1
IDENTIFYING_HBPC : 1
EDUCATION_ADL : 1
REDUCING_ANGER : 1
MEETS_CRITERIA : 1
NORMAL_COHERENT : 1
CTAB_COLOR : 1
HIM_WERE : 1
UP_VISIT : 1
PATIENT_NAUSEA : 1
LIGHT_PD : 1
DEAR_HIS : 1
AO_EXPOSURE : 1
WITHDRAWAL_TREMOR : 1
UP_NOTE : 2
THOUGHT_DISORDER : 1
PULMONARY_PROCEDURE : 1
SHOULDER_GOT : 1
FOR_RATED : 1
RENEWAL_NOTE : 1
VOMITING_DO : 1
PHYSCIAL_ANOMALIES : 1
ABILITY_PLAN : 1
REMINDER_PLAN : 1
VET_IS : 1
BEEN_VETERANS : 1
PSYCHOACTIVE_SUBSTANCES : 1
MAIL_ENOUGH : 1
COMPLETE_THE : 1
CHO_MG : 1
HEARING_THAT : 1
AND_REQUIRE : 1
URINE_PERSONAL : 1
HAS_PATIENT : 1
FOR_EXERCISEOCC : 1
OF_IS : 1
INTAKE_PATIENT : 1
PLAQUE_LIGHT : 1
POHX_THEN : 1
WITHOUT_DELUSIONAL : 1
HYDROCHLOROTHIAZIDE_TAB : 1
VISTA_CONTAINS : 1
THE_ULCER : 1
WORK_ON : 1
HAS_LEVEL : 1
TO_VERBAL : 1
TEARFUL_STAFF : 1
IF_NEEDED : 1
FINGER_APART : 1
THAT_WHEN : 1
APARTMENT_MEDICAL : 1
ALBUTEROL_CFCF : 1
TO_DTC : 1
APR_RESPIRATIONS : 1
USED_THE : 2
MH_DRRTP : 1
MID_LATERAL : 1
ACTIVITIES_MET : 1
BEFORE_OUT : 1
APPOINTED_PRASHANT : 1
NOTE_YOWM : 1
MOTION_RIGHT : 1
LEAVE_VOICE : 1
HE_ON : 2
ASSISTANCE_URINE : 2
TO_CALL : 1
WELL_HOMICIDAL : 1
AND_IS : 4
AND_DD : 1
FULL_SCHEDULE : 1
RESPIRATORY_THERAPY : 1
SHOWING_NO : 1
STATED_SHE : 1
SCHIZOPHRENIA_LIVING : 1
PROCEDURE_SIDE : 1
MYSELF_HAD : 1
SOCKS_SHOES : 1
HIS_CASE : 1
THIS_IS : 3
APPOINTMENT_CAN : 1
BEFORE_YEARS : 1
ABOUT_SUPPORT : 1
IN_MUSCLE : 1
AREA_SWELLING : 1
MEDICAL_RECORD : 1
PROTECTION_AVOIDANCE : 1
CALCULATION_AWAIT : 1
SKELETAL_NEUROLOGIC : 1
RESIDUAL_OF : 1
DETERMINED_BY : 1
THE_MOVED : 1
INTO_VA : 1
PHYSICAL_CONSULT : 1
INFORMED_THAT : 1
STARES_AROUDN : 1
PUEBLO_CHAPLAINVISITATION : 1
ASSISTANCE_DISCUSSED : 1
DISABILITIES_ZZPATIENT : 1
THESE_IS : 1
AND_ANY : 2
OUTPATIENT_MEDICATIONS : 4
TAB_TWO : 1
DAILY_PATRICIA : 1
ASSISTANCE_PROVIDED : 2
RECONCILED_MEDICATION : 1
OF_BED : 1
OS_SHOW : 1
IS_ECP : 1
RISK_AT : 1
REPORTS_NO : 1
WORKING_ON : 2
THIS_BY : 1
NEEDED_FOR : 1
MOST_PAINFUL : 1
AZITHROMYCIN_FOR : 1
REMAINING_HAIR : 1
DOESNT_THE : 1
IN_APARTMENT : 1
INSTRUCTION_EVALUATION : 1
ASSESSMENT_PLAN : 1
OF_MARY : 1
DT_09 : 1
UNDERLYING_MALIGNANCY : 1
LENGTH_MINUTES : 5
AT_IN : 1
SATISFACTORY_SC : 1
RESIDENT_AND : 1
ADL_OF : 2
ALSO_REPORTS : 1
MINS_VITAL : 1
OD_CLEAR : 1
THAT_THE : 1
OFFERED_GROUPS : 2
ANTERIOR_WORK : 1
SLT_WNL : 1
READING_BLOOD : 1
MORE_WITH : 1
TAB_TAKE : 4
HIS_WILL : 1
FOCAL_FOV : 1
MM_FOCUS : 1
ONE_TABLET : 5
INTERVENTIONS_TREATMENTS : 1
NEG_FOR : 1
STAFF_PERFORMED : 1
MOWING_THE : 1
SWER_AND : 1
EXPECTATIONS_OF : 1
WAS_GONE : 1
MET_WITH : 1
REPLACEMENT_NUTRITIONINTAKE : 1
APPROPRIATE_TO : 1
THE_SHOTGUN : 1
OXYGEN_DELIVERED : 1
DAILY_CHAPLAINVISITATION : 1
THE_VA : 3
SEE_DAVE : 1
SIMILAR_INTAKE : 1
HEMORRHOIDS_PATIENTS : 1
NOTE_PATIENT : 2
PICK_NO : 1
VETERAN_WELLKNOWN : 1
IS_UNCIRCUMCISED : 1
THERAPEUTIC_TO : 1
WITHIN_PREVIOUSLY : 1
GROUPS_BEEN : 2
BLOOD_UPPER : 1
OPERATE_CONTROL : 1
MENTATION_ORIENTED : 1
TASK_READER : 2
ENVIRONMENT_NO : 1
VETERANS_TO : 2
HAS_KNOWN : 1
KIN_AND : 1
ACTIVE_RANGE : 2
SA_AND : 1
CARDIAC_CATHETERIZATION : 1
INTAKE_AND : 1
LIFT_MAY : 2
FEELS_AM : 1
SEVERE_FLAREUP : 1
KLONOPIN_TALKED : 1
REGIME_INITIALLY : 1
ADL_MEAL : 1
FOLLOWING_EDUCATIONAL : 1
FROM_OTHERWISE : 1
SHAMPOO_PT : 1
CODE_PRO : 1
URINE_OF : 1
VALID_THRU : 1
NEEDED_TO : 2
VALID_SOCIAL : 1
MG_GIVEN : 1
IN_PROTECTION : 1
LABRAL_PATHOLOGY : 1
WERE_YOU : 1
HURT_SELF : 1
REASON_HAS : 1
FEELINGS_MONITORED : 1
SERVED_IN : 1
BUT_DERMATOLOGY : 1
SISTER_NAOMI : 1
PATIENT_THIS : 1
SPEAK_TEAM : 1
REMOTE_NONVA : 1
IF_NECESSARY : 1
SESSIONS_SHAMPOO : 1
HIS_MSE : 1
ATION_INSOMNIA : 1
WITH_TOXICOLOGY : 1
OF_AN : 1
MH_INTEGRATED : 1
TOOK_PLACE : 1
PERIODS_OF : 1
OF_RADIOACTIVE : 1
CALL_TO : 1
DISCOMFORT_PTS : 1
AM_IMPROVING : 1
YEARS_READY : 1
FOCUS_IS : 1
WONDERING_IF : 1
THE_ASSESSMENT : 1
THEY_ARRANGED : 1
AUDITORY_OR : 1
HC_PHONE : 1
WITH_DOSE : 1
HEADACHES_HER : 1
YES_PATPU : 1
HX_HAIR : 1
ASSISTANCE_HIS : 1
FINDINGS_SHOULD : 1
TOLERANCE_IS : 1
UPPER_IMPACTED : 1
CALCULUS_MM : 1
LIDOCAINE_WHEAL : 1
CALL_YOU : 1
THIS_MORNING : 2
NO_DING : 1
ALLERGY_TO : 1
PTSD_IS : 1
COGNITIVE_OR : 1
PSYCHOTHERAPY_WITH : 1
CHEN_MD : 1
QUESTIONS_DO : 1
FOOD_BREAKFAST : 1
AMOUNT_OF : 4
CAPACITY_AT : 1
CLINIC_SINCE : 1
REASON_STUDY : 1
TO_WAS : 1
PATIENTS_MOOD : 1
ALERT_TO : 1
DENIES_CHEST : 1
ABNORMAL_TEST : 1
SUBMITTED_CARE : 1
RAL_MEDICAL : 1
THE_IDENTIFYING : 1
TRANSFERRED_BASCOM : 1
HEARING_IN : 1
BRANDEN_SCALE : 1
PROVENTIL_ATROVENT : 1
PERSONAL_BATH : 1
SYSTEM_DOCUMENTING : 1
EDUCATIONAL_MATERIAL : 1
THIS_SPECIMEN : 1
TIMES_HE : 1
HAVEDISCUSSED_PATIENT : 1
HE_NO : 1
RESIDENT_RESTORATIVE : 1
FREE_SCOPE : 1
MOOD_SEC : 1
OF_NO : 2
SHE_ALSO : 1
STAFF_MD : 1
ONCOLOGY_SERVICE : 1
CALLED_THERAPIST : 1
COUGH_PREVIOUS : 1
OF_CARE : 7
TO_TIMES : 1
CONSULT_PT : 1
EXTRA_DOSE : 1
ISSUE_FOR : 1
GERD_OF : 1
CELL_PERCEPTION : 1
FOLLOWING_MATERIAL : 1
AN_IF : 1
HEAD_HAND : 1
OF_LOCATION : 1
MADE_THE : 1
AND_PAIN : 2
HYDROCHLOROTHIAZIDE_MG : 1
PTS_EXERCISE : 1
SIDE_MINUTE : 1
MG_LIN : 1
CARE_EXCISION : 1
OFFER_PATIENT : 1
STOMACH_HAVE : 1
HAD_CHILDREN : 1
VET_YOURSELF : 1
FUNDING_ORDERS : 1
NURSING_METHOD : 1
FULL_NAME : 2
REFUSE_ELECTRONICALLY : 1
RECOMMENDATIONS_ALPHABETIZED : 1
ALLOW_THE : 1
COURT_AND : 1
TOPIC_EVALUATION : 1
TO_NONE : 1
SEX_HT : 1
ADL_YO : 1
THESE_PERSISTENT : 1
WITH_INR : 1
DOES_TRANSFER : 1
CONSENT_FORM : 1
FISH_PLEASE : 1
WAS_THE : 2
IS_VERY : 1
CONSULT_LUNGS : 1
THUS_PLAN : 1
FUTURE_WANTED : 1
HEALTH_HANDOUT : 1
CT_HEAD : 1
PT_PC : 1
IS_EXTENDED : 1
TWO_BY : 1
OF_SOFT : 1
TECH_NOTE : 1
DENT_CLC : 1
PSYCHOTIC_WHO : 1
CONSENT_IMED : 1
NKA_ENROLLED : 1
AND_LEFT : 2
MOTHER_CALLED : 1
AT_CLC : 1
SUPPORT_BUT : 1
HAS_ED : 1
TO_CALLER : 1
BE_WITH : 2
IF_HELPS : 1
EXAMINATION_ON : 1
HEARING_VOICE : 1
DATE_INTERVENTIONS : 1
IS_ENROLLED : 1
PERFORMED_AND : 1
GET_PL : 1
BP_PMR : 1
ABOVE_OF : 1
LIST_IF : 1
IMMUNIZATION_COMPLIANCE : 1
MANAGEMENT_HEIGHT : 1
INFORMATION_PROGRESS : 1
RELIEVED_HIS : 1
LEARN_VERBAL : 1
COLORS_DETERMINE : 1
ANY_BARRIERS : 1
STARTED_ALCOHOL : 1
VET_HIS : 1
HOW_DID : 1
SERVICE_FUNDING : 1
ABD_SOFT : 1
STATE_THROUGH : 1
QD_DRINK : 1
ALBUTEROL_AS : 1
OF_ES : 1
ALLERGY_POLYMYXIN : 1
LS_SESSIONS : 2
MATERIAL_MG : 1
WITH_POOR : 1
GASTROESOPHAGEAL_DISEASE : 1
OTHER_DRUGS : 1
DEMONSTRATING_WOULD : 1
ACTIVE_INPATIENT : 3
PLAN_ASSIST : 1
LOCATION_ROOM : 2
TO_PCP : 1
APPETITE_OK : 1
FOR_MOOD : 1
FEELINGS_BREAK : 1
SHIFT_WILL : 1
OF_DRESSING : 1
AND_TREECE : 1
OH_FAIR : 1
WHO_SELF : 1
FALL_OR : 1
COLONOSCOPY_EMOTIONAL : 1
SOUNDED_LAUGHED : 1
VISIT_PAIN : 1
CGY_SEX : 1
FROM_REQUESTS : 1
TO_ADDRESS : 2
SIDES_REPORTS : 1
DR_RATE : 1
TO_THIS : 1
NOTE_GERIATRIC : 1
INTAKE_OF : 1
INITIATED_AS : 1
ANGER_FEELING : 1
MOSTLY_JUMPING : 1
PAIN_UNCHANGED : 1
MN_FINDINGS : 1
EDUCATION_INSTRUCTION : 1
MEDICATION_PATIENT : 1
OTHER_SERVICE : 1
TO_ETOH : 1
AGO_LENGTH : 1
USES_THE : 1
COMPLETED_SCREEN : 1
HE_DESCRIBED : 1
ADJUSTMENTS_BEING : 1
ELEVATED_IT : 1
BEEN_GETTING : 1
REQUESTING_WOUND : 1
ANY_PT : 1
RISK_COMMENTS : 1
TWICE_TO : 1
THIS_GROUP : 1
THE_PUEBLO : 1
AND_CONTAINERS : 2
TO_DAVE : 1
AN_VET : 1
RESPONSE_TO : 2
NO_REPORTED : 1
VISIT_CONCURRENT : 1
AND_TRANSFERRING : 1
PARTICIPATE_TYPE : 1
SOCIAL_IN : 1
PERCEPTION_ABNORMALITY : 1
STARTED_BBLOCKER : 1
REASON_VETERAN : 1
IN_NEGATIVE : 1
SET_HIS : 1
COMPLETED_PHONE : 1
PING_MUCH : 1
SUPERVISING_PRACTITIONER : 2
TO_WILL : 1
NO_MONITORED : 2
SUPPORTIVE_THERAPY : 2
MORNING_NOON : 1
HEALTH_HOSPITAL : 1
DRIVER_CARDIAC : 1
PAIN_DISORDER : 1
FLOMAX_TITLE : 1
REQUIRES_SUPERVISION : 1
OBESITY_SOUNDS : 1
PODOFILOX_SOLN : 1
SANDERS_EVALUATION : 1
FOR_BMI : 1
LS_REMAINING : 1
SOCIAL_FALLS : 1
PHOTOGRAPHY_MOTHER : 1
CONCERN_TO : 1
AM_APRIL : 2
INSTITUTE_DATED : 1
FOOD_THE : 1
POSSIBLE_MALIGNANCY : 1
PRIMARY_IDENTIFIED : 1
BE_RECEPTIVE : 1
PHYSICIAN_AT : 2
NAUSEA_AND : 2
DETERMINE_DIRECTION : 1
USUAL_AGE : 1
ALBUTEROL_REORDERED : 1
ON_THUS : 1
MS_RESIDENT : 1
NAME_VIEW : 1
CAME_IN : 1
CHILD_AND : 1
ANTICOAGULANT_VISIT : 1
AND_PT : 1
FALLS_PRECAUTIONS : 1
TABLET_MOUTH : 5
UNEMPLOYMENT_BENEFITS : 1
FAMILY_HX : 1
INFORMATION_ECHOGENIC : 1
MED_POSSIBLE : 1
CONSIDERATIONS_LEARNING : 1
GROUP_CSAC : 1
LEADERS_AND : 1
HE_STARTING : 1
HOURS_DURING : 1
HE_HAS : 12
MH_DOM : 1
PRESENT_NO : 1
FOR_TKA : 1
SATISFACTORY_YES : 1
MET_LOCATION : 1
WM_BPH : 1
THROBBING_FROM : 1
LIVING_AND : 1
WELL_IDEATION : 1
SHE_TALKED : 1
RECENT_INJURY : 1
ADMIT_HEARING : 1
NY_BRONX : 1
THOUGHT_DISORDERMET : 1
NOCTURNAL_EXTENSION : 1
SAFE_AND : 1
DIAGNOSIS_PATIENT : 1
WAS_ANTERIOR : 1
OF_PHONE : 1
WITH_CBSST : 1
AND_WANTS : 1
TO_MUSIC : 1
STOOL_ORIENT : 1
WITH_CHEMISTRIES : 1
WHEN_COMES : 1
GET_FROM : 1
BOWEL_URINE : 1
CALL_PATIENT : 1
FOUND_DSMIV : 1
HIS_OVERALL : 1
THERAPY_TIME : 1
FACT_HE : 1
PT_DENIES : 1
PROCEDURE_SHOULDER : 1
CONTACTED_BASCOM : 1
CUEING_MEDS : 1
GLASSES_MG : 1
CANE_NO : 1
LABS_AUG : 1
ONSET_FOLLOW : 1
TEST_STRESS : 1
POSSIBLE_NOX : 1
WITH_MODERATE : 2
LIKE_PLT : 1
LDL_PLASMA : 1
AEROBICS_STILL : 1
ASSISTANCE_NEEDED : 1
PROVIDED_FOR : 2
DATED_MS : 1
WAS_ALONG : 1
FOUND_HE : 1
AND_CONSULT : 1
IS_CONTINUE : 1
OF_ASSISTS : 1
BEFORE_NEW : 1
COMMENT_FOCAL : 1
IS_UNSURE : 1
TO_BEFORE : 1
SINCE_IT : 1
PINES_MAY : 1
SERVICE_CM : 1
PROMOTION_DISEASE : 1
INSTITUTE_SURGICAL : 1
WHEN_CAPACITY : 1
FUNCTIONAL_SCREEN : 1
NO_OR : 2
SON_BE : 1
OVERSIGHT_OR : 3
DIABETES_MET : 1
THEM_OFTEN : 1
CLEAR_CONTACTED : 1
DEPENDENCE_PAIN : 1
COLOR_SPEECH : 1
FOR_PLEASE : 1
NEVER_MARRIED : 1
DAILY_WITH : 1
TO_PERSON : 1
NEXT_OF : 1
TV_DVDS : 1
STRUCK_THE : 1
RISK_FALL : 1
THEY_FRIGHTEN : 1
GIVE_IT : 1
BREATH_CRACKLES : 1
SESSION_TIME : 1
ACTIVE_DURING : 1
MOBILITY_INDEPENDENT : 1
HAD_FOR : 1
PHYSICIAN_SOCIAL : 1
SINCE_PATIENTS : 1
BASCOM_PREDICTION : 1
MIN_SEE : 1
OR_ANYONE : 1
ASSESS_FOR : 1
THE_RUN : 1
THE_PHONE : 1
INTIAL_DIAGNOSIS : 1
LEVEL_ON : 1
GRAMS_INTO : 1
LIMITED_BY : 1
BACK_PAIN : 2
BETTER_EXTRA : 1
RESPONSE_ADDENDUM : 2
MN_COMMENT : 1
CONTACT_ONCOLOGY : 1
CRITERIA_SHORT : 1
ANXIETY_OTHER : 1
MH_CLINIC : 1
APPROPRIATE_PLEASANT : 1
FACILITY_PCP : 2
SAME_ALSO : 1
SEX_ADDENDUM : 1
MONO_HIS : 1
HAS_WHERE : 1
MONITORED_LEVEL : 1
THE_CUEING : 1
GUNSHOT_WOUND : 1
BE_IF : 1
COLLECTION_SAMPLE : 1
ATYPICAL_NEGATIVE : 1
STRESS_DATE : 1
LIFESTYLE_ALERT : 1
NEGATIVE_INPATIENT : 1
TIME_TREATMENT : 2
ASSESSMENT_PATIENT : 2
MALE_STEARS : 1
EXTRA_GIVEN : 1
OF_SKIN : 1
NOTE_DISEASE : 1
NOTE_TOOTH : 1
CM_INTERMITTENT : 1
IN_MID : 1
UNTIL_DISCUSSED : 1
COMMENT_DRINK : 1
HAS_REPORTED : 2
PL_PROCEDURES : 1
THE_PAPERWORK : 1
SET_CUTTING : 2
THERAPY_ON : 1
RANGE_OF : 3
THAT_ANESTHESIA : 1
TREATMENT_AND : 1
TEST_OCT : 1
UNDERSTANDS_AGREES : 1
SEX_MALE : 2
DSHI_DISPOSITION : 1
HIS_HAS : 1
VETERAN_IN : 2
MEDS_PROFILE : 1
IMAGING_SYSTEM : 1
ON_OBJECTIVE : 1
THEIR_NOTE : 1
DECEMBER_RX : 1
HE_DOING : 1
TO_CLEAN : 1
UPON_APPROACH : 2
ALCOHOL_PAIN : 1
EXPRESSED_BY : 1
LIN_ASSIGNED : 1
SEPTEMBER_DIABETES : 1
HAD_ANY : 1
WAS_GUIDED : 1
KG_SHOOTING : 1
VOMITUS_FOUND : 1
COMMENT_WILL : 1
IN_REHABILITATION : 1
PATIENT_ADDENDUM : 1
EVENING_ATE : 1
IDENTIFIERS_USED : 1
DPT_ADMITTED : 1
OK_PHYSICIAN : 1
KT_TO : 1
FOUND_STATES : 1
YOU_COMPLETED : 1
APPROPRIATELY_RETURN : 1
TAKE_MR : 1
REGARDING_TO : 1
REPORT_AGE : 1
ANTICOAGULANT_WIFE : 1
HAIR_LOSS : 1
IMAGING_FOR : 1
MET_THE : 1
ACTIVE_TREATMENT : 1
INDEX_PULSE : 1
AND_TO : 9
OT_PROVIDE : 1
HISTORY_IS : 2
OR_TIME : 1
HIS_STATED : 1
THE_PRINTED : 1
OBJECTIVE_DESIRE : 1
VETERAN_COMPLETE : 1
PAIN_MEDICATION : 1
OF_OVERWEIGHT : 1
ATTEND_PROBLEM : 1
IT_IS : 4
FULL_SECURITY : 1
TH_SSOME : 1
THAT_REGIME : 1
CASE_VISIT : 1
IN_ANTICOAGULANT : 1
PROGRAM_VA : 1
LIDOCAINE_SKIN : 1
THERAPY_THE : 1
LISTENING_MUSIC : 1
VICTIM_SERVICES : 1
PROCESS_DIFFICULTY : 1
PRIMARY_PAIN : 2
KEPT_BP : 1
MARY_BETH : 1
UPDATE_TREATMENT : 1
MEDICATIONS_FIND : 1
MELISSA_FAIR : 1
HAND_VETERAN : 1
UNABLE_TO : 1
AND_NOX : 1
BS_LIFT : 1
THIS_FOR : 1
NEAR_GLARE : 1
REQUIRE_NURSING : 1
PAIN_SPECIFY : 1
MEDICATIONS_TO : 1
HAS_WORSENED : 1
PARKINSON_DISEASE : 1
JUMPING_FRONT : 1
WILL_PROVIDED : 1
REQUIRED_LOCATION : 1
OF_TIME : 1
AT_APPT : 1
ANCHORAGE_ORTHOPEDIC : 1
MEDICATIONS_INCLUDING : 4
FELT_THE : 1
RELIEVES_ALSO : 1
EXPLAIN_AUDITORY : 1
CHAPLAINVISITATION_NOTE : 2
WEEKLY_DIET : 1
PTSD_FIRST : 1
FREE_BY : 1
BANK_WILL : 1
RT_ASSISTED : 1
CIRRHOSIS_HE : 1
CURRENTLY_HI : 1
TIME_OF : 7
THE_HIGHS : 1
BRANDEN_SCORE : 1
BREATH_SOUNDS : 2
RELATIONSHIP_ENVIRONMENTAL : 1
PTS_CALLED : 1
RACE_STEARS : 1
NONE_ON : 1
NAME_RESPONSIBLE : 1
PHONE_MIN : 1
AND_PAYMENT : 1
WAS_VERY : 1
IS_DISTURBING : 1
WANTED_TO : 1
HAGGERTY_ELIGIBILITY : 1
UPON_REPORTED : 1
TO_PHYSICIAN : 2
REQUIRED_AND : 1
PATIENT_RECEIVED : 1
ACTIVE_WILL : 1
STATES_ARE : 1
STUDY_LDL : 2
LE_DVT : 1
GASTRITIS_GASTRODUO : 1
TRANSFERRING_KNOWLEDGE : 1
DISCHARGE_PLANNING : 1
COLOR_PERSONAL : 1
BACK_FROM : 2
SKILLS_WPB : 1
HEPARIN_ADMINISTRATION : 1
REMOVED_NONE : 1
IN_REDUCING : 1
NO_NOTED : 1
WELL_STRUCTURED : 1
BARRIERS_LEARNING : 2
UPON_AFFECT : 1
ODY_BOWELS : 1
PATIENT_COMMENT : 1
WITH_AT : 2
BY_ACTIVE : 6
MEAT_OPENING : 2
ORIENTATION_DISTRESS : 1
INJURY_COMMENT : 1
EXTREMITIES_RANGE : 1
THE_PSYCHOSOCIAL : 1
OF_NOSHOW : 1
COMFORT_PAIN : 1
PATIENT_HOME : 1
NOTE_DOSE : 1
WAS_UNABLE : 1
SKIN_HIP : 1
AMBIGUOUS_EXPEDITED : 1
ED_TO : 1
SESSIONS_REQUESTED : 1
STATUS_UNIT : 1
STOOL_RISK : 1
SULFIDE_TIW : 1
GROOMING_BECAME : 1
ANESTHESIA_WILL : 1
REGARDING_OF : 1
CHOICE_DECLINE : 1
ORIENTED_VOICED : 1
ON_DISTAL : 1
PHONE_SUBJECTIVE : 1
ROTATOR_REPAIR : 1
APPOINTED_PCP : 2
DIET_DISCUSSED : 1
MONTH_CALLED : 1
DTC_RECENTLY : 1
SECURITY_APPEARANCE : 1
PROTOCOL_GEMFIBROZIL : 1
TO_ATTEND : 1
FOR_BACK : 1
PC_INTEGRATED : 1
ED_PROCEDURES : 1
PATIENT_DECLINES : 1
AUGUST_NONE : 1
SINCE_ADDITIONAL : 1
CARE_FUNDING : 1
INSUFFICIENCY_AOX : 1
AGREES_MY : 1
RINGING_HAS : 1
DOSE_WEDNES : 1
ADMINISTERED_NURSE : 1
HAD_SIZED : 1
VISION_AND : 1
WAS_BACK : 1
DEPENDENCE_DISORDER : 1
SEE_HE : 1
NUMBER_PATIENTS : 1
NARCOTICS_HAS : 1
PHONE_NUMBER : 4
IS_FOLLOWED : 1
IVE_FELT : 1
ADJUSTMENTS_ARE : 1
PHOTOGRAPH_BLOOD : 1
OUTPATIENT_INPATIENT : 1
USUAL_FASHION : 1
CLINICAL_REMINDER : 1
ASSESSMENT_SAFE : 1
SPEAK_TO : 1
WEEK_INCLUDE : 1
SCREEN_VET : 1
OF_HOURS : 2
TEXAS_RECENTLY : 1
CHOICES_ARE : 1
FOOT_SIDE : 1
ASSESSMENT_ORGANIZED : 1
RATED_DISABILITIES : 1
RAISED_NAME : 1
IMAGING_REPORT : 1
TABLETS_BY : 1
LIGHT_AND : 1
OX_MEASUREMENT : 1
PHYSICIAN_CONCURS : 1
NURSING_AND : 1
INHL_FALL : 1
ROUNDS_MMOL : 1
CRACKERS_COMMUNICATION : 1
CT_OF : 1
PELLETS_THE : 1
HIS_BILATE : 1
THE_CONTACTED : 1
HIS_PRIOR : 1
WEDNES_MG : 1
UG_PAKULA : 1
AS_EXPRESSED : 1
SEEN_VAMC : 1
PH_TO : 1
TO_BED : 1
ICDCM_ICDCM : 1
PT_NEEDS : 1
WAS_PRESENT : 1
REVIEWED_HIS : 2
THAT_ON : 1
WEIGHT_TAPMEDICATION : 1
HOW_BEST : 1
BOWEL_ELIMINATION : 3
NEGATIVE_PT : 1
HE_DECLINES : 1
SURGICAL_INTERVENTION : 2
IDENTIFIED_SOFT : 1
YEARS_HAS : 1
THEY_WERE : 1
TAKE_CAPSULE : 2
FLOW_SHEET : 2
FINGER_SPREAD : 1
AVG_NONE : 1
FALLS_RISK : 1
CARE_MIX : 1
QUESTION_HIS : 1
MAY_TAXI : 1
PAST_AT : 1
FLOW_COMMANDS : 1
FLU_URINARY : 1
TEARFUL_TIMES : 1
OU_PRIMARY : 1
THINPREP_SYSTEM : 1
IF_WAS : 1
OF_SALES : 1
GROUP_CPS : 1
AND_SHOES : 1
GIVES_ALL : 2
NOT_IDENTIFIED : 2
UP_MEAT : 2
WAS_IN : 3
PING_APPETITE : 1
INTERMITTENT_VERBAL : 1
FUNCTION_PATIENT : 1
METHADONE_AS : 1
PATIENT_FOOT : 1
ASK_DO : 1
BBLOCKER_NOSHOW : 1
FOLLOWING_OFFERED : 2
FALLING_NO : 1
AREA_OF : 2
COMMANDS_SYSTEM : 1
PT_AT : 1
HAS_IS : 1
FRONT_TRAIN : 1
NUMBER_HOURS : 2
CELLULAR_PHONE : 1
SOFT_BS : 1
EDV_PARKINSON : 1
HE_COMMENT : 1
MORE_RECENTLY : 1
URINECLEAN_COLLECTION : 1
GROUP_NOTE : 2
NO_HAS : 1
THE_BLAST : 1
DATED_PING : 1
EVALUATION_CODE : 1
ASSESSMENT_WALKS : 1
RECORD_PT : 1
TO_COVER : 1
REQUESTED_BID : 1
HE_BECAME : 2
INTERVENTIONS_HEALTH : 1
RAISED_PATIENT : 1
STARTED_DRINKING : 1
NARCOTIC_REFILL : 1
RACE_UNKNOWN : 1
PHYSICIAN_OFFICE : 1
SERVICE_SOCIAL : 1
HEARING_ANYTHING : 1
AND_AFFECT : 1
DEPRESSION_INSTRUCTED : 1
AZITHROMYCIN_CAP : 1
CURRENT_PLAN : 1
RESIN_ONE : 2
TRANSFERRING_TIME : 1
PROCEDURE_CONSULT : 1
PRESSURE_UPPER : 1
NOS_INFORMED : 1
BELL_AND : 1
EVALUATION_MANAGEMENT : 2
COMPLICATIONS_WILL : 1
PAIN_DOM : 1
NO_MR : 1
OF_BETWEEN : 1
CAPSULE_BY : 2
ROOM_OF : 1
ADDRESS_NEEDS : 1
THE_VINELAND : 1
HTN_WILL : 1
FROM_SHOTGUN : 1
DO_HAVE : 3
COMMENTS_INFORMATION : 1
MEDIAL_LEFT : 1
SCHIZOPHRENIA_MINUTE : 1
RISK_LEVEL : 2
DETOXING_WELL : 1
AND_PERCUSSION : 1
NURSING_NOTE : 7
LEVEL_LEVEL : 1
TESTS_OF : 1
AND_PATIENT : 5
TO_SYMPTOMS : 1
HISTORY_LIVES : 1
ALSO_HIM : 1
HOSPITAL_STAY : 1
FOR_ATTENDED : 1
HEAD_AND : 1
VISIT_THIS : 1
ANKLE_PAINFUL : 1
PO_AND : 1
CHAPLAINVISITATION_CURRENT : 1
FINGERTIP_HARSH : 1
THE_DOES : 1
NUTRITION_PLAN : 1
THIS_TREATMENT : 1
WHERE_THERE : 1
CHEMISTRIES_ADENOSINE : 1
HISTORY_SHE : 2
ARTH_LAST : 1
WELLBUTRIN_AT : 1
AT_PATIENT : 2
ACTIVITY_ELIMINATION : 1
RELATES_IT : 1
AN_NATIVE : 1
INSPECTION_VOMITUS : 1
PHYSICIAN_IMMUNIZATIONS : 1
PAKULA_MD : 1
SUBJECTIVE_DESIRE : 1
YOU_TO : 2
REPORT_ENTERED : 1
ONLY_MINUTES : 1
IN_PARKING : 1
ON_SOCKS : 1
BOWEL_FOR : 1
COUNSELED_ON : 1
APPARENTLY_PLANS : 1
NOTE_DENIES : 1
ANXIETY_RELATED : 1
MORE_TO : 1
VERBAL_CUING : 1
HANDS_WAS : 1
MOOD_ADVISED : 1
POLYSOMNOGRAPHY_REPORT : 1
DEPRESSION_SCALE : 1
TAB_OIL : 2
ORTHOPEDIC_NOTE : 1
LIFE_STYLE : 1
TAKE_TO : 1
INSTRUCTED_PT : 1
ICDCM_WITH : 1
BECAUSE_HER : 1
HAS_DECISIONMAKING : 2
ONE_LENGTH : 1
TKA_ION : 1
NORMAL_ETHNIC : 1
LUNG_CLEAR : 1
INFORMATION_PATIENT : 1
AREA_VETERAN : 1
SCAN_AND : 1
THERAPY_PATIENT : 2
DUE_TO : 2
DATE_AND : 1
SUPRAPUBIC_WHO : 1
ORDERS_AND : 1
OF_PER : 1
IT_DECLINES : 1
MADE_PILLS : 1
YELLOW_OF : 1
HELP_THE : 1
SCHEDULED_VISION : 1
GET_BACHELORS : 1
FAIR_SALTY : 1
PROCEDURE_NOTE : 1
CM_HAS : 1
DONE_AND : 1
AXIS_REFLUX : 1
MOTION_ARM : 1
RAL_COOPERATIVE : 1
CHARACTERISTICS_THAT : 1
RR_ED : 1
MEDICALLY_FLOMAX : 1
REVIEWED_THERE : 1
ALSO_SEEN : 1
IF_PAT : 1
AUGUST_FEMALE : 1
ADMITTED_FOR : 1
HIS_THERAPY : 1
PTSD_ANXIETY : 1
FOR_SUPPORTIVE : 1
TO_UP : 1
TO_ROOM : 1
FUNCTIONAL_ANTICOAGULATION : 1
PLACE_TIME : 1
PROVIDER_CALL : 1
FEELING_TO : 1
LIVING_SERVICES : 1
TRP_NOTE : 1
AWAKE_NOT : 1
DO_THEY : 1
HISTORY_ALONE : 1
REPAIRED_RUPTURED : 1
AND_RECORD : 1
VET_REPORTS : 1
DUE_THE : 1
OF_PROGRESS : 1
SELF_VETERAN : 1
WITH_PLAN : 1
CAN_FELT : 1
PCP_GOLD : 1
NONVA_BY : 1
THE_DIRECTIVE : 1
TIME_PHYSICIAN : 1
VITALS_FOR : 1
THE_IN : 4
INCREASED_ANXIETY : 1
SELF_TAKE : 1
FOR_GROUPS : 1
APPT_NO : 2
TEAM_COMMENT : 1
FELT_FAR : 1
DINNER_DRINKS : 1
THERAPIST_SOCIAL : 1
THE_IS : 2
THAT_AM : 1
THERAPIST_IER : 1
REQUEST_TO : 1
THE_TIME : 3
USING_TOBACCO : 1
VETERANS_REGARDING : 1
INFORMED_IMED : 1
OBJECTIVE_ALERT : 1
STAY_SATISFACTORY : 1
CONTACTED_PATIENT : 1
DRUGS_MULTIVITAMINS : 1
UNIT_CM : 1
OPH_DROP : 1
TO_THAT : 1
PAIN_FEW : 1
HAGGERTY_CLASS : 1
ED_MEMBERS : 1
RIGHT_MUSCLE : 1
TEAM_COORDINATOR : 1
YEAR_PATIENT : 1
CLOSELY_WITH : 1
LUN_SWER : 1
HOURS_TO : 1
PLAY_ACTIVE : 1
PT_AND : 1
NOTE_PAIN : 1
VOICES_THAN : 1
PT_KT : 1
SUPPLIES_THE : 1
THEY_FOOD : 1
HE_COULD : 1
SAME_CALL : 1
NOTE_IMPAIRMENT : 1
BID_ADV : 1
BE_GIVEN : 1
OPH_BOTH : 1
RIGHT_SHOULDER : 1
PREREGISTRATION_COMPLETED : 1
EXAMINED_PHYSICIAN : 1
NEW_MUSCLE : 1
FAMILY_FEEL : 1
LEARNING_CHARACTERISTICS : 1
PLAN_DOES : 1
BARRIERS_IS : 1
PVD_UNSURE : 1
MAY_IMPROVED : 2
CARE_ADL : 5
FISH_POULTRY : 1
FOR_REEVALUATION : 1
POST_INSTRUCTIONS : 1
CATHETERIZATION_CART : 1
TO_STOMACH : 1
DISCUSSED_GOAL : 1
PLAN_CARE : 6
POSSIBLE_SIDE : 1
MED_ADJUSTMENTS : 1
PROCEDURE_TO : 1
PAIN_PHONE : 1
OTHER_NEGA : 1
INTERVENTION_FOR : 1
OUTPATIENT_RXS : 1
TACTILE_DISTURBANCES : 1
DATED_MUCH : 1
AFTERNOON_ANESTHESIA : 1
DERM_PHOTO : 1
EDV_LT : 1
ACQUAINTANCES_GAINING : 1
FOR_FALL : 1
DEATH_VETERAN : 1
WANT_TO : 2
OF_DIVORCING : 1
HISTORY_OF : 3
FEELS_NEEDS : 1
TURNS_AND : 1
CLEAR_CONSISTENCY : 1
MANAGEMENT_MIN : 1
TO_FINGERTIP : 1
IF_TO : 1
WAS_REASON : 1
CONSULT_ADDENDUM : 1
PULSE_YES : 1
INTEGRATED_TEAM : 2
AND_VA : 1
PREP_PROTOCOL : 1
BUT_AWARE : 1
THAT_HAD : 1
MM_ECHOGENIC : 1
AN_PRACTITIONER : 1
IN_MIAMI : 1
MET_VETERAN : 1
THIS_ONE : 1
AS_PATTERNS : 1
FRIGHTEN_YOU : 1
NY_DID : 1
WAS_DOING : 1
HCV_CIRRHOSIS : 1
EDUCATION_TOPIC : 1
HOME_VISITS : 1
PHYSICIAN_ROOMED : 1
ABNORMALITY_DSMIV : 1
PT_MY : 1
GOOD_MET : 1
SIGNIFICANT_REPORTED : 1
CONDUCTED_MS : 1
WITH_DELIVERED : 1
COMPLETED_TEMP : 1
AREAS_BREATH : 1
CARE_CONTRACT : 1
APPT_LETTER : 2
PHARMACY_TO : 1
ANALYZED_THE : 1
CONDITION_DUE : 1
AGE_SEX : 1
THE_WENT : 1
ACTIVE_MYLAN : 1
WALK_CLINIC : 1
COUNTS_COAGS : 1
EXTENDED_CARE : 1
SAFETY_ISSUE : 1
MET_HE : 1
ALERT_ORIENTED : 3
ALLERGIES_FOR : 1
KG_BACK : 1
PAIN_HIGHER : 1
ANKLE_SWOLLEN : 1
ANY_ITCHING : 1
SPENDING_READING : 1
IN_NOTE : 2
REFERRED_DIETITIAN : 1
AND_BE : 1
PATIENT_SIDE : 1
ISSUE_IN : 1
HT_CM : 2
CALL_NEXT : 1
FOR_FALLS : 1
WOUND_OF : 1
NOTE_APPOINTED : 1
SELF_PRESENTED : 1
VERBAL_AND : 1
TRANSFER_OVERSIGHT : 1
UNTIL_APPT : 1
TO_RESIST : 1
YES_ADVERSE : 1
PRINTED_THE : 1
ARRANGED_TAXI : 1
INDIAN_NATIVE : 1
HOME_BP : 1
ADVERSE_NO : 2
AND_PREVIOUS : 1
THAN_HIS : 1
VALUE_WORDS : 1
DEC_CONSULT : 1
DRINKING_SINCE : 1
COLLECTION_URINECLEAN : 1
YEAR_AGO : 1
THE_EDUCATIONAL : 1
PATIENTS_DOPPLER : 1
SUPPORT_FROM : 1
THE_DIABETES : 1
IN_HAVE : 1
CD_RECOMMENDATIONS : 1
TRY_TO : 1
HIS_RAISED : 1
NOTE_NO : 4
NEEDS_AND : 1
SESSION_MR : 1
VETERAN_READINESS : 1
IS_FAIRLY : 1
THIS_ZZPATIENT : 1
ILLNESS_AND : 1
RELEIVED_BY : 1
PSYCHOTIC_ATTENTION : 1
THIS_LEVOTHYROXINE : 1
CUTTING_AND : 3
DO_RATE : 1
PCP_SUBMIT : 1
AND_IT : 2
THEN_UNTIL : 1
BEAT_ORDERED : 1
READ_THE : 1
BY_SANDERS : 1
VALUES_LIFE : 1
APPT_HE : 1
ALSO_PROVIDED : 1
INTERVENTION_SAFE : 1
DIAGNOSED_SECOND : 1
MRI_PAIN : 1
BEHAVIOR_WITHDRAWAL : 1
NO_CONSISTENCY : 1
PHARMACY_REVIEW : 1
READER_ALLOW : 1
INTERVAL_DATE : 1
VERIF_THERE : 1
COORDINATOR_INTRODUCED : 1
DIAGNOSTIC_COLONOSCOPY : 1
AT_OF : 1
INSTRUCTED_IN : 1
AND_KNOWLEDGE : 1
BASIS_OPEN : 1
IN_SPASMS : 1
FOR_FOBT : 1
PATIENT_NAME : 3
DECLINES_LINFLUENZA : 1
DEPENDENCE_MEDICATIONS : 1
FEE_BASIS : 1
TYPE_WT : 1
THAN_FLAREUP : 1
ON_MAINTAINANCE : 1
PNEUMONIA_DECEMBER : 1
THE_DISTAL : 1
TENDERNESS_WHO : 1
DID_NOT : 4
MINUTE_PATIENT : 1
PATIENT_REGARDING : 1
PUT_SOCKS : 1
DRINK_ADDENDUM : 1
HIS_IER : 1
VITAL_SECRETION : 1
NEEDS_PERTINENT : 1
REGARDING_THEY : 1
WILL_SAFE : 2
RATED_ZZPATIENT : 1
HIS_STOPS : 1
FALLS_NAUSEA : 1
HIGH_LETHALITY : 1
COMES_FROM : 2
HIS_LEFT : 1
RAL_ALERT : 1
TO_GOOD : 1
STATUS_OR : 1
IER_TO : 1
STATED_WOULD : 1
LPN_CLINIC : 1
WITH_DR : 1
MENTAL_HOSPITAL : 1
READER_COLORS : 1
VENOUS_INSUFFICIENCY : 1
STOOL_NOT : 1
POSTTRAUMATIC_STRESS : 1
GOOD_TO : 1
REMAINS_AT : 1
URINE_SHIFT : 1
COMMENT_THIS : 1
DENIED_SYMPTOMS : 1
COUSIN_SHE : 1
THE_ABILITY : 1
THEY_WILL : 1
HE_SPENDING : 1
SERVICE_ENGINEER : 1
DECLINE_PARTIES : 1
AN_ALASKAN : 1
TR_REASON : 1
DEPRESSION_THE : 1
TREATMENT_AVAILABLE : 1
IT_ALSO : 1
IN_ANGER : 1
SUCCESSFULLY_COMPLETED : 1
AN_INDIAN : 1
OF_MODERATE : 1
VACCINE_GLAUCOMA : 1
REAL_AND : 1
IDEATION_HAS : 1
FOR_AO : 1
ON_FOR : 2
PATIENT_IDENTIFICATION : 1
PERFORMED_MINS : 1
PROVIDE_SAFE : 1
FOR_AGE : 2
TINGLING_NATURE : 1
WELL_TO : 1
MINUTE_HOME : 1
ICDCM_MARY : 1
WHILE_PT : 1
ADDENDUM_FOR : 2
BE_PT : 1
INTERVENTIONS_POSTERIOR : 1
INPATIENT_INCLUDING : 1
FOR_MEETINGS : 1
ADL_NUMBER : 1
AND_PRIOR : 1
TWICE_NEEDED : 1
CHANGED_PATIENTS : 1
CHF_FINDINGS : 1
PT_NAUSEA : 1
SEBACEOUS_TEXT : 1
SIGNS_SECRETION : 1
ALSO_MIGRAINE : 1
DISPOSITION_THROBBING : 1
HYGIENE_BATH : 1
PO_IF : 1
THE_SWER : 1
SUBMITTED_EXTENDED : 1
QD_LAST : 1
TITRATED_WAS : 1
IS_BURNING : 1
AS_HOMICIDAL : 1
PATIENT_REFERRED : 1
OF_SAID : 1
APPROXIMATELY_ADDRESS : 1
OCR_ZIPPERS : 1
HAVE_RECONCILED : 1
REMOVED_SAME : 1
BEEN_REPORTED : 2
NAUSEA_VOMITING : 2
FOR_MOTHER : 1
CURRENT_DIAGNOSIS : 3
NAME_PAPER : 1
APPRECIATIVE_MH : 1
CALL_NOTE : 2
WILL_PRE : 1
PRACTITIONER_ACCESS : 1
TO_STAY : 1
BARRIERS_MAKING : 1
PATIENT_HAS : 5
APPROACH_RESPOND : 1
PREVENTION_PMH : 1
MEDICATIONS_ACTIVE : 1
AIDS_CANE : 1
PATIENT_BY : 1
LAWN_AND : 1
COLOR_PROTECTORS : 1
PHYSICIAN_THE : 1
REPORT_LUNGS : 1
TEENS_PER : 1
AS_MIAMI : 1
THAT_WORK : 1
RESCHEDULED_UG : 1
PMH_OF : 1
PER_ENDOSCOPY : 1
HCL_MG : 1
OF_FOR : 1
ASSESS_PT : 1
GROUP_DISCUSSED : 1
CURRENT_PAIN : 2
FOR_ON : 1
THAT_BE : 1
ONCOLOGY_THERAPY : 1
FOR_CONSULT : 2
SCHIZOPHRENIA_EDUCATION : 1
FOR_PAST : 1
RIGHT_GLUTEAL : 1
OR_WHEN : 1
STILL_SKATES : 1
NUMBER_RETURN : 1
TO_VOICE : 1
BY_END : 2
BLADDER_ASSISTANCE : 1
HAS_NO : 1
SHOE_LIFT : 2
BE_RISK : 1
ANXIETY_TO : 1
AND_ADDENDUM : 1
CARE_TAKE : 1
BP_SLIGHTLY : 1
EYEBALL_PENG : 1
IS_GOOD : 3
OBSERVED_DELUSIONAL : 1
PRIMARY_HIS : 1
ADDENDUM_HELP : 1
FEW_VOLUNTARY : 1
MUCH_LESS : 1
STAFF_ASSESSMENT : 1
CLINIC_AM : 1
SOCIAL_WAS : 1
CLEAR_NAME : 1
MR_REQUEST : 1
WENT_BY : 1
BATH_REFUSED : 1
FOUR_TIMES : 1
VIEWED_BY : 1
AND_ANESTHESIA : 1
SIZED_STOOL : 1
BILATERAL_WRISTS : 1
PERFORMED_OF : 1
WITH_EXTRA : 1
BONNIE_ELIGIBILITY : 1
CINNAMON_PATIENTS : 1
DS_TAB : 1
SELF_TO : 2
MR_MARRIED : 1
OFFICE_LAST : 1
PAIN_INCREASED : 1
FROM_PROVIDER : 1
PRINTED_INFORMATION : 1
OF_RELATIONSHIP : 1
LESSON_DISCUSSED : 1
CONCERN_THESE : 1
HAVE_ANY : 2
HAS_EPIS : 1
OF_RIGHT : 2
YOU_CALL : 1
AGE_MALE : 2
AGE_UNTIL : 1
PROVIDER_IDENTIFIED : 1
ELEVATOR_ONCE : 1
MARY_FEELING : 1
EASILY_AND : 1
NO_LA : 1
ABILITY_TO : 1
PRIMARY_PROVIDER : 1
WITHDRAWAL_FALL : 1
FOLLOWED_MHC : 1
ALCOHOL_THIS : 1
DISEASE_DOSE : 1
BREAKFAST_FOOD : 1
MAIL_NILANDRON : 1
FROM_TEXAS : 1
WOULD_MYSELF : 1
TO_TAPER : 1
HOSPITALIZATION_INPATIENT : 1
ACTIVE_MOUTH : 1
HAS_AND : 1
RELATED_KNOWLEDGE : 1
ROOM_CONSISTENCY : 1
WEIGHT_AND : 1
WERE_HIM : 1
NOTE_ADDITIONAL : 1
IMED_TREATMENT : 1
ON_SCALP : 1
NOTICED_HIS : 1
BUT_CONSULTSOAP : 1
WITH_AFFECT : 1
OKAY_REVIEWED : 1
WHEN_STOPS : 1
PAPER_SIGNATURES : 1
HAS_ANY : 1
LABRAL_PT : 1
NOT_INTERESTED : 1
HIS_NAOMI : 1
USE_AND : 1
CONNECTED_HYPOKALEMIA : 1
COMPLIANCE_CONT : 1
MEDICATION_HAD : 1
AFTER_MIDNIGHT : 1
FROM_PSYCHOACTIVE : 1
PLEASANT_APPROACH : 2
ON_AIR : 1
RNBC_UNSCHEDULED : 1
AT_COMMENTS : 1
NO_PTS : 1
BE_PROVIDED : 1
FOR_FOLLOWUP : 1
PNUEMONIA_THESE : 1
NEGATIVE_CLINIC : 1
CHANGED_HX : 1
DEPENDENCE_QUESTIONS : 1
ASTHMA_CHO : 1
NEGATIVE_ACTIVE : 1
BE_MADE : 2
HOME_AND : 1
HOME_SCHEDULED : 1
AS_ORDERED : 1
EYEBALL_CHEN : 1
IMMUNIZATION_DEPENDENCE : 1
WAS_AT : 1
THE_VOLUME : 1
TAKE_WITH : 2
RESULTS_THE : 1
HAS_CHANGED : 1
INTEGRITY_RESP : 1
HI_UCINATIONS : 1
CONTAINS_ED : 1
USED_TOILET : 1
THAN_IN : 1
WHERE_EXPECTATIONS : 1
GUIDE_CHAIR : 1
SERVICE_TREATMENT : 1
TEMPERATURE_SURGICAL : 1
FOR_DERM : 1
NOT_PRESENT : 1
YOU_CURRENT : 1
PARTIES_THERE : 1
RECEIVED_VOICEMAIL : 1
IDEATION_VOLUNTARILY : 1
MANAGER_NOTE : 1
PLANO_IOP : 1
MAILED_REVIEWED : 1
BY_PHYSICIAN : 1
VOIDING_INTEGRATED : 1
SHE_IN : 1
BEHAVIOR_FALL : 1
RESIDENT_EXAMINED : 1
USED_IDENTIFIED : 2
PROVIDER_THAT : 1
ANGER_AND : 1
GOAL_AND : 1
YOUR_KEY : 1
HAD_CHANCE : 1
PT_AGREES : 1
BEVERAGES_UNLESS : 1
IN_SUPPORT : 1
HAD_IN : 1
PATIENT_ACTIVITIES : 1
WITHOUT_HEMATOMA : 1
GOAL_IOP : 1
MG_INFORMATION : 1
ATYPICAL_LABS : 1
CONTACT_RADIATION : 1
PRIOR_TO : 1
INSOMNIA_YEAR : 1
MEDICATIONS_MEMBER : 1
FOLLOWING_IDENTIFIERS : 1
IS_PAIN : 1
PATIENT_PRESENTS : 2
OF_AROUND : 1
UP_CUTTING : 2
NAME_GENDER : 1
WITH_RESIDENT : 1
BASIS_UNSPECIFIED : 1
THE_DID : 2
THROUGHOUT_STAFF : 1
STUDY_PVD : 1
INCOMING_TO : 1
PT_IS : 6
AS_WALKIN : 1
SCOPE_POSITIVE : 1
IOP_LOW : 1
PH_NEAR : 1
THINK_AM : 1
LEVEL_ONE : 2
CORRECT_PROCEDURE : 1
PROTECTOR_OFF : 1
MEDS_HE : 1
NOTE_YES : 1
SUPPORTTALKING_TO : 1
TO_IT : 1
COMPLETE_AND : 1
ORDERS_REMOTE : 1
TO_HE : 4
FOBT_DAILY : 1
STABLE_ORIENTED : 1
TREATED_WITH : 1
HISTORY_DISPOSITION : 1
ALTERATION_COMFORT : 1
FEEL_DATE : 1
SKATES_WK : 1
RELIEVED_SUBJECTIVE : 1
AND_TRUCK : 1
PSYCHOSOCIAL_ASSESSMENT : 1
BASELINE_FUNCTIONING : 1
LABWORK_DONE : 1
HIP_SHE : 1
IDENTIFIED_DISTURBANCES : 1
UNSPECIFIED_GASTRITIS : 1
CHANCE_OF : 1
TO_VERIF : 1
ANY_SESSION : 1
LATHER_SIT : 1
MAIL_MESSAGES : 1
SUPPLIES_SCOPOLAMINE : 1
WIFE_NOT : 1
NEXT_TO : 1
ANY_MENTAL : 1
CYST_WEIGHT : 1
THAT_HOME : 1
MONTH_SIZE : 1
STOOL_PROCEDURES : 1
BLADDER_HE : 1
PERFORM_AUDITC : 1
NARCOTICS_BE : 1
PLANNING_NOTE : 1
ODY_SOCIAL : 1
OF_TO : 2
SCHEDULED_FOR : 2
SOUNDS_CRACKLES : 1
MR_TO : 2
SIZE_NOT : 1
POSITIVE_THIS : 1
PANEL_IN : 1
AND_APPT : 1
THAT_PATIENT : 1
GOAL_GOAL : 1
FEEL_TO : 1
EAST_INDIAN : 1
WITH_VETERAN : 3
FUNCTIONAL_ABILITY : 1
IN_VIETNAM : 1
WHEN_QUESTIONED : 1
MMOL_HE : 1
BED_MOBILITY : 1
VICODIN_FOR : 1
SCHEDULE_LMP : 1
OF_EGOMANIAC : 1
SALES_PERSON : 1
SHIFT_PHYSICIAN : 2
REGULAR_MADE : 1
LATHER_TO : 1
THE_FAMILY : 1
BRISTOL_MINUTES : 1
LEVOTHYROXINE_TAB : 1
NEGATIVE_MENTAL : 1
WORK_SO : 1
LAUGHED_SEVERAL : 1
NO_PC : 1
GOALS_FACILITY : 1
INCONTINENT_URINE : 1
REPORTED_THEY : 1
STARTING_PM : 1
TO_REHABILITATION : 1
HIS_BANK : 1
OF_OF : 1
THEY_HARSH : 1
ON_TEAM : 1
NONE_FOR : 1
STRESS_THE : 1
DURING_PATIENT : 1
BEDTIME_FOR : 1
BID_TAMSULOSIN : 1
CLICK_ON : 1
GASTRODUO_TREECE : 1
TREATMENT_ADDRESS : 1
HEALTH_ADDENDUM : 1
PRIMARY_ASSESSMENT : 1
TAPER_OFF : 1
CURRENT_TOBACCO : 1
IN_LEFT : 1
PHYSICIAN_WITHOUT : 1
SINCE_MAY : 1
SAME_MEASURED : 1
THE_NAME : 1
AND_POST : 1
TRACER_HELP : 1
ENCOURAGE_HIM : 1
MENTAL_ILLNESS : 1
BAND_ON : 1
SCHIZ_RESIDUAL : 1
CPAP_AND : 1
RECHECK_SITE : 1
CARE_ES : 1
TITRATED_HE : 1
REFUSED_IMMUNIZATION : 1
HOME_IN : 1
UG_MH : 1
LIMITED_SKELETAL : 1
OF_FIRM : 1
NOTE_ASSISTANCE : 1
THE_YOU : 1
TO_THEMSELVES : 1
AN_APT : 1
CONTAINERS_ASSISTANCE : 1
FISH_SARDINES : 1
WILL_ASSISTANCE : 1
VOICE_MESSAGES : 1
PLASM_INFORMATION : 1
PTS_TOLERANCE : 1
COMPLICATIONS_MAIL : 1
DEATH_OF : 1
CAN_BE : 2
SOCIAL_LIVES : 1
AND_THIS : 1
TOENAILS_CONSULT : 1
OUTPATIENT_BRIGHT : 1
WERE_CONCERNS : 1
IS_UNCHANGED : 1
NOTICED_THAT : 1
MIAMI_PATIENT : 1
RELATED_VETERAN : 1
MADE_STRETCH : 1
MOOD_AND : 2
AND_MEDICATE : 1
HIS_CHOICE : 1
DSMIV_CRITERIA : 1
FORMOTEROL_INHL : 1
THE_PLANO : 1
SUPPLIES_CSECTIONS : 1
PATIENT_MENTAL : 1
UNDER_DIRECT : 1
AND_AN : 1
IF_PAIN : 1
HE_STATES : 1
ACTIVE_THIS : 1
URINE_COLOR : 6
SCHED_LPN : 1
TO_GIVES : 2
MY_WIFE : 1
NEW_RELAXANT : 1
TYPE_DETAILS : 1
BARNES_OSAT : 1
EVALUATION_EDUCAION : 1
NOTE_LIST : 1
GIVEN_FOLLOWING : 1
CARE_DVAMC : 1
WERE_SATURATION : 1
IN_THAT : 1
HOME_OXYGEN : 1
ALLOW_TO : 1
NURSING_CLINIC : 1
OF_CONSENT : 1
PT_UNDERSTANDS : 1
AND_BEHAVIOR : 2
OF_SEBACEOUS : 1
JUDGMENT_WERE : 1
RANGE_TO : 1
SUICIDE_HAS : 1
REQUESTING_INR : 1
GLOBES_WITH : 1
WANT_HURT : 1
LOCATION_RESIDENT : 2
GROUP_IN : 1
DENIES_PREVIOUS : 1
HIS_LEATHER : 1
DELUSIONS_SOCIAL : 1
MEDICATIONS_SUPPLIES : 4
AND_FINGER : 1
INSTITUTE_NORTH : 1
EDUCATE_REGARDING : 1
NEXT_KIN : 1
ERYTHEMA_OR : 1
EC_CAP : 1
VISITS_SUPPORTIVE : 1
PROCEDURE_CPAP : 1
THIS_TO : 1
IS_LOOKING : 1
PLASM_TAUGHT : 1
INCREASING_DIFFICULTY : 1
ON_COUMADIN : 1
THEY_USING : 1
AND_HOW : 1
DRINKS_HAS : 1
NOTE_THE : 1
IF_THE : 2
AND_BX : 1
DTC_STAFF : 1
FULL_AND : 1
BY_RANKINE : 1
FOCUS_SEEN : 1
CONTINUES_CPAP : 1
VA_NOTE : 1
UNCIRCUMCISED_OF : 1
DT_SCHEDULED : 1
AND_OPERATIONS : 1
THERAPIST_TO : 1
SOLN_ML : 1
HIS_HE : 1
LEG_HE : 1
AND_PATTERNS : 1
NO_TELEPHONEORTHOPEDICS : 1
MARITAL_STATUS : 1
DIPHENHYDRAMINE_MG : 1
PRINTED_MATERIALS : 1
SERVED_VIETNAM : 1
HAVE_PATCHES : 1
LIST_ANKLE : 2
AND_SUICIDAL : 1
ON_ROOM : 1
VOLUME_ALTERATION : 1
OR_APRIL : 1
VOMITUS_WAS : 1
ALERT_APPROPRIATE : 1
ASSOCIATED_HO : 1
CLINIC_DIPHENHYDRAMINE : 1
INVOLVED_IN : 2
FOR_DISCHARGE : 1
WEEK_NO : 1
VETERAN_FEELING : 1
RESPIRATION_EFFECTIVENESS : 1
REPLACEMENT_SURGERY : 1
ASA_TAB : 1
SYMPTOM_ARMS : 1
HOWEVER_VETERAN : 1
LEARN_CHOOSING : 1
DISEASE_FOR : 1
LOW_TO : 1
WANT_ADJUSTMENTS : 1
MALE_SCHIZ : 1
CRITERIA_FOR : 2
PRESENTS_CLINIC : 1
HIS_LABS : 1
THE_REQUIRED : 1
DISCHARGE_NOTE : 1
DIAGNOSIS_TO : 1
SWELLING_AROUND : 1
PLAN_DD : 1
YOUR_SKIN : 1
NOT_REFUSE : 2
TIME_PULSE : 1
NO_GOAL : 1
IUD_AUGUST : 1
QHS_COSOPT : 1
MEATS_FISH : 1
NO_SUPRAPUBIC : 1
NURSE_FOLLOW : 1
SCALE_LPM : 1
MALE_IN : 1
SNACKS_DEC : 1
PATIENT_IN : 3
NUTRITIONINTAKE_PRESENTS : 1
DIRECT_CARE : 2
ISSUES_REPORTED : 1
CHANGE_FUNCTIONAL : 1
RECORD_WAS : 1
VETERAN_ON : 2
FLORIDA_NEW : 1
HAVE_YOU : 2
NOTE_IMMUNIZATIONS : 1
EVALUATION_DRINK : 1
REQUESTING_RESCHEDULE : 1
BUTTOCK_AND : 1
WARFARIN_POSSIBLE : 1
DURATION_OF : 1
TO_WHILE : 1
CALL_WAS : 1
SUMMARY_AND : 1
REFUSED_INFLUENZA : 1
FOR_PERIODS : 1
OR_OBESE : 1
AND_STORIES : 1
ELIGIBILITY_CLASS : 1
WRITERS_ROLE : 1
OTHER_RISK : 1
IMED_PROCEDURE : 1
NOT_STARTED : 1
PERFORM_OTHERS : 1
LIKE_BRONX : 1
MS_WAS : 1
REMINDERS_TO : 1
ALL_AREAS : 1
DOCUMENTING_DECISION : 1
TAKE_MEDS : 1
HANGING_ON : 1
STRONG_POSITIVE : 1
POSTIVE_SIGN : 1
PATIENT_PLAN : 1
COOPERATIVE_THE : 1
THE_SITE : 1
CARE_AMOUNT : 1
AND_OPENING : 2
MEDICAL_HISTORY : 3
TO_YES : 1
OF_SITE : 1
CONSULT_CLEAR : 1
INDEPENDENTLY_AND : 2
THIS_TOXICOLOGY : 1
AND_MAILED : 1
DIVISION_OF : 1
AND_HAVE : 2
INFORMATION_VET : 1
IV_CEFTRIAXONE : 1
WITH_IV : 1
PATIENT_PLEASANT : 1
OR_FOR : 1
TEENS_OU : 1
WILL_UPON : 1
DISORDER_WHO : 1
TO_VALID : 1
OPENING_CONTAINERS : 2
PATIENT_INPATIENT : 1
OU_CARE : 1
CONTINUE_CURRENT : 2
LIST_BILATERAL : 1
PLEASE_BREAST : 1
VET_IN : 1
RESPONDED_TO : 1
BY_CHRISTENSEN : 1
WEDNES_TABLETS : 1
NOTE_PARTIAL : 1
TO_FOUR : 1
POULTRY_ORDER : 1
FLORIDA_VA : 1
VOLUME_MINIMAL : 1
BENEFITS_OF : 1
EVERY_BLOOD : 1
FROM_VICTIM : 1
HARM_SELF : 1
ELSE_NO : 1
MEDICATION_ADDENDUM : 1
MG_ANTICOAGULANT : 1
NOX_HEPARIN : 1
OR_VISIT : 1
STATES_INTEGRITY : 1
DRINKS_ON : 1
AND_COAGS : 1
AND_SOCIAL : 1
VOICE_MAIL : 1
UPDATE_IN : 1
SEATTLE_PHOTOGRAPHY : 1
GIVEN_TRANSFERRING : 1
THERE_IS : 3
HELPFUL_OFFERED : 1
WORKER_TRAINING : 1
MG_IS : 1
SEEM_BE : 1
THE_RINGING : 1
WOUND_ON : 1
THE_VOICES : 1
INT_RESPIRATORY : 1
CONTINUE_STANDARD : 1
SHIFT_PATIENT : 2
INTERACTING_MEDICATIONS : 1
HIS_HANDS : 1
FINDINGS_HYPOECHOIC : 1
HYPERGLYCEMIA_ICDCM : 1
CARE_UNRE : 1
WALKING_LONG : 1
ASSISTANCE_REQUIRES : 1
EVALUATION_PAK : 1
CALL_FROM : 1
NEGATIVISM_IN : 1
MEASUREMENT_DT : 1
HIS_ROOM : 1
OUT_BED : 1
OIL_PATIENTS : 1
FOOD_DINNER : 1
INPATIENT_STATUS : 2
INCREASED_WALKING : 1
NATIVE_BLADDER : 1
WATCHING_TV : 1
THE_ACTIVE : 1
SHE_REQUIRES : 1
IS_SPOKE : 1
REPORTED_RESPONSE : 1
FROM_PATIENT : 1
BETTER_DISCHARGE : 1
MR_FILL : 1
NEEDS_DURING : 1
IS_PROCESS : 1
BASCOMPALMER_THURS : 1
MYLAN_MG : 2
AFFECT_WERE : 1
STATED_LEVEL : 1
MEAL_SNACKS : 1
MUCH_SEVERE : 1
VETERAN_DENIED : 1
PATIENT_BEING : 1
PHYSICIAN_APPROPRIATELY : 1
TO_HIS : 4
SC_THAN : 1
PERTINENT_SYMPTOMS : 1
INPATIENT_ORDERS : 1
NONTENDER_BS : 1
HIS_SCHEDULED : 1
THERAPY_ADMINISTERED : 1
RX_TO : 1
AT_THIS : 3
UROLOGY_BMI : 1
DISEASE_PROCEDURE : 1
MENTATION_EFFECTIVENESS : 1
PT_NOT : 1
INTERESTED_MS : 1
BEEN_POSSIBLE : 1
SC_CLERK : 1
BEFORE_VET : 1
HAS_FOR : 1
HIS_RELATIONSHIP : 1
SLEPT_WELL : 1
MINUTES_WORKING : 1
AUTHOR_ALLERGIES : 1
CLEAR_CALL : 1
BLOOD_RETURN : 1
COMPLETED_REASSESSMENT : 1
BY_PURPOSE : 1
HE_WAS : 12
NARCOTIC_PT : 1
SAFE_THERAPEUTIC : 1
PATIENT_DENIES : 3
ATTENDING_HAVE : 1
PSYCHOSIS_SCHIZ : 1
ELIMINATION_CARE : 2
CONTENT_AND : 1
UP_STAFF : 1
IMAGE_THE : 1
ADDENDUM_ENROLLED : 1
REPORTS_THAT : 2
FROM_RECENT : 1
DRRTP_SHOW : 1
THE_TOTAL : 2
WELLKNOWN_THE : 1
MAKING_LIFESTYLE : 1
OF_BP : 1
DSHI_REPORT : 1
PATIENT_MY : 3
LEARNING_LIST : 1
COLOR_CONTACTED : 1
MIN_CONSIDER : 1
WHEAL_WAS : 1
CIU_MALE : 1
WERE_INSTRUCTED : 1
BETTER_BY : 1
FEMALE_HERE : 1
AND_CALL : 1
KILL_MYSELF : 1
BE_IMPLEMENTED : 1
THE_PATIENTS : 3
CBSST_DIAGNOSIS : 1
FAR_MORNING : 1
XYOLCAINE_EPINEPHRINE : 1
ADDENDUM_PROGRESS : 1
FOR_ED : 1
THE_AFTER : 1
MONTHS_VOLUNTARY : 1
CHECKS_NARCOTICS : 1
GASTRODUO_ELLIS : 1
TIP_RELATES : 1
AND_DOES : 1
NOON_AGREEABLE : 1
WITH_WITHOUT : 1
REVIEWED_AFTER : 1
SHORT_STAY : 1
SUPERVISORING_YOUR : 1
THAN_WAS : 2
AND_AGREES : 2
FOR_HIS : 2
CONSULT_BMI : 1
IS_ADDENDUM : 1
NOT_APPLICABLE : 2
DRAPED_THE : 1
OBTAINED_AM : 1
JUNE_IS : 1
CUEING_TIME : 1
REMAINS_THINKS : 1
VETERAN_TO : 5
BIRCH_REPORTS : 1
QUESTION_DURING : 1
ORIENTED_TIMES : 1
MINUTES_MINUTES : 1
SHOWED_RESIDUAL : 1
CARE_AT : 1
ED_ATTACHED : 1
THE_PINS : 1
MONITORED_BEHAVIOR : 1
MAIL_MORPHINE : 1
STATE_NEEDLE : 1
NOTE_IMAGING : 1
BY_SHOULDER : 1
CONSTIPATION_NO : 1
DEFICIT_OF : 1
PHYSICIAN_HIS : 1
LIKE_MCH : 1
BUT_OF : 1
OF_HOWEVER : 1
WILL_INFORMED : 1
OTHERS_WHILE : 1
CHANGE_MEDICATION : 1
PROCEDURE_TEMPERATURE : 1
ARRIVED_THE : 1
TO_BASELINE : 1
HEALTH_NEEDS : 1
THIS_CALL : 1
PARTICIPATED_VERY : 1
PATIENT_RETURN : 1
CLINICAL_TO : 1
IS_WM : 1
AND_POOR : 1
OF_BODY : 1
REFRACTION_ALBUTEROL : 1
ON_POSTIVE : 1
ADDENDUM_IN : 1
CAP_ONE : 2
VISIT_USE : 1
APPT_PCP : 1
THE_SKIN : 1
ABOUT_SUICIDE : 1
BY_DAILY : 1
WITHOUT_HIS : 1
MH_CASE : 1
VETERAN_MEDICAL : 1
MOOD_REAL : 1
SHOWING_OOZING : 1
INDIVIDUALS_WITH : 1
WAS_PSYCHOTHERAPY : 1
TRAIN_THIS : 1
MEDICATION_HPI : 1
IN_BEGIN : 1
CONTINUES_WITH : 1
RN_RM : 1
ACCUCHECK_STRIPS : 1
ON_UNIT : 1
WHAT_ATTORNEY : 1
VETERAN_ADDRESS : 1
CRACKLES_BOWEL : 1
THE_CHANCE : 1
POSITIVE_RELATIONSHIP : 1
STOOL_PHYSICIAN : 1
DOES_NURSING : 1
THIS_LENGTH : 1
WAS_VETERAN : 1
WILL_MAIL : 2
TESTING_TWICE : 1
NON_MODALITIES : 1
TEARFUL_THROUGHOUT : 2
TURNIN_PHARMACY : 1
DISCUSSED_WRITERS : 1
SEE_HOW : 1
ENCOUNTER_MEDICATIONS : 1
ADMINISTERED_ACA : 1
MEDICATION_DOSE : 1
DYSTHYMIC_SEC : 1
MADE_AT : 1
RULE_YOU : 1
DVAMC_REPORTED : 1
TO_DL : 1
THE_LOT : 1
THERAPIST_RADIATION : 1
DIABETES_COLLABORATIVE : 1
THE_OUTPATIENT : 1
STATING_HE : 1
FAMILY_PROCEDURE : 1
BID_MORPHINE : 1
POLYSOMNOGRAPHY_CONSULT : 1
OBVIOUS_SOCIAL : 1
LOCULATED_LEFT : 1
TO_HURT : 1
IN_PL : 1
NECESSITY_THE : 1
CONSULT_AS : 1
RETURN_FOR : 1
NOT_DURING : 1
DOPPLER_SIGNALS : 1
WHEELCHAIR_CANE : 1
ANKLE_ON : 1
SELF_AMBULATORY : 1
EXPECTATIONS_ABOUT : 1
MIX_ALCOHOL : 1
PATIENTS_MENTAL : 1
HAD_AWARE : 1
ASSISTANCE_FOR : 2
OR_MORE : 1
MH_123 : 1
AFTERNOON_AND : 1
HYPERLIPIDEMIA_GERD : 1
SON_YO : 1
WITH_HANDS : 1
STANDING_BY : 1
DANGER_HARM : 1
NOSHOW_RN : 1
CARE_NEW : 1
CHIN_AREA : 1
ORDER_BREAST : 1
DECLINE_WHERE : 1
PHYSICIAN_LENGTH : 1
ORDER_FOR : 1
TO_THOUGHT : 1
MR_WITH : 1
PRIOR_VISIT : 1
BEEN_ANALYZED : 1
SUBMIT_THE : 1
SCREEN_ABOUT : 1
SIGHT_IMPAIRMENT : 1
DOSE_MEDICAL : 1
BETH_OF : 1
TO_CHAIR : 1
PROCEDURES_OR : 1
DENIES_PAIN : 2
PROVIDER_BY : 1
RECORD_OT : 1
NOT_ON : 1
MY_DOES : 1
ANSWERED_ASKED : 1
ANTICOAGULANT_TABLET : 1
PATIENT_FRI : 1
IS_LIMITED : 1
WILL_IT : 1
AN_AM : 1
OFTEN_YOU : 1
MR_WAS : 1
ING_TAKE : 1
NOCTURIA_INDIAN : 1
IT_HAS : 1
INPATIENT_OUTPATIENT : 1
BOWEL_THIS : 7
INNERVATED_EXCEPT : 1
BEEN_REALLY : 1
FOR_CIU : 1
IN_HER : 1
PROGRESS_WORKED : 1
CLEAR_FLAT : 1
INR_RANGE : 1
CURRENT_SCHIZOPHRENIA : 3
WITH_CONTROLLED : 1
LAST_ON : 1
CHAPLAIN_DOCUMENTATION : 1
PALMER_SURGICAL : 1
HAVE_BARRIER : 1
LESS_INCREASE : 1
STILL_HANGING : 1
DURING_THE : 1
REPORTED_HIS : 1
UPON_INSPECTION : 1
SEE_VISTA : 1
YEAR_MALE : 1
MOUTH_ACTIVE : 6
SCHEDULE_JULY : 1
REQUEST_OF : 3
FEEDING_RESIDENT : 1
GOING_BACK : 1
THAN_STATED : 1
STATING_OBJECTIVE : 1
WAS_MAINTAINANCE : 1
OPERATE_THE : 1
PAINFUL_WEEK : 1
QID_ACTIVE : 1
AWARE_APPT : 1
WITH_FOR : 2
ALCOHOL_CONTROLLED : 1
REPORTS_HIS : 1
AWAY_ME : 1
COMPLAINT_ILLNESS : 1
VISIBLE_CAN : 1
RUN_AT : 1
BY_THE : 9
TINGLING_TO : 1
BEING_OVERWEIGHT : 1
MET_THIS : 1
PMR_PHYSICAL : 1
APPEARANCE_THOUGHT : 1
VS_OF : 1
THE_DIRECT : 1
BY_PH : 1
PATIENT_CT : 1
DROP_EYES : 1
SPEECH_OF : 1
PRASHANT_GOLD : 1
PERSISTENT_PREVIOUS : 1
DIFFICULTY_WITH : 2
FOR_PATIENT : 2
FOR_TO : 5
IT_TRY : 1
THERAPY_IV : 1
WM_WITH : 1
YELLOW_CONSISTENCY : 1
MM_FORMOTEROL : 1
HBPC_AND : 1
BY_HIS : 1
TO_FACE : 1
HAS_SC : 1
YOU_SKIN : 1
NO_INDICATION : 1
IS_WHAT : 1
AND_BECAME : 1
SUPPORT_YRS : 1
BOTH_QID : 1
MAILED_HIS : 1
IT_LS : 1
COLOR_ONE : 1
CRACKLES_WHEEZES : 1
ANESTHESIA_CONSENT : 1
THE_DOPPLER : 1
PATHOLOGY_PT : 1
SCALE_NOT : 1
SERVICE_MEDICATION : 1
SHOULD_ALLOW : 1
NO_ABDOMEN : 2
REQUEST_REFILL : 1
BOTH_PRESUMED : 1
SYMPTOMS_RELEIVED : 1
IN_WEEK : 1
LOW_THIS : 1
CHANGES_OU : 1
MALE_PMH : 1
DIAGNOSIS_PTSD : 1
THERAPY_WITH : 1
PAIN_FOR : 1
GOOD_WITH : 1
MG_PHARM : 1
WERE_MAKING : 1
AT_HE : 1
VA_PH : 1
CARE_OF : 1
PURPOSE_THEME : 1
SINCE_HE : 1
ITEMS_BEDSIDE : 1
YES_CONSENT : 1
IDENTIFIED_CENTER : 1
PLEASANT_UPON : 2
SAYS_HE : 2
APPROPRIATELY_FOR : 1
POSTED_WITH : 1
TO_MEDS : 1
SHE_HE : 1
ADJUST_VOLUME : 1
MAY_HAS : 1
DIAGNOSIS_DEPRESSION : 1
AT_PUEBLO : 1
POINT_BECAUSE : 1
STANDING_WALKING : 1
YOU_ON : 1
NATURE_IT : 1
CONDITION_NONE : 1
LIVING_BLADDER : 1
FRONT_OF : 1
AND_PROVIDED : 1
MIAMI_THE : 1
HESITANCY_VETERANS : 1
HE_LIKE : 2
FOOTWEAR_IF : 1
VA_WEEKLY : 1
BE_FINGERTIP : 1
OR_BY : 1
NO_OOZING : 1
CLINIC_TABLET : 1
NY_PATIENT : 1
PUPILS_CONSTRICTED : 1
ING_CLERK : 1
HE_COMPLIED : 1
ILLNESS_SEE : 1
ANY_IN : 1
BEEN_GOOD : 1
USED_TO : 1
SETTING_DATE : 1
CALCULATION_PLASMA : 1
AN_EGOMANIAC : 1
OX_MINIOPEN : 1
LOW_OU : 1
SURGERY_IN : 1
HRS_NO : 1
WITH_EPINEPHRINE : 1
OF_AGREE : 1
THE_WHICH : 1
YRS_DEMONSTRATING : 1
FOR_TAKE : 1
WELL_AS : 2
SURGICAL_FOR : 1
AND_WITH : 3
TREECE_ELLIS : 1
HOW_THE : 1
DISCUSSED_HIS : 1
STOOL_NUTRITION : 1
RECENT_LAB : 1
THE_HAS : 3
CLC_IN : 1
AGE_BY : 1
DEPRESSION_HIS : 1
UNLESS_PROMPTED : 1
IN_OF : 4
RACE_OF : 1
OF_DISPOSITION : 1
OTHER_HEALTH : 1
CPS_NUTRITION : 1
BASCOM_FOR : 1
DID_REFUSE : 2
PROGRESS_MENTATION : 1
IS_STABLE : 1
ELLIS_CONTACT : 1
MG_EC : 1
AT_PM : 1
GETTING_WITH : 1
BRISTOL_LENGTH : 1
THE_IMAGE : 1
BREAKFAST_CRACKERS : 1
TH_MIAMI : 1
AUTHOR_BETTY : 1
BEVERAGES_APPROVED : 1
DINNER_HE : 1
LESION_PT : 1
SESSION_WITH : 1
TO_MODERATE : 1
TRANSFER_INDEPENDENTLY : 1
PER_OX : 1
ADDENDUM_WORKER : 1
EDUCATION_HT : 1
PATIENTS_AGE : 2
HIS_HEARTRATE : 1
WHAT_DO : 1
DO_FEEL : 1
THE_CAUSE : 1
OUTPATIENT_MSW : 1
INJURED_NO : 1
NORMAL_IN : 1
USING_AND : 1
HIS_OF : 1
FOR_OR : 1
ENCOURAGE_FOLLOW : 1
DOESNT_FEEL : 1
NOTE_SATISFACTORY : 1
BELT_PT : 1
VETERAN_READ : 1
TO_DEFICIT : 1
THE_PILLS : 1
ME_OTHERWISE : 1
MEDICAL_MANAGEMENT : 1
GERIATRIC_DEPRESSION : 1
PRESENT_SEE : 1
OF_UNRE : 1
JUDGEMENT_IS : 1
OVER_IN : 1
ARNP_REMOVED : 1
FUNCTIONING_BETTER : 1
LUNGS_CTAB : 1
SUICIDAL_CONTACT : 1
EVENING_HE : 1
TO_TAKE : 2
LEFT_ARM : 1
CONTACT_PT : 1
BACK_WHICH : 1
PAIN_APPOINTMENT : 1
DRRTP_NO : 1
REMOTE_AND : 1
OPTIONS_AVAILABLE : 1
AS_PELLETS : 1
TEXAS_TO : 1
HEAD_OBJECTIVES : 1
ALSO_THE : 1
INR_RESTARTING : 1
DECISIONMAKING_COMPLICATIONS : 1
TABLET_STRENGTH : 1
CLINIC_VISIT : 1
PRECAUTIONS_AND : 1
INTAKE_PT : 1
PRO_VISIT : 1
LPM_EXERCISE : 1
OF_TOBACCO : 1
WITH_SKILLS : 1
FELL_THE : 1
SPEECH_NORMAL : 1
AND_LEADER : 1
COMPLETED_HEALTH : 1
GIVEN_IN : 1
PATIENT_AMBULATORY : 1
CHIEF_PRESENT : 1
TO_SEE : 7
ALBUTEROL_MCG : 1
THE_END : 2
HAS_HISTORY : 1
DID_YOU : 1
DEMONSTRATED_THE : 1
DEDRA_BID : 1
DRINK_SCALE : 1
PERSONAL_AMOUNT : 1
COAGS_HAVE : 1
NO_ISSUES : 1
DISTAL_TIP : 1
INDUCES_STATE : 1
INHL_PUFFS : 1
STATUS_MARRIED : 1
PHYSICIAN_HE : 1
ROOM_ALERT : 1
YOU_BEEN : 1
COLONOSCOPY_FOR : 1
HALDOL_MG : 1
PALMER_INSTITUTE : 3
ORDERS_OBESITY : 1
DECOMPRESSION_OR : 1
SCHEDULED_APPT : 1
AT_RISK : 3
DISEASE_PREVENTION : 1
LEATHER_PT : 1
OF_TASK : 1
WE_ISSUED : 1
IDENTIFIED_PC : 1
NEGATIVE_OR : 1
UPDATE_ON : 1
NKA_DIAGNOSES : 1
NOT_PULSE : 1
OR_SURROGATE : 1
AS_ASSESS : 1
USE_AMBULATORY : 1
LOSS_RENEWAL : 1
HISTORY_NONE : 1
ACTIVE_OUTPATIENT : 2
PUPILS_PCA : 1
ABLE_TO : 2
TO_VET : 1
THAT_HIS : 3
YEAR_TO : 1
WORK_WAS : 1
SOME_FOOD : 1
WOUND_PTS : 1
UTI_THE : 1
CONCERNS_NOTED : 1
PERSON_ASSIST : 1
LEATHER_BELT : 1
BASCOM_PALMERS : 1
GARLIC_OIL : 1
HAMLIN_TIME : 1
CUING_STATED : 1
ACCIDENT_INJURY : 1
TO_THEY : 2
ON_RECENT : 1
VACCINATION_VALID : 1
WILL_GIVEN : 1
THE_FOOD : 1
SUN_AVOIDANCE : 1
DEPENDENCE_SUBSTANCE : 1
TO_CHECK : 1
OUT_AMB : 1
YOU_SICK : 1
BY_WITH : 1
PSYCHOTHERAPY_SESSION : 1
MR_BASCOMPALMER : 1
OF_AFTER : 1
CPS_THIS : 1
NOT_CHANGED : 1
END_OF : 2
MAKING_HIM : 1
SERVICE_DENTAL : 1
SUICIDE_OR : 1
OLD_ON : 1
ANXIETY_PATIENT : 1
IN_PROCEDURE : 1
HOW_WAS : 1
WILL_GOOD : 1
TREATMENT_THE : 1
TIMES_MONTH : 1
HELPING_HIM : 1
AND_ENCOURAGE : 1
TO_MEDICATIONS : 1
OR_SELF : 1
OU_WITH : 1
SC_IMAGE : 1
BACK_ENEMIES : 1
IN_DECREASING : 1
PRESENT_THE : 1
PAPERWORK_CONDUCT : 1
TIA_BY : 1
IMPROVED_DURING : 1
SELENIUM_SHAMPOO : 1
THRU_WORK : 1
HEALTH_EDUC : 1
TWICE_ACTIVE : 1
GLAUCOMA_OS : 1
TO_RELIEVE : 1
FLIGHT_THANKED : 1
IF_YOU : 1
AT_CHECK : 1
TO_PTSD : 1
CAMARA_TO : 1
CONCENTRATING_BEEN : 1
CONSULTSOAP_ALLERGIES : 1
PREVIOUS_OF : 1
HAS_LIVING : 1
SESSION_STATED : 1
MEETINGS_GROUPS : 1
WITH_EXERCISE : 1
RANGE_RESTARTING : 1
SUBSTANCES_ABUSE : 1
VETERAN_BIRCH : 1
VERBAL_INJECTION : 1
ALL_HIS : 2
WITH_HEMORRHOIDS : 1
VISIT_NOTE : 1
SC_LESS : 2
LENGTH_THE : 2
APPEARANCE_SITE : 1
TO_STATED : 1
ITS_THE : 1
AND_THEY : 1
RANGE_WARFARIN : 1
PT_THAT : 2
OR_BEHAVIOR : 1
OSAT_NEEDS : 1
ALLERGIES_HAVE : 1
PSYCHIATRY_NOTE : 1
IS_ASSIGNED : 1
NURSE_TO : 1
DATE_ONSET : 1
WRISTS_PATIENT : 1
PHONE_PATIENT : 1
SPENDING_TIME : 1
NO_SHOW : 2
CONTRACEPTION_USED : 1
DOSE_WITH : 1
SOCIAL_WORKER : 2
ATTENDING_STEPS : 1
AGREES_WITH : 3
FOR_SCHEDULED : 1
FOR_TAXI : 1
FOR_LEARNING : 1
OFFICE_WED : 1
MEDICAITON_ISSUE : 1
CONTINENT_STAFF : 1
OF_ML : 1
FAMILY_MOVED : 1
SOFT_NONTENDER : 1
FAIR_POOR : 1
MA_RNBC : 1
FEEL_THE : 1
SCREEN_ANTICOAGULATION : 1
DISORDER_SELF : 1
APPLICABLE_ASSISTANCE : 1
MG_TAKE : 6
MEMBER_DISCHARGE : 1
VISIT_FALL : 1
PAIN_MEDICAITON : 1
IF_HAVE : 1
ADR_REPORT : 1
DURATION_INTERMITTENT : 1
CATHETERIZATION_PROCEDURE : 1
FOR_SUPPORTTALKING : 1
PODOFILOX_TOPICAL : 1
GEMFIBROZIL_TAB : 1
NONE_READY : 1
MCG_RISK : 1
RANGE_TREATMENT : 1
INFORMATION_THE : 1
LEAVE_MAIL : 1
PRESUMED_FOR : 1
FEARFUL_THE : 1
PAST_PATIENT : 1
STRETCH_DISCUSSED : 1
ON_LIFE : 1
REFUSED_TO : 1
MASS_PULMONARY : 1
AT_AND : 3
MAKING_SICK : 1
THE_WORST : 1
SCHEDULED_APPOINTMENTS : 1
NOTE_STUDY : 1
ON_SUBJECTIVE : 1
PATTERNS_ANY : 1
TO_BLIND : 1
ASSESSMENT_IS : 1
ATTACHED_TO : 1
OF_FALLING : 1
BEEN_THAT : 1
LEARNING_IDENTIFIED : 1
OTHER_MENTAL : 1
CONTACT_ALLERGIES : 1
UPPER_LEFT : 1
MINIOPEN_ROTATOR : 1
APPROPRIATE_SOUNDS : 1
DIAGNOSIS_SCHIZOPHRENIA : 3
HIS_LIFE : 1
HAD_WHICH : 1
COLOR_STAFF : 1
MARRIED_IN : 1
TO_REQUEST : 1
HE_AS : 1
VET_WIFE : 1
GOOD_SIZED : 1
ES_BONNIE : 1
DID_HAVE : 1
THE_FOLLOWING : 5
ACUTE_ALCOH : 1
YES_SC : 2
BY_IN : 1
THROUGH_LIST : 1
STATED_OF : 1
IS_EXTREMELY : 2
STAFF_WILL : 1
DISEASE_HYPOTHYROIDISM : 1
MINUTES_ON : 1
THIS_RELIEVED : 1
TABLET_MG : 1
MESKENAS_RNBC : 1
DOES_REQUIRE : 1
RECENT_SUICIDAL : 1
CIRRHOSIS_ALLERGIES : 1
LMSW_VETERANS : 1
NONDISTENDED_BOWEL : 1
IMMUNIZATION_GTTS : 1
THOUGHT_WAS : 1
GOAL_PATIENT : 1
OUT_STATES : 1
PLEASE_RADIATION : 1
MOUTH_DAILY : 2
CONTROL_IN : 1
OF_TIMES : 1
SERVICECONNECTED_FOR : 1
PHYSICAL_EXAMINATION : 1
VISIT_FALLS : 1
HEARING_HIS : 1
AND_DOESNT : 1
PENICILLIN_MEPERIDINE : 1
MEDICATIONS_PT : 1
PALMER_EYE : 3
PRIMARY_CLINIC : 1
YES_PATIENT : 1
EXPLOSIVE_THIS : 1
DX_WITH : 1
CALL_MIN : 1
EDUCATIONAL_MET : 1
INTERVENTION_COMPLETED : 1
SHIFT_WAS : 1
WITHIN_HOURS : 1
REINFORCED_CHOICE : 1
LESS_THAN : 2
QUESTIONS_YOUR : 2
WITH_ULCER : 1
HEART_SKIPPING : 1
MANAGEMENT_GROUPS : 1
NOT_THINK : 1
SYMPTOMS_MEDICATE : 1
ANATOMICAL_LOCATION : 1
DOM_RTU : 1
NOTIFIED_AND : 1
WAS_THERE : 1
OS_OU : 1
PROCEDURE_NURSING : 1
NO_OBVIOUS : 1
TASK_ONE : 1
IS_CONTINENT : 2
AFTER_SCALE : 1
NO_RX : 1
HIS_RATIONAL : 1
INNERVATED_MUSCLES : 1
TH_MEDICATION : 1
WILL_REQUEST : 1
IMMUNIZATIONS_OCT : 1
TOLERATING_YES : 1
NEGATIVE_OTHERWISE : 1
AND_NO : 1
NEGLECT_SCREEN : 1
THIS_PROCEDURE : 1
FOR_LITTLE : 1
MIN_FACILITATORS : 1
ASSIST_MR : 1
LOT_YEAR : 1
CONTACT_MG : 1
OTHER_CONNECTED : 1
FEELINGS_BEHAVIOR : 1
RTC_WALK : 1
SCHIZOPHRENIA_WEEKLY : 1
CONTACTING_WAS : 1
BE_FELT : 1
FRI_IN : 1
ONCE_HIS : 1
REPORT_CONSULT : 1
CHRISTENSEN_LEAD : 1
THE_STERILE : 1
LMSW_TIME : 1
OF_PERCOCET : 1
OCCURED_IN : 1
WAS_AND : 2
RADIATION_SERVICE : 1
PATIENT_ARE : 1
ARE_BOTH : 1
ENROLLED_IN : 2
PRN_SCHEDULED : 1
THIS_WRITERS : 1
REMAINS_THE : 1
DL_CLINIC : 1
ON_SKIN : 1
MOOD_IS : 1
STRETCH_UNTIL : 1
IN_TO : 4
GO_COURT : 1
PATIENT_READY : 1
TIME_IS : 1
FOR_VETERAN : 1
HYPOTHYROIDISM_EMERGENCY : 1
SMART_GOAL : 1
LUNGS_PATIENT : 1
OMEPRAZOLE_EC : 1
TIMES_WAS : 1
BETWEEN_AND : 1
NOTE_DIAGNOSIS : 1
POSITIVE_FOBT : 1
THE_LUN : 1
WORK_AND : 1
GOOD_THAT : 1
SUPPORTIVE_FOCUSING : 1
CITALOPRAM_MG : 1
COULD_ARRANGE : 1
CORRECT_SITE : 1
STATES_NAME : 1
GLARE_POHX : 1
MOUTH_MAR : 1
EFFECTS_PATIENT : 1
THAT_DREAM : 1
POSTERIOR_PART : 1
AND_PROCEDURE : 3
BANK_GIVE : 1
TO_TESTING : 1
OTHER_SON : 1
FOLLOWED_BY : 1
MSW_CRADC : 1
ETC_IS : 1
FOR_INCREASED : 1
BREAST_NORTH : 1
SYMPTOMS_OFTEN : 1
ALCOHOL_AND : 1
THEIR_SAFETY : 1
CLERK_PATIENT : 1
COMMUNICATION_THOUGHTS : 1
WITH_LE : 1
VISIT_WILL : 1
SHORT_TRANSITIONAL : 1
SERVICES_LACK : 1
CONTENT_INSIGHT : 1
UNSURE_HIS : 1
HPI_PT : 2
TREATMENT_PAIN : 1
INDUCES_RELAXED : 1
TEXAS_NY : 1
MEDICATION_RX : 1
FAR_IS : 1
TO_BY : 2
REMINDER_ACTIVITY : 1
CENTER_FACILITY : 1
ORIENTED_PATIENT : 1
RR_PL : 1
UNSURE_WHAT : 1
USE_ANY : 1
URINARY_POLYURIA : 1
SECRETION_CHARACTERISTICS : 2
DESCRIBED_ON : 1
DRAPED_IN : 1
STENOSIS_PSV : 1
AWAKE_DO : 1
HIS_EXPECTATIONS : 1
HIS_FALLS : 1
WAS_ALSO : 1
REQUESTING_SPEAK : 1
REVIEWED_WERE : 1
HAD_DONE : 1
MEMBERS_INTRODUCED : 1
RX_CHEMISTRIES : 1
WILL_BE : 6
ING_ADDENDUM : 1
SUPPORTTALKING_YOUR : 1
HIS_STATING : 1
RT_RESIDENT : 1
IS_ABSTINENCE : 1
SPECIMEN_BEEN : 1
WITHDRAWAL_SYMPTOM : 1
STATUS_FOOD : 1
SNACKS_NUMBER : 1
THE_CRITERIA : 1
IS_WORRIED : 1
CONDITIONS_AO : 1
PINS_AND : 1
AT_OR : 1
MAINTAINS_FAIR : 1
OS_OD : 1
LENGTH_LENGTH : 1
DUE_NOT : 1
TO_RECEPTIVE : 1
PRECAUTIONS_DEPENDENCE : 1
MOOD_DYSTHYMIC : 1
THE_VETERANS : 1
OPERATIVE_RECORD : 1
THE_CONTROL : 1
FAIR_QUETIAPINE : 1
WHO_MEETS : 1
MEPERIDINE_VISUAL : 1
ASSIST_IMPROVED : 2
AND_ALBUTEROL : 1
STERILE_FINDINGS : 1
LETHALITY_PHYSICIAN : 1
DRINKING_ALCOHOL : 2
WELL_IT : 1
CAL_MEDICATION : 1
LOCATION_OF : 2
INCOMING_STAFF : 1
IN_SOCIAL : 1
ISSUE_THAT : 1
NEVER_SACKER : 1
SCHEDULED_VISIT : 1
DATE_NAME : 1
TO_MISSED : 1
MORPHINE_RESPONDED : 1
CONTACT_NOTE : 1
ACUTE_INTOXICATION : 1
BLADDER_MEAL : 1
HISTORY_RECONCILED : 1
HE_THE : 2
SIGNAL_IN : 1
BOARD_AND : 1
AS_IF : 1
CLEAN_WITHOUT : 1
OCCURED_AT : 1
DISORDERMET_WITH : 1
THE_ONCE : 1
REQUESTING_ACCUCHECK : 1
OTHER_DSHI : 1
POPLITEAL_WEIGHT : 1
PATIENT_RECORD : 1
DOSE_CGY : 1
TO_AWAY : 1
IDENTIFIED_WEIGHT : 1
NOW_ON : 1
AND_THERAPEUTIC : 1
ORAL_INHL : 1
TREMORS_ATTENDED : 1
DOES_PATIENT : 1
FOOD_FOR : 1
BY_AND : 1
REASSESS_LESION : 1
REDDNESS_MALE : 1
FOOD_DEPRESSION : 1
MAILED_TO : 1
PAST_HAS : 1
IS_SC : 1
INPATIENT_ACUTE : 1
THIS_ENCOUNTER : 1
PERFORMED_NONE : 1
HOWEVER_HE : 1
AN_ANESTHESIA : 1
AND_NONVA : 1
DISPL_RESIN : 1
STOOLS_ANURIA : 1
APPT_TO : 1
WEEK_FOR : 1
CALL_CENTER : 2
WEEK_WHICH : 1
REHABILITATION_TOOK : 1
AT_TO : 1
AND_BREAK : 1
SLIGHTLY_HIGH : 1
SUPERVISORING_PRACTITIONER : 1
STOOLS_DYSURIA : 1
SHOULD_LATHER : 1
PATPU_NUMBER : 1
NEXT_INR : 1
PATIENT_FOR : 3
NOTES_COULD : 1
AT_TREATMENT : 1
REORDERED_HE : 1
TEST_CONDITION : 1
VISIT_TO : 1
REQUIRED_PAPERWORK : 1
BECAME_AND : 1
THE_THINPREP : 1
FAMILY_RIGHT : 1
QUESTIONED_PATIENT : 1
PLAN_OF : 6
NO_IN : 1
AND_ACEI : 1
LEVEL_OF : 1
AND_WERE : 3
SKIPPING_BEAT : 1
FLIGHT_THIS : 1
ELIMINATION_ZZPATIENT : 1
SERVICES_SO : 1
WHEN_THEY : 1
SERVICES_GERD : 1
APPRECIATIVE_PAIN : 1
FOR_LEFT : 1
NEW_HYDROCHLOROTHIAZIDE : 1
OF_SINCE : 1
FEVERS_PNEUMONIA : 1
XYZZY_PATIENT : 2
TO_HALF : 1
NO_SUICIDAL : 1
INFORMATION_MH : 1
BY_ELEVATOR : 1
HYPERTENSION_COMPENSATED : 1
ALLERGIES_YOU : 1
REPORTS_CHANGE : 1
AS_WELL : 2
BETWEEN_FRIENDS : 1
ON_ONE : 1
HE_ARRANGE : 1
HE_VERY : 1
WILL_CALL : 1
PT_IN : 2
ON_RISKS : 1
SYMPTOMS_BY : 1
WEAR_PMHX : 1
UP_PROVIDER : 1
QUESTIONED_AGE : 1
INSTRUCTIONS_WILL : 1
FLORIDA_BEFORE : 1
SHE_WAS : 1
MAIL_ON : 1
YRS_HR : 1
LIST_BEFORE : 1
AGREED_PARTICIPATE : 1
PREVIOUS_DECEMBER : 1
DONE_MOWING : 1
NEXT_CONCURRENT : 1
YOU_RATE : 1
USED_VERIF : 1
MORPHINE_TO : 1
MCH_PLT : 1
RTU_NOTE : 1
INTAKE_DIAGNOSIS : 1
CARE_TELEPHONE : 1
NAME_AND : 1
MIGRAINE_HEADACHES : 1
SHAMPOO_BRC : 1
TIME_MINUTES : 1
YES_PHONE : 1
BASE_RESIDENT : 1
EFFECTIVENESS_FLEXERIL : 1
CLEAR_YELLOW : 1
INITIAL_GROUP : 1
THOUGHT_IT : 1
THIS_BECAUSE : 1
QID_TREATMENT : 1
CARE_COLOR : 1
HESITANCY_URGENCY : 1
VETERAN_DISCOURAGED : 1
CHANGED_FAMILY : 1
SUMMARY_RESTORATIVE : 1
SNACKS_OF : 1
RIGHT_UPPER : 1
HISTORY_THIS : 1
UNDERSTOOD_THE : 1
STOPS_DECOMPRESSION : 1
ALPHAGAN_BID : 1
SINCE_IS : 1
APPROVED_PH : 1
TRACE_MR : 1
IN_SINCE : 2
BY_LIST : 1
TIMES_PATIENTS : 1
LIKE_HIGHS : 1
PATIENT_HERE : 1
ELIMINATION_URINE : 1
FOR_HEALTH : 1
BE_STRESS : 1
AXIS_PTSD : 1
HE_HIS : 1
RESIDENT_EDUCATION : 1
FINGER_AND : 1
LIFE_VETERAN : 1
IS_FAIR : 1
GROUPS_HIS : 1
SHOULD_SAY : 1
TESTS_NUMBER : 1
EYE_NORTH : 1
DEC_DENT : 1
THE_USE : 2
VOLUME_MIN : 1
FILL_MORPHINE : 1
OF_KLONOPIN : 1
SERVICES_THAT : 1
DISABILITY_SULFIDE : 1
DISJOINTED_AT : 1
CAMARA_PHOTOGRAPH : 1
PATIENT_THEN : 1
PHONE_LEFT : 1
TINGLING_CLEAN : 1
CONCURS_IMPAIRED : 1
TAKE_PATIENT : 1
SECOND_DEGREE : 1
COORDINATOR_MELISSA : 1
CLINICIAN_RAL : 1
SEE_IMAGING : 1
URINARY_DYSURIA : 1
PHYSICIAN_FOR : 1
PATIENT_AXIS : 1
USED_PILLS : 1
HYPOECHOIC_AREA : 1
OF_NUMBNESS : 1
PREFERENCES_EXPRESSED : 1
SOME_OF : 1
MONITORED_AND : 1
CARE_CURRENT : 1
VIETNAM_WAS : 1
STATED_THE : 2
HANGING_TO : 1
SEEN_THE : 3
HAS_NOW : 1
AND_MY : 1
IS_HIM : 1
SCALE_THE : 1
DATE_SEPTEMBER : 2
HE_REPORTED : 1
WERE_UNRE : 1
BP_PAIN : 1
WOUND_EYEBALL : 1
CHO_OL : 1
AND_MORE : 1
CONVERSATION_HAS : 1
THE_ER : 1
SAW_PATIENT : 1
IN_MOOD : 1
PRESENT_DIAGNOSIS : 1
ABOUT_UNEMPLOYMENT : 1
MISSED_FROM : 1
EDUCATIONAL_NEEDS : 1
PATIENT_ALLERGY : 1
BOTH_PATIENT : 1
LIGHT_ADJUST : 1
NO_UCINATIONS : 1
TAXI_DIA : 1
CATARACT_NOS : 1
RX_TURNIN : 1
NEGATIVE_AMBIGUOUS : 1
MD_REHABILITATION : 1
FOR_POSITIVE : 1
ASA_GARLIC : 1
THE_WITH : 5
YOUR_CONDITION : 2
BED_PT : 1
LIST_HPI : 1
MOOD_BEHAVIOR : 1
FEMALE_FOR : 1
HAD_HISTORY : 1
NS_OU : 1
MONITORED_PAIN : 1
CONTRACT_DVAMC : 1
FROM_HAS : 1
PEERS_STAFF : 1
TWO_OF : 1
CONTACT_MADE : 2
ALCOHOL_ABUSEUNSPEC : 1
YOU_YOU : 1
BY_EVALUATION : 1
HYG_TUTTLE : 1
THIS_OCCURED : 1
COMPLIED_WITH : 1
TO_SURROUNDINGS : 1
STAFF_KNOW : 1
TOTAL_KNEE : 1
FEMALE_OF : 1
ATENOLOL_TREMORS : 1
TO_OPERATE : 1
EXPEDITED_ANY : 1
THE_AND : 12
LEADER_WAS : 1
STABLE_NO : 1
SOUNDED_UPBEAT : 1
WITH_ANESTHESIA : 1
NEGLECT_AND : 1
DELIVERED_AND : 1
ONE_IN : 1
AND_EXCLUSION : 1
RECENT_DEATH : 1
HAVEDISCUSSED_THE : 1
WITH_ICDCM : 1
SKIN_INTEGRITY : 1
OLD_EXAMINED : 1
CEFTRIAXONE_AND : 1
SOUNDS_PATIENT : 1
NSC_VET : 1
NEEDLES_RECREATIONAL : 1
TREATMENT_ING : 1
DAILY_HIP : 1
TO_RESCHEDULE : 1
LAST_CLINIC : 1
PLEASE_CONTACT : 1
NOTE_AND : 2
ONCE_WK : 1
TITLE_DIABETOLOGY : 1
MET_SATURATION : 1
AND_VITAL : 1
THUS_FAR : 1
FOR_LONG : 1
ALLERGIES_SPEECH : 1
COLOR_NORMAL : 1
ON_APPARENTLY : 1
MALE_PSYCHOSIS : 1
VERIFIED_CHARGE : 1
WHICH_BETTER : 1
BEHAVIORS_BY : 1
WITH_TO : 2
MEASURED_APPROX : 1
TEMP_INTERDISCIPLINARY : 1
CLC_TUTTLE : 1
STRENGTH_MG : 1
DOCTOR_ABOUT : 1
CHECK_BLOOD : 1
TO_CLINIC : 1
DORSUM_NOTIFIED : 1
INTRODUCED_THEMSELVES : 1
NOT_OX : 1
PT_SCHED : 1
THE_FACE : 1
CORRECT_PAIN : 1
TO_RTC : 1
CALL_TYPE : 1
IN_WALK : 1
HE_STABLE : 1
AM_STATES : 1
HEIGHT_IN : 2
STABLE_EXTREMITIES : 1
THE_DOCUMENT : 1
JOST_MARY : 1
FACILITATORS_LE : 1
ORDERED_MIAMI : 1
MR_TR : 1
AND_GROOMING : 1
AGREES_ABOVE : 1
LOW_BACK : 1
GROUP_GERIATRIC : 1
SAFETY_THAT : 1
VS_TWO : 1
LEARN_JOINT : 1
VET_THAT : 1
CLINICAL_REMINDERS : 1
HAD_GUNSHOT : 1
QUESTIONNAIRE_IS : 1
SHEET_DRESSES : 1
DENVER_VA : 1
MEDICATE_AS : 1
FOR_VAMC : 1
HE_IN : 1
COMORBID_HEALTH : 1
BPH_WHO : 1
CALL_SUSPENDED : 1
WAS_REFERRED : 1
TIME_REASSESS : 1
ROOM_LUNGS : 1
THE_IDENTIFIERS : 1
STAFF_CONVERSATION : 1
MY_SUPERVISORING : 1
TIME_READING : 1
SHE_STATES : 1
APPOINTMENT_REPORT : 1
SLEPT_HAS : 1
OF_MOTION : 2
SHIFT_OF : 2
HOMICIDAL_NEGATIVE : 1
THE_MR : 1
COLONOSCOPY_BARRIER : 1
NOTE_IN : 1
TO_UNTIL : 1
AND_OFFERED : 1
COUNSELING_DEPENDENCE : 1
THAT_IS : 5
GOOD_WENT : 1
LPM_WITH : 1
PASSING_PATIENT : 1
FOLLOWUP_MEDICATION : 1
MUSIC_HE : 1
HE_PASSING : 1
AND_SKIN : 1
VA_NURSING : 1
MEDICATION_SMART : 1
THE_PANEL : 1
HE_FEELS : 1
REFUSE_SNACKS : 1
NEUROLOGY_UP : 1
LIVING_PROTECTORS : 1
CALL_SEE : 1
PRESENTS_DL : 1
TO_THESE : 1
SHOTGUN_STRUCK : 1
SPIRIVA_DX : 1
BASE_MS : 1
OPENING_ASSISTANCE : 1
HALF_WAY : 1
ENTERED_RESPIRATION : 1
OF_DO : 1
DURING_TREATMENT : 1
CLOZAPINE_MG : 2
HIS_VISIT : 1
NOTE_ANTERIOR : 1
HE_DISJOINTED : 1
AND_HE : 6
MG_PLASM : 1
CATCH_DATE : 1
DISCHARGE_PROVIDER : 1
VETERANS_MEDICAL : 1
GROUPS_HAS : 2
YES_FORM : 1
THAT_UNDERSTOOD : 1
SAYS_THIS : 1
RISK_ASSESSMENTIS : 1
MIN_VISTA : 1
DECREASING_IM : 1
TO_SEDATION : 1
SKILLS_ASSESSMENT : 1
MINUTES_LABS : 1
EFFECTIVENESS_THERAPY : 1
AS_TO : 1
THE_AUDITC : 1
PASSING_OUT : 1
POOR_VISION : 1
CLINIC_OH : 1
MEASUREMENT_POX : 1
FARIBAULT_MN : 1
ANESTHESIA_PRACTITIONER : 1
RELATED_TO : 3
TREATMENT_OT : 1
FOR_VISION : 1
WK_COLONOSCOPY : 1
PHYSICIAN_NO : 2
PUEBLO_DAILY : 1
INHL_INHALE : 1
AND_OUTPATIENT : 1
ARE_LEAN : 1
READER_TO : 1
SCHEDULING_CONFLICT : 1
DOSE_NEXT : 1
RULE_DO : 1
NUTRITION_LOW : 1
RADIATION_ONCOLOGY : 3
FOR_DRINK : 1
WHERE_PT : 1
NOTE_FAIR : 1
YRS_URINARY : 1
WHILE_THE : 1
STEREO_DIAGNOSIS : 1
LATERAL_NONPHARMACOLOGICAL : 1
NEGATIVISM_EMERGED : 1
ELEVATED_THINKS : 1
COMMENT_FINDINGS : 1
SATURATION_PER : 1
CONDITION_AT : 1
HR_WOULD : 1
STATES_SHOULD : 1
HAMLIN_LMSW : 3
CONTROL_AND : 1
SCHEDULING_HE : 1
YOUR_OBSERVATION : 1
NO_NO : 4
AND_AS : 3
MOST_WITH : 1
RECEPTIVE_TO : 1
BEHAVIOR_LFTS : 1
RELEIVED_GOOD : 1
NO_DISCOMFORT : 1
CM_EYE : 1
VETERAN_SPENDING : 1
PUFFS_ADDENDUM : 1
AGREES_DANGER : 1
THE_TH : 2
EMERGENCY_ROOM : 1
IS_RALLY : 1
RESP_BP : 1
CARE_SINCE : 1
BY_DENVER : 1
THINKS_PATIENT : 1
THE_HAVING : 1
PATIENT_TO : 5
HE_DONE : 1
PATIENT_CONTACT : 1
IMMUNIZATIONS_FLU : 1
ANY_PSYCHOTHERAPY : 1
MAY_ST : 1
PHYSICIAN_HEMATOMA : 1
ARRANGE_APT : 1
LAST_NURSING : 1
YOU_IN : 1
BREATH_CLEAR : 1
WHICH_OTHERWISE : 1
RECRUITMENT_IN : 1
SO_MORNING : 1
PCP_MARCO : 1
SHE_NOT : 2
PAIN_OF : 2
TIW_PT : 1
CONTACTED_ANA : 1
MODALITIES_NEEDS : 1
TO_NURSING : 1
ASSESSMENTIS_LOW : 1
WITH_NARCOTIC : 1
SO_THAT : 1
SOUNDS_PREOPERATIVE : 1
TOTAL_APPT : 1
MCG_FALL : 1
INDEX_PULMONARY : 1
SUPPLIES_PATIENT : 1
WITH_AND : 4
WELLBUTRIN_WILL : 1
IN_THERAPEUTIC : 1
PATIENT_ANY : 1
ITCHING_PINS : 1
PARTIES_WHERE : 1
SWOLLEN_WEEK : 1
HUMANA_THE : 1
HAS_SEEN : 1
MORPHINE_ENOUGH : 1
TO_LESION : 1
INSTRUCTIONS_OD : 1
DATA_BASE : 1
RESIST_VETERANS : 1
THIS_BACTRIM : 1
THE_HE : 3
NEGATIVE_NAME : 1
UNIT_TO : 1
AND_VM : 1
TO_WITH : 3
IDENTIFIED_CALL : 1
RECENT_COMMENT : 1
OF_ANESTHESIA : 1
FOR_ELOPEMENT : 1
LIKELY_WITH : 1
FOR_PHOTOGRAPHY : 1
IN_RECENTLY : 1
CONSTIPATION_LEARNING : 1
IN_DURING : 1
MY_PRACTITIONER : 3
FAMILY_COMPENSATED : 1
HER_OTHER : 1
VICTIM_ADVOCATE : 1
VIETNAM_BUT : 1
WAS_HOSPITAL : 1
PREVENTION_AGE : 1
CTAB_SECRETION : 1
CORTICAL_NS : 1
NONTENDER_NONDISTENDED : 1
WITH_ARM : 1
CLC_CONCERN : 1
OF_BY : 1
EYES_ACTIVE : 1
UNTIL_EVENING : 1
OF_WITH : 2
AND_APNEA : 1
WAS_EXAMINED : 1
WITH_WRITER : 1
ED_PT : 1
OF_TRACER : 1
IS_RISK : 1
PT_ALSO : 1
IS_SIGNIFICANT : 1
MARCH_APRIL : 1
OF_ATION : 1
OTHER_MULTIVITAMINS : 1
NO_ATTENTIVE : 1
MINUTES_PROTOCOL : 1
FOR_PICK : 1
BASCOMPALMER_TOMORROW : 1
PTS_LT : 1
AND_ACQUAINTANCES : 1
ASSESSMENT_AND : 1
IS_TO : 6
OF_RECENT : 1
HIS_RECORD : 1
CONTROL_HOSPITALIZATION : 1
ADDENDUM_YOU : 1
PERTINENT_SAW : 1
ONE_REQUIRED : 1
RECEIVED_PAIN : 1
WAS_OF : 2
ER_BY : 1
RESTORATIVE_NO : 1
BE_CONSENT : 1
UNSCHEDULED_FALL : 1
VISIT_CHAPLAIN : 1
AND_DISEASE : 1
HE_MISSED : 1
WKS_ON : 1
APNEA_CONSULT : 1
MAILED_VET : 1
IN_SERVICE : 1
LIQUID_PT : 1
INPATIENT_AND : 1
HAS_FREQUENT : 1
SELF_PATIENT : 1
TRUS_FINDINGS : 1
TEMPERATURE_HP : 1
PT_ALLOW : 1
THE_MEDICATION : 1
JULY_USES : 1
CELL_NO : 1
HIS_TO : 2
SHE_EXTREMELY : 2
PROVIDED_ADDITION : 1
LMSW_OF : 1
POINT_HER : 1
NOW_HOUR : 1
FOR_HIM : 2
DD_ALERT : 1
THE_LEFT : 1
PAST_YRS : 1
PATIENT_NOT : 4
WITHOUT_PH : 1
BONNIE_HAGGERTY : 1
HOUSING_IM : 1
RIGHT_SOUNDS : 1
NOT_ANY : 2
CONTINUE_DOSE : 1
COMMENT_SPECIMEN : 1
WAS_ASSISTANCE : 1
DURING_ACTIVITY : 1
PHOTO_OF : 1
PHONE_REGARDING : 1
REPORTED_MA : 1
WERE_FAIR : 1
SYMPTOMS_THE : 1
PROVIDED_TO : 1
REFLUX_ADDENDUM : 1
AROUND_AREA : 1
BARRIERS_PT : 1
RESIDENT_ROOM : 2
FILED_CARE : 1
QUIT_WATCHING : 1
NUMBER_PER : 1
WHILE_REMAINS : 1
AND_RIGHT : 1
LAST_WED : 1
RETURN_YOUR : 1
OF_CSAC : 1
PULSE_TEMPERATURE : 1
THE_SAME : 1
CONSULT_EXTENDING : 1
SCOPOLAMINE_SOLN : 1
PT_WITH : 3
AND_CORRECT : 1
TO_SHUTDOWN : 1
TREATMENT_COORDINATOR : 1
STATED_THAT : 10
ELIGIBILITY_VI : 1
INJURY_OTHER : 1
GOAL_THE : 1
SCHOSOME_STATE : 1
IDENTIFYING_SWER : 1
THE_PAIN : 1
BLIND_REHABILITATION : 2
TIMES_PROCEDURE : 1
ING_TO : 1
PT_INTERDISCIPLINARY : 1
FUNCTIONAL_MET : 1
RENEWAL_YOWM : 1
PROVIDE_AND : 2
LAB_BEFORE : 1
UNKNOWN_PROGRESS : 1
PROVIDER_ED : 1
SC_PATIENT : 1
DAILY_LIVING : 2
OF_EDUCATION : 1
COUMADIN_PREVIOUS : 1
HAS_CAPACITY : 2
HAVE_SIX : 1
INTOXICATION_IN : 1
PAIN_REASSESSMENT : 1
AGE_GENDER : 1
RELATIONSHIP_ALSO : 1
METHADONE_LIN : 1
DURATION_PAIN : 1
HAVE_THE : 3
VISUAL_DIPLOPLIA : 1
TH_STATE : 1
IT_WAS : 3
NOSHOW_EDUCATION : 1
TO_DENIES : 1
LIFE_DEATH : 1
SHIFT_THE : 1
DOCUMENTING_THEIR : 1
OF_NEED : 1
WAS_ADVISED : 1
PRASHANT_TEMPERATURE : 1
MIAMI_FEE : 1
NURSE_DEDRA : 1
NO_STAFF : 1
IN_BUT : 1
PAIN_MED : 1
RESP_PAIN : 2
MAY_THE : 1
PROVENTIL_MEALS : 1
INFLUENZA_NICOTINE : 1
DISCOURAGED_AM : 1
IN_PATIENTS : 1
WELL_COUNSELING : 1
YOU_NO : 1
IS_MAINTAINING : 1
HOME_OR : 1
DISCHARGED_SCHEDULED : 1
REQUEST_VET : 1
FOR_WEDNES : 1
AT_BEDSIDE : 1
ETOH_OR : 1
GROUPS_WEIGHT : 1
BUT_OT : 1
CAN_MADE : 1
FOR_SURGERY : 1
EXTREME_READER : 2
NURSING_ADL : 1
MOBILITY_OF : 1
KEPT_LOG : 1
SPOKE_LENGTH : 1
MS_PROVIDED : 1
REPORTS_SPENDING : 1
NIGHT_SURGERY : 1
WE_DISCUSSED : 1
RIGHT_ARTH : 1
AND_CELLULAR : 1
TKA_EXPECTATIONS : 1
DIABETES_CASE : 1
UDS_FOR : 1
DEAR_MS : 2
CONSULTSOAP_NKA : 1
APPT_RTC : 1
VETERAN_REPORTS : 3
FEVERS_LIKELY : 1
INPATIENT_ADMISSION : 1
PATIENT_NO : 3
DOB_PHYSICAL : 1
FOR_TRANSITIONAL : 1
ELECTRONICALLY_ZZPATIENT : 1
ASSISTANCE_OVERSIGHT : 1
GASTRITIS_AND : 1
DENIED_OF : 1
NEEDS_IT : 1
HIS_INDIVIDUAL : 1
DIRECT_SINCE : 1
HE_BE : 1
PATTERNS_AND : 1
UP_HIS : 1
CRITERIA_AND : 1
IS_DEPRESSED : 1
DIAGNOSIS_RECHECK : 1
AND_SAT : 1
FOLLOWING_WERE : 1
IN_COMFORT : 1
THE_WHEN : 1
PARTICULAR_INSIDE : 1
THE_INFORMATION : 1
SOCIAL_WORK : 2
RESIDENT_PERSONALLY : 1
ALSO_BP : 1
PVT_AND : 1
PL_ING : 2
GIVEN_TO : 2
VACCINATION_TO : 1
DECLINES_IMMUNIZATION : 1
BLOODY_CLAY : 1
PAIN_CHAINS : 1
IF_HAS : 1
HE_STATED : 2
CHANGES_ORIENTED : 1
DONE_SHOWED : 1
PSYCHOLOGIST_SOCIAL : 1
MESKENAS_MA : 1
EMERGED_IN : 1
OF_CONTINUE : 1
KIN_MON : 1
OF_SUICIDE : 1
MIDNIGHT_REPORT : 1
AGE_THEN : 1
HE_IS : 13
HE_EPIS : 1
MORNING_DUE : 1
SATURATION_PULSE : 1
CONSULT_SUPPORT : 1
PREVIOUS_CHART : 1
REPORTED_WHEN : 1
IT_HE : 3
SEEN_WITH : 3
WAS_STARTED : 1
HAS_STRONG : 1
PRACTITIONER_YOUR : 1
HIS_FLIGHT : 1
SKIN_ASSESSMENT : 1
DEFICIT_PROCEDURE : 1
ANYONE_ELSE : 1
CBSST_GROUP : 1
DOSAGES_WILL : 1
REAL_IF : 1
TO_AND : 8
SITE_IS : 1
PERSON_INSTRUCTED : 1
CALL_WEEK : 1
ASSISTANCE_SET : 2
SKILLS_VETERAN : 1
EDUC_YOUR : 1
SEEN_IN : 2
SIDE_EFFECTS : 1
AND_AUTHOR : 1
HRS_STAFF : 1
CONDITION_DEAR : 1
DRINK_WATER : 1
YOURSELF_ANYONE : 1
SCOPOLAMINE_OPHT : 1
SACKER_MALE : 1
HP_UPDATE : 1
SHOW_FOR : 1
STATE_PT : 1
HEALTH_SCREEN : 1
DISCUSSED_OF : 2
AN_NSC : 1
AN_ACTIVE : 1
ANXIETY_THIS : 1
REVIEW_HIS : 1
OR_STAFF : 1
THE_DTC : 1
NOX_ADMINISTRATION : 1
CSAC_CPS : 1
AS_LISTED : 1
OF_CHEN : 1
HIS_FAMILY : 1
MS_YO : 1
TAMSULOSIN_MEDICAL : 1
NURSING_PLAN : 1
NOTIFIED_VIEWED : 1
IOP_STATES : 1
PREVIOUS_HISTORY : 1
OBJECTIVES_WERE : 1
HE_RELIEVED : 1
PROCEDURE_REQUESTING : 1
DEPRESSION_MOOD : 1
NATURE_RELATING : 1
IS_PROGRESS : 1
LFTS_CELL : 1
HPI_WITH : 1
EXTRA_FLUIDS : 1
FINGER_NOTIFIED : 1
STANDING_THE : 1
ATTORNEY_HAS : 1
ESOPHAGEAL_ADDENDUM : 1
TO_GET : 3
CANCELLED_PATIENT : 1
VERY_INTERVENTION : 1
NKA_ADDENDUM : 1
INSPECTION_NO : 1
HIS_ANSWERED : 1
NATIVE_AN : 1
PHONE_HE : 1
INTAKE_UPDATE : 1
ORDERED_STATES : 1
WAS_PTSD : 1
SEVERAL_CALLS : 1
OF_EXERCISE : 1
MRI_AT : 1
WAS_AREA : 1
FREQUENT_SUICIDAL : 1
DOES_NOT : 4
OF_KIN : 1
APPROXIMATELY_PATIENT : 1
TO_MOOD : 1
BACK_XYOLCAINE : 1
CURRENT_THOUGHTS : 1
GLAUCOMA_NURSING : 1
APNEA_UROLOGY : 1
HIM_TAPE : 1
SEE_IF : 2
GIVE_AND : 1
DONE_THE : 1
HIGH_TO : 1
YOUR_PAIN : 1
BEFORE_IS : 1
BEEN_SEEN : 1
PHYSICIAN_USES : 1
USER_WAS : 1
MINUTES_THE : 1
ML_THIS : 1
SHUTDOWN_MACHINE : 1
UCINATIONS_PATIENT : 1
NOT_LIKE : 1
PSV_STENOSIS : 2
SESSION_SPIRITUALITY : 1
VISIT_DEC : 1
SESSIONS_REMAINING : 1
NOT_WANT : 2
STRESS_ADENOSINE : 1
OTHER_UNSPEC : 1
VA_PC : 1
REFILL_DIABETES : 1
IN_CLINIC : 3
SPREAD_OBSERVATION : 1
VERIF_IS : 1
FOR_DISCUSSED : 1
PATIENT_PT : 1
SCHEDULED_PHONE : 1
WITHOUT_WIFE : 1
PAST_AND : 2
SAFETY_FOR : 2
POST_PROCEDURE : 1
OPEN_WOUND : 1
ONCWATCH_COLONOSCOPY : 1
GAIT_SHOE : 1
MEETS_FOR : 1
EAST_SCHOSOME : 1
OTHERS_ENGE : 1
COMPLETE_DIRECTIVE : 1
REVIEWED_LABS : 1
AND_PLAY : 1
HOURS_TRY : 1
OPERATIVE_BASCOM : 1
VERIFIED_FULL : 1
AT_VERIFIED : 1
CARE_CONTINUE : 1
TRANSFERRING_MOBILITY : 1
EXERCISEOCC_STILL : 1
THEY_SYMPTOMATIC : 1
CALLER_AREA : 1
SUPPORT_MOSTLY : 1
MANAGER_INITIAL : 1
WITH_CONCURS : 1
ALSO_UDS : 1
PROCEDURE_TASK : 1
FASHION_SHOULD : 1
FIXING_TEETH : 1
HEAD_WERE : 1
IN_ADDITION : 1
MEDS_COMPLETED : 1
SNACKS_VISIT : 1
RESPONDED_WELL : 1
LEG_SAYS : 1
HE_SLEPT : 1
MUCH_IS : 1
WILL_TAPE : 1
STATED_HE : 6
INDEPENDENTLY_HE : 1
BY_THINPREP : 1
ARE_HEARING : 1
WHICH_EXAMINED : 1
FOOTWEAR_NECESSARY : 1
PSYCHOSOCIAL_PATIENTS : 1
DO_NOT : 1
NORMAL_RECRUITMENT : 1
AND_DRAPED : 1
LENGTH_SESSION : 1
CHECK_SUGARUSE : 1
IS_HIGH : 2
PATIENTS_REPORTED : 1
READY_PICK : 1
AND_MEDICATIONS : 1
PROBLEMS_STEPS : 1
NO_DELUSIONS : 2
SESSION_REPORTEDLY : 1
PHONE_TO : 1
HAS_HE : 1
NO_SKILLS : 1
TWO_THE : 1
GLARE_THEN : 1
DENIES_DIFFICULTY : 1
WITHOUT_NEAR : 1
WAS_MAINTAINED : 1
WITH_PSYCHOLOGICAL : 1
ADMISSION_SAFETY : 1
FALL_RISK : 2
BEEN_THE : 1
ILLNESS_MANAGEMENT : 1
NONE_LIST : 1
CALLED_AND : 1
PROGRESS_VETERAN : 2
WIFE_BUT : 1
OJ_CRACKERS : 1
DISCUSSED_ISSUED : 1
CONTINUOUS_DRINKING : 1
HAVE_DIAGNOSED : 1
TOPIC_FOR : 1
OFTEN_DID : 1
NEXT_DUE : 1
WOULD_LIKE : 2
HE_KIND : 1
ORGANIZED_WITHOUT : 1
SON_WILL : 1
HE_THIS : 1
PATIENT_NOTE : 1
THE_THEME : 1
CONDUCT_PSYCHOSOCIAL : 1
IS_WITH : 3
TO_BACTRIM : 1
TO_ADDENDUM : 1
HAVE_REVIEWED : 1
INCLUDING_CSECTIONS : 1
MODERATE_RISK : 2
YOU_NEGATIVE : 1
STATUS_AND : 2
BOTH_SIDES : 1
PT_SETTING : 1
NONE_IF : 1
ARD_ON : 1
UPBEAT_SEVERAL : 1
ADDITION_DESCRIPTION : 1
HEART_STRESS : 1
TAKING_TO : 1
ABUSE_SCREEN : 1
CONGESTION_COUGH : 1
OBESE_AS : 1
ACUTE_UNIT : 1
BASE_IN : 1
FOR_TREATMENT : 2
FOOD_ALLERGIES : 1
WITH_WALKING : 1
AND_ACKNOWLEDGED : 1
THEMSELVES_SOCIAL : 1
AND_FEEL : 2
SHEET_CARDIOVASCULAR : 1
IS_ALTERATION : 1
VISIT_NUMBER : 1
BRUIT_SUPRAPUBIC : 1
IS_EXPECTED : 1
OF_ADMISSION : 1
MEDICATIONS_SIGNS : 1
NECESSARY_PULSE : 1
CABG_BOTH : 1
PNEUMONIA_RX : 1
SURGERY_NUTRITIONINTAKE : 1
HAVE_QUESTIONS : 2
FEELS_DISCOURAGED : 1
STRIPS_OF : 1
TO_FORGETS : 1
ADMINISTRATION_BY : 1
CONTAINERS_COLOR : 1
MAY_STRESS : 1
SEP_RADIATION : 1
WITH_MH : 1
CONTROLLED_HIS : 1
TEMPERATURE_DIAGNOSIS : 1
FOR_ACTIVITIES : 1
MD_CANCELLED : 1
LUNG_SOUNDS : 2
THE_CONSIDER : 1
UNCHANGED_SINCE : 1
EVALUATION_POTENTIAL : 1
WITH_TEAM : 1
ATTENDED_GROUPS : 1
REINFORCED_HIS : 1
MED_IF : 1
STAFF_LE : 1
LOCATION_ALL : 1
ALLERGIES_PENICILLIN : 1
TOMORROW_THURS : 1
APPLICABLE_SUBMIT : 1
SURGERY_INITIATED : 1
NUMBER_STARTING : 1
CGY_MALE : 1
SEE_AND : 1
CM_SLIVER : 2
ADVOCATE_THE : 1
DOSE_PREVIOUS : 1
SESSION_MIN : 1
REGARDING_STATES : 1
FROM_YRS : 1
LACE_CURRENT : 1
RESCHEDULE_APPT : 1
RISK_FOR : 4
GOAL_SETTING : 1
OR_VISUAL : 1
WORKED_ON : 1
FROM_AND : 1
OLD_PRESENTS : 1
OBSERVATION_MG : 1
TV_AND : 1
BEGINNING_OF : 1
WHO_GIVES : 2
ADDENDUM_VETERAN : 1
THAT_SISTER : 1
SERVICES_DIVISION : 1
FUNCTIONING_OR : 1
THIS_TASK : 2
PROVIDER_STATED : 1
ISOLATIVE_INTERACTION : 1
GO_THE : 1
DL_PROVIDER : 1
TIME_TO : 2
SO_AN : 1
CLINIC_NOTE : 3
SKIN_HYPERTENSION : 1
DOSE_OF : 1
TRUCK_PAYMENT : 1
PHOTOGRAPH_PRESSURE : 1
WITH_HE : 1
MEAL_SUPERVISION : 1
WOULD_KILL : 1
MEDICAL_INFORMED : 1
ALLERGIES_NORMAL : 1
SHOULD_ON : 1
OFTEN_HIM : 1
CONSULT_ETOH : 1
BE_AT : 1
FLOW_DRESSES : 1
WITH_INSTRUCTIONS : 1
HERE_SEE : 1
IMPAIRMENT_SCREEN : 1
JOINT_WITH : 1
MONTH_INTERVENTIONS : 1
COORDINATOR_FAIR : 1
HIS_THANKED : 1
AND_BACK : 1
TIME_IN : 1
RESPONSES_DOSE : 1
REAL_AS : 1
EXAMINED_THE : 1
IDEATIONS_PSYCHOTIC : 1
MEDICATIONS_AT : 1
LEAN_MEATS : 1
PERSONAL_URINE : 1
THE_AT : 1
SHE_IS : 4
THURS_CALLS : 1
AND_UP : 2
RM_RESPIRATIONS : 1
DOSE_SEX : 1
YOUR_ACCESS : 1
ADMISSION_BAY : 1
PROVIDER_PURPOSE : 1
IS_SLIGHTLY : 1
THE_MEDICAL : 1
VAMC_MINNEAP : 1
TO_FOR : 4
MENTATION_ADDENDUM : 1
MILIEU_THERAPY : 1
HAS_INVOLVED : 1
UNIT_SERVICE : 1
BP_AVG : 1
TO_THE : 14
RUPTURED_OU : 1
LE_ON : 1
SHE_WORRIED : 1
ASSIST_VETERAN : 1
DERMATOLOGY_CONSULTSOAP : 1
FEMALE_SIGNATURES : 1
RANKINE_REMOVED : 1
PAK_BEER : 1
CONSISTENCY_OF : 4
BY_MOUTH : 8
THE_ABSTINENCE : 1
CONSTIPATION_BLOODY : 1
QUETIAPINE_MG : 1
PRACTITIONER_WILL : 1
EPINEPHRINE_THIS : 1
MODALITIES_PT : 1
BECAME_COMMENT : 1
TEAM_WITH : 1
ED_IMAGE : 1
KNEE_SURGERY : 1
BS_SHOE : 1
MULTIVITAMINS_GARLIC : 1
TRANSFER_SUPERVISION : 1
OVERSIGHT_ENCOURAGEMENT : 3
MG_IM : 1
CONTROL_PANEL : 1
ADMISSION_NOTE : 1
WALKIN_WITH : 1
PATIENT_GO : 1
SHAKING_HAND : 1
LEFT_FOR : 1
THERAPEUTIC_ENVIRONMENT : 1
ADDENDUM_DENIES : 1
HER_HAS : 1
AFFECT_UNRE : 1
TEMPERATURE_INVOLVED : 1
THIS_MEDICATIONS : 1
FULL_STATED : 1
HERE_HOSPITAL : 1
HIS_EMERGED : 1
QUESTIONNAIRE_VET : 1
WIFE_SHE : 1
MD_MIAMI : 1
ATE_APPROX : 1
TRY_GET : 1
ACTIVE_APPOINTMENTS : 1
SHOULD_LOCULATED : 1
PL_TO : 1
HERE_THE : 1
MEMBERS_THEMSELVES : 1
WEEK_REQUEST : 1
VISION_POOR : 1
AND_LINFLUENZA : 1
TEXAS_TAKING : 1
001_HIM : 1
REGULAR_CALL : 1
MADE_PT : 1
REASON_FOR : 4
AND_MEDICATION : 1
BREAK_THE : 1
SUBJECTIVE_FEMALE : 1
WITH_BLUNTED : 1
UNLESS_BY : 1
WILL_SUBMIT : 1
NOTE_HE : 2
TAKE_TABLET : 5
AND_AT : 3
HES_BE : 1
UNDERSTANDING_PLAN : 1
DELUSIONAL_INSIGHT : 1
ANTERIOR_LATERAL : 1
WITH_ASSOCIATED : 1
NOT_THAT : 2
NOS_PT : 1
PT_CONGESTION : 1
RESTARTING_WARFARIN : 1
REPORT_MDS : 1
OR_YEAR : 1
OR_PATIENT : 3
THERAPIST_SERVICES : 1
KIND_AN : 1
NAME_SOCIAL : 2
AS_THE : 3
CENTER_NOTE : 2
AS_BENEFITS : 1
PROVIDER_CLOZAPINE : 1
TIMES_THREE : 1
PRESENTS_IN : 1
APPT_FOR : 1
RISK_PROVENTIL : 1
DENTAL_AND : 1
SEEN_FOR : 1
AND_MANAGEMENT : 1
STARTING_AT : 1
SHIFT_FEEDING : 1
TO_STAFF : 1
LE_AND : 1
THE_THE : 2
TAUGHT_DISCUSSED : 1
WILL_NEXT : 1
AUG_MHC : 1
IT_MOST : 1
PREVIOUS_PNEUMONIA : 1
INJECTION_DUE : 1
THAT_WAS : 2
TO_SEATTLE : 1
IN_USUAL : 1
FIND_PATIENT : 1
REFER_TO : 1
WATER_PATIENT : 1
NOT_FAMILY : 1
DISJOINTED_TIMES : 1
AND_IUD : 1
BLIND_DATA : 1
POOR_AND : 1
MALIGNANCY_IN : 1
OF_PATIENT : 1
HOSPITAL_ADMISSION : 1
VIEW_ACTIVE : 1
AROUDN_HEARING : 1
AND_DECOMPRESSION : 1
IN_TRAINING : 1
BLOOD_OR : 1
OBSERVED_CONTENT : 1
EXAMINED_ON : 1
AND_FOR : 2
APPROACH_REPORTED : 1
NEXT_VISIT : 1
FOR_TASK : 2
BREAKFAST_DRINKS : 1
BP_PHYSICAL : 1
RXS_INPATIENT : 1
WITH_OF : 4
BY_NURSING : 1
ALONG_BY : 1
MOTION_LUNG : 1
AND_HIM : 1
FEARFUL_OF : 1
TIMES_STARES : 1
SCREEN_QUESTIONNAIRE : 1
PHONE_YRS : 1
VISITS_FOR : 1
BY_ARNP : 1
THEM_HOW : 1
SYMPTOMS_AND : 1
UNRE_ABLE : 2
ARE_PRURITIC : 1
MALE_OF : 1
FOR_PROMOTION : 1
HAVE_COLONOSCOPY : 1
REMAINS_DISJOINTED : 1
VISITING_THE : 1
PATIENT_THEY : 1
ANTERIOR_FUNCTION : 1
INJECTION_OF : 2
TOXICOLOGY_BEFORE : 1
ATROVENT_MEALS : 1
BUT_PT : 1
THE_LAWN : 1
REVIEWED_NPO : 1
BP_UNCONTROLLED : 1
CONVERSATION_HE : 1
WPB_AND : 1
LEVOTHYROXINE_MG : 1
AND_NOT : 1
HPI_IS : 1
PHONE_HEALTH : 1
SURGERY_PATIENT : 1
ADDITION_TO : 1
TECH_INTAKE : 1
MANUAL_SKILLS : 1
AGE_PATIENT : 1
BEEN_ADVERSE : 1
RELATIONSHIP_HIS : 1
CINNAMON_AGE : 1
OTHER_AND : 1
GENDER_ASSESSMENTIS : 1
TO_PLACE : 1
SESSION_LENGTH : 1
MASS_PULSE : 1
COURT_REFRACTION : 1
OR_ABUSE : 1
AMBULATORY_WHEELCHAIR : 1
OF_PERSONS : 1
CONTROLLED_AND : 1
TRAIN_IS : 1
LEFT_PLANO : 1
STATES_MY : 1
OBSERVATION_PHYSICIAN : 1
CATCH_COLLECTION : 1
TYPE_REFILL : 1
YOUR_CARE : 1
ADDENDUM_MN : 1
UNKNOWN_NURSING : 1
SLIVER_NO : 1
ST_TO : 1
DRINKING_HE : 1
WORSE_THAN : 1
MH_CARE : 1
GIVEN_PO : 1
ON_THAT : 1
ASSISTANCE_UP : 2
GARLIC_TAB : 1
RECEIVED_ON : 1
COMFORTABLE_TO : 1
READY_LEARN : 1
TO_REST : 1
TRY_CARE : 1
GOOD_WHICH : 1
PT_FAIR : 1
NO_IT : 1
SUBSTANCE_PSYCHOTIC : 1
TOTAL_AMOUNT : 1
NORTH_SSOME : 1
DISEASE_AGE : 1
CLOZAPINE_MYLAN : 2
OFFER_TO : 1
COORDINATOR_SELF : 1
OJ_COMMUNICATION : 1
TREMOR_ARMS : 1
IN_MINNEAP : 1
FACTORS_SHIFT : 1
CAREGIVER_DRIVER : 1
MANAGER_VISIT : 1
MD_AT : 1
LIVING_HIP : 1
TO_SURE : 1
DIAGNOSES_DEPRESS : 1
STAY_FROM : 1
OF_ACHING : 1
STATED_LIKE : 1
REPAIRED_GLOBES : 1
COMES_BACK : 1
APPLICABLE_MEAL : 1
VOICES_STATES : 1
AREA_GONE : 1
CUTTING_MEAT : 2
AND_PROGNOSIS : 1
BY_TWICE : 2
HO_NONTENDER : 1
ON_ROUTE : 1
SEEN_AT : 1
CONCURRENT_USE : 1
BX_THERAPY : 1
DRINKING_UNIT : 1
RESPIRATORY_TREATMENT : 1
ACTIVITY_PAIN : 1
TREATMENT_RECORD : 1
FORMAL_ASSESSMENT : 1
IN_THROUGH : 1
IF_ADR : 1
CALL_NARCOTIC : 1
MOBILITY_SNACKS : 1
ON_LEATHER : 1
SWOLLEN_PAINFUL : 1
ASSOCIATED_PSYCHOLOGICAL : 1
ROOM_NUMBER : 1
VETERAN_AND : 1
TO_MY : 1
FEB_IF : 1
TREATMENT_IF : 1
GAINING_PMH : 1
RETURN_TO : 1
MAIL_HIM : 1
NOTE_09 : 1
VIOLATING_THIS : 1
HAS_ON : 1
HOSPITALIZATION_ACTIVE : 1
NOT_SNACKS : 1
NONE_NURSING : 1
LIKE_THE : 1
ANYTHING_THAT : 1
SNACKS_ELECTRONICALLY : 1
THE_ANTICOAGULANT : 1
EXERCISE_CONTROL : 1
VIEW_THE : 1
IS_SCALE : 1
PERSONAL_ITEMS : 1
CASE_NOTE : 1
BETTER_DIABETES : 1
STOOL_REPORT : 1
THE_PERSONALLY : 1
STEPS_SPIRITUALITY : 2
WAS_THIS : 1
NOTE_BAKER : 1
OF_PULSE : 1
PHONE_WITHOUT : 1
RALLY_CAP : 1
HYPOKALEMIA_ICDCM : 1
WAS_STATES : 1
WHICH_GOING : 1
PROVIDE_THERAPY : 1
TH_STREET : 1
LEAD_ING : 1
STAFF_RECENTLY : 1
STOOL_OTHER : 1
PRESENTS_FOR : 1
OF_DEPRESSION : 1
FROM_SUBSTANCES : 1
OF_EVERY : 1
SEE_OTHER : 1
COPD_INFORMED : 1
TEAM_ENTERED : 1
VISION_IN : 1
REHABILITATION_DATA : 1
HE_UP : 1
IDENTIFIED_LB : 1
NOT_NY : 1
CHANGES_PRIMARY : 1
REGARDING_DECISIONMAKING : 1
PAIN_TO : 2
ONE_LOW : 1
OR_AS : 1
AIR_CTAB : 1
DEGREE_SC : 1
AND_PHYSICIAN : 1
APPT_AND : 1
PSYCHOLOGICAL_NONTENDER : 1
UPPER_WHICH : 1
SOUNDED_RELIEVED : 1
BLOOD_HISTORY : 1
MATERIAL_OMEPRAZOLE : 1
HOW_OFTEN : 1
DISTURBING_CIWA : 1
GOOD_INSIGHT : 1
SPECIMEN_HAS : 1
AND_APPRECIATIVE : 1
KNOWLEDGE_OF : 1
SWS_DATED : 1
LENGTH_ON : 1
GOING_HE : 1
AND_SYMPTOM : 1
PHOTO_TOENAILS : 1
NONE_YEARS : 1
AND_LATERAL : 1
FORGETS_TO : 1
SMOKING_VETERAN : 1
HAS_POSITIVE : 1
LB_KG : 3
POSTIVE_NO : 1
MAINTAINANCE_METHADONE : 1
TRAVATAN_QHS : 1
SUPERVISION_ALBUTEROL : 1
CONCENTRATING_HAS : 1
POOR_PROGNOSIS : 1
WITH_RN : 1
THIS_NOW : 1
PINS_NEEDLES : 2
PSYCHOS_ACTIVITIES : 1
CHEST_BUT : 1
AND_AROUDN : 1
HIM_THEY : 1
TKA_PUPILS : 1
BE_BY : 1
BED_STAFF : 1
ROUNDS_CO : 1
LOW_TEENS : 1
EXCISION_POSTOCCIPITAL : 1
MIDNIGHT_POLYSOMNOGRAPHY : 1
HIM_BE : 2
STARTING_TO : 1
DIAGNOSED_WITH : 1
IS_STAFF : 1
ON_IMAGE : 1
IN_REACTION : 1
LIN_IS : 1
RESTED_LITTLE : 1
ON_DEATH : 1
SKIN_IDENTIFYING : 1
COLOR_CLEAR : 2
IS_FEARFUL : 1
FOR_POSTTRAUMATIC : 1
THE_LIGHT : 1
VERIFY_CLICK : 1
IS_TOTAL : 1
SUPPLIES_LAST : 1
SUPPORT_THOUGHTS : 1
AND_VIEWED : 1
NO_ERYTHEMA : 1
SINCE_LAST : 2
OLD_MALE : 2
IN_PAST : 5
ACTION_THIS : 1
PLAN_NOT : 1
GLAUCOMA_OD : 1
PATIENT_PROBLEM : 1
RECENTLY_EXPIRED : 1
EXPRESSED_THE : 1
OF_FOOD : 1
AT_REQUEST : 2
BASELINE_COGNITIVE : 1
LEVEL_AND : 1
CRADC_LMSW : 1
HISTORY_AGE : 1
SUBMITTED_BUT : 1
AMBULATORY_AIDS : 1
NEED_FOR : 1
SERVICE_CONNECTED : 1
ELIMINATION_FOR : 1
NEW_GLASSES : 1
THIS_POINT : 1
MED_ARE : 1
STANDING_AND : 1
TRANSFER_AND : 1
MINUTES_WAS : 1
THERAPY_TREATMENT : 1
THE_SERVICES : 1
MINUTES_ATYPICAL : 1
HIS_SOCIAL : 1
PREVENTIVE_EDUC : 1
HELP_INTERVENTIONS : 1
PREVIOUSLY_COORDINATOR : 1
OF_LIGHT : 1
WHO_UNCIRCUMCISED : 1
FAR_PLAN : 1
CITALOPRAM_TAB : 1
DEP_IN : 1
STOPS_AND : 1
MR_ARRIVED : 1
DISCHARGE_VISIT : 1
URGENCY_HEMATURIA : 1
TO_GO : 2
SIT_SCALP : 1
YOU_HAVE : 6
UPPER_RIGHT : 1
ASSESSMENT_WRIST : 1
ONE_SURFACEANTERIOR : 2
TO_IF : 4
VETERAN_LIKE : 1
OPENING_URINE : 1
AMOUNT_SCHEDULED : 1
EXAMINATION_THE : 1
LIST_PT : 1
FOR_PVD : 1
ASSISTANT_ADL : 1
REFERRAL_TESTING : 1
MONTHS_ASSISTANT : 1
OVER_ADVERSE : 1
RECONCILIATION_LISTED : 1
RELAXED_THROUGH : 1
BY_CHOOSING : 1
BP_HTN : 1
CALL_COMMENT : 1
CANE_VOIDING : 1
DISCHARGED_HOME : 1
DETAILS_WT : 1
RISK_ELOPEMENT : 1
VISIT_PHYSICIAN : 1
ANTERIOR_MEDIAL : 1
MET_PER : 1
YOU_HEALTH : 1
ADDENDUM_CONSIDERATIONS : 1
MINNEAP_AND : 1
HAS_POSSIBLE : 1
NO_THE : 1
INSIGHT_JUDGMENT : 1
BLADDER_OF : 1
PAIN_REASON : 1
AWAY_FROM : 1
MENTAL_HEALTH : 4
BEEN_MUCH : 1
FLEXERIL_GIVEN : 1
IN_CURRENT : 1
USES_USED : 1
ON_LT : 1
CAP_INHL : 1
MUCH_COMPLETED : 1
JOINT_OF : 1
INJECTION_JOINT : 1
VOLUNTARY_ADMISSION : 1
WENT_SEATTLE : 1
BE_ON : 2
ONE_PERSON : 1
PATRICIA_PHONE : 1
PATIENT_PHONE : 4
PT_REMAINS : 1
THE_MRI : 1
NOTE_FACILITY : 1
PATPU_PHONE : 1
TO_PARTICIPATE : 1
VOL_TO : 1
FLUID_SNACKS : 1
WHO_ENGE : 1
CONVERSATION_LIN : 1
LETTER_MAILED : 1
SHOWER_REFUSED : 1
CONSIDER_IF : 1
YEAR_OLD : 2
ORDER_SCAN : 1
OVERWEIGHT_OBESE : 1
EVERY_BEHAVIOR : 1
HALF_THROUGH : 1
WERE_USED : 1
CO_MMOL : 1
AREA_LENGTH : 1
SIGNALS_PSV : 1
DO_FRIGHTEN : 1
ACEI_TITRATED : 1
EDV_STENOSIS : 2
ABOUT_OR : 1
IS_FOR : 4
HE_TEL : 1
BY_NO : 1
RADIATION_THERAPIST : 1
PATIENT_DOB : 1
IDENTIFIED_ABD : 1
THE_AMOUNT : 1
IS_BEING : 1
AND_MILIEU : 1
MARRIED_SACKER : 1
SEE_IT : 1
COHERENT_AND : 1
SSOME_STATE : 1
AR_IN : 2
AT_HIS : 1
STAFF_PROMPTED : 1
LONG_PERIODS : 1
STORIES_OF : 1
ALSO_IS : 1
SIDE_OF : 1
CANCELLED_BY : 1
DAILY_THERAPY : 1
ANXIETY_WITHDRAWAL : 1
LEAD_SC : 1
PARKINSON_ICDCM : 1
HELPS_SHE : 1
READING_ILL : 1
HIS_TEETH : 1
THROUGH_NEEDLE : 1
CLEAN_PHYSICIAN : 1
SUBMIT_REQUIRED : 1
TEMP_RESP : 1
AMOUNT_APPT : 1
IN_ANTERIOR : 1
USE_ADVISED : 1
WILL_REFER : 1
VIOLATION_IS : 1
TAXI_MAILED : 1
AND_DINNER : 1
ANYONE_NO : 1
AND_SPREAD : 1
UNEMPLOYMENT_IN : 1
HIS_REMAINS : 1
TAKING_HOURS : 1
OOZING_OR : 1
RECENTLY_OUTPATIENT : 1
IS_TEARFUL : 3
TO_MEDICATION : 1
STANDARD_DIABETOLOGY : 1
DATE_TIME : 2
LIST_SWOLLEN : 1
WANTS_ALBUTEROL : 1
TO_RECHECK : 1
TOBACCO_PRODUCT : 1
INTERESTED_IN : 1
POTENTIAL_INCREASED : 1
ROOMED_APPROPRIATELY : 1
DISCHARGE_CHECK : 1
SC_SELENIUM : 1
CONSENT_OBTAINED : 1
WK_RESCHEDULED : 1
FOR_INFORMATION : 1
ADVERSE_SIDE : 1
REPORT_YOU : 1
RISK_OF : 1
SURGICAL_HISTORY : 1
VENOUS_MENTATION : 1
MORE_FISH : 1
EPIS_WHERE : 1
SITE_PAIN : 2
VAMC_REPORTS : 1
VET_UPBEAT : 1
AWOKE_OVER : 1
ABD_NONTENDER : 1
BE_INFORMED : 1
FEMALE_PRESENTS : 1
REACTION_NO : 2
DECLINES_INFLUENZA : 1
DOCUMENT_TO : 1
LEFT_ION : 1
CURRENTLY_NO : 1
NO_HI : 1
MS_YEARS : 1
REQUIRES_HOUR : 1
PRN_AND : 1
ROUTE_TO : 1
ABOUT_CARE : 1
KNOW_HE : 1
EXCELLENT_NO : 1
FOV_OS : 1
EMERGENCY_NOTE : 1
COMPLETED_SEVERAL : 1
APPT_MAILED : 1
MOBILITY_TRANSFER : 1
FOR_THIS : 3
AND_OR : 6
QUALITY_RIGHTSORE : 1
LENGTH_PLAN : 1
OF_URINE : 1
MYLAN_TAKE : 2
REPORTS_TO : 1
IS_OF : 2
EXPRESS_IN : 1
CAP_MCG : 1
REPORT_RESPIRATION : 1
TOOTH_QUESTION : 1
OBESITY_HTN : 1
THOUGHTS_BY : 1
OF_HE : 3
THIS_NUMBER : 1
PERSONAL_AT : 1
ETOH_NONE : 1
INSIDE_STORIES : 1
STRESS_VACCINATION : 1
OR_FAMILY : 1
REPORTS_PAIN : 1
KNEE_AND : 1
INCLUDED_MID : 1
FLUID_VOLUME : 1
COMPLAINTS_EXC : 1
COMMENTS_ATROVENT : 1
PLACE_ELIMINATION : 1
SWELLING_ABUSE : 1
MONTH_BEEN : 1
WORK_CLOSELY : 1
HIS_HEALTH : 1
CAL_RECONCILIATION : 1
BEEN_INVOLVED : 1
OF_LIFE : 1
ADDRESS_THEM : 1
RXS_ORDERS : 1
SC_FOR : 1
VERBAL_JOINT : 1
SC_DOCUMENT : 1
UPPER_BACK : 1
SON_RACE : 1
OCR_DETERMINE : 1
BE_FOR : 1
ALLERGIC_CHO : 1
ARTHROPLASTY_TKA : 1
OIL_FLAX : 2
STRUCK_PATIENT : 1
TO_SCHEDULED : 1
ATE_OF : 1
CALL_AT : 1
THESE_PAIN : 1
CHANGES_ONCE : 1
IMPROVED_GAIT : 2
CIRCUMCISION_INVOLVES : 1
PHONE_CELL : 1
GAIT_DURING : 1
VITALS_RECORD : 1
WHEN_DENIED : 1
EPIS_FEELS : 1
WHILE_HIS : 1
MEALS_ADL : 1
MEDICALLY_CONTINUE : 1
POSTOCCIPITAL_SEBACEOUS : 1
PLACE_DECLINED : 1
HIGHS_DESCRIBED : 1
TABLET_BY : 5
SHOES_AT : 1
ALTERATION_MIN : 1
STRUCTURED_SERVICES : 1
WITH_SYMPTOMS : 2
SPIRITUALITY_ORIENTATION : 2
BPH_IS : 1
OR_SKIN : 2
ADMIT_TO : 1
SHOULDER_ALSO : 1
SKIN_RESP : 1
FUNCTIONAL_PATIENT : 1
PATIENT_SEEN : 3
LIFE_THE : 1
PROTOCOL_MG : 1
VERBAL_WITH : 1
OLD_PATIENT : 1
WIFE_HE : 1
AGITATED_AND : 1
DID_ADMIT : 1
COLON_OBESITY : 1
HE_AND : 1
PROBLEM_FLUID : 1
MEDICATIONS_OUTPATIENT : 1
HIS_NEGATIVISM : 1
MEDICATIONS_LUNCH : 1
PRACTITIONER_BELL : 1
COVER_UNTIL : 1
NOTIFY_PATIENT : 1
RECENT_THESE : 1
SACKER_PSYCHOSIS : 1
SYMPTOMS_SYMPTOMS : 1
ED_ETC : 1
HE_PERSONAL : 1
TO_FLORIDA : 2
HIS_NO : 1
CONFIDENTIALITY_THIS : 1
HE_FEARFUL : 1
WITH_PEERS : 2
FELL_IN : 1
BETTER_VS : 1
METHADONE_SEEN : 1
TO_PLEASANT : 1
PROVIDER_NOTE : 1
AN_APPOINTMENT : 2
VISIT_DENT : 1
DEPRESSED_RECENTLY : 1
NEGATIVE_AUG : 1
ANXIETY_AND : 2
PROVIDER_BAKER : 1
INTAKE_DT : 1
EXERCISEOCC_AEROBICS : 1
GASTROESOPHAGEAL_REFLUX : 1
UNIT_ENCOURAGE : 1
AGREE_WITH : 1
CLICK_THE : 1
EDUCATION_LPN : 1
ABOUT_ILL : 1
LEVEL_THAN : 1
HIS_LEG : 1
BASCOM_PALMER : 4
SHEET_GOAL : 1
CHIEF_OF : 2
CHARACTER_TO : 1
POULTRY_PLEASE : 1
BEEN_RECONCILED : 1
EYE_INSTITUTE : 3
QUIT_TV : 1
WITH_WHO : 1
DISPOSITION_PTS : 1
THEY_YOU : 1
LAB_FINDINGS : 1
NY_SHE : 1
YEAR_LENGTH : 1
TENDERNESS_ARE : 1
CHECK_OUT : 1
BY_RESPIRATION : 1
NO_AND : 1
IMAGING_SC : 1
HAD_HEALTH : 1
DECREASE_YEARS : 1
TO_PATIO : 1
LOW_PAIN : 1
MOOD_POSTERIOR : 1
WHERE_FEELS : 1
OF_REASON : 1
OBESITY_HYPERLIPIDEMIA : 2
IN_WPB : 1
PROBLEMS_AT : 1
IS_GIVEN : 1
MORE_POULTRY : 1
PROBLEMS_ADDENDUM : 1
HOUSING_MARY : 1
PATIENT_SERVICE : 1
FILL_MAIL : 1
LISTED_BEEN : 1
SHE_UTI : 1
FOR_OF : 2
WOULD_TO : 2
TIME_IDENTIFIED : 1
TAKING_THAT : 1
OF_HAS : 2
HOW_DO : 1
FEE_UNSPECIFIED : 1
WILL_GIVE : 1
OUTPATIENT_OF : 1
BEFORE_NOON : 1
STATES_THAT : 2
WITH_YEARS : 1
MIAMI_REPORTED : 1
DIRECTIVE_DELUSIONS : 1
KEY_GOOD : 1
LIVES_IN : 1
AND_SCHEDULED : 1
AMBIGUOUS_IF : 1
BEGIN_CURRENT : 1
ENCOURAGEMENT_OR : 3
ASSISTED_RESIDENT : 1
SAW_THE : 1
DRINKS_PATIENT : 2
CRACKERS_THOUGHTS : 1
PHYSICAL_DUE : 1
LB_HEIGHT : 1
WITH_PATIENT : 6
FORMAT_NUMBER : 1
CORRECT_SURGERY : 1
RISKS_TOBACCO : 1
ETOH_CIRRHOSIS : 2
SHOOTING_BACK : 1
CONNECTING_WITH : 1
OR_USE : 1
BED_SAID : 1
WERE_TO : 1
PAIN_LLE : 1
VIOLATION_POSTED : 1
PICK_PATIENT : 1
ATROVENT_ADL : 1
PRODUCT_PATIENT : 1
POHX_TRANSFERRED : 1
PT_CHAPLAIN : 1
ICDCM_TREATED : 1
MH_NO : 1
OTHERS_ABOUT : 1
FOR_EDUCATION : 1
STATES_MONTH : 1
HIM_IS : 1
HELPS_IS : 1
IT_MEDICALLY : 1
IN_IM : 1
REFILL_OF : 1
REQUESTING_STRIPS : 1
HE_DENIES : 1
IS_WELLKNOWN : 1
OU_POOR : 1
ETOH_ALLERGIES : 1
WHILE_AWOKE : 1
PATIENT_CONSULT : 1
WITH_LAB : 1
WAS_BEING : 1
IS_RELIEVED : 1
AND_APPROPRIATE : 1
BACTRIM_DS : 1
VACCINE_NURSING : 1
RESIDENT_WAS : 1
FOCUSING_SUBJECTIVE : 1
ROLE_PROVIDE : 1
ADDITIONAL_SESSIONS : 1
DOES_THINK : 1
WITH_COUGH : 1
AND_DOSAGES : 1
LLE_RADIATING : 1
CHANGED_SINCE : 1
BECAME_AGITATED : 1
ON_PLAN : 1
IVE_SO : 1
VET_MEETS : 1
ACCESS_INTERMITTENT : 1
SOFT_NAME : 1
IN_OR : 1
VOICES_HE : 1
BEFORE_LUN : 1
FOR_AN : 1
FAR_BEFORE : 1
ISOLATIVE_BY : 1
THEY_DO : 1
THAT_ATIVAN : 1
STATE_STATES : 1
INVOLVES_CUTTING : 1
DENIES_OR : 1
INTEGRATED_CARE : 1
CM_PROGRESS : 1
HYG_CLC : 1
INDIAN_STATE : 1
STABLE_WITH : 1
FOR_CONSIDER : 1
REFERRED_TO : 1
AND_LIFE : 1
ABLE_HE : 1
PARKING_YEAR : 1
CALL_DOSAGES : 1
ON_DATE : 1
AMOUNT_RADIOACTIVE : 1
WITH_NO : 1
MAY_ASSIST : 2
THE_BED : 1
HE_GOOD : 2
WITH_ALCOHOL : 1
FORGETS_TAKE : 1
THAT_DATE : 1
RESTORATIVE_PRO : 1
HAS_MUCH : 1
NORTH_TH : 2
AS_THIS : 1
PATIENT_DETOXING : 1
DR_HEART : 1
INJURY_OLD : 1
IN_OK : 1
NO_UNK : 1
REMAIN_FROM : 1
HE_ACCOMPANIED : 1
THAT_WOULD : 2
DISPL_ONE : 1
RADIOACTIVE_TRACER : 1
AND_DIET : 2
BE_BACK : 1
CLINIC_WALKIN : 1
ASSESSMENT_PATIENTS : 1
SOCIAL_RISK : 1
PROCEDURE_PATIENT : 1
DESCRIPTION_TO : 1
SPASMS_MUCH : 1
HAVE_THOUGHTS : 1
SCHEDULED_ANTINAUSEA : 1
BLAST_TYPE : 1
HOURS_PREVIOUSLY : 1
NO_DIET : 1
STATUS_NUMBER : 1
MOOD_SPOKE : 1
CLINICAL_ACTIVITY : 1
HIS_HISTORY : 2
WRITERS_AS : 1
AND_DOWN : 1
MEDICAL_HTN : 1
THE_NEED : 1
CHARACTERISTICS_ANY : 1
WITHOUT_OBSERVED : 1
THURS_JUNE : 1
YO_RACE : 1
IS_NONSLIP : 1
PAPER_FEMALE : 1
DISCHARGED_NUTRITION : 1
CURRENT_ALLERGIES : 1
VICODIN_PAIN : 1
TYPE_NARCOTIC : 1
THANKED_WRITER : 1
ION_PUPILS : 1
OF_MOVEMENTS : 7
LIN_CHIEF : 1
AVAILABLE_OTHER : 1
ORIENTATION_NUMBER : 1
TO_ENCOURAGE : 1
THE_TO : 3
REPORT_DO : 1
WORSE_IT : 1
YESTER_AFTER : 1
ADJUST_THE : 1
THEN_PREPPED : 1
VOLUNTARILY_TREATMENT : 1
AND_TIME : 3
RETURN_HISTORY : 1
FOR_PHYSCIAL : 1
UNRE_OVERSIGHT : 1
THERAPY_RECORD : 1
PLAN_IS : 1
NAME_FULL : 1
ADENOSINE_STRESS : 2
YEARS_HE : 1
INSTRUCTOR_OF : 1
AND_CONDUCT : 1
IT_LETS : 1
WERE_NOT : 1
COLORS_DIRECTION : 1
DEPENDENCE_INDUCED : 1
OF_NIGHT : 1
SC_SC : 1
PATCHES_ON : 1
SINCE_MR : 1
VA_HE : 1
PT_DID : 2
HEARING_LOW : 1
WHAT_HIS : 1
OF_DAILY : 2
APPLICABLE_THE : 1
SUPERVISING_CALL : 1
COLLECTION_SEP : 1
BELIEVES_IT : 1
HOWEVER_WAS : 1
OD_OS : 1
CONSULT_BUT : 1
MEDICATION_THAT : 1
IS_POSTED : 1
OF_FEW : 1
DOES_HAVE : 1
RESTORATIVE_ADL : 1
ADDENDUM_CALL : 1
PREDICTION_THE : 1
WNL_PAIN : 1
BEER_QD : 1
AND_INSIDE : 1
OF_GROUP : 2
STARTING_GO : 1
CARE_ABLE : 1
MODERATE_FOR : 1
PULSE_WAS : 1
VA_TOLERATING : 1
ADV_GLAUCOMA : 1
BE_CAUSE : 1
GRAMS_VA : 1
HEALTH_TECH : 1
YOUR_HOSPITAL : 1
NEEDED_ASSESS : 1
SECONDS_THIS : 1
TO_PRINTED : 1
YOU_QUESTIONS : 2
AS_NEEDED : 2
CLINIC_REILLY : 1
REFILL_PERCOCET : 1
IS_AT : 4
THE_ALSO : 1
POPLITEAL_CYST : 1
THE_NO : 1
STATED_NAME : 2
OL_MG : 1
THAT_OF : 1
WHEN_DECISIONMAKING : 1
HISTORY_SEX : 1
WED_OR : 1
GO_TO : 4
FINDINGS_THE : 1
THIS_AMOUNT : 1
BEHAVIOR_RESPONSES : 1
HOURS_DO : 1
FOLLOWUP_RECONCILIATION : 1
TO_DS : 1
PERSON_WERE : 1
BARRETTS_INFORMED : 1
CONGESTION_PREVIOUS : 1
AND_AZITHROMYCIN : 1
PATIENT_DISCUSSED : 2
DISORDER_WITH : 1
SUPERVISION_OVERSIGHT : 2
OF_EVENING : 1
ER_INCREASING : 1
AGE_HE : 1
OF_NEUROLOGY : 1
WHO_YOU : 2
AO_VETERAN : 1
VITAL_SIGNS : 1
BEING_DISCHARGED : 1
RETURN_CALL : 1
BID_MEDICAL : 1
OCT_NAME : 1
ML_ACTION : 1
OT_KT : 1
IN_TREATMENT : 2
NOTE_ORIENTED : 1
CHOICES_LEAN : 1
FELT_TO : 1
BILATE_LE : 1
ELBOW_AS : 1
OR_DSHI : 1
IS_MET : 1
ALASKAN_NATIVE : 1
FOR_HOSPITAL : 1
ROLE_SUPPORT : 1
SHIFT_BASCOM : 1
WHEN_ASKED : 1
VISITING_FOR : 1
INCREASED_RELATED : 1
THE_STRUCK : 1
AUDITC_OTHERS : 1
IS_CURRENT : 1
ALPHABETIZED_LIST : 1
APPOINTMENTS_WANTED : 1
TO_LEARN : 2
IF_PINESS : 1
INJURY_YEAR : 1
BEING_OR : 1
GUIDE_TO : 1
TREATMENT_MELISSA : 1
USE_OLD : 1
ER_HAVING : 1
LATERAL_LEFT : 1
ARE_BEING : 1
PAKULA_CANCELLED : 1
BAND_PARTICULAR : 1
VETERAN_MET : 1
ALCOH_SM : 1
MELISSA_SALTY : 1
TWICE_CHECK : 1
MENTAL_NUMBER : 1
NEGLECT_THERE : 1
YOUR_TO : 1
ACTIVE_MAR : 1
BEEN_WORST : 1
HEALTH_AND : 1
CLINIC_MEDICATION : 1
PATIENT_NUMBER : 2
STAFF_TAPE : 1
PROCEDURE_RIGHT : 1
AND_CARE : 1
VM_TO : 1
ISSUE_AND : 1
WHO_COMPLETED : 1
THAT_HAVE : 1
HIM_VETERANS : 1
KNEE_REPLACEMENT : 1
MUSIC_SET : 1
GENDER_RISK : 1
DELUSIONS_HISTORY : 1
ICDCM_JOST : 1
NEEDS_MET : 1
WITH_CCS : 1
SAMPLE_CATCH : 1
EXCLUSION_CRITERIA : 1
RIGHT_HIP : 1
BAND_LEADERS : 1
CURRENT_PREVIOUS : 1
CHANGE_IN : 1
AND_WAS : 2
MAJOR_DEPRESS : 1
ANTICOAGULATION_PATIENTS : 1
REDUCING_HIS : 1
AMB_CLINIC : 1
THERAPEUTIC_WITH : 1
WITH_VERBAL : 1
FOLLOWUP_ONCWATCH : 1
WILL_FOLLOW : 1
AND_DENIES : 1
UNSPECIFIED_WOUND : 1
TELEPHONE_TOOTH : 1
EMERGED_THE : 1
NOTED_BY : 1
RESPOND_OTHERS : 1
CALLER_BRISTOL : 1
PATIENT_RAL : 1
APPROX_THE : 1
SPH_PATIENT : 1
PC_PROVIDER : 1
MD_BY : 1
TEARFUL_WIFE : 1
IS_CONVERSATION : 1
INFORMATION_DRRTP : 1
CONTACTED_REGARDING : 1
FOLLOW_VISIT : 1
IV_RESPIRATORY : 1
SICK_STARTED : 1
LABS_NO : 1
NEUROLOGIC_DISEASE : 1
TAPE_PUT : 1
FLORIDA_DISCHARGE : 1
BEING_HOME : 1
OF_TREATMENT : 3
ELOPEMENT_GENDER : 1
NO_ABNORMALITY : 1
LEFT_WAS : 1
ONCE_PT : 1
POSITIVE_MOUTH : 1
MALIGNANCY_PROCEDURE : 1
TO_DOCUMENTATION : 1
SUPPORT_AND : 1
FLAX_CINNAMON : 1
MONITORED_PATIENT : 1
CONTACTED_PALMER : 1
ADDENDUM_THE : 1
MCH_ILLNESS : 1
TAKE_FULL : 1
NO_WOUNDS : 1
DISCUSSED_SMART : 1
ANY_OTHER : 1
PRECAUTION_FUNCTIONAL : 1
EYE_DATED : 1
YO_VETERAN : 1
METHOD_EATING : 1
PT_BEEN : 1
MRI_IF : 1
NOS_DID : 1
COMMENTS_PROVENTIL : 1
PT_ACTUALLY : 1
BY_TEAM : 1
CHANGES_THE : 1
IN_EXPLAIN : 1
FOR_FUNCTIONAL : 1
TUFTS_PROGRAM : 1
VA_ORDERS : 1
OTHER_PERSONAL : 2
IN_DENIES : 1
WITH_STANDING : 1
BEER_LAST : 1
IMPLEMENTED_VACCINE : 1
CARE_MD : 1
DISCUSSED_SOME : 1
MEDS_HAS : 1
MINUTE_SAFETY : 1
WEIGHT_AGE : 1
IS_ALERT : 1
SERVICE_BY : 1
DREAM_WAS : 1
IN_MY : 1
UNIT_CHIEF : 1
REQUIRES_ASSISTANCE : 3
IT_SELF : 1
THE_PRIMARY : 1
FEELING_MORE : 1
THE_MEDIAL : 1
SAFETY_CHECKS : 1
PAIN_ISSUE : 1
CONSULT_SUBMITTED : 2
TEXT_SHE : 1
LEFT_PT : 1
RACHEL_IN : 1
PL_REPORTS : 1
SYMPTOMS_REPORTS : 1
ADDENDUM_OPERATE : 1
ENVIRONMENTAL_DEMONSTRATED : 1
OUTPATIENT_INCLUDING : 3
RESPIRATION_MENTAL : 1
MESSAGES_ON : 1
WT_LB : 1
ASSESSMENT_LE : 1
TO_HEALTH : 1
CARE_NO : 1
LT_BE : 1
TO_FULL : 1
HAS_COMPLAINT : 2
FLEXERIL_MGS : 1
WITH_CEFTRIAXONE : 1
NEGLECT_NURSE : 1
HIGHER_THAN : 1
IT_TO : 1
HIT_WITH : 1
STATES_IT : 1
DIARRHEA_STOOLS : 1
SPIRIVA_PT : 1
BODY_INDEX : 2
CLASS_VI : 1
YRS_MALE : 1
ACUTE_PSYCHIATRIC : 1
ASSESSMENT_DENIES : 1
RAISED_ANTERIOR : 1
PORT_AMOUNT : 1
TIW_SHOULD : 1
RIGHT_AND : 2
ROOM_NOTE : 1
TO_LEFT : 1
GTTS_TRAVATAN : 1
STATES_THEY : 2
BY_PVT : 1
IN_AS : 1
RELATED_VACCINATION : 1
FOR_DEP : 1
VA_FOR : 1
UDS_NEG : 1
TELEPHONEORTHOPEDICS_NKA : 1
WAS_STATED : 1
WAS_PROVIDED : 1
FILED_ZZPATIENT : 1
ALSO_STANDING : 1
TO_EXPRESS : 1
PATIENT_CLINICIAN : 1
FOR_TIA : 1
SCRIPTURE_BLOOD : 1
UP_WITH : 1
FOR_PERSON : 1
HOME_SERVICE : 1
SIGNALS_RT : 1
SHE_DID : 1
DAILY_TAKE : 1
PERSONAL_HYGIENE : 1
CAP_TAKE : 2
KLONOPIN_ORDERED : 1
SURGERY_PAIN : 1
PRESSURE_BACK : 1
DL_PHYSICIAN : 1
DISCHARGED_EXCELLENT : 1
COLOR_FOR : 1
TO_POLYMYXIN : 1
INTERACTING_MEMBER : 1
AN_CAN : 1
GROUP_OF : 2
PRINTED_SUCH : 1
MONTH_TREATMENTS : 1
AN_UNDERSTANDING : 1
LPN_PROVIDE : 1
PRIOR_SEDATION : 1
ESOPHAGEAL_REFLUX : 1
THROUGH_PLACED : 1
TOBACCO_HAVE : 1
IOP_TEENS : 1
ENGE_YOU : 1
SEEN_STANDING : 1
SM_DRINKING : 1
INTERVENTIONS_GOALS : 1
CORRECT_AND : 1
STORIES_HIS : 1
PREOPERATIVE_DIAGNOSIS : 1
MIAMI_DISCHARGE : 1
HAVE_APPARENT : 1
PNEUMOCOCCAL_GLAUCOMA : 1
CHART_REVIEW : 1
EVERY_ACTIVE : 1
TAPER_HIS : 1
BOWEL_SOUNDS : 1
KT_CHAPLAIN : 1
STAFF_HAMLIN : 1
INR_WKS : 1
GOLD_TEMPERATURE : 1
REPORT_PAIN : 1
DIAGNOSIS_EDUCATION : 1
CHARACTERISTICS_AND : 1
TO_HUMANA : 1
WILL_GOING : 1
RECEIVED_TO : 1
HAS_THE : 2
HAD_BLADDER : 1
WAS_CONDUCTED : 1
EXAMINED_BY : 1
TO_BEGIN : 1
LABS_SIGNIFICANT : 1
RESEARCH_GROUP : 1
ULCER_SAYS : 1
HAS_HAD : 2
OF_UPPER : 1
VISTA_FOR : 1
CONTINUES_TO : 2
COGNITIVE_FUNCTIONING : 1
NUMBER_LS : 1
PSYCHIATRY_FOLLOWUP : 1
YES_REPORT : 1
SCALE_SCORE : 1
IM_IF : 1
RATE_YOUR : 1
VOMITING_ASSESS : 1
ON_THE : 7
DISCUSSED_INSTRUCTED : 1
INTERVENTIONS_FOR : 1
PROMPTED_HE : 1
ON_LAST : 1
WAS_ACCOMPANIED : 1
TO_HELP : 1
REST_BAND : 1
OF_THE : 13
STOOL_RT : 1
CHOICE_TO : 1
BREAK_UP : 1
OR_CELLULAR : 1
THEME_MAINTAINING : 1
CHAIR_SO : 1
HAVING_INCREASING : 1
THEIR_REGARDING : 1
BRONX_PATIENT : 1
ADDRESS_THAT : 1
NARCOTIC_MODALITIES : 1
IS_MOST : 1
OF_ORIENT : 1
REPORTED_HE : 1
WORKED_ROUTE : 1
MS_ABOVE : 1
WOUNDS_PRESSURE : 1
RIGHT_SHE : 1
IN_GET : 1
PERSISTENT_PHARMACY : 1
AND_JUDGMENT : 1
IS_SEEN : 1
HAS_NOT : 1
OS_GOAL : 1
STARTED_ON : 1
ALLERGIES_DIAGNOSES : 1
BEST_TO : 1
REQUEST_CLINIC : 1
NUMBER_TIMES : 1
HAS_CHIEF : 2
TO_NEXT : 1
LAST_UDS : 1
SAID_VALUE : 1
SO_AS : 1
UPBEAT_LAUGHED : 1
DOES_REPLACE : 1
WIFE_CARDIAC : 1
AND_REVIEWED : 1
PENCIL_STAY : 1
HE_DIFFICULTY : 1
FLUID_ALTERATION : 1
ENTERED_BY : 1
ABLE_AND : 1
PATIENTS_OUTSIDE : 1
INFORMATION_MM : 1
PT_HE : 1
OF_MEDICATIONS : 1
SO_FAR : 1
READY_TO : 1
TO_PINES : 1
THE_APPEARS : 1
AGE_PMH : 1
WITH_HIS : 5
MAINTAINANCE_MG : 1
IS_REQUESTING : 1
UROLOGY_CONSULT : 2
DENTAL_ATTENDING : 1
ACTIVITY_OF : 1
DETERMINED_INPATIENT : 1
SEE_INTIAL : 1
INCLUDED_IN : 1
OF_RESPONSIBLE : 1
LIQUID_INTAKE : 1
SOUNDS_YES : 1
OF_LEARNING : 1
SEPTEMBER_CASE : 1
SHORTNESS_BREATH : 1
DEPRESSED_RELATED : 1
BID_ALPHAGAN : 1
QUESTIONS_REGARDING : 1
SELENIUM_SULFIDE : 1
IMAGING_HOLOGIC : 1
SO_OTHER : 1
CARE_ASSESSMENT : 1
URGENCY_BP : 1
CALL_MADE : 1
NO_IDENTIFICATION : 1
IN_NECK : 1
REPORTED_HEALTH : 1
CONSULT_SIMILAR : 1
PROGRESS_PROTOCOL : 1
ENVIRONMENT_WAS : 1
NOT_ABLE : 1
WISH_TO : 1
GONE_PALPATION : 1
THINPREP_IMAGING : 1
BLUNTED_AFFECT : 1
NOTE_NUMBER : 1
FOR_NONVA : 1
MEDICATIONS_THAT : 2
ORIENTED_TO : 1
CHOLECALCIFEROL_BID : 1
INFORMED_EDUCATION : 1
ANY_ON : 1
WATER_ADDENDUM : 1
VOICED_NO : 1
REPORT_NAME : 1
DS_PO : 1
WITH_TAPE : 1
IN_TEXAS : 1
HOLOGIC_THAT : 1
GET_SUPPORT : 1
PROVIDER_ANCHORAGE : 1
LEARNING_NONE : 2
GOLD_IS : 1
METHADONE_PATIENT : 1
DEATH_FEELS : 1
FEEDING_LOCATION : 2
HESITANCY_HEMATURIA : 1
NOTE_001 : 1
REPORTED_BY : 1
ATTENDING_PHYSICIAN : 1
ENSURE_PATIENT : 1
LINFLUENZA_PRIMARY : 1
PULSE_OX : 3
BUTTOCK_RIGHT : 1
THERAPIST_NOTE : 1
NOTE_OF : 6
NONE_CONSULTS : 1
USE_YEAR : 1
ADDRESS_HOW : 1
QUALITY_SOUNDS : 1
NEG_METHADONE : 1
HER_SON : 1
BY_PHONE : 1
WITH_ABSTINENCE : 1
LAINED_VET : 1
NO_OTHER : 1
STATE_PAST : 1
RALLY_FORMOTEROL : 1
CHANGE_TO : 1
ULCER_HE : 1
ALPHAGAN_OU : 1
MEDICATION_ON : 1
CLEAR_DOES : 1
TO_PMHX : 1
ARE_YOU : 2
STOP_DRINKING : 1
NOT_CALL : 1
TEMPERATURE_CURRENT : 1
INITIATED_WELL : 1
FEELING_AND : 1
WOUND_THE : 1
BEFORE_GETTING : 1
ACKNOWLEDGED_UNDERSTANDING : 1
BRC_MANUAL : 1
ANKLE_HERE : 1
VOMITING_PT : 1
AND_STARTED : 1
TEXT_STATES : 1
ONE_RISK : 1
PROVIDER_PATIENT : 1
WORK_LE : 1
REASSESS_PT : 1
STATING_SUBJECTIVE : 1
PROFILE_TESTS : 1
WALKIN_THE : 1
THE_ACTIVITY : 1
ACTIVE_FITTING : 1
IDEATIONS_NO : 1
FOR_CONTROL : 1
WAS_DISORIENTED : 1
DIABETES_LIST : 1
CAPACITY_WILL : 1
HE_CALL : 1
DAVE_MARCH : 1
AND_NOW : 1
PRESBYOPIA_INFORMED : 1
IN_LAW : 1
EFFECTS_MINUTE : 1
AT_MEDICAL : 1
DIPLOPLIA_PAIN : 1
ATTEMPTED_NOTIFY : 1
OR_DRINKS : 1
REFUSE_MEAL : 1
PENICILLIN_EYES : 1
SUPRAPUBIC_TENDERNESS : 1
THERAPEUTIC_RANGE : 1
ARE_PRESUMED : 1
RANDOMIZATION_DATE : 2
TWO_NOTE : 1
PLEASANT_SPOKE : 1
RADIATING_VISIT : 1
IS_CURRENTLY : 1
PHYSICAL_THERAPY : 1
CRITERIA_ALCOHOL : 1
SETTING_AND : 2
WITH_HAS : 2
HYGIENE_SHOWER : 1
BY_ATTEMPTED : 1
OR_OPERATIONS : 1
MATTER_SECONDS : 1
WITH_SECOND : 1
SARDINES_STOP : 1
FLORIDA_IF : 1
THERAPY_MENTAL : 1
DOING_WITH : 1
PNEUMONIA_POSSIBLE : 1
NO_PSYCHOTIC : 1
PRESENT_DURING : 1
WRIST_ON : 1
SCHEDULED_IF : 1
LEVEL_HIGHER : 1
APPROPRIATE_BLIND : 1
EXCISION_OF : 1
PROGNOSIS_OU : 1
THAT_IMPROVING : 1
FEW_DEMONSTRATING : 1
RELIEVES_SYMPTOMS : 1
RECREATIONAL_THERAPY : 1
VETERANS_RESPONSE : 2
VET_WHO : 1
VETERAN_NOT : 1
YES_PHYSICIAN : 1
DOM_123 : 1
FOCUSING_ON : 1
DECLINED_TO : 1
NEEDED_COMPLETE : 1
VS_DEPENDENCE : 1
TO_AVAILABLE : 1
TO_DISCHARGE : 1
PMH_COLON : 1
IS_AND : 3
REPORTED_TO : 1
BY_SOCIAL : 1
HER_BUTTOCK : 1
MUSCLE_NEXT : 1
INTERMITTENT_IV : 1
ILLNESS_DIET : 1
STEREO_LAST : 1
MH_FOR : 1
WITH_CHARGE : 1
SKIN_WAS : 1
SLT_OS : 1
POOR_OU : 1
OF_BOWEL : 7
THURS_THE : 1
MCG_ORAL : 1
BP_LOG : 1
CARE_WALKS : 1
AND_ENVIRONMENT : 1
VOICE_THIS : 1
PROGRESS_AT : 1
ABDOMEN_PATIENT : 1
ANTONIO_HUNTSVILLE : 1
PILLS_UNTIL : 1
IDENTIFIED_ANCHORAGE : 1
AND_BEST : 1
PATIENT_WAS : 8
VISUAL_CHANGES : 1
WAS_KIND : 1
HEALTH_PROBLEMS : 1
WITH_ASSESSMENT : 2
UPON_NO : 1
XYZZY_COUNSELED : 1
BODY_SIDES : 1
UNTHREATENED_OS : 1
OF_PRIMARY : 2
AND_DRINKING : 1
APT_HE : 1
TO_SOCIAL : 1
DECISIONMAKING_THE : 1
VOICEMAIL_CONTINUE : 1
STAFF_URINE : 1
PMH_DIABETES : 1
TO_READ : 1
PROGRESS_INFORMATIONAL : 1
READER_OCR : 2
ASSESSMENT_SOME : 1
AND_IMMUNIZATION : 1
HAS_STRUCTURED : 1
NO_ETOH : 1
AND_RELATES : 1
ACQUAINTANCES_BETTER : 1
THAT_AN : 2
FOLLOW_WITH : 1
WITH_NEXT : 1
DECOMPRESSION_MULTILEVEL : 1
MID_AND : 1
KNEE_ARTHROPLASTY : 1
VISIT_RISK : 1
PATIENT_GIVEN : 1
LEGIBLE_YES : 1
ABUSEUNSPEC_STATED : 1
MY_DIRECT : 1
AND_ADJUST : 1
TO_BEZNO : 1
MINS_SIGNS : 1
IN_INJECTION : 1
DRUGS_ASA : 1
TRY_SELF : 1
TIME_JUDGEMENT : 1
GAIT_TRANSFERRING : 1
AT_FOR : 4
INT_THERAPY : 1
REFUSED_THOUGHT : 1
BY_PROGRESS : 1
WAS_ON : 2
NOTE_ONCWATCH : 1
IT_SHE : 1
NOTE_SIGHT : 1
PATIENTS_WRIST : 1
HE_AGREES : 1
MANAGEMENT_OUTLINED : 1
PINESS_WITH : 1
FOR_BLOOD : 1
PATIENT_THE : 3
AND_SURROGATE : 1
CHANGES_PT : 1
QUIT_TOBACCO : 1
WEEK_TO : 1
ADDENDUM_SPECIFICS : 1
TAB_BARRIERS : 1
BLIND_BUT : 1
VAMC_VETERAN : 1
LAST_PAIN : 1
DOES_THE : 1
OF_ASTHMA : 1
SC_ING : 1
TOXICOLOGY_LAB : 1
AGREEABLE_OR : 1
SCALE_OF : 2
SEE_PCP : 2
ANY_MEAL : 1
SMOKING_AREA : 1
AM_ON : 2
ASSIGNED_TO : 2
NAME_THE : 1
PRIMARY_ALCOHOL : 1
NONSLIP_IF : 1
WIFE_STATING : 1
PATIO_ELBOW : 1
JOINT_INJECTION : 1
REPORTS_HE : 1
ADDITIONAL_HISTORY : 1
PL_ED : 2
BILATE_AND : 1
CONTAINS_SC : 1
PMHX_MEAL : 1
PROVIDED_HIM : 1
BEFORE_NOS : 1
EXPLAINING_HIM : 1
APPEARS_HE : 1
WITH_PHYSICIAN : 2
IN_PROCESS : 1
INSTRUCTION_POTENTIAL : 1
PAIN_LPM : 1
BENEFITS_WEIGHT : 1
LIFE_MSE : 1
AS_AND : 1
OTHERS_GETTING : 1
MEDICATION_PHYSICIAN : 1
TIME_SCRIPTURE : 1
FEATURES_IS : 1
MAR_SERVICECONNECTED : 1
REALLY_GOOD : 1
ADVISED_QUIT : 1
EFFECTIVENESS_OF : 1
DENIES_WITH : 1
VI_PATIENT : 1
TO_CALLED : 1
OUTPT_TECH : 1
WANT_MED : 1
HIS_VET : 1
GIVEN_RELIEVE : 1
HAS_RTC : 1
ITEMS_AT : 1
YES_AND : 1
WORKING_REDUCING : 1
OF_INTERACTING : 1
SUCCESSFULLY_SEVERAL : 1
LEFT_SPERMATOCELE : 1
REILLY_ESOPHAGEAL : 1
NEEDLES_SEE : 1
ADMISSION_TO : 2
TO_USING : 1
NEXT_WEEK : 1
PHARMACY_NEXT : 1
PAIN_REPORTEDLY : 1
CUING_AND : 1
STENOSIS_LT : 1
TOBACCO_COUNSELING : 1
DATE_DIABETES : 1
VETERAN_INDICATED : 1
DISCHARGE_OUT : 1
AS_SESSION : 1
HAS_ANALYZED : 1
APPT_APPT : 1
INSTRUCTED_SUN : 1
CHARACTER_READER : 1
SHOULDER_ARTH : 1
RTC_IN : 2
ADJUST_NEW : 1
RAISED_FUNCTION : 1
MRI_THAT : 1
NOTE_INITIAL : 1
PHYSICIAN_WAS : 1
VAMC_CHAPLAINVISITATION : 1
SOCIAL_HISTORY : 1
NOT_ENROLLED : 1
NKA_MAJOR : 1
YES_ADR : 1
COMPLETED_PORT : 1
AS_HAS : 1
TYPE_ADDITIONAL : 1
UNSPECIFIED_AND : 1
AUDITC_IN : 1
PATIENTS_SESSION : 1
PRO_CALL : 1
TIME_GROUP : 1
ADL_TIME : 1
123_RTU : 1
ALCOHOL_IN : 1
MIN_GROUPS : 1
STAY_YES : 2
REPORTS_BETTER : 1
ALLERGIES_ADDENDUM : 1
TAPMEDICATION_NOTE : 1
OR_MULTILEVEL : 1
ASSISTANCE_NO : 2
THOUGHTS_ABOUT : 1
RESPIRATION_HEALTH : 1
PERCOCET_CYST : 1
AND_UPDATE : 1
VETERAN_IS : 3
TAKE_TABLETS : 1
MOUTH_TWICE : 2
PCA_FLOW : 1
THIS_HE : 1
BEING_WHILE : 1
AR_THE : 1
PLASMA_AWAIT : 1
OTHERS_IN : 1
HE_CALLED : 1
PNEUMOCOCCAL_VACCINE : 1
FULL_LMP : 1
DORSUM_FINGER : 1
CIWA_ASSESSMENT : 1
MEAL_SET : 2
HIP_FELL : 1
YOWM_CORTICAL : 1
LETHALITY_AT : 1
OR_HE : 1
SYMPTOMS_OF : 1
OU_CPRS : 1
GROUPS_REINFORCED : 1
TO_YOUR : 2
AND_UNDER : 1
ONSET_NEUROLOGY : 1
WAS_THEN : 1
APPT_LESSON : 1
THAT_APPOINTMENT : 1
DETOXING_TOBACCO : 1
INDEPENDENT_TURNS : 1
DISEASE_EMERGENCY : 1
SERVICECONNECTED_POSTTRAUMATIC : 1
VETERANS_IN : 1
BY_TIME : 1
FACT_PARTICIPATED : 1
BID_OU : 2
PROVIDE_SUPPORTIVE : 1
NEEDLE_CONGESTION : 1
PAIN_WILL : 1
OS_FLAT : 1
OR_UNLESS : 1
IN_RELATING : 1
PATIENT_ADVISED : 1
LESSON_SOME : 1
INCIDENT_RINGING : 1
TO_RISK : 1
CONVERSATION_SOUNDED : 1
NUTRITION_EXCELLENT : 1
FOR_RAL : 1
ENSURING_SURGERY : 1
CONDITION_TO : 1
DEMONSTRATING_HR : 1
HAIR_OR : 1
ASSESS_HEALTH : 1
LEARNING_FOR : 1
MEDICATIONS_STATUS : 2
NOTE_VISTA : 1
WAS_ALERT : 1
PSYCHOLOGICAL_HO : 1
COMPENSATED_CIRRHOSIS : 1
OF_PT : 1
IF_AR : 1
MHC_AND : 1
GUNSHOT_TO : 1
ENVIRONMENT_MAINTAINED : 1
GETTING_BETTER : 1
WITH_PCP : 1
MENTAL_SERVICE : 1
REGARDING_YOUR : 2
ASSISTANCE_CONSTIPATION : 1
CLINIC_MHC : 1
SCHIZ_AND : 1
THIS_DOES : 1
THINK_THAT : 1
PTSD_COUSIN : 1
HX_OF : 1
MEAL_FLUID : 1
SECRETION_COLOR : 2
CURRENT_RADIATION : 1
CARDIAC_CART : 1
IS_NOT : 2
ON_HOME : 1
RECENT_OF : 1
HIS_SISTER : 1
OUTLINED_IN : 1
ION_PEERS : 1
OF_HER : 1
YOU_SIX : 1
MINUTES_ADDENDUM : 1
TO_MR : 1
SAY_LOCULATED : 1
ENCOURAGE_UP : 1
SURROUNDINGS_UROLOGY : 1
WHICH_NEGATIVE : 1
DISCONTINUE_WITH : 1
RELAXED_MR : 1
ABLE_ENCOURAGEMENT : 1
DONE_WHICH : 1
WITH_LIN : 1
OUT_PATIENT : 1
OF_PAIN : 3
DX_LE : 1
MOUTH_CLOZAPINE : 1
BEEN_STABLE : 1
MANAGEMENT_IN : 1
DECLINED_REFUSED : 1
ALONG_THE : 1
PRESSURE_SWELLING : 1
STEARS_NOTES : 1
STAFF_TO : 2
NATIVE_PSYCHOS : 1
DEC_HYG : 1
THAT_RELAXED : 1
ADDENDUM_FITTING : 1
ASKING_CONTACT : 1
THE_ELEVATOR : 1
PT_SAYS : 1
ONCOLOGY_THERAPIST : 1
ADDENDUM_TO : 1
ELOPEMENT_AGE : 1
SUBJECTIVE_OBJECTIVE : 2
OK_NEEDS : 1
VET_OF : 1
GROOMING_HE : 1
MODERATE_OF : 1
USING_AS : 1
ANATOMICAL_REMOVAL : 1
BUT_CAN : 1
FLUIDS_GAIT : 1
PATIENT_ORDER : 1
FOOT_OF : 1
RN_BACK : 1
TO_MAKING : 1
POSTED_CONVERSATION : 1
MY_SELF : 1
AND_MEDS : 1
THE_MONTH : 1
OF_RUPTURED : 1
NUMBER_LEFT : 1
RT_EDV : 1
SEVERAL_CORRECT : 1
TO_WEST : 1
FOCAL_UNTHREATENED : 1
MEDICAL_OUTLINED : 1
ALL_OF : 2
FROM_THE : 2
ELECTRONICALLY_FILED : 1
FOR_DEPRESSION : 1
COLOR_MOBILITY : 1
LETTER_TO : 1
DATE_MONTH : 1
TWO_CHILDREN : 1
DINNER_WAS : 1
THE_VICTIM : 1
THIS_ROLE : 1
ABNORMALITY_FOUND : 1
SCHEDULED_HE : 1
IS_ANATOMICAL : 1
DOING_THE : 1
WORRIED_ABOUT : 1
HOSPITAL_SUMMARY : 1
ATENOLOL_FOR : 1
FUNDING_VA : 1
FOR_STUDY : 1
HER_HYPERTENSION : 1
PATIENT_REMAIN : 1
ADDENDUM_SPIRITUALITY : 1
CLINIC_RN : 1
TEMP_OUT : 1
PATIENT_USE : 1
SPECIFICS_CONTACT : 1
TO_WEAR : 1
ATTENDED_USUAL : 1
HTN_GRAMS : 1
EDUCATION_TOPICS : 1
PSYCHOLOGIST_THERAPIST : 1
BRIGHT_CRADC : 1
KG_NAME : 1
SHAMPOO_TIW : 1
CARE_CONSULT : 1
DIFFICULTY_HAS : 1
INFLUENZA_IMMUNIZATION : 2
UNCIRCUMCISED_WITH : 1
OOZING_ERYTHEMA : 1
CONGESTION_LIKELY : 1
LE_HAMLIN : 2
AND_REMOVED : 1
THE_TIP : 1
STRESS_CONDITION : 1
SPOKE_IT : 1
ADR_ENTERED : 1
SINCE_INCIDENT : 1
APPROACH_OR : 1
TO_AT : 1
OX_ON : 1
BED_INDEPENDENT : 1
ALERT_CONSISTENCY : 1
SAYS_WAS : 1
RECORD_TO : 1
SURGICAL_UPDATE : 1
TO_WATCHING : 1
END_THE : 2
CONDUCTED_DEAR : 1
PREVIOUS_BY : 1
FEELING_COMFORTABLE : 1
OUT_OF : 2
WED_THURS : 1
IN_LPN : 1
INITIALLY_NARCOTICS : 1
MOUTH_TAKE : 1
WITH_DANGER : 1
HE_CAME : 1
ON_RANGE : 1
THE_USED : 1
THE_INPATIENT : 1
HE_BACK : 1
EXPIRED_OUTPATIENT : 1
TO_REMAINS : 1
RUPTURED_GLOBES : 1
THE_CLINIC : 1
ULTRASOUND_NORTH : 1
AREAS_SOUNDS : 1
PROCEDURE_INVOLVES : 1
FELT_FINGERTIP : 1
DISCUSSED_WITH : 1
PHYSICIAN_LAST : 1
PSYCHOS_BLADDER : 1
REPORTED_MESKENAS : 1
PROMPTED_IS : 1
ALLERGIES_REASON : 1
HYPERTENSION_HOME : 1
GOOD_HEALTH : 1
PAINFUL_WITH : 1
LEVEL_LOW : 1
UNDERLYING_IN : 1
CONSULT_HCV : 1
HAD_TWO : 1
MOTHER_IN : 1
WHERE_IS : 1
APPROX_OF : 1
FILLED_DIABETES : 1
TWICE_AS : 1
WILL_VISITING : 1
HIS_PHYSICAL : 1
ONE_ASSIST : 1
COMMENTS_MM : 1
SOLN_DROP : 1
FITTING_ADJUSTMENTS : 1
PCP_PATIENT : 1
HOME_CARE : 1
ETOH_TOBACCO : 1
ON_OCCASION : 1
OF_EATING : 1
GOOD_PROGRESS : 1
DEGREE_ED : 1
THIS_FAIRLY : 1
VETERAN_ALSO : 1
WITH_ACKNOWLEDGED : 1
FAIRLY_HIGH : 1
OF_OPTIONS : 1
SHOW_HAS : 1
WITH_LIQUID : 1
EXPECTED_THAT : 1
POLYMYXIN_TEMPERATURE : 1
LEFT_REQUESTING : 1
THIS_TIME : 1
SERVICE_DURATION : 1
REGARDING_HEALTH : 1
DISORDER_NEGATIVE : 1
PCP_POSITIVE : 1
COMPLAINT_PRESENT : 1
SAYS_IS : 1
ENCOURAGE_TO : 1
RESCHEDULED_MH : 1
EATING_LOCATION : 1
HIM_WITH : 1
BENT_IN : 1
AT_TUFTS : 1
AM_INDIAN : 1
OF_AND : 2
SERVICE_COLLECTION : 1
THOUGHT_WITH : 1
HAS_RECEIVED : 1
PILLS_IN : 1
FOR_DOE : 1
RATE_AT : 1
ASSISTS_INDIVIDUALS : 1
OF_PERSON : 1
EXTREMITIES_ACTIVE : 1
TO_TIME : 1
CHANGES_DIPLOPLIA : 1
BLOOD_AND : 1
LINE_PROVIDER : 1
REGARDING_TRANSFER : 1
PLANS_TO : 2
EC_TAKE : 1
LMP_JULY : 1
GET_LABWORK : 1
CONT_QHS : 1
NAOMI_DIFFICULTIES : 1
ANXIETY_NOS : 1
FOR_TOPIC : 1
FOR_DISABILITIES : 1
BENEFITS_DECREASING : 1
MEDICATION_HOURS : 1
AGE_WANT : 1
CONDITION_MR : 1
OR_RESPOND : 1
SHIFT_PALMER : 1
TO_PAIN : 1
COUSIN_ALSO : 1
FEEL_SAME : 1
DESCRIBED_SPENDING : 1
PT_STATED : 3
ON_BBLOCKER : 1
RESCHEDULED_FOR : 1
MATTER_OF : 1
ADDENDUM_HER : 1
TOLERATING_DIET : 1
SAYS_WILL : 1
AGE_MED : 1
REPORT_NEW : 1
HE_NEEDED : 1
OBTAINED_AT : 1
PC_MH : 1
BRIGHT_MSW : 1
LMSW_MG : 1
TOBACCO_USER : 1
FORMOTEROL_CAP : 1
ENEMIES_STATED : 1
LEFT_TKA : 1
IN_ALCOH : 1
PARTICULAR_AND : 1
TRUS_HYPOECHOIC : 1
TKA_ABOUT : 1
DEC_BODY : 1
WEIGHT_USUAL : 1
RESTARTING_AND : 1
FOR_SURGICAL : 2
BP_PATIENT : 1
REQUIRES_NO : 3
FAIR_CONTACT : 1
HIS_SKILLS : 1
YOUR_STOMACH : 1
ARRIVED_ON : 1
ON_INPATIENT : 1
BARNES_EDUCATIONAL : 1
ALBUTEROL_PT : 1
FALL_VISIBLE : 1
BEZNO_FREE : 1
ING_AFRICAN : 1
ENCOURAGEMENT_CUEING : 3
CONVERSATION_WITH : 2
PREP_GEMFIBROZIL : 1
TRANSFERRED_TO : 1
CELL_AND : 1
HOSPITAL_VA : 1
RN_REHABILITATION : 1
ST_TAXI : 1
PT_MAINTAINS : 1
NOT_SUBMIT : 1
INJECTION_DOES : 1
VINELAND_ON : 1
PRESENTED_TO : 1
PO_HRS : 1
PT_WAS : 1
AWARE_OF : 2
USED_NOT : 2
READY_FOR : 1
APPROX_CM : 2
FLUIDS_GIVEN : 1
SKIN_CITALOPRAM : 1
ORAL_INHALE : 1
IN_ORDER : 1
OFTEN_WITH : 1
TEAM_FLICK : 1
TOPIC_ASKING : 1
YES_INTEGRATED : 1
THERAPEUTIC_RELATIONSHIP : 1
ACEI_WAS : 1
DRESSING_ONCE : 1
UNSPECIFIED_OPEN : 1
HES_BUT : 1
AGREED_TO : 1
SELF_CARE : 1
THE_DREAM : 1
TO_CLINICIAN : 1
HAS_RAL : 1
CONDITIONS_FOR : 1
PVD_IS : 1
OU_PER : 1
MACHINE_MODERATE : 1
CLINIC_WEEK : 1
PRECAUTION_FOR : 1
GOOD_IS : 1
OR_PHONE : 1
ASSESS_STATUS : 1
APPOINTED_ORTEGA : 1
PRIMARY_MIX : 1
VERY_AND : 1
MAINTAINED_ALONG : 1
AS_WITH : 2
KNEE_TKA : 1
CONSTIPATION_DIARRHEA : 1
SISTER_DIFFICULTIES : 1
PLAN_WITH : 1
ABOUT_VERIFIED : 1
YOUR_DOCTOR : 1
CASE_MANAGER : 2
HAS_PL : 1
OF_HAIR : 1
MUSCLE_MEDICATION : 1
DESCRIPTION_AVAILABLE : 1
STUDY_IS : 1
DIABETES_MANAGER : 1
GLAUCOMA_NOTE : 1
WITH_RECENT : 2
NOTE_TIME : 3
INDICATED_READINESS : 1
SCORE_NOT : 1
AFTER_POLYSOMNOGRAPHY : 1
BEZNO_BY : 1
PHARMACY_OF : 1
THINKS_IT : 1
WAS_WORSE : 1
USER_PATIENT : 1
VOICEMAIL_TO : 1
SCAN_READ : 1
ILLNESS_INTIAL : 1
FROM_SELF : 1
PEERS_OR : 1
MULTIVITAMINS_ASA : 1
REMAINING_SHAMPOO : 1
PRIOR_PATIENT : 1
READING_SCRIPTURE : 1
MOVEMENTS_SHIFT : 7
EXC_EAST : 1
MAINTAINING_FROM : 1
DIARRHEA_BLOODY : 1
AS_HE : 2
PM_VETERAN : 1
REPLACE_ANY : 1
AS_SUPPORT : 1
WEEK_REEVALUATION : 1
LEFT_VM : 1
HAVE_ABOUT : 1
PATIENT_ALERT : 2
NONVA_PREREGISTRATION : 1
ADJUSTMENTS_ADJUST : 1
TOPICS_HT : 1
HAD_GOOD : 1
YRS_POLYURIA : 1
REVIEW_OF : 1
SPENDING_ON : 1
AND_GASTRODUO : 1
CM_THERAPEUTIC : 1
ASSESSMENT_BRC : 1
WORK_SERVICES : 1
CHARACTERISTICS_IV : 1
WT_KG : 1
PER_PULSE : 1
WITHOUT_CONSTIPATION : 1
PROVIDE_PRE : 1
KIND_OF : 1
AND_WILL : 3
TREATMENT_TEMP : 1
HOME_OK : 1
CA_HYPERLIPIDEMIA : 1
SOCIAL_EXTRA : 1
FOR_GROUP : 1
CLC_WELL : 1
LB_REPORTS : 1
THIS_NOTE : 1
OF_PMR : 1
MIGRAINE_IN : 1
CARE_REPORT : 1
YOWM_ANTERIOR : 1
GETTING_OUT : 1
NO_REQUIRED : 1
HE_THAT : 2
SICK_YOUR : 1
EVALUATION_RR : 1
HE_WITH : 2
SWER_CONTACTED : 1
AVG_ETOH : 1
PAINFUL_STANDING : 1
ON_REDUCING : 1
IN_CM : 4
CLEAR_REGULAR : 1
FOR_TH : 1
ALPHABETIZED_OF : 1
TO_HER : 1
POSSIBLE_ADVERSE : 1
THEIR_DECISION : 1
FOR_INDEPENDENTLY : 1
THE_MACHINE : 1
OF_VOICES : 1
HEARING_THAN : 1
COMMENT_DX : 1
CURRENT_DOSE : 2
INCLUDING_LAST : 1
ONCWATCH_DIAGNOSTIC : 1
THREE_PATIENTS : 1
PROBLEM_THOUGHT : 1
ACTIVE_RESPIRATION : 1
BUT_BENT : 1
PLACE_THIS : 1
TEAM_RM : 1
AT_ABOVE : 1
ORIENTED_THREE : 1
ADMISSION_DISEASE : 1
CPRS_VETERAN : 1
ASSIGNED_CALLER : 1
NO_EXCLUSION : 1
ASSESSMENT_DATED : 1
CARE_CONTACT : 1
ANY_WITH : 1
GIVEN_KNEE : 1
WITH_GROUP : 1
COMPLAINT_NOT : 2
PATIENT_AND : 5
HE_DISPL : 1
RECURRENT_ALCOHOL : 1
SAT_CHEST : 1
JOB_SERVICE : 1
RECONCILED_REVIEWED : 1
GOALS_SIDERAILS : 1
DX_LOW : 1
THERE_AN : 1
THE_UNIT : 1
KLONOPIN_SHE : 1
THE_CHANGED : 1
IF_POSSIBLE : 1
PH_PH : 1
SCORE_APPLICABLE : 1
COUGH_PNEUMONIA : 1
NOTE_BY : 1
WITH_DVT : 1
NURSING_RESTORATIVE : 1
HEALTH_WHICH : 1
COMMENT_ENTERED : 1
OBSERVATION_PODOFILOX : 1
AND_RECENTLY : 1
WAS_AXIS : 1
AT_ON : 2
GROUP_ALCOH : 1
OF_USE : 1
LUN_CONTACTED : 1
CONDITION_CONSULTS : 1
ALONE_IN : 1
FOLLOW_UP : 3
MG_TAB : 5
IN_THE : 17
NOTE_VETERAN : 1
PM_WOULD : 1
RECONCILED_PATIENT : 1
WITH_MS : 1
PAIN_AND : 1
PAIN_MONTHS : 1
REMAINS_ELEVATED : 1
MENTAL_NEEDS : 1
IS_HANGING : 1
DELUSIONS_OR : 1
AND_PRN : 1
REFILL_FILLED : 1
WAS_WITH : 2
ARM_RANGE : 1
NUTRITION_THIS : 1
EXAMINED_PATIENT : 1
PMH_DEPRESSION : 1
LACE_TEMPERATURE : 1
ANY_CHANGES : 1
TEL_WITH : 1
AGE_SANDERS : 1
SITE_PATIENT : 1
OF_RESIDENT : 1
PRURITIC_PMH : 1
STATES_PAST : 1
EYE_PT : 1
NURSING_STAFF : 1
FOR_PHOTO : 1
PSYCHOTIC_DISORDER : 1
STOP_PAIN : 1
PAIN_BLUNTED : 1
TEAM_CONSULT : 1
NOT_HAVE : 1
BEGIN_RADIATION : 1
BY_WIFE : 1
THIS_NONVA : 1
OF_AMOUNT : 1
WRITER_SCHEDULING : 1
BACK_CHOLECALCIFEROL : 1
MET_DURING : 2
CONCURS_HEARING : 1
CHOOSING_ATTEND : 1
MAINTAINS_EYE : 1
VETERANS_RANGE : 1
PCP_WILL : 1
EYE_FOR : 1
SESSIONS_SUCCESSFULLY : 1
OUT_CABG : 1
FIND_THAT : 1
PERSON_LOCATION : 1
OUTPATIENT_FIND : 1
MORNING_TO : 1
EVENING_AFTER : 1
OF_OBJECTIVES : 1
ENROLLED_THE : 1
OUTSIDE_PHYSICIAN : 1
PROTECTORS_PLACE : 2
HIM_SICK : 1
HAS_REALLY : 1
MINUTE_WEEKLY : 1
PRESENTS_TO : 2
DUE_ETOH : 1
PATIENT_SAFETY : 1
OR_BETTER : 1
ULCERS_OTHER : 1
IV_INTERMITTENT : 1
TREATMENT_CIRCUMCISION : 1
COUNTS_AND : 1
PHYSICIAN_TO : 1
RELATES_IS : 1
PATRICIA_SUBJECTIVE : 1
NOON_VET : 1
USUAL_STERILE : 1
ADDITIONAL_INFORMATION : 1
SURFACEANTERIOR_MR : 1
AOX_ADDENDUM : 1
BE_GOING : 1
ASSISTS_WITH : 1
ARRANGE_AN : 1
OF_LIDOCAINE : 1
INTERVENTION_THE : 1
MARCO_ANTONIO : 1
WITH_FOOD : 1
NONCOMPLIANT_MEDICAL : 1
PAIN_ACTIVE : 1
MEDICAL_RECONCILED : 1
FOV_UNTHREATENED : 1
TUTTLE_WELL : 1
CHEST_SHORTNESS : 1
AND_GIVE : 1
BE_TO : 2
PLANNING_TIME : 1
ANA_VICTIM : 1
IN_DECLINED : 1
LIKE_TO : 1
ATION_OF : 1
PROGRESS_IN : 1
MEDS_TO : 1
PHYSICIAN_AND : 1
EXPECTED_AN : 1
INFORMATION_TAUGHT : 1
PATIENT_AGE : 1
TESTING_TO : 1
MEDICAL_APPT : 1
DIET_WERE : 1
THIS_WRITER : 2
NOT_TO : 3
POSSIBLE_HEPARIN : 1
CART_PROCEDURE : 1
SOCIAL_SECURITY : 3
HE_HAD : 5
HAD_AN : 1
TAMSULOSIN_MANAGEMENT : 1
MG_DL : 1
PREVIOUS_SURGICAL : 1
GET_WAY : 1
WITH_PENCIL : 1
CIRCUMCISION_THE : 1
WHO_ARE : 1
GOT_BETTER : 1
CIRRHOSIS_SPEECH : 1
FINDINGS_SAY : 1
ISOLATIVE_NO : 1
ORTHOPEDIC_PROVIDER : 1
RN_LPN : 1
DECISIONMAKING_IS : 1
AFRICAN_AN : 1
HOME_UNCONTROLLED : 1
SOME_FOR : 1
THOUGHT_DIFFICULTY : 1
WHEN_WILL : 1
SKIPPING_KLONOPIN : 1
PERSONALLY_EXAMINED : 1
DIAGNOSIS_LIVING : 1
NAME_PATRICIA : 1
STATE_NOS : 1
THAN_HE : 1
MEDGROUP_REFLUX : 1
FOR_CAP : 1
LAST_DIAGNOSIS : 1
AN_IN : 1
PROCEDURE_INSTRUCTIONS : 1
SOUNDS_NO : 1
TO_YOU : 1
FACE_OF : 1
PATIENT_CONTINENT : 3
DENIES_ALLERGY : 1
DYSURIA_EDUCATE : 1
OS_WNL : 1
THE_DAILY : 1
PATIENT_NOTICED : 1
OR_THURS : 1
NOTIFIED_OF : 1
OR_AMBIGUOUS : 1
AGREEABLE_YOURSELF : 1
INTERVENTION_CONTROLLED : 1
OCT_YRS : 1
LONG_OF : 1
SHE_HAD : 1
ACCOMPANIED_HIS : 1
RN_EVALUATION : 1
ALSO_HAD : 1
OR_PSYCHOTHERAPY : 1
ORDER_TO : 1
THERAPY_NO : 1
AND_NURSING : 2
SERVICES_SKIPPING : 1
LITTLE_BUT : 1
OPHT_SOLN : 2
MAKE_PATIENT : 1
PC_HEALTH : 1
HE_CALLS : 1
PROCEDURE_SITE : 1
PTSD_ALCOHOL : 1
FLU_YRS : 1
YOUR_VISIT : 1
DECISIONMAKING_CAPACITY : 3
TO_HEARING : 1
AFTER_DINNER : 1
RETURN_AND : 1
CHANCE_DURATION : 1
CHEN_PENG : 1
CAUSE_OF : 1
PSYCHIATRIST_PSYCHOLOGIST : 1
CONTINENT_PERFORMED : 1
ON_ATENOLOL : 1
OF_ACTIVITY : 1
CHOLECALCIFEROL_TAMSULOSIN : 1
TO_FROM : 1
GOOD_STOOL : 1
MEDICAL_CENTER : 1
WORKER_WAS : 1
WITH_ACTIVE : 1
JUNE_THE : 1
EXTENDED_SERVICE : 1
NICOTINE_DEPENDENCE : 1
BUT_SHE : 1
BODY_BOTH : 1
INJURY_NUTRITION : 1
THAT_SHE : 1
SIGN_HAND : 1
HIS_BUT : 1
RECORD_PAST : 1
FAIR_TO : 1
LOSING_UNEMPLOYMENT : 1
MEDICATION_WITHIN : 1
BE_AND : 1
ENOUGH_COVER : 1
MOBILITY_EASILY : 1
LIKELY_PNEUMONIA : 1
IM_GIVEN : 1
TO_INTO : 1
RECRUITMENT_THROUGH : 1
OUTPT_HEALTH : 1
WELL_THE : 2
VA_RACHEL : 1
PROBLEM_VOLUME : 1
TIMES_RESIDENT : 1
RN_WILL : 1
HER_FAMILY : 1
THROBBING_MOVED : 1
MOUTH_AS : 1
THE_MUSCLE : 1
SYSTEMIC_MEDS : 1
GIVE_PRN : 1
RECENTLY_HAD : 1
INFORMED_WAS : 1
IMPAIRED_HEARING : 1
CODE_HC : 1
PATIENT_ACUTE : 1
RN_APR : 1
COMPLIED_HIS : 1
OBVIOUS_DELUSIONS : 1
SUGARUSE_IN : 1
DATA_MS : 1
SC_RACE : 1
ADDENDUM_ADJUSTMENTS : 1
NOTED_ADDENDUM : 1
PHYSICIAN_ON : 2
EXPECTATIONS_KNEE : 1
INSUFFICIENCY_MENTATION : 1
FEMALE_TO : 1
TIP_AND : 1
APPEARANCE_SATISFACTORY : 1
DISCHARGE_AND : 1
FUTURE_APPOINTMENTS : 1
PRE_AND : 1
MSW_HAMLIN : 1
EXPIRED_MEDICATIONS : 1
CONTINUES_RESIST : 1
SUPERVISION_ENCOURAGEMENT : 2
DIETITIAN_PTSD : 1
WAY_THROUGH : 1
MS_NUMBER : 1
ASSIST_WITH : 1
LT_ANKLE : 1
SUPERVISING_PHYSICIAN : 1
SHIFT_LOCATION : 1
HE_SOUNDED : 1
AND_READ : 1
PCP_PRASHANT : 1
COUMADIN_FOR : 1
IT_HELPS : 1
WITHDRAWAL_MADE : 1
WORSENED_SHE : 1
IS_STARTING : 1
WITH_POSSIBLE : 1
POSTIVE_TRACE : 1
INFORMATIONAL_REQUEST : 1
HOMICIDAL_AND : 1
MOUTH_FUTURE : 1
CHOOSING_TO : 1
DIABETOLOGY_CONSULT : 1
FINGERTIP_FINGERTIP : 1
LAWN_SAT : 1
CONSTRICTED_FLOW : 1
NAME_OF : 3
RTU_NURSING : 1
FAMILY_HYPERTENSION : 1
ANY_CONTINUES : 1
THEN_YESTER : 1
NONE_EDUCATION : 1
WHICH_SHOWED : 1
WILL_REFERRAL : 1
HIS_AS : 1
DISEASE_HOME : 1
NO_COMPLAINTS : 1
DID_LIKE : 1
HE_BEING : 1
NOTE_GOAL : 1
RTC_TO : 1
NO_LESSON : 1
RESPOND_TO : 1
AIR_LUNGS : 1
TAKE_ONE : 7
PATIENTS_SIGNALS : 1
FARIBAULT_COMMENT : 1
HIS_PHYSICIAN : 1
SHIFT_BACTRIM : 1
AND_ALSO : 1
WAY_LIST : 1
ABILITY_PATIENT : 1
FACILITY_APPOINTED : 2
HEALTH_NEGATIVE : 1
BACTRIM_WILL : 1
FINGERTIP_TO : 1
PATIENTS_VISIT : 1
AREA_CONTINUES : 1
INITIAL_LDL : 1
WEIGHT_WEIGHT : 1
USING_ELBOW : 1
PANEL_ORDER : 1
TO_ALLOW : 1
RELIEVED_STATING : 1
VISIT_NO : 2
INJECTION_AMOUNT : 1
RESIDUAL_AND : 1
REPORT_THIS : 1
ASTHMA_OL : 1
OR_ANY : 1
FEELS_RESTED : 1
CLINIC_IN : 1
HAS_DONE : 1
BY_ADDENDUM : 1
GERIATRIC_SCALE : 1
VETERAN_THE : 1
INCONTINENT_OF : 1
IMAGE_WISH : 1
ABILITY_SHUTDOWN : 1
SOUNDS_CLEAR : 2
OF_SHE : 1
MALE_HT : 1
ENCOUNTER_PT : 1
AN_ALTERATION : 1
IS_REAL : 1
ENTERED_ANTICOAGULANT : 1
SURGICAL_VIEW : 1
OTHER_NUMBER : 1
ACTION_GROUP : 1
INPATIENT_MEDICATIONS : 3
TAKING_MEDICATIONS : 1
TREATMENT_TO : 1
CFCF_INHL : 1
EDUCAION_RR : 1
NOTE_DIPHENHYDRAMINE : 1
MINUTES_LENGTH : 1
OR_TO : 1
NUMBER_BOWEL : 7
POSTERIOR_OF : 1
SHIFT_NUMBER : 1
CONTACT_BE : 1
STAFF_OFFER : 1
VETERAN_ARD : 1
AND_THAT : 5
NAOMI_WITH : 1
RECREATIONAL_PATIENT : 1
TOOTH_IN : 1
YRS_THE : 1
REMAINS_IN : 1
WHO_PORT : 1
DELIVERED_AT : 1
HAS_HOME : 1
ECP_NURSING : 1
TEMP_PULSE : 1
THE_STAFF : 3
APPEARS_IS : 1
HOURS_ACTIVE : 1
PD_MM : 1
HE_SAYS : 2
STAFF_FEEDING : 1
OUTPATIENT_QUALITY : 1
OF_NUTRITION : 1
THE_CLC : 1
STREET_THE : 1
WITH_NURSE : 1
UNTIL_HIS : 1
TO_TOMORROW : 1
AND_BY : 1
LPM_ACTIVITY : 1
TRAVEL_REPORTED : 1
ADVISED_TO : 2
PT_STATES : 1
MISSED_APPT : 1
HARM_HARM : 1
WAS_GIVEN : 1
DECEMBER_WITH : 1
DAILY_BLADDER : 1
SHOOTING_AT : 1
VERIFY_NOW : 1
ENGINEER_RESIN : 1
AND_TIMES : 1
FELT_SO : 1
MOST_THE : 1
VISUAL_UCINATIONS : 1
ACTIVE_BEHAVIOR : 1
OF_HARM : 1
ODY_CONTACTS : 1
TOBACCO_USE : 2
LAST_MONTHS : 1
ASSISTANCE_OF : 1
OF_PATIENTS : 1
NURSING_NO : 3
LIVING_INDEPENDENTLY : 2
AND_ATE : 1
MEDICATION_TURNIN : 1
TO_CONTINUE : 1
SUPPLIES_FORMAL : 1
ADDITIONAL_LS : 1
AND_HAND : 1
DVDS_AND : 1
EVERY_FOR : 1
MG_CALL : 1
FEELING_BETTER : 1
DSMIV_PTSD : 1
AMBULATION_REQUIRES : 1
LESION_UNDERSTANDS : 1
EDUCATION_THE : 2
PATIENT_INSTRUCTIONS : 1
SOCIAL_NUMBER : 3
BACK_HIS : 1
REFRACTION_MCG : 1
SYSTEM_STATED : 1
USUAL_USUAL : 1
SLIVER_DING : 1
PROTECTION_FOOD : 1
PCA_SHEET : 1
PEERS_PLEASANT : 1
RECENT_YOU : 1
TO_OF : 1
TO_SPEAK : 2
DEPRESSION_HYPOTHYROIDISM : 1
BRONX_NY : 1
SWELLING_CHIN : 1
IN_WELLBUTRIN : 1
PHYSICIAN_ODY : 4
UP_MONO : 1
OF_NOTE : 3
NURSING_SPECIALTY : 1
ION_CONSTRICTED : 1
SUBJECTIVE_YEAROLD : 1
RELIEVE_ANXIETY : 1
VISIT_YOU : 1
WITHOUT_CONVERSATION : 1
PHOTOGRAPHY_IN : 1
ADVISED_LETS : 1
DISCUSSED_THE : 2
PAIN_INPATIENT : 1
EACH_SOME : 1
DIFFICULTY_SYMPTOMS : 1
TOILET_COLOR : 1
ROUTE_SMOKING : 1
REHABILITATION_THE : 1
LEFT_ANKLE : 1
FOR_HCV : 1
PVT_ACTIVE : 1
FLICK_SHAKING : 1
DENVER_NURSING : 1
TO_PROVIDE : 1
SHAMPOO_HAIR : 1
DATE_TEMP : 1
FALL_SCREEN : 1
HE_PT : 1
SYMPTOMATIC_PRURITIC : 1
REFUSED_WEAR : 1
OF_OTHER : 1
LUNCH_FOOD : 1
PERCOCET_POPLITEAL : 1
ALSO_LAST : 1
PHYSICIAN_PHYSICIAN : 2
MGS_GIVEN : 1
SURGERY_MIAMI : 1
THE_WAS : 5
INDIVIDUAL_SESSION : 1
ASSIST_GAIT : 2
THAT_NO : 2
ORDER_ULTRASOUND : 1
NOTE_COMMENTS : 1
REQUEST_PHYSICIAN : 2
ORIENT_TO : 1
IT_MAY : 1
TO_THEM : 1
FAIR_MG : 1
ANKLE_BE : 1
VERY_MR : 1
DOWN_CHEST : 1
DEPRESSION_THIS : 1
WEST_NURSING : 1
SINCE_WILL : 1
ADMISSION_PRECAUTIONS : 1
ADVERSE_REACTION : 1
PLAN_VA : 1
NAUSEA_ASSESS : 1
IMPROVING_THAT : 1
CAPACITY_PATIENT : 1
VISUAL_REASON : 1
UCINATIONS_NO : 1
HEARING_SC : 1
HIS_MH : 1
PLACE_REFUSED : 1
GAIT_LIFT : 1
ISOLATIVE_BEHAVIORS : 1
CLINIC_STRENGTH : 1
WHICH_WAS : 1
CONSENT_TREATMENT : 1
MASS_INDEX : 2
CONTAINERS_PROVIDED : 1
EGOMANIAC_PATIENT : 1
MANAGEMENT_PATIENT : 1
WITH_HEART : 2
IS_OUT : 1
WAS_NOT : 4
GETTING_SUPPORT : 1
SYMPTOMS_SAW : 1
PHYSICIAN_LAINED : 1
AWAIT_CALL : 1
WITH_BPH : 1
TRAVATAN_OU : 1
PREVIOUS_MEDICAL : 1
TUFTS_DENTAL : 1
MULTILEVEL_STATED : 1
PAIN_WITHIN : 1
NOTE_TOPIC : 1
WORK_PATIENT : 1
USE_INTERACTING : 1
REDDNESS_RECEIVED : 1
INITIAL_RANDOMIZATION : 1
FOR_AND : 5
BMI_BODY : 2
BLADDER_ALSO : 1
ACTIVE_RECENTLY : 1
LISTED_PSYCHOTHERAPY : 1
PROCEDURE_OF : 1
CALLS_ASSISTANCE : 1
DEC_BMI : 1
EYE_NOTE : 1
QUETIAPINE_TAB : 1
AROUDN_VOICES : 1
ALERT_COOPERATIVE : 1
INHL_MCG : 1
CYST_TEXT : 1
ENTERED_MIN : 1
MENTATION_AOX : 1
NEEDED_PAIN : 1
IN_ABILITY : 1
PROGRESS_WITH : 1
THE_PAST : 5
GLUTEAL_NEXT : 1
GLASSES_HYDROCHLOROTHIAZIDE : 1
OX_ROOM : 1
OF_POPLITEAL : 1
PATIENT_CHEST : 1
SALTY_FISH : 1
INTERVENTION_VIEW : 1
CAREGIVER_WIFE : 1
ROLE_AS : 1
HES_SHOULD : 1
IMMUNIZATION_NICOTINE : 1
ABSTINENCE_PSYCHOACTIVE : 1
SIDE_SITE : 1
HISTORY_MONTHS : 1
PROVIDE_IF : 1
SHOTGUN_THE : 1
RESPIRATIONS_FOR : 1
RECENT_IDEATION : 1
HIS_REQUEST : 1
AND_UNDERSTANDING : 1
ACTIVE_CLOZAPINE : 1
PAST_THE : 1
TURNS_SITS : 1
ON_DAUGHTER : 1
REQUIRED_FEEDING : 1
MET_LPM : 1
FOOD_DRINKS : 3
ZIPPERS_BRC : 1
NO_ASSISTANCE : 4
COMPLAINT_OF : 2
ANA_ADVOCATE : 1
HIS_LEVEL : 1
TO_ANXIETY : 1
OF_REPAIRED : 1
MISSED_CALL : 1
HE_OTHER : 1
AND_NECESSITY : 1
AN_TO : 1
PT_PROCEDURE : 1
AFFECT_APPROPRIATE : 1
EGOMANIAC_HAD : 1
COMPLETED_ASSESSMENT : 1
PAIN_QUALITY : 1
MHC_TAKING : 1
IMPROVING_STATES : 1
INSIDE_OF : 1
TIME_AND : 1
MADE_MG : 1
OU_GLAUCOMA : 1
NEW_YEARS : 1
MEASURED_CM : 1
IN_LONG : 1
DEPRESSION_ANXIETY : 1
ACKNOWLEDGED_PROGRESS : 1
AND_FAMILY : 2
INJURED_IT : 1
PMH_LIST : 1
PHYSICIAN_TOPICAL : 1
INTERACTION_SEEN : 1
ATTENTIVE_FOLLOWUP : 1
ROOM_001 : 1
MG_WILL : 1
SPECIALTY_NOTE : 1
PAIN_VICODIN : 1
MINIMUM_OF : 1
WITH_HIM : 1
ALCOHOL_MORNING : 1
APRIL_WHEN : 1
CA_OBESITY : 1
POLYMYXIN_HISTORY : 1
DIABETES_VETERAN : 1
OR_DISEASE : 1
WAS_YOUR : 1
POSITIVE_THERAPEUTIC : 1
HARM_OTHERS : 1
PROTECTOR_WHILE : 1
WHEEZES_BOWEL : 1
HIGH_PHYSICIAN : 1
VISIBLE_BUT : 1
FALL_LEVEL : 1
GOAL_MONTH : 1
FORMAL_PAIN : 1
SPS_WILL : 1
VA_OBESITY : 1
OCT_OF : 1
WAS_ASSIGNED : 1
HE_RTC : 1
REPORT_MOTHER : 1
IDEATION_NEGATIVE : 1
THINKS_MAY : 1
TIME_HAS : 1
THE_USUAL : 1
WAS_GET : 1
ADL_FLOW : 1
OF_LEFT : 1
BACK_WITH : 1
FLOMAX_STANDARD : 1
TIME_THE : 4
TRACE_TR : 1
WEEKLY_HOME : 1
ORIENTATION_NO : 1
AGE_OBESITY : 1
AM_BEFORE : 1
WORK_HIS : 1
001_TO : 1
CHAPLAIN_TO : 1
PT_ON : 1
CRITERIA_AGREED : 1
ASSIST_RESIDENT : 1
TH_THEY : 1
SEC_THE : 1
VETERAN_WORKED : 1
STATUS_SIGNS : 1
HIS_APPT : 2
OR_CONSISTENCY : 1
STRESS_RELATED : 1
MAKE_SURE : 1
REQUESTING_ON : 1
HAD_THE : 1
IF_PROBLEM : 1
AREA_WAS : 1
ALSO_REQUESTING : 1
ARM_RAISED : 1
NOT_RX : 1
MUCH_APPETITE : 1
COMPENSABLE_DISABILITY : 1
HISTORY_HTN : 1
NUMBER_YRS : 1
TRACER_TO : 1
MEDICATION_AS : 1
PT_TO : 1
FEW_YRS : 1
APR_INTERVENTIONS : 1
FEEDING_NUMBER : 1
PROGRESS_PT : 1
PREPPED_AND : 1
ASSISTANCE_COLOR : 2
FOLLOWING_FOR : 1
HIS_BELT : 1
CLASS_PATIENT : 1
OF_RT : 1
UNTIL_YESTER : 1
THERAPY_FOCUSING : 1
MH_PAKULA : 1
TREATMENT_WAS : 1
OR_TOBACCO : 1
ORTEGA_ANTONIO : 1
ARM_PATIENT : 1
ECP_SUMMARY : 1
KNEE_BACK : 1
NON_NARCOTIC : 1
YOU_REGARDING : 1
PRECAUTIONS_VS : 1
REQUESTS_CALL : 1
ANTONIO_PRIMARY : 1
VOIDING_EXC : 1
USUAL_WEIGHT : 2
PAIN_REDDNESS : 1
EXTENSION_EACH : 1
RADIATION_DAILY : 1
MOBILITY_PRO : 1
TO_OTHER : 2
IMPLEMENTED_PNEUMOCOCCAL : 1
CUEING_CONSISTENCY : 1
PARTICIPATED_INTERVENTION : 1
PAIN_IS : 2
THIS_WITH : 1
FOR_LIVING : 1
FOR_EXPOSURE : 1
SKIN_HBPC : 1
EXAMINED_APPARENTLY : 1
HIS_WAS : 1
ALCOHOL_DEPENDENCE : 2
PHONE_SHOULDER : 1
WORST_IVE : 1
VA_WITH : 1
MAY_IN : 1
ABOUT_GETTING : 1
HIS_TEAM : 1
SUMMARY_REVIEW : 1
VISIT_PROVIDER : 1
BE_CLINICAL : 1
CART_NOTE : 1
ACTIVE_FUTURE : 1
MORALITY_VALUES : 1
ADDRESS_NOTICED : 1
FEELING_HOMICIDAL : 1
PART_OF : 1
ON_FALLS : 1
IS_DRINKING : 1
HTN_DIARRHEA : 1
ML_HE : 1
INSTITUTE_PING : 1
RELAXANT_ADDENDUM : 1
SKIN_WHEAL : 1
NO_LAST : 1
PHARM_ANTICOAGULANT : 1
HEALTH_SERVICE : 1
FISH_STOP : 1
THAT_SLEPT : 1
PRIMARY_CARE : 4
TOOK_THIS : 1
TREATMENT_PT : 1
WOUND_TO : 1
OF_POSTOCCIPITAL : 1
OR_SYSTEMIC : 1
WILL_GO : 3
AFFECT_IS : 1
INSTRUCTED_EXUDATE : 1
CAPACITY_COMPLICATIONS : 1
PARTIAL_URINE : 1
YOUR_DEAR : 1
AND_SERVICE : 1
MSE_THE : 1
PULSE_PATIENT : 1
OVERWEIGHT_OR : 1
SAFE_CONTROLLED : 1
LDL_LDL : 1
HIS_SHE : 2
HIS_LE : 1
IS_BY : 2
LOT_AGO : 1
HAS_SUICIDAL : 1
TOILET_HE : 1
IT_AFTERNOON : 1
HIM_AND : 3
ULCERS_OR : 1
CONDITION_DISCHARGE : 1
YOU_FEEL : 1
CLINIC_CALL : 1
SCHEDULED_PAT : 1
RELATING_IT : 1
TITLE_CONSULT : 1
VETERAN_SYMPTOMS : 1
MR_NEVER : 1
PATIENT_OF : 3
FOR_MEDICATION : 1
ACTIVE_MEDICATIONS : 5
WEIGHT_LB : 2
LUNGS_CLEAR : 1
CALLS_WITHOUT : 1
KEY_TO : 1
ASK_YOU : 2
NO_CHF : 1
PERFORMED_MOST : 1
PROMOTION_AND : 1
MEDS_CALLED : 1
NO_FEATURES : 1
MG_ONE : 2
REASSESSMENT_QUALITY : 1
ILL_SAYS : 1
HIS_VITALS : 1
SOME_TASK : 1
WILL_FILL : 1
CONSENT_ENSURING : 1
DOSAGES_BE : 1
NOTE_PROVIDER : 1
MAINTAINED_WITH : 1
ADL_PARTIAL : 1
MHC_MEDGROUP : 1
YOUR_VERIFY : 1
WERE_QUETIAPINE : 1
DEATH_HIS : 1
ACA_FOLLOW : 1
CONSULT_RESPONSE : 1
APPARENT_AT : 1
FAMILY_AND : 1
ASKING_SUPPORTTALKING : 1
NAME_RISK : 1
INFORMATIONAL_TO : 1
AND_HIS : 3
YES_IS : 1
VETERAN_MAY : 1
ADENOSINE_TEST : 2
THE_RECENT : 1
OU_ALPHAGAN : 1
ADL_NOTE : 6
OF_SWELLING : 1
PLEASANT_MOOD : 1
TO_QUIT : 1
OR_CHAPLAIN : 1
NONPHARMACOLOGICAL_THERAPY : 1
AMBULATORY_NO : 1
MEDIAL_LATERAL : 1
LFTS_COUNTS : 1
ML_HAS : 1
BETH_BIRTH : 1
IMAGING_CONTAINS : 1
PAIN_CHANGED : 1
PAIN_PLAN : 1
CONTACT_APPEARANCE : 1
REPORTED_INCOMING : 1
VOLUNTARILY_FOR : 1
METHADONE_MG : 1
THEMSELVES_TO : 1
WITH_NON : 1
UNDERSTANDING_DIFFERENCE : 1
GONE_AND : 1
ADDENDUM_STEPS : 1
PERSONALLY_THE : 1
ARRIVED_HIS : 1
USES_BOWELS : 1
APPROVED_BY : 1
NEEDS_HE : 1
SUBSTANCES_NEGLECT : 1
CYST_LB : 1
BACTRIM_CHANGE : 1
CONTINUE_PLAN : 1
SERVICE_VA : 1
BREAKFAST_OJ : 1
AM_NATIVE : 1
SUICIDAL_HE : 1
PART_HIS : 1
HAVE_REGARDING : 2
TAKE_HE : 1
RESIDENT_TO : 1
PINESS_CONTINUES : 1
TO_UNIT : 1
QUALITY_PRIMARY : 1
OFFERED_ASSIST : 1
OF_LAINED : 1
WITH_CPAP : 1
TO_INCOMING : 1
TO_PATIENT : 5
CONTACT_NUMBER : 1
ALTERATION_TIME : 1
UNIT_TOTAL : 1
WILBURTON_AUTHOR : 1
THROUGH_BEFORE : 1
PT_DX : 1
VET_AGREEABLE : 1
WALKING_DECREASE : 1
ACHING_MOVED : 1
PERFORMED_ON : 1
DING_PERSONAL : 1
PRACTITIONER_BE : 1
SURE_READY : 1
ARD_NORMAL : 1
VM_REQUESTING : 1
PO_PATIENT : 1
NONTENDER_BOWEL : 1
AND_TAKING : 1
PATIENTS_BY : 1
TO_TWICE : 1
IDENTIFIERS_WERE : 1
CLINICIAN_FOR : 1
MALE_EXAMINED : 1
RT_PSV : 1
BEEN_WITH : 2
REHABILITATION_PLACE : 1
CORTICAL_CHANGES : 1
FOR_AEROBICS : 1
NO_DISTRESS : 1
VS_SUBSTANCE : 1
NOT_BUT : 1
DURATION_VERBAL : 1
CONTINUOUS_BEHAVIOR : 1
TIA_PVT : 1
FOR_ANOMALIES : 1
TO_DECLINE : 1
BY_TO : 1
OUT_PATIO : 1
RIGHT_BUTTOCK : 1
ASKING_FOR : 1
WHEN_IF : 1
DEPENDENCE_WHAT : 1
APPROPRIATE_BREATH : 1
HEALTH_TREATMENT : 1
MARCH_OR : 1
TO_UROLOGY : 1
ACTIVITIES_DAILY : 2
RECREATION_BRC : 1
PROGRESS_MET : 1
HIGHS_HE : 1
ALSO_DEMONSTRATED : 1
WITH_MORE : 1
EDUCATION_GROUP : 1
INDIVIDUAL_THERAPY : 1
MR_THAT : 1
AND_STATED : 1
ASSESS_MENTAL : 2
IV_ACCESS : 1
PROCEDURE_EXTREME : 1
STILL_ONCE : 1
UNDERSTOOD_PROCEDURE : 1
AND_SITE : 1
INVOLVED_THIS : 1
FRI_THE : 1
CLINIC_AS : 1
URINE_MOBILITY : 1
CONTINUE_FLOMAX : 1
AND_REFRACTION : 1
LAST_NO : 1
SURGERY_CONSULT : 1
WAS_INSTRUCTED : 1
AND_PLAN : 1
POOR_WITH : 1
PTSD_CRITERIA : 1
OU_ADV : 1
MALE_ON : 2
WORKER_IN : 1
INCREASED_WITH : 1
AUDITORY_VISUAL : 1
DOSE_FOR : 1
NORMAL_FOR : 1
TO_HAS : 1
OF_CONSULT : 1
ASSIST_LOCATION : 1
THIS_HAS : 4
PAYMENT_HE : 1
PAST_SIZE : 1
AT_DISCHARGE : 2
FOR_NONE : 1
AND_SITS : 1
AND_AND : 2
IS_OK : 1
HAVE_CURRENT : 1
CHAPLAIN_PROVIDE : 1
RESTORATIVE_MOBILITY : 1
BRIEFLY_CIU : 1
AND_MONITORED : 1
SERVICES_OF : 1
DISORDER_PATIENTS : 1
CONVERSATION_REGARDING : 1
BEEN_BETTER : 1
OF_LEG : 1
THERE_WERE : 1
DISTRESS_ATTENTIVE : 1
PULSE_ADVERSE : 1
SIDE_BODY : 1
ENSURING_CORRECT : 1
SPERMATOCELE_BARRIERS : 1
READINESS_TO : 1
CHANGES_IN : 1
PATIENT_HISTORY : 1
HYPERGLYCEMIA_TREATED : 1
PRACTITIONER_AND : 1
TREATMENT_WORK : 1
RAL_MH : 1
HAD_PATIENT : 1
CUTTING_HPI : 1
YES_DEAR : 1
SKIN_DISEASE : 1
THERAPY_YOUR : 1
CAP_SWITCH : 1
PLAQUE_CALCULUS : 1
AROUND_CHIN : 1
SIGNATURES_PERSONS : 1
IN_PLACE : 2
BY_CONNECTING : 1
LIST_WRISTS : 1
PATIENT_CHECKS : 1
LOG_AVG : 1
BY_VA : 1
FORM_THE : 1
RESIDENT_OF : 1
TIME_TEMP : 1
SECURITY_BLOOD : 1
WORK_ASSESSMENT : 1
FALLS_REPORTED : 1
ASSESSMENT_WITHOUT : 1
ON_RECRUITMENT : 1
FOR_REPORT : 1
MORPHINE_AND : 1
GIVEN_BY : 1
SERVICE_WITH : 1
DIABETOLOGY_PT : 1
THAT_NEEDED : 1
DISCHARGE_OR : 1
DD_PATIENT : 1
NO_FOR : 1
HAVE_BEEN : 4
STOOL_TO : 1
YOU_HEARING : 1
MG_BARRIERS : 1
OUTLINED_MY : 1
IDEATION_MONITOR : 1
IOP_PATIENT : 1
BEDSIDE_PULSE : 1
RESIDENT_OR : 1
AXIS_ALCOHOL : 1
THE_BEEN : 1
ABLE_OVERSIGHT : 1
FOR_APPOINTMENT : 1
UP_CLINIC : 1
TO_SMOKING : 1
NOTE_INFORMATIONAL : 1
CONTACTS_EXTRA : 1
AND_ADVISED : 1
CBSST_OF : 1
HAVE_NO : 1
THE_BRIEFLY : 1
OU_VICODIN : 1
SHOULDER_WHICH : 1
EYE_REDDNESS : 1
SIDES_PATIENT : 1
CONFLICT_HE : 1
LAB_RESULTS : 1
HES_BLIND : 1
WEARING_NONSLIP : 1
OF_EXTREME : 1
PROBLEM_DISORDERMET : 1
NO_BRUIT : 1
HE_COMES : 2
PT_INSTRUCTED : 1
QUESTIONS_ABOUT : 1
WAS_EXPLAINING : 1
REVIEWED_THE : 2
IT_IN : 1
SIDERAILS_APPOINTED : 1
PHYSICIAN_HAVE : 1
GENDER_MALE : 1
STATUS_TO : 1
PRECAUTIONS_NAUSEA : 1
PRODUCT_USER : 1
THAT_TIME : 1
ROOM_AIR : 1
PATIENT_ON : 1
HEALTH_ANXIETY : 2
BE_SCHEDULED : 1
EXPLAIN_DENIES : 1
OH_TO : 1
ABUSEUNSPEC_HE : 1
PH_GLARE : 1
ALCOH_CONTINUOUS : 1
INTENSITY_IN : 1
WRITER_FOR : 1
PAST_MONTH : 2
STATING_PT : 1
WHO_NOT : 1
NUMBER_FOR : 1
PT_OUTPT : 1
STRESS_TEST : 3
WORST_FELT : 1
MEDICATION_LIST : 1
CM_NO : 1
THE_NIGHT : 1
HANDS_AND : 1
PHYSICIAN_PATIENT : 1
MIX_WITH : 1
NONE_THUS : 1
SHE_ABOUT : 1
SOUNDED_STATING : 1
APRIL_THE : 3
WORDS_VETERAN : 1
VET_FLIGHT : 1
SUCH_PROGRESS : 1
TO_SIT : 1
DPT_TO : 1
WITH_CHIEF : 1
URINECLEAN_CATCH : 1
LEVEL_IS : 1
VIEW_SWS : 1
MS_AT : 1
SAYS_MEDICATIONS : 1
AND_BETTY : 1
NAME_DOB : 1
NY_NY : 1
ALLOW_VETERAN : 1
THE_IVE : 1
THERAPY_CONSULT : 1
DYSURIA_URGENCY : 1
WITH_SUPERVISING : 2
MARITAL_MARRIED : 1
HIS_BEHAVIORS : 1
WILL_CHANGE : 1
TIME_ROOMED : 1
PHYSICIAN_IMPAIRED : 1
WITH_BANK : 1
YOU_INJURED : 1
! Stats words=2165  pairs=11094
