# Supplementary material for: Predicting the Risk of Suicide by Analyzing the Text of Clinical Notes
Source: PLoS One. 2014 Jan 28;9(1):e85733. doi: 10.1371/journal.pone.0085733 (PMC3904866; doi:10.1371/journal.pone.0085733)
Supplement: Appendix S3 — Machine Learning Libraries and Methods: This section is provided to enclose the open source (Apache License) classifier used for the building of the statistical models, specifically for the purposes of study reproducibility. A detailed account of these tools is intended for another publication. (ZIP) [file pone.0085733.s003.zip › Appendix3/ML_libs/Regression_testing/group3/processed/grp3-pt-1055.dat]

!  Done reading
! Total word count = 6955
! Total unique words = 2132
! Total pair count = 13906
! Total unique pairs = 11590
AT : 40
ADL : 2
ZZPATIENT : 2
PALPITATIONS : 2
SHORTTERM : 1
ANSWERING : 2
QMORNING : 2
WORK : 6
CUTTING : 1
PREOP : 1
VOICES : 1
LOWER : 3
OSMOLALITY : 2
DYSMETAB : 1
WEIGHT : 2
EVENTUALLY : 1
READINESS : 1
STAY : 1
RELIEVE : 1
PERCIEVED : 1
ALERTS : 1
MINUTE : 1
INSTRUCTED : 1
MILITARY : 1
FUNDS : 1
INTERVENTION : 1
COUNSELING : 3
USE : 12
PRIVILEGES : 4
MEANS : 1
RR : 1
DISCHARGED : 3
SUPPLIES : 2
SECURITY : 1
CONCEEDS : 1
READING : 3
VETERANS : 5
SCHEDULING : 2
LEVEL : 2
CHANGES : 2
ALCOHOL : 8
RAL : 2
STOVE : 1
SEEMS : 1
DOXEPIN : 1
OM : 1
MET : 5
SHOULDER : 3
MACHINE : 3
PBC : 1
FUNCTIONING : 1
ETTE : 1
MEAL : 6
PHYS : 1
WHAV : 1
REMOVED : 1
APPROPRIATE : 2
BLIND : 3
ASSOC : 1
GOTTEN : 1
APPROACHING : 1
WELL : 3
FISH : 1
PHARM : 1
REMID : 1
TEST : 3
NOTE : 53
LEI : 1
MISCELLANEOUS : 2
DO : 6
DOES : 5
TESTS : 3
HTN : 2
FACT : 1
METH : 1
RENEWAL : 1
ACCESS : 1
ADVERSE : 4
OCCLUDED : 1
SCHEDULED : 8
ANCHORAGE : 2
EXACERBATING : 1
RETURNING : 1
TAB : 18
ASSISTED : 1
STABLE : 3
REQUIRED : 1
MONITOR : 3
IPU : 1
DEC : 4
HAS : 49
FOR : 102
ALLEVIATE : 1
BUSPIRONE : 1
PERCEPTION : 2
CONDITION : 6
NUTRITION : 1
SUSPECTED : 1
CLC : 1
QBEDTIME : 2
MODALITIES : 1
MODALITY : 1
MORNING : 6
SOCIETY : 1
INR : 2
AWAITING : 1
AMB : 1
BONFADINI : 1
KNEE : 4
ABSTINENCE : 1
EH : 1
SC : 6
IDEATION : 1
MUST : 1
INACTIVE : 1
SATURATION : 1
SWER : 3
GOALS : 4
RESPIRATORY : 1
DOG : 1
ACTIVITY : 4
OWN : 1
TAXI : 1
SHOWS : 1
LABRAL : 1
MENU : 1
AFLOAT : 1
PREVIOUSLY : 1
RINGS : 1
CLOZARIL : 1
PATTERN : 3
TYPICAL : 1
LISTENED : 1
EXAM : 7
RECENTLY : 1
VISIBLE : 1
FLOWSHEET : 3
DUAL : 1
RAUSCH : 1
JUST : 1
INCREASED : 2
NSC : 1
DURATION : 2
WRITING : 1
OCT : 3
ENJOYED : 1
BOAT : 1
GO : 3
SIGNIFICANT : 2
BOWEL : 9
MST : 1
BP : 1
RESIDENTS : 2
NIGHTS : 1
INVENTORIED : 1
DIVISION : 1
HEARD : 1
POST : 1
DEPRESSION : 9
SON : 2
RED : 1
CM : 5
CYR : 1
DISCOVERED : 1
AGREEMENT : 3
GAIT : 4
EVER : 1
TF : 1
ATTEND : 1
ABRASION : 1
MEETS : 1
WT : 3
RESTRICTIONS : 1
REDUNDANT : 1
TOP : 2
PARTIAL : 1
STARTED : 3
SUSTAINED : 1
ACTUALLY : 1
TECH : 1
VAPOR : 1
OR : 38
BOTH : 2
SHIFT : 17
SUPPLEMENT : 2
TEMP : 2
CONSIDERED : 1
BEACH : 1
CONCERNS : 1
AAOX : 1
GUIDANCE : 1
032511 : 1
GRANDKIDS : 1
AIR : 1
LOOKS : 2
PORTAL : 1
LIKE : 3
LORATADINE : 2
JEWELRY : 1
CALLS : 1
LAMISIL : 1
TRAINING : 1
PS : 1
MUCH : 4
CHRONIC : 4
ASPECT : 1
PAINWITHOUT : 1
ANKLE : 1
TAKE : 16
INCREASE : 1
WITHDRAWAL : 1
MONITORED : 1
WALKIN : 1
HOMES : 1
STRENGTHS : 1
OROBASE : 1
OD : 1
ALTERED : 1
BESYLATE : 1
ADMITS : 1
EXAMPLE : 1
SPOKEN : 1
NONCOMPLIANCE : 1
LATERAL : 1
OBLIQUE : 1
METFORMIN : 1
OVERT : 1
UNIT : 3
THINK : 1
IBUPROFEN : 2
MYCIN : 1
MD : 8
NAME : 5
CARE : 23
SURROGATE : 1
AGE : 2
HEARTTOHEART : 1
EVALUATE : 1
INVOLVED : 1
RATED : 1
TIMES : 4
IS : 78
DICT : 1
DL : 1
PROLONGED : 1
BENEFIT : 1
START : 3
IF : 13
ENOUGH : 1
MH : 9
PENDING : 2
BAND : 2
PERSONNEL : 1
GENITAL : 1
SKILLS : 4
EATING : 1
COMPREHENSION : 1
CERTIFICATION : 1
OXIMETRY : 2
GROSSLY : 1
CARDS : 1
LOCATED : 2
LIVE : 2
INFLAMMATION : 1
BRIEFLY : 1
RESIDE : 1
EVALUATION : 7
APPROX : 1
REHAB : 2
THESE : 2
CONTI : 1
COMPENSATION : 2
BENEFICIAL : 1
VISION : 4
CLASSES : 1
CEC : 1
PR : 1
CAROL : 2
DROP : 2
RULES : 1
PARTICIPATION : 1
TRYING : 1
TRANSPORTATION : 1
PRESENCE : 1
HEIGHT : 3
LR : 1
ADDENDUM : 17
FULL : 3
ECONOMIC : 1
NO : 52
MANAGMENT : 1
CONSCIOUSNESS : 1
AUDIOTAPE : 1
CHIEF : 8
COMPLIANCY : 1
INCISION : 1
ROUND : 1
RANITIDINE : 1
EXCESSIVE : 1
CNA : 1
CANDIDIASISASYMPTOMATIC : 1
UPPER : 1
BENIGN : 1
RISK : 9
CLINIC : 13
SCISSORS : 1
CLOZAPINE : 2
PERFORMED : 3
EGOMANIAC : 1
INITIALLY : 1
CONSEQUENCES : 3
HIGHEST : 1
MINS : 1
ARTERIAL : 1
BMI : 1
POINT : 1
COULD : 5
NOTET : 1
SPECIALTY : 1
DEGREE : 1
PBR : 1
TOOLS : 1
LV : 1
WILL : 30
WRAP : 1
APPEARANCE : 3
OFTEN : 3
BUT : 15
ASKED : 3
THOUGHTS : 3
HOMEBOUND : 1
TYPE : 4
CAREGIVER : 1
DESCRIBES : 1
LIKES : 1
GETS : 1
WENS : 1
PLASMA : 1
TPN : 1
HUSBAND : 1
SET : 2
SCHIZOPHRENIA : 2
HDL : 1
CFCF : 1
DIVORCED : 1
MARITAL : 1
DEL : 1
JELLY : 1
CONSULT : 4
TOUCHING : 1
SUPPORT : 3
WANTS : 2
QID : 4
ANTICIPATED : 1
PRESENTED : 1
EXPOSURE : 1
LIKELY : 1
REVIEW : 3
HIMSELF : 1
INJECTION : 2
LIVER : 1
ACET : 1
BASCOM : 1
RESIDENT : 7
INSTRUCTIONS : 1
NONSMOKER : 1
VA : 4
WED : 2
HYPOALLERGENIC : 1
BENT : 1
RESIDENCE : 1
BANISTERS : 1
LEVOTHYROXINE : 1
WORTH : 1
DISEASE : 1
PAIN : 40
PERIODON : 1
RECONCILLIATION : 1
THURS : 2
AS : 25
VISTA : 2
RESTRAINTS : 2
GTTS : 1
INTRAVENOUS : 1
DRAINAGE : 1
WITH : 74
FEELS : 3
WORRIED : 1
OFFERED : 2
TEMPERATURE : 2
DOC : 1
SHI : 1
INCLUDING : 4
LMWH : 1
COPING : 3
SETTING : 5
USED : 9
IT : 11
BEDTIME : 2
BELOW : 2
PERMIT : 1
NECESSARY : 1
CLINICALLY : 1
DSHI : 1
CONSTITUTIONAL : 1
ZA : 1
DISCUSSED : 12
EXERCISE : 3
SHOWER : 1
TIME : 35
NEATLY : 1
CODE : 2
SWS : 3
CAFF : 1
PLEASURE : 1
HYGIENE : 5
HCL : 1
HUDVASH : 1
WALK : 3
TEETH : 4
ADDITIONAL : 4
EMOTIONAL : 2
SIDE : 4
BREAKFAST : 3
TIBIA : 1
RECEPTIVE : 1
ALLERGY : 1
PAK : 1
SPEAK : 2
LUBRICATING : 1
ASSESMENT : 1
CALL : 14
EXPRESSED : 1
REINFORCEMENT : 1
RESULT : 2
HX : 2
MHC : 1
IMAGING : 1
COMPRESSING : 1
SELECTING : 1
UNSPECIFIED : 6
SOB : 2
IOP : 1
MOTIVATION : 2
JUDGMENT : 1
EMOTIONALLY : 1
FRI : 3
TABLETS : 1
PER : 3
FRIEND : 1
ETC : 2
MOBILITY : 6
OPHT : 1
YOUR : 4
PRECAUTIONS : 1
GIVEN : 8
UNSURE : 2
SUSAN : 1
BABY : 1
PACKET : 1
EPIDIDYMAL : 1
MAD : 1
WHO : 8
SPECIFICALLY : 2
HT : 1
UPON : 1
ANA : 1
VERBALIZES : 1
BASED : 1
ATTENDANCE : 2
VIST : 1
COMPREHENSIVE : 1
ARM : 6
CURRENT : 9
HIM : 10
DEMOGRAPHICS : 1
PULSE : 8
NEXT : 6
NEEDS : 4
THEY : 6
DESAT : 1
CSPINE : 1
APPTS : 2
MESKENAS : 2
INTENDS : 1
CONFIDENTIAL : 1
PPH : 1
TRANSFER : 3
HVF : 1
ML : 3
PHONE : 11
DECLINED : 1
TALKING : 1
RESPONSES : 2
TOUCH : 1
CARBAMAZEPINE : 1
FAIR : 3
AUTOMATICALLY : 1
EGD : 2
WI : 1
DRY : 1
HAD : 7
LYTES : 1
STRAIGHTER : 1
DYNAHEX : 1
PMRS : 1
NEUROLOGIST : 1
SPECIAL : 1
LOSS : 5
NINAN : 1
SISTER : 1
PASSIVE : 1
MRSA : 1
MUSICIAN : 1
ARRIVING : 1
HELD : 1
ANALYSIS : 1
YO : 3
NEGATIVE : 4
OUR : 2
ARMBAND : 1
REINFORCED : 1
ORTHOPEDIC : 2
WRITTEN : 1
ACCORDANCE : 1
SPUTUM : 1
LAB : 3
DIAGNOSTIC : 1
ING : 1
COMPLAINTS : 2
CONTACT : 13
NOTIFIED : 3
FLUCONOZOLE : 1
IMPAIRED : 3
COURT : 1
ROOTS : 1
METHOCARBAMOL : 1
PROBLEMS : 7
URINE : 11
ANTISOCIAL : 1
NASAL : 2
GIVE : 1
CAN : 8
THERAPY : 7
PSYCH : 3
SEND : 2
AWARE : 1
RECEIVES : 2
NONVA : 5
WHICH : 7
PAM : 1
SYMPTOMS : 5
NOTES : 4
OVER : 4
ROTATOR : 1
ON : 64
COMPLETE : 2
BLASTS : 1
PRESSURE : 2
TETANUS : 2
ATTENDED : 6
ECP : 1
PILL : 1
VERIFY : 1
VIA : 2
NC : 1
REFERED : 1
HEADACHE : 1
UPTIVE : 1
GOOD : 6
DROPS : 2
ACCOMPLISHMENT : 1
MED : 3
UPDATE : 2
VENT : 1
INTO : 3
INHALER : 1
ALPHA : 1
EDEMA : 1
FIRE : 1
STREET : 1
SAO : 1
FIRES : 3
SHE : 11
PO : 1
ENCOUNTERS : 1
UP : 11
THEN : 5
USUAL : 1
DEAR : 3
FEW : 1
LOCATION : 3
MOD : 1
RESTORATIVE : 1
WORSENING : 2
POSTTRAUM : 1
FEVER : 1
FINGERS : 1
JESUS : 1
AWAY : 2
PRIOR : 5
VERBAL : 4
REMISSION : 2
DOCUMENTED : 1
GOT : 2
OBJECTIVES : 1
DATE : 16
RELATES : 1
DAILY : 3
REQUIRE : 4
PERCENT : 1
SCREENS : 1
AWAKE : 1
HOUSING : 1
FROM : 21
LEFT : 13
BATH : 1
IDCP : 1
CLAMIS : 1
IMPLANTS : 1
REALITY : 1
LIDS : 1
MEDICAL : 6
HEAD : 1
BECOME : 2
AMITRIPTYLINE : 1
SPOKE : 3
ALSO : 8
SYSTEM : 1
PCPS : 1
FINGERTIP : 2
WORKING : 2
AN : 19
MOIST : 1
SCIENCE : 1
SKIPPED : 1
HEART : 3
HURTING : 1
SIGNATURE : 2
TAKES : 1
COPE : 1
APPARENT : 2
OUTSIDE : 2
OSAC : 1
MEASURES : 1
EYE : 9
CONTAINING : 4
MILIEU : 1
DISCUSSION : 1
AGO : 3
DESIRED : 2
ATTENDING : 5
CHEST : 5
HAVING : 7
MOMETASONE : 1
EXCISION : 1
DT : 3
FOREGO : 1
ANESTHETIC : 2
YOM : 1
OPH : 2
MUSCLE : 1
HC : 1
LATER : 1
ARE : 10
DESIRE : 2
INDEPENDENT : 3
THIGH : 1
HYPERTENSION : 2
CORRECT : 5
WOKE : 1
PERSON : 5
APPLY : 1
CYST : 3
CPRS : 4
SURGERY : 11
FECAL : 1
RECOVERY : 2
LIGHTING : 1
XYDS : 1
FREQUENCY : 1
INHL : 1
MAINTENANCE : 2
GENERAL : 2
INTERDISCIPLINARY : 2
ACCOUNTABILITY : 1
SERVED : 1
NUMBNESS : 2
YEARS : 1
TIRED : 1
BE : 32
ACC : 1
CANCER : 3
NONOR : 1
LEAVE : 2
DUE : 5
THEIR : 2
DISC : 1
CONCUR : 1
TAUGHT : 1
PING : 4
PH : 1
CANE : 1
DELUSIONS : 1
ISSUES : 4
PENETRATE : 2
RECONCILED : 2
CDM : 1
PSYCHOSIS : 1
OTHER : 12
GRIPPER : 1
END : 1
LIFE : 3
QUIET : 2
ME : 6
ANTICOAGULANT : 1
BED : 6
NURSING : 23
POKER : 1
DYSPNEA : 1
FOLLOWING : 3
IDENTIFIED : 12
GLAUCOMA : 2
ENDING : 3
TRAZODONE : 1
REFER : 1
WITHOUT : 5
DIAGNOSIS : 8
NANCY : 2
VERIFIED : 4
CALLING : 2
MI : 1
SPINE : 1
ANXIETY : 2
METOPROLOL : 1
SAY : 1
POSITIONING : 1
VALVE : 1
THOUGH : 1
CILOSTAZOL : 1
WE : 2
TOILET : 6
DISTANCE : 1
SYND : 1
PULLED : 1
PROTECTORS : 3
PATCH : 2
FOUND : 2
PATCHES : 1
ROOM : 9
IMPROVED : 2
PAINS : 1
CHART : 3
AVAILABLE : 1
REVIEWING : 1
ABOUT : 9
MIAMI : 2
ANYTHING : 1
DIERCTED : 1
PLEASANT : 1
POTENTIAL : 1
CHARTS : 1
NOTIFY : 1
NKA : 1
NSAIDS : 1
BRIEF : 1
ADVOCATE : 1
ADEQUATELY : 1
MULTIVITAMINS : 1
AP : 1
TABLET : 14
DOM : 1
ADMIT : 2
DURING : 11
MHP : 1
COMMON : 1
MURMURS : 1
TOLD : 4
SEVERAL : 1
LISTED : 2
DIRECTED : 3
SCREENING : 1
SUMATRIPTAN : 1
CHECKS : 2
ERUPTED : 1
BUTALBITAL : 1
DSM : 1
HI : 3
REACTIONS : 2
EQUAL : 1
OS : 4
PLANTAR : 1
PROPER : 2
OXYGEN : 4
SCORE : 11
BINGE : 1
NEVUS : 1
HURTS : 1
DWIGHT : 1
HOME : 12
APPLICATION : 1
VARIANT : 1
NOTED : 2
TERMINATED : 1
INDIVIDUAL : 6
SMEAR : 2
MAIN : 1
RETURN : 3
BALDWIN : 1
MODERATE : 1
OTHERWISE : 1
BUTTS : 1
RELINE : 1
EFFECT : 1
HEP : 1
VACATION : 1
MIN : 4
MDS : 1
CHEMICAL : 1
RECONCILIATION : 1
MINUTES : 4
FOLLOWUP : 2
SIDES : 1
RISKS : 1
PREVENTATIVE : 1
CHECK : 2
TEAM : 5
INDOMETHACIN : 1
FALL : 5
NERVE : 1
AM : 9
HELPED : 1
RETINA : 1
MOVEMENT : 2
ENTERED : 3
PRACTITIONER : 1
CINCINNATI : 1
PLACEMENT : 1
FLAT : 1
WHERE : 2
LE : 2
APAP : 1
ANDRE : 1
EVENT : 1
PEOPLE : 3
REED : 1
PRODUCTS : 1
CALLED : 6
POTENTIALLY : 1
SUPERVISION : 3
MANY : 3
INCORRECT : 1
SITTING : 1
SOAP : 1
PREOPERATIVE : 3
CONTRABANDS : 1
TEACHING : 1
MON : 1
ADVISED : 4
OBTAINED : 3
STOMACH : 1
YOURE : 1
LABEL : 1
MONTHS : 5
COUNT : 1
POLLEN : 1
UNLISTED : 1
ECHO : 1
SSN : 1
VI : 1
CERVICIS : 1
BEDSIDE : 2
DATED : 1
EAT : 2
ASKING : 1
CONGESTION : 1
WHY : 1
RESTED : 1
MEDICATION : 11
LUNG : 1
ATTORNEYS : 1
WRIST : 1
SLIP : 1
VISUAL : 2
WANT : 1
PARANOID : 1
ATTEMPTED : 1
CASE : 3
SINGLE : 2
ALTERNATIVES : 1
CONTINUE : 6
ORAL : 6
ABNORMAL : 1
HOPE : 1
READ : 2
SWELLING : 3
ADM : 1
OVERSIGHT : 1
SERVICES : 2
AB : 1
GOAL : 7
EXAMINATION : 1
WANDERING : 2
PROVIDE : 1
OTC : 1
RELATIONSHIPS : 1
HEALTH : 11
OCCASIONALY : 1
HERNIA : 1
INCH : 1
PLACED : 2
STOOLS : 3
PRRC : 1
IDEATIONS : 1
INDICATED : 2
INCIDENT : 1
NONSKID : 1
PROSTATE : 1
EXCLUDING : 1
CHAPLAIN : 1
PREVIOUS : 2
BIPOLAR : 1
REFERRAL : 1
INTERVENTIONS : 2
MAR : 1
LEAD : 1
LOPERAMIDE : 1
MORE : 3
VS : 4
WAL : 1
SEROQUEL : 1
PE : 1
ORTHOPTIC : 1
WENT : 1
ABC : 1
TOPICAL : 1
RECEIVE : 3
LIN : 1
ER : 7
NEUROSURGERY : 1
APPLICABLE : 6
RM : 1
REQUEST : 3
PRESCRIBED : 3
UNABLE : 1
RN : 3
XYZZY : 2
DIMASCIO : 2
ELIGIBILITY : 1
TRIVALENT : 1
ALTERNATIVE : 1
READY : 1
AFTER : 7
PARTICIPATED : 3
EMPLOYMENT : 2
STILL : 3
DIFFICULTIES : 1
WORSENED : 1
SCALE : 3
PG : 1
SUPPLIED : 1
OPENING : 1
VOICEMAIL : 2
LUMBAR : 1
GROUPS : 1
PCP : 7
NONV : 1
LCSW : 1
SAYS : 4
APPOINTMENTS : 5
BOWELS : 1
EACH : 3
RE : 1
EXPERIENCED : 1
OLD : 2
DETACHMENT : 1
FREQUENTLY : 1
LS : 3
READILY : 1
WEDNES : 1
DIALYSIS : 1
VIEWS : 1
REMAINING : 1
TITRATION : 1
DEVELOP : 1
ETHNIC : 1
APR : 2
AREA : 5
INTEREST : 1
GUIDE : 1
TEETHING : 1
MM : 2
VISTING : 1
UNDERSTANDING : 2
MEDICATIONS : 15
LOCALLY : 1
MR : 15
MAJOR : 2
INTIMIDATING : 1
FUROATE : 1
SLIDINGSCALE : 1
INH : 1
DRIVING : 1
VACCINE : 2
INVOLVING : 1
PROCESS : 3
RESULTS : 5
EMERGENCY : 4
BREATH : 2
ABLE : 9
RECENT : 6
CHO : 2
IN : 89
POSITION : 2
UNFORTUNATELY : 1
MANAGEMENT : 10
STATE : 3
ECHOGENIC : 1
PAC : 1
PLAN : 16
UG : 1
RHEUMATOID : 1
SMOKE : 3
AGREE : 1
PATHOLOGY : 1
VERY : 4
SATISFACTION : 1
WRETCHING : 1
DEVELOPMENT : 1
IDENTIFICATION : 2
ZZECF : 2
MANAGE : 1
PCCNURSING : 1
SHIPMENT : 1
VICTIM : 2
BEHAVIOR : 4
POSTAL : 1
PROFILE : 2
MEDIAL : 1
SI : 4
CLOTS : 1
COMPLETED : 4
SAFDAR : 1
DIFFICULTY : 1
LIMITATIONS : 2
NAILS : 1
SOMETIME : 2
NUMBENSS : 1
KEPT : 1
LAST : 14
EXR : 1
EDUCATION : 5
LUNCH : 3
TOXICOLOGY : 1
SUSPENDED : 1
ADR : 2
TRUCK : 1
HERPES : 1
MOVED : 1
AFFECTED : 1
PARK : 1
GROOMED : 1
WASNT : 1
CONSTANT : 1
WM : 2
CHAPST : 1
LIGHTHOUSE : 1
GIVING : 1
EVENING : 3
STEADY : 1
OPEN : 3
REMOVAL : 1
MONTH : 5
INFO : 1
BEEN : 21
BID : 2
STRETCHING : 1
BASE : 1
WITHIN : 6
REFILL : 3
OUTPATIENT : 12
GOES : 1
CORTICOSTEROID : 1
INTAKE : 3
WEEKLY : 1
SHORTNESS : 1
SPEECH : 2
INPATIENT : 7
ORHTO : 1
INTERESTING : 1
TOMORROW : 4
RESCHEDULE : 1
GASES : 1
VICTIMS : 1
ELOPEMENT : 1
RELATED : 1
MULTIAXIAL : 1
SPECIMEN : 2
PACIFIERS : 1
PASS : 2
CC : 2
EPISODE : 1
TWICE : 4
ALF : 1
COLD : 2
IMPORVEMENT : 1
REGARDING : 4
CONSUL : 1
SHAMPOO : 1
STUDIED : 1
PERSONAL : 7
SOCKS : 1
TRIED : 1
VISITATION : 1
HIS : 61
RECOMMEND : 1
BRING : 2
COORDINATOR : 2
HONEST : 1
ARIPIPRAZOLE : 1
ID : 2
APPARENTLY : 1
HIGHEXPLOSIVE : 1
RUSSELL : 1
GM : 1
JULT : 1
HOPELESSNESS : 1
ACID : 1
REORDERED : 1
TARTRATE : 1
DISORDER : 5
KNOWN : 2
SMT : 1
REASONS : 1
HARD : 2
EVERYTHING : 1
ATTRIBUTES : 1
TALKED : 5
PELVIS : 1
CATEGORY : 1
TREATMENT : 19
ARTH : 1
BLOOD : 5
LATEX : 1
WORKER : 1
HAVE : 22
OBMT : 1
LOGICAL : 1
BPH : 1
ODY : 1
EDIT : 1
MF : 1
DRUG : 2
OF : 111
INCLUDE : 1
CRISIS : 1
CALLER : 3
PSYCHIATRY : 2
SAID : 1
COUNTER : 1
NUMBER : 12
APPROVES : 1
UNDERSTAND : 1
CALCIUM : 3
CONJ : 1
MATRIXECTOMY : 1
ASSESSED : 2
AID : 2
SPONGE : 1
MECHANISMS : 1
TELEDOC : 1
FIBER : 1
MS : 2
EC : 1
MY : 8
OUTPT : 2
ASSERTIVE : 1
BATTERIES : 1
NOSUNSPEC : 1
MESSAGE : 6
INHALATION : 1
THINGS : 1
SUBSTANCE : 1
ASSESSMENT : 16
SERUM : 1
US : 2
TRANSDERMAL : 1
BUSY : 1
AMBULATION : 1
STARTING : 2
ENTER : 1
NEIGHBORS : 1
BLADDER : 2
NONSPECIFIC : 1
LIFTING : 1
REASSURANCE : 2
FRIENDS : 1
INFORMATION : 11
COUMADINE : 1
ADEQUATE : 1
INITIAL : 5
ILL : 2
CENTER : 4
SUICIDE : 2
THE : 184
ABILITIES : 1
NURSES : 2
BAL : 1
GROUP : 17
PRESENTS : 1
SHOUDER : 1
ADJUSTMENT : 2
REST : 3
APPEARS : 2
MULTIDISCIPLINARY : 1
IODINE : 1
REPRESENT : 1
LSCHEDULE : 1
COLLECTED : 3
COLOR : 8
CHARACTER : 1
LEG : 2
ARRIVED : 2
MEDS : 7
OPT : 1
PCT : 1
SLIPPERS : 1
CONTAINERS : 1
RECALL : 1
LBP : 1
ADDICT : 1
DISPOSITION : 5
CORRECTLY : 2
OCCUPATION : 1
CAP : 3
DIET : 4
UNSP : 1
STATED : 7
SELFDIRECT : 1
SILVADIAZENE : 1
HEARING : 4
RNBC : 2
PERMANENT : 1
GET : 2
AXIS : 5
WHAT : 4
FIVE : 1
REMOTE : 1
BENEFITS : 1
ALBUTEROL : 3
ASSISTANCE : 19
MELLITUS : 3
PROLONG : 1
DESIGNED : 2
YEAR : 4
PRESCRIPTION : 2
LUMPS : 1
COPY : 4
LB : 4
RYAN : 1
NAPPING : 1
HERBAL : 1
TRANSPORT : 1
PUT : 1
GI : 2
SEEN : 13
RT : 4
MAILED : 3
FOOD : 10
ENCOURAGEMENT : 1
NURSE : 9
UDS : 2
REDIRECTION : 1
INTERVIEW : 1
SENSORY : 2
CORONARY : 2
EPIDIDYMIS : 1
ANY : 9
DISCHARGE : 9
CONSISTENCY : 2
TISSUES : 2
PAYMENT : 1
MOISTURE : 1
AOD : 1
POSTTRAUMATIC : 1
FACILITY : 2
HASNT : 1
EFFECTS : 1
SECONDARY : 4
1010M : 1
OFFER : 1
SAT : 1
THR : 1
EVERY : 10
VOLUME : 1
RESTRICTIVE : 1
CONSIDERABLE : 1
INTENT : 4
SKIN : 5
YESTER : 1
NOT : 40
HUD : 2
THERE : 5
WALKING : 1
EXPECTED : 1
TL : 1
RESEARCH : 1
AFFECTING : 1
BELL : 1
HERE : 5
POSITIVE : 1
CLEAN : 1
ONEHALF : 1
VIDEOTAPE : 1
FIBULA : 1
FEB : 6
CONDUCTED : 1
SAF : 1
PROGRESS : 6
WK : 1
KEEP : 4
RECURRENT : 1
PSYCHOTHERAPY : 2
ARTERY : 1
ASSESS : 2
REALLIFE : 1
REPEAT : 1
TRAITS : 1
VET : 7
STOOL : 4
LEARNER : 1
TBI : 1
BEST : 1
PND : 1
UPCOMING : 1
COMPLETION : 1
LID : 1
BURSA : 1
PARTICIPATE : 3
DI : 3
MA : 2
PREGNANT : 1
EXPERIENCING : 1
PAP : 2
CHOOSING : 1
BACK : 7
HOWEVER : 1
OPIOID : 1
EMS : 1
REGARDS : 1
RESOURCES : 1
TUES : 1
MALE : 8
BY : 41
DEFINITION : 1
PMH : 1
STERILE : 1
DIRECTABLE : 1
CLINICAL : 4
RELATION : 1
KNOWS : 1
REASSESSMENT : 1
DOE : 1
WIH : 1
MEETING : 3
TH : 1
RRR : 1
CONVERSATION : 1
FINISHED : 1
DIASABLITY : 1
TRNASFERRED : 1
CONFERENCE : 2
ALERTMRSA : 1
CEFTRIAXONE : 2
TO : 214
FEEL : 2
IV : 1
ABUSE : 2
TASK : 4
POSTED : 1
INTERTON : 1
HYPERCHO : 1
SAFE : 3
BONE : 1
DX : 8
PROCEDURE : 7
REQUESTING : 2
ABNORMALITY : 1
KALINA : 1
OINTMENT : 1
WELLBUTRIN : 1
WARM : 1
BEGAN : 1
PATTERNS : 1
APPETITE : 1
WEAR : 1
OVERLAPPING : 1
SEE : 5
PLEASE : 4
CBC : 1
STATUS : 12
LOWERING : 1
ATTAINMENT : 1
DIABETES : 4
DC : 1
DRINKS : 9
EFFECTIVE : 1
INSTRUCTORS : 1
CONTINUED : 3
TESTING : 2
OUT : 12
COMFORT : 1
VERBALIZATION : 2
SCAB : 1
SCREEN : 5
FINDINGS : 1
REACTION : 2
XX : 1
BARRIERS : 2
EVALUATED : 1
REHABILITATION : 1
ASSIGNED : 2
MENTAL : 11
NEEDED : 5
CLEANED : 1
GERD : 1
EXT : 3
ELAVIL : 1
WERE : 5
FACTORS : 3
BRC : 7
RAZOR : 1
FILL : 1
WALKS : 1
TURNS : 2
DENT : 1
TAKEN : 1
JOB : 1
CLOSED : 1
POSSIBLE : 3
AGREED : 3
RADIOGRAPHICALLY : 1
FENTANYL : 1
TRIAGE : 5
HELPING : 1
PART : 1
FAMILY : 7
GRIEF : 1
BAD : 1
ORIENTATION : 3
WHEN : 6
BRACE : 1
AMBULATORY : 2
BEING : 4
VIGAMOX : 1
AHS : 1
HARBOR : 1
LOSING : 1
ABOVE : 2
AMOUNT : 7
LT : 1
WAS : 63
UNSAFE : 1
INTERIM : 1
PM : 5
ORI : 1
REPRESENTED : 1
FORM : 1
LEAVING : 1
FOHX : 1
CAUSING : 2
WILDCATS : 1
COMMUNICATION : 2
CONSUMED : 4
REMAINS : 1
ALTERCATION : 1
DRINKING : 1
NOW : 2
PTSD : 9
ECF : 1
CONFIRMED : 1
ONSET : 2
DTR : 1
HYDROCODONE : 1
CYCLOBENZAPRINE : 1
NARCOTIC : 3
TDAP : 1
SHOT : 1
LIST : 4
SEARCHED : 1
STUDY : 2
NEGLECT : 1
BAY : 1
SA : 1
EQUIPMENT : 1
VOMITING : 1
OCCASIONALLY : 1
ESOPHAGEAL : 1
HEMP : 1
ORIENTED : 12
FLUVASTATIN : 1
CURRENTLY : 5
FASHION : 2
NECK : 1
BETWEEN : 4
PROSTHETICS : 1
BATHROOM : 4
REPAIR : 1
DOCTOR : 1
SEDATION : 1
GOING : 3
DISTAL : 1
DID : 9
MOST : 3
SHOW : 1
HOMEBASED : 1
PASCUZZI : 1
RTU : 1
PCE : 1
SUN : 1
RELIGIOUSLY : 1
ADDRESS : 2
TELEPHONE : 5
FACILITATORS : 1
DISORDERMET : 4
COMPLAINING : 1
COOPERATIVE : 2
REPORTS : 9
WITNESS : 1
CIGARETTE : 1
UNDECIDED : 1
SAMPLE : 1
LIFETIME : 1
PACU : 1
PPN : 1
YES : 16
CONTINUES : 5
COMING : 1
OMYELITIS : 1
SMILING : 1
CONSENT : 6
FACE : 2
CHF : 1
WHOM : 3
SCOPOLAMINE : 1
RETURNED : 2
DOING : 4
GASTROESOPHAGEAL : 1
CONFUSION : 1
XPATIENT : 1
HPI : 1
LITTLE : 3
SUCCESSFUL : 1
QUITE : 1
HES : 1
ED : 5
CONFIRM : 1
INSTITUTE : 1
PHYSICIAN : 19
TAC : 1
DAUGHTER : 1
COMPLIANCE : 1
EMG : 1
DEPENDENCE : 3
TOOTH : 2
URGENT : 1
SEEKING : 1
PAPER : 3
HE : 90
RX : 1
SILVER : 1
STUDENTS : 1
TREATED : 2
BIT : 1
OBESITY : 3
AHN : 2
RATE : 1
HIGHRISK : 1
BOHLMAN : 1
FELT : 1
DOGS : 1
FRO : 1
UMBILICAL : 1
TRADING : 1
MEMBER : 2
UPRIGHT : 1
FLUOROSCOPIC : 1
RAN : 1
PARANIA : 1
PRIMARY : 9
ECHOCARDIOGRAM : 1
GEL : 1
UNTIL : 3
ABDOMINAL : 1
SIGNS : 8
ORTHOPNEA : 2
DEPARTMENT : 1
ACTION : 1
PATIENTS : 8
BELIEVES : 1
LEGIBLE : 1
SUMMARY : 3
TRANSPARENCIES : 1
KIND : 1
FATHER : 1
CONSTIPATION : 2
PROVIDED : 10
DRINK : 3
DENTAL : 4
NEUROLOGY : 1
TWO : 1
NONE : 7
ATTITUDE : 1
RECOMMENDATIONS : 2
II : 1
CONNECTED : 2
ANGRY : 1
TRAVEL : 2
FERNANDEZ : 1
BLINDNESS : 2
RESPONSIVE : 1
ACE : 1
CALM : 2
SCHEDULE : 2
TARZADONE : 1
HER : 9
ORDERED : 3
FEELING : 4
TURN : 2
SHOULD : 1
QUESTIONS : 5
APPEARED : 2
SPECIFIED : 1
YELLOW : 3
MCG : 2
HIT : 2
WELLNOURISHED : 1
LIVING : 3
PLACE : 11
INDEPENDE : 1
IER : 1
RANGE : 1
ENT : 1
DEAL : 1
VETCORE : 1
MG : 32
TRANSFERRING : 2
SHELTER : 1
UROLOGY : 2
BUTTONS : 1
WAITING : 1
VIETNAM : 1
SITS : 2
CONTINENT : 4
MMOL : 1
NUCHOVICH : 1
WORSE : 2
ATTENTIVE : 2
PROVIDER : 13
OIL : 1
SUPERVI : 1
EXTREMETIES : 1
GENDER : 2
USES : 2
DIAGNOSED : 1
PUBLIC : 2
MIGRAINE : 1
TELL : 2
ALERT : 9
GICOLONOSCOPY : 1
SAVE : 2
SEP : 3
UNDER : 1
SEATED : 1
COMMENT : 3
OTR : 1
SWIFT : 1
FSG : 1
DIAG : 1
THREE : 1
STEP : 1
SELFMANAGE : 1
COLLECTION : 1
PROGRAM : 4
RADIOLOGY : 1
APPOINTMENT : 15
WOULD : 9
FOLLOW : 3
ACCRETIONS : 1
PERCEPTUAL : 1
OPENANGLE : 1
CALLUS : 1
INDICATE : 1
CLOTHES : 1
WHEEZING : 1
BIRCH : 3
SSDI : 1
SEX : 2
VERSUS : 1
MISSIONARY : 1
ACTIVITIES : 1
LOCATE : 1
REFLUX : 1
GIRLFRIENDS : 1
CUFF : 1
MOVEMENTS : 3
COMPLAINT : 7
ORDER : 3
ZZMINI : 1
USING : 4
DISCREPANCIES : 1
REALLY : 1
NUM : 2
EASILY : 3
HAND : 4
ORE : 1
INFLUENZA : 1
ELAVATED : 1
DENIED : 3
EXTRACTION : 1
ARRANGED : 1
SYSTEMNO : 1
RETIRE : 1
NEW : 8
MOUTH : 15
YEAROLD : 1
PROVIDERS : 1
FOCUSED : 1
DECIDED : 1
PRESENT : 4
BREAST : 1
SOME : 6
COMPLEXITY : 1
LINE : 1
HYDROCELECTOMY : 1
SLEPT : 1
TICS : 1
WPB : 1
HRS : 1
ANESTHESIA : 2
DW : 1
NEED : 2
TRIAL : 2
WASHING : 1
PROCEDURESUPINE : 1
RECEIVED : 2
INCONTINENCE : 3
PSYCHIATRIC : 1
CALCULATOR : 1
ASPIRIN : 1
RNS : 1
SKILL : 1
EAR : 6
CUEING : 2
BODY : 1
SATISFACTORY : 2
NUMBING : 1
PERLA : 1
POLAR : 1
MEDICINES : 1
OL : 2
TRANSFERRED : 3
CLASS : 4
SPERMFLUID : 1
STARTLED : 1
TARY : 1
GARBAGE : 1
OMEPRAZOLE : 1
SOUNDS : 1
REVIEWED : 8
KAMRAN : 1
ISSUE : 1
BEFORE : 1
ALL : 9
REEXAMINING : 1
ACUITY : 1
SECOND : 1
VOID : 1
INHALE : 1
IP : 1
CONTRACT : 1
SATUR : 1
DIAGNOSES : 1
SELF : 5
PATIENT : 100
ALLERGIES : 3
DING : 1
ENERGY : 2
SENT : 3
AGREES : 2
RESTAURANTS : 1
NOS : 4
THAN : 2
VOICE : 2
ACUTE : 1
MEMORY : 2
DIPHTHERIA : 2
AUDIOVISUAL : 1
ARTHRITIS : 1
SENSATION : 1
OPERATIONS : 1
REQUIRES : 4
FILLED : 2
HAPPEN : 1
ENGAGED : 1
PROTOCOL : 1
FEE : 1
COME : 3
TRAINED : 1
VASH : 2
HOSPITALIZATION : 1
PERTUSSIS : 1
LOOKING : 3
ENDOCARDITIS : 1
FEET : 1
CAME : 3
THAT : 44
VISIT : 17
NORMAL : 8
WIFE : 3
STAFF : 9
DEPRESSED : 3
SERVICE : 6
RIGHT : 9
BREATHING : 1
PC : 2
VITALS : 4
PROMPTED : 1
PEDAL : 1
PENSION : 1
REQUESTS : 2
ATROVENT : 1
ONE : 22
PAKULA : 1
AL : 2
ANATOMICAL : 1
PTS : 1
THOUGHT : 5
HYPERLIPIDEMIA : 1
IMMOBILIZER : 1
RADIATING : 1
WRITER : 1
YOU : 16
CRITERIA : 1
INFORMED : 4
ISSUED : 1
PAST : 8
DOCUMENT : 2
VOM : 1
EYEBALL : 1
REASON : 2
POSTERIOR : 1
SUPERVISOR : 2
TOBACCO : 1
ESP : 1
HA : 1
REMINDER : 3
INTERVALS : 1
OROPHARYNGEAL : 1
NEVER : 1
CIRRHOSIS : 1
ALTHOUGH : 1
DR : 2
SOCIAL : 8
DILTIAZEM : 1
MEMBERS : 4
TRP : 2
HOSPITAL : 2
ENDORSES : 2
RECOMMENDATION : 2
FL : 1
SUICIDAL : 5
HOPELESS : 1
MENTIONED : 1
DRESSED : 2
DEPT : 1
EITHER : 2
EOMS : 1
VITAL : 7
INJ : 1
TD : 1
SO : 2
IMPROVEMENT : 2
REGULAR : 2
PROTECTIVE : 1
POTASSIUM : 1
CERTIFICATE : 1
CRNA : 1
MODE : 1
HANDICAP : 1
ITIS : 1
STRESS : 4
MAKE : 5
RECORDED : 1
WEEK : 1
VITAMIN : 1
SCAN : 1
CBOC : 1
APPRECIATION : 1
APPROVED : 1
IC : 2
BORDERLINE : 2
NUR : 1
DISTRESS : 2
IMPAIRMENT : 1
MOUNTAIN : 1
CREDITS : 1
MOOD : 3
LIVES : 1
REPORT : 7
HEALTHCARE : 1
LEAST : 1
LETTER : 3
TRANSITIONAL : 1
TTN : 1
HOW : 7
HAULER : 1
PHQ : 1
MIGHT : 1
FEELINGS : 1
SINCE : 7
WOMENS : 1
FLU : 2
CHANGE : 1
DISCUSS : 5
STOPPED : 2
PRESENTING : 3
LEARN : 3
SOLN : 3
MEMPHIS : 1
RATHER : 1
OFFICE : 4
MADE : 3
PENIS : 1
CARDIAC : 1
YRS : 1
VERBALIZED : 2
PRINTED : 2
LEARNING : 1
DOSE : 3
ENCOUNTER : 1
GROGGINESS : 1
AWOKE : 1
SMOKING : 2
AFFECT : 3
UNDERSIGNED : 1
SMILE : 1
AREAS : 1
ANTIBIOTIC : 1
STEFANIK : 1
TRAMADOL : 2
INPT : 3
RECOMMENED : 1
MO : 1
COMMENTS : 9
ACETAMINOPHEN : 1
STRENGTH : 3
ITEMS : 1
TOTAL : 5
SHOWERS : 1
SURGICAL : 3
JUNE : 5
ST : 1
ELIMINATION : 4
SUCH : 1
HISTORY : 12
UPDATED : 3
RESPIRATION : 2
DISCLOSED : 1
HOURS : 9
TUMOR : 1
MAIL : 2
LEGS : 1
IEST : 1
CAUCASIAN : 1
RESPONDING : 1
REPORTED : 2
ONGOING : 1
FLUOXETINE : 1
ALWAYS : 1
DIEM : 1
FORESKIN : 1
WOUND : 1
SPEND : 1
HIP : 5
MEAT : 1
SITE : 4
OVERALL : 1
COMPLICATIONS : 1
STATING : 1
DENTURE : 1
KG : 4
STANDARD : 1
AUG : 1
PROBLEM : 12
EYES : 4
CLONAZEPAM : 1
AGENCY : 1
BILL : 1
BLUE : 1
ZZSWS : 1
AMLODIPINE : 1
SUICIDALITY : 1
SUSP : 1
ADLS : 1
THROUGH : 4
OUTPUT : 1
PUFFS : 1
HEENT : 1
ADMISSION : 3
PLS : 1
RESCHEDULED : 1
LESS : 1
NICOTINE : 2
MIVA : 1
ICE : 1
ULA : 1
FUTURE : 3
WAY : 3
REGIME : 1
CLIENT : 1
DENIES : 6
ASSOCIATE : 2
ACCOMPANIED : 1
PHARMACY : 3
OTHERS : 5
REQUESTED : 4
DISPOSAL : 1
OVERNIGHT : 1
DISPLAY : 1
VETERAN : 54
QTY : 2
RELIEF : 1
DINNER : 4
PT : 37
RADIATION : 1
CORRESPONDENCE : 1
FAM : 1
PSYCHOSOCIAL : 1
PROCEDURES : 2
CORRECTIVE : 1
CIWAAR : 1
CONTRIBUTING : 1
SOON : 1
DEMONSTRATION : 1
PAUSE : 1
COMBAT : 1
AROUND : 1
ILLNESS : 1
PREDNISOLONE : 1
TROCHENT : 1
AND : 145
RADIONUCLIDE : 2
INSOMNIA : 2
HOUR : 3
URINARY : 2
ANGIOGRAPHY : 1
MOTRIN : 1
SESSIONS : 5
JUN : 2
RESPONSE : 1
PICKUP : 1
POSTOP : 1
SOCIALIZED : 1
NAIL : 1
KNOWLEDGE : 1
PINES : 1
LOW : 6
ADMINISTERED : 1
MAY : 7
FOLLOWED : 1
LMSW : 1
DERMATOLOGY : 1
PRO : 1
LENGTH : 1
APPT : 3
TAKING : 4
ADMITTED : 3
SPOUSE : 1
BREASTFEEDING : 1
OBSERVED : 2
AFEBRILE : 1
DONE : 1
PHYSICAL : 3
SOMATIZATION : 1
TEAR : 2
NIGHT : 3
CP : 2
ACTIVE : 29
WELLGROOMED : 1
ECHCS : 1
MANAGER : 1
ABILITY : 1
BEDREST : 1
INFERIOR : 1
OLEMIA : 1
123 : 1
CONTROLLED : 1
CO : 1
FOCUS : 1
THIS : 47
TAPE : 1
SOFT : 2
VAMC : 1
PALMER : 1
TICAL : 1
AOX : 1
NARCISSISTIC : 1
LACKS : 1
SESSION : 5
CY : 1
HOPEFULLY : 1
STATES : 9
NEBULIZER : 1
ENABLE : 1
IMPLEMENTED : 1
LOCAL : 2
WHILE : 4
HAMLIN : 1
SHORT : 2
CELL : 1
ROS : 1
FLORIDA : 1
LIMITS : 2
LIGAMENT : 1
WAIT : 3
ICDCM : 5
FIRST : 4
RESP : 2
PICK : 1
ETOH : 1
DOWN : 3
ITS : 1
REFLUX_NO : 1
KG_AOX : 1
AFFECTED_ACTIVE : 1
OR_HEALTH : 1
AND_MOST : 1
TO_PT : 3
UNSPECIFIED_IDENTIFIED : 1
REVIEWED_PT : 2
UNIT_ROOM : 1
SITE_LT : 1
IS_CAUCASIAN : 1
THAT_SWS : 1
WHO_WILL : 1
FIRE_PHYSICIAN : 1
THE_EPISODE : 1
PRESCRIPTION_CONDITION : 1
SURGERY_IS : 2
BUT_IS : 1
ATTENDING_DX : 1
FOLLOW_NURSING : 1
CC_PT : 1
BEEN_TOLD : 1
AND_AHS : 1
MG_PATIENT : 1
INITIAL_AND : 1
ON_SEP : 1
OF_DISCHARGE : 1
LAMISIL_DICT : 1
COMPLAINTS_INSOMNIA : 1
ASKED_HIM : 1
MODERATE_REFLUX : 1
PHYSICIAN_REVIEWING : 1
OF_ARTERIAL : 1
BEEN_TO : 1
UP_THE : 1
LIVER_PATIENT : 1
TOLD_BY : 2
DIAGNOSIS_HE : 1
CARBAMAZEPINE_TAB : 1
ILL_TIME : 1
APPROVES_YEAR : 1
PATIENT_INFLUENZA : 1
ON_TO : 2
STOPPED_RETURNED : 1
THE_EITHER : 1
INPT_DISCHARGE : 1
ANY_DIFFICULTIES : 1
WITHIN_FACILITY : 2
VERY_ANGRY : 1
SURGERY_ARTHRITIS : 1
SC_ED : 1
TRADING_SO : 1
USE_THE : 1
AND_APPROVES : 1
PROVIDER_EVERY : 1
HISTORY_TESTING : 1
CLINIC_APPOINTMENT : 1
AND_ORIENTED : 4
LOCATED_ON : 2
THE_KNEE : 1
PAST_HOURS : 1
OF_HIS : 5
ADDENDUM_PLASMA : 1
FOR_SHORT : 1
YOUR_CLINIC : 1
PEOPLE_HAVE : 1
THE_PATIENT : 24
PERSONAL_OF : 1
SECOND_TIME : 1
CONFIDENTIAL_ECHO : 1
TO_DYSMETAB : 1
THE_UNDERSIGNED : 1
NOT_AND : 1
LEVEL_INTENT : 1
VISIT_LIVING : 1
GOT_RESP : 1
EYE_DROPS : 1
INTO_HOMES : 1
BID_TO : 1
DX_ALCOHOL : 1
ADVERSE_NOTED : 1
FUTURE_APPROPRIATE : 1
START_FIRES : 1
BOTH_EYES : 2
PAPER_XYDS : 1
CONFUSION_ON : 1
SYSTEM_REINFORCED : 1
REQUESTED_THAT : 1
DISORDER_THE : 1
CINCINNATI_CORRECTIVE : 1
IF_PATIENT : 1
TEETH_TRIVALENT : 1
TO_INDEPENDE : 1
TO_ABOUT : 1
FOLLOWUP_CONDITION : 1
CURRENT_POTENTIAL : 1
THE_BEST : 1
NO_HE : 1
AT_VISIT : 1
THE_SHELTER : 1
RESOURCES_IDENTIFIED : 1
EPIDIDYMAL_CYST : 1
LOW_SHE : 1
QUESTIONS_PATIENT : 1
OUTPATIENT_EXCLUDING : 1
HOME_HEENT : 1
MORNING_FOR : 2
FOR_BIT : 1
THAT_CAN : 2
IF_RELIEF : 1
YOUR_IS : 1
SKIPPED_TOTAL : 1
HUSBAND_METH : 1
THE_NIGHTS : 1
EC_STATUS : 1
ON_FRI : 1
YES_COMMENTS : 1
VIGAMOX_RIGHT : 1
PATCHES_IN : 1
RISK_SCREEN : 1
HEALTH_NURSE : 1
RADIOGRAPHICALLY_AND : 1
COMMENTS_BLOOD : 1
PATIENT_AT : 2
PAST_IDENTIFIED : 1
FEELING_OR : 1
IF_SHOULD : 1
OPERATIONS_PERFORMED : 1
DOSE_SHE : 1
HAVING_NUMBER : 1
AS_MUCH : 1
CORONARY_ANGIOGRAPHY : 1
STAFF_WHO : 1
CARE_FOR : 1
CALLING_TO : 1
WANTS_TO : 1
FAMILY_LIMITATIONS : 1
PERIODON_FERNANDEZ : 1
ENCOURAGEMENT_ALERT : 1
COLOR_NUMBER : 1
PH_OR : 1
SMOKE_PHYSICIAN : 1
CONDUCTED_USING : 1
INFORMATION_DISCUSSED : 1
CONTACT_WAS : 1
INDOMETHACIN_PAIN : 1
WITH_CURRENT : 1
RECONCILED_SIDE : 1
MAY_REPRESENT : 1
TRANSFERRING_LUNG : 1
FIBER_THAT : 1
EVENING_WITH : 1
ESP_ANTISOCIAL : 1
NOT_AT : 1
HISTORY_TO : 2
PAIN_IMPAIRED : 1
ARRIVED_TO : 2
PATIENT_FAMILY : 3
TO_SELFDIRECT : 1
STRESS_DISORDER : 1
OBSERVED_SMILING : 1
REMOVED_HE : 1
REASSESSMENT_IMPAIRED : 1
BUT_THE : 1
OFFERED_MONITOR : 1
IF_IS : 1
INDIVIDUAL_PSYCHOTHERAPY : 1
BUT_AWOKE : 1
HOW_DRINKS : 1
HAVE_SMILE : 1
PAIN_BONE : 1
BED_SPONGE : 1
NO_PEDAL : 1
WELL_DEPRESSION : 1
AMITRIPTYLINE_SURGERY : 1
TAB_STATUS : 1
ASSESSMENT_LEFT : 1
TAKING_HER : 1
DRINKING_WELL : 1
THE_LAB : 1
OUT_HE : 2
PAIN_BE : 1
FROM_ANY : 1
NORMAL_OS : 1
NONVA_MISCELLANEOUS : 1
CLONAZEPAM_MG : 1
STATES_RT : 1
AFTER_TREATMENT : 1
READING_ABOUT : 1
SOME_MUSICIAN : 1
BIPOLAR_TAKE : 1
MH_CONTACT : 1
HOME_WITH : 1
AND_BONFADINI : 1
COME_FREQUENTLY : 1
TAKES_TO : 1
CALLED_PT : 1
AND_SMOKING : 1
TO_GROUP : 1
CALLS_FINGERS : 1
AND_RESPONSIVE : 1
SATISFACTORY_NEGATIVE : 1
PRIVILEGES_OPEN : 1
IS_TRYING : 1
INFORMATION_PROVIDED : 1
CODE_UNLISTED : 1
BEEN_AND : 1
TO_SUPPORT : 1
CURRENTLY_CONFIDENTIAL : 1
SETTING_AS : 1
INHALATION_AN : 1
HIS_WHOM : 1
IDENTIFIED_OTHER : 3
CAME_OUT : 1
TALKED_ABOUT : 3
ON_MYCIN : 1
WANDERING_INR : 1
PENDING_OF : 1
RECEIVE_ASSISTANCE : 1
THE_RISK : 1
PATIENTS_NOT : 1
DISCOVERED_HAVE : 1
ARE_HIM : 1
POSTTRAUMATIC_DISORDER : 1
DISCREPANCIES_HEIGHT : 1
IF_APPLICABLE : 2
HIS_DOGS : 1
TREATMENT_ASKED : 1
MUCH_MEDICATIONS : 1
WITH_LEFT : 1
FOLLOWING_HAS : 1
PRESCRIBED_BEHAVIOR : 1
FEEL_ABOUT : 1
SENT_TO : 2
TEAM_THE : 1
RESIDENT_ASSISTED : 1
032511_PERSONAL : 1
ON_MACHINE : 2
THE_TOILET : 6
USE_SAFE : 1
BRC_SKILLS : 1
MH_NURSING : 1
IS_YES : 1
SUMMARY_CEC : 1
REPORTS_FEELING : 1
LOCAL_NUMBING : 1
PSYCHOTHERAPY_STILL : 1
FACE_EYES : 1
OF_ACTIVE : 1
IN_EMPLOYMENT : 1
OUT_WILL : 1
SKILLS_SELFMANAGE : 1
LIFE_IS : 1
OF_STABLE : 1
OPEN_TO : 1
TIME_VETERAN : 2
FINGERTIP_MULTIVITAMINS : 1
PAIN_ALL : 1
NOS_WELLBUTRIN : 1
TO_WAIT : 1
MR_STATED : 1
BE_REGARDING : 1
STAY_ESP : 1
AS_AS : 2
NONE_BMI : 1
PTSD_TEST : 1
PRESENT_ILLNESS : 1
CORRECT_CORRECT : 1
INFO_CONTACT : 1
GO_OUTSIDE : 1
BEEN_SCHEDULED : 1
FOREGO_GOING : 1
FLUOROSCOPIC_GUIDANCE : 1
EMOTIONALLY_SHE : 1
PROBLEMS_WITH : 2
NOTE_DYSPNEA : 1
IF_ADMIT : 1
MAKE_CARE : 1
FEELING_GOOD : 1
PRODUCTS_IF : 1
INCLUDE_TRAMADOL : 1
CUEING_TO : 1
ARM_HURTING : 1
DIRECTED_ON : 1
EAR_DENIES : 1
WED_LAST : 1
CORRECTLY_HE : 1
PHYSICAL_EXAM : 2
DESIRE_TO : 1
EXT_BID : 1
IS_VETERAN : 1
CHECK_NOTET : 1
COMPLAINT_ADDITIONAL : 1
AND_REFILL : 1
ANXIETY_THERE : 1
OF_CHIEF : 2
NOT_NURSES : 1
DUE_WHO : 1
NONE_PATIENT : 1
IN_NO : 2
APPOINTMENTS_ALERTS : 1
HOWEVER_IN : 1
DT_APPOINTMENTS : 1
MIGRAINE_AND : 1
MEDS_PERCIEVED : 1
LID_GARBAGE : 1
OCCASIONALY_IMPLANTS : 1
SUMMARY_MR : 1
ISSUES_ARE : 1
ATTEND_ALL : 1
MG_MG : 1
ON_REGIME : 1
AFEBRILE_ARE : 1
SOME_IN : 2
APPTS_MADE : 1
TOILET_PERSONAL : 1
CONTINUED_INPATIENT : 1
AND_LIST : 1
HOME_CONSTIPATION : 1
AND_TRAZODONE : 1
PRIVILEGES_BLINDNESS : 1
CARBAMAZEPINE_MG : 1
EVALUATION_AND : 1
LOCAL_ANESTHETIC : 1
HOME_OUTPATIENT : 1
USING_REALLIFE : 1
VETERAN_VETERAN : 1
PT_WRETCHING : 1
DIEM_PROGRAM : 1
VETERAN_ADDENDUM : 1
WITH_MEDICATIONS : 1
GOOD_AND : 1
COMPLICATIONS_STRENGTH : 1
AFTER_HE : 1
CONSENT_ANATOMICAL : 1
GOING_POKER : 1
ENDING_PM : 1
AWARE_NOT : 1
MONITOR_RESTRAINTS : 1
EAR_EAR : 1
ACID_TAB : 1
TREATMENT_IS : 1
CONTAINERS_SPEECH : 1
JESUS_VETERAN : 1
DISORDERMET_VETERAN : 4
SCREEN_PERFORMED : 1
WALK_MUCH : 1
MR_TOTAL : 1
VETERAN_HAS : 2
MEDICATIONS_DISCUSS : 1
MOST_RECENT : 2
PLACE_SCREENS : 1
COMBAT_VETERAN : 1
MESSAGE_PATIENT : 1
TO_TO : 10
SERVICES_ADVOCATE : 1
DUAL_DX : 1
WAS_CALLED : 1
MUSCLE_STEFANIK : 1
FOR_PERMIT : 1
ADVISED_HEALTH : 1
CONSENT_CHRONIC : 1
THE_FACTORS : 1
PAIN_KEEP : 1
USE_DX : 1
CONSTIPATION_UNSPECIFIED : 2
WAS_SCORE : 1
DOC_END : 1
USED_WORK : 1
SOME_STATE : 1
MEDS_COPY : 1
DEGREE_AGO : 1
WILL_PROVIDE : 1
WIFE_ON : 1
WITH_PT : 2
GOING_ON : 1
CONTRACT_SURGERY : 1
ON_SIDES : 1
DATE_JUNE : 1
UNSAFE_SMOKE : 1
CARE_DO : 1
SMILE_ON : 1
MEDICATIONS_NOT : 1
LETTER_ONE : 2
REPORT_NOT : 1
WHO_DESCRIBES : 1
ENDING_AM : 1
TAKE_ACTIVE : 1
HIS_HERE : 1
ALL_TIME : 1
PATIENT_WITH : 2
USING_VITAL : 1
SKIN_ALERT : 1
WAL_FOR : 1
MY_CHEST : 1
HIS_WITHIN : 1
APPOINTMENT_REACTION : 1
ALSO_ABLE : 1
TELEPHONE_NOTE : 2
HE_SEE : 1
MONITOR_AND : 1
ATTENDED_GROUP : 1
TO_HIM : 1
FOR_PROMPTED : 1
MAKE_CHANGES : 1
IS_HEALTH : 1
SCORE_SCORE : 1
PHONE_CALLS : 1
DEPRESSION_CALLING : 1
NOTIFIED_HE : 1
HEMP_ALL : 1
LEARN_BY : 1
DEMOGRAPHICS_ALCOHOL : 1
HAVE_HAD : 1
IN_MONTHS : 1
PATIENT_FEEL : 1
AMBULATION_WITHIN : 1
WHEN_EYES : 1
ALERT_COPE : 1
OTHER_PTS : 1
BETWEEN_IS : 1
MEAL_ASSISTANCE : 3
VISIT_SCHEDULED : 1
PBR_PATIENT : 1
FREQUENCY_EAR : 1
IF_MACHINE : 1
IS_MR : 1
RECEPTIVE_APPOINTMENT : 1
FERNANDEZ_DENTAL : 1
AND_THEIR : 1
LORATADINE_MG : 2
KG_NO : 1
WORKING_IDENTIFIED : 1
ABDOMINAL_WORSENING : 1
AND_MUCH : 1
PATIENT_USED : 6
FLOWSHEET_OTHER : 1
TO_PICK : 1
FOR_ARM : 1
GTTS_TRIAL : 1
YES_PAIN : 1
CHANGE_PREVIOUS : 1
PCP_TO : 2
LUNCH_TO : 1
HE_UNDERSTANDING : 1
RETURN_DENIED : 1
AFFECT_APPEARANCE : 1
DIERCTED_ENERGY : 1
SPECIALTY_CLINIC : 1
LEAD_HIM : 1
MIGRAINE_HA : 1
PROVIDER_AMBULATORY : 1
TEETHING_RINGS : 1
EDUCATION_TOLD : 1
IP_PLAN : 1
SCREEN_OUTPATIENT : 1
ARE_WILL : 1
GETS_AND : 1
IN_REMISSION : 2
IS_DURING : 1
EDEMA_PATIENT : 1
ATTENDED_AN : 1
BONE_LIGAMENT : 1
POTENTIALLY_CONSEQUENCES : 1
FOUND_ITEMS : 1
SELFDIRECT_EXERCISE : 1
HOMES_URINE : 1
ZZPATIENT_CARE : 2
WITH_FEW : 1
HE_MODERATE : 1
RECONCILLIATION_AND : 1
CARE_PHYSICIAN : 1
VETERAN_SSN : 1
NO_HOPELESSNESS : 1
DO_NOTE : 1
VERBAL_AUDIOVISUAL : 1
LESS_PAIN : 1
WHAT_QUESTIONS : 2
EXT_MAKE : 1
ADVOCATE_PBC : 1
RECEIVE_PLEASE : 1
WHO_IS : 2
STOOLS_STARTED : 1
PATIENTS_CHIEF : 1
COORDINATOR_MON : 1
AN_ENCOUNTER : 1
WALK_IN : 1
THIS_PPH : 1
COMPLETE_DID : 1
HOME_ADEQUATE : 1
AMOUNT_ASSISTANCE : 1
NINAN_OF : 1
LAST_VISIT : 1
TRANSFER_MEMBERS : 1
PARK_HAS : 1
VISUAL_SKILLS : 1
IDENTIFIED_PROBLEM : 3
TEMPERATURE_COLOR : 1
ALERT_PHYSICIAN : 1
AN_HAD : 1
HAD_AND : 1
RIGHT_SETTING : 1
HOME_TO : 1
MAY_DEPRESSION : 1
SOCKS_HAS : 1
IDENTIFICATION_VERIFIED : 1
APPROVED_LOW : 1
BEING_WITH : 1
FLUOXETINE_AND : 1
FINISHED_DRUG : 1
HE_NOT : 4
MEDICATION_MANAGEMENT : 1
ORDERED_PROTECTIVE : 1
NOT_EXPECTED : 1
QTY_PATIENT : 1
OUTPATIENT_PRECAUTIONS : 1
ASSISTANCE_AMOUNT : 1
TO_ME : 3
EFFECTIVE_MANAGEMENT : 1
ABLE_TURN : 2
FOR_HERNIA : 1
HIP_IMPROVEMENT : 1
LEFT_EAR : 3
MOUTH_TIMES : 1
SCREENING_PTSD : 1
PERSONAL_HISTORY : 1
HAD_GOAL : 1
TAKEN_PRIOR : 1
INTERESTING_PEOPLE : 1
MDS_PAPER : 1
IS_CONSIDERED : 1
ON_SWIFT : 1
NONOR_PROCEDURES : 1
ROS_AND : 1
ON_HIS : 2
ME_NO : 1
WERE_MET : 1
DIRECTED_WORKING : 1
INSOMNIA_PS : 1
TREATMENT_PATIENT : 1
BACK_CALL : 1
KNOWN_MEDS : 1
IDEATIONS_SHE : 1
PAIN_OVER : 1
IN_RIGHT : 2
NEGLECT_THE : 1
SOCIAL_REHAB : 1
SEP_PASCUZZI : 1
RESP_ER : 1
PUT_MYCIN : 1
UNTIL_REFILL : 1
STEADY_GAIT : 1
BATHROOM_PRIVILEGES : 4
NURSING_SUMMARY : 1
EASILY_TURNS : 2
NONCOMPLIANCE_DROPS : 1
COME_SEE : 1
THE_CERTIFICATION : 1
BUT_RECEIVED : 1
PULLED_IS : 1
PBC_THIS : 1
THAT_HAS : 7
PT_FOR : 3
CLEAN_REGULAR : 1
REPORTS_DURATION : 1
CYST_PUBLIC : 1
CALCULATOR_MR : 1
PRO_PHONE : 1
IN_REGARDS : 1
AFFECTING_LAB : 1
ON_TOUCHING : 1
AOX_DIRECTABLE : 1
OR_MH : 1
NURSE_READING : 1
APPT_PTSD : 1
REQUEST_ED : 1
THE_CURRENT : 1
DETACHMENT_THAT : 1
SCORE_OBTAINED : 2
FOR_EXT : 1
HIS_RAUSCH : 1
AND_NEEDS : 1
DING_IN : 1
PLACE_NUMBER : 2
GROUP_HEALTH : 1
AT_HOME : 1
RIGHT_POSTERIOR : 1
INCREASED_WELLBUTRIN : 1
REMISSION_BREAST : 1
NIGHTS_WITH : 1
BE_COME : 1
CONSENT_FOR : 2
EMERGENCY_PART : 1
OBESITY_CHIEF : 1
TO_MAKE : 4
MEDICATIONS_EXCLUDING : 1
STATES_HAS : 1
ITS_UNSAFE : 1
VERY_UNSAFE : 1
ASSESS_THE : 1
FEB_EYE : 1
DOSE_IS : 1
HAVING_VOMITING : 1
DISORDER_COMING : 1
AND_SESSIONS : 1
ONE_GIVING : 1
TO_SELF : 3
RE_SPOKE : 1
NURSING_MEDS : 1
NEBULIZER_ASSESSMENT : 1
COPING_WITHIN : 1
FEEL_AS : 1
TO_GOAL : 1
OF_START : 1
HOURS_INPT : 1
WAS_WOULD : 1
EYEBALL_WITH : 1
MAY_BE : 1
TRIAL_EYE : 1
VERY_WELL : 1
ACCESS_RESPIRATORY : 1
LEG_WITH : 1
DIALYSIS_NO : 1
DESIGNED_TO : 1
EDUCATION_TEST : 1
PAINS_MY : 1
RECEIVES_AAOX : 1
LUMPS_ON : 1
ACTIVE_AND : 1
LAST_WK : 1
TOUCH_OF : 1
PULSE_PRESCRIPTION : 1
ANGIOGRAPHY_VITAL : 1
SOCIALIZED_WITH : 1
CALL_AS : 1
SOLN_OPH : 2
PATIENT_ALL : 1
SETTING_HIS : 1
TAB_MAIL : 1
ASSESS_RISK : 1
HOURS_EACH : 1
USING_VETERANS : 1
UNDECIDED_ONE : 1
BIRCH_REPORTED : 1
REALITY_REDIRECTION : 1
DISCUSSED_PERCIEVED : 1
HIS_EAR : 1
MEDS_PROVIDED : 1
IMPROVED_FAIR : 1
SUICIDAL_IDEATION : 1
ON_PREOPERATIVE : 1
PERMIT_APPARENTLY : 1
COULD_SCHEDULE : 1
JOB_THE : 1
HIS_COURT : 1
WHILE_ATTENDANCE : 1
ADVERSE_IN : 1
SPEAK_CALL : 1
FATHER_AGE : 1
DENTURE_BASE : 1
TAKE_CLASSES : 1
EMPLOYMENT_TRYING : 1
THE_REDUNDANT : 1
FEELINGS_OF : 1
REACTIONS_IN : 1
USE_ENDING : 1
AS_ONE : 1
SYMPTOMS_COMPLAINTS : 1
STATUS_SMOKING : 1
GIVING_ME : 1
IS_LIFETIME : 1
SOME_LIDS : 1
TO_WORK : 1
DEVELOP_COPING : 1
THE_WORK : 1
SUICIDALITY_OR : 1
OF_PUBLIC : 1
HE_CLAMIS : 1
ORAL_AS : 1
DIAGNOSIS_FOR : 1
GROGGINESS_THE : 1
OVER_COUNTER : 1
AND_SHE : 3
AMBULATION_HIS : 1
CANCER_PAP : 1
ALSO_INTENDS : 1
YEAR_IS : 1
YO_SINGLE : 1
PERSON_AND : 1
WHAT_IT : 1
ELOPEMENT_RISK : 1
MIGHT_IMPROVED : 1
BATHROOM_HIP : 1
LMSW_IN : 1
PLACE_AND : 1
RESIDENT_LUNCH : 1
ZZSWS_ECF : 1
FOR_TRANSPORT : 1
AND_POSSIBLE : 1
PHYSICIAN_ELIMINATION : 2
VITAL_MONITORED : 1
NO_GOOD : 2
BODY_OF : 1
BEDTIME_ACTIVE : 1
ORDER_HIS : 1
RESP_OF : 1
ASKED_TO : 1
RE_WITH : 1
ACTIVE_ACTIVE : 1
WAS_OCCLUDED : 1
SWER_AMOUNT : 1
STRENGTHS_VISIBLE : 1
ALERTMRSA_PERSONAL : 1
IN_STERILE : 1
PERSON_PLACE : 5
OR_ORI : 1
ACCRETIONS_TEETH : 1
IS_STILL : 1
VAPOR_THE : 1
HISTORY_OMYELITIS : 1
HIS_ZZECF : 1
THE_REASONS : 1
RELIEVE_AND : 1
CHARACTER_OF : 1
THE_MET : 1
AND_OUT : 1
SATISFACTORY_MEETS : 1
STATED_DID : 1
NOTE_QUESTIONS : 1
THE_EQUIPMENT : 1
FACILITATORS_STAFF : 1
CORRECT_MUSCLE : 1
MS_ASSESS : 1
PATIENT_PAIN : 1
OF_FUNCTIONING : 1
GO_SMOKE : 1
ANCHORAGE_PC : 1
EXAM_NOTE : 1
FUNCTIONING_HIGHEST : 1
ER_EVALUATION : 1
VISIT_OF : 1
TO_LOW : 1
REINFORCEMENT_TO : 1
WAS_TO : 8
WAITING_HIS : 1
SKIN_PROBLEMS : 1
SHE_NOW : 1
MEDICATIONS_AND : 1
RT_HYDROCELECTOMY : 1
DOG_HE : 1
ATTENDED_BACK : 1
PUFFS_ACTIVE : 1
PLACEMENT_WHERE : 1
THAT_SKIPPED : 1
MY_FOR : 1
FOR_IN : 1
NONE_TO : 1
MOVEMENT_DECIDED : 1
APPEARED_BE : 1
NEEDS_UPDATED : 2
BE_GLAUCOMA : 1
CIRRHOSIS_PORTAL : 1
VIA_THE : 1
AND_CONTINUE : 1
CALL_VET : 1
YES_NOTE : 1
BRC_SWS : 1
ABUSE_NEGLECT : 1
TELEPHONE_WANTS : 1
DEPRESSED_HE : 1
AND_CURRENTLY : 1
APPOINTMENTS_WITH : 1
PATIENT_DOES : 1
DEPRESSION_MAIN : 1
PLASMA_URINE : 1
STOOL_MOISTURE : 1
OR_GRIPPER : 1
SWELLING_NICOTINE : 1
THE_MEETING : 1
MCG_CFCF : 1
THE_BELL : 1
ON_SAT : 1
FEELINGS_PARANIA : 1
SEE_PAIN : 1
AT_CALL : 1
NO_IMPAIRMENT : 1
ADDENDUM_AGREE : 1
TICS_PT : 1
LMWH_POST : 1
NUMBENSS_LOSS : 1
PATIENT_BEDSIDE : 1
DIALYSIS_HOMEBASED : 1
OMEPRAZOLE_MG : 1
PHYSICIAN_SCORE : 1
WAS_REMOVED : 1
NOTE_TO : 2
USING_THE : 2
THAT_SUBSTANCE : 1
ON_DISCHARGE : 1
HIS_AND : 4
BUT_THEN : 1
AND_PORTAL : 1
MM_EPIDIDYMAL : 1
WITH_PROCEDURES : 1
NEEDS_TO : 1
BP_PATIENTS : 1
TAKES_BE : 1
DIVISION_ADVOCATE : 1
NEW_LUBRICATING : 1
NONSPECIFIC_HOWEVER : 1
SHIPMENT_OF : 1
PASSIVE_WITH : 1
WAS_ACTIVE : 1
SYMPTOMS_WALKS : 1
OF_PROCEDURE : 1
ADVERSE_CONSEQUENCES : 1
LOW_REINFORCEMENT : 1
NOTE_ZZPATIENT : 1
WAY_TO : 2
OBESITY_DEPRESSION : 1
CARE_NOTE : 4
RISK_PHYSICIAN : 1
WASNT_FEELING : 1
OSAC_AND : 1
ACTIVE_MG : 1
HE_UNDECIDED : 1
DISCREPANCIES_IN : 1
PARANOID_TALKED : 1
THERAPY_SESSION : 2
PREOPERATIVE_CANE : 1
PROVIDERS_EMERGENCY : 1
NEW_PAIN : 2
FACE_AND : 1
ALL_SILVADIAZENE : 1
OUR_FROM : 1
IS_OBMT : 1
AS_FOR : 4
TO_AFFECTED : 1
LUNG_ONSET : 1
THEN_ILL : 1
INTEREST_PLEASURE : 1
MEAL_SMOKING : 1
TREATMENT_ARM : 1
PROGRESS_LUNCH : 1
LV_SIGNIFICANT : 1
TAB_PO : 1
LEFT_PHONE : 1
BOAT_AND : 1
DISPOSITION_COMMENTS : 1
EYES_HIS : 1
QUIET_FLAT : 1
SOCIETY_SMEAR : 1
MEDS_GOAL : 1
ADDENDUM_WOULD : 1
YOUR_NEXT : 1
MONTHS_TREATMENT : 1
OF_ETOH : 1
REGARDS_UPCOMING : 1
OIL_ORAL : 1
BEEN_ON : 1
UNSURE_HE : 1
FEELS_HE : 1
PAIN_SENSORY : 1
TASK_OVERSIGHT : 1
SCORE_OF : 2
HI_PERCEPTUAL : 1
WHOM_THE : 1
TASK_REQUIRES : 2
SEE_COMFORT : 1
SAYS_HAS : 1
JUNE_WOULD : 1
LEFT_THIGH : 1
HIM_TO : 3
MUSICIAN_WHO : 1
OR_BREASTFEEDING : 1
IS_OLD : 1
IN_PAIN : 1
AND_MOOD : 1
AS_DISCUSSED : 1
SHOULDER_ROTATOR : 1
HEART_NO : 1
HIS_PULSE : 2
ACC_LUMPS : 1
FOR_THE : 7
IODINE_FOLLOW : 1
INDICATED_TO : 1
HARBOR_MET : 1
ENGAGED_INTERVENTIONS : 1
TESTS_PERFORMED : 1
CAN_THINK : 1
URINE_STOOLS : 1
START_TIME : 1
ON_FLUCONOZOLE : 1
INCISION_ASSESSED : 1
MEDS_DISCUSSED : 1
TRAVEL_HOME : 1
OF_SESSIONS : 2
CYCLOBENZAPRINE_MEDS : 1
WEDNES_ACTION : 1
OF_ORDER : 1
STATE_IF : 1
BEEN_BY : 1
TO_EVENING : 2
ADDENDUM_ERUPTED : 1
BLOOD_VET : 1
ML_ADVERSE : 1
PAPER_TAPE : 1
THE_BACK : 2
THE_PROCEDURE : 1
ALSO_APPOINTMENT : 1
AND_INDOMETHACIN : 1
CONSTANT_THE : 1
MEAT_AND : 1
SC_COMPENSATION : 1
BLOOD_IN : 1
PROBLEM_COPING : 1
THE_FROM : 1
AND_HOPEFULLY : 1
HIS_MIAMI : 1
PATTERN_DURING : 1
PHYSICIAN_DWIGHT : 1
ON_LEGIBLE : 1
BREAKFAST_OTHER : 1
LIKES_TO : 1
HE_WILL : 1
COMPLETED_SOMATIZATION : 1
WILL_TO : 4
MANAGEMENT_WEIGHT : 1
THE_BRC : 1
EXT_EVENING : 1
WOULD_BENEFICIAL : 1
WAS_CONTINENT : 3
LAST_SEEMS : 1
ASKING_TO : 1
WILL_WORK : 1
USED_RELIEVE : 1
JULT_MOMETASONE : 1
SUPERVISION_ASSISTANCE : 1
VERBALIZATION_NUM : 2
MEDICATIONS_PAIN : 1
CONFERENCE_FOR : 1
CHAPLAIN_VISITATION : 1
HIS_COMPLAINT : 1
MR_IS : 1
APPARENT_PTSD : 1
LIFE_HE : 1
AN_ANXIETY : 1
CONTRACT_RHEUMATOID : 1
INDEPENDE_URINE : 1
PAINWITHOUT_PAIN : 1
ON_VICTIM : 1
HAS_AN : 1
WRITING_OWN : 1
AND_INCONTINENCE : 2
RED_SCORE : 1
MEDIAL_OF : 1
FAMILY_TO : 1
DATE_OF : 3
CERVICIS_PROVIDER : 1
HEARING_LOSS : 1
CAP_ORAL : 1
COLLECTED_CYR : 1
DEPRESSION_AXIS : 1
TO_DISC : 1
AND_THOUGHTS : 1
PICK_UP : 1
ANYTHING_YOU : 1
PHONE_CALL : 2
ALLEVIATE_PT : 1
HOSPITAL_TRAVEL : 1
EXPERIENCED_MOST : 1
PROVIDERS_ROOM : 1
TO_SCREENS : 1
DAILY_GETS : 1
FOR_MED : 1
PHYSICIAN_NICOTINE : 1
YES_MODALITIES : 1
OCCASIONALY_SURGICAL : 1
DINNER_FOOD : 4
HIGHRISK_PATIENT : 1
HAVE_YOUR : 2
WITH_DIAGNOSIS : 1
WITH_TREATMENT : 1
MR_APPROVED : 1
SECURITY_NUMBER : 1
AHN_PROVIDER : 1
CHECKS_ON : 2
FOR_PAIN : 5
BUT_VOMITING : 1
THE_ROOTS : 1
THE_PENETRATE : 1
NEW_IN : 1
MY_ARM : 1
DOCTOR_THAT : 1
MG_PROVIDER : 1
CARE_INVOLVING : 1
HERBAL_MEDICATIONS : 1
OTHERS_STAFF : 1
ON_HE : 1
TEETH_FLU : 1
OR_PULSE : 2
VOICES_TELL : 1
EMERGENCY_ZZMINI : 1
REQUESTED_EVALUATE : 1
THE_SERVICE : 1
OCT_VITAL : 1
BRIEF_HISTORY : 1
STREET_CLOTHES : 1
BUT_ENDORSES : 1
TO_DIERCTED : 1
DYSMETAB_SYND : 1
PAST_WILL : 1
CANDIDIASISASYMPTOMATIC_RADIONUCLIDE : 1
GIVEN_ORDERED : 1
IN_WOULD : 1
FROM_TO : 2
MODALITY_ULA : 1
PERIODON_DENTAL : 1
IMPAIRED_VERBAL : 1
PAPER_CARE : 1
NONVA_FISH : 1
HOW_FEELS : 1
NURSING_NONE : 1
RISKS_ALTERNATIVES : 1
OUTPT_MEDICATION : 1
MMOL_COMMON : 1
CHEST_THEY : 1
SECOND_AT : 1
DURING_MEAL : 1
MET_FOLLOWING : 1
INFORMATION_LIN : 1
CAREGIVER_HIS : 1
CONTINUE_EMERGENCY : 1
PROCEDURE_CORRECT : 1
NONV_FACILITY : 1
ABUSE_BE : 1
HIM_DIASABLITY : 1
LAB_RE : 1
LAST_DOCUMENTED : 1
WANT_PATIENT : 1
TREATMENT_BUT : 1
EYE_CONTACT : 2
PROCESS_OF : 1
NO_IDENTIFIED : 1
OF_FEB : 2
TO_POSTED : 1
PT_PSYCHIATRY : 1
PAIN_ON : 1
ORIENTED_SAID : 1
CHEST_PROCEDURE : 1
THAT_HUDVASH : 1
PACIFIERS_BEDTIME : 1
OF_LS : 2
THE_MODE : 1
THE_LOCATION : 1
WILL_NOTIFY : 1
WORSENED_AND : 1
CAUSING_HIM : 1
AND_AP : 1
PROCEDURES_TO : 1
WITH_BALDWIN : 1
AT_THE : 6
STOVE_WANDERING : 1
YRS_RECENTLY : 1
FOR_DIABETES : 1
ONE_OF : 1
PLACE_PING : 1
AFFECT_INPATIENT : 1
QID_WHILE : 1
IN_ER : 1
SEATED_POSITION : 1
CONDITION_PATIENT : 1
FOR_CHEST : 1
NOT_REQUIRE : 3
DRINKS_ALCOHOL : 1
ADDENDUM_EXTRACTION : 1
NURSING_FALL : 1
HAVE_ISSUES : 1
MAY_HIS : 1
DIFFICULTIES_VERBAL : 1
NOTE_FUTURE : 1
SC_THE : 1
THE_MANAGEMENT : 1
EDUCATION_ENTER : 1
PAIN_MEDICATIONS : 1
TRANSFERRING_CARE : 1
SPECIFIED_HOUSING : 1
HER_PT : 1
TO_VA : 1
PART_TRIAGE : 1
HERE_HE : 1
ON_MAY : 1
GUIDANCE_LATERAL : 1
ONE_TO : 2
STATES_CELL : 1
TO_PREVIOUSLY : 1
TO_PULSE : 1
FOCUS_MAY : 1
PHONE_NURSE : 1
VITAL_DEMOGRAPHICS : 1
VISIT_BANISTERS : 1
OUTPATIENT_NOT : 1
LIFTING_THE : 1
ISSUED_TIME : 1
SIGNATURE_INFORMED : 1
NORMAL_NORMAL : 1
IN_VA : 1
EVERY_BE : 1
DURING_SHIFT : 4
NAME_VETERAN : 1
DEPRESSION_AN : 1
CURRENT_YO : 1
HAS_TELEDOC : 1
NONE_BETWEEN : 1
NO_PND : 1
WAL_REQUEST : 1
ON_FACE : 1
FECAL_INCONTINENCE : 1
DIABETES_MELLITUS : 3
PCT_HEALTH : 1
HEP_WHICH : 1
PT_HERE : 1
TERMINATED_AT : 1
PROVIDED_ON : 1
SCHEDULED_THIS : 1
TISSUES_WILL : 1
SINGLE_YO : 1
CAN_DISCHARGED : 1
PROCEDURE_AND : 1
TIME_NUMBER : 1
EMERGENCY_WALKIN : 1
SMILING_TO : 1
VISTA_IMAGING : 1
BENT_OVER : 1
WOULD_ALSO : 1
RAUSCH_IN : 1
RADIATION_TO : 1
GIVEN_THE : 2
BENEFICIAL_HIM : 1
LID_CONTACT : 1
CATEGORY_VI : 1
UPON_HER : 1
RELIGIOUSLY_BUT : 1
IBUPROFEN_TAB : 2
SWS_VETERAN : 1
BLINDNESS_FALL : 1
HYPERTENSION_POSTTRAUM : 1
TO_TBI : 1
MODE_START : 1
EYE_COLOR : 1
PALPITATIONS_PATIENT : 1
NO_WAS : 1
MEMORY_SECONDARY : 1
OF_CRNA : 1
PUT_ON : 1
PRESENTED_THE : 1
BLINDNESS_WOUND : 1
NO_ONE : 1
THE_DOWN : 1
PT_REPORTS : 1
NOT_THE : 3
PREOP_HE : 1
AFTER_IF : 1
CAP_ASKING : 1
SIGNS_NONVA : 1
NEW_CORTICOSTEROID : 1
AM_EVALUATION : 1
PROTOCOL_DIABETES : 1
SCORE_DISEASE : 1
VERIFY_CORRECT : 1
TO_SELFMANAGE : 1
BLOOD_HEIGHT : 1
RESIDENTS_MEAL : 1
WHEN_HE : 2
NUMBENSS_SENSATION : 1
URINE_URINE : 1
VETERAN_ALERT : 1
HIS_DEFINITION : 1
WAS_WHICH : 1
NAME_MDS : 1
MESSAGE_PHYSICIAN : 1
DIASABLITY_AND : 1
INJ_CEFTRIAXONE : 1
AREA_MHC : 1
AS_LOW : 1
URINARY_ANESTHESIA : 1
INHALE_PUFFS : 1
ARTHRITIS_TREATMENT : 1
TO_DO : 2
ON_IDENTIFIED : 1
THIS_SCHEDULED : 1
PAIN_EVENING : 1
YOU_ARE : 1
MANAGEMENT_WORK : 1
NOTE_DISCREPANCIES : 1
LEARNING_UNDER : 1
TAPE_XYDS : 1
NOTE_AN : 1
BRC_FAMILY : 1
ASSESMENT_RECOMMENDATIONS : 1
ITIS_BPH : 1
SENSORY_NO : 1
MACHINE_COULD : 1
TRAVEL_HIS : 1
PAIN_MEDS : 1
IDENTIFICATION_SOCIAL : 1
INITIAL_IN : 1
HOPEFULLY_HIS : 1
CALLED_LEFT : 1
MANAGEMENT_CODE : 2
CURRENT_RISK : 1
PLACE_PATTERN : 1
PULSE_OTHER : 1
AND_CAN : 1
HOSPITALIZATION_HIS : 1
MESSAGE_ANSWERING : 2
EACH_FROM : 1
THE_REPORT : 1
VETERAN_READILY : 1
POINT_AND : 1
UNDERSTANDING_DENIED : 1
SHOWS_PHONE : 1
FRIENDS_WHO : 1
PAP_COLLECTED : 1
PARANIA_DIALYSIS : 1
TASK_SUPERVISION : 1
SURGERY_INTERVENTION : 1
PRIOR_PROCEDURESUPINE : 1
SERVICE_ON : 1
WRAP_PAK : 1
ER_OF : 1
MINUTE_REQUESTS : 1
THE_DURATION : 1
HE_THAN : 1
THE_ALERT : 1
POSSIBLE_TO : 1
PT_AGREED : 1
BAD_TAKE : 1
THOUGHT_GOAL : 1
HIS_HER : 1
ANXIETY_IS : 1
SURGERY_NOTE : 3
ADM_DEPRESSION : 1
AN_INDIVIDUAL : 1
TO_NOT : 2
HIP_THE : 1
TASK_NO : 2
COMPLAINT_QUESTIONS : 1
NURSING_ASKED : 1
CPRS_LOPERAMIDE : 1
MY_AWAY : 1
WANDERING_NEIGHBORS : 1
HRS_DURING : 1
MAD_REQUESTED : 1
NOS_ANXIETY : 1
MEETING_STAFF : 1
FACTORS_VETERAN : 1
AND_TALKED : 1
INFORMATION_HE : 1
NOTE_THAT : 1
AND_GIVEN : 1
MALE_COMBAT : 1
OFFERED_MENTAL : 1
VERIFIED_TO : 1
USING_RISK : 1
TRAVEL_AT : 1
IMPROVEMENT_IF : 1
SHOULD_OCCUPATION : 1
ER_HE : 1
COMPLEXITY_ON : 1
AND_PARTICIPATED : 2
PLS_CALL : 1
EITHER_TO : 1
PILL_COUNT : 1
TO_ON : 3
AGREE_THE : 1
QUESTIONS_YOU : 2
TRANSDERMAL_PATCH : 1
TH_BRC : 1
FOR_FIRST : 1
ONE_TRANSFER : 1
BY_WHICH : 1
WHO_REPORTS : 1
VIEWS_TO : 1
OVERT_DEPRESSION : 1
CURRENTLY_BY : 1
SELFMANAGE_MEDICAL : 1
IN_ON : 1
APPROX_NURSING : 1
EDUCATION_VETERAN : 1
METOPROLOL_TARTRATE : 1
NOSUNSPEC_ON : 1
ICDCM_PT : 1
TDAP_ASSESMENT : 1
MEETS_PATIENTS : 1
KNEE_OCCASIONALY : 1
SESSION_EXPRESSED : 1
CURRENT_CLOZAPINE : 2
TRANSFERRING_INTERIM : 1
DIAGNOSED_CANCER : 1
DIABETES_FROM : 1
NOTE_REVIEWED : 1
CLINICAL_HISTORY : 1
WAS_COPY : 1
MIAMI_ALSO : 1
DRIVING_OR : 1
PING_PATTERNS : 1
CLAMIS_HIS : 1
CONTINUE_TO : 4
PCP_PROBLEM : 1
BEHAVIOR_TREATMENT : 1
RYAN_FOR : 1
ENERGY_SCORE : 1
OR_ALERT : 1
HAVE_DRINK : 3
EMOTIONALLY_AND : 1
OCCASIONALLY_SKIN : 1
ANSWERING_BLINDNESS : 1
AT_AM : 2
SUPPLIED_PAIN : 1
PULSE_HE : 1
VET_HE : 1
REGIME_ORDER : 1
WAS_NEGATIVE : 1
HE_BEEN : 5
PCP_FOR : 3
MD_KNOWS : 1
THE_NORMAL : 1
WHICH_ONE : 1
DIPHTHERIA_TDAP : 1
FROM_ONE : 1
BUT_MODERATE : 1
PREOPERATIVE_LSCHEDULE : 1
IDENTIFIED_INDICATE : 1
HIS_TRAMADOL : 1
TOP_OF : 1
THEY_AS : 1
NOTE_CALLED : 1
LIST_OF : 1
FOR_CHART : 1
PAIN_MANAGEMENT : 3
LABEL_TRIED : 1
EXAM_PHYSICIAN : 1
MALE_MARITAL : 1
DISCHARGED_PROVIDER : 1
PROGRESS_THE : 1
SEE_CARDIAC : 1
CASE_NO : 1
TREATMENT_PROCEDURE : 1
ML_ATROVENT : 1
THIS_AND : 1
GUIDE_REDUNDANT : 1
SYMPTOMS_DAILY : 1
SO_HE : 1
ON_THEY : 1
FEB_PERIODON : 1
LIKE_DOG : 1
CARE_ON : 1
AUDIOTAPE_TRANSPARENCIES : 1
ADDENDUM_HOW : 1
NOT_LOOKING : 1
PREOPERATIVE_MENTAL : 1
ILLNESS_ANGIOGRAPHY : 1
AND_ONE : 1
TARY_FOHX : 1
INFLUENZA_BUSPIRONE : 1
THE_TRIED : 1
CNA_HEARD : 1
BREAKFAST_INTIMIDATING : 1
PROPER_DISPOSAL : 1
IN_OFFICE : 2
POKER_AS : 1
SOME_WITH : 1
AND_AWAKE : 1
PLAN_WAS : 2
QID_RIGHT : 1
LISTENED_OTHERS : 1
WITH_INSOMNIA : 1
CHEST_PAIN : 2
DRINKS_THIS : 1
VETERAN_SINCE : 2
RISK_FACTORS : 2
IF_PERSONNEL : 1
ALL_REFILL : 1
THIS_PLAN : 1
PRESENT_DATE : 1
INFORMATION_NO : 1
DATE_URINE : 1
THERAPY_APPOINTMENTS : 1
ON_SC : 1
BATTERIES_ORDERED : 1
SEND_LETTER : 2
AT_NONSPECIFIC : 1
DAILY_AND : 1
GOALS_CHECK : 1
EYE_APPOINTMENT : 1
IS_IF : 1
APPOINTMENT_INFORMATION : 1
TO_EACH : 1
IN_EXACERBATING : 1
FIBULA_NONOR : 1
VIST_MON : 1
KG_CONSENT : 1
DIFFICULTY_THE : 1
PENETRATE_THROUGH : 1
THE_GROUP : 2
REQUEST_PAIN : 1
MEDICATION_ML : 1
ACCORDANCE_WITH : 1
MANAGEMENT_TOLD : 1
FOR_ANALYSIS : 1
THE_CALCULATOR : 1
STATUS_OF : 1
TO_PROVIDER : 1
TICAL_SCIENCE : 1
HE_AN : 1
WAS_SEEN : 5
COULD_AN : 1
WORK_REHAB : 1
NOTE_DT : 3
DOSE_MG : 2
FLAT_PERSONAL : 1
LEFT_IT : 1
SOMETIME_THE : 1
GI_ME : 1
OF_VETERAN : 2
COMPLETED_CARE : 2
DIAGNOSES_PAINWITHOUT : 1
LIST_WAS : 1
THEN_HEARING : 1
OD_NORMAL : 1
JESUS_NO : 1
DISPOSITION_REPORT : 1
RN_DERMATOLOGY : 1
DISCLOSED_RECOVERY : 1
HAS_DEPRESSION : 1
VISIT_SERVICES : 1
IDENTIFICATION_NAME : 1
FORESKIN_IS : 1
NO_URINE : 1
THE_SHORTTERM : 1
APPEARANCE_SPEECH : 1
DERMATOLOGY_SURGICAL : 1
INFORMED_HER : 1
VERBALIZED_UNDERSTANDING : 1
TO_HIGHRISK : 1
EVERY_OVERALL : 1
TO_ER : 3
VERIFIED_AS : 1
TRAMADOL_AND : 1
EXR_TOOTH : 1
ICDCM_NOSUNSPEC : 1
NARCOTIC_CONTRACT : 1
AND_MET : 1
ILL_HE : 1
ENDORSES_CHRONIC : 1
DEFINITION_OF : 1
OM_TO : 1
AM_NOTE : 1
FOR_ASSISTANCE : 1
PATIENT_VERBALIZATION : 2
TO_BE : 8
PERSONAL_CARE : 1
CONFIRM_VETERAN : 1
COMPLAINT_MANAGMENT : 1
THE_RESULTS : 1
ATTENDED_OFFERED : 1
ASKED_HE : 1
IS_QUITE : 1
PRESENT_IS : 1
HYPOALLERGENIC_TAPE : 1
COPY_PHARMACY : 1
SMEAR_RECOMMENDATIONS : 1
COMMENT_FOR : 1
MOUTH_FOR : 3
ELIMINATION_CUEING : 1
XYZZY_EITHER : 2
PHARM_VISIT : 1
BUT_APPEARED : 1
WHO_HIM : 1
CHEMICAL_NAIL : 1
THE_TEAM : 1
THE_DEC : 1
IDENTIFIED_WILL : 1
REVIEW_ALLERGIES : 1
AND_MG : 2
OR_PTSD : 1
PEDAL_SWELLING : 1
THE_QUIET : 1
LAST_SCORE : 1
SOCIAL_DISCHARGE : 1
THE_VETERAN : 5
PHARMACY_CHART : 1
KEPT_INPT : 1
BRC_SWER : 1
PROBLEMS_THE : 2
ONE_INTERVALS : 1
RNS_MET : 1
THE_HEALTH : 1
HAS_USING : 1
TELEPHONE_ALLERGIES : 1
WITH_THE : 10
WAS_HE : 2
COMMENTS_YES : 1
AMOUNT_BLADDER : 1
REGARDING_VISION : 1
YOUR_HOME : 1
MAJOR_ISSUE : 1
MEDS_PATIENT : 1
UNDERSTAND_THAT : 1
IN_WHY : 1
SUN_WAS : 1
COMMUNICATION_IDENTIFIED : 1
IN_THINGS : 1
BINGE_TYPE : 1
FRO_THIS : 1
LBP_REPORTS : 1
MIAMI_VETERAN : 1
AND_FECAL : 1
THE_NEATLY : 1
THE_SELF : 1
TIMES_THEY : 1
HEALTH_INTAKE : 1
DEPRESSION_SUICIDAL : 1
SHE_NOTED : 1
TO_BLOOD : 1
UNTIL_HAD : 1
HAS_TEETH : 1
SINCE_JUNE : 1
VETERAN_CONTINUE : 1
INR_LAB : 1
ON_AT : 4
AT_ST : 1
BOWEL_MOVEMENTS : 3
ADDENDUM_BESYLATE : 1
NAME_SECURITY : 1
THIS_ASKED : 1
CORTICOSTEROID_MEDICATION : 1
TESTING_HAS : 1
WOULD_ASSISTANCE : 1
ESOPHAGEAL_REQUESTS : 1
LATEX_IODINE : 1
REVIEW_PATIENT : 1
REMOVAL_OF : 1
OR_CALL : 1
ONEHALF_TABLET : 1
JOB_ADDENDUM : 1
INTERTON_FEELING : 1
DISCHARGE_CLINIC : 1
AM_NURSING : 1
CLEANED_STERILE : 1
LOW_LAST : 1
CYCLOBENZAPRINE_NONVA : 1
PCP_WAS : 1
OR_WAY : 1
THEIR_APPARENT : 1
SELECTING_IMAGING : 1
MED_OR : 1
CONSULT_PCP : 1
DENTAL_NOTE : 1
ORIENTED_PERSON : 5
MALE_FOR : 1
INCLUDING_THE : 1
HAS_MUSICIAN : 1
BRC_LOW : 1
INJECTION_THAN : 1
MOBILITY_NUMBER : 1
COME_AS : 1
BEDREST_MR : 1
PERCENT_CONSUMED : 1
ALCOHOL_CIWAAR : 1
VISION_HE : 1
SCORE_AMLODIPINE : 1
BED_CURRENT : 1
THAT_LIFE : 1
CPRS_BEHAVIOR : 1
MAR_RECALL : 1
PT_OVERT : 1
YES_AN : 1
PAM_SHE : 1
WILL_MORE : 1
JUN_ABC : 1
READ_IN : 1
SHAMPOO_URINE : 1
DENTAL_WHAV : 1
VISION_MR : 1
ELAVIL_IN : 1
STATES_SUN : 1
NSAIDS_COMMENTS : 1
RECOMMENED_THAT : 1
CM_ROOM : 1
OR_LCSW : 1
IF_HE : 2
FL_GAIT : 1
TO_PHARMACY : 1
LIVES_FLORIDA : 1
AMOUNT_STOOL : 2
HEAD_THE : 1
HE_ARM : 1
TO_GENDER : 1
CALLED_INSTRUCTED : 1
HE_SPECIFICALLY : 1
OUTPUT_REASON : 1
MENTAL_RECOMMEND : 1
TO_ALTHOUGH : 1
HAS_BEEN : 16
RAN_SAYS : 1
AMB_CARE : 1
UNSPECIFIED_COUNSELING : 3
COMPLETED_LOOKING : 1
FOR_FOLLOW : 1
SUSPECTED_PROSTATE : 1
MANY_DRINKS : 1
OF_DOCUMENT : 1
PRESSURE_IN : 1
MENTAL_NOTE : 1
MEANS_AVAILABLE : 1
COLLECTED_ACC : 1
MENTAL_GROUP : 1
BY_FAMILY : 1
CYST_AROUND : 1
DIAGNOSIS_GLAUCOMA : 1
ICDCM_SEEN : 1
DX_ATTITUDE : 1
ONSET_HYPERLIPIDEMIA : 1
MF_PERSONAL : 1
STOPPED_THEN : 1
TO_PROBLEM : 1
OXIMETRY_OTHER : 1
SKIN_COLOR : 1
DELUSIONS_VERBALIZED : 1
BE_AS : 1
SENT_SCREEN : 1
TF_TPN : 1
VISIT_SEP : 1
WITH_ON : 1
TOLD_THAT : 1
COMPLETED_ANY : 1
HOURS_NAPPING : 1
OF_FOLLOWING : 1
ATTITUDE_COOPERATIVE : 1
SIGNS_AND : 3
PSYCHOSIS_DENIES : 1
NOTE_HT : 1
IS_WORTH : 1
FRI_FROM : 1
NANCY_PROVIDER : 1
FULL_WITH : 1
REQUESTING_TO : 1
HE_PING : 1
EFFECTIVE_PAIN : 1
PSYCHIATRY_MEDICATION : 1
MOOD_HAS : 1
VERIFIED_PATIENT : 1
NOS_SURGERY : 1
MESSAGE_FROM : 1
DENIES_ANY : 2
PROBLEM_UNSPECIFIED : 3
TO_OR : 2
MG_ORAL : 1
FILL_MEDICATIONS : 1
MS_BACK : 1
MG_CAP : 2
THE_RESTRICTIVE : 1
MEAL_REQUIRES : 1
TOILET_PATIENT : 2
GET_PATCH : 1
ENCOUNTER_RANITIDINE : 1
CUFF_AND : 1
MST_BORDERLINE : 1
OROPHARYNGEAL_HEART : 1
BRC_NURSING : 1
SESSIONS_PM : 1
AWOKE_BENT : 1
BUT_HAVING : 1
MORNING_DISCUSS : 1
AT_BEDTIME : 1
ASSESMENT_AND : 1
OR_PSYCHOSIS : 1
NEVER_GOT : 1
AL_PT : 1
FAIR_CENTER : 1
REPRESENT_FILLED : 1
ED_PROVIDER : 1
HYPERLIPIDEMIA_ICDCM : 1
AGO_IS : 1
IT_COULD : 1
NEEDS_REFILL : 1
PATIENT_IS : 15
PAIN_THIS : 2
ADMISSION_JUNE : 1
HAS_READING : 1
CONSENT_NARCOTIC : 1
BEEN_UP : 1
KEPT_AFTER : 1
ISSUES_WITH : 1
SET_ASSISTANCE : 1
FOR_MOST : 1
SINCE_APPOINTMENT : 1
DEFINITION_WHAT : 1
THERAPY_NOTE : 1
AFFECT_CONTINUES : 1
SERUM_CALCIUM : 1
SHIFT_CLC : 1
SHIFT_STATE : 1
LE_LMSW : 1
WILL_ALERT : 1
READ_HE : 1
SPEAK_FROM : 1
PHQ_WAS : 1
STOMACH_ACTIVE : 1
WITHIN_NORMAL : 2
COMMENTS_MHP : 1
UP_PACU : 1
NOTED_MR : 1
HX_AND : 1
AM_CANCER : 1
PLACE_ACTIVITIES : 1
REGARDING_CONDITION : 1
OF_WAY : 1
THAT_HIM : 2
TESTING_AND : 1
ON_OPT : 1
DYSPNEA_NEW : 1
BEEN_IN : 1
OBESITY_UNSP : 1
INHALE_ACTIVE : 1
RECONCILED_THIS : 1
GAIT_STATES : 1
HEARING_VOICES : 1
NASAL_ON : 1
SSN_PATIENT : 1
ADLS_COMMUNICATION : 1
TO_LEGS : 1
ACTIVE_NURSE : 1
NURSING_PROCEDURE : 1
UNIT_INCLUDING : 1
TO_SAVE : 1
GROUPS_STAFF : 1
CONTINUED_FOR : 1
MORNING_BEDREST : 1
AND_THE : 5
DR_PRESCRIBED : 1
MEETS_PAIN : 1
PREDNISOLONE_ACET : 1
GOAL_SENSORY : 1
HOURS_AND : 2
ABNORMAL_PT : 1
PROGRESS_NOTE : 5
IC_ALERTMRSA : 1
TO_AID : 1
TRADING_HE : 1
PATIENT_THAT : 1
NOT_FROM : 1
YOUR_SURGERY : 1
VISIT_APPT : 1
NO_KNOWN : 1
PLACE_LOCATION : 1
FLOWSHEET_HE : 1
VET_VS : 1
FROM_COMPENSATION : 1
AS_GUIDE : 1
FOR_REPAIR : 1
AHS_EDUCATION : 1
INPATIENT_VITAL : 1
MANAGEMENT_SERVICE : 1
STAFF_WORK : 1
VERBAL_CLASS : 1
TO_FIRES : 2
PRIMARY_DIAGNOSIS : 1
AND_PRESENT : 1
GROUP_MESKENAS : 1
AND_LEGIBLE : 1
FREQUENTLY_ONE : 1
VS_STABLE : 1
FATHER_MI : 1
DISPOSITION_ADDITIONAL : 1
HE_TO : 5
TEETH_CONTI : 1
HIS_PAIN : 1
INACTIVE_MS : 1
NORMAL_SCREENING : 1
SINGLE_CONNECTED : 1
FACTORS_IS : 1
GOING_TO : 2
ZZPATIENT_ADL : 2
ADVOCATE_FROM : 1
CYST_HEALTH : 1
SC_STATES : 1
APPEARED_WITHOUT : 1
OF_PLAN : 2
NO_NURSES : 1
THE_REVIEWED : 1
OF_POSTTRAUMATIC : 1
USE_VETERAN : 1
OUTPATIENT_STANDARD : 1
WHERE_WAS : 1
DOING_THINGS : 1
NOTE_PRESENTING : 1
PAIN_EDUCATION : 1
HIS_ATTENDING : 1
SOFT_MOISTURE : 1
IN_FASHION : 1
PSYCHOTHERAPY_TL : 1
CYR_ON : 1
WOULD_ARRIVING : 1
HAS_CONCERNS : 1
BEDTIME_WITH : 1
SOCIAL_VOID : 1
ON_WILL : 1
ON_OF : 2
PENSION_PAIN : 1
REQUESTS_THIS : 1
YOU_CARDIAC : 1
CEFTRIAXONE_INJ : 1
TABLETS_PTSD : 1
SERVICE_AUG : 1
AN_RESPONDING : 1
BLIND_HE : 1
VITAMIN_FOOD : 1
STAFF_NEEDED : 1
FOR_THEN : 1
HE_NEEDS : 1
LIVE_INDEPENDE : 1
BY_CM : 1
VETERANS_AND : 1
AS_DICT : 1
ZA_WERE : 1
GROUP_GROUP : 1
ORAL_CAP : 1
PCE_DIAGNOSIS : 1
ATTEMPTED_CONTACT : 1
SINCE_CSPINE : 1
HIGHRISK_AT : 1
VETERAN_CALCIUM : 1
PLAN_SCOPOLAMINE : 1
CARE_PE : 1
PT_TRNASFERRED : 1
STARTLED_UNFORTUNATELY : 1
AOD_CDM : 1
AM_BY : 1
WHICH_MAY : 1
ORDERED_PATCHES : 1
TIME_PLAN : 1
OTHER_WAS : 1
US_THE : 1
MINUTE_NO : 1
LIFTING_ARM : 1
MG_ORTHOPEDIC : 1
SOME_GROGGINESS : 1
PERCEPTION_NO : 2
ER_AMBULATORY : 1
VERBAL_TIME : 1
FOOD_PASS : 1
PRESENT_HE : 1
PRESENCE_OF : 1
COMMENTS_PHARMACY : 1
LOWER_BACK : 1
HOUR_INTERVALS : 1
NOTE_RISK : 1
CONSIDERED_BE : 1
BLIND_ZZECF : 1
PT_EDUCATION : 1
WAS_HIS : 1
COPING_MECHANISMS : 1
RAL_HISTORY : 1
CARDS_FUTURE : 1
AREA_RESTAURANTS : 1
BUTTS_HIS : 1
AND_YES : 1
THREE_ATTENDING : 1
MOUTH_WEDNES : 1
PROVIDER_INFORMED : 1
IC_ON : 1
MOST_OF : 1
SUPPLEMENT_FOOD : 1
NOT_ACE : 1
BRING_DISC : 1
NOTE_NOTE : 1
SUICIDE_BASED : 1
DEVELOP_ALTERNATIVE : 1
TO_IN : 5
ER_CORRECTLY : 1
TO_DISORDER : 1
SHELTER_DIEM : 1
HIS_KNOWN : 1
USE_PH : 1
FEB_UP : 1
DIAGNOSIS_APPT : 1
AN_ALF : 1
WORK_THE : 2
HE_ABOUT : 1
HAVE_SPOKEN : 1
WOULD_BE : 4
NOTE_IBUPROFEN : 2
AS_IN : 1
KAMRAN_SAFDAR : 1
AXIS_NO : 1
NUMBER_OF : 6
INDOMETHACIN_FOR : 1
UMBILICAL_HERNIA : 1
HEIGHT_CM : 3
SCREEN_STANDARD : 1
BLINDNESS_OPEN : 1
CAN_SEE : 1
ACID_MG : 1
HELPED_PAIN : 1
PARTICIPATED_NO : 1
OSMOLALITY_URINE : 2
ANY_CPRS : 1
ASKED_SINCE : 1
OR_LITTLE : 1
INTIMIDATING_OTHER : 1
MEMBERS_IN : 1
MANAGEMENT_DT : 1
AMOUNT_THAT : 1
COPY_IF : 1
WITH_CANCER : 1
UPRIGHT_PREOP : 1
CONTINENT_WOULD : 1
SMOKING_IS : 1
TERMINATED_THE : 1
UP_WITHOUT : 2
INFORMATION_HOUR : 1
DURING_HIS : 1
PTSD_WAS : 1
MOMETASONE_FUROATE : 1
BATHROOM_THIS : 1
SURGICAL_IMPLANTS : 1
SAO_LEVEL : 1
AN_PALPITATIONS : 1
NASAL_PATIENT : 1
HERE_FOR : 2
GROUP_DISCUSSION : 1
TREATMENT_SESSION : 1
HAS_TO : 2
PATIENT_ORIENTED : 1
VETERANS_CURRENT : 1
WHAV_FINDINGS : 1
CLASSES_ONE : 1
OF_COMPLAINT : 2
SEEN_SECONDARY : 1
MH_TELEPHONE : 1
NOTE_YOU : 1
TEMP_NURSING : 1
NURSING_VETERAN : 2
FOR_ING : 1
CLINICAL_HAVE : 1
PERTUSSIS_ROS : 1
MAILED_HX : 1
SEEN_DEL : 1
THE_PLAN : 1
PRESSURE_HEIGHT : 1
PSYCHOSOCIAL_OF : 1
DISCHARGE_NEGATIVE : 1
EMOTIONAL_ACID : 1
HERE_CHART : 1
HIS_IS : 1
VET_ATTENDED : 1
INPATIENT_NONV : 1
NOTE_ABILITIES : 1
BY_SUSAN : 1
DT_CHIEF : 1
AND_APPEARANCE : 1
HIS_NAILS : 1
IDENTIFIED_LIVER : 1
IS_HERE : 2
NOT_HOMEBOUND : 1
CPRS_ON : 1
BEEN_LIVING : 1
BY_PROVIDER : 1
BLOOD_PRODUCTS : 1
WORSENING_PATIENTS : 1
IMPROVEMENT_IN : 1
IS_STARTLED : 1
LOCATION_THERAPY : 1
TWO_TIMES : 1
SEEN_BY : 1
ACTIVE_REPORT : 1
PULSE_LIVER : 1
AND_EVALUATED : 1
HOUR_PATIENT : 1
HIS_PROBLEM : 1
EAR_MEMORY : 1
FINGERS_OF : 1
MEDICATIONS_METOPROLOL : 1
NO_PATIENT : 3
LISTED_REPORT : 1
HE_REQUIRE : 1
OUT_PRESSURE : 1
SIGNS_ID : 1
PLAN_REVIEW : 1
OPEN_OF : 1
INVOLVING_ORTHOPTIC : 1
INTAKE_NOTE : 2
GARBAGE_HAULER : 1
THOUGHT_PROCESS : 1
FROM_WOULD : 1
EAR_PRIMARY : 1
YEAR_SC : 1
JUN_HAS : 1
LOCATE_THE : 1
FOR_EVALUATION : 2
EXAM_DYSMETAB : 1
THE_EAR : 1
LOW_SUMMARY : 1
AT_CALLUS : 1
APPROACHING_OTHERS : 1
EYE_PERSONAL : 1
OFFICE_CLOSED : 1
GIRLFRIENDS_WHO : 1
REPORTED_CONTINUES : 1
OR_SAVE : 1
ADDENDUM_TAXI : 1
DX_BY : 1
THE_LABEL : 1
MESSAGE_TRAVEL : 1
PROFILE_TIME : 2
THE_TABLET : 1
FALL_IN : 1
MG_GENDER : 1
THEY_ARE : 1
OF_SPINE : 1
MENTIONED_LIKES : 1
CC_REFILL : 1
HEART_THE : 1
PPN_GOALS : 1
INPATIENT_WITH : 1
GRIPPER_CLIENT : 1
ME_FROM : 2
AND_NOS : 1
ECHOGENIC_FOCUS : 1
ACE_WRAP : 1
COMPLAINING_CHEST : 1
DISCHARGED_AXIS : 1
FUNDS_NUMBER : 1
TAXI_HOME : 1
MEDICATION_TO : 2
CHF_WALKS : 1
WAS_INVOLVED : 1
ER_COMPLAINING : 1
EAR_LEFT : 1
ADJUSTMENT_DEPRESSION : 1
REFILL_STILL : 1
PM_TIME : 1
BRIEF_CLINICAL : 1
ADMITTED_TO : 1
ANY_SPECIAL : 1
THE_REORDERED : 1
NOTE_WILDCATS : 1
IN_YRS : 1
NO_PRIMARY : 1
HOW_MANY : 1
NO_PROVIDER : 4
TRIVALENT_FLU : 1
WHEN_CURRENTLY : 1
IODINE_FOR : 1
PAIN_CP : 1
HE_ADDENDUM : 1
PROCEDURESUPINE_HISTORY : 1
PCT_WOMENS : 1
FL_TRANSFERRING : 1
OBTAINED_PT : 1
OS_PATIENT : 1
THE_PENIS : 1
OBJECTIVES_MET : 1
MOST_DATE : 1
TO_PLEASE : 1
WITH_MY : 1
AS_CORRECT : 1
FROM_ALF : 1
DENTURE_FEE : 1
THE_DR : 1
CANCER_LOSING : 1
AMOUNT_DURING : 1
NORMAL_GAIT : 1
NO_HISTORY : 2
YES_BLIND : 1
PAKULA_CBOC : 1
INITIAL_ASSESSMENT : 1
SEEN_ER : 1
WIFE_DEPRESSED : 1
GROUP_SELF : 1
HE_HE : 2
WAS_BRC : 1
EVER_BEEN : 1
DISCHARGE_CALLED : 1
ON_PROVIDER : 1
ORDER_SITE : 1
OF_SCREEN : 1
YES_IDENTIFIED : 1
THE_HEAD : 1
LOW_PROSTHETICS : 1
EVALUATION_CONTINUES : 1
BRC_BRC : 1
THE_MILIEU : 1
IN_GROUP : 2
OUR_CARE : 1
BEHAVIOR_MOOD : 1
PRIVILEGES_HIP : 1
CHART_PT : 1
CYR_LUMPS : 1
DSM_IV : 1
ADL_AMOUNT : 2
BEEN_ARIPIPRAZOLE : 1
INFORMED_CONSENT : 2
EASILY_STARTLED : 1
PHONE_CHAPST : 1
MG_QBEDTIME : 2
DEPENDENCE_TYPE : 1
PT_RESTED : 1
BLOOD_IF : 1
HIS_WIFE : 1
INFORMATION_PCP : 1
MAY_EYES : 1
WAIT_THE : 1
OTHERS_NOTE : 1
HYPERTENSION_TREATMENT : 1
ATTENDED_EXERCISE : 1
APPARENT_THAT : 1
TO_LEAVE : 1
THE_INDICATED : 2
LUBRICATING_GEL : 1
NOTIFIED_LEI : 1
AT_THAT : 1
DOCTOR_YOU : 1
PLAN_VETERAN : 1
AGREES_KEEP : 1
AT_APPROX : 1
PAST_WITH : 1
TO_IC : 1
CBOC_INTAKE : 1
BURSA_IN : 1
ONE_DAILY : 1
ORAL_CALLER : 1
WORK_WITH : 2
PATIENT_TIME : 1
LEFT_MESSAGE : 3
ALERT_BOWEL : 1
BED_BATH : 1
ALERT_AND : 5
NOT_AFFECTING : 1
HAS_MAILED : 1
APPOINTMENT_NO : 1
OVERNIGHT_ASSOC : 1
COLOR_DINNER : 1
TASK_SET : 1
BELIEVES_IS : 1
AND_PHARM : 1
RESIDENT_WITH : 2
AND_RECOMMENDATIONS : 1
BRC_INSTRUCTORS : 1
OUR_URGENT : 1
HIS_MEDICATIONS : 1
OCT_CALL : 1
ALCOHOL_YOU : 1
REQUESTED_SUSAN : 1
HER_ACTIVE : 1
TO_PRODUCTS : 1
OUT_NOTE : 1
WORSENING_DIABETES : 1
NEXT_ALTHOUGH : 1
WITH_SINCE : 1
TO_TURN : 2
HI_OR : 1
FEB_IDENTIFICATION : 1
THE_FASHION : 1
FOLLOWING_NO : 1
IN_ML : 1
LOOKS_TO : 1
CONSTANT_TO : 1
BLOOD_PRESSURE : 2
SHIFT_IF : 1
GROUP_ALL : 1
RECOMMENDATIONS_TO : 1
REACTION_NONVA : 1
TO_VERBALIZED : 1
IS_APPROPRIATE : 1
ON_AUG : 1
TICAL_SOON : 1
HIP_PROTECTORS : 3
WHOM_HE : 1
123_CASE : 1
THE_OF : 12
THAN_UNTIL : 1
PAIN_ASSESSMENT : 3
AND_LIGAMENT : 1
PATIENT_EDUCATION : 1
ISSUED_EQUIPMENT : 1
ANGIOGRAPHY_SIGNS : 1
AS_ENERGY : 1
IS_WELLGROOMED : 1
PHONE_BUSY : 1
SUSP_DROP : 1
MEDS_AND : 1
SISTER_WILL : 1
SWS_SWS : 1
ACCOUNTABILITY_REACTION : 1
TOTAL_HRS : 1
BREATH_SPUTUM : 1
PARTICIPATED_COMPREHENSION : 1
COLD_SUN : 1
CONSISTENCY_STOOL : 2
VISIT_MH : 1
QUIET_WITH : 1
TO_MONITOR : 2
SENT_MIVA : 1
DISCUSS_OLEMIA : 1
ASSESSMENT_ORIENTATION : 1
EXERCISE_TO : 1
HISTORY_PHYSICAL : 1
PT_HAS : 1
SOCIALIZED_FEW : 1
CHIEF_COMPLAINT : 7
HE_SOME : 1
LSCHEDULE_GICOLONOSCOPY : 1
EMERGENCY_CONTACT : 2
TBI_GENDER : 1
MALE_HE : 1
LOCATED_FLOWSHEET : 2
CONTACT_NOT : 1
THAT_HE : 14
TRANSITIONAL_AT : 1
MON_AM : 1
THE_LIGHTHOUSE : 1
HIS_EACH : 1
IS_DIAGNOSIS : 1
OPEN_REPAIR : 1
PROMPTED_BY : 1
AS_GOALS : 1
ANY_DIET : 1
UNDER_PATIENT : 1
DR_AFTER : 1
ABOUT_PTSD : 1
INJECTION_NO : 1
PAIN_RADIATING : 1
ABNORMAL_AGREED : 1
THE_HERBAL : 1
THE_FOR : 3
LOSS_OF : 1
TISSUES_THE : 1
BEEN_TELEDOC : 1
DISCUSSED_ASSESS : 1
ER_OUTPATIENT : 1
IS_ACCOMPLISHMENT : 1
THIS_THE : 7
REACTIONS_TREATMENT : 1
WAS_TOLD : 1
PHONE_VOICE : 1
DO_YOU : 3
THE_LS : 1
HAVE_BE : 1
PERFORMED_THE : 1
SINCE_THE : 1
DISCUSS_AND : 1
ELAVATED_CBC : 1
VISITATION_STRENGTHS : 1
PT_FAM : 1
RIGHT_STOPPED : 1
OF_RISK : 1
HELD_AT : 1
WHO_HERE : 2
FOOD_PATIENT : 2
MG_RESULT : 1
PATIENT_MENTIONED : 1
SPEAK_HIS : 1
REQUIRED_ASSESSMENT : 1
NINAN_THIS : 1
NONVA_NOTE : 1
OF_ICDCM : 1
ETC_AGREED : 1
AM_HEART : 1
OUTSIDE_KNEE : 1
ONE_BY : 10
BEDREST_FOR : 1
TO_LATER : 1
TO_EVERYTHING : 1
MANAGEMENT_HC : 1
BAND_AND : 1
NUMBNESS_OR : 1
LOOKS_HE : 1
LAST_WITH : 1
TO_TUMOR : 1
OF_WHAT : 2
AL_IER : 1
ASSISTANCE_HIP : 1
HIT_HIM : 1
WIFE_FOR : 1
WITH_ABOVE : 1
INCONTINENCE_HAS : 1
DW_ACTIVE : 1
HOUR_CRISIS : 1
REMOVAL_SPERMFLUID : 1
HE_GOT : 1
TIME_RESIDENT : 1
NUM_AL : 2
INFORMED_OF : 1
PATIENT_AS : 2
AND_ADVERSE : 1
FROM_AN : 1
COLD_ICDCM : 1
IDENTIFIED_AMBULATORY : 1
SELF_SAFE : 1
INSTRUCTED_GO : 1
HAVE_VENT : 1
HE_WORRIED : 1
EVERY_HOURS : 1
WARM_FALL : 1
PASCUZZI_DISCUSSED : 1
HAS_UNABLE : 1
BEEN_WORKING : 1
WAS_AN : 1
ON_SURROGATE : 1
WITH_THIS : 3
THE_PT : 1
PATIENT_INITIALLY : 1
NOT_MAD : 1
IDENTIFIED_THAT : 1
MR_LAST : 1
ANY_HERE : 1
STRAIGHTER_INCREASED : 1
VERSUS_OUTPATIENT : 1
RECURRENT_CHRONIC : 1
OINTMENT_PHYSICIAN : 1
INR_COMMENT : 1
COMPLETE_PT : 1
PREGNANT_OR : 1
LAST_THE : 1
MUSCLE_PROVIDER : 1
ROOM_VISIT : 1
REQUIRE_AN : 1
THE_THAT : 1
NOT_CONTINUED : 1
PAK_KNEE : 1
THE_ASSOCIATE : 1
ENTERED_INTO : 1
PATTERNS_NO : 1
TO_OTHERS : 3
LIGAMENT_COMPRESSING : 1
WIFE_IS : 1
ARE_THE : 1
PRIVILEGES_PROTECTORS : 1
BOAT_PBR : 1
NARCOTIC_COMMENT : 1
HIS_FOR : 1
ASSESS_VETERAN : 1
OUT_NOTET : 1
INDIVIDUAL_VITAL : 1
CEFTRIAXONE_SOLN : 1
SOMETIME_IN : 1
AN_RANITIDINE : 1
DROPS_AS : 1
BAY_PINES : 1
HE_QUITE : 1
PAST_ADMISSION : 1
CIGARETTE_BUTTS : 1
IN_LAST : 1
DATE_OCT : 1
WITHOUT_ASSISTANCE : 2
APPLICABLE_SHIFT : 2
SWIFT_BOAT : 1
PHYSICAL_LIMITATIONS : 1
GROUP_LBP : 1
THE_ARRIVED : 1
ED_FILL : 1
THIS_REVIEWED : 1
ACTIVE_APPEARANCE : 1
SESSION_VETERAN : 2
DEAR_MR : 2
SINCE_HIS : 2
WAY_MAKE : 1
THAT_THEY : 1
HIS_THE : 2
PATIENT_PHYSICAL : 1
BATTERIES_WERE : 1
PING_DURING : 1
WRITER_BEEN : 1
DROPS_RAN : 1
VOM_ALL : 1
AXIS_COLLECTION : 1
IF_NO : 1
LIMITATIONS_AND : 1
UPDATE_STEP : 1
OF_ILLNESS : 1
FEB_PATIENT : 1
TIME_APR : 1
CORRECTIVE_CURRENTLY : 1
THEN_THEN : 1
FIRST_YES : 1
HAS_PER : 1
SERVICE_PAST : 1
STAFF_HE : 1
BEST_DAUGHTER : 1
VOICE_MESSAGE : 1
THURS_LAST : 1
UNSPECIFIED_ONSET : 1
ADDICT_IN : 1
HE_SCHEDULE : 1
CHEST_COMPLETE : 1
DISCHARGE_FEB : 1
TO_NO : 1
THROUGH_NORMAL : 1
NURSING_ASSESSMENT : 1
ANSWERING_VOICE : 1
STERILE_FASHION : 1
AS_BELOW : 1
CPRS_BY : 1
PT_DYNAHEX : 1
YO_CONNECTED : 1
OR_OFFICE : 1
WHICH_REPRESENT : 1
ISSUE_PROMPTED : 1
LIMITATIONS_BARRIERS : 1
IN_ACCORDANCE : 1
RATE_TEMPERATURE : 1
WALKING_WAY : 1
IN_ASSISTANCE : 1
VOID_APPLICABLE : 1
THIS_LIST : 1
BEEN_REVIEWED : 1
CILOSTAZOL_MG : 1
OUTPUT_FOR : 1
TO_SATUR : 1
SAFE_MEDICAL : 1
ORIENTED_SIGNS : 1
MONTH_LB : 1
CLINIC_ON : 1
WITH_DENIED : 1
TO_ORIENTED : 1
NO_CHANGE : 1
CONSENT_LOCATION : 1
OPT_MG : 1
PATIENT_SEATED : 1
SKILLS_PLAN : 1
TO_GOTTEN : 1
APPOINTMENT_WITH : 2
MEMBERS_VETERAN : 1
ANESTHESIA_UROLOGY : 1
REFILL_PROCESS : 1
UP_HOURS : 1
BLADDER_ADJUSTMENT : 1
PMH_OBESITY : 1
SIGNS_SITE : 2
MADE_WITH : 1
SCREEN_VA : 1
VOLUME_TO : 1
MG_IT : 1
PLAN_DATE : 1
CLINIC_WOMENS : 1
CHANGES_BY : 1
ON_SOCIAL : 1
AT_AREA : 1
CONSUL_WHICH : 1
WERE_CASE : 1
WALKS_DAILY : 1
NO_THAT : 1
TEST_WAS : 1
AM_AND : 1
ANDRE_WITNESS : 1
ORTHOPNEA_LE : 1
LISTENED_TO : 1
INTEREST_OR : 1
AGO_WHICH : 1
PBR_SUSTAINED : 1
SYND_PASS : 1
SHIFT_AND : 1
NEUROSURGERY_TELEPHONE : 1
RM_OBESITY : 1
BASED_MEDICATIONS : 1
WE_GAIT : 1
SINCE_LIVES : 1
ELIGIBILITY_VA : 1
RETURNED_TO : 1
RADIATION_THERAPY : 1
PRESENT_MEETING : 1
NEW_COMPLAINTS : 1
HOME_ASKED : 1
SPECIAL_DIET : 1
TITRATION_CARE : 1
TO_BRING : 1
CONTACT_THE : 2
PATIENT_SHE : 1
TRAMADOL_OVER : 1
IS_VS : 1
WITH_CONTINUED : 1
FAM_TEST : 1
MENTAL_TRP : 1
PROBLEMS_LEAD : 1
VITAMIN_SUPPLEMENT : 1
ALL_MH : 1
PROGRAM_THIS : 1
APPROX_AM : 1
PAIN_GEL : 1
MG_BID : 1
SIGNATURE_CONSENT : 1
DRINKS_BOWEL : 1
GROUPS_FACILITATORS : 1
EGD_DUE : 1
ENERGY_MOTIVATION : 1
INTENT_PLAN : 1
HIT_PRESENTING : 1
WITH_MEAL : 1
NOTE_DINNER : 1
RISK_ALERT : 1
INSOMNIA_HOURS : 1
HOME_FRI : 1
ENCOUNTER_TAB : 1
THE_RESIDENT : 1
TO_CINCINNATI : 1
OF_MIN : 1
DEPENDENCE_BINGE : 1
SUSPENDED_TEMPERATURE : 1
PHONE_FINGERS : 1
UPDATED_AGREEMENT : 1
DATE_DATE : 1
SIDES_THE : 1
DOC_HIS : 1
ALCOHOL_THE : 3
AGREEMENT_UDS : 1
WAS_OTHER : 1
MOOD_TO : 1
FOR_BLIND : 1
NORMAL_PTSD : 1
DATE_CALLED : 1
ISSUES_USING : 1
HIS_HEADACHE : 1
FOOD_ZZPATIENT : 1
FOR_AS : 1
RENEWAL_FOR : 1
YES_NOTIFIED : 1
LIKELY_OCCLUDED : 1
PLACE_ASSISTED : 1
BY_EVERY : 5
THE_ISSUED : 1
EFFECTS_ETOH : 1
CONSUMED_BREAKFAST : 1
INTENDS_IS : 1
READILY_ADMITTED : 1
PATIENT_BEEN : 1
HAVE_TEETHING : 1
FEET_MEDS : 1
PULSE_IS : 1
USE_TAUGHT : 1
FOR_MANAGEMENT : 1
SUICIDAL_PT : 1
DI_CONSULT : 1
DIPHTHERIA_OR : 1
POSITION_OF : 1
PROBLEMS_HIP : 1
TEAM_APPOINTMENT : 1
YOU_MEDICAL : 1
PLAN_COMPLETION : 1
THEN_RESTRAINTS : 1
LEFT_ON : 2
PT_ONE : 1
AND_IN : 4
STARTED_OCT : 1
KEEP_APPOINTMENTS : 1
HA_AND : 1
FIRST_YRS : 1
WITHOUT_STAFF : 2
ALLERGIES_NKA : 1
CALM_AND : 2
MISCELLANEOUS_NOTE : 1
GENERAL_SURGERY : 2
IBUPROFEN_MG : 2
VA_CY : 1
TRP_UP : 1
CDM_ACCORDANCE : 1
THE_LAST : 5
SMILING_TALKING : 1
EVERYTHING_WITH : 1
ROOTS_WHILE : 1
ER_FOR : 2
NO_VOID : 1
ICDCM_CHIEF : 1
BEEN_AT : 1
CORRECTIVE_SURGERY : 1
PLAN_HIM : 1
OUTPATIENT_HYPOALLERGENIC : 1
AND_ORIENTATION : 1
TOUCHING_NO : 1
ON_HAS : 1
NECESSARY_THROUGH : 1
CAFF_MG : 1
SPUTUM_COLLECTED : 1
FRI_AM : 1
DOING_OUTPATIENT : 1
VETERAN_CONTINUES : 2
COMPREHENSIVE_ASSESSMENT : 1
CONFIRMED_SMT : 1
YEAROLD_CAUCASIAN : 1
MH_INPT : 1
ABUSE_MAY : 1
PE_URINE : 1
PULSE_NONVA : 1
RISK_OUTPATIENT : 1
HYGIENE_PICKUP : 1
SMILE_HIS : 1
WITH_FLAT : 1
PHONE_MESSAGE : 1
LOCAL_IDENTIFIED : 1
ACTIVE_IOP : 1
ATTENTIVE_VIDEOTAPE : 1
CONDITION_HAS : 1
CP_THE : 1
WAS_ABLE : 1
NEW_OR : 1
INPATIENT_USE : 1
TAKING_YEARS : 1
LIVING_OUT : 1
EVERY_AT : 1
PATIENTS_BAND : 1
PRESCRIPTION_FOR : 1
BLIND_WOULD : 1
LBP_HE : 1
AWAITING_FOR : 1
NOT_VISIBLE : 1
AND_ASSISTANCE : 1
HIS_INCONTINENCE : 1
STEADY_STATES : 1
AUDIOTAPE_BY : 1
HAULER_PROPER : 1
AND_PBR : 1
REPEAT_TO : 1
NOT_REQUIRED : 1
OF_PAP : 1
NOT_WED : 1
IS_NO : 1
ST_VISIT : 1
MAR_LETTER : 1
PCP_IDENTIFIED : 1
EXR_DX : 1
TREATMENT_STATUS : 1
TEMP_ORHTO : 1
TO_DIAGNOSED : 1
USING_SIGNS : 1
TO_POKER : 1
VOMITING_HEARD : 1
COMPLICATIONS_EQUAL : 1
THE_EXCESSIVE : 1
OVERT_OR : 1
WORSENING_MELLITUS : 1
ALSO_REMID : 1
VETERAN_USES : 1
DISCHARGE_DEC : 1
PT_CAME : 2
SIDE_MM : 1
PTSD_NEGATIVE : 1
HOW_YOU : 2
ON_APPROX : 1
FEB_YES : 1
CLINICAL_CLONAZEPAM : 1
SURGERY_RHEUMATOID : 1
AM_TIME : 1
THAT_THERE : 1
HAS_APPARENT : 1
FROM_VICTIMS : 1
CSPINE_SURGERY : 1
DENIES_SUICIDALITY : 1
THAT_SOMETIME : 1
PATIENT_PREGNANT : 1
FOR_COPY : 1
STOOLS_MOOD : 1
GROOMED_SPEECH : 1
MEDICATIONS_PRESCRIBED : 1
HOURS_DOING : 1
NURSES_ASSESSMENT : 2
VITAL_PULSE : 1
AN_DELUSIONS : 1
WRIST_BAND : 1
TO_MIVA : 1
CFCF_ORAL : 1
GROUP_MENTAL : 1
CONTI_PSYCHIATRY : 1
PROLONGED_CHIEF : 1
NURSING_TO : 1
MEMBERS_PRESENT : 2
WEIGHT_KG : 2
PATIENT_OUT : 2
CORRECTLY_AND : 1
ER_FOCUSED : 1
PRACTITIONER_EDIT : 1
LIST_HAS : 1
ANKLE_COULD : 1
PATIENTS_PAIN : 1
THAT_CALCIUM : 1
EVENING_CHO : 1
FOR_HANDICAP : 1
THIS_PATIENT : 6
LITTLE_WHILE : 1
CONTINUE_INDIVIDUAL : 1
DC_AWAITING : 1
MOIST_PROBLEMS : 1
AND_DESIRE : 1
AREA_THREE : 1
CUEING_ORIENTED : 1
DATED_WAS : 1
DATE_DEC : 2
IN_BLADDER : 1
ONE_FILLED : 1
HAS_LIVE : 1
RESPONSES_CONSEQUENCES : 1
START_SUCH : 1
ACTIVE_COME : 1
GOOD_UNDERSTANDING : 1
STAFF_AMOUNT : 1
WILL_WITH : 1
ORAL_MG : 1
TEETH_AND : 1
FRIEND_OF : 1
AGREED_STATED : 1
WHAT_TO : 1
NONVA_MEDS : 2
SHORT_OF : 1
PT_DISCHARGED : 1
BED_DRIVING : 1
WITHIN_NONV : 1
VAPOR_URINARY : 1
FIVE_MEMBERS : 1
INFORMATION_FLUOROSCOPIC : 1
WAS_OUTPATIENT : 1
WITH_HISTORY : 1
BEACH_WITH : 1
THAN_WAIT : 1
UDS_CURRENT : 1
TTN_MH : 1
WITH_WIFE : 1
BURSA_CLEANED : 1
HE_APPOINTMENT : 1
OF_BREATH : 2
FEB_CONTACT : 1
HT_IN : 1
TREATMENT_REMOVAL : 1
CARE_HIMSELF : 1
STATUS_IN : 1
NOTE_MOTIVATION : 1
BRACE_PMH : 1
ON_PATIENT : 3
PLAN_PATIENTS : 1
WELLNOURISHED_HE : 1
HASNT_HIS : 1
APPOINTMENTS_FOR : 1
HIS_INTERVIEW : 1
AGO_STATED : 1
UP_AGENCY : 1
HAD_READING : 1
BEDTIME_FOOD : 1
COMPLAINT_MAR : 1
ENDING_AT : 2
POTENTIAL_FOR : 1
HIS_DIET : 1
HE_SERVICE : 1
DEC_MH : 1
FOR_CORRECTIVE : 1
NEUROLOGY_FREQUENCY : 1
NURSING_IS : 1
DEAL_CURRENT : 1
EVALUATION_THAT : 1
PACIFIERS_WITH : 1
LATERAL_AP : 1
SIGNS_TIME : 1
CARE_CLINIC : 1
STRESS_RADIONUCLIDE : 1
ASSESSED_INCLUDING : 1
AT_EXT : 1
HAVE_THAT : 1
VICTIM_WITNESS : 1
TO_SIDE : 1
ADMITS_TO : 1
NO_ESOPHAGEAL : 1
SIGNS_ARMBAND : 1
MELLITUS_II : 1
EDUCATION_RESULTS : 1
NORMAL_IS : 1
RNBC_DATE : 1
PROGRAM_STRETCHING : 1
WILL_AWAY : 1
PRESCRIBED_THAT : 1
EACH_OF : 1
NURSE_NONSPECIFIC : 1
PHYSICIAN_NOTE : 2
ADVISED_VET : 1
ECF_APPEARS : 1
SCHEDULING_MR : 1
JUST_LOCAL : 1
ARTERY_LEARNING : 1
APPROACHING_THIS : 1
CALCIUM_COMMENTS : 1
INTERVENTION_DISPOSITION : 1
ROTATOR_CUFF : 1
MEDICATIONS_AS : 1
DIMASCIO_SON : 2
WORKING_WITH : 1
REASSURANCE_NEEDED : 1
TESTS_STRESS : 1
AB_PATIENT : 1
CURRENT_ACTIVE : 1
THE_BELIEVES : 1
ON_COUMADINE : 1
ASPECT_OF : 1
TO_ENT : 1
WILL_IN : 1
NOT_MADE : 1
USE_VITAL : 1
AWAKE_BRIEFLY : 1
CAME_BY : 1
HOPELESSNESS_THIS : 1
TRANSITIONAL_STAY : 1
COURT_CASE : 1
OTHER_CARE : 1
PICKUP_OF : 1
EAR_EXAM : 1
WITH_JUNE : 1
IMPAIRMENT_RISK : 1
FAMILY_PT : 1
MUCH_MORE : 1
OF_CONFUSION : 1
MA_DATE : 1
FRI_AT : 1
DENTAL_CATEGORY : 1
INFLAMMATION_LIST : 1
KG_ASSOCIATE : 1
ID_DURING : 1
PRESSURE_ATTENDED : 1
IN_EFFECT : 1
ROOM_DISCUSSED : 1
PT_CONCEEDS : 1
HEADACHE_VETERAN : 1
WITH_YO : 1
THIS_REQUIRES : 2
HYPOALLERGENIC_PAPER : 1
DIET_BY : 1
PUFFS_YES : 1
FOR_CIGARETTE : 1
VISUAL_EXAM : 1
SURGICAL_REPORT : 1
REFERRAL_BACK : 1
RADIONUCLIDE_STRESS : 2
HAS_MEDICAL : 2
STAFF_ASSISTANCE : 2
OF_WHICH : 1
NECK_EXCISION : 1
FOLLOWING_CRITERIA : 1
DURING_INITIAL : 1
FOR_NARCOTIC : 1
FOR_HOSPITALIZATION : 1
OLD_SC : 1
CHARTS_HAS : 1
READINESS_LEARN : 1
FACILITY_NURSING : 1
LEFT_PARTIAL : 1
PREVENTATIVE_MAINTENANCE : 1
MHP_MINS : 1
AND_ON : 2
STRESS_TESTS : 2
ORIENTATION_WAS : 1
PARTICIPATE_IN : 3
HE_WALK : 1
HE_UNSURE : 2
OTHERS_THE : 1
AREAS_MUST : 1
TWICE_PAIN : 2
FOR_PMRS : 1
BEHAVIOR_PROVIDED : 1
DURING_ROUND : 1
SOCKS_CLIENT : 1
NOW_REQUIRES : 1
CARE_HEARING : 1
DOWN_LOWER : 1
REASONS_NO : 1
THE_ALBUTEROL : 1
CONDITION_WORSENED : 1
MANY_HAVE : 1
BID_STOMACH : 1
PROBLEM_OTHER : 3
SHORT_BREATH : 1
OVER_TROCHENT : 1
BE_THE : 1
AND_LOSING : 1
GI_TOLD : 1
AMOUNT_WAS : 1
NOTES_ENTER : 1
WITH_AXIS : 1
PHYSICIAN_TRANSDERMAL : 1
ASSESSMENT_INTERDISCIPLINARY : 1
PT_CALLED : 1
OFFERED_PRESCRIBED : 1
IT_LIKE : 1
HIS_STRESS : 1
EMG_THE : 1
BARRIERS_MMOL : 1
THEY_EVERY : 1
LAST_WHEN : 1
MEDICATIONS_BY : 1
ASSESSMENT_INVOLVING : 1
LOGICAL_ASSISTANCE : 1
MAINTENANCE_AND : 1
INTO_RESP : 1
NURSING_EMPLOYMENT : 1
USE_HIS : 1
FLOWSHEET_ENDING : 1
TISSUES_TO : 1
REHAB_JUDGMENT : 1
ATTRIBUTES_HAVING : 1
OR_CHRONIC : 1
TEAR_LOCAL : 1
HIS_MAIN : 1
FOR_ETHNIC : 1
WITH_MM : 1
DATE_SCHEDULED : 1
NORMAL_TO : 1
TO_PCPS : 1
BENEFIT_FROM : 1
PHARMACY_NOTE : 1
STATE_ATTORNEYS : 1
INFORMATION_WAS : 1
HI_NO : 1
APPOINTMENT_WHEN : 1
VETCORE_RECOVERY : 1
WHOM_AT : 1
INCLUDING_SUPPLIES : 1
BLINDNESS_RISK : 1
COPE_RECENT : 1
HIM_FOR : 1
TO_HISTORY : 2
MOUTH_EVERY : 5
BENEFITS_AND : 1
THE_SECOND : 1
EXPRESSED_HER : 1
MONTHS_STATED : 1
PROVIDED_WIH : 1
THE_PROPER : 1
MONTHS_AGO : 2
NO_REACTIONS : 1
EVERY_VITAMIN : 1
THE_REPORTS : 1
ALSO_HAS : 2
BLIND_ITS : 1
SUICIDAL_MEDICAL : 1
EXAM_THIS : 1
STATUS_NONE : 1
BE_ARRIVING : 1
POSSIBLE_SWS : 1
TIME_COMPLETED : 1
PRIVILEGES_THIS : 1
CLOTS_LEFT : 1
ENGAGED_IN : 1
UP_GROUP : 1
DYSMETAB_PASS : 1
TRYING_TO : 1
DESIGNED_ADDRESS : 1
RESTED_FOR : 1
ONSET_DOING : 1
STATUS_BETWEEN : 2
STRENGTHS_NOT : 1
ARE_ON : 1
TAUGHT_OM : 1
ACTIVITY_RESTRICTIONS : 1
WAS_STUDIED : 1
RETURN_UNDERSTANDING : 1
MENTIONED_SHE : 1
COMMENTS_RESIDENT : 1
CARE_IS : 1
DX_OROPHARYNGEAL : 1
NOTE_AMOUNT : 2
UROLOGY_CLINIC : 1
ALL_AND : 1
URINE_FECAL : 1
TOOTH_PHONE : 1
DTR_BABY : 1
PBC_PUBLIC : 1
POLAR_PAK : 1
PAIN_PATIENT : 1
AFTER_GOT : 1
ABRASION_HAND : 1
PATTERN_PHYSICIAN : 1
DX_CANDIDIASISASYMPTOMATIC : 1
WHO_BE : 2
IN_FOR : 1
RAZOR_AND : 1
EITHER_MED : 1
ORAL_INH : 1
HE_HOPE : 1
AGE_PROLONGED : 1
SYSTEMNO_PAIN : 1
TO_DIABETES : 1
DO_WALK : 1
INTERESTING_WITH : 1
GOAL_ADDENDUM : 1
THE_POTENTIALLY : 1
NURSE_COMMENTS : 1
TIMES_PHYSICIAN : 1
APPOINTMENTS_APPROPRIATE : 1
AT_PRESENT : 1
VISIT_WITH : 1
WAS_REVIEWED : 1
STATES_WILL : 1
COMMENT_NORMAL : 1
ATTRIBUTES_TO : 1
MILIEU_EAT : 1
RELATES_HE : 1
AT_BIRCH : 3
PROVIDED_THIS : 4
HAS_SOME : 1
POLLEN_PHONE : 1
SPECIMEN_DEC : 1
CARE_TRIAGE : 1
OXIMETRY_SPECIFIED : 1
DURING_SESSION : 1
CORRESPONDENCE_CONDITION : 1
BY_PATIENT : 3
HIM_HOPELESS : 1
INFORMATION_HAVING : 1
AND_PATIENTS : 1
PICKUP_VETERAN : 1
USED_TAC : 1
AND_GROUP : 1
HER_OF : 1
SELF_STATED : 1
SUSPENDED_NURSE : 1
WANTS_THE : 1
EXAMPLE_MIN : 1
TO_MULTIVITAMINS : 1
PATIENT_REPORTS : 2
TREATMENT_CONTRACT : 1
RECOMMEND_FSG : 1
WAS_GOOD : 1
TAB_ONE : 8
TO_TEMP : 1
FROM_BUT : 1
ABOUT_SAYS : 1
UP_BUT : 1
OR_UNSPECIFIED : 1
FINDINGS_PATIENT : 1
ONE_MONTH : 2
COMMENTS_NSAIDS : 1
WERE_GIVEN : 1
VET_MAKE : 1
TRANSPORT_MENTAL : 1
DATE_JUN : 1
ITEMS_ADDENDUM : 1
SCALE_PT : 1
POLAR_AND : 1
REQUESTING_PICK : 1
ACTIVE_OF : 1
HYDROCELECTOMY_INCONTINENCE : 1
BACK_PRESENTING : 1
TO_LEAST : 1
COOPERATIVE_WILL : 1
KNEE_WITH : 1
SKILL_AREA : 1
FLUOXETINE_TRAZODONE : 1
DSM_MULTIAXIAL : 1
IN_HE : 1
USE_READILY : 1
MANAGEMENT_WITH : 1
THEY_WORSE : 1
STATUS_EXAM : 1
RADIOGRAPHICALLY_CLINICALLY : 1
COMPLAINT_HAVE : 1
IS_EPIDIDYMIS : 1
GROUP_AND : 1
OR_THIS : 1
TOLD_DOCTOR : 1
USE_OF : 3
ABDOMINAL_SWELLING : 1
PAIN_TIME : 1
WAS_SUSPENDED : 1
SURROGATE_IF : 1
PATIENT_WILL : 4
CARE_DISORDER : 1
VICTIM_DIVISION : 1
QUIET_AND : 1
ITS_VERY : 1
REORDERED_AS : 1
COLOR_YELLOW : 3
IT_THAT : 1
RENEWAL_COMMENT : 1
EAR_PT : 1
HAVING_FUNDS : 1
HISTORY_CORONARY : 1
SHE_ANY : 1
ONE_NEXT : 1
HOUSING_OR : 1
PT_RESIDENT : 1
REPORTS_PT : 1
EXACERBATING_CAN : 1
ALTERNATIVE_COPING : 1
US_AND : 1
SEDATION_PATIENT : 1
DISORDER_MONTHS : 1
IN_COMMENTS : 1
HE_ALSO : 4
LIGHTHOUSE_THE : 1
ALCOHOL_COMPLIANCY : 1
THE_ASPECT : 1
DIABETES_TYPE : 1
ATTEMPTED_TO : 1
PATIENT_ASSESSED : 1
TELL_HER : 1
INCIDENT_SINCE : 1
SCHIZOPHRENIA_ON : 1
DRY_SCAB : 1
AGO_PAIN : 1
OF_OCT : 1
HIP_UNDERSIGNED : 1
RYAN_PSYCHIATRIC : 1
THE_SCHEDULING : 1
OR_WORSENING : 1
MULTIDISCIPLINARY_TEAM : 1
OF_THIS : 5
STRAIGHTER_DISTANCE : 1
EXERCISE_WAS : 1
FULL_CONSENT : 2
REASSURANCE_BRIEFLY : 1
CARE_IN : 1
GOT_INTO : 1
CALLS_OF : 1
PROBLEMS_THAT : 1
PATIENT_GUIDANCE : 1
PRESCRIBED_MONITOR : 1
TO_THEIR : 2
TO_VS : 1
EVALUATED_BY : 1
STATES_NEEDS : 1
IS_BED : 1
DENT_FERNANDEZ : 1
REDIRECTION_AND : 1
IN_PROGRESS : 1
CAFF_TAB : 1
DX_OPIOID : 1
ARTERIAL_BLOOD : 1
HAS_BECOME : 2
ASSISTED_WITH : 1
YOUR_NONE : 1
RECEIVED_THE : 1
CONSULT_TO : 1
VETERAN_ENGAGED : 1
MH_MD : 1
NOTED_SIDE : 1
TAB_FOR : 1
MD_ENDOCARDITIS : 1
ADVERSE_PHYSICIAN : 1
PEOPLE_WHOM : 1
SCORE_HOME : 1
HONEST_AFFECT : 1
AOX_EMOTIONAL : 1
CLASS_TREATMENT : 1
SINGLE_SERVICE : 2
IN_ADDENDUM : 2
NONE_BATHROOM : 1
HE_REPORTS : 4
NO_ASSESSMENT : 2
NOT_ASSESSED : 1
CAN_OF : 1
LUNCH_DRINKS : 2
SAFE_SEEKING : 1
IS_THE : 3
HIP_IN : 4
PT_BY : 2
PATIENT_CAREGIVER : 1
ADDITIONAL_COMMENTS : 4
VITALS_YO : 1
THAT_TO : 1
ACETAMINOPHEN_MG : 1
WAS_HELPING : 1
WAS_HIP : 1
PATIENT_INDICATED : 1
PHYSICAL_YES : 1
HE_NOTES : 1
MAINTENANCE_WILL : 1
PROCEDURES_PLACE : 1
RESPONSES_AND : 1
THE_SCORE : 1
AND_PAUSE : 1
INJECTION_PATIENT : 1
TELEPHONE_NURSE : 1
SAID_WAS : 1
IF_YES : 3
HYPERTENSION_DISCUSS : 1
CAP_MG : 1
SPERMFLUID_AROUND : 1
FIBULA_PROCEDURES : 1
PT_CONTINUES : 1
IS_SCHEDULED : 2
DOCUMENTED_SEP : 1
MANAGEMENT_EDUCATION : 1
NURSING_ZZPATIENT : 1
GARBAGE_FOR : 1
UNABLE_KEEP : 1
AM_AN : 1
PLACED_CONTACT : 1
STABLE_WILL : 1
DOXEPIN_MG : 1
BY_OF : 1
MACHINE_FALL : 1
REQUIRE_GAIT : 1
DURING_THIS : 4
THIS_PAIN : 1
FOR_VISIT : 3
THIS_YO : 2
SWER_ALSO : 1
PROBLEM_OF : 1
SUPPLIES_IV : 1
ADDENDUM_PATIENTS : 1
USE_SIGNS : 1
THE_ORAL : 1
HAVE_SEX : 1
RETIRE_AND : 1
THE_ASSESSED : 1
SCHEDULED_APPOINTMENT : 2
CALLING_BACK : 1
MEAL_DIABETES : 1
PHYSICIAN_EYE : 1
NO_ASSOCIATE : 2
QUESTIONS_DENIES : 1
SEEKING_MEDICAL : 1
SUPPLEMENT_HIS : 1
RESULTS_IN : 2
SUPERVISION_PATIENT : 1
BY_FOR : 2
AN_UPDATED : 1
VETERANS_TRANSPORTATION : 1
EXCESSIVE_THAT : 1
CONTINENT_ALSO : 1
ARM_SOME : 1
PROTECTORS_IN : 3
BLADDER_BREAKFAST : 1
DESIRED_TIBIA : 1
AND_AMBULATION : 1
WASHING_FOOD : 1
ER_AND : 1
REDUNDANT_FORESKIN : 1
GOOD_COPY : 1
INDEPENDENT_EASILY : 2
SUMATRIPTAN_SINCE : 1
ORAL_CARBAMAZEPINE : 1
SITS_UP : 2
ONE_HOUR : 1
WELLGROOMED_WELLNOURISHED : 1
RECENTLY_THE : 1
STOOL_NONE : 1
HAD_OF : 1
GIVE_ANTIBIOTIC : 1
STATUS_EMERGENCY : 1
THREE_TIMES : 1
RANITIDINE_MG : 1
HIS_PCP : 2
CONNECTED_VETERAN : 2
FOR_HOME : 1
TOTAL_TO : 2
FOR_PROPER : 1
ADDENDUM_HOME : 1
METFORMIN_NOTE : 1
DOWN_TO : 1
APPEARS_VERY : 1
MISCELLANEOUS_IS : 1
THINGS_OUT : 1
INDICATED_SOMETIME : 1
RIGHT_LEFT : 1
OUT_WAS : 1
CHAPST_EYE : 1
CAP_PLEASE : 1
ZZMINI_STATUS : 1
INTERVENTIONS_AS : 1
CUEING_PROVIDED : 1
RATHER_THAN : 1
BEHAVIOR_AND : 1
THE_STATES : 1
HOME_VETERAN : 1
ON_NO : 3
MEDICATIONS_HERE : 1
ADVERSE_REACTIONS : 2
ARMBAND_AND : 1
CAME_ED : 1
CALCIUM_MG : 1
DISCUSSED_DIET : 1
SKIN_OR : 1
IT_NOT : 2
WORKER_PAIN : 1
ABNORMALITY_ITEMS : 1
FOR_ALCOHOL : 1
AMBULATORY_HIS : 1
NO_FOUND : 1
THE_SIDE : 1
COMMENTS_MODALITIES : 1
BY_ED : 1
LIVE_URINE : 1
OF_STOOL : 4
TOILET_BATHROOM : 1
REMINDER_YOU : 1
GUIDANCE_OBLIQUE : 1
WILL_ABLE : 2
SO_IS : 1
TIMES_ACTIVE : 1
PAINS_IN : 1
IN_MOBILITY : 2
ATTENDANCE_VETERAN : 1
AAOX_CALM : 1
THE_ISSUES : 1
GUIDE_THE : 1
BY_WHOM : 1
OUTPATIENT_TELEPHONE : 1
BY_MM : 1
ELIMINATION_ENJOYED : 1
NO_CHEST : 1
HISTORY_PLAN : 1
COMPREHENSIVE_PAIN : 1
IDENTIFIED_CURRENT : 1
VA_NO : 1
OCCLUDED_IN : 1
SHORTTERM_CERTIFICATION : 1
LOSING_HOME : 1
SPONGE_BATH : 1
PCP_NINAN : 1
THE_MENTAL : 1
DRINK_CONTAINING : 3
THIS_WILL : 1
RESTRICTIVE_SETTING : 1
CARE_ADVISED : 1
PATIENTS_GOAL : 1
PLACE_CONSUMED : 1
HOSPITAL_CARE : 1
ON_AND : 2
ENTERED_YES : 1
MEETING_MR : 1
IN_RESIDENT : 2
MONITOR_PT : 1
DENTAL_PROGRESS : 1
WRETCHING_BUT : 1
VA_SCHEDULE : 1
HE_WOULD : 3
HIS_WT : 1
AM_ABRASION : 1
NEGLECT_IN : 1
ARE_FEELING : 1
MG_AT : 1
STOPPED_SINCE : 1
TAB_DOXEPIN : 1
BE_MR : 1
ETHNIC_ADDENDUM : 1
TRAMADOL_INDOMETHACIN : 1
SPOUSE_THAT : 1
TO_MED : 1
TOOTH_DX : 1
IN_NAME : 1
NO_RELIEF : 1
THEY_DISCUSSED : 1
FROM_SPECIMEN : 1
BIT_THEN : 1
APPRECIATION_THE : 1
COLOR_OF : 1
TO_SMOKE : 2
MALE_PRESENTS : 1
SCORE_CERTIFICATE : 1
REMOTE_GROSSLY : 1
ACTIVE_SURGICAL : 1
HE_SYMPTOMS : 1
HEARTTOHEART_WOULD : 1
REQUEST_FOR : 2
SIGNIFICANT_MENTAL : 1
BACK_TO : 3
SATISFACTION_INFORMED : 1
ZZECF_PROGRESS : 2
TIME_PAYMENT : 1
ON_SCHEDULING : 1
OBTAINED_BY : 2
II_OR : 1
PULSE_ALWAYS : 1
IS_ABOUT : 2
HAS_ORDER : 1
CENTER_NURSING : 1
GIRLFRIENDS_RESIDE : 1
HE_SEEN : 1
USE_PATIENT : 1
SCHEDULING_DEPARTMENT : 1
AND_NOTE : 1
THESE_ASSISTANCE : 1
DISCHARGE_HE : 1
MIN_DX : 1
NC_AT : 1
CP_OVER : 1
RESCHEDULE_OTHERS : 1
TIME_OUT : 2
ON_OUTPT : 1
REVIEWED_OL : 1
PROTOCOL_MELLITUS : 1
INTAKE_RT : 1
SUBSTANCE_MAY : 1
SHOULDER_HE : 1
ITEMS_EXTRACTION : 1
STAY_AT : 1
EXTRACTION_TOOTH : 1
RESIDE_AND : 1
AP_VIEWS : 1
CONDITION_SAVE : 1
MULTIVITAMINS_DOXEPIN : 1
PROVIDER_MD : 2
WILL_LEAVE : 1
AND_SIDE : 1
BEEN_AUTOMATICALLY : 1
ID_ARMBAND : 1
TOTAL_SESSIONS : 2
EVALUATION_PT : 1
PATIENT_POSITION : 1
AND_EASILY : 1
PULSE_FISH : 1
HIT_BACK : 1
WITH_NEW : 1
DEPRESSION_IDENTIFIED : 1
LCSW_OF : 1
DRY_THOUGHT : 1
WILDCATS_AREAS : 1
HOMEBOUND_RESPIRATION : 1
DOCUMENT_HOW : 1
JUNE_JULT : 1
ROOM_AND : 2
HERNIA_FOR : 1
SURGICAL_NURSE : 1
PROVIDER_DIMASCIO : 2
MENTAL_STATUS : 4
COPY_TO : 2
DISTANCE_HAS : 1
HAVING_WORK : 1
CANCER_SOCIETY : 1
SHIFT_HAS : 1
RN_PROVIDE : 1
COPY_PATIENT : 1
PREVIOUSLY_TAUGHT : 1
PERMANENT_SMILE : 1
INCREASE_SOCIAL : 1
FOCUSED_MOD : 1
DESIRE_CHAPLAIN : 1
PUBLIC_NURSE : 1
AND_OF : 2
SHORTNESS_OF : 1
WILL_NOT : 1
MILIEU_DID : 1
ATTORNEYS_CENTER : 1
START_AND : 1
OF_ANESTHETIC : 1
CHEST_NO : 1
DIET_WT : 1
SAVE_AND : 1
VITAL_TIME : 1
BENIGN_HYPERTENSION : 1
POSTOP_OPENANGLE : 1
HOUR_SUPERVISION : 1
APPOINTMENT_VERIFIED : 1
THERAPY_TO : 2
NOTE_SUICIDE : 1
TRP_INTAKE : 1
REVIEW_AND : 1
KAMRAN_MD : 1
BEEN_VIA : 1
NO_IS : 3
TEAM_ALLERGY : 1
IN_HIS : 4
DYNAHEX_FOR : 1
SIDE_ARM : 1
OF_APPOINTMENT : 1
TO_MH : 1
HAS_TOUCH : 1
ALLERGIES_REQUESTING : 1
MOTIVATION_LEARN : 1
DX_VAMC : 1
LEFT_ADDENDUM : 1
REVIEWED_WITH : 3
SAMPLE_COLLECTED : 1
EYE_BLUE : 1
PG_ECHOCARDIOGRAM : 1
REGULAR_PPN : 1
MATRIXECTOMY_WAS : 1
DEGREE_YEARS : 1
FRIENDS_WILL : 1
RECENTLY_FIRST : 1
POTENTIAL_SUICIDAL : 1
NURSING_OTHER : 1
IS_ON : 5
WAY_ACCOUNTABILITY : 1
LEFT_SHOULDER : 3
BUT_WAS : 1
PT_CONTINUED : 1
FROM_ETTE : 1
TO_BEACH : 1
NONSMOKER_OR : 1
BE_GOAL : 1
PATIENT_PHYSICIAN : 1
SOLN_SOLN : 1
FOR_DURING : 1
AND_SENT : 2
SCHIZOPHRENIA_ATTRIBUTES : 1
SEE_TO : 1
WILL_SUCCESSFUL : 1
EXCISION_CYST : 1
FOR_ADDITIONAL : 1
TO_INDIVIDUAL : 2
THAT_PULSE : 1
SEX_MAKE : 1
WERE_INTRAVENOUS : 1
ADVISED_CALL : 1
ABOUT_DEGREE : 1
WITH_ECHCS : 1
STILL_CHRONIC : 1
ACTIVITY_ADDITIONAL : 1
DISCHARGE_FOR : 1
LITTLE_ENERGY : 1
HOME_INSTRUCTIONS : 1
PATIENT_POSITIONING : 1
INDIVIDUAL_REQUESTED : 1
OF_CURRENT : 1
CONTACT_SESSIONS : 1
MESSAGE_VOICEMAIL : 1
ETTE_VICTIM : 1
GOOD_PT : 1
UNTIL_SCHEDULED : 1
GIVEN_AS : 1
OROBASE_SC : 1
ETHNIC_GROUP : 1
TRANSFER_TO : 1
RIGHT_EAR : 2
PER_NO : 1
SLIPPERS_GRIPPER : 1
THE_NEW : 2
ALCOHOL_DID : 1
SYMPTOMS_RAL : 1
ACTIVE_PROBLEM : 1
HOW_HE : 1
HE_FEELING : 2
GOALS_PATIENT : 2
NEW_DIAGNOSIS : 1
VISIT_WANDERING : 1
OCCUPATION_LACKS : 1
BE_HIGHRISK : 1
PATIENT_ADMITTED : 1
HEALTH_HOME : 1
SEVERAL_PROBLEMS : 1
PTSD_COMPLAINT : 1
CHF_SYMPTOMS : 1
THE_BLIND : 1
RESPONSIVE_MOST : 1
SYSTEM_HIS : 1
APPOINTMENT_DUE : 2
RECALL_LETTER : 1
LOOKING_GTTS : 1
ACCOMPANIED_BY : 1
WILL_DEVELOP : 1
NOT_BEEN : 1
MH_PSYCHOTHERAPY : 1
NIGHT_DEC : 1
SWELLING_AND : 1
MONTHS_ARE : 1
MILITARY_HISTORY : 1
HAS_IN : 1
GIVEN_FOR : 1
AM_THE : 1
WOULD_FROM : 1
TO_AS : 3
IS_AN : 1
SUPERVI_ORIENTED : 1
TO_HAVING : 2
VISIT_ACTIVE : 1
ADMITTED_THE : 1
NOT_COMPLETED : 1
ONSET_PENDING : 1
SEEMS_AM : 1
SAVE_MY : 1
PCE_ACCRETIONS : 1
BECOME_MAJOR : 1
CHAPST_ADDENDUM : 1
TH_VISUAL : 1
WHAV_DISCUSSED : 1
ADDENDUM_PATIENT : 1
SIGNATURE_NOT : 1
WITH_NOS : 1
AXIS_DEPENDENCE : 1
WITH_CLOZAPINE : 1
AN_REQUESTED : 1
VISIT_SEE : 1
PRRC_PLAN : 1
OF_PSYCHOTHERAPY : 1
CHRONIC_RECOMMEND : 1
ADJUSTMENT_WITH : 2
THE_OBSERVED : 1
PM_MR : 1
ORIENTED_APPEARS : 1
COLOR_BED : 1
START_APR : 1
STATES_RESCHEDULED : 1
ARRIVING_AT : 1
OVERALL_IS : 1
ASSESSMENT_PROCEDURE : 2
ANKLE_SATUR : 1
MEDS_ANTICIPATED : 1
COMMENT_BY : 1
THIS_CONTINUES : 1
DICT_TO : 1
XPATIENT_NOT : 1
THIS_SHIFT : 16
CONSULT_FREQUENCY : 1
BUT_CURRENT : 1
DEMOGRAPHICS_IN : 1
PACKET_EXT : 1
ARM_ASSESSMENT : 1
BE_SUCCESSFUL : 1
VETERAN_AT : 5
PLAN_TO : 2
MELLITUS_CALL : 1
ON_THIS : 3
AGREEMENT_WILL : 1
STILL_FLUCONOZOLE : 1
AT_LENGTH : 1
SCORE_WAS : 1
BASED_AS : 1
REVIEWED_CHO : 1
HE_DRINKING : 1
BACK_CARE : 1
PTSD_APPTS : 1
STATES_HE : 5
OR_VITALS : 1
PELVIS_PENETRATE : 1
WAS_DEAR : 1
REPORT_THAT : 1
CAP_CALL : 1
VISION_HAS : 1
SCORE_WHICH : 1
OF_MG : 1
NO_PHARMACY : 1
ALSO_CONFIRMED : 1
PENIS_AS : 1
SIGNS_PULSE : 1
ON_MOVED : 1
IS_IN : 4
DISEASE_OUTPATIENT : 1
WEAR_CLOTHES : 1
NOT_CHAPLAIN : 1
SPEND_HIS : 1
GOALS_CLOZAPINE : 1
CAUSING_DISTRESS : 1
SETTING_MISSIONARY : 1
IDENTIFIED_TELEPHONE : 1
LIDS_NORMAL : 1
CLINIC_FOR : 1
FOR_BY : 3
HIGHEST_DSHI : 1
LAB_IN : 1
TO_MILITARY : 1
ASSISTANCE_ARM : 1
VETERAN_WHO : 3
AT_TOP : 1
FINISHED_REHAB : 1
AID_OF : 1
RECOMMENDATIONS_WITH : 1
STILL_ON : 1
BY_STAFF : 1
BUT_BE : 1
EYE_PATIENT : 1
RECEPTIVE_CALLED : 1
MENTAL_APPOINTMENTS : 1
MEDS_DOCUMENTED : 1
THAT_WE : 1
THIS_PHQ : 1
ALCOHOL_PULSE : 1
FOR_WHILE : 1
STOOL_ORIENTED : 1
ACTIVE_TRANSFER : 1
VISION_DATE : 1
WAS_LOW : 1
FROM_PAST : 1
ACUITY_EXAM : 1
HEALTH_TRP : 1
DENIED_SI : 2
TO_RT : 2
SMOKE_DOES : 1
NO_ON : 1
OR_USING : 1
ALERT_WITH : 1
NURSE_INTAKE : 1
PAIN_PLANTAR : 1
AWAY_FOR : 1
OF_ALL : 1
PROBLEMS_VETERAN : 1
USES_HIS : 1
THROUGH_CORRESPONDENCE : 1
EYES_QID : 2
TARZADONE_LEVEL : 1
IN_ADLS : 1
SPOKEN_TO : 1
1010M_MONTHS : 1
FOLLOWED_THE : 1
RESPIRATION_OF : 1
PREVIOUS_AS : 1
HARBOR_VETERAN : 1
MH_OUTPT : 1
REFERED_VA : 1
IN_AND : 1
VERIFIED_WITH : 1
FOR_HARD : 1
NOTE_POLLEN : 1
LOOKING_FOR : 1
MAIL_IN : 1
WEDNES_DATE : 1
ANALYSIS_BAL : 1
WITH_GAIT : 1
FILLED_REQUEST : 1
PATTERN_ASSESSMENT : 1
PUBLIC_HEALTH : 1
HAS_PAIN : 1
ON_EH : 1
THIS_EVENTUALLY : 1
VIDEOTAPE_AUDIOTAPE : 1
AT_BUT : 1
DEL_IDCP : 1
ALTERCATION_STAFF : 1
DIPHTHERIA_TD : 1
TO_AREA : 2
WAS_PERFORMED : 1
THAT_COULD : 1
EXAM_SMOKING : 1
LE_PALPITATIONS : 1
REPORTS_ABUSE : 1
SAVE_TEETH : 1
TREATMENT_PLAN : 4
MOTIVATION_FAIR : 1
VETERANS_RISK : 1
TIME_ENDORSES : 1
AS_FREQUENTLY : 1
MHC_HEALTH : 1
DROP_BOTH : 2
LR_PATHOLOGY : 1
RETIRE_ORIENTATION : 1
SCALE_IER : 1
ATTENDING_KAMRAN : 1
MOVEMENTS_THIS : 3
ARIPIPRAZOLE_MG : 1
AGREED_TRIAL : 1
TO_START : 1
INH_CALLER : 1
XPATIENT_IS : 1
WHILE_BUT : 1
QTY_FOR : 1
NOT_IN : 2
EVENING_AND : 1
TICS_PATIENT : 1
BACK_RADIATING : 1
OF_EYEBALL : 1
STOOL_SOFT : 1
WRAP_POLAR : 1
RESIDENT_SOAP : 1
SHOUDER_ID : 1
RRR_AMOUNT : 1
COME_THE : 1
FOR_CLOZARIL : 1
WORK_PT : 1
MAJOR_FOR : 1
PRIMARY_PCE : 1
BEEN_LIGHTING : 1
SET_UP : 2
PLACE_NOW : 1
CAN_WALK : 1
INR_SEP : 1
CPRS_BOWEL : 1
THE_NEXT : 2
TO_IDENTIFIED : 2
GROUP_ATTENDANCE : 1
EVERY_OUTPT : 1
PATIENT_OR : 2
NUMBNESS_VAPOR : 1
BY_PHYS : 1
SMOKE_MEMBERS : 1
TIME_ACUTE : 1
CHART_OPERATIONS : 1
AT_TIME : 8
THERE_NO : 1
TO_VETERAN : 3
DEC_HYGIENE : 1
HAS_STOOLS : 1
ECONOMIC_HEMP : 1
NOTE_CC : 1
SETTING_REPORTED : 1
MMOL_COLD : 1
HE_INVOLVED : 1
SITS_WITHOUT : 2
CONTAINERS_RRR : 1
YES_NO : 1
NONVA_LAST : 1
HC_PRO : 1
UDS_NEEDS : 1
NOT_OFFICE : 1
THIS_WAS : 4
SHE_PATIENT : 1
UP_VISIT : 1
SECONDARY_BEING : 2
JULT_FUROATE : 1
RECONCILED_PAIN : 1
TYPE_DIAGNOSTIC : 1
FACT_MANY : 1
NIGHTS_SOME : 1
PALMER_MOBILITY : 1
JUDGMENT_THE : 1
SEEN_BEDSIDE : 1
FIRES_THR : 1
ASSOCIATE_IDENTIFIED : 2
QUITE_IN : 1
VETERAN_WITH : 1
SURGERY_SCHEDULED : 1
EAR_CARE : 1
ALLERGIES_AND : 1
HEARING_THAT : 1
ATTENTIVE_XX : 1
YOURE_NO : 1
FUNDS_OF : 1
PATIENT_TRAINED : 1
MOOD_BEEN : 1
INFORMED_IT : 1
EMERGENCY_DEPT : 1
WE_PHYSICIAN : 1
DATE_ADDENDUM : 1
FOR_MENTAL : 1
AFTER_FINISHED : 1
USE_BY : 1
TABLET_DAILY : 1
OF_IS : 1
HE_MADE : 1
COUMADINE_NO : 1
CONTINUE_THERAPY : 1
STUDENTS_FAMILY : 1
UNTIL_AS : 1
COLLECTED_AND : 2
PARTICIPATION_AND : 1
COMMENTS_ON : 1
MALE_DIAGNOSIS : 1
IDENTIFIED_GOALS : 1
SEX_INTERTON : 1
THAT_EVALUATE : 1
SCHEDULED_UMBILICAL : 1
HEART_RADIONUCLIDE : 1
CO_AGREES : 1
DIAGNOSIS_SUSPECTED : 1
OR_PLEASURE : 1
WANT_THE : 1
AT_PINES : 1
APPOINTMENT_CALLED : 1
UPTIVE_BEHAVIOR : 1
SPOKE_PATIENT : 1
LOSS_HOPEFULLY : 1
WOULD_CONSIDERABLE : 1
ALBUTEROL_CFCF : 1
PENETRATE_SKIN : 1
THIS_ADMISSION : 1
DATE_SECONDARY : 1
USED_THE : 6
MEDICATION_NOT : 1
RESIDENT_REVIEWED : 1
FAIR_THOUGHTS : 1
VISIT_PATIENT : 1
HUSBAND_IS : 1
THE_INR : 1
HE_ON : 1
DEPENDENCE_SHORTTERM : 1
CONJ_CC : 1
FOR_DISPOSAL : 1
ASSISTANCE_URINE : 2
TO_CALL : 4
REPRESENTED_CASE : 1
AND_IS : 2
THERE_ANYTHING : 1
FOR_ORIENTATION : 1
NEEDED_DX : 1
PLAN_OPHT : 1
ACTIVE_DISORDER : 1
PATIENT_PATIENT : 2
PAPER_ROOM : 1
UNFORTUNATELY_HE : 1
BELL_SHELTER : 1
EITHER_FOR : 1
AND_CLINICALLY : 1
ARM_NO : 1
THIS_IS : 1
HAVING_CNA : 1
CARE_DINNER : 1
UNSPECIFIED_HARD : 1
AS_HAD : 1
RECONCILIATION_NOTE : 1
PHONE_ACTIVE : 1
FOR_RX : 1
NOTE_IS : 1
WELL_BUT : 1
WAS_AFTER : 1
FEB_RESPIRATION : 1
AUG_CONJ : 1
ON_IN : 1
ASSISTANCE_TIME : 1
DOWN_ANKLE : 1
SEP_OPT : 1
CURRENT_NUMBER : 1
BE_COMPLIANCE : 1
PEOPLE_RETURN : 1
SPOKEN_PATIENT : 1
OUTPATIENT_MEDICATIONS : 6
HIS_FACE : 1
HE_CAN : 2
ASSISTANCE_PROVIDED : 4
FOR_REACTION : 1
GET_FENTANYL : 1
OF_BED : 1
DETACHMENT_THERE : 1
DEPT_PART : 1
WORKING_ON : 1
REPORTS_NO : 1
NO_INTENT : 1
NOTE_PRIMARY : 1
NEEDED_FOR : 3
FACTORS_HAPPEN : 1
ASSESSMENT_PLAN : 1
LOSS_VISION : 1
PLEASE_FOR : 1
CHIEF_BEEN : 1
DISCUSSED_MR : 1
WHEEZING_AND : 1
TASK_UP : 1
LENGTH_MINUTES : 1
MOBILITY_BED : 1
AT_IN : 1
TALKED_ME : 1
AMOUNT_ONE : 1
PING_INITIAL : 1
MEDICATION_WED : 1
ACET_SUSP : 1
RESIDENT_AND : 1
BACK_EACH : 1
LT_IMPROVEMENT : 1
SSDI_CASE : 1
MEDIAL_ASPECT : 1
THAT_THE : 3
BLUE_OBTAINED : 1
FOR_DIASABLITY : 1
BILL_THE : 1
PER_PROGRAM : 1
HEALTH_NOTE : 3
TAB_TAKE : 11
HIS_WILL : 1
NOW_MG : 1
WITH_PALMER : 1
MM_FOCUS : 1
ONE_TABLET : 11
FLOWSHEET_SAT : 1
MET_WITH : 3
THAT_NOT : 1
SECONDARY_DX : 1
TIME_PHQ : 1
HE_SHOULD : 1
CHANGES_CPRS : 1
ALCOHOL_REMISSION : 1
THE_OR : 1
NOTE_PATIENT : 5
NOTE_COOPERATIVE : 1
DEPRESSION_NOS : 2
NORMAL_ORIENTED : 1
LS_SESSION : 1
WITH_STAFF : 1
HE_SC : 1
AN_ASSERTIVE : 1
BE_AWAY : 1
ESP_BORDERLINE : 1
WEAR_STREET : 1
OBMT_NOTE : 1
DATE_LAST : 1
RECOVERY_ISSUES : 1
INITIAL_BP : 1
NUMBER_CALL : 1
MAILED_THE : 1
DISTAL_PT : 1
MEDICATIONS_WAS : 1
FROM_THERE : 1
IS_ABLE : 3
VETERANS_TO : 1
THESE_MAY : 1
ENTERED_NOT : 1
NOTE_NURSING : 3
DRINKS_ZZPATIENT : 1
HAND_SINCE : 1
GROUP_ON : 1
INTRAVENOUS_GERD : 1
ACTIVE_SURGERY : 1
CODE_PRO : 1
PT_BUT : 1
GOTTEN_OUT : 1
AND_LEI : 1
AT_ALERT : 1
THOUGH_FOR : 1
RECOMMENDATION_IT : 1
AND_DISCUSSED : 1
PATIENT_THIS : 1
IF_NECESSARY : 1
LEI_EXAM : 1
WHILE_NOT : 1
OF_AN : 2
MY_UNDERSTAND : 1
FOR_HE : 1
NURSE_HOURS : 1
PT_REQUESTS : 1
CALL_TO : 3
ASSISTANCE_PROTECTORS : 1
BOHLMAN_PATIENT : 1
MAILED_VIA : 1
PINES_FOR : 1
THE_ASSESSMENT : 1
SCIENCE_AFTER : 1
HC_PHONE : 1
IS_NEGATIVE : 1
HIS_ALERTMRSA : 1
ASSISTANCE_HIS : 1
TEST_RESULTS : 2
AND_MR : 1
BOHLMAN_ABLE : 1
GOAL_YOU : 1
INACTIVE_SYSTEMNO : 1
HEALTH_POLLEN : 1
AWAKE_BUT : 1
THIS_MORNING : 3
STARTED_THURS : 1
NO_DING : 1
REVIEWED_IS : 1
LCSW_HISTORY : 1
PTSD_IS : 2
WERE_VISIT : 1
THE_VISIT : 2
NURSING_NURSING : 1
QUESTIONS_DO : 2
ON_CONTACT : 2
AMOUNT_OF : 2
CALLER_MOUNTAIN : 1
GROUP_PLASMA : 1
LAST_AND : 1
MALE_STATUS : 1
RT_TREATMENT : 1
PAIN_NOT : 1
PATIENTS_MOOD : 1
RAL_MEDICAL : 1
MEDS_REVIEWED : 1
BIPOLAR_PT : 1
VETERAN_MALE : 1
CM_APPLICATION : 1
HEARING_IN : 2
BE_DEPRESSED : 1
TARY_EOMS : 1
RELIGIOUSLY_SHE : 1
HAD_BEEN : 1
ALL_CURRENT : 1
ADDENDUM_NURSING : 1
TIMES_HE : 1
TAB_QTY : 1
FACTORS_CAN : 1
WENT_OF : 1
AND_ANXIETY : 2
APPROPRIATE_ALERTS : 1
WITHOUT_PT : 1
PLAN_SESSION : 1
REFERRAL_PLS : 1
REALLY_NONVA : 1
OF_NO : 1
PATIENTS_STRENGTHS : 1
SIGNS_OR : 1
THE_DISCUSSED : 1
DID_LUNCH : 1
RISK_POTENTIAL : 1
SENSATION_TO : 1
MG_NO : 1
ISSUE_FOR : 1
HIS_ACTIVITY : 1
MATRIXECTOMY_DISCUSSED : 1
AND_ETC : 1
PARK_USED : 1
ALL_ACTIVE : 1
STARTED_TEMP : 1
VOICEMAIL_SYSTEM : 1
FIRES_WITH : 1
ASSISTED_MOUTH : 1
THE_EXTREMETIES : 1
CHRONIC_SI : 1
PARTICIPATED_GROUP : 1
WAY_DISCUSSED : 1
VETERAN_SERUM : 1
PLAN_ABLE : 1
FRI_PM : 2
CONSUMED_ASSISTANCE : 1
DISCHARGE_FROM : 2
STATES_IS : 1
ELAVIL_LOW : 1
EXCLUDING_CILOSTAZOL : 1
OTHER_OBESITY : 1
TABLET_ACTIVE : 3
BY_AOD : 1
TO_TICAL : 1
MADE_IODINE : 1
OR_APPTS : 1
ACTIVE_REFER : 1
VETERANS_SYMPTOMS : 1
CALL_STARTED : 1
PHONE_MEANS : 1
INCLUDING_VERSUS : 1
DESIRED_MONTH : 2
YO_DEPRESSION : 1
DI_BEHAVIOR : 1
SYMPTOMS_DI : 1
DX_DEPENDENCE : 1
CONSCIOUSNESS_AND : 1
REFILL_SHE : 1
WILL_ACCOMPANIED : 1
BUTTONS_START : 1
TO_RECEIVE : 2
IS_VERY : 1
WAS_THE : 2
NUM_SCALE : 2
MG_BY : 1
PT_DC : 1
LOSS_SECONDARY : 1
OF_SOFT : 1
ACTIVITIES_REASSESSMENT : 1
IN_DESIGNED : 2
VETERANS_PRESENTING : 1
ALSO_FACT : 1
TECH_NOTE : 1
FOLLOWUP_APPOINTMENT : 1
CALLER_RESPONSE : 1
USE_APPOINTMENT : 1
ARE_IN : 2
LITTLE_OR : 1
INCLUDE_SKIN : 1
INCISION_NOT : 1
LIMITS_IS : 1
THROUGH_CLINICAL : 1
ENDING_SEVERAL : 1
NEEDS_SEE : 1
FOR_STOMACH : 1
OF_SHOULDER : 1
YES_AM : 1
ENERGY_PAIN : 1
ACTIVE_OVERALL : 1
SON_HYDROCODONE : 1
TO_CALLER : 2
LEFT_PRIMARY : 1
WITHIN_HOME : 1
BE_WITH : 1
WITH_INHALATION : 1
OF_BRC : 1
ACTIVE_THEY : 2
FENTANYL_PRIMARY : 1
FALL_IMPLEMENTED : 1
ATTENDANCE_ENGAGED : 1
LOCATE_MODE : 1
THEY_BE : 1
DYSPNEA_OR : 1
BID_AFFECTED : 1
ASSESSMENT_STABLE : 1
SPUTUM_SAMPLE : 1
OTHER_HOUSING : 1
FOLLOW_GROUP : 1
PRIOR_THE : 3
PAIN_CONTROLLED : 1
TO_SYND : 1
MD_NOTE : 2
POSITIONING_VERIFIED : 1
ON_REGARDING : 1
HOW_DID : 3
NOTE_CONFIDENTIAL : 1
HISTORY_REPEAT : 1
CONSULT_OBESITY : 1
WERE_MANAGEMENT : 1
ALBUTEROL_AS : 1
COOPERATIVE_PLEASANT : 1
MONTH_FIBULA : 1
DIET_ACTIVITY : 1
CLINIC_FOLLOW : 1
LS_SESSIONS : 2
PLEASANT_WILL : 1
GOOD_GET : 1
ASPECT_THE : 1
ASSISTANCE_PHYSICIAN : 1
CAN_NOT : 1
LOCATION_ROOM : 1
WITH_DRAINAGE : 1
SCAN_PAUSE : 1
TO_PCP : 3
NOTES_CONSTIPATION : 1
TRANSFERRED_PULSE : 1
SHIFT_WILL : 1
SPECIMEN_FEB : 1
NONCOMPLIANCE_WITH : 1
APAP_CAFF : 1
REMINDER_ONE : 2
NERVE_WHILE : 1
PER_DIEM : 1
NO_PAIN : 4
OR_HAS : 1
CARE_APPT : 1
TO_ADDRESS : 2
RETURN_THE : 1
PTSD_TRAITS : 1
TO_THIS : 1
INTAKE_OF : 1
CHIEF_SHORT : 1
TO_SPEND : 1
ASSESSMENT_OF : 5
AWAY_CONFERENCE : 1
END_HIS : 1
AT_HOWEVER : 1
DISCHARGED_TO : 2
PT_RETURN : 1
KNEE_IN : 1
IS_FACT : 1
ANY_PT : 1
NONE_VET : 1
AT_FIRST : 1
SURGERY_ON : 1
AND_CONTAINERS : 1
BY_VERBALIZATION : 2
HE_PATIENT : 2
PERCEPTION_ABNORMALITY : 1
IT_CAME : 1
PROGRAM_TOTAL : 1
ENJOYED_MEAL : 1
MG_GOAL : 1
TOLD_TO : 1
UP_NOT : 1
ADEQUATELY_AND : 1
OF_HRS : 1
INPATIENT_AXIS : 1
IN_BELL : 1
PSYCHIATRY_TEAM : 1
IN_INTERVENTIONS : 2
REQUIRES_SUPERVISION : 1
MAILED_HAS : 1
RESTRICTIONS_HIS : 1
TROCHENT_CLEANED : 1
MG_HE : 2
APPOINTMENT_WILL : 2
TELEPHONE_TRIAGE : 1
IN_SHE : 1
MAY_ASSISTANCE : 1
WRITTEN_CONDITION : 1
HIS_APPOINTMENT : 1
MEDICATION_AND : 1
FORM_APPARENTLY : 1
PRIMARY_IDENTIFIED : 1
ED_ATTENDING : 1
BREAST_TO : 1
LETTER_MONTH : 2
ROOM_THE : 1
ALBUTEROL_REORDERED : 1
NOTES_IS : 1
APPEARS_THAT : 1
ACTIVE_HE : 1
DATE_ORDER : 1
IN_BEHAVIOR : 1
ANTICOAGULANT_VISIT : 1
AND_PT : 3
TABLET_MOUTH : 10
SUICIDALITY_PSYCHOSIS : 1
THE_CALCIUM : 1
SKIN_OVER : 1
LOW_WHEN : 1
HE_HAS : 16
MH_DOM : 1
OR_NO : 2
PULSE_TO : 1
MG_MOUTH : 2
CONTRABANDS_FOUND : 1
ALSO_OFFERED : 1
HE_RECEIVE : 1
VISIT_MO : 1
HAS_SOCIAL : 1
OTHER_NOTE : 1
MORNING_AND : 1
FEB_ON : 1
BID_FOR : 1
ONE_MORE : 1
POLLEN_PATIENT : 1
PSYCHOTHERAPY_NOTE : 1
HE_PLACED : 1
PAIN_AT : 2
THOUGHT_DISORDERMET : 4
CALCIUM_ADDITIONAL : 1
DISCHARGE_MEDICATIONS : 1
BANISTERS_WANDERING : 1
CONSENT_INHALATION : 1
WITNESS_STATE : 1
MALE_YES : 1
DRINKS_ASSISTANCE : 1
TO_HIGHEXPLOSIVE : 1
ACCESS_GERD : 1
JUNE_ALSO : 1
MEMBERS_ALSO : 1
HE_LIVES : 1
HOW_ARE : 1
NUCHOVICH_ANA : 1
RATED_THROUGH : 1
COUNSELING_INDICATE : 1
READING_NEW : 1
CALLER_ANCHORAGE : 1
FREQUENCY_RIGHT : 1
THERAPY_TIME : 2
TO_BLASTS : 1
PATIENT_FLUOROSCOPIC : 1
CALL_SCHEDULING : 1
PT_DENIES : 2
PROCEDURE_SHOULDER : 1
WOULD_BENEFIT : 1
STARTING_HAVE : 1
SOMATIZATION_VISUAL : 1
SUPERVISION_MEAL : 1
ORTHOPEDIC_SURGERY : 1
HISTORY_MG : 1
WITH_WHOM : 1
NO_DRAINAGE : 1
CALLUS_THREE : 1
MODALITY_NASAL : 1
PROVIDED_FOR : 4
OF_SPUTUM : 1
THE_CENTER : 1
HAS_OBSERVED : 1
THE_FORESKIN : 1
LIVING_SI : 1
AND_CONSULT : 1
MORE_FOLLOWUP : 1
ICDCM_OF : 1
CONTINENT_CONSISTENCY : 1
NO_THOUGHTS : 1
IS_UNSURE : 2
HE_TOUCH : 1
CC_HAS : 1
VISIT_IN : 1
BEEN_FIBER : 1
ACTIVITIES_PAIN : 1
WAS_DISCOVERED : 1
AND_STOPPED : 1
SMOKE_TEAM : 1
NO_OR : 3
PHYSICIAN_RESEARCH : 1
BUT_VETERAN : 1
OVERSIGHT_OR : 1
BED_SITTING : 1
DIVORCED_PT : 1
URINARY_ITIS : 1
INFORMATION_CRISIS : 1
TO_PERSON : 5
NEXT_OF : 1
CHAPLAIN_PATIENTS : 1
ACTIVE_ADMISSION : 1
MINUTES_TREATMENT : 1
FINGERTIP_TAB : 1
BLASTS_DURING : 1
SESSION_TIME : 2
CONTACT_QUIET : 1
IMPROVED_HOSPITAL : 1
MOBILITY_INDEPENDENT : 2
DRINKS_CARE : 1
RAN_OUT : 1
TAB_ONEHALF : 1
THE_PHONE : 2
CONTROLLED_STABLE : 1
WAS_IS : 1
WILL_DISCHARGED : 1
PAIN_SCREEN : 1
DEPENDENCE_THE : 1
HELD_ON : 1
BACK_PAIN : 1
PROCEDURE_ON : 1
GRIEF_AND : 1
FUTURE_ON : 1
TO_ARE : 1
CRITERIA_SHORT : 1
SECONDARY_TO : 3
GOT_HIS : 1
GAIT_HE : 1
HYPERCHO_NAME : 1
VALVE_PATIENT : 1
MEDICATIONS_THIS : 1
CALLED_OCT : 1
RANITIDINE_TAB : 1
CAUCASIAN_MALE : 1
EACH_SIDE : 1
DISCUSSED_AND : 1
TRNASFERRED_TO : 1
HE_OBMT : 1
THE_CUEING : 1
ATROVENT_ML : 1
SCHEDULED_DUE : 1
BE_IF : 1
NAIL_WAS : 1
ASSESSMENT_PATIENT : 1
ALTERED_MECHANISMS : 1
DENIES_CHANGES : 1
BUT_TO : 1
NOTE_CONSUMED : 1
CHECKS_LOCATED : 2
COLLECTION_YOU : 1
INCREASE_HIS : 1
ANTISOCIAL_THIS : 1
OF_ASSESSMENT : 2
NOTED_THAT : 1
OXYGEN_INJ : 1
OR_CHART : 1
SESSIONS_TO : 2
DATE_LEGS : 1
SET_CUTTING : 1
SHE_TO : 2
THAT_ANESTHESIA : 1
BREAST_EXAMINATION : 1
TREATMENT_AND : 2
CONTACT_FOR : 1
PHYSICIAN_BOWEL : 2
COMPLAINING_OF : 1
REINFORCEMENT_USE : 1
SEX_MALE : 1
HIS_HAS : 1
DSHI_DISPOSITION : 1
VETERAN_IN : 3
PLAN_MD : 1
THAT_PTSD : 1
TEAR_JUST : 1
SCHEDULE_IN : 1
HISTORY_SERVED : 1
RESIDENTS_REVIEWED : 1
HEART_PROCEDURE : 1
TO_ALLEVIATE : 1
COMPENSATION_HE : 1
AT_HISTORY : 1
OROBASE_ER : 1
PLAN_WEEKLY : 1
APPTS_HAD : 1
RESP_PROBLEM : 1
HAD_ENCOUNTER : 1
NURSE_BLOOD : 1
LIN_ASSIGNED : 1
MS_SYSTEMNO : 1
AND_REMOTE : 1
TOMORROW_OTHER : 1
HAVING_KNEE : 1
CY_OF : 1
THEY_STATES : 1
IS_NEW : 2
PERSONAL_SHAMPOO : 1
VETERANS_EXAMPLE : 1
THAT_MANY : 1
CLASS_PT : 1
NIGHT_MAY : 1
CONTACT_WITH : 1
AND_WENT : 1
ANCHORAGE_MHC : 1
LIDS_OD : 1
NONE_PROBLEM : 1
AT_BAY : 1
OR_HOME : 1
TAXI_ARRANGED : 1
WEEK_VETERAN : 1
IS_YEAR : 1
SHORTTERM_DATED : 1
MET_THE : 1
ON_ON : 1
SHI_OR : 1
FOR_BEHAVIOR : 1
AND_TO : 7
RECENT_OR : 1
INTERDISCIPLINARY_PSYCH : 1
SAMPLE_AND : 1
EDUCATION_NOTES : 1
CILOSTAZOL_TAB : 1
THE_PRINTED : 1
UNSAFE_TO : 1
HAVE_MEDICAL : 1
OR_ISSUES : 1
PAIN_MEDICATION : 4
PT_CALM : 1
MONTHS_COMPLETE : 1
IT_IS : 3
OTHER_ATTENDED : 1
HEALTH_CLINIC : 1
THAT_REGIME : 1
REPORT_MCG : 1
LOCAL_RESOURCES : 1
OF_HIGHEST : 1
THERAPY_THE : 1
OF_LAST : 3
VICTIM_SERVICES : 1
FOR_STRENGTH : 1
ACTIVE_LR : 1
AIR_RADIOLOGY : 1
COMPREHENSION_GET : 1
UNABLE_TO : 1
OF_SPERMFLUID : 1
ADEQUATE_WOULD : 1
TO_USE : 2
PROVIDED_DATE : 1
REQUIRE_NURSING : 2
IS_DILTIAZEM : 1
HAS_WORSENED : 1
ELOPEMENT_NO : 1
NOTE_DISPOSITION : 1
OF_TIME : 1
HOURS_TIME : 1
TAKEN_TO : 1
MEDICATIONS_INCLUDING : 1
RESPIRATORY_SKIN : 1
BAY_DOWN : 1
FIRES_AS : 1
RIGHT_EYE : 2
LMWH_SURGERY : 1
DING_URINE : 1
ISSUES_NURSING : 1
THE_WANDERING : 1
PAIN_GOAL : 2
STATES_APPOINTMENT : 1
TIME_OF : 12
THIS_PROVIDED : 1
MEDS_MISCELLANEOUS : 1
APPT_TABLETS : 1
CLINIC_UP : 1
ITIS_LUMBAR : 1
NOTE_FOOD : 2
OVERALL_APPEARANCE : 1
PLAN_WILL : 1
OLEMIA_OF : 1
FOR_DEMONSTRATION : 1
PHONE_MIN : 1
OUTPATIENT_PAPER : 1
HEALTH_DEAR : 1
DISCUSSED_RULES : 1
SUICIDAL_BEHAVIOR : 1
TO_PHYSICIAN : 2
EQUIPMENT_TIME : 1
INCH_TO : 1
NOTIFY_NINAN : 1
STATUS_RECEIVES : 1
ACTIVE_WILL : 1
PC_NURSE : 1
THAT_REMOVED : 1
MEMBERS_GIVEN : 1
PASS_INFORMATION : 1
SCHEDULE_NEXT : 1
ORIENTATION_AND : 1
MECHANISMS_WITHIN : 1
HOME_PATIENT : 1
QMORNING_MG : 2
TRANSPORT_STATUS : 1
ANTIBIOTIC_OINTMENT : 1
MACHINE_BLINDNESS : 1
AREA_HOME : 1
WAS_NOTIFIED : 1
FOR_FROM : 1
ACTIVE_RECEIVED : 1
BODY_USE : 1
WITH_AT : 4
THOUGHTS_LIFE : 1
THIS_SEE : 1
BY_ACTIVE : 5
MEAT_OPENING : 1
NOTE_MG : 2
CAME_TO : 1
MINUTES_CAROL : 1
EYE_BOHLMAN : 1
PHYSICAL_TARY : 1
STATING_HER : 1
REHABILITATION_VETERAN : 1
NOT_SC : 1
OF_BLOOD : 1
APPOINTMENT_THURS : 1
ED_TO : 3
VICTIMS_PROGRAM : 1
IMPROVEMENT_HIS : 1
CALM_VITAL : 1
PTSD_SA : 1
ANTICIPATED_GOAL : 1
DISCUSS_TRANSFER : 1
INTERDISCIPLINARY_IP : 1
BUTTONS_SCAN : 1
ORTHOPNEA_INVENTORIED : 1
DIVORCED_RECEIVES : 1
THE_TOOLS : 1
COMMUNICATION_TO : 1
POSTAL_ON : 1
INCONTINENCE_NOT : 1
RIGHT_SHOWS : 1
DEPENDENCE_ORAL : 1
TO_ATTEND : 1
DISCUSSED_ACCOUNTABILITY : 1
QBEDTIME_GOAL : 1
RISK_MEDICATIONS : 1
IN_SWELLING : 1
FSG_WHILE : 1
RESIDENT_CONCUR : 1
AND_NEXT : 1
ANESTHESIA_PLEASE : 1
MR_INR : 1
TREATMENT_ABLE : 1
NOTES_MANAGEMENT : 1
OF_UPTIVE : 1
DW_ML : 1
PERLA_PATIENT : 1
VISION_AND : 2
BEDSIDE_PT : 1
YOU_FEELING : 1
NURSE_AT : 1
THIS_BETWEEN : 1
AND_ELAVATED : 1
VERIFIED_PRIOR : 1
NEW_WORSENING : 1
EH_CONJ : 1
NOT_WORTH : 1
WAS_HAVING : 1
NOT_REFERRAL : 1
PHONE_NUMBER : 3
NOTE_OVER : 1
PICK_NEXT : 1
THE_MENTIONED : 1
USUAL_FASHION : 1
DI_NEUROLOGY : 1
CLINICAL_REMINDER : 1
IN_SC : 1
SPEAK_TO : 1
OFFICE_IS : 1
OS_OS : 1
OF_HOURS : 2
SIDES_OF : 1
NICOTINE_ORAL : 1
BY_MIN : 1
BE_MED : 1
ED_NOTE : 1
IMPROVED_MOTIVATION : 1
MY_TO : 1
CM_TAXI : 1
PROVIDER_OF : 1
HE_CALM : 1
STARTLED_HE : 1
PRACTITIONER_PLEASE : 1
THAT_ARE : 1
NURSING_IBUPROFEN : 1
REGULAR_MEDICATIONS : 1
FIBER_HAS : 1
VIETNAM_VETERAN : 1
STABLE_GIVE : 1
GROUP_TO : 1
SCORE_CHANGE : 1
OR_APPROPRIATE : 1
UG_PAKULA : 1
NEEDS_OF : 1
IN_DOSE : 1
BEEN_MS : 1
OS_WILL : 1
LATER_TO : 1
TOMORROW_SOMETIME : 1
DAILY_WAS : 1
CPRS_OR : 1
BARRIERS_IDENTIFIED : 1
CONTINUE_PRIMARY : 1
CENTER_PRINTED : 1
VERY_THERE : 1
BOWEL_ELIMINATION : 4
EYE_GIVEN : 1
NEGATIVE_PT : 1
SHIFT_CONTINUE : 1
CALL_DIAGNOSTIC : 1
MESSAGE_ON : 2
ORAL_LAMISIL : 1
RECEIVE_FOR : 1
THE_PULSE : 1
MORE_RETURN : 1
TWICE_NURSE : 1
WITH_SOME : 1
OFFER_HONEST : 1
PREVIOUS_ENDOCARDITIS : 1
PT_READING : 1
PROSTHETICS_VALVE : 1
INCLUDING_OF : 1
WITH_STEADY : 1
HOME_MEDICATIONS : 1
PERLA_TO : 1
HAVE_MAKE : 1
MAIL_CURRENT : 1
ON_FLOWSHEET : 2
WITH_LOSS : 1
CHO_LOWERING : 1
WHICH_ABOUT : 1
PERCEPTION_IMPAIRMENT : 1
UP_MEAT : 1
WAS_IN : 6
NOT_HURTS : 1
RECEIVES_SC : 1
AND_PHYSICAL : 2
PROVIDED_WENS : 1
MENTAL_PROBLEMS : 1
TAKE_TRAMADOL : 1
ON_CHART : 1
HOUSING_ECONOMIC : 1
ADMITTED_OUR : 1
GOAL_ATTAINMENT : 1
PATIENT_STUDIED : 1
RECOVERY_PLAN : 1
TRIVALENT_SHOT : 1
HIM_PRESENTED : 1
SEEN_TO : 2
SCHEDULED_INFORMATION : 1
NUMBER_HOURS : 2
FOR_SHOUDER : 1
WEEK_CONTINUES : 1
ANY_SHI : 1
OR_IDEATION : 1
CLOTHES_HE : 1
WRITTEN_CORRESPONDENCE : 1
EYE_VETERAN : 1
TO_EVERY : 1
THIS_VETERAN : 2
MANAGEMENT_LB : 1
GROUP_NOTE : 2
NO_HAS : 1
SERVICES_REPRESENTED : 1
LAST_DIFFICULTY : 1
IV_MULTIAXIAL : 1
EVALUATION_CODE : 2
ME_DISCUSS : 1
OS_WITH : 1
ANGRY_AND : 1
TALKED_PROBLEM : 1
TRIAGE_PATIENT : 1
AM_LOOKING : 1
IN_MILIEU : 1
PASSIVE_SI : 1
JUNE_DATE : 1
SUCCESSFUL_QID : 1
THE_HAVE : 1
AT_HAS : 1
DOING_TRADING : 1
PRESCRIPTION_OR : 1
SHAMPOO_PE : 1
EVALUATION_MANAGEMENT : 3
ACTIVE_LOSS : 1
PRIVILEGES_ECP : 1
HYGIENE_NOT : 2
CONCERNS_QUESTIONS : 1
APR_PAIN : 1
CAN_TELL : 1
NOTE_THIS : 1
BOWEL_DECIDED : 1
TO_LIVE : 2
DO_HAVE : 2
NOT_DESIRE : 1
CONDITION_DIAGNOSIS : 1
COMMENTS_INFORMATION : 4
EXPERIENCED_DURING : 1
PATHOLOGY_ALBUTEROL : 1
ATTENDANCE_OFFERED : 1
NURSING_NOTE : 11
SEARCHED_CONTRABANDS : 1
SERVICE_TO : 1
THIS_DATE : 1
ON_TRIVALENT : 1
MANAGEMENT_OF : 1
AND_PATIENT : 4
FOR_RESPONSES : 1
HOPELESS_HE : 1
IS_TICS : 1
TRAITS_DURATION : 1
TRANSPARENCIES_MOUTH : 1
BEEN_FALL : 1
DISCLOSED_OR : 1
TURN_AND : 2
TRAINING_WT : 1
RESIDENT_US : 1
THIS_STATE : 1
USE_FEEL : 1
WELLBUTRIN_AT : 1
OUTPT_AT : 1
NEXT_IN : 1
AT_PATIENT : 1
PATIENT_INCLUDING : 1
INCONTINENCE_ITIS : 1
REMINDER_HAVE : 1
YOU_TO : 1
WHO_WOULD : 1
CHIEF_MANAGMENT : 1
REPORT_ENTERED : 2
REPEAT_EXPOSURE : 1
PTSD_DTR : 1
LT_HIP : 1
MH_COPY : 1
LEFT_WITH : 2
IMPORVEMENT_AND : 1
FAMILY_SPOUSE : 1
THE_ONE : 3
MODALITIES_MINS : 1
DEPRESSION_ORTHOPEDIC : 1
WITH_DROPS : 1
HAS_USED : 1
NEXT_CLINIC : 1
FOR_LAST : 1
READ_STATES : 1
OFFERED_GROUP : 1
HIS_SURGERY : 2
HIS_RATHER : 1
WITH_GOOD : 1
INITIAL_SLIDINGSCALE : 1
LOSING_HIS : 1
ABOUT_ACTIVE : 1
ORTHOPEDIC_NOTE : 2
ATTENTIVE_HERE : 1
ENTERED_APPLICABLE : 1
VIST_COORDINATOR : 1
RESTRAINTS_USE : 2
MF_HISTORY : 1
TEETHING_PACIFIERS : 1
GOALS_RESIDENT : 1
NORMAL_ETHNIC : 1
MONTH_YOM : 1
INFORMATION_PATIENT : 1
THERAPY_PATIENT : 1
LAB_SLIP : 1
ANTICOAGULANT_BANISTERS : 1
SCAN_AND : 1
DUE_TO : 3
REMAINS_SAFE : 1
DRAINAGE_ADVERSE : 1
DATE_AND : 1
AND_USES : 1
ORDERED_NEEDS : 1
AN_ORDER : 1
UNIT_HIS : 1
FOOD_HDL : 1
YELLOW_OF : 2
DONE_AND : 1
IN_URINE : 2
UNSPECIFIED_WERE : 1
MEETING_PATIENTS : 1
GOING_THE : 2
LITTLE_INTEREST : 1
SPEECH_IS : 1
DOCUMENT_IT : 1
ABLE_LOCATE : 1
YELLOW_FOOD : 1
HIM_UP : 1
NEW_FOR : 1
HIS_THERAPY : 2
DENIED_HI : 2
CM_ADDENDUM : 1
DATE_WENS : 1
FOR_REVIEWED : 1
DX_WPB : 1
TO_UP : 1
USES_DENTAL : 1
WHO_LOCALLY : 1
SITTING_WALKING : 1
TO_ROOM : 1
AND_REHABILITATION : 1
OTHERS_NURSING : 1
PLACE_TIME : 5
MOOD_DEMONSTRATION : 1
ABC_MINUTES : 1
APPOINTMENT_YES : 1
FROM_NOTES : 1
FEELING_TO : 1
TIMES_MEAL : 1
ENT_CONFERENCE : 1
WITH_SMT : 1
SCORE_EXCESSIVE : 1
WITH_RAN : 1
TRP_NOTE : 1
DIAGNOSTIC_RESULTS : 1
TO_LOCATE : 1
MI_PROLONGED : 1
SCORE_THE : 1
AND_GROOMED : 1
CONVERSATION_CAME : 1
CAN_FELT : 1
IMPROVEMENT_POSSIBLE : 1
TIME_PHYSICIAN : 1
COLOR_UPPER : 1
IDENTIFIED_PAIN : 1
THE_IN : 2
PT_GO : 1
INCONTINENCE_AND : 1
STATUS_EVALUATION : 1
HAPPEN_WHEN : 1
INCORRECT_INFORMED : 1
DINNER_DRINKS : 4
CORRECT_PATIENT : 2
HE_PHONE : 1
THE_IS : 5
THAT_AM : 1
OF_COMPLETED : 1
US_VETERANS : 1
ON_STOVE : 1
NUR_DISCHARGE : 1
THE_TIME : 4
DEMONSTRATION_ADMITTED : 1
SOLN_GM : 1
WITH_CARE : 1
THE_TOP : 1
STRESS_RN : 1
MEDICATION_AT : 2
DATE_TO : 1
FAM_EDUCATION : 1
ETTE_ANDRE : 1
OPH_DROP : 2
WORSE_ETC : 1
ALTERCATION_WITH : 1
TROCHENT_BURSA : 1
VITAL_ID : 1
LAST_JUNE : 1
SERVICE_WM : 2
OVER_THE : 2
COLOR_BODY : 1
EOMS_PHYSICIAN : 1
VISIT_WAL : 1
TDAP_ROS : 1
MUCH_UNTIL : 1
THE_ELAVIL : 1
PHYSICIAN_DOES : 1
WITH_FEVER : 1
MH_NOTE : 2
PT_AND : 1
ACTIVE_VETERAN : 1
DOSE_QMORNING : 2
HOPE_DOC : 1
WITH_QUESTIONS : 1
INCREASED_AT : 1
TIME_ACTIVITIES : 1
NOT_REALLY : 1
HAS_UP : 1
NC_PERLA : 1
HAVE_FAMILY : 1
HE_COULD : 2
TAB_MALE : 1
BE_CALCIUM : 1
NO_DISTAL : 1
USE_NONSKID : 1
MANAGEMENT_NOTE : 1
WORSE_THEY : 1
OPH_BOTH : 2
LAST_VETERAN : 1
MS_FALL : 1
ARE_STABLE : 1
WAS_OPEN : 1
OF_WK : 1
DISCUSSED_FOR : 1
WAS_SOCIAL : 1
SERVICE_FROM : 1
SPOKE_WITH : 3
NUMBER_NASAL : 1
MORNING_CARDS : 1
PATIENT_PROCEDURE : 1
ADDENDUM_WEEK : 1
PLAN_UPDATE : 2
AND_EXAM : 3
HEARTTOHEART_BE : 1
SOB_AND : 1
CARE_ADL : 2
TRUCK_MOST : 1
DISCUSSION_ASSESS : 1
THE_THIGH : 1
CLINICAL_INSTITUTE : 1
FAMILY_UNIT : 1
TURN_SELF : 2
CLOTHES_TALKED : 1
TABLETS_IN : 1
TO_HOURS : 2
IN_REMAINS : 1
PTSD_BORDERLINE : 1
PPN_TPN : 1
HAS_STATED : 1
UNIT_ORIENTATION : 1
ARE_HOW : 1
SKIN_TEMPERATURE : 1
PROCEDURE_TO : 1
CAN_MED : 1
MR_VETERAN : 1
OR_SUSPECTED : 1
RECOMMENDATIONS_BEING : 1
THE_STOVE : 1
AT_CONFERENCE : 1
VISIT_REPRESENTED : 1
TIRED_OR : 1
APPLY_INCH : 1
ASSESSMENT_YES : 1
FOR_CONGESTION : 1
TREATED_DOG : 1
ACTIVE_INITIAL : 1
MRSA_POSITIVE : 1
AND_YEAR : 1
SCREENING_TEST : 1
PROBLEM_VISION : 1
LUMBAR_NUMBER : 1
EXTREMETIES_NUMBNESS : 1
TO_OFFER : 1
SATURATION_TREATMENT : 1
YES_TO : 2
WITH_DEPRESSED : 1
HISTORY_OF : 6
OF_WILL : 1
THESE_WELL : 1
TURNS_AND : 2
TO_FINGERTIP : 1
IDENTIFIED_AS : 1
EVENT_LOW : 1
APPROVES_OLD : 1
FOR_OXYGEN : 1
EAR_THEN : 1
ACETAMINOPHEN_TAB : 1
TRIAGE_DT : 1
IN_ATTENDANCE : 1
INDEPENDENT_IN : 1
INPT_AFTER : 1
RANGE_LAB : 1
MM_ECHOGENIC : 1
TAC_IN : 1
COUNSELING_SHOULDER : 1
AN_PRACTITIONER : 1
NOTES_VETERANS : 1
IN_MIAMI : 1
MET_VETERAN : 1
DIAGNOSIS_HIM : 1
SOON_MR : 1
AN_ALTERCATION : 1
SIGNS_DEMOGRAPHICS : 1
STABLE_WORSE : 1
FALL_PRECAUTIONS : 1
AND_ABOUT : 1
ORTHOPEDIC_SEND : 1
NOT_ENOUGH : 1
THE_RANGE : 1
PRINTED_ON : 1
LIFETIME_NONSMOKER : 1
BACK_PLS : 1
SLIP_SPOKE : 1
OPEN_REEXAMINING : 1
CALL_TIME : 1
ON_TUES : 1
RANGE_SLIP : 1
TRNASFERRED_ME : 1
HIS_ADDENDUM : 1
DISCUSS_HYPERCHO : 1
CALL_FOR : 1
ED_PCP : 1
OF_VISIT : 1
PLACED_ORDER : 1
PATIENT_LEFT : 1
SEEN_SCHEDULED : 1
RISK_ASSESSMENT : 1
AMOUNT_CONSUMED : 3
DATE_DX : 1
GIVEN_AN : 1
IMPLEMENTED_HAS : 1
OXIMETRY_FOR : 1
AGE_SEX : 1
LB_AOX : 1
UPDATED_PAIN : 1
PROBLEMS_AND : 1
HELPED_HIS : 1
ADDENDUM_LOSS : 1
TREATMENT_THIS : 1
ANGRY_HAS : 1
AND_CONCUR : 1
AS_ON : 1
ALERT_ORIENTED : 3
DR_ON : 1
YOU_THINK : 1
RR_MG : 1
NOT_CONSIDERED : 1
OTC_PAIN : 1
THAT_HER : 1
VISIT_DATE : 1
REPRESENT_REQUEST : 1
DRUG_REHAB : 1
SHOWER_PICKUP : 1
AND_BE : 1
LUNCH_IN : 1
PATIENT_SIDE : 1
THOUGHTS_PT : 1
TYPE_QUESTIONS : 1
AND_COMPLAINTS : 1
HT_CM : 1
AWAITING_TRANSPORT : 1
NAME_CONSTITUTIONAL : 1
WOUND_OF : 1
MED_RECONCILLIATION : 1
LOW_VOLUME : 1
YES_FAMILY : 1
LIVER_THE : 1
NEXT_WRITER : 1
ROOM_FOR : 1
MI_AGE : 1
THE_CONSUL : 1
LEAD_HOPELESS : 1
MEDS_THIS : 1
NONSKID_SLIPPERS : 1
IN_USE : 3
TUMOR_TISSUES : 1
HIM_DURING : 1
TESTING_REDIRECTION : 1
ADVERSE_NO : 1
DATE_PSYCHOSOCIAL : 1
STATES_SHE : 1
MONITORED_RECORDED : 1
DISPOSITION_VERBAL : 1
DRAINAGE_PHYSICIAN : 1
POTASSIUM_COMMON : 1
HIS_ALBUTEROL : 1
FROM_PSYCH : 1
FLU_VACCINE : 1
HAS_MIGRAINE : 1
FEW_RESIDENTS : 1
OF_CHEST : 1
PATIENT_YEAROLD : 1
SPINE_SILVER : 1
PT_EVALUATION : 1
ORAL_ASKING : 1
CONTINENT_PERSONAL : 1
HEARD_PT : 1
VERBAL_COMMUNICATION : 1
GOALS_WILL : 1
BLIND_SO : 1
BE_WEIGHT : 1
IMPAIRED_COMMUNICATION : 1
ENDORSES_FEELINGS : 1
VETERAN_READINESS : 1
THE_SYMPTOMS : 1
TO_AFTER : 1
POSITION_SURGERY : 1
INCLUDING_ASSESSMENT : 1
VETERAN_HIP : 1
EAT_WITHOUT : 1
BREASTFEEDING_ON : 1
DIAGNOSES_MOTRIN : 1
MONTHS_SEEMS : 1
CUTTING_AND : 1
IDENTIFICATION_BY : 1
USE_REMAINS : 1
FAMILY_STATING : 1
OUT_THE : 2
ENTERED_CPRS : 1
PLACE_PROVIDED : 1
PHYS_MIN : 1
INSTITUTE_WITHDRAWAL : 1
COUNSELING_COPY : 1
COUNT_IN : 1
PSYCH_LAST : 1
MANAGEMENT_SOME : 1
GOES_ALL : 1
HIS_PULLED : 1
CONTINUED_DISCUSS : 1
HIGHEST_DISPOSITION : 1
PHARMACY_REVIEW : 1
DO_HE : 1
PRESENTS_VISIT : 1
RESCHEDULE_STAFF : 1
BREATH_SAMPLE : 1
SELECTING_VISTA : 1
SUSAN_OBTAINED : 1
SAVE_LIFE : 1
CALLUS_AREA : 1
CONTINUES_HAVE : 1
BY_REVIEWED : 1
EXAM_TARY : 1
AND_QUIET : 1
APPT_EGD : 1
LIFE_THAT : 1
DAILY_NOT : 1
PR_MOUTH : 1
AT_OF : 3
IS_NOTE : 1
BETWEEN_EMPLOYMENT : 1
MISSIONARY_FRIEND : 1
TYPE_II : 1
WILL_EMOTIONAL : 1
EMERGENCY_SESSIONS : 1
PATIENT_NAME : 2
RECEIVE_WITH : 1
TESTS_RADIONUCLIDE : 1
REQUESTED_TO : 1
AWAY_RETIRE : 1
MADE_SOCIAL : 1
THINGS_TIME : 1
NOTE_PT : 2
DID_NOT : 4
EXAM_RESULT : 1
NOS_INCREASED : 1
ON_VITAL : 1
DISPOSITION_IMPAIRED : 1
OUT_THAT : 1
ARTHRITIS_PROCEDURE : 1
DATED_TERMINATED : 1
MD_PROVIDER : 1
BE_ACCOMPANIED : 1
OTC_MEDICATION : 1
HE_INPATIENT : 1
TO_GOOD : 1
FEELING_VERY : 1
CUEING_ASSISTANCE : 1
FAMILY_MEMBER : 1
MOBILITY_BLADDER : 1
LEVEL_SEDATION : 1
IER_TO : 1
BECOME_THAT : 1
BY_THAT : 1
SAF_ON : 1
POSTTRAUMATIC_STRESS : 1
APPEARANCE_IS : 2
ONE_PRIOR : 2
PATIENT_AFEBRILE : 1
AMITRIPTYLINE_YOUR : 1
HAVING_GOALS : 1
THEY_WILL : 1
THE_ABILITY : 1
PRESENTING_AND : 1
MOUNTAIN_BREATHING : 1
CONTINUED_RADIOGRAPHICALLY : 1
BEHAVIOR_LOPERAMIDE : 1
DIEM_POSTOP : 1
MY_PULSE : 1
BE_CONSIDERABLE : 1
NEW_GROUP : 1
WITH_MEMBER : 1
SKILL_STATED : 1
IT_ALSO : 1
OF_MEMPHIS : 1
HYGIENE_APPLICABLE : 2
SEDATION_THE : 1
UNSPECIFIED_DOING : 1
BE_ABLE : 3
OLEMIA_NAME : 1
RISK_PT : 1
ON_FOR : 2
HEALTH_VETERAN : 1
PATIENT_IDENTIFICATION : 1
TO_LAB : 1
CHIEF_DISPOSITION : 2
IS_TREATED : 1
TOILET_HYGIENE : 1
SUICIDAL_IS : 1
REMID_THE : 1
COMMUNICATION_RELATED : 1
PATIENT_SETTING : 1
TIME_AWARE : 1
INTENT_OF : 1
COMPRESSING_NERVE : 1
ALLERGIES_FULL : 1
WANDERING_THE : 1
ELIMINATION_ORIENTED : 2
PER_FLU : 1
VERY_TO : 1
OR_ON : 1
STATUS_PROBLEMS : 1
TREATED_THE : 1
IS_WAITING : 1
COMPLAINT_DENIES : 1
EXPRESSED_APPRECIATION : 1
WOMENS_HEALTH : 1
FIRES_YES : 1
RISKS_BENEFITS : 1
COOPERATIVE_SPOKEN : 1
SHE_THAT : 1
HIGHEXPLOSIVE_BLASTS : 1
INTRAVENOUS_ACCESS : 1
SOAP_WILDCATS : 1
ARM_LOSS : 1
HOWEVER_THE : 1
COMPENSATION_PROGRAM : 1
OUT_SAYS : 1
DI_UPTIVE : 1
DAILY_CONSULT : 1
ICDCM_ASSESSMENT : 1
MORE_VITALS : 1
GLAUCOMA_USE : 1
OF_RESOURCES : 1
AUTOMATICALLY_SENT : 1
WHEN_PRESENTED : 1
SISTER_AND : 1
HIS_AREA : 1
ASSISTANCE_WAS : 2
FOR_OPEN : 1
MOTIVATION_TO : 1
SEP_ASPIRIN : 1
CURRENT_DIAGNOSIS : 1
NAME_PAPER : 1
PRIOR_DISCHARGE : 1
DEPENDENCE_HYGIENE : 1
PERMANENT_ON : 1
AUDIOVISUAL_CLASS : 1
RIGHT_NECK : 1
WAS_VISTING : 1
WAS_WAIT : 1
OR_SEND : 1
PATIENT_HAS : 3
PENDING_OUTPATIENT : 1
INFORMATION_REGARDING : 1
WIH_LIST : 1
SERUM_MG : 1
RECENT_DATE : 1
OTHER_UNSPECIFIED : 3
DX_DEPRESSION : 1
MEMBERS_WERE : 2
EXERCISE_PRIOR : 1
VETERAN_REGARDING : 1
PHYSICIAN_THE : 1
PT_CONTI : 1
OR_PLAN : 1
PS_AND : 1
CHO_AND : 1
THE_PELVIS : 1
AND_MENTAL : 1
HCL_MG : 1
OF_FOR : 1
WRITING_THEIR : 1
GROUP_DISCUSSED : 1
MY_CALL : 1
REHAB_INCISION : 1
FOR_CONSULT : 2
ACCOMPLISHMENT_THAT : 1
THAT_BE : 1
PHONE_FOR : 1
PATIENT_BLOOD : 1
FOR_PAST : 2
IMPAIRED_SOUNDS : 1
IN_DR : 1
WALKING_DISCUSSED : 1
AS_WHEN : 1
TREATMENT_VETERAN : 1
BORDERLINE_ANTISOCIAL : 1
TIME_DENIES : 1
TO_MD : 1
BEEN_TREATED : 1
PROVIDER_MAIL : 1
HAS_NO : 3
INTO_BOWEL : 1
RECEIVE_REGARDING : 1
BUTTS_AND : 1
AHN_PREVIOUS : 1
SMEAR_ACC : 1
DIRECTABLE_ACID : 1
PCP_ADDRESS : 1
BUSPIRONE_HCL : 1
FOR_PROBLEMS : 1
BY_MD : 1
INFERIOR_AHS : 1
MUCH_LESS : 1
FUTURE_LEAVING : 1
HEALTH_FOR : 1
CONSUMED_THIS : 1
WRITER_HAS : 1
AN_WITH : 2
CLIENT_NO : 1
CPRS_MOVEMENT : 1
PROTECTIVE_PATCHES : 1
SOB_CAME : 1
NO_NEW : 1
DILTIAZEM_CONSENT : 1
HEALTH_WILL : 1
PHARMACY_PROBLEM : 1
BOWEL_HEIGHT : 1
BENEFITS_ALTERNATIVES : 1
BATHROOM_BLINDNESS : 1
FROM_PROVIDER : 1
PRINTED_INFORMATION : 1
TAB_ACTIVE : 1
METH_PAINS : 1
POINT_INFERIOR : 1
HAVE_ANY : 2
ACTIVE_DATE : 2
OF_RIGHT : 1
ASSESSMENT_CARE : 1
DISTRESS_HAVE : 1
AGE_MALE : 1
VERBALIZES_DETACHMENT : 1
CANE_MENTAL : 1
TO_WITHOUT : 3
PSYCHOSOCIAL_STATUS : 1
PROVIDER_IDENTIFIED : 3
SHOWERS_PR : 1
THE_BUTTONS : 1
CAN_WHEN : 1
DIET_OR : 1
EASILY_AND : 2
ABILITIES_AND : 1
LISTED_VERIFIED : 1
ABILITY_TO : 1
PRIMARY_PROVIDER : 1
OBLIQUE_LATERAL : 1
PROPER_IDENTIFICATION : 1
IN_DW : 1
WITH_NOT : 1
SKIN_POSTERIOR : 1
AS_ADDENDUM : 1
BREAKFAST_FOOD : 2
FIRES_HIS : 1
CONTINENT_OTHER : 1
HISTORY_AND : 1
BY_OR : 1
THURS_MIAMI : 1
SCORE_DISTRESS : 1
HAS_AND : 2
WHO_HE : 1
OTR_GROUP : 1
IS_CALM : 1
LEARN_RECEPTIVE : 1
SEEN_EVALUATED : 1
HAS_REVIEWED : 1
PAST_NIGHTS : 1
ACUTE_PATIENT : 1
RECENT_REMOTE : 1
ARTH_AGE : 1
SUPERVISOR_NOTIFIED : 1
WITH_AFFECT : 1
BABY_AND : 1
TO_HEENT : 1
DISPOSAL_IDENTIFICATION : 1
EDIT_IF : 1
IDCP_FOR : 1
STERILE_RR : 1
NEUROLOGY_CONSULT : 1
AXIS_OPIOID : 1
PHONE_PHYS : 1
WAS_BEFORE : 1
OF_BILL : 1
FOR_FOLLOWUP : 1
APPT_MONTHS : 1
IN_NAILS : 1
IN_ALTERCATION : 1
VET_BACK : 2
ON_VISIT : 3
RIGHT_BURSA : 1
HOME_AND : 1
AS_ORDERED : 1
WAS_AT : 1
GI_NOTE : 1
HEARING_OBESITY : 1
TO_BUT : 1
OUTSIDE_SURGERY : 1
HELPING_HOW : 1
BUT_FEELINGS : 1
OCT_WAS : 1
ADDENDUM_RN : 1
HARD_COPY : 2
USED_TOILET : 6
FASHION_RR : 1
MEDICATION_NOTE : 1
ALERT_RESPONSIVE : 1
TO_BEING : 2
DEAR_LAST : 1
SEE_NARCOTIC : 1
DIRECTABLE_MG : 1
NUMBNESS_THE : 1
OXYGEN_SATURATION : 2
SC_CORRECTLY : 1
RECENT_ENTERED : 1
LOW_DOSE : 1
SATUR_COULD : 1
RECEIVED_VOICEMAIL : 1
HAS_TAKING : 1
MANAGER_NOTE : 1
LUMBAR_TO : 1
INSTRUCTORS_SWER : 1
ASSISTANCE_CURRENT : 1
THE_EFFECTS : 1
DL_NOTE : 1
HOMEBOUND_RESULTS : 1
EACH_SINCE : 1
SHE_IN : 1
TRIAL_SEROQUEL : 1
APPLICABLE_TOTAL : 1
PROVIDER_THAT : 1
GENITAL_HERPES : 1
RETURNED_HEARING : 1
TRANSFER_WILL : 1
GOAL_AND : 2
FALL_THE : 1
OBTAINED_PATIENT : 2
NEIGHBORS_HOMES : 1
UNSPECIFIED_GOING : 1
DISORDER_ABOUT : 1
INSOMNIA_FOR : 1
ALSO_PRESCRIBED : 1
OTHERWISE_TO : 1
LABRAL_JUST : 1
HAVE_EVER : 1
HER_IS : 1
PATTERN_THIS : 1
CONSEQUENCES_CONSEQUENCES : 1
ORHTO_NO : 1
OF_AL : 2
EXAM_ABNORMAL : 1
HAMLIN_WHILE : 1
BENEFIT_AN : 1
RESTRICTIVE_AS : 1
REALLIFE_MIN : 1
THERAPY_VITAL : 1
PRIOR_TO : 5
DOING_PENDING : 1
RESULTS_CPRS : 1
IS_PAIN : 1
RR_LORATADINE : 1
WILL_PCP : 1
THERE_BE : 1
UP_CUTTING : 1
WITH_RESIDENT : 1
DISORDER_NOS : 1
THE_DID : 1
HURTING_FROM : 1
APPLICABLE_CHEMICAL : 1
RELATIONSHIPS_AND : 1
PATIENT_CURRENTLY : 2
OR_DENIES : 1
REPAIR_ON : 1
HVF_NONCOMPLIANCE : 1
PT_IS : 1
NOT_TREATMENT : 1
MR_ONE : 1
LB_CONSENT : 1
RECOMMENDATION_HOURS : 1
VACATION_FOR : 1
BELOW_REPORT : 1
BE_DIRECTED : 1
CORRECT_PROCEDURE : 1
TO_NC : 1
GTTS_ALPHA : 1
UP_FROM : 1
PROCEDURES_RESP : 1
APPOINTMENT_BENEFITS : 1
TO_IT : 1
VOICES_THAT : 1
DIAGNOSIS_OF : 1
TO_HE : 3
EGD_GI : 1
MOMETASONE_MCG : 1
PAIN_CALLED : 1
TO_HAND : 1
COMMENTS_EVALUATION : 1
MULTIVITAMINS_TAB : 1
SKILLS_DEAL : 1
APPTS_DTR : 1
NOT_ED : 1
NANCY_HYDROCODONE : 1
RECONCILIATION_ABILITIES : 1
RECURRENT_OR : 1
BACK_PROSTHETICS : 1
BUT_WANTS : 1
AND_LOGICAL : 1
HOME_AREA : 1
CLOTS_IN : 1
FOR_ALBUTEROL : 1
ATTENDING_TO : 1
PREDNISOLONE_SUSP : 1
XX_TRANSPARENCIES : 1
MUST_BE : 1
MEDS_LAST : 1
WAS_MR : 1
MOUTH_AT : 1
NO_PHONE : 1
SIGNIFICANT_ATTENDED : 1
APPLICATION_MOVEMENT : 1
BEDSIDE_FOR : 2
CLINICAL_THESE : 1
GIVEN_PATIENT : 1
OF_TO : 3
HISTORY_TOBACCO : 1
ON_DC : 1
APPARENTLY_LAST : 1
MEMORY_CP : 1
PROCEDURES_DATE : 1
SCHEDULED_FOR : 2
COULD_SC : 1
MR_TO : 2
SEE_YOU : 1
RECENT_AND : 1
DRESSED_AND : 1
ER_CHEST : 1
COPY_GIVEN : 1
BEST_CO : 1
MAY_HE : 1
IS_NONSMOKER : 1
WITH_VETERAN : 9
CLAMIS_THAT : 1
PAIN_MEDICAL : 1
RN_THE : 1
BED_MOBILITY : 2
ONGOING_NICOTINE : 1
INDIVIDUAL_TO : 2
ADLS_YES : 1
OF_EGOMANIAC : 1
THE_ATTEMPTED : 1
EYE_TECH : 1
LEVOTHYROXINE_TAB : 1
CELL_PHONE : 1
REINFORCED_OSAC : 1
HASNT_TRANSFERRED : 1
PROCEDURE_PROGRESS : 1
ADDENDUM_COLOR : 1
NUMBER_LISTED : 1
OF_OF : 1
ETOH_WITH : 1
PULSE_THE : 1
PAIN_AGREEMENT : 2
BINGE_WHAT : 1
PROGRESS_IBUPROFEN : 1
WELL_AND : 1
SLIDINGSCALE_EFFECT : 1
ADDENDUM_MEMORY : 1
PATIENT_NONCOMPLIANCE : 1
IMPLEMENTED_VETERAN : 1
EGD_TOLD : 1
VIGAMOX_QID : 1
AMLODIPINE_MG : 1
OTHER_NURSING : 1
LOPERAMIDE_CAP : 1
HIS_HEARING : 1
NOTE_NEUROSURGERY : 1
AND_INCISION : 1
ROOM_PLEASE : 1
NO_COMPREHENSION : 1
NOTE_CARE : 2
IN_LEFT : 4
SINCE_MAY : 1
PATIENTS_MEDICATION : 2
SYND_INFORMATION : 1
STABLE_ETC : 1
OUT_FULL : 1
BAND_ON : 2
SA_RECENT : 1
QUESTIONS_LAST : 1
HOURS_AS : 1
HE_STOOLS : 1
MEDICATION_APPOINTMENT : 1
UG_MH : 1
WITH_ATTENDING : 1
THIS_ATTENDED : 1
MEDICAL_ASSISTANCE : 1
CONSEQUENCES_HAS : 1
MAIN_IS : 1
TOOLS_MENU : 1
YOU_OFTEN : 1
MISCELLANEOUS_PATIENT : 1
WHILE_SLIDINGSCALE : 1
REASSURANCE_AWAKE : 1
CAN_BE : 3
COULD_WALK : 1
TESTING_SESSION : 1
WENS_PROBLEM : 1
CANCER_AND : 1
HER_RETURN : 1
CENTER_TRAVEL : 1
ADDENDUM_LACKS : 1
PROCEDURE_LEFT : 1
VACCINE_PROTOCOL : 1
SHOW_TO : 1
FOR_LV : 1
WM_WHO : 2
CONFERENCE_JUNE : 1
HIS_CSPINE : 1
POSSIBLE_AND : 1
ADEQUATELY_DRESSED : 1
AND_AN : 2
CAUSING_VAPOR : 1
NOTET_NURSING : 1
HE_STATES : 1
PAST_YEAR : 2
URINE_COLOR : 6
CONTINUES_PARTICIPATE : 1
CNA_PT : 1
REQUESTING_THERAPY : 1
TO_PROCEDURESUPINE : 1
PM_PM : 1
MY_WIFE : 1
PERMIT_FORM : 1
SCALE_FOR : 1
PINES_DOWN : 1
EXCESSIVE_AMOUNT : 1
DEVELOPMENT_TREATMENT : 1
IDEATION_REQUESTING : 1
TD_TETANUS : 1
DERMATOLOGY_NURSE : 1
HOME_OXYGEN : 1
ADDENDUM_NOTE : 1
PTSD_SCREENING : 1
CONTACT_NKA : 1
FOLLOWING_SUPERVISOR : 1
MENTAL_FSG : 1
NURSING_CLINIC : 1
RESP_DATE : 1
ACTIVITY_ANY : 1
REASSESSMENT_PHYSICIAN : 1
EOMS_FOHX : 1
MESSAGE_FOR : 2
ICE_PAIN : 1
HAVE_CONTAINING : 3
TOXICOLOGY_YOU : 1
ANTICIPATED_ATTAINMENT : 1
APPOINTMENTS_RATED : 1
NURSE_NOTE : 1
LOCATION_RESIDENT : 1
ON_MAJOR : 1
SENSATION_HAND : 1
MD_WITH : 1
ADMISSION_HISTORY : 1
STRENGTH_AND : 2
EVENING_REVIEWED : 1
MEDICATIONS_SUPPLIES : 2
HIS_ON : 1
PTSD_AND : 2
PLEASURE_DOING : 1
VETERAN_LEFT : 1
TO_VERIFY : 1
LOWER_FEE : 1
INVENTORIED_IS : 1
VS_MISCELLANEOUS : 1
THIS_TO : 2
LOSS_ICDCM : 1
HYPERLIPIDEMIA_PT : 1
SURGERY_WILL : 1
NOTE_THE : 3
LINE_AND : 1
IF_THE : 1
FULL_AND : 1
DURING_AND : 1
THIS_CLC : 1
WORSE_THEN : 1
SCHEDULE_AN : 1
TO_INPATIENT : 1
BRING_BACK : 1
DECIDED_STUDY : 1
FINDINGS_WITH : 1
DIAGNOSIS_MST : 1
SI_PERCEPTUAL : 1
HIS_HE : 2
INCIDENT_HIS : 1
GERD_RESPIRATORY : 1
MARITAL_STATUS : 1
PAIN_DISCUSSED : 1
DECLINED_INFLUENZA : 1
PAST_PAIN : 1
ONGOING_DEPENDENCE : 1
MD_PREVIOUS : 1
AND_SUICIDAL : 1
TOP_MH : 1
CONSTIPATION_OBJECTIVES : 1
NOTE_DISCHARGE : 1
LOOKING_CIGARETTE : 1
HAVE_WITH : 1
IT_DID : 1
OR_CAN : 1
HES_SO : 1
LEARN_CHOOSING : 1
CLASS_AND : 1
NONVA_OIL : 1
SUPERVISOR_AT : 1
DIET_REGULAR : 1
CRITERIA_FOR : 1
DISPLAY_THE : 1
WAS_FROM : 1
AND_LABRAL : 1
ABLE_EAT : 1
MONTHS_WHICH : 1
DISCHARGE_NOTE : 2
WHEN_WAS : 1
ABSTINENCE_GROUP : 1
PRESENTED_WITH : 1
CONTACT_VETERAN : 1
MANY_PEOPLE : 2
SUICIDE_RISK : 2
BANISTERS_INTO : 1
CURRENTLY_WITHIN : 2
FOR_UP : 1
TEACHING_LEARNING : 1
HOURS_NEEDED : 1
VETERAN_ON : 3
LIMITS_OF : 1
LIMITS_ASSIGNED : 1
OROPHARYNGEAL_CANDIDIASISASYMPTOMATIC : 1
HAVE_YOU : 1
CAN_VET : 1
YEAR_IT : 1
CLINIC_HE : 1
AND_INFLAMMATION : 1
NSC_VA : 1
DIABETES_CALL : 1
MEAL_SOCIALIZED : 1
PROBLEMS_MENTAL : 1
VERY_EMOTIONALLY : 1
DURATION_OF : 2
CALL_WAS : 2
MEDICATION_WAS : 1
OF_RNS : 1
TRAINED_AND : 1
MG_DAILY : 1
TO_APAP : 1
CONSUMED_RECURRENT : 1
INPATIENT_WITHIN : 2
TIME_DURING : 1
NOT_FOR : 2
THE_PERSONAL : 1
MAIL_PHONE : 1
ALL_AREAS : 1
ARTERIAL_GASES : 1
PAST_PHONE : 1
NOT_BRING : 1
LEFT_ID : 1
PULSE_OXIMETRY : 2
EATING_CORRECTLY : 1
AT_PERLA : 1
THE_SC : 1
PROGRAM_HARBOR : 1
MEDICAL_HISTORY : 1
AND_OPENING : 1
REQUESTS_EAR : 1
TO_ADEQUATELY : 1
BEEN_UNABLE : 1
LIVE_REST : 1
THIGH_DID : 1
HE_LMWH : 1
LIFE_BLIND : 1
OPT_ASPIRIN : 1
WANDERING_INTO : 1
FIVE_WERE : 1
RECORDED_CPRS : 1
USES_RM : 1
COMPLIANCE_IN : 1
OXYGEN_PATIENT : 1
PER_VACCINE : 1
VERY_HAS : 1
ACC_CYR : 1
OPENING_CONTAINERS : 1
HAND_TRP : 1
FOCUSED_COMPLEXITY : 1
FROM_DISCUSS : 1
COUNTER_MEDICATIONS : 1
PUBLIC_THIS : 1
IS_IS : 1
FOR_CHO : 1
ERUPTED_EXR : 1
WORK_DISCHARGE : 1
TD_OR : 1
HEALTH_PHYSICIAN : 1
BIRCH_IS : 1
IS_THIS : 1
DRUG_CAUSING : 1
PAIN_WEIGHT : 1
COMMENT_RYAN : 1
PAIN_KNEE : 1
NUMBER_ACTIVE : 1
APPLICATION_BOWEL : 1
WITH_RESIDENTS : 1
SEEMS_THAT : 1
SURGERY_THIS : 1
THAT_FEELS : 1
FOR_AGREED : 1
VOICE_MAIL : 1
THE_TREATMENT : 2
SEEN_HIS : 1
TO_SUPERVI : 1
EMPLOYMENT_IN : 1
MOUNTAIN_HOME : 1
NOTE_LBP : 1
THERE_IS : 1
TIMES_WITH : 1
MG_IS : 1
EYE_SINCE : 1
FLOWSHEET_SIGNS : 1
SHIFT_PATIENT : 10
ALERT_GLAUCOMA : 1
ASSISTANCE_REQUIRES : 1
NURSING_RISK : 1
CALL_FROM : 1
TYPE_OUTPATIENT : 1
CLC_PHARMACY : 1
TRIED_CALL : 1
ATTENDED_AND : 2
HIS_ROOM : 1
OUT_BED : 1
WHEN_MAY : 1
THE_ACTIVE : 1
FOR_BREAKFAST : 1
SHE_REQUIRES : 1
BEHAVIOR_IS : 1
VETERAN_ADMITTED : 1
FOR_FOR : 1
SEEN_DISCHARGE : 1
UP_ASSISTANCE : 1
SHI_INTENT : 1
STATED_LEVEL : 1
WILL_TOPICAL : 1
HEALTHCARE_PROVIDER : 1
BOWEL_ENJOYED : 1
ACTIVE_MI : 1
REQUESTING_INDIVIDUAL : 1
AM_GTTS : 1
VETERAN_DENIED : 1
BONFADINI_MET : 1
ASSESSMENT_CHIEF : 2
ON_MEDIAL : 1
APPEARANCE_AND : 1
WITHDRAWAL_FOR : 1
TO_HIS : 10
TREATMENT_PROVIDED : 1
FOR_REALITY : 1
OMYELITIS_ASSESSMENT : 1
ORIENTED_RECENT : 1
CALL_PROBLEMS : 1
NEVER_HIS : 1
CARE_SOMATIZATION : 1
MR_GOT : 1
SSDI_COURT : 1
AT_THIS : 3
ALSO_YOU : 1
RESIDENCE_STATES : 1
REMID_YOU : 1
HIS_COPING : 1
HIS_RESIDENCE : 1
NURSING_GAIT : 1
PT_NOT : 1
URINE_YELLOW : 3
VOM_THE : 1
HAVE_ON : 1
SPOKE_PAM : 1
ON_VS : 1
MAKE_THE : 1
NARCOTIC_TREATMENT : 1
HAS_FOR : 1
COMPLIANCE_SCISSORS : 1
THURS_OF : 1
OR_IN : 2
AND_BEDREST : 1
CONSUMED_BLADDER : 1
FEE_RESTORATIVE : 1
TREATMENT_SEEN : 1
MINUTES_ASSERTIVE : 1
EMPLOYMENT_STATUS : 1
TIMES_ATTENDING : 1
TIME_OBTAINED : 1
DATE_GROUP : 1
AND_PCP : 1
TREATMENT_GOALS : 1
HE_WAS : 10
MEMORY_LOSS : 1
PM_MINUTES : 1
CONCEEDS_TO : 1
AND_WED : 1
HE_LIKELY : 1
DENIED_ANY : 1
JUST_ANESTHETIC : 1
UP_STAFF : 2
MORNING_DEPRESSION : 1
ATTORNEYS_OFFICE : 1
REPORTS_THAT : 2
EMS_READING : 1
OF_SEATED : 1
AND_SOCIALIZED : 1
WED_ALL : 1
BEEN_OUT : 1
TO_FILL : 1
DSHI_REPORT : 1
FOR_TOMORROW : 1
WRETCHING_THEN : 1
ATTENDING_DWIGHT : 1
ALTHOUGH_WRITER : 1
PROSTATE_AMB : 1
MIN_ATTITUDE : 1
OF_THAT : 1
OUTPATIENT_STATUS : 3
VENT_ATROVENT : 1
NOT_TIME : 1
GIVEN_ADMINISTERED : 1
THE_PATIENTS : 3
BY_PCP : 1
DENIES_SHI : 1
NARCOTIC_WAS : 1
XYZZY_FOR : 1
FOR_ED : 2
THE_AFTER : 1
LEG_GOES : 1
SHE_BE : 1
PERCIEVED_NURSING : 1
AND_DOES : 2
TAC_OROBASE : 1
INTO_ER : 1
SHORT_STAY : 1
THE_MEANS : 1
PTSD_REMISSION : 1
CALCIUM_IN : 1
FACILITY_RESIDENT : 1
OF_KNEE : 1
REASONS_IN : 1
FOR_HIS : 2
THE_ARM : 2
NOT_APPLICABLE : 4
TIME_THIS : 1
CALL_CONFIRM : 1
VETERAN_TO : 3
BIRCH_REPORTS : 1
THE_DESIRED : 2
CALL_OUT : 1
CARDIAC_MURMURS : 1
ETC_PAIN : 1
DR_NUCHOVICH : 1
MENTAL_TO : 1
WITH_ECHOGENIC : 1
TETANUS_DIPHTHERIA : 2
FISH_OIL : 1
SCHIZOPHRENIA_HE : 1
AND_RESTAURANTS : 1
THE_PHYSICIAN : 2
REVIEWED_AND : 3
ON_PHONE : 1
MOVED_UP : 1
APPLICABLE_PATIENT : 1
CALLED_THIS : 1
PLACE_MOBILITY : 1
CALL_STAFF : 1
NEEDED_PATIENT : 1
FLORIDA_HE : 1
HE_TAKE : 1
AREA_AND : 1
CALCULATOR_TO : 1
YEAR_INTEREST : 1
APPLICABLE_SKIN : 1
THE_SKIN : 1
PROBLEM_IS : 1
PHYSICIAN_TALKED : 1
AND_NOTED : 1
STOVE_THE : 1
IN_CHEST : 1
SUICIDAL_SHE : 1
LIVING_JUNE : 1
IF_SWS : 1
CONSUMED_DURING : 1
VITALS_INTO : 1
WENS_ALTERED : 1
ON_UNIT : 1
EMPLOYMENT_IS : 1
WELL_EMOTIONALLY : 1
WHICH_HAS : 1
CLINIC_TIMES : 1
TO_AWAITING : 1
DIAG_OF : 1
STEFANIK_GENITAL : 1
MEAL_FOR : 1
KNOWS_INTERESTING : 1
HUDVASH_WILL : 1
SHE_USED : 1
INCREASED_AND : 1
NEXT_LS : 1
TIRED_HAVING : 1
AND_CONSEQUENCES : 2
ACTIVITY_AND : 1
THE_SYSTEM : 1
FAIR_FAIR : 1
THAT_SPECIFICALLY : 1
CONTINUES_USE : 1
MALE_IS : 2
SEROQUEL_MH : 1
EDEMA_PALPITATIONS : 1
APPOINTMENTS_WI : 1
GOOD_AT : 1
OTHERS_OTHERS : 1
OTHER_COUNSELING : 3
LEARN_POSITION : 1
ON_ACTIVITY : 1
TO_CONTACT : 1
NEEDED_DUAL : 1
ABLE_SELFDIRECT : 1
BALDWIN_BREAKFAST : 1
HIS_DATE : 1
WAS_INFORMATION : 1
MIGHT_HAVE : 1
ASSISTANCE_FOR : 5
OR_MORE : 1
THOUGHTS_OF : 1
THAT_HEADACHE : 1
REALITY_TESTING : 1
MH_123 : 1
SELF_SEEKING : 1
ADDICT_PAINS : 1
WAS_ADMITTED : 1
AND_COMPLICATIONS : 1
TEST_RIGHT : 1
CHRONIC_NARCOTIC : 1
OINTMENT_WE : 1
DEAR_VETERAN : 2
FOR_ONE : 2
IDENTIFIED_TRIAGE : 1
ABOVE_AND : 1
PATIENT_CORRECT : 1
ORDER_FOR : 2
GLAUCOMA_HVF : 1
EXACERBATING_FACTORS : 1
KEEP_SELF : 1
TO_THOUGHT : 1
FEB_BOHLMAN : 1
EVALUATE_FOR : 1
POTENTIALLY_ADVERSE : 1
WHEEZING_SOB : 1
MAD_AS : 1
GM_IN : 1
APPARENT_INFORMED : 1
EPIDIDYMIS_MEASURES : 1
APPOINTMENT_PRIMARY : 1
INDICATE_HE : 1
OBESITY_DATE : 1
AND_BOWEL : 1
METHOCARBAMOL_PRESCRIPTION : 1
ANY_MEMBER : 1
REQUESTED_SPEAK : 1
FOUND_ADDENDUM : 1
OFTEN_YOU : 3
YOU_NEXT : 1
OIL_MG : 1
MR_WAS : 3
IT_HAS : 1
ACTIVE_WEDNES : 1
BOWEL_THIS : 3
AND_CONTINUED : 1
VISIT_CONTACT : 1
TO_DAILY : 1
PENIS_GUIDE : 1
PAC_NUMBER : 1
INR_RANGE : 1
CURRENT_SCHIZOPHRENIA : 1
DURING_MOST : 1
DRINKS_CONTAINING : 1
RESPIRATORY_RATE : 1
LAST_ON : 1
PAYMENT_VICTIMS : 1
SC_MALE : 1
HEALTH_APPOINTMENTS : 1
BLOOD_GASES : 1
THEN_HAVE : 1
MAY_SURROGATE : 1
FOR_POSSIBLE : 1
SHIPMENT_ZA : 1
FOLLOWUP_YES : 1
DURING_THE : 2
FOR_LOOKING : 1
YEAR_MALE : 1
NONVA_OVER : 1
FROM_TIMES : 1
NEUROSURGERY_NOTE : 1
MOUTH_ACTIVE : 8
ON_GOALS : 1
FOR_HIMSELF : 1
CLIENT_HAS : 1
TRANSFERRING_IMPAIRED : 1
AT_LAST : 1
QID_ACTIVE : 2
PATIENT_LIFETIME : 1
THAT_LOOKING : 1
AN_AID : 1
DISCHARGE_NOTES : 1
LIVING_OF : 1
CHARACTER_STOOLS : 1
GIVEN_SCORE : 1
GOOD_THIS : 1
WITH_FOR : 2
TREATMENT_EXAM : 1
FACILITY_AND : 1
SUPPORT_TREATMENT : 1
SATURATION_AFTER : 1
VISIBLE_CAN : 1
SATUR_NOT : 1
VASH_GROUP : 1
ANY_REPORTS : 1
BRC_VISUAL : 1
BY_THE : 1
HAS_THAT : 1
VERBALIZED_EMERGENCY : 1
APPARENT_SATISFACTION : 1
MET_THIS : 2
TO_REQUESTED : 1
MENU_THE : 1
YES_PERSONNEL : 1
CLINIC_PROVIDER : 1
CARE_SCOPOLAMINE : 1
CONTINUE_OFFER : 1
BY_PH : 1
HE_DRUG : 1
DROP_EYES : 2
ANESTHETIC_NUMBING : 1
AXIS_TOXICOLOGY : 1
AGO_WAS : 1
MINUTES_ATTENDED : 1
FOR_PATIENT : 2
LIGAMENT_THE : 1
APPEARANCE_CLEAN : 1
MG_QTY : 2
AND_BIPOLAR : 1
FOR_TO : 5
COME_YOU : 1
LOOKING_AT : 1
FOR_RETIRE : 1
THE_MOBILITY : 1
ALSO_WITH : 1
IS_ANYTHING : 1
CANE_STATUS : 1
SCREEN_PATIENT : 1
YELLOW_CONSISTENCY : 1
BY_HIS : 3
TO_FACE : 1
SCHEDULED_TABLETS : 1
HOME_WAS : 1
BOTH_QID : 2
AP_TO : 1
RESEARCH_NOTE : 1
DISCUSSED_MANAGEMENT : 1
OF_CORONARY : 1
IS_ALSO : 1
PHARMACY_IDENTIFIED : 1
LUBRICATING_JELLY : 1
SEEN_SEEN : 1
HOURS_MH : 1
WORTH_LIVING : 1
TEAM_MEETING : 1
LOPERAMIDE_ORAL : 1
NOTE_AM : 1
GROUP_ASSESS : 1
PATIENT_PUT : 2
SENT_LAB : 1
OF_BATTERIES : 1
PAIN_ORTHOPNEA : 1
ABLE_HOURS : 1
ON_EVERY : 1
CRNA_PROGRESS : 1
OTHER_PHONE : 1
DIAGNOSIS_PTSD : 1
BEEN_HER : 1
STRETCHING_STRENGTH : 1
OF_PRESENT : 1
NANCY_DIMASCIO : 1
INDEPENDE_COLOR : 1
HURTING_ME : 1
PCCNURSING_INTAKE : 1
SOB_PT : 1
HIS_DENTAL : 1
EVALUATE_HIM : 1
THIS_SESSIONS : 1
EXPOSURE_TO : 1
DOING_ARE : 1
PLAN_SATISFACTORY : 1
HER_MEDICATIONS : 1
OF_INTERDISCIPLINARY : 1
URINE_NUMBER : 1
AT_HE : 4
COMPLAINT_LORATADINE : 1
THE_VOICEMAIL : 1
SINCE_HE : 1
NO_AGREES : 1
SAYS_HE : 3
SURROGATE_APPLICABLE : 1
IMPAIRED_PHYSICIAN : 1
DOES_DESIRE : 1
INHALATION_OF : 1
LIKE_IS : 1
HYPERCHO_OLEMIA : 1
SHOULDER_REQUEST : 1
CONFUSION_STARTED : 1
YOU_ON : 1
CM_MM : 1
CONDITION_NONE : 1
TOOLS_AT : 1
REMISSION_PAIN : 1
THE_GROUPS : 1
ACTIVE_REVIEWED : 1
EVERY_OS : 1
STATUS_PROVIDERS : 1
HE_LIKE : 1
REST_OF : 3
BREATH_OR : 1
DISCUSSED_IN : 1
UPRIGHT_THAN : 1
BE_FINGERTIP : 1
SOCIAL_RELATIONSHIPS : 1
1010M_AGO : 1
BY_CDM : 1
LITTLE_PAIN : 1
NURSE_TRIAGE : 1
VA_ECHCS : 1
BE_DEAR : 1
LEG_PROCEDURES : 1
IS_MALE : 1
VETERAN_MESSAGE : 1
USED_TO : 2
WITH_DRY : 1
GET_PT : 1
BE_HAVING : 1
AN_EGOMANIAC : 1
ON_CLINIC : 1
SURGERY_IN : 1
THE_ATTENDING : 1
HAVE_EVERY : 1
ENOUGH_WORK : 1
ARE_HE : 1
RUSSELL_PAC : 1
HYPERTENSION_PROLONG : 1
PLACE_RESIDENT : 1
BUT_DISTAL : 1
AND_WITH : 5
PAIN_SCORE : 4
ED_THE : 1
LB_VARIANT : 1
SURGERY_WITH : 1
TEACHING_ENCOUNTERS : 1
DOWN_THE : 1
VIA_AIR : 1
DISCUSSED_HIS : 1
CONSEQUENCES_SPECIFICALLY : 1
THE_HAS : 3
PEDAL_ONGOING : 1
CONDITION_OR : 2
DEPRESSION_HIS : 1
ACTIVE_NAME : 1
ACTIVITY_HE : 1
AREA_TIMES : 1
SYMPTOMS_PRESENTING : 1
BECOME_APPARENT : 1
AND_HUSBAND : 1
REQUESTED_AMOUNT : 1
MG_EC : 1
WHAT_TAKES : 1
AT_PM : 2
IN_LEG : 1
PROVIDER_COMPREHENSIVE : 1
HAND_MH : 1
PSYCHIATRIC_BY : 1
TESTS_RN : 1
ORDER_OCT : 1
HAS_WORKING : 1
DISCUSSED_TEAM : 1
MD_DO : 1
INSTRUCTORS_WILL : 1
AN_DOE : 1
EPIDIDYMIS_BY : 1
TRIAGE_ABOUT : 1
SCORE_MEDICAL : 1
TO_HAVE : 4
SUPPORT_AFFECT : 1
INFORMATION_YES : 1
COULD_USE : 1
THROUGH_WRITTEN : 1
LEAST_SETTING : 1
HIM_DID : 1
VETERAN_PARTICIPATED : 1
TO_FENTANYL : 1
TAKE_BY : 1
WHAT_DO : 3
DO_FEEL : 1
EITHER_LISTENED : 1
ARE_WORSE : 1
HIS_OF : 1
FOR_OR : 2
DRESSED_GROOMED : 1
AGREEMENT_ORDERED : 1
ATTENDING_CC : 1
NOTE_REMINDER : 1
RESPONSE_OTHER : 1
CONTAINING_DID : 1
OUTPATIENT_SUPPORT : 1
DEAL_WITH : 1
NASAL_ULA : 1
OL_AND : 1
IT_BECOME : 1
ECHO_PG : 1
HE_RT : 1
HISTORY_CLONAZEPAM : 1
BY_EMS : 1
IS_NORMAL : 1
EVALUATION_WHOM : 1
AUTOMATICALLY_PAIN : 1
DISC_AND : 1
EQUIPMENT_YES : 1
SIDE_PAIN : 1
COMPLAINTS_LEAVING : 1
UNDECIDED_WHICH : 1
OVER_IN : 1
ANY_NO : 1
TO_TAKE : 2
TO_INFORMATION : 1
STOOL_SHIFT : 1
ARM_NUMBENSS : 1
REFERED_TO : 1
UROLOGY_FOLLOW : 1
CONTINUED_ABSTINENCE : 1
SOMETIME_OR : 1
HAVE_SOME : 1
GOTTEN_OF : 1
POSTERIOR_EXCISION : 1
THE_TUMOR : 1
CLINIC_VISIT : 4
DRINKS_PREDNISOLONE : 1
MON_FRI : 1
HIS_AMBULATION : 1
PRIMARY_PHYSICIAN : 1
FROM_PULSE : 1
NOT_RESPIRATION : 1
RULES_WENT : 1
OF_TOBACCO : 1
KEEP_EVERYTHING : 1
ATTENDED_CARE : 1
NOTE_032511 : 1
ASSOC_FEVER : 1
MISSIONARY_OF : 1
SIGNATURE_REQUIRED : 1
HAS_SCHEDULED : 1
SHE_WILL : 1
QTY_ACTIVE : 1
TO_SEE : 3
ALBUTEROL_MCG : 1
MEETING_AND : 1
OVERLAPPING_APPOINTMENT : 1
THE_END : 1
ALERTS_HAVE : 1
NONVA_MG : 1
CALM_QUIET : 1
DID_YOU : 4
SESSION_IS : 1
HAS_HISTORY : 2
LOW_AS : 1
CONCUR_THE : 1
HVF_PATIENT : 1
REQUESTED_BY : 1
SETTING_MAY : 1
INHL_PUFFS : 1
CONSCIOUSNESS_ALERT : 1
REFER_MD : 1
NONOR_RESP : 1
RECOMMENDATION_CONVERSATION : 1
CHIEF_QUESTIONS : 1
ROOM_ALERT : 1
HAS_APPOINTMENT : 2
HAS_NEW : 1
LOWERING_NO : 1
DISPOSITION_VETERAN : 1
PROVIDER_SUBSTANCE : 1
YOU_BEEN : 1
MED_TO : 1
CONFIRM_PARTICIPATED : 1
JUNE_AND : 1
NONSPECIFIC_IN : 1
TOOTH_EXR : 1
SCHEDULED_APPT : 1
SETTING_THR : 1
PHYSICIAN_HOW : 1
MINS_CONSTANT : 1
AT_RISK : 1
WORK_NOTE : 1
IDENTIFIED_PC : 1
PLAN_ADVISED : 1
DISORDER_VISUAL : 1
GRIPPER_SOCKS : 1
ANY_SHORTNESS : 1
VIETNAM_COMBAT : 1
OFFICE_VET : 1
RECENT_LOSS : 1
VETERAN_COMPLETED : 1
TO_MIAMI : 1
IS_WHICH : 1
XX_AUDIOTAPE : 1
HIS_BLIND : 1
NEGATIVE_RESPONSES : 1
NOT_CORRECTLY : 1
PELVIS_THROUGH : 1
VICTIMS_COMPENSATION : 1
LEAVE_MESSAGE : 1
EFFECT_AID : 1
ACTIVE_OUTPATIENT : 6
OTHERS_SHIFT : 1
HAVE_DIABETES : 1
THIS_NEW : 1
ABLE_TO : 8
OBESITY_VETERAN : 1
STATUS_MEDICATIONS : 1
ARRANGED_BY : 1
PERFORMED_SCORE : 1
TO_VET : 1
THAT_HIS : 2
FAIR_HOSPITAL : 1
PEOPLE_HAD : 1
LATEX_FOR : 1
THROUGH_THE : 1
VS_GI : 1
INFORMATION_TO : 1
PLAN_DUE : 1
REPORTED_PATIENT : 1
DIABETES_THERE : 2
EFFECT_TO : 1
HOPELESSNESS_AT : 1
HISTORY_HAS : 1
THIS_THIS : 2
DECIDED_TO : 1
PROSTHETICS_HEART : 1
PER_DING : 1
ENDOCARDITIS_COMMENTS : 1
ETC_SUPPLIED : 1
MEDICAL_TO : 1
AN_RISK : 1
OBESITY_ICDCM : 1
SCORE_NO : 2
INTERDISCIPLINARY_PT : 1
PALMER_IN : 1
BY_WITH : 1
UP_CONTACT : 1
NOTE_IPU : 1
NOT_CLASSES : 1
PROVIDED_VS : 1
SHE_DENIES : 1
ILLNESS_CORONARY : 1
MET_ACCESS : 1
TREATMENT_YES : 1
PC_NURSING : 1
UPTIVE_TREATMENT : 1
SKILLS_TO : 3
ARE_CAUSING : 1
BORDERLINE_TRAITS : 1
RIGHT_ARM : 1
OF_SEDATION : 1
TREATMENT_THE : 1
LORATADINE_TAB : 2
BE_COMPLETED : 1
STEFANIK_HERPES : 1
OF_JESUS : 1
NOS_AND : 1
UROLOGY_STATES : 1
INFORMATION_IS : 2
ABOUT_HOW : 1
PARTIAL_ROTATOR : 1
VETERAN_AFFECT : 1
HPI_RETURNING : 1
HOURS_TRADING : 1
TEAM_MEMBERS : 1
TOMORROW_TIMES : 1
SUPERVI_TO : 1
OS_HVF : 1
NEIGHBORS_URINE : 1
RESCHEDULED_EDUCATION : 1
WAY_DOWN : 1
NOTE_TREATMENT : 1
LS_EXPRESSED : 1
BY_SELECTING : 1
FOR_INTIMIDATING : 1
AID_TELEPHONE : 1
THIS_SINGLE : 2
SELF_DOES : 2
TWICE_ACTIVE : 2
TO_RELIEVE : 1
GLAUCOMA_OS : 1
OF_REPEAT : 1
HIS_METHOCARBAMOL : 1
GOAL_DIRECTED : 2
SHIFT_SHIFT : 2
ULA_ON : 1
NOTE_TTN : 1
NEEDED_EFFECTIVE : 1
FOR_CLINIC : 1
MUST_COMPLETED : 1
AN_SOCIETY : 1
LIKES_RELATION : 1
CARE_CLASS : 1
VERBAL_NO : 1
REPORTS_PARANOID : 1
OR_COPE : 1
VASH_WORKER : 1
VISTA_DOES : 1
MR_ON : 1
HAS_LIVING : 1
DISORDER_ACUITY : 1
SIGNS_SYMPTOMS : 1
OR_SUICIDAL : 1
EATING_SAYS : 1
GOOD_ARM : 1
THR_YES : 1
DISTRESS_VIDEOTAPE : 1
CM_VIA : 1
SPEECH_AMOUNT : 1
REACTION_RESPONSES : 1
ANY_FAMILY : 1
CLINIC_WAS : 2
VETERAN_BIRCH : 3
TOILET_URINE : 1
OMEPRAZOLE_TO : 1
VISIT_NOTE : 1
PSYCHIATRY_MULTIDISCIPLINARY : 1
AND_ARE : 1
ABLE_WEIGHT : 1
VETERAN_AN : 1
HIS_SINCE : 1
WIH_PRINTED : 1
TO_STATED : 1
IS_SWER : 1
AN_FOR : 1
DOES_WANT : 1
TREATMENT_WEEKLY : 1
IS_ASSIGNED : 2
APPLY_TO : 1
SOME_FRIENDS : 1
YO_SERVICE : 2
LACKS_KNOWLEDGE : 1
SOON_AFTER : 1
AND_VIEWS : 1
LIVE_THE : 1
CONGESTION_AT : 1
NO_SHOW : 1
WORSENING_CHIEF : 1
COMPLAINTS_FUTURE : 1
HOPEFULLY_SURGERY : 1
SOCIAL_WORKER : 1
CEC_ECHOCARDIOGRAM : 1
SWS_AND : 1
FOR_SCHEDULED : 2
RESTRICTIONS_DISCUSSED : 1
DISCUSSED_GROUP : 1
DUE_SCREEN : 1
SILVER_SILVADIAZENE : 1
DIAGNOSTIC_TEST : 1
COUNT_ABDOMINAL : 1
OBMT_PROGRESS : 1
CURRENTLY_INPATIENT : 2
MONITOR_ARE : 1
LIGHTING_WITH : 1
MA_RNBC : 2
OF_SLIPPERS : 1
ENDORSES_OF : 1
IN_VIA : 1
MG_TAKE : 11
THAT_IEST : 1
BOWELS_BOWEL : 1
ADR_REPORT : 2
COMPENSATION_AND : 1
HAPPEN_IN : 1
OUTSIDE_TO : 1
HE_CURRENTLY : 1
HAVE_RECOMMENED : 1
PATIENT_BATHROOM : 4
INFORMATION_THE : 1
QTY_WAS : 1
STILL_RECEIVE : 1
DIASABLITY_DIRECTED : 1
APR_ACUTE : 1
BE_MORE : 1
VET_WAS : 1
ADDENDUM_WITH : 1
THERAPY_MILITARY : 1
ROOM_GET : 1
PATIENT_CONTINUES : 2
ASSESSMENT_IS : 1
VOMITING_CNA : 1
INFLAMMATION_MEDICATION : 1
MH_FOLLOW : 1
NEATLY_NORMAL : 1
BEEN_THAT : 1
MAINTENANCE_HIS : 1
PATIENT_IDENTIFIED : 1
CONTACT_ALLERGIES : 1
COMPLEXITY_TOUCHING : 1
DIAGNOSIS_SCHIZOPHRENIA : 1
HIS_LIFE : 1
APPRECIATION_OF : 1
UPDATED_PILL : 1
AND_PRESENCE : 1
DID_HAVE : 5
DEC_STATUS : 1
THE_FOLLOWING : 3
AND_BAD : 1
WAIT_UNTIL : 2
LEFT_HE : 1
BY_IN : 1
WITH_OS : 1
STATED_OF : 1
STAFF_WILL : 1
MESKENAS_RNBC : 2
SITE_LOCATED : 2
SWS_BRC : 2
ADMISSION_AB : 1
DOES_REQUIRE : 2
LOOKING_ALPHA : 1
TEETH_WIFE : 1
MR_INTO : 1
FROM_DIMASCIO : 1
BEING_DIAGNOSED : 1
HEARING_HIS : 1
IN_PARK : 1
IS_EYE : 2
CM_BOWELS : 1
HE_FINISHED : 1
YES_PATIENT : 1
MEDICATIONS_PT : 1
GOOD_ONE : 1
SAFE_TO : 1
MEDICATIONS_AM : 1
CALL_MIN : 1
TO_HYPERCHO : 1
SHIFT_WAS : 3
DISCUSS_ANY : 1
DRINK_ALCOHOL : 3
ENTER_CONSTIPATION : 1
LIVING_HI : 1
SECONDARY_VAMC : 1
OR_HEMP : 1
LSCHEDULE_APPT : 1
ANATOMICAL_LOCATION : 1
PROGRESS_DINNER : 1
IT_OUT : 1
DOM_RTU : 1
MADE_LATEX : 1
RECOMMEND_QID : 1
NOTIFIED_AND : 1
ASPIRIN_MG : 1
ACTIVITY_COMMENTS : 1
POSTAL_SERVICE : 1
INTENT_THIS : 1
WHILE_IN : 1
LOSS_OBESITY : 1
HIS_WHO : 1
ON_YES : 1
EPISODE_WOKE : 1
DRINKS_ELIMINATION : 1
THEN_THEY : 1
IS_CONTINENT : 1
IS_WELL : 1
EYES_ON : 1
ACTIVE_DENTAL : 1
ORIENTED_ORIENTED : 1
PACU_FLOWSHEET : 1
REQUEST_NARCOTIC : 1
COPE_WITH : 1
CAUSING_NUMBNESS : 1
AND_NO : 3
HX_HA : 1
ABOVE_ISSUES : 1
IS_CONTACT : 1
KNOWN_TO : 1
YOU_THE : 1
FOR_LITTLE : 1
IMPAIRED_BOWEL : 1
AND_TRANSFERRED : 1
TO_OUR : 1
RECOVERY_UPDATE : 1
TF_PPN : 1
AFFECT_PERSONAL : 1
SC_AND : 1
FEW_DURING : 1
FOR_BONE : 1
BE_FELT : 1
FROM_PUBLIC : 1
BUT_HE : 1
DURING_RECENT : 1
AFLOAT_WITH : 1
WITHOUT_DIFFICULTIES : 1
NUMBER_MODALITY : 1
YOU_DRINK : 3
WAS_AND : 3
TYPE_WHAT : 1
SAFE_ON : 1
EYES_PATIENT : 1
COLD_SCHIZOPHRENIA : 1
VIA_POSTAL : 1
WAS_TEMPERATURE : 1
MEDICAL_CERTIFICATE : 1
CONTACT_HAULER : 1
MANAGEMENT_THE : 1
CHIEF_MAR : 1
NOTE_RATED : 1
IN_TO : 5
READ_URINE : 1
QID_EYE : 1
THE_ADVISED : 1
TIME_IS : 1
FOR_VETERAN : 1
OUTPATIENT_FALL : 1
TUES_DURING : 1
OR_PATIENTS : 1
ORIENTATION_CONSCIOUSNESS : 1
BETWEEN_AND : 1
DENT_PERIODON : 1
MALE_SEEN : 1
INTENT_AGREES : 1
CYST_IS : 1
WORK_AND : 1
CORRECT_SITE : 1
CONFIDENTIAL_SUMMARY : 1
REED_SURGERY : 1
ACTIVE_HEARING : 1
HOME_NURSE : 1
MECHANISMS_BRC : 1
CURRENT_PHONE : 1
QUITE_THE : 1
AHS_ASSESSMENT : 1
ALCOHOL_BINGE : 1
RNBC_OF : 1
ON_ORHTO : 1
FOR_BAL : 1
FOLLOWED_BY : 1
DEPRESSED_CAROL : 1
SKILLS_CARE : 1
FALL_ON : 1
SHORT_TRANSITIONAL : 1
CHANGES_HIS : 1
RETURNING_OF : 1
TO_BY : 3
CAP_BY : 1
SUSP_OPH : 1
CLINIC_ASSESSMENT : 1
UNSURE_WHAT : 1
RELATION_WITH : 1
HAND_RUSSELL : 1
THERE_WOULD : 1
CSPINE_IN : 1
MEDICAL_NURSING : 1
EXAM_YES : 1
BOWELS_APPLICATION : 1
VETERAN_YEAR : 1
PENETRATE_THE : 2
DEC_PT : 1
HTN_AN : 1
WAS_ALSO : 2
VERIFIED_CORRECT : 1
TOLD_MR : 1
MULTIDISCIPLINARY_NOTE : 1
WILL_BE : 13
AND_REPORTS : 1
PAIN_GOES : 1
PROFILE_AT : 2
MONTH_TO : 2
ME_COME : 1
AM_ATTENDING : 1
THE_CRITERIA : 1
IS_WORRIED : 1
REMAINING_ENABLE : 1
LS_PROVIDED : 1
BOWEL_MOVEMENT : 2
DUE_NOT : 1
IS_HAS : 1
TOMORROW_WITH : 1
ASSISTANCE_BAND : 1
TO_RECEPTIVE : 1
DIERCTED_IMPROVED : 1
FOR_EFFECTIVE : 1
SELF_AND : 2
GOOD_MY : 1
CELL_CHAPST : 1
THE_VETERANS : 1
VERBAL_OF : 1
REFILL_TIME : 1
WITH_FLUOXETINE : 1
LEARNER_LIMITATIONS : 1
IS_VISION : 1
CIRRHOSIS_AND : 1
WITH_CALCULATOR : 1
PATIENTS_PROFILE : 2
GROSSLY_CP : 1
TO_PROCEDURE : 1
ATTAINMENT_CENTER : 1
WITH_SURGICAL : 1
DISCHARGED_FROM : 1
INTENT_OR : 2
LOCATION_OF : 1
PSYCHIATRIC_HOSPITALIZATION : 1
OR_SHIFT : 1
TO_INFERIOR : 1
NOT_AS : 1
IN_SOCIAL : 1
URINARY_SYMPTOMS : 1
TO_CARE : 2
RECORDED_IN : 1
HOSPITALIZATION_BY : 1
HTN_MURMURS : 1
SUICIDAL_IDEATIONS : 1
ADDRESS_THE : 1
ASSESSMENT_TESTING : 1
MONITOR_WITH : 1
OF_NONE : 1
MORE_IN : 1
FUROATE_ORAL : 1
AS_HIS : 1
DYNAHEX_SHOWERS : 1
VETERAN_UPON : 2
HAS_HX : 1
WITH_GROGGINESS : 1
DISORDERMET_WITH : 4
ASSESSMENT_PSYCH : 1
VISIT_WAS : 2
ACCORDANCE_VA : 1
PHYSICIAN_IN : 1
IN_VISTA : 1
TO_ED : 1
ALLERGY_REACTION : 1
GROUP_MA : 1
NOW_ON : 1
ORAL_INHL : 1
RECONCILLIATION_DONE : 1
MM_CYST : 1
WHO_HIT : 1
MURMURS_AN : 1
TO_TALKED : 1
AND_ATTENTIVE : 1
AN_ANESTHESIA : 1
NOTE_DATE : 1
GOAL_FAIR : 1
HPI_PATIENT : 1
OR_ECONOMIC : 1
WALKIN_NOTE : 1
GROGGINESS_IN : 1
SUSTAINED_MENTAL : 1
BUT_ARE : 1
SCREEN_CALLED : 1
AT_TO : 1
GOES_THE : 1
AN_PLACEMENT : 1
VETERAN_HE : 1
RELATION_ACTIVITY : 1
INFLUENZA_VACCINE : 1
MRSA_FROM : 1
PATIENT_FOR : 1
BEEN_FOR : 1
SUPPLIED_SCORE : 1
WITHIN_RESIDENT : 1
AND_KNEE : 2
REORDERED_HE : 1
ACTIVITY_DISCUSSED : 1
STABLE_EYE : 1
HIM_HAVE : 1
VETERAN_WAS : 3
RESPIRATION_IF : 1
ACTIVE_LEVOTHYROXINE : 1
IN_SOME : 1
NO_IN : 2
THE_DEPARTMENT : 1
INFORMATION_CORRECT : 1
SITE_CHECKS : 2
LEVEL_OF : 2
REVIEW_BATHROOM : 1
CLOZARIL_LEARNER : 1
HIM_THE : 1
NO_ABUSE : 1
MINS_TO : 1
FOR_LEFT : 2
HERBAL_HYPERTENSION : 1
PERSONAL_NOT : 2
EVERY_EVENING : 1
FOUND_VET : 1
JUDGMENT_VETERANS : 1
TO_EYE : 1
ELIMINATION_MOBILITY : 1
HAS_LIGHTING : 1
STRENGTH_REASON : 1
PATCH_CARE : 1
HE_VERY : 1
AND_QBEDTIME : 2
PT_IN : 1
WILL_CALL : 1
AS_ELOPEMENT : 1
AMBULATORY_CARE : 1
SHE_WAS : 1
UNSURE_OF : 1
ORIENTATION_THE : 1
TAKING_PATIENT : 1
LAST_SEP : 1
AT_MENTAL : 1
PAKULA_PC : 1
WALK_TO : 1
POSTERIOR_NECK : 1
BEGAN_WITH : 1
PATIENT_PROVIDED : 2
YES_ORIENTED : 1
AFTER_MR : 2
HOSPITAL_HIS : 1
OTHER_ENDING : 1
CARE_TELEPHONE : 1
SMEAR_COLLECTED : 1
MEDICINES_RELIGIOUSLY : 1
YOM_ADM : 1
ASSESSMENT_FEB : 2
BASE_TREATMENT : 1
DENIES_SYMPTOMS : 1
AGREEMENT_NEED : 1
COMFORT_GOAL : 1
IS_METH : 1
NONE_FOUND : 1
CONSIDERABLE_IMPROVEMENT : 1
CONSIDERED_TO : 1
TO_AXIS : 1
SHOT_ADMINISTERED : 1
ACTIVE_GROUP : 1
IN_EAR : 1
BRIEFLY_OTHERWISE : 1
STATE_LIDS : 1
MODERATE_GASTROESOPHAGEAL : 1
BE_INPT : 1
SHE_HAS : 2
ON_TEMP : 1
WELL_HAVING : 1
ELIMINATION_MEAL : 1
RNS_WITH : 1
HIS_MUCH : 1
CHEST_HEART : 1
ADDENDUM_TRIAGE : 1
FOR_VET : 1
MED_PTSD : 1
OCT_SIGNS : 1
CURRENTLY_EXPERIENCING : 1
THE_USE : 1
APPOINTMENT_THIS : 1
MOD_ON : 1
WITHIN_STUDENTS : 1
NUR_INPT : 1
ASSERTIVE_RESPONDING : 1
CARE_INSTRUCTIONS : 1
ASPIRIN_EC : 1
CARE_CALLED : 1
BUSPIRONE_MG : 1
MARITAL_DIVORCED : 1
POST_SURGERY : 1
AWAY_AT : 1
TO_DUE : 1
TALKING_OTHERS : 1
VETERAN_LISTENED : 1
PATCH_QTY : 1
HIS_INHALER : 1
MONITORED_AND : 1
COMPLAINT_DISPOSITION : 2
VS_IT : 1
ADVISED_PREVENTATIVE : 1
ON_VACATION : 1
ORIENTATION_INCLUDING : 1
DEPRESSION_SCREEN : 1
APPROPRIATE_HAVE : 1
FUNCTIONING_DSHI : 1
ANY_OF : 2
STATED_THE : 1
TO_SERVICE : 1
GIVEN_DYNAHEX : 1
CASE_SOCIAL : 1
NOTE_FAMILY : 1
DIAGNOSIS_ACCRETIONS : 1
INVOLVING_TRAINING : 1
HE_REPORTED : 1
CLEAN_DIET : 1
INTIMIDATING_PTS : 1
WOUND_EYEBALL : 1
TO_SUICIDAL : 1
WALKS_HE : 1
LOWER_NUMBNESS : 1
CONGESTION_LOOKING : 1
CHO_OL : 2
REVIEWED_GIVEN : 1
THE_ER : 4
ANY_INTENT : 1
WILL_NEED : 1
SURGERY_CURRENTLY : 1
TAB_MOUTH : 1
TO_STUDY : 1
CLINIC_SC : 1
URINE_PENDING : 1
AWARE_PHYSICIAN : 1
MENU_AT : 1
NOTET_SPECIALTY : 1
TRAMADOL_SKIN : 1
ADDENDUM_OCCUPATION : 1
BESYLATE_MG : 1
YOUR_CONDITION : 1
THE_WITH : 3
TBI_MALE : 1
THE_AWARE : 1
VISIT_DISCREPANCIES : 1
NORMAL_GI : 1
FOOD_DURING : 1
CEFTRIAXONE_IN : 1
VISIT_DENTAL : 1
TO_CONFERENCE : 1
RRR_OF : 1
WAS_WIH : 1
SOME_ASSISTANCE : 1
SOB_USES : 1
SHOWS_NO : 1
CONTACT_MADE : 2
HAVING_OUT : 1
GROUP_VETCORE : 1
RX_LIMITATIONS : 1
PATCH_PRIMARY : 1
AM_CHEST : 1
BPH_NUMBER : 1
STATE_OD : 1
OTHER_IN : 1
THAT_CONSENT : 1
STATUS_PATIENT : 1
THE_AND : 5
PERCENT_RECURRENT : 1
FOR_FEB : 1
RESTAURANTS_EMERGENCY : 1
SUPPLIES_CILOSTAZOL : 1
REMISSION_FACTORS : 1
OR_PT : 1
NURSING_DYSPNEA : 1
RESULT_REPORTS : 1
TAB_PROVIDER : 1
CLC_CHART : 1
SWER_SPEAK : 1
BELOW_NARCOTIC : 1
TIME_SHE : 1
PT_NEW : 1
TO_RESCHEDULE : 1
WORK_OF : 1
HOPELESS_SLEPT : 1
SCALE_ALCOHOL : 1
AND_NOTIFIED : 1
LETTER_BE : 1
AND_RECENT : 1
NOTE_AND : 2
CONFERENCE_ROOM : 1
FOOD_INFO : 1
AND_VITAL : 1
PRESENTING_COMPLAINT : 2
APPOINTMENT_RESCHEDULED : 1
COLOR_NORMAL : 1
IS_UNDECIDED : 1
BOWEL_ORIENTED : 1
OR_OMEPRAZOLE : 1
EXAMPLE_TO : 1
WITH_TO : 3
MEDICATIONS_BIPOLAR : 1
MOVEMENT_HEIGHT : 1
OWN_PHYSICIAN : 1
PTS_THE : 1
INPATIENT_TIME : 1
ON_BOAT : 1
REVIEWING_CHARTS : 1
HAD_THOUGHTS : 1
FILLED_OUT : 1
WHICH_TO : 1
CONVERSATION_IT : 1
PAIN_THE : 1
AN_ELOPEMENT : 1
GET_TO : 1
CASE_YOURE : 1
FUROATE_MCG : 1
CONTACT_WANTS : 1
TO_CLINIC : 2
EAR_ADDENDUM : 1
ACTIVE_HYPOALLERGENIC : 1
THE_PARK : 1
COUNSELING_HARD : 1
REVIEWED_PATIENT : 2
RESIDENCE_HE : 1
VOICEMAIL_NOT : 1
THE_FACE : 1
ROUND_NO : 1
RADIOLOGY_METFORMIN : 1
TEST_PTSD : 1
BACK_HEART : 1
SCHIZOPHRENIA_NOSUNSPEC : 1
CALL_TYPE : 1
REQUIRE_AID : 1
ATTENDED_MA : 1
SILVADIAZENE_FLUVASTATIN : 1
USE_COPING : 1
THE_TAKE : 1
UP_ALL : 1
NOTE_MEDS : 1
SESSIONS_ENABLE : 1
VOLUME_REINFORCEMENT : 1
STRETCHING_AND : 1
SIGNS_MONITORED : 1
HIS_THAT : 1
HEIGHT_IN : 3
THE_DOCUMENT : 1
HAVE_PROBLEMS : 1
FACILITATORS_LE : 1
IN_BED : 2
AS_HOUR : 1
CHRONIC_HEALTH : 1
SEVERAL_MEDICAL : 1
PSYCHIATRY_MANAGEMENT : 1
LOW_BACK : 1
REPRESENTED_WERE : 1
MINUTES_AN : 1
TO_TITRATION : 1
SURGERY_BE : 1
ARE_PS : 1
THINK_OF : 1
VERBALIZED_NONE : 1
AND_REPORTED : 1
RESTAURANTS_PRIMARY : 1
DEMONSTRATION_WAS : 1
MEMBER_HIT : 1
HE_IN : 2
DISORDER_CONDITION : 1
WIFE_AWAY : 1
ONE_OUT : 1
MOD_COMPLEXITY : 1
CONTRIBUTING_MH : 1
CALL_SUSPENDED : 1
DISCUSSED_DEAR : 1
THE_LAMISIL : 1
VISIT_INFORMED : 1
AND_HAD : 1
SWIFT_AND : 1
APPOINTMENT_PATIENT : 1
HERPES_AND : 1
ACTIVE_RECOMMENDATION : 1
ABC_GROUP : 1
RESIDENT_VETERAN : 1
NOT_HIS : 1
THE_MR : 1
JUN_GROUP : 1
NOTE_IN : 1
TO_UNTIL : 1
STATUS_INACTIVE : 1
THAT_IS : 4
NOT_BACK : 1
HE_FEELS : 3
MST_PTSD : 1
PROSTATE_CANCER : 1
PROCESS_FROM : 1
LEARN_OF : 1
NOT_NURSING : 2
IS_SERVICE : 1
PHQ_SCREEN : 1
APPOINTMENTS_NOTE : 1
TIME_LOCATION : 1
DATE_ACTION : 1
MOTRIN_CAN : 1
EVALUATED_TO : 1
TETANUS_TD : 1
VETERAN_OPEN : 1
DURING_TREATMENT : 1
CLOZAPINE_MG : 2
CERTIFICATION_WAS : 1
DRUG_NUMBNESS : 1
CM_PRIMARY : 1
WILL_SOFT : 1
COMMON_ICDCM : 1
AND_HE : 6
QBEDTIME_PROCEDURE : 1
CARDIAC_HTN : 1
TRIED_TO : 1
THAT_IN : 1
EXPERIENCING_PAIN : 1
PLACED_ON : 1
SESSIONS_AM : 1
SAT_HE : 1
MULTIAXIAL_DIAGNOSES : 1
AND_RESIDENTS : 1
TO_DESIRED : 2
EXCLUDING_SUPPLIES : 1
VETERAN_AGREED : 1
FEEL_TAKING : 1
TUES_THE : 1
REDUNDANT_IS : 1
MR_NOT : 2
ROOM_TRIAGE : 1
CLASS_EVALUATION : 1
CURRENTLY_FOLLOWED : 1
ACTIVE_ED : 1
ASSISTANCE_CONSUMED : 1
AN_TIME : 1
THERE_WAS : 1
AS_TO : 1
CREDITS_HE : 1
WITH_SINGLE : 1
IS_MRSA : 1
KG_INFORMED : 1
DRINKS_DURING : 1
ANESTHESIA_PRACTITIONER : 1
FAMILY_ISSUES : 1
RELATED_TO : 1
PHYSICIAN_NO : 2
INHL_INHALE : 1
THE_REASON : 1
BEEN_DISCHARGE : 1
WAIT_AS : 1
RATED_CLINICAL : 1
INTENDS_PATIENT : 1
CANDIDIASISASYMPTOMATIC_HEART : 1
HIGHEXPLOSIVE_EXPERIENCED : 1
WAS_PLACED : 1
NEW_PAPER : 1
BELOW_AGREEMENT : 1
RT_CALL : 1
APPOINTMENT_TO : 3
BABY_HER : 1
DT_TTN : 1
DISCHARGED_COME : 1
REPORT_ALBUTEROL : 1
SCREEN_EVERY : 1
VARIANT_HER : 1
PLAN_ASKED : 1
TREATMENT_PROGRAM : 1
WK_WHEN : 1
LOGICAL_MEAL : 1
WITHIN_HIS : 1
HAMLIN_LMSW : 1
SINCE_STARTING : 1
SITTING_OR : 1
NOT_HOW : 1
AND_AS : 1
RESULTS_READ : 1
NAILS_STARTING : 1
GASES_PULSE : 1
MEMBER_WOULD : 1
DOCUMENT_OFTEN : 1
ARE_INSOMNIA : 1
EMERGENCY_ROOM : 1
ONSET_ICDCM : 1
CY_MANAGEMENT : 1
LAST_ONE : 1
SWELLING_INFLAMMATION : 1
TYPICAL_CLINIC : 1
PATIENT_TO : 8
TRP_FOLLOW : 1
MD_KAMRAN : 1
OCCASIONALLY_MOIST : 1
UPCOMING_CONTACT : 1
SAFE_TAKE : 1
HEALTH_TO : 1
PCP_POSSIBLE : 1
AT_SKILL : 1
INTERVALS_HE : 1
WELL_NOS : 1
RETINA_THAT : 1
PROPER_HOW : 1
RESPONSE_PHONE : 1
RECEIVE_INFORMATION : 1
SCHEDULED_REFILL : 1
TAB_GENDER : 1
HEALTHCARE_THAT : 1
PROCESS_DIRECTED : 1
FEET_CURRENT : 1
GAIT_ORIENTED : 1
SLIPPERS_OR : 1
MEDICAL_FOR : 1
TELL_TO : 1
NEW_MEDICATION : 1
NOTE_CONTINUE : 1
RADIATING_DOWN : 1
REPORTS_HAS : 2
SCHEDULED_WAS : 1
BILL_IF : 1
TO_NURSING : 2
NOTE_LUNCH : 1
ANSWERING_MACHINE : 2
ADMITTED_THROUGH : 1
PAM_AND : 1
ASKED_VETERAN : 1
INPATIENT_FACILITY : 1
WITH_AND : 6
PT_SUICIDAL : 1
LAB_KNOWN : 1
MAIN_PROBLEM : 1
GETS_WHEEZING : 1
DIPHTHERIA_PERTUSSIS : 1
SHIFT_TO : 1
HE_UPRIGHT : 1
PAIN_CAN : 1
NUMBER_TO : 1
EXAMINATION_AS : 1
THE_HE : 2
UNIT_TO : 1
DENIES_OVERT : 1
TO_WITH : 5
ADMINISTERED_FLU : 1
AN_ANESTHETIC : 1
TO_UPCOMING : 1
WALKIN_VISIT : 1
IN_RECENTLY : 1
RECOMMENDATIONS_STARTING : 1
PAIN_ADDENDUM : 1
TRIAGE_BY : 1
IT_LOOKS : 2
ARTH_SEX : 1
CAROL_RN : 1
AND_ALL : 1
NO_PT : 1
DOWN_FOR : 1
ALL_WAY : 1
PULLED_WIFE : 1
CLINIC_WITH : 1
COULD_NOT : 2
SAF_SIDES : 1
SHOUDER_DURING : 1
MEAL_AND : 2
OF_OR : 2
WAS_TRANSFERRED : 2
AS_US : 1
GROUP_WERE : 1
LATER_OR : 1
LABEL_TO : 1
REACTION_CYCLOBENZAPRINE : 1
MANAGEMENT_THESE : 1
NOSUNSPEC_PREOPERATIVE : 1
EYES_ACTIVE : 2
ANDRE_VICTIM : 1
NOTE_HOW : 1
OF_WITH : 1
ON_CEFTRIAXONE : 1
UNSPECIFIED_LEFT : 1
CENTER_VETERAN : 1
IMAGING_DISPLAY : 1
PLANTAR_AREA : 1
ELIMINATION_BED : 1
ZZMINI_MENTAL : 1
TAKE_ELAVIL : 1
VISIT_THE : 2
HAS_HEARING : 1
AND_MORNING : 1
NO_ATTENTIVE : 1
PASS_APPROACHING : 1
VISTING_STATED : 1
TO_ANY : 2
MR_WELLGROOMED : 1
INH_RESPONSE : 1
IS_TO : 8
ASSESSMENT_AND : 2
MR_IT : 1
SHOULDER_PARTIAL : 1
NONSKID_OR : 1
PREOPERATIVE_CLINIC : 1
ADDENDUM_YOU : 1
SEEN_LV : 1
WAS_OF : 1
IS_CLEAN : 1
GICOLONOSCOPY_EGD : 1
RESPIRATION_RESULTS : 1
COMMENT_WITHIN : 1
VETERAN_SI : 1
GIVEN_PER : 1
CHEMICAL_MATRIXECTOMY : 1
INPATIENT_AND : 1
OF_NUM : 2
POSTED_UDS : 1
EVENTUALLY_RETURNED : 1
ASSESSED_WRAP : 1
THE_MEDICATION : 3
ON_OXYGEN : 3
PHYSICIAN_PING : 1
IMMOBILIZER_PLACE : 1
FROM_PM : 2
BED_TALKED : 1
CORONARY_ARTERY : 1
SOUNDS_ONSET : 1
HIS_TO : 3
PERTUSSIS_TDAP : 1
ALBUTEROL_MESSAGE : 1
PLAN_TESTING : 1
NOW_HOUR : 1
FOR_HIM : 2
WPB_COORDINATOR : 1
THE_LEFT : 2
PATIENT_NOT : 2
VETERAN_CARE : 1
HOME_BY : 1
EMS_PT : 1
TO_SECONDARY : 2
NOT_ANY : 1
WAS_TRNASFERRED : 1
FROM_CLINIC : 1
DISCUSS_DISCUSSION : 1
SCREEN_WAS : 1
FIRST_WHICH : 1
LOWER_DENTURE : 1
WAS_CONSISTENCY : 1
ABLE_LB : 1
TEMPERATURE_NORMAL : 1
SWER_CONSUMED : 1
MY_CONSENT : 1
CRNA_NOTE : 1
SHE_BEEN : 2
TOOTH_TOOTH : 1
GM_DW : 1
CP_CHF : 1
PROVIDED_TO : 2
RESIDENT_ROOM : 1
HAVING_OUTSIDE : 1
HAS_QUESTIONS : 1
ALL_HOURS : 1
AND_PROBLEMS : 1
EVER_TOLD : 1
PT_WITH : 2
SCOPOLAMINE_SOLN : 1
AND_CORRECT : 1
MIVA_ANALYSIS : 1
SHIFT_PHARMACY : 1
PPH_MY : 1
STATED_THAT : 5
IDENTIFIED_LEAVE : 1
SOCIAL_NO : 1
HERNIA_OPEN : 1
UNLISTED_EVALUATION : 1
DRINKS_MEAL : 1
THE_NERVE : 1
TO_APPTS : 1
NONSMOKER_HAS : 1
DENTAL_DISORDER : 1
THE_PAIN : 1
GROUP_RULES : 1
SOFT_LOWER : 1
OUT_BLOOD : 1
WORRIED_HER : 1
TO_POSITION : 1
SITE_POSITIONING : 1
KEEP_AFLOAT : 1
STOMACH_RECEIVED : 1
VITAL_AND : 2
TO_REEXAMINING : 1
UNSPECIFIED_ON : 1
GEL_JELLY : 1
WITH_ACTIVITY : 1
THE_IDCP : 1
ML_ACTIVE : 1
DEPRESSED_HIS : 1
HAS_LESS : 1
ALERTMRSA_HYGIENE : 1
SAO_TARZADONE : 1
NO_SWELLING : 1
PAIN_REASSESSMENT : 1
HER_IT : 1
PAIN_ORDERED : 1
HE_HASNT : 1
UPDATE_PATTERNS : 1
CONTACT_MENTAL : 1
APPTS_CONTACT : 1
DURATION_PAIN : 1
WAS_APPROVED : 1
ACTIVE_YES : 1
IT_WAS : 1
FLUOROSCOPIC_OBLIQUE : 1
STILL_TO : 1
TO_DENIES : 1
TO_APPARENT : 1
NEXT_REVIEW : 1
COMPLAINT_SHORT : 1
SHIFT_THE : 7
REGARDS_TO : 1
OF_NEED : 1
WAS_ADVISED : 1
MR_TUES : 1
WITH_BEING : 1
PAP_RECOMMENDATIONS : 1
BY_POTENTIALLY : 1
ECHO_SUMMARY : 1
IS_LOSS : 1
PHYSICIAN_OROPHARYNGEAL : 1
IN_BUT : 1
PATIENT_PATIENTS : 1
REGULAR_DIET : 1
BEEN_FIRES : 1
PRODUCTS_APPLICABLE : 1
MEDICATIONS_CONTINUED : 1
OUT_NURSING : 1
COMPLAINT_ISSUES : 1
TEAM_PRESENT : 1
DONE_UPDATED : 1
IS_LOW : 1
RISK_NO : 1
IN_TEAM : 1
HAS_THERE : 1
AT_BEDSIDE : 1
IS_EXPERIENCING : 1
THEY_GROUP : 1
AS_BEEN : 1
NIGHT_ADDENDUM : 1
PRIMARY_IS : 1
WELLNOURISHED_MALE : 1
FOR_SURGERY : 2
WORK_CREDITS : 1
FAIR_NO : 1
MOBILITY_OF : 1
BRC_STUDENTS : 1
AFEBRILE_VS : 1
NEW_FIVE : 1
ON_REGULAR : 1
NECK_OF : 1
INTERVENTION_WILL : 1
TOILET_DINNER : 1
LAST_YOM : 1
RESIDENTS_DURING : 1
INFORMED_FOR : 1
FROM_NUCHOVICH : 1
COURT_YOURE : 1
IS_TAKING : 1
VETERAN_REPORTS : 1
VOICEMAIL_WAS : 1
DEC_HAND : 1
MOOD_FOR : 1
AREAS_BE : 1
VA_PENSION : 1
NEEDED_CONGESTION : 1
PATIENT_NO : 2
ARE_RESTRAINTS : 2
VERSUS_GRIEF : 1
AAOX_AND : 1
RTU_MANAGER : 1
FOR_TRANSITIONAL : 1
HAVE_AUTOMATICALLY : 1
NOTE_PLACED : 1
AS_DIERCTED : 1
PROCEDURE_THE : 1
SERVICES_WERE : 1
CONSEQUENCES_DI : 2
MYCIN_MG : 1
PATIENT_PREOPERATIVE : 1
RECALL_TO : 1
FOR_INPATIENT : 1
HIS_INDIVIDUAL : 2
HE_BE : 2
UNDERSIGNED_TO : 1
EVALUATION_PSYCH : 1
ALTERNATIVE_SKILLS : 1
ABRASION_RUSSELL : 1
VISTING_MR : 1
HIS_PCPS : 1
IS_DEPRESSED : 1
THE_STRENGTH : 1
HAVING_LITTLE : 1
DX_TREATMENT : 1
MR_BRC : 1
THE_INFORMATION : 2
SOCIAL_WORK : 2
GIVEN_TO : 3
IN_STATE : 1
INITIAL_HE : 1
IF_HAS : 1
NOT_AN : 1
HE_STATED : 1
CONNECTED_WM : 2
ATTENDED_PARTICIPATED : 1
UNSPECIFIED_OBJECTIVES : 1
STUDY_WITHIN : 1
BONFADINI_WITH : 1
MESKENAS_MA : 2
OF_CONTINUE : 1
OF_SUICIDE : 1
HE_IS : 12
CERTIFICATION_DATED : 1
ALTERED_COPING : 1
TRAZODONE_PHARM : 1
FOR_ACTIVE : 3
EXAMINATION_TO : 1
WITHIN_LIMITS : 2
OF_DURING : 1
MUCH_THIS : 1
SUPERVISOR_BAY : 1
TO_SEEN : 1
OF_COLD : 1
AMBULATORY_OUTPATIENT : 1
PT_REFERED : 1
LEFT_HAND : 1
TO_AND : 4
TO_SETTING : 1
HIS_SSDI : 1
ASSISTANCE_SET : 1
YES_IF : 1
USING_HEAD : 1
SKILLS_VETERAN : 1
SEEN_IN : 1
DOING_SO : 1
HERE_BY : 2
CORRESPONDENCE_HAS : 1
STANDARD_OUTPATIENT : 1
TRANSFERRED_HIS : 2
STATUS_HIS : 1
HIS_TRUCK : 1
THE_THIS : 1
HE_USE : 1
PTSD_CHIEF : 1
SCOPOLAMINE_OPHT : 1
ALL_MUST : 1
SHOW_FOR : 1
LISTED_BELOW : 1
ARM_HAVE : 1
AN_DRUG : 1
LIMITATIONS_POTASSIUM : 1
OF_ARTERY : 1
HOURS_THE : 1
TO_RELATION : 1
THIGH_IT : 1
SWER_CONFIRMED : 1
CLOZARIL_RX : 1
SCORE_ADDENDUM : 1
OF_STATES : 1
NURSING_PACU : 1
MANAGEMENT_DI : 1
FEELING_TIRED : 1
AND_PRIMARY : 1
APPLICABLE_ADMIT : 1
AS_LISTED : 1
ABILITIES_TO : 1
FECAL_NOT : 1
AM_PM : 1
NURSING_PLAN : 1
MEASURES_CM : 1
NICOTINE_TRANSDERMAL : 1
ROUND_WITH : 1
APPLICABLE_RIGHT : 1
OBJECTIVES_WERE : 1
THE_SUPERVISOR : 1
THE_PROCESS : 1
MACHINE_MAIL : 1
LEAVE_FOR : 1
IS_PROGRESS : 1
ARM_IS : 1
CURRENTLY_PAIN : 1
HEALTH_WITH : 1
ANY_PERFORMED : 1
STATUS_THAT : 1
BEING_LIKE : 1
DUE_OVERLAPPING : 1
TO_GET : 1
AMLODIPINE_BESYLATE : 1
ADDENDUM_RAUSCH : 1
OUT_HIS : 1
THE_SPINE : 1
VI_TREATMENT : 1
INJECTION_RATHER : 1
OTHERS_THIS : 1
VS_TOMORROW : 1
USE_AT : 1
QBEDTIME_IS : 1
YEARS_AGO : 1
OF_PENIS : 1
CAROL_FOOD : 1
TO_TRANSFER : 2
WAS_OFFERED : 1
KG_TO : 1
REPORT_YES : 1
PROVIDED_PSYCHOTHERAPY : 1
PROGRESS_PATIENT : 1
CEC_TETANUS : 1
PLEASE_THE : 1
WHEN_BED : 1
BY_PT : 1
NURSING_CARE : 1
OVERLAPPING_EYE : 1
MOIST_SKIN : 1
DOES_NOT : 4
NEGATIVE_ON : 1
OUR_SERVICE : 1
AND_PROCESS : 1
FOR_KEEP : 1
COLOR_TIME : 1
YEARS_PAIN : 1
RECEIVES_PT : 1
VERBALIZES_RETINA : 1
WAS_DISCUSSED : 3
BE_PATIENT : 1
VS_TO : 1
SMT_TRANSPORTATION : 1
NONE_CARE : 1
CONTACT_INFORMATION : 1
POTASSIUM_MMOL : 1
IN_KNOWN : 1
WAS_PRIOR : 2
HYGIENE_MG : 1
PLACEMENT_HE : 1
BE_MAILED : 2
APPLICABLE_THIS : 2
HEALTH_PROBLEM : 1
FROM_PHYSICIAN : 1
WAS_TERMINATED : 1
FROM_EVALUATION : 1
REST_THE : 1
SON_NANCY : 2
NORMAL_VS : 1
THE_SHIFT : 2
THIS_PT : 1
BLIND_MOBILITY : 1
VISIT_DEC : 1
SESSIONS_REMAINING : 1
HAS_SEVERAL : 1
MALE_VETERAN : 2
PAK_AND : 1
NOT_WANT : 1
SCHEDULED_TEAM : 1
THAT_APPOINTMENTS : 1
CLOZAPINE_DOSE : 2
CONTACT_REMAINING : 1
VITALS_FOLLOWUP : 1
IMPLANTS_NO : 1
EYE_JUNE : 1
THAT_DOES : 1
MAY_NURSING : 1
TIMES_HAS : 1
THIS_BUT : 2
TIME_PPH : 1
TREATMENT_CENTER : 1
OPEN_WOUND : 1
DISTAL_ESOPHAGEAL : 1
CC_NEEDS : 1
LIKE_HE : 2
DEPRESSED_BALDWIN : 1
LIST_BEEN : 1
ERUPTED_TOOTH : 1
PASS_OTHERS : 1
CIWAAR_DISCUSSED : 1
HEAD_OF : 1
HOSPITAL_HOME : 1
SHIFT_THIS : 2
CALLER_OTHER : 1
FILLED_PAIN : 1
WERE_AN : 1
COMPLAINTS_ARE : 1
WT_TO : 1
MOVED_CONTACT : 1
BE_POSTED : 1
TOMORROW_SIGNIFICANT : 1
WILL_FOREGO : 1
GAIT_IMPAIRED : 1
RHEUMATOID_TREATMENT : 1
PACKET_BID : 1
ASKED_UPRIGHT : 1
CALLER_AREA : 2
POST_SPOKE : 1
BRACE_RM : 1
VETERAN_EITHER : 1
SI_INTENT : 1
VETERAN_WILL : 3
STARTING_THE : 1
PHYSICIAN_DROPS : 1
ID_LAST : 1
BEHAVIOR_CAP : 1
IMPORVEMENT_RADIOGRAPHICALLY : 1
SMT_VETERANS : 1
AMBULATORY_GRANDKIDS : 1
WELLGROOMED_MALE : 1
CONSENT_USE : 1
UPPER_USE : 1
CONTRIBUTING_TO : 1
HERE_CLOZARIL : 1
HE_SLEPT : 1
MUCH_IS : 1
NOTE_INTERVENTION : 1
STATED_HE : 5
INCONTINENCE_BPH : 1
SCREENS_ON : 1
PROVIDER_AHN : 2
BENEFICIAL_TO : 1
TO_DRESSED : 1
MR_CHARTS : 1
AND_TOTAL : 1
CHART_REVIEWED : 1
SWER_WILL : 1
BUT_EVENTUALLY : 1
SIDE_WITH : 1
VET_GIVEN : 1
CORRECTLY_THE : 1
IN_MEETING : 2
REGULAR_TF : 1
URINE_COLLECTED : 1
VOICEMAIL_REINFORCED : 1
BE_DISCHARGED : 2
PATIENT_MANAGEMENT : 1
PLEASURE_IN : 1
ANA_SERVICES : 1
CLASS_YESTER : 1
BY_MET : 1
BEEN_THE : 1
FALL_RISK : 3
MADE_VETERAN : 1
CALLED_AND : 1
XYDS_APPLY : 1
BEING_ON : 1
WED_MH : 1
TELL_FROM : 1
HARD_TO : 1
CONTACT_ON : 1
AT_WHO : 1
SKIN_IS : 1
FAMILY_WHO : 1
REMAINS_ON : 1
NO_VETERAN : 1
WHO_THE : 1
AT_BORDERLINE : 1
CDM_IN : 1
SATISFACTION_CONSENT : 1
OFTEN_DID : 3
WOULD_LIKE : 1
OR_SYMPTOMS : 1
HE_KIND : 1
COMPLETE_ARE : 1
TO_WRITING : 1
EFFECTS_OF : 1
MALE_WITH : 1
IS_WITH : 1
EXTREMETIES_OR : 1
VETERAN_HIS : 1
VETERAN_HER : 1
TAKE_HIS : 1
HEART_STRESS : 1
LOCATION_CONDITION : 1
FERNANDEZ_CATEGORY : 1
LEARNING_ENCOUNTERS : 1
NAPPING_OF : 1
ANY_TESTS : 1
TIME_FL : 1
TRANSPARENCIES_BY : 1
APR_PERCEPTION : 1
NUMBER_COMMENTS : 1
FOR_TREATMENT : 1
IN_PERCENT : 1
BESYLATE_TAB : 1
THE_RNS : 1
AB_WAS : 1
MG_PROCEDURE : 1
IS_EXPECTED : 1
FIRES_SUCH : 1
THE_ROOM : 2
SERVICE_HIS : 1
EXAM_EOMS : 1
PMRS_CONSULT : 1
AMB_MD : 1
NO_SIGNS : 1
ASSERTIVE_EXERCISE : 1
AXIS_OF : 1
PHONE_VERIFIED : 1
UPDATE_PING : 1
UNDERSTAND_MY : 1
HI_HOPELESSNESS : 1
SMEAR_STARTING : 1
PRESCRIBED_SUPPLEMENT : 1
HIM_HE : 2
BATH_PROVIDED : 1
PT_GOOD : 1
SIDE_THE : 1
WERE_PRESENT : 1
NUMBER_VERIFIED : 1
DX_COOPERATIVE : 1
ADDENDUM_EYE : 1
NOTES_SYMPTOMS : 1
APAP_BUTALBITAL : 1
GOALS_CURRENT : 1
CARE_YESTER : 1
TO_MAILED : 1
ROOM_REST : 1
SEARCHED_FOR : 1
ALERT_HIP : 1
FLU_GIVEN : 1
CARE_ICE : 1
LUNG_SOUNDS : 1
ORDERED_ON : 1
FUTURE_NOTE : 1
TO_REED : 1
INJ_SOLN : 1
NOT_TAKE : 1
EPIDIDYMAL_IS : 1
ENABLE_THE : 1
REINFORCED_HIS : 1
STAFF_LE : 1
HOMEBASED_NO : 1
SINCE_PLAN : 1
CLINIC_WHAT : 1
VISIT_BELOW : 1
NEED_BE : 1
INHALER_FOR : 1
IN_IT : 1
TAB_TABLET : 2
ODY_VERBALIZES : 1
DX_PROGRAM : 1
OR_RESTRICTIONS : 1
PACU_OTHER : 1
PAIN_LUBRICATING : 1
PERCEPTUAL_HX : 1
STUDY_SCIENCE : 1
MY_MEDS : 1
IS_MONTHS : 1
AND_YOUR : 1
PATIENT_MESSAGE : 1
CONCEEDS_SAVE : 1
ABOVE_USING : 1
HA_HAS : 1
THE_ALL : 2
RISK_FOR : 1
OR_THE : 2
GOAL_SETTING : 2
WITHOUT_ANY : 1
FEB_DENT : 1
BE_WHEN : 1
TEAM_BE : 1
OLD_PRESENTS : 1
IPU_TREATMENT : 1
MEDICATIONS_TRAMADOL : 1
CURRENT_EPIDIDYMIS : 1
METFORMIN_RECONCILIATION : 1
SERVICES_DIVISION : 1
TO_WARM : 1
WITH_LIVING : 1
THE_RIGHT : 2
THIS_TASK : 4
ENOUGH_CREDITS : 1
TOXICOLOGY_COLLECTION : 1
MHC_MENTAL : 1
SPINE_ALL : 1
GO_THE : 1
STAFF_WRITING : 1
CLINIC_NOTE : 1
FOR_STRETCHING : 1
PROCEDURE_VERIFY : 1
POSITIVE_NASAL : 1
USE_AXIS : 1
STATUS_METOPROLOL : 1
SEND_REMINDER : 2
SUICIDAL_THOUGHTS : 1
WILL_SCHEDULE : 1
WITH_HE : 1
VOICE_FROM : 1
MAKE_ABOUT : 1
PLEASANT_CONTINUE : 1
ARE_STATES : 1
ECONOMIC_VOM : 1
FSG_QID : 1
BE_AT : 2
HIMSELF_SAF : 1
ILL_CALL : 1
CALL_MESSAGE : 1
ALSO_PATIENT : 1
URINE_UPPER : 1
IN_COMPLETE : 1
TOMORROW_CAN : 1
INCREASED_DISTANCE : 1
AFFECTING_THE : 1
WITH_MOUTH : 1
PREVIOUS_INTERVENTIONS : 1
CARE_NONVA : 1
SHE_IS : 2
DRINKS_OTHERS : 1
AND_UP : 2
SIGNS_ALCOHOL : 1
IN_LOW : 1
CAROL_BREAKFAST : 1
RESPONSES_PT : 1
IMPAIRED_LUNG : 1
NUCHOVICH_ON : 1
ATTENDED_CLASS : 1
TRANSDERMAL_MG : 1
HI_INTENT : 1
TO_FOR : 10
FACTORS_PT : 1
HIM_RT : 1
ON_MG : 2
MR_SWS : 1
ON_ANSWERING : 2
WITH_PAM : 1
TO_THE : 25
TWO_ACTIVE : 1
HAS_SUMATRIPTAN : 1
PROVIDER_SON : 2
TO_COME : 1
NOT_SKIN : 1
STATUS_ACTIVE : 1
ASSISTANCE_PING : 1
YES_WHEN : 1
CONSISTENCY_OF : 2
MULTIAXIAL_PAINWITHOUT : 1
CLINICALLY_NEEDS : 1
BY_MOUTH : 13
MONTH_TIBIA : 1
LEFT_ARTH : 1
HER_RELIGIOUSLY : 1
UNSP_DATE : 1
KNEE_SURGERY : 1
PT_DRESSED : 1
REVIEWED_WED : 1
ORHTO_IF : 1
TRIAGE_ADMITTED : 1
NURSES_OF : 2
IMAGING_FROM : 1
PT_TAKE : 1
AND_CONCEEDS : 1
OVERSIGHT_ENCOURAGEMENT : 1
SCREENS_NOW : 1
PULSE_OMEPRAZOLE : 1
DOGS_VETERAN : 1
BE_ALERT : 1
OCCUPATION_KNOWLEDGE : 1
BEING_TREATED : 1
ATROVENT_MG : 1
APPOINTMENTS_DIAGNOSIS : 1
SCHEDULE_INDIVIDUAL : 1
ALERT_PROTECTORS : 1
BY_SISTER : 1
WILL_SPEAK : 1
GIVEN_DELUSIONS : 1
SCALE_REFERED : 1
IMMOBILIZER_IN : 1
PROPER_DOCUMENT : 1
ROOM_LUNCH : 1
OCCLUDED_THE : 1
THEY_READ : 1
SUPERVISOR_WAS : 1
LEI_PHYSICAL : 1
MUSICIAN_FRIENDS : 1
KNOWLEDGE_LOCAL : 1
AND_RECONCILED : 2
REASON_FOR : 2
AND_MEDICATION : 1
NOTE_HE : 1
TAKE_TABLET : 13
HIS_STATES : 1
AND_AT : 1
TO_WHEN : 1
MESSAGE_BUT : 1
WASHING_DINNER : 1
THE_HUDVASH : 1
GROUP_ATTENDED : 2
SOCIAL_ACTIVITY : 1
NOT_THAT : 1
AN_NONE : 1
REPORT_MDS : 1
AFTER_WILL : 1
CONTACT_ASSESSMENT : 1
THE_PREGNANT : 1
ATTAINMENT_FAIR : 1
LIFETIME_OR : 1
IF_TOTAL : 1
OR_PATIENT : 1
CARE_HIS : 1
INTO_CPRS : 1
LEARNER_BARRIERS : 1
KIND_AN : 1
REVIEW_DOCUMENT : 1
AS_THE : 1
NAME_SOCIAL : 1
GROUP_MINUTES : 1
CENTER_NOTE : 1
HAS_TREATED : 1
PROBLEM_TARZADONE : 1
UNSP_JUNE : 1
OR_RECOVERY : 1
DEC_PSYCHOSOCIAL : 1
ORAL_HYGIENE : 1
BELOW_NEW : 1
UP_REVIEW : 1
CALL_VOICE : 1
CLONAZEPAM_TAB : 1
SEEN_FOR : 5
PATIENT_RETURNING : 1
THE_SENSORY : 1
TWICE_INCLUDING : 1
SPECIMEN_ON : 1
STARTED_AT : 1
AND_MANAGEMENT : 1
ADDRESS_TO : 1
STOOLS_NO : 1
VISITATION_PATIENTS : 1
NO_BARRIERS : 1
TO_EATING : 1
TO_STAFF : 2
THE_THE : 2
PLAN_STEP : 1
AND_HTN : 1
OF_TRUCK : 1
PAIN_GIRLFRIENDS : 1
THAT_WAS : 1
MEDICATIONS_XPATIENT : 1
IN_USUAL : 1
ECHOCARDIOGRAM_TETANUS : 1
CERTIFICATE_1010M : 1
PROVIDER_GENITAL : 1
PENSION_NO : 1
REFER_TO : 1
IN_BETWEEN : 1
JUN_HE : 1
PAST_LITTLE : 1
OF_PATIENT : 3
DATE_ABC : 1
LEAST_RESTRICTIVE : 1
CPRS_SELECTING : 1
TRANSFER_ORIENTED : 1
BOWEL_BED : 1
TOTAL_NAIL : 1
NOTE_LID : 1
IS_WEAR : 1
BLOOD_OR : 1
AND_FOR : 3
PARANIA_WHICH : 1
DC_TO : 1
NEXT_VISIT : 2
OF_FROM : 1
CORRECTLY_SAYS : 1
FOR_TASK : 4
BREAKFAST_DRINKS : 2
AFTER_EACH : 1
GROUP_THEY : 1
WITH_OF : 2
AND_HIM : 1
KNOWN_HAVE : 1
WE_FL : 1
KNOWN_NONVA : 1
BMI_PROBLEM : 1
QUIET_ROOM : 1
DISCUSSED_EFFECTS : 1
FLUCONOZOLE_VISIT : 1
STOOLS_CONFUSION : 1
SYMPTOMS_AND : 1
AGREEMENT_WAS : 1
SAID_HE : 1
CENTER_THIS : 1
TL_SPOUSE : 1
SC_AMBULATORY : 1
AFFECTED_REPORT : 1
ASSISTANCE_HE : 2
FACE_THAT : 1
DAILY_HE : 1
AT_OCT : 1
ARE_THEN : 1
PRIVILEGES_SHIFT : 1
YOU_ABOUT : 2
NEEDED_GOALS : 1
RULES_AND : 1
DOG_IS : 1
READILY_THAT : 1
FOR_SMOKE : 1
FILLED_BLOOD : 1
FLORIDA_WHY : 1
EMG_OF : 1
NURSING_TRANSFERRING : 1
MG_AND : 3
LEVOTHYROXINE_MG : 1
AND_NOT : 5
SURGERY_PATIENT : 1
FOR_UMBILICAL : 1
DTR_HAD : 1
PALPITATIONS_ORTHOPNEA : 1
ABOUT_HE : 1
TO_PLACE : 6
MD_BEDSIDE : 1
WAS_HELD : 1
SPECIFIED_OR : 1
NONE_NONE : 1
CURRENTLY_NOTE : 1
BALDWIN_CAROL : 1
MED_ROOM : 1
MADE_RELATIONSHIPS : 1
DISCHARGE_STABLE : 1
VETERAN_BELIEVES : 1
URGENT_CLINIC : 1
BEEN_MAILED : 1
SUPPLEMENT_PATIENT : 1
TRIAGE_NOTE : 2
HE_INTENDS : 1
ON_THAT : 1
ASSISTANCE_UP : 1
STOOLS_SECONDARY : 1
OF_ORIENTED : 1
WHERE_WOULD : 1
INTERIM_CARE : 1
READY_LEARN : 1
SHOT_GIVEN : 1
STEP_GROUP : 1
PATIENT_DO : 1
AHN_MD : 2
AL_SCALE : 2
COMPLIANCY_DISCUSSED : 1
NO_NOT : 1
HANDICAP_PERMIT : 1
CALCIUM_DL : 1
CEFTRIAXONE_GM : 1
CINCINNATI_FOR : 1
HOMEBASED_COMMENTS : 1
MO_SHE : 1
WHEN_TO : 1
DATE_TEAM : 1
WITH_WILL : 2
REQUIRED_NURSES : 1
BEEN_VOICES : 1
SUPPLEMENT_THAT : 1
PING_PHYSICIAN : 1
CURRENT_VITALS : 1
WALK_STRAIGHTER : 1
EAR_STOPPED : 1
COLLECTED_SENT : 2
VACATION_VET : 1
NARCISSISTIC_THIS : 1
MD_AT : 1
FROM_MY : 1
AIR_METFORMIN : 1
PHYS_DX : 1
DISCUSS_SPECIAL : 1
INFORMATION_EVALUATION : 1
HE_GETS : 1
CBOC_NURSE : 1
YES_RESPIRATION : 1
PATIENT_CONCERNS : 1
RHEUMATOID_ARTHRITIS : 1
OUT_FOR : 1
WOULD_ABLE : 1
PRESENTING_CHIEF : 2
FOR_AT : 1
AS_PROTECTIVE : 1
INPT_NOTE : 2
AT_ESP : 1
ACCOUNTABILITY_FOR : 1
NURSE_WITH : 1
CUTTING_MEAT : 1
BY_TWICE : 4
TOTAL_CHEMICAL : 1
MG_PLEASE : 1
OBSERVED_HAS : 1
TO_LOOKS : 1
OF_PARANIA : 1
SEEN_AT : 1
AND_GOING : 2
RATE_SKIN : 1
SENSORY_PERCEPTION : 1
OBSERVED_MOOD : 1
ASSESSMENT_CONTROLLED : 1
AN_THAT : 1
AS_PRESCRIBED : 1
IDENTIFIED_HIS : 1
IDEATION_INDIVIDUAL : 1
CALLING_FOR : 1
HOURS_NUMBER : 1
IF_ADR : 2
HAVING_ENERGY : 1
BETWEEN_TO : 1
BLADDER_FOOD : 1
COUNTER_HERBAL : 1
APPOINTMENT_BASCOM : 1
NEVUS_CC : 1
RECEIVES_COMPENSATION : 1
WHEN_IN : 1
VETERAN_AND : 3
IN_ROOM : 2
OR_ACTIVITY : 1
REACTIONS_VISTA : 1
TO_MY : 2
TREATMENT_IF : 1
LYTES_PENDING : 1
SHOWERS_BY : 1
HOUR_SAYS : 1
HAS_ON : 3
REQUEST_AGREEMENT : 1
ASSOC_WITH : 1
IS_ME : 2
PROBLEMS_INSOMNIA : 1
BETWEEN_ABRASION : 1
ECHOCARDIOGRAM_DIPHTHERIA : 1
ME_AND : 1
AFLOAT_JOB : 1
VASH_ON : 1
NONE_NURSING : 1
ANYTHING_THAT : 1
DEAR_SERUM : 1
OF_STOOLS : 1
MAINTENANCE_FOREGO : 1
CASE_NOTE : 1
ENDORSES_PASSIVE : 1
MOTRIN_PAIN : 1
IOP_VERSUS : 1
INVOLVED_WAIT : 1
COLOR_SCORE : 1
INTERVIEW_HE : 1
PAPER_IN : 1
MR_FOR : 1
PHYSICIAN_VERBALIZES : 1
TREATMENT_INFORMATION : 1
TISSUES_PATIENT : 1
OF_RISKS : 1
FOHX_EYE : 1
THE_FIRST : 3
FIRST_IN : 1
RIGHT_SINCE : 1
CENTER_HOSPITAL : 1
REACTION_AND : 1
OF_DEPRESSION : 1
PRESENTS_FOR : 1
THE_YEAR : 2
TEAR_AND : 1
RT_URINARY : 1
PRESSURE_VET : 1
UMBILICAL_FOR : 1
ALWAYS_IN : 1
RIGHT_ACTIVE : 1
PATIENT_DEVELOP : 1
NOTIFIED_DATE : 1
CHEST_PT : 1
THIS_SUPERVISION : 1
TIME_WAS : 4
NORMAL_LIMITS : 2
FLU_SHOT : 1
COMPLETION_JUN : 1
DISTANCE_AND : 1
TEETH_PULLED : 1
ENDOCARDITIS_NO : 1
FOR_TRAVEL : 1
CALLED_VITAL : 1
NOTE_PLEASANT : 1
COMPLIANCY_THE : 1
HOW_OFTEN : 3
CONTACT_GARBAGE : 1
NORMAL_TISSUES : 1
WITH_DOGS : 1
NEVUS_NEEDS : 1
ROOM_RADIOLOGY : 1
OF_CHRONIC : 1
VET_LEAVE : 1
PHONE_ADDENDUM : 1
CURRENT_ANTICIPATED : 1
CONSULT_ENT : 1
KNOWLEDGE_OF : 1
CONSENT_TO : 1
PATIENT_EYE : 1
ASSISTANCE_AGENCY : 1
UNDERSTANDING_SI : 1
IEST_HE : 1
LB_KG : 4
RT_NUMBENSS : 1
HIS_DISCHARGE : 1
GOAL_STUDY : 1
NOTED_TREATMENT : 1
HRS_THE : 1
THROUGH_OUR : 1
YEAR_LITTLE : 1
TO_PREOPERATIVE : 1
CO_THAT : 1
DIAGNOSIS_OPENANGLE : 1
STOOL_PATIENT : 1
VETERAN_THIS : 3
HE_CELL : 1
CONSTITUTIONAL_CARE : 1
COMMENTS_LIN : 1
FOLLOWUP_ON : 1
BE_BY : 2
DISCUSSED_MS : 1
AFTER_AND : 1
PALPITATIONS_CHECK : 1
SPECIFICALLY_NEEDED : 1
PLANTAR_CALLUS : 1
HIM_BE : 1
SEEN_MINUTES : 1
STARTING_TO : 1
OXYGEN_AFTER : 1
DIAGNOSED_WITH : 1
PLAN_INDIVIDUAL : 1
LOSS_TO : 2
ORTHOPTIC_ICDCM : 1
PORTAL_LEFT : 1
LIN_IS : 1
RESTED_LITTLE : 1
MIN_MH : 1
WITHOUT_TEETH : 1
THE_WAY : 2
CONTINUE_TAKE : 1
INHALER_MESSAGE : 1
TO_CONFIRM : 1
PTS_IN : 1
BATHROOM_ECP : 1
ALL_GROUP : 1
MOUTH_HEARING : 1
IN_DOING : 1
PATIENT_SCHEDULED : 1
TO_STREET : 1
HIS_PT : 1
SOCIETY_PAP : 1
HIS_PTSD : 1
IN_PAST : 5
OLD_MALE : 2
SCISSORS_RAZOR : 1
IS_UNIT : 1
TOPICAL_OINTMENT : 1
TL_FAMILY : 1
OR_ONSET : 1
CASE_MANAGEMENT : 1
VETERAN_ATTENDED : 2
FOR_PR : 1
EXAM_RESIDENTS : 1
TAPE_APPLY : 1
NEED_FOR : 1
DEPRESSION_EVERY : 1
SERVICE_CONNECTED : 2
OF_NONSKID : 1
PERFORMED_INPT : 1
CONSTIPATION_GOING : 1
DIRECTED_TO : 1
PRESENT_IN : 1
AFTER_PRESCRIBED : 1
ACTIVE_RESULTS : 1
PERCIEVED_AND : 1
HIS_SOCIAL : 2
OUTPATIENT_OUTPATIENT : 1
ORE_THE : 1
ME_FOR : 1
ATTENDANCE_ATTENDED : 1
FASHION_FOR : 1
MOVEMENT_IN : 1
MR_ARRIVED : 2
NOTE_CONTACT : 1
SENSORY_IS : 1
TOP_PACKET : 1
TO_GO : 3
AND_COMPRESSING : 1
YOU_HAVE : 7
BE_SEEN : 2
IS_VOLUME : 1
QUESTIONS_ADVISED : 1
PATIENT_OXYGEN : 2
RIGHT_CLINICAL : 1
SCHEDULING_ARRIVED : 1
SENT_PAIN : 1
EVALUATION_AT : 1
ICDCM_WT : 1
BY_RYAN : 1
JEWELRY_IMPAIRED : 1
WITH_DESAT : 1
DO_IN : 1
ARM_NEBULIZER : 1
BE_UDS : 1
AVAILABLE_START : 1
TELEPHONE_CONTACT : 2
WAS_LAST : 1
BY_CHOOSING : 1
JUNE_APPOINTMENT : 1
RESIDENT_USE : 1
THERE_THAT : 1
WAS_CONTACT : 1
TO_MG : 1
NURSE_HOME : 1
REPAIR_AT : 1
KALINA_DERMATOLOGY : 1
MG_ML : 1
MOBILITY_MOBILITY : 1
PPH_FROM : 1
STAFF_ADMITS : 1
USES_BRACE : 1
MIAMI_HE : 1
CODE_EVALUATION : 1
NO_THE : 4
HIMSELF_IN : 1
CALLED_MORNING : 1
MOBILITY_PROGRESS : 1
STEP_MESKENAS : 1
MY_IS : 1
MENTAL_HEALTH : 6
RESCHEDULED_NO : 1
TRUCK_FOR : 1
SAYS_BE : 1
SLEPT_OF : 1
PATIENT_RECONCILED : 1
AGREED_PATIENTS : 1
ADMIT_INPATIENT : 1
PATIENTS_OBSERVED : 1
PATIENT_PHONE : 1
ST_CLINIC : 1
OUTPT_THE : 1
THOUGHTS_THAT : 1
TO_PARTICIPATE : 3
AREA_HE : 1
MIVA_FOR : 1
TEMPERATURE_RECOMMENDATION : 1
PRESCRIPTION_HOME : 1
EVENING_FOR : 1
MORNING_WAS : 1
INFORMATION_MANAGEMENT : 1
IMPLANTS_PROVIDER : 1
SHE_LEG : 1
YEAR_OLD : 2
READING_LOW : 1
DISPOSITION_WILL : 1
WILL_REQUIRE : 2
IS_CLOSED : 1
IS_POSITIVE : 1
OF_NAPPING : 1
SI_WITH : 1
WI_DIAGNOSIS : 1
NEGATIVE_YES : 1
RESTRAINTS_IN : 2
FOOD_BOWEL : 1
LEAVE_BUT : 1
FRI_MAINTENANCE : 1
COMPLETED_FOR : 2
IS_FOR : 2
BY_NO : 1
THE_AMOUNT : 2
IS_BEING : 1
TRAINED_INDEPENDENT : 1
POSTOP_DIAGNOSIS : 1
CHRONIC_MENTAL : 1
CLINIC_PATIENT : 1
RESIDENTS_NOTE : 1
AT_HIS : 2
RT_SINCE : 1
AN_ACCOMPLISHMENT : 1
IS_HOMEBOUND : 1
MAJOR_OPERATIONS : 1
PATIENTS_LEVEL : 1
SMOKE_WITHOUT : 1
SIDE_OF : 1
MYCIN_IT : 1
MAY_BRC : 1
SKIN_RIGHT : 2
MH_PSYCHIATRY : 1
ONE_IS : 1
READING_ILL : 1
HIS_TEETH : 1
NKA_REQUESTING : 1
INCH_THE : 1
SLIP_RE : 1
STAFF_MEMBER : 1
THIS_AS : 1
RESULTS_REVIEWED : 1
MAKE_FEELING : 1
TO_KEEP : 3
LIKE_SPEND : 1
SHOWER_OF : 1
GIVE_TOPICAL : 1
WILL_REFER : 1
FLUVASTATIN_AMITRIPTYLINE : 1
DIAGNOSIS_PROSTATE : 1
UNDER_EDUCATION : 1
INTENT_TO : 1
STRENGTH_OTR : 1
THEN_ARE : 1
MALE_VIETNAM : 1
EYES_INJECTION : 1
CONTROLLED_WORSE : 1
RECENT_TO : 1
WITH_OCCASIONALY : 1
THAT_YOU : 2
NO_EDUCATION : 1
ER_TO : 1
ON_SATISFACTORY : 1
HAVE_TAKING : 1
BY_INJECTION : 1
ACTIVE_ATTENDING : 1
TO_MEDICATION : 1
HAS_MAJOR : 1
COMMENT_ED : 1
GROUP_MEMBERS : 2
LOOKS_LIKE : 1
DATE_TIME : 1
VETERAN_SEARCHED : 1
WANTS_ALBUTEROL : 1
LATERAL_AND : 1
ABOUT_PROBLEM : 1
RESULT_PT : 1
NO_PHYSICIAN : 1
MIN_BENIGN : 1
PATIENT_AGREED : 1
COMPRESSING_THE : 1
HE_TOTAL : 1
STOOLS_PER : 1
CARE_THIS : 1
SERVED_SWIFT : 1
APPOINTMENT_AND : 1
EACH_FRI : 1
THE_ADVERSE : 1
HE_FOR : 1
THEIR_OWN : 1
INSTRUCTIONS_OTC : 1
PLEASE_IF : 1
DX_AXIS : 1
COMING_TIMES : 1
AWOKE_OVER : 1
WITHIN_BRC : 1
ON_HISTORY : 1
ARE_DOING : 1
THEN_IN : 1
IN_BOWELS : 1
THOUGH_THE : 1
AND_FOLLOWED : 1
SWS_BONFADINI : 1
ANESTHETIC_MEDICATION : 1
SIGNIFICANT_HEALTH : 1
DISORDER_DEPRESSED : 1
DI_START : 1
REQUIRES_HOUR : 1
ALLERGIES_DILTIAZEM : 1
MEDICATIONS_FOR : 2
FOR_PCP : 1
HAD_PROBLEMS : 1
POKER_MUCH : 1
FOR_RELATES : 1
FOR_THIS : 8
BORDERLINE_DURATION : 1
AND_OR : 1
FOR_EVERY : 1
LOWER_TO : 1
HEART_VALVE : 1
DROPS_GIVEN : 1
REPORTS_TO : 1
LEGS_FEET : 1
IS_OF : 2
OF_VISION : 1
NEED_PMRS : 1
STATING_HIS : 1
WORKER_SCORE : 1
OF_HE : 1
BREATH_SEND : 1
TRANSFERRED_REED : 1
FRO_PT : 1
ME_THE : 1
SSN_ADDENDUM : 1
IN_VETERAN : 1
OR_FAMILY : 1
REFLUX_BUT : 1
TIME_JUN : 1
CLINIC_OF : 1
EYE_HYGIENE : 1
LEAVING_ON : 1
TO_OUTSIDE : 1
DRESSED_NORMAL : 1
THE_MENU : 1
SOFT_RELINE : 1
GERD_RATE : 1
HE_DISCOVERED : 1
BUT_RETURNED : 1
RETURNED_THEN : 1
OPENANGLE_GLAUCOMA : 1
NAIL_MATRIXECTOMY : 1
PSYCH_IP : 1
MEDICATION_PROFILE : 2
FROM_DR : 1
OF_LIFE : 1
EMOTIONAL_AND : 1
JUNE_CURRENTLY : 1
KALINA_RN : 1
BE_FOR : 2
METH_ADDICT : 1
OPIOID_DEPENDENCE : 1
PATIENT_NOTES : 1
CALL_AT : 1
PHYSICIAN_IC : 1
DAUGHTER_AGREES : 1
OR_SOCKS : 1
TELEDOC_DISCHARGE : 1
ROOM_WALKIN : 1
LAST_FILLED : 1
WITH_HDL : 1
TREATMENT_OF : 1
HER_CONSTITUTIONAL : 1
ORDER_HIM : 1
WI_MST : 1
TOPICAL_ANTIBIOTIC : 1
TABLET_BY : 12
RISK_CARE : 1
BAL_ON : 1
GROSSLY_DENIES : 1
THEY_HAVE : 1
UNIT_THE : 1
CHECK_NOTE : 1
MEAL_HIP : 1
MUCH_PAIN : 1
FOR_ANY : 1
ADMIT_TO : 1
SILVADIAZENE_AMITRIPTYLINE : 1
OUTPATIENT_MD : 1
PATIENT_SEEN : 5
PARTICIPATED_THE : 1
FAMILY_CAREGIVER : 1
AOD_IN : 1
TAKE_THE : 2
MY_LIFE : 1
RELINE_DENTURE : 1
MODE_BUTTONS : 1
TEETH_PT : 1
SUPERVISION_BLOOD : 1
POSTTRAUM_PROBLEM : 1
BECOME_ISSUE : 1
THE_ST : 1
UPCOMING_APPTS : 1
STOOL_THIS : 1
REALLIFE_EXAMPLE : 1
TO_OUTPT : 1
HIS_NO : 2
TO_ACTIVE : 2
NEGATIVE_AM : 1
SOCIAL_AND : 2
ASSESSMENT_FUNCTIONING : 1
POSSIBLE_CONSULT : 1
VISIT_DENT : 1
AN_APPOINTMENT : 1
MAY_CONTRIBUTING : 1
PHONE_BY : 1
HE_NEVER : 1
HE_WHEEZING : 1
HX_CIRRHOSIS : 1
THOUGHTS_WAS : 1
COUMADINE_NURSES : 1
THOUGHTS_ENDING : 1
INTAKE_DT : 1
MEDICATION_HE : 1
WHILE_AFFECTING : 1
POSSIBLE_COMPLICATIONS : 1
GOAL_MISSIONARY : 1
GASTROESOPHAGEAL_REFLUX : 1
PSYCHOTHERAPY_ENDORSES : 1
DISTRESS_RECOMMENED : 1
DESIRED_WT : 1
NAME_DIAGNOSIS : 1
WHY_HE : 1
UP_NURSING : 1
PCPS_AT : 1
AGREE_WITH : 1
MOUTH_LR : 1
BE_NECESSARY : 1
PATIENT_COUMADINE : 1
ABOUT_ILL : 1
SIDE_NEBULIZER : 1
BASCOM_PALMER : 1
TO_CANE : 1
LAST_PAP : 1
MAKE_INTERTON : 1
VET_CALLING : 1
LIGHTING_FIRES : 1
PAIN_INTERDISCIPLINARY : 1
PRESENCE_JESUS : 1
FULL_CHRONIC : 1
GRIEF_SUPPORT : 1
CHECK_OUT : 2
BMI_THOUGHT : 1
LOW_PAIN : 1
HAD_DISCUSSED : 1
MOST_VITALS : 1
IC_PERSONAL : 1
MET_INTRAVENOUS : 1
COMPLETE_ON : 1
AND_IMMOBILIZER : 1
MANY_CONTAINING : 1
FOR_VITAMIN : 1
SCORE_DEPRESSION : 1
IN_WITH : 1
MEDICATION_VENT : 1
POSITIONING_WAS : 1
FOR_OF : 4
IN_PREVIOUS : 1
WOULD_TO : 1
AT_PLANTAR : 1
PREGNANT_BREASTFEEDING : 1
HE_WASNT : 1
TAKING_THAT : 1
OF_MH : 1
OF_HAS : 2
INCONTINENCE_BECOME : 1
LS_AM : 1
HOW_DO : 1
PAIN_XPATIENT : 1
HIS_VETERAN : 2
WILL_GIVE : 1
UDS_UPDATED : 1
RECENT_ADMIT : 1
INTERVIEW_TALKED : 1
EXPOSURE_HIGHEXPLOSIVE : 1
PLEASE_EDIT : 1
LOCALLY_AT : 1
MEETING_FOR : 1
AND_INDEPENDENT : 1
ELIMINATION_TO : 1
LIVES_IN : 1
MEMBER_WHO : 2
AND_SCHEDULED : 1
ONEHALF_BY : 1
ER_PROBLEM : 1
ENCOURAGEMENT_OR : 1
DRINKS_PATIENT : 1
HIS_NAME : 1
WITH_PATIENT : 6
DUE_IN : 1
INVENTORIED_PATIENT : 1
WITHOUT_SUPERVISION : 1
DISCHARGE_SATISFACTORY : 1
THE_INSTRUCTORS : 1
CONSUL_IS : 1
COUNSELING_IDENTIFIED : 1
HIS_BRIEF : 1
YESTER_CALLING : 1
FOCUS_WHICH : 1
TAKING_MEDICINES : 1
ENABLE_VETERAN : 1
SESSION_HAS : 1
DENTAL_NOS : 1
AS_CERVICIS : 1
TYPE_TEST : 1
BE_OUT : 1
HAVE_MEDICATION : 1
ASSESS_FALL : 1
CATEGORY_CLASS : 1
UNDERSIGNED_ATTEMPTED : 1
BASE_RESTORATIVE : 1
REFILL_OF : 1
TO_OVERLAPPING : 1
REGARDING_HIS : 1
INITIALLY_AT : 1
CLINICAL_WITHDRAWAL : 1
BELIEVES_TAKING : 1
SC_ER : 2
WHILE_AWOKE : 1
OF_ADJUSTMENT : 1
CONSULT_FOR : 1
STATES_ADDENDUM : 1
OTR_ATTENDANCE : 1
TYPE_OR : 1
HE_ATTRIBUTES : 1
MELLITUS_THERE : 1
MCG_INH : 1
ISSUES_THAT : 1
PC_ADDENDUM : 1
PH_LCSW : 1
AUDIOVISUAL_EVALUATION : 1
THE_LOW : 1
REGIME_HAS : 1
MAY_IF : 1
IN_DX : 1
URINE_OSMOLALITY : 1
ALSO_TO : 1
ON_PLAN : 1
SUPPLIES_MG : 1
BETWEEN_OR : 1
LAST_SMEAR : 1
PATIENT_GOAL : 1
JEWELRY_DISPOSITION : 1
IN_OR : 2
THE_BILL : 1
AFFECT_FULL : 1
FOR_AN : 1
SEEN_BEFORE : 1
RESPONDING_EXERCISE : 1
DENIES_OR : 1
TO_MEMBERS : 1
PROVIDED_PT : 1
VERBAL_RELATED : 1
AT_CHEST : 1
PEOPLE_WITH : 1
REMINDER_LETTER : 2
USED_IN : 1
AFTER_REVIEWING : 1
ADDRESS_LATER : 1
ARM_BAND : 1
SAY_PROPER : 1
ON_DATE : 1
PLACED_AN : 1
CONTI_MULTIDISCIPLINARY : 1
FROM_ADMISSION : 1
RINGS_BEDTIME : 1
WITH_NO : 2
EXT_TO : 2
EYE_THE : 1
WHILE_INITIAL : 1
HE_GOOD : 1
ON_LABEL : 1
NOT_THIS : 2
FOR_COMMENTS : 1
RESIDENT_NOTE : 1
GOT_METHOCARBAMOL : 1
REQUIRE_LMWH : 1
HAS_MUCH : 1
TARTRATE_MG : 1
SHELTER_PER : 1
AT_RESIDENCE : 1
SUICIDE_FACTORS : 1
APPROPRIATE_AND : 1
OXIMETRY_PRESCRIPTION : 1
ASSESSMENT_NEEDED : 1
OF_EXPOSURE : 1
ANCHORAGE_ADDENDUM : 1
URGENT_CARE : 1
THAT_WOULD : 1
OR_MY : 1
GENDER_MARITAL : 1
DRINKS_ZZSWS : 1
ALTERNATIVES_AND : 1
IT_MR : 1
AT_INFORMATION : 1
PROCEDURE_PATIENT : 1
INSTITUTE_SCALE : 1
HAVE_THOUGHTS : 1
EXPERIENCING_VERBAL : 1
BEEN_DISCUSSED : 1
RELIEF_HE : 1
THE_HOURS : 1
TYPE_ATTENDING : 1
OVER_COMMENTS : 1
THAT_SPOKE : 1
AN_PROGRAM : 1
HIM_DISTRESS : 1
DATE_HAND : 1
AND_SA : 1
DENTAL_CLASS : 1
EDIT_INCORRECT : 1
WORTH_SI : 1
FIRST_EPISODE : 1
AN_EXERCISE : 1
APPOINTMENT_SCHEDULED : 1
IF_SIGNATURE : 1
OF_MOVEMENTS : 3
ANALYSIS_NEGATIVE : 1
SUPPORT_HONEST : 1
CONDUCTED_VETERANS : 1
THE_TO : 6
ALERT_ATTENTIVE : 1
OF_SEROQUEL : 1
IS_NEEDED : 1
IS_HISTORY : 1
CONSULT_OTHER : 1
PENDING_MEDICATIONS : 1
POSITION_PATIENT : 1
HDL_HIS : 1
DESIGNED_PLAN : 1
AND_TIME : 3
OXYGEN_CEFTRIAXONE : 1
PATCHES_PLACE : 1
PSYCH_PROGRESS : 1
PRESENTING_SYMPTOMS : 1
PLAN_IS : 1
TREATMENT_SURGERY : 1
ONE_AND : 1
PERSONNEL_NOTIFIED : 1
THEIR_FIRE : 1
OF_NIGHT : 2
HAS_OF : 2
DRINKS_ECF : 1
WAS_DISCHARGED : 1
PT_DID : 1
ACCRETIONS_ON : 1
HEMP_VOM : 1
FOR_SUICIDAL : 1
AT_GIRLFRIENDS : 1
NOTE_NONE : 1
OD_OS : 1
DENTAL_PASCUZZI : 1
HX_MIGRAINE : 1
MEDICATION_THAT : 1
DOING_HOW : 1
AFTER_NURSING : 1
STUDIED_THE : 1
PTSD_IN : 1
SAFDAR_MD : 1
ADDENDUM_CALL : 1
FIRST_CONSUL : 1
NO_ADVERSE : 2
CANCER_AMB : 1
THEY_COME : 1
GROUP_THERAPY : 1
NOT_HELPED : 1
OF_GROUP : 1
REQUESTS_OR : 1
EACH_INCIDENT : 1
HAS_STOPPED : 1
MENTAL_CLINIC : 1
PHYSICIAN_NOT : 3
WELLBUTRIN_FIRST : 1
PATIENT_CHECK : 2
COMMON_COLD : 1
DRUG_JUDGMENT : 1
SEE_STATES : 1
HEALTH_TECH : 1
VETERAN_MORNING : 2
FLAT_AFFECT : 1
YOUR_HOSPITAL : 1
FOR_CONDITION : 1
HUDVASH_TEAM : 1
UPON_RETURN : 1
MOISTURE_OCCASIONALLY : 1
EGD_IN : 1
VERIFIED_BY : 1
AS_NEEDED : 3
DID_PENETRATE : 1
ADDENDUM_OSMOLALITY : 1
MOUTH_TWO : 1
DOWN_BIT : 1
THIS_SET : 1
SEEN_INITIALLY : 1
LIFE_UNDERSTAND : 1
ASSESSMENT_SIGNATURE : 1
SPECIFICALLY_BEEN : 1
THE_NO : 1
HEENT_AT : 1
UPDATED_GIVEN : 1
GO_TO : 2
UNDERSTANDING_DEPT : 1
SERVICE_OF : 1
BY_HEP : 1
BE_OUTSIDE : 1
IS_ADDICT : 1
BUSY_OTHER : 1
MELLITUS_TYPE : 2
OTHERS_APPROACHING : 1
NSAIDS_YES : 1
EVERY_MORNING : 2
AND_DIRECTED : 1
FOR_PT : 1
DISORDER_WITH : 1
SUPERVISION_OVERSIGHT : 1
FLUVASTATIN_YOUR : 1
VITAL_SIGNS : 7
UNSURE_IF : 1
CBC_ARE : 1
ICDCM_HAVE : 1
IN_TREATMENT : 1
RTU_CASE : 1
ME_MY : 1
PT_NEATLY : 1
OPEN_ON : 1
FELT_TO : 1
RAUSCH_RN : 1
SCHEDULING_AT : 1
MONTHS_THAT : 1
BRC_VISION : 1
FOR_PSYCHIATRIC : 1
RISK_ON : 1
MIN_TELEPHONE : 1
HAVE_TYPICAL : 1
OMYELITIS_ICDCM : 1
SOCIAL_PLAN : 1
IS_CURRENT : 1
ID_ON : 1
ASSESSED_ACE : 1
MONITOR_BEHAVIOR : 1
TO_LEARN : 3
SURGERY_INPATIENT : 3
EDUCATION_SIGNATURE : 1
NURSING_IPU : 1
QUESTIONS_ADDENDUM : 1
WITHOUT_MEAL : 1
EVERY_AS : 1
AND_REASON : 1
NURSE_DEVELOPMENT : 1
OTHERS_WILL : 1
NOTE_SEND : 1
PREVENTATIVE_HEALTH : 1
FEELS_ONE : 1
SURGICAL_NO : 1
VETERAN_MET : 1
FEELING_PARANOID : 1
NOTE_STATUS : 1
MAKE_NEW : 1
PILL_IN : 1
UPDATED_COUNT : 1
FEELS_GOOD : 1
HAULER_FOR : 1
IS_EASILY : 1
INFORMED_ANATOMICAL : 1
SETTING_FIRES : 1
ATTENDING_MD : 1
DEPARTMENT_AT : 1
PATIENT_NUMBER : 1
CURRENT_MEASURES : 1
AND_CARE : 1
MA_VETERAN : 1
NEUROLOGIST_WHO : 1
WAITING_FOR : 1
YES_COMMUNICATION : 1
RIGHT_OUTPATIENT : 1
LYTES_CHARACTER : 1
THAT_HAVE : 2
REVIEWING_MR : 1
ON_RESULT : 1
TRIAL_OF : 1
PROVIDED_INDIVIDUAL : 1
JUNE_TH : 1
HAS_APPEARED : 1
MORNING_AM : 1
PROVIDER_STEFANIK : 1
OR_DIAGNOSIS : 1
AT_RECEIVED : 1
FOR_TRIAGE : 1
BE_HAS : 1
CHANGE_IN : 1
AND_WAS : 4
MENTAL_EXAM : 1
MEDICATIONS_INCLUDE : 1
HEP_HAS : 1
NO_AUDIOVISUAL : 1
LIVING_TH : 1
VISION_SUMMARY : 1
COMMENTS_PATIENT : 1
REHABILITATION_AFFECT : 1
CONCUR_WITH : 1
IT_SAFE : 1
ETOH_MEDICATIONS : 1
PATIENT_RAL : 1
IN_VISIT : 1
DESIRE_VISITATION : 1
VI_STATUS : 1
PC_CBOC : 1
TREATED_AT : 1
AND_REACTIONS : 1
SUPPORT_REASSURANCE : 1
REGARDING_MR : 1
OR_TETANUS : 1
MIAMI_APPOINTMENT : 1
APPLICABLE_TYPE : 1
MD_AHN : 1
HIS_CLINICAL : 1
FOLLOW_VISIT : 1
MH_MEDS : 1
AGREED_WAIT : 1
PATIENT_BE : 3
OF_EVENT : 1
BUT_NO : 1
NONV_OR : 1
NOTE_TL : 1
BEING_HOME : 1
OF_TREATMENT : 1
BORDERLINE_NARCISSISTIC : 1
NO_ABNORMALITY : 1
OUTPT_PSYCHIATRY : 1
HAS_IDEATIONS : 1
WITH_US : 1
GICOLONOSCOPY_GI : 1
SUPPORT_AND : 2
FLOWSHEET_VITAL : 1
ADDENDUM_THE : 1
LOOKS_SAFE : 1
SURGERY_HE : 1
SINCE_DISCHARGE : 1
HISTORY_NOT : 1
SCORE_BY : 2
HAD_BABY : 1
CLINIC_WHERE : 1
PT_ACTUALLY : 1
ORTHOPTIC_TRAINING : 1
TO_DEAL : 1
OTHER_PERSONAL : 1
GOOD_RETURN : 1
PM_HUD : 1
HE_DID : 2
PHYSICAL_AND : 1
CARE_MD : 1
CONSTITUTIONAL_COMPLETED : 1
IS_ALERT : 2
NUMBER_NURSE : 1
NO_ORTHOPNEA : 1
AND_APPEARED : 1
ASSESSED_ASSESSMENT : 1
IN_MY : 1
PROLONG_POSTTRAUM : 1
LIFE_NOT : 1
REQUESTED_SWER : 1
REQUIRES_ASSISTANCE : 3
SPERMFLUID_CYST : 1
URINE_AND : 2
PLAN_DISCUSSED : 1
WHICH_DIALYSIS : 1
THE_MEDIAL : 1
OVERNIGHT_WITH : 1
VET_RELATES : 1
IS_DUE : 1
STOPPED_SUMATRIPTAN : 1
ADMISSION_LAST : 1
SATISFACTORY_AND : 1
PROGRAM_DIAGNOSIS : 1
LEFT_PT : 1
SPOUSE_ISSUES : 1
PROMPTED_STAFF : 1
PROBLEM_SAO : 1
OF_MENTAL : 1
THE_HUD : 1
ONE_TIME : 1
APPARENTLY_THE : 1
DT_PRESENTING : 1
TETANUS_PERTUSSIS : 1
CALL_BENIGN : 1
OUTPATIENT_INCLUDING : 1
FALL_ASSESSMENT : 1
OSMOLALITY_LYTES : 1
DURING_NEXT : 1
NEEDED_ASSISTANCE : 1
SURGERY_SPOKE : 1
WT_LB : 2
ATTENTIVE_ORIENTED : 1
TO_HEALTH : 1
DRINKS_BATHROOM : 1
OFFICE_CENTER : 1
ALBUTEROL_INHALER : 1
ABOUT_PT : 1
INCORRECT_SIGNATURE : 1
COMBAT_WITH : 1
CIWAAR_COMPLIANCY : 1
DIAGNOSIS_ON : 1
ALF_WHERE : 1
ML_MG : 1
ACTIVE_NUMBER : 1
IT_TO : 1
STATES_IT : 1
AFFECT_TO : 1
ECF_THAT : 1
CLASS_VI : 1
ORIENTED_HERE : 1
PERSONAL_APPEARANCE : 1
SOLN_CEFTRIAXONE : 1
ALL_SILVER : 1
FOR_COMPLETE : 1
ROOM_NOTE : 1
DO_REPORTS : 1
EVERY_FATHER : 1
PR_BY : 1
FREQUENTLY_AS : 1
QBEDTIME_SETTING : 1
IN_AS : 1
VA_FOR : 1
REPORTS_IN : 1
AND_OTR : 1
WAS_PROVIDED : 1
TAUGHT_SKILLS : 1
TESTS_WILL : 1
THE_LOWER : 2
FEELS_IS : 1
HIS_IC : 1
STATUS_TARTRATE : 1
DICT_CONTINUE : 1
MONTH_PRIOR : 2
MD_YOU : 1
RESULT_HE : 1
OF_NOTES : 1
SESSIONS_PROVIDED : 1
DESIRE_MAKE : 1
DIRECTED_HIM : 1
PULSE_SHIPMENT : 1
VISTA_PATIENT : 1
OPERATIONS_NUR : 1
FOOD_PREDNISOLONE : 1
DECLINED_VACCINE : 1
PERSONAL_HYGIENE : 4
ECHCS_CY : 1
ASKING_GO : 1
CAROL_KALINA : 1
WHICH_NOT : 1
PRIMARY_EMERGENCY : 2
TO_PERMANENT : 1
BAD_THE : 1
PATIENT_DECLINED : 1
VETERAN_PATIENTS : 1
OPIOID_THE : 1
OCT_SITE : 1
THEIR_SATISFACTION : 1
UROLOGY_HE : 1
NUMBER_PROBLEM : 1
COLOR_FOR : 1
CHRONIC_PASSIVE : 1
HER_HUSBAND : 1
OBLIQUE_AND : 1
ACTION_COLLECTED : 1
TIBIA_NONOR : 1
PAIN_VERBAL : 1
PATIENT_MRSA : 1
STUDY_TICAL : 1
OR_HAVING : 1
VA_CINCINNATI : 1
SPEND_BRIEF : 1
COLD_STATES : 1
DIAGNOSIS_LSCHEDULE : 1
TAKING_FIBER : 1
THAT_CAUSING : 1
EVERYTHING_AFLOAT : 1
FOLLOWING_WAS : 1
EDUCATION_ASSESSMENT : 1
REALLY_BEEN : 1
DENIED_SHORTNESS : 1
NEXT_SESSION : 1
BEEN_SENT : 1
TOTAL_MG : 1
OUT_JUN : 1
CORRECT_AND : 1
MANAGMENT_MG : 1
PREOPERATIVE_DIAGNOSIS : 1
HER_APPRECIATION : 1
MED_DONE : 1
ON_TEETH : 1
CHART_REVIEW : 1
PAST_PSYCH : 1
EVERY_ACTIVE : 3
APPROPRIATE_HE : 1
SMOKING_THIS : 1
STAFF_HAMLIN : 1
REASON_VISIT : 2
REPORT_PAIN : 1
STAFF_MORNING : 1
OF_CONDITION : 1
OF_INTENT : 1
FROM_APAP : 1
WILL_GOING : 1
CHIEF_HAVE : 2
DIRECTED_LOGICAL : 1
WAS_CONDUCTED : 1
DAUGHTER_CO : 1
SIDE_AND : 1
PORTAL_HTN : 1
CONTAINING_ALCOHOL : 4
IN_AN : 1
PERFORMED_OR : 1
TWICE_FOR : 2
TUMOR_PATIENT : 1
INTERIM_PLAN : 1
HAS_HAD : 2
DATE_PROBLEM : 1
IP_INITIAL : 1
CONTINUES_TO : 5
SLEPT_TOTAL : 1
NUMBER_LS : 1
YES_REPORT : 2
ASSESSMENT_NOT : 1
EMOTIONAL_DIRECTABLE : 1
ETC_VETERAN : 1
ON_THE : 8
SLIDINGSCALE_IN : 1
AND_INSTITUTE : 1
PMRS_OTHER : 1
ALLEVIATE_ANY : 1
PAST_IT : 1
PAUSE_VETERAN : 1
PAIN_EXAMINATION : 1
WAS_THAT : 1
WHOM_WOULD : 1
INFORMATION_ON : 1
NUMBER_APPOINTMENT : 1
SUICIDAL_CENTER : 1
ING_SHE : 1
REVIEWED_RECONCILED : 1
OF_THE : 21
HYDROCODONE_ACETAMINOPHEN : 1
RELATED_PREOPERATIVE : 1
ACTIVE_EGD : 1
SESSION_BEEN : 1
RESTORATIVE_AND : 1
OF_ZA : 1
CM_EPIDIDYMAL : 1
REMISSION_EXACERBATING : 1
COMPENSATION_THIS : 1
APR_SENSORY : 1
FOR_ASSESSMENT : 1
WOKE_HIM : 1
MANY_INTERESTING : 1
ROTATOR_TEAR : 1
HAS_NOT : 2
THE_COULD : 1
NOT_WALK : 1
STARTED_ON : 2
AND_ADDITIONAL : 1
DOES_PING : 1
EPISODE_HIM : 1
MH_PC : 1
YOM_DX : 1
INTERTON_TIRED : 1
TO_NEXT : 1
MELLITUS_IS : 1
WALK_HURTS : 1
CLOSED_ON : 1
THIS_PCE : 1
GROUP_FRI : 1
VET_TO : 3
FOR_SHOWERS : 1
APPEARS_APPOINTMENTS : 1
LIST_TO : 1
OF_CLINIC : 2
AS_SUPPLEMENT : 1
WARM_NURSING : 1
ON_DURING : 1
WILL_SEEN : 1
SCALE_TO : 1
OF_MEDICATIONS : 1
IS_WITHIN : 1
FOOD_ZZSWS : 1
READY_TO : 1
INSOMNIA_THE : 1
AND_TREATMENT : 1
CYST_EYE : 1
WITH_HIS : 5
FEVER_ELAVATED : 1
HARD_IF : 1
HER_LOOKS : 1
ORIENTED_NO : 1
TO_SOME : 1
FEB_MOVED : 1
LOW_VISION : 1
ACET_OPH : 1
TO_SERVED : 1
OFFICE_THE : 1
WILL_CONTINUE : 3
PRECAUTIONS_IMPLEMENTED : 1
SHORTNESS_BREATH : 1
COMPLETED_HIS : 1
SUMATRIPTAN_HIS : 1
HIS_NURSE : 1
BE_OS : 1
REEXAMINING_HIS : 1
ECHOGENIC_WHICH : 1
AND_CONSCIOUSNESS : 1
ROOM_TO : 1
IS_AFEBRILE : 1
VITALS_STATES : 1
NOTE_TALKED : 1
PRIVILEGES_NURSING : 1
VA_WILL : 1
TIME_FROM : 2
RETURNING_FOR : 1
SEEN_EXAM : 1
ATTENDING_NOTE : 1
IDENTIFIED_COMPREHENSIVE : 1
ORIENTED_TO : 6
WHERE_HE : 2
TOILET_NUTRITION : 1
THE_IEST : 1
HAD_AS : 1
TABLET_DENTAL : 1
RM_PMH : 1
HE_TALKED : 2
TO_MESSAGE : 1
TO_TRIAL : 1
REPORT_NAME : 1
THE_OXIMETRY : 1
HIS_CHIEF : 1
OF_LOCAL : 1
HAVE_PERMANENT : 1
PROVIDER_ANCHORAGE : 1
STATUS_AM : 1
NKA_TO : 1
CONTINENT_OF : 1
TELEPHONE_CARE : 1
STARTING_ORAL : 1
CARDS_APPOINTMENTS : 1
ATTENDING_PHYSICIAN : 3
THE_FACILITATORS : 1
STABLE_FEB : 1
NOTE_OF : 3
AREA_MOUNTAIN : 1
BENIGN_PROLONG : 1
HYDROCELECTOMY_URINARY : 1
DENIES_RECENT : 1
NURSE_CARE : 1
FOR_AXIS : 1
NEEDS_PILL : 1
WITH_JOB : 1
WITH_IMPORVEMENT : 1
NOT_EATING : 1
CIGARETTE_AND : 1
INITIAL_PLAN : 1
NO_OTHER : 1
WALK_INCREASED : 1
YES_MAY : 1
OTHER_LISTED : 1
HAS_HIS : 1
RX_LEARNER : 1
LEFT_SHOUDER : 1
ARE_YOU : 1
AND_RECORDED : 1
WANTS_SEE : 1
FEELING_AND : 1
MANAGEMENT_TO : 1
COMMENTS_SOAP : 1
BRING_REFERRAL : 1
TIME_ALERT : 1
FAMILY_TRAINED : 1
IT_TAKES : 1
PATTERN_INITIAL : 1
VOICE_IN : 1
ARM_SHOWS : 1
YEAROLD_MALE : 1
STATE_HE : 1
PCPS_NURSE : 1
OUT_BREAKFAST : 1
ME_DR : 1
KG_VARIANT : 1
CALLED_FOR : 1
BEEN_TAKING : 2
UNFORTUNATELY_ALSO : 1
FAMILY_PHYSICAL : 1
PULSE_OF : 1
IS_LEG : 1
OUTSIDE_SMOKE : 1
DISPOSAL_VERIFIED : 1
PATIENT_STILL : 1
SI_NO : 2
LB_NO : 1
AND_NOW : 1
FACTORS_WAS : 1
HEALTH_GROUP : 1
ALLERGY_CYCLOBENZAPRINE : 1
OF_HAND : 1
RN_IN : 1
IF_INCORRECT : 1
THE_LEAST : 1
INTERVENTIONS_DESIGNED : 1
IS_CURRENTLY : 2
ADJUSTMENT_DISORDER : 1
GASTROESOPHAGEAL_BUT : 1
SETTING_AND : 1
ARIPIPRAZOLE_TAB : 1
BY_SCORE : 1
PT_DESAT : 1
TEAR_LABRAL : 1
PHYSICIAN_MAD : 1
PROGRESS_AM : 1
REQUESTS_EXAM : 1
GROUP_MEMPHIS : 1
INDEPENDENT_THE : 1
AM_HAND : 1
PALPITATIONS_DOE : 1
EXT_EVERY : 1
YES_DUE : 1
HYGIENE_SHOWER : 1
APPETITE_NO : 1
LOSS_SENSATION : 1
BE_IMPROVEMENT : 1
RESIDE_LOCALLY : 1
SESSIONS_DATE : 3
AGO_THAT : 1
PARTICIPATION_CONTINUED : 1
NO_NUMBER : 2
WRIST_ON : 1
OTHER_UNSP : 1
IN_RAZOR : 1
NUMBNESS_USING : 1
RESTORATIVE_TREATMENT : 1
PATIENT_CLOTS : 1
NASAL_SPECIMEN : 1
HIM_FROM : 1
EXCISION_OF : 1
ICDCM_READY : 1
CLASSES_THE : 1
THAT_LEAD : 1
WITHDRAWAL_SCALE : 1
TAKING_DEGREE : 1
FEVER_AND : 1
OR_IS : 2
IS_THERE : 1
VITALS_WITH : 1
VETERAN_NOT : 1
DOM_123 : 1
REPORT_THEY : 1
IN_SCREEN : 1
SUCH_US : 1
UDS_IS : 1
PROVIDER_PCT : 1
DIAG_AXIS : 1
TO_DISCHARGE : 1
HIS_PARTICIPATION : 1
NURSING_TRIAGE : 2
VERIFIED_VETERAN : 1
SOCIAL_PAIN : 1
IS_AND : 6
REPORTED_TO : 1
HIS_OSAC : 1
TELEPHONE_PLACED : 1
ULA_PATIENT : 1
AND_REASSURANCE : 2
SIGNS_SPECIMEN : 1
RUSSELL_NUMBER : 1
PATIENTS_COMPLAINT : 1
MEDICATIONS_INJECTION : 1
SYSTEMNO_BACK : 1
ONE_BAD : 1
OF_CYST : 2
OF_BOWEL : 3
EVENT_WAS : 1
MCG_ORAL : 2
PT_EAR : 1
OF_UG : 1
LOCATION_RADIATION : 1
SOMETIME_BETWEEN : 1
IDENTIFIED_ANCHORAGE : 1
PATIENT_WAS : 12
THE_DOC : 1
RELIEVE_SWELLING : 1
WAS_KIND : 1
FOHX_PHYSICIAN : 1
OPENING_SPEECH : 1
OBSERVED_TALKING : 1
WAS_BUSY : 1
YES_OUR : 1
GROUP_FIVE : 1
ACCOMPLISHMENT_HE : 1
ABSTINENCE_DISCUSS : 1
OVER_LAST : 1
PT_PATIENT : 1
QMORNING_AND : 2
PERSONAL_BED : 1
HE_SPOKE : 1
OF_PRIMARY : 1
YO_WITH : 1
SCHEDULED_FEB : 1
TIBIA_FIBULA : 1
STAFF_URINE : 1
HERE_HEP : 1
SILVER_FLUVASTATIN : 1
IS_PATIENT : 2
NOS_ORTHOPEDIC : 1
NOTIFY_PCP : 1
ABLE_PARTICIPATE : 2
NO_AHN : 1
THAT_AN : 1
PAINWITHOUT_MOTRIN : 1
DATE_JULT : 1
HOMES_AND : 1
LEGIBLE_YES : 1
PERSONNEL_DATE : 1
ABOUT_TAKING : 1
TOMORROW_BETWEEN : 1
FOR_SECOND : 1
HAVE_MELLITUS : 1
UNTIL_PEOPLE : 1
ADMITTED_THAT : 1
REED_FOR : 1
PRINTED_LIST : 1
AREA_ANCHORAGE : 1
TOBACCO_ENDING : 1
GAIT_TRANSFERRING : 2
PM_TO : 2
AT_FOR : 1
WILL_IF : 1
RELATIONSHIPS_TOTAL : 1
SURGICAL_DEVELOPMENT : 1
WAS_ON : 2
PCP_FOLLOWUP : 1
PATIENTS_WRIST : 1
PATIENT_THE : 9
FOR_CONTRABANDS : 1
TOILET_FOOD : 1
SCREEN_MORNING : 1
NEGATIVE_SCORE : 2
SECONDARY_TBI : 1
HE_KEPT : 1
PATHOLOGY_REPORT : 1
NOTE_HPI : 1
MENTAL_PROVIDERS : 1
LAST_PAIN : 1
INTERVALS_SAYS : 1
ADDENDUM_DECLINED : 1
RELINE_LOWER : 1
SC_ING : 1
CONJ_NEVUS : 1
WEEKLY_PING : 1
OF_GROUPS : 1
OF_IT : 1
EVERY_GROUP : 1
REGARDING_SCHEDULING : 1
ASSIGNED_TO : 2
BUTALBITAL_CAFF : 1
FISH_MG : 1
PROVIDE_SUPPORT : 1
THIS_TOTAL : 1
AND_ABILITY : 1
REPORTS_HE : 4
DRESSED_GAIT : 1
LIST_REVIEWED : 1
CARE_WASHING : 1
CONFIRMED_WITH : 1
INPATIENT_NOTE : 2
VERBALIZED_BMI : 1
HIS_IN : 1
DIFFICULTY_LIFTING : 1
WITH_PHYSICIAN : 2
IN_PROCESS : 1
NOTES_EVALUATION : 1
VETCORE_PRRC : 1
IDEATIONS_HAS : 1
NOTE_TELEPHONE : 1
NOT_SEEN : 2
ALTHOUGH_HAS : 1
NEBULIZER_OF : 1
NOTIFIED_THAT : 1
WITH_ZZECF : 1
OR_MOOD : 1
AREA_STATED : 1
FOR_REPORTS : 1
CALL_ETTE : 1
PENDING_CHARACTER : 1
IMPROVED_YOUR : 1
ABOUT_TICS : 1
CYST_JEWELRY : 1
TIME_SPECIMEN : 1
HOME_BREATHING : 1
RECOMMENED_HE : 1
WOKE_UP : 1
PCP_AND : 1
APPOINTMENT_ON : 1
OR_OXIMETRY : 1
MAKE_SOME : 1
SOME_CHANGES : 1
MOISTURE_MOIST : 1
HE_REQUEST : 1
NOTE_EMPLOYMENT : 1
LIMITS_EMG : 1
COUNSELING_LEFT : 1
APPOINTMENT_RISKS : 1
ADMISSION_TO : 1
CLASS_VET : 1
THAT_WASNT : 1
VARIANT_INFORMED : 1
INTERVENTIONS_LISTED : 1
IN_FLORIDA : 1
TIME_DISCHARGE : 1
IN_NEXT : 1
START_SCAN : 1
COPING_SKILLS : 2
NUTRITION_IS : 1
CHEST_ARE : 1
VETERAN_INDICATED : 1
HIT_HE : 1
AS_OUT : 1
ADDENDUM_SUICIDE : 1
WHICH_HOMEBASED : 1
OTHER_SPECIFIED : 1
SHOULDER_ARTH : 1
THESE_SOME : 1
THIS_MEDICATION : 1
MEDS_BUT : 1
MUCH_INCLUDE : 1
ABOUT_THOUGHT : 1
SOCIAL_HISTORY : 1
PATCH_MG : 1
VIDEOTAPE_XX : 1
YES_ADR : 2
ALERT_FOR : 1
THIS_EVENING : 1
AS_HAS : 1
TO_PELVIS : 1
ICE_OTC : 1
REST_HIS : 2
WT_READY : 1
PRO_CALL : 1
ONE_PAYMENT : 1
UNLISTED_AND : 1
AND_TOLD : 1
TO_AB : 1
123_RTU : 1
ALCOHOL_IN : 4
ASSISTANCE_NO : 1
DRINKS_PASS : 1
ADDENDUM_LAST : 1
HAS_PROBLEMS : 1
VETERAN_IS : 6
YOU_HOW : 2
MOUTH_TWICE : 4
DID_EAT : 1
ALL_DOING : 1
IN_ABDOMINAL : 1
HIS_RIGHT : 1
OBTAINED_DEC : 1
HAVING_GOTTEN : 1
OTHERS_IN : 1
TRIAL_RIGHT : 1
SUCH_AS : 1
MEASURES_BY : 1
DELUSIONS_NONE : 1
BEFORE_DISCHARGE : 1
THIS_VISIT : 1
HAND_RT : 1
MEAL_SET : 1
HE_STARTED : 1
CUFF_TEAR : 1
REHAB_AND : 1
COULD_THAT : 1
SYMPTOMS_OF : 1
TO_YOUR : 1
ADM_DX : 1
RAL_CLINIC : 1
HOURS_AFTER : 1
THAT_MIGHT : 1
INDEPENDENT_TURNS : 2
TREATMENT_INDIVIDUAL : 1
IS_CORRECT : 1
ANXIETY_INCREASED : 1
BY_ME : 1
OF_MIGHT : 1
VERIFY_PATIENT : 1
RIGHT_PERSONAL : 1
RAL_UROLOGY : 1
WORK_HE : 1
PRIMARY_CONTACT : 2
BE_RECONCILLIATION : 1
CARE_FRO : 1
PAIN_WILL : 1
SUMMARY_CALLS : 1
TOLD_ME : 1
PATIENT_ADVISED : 2
OTHERWISE_APPEARED : 1
ME_TO : 1
SUSPECTED_CANCER : 1
RETURN_IN : 1
TITRATION_TELEPHONE : 1
NAME_COMPLETED : 1
SOUNDS_HYPERLIPIDEMIA : 1
LIMITATIONS_ASSISTANCE : 1
CONTRABANDS_NONE : 1
FROM_TOOLS : 1
BRING_AND : 1
AROUND_JEWELRY : 1
GO_FOR : 1
PLAN_ALLERGIES : 1
SECURITY_MODALITY : 1
FEELING_WELL : 1
IOP_OUTPATIENT : 1
LR_SURGICAL : 1
RT_MY : 1
MEDICATIONS_STATUS : 3
TIME_HES : 1
MACHINE_NOT : 1
DRINKS_ACET : 1
OF_PT : 2
FLU_PROTOCOL : 1
OR_STOOLS : 1
AID_TITRATION : 1
LIGHTHOUSE_FOR : 1
STAFF_AS : 1
PATTERNS_MINUTE : 1
REGARDING_YOUR : 1
MORNING_BETWEEN : 1
BRIEFLY_BUT : 1
LE_EDEMA : 1
CURRENT_OUTPATIENT : 1
MEDICATION_ALLEVIATE : 1
DISCUSS_TREATMENT : 1
SMOKING_ELIMINATION : 1
NOT_LIVING : 1
WITH_VETERANS : 2
THINK_THAT : 1
TOLD_HEALTHCARE : 1
RESULT_ABNORMAL : 1
AN_IS : 1
WAS_TAKEN : 1
CARE_NURSE : 2
BUT_OTHERWISE : 1
CLINICAL_SETTING : 1
HTN_PHONE : 1
BAND_PATIENT : 1
SIGNIFICANT_OTHER : 1
EXTRACTION_ERUPTED : 1
EXAM_WITH : 1
APPT_GICOLONOSCOPY : 1
IS_NOT : 4
ME_PAIN : 1
RECENT_OF : 1
ON_HOME : 1
VETERAN_BRACE : 1
OR_WALKING : 1
HIS_SISTER : 1
TRAINING_ICDCM : 1
TRANSPORTATION_TO : 1
SHOULD_ADDENDUM : 1
TO_MR : 1
RETURN_HIS : 1
SPECIFICALLY_HAS : 1
IN_YES : 1
HAND_DRY : 1
REMOTE_MEMORY : 1
PROBLEM_MOD : 1
MEDICAL_RINGS : 1
CONTAINING_IN : 3
WHICH_NEGATIVE : 1
DISPLAY_FROM : 1
GROUP_DESIGNED : 1
STATES_AGREE : 1
OF_PAIN : 3
AND_EYES : 1
LACKS_OF : 1
VISIT_FEB : 1
STAFF_TO : 1
THIS_MANAGE : 1
AS_AN : 1
LENGTH_CAROL : 1
VISUAL_PLAN : 1
FULL_INPATIENT : 1
INCLUDING_IOP : 1
CALL_THE : 1
ADDENDUM_TO : 1
HYGIENE_BED : 1
THE_DIFFICULTY : 1
YES_EGD : 1
THURS_IN : 1
IMPAIRMENT_AT : 1
THE_CLINICAL : 1
SCHEDULED_TIME : 1
ON_SKILL : 1
VALVE_NO : 1
BUT_CAN : 1
PLAN_CONTINUE : 1
GIVEN_RED : 1
VISIT_MIN : 1
INITIALLY_SEEN : 1
HIS_HOME : 4
DOING_TIME : 1
GRANDKIDS_NO : 1
NURSING_PHONE : 1
THE_MONTH : 3
WAS_HEARTTOHEART : 1
PO_FOR : 1
COULD_BE : 1
AND_STATUS : 1
RESIDENT_CHO : 1
HEADACHE_SEARCHED : 1
HAS_STARTED : 1
IS_REGULAR : 1
HISTORY_INTERDISCIPLINARY : 1
FROM_THE : 1
COLOR_MOBILITY : 1
FOR_DEPRESSION : 1
LETTER_TO : 1
FOR_CIWAAR : 1
IDENTIFIED_PULSE : 1
PAIN_THESE : 1
ABNORMALITY_FOUND : 1
IS_YEAROLD : 1
FEELS_ORE : 1
WAS_DUE : 1
WORRIED_ABOUT : 1
GENITAL_PTSD : 1
CLOSED_SOCIAL : 1
TO_WEAR : 1
RECEIVED_VETERAN : 1
SWELLING_WORSENING : 1
MAKE_DISORDER : 1
IS_GIVING : 1
READING_AS : 1
AVAILABLE_TO : 1
PROCEDURE_REMOVAL : 1
LEAVING_VACATION : 1
KEEP_SAFE : 1
BLASTS_EXPERIENCED : 1
SO_ITS : 1
DISPOSITION_PCCNURSING : 1
HIS_INJECTION : 1
AMOUNT_FROM : 1
ARRANGED_AOD : 1
PM_LENGTH : 1
CLINIC_PCT : 1
OS_PTSD : 1
DRINKING_BUT : 1
COMPLAINT_RECALL : 1
LE_HAMLIN : 1
PAIN_THERAPY : 1
DID_BRING : 1
PROCEDURESUPINE_OF : 1
IN_OROBASE : 1
TIME_LS : 1
STRESS_CONDITION : 1
OL_NO : 1
DEC_PERSONAL : 1
SOMATIZATION_DISORDER : 1
BREATHING_CONSTIPATION : 1
LIKELY_WAS : 1
VITALS_ARE : 1
WHOM_MD : 1
AXIS_PERCEPTION : 1
EAT_TEETH : 1
ADR_ENTERED : 2
PHONE_AVAILABLE : 1
IPU_PLAN : 1
BETWEEN_OFFICE : 1
SERVED_ON : 1
PLEASE_CALL : 1
ALPHA_RIGHT : 1
MEMORY_GROSSLY : 1
BED_INDEPENDENT : 2
HUD_GROUP : 1
AT_FROM : 1
KEEP_THERAPY : 1
PCCNURSING_RT : 1
BE_BENEFICIAL : 1
ATTITUDE_HAVE : 1
SAYS_WAS : 2
BY_NEUROLOGIST : 1
OF_AXIS : 1
CONFERENCE_FROM : 1
ON_DIET : 1
PASS_TO : 1
ODY_RETINA : 1
RETURN_INCREASE : 1
MO_HAS : 1
MR_HELD : 1
COMPLAINT_PCCNURSING : 1
HOUR_LINE : 1
SWELLING_ONGOING : 1
REFILL_MEDICATIONS : 1
MENTAL_NONE : 1
OUT_OF : 3
AGENCY_USED : 1
PERSON_TIME : 4
FOUND_WAS : 1
GAIT_INTERIM : 1
COMPLETION_DATE : 1
APPOINTMENTS_ONE : 1
CAN_HAPPEN : 1
PROBLEMS_ALERT : 1
PRIMARY_NONVA : 1
THE_USED : 6
PREOPERATIVE_NURSING : 1
THIS_EVENT : 1
SUMMARY_PHONE : 1
THE_CLINIC : 4
IS_WELLNOURISHED : 1
OTHER_CLASS : 1
PHONE_WAS : 1
ISSUES_NOTE : 1
FIRST_TIME : 1
FELT_FINGERTIP : 1
OFFICE_TO : 1
DISCUSSED_WITH : 3
TEAM_NOTE : 1
PAST_ASSESSMENT : 1
CALLED_PATIENT : 1
HELPING_DO : 1
SHOULDER_AGE : 1
HE_TRANSFERRED : 2
RESULTS_ACTIVE : 1
NOTE_FULL : 1
LV_TOMORROW : 1
NO_TIME : 1
NEXT_VASH : 1
ED_AMOUNT : 1
MOBILITY_ZZECF : 1
THE_OFFICE : 1
RISK_PAIN : 1
USUAL_FOR : 1
DENIES_DEPRESSION : 1
PROVIDER_CURRENT : 1
WILL_RELINE : 1
PARTICIPATE_ADDENDUM : 1
SOLN_DROP : 1
HOME_CARE : 2
ON_THURS : 2
AGREES_HE : 1
ORIENTED_VERY : 1
PERFORMED_NUR : 1
CENTER_THE : 1
SEP_BY : 1
GROUP_ADDENDUM : 1
LEFT_LEG : 1
VETERAN_ALSO : 1
AND_INSTRUCTED : 1
SETTING_THESE : 1
FACE_IS : 1
AT_DEL : 1
METOPROLOL_MG : 1
NAME_PREOPERATIVE : 1
ENCOUNTERS_PATIENT : 1
DIET_MEDICATIONS : 1
NOT_HIT : 1
PAC_OF : 1
BREATHING_UNSPECIFIED : 1
EXPECTED_THAT : 1
TREATMENT_RESIDENT : 1
THIS_TIME : 3
PROVIDED_PRINTED : 1
BEEN_OBSERVED : 1
LIST_GIVEN : 1
PRRC_RECOVERY : 1
ROOM_FOOD : 1
BUT_HARBOR : 1
CONTACT_NORMAL : 1
NEED_TO : 1
SERVICE_BRING : 1
IN_CPRS : 2
NONVA_ARIPIPRAZOLE : 1
BENT_IN : 1
ANTISOCIAL_NARCISSISTIC : 1
AGENCY_SHE : 1
FROM_HE : 2
AGREES_THAT : 1
AND_SOB : 1
GOOD_WAS : 1
THOUGHT_WITH : 4
SEEN_AND : 2
AND_EDUCATION : 1
PERSONAL_SHOWER : 1
NOS_COMING : 1
TO_APPOINTMENT : 1
COPING_TO : 2
AXIS_DX : 1
BY_VISTA : 1
PLEASE_NOTE : 1
CONSENT_WITH : 1
COLLECTION_ARE : 1
OR_REMINDER : 1
RADIOLOGY_RECONCILIATION : 1
ANXIETY_NOS : 1
HERE_MET : 1
HAD_WITH : 1
CORONARY_TEACHING : 1
HYGIENE_SPONGE : 1
TO_EAT : 1
MH_TRP : 1
BY_ONE : 1
ORIENTED_WORK : 1
REPORTED_DESIRE : 1
CERTIFICATE_MONTHS : 1
TO_PAIN : 2
FROM_NASAL : 1
ESOPHAGEAL_PT : 1
DEPRESSION_VETERAN : 1
NUMBING_TO : 1
PATIENT_ABLE : 4
MOBILITY_ADJUSTMENT : 1
NO_VERBAL : 1
MONTH_WT : 1
WAS_SHOW : 1
ACTUALLY_FOR : 1
SAYS_WILL : 1
HE_NEEDED : 1
REPORT_NEW : 1
CONSEQUENCES_NEUROLOGY : 1
AND_SIGNS : 1
MEDICAL_PROBLEMS : 1
WHY_HASNT : 1
MISCELLANEOUS_PRIMARY : 1
PM_TEMP : 1
PRIMARY_NSC : 1
READING_PAPER : 1
JELLY_TOP : 1
OR_OF : 1
BUTALBITAL_MG : 1
NIGHT_PERSONAL : 1
ALPHA_TRIAL : 1
SETTING_FRIEND : 1
ABOUT_MONTHS : 1
PS_HOURS : 1
MOVEMENT_TO : 1
IN_STAFF : 1
ADVISED_DISCUSS : 1
FOR_SUPERVISOR : 1
NOTE_HEIGHT : 1
DUE_VETERAN : 1
NURSING_FLOWSHEET : 1
REQUIRES_NO : 3
JUNE_BRC : 1
VS_SOMETIME : 1
DESCRIBES_THE : 1
REMOVED_LIKELY : 1
ABOVE_ASSESSMENT : 1
MORNING_FUTURE : 1
HIS_SKILLS : 1
WASNT_VERY : 1
ORDERED_UDS : 1
COOPERATIVE_HAVE : 1
TRANSFERRED_TO : 2
NEGATIVE_VERBAL : 1
WITH_LIGHTHOUSE : 1
TO_BUTALBITAL : 1
POSSIBLE_EQUAL : 1
WOULD_HOPE : 1
OSAC_PARTICIPATION : 1
TIME_ASSESSMENT : 2
HOURS_FOR : 1
POSTED_IS : 1
DISPOSITION_INTAKE : 1
HUD_VASH : 2
AND_ABSTINENCE : 1
PASCUZZI_WHAV : 1
PT_WAS : 5
DEPARTMENT_EXT : 1
BAL_NEGATIVE : 1
CORONARY_VITAL : 1
AUG_EH : 1
CORRECT_UNIT : 1
APPOINTMENTS_PHYSICIAN : 1
ORAL_INHALE : 1
NONE_VERBALIZED : 1
THE_DINNER : 1
OF_OMYELITIS : 1
THE_BEACH : 1
FAMILY_GIVEN : 1
RECENT_ALCOHOL : 1
BEFORE_FROM : 1
NARCOTIC_RENEWAL : 1
PATIENT_SIGNIFICANT : 1
PND_EDEMA : 1
OUT_REST : 1
COULD_PATIENT : 1
AGREED_TO : 2
SAFE_UNIT : 1
OF_DI : 2
BY_DOCTOR : 1
RESULTS_OF : 1
HAS_RAL : 1
DIFFICULTIES_NO : 1
PCP_OF : 1
DURATION_VISIT : 1
ORTHOPNEA_PND : 1
RADIATING_THE : 1
FROM_ANDRE : 1
PSYCH_IN : 1
ORTHOPNEA_PATIENT : 1
THERE_FALL : 1
PROBLEMS_PATIENT : 1
VERY_AND : 1
NO_AT : 4
FLUCONOZOLE_SEP : 1
CASE_MANAGER : 1
DATE_MOMETASONE : 1
TIME_NOT : 1
PROBLEM_DATE : 1
TESTS_TO : 1
AND_ACTIVITY : 1
STUDY_IS : 1
ON_WHERE : 1
WILL_PRIMARY : 1
OL_LOWERING : 1
WITH_RECENT : 1
KNEE_IMMOBILIZER : 1
CAN_STRAIGHTER : 1
NOTE_TIME : 1
INDICATED_READINESS : 1
ON_REPORT : 1
ML_NO : 1
ATTENDED_MESKENAS : 1
VISIT_REQUEST : 1
SITE_HIP : 1
IN_MO : 1
FOR_TEAM : 1
TRANSFER_HE : 1
TIME_YES : 2
COPY_PROVIDED : 1
FROM_SELF : 1
NURSING_THE : 1
OR_DIPHTHERIA : 1
RT_ARM : 1
PROGRAM_FOR : 1
MEMPHIS_VETCORE : 1
BREASTFEEDING_PATIENT : 1
HIS_PRESCRIPTION : 1
SMOKING_BOWEL : 1
IER_HE : 1
MOVEMENTS_SHIFT : 3
DIET_LB : 1
TO_EXERCISE : 1
AS_HE : 3
RELIEF_REQUESTED : 1
CANCER_CARE : 1
COMMENTS_PRESSURE : 1
STATUS_MS : 1
THE_MONTHS : 1
ANESTHESIA_RAL : 1
HAVE_ABOUT : 1
PATIENT_ALERT : 1
SEROQUEL_UG : 1
DENIES_ALCOHOL : 1
FRIEND_HIS : 1
ARTERY_TEACHING : 1
MANAGER_032511 : 1
REVIEW_OF : 1
WM_VETERAN : 2
WT_KG : 2
SPEECH_RRR : 1
PROVIDED_NURSING : 1
KIND_OF : 1
EDUCATION_BY : 1
AND_WILL : 3
THIS_PRIMARY : 1
ANTIBIOTIC_WE : 1
FOR_GROUP : 1
COLOR_CONSISTENCY : 1
WAS_TREATMENT : 1
NUTRITION_PATIENT : 1
APPROVED_BRC : 1
CLEANED_IN : 1
RESPIRATION_YES : 1
TO_WIFE : 1
AGE_PTSD : 1
WITH_BASCOM : 1
HE_THAT : 5
WK_HE : 1
STRENGTH_OUTPUT : 1
ANATOMICAL_RADIATION : 1
HDL_HAS : 1
REPORTS_OF : 1
VAMC_VIST : 1
DIRECTED_AND : 1
NIGHT_BRC : 1
HE_WITH : 1
REEXAMINING_DEFINITION : 1
RESEARCH_LID : 1
REMAINING_THE : 1
PAIN_BREAST : 1
THE_REST : 3
IN_CM : 4
MD_SAFDAR : 1
ELAVATED_VITALS : 1
TO_HER : 1
IN_SAF : 1
THE_MACHINE : 1
CHRONIC_TREATMENT : 1
REACTIONS_NOTED : 1
CURRENT_DOSE : 2
UP_THERAPY : 1
LABRAL_TEAR : 1
PAIN_COMFORT : 1
FIRE_AFTER : 1
CONTINUES_BE : 2
MANAGEMENT_UNLISTED : 1
CONCERNS_PATIENT : 1
PROBLEM_THOUGHT : 4
TO_SWELLING : 1
NOT_SOME : 1
BUT_BENT : 1
PULSE_STATES : 1
ASSIGNED_CALLER : 2
CARE_CONTACT : 1
MEDICATIONS_HIS : 1
UPPER_BODY : 1
THROUGH_REMINDER : 1
PRESCRIBED_NURSING : 1
PATIENT_AND : 3
REPORTS_THE : 1
WAS_BEGAN : 1
OSMOLALITY_OSMOLALITY : 1
INCLUDING_LOCATION : 1
NOTE_ECHO : 1
CAREGIVER_STATING : 1
BEEN_NONVA : 1
AND_UPDATED : 1
CONTACT_PATIENT : 1
IF_POSSIBLE : 1
AT_HUD : 1
ORAL_TO : 1
PROGRAM_POSTOP : 1
PLACE_ASSISTANCE : 1
BEEN_HEARING : 1
ENT_ROOM : 1
FENTANYL_PATCH : 1
INDICATE_THAT : 1
OF_USE : 1
EYEBALL_ADJUSTMENT : 1
AND_APPEARS : 1
HER_MEDICINES : 1
FOLLOW_UP : 3
MG_TAB : 16
NEW_FUTURE : 1
IN_THE : 25
NOTE_VETERAN : 1
BELL_PER : 1
RISK_VETERAN : 1
FOOD_MEAL : 1
PAIN_AND : 3
PAIN_MONTHS : 1
STUDENTS_UNIT : 1
MDS_CARE : 1
VETERANS_HAD : 1
WITH_DIAG : 1
PSYCH_ADMISSION : 1
HERPES_PTSD : 1
WAS_WITH : 5
DROPS_OUT : 1
SUPPLIES_DSM : 1
NOTE_NEW : 1
UPDATE_GROUP : 1
PROTECTIVE_IN : 1
PMH_DEPRESSION : 1
RECOMMENDATION_COMMENT : 1
WOULD_THE : 1
ING_STATES : 1
DX_PHONE : 1
MIN_HYPERTENSION : 1
ML_GENERAL : 1
WIFE_THE : 1
ANY_CHANGES : 1
INDICATED_THAT : 1
RESPONSIVE_RECENT : 1
NOTE_THROUGH : 1
SITE_PATIENT : 1
FOR_MR : 2
NOTE_OTHER : 1
CARE_ORTHOPTIC : 1
INPATIENT_MOTIVATION : 1
CONSUMED_OR : 1
FOR_WAS : 3
NURSING_STAFF : 1
RNBC_ATTENDED : 1
TIME_BUT : 2
NOT_HAVE : 1
AND_HAS : 5
IF_THROUGH : 1
HEENT_NC : 1
PING_PATTERN : 3
MIN_TO : 1
CRISIS_AND : 1
CHOOSING_ATTEND : 1
SPEECH_LOW : 1
THAT_READ : 1
FOR_SERVICES : 1
XYDS_INCH : 1
MINUTES_FOR : 1
TARZADONE_OF : 1
DOCUMENT_NOTES : 1
MORNING_TO : 1
RECEIVED_IN : 1
PND_LE : 1
PROTECTORS_PLACE : 3
APPEARS_ANGRY : 1
FASHION_LORATADINE : 1
HAS_REALLY : 1
PAPER_FRO : 1
STUDIED_IN : 1
CHART_PATIENT : 1
PHYSICIAN_TO : 1
TOTAL_OF : 2
VASH_SOCIAL : 1
ADDITIONAL_INFORMATION : 4
TIME_SCREEN : 1
RESULTS_RIGHT : 1
THIS_ON : 1
LAB_NO : 1
NERVE_ROOTS : 1
NO_FOLLOWING : 1
THAT_PEOPLE : 1
WITH_FOOD : 1
URINE_OR : 1
DO_HT : 1
TO_POINT : 1
ALL_MEMBERS : 1
MOTIVATION_APPETITE : 1
MAKE_PRIMARY : 1
BE_TO : 5
DILTIAZEM_FULL : 1
APPLICABLE_TREATMENT : 1
ANA_VICTIM : 1
PARTICIPATED_IN : 2
TALKED_TO : 2
LIKE_TO : 1
WILL_FOR : 1
APPEARANCE_CLINICAL : 1
RISK_BASED : 1
BLADDER_DISORDER : 1
GAIT_RECENT : 1
EXPECTED_AN : 1
SOME_PROBLEMS : 1
FORESKIN_ALLERGIES : 1
EXAM_TO : 2
VETERAN_BEEN : 1
PAST_MH : 1
PROCESS_ON : 1
STRESS_PROBLEM : 1
INFORMED_NEED : 1
ORIENTED_AND : 1
CONTACT_HOUR : 1
IN_PLEASE : 1
CLINICALLY_AN : 1
MOOD_SECONDARY : 1
INSTRUCTIONS_ICE : 1
NOT_TO : 2
TO_TEETH : 1
BIRCH_HE : 3
RN_SURGICAL : 1
SOCIAL_SECURITY : 1
HE_HAD : 2
SYMPTOMS_VETERANS : 1
OTHER_AT : 1
EVENING_PT : 1
HAD_AN : 1
MG_DL : 1
EQUAL_STRENGTH : 1
BLUE_SCORE : 1
VITALS_ENTERED : 1
WHICH_AFTER : 1
HIS_INITIAL : 1
COMING_TOMORROW : 1
SCREEN_WILL : 1
COMMENTS_ADDENDUM : 1
ENERGY_IMPROVED : 1
NOT_HELPING : 1
TO_MENTAL : 2
PSYCHOSIS_RECENT : 1
BP_WRIST : 1
HE_ORE : 1
TOMORROW_NOT : 1
OS_SOFT : 1
MORE_PEOPLE : 1
PSYCH_INITIAL : 1
TIME_WE : 1
THE_APR : 1
THAN_HE : 1
OR_HISTORY : 1
WAS_PREVENTATIVE : 1
TO_DX : 1
ISSUES_MY : 1
CALL_RESCHEDULE : 1
HIS_GRANDKIDS : 1
CARE_SHAMPOO : 1
KEEP_MENTAL : 1
THE_AS : 2
PROCESS_GOAL : 1
CALLED_QUESTIONS : 1
REGARDING_HAVING : 1
GLAUCOMA_FOR : 1
ABOUT_TESTS : 1
TEETH_APPROVES : 1
BONE_AND : 1
PATIENTS_STATED : 1
AND_TEAR : 1
SYMPTOMS_ANESTHESIA : 1
PATIENT_CONTINENT : 4
FOREGO_TO : 1
THROUGH_URGENT : 1
YOU_EVER : 1
WITNESS_COORDINATOR : 1
TELL_NOTES : 1
LOWERING_PEDAL : 1
PLEASE_THAT : 1
ACCOMPANIED_HIS : 1
RED_DISEASE : 1
ANCHORAGE_MENTAL : 1
KEEP_HEALTH : 1
AND_NURSING : 1
GROUP_DISCLOSED : 1
MD_STEADY : 1
LITTLE_BUT : 1
OPHT_SOLN : 2
MY_THEY : 1
QID_ADMISSION : 1
SOFT_OCCASIONALLY : 1
VETERAN_HISTORY : 1
TARTRATE_TAB : 1
VETERAN_CALLING : 1
SUN_IT : 1
DISCUSSION_THE : 1
FAIR_APPETITE : 1
INDIVIDUAL_STILL : 1
SURGICAL_PATHOLOGY : 1
APPT_IN : 1
HEARD_WRETCHING : 1
OUTPATIENT_GRIEF : 1
GOAL_WORKING : 1
ON_TYPICAL : 1
HE_REQUESTED : 1
APPETITE_FAIR : 1
OFFER_SUPPORT : 1
AS_REQUESTED : 1
NEUROLOGIST_DESCRIBES : 1
HAND_PAC : 1
GROOMED_APPEARANCE : 1
HOURS_COMMENT : 1
UPDATED_LIST : 1
COLOR_BLUE : 1
DUE_PROBLEM : 1
DEPT_NURSING : 1
BACK_CHIEF : 1
IN_SCISSORS : 1
TO_FROM : 2
NO_OF : 2
MEDICAL_CENTER : 1
BEDSIDE_LEFT : 1
ENCOUNTERS_UNDER : 1
OF_WORK : 1
VACCINE_HCL : 1
NICOTINE_DEPENDENCE : 1
DESAT_OVERNIGHT : 1
BUT_SHE : 1
SELF_THAT : 1
ISSUES_VITAL : 1
MANAGE_LIVE : 1
DEPRESSION_PATIENT : 1
INTO_NEIGHBORS : 1
ACTIVE_HISTORY : 1
VISUAL_ACUITY : 1
NOTIFIED_CALLED : 1
BEDTIME_TRANSFER : 1
OR_TOMORROW : 1
OPENANGLE_OS : 1
ENTER_UNSPECIFIED : 1
WERE_ORDERED : 1
DISCOVERED_TO : 1
PARTIAL_CUFF : 1
STANDARD_FALL : 1
PG_CEC : 1
IN_PING : 1
THIS_AN : 1
HAVING_ENOUGH : 1
CONSULT_RIGHT : 1
MOBILITY_EASILY : 2
ARRIVING_HIS : 1
MINUTES_MESKENAS : 1
YOU_HTN : 1
CORRECT_CERVICIS : 1
DISCUSSED_FINDINGS : 1
KNEE_ON : 1
WHEN_APPOINTMENT : 1
WAS_NO : 2
TO_DEPRESSED : 1
CORTICOSTEROID_USED : 1
STATUS_WILL : 1
REHAB_THE : 1
RIGHT_TROCHENT : 1
NARCOTIC_AGREEMENT : 1
RN_WILL : 1
YOU_MANY : 1
CONTACT_VS : 1
APPEARED_TO : 2
CLINIC_NURSING : 1
VAMC_WPB : 1
IN_MENTAL : 1
CODE_HC : 1
MAY_WELL : 1
CAUCASIAN_VIETNAM : 1
MAJOR_PERFORMED : 1
HER_NAME : 1
PHYSICIAN_ON : 1
IN_COLOR : 1
RESPONSES_WAS : 1
VIEWS_POINT : 1
BEACH_HIS : 1
HANDICAP_FORM : 1
WILL_MAILED : 1
FUTURE_APPOINTMENTS : 2
DEL_THE : 1
SUPERVISION_ENCOURAGEMENT : 1
SENSORY_STUDY : 1
CARE_DUE : 1
PROCEDURE_CRNA : 1
NANCY_ACETAMINOPHEN : 1
WAS_THROUGH : 1
ALCOHOL_OR : 1
PRESENT_CORONARY : 1
HOME_ARRANGED : 1
ACTIVE_FATHER : 1
HIM_WHEN : 1
GENERAL_INPATIENT : 2
ADDRESS_ABOVE : 1
SOME_CURRENT : 1
ASSISTANCE_SHE : 1
LAST_LIFTING : 1
DATE_FEET : 1
CALLING_HANDICAP : 1
RESPONDING_WAS : 1
WOMENS_DEAR : 1
WORSENED_SHE : 1
MAY_FILLED : 1
PT_ANY : 1
TAB_MG : 3
EYE_NORMAL : 1
IS_DIET : 1
CHOOSING_TO : 1
FINGERTIP_FINGERTIP : 1
BE_KEPT : 1
LIST_ALL : 1
COORDINATOR_ATTORNEYS : 1
PM_VASH : 1
NUMBER_AS : 1
AFTER_INCIDENT : 1
BED_TO : 1
DURING_LAST : 1
SON_PROVIDER : 1
CARE_REVIEW : 1
HE_DOES : 1
NAME_OF : 1
LOOKING_THE : 1
OF_ENDING : 1
TALKED_HOW : 1
DIMASCIO_NANCY : 2
LAST_WAL : 1
THE_LEVOTHYROXINE : 1
ADMITS_SETTING : 1
PROBLEM_ALTERED : 1
CLASS_PARTICIPATED : 1
NORMAL_EMG : 1
CRISIS_LINE : 1
ALERTS_BEEN : 1
TIME_PT : 1
HIS_TIME : 1
DISEASE_HOME : 1
SEE_BELOW : 1
NO_COMPLAINTS : 1
ON_VERBAL : 1
DEC_RESTED : 1
OM_SKILLS : 1
HE_BEING : 1
LAST_FIRST : 1
TAKING_IS : 1
TAKE_ONE : 10
AS_UNTIL : 1
HIS_PHYSICIAN : 1
ALF_PLACEMENT : 1
PERCEPTUAL_CIRRHOSIS : 1
HE_GASTROESOPHAGEAL : 1
AT_ACTIVE : 1
COORDINATOR_STATE : 1
FINGERTIP_TO : 1
REDIRECTION_REASSURANCE : 1
WITH_DEPRESSION : 2
LOSS_AND : 1
AND_MEAL : 1
ORI_CALL : 1
ACUITY_RESULT : 1
ZZECF_NOTE : 2
RESULTS_ARTERIAL : 1
OF_AT : 1
DRIVING_SITTING : 1
YOU_DOING : 1
MEDICATION_USED : 1
VACCINE_BUSPIRONE : 1
CONSUMED_PROVIDED : 1
VETERAN_THE : 3
MR_SKIPPED : 1
SESSION_INFORMATION : 1
STAFF_AND : 1
WENT_OUT : 1
PROBLEMS_USES : 1
MEDICATIONS_HYPERTENSION : 1
MEDICINES_BUT : 1
VETERAN_SEEN : 2
OTHER_NUMBER : 1
IC_PATIENT : 1
AS_THOUGH : 1
DESAT_ASSOC : 1
VISTA_DISPLAY : 1
OWN_FIRE : 1
RECONCILED_ON : 1
MANAGEMENT_SOCIAL : 1
OVER_RIGHT : 1
CFCF_INHL : 1
EVALUATION_BY : 2
END_IC : 1
SPECIMEN_OBTAINED : 1
DISC_REPORTS : 1
TRIAGE_READING : 1
NUMBER_BOWEL : 3
CERVICIS_MUSCLE : 1
THE_COUNTER : 1
TREATMENT_SIDE : 1
TEST_MEDS : 1
AND_THAT : 1
HIS_POSTTRAUMATIC : 1
SELF_DISCLOSED : 1
YRS_THE : 1
SWELLING_DIABETES : 1
SUMMARY_FOR : 1
DWIGHT_HOW : 1
MALE_IF : 1
MOUTH_CARE : 1
AND_CLINICAL : 1
ECP_NURSING : 1
CP_DENIES : 1
LUMPS_THE : 1
EASILY_UNFORTUNATELY : 1
PREVIOUSLY_OM : 1
WITH_OVERNIGHT : 1
NOT_HAVING : 1
ON_FEB : 2
RISK_EVERY : 1
HONEST_FULL : 1
SINCE_TREATMENT : 1
HAS_HELPED : 1
PAST_CALL : 1
DIAGNOSIS_CHRONIC : 1
AND_MEMORY : 1
HOURS_ACTIVE : 1
WILDCATS_ALL : 1
ASSISTANCE_PAIN : 1
EH_NEVUS : 1
RETURNED_MED : 1
THERAPY_WI : 1
URINARY_INCONTINENCE : 1
TO_TOMORROW : 2
PAIN_NO : 2
ASSISTANCE_WITH : 1
ALTERNATIVES_POSSIBLE : 1
ABOUT_AGO : 1
ACE_POLAR : 1
ACTIVE_INCLUDING : 1
CHEST_CP : 1
ADVISED_TO : 3
REPORT_SSN : 1
YES_NURSING : 1
LAST_MONTH : 1
WAS_USING : 1
THE_ABOVE : 2
PAP_SMEAR : 2
OF_WHOM : 1
BEING_BEST : 1
WAS_GIVEN : 2
ADMITTED_HE : 1
YOURE_GOOD : 1
MEETING_THE : 1
PROVIDER_HOURS : 1
MOST_THE : 1
AID_TIME : 1
ASSISTANCE_VITALS : 1
INPT_AND : 1
CONSIDERABLE_IF : 1
TOBACCO_USE : 1
ASSISTANCE_OF : 1
LAST_MONTHS : 1
OF_ON : 1
NUMBING_MEDICATION : 1
THEN_RETURNED : 1
SEEKING_ASSISTANCE : 1
BY_TWO : 1
IS_ALLERGIES : 1
OS_NORMAL : 1
TO_CONTINUE : 1
ASSESSMENT_REALITY : 1
AND_CAME : 1
BATH_ASSISTANCE : 1
NOTE_ELIGIBILITY : 1
FOR_TIME : 1
NOS_TOMORROW : 1
EVERY_FOR : 3
WITH_RESEARCH : 1
EDUCATION_THE : 1
PROBLEM_FOCUSED : 1
SOCIAL_NUMBER : 1
REQUIRE_POST : 1
COME_TO : 1
SEE_UROLOGY : 1
POSTTRAUM_STRESS : 1
VS_ARE : 1
RAZOR_SUICIDAL : 1
MACHINE_VOICE : 1
FROM_PBC : 1
SOAP_NOTE : 1
NAPPING_TIME : 1
TPN_GOALS : 1
PRIMARY_ELIGIBILITY : 1
COPY_WAS : 1
LAMISIL_AS : 1
TO_OF : 1
INTAKE_HYDROCELECTOMY : 1
SEX_IF : 1
TO_SPEAK : 1
TO_WANTS : 1
SUCCESSFUL_VIGAMOX : 1
LEAVE_PCP : 1
VISION_LOSS : 1
PHYSICIAN_ODY : 1
ADEQUATE_HEARTTOHEART : 1
NURSING_SPECIALTY : 1
NEATLY_DRESSED : 1
LEG_PAIN : 1
TEMP_IF : 1
SPONGE_ASSISTANCE : 1
PT_AAOX : 1
HER_OUTPATIENT : 1
DISCUSSED_THE : 4
TOILET_COLOR : 1
CREDITS_RECEIVES : 1
RELATES_CAN : 1
MOUTH_BEDTIME : 1
YES_HES : 1
THE_IDENTIFIED : 1
LISTED_APPOINTMENT : 1
FALL_SCREEN : 1
THE_ADDITIONAL : 1
ON_ANA : 1
CHART_MAJOR : 1
SPECIAL_OR : 1
TEMPERATURE_NURSE : 1
AND_FEELS : 1
UP_NEXT : 1
ENJOYED_AND : 1
LUNCH_FOOD : 2
HE_VERBALIZED : 1
MURMURS_PALPITATIONS : 1
AND_APPOINTMENT : 1
THE_WAS : 3
INDIVIDUAL_SESSION : 2
MONTHS_DURING : 1
ENDING_HAS : 1
MEANS_TO : 1
RESULTS_MEDS : 1
HURTS_MUCH : 1
INTERVENTIONS_PLAN : 1
PREVIOUS_NO : 1
AND_MEETS : 1
ZA_BATTERIES : 1
CONSENT_ADDITIONAL : 1
ADVERSE_SPECIFICALLY : 1
ALSO_DEPRESSION : 1
SCHEDULED_ON : 1
INPATIENT_CAN : 1
SUBSTANCE_ABUSE : 1
PATIENT_INFO : 1
KNEE_PROBLEMS : 1
THAT_ABUSE : 1
PRESCRIBED_NOTE : 1
ENTERED_NURSING : 1
MY_PAIN : 1
WHICH_WAS : 1
TO_MINUTES : 1
DESIGNED_COMPLETION : 1
HAVE_IMPROVED : 1
TRIAGE_COOPERATIVE : 1
TIME_MR : 1
PHARMACY_ADDENDUM : 1
EGOMANIAC_PATIENT : 1
THAT_MR : 2
ORIENTED_HE : 2
WAS_NOT : 3
LAST_ROUND : 1
TOP_EXT : 1
BEEN_USING : 1
YELLOW_TIME : 1
PROCESS_STILL : 1
ANESTHETIC_DRUG : 1
HAND_WITH : 1
VACCINE_DIABETES : 1
BY_PSYCH : 1
FOR_AND : 1
KG_EMOTIONAL : 1
CARE_PLAN : 3
INITIAL_RESULTS : 1
DISCUSS_GROUP : 1
PROCEDURE_OF : 1
EXERCISE_FOR : 1
REGARDING_FUNDS : 1
DT_MH : 1
TOUCH_COLD : 1
CONDITION_THE : 1
TO_DATE : 2
WILL_HE : 2
VENT_ML : 1
VERBAL_BARRIERS : 1
AN_PAIN : 1
BEING_THE : 1
PING_MINUTE : 1
DOE_INVENTORIED : 1
HEARING_LEFT : 1
THE_PAST : 7
AND_SAID : 1
HOME_EACH : 1
INITIAL_INTERVIEW : 1
MY_SHIPMENT : 1
ADMIT_OUTPATIENT : 1
DURING_NIGHT : 1
WAIT_OUT : 1
BEEN_ALL : 1
PARANOID_AND : 1
YESTER_VET : 1
DOCUMENTED_ON : 1
PO_BID : 1
DUAL_TREATMENT : 1
ORIENTATION_BEGAN : 1
AM_MAINTENANCE : 1
FOR_OL : 1
ADDENDUM_BE : 1
ADDENDUM_AMLODIPINE : 1
BACK_CLASS : 1
AND_ALERT : 2
TURNS_SITS : 2
SUSTAINED_SIGNIFICANT : 1
FOOD_DRINKS : 8
RESOURCES_TELEPHONE : 1
CONTACT_ZZMINI : 1
NO_ASSISTANCE : 3
COMPLAINT_OF : 1
ONE_OR : 1
TO_CORRECT : 1
ARMBAND_ON : 1
DISCUSS_TO : 1
WAS_RED : 1
EGOMANIAC_HAD : 1
NURSE_OF : 1
LINE_NOTIFIED : 1
INPT_NURSING : 1
IS_ACTUALLY : 1
YOU_CAN : 1
TIME_AND : 1
THAT_MY : 1
TO_WALK : 1
WITH_SCAB : 1
ALLERGIES_ADVERSE : 1
SI_HI : 3
AND_FAMILY : 1
PTSD_NEW : 1
BUSY_NO : 1
ROS_ASSESMENT : 1
BOWEL_CUEING : 1
RECOVERY_NURSING : 1
OXYGEN_OXYGEN : 1
SINCE_ASSISTANCE : 1
HI_HX : 1
MG_WILL : 1
SPECIALTY_NOTE : 1
WITH_ADDENDUM : 2
CONTINENT_SWER : 1
PROLONGED_PTSD : 1
DEPRESSION_AND : 2
BASCOM_IN : 1
TIME_AT : 1
GIVING_MY : 1
PROGRESS_DISCHARGE : 1
GI_MISCELLANEOUS : 1
HIS_NEUROLOGIST : 1
TRAITS_OF : 1
CONTINUED_IMPORVEMENT : 1
TTN_DOM : 1
VISIBLE_BUT : 1
TEMP_WARM : 1
SEP_COMMENT : 1
ON_NSAIDS : 1
NURSING_PATIENT : 2
BUT_VOICEMAIL : 1
DEVELOPMENT_OF : 1
SCISSORS_AND : 1
GEL_TOP : 1
NOT_TELL : 1
SELFDIRECT_PRIOR : 1
HUD_SOCIAL : 1
INVOLVED_OUT : 1
FASHION_EXT : 1
THE_USUAL : 1
ON_SEEN : 1
PRIMARY_APPT : 1
OF_LEFT : 2
NECESSARY_WRITTEN : 1
TIME_THE : 6
BEEN_SMILING : 1
HAVE_TO : 1
WAS_ADEQUATE : 1
WAS_ORIENTED : 1
EVENTUALLY_TO : 1
PARTICIPATE_THE : 1
DISCHARGE_NEUROSURGERY : 1
VIA_ROOM : 1
WAIT_SCHEDULED : 1
EAR_TO : 1
POSITION_GENERAL : 1
HE_PROVIDED : 1
TIME_PAIN : 2
PT_ON : 1
SC_VETERAN : 1
YES_MEDICATION : 1
THE_IF : 1
NURSE_RECOMMENDATION : 2
IN_COULD : 1
PRECAUTIONS_VETERAN : 1
PUBLIC_PATIENT : 1
WORSE_SUPPLIED : 1
NURSE_CONVERSATION : 1
HURTS_IS : 1
PHYSICIAN_SELF : 1
PROCEDURE_IS : 1
FOR_MINUTES : 2
AGREES_TO : 1
MAILED_APPOINTMENT : 1
NO_THIS : 1
EAT_TO : 1
SKIPPED_OF : 1
PAYMENT_FROM : 1
NARCISSISTIC_PATIENT : 1
SPECIFICALLY_DUAL : 1
PT_TO : 7
DISCHARGE_THIS : 1
ASSISTANCE_COLOR : 2
ROOTS_NOT : 1
FOLLOWING_FOR : 1
OUT_TAKEN : 1
MH_PAKULA : 1
PLACE_PERCENT : 1
PLEASE_HARD : 1
RECENT_VITALS : 1
NSC_PENSION : 1
ARM_PATIENT : 1
ECP_SUMMARY : 1
PATTERN_SCORE : 1
YOU_REGARDING : 1
HAVING_TREATMENT : 1
EVERY_CARDS : 1
WITH_INTENT : 1
PLAN_MH : 1
BRC_VETERAN : 3
DEPRESSED_REGARDING : 1
INCLUDING_DSM : 1
WEEKLY_UPDATE : 1
WHO_RESIDE : 1
SAY_THE : 1
PAIN_IS : 4
ALCOHOL_DEPENDENCE : 1
EQUAL_OUTPUT : 1
IN_DRIVING : 1
ATTEND_GROUP : 1
HIS_WAS : 1
SUICIDAL_REQUESTING : 1
HCL_TAB : 1
TPN_PATIENT : 1
VISIT_PROVIDER : 1
FROM_JUNE : 1
STILL_ENDORSES : 1
THERE_BEEN : 1
IS_DRINKING : 1
TRYING_KEEP : 1
PHARM_ANTICOAGULANT : 1
PRESENT_VISIT : 1
PLAN_BP : 1
DISCHARGE_DATE : 1
SCIENCE_SOON : 1
LOWER_EXTREMETIES : 1
THAT_TELL : 1
ACUTE_PAIN : 1
PRIMARY_CARE : 4
FACT_THAT : 1
TREATMENT_PT : 1
HAS_MADE : 1
ECHCS_MANAGEMENT : 1
REQUIRE_THE : 1
OF_PERCEPTION : 1
MEDICATION_HAS : 1
PLASMA_OSMOLALITY : 1
HIS_VISION : 1
INFERIOR_AND : 1
TEAM_AND : 1
FEEL_THOUGH : 1
MANAGE_TO : 1
WHOM_VETERAN : 1
AND_SERVICE : 1
DI_TIME : 1
CALCIUM_IT : 1
WILL_ALTERNATIVE : 1
SPOKE_HIS : 1
ALL_MEDS : 1
DEPRESSION_OR : 1
MONTH_ADM : 1
FEELS_THE : 1
THAT_WITH : 1
IS_BY : 2
TALKING_TO : 1
SATISFACTORY_RESPONSES : 1
HAS_SUICIDAL : 1
OUTPATIENT_CARE : 1
PE_COLOR : 1
FEE_BASE : 1
BEGAN_THE : 1
CONDITION_DISCHARGE : 1
PERFORMED_TO : 1
YOU_FEEL : 1
ABOUT_ANY : 1
ANESTHETIC_CAUSING : 1
PT_GIVEN : 1
PATIENT_OF : 2
HYGIENE_CARBAMAZEPINE : 1
ACTIVE_MEDICATIONS : 4
WEIGHT_LB : 2
NEXT_HUD : 1
ORIENTED_SOCIAL : 1
LEARN_APPOINTMENT : 1
TREATMENT_INACTIVE : 1
PREOP_NEVER : 1
NOTE_MF : 1
PARTICIPATE_ADLS : 1
US_ON : 1
SEATED_GENERAL : 1
THE_COMPLAINING : 1
THE_URINE : 1
PEOPLE_IN : 1
SAFDAR_KNOWS : 1
TREATED_LIKE : 1
BED_BUT : 1
NO_COMMENTS : 2
ILL_SAYS : 1
ABILITY_ADEQUATELY : 1
PHYSICIAN_DX : 1
DENIES_CHF : 1
VITALS_APPOINTMENT : 1
PATIENT_NICOTINE : 1
PT_THE : 2
MHP_CONSTANT : 1
UNTIL_MORE : 1
HYDROCODONE_MG : 1
THE_POSTAL : 1
TALKED_HIS : 2
FAMILY_AND : 1
MILITARY_HAS : 1
AND_HIS : 5
YES_IS : 1
VETERAN_MAY : 1
LAST_WEEK : 1
PHYSICIAN_PATTERN : 1
YELLOW_DINNER : 1
ADL_NOTE : 2
URINE_LYTES : 1
EMOTIONAL_SUPPORT : 1
BLOOD_CLOTS : 1
PROVIDER_CLINIC : 1
TOILET_CUEING : 1
BE_CONTRIBUTING : 1
PROVIDE_EMOTIONAL : 1
ALSO_THAT : 1
TAKE_ONEHALF : 1
SHIFT_MANAGE : 1
DIVISION_FROM : 1
RETINA_DETACHMENT : 1
DOE_ORTHOPNEA : 1
METHOCARBAMOL_CONDITION : 1
ICDCM_SCHIZOPHRENIA : 1
DID_HIT : 1
HE_ADMITS : 1
ARRIVED_HIS : 2
LEGIBLE_ORIENTED : 1
WED_AT : 1
VICTIM_COORDINATOR : 1
DOXEPIN_CAP : 1
IS_SATISFACTORY : 1
VETERANS_REALLIFE : 1
DESCRIBES_REASONS : 1
HTN_LEFT : 1
DEPRESSION_TOXICOLOGY : 1
HOURS_WITHIN : 1
ABOUT_HER : 1
NOT_PENETRATE : 1
TREATMENT_ETC : 1
JELLY_PACKET : 1
BPH_LUMBAR : 1
FINGERS_LEFT : 1
MINUTES_KALINA : 1
JUNE_TO : 1
SEE_VET : 1
TO_DEAR : 1
FOR_USE : 3
FOR_SSDI : 1
OF_SHIFT : 1
HAVE_REGARDING : 1
AS_ASKED : 1
HISTORY_PRESENT : 1
EYE_HEALTH : 1
EXERCISE_CONDUCTED : 1
TOUCHING_SOB : 1
EXERCISE_PROGRAM : 1
SHE_LIKES : 1
TO_PATIENT : 4
PROGRAM_BUT : 1
CORRECT_ORIENTATION : 1
MG_PO : 1
HE_RECEIVES : 1
DISPOSITION_NOTIFY : 1
PATIENT_SUSTAINED : 1
ADMIT_TYPE : 1
DT_FUTURE : 1
GOALS_USE : 1
THERE_HE : 1
PHYSICIAN_AFTER : 1
STRENGTH_PRESENCE : 1
PAIN_CORTICOSTEROID : 1
TO_PRIMARY : 2
LEGS_CURRENT : 1
BARRIERS_PULSE : 1
FACILITY_OR : 1
PAUSE_REHABILITATION : 1
CHARTS_IT : 1
MANAGMENT_LORATADINE : 1
MEDICAL_AND : 1
NO_SOB : 1
BEEN_WITH : 1
NO_DISTRESS : 1
HOME_VISIT : 1
MD_MANY : 1
SCAB_PROCESS : 1
COORDINATOR_FRI : 1
NOT_BUT : 1
ONE_THE : 1
SMOKE_SUPERVISION : 1
CBC_VITALS : 1
HAS_TAC : 1
ORDERED_THEY : 1
KNEE_VETERAN : 1
THE_MAY : 1
NURSING_HOME : 1
BY_TO : 1
STATUS_DIVORCED : 1
USE_PREVIOUSLY : 1
HER_TO : 2
STRESS_THOUGHT : 1
ASSOCIATE_PROVIDER : 2
TO_UROLOGY : 1
PAIN_MUCH : 1
SELF_OR : 1
GASES_OR : 1
ACTIVE_GENERAL : 1
UNDERSTANDING_EMERGENCY : 1
THR_PATIENT : 1
CALLED_WITH : 1
GENDER_VETERAN : 1
DIET_TF : 1
NICOTINE_PATCH : 1
BUT_DIAGNOSIS : 1
IS_HURTING : 1
OL_THE : 1
OUTPATIENT_ATTENDING : 1
WOULD_RECEIVE : 1
INDIVIDUAL_THERAPY : 4
QUESTIONS_SUICIDALITY : 1
AND_STATED : 1
MR_THAT : 1
HER_INCREASE : 1
TOILET_ASSISTANCE : 1
NO_NONVA : 1
IEST_COULD : 1
AND_SITE : 3
MIN_HOURS : 1
THERAPY_SIGNS : 1
WHICH_IS : 2
NOTES_IT : 1
HIM_HIS : 1
THE_URINARY : 1
URINE_MOBILITY : 1
PAIN_FAMILY : 1
STREET_HE : 1
TABLET_WAS : 1
NIGHT_STATES : 1
NEW_THAT : 1
AND_PLAN : 2
WAS_VERIFIED : 1
OR_NEGLECT : 1
ADMINISTERED_PER : 1
OF_ISSUED : 1
IN_PATIENT : 2
MEMPHIS_PRRC : 1
KNOWS_MANY : 1
PLS_WAS : 1
NORMAL_FOR : 1
ON_LOWER : 1
WITH_VA : 1
WPB_VIST : 1
LOCALLY_AND : 1
ZZSWS_APPEARS : 1
MEDICAL_1010M : 1
MEDICAL_TEETHING : 1
TRAZODONE_ANTICOAGULANT : 1
GRANDKIDS_CHEST : 1
PT_SEEN : 1
SAT_CLAMIS : 1
SELFMANAGE_SUICIDAL : 1
CAME_THAT : 1
FOR_NONE : 1
RECENT_ADDENDUM : 1
AND_SITS : 2
BIT_ILL : 1
AND_AND : 2
WHEN_WITH : 1
ASSESSMENT_SUICIDE : 1
MOUTH_WASHING : 1
PHYSICIAN_STATED : 1
AN_CANCER : 1
NO_REQUESTS : 1
VOID_NOT : 1
OXYGEN_IS : 1
PART_NURSING : 1
ORE_STRENGTH : 1
II_UNSPECIFIED : 1
FROM_THIS : 1
DISTRESS_ATTENTIVE : 1
FOR_SUPPLEMENT : 1
LAST_INR : 1
NAILS_SINCE : 1
MOUTH_MORNING : 1
INSTRUCTED_TO : 1
READINESS_TO : 1
SESSION_HER : 1
MORE_COMPLIANCE : 1
CHANGES_IN : 1
THEN_CALL : 1
OFFICE_BUT : 1
RADIONUCLIDE_TESTS : 2
CONTINENT_BENEFIT : 1
032511_MF : 1
DOES_PATTERN : 1
DX_PATIENT : 1
HIS_PROGRESS : 2
OR_NURSING : 1
HAD_PATIENT : 1
ACTION_URINE : 1
ELIGIBILITY_NSC : 1
TELEDOC_MEDICATIONS : 1
WERE_ON : 1
SO_VERY : 1
IN_PLACE : 5
WAS_RESIDENT : 1
FOOD_HAS : 1
MG_QMORNING : 2
FORM_THE : 1
REPORT_VETERAN : 1
DOGS_DENIED : 1
IS_ALWAYS : 1
PLACE_DURING : 1
HERE_IS : 1
PROLONG_STRESS : 1
IDENTIFIED_AN : 1
FOR_RENEWAL : 1
AND_CHECKS : 2
CLINIC_FLUOXETINE : 1
IS_MAY : 1
NO_FOR : 1
ALWAYS_THE : 1
HAVE_BEEN : 2
STOOL_TO : 1
MODALITIES_MHP : 1
POSITIVE_FROM : 1
AXIS_ALCOHOL : 1
INTENT_ORI : 1
INITIAL_READ : 1
CONDITION_ON : 1
APPOINTMENT_ALLERGY : 1
TRANSPORTATION_HIS : 1
HAS_CALCIUM : 1
TEAM_WILL : 1
CONTINUE_MONITOR : 2
HOPE_THE : 1
VERBALIZATION_OF : 2
FOR_APPOINTMENT : 1
WOULD_REMID : 1
APPOINTMENT_VETERAN : 2
TO_ANKLE : 1
DEPRESSED_AND : 1
VETERAN_FOR : 3
OCT_LT : 1
ABUSE_OR : 1
WE_ODY : 1
WILL_HAVING : 1
THAN_PREOP : 1
CHRONIC_PROBLEM : 1
QID_INITIAL : 2
RNBC_VETERAN : 1
LAB_RESULTS : 1
NOTE_CONSENT : 1
HES_BLIND : 1
BE_VIGAMOX : 1
FOR_SC : 1
HEALTH_SAO : 1
PATIENT_PRIVILEGES : 4
TO_SEX : 1
MAILED_WHEN : 1
SEP_DENTAL : 1
PROBLEM_DISORDERMET : 4
FILL_HER : 1
AND_HER : 1
PERSONAL_AND : 1
NURSE_CALLED : 1
THE_DAUGHTER : 1
VETERAN_BE : 2
IT_IN : 1
GENDER_MALE : 2
EAT_LUNCH : 1
VETERAN_VISTING : 1
TO_SAY : 2
BEHAVIOR_EYE : 1
BARRIERS_POTASSIUM : 1
THAT_TIME : 1
AXIS_DIAG : 1
ROOM_AIR : 1
ADMISSION_AND : 1
PATIENT_ON : 5
ACTUALLY_WAITING : 1
NOTE_ALL : 1
PHYSICIAN_REQUESTED : 1
COMFORT_ADDENDUM : 1
SUMMARY_PG : 1
LESS_AT : 1
AGREEMENT_GOOD : 1
TYPICAL_PROVIDER : 1
BETWEEN_AM : 1
INTERDISCIPLINARY_FAM : 1
CURRENT_MEDS : 1
COMPREHENSION_GOOD : 1
TO_DISCUSS : 2
STATE_OFFICE : 1
ALL_THE : 2
PAIN_DOWN : 1
IDCP_MEETING : 1
PRINTED_OF : 1
CM_NO : 1
MEDICATION_LIST : 2
THE_NIGHT : 3
DWIGHT_OFTEN : 1
TRANSFER_SUPERVI : 1
WORKING_VETERAN : 1
EC_TAB : 1
INFO_EYE : 1
THE_TISSUES : 2
HEALTH_MAINTENANCE : 1
HISTORY_BEEN : 1
SA_ADMIT : 1
LMSW_WHILE : 1
AND_CBC : 1
TECH_HPI : 1
COMMUNICATION_PROBLEM : 1
IV_DIAGNOSES : 1
AROUND_DISPOSITION : 1
TRAVEL_SUPERVISOR : 1
WITH_CHIEF : 1
FOR_BUTTS : 1
NEEDS_AN : 1
TRIAGE_ONE : 1
RINGS_PACIFIERS : 1
SCAB_THOUGHT : 1
FIRST_WOKE : 1
ABOUT_HIS : 1
OF_APR : 1
SUSAN_SCORE : 1
CAME_EMS : 1
REASSURANCE_AS : 1
OFFICE_ADVISED : 1
NOT_LATEX : 1
BY_HEALTHCARE : 1
MAIL_REGARDS : 1
BY_HE : 1
RATHER_WAIT : 1
ACTIVITY_DENIED : 1
CONSENT_BLOOD : 1
AS_SWER : 1
ORI_STARTED : 1
NOTE_WHAT : 1
DL_ORTHOPEDIC : 1
CALL_HAVING : 1
THE_NUTRITION : 1
VETERAN_RECEIVE : 1
! Stats words=2132  pairs=11590
