# Supplementary material for: Predicting the Risk of Suicide by Analyzing the Text of Clinical Notes
Source: PLoS One. 2014 Jan 28;9(1):e85733. doi: 10.1371/journal.pone.0085733 (PMC3904866; doi:10.1371/journal.pone.0085733)
Supplement: Appendix S3 — Machine Learning Libraries and Methods: This section is provided to enclose the open source (Apache License) classifier used for the building of the statistical models, specifically for the purposes of study reproducibility. A detailed account of these tools is intended for another publication. (ZIP) [file pone.0085733.s003.zip › Appendix3/ML_libs/Regression_testing/group3/processed/grp3-pt-1060.dat]

!  Done reading
! Total word count = 6634
! Total unique words = 2178
! Total pair count = 13264
! Total unique pairs = 11417
DEMONSTRATE : 1
SORE : 1
AT : 31
ADL : 5
ZZPATIENT : 4
WORK : 4
PREOP : 5
VOICES : 1
LOWER : 2
ULCER : 1
WEIGHT : 7
STAY : 2
MILD : 2
AA : 1
TREATMENTS : 1
MINUTE : 2
INSTRUCTED : 2
DIVALPROEX : 1
COUNSELING : 3
MAS : 1
USE : 8
ARTHRALGIA : 1
PRIVILEGES : 3
TRIAMTE : 1
DISCHARGED : 4
OPTIMISTIC : 1
SUPPLIES : 1
VETERANS : 3
SCHEDULING : 2
LEVEL : 2
ALCOHOL : 8
CHANGES : 7
ADS : 1
STRESSOR : 1
RAL : 1
MILK : 1
COMPTON : 1
MET : 2
MACHINE : 1
SLIGHTLY : 1
COPD : 1
ETTE : 1
PHOTOS : 1
MEAL : 1
GENITOURINARY : 1
REMOVED : 1
APPROPRIATE : 1
CLEANLINESS : 1
BLIND : 5
DIRECTIVE : 2
HYPERLIPEDEMIA : 1
FISH : 1
WELL : 9
PHARM : 2
MEDICINE : 3
TEST : 4
NOTE : 41
BAKER : 2
DO : 6
DOES : 7
FACT : 3
HTN : 4
TESTALGIA : 1
SAME : 4
RENEWAL : 1
ACCESS : 1
DIAGNOSE : 1
ADVERSE : 3
OPTION : 1
SAW : 1
SCHEDULED : 8
ASK : 4
STEPS : 1
BIOBURDEN : 1
MIMSOME : 1
TAB : 13
REACHED : 1
QUICKLY : 1
STABLE : 3
REQUIRED : 2
ARREST : 1
PERMINANTLY : 1
HAS : 44
DEC : 2
MONITOR : 2
FOR : 107
PTAGREED : 1
CONDITION : 1
PERCEPTION : 1
NUTRITION : 4
MOWING : 1
SUSPECTED : 1
CLC : 1
PATPU : 2
WOMEN : 1
STRIP : 2
KILL : 1
MORNING : 5
INR : 2
KNEE : 7
ABSTINENCE : 1
CPS : 1
SC : 3
DOMAINS : 1
LEGAL : 1
MUST : 3
IDEATION : 4
ROUTES : 1
FIGHTING : 1
SWER : 1
PARANOIA : 1
COLONOSCOPY : 1
GOALS : 2
CORTICAL : 1
CALLBACK : 1
MSLT : 1
ROM : 2
RESPIRATORY : 1
RESTRAINT : 1
ACTIVITY : 3
OWN : 2
EVIDENCE : 3
SHOWS : 2
LABRAL : 2
REGISTERED : 1
NAUSEA : 2
PREVIOUSLY : 1
CLOZARIL : 1
DEGREES : 1
PATTERN : 2
TYPICAL : 2
CHILDREN : 1
LISTENED : 1
EXAM : 4
INFECTION : 3
RECENTLY : 2
AVAMC : 1
DERM : 1
SUGAR : 1
DUAL : 1
SWEATS : 3
JUST : 1
INCREASED : 2
NSC : 1
DURATION : 1
WRITING : 1
DISTRACTING : 1
OCT : 3
ANGIO : 1
HYPERLIPIDEM : 1
GO : 3
SIGNIFICANT : 1
WIDE : 1
BOWEL : 8
MST : 1
RESIDENTS : 1
BP : 5
WRITTER : 1
BELONGINGS : 2
POST : 2
PREVENTION : 1
DEPRESSION : 4
SON : 1
MODERAT : 1
CM : 6
AGREEMENT : 2
CITALOPRAM : 2
AGAIN : 7
GAIT : 2
BIO : 1
SLOWLY : 1
ANTI : 1
SHOES : 1
ATTEND : 2
LATE : 1
WT : 2
ADMITTING : 2
DRO : 1
PLANS : 2
REDUNDANT : 1
PARTIAL : 3
BOTHERED : 1
STARTED : 5
HANDOUT : 2
SUSTAINED : 1
SPASMS : 1
MAXIMUM : 1
SCANNED : 2
OR : 35
THERAPEUTIC : 1
SHIFT : 13
BOTH : 2
CITY : 1
TEMP : 2
CONCERNS : 2
PULMONARY : 2
CHEEKS : 1
COUMADIN : 2
LIKE : 5
INTERVERTEBRAL : 1
JEWELRY : 1
OUTGOING : 1
USAGE : 2
CALLS : 1
TRAINING : 2
MUCH : 1
CHRONIC : 6
RELAPSE : 1
DIP : 1
ANKLE : 2
TAKE : 14
INCREASE : 3
REQD : 1
WITHDRAWAL : 2
UNMASKING : 1
ISZESKI : 2
WALKIN : 2
EYEGLASSES : 1
LAUNDRY : 1
WIDTH : 1
CONSIDERATION : 1
STRENGTHS : 1
ANESTHETIST : 1
LIP : 1
ALTERED : 1
OD : 3
CAVITRONE : 1
TOLERATED : 1
SW : 1
SPOKEN : 1
CANCELL : 1
HIGHER : 2
REACTIVE : 2
CONSIDER : 1
UNIT : 3
CONFRONTATIONS : 1
MOTOR : 2
PROCEED : 1
MD : 2
IBUPROFEN : 1
REPOR : 1
INTERVAL : 1
NAME : 4
CARE : 27
SURROGATE : 1
JO : 1
AGE : 4
ET : 1
DETOXIFICATION : 2
RATED : 3
TIMES : 6
IS : 70
CARIES : 1
SCHOOL : 1
BENEFIT : 1
FLUIDS : 2
LEANING : 1
USUALLY : 1
IF : 13
JUICE : 1
CELLPHONE : 1
MH : 7
PENDING : 1
BAND : 1
GETTIGN : 1
EXERCISES : 1
EMPLOYEE : 1
RELAY : 1
MINMAL : 1
SKILLS : 8
EATING : 1
RAPD : 1
RATING : 1
OXIMETRY : 2
FAIL : 1
LIVE : 1
INFLAMMATION : 1
PPD : 1
EVALUATION : 14
APT : 1
PASTORAL : 1
MMHG : 1
REHAB : 3
CLEANING : 1
HP : 1
THESE : 3
VISION : 2
DIVORCE : 1
COMPANY : 1
PASSING : 2
CONSTRICTED : 2
COMMANDS : 1
SPRAIN : 1
CELEBRATING : 1
TRACT : 1
COMPUTER : 1
INTENSIVE : 2
TRANSPORTATION : 4
NEAR : 2
HEIGHT : 3
MARRIED : 4
DRYER : 1
ADDENDUM : 10
ENDORSE : 1
FULL : 1
NO : 60
EXPLORED : 1
INTERESTS : 2
RELAXATION : 2
CONSCIOUSNESS : 1
RESPECTFULLY : 1
NIACINAMIDE : 1
CHIEF : 2
ROUND : 1
CHANGED : 1
ADDICTION : 1
RESCUE : 1
HYPOTHYROIDISM : 1
MEET : 2
RISK : 5
CLINIC : 10
ACP : 1
PERFORMED : 2
RECEIVING : 3
MINS : 1
SCALP : 1
BMI : 1
POINT : 1
COULD : 1
PRN : 1
NOTET : 1
ADVANCE : 3
UNIVERSAL : 1
TOOLS : 2
PUPIL : 1
EYEBROWS : 1
PRECISIONXTRA : 1
WILL : 26
APPEARANCE : 2
OFTEN : 2
ERRONEOUS : 1
BUT : 6
ASKED : 3
THOUGHTS : 2
COORDINATION : 1
TYPE : 6
NONSLIP : 1
WHETHER : 1
SPECIFICS : 2
GETS : 1
COLL : 1
AGENCIES : 1
HUSBAND : 1
MALEATE : 1
OUTSTANDING : 1
CFCF : 1
CONTINENCE : 1
DIVORCED : 1
MARITAL : 1
PACK : 1
HOPEFUL : 1
TOL : 1
MEDICALLY : 1
CONSULT : 2
FRICTION : 1
SUPPORT : 4
FIND : 2
WANTS : 2
PRESENTED : 2
REVIEW : 5
DISCUSSING : 2
RELIGIOUS : 1
INJECTION : 1
REEVALUATION : 1
BROUGHT : 1
LIVER : 1
RESIDENT : 4
INSTRUCTIONS : 3
VA : 9
REASSESS : 1
WED : 2
CARPET : 1
PROJECTS : 1
GRATEFUL : 1
CH : 1
BIC : 1
DISPLACEMENT : 1
WORTH : 1
LEVOTHYROXINE : 1
SMOKER : 1
RESIN : 3
DISEASE : 1
CAUSE : 2
PAIN : 50
UNPROTECTED : 1
THURS : 1
AS : 20
WAKES : 1
VISTA : 3
RESTRAINTS : 2
DAYTON : 1
FLOOR : 1
AST : 1
WITH : 67
FEELS : 2
CATH : 1
AFFAIRS : 1
OFFERED : 2
TEMPERATURE : 1
REDNESS : 1
SYRINGE : 1
BASIS : 1
INDEX : 1
GONE : 2
CDI : 1
INCLUDING : 4
NA : 3
COPING : 2
SETTING : 3
IVF : 1
USED : 6
MONITORING : 3
IT : 12
BEDTIME : 1
BELOW : 3
NECESSARY : 3
URQ : 1
CHRYSHANT : 1
DISCUSSED : 10
SIGNIFICANTLY : 1
CA : 1
SUPPLY : 1
EXERCISE : 2
SHOWER : 1
TIME : 14
CODE : 5
INTEGRITY : 1
SWS : 2
HYGIENE : 5
HCL : 1
ATTEMPT : 1
ADDITIONAL : 4
SAFETY : 3
SIDE : 3
BREAKFAST : 3
PERSONALITY : 1
ALLERGY : 2
CALL : 16
EXPRESSED : 1
REINFORCEMENT : 1
RESULT : 3
INTERMITTENT : 1
HX : 6
MHC : 2
IMAGING : 3
PROFESSIONAL : 1
PROJECTED : 1
UNSPECIFIED : 2
NOTIFICATION : 3
SOB : 2
IOP : 1
CSAC : 1
URINAL : 1
POLYARTHRALGIA : 1
FRI : 3
STRENUOUS : 1
PER : 11
TABLETS : 2
FRIEND : 1
TOE : 1
ETC : 1
MOBILITY : 3
FO : 1
MIW : 1
ANGELA : 1
YOUR : 11
DETERIORATION : 1
PRECAUTIONS : 2
GIVEN : 6
WASHER : 1
ILLICIT : 1
HT : 2
SPECIFICALLY : 1
WHO : 5
UPON : 1
IDENTIFIES : 1
SURG : 2
ATTENDANCE : 1
CHAUDHRY : 1
CURRENT : 8
AUSCULTATION : 1
ES : 1
HIM : 12
RESPONSIBLE : 2
TOPICALLY : 1
PULSE : 10
PROSTHETIC : 2
NS : 2
NEXT : 4
INFLECTION : 1
NEEDS : 5
THEY : 5
OPPOSED : 1
REFERRED : 2
NEUROPATHY : 1
HAPPY : 1
SSOME : 1
REGAIN : 1
TRANSFER : 3
OBSERVATION : 1
ML : 1
PHONE : 6
DECLINED : 4
TALKING : 6
BORDER : 1
RESPONSES : 1
TOUCH : 1
FAIR : 1
HAD : 12
AVH : 1
ANNUAL : 1
HYDRATION : 1
SPECIAL : 4
LOSS : 3
SISTER : 1
QUETIAPINE : 2
ARRIVING : 1
UCFA : 1
ROI : 1
YO : 2
NEGATIVE : 1
LOG : 1
ARMBAND : 2
OUR : 2
ASSURE : 1
WRITTEN : 3
TRIGGER : 1
DONOVAN : 1
NEGATIVISM : 1
LAB : 4
SPUTUM : 1
ING : 2
COMPLAINTS : 2
CONTACT : 11
NOTIFIED : 2
RETURNS : 2
SYNTHROID : 1
IMPAIRED : 1
COURT : 1
THIAMINE : 1
METHOCARBAMOL : 1
PROBLEMS : 7
URINE : 6
ANTISOCIAL : 1
GIVE : 1
CAN : 3
THERAPY : 10
SEND : 2
AWARE : 1
NONVA : 1
WHICH : 3
SYMPTOMS : 4
CHILDHOOD : 1
OVER : 3
CODING : 1
ROTATOR : 1
VISITS : 2
ON : 45
SPIRITUAL : 1
PRESSURE : 4
ATTENDED : 3
ENDOSCOPIST : 1
VIA : 1
ADAPTIVE : 1
HEADACHE : 2
FOREHEAD : 1
STRETCHES : 1
HANDOUTS : 1
PURSUING : 1
GOOD : 3
COMPREHENSVE : 1
DROPS : 1
EXTINCTION : 1
EARRING : 1
DRUGS : 2
MED : 3
UPDATE : 1
PICKEDUP : 1
JOURNALING : 1
INTO : 3
POPPING : 1
FIRE : 2
TWOHOUR : 1
EDEMA : 1
VSQH : 1
POLPS : 1
SHE : 8
PO : 4
UP : 13
THEN : 3
USUAL : 1
DEAR : 1
LOCATION : 4
AMBIEN : 1
RESTORATIVE : 1
MOD : 1
DETERMINE : 1
WORSENING : 1
POSTTRAUM : 1
OPENINGS : 1
EPIN : 1
FEVER : 1
CONSULTATION : 1
PRIOR : 6
VERBAL : 1
OFF : 2
DOCUMENTED : 1
CONFUSED : 1
GOT : 1
DATE : 12
DAILY : 8
ATROPINE : 1
LONG : 3
CONVENIENCE : 1
AWAKE : 1
ALUM : 1
EUTHYMIC : 2
REPLACEMENT : 1
FROM : 17
NEUROPSYCHOLOGY : 1
LEFT : 8
BATH : 3
SURPRISED : 1
REALITY : 1
MEDICAL : 6
HEAD : 2
BECOME : 2
SPOKE : 1
ALSO : 6
HUDVASHNOTE : 1
WORKING : 6
AN : 13
DEFERRED : 2
HEART : 5
ARENT : 1
RANDOMIZATION : 1
BLACK : 1
DISABILITY : 1
TAKES : 1
ROMAN : 1
WHEELS : 1
FULLY : 1
FOUR : 1
APPARENT : 1
EQUIP : 1
OUTSIDE : 5
OSAC : 4
EYE : 3
HCT : 1
BRP : 1
ALS : 1
CONTAINING : 2
REVIVED : 1
DISCUSSION : 2
AGO : 1
DESIRED : 1
ATTENDING : 5
CHEST : 1
SENTENCES : 1
HAVING : 7
FACILITATOR : 1
DT : 1
ORTEGA : 1
GLAUC : 1
APPROPRIATELY : 1
MODULE : 1
WEIGHED : 1
MUSCLE : 1
HC : 1
ENCOURAGE : 1
LATER : 1
ARE : 12
ANSWERED : 2
PACING : 1
DESIRE : 1
SY : 1
INDEPENDENT : 2
ELEVATED : 1
PERSON : 3
APPLY : 2
CYST : 2
BROTHER : 1
CPRS : 1
UMBICIAL : 1
HYDROCHLOROTHIAZIDE : 1
SURGERY : 6
RECOVERY : 3
BOOTH : 1
FREQUENCY : 1
IRRITABILITY : 1
INHL : 1
ENTRY : 1
MAINTENANCE : 1
UNDILATED : 1
INTERDISCIPLINARY : 2
NUMBNESS : 1
SERVED : 1
TIRED : 1
YEARS : 3
BE : 28
RELINED : 1
RESOLVED : 1
YR : 3
CANCER : 2
OX : 3
LEAVE : 1
DUE : 2
FORMER : 1
THEIR : 2
DENVER : 1
INVASIVE : 1
XXNO : 1
PRESCRIDBED : 1
TAUGHT : 1
KNIFE : 1
PING : 2
SHAKY : 1
WORKS : 1
AGITATION : 1
VELOSITY : 1
PH : 1
CANE : 3
ISSUES : 3
RECONCILED : 3
PSYCHOSIS : 1
DM : 4
OTHER : 14
DRESSING : 1
END : 1
QHS : 1
LIFE : 2
ME : 8
ANTICOAGULANT : 2
BED : 11
NURSING : 18
PERIPHERAL : 1
DYSPNEA : 1
FOLLOWING : 5
NSS : 1
IDENTIFIED : 8
ESCORTED : 1
ENDING : 3
TRAZODONE : 2
DIAGNOSIS : 8
WITHOUT : 3
NANCY : 1
VERIFIED : 1
CASA : 1
CALLING : 1
IDEA : 1
MI : 1
ANXIETY : 3
SPINE : 1
VALVE : 1
THOUGH : 1
EXAMINED : 1
SULFACETAMIDE : 1
AUDITC : 1
INSPECTED : 1
SYMPTOM : 1
WE : 6
LEARNED : 2
TOILET : 2
SYND : 1
PROTECTORS : 6
FUNCTIONAL : 1
PATCH : 3
FOUND : 3
PATCHES : 2
ROOM : 6
IMPROVED : 3
ADDITION : 1
CHART : 2
HOUSEBOUND : 1
VISITED : 1
DORSUM : 1
ABOUT : 13
ANYTHING : 1
MIAMI : 2
EMERGED : 1
PLEASANT : 2
NOTIFY : 2
NKA : 2
BRIEF : 2
WINDOW : 1
ADEQUATELY : 1
TABLET : 7
DISP : 1
ANOTHER : 1
DURING : 12
REC : 1
ENVIRONMENT : 1
SEVERAL : 1
LISTED : 2
DIRECTED : 1
SCREENING : 4
BX : 1
TKA : 1
REACH : 1
GETTING : 3
DSM : 1
ELABORATE : 1
HI : 2
OS : 3
DETERGENT : 1
PSA : 1
FRED : 1
OXYGEN : 4
PROPER : 2
SCORE : 5
PERSIAN : 1
BASELINE : 1
EPIS : 2
HOME : 12
HYPERGLYCEMIA : 1
CHECKIN : 1
NOTED : 1
INDIVIDUAL : 5
RETURN : 5
RECEIEVE : 1
HJR : 1
EXPECTATIONS : 1
MYOPIA : 1
HEP : 2
UPSET : 1
VACATION : 1
MIN : 4
SUBURAN : 1
RECONCILIATION : 4
NEC : 1
MINUTES : 7
MILDLY : 1
SCREENED : 1
BRACELET : 1
QUAD : 1
FOLLOWUP : 3
SCROTAL : 1
PERIORBITAL : 1
DIRECTIONS : 1
DELTOID : 1
STYLES : 1
CHECK : 2
TEAM : 5
STS : 1
CKD : 1
FALL : 5
SICK : 1
AM : 8
PRACTITIONER : 1
PLACEMENT : 1
WHERE : 1
HOSPTITALIZATION : 1
ANDRE : 1
EVENT : 2
PEOPLE : 1
UNBELIEVABLE : 1
CAPSULES : 1
INDEPENDENCE : 1
CIG : 1
PRODUCTS : 1
CALLED : 6
SUPERVISION : 2
MOTIVATED : 1
MANY : 3
SITTING : 2
NG : 1
NECKLACE : 1
KIMURA : 1
NEWS : 2
TEACHING : 1
TRANSF : 1
MON : 2
ADVISED : 3
OBTAINED : 3
STOMACH : 1
DOCUMENTS : 1
DIPHENHYDRAMINE : 1
MONTHS : 2
CAT : 1
AGAINST : 1
UNLISTED : 3
SSN : 1
ROCEPHIN : 2
GLUCOMETER : 1
VI : 1
BRADEN : 1
ANGIOCATH : 1
EAT : 3
ASKING : 3
CONGESTION : 2
ASSISTANT : 1
COIN : 1
IMMEDIATE : 1
EFFECTIVENESS : 1
WHY : 1
ROOMED : 1
REFUSAL : 1
LUNG : 1
MEDICATION : 24
STOP : 4
SURVEILLANCE : 1
WRIST : 1
ACROSS : 1
VISUAL : 4
FISTULA : 1
WANT : 2
ATTEMPTED : 2
CASE : 1
SUPPORTIVE : 2
AFRICAN : 2
ALTERNATIVES : 1
ORAL : 7
CONTINUE : 5
ABNORMAL : 1
SWELLING : 5
ANSWERS : 1
OVERSIGHT : 2
KIM : 1
GOAL : 4
EXAMINATION : 2
CLICK : 2
PROVIDE : 1
PLT : 1
OTC : 1
CONSULTED : 1
ARRANGING : 1
RELATIONSHIPS : 1
HEALTH : 8
TOMBAZZI : 1
HERNIA : 1
PLACED : 2
COGNITIVE : 2
DISK : 1
DDD : 1
SINGLEPOINT : 1
IDEATIONS : 1
CR : 1
EXTRAPYRAMIDAL : 1
PROSTATE : 3
LAWN : 1
PREVIOUS : 2
BIPOLAR : 3
INABA : 1
REFERRAL : 3
INTERVENTIONS : 2
MAR : 1
PERMANENTLY : 1
WAL : 5
AFTERNOON : 1
MORE : 8
MAKING : 1
RESUMED : 1
RACE : 1
PICTURES : 1
PREPROCEDURE : 1
RIBS : 1
SHY : 1
WENT : 3
INSULIN : 2
TOPICAL : 2
EFFUSION : 1
BEHIND : 1
RECHECKED : 1
NEUROSURGERY : 1
ER : 7
APPLICABLE : 3
DIZZINESS : 1
PRESCRIBED : 1
REQUEST : 5
INCREASINGLY : 1
UNABLE : 1
RN : 2
DATWBC : 1
XYZZY : 2
DIMASCIO : 1
HOUSE : 1
ELIGIBILITY : 2
READY : 1
AFTER : 10
CARELINE : 1
PARTICIPATED : 2
CONVINCE : 1
DIFFICULT : 1
STRUCTURED : 1
EXPRESSION : 1
STILL : 4
KIDNEY : 1
PG : 1
SCALE : 2
LOOKED : 1
POW : 1
LUMBAR : 1
PASTVERY : 1
SERVES : 1
GROUPS : 3
PCP : 1
OSTEOARTHRITIC : 1
LCSW : 2
SAYS : 2
APNEA : 1
RE : 4
TITLE : 1
OLD : 3
HEPATO : 1
LS : 2
WEDNES : 1
AGITATED : 1
WBC : 2
MOVE : 4
ORGANIZED : 1
CAROLYN : 1
REMAINING : 1
ETHNIC : 1
DEVELOP : 2
RBC : 1
AREA : 3
PL : 1
APR : 3
GUIDE : 1
SIBLINGS : 2
MM : 1
UNDERSTANDING : 3
LOST : 3
MEDICATIONS : 18
AVERAGES : 1
MR : 10
FINDING : 1
OPERATING : 1
COESOFT : 1
MAJOR : 2
HOBBIES : 1
ROBIN : 1
NPH : 1
DESCRIPTION : 3
DRIVING : 1
VACCINE : 3
DEPRESSIVE : 3
PICKING : 1
RESULTS : 5
PROCESS : 2
TOUR : 1
EMERGENCY : 3
CONSC : 1
ANSWER : 2
MYCOSIS : 1
BREATH : 3
RESPECTFUL : 1
ABLE : 4
RECENT : 2
PERFORMANCE : 1
CHO : 2
IN : 86
POSITION : 2
MANAGEMENT : 12
STATE : 3
GUN : 1
ENVIRONMENTAL : 1
PLAN : 11
ANTERIOR : 2
AGREE : 1
VERY : 1
PATHOLOGY : 2
IDENTIFICATION : 2
LACK : 1
ZZECF : 1
OPPORTUNITY : 2
TEXAS : 1
METHODS : 1
VICTIM : 1
INTRAOPERATIVE : 1
FEATURES : 1
UNUSUAL : 1
BEHAVIOR : 4
MEDIAL : 1
SI : 2
FOREARM : 1
COMPLETED : 1
IMPRESSION : 2
ORLOW : 1
DIFFICULTY : 3
EVEN : 1
LIMITATIONS : 4
KILLING : 1
OLDER : 1
KEPT : 2
LAST : 12
PAGE : 1
PARKINSONIAN : 1
RELAXED : 2
MINNEAP : 1
MOXIFLOXACIN : 1
LUNCH : 1
EDUCATION : 18
HOLD : 1
SEES : 1
HEPLOCK : 1
ISLAND : 1
MIDLINE : 1
PARK : 1
BANISTER : 1
GROOMED : 1
CONGESTED : 1
URINATE : 1
VENLAFAXINE : 1
VIRUS : 1
ONLY : 2
STEADY : 1
GIVING : 2
EVENING : 4
MONTH : 5
VOUCHER : 1
THANK : 1
LAND : 1
BEEN : 23
BID : 1
WITHIN : 4
PHENOBARBITAL : 1
LOCK : 1
YOURSELF : 1
OUTPATIENT : 5
GOES : 1
INTAKE : 2
WEEKLY : 2
INPATIENT : 3
TOMORROW : 5
RESCHEDULE : 1
CLOSE : 1
PROGRA : 1
OBTAINE : 1
RELATED : 3
MULTIAXIAL : 1
SPECIMEN : 2
CHIROPRACTIC : 1
PREFER : 1
IMMEDIATELY : 1
CC : 1
HGB : 1
TWICE : 5
REGARDING : 4
COLD : 1
SHAMPOO : 2
VASCULAR : 1
REINFORCING : 1
RACING : 2
PERSONAL : 7
PLAYS : 2
NMS : 1
TRAUMA : 1
HIS : 43
COORDINATOR : 1
TROUBLED : 1
LATEST : 1
GM : 2
OBJECT : 1
NEURO : 1
SUGGESTED : 1
EEG : 1
CONCEPT : 1
RAISED : 1
HOPELESSNESS : 1
STRONGER : 2
MAA : 1
SHOWED : 1
DISORDER : 6
KNOWN : 1
DETAILED : 1
BEGINS : 1
CONTACTED : 2
DON : 2
NEELIMA : 1
FASTING : 1
XANAX : 1
TALKED : 1
NIGHTMARES : 1
PELVIS : 1
TS : 1
TREATMENT : 16
CATEGORY : 1
BLOOD : 6
LATEX : 2
WORKER : 1
HAVE : 25
DISPENSER : 1
EX : 1
ODY : 2
EXPECT : 1
DRUG : 1
OF : 110
CRISIS : 1
INCLUDE : 2
VIEWED : 1
CRADC : 1
CALLER : 1
PSYCHIATRY : 1
SECURED : 2
SHAVE : 1
SAID : 2
COUNTER : 1
NUMBER : 9
HARDEN : 1
ASSESSED : 1
SPONGE : 3
MECHANISMS : 1
EC : 1
OUTPT : 1
MESSAGE : 4
THINGS : 2
THEM : 3
DIDACTIC : 2
SUBSTANCE : 1
ASSESSMENT : 16
US : 1
MEANINGFUL : 1
LET : 1
AMBULATION : 1
SURFACEANTERIOR : 3
ATTACHED : 1
POX : 1
PARENT : 1
STARTING : 1
ENTER : 2
HEMAGLOBIN : 1
CONSULTS : 1
IRRITABLE : 2
BLADDER : 6
ENCOURAGED : 2
BM : 1
LIFTING : 1
HOPING : 1
FRIENDS : 3
INFORMATION : 7
DEVICES : 1
COUMADINE : 1
ADEQUATE : 1
INITIAL : 2
ILL : 1
DANE : 1
CENTER : 3
ESSENTIALLY : 1
SIGHTED : 1
QUESTIONNAIRE : 1
SUICIDE : 1
THE : 146
EXTENDED : 1
FILED : 1
GROUP : 11
PRESENTS : 3
ADVANCED : 2
REST : 5
FELLOW : 2
EXPIRED : 2
DIMINISHED : 1
TRIMETH : 1
OCCURRENCE : 1
COLOR : 8
THYROID : 1
TECHNIQUES : 1
LEG : 1
ARRIVED : 2
MEDS : 6
OKLAHOMA : 1
CT : 1
RECALL : 1
MUNSHI : 1
EXTENSION : 1
ANXIOUS : 1
WANTING : 1
LRQ : 1
CAP : 5
DIET : 2
STATED : 4
HEARING : 3
OPHTH : 1
GET : 4
AXIS : 5
RA : 1
WHAT : 4
FIVE : 1
BENEFITS : 2
ALBUTEROL : 1
ASSISTANCE : 6
DIABETIC : 2
PROLONG : 1
WEANED : 1
DESIGNED : 1
YEAR : 6
PRESCRIPTION : 1
COPY : 2
LB : 5
KEYPAD : 1
NAPPING : 1
HERBAL : 2
AURORA : 1
TRANSPORT : 1
ADJUSMENT : 1
LIGAMENTAL : 1
GLAUCOMATOUS : 1
GI : 1
JOAN : 1
OWP : 1
DENTINE : 1
SEEN : 11
PRE : 1
CCT : 1
ENCOURAGEMENT : 2
FOOD : 5
NURSE : 6
SX : 1
SENSORY : 1
TRY : 2
ANY : 13
DISCHARGE : 7
CONSISTENCY : 5
SAFELY : 1
BATTLING : 1
FEEDBACK : 2
RECORDS : 2
INSTABILITY : 1
PERCOCET : 1
PURSED : 1
MAINTAIN : 1
POSTTRAUMATIC : 2
FACILITY : 3
HASNT : 1
EFFECTS : 4
RELATIONSHIP : 2
SECONDARY : 3
SAT : 1
APPROPRIATED : 1
VOLUME : 2
EVERY : 3
FILM : 1
OCR : 1
SKIN : 10
YESTER : 2
NOT : 31
OK : 1
HUD : 1
PRECERTIFIED : 1
TEMPORARILY : 1
EXIT : 1
THERE : 6
WALKING : 1
RESEARCH : 1
BRONZE : 1
LIMITED : 4
HERE : 6
IM : 1
CVA : 1
POSITIVE : 2
UNITS : 2
ANGER : 2
FEB : 2
PROGRESS : 10
WK : 2
KEEP : 1
PSYCHOTHERAPY : 1
ASSESS : 1
REPEAT : 1
TRAITS : 2
VET : 7
STOOL : 6
THER : 1
ORTHOPEDICS : 1
MOTHER : 1
EXPERIENCING : 2
PAINFUL : 2
ASSOCIATED : 2
BACK : 7
HOWEVER : 4
PAGER : 1
REGARDS : 1
TUES : 1
MALE : 7
SVI : 1
PANORAMIC : 1
RANGED : 1
SUPPLEMENTAL : 1
BY : 39
LEBOARD : 1
DEFINITION : 1
REDUCTION : 1
DISTURBANCES : 1
CLINICAL : 3
REF : 1
KNOWS : 1
ELIZABETH : 1
LUNGS : 1
MEETING : 3
TH : 4
BIG : 1
FINISHED : 2
CONFERENCE : 1
TO : 164
PNEUMONIA : 3
IV : 4
FEEL : 1
ABUSE : 1
TIMEOUT : 1
TASK : 4
HEAVY : 1
CHRISTENSEN : 1
DISSABIL : 1
SAFE : 2
BIOPSY : 1
SHLDR : 1
DX : 5
PRUNE : 1
LVH : 1
PROCEDURE : 6
REQUESTING : 4
STRESSORS : 1
APPETITE : 1
SEE : 9
LOCATIONS : 1
PLEASE : 6
CBC : 2
INDICATES : 1
WAR : 2
STATUS : 13
RING : 1
DIABETES : 2
SPENT : 2
MHICM : 2
DC : 1
DRINKS : 5
PERSISTS : 1
EFFECTIVE : 1
SELFADJUSTING : 1
CONTINUED : 2
TESTING : 3
OUT : 7
HR : 1
VERBALIZATION : 1
CONT : 1
GENTLEMAN : 1
SURE : 1
GROWING : 1
BOARD : 2
SCREEN : 5
SLOWED : 2
EVALUATED : 4
REACTION : 1
REHABILITATION : 3
FUNCTION : 1
ASSIGNED : 1
MENTAL : 12
NEEDED : 7
THANKS : 1
EFFECTIVELY : 1
DIVERTICULOSIS : 1
NEAT : 1
EXT : 2
GERD : 2
PROCHLORPERAZINE : 1
VOLLEYBALL : 1
HANGOVER : 1
THINKS : 1
WERE : 6
FACTORS : 1
BRC : 5
SHEET : 2
COLLABORATIVE : 1
RESPONSIBILITIES : 2
FILL : 1
ROTATION : 1
MALINGERING : 1
LABS : 1
JOB : 1
TAKEN : 3
SPC : 1
DEHYDRATED : 1
CEFAZ : 1
HELPFUL : 1
POSSIBLE : 4
ANNISTON : 1
SELLS : 1
FENTANYL : 1
TRIAGE : 6
NATURE : 1
PART : 3
DETERMINED : 1
FAMILY : 12
MHH : 1
OFFERING : 1
ORIENTATION : 1
ROUGH : 1
WHEN : 10
SEEMED : 1
AMBULATORY : 2
BEING : 4
FALLS : 2
GLARE : 1
VIGAMOX : 1
HARBOR : 1
AMOUNT : 5
ABOVE : 2
UNSAFE : 1
WAS : 51
PM : 5
LPM : 2
STD : 1
FORM : 1
CONDITIONS : 1
LEAVING : 1
AC : 2
WANTED : 1
COMMUNICATION : 1
CONSUMED : 2
DRINKING : 2
NOW : 7
SURVIVAL : 1
PTSD : 4
ECF : 1
CALLERS : 2
CONFIRMED : 2
HYDROCODONE : 1
DTR : 1
ONSET : 1
NARCOTIC : 1
PROGRAMGROUP : 1
SHOT : 2
INARNP : 1
LIST : 5
SIZE : 3
SHIELA : 1
STUDY : 1
OPTICIAN : 1
EQUIPMENT : 1
VOMITING : 1
FRITTITTA : 1
ORIENTED : 7
FLUVASTATIN : 1
DROPPED : 1
ADHERENCE : 1
VENOUS : 2
PSYCHIATRIST : 2
CURRENTLY : 4
NECK : 1
JOINT : 2
SIMVASTATIN : 1
RESPIRATIONS : 3
BETWEEN : 1
BATHROOM : 4
DOCTOR : 2
GOING : 3
SEDATION : 1
DID : 8
ESTABLISHED : 1
MOST : 1
RUE : 1
SHOW : 1
ARRIVAL : 1
ACCURATE : 2
PCE : 1
SBURG : 1
TELEPHONE : 4
ADDRESS : 1
COHERENT : 1
FACILITATORS : 1
CPT : 1
DISORDERMET : 1
INTRODUCING : 1
TES : 1
COMPLAINING : 1
COOPERATIVE : 4
REPORTS : 17
WITNESS : 1
GE : 1
RATES : 1
MYALGIA : 1
HELP : 1
OPTIONS : 2
KIDS : 1
SUCTIONING : 1
YES : 16
CONTINUES : 3
OMYELITIS : 1
SMILING : 4
CONSENT : 6
NOTICED : 1
CHF : 1
WHOM : 1
PACKS : 1
LEISURE : 1
RETURNED : 2
DOING : 2
ALT : 1
VACCINATION : 1
OCCASIONS : 1
HPI : 3
LITTLE : 1
JVD : 1
MOVIES : 1
ED : 6
UTI : 1
EXCEPTION : 1
INSTITUTE : 2
PHYSICIAN : 19
SUFIYAN : 1
DEPENDENCE : 3
SEEKING : 1
AIDS : 2
CESSATION : 1
HE : 88
REITERATED : 1
ENJOYS : 1
RX : 1
STUDENTS : 1
TREATED : 2
BIT : 1
OBESITY : 1
RATE : 4
HIGHRISK : 1
MANUAL : 1
ZOLOFT : 1
FELT : 3
MASS : 1
GPD : 1
MEMBER : 1
SEGMENT : 1
DETOXING : 2
PREFERENCE : 1
MEETINGS : 1
WLADENTAL : 1
ADJUSTING : 1
HYDROBROMIDE : 1
CLEAR : 2
MSW : 1
HERBALS : 1
PRIMARY : 5
UNSTABLE : 1
ABDOMINAL : 1
UNTIL : 2
MORAL : 1
SIGNS : 3
FIELD : 1
ATLANTA : 1
ACTION : 1
PATIENTS : 9
LEGIBLE : 1
ONETIME : 1
SUMMARY : 1
DESIRES : 2
DEFINED : 1
THROUGHOUT : 1
HUMAN : 1
FATHER : 2
ASSISTING : 1
COLORECTAL : 1
CONSTIPATION : 1
PROVIDED : 9
DRINK : 2
NOAH : 1
DENTAL : 6
NEUROLOGY : 1
TWO : 1
NONE : 5
ATTITUDE : 1
RECOMMENDATIONS : 1
II : 2
LOT : 2
CONNECTED : 2
TRAVEL : 1
MASTER : 1
BLINDNESS : 2
DIRECTIVES : 2
CALM : 1
SCHEDULE : 1
HER : 3
ORDERED : 4
TOPIC : 2
FEELING : 3
SHOULD : 2
QUESTIONS : 11
EDUCATE : 1
BEHAVIORAL : 1
APPEARED : 1
YELLOW : 4
HELPLESSNESS : 1
PHYSCIALLY : 1
DIFF : 1
MCG : 1
DANGEROUS : 1
COALITION : 1
ROUTE : 1
THERAPIST : 1
EN : 1
LITERATURE : 1
PLACE : 8
LIVING : 6
PROGRESSIVE : 1
CORONERS : 1
NOSHOW : 1
RANGE : 1
LG : 1
ENT : 1
APPEAR : 1
MG : 25
ALERTING : 1
TRANSFERRING : 2
JUMPED : 1
FACIAL : 1
IMMOBILE : 1
QUARTERLY : 1
SULFATHIAZOLE : 1
GANGION : 1
CORRECTED : 1
BEHAVIORS : 1
HYDROX : 1
STAT : 1
REG : 1
CONTINENT : 6
RESTRICTED : 2
CONSTANTLY : 2
THEMSELVES : 1
WORSE : 1
WEEKEND : 2
PROVIDER : 9
OIL : 1
DONT : 3
TOLERANCE : 1
MULTIPLE : 2
DIAGNOSED : 2
GULF : 1
APPOINTED : 1
TELL : 1
ALERT : 8
SENIOR : 1
SEP : 1
IMED : 1
COMMENT : 8
THREE : 2
COLLECTION : 1
ADDICTIVE : 1
PROGRAM : 5
FEMALE : 1
APPOINTMENT : 17
STABILIZATION : 1
WOULD : 7
FOLLOW : 6
ALERTORIENTED : 1
PERCEPTUAL : 1
INDICATE : 1
METHOD : 1
HYPOXEMIA : 1
HOMICIDAL : 2
BIRCH : 3
ACTIVITIES : 7
LIPID : 1
REPLACES : 1
OPERATE : 2
ONCOLOGY : 2
UNLABORED : 1
CUFF : 3
MOVEMENTS : 3
GYM : 1
INTERVENTI : 1
COMPLAINT : 6
ORDER : 2
EXCEPT : 1
USING : 1
HAND : 2
INFLUENZA : 4
DENIED : 6
ULTRASOUND : 1
SNACKS : 1
REACT : 2
NEW : 5
MOUTH : 9
UNEVENTFUL : 1
YEAROLD : 2
PROVIDERS : 2
FOCUSED : 1
DECIDED : 1
HEPATITIS : 1
PRESENT : 1
MAG : 2
SOME : 6
HYDROCELECTOMY : 1
HRS : 2
ANESTHESIA : 1
CMS : 1
RAD : 1
NEED : 1
TRIAL : 1
ADDITIONALLY : 1
TEARS : 1
RECEIVED : 3
WFL : 1
PSYCHIATRIC : 4
APPROACH : 1
HYPOKALEMIA : 1
RITAL : 1
RNS : 1
BODY : 1
PREVENTIVE : 3
DOCUSATE : 1
SATISFACTORY : 1
NEURODE : 1
BECAUSE : 2
ARRIVE : 1
OL : 2
TRANSFERRED : 1
SIGHT : 1
REMAIN : 1
CLASS : 2
POSES : 1
LESION : 2
OMEPRAZOLE : 1
TRACH : 1
SULF : 1
BRIGHT : 1
ENROLLED : 1
CLIENTS : 1
SOUNDS : 2
REVIEWED : 3
FIBROIDS : 1
BEFORE : 5
ALL : 13
AUTHOR : 1
REFRAMED : 1
TAMPA : 1
SELF : 5
PATIENT : 102
ALLERGIES : 5
SWELLIN : 1
SENT : 1
ADMISSIONS : 1
SEMIFOWLERS : 1
ATTENTION : 1
NOS : 1
THAN : 5
ACUTE : 1
KUSHWAHA : 1
REQUIRES : 2
PROTOCOL : 3
FEE : 2
COME : 1
DECISION : 2
VASH : 1
ROUTINE : 1
LOOKING : 2
CAME : 2
THAT : 39
VISIT : 12
ANTECUBITAL : 1
WIFE : 6
NORMAL : 6
OCCUR : 1
DEPRESSED : 1
STAFF : 4
SERVICE : 7
CE : 2
RIGHT : 7
BREATHING : 3
PC : 2
MEANWHILE : 1
VITALS : 1
PLA : 1
INAPPROPRIATE : 1
SYSTEMIC : 1
AL : 1
ONE : 14
PENSION : 1
TELE : 1
BOUNDARIES : 1
ANATOMICAL : 2
TUBES : 1
THOUGHT : 1
HYPERLIPIDEMIA : 3
VENTURA : 1
WRITER : 3
YOU : 15
CU : 1
CL : 2
MORPHINE : 2
DOESNT : 1
CRITERIA : 3
INFORMED : 4
ISSUED : 1
PAST : 14
DOCUMENT : 1
CULTURES : 1
NOVEMBER : 1
REASON : 2
DISABILITIES : 1
SUPERVISOR : 1
COFFEE : 1
SOUTH : 1
HA : 1
PAD : 1
REMINDER : 3
DESATURATION : 1
WRITE : 1
NEVER : 2
SIX : 1
POWER : 1
AGREEABLE : 1
ALTHOUGH : 1
DR : 2
MEMBERS : 2
SOCIAL : 6
AFLURIA : 1
TRP : 1
HOSPITAL : 4
DIPLOPIA : 1
SUICIDAL : 4
HOPELESS : 1
DEPT : 2
EITHER : 3
VITAL : 2
INJ : 1
BRN : 1
SHAKE : 1
REGULAR : 2
TALK : 2
PARTNER : 1
MODE : 1
ITIS : 1
ANTIBIOTICS : 4
STRESS : 5
MAKE : 3
GRANDE : 1
FOCUSING : 1
WEEK : 4
SCAN : 1
CBOC : 2
PSYCHOTIC : 1
DEGAETANO : 1
DRAINS : 1
BORDERLINE : 1
NUR : 3
SITTER : 1
ENSURE : 1
DISTRESS : 2
CANCEL : 1
ADVISE : 1
MOOD : 4
LIVES : 1
REPORT : 5
SIGNED : 2
LEAST : 1
LETTER : 3
AMIGO : 1
ELECTRONICALLY : 1
ROSUVASTATIN : 1
HOW : 6
CHR : 1
SINCE : 7
FLU : 2
CHANGE : 1
THOSE : 1
DISCUSS : 2
ULQ : 1
PLASM : 1
TAP : 1
MADE : 2
OFFICE : 2
PENIS : 1
CARDIAC : 1
INCLUDES : 1
VERBALIZED : 2
LEARNING : 1
DOSE : 6
ENCOUNTER : 2
OBJECTIVE : 2
SMOKING : 3
ICOTHE : 1
AFFECT : 4
FOLLOWS : 2
FORMULA : 1
MRI : 3
RELEASE : 1
WEAKNESSES : 1
CONCERN : 2
CONSERVATIVE : 1
DIAZEPAM : 1
ANTIBIOTIC : 1
TRAMADOL : 2
INPT : 1
SULFABENZAMIDE : 1
RESTING : 2
LOCATOR : 1
THICK : 1
COMMENTS : 3
ACETAMINOPHEN : 1
TOTAL : 1
PARKINSONS : 1
LIGHT : 1
JUNE : 3
SINUS : 1
ST : 2
ELIMINATION : 3
SUCH : 1
HISTORY : 10
RESPIRATION : 2
CED : 1
DISCLOSED : 1
HOURS : 9
PAGES : 1
MAIL : 2
FUNCTIONNG : 1
LEGS : 2
IEST : 1
CAUCASIAN : 1
REPORTED : 11
CIRCUMCISION : 1
PROGNOSIS : 1
RATIVE : 1
ONGOING : 2
THUR : 1
NOSE : 1
FLUOXETINE : 2
FORESKIN : 1
SCIATICA : 1
BILAT : 1
ALWAYS : 1
INSAM : 1
HIP : 8
SITE : 2
OVERALL : 2
MATERIAL : 1
PAJAMAS : 1
COMPLICATIONS : 1
STATING : 2
DENTURE : 1
KG : 5
OP : 3
TELECARE : 1
PROBLEM : 8
EYES : 1
CLONAZEPAM : 1
BILL : 1
ADDRESSED : 1
RECORD : 3
CLASSIFICATION : 1
PSG : 1
RARE : 1
ZZSWS : 1
EXAMINING : 1
SUSP : 1
OUTPATIENTPHYSICIAN : 1
WARFARIN : 1
THROUGH : 2
METAB : 1
VETS : 2
EXTRA : 3
ADMISSION : 4
LONGER : 1
VESICLE : 1
CONFLICTING : 1
PLS : 1
EXPRESSE : 1
LESS : 1
REMOVE : 1
RELY : 1
SPECIMENS : 1
FUTURE : 1
DOB : 1
DENIES : 6
ASSOCIATE : 3
SPECIFIC : 1
PHARMACY : 4
OTHERS : 7
LENGTHY : 1
REQUESTED : 3
MODIFIED : 1
CLAUDIO : 1
VETERAN : 26
CAPSULE : 2
RELIEF : 3
PT : 37
INJURY : 3
RADIATION : 3
CORRESPONDENCE : 1
PROCEDURES : 2
HLIP : 1
PSYCHOSOCIAL : 1
TRICOMPARTMENTAL : 1
CATHETER : 2
SKILLED : 1
GRAINS : 1
MINIMAL : 1
PERFORM : 2
SEXUAL : 2
STRATEGIES : 2
COMBAT : 2
AROUND : 1
BRISTOL : 1
AND : 152
SIMETHICONE : 1
HOUR : 1
URINARY : 3
FLUSHED : 1
SESSIONS : 4
JUN : 1
RESPONSE : 2
COMMUNITY : 2
POSTOP : 1
FOOTWEAR : 1
DETERMINING : 1
NAIL : 2
DISPLAYING : 1
KNOWLEDGE : 1
LOW : 1
FOLLOWED : 3
MAY : 10
BR : 1
LMSW : 1
LENGTH : 3
PRO : 1
APPT : 4
GROIN : 1
CONCURRED : 1
TAKING : 6
ADMITTED : 1
YET : 1
OBSERVED : 6
DONE : 5
PHYSICAL : 2
WEARING : 2
TEAR : 1
NIGHT : 5
ACTIVE : 21
KNOW : 2
KERATITIS : 1
SULLIVAN : 1
MANAGER : 1
ABILITY : 4
PACT : 1
BEGIN : 1
OPTOMISTIC : 1
CONTROLLED : 1
THIS : 55
NIACIN : 1
MIRAPEX : 1
SOFT : 1
VAMC : 1
ADDED : 1
ANC : 1
DIED : 1
RIGHTS : 1
FINANCIAL : 1
MANAGING : 1
EXTREMITIES : 1
FLASHBACKS : 1
SESSION : 5
STATES : 8
NEBULIZER : 1
PHYSICALLY : 1
IMURA : 1
OU : 4
LOCAL : 1
WHILE : 2
HAMLIN : 1
QUESTION : 2
ILISOME : 1
DEFECT : 1
INTRUSIVE : 1
FIRST : 3
ICDCM : 5
WAIT : 1
RESP : 2
LAUGHING : 1
PICK : 1
ETOH : 3
DOWN : 2
BOVIE : 1
WAS_ADVERSE : 1
DEC_REPORTS : 1
PATIENT_INFORMATION : 1
BANISTER_HOUSE : 1
TO_PT : 2
LUNG_HIS : 1
ANYTHING_STS : 1
NOT_ZZPATIENT : 1
TUBES_PRECAUTIONS : 1
ATROPINE_ATTENDING : 1
SURGERY_IS : 1
THINGS_ON : 1
CURRENT_AND : 1
NUTRITION_DIRECTIONS : 1
USE_DESIRES : 1
INTRODUCING_THEMSELVES : 1
SOME_POLPS : 1
HIM_HOW : 1
MG_PATIENT : 1
HERE_THIS : 1
IS_KEEP : 1
OF_DISCHARGE : 1
VALVE_COMMENTS : 1
KG_OTHER : 1
ROOM_PROJECTED : 1
DENTAL_CARIES : 1
ALERT_NUMBER : 1
WITH_PSG : 1
UP_THE : 2
MED_EDUCATION : 1
BEEN_TO : 1
PLAN_BE : 1
TOMORROW_SESSIONS : 1
NIACIN_MG : 1
ALERT_THROUGHOUT : 1
NOT_TAKING : 2
GOAL_TO : 1
DONE_CAVITRONE : 1
THE_BENEFITS : 1
EUTHYMIC_OUTPATIENT : 1
CHRONIC_TO : 1
PATIENT_INFLUENZA : 1
ALERT_CARE : 1
WORTH_PARTIAL : 1
CARE_WILL : 1
DISCHARGED_FRI : 1
PPD_BOWEL : 1
IEST_IF : 1
STD_REPORTS : 1
WITHIN_FACILITY : 1
SC_ED : 1
PATIENT_HAD : 1
NO_CONTINENT : 1
USE_THE : 1
PICKEDUP_ADDITIONALLY : 1
PLACE_BOWEL : 1
OF_EYEBROWS : 1
PO_ACTIVE : 2
AND_ORIENTED : 2
MAINTAIN_TWICE : 1
FACILITY_SECONDARY : 1
FRIENDS_AND : 1
PAST_HOURS : 2
PATIENT_CONTACTED : 1
OF_HIS : 5
EXT_OR : 1
AND_DRYER : 1
PEOPLE_HAVE : 1
ME_YOUR : 1
ON_AC : 1
HAVING_DIFFICULT : 1
THE_PATIENT : 21
PRESENTS_COMPLAINT : 1
OF_EVALUATION : 1
THE_SUPPORT : 1
MALINGERING_SAFE : 1
REPORTS_DX : 1
SPECIMENS_CL : 1
ABOUT_PURSUING : 1
NOT_AND : 2
SEE_ABOVE : 1
PT_STOP : 1
WEANED_OFF : 1
HA_HE : 1
PASTVERY_SOB : 1
NURSE_ANNUAL : 1
TO_ACETAMINOPHEN : 1
GLAUCOMATOUS_CHANGES : 1
NOTE_MIW : 1
SOME_OUTSIDE : 1
SCREEN_RITAL : 1
BETWEEN_THE : 1
CORRESPONDENCE_REMINDER : 1
BOWEL_PROBLEMS : 1
COULD_TRIGGER : 1
HAS_PREVIOUSLY : 1
AT_AGE : 1
BEFORE_IOP : 1
SCREEN_COMMUNITY : 1
TO_ABOUT : 1
PATIENT_QUESTIONS : 1
DANGEROUS_TO : 1
MEDS_AXIS : 1
LABS_BELOW : 1
BE_PICKEDUP : 1
PLEASANT_DOSE : 1
PATIENT_CURRENT : 1
NOTE_THERE : 1
OF_TAB : 1
AGAIN_COIN : 1
MEDICATIONS_MAY : 1
IDENTIFIES_FOLLOWING : 1
ISSUED_WEIGHT : 1
TO_VERIFIED : 1
CONTINENT_THIS : 1
ASSISTING_ENSURE : 1
RETURN_ON : 1
ADDENDUM_BRC : 1
BRP_FOUND : 1
WITH_STATES : 1
INJURY_FROM : 1
EXTENDED_AND : 1
BREATHING_NEW : 1
BY_DISTRESS : 1
DIVERTICULOSIS_ME : 1
ROM_RUE : 1
PRIVILEGES_INTERDISCIPLINARY : 1
AUDITC_NEGATIVE : 1
ON_FRI : 1
RISK_SCREEN : 1
ARRIVE_HOUR : 1
VETERAN_PRESCRIDBED : 1
DATE_INFLUENZA : 1
HE_PLANS : 1
MORNING_MG : 1
VETERAN_DEMONSTRATE : 1
SUICIDAL_ADVANCE : 1
CONTACT_PHONE : 2
THIS_THAN : 1
HIS_PRESSURE : 1
ON_WEIGHT : 1
AGITATED_NO : 1
TREATMENT_DURING : 1
AM_MINUTES : 1
AND_WIFE : 1
DENIED_ASSIGNED : 1
LOOKING_MR : 1
WANTS_TO : 1
ANTISOCIAL_TRAITS : 1
NEC_SUICIDE : 1
ICOTHE_VA : 1
MIAMI_ON : 1
ADVANCE_SCREENING : 1
HAD_DIFFICULT : 1
CHECK_MEDICATIONS : 1
STRIP_STRIP : 1
USAGE_MINS : 1
MULTIPLE_CONCERNS : 1
EXAMINATION_OU : 1
OL_THIS : 1
BELOW_ROM : 1
HPI_REPORTS : 1
FOR_NO : 2
OF_ATTENTION : 1
SEDATION_DRO : 1
HYPOKALEMIA_HYPERGLYCEMIA : 1
HCL_CAP : 1
OUTPATIENT_ENCOURAGED : 1
WITH_CURRENT : 1
PROTOCOL_USED : 2
EDUCATION_SKILLS : 1
LIVING_THIS : 1
CM_OU : 1
HOUSE_PATIENT : 1
HAD_ULTRASOUND : 1
PATIENT_FAMILY : 4
NOT_RECEIEVE : 1
DEVELOP_TOOLS : 1
COOPERATIVE_RESPECTFUL : 1
STRESS_DISORDER : 1
OBSERVED_SMILING : 3
HIS_REFERRAL : 1
HAD_PNEUMONIA : 1
CARE_ORAL : 1
THE_WHOM : 1
WITH_OR : 1
PERFORMED_AT : 1
IF_IS : 1
DRUG_NIGHT : 1
INDIVIDUAL_PSYCHOTHERAPY : 1
HOW_DRINKS : 1
CURRENTLY_NOT : 1
HISTORY_SUBSTANCE : 1
SETTING_ALERT : 1
AXIS_II : 2
BED_SPONGE : 3
BEEN_NO : 1
INCLUDING_PSA : 1
IM_TO : 1
CAPSULE_MOUTH : 2
DRINKING_WELL : 1
ISSUES_PSYCHIATRIC : 1
ASSISTANT_HIP : 1
PROCEDURE_PRESENT : 1
PC_ANNISTON : 1
CLONAZEPAM_MG : 1
OR_WITHOUT : 1
NECK_PAST : 1
YES_RECONCILIATION : 1
OU_SEE : 1
NUTRITION_SKIN : 1
AND_HA : 1
ACTIVE_HIM : 1
HE_FELT : 3
HOME_WITH : 1
CHRONIC_TESTALGIA : 1
OPTIONS_SEE : 1
DISABILITY_YO : 1
ANY_BOWEL : 2
THE_WITNESS : 1
HEALTH_ATTEMPTED : 1
WITH_SUPPLEMENTAL : 1
BIT_HE : 1
BEEN_AND : 1
SAW_EVALUATED : 1
CODE_UNLISTED : 3
STRONGER_SIDE : 1
CE_ASSISTING : 1
ARRIVED_PM : 1
PHARMACY_AMIGO : 1
CALM_MOOD : 1
BE_TIRED : 1
CKD_OF : 1
WILL_OUR : 1
TRAITS_HISTORY : 1
FORMULA_IS : 1
HIM_ADMITTING : 1
WEAKNESSES_INCLUDE : 1
PAINFUL_HAD : 1
ROOM_OR : 1
DIED_ON : 1
RECORD_GENITOURINARY : 1
HOWEVER_THERE : 1
SIBLINGS_THE : 1
WITH_SIBLINGS : 1
IDENTIFIED_OTHER : 2
TALKED_ABOUT : 1
PREVENTIVE_HEALTH : 1
POSTTRAUMATIC_DISORDER : 1
PROGRAM_HAS : 1
YOUR_SCHEDULED : 1
IF_APPLICABLE : 1
CLINIC_AND : 2
PAIN_PM : 1
ACTIVITIES_ADVISED : 1
VACCINE_IS : 1
FOLLOWING_OF : 1
FOR_HEAD : 1
MR_YEAROLD : 1
TIME_ALLERGY : 1
TEAM_THE : 1
CANCER_OF : 1
TO_HYDROCODONE : 1
PLACE_OR : 1
AND_WOULD : 1
THE_TOILET : 2
BRC_SKILLS : 3
ZZSWS_FRIENDS : 1
REPORTED_PRIMARY : 1
INFLUENZA_VA : 1
TRAZODONE_AT : 1
REGARDING_FOLLOWING : 1
COURT_TREATMENT : 1
BY_CLINIC : 1
MAY_BEEN : 1
OF_ACTIVE : 1
SEE_PATIENT : 1
APPEARANCE_THE : 1
PT_WILL : 1
CONSERVATIVE_HIS : 1
OF_STABLE : 1
HOW_HAS : 1
INSTRUCTED_FOLLOW : 1
AS_AS : 3
PAIN_THAT : 1
NOT_RETURN : 1
NANCY_SMOKING : 1
PAIN_ISZESKI : 1
BOTH_TIMES : 1
DECISION_REITERATED : 1
PROBLEMS_QUESTIONS : 1
PREOP_ALERTORIENTED : 1
TREATMENT_DENTAL : 1
SUPPORTIVE_AND : 1
PROBLEMS_WITH : 1
CANE_LOT : 1
WITHDRAWAL_EAT : 1
BX_PTSD : 1
AFTER_PROBLEMS : 1
COMMUNITY_OR : 1
SESSION_IDEATION : 1
OF_FIELD : 1
THAT_THESE : 1
DOSE_ANTIBIOTICS : 1
STATED_THEY : 1
MSLT_DEFINITION : 1
ABSTINENCE_BE : 1
INSULIN_IS : 1
INAPPROPRIATE_RELATED : 1
MONTH_IN : 1
WHEN_DUE : 1
NEWS_MIAMI : 1
FAMILY_ARRIVAL : 1
DISP_KIM : 1
MEMBER_THE : 1
WED_SHE : 1
PHYSICAL_EXAM : 1
DESIRE_TO : 1
HE_ABLE : 1
IS_VETERAN : 1
SIGNIFICANT_HX : 1
AS_OPPOSED : 1
IDENTIFIED_CALLER : 1
SEDATION_NG : 1
BEEN_ABOUT : 1
DOING_THIS : 1
SPECIMEN_TEST : 1
RELAY_TO : 1
LEISURE_LIFE : 1
FALLS_OR : 1
PT_RETURNS : 1
MG_MG : 3
MEANINGFUL_VETERAN : 1
HAS_MULTIPLE : 2
INFORMATION_SULLIVAN : 1
BP_BY : 1
SHOES_STARTED : 1
THE_CONSULT : 1
PROSTATE_OUTPATIENT : 1
POWER_FAMILY : 1
EVALUATION_AND : 3
HIS_ISSUES : 1
CLINIC_VET : 1
AND_STRETCHES : 1
HOME_LPM : 1
PERCEPTION_LIMITED : 1
GOOD_AND : 2
AFTER_HE : 2
SIDE_REPOR : 1
ENDING_PM : 1
VENOUS_MANAGEMENT : 1
HE_WELL : 1
IN_TELECARE : 1
NO_YES : 3
WITH_TRAZODONE : 1
DISORDERMET_VETERAN : 1
CLINIC_MENTAL : 1
PRN_MORPHINE : 1
NOTIFICATION_ELABORATE : 1
CONSIDER_MRI : 1
GOAL_CLASS : 1
SVI_AND : 1
MOST_RECENT : 1
SUPPORT_BLOOD : 1
CALLED_REGARDING : 1
REFERRAL_TO : 1
CLEANLINESS_PATIENT : 1
HE_PARTICIPATED : 1
MESSAGE_PATIENT : 2
TO_TO : 9
AND_GROUPS : 1
DUAL_DX : 1
PAIN_SINCE : 1
THERAPY_MINMAL : 1
MODERAT_PSA : 1
HAVING_BEEN : 1
LB_COMPLAINT : 1
WAS_SCORE : 1
STRESSORS_COULD : 1
CARE_OUTPATIENT : 1
AGENCIES_OR : 1
WITH_PT : 4
WILL_TOUCH : 1
CA_PATIENT : 1
MOOD_PREOP : 1
PHYSICIAN_INABA : 1
ANTERIOR_NS : 1
AT_EEG : 1
OXYGEN_TEST : 1
BLOOD_WRITTEN : 1
RITAL_NEVER : 1
SIZE_CLINICAL : 1
RELATIONSHIPS_NUMBNESS : 1
IF_CONTINUES : 1
PLAN_ADVISE : 1
OBESITY_AND : 1
LETTER_ONE : 1
HERBAL_PULSE : 1
ENDING_AM : 1
WHO_PROTECTORS : 1
LEAST_YR : 1
CITY_GO : 1
TAKE_ACTIVE : 2
FOR_STATED : 1
GOOD_FROM : 1
PATIENT_WITH : 6
THE_PHARMACY : 1
WAL_FOR : 3
ARRANGING_HAS : 1
ATTENDED_GROUP : 2
TO_PERSONAL : 1
MONITOR_AND : 1
HEART_ADDENDUM : 1
FOR_EYEGLASSES : 1
PHONE_CALLS : 1
MESSAGE_MEDICATION : 1
WAS_DATE : 1
LOST_WIFE : 1
PNEUMONIA_DOES : 1
IS_PATIENTS : 1
NOVEMBER_PHENOBARBITAL : 1
HAVE_HAD : 1
WITH_TREATMENTS : 1
ARRIVING_TO : 1
PROVIDED_EFFECTS : 1
WAS_INTO : 1
BEFORE_OR : 2
RECEIVING_AUTHOR : 1
AT_LEAST : 1
OSAC_JO : 1
MEAL_ASSISTANCE : 1
COULD_RELAPSE : 1
PAGES_MORE : 1
PRIOR_ADMISSION : 1
OTHERS_STRESSORS : 1
IS_SINCE : 1
FOUND_HELPFUL : 1
ANXIETY_OR : 1
MODE_PROVIDED : 1
APR_RESPIRATION : 1
SEE_THIS : 1
CLINIC_GAIT : 1
YOUR_MENTAL : 1
AND_THEIR : 1
PM_YOUR : 1
ANGELA_WEIGHT : 1
OF_YELLOW : 1
HAVE_ADVANCED : 1
ME_WITH : 1
ABDOMINAL_WORSENING : 1
DRINKING_IN : 1
PATIENT_USED : 2
TO_PICK : 1
YES_PAIN : 2
KIDS_STEADY : 1
CHANGE_PREVIOUS : 1
JOINT_SURGERY : 1
MOTHER_WOULD : 1
REPORTED_TAKING : 2
KNEE_TRICOMPARTMENTAL : 1
NEWS_WAR : 1
REPORT_URINARY : 1
MALE_OVER : 1
DISORDER_HX : 1
PATIENT_THIAMINE : 1
ULCER_ASSESSMENT : 1
ADVANCE_THIS : 1
THE_FACT : 1
ACTIVITY_PLAN : 1
TABLETS_MG : 1
YES_VETERAN : 1
DEC_THAT : 1
ALL_COGNITIVE : 1
FIGHTING_ADDENDUM : 1
OF_THICK : 1
SCREEN_OUTPATIENT : 1
IN_LEANING : 1
THESE_WORKING : 1
OF_REGULAR : 1
NOTE_PROTOCOL : 1
FELT_HIS : 1
OUTPATIENT_THERAPY : 1
IMPRESSION_SIGNS : 1
UNIVERSAL_FALL : 1
UP_VETERAN : 2
TOMORROW_NONE : 1
VIA_CPRS : 1
ZZPATIENT_CARE : 4
IS_GENTLEMAN : 1
ASKING_QUESTIONS : 1
ALWAYS_BEHIND : 1
BACK_IN : 1
WHAT_QUESTIONS : 1
BEEN_ABLE : 1
GERD_ONSET : 1
CHF_HYPERLIPIDEM : 1
ROTATION_IN : 1
WHO_IS : 1
DOCTOR_ANY : 1
OPTIMISTIC_HIS : 1
NAME_ISZESKI : 1
ARMBAND_PT : 1
FALLS_OF : 1
TH_ABOUT : 1
ADEQUATELY_GROOMED : 1
ABNORMAL_PROSTATE : 1
LAST_VISIT : 3
VISUAL_SKILLS : 1
WITH_EXTREMITIES : 1
IN_THIS : 3
IDENTIFIED_PROBLEM : 2
PSYCHIATRIST_TO : 1
HOME_TO : 1
LAUGHING_TO : 1
IN_FACT : 1
MOUTH_XANAX : 1
SUCTIONING_AMBULATORY : 1
TRANSPORTATION_ATTEMPT : 1
THE_DETOXIFICATION : 1
HIS_TALK : 1
FINISHED_DRUG : 1
HE_NOT : 2
MILD_APNEA : 1
AMBIEN_SOCIAL : 1
ANTIBIOTICS_UNTIL : 1
VOUCHER_CONTACT : 1
APR_HEAD : 1
NEED_CARE : 1
RESIDENT_PERFORMED : 1
MOVE_ANOTHER : 1
AVERAGES_HIM : 1
SCALE_BLOOD : 1
HTN_DM : 1
EXT_DENTAL : 1
MAR_COMMENT : 1
HAVE_GOAL : 1
OTHER_BEHAVIOR : 1
CYST_MAY : 1
FALL_PREVENTION : 1
DETOXING_COMPLICATIONS : 1
MOUTH_TIMES : 3
ODY_THAT : 1
IN_PM : 1
CARE_DISTRESS : 1
TO_STRESS : 1
UP_PATIENT : 1
ON_HIS : 3
PATIENT_REPORTED : 2
NOTE_IM : 1
TAB_TAKES : 1
KNIFE_OF : 1
IN_RIGHT : 2
WILL_ARRIVING : 1
PSYCHOTIC_ASSOCIATE : 1
FIVE_GROUPS : 1
MEETING_MIN : 1
FOR_SPECIFICS : 2
CONT_SCANNED : 1
BATHROOM_PRIVILEGES : 3
TIMES_IN : 1
DESIGNED_INCREASE : 1
STATUS_THE : 1
BREATHING_ORAL : 1
CARE_ROM : 1
RESP_GLUCOMETER : 1
PACK_WAS : 1
HEPATITIS_THIS : 1
AT_COLOR : 1
OFF_ALL : 1
MARRIED_NEUROPSYCHOLOGY : 1
THAT_HAS : 4
PT_FOR : 1
THE_LIVES : 1
MENTAL_EXAMINATION : 1
PRO_PHONE : 1
ANSWER_MESSAGE : 1
THAN_TYPICAL : 1
IN_REGARDS : 1
WITH_IN : 2
NEEDED_SEEMED : 1
REQUEST_ED : 1
BIG_NAIL : 1
RESTING_BED : 1
VISIT_WARFARIN : 1
STRONGER_THAN : 1
BRONZE_CLINIC : 1
NUMBER_SAME : 1
AT_HOME : 2
HYDROX_SIMETHICONE : 1
BE_COME : 1
CONSENT_FOR : 1
EMERGENCY_PART : 2
TO_MAKE : 3
OWP_REPORTS : 1
STATES_HAS : 1
DETOXIFICATION_TAKE : 1
ULTRASOUND_INFORMED : 1
TEST_USE : 1
PATIENT_CARE : 1
NIACINAMIDE_TAB : 1
ASSESS_THE : 1
CONSENT_WAS : 2
KEYPAD_THE : 1
TO_SCHOOL : 1
DX_RELATIONSHIP : 1
DIED_CONTACT : 1
PRESENT_FOR : 1
ORDER_THE : 1
ALLERGIES_LIVER : 1
NO_COLOR : 1
TO_SELF : 1
DISTRACTING_SCANNED : 1
OIL_IN : 1
GLUCOMETER_TEST : 1
PAIN_HIS : 2
TO_PNEUMONIA : 1
CURRENT_MEDICATION : 1
UP_TOMORROW : 1
QUESTIONS_WAS : 1
COPING_WITHIN : 1
STATUS_NEVER : 2
VENTURA_SSOME : 1
REHAB_OTHERS : 1
TO_GOAL : 1
WITH_SC : 1
NOAH_AT : 1
MAY_BE : 3
REQUEST_REFERRAL : 1
DESIGNED_TO : 1
TO_OWN : 1
OBESITY_OFFERING : 1
OUTSIDE_RECORDS : 1
ACTIVE_AND : 1
ENJOYS_YO : 1
SUICIDE_SCREENING : 1
OF_VESICLE : 1
HAD_NO : 1
CEFAZ_THERE : 1
CURRENT_HOMICIDAL : 1
EXPERIENCING_AND : 1
PRIOR_PNEUMONIA : 1
BIRCH_REPORTED : 1
PROGNOSIS_MEDICATIONS : 1
BE_DETERMINED : 1
TO_IS : 3
CIRCUMCISION_SERVES : 1
SUICIDAL_IDEATION : 2
EEG_IN : 1
REQUESTED_DONOVAN : 1
REGARDING_PAIN : 1
CHIEF_SUICIDAL : 1
DETERMINING_HE : 1
UP_SHAKY : 1
NO_HJR : 2
BLADDER_COMPLAINTS : 1
AND_PELVIS : 1
VERBALIZED_AND : 1
PNEUMONIA_MOOD : 1
BATHROOM_RESTORATIVE : 1
NO_CLINICAL : 1
AND_DECIDED : 1
TO_ALL : 1
TO_FOLLOW : 1
THAT_WILL : 2
WITH_LOCATION : 1
FOUND_THEM : 1
ELIGIBILITY_SERVICE : 1
DISEASE_OF : 1
HTN_AND : 1
WANTS_DONE : 1
LEFT_KNEE : 3
ER_LAST : 1
HE_AGREEABLE : 1
SENT_RELINED : 1
AND_VOMITING : 1
FRIENDS_NOT : 1
OR_DEVICES : 1
EXTRA_PASSING : 1
THE_MH : 1
SHY_HAPPY : 1
THIS_REACTION : 1
THIS_YEAROLD : 1
VENOUS_CLEANING : 1
PATIENTS_LAST : 1
OVER_COUNTER : 1
FOCUSING_VETERAN : 1
APPT_MRI : 1
DETOXING_WITHOUT : 1
THIS_SKIN : 1
HAS_OPERATING : 1
WITH_IRRITABLE : 1
DC_HOME : 1
OF_THERAPY : 1
PT_LEFT : 1
VENOUS_EVALUATION : 1
OXIMETRY_ADVERSE : 1
PERSON_AND : 1
WHAT_IT : 1
TOMORROW_FOR : 1
ACTIVE_SHLDR : 1
HIS_CHEST : 1
MALE_ARRIVED : 1
LESION_PULMONARY : 1
MEMBER_FROM : 1
AIDS_WRITTEN : 1
INSTRUCTIONS_TO : 1
MOBILITY_SELF : 1
NECK_THE : 1
WITH_REGARDING : 1
SCREEN_NOTE : 1
PLACE_AND : 1
SCHEDULED_OFTEN : 1
NOT_HE : 1
DEMONSTRATE_THE : 1
AN_ULTRASOUND : 1
UP_DETAILED : 1
ZZSWS_ECF : 1
CATH_WITH : 1
NEWS_FROM : 1
FO_ONE : 1
OF_CHRISTENSEN : 1
DOB_CHF : 1
MG_MORPHINE : 1
BEDTIME_ACTIVE : 1
MORNING_HPI : 1
MINUTES_DESCRIPTION : 1
AM_MALE : 1
PSYCHIATRIC_DIAGNOSIS : 1
TO_MEDICAL : 1
REFRAMED_ORIENTED : 1
ASKED_TO : 1
SERVICE_NSC : 1
SOME_MEDICATIONS : 1
QUESTIONS_THAN : 1
WAS_OR : 1
OR_COMPLAINTS : 1
NO_OIL : 1
CURRENT_TS : 1
ACTIVE_LISTED : 1
WITH_EPIN : 1
BATH_THE : 1
ELECTRONICALLY_MR : 1
QUESTIONS_MENTAL : 1
IN_ZZPATIENT : 1
PERSON_PLACE : 1
ON_OCCASIONS : 1
HOUSEBOUND_MASS : 1
NOT_GET : 1
GLAUC_KERATITIS : 1
PAIN_GROIN : 1
SUBURAN_INR : 1
NO_BOUNDARIES : 1
DDD_HAS : 1
PATIENT_SEE : 1
APR_RESCHEDULE : 1
INDEPENDENCE_SESSIONS : 1
MR_MAIL : 1
CALL_HERE : 1
ME_AGAIN : 1
OF_PROVIDER : 1
THE_EQUIPMENT : 1
PSYCHOSOCIAL_ON : 1
MANAGEMENT_WAS : 1
NIGHT_RACING : 1
THE_DISCUSSION : 1
SUSP_ORAL : 1
ORDER_MEDICAL : 1
GI_RA : 1
THIS_HAD : 1
PATIENT_PAIN : 1
TRACT_QUESTION : 1
VA_AND : 1
MAY_ADDED : 1
RETURN_OKLAHOMA : 1
AWAKE_AND : 1
ER_EVALUATION : 1
OF_DEPRESSIVE : 1
HAS_REQUESTED : 1
ADMITTING_TO : 1
WAS_TO : 1
REINFORCEMENT_TO : 1
CANE_HE : 1
ASSESSMENT_DENIED : 1
ME_IT : 1
SKIN_PROBLEMS : 2
MEDICATIONS_AND : 3
WANTING_TO : 1
RESPIRATIONS_RESPIRATIONS : 1
SYRINGE_STARTED : 1
INFORMED_INSPECTED : 1
ALLERGIES_SULFABENZAMIDE : 1
FOR_IN : 1
WILL_PATIENT : 1
NOTE_ANY : 1
FROM_STAFF : 1
MG_OF : 1
SESSION_PATPU : 1
BEEN_NURSING : 1
ACTIVITY_THERAPY : 1
STRESS_IT : 1
MAY_WE : 1
LAND_NONE : 1
PATIENT_DOES : 2
MCG_CFCF : 1
SAME_LOCATION : 1
WEEK_ALSO : 1
INJURY_MARITAL : 1
OMEPRAZOLE_MG : 1
ENT_MEDICATION : 1
NOTE_TO : 2
SAFETY_PRECAUTIONS : 1
YESTER_EVENING : 1
HIS_AND : 2
COPD_KUSHWAHA : 1
WILL_THE : 2
OF_SAME : 1
HOSPITAL_PATIENT : 1
PATIENTS_THE : 1
DIRECTIVES_APR : 1
TRANSPORTATION_AND : 1
TO_BATHROOM : 1
WAS_ACTIVE : 1
YEARS_IS : 2
RN_MOVEMENTS : 1
OXIMETRY_SITE : 1
OF_PROCEDURE : 2
WEEKLY_VISITS : 2
PT_FROM : 1
DEPENDENCE_AND : 1
ABOUT_WHETHER : 1
TO_DOWN : 1
LOCAL_TITLE : 1
CARE_NOTE : 4
USED_AMOUNT : 1
SCALP_DIRECTIVE : 1
IM_REACTIVE : 1
REACTIVE_STRESS : 1
WHEELS_HOWEVER : 1
DISCUSSION_IN : 1
THERAPY_SESSION : 1
PROVIDERS_EMERGENCY : 1
REPORTED_THIS : 1
NEW_PAIN : 1
IS_MEDICALLY : 1
NO_ALLERGIES : 1
ANESTHESIA_ANESTHETIST : 1
SLIGHTLY_BLADDER : 1
QUESTIONS_REINFORCEMENT : 1
AS_FOR : 3
UNUSUAL_METHODS : 1
VETERAN_DISCLOSED : 1
ON_UNBELIEVABLE : 1
PATTERN_MEDICATION : 1
NEVER_NEUROPSYCHOLOGY : 1
ON_SCALE : 1
LOSS_AIDS : 1
TAB_PO : 1
SKILLS_FOR : 1
VENOUS_MACHINE : 1
PAIN_LEVEL : 1
HEPLOCK_TO : 1
DOCTOR_TO : 1
BRONZE_YESTER : 1
AFTER_HEAVY : 1
OF_COUMADIN : 1
OR_AND : 1
INTERDISCIPLINARY_PSYCHIATRIC : 1
THESE_CURRENT : 1
IN_PT : 1
NOW_WILL : 1
OF_ETOH : 1
HIS_DM : 1
BOWEL_PATIENT : 1
FOR_FOLLOWING : 2
QUESTION_ANSWER : 1
SPUTUM_DRINKING : 1
COOPERATIVE_OF : 1
TASK_OVERSIGHT : 2
SCORE_OF : 1
PSYCHIATRIC_FOLLOW : 1
CHANGES_OD : 1
IS_YO : 1
TASK_REQUIRES : 1
HAS_NS : 1
THAT_MRI : 1
INTRUSIVE_OTHERS : 1
SURFACEANTERIOR_RESIN : 1
HIM_TO : 2
OWP_THAT : 1
AGAIN_HAD : 1
IS_OLD : 1
IN_PAIN : 2
NO_SUSTAINED : 1
PULSE_PROVIDED : 1
CONSUMED_ZZPATIENT : 1
AND_MOOD : 1
MEDICATION_LEGAL : 1
HEART_NO : 1
ON_YOU : 1
DISCUSSING_THE : 2
FOR_THE : 5
ADDENDUM_DIAGNOSIS : 1
EYES_ARE : 1
TEARS_ANESTHETIST : 1
MOBILITY_BRC : 1
NORMAL_RANGED : 1
ADVERSE_OCCURRENCE : 1
CODING_USAGE : 1
TREATMENT_RATES : 1
THREE_FOR : 1
OF_SESSIONS : 2
EYE_PROVIDED : 1
PATIENT_TAKEN : 1
TIME_VERBAL : 1
WAS_DONE : 1
FOR_FLUOXETINE : 1
PHYSICIAN_PH : 1
FOR_SWS : 1
GROUP_PLAYS : 1
RESTRICTED_IN : 1
REQUESTED_FOR : 1
EYE_HE : 1
PROBLEM_COPING : 1
AND_TAUGHT : 1
ON_LEGIBLE : 1
SCIATICA_ICDCM : 1
RATING_MENTAL : 1
MORPHINE_COMPANY : 1
PATIENT_EVENING : 1
ACTIVITIES_OF : 4
NOTE_MONTHS : 1
HE_WILL : 4
WAS_FASTING : 1
WORK_INTAKE : 1
ASSESSMENT_ANY : 1
CAP_SHOES : 1
LAB_PT : 1
WAS_CONTINENT : 3
PATIENTS_CLONAZEPAM : 1
ASKING_TO : 2
LEBOARD_VOLLEYBALL : 1
BE_ADDED : 1
ACTIVE_HEIGHT : 1
HAS_STABLE : 1
SCHEDULED_TO : 1
URINE_AN : 1
MINUTES_NO : 1
POSSIBLE_NEUROSURGERY : 1
CONFERENCE_FOR : 1
VENTURA_STATE : 1
TO_ROI : 1
FOR_FEE : 1
MR_IS : 2
TESTING_PERFORMANCE : 1
MYOPIA_MOVEMENTS : 1
WHEN_ABOUT : 1
DAILY_PATIENT : 1
HIS_LOT : 1
LIVER_ENTER : 1
CONCURRED_THE : 1
CLINIC_TRANSFERRING : 1
AND_FEELING : 1
PICKING_HIM : 1
HE_HAVING : 2
FAMILY_TO : 1
MEDIAL_OF : 1
HEARING_LOSS : 1
CAP_ORAL : 1
NOW_KNEE : 1
BY_ARRANGING : 1
SURG_PARENT : 1
ISSUED_OTHER : 1
SIZE_AND : 1
PREFER_REST : 1
PICK_UP : 1
IT_MILD : 1
GETTING_MED : 1
ALTERNATIVES_FOR : 1
OUT_TYPE : 1
ANXIETY_PTSD : 1
ORIENTED_AM : 1
NEEDS_IN : 1
THE_OUTSIDE : 2
PHONE_CALL : 1
KNEE_INSTABILITY : 1
PROVIDERS_ROOM : 1
CONSTANTLY_TO : 1
ENVIRONMENT_MINUTES : 1
CARE_GPD : 1
WRITER_DETERMINE : 1
NOT_GIVEN : 1
AND_PROCEDURES : 1
LRQ_DONE : 1
PREVENTION_MHC : 1
WENT_TO : 2
SELF_OF : 1
LMSW_CSAC : 1
TRAMADOL_TAB : 1
MEDICATIONS_HAVE : 1
HI_AT : 1
LIMITED_NEW : 1
HAVE_YOUR : 2
ING_LOCATOR : 1
UNITS_REF : 1
SUICIDAL_HOMICIDAL : 2
COLOR_CONGESTION : 1
AND_STILL : 1
WITH_DIAGNOSIS : 1
ADMITTING_LACK : 1
NOT_APPEAR : 1
AS_DIRECTED : 1
CLC_PROGRESS : 1
RX_OPTICIAN : 1
ME_HE : 1
PT_AS : 1
FOR_PAIN : 3
IN_HISTORY : 1
WE_REPORTS : 1
NEW_IN : 1
HERBAL_MEDICATIONS : 1
THE_WILL : 1
EDUCATION_AN : 1
WILL_TRY : 1
BEING_INTRUSIVE : 1
COMPLAINT_KNEE : 1
DIMINISHED_MUST : 1
QUESTIONS_PROVIDED : 1
RESPECTFUL_OF : 1
IMMEDIATELY_TO : 1
LEG_VENOUS : 1
ALL_DRUGS : 1
RELATIONSHIP_WITH : 1
NOTIFICATION_NEEDED : 1
SOME_STRESSOR : 1
TOL_WELL : 1
REPLACES_PATIENT : 1
PRESSURE_FO : 1
ARE_SORE : 1
PT_HAVE : 1
STABLE_MOOD : 1
IS_WHEN : 1
LIVING_SHIFT : 1
DIABETIC_RESP : 1
AND_REQUESTING : 1
MEDICATION_AUTHOR : 1
CM_SEE : 1
ADDICTION_SKILLS : 1
REGAIN_SIGHT : 1
YOURSELF_DURING : 1
IN_SEEN : 1
PHYSICIAN_YES : 1
BOWEL_AMOUNT : 1
HAS_MEDICATION : 1
AT_YOUR : 1
DONT_KNOW : 2
EXT_DENTINE : 1
CU_MAR : 1
MH_WORK : 2
LABRAL_ANESTHESIA : 1
SIGNIFICANTLY_MR : 1
ALL_FIVE : 1
PERSONALITY_AND : 1
TREATMENT_BUT : 1
DX_PER : 1
ORAL_EVALUATION : 1
RESIDENT_ALERT : 1
OF_FEB : 2
TRIGGER_FOR : 1
UNIT_FACILITATORS : 1
PROCESS_AIDS : 1
PAIN_ON : 2
PICKEDUP_BY : 1
OF_OFFICE : 1
INTERDISCIPLINARY_TEAM : 1
ALL_ANTIBIOTICS : 1
LOST_BOTH : 1
OF_LS : 2
MANAGEMENT_PROVIDED : 1
JUST_IN : 1
FOR_THERAPY : 2
IF_DOES : 1
IN_OU : 1
CHRONIC_CONTROLLED : 1
WAS_COMPLAINING : 1
MR_HIS : 2
EARRING_SAID : 1
AT_THE : 9
HE_WENT : 1
FOR_TABLETS : 1
REPORTS_GONE : 1
SEGMENT_TYPE : 1
FOR_DIABETES : 1
ONE_OF : 1
KNIFE_POSSIBLE : 1
INTERESTS_YES : 1
LATEX_AND : 1
RISK_FALLS : 1
CR_PREVENTIVE : 1
CONDITION_PATIENT : 1
APPROPRIATELY_FIBROIDS : 1
DRINKS_ALCOHOL : 1
PO_DAILY : 1
NAPPING_DURING : 1
IDENTIFIED_NA : 1
SUGGESTED_MOVE : 1
ASKED_TRANSPORTATION : 1
RIGHT_FOREARM : 1
ASSESSMENT_TO : 1
PAIN_RESIN : 1
WERE_DRINKING : 1
EYEBROWS_PERIORBITAL : 1
INDICATES_NO : 1
MOTIVATED_AT : 1
HER_PT : 1
TO_LOWER : 1
DECLINED_CONSUMED : 1
REC_TO : 1
TO_VA : 1
SELF_DRAINS : 1
PART_TRIAGE : 1
ON_MAY : 3
WASHER_AND : 1
ACTIVE_EFFECTS : 1
HIM_IN : 1
FRI_TO : 1
STATUS_PERSIAN : 1
REFERRAL_FORM : 1
WILL_RECEIEVE : 1
WITH_FORMER : 1
COUNSELING_MINUTES : 1
HAS_RELY : 1
LOCATION_SCALP : 1
BOWEL_NUMBER : 1
AND_ONLY : 1
WHEN_STAFF : 1
MEDICATION_FOR : 2
COMMENT_TECHNIQUES : 1
ROUND_MINUTES : 1
IS_ACTIVE : 1
THE_PROBLEM : 1
DURING_SHIFT : 7
NAME_VETERAN : 1
PARTNER_SHEET : 1
WAL_REQUEST : 1
PLASM_PATIENT : 1
NOTE_ATTEMPTED : 1
NO_OPERATE : 1
AXIS_DEFERRED : 1
RECONCILED_WITH : 1
WAS_FOR : 1
SUPPORT_RECOVERY : 1
NOS_REPORTED : 1
PROCEDURE_AND : 1
EMERGENCY_WALKIN : 1
HEPLOCK_STARTED : 1
DIPLOPIA_PATIENT : 1
SMILING_TO : 2
ORIENTATION_ON : 1
VISTA_IMAGING : 2
HAD_MEDS : 1
ADDED_OPENINGS : 1
NURSING_WAS : 1
SCAN_LUNG : 1
GETTING_INTERVERTEBRAL : 1
REQUESTING_OF : 1
GIVEN_THE : 1
INTERESTS_ARE : 1
ALTERNATIVES_TRANSPORTATION : 1
HE_NOTICED : 1
OR_GET : 1
CATEGORY_VI : 1
MONTH_SERVED : 1
TO_FOLLOWING : 1
UNDERSTANDING_AND : 1
PAIN_PROLONG : 1
IBUPROFEN_TAB : 1
PERMINANTLY_LB : 1
LEGS_HE : 1
BACK_THE : 2
AND_ATROPINE : 1
VISION_OS : 1
PT_REPORTS : 1
VA_HAVE : 1
NOT_THE : 1
SIGNS_NONVA : 1
HANDOUTS_SUGGESTED : 1
WHEN_HE : 1
TS_ARREST : 1
LIMITED_BREATHING : 1
DIPLOPIA_ALLERGIES : 1
FOR_ELECTRONICALLY : 1
VETERAN_ALERT : 1
NOTE_PATTERN : 1
UP_HT : 1
METAB_TRIAMTE : 1
MOVEMENTS_FOREHEAD : 1
TYPICAL_LB : 1
EDUCATION_MEDICATIONS : 1
AND_DOING : 1
AND_RAL : 1
CONVENIENCE_IF : 1
TO_DO : 1
EYEGLASSES_LG : 1
NOTICED_MORE : 1
IS_ORIENTED : 1
THE_TOPICALLY : 1
NARCOTIC_OVER : 1
APPROACH_RIGHT : 1
THEIR_FAMILY : 1
WITH_IS : 1
SYMPTOMS_VETERAN : 1
BRC_FAMILY : 1
TUBES_SAFETY : 1
WAS_TRANSPORT : 1
INFECTION_FLUOXETINE : 1
WEARING_PAJAMAS : 1
FINDING_LOCATOR : 1
MANAGEMENT_CODE : 4
GYM_AT : 1
FOLLOWED_THROUGH : 1
PULSE_OTHER : 1
RNS_MH : 1
MINUTE_FOR : 1
TO_RN : 1
AND_CAN : 1
GET_RETURN : 1
USAGE_HRS : 1
RECORD_DENIED : 1
PROBLEMS_WHAT : 1
GROUP_RANDOMIZATION : 1
HIS_AT : 1
RECONCILED_AND : 1
REACTIVE_NEXT : 1
TASK_SUPERVISION : 2
PATIENT_WEIGHED : 1
OTHERS_URINE : 1
TO_PATHOLOGY : 1
ANY_PATCHES : 1
WRITTEN_ON : 1
ALL_ILLICIT : 1
SEE_DR : 1
DAILY_RELAXATION : 1
EMPLOYEE_OF : 1
TAKING_BP : 1
WEEKEND_HE : 1
FELT_RELIEF : 1
CALL_SOUTH : 1
PLAN_SINGLEPOINT : 1
HIS_HER : 1
SURGERY_NOTE : 1
TASK_NO : 1
NOTE_FUNCTION : 1
NURSE_JO : 1
CONCURRED_WITH : 1
SIBLINGS_BROTHER : 1
INFORMATION_HE : 1
ANTISOCIAL_PERSONALITY : 1
INCLUDING_ORDERED : 1
SURE_IF : 1
VETERAN_CURRENTLY : 1
SPECIMEN_NAME : 1
ASK_REINFORCEMENT : 1
DENIES_URINATE : 1
WITH_LEAST : 1
PERSISTS_LEGS : 1
VIGAMOX_MOXIFLOXACIN : 1
HYPERLIPIDEMIA_SYSTEMIC : 1
REINFORCEMENT_WANTING : 1
WORSENING_OBESITY : 1
SINCE_OUT : 1
OD_TRAUMA : 1
AND_PARTICIPATED : 1
OKLAHOMA_CITY : 1
SI_AND : 2
ADDITIONAL_ALLERGIES : 1
TO_OBSERVED : 1
FOUND_PHYSICIAN : 1
LIVING_PATIENT : 1
MEDICATION_RECONCILIATION : 4
TO_ON : 3
INDIVIDUAL_ELIGIBILITY : 1
QUESTIONS_YOU : 2
BED_JUMPED : 1
JUST_SEEN : 1
GENITOURINARY_COMMENT : 1
INTO_WITH : 1
TO_GRANDE : 1
ADL_BLADDER : 1
SURGERY_TESTING : 1
STS_LIKE : 1
DIFF_COLL : 1
SUPPORT_WBC : 1
PERSON_ALL : 1
FOR_RACING : 1
VA_ENTER : 1
GI_BILL : 1
HIS_NEEDS : 1
IS_WEARING : 1
IRRITABILITY_IS : 1
PAIN_MAA : 1
AT_PHARMACY : 1
INFLAMMATION_BMI : 1
HISTORY_PACK : 1
FOLLOWING_RESULTS : 1
TOPICAL_ALS : 1
STRATEGIES_FOR : 1
GERD_APPLY : 1
SCIATICA_ALLERGY : 1
GUN_PULSE : 1
EYE_ASSISTANCE : 1
MG_TH : 1
PURSUING_RELATIONSHIP : 1
CE_BEFORE : 1
LONG_HX : 1
SAFETY_RESPIRATIONS : 1
PAINFUL_AND : 1
TO_BIO : 1
WIFE_TO : 2
HIS_PATIENT : 1
CAROLYN_WITH : 1
SKILLS_WOULD : 1
CONTINUE_TO : 1
IMPROVED_PHARM : 1
PM_PT : 1
OBJECTIVE_AT : 1
FUTURE_DISCUSS : 1
IV_MR : 1
JUICE_AT : 1
PULSE_SITE : 1
FLU_EMERGENCY : 1
HAVE_DRINK : 1
USE_CUFF : 1
VA_CLINIC : 1
DOESNT_HELP : 1
AT_AM : 2
PROPER_ORDER : 1
PULSE_HE : 1
LACK_OF : 1
SEMIFOWLERS_POSITION : 1
OTC_DENIES : 1
RACING_THOUGHTS : 1
SUPPLY_PROVIDED : 1
DIET_YES : 1
WAS_NEGATIVE : 1
STARTED_TO : 1
SC_REPORT : 1
HE_BEEN : 5
REHAB_NIGHT : 1
ONCOLOGY_ADDENDUM : 1
COLORECTAL_SCREENING : 1
EPIS_OF : 1
AND_NECESSARY : 1
LIST_OF : 1
WIDTH_TYPE : 1
MAKE_APPROPRIATE : 1
IV_HPI : 1
PAIN_MANAGEMENT : 2
SUFIYAN_MD : 1
SEEN_MOBILITY : 1
TREATMENT_PROCEDURE : 1
CONTINUED_DISCUSSION : 1
AND_MULTIPLE : 1
THIS_AND : 2
CHANGES_PATPU : 1
MINS_WELL : 1
OF_FOREHEAD : 1
PATIENT_BELONGINGS : 1
COGNITIVE_DOMAINS : 1
DEVELOP_STRATEGIES : 1
IN_DISCUSSION : 1
NEW_DM : 1
COMMUNITY_MEETING : 1
LIGHT_CALL : 1
SWELLIN_MEDICATION : 1
FOOD_PT : 1
PATIENT_RESIDENT : 1
HE_ALWAYS : 1
OFFICE_NOT : 1
MEETING_CURRENT : 1
INFECTION_QUESTION : 1
HOUSE_YES : 1
VET_THIS : 1
BIPOLAR_HX : 1
EXT_PAGER : 1
IS_CHRONIC : 1
FIRST_TO : 1
THE_EXCEPTION : 1
AND_CONSULTED : 1
GIVE_BP : 1
COPY_OF : 2
HIS_SEEN : 1
BECAUSE_WANTS : 1
SHEET_IN : 1
BLOOD_SUGAR : 1
AND_AWAKE : 1
EVENING_PAST : 1
CH_MH : 1
NUTRITION_OF : 1
DRINKS_THIS : 1
ME_WILL : 1
USUAL_SHIFT : 1
RISK_FACTORS : 1
HE_AGAIN : 1
PROVIDED_FUNCTIONAL : 1
AND_EXTENSION : 1
AND_VET : 1
LIKE_IT : 1
HIS_OVER : 1
AND_RESPIRATORY : 1
SULFATHIAZOLE_PAIN : 1
ALCOHOL_TEST : 1
THAT_PHYSICIAN : 1
BASIS_HE : 1
TIME_REPORTS : 1
SEND_LETTER : 1
MINNEAP_MOTOR : 1
LESS_YOUR : 1
HIM_THIS : 1
NO_BM : 1
TOMBAZZI_FELLOW : 1
HIM_YEARS : 1
WELL_OTHER : 1
TRAITS_VET : 1
DIRECTED_BY : 1
APPOINTMENT_INFORMATION : 1
CONSULTED_FOR : 1
TH_VITAL : 1
TRY_AGAIN : 2
OF_CONDITIONS : 1
CPS_WALKING : 1
ANTI_AS : 1
DAILY_ACTIVE : 1
DIFFICULTY_THE : 1
THE_GROUP : 2
DISP_HOME : 1
AGAIN_REPORTS : 1
THIS_CONSTANTLY : 1
RECALL_ORDER : 1
RAD_SPECIAL : 1
SCREEN_EDUCATION : 1
MG_KNIFE : 1
SCORE_BROTHER : 1
LVH_FOR : 1
PRIMARY_GPD : 1
TRAZODONE_AN : 1
MEDICAL_DEAR : 1
DEPRESSIVE_AND : 1
HE_AN : 1
CARE_REASON : 1
YELLOW_CONGESTION : 1
COMMUNICATION_MODULE : 1
WAS_SEEN : 5
PHYSICIAN_OR : 1
WANTS_IT : 1
DOSE_MG : 1
TRICOMPARTMENTAL_OSTEOARTHRITIC : 1
MORE_THAN : 1
REQUEST_HEART : 1
WHEN_VETERAN : 1
NA_MG : 2
PHENOBARBITAL_VENLAFAXINE : 1
DONE_USING : 1
OF_VETERAN : 1
COMPLETED_CARE : 1
IN_COMBAT : 1
MIMSOME_STATE : 1
LIST_WAS : 2
DID_ATTEND : 1
EFFUSION_HAS : 1
CHRYSHANT_TRIAGE : 1
TO_OPENINGS : 1
AREA_FOR : 1
CONTACTED_NOTIFIED : 1
FIRST_OF : 1
TREATMENTS_VOLUME : 1
HELPLESSNESS_AND : 1
AND_EAT : 1
OR_INJURY : 1
MINMAL_HE : 1
INARNP_MEAL : 1
VERBALIZED_UNDERSTANDING : 2
SINCE_WEAKNESSES : 1
PATHOLOGY_CONTACT : 1
AT_INSTITUTE : 1
HISTORY_HYPOTHYROIDISM : 1
IN_MEDICATIONS : 1
UNSAFE_BEHAVIOR : 1
TO_ER : 4
VET_STATE : 1
AND_MET : 1
WITH_STRESSORS : 1
FACIAL_EXPRESSION : 1
DEFINITION_OF : 1
GRAINS_PATIENT : 1
ALSO_REPORTED : 1
THE_HOSPITAL : 1
SKIN_RISK : 1
GIVEN_HYGIENE : 1
EXCEPT_FENTANYL : 1
RELATIONSHIP_FORMER : 1
WITH_KNEE : 1
SIBLINGS_ON : 1
TO_BE : 7
GOING_BIO : 1
PERSONAL_CARE : 2
THAN_YOUR : 1
FISTULA_PTAGREED : 1
THE_RESULTS : 2
ATTENDED_OFFERED : 1
STRATEGIES_CONT : 1
SURVEILLANCE_AUSCULTATION : 1
SCREENED_WITH : 1
FELT_SOME : 1
INTO_RIGHT : 1
AS_PARTIAL : 1
WRITTEN_HIS : 1
PATIENT_HAVING : 1
RESTRAINT_NOTE : 1
OBJECT_PT : 1
INJECTION_PROBLEMS : 1
APPT_ANTERIOR : 1
PHARM_VISIT : 2
AND_BRIEF : 1
NUMBNESS_BOWEL : 1
ESCORTED_BY : 1
MULTIPLE_ROOM : 1
THE_TEAM : 1
COLOR_FALL : 1
CONTINUES_LABRAL : 1
WHY_ARENT : 1
ST_SBURG : 1
SWEATS_APPOINTMENT : 1
AND_BEFORE : 1
PREVIOUS_PHARMACY : 1
OR_PTSD : 1
AND_GETS : 1
SEEN_NS : 1
DISORDER_DISORDER : 1
THE_VETERAN : 4
PHARMACY_CHART : 1
WHAT_LISTED : 1
FLUOXETINE_MG : 2
ELIZABETH_STATES : 1
WITH_THE : 11
LATEX_PAST : 1
WAS_HE : 1
STRENGTHS_PLASM : 1
YOUR_ANTIBIOTICS : 1
PER_PHYSICIAN : 1
TO_TRY : 1
HIS_SELF : 1
TAP_DAYTON : 1
ENCOURAGED_MORE : 1
THE_WASHER : 1
OTHERS_PT : 1
APT_IN : 1
WELL_HE : 1
MEMBERS_WITH : 1
MG_LEARNED : 1
PAST_EMERGENCY : 1
HEALTH_CARE : 1
OP_ATTENDING : 1
ATTENDED_GOALS : 1
LIMITED_RESUMED : 1
ORIENTED_MR : 1
YET_DECISION : 1
WITH_PERSONAL : 1
SECURED_EVALUATION : 1
OF_IDENTIFIED : 1
WILL_COLONOSCOPY : 1
MEDICATION_PER : 1
TIRED_VETERAN : 1
AN_WILL : 1
HAVING_VETERAN : 1
CARE_DENTAL : 1
EVALUATION_IV : 1
ABOUT_PLAN : 1
BOWEL_MOVEMENTS : 2
TO_SAME : 1
STAY_THE : 1
CHRONIC_LABS : 1
EFFECTS_SEDATION : 1
WORK_RELATIONSHIPS : 1
THICK_YELLOW : 1
NOT_ENDORSE : 1
MON_TUES : 1
PLACEMENT_AND : 1
INTERMITTENT_ANXIOUS : 1
ATTEMPT_APPETITE : 1
MONTHS_DON : 1
BOARD_EXTRA : 1
MONITORING_FILED : 1
MEDICINE_CONSULTATION : 1
WAL_TRAMADOL : 1
HYPOTHYROIDISM_GERD : 1
DELTOID_AND : 1
SOME_AFTER : 1
COUNSELING_MCG : 1
PHYSICIAN_SKIN : 1
HANDOUT_COMMENTS : 1
SINCE_CLINIC : 1
INTRUSIVE_OF : 1
ORIENTED_PERSON : 2
MALE_FOR : 2
APPOINTMENT_DONT : 1
FAMILY_FROM : 2
VISIT_AM : 1
DX_MAXIMUM : 1
HGB_PLT : 1
PERFORMANCE_ACROSS : 1
INCLUDING_THE : 1
POSITION_SWEATS : 1
HAVE_AXIS : 1
DRINKS_PT : 1
CHECK_IN : 1
DONE_MHICM : 1
TO_ACTIVITIES : 1
HOSPITAL_PAJAMAS : 1
WANT_DOCTOR : 1
BECOME_CONFUSED : 1
BACK_ON : 1
RATE_COHERENT : 1
PUPIL_SIZE : 1
PROGRESS_BEEN : 1
PENSION_DENIES : 1
THE_RESPIRATORY : 1
NOT_CANCEL : 1
SHE_CALL : 1
THE_PTSD : 1
TALKING_WITH : 3
OUT_TO : 2
OU_ABOVE : 1
NO_PSYCHOSIS : 1
FRIEND_HAD : 1
CM_ROOM : 1
TAB_CONNECTED : 1
IF_HE : 1
DESCRIPTION_STATUS : 1
AMOUNT_STOOL : 1
HEAD_THE : 1
TALKING_OTHER : 1
HE_SPECIFICALLY : 1
DIFFICULTY_FELT : 1
DETAILED_IS : 1
PSYCHIATRIC_TREATMENT : 1
HAS_BEEN : 16
REMAINING_BED : 1
WORSE_DISPLACEMENT : 1
ALLERGIES_METHOCARBAMOL : 1
CALLING_REQUESTING : 1
NEEDED_BE : 1
HR_AND : 1
NO_PROBLEMS : 1
UNSPECIFIED_COUNSELING : 2
PROCEDURES_PERFORMED : 1
MORE_EXERCISE : 1
FOR_FOLLOW : 1
TO_INCREASED : 1
SKIN_OBSERVATION : 1
MANY_DRINKS : 1
GIVEN_CEFAZ : 1
OF_WITHDRAWAL : 1
MENTAL_NOTE : 1
AT_PASSING : 1
WITH_HIGHRISK : 1
VISIT_KNEE : 1
WIFE_GET : 1
IF_SENIOR : 1
LACK_MEDICATION : 1
CAP_TWO : 1
IS_LONGER : 1
AS_PATIENT : 1
EFFECTIVELY_CONSIDER : 1
TO_PROBLEM : 1
SKIN_COLOR : 2
BEING_ENROLLED : 1
JUNE_PLANS : 1
FUNCTION_FISH : 1
VISIT_SEP : 1
PANORAMIC_DX : 1
DENVER_OFFICE : 1
COMMENT_PSYCHOTIC : 1
CONTINUE_NEXT : 1
TO_LABRAL : 1
FOLLOWED_WITH : 1
HOURS_NAPPING : 1
TIME_PROCESS : 1
FOCUSED_ON : 1
WITH_NSS : 1
PROVIDED_DISCUSSED : 1
FILL_MENTAL : 1
UNDERSTANDING_CONCURRED : 1
ELIZABETH_PT : 1
TO_NEURODE : 1
ONETIME_OF : 1
AND_PROPER : 1
MONTH_LAST : 1
HAS_RETURNED : 1
THE_COLLABORATIVE : 1
AM_OPERATE : 1
INPT_ASSESSMENT : 1
URINAL_AMOUNT : 1
TROUBLED_HIM : 1
STRESS_IDENTIFIED : 1
RIGHTS_RESPONSIBILITIES : 1
FOR_HER : 1
AGAINST_IN : 1
MEDS_PRESCRIPTION : 1
OR_PERSON : 1
AS_TOPICAL : 1
DENIES_ANY : 1
PROBLEM_UNSPECIFIED : 2
NEW_SYRINGE : 1
WITH_FAMILY : 1
CONSULT_RESULT : 1
TO_OR : 3
SURVIVAL_CONT : 1
OBTAINE_CONSENT : 1
IN_CONFERENCE : 1
MEDICATION_EDUCATION : 1
DISPLAYING_PATIENT : 1
MG_CAP : 3
WIFE_CONTACT : 1
PROVIDED_EFFECTIVE : 1
MEAL_REQUIRES : 1
KNOWN_ALLERGIES : 1
PT_OCT : 1
TRAMADOL_SEEN : 1
CUFF_AND : 2
STRESS_SHOES : 1
MST_BORDERLINE : 1
SYMPTOM_PT : 1
FISH_IN : 1
MAY_REQUIRED : 1
MOWING_LAWN : 1
STATE_SUPPLY : 1
OF_ADDICTION : 1
PREVENTION_INTERVENTIONS : 1
ANGER_STYLES : 1
MEDICATION_BUT : 1
MENTAL_PROFESSIONAL : 1
OR_HEPATO : 1
ACTIVITIES_INTERESTS : 1
AND_NUTRITION : 1
YOURSELF_CHILDHOOD : 1
AND_FELT : 1
FEELS_LIKE : 1
OF_NOT : 2
PATIENT_IS : 9
PLACE_CARE : 1
AUDITC_WAS : 1
HAND_NAIL : 1
GULF_VETERAN : 1
PSYCHIATRIST_AS : 1
FOR_MOST : 1
SCREENING_LOCATION : 1
TAKE_TWO : 1
OPERATE_DETERGENT : 1
IT_THER : 1
DR_ORTEGA : 1
INPATIENT_MAY : 1
TEMPORARILY_TO : 1
AFFECT_CONTINUES : 1
HAVING_ANY : 1
PLAN_PATIENT : 1
HIS_BLOOD : 2
AS_TEAM : 1
AROUND_PROVIDED : 1
PROGRAM_CHILDREN : 1
SUGAR_VITALS : 1
COOPERATIVE_WAS : 1
ESSENTIALLY_IN : 1
DATE_EDUCATION : 1
OR_AFTERNOON : 1
PSA_VELOSITY : 1
MEDICATION_PAGE : 1
BY_REPEAT : 1
SULFABENZAMIDE_SULFACETAMIDE : 1
DIRECTIVE_REACTION : 1
AND_ORGANIZED : 1
SINCE_EXAMINATION : 1
LATER_MORNING : 1
FOR_MONTHS : 1
SC_ACTIVE : 1
BEEN_IN : 5
ETOH_PHYSICALLY : 1
ONLY_LIGHT : 1
EDUCATION_FOLLOW : 1
SOME_INTRODUCING : 1
IN_DIVORCE : 1
IF_LITERATURE : 1
RETURN_TAMPA : 1
HEARING_VOICES : 1
EDEMA_PERSISTS : 1
BIC_AND : 1
ARRIVED_AT : 1
MONTH_VISIT : 1
OF_INSTRUCTIONS : 1
SIGNS_STILL : 1
AND_THE : 7
PULSE_DECLINED : 1
OL_OUR : 1
DON_JOAN : 1
CARE_AND : 2
MED_MONITORING : 1
FASTING_NOT : 1
EFFECTS_HE : 1
WORKER_POLYARTHRALGIA : 1
PROGRESS_NOTE : 7
TIMES_FOR : 1
DISCUSS_HOME : 1
AST_II : 1
PATIENT_THAT : 4
YO_GENTLEMAN : 1
YOUR_SURGERY : 1
VISIT_APPT : 1
NO_KNOWN : 1
MHICM_MAINTAIN : 1
UP_TIMES : 1
KEPT_SCHEDULED : 1
KNOWS_LIMITATIONS : 1
MANAGEMENT_SERVICE : 3
FOR_CARE : 1
PRIMARY_DIAGNOSIS : 1
HOME_UP : 1
AND_LEGIBLE : 1
PAIN_ACTIVITY : 1
CM_URINE : 1
ANY_CALL : 1
DATWBC_HGB : 1
METHOD_OF : 1
HE_TO : 6
SUPPLEMENTAL_OXYGEN : 1
SENSORY_SLIGHTLY : 1
ETC_GROUP : 1
CONTINUE_WORKING : 1
THEY_FINISHED : 1
EVENING_TO : 2
ILLICIT_DRUGS : 1
NOT_YET : 1
STARTING_DISCUSSING : 1
THOUGH_HE : 1
CARELINE_MON : 1
DURING_MMHG : 1
BEEN_FROM : 1
GOING_TO : 2
CANE_SKILLS : 1
ZZPATIENT_ADL : 4
SEEKING_PER : 1
MARRIED_AND : 2
TO_TEXAS : 1
INSULIN_HUMAN : 1
IN_EVENING : 1
MEETING_RE : 1
MUSCLE_SPASMS : 1
DESCRIPTION_OF : 2
LEARNED_AND : 1
STATUS_PT : 2
ON_PT : 1
INCLUDING_MODERAT : 1
OSAC_GROUP : 1
HAS_CONCERNS : 1
CESSATION_TAKE : 1
DR_AGAIN : 1
FRIENDS_ARE : 1
CONCEPT_ADDICTION : 1
TO_ZZSWS : 1
ALL_PATIENTS : 2
VISIT_LEFT : 1
HOURS_PHONE : 1
WITH_KILLING : 1
YOUR_UNTIL : 1
TO_PRUNE : 1
STAFF_NEEDED : 1
REASSESS_OP : 1
FOR_THEN : 1
RECOVERY_VETERANS : 1
REPORT_INCREASED : 1
HE_PREFER : 1
VETERANS_AND : 1
LUNGS_DISCUSSED : 1
SAFE_TRANSFER : 1
HX_TO : 1
AFTERNOON_BY : 1
BY_TOLERANCE : 1
ELIMINATION_OF : 2
NEAT_APPEARANCE : 1
PCE_DIAGNOSIS : 1
ATTEMPTED_CONTACT : 1
APPROPRIATED_COLOR : 1
MONITOR_PHYSICIAN : 1
SCHEDULING_LETTER : 1
LEVOTHYROXINE_NA : 1
INSTRUCTIONS_PATIENT : 2
WALKING_VETERANS : 1
HIS_TESTALGIA : 1
HAD_PT : 1
AMBULATORY_INDEPENDENT : 1
IS_OLDER : 1
BEGIN_COMMUNICATION : 1
PC_CLINIC : 2
SPC_NOTE : 1
HE_NURSING : 1
NURSING_ARE : 1
OUTSIDE_CONSULT : 1
MEDS_II : 1
NECESSARY_RISK : 1
HAS_WITH : 1
MOUTH_THREE : 2
FAMILY_OF : 1
BUT_PROGRAM : 1
ARREST_NO : 1
UP_DEGREES : 1
HYPOXEMIA_CORRECTED : 1
COPING_MECHANISMS : 1
FEELING_OK : 1
INSTRUCTIONS_AND : 1
CHANGES_COMPLETED : 1
IF_PROGRESS : 1
PROVIDED_LIST : 1
AND_YES : 2
RACING_AND : 1
MEDICATION_ONE : 1
GPD_NOTIFICATION : 1
ER_YES : 1
NOTE_NOTE : 1
ENROLLED_PAIN : 1
IMPAIRED_PAIN : 1
ISZESKI_FELLOW : 1
TO_IN : 5
HERE_IN : 1
FIRST_THERAPY : 1
THAT_THIS : 1
GENTLEMAN_WITH : 1
NS_CHANGES : 1
REPORTED_PAIN : 1
THERAPIST_YES : 1
DENTINE_PANORAMIC : 1
QUESTIONS_WE : 1
WOULD_BE : 3
AXIS_NO : 1
ARENT_THESE : 1
NOTE_LEVOTHYROXINE : 1
NUMBER_OF : 5
WAS_EUTHYMIC : 1
DIAGNOSE_IV : 1
NO_APPARENT : 1
HEIGHT_CM : 3
THANKS_MINNEAP : 1
SURE_HE : 1
BE_BOVIE : 1
CONTACT_ETTE : 1
SURGERY_PROGRESS : 1
REPORTS_WENT : 1
TO_CALLERS : 1
NO_DIAGNOSIS : 1
MUST_OFF : 1
ANTERIOR_APPROACH : 1
OUTSIDE_AND : 1
JO_ON : 1
MEDICATIONS_REPORTED : 1
SEXUAL_TO : 1
PERCEPTUAL_STAFF : 1
PLS_CANCELL : 1
DEPRESSIVE_ANXIETY : 2
HAS_MOOD : 1
COMMENTS_THIS : 1
DORSUM_HOME : 1
DISPENSER_TYPE : 1
OFFERED_HAS : 1
PTSD_WAS : 1
PLEASE_REVIEW : 1
OVERALL_PROGRESS : 1
LENGTH_OF : 1
PRN_FOR : 1
YOUR_CONVENIENCE : 1
PHYSICIAN_ROBIN : 1
HERE_FOR : 4
ROCEPHIN_IV : 1
DOCUSATE_NA : 1
GROUP_DISCUSSION : 1
YES_GIVEN : 1
HAS_TO : 3
NO_OCCURRENCE : 1
THE_DATE : 1
AVERAGES_THEN : 1
AGE_PT : 1
OF_COMPLAINT : 1
ADDITIONAL_VIA : 1
OFFERING_TO : 1
SERVES_REDUNDANT : 1
IDENTIFIED_FAMILY : 1
LOCATOR_OWP : 1
RAISED_WHETHER : 1
PREVIOUSLY_MORE : 1
TIME_ADMISSION : 1
PLANS_MR : 1
RATE_ADDENDUM : 1
LOCATION_ADVANCE : 1
THE_PLAN : 1
EITHER_AN : 1
PAIN_PROBLEM : 1
HIS_IS : 1
SELF_TUBES : 1
DANE_BRISTOL : 1
CHILDHOOD_OUTGOING : 1
SKILLS_NUMBER : 1
LIVER_ADDITIONAL : 1
APR_RATE : 1
INSTITUTE_FALL : 1
BILAT_OVERALL : 1
IS_HERE : 1
RELY_ON : 1
BY_PROVIDER : 1
CHANGES_NOTE : 1
WORKING_ORDER : 1
SEEN_BY : 2
LOT_THE : 1
DISCUSSED_PULMONARY : 1
AND_EVALUATED : 3
STABLE_DOES : 1
MON_AND : 1
EDUCATION_NAME : 1
XXNO_YES : 1
ABOUT_THE : 3
HX_DM : 1
AND_SEEN : 1
OPTIONS_FOR : 1
ISSUES_DIZZINESS : 1
INTENSIVE_OUTPATIENT : 1
DIDACTIC_PROCESS : 1
INTAKE_NOTE : 2
PATIENTS_IN : 1
IEST_CONVENIENCE : 1
FOR_EVALUATION : 1
CLEAR_WITH : 1
DM_ORTHOPEDICS : 1
AA_MEETINGS : 1
ROCEPHIN_URINARY : 1
MUCH_OF : 1
CRADC_MEETING : 1
THER_NOTIFY : 1
RELIGIOUS_PREFERENCE : 1
THEN_HIM : 1
GROUP_DATE : 1
FEE_ED : 1
VISUAL_MOUTH : 1
FALL_IN : 2
THEY_ARE : 2
RELIGIOUS_IS : 1
GROUP_FOR : 1
DISCUSSION_REGARDING : 1
LAST_STEADY : 1
WAR_WITH : 1
JOINT_ANKLE : 1
CONDITION_HE : 1
RISK_SCREENING : 1
ASSESSED_DATE : 1
OF_HOPING : 1
DISCUSS_HIS : 1
PRESENTS_DEPRESSED : 1
HYDRATION_AND : 1
WELL_HAS : 1
NUTRITION_SHIFT : 1
NOTE_WERE : 1
NO_PRIMARY : 1
HOW_MANY : 1
CM_MEDICATION : 1
MARRIED_DIVORCED : 1
NO_PROVIDER : 3
WEEKEND_FOUND : 1
AND_RESPONSIBILITIES : 1
PER_PATIENT : 1
RATIVE_CONDITION : 1
CONGESTED_ORDERED : 1
UNSTABLE_PAST : 1
SITTING_CALM : 1
REACH_BY : 1
OTHERS_PLACED : 1
REF_DIDACTIC : 1
CALLERS_TO : 1
SLOWED_PATIENT : 1
HE_EMPLOYEE : 1
IS_SENTENCES : 1
PREOP_ANTIBIOTICS : 1
FROM_VETERANS : 1
TAKE_IT : 1
THE_PENIS : 1
VISUAL_DEFECT : 1
PHYSCIALLY_EXAMINING : 1
FEEL_SICK : 1
ALL_HIGHER : 1
BEEN_GROWING : 1
ASSISTING_PATIENT : 1
GIVEN_OPPORTUNITY : 1
WHEN_NO : 1
LIMITATIONS_WILL : 1
BASELINE_OF : 1
HPI_DATE : 1
BATHROOM_QUARTERLY : 1
INITIAL_ASSESSMENT : 1
FOR_BRADEN : 1
TES_ALL : 1
HE_HE : 2
THIS_WENT : 1
AGITATED_WHEN : 1
ED_NURSING : 2
FIND_HIS : 1
FELT_AND : 1
WITH_COMPLAINT : 1
OPENINGS_IN : 1
PAST_HE : 1
IN_GROUP : 2
BLOOD_FIRST : 1
NURSE_PATIENT : 1
ALCOHOL_ICDCM : 1
LEISURE_EDUCATION : 1
EXPLORED_THAT : 1
CARE_FOLLOWS : 1
STATUS_NO : 1
DSM_IV : 1
ING_DIRECTIVE : 1
INFORMED_CONSENT : 4
LATEX_NO : 1
QUAD_ISSUED : 1
RESPONSE_THE : 1
CHIROPRACTIC_PROSTHETIC : 1
ENSURE_IS : 1
OPERATE_WASHER : 1
HIS_WIFE : 4
NURSE_BEHAVIORAL : 1
COMMENT_PSYCHOSOCIAL : 1
EDUCATION_FLU : 1
DIFFICULTY_HE : 1
RESP_LOCAL : 1
EXPRESSED_WITH : 1
PAIN_POST : 1
THE_KEYPAD : 1
SAME_AND : 1
FOR_CHIROPRACTIC : 1
MINUTE_SESSION : 1
HOPELESS_THE : 1
AN_TREATMENT : 1
PERMANENTLY_TEMPORARILY : 1
MAY_GANGION : 1
NURSING_ASSISTANT : 1
AT_THAT : 2
SHEET_NOW : 1
PAST_WITH : 2
IN_HOUSE : 1
HE_UTI : 1
HEADACHE_PATIENT : 2
ARE_ESSENTIALLY : 1
RESTING_AT : 1
EXCEPT_FOR : 1
PROCEDURE_BE : 1
ALL_POSES : 1
MACHINE_SY : 1
BED_BATH : 3
CALL_BACK : 1
ALERT_AND : 2
MEDICATIONS_MALE : 1
NUMBER_IN : 1
VETERAN_PROBLEM : 1
HERE_AT : 1
WED_HE : 1
STRONGER_WHEN : 1
THAT_ALL : 2
HIS_MEDICATIONS : 1
ALCOHOL_YOU : 1
FOR_SAFETY : 1
WITH_STABLE : 1
LOCATION_DO : 1
OUT_NOTE : 1
CONSULTATION_FOR : 1
PREVENTIVE_NOTE : 1
LIVE_PATIENT : 1
ON_FACILITY : 1
OF_HEARING : 1
COHERENT_WELL : 1
ORAL_CARE : 1
NOT_DOCUSATE : 1
AFTER_RECEIVING : 1
CONFIRMED_BY : 2
OPPOSED_GIVING : 1
MORE_GLARE : 1
PATIENT_MAY : 1
PULMONARY_STRESS : 1
THE_FLOOR : 1
APPOINTMENT_THAT : 1
BLOOD_PRESSURE : 3
FAMILY_HIS : 1
VETERAN_THEY : 1
HIP_PROTECTORS : 6
OCCASIONS_DRINKS : 1
AFTER_WAS : 1
LAST_THURS : 1
HPI_MR : 1
THEIR_ACTIVE : 1
WERE_ABLE : 1
DISORDER_BY : 1
THE_OF : 6
PAIN_ASSESSMENT : 3
PATCH_HAVE : 1
ESSENTIALLY_NORMAL : 1
PATIENT_EDUCATION : 6
ONE_CAPSULE : 2
PAIN_WITH : 3
DENTURE_WITH : 1
AND_ENDING : 2
CONSISTENCY_STOOL : 5
AND_MOTHER : 1
THE_WEEKEND : 1
TO_MONITOR : 1
IN_INTERVENTI : 1
ROOM_ON : 1
HISTORY_PHYSICAL : 1
PT_HAS : 3
LEAVING_MONTHS : 1
CHIEF_COMPLAINT : 2
HE_SOME : 1
CYST_CODING : 1
SIGNIFICANT_CONFLICTING : 1
PPD_ELIMINATION : 1
THE_CC : 1
SHE_WORTH : 1
ICDCM_AND : 1
TO_PACING : 1
DROPS_WORKING : 1
THAT_HE : 15
DEPENDENCE_BIPOLAR : 2
AC_IS : 1
CULTURES_DOSE : 1
EUTHYMIC_AFFECT : 1
MON_AM : 1
DEVICES_NO : 1
SIMVASTATIN_FLUVASTATIN : 1
MOOD_RELAXED : 1
IS_DDD : 1
DIAGNOSIS_ETOH : 1
COMMENT_HEART : 1
EXERCISE_LOCK : 1
LONG_AT : 1
REACT_REMINDER : 1
TELECARE_MANAGER : 1
NO_POW : 1
OR_NUTRITION : 1
THE_HERBAL : 1
RESPIRATION_WEIGHT : 1
RECEIVING_PERCOCET : 1
THE_FOR : 4
LOSS_OF : 1
NOTE_PICK : 1
WE_THAT : 1
AND_BEEN : 2
FINISHED_NOT : 1
FOLLOW_HYPERLIPEDEMIA : 1
THIS_THE : 7
MEDICINE_PAIN : 1
WIFE_WILL : 2
ERRONEOUS_OR : 1
REPORTS_THESE : 1
DO_YOU : 3
PURSED_LIP : 1
HE_STILL : 1
SINCE_THE : 1
REALITY_ORIENTED : 1
HE_DIED : 1
THE_COMPANY : 1
FAMILY_THINKS : 1
SW_HANDOUTS : 1
VET_CONTACTED : 1
WITH_EVERY : 1
SHIFT_CONSTIPATION : 1
HIS_EDUCATION : 1
BLOOD_CONTACT : 1
EVENT_PRACTITIONER : 1
LITERATURE_SCROTAL : 1
ORDER_WITHIN : 1
DRINKS_OF : 1
VETERAN_CALLERS : 1
FRI_JUNE : 1
ME_ATTITUDE : 1
YR_OF : 1
ON_CARPET : 1
FALLS_RESIDENT : 1
ONE_ACTIVE : 1
ONE_BY : 7
WAS_MOWING : 1
PROVIDER_DISCHARGE : 1
ADDITIONAL_ABOUT : 1
YR_WAS : 1
MANAGEMENT_HC : 1
HERBAL_DENIES : 1
APPARENT_PROBLEM : 1
BAND_AND : 1
TOPIC_HANDOUT : 1
PAIN_SCALE : 2
ACTIVE_PENDING : 1
REFERRAL_APPROPRIATED : 1
FLUVASTATIN_NIACIN : 1
FRIENDS_DON : 1
ALUM_HYDROX : 1
DIABETIC_SURVEILLANCE : 1
CONFUSED_AND : 1
SCORE_MENTAL : 1
WORSE_INTERVERTEBRAL : 1
PING_MEDICATION : 1
REPORT_MEDICAL : 1
FRICTION_NO : 1
IT_WHEN : 1
BELOW_OBJECTIVE : 1
ATTEMPT_HIS : 1
NO_ADVISED : 1
TIME_THEMSELVES : 1
RESEARCH_JVD : 1
VITALS_OUT : 1
DISCUSSED_THAT : 1
NOT_AROUND : 1
ATTITUDE_AND : 1
GUIDE_LIMITATIONS : 1
PATPU_ADDENDUM : 1
BEEN_WORKING : 1
WAS_AN : 1
CORRECTED_SUPPLEMENTAL : 1
EXTENSION_HIS : 1
WITH_THIS : 3
ORDERED_OF : 1
THE_PT : 4
IV_CATHETER : 1
ANKLE_AND : 1
CHANGES_MUST : 1
FOR_INDEPENDENT : 1
DX_CHART : 1
STRONGER_TYPICAL : 1
HE_WORKING : 1
POX_APPOINTMENT : 1
DONE_NOW : 1
THE_FACILITY : 1
ONE_PREVENTIVE : 1
WILL_AGAIN : 1
POWER_POINT : 1
LAST_THE : 1
NURSE_REPORT : 1
FOLLOWING_EFFECTS : 1
ROOM_VISIT : 1
THE_THAT : 1
TREATMENT_CPT : 1
PROVIDE_ADEQUATE : 1
ENT_RECONCILIATION : 1
TO_OTHERS : 2
OF_ABNORMAL : 1
RE_LCSW : 1
MENTAL_WAS : 1
TEST_FOR : 1
HIS_FOR : 2
AND_EVALUATION : 1
SAFETY_SAFE : 1
HAVE_RESPONSIBLE : 1
IN_LAST : 2
TO_RETURN : 2
DATE_OCT : 2
THIS_DUE : 1
THE_ASSISTANCE : 1
THE_OUT : 1
NEELIMA_DONT : 1
NOTE_BUT : 1
NURSING_ISLAND : 1
MORAL_SPIRITUAL : 1
TRAUMA_DISABILITIES : 1
HYPERLIPIDEM_PROVIDER : 1
UCFA_DENIES : 1
OPHTH_KIDNEY : 1
YR_CAUCASIAN : 1
SINCE_HIS : 1
BE_TOMORROW : 1
LB_KNEE : 1
THAT_THEY : 2
CONTINUE_SAME : 1
DONT_FOR : 1
GIVING_IN : 1
HOUSEBOUND_BENEFITS : 1
OTHER_INJURY : 1
ETTE_THE : 1
EXAM_SLOWED : 1
KNOW_WHAT : 1
NOTE_NA : 1
YOU_YOUR : 1
PATIENT_EXPRESSE : 1
CHF_AND : 1
SECONDARY_FRITTITTA : 1
IMMOBILE_URINE : 1
RELAXATION_TECHNIQUES : 1
WITH_POPPING : 1
RECORDS_FOR : 1
UNTIL_ARE : 1
THINGS_HAVE : 1
MESSAGE_WILL : 1
ANY_IDEA : 1
AREA_MINUTES : 1
DIAGNOSIS_MALEATE : 1
TO_NO : 1
INTRAOPERATIVE_MONITORING : 1
NURSING_ASSESSMENT : 2
PT_LONG : 1
SUSTAINED_SITE : 1
PSYCHOSOCIAL_PATIENT : 1
PROBLEMS_TO : 1
NOTIFIED_THE : 1
RESIDENT_SWS : 1
PATIENT_RIGHT : 1
NONSLIP_FOOTWEAR : 1
PENSION_PT : 1
NO_DURING : 1
PAIN_OPTIONS : 1
TIME_HE : 1
WHAT_THE : 1
MILK_FOR : 1
HE_IT : 1
MEET_HOWEVER : 1
REPORTED_INCLUDING : 1
RATE_AND : 1
SEXUAL_HIS : 1
THIS_LIST : 1
CONSENT_MODIFIED : 1
PRESCRIPTION_RENEWAL : 1
UNLABORED_ADEQUATELY : 1
MILD_NECK : 1
ROUGH_HE : 1
PARTIAL_FILL : 1
PERIPHERAL_JOINT : 1
NOTE_FATHER : 1
CLINIC_ON : 1
MOST_LIPID : 1
NO_CHANGE : 1
EDUCATION_SWS : 1
SPIRITUAL_DIZZINESS : 1
WILL_THEM : 1
LOSS_WAS : 1
SKILLS_PLAN : 1
BEEN_ROUGH : 1
WORKS_THUR : 1
PCP_DANE : 1
FLUIDS_PERSONAL : 1
SURFACEANTERIOR_ONSET : 1
ABOUT_DECISION : 1
BLADDER_SENSORY : 1
URINARY_TRACT : 1
GET_GOOD : 1
HOURS_CHRONIC : 1
AM_PACT : 1
REC_PT : 1
OVERALL_BUT : 1
PERSIAN_WAR : 1
ANY_TREATMENT : 1
BEEN_DISCHARGED : 1
UNTIL_THEY : 1
EDUCATION_OPPORTUNITY : 1
LOCATION_SEE : 1
AA_AT : 1
TO_SKIN : 1
HE_READY : 1
BY_MENTAL : 1
TEST_WAS : 1
IN_SEMIFOWLERS : 1
WERE_NO : 1
APT_HOSPITAL : 1
FOR_WILL : 2
PASTORAL_ESTABLISHED : 1
PAST_HISTORY : 2
BIC_WAS : 1
IDEATION_AND : 1
LISTENED_TO : 1
AGO_WHICH : 1
RACE_OR : 1
FOR_NEWS : 1
COLOR_URINE : 1
SHIFT_AND : 1
YEAR_WEIGHED : 1
ON_DIAGNOSIS : 1
ALLERGIES_PATIENT : 1
IN_HAS : 1
MEDICATIONS_RECHECKED : 1
STATUS_MALE : 1
PICK_AT : 1
DELTOID_ONLY : 1
SPECIAL_DIET : 1
MHC_CLC : 1
SKILLED_IN : 1
PATCHES_THE : 1
CONTACT_THE : 1
ARE_LEARNED : 1
EPIN_URQ : 1
PROVIDER_CALLER : 1
ANY_THOSE : 1
FOLLOWING_SIDE : 1
SOCIAL_POLYARTHRALGIA : 1
WHAT_PROBLEM : 1
IF_DTR : 1
ROOM_LENGTH : 1
OF_PATCH : 1
MG_BID : 1
BUT_KNOW : 1
SCHOOL_ON : 1
NEC_RISK : 1
RETURNED_SUSTAINED : 1
POSSIBLE_ANTISOCIAL : 1
PER_PERFORMED : 1
ELIGIBILITY_CRITERIA : 1
GLAUCOMATOUS_OS : 1
FEB_EFFECTIVENESS : 1
PRACTITIONER_NOSHOW : 1
THE_NURSING : 1
PSYCHIATRIC_MASTER : 1
THIS_IN : 1
LIST_PRESCRIPTION : 1
RESEARCH_STUDY : 1
PATCHES_GLUCOMETER : 1
MINNEAP_VAMC : 1
WELL_PC : 1
BED_SEMIFOWLERS : 1
PCE_DENTAL : 1
IT_FROM : 1
ORTEGA_AGAIN : 1
ALCOHOL_THE : 1
OF_LUNG : 1
NURSE_SCREEN : 1
ENDOSCOPIST_TOMBAZZI : 1
SHOT_EMERGENCY : 1
DATE_CALLED : 1
HCT_SIDE : 1
NO_YOU : 2
DEFINITION_PAIN : 1
FOR_AS : 1
ADHERENCE_THAT : 1
THE_WEEK : 1
AGITATION_HEIGHT : 1
ICDCM_VOLUME : 1
EFFECTS_ETOH : 1
MEDICAL_INFORMATION : 1
UNDERSTANDING_OF : 2
DOES_DRINK : 1
PATIENT_BEEN : 4
CHART_VIGAMOX : 1
FOR_MANAGEMENT : 3
TRANSPORT_PHYSICIAN : 1
ICDCM_HYPERGLYCEMIA : 1
CHR_VENOUS : 1
SECONDARY_PROVIDER : 1
THYROID_MEDICATION : 1
CANCER_SCREENING : 1
PROVIDED_LEAVING : 1
PROBLEMS_HIP : 1
BLIND_AND : 1
MATERIAL_POWER : 1
IDEATIONS_MG : 1
RECONCILED_PULSE : 1
LEFT_ON : 1
AND_IN : 3
TIME_FOLLOWS : 1
EXERCISES_TIME : 1
AND_SAYS : 1
PATIENT_STATES : 2
ANESTHETIST_CALLBACK : 1
FROM_ON : 1
LEGAL_AS : 1
MEDICATIONS_ARE : 1
DISCHARGE_REGULAR : 1
LENGTH_IDENTIFIED : 1
RIBS_AND : 1
IBUPROFEN_MG : 1
DEFERRED_DATE : 1
ADVANCE_DIRECTIVE : 2
BACK_HAVE : 1
THE_LAST : 1
SMILING_TALKING : 3
AND_CHANGES : 1
TOPICAL_ANTI : 1
YES_HYGIENE : 1
ER_FOR : 1
SEE_DESCRIPTION : 1
WITH_OXYGEN : 1
SUCH_COLD : 1
OFF_HIS : 1
REPORTS_VISION : 1
DRYER_OPERATE : 1
PLACE_PERSON : 1
GRANDE_SOCIAL : 1
NECESSARY_THROUGH : 1
DOB_AGE : 1
CPS_JOURNALING : 1
HE_DENIED : 1
THAN_PAGES : 1
PT_TOLERATED : 1
FRI_AM : 1
ALERT_THE : 1
BLOOD_TO : 1
AND_WELL : 2
EDUCATION_BRC : 1
REPORTED_ICDCM : 1
DECISION_MAKING : 1
WITHOUT_NEAT : 1
AGE_REC : 1
PROVIDER_INSTRUCTIONS : 2
RISK_OUTPATIENT : 1
PATTERN_CARE : 1
SHLDR_ROTATOR : 1
WHEN_CHANGE : 1
COLLABORATIVE_RESEARCH : 1
GERD_MYCOSIS : 1
ANY_WITHDRAWAL : 1
PC_STAFF : 1
THAT_INCREASE : 1
WITH_COMPLAINTS : 1
TIME_SPENT : 1
CARE_IOP : 1
DERM_PHOTOS : 1
MI_AN : 1
ENCOURAGEMENT_NUTRITION : 1
ASSOCIATED_TRACH : 1
DISPLACEMENT_HEARING : 1
PATIENT_SNACKS : 1
MAINTAIN_WEEKLY : 1
PATIENTS_BAND : 1
AND_INTERESTS : 3
NO_ANSWER : 1
BY_DISCUSSING : 1
CALL_NEUROLOGY : 1
LIGAMENTAL_IN : 1
REPORTED_COPD : 1
THE_DISCUSSING : 1
IS_NO : 2
PASSING_IS : 1
NA_CAP : 1
TREATMENT_STATUS : 1
TO_ILISOME : 1
BP_IN : 1
DISCUSSING_BENEFITS : 1
SHIELA_FROM : 1
ST_APT : 1
RESCHEDULE_JUNE : 1
RN_OR : 1
LIFE_MINUTES : 1
SHE_GIVING : 1
WEARING_FOOTWEAR : 1
DENTURE_COESOFT : 1
CAVITRONE_AND : 1
USING_CAVITRONE : 1
PAST_SCAN : 1
BELONGINGS_KEPT : 1
NORMAL_BED : 1
IDENTIFIED_EVALUATION : 1
PHYSICIAN_VA : 1
JUMPED_OF : 1
FAMILY_WAS : 1
WITH_LIVER : 1
YOU_WERE : 1
DIAGNOSED_HTN : 1
MIN_BAKER : 1
WOULD_NOT : 1
SEE_WAL : 1
THE_WORKER : 1
ULQ_LRQ : 1
WITHIN_NEXT : 1
WRITER_NEEDED : 1
HIGHRISK_CRITERIA : 1
PHONE_PPD : 1
AS_INARNP : 1
WRIST_BAND : 1
MORNING_PHYSICIAN : 1
DISCHARGED_HE : 1
OUR_COPY : 1
UP_AT : 1
CFCF_ORAL : 1
TREATMENT_REVIEW : 1
MAIL_DUE : 1
OR_CAT : 1
SITTING_COOPERATIVE : 1
PULSE_LIST : 1
WANTING_MOVE : 1
ACTIVITIES_NO : 1
EAT_AND : 1
WEIGHT_KG : 4
OF_SEXUAL : 1
REMOVE_OLD : 1
OUTSTANDING_FOR : 1
LISTED_HAVE : 1
THIS_PATIENT : 10
PT_REQUEST : 1
AND_MSLT : 1
OP_PSYCHIATRY : 1
BOVIE_PAD : 1
ADDENDUM_AFFAIRS : 1
SUGAR_OUT : 1
TUES_WORKS : 1
VIGAMOX_TIMES : 1
LENGTHY_TALKED : 1
EFFECTS_HYPERLIPIDEMIA : 1
MIN_RESPONSE : 1
FACILITY_TOMORROW : 1
PLA_BIC : 1
ORAL_MG : 1
MIN_VETERANS : 1
OF_FISTULA : 1
GANGION_CYST : 1
COLONOSCOPY_HISTORY : 1
NOW_INFECTION : 1
OPTICIAN_WHEN : 1
RESULT_PHONE : 1
ROOM_CMS : 1
PATIENT_STRENGTHS : 1
OWN_ABILITY : 1
DIAGNOSIS_AXIS : 1
ANTERIOR_CORTICAL : 1
BRC_LIVING : 1
VET_PARTICIPATED : 1
YR_OLD : 1
ARMBAND_MYALGIA : 1
FOLLOW_VETERAN : 1
DAILY_CONSISTENCY : 1
ENDORSE_CURRENT : 1
REQUESTING_EXTENSION : 1
MORE_INFORMATION : 1
CURRENT_PRESSURE : 1
STATE_KNEE : 1
THE_ANKLE : 1
SESSIONS_LEAVING : 1
OF_BREATH : 1
LIP_BREATHING : 1
CURRENT_HAVE : 1
INCREASE_KNOWLEDGE : 1
WITH_YEAR : 1
OR_FOUND : 1
HE_CONTINUES : 1
ASSESSMENT_SKIN : 1
HT_IN : 2
RELINED_DENTURE : 1
BE_IMMEDIATELY : 1
SENTENCES_THE : 1
GOALS_THAT : 1
INCLUDING_MORAL : 1
HAS_BE : 1
BIRCH_VETERAN : 1
AND_SESSION : 1
DIABETES_RESEARCH : 1
REPORT_ROUTINE : 1
ENDING_AT : 2
SPINE_THE : 1
NO_PATPU : 1
TABLET_LEARNED : 1
GROUP_FACILITATOR : 1
TOOLS_ON : 1
WITH_HTN : 2
ACTIVE_BOOTH : 1
EVALUATION_THAT : 1
EDUCATION_CONSENT : 1
OBTAINED_AND : 1
TAKE_FROM : 1
MALE_PERSIAN : 1
DOCUMENTED_PRIOR : 1
ROOMED_FIBROIDS : 1
MODIFIED_SESSIONS : 1
LITTLE_FLU : 1
MESSAGE_RECEIVED : 1
ATTACHED_FACILITY : 1
VICTIM_WITNESS : 1
FAMILY_AT : 1
VOMITING_ASK : 1
HAVE_DIVERTICULOSIS : 1
DURING_CHECKIN : 1
APPLICABLE_INDEX : 1
EXPLORED_HE : 1
SESSIONS_SEEN : 1
WAS_WORKING : 1
CBOC_POSITIVE : 1
BATTLING_PNEUMONIA : 1
HIM_DETAILED : 1
MORE_WHEN : 1
THIS_BED : 1
OBJECT_IS : 1
SERVICE_MINUTES : 1
VOLLEYBALL_AND : 1
GIVING_IT : 1
COMPLAINT_SUICIDAL : 1
ME_CASE : 1
FOR_DATE : 1
SUSPECTED_SAFETY : 1
BRIEF_SUMMARY : 1
NEURODE_RATIVE : 1
INCREASE_DOSE : 1
ROTATOR_CUFF : 1
DIMASCIO_SON : 1
WORKING_WITH : 1
NO_LB : 1
FOREHEAD_PERIORBITAL : 1
NOTE_WAL : 1
ON_COUMADINE : 1
TRIAGE_PART : 1
WILL_IN : 1
REPLACES_THE : 1
EUTHYMIC_IS : 1
NOT_MADE : 1
ACROSS_COGNITIVE : 1
BRADEN_SKIN : 1
EITHER_ERRONEOUS : 1
BACK_THIS : 1
IN_LOCATIONS : 1
IMAGING_MAY : 1
HAS_INCREASED : 1
COMPREHENSVE_EVALUATION : 1
THERAPY_DURING : 1
ADL_NO : 1
PROCEDURE_ATTACHED : 1
DISCLOSED_THAT : 1
PROBLEMS_CONTINUES : 1
NEEDS_LETTER : 1
HIS_RECENT : 1
OPTIONS_MANAGEMENT : 1
STILL_ACTIVE : 1
OTHER_CARE : 2
JOINT_PAIN : 1
TO_DEPRESSION : 1
CARE_TRANSF : 1
EVALUATION_VISUAL : 1
NOTIFICATION_AS : 1
WITH_TOL : 1
DENTAL_CATEGORY : 1
BEEN_BELONGINGS : 1
ON_HOWEVER : 1
GM_THERE : 1
INCLUDE_OF : 1
ABOUT_TIME : 1
PROTOCOL_NOT : 2
ENDING_SIMVASTATIN : 1
TO_URINE : 1
OF_PROTOCOL : 1
FAMILY_SHOWS : 1
THIS_REQUIRES : 1
GO_TEXAS : 1
ARE_NORMAL : 1
THICK_SPUTUM : 1
LG_CITALOPRAM : 1
FOREARM_LIFTING : 1
TO_TAMPA : 1
USE_AGAINST : 1
BP_ANC : 1
STRESS_ELIZABETH : 1
ADAPTIVE_STRATEGIES : 1
UNDERSTANDING_THE : 1
OS_TO : 1
VESICLE_PER : 1
ADDENDUM_RELATIONSHIPS : 1
AND_ON : 1
HOURS_SVI : 1
NOTE_MAY : 1
STOMACH_YOU : 1
THE_TREATMENTS : 1
ALSO_OLDER : 1
PRIVILEGES_USED : 1
DETOXING_HAS : 1
HEALTH_ASSESSMENT : 1
FORMER_EX : 1
ALERT_OF : 1
TRIAMTE_ALL : 1
THE_PROVIDER : 1
MORAL_ISSUES : 1
NO_FEVER : 1
REHAB_HAS : 1
TH_IS : 1
THE_CHRYSHANT : 1
ABOUT_YOUR : 1
KIMURA_BRN : 1
AND_HYPERLIPIDEM : 1
MARRIED_FEMALE : 1
MANY_HAVE : 1
SULF_MG : 1
OF_SUSPECTED : 1
AFRICAN_AM : 2
PROBLEM_OTHER : 2
AND_PULSE : 1
WRITTER_GONE : 1
NOTE_PHYSICIAN : 1
NONE_APPOINTMENT : 1
BE_THE : 1
DAILY_ASSESSMENT : 1
AFFECT_HAS : 1
RETURNED_MIAMI : 1
GONE_BLIND : 1
DENIED_BOWEL : 1
UP_SESSIONS : 1
LATE_AFTERNOON : 1
FINANCIAL_AFFAIRS : 1
VETERAN_HEARING : 1
PT_CALLED : 1
THE_COALITION : 1
RECONCILIATION_DORSUM : 1
MEDICATIONS_BY : 1
MAINTENANCE_AND : 1
USE_HIS : 1
HEART_RATE : 2
CONSIDERATION_AS : 1
HX_AMIGO : 1
OF_BOTH : 1
ON_TOOLS : 1
FOR_HEART : 1
ABNORMAL_RESULTS : 1
WILL_HAVE : 1
FOR_ETHNIC : 1
CONCERNS_IN : 1
RECENT_RESULTS : 1
SPECIAL_YES : 1
BENEFIT_FROM : 1
HYPERLIPIDEMIA_MEDS : 1
INFORMATION_WAS : 1
SOUNDS_URINARY : 1
SAME_MUCH : 1
INCLUDING_SUPPLIES : 1
HIM_FOR : 1
NO_FISH : 1
BETWEEN_RIBS : 1
ARE_ME : 1
GIVEN_ZZPATIENT : 1
GUN_ADDENDUM : 1
OUTGOING_HAPPY : 1
DISCUSSED_THEIR : 1
WITH_COESOFT : 1
PM_PTSD : 1
MONTHS_AGO : 1
BE_RESPECTFULLY : 1
PROGRESS_THIS : 1
LEFT_EFFUSION : 1
ALSO_HAS : 1
RESIN_SURFACEANTERIOR : 3
AND_LOST : 1
BE_ARRIVING : 1
ILLICIT_OUTSIDE : 1
WITH_SW : 1
AND_ATTEMPTED : 1
TO_AL : 1
SELF_CONSISTENCY : 1
ANGELA_NO : 1
SCANNED_DOCUMENT : 1
TOMORROW_AN : 1
NOTE_COMPLAINTS : 1
INCREASINGLY_AND : 1
EVALUATION_PATIENT : 2
FOR_ACUTE : 1
CONSULTED_OF : 1
TIMES_PER : 1
ALL_AND : 2
TEAM_CURRENT : 1
VISUAL_LIMITATIONS : 2
TREATED_TO : 1
PAIN_PATIENT : 2
KG_ACTIVE : 1
GOALS_GROUP : 1
KG_OF : 1
STATUS_HE : 1
WHO_BE : 1
IN_FOR : 2
MEDICATIONS_THE : 1
LIFE_AN : 1
SHOWER_PROGRESS : 1
UPON_HOME : 1
OR_OXYGEN : 1
KEYPAD_OF : 1
EITHER_BEFORE : 1
FLUSHED_NSS : 1
STATES_WILL : 1
PRECERTIFIED_CALLED : 1
WAS_REVIEWED : 2
ON_IMAGING : 1
ON_AFFECT : 1
OF_THYROID : 1
YELLOW_FLUIDS : 1
HAD_UTI : 1
AT_BIRCH : 2
CRISIS_SURVIVAL : 1
PROVIDED_THIS : 3
STATES_DISCUSS : 1
IN_HEP : 1
IS_YR : 1
IS_CENTER : 1
DETAILED_VETERAN : 1
RIBS_PELVIS : 1
WRITE_DOWN : 1
CARE_WITH : 1
BY_PATIENT : 1
XXNO_IF : 1
EXAM_IDEATION : 1
SCORE_VISIT : 1
ONGOING_PAIN : 1
YEAR_INTRAOPERATIVE : 1
HE_RECEIVED : 1
RESPIRATION_RATE : 1
SWEATS_OR : 1
MACHINE_HX : 1
ANNISTON_NOTET : 1
AGAIN_ORDERED : 1
REITERATED_OPTIONS : 1
QUESTIONS_THE : 1
TALKED_PURSUING : 1
PATIENT_REPORTS : 2
LISTENED_VET : 1
STRESSOR_MAY : 1
PAD_QUESTION : 1
TAB_ONE : 5
ORAL_UNEVENTFUL : 1
PATIENT_RE : 1
UNDILATED_GOING : 1
PL_ADVANCE : 1
INR_RESULT : 1
COPING_FOR : 1
ONE_MONTH : 1
ES_SULLIVAN : 1
WERE_GIVEN : 1
AN_MALE : 1
EVALUATED_THIS : 1
THERE_WAIT : 1
AT_VETERAN : 1
FEMALE_VETERAN : 1
SCREEN_TRANSPORTATION : 1
APPLY_LESION : 1
WAS_OBTAINED : 2
BEHAVIOR_RELATED : 1
IN_HE : 2
DSM_MULTIAXIAL : 1
PT_HRS : 1
QHS_PT : 1
YEAR_REQUEST : 1
REALITY_MR : 1
STATUS_EXAM : 2
OU_COMPLETED : 1
ADDRESS_ST : 1
TWOHOUR_EVALUATION : 1
BOWEL_COMPLAINT : 1
GROUP_AND : 2
ABDOMINAL_SWELLING : 1
PATIENT_WILL : 1
SURROGATE_IF : 1
THAT_MAY : 1
BLADDER_DENIED : 1
WITH_TOPICAL : 1
FINANCIAL_HAS : 1
THINKS_IRRITABILITY : 1
OSAC_PSYCHIATRIC : 1
DATE_GOAL : 1
HIS_WITH : 1
COLOR_YELLOW : 3
TO_RELAY : 1
OR_LIMITED : 1
RELAXED_CONSC : 1
ALTHOUGH_PERFORMED : 1
HIS_SIBLINGS : 1
OD_ANTERIOR : 1
IS_PAINFUL : 1
NURSING_OR : 1
HOBBIES_NUMBNESS : 1
TYPE_MEDICATION : 1
CONVINCE_DEPRESSION : 1
MANAGEMENT_COMMENT : 1
ORIENTATION_NONE : 1
HIS_MHH : 1
PERCEPTUAL_DISTURBANCES : 1
DESCRIPTION_MARITAL : 1
ADDITION_THE : 1
ACROSS_ALL : 1
ADMISSIONS_BE : 1
TOUCH_OR : 1
DAILY_RATED : 1
REPORTED_AND : 1
EXERCISE_IN : 1
OFF_ANTIBIOTICS : 1
HE_ALSO : 2
CONTINUE_PATIENT : 1
RA_ASSOCIATE : 1
ATTEMPTED_TO : 1
JOB_NURSE : 1
TH_HE : 1
QUETIAPINE_KNIFE : 1
TRAZODONE_IN : 1
WHEELS_THERE : 1
OF_THIS : 1
FULL_CONSENT : 1
ADDENDUM_HYPOKALEMIA : 1
CARE_IN : 1
RESPIRATION_COMMENT : 1
CARE_GOOD : 1
HAVE_INCREASINGLY : 1
OUTPATIENT_PROGRESS : 1
EVALUATED_BY : 2
BR_RELAXED : 1
LPM_DURING : 1
FACILITY_PAIN : 1
HAS_BECOME : 1
PERSON_PLA : 1
THERAPY_YES : 1
COMMANDS_RATE : 1
NG_ALCOHOL : 1
STRESSORS_THAT : 1
MEDICATIONS_FOLLOW : 1
COMMENT_PT : 1
ADVERSE_PHYSICIAN : 2
DM_ON : 1
SMOKING_METHOD : 1
CLASS_TREATMENT : 1
STATE_ANTICOAGULANT : 1
HE_REPORTS : 6
CR_SCREEN : 1
CALL_WED : 1
LUNCH_DRINKS : 1
AGAIN_TOMORROW : 1
CHART_LEARNING : 1
SWELLING_YEARS : 1
OUTPT_INTAKE : 1
IS_THE : 1
WE_SCREEN : 1
THAT_VET : 1
USE_STRIP : 1
HIP_IN : 6
PT_BY : 1
TO_COGNITIVE : 1
ADDITIONAL_COMMENTS : 1
OX_OCT : 1
THAT_TO : 1
ACETAMINOPHEN_MG : 1
WAS_BY : 3
WAS_DIAGNOSED : 2
TYPE_EDUCATION : 1
HAD_QUESTIONS : 1
IF_YES : 1
CAP_MG : 1
OF_LIVING : 4
IS_SCHEDULED : 2
COUMADIN_CLINIC : 1
SKIN_PULSE : 1
AMOUNT_ALERT : 1
CONTROLLED_CURRENT : 1
IN_HOME : 1
TEMPERATURE_IS : 1
MORE_TABLETS : 1
GETS_UP : 1
DIRECTED_COUMADIN : 1
HAVE_TROUBLED : 1
AM_AN : 2
MANAGEMENT_CKD : 1
NURSING_COMMENT : 1
OTHERS_LOCATION : 1
FENTANYL_SHOULD : 1
BY_OF : 1
OBJECTIVE_HOME : 1
MYCOSIS_APPLY : 1
THE_SESSION : 1
NOTE_COLOR : 1
SCHEDULE_MEDICATIONS : 1
HOLD_FOR : 1
DATE_GOING : 1
DURING_THIS : 7
THIS_PAIN : 1
CH_HUDVASHNOTE : 1
IOP_ON : 1
PATIENT_EVENT : 1
AGAIN_HE : 1
KIDNEY_FUNCTION : 1
UNIVERSAL_PRECAUTIONS : 1
REHAB_NO : 1
AS_MEMBERS : 1
MG_BEDTIME : 1
NURSING_PART : 1
HJR_HEPATO : 1
MILD_OF : 1
FOR_MONTH : 1
TRIAGE_INTAKE : 1
ANY_EVENT : 1
EDEMA_BILAT : 1
ATTENDING_PROGRESS : 1
TO_KNOWLEDGE : 1
NO_MENTAL : 2
SCHEDULED_APPOINTMENT : 3
TRAINING_HE : 1
NO_ASSOCIATE : 3
HANGOVER_BEHAVIORS : 1
CLINIC_YESTER : 1
CALLBACK_SAME : 1
FAMILY_HISTORY : 1
HIM_ROI : 1
RESIDENTS_HISTORY : 1
HYDROCELECTOMY_ON : 1
CALL_BY : 1
IMED_CONSENT : 1
PROTECTORS_IN : 6
DRINKING_HAS : 1
AND_WAR : 1
ER_AND : 1
REDUNDANT_FORESKIN : 1
WRITER_TO : 1
UP_TO : 2
NOTE_RESTRAINTS : 1
PT_PLEASANT : 1
HAD_OF : 1
NA_ELIGIBILITY : 1
LEGIBLE_ADMITTING : 1
AN_ALLERGIES : 1
THREE_TIMES : 2
IN_LATER : 1
PAIN_CONTINUES : 1
PROTOCOL_ONE : 1
LOT_COFFEE : 1
FOR_HOME : 1
SITTING_IN : 1
DX_GROUP : 1
PHOTOS_WERE : 1
PAIN_RIGHT : 1
SURFACEANTERIOR_GERD : 1
MD_PREPROCEDURE : 1
CASE_WITH : 1
INFECTION_HCL : 1
PSYCHIATRIC_UP : 1
LEARNED_THAT : 1
EDUCATION_ANYTHING : 1
MEDS_DEPRESSION : 2
ADS_AS : 1
FOR_JUNE : 1
HEP_DC : 1
OUTPT_TRIAGE : 1
GET_CASA : 1
CRISIS_STRATEGIES : 1
INCREASE_THE : 1
FROM_THER : 1
DTR_DOES : 1
STATING_THAT : 2
MOVE_BIRCH : 1
ON_VETERAN : 1
HERE_TO : 1
HOW_WILL : 1
YOUR_HAVE : 1
SITE_STATUS : 1
FLASHBACKS_NMS : 1
RECORDS_DOCUMENT : 1
AND_HISTORY : 2
FOLLOWED_MAJOR : 1
THE_STATES : 2
USAGE_BED : 1
HOME_VETERAN : 1
TO_NAME : 1
ON_NO : 1
AT_BREAKFAST : 1
BENEFITS_HAVE : 1
THEM_NURSING : 1
AMBULATION_MMHG : 1
THEM_RESCUE : 1
SCHEDULE_OTHER : 1
IT_NOT : 1
WAS_GOAL : 1
CONTINENCE_NONE : 1
HYPERLIPEDEMIA_PATIENT : 1
DORSUM_MIDLINE : 1
BY_COUMADIN : 1
COORDINATOR_OF : 1
ONETIME_DOSE : 1
REMOVED_HAVE : 1
THE_SIDE : 1
BY_ED : 1
ADMITTED_INTO : 1
OF_STOOL : 6
ED_TOPIC : 1
TIMES_ACTIVE : 1
SPECIFICS_PLEASE : 2
ADEQUATE_AND : 1
ANGIOCATH_WELL : 1
AREA_CLOSE : 1
ILL_CELEBRATING : 1
HEARING_TO : 1
PT_SCHEDULED : 1
ONSET_ARTHRALGIA : 1
ALLERGY_YES : 1
RESPIRATIONS_AND : 1
FOR_LAB : 1
HAVE_PT : 1
ACTIVE_ADDENDUM : 1
BY_SWER : 1
WITH_OSAC : 1
THAT_TRIGGER : 1
SPONGE_BATH : 3
TO_RESOLVED : 1
DRINK_CONTAINING : 1
VISUAL_FIELD : 1
INTERVAL_MUST : 1
PICKING_UP : 1
FOR_ARREST : 1
MEANWHILE_HAS : 1
WAS_FOUND : 1
ON_AND : 5
THE_OFFERED : 1
BOARD_CARE : 1
VA_WEEK : 1
CONNECTED_NSC : 1
NEURO_IT : 1
COMPREHENSVE_ORAL : 1
NO_DISABILITY : 1
REHABILITATION_CONSENT : 1
BLADDER_PROBLEMS : 1
DENTAL_PROGRESS : 1
HE_WOULD : 4
PROBLEMS_ORLOW : 1
DEHYDRATED_UNMASKING : 1
SICK_TO : 1
PAGER_HOURS : 1
ARE_FEELING : 1
NO_MEDS : 1
THAT_INCLUDES : 1
FACILITATORS_BOARD : 1
FOR_MOBILITY : 1
STOP_ILLICIT : 1
NO_RELIEF : 1
STATUS_INSTRUCTIONS : 1
AND_COOPERATIVE : 1
STATUS_MOTOR : 1
URINARY_CATHETER : 1
FOR_WEEK : 1
IS_AGREEMENT : 1
CHECK_ROOM : 1
STRIP_ACTIVE : 1
TESTING_ILL : 1
REQUEST_FOR : 2
WORKING_NO : 1
BACK_TO : 1
ZZECF_PROGRESS : 1
AND_CONCURRED : 1
ANY_THAT : 1
HAD_LOST : 1
PT_NO : 1
DEVELOP_ADAPTIVE : 1
WORK_RESULT : 1
PUPIL_REACT : 1
PT_FOLLOWED : 2
ALCOHOL_PROTOCOL : 1
WITH_SIGNIFICANT : 1
PAIN_PARKINSONS : 1
KILLING_EXTREMITIES : 1
NSS_QUESTIONS : 1
NOAH_APPOINTMENT : 1
DOING_DID : 1
IN_MALE : 1
RAPD_OS : 1
OR_BREATHING : 1
NOTE_PLAN : 1
PATIENT_REQUESTING : 2
NURSING_WHO : 1
RN_EXT : 1
SHOT_IN : 1
CHANGES_FOR : 1
OF_SIGNED : 1
INJURY_UNBELIEVABLE : 1
TEMP_PAIN : 1
DATE_BE : 1
DEPRESSION_HAD : 1
RATED_DISABILITY : 1
STAY_TO : 1
EVALUATION_PT : 1
MAY_SOCIAL : 1
TO_SHE : 1
FOR_STRESS : 1
WITH_NEW : 1
TWO_CAPSULES : 1
HOW_TO : 1
FRI_SIGNS : 1
APPLICABLE_FOR : 1
IS_TRANSFERRED : 1
ROOM_AND : 1
WORKING_STATES : 1
PROVIDER_DIMASCIO : 1
MENTAL_STATUS : 6
FOR_INR : 1
HE_COMPLAINING : 1
CONSTIPATION_AND : 1
CONTACT_COPY : 1
DETOXIFICATION_PROGRAM : 1
CAPSULES_MOUTH : 1
TO_STOP : 2
FOR_SUPPORT : 1
PHARMACY_ACTION : 1
GUIDE_VISUAL : 1
TAKES_THE : 1
NO_QUESTIONS : 1
TREATED_OVERALL : 1
AND_OF : 3
WILL_NOT : 1
IDENTIFIED_HIM : 1
AT_ALCOHOL : 1
HIGHRISK_FOR : 1
ABILITY_USE : 1
COMMENTS_ABOUT : 1
OSAC_NURSE : 1
DEPRESSIVE_ARE : 1
AND_KIDS : 1
KEPT_THE : 1
PATIENT_PLASM : 1
OF_SUICIDAL : 1
DID_ABOUT : 1
FOLLOWING_GROUPS : 1
MEDICATION_REVIEW : 1
KIM_CANCELL : 1
TWICE_APPLY : 1
NO_IS : 2
REVIEWED_BY : 1
RAD_PROCEDURE : 1
YELLOW_COLOR : 1
VITAL_POSTOP : 1
MOVE_GOAL : 1
APPOINTMENT_STATING : 1
IN_HIS : 1
SEVERAL_HE : 1
OF_QUICKLY : 1
STARTED_DEC : 1
OF_APPOINTMENT : 1
TO_MH : 1
CONTACT_ME : 1
VA_PATIENT : 1
PROVIDER_FRITTITTA : 1
FOOD_GRAINS : 1
SAT_DOWN : 1
AND_ITIS : 1
REVIEWED_WITH : 2
DEFERRED_LEISURE : 1
OF_DISK : 1
DENIES_HISTORY : 1
PHARMACY_TELEPHONE : 1
LIKE_WHEN : 1
INAPPROPRIATE_BEHAVIOR : 1
FOLLOW_PROGRESS : 1
ALCOHOL_SCIATICA : 1
INPATIENT_WIFE : 1
IS_ON : 1
YR_FATHER : 1
ACTIVE_PROVIDED : 1
SY_HX : 1
POSSIBLE_NEED : 1
WILL_HERE : 1
AND_DENIED : 1
WAL_IS : 1
DESIRES_AND : 1
TH_IF : 1
ADVISED_SHE : 1
SCORE_XXNO : 1
SBURG_PATIENT : 1
YOUR_ACTIVITIES : 1
SETTING_ON : 1
TO_INDIVIDUAL : 1
ON_NORMAL : 1
FOR_PHYSICIAN : 1
THIS_WK : 1
AND_FRIENDS : 1
ADVISED_CALL : 1
CE_WHAT : 1
COLD_PATIENT : 1
ORDERED_IMURA : 1
SIDE_WHEN : 1
NOT_SHOW : 1
TRAINING_WRITTEN : 1
CA_THE : 1
BY_ADDITIONALLY : 1
NUR_RELATED : 1
PREOP_MOOD : 1
HOME_IS : 1
ULCER_HIP : 1
TH_POSSIBLE : 1
KG_KNEE : 1
MORE_OPTOMISTIC : 1
CONSULTS_FOR : 1
ETHNIC_GROUP : 1
SCORE_PULSE : 1
MAKING_HE : 1
RAISED_ABOUT : 1
FACILITATOR_REFRAMED : 1
COLOR_WITH : 1
THE_NEW : 1
ALCOHOL_DID : 1
HOW_HE : 1
INTERVERTEBRAL_HLIP : 1
DISTRESS_OR : 1
IS_BREATH : 1
TASK_ALTHOUGH : 1
OR_GO : 1
MORE_THAT : 1
ANTIBIOTIC_ROUTE : 1
ABILITY_PERFORM : 2
AND_AGITATED : 1
PROBLEM_SELFADJUSTING : 1
FOOD_OR : 1
INR_PHONE : 1
THE_BLIND : 1
SNACKS_PRESSURE : 1
CASA_MH : 1
TAP_TELE : 1
FORM_AS : 1
ELABORATE_TREATMENT : 1
SINGLEPOINT_CANE : 1
AND_TALKING : 2
AT_YR : 1
ORDERED_ONETIME : 1
ETHNIC_DIABETIC : 1
FOLLOWUP_AFTER : 1
POST_QHS : 1
SHOULD_PROCEED : 1
NO_IDEA : 1
PT_RATES : 1
WIDE_CYST : 1
FOR_CIRCUMCISION : 1
ONGOING_AND : 1
TO_TRAZODONE : 1
PT_HEART : 1
HAS_IN : 1
BE_REQUIRED : 1
WOULD_FROM : 1
TO_AS : 1
NOTE_KIDNEY : 1
WEIGHT_LOSS : 1
APPT_AFTER : 1
RECEIVED_PATIENT : 1
MORNING_HEIGHT : 1
ADMITTED_THE : 1
NOTE_MEDICAL : 1
RETURNS_HAVING : 1
MYCOSIS_AMOUNT : 1
NOTE_USED : 1
MEDICATIONS_LISTED : 1
AXIS_DEPENDENCE : 1
TELE_TRIAGE : 1
OF_LOSS : 1
NIGHT_HAS : 1
THE_MODULE : 1
REACTIVE_CALL : 1
DRO_ALCOHOL : 1
IF_ANY : 1
MAIL_WHEN : 1
ACTIVE_MEDICATION : 1
CALL_IS : 1
URINATE_CONCERN : 1
LOSS_PROGRAM : 1
ANY_AMOUNT : 1
TWICE_WEEKLY : 1
OR_STATUS : 1
THIS_ADDITIONAL : 1
APPEAR_TO : 1
MANAGEMENT_PO : 1
CARE_RELIGIOUS : 1
RETURN_HOME : 1
REMAINING_MOBILITY : 1
STOOL_APPLICABLE : 1
REQUIRED_THICK : 1
ABOUT_PAIN : 1
VELOSITY_YR : 1
TELEPHONE_MINUTE : 1
KNEE_SPRAIN : 1
THIS_SHIFT : 13
TO_HOUR : 1
AT_VA : 2
WHO_BY : 1
PAIN_SIGNIFICANT : 1
WANT_TRY : 1
VETERAN_AT : 1
PLAN_TO : 1
ON_THIS : 1
AT_LENGTH : 1
GROWING_SIZE : 1
URINE_MH : 1
RECONCILIATION_MIMSOME : 1
KIDS_LAST : 1
NEXT_REASSESS : 1
STATES_HE : 4
OTHER_LOCATIONS : 1
ET_ER : 1
BROTHER_LEFT : 1
OF_MG : 1
NKA_NO : 1
MAY_TWOHOUR : 1
HAVE_DISCUSSED : 1
NO_TO : 1
RESTRICTED_OR : 1
UNITS_INSAM : 1
REQUEST_APPT : 1
IS_IN : 2
BEHAVIORAL_NOTE : 1
FOR_BENEFITS : 1
SYND_EXTRAPYRAMIDAL : 1
CHART_PAIN : 1
REPORTED_FEELING : 1
OF_INDIVIDUAL : 1
PRIVILEGES_RESTORATIVE : 1
BIRCH_AND : 1
PATIENT_ISZESKI : 2
SPECIAL_PROCEDURE : 1
CLEAR_CATHETER : 1
FOR_BY : 1
HE_CONVINCE : 1
ED_PROCEDURE : 1
POSITIVE_ABDOMINAL : 1
BLIND_OTHERS : 1
PATIENT_STAT : 1
IDENTIFIED_PLAN : 1
SEXUAL_AND : 1
TOUR_SKIN : 1
SURG_DIP : 1
ADDENDUM_OX : 1
HAD_TO : 1
MAY_RISK : 1
FINISHED_REHAB : 1
OF_MEDICATION : 2
IN_IN : 1
SYSTEMIC_AXIS : 1
DISCUSSION_FACT : 1
STRUCTURED_ENVIRONMENT : 1
PERFORM_ACTIVITIES : 2
DIVALPROEX_ATROPINE : 1
AND_ASK : 1
HE_TIME : 1
WAS_DURING : 1
THAT_WE : 1
INPATIENT_WILL : 1
THIS_WHAT : 1
PERSIAN_GULF : 1
THE_PAGES : 1
ABOUT_TOPICALLY : 1
THE_REHABILITATION : 1
FOR_YEARS : 2
HOME_HIS : 1
CURRENT_FOR : 1
PH_APPOINTMENT : 1
THEY_SOME : 1
PATIENT_WEARING : 1
INTO_BLIND : 1
DENIED_NAUSEA : 1
AS_BY : 1
PAIN_INSTABILITY : 1
ONGOING_HAS : 1
PATIENTS_ADMISSION : 1
ARTHRALGIA_ON : 1
ASSESSMENT_HIP : 1
PER_RIGHT : 1
OF_ALL : 1
PROJECTS_MARRIED : 1
THROUGH_CORRESPONDENCE : 1
YOU_AREA : 1
ROUGH_RETURNS : 1
SERVICE_OX : 1
PATIENT_MEDICATION : 1
OSAC_TO : 1
GET_ANSWERS : 1
FOR_CALL : 1
PHYSICIAN_DENIED : 1
REPORTED_FRIEND : 1
THAT_WANTS : 1
HOME_FOR : 2
IN_AND : 2
BAKER_ADDRESSED : 1
INDICATES_RISK : 1
ALWAYS_SENTENCES : 1
TO_REPORT : 2
OF_EXTINCTION : 1
THE_PROGRAM : 1
IN_ALL : 1
SUFIYAN_CHAUDHRY : 1
HAS_OUTSTANDING : 1
THIS_AGAINST : 1
CPT_SUPPORT : 1
ACTIVE_ADVISED : 1
NOW_BLINDNESS : 1
HAS_PAIN : 2
ONE_RESIN : 1
LUMBAR_SPINE : 1
IS_PLEASANT : 2
LOT_OF : 1
UNDILATED_TO : 1
THAT_COULD : 1
YOU_MAY : 1
PROVIDERS_TO : 1
MEDICATION_WAL : 1
RADIATION_TOLERATED : 1
SINCE_GOT : 1
REGARDING_WITH : 1
DISORDER_TO : 2
TREATMENT_PLAN : 3
PT_CENTER : 1
INARNP_ASSISTANCE : 1
COUNSELING_ALBUTEROL : 1
INTERESTS_HYGIENE : 1
HYGIENE_ZZECF : 1
NURSING_MEDICAL : 1
BEEN_BED : 1
MHC_HEALTH : 1
WEEK_NOW : 1
BELONGINGS_BY : 1
ANTICOAGULANT_PATIENT : 1
HIM_PHYSICIAN : 1
MASS_HAVE : 1
MOVEMENTS_THIS : 2
CONTINUED_DISCHARGE : 1
THAT_STYLES : 1
PLANS_RETURN : 1
IS_REFERRED : 1
ISZESKI_SSN : 1
NOT_IN : 1
RATING_SCORE : 1
SEE_OF : 1
NATURE_PRIMARY : 1
PART_PROVIDER : 1
ALERTORIENTED_NURSING : 1
STOOL_SOFT : 1
COME_THE : 1
ASK_HE : 1
FOR_CLOZARIL : 1
INHL_INFORMATION : 1
VISITED_PASTORAL : 1
ATTENDED_MOVE : 1
THOUGH_IS : 1
REPORT_THE : 1
PRIMARY_PCE : 1
THE_HIGHRISK : 1
ABOUT_TRANSPORTATION : 1
ADDENDUM_MARRIED : 1
PER_NURSING : 1
INCREASE_OF : 2
LAB_ELABORATE : 1
THE_NEXT : 1
GROUP_ATTENDANCE : 1
BED_REST : 1
CANCEL_AND : 1
NOT_CURRENT : 1
AT_TIME : 2
STILL_BEGINS : 1
THERE_NO : 3
TO_VETERAN : 2
TALKING_HIS : 1
FEE_TRANSFER : 1
ANY_BLADDER : 1
REGULAR_IMED : 1
PROSTHETIC_THAT : 1
NIGHT_THAT : 1
CASE_DISCUSSED : 1
ATTENDING_MENTAL : 1
OF_EITHER : 1
BY_NOT : 1
THE_DENVER : 1
THAT_INCREASED : 1
THE_FACILITATOR : 1
PRIVILEGES_QUARTERLY : 1
TABLETS_SPOKE : 1
VERBAL_COMMANDS : 1
HC_PRO : 1
BLADDER_PATTERN : 1
RESPONSIBILITIES_REGARDING : 1
FOR_MONITORING : 1
NORMAL_COHERENT : 1
PROGNOSIS_FAIR : 1
COMMENT_RELAXATION : 1
THIS_WAS : 3
DOWN_ASKING : 1
PAIN_SITTING : 1
UP_NOTE : 1
SCHEDULED_STATES : 1
FACT_MANY : 1
RENEWAL_NOTE : 1
VOMITING_DO : 1
PNEUMONIA_SHE : 1
FEELING_HOPELESS : 1
REMINDER_PLAN : 1
ASSOCIATE_IDENTIFIED : 3
VETERAN_WITH : 1
INITIAL_CAUSE : 1
JUICE_BREAKFAST : 1
HAS_PATIENT : 2
EMERGENCY_DEPT : 2
CURRENTLY_TRAMADOL : 1
PT_MAG : 1
AFTER_FINISHED : 1
NUR_VASCULAR : 1
VETERAN_ALTERNATIVES : 1
UTI_PT : 1
COUMADINE_NO : 1
PREOP_CONSC : 1
STUDENTS_FAMILY : 1
HYDROCHLOROTHIAZIDE_TAB : 1
PAIN_ONGOING : 1
BE_CYST : 1
BIT_AND : 1
INJURY_ON : 1
APPOINTMENT_THE : 2
WEEK_BRIEF : 1
STAT_PREVENTIVE : 1
CURRENT_PER : 1
TRACH_ROM : 1
USED_URINAL : 1
NUR_PATIENT : 1
SPOKE_PATIENT : 1
SHE_DOES : 1
ALBUTEROL_CFCF : 1
WAL_PATIENT : 1
OR_TEMP : 1
CORRESPONDENCE_CLINICAL : 1
HERBALS_CHANGES : 1
USED_THE : 2
LUMBAR_BETWEEN : 1
PLT_SIDE : 1
THERAPY_SKILLED : 1
NIGHT_EVIDENCE : 1
VISIT_PATIENT : 1
AND_SOME : 1
HE_ON : 1
CARE_BEFORE : 1
CVA_THE : 1
COMMENT_NONE : 1
AND_IS : 7
OUT_AN : 1
NEEDED_DX : 1
OF_CAUSE : 1
AGREEMENT_OD : 1
RESPIRATORY_THERAPY : 1
AM_MEDICATION : 1
HAVE_HIM : 2
LIMITED_IN : 1
THE_HUSBAND : 1
DID_SHOW : 1
ARE_GOOD : 1
EXAMINING_PATIENT : 1
THIS_IS : 3
ADL_ACTIVITIES : 1
AGREEMENT_CIRCUMCISION : 1
THE_SNACKS : 1
MEDICAL_RECORD : 1
HE_FASTING : 1
FEELS_IV : 1
DETERMINED_BY : 1
FELT_LIKE : 1
RECONCILIATION_NOTE : 1
IN_ENT : 1
THIS_FACILITY : 1
IS_GROUP : 1
FOR_AM : 1
WAS_AFTER : 1
OR_TREATMENT : 1
DOMAINS_WAS : 1
OUTPATIENT_MEDICATIONS : 2
AND_ANY : 1
HOURS_OF : 1
HE_CAN : 1
UNSAFE_INAPPROPRIATE : 1
PRESCRIDBED_FLUOXETINE : 1
EXTRAPYRAMIDAL_SIGNS : 1
ASSISTANCE_PROVIDED : 3
OF_BED : 1
DEPT_PART : 2
WORKING_ON : 1
THIS_BY : 1
HOWEVER_IF : 1
AND_STRUCTURED : 1
NEEDED_FOR : 2
RECENT_LIPID : 1
CULTURES_FIRST : 1
NO_FOLLOWED : 1
OTHERS_IS : 1
PELVIS_INFLUENZA : 1
CARE_FRED : 1
GONE_FRIENDS : 1
HANDOUT_SURVIVAL : 1
KNEE_LIGAMENTAL : 1
WHY_THESE : 1
SPECIAL_TRANSPORTATION : 1
SPOKEN_WITH : 1
LENGTH_MINUTES : 2
WHO_SHOWS : 1
RE_INTERVENTIONS : 1
DIDACTIC_THERAPEUTIC : 1
RESIDENT_AND : 1
TKA_PT : 1
INSULIN_NPH : 1
CATHETER_BREATH : 1
THAT_THE : 1
LOSS_DISK : 1
OFFERED_GROUPS : 1
PATIENT_ANSWERED : 2
FROM_COALITION : 1
HEALTH_NOTE : 1
TAB_PATIENT : 1
HOURS_TRIAGE : 1
TAB_TAKE : 6
OTHER_WEIGHT : 1
HIS_WILL : 1
MOVIES_AND : 1
HOSPITAL_INPATIENT : 1
THAN_PER : 1
PLEASANT_REACTIVE : 1
ONE_TABLET : 5
THAT_LONG : 1
ANSWER_PATPU : 1
SAME_ANATOMICAL : 1
MIN_AMBULATORY : 1
MOWING_THE : 1
BLADDER_BOWEL : 1
EXPECTATIONS_OF : 1
NEBULIZER_IS : 1
ARENT_DROPS : 1
COGNITIVE_ASSESSED : 1
THE_VA : 4
MM_MAR : 1
NOTE_PATIENT : 3
CARE_LAB : 1
NOTE_COOPERATIVE : 1
OF_POST : 1
VETERAN_STATED : 1
IS_THAT : 1
OR_MILK : 1
BIRCH_BOARD : 1
SHE_DIABETES : 1
AT_SVI : 1
SIX_MONTH : 1
ANY_NAUSEA : 1
IN_CHRONIC : 1
GROUPS_BEEN : 1
RECOVERY_ISSUES : 1
WAS_NONE : 1
PATCH_ATTENDING : 1
MM_COMMENT : 1
SERVICE_PULSE : 1
IS_AFRICAN : 1
CAPSULES_BY : 1
DATE_PROLONG : 1
PACT_ANNUAL : 1
REQUESTED_MEDICATION : 1
INABA_ROBIN : 1
IS_ABLE : 1
VETERANS_TO : 1
NOTE_NURSING : 1
SURFACEANTERIOR_ONE : 1
EVERY_TO : 1
TO_OSAC : 1
WEEK_OF : 1
ETOH_WITHDRAWAL : 1
CODE_PRO : 1
MANY_YOUR : 1
NEEDED_TO : 2
LABRAL_PATHOLOGY : 1
PHYSICIAN_STATES : 1
FINISHED_DO : 1
SERVED_IN : 1
RIGHT_BX : 1
AND_DISCUSSED : 2
OTHER_PAIN : 1
TREATMENT_PERSONAL : 1
PATIENT_GLARE : 1
PATIENT_THIS : 1
LETTER_SENT : 1
IF_NECESSARY : 2
MAINTENANCE_CARE : 1
DERM_WERE : 1
ALL_RECEIVING : 1
DRINKING_THE : 1
OBSERVATION_THE : 1
FROM_SISTER : 1
FOR_HE : 4
EARRING_THAT : 1
CURRENT_SKIN : 1
CBOC_FRED : 1
MEDICATIONS_EPIN : 1
KERATITIS_PER : 1
EFFECTIVELY_THAT : 1
PLACED_RIGHT : 1
TO_SBURG : 1
HOME_SUPPORT : 1
MD_ASSESSMENT : 1
CKD_CAUSE : 1
HC_PHONE : 1
WITH_DOSE : 1
PT_REPORTED : 3
AND_DID : 3
IN_AREA : 1
INFORMATION_AND : 1
LAB_AS : 1
ADDITIONALLY_WILL : 1
HX_CHRONIC : 2
COMMUNITY_AGENCIES : 1
THIS_MORNING : 2
DONE_PAD : 1
OF_FALLS : 1
DISCHARGED_US : 1
ADAPTIVE_FOR : 1
SCANNED_DOCUMENTS : 1
LEFT_CLINIC : 1
THE_VISIT : 1
NURSING_NURSING : 1
QUESTIONS_DO : 1
ON_CONTACT : 1
ED_MEDICATION : 1
AMOUNT_OF : 2
TO_WAS : 1
PAIN_OR : 1
ALERT_TO : 1
SOME_MAY : 1
IF_URINE : 1
CPRS_IN : 1
IN_PROGNOSIS : 1
HOME_KIM : 1
HAD_BEEN : 1
TIMES_HE : 1
EXPRESSE_PARTNER : 1
HE_NO : 2
AND_ANXIETY : 1
OF_VISUAL : 1
NOW_THIS : 1
FOR_MINUTE : 1
ONCOLOGY_SERVICE : 2
OF_CARE : 2
THE_DISCUSSED : 2
TO_TIMES : 1
TO_SIGHTED : 1
TO_RESTRICTED : 1
RETURNS_NOW : 1
DONT_HAVE : 1
ADDENDUM_WILL : 1
PATIENT_TYPE : 1
ACTIVE_UP : 1
VET_MULTIPLE : 1
RE_CONSISTENCY : 1
SHOWED_TO : 2
FOCUSED_DETERMINING : 1
SPECIFIC_QUESTIONS : 1
HYDROCHLOROTHIAZIDE_MG : 1
STATES_IS : 2
OR_MENTAL : 1
TABLET_ACTIVE : 2
OTHER_HEART : 1
STOMACH_HAVE : 1
NEAR_FUTURE : 1
DEPRESSIVE_ESSENTIALLY : 1
TOE_NAIL : 1
TOMORROW_WILL : 1
TOPICAL_PATIENT : 1
CONTACT_NO : 2
AND_HERE : 2
DESIRED_MONTH : 1
WAS_SCREENED : 1
GOOD_HELPLESSNESS : 1
REACTIVE_TO : 1
POSES_AND : 1
DENIES_HAVING : 1
HIS_HIGHER : 1
INFLECTION_IS : 1
WAS_THE : 1
INSPECTED_FOR : 1
MG_BY : 1
SUSTAINED_RELIEF : 1
FOR_MANAGING : 1
DR_TEAM : 1
NO_HPI : 1
PRESENTED_ER : 2
PHYSICIAN_RITAL : 1
PREVENTIVE_PHYSICIAN : 1
TWO_BY : 1
OF_SOFT : 1
ABILITY_KNOWS : 1
DISABILITIES_VA : 1
CDI_DRESSING : 1
ALSO_FACT : 1
DISCUSSED_TO : 1
FOLLOWUP_APPOINTMENT : 2
MODULE_STARTING : 1
CALLER_RESPONSE : 1
EFFECTS_WAS : 1
METHOCARBAMOL_SULFACETAMIDE : 1
ARE_IN : 2
SEEN_BRC : 1
SEEKING_USUAL : 1
BOARD_YES : 1
TIME_NA : 1
REGULAR_INFORMED : 1
IDENTIFIED_RESPONSE : 1
WEIGHT_WILL : 1
REST_DO : 1
GIVING_TO : 1
WIFE_PROGRESSIVE : 1
OTHERS_RESIDENT : 1
APPT_HIP : 1
HAVING_THOUGHTS : 1
OTHER_DESCRIPTION : 1
UNEVENTFUL_WBC : 1
ANTIBIOTIC_DOSE : 1
PHYSICIAN_UNDERSTANDING : 1
THE_PROSTHETIC : 1
MEDICATION_ADHERENCE : 1
PATIENT_PRESENTED : 1
LIST_IF : 1
DYSPNEA_OR : 1
BY_THEY : 1
TRANSPORT_PT : 1
VISITED_CARE : 1
PRIOR_THE : 1
PAIN_CONTROLLED : 1
STARTED_ALCOHOL : 1
HOW_DID : 1
PROGRESS_EXPECTATIONS : 1
INTERVENTIONS_CONSISTENCY : 1
LEFT_PAIN : 1
STATE_PHARM : 1
STS_FEELS : 1
TO_REHAB : 1
OCCUR_IN : 1
LS_SESSIONS : 2
SULFACETAMIDE_ASSESSMENT : 1
INDEX_BODY : 1
LOCATION_ROOM : 1
LENGTH_STAY : 1
LAUNDRY_WILL : 1
TO_MEET : 1
RESULTS_HIS : 1
INTERVENTI_RESPIRATIONS : 2
BELOW_PROVIDER : 1
VACCINE_REFUSAL : 1
PAIN_PHYSICIAN : 2
VISIT_PAIN : 1
REMINDER_ONE : 1
CENTER_MEDICATION : 1
THURS_REPORTED : 1
WAS_JUST : 1
REITERATED_HER : 1
NO_PAIN : 3
DESIRES_OPTION : 1
PTSD_TRAITS : 1
TO_THIS : 7
MORPHINE_PAIN : 1
ASSESSMENT_OF : 2
CM_RECONCILIATION : 1
LIVING_TAKEN : 1
IV_STARTED : 1
THERAPY_SELF : 1
WITH_EX : 1
MEDICATION_PATIENT : 1
URINE_CH : 1
DISCHARGED_TO : 1
IS_UP : 1
IDENTIFIED_THIS : 1
APNEA_THE : 1
PLAN_PATHOLOGY : 1
PATIENTS_RIGHTS : 1
IS_FACT : 1
PER_TO : 1
HEMAGLOBIN_AC : 1
THEM_HELPFUL : 1
HIGHER_COMMENTS : 1
FACILITATORS_YES : 1
NOTE_REACTIVE : 1
TWICE_TO : 1
GM_IV : 1
TO_LAST : 2
BY_VERBALIZATION : 1
PATCH_TESTING : 1
RESPONSE_TO : 1
SHAMPOO_LUNCH : 1
RELIEF_THE : 2
PATIENT_ED : 1
HE_PATIENT : 1
WAS_MOBILITY : 1
CURRENT_RATING : 1
SUPPORTIVE_THERAPY : 2
DETERMINE_IF : 1
ADEQUATELY_AND : 1
NOTET_ANGER : 1
TAKE_ANTIBIOTICS : 1
NUTRITION_RE : 1
DONT_GOAL : 1
SBURG_FOR : 1
MAKE_LITTLE : 1
PLACED_INTO : 1
APPOINTMENT_WILL : 2
IN_SHE : 1
LS_REMAINING : 1
PAIN_LEARNING : 1
HIS_APPOINTMENT : 1
PATIENT_REQUESTED : 1
MEDICATION_AND : 2
DURING_AMBULATION : 1
ASSESSMENT_SHOT : 1
NAUSEA_AND : 2
RESUMED_NORMAL : 1
LETTER_MONTH : 1
WITH_PROGRESSIVE : 1
HEALTH_SECONDARY : 1
MUSCLE_HYPERLIPIDEMIA : 1
RESTING_HOME : 1
PLAN_PRIOR : 1
ACTIVE_HE : 1
CAME_IN : 1
ANTICOAGULANT_VISIT : 2
AND_PT : 2
TABLET_MOUTH : 3
IS_REGARDS : 1
BED_FRIENDS : 1
EYE_AND : 1
HOURS_DURING : 1
HE_HAS : 12
OR_NO : 2
MG_MOUTH : 1
SKIN_FALL : 1
AND_PERCEPTUAL : 1
CHECKIN_PSYCHIATRIST : 1
WHEN_NEEDED : 2
FREQUENCY_TO : 1
BID_FOR : 1
PROGRAM_CM : 1
PSYCHOTHERAPY_NOTE : 1
IN_AT : 1
FOR_NURSING : 1
SWELLING_VENOUS : 1
THOUGHT_DISORDERMET : 1
OCT_MEDICATION : 1
SAFE_AND : 1
VISTA_ALLERGIES : 1
THE_WINDOW : 1
TRANSFER_MEANWHILE : 1
DISORDER_TREATED : 1
TAKEN_REC : 1
MEDS_LIST : 1
ALLERGY_NO : 1
DM_OUTPATIENTPHYSICIAN : 1
WILL_SEE : 1
WITHDRAWAL_BIPOLAR : 1
BEING_BACK : 1
LIGAMENTAL_SPRAIN : 1
ST_FOR : 1
WHO_HIP : 1
PATIENT_MEDICALLY : 1
COUNSELING_INDICATE : 1
CALL_PATIENT : 2
HAVE_DO : 1
ANTECUBITAL_ANGIO : 1
WEEKEND_IS : 1
OTHER_HX : 1
FACT_HE : 1
PER_WITH : 1
PT_DENIES : 2
THESE_PLEASE : 1
RATES_THAT : 1
WITHIN_PHONE : 1
WOULD_BENEFIT : 1
BY_PREVENTIVE : 1
WHEN_DRIVING : 1
HOWEVER_STATED : 1
COLLECTION_SPECIMEN : 1
TEST_STRIP : 1
COMPLAINT_NOTIFICATION : 1
SEMIFOWLERS_SWEATS : 1
MHH_PT : 1
TAKING_THIS : 1
TAKE_YOUR : 1
THAT_PT : 1
INTEGRITY_PATIENTS : 1
WALKING_MIN : 1
OTHER_COMMENT : 1
PROVIDED_FOR : 5
ANTI_ALS : 1
HAS_OBSERVED : 4
ASSESSMENT_LIMITED : 1
II_DIAGNOSIS : 1
AM_HAVE : 1
PROGRAM_VETERAN : 1
OUTPATIENTPHYSICIAN_EDEMA : 1
ALL_NIGHTMARES : 1
RESPONSIBILITIES_PAIN : 1
AIDS_CHR : 1
OF_OCR : 1
ORTHOPEDICS_SWELLING : 1
KUSHWAHA_DONT : 1
FUNCTIONAL_SCREEN : 1
NO_OR : 3
REQUEST_WED : 1
GOT_SPC : 1
OVERSIGHT_OR : 2
FROM_QUESTIONNAIRE : 1
ON_RARE : 1
GROOMED_AND : 1
ARRANGING_MEDICAL : 1
FOR_PLEASE : 3
COURT_ORDERED : 1
JOURNALING_MIN : 1
NEVER_MARRIED : 2
TO_PERSON : 2
CLOSE_THE : 1
RATE_WEIGHT : 1
WHEN_YOU : 1
CONTINUE_REINFORCING : 1
HYGIENE_CLEANLINESS : 1
PROBLEM_PAIN : 1
MEDICATION_FO : 1
NURSE_ON : 1
ENTER_THE : 1
DM_ANC : 1
SINCE_PATIENTS : 1
DISCUSSING_RESULTS : 1
ILL_BE : 1
STILL_HAS : 1
FIRST_INDIVIDUAL : 1
BELOW_HAS : 1
RESP_TITLE : 1
BX_PM : 1
SEE_BELONGINGS : 1
WILL_DISCHARGED : 2
AND_THEM : 1
ADVANCED_WITH : 1
QUARTERLY_INTERDISCIPLINARY : 1
TRANSFER_WRITTER : 1
BACK_PAIN : 2
FOR_NURSE : 1
CRITERIA_CONSIDERATION : 1
CONCERNS_OBTAINED : 1
SPRAIN_IN : 1
MEDICATION_PATCHES : 1
CONTACT_ONCOLOGY : 2
REASON_TRANSFER : 1
TRAMADOL_PATIENT : 1
BP_ATTENDING : 1
ORAL_SURG : 1
SECONDARY_TO : 1
LETTER_STATING : 1
FACILITY_PCP : 1
DT_SPECIMEN : 1
WHERE_IV : 1
WELL_ROCEPHIN : 1
COIN_LESION : 1
CALLED_OCT : 1
CAUCASIAN_MALE : 1
HAS_WHERE : 1
WIFE_AGAIN : 1
INTERVENTIONS_MHC : 1
BEEN_HE : 1
ALT_AST : 1
TRANSPORTATION_WHEELS : 1
ALTERED_MECHANISMS : 1
AND_WORKING : 1
DESCRIPTION_YOURSELF : 1
ILISOME_STATE : 1
EXTRA_GIVEN : 1
LABRAL_TEARS : 1
DISCUSSED_RESIDENT : 1
OF_ASSESSMENT : 1
HAS_REPORTED : 3
POSTOP_WITHIN : 1
SESSIONS_TO : 1
STD_PATIENT : 1
THERAPY_ON : 1
DIRECTIVES_WITH : 1
BOOTH_MORNING : 1
BED_AND : 1
COMPLAINING_OF : 1
CHRYSHANT_NURSING : 1
SERVES_TO : 1
FREQUENCY_UP : 1
VETERAN_IN : 1
RESCUE_BECAUSE : 1
PRIMARY_CBOC : 1
HE_DOING : 1
BATHROOM_HIS : 1
STATUS_WEIGHT : 1
WAS_PROVIDE : 1
FALLS_PATIENT : 1
PROPER_VET : 1
PREFER_TO : 1
PAIN_INDEX : 1
COFFEE_AND : 1
FROM_DATE : 1
IS_NEW : 1
COMMENT_WILL : 1
ON_JUNE : 1
PERSONAL_SHAMPOO : 1
THAT_MANY : 1
REFERRED_HIM : 1
SURGERY_BUT : 1
DIVORCE_THE : 1
PRECISIONXTRA_STRIP : 1
TO_SPECIFIC : 1
WEEK_VETERAN : 1
MEETINGS_THE : 1
IMAGING_FOR : 1
MET_THE : 1
BECOME_INCREASINGLY : 1
MIN_BEHAVIOR : 1
PROBLEM_GROUP : 1
FOR_BEHAVIOR : 1
ALLERGIES_HAS : 1
CATHETER_NO : 1
HE_USUALLY : 1
NURSE_RESTRAINT : 1
OR_AM : 1
HAVE_MEDICAL : 1
RAL_LEBOARD : 1
DISCLOSED_HE : 1
IN_NOW : 1
PM_MEDICATION : 1
IT_IS : 4
DETOXIFICATION_HE : 1
PAST_NOW : 1
WORKING_EYES : 1
HIS_LATEST : 1
PAIN_PAIN : 1
BEHAVIOR_DANGEROUS : 1
WEEKLY_TO : 1
PAIN_OBSERVED : 1
ACTIVE_THE : 1
CONSENT_THE : 1
PRIMARY_PAIN : 1
THE_WEAKNESSES : 1
BEEN_DIAGNOSIS : 1
UNABLE_TO : 1
MOD_CALLED : 1
THIS_FOR : 1
TO_USE : 4
TREATMENT_CODE : 1
ANGIOCATH_TOL : 1
ACTIVE_FROM : 1
THEMSELVES_THE : 1
FOLLOWED_DISTRESS : 1
SOB_CONGESTION : 1
FEATURES_IVF : 1
OF_TIME : 1
HOURS_TIME : 1
TAKEN_TO : 2
MEDICATIONS_INCLUDING : 1
RIGHT_EYE : 2
RESPONSIBLE_MONITORING : 1
DETOXIFICATION_PROTOCOL : 1
UMBICIAL_NEXT : 1
BREATHING_TIME : 1
AND_INFLECTION : 1
TIME_OF : 3
YESTER_THERE : 1
MEDICALLY_UNSTABLE : 1
BREATH_SOUNDS : 2
THE_NEEDS : 1
DRUGS_DENIES : 1
AND_PICTURES : 1
ONGOING_IS : 1
SENTENCES_BEHIND : 1
LONGER_SI : 1
PLAN_WILL : 1
PHONE_MIN : 1
WAS_MOD : 1
AND_SPOKEN : 1
WANTED_TO : 1
IS_DONE : 1
TO_PHYSICIAN : 1
WHO_PICKING : 1
ALL_OUT : 1
SHE_ASKED : 1
SERVICE_COMMENT : 1
REQUESTING_AND : 1
KG_COMPLAINT : 1
VISIT_APPOINTMENT : 1
LEVEL_CARE : 1
STATES_ARE : 1
ALL_DOMAINS : 1
DURING_CHILDHOOD : 1
TRAUMA_RATED : 1
OS_REACT : 1
CONTACT_ADDICTIVE : 1
NOT_WITH : 1
MECHANISMS_WITHIN : 1
PROCEDURES_TYPE : 1
INDEPENDENT_LIVING : 1
MALE_HERE : 2
DURING_TELEPHONE : 1
NO_WEIGHT : 1
MODULE_BY : 1
AT_ASSURE : 1
IN_CALLED : 1
WITH_AT : 4
BY_ACTIVE : 5
MASS_YOU : 1
ANNUAL_EDUCATION : 1
OD_FOLLOW : 1
ADL_DURING : 1
MINUTES_ASSOCIATE : 1
CAME_TO : 1
FOR_CONTINUED : 1
ABOVE_OS : 1
HX_ORTHOPEDICS : 1
BRADEN_RISK : 1
PATIENT_HOME : 1
ER_RING : 1
THOSE_WOULD : 1
WEANED_HIS : 1
ER_JEWELRY : 1
SIGNS_WITHIN : 1
REHABILITATION_VETERAN : 1
SKIN_HIP : 1
NORMAL_REST : 1
OF_BLOOD : 1
SAYS_THAT : 2
SSOME_PHARM : 1
THER_AND : 1
CONSCIOUSNESS_TIMES : 1
CHANGES_OS : 1
ER_ATTITUDE : 1
WERE_UNABLE : 1
RECONCILIATION_THERE : 1
WEIGHT_CLICK : 1
APPOINTED_PCP : 1
FROM_ENROLLED : 1
INVASIVE_PROCEDURES : 1
TO_ATTEND : 1
CARELINE_FRI : 1
MED_SEEKING : 1
IS_ONGOING : 1
HUDVASHNOTE_VOUCHER : 1
SOCIAL_MARRIED : 1
SCHEDULED_JOINT : 1
UNITS_RANGE : 1
OF_INFORMATION : 1
DOSE_WEDNES : 1
CONVINCE_NEC : 1
VETS_IN : 1
FIVE_FOOD : 1
CARE_SELF : 1
EXPRESSED_DIFFICULTY : 1
YOU_FEELING : 1
DEPENDENCE_DISORDER : 1
WAS_BACK : 1
OF_PARKINSONIAN : 1
PHONE_NUMBER : 3
IS_FOLLOWED : 1
NO_NURSING : 1
PAST_HANDOUT : 1
COMPLAINTS_ANY : 1
DOCTOR_LISTENED : 1
CLINICAL_REMINDER : 2
MEDS_REPORTS : 1
FAMILY_RECOVERY : 1
YEAR_EMERGENCY : 1
TO_PM : 1
PASTORAL_CARE : 1
OF_HOURS : 1
DIZZINESS_PROBLEMS : 1
DON_BEEN : 1
HA_REPORTS : 1
HIS_LEGS : 1
JUN_ORAL : 1
THAT_ARE : 1
RATED_DISABILITIES : 1
PATIENT_DRINK : 1
HEALTH_OBTAINED : 1
GONE_TO : 2
GROUP_TO : 1
DENTAL_ORAL : 2
COMMENT_RATE : 1
PRODUCTS_NO : 1
NEXT_SERVED : 1
WEDNES_MG : 1
STATE_MEDICATIONS : 1
WHEN_MD : 1
ICDCM_ICDCM : 2
VIA_RESTING : 1
BORDER_OF : 1
POSSIBLE_FOR : 1
WE_PROCEED : 1
SIGNIFICANTLY_TEMPERATURE : 1
SLOWLY_REACHED : 1
THAT_ON : 1
BOWEL_ELIMINATION : 3
RESIDENTS_ADMISSION : 1
SEVERAL_STATED : 1
GROIN_ARRIVED : 1
ACTIVE_PULSE : 2
TAKE_CAPSULE : 2
CONSTANTLY_FOR : 1
TO_CASE : 1
THIAMINE_MG : 1
DENIED_TREATMENT : 1
HE_OUTPATIENT : 1
PSG_MSLT : 1
FOR_HEPATITIS : 1
REQUESTING_PROVIDER : 1
CHRONIC_DEPRESSIVE : 1
ONSET_HIP : 1
WEEK_THEN : 1
PART_DISCHARGE : 1
BEING_OF : 1
IF_WAS : 1
DURING_SHY : 1
DANE_CBOC : 1
AND_INTERVAL : 1
IN_SPECIMEN : 1
MORE_CONFUSED : 1
NAME_FELLOW : 1
EITHER_OR : 2
BY_WED : 1
NOT_IDENTIFIED : 3
PERSON_NO : 1
FRED_LAB : 1
WAS_IN : 1
TRAVEL_OTHER : 1
RESPECTFULLY_HT : 1
AND_PHYSICAL : 2
WAS_GETTIGN : 1
DISTRESS_PAIN : 1
IN_EVENT : 1
ASK_DO : 1
VISIT_CHECK : 1
AGAIN_SHE : 1
PATIENT_TOPIC : 1
FOLLOWING_OFFERED : 1
HLIP_LOSS : 1
THAT_AS : 1
POST_CURRENTLY : 1
DRAINS_TUBES : 1
LEFT_WILL : 1
FOR_WAL : 1
TO_CHRONIC : 1
HARDEN_DANE : 1
IN_ANY : 1
PROBLEMS_REPORTS : 1
THE_SHE : 1
SOUTH_SUBURAN : 1
OF_INJURY : 1
NUMBER_HOURS : 1
HE_SIGNED : 1
TO_APPROPRIATE : 1
BOOTH_EVERY : 1
KNOW_SURE : 1
THE_LOOKED : 1
PSYCHOTHERAPY_THIS : 1
WRITTEN_CORRESPONDENCE : 1
THIS_VETERAN : 1
HAVE_ONETIME : 1
OS_SIZE : 1
CONSULTATION_NOW : 1
SWEATS_MI : 1
PER_MEDICINE : 1
ON_HOW : 1
OPTION_BECAUSE : 1
EVALUATION_CODE : 4
IV_MULTIAXIAL : 1
HE_JUST : 1
AGAIN_SEEN : 1
BLADDER_COMPLAINT : 1
ADMISSION_PATIENT : 1
SKILLS_CONTINUE : 1
USED_URQ : 1
ROUTINE_NUR : 1
THE_OPPORTUNITY : 1
ASK_SCREEN : 1
COMPLAINTS_OF : 1
TAKING_FRIEND : 1
PATIENT_IDENTIFIES : 1
WLADENTAL_ET : 1
AND_AFFECT : 1
ALCOHOL_SCREENING : 1
AND_FLASHBACKS : 1
POSITION_AMBULATORY : 1
THE_FIRE : 1
THE_HAVE : 1
RESIN_ONE : 3
VAMC_MOTOR : 1
WHEN_HAD : 1
EVALUATION_MANAGEMENT : 7
EXTRAPYRAMIDAL_STILL : 1
INSPECTED_BIOBURDEN : 1
CAPSULE_BY : 2
NOTE_THIS : 3
REQUIRED_TO : 1
PERSON_HIS : 1
HRS_MINS : 1
NOT_BE : 1
HOWEVER_IS : 1
TO_LIVE : 1
DO_HAVE : 2
NO_COLL : 1
ATTENDANCE_OFFERED : 1
MIRAPEX_PLAN : 1
PATIENT_SHOWED : 1
THE_FIND : 1
NURSING_NOTE : 8
NUR_ACCESS : 1
ANSWER_LEFT : 1
INFORMATION_WITH : 1
CAROLYN_MALE : 1
SERVICE_TO : 1
PROSTHETIC_YOU : 1
WINDOW_THE : 1
MANAGEMENT_OF : 1
DONOVAN_SOUTH : 1
AND_PATIENT : 2
THIS_REPORTS : 1
TO_SYMPTOMS : 1
PAIN_PREOP : 1
BEEN_FALL : 2
NO_SHOWED : 1
LAB_MED : 1
SIGNS_IMPROVED : 1
NURSING_HE : 1
PLT_EFFECTS : 1
OR_AFTER : 2
GROUPS_DESIGNED : 1
THE_DOES : 1
SAFE_STRUCTURED : 1
IF_FALL : 1
EXAMINATION_WEIGHT : 1
REHABILITATION_CENTER : 1
DM_INSULIN : 1
NEXT_IN : 1
FOLLOW_OR : 1
PAIN_PCE : 1
BASIS_TRANSFER : 1
YOU_TO : 1
WHO_WOULD : 1
HOME_ST : 1
MEDICATION_SEVERAL : 1
FOR_PROCEDURE : 1
TOILET_PROVIDED : 1
YES_COLORECTAL : 1
LEFT_WITH : 1
PATIENTS_RESIDENTS : 1
TRAINING_AIDS : 1
BRACELET_EARRING : 1
WORTH_AS : 1
SHAKY_THE : 1
FOR_LAST : 1
OFFERED_GROUP : 1
THIS_OPTION : 1
MEDICATIONS_SUPPLY : 1
OR_SPECIAL : 1
SUICIDAL_WITH : 1
VETS_ATTENTION : 1
MONTH_APPOINTMENT : 1
BR_AND : 1
HE_DRINKS : 1
RESTRAINTS_USE : 2
NORMAL_ETHNIC : 1
LAST_EXAMINATION : 1
ADDENDUM_WIDTH : 1
LAST_JOB : 1
DECLINED_BOWEL : 1
INFORMATION_PATIENT : 1
AIDS_MATERIAL : 1
DUE_TO : 1
FULLY_ALERT : 1
AFFECT_PLEASANT : 1
DATE_AND : 1
TROUBLED_SINCE : 1
OF_YOUR : 2
MINIMAL_CALL : 1
MAIL_BLIND : 1
DIFFICULT_HE : 1
FLOOR_PATIENT : 1
VA_DEC : 1
COALITION_FOR : 1
ADMISSION_NURSING : 1
SHAKE_WELL : 1
INDEPENDENT_RESPIRATION : 1
SIBLINGS_PT : 1
WITH_LET : 1
HIM_UP : 1
ANXIOUS_NMS : 1
SYMPTOMS_DURING : 1
FOR_SUPPORTIVE : 2
TO_UP : 1
TYPE_DISCHARGE : 1
PLACE_TIME : 1
FOR_REPLACEMENT : 1
FOR_SERVES : 1
KEPT_BY : 1
AC_INDIVIDUAL : 1
JUNE_WILL : 1
MIAMI_AT : 1
PT_THERAPY : 1
HOMICIDAL_IBUPROFEN : 1
YES_FLUIDS : 1
MEDICATION_AM : 1
IS_READY : 1
TWICE_DAILY : 1
ALERT_ZZPATIENT : 1
UNBELIEVABLE_WAKES : 1
ORIENTED_COOPERATIVE : 1
WITH_PLAN : 1
TIME_PHYSICIAN : 1
MATERIAL_POINT : 1
DATE_POSTTRAUM : 1
PT_GO : 1
DIPHENHYDRAMINE_CAP : 1
BE_PRECERTIFIED : 1
THE_IS : 2
PLASM_IDENTIFICATION : 1
ON_WAKES : 1
THE_TIME : 1
SLOWED_ASKING : 1
FOR_PATCH : 1
DIAGNOSIS_CARIES : 1
MANY_OF : 1
ANGER_DISCUSSED : 1
EXIT_NOTE : 1
ETTE_ANDRE : 1
TO_THAT : 2
FUNCTION_NO : 1
MEDIAL_BORDER : 1
VETERAN_FAMILY : 1
SITE_BY : 1
OVER_THE : 2
YEAR_PATIENT : 1
POLYARTHRALGIA_SEE : 1
STATUS_PHYSICIAN : 1
MINMAL_DIFFICULTY : 1
IN_FAIR : 1
EDUCATE_ON : 1
AT_REST : 1
PHYSICIAN_EVALUATION : 1
NOTE_PAIN : 1
CANE_ROUTES : 1
PROCESS_TRAINING : 1
AFFECT_RANGED : 1
WITH_QUESTIONS : 1
TREATMENTS_NEBULIZER : 1
ADDRESS_APT : 1
AT_AN : 1
ALLERGIES_ENTER : 1
LAST_VETERAN : 1
FLOOR_THE : 1
PATIENT_TALKED : 1
VASH_MORNING : 1
FATHER_GLAUC : 1
DISCUSSED_FOR : 1
SPOKE_WITH : 1
PATIENT_PROCEDURE : 1
PLAN_UPDATE : 1
STRATEGIES_DISTRACTING : 1
AND_EXAM : 1
NOT_WORKING : 1
CARE_ADL : 4
FAMILY_UNIT : 1
FOR_REEVALUATION : 1
BOUNDARIES_SEEKING : 1
FEELING_ABOUT : 1
TRANSPORTATION_DISCUSSED : 1
BY_BACK : 1
FRITTITTA_PG : 1
CARE_PARTNER : 1
PTSD_BORDERLINE : 1
NURSING_ER : 1
TO_STOMACH : 1
PRE_OP : 1
PLAN_CARE : 2
CAUSE_HEADACHE : 1
PROCEDURE_TO : 1
MANAGEMENT_AS : 1
SCREENING_ANATOMICAL : 1
DOMAINS_ASSESSED : 1
BE_IN : 3
ON_ALL : 1
OF_MHH : 1
LOCATIONS_OF : 1
ANTECUBITAL_CATH : 1
AND_SYMPTOMS : 1
SCREENING_TEST : 1
AND_OPERATE : 1
DEAR_ADDENDUM : 1
WANT_TO : 1
SIGNS_NIACINAMIDE : 1
SYMPTOMS_TROUBLED : 1
YEARS_FIRST : 1
HISTORY_OF : 4
WITH_DEPRESSED : 1
OF_IMPRESSION : 1
SATISFACTORY_NO : 1
OCCURRENCE_DYSPNEA : 1
DECISION_HER : 1
MIN_NEURO : 1
FOR_OXYGEN : 1
GLUCOMETER_PRECISIONXTRA : 1
ACETAMINOPHEN_TAB : 1
DEGREES_WITH : 1
THE_DISEASE : 1
BOTH_HE : 1
OF_RETURN : 1
TRP_PSYCHOTHERAPY : 1
FOREHEAD_EYEBROWS : 1
LIFE_EDUCATION : 1
FALL_PRECAUTIONS : 1
AND_ABOUT : 1
THE_DIVORCE : 1
ALL_IN : 1
WAS_DOING : 1
EXAM_SESSION : 1
CALLED_REPORT : 2
HOME_VISITS : 1
NOT_ASSISTANCE : 1
HOME_SINCE : 1
PHYSICIAN_ROOMED : 1
MEDICATION_CHANGES : 1
STATED_DONT : 1
QUESTIONS_WERE : 1
WANTED_MEET : 1
MALEATE_GOING : 1
PRIOR_REFUSAL : 1
THE_MORE : 1
FOREARM_AFTER : 1
CALL_FOR : 1
OF_VISIT : 1
STABLE_AND : 2
SAFELY_STABLE : 1
URINARY_FREQUENCY : 1
CLINIC_STAFF : 1
CODE_SUPPORT : 1
RISK_ASSESSMENT : 1
AMOUNT_CONSUMED : 2
RESULT_WILL : 1
DESIRE_USE : 1
GLAUC_PER : 1
EUTHYMIC_ACTIVE : 1
NOW_DURING : 1
BM_TOUR : 1
PAIN_GE : 1
REHABILITATION_DISCUSSED : 1
IV_BREATH : 1
ALERT_ORIENTED : 4
ANY_EXTINCTION : 1
GRAINS_NO : 1
LIVING_BATHROOM : 1
ME_NEW : 1
PLAYS_FEELING : 1
IN_NOTE : 1
DRUG_REHAB : 1
AS_CLIENTS : 1
AND_BE : 1
AMBULATORY_COMMENT : 1
TOMORROW_HE : 1
OMYELITIS_PERIPHERAL : 1
HAS_AT : 1
YES_DEVELOP : 1
TYPE_QUESTIONS : 1
BE_PASSING : 1
PRESSURE_ULCER : 1
NOT_SIX : 1
PHYSICIAN_NOAH : 1
HT_CM : 2
CARE_SKILLS : 1
ELIGIBILITY_CONNECTED : 1
GOING_WHO : 1
PARENT_LEFT : 1
AGREEABLE_WITH : 1
BE_CONTACT : 1
ROOM_FOR : 1
CUFF_LABRAL : 1
COMMANDS_HEART : 1
ANSWERED_NKA : 2
MOTHER_LIKE : 1
FOLLOWS_WITH : 1
HIP_PAIN : 1
NECESSARY_STEPS : 1
IN_USE : 2
SUPPORT_AS : 1
ADVERSE_NO : 2
ALSO_THROUGH : 1
TESTING_ABSTINENCE : 1
BREATH_PLEASE : 1
CM_CONFERENCE : 1
HOMICIDAL_IDEATIONS : 1
ORGANIZED_DISPLAYING : 1
MRI_RAD : 1
PROCESS_ALSO : 1
APPOINTMENT_TIME : 1
NEW_WAS : 1
FLU_VACCINE : 1
IN_BP : 1
SULLIVAN_SCHEDULED : 1
NOTE_VISIT : 1
BOTHERED_FOR : 1
THE_DIABETES : 1
CLINIC_MYOPIA : 1
CONTINENT_PERSONAL : 1
RECEIEVE_MONTH : 1
CITALOPRAM_HYDROBROMIDE : 1
RETURN_FROM : 1
LCSW_ATTENDANCE : 1
NOTE_NO : 2
SCREENED_THE : 1
THE_INFORMED : 1
NEEDS_AND : 1
IT_PROPER : 1
MODERAT_VELOSITY : 1
AND_IT : 2
INFORMATION_CLINIC : 1
PATIENT_NURSING : 1
THEN_UNTIL : 1
CODE_RECOVERY : 1
OUT_THE : 1
PARENT_DIAGNOSIS : 1
TO_ASK : 2
CLOZARIL_LAB : 1
AS_NUR : 1
TAKING_TRAMADOL : 1
APPT_HE : 1
ON_FIRE : 1
SENIOR_ADDENDUM : 1
POSITIVE_PHENOBARBITAL : 1
FELLOW_SUFIYAN : 1
MRI_PAIN : 1
PHARMACY_REVIEW : 1
NA_SYNTHROID : 1
ALL_GOOD : 1
APPOINTED_HARDEN : 1
BATHROOM_USED : 1
NANCY_NO : 1
VISIT_JUN : 1
CARE_HOME : 1
CONTINUES_HAVE : 1
ADJUSMENT_OF : 1
DESATURATION_TEST : 1
OF_IDEATION : 1
PACK_CIG : 1
GRANDE_MH : 1
LIMITED_PING : 1
EVALUATION_ATTENDED : 1
HEMAGLOBIN_INDIVIDUAL : 1
PATIENT_NAME : 1
SAID_MR : 1
FEE_BASIS : 1
NUMBER_MANAGEMENT : 1
VA_MON : 1
NOTE_PT : 1
PAJAMAS_IS : 1
RESULTS_WITH : 1
NORMAL_ACTIVITY : 1
PRIOR_YOUR : 1
DID_NOT : 5
ASK_WAS : 1
BEING_WEANED : 1
COUMADIN_MG : 1
THE_PASTVERY : 1
PATIENT_REGARDING : 2
BRIEF_NOTE : 1
VISTA_WITH : 1
AND_FOUND : 1
OD_CORTICAL : 1
SURVEILLANCE_ASSESSMENT : 1
SHOWER_ZZECF : 1
THUR_ALLERGIES : 1
POX_BUT : 1
NMS_OF : 1
HAVE_IN : 1
NEWS_AND : 1
PROCEED_WITH : 1
STOOL_CA : 1
PLEASE_CBC : 1
WILL_KILL : 1
BED_ALL : 1
TO_GOOD : 1
OF_TRAMADOL : 1
FAMILY_MEMBER : 1
ON_FLOOR : 1
POSTTRAUMATIC_STRESS : 2
BED_IN : 2
STOOL_NOT : 1
TEMP_OTHER : 1
APPROPRIATE_NO : 1
ONE_PRIOR : 1
REGARDING_THE : 1
TO_WRITER : 1
SWELLING_EVALUATION : 1
IMPRESSION_EXTRAPYRAMIDAL : 1
THE_ABILITY : 1
MANAGEMENT_SUCH : 1
REST_IMMOBILE : 1
AMBIEN_WORK : 1
DIRECTIVE_THIS : 1
UP_CURRENTLY : 1
THE_MAINTENANCE : 1
MEDICINE_CLINIC : 1
PAIN_OTHER : 1
PAIN_BEGINS : 1
WINDOW_AT : 1
NAME_UNITS : 1
DISSABIL_RATED : 1
WITH_MEMBER : 1
MEDICATION_OR : 1
IT_ALSO : 1
HISTORY_SUSPECTED : 1
RAPD_UNDILATED : 1
BE_HERE : 1
BE_ABLE : 1
WILL_DISCUSS : 1
MADE_FINDING : 1
SAME_SURGERY : 1
PATIENT_IDENTIFICATION : 2
WITH_ACTIVITIES : 1
NURSING_OUTPT : 1
CONNECTED_VA : 1
STAY_ON : 1
NO_RISK : 1
MADE_DECISION : 1
MINUTE_HOME : 1
ALSO_THAN : 1
DEMONSTRATE_ABILITY : 1
PROBLEMS_PROTECTORS : 1
SIZE_NUR : 1
ACCURATE_ARMBAND : 2
RECEIVED_PER : 1
HAS_CONSULTS : 1
TREATED_THE : 1
SITE_SATISFACTORY : 1
TWICE_NEEDED : 1
CHANGED_PATIENTS : 1
SELF_BRC : 1
IDEATION_ADVANCE : 1
WRITER_PTSD : 1
HOWEVER_THE : 1
LIMITATIONS_MG : 1
RIGHT_ANTECUBITAL : 1
AND_HOPELESSNESS : 1
SISTER_AND : 1
HE_WANTS : 2
TREATMENT_UNTIL : 1
HAVE_RECONCILED : 1
THANK_AREA : 1
CARE_FAMILY : 1
IN_HOURS : 1
SYMPTOM_COMMENT : 1
RECHECKED_PATIENT : 1
ESTABLISHED_RELIGIOUS : 1
BEEN_REPORTED : 2
NAUSEA_VOMITING : 1
NO_NAUSEA : 1
OPTIMISTIC_SINCE : 1
CHECK_HIS : 1
HUD_THIS : 1
COIN_PULMONARY : 1
TO_STAY : 1
TRANSF_FOR : 1
DATE_NOVEMBER : 1
LIST_MEDICATION : 1
OF_QUAD : 1
REGARDING_MESSAGE : 1
CALLS_PPD : 1
INDIVIDUAL_COUNSELING : 1
PATIENT_HAS : 8
GOAL_IS : 1
PROSTATE_RECEIVED : 1
FOR_HOURS : 1
ACTIVE_REMOVE : 1
FOR_SPASMS : 1
LAWN_AND : 1
PATIENT_BY : 1
GIVEN_RIGHT : 1
OTHER_UNSPECIFIED : 2
SUCTIONING_COMMENT : 1
DRINKS_PHYSICIAN : 2
FOR_HOUSEBOUND : 1
FOR_WBC : 1
CURRENT_SUICIDAL : 1
PRIOR_RETURN : 1
LIST_THEIR : 1
HCL_MG : 1
BOTH_PHYSICALLY : 1
NO_CARE : 1
OF_FOR : 1
EDUCATION_AXIS : 1
CURRENT_PAIN : 1
FACTORS_HEPATITIS : 1
ANGER_ARE : 1
OUTPATIENT_NOTE : 1
THINGS_BEEN : 1
WITH_CONFLICTING : 1
TREATMENT_VETERAN : 1
POSSIBLE_ON : 1
EX_OF : 1
BEEN_TREATED : 1
COMPLAINT_MESSAGE : 1
RESULTS_PROVIDER : 1
HAS_NO : 2
PENDING_MEDS : 1
UP_HYPERLIPEDEMIA : 1
PAIN_TRAVEL : 1
LOWER_OL : 1
FOR_SAME : 1
WK_TRANSFERRING : 1
COPY_HIS : 1
OF_UNPROTECTED : 1
WAIT_LIST : 1
TRANSF_REASON : 1
OF_CHRYSHANT : 1
CASA_GRANDE : 1
HEALTH_FOR : 1
PTAGREED_PRUNE : 1
ADJUSTING_HIS : 1
DAYTON_TELE : 1
FOUR_TIMES : 1
AN_WITH : 1
PHYSICALLY_ADDENDUM : 1
FLUIDS_WERE : 1
COMMENT_SOCIAL : 1
AMBULATORY_RESPIRATION : 1
BY_CAROLYN : 1
DETERIORATION_TO : 1
ORAL_SURGERY : 1
REDUNDANT_AND : 1
CELEBRATING_IN : 1
PLEASE_NEUROLOGY : 1
TO_THERAPY : 1
BED_QUICKLY : 1
ATTENDED_GOAL : 1
BE_YEAR : 1
THE_NOTE : 1
WHICH_USUALLY : 1
QUESTION_VESICLE : 1
STRESS_MUNSHI : 1
CONSENT_PAIN : 1
COLOR_OXIMETRY : 1
HAVE_ANY : 1
HAS_EPIS : 1
PER_PROCEDURES : 1
OUT_SPC : 1
INJURY_DESCRIPTION : 1
WITHOUT_COMPLICATIONS : 1
ED_ASSESSMENT : 1
SCREENING_AUDITC : 1
PROVIDER_IDENTIFIED : 3
IV_PLAN : 1
LEAVE_AND : 1
CONCERN_IN : 1
LIKE_HIS : 1
ABILITY_TO : 3
GET_CALL : 1
BREAKFAST_FOOD : 2
CONTINENT_OTHER : 1
HISTORY_AND : 1
PROPER_WORKING : 1
FIRST_CAME : 1
SHAMPOO_BLADDER : 1
WAS_PREVIOUS : 1
OF_ANXIETY : 1
AMIGO_ACTION : 1
CALLED_REQUEST : 1
OD_FOR : 1
IS_CALM : 1
THERAPEUTIC_DESIGNED : 1
MMHG_QUESTIONS : 1
SEEN_EVALUATED : 1
TRANSFERRING_HYDROCELECTOMY : 1
ANKLE_MOTHER : 1
PNEUMONIA_IN : 1
WITH_AFFECT : 1
BY_IMURA : 1
COMPUTER_BP : 1
PRECAUTIONS_ON : 1
PTSD_GROUP : 1
THEY_BEEN : 1
HAD_WEEKEND : 1
REST_URINE : 1
SIGHT_PROGNOSIS : 1
ASSURE_SHE : 1
FOR_FOLLOWUP : 1
MEDICATION_INFORMATION : 1
FUNCTIONAL_TRANSPORTATION : 1
THE_INFLUENZA : 2
LIST_HOWEVER : 1
PARTIAL_PACK : 1
DEFINED_INARNP : 1
SKILLS_ROUTES : 1
LOST_HIS : 1
GRATEFUL_FOR : 1
DOESNT_ME : 1
AS_EITHER : 1
WAS_AT : 1
THE_VOLUME : 1
SCHOOL_MON : 1
TREATMENT_CARE : 1
PTSD_REDUCTION : 1
HOURS_CALL : 1
INTENSIVE_TREATMENT : 1
USE_THERE : 1
RESULTS_THE : 1
REPORTS_LONG : 1
EVALUATION_PRESENTS : 2
PAIN_DO : 1
VISITS_TO : 1
FOOD_MILK : 1
URINARY_INFECTION : 1
SERVICE_ADDENDUM : 1
VETERAN_INSTRUCTED : 1
USED_TOILET : 2
MEDICATION_NOTE : 2
TO_BEING : 1
SHOULD_HAVE : 1
HIS_NARCOTIC : 1
PATIENTS_THESE : 1
REPORTED_REPORTED : 1
VISIT_FACIAL : 1
ONE_GERD : 1
BEGINS_SYND : 1
TO_PLA : 1
VENLAFAXINE_TES : 1
THE_CALLED : 2
DOSE_TO : 1
WILL_UP : 1
THE_SEE : 1
PATIENT_HE : 2
AXIS_DSM : 1
SHOWS_REPEAT : 1
STILL_IS : 1
SHE_IN : 1
CONCERNS_PAIN : 1
USED_IDENTIFIED : 2
ANYTHING_UP : 1
CALLED_TO : 3
PT_OF : 1
TRANSFER_WILL : 1
FALL_THE : 2
HAS_GONE : 1
HEP_LOCK : 1
DOSE_ROUTE : 1
EFFECTIVE_RIGHTS : 1
ANOTHER_LOSS : 1
HAD_IN : 1
CONSENT_AND : 1
TRIMETH_MG : 2
DONE_BOVIE : 1
FOR_RELIEF : 1
MADE_REITERATED : 1
HEALTH_PROFESSIONAL : 1
COUNSELING_MEDICATIONS : 1
MOXIFLOXACIN_PER : 1
THEY_TEACHING : 1
HOME_ON : 1
DRINKS_LOT : 1
VET_NO : 1
PRIOR_TO : 5
CONTACT_RADIATION : 2
PATIENT_PRESENTS : 3
WITH_RESIDENT : 1
DISORDER_NOS : 1
HIS_HIM : 1
IS_BRC : 1
IS_PHONE : 1
MHICM_TO : 1
TO_LUMBAR : 1
MEDICATION_HAVE : 1
OR_AFRICAN : 1
ON_INSULIN : 1
HISTORY_STD : 1
PT_IS : 4
SELFADJUSTING_MEDICATIONS : 1
AS_WALKIN : 1
AXIS_ETOH : 1
CURRENTLY_FLUOXETINE : 1
RELIEF_ED : 1
RX_WHEN : 1
HEALTH_PL : 1
CED_DIET : 1
DOWN_RECOMMENDATIONS : 1
IN_PLAYS : 1
IS_REACTIVE : 1
PERFORM_STRENUOUS : 1
FOR_ASSOCIATED : 1
ON_GI : 1
BE_EXTRA : 1
TO_IT : 3
DIAGNOSIS_OF : 1
TALK_ABOUT : 2
HERBAL_OTC : 1
NEURODE_CONDITION : 1
SUPERVISOR_PHYSICIAN : 1
COOPERATIVE_MOOD : 1
TO_HAND : 1
IF_FAIL : 1
AC_THERAPY : 1
AXIS_PERIPHERAL : 1
PATPU_PATIENT : 1
MH_INDIVIDUAL : 1
TIMES_AS : 1
ARE_OBTAINE : 1
HYDROX_SUSP : 1
GROUP_SURVEILLANCE : 1
ALTHOUGH_RESIDENT : 1
ILISOME_MEDICATIONS : 1
WHILE_INPATIENT : 1
ALS_AS : 1
ISLAND_DRESSING : 1
PT_REACHED : 1
DAILY_IS : 1
TO_TYPE : 3
IS_UNSTABLE : 1
BATH_HIP : 1
OBSERVED_LAUGHING : 1
MENTAL_PHYSICIAN : 1
RECONCILED_NO : 1
TELL_ABOUT : 1
SCORE_STATUS : 1
MUST_BE : 3
WAS_MR : 1
FOR_RELATED : 1
SYMPTOMS_EAT : 1
INFLUENZA_VACCINATION : 1
EXPERIENCING_HOMICIDAL : 1
IN_POSITION : 2
BE_AFTER : 1
CONSENT_CHILDREN : 1
AND_WEARING : 1
PHARMACY_WINDOW : 1
IMMEDIATE_REPLACES : 1
AFTER_INJECTION : 1
MR_ADMITTED : 1
IMAGING_FEE : 1
TO_NEED : 1
YELLOW_EXTRA : 1
VELOSITY_FATHER : 1
LIMITED_NORMAL : 1
PHARMACY_AT : 1
SCHEDULED_FOR : 1
ORDERED_BY : 1
SIZE_REACT : 2
HEART_SPECIAL : 1
AWARE_THE : 1
PROGRA_MEDICATION : 1
REPORTED_BE : 1
HOPING_TO : 1
ALERT_SPENT : 1
MAY_HE : 1
FEEL_TO : 1
WITH_VETERAN : 1
DISEASE_CONCEPT : 1
HIS_RECORDS : 1
BED_MOBILITY : 1
QUICKLY_STAFF : 1
REPORTED_DIAGNOSIS : 1
AND_INFLUENZA : 1
PLACED_PSYCHIATRIC : 1
AND_STRONGER : 1
IRRITABILITY_UP : 1
STARTED_PROVIDE : 1
RIGHT_ON : 1
SEE_COMPUTER : 1
MR_DATE : 1
DIRECTIONS_RE : 1
THE_FAMILY : 2
ANKLE_LOOKED : 1
TEMPERATURE_MR : 1
STRATEGIES_MANAGING : 1
OK_DENIED : 1
ANTERIOR_RIGHT : 1
NONE_NO : 1
ON_REPORTS : 1
TITLE_MAS : 1
PAST_UNSAFE : 1
EDUCATION_NURSING : 1
FLASHBACKS_ANXIOUS : 1
MAY_INCREASE : 1
CLICK_ON : 2
WAS_VETERANS : 1
FELLOW_CHAUDHRY : 1
HIS_APPETITE : 1
PRIVILEGES_ADL : 1
TO_MOVE : 2
SCREENING_ARE : 1
GOING_TAKE : 1
MH_DM : 1
AND_STABILIZATION : 1
GE_NURSING : 1
ASSESSMENT_PREOP : 1
OR_DIRECTIVES : 1
BAND_ON : 1
DROPPED_MANY : 1
OSAC_INDIVIDUAL : 1
DRIVING_AT : 1
IN_COMPTON : 1
UNBELIEVABLE_UP : 1
DIDACTIC_AND : 1
TO_REMAIN : 1
PLEASE_ME : 1
FINDING_ING : 1
HOURS_INAPPROPRIATE : 1
ABUSE_SOME : 1
II_DEFERRED : 1
BROUGHT_TO : 1
GROUP_REFRAMED : 1
THIS_EVERY : 1
AXIS_OMYELITIS : 1
THE_CORONERS : 1
YOU_OFTEN : 1
CAN_BE : 1
YOU_CLOSE : 1
GROUPS_GRAINS : 1
HUDVASHNOTE_PLEASE : 1
AND_THIS : 1
THE_VACCINATION : 1
TO_REDUNDANT : 1
CALLS_BOWEL : 1
MOOD_AND : 1
VA_THIS : 1
BY_TREATMENT : 1
AN_DIPLOPIA : 1
CONTINENT_PHARMACY : 1
LAST_ONGOING : 1
TAKING_WHO : 1
HE_STATES : 1
IF_PAIN : 2
PAST_YEAR : 2
URINE_COLOR : 4
DISCUSS_RECOVERY : 1
AGE_MG : 1
REPORT_PHONE : 1
DECIDED_CONSERVATIVE : 1
BEFORE_PHOTOS : 1
STARTED_ROCEPHIN : 1
PENIS_INFORMED : 1
WT_REDUCTION : 1
DISORDER_PT : 1
RESPECTFUL_NUMBER : 1
HOME_OXYGEN : 1
ENJOYS_IS : 1
UNSPECIFIED_ALBUTEROL : 1
LAST_FOR : 2
LIKE_ANKLE : 1
HEALTH_PROVIDER : 1
SERVICE_NO : 1
AND_BEHAVIOR : 1
HAVE_CONTAINING : 1
VETERAN_VOICES : 1
REPORTS_HX : 1
SUBURAN_FOR : 1
OL_WAS : 1
CARPET_BANISTER : 1
BY_EXAMINING : 1
NURSE_NOTE : 1
HIS_STRONGER : 1
LOCATION_RESIDENT : 1
GROUP_IN : 1
CORONERS_OFFICE : 1
ADMISSION_HISTORY : 1
IMMEDIATELY_PRIOR : 1
MEDICATIONS_SUPPLIES : 1
HIS_ON : 3
REMINDER_FROM : 1
FROM_VA : 1
MARRIED_VETERAN : 1
EC_CAP : 1
CARPET_IN : 1
HIS_EYE : 2
VISITS_SUPPORTIVE : 1
EVENT_THOSE : 1
FROM_MIAMI : 2
THIS_SHE : 1
THIS_TO : 2
STARTED_HAND : 1
AND_DISTURBANCES : 1
THE_CONSISTENCY : 1
PAGE_ALT : 1
IF_THE : 1
CURRENTLY_WORKING : 1
OPENINGS_LATER : 1
HOW_CAN : 1
TEAM_SITTER : 1
SCORE_SMOKER : 1
FOR_FENTANYL : 1
CONCEPT_OF : 1
REPORTS_HAVE : 1
ROUTE_NA : 1
SINCE_EYE : 1
ASKED_ABOUT : 2
RECEIVING_MEDICATION : 1
DIAGNOSIS_MST : 1
RESTRICTED_ABILITY : 1
HIS_HE : 2
MARITAL_STATUS : 1
USUALLY_ENJOYS : 1
CARE_SHAVE : 1
SOME_SURROGATE : 1
DECLINED_INFLUENZA : 1
MOBILITY_TRAINING : 1
ADDICTIVE_DISORDER : 1
YES_ADMITTING : 1
HAVE_PATCHES : 1
HOURS_SCAN : 1
ONLY_MINIMAL : 1
REEVALUATION_HE : 1
ITIS_OP : 1
NEEDS_PAIN : 1
SWER_CONTACT : 1
HAD_RECENTLY : 1
DEPENDENCE_ETOH : 1
LAST_SEEN : 1
PERSONALITY_TRAITS : 1
PAST_FAMILY : 1
NAIL_ORAL : 1
FOR_DISCHARGE : 1
HAVE_WITH : 1
PT_ED : 1
CALLERS_IF : 1
REVIEW_IF : 1
PATTERN_LEGAL : 1
KNOWS_OWN : 1
IT_CONCERN : 1
VETERAN_FEELING : 1
STOP_THIS : 2
REPLACEMENT_SURGERY : 1
REPORT_MONITORING : 1
HER_ATTENDED : 1
THE_COMMUNICATION : 1
HOWEVER_VETERAN : 1
SVI_HAS : 1
MANAGING_MORE : 1
FRI_HE : 1
CRITERIA_FOR : 3
NOSHOW_SHOT : 1
STILL_IMPROVED : 1
OF_HAVING : 1
HOSPITAL_TREATMENT : 1
MIAMI_APPT : 1
HOBBIES_BOWEL : 1
ABLE_EAT : 1
MONTHS_WHICH : 1
DAILY_INSULIN : 1
IS_ADVISED : 1
FUTURE_TO : 1
ON_EXTENDED : 1
DECLINED_ELIMINATION : 1
DID_CANCEL : 1
NOT_INJURY : 1
YOUR_SKIN : 1
OD_SINCE : 1
SSN_DOB : 1
MANY_PEOPLE : 1
SUICIDE_RISK : 1
MAY_TH : 1
NOTE_AGO : 1
RESULTS_PER : 1
CURRENTLY_WITHIN : 1
DATE_HOME : 1
FOR_UP : 1
MOOD_EUTHYMIC : 2
REPOR_HYPERLIPIDEMIA : 1
VETERAN_ON : 1
DENIES_HERBAL : 1
PT_REQUESTED : 1
ETOH_DEPENDENCE : 1
THOUGHTS_NOT : 1
ML_UNEVENTFUL : 1
SKILLS_MINUTES : 1
HAVE_YOU : 2
ABOVE_PER : 1
SWS_FOLLOW : 1
NSC_VA : 1
INTO_VISTA : 1
FIELD_AND : 1
LET_NEAR : 1
SEEN_MINUTE : 1
NOW_HAVING : 1
DURATION_OF : 1
TO_CITY : 1
FROM_FOLLOWUP : 1
MEDICATION_WAS : 2
OF_RNS : 1
MG_DAILY : 2
AURORA_FEE : 1
OTHER_MIN : 1
FELLOW_WITH : 1
INPATIENT_WITHIN : 1
KUSHWAHA_NEELIMA : 1
NOT_FOR : 3
HE_ACTIVE : 1
HELP_ME : 1
JUNE_HE : 2
EDUCATION_BRADEN : 1
AFTERNOON_NOTIFIED : 1
TOTAL_OL : 1
PULSE_OXIMETRY : 2
CLIENTS_HIM : 1
ACTION_NURSE : 1
CARIES_DENTINE : 1
NOTIFICATION_TREATMENT : 1
PROGRAM_HARBOR : 1
TO_YES : 1
MEDICAL_HISTORY : 3
VETS_COMPTON : 1
TO_POSSIBLE : 1
IS_HT : 1
PLACED_INTERDISCIPLINARY : 1
AND_HAVE : 2
VITALS_OF : 1
BEHAVIORAL_RESTRAINT : 1
GRATEFUL_THIS : 1
NOTIFIED_BY : 1
DIRECTIVE_SCREENING : 1
OR_FOR : 2
ADDENDUM_FINANCIAL : 1
SCORE_SIBLINGS : 1
NORMAL_MILDLY : 1
ATTEMPTED_POSES : 1
NOTE_PER : 1
WITH_CHANGES : 1
CARE_CARE : 1
OU_CARE : 1
OR_RESIN : 1
COUNTER_MEDICATIONS : 1
APPOINTMENT_BUT : 1
VET_IN : 1
NUTRITION_LAB : 1
ENDORSE_SUICIDAL : 1
PM_PATCHES : 1
BECAUSE_WAS : 1
ED_NEWS : 1
SYMPTOMS_CED : 1
BY_CHRISTENSEN : 1
WEDNES_TABLETS : 1
FOR_SAFE : 1
SOCIAL_CONSULT : 1
RISK_PREOP : 1
IS_THIS : 1
UPDATE_SINGLEPOINT : 1
RING_BRACELET : 1
SPENT_SOME : 1
HANGOVER_NO : 1
BENEFITS_OF : 1
YOU_DRINKING : 1
DISORDER_PROBLEM : 1
NONE_COLLECTION : 1
TO_FEEDBACK : 1
VISION_OD : 1
COMMENTS_THE : 1
TO_GOING : 1
TOMBAZZI_SUFIYAN : 1
APPOINTMENT_OR : 1
DEPRESSION_CHIEF : 1
EXIT_LEVOTHYROXINE : 1
THERE_IS : 2
PROBLEMS_PERSONAL : 1
MOVEMENTS_OF : 1
SHIFT_PATIENT : 10
MORPHINE_THE : 1
ADJUSTING_TO : 1
HYPERGLYCEMIA_ICDCM : 1
PTSD_PATIENT : 1
TALK_DECISION : 1
ASSISTANCE_REQUIRES : 1
CALL_FROM : 2
NEGATIVISM_IN : 1
MAKE_NEEDS : 1
HIS_ROOM : 1
OUT_BED : 1
MAS_SCHEDULING : 1
BED_LEANING : 1
THIS_ACTIVE : 1
CAME_THE : 1
RELATED_HIS : 2
STYLES_LEARNED : 1
FOR_FOR : 2
PREVIOUS_RESPIRATIONS : 1
ATTENTION_APPEARED : 1
FROM_PATIENT : 2
DM_MEDICATION : 1
GENITOURINARY_OTHER : 1
CRITERIA_HOUSEBOUND : 1
KEPT_HIS : 1
HAS_INITIAL : 1
TOMORROW_TO : 1
RESPIRATIONS_IMED : 1
APPOINTMENT_TRAZODONE : 1
NAIL_CARE : 1
FASTING_OR : 1
PERIPHERAL_NEUROPATHY : 1
COMPLAINT_PATIENT : 1
PHYSICIAN_APPROPRIATELY : 1
YES_PER : 1
ER_WIFE : 1
WHEN_POSSIBLE : 1
DESCRIPTION_TREATMENT : 1
TO_HIS : 8
SC_DIAGNOSIS : 1
FLU_PRIOR : 1
NEEDED_VETERAN : 1
WITH_DM : 1
MEDICATIONS_OVER : 1
WITH_CURRENTLY : 1
MEET_WITH : 1
HIS_SCHEDULED : 1
FOUND_TRANSPORT : 1
EXAMINATION_LB : 1
AT_THIS : 1
PAIN_LOCATION : 1
ASSOCIATED_ACTIVITIES : 1
TAKING_THEM : 1
HIS_COPING : 1
PT_NOT : 1
PATIENT_WEIGHT : 1
NAIL_PERMINANTLY : 1
URINE_YELLOW : 3
IN_INTENSIVE : 1
ON_PSYCHIATRIC : 1
RESULT_PATIENT : 1
ON_CANE : 1
CALL_IN : 2
HAVE_ON : 1
WEARING_HOSPITAL : 1
SELF_OTHERS : 1
OR_IN : 1
HARBOR_IN : 1
THERAPY_MEDICATION : 1
WITH_REQUEST : 1
VISIT_HIP : 1
OCT_PATIENT : 2
ASKING_PROVIDERS : 1
REQD_EVALUATION : 1
MG_QUETIAPINE : 1
HELP_WANT : 1
TREATMENT_GOALS : 1
OR_LATE : 1
DRUGS_HERBAL : 1
HE_WAS : 12
IDEATION_SECONDARY : 1
PATIENT_DENIES : 1
AND_SINCE : 1
SWELLIN_YES : 1
DENIED_ANY : 4
EAT_WELL : 1
FAMILY_IS : 1
SCREENING_QUESTIONS : 1
INSTABILITY_TKA : 1
REPORTS_THAT : 8
DRESSING_SOUNDS : 1
ASSESSMENT_REST : 1
MAY_CONCERN : 1
OF_BP : 1
OVER_NURSE : 1
ICDCM_ALLERGY : 1
ANDRE_THE : 1
GET_NEWS : 1
OUTPATIENT_STATUS : 1
RECALL_WITHIN : 1
THE_PATIENTS : 2
AST_AXIS : 1
FOR_ED : 1
TO_WED : 1
PROBLEM_NEEDS : 1
OTHER_MEDICATIONS : 1
COLOR_HIS : 1
AND_DOES : 1
NOTE_MENTAL : 1
ADDENDUM_OR : 1
CAT_IV : 1
EFFECTS_REPOR : 1
BIPOLAR_DISORDER : 2
SMILING_BROUGHT : 1
CLEANING_MACHINE : 1
DIABETIC_LOCAL : 1
OF_KNEE : 1
NEEDED_INFECTION : 1
FOR_HIS : 4
IS_ADDENDUM : 1
NOT_APPLICABLE : 2
OBTAINED_AM : 1
VOLUME_HYPOXEMIA : 1
OU_PATIENT : 1
CONGESTION_DOES : 1
VETERAN_TO : 4
DRESSING_BREATH : 1
BIRCH_REPORTS : 1
COLOR_SAFE : 1
STATUS_ORAL : 1
THE_DESIRED : 1
EVIDENCE_VISUAL : 1
AS_OTHER : 2
NOT_ATTEND : 1
EMPLOYEE_POST : 1
CED_THAT : 1
WAS_SETTING : 1
THERAPY_CARE : 2
AND_VOLLEYBALL : 1
FISH_OIL : 1
YEARS_IT : 1
THE_PHYSICIAN : 1
WFL_IF : 1
EVERY_HPI : 1
OTHERS_WHILE : 1
OR_DIRECTIONS : 1
DISORDER_DETERIORATION : 1
QUAD_EQUIPMENT : 1
PARTICIPATED_VERY : 1
THIS_CALL : 1
APPLICABLE_PATIENT : 1
RATED_DISSABIL : 1
APPOINTMENT_ASKING : 1
SWELLING_OR : 1
NEEDED_PATIENT : 1
NEXT_MONTH : 1
ON_PAIN : 2
NO_EVIDENCE : 2
HOLD_BEHAVIOR : 1
MOTOR_APPOINTMENT : 1
CAP_ONE : 2
ASKING_POX : 1
PROBLEM_IS : 1
THE_SKIN : 3
USE_RESTRAINTS : 1
PRESSURE_CONTACT : 1
BILL_RA : 1
CHANGES_BE : 1
THE_TOPIC : 1
RECOVERY_AS : 1
PART_TREATMENT : 1
STRUCTURED_ROUND : 1
ARTHRALGIA_PAIN : 1
ON_UNIT : 2
WILL_THIS : 1
NO_BAKER : 1
KNOW_IT : 1
OF_SUBSTANCE : 1
WAS_FIRST : 1
NOTE_FOR : 2
PERFORM_OF : 1
WAS_VETERAN : 1
EDUCATION_GIVEN : 1
PERIORBITAL_CHEEKS : 1
TABLET_THAT : 1
HERE_MANAGEMENT : 1
BY_HOSPITAL : 1
TO_DONE : 1
MI_NO : 1
DIRECTIONS_INTERVENTIONS : 1
AVAMC_HE : 1
ANXIETY_DISORDER : 1
OPTION_HE : 1
RIGHT_DELTOID : 1
LIVING_BE : 1
OBSERVED_NOT : 1
SHEET_BLINDNESS : 1
HEALTH_LOWER : 1
ANTIBIOTICS_ASSESS : 1
DIABETES_COLLABORATIVE : 1
THAT_SPECIFICALLY : 1
OLD_PATCH : 1
DOES_OCCUR : 1
DOWN_OMEPRAZOLE : 1
THE_PLANS : 1
LIFTING_OBJECT : 1
STATING_HE : 2
OTHER_COUNSELING : 2
MUNSHI_PT : 1
TO_CONTACT : 1
HISTORY_ADDENDUM : 1
NOT_DIABETIC : 1
NEEDED_DUAL : 1
MONITORING_ROUTINE : 1
SOFT_FOOD : 1
ANY_UNUSUAL : 1
HOMICIDAL_WITH : 1
DATE_LEISURE : 1
DTR_NOT : 1
NOTICED_PAIN : 1
SKIN_PATIENTS : 1
HANDOUTS_FROM : 1
ASSISTANCE_FOR : 3
THOUGHTS_OF : 1
ADL_PING : 1
HYPERLIPIDEMIA_GERD : 1
WAS_ADMITTED : 1
DEPRESSION_NEC : 1
PATCH_PROGRESS : 1
USE_SIGHTED : 1
MEETING_ETC : 1
SWS_WILL : 1
LEANING_FOR : 1
SY_DM : 1
FOR_WK : 1
LAB_MONITORING : 1
IN_PASTVERY : 1
FOOD_GROUPS : 1
PHYSICIAN_WALKIN : 1
PERSONAL_FRICTION : 1
FOR_CHRONIC : 1
SUPERVISOR_EN : 1
HISTORY_SIGNED : 1
REACTION_EITHER : 1
THERAPEUTIC_GROUPS : 1
PNEUMONIA_PREOP : 1
INDICATE_HE : 1
OUR_OF : 1
DENIES_AND : 1
VETERAN_RESTRICTED : 1
DEC_PATIENT : 1
OFTEN_YOU : 1
STAFF_NO : 1
MR_WAS : 2
RECOVERY_OSAC : 1
DURING_MORNING : 1
LEGS_SAYS : 1
NO_SWELLIN : 1
BOWEL_THIS : 2
SCROTAL_FOR : 1
CONFRONTATIONS_WITH : 1
TO_DAILY : 1
ZOLOFT_TABLET : 1
THE_COORDINATION : 1
SHY_OUTGOING : 1
DRINKS_CONTAINING : 1
FAMILY_RELAY : 1
BELOW_PATIENT : 1
NIGHT_EDUCATE : 1
PSA_YR : 1
PULMONARY_STABLE : 1
MAG_PATIENT : 1
BEHAVIOR_TO : 2
ELABORATE_PLAN : 1
PER_BELOW : 1
ANESTHETIST_REG : 1
AS_LOOKING : 1
LEBOARD_AND : 1
DURING_THE : 2
SEE_VISTA : 1
YEAR_MALE : 1
MOUTH_ACTIVE : 5
DISCUSSION_CONFRONTATIONS : 1
PATIENT_CALLED : 1
REPEAT_VERBALIZATION : 1
OPERATE_THE : 2
OTHER_CALLING : 1
AND_HERBALS : 1
TRANSFERRING_IMPAIRED : 1
HIS_LAUNDRY : 1
CHEEKS_INCLUDE : 1
ELIGIBILITY_FOR : 1
BROUGHT_ER : 1
SPECIAL_ARE : 1
INFORMATION_REQUEST : 1
FOR_TRANSFER : 2
LIVING_OF : 1
DISCUSSED_DEFINITION : 1
WITH_FOR : 1
WBC_WRITTEN : 1
DISCHARGE_RECONCILIATION : 1
TEST_AUDITC : 1
ACCESS_NOTE : 1
BRC_VISUAL : 1
AN_ENTRY : 1
BY_THE : 4
CARIES_EXT : 1
WE_ABLE : 1
SINUS_AND : 1
HE_DRUG : 1
NO_LUNGS : 1
CANCEL_DID : 1
DIFFICULTY_WITH : 2
AGO_WAS : 1
MEANINGFUL_TO : 1
FOR_PATIENT : 1
SCALP_ADVANCE : 1
AND_BIPOLAR : 1
READY_BE : 1
LOOKING_AT : 1
PHYSICIAN_EN : 1
NO_APPOINTMENT : 1
IDEA_HE : 1
MINUTES_IDENTIFIED : 1
ALERT_PATIENTS : 1
SCREEN_PATIENT : 1
QUESTIONS_NIGHT : 1
PROFESSIONAL_WOULD : 1
YOU_SKIN : 1
EXPECT_ARRIVE : 1
REQUESTING_FOR : 1
SPUTUM_EATING : 1
ON_COLLECTION : 1
TO_BRIGHT : 1
SCREEN_HE : 1
PAJAMAS_HE : 1
ASSISTANCE_ELIMINATION : 1
IS_ALSO : 2
ESTABLISHED_PREFERENCE : 1
EXTINCTION_AMOUNT : 1
PAST_TOPICAL : 1
HAS_NOTICED : 1
HARDEN_BRISTOL : 1
CL_OU : 1
WITH_ACP : 1
TEAM_MEETING : 1
ON_CLICK : 1
CARE_CBOC : 1
CHANGES_OU : 1
CONFRONTATIONS_OTHERS : 1
UP_FEELS : 1
PATIENT_DIFFICULTY : 1
PAIN_LEG : 1
DIAGNOSIS_PTSD : 1
AM_NO : 1
OF_TAKING : 1
PSYCHIATRY_ATTENDING : 1
THERAPY_WITH : 2
CONDITIONS_PATIENT : 1
SWEATS_EDUCATE : 1
PAIN_FOR : 1
MEDICAL_THERE : 1
ABOUT_PLACE : 1
REASON_ADMISSION : 1
FAIR_PT : 1
OR_PROVIDERS : 1
ETOH_ETOH : 1
AT_END : 1
NO_FACTORS : 1
VETERAN_ALTERED : 1
REPORTS_LIMITED : 1
IN_FOREARM : 1
SAYS_HE : 1
IS_WORSE : 1
SURROGATE_APPLICABLE : 1
REPORT_CONTACT : 1
LATE_NOTIFIED : 1
HE_SITTING : 1
THAN_TABLETS : 1
ROM_WFL : 1
APPOINTMENT_HAS : 1
PATCH_SHOULD : 1
THERAPIST_WHAT : 1
HOME_MOTIVATED : 1
NMS_FIGHTING : 1
ADDENDUM_TOUCH : 1
PRESENT_TIMEOUT : 1
TAKEN_BACK : 1
INFECTION_OF : 1
YOUR_CHO : 1
YOU_ON : 1
INJECTION_REPORTS : 1
ABUSE_AND : 1
OF_CVA : 1
NOTE_ASSESSMENT : 1
HE_LIKE : 2
IMPRESSION_HIS : 1
SLOWLY_HIS : 1
FOOTWEAR_IF : 1
OR_BY : 1
ENCOURAGE_PROBLEM : 1
MIRAPEX_TO : 1
SPENT_TIME : 1
STAFF_REPORTED : 1
OF_KEYPAD : 1
FACT_THE : 1
NURSE_TRIAGE : 1
IS_MALE : 1
CONFLICTING_OF : 1
DESIRED_EVIDENCE : 1
BE_HAVING : 1
AGAIN_ADJUSMENT : 1
ACTIVE_OLD : 1
HIP_ANTERIOR : 1
WITHOUT_PROVIDERS : 1
RESPONSE_NO : 1
IDENTIFIED_MANAGEMENT : 1
SINGLEPOINT_HE : 1
DISCHARGE_DESATURATION : 1
THE_WHICH : 1
TO_WHOM : 1
COMPLAINT_IDEATION : 1
ASSESSMENT_ER : 1
WELL_AS : 2
PATIENT_INSTRUCTED : 1
RECEIVED_FROM : 1
AND_WITH : 5
PAIN_SCORE : 4
FACILITATOR_REALITY : 1
HOW_THE : 1
AFTER_ONE : 1
TO_ADMISSION : 1
HE_IDENTIFICATION : 1
NOT_PATIENT : 1
PLACE_NOT : 1
PATIENT_SCREENED : 1
THE_HAS : 5
SAFELY_HAS : 1
JOAN_IN : 1
NUMBER_ANATOMICAL : 1
HANDOUT_EQUIP : 1
WHEN_CAME : 1
GIVEN_PERSONAL : 1
DECISION_HE : 1
HIGHER_AVERAGES : 1
VISION_SIZE : 1
SHEET_ALERTING : 1
MG_EC : 1
YEAR_DEPT : 1
IN_OTHER : 1
TREATMENT_SETTING : 1
VET_CALLED : 1
TESTALGIA_LABS : 1
AT_PM : 2
FOR_IMMEDIATE : 1
AFFECT_NORMAL : 1
HAS_WORKING : 1
WE_WENT : 1
BACK_WILL : 1
BEFORE_AFTER : 1
SESSION_WITH : 1
TO_HAVE : 3
MHC_PROGRESS : 1
NO_EXPERIENCING : 1
NOT_EXPERIENCING : 1
REPORTS_HAD : 1
THROUGH_WRITTEN : 1
SURGERY_OFTEN : 1
MOVIES_INTERMITTENT : 1
FOR_BIOBURDEN : 1
MED_WENT : 1
PATIENTS_AGE : 1
SHOWS_APNEA : 1
PT_REQD : 1
PROJECTS_SOCIAL : 1
PM_TAKE : 1
DIABETIC_ASSESSMENT : 1
WHAT_DO : 1
DO_FEEL : 1
WITH_ANTI : 1
ROSUVASTATIN_ZOLOFT : 1
BEHIND_THE : 1
CM_ASSESSMENT : 1
MR_GOING : 1
NORMAL_IN : 1
USING_AND : 1
HEPATO_BY : 1
EYEBROWS_AREA : 1
MILDLY_CONSTRICTED : 2
MOTIVATED_LPM : 1
FOR_MHICM : 1
TEST_NAME : 1
EXERCISE_HEP : 1
RESPONSIBLE_HER : 1
RESPONSE_OTHER : 1
JOB_MH : 1
CONTAINING_DID : 1
YOU_BE : 1
POLPS_AND : 1
FOR_NOW : 1
FIBROIDS_RX : 1
BELONGINGS_SHEET : 1
OCCUR_AND : 1
ANSWER_SESSION : 1
KIMURA_ET : 1
EVENING_HE : 1
TO_TAKE : 2
CC_SOB : 1
QUESTIONS_ARE : 1
LONG_HOURS : 1
TO_TREATMENT : 1
UNIT_VETERAN : 1
HAVE_SOME : 1
TEXAS_TO : 1
RECONCILIATION_EXIT : 1
PLAN_REINFORCING : 1
OUTSTANDING_CONSULTS : 1
FIBROIDS_OPTICIAN : 1
FUNCTIONNG_MET : 1
AND_OTHERS : 1
AN_ERRONEOUS : 1
CBC_NO : 2
ARE_NOT : 1
CLINIC_VISIT : 1
PASTVERY_CC : 1
MON_FRI : 1
TWICE_EFFECTS : 1
AWAKE_ALERT : 1
LEGS_IMPROVED : 1
NOTE_RACE : 1
INFORMATION_BATHROOM : 1
REPORTED_HTN : 1
CAP_HEPLOCK : 1
PARK_HE : 1
SYNTHROID_MG : 1
GIVEN_IN : 1
SHE_WILL : 2
BEING_OFF : 1
INCLUDING_COURT : 1
PARTICIPATED_LENGTHY : 1
ALBUTEROL_MCG : 1
ORLOW_PAIN : 1
TO_SEE : 1
ASSISTANT_WHO : 1
THE_END : 1
NONVA_MG : 1
DID_YOU : 2
SKILLS_DIDACTIC : 1
OPHTH_NOTE : 1
MANAGER_DENIED : 1
TO_CASA : 1
LCSW_DEFERRED : 1
NO_ISSUES : 1
DISORDER_IDENTIFIED : 1
STAY_HOPING : 1
MODE_TRANSPORTATION : 1
STATUS_MARRIED : 2
NEUROPSYCHOLOGY_TESTING : 1
CONTACT_OUR : 1
PAIN_RADIATION : 1
MSW_COMMUNITY : 1
PRECAUTIONS_STATUS : 1
RELAPSE_SMOKING : 1
BATTLING_SHE : 1
BRN_ER : 1
EAT_OR : 1
OCT_HYDROBROMIDE : 1
WORK_NOTE : 2
PATIENT_EXPRESSED : 1
NAME_RESULT : 1
EDUCATION_ELIGIBILITY : 1
BE_DOCUMENTED : 1
CHANGES_HOURS : 1
ON_LIP : 1
MONTH_OF : 1
FAIL_TO : 1
DIAGNOSIS_MAJOR : 1
ZOLOFT_MG : 1
AND_WHEELS : 1
OR_TEMPORARILY : 1
LIKE_DOES : 1
FROM_APPT : 2
ADEQUATE_HYDRATION : 1
OF_SINUS : 1
NEUROPATHY_PAIN : 1
SOB_OF : 1
NIACINAMIDE_MG : 1
ONLY_GETS : 1
ACTIVE_OUTPATIENT : 2
GM_STARTED : 1
THIS_NEW : 1
ABLE_TO : 4
NO_KIDS : 1
THAT_HIS : 1
TO_VET : 2
PENIS_CONSENT : 1
SEES_ONLY : 1
PEOPLE_HAD : 1
ASSISTANCE_BOWEL : 1
THAT_WIFE : 1
TOOLS_AND : 1
JUN_DENTAL : 1
SKIN_TWICE : 1
DIZZINESS_CE : 1
INFORMATION_TO : 1
CAUSE_PATIENT : 1
OR_DM : 1
OF_ACTIVITIES : 1
OR_CMS : 1
PAIN_REPORTS : 2
SEEN_THIS : 1
PRESENTS_IRRITABLE : 1
OPPOSED_TO : 1
DRIVING_NIGHT : 1
MEDICATION_QUESTIONS : 1
ICDCM_TAP : 1
INFLECTION_MOOD : 1
IN_SIZE : 1
PARKINSONS_SYND : 1
MEDICAL_TO : 1
SORE_CONTINUE : 1
NOT_OSAC : 1
TO_CHECK : 1
CC_OF : 1
INFLUENZA_VIRUS : 1
PAIN_ADVERSE : 1
YOU_SICK : 1
BY_WITH : 2
WITH_PROBLEMS : 1
WALKIN_EITHER : 1
THIS_HIM : 1
WHO_HAD : 1
END_OF : 1
FOR_BEFORE : 1
PTAGREED_TO : 1
CALLED_TELEPHONE : 1
BORDERLINE_TRAITS : 1
PROGRAMGROUP_SELF : 1
GIVING_PROPER : 1
STOP_TAKING : 1
PAINFUL_YOU : 1
HTN_OR : 1
RECEIEVE_SIX : 1
ADVISED_HIM : 1
ENDOSCOPIST_CLAUDIO : 1
DISCUSSED_FAMILY : 1
DEPENDENCE_WITHDRAWAL : 1
BP_AND : 1
AND_ENCOURAGE : 1
SIMETHICONE_SUSP : 1
PARTIAL_ROTATOR : 1
INJ_SC : 1
TEAM_MEMBERS : 1
ICOTHE_TO : 1
TELEPHONE_CHECKIN : 1
LEFT_TOE : 1
OTHERS_WAS : 1
COMPANY_NEEDS : 1
IOP_ORIENTATION : 1
STARTED_ADEQUATE : 1
HEALTH_HOLD : 1
VERIFIED_BRIGHT : 1
ON_TWOHOUR : 1
IN_UPON : 1
WAS_OUR : 1
TO_HOME : 1
TREATMENT_TEAM : 1
RECORDS_NOW : 1
TRANSPORTATION_AGENCIES : 1
PULSE_VISIT : 1
TWICE_ACTIVE : 1
REMAIN_AREA : 1
IF_YOU : 1
VESICLE_FISTULA : 1
UNDERSTANDING_PROVIDER : 1
DRINKS_GO : 1
CHANGES_MODERAT : 1
POSSIBLE_PREPROCEDURE : 1
SEEN_DR : 1
FOR_CLINIC : 1
TO_HERE : 1
IS_REPORTS : 1
CONTACTED_AND : 1
IV_CLASSIFICATION : 1
ANSWERED_BLOOD : 1
BECOME_MORE : 1
SIDE_POSSIBLE : 1
NO_OBSERVED : 1
BE_OFF : 1
PT_ATTENDED : 2
VETERAN_BIRCH : 1
YOUR_WITH : 1
DENIES_OF : 1
VISIT_NOTE : 1
ASSESSMENT_LEVEL : 1
AND_ARE : 2
DM_BP : 1
INSTITUTE_IN : 1
PROCHLORPERAZINE_MALEATE : 1
ALL_RESIDENTS : 1
CENTER_ON : 1
NEAR_TO : 1
TS_FOR : 1
ACTIVE_OXIMETRY : 1
DOES_WANT : 1
AUTHOR_ANGELA : 1
QUESTIONS_SWEATS : 1
TIMES_NEEDED : 1
TO_RELY : 1
PSYCHIATRY_NOTE : 1
APPLY_TO : 2
PERSONAL_SHAVE : 1
PHONE_PATIENT : 1
PLEASANT_WITH : 1
DO_KILLING : 1
IDEATIONS_IBUPROFEN : 1
TABLET_PREVENTIVE : 1
ASSOCIATED_TO : 1
DIDACTIC_TRAINING : 1
OF_MALINGERING : 1
PAIN_CHRONIC : 1
VERY_PATIENT : 1
FAMILY_WORK : 1
CONSTIPATION_PT : 1
SOCIAL_WORKER : 1
CLOZARIL_MED : 1
FOR_SCHEDULED : 2
INDIVIDUAL_APPOINTMENT : 1
STATED_WAS : 1
ATROPINE_AND : 1
MED_WE : 1
ATTENDING_MEETINGS : 1
FATHER_WAS : 1
AND_FROM : 2
INFLUENZA_ATLANTA : 1
CURRENTLY_INPATIENT : 1
ANATOMICAL_SCALP : 1
DOES_ENDORSE : 1
LOST_OF : 1
EEG_INSTITUTE : 1
THURS_VETERAN : 1
PRESENTS_WITH : 3
SHIFT_WENT : 1
TO_ASSURE : 1
RECOMMENDATIONS_QUESTIONS : 1
MG_TAKE : 8
SPECIAL_SEND : 1
INSTITUTE_LAND : 1
THE_NECESSARY : 1
SINUS_CONGESTION : 1
HE_CURRENTLY : 1
NOTE_MEDICATIONS : 1
IDENTIFIED_AND : 1
PATIENT_BATHROOM : 3
BMI_MAG : 1
PROFESSIONAL_WHO : 1
SESSIONS_BRC : 1
SIGNED_THIS : 1
PAST_PATIENT : 1
POLYARTHRALGIA_DR : 1
PAGER_AFTER : 1
RELAPSE_FOR : 1
SURGERY_AND : 2
PANORAMIC_FILM : 1
BIO_FEEDBACK : 1
APPEARANCE_PATIENT : 1
ATTENDING_INABA : 1
UNSPECIFIED_MEDICATIONS : 1
AT_AND : 2
WORKING_HOURS : 1
ORIENTED_KEPT : 1
IN_NOT : 1
TO_BLIND : 1
ACTION_REGISTERED : 1
ADVERSE_DYSPNEA : 1
OS_UNDILATED : 1
OF_MUCH : 1
SEE_RAPD : 1
SYNTHROID_TAB : 1
BEEN_RE : 1
AVAMC_WAS : 1
TRIAMTE_SCHEDULED : 1
TAB_SERVICE : 1
BEFORE_ASSISTING : 1
PATIENT_INFORMED : 1
TO_ANSWERS : 1
HEP_UPON : 1
TO_REQUEST : 1
FOR_CONSERVATIVE : 1
THE_FOLLOWING : 5
DID_HAVE : 2
REGARDING_RECEIVED : 1
VACCINE_PRIOR : 1
AIDS_VENOUS : 1
BY_IN : 1
DUE_DEPRESSION : 1
HCT_PLT : 1
TEST_HOME : 1
BLINDNESS_DEFINED : 1
RESOLVED_RESPECTFULLY : 1
BOWEL_OR : 1
ON_PURSED : 1
TABLET_PRIMARY : 1
SWS_BRC : 1
NOTED_LIST : 1
BY_ACCURATE : 2
HLIP_HEARING : 1
MEDICATION_EXPLORED : 1
REFUSAL_RETURN : 1
OUT_STATES : 1
PM_THE : 1
PLEASE_RADIATION : 2
GROWING_IN : 1
WITH_RIGHT : 1
ROUND_FOR : 1
EDUCATE_PATIENT : 1
NO_CHANGES : 2
SINCE_RATED : 1
KILL_RESCUE : 1
HE_FINISHED : 1
DISCHARGE_INSTRUCTIONS : 2
ASSESSMENT_RESIN : 1
MAG_SIMETHICONE : 1
UNIT_STATED : 1
YES_PATIENT : 1
TYPE_VISION : 1
MEDICATIONS_PT : 1
WAS_AGAIN : 1
CALL_MIN : 1
WAS_AWAKE : 1
SHIFT_WAS : 3
WITHIN_HOURS : 1
IN_MEDS : 1
SMILING_LAUGHING : 1
PATIENT_CALL : 1
DRINK_ALCOHOL : 2
ADVISED_BACK : 1
LESS_THAN : 1
STRENGTHS_PATIENT : 1
DIAGNOSIS_LEFT : 1
ANATOMICAL_LOCATION : 2
ALL_SCHEDULED : 1
KNEE_EFFUSION : 1
HAPPY_HAMLIN : 1
ENCOUNTER_OF : 1
CHANGES_REVIEW : 1
OPERATING_OR : 1
WHILE_IN : 1
HAD_WORTH : 1
CL_CCT : 1
WHICH_THE : 1
VENLAFAXINE_METAB : 1
FOLLOWING_PHARMACY : 1
IS_CONTINENT : 2
NUMBER_GROUP : 1
DIAZEPAM_MG : 1
IS_WELL : 1
CLEAR_URINARY : 1
AND_TH : 1
ATTENDING_AA : 1
AND_NO : 2
NONE_POX : 1
AND_TRANSFERRED : 1
THIS_ENT : 1
PRIMARY_CALL : 1
PRIVILEGES_URINAL : 1
VETERAN_ARRIVED : 1
PROVIDER_PLAN : 1
EPIS_UNPROTECTED : 1
THESE_DROPS : 1
HTN_HYPERLIPIDEMIA : 1
PAIN_CLINIC : 1
AN_ACUTE : 1
BUT_HE : 2
THIS_AGITATION : 1
YOU_DRINK : 1
WAS_AND : 4
RADIATION_SERVICE : 2
ENROLLED_IN : 1
DENIES_OTC : 1
UNIT_ADJUSTING : 1
SURPRISED_NUMBER : 1
RATE_SULF : 1
ON_SKIN : 1
TO_CL : 1
MOOD_IS : 2
DATE_PATIENT : 1
HAS_OTHER : 1
HYPERLIPIDEMIA_MYCOSIS : 1
NO_PATIENTS : 1
IN_TO : 5
RIGHTS_AND : 1
ROTATION_PAIN : 1
TIME_IS : 1
TOLERANCE_HANDOUT : 1
ELIMINATION_NOTE : 1
METAB_TES : 1
INTRAOPERATIVE_REPORT : 1
OMEPRAZOLE_EC : 1
TIMES_WAS : 1
MINUTES_CLOZARIL : 1
CITALOPRAM_MG : 2
SUPPORTIVE_FOCUSING : 1
ADDICTIVE_TREATED : 1
ALL_HELPLESSNESS : 1
ABOUT_IT : 1
MG_TABLET : 1
CHO_WAS : 1
CARE_RECOVERY : 1
MECHANISMS_BRC : 1
TIMEOUT_CHIEF : 1
ARE_FINISHED : 1
FOLLOWED_BY : 1
KIM_PLS : 1
RESPONSIBILITIES_OF : 1
ALERTORIENTED_OR : 1
MSW_CRADC : 1
HIM_NEAR : 1
CLEANLINESS_EXPRESSE : 1
MG_SERVICE : 1
FATHER_KERATITIS : 1
FAMILY_CANCER : 1
VASCULAR_ACCESS : 1
AM_FOR : 1
IN_CONTINUED : 1
OLD_CAUCASIAN : 1
ALCOHOL_AND : 1
FALL_ON : 1
NONE_CL : 1
HPI_PT : 1
ALLERGIES_TO : 1
INDEX_PREOP : 1
SISTER_SAID : 1
TO_BY : 1
POSTTRAUM_CAP : 1
REMINDER_ACTIVITY : 1
OTHER_KEPT : 1
WHEN_SHE : 1
COMBAT_YES : 1
ER_UNMASKING : 1
SEND_PATIENT : 1
INCLUDES_ALL : 1
NURSING_TREATMENT : 1
IN_GROIN : 1
STOOL_BATHROOM : 1
AFFECT_AND : 1
PROVIDER_THE : 1
PHYSICIAN_GE : 1
CAN_VIEWED : 1
ELIMINATION_NURSING : 1
PHYSICIAN_EXTENDED : 1
ALERTING_OF : 1
VETERAN_SURPRISED : 1
PATIENT_VISITED : 1
CHRONIC_PAIN : 4
PG_HEIGHT : 1
WILL_BE : 9
ADDENDUM_SEGMENT : 1
KG_OX : 1
LETTER_HEALTH : 1
WHEN_AT : 1
MONTH_TO : 1
THIS_WEEK : 1
IS_UPSET : 1
DISCUSSED_ALTERNATIVES : 1
MENTAL_THE : 1
UNIT_IS : 1
THE_CRITERIA : 1
LS_PROVIDED : 1
TAB_MANAGEMENT : 1
WAR_MOVIES : 1
AND_YOU : 1
DEPRESSION_NO : 1
OS_OD : 1
SCHEDULING_REQUEST : 1
COMMENT_FATHER : 1
II_VITAL : 1
SCHEDULED_ADMISSIONS : 1
DISCHARGED_TOMORROW : 1
ME_OR : 1
THERAPY_LAST : 1
SMOKER_YES : 1
MG_PAIN : 1
THE_RIBS : 1
ON_ROTATION : 1
SELF_AND : 1
HIM_INFORMATION : 1
NEAR_AGAIN : 1
HE_WEEKLY : 1
LOOKING_AFTER : 1
ROBIN_SMOKING : 1
ROOM_ENVIRONMENTAL : 1
EQUIP_SOME : 1
DON_AND : 1
ROUTE_TIME : 1
IRRITABLE_CONTINUES : 1
DENTAL_EXT : 1
INDEPENDENT_WILL : 1
REVIEW_MOXIFLOXACIN : 1
OF_COFFEE : 1
THROUGHOUT_THE : 1
BIOBURDEN_AND : 1
TO_PROCEDURE : 1
HAS_SPOKEN : 1
TOPICAL_THE : 1
RIGHT_PATIENT : 1
DISCHARGED_FROM : 1
DISCHARGED_ON : 1
WEIGHED_TO : 1
STUDY_JVD : 1
SURG_MEDICINE : 1
SCROTAL_SWELLING : 1
IT_SHOWS : 1
RESTRAINT_MONTHS : 1
SCHEDULED_VISIT : 1
SUICIDAL_IDEATIONS : 1
STOP_ALL : 1
DETERGENT_DISPENSER : 1
WBC_MM : 1
SUPPLY_EXCEPT : 1
PHYSICAL_REGAIN : 1
MORE_IN : 2
HASNT_ABLE : 1
LAST_APPT : 1
AS_HIS : 1
BOARD_AND : 1
COMPTON_MH : 1
LEARNING_ASSESSMENT : 1
PHONE_EVALUATION : 1
DISORDERMET_WITH : 1
PT_HIS : 1
WAS_VISITED : 1
PERFORMED_ALERT : 1
IN_VISTA : 1
WEAKNESSES_HISTORY : 1
HIGHER_THEN : 1
ORAL_INHL : 1
AND_THERAPEUTIC : 1
THERAPY_AND : 1
TRAZODONE_PAST : 1
KILLING_NO : 1
LIFTING_HEAVY : 1
BATH_NUTRITION : 1
OF_RACING : 1
NOTE_SHIELA : 1
THIS_ENCOUNTER : 1
OSTEOARTHRITIC_INCLUDING : 1
WITH_MINMAL : 1
PAIN_RECEIVING : 1
WALKIN_NOTE : 1
APPROPRIATE_KNOWN : 1
LVH_HERE : 1
CALL_CENTER : 1
REF_RANGE : 1
NOW_BLOOD : 1
AT_TO : 1
EXTREMITIES_SWELLIN : 1
RELATED_PRACTITIONER : 1
AURORA_BASIS : 1
COUMADIN_GAIT : 1
CLAUDIO_TOMBAZZI : 1
MENTAL_HOLD : 1
NUMBER_EVALUATION : 1
INFLUENZA_VACCINE : 2
APNEA_NECK : 1
STATES_EYES : 1
APPROACH_PATIENT : 1
PATIENT_FOR : 2
CONTINUED_NEEDS : 1
BEEN_FOR : 1
VISIT_TO : 1
ASSESSMENT_CAUSE : 1
WAS_LONG : 1
VETERAN_WAS : 1
MEDICATION_NOSE : 1
GROUP_DIABETIC : 1
PLAN_OF : 1
NO_IN : 1
RESUMED_ACTIVITY : 1
PRESSURE_MEDICATION : 1
NAPPING_THIS : 1
POPPING_TRICOMPARTMENTAL : 1
REPORTS_EPIS : 1
INTERDISCIPLINARY_MEETING : 1
LEVEL_OF : 2
RECEIVING_THESE : 1
TECHNIQUES_AND : 1
MEDICATIONS_MEDICATION : 1
HIM_THE : 2
FOUND_BLIND : 1
TOLERANCE_CRISIS : 1
AND_MORPHINE : 1
COORDINATOR_THE : 1
ADVANCE_CARE : 1
EVERY_EVENING : 1
XYZZY_PATIENT : 2
IN_LAND : 1
LEGS_OVERALL : 1
NOTIFY_YOUR : 1
NOTET_WE : 1
YOU_HOPELESS : 1
AS_WELL : 3
GLARE_DRIVING : 1
HE_VERY : 1
VISUAL_MR : 1
TOUR_INTEGRITY : 1
WILL_CALL : 1
INFORMATION_LEFT : 1
MONITORING_AND : 1
AT_IEST : 1
FACIAL_SMILING : 1
WEEK_PATCH : 1
PER_OPHTH : 1
ORIENTED_OWN : 1
OBTAINED_BP : 1
NEEDS_SUPPORT : 1
COLL_RBC : 1
TAKING_PATIENT : 1
RELATED_EVENT : 1
DRUGS_RECORDS : 1
CHO_STOP : 1
DONE_MOWING : 1
BILAT_LEGS : 1
HANDOUT_CRISIS : 1
WAS_CONGESTED : 1
FORMULA_LATEX : 1
OCR_PLANS : 1
AFTER_MR : 1
AFTER_PROSTHETIC : 1
PATIENT_MORE : 1
MONITORING_EDUCATION : 1
ASSESSMENT_FEB : 1
AREA_CHEEKS : 1
INITIAL_GROUP : 1
TKA_IS : 1
IDENTIFICATION_CONFIRMED : 2
IN_BRONZE : 1
THIS_BECAUSE : 1
NONE_FOUND : 1
ASSURE_IS : 1
ORAL_ML : 1
SOUTH_FOR : 1
TOOLS_CLICK : 1
ASSESSMENT_RESUMED : 1
THE_BIG : 1
ENCOUNTER_WANTED : 1
FEVER_DEVICES : 1
MIW_BLACK : 1
ABLE_ATTEND : 1
PROVIDER_HIM : 1
DIAGNOSIS_INCLUDING : 1
TO_DEGREES : 1
IN_SINCE : 1
SHE_HAS : 1
OF_GUN : 1
ET_BRN : 1
SKIN_SKIN : 2
WELL_FOR : 2
RESIDENT_EDUCATION : 1
PROGRESS_SAW : 1
PLANS_FOR : 1
DENTAL_SURGERY : 1
BMI_ALUM : 1
BREATH_PATIENT : 1
WITHIN_STUDENTS : 1
OF_ABOVE : 1
THIS_THERAPIST : 1
NUR_INPT : 1
FOLLOWUP_FROM : 1
WITH_EXCEPTION : 1
WHAT_IS : 1
IN_FIND : 1
BEEN_MADE : 1
SECONDARY_LOCATION : 1
TALKING_OTHERS : 3
NUMBER_COMPUTER : 1
SEE_IMAGING : 1
TRAVEL_NEEDS : 1
RATIVE_HE : 1
ARE_EXPIRED : 1
EXPIRED_PT : 1
PLAN_URINARY : 1
HIS_NEURODE : 1
SEEN_THE : 1
EVEN_AND : 1
OXYGEN_USAGE : 1
INTEGRITY_WRIST : 1
HIS_CHRONIC : 1
IS_HIM : 1
ASKING_NONE : 1
THE_MHICM : 1
STOOL_PERSONAL : 2
FOLLOWS_MH : 1
CHO_OL : 2
AND_MORE : 1
THE_ER : 1
OK_AND : 1
CENTER_PATIENT : 1
REVIVED_WITH : 1
PARTNER_NOW : 1
DOCUMENT_MAIL : 1
II_NO : 1
CM_PATIENT : 1
OP_HP : 1
DIET_INCLUDES : 1
TO_ABILITY : 1
RATE_CLICK : 1
WITHIN_SECONDARY : 1
AND_OUTSIDE : 1
THE_WITH : 3
TWICE_VISITS : 1
FOOD_DURING : 1
VISIT_DENTAL : 1
INTERMITTENT_FLASHBACKS : 1
NOTE_ARE : 1
DEAR_OR : 1
NS_OU : 1
CLINICAL_ISSUES : 1
MODIFIED_INDEPENDENCE : 1
PAST_TOPIC : 1
TREATMENT_THEN : 1
ME_WANT : 1
STATED_ARE : 1
COMPLETED_DENTAL : 1
SCHEDULED_MUST : 1
DAILY_WHICH : 1
ACTIVITIES_TRACH : 1
ULQ_DONE : 1
STATUS_PATIENT : 1
HAND_ANGIOCATH : 1
THE_AND : 7
EXAMINED_AND : 1
CL_AL : 1
IN_DATE : 1
SEEN_CR : 1
ARE_TEACHING : 1
OR_PT : 1
LAST_WITHOUT : 1
SKIN_INTEGRITY : 1
TREATMENT_COURT : 1
NO_THANK : 1
DR_TREATMENT : 1
ADVISE_TO : 1
ON_ENVIRONMENTAL : 1
SOUNDS_PATIENT : 1
ADDITIONAL_HANDOUTS : 1
VETERAN_THAT : 2
YEAR_IN : 1
LAST_CLINIC : 1
TYPE_VISIT : 1
PLEASE_CONTACT : 3
AND_NOTIFIED : 1
CARDIAC_PATIENT : 1
OX_HAS : 1
NOTE_AND : 2
CONFERENCE_ROOM : 1
COLOR_NORMAL : 1
ADVISED_THAT : 2
WITH_TO : 2
BEHAVIORS_BY : 1
LAST_HEMAGLOBIN : 1
AT_NIGHT : 1
AS_FILL : 1
LEAVE_REQUESTED : 1
RECEIVED_FEEDBACK : 1
BEDTIME_REMOVE : 1
CAUSE_PROTOCOL : 1
FOR_UMBICIAL : 1
HAD_THOUGHTS : 1
BOUNDARIES_MED : 1
CIRCUMCISION_TO : 1
FOR_PROBLEM : 1
GET_TO : 2
TRANSFERRED_CL : 1
REHABILITATION_ON : 1
TO_CLINIC : 1
HOW_USE : 1
THE_PARK : 1
REVIEWED_PATIENT : 1
PT_SLOWLY : 1
BAKER_LCSW : 2
CALL_TYPE : 2
SWEATS_AN : 1
WORK_HOBBIES : 1
QUESTION_AND : 1
NG_DRUGS : 1
UP_ALL : 1
MOVE_SETTING : 1
LAST_HAS : 1
HEIGHT_IN : 3
ACTIVE_CARE : 1
HAVE_PROBLEMS : 1
AGREEABLE_THIS : 1
IN_BED : 4
MAJOR_DISORDER : 1
HIS_LOOKING : 1
ES_SCHEDULED : 1
MENTAL_FULLY : 1
SESSIONS_BED : 1
HE_IN : 1
HARBOR_PROGRAM : 1
SHOW_SCHEDULED : 1
WITHOUT_EMERGENCY : 1
TITLE_SCHEDULING : 1
DENVER_CORONERS : 1
MILK_PAIN : 1
ARRIVE_PRIOR : 1
THIS_WHEN : 2
HAS_RELEASE : 1
FOR_TRANSPORTATION : 1
BEEN_OTHER : 1
LAST_EVENING : 1
PAIN_MENTAL : 1
FOR_DEPRESSIVE : 1
SIDE_SEDATION : 1
RELAXED_AND : 1
TAKE_CAPSULES : 1
PHONE_SAME : 1
BREAKFAST_COLOR : 1
HIM_ME : 1
PRECERTIFIED_DATE : 1
THEM_ATTENDING : 1
VISIT_MEDICATION : 1
SUPPLIES_MORAL : 1
PHYSICIAN_PER : 1
BEEN_BATTLING : 1
SKILLS_OF : 1
NOT_HIS : 2
OUTSIDE_HOSPITAL : 1
NOTE_IN : 1
FOR_SHIFT : 1
GROUPS_TO : 1
THAT_IS : 5
MEDICATIONS_EDUCATION : 1
PASSING_PATIENT : 1
AND_SKIN : 1
AMOUNT_TO : 1
DIAGNOSED_ACP : 1
MST_PTSD : 1
SIX_FOLLOWUP : 1
NOTE_EXPRESSION : 1
THE_FEB : 1
RESPIRATIONS_EVEN : 1
IMAGING_YOU : 1
TOLERATED_THERAPY : 1
OUTPATIENT_PATIENT : 1
CONTINUE_WITH : 1
TEAM_HOWEVER : 1
UP_PROGRESS : 1
REVIEW_HOURS : 1
FOR_MUSCLE : 1
STRESS_MORE : 1
CONNECTED_VERIFIED : 1
CLINICAL_THAT : 1
SITTER_HE : 1
WHILE_WIFE : 1
HIS_NEW : 1
LAUNDRY_TOMORROW : 1
ED_BY : 1
NO_ALL : 1
KG_PULSE : 1
CHAUDHRY_ANTIBIOTIC : 1
AND_NAME : 1
AT_WAS : 1
THROUGH_WITH : 1
MINUTES_PROBLEM : 1
HE_FEEDBACK : 1
COMMENTS_EQUIP : 1
SMOKING_REVIEW : 1
ON_HIP : 1
AND_HE : 6
SULFATHIAZOLE_ASSESSMENT : 1
AUSCULTATION_SEND : 1
GROUPS_HAS : 1
SAYS_THIS : 1
BEHAVIOR_INDEPENDENT : 1
EXTREMITIES_NO : 1
SERVICE_PAIN : 1
TO_DESIRED : 1
EXERCISE_THE : 1
IT_DOES : 1
WITH_ALLERGIES : 1
THE_DISPENSER : 1
CPT_CODE : 1
CAN_TO : 1
THIS_NEXT : 1
FROM_MOVE : 1
FOR_AFTER : 1
ASSESSMENT_COPY : 1
MR_NOT : 1
MORNING_ICOTHE : 1
ADMISSIONS_MUST : 1
ROOM_TRIAGE : 1
OR_BP : 1
CARE_WRITING : 1
CALL_ASSESSMENT : 1
MOD_IN : 1
EFFECTIVENESS_THERAPY : 1
DESIRES_VET : 1
REPORTS_VETERAN : 1
THERE_WAS : 1
PERFORMED_NUMBER : 1
AS_TO : 1
ALLERGIES_CPRS : 1
MAR_PROJECTS : 1
APPEAR_BE : 1
SHLDR_PARTIAL : 1
APPOINTMENT_DATE : 1
PASSING_OUT : 1
VA_CARELINE : 1
DRINKS_DURING : 1
SPONGE_NUTRITION : 1
RELATED_TO : 2
DOING_CONSTANTLY : 1
PHYSICIAN_NO : 2
ENTER_ADDITIONAL : 1
CONTINENCE_BRP : 1
REDNESS_SWELLING : 1
MESSAGE_NOTED : 1
MORE_AND : 2
WENT_BACK : 1
HI_AVH : 1
COMMENT_PSYCHOSIS : 1
GIVE_MONITOR : 1
RECORD_THE : 1
EVENT_WOULD : 1
DOES_DIABETES : 1
GM_WAS : 1
CESSATION_MORE : 1
ENTRY_WAS : 1
CONCERN_HAS : 1
AND_JOAN : 1
USE_THIS : 1
WAS_PLACED : 1
THIS_MAY : 1
KNEE_BUT : 1
OR_PAGER : 1
RADIATION_ONCOLOGY : 2
SWELLING_DISCHARGE : 1
ASSESSMENT_PROTECTORS : 1
MAG_HYDROX : 1
CONTACT_ENCOUNTER : 1
BE_NO : 1
WILL_PICKEDUP : 1
EXPECTATIONS_TREATMENT : 1
NEGATIVISM_EMERGED : 1
CVA_CA : 1
DISCHARGED_COME : 1
PROGRAM_IN : 1
PLAN_FROM : 1
ACTIVE_ON : 1
TREATMENT_PROGRAM : 1
BLIND_PROGRAM : 1
RATE_TRIMETH : 1
WILL_ME : 1
CONGESTION_HA : 1
ED_AND : 1
RECOVERY_WAS : 1
STAT_CR : 1
HE_LOT : 1
FOR_INFLAMMATION : 1
HAMLIN_LMSW : 1
WFL_NECESSARY : 1
ODY_ODY : 1
NONE_BLIND : 1
PROGRAM_HE : 1
ERRONEOUS_ENTRY : 1
YOUR_OBSERVATION : 1
AT_SINCE : 1
LONG_AS : 1
WITH_FRICTION : 1
SNACKS_CURRENT : 1
PERSONAL_NO : 1
AND_AS : 1
NO_NO : 2
OCR_FOR : 1
OF_FUNCTIONNG : 1
ORGANIZED_CARDIAC : 1
SIGNED_RETURN : 1
DISCUSSED_DIRECTIVES : 1
ADDENDUM_FEMALE : 1
AND_EVIDENCE : 1
DISPENSER_TO : 1
OTC_URINATE : 1
CHILDREN_INDEPENDENCE : 1
HAS_NKA : 2
TO_LACK : 1
FAMILY_DIAGNOSIS : 1
EMERGENCY_ROOM : 1
RISK_QUESTIONS : 1
BRIEF_OF : 1
PATIENT_TO : 7
HE_DONE : 1
DOCUSATE_MG : 1
LIP_EXERCISES : 1
RECORD_AND : 1
OLDER_THAN : 1
GROOMED_WEARING : 1
REGARDS_HYDROCODONE : 1
COOPERATIVE_WITHOUT : 1
OF_STD : 1
DOCTOR_FOR : 1
IS_GETTING : 1
ACTIVE_EVERY : 1
ANATOMICAL_SEE : 1
BREATH_CLEAR : 1
EXTENSION_ON : 1
CT_RAD : 1
HUSBAND_THE : 1
PAIN_OF : 1
SHE_NOT : 2
RESCUE_HE : 1
NEW_MEDICATION : 1
THE_TWICE : 2
TREATMENT_FROM : 1
INJURY_FALLS : 1
THE_NIGHTMARES : 1
THINGS_FIRE : 1
TO_NURSING : 1
BECOME_PAINFUL : 1
HE_REQUESTING : 1
BODY_PRIMARY : 1
PATCH_ABSTINENCE : 1
CCT_GLAUCOMATOUS : 1
MALE_TO : 1
ENTER_ALLERGIES : 1
RELATIONSHIP_VETERAN : 1
INPATIENT_FACILITY : 1
WITH_AND : 6
CALLED_PHARMACY : 1
TIME_ACTIVE : 1
REQUESTING_WAL : 2
SUPPORT_PT : 1
CURRENTLY_PRESCRIDBED : 1
NAUSEA_TH : 1
LPM_AMBULATION : 1
CONSENT_PATIENT : 1
MENTAL_SECONDARY : 1
SHIFT_TO : 1
SHAMPOO_NAIL : 1
HAS_SEEN : 1
ON_DETERMINING : 1
BP_MONITOR : 1
ISZESKI_WITH : 1
PROBLEM_ADVERSE : 1
TO_LESION : 1
AFTER_CALL : 1
ABILITY_OWN : 1
RESIDENT_AGREE : 1
PSYCHIATRIST_PHYSICIAN : 1
INFECTION_OMYELITIS : 1
THE_HE : 2
CONTROLLED_WITH : 1
ARRIVAL_APR : 1
TO_WITH : 3
RATED_YO : 1
ER_NIGHT : 1
NOTE_PING : 1
WALKIN_VISIT : 1
IN_ALERTING : 1
THE_AFLURIA : 1
ICDCM_DAYTON : 1
VET_WOULD : 1
TRIAGE_BY : 1
AND_ALL : 1
PAIN_WE : 1
TRY_IT : 1
HERE_MONTH : 1
CORTICAL_NS : 1
OF_OR : 2
NOT_DONE : 1
LATER_OR : 1
OF_BY : 1
ANDRE_VICTIM : 1
UNTIL_EVENING : 1
SCREENING_PATIENT : 1
WAS_EXAMINED : 1
REGARDING_MANAGEMENT : 1
EXAMINING_THE : 1
OF_PROSTATE : 2
PT_ALSO : 1
OF_ABUSE : 1
SCREEN_PHYSICIAN : 1
OIL_MEDS : 1
NEURO_SHOWS : 1
ACTIVE_NPH : 1
COUMADINE_THANK : 1
ENVIRONMENT_ROUND : 1
HIS_CANE : 1
MALE_GULF : 1
MAG_EVALUATION : 1
FOR_UNUSUAL : 1
REDUCTION_FOR : 1
IS_TO : 9
THE_THERAPY : 1
TO_ETC : 1
APPOINTMENT_LEFT : 1
HOSPTITALIZATION_NURSING : 1
PROGRESS_TO : 1
SURPRISED_BY : 1
BEEN_NOTE : 1
ORLOW_BACK : 1
WAS_OF : 1
BE_CELEBRATING : 1
BY_NUMBER : 1
ACTIVITY_PHYSICAL : 1
OLD_HERE : 1
ER_BY : 1
RESTORATIVE_NO : 1
PATIENT_PHYSCIALLY : 1
ACTIVE_SEGMENT : 1
PERIORBITAL_AREA : 1
HAS_ENDING : 1
DURATION_COMPLAINT : 1
MAJOR_DEPRESSIVE : 2
NOTIFY_DOCTOR : 1
PERMINANTLY_WT : 1
TRIAL_HIP : 1
IN_ADDRESS : 1
TRY_TOMORROW : 1
QUESTION_OF : 1
ON_OXYGEN : 1
BE_ALL : 1
POSITION_MI : 1
LEARNED_DISCUSSED : 1
HIS_TO : 1
EN_MEDS : 1
IS_OTHER : 1
THE_HEART : 1
BEFORE_ORIENTATION : 1
PROGRESS_VISIT : 1
THE_LEFT : 1
PATIENT_NOT : 2
BIPOLAR_BY : 2
HER_SEE : 1
BLIND_CENTER : 1
NOT_ANY : 1
COMPLAINING_HAVING : 1
LIMITATIONS_CARE : 1
CONTINUE_DOSE : 1
EAT_HE : 1
TO_AN : 1
TH_TIME : 1
WHICH_HE : 1
THE_QUAD : 1
AS_COLD : 1
LOWER_DENTURE : 1
BOWEL_BLADDER : 2
ETOH_BOTH : 1
RATED_VA : 1
APPOINTMENT_LAST : 1
WITHDRAWAL_SYMPTOMS : 1
WORK_PROGRESS : 1
COMMENTS_WIDE : 1
TO_FRIENDS : 1
LEARNING_COPY : 1
PARKINSONS_IMPRESSION : 1
PATIENTS_AND : 2
HOPELESS_ABOUT : 1
DIET_IS : 1
GROUP_STRESS : 1
RESIDENT_ROOM : 1
EXPRESSION_CONSTANTLY : 1
OWN_INSTITUTE : 1
THE_NEAR : 1
ROSUVASTATIN_NIACIN : 1
AT_BOARD : 1
TESTING_APPOINTMENT : 1
PREVIOUSLY_BECOME : 1
CHRONIC_SINCE : 1
HEARING_AIDS : 1
SCREEN_REPORTS : 1
COMBAT_DEVELOP : 1
JOINT_REPLACEMENT : 1
GETTIGN_CONGESTED : 1
HAS_MORE : 1
DIFF_DATWBC : 1
UNLISTED_EVALUATION : 3
COESOFT_PT : 1
GOAL_THE : 1
IS_ASKED : 1
LOST_CONSCIOUSNESS : 1
WITH_RADIATION : 1
DISORDER_ANXIETY : 1
TOPICALLY_TWICE : 1
THE_PAIN : 1
BLIND_REHABILITATION : 3
HIP_APPROACH : 1
MOVE_QUESTIONNAIRE : 1
WILL_TELEPHONE : 1
LIVING_CONSISTENCY : 1
MINUTES_AFTER : 1
DAILY_LIVING : 4
PLAN_PRIMARY : 1
OF_EDUCATION : 1
NOTE_RECONCILED : 1
DURING_PAST : 1
CORONERS_TO : 1
MD_ANTIBIOTIC : 1
UTI_DENIES : 1
APPEARED_ON : 1
HAVING_RECENTLY : 1
HE_HASNT : 1
AND_INVASIVE : 1
DENIED_SX : 1
LONGER_EXPERIENCING : 1
PAST_YEARS : 1
STILL_TO : 1
NOTE_DISP : 1
NOSHOW_EDUCATION : 1
REQUESTED_MEET : 1
NEEDS_OTHER : 1
APPEARANCE_THIS : 1
SHIFT_THE : 6
REGARDS_TO : 1
NOT_SUICIDAL : 1
TO_EDUCATION : 2
UNITS_SC : 1
PHYSICIAN_DEGAETANO : 1
PAIN_MED : 1
MAY_THE : 1
MONTH_EVIDENCE : 1
MYALGIA_AGE : 1
CLC_NOTE : 1
CALL_CARELINE : 1
QUESTIONS_HEALTH : 1
DAYTON_NURSE : 1
WEEK_BLOOD : 1
LAST_NIGHT : 2
TEAM_PRESENT : 1
COMMUNITY_MIN : 1
ASSESS_PATIENTS : 1
SMOKING_CESSATION : 1
DIAGNOSE_DSM : 1
VOLUME_NEBULIZER : 1
FACTORS_FOR : 1
WE_SHOULD : 1
PO_QHS : 1
HAS_THERE : 2
FOR_WEDNES : 1
STRIP_USE : 1
IS_EXPERIENCING : 1
HIS_DID : 1
ANGER_WE : 1
FOR_SURGERY : 1
MANAGING_STRESS : 1
OR_WILL : 1
PER_EYE : 1
WILL_HIS : 1
MOBILITY_OF : 1
BRC_STUDENTS : 1
MEDICATIONS_PROVIDED : 1
WE_DISCUSSED : 1
FOLLOW_TOMORROW : 1
IS_TAKING : 2
VETERAN_REPORTS : 1
THE_DISCLOSED : 1
VASCULAR_NOTE : 1
VA_PENSION : 1
SURFACEANTERIOR_MEDICINE : 1
PATIENT_NO : 2
ARE_RESTRAINTS : 2
STRESS_EFFECTIVELY : 1
PROCEDURE_THE : 1
DENIED_OF : 1
ATLANTA_VA : 1
HE_BE : 4
UPSET_HE : 1
MEDS_APPOINTMENT : 1
SUPPLIES_SPIRITUAL : 1
UP_ON : 2
CONTINENT_PERCEPTION : 1
ON_DETOXIFICATION : 1
TEAM_DURING : 1
POSSIBLE_MD : 1
DX_TREATMENT : 1
AND_SAT : 1
VERIFIED_MSW : 1
OFFICE_PATIENT : 1
THE_INFORMATION : 1
THE_STOP : 1
SOCIAL_WORK : 3
IS_EUTHYMIC : 1
FEVER_OR : 1
PL_ING : 1
LOSS_HEARING : 1
BATH_PROTECTORS : 1
HAS_HOPEFUL : 1
STAFF_WELL : 1
AGITATION_IN : 1
PSYCHOTIC_NO : 1
PAIN_ANKLE : 1
ACTIVE_TELECARE : 1
LABS_RESULTS : 1
PERCOCET_AND : 1
EMERGED_IN : 1
HISTORY_ARRIVAL : 1
OR_DIET : 1
HE_IS : 17
HE_EPIS : 1
ALTERED_COPING : 1
NO_HOW : 1
FOR_ACTIVE : 1
SOCIAL_PROGRESS : 1
NKA_BLOOD : 1
XYZZY_IS : 1
MEDICATION_ORDERED : 1
ON_REFERRAL : 1
LOG_INTO : 1
ANY_CURRENT : 1
WELL_DENIED : 1
PREVIOUS_CHART : 1
OF_DURING : 1
COPD_ICDCM : 1
WAS_STARTED : 2
WE_ASK : 1
SKIN_ASSESSMENT : 2
HR_PROCEDURE : 1
USE_HAS : 1
AND_REQUEST : 1
COMPLAINTS_DENIED : 1
TYPE_COMMENT : 1
TO_AND : 6
FOLLOWED_FOR : 1
WHOM_MAY : 1
YES_IF : 1
UP_IN : 1
SEEN_IN : 2
SIDE_EFFECTS : 2
LEFT_RESPONSIBILITIES : 1
PREOP_RELAXED : 1
WORSENING_AND : 1
MOVE_OR : 1
BELONGINGS_IN : 1
CAT_HPI : 1
THE_THIS : 2
HAD_THIS : 1
NOTED_MEDICATION : 1
DEGAETANO_NOAH : 1
AND_LVH : 1
SEES_MINIMAL : 1
SHOW_FOR : 1
LISTED_BELOW : 1
NO_DIFF : 1
COMMENT_PROJECTS : 1
IS_ROMAN : 1
SAT_OMEPRAZOLE : 1
TOPIC_CHANGES : 1
IDENTIFICATION_IS : 2
NUTRITION_NUMBER : 1
DISCUSSED_OF : 2
FOR_PC : 1
NIGHT_SWEATS : 1
TIMES_RIGHT : 1
FOLLOW_FOR : 1
FOUR_AS : 1
CSAC_CPS : 1
ORDERED_DOSE : 1
AM_PM : 1
MEDICINE_NOTE : 1
EVIDENCE_OF : 3
NURSING_PLAN : 1
FILL_MHC : 1
APPLICABLE_PAIN : 1
TRIAGE_DENIED : 1
CLINIC_BEFORE : 1
SEP_WLADENTAL : 1
DEFECT_AND : 1
ASSISTANCE_THIS : 1
INDEPENDENCE_SEEN : 1
HYDRATION_NUTRITION : 1
CHIROPRACTIC_AND : 1
CM_PULSE : 1
PRESCRIBED_REFERRED : 1
HIS_GETTING : 1
MEDICATION_BLINDNESS : 1
AND_CLEANLINESS : 1
EXTRA_FLUIDS : 2
OCT_CITALOPRAM : 1
OXYGEN_TIME : 1
TRACH_CARE : 1
TO_GET : 3
OFF_MEDS : 1
PM_WT : 1
OUT_HIS : 1
VI_TREATMENT : 1
THE_SPINE : 1
OBJECTIVE_RUE : 1
POSSIBLE_PERSONALITY : 1
MIDLINE_VISIT : 1
FOR_SUCH : 1
MALE_HTN : 1
EXAM_SIGHT : 1
IMED_INFORMED : 1
PACING_ALTHOUGH : 1
FOLLOWING_CALLED : 1
OF_PENIS : 1
PT_INR : 1
OBTAINE_FULL : 1
PROGRESS_PATIENT : 1
SUICIDAL_SECONDARY : 1
PLEASE_THE : 1
NOT_STOP : 1
SUPPLEMENTAL_LPM : 1
RESULTS_BELOW : 1
NURSING_CARE : 1
DOES_NOT : 5
HTN_IN : 1
MEDICATION_NOTIFY : 1
AND_PROCESS : 1
WERE_GOING : 1
SKILLS_MEANINGFUL : 1
HAVE_ROUGH : 1
MAY_ASK : 1
THE_AVAMC : 1
YOU_FAIL : 1
REACTION_WAS : 1
TEMP_CURRENT : 1
AN_SCREENING : 1
EQUIPMENT_OTHER : 1
DONE_THE : 1
IS_PRESCRIBED : 1
IS_NURSING : 1
APPLICABLE_THIS : 2
FROM_PHYSICIAN : 1
EDUCATION_EXIT : 1
WORKING_PSYCHIATRIST : 1
NOT_LIKE : 1
THE_SOCIAL : 1
PHYSICIAN_VETERAN : 1
FLUOXETINE_HCL : 1
MASTER_CARE : 1
CONSC_NURSING : 1
REST_THE : 2
SON_NANCY : 1
CLICK_TOOLS : 1
PERSISTS_BILAT : 1
SESSIONS_REMAINING : 1
ASSESSMENT_EFFECTIVENESS : 1
MEDICATIONS_OR : 1
AGAINST_HIM : 1
NOT_WANT : 1
WRITING_PLAN : 1
SEE_PT : 1
NECESSARY_FALL : 1
TWICE_RATED : 1
THE_ATTACHED : 1
IN_CLINIC : 1
EFFECTIVE_PATIENTS : 1
PAST_DID : 1
CURRENT_SYMPTOMS : 1
PATIENT_PT : 1
PER_CONSULTATION : 1
PAST_AND : 3
PLA_HIS : 1
THIS_BUT : 1
BOTH_ADDENDUM : 1
REQUESTED_WITH : 1
ROMAN_CALLS : 1
LIKE_HE : 1
REACT_CLINICAL : 1
AL_FOR : 1
HEAD_OF : 1
DECLINED_AMOUNT : 1
DAILY_THIS : 1
SHIFT_THIS : 1
CALLER_OTHER : 1
CDI_ISLAND : 1
TO_INCREASE : 1
CHILDREN_MODIFIED : 1
GAIT_IMPAIRED : 1
TALKING_TRAZODONE : 1
ARRIVED_TIME : 1
RECHECKED_OTHER : 1
THEIR_MEDICATIONS : 1
PROVIDED_EXCEPT : 1
ER_DEHYDRATED : 1
VETERAN_WILL : 1
FIRE_CARPET : 1
CM_PAIN : 1
IMPROVED_BUT : 1
VISIT_PROGRA : 1
SEND_HOME : 1
IN_ADDITION : 1
VACCINE_HEALTH : 1
COMPLAINT_ADVISED : 1
RECENT_LOST : 1
PLACE_PROTECTORS : 1
HAD_WANTED : 1
LAUGHING_TALKING : 1
HOME_USAGE : 1
ORTEGA_COIN : 1
STATED_HE : 2
MALEATE_WERE : 1
ANTICOAGULANT_WARFARIN : 1
THE_BEGIN : 1
HAVING_FOR : 1
SWER_WILL : 1
FOOTWEAR_NECESSARY : 1
KG_SURGERY : 1
DO_NOT : 1
IT_AGAIN : 1
POSTOP_HOURS : 1
OF_WAS : 1
INTERVENTIONS_CLC : 1
BE_DISCHARGED : 3
PER_PAIN : 1
NEEDS_STATING : 1
WENT_SEE : 1
DETERMINING_HOW : 1
ABLE_MAKE : 2
UP_STS : 1
CANCER_ANATOMICAL : 1
ADJUSMENT_THYROID : 1
HOPELESSNESS_STRONGER : 1
VACATION_DON : 1
FALL_RISK : 1
OR_ADVANCED : 1
BEING_ON : 1
SHAVE_HAND : 1
HOWEVER_SITTER : 1
ETC_THE : 1
REQD_MAG : 1
SKILLS_TOOLS : 1
QUESTIONS_VA : 1
WILL_ON : 1
OTHER_CLIENTS : 1
FAMILY_WHO : 1
ONE_NOW : 1
PLAN_PHYSICIAN : 1
HAS_SIGNED : 1
LIFE_SKILLS : 1
SCREENING_INDICATES : 1
NECKLACE_EARRING : 1
ANY_GOALS : 1
MIN_IT : 1
LOCK_INTO : 1
OFTEN_DID : 1
WOULD_LIKE : 2
PRESSURE_ASSESSMENT : 1
VOLLEYBALL_STILL : 1
CARE_ACTIVE : 1
HE_THIS : 1
AGE_VERBALIZED : 1
EFFECTS_OF : 1
MALE_WITH : 2
MORNING_LATE : 1
IS_WITH : 2
EXPIRED_WITHOUT : 1
MD_DOSE : 1
REVIEW_METHOD : 1
HAS_RIGHT : 1
FROM_BEING : 1
REINFORCING_SKILLS : 1
HAVE_STRESSOR : 1
EAT_CED : 1
FOR_TREATMENT : 1
LIMITED_BLADDER : 1
THE_RNS : 1
CONSTRICTED_CONSTRICTED : 1
THESE_MEDICATIONS : 1
FUNCTIONNG_AND : 1
OF_ADMISSION : 1
THE_ROOM : 1
PROCESS_HE : 1
SINCE_TRAUMA : 1
SERVED_COMBAT : 1
HEALTH_WHO : 1
CURRENT_ASSESSMENT : 1
EVALUATION_INITIAL : 1
BY_KNEE : 1
OF_PERSONAL : 2
LOT_FACT : 1
TRANSFERRING_MENTAL : 1
OS_FOR : 1
FEMALE_FAMILY : 1
WHAT_YES : 1
CARE_DRAINS : 1
OR_PREOP : 1
HIM_HE : 1
REMAIN_IN : 1
AXIS_DIAGNOSE : 1
EDUCATION_INFORMATION : 1
TOLERATED_WITH : 1
WITH_MH : 1
HAS_YET : 1
PAIN_DEPRESSIVE : 1
NUMBER_SEE : 1
PAIN_PULSE : 1
HYPOTHYROIDISM_HYPERLIPIDEMIA : 1
NIGHT_NO : 1
CEFAZ_GM : 1
CARE_ESTABLISHED : 1
APPOINTMENT_DURING : 1
USUALLY_IS : 1
REACT_VASCULAR : 1
HIS_FORM : 1
ROI_HE : 1
YES_PACKS : 1
HE_MOD : 1
MG_VENTURA : 1
HERE_SCHEDULED : 1
ACTIVE_INSULIN : 1
AND_HOWEVER : 1
YOUR_FOR : 1
ST_IN : 1
SWELLING_EDEMA : 1
CRADC_COMMUNITY : 1
THE_VASH : 1
TAB_TABLET : 1
ROUTINE_INPT : 1
DX_PROGRAM : 1
PACKS_PROCEDURES : 1
MAKE_NO : 1
PROBLEMS_BAKER : 1
TELE_NURSE : 1
RING_NECKLACE : 1
OR_HERBALS : 1
DROPS_STATES : 1
LIMITATIONS_QUETIAPINE : 1
THAN_NORMAL : 1
WERE_IN : 1
PATIENT_MESSAGE : 1
IS_SIGNIFICANTLY : 1
AND_YOUR : 1
INHL_APPOINTMENT : 1
SCHEDULING_FOR : 1
RISK_FOR : 1
PLS_BIOPSY : 1
GOAL_SETTING : 1
CANCER_PROSTATE : 1
INSTRUCTIONS_CONTACTED : 1
AND_ADEQUATELY : 1
FROM_AND : 1
HOURS_AT : 1
PRECAUTIONS_DISCHARGE : 1
REVIEW_EXPECTATIONS : 1
REACT_NUR : 1
WITHOUT_NO : 1
THIS_TASK : 3
VACCINATION_NO : 1
MHC_MENTAL : 1
GO_THE : 1
DOING_MR : 1
CLINIC_NOTE : 1
MULTIPLE_PAIN : 1
SPECIMEN_CH : 1
LEG_SWELLING : 1
WIFE_WITH : 1
SEND_REMINDER : 1
DOSE_OF : 3
BODY_PAIN : 1
FOLLOWUP_AT : 1
SPENT_ACTIVE : 1
YOUR_IEST : 1
MR_ATTEMPT : 1
EVALUATED_PATIENT : 2
NOT_OCCUR : 1
DENIES_DIVALPROEX : 1
YOU_PAIN : 1
HGB_HCT : 1
CALM_COOPERATIVE : 1
SAFETY_AND : 1
YES_STRENGTHS : 1
BE_AT : 1
ON_MON : 1
IN_OD : 1
PROGRESSIVE_IS : 1
WEIGHT_PROGRAM : 1
CONSERVATIVE_MANAGEMENT : 1
PSYCHIATRIC_ED : 1
FOR_BREATHING : 1
RESOLVED_HT : 1
MEDICATIONS_AT : 1
ELEVATED_AST : 1
RIGHT_ANGIO : 1
SHE_IS : 1
THE_AT : 1
FROM_BIRCH : 1
DATE_THE : 2
IN_LOW : 1
DENIED_BLADDER : 1
HOSPITAL_WHILE : 1
WELL_GM : 1
TO_FOR : 2
IT_NOW : 1
IDEATION_TO : 2
CARE_BLADDER : 1
RESTRICTED_SPECIAL : 1
CHRISTENSEN_AFLURIA : 1
USE_GUIDE : 1
TO_THE : 12
CONTACT_ANDRE : 1
HYPERLIPIDEMIA_MODE : 1
YES_HPI : 1
SEEMED_BY : 1
IMPROVED_PLAN : 1
PROVIDER_SON : 1
DIP_PARENT : 1
THE_MEDICATIONS : 1
ARE_FULL : 1
CONSISTENCY_OF : 5
PAIN_INFLAMMATION : 1
TRANSPORTATION_MR : 1
TEARS_ANESTHESIA : 1
BY_MOUTH : 8
CHRISTENSEN_THE : 1
QUETIAPINE_MG : 2
MORE_BREAKFAST : 1
USAGE_IN : 1
PATIENT_ENCOURAGED : 1
ADDITIONALLY_SWER : 1
TO_TALK : 1
KNEE_SURGERY : 1
OVERALL_IMPROVED : 1
SSN_AGE : 1
THE_CALL : 2
OR_WEIGHT : 1
LEFT_TRY : 1
OVERSIGHT_ENCOURAGEMENT : 2
WAS_PATIENTS : 1
SKILLED_CARE : 1
ADMISSION_NOTE : 1
GOING_HOME : 1
OF_INCLUDING : 1
NOTE_BOUNDARIES : 1
REGARDING_CONFRONTATIONS : 1
PAIN_SWELLING : 2
IS_LIFE : 1
SCANNED_MAIL : 1
NO_ENCOUNTER : 1
HIS_EMERGED : 1
ER_PACKS : 1
REMINDER_ACTIVE : 1
NOSE_DORSUM : 1
NEUROSURGERY_ON : 1
THE_CONCEPT : 1
LEAST_HISTORY : 1
STRIP_FOR : 1
TIME_PLACE : 1
IS_CONFIRMED : 2
WITH_REHAB : 1
HISTORY_APR : 1
AND_RECONCILED : 1
PROCEDURE_SEND : 1
CLINIC_HEALTH : 1
VISIT_RE : 1
GETTIGN_AGAIN : 1
REASON_FOR : 2
AND_MEDICATION : 1
TAKE_TABLET : 6
WITH_ASSOCIATED : 1
GROUP_ATTENDED : 1
WAS_FULLY : 1
NOS_PT : 1
THIS_LESS : 1
OXIMETRY_PHYSICIAN : 1
OXYGEN_BED : 1
AND_THINGS : 1
OR_PATIENT : 1
TO_DESIRE : 1
BIOPSY_ON : 1
SYMPTOMS_DIFFICULTY : 1
AS_THE : 1
HAS_TREATED : 1
LAST_PRIOR : 1
MYALGIA_PATIENTS : 1
HAVE_DIAGNOSE : 1
CYST_BE : 1
CLONAZEPAM_TAB : 1
SEEN_FOR : 4
NEBULIZER_HYPOXEMIA : 1
ACTIVE_IN : 2
SOCIAL_INTAKE : 1
AND_MANAGEMENT : 4
AGAIN_COMMENT : 1
THE_THE : 2
HAVE_PAIN : 1
OPPORTUNITY_TO : 2
NO_BRP : 1
FEEDBACK_AT : 1
DIVORCED_AND : 1
AND_THUR : 1
THAT_WAS : 2
MINUTES_OLD : 1
HIS_HERNIA : 1
MESSAGE_TO : 1
TOPICALLY_AS : 1
EXAMINED_EVALUATED : 1
WELL_BEEN : 1
RECENTLY_BEEN : 1
PER_PTAGREED : 1
NOT_FAMILY : 1
UMBICIAL_HERNIA : 1
PROGRESS_REVIEW : 1
IS_ACTIVITIES : 1
EXPERIENCING_SUICIDAL : 1
THE_DOSE : 1
ACTIVE_CELLPHONE : 1
AND_INTERMITTENT : 1
OF_PATIENT : 5
KNEE_DURATION : 1
WAR_AND : 1
RESPONSES_ABDOMINAL : 1
ADDENDUM_MANUAL : 1
UNLABORED_GROOMED : 1
ARE_AROUND : 1
WENT_IN : 1
AND_FOR : 4
DATE_POSITIVE : 1
OF_FROM : 1
ON_ASKED : 1
FOR_TASK : 3
TEACHING_ME : 1
BREAKFAST_DRINKS : 2
ENCOUNTER_REQUIRED : 1
SAID_THAT : 2
WITH_OF : 2
BY_NURSING : 2
AND_HIM : 1
POW_YOU : 1
SC_INSAM : 1
TAUGHT_HOW : 1
VISITS_FOR : 1
DISCUSSED_EFFECTS : 1
MEDICAL_MORE : 1
NEEDS_LATEST : 1
CHRONIC_LAST : 1
SYMPTOMS_AND : 1
AM_MAY : 1
BP_CUFF : 1
GROUP_STATED : 1
SAID_HE : 1
ME_ER : 1
HAVE_COLONOSCOPY : 1
PARKINSONIAN_FEATURES : 1
LOOKED_AT : 1
CLINIC_ANGER : 1
BOVIE_PLACEMENT : 1
GOALS_AND : 1
OFFICE_CURRENTLY : 1
MEDICATION_MIMSOME : 1
YOU_ABOUT : 1
RESULTS_HE : 1
BP_HR : 1
ON_DIPHENHYDRAMINE : 1
INCREASED_FREQUENCY : 1
THE_LAWN : 1
SCHEDULING_PLEASE : 1
AND_NOT : 5
NO_OUTPT : 1
ADDITION_TO : 1
VOUCHER_PLEASE : 1
COLD_NUR : 1
MANUAL_SKILLS : 1
WBC_CU : 1
WAL_THE : 2
TIME_INTRODUCING : 1
TO_PLACE : 1
VISIT_VETERAN : 1
DENIED_VETERAN : 1
NEXT_CALL : 1
DISK_PATIENT : 1
SETTING_THINGS : 1
CALL_NEURO : 1
IT_PAINFUL : 1
APR_AND : 1
COOPERATIVE_NUMBER : 1
COUNSELING_YEAR : 1
AND_REGARDING : 1
BREAKFAST_NORMAL : 1
YES_EDUCATION : 1
RENEWAL_MIW : 1
PTSD_WT : 1
CARE_CALL : 1
EDUCATION_UP : 2
HISTORY_DEAR : 1
TRIAGE_NOTE : 3
ARE_DO : 1
NEEDED_CHECK : 1
PARANOIA_PERCEPTUAL : 1
LCSW_GROUP : 1
DDD_AND : 1
TRIAGE_NURSING : 1
SHOT_GIVEN : 1
ONLY_UP : 1
TO_REST : 1
ANTIBIOTICS_FOR : 1
BOWEL_NURSING : 1
ACTIVE_EYEGLASSES : 1
KNEE_POPPING : 1
SLOWED_APPOINTMENT : 1
JO_PSYCHIATRIC : 1
EVALUATION_DX : 1
LEARNED_THEY : 1
NATURE_OF : 1
COMBAT_POW : 1
VA_DISCUSSED : 1
HJR_OR : 1
SAFETY_EVEN : 1
PAIN_HOW : 1
UNABLE_REACH : 1
MEDICATION_PLAYS : 1
OUTSIDE_MEDIAL : 1
CODING_MAXIMUM : 1
BENEFIT_BEING : 1
SOME_IF : 1
CLINIC_LEFT : 1
SEGMENT_WIDTH : 1
WHO_RECENTLY : 1
ISSUES_NEEDED : 1
CBOC_RESPONSES : 1
VOLUME_INFLECTION : 1
PRECAUTIONS_ALL : 1
REVIEW_THE : 1
NOSE_MIDLINE : 1
HOME_TRIAL : 1
IN_GYM : 1
FOR_AT : 2
NOTE_JUN : 1
RE_BAKER : 1
HERBALS_NO : 1
BY_TWICE : 1
AGE_AND : 1
MALE_AT : 1
CHEST_WAS : 1
SENSORY_PERCEPTION : 1
CONTINUES_PAIN : 1
RESPIRATORY_TREATMENT : 1
INTERESTS_ALL : 1
ATTEND_THERAPY : 1
RELAY_MESSAGE : 1
ACTIVITY_PAIN : 1
COMPLAINTS_SUICIDAL : 1
FRICTION_APPARENT : 1
TREATMENT_RECORD : 1
LIVING_NUMBER : 1
PRESCRIBED_HIM : 1
PHYSCIALLY_THE : 1
HOURS_NUMBER : 1
SLIGHTLY_LIMITED : 1
BLADDER_FOOD : 1
SYRINGE_WAS : 1
COUNTER_HERBAL : 1
ASKED_GETTING : 1
SWELLING_PERSISTS : 1
KG_TEMP : 1
ARE_OR : 1
IN_ROOM : 1
QUESTIONS_TREATMENT : 1
PRECISIONXTRA_TEST : 1
RETURN_TO : 2
VETERAN_ASKED : 1
HE_PRESCRIBED : 1
OBSERVED_SITTING : 1
THEN_SUMMARY : 1
IS_DIABETIC : 1
LPM_AT : 1
MAKING_REPORTS : 1
FOR_IT : 1
COLOR_PULSE : 1
TO_SEXUAL : 1
BED_IMMOBILE : 1
NORMAL_YES : 1
NEW_MAA : 1
ALCOHOL_DENIES : 1
CT_SPECIAL : 1
LIKE_THE : 1
VET_BENEFIT : 1
STATUS_SATISFACTORY : 1
HAPPY_LMSW : 1
AS_LONG : 1
ONE_ADDENDUM : 1
PROVIDE_HYDRATION : 1
THE_FUTURE : 1
MET_CRITERIA : 1
AT_WOMEN : 1
NOTE_NATURE : 1
HAND_CARE : 1
DIPHENHYDRAMINE_ORAL : 1
NKA_COMBAT : 1
HYPOKALEMIA_ICDCM : 1
MUNSHI_ELIZABETH : 1
IN_AGREEMENT : 1
WILL_USE : 1
RELAXED_PREOP : 1
THE_YEAR : 2
LIKE_LIVE : 1
VISION_IN : 1
FOLLOW_CONTINUED : 1
THIS_SUPERVISION : 2
METHODS_EVERY : 1
PAIN_TO : 3
SEEN_MENTAL : 1
BATH_ON : 1
BEHAVIOR_AMBULATORY : 1
FLU_SHOT : 1
RITAL_STATUS : 1
RELAXATION_PUPIL : 1
AND_PHYSICIAN : 1
UNSTABLE_SOCIAL : 1
NS_IN : 1
CAN_DEPRESSION : 1
APPT_AND : 1
PROVIDED_OF : 1
THAT_DIED : 1
INSTRUCTED_REMAIN : 1
HOW_OFTEN : 1
CCT_CHANGES : 1
OF_CHRONIC : 2
MOTOR_SLOWED : 2
AND_AVH : 1
EDUCATION_METHODS : 1
KNOWLEDGE_OF : 1
HAVE_AVERAGES : 1
WEIGHT_HE : 1
LB_TEMP : 1
SURFACEANTERIOR_PREVENTIVE : 1
EDUCATION_AT : 1
OXIMETRY_STATUS : 1
CAVITRONE_HI : 1
GOES_SCHOOL : 1
STARTING_BY : 1
PAIN_PROVIDED : 1
IF_APPROPRIATED : 1
LB_KG : 5
LIMITATIONS_BE : 1
BP_ORDERED : 1
ORAL_TRANSF : 1
RECEIVED_HAD : 1
CBC_DIFF : 1
NOTE_CONSISTENCY : 1
OR_ANOTHER : 1
PROVIDER_WITH : 1
REPORTED_SCORE : 1
ADDRESSED_DEFERRED : 1
STOOL_PATIENT : 1
CONTINENT_SENSORY : 1
COORDINATION_CE : 1
TAUGHT_HIM : 1
BE_BY : 3
ATLANTA_DEC : 1
EAT_DIET : 1
SPECIFICALLY_NEEDED : 1
SEEN_MINUTES : 1
GPD_LAB : 1
DIAGNOSED_WITH : 2
RESPECTFULLY_IN : 1
NOTIFICATION_OF : 1
KEEP_THIS : 1
ROUTES_TO : 1
NOTE_ADDENDUM : 1
STABILIZATION_THOUGHT : 1
YR_HISTORY : 1
PRESSURE_PHONE : 1
HPI_CANCER : 1
CONSC_ALERTORIENTED : 1
RANDOMIZATION_DENTAL : 1
MEDICATIONS_REVIEW : 1
OF_TESTING : 1
CONSULT_BE : 1
WITH_DIFFICULTY : 1
YOUR_ANTERIOR : 1
IN_DOING : 1
NONE_PSYCHOTIC : 1
HE_PNEUMONIA : 1
SINCE_LAST : 3
IN_PAST : 8
OLD_MALE : 2
RATED_NO : 1
LOW_SUCTIONING : 1
BED_WHEN : 1
PATIENT_PROBLEM : 1
FIND_OUT : 1
ATTEMPTED_ALL : 1
SMOKING_TIME : 1
ADMITTING_DEGAETANO : 1
NEED_FOR : 1
SERVICE_CONNECTED : 2
THANKS_VAMC : 1
MESSAGE_LEFT : 1
NECKLACE_BRACELET : 1
FRIENDS_FOR : 1
DOES_SEE : 1
THAT_CURRENT : 1
OTHER_HIS : 1
THERAPY_TREATMENT : 1
WITH_MEDICATION : 1
POINT_FAMILY : 1
CITALOPRAM_TAB : 1
ABOUT_PATIENT : 1
ATTENDANCE_ATTENDED : 1
BEHAVIORS_FOLLOWED : 1
FOLLOWUP_APPT : 1
TAB_PAIN : 1
TO_GO : 1
RBC_HCT : 1
YOU_HAVE : 4
COLL_DATWBC : 1
BE_SEEN : 1
ACTIVITIES_CARE : 1
ONE_SURFACEANTERIOR : 3
TO_IF : 1
TEAR_TEARS : 1
PATIENT_OXYGEN : 1
VSQH_SAFELY : 1
LOWER_WITH : 1
NOTIFICATION_ABNORMAL : 1
XANAX_AND : 1
LAST_OU : 1
POSTTRAUMATIC_MUNSHI : 1
EVALUATION_AT : 1
NUMBNESS_BLADDER : 1
OSAC_FOLLOW : 1
AM_TO : 1
CALL_VETERANS : 1
SECURED_ARMBAND : 2
WORK_CONSULT : 1
AVH_IS : 1
TELEPHONE_CONTACT : 2
HIS_OUT : 1
HEAVY_PT : 1
WAS_LAST : 1
REMOVE_PATCH : 1
PROJECTED_OF : 1
TO_MG : 1
IN_DESIRE : 1
CONTINENT_DURING : 1
BED_LOW : 1
LITERATURE_GIVEN : 1
CODE_EVALUATION : 3
ATTENDING_TALKING : 1
SETTING_CLASS : 1
SKIN_LAB : 1
PATIENT_THINKS : 1
NO_THE : 1
DYSPNEA_LIMITED : 1
ASSOCIATED_VISIT : 1
FO_WEEK : 1
IRRITABLE_AFFECT : 2
MENTAL_HEALTH : 5
REACHED_BASELINE : 1
OUTSIDE_MEDICATIONS : 1
CONSIDERATION_TEAM : 1
HYPERLIPIDEM_REQUESTING : 1
AND_SHIELA : 1
OXYGEN_LPM : 1
PATIENT_RECONCILED : 1
DIVORCE_DISCUSSED : 1
BE_ON : 1
RECORDS_SCANNED : 1
REACHED_HIS : 1
RECONCILIATION_STATE : 1
EDUCATION_SHOT : 1
TO_DETERMINE : 1
RECOVERY_OPPOSED : 1
EXAMINATION_THIS : 1
HOURS_PAIN : 1
AND_MEET : 1
TAB_BY : 1
OR_RECALL : 1
VETERAN_NAME : 1
THIS_CYST : 1
THE_ASSOCIATED : 1
PROGRAMGROUP_THERAPY : 1
TIMES_MUSCLE : 1
CONSIDER_IF : 1
DENIES_CONCERN : 1
PROBLEM_TRAVEL : 1
YEAR_OLD : 1
LEFT_FAMILY : 1
NO_BEHAVIORS : 1
OF_NAPPING : 1
NO_ANY : 1
RESTRAINTS_IN : 2
PROCEED_PSG : 1
ABOUT_OR : 1
ISSUES_OSAC : 1
TO_NEW : 1
IS_FOR : 3
HAS_NURSING : 2
TEXAS_FIND : 1
IS_BEING : 1
COHERENT_AND : 1
SSOME_STATE : 1
IT_GETTING : 1
ADL_CONSISTENCY : 1
BENEFITS_YOUR : 1
PROVIDER_WE : 1
MH_PSYCHIATRY : 1
MANAGEMENT_PAIN : 1
OF_ASSESS : 1
YELLOW_EATING : 1
STOOL_BREAKFAST : 1
ALCOHOL_BIPOLAR : 1
MOBILITY_HE : 1
SITTING_BED : 1
HIS_UMBICIAL : 1
TO_KEEP : 1
RESULT_UNITS : 1
IN_NOVEMBER : 1
CONSULTS_CHIROPRACTIC : 1
WITHIN_THE : 1
ASSESSMENT_FLU : 1
DETERMINE_ANY : 1
IDENTIFIED_DOCUSATE : 1
NORMAL_RATE : 1
STRESS_CAP : 1
WELL_DISPLAYING : 1
COMMENTS_SOME : 1
PSYCHOSIS_IS : 1
THAT_YOU : 1
WIDTH_OF : 1
BE_RESOLVED : 1
PAGE_ELEVATED : 1
MEETINGS_AT : 1
GROUP_MEMBERS : 1
HERNIA_MONTH : 1
DATE_TIME : 2
BE_VETERAN : 1
DISTRACTING_INPATIENT : 1
HOURS_UNSAFE : 1
ROOMED_APPROPRIATELY : 1
NEAR_ME : 1
TO_JUICE : 1
CONSENT_OBTAINED : 2
RISK_OF : 1
ANY_OR : 1
TO_BR : 1
GETTING_HIGHER : 1
EPIS_WHERE : 1
SON_SMOKING : 1
MINUTES_INJECTION : 1
AFFAIRS_PREVIOUSLY : 1
MAS_REQUEST : 1
MEDICATIONS_WITH : 2
PROGRA_FOR : 1
SESSION_NOTE : 1
WITHIN_BRC : 1
TRICOMPARTMENTAL_CHANGES : 1
EXPIRED_OR : 1
ARRIVING_ZZSWS : 1
HAS_RAISED : 1
STATES_WHY : 1
ON_ALCOHOL : 1
ON_NONE : 1
REDNESS_PAIN : 1
BUT_PAIN : 1
SWELLING_FOR : 1
ADDITIONAL_SUGGESTED : 1
SULF_TRIMETH : 1
MEDICATIONS_BIRCH : 1
HE_FIRST : 1
SWELLING_OBESITY : 1
NO_BOWEL : 1
PENDING_EXPIRED : 1
ANTIBIOTICS_WEEK : 1
JVD_NO : 2
LATEST_SCORE : 1
TO_CHO : 1
HE_SX : 1
AT_PC : 1
FOR_VACATION : 1
FOR_THIS : 7
AND_OR : 2
OPERATING_ROOM : 1
HAS_LOOKING : 1
ITIS_BRIEF : 1
REPORTS_SHE : 1
EYE_WK : 1
HEART_VALVE : 1
YOU_EXPECT : 1
WITH_ANGIOCATH : 1
REPORTS_TO : 1
IS_OF : 3
OF_VISION : 1
WORKING_LONG : 1
INDIVIDUAL_CRITERIA : 1
CSAC_JOURNALING : 1
CARDIAC_HAS : 1
TAKING_NURSING : 1
MONITORING_ELECTRONICALLY : 1
ANTIBIOTICS_CEFAZ : 1
OF_HE : 1
NURSE_INTRAOPERATIVE : 1
ME_THE : 1
STATES_ARENT : 1
APPROPRIATED_URINE : 1
THYROID_BUT : 1
PATIENT_CONTINUE : 1
GROUP_MET : 1
BEEN_NOT : 1
OFTEN_TESTING : 1
AND_OPTOMISTIC : 1
WOULD_PREFER : 1
STRESS_AND : 1
THAN_THURS : 1
BIPOLAR_DETERIORATION : 1
VOLUME_AND : 1
WAS_PASTORAL : 1
OF_PERMANENTLY : 1
RATES_PAIN : 1
BE_FOR : 1
HEADACHE_FAMILY : 1
HUMAN_INJ : 1
TEAM_FOR : 1
SOB_SOB : 1
ENTRY_OR : 1
TO_SCHEDULED : 1
CALL_AT : 1
IN_SPECIMENS : 1
HEAD_NURSING : 1
VETERANS_FIRST : 1
THE_CUFF : 1
ROOM_WALKIN : 1
WK_REASSESS : 1
FOR_RESPIRATIONS : 1
MUST_DOCUMENTED : 1
EPIS_FEELS : 1
HYPERLIPIDEMIA_SPECIAL : 1
LOST_EITHER : 1
PLACE_DECLINED : 3
DROPPED_OF : 1
TABLET_BY : 5
ORDERED_CPT : 1
THEY_HAVE : 2
HI_AND : 1
OF_YES : 1
FOR_TIMEOUT : 1
INFORMED_AND : 1
NS_THE : 1
FOR_ANY : 1
TAKING_HIS : 1
PATIENT_SEEN : 4
HIS_LOST : 1
CU_MM : 1
PHYSICIAN_AS : 1
TELEPHONE_HE : 1
HOSPITAL_THE : 1
WIFE_HE : 1
EVALUATION_LIMITATIONS : 1
WEIGHT_ON : 1
EDUCATION_LIFE : 1
MH_SOCIAL : 2
AND_SUPPORT : 1
GOOD_BIT : 1
DEFERRED_SIGNS : 1
TEMPORARILY_MAKE : 1
ARE_ALL : 1
HIS_NEGATIVISM : 1
GAIT_MENTAL : 1
SLOWED_IDENTIFIES : 1
HX_HIS : 1
SPECIMENS_NONE : 1
PROSTHETIC_HEART : 1
OX_FOR : 1
TO_LITTLE : 1
WIFE_USE : 1
FLUSHED_WITH : 1
SUPPORT_MET : 1
PT_DATE : 1
AN_APPOINTMENT : 1
THIS_CONSTIPATION : 1
SKILLS_CHRONIC : 1
SKIN_APPLY : 1
THOUGHTS_ENDING : 1
TIME_LIFE : 1
MEDICATION_HE : 1
NIGHT_WITHOUT : 1
IMPRESSION_NEGATIVISM : 1
WITH_DEPENDENCE : 1
CUFF_MAINTENANCE : 1
FACILITY_FOR : 1
AGREE_WITH : 1
RELAXATION_REST : 1
LENGTH_NO : 1
HRS_NIGHT : 1
PATIENT_COUMADINE : 1
ANNUAL_SCREEN : 1
COLOR_PREVENTION : 1
ME_AT : 1
URINE_FOR : 1
PATIENTS_SOME : 1
DX_CALLERS : 1
LEVOTHYROXINE_SYNTHROID : 1
EVALUATED_ME : 2
BEEN_RECONCILED : 1
WALKIN_BEFORE : 1
STRESSOR_HAVE : 1
TO_OP : 1
MENTAL_CONCERNS : 1
WAIT_HOWEVER : 1
THIS_TOUR : 1
NO_AND : 1
POSITIVE_VENLAFAXINE : 1
OF_DEVELOP : 1
AGENCIES_ADVANCED : 1
HE_SCHEDULED : 1
ADDENDUM_ICDCM : 1
OF_REASON : 1
WHERE_FEELS : 1
BY_HEALTH : 2
MANY_CONTAINING : 1
CONSTRICTED_PATIENT : 2
SUSPECTED_MALINGERING : 1
VITAL_NONVA : 1
WAS_ASKING : 1
ML_WBC : 1
IN_WITH : 1
PROBLEMS_HE : 1
LISTED_BEEN : 1
IS_HE : 2
IN_PREVIOUS : 1
FOR_OF : 2
NOTE_HISTORY : 1
ASSESSMENT_WILL : 1
GIVEN_SWELLING : 1
WOULD_TO : 2
SPENT_IN : 1
CIG_SEEN : 1
PREVENTIVE_MEDICINE : 1
NEUROPATHY_JOINT : 1
HTN_GIVE : 1
ROOM_EVALUATION : 1
VAMC_SLOWED : 1
PAST_MEDICAL : 1
ALERTING_PT : 1
CARE_CENTER : 1
STATES_THAT : 2
AN_INFORMED : 1
LIVES_IN : 1
LOCATIONS_HX : 1
PLAN_ROCEPHIN : 1
DEFECT_NO : 1
NURSING_CDI : 1
CARE_STABLE : 1
ENCOURAGEMENT_OR : 2
IN_PULSE : 1
PRODUCTS_MENTAL : 1
WELL_OF : 1
URINARY_UP : 1
EXPERIENCING_SI : 1
CONSULT_CAN : 1
HAVING_WAS : 1
PARK_WHICH : 1
ACTIVITIES_AND : 1
WITH_PATIENT : 5
SESSION_PARANOIA : 1
OBTAINED_CUFF : 1
RETURN_BY : 1
SEE_ON : 1
CONSUMED_BED : 1
ABOVE_RAPD : 1
HOURS_HE : 1
NEEDED_ED : 1
APPETITE_AND : 2
HE_DOESNT : 1
CURRENT_ULCER : 1
WERE_TO : 2
NAIL_WT : 1
BASELINE_LEVEL : 1
MEDICATION_RENEWAL : 1
DOWN_MG : 1
SEE_ORTEGA : 1
TAB_THIAMINE : 1
THAT_THINGS : 1
CANCELL_BIOPSY : 1
FOR_EDUCATION : 1
HIM_IS : 1
PHONE_WILL : 1
THIS_SIGNIFICANTLY : 1
BEEN_RESPONSIBLE : 1
CATEGORY_CLASS : 1
NEAT_THIS : 1
MH_ON : 1
HTN_HYPOTHYROIDISM : 1
RANGED_CONSTRICTED : 1
DISSABIL_NO : 1
MEDICINE_NURSING : 1
DONE_DURING : 1
SITTER_STATED : 1
NEUROSURGERY_AND : 1
POW_NO : 1
THERAPY_OBJECTIVE : 1
WAS_BEING : 1
ENTER_DETOXIFICATION : 1
SENIOR_IS : 1
IS_AFFECT : 2
MG_WHICH : 1
KIDNEY_NO : 1
ISSUES_THAT : 1
PROCEDURE_EXT : 1
HE_UPSET : 1
IN_MORNING : 1
CHANGED_SINCE : 1
DT_TEST : 1
ALSO_TO : 1
INCLUDES_FIVE : 1
EVENING_LOWER : 1
THIS_PAST : 2
TAB_FRI : 1
HE_GRATEFUL : 1
WAKES_UP : 1
MEMBERS_REVIVED : 1
FOR_AN : 1
HIM_SINCE : 1
TAB_TH : 1
COMPUTER_HR : 1
GANGION_DX : 1
CBC_CBC : 1
POPPING_OSTEOARTHRITIC : 1
WILL_ETTE : 1
METHOD_TAKING : 1
REFERRED_TO : 2
TIME_ATTEMPTED : 1
CATHETER_CARE : 1
REMINDER_LETTER : 1
PROTOCOL_TAKE : 1
BRISTOL_CBOC : 1
OF_STAY : 1
AFTER_LIFTING : 1
THOSE_BE : 1
DOSE_AMBIEN : 1
ISZESKI_DOB : 1
AND_SETTING : 1
WITH_NO : 2
MOUTH_WRITING : 1
HYDROBROMIDE_MG : 1
NOT_THIS : 1
WITH_ALCOHOL : 1
NOT_EVALUATION : 1
ABOUT_DIAZEPAM : 1
ACTIVE_EXPIRED : 1
CONGESTION_AND : 1
ASSESSMENT_COLOR : 1
LOG_VISTA : 1
FRIEND_WHO : 1
THAT_WOULD : 2
VERY_LENGTHY : 1
RACE_BLACK : 1
OWN_LIMITATIONS : 1
RESULTS_RECEIVED : 2
ACP_AT : 1
HAVING_SURGERY : 1
LAB_INR : 1
TO_ARRIVE : 1
OF_ANTIBIOTICS : 1
HAVE_THOUGHTS : 1
PULSE_OCT : 1
NAME_NOT : 1
MAY_HAVE : 1
BY_HX : 2
HER_OPTIONS : 1
PATIENT_STARTED : 1
THE_HOURS : 2
ANY_QUESTIONS : 1
CLINICAL_ACTIVITY : 1
TOL_ROCEPHIN : 1
OP_PLAN : 1
NURSE_EVALUATED : 1
AND_DOWN : 1
PROGRESS_HAD : 1
MEDICAL_HTN : 1
MG_TAKES : 1
AND_NOTIFY : 2
NORMAL_APPEARANCE : 1
DENTAL_CLASS : 1
IS_NONSLIP : 1
TRAITS_CONTACTED : 1
TAKEN_AGE : 1
WHILE_AN : 1
YELLOW_DOES : 1
EDUCATION_AND : 1
CHAUDHRY_MD : 1
PATIENT_LIVES : 1
ORAL_APPOINTMENT : 1
TRP_INDIVIDUAL : 1
INFORMATION_ELEVATED : 1
OF_MOVEMENTS : 2
BRC_THIS : 1
REGULAR_DISCHARGE : 2
WAS_GRATEFUL : 1
THE_TO : 5
YESTER_AFTER : 1
FORESKIN_AND : 1
DECIDED_FOR : 1
COESOFT_RETURNS : 1
MINUTES_SAFETY : 1
MH_VOUCHER : 1
SOME_REMOVED : 1
AND_TIME : 2
GYM_THE : 1
TIMES_HOURS : 1
LIMITATIONS_MOUTH : 1
RECORD_MANAGER : 1
SEE_BP : 1
THERAPY_RECORD : 1
YEARS_HE : 2
WERE_NOT : 1
MOVE_HE : 1
PROCEDURE_INTERVAL : 1
ANXIOUS_OF : 1
YESTER_AND : 1
TRANSFER_CONTINENCE : 1
BAKER_GROUP : 1
PATCHES_ON : 1
ADDICTION_DEVELOP : 1
OLDER_THE : 1
MEDICATIONS_PULSE : 1
PACT_NURSE : 1
TO_OKLAHOMA : 1
OF_DAILY : 4
EVENING_MEDICAL : 1
NO_CONTINENCE : 1
INSAM_UP : 1
BE_RECEIVING : 1
FROM_WRITER : 1
NEUROLOGY_FOR : 1
PSYCHIATRIC_ALCOHOL : 1
NO_PROBLEM : 1
TO_PREOP : 1
DOES_GET : 1
DOES_HAVE : 1
INCREASED_URINARY : 1
OF_POSSIBLE : 1
INSTRUCTIONS_IS : 1
NOTIFY_HUSBAND : 1
RESTORATIVE_ADL : 1
SHAKY_ALL : 1
SESSION_THIS : 1
NOTE_HOME : 1
NO_ADVERSE : 1
YOU_DROPPED : 1
TYPE_SYMPTOM : 1
SIGHT_IN : 1
FOLLOWS_COMMANDS : 1
TO_BACK : 1
YO_ALCOHOL : 1
RETURNS_FOR : 1
CALL_SUBURAN : 1
INTAKE_WITH : 1
OVER_ADS : 1
WAS_OUT : 1
PATHOLOGY_PHYSICIAN : 1
SESSION_SUPPORTIVE : 1
IN_NEAR : 1
DM_PER : 1
PRESCRIDBED_MG : 1
MH_BEHAVIORAL : 1
BY_SHE : 1
HEALTH_RELINED : 1
CONSENT_INSPECTED : 1
OR_KILL : 1
QUICKLY_WHEN : 1
BATHROOM_FOR : 1
WELL_IMMEDIATE : 1
RARE_OCCASIONS : 1
AS_NEEDED : 3
EXERCISES_FOLLOWS : 1
AT_PARK : 1
VACCINE_FORMULA : 1
CMS_CURRENT : 1
CANE_IS : 1
ALLERGY_TAP : 1
SIZE_HAVE : 1
VIRUS_FORMULA : 1
NO_PROCHLORPERAZINE : 1
POSES_STRETCHES : 1
GO_TO : 3
COMBAT_NO : 1
WAS_EITHER : 1
ADHERENCE_EXPLORED : 1
POSITION_SUCTIONING : 1
OP_SURG : 1
USE_FOR : 1
GETTING_ADDITIONAL : 1
OF_OS : 1
CELLPHONE_CITALOPRAM : 1
ASSESSMENT_RELAXATION : 1
PROGRAM_WAS : 1
EQUIPMENT_ISSUED : 1
EVERY_MORNING : 2
APPOINTMENT_RECALL : 1
FOR_PT : 2
PATIENT_DISCUSSED : 1
REST_BEGIN : 1
VISIT_REPORTS : 1
MANAGEMENT_LENGTH : 1
DIRECTIVES_THE : 1
SUPERVISION_OVERSIGHT : 2
PM_PC : 1
NEW_DOCTOR : 1
POLPS_REMOVED : 1
VITAL_SIGNS : 2
RETURN_CALL : 2
OR_ASSESSMENT : 1
SYMPTOMS_HAVE : 1
WITH_THERAPIST : 1
NOTE_ORIENTED : 1
MOOD_WAS : 1
CORRECTED_WITH : 1
NEEDS_MIN : 1
THAT_CONSIDER : 1
PT_COPD : 1
LEGAL_BLINDNESS : 1
APPOINTMENT_SEE : 1
PHYSICIAN_HRS : 1
OTHER_OVER : 1
EXPIRED_MEDS : 1
ADMITTING_PHYSICIAN : 1
CONSTRICTED_PRESENTS : 1
WHEN_ASKED : 1
NURSING_ALERT : 1
TAKEN_UNABLE : 1
ONCOLOGY_PULSE : 1
YOUR_STATUS : 1
HAS_FELT : 1
MEDICATION_RAL : 1
OBTAINED_THE : 1
HAVE_TYPICAL : 1
NO_SWEATS : 1
MED_PER : 1
OXYGEN_OF : 1
TELEPHONE_PSYCHIATRIST : 1
BIG_TOE : 1
YES_YES : 1
PREFERENCE_IS : 1
ORIENTED_VSQH : 1
AMOUNT_NORMAL : 1
COLLECTION_DT : 1
TRACT_INFECTION : 1
RESPONSES_SWELLING : 1
HOPING_GET : 1
NOTE_STATUS : 1
HEADACHE_PSYCHOSOCIAL : 1
OBJECTIVE_ROM : 1
NEXT_YEAR : 1
AFTER_MAIL : 1
PRESSURE_IS : 1
PSYCHIATRIC_HOSPTITALIZATION : 1
OR_BLADDER : 1
CIG_WAS : 1
TIME_ELIGIBILITY : 1
REASSESS_PRE : 1
MR_YR : 1
DAILY_TAKEN : 1
AND_CARE : 2
NEEDS_UCFA : 1
APPOINTMENT_HE : 2
PT_LAST : 2
AGE_CLONAZEPAM : 1
THAT_HAVE : 2
RESPIRATION_HEADACHE : 1
TREATMENT_PROGRESS : 1
MG_SSOME : 1
FOR_ADMISSION : 1
SOCIAL_DIVORCED : 1
MARRIED_LOST : 1
CE_PROBLEMS : 1
JUNE_TH : 1
CHANGES_INCLUDING : 1
REGISTERED_EVALUATED : 1
SIGNS_POSTOP : 1
HIP_ARTHRALGIA : 1
STRETCHES_WITH : 1
SETTING_HYGIENE : 1
HIS_MRI : 1
FOR_TRIAGE : 1
OF_AMBIEN : 1
USE_ARE : 1
HAVE_DROPPED : 1
WITH_ADMITTING : 1
AND_WAS : 5
CHANGE_IN : 1
MENTAL_EXAM : 2
UPDATE_CANE : 1
ASK_QUESTIONS : 2
JUNE_IF : 1
TECHNIQUES_PAIN : 1
IF_NOT : 1
EDUCATION_SKIN : 1
GIVEN_GM : 1
PROSTHETIC_VALVE : 1
FOR_ALSO : 1
ABOUT_MEDICATIONS : 1
HOSPITAL_HE : 1
WILL_FOLLOW : 2
HAMLIN_CSAC : 1
WAR_VETERAN : 1
EMERGED_THE : 1
AND_TUES : 1
CONTINENT_PREVIOUS : 1
VI_STATUS : 1
ANY_AND : 1
RESCHEDULE_FOR : 1
PULMONARY_POSTTRAUMATIC : 1
PATIENT_EXAMINED : 1
DOCUMENTS_MAY : 1
SESSION_AND : 1
ALL_ADMISSIONS : 1
NOT_HAD : 1
NIACIN_ZOLOFT : 1
BREATHING_EXERCISES : 1
STOP_DUE : 1
CALLERS_RELATIONSHIP : 1
ICDCM_KUSHWAHA : 1
LIMITATIONS_UNIVERSAL : 1
PROBLEMS_BACK : 1
ULTRASOUND_CONSENT : 1
ODY_PHYSICIAN : 1
VACCINATION_FEVER : 1
FIND_WHAT : 1
TREATMENT_GENITOURINARY : 1
EDUCATION_DIAGNOSIS : 1
PATIENT_BE : 3
SPECIAL_MODE : 1
TOUCH_ME : 1
CLINIC_NOTET : 1
ALSO_CONTINUE : 1
ARE_AND : 1
TESTING_ACROSS : 1
OF_TREATMENT : 2
ATTITUDE_BEHAVIOR : 1
SMOKER_XXNO : 1
SCHEDULED_PROGRA : 1
ON_RETURNED : 1
NO_MESSAGE : 1
REHAB_WHILE : 1
THANK_YOU : 1
THEM_BECAUSE : 1
CONT_DISTRACTING : 1
SURGERY_HE : 1
PLACE_ADDITIONAL : 1
OF_VETS : 1
HER_STRONGER : 1
SERVICE_LENGTH : 1
RELEASE_THIS : 1
THOUGHTS_TAKING : 1
SCORE_BY : 1
FROM_DENIED : 1
HAVE_BECOME : 1
RECENTLY_DISCHARGED : 1
AND_SPECIAL : 1
AND_ATTENDING : 1
MRI_IF : 1
SKILLS_DESCRIPTION : 1
TO_ENTER : 1
ADVANCED_DIRECTIVES : 2
AFTER_CT : 1
BLIND_REHAB : 2
PACKS_PER : 1
OR_DISCHARGE : 1
CHANGES_THE : 1
OTHER_PERSONAL : 2
CM_SPECIMEN : 1
APPOINTMENT_HEMAGLOBIN : 1
YELLOW_SPUTUM : 1
IN_DENIES : 1
APPLY_AMOUNT : 1
HE_DID : 1
PREPROCEDURE_ENDOSCOPIST : 1
MONTH_FOLLOWUP : 1
HIS_SUGAR : 1
MIAMI_MAY : 1
AND_CE : 1
WAS_INTERDISCIPLINARY : 1
SHIFT_DURING : 1
IDENTIFIES_THE : 1
IS_ALERT : 2
INTO_ANTECUBITAL : 1
ASKED_TALK : 1
PROLONG_POSTTRAUM : 1
ALL_FOOD : 1
REQUIRES_ASSISTANCE : 2
WRITTER_HAS : 1
SELF_LIVING : 1
PROSTATE_PM : 1
THE_PRIMARY : 1
THE_MEDIAL : 1
PROGRESS_COLOR : 1
VETERAN_SC : 1
MORNING_HYDROCHLOROTHIAZIDE : 1
BRC_DESIRES : 1
COLLABORATIVE_STUDY : 1
THE_STEPS : 1
IMAGING_EXERCISE : 1
SHIFT_IS : 1
PREFERENCE_ROMAN : 1
FEEDBACK_FROM : 1
LEFT_PT : 1
PHYSICIAN_PT : 2
OF_MENTAL : 1
THE_HUD : 1
MUCH_VETS : 1
SHOES_HEPLOCK : 1
NPH_HUMAN : 1
LB_PULSE : 1
WAS_WEANED : 1
OUTPATIENT_INCLUDING : 1
CHILDHOOD_SHY : 1
WT_LB : 1
ED_HE : 1
VETERANS_INDIVIDUAL : 1
CARE_NO : 1
ADDITIONAL_EDUCATION : 1
OU_GLAUCOMATOUS : 1
HEPATO_MOUTH : 1
HE_AM : 1
CONSUMED_ALERT : 1
PROBLEM_MEDICATIONS : 1
SELFADJUSTING_AND : 1
OUTPATIENTPHYSICIAN_SWELLING : 1
NIGHT_FOR : 1
IS_INTRUSIVE : 1
AFFECT_TO : 1
MAIL_REHABILITATION : 1
SC_OF : 1
SHOT_DEPT : 1
CLASS_VI : 1
TREATMENT_INCLUDING : 1
CURRENT_DX : 1
ACUTE_PSYCHIATRIC : 1
SPRAIN_PAST : 1
NOTE_DURING : 1
CLEAR_DISCUSSED : 1
AUSCULTATION_WILL : 1
COLONOSCOPY_MEDICAL : 1
RIGHT_AND : 2
BLINDNESS_AS : 1
GE_PER : 1
PH_MEDS : 1
SELLS_NO : 1
VET_ANSWER : 1
STATES_THEY : 1
SI_IT : 1
VA_FOR : 2
WAS_PROVIDED : 1
OR_ORDER : 1
MONTH_PRIOR : 1
ON_TELEPHONE : 1
FOR_TRAINING : 1
SESSIONS_PROVIDED : 1
OF_BACK : 1
MEDICATIONS_RECONCILED : 1
INCREASINGLY_PAINFUL : 1
SPECIFIC_WE : 1
DIFFICULT_WEEKEND : 1
SPASMS_SPECIAL : 1
PATIENT_MG : 1
FILM_CALLERS : 1
DECLINED_VACCINE : 1
PERSONAL_HYGIENE : 4
CAP_TAKE : 3
TYPICAL_RATE : 1
LIVING_SKILLS : 1
TOMORROW_COMMENT : 1
APPROPRIATELY_RX : 1
INCLUDING_DISEASE : 1
DIVALPROEX_AND : 1
PATIENT_DECLINED : 1
CLOSE_TO : 1
COLOR_FOR : 2
EYES_SORE : 1
MARRIED_TESTING : 1
MEDICINE_NOW : 1
ABOUT_WEEK : 1
OR_THAT : 1
AN_UNDERSTANDING : 1
POSITIVE_RESPONSES : 1
FOLLOWS_VERBAL : 1
SESSION_DID : 1
ECF_FRIENDS : 1
HISTORY_INFORMATION : 1
TO_MAINTAIN : 1
IMURA_MALE : 1
USED_ULQ : 1
VISTA_EXERCISE : 1
CLASSIFICATION_TO : 1
MONTHS_VACATION : 1
VIEWED_IN : 1
EDUCATION_ASSESSMENT : 1
LABRAL_SUPERVISOR : 1
DIVERTICULOSIS_TELL : 1
EDUCATION_EVERY : 1
OFFERING_REFERRAL : 1
VACATION_HAS : 1
DIAGNOSIS_KNEE : 1
BM_THIS : 1
TO_DDD : 1
ON_APR : 1
SUPPORT_GROUP : 1
CHART_REVIEW : 1
DISCUSS_RETURN : 1
SORE_TO : 1
TAKES_MORPHINE : 1
REQUEST_SENT : 1
LEAVING_FOR : 1
STEADY_MH : 1
DEVICES_PRODUCTS : 1
NOTE_MEDICATION : 1
OF_TOTAL : 1
CHEEKS_THANKS : 1
NOT_VETERAN : 1
HAS_THE : 2
TRIAL_PROTECTORS : 1
TO_FIRE : 1
NEW_PATIENTS : 1
CONTAINING_ALCOHOL : 2
IN_AN : 1
DOCUMENTS_WE : 1
INCREASED_LAST : 1
HAVING_RACING : 1
FELLOW_PT : 1
DIFFICULTY_TALKING : 1
CONTINUES_TO : 3
VISTA_FOR : 1
SATISFACTORY_REDNESS : 1
COUMADIN_TAB : 1
HRS_SHAKE : 1
NUMBER_LS : 2
DETERMINED_OUTSIDE : 1
PROCEDURE_REMINDER : 1
WK_GAIT : 1
HERNIA_NEXT : 1
XANAX_SAYS : 1
WERE_CLINICAL : 1
ON_THE : 8
SCHEDULED_GO : 1
SWS_DESIRES : 1
GOAL_HAS : 1
POST_PO : 1
AMBULATORY_RELAXATION : 1
OSTEOARTHRITIC_CHANGES : 1
BECAUSE_HE : 2
OF_YOURSELF : 1
OF_THE : 10
HUMAN_UNITS : 1
HYDROCODONE_ACETAMINOPHEN : 1
APPARENT_SELFADJUSTING : 1
STOP_THEM : 1
COPY_SAME : 1
MIN_RE : 1
ELIMINATION_AMOUNT : 1
PLACE_AMOUNT : 1
INTERVAL_CHANGES : 1
TIME_LATEX : 1
GROUP_REVIVED : 1
TRANSFER_NO : 1
TAMPA_OSAC : 1
FIRST_DOSE : 1
SUPPORT_HAS : 1
HAS_NOT : 2
ROTATOR_TEAR : 1
BELOW_DIMASCIO : 1
STARTED_ON : 2
FRED_NOTIFICATION : 1
IS_LATEX : 1
LPM_REST : 1
SPIRITUAL_ISSUES : 1
VET_TO : 1
AND_REVIEWED : 1
WITH_BLIND : 1
VETERAN_DURING : 1
RECONCILIATION_NOSE : 1
QUARTERLY_TEAM : 1
PER_USUAL : 1
PT_HE : 2
EVIDENCE_ANY : 2
READY_TO : 1
SUSP_ML : 1
AND_TREATMENT : 1
NIGHT_HANGOVER : 1
WITH_HIS : 3
OF_SOB : 1
AC_ON : 1
DETERGENT_TO : 1
IS_REQUESTING : 2
OUT_WHAT : 1
MRI_SKILLS : 1
PATIENT_RELATED : 1
REST_AND : 1
PAIN_BMI : 1
ACTIVITY_OF : 1
THE_CURRENTLY : 1
GO_BR : 1
TO_SOME : 1
THEIR_ADDENDUM : 1
SCHEDULED_SURGERY : 1
TREATMENT_RELATED : 1
IN_APPEARANCE : 1
ASSESSMENT_ANTIBIOTICS : 1
ENVIRONMENTAL_CAP : 1
PROVIDER_SHOULD : 1
THAT_HOW : 1
FIND_WIFE : 1
WILL_CONTINUE : 1
ASSIGNED_PHYSICIAN : 1
THAT_TAKE : 1
TO_FORESKIN : 1
PG_IN : 1
DISPLACEMENT_HLIP : 1
INTO_THE : 1
CLASSIFICATION_REFERRED : 1
CARE_PL : 1
ORAL_MEDICINE : 1
QUESTIONS_WANTING : 1
TAKE_MORE : 1
ISLAND_BREATH : 1
BIO_AT : 1
CAN_EXPECT : 1
AND_CONSCIOUSNESS : 1
BLADDER_CONTINENT : 1
FOLLOWING_THAT : 1
PLAYS_AND : 2
MHICM_HOWEVER : 1
HE_OF : 2
DECLINED_EDUCATION : 1
INFLAMMATION_ALUM : 1
FAMILY_ADDENDUM : 1
NOT_ABLE : 1
ATTENDING_NOTE : 2
PREOP_LIMITED : 1
MEDICATIONS_THAT : 3
ORIENTED_TO : 3
TOILET_NUTRITION : 1
RECEIVING_AND : 1
PATIENT_WHO : 1
METHOCARBAMOL_SULFABENZAMIDE : 1
ANY_ON : 1
HAD_AS : 1
TO_MESSAGE : 1
CALL_TRIAGE : 1
AMIGO_REGISTERED : 1
APPOINTMENT_STATES : 1
WLADENTAL_KIMURA : 1
BILL_NO : 1
BY_SHLDR : 1
DANGEROUS_SELF : 1
MAA_HAS : 1
LEFT_BIG : 1
SPECIMEN_URINE : 1
AND_ANSWER : 1
TO_AM : 1
CONTINENT_OF : 1
ANGIO_CATH : 1
MR_REPORTS : 1
NOTE_PATHOLOGY : 1
HOPEFUL_AND : 1
ATTENDING_PHYSICIAN : 1
ENSURE_PATIENT : 1
THE_FACILITATORS : 1
PULSE_OX : 3
TAKING_OF : 1
NOTE_OF : 2
OMYELITIS_NEUROPATHY : 1
THE_LUMBAR : 1
COOPERATIVE_DETOXING : 1
WARFARIN_STARTED : 1
TAKE_OUTSIDE : 1
BED_FOR : 1
FOR_AXIS : 1
RADIATION_PT : 1
EN_PH : 1
INCREASED_SINCE : 1
MIDLINE_HOME : 1
WAL_OF : 1
CONCERNS_BP : 1
KEEP_LESS : 1
THEY_TAKE : 1
PROGRAM_CONSENT : 1
DRUGS_OUTSIDE : 1
THINKS_HIS : 1
FAIR_MEDICATIONS : 1
SW_ADDITIONAL : 1
WE_LIMITED : 1
ADDRESSED_DATE : 1
ATTENTION_FOCUSED : 1
PATPU_NOTE : 2
ARE_YOU : 1
VISIT_WLADENTAL : 1
HE_TAKING : 1
ENCOURAGE_STABILIZATION : 1
WELL_ORGANIZED : 1
FEELING_AND : 1
VETERAN_CALL : 1
QUESTIONNAIRE_HE : 1
PAIN_IN : 5
DEGREES_ASSOCIATED : 1
PREOP_BODY : 1
BRC_MANUAL : 1
OCCASIONS_HE : 1
AROUND_ASSISTANCE : 1
LESION_POSTTRAUMATIC : 1
AREA_TO : 1
PARTIAL_CIG : 1
YEAROLD_MALE : 1
NEELIMA_KNOW : 1
OUTPATIENT_PROGRAMGROUP : 1
TYPE_OF : 4
DIAGNOSIS_PROCHLORPERAZINE : 1
FOR_SESSION : 1
MARITAL_NEVER : 1
CONGESTED_AGAIN : 1
CENTER_MAY : 1
TO_STRENUOUS : 1
SEEMED_SURPRISED : 1
TO_ST : 1
COMMENT_GLAUC : 1
ON_TRIAL : 1
TOILET_NUMBER : 1
SELLS_ANGELA : 1
ANOTHER_WEIGHT : 1
DIRECTIVES_HEAD : 1
RANDOMIZATION_DATE : 1
IS_CURRENTLY : 1
AN_OPPORTUNITY : 1
PHYSICAL_THERAPY : 1
BY_IS : 1
DIAZEPAM_TAB : 1
SIMETHICONE_ORAL : 1
COMPANY_LETTER : 1
MENTAL_HE : 1
PT_MOVE : 1
HIS_RECOVERY : 1
AFTER_MEDICATION : 1
TEAR_LABRAL : 1
SWEATS_PATIENT : 1
HRS_LAST : 1
HOSPITAL_FOR : 1
FEB_CONSISTENCY : 1
DISTURBANCES_STAFF : 1
NIGHTMARES_TO : 1
INTAKE_IM : 1
HYGIENE_SHOWER : 1
COGNITIVE_LIMITATIONS : 1
ANTIBIOTICS_THEY : 1
TO_RECENT : 1
IT_VET : 1
ATTACHED_APPOINTED : 1
QHS_SLOWLY : 1
SESSIONS_DATE : 1
TH_FRI : 1
WRIST_ON : 1
AT_FEE : 1
EVALUATED_THE : 1
YES_OBJECTIVE : 1
FOR_SEVERAL : 1
EDUCATION_INFORMED : 1
FOR_RECENT : 1
ARMBAND_EVALUATION : 1
VETERANS_RESPONSE : 1
YES_PHYSICIAN : 1
PROJECTED_LENGTH : 1
CHEST_GETTIGN : 1
TOE_PERMINANTLY : 1
FOCUSING_ON : 1
AND_HI : 1
SMOKING_TAKE : 1
WRITE_RECOMMENDATIONS : 1
IMMOBILE_COLOR : 1
IS_AND : 5
REPORTED_TO : 3
NURSING_TRIAGE : 3
WORKING_MEDICAL : 1
FEELING_AS : 1
VOICES_TO : 1
REACH_PT : 1
WHEN_WERE : 1
OUTSIDE_CAN : 1
OF_BOWEL : 2
RESIDENT_PROJECTED : 1
NOTE_MARRIED : 1
YELLOW_URINE : 1
MCG_ORAL : 1
KG_PENDING : 1
STEPS_UCFA : 1
AND_ENVIRONMENT : 1
REPORTS_CURRENT : 1
OF_USED : 1
RACING_NOT : 1
BUT_HAS : 1
PATIENT_WAS : 9
PARTIAL_MHC : 1
OBSERVED_TALKING : 3
ANC_THE : 1
TUES_AND : 1
WANT_NEW : 1
PROVIDED_WAS : 1
DETERIORATION_MEETING : 1
DONE_IN : 1
SECONDARY_PAIN : 2
NEUROPSYCHOLOGY_PERFORMANCE : 1
ACP_AGE : 1
STRENUOUS_NO : 1
POINT_CANCER : 1
PERSONAL_BED : 3
FOR_COMPREHENSVE : 1
OF_PRIMARY : 1
ANC_IN : 1
THAT_EXPIRED : 1
INTRODUCING_TO : 1
YO_WITH : 2
HEART_AND : 2
MINIMAL_LIGHT : 1
PAST_WEEKEND : 1
WED_WILL : 1
PREVENTIVE_EDUCATION : 1
ATTEND_APPOINTMENT : 1
SERVICE_HYPOKALEMIA : 1
PER_VERBALIZED : 1
MRI_COPING : 1
OF_ADHERENCE : 1
LEGIBLE_YES : 1
TOMORROW_FOLLOW : 1
VA_TO : 1
DATE_LATEX : 1
WEIGHED_MH : 1
OXYGEN_DESATURATION : 1
NOT_TALKING : 1
STATED_HAD : 1
GAIT_TRANSFERRING : 2
TEST_RESULT : 1
AND_VSQH : 1
NO_REDNESS : 1
CONTINENT_ACTIVITIES : 2
STILL_MIRAPEX : 1
WAS_ON : 1
IT_SHE : 1
WENT_ST : 1
PATIENTS_WRIST : 1
PHENOBARBITAL_METAB : 1
AND_SURROGATE : 1
FOR_BLOOD : 1
PATIENT_THE : 5
HPI_COLORECTAL : 1
MORPHINE_FOR : 1
TELEPHONE_ADDICTIVE : 1
NO_BLADDER : 1
AND_MOVIES : 1
NEGATIVE_SCORE : 1
IS_SITTING : 1
AND_HOSPITAL : 1
PATHOLOGY_REPORT : 1
METHODS_EVENING : 1
ABOUT_RELATIONSHIP : 1
BID_SWS : 1
PERCOCET_PRN : 1
CENTER_CALLED : 1
DEGAETANO_APPOINTMENT : 1
SURGERY_INVASIVE : 1
HIM_THAT : 1
WELL_TOPICAL : 1
GETS_ON : 1
BLIND_VETERAN : 1
AN_NO : 1
AM_ON : 1
ASSIGNED_TO : 1
NONSLIP_IF : 1
AN_SECURED : 2
ALL_FOR : 1
OF_TEAM : 1
HEART_SULF : 1
HIS_BASELINE : 1
OF_INTENSIVE : 1
REPORTS_HE : 7
MEET_ON : 1
LEANING_HEAD : 1
LIST_REVIEWED : 2
STATUS_EXAMINATION : 1
ACTIVE_PARTIAL : 1
EXTRA_OUT : 1
HIS_CONSISTENCY : 1
OF_MESSAGE : 1
ALCOHOL_DETOXIFICATION : 1
EATING_WELL : 1
TO_PROBLEMS : 1
PAST_DECIDED : 1
SKILLS_WAS : 1
SEEN_STAT : 1
LOW_POSITION : 1
BLACK_OR : 1
LOCAL_MAS : 1
IS_LIST : 1
RUE_IF : 1
OVER_YEAR : 1
ALL_JUMPED : 1
REQUEST_AND : 1
LESION_DAILY : 1
EFFECTIVENESS_OF : 1
SOFT_BREAKFAST : 1
PLEASANT_NEXT : 1
DRAINS_SAFETY : 1
TEMP_INJURY : 1
AGREE_LET : 1
REFERRAL_IF : 1
LIMITATIONS_INSTITUTE : 1
BE_TELEPHONE : 1
EXTENDED_LEAVE : 1
BORDERLINE_VET : 1
CHR_CLEANING : 1
OU_THIS : 1
IN_LEGS : 1
SENT_HEALTH : 1
YES_AND : 1
TABLETS_VENTURA : 1
NKA_CULTURES : 1
TO_THAN : 1
BY_DR : 1
RELIEF_SITE : 1
CONTACT_VET : 1
HE_NOW : 1
AS_SCHEDULE : 1
PAINFUL_HE : 1
PAIN_LEFT : 1
DIAGNOSIS_ALCOHOL : 1
THESE_SYMPTOMS : 1
HP_DIP : 1
WAS_EFFECTIVE : 1
COPING_SKILLS : 1
AND_DIFFICULTY : 1
OFTEN_APPOINTMENT : 1
VASH_THIS : 1
DIAGNOSIS_DEPENDENCE : 1
ENCOURAGEMENT_MENTAL : 1
AND_REFERRAL : 1
COOPERATIVE_NATURE : 1
THIS_MEDICATION : 1
OF_RECORDS : 1
CLICK_IMAGING : 1
THIS_WEIGHT : 1
HOME_PLS : 1
PRIOR_COGNITIVE : 1
SOCIAL_HISTORY : 1
FIGHTING_GUN : 1
DATE_CATEGORY : 1
PLAN_REPORT : 1
EDUCATION_PATIENT : 1
SIGHTED_GUIDE : 1
THIS_EVENING : 1
NOW_INCREASE : 1
FORM_WELL : 1
TIME_OR : 1
NONE_DT : 1
PRO_CALL : 1
ROM_ACTIVE : 1
THE_INCLUDE : 1
UNLISTED_AND : 3
MONITOR_ATTENDING : 1
ALCOHOL_IN : 1
INTENSIVE_PROGRAMGROUP : 1
OTHERS_TASK : 1
ASSISTANCE_NO : 1
CRITERIA_MOST : 1
IS_WAL : 1
VETERAN_IS : 1
YOU_HOW : 2
ABOUT_MR : 1
BREATHING_COMPREHENSVE : 1
MOUTH_TWICE : 1
INSTITUTE_UNIVERSAL : 1
OTHER_PATIENT : 1
DISCHARGE_MEDICATION : 2
THIS_HE : 3
ALUM_MAG : 1
HEP_PLACED : 1
HIS_RIGHT : 1
TELECARE_RECORD : 1
OTHERS_IN : 1
PHYSICIAN_STATUS : 1
AN_OF : 1
PHYSICIAN_ICOTHE : 1
SUCH_AS : 1
VIRUS_VACCINE : 1
HE_MINUTE : 1
AN_INTENSIVE : 1
PROCEDURES_RESTING : 1
CUFF_TEAR : 1
BEEN_RAISED : 1
OR_HE : 1
REHAB_AND : 1
MOUTH_FOUR : 1
DISTRESS_TOLERANCE : 1
TO_YOUR : 2
SHOULD_WITH : 1
ANY_PROGRESS : 1
ORIENTED_DETOXING : 2
SHAKE_FOR : 1
NUR_DAILY : 1
DENTINE_DENTAL : 1
LET_HIM : 1
AND_OPTIMISTIC : 1
LATEST_PAIN : 1
OUR_IS : 1
VET_ILISOME : 1
BY_ME : 2
YOUR_TOTAL : 1
PAIN_PRIMARY : 1
FACT_PARTICIPATED : 1
MEET_HIM : 1
REQUEST_LETTER : 1
MALINGERING_SAFETY : 1
HIS_STAY : 1
WRITING_SKILLS : 1
ROCEPHIN_TRACT : 1
PATIENT_ADVISED : 1
OF_CKD : 1
ME_TO : 1
NOTE_ACTIVITIES : 1
SULLIVAN_VISIT : 1
HAS_ANSWERED : 2
MET_FOR : 2
TO_DISCUSSED : 1
OF_FEATURES : 1
IS_EMPLOYEE : 1
NEXT_WK : 1
SUBSTANCE_AND : 1
EXTINCTION_OF : 1
WITHOUT_HANGOVER : 1
MEDICATIONS_STATUS : 1
MAXIMUM_HRS : 1
RE_FINDING : 1
WAS_ALERT : 2
URINARY_CARE : 1
OF_PT : 1
AFTER_HOURS : 1
STAFF_AS : 1
AT_AVAMC : 1
AGAIN_LESION : 1
UNPROTECTED_TO : 1
ANKLE_AT : 1
AND_THERE : 1
OPTOMISTIC_FOOD : 1
COLOR_EXTRA : 1
HX_OF : 3
IS_IT : 1
WAS_TAKEN : 1
SELF_FAMILY : 1
TO_WRITE : 1
HYPERGLYCEMIA_VOLUME : 1
AND_WORKS : 1
IS_NOT : 3
RECENT_OF : 1
EXCEPTION_MILD : 1
WEEKEND_AND : 1
RELATIONSHIP_TO : 1
ALLERGY_ICDCM : 1
MILD_LOSS : 1
AGAIN_CURRENT : 1
IN_YES : 2
PROSTATE_RESULTS : 1
MAY_EVALUATION : 1
FEELS_CATHETER : 1
RECEIVING_MEDICATIONS : 1
DETOXING_SAFELY : 1
CONTAINING_IN : 1
OL_STOP : 1
OUT_PATIENT : 1
OF_PAIN : 4
RESPIRATIONS_REGULAR : 2
MANAGEMENT_POST : 1
CONTACT_DENVER : 1
BY_PHYSCIALLY : 1
AND_CRITERIA : 1
STAFF_TO : 1
THAN_MENTAL : 1
CANE_THE : 1
BLADDER_LUNCH : 1
KNEE_HAS : 1
SPOKEN_BLIND : 1
PELVIS_ATLANTA : 1
BRISTOL_POSITIVE : 1
HIS_ASSISTANCE : 1
HOME_GOT : 1
NEVER_AND : 1
PT_AGAIN : 1
REINFORCING_CANE : 1
ADDENDUM_TO : 1
HYGIENE_BED : 3
APPT_GOES : 1
EFFUSION_RETURNED : 1
VALVE_NO : 1
PSYCHOSIS_OBSERVED : 1
POST_OFFICE : 1
SHOWS_MILD : 1
UNUSUAL_EDUCATION : 1
IN_ARE : 1
PLAN_CONTINUE : 2
DISABILITY_WITH : 1
LAST_AC : 1
PAIN_RATING : 1
IS_CORRECTED : 1
SKILLS_MR : 1
TOTAL_CHO : 1
THE_MONTH : 1
PO_FOR : 1
AN_PSYCHIATRIC : 1
INFECTION_AXIS : 1
TALK_HIS : 1
RANGE_PROCESS : 1
REPORT_INFORMATION : 1
FROM_THE : 4
PING_ZZPATIENT : 1
ELECTRONICALLY_FILED : 1
FOR_DEPRESSION : 2
CELEBRATING_YEAR : 1
THE_VICTIM : 1
MIMSOME_KNEE : 1
GLARE_WHEN : 1
IS_TEMPERATURE : 1
ALSO_WORKING : 1
SCHEDULED_HE : 2
IS_YEAROLD : 2
PREOP_ASSESSMENT : 1
HEARING_CHR : 1
STABLE_TO : 1
CLINIC_RN : 1
RA_NO : 1
MIW_RACE : 1
MOUTH_PULSE : 1
SWELLING_WORSENING : 1
SPECIFICS_CONTACT : 2
NOTE_EDUCATION : 1
IS_GIVING : 1
BRIGHT_CRADC : 1
SULFABENZAMIDE_SULFATHIAZOLE : 1
OTHER_BELONGINGS : 1
HEAVY_OBJECT : 1
BEGIN_THE : 1
PATCHES_RESP : 1
ADVANCE_HEALTH : 1
PROGRESS_AND : 1
WAS_ESCORTED : 1
VETS_APPEARED : 1
FOR_REFERRAL : 1
DECLINED_ADDITIONAL : 1
STAFF_VET : 1
STILL_PAIN : 1
THE_DETERGENT : 1
PLEASE_CALL : 2
TO_AT : 1
HIS_IRRITABILITY : 1
ACUTE_HOSPTITALIZATION : 1
MORE_PAIN : 1
ANSWERED_COMBAT : 1
PROVIDED_SCREEN : 1
URQ_ULQ : 1
VET_HAS : 1
INFLUENZA_MENTAL : 1
BOTHERED_HIM : 1
PROVIDER_AND : 1
WRITTEN_MATERIAL : 1
HYPOXEMIA_IS : 1
SITE_ED : 1
EVERY_HYDROCHLOROTHIAZIDE : 1
AND_REQD : 1
PRESSURE_TO : 1
BEEN_AFTER : 1
UNEVENTFUL_CU : 1
ASSESSMENT_PAIN : 1
REST_OUTSIDE : 1
YES_LITERATURE : 1
DO_LAUNDRY : 1
END_THE : 1
PLACEMENT_QUESTION : 1
PSG_AND : 1
CONTACT_AT : 1
ARREST_BM : 1
HTN_LVH : 1
IN_HOSPITAL : 1
MMHG_ANY : 1
DIMINISHED_PATIENT : 1
OUT_OF : 2
CARE_SHEET : 1
PATTERN_ZZPATIENT : 1
AT_URINE : 1
HE_CAME : 1
THE_USED : 2
THE_INPATIENT : 1
BEING_IN : 1
PATHOLOGY_SUPERVISOR : 1
MANAGEMENT_HIS : 1
WITH_OVER : 1
UNMASKING_OF : 1
NURSING_INITIAL : 1
THE_CLINIC : 2
YOUR_AND : 1
VETERAN_AS : 1
RESP_PRECISIONXTRA : 1
MORNING_AGITATION : 1
DISCUSSED_WITH : 3
OFFICE_TO : 1
TOPIC_MEDICATION : 1
ADVISE_PATIENT : 1
NOTIFIED_BACK : 1
DID_TALK : 1
CALLED_PATIENT : 1
NO_TIME : 1
OF_FIGHTING : 1
ANSWERS_SPECIFIC : 1
RN_MYOPIA : 1
BREATH_DIMINISHED : 1
ADS_SCHEDULE : 1
URQ_LRQ : 1
FROM_FAMILY : 1
TRANSPORTATION_COMMUNITY : 1
DO_STOP : 1
DC_MOTIVATED : 1
WHOM_IT : 1
HOUR_PRIOR : 1
INTERDISCIPLINARY_MASTER : 1
TWICE_AS : 1
AS_DEFINED : 1
ANXIETY_VETERAN : 1
FEELS_WHEN : 1
ON_TIME : 2
MOUTH_HEIGHT : 1
DISCHARGE_PATIENT : 1
ASSESSMENT_HEADACHE : 1
REQUESTING_WE : 1
USE_HER : 1
GOOD_NEWS : 1
VETERAN_ALSO : 1
SESSION_FOR : 1
IS_MEMBERS : 1
OF_OPTIONS : 1
HAVE_TELL : 1
INPT_DAILY : 1
YES_SCORE : 1
NO_LONGER : 1
YES_NOSHOW : 1
PTSD_SUPPORT : 1
PROCEDURES_CALL : 1
CATH_FLUSHED : 1
STABILIZATION_PROBLEM : 1
BEEN_OBSERVED : 4
ACCURATE_SECURED : 2
HAS_BATTLING : 1
YEAR_NURSE : 1
BUT_HARBOR : 1
HUSBAND_AND : 1
CALL_VA : 1
EVEN_UNLABORED : 1
HIM_WITH : 1
VIEWED_VISTA : 1
BY_FOUR : 1
BRN_JEWELRY : 1
OR_PAIN : 1
OF_AND : 1
FROM_HE : 1
IRRITABLE_AND : 1
THOUGHT_WITH : 1
SURG_CLINIC : 1
OF_OTHERS : 1
ENCOURAGED_USE : 1
SEEN_AND : 1
DRO_NG : 1
DIRECTIVE_PATIENT : 1
PERSONAL_SHOWER : 1
CPRS_RESTING : 1
ADDENDUM_WORK : 1
AND_DO : 1
WE_BACK : 1
UNPROTECTED_SEXUAL : 1
IN_JUNE : 1
TO_APPOINTMENT : 3
CHRONIC_BACK : 1
LEVEL_FUNCTIONNG : 1
EC_TAKE : 1
PLANS_TO : 1
TRAINING_WAS : 1
AGE_CHF : 1
HISTORY_PARTIAL : 1
ANXIETY_NOS : 1
PATIENT_SSN : 1
APPT_AT : 1
YEAR_JUNE : 1
THIAMINE_TAB : 1
AND_FOLLOWS : 1
HYGIENE_SPONGE : 3
TO_EAT : 2
BY_ONE : 1
MH_TRP : 1
MEDICALLY_PAST : 1
TO_PAIN : 2
DISCHARGE_TO : 1
BY_PRESENTED : 1
IS_WAIT : 1
CARE_ING : 1
NOTE_FACIAL : 1
LOCATION_YOU : 1
BY_PHARMACY : 1
LB_ACTIVE : 1
FROM_VETS : 1
HE_NEEDED : 1
OBTAINED_AT : 1
OX_SPECIFICS : 1
TO_OVERALL : 1
BRIGHT_MSW : 1
CAUCASIAN_HERE : 1
TO_FIND : 1
OR_OF : 1
CANCELL_ON : 1
LEFT_TKA : 1
FULL_PAIN : 1
PROVIDERS_WRITE : 1
WOMEN_BY : 1
FRI_VITAL : 1
REQUIRES_NO : 2
PULSE_HAS : 1
SIGHTED_VISUAL : 1
AND_REQUESTED : 1
YOUR_STOMACH : 1
ARRIVED_ON : 1
BUT_STILL : 2
SURVIVAL_STRATEGIES : 1
SYND_IMPRESSION : 1
TRANSFERRED_TO : 1
WRITTEN_POWER : 1
PHYSICIAN_VERBALIZED : 1
CLASS_ALERT : 1
THUR_METHOCARBAMOL : 1
PREVENTIVE_SCREEN : 1
TIME_ASSESSMENT : 1
KNOWLEDGE_MENTAL : 1
HUD_VASH : 1
STOOL_HYGIENE : 2
PRESENTED_TO : 2
REFRAMED_REALITY : 1
PT_WAS : 2
AWARE_OF : 1
ALCOHOL_DRUGS : 1
USED_NOT : 2
DEPT_PROVIDER : 1
STATUS_HAS : 1
GIVEN_CARE : 1
FLUIDS_GIVEN : 1
OUTSIDE_WHILE : 1
PROGRESS_FLU : 1
BENEFITS_MASS : 1
OX_PATIENT : 1
RECENTLY_LOST : 1
CALLING_WAL : 1
MALE_ABILITY : 1
IMPROVED_MIRAPEX : 1
FEELING_THOUGH : 1
DIABETES_SEE : 1
THIS_DURING : 1
MORE_EFFECTIVELY : 1
BE_RESPONSIBLE : 1
INR_AS : 1
PULMONARY_TO : 1
BEFORE_DERM : 1
CHECKIN_PHYSICIAN : 1
TO_LIMITATIONS : 1
SELF_CARE : 1
DEC_DOES : 1
KNOW_FOR : 1
ENCOURAGED_EXERCISE : 1
RESULTS_OF : 1
RELATIONSHIPS_HOBBIES : 1
HOURS_DTR : 1
LOOKING_WOMEN : 1
ASSISTANCE_DURING : 1
KNEE_RESPONSIBILITIES : 1
WT_FOR : 1
VSQH_DETOXING : 1
RELY_HIS : 1
THROUGH_OSAC : 1
THERE_FALL : 2
BY_AN : 2
ODY_MEDICATIONS : 1
OTHERS_THAT : 1
MINS_SHAKE : 1
GROIN_MALE : 1
ORDERED_ADJUSMENT : 1
PROCEDURE_TEAM : 1
YOUR_DOCTOR : 1
ELEVATED_ALT : 1
NSS_ABOUT : 1
PAGES_ENCOURAGED : 1
CLASS_ORIENTED : 1
PATIENT_ABOUT : 1
AND_ACTIVITY : 1
QUESTIONS_CALL : 1
REHABILITATION_PROGRAM : 1
REPOR_SYSTEMIC : 1
OF_MILD : 1
REPORTED_OK : 1
CHIEF_NOTIFICATION : 1
MINUTES_OF : 1
RESULT_HOW : 1
TRANSFER_HE : 1
AFTER_MRI : 1
DISTURBANCES_REPORTED : 1
HX_PRESENTED : 1
ADMISSION_THIS : 1
TELL_ME : 1
MOVEMENTS_SHIFT : 2
SKIN_PT : 1
AS_HE : 2
COORDINATION_AND : 1
FOR_JOINT : 1
INSAM_ACTIVE : 1
STATED_HAVE : 1
AT_AURORA : 1
ALL_HAVE : 1
REPORT_PROCEDURE : 1
PATIENT_ALERT : 1
HAVE_ABOUT : 1
MAKE_HIS : 1
RESTING_IN : 1
THE_GYM : 1
CONTINENT_MOBILITY : 1
IS_EDUCATION : 1
PRUNE_AT : 1
VETERAN_ASSIGNED : 1
TRIAGE_PROTOCOL : 1
REVIEW_OF : 2
REPEAT_UNDERSTANDING : 1
WIDE_THIS : 1
WT_KG : 1
PSYCHIATRIST_BEING : 1
SULFACETAMIDE_SULFATHIAZOLE : 1
URINATE_HAS : 1
BEHIND_REST : 1
PROPER_CALLED : 1
EFFECTS_DRO : 1
EITHER_PERMANENTLY : 1
RANGE_DIDACTIC : 1
THE_BATHROOM : 1
BE_GANGION : 1
ENVIRONMENTAL_DIPHENHYDRAMINE : 1
FIRE_PROBLEMS : 1
HYDROBROMIDE_TAB : 1
WOULD_EXTRA : 1
FOR_GROUP : 1
INVASIVE_CALL : 1
THIS_NOTE : 1
RECOMMENDATIONS_ASKING : 1
NO_REQUIRED : 1
HE_THAT : 3
SICK_YOUR : 1
HAD_WHEN : 1
REPORTS_OF : 1
APPOINTMENT_FOLLOWUP : 1
WORKING_SWEATS : 1
OTHERS_PACING : 1
HER_SIDE : 1
IN_CM : 6
THE_REST : 1
INDIVIDUAL_NOTE : 1
FOR_TH : 1
SOCIAL_FAMILY : 1
CLINIC_HAS : 1
RATE_FINANCIAL : 1
GROUPS_PATIENT : 1
MONITOR_ENCOURAGE : 1
GOT_OUT : 1
REVIEW_AGREEMENT : 1
HAVE_GROWING : 1
OFFERED_POSTTRAUMATIC : 1
OBSERVED_IS : 1
MANAGEMENT_UNLISTED : 3
SCALE_RECEIVING : 1
PROBLEM_THOUGHT : 1
HOMICIDAL_FOOD : 1
RELEASE_PAST : 1
FOR_HAD : 1
FLUOXETINE_QUETIAPINE : 1
RE_ING : 1
ALSO_OUTSTANDING : 1
IS_AWARE : 1
OPTOMISTIC_BREAKFAST : 1
COMPLAINT_NOT : 1
PATIENT_AND : 3
RBC_HGB : 1
OPPORTUNITY_ASK : 2
COGNITIVE_QUETIAPINE : 1
TO_REACH : 1
RECONCILED_REVIEWED : 1
PER_SPOKE : 1
AFFAIRS_HAS : 1
THE_UNIT : 2
THE_CHANGED : 1
IF_POSSIBLE : 1
AT_HUD : 1
DENTAL_PANORAMIC : 1
SEXUAL_DESIRES : 1
SETTING_PERSONAL : 1
SHOULD_AXIS : 1
PER_CDI : 1
AT_ON : 1
ANY_TS : 1
WED_APPT : 1
PACING_TASK : 1
SERVICE_SCALE : 1
ORTHOPEDICS_OUTPATIENTPHYSICIAN : 1
FENTANYL_PATCH : 1
FROM_US : 1
INDICATE_THAT : 1
NOW_SEES : 1
OP_NOTE : 1
CONSUMED_NORMAL : 1
BP_PROCEDURE : 1
FOR_CONSIDERATION : 1
LITTLE_PROGRESS : 1
FOLLOW_UP : 4
MG_TAB : 11
IN_THE : 18
WAS_FUNCTIONAL : 1
GIVEN_SCROTAL : 1
ABSTINENCE_ILL : 1
BEGINS_PARKINSONS : 1
DX_INITIAL : 1
RAL_PLAYS : 1
PT_PAIN : 1
ORDER_RECORD : 1
RECONCILED_PATIENT : 1
FEB_OF : 2
DON_HAS : 1
CALLERS_NAME : 1
PAIN_AND : 3
ROMAN_PHONE : 1
HIS_RATIVE : 1
EXAM_REGAIN : 1
IT_DONE : 1
MH_NURSE : 1
MOUTH_MEDICATIONS : 1
STUDENTS_UNIT : 1
DENIES_SI : 1
BACK_DATE : 1
BIOBURDEN_PROPER : 1
AND_PRN : 1
WAS_WITH : 5
EXAM_CLEAR : 1
NUTRITION_THIS : 1
WOULD_THE : 1
DISCHARGE_OXYGEN : 1
PRACTITIONER_YES : 1
APPOINTMENT_CHECK : 1
PARKINSONIAN_IMPROVED : 1
OUR_GOAL : 1
FOUND_REHABILITATION : 1
RIGHT_AFTER : 1
ROM_PULSE : 1
DESIRES_THIS : 1
NEEDED_BREATHING : 1
FOR_MR : 1
DOCUMENT_WHEN : 1
THE_WHY : 1
FOR_SELF : 1
RARE_HE : 1
MR_KEPT : 1
NOT_HAVE : 1
APPOINTMENT_AT : 2
BY_WIFE : 1
AND_HAS : 7
THE_EXPRESSED : 1
IF_THROUGH : 1
PING_PATTERN : 2
DENTAL_SURG : 1
AGREEMENT_FOR : 1
EYE_FOR : 1
ABOUT_MAKING : 1
TIMEOUT_COMPLAINT : 1
JOURNALING_WALKING : 1
FIRE_BANISTER : 1
MINUTES_FOR : 2
HE_HELP : 1
PARTICIPATED_CONTINUED : 1
EVENING_AFTER : 1
PROTECTORS_PLACE : 6
MINUTE_WEEKLY : 1
WORKING_INJURY : 1
DESATURATION_FOR : 1
VETERAN_HAVING : 1
BEHAVIOR_RESPECTFUL : 1
REQUIRED_LOG : 1
THE_ENCOURAGED : 1
ADDITIONAL_INFORMATION : 1
EXAM_MOTOR : 1
FILM_DX : 1
LOWER_CHO : 1
ALS_WELL : 1
ALT_AXIS : 1
THAT_PEOPLE : 1
ENCOUNTER_HAD : 1
BLOOD_CULTURES : 1
SPONGE_ON : 1
OBSERVED_THIS : 1
WITH_FOOD : 1
PAST_SOCIAL : 1
RESPONSIBILITIES_DURATION : 1
BY_MEDICAL : 1
IVF_ANTICOAGULANT : 1
AND_RELAXED : 1
TRANSPORTATION_PROVIDED : 1
IMPROVED_IVF : 1
BE_TO : 5
ETOH_BIPOLAR : 1
IN_GIVE : 1
THE_YEARS : 1
YEAROLD_AFRICAN : 1
IN_DECLINED : 3
PARTICIPATED_IN : 1
CELLPHONE_LG : 1
HE_GOES : 1
LIKE_TO : 1
DOSE_COUMADIN : 1
AND_OFFERING : 1
WILL_FOR : 1
PICTURES_ARE : 1
MH_OP : 1
HEARING_HEARING : 1
HAVING_CURRENT : 1
EXAM_LUNGS : 1
TOOLS_DIDACTIC : 1
SEE_NOTE : 1
IN_MHICM : 1
ANGIO_FLUSHED : 1
WHETHER_NOT : 1
TEACHING_ER : 1
MEDICAL_HAS : 1
NOT_TO : 2
THIS_WRITER : 3
CALLBACK_FOR : 1
BIRCH_HE : 1
BRACELET_SAID : 1
ADDENDUM_PULSE : 1
MEDICATIONS_PLEASE : 1
PERFORMED_RESTING : 1
FISTULA_PER : 1
FOLLOWING_MEDICATIONS : 1
HE_HAD : 4
HE_OUT : 1
ANTIBIOTICS_GIVEN : 1
HAD_AN : 1
AFTER_RESIN : 1
CONCERN_ADDITION : 1
STABLE_BE : 1
FIELD_DEFECT : 1
BRP_NONE : 1
LATEX_ALLERGY : 1
PROVIDER_PG : 1
WHICH_AFTER : 1
WAKES_SHAKY : 1
INCREASE_RISK : 1
HIS_MEDS : 1
TES_TRIAMTE : 1
IT_MG : 1
OPTIONS_NOTE : 1
ACTIVE_XANAX : 1
AT_ENCOUNTER : 1
TO_ECF : 1
AFRICAN_AN : 2
COLORECTAL_CANCER : 1
APPOINTMENT_PROVIDERS : 1
GETTING_PAIN : 1
MAKE_PROGRESS : 1
TIME_WE : 1
HOUR_TO : 1
ARRIVAL_RESPIRATION : 1
SCALE_PERCOCET : 1
MR_ASKING : 1
FOR_RESULT : 1
CARE_SHAMPOO : 2
THE_AS : 2
CLIENTS_HIS : 1
ATTEND_OSAC : 1
CONNECTED_TO : 1
SPC_FOR : 1
RECEIVED_BELOW : 1
PATIENT_CONTINENT : 5
WAS_AGREEABLE : 1
BY_OUTSIDE : 1
NOTIFIED_OF : 1
AGREEMENT_YOUR : 1
RANGED_MILDLY : 1
RECONCILIATION_EDUCATION : 1
HOURS_IF : 1
MEETING_SKIN : 1
WITNESS_COORDINATOR : 1
TAKE_SOME : 1
CONVENIENCE_YOU : 1
NOT_IT : 1
LONG_OF : 1
PROSTATE_INTENSIVE : 1
BRIEF_OP : 1
MR_DID : 1
HOWEVER_SENIOR : 1
SHE_HAD : 1
IN_HIP : 1
WE_WERE : 1
TYPICAL_NORMAL : 1
NOTE_SAW : 1
FOR_DID : 1
OUTSIDE_SCANNED : 1
INPATIENT_DOCUMENTS : 1
VETERAN_GIVEN : 1
PROCEDURE_RN : 1
ING_ADVANCE : 1
DISTRESS_HANDOUT : 1
ON_TYPICAL : 1
BEFORE_HTN : 1
HAVING_HAD : 1
REPORTED_BEFORE : 1
PT_DIVALPROEX : 1
SEEN_VISUAL : 1
THE_ES : 1
JOAN_THE : 1
PULSE_FOR : 1
MHICM_TEAM : 1
ISSUES_CE : 1
CAUSE_OF : 1
SAFE_MEANWHILE : 1
TREATED_IN : 1
DEPT_NURSING : 1
LIKE_CHEST : 1
CONDITIONS_IS : 1
ON_LEAVE : 1
TO_FROM : 1
NO_OF : 2
REVIEW_VIGAMOX : 1
UNMASKING_PARKINSONIAN : 1
WAS_THINGS : 1
WILL_SEND : 1
HOME_ADDRESS : 1
HE_ENJOYS : 1
ING_OWP : 1
ACTIVITY_YES : 1
IDEA_THAT : 1
AND_ARRANGING : 1
THAT_SHE : 2
ASSESSMENT_CLAUDIO : 1
DISCUSSED_ANGER : 1
PURSUING_WITH : 1
LIVE_SEEN : 1
MEDICATION_MEDICINE : 1
IMAGING_HEP : 1
GOAL_PT : 1
LOCATION_DESCRIPTION : 1
PARTIAL_CUFF : 1
THE_OCR : 1
DX_CODING : 1
PHYSICAL_SKILLED : 1
INCLUDE_THANKS : 1
OR_EVALUATION : 1
COMMENT_NO : 1
PROSTATE_BX : 1
OXYGEN_DURING : 1
CONSULT_HOW : 1
UCFA_IN : 1
ASSESSMENT_DEHYDRATED : 1
TO_TIRED : 1
HIS_BILL : 1
EXPRESSION_SMILING : 1
OF_ANTISOCIAL : 1
IMURA_CAROLYN : 1
ADMISSION_IS : 1
TO_INTO : 1
MEDICATION_NIGHT : 1
FLUVASTATIN_ROSUVASTATIN : 1
HAVE_HIGHER : 1
BUT_IN : 1
WAS_NO : 1
AND_DISORDER : 1
IDENTIFIED_ADVISE : 1
STEPS_NEEDS : 1
THE_AGREEMENT : 1
INSULIN_AC : 1
AGAIN_DOESNT : 1
GERD_HIP : 1
IT_DIAZEPAM : 1
PHOTOS_TAKEN : 1
YOU_MANY : 2
SX_ANXIETY : 1
CLINIC_NURSING : 1
SYSTEMIC_MEDS : 1
BLINDNESS_ONLY : 1
LG_TAB : 1
MULTIAXIAL_CLASSIFICATION : 1
INFORMED_WAS : 2
NO_MED : 1
CODE_HC : 1
OWN_KNOWS : 1
MAXIMUM_USAGE : 1
AND_GOOD : 1
PASSING_BY : 1
VETERAN_SEEMED : 1
PHYSICIAN_ON : 1
YOUR_OD : 1
NURSING_THEN : 1
BROTHER_PT : 1
RECORD_OTHER : 1
AFLURIA_INFLUENZA : 1
QUESTIONNAIRE_HAS : 1
DISCHARGE_AND : 1
AND_DONT : 1
FOR_DANGEROUS : 1
LIVING_AGE : 1
NOW_RECENTLY : 1
SUPERVISION_ENCOURAGEMENT : 2
GROUP_POSTTRAUMATIC : 1
PO_BEDTIME : 1
LRQ_USING : 1
MEDS_STATING : 1
AN_ACCURATE : 2
EVALUATION_CAT : 1
THAT_ANGER : 1
FOR_PACT : 1
NOT_RESP : 1
THE_DENIES : 1
REFERRED_IN : 1
ROUTES_MEANINGFUL : 1
HI_ENDING : 1
IMMEDIATE_RELIEF : 1
AND_WHEN : 1
YES_AT : 1
KNEE_LEG : 1
AND_AGREE : 1
THAT_BOTHERED : 1
BUT_ANY : 1
HP_SURG : 1
CUFF_TAUGHT : 1
TAB_MG : 3
TWOHOUR_VISUAL : 1
SUGGESTED_FROM : 1
OX_HE : 1
ENDING_FLUVASTATIN : 1
LAWN_SAT : 1
NAME_OF : 1
OF_ENDING : 1
DIMASCIO_NANCY : 1
DISCUSSED_ADVANCED : 1
MSLT_DISCUSSED : 1
NOW_PRESSURE : 1
CENTER_FOR : 1
SIGNED_CALL : 1
THEN_YESTER : 1
MUST_PRECERTIFIED : 1
VERBAL_HEART : 1
SOUNDS_DIMINISHED : 1
PROBLEM_ALTERED : 1
RETURNED_FROM : 1
COMPLICATIONS_APPEARANCE : 1
IS_ADJUSTING : 1
NEW_LISTENED : 1
RELINED_LOWER : 1
OF_SELF : 1
MULTIAXIAL_REFERRED : 1
DID_LIKE : 1
YES_BELOW : 1
HE_BEING : 2
HIS_STATUS : 1
THEN_HE : 1
GETTING_WORSE : 1
WILL_DEMONSTRATE : 1
TAKE_ONE : 8
US_IN : 1
EATING_DRINKING : 1
PT_GOALS : 1
PROGRESSIVE_ORIENTED : 1
EYEGLASSES_CELLPHONE : 1
OR_NOT : 2
FACILITY_APPOINTED : 1
EDUCATION_NOTE : 3
RELAXED_MORE : 1
DEVELOP_SKILLS : 1
NOTE_WITH : 2
MEANWHILE_WRITTER : 1
PATIENTS_VISIT : 1
WITH_USED : 1
CARE_IDEATION : 1
WOMEN_PASSING : 1
WILL_CONTACT : 2
WELL_AWARE : 1
KERATITIS_OPHTH : 1
HAVING_TO : 1
CONCERN_BEEN : 1
ZZECF_NOTE : 1
THE_ASKED : 1
FOLLOW_RESTRICTED : 1
RECENTLY_HIS : 1
MANAGER_ANY : 1
NOT_EDUCATION : 1
LMSW_CPS : 1
VETERAN_THE : 1
MRI_CT : 1
DEHYDRATED_OF : 1
INTENSIVE_SETTING : 1
ROBIN_REVIEW : 1
CYST_DX : 1
SOUNDS_CLEAR : 1
LOCK_PLACED : 1
FOR_CESSATION : 1
DEFERRED_VITAL : 1
TAKING_MEDICATIONS : 1
AS_THOUGH : 1
NA_SERVICE : 1
FAMILY_EDUCATION : 2
WASHER_DRYER : 1
ATTENDING_AND : 1
EX_EVALUATION : 1
THIS_TOMORROW : 1
AUTHOR_SELLS : 1
TREATMENT_TO : 1
FOOD_PHYSICIAN : 1
CFCF_INHL : 1
RELIEF_REPLACES : 1
CONGESTION_NOT : 1
WILL_INCREASE : 1
FATHER_DIAGNOSED : 1
AND_PROSTHETIC : 1
OR_TO : 3
NUMBER_BOWEL : 2
THE_COUNTER : 1
TRANSFERRING_STATUS : 1
YES_LISTED : 1
YOUR_MEDICATIONS : 1
AND_THAT : 4
VISIT_ONGOING : 1
APPEARED_FOCUSED : 1
MOTOR_PATIENT : 1
SURGERY_HIS : 1
HAVE_BOTHERED : 1
MOUTH_CARE : 1
PO_PT : 1
NOW_FOR : 1
SPINE_BETWEEN : 1
MEDICATION_RESP : 1
THE_STAFF : 1
PLACE_HIP : 1
HIS_BIC : 1
TIRED_ARRIVED : 1
PERCEPTION_SLIGHTLY : 1
PARANOIA_AND : 1
CALL_SYMPTOM : 1
CMS_TEMP : 1
HE_SAYS : 1
PAIN_DATE : 1
ENCOURAGED_TO : 1
HIS_TOMORROW : 1
VERBALIZED_AN : 1
ON_CONSULTED : 1
THE_BRONZE : 1
WHETHER_OR : 1
BEHAVIOR_COOPERATIVE : 1
WITH_NURSE : 1
LOCATOR_REPORTS : 1
AND_BY : 3
STUDY_NO : 1
NO_WIDE : 1
SAFETY_STATUS : 1
PT_STATES : 2
ALLERGIES_ORIENTED : 1
FOR_GAIT : 1
PREOP_PAIN : 1
THE_ABOVE : 1
WITH_OTHERS : 2
ABOUT_TREATMENT : 1
WAS_GIVEN : 1
PAIN_SMOKER : 1
MEETING_THE : 1
ADDED_TO : 1
NONE_OU : 1
SX_OF : 1
CONTACTED_THIS : 1
THEY_ALL : 1
MEDS_FOR : 2
MASTER_TREATMENT : 1
BE_HEP : 1
NO_STATUS : 1
REG_FOR : 1
SHAMPOO_HAND : 1
NURSING_NO : 2
HX_PHARMACY : 1
REFUSAL_TO : 1
SOB_SINUS : 1
FEATURES_IMPROVED : 1
MYOPIA_OF : 1
TOPIC_COMMENTS : 1
TO_CONTINUE : 2
AND_ESCORTED : 1
GULF_WAR : 1
WITH_PULMONARY : 1
CONFUSED_AGITATED : 1
PATIENT_PLEASE : 1
FELT_HOPEFUL : 1
OF_MAJOR : 1
EDUCATION_THE : 1
JEWELRY_NECKLACE : 1
MAJOR_ARE : 1
COME_TO : 1
POSTTRAUM_STRESS : 1
INCLUDE_HISTORY : 1
TRIGGER_RELAPSE : 1
TO_OF : 3
OF_THEIR : 1
EPIN_USED : 1
PHYSICIAN_ODY : 3
NOVEMBER_POSITIVE : 1
OF_ANY : 2
ASSESSMENT_ONE : 1
FIRE_HE : 1
ROCEPHIN_GM : 1
ANY_HAD : 1
THE_PROBLEMS : 1
DISCUSSED_THE : 2
DRYER_AND : 1
SCALE_PRESSURE : 1
FALL_SCREEN : 1
LUNG_IMPRESSION : 1
LIVING_WILL : 1
LAB_NOTIFICATION : 2
CLINICAL_ACTIVE : 1
HEPATITIS_AT : 1
STRETCHES_NO : 1
NO_RATED : 1
STATUS_IS : 1
BEEN_PNEUMONIA : 1
CLEANING_SY : 1
THAT_HASNT : 1
OLD_ATTENDING : 1
LUNCH_FOOD : 1
PHYSICIAN_PHYSICIAN : 2
OCCURRENCE_OR : 1
INDIVIDUAL_SESSION : 1
THE_WAS : 3
DUE_DIAGNOSIS : 1
PT_CLINIC : 1
DIVORCED_NO : 1
IF_NEUROSURGERY : 1
IN_MEDICATION : 2
HELPFUL_AA : 1
EXPRESSE_CARE : 1
AMOUNT_THE : 1
DEPRESSION_COMPLAINT : 1
LISTED_OBJECTIVE : 1
IT_MAY : 1
EVENT_YES : 1
TIMES_BOOTH : 1
RE_DONOVAN : 1
SMILING_CONSTANTLY : 1
PATIENT_DISCUSSING : 1
AM_DIPLOPIA : 1
NO_SKIN : 1
SUBSTANCE_ABUSE : 1
BREATHING_SYRINGE : 1
HOW_ALSO : 1
YES_PROBLEM : 1
INJ_UNITS : 1
NAME_IF : 1
HYDROCELECTOMY_PAIN : 1
PM_ANNISTON : 1
LIVES_WITH : 1
WHICH_WAS : 1
STARTED_PLAN : 1
TRIAGE_COOPERATIVE : 1
AND_UNLABORED : 1
MANAGEMENT_PATIENT : 1
THAT_MR : 1
APPOINTMENT_TELEPHONE : 1
SMOKING_NO : 1
ADVANCED_APR : 1
WILL_ALSO : 1
ORIENTED_HE : 1
CALLED_CITALOPRAM : 1
VA_PT : 1
IVF_PHARM : 1
NOTE_COMMENT : 1
EQUIP_POLPS : 1
ASSESSMENT_ENDOSCOPIST : 1
DIP_DIAGNOSIS : 1
TO_LOG : 1
HAND_WITH : 1
UP_RARE : 1
PATIENT_CALLING : 1
NARCOTIC_THE : 1
LIPID_HE : 1
INITIAL_RANDOMIZATION : 1
FOR_AND : 3
CARE_PLAN : 2
INDEPENDENT_COMMENT : 1
ANNISTON_CLINIC : 1
PHARMACY_CONTACT : 1
QUETIAPINE_TAB : 1
ALERT_COOPERATIVE : 1
CITY_OR : 1
ALLERGIES_VIA : 1
TO_DATE : 1
RETURNS_REEVALUATION : 1
DUE_ADDENDUM : 1
INFORMATION_PAGE : 1
IN_ABILITY : 1
GOAL_VETERAN : 1
MEDICATIONS_INDICATE : 1
THE_PAST : 8
AND_SAID : 1
DIABETES_VISTA : 1
OR_WAS : 1
ANY_EDUCATION : 1
HYPERLIPEDEMIA_PRESENTED : 1
PAIN_BLOOD : 1
WITH_PSYCHIATRIST : 1
WILL_DETERMINED : 1
CL_FOR : 1
DUAL_TREATMENT : 1
PO_BID : 1
INTERVERTEBRAL_DISPLACEMENT : 1
IS_RESTRICTED : 1
BE_VIEWED : 1
FOOD_DRINKS : 3
PATIENTS_RECEIVING : 1
NO_ASSISTANCE : 2
COMPLAINT_OF : 3
LIPID_RESULTS : 1
ARE_CONTINUE : 1
HIS_LEVEL : 1
HASNT_BEEN : 1
THREE_ACTIVE : 1
CONSCIOUSNESS_BOTH : 1
AN_TO : 1
APPEARANCE_WITH : 1
FOR_INFECTION : 2
AT_UP : 1
PHONE_SEE : 1
STATUS_SESSION : 1
IMPROVED_STILL : 1
YOU_CAN : 1
TIME_AND : 1
COMPLAINT_NOTED : 1
PATIENT_ANYTHING : 1
THERAPY_APPOINTMENT : 2
BE_DONE : 1
PATIENTS_SPENT : 1
THAN_THE : 1
SI_HI : 1
HE_RETURNS : 1
SAME_DOSE : 1
REDUCTION_SPECIFICS : 1
HOPEFUL_OPTIMISTIC : 1
CONSTANTLY_HOURS : 1
USE_SEXUAL : 1
MINUTES_YEAR : 1
DEPRESSIVE_DISORDER : 1
DISABILITIES_HAVE : 1
WITH_HIM : 2
VETERANS_SISTER : 1
DEPRESSION_AND : 1
STATUS_DISCHARGE : 1
AMOUNT_TIME : 1
REST_PUPIL : 1
NIGHTMARES_HAVE : 1
HAD_ABOUT : 1
BED_SELF : 1
FORMER_OF : 1
INTERVENTIONS_OF : 1
PLACE_APPLICABLE : 1
IN_BE : 1
THIS_INSTRUCTED : 1
REPLACEMENT_AND : 1
CALL_CBC : 2
SHIELA_THE : 1
TREATMENT_UPDATE : 1
BE_SURGERY : 1
WILL_AFTER : 1
FRIENDS_HOME : 1
TYPICAL_WEIGHT : 1
LIGHT_FROM : 1
ACCESS_DISP : 1
RUE_WFL : 1
OF_LEFT : 1
NECESSARY_WRITTEN : 1
WIFE_OUT : 1
BACK_WITH : 2
NEXT_WAL : 1
BEEN_SMILING : 3
TIME_THE : 1
HAVE_TO : 1
OF_SIMVASTATIN : 1
TAMPA_TO : 1
PURSED_BREATHING : 1
PAD_PLACEMENT : 1
EDUCATION_INDIVIDUAL : 1
AGE_URINE : 1
CALL_MEDICATION : 1
WEEKLY_HOME : 1
ASSESSED_WAS : 1
PAST_PARTIAL : 1
PULSE_RECHECKED : 1
FOR_SCHEDULING : 1
COFFEE_ALL : 1
REVIVED_THIS : 1
HAS_PROSTATE : 1
YEAROLD_ABILITY : 1
GOES_TO : 1
CONTINUED_REGARDING : 1
HOME_WHO : 1
KILL_THEM : 1
YEAROLD_AM : 1
AGAIN_FOR : 1
RESPONSIBLE_FOR : 2
ON_TH : 1
MEDS_PT : 1
YES_MEDICATION : 1
PHYSICALLY_WILL : 1
VISITS_MONITOR : 1
RE_REQUESTED : 1
COMPTON_TRP : 1
IS_PICKING : 1
HYGIENE_AND : 1
PREVIOUS_INTERVENTI : 1
CAME_LAST : 1
INABA_SMOKING : 1
STATUS_DENTAL : 1
FOR_MINUTES : 2
TOMORROW_IS : 1
DENTAL_FILM : 1
PERMANENTLY_OR : 1
SCANNED_INPATIENT : 1
REPORTS_HAVING : 3
WRITER_WHEN : 1
SIGNED_RELEASE : 1
TO_DISCHARGED : 1
AN_NAUSEA : 1
NO_THIS : 1
ORAL_DX : 1
DO_WITH : 1
HISTORY_HTN : 1
SPECIFICALLY_DUAL : 1
CBOC_LAB : 1
PT_TO : 5
OTHER_LB : 1
URINE_VERBALIZED : 1
BLACK_AFRICAN : 1
APPOINTMENT_DID : 1
PAIN_ROTATION : 1
THAN_LAST : 1
FILED_MR : 1
UNTIL_YESTER : 1
UNIT_BOARD : 1
THERAPY_FOCUSING : 1
NPH_INJ : 1
AND_PAST : 1
SAME_OF : 2
SHAVE_SHAMPOO : 1
LIMITED_VISION : 1
FROM_FALLS : 1
VISUAL_WILL : 1
THEM_CARE : 1
NSC_PENSION : 1
COMMENT_HEADACHE : 1
ED_LEFT : 1
YEAR_WAL : 1
PRUNE_JUICE : 1
AMBULATION_ANY : 1
OKLAHOMA_OR : 1
PREPROCEDURE_ASSESSMENT : 1
TO_OTHER : 1
OF_MRI : 1
INDIVIDUAL_MINUTES : 1
WRITTEN_CLINICAL : 1
PREOP_GIVEN : 1
SKIN_FOR : 1
DENTAL_OUTPATIENT : 1
PAIN_IS : 3
FOR_LIVING : 1
HIS_WAS : 1
ALCOHOL_DEPENDENCE : 2
ATTEND_GROUP : 1
MAY_IN : 1
MULTIPLE_OPERATING : 1
ABOUT_GETTING : 2
FEE_SC : 1
PER_NOTE : 1
DEPRESSED_IRRITABLE : 1
VERBALIZATION_UNDERSTANDING : 1
THERE_BEEN : 2
TO_REPORTS : 2
BE_DATE : 1
REFERRAL_AS : 1
LESION_TWICE : 1
NO_LAST : 1
PHARM_ANTICOAGULANT : 2
MOVE_FROM : 1
MH_HUDVASHNOTE : 1
BLOOD_VITALS : 1
SEP_KIMURA : 1
ELIMINATION_NUMBER : 1
FACT_THAT : 2
PRIMARY_CARE : 3
TREATMENT_PT : 1
BY_THREE : 2
OSAC_COUNSELING : 1
DO_HIS : 1
HERE_AURORA : 1
HOSPTITALIZATION_ED : 1
AFFECT_IS : 1
TO_PERFORM : 2
AND_SERVICE : 3
PULSE_PATIENT : 2
COALITION_INDEPENDENT : 1
PATIENT_EPIS : 1
GROUP_PATIENT : 1
RELIEF_AFTER : 1
TRIAGE_ASSESSMENT : 1
REEVALUATION_IS : 1
VISIT_STARTED : 1
IS_BY : 2
TALKING_TO : 3
RACING_HEART : 1
REGISTERED_NURSE : 1
DIAGNOSIS_THE : 1
CALL_DATE : 2
HIM_AND : 1
QUESTIONS_TO : 1
ON_BEFORE : 1
YOU_FEEL : 1
ORAL_PO : 1
MORNING_PT : 1
VA_HIS : 1
PRESCRIPTION_MEDICATION : 1
VETERAN_TYPE : 1
BEEN_LOOKING : 1
PATIENT_OF : 1
FOR_MEDICATION : 2
DISCHARGE_DISCHARGE : 2
CONTINUE_CANE : 1
ACTIVE_MEDICATIONS : 4
LUNGS_CLEAR : 1
WEIGHT_LB : 4
OPTICIAN_YOU : 1
BLINDNESS_SEES : 1
ASK_YOU : 1
IN_MH : 1
ANESTHESIA_REG : 1
EXPECT_TO : 1
ABOVE_NOTE : 1
TRAMADOL_MG : 1
FEEDBACK_THE : 1
CAN_CONVINCE : 1
THE_ADS : 1
WHEN_ADDENDUM : 1
ADMISSION_WAS : 1
DATWBC_RBC : 1
INCLUDE_MINNEAP : 1
NO_COMMENTS : 1
DEPRESSION_SYMPTOMS : 1
WBC_BLOOD : 1
HOPELESSNESS_THAN : 1
REQUESTED_CALL : 1
PERFORMANCE_ALL : 1
HYDROCODONE_MG : 1
FAMILY_AND : 1
HIS_GI : 1
FEEDBACK_EEG : 1
HELPFUL_ATTENDING : 1
AND_HIS : 2
YES_IS : 1
HE_DIAGNOSED : 1
THIS_SW : 1
APPOINTMENT_IN : 2
AND_IRRITABLE : 1
ADL_NOTE : 4
STATE_LIGAMENTAL : 1
LAND_SPECIMENS : 1
USUAL_THIS : 1
HEALTH_CONCERNS : 1
SCAN_OF : 1
HAVING_GONE : 1
BY_ASSISTANT : 1
ALSO_THAT : 1
WANTS_POSSIBLE : 1
PAIN_CHANGED : 1
BIOPSY_APR : 1
ACTIVE_PRIMARY : 1
STOOL_CVA : 1
NOW_WITH : 1
THE_YOUR : 1
HEALTH_EDUCATION : 1
THEN_BRIEF : 1
THEMSELVES_TO : 1
AFLURIA_VIRUS : 1
UPSET_HAS : 1
REG_CALLBACK : 1
JUMPED_OUT : 1
AND_DIVERTICULOSIS : 1
OBSERVED_IN : 1
VICTIM_COORDINATOR : 1
PROCHLORPERAZINE_WERE : 1
FLUIDS_NOT : 1
TESTING_DATE : 1
MR_BLIND : 1
ORDERED_TREATMENT : 1
CONSTANTLY_BROUGHT : 1
PATIENT_PURSED : 1
NEUROLOGY_FOLLOWUP : 1
PATIENT_INDICATES : 1
REFERRAL_MOVE : 1
PLACE_ZZPATIENT : 1
MANUAL_HE : 1
KNEE_PAIN : 2
STEADY_JOB : 1
VETERAN_DISCUSSED : 1
FALL_INTERVENTIONS : 1
HELPLESSNESS_HOPELESSNESS : 1
MAA_HOW : 1
SECURED_MYALGIA : 1
MHH_STATUS : 1
AREA_INCLUDE : 1
PNEUMONIA_THE : 1
PRIMARY_DATE : 1
PHYSICIAN_MEDICATIONS : 1
VA_HOSPITAL : 1
TO_PATIENT : 7
ON_DERM : 1
PROGRAM_BUT : 1
CONTACT_NUMBER : 2
TABLETS_PER : 1
MG_PO : 4
GENTLEMAN_AT : 1
LONG_HIS : 1
VACCINE_MENTAL : 1
PLAYS_LEBOARD : 1
BORDER_THE : 1
SOME_RELIEF : 1
OF_NARCOTIC : 1
OF_SPENT : 1
WRITER_THE : 1
EXTRA_WERE : 1
DIET_THAT : 1
HAS_EXAM : 1
RIGHT_FOR : 1
FOR_MAJOR : 1
WK_PRE : 1
TO_TWICE : 2
INFORMATION_ES : 1
MEDICAL_AND : 1
BUT_DONT : 1
DISPLAYING_CARDIAC : 1
CORTICAL_CHANGES : 1
PICTURES_OBTAINE : 1
NO_DISTRESS : 1
HOME_VISIT : 1
ON_DEC : 1
IDEATION_PARANOIA : 1
THE_MORNING : 1
DISK_CONDITIONS : 1
ONE_THE : 1
WORKS_ALLERGIES : 1
BLADDER_PING : 1
PER_THIS : 1
RNS_SOCIAL : 1
BY_TO : 1
DAILY_DISSABIL : 1
YES_ADAPTIVE : 1
ASSOCIATE_PROVIDER : 3
GOALS_VETERAN : 1
KNOWN_ORIENTED : 1
ACTIVITIES_DAILY : 4
IMPAIRED_HYDROCELECTOMY : 1
OBSERVATION_FOR : 1
REST_SIZE : 1
REGAIN_IN : 1
ANY_SYMPTOMS : 1
THROUGHOUT_SESSION : 1
INDIVIDUAL_THERAPY : 2
ROI_AS : 1
VOICES_PT : 1
DONOVAN_CALL : 1
AND_STATED : 1
MR_THAT : 1
RIGHT_PROSTATE : 1
TOILET_ASSISTANCE : 1
HIGHER_ADDITIONAL : 1
WHICH_IS : 1
HIM_HIS : 1
SPASMS_HYPERLIPIDEMIA : 1
ON_PATIENTS : 1
ME_ABOUT : 1
AM_LENGTH : 1
WAS_INSTRUCTED : 1
TO_QUESTIONS : 4
SHE_CAME : 1
OTHERS_COLOR : 1
SKILLS_HE : 1
INFLUENZA_NO : 1
MORNING_OR : 1
IN_PATIENT : 1
SUMMARY_OF : 1
ONE_WEEK : 1
DOSE_FOR : 1
NORMAL_FOR : 1
PULSE_SEP : 1
FOR_SMOKING : 1
INSTABILITY_LEFT : 1
REPORTED_NO : 1
CONFLICTING_HX : 1
FAIL_THAT : 1
ANSWERS_TO : 1
HAD_MADE : 1
AND_AND : 6
OCT_IS : 1
PROBLEMS_LCSW : 1
APR_OF : 1
LETTER_THAT : 1
ASSESSMENT_AUSCULTATION : 1
DRINK_SCIATICA : 1
DISCHARGE_NEEDS : 1
HEART_WAS : 1
STOP_PATIENT : 1
SOME_TIME : 1
HAVE_ORDERED : 1
OF_SOCIAL : 1
OUTSIDE_BORDER : 1
PART_NURSING : 2
ARMBAND_PATIENTS : 1
THERE_WERE : 1
FROM_THIS : 1
ESCORTED_NURSING : 1
DATE_DENTAL : 1
MADE_RE : 1
PULSE_ADVERSE : 1
INSTRUCTED_TO : 2
CLAUDIO_FELLOW : 1
TAKING_ORDERED : 1
WITNESS_OF : 1
DONT_WHAT : 1
ED_REPORT : 1
WERE_TAKEN : 1
SPECIAL_PICTURES : 1
OR_PRODUCTS : 1
AVH_HE : 1
BEEN_BEFORE : 1
NO_CALL : 1
BATH_THIS : 1
IN_IMAGING : 1
BLOOD_ON : 1
THE_TELEPHONE : 1
UPON_DC : 1
VETERAN_REPORTED : 4
HISTORY_MORE : 1
TASK_RESIDENT : 1
URINAL_CONSUMED : 1
PLAN_IDEATION : 1
APPOINTMENT_FROM : 1
IN_PLACE : 6
RETURNED_NO : 1
TREATMENT_RN : 1
RELAXATION_PAIN : 1
IS_ALWAYS : 1
CONTACT_DISORDER : 1
STAFF_HAS : 1
PROLONG_STRESS : 1
RESULT_REF : 1
THIS_YEAR : 1
TRAITS_AND : 1
FILED_IS : 1
DENIES_HI : 1
ECF_DON : 1
THAT_NEEDED : 1
TO_MEETING : 1
IN_RECORD : 1
NURSING_PREOP : 1
MOBILITY_ACTIVITIES : 1
SUMMARY_REASON : 1
ANXIETY_SYMPTOMS : 1
NO_FOR : 2
LCSW_ADDRESSED : 1
HAVE_BEEN : 4
OTHER_NO : 1
HE_VET : 1
ORAL_PROGRESS : 1
EVENING_PRIOR : 1
AT_MEDICATION : 1
WARFARIN_ON : 1
DOSE_TIME : 1
BACK_THEY : 1
PER_CHART : 1
BLOOD_MEDICATION : 1
CONTINUE_THIS : 1
VERBALIZATION_OF : 1
DATE_WILL : 1
FOR_APPOINTMENT : 3
WITHDRAWAL_BY : 1
YES_EXTRA : 1
AND_BIT : 1
SPONGE_HIP : 1
IN_LIST : 1
FOR_SURE : 1
DEPRESSED_AND : 1
CONFIRMED_AN : 2
WILL_HAVING : 1
SAW_AND : 1
HEAD_NOTE : 1
ADDENDUM_MST : 1
LENGTHY_PATIENT : 1
NO_EXAM : 1
AS_STATES : 1
WEARING_NONSLIP : 1
FOR_SC : 1
PATIENT_PRIVILEGES : 3
AND_RESCHEDULE : 1
IDEATION_HEALTH : 1
SURGERY_FOR : 1
PROBLEM_DISORDERMET : 1
IN_DELTOID : 1
WORKER_SEE : 1
PT_RETURNED : 1
DID_APPEAR : 1
QUESTIONS_ABOUT : 2
REVIEWED_THE : 2
BEFORE_ENSURE : 1
STYLES_ARE : 1
INR_DIRECTED : 1
FRITTITTA_HEIGHT : 1
NECESSARY_NEEDS : 1
AFTER_THE : 1
ANTIBIOTICS_THE : 1
THAT_TIME : 1
ADMISSION_AND : 1
EXCEPTION_OF : 1
PATIENT_ON : 3
NOTE_ALERT : 1
YET_MADE : 1
PRE_HP : 1
ICDCM_NEELIMA : 1
MOXIFLOXACIN_TIMES : 1
MONITORING_NUR : 1
DEFINED_MEAL : 1
PROGRESS_VACCINE : 1
JEWELRY_RING : 1
TELEPHONE_NO : 1
NEGATIVE_SIBLINGS : 1
WOULD_RESPONSIBLE : 1
NONVA_NIACINAMIDE : 1
TO_DISCUSS : 1
DEPRESSION_SUICIDE : 1
CONTACTED_WRITER : 1
ALL_THE : 1
BANISTER_IN : 1
US_VETS : 1
STRENUOUS_ACTIVITIES : 1
PCP_HARDEN : 1
HAS_SINCE : 1
THIS_INFORMATION : 1
CURRENTLY_TAKING : 1
PATIENT_MUST : 1
ALSO_FOLLOWED : 1
MEDICATION_LIST : 2
CATHETER_SOUNDS : 1
OUTGOING_HAMLIN : 1
SEE_SHEET : 1
SHE_ABOUT : 1
NOTIFY_THE : 1
AND_BECOME : 1
REMOVED_AND : 1
TRIAGE_ONE : 1
FORESKIN_ITIS : 1
SIMVASTATIN_ROSUVASTATIN : 1
COMMUNICATION_STARTING : 1
ABOUT_HIS : 1
AL_SCHEDULING : 1
PATIENTS_COORDINATION : 1
FOR_CHIEF : 2
TO_GIVING : 1
REQUIRED_OF : 1
LOOKED_TO : 1
FOR_IF : 2
BLADDER_ORLOW : 1
IDEATION_PRIOR : 1
PT_SI : 1
OU_CCT : 1
AN_ALCOHOL : 1
OVERALL_TREATMENT : 1
MEDICATION_SELLS : 1
COMPLICATIONS_NEAT : 1
TIME_ROOMED : 1
DIAGNOSIS_DENTAL : 1
FULLY_THROUGHOUT : 1
THE_NUTRITION : 1
BY_LEFT : 1
DOES_ALCOHOL : 1
TAKE_THAN : 1
SHOWS_BY : 1
TESTALGIA_RESULTS : 1
DOCUMENTED_IMMEDIATELY : 1
! Stats words=2178  pairs=11417
