# Supplementary material for: Predicting the Risk of Suicide by Analyzing the Text of Clinical Notes
Source: PLoS One. 2014 Jan 28;9(1):e85733. doi: 10.1371/journal.pone.0085733 (PMC3904866; doi:10.1371/journal.pone.0085733)
Supplement: Appendix S3 — Machine Learning Libraries and Methods: This section is provided to enclose the open source (Apache License) classifier used for the building of the statistical models, specifically for the purposes of study reproducibility. A detailed account of these tools is intended for another publication. (ZIP) [file pone.0085733.s003.zip › Appendix3/ML_libs/Regression_testing/group3/processed/grp3-pt-1084.dat]

!  Done reading
! Total word count = 6090
! Total unique words = 2114
! Total pair count = 12176
! Total unique pairs = 10650
PASSED : 1
CONTAINS : 1
SORE : 3
AT : 36
ADL : 2
ZZPATIENT : 2
PALPITATIONS : 1
ANSWERING : 1
WORK : 6
CUTTING : 1
DECOMPRESSIONS : 1
PREOP : 1
FINGER : 2
LOWER : 2
ULCER : 2
WEIGHT : 5
ACCORDING : 1
MILD : 2
TREATMENTS : 3
INSTRUCTED : 1
103203 : 1
UNRESTRICTED : 1
FORE : 1
HAIR : 1
USE : 4
ARTHRALGIA : 1
PRIVILEGES : 3
BOWLING : 1
CLIP : 1
MEANS : 1
CMHP : 1
DISCHARGED : 3
SPINAL : 2
SUPPLIES : 1
ASA : 1
SAUDI : 1
VETERANS : 4
READING : 1
LEVEL : 3
LL : 3
CHANGES : 8
ALCOHOL : 5
STRESSOR : 1
RAL : 1
INABILITY : 1
REALIZE : 1
SEEMS : 1
MET : 2
MACHINE : 1
MEAL : 3
ACCEPTANCE : 1
STYLOID : 1
WHAV : 1
REMOVED : 1
WORKLOAD : 1
KNEW : 1
BLIND : 2
REPAYMENT : 1
DIRECTIVE : 2
TINY : 1
WELL : 8
PHARM : 1
MEDICINE : 4
NOTE : 36
TEST : 1
RESUM : 1
BAKER : 3
MISCELLANEOUS : 1
DO : 8
DOES : 6
UNDERSTANDS : 1
FACT : 1
SAME : 2
ADVERSE : 2
OPTION : 2
VOLUNTEER : 1
BUSINESS : 1
SCHEDULED : 5
ASK : 1
STEPS : 1
ANCHORAGE : 1
PERCODAN : 1
TAB : 13
REACHED : 2
STABLE : 1
DEC : 3
HAS : 41
FOR : 82
ATTRIBUTED : 1
CONDITION : 3
NUTRITION : 4
CLC : 5
STATEMENTS : 1
PATPU : 1
MODALITY : 1
MORNING : 2
INR : 1
AMB : 1
BONFADINI : 1
KNEE : 4
ABSTINENCE : 1
SC : 3
INACTIVE : 1
MUST : 2
IDEATION : 3
ROUTES : 1
RECREATION : 1
GEN : 1
FIGHTING : 1
SWER : 1
ROHENALUGO : 1
COLONOSCOPY : 2
CALLBACK : 1
RESPIRATORY : 1
TSTRAP : 1
PINS : 1
WISHES : 1
ACTIVITY : 1
CLEARER : 1
TAXI : 1
INTERNAL : 1
ND : 1
ACTINIC : 1
IMPAC : 1
PATTERN : 1
INSTANCES : 1
IPTON : 1
CHILDREN : 1
EXAM : 6
INFECTION : 1
DERM : 1
SUGAR : 1
ATTEMPTS : 2
JUST : 3
INCREASED : 4
NSC : 1
DURATION : 1
ARTILLERY : 1
OCT : 3
AUDITORY : 1
GO : 1
SIGNIFICANT : 3
BOWEL : 5
EXPERIENTIAL : 1
BP : 1
BELONGINGS : 1
DIVISION : 1
HEARD : 1
POST : 3
PREVENTION : 3
DEPRESSION : 5
RED : 1
MATCH : 1
INHAL : 1
CM : 7
AQUATICS : 1
CITALOPRAM : 4
AGAIN : 3
GAIT : 1
DESCRIBE : 1
SLOWLY : 1
BREAK : 1
SHOES : 1
FINANCES : 1
ATTEND : 1
SOMETIMES : 1
JGXMT : 1
ABRASION : 2
BRUSH : 1
RIVIERA : 1
WT : 1
ADMITTING : 1
GENTEAL : 1
PLANS : 3
PARTIAL : 1
ACUTELY : 1
STARTED : 2
SPASMS : 1
FEEDING : 1
SCANNED : 1
OR : 31
EXPLORE : 2
THERAPEUTIC : 4
SHIFT : 8
BOTH : 3
SUPPLEMENT : 1
TEMP : 2
PULMONARY : 1
CONCERNS : 5
POSSIBILITY : 1
COUMADIN : 1
QUADRANT : 1
GRANDKIDS : 2
LIKE : 3
MEATUS : 1
TXS : 1
PRESSING : 1
USAGE : 1
SURVEY : 1
IRAQ : 1
CONSCIOUS : 2
MUCH : 3
CHRONIC : 7
ASPECT : 1
NEOPLASM : 1
TAKE : 12
ANKLE : 1
NITRO : 1
INCREASE : 3
WITHDRAWAL : 3
ISZESKI : 1
IMPLICATIONS : 1
WALKIN : 2
LAUNDRY : 1
LIP : 1
OD : 2
PARTIALLY : 1
SW : 2
TOLERATED : 2
ADMITS : 1
METFORMIN : 1
DEFICIT : 1
UNIT : 4
MD : 2
INTERVAL : 1
NAME : 8
CARE : 19
SURROGATE : 1
AGE : 5
MULTIVITAMIN : 1
INVOLVED : 1
EVALUATE : 1
KUWAIT : 1
ET : 1
FOWLER : 2
TIMES : 4
IS : 67
CARIES : 1
DL : 1
SCHOOL : 1
DOSES : 1
FXN : 1
BENEFIT : 1
FLUIDS : 1
LEANING : 1
IF : 13
CHLORIDE : 2
MH : 9
PENDING : 3
CANCELLED : 2
PERSONNEL : 1
ONCE : 2
EXERCISES : 1
RESENT : 2
SKILLS : 2
ANES : 1
CARDS : 1
EVALUATION : 5
CONTRAINDICATIONS : 1
RUQ : 1
ACKNOWLEDGED : 1
NVD : 1
REHAB : 2
THESE : 6
DEATHS : 1
VISION : 5
DIVORCE : 2
CAROL : 1
DROP : 2
HOPES : 1
EDUCATED : 1
VIT : 1
TRYING : 1
HEIGHT : 7
BROS : 1
ADDENDUM : 13
FULL : 3
SOUGHT : 1
NO : 58
RELAXATION : 1
INTENSITY : 2
CONSCIOUSNESS : 1
HEMOGLOBIN : 1
ADMINISTER : 2
CHIEF : 6
INCISION : 1
CHANGED : 1
HYPOTHYROIDISM : 1
UPPER : 2
BENIGN : 2
RISK : 6
MEET : 6
CLINIC : 11
PERFORMED : 2
CLOZAPINE : 1
NEEDE : 1
BMI : 1
POSTOPERATIVELY : 1
PRN : 1
COULD : 4
NOTET : 1
DYSPHAGIC : 1
HUMBLING : 1
ADVANCE : 1
CONTINUOUSLY : 1
WILL : 26
APPEARANCE : 2
OFTEN : 2
BUT : 9
ASKED : 1
CTA : 1
THOUGHTS : 4
MOREOVER : 1
TYPE : 3
ASF : 2
TV : 1
SPECIFICS : 3
DESCRIBES : 2
GETS : 1
PLASMA : 2
HUSBAND : 1
SET : 3
AUTODROP : 1
ENEMY : 1
KIT : 1
SCHIZOPHRENIA : 1
DIVORCED : 2
MARITAL : 2
CONSULT : 9
SUPPORT : 2
ACCOMPANY : 1
WANTS : 1
LASHES : 1
IMPROVE : 1
STRETCHER : 1
ANTICIPATED : 1
PRESENTED : 2
LIKELY : 2
REVIEW : 2
DISCUSSING : 2
HIMSELF : 4
COMES : 2
RELIGIOUS : 1
INJECTION : 3
LIVER : 2
HFA : 1
BASCOM : 2
ANGIOECTASIA : 1
RESIDENT : 5
CONTACTS : 1
INSTRUCTIONS : 4
VA : 9
TEA : 1
PREFERENCES : 1
FORGOT : 1
APRIL : 1
RESIDENCE : 1
DOCTORS : 2
CH : 1
RESIN : 1
SMOKER : 1
NEEDLES : 1
INITIATED : 1
DISEASE : 1
CAUSE : 1
PAIN : 47
JUANITA : 1
AS : 29
THURS : 2
RESTRAINTS : 2
DRAINAGE : 1
WITH : 71
FEELS : 4
OFFERED : 2
WORRIED : 2
TEMPERATURE : 2
PUTTING : 1
REDNESS : 1
DECISIONS : 1
INCLUDING : 1
LMWH : 1
FOBT : 1
COPING : 2
FLOATER : 1
USED : 5
IT : 13
BELOW : 1
BEDTIME : 2
NECESSARY : 1
GAMMA : 1
TRANSVERSE : 1
DISCUSSED : 1
DENTURES : 1
EXERCISE : 1
SUPPLY : 1
TIME : 20
CODE : 2
ITSELF : 1
DRIVER : 2
SWS : 2
DISKECTOMY : 1
OIDES : 1
HYGIENE : 4
HCL : 4
ACQUIESCE : 1
DEVIL : 1
TEETH : 2
WALK : 1
ADDITIONAL : 3
SAFETY : 6
OXYCODONE : 1
SIDE : 5
PERSONALITY : 1
BREAKFAST : 1
TREMENDOUS : 2
ECCHYMOSIS : 1
CALL : 10
WORN : 1
RESULT : 1
INTERMITTENT : 3
HX : 4
MHC : 3
CLAUDICATION : 1
IMAGING : 1
NOTIFICATION : 1
UNSPECIFIED : 2
PROTECTION : 1
ALLERIGES : 1
MOTIVATION : 2
PALMAR : 1
FRI : 1
PER : 12
CONSISTENT : 2
FRIEND : 1
TOE : 1
ALCOH : 1
UNT : 1
MOBILITY : 9
YOUR : 8
PRECAUTIONS : 2
GIVEN : 3
PACKET : 1
TACHYCARDIA : 4
CONTENTS : 1
ILLICIT : 1
HT : 1
WHO : 3
UPON : 1
IDENTIFIES : 1
SURG : 1
VERBALIZES : 1
BASED : 1
ATTENDANCE : 2
ARM : 1
CURRENT : 5
CONTROL : 2
GROOMING : 1
TERM : 1
EXPOSED : 1
ES : 1
HIM : 8
RESPONSIBLE : 1
DEMOGRAPHICS : 1
LIKELIHOOD : 1
PULSE : 5
NS : 1
NEXT : 3
THEY : 7
NEEDS : 2
REFERRED : 2
TYLENOL : 1
MEDIUM : 1
HORTON : 1
INTENDS : 1
ABINOIDS : 1
TRANSFER : 3
AUTONOMIC : 1
OBSERVATION : 2
ML : 4
PHONE : 10
DECLINED : 1
TALKING : 2
TOUCH : 2
FAIR : 2
NEGOTIATE : 1
HAD : 17
OVERSEES : 1
SPECIAL : 1
LOSS : 2
SISTER : 2
SULFA : 1
HELD : 1
ANALYSIS : 1
NEGATIVE : 5
ARMBAND : 1
OUR : 1
REINFORCED : 1
ORTHOPEDIC : 1
LAB : 5
SPUTUM : 2
SALINE : 2
LESIONS : 1
MISSING : 2
COMPLAINTS : 2
CONTACT : 8
NOTIFIED : 1
TRAV : 1
NPO : 2
IMPAIRED : 1
METHOCARBAMOL : 1
THIAMINE : 1
PROBLEMS : 10
URINE : 6
ANTISOCIAL : 1
NASAL : 1
BELONG : 1
RTC : 1
REAFFIRMED : 1
BLOODCLOTS : 1
CAN : 6
NEG : 2
THERAPY : 5
SEEING : 1
PSYCH : 2
EXWIFE : 1
STOPS : 1
SEND : 1
RECEIVES : 1
NONVA : 1
WHICH : 5
SYMPTOMS : 5
NOTES : 1
POH : 1
BREAKTHROUGH : 1
OVER : 2
LOUD : 1
VISITS : 1
ON : 34
QUIT : 1
COMPLETE : 4
BLASTS : 1
PCC : 1
PORTABLE : 1
PRESSURE : 6
TETANUS : 2
ATTENDED : 3
APART : 1
COVER : 1
VERIFY : 1
VIA : 3
INFOPRO : 1
MINNESOTA : 1
GOOD : 3
KERATOSES : 1
DORSAL : 1
FALLING : 1
TMSGOOD : 1
DRUGS : 1
MED : 2
UPDATE : 2
VENT : 1
PERSONNAL : 1
INHALER : 1
INTO : 2
CAUTION : 2
EDEMA : 1
RECD : 1
STREET : 2
SHE : 5
PO : 2
UP : 14
USUAL : 2
AMMENABLE : 1
LOCATION : 9
FEW : 2
REAC : 1
RESTORATIVE : 1
DIRECTLY : 1
WORSENING : 1
FEVER : 2
TAK : 1
BOSS : 1
CONSULTATION : 1
AWAY : 1
PRIOR : 5
REMISSION : 1
OFF : 2
DOCUMENTED : 1
DATE : 17
FRONT : 1
DISCHARGES : 1
RELATES : 1
ONEONONE : 1
DAILY : 5
BROKEN : 1
REQUIRE : 1
PERCENT : 1
LONG : 4
ELSE : 1
AWAKE : 2
HOUSING : 1
FROM : 19
NEUROPSYCHOLOGY : 1
INCREMENTS : 1
LEFT : 8
NORMALIZING : 1
BATH : 1
IDCP : 1
LIDS : 1
MEDICAL : 8
HEAD : 3
BECOME : 1
IR : 1
PLATE : 1
SPOKE : 1
ALSO : 6
SYSTEM : 2
SERIOUS : 1
WORKING : 2
AN : 11
MOIST : 1
SHINGLES : 1
HEART : 1
DISABILITY : 2
EPISODIC : 1
FOUR : 2
HEMORRHOIDS : 1
APPARENT : 2
CN : 1
OSAC : 1
MEASURES : 1
EYE : 7
MILIEU : 1
DISCUSSION : 1
URGES : 1
MYSELF : 2
AGO : 1
SHARING : 1
ATTENDING : 3
CHEST : 7
HAVING : 7
FACILITATOR : 1
INTELLIGENCE : 1
EXCISION : 2
DT : 1
ANESTHETIC : 1
HC : 2
OA : 1
MUSCLE : 2
LATER : 3
DRAINED : 1
ARE : 15
ADJUVANT : 1
DTC : 2
ANSWERED : 2
STRATEGY : 1
INDEPENDENT : 4
CONVINCED : 1
THIGH : 1
HYPERTENSION : 2
PERSON : 5
TRUSTING : 1
CANAL : 2
CYST : 1
CPRS : 1
PROGRAMS : 1
UMBICIAL : 1
SURGERY : 6
DERMATITIS : 2
RECOVERY : 3
SPREAD : 1
OFFICERS : 1
NIGHTSTAND : 1
WIDOWED : 1
INHL : 1
GENERAL : 2
INTERDISCIPLINARY : 2
SERVED : 1
NUMBNESS : 1
YEARS : 5
DOZ : 1
COLON : 1
BE : 24
RESOLVED : 2
CANCER : 1
OX : 1
LEAVE : 1
DUE : 6
PLM : 1
DENVER : 1
THEIR : 2
DISC : 2
BERNA : 1
ANTICIPATE : 1
RESTRUCTURING : 1
PING : 2
PH : 1
CANE : 1
ISSUES : 5
RECONCILED : 1
UNDERGO : 1
PSYCHOSIS : 1
ANEURYSM : 1
OTHER : 14
DRESSING : 1
PRODUCTIVE : 2
END : 1
QHS : 2
LIFE : 1
QUIET : 2
ME : 5
ANTICOAGULANT : 1
BED : 6
NURSING : 10
FOLLOWING : 3
IDENTIFIED : 6
PROBABLE : 1
LIQ : 1
PHENYLEPHERINE : 1
GLAUCOMA : 1
MORSE : 1
ENDING : 1
TRAZODONE : 1
DIAGNOSIS : 6
WITHOUT : 6
NANCY : 1
VERIFIED : 1
NIASPAN : 1
ATYPICAL : 2
CASA : 1
SHELLED : 1
EARSCANALS : 1
ICA : 1
CALLING : 1
ANXIETY : 4
SAY : 1
VERTIGO : 1
WE : 3
MANIPULATION : 1
SYND : 2
PROTECTORS : 1
PATCH : 2
FOUND : 2
DESIGNATED : 1
ROOM : 3
IMPROVED : 3
HAT : 1
PAINS : 1
INSTILL : 1
ELEVATOR : 1
AGENTS : 1
CHART : 2
MIDNIGHT : 1
AVAILABLE : 1
ABOUT : 11
THANKED : 1
ANYTHING : 1
MIAMI : 2
RECHECK : 1
IMPULSE : 1
POTENTIAL : 1
CHARTS : 1
YOUNG : 1
NOTIFY : 4
NKA : 3
BRIEF : 2
ADEQUATELY : 3
WINDOW : 2
AP : 1
PAT : 1
TABLET : 9
ANOTHER : 2
TROPICAMIDE : 1
DURING : 9
ENVIRONMENT : 1
TOLD : 5
SEVERAL : 2
LISTED : 1
SCREENING : 4
STUDIES : 1
CHECKS : 1
TKA : 3
CARDIOLOGY : 1
VOICED : 1
LYMPH : 1
HI : 1
REACTIONS : 1
OS : 1
FRED : 1
OXYGEN : 1
SCORE : 5
PERSIAN : 1
BASELINE : 3
ORTHO : 1
SP : 1
MDD : 1
HOME : 7
NLR : 1
AMBULATING : 1
NOTED : 7
TERMINATED : 1
ESTABLISH : 2
LN : 1
BIBLE : 1
RETURN : 5
BALDWIN : 1
PANEL : 1
MODERATE : 1
FLIGHT : 1
EFFECT : 1
RESOLUTION : 1
LOBBY : 1
METHADONE : 1
ADEPRESSION : 1
ANT : 1
UPSET : 1
MIN : 7
POOR : 1
CHEMICAL : 1
NEC : 2
MINUTES : 3
POINTS : 1
LLD : 1
STENT : 1
FOLLOWUP : 4
DIRECTIONS : 1
TOLERATING : 1
CBSST : 1
RISKS : 4
TEAM : 1
DROWSY : 1
FALL : 4
SICK : 1
ALRIGHT : 1
DATA : 1
NERVE : 1
SLEEP : 1
AM : 10
MOVEMENT : 2
ENTERED : 2
PENDENCE : 1
CINCINNATI : 2
FLAT : 1
WHERE : 1
EVENT : 2
PRESSURES : 1
SHORTER : 2
DEMENTIA : 1
REFUSE : 1
PRODUCTS : 1
CALLED : 8
TOOK : 1
SUPERVISION : 1
MANY : 1
SITTING : 1
ARABIA : 1
INC : 1
PREOPERATIVE : 1
NEWS : 2
TEACHING : 3
ADVISED : 2
OBTAINED : 4
MONTHS : 1
DEATH : 1
COUNT : 1
LESSON : 1
POLLEN : 1
PALPATION : 1
MEASUREMENT : 1
SSN : 3
NOON : 3
GIRLFRIEND : 1
BRADEN : 3
APPLIED : 1
REFUSES : 2
UCINATIONS : 1
EAT : 1
COIN : 1
EFFECTIVENESS : 1
IMMEDIATE : 2
REFUSAL : 1
MEDICATION : 14
ATTORNEYS : 1
VISUAL : 2
ATTEMPTED : 2
SUPPORTIVE : 3
CASE : 4
ORAL : 3
CONTINUE : 6
ABNORMAL : 1
READ : 1
SWELLING : 2
ABSCESS : 1
OVERSIGHT : 1
SERVICES : 1
GOAL : 4
EXAMINATION : 1
INFUSE : 1
PROVIDE : 4
CONSULTED : 2
RELATIONSHIPS : 1
HEALTH : 15
ADD : 1
HERNIA : 1
PLACED : 2
STOOLS : 1
COGNITIVE : 2
AWAKENS : 1
OYED : 1
DUPLEX : 1
PROSTATE : 2
CHAPLAIN : 1
PREVIOUS : 1
BIPOLAR : 1
PICKED : 2
REFERRAL : 2
INTERVENTIONS : 2
MAR : 1
LI : 1
AFTERNOON : 1
WAL : 2
VS : 2
MORE : 5
MAKING : 3
POSTURE : 1
RACE : 1
STERISTRIPS : 1
ISTON : 1
BEHIND : 1
LIN : 2
ER : 3
APPLICABLE : 4
DIZZINESS : 1
REQUEST : 5
INCREASINGLY : 1
SOMEWHAT : 1
BARNES : 1
RN : 1
UNABLE : 2
XYZZY : 2
AUGUST : 2
HEADACHES : 2
AFTER : 7
PARTICIPATED : 3
DIFFICULT : 1
OFFICER : 1
STILL : 1
CONCERNING : 1
SCALE : 6
POW : 1
WELLNESS : 1
OPENING : 2
COUGHING : 1
LUMBAR : 2
VOICEMAIL : 1
GROUPS : 1
PCP : 1
SAYS : 4
LCSW : 2
HYPONATREMIAIMPROVING : 1
APPOINTMENTS : 2
APNEA : 2
EACH : 1
RE : 1
WNL : 1
IUNABLE : 1
OLD : 3
FOOT : 1
VERBALIZE : 1
STATEMENT : 1
LS : 1
COAT : 1
GLUCOSE : 1
WEDNES : 1
WBC : 2
MOVE : 1
ETHNIC : 2
APR : 4
AREA : 5
UNAWARE : 1
CRITICAL : 1
GUIDE : 1
MM : 1
UNDERSTANDING : 2
MEDICATIONS : 13
PNEUMOCOCCAL : 1
MR : 4
MAJOR : 1
VOLUNTEERED : 1
INTIMIDATING : 1
DESCRIPTION : 2
DELIVERY : 1
TISSUE : 1
INH : 1
DRIVING : 1
RECOMMENDED : 1
CRACKLES : 1
VACCINE : 4
BETTER : 3
RESULTS : 3
PROCESS : 6
EMERGENCY : 1
SHRAPNEL : 1
ANSWER : 1
GLAND : 1
MYCOSIS : 1
BREATH : 1
ABLE : 3
RECENT : 4
IN : 79
POSITION : 2
MANAGEMENT : 7
STATE : 3
GUN : 1
ENVIRONMENTAL : 1
PAC : 2
PLAN : 10
SMOKE : 2
PATHOLOGY : 1
VERY : 6
TC : 1
TALKATIVE : 1
SPONSOR : 1
FRUSTRATION : 1
LAID : 1
IDENTIFICATION : 1
INTRAOPERATIVE : 1
FEATURES : 1
BEHAVIOR : 5
TOLERATE : 2
POSTAL : 2
NEWLY : 1
SI : 2
SEASON : 1
COMPLETED : 1
REASSURE : 1
COUNTED : 1
EVEN : 1
DIFFICULTY : 5
LIMITATIONS : 2
DECISIONMAKING : 1
NEUROPSYCHOLOGIST : 1
SCOPE : 1
PRIORITIES : 1
KEPT : 1
LAST : 5
FIBRILLATION : 1
EDUCATION : 7
LUNCH : 2
HOLD : 1
SOBRIETY : 1
ADR : 1
INHIBITORY : 1
IE : 1
INTRODUCTORY : 1
RENAL : 1
HERPES : 1
NONDE : 1
STAMPED : 1
CAUSES : 1
DETAILS : 2
GTP : 1
NEXTOFKIN : 1
GROOMED : 4
DEP : 1
ZIMBLEMAN : 1
VIRUS : 1
CONSTANT : 2
EASE : 1
ONLY : 5
PERTINENT : 1
EVENING : 2
OPEN : 1
ESCAPE : 1
MONTH : 2
THANK : 1
AROUSE : 1
REFILLS : 2
BEEN : 21
AVULSION : 1
BID : 1
INFECTED : 1
WITHIN : 2
REFILL : 1
LOCK : 2
NECESSITATE : 1
ASSISTIVE : 2
OUTPATIENT : 9
INTAKE : 2
WEEKLY : 1
INPATIENT : 3
SPEECH : 2
INTERESTING : 1
CULTURAL : 1
TOMORROW : 1
RESCHEDULE : 1
VICTIMS : 1
GOWN : 1
RELATED : 3
CC : 1
HGB : 1
HEMATURIA : 1
WHEEZES : 1
ERROR : 1
TWICE : 1
REGARDING : 2
CHEW : 1
SHAMPOO : 1
VASCULAR : 3
CHAMBER : 1
INACTIVATED : 1
RACING : 1
SOCKS : 1
PERSONAL : 5
NMS : 1
TRAUMA : 1
HIS : 42
RECOMMEND : 1
HD : 1
COORDINATOR : 1
RUSSELL : 1
NEURO : 1
REORDERED : 2
DISORDER : 3
KNOWN : 1
SHOWED : 1
CONTACTED : 2
REASONS : 1
HARD : 1
JULY : 1
PELVIS : 1
TREATMENT : 6
BLOOD : 8
ATRIAL : 1
OB : 1
CONSTRUCTION : 1
WORKER : 2
DEFICIENCY : 2
HAVE : 22
OBMT : 1
ASSIST : 3
ODY : 1
EVIDENCED : 1
CONSTRICT : 1
OF : 110
DRUG : 3
REFILLING : 1
BUPROPION : 1
CALLER : 5
PSYCHIATRY : 1
TRAVATAN : 1
SECURED : 1
SHAVE : 1
XD : 1
SAID : 1
NUMBER : 12
CALCIUM : 3
CLONIDINE : 1
MATRIXECTOMY : 1
HARDEN : 1
SPONGE : 1
BEGINNING : 1
MS : 4
EC : 1
CLOTHING : 1
OUTPT : 2
MY : 1
INSTRUCTION : 2
ASSERTIVE : 1
BATTERIES : 1
MESSAGE : 1
THINGS : 2
SUBSTANCE : 1
DOSIMETRY : 1
THEM : 2
DIDACTIC : 1
ASSESSMENT : 15
SERUM : 1
US : 1
TACTILE : 1
BUSY : 1
ARMS : 1
LET : 1
ENVELOPE : 1
AMBULATION : 2
SURFACEANTERIOR : 1
DEFINITELY : 1
STARTING : 1
ENTER : 1
BLADDER : 3
ENCOURAGED : 1
FRIENDS : 2
INFORMATION : 9
DISCONTINUED : 1
STENOSIS : 4
THATS : 1
INITIAL : 2
ILL : 2
DANE : 1
TRIGLYCERIDE : 1
INBETWEEN : 1
CENTER : 1
UPBEAT : 1
SUICIDE : 5
MEDICARE : 1
THE : 125
BIOLOGICAL : 1
NURSES : 2
EXTENDED : 1
BAL : 1
GROUP : 18
NATIONAL : 1
IDENTIFY : 1
ADJUSTMENT : 1
FELLOW : 1
REST : 1
APPEARS : 2
EXPIRED : 2
INTRAOCULAR : 1
TALKS : 1
COLLECTED : 1
COLOR : 7
THYROID : 2
CHARACTER : 1
LEG : 4
MEDS : 1
PCT : 2
INDICATION : 1
RAPID : 1
CT : 1
CONTAINERS : 1
PSYCHOLOGY : 2
RECALL : 1
LBP : 1
AGGRAVATING : 1
DISPOSITION : 2
ANXIOUS : 2
SATAN : 1
CORRECTLY : 1
OCCUPATION : 2
CLENCHING : 1
CAP : 3
DIET : 1
EBRT : 1
LEATHER : 1
STATED : 6
HEARING : 3
BLD : 1
LEADERS : 1
CODLIVER : 1
HANDS : 1
STERIOD : 1
GET : 8
AXIS : 1
WHAT : 5
PAROLE : 1
BRAINS : 1
BENEFITS : 3
ALBUTEROL : 2
ASSISTANCE : 13
ADJUSTED : 1
DESIGNED : 2
YEAR : 5
COPY : 1
LB : 3
NARCOTICS : 2
TRANSPORT : 1
WINDSHIELD : 1
KAY : 1
ITCHING : 1
SEEN : 5
SHAKING : 1
RT : 1
MAILED : 3
ENCOURAGEMENT : 1
FOOD : 2
NURSE : 5
LAW : 1
SX : 1
VENTILATION : 1
LABORATORY : 1
INJECTIONS : 1
SECTION : 1
CORONARY : 1
ATTACKS : 1
ANY : 12
RELATIVE : 1
TRY : 1
DISCHARGE : 4
CONSISTENCY : 2
SAFELY : 1
RECORDS : 1
SYSTEMS : 1
QH : 2
PERCOCET : 2
MAINTAIN : 3
FACILITY : 1
EFFECTS : 2
RELATIONSHIP : 1
OCCLUSION : 1
SECONDARY : 2
VOLUME : 3
RESOLVE : 1
INTENT : 1
SKIN : 6
YESTER : 1
NOT : 35
OK : 1
TEMPORARILY : 1
GOOE : 1
DTN : 1
MINIMIZE : 1
THERE : 6
WALKING : 1
TL : 1
HERE : 10
TANGENTIAL : 1
ELECTRIC : 1
PHSYCOLOGISTS : 1
CVA : 1
PRESSED : 1
POSITIVE : 2
CLEAN : 1
LIPOMA : 2
ANGER : 1
FEB : 1
CONDUCTED : 1
NEWTON : 1
PROGRESS : 7
KEEP : 1
RECURRENT : 1
PSYCHOTHERAPY : 4
ASSESS : 1
REPEAT : 1
TRAITS : 1
VET : 16
STOOL : 7
EXPLAINED : 3
BEST : 2
THER : 1
UPCOMING : 1
COMPLETION : 2
PARTICIPATE : 1
EXPERIENCING : 2
PAINFUL : 3
ASSOCIATED : 2
BACK : 9
HOWEVER : 2
PENCIL : 1
ANTICOAG : 1
OPIOID : 1
MORTARS : 1
MALE : 9
TRACK : 1
BY : 24
PMH : 2
DISTURBANCES : 1
CLINICAL : 3
REAL : 1
KNOWS : 1
LUNGS : 2
ELECTIVE : 1
MEETING : 2
TH : 3
QUICK : 1
CONVERSATION : 3
ALERTMRSA : 1
BURN : 1
TO : 160
PNEUMONIA : 1
IV : 2
FEEL : 1
REPAIRS : 1
ABUSE : 1
CASUALLY : 2
DVT : 1
TASK : 3
COUNSELED : 1
PPV : 1
SAFE : 2
BIOPSY : 1
AFTERCARE : 2
PROCEDURE : 6
REQUESTING : 2
ABNORMALITY : 1
CAPACITY : 1
WARM : 1
WATCH : 1
BEGAN : 1
STRESSORS : 1
APPETITE : 2
WEAR : 2
DEPTH : 1
LIQUID : 1
SEE : 4
LOCATIONS : 1
PTA : 1
PLEASE : 7
ANEMIA : 1
WAR : 1
STATUS : 13
RING : 1
DC : 4
DRINKS : 1
CONTINUED : 1
MYOFASCIAL : 1
TESTING : 2
OUT : 5
SUPERFICIAL : 1
COMFORT : 2
VERBALIZATION : 1
LOOSENING : 1
SURE : 1
LEVELS : 1
SCREEN : 2
REACTION : 1
XX : 1
BARRIERS : 2
EVALUATED : 1
CONDUCIVE : 1
ASSIGNED : 4
FUNCTION : 1
MENTAL : 12
NEEDED : 4
ABNORMALITIES : 2
EXT : 1
WERE : 5
THINKS : 3
BRC : 2
FACTORS : 2
SHEET : 1
RAZOR : 1
NEUROLOGIC : 1
CHANGING : 1
TURNS : 3
LABS : 4
TAKEN : 1
JOB : 1
POSSIBLE : 1
AGREED : 1
TRIAGE : 2
NATURE : 1
HELPING : 1
COHESIVE : 1
PART : 1
FAMILY : 5
DETERMINED : 1
OFFERING : 1
ASSERTION : 1
ORIENTATION : 1
WHEN : 10
COCAINE : 1
BRACE : 1
AMBULATORY : 4
BEING : 4
CREATININE : 1
ABOVE : 2
AMOUNT : 4
WAS : 46
LT : 1
UNSAFE : 1
INTERIM : 1
PM : 4
ROOT : 1
THEREFORE : 1
FORM : 3
AC : 1
WANTED : 2
COMMUNICATION : 2
CONSUMED : 1
SIG : 1
GAUGE : 1
REMAINS : 2
DRINKING : 2
HEALING : 1
NOW : 5
ABD : 1
PTSD : 7
COMPARISON : 1
INTACT : 1
CONFIRMED : 2
ONSET : 5
HYDROCODONE : 2
TDAP : 1
VARIOUS : 1
SHOT : 1
NAOMI : 1
LIST : 2
SIZE : 2
STUDY : 3
BAY : 1
SA : 2
ARTICLES : 1
EQUIPMENT : 1
OCCASIONALLY : 1
ORIENTED : 5
ADHERENCE : 1
CURRENTLY : 2
MCADOO : 1
NECK : 2
JOINT : 2
RESPIRATIONS : 3
BATHROOM : 3
DOCTOR : 3
SOFTENER : 1
GOING : 3
SEDATION : 4
VALUES : 1
DID : 3
MOST : 2
RUE : 1
SHOW : 4
ARRIVAL : 2
OPERATION : 1
ACCURATE : 1
ADDRESS : 4
TELEPHONE : 3
DISORDERMET : 1
INTRODUCING : 1
TES : 1
COMPLAINING : 2
REPORTS : 10
DEPAR : 1
HELP : 2
OPTIONS : 1
PACU : 1
COMING : 1
YES : 10
CONTINUES : 2
COUSIN : 1
FURTHER : 3
SIMPLE : 1
TOXIC : 1
SMILING : 1
CONSENT : 8
CHF : 1
DOING : 2
RETURNED : 1
NAILBEDS : 1
RACHEL : 1
STATIONED : 1
LITTLE : 1
HPI : 1
QUITE : 1
HES : 2
MOVIES : 1
ED : 2
THROBBING : 1
PHYSICIAN : 27
GLOBES : 1
DAUGHTER : 2
LACERATION : 1
COMPLIANCE : 1
DEPENDENCE : 4
URGENT : 2
TOOTH : 1
AIDS : 1
CESSATION : 1
HE : 84
RX : 4
TREATED : 2
BIT : 1
OBESITY : 2
AHN : 1
RATE : 1
EASY : 2
FIRESEEKING : 1
FELT : 1
CANCELLATION : 1
INTOLERANCES : 1
PREFERENCE : 1
DOWNSTAIRS : 1
HYDROBROMIDE : 1
CLEAR : 3
PREDICTING : 2
PRIMARY : 3
UNTIL : 1
ABDOMINAL : 2
REACTED : 1
CILO : 1
MACRODANTIN : 1
SIGNS : 2
FIELD : 1
ACTION : 4
SUBCUTANEOUS : 1
PATIENTS : 6
SUMMARY : 2
FATHER : 1
CONSTIPATION : 1
PROVIDED : 4
PSYCHOEDUCATION : 1
STEADILY : 1
DRINK : 2
DENTAL : 5
EMPLOY : 1
TWO : 2
NONE : 9
OUTCOMES : 1
II : 2
DATES : 1
TRAVEL : 1
BLINDNESS : 1
SCHEDULE : 3
CALM : 1
HER : 6
ORDERED : 1
FEELING : 3
TERAZOSIN : 2
QUESTIONS : 7
COMPLY : 1
BEHAVIORAL : 3
MANUFACTURERS : 1
LONELINESS : 1
ROUTE : 1
THERAPIST : 1
LIVING : 1
PLACE : 6
WITHOUTENCOUNTER : 1
TANAKA : 1
NOSHOW : 1
RANGE : 1
CONFIDENT : 1
MHICMINTENSIVE : 1
ENT : 1
TOENAIL : 1
MG : 20
UROLOGY : 1
BUTTONS : 2
ORIEN : 1
LICHENOID : 1
SPECIALIST : 1
VIETNAM : 1
SITS : 3
AFRAID : 1
CONTINENT : 7
RESTRICTED : 1
HYPERTROPHY : 1
WORSE : 1
PROVIDER : 4
CHAP : 1
MARCH : 1
OIL : 1
DONT : 2
IMPORT : 1
TOLERANCE : 1
GENDER : 1
MULTIPLE : 2
USES : 1
DIAGNOSED : 1
GULF : 1
MIGRAINE : 1
APPOINTED : 1
ALERT : 3
SUBMITTED : 1
SHARED : 2
STABILITY : 1
UNDER : 3
SEP : 1
WHEEZE : 1
COMMENT : 1
UNCERTAIN : 1
THREE : 2
STEP : 1
COLLECTION : 1
TEAMS : 1
PROGRAM : 8
APPOINTMENT : 11
RADIOLOGY : 1
WOULD : 5
CALMED : 2
PLY : 1
FOLLOW : 5
SUTURES : 1
AKA : 1
RECOVE : 1
METHOD : 3
RECS : 1
EXPOSURES : 1
HOMICIDAL : 3
BIRCH : 1
CONTRAST : 1
SEX : 4
ACTIVITIES : 1
LIPID : 1
REPLACES : 1
MUSCLES : 3
OPERATE : 1
ONCOLOGY : 5
MOVEMENTS : 2
COMPLAINT : 7
ORDER : 5
USING : 2
EASILY : 3
HAND : 4
INFLUENZA : 2
DENIED : 1
HOARSENESS : 1
OCCURING : 1
ULTRASOUND : 1
LIFESTYLE : 2
ARRANGED : 1
DIFFERENT : 1
NEW : 6
MOUTH : 6
NUSTEP : 1
PRESENT : 3
EXPIRES : 1
SOMTHING : 1
USEFUL : 1
SOME : 8
HYDROCELECTOMY : 1
SPENDING : 1
DETECT : 1
EXPLAIN : 1
ANESTHESIA : 2
REVIEWEDUNCHANGED : 1
NEED : 7
TINNITUS : 1
WASHING : 1
TEARS : 1
RECEIVED : 3
PSYCHIATRIC : 2
GRENADES : 1
SKILL : 1
CUEING : 4
LIES : 1
VERBALIZING : 1
BECAUSE : 4
BILLING : 1
REMAIN : 1
CLASS : 1
HUSBANDS : 1
PROMOTION : 1
LESION : 1
DVAMC : 1
OMEPRAZOLE : 1
ENROLLED : 1
SEVERE : 1
ALLOW : 1
SOUNDS : 1
REVIEWED : 6
BEFORE : 4
ALL : 3
SAL : 1
CAROTID : 2
INHALE : 1
CONTRACT : 1
DIAGNOSES : 1
SELF : 3
PATIENT : 86
ACCEPT : 1
ALLERGIES : 6
LIMB : 1
ALLOWED : 1
ENERGY : 1
SENT : 2
OBTAIN : 2
AGREES : 3
DIAL : 1
ABDOMEN : 1
JOINTS : 2
NOS : 1
THAN : 2
RELIEVES : 2
ARTHRITIS : 1
REQUIRES : 2
PROTOCOL : 5
COME : 2
HOSPITALIZATION : 1
ROUTINE : 4
LENSECTOMY : 1
CAME : 1
VISIT : 6
THAT : 39
WIFE : 5
NORMAL : 2
DEPRESSED : 3
STAFF : 4
CE : 3
SERVICE : 8
RIGHT : 9
PC : 1
BREATHING : 1
PLEDGED : 1
ASI : 1
INAPPROPRIATE : 1
IEDS : 1
AAM : 1
UR : 1
HBPC : 1
ATROVENT : 1
ONE : 10
PMR : 1
COMPONENTS : 1
FBS : 1
PTS : 2
SPEC : 2
THOUGHT : 3
HYPERLIPIDEMIA : 1
WRITER : 3
TREMBLING : 1
YOU : 16
HCV : 1
MORPHINE : 2
DOESNT : 1
CRITERIA : 2
INFORMED : 7
PAST : 7
RESPONDED : 1
DOCUMENT : 4
NOVEMBER : 1
INTERESTED : 1
REASON : 1
SUPERVISOR : 1
TOBACCO : 1
SOUTH : 2
HA : 1
TREMOR : 1
WRITE : 1
CBT : 1
MYLAN : 1
DR : 1
DILTIAZEM : 1
SOCIAL : 2
MEMBERS : 1
TRP : 1
HOSPITAL : 5
RECOMMENDATION : 2
SUICIDAL : 6
HOPELESS : 1
DRESSED : 4
DEPT : 1
VITAL : 2
SO : 3
SHAKE : 1
TD : 1
IMPROVEMENT : 1
HYPERTROP : 1
REGULAR : 1
GEC : 1
IDENTIFIERS : 2
TALK : 1
MAINTAINING : 1
POTASSIUM : 2
BELIEFS : 2
MODE : 1
CCRC : 1
MT : 1
STRESS : 2
JR : 1
MAKE : 2
GRANDE : 1
WEEK : 1
SES : 1
OPTIMAL : 1
VITAMIN : 2
VIAL : 1
CBOC : 5
SCAN : 2
SURBUBAN : 1
MEMORIES : 1
IC : 1
DRAINS : 1
BORDERLINE : 1
BRAIN : 1
IMPAIRMENT : 2
THRU : 1
DISTRESS : 1
MOUNTAIN : 1
ADVISE : 1
MOOD : 2
LIVES : 3
REPORT : 6
LETTER : 2
TRANSITIONAL : 1
HOW : 10
LEGIONELLA : 1
PHQ : 2
FEELINGS : 1
SINCE : 9
MOUTHPIECE : 1
DESCRIBED : 2
FLU : 2
THOSE : 2
DISCUSS : 5
COUGH : 2
CHANGE : 2
LEARN : 1
SOLN : 1
NENT : 1
PLASM : 1
MADE : 2
OFFICE : 2
PENIS : 1
CARDIAC : 1
BACTRIM : 1
LEARNING : 1
PRINTED : 1
DOSE : 3
ENCOUNTER : 1
OBJECTIVE : 4
SMOKING : 2
RETAINED : 1
ZOSTAVAX : 1
HISP : 1
MRI : 1
MILATARY : 1
HOSPITALS : 1
COMPUTERS : 1
BAXORETENE : 1
ARTIFICIAL : 1
CMC : 1
PIP : 1
BUCKLING : 1
ANTIBIOTIC : 1
NUTRITIONAL : 1
PARTICULAR : 1
INPT : 2
COMMENTS : 5
ACETAMINOPHEN : 1
SUFFICIENT : 1
STRENGTH : 1
CLACICLE : 1
TOTAL : 5
PARKINSONS : 1
JUNE : 2
SINUS : 2
INSIDE : 1
DISTANT : 1
ST : 2
ELIMINATION : 3
SUCH : 1
HISTORY : 8
HAIRBRUSH : 1
FOLLOWI : 1
RESPIRATION : 1
HOURS : 9
FUNCTIONNG : 1
MAIL : 1
BARETT : 1
NAPROXEN : 1
REPORTED : 11
WHIPPLE : 1
UA : 1
PURPOSES : 1
CONFERRED : 1
PILLS : 1
WOUND : 2
BILAT : 1
VM : 1
DUB : 1
HIP : 3
ILLNESSES : 1
NOTHING : 1
MEAT : 1
SITE : 1
STANDING : 1
WOOTEN : 1
COMPLICATIONS : 3
STATING : 3
EMAIL : 1
KG : 3
OP : 1
STANDARD : 1
OBJECTIONS : 1
AUG : 1
PROBLEM : 6
ACTIVELY : 1
EYES : 1
CLONAZEPAM : 2
ELIGIBLE : 1
RECORD : 4
THROUGH : 2
WARFARIN : 1
PUFFS : 1
VETS : 2
HEENT : 1
EXTRA : 2
ADMISSION : 6
ARRYTHMIA : 1
ANALGESIA : 1
BUTTOCK : 1
COORDIANATED : 1
HOSPITALIZED : 1
REMOVE : 1
MIVA : 1
ICE : 1
ULA : 1
FUTURE : 2
OBSERVATIONS : 2
CLIENT : 1
DENIES : 10
DOB : 1
BISACODYL : 1
SPECIFIC : 1
PHARMACY : 2
CANCE : 1
OTHERS : 3
PPARENT : 1
REQUESTED : 3
EXTRACTED : 1
CODEINE : 1
DECREASING : 1
VETERAN : 39
CAPSULE : 1
DINNER : 1
RELIEF : 1
PT : 42
HOGAR : 1
RADIATION : 6
DOUBLE : 1
BOOSTER : 1
BLOCKAGES : 1
ANTE : 1
MANAGED : 1
LAMINECTOMY : 1
SOON : 1
CATHETER : 1
ENDS : 1
RETINAL : 1
NI : 1
MINIMAL : 1
STRATEGIES : 1
AROUND : 3
ILLNESS : 1
SENSE : 1
PREDNISOLONE : 1
BRISTOL : 1
AND : 129
URINARY : 1
HYDROCELE : 1
JUN : 1
SESSIONS : 4
RESPONSE : 2
INCISED : 1
NAIL : 3
GROWN : 1
KNOWLEDGE : 2
PINES : 1
ADMINISTERED : 1
CUT : 2
LOW : 3
MAY : 8
FOLLOWED : 2
COMPREHENDING : 1
VARDENAFIL : 1
LENGTH : 3
PRO : 2
APPT : 5
TAKING : 2
NEUROFORAMINAL : 2
ADMITTED : 1
SPOUSE : 1
OBSERVED : 2
CONSIDERATIONS : 1
ROSEMONT : 1
LISTS : 1
SS : 1
NEUROGENIC : 1
RFC : 1
DONE : 4
DEPOSITS : 1
PHYSICAL : 3
DJD : 1
WEARING : 1
NIGHT : 1
ACTIVE : 15
KNOW : 3
CONCENTRATING : 1
MANAGER : 3
VESTING : 1
ABILITY : 1
BEDREST : 1
NDA : 1
OPTOMISTIC : 1
CO : 1
NURDEPRESSION : 1
SUGARS : 1
MANAGEABLE : 1
THIS : 31
SUPERVISING : 1
AK : 1
LPN : 2
NIACIN : 1
HIGH : 1
REMEMBER : 1
AVE : 1
SELECTIVE : 1
PALMER : 1
ADDED : 1
RYLAND : 1
NARCISSISTIC : 1
RIGHTS : 2
FINANCIAL : 2
FLASHBACKS : 1
SESSION : 2
STATES : 9
NEBULIZER : 1
WIFES : 1
SUPPER : 1
OU : 3
IMPLEMENTED : 1
WHILE : 2
LOCAL : 1
QUESTION : 1
SHORT : 1
ROS : 1
THOUSAND : 1
ICDCM : 5
FIRST : 2
RESP : 1
PICK : 1
ETOH : 2
ITS : 1
DOWN : 2
PAIN_OBJECTIVE : 1
IS_CONSISTENCY : 1
UP_PT : 1
PATIENT_INFORMATION : 1
TO_PT : 4
ANY_SIDE : 1
DOB_STATUS : 1
INPATIENT_EXAM : 1
WITH_UROLOGY : 1
MANAGED_PHYSICIAN : 1
CHANGED_THAT : 1
HAS_PENDING : 1
HIS_CLINIC : 1
CHANGES_PROVIDER : 1
REQUEST_DAUGHTER : 1
HER_NURSING : 1
CALLED_VETERAN : 1
IV_SEDATION : 1
ABOUT_HERPES : 1
SUPPER_MEDICATION : 1
WAS_AS : 1
AT_ADDITIONAL : 1
TOLERATED_WELL : 1
MS_PROGRAM : 1
BEHAVIOR_HOWEVER : 1
TO_ESTABLISH : 2
DATE_TOTAL : 1
WELL_PTSD : 1
DENTAL_CARIES : 1
ABOUT_MEDICATION : 1
SCOPE_FOR : 1
DENTURES_SOCKS : 1
AND_CT : 1
ANY_EFFECTS : 1
OF_DAUGHTER : 1
UP_THE : 1
WAS_SHARED : 1
NIACIN_MG : 1
THE_BENEFITS : 1
CLEAN_DRESSED : 1
GOAL_ADMISSION : 1
SIGNIFICANT_SYMPTOMS : 1
HOLD_OR : 1
HOMICIDAL_THOUGHTS : 1
HIS_DRESSED : 1
SC_ED : 1
OVER_IV : 1
PATIENT_HAD : 2
CAPACITY_ADDENDUM : 1
AS_AM : 1
SCORE_FIELD : 1
NOT_THERE : 1
LET_KNOW : 1
AND_ORIENTED : 3
WHEEZE_CHAMBER : 1
FRIENDS_AND : 1
PAST_HOURS : 2
ABDOMINAL_CONSTANT : 1
OF_HIS : 5
RADIOLOGY_NOTE : 1
FOLLOWED_AT : 1
BLOOD_PRESSURES : 1
TO_TOUCH : 1
THE_PATIENT : 8
SEVERAL_DIVORCE : 1
OF_EVALUATION : 1
AND_HEIGHT : 1
MUCH_IMPROVED : 1
HAVE_AND : 1
HEARD_MYSELF : 1
METFORMIN_PT : 1
IS_ABINOIDS : 1
CLIP_HAS : 1
EXAM_LASHES : 1
ADVERSE_NOTED : 1
IT_ACUTELY : 1
BOTH_EYES : 1
UP_INTERVENTIONS : 1
NONDE_HCL : 1
LEFT_OF : 1
PROGRAM_DATE : 1
PHONE_YES : 1
TO_AROUSE : 1
OUT_AGAIN : 1
SHIFT_HE : 1
INFORMED_SCANNED : 1
TO_ABOUT : 1
PATIENT_QUESTIONS : 1
WRITER_REINFORCED : 1
REQUEST_MODERATE : 1
MOUTH_PENDING : 1
AWAKE_CONSUMED : 1
THE_BEST : 1
NO_HE : 1
TOENAIL_PLATE : 1
MINUTES_QH : 1
THAT_CAN : 1
PATPU_YOU : 1
CONTINENT_IC : 1
CLINIC_INCISED : 1
ANXIOUS_TIME : 1
EXTENDED_AND : 1
THOSE_OUT : 1
RIGHT_STENT : 1
STATES_WAS : 1
DISTURBANCES_HAVE : 1
PROCESS_RIGHT : 1
FACILITATOR_REQUESTING : 1
HE_PLANS : 1
CONTACT_PHONE : 3
DOUBLE_VISION : 1
SINUS_MAKING : 1
SUPPLIES_RECEIVED : 1
TRANSITIONAL_HOUSING : 1
REVIEW_RESOLVE : 1
ESTABLISH_TRUSTING : 1
SOUNDS_WHEEZES : 1
HAS_TOLD : 1
STENOSIS_OR : 2
IS_ANXIOUS : 1
ALRIGHT_JUST : 1
NOON_RESPIRATIONS : 1
WEEK_HE : 1
CALLING_TO : 1
GROWN_SIZE : 1
WANTS_TO : 1
DIAGNOSIS_NUTRITIONAL : 1
ANTISOCIAL_TRAITS : 1
BY_OBMT : 1
FAMILY_LIMITATIONS : 1
RESTRUCTURING_ACCEPTANCE : 1
EVEN_DEPRESSED : 1
OR_MEDICAL : 1
ANTICOAGULANT_CLINIC : 1
MG_DURATION : 1
PROGRAM_OF : 1
AT_BASELINE : 1
CTA_NO : 1
PHYSICIAN_WITH : 1
COLLECTION_SPEC : 1
OTHERS_SPOUSE : 1
FEATURES_CONSISTENT : 1
COUNT_PROVIDE : 1
THYROID_STUDY : 1
FOR_NO : 2
HCL_CAP : 2
WITH_OIDES : 1
PAIN_PT : 1
PRESSURE_ALCOHOL : 1
COMPLAINT_CHIEF : 1
THE_SURGERY : 1
PAIN_VACCINE : 2
PROTOCOL_USED : 3
ARM_PAIN : 1
REPORTS_INCREASED : 1
REPORTS_SOME : 1
WIDOWED_NSC : 1
WHEN_IS : 2
NARCOTICS_FROM : 1
DISCUSSED_VET : 1
TOXIC_AGENTS : 1
SC_WAS : 1
JOINT_THIS : 1
NOT_AT : 1
WHEN_IT : 1
NONE_HYPONATREMIAIMPROVING : 1
PATIENT_FAMILY : 1
WITH_INC : 1
NOTE_WHAV : 1
OTHER_LABS : 2
AROUND_LUNCH : 1
OBSERVED_SMILING : 1
NO_DOZ : 1
CARE_ORAL : 2
MEDICAL_WAS : 2
WITH_OR : 3
AXIS_II : 1
WORKING_CONSTRUCTION : 1
GENERAL_ROS : 1
BED_SPONGE : 1
DIFFICULTY_MAKING : 1
ITS_AND : 1
BEEN_DOING : 1
STATUS_GEC : 1
INFORMATION_OBTAINED : 1
AND_BENEFITS : 2
PAIN_BE : 1
CLONAZEPAM_MG : 1
NONVA_MISCELLANEOUS : 1
OR_WITHOUT : 1
ABINOIDS_AGE : 1
SIZE_GAUGE : 1
HE_FELT : 1
GUIDE_AND : 1
MATCH_THE : 1
RELATIVE_TACHYCARDIA : 1
WORK_HOURS : 1
PLEDGED_FOLLOW : 1
ANY_BOWEL : 1
INFORMATION_ACTIVE : 1
PLACE_CONSISTENCY : 1
ITSELF_HEIGHT : 1
BEEN_AND : 1
LCSW_VA : 1
RESPIRATORY_PROGRESS : 1
SELF_IN : 1
PATIENT_DISCHARGED : 1
PULSE_PHYSICIAN : 1
AT_RIGHT : 1
MH_BAKER : 1
UNSAFE_INCREASED : 1
THAT_ARRANGED : 1
MS_SINCE : 1
NOTIFICATION_FOR : 1
SCAN_VA : 1
SAL_CMC : 1
ABNORMALITIES_SPINAL : 2
DOWNSTAIRS_SMOKE : 1
LEG_REAFFIRMED : 1
GTP_HEARD : 1
IF_APPLICABLE : 2
CLINIC_AND : 2
FOR_HEAD : 1
MINNESOTA_AND : 1
SENT_TO : 1
PRESENT_TIME : 1
POH_HE : 1
HIS_OBJECTIONS : 1
ON_MACHINE : 1
PROCESS_PER : 1
OPTION_TO : 1
TANAKA_FOR : 1
TRYING_HARD : 1
MOTIVATION_OBSERVATIONS : 1
SOUTH_CLINIC : 1
TREMOR_EXTENDED : 1
DOSES_RECEIVED : 1
LOCATION_COLOR : 1
LIFE_IS : 1
AMMENABLE_TO : 1
IN_EYE : 1
VET_BEING : 1
AS_AS : 1
PRESENT_ILLNESS : 1
TO_NOTIFY : 1
PTSD_TEST : 1
VETERAN_HAD : 1
LOW_REPORTS : 1
LEG_ABNORMALITY : 1
EVENING_REPORTED : 1
SUICIDE_IDEATION : 1
NOTE_CALLBACK : 1
AT_YES : 1
SUPPORTIVE_AND : 1
DID_GET : 1
NO_IMMEDIATE : 1
PROBLEMS_WITH : 2
RESPIRATIONS_PAC : 1
BRACE_VA : 1
CUEING_OF : 1
PRODUCTS_IF : 1
RELIEF_MEDICINE : 1
AS_OPTION : 1
DO_IMPROVE : 1
IF_KNEW : 1
MORE_OFTEN : 1
REPORT_OF : 1
PRESSURE_RELIEVES : 1
PHYSICIAN_ATTENDED : 1
HE_LOCATION : 1
MEDICATIONS_CONCERNS : 1
SIDE_DENIES : 1
TRP_TELEPHONE : 1
PHYSICAL_EXAM : 1
OCT_MH : 1
CRITERIA_WEIGHT : 1
OR_BAY : 1
AND_ME : 1
IS_VETERAN : 1
FIRST_SHE : 1
OF_CHIEF : 1
LN_WITH : 1
BAKER_SYSTEMS : 1
RISKS_OF : 2
REQUEST_SEDATION : 1
NONE_PATIENT : 2
DEPRESSION_IN : 1
METHADONE_OXYCODONE : 1
YOUR_RECENT : 1
VETERANS_RECORD : 2
PRESENT_BEHAVIOR : 1
PENDING_GENERAL : 1
ARE_TO : 2
RECEIVED_RE : 1
DATE_BEEN : 1
GRANDE_LABORATORY : 1
FOLLOWING_BEST : 1
PHARM_ANTICOAG : 1
SPREAD_APART : 1
ATRIAL_FIBRILLATION : 1
OF_AMBULATION : 1
SKIN_LIPOMA : 1
EVALUATION_AND : 1
LOCAL_ANESTHETIC : 1
HIS_ISSUES : 1
BE_THAT : 1
CHANGE_USUAL : 1
WAS_TALKATIVE : 1
OCCUPATION_WORKER : 1
GOOD_AND : 1
AFTER_HE : 2
ENDING_PM : 1
SHE_CONTACT : 1
STOOL_LOCATION : 1
REPORTED_WORN : 1
DISORDERMET_VETERAN : 1
GUN_MR : 1
OPTION_INCREASE : 1
STATING_NEED : 1
VETERAN_HAS : 2
FROM_FOR : 1
MOST_RECENT : 1
CARE_FOOD : 1
TO_TO : 5
LENGTH_BRAIN : 1
AND_GROUPS : 1
IS_DEFINITELY : 1
PATIENT_PROTOCOL : 1
MIN_BEFORE : 1
MALE_HOPES : 1
WHEN_EXPOSED : 1
RESENT_BELIEFS : 2
EXAM_WILL : 1
OLD_HISP : 1
HAVING_BEEN : 1
AS_STREET : 1
ANEMIA_RYLAND : 1
WAS_SCORE : 1
OUTPATIENT_MRI : 1
CAROTID_IN : 1
SOME_STATE : 2
MAY_ADMINISTER : 1
VET_AND : 1
WILL_PROVIDE : 1
NAOMI_VA : 1
HI_DERMATITIS : 1
WITH_PT : 3
RISK_MOBILITY : 1
MOOD_STATING : 1
CONSULT_ALLERIGES : 1
CONVINCED_HE : 1
CONDUCTED_SCREENING : 1
PLAN_ADVISE : 1
STATUS_MOVEMENT : 1
SUICIDAL_THAT : 1
AT_ALL : 1
OR_RESULT : 1
TAKE_ACTIVE : 1
SPONSOR_OR : 1
PARTIALLY_QUICK : 1
CHART_FOR : 1
FROM_AS : 1
FOLLOWING_FIRST : 1
LABS_VASCULAR : 1
PATIENT_WITH : 1
ANES_TO : 1
PAIN_CONTRACT : 1
TELEPHONE_NOTE : 1
GLAUCOMA_RETINAL : 1
ATTENDED_GROUP : 2
TO_HIM : 2
ME_DO : 1
AT_NOON : 1
INTRAOCULAR_ANTIBIOTIC : 1
MILD_HEADACHES : 1
VOLUNTEERED_TO : 1
HE_WHEN : 1
NO_PATCH : 1
AMBULATORY_DENIES : 1
DELIVERY_METHOD : 1
IS_PATIENTS : 1
NO_MUCH : 1
PERSONALITY_RTC : 1
ALL_YEARS : 1
THERAPY_RESTRICTED : 1
INITIAL_PORTABLE : 1
STANDING_HAD : 1
OTHER_PTS : 1
HERE_DRIVING : 1
TC_DISCUSS : 1
MEAL_ASSISTANCE : 2
MENTAL_MALE : 1
PRIOR_ADMISSION : 1
IN_FAMILY : 2
ANSWERING_DOES : 1
MEDICATION_POTASSIUM : 1
LEAVE_WELL : 1
HE_MH : 1
SCHEDULED_TRANSFER : 1
WORSENING_HE : 1
RESTORATIVE_FEEDING : 1
TXS_MEDICINE : 1
ABOUT_YEARS : 1
PAIN_IR : 1
BLADDER_PHYSICIAN : 1
BENIGN_TRIGLYCERIDE : 1
YES_PAIN : 1
ASSISTANCE_PROBLEMS : 1
NOTIFICATION_THE : 1
BRAINS_OUT : 1
ADMINISTERED_RESTRICTED : 1
INFORMATION_CONTAINS : 1
ABNORMALITY_GAIT : 1
NEWS_WAR : 1
LUNCH_TO : 1
GOOE_IS : 1
STRESSORS_PATIENT : 1
MENTAL_HISTORY : 1
BIOLOGICAL_AND : 1
HERE_ESTABLISH : 1
HAD_NURSING : 1
THE_FACT : 1
REPORTS_HEADACHES : 2
REPORTED_THAT : 8
GROUP_PCT : 1
AGREES_OF : 1
IN_LEANING : 1
THE_UPPER : 1
IN_REMISSION : 1
SATAN_PT : 1
SAME_SCHEDULE : 1
SUICIDE_ATTEMPTS : 1
MINUTES_ANEURYSM : 1
NEXT_APPT : 1
SKILLS_WITH : 1
VIA_CPRS : 1
VIT_DATE : 1
RECS_WILL : 1
ZZPATIENT_CARE : 2
AND_TRYING : 1
LIMITATIONS_NAME : 1
TO_PLAN : 1
FOR_EDEMA : 1
SAY_THEY : 1
BACK_IN : 1
ZOSTAVAX_CHLORIDE : 1
WHAT_QUESTIONS : 1
DURING_OBSERVATION : 1
NEGATIVE_THINKS : 1
NECK_THAT : 1
APPOINTMENTS_HYGIENE : 1
UNDER_ANESTHESIA : 1
PLEASE_IE : 1
SINCE_OTHER : 1
IS_IMAGING : 1
ADEQUATELY_GROOMED : 1
IN_HEIGHT : 2
ASSISTANCE_IF : 1
BASELINE_LPN : 1
PATHOLOGY_ONSET : 1
HEALTH_RECREATION : 1
LAST_NEURO : 1
VERY_COHESIVE : 1
NOTE_MH : 1
PATIENT_HIS : 1
IS_GOING : 1
AT_VITAL : 1
DEFINITELY_MOBILITY : 1
CONTROL_PATIENT : 1
MANAGEMENT_REPAIRS : 1
THANKED_THIS : 1
POW_EXPIRED : 1
NAME_INJECTION : 1
HE_NOT : 5
TO_SHORTER : 1
AT_US : 1
RATE_PRIMARY : 1
KNOWLEDGE_DEFICIT : 1
THINKS_ABSCESS : 1
LB_ORTHOPEDIC : 1
PROBLEMS_ON : 1
BACK_DUE : 1
EXPOSED_MALE : 1
STOOL_URINE : 1
WAS_SUICIDAL : 1
ESTABLISH_CARE : 1
OIL_STANDARD : 1
OUTPATIENT_PRECAUTIONS : 1
MH_ATTENDING : 1
WIFE_JUANITA : 1
MOUTH_TIMES : 1
AS_NO : 1
WITH_CHEST : 1
SCREENING_PTSD : 1
RECOMMENDED_LOCATION : 1
SENT_NO : 1
DOSE_SOLN : 1
HOW_THEY : 1
ON_HIS : 2
TREATMENT_PATIENT : 1
MANAGEMENT_FROM : 1
KNOWN_MEDS : 1
EXAM_HAS : 1
IN_RIGHT : 1
AND_RACING : 1
INSTRUCTIONS_FOLLOWUP : 1
FOR_BONFADINI : 1
FOR_SPECIFICS : 3
BRIEF_SUICIDE : 1
BATHROOM_PRIVILEGES : 3
AMBULATORY_CLINIC : 1
CONTINENT_BED : 1
CANE_WITH : 1
DESIGNED_INCREASE : 1
STATUS_THE : 1
WORK_DESCRIBED : 1
EASILY_TURNS : 3
VETERAN_NORMALIZING : 1
MANAGEMENT_XX : 1
MOOD_CANCE : 1
ISSUES_PROVIDE : 1
PT_FOR : 1
THAT_HAS : 3
POST_SALINE : 1
PRO_PHONE : 2
THE_LIVES : 1
WITH_IN : 2
PROTECTION_WHEN : 1
KNOW_THERE : 1
ND_VACCINE : 1
HOW_IT : 1
AND_HD : 1
TO_OCCUPATION : 1
THE_CURRENT : 1
WILL_NARCOTICS : 1
CLINICAL_MDD : 1
IS_VET : 2
BENEFIT_AS : 1
AT_HOME : 1
GRENADES_IEDS : 1
WITH_GIRLFRIEND : 1
AS_VERY : 1
TO_MAKE : 1
ANXIETY_STATE : 1
AGAIN_AND : 1
JUST_BEHIND : 1
PIP_JOINT : 1
CATHETER_GAUGE : 1
PTS_PATIENT : 1
CONSENT_WAS : 3
BASCOM_EYE : 1
PLACED_TEMP : 1
MADE_BE : 1
AND_THEREFORE : 1
STILL_REPORT : 1
INTOLERANCES_FEEDING : 1
ALLERGIES_LIVER : 1
SPEC_TAKEN : 1
SCHEDULED_NO : 1
TASK_PERSON : 1
SINCE_PATIENT : 1
VM_ED : 1
HE_MAINTAIN : 1
NOTIFY_HIM : 1
FOR_SEEN : 1
AT_BY : 1
RECHECK_IS : 1
MAY_BE : 1
DESIGNED_TO : 2
AGAIN_TRP : 1
SERVED_AS : 1
PLANS_VET : 1
WITH_ADEQUATELY : 1
PHYSICIAN_MH : 1
PROCEDURE_IV : 1
AM_AS : 1
TO_UNDERGO : 1
USED_VERIFY : 1
ADHERENCE_IN : 1
DURING_VISIT : 1
URINE_CLEAR : 1
BE_DETERMINED : 1
TO_IS : 1
IMPROVED_FAIR : 1
SUICIDAL_IDEATION : 2
TWO_TO : 1
AGENTS_NEED : 1
DESCRIPTION_PLAN : 1
MCADOO_NDA : 1
ASSESSMENT_IN : 1
OR_PHYSICIAN : 2
YEARS_CAUSE : 1
OR_CLINICAL : 1
DOCUMENT_WEIGHT : 1
AND_PHONE : 1
MORE_BY : 1
FOR_WHEN : 1
STATUS_POST : 1
MEASUREMENT_DURING : 1
REACHED_AT : 1
TO_ALL : 1
THAT_WILL : 1
TO_FOLLOW : 2
POINTS_THE : 1
XYZZY_PROBLEM : 2
OF_UNCERTAIN : 1
LEFT_KNEE : 1
POSITIVE_OUTCOMES : 1
PLAN_REFUSES : 1
DATE_EVENT : 1
ONCOLOGY_ASSESSMENT : 1
PROBLEM_SAYS : 1
BEING_MANAGED : 1
TO_COMPLY : 1
THE_WORK : 1
ANCHORAGE_IN : 1
HAVE_OTHER : 1
FROM_MEDICATION : 1
OF_THERAPY : 1
ALSO_INTENDS : 1
AUG_TELEPHONE : 1
OR_NONE : 1
NURSES_NOTES : 1
HEALTH_PROMOTION : 1
AS_BROS : 1
TOMORROW_FOR : 1
TO_PALMER : 1
TOLD_LEAVE : 1
LESION_PULMONARY : 1
PER_TREMOR : 1
PLACE_AND : 1
NO_NEGATIVE : 1
KEEP_TRACK : 1
QUESTIONS_TRANSFER : 1
NOT_HE : 1
AND_ALCOHOL : 1
AS_BEFORE : 1
FOR_TRANSPORT : 1
BATHROOM_DURING : 1
SHEET_FOR : 1
TO_LIFESTYLE : 1
ASK_HAVE : 1
LL_PLACED : 1
DT_SPEC : 1
UPDATE_YOU : 1
WHO_NO : 1
TO_DRINK : 2
SCALE_IT : 1
GUN_DID : 1
ST_OF : 1
HOME_LONELINESS : 1
WAS_OR : 1
NEW_SX : 1
WORK_OR : 1
LPN_MH : 1
APPLICABLE_TO : 1
AND_STATES : 1
INTO_AND : 1
DOES_COPY : 1
TKA_INSTRUCTION : 1
GLOBES_OU : 1
AND_TABLET : 2
SCREENING_PT : 1
PERSON_PLACE : 1
NOW_TO : 1
ANTICOAGULANT_SINCE : 1
NOT_GET : 1
COVER_THOSE : 1
NECK_HAS : 1
APPOINTMENT_REQUEST : 1
CHARACTER_OF : 1
NURSING_MD : 1
COMING_THURS : 1
INSTRUCTIONS_OU : 1
SOCIAL_ASSESSMENT : 1
HYDROCODONE_OUR : 1
HOURS_PRESSURE : 1
THINKS_VARIOUS : 1
PATIENT_PAIN : 1
BEEN_RUQ : 1
QUIET_OS : 1
MEDICAL_RECORDS : 1
DIAGNOSIS_DATE : 1
VISIT_OF : 1
NO_DISC : 2
WHEEZE_ANT : 1
SHORT_LEFT : 1
AND_RESTORATIVE : 1
OUTPATIENT_THE : 1
WAS_TO : 8
SKIN_PROBLEMS : 1
MEDICATIONS_AND : 1
APPOINTMENT_FOR : 1
VISIT_DTC : 1
FOR_IN : 1
AS_MAKING : 1
NOTE_CRITICAL : 1
VIA_THE : 1
AND_CONTINUE : 1
LENGTH_CALL : 1
CALL_VET : 1
HA_ABLE : 1
ON_YEARS : 1
APPOINTMENTS_WITH : 1
TO_EVALUATE : 1
FOLLOWUP_NO : 1
CARE_VESTING : 1
PATIENT_DOES : 1
ASA_PATIENT : 1
CAPSULE_ACTIVE : 1
AMBULATORY_FOR : 1
DC_DIAGNOSES : 1
PENDENCE_NEW : 1
CONSULTED_NOTHING : 1
YES_PATIENTS : 1
LMWH_POST : 1
YESTER_EVENING : 1
HIS_AND : 7
WILL_THE : 1
COGNITIVE_BEHAVIORAL : 1
OBJECTIVE_COMMENTS : 1
DENIES_GTP : 1
OBTAINED_PM : 2
BEGINNING_THE : 1
OF_CONTENTS : 1
NEEDS_TO : 1
AN_PATIENT : 1
HAD_PPV : 1
CARDIAC_ARRYTHMIA : 1
TAKE_AS : 1
HYPERTROP_ADDENDUM : 1
OF_PROCEDURE : 1
ASSESSMENT_TIME : 2
TEARS_INSTILL : 1
DAUGHTER_OCCUPATION : 1
CARE_NOTE : 5
HISTORY_STENOSIS : 1
DIVORCED_HE : 1
READ_PRINTED : 1
IN_CINCINNATI : 1
VA_PAIN : 1
WITH_HAVING : 1
LEFT_MM : 1
VERY_HE : 2
APR_HIS : 2
ENVIRONMENTAL_COMPLETED : 1
AMMENABLE_AN : 1
AND_MANAGEABLE : 1
PERFORMED_HELP : 1
ROUTES_THE : 1
MINIMAL_KERATOSES : 1
AS_FOR : 1
ED_WEIGHT : 1
ANY_NURSING : 1
EDUCATION_DO : 1
ON_SCALE : 1
PUFFS_BY : 1
CONTRAINDICATIONS_TEACHING : 1
SINCE_WIFE : 1
TAB_PO : 1
NORMAL_NURSING : 1
ON_PRECAUTIONS : 1
THAT_HOUSING : 1
COMPLAINT_MONTH : 1
BONFADINI_HAS : 1
PAIN_LEVEL : 2
RECOMMENDATION_TO : 1
CONSULTATION_CHAPLAIN : 1
NEGATIVE_PATIENT : 1
MENTAL_GEC : 1
OF_COUMADIN : 1
OR_GROUP : 1
SORE_SELF : 1
PROCESS_CONCENTRATING : 1
YOUR_NEXT : 1
OBSERVATION_DID : 1
NUTRITIONAL_IMPLICATIONS : 1
OX_PHYSICIAN : 1
BEEN_ON : 1
GROUP_BOWLING : 1
BOWEL_PATIENT : 1
FEELS_HE : 1
OTHER_VETERAN : 1
RETURN_PATIENT : 1
PSYCHIATRIC_FOLLOW : 1
WORK_UP : 1
REHAB_HERE : 1
PRECAUTIONS_WITH : 1
MOBILITY_PERSON : 1
INTERNAL_HEMORRHOIDS : 1
CLINICAL_INFORMATION : 1
FINANCIAL_NO : 1
HIM_TO : 2
NO_BUT : 1
SPECIAL_FOR : 1
PM_HEALTH : 1
DIFFICULTY_COMPREHENDING : 1
IS_OLD : 2
OBJECTIVE_BOWEL : 1
HEART_NO : 1
FOR_THE : 1
DISCUSSING_THE : 2
PTSD_OPIOID : 1
WITH_NEED : 1
PAIN_BUT : 1
DISCUSS_INAPPROPRIATE : 1
ONLY_WHEN : 1
ACTIVE_APPARENT : 1
UP_INHIBITORY : 1
TO_ENDS : 1
ROUTINE_EXAM : 1
INTRODUCING_AS : 1
YEARS_SKIN : 1
LT_AND : 1
THREE_FOR : 1
OF_SESSIONS : 1
AK_LOWER : 1
LAID_OFF : 1
HOURS_ELIMINATION : 1
ANESTHESIA_REPORT : 1
OR_WIFES : 1
PHSYCOLOGISTS_SHORT : 1
DONE_TO : 1
NS_PERSONAL : 1
PTSD_COGNITIVE : 1
IDEATION_PROBLEM : 1
THE_PROCEDURE : 2
ALSO_APPOINTMENT : 1
MEDIUM_BLADDER : 1
MEAT_AND : 1
KEEP_BETTER : 1
BIBLE_STUDY : 1
THE_FROM : 1
ACTIVITIES_OF : 1
HE_WILL : 4
PAST_SOME : 1
ORAL_ACTIVE : 1
WILL_TO : 2
HE_RISK : 1
SWER_PROVIDE : 1
WHEN_BEGAN : 1
WAS_CONTINENT : 3
EASE_GUIDE : 1
CHAP_RELATIONSHIPS : 1
TIME_ALLERGIES : 1
BUTTONS_THE : 1
HEALTH_CALLER : 1
PROVIDE_WITH : 1
SCHEDULED_TO : 1
MR_IS : 1
SOME_WANTED : 1
NO_BLOODCLOTS : 1
TERAZOSIN_HCL : 2
TRANSFER_BLIND : 1
SIGNIFICANT_ISSUES : 1
LIKELIHOOD_THAT : 1
SAFE_WAS : 1
DAILY_PATIENT : 1
LIVER_ENTER : 1
FORGOT_THE : 1
OF_SUPPORTIVE : 1
OFFICE_VICTIMS : 1
TO_EBRT : 1
AND_FEELING : 1
SCHEDULE_AS : 1
DATE_OF : 3
AND_VETERAN : 1
ANTIBIOTIC_RESIDENT : 1
HEARING_LOSS : 1
DIFFICULT_HOME : 1
VET_WILL : 3
ON_URINE : 1
IS_ABRASION : 1
STUDIES_PAST : 1
INTRODUCING_MYSELF : 1
AVULSION_WITH : 1
CUT_IT : 1
HERE_ROUTINE : 2
AT_TIMES : 1
AND_THOUGHTS : 2
VASCULAR_PROCEDURE : 1
FROM_ALCOHOL : 1
ABDOMEN_ABD : 1
PICK_UP : 1
COORDIANATED_PAIN : 1
AND_CALCIUM : 1
PHONE_CALL : 2
ONLY_ILL : 1
DRIVING_WITHOUT : 1
IDENTIFIED_MENTAL : 1
SCORE_OCCLUSION : 1
NOT_GIVEN : 1
IS_ELIGIBLE : 1
MAY_INR : 1
SEEMS_NARCOTICS : 1
MISSING_SCHEDULED : 1
NOTIFY_NURSE : 2
IN_SA : 1
APNEA_ICDCM : 1
REPORTS_MULTIPLE : 1
DEC_INPATIENT : 1
ANSWERED_TAKING : 1
DINNER_FOOD : 1
MEDICATIONS_HAVE : 3
SYSTEM_HOURS : 1
RESOLVE_ALL : 1
HAVE_YOUR : 1
SUICIDAL_HOMICIDAL : 3
DIAGNOSES_OPIOID : 1
PERCODAN_TABLET : 1
ONLY_OPTION : 1
PATIENT_OBJECTIVE : 1
AND_VOLUNTEERED : 1
AND_ATTRIBUTED : 1
CLC_PROGRESS : 1
DERMATITIS_WITH : 1
WILL_PAIN : 1
NO_CONCERNS : 2
HIS_INTAKE : 1
ATYPICAL_PAIN : 2
PUTTING_EXTRACTED : 1
TEMP_VASCULAR : 1
RESPONDED_NO : 1
FOR_PAIN : 2
IS_MORE : 1
BEEN_WILL : 1
KNEE_OR : 1
SIZE_ABNORMAL : 1
SSN_PROTOCOL : 1
ABOUT_PAINFUL : 1
THOSE_STATEMENTS : 1
ON_HE : 2
BRC_BEEN : 1
THE_SERVICE : 1
SEVERAL_YEARS : 1
IRAQ_MAY : 1
BRIEF_HISTORY : 1
WELL_UPSET : 1
BY_NURSE : 1
OF_PHYSICIAN : 1
CAME_HERE : 1
DEPOSITS_THE : 1
FINANCES_AND : 1
CARIES_VISUAL : 1
FEELING_DEPRESSED : 1
FROM_TO : 2
MODALITY_ULA : 1
HOSPITALIZATION_PSYCH : 1
SPINAL_CANAL : 2
LLD_SHORTER : 1
AT_WORKLOAD : 1
PT_HAVE : 1
BEHAVIOR_SKIN : 1
PM_APPLICABLE : 1
UPBEAT_THE : 1
AND_SPOUSE : 1
LAST_HE : 1
AND_REQUESTING : 1
NOT_CONTACT : 1
DOZ_GET : 1
THAT_DOCTOR : 1
WIFE_SISTER : 1
IN_SEEN : 1
ABNORMAL_RESPONSE : 1
TXS_TO : 1
EXAM_PT : 1
PSYCHIATRIC_INTERDISCIPLINARY : 1
WOOTEN_VISIT : 1
CLAUDICATION_POSTOPERATIVELY : 1
NURSING_GROUP : 1
NO_IDENTIFIED : 1
CRITERIA_HOSPITALIZATION : 1
OF_FEB : 1
DIVORCED_SAYS : 1
WHAT_WOULD : 1
REASSURE_VETERAN : 1
PT_PHYSICIAN : 1
DIAGNOSIS_WITH : 1
COAT_HE : 1
OF_LS : 1
WORKER_DATES : 1
TO_ADMITTED : 1
LABS_DONE : 1
PROBLEM_ARM : 1
HIMSELF_AND : 2
WAS_COMPLAINING : 1
TO_AUGUST : 1
WITH_BALDWIN : 1
AS_WILL : 1
AT_THE : 6
MEET_FOR : 1
YOUR_NO : 1
EMAIL_SHARED : 1
THIS_RECORD : 1
HGB_DENIES : 1
WHICH_HEIGHT : 1
DISKECTOMY_PRESSURE : 1
IN_ER : 1
INCREASED_DOSE : 1
DC_NOTE : 1
COLOR_LOCATION : 1
NOT_REACTED : 1
FROM_WANTS : 1
COMMENT_AS : 1
WELLNESS_FOR : 1
TL_NO : 1
OF_LETTER : 1
COMMUNICATION_TEACHING : 1
IMPROVE_YOUR : 1
QH_MODALITY : 1
ASSESSMENT_TO : 1
AVAILABLE_WEIGHT : 1
PAIN_MEDICATIONS : 1
SINCE_INR : 1
NURSING_DRESSING : 1
FLOATER_IN : 1
BACK_PLEASE : 1
SAYS_HES : 1
AFTERCARE_PLAN : 1
CALL_AGAIN : 1
YOUR_PLAN : 1
IT_WILL : 1
AND_ONLY : 1
NOS_DOES : 1
WITH_ARRIVAL : 1
HIS_BIBLE : 1
MORE_DEPRESSED : 1
103203_PHONE : 1
DURING_SHIFT : 4
NAME_VETERAN : 1
DOSIMETRY_FROM : 1
HOURS_AMOUNT : 1
ONCE_MHC : 1
PT_HERE : 2
MS_LOCATION : 1
CHAPLAIN_WILL : 1
PER_CONSULT : 1
STATUS_SLEEP : 1
FROM_DENIES : 1
MINUTES_RESIN : 1
PSYCHOTHERAPY_COGNITIVE : 1
PROCEDURE_AND : 1
SMILING_TO : 1
COULD_RESULT : 1
EXPLAINED_TO : 1
LESION_HPI : 1
TREMBLING_HIS : 1
AFTER_DISCUSSING : 2
NOT_OF : 2
SEP_PATIENT : 1
OTHER_DRUG : 1
URGENT_APPOINTMENT : 1
PENIS_SURGERY : 1
IN_NIGHTSTAND : 1
PING_THE : 1
CREATININE_USES : 1
COMMENTS_EXAMINATION : 1
PATIENT_ADDRESS : 1
THAT_STOOL : 1
IDENTIFIES_FOLLOWI : 1
BEING_HOPELESS : 1
PT_REPORTS : 1
IN_APRIL : 1
NOT_THE : 1
THIS_SSN : 1
SOME_THERAPEUTIC : 1
WHEN_HE : 1
CITALOPRAM_OLD : 1
EXT_EXAM : 1
VETERAN_ALERT : 1
SUPPORTIVE_WITH : 1
INHALE_PUFFS : 1
TO_DO : 1
CONSIDERATIONS_BREAKTHROUGH : 1
YOU_ARE : 2
NOTE_CALLER : 1
CONSTANT_AND : 1
AS_SYSTEM : 1
WITH_IS : 1
SHOW_LETTER : 1
BID_PT : 1
MARCH_WILL : 1
SEDATION_WITH : 1
BE_PARTIALLY : 1
MANAGEMENT_CHIEF : 1
PATIENT_LIES : 1
BLOOD_PHQ : 1
THERAPIST_IDENTIFY : 1
PTSD_DEPENDENCE : 1
CALLED_LEFT : 1
MANAGEMENT_CODE : 2
TOOTH_OR : 1
BY_MINNESOTA : 1
ARE_WANTED : 1
PER_THESE : 1
MESSAGE_ANSWERING : 1
TO_SCAN : 1
CM_AND : 1
CURRENT_ANY : 1
MEDICATIONS_SLEEP : 1
GET_IT : 1
TO_TOLERATE : 1
HGB_EXPLAIN : 1
MIDNIGHT_ANESTHESIA : 1
RECONCILED_AND : 1
THEIR_CONTENTS : 1
THEM_AT : 1
PLASMA_NPO : 1
SERVICE_ON : 1
ITSELF_NOT : 1
CONSCIOUSNESS_BELONGINGS : 1
CLIP_REORDERED : 1
LUNGS_CHARACTER : 1
THE_PAT : 1
BEHAVIOR_ON : 1
STATED_WANTED : 1
COUGH_NOTED : 1
COMFORT_ASSISTANCE : 1
THE_ALLERGIES : 1
WIFE_FATHER : 1
CT_CHEST : 1
FOR_DC : 1
HIS_HER : 1
HAVING_RUQ : 1
WAS_IF : 1
LONG_HOW : 1
ALCOHOL_PTSD : 1
STILL_PATIENT : 1
ANTISOCIAL_PERSONALITY : 1
WITHIN_EASY : 1
NOTED_FLOATER : 1
BOSS_VET : 1
SI_AND : 1
ADDITIONAL_ALLERGIES : 1
LIVING_PATIENT : 1
YES_ON : 1
NOTED_PATIENT : 1
ANXIETY_CURRENTLY : 1
MT_PROCESS : 1
NUTRITION_ASSESSMENT : 1
QUESTIONS_YOU : 1
DATE_COMPARISON : 1
NIGHT_ZZPATIENT : 1
INSTRUCTION_PTSD : 1
NECK_SHAKE : 1
SEEN_NUMBER : 1
MG_SPUTUM : 1
CONCERNS_MEDICATION : 1
CONDITION_GENDER : 1
NOT_TOLERATE : 1
ALCOHOL_ABUSE : 1
CLINIC_DATE : 1
TRANSITIONAL_COULD : 1
SCHEDULE_BEFORE : 1
HAD_TKA : 1
NOON_TO : 1
CONCERNS_BY : 2
ABNORMAL_WOULD : 1
EXAM_SUICIDAL : 2
REPORTS_SIDE : 1
AND_SHELLED : 1
THINKS_THE : 1
MG_TH : 1
AND_SAFETY : 1
STATES_THE : 1
REMISSION_TAKE : 1
ME_NOT : 1
DUE_BUSY : 1
FIRST_COUSIN : 1
VERTIGO_HOARSENESS : 1
CLINICAL_HISTORY : 1
MIAMI_ALSO : 1
REPORTS_ABSTINENCE : 1
EDUCATION_OF : 1
CINCINNATI_IN : 1
CONTINUE_TO : 2
MEDICAL_CONDITION : 1
ACTIVE_INFUSE : 1
PAIN_BEGAN : 1
OR_PROBLEMS : 1
AGE_SEASON : 1
HE_HIM : 1
NEED_SESSIONS : 1
DONE_VISIT : 1
AT_AM : 3
ASSESSMENT_TREATMENTS : 1
OTHER_GOING : 1
JUNE_PT : 1
PER_MUST : 1
NOTE_INCISION : 1
RACING_THOUGHTS : 1
ANGER_MANAGEMENT : 1
STARTED_TO : 1
WAS_NEGATIVE : 2
NURDEPRESSION_SIGNIFICANT : 1
HE_BEEN : 5
RAPID_FLU : 1
MIN_OBJECTIVE : 1
LET_ME : 1
AND_NECESSARY : 1
TOLD_PACKET : 1
HOME_UNTIL : 1
HAND_AND : 1
LIST_OF : 1
EXTENDED_FINGER : 1
GLAND_FORE : 1
NEW_CASE : 1
RELATIVE_IS : 1
AN_HISTORY : 1
TO_ADD : 1
AWAKE_PROGRAM : 1
VASCULAR_LAB : 1
PLACE_OF : 1
NOW_STATES : 1
ML_ATROVENT : 1
THIS_AND : 1
THAT_MH : 1
SEX_FOLLOWUP : 1
SO_HE : 1
INFLUENZA_PRESSURE : 1
POSITIVE_ANGIOECTASIA : 1
DIFFICULTY_CONCENTRATING : 1
MAY_INTRAOPERATIVE : 1
NAME_PCT : 1
REACTION_PAIN : 1
AND_PERSON : 1
JOINTS_LENGTH : 1
ODY_TEMPERATURE : 1
ANGIOECTASIA_IN : 1
INFECTED_BACK : 1
PATIENT_RESIDENT : 1
HYGIENE_OR : 1
VET_THIS : 1
NEWLY_DIAGNOSED : 1
USE_COGNITIVE : 1
SPONGE_AMOUNT : 1
INTELLIGENCE_FINANCIAL : 1
CHRONIC_HIS : 1
COPY_OF : 1
PROCESS_IS : 1
PLEDGED_TO : 1
NO_NEED : 1
REASSURE_BY : 1
HAVING_OTHER : 1
CHEST_PAIN : 4
TO_NATURE : 1
GET_MORE : 1
TROPICAMIDE_AND : 1
GET_HERE : 1
LONG_THEY : 1
AND_LIFESTYLE : 1
AND_VET : 1
WELL_THIS : 1
WITH_MEDICAL : 1
ROOM_PERSONAL : 1
FRI_COIN : 1
NOT_CLEAR : 1
MEDICATION_REQUEST : 1
THAT_PHYSICIAN : 1
CONDITION_WITH : 1
PROBLEMS_STANDING : 1
FIBRILLATION_MEDICATIONS : 1
WHEN_PAIN : 1
TAKE_TOLERATE : 1
KIT_HE : 1
MUCH_OPEN : 1
ENDS_MEET : 1
EXAM_PAIN : 1
APPOINTMENT_INFORMATION : 1
SW_HAS : 1
PRESENTED_AS : 1
VISIT_PSYCHOTHERAPY : 1
TH_VITAL : 1
IS_CONFIDENT : 1
ATTEMPTS_HAS : 1
WAS_HA : 1
NOTED_MOOD : 1
MEDICATION_ML : 1
LONG_SINCE : 1
HE_THIAMINE : 1
FOR_ANALYSIS : 1
DO_ASKED : 1
ORDER_COMPLETE : 1
RISK_RESTRAINTS : 1
ON_ET : 1
TO_OXYCODONE : 1
CHLORIDE_GOING : 1
DOCTORS_THAT : 1
HE_AN : 1
WAS_SEEN : 1
DISPOSITION_RESPIRATIONS : 1
NOTE_DT : 1
ANXIETY_RACING : 1
COORDIANATED_MARITAL : 1
THE_INTERVAL : 1
MOVEMENT_VASCULAR : 1
CONFERRED_WITH : 1
OF_VETERAN : 1
INTACT_OTHER : 1
DRESSED_RN : 1
PRN_CLONAZEPAM : 1
ON_AVAILABLE : 1
IS_COMING : 1
DC_DEPRESSION : 1
VERTIGO_SORE : 1
PT_ESCAPE : 1
XD_INACTIVE : 1
LIES_ON : 1
FIRST_OF : 1
WAS_INTERESTED : 1
LUNGS_CTA : 1
TREATMENTS_VOLUME : 1
ASSISTANCE_APPLICABLE : 1
SAFETY_COMFORT : 1
OF_TRAVATAN : 1
ROUTINE_LAB : 1
ALBUTEROL_UNIT : 1
APPEARANCE_SPEECH : 2
PAIN_POLLEN : 1
RECOVERY_NOTET : 1
HIS_UPCOMING : 1
PTSD_HAVE : 1
NEUROLOGIC_ASSOCIATED : 1
HIS_BACK : 2
WITH_AUTONOMIC : 1
TIME_OCT : 2
AND_MET : 1
ILL_HE : 1
SCORE_PT : 1
WAS_INFECTED : 1
ALSO_REPORTED : 1
THE_HOSPITAL : 3
PROGRAM_AND : 1
CE_OFFICER : 1
ILL_ALRIGHT : 1
OBTAINED_FROM : 1
TO_BE : 10
PERSONAL_CARE : 2
CONSISTENT_MYCOSIS : 1
ATTENDED_OFFERED : 2
ASKED_HE : 1
BATTERIES_AND : 1
THAT_GROWN : 1
CC_PATIENT : 1
THE_ARE : 1
PRESENT_IS : 1
MAKING_AS : 1
WILL_ONLY : 1
STATIONED_KUWAIT : 1
TO_THROUGH : 1
HOME_BLINDNESS : 1
FOR_MANY : 1
MOUTH_FOR : 1
VARDENAFIL_MG : 1
PROVIDE_ON : 1
TELEPHONE_CONSULTATION : 1
BOOSTER_GROUP : 1
CHEMICAL_NAIL : 1
WELL_REFUSES : 1
DUE_BRAINS : 1
PATIENT_WELL : 1
CONSTRICT_YOUR : 1
ADDENDUM_SELF : 1
THE_VETERAN : 4
KEPT_INPT : 1
INHL_ML : 1
MH_SERVICES : 1
OUTPATIENT_PAIN : 1
HAD_CALCIUM : 1
OF_HOW : 1
MORE_SHE : 1
THE_HEALTH : 3
WITH_THE : 3
MG_PER : 1
TO_TRY : 1
HE_BUTTONS : 1
SSN_CLONIDINE : 1
FAMILY_OUTPATIENT : 1
HEALTH_CARE : 1
DEPENDENCE_HAIR : 1
AS_FACILITATOR : 1
INTERDISCIPLINARY_TREATMENT : 1
OP_ATTENDING : 1
MDD_IN : 1
MEDICATION_PER : 1
TO_BLOOD : 1
RE_PER : 1
ITCHING_AND : 1
NONE_ORIENTED : 1
CONTINENT_BATHROOM : 1
ON_AT : 1
BOWEL_MOVEMENTS : 2
TO_SAME : 1
JUNE_AUGUST : 1
HAS_GROWN : 1
OF_SOME : 1
PERFORMED_MIN : 1
YOU_HOSPITALIZED : 1
COMPLETION_NEEDS : 1
MADE_ANOTHER : 1
PRESSURES_AND : 1
INTERMITTENT_ANXIOUS : 1
MISCELLANEOUS_VITAMIN : 1
APART_OBSERVATION : 1
BP_IS : 1
MM_CTA : 1
TRAVEL_THAT : 1
CLIENT_RECEIVED : 1
YEARS_HAD : 1
ARTHRITIS_TKA : 1
VERBALIZATION_PATIENT : 1
MANAGEMENT_QUESTIONS : 1
NUMBER_EYE : 1
DOES_BELONG : 1
DENIES_SUICIDAL : 2
PHYSICIAN_SKIN : 1
PLAN_WOULD : 1
CLC_UNIT : 1
AND_NEEDLES : 1
DENTAL_NOTE : 1
NURSE_FRIEND : 1
ORIENTED_PERSON : 1
SHOWED_DERMATITIS : 1
TO_MAY : 1
LCSW_THAT : 1
MOBILITY_NUMBER : 2
OR_MEATUS : 1
VA_CONSENT : 1
INFORMATION_STATEMENT : 1
APPT_REPORTED : 1
LABS_SHOW : 1
DOUBLE_ANXIETY : 1
REDNESS_SITE : 1
THAT_LIFE : 1
NO_EXPIRED : 1
COMPLAINTS_NEW : 1
STATUS_DENIES : 2
RADIATION_DETAILS : 1
OR_UCINATIONS : 1
SLEEP_CONSULT : 1
VETERAN_COMPLICATIONS : 1
ONCOLOGY_NOTE : 1
DEPRESSION_HIGH : 1
DOCUMENT_TYPE : 1
IF_HE : 4
FACT_SIGNIFICANT : 1
THINGS_EMPLOY : 1
ASSESSMENT_DATE : 1
AMOUNT_STOOL : 3
GET_HE : 2
HEAD_THE : 1
SERVICE_IRAQ : 1
UNIT_ARMS : 1
LIVING_IS : 1
BUT_WBC : 1
RECORDS_PLEDGED : 1
LOSS_OR : 1
NURSING_RECOVERY : 1
VISIT_PROGRAM : 1
TACHYCARDIA_IS : 1
OBJECTIONS_THE : 1
HAS_BEEN : 14
OR_CHEW : 1
AMB_CARE : 1
ASSISTANCE_SAFETY : 1
AT_BEGINNING : 1
VISUAL_NO : 1
LIFESTYLE_DATE : 1
SHE_REPORTS : 1
MENTAL_NOTE : 1
IS_STATUS : 1
SWELLING_AT : 1
HYPERTENSION_DEPAR : 1
AS_PATIENT : 1
PSYCHOEDUCATION_PT : 1
CRITICAL_NOTE : 1
MINNESOTA_HEAD : 1
BE_AS : 1
PHYSICIAN_CONSCIOUSNESS : 1
REPORTS_MIGRAINE : 1
SUPPLIES_SS : 1
ME_HOW : 1
MAY_PARTIALLY : 1
OU_NI : 1
REINFORCED_HIM : 1
COULD_COORDIANATED : 1
INCISION_IS : 1
INTOLERANCES_RESTORATIVE : 1
NOTE_HT : 1
AND_ADHERENCE : 1
COGNITIVE_EXPERIENTIAL : 1
DAUGHTER_LAW : 1
MG_DENTAL : 1
BY_THIS : 1
NEW_STRATEGIES : 1
NDA_CARDIAC : 1
OF_FINANCES : 1
ASSISTANCE_NOT : 1
ROOT_INJECTION : 1
AS_HUMBLING : 1
WALKIN_LOCATION : 1
STATED_PREVIOUS : 1
PREVENTION_FOLLOWUP : 1
ED_NURSE : 1
APPLICABLE_HEALTH : 1
INDEPENDENT_AS : 1
DENIES_ANY : 1
REACTED_HEALTH : 1
ML_VIAL : 1
EVIDENCED_POOR : 1
AWAY_ADDENDUM : 1
VOLUME_EMPLOY : 1
STATUS_DEFICIENCY : 1
RESULTS_DENTAL : 1
MG_CAP : 3
BORDERLINE_AND : 1
SEDATION_LUNGS : 1
HEAD_NO : 1
MACHINE_PATIENT : 1
MILD_INCREASE : 1
PROGRESS_CRITICAL : 1
BLOODCLOTS_BUT : 1
TSTRAP_BUT : 1
PERSONAL_ARE : 1
GENDER_PAIN : 1
REAC_NURSING : 1
AT_BEDTIME : 2
TREATMENTS_PHYSICIAN : 4
APRIL_NEGATIVE : 1
PROGRAM_MEDICATION : 1
ML_INFUSE : 1
OF_NOT : 2
TO_TH : 1
AREA_ISTON : 1
PATIENT_IS : 12
REQUEST_FOLLOWING : 1
HAND_NAIL : 1
THIS_PROVIDER : 1
KEPT_AFTER : 1
TO_REVIEW : 1
ISSUES_WITH : 1
SET_ASSISTANCE : 1
IT_THER : 1
THERAPEUTIC_PATIENT : 1
AP_VETERAN : 1
PLAN_PATIENT : 2
PULMONARY_HPI : 1
PERSONNEL_COLOR : 1
SINCE_APR : 1
PERCODAN_MACRODANTIN : 1
CURRENT_ORDER : 1
PRIVILEGES_DURING : 1
SURGERY_MAY : 1
MOBILITY_TO : 1
ISSUES_OF : 1
OF_MEANS : 1
AND_EVEN : 1
THAT_HIM : 1
INCREASE_FOR : 1
FRONT_BELOW : 1
APR_WITH : 1
LATER_BUT : 1
WHICH_BEEN : 1
PROVIDED_CANE : 1
BEEN_IN : 4
FBS_INTRAOCULAR : 1
MOREOVER_REPORTS : 1
NAIL_CONSENT : 1
ONSET_THREE : 1
RAPID_NEGATIVE : 1
ANY_PINS : 1
INFORMATION_FROM : 1
DISTANT_INTIMIDATING : 1
FRIENDS_HIS : 1
PAIN_NOTES : 1
OF_INSTRUCTIONS : 1
CHANGE_VISION : 1
INACTIVE_MEDICATIONS : 1
WALKING_MORE : 1
FRUSTRATION_HE : 1
AND_THE : 7
STAFF_NOT : 1
VERY_STATUS : 1
STOOLS_ADDITIONAL : 1
TRIAGE_HT : 1
PMR_THERAPY : 1
HOURS_AND : 1
PAIN_STRESSORS : 1
OUTCOMES_HIP : 1
OCCASIONALLY_DROWSY : 1
PROGRESS_NOTE : 5
BMI_MOST : 1
SES_CONCERNS : 1
IC_ALERTMRSA : 1
HIS_REVIEWED : 1
TIMES_FOR : 1
NO_KNOWN : 2
OR_MEDICATIONS : 1
SUGARS_PRESSURES : 1
IN_HAND : 1
ENDS_WITH : 1
FOR_CARE : 1
IF_TXS : 1
LOSS_VERTIGO : 1
THAT_IT : 1
STABILITY_PERCENT : 1
METHOD_OF : 1
VIRUS_FINANCIAL : 1
AND_OS : 1
HE_TO : 3
GOING_WRITE : 1
GOAL_AC : 1
AND_LIVER : 1
BENIGN_PROSTATE : 1
ALLOW_HIM : 1
FRIEND_OTHER : 1
YEAR_STATES : 1
FIBRILLATION_ACTIVE : 1
WITH_PROSTATE : 1
GOING_TO : 3
ZZPATIENT_ADL : 2
THEY_OPTOMISTIC : 1
SSN_NUMBER : 1
PARKINSONS_ADDENDUM : 1
BY_IMPULSE : 1
DENVER_WITH : 1
NOT_LIKELIHOOD : 1
NO_NURSES : 1
BARRIERS_TO : 1
NURSE_REDNESS : 1
THE_STREET : 1
NANCY_WHO : 1
DIAGNOSIS_LOOSENING : 1
RIGHT_ANTE : 1
WHERE_WAS : 1
RUQ_PAIN : 1
TEETH_UNSPECIFIED : 1
FOR_SOME : 1
FRIENDS_HOGAR : 1
ON_PT : 2
FRIENDS_AT : 1
STATUS_CAN : 1
ON_OF : 1
ON_WILL : 1
CONTACT_SOUTH : 1
TO_SAFETY : 1
GOOD_APPOINTMENTS : 1
SERVICE_AUG : 1
STATUS_FOUR : 1
OFTEN_BY : 1
MINIMAL_ACTINIC : 1
THAT_GROUP : 1
PLAN_PROBLEMS : 1
IN_SUGAR : 1
OVER_MINUTES : 1
CHANGED_REPORTS : 1
PLAN_REMOVE : 1
PERCOCET_CODEINE : 1
TH_MT : 1
HX_TO : 1
GROUP_GROUP : 1
MENTAL_RECREATION : 1
OLD_NOT : 1
OCCLUSION_AND : 1
HER_PRIORITIES : 1
WHIPPLE_TISSUE : 1
THE_EPISODIC : 1
SOFTENER_CASE : 1
LISTS_FOR : 1
HYDROCODONE_GOAL : 1
PC_CLINIC : 1
NAME_MEDICATION : 1
WOULD_COULD : 1
HAS_WITH : 1
OF_SUGARS : 1
TO_CHIEF : 1
THEIR_THE : 1
AND_REALIZE : 1
PRESSURE_WHAT : 1
SEDATION_CONSCIOUS : 1
THE_AVAILABLE : 1
ARRANGED_FOR : 1
WAS_HIS : 1
ET_KIT : 1
OPTOMISTIC_DURING : 1
SERVICE_THE : 1
MOST_OF : 1
CVA_POSTURE : 1
MILATARY_OFFICER : 1
HE_FOLLOW : 1
NOTE_POTASSIUM : 1
TO_IN : 5
LIFESTYLE_VETERAN : 1
ABSCESS_ON : 1
THAT_THIS : 1
GET_TOUCH : 1
PICKED_UP : 2
NOT_LOW : 1
WITH_EVALUATION : 1
LEARNING_ROUTES : 1
CHEST_VA : 1
WOULD_BE : 1
SKIN_TISSUE : 1
WAS_PT : 1
AS_IN : 2
HE_CHRONIC : 1
BEGAN_CONTACT : 1
NUMBER_OF : 5
NO_APPARENT : 1
VOICEMAIL_FOR : 1
HEIGHT_CM : 6
PULSE_PT : 1
NERVE_ROOT : 1
VERBALIZE_TACTILE : 1
HEALTH_WORK : 1
LEFT_SIDE : 1
OR_CHANGE : 1
WEDNES_THE : 1
VM_SC : 1
INSTRUCTION_DIAGNOSES : 1
ANY_FROM : 1
DOESNT_GET : 1
PHYSICIAN_ND : 1
INTIMIDATING_OTHER : 1
OF_MINUTES : 1
FOR_RADIATION : 1
HISTORY_FROM : 1
OR_AMBULATORY : 1
OFFICERS_FURTHER : 1
WITH_CANCER : 1
PT_COMING : 1
IT_AS : 1
WITH_YOU : 1
RING_ICDCM : 1
PT_GROUP : 1
PAIN_NONE : 1
SCHEDULE_AGREES : 1
FOOD_URINE : 1
UP_WITHOUT : 3
ADD_PER : 1
MHICMINTENSIVE_CASE : 1
RECENT_DISCHARGED : 1
PTSD_WAS : 1
LOCATION_MATCH : 1
HELPING_ANXIETY : 1
WAS_CONVINCED : 1
LENGTH_OF : 1
PHYSICIAN_NEW : 1
HERE_FOR : 4
SUPERVISOR_ME : 1
HIS_CULTURAL : 1
HAS_TO : 1
ASSESSMENT_PHYSICIAN : 1
BUT_QUICK : 1
HOMICIDAL_IDEATION : 2
COUGH_OCCASIONALLY : 1
OF_COMPLAINT : 1
CONSENT_YES : 1
MH_TELEPHONE : 1
ADDITIONAL_VIA : 1
ORIEN_MEDICATIONS : 1
NOTE_YOU : 1
SKIN_BRADEN : 1
PLANS_CONTINUE : 1
MANIPULATION_KNEE : 1
GENERAL_UA : 1
HAS_ISSUES : 1
OR_NEUROFORAMINAL : 2
STUDY_ADDENDUM : 1
THE_PLAN : 1
MALE_BRADEN : 1
CAUSE_HAS : 1
PATIENT_LENGTH : 1
STENOSIS_OF : 2
TISSUE_EXCISION : 1
IEDS_WHILE : 1
KERATOSES_YOU : 1
HIS_IS : 1
YES_CONTACT : 1
MAY_NECESSITATE : 1
DANE_BRISTOL : 1
CYST_AT : 1
AND_APPEARANCE : 2
LIVER_ADDITIONAL : 1
ME_IN : 1
DERM_HAD : 1
TEMPORARILY_DUE : 1
DIAGNOSIS_RIGHT : 1
PROBLEMS_TIME : 1
REPORTS_CONSENT : 1
RE_SURGERY : 1
FOR_GET : 1
IS_HERE : 3
SPECIAL_CONSIDERATIONS : 1
BLOOD_PRODUCTS : 1
SAFETY_EDUCATION : 1
BENEFITS_THE : 2
SEEN_BY : 1
EVALUATION_WAS : 1
CM_COUGHING : 1
RECOVERY_DISCHARGE : 1
ABOUT_THE : 1
REMAIN_SAFE : 1
QUADRANT_PAIN : 1
KAY_TANAKA : 1
BOWEL_BRADEN : 1
IT_BACK : 1
COMPARISON_OF : 1
UROLOGY_CINCINNATI : 1
TO_DEATH : 1
NO_PATIENT : 1
NOW_HAS : 1
HE_REQUIRE : 1
DRINKING_ASSIGNED : 1
INAPPROPRIATE_PATIENT : 1
THE_LONELINESS : 1
RECORD_BE : 1
THE_FOLLOWI : 1
INTAKE_NOTE : 1
BASELINE_SEE : 1
VET_HISTORY : 1
THOUGHT_PROCESS : 1
MUSCLES_PT : 1
MAINTAINING_RELATIONSHIPS : 1
UNSPECIFIED_DENTAL : 1
REFILLS_UNDERSTANDS : 1
REHAB_CENTER : 1
THER_NOTIFY : 1
FALL_IN : 2
THEY_ARE : 2
LUNCH_HE : 1
HER_ARRIVAL : 1
TABLET_MACRODANTIN : 1
AND_COLONOSCOPY : 1
MH_NAOMI : 1
OUTCOMES_PAIN : 1
OB_HD : 1
DECREASING_IN : 1
DISCUSS_HIS : 1
MOTIVATION_AMB : 1
IUNABLE_TO : 1
DISCHARGES_PER : 1
CLEAR_TO : 1
PT_INC : 1
BRIEF_CLINICAL : 1
PT_EVALUATED : 1
ADMITTED_TO : 1
DISORDER_PLM : 1
DEATH_PRIOR : 1
NO_PRIMARY : 1
NO_PROVIDER : 1
VASCULAR_STUDIES : 1
PER_PATIENT : 1
WITH_CONTRAST : 1
INSTRUCTIONS_LESIONS : 1
NEGATIVE_SES : 1
PLAN_IDENTIFIED : 1
THE_MED : 1
YOU_ANY : 2
TO_HOSPITAL : 1
TAKE_IT : 1
LEADERS_NANCY : 1
THE_PENIS : 1
NUSTEP_MIN : 1
REFERRAL_AFTER : 2
PRESENT_ER : 1
BY_NORMALIZING : 1
WAS_BED : 1
LEARNING_AROUND : 1
DEC_AT : 1
WAS_LAID : 1
ALCOHOL_USE : 1
GET_IN : 1
THE_DR : 1
NO_HISTORY : 1
BASELINE_OF : 1
YOUR_PRIMARY : 1
RECREATION_THERAPY : 1
QUITE_BIT : 1
HE_HE : 2
HIS_CITALOPRAM : 1
STATED_INCREASINGLY : 1
IF_FROM : 1
FROM_GRENADES : 1
HOSPITAL_PHYSICIAN : 1
EVENING_THEM : 1
TEMP_NUTRITION : 1
WITH_COMPLAINT : 1
THE_HEAD : 2
YES_ACTION : 1
THE_MILIEU : 1
IN_GROUP : 3
INCREASINGLY_INCREASED : 1
BACK_AT : 1
IN_RACHEL : 1
RELAXATION_AS : 1
STATUS_NO : 1
VERBALIZES_AN : 1
INFORMED_CONSENT : 4
VITAMIN_UNT : 1
BLOOD_IF : 1
ABOUT_COMPLIANCE : 1
OFFICER_THE : 1
HIS_WIFE : 1
SCHEDULED_VISITS : 1
DEATHS_WIFE : 1
INFORMED_THE : 1
QUESTION_IS : 1
BEEN_MAJOR : 1
MOOD_CALM : 1
ANESTHESIA_KNEE : 1
TO_LEAVE : 1
THAN_DEMENTIA : 1
ADDED_HAS : 1
PLAN_VETERAN : 1
PAST_WITH : 2
JGXMT_TIME : 1
OF_IN : 3
IN_TWO : 1
PSYCHOTHERAPY_ASSESSMENT : 1
NONE_BEDREST : 1
LEFT_MESSAGE : 1
BED_BATH : 1
SCORE_ONSET : 1
ALERT_AND : 1
HAS_MAILED : 1
TASK_SET : 1
PATIENT_DATE : 1
PATIENTS_CONDITION : 1
HERE_AT : 1
PROGRESS_HE : 1
TO_NEEDS : 1
103203_CURRENT : 1
CMHP_BARRIERS : 1
TO_PRODUCTS : 1
LOCATION_DO : 1
PLACE_ER : 1
POLLEN_PULSE : 1
POSTOPERATIVELY_WAS : 1
WITH_SINCE : 1
ORAL_CARE : 2
CONFIRMED_BY : 1
THANK_IF : 1
TKA_OF : 1
PRODUCTIVE_NOTED : 1
BLOOD_PRESSURE : 3
ALERT_AMOUNT : 1
ON_AUG : 1
HIP_PROTECTORS : 1
ADEQUATELY_VET : 1
CAN_HIS : 1
WHICH_IN : 2
AFTER_WAS : 1
HOURS_AWAKE : 2
ISSUES_HE : 1
THE_OF : 5
RX_SHOES : 1
PAIN_ASSESSMENT : 2
DC_AFTER : 1
PATIENT_EDUCATION : 2
DAILY_FOR : 1
NOS_PATIENT : 1
ONE_CAPSULE : 1
PAIN_WITH : 1
IN_AM : 1
PERTINENT_NUTRITION : 1
CONSISTENCY_STOOL : 2
ANES_CLINIC : 1
NOT_INTERMITTENT : 1
SENT_MIVA : 1
ASSISTANCE_MHC : 1
ICA_NAME : 1
TKA_DISCHARGE : 1
PT_HAS : 2
SPOUSE_STATED : 1
HAVE_ACTIVE : 1
CHIEF_COMPLAINT : 6
TO_MISSING : 1
NURSE_EVALUATE : 1
OPIOID_CHRONIC : 1
ASSIST_WHO : 1
EXERCISE_PERFORMED : 1
TO_FOLLOWED : 1
FOR_ANXIETY : 1
MEMORIES_THE : 1
LACERATION_NOTE : 1
NOTE_HAS : 1
PLANS_WILL : 1
THAT_HE : 15
FROM_PERCOCET : 1
SO_FROM : 1
HE_OP : 1
IR_INJECTIONS : 1
DIAGNOSIS_ETOH : 1
DIVORCE_THIS : 1
CONTROL_IDENTIFICATION : 1
AS_GROUP : 1
MEET_VETERAN : 1
DR_AFTER : 1
USING_MOIST : 1
UP_OF : 1
PATIENT_RACE : 1
PATIENT_STATED : 1
AN_VOICEMAIL : 1
REQUEST_NATIONAL : 1
THE_FOR : 4
DESIGNATED_DRIVER : 1
HEAD_PATCH : 1
LIMITATIONS_PROBLEM : 1
AWAKE_DYSPHAGIC : 1
VACCINE_STATEMENT : 1
THIS_THE : 2
WAS_TOLD : 1
ENT_DENIES : 1
TEMPERATURE_HE : 1
WIFE_WILL : 1
DO_YOU : 5
BUTTOCK_THIGH : 1
PRESSURE_PHQ : 1
HIMSELF_PREDNISOLONE : 1
FINGER_ON : 1
THE_SURBUBAN : 1
HISTORY_WITH : 1
THEREFORE_HIM : 1
MORE_NENT : 1
PT_HAD : 1
YOU_IF : 1
NI_AAM : 1
REFUSAL_DOCUMENT : 1
ANY_PATIENT : 1
SITE_NURSE : 1
ARMS_AND : 1
DATA_WHICH : 1
ST_CHEST : 1
IEDS_IN : 1
PLACE_PATIENT : 1
WORN_OUT : 1
PRIORITIES_ARE : 1
WORK_IS : 1
DONT_NEED : 1
KG_BMI : 1
QUESTIONS_OR : 1
PRIORITIES_NOT : 1
ONE_BY : 5
MIN_WORK : 1
ARTIFICIAL_TEARS : 1
MANAGEMENT_HC : 2
TYPE_REPORT : 1
PAIN_SCALE : 2
IMPULSE_PATIENT : 1
CE_HE : 1
PROBABLE_RECOVE : 1
AFRAID_TO : 1
RT_DTC : 1
ENTERED_TOENAIL : 1
LL_DATE : 1
RECOVE_TO : 1
BETTER_TRACK : 1
PROVIDE_ASSISTANCE : 1
HAT_FOR : 1
PATIENT_AS : 1
OF_AWAKE : 2
PATIENT_DECISIONMAKING : 1
GROUP_LEADERS : 1
AND_JUST : 1
SULFA_DRUGS : 1
SX_CONCERNS : 1
VA_THE : 1
HIS_EXWIFE : 1
DATES_OF : 1
CALL_WITH : 1
PLACE_GLAND : 1
BEEN_WORKING : 1
BIOPSY_ANKLE : 1
WITH_THIS : 2
OF_VARIOUS : 1
THE_PT : 1
NOW_DIZZINESS : 1
YES_DRAINS : 1
SECONDARY_NEXTOFKIN : 1
FOR_NOTE : 1
RACING_NO : 1
PRIVILEGES_MOBILITY : 1
EXPERIENCING_ANY : 1
FROM_MORTARS : 1
RN_FEELING : 1
PAST_BIT : 1
DRINKING_HIS : 1
NURSE_REPORT : 1
AWAKE_AMOUNT : 1
ABLE_VERBALIZE : 1
PHYSICIAN_IPTON : 1
GLUCOSE_EVENING : 1
BY_GEN : 1
ASKED_IF : 1
TO_OTHERS : 1
GLAUCOMA_BLINDNESS : 1
CARE_THE : 1
HISTORY_ICA : 1
CONSUMED_SURGERY : 1
BAY_PINES : 1
TO_RETURN : 1
HOME_COMPLAINTS : 1
DATE_OCT : 2
IN_LAST : 1
WITH_NUTRITIONAL : 1
WITHOUT_ASSISTANCE : 3
NEW_SKILL : 1
WBC_AND : 1
BE_THAN : 1
HISTORY_WITHDRAWAL : 1
PAIN_DENTAL : 1
AREA_CBOC : 1
MANAGER_HAS : 1
PHYSICAL_LIMITATIONS : 1
AND_STEP : 1
MIN_WORKLOAD : 1
HE_OYED : 1
BEHAVIORAL_AS : 1
SINCE_HIS : 1
ENCOURAGED_OF : 1
THAT_THEY : 1
NURSING_POTASSIUM : 1
OBTAIN_FROM : 1
HIS_THE : 1
CONTINUE_SAME : 2
PATIENT_PHYSICAL : 1
SCHEDULE_TO : 1
NOT_HISP : 1
HEARD_TALKING : 1
OBESITY_OTHER : 1
CLINIC_RT : 1
NOT_ORIENTATION : 1
PAINS_HE : 1
CATHETER_SIZE : 1
OBJECTIVE_ALBUTEROL : 1
PATIENT_ARTICLES : 1
WAS_PATIENT : 2
OF_ILLNESS : 1
PROVIDER_MET : 1
YOU_YOUR : 2
NEGATIVE_HE : 1
FORM_BLIND : 1
BLD_EDUCATION : 1
OBESITY_TACHYCARDIA : 1
MEDICATIONS_HEALTH : 1
TOENAIL_NAIL : 1
DOCUMENT_LB : 1
TIME_AWAKENS : 1
DIZZINESS_DIAGNOSIS : 1
NURSING_ASSESSMENT : 2
MEDICATION_CONTINUE : 1
PROBLEMS_TO : 1
DVAMC_TRAVEL : 1
NONE_FAMILY : 1
PATIENT_RIGHT : 1
IN_THREE : 1
NO_DEPENDENCE : 1
EYE_ADJUSTMENT : 1
SUPERVISING_ATTENDING : 1
THESE_YEARS : 1
OF_INFLUENZA : 1
IS_OCCLUSION : 1
TIME_HE : 1
MEETING_DISCUSS : 1
BEFORE_MEDICATION : 1
WHAT_THE : 2
HER_HUSBANDS : 1
KNOWS_CURRENT : 1
HE_REMAINS : 1
USE_PTSD : 1
BE_SHORTER : 1
AND_CASE : 1
TIME_MEDICATION : 1
MALE_POW : 1
RESPONSIBLE_THIS : 1
MOST_LIPID : 1
REFILLING_RESOLVED : 1
TACHYCARDIA_CONSISTENT : 1
THINGS_YOU : 1
NAIL_PLATE : 1
WARFARIN_RECEIVED : 1
TO_SET : 1
APPOINTMENT_WITH : 2
OF_CAROTID : 1
HE_YES : 1
PERTINENT_TO : 1
HISTORY_WAS : 1
MEMBERS_VETERAN : 1
THE_VIRUS : 1
PCP_DANE : 1
NEEDE_WAS : 1
HIMSELF_ZIMBLEMAN : 1
APPLICABLE_STRESSOR : 1
NURSING_OUTPATIENT : 1
CALL_WRITER : 1
DENTAL_SCALE : 1
CALLED_IN : 1
BURN_CLOTHING : 1
HYDROCELE_NEC : 1
TO_CHARTS : 1
NO_ABNORMALITIES : 2
EDUCATION_CALLED : 1
OCCURING_FOLLOWING : 1
ILLNESS_ER : 1
ANESTHETIC_BRIEF : 1
LOW_THINGS : 1
NO_THAT : 1
CM_IN : 1
ETHNIC_CULTURAL : 1
TEST_WAS : 1
SHOW_MILD : 1
DEP_DO : 1
WERE_NO : 2
VERY_NO : 1
OR_INTENT : 1
YEAR_CN : 1
LL_AND : 1
SO_THIS : 1
RELATIONSHIP_JUANITA : 1
PHYSICIAN_PPARENT : 1
VETERANS_MOOD : 1
TO_BECOME : 1
AXIS_NARCISSISTIC : 1
REPORTS_MILD : 1
ALLERGIES_PATIENT : 2
ASSESSMENT_THE : 1
IN_HAS : 1
LOOSENING_LEFT : 1
SIG_ONE : 1
GROUP_VERBALIZES : 1
SEX_POW : 1
HAD_RECENT : 1
ONCOLOGY_DOSIMETRY : 1
MHC_CLC : 1
LOWER_LIP : 1
CONTACT_THE : 1
WITH_NANCY : 1
LIPOMA_EXCISION : 2
WEARING_HE : 1
VISION_HIS : 1
OF_JOINT : 1
BRAIN_ANEURYSM : 1
WITH_LESIONS : 1
VITAMIN_SUPPLEMENT : 1
OTHERS_HIP : 1
CONSISTENT_AUTONOMIC : 1
OF_VET : 1
FLU_PATIENT : 1
MG_BID : 1
PULMONARY_ER : 1
CAP_CHRONIC : 1
PALPITATIONS_HE : 1
MHC_ROS : 1
ONLY_REAL : 1
TREATMENT_ARE : 1
ENERGY_MOTIVATION : 1
UPDATE_IS : 1
ABILITY_ALSO : 1
TO_BASCOM : 2
STOOL_MOBILITY : 1
CANCELLED_ON : 1
TOLD_HIM : 1
HAD_VISITS : 1
PARTICIPATED_IDCP : 1
ADMISSION_DIAGNOSIS : 1
OF_MIN : 1
BLADDER_ODY : 1
TAK_DILTIAZEM : 1
ICDCM_SINUS : 1
TABLET_APPOINTMENTS : 1
STENOSIS_NAME : 1
NUMBER_USED : 1
MS_CUEING : 1
IT_FROM : 1
GET_THIS : 1
BECAUSE_HAD : 1
UNSPECIFIED_CARIES : 1
ONSET_SEVERE : 1
ISSUES_USING : 1
MG_VITAMIN : 1
TIME_PACU : 1
WILL_HIM : 1
APR_CODLIVER : 1
AS_BED : 1
MEDICAL_INFORMATION : 1
UNDERSTANDING_OF : 1
ROOM_PROVIDED : 1
PATIENT_BEEN : 2
AND_SO : 1
LEARN_ABOUT : 1
THERAPY_NOSHOW : 1
SUICIDAL_PT : 1
OU_HE : 1
MEDICAL_PERTINENT : 1
TO_CONSULT : 1
POSITION_OF : 2
SHAKING_WORRIED : 1
OF_LL : 1
LEFT_ON : 1
SOBRIETY_WITH : 1
WITHOUT_STAFF : 3
ARRIVAL_TIME : 1
MANIPULATION_OF : 1
ARTILLERY_OTHER : 1
SINCE_WAS : 1
HIS_ONLY : 1
EXPERIENTIAL_ACCEPTANCE : 1
CALL_LABS : 1
MEDICATIONS_ARE : 1
ANY_DRAINAGE : 1
HYPERTENSION_MEDICATION : 1
BACK_HAVE : 1
ADVANCE_DIRECTIVE : 1
CODLIVER_STANDARD : 1
SMILING_TALKING : 1
BEEN_EXTRA : 1
FOR_PREOP : 1
ICDCM_MCADOO : 1
STATE_WANTED : 1
HER_RIGHTS : 1
AND_CHANGES : 1
NPO_MIDNIGHT : 1
ASSOCIATED_FROM : 1
THE_WEIGHT : 1
BEEN_AT : 1
LAB_SCREENING : 1
ROHENALUGO_PROGRAM : 1
APPT_IS : 1
UNT_TAB : 1
ON_HAS : 1
PLACE_PERSON : 1
DOB_AGE : 1
ES_NEED : 1
ADMISSION_SUICIDE : 1
FOR_PRESSURE : 2
TO_HIP : 1
MH_INPT : 1
CCRC_TO : 1
AGE_HERE : 1
PPV_REMOVED : 1
MEAL_THE : 1
VA_BAY : 1
PACKET_CONTAINS : 1
FATHER_SEVERAL : 1
RELAXATION_TAKE : 1
WAS_ABLE : 1
HAND_HAD : 1
HAS_ADEPRESSION : 1
HAD_SCOPE : 1
LASHES_REQUESTED : 1
SURBUBAN_CLINIC : 1
WORK_PSYCHIATRIC : 1
RACHEL_FOR : 1
FACTORS_THE : 1
NO_ANSWER : 1
CONSCIOUS_NPO : 1
OF_GAIT : 1
AND_ASSISTANCE : 1
NEWTON_HE : 1
DEPRESSION_PAIN : 1
THYROID_SEX : 1
IDEATION_PROVIDER : 1
BOTH_STATED : 1
OBJECTIVE_GROUP : 1
VISITS_PHYSICIAN : 1
FOR_PURPOSES : 1
CLOTHING_PHARM : 1
INTRODUCTORY_WITH : 1
CONTINUES_IN : 1
HOW_YOU : 1
PTSD_NEGATIVE : 1
OFF_OR : 1
TINY_LOWER : 1
REMEMBER_SHE : 1
INSTILL_IN : 1
IN_MS : 1
OF_FEELINGS : 1
PHYSICIAN_VA : 1
YOU_WERE : 1
DENTURES_UPPER : 1
SECTION_THE : 1
INTERVAL_HIS : 1
VETERAN_IF : 1
PROGRAM_ALERT : 1
DOCUMENTED_IMPAC : 1
OBSERVATIONS_AMB : 1
MIN_BAKER : 1
GROOMED_SPEECH : 2
WOULD_NOT : 1
SYMPTOMS_PERCOCET : 1
KNOW_WHEN : 1
UP_OR : 1
NURSES_ASSESSMENT : 1
OF_TOOK : 1
INHALE_BY : 1
SW_NEWTON : 1
TO_MIVA : 1
UP_AT : 2
PROCESS_THAT : 1
BECAUSE_OU : 1
PAST_VETERAN : 1
REFUSES_AFTER : 2
WEIGHT_KG : 2
YOUR_LEG : 1
RIGHT_ASSERTION : 1
VICTIMS_RIGHTS : 1
PATIENTS_PAIN : 1
ASSESSMENT_TEMPORARILY : 1
FROM_BERNA : 1
COMPUTERS_PATIENT : 1
PT_PLEDGED : 1
NOTE_PROCESS : 1
BEEN_SUCH : 1
LISTED_HAVE : 1
THIS_PATIENT : 5
PT_REQUEST : 1
OP_PSYCHIATRY : 1
BEEN_HAVING : 2
IS_ONLY : 1
PHYSICIAN_DISCUSS : 1
TKA_BUT : 1
DATE_DEC : 1
CBSST_WILL : 1
IF_CLEAR : 1
TO_UPDATE : 1
WILL_WITH : 1
SEEN_DOCTORS : 1
MAKING_SUCH : 1
WORKING_LEATHER : 1
PAST_QUITE : 1
WILL_RETURN : 1
AN_ICA : 1
THESE_CHANGES : 2
QUESTIONS_AND : 1
YEARS_PT : 1
EDUCATION_STATUS : 2
OR_SUPPORT : 1
SISTER_FATHER : 1
COMPREHENDING_INFORMATION : 1
WHAT_TO : 1
NONVA_MEDS : 1
VISION_REPORTED : 1
USEFUL_HIM : 1
THE_MT : 1
IT_AUTODROP : 1
ATTENDING_FOR : 1
WITH_HISTORY : 1
OF_RECALL : 1
DRAINED_VERY : 1
OF_INJECTION : 1
BY_MH : 1
EPISODIC_KAY : 1
WITH_WIFE : 1
MALE_DESCRIPTION : 1
PRESSING_ON : 1
INCREASE_KNOWLEDGE : 1
WITH_REPAYMENT : 1
HT_IN : 1
RIVIERA_TO : 1
ASSESSMENT_SKIN : 1
THIGH_IS : 1
HOWEVER_RX : 1
PHYSICIAN_REFILLING : 1
NITRO_GET : 1
FOOD_AND : 1
LIES_FLAT : 1
ENDING_AT : 1
PHQ_ALCOHOL : 1
GENTEAL_ARE : 1
POTENTIAL_FOR : 1
NIGHTSTAND_LESSON : 1
HIS_DIET : 1
NO_LATER : 1
GROUP_FACILITATOR : 1
RELATED_MOVEMENT : 1
TRAUMA_SHOT : 1
OBJECTIONS_TO : 1
BELONG_TO : 1
LEG_LEFT : 1
PAROLE_VET : 1
LESSON_ROUTE : 1
IS_NEWS : 1
TAKE_FROM : 1
HIS_ADEQUATELY : 1
LUMBAR_BLOOD : 1
RESTRUCTURING_EXPERIENTIAL : 1
THOUSAND_PSYCHOEDUCATION : 1
CTA_BILAT : 1
ADMITS_TO : 1
INTENSITY_REPORTS : 1
TDAP_PLACE : 1
LABS_TO : 1
CHART_THE : 1
IF_ATTEMPTED : 1
WORRIED_ASSESSMENT : 1
LIKELIHOOD_PT : 1
MINIMIZE_HIS : 1
SESSIONS_SEEN : 1
GTP_MYSELF : 1
BRUSH_OD : 1
LN_INSTRUCTIONS : 1
PART_AN : 1
TALKATIVE_UPBEAT : 1
OF_MUSCLE : 1
SERVICE_MINUTES : 1
PHYSICIAN_NOTE : 1
BACK_LET : 1
CHECKS_COMPLETED : 1
ASF_FOLLOWUP : 1
AND_PREVENTION : 1
IT_HUMBLING : 1
HES_HAD : 1
PAIN_YES : 2
HIS_SYMPTOMS : 1
PAIN_LOWER : 1
CALMED_MY : 1
SIGNIFICANT_GOING : 1
WE_WOULD : 1
APRIL_WAS : 1
ASPECT_OF : 1
WE_EXPLAINED : 1
DEFINITELY_HEALING : 1
WILL_IN : 1
FAMILY_NURSING : 1
ANALGESIA_SEDATION : 1
OR_ILLICIT : 1
CHANGES_GROUP : 1
IN_LOCATIONS : 1
CLINIC_MAY : 1
MAY_TIME : 1
NOVEMBER_THE : 1
OUTPT_ACQUIESCE : 1
TACTILE_ASK : 1
OTHER_CARE : 2
BEDREST_ASSIST : 1
OF_CONTRAINDICATIONS : 1
PAIN_STERIOD : 1
NARCISSISTIC_BORDERLINE : 1
GAMMA_HEARD : 1
MUCH_MORE : 1
GRANDKIDS_NOT : 1
HX_FOLLOW : 1
NOT_WIDOWED : 1
HAVE_OF : 1
PROTOCOL_NOT : 4
APPLIED_LIN : 1
UA_PT : 1
DAUGHTER_IN : 1
PM_ON : 2
TO_COMPLETE : 3
STAFF_ASSISTANCE : 3
OF_WHICH : 1
FOR_HOSPITALIZATION : 1
EXPIRES_ST : 1
DISORDER_BREAK : 1
NOW_CURRENT : 1
AND_ON : 2
LIMITATIONS_PATIENT : 1
CLINIC_APPT : 1
PRESSURE_BLOOD : 1
PARTICIPATE_IN : 1
CONCERNS_HE : 1
ORDER_LAB : 1
CAROL_BACK : 1
THE_PNEUMOCOCCAL : 1
HAS_REORDERED : 1
WITH_ME : 1
CUT_INTO : 1
IN_UP : 1
SMOKER_QUIT : 1
ALERT_OF : 1
PAIN_SCREENING : 1
SUICIDE_BUT : 1
STENOSIS_NEUROFORAMINAL : 2
HAS_EXTRA : 1
ABOUT_YOUR : 2
THIS_WOUND : 1
SINUS_DIFFICULTY : 1
SISTER_OVER : 1
HE_THERAPY : 1
SEP_ALLERGIES : 1
HAS_INFORMED : 1
IMPAC_FOR : 1
EXCISION_DENIED : 1
FROM_PMR : 1
ENVIRONMENTAL_CHECKS : 1
MAR_ZZPATIENT : 1
RESPIRATIONS_CASUALLY : 1
ILL_THAT : 1
LENSECTOMY_REMOVED : 1
CONTACT_SEP : 1
COLONOSCOPY_ITS : 1
HAIRBRUSH_AND : 1
PT_AWAKENS : 1
AND_INTOLERANCES : 1
OF_OPENING : 1
IN_MEDICARE : 1
PROVIDER_NIACIN : 1
FOR_ETHNIC : 1
PATCH_BUT : 1
DETECT_BLOCKAGES : 1
RESULT_THE : 1
RECENT_RESULTS : 2
TAKING_II : 1
MEDICINE_DESCRIBED : 1
SERVICE_RESIN : 1
AS_PT : 2
DISCHARGE_FIELD : 1
INCLUDING_SUPPLIES : 1
ELEVATOR_DOWN : 1
LAB_CITALOPRAM : 1
REQUESTING_PAIN : 1
ADDRESS_PHONE : 1
HIM_FOR : 1
REMOVE_SUTURES : 1
BEING_AND : 1
BENEFITS_AND : 1
GAMMA_GTP : 1
OTHER_INFOPRO : 1
CONSIDERATIONS_FOR : 1
DISTRESS_PATIENT : 1
NO_REACTIONS : 1
HEALTH_SOCIAL : 1
ALSO_HAS : 1
RESIN_SURFACEANTERIOR : 1
NONE_SPUTUM : 1
LIPID_SINCE : 1
AGO_BRADEN : 1
INTRAOPERATIVE_PATIENT : 1
COUNSELED_THE : 1
WILL_REMAIN : 1
TESTING_NEUROPSYCHOLOGIST : 1
BARRIERS_COMMUNICATION : 1
IDENTIFIED_MHC : 1
PRIVILEGES_THIS : 1
CH_DUE : 1
RFC_APPARENT : 1
ON_SUICIDE : 1
SCANNED_DOCUMENT : 1
EXAM_HAVE : 1
DESIGNED_ADDRESS : 1
TRYING_TO : 1
TIME_EVENING : 1
HEADACHES_IN : 1
DISC_SPINAL : 2
OR_CUEING : 1
LEG_MM : 1
CARE_IS : 2
DATES_SERVICE : 1
PAIN_PATIENT : 3
ABRASION_HAND : 1
QH_AS : 1
NEW_COPING : 2
IN_FOR : 2
STATUS_HE : 1
PHYSICIAN_RING : 1
NEED_CCRC : 1
IS_CALLED : 1
IS_ADDRESS : 1
TAKE_CARE : 1
KNEE_ARTHRALGIA : 1
SEEN_APPOINTMENT : 1
GULF_NEWS : 1
AT_PRESENT : 1
WAS_REVIEWED : 2
MILIEU_EAT : 1
DENIES_AUDITORY : 1
AT_BIRCH : 1
CENTER_BUT : 1
PROVIDED_THIS : 3
RANGE_LOCATION : 1
CONCERNS_THE : 1
VERY_PAINFUL : 1
HE_WHERE : 1
AROUSE_SYND : 1
MORE_AT : 1
SUCH_OFFERING : 1
DERM_DONE : 1
FOR_OB : 1
DURING_HOURS : 1
STARTING_SOON : 1
PHYSICIAN_TREMBLING : 1
BOWEL_FOLLOWED : 1
MOUTH_RFC : 1
ONSET_TIMES : 1
DECISIONS_WHAT : 1
MS_WITH : 1
IN_EXPLAINED : 1
MEDICAL_PT : 1
ARMS_EXTENDED : 1
PT_LIKELY : 1
YEARS_THINKS : 1
ALCOHOL_HGB : 1
QUESTIONS_THE : 1
GLUCOSE_YESTER : 1
TO_DETECT : 1
TANGENTIAL_DURING : 1
WHO_OVERSEES : 1
TAB_ONE : 2
MANAGEABLE_SIGNS : 1
OR_UNSPECIFIED : 1
URINARY_BREATH : 1
HOURS_PLEASE : 1
DEMOGRAPHICS_ANY : 1
ADMITS_CLENCHING : 1
ATTEMPTS_ACTIVE : 1
REPORT_AND : 1
BASED_UPON : 1
REVIEWED_NOTE : 1
IN_PROGRAM : 1
PREOP_PHYSICIAN : 1
SPENDING_HE : 1
NO_LETTER : 1
ADDENDUM_STATED : 1
WAS_OBTAINED : 3
IN_HE : 3
ON_PSYCH : 1
QHS_PT : 1
DISCHARGED_OR : 1
TALKS_ABOUT : 1
STATUS_EXAM : 2
WOUND_CAUSES : 1
DC_SUMMARY : 1
BOWEL_COMPLAINT : 1
INFOPRO_JGXMT : 1
DIAL_ASPECT : 1
GROUP_AND : 1
THE_BEGINNING : 1
POTASSIUM_PLASMA : 1
FOR_POST : 1
SURROGATE_IF : 1
QUIET_AND : 1
OSAC_PSYCHIATRIC : 1
DATE_GOAL : 1
HIS_WITH : 2
BETTER_OF : 1
PTSD_SCREEN : 1
IS_PAINFUL : 1
BE_HOME : 1
HE_NAME : 1
PSYCH_HERE : 1
STABLE_SPECIFICS : 1
INFORMATION_INTERIM : 1
CONTINUES_ADDENDUM : 1
DAILY_WOUND : 1
ADDENDUM_APR : 1
WORKING_IN : 1
OBMT_WAS : 1
OF_CLAUDICATION : 1
DESCRIPTION_THROBBING : 1
US_AND : 1
AROUND_JUST : 1
ESCAPE_IF : 1
EBRT_HAT : 1
TEMP_ADMISSION : 1
BELIEFS_TERAZOSIN : 1
HBPC_DATE : 1
VOLUNTEER_NO : 1
ELECTIVE_NO : 1
HE_ALSO : 2
SKILL_ANTICIPATE : 1
HE_LAST : 1
ATTEMPTED_TO : 2
PAIN_CLONAZEPAM : 1
CUEING_MEAL : 1
APPOINTMENT_NATIONAL : 1
AROUND_THE : 1
AND_CAUTION : 1
SUICIDE_CASA : 1
FOR_PREOPERATIVE : 1
HIS_BEHAVIOR : 1
FULL_CONSENT : 2
NEEDLES_TO : 1
REQUESTED_HAIRBRUSH : 1
WOULD_CILO : 1
HAVE_DRIVER : 1
MORPHINE_CODEINE : 1
RUQ_ABDOMINAL : 1
WAS_CHANGED : 1
EVALUATED_BY : 1
ADDRESS_ENDING : 1
IN_PROGRESS : 1
MAR_CARE : 1
PAIN_PNEUMOCOCCAL : 1
MULTIPLE_TO : 1
THERAPY_YES : 1
SUICIDAL_URGES : 1
IDENTIFIERS_NAME : 1
ASSIST_PLACE : 1
DISCHARGED_STRETCHER : 1
ADVERSE_PHYSICIAN : 1
PTSD_RESTRUCTURING : 1
LOWER_LEG : 1
GROOMED_ORIENTED : 1
IN_ADDENDUM : 1
YES_REFERRED : 1
HE_REPORTS : 2
HEMORRHOIDS_WAS : 1
INSTRUCTION_FOR : 1
PCC_NLR : 1
HPI_ER : 1
STRETCHER_DATE : 1
WRITER_PLEASE : 1
OUTPT_INTAKE : 1
GET_BETTER : 1
NONE_ARTIFICIAL : 1
IS_THE : 3
UNTIL_TO : 1
CALL_IE : 1
SIG_TAKE : 1
HIP_IN : 1
STATUS_REFERRED : 1
SCHOOL_SI : 1
HYPONATREMIAIMPROVING_COLOR : 1
ADDITIONAL_COMMENTS : 1
MODERATE_ANALGESIA : 1
ACETAMINOPHEN_MG : 1
ADDENDUM_PAIN : 1
NEUROFORAMINAL_THAT : 1
WAS_BY : 1
SKIN_MORSE : 1
NO_SEEN : 1
TYPE_EDUCATION : 1
ULTRASOUND_RESULTS : 1
CAP_OR : 1
GIVEN_BED : 1
SAFELY_AN : 1
IF_YES : 1
NO_WHEEZE : 1
OF_LIVING : 1
BASED_THE : 1
IS_SCHEDULED : 1
NEXT_LEFT : 1
SIGNIFICANT_MANY : 1
NOTED_PLASM : 1
DRINKS_URINE : 1
EASY_AROUSE : 1
HYPERTENSION_VENT : 1
TO_MEMORIES : 1
ABD_TRIGLYCERIDE : 1
MUSCLE_TAKE : 1
ABLE_NEGOTIATE : 1
SURGERY_PER : 1
MINUTES_BRAIN : 1
VETS_HYGIENE : 1
GIVEN_MOBILITY : 1
RIGHT_NEUROLOGIC : 1
NOT_PER : 1
THE_OTHER : 1
NOTE_COLOR : 1
THE_SESSION : 2
AS_RADIOLOGY : 1
DURING_THIS : 4
REVIEWED_FUTURE : 1
NOW_TWO : 1
FOR_VISIT : 2
FOR_APPT : 2
AND_MANUFACTURERS : 1
NOT_PHYSICIAN : 1
BY_CALM : 1
STOOL_NEW : 1
ANXIOUS_AND : 1
BUT_THEY : 1
TEMPERATURE_VETERAN : 1
CUT_AROUND : 1
DTC_CLINIC : 2
TRIAGE_INTAKE : 1
QHS_OU : 1
MATRIXECTOMY_NAIL : 1
TO_KNOWLEDGE : 2
SCHEDULED_APPOINTMENT : 1
SUBMITTED_FOR : 1
WILL_RESOLVED : 1
TRANSVERSE_NONDE : 1
PULSE_TREATMENTS : 1
HOPES_PHYSICIAN : 1
THREE_AND : 1
RECORD_REVIEWED : 2
HAS_DIFFICULT : 1
HAVING_TOLERANCE : 1
HE_CALCIUM : 1
SP_HAS : 1
WORKER_VOLUNTEER : 1
PROTECTORS_IN : 1
BETTER_THINKS : 1
AND_WAR : 1
OPTION_IF : 1
INDEPENDENT_EASILY : 3
TO_BRAINS : 1
THEY_FOR : 1
SITS_UP : 3
HX_SIGNIFICANT : 1
REFERRED_HIS : 1
FEELINGS_AND : 1
THREE_TIMES : 1
THIS_HIMSELF : 1
POSTURE_GOOD : 1
BEGAN_NO : 1
SITTING_IN : 1
SEEN_LAST : 1
FOWLER_DIAGNOSIS : 1
TOTAL_TO : 2
ANYTHING_OF : 1
APPEARS_VERY : 1
ANT_OD : 1
PSYCHIATRIC_UP : 1
SIGNS_TERAZOSIN : 1
TO_PSYCHOTHERAPY : 1
RESIDENT_WITHIN : 1
DETAILS_FOR : 1
BUSINESS_HOURS : 1
REACTION_NONE : 1
FIRESEEKING_BURN : 1
PHYSICIAN_DISCHARGE : 1
REPAIRS_AND : 1
TO_TOTAL : 1
OUTPT_TRIAGE : 1
AND_SOBRIETY : 1
FROM_THER : 1
STATING_THAT : 2
SKIN_MEATUS : 1
ON_VETERAN : 1
HERE_TO : 2
PRIVILEGES_BED : 1
RESTRICTED_DRUG : 1
SPUTUM_NONE : 2
FORM_CURRENT : 1
FLASHBACKS_NMS : 1
OA_MARCH : 1
ADVERSE_REACTIONS : 1
FLIGHT_PHYSICIAN : 1
PLATE_WITH : 1
CALCIUM_MG : 1
SKIN_OR : 1
AND_UPBEAT : 1
NEG_AGE : 1
FOUR_PARTICULAR : 1
MORNING_SYMPTOMS : 1
AT_CBOC : 1
DIFFICULTY_RECOMMENDATION : 1
WHO_PERSONAL : 1
AS_ACTIVE : 1
DISCHARGE_OU : 1
ON_YOUR : 1
ASSERTIVE_SKILLS : 1
COMES_CONVERSATION : 1
EDEMA_BLOODCLOTS : 1
WORK_DISABILITY : 1
THE_SIDE : 1
COHESIVE_VOLUNTEERED : 1
NUMBER_RECALL : 1
TO_BARETT : 1
DENTAL_CONSULT : 1
PSYCHOTHERAPY_MEDICAL : 1
OF_STOOL : 5
TRIGLYCERIDE_MG : 1
IMPROVE_HEALTH : 1
SW_HE : 1
ANSWER_BISACODYL : 1
WILL_ABLE : 1
HOSPITALS_OR : 1
ACTIVE_NOTE : 1
SPECIFICS_PLEASE : 3
ILLNESSES_PROBLEM : 1
INCISION_AREA : 1
ISTON_CBOC : 1
WANTED_UPDATE : 1
NEC_KNEE : 1
MEET_TANAKA : 1
FROM_REPORTS : 1
THE_ISSUES : 1
NAME_PHYSICIAN : 1
BEHAVIORAL_CONCERNS : 1
REQUESTED_WAL : 1
FEELS_BETTER : 1
IT_CALMED : 1
UNIT_MEET : 1
AND_INTAKE : 1
VA_OR : 1
WHAV_NUMBER : 1
SPONGE_BATH : 1
SUICIDE_SCREEN : 1
ANKLE_PATIENT : 1
THE_MENTAL : 1
INJECTIONS_EYE : 1
NEBULIZER_TIME : 1
KNEE_DISCHARGE : 1
THIS_WILL : 1
PATIENTS_GOAL : 1
PINES_SOME : 1
WAS_FOUND : 2
SCREENING_STATES : 1
AMBULATORY_CHEST : 1
OF_EXWIFE : 1
HIS_ANXIETY : 1
MISSING_PATIENT : 1
DENTAL_PROGRESS : 1
POOR_CONTROL : 1
HE_WOULD : 2
NOTE_HYDROCELE : 1
DISCUSS_CONSENT : 1
AM_TREMENDOUS : 2
DIET_RX : 1
TOLERATED_PTA : 1
NOTE_FEELING : 1
CLINIC_CLINIC : 1
VET_MYSELF : 1
ASSERTION_ASSOCIATED : 1
SPOUSE_THAT : 1
TO_MED : 1
BECOME_DURING : 1
ASSESSMENT_HELD : 1
SULFA_BACTRIM : 1
INFECTION_CARE : 1
ABOUT_COLONOSCOPY : 1
TO_SMOKE : 1
HIM_HAD : 1
IN_CORONARY : 1
CONTINENT_NUMBER : 1
MS_IT : 1
ABDOMINAL_PULSE : 1
BACK_TO : 3
SURGERY_ED : 1
BAKER_BARRIERS : 1
AS_OFFERING : 1
THE_PROGRESS : 1
AMBULATORY_TREATMENT : 1
PROTECTION_EXPOSED : 1
ALBUTEROL_INHAL : 1
ADMINISTER_THEM : 1
ICE_TEA : 1
CRITICAL_CARE : 1
THAT_DESCRIBES : 1
REPORTS_INFORMED : 1
FACTORS_PATIENT : 1
OBESITY_LABS : 1
ORIENTED_YES : 1
CLC_TRANSPORT : 1
SEDATION_SINCE : 1
REPORT_ONSET : 1
TETANUS_CAUSES : 1
BISACODYL_EC : 1
ALCOHOL_REPORTS : 1
NAIL_AVULSION : 1
THOUSAND_PROVIDE : 1
IS_NEXT : 1
ONSET_OF : 2
RECURRENT_PARTIAL : 1
NUMBER_CLONIDINE : 1
PROVIDER_MD : 1
PATIENT_EMAIL : 1
IPTON_TEA : 1
DATE_BE : 1
VISIT_CONSULT : 1
PSYCHOTHERAPY_CONDUCTED : 1
TOTAL_SESSIONS : 1
TAB_HE : 1
RETURN_BACK : 1
HIMSELF_MH : 1
HOW_TO : 1
FOR_HELP : 1
APPLICABLE_FOR : 1
PHYSICIAN_ICE : 1
NO_BEHAVIORAL : 2
MENTAL_STATUS : 3
VESTING_PATIENT : 1
HE_COMPLAINING : 1
RANGE_DENVER : 1
VET_INTRODUCING : 1
ADDENDUM_SKILLS : 1
DOCTOR_TOLD : 2
PACKET_ADVANCE : 1
ON_HIMSELF : 1
OBTAIN_AND : 1
WAS_ACUTELY : 1
TAXI_AND : 1
AND_OF : 2
NEUROGENIC_POSTOPERATIVELY : 1
MILIEU_DID : 1
WILL_NOT : 1
FEW_YEARS : 1
DATE_PLACED : 1
SYMPTOMS_FROM : 1
DC_NOON : 1
YES_CT : 1
IN_WHICH : 2
BUPROPION_FOR : 1
DISCUSSION_AT : 1
TO_FORM : 1
CLC_SOUTH : 1
ASSISTANCE_SUPERVISION : 1
DATE_SPEC : 1
CURRENTLY_HEIGHT : 1
ON_SIDE : 1
APPOINTMENT_VERIFIED : 1
FAMILY_ANGER : 1
PHYSICIAN_OF : 1
NOTE_SUICIDE : 1
CODEINE_HYDROCODONE : 1
CLC_BRC : 1
LOOSENING_TKA : 1
BEEN_VIA : 1
NO_IS : 1
CO_STATUS : 1
CLEARER_VETERAN : 1
BLINDNESS_SECONDARY : 1
LATER_SAYS : 1
TO_MH : 1
FOR_VICTIMS : 1
REVIEWED_WITH : 1
NONE_PAIN : 1
RECENT_URINE : 1
ALLERGIES_PHONE : 1
NO_CONTACT : 1
HIP_STERIOD : 1
ALLOWED_AT : 1
APPARENT_INDICATION : 1
SHELLED_BY : 1
RED_RIGHT : 1
DEPRESSED_NO : 1
INCREASE_CREATININE : 1
FOLLOW_PROGRESS : 1
IS_ON : 2
THAT_HUSBANDS : 1
SUPPORT_AMBULATORY : 1
LEFT_VOICEMAIL : 1
THE_COLON : 1
BLOCKAGES_IN : 1
FOUND_TO : 2
ADMINISTER_HIMSELF : 1
INPATIENT_WARFARIN : 1
ON_ANY : 1
PHONE_PULSE : 1
PATIENT_PHYSICIAN : 1
AND_SENT : 1
THE_RISKS : 3
EACH_CVA : 1
STATE_TO : 1
FOR_DUE : 1
FOR_PHYSICIAN : 2
HAS_HAVING : 2
NOT_SHOW : 1
SAFETY_AS : 1
MUSCLES_SPASMS : 1
VERY_INTERESTING : 1
MHICMINTENSIVE_MANAGEMENT : 1
SCHEDULED_TL : 1
AUTONOMIC_PENDING : 1
THE_GULF : 1
ED_DOCUMENT : 1
INTERESTING_HE : 1
ETHNIC_GROUP : 1
TRANSFER_TO : 1
NOT_UP : 1
PSYCH_CARE : 1
AT_SIGNS : 1
ACTIVE_PROBLEM : 1
NEUROFORAMINAL_LL : 1
PT_AN : 1
FORM_REHAB : 1
KNEW_WHERE : 1
NENT_AT : 1
ON_ADMISSION : 1
AS_CASUALLY : 1
BE_COORDIANATED : 1
STATEMENT_INACTIVATED : 1
ENEMY_ARTILLERY : 1
XX_OBSERVATIONS : 1
THIS_HAVING : 1
PLM_KNEE : 1
CONSULT_INITIATED : 1
RECALL_LETTER : 1
USUAL_TO : 1
DISCHARGES_VA : 1
ATTEMPTS_BUT : 1
ILLNESS_TRIAGE : 1
NOTET_DATE : 1
CONTINUE_WORK : 1
MYSELF_TALKING : 1
TH_COIN : 1
SUPPLEMENT_BEHAVIOR : 1
HAS_IN : 2
BUCKLING_STATES : 1
AM_THE : 1
EMPLOY_NEW : 1
TO_MULTIPLE : 1
TO_AS : 2
IS_AN : 1
DJD_PSYCHOSIS : 1
COLONOSCOPY_LN : 1
RECEIVED_PATIENT : 1
LIST_NEOPLASM : 1
ADMITTED_THE : 1
PERSONAL_PREFERENCES : 1
ANYTHING_BUPROPION : 1
COMMENTS_APNEA : 1
ADDENDUM_PATIENT : 1
MEDICATIONS_LISTED : 1
DO_PATIENT : 1
DENIES_LOSS : 1
JUN_TAKING : 1
NAME_REASON : 1
TRANSFER_SELF : 1
OF_REPAIRS : 1
IF_REDNESS : 1
CAP_ACTIVE : 2
OF_PSYCHOTHERAPY : 1
OF_SENSE : 1
ADJUSTMENT_WITH : 1
TOLD_INFORMATION : 1
MUST_PICKED : 1
LUMBAR_SELECTIVE : 1
BY_MAIL : 1
RAL_LEFT : 1
AFTERCARE_DC : 1
ORIENTED_APPEARS : 1
TABLET_AND : 1
SAFETY_MEASURES : 1
GOOD_HIS : 1
CONSTRUCTION_OF : 1
VISIT_PT : 1
REACHED_DATE : 1
KNEE_APPOINTMENT : 1
THE_ADDENDUM : 2
ADMISSION_TIME : 1
VASCULAR_ULCER : 1
RELIGIOUS_FOOD : 1
INCREASE_IN : 1
MEASUREMENT_DONE : 1
LOCATION_PHYSICIAN : 2
WINDOW_GET : 1
FRI_LESION : 1
WINDSHIELD_IN : 1
THIS_SHIFT : 6
DIVORCED_PATIENT : 1
ADDENDUM_CARE : 1
APPT_LEFT : 1
VETERAN_COULD : 1
AT_VA : 1
WITHDRAWAL_DISCUSSED : 1
THE_DOCTORS : 1
VETERAN_AT : 1
PLAN_TO : 1
ON_THIS : 1
AT_LENGTH : 1
SCORE_WAS : 1
HE_DRINKING : 1
ASSIGNED_WHO : 1
ONCOLOGY_DAILY : 1
AGREES_NAME : 1
STATES_HE : 5
OTHER_LOCATIONS : 1
GOAL_HEMOGLOBIN : 1
CANCELLED_WEDNES : 1
ALERT_REQUESTING : 1
FEELINGS_THOUGHTS : 1
FOLLOWUP_NOTE : 1
VISION_HAS : 1
OF_MG : 1
HBPC_ADMISSION : 1
NO_TO : 3
LIN_HAS : 1
NOW_LIVES : 1
COMPLAINT_NO : 1
HYPOTHYROIDISM_CAUTION : 1
OR_REPORTED : 1
VET_EXPLORE : 1
DENTAL_PAIN : 1
OR_MEASUREMENT : 1
REPORTED_FEELING : 1
CASA_CBOC : 1
GRANDKIDS_OR : 1
WILL_THIAMINE : 1
FOR_WEIGHT : 1
PATIENT_ISZESKI : 1
AMBULATION_NO : 1
CLINIC_FOR : 1
MAY_LOCAL : 1
EVENT_INPATIENT : 1
INSTANCES_HIS : 1
TERAZOSIN_MG : 2
ASSESSMENT_PURPOSES : 1
OF_MUSCLES : 2
OF_HISTORY : 2
REQUEST_AVE : 1
MOVEMENTS_BRADEN : 1
IN_IN : 1
ST_VETERAN : 1
EYE_PATIENT : 2
GROOMED_WAS : 1
LEFT_CHARACTER : 1
TREATED_PATIENT : 1
DISPOSITION_NURSING : 1
ASI_MR : 1
WAL_SCORE : 1
SPONSOR_GROUP : 1
VETERAN_MENTAL : 1
WRITER_BACK : 1
AND_SHAKE : 1
PERSIAN_GULF : 1
OK_PT : 1
RESULTS_PATIENT : 2
SHE_CAN : 1
EYES_AS : 1
FOR_YEARS : 1
SOME_VARDENAFIL : 1
IS_AREA : 1
FROM_PAST : 1
THE_ASSERTIVE : 1
SCALE_HOW : 1
CARIES_IMPAIRMENT : 1
AS_BY : 1
CONDITION_MALE : 1
BRADEN_MEDICATION : 1
RISK_HIMSELF : 1
WILL_ABOVE : 1
BARRIERS_FRIENDS : 1
IS_AFRAID : 1
HEALTH_RISKS : 2
AMBULATORY_TREATMENTS : 1
REALIZE_PROCESS : 1
PATIENT_COUNSELED : 1
CLACICLE_XD : 1
CALLER_ISTON : 1
IN_AND : 5
VERIFIED_WITH : 1
HEADACHES_WHEN : 1
MAIL_IN : 1
ANALYSIS_BAL : 1
THE_PROGRAM : 1
RENAL_FXN : 1
LCSW_CE : 1
INJECTION_NONE : 1
APPT_CUT : 1
OD_ACTIVITIES : 1
PER_VA : 1
LABS_MILD : 1
HEAD_NECK : 1
YOU_ITCHING : 1
QUICK_BECOME : 1
RECOMMEND_REPEAT : 1
DAILY_ADMINISTERED : 1
DISABILITY_WORRIED : 1
TO_AREA : 4
BEHAVIORAL_SX : 1
AND_RX : 1
TREATMENT_PLAN : 2
TO_SO : 1
BETTER_BREAKFAST : 1
CONSULT_NO : 1
SHE_THE : 1
MOTIVATION_FAIR : 1
BACK_WAS : 1
MHC_HEALTH : 1
COMPREHENDING_MEDICAL : 1
DROP_BOTH : 1
HFA_INHALER : 1
MOVEMENTS_THIS : 1
AM_UNDER : 2
NO_COMPREHENDING : 1
GAIT_SHORTER : 1
BEFORE_CHANGING : 1
NONE_YES : 1
MANAGER_QHS : 1
ISZESKI_SSN : 1
NOT_IN : 3
EYE_EXAM : 1
PSYCHOTHERAPY_BEHAVIORAL : 1
HYGIENE_IS : 1
IS_SUPERFICIAL : 1
THE_SCHEDULED : 1
COME_THE : 1
SESSION_STATES : 1
HAVE_DRAINED : 1
THE_PRESSURE : 1
SEE_WITH : 1
SET_UP : 3
TES_METHOCARBAMOL : 1
NARCISSISTIC_AND : 1
DISTURBANCES_ASK : 1
LEATHER_ET : 1
INCREASE_OF : 1
CALLER_WITH : 1
AS_PCC : 1
GROUP_ATTENDANCE : 3
MEDICATION_CHLORIDE : 1
INCREASED_APPETITE : 1
TO_NEGOTIATE : 1
EXPLAINED_CHANGES : 1
BRAINS_PATIENT : 1
TEMPERATURE_SAID : 1
AT_TIME : 4
THERE_NO : 2
TO_VETERAN : 2
QUESTIONS_BUSINESS : 1
CPRS_CITALOPRAM : 1
BEFORE_ATRIAL : 1
ANY_BLADDER : 1
PATIENT_ACTIVE : 1
SITS_WITHOUT : 3
PER_ORDER : 1
PATCH_IN : 1
BY_NOT : 1
SHIFT_APR : 1
WALKING_SYMPTOMS : 1
OF_AMBULATORY : 1
PAIN_PUFFS : 1
HC_PRO : 2
BLADDER_PATTERN : 1
OD_QUIET : 1
TOTAL_ONSET : 1
MILD_ONLY : 1
NOT_SURE : 1
PAIN_SITTING : 1
UP_NOTE : 1
FOR_COMPLETION : 1
RELIGIOUS_PERSONAL : 1
LEFT_LUNGS : 1
SELF_MOBILITY : 1
TO_MEDICINE : 1
INFORMATION_PROBLEMS : 1
TC_TO : 1
HIS_DISABILITY : 1
COMPLETE_THE : 1
BE_BASED : 1
THIS_PATIENTS : 1
FROM_VET : 1
EXPLORE_CONTACTS : 1
HAD_LENSECTOMY : 1
VENTILATION_FEELINGS : 1
HE_STOPS : 1
OF_SCHEDULED : 1
HAS_PATIENT : 1
FOR_MENTAL : 1
DATE_ADDENDUM : 2
ON_JULY : 1
LIQUID_BARRIERS : 1
IDENTIFIED_INFORMED : 1
WOUND_DEFINITELY : 1
FOR_EYE : 1
HE_MADE : 1
FOR_II : 1
BIT_AND : 1
COLLECTED_AND : 1
SUBMITTED_OB : 1
THE_ULCER : 1
TAB_TAK : 1
DISCHARGE_NOTET : 1
WORK_ON : 1
REPEAT_CMC : 1
IF_NEEDED : 1
TELEPHONE_CHAPLAIN : 1
FROM_CHRONIC : 1
HIS_OR : 1
REFILLS_VETERAN : 1
FINGER_APART : 1
THAT_WHEN : 1
COMPLICATIONS_IMMEDIATE : 1
PATIENTS_RECORD : 1
AS_MILATARY : 1
USED_THE : 1
AUG_CONSULTATION : 1
INCREASED_WE : 1
FAIR_THOUGHTS : 1
SOME_VERY : 1
ORIEN_MEDICATION : 1
TALKING_OUT : 1
TO_CALL : 2
TEMP_ULCER : 1
AND_IS : 2
HAVE_HIM : 1
PATIENT_PATIENT : 2
ONE_DOWNSTAIRS : 1
COMPLETE_ASSESSMENT : 1
THE_HUSBAND : 1
REFILLING_WILL : 1
DID_SHOW : 1
ANTE_ASPECT : 1
THIS_IS : 5
DURING_DISCUSSION : 1
HAVING_PROBLEMS : 1
ISSUES_FINANCES : 1
MEDICAL_RECORD : 2
CARE_DINNER : 1
NONE_NURSE : 1
TO_FEEL : 1
SHOT_ME : 1
IRAQ_TIME : 1
SESSIONS_HIS : 1
HYPERTROPHY_BENIGN : 1
PHYSICAL_CONSULT : 1
AND_INFORMED : 1
HIS_RESUM : 1
INFORMED_THAT : 2
NOTE_IS : 3
TOXIC_NO : 1
ON_IN : 1
OR_TREATMENT : 1
CURRENT_NUMBER : 1
FOLLOWI_SAFETY : 1
OUTPATIENT_MEDICATIONS : 5
HE_CAN : 2
CALMED_THAT : 1
FURTHER_WORK : 1
COMMENTS_MOVEMENTS : 1
ASSISTANCE_PROVIDED : 3
WORKING_ON : 1
REPORTS_NO : 1
NEEDED_FOR : 1
ACTION_OBJECTIVE : 1
LOCATION_BLADDER : 1
RECENT_LIPID : 1
CARE_FRED : 1
STOOL_FOR : 1
TASK_UP : 1
LENGTH_MINUTES : 1
THESE_AND : 1
RETURN_OPTIMAL : 1
KG_CONSULT : 1
FACTORS_MAKE : 1
DIDACTIC_THERAPEUTIC : 1
TRANSPORT_TO : 1
ALSO_REPORTS : 1
AN_OPTION : 1
VETERAN_SHARED : 1
WRITER_WILL : 1
SAFETY_MARITAL : 1
THAT_THE : 2
FOR_DETAILS : 1
METHOCARBAMOL_TYLENOL : 1
PATIENT_ANSWERED : 2
NEEDS_SET : 1
HEALTH_NOTE : 1
UNIT_ON : 1
SHORT_LEG : 1
TAB_TAKE : 5
PER_UNIT : 1
PHYSICIAN_NS : 1
MOVIES_AND : 1
HIS_WILL : 1
HERE_HELP : 1
ONE_TABLET : 4
BLADDER_BOWEL : 1
DEPRESSION_CHRONIC : 1
MET_WITH : 1
PNEUMONIA_NO : 1
NEUROGENIC_CLAUDICATION : 1
WORSE_LISTED : 1
LONG_TERM : 1
THE_VA : 3
THE_OR : 1
NOTE_PATIENT : 3
HISTORY_CONTRAINDICATIONS : 1
IS_THAT : 1
HE_SC : 1
INTENSITY_LUMBAR : 1
RETURNED_MAY : 1
NOTE_NOTIFIED : 1
OR_RECORDS : 1
PRESENTED_CLEAN : 1
NATIONAL_HIS : 1
MAILED_THE : 1
PROGRESS_IMPROVED : 1
OF_AS : 1
NUTRITION_HAS : 1
OPERATE_CONTROL : 1
OR_SEEN : 1
THAN_RIGHT : 1
APPARENT_CYST : 1
MEASURES_PLACE : 1
LABORATORY_DATA : 1
AUTODROP_EASE : 1
ATTENDING_HAS : 1
CODE_PRO : 2
INTRODUCTORY_LESSON : 1
THE_MAR : 1
DOCTORS_KNOW : 1
NEEDED_TO : 1
ONEONONE_TO : 1
MG_GIVEN : 1
ZOSTAVAX_SHINGLES : 1
IDENTIFIED_ADMISSION : 1
VIETNAM_AND : 1
NOSHOW_THE : 1
HAS_REACTED : 1
COAT_FEELS : 1
UA_NEG : 1
HAVE_GO : 1
IN_EYES : 1
OF_AN : 1
TO_REASSURE : 1
PROVIDE_PSYCHOEDUCATION : 1
ACCEPTANCE_ON : 1
NOTED_AMBULATORY : 1
FOR_HE : 1
PREFERENCE_LEGIONELLA : 1
CBOC_FRED : 1
MAILED_VIA : 1
PINES_FOR : 1
STATE_VARDENAFIL : 1
COORDINATOR_PAIN : 1
THEY_ARRANGED : 1
AUDITORY_OR : 1
ACTIVE_MEDICAL : 2
CPRS_MG : 1
NUMBER_AND : 1
HC_PHONE : 2
HEADACHES_HER : 1
VETERANS_CALMED : 1
PT_REPORTED : 3
WNL_NO : 1
EACH_VET : 1
AND_CHF : 1
PSYCHOTHERAPY_WITH : 1
ATTEND_PSYCHOTHERAPY : 1
COMPLY_THE : 1
QUITE_AND : 1
QUESTIONS_DO : 1
AMOUNT_OF : 3
CALLER_MOUNTAIN : 1
LAST_AND : 1
CLINIC_SINCE : 1
ICE_PATIENT : 1
THIS_ATTORNEYS : 1
TOUCH_YOU : 1
DENIES_CHEST : 1
CHRONIC_NATURE : 1
IV_MODALITY : 1
CAME_FOR : 1
REPEAT_SAL : 1
RESULT_IN : 1
WITH_RED : 1
PRESSING_LEFT : 1
DIAGNOSIS_SPEC : 1
HAD_BEEN : 2
BETTER_HE : 2
SINUS_ICDCM : 1
THIS_PLANS : 1
HE_NO : 3
YEAR_NOT : 1
HAD_OFF : 1
AS_DISCUSS : 1
AND_MAINTAIN : 1
OF_NO : 1
WITHOUT_FALLING : 1
REHAB_ON : 1
SHE_ALSO : 1
AT_TOTAL : 1
HIMSELF_TO : 1
ONCOLOGY_SERVICE : 3
POH_TRAUMA : 1
ADDENDUM_HE : 1
DID_LUNCH : 1
FROM_DEMOGRAPHICS : 1
ADDENDUM_WILL : 1
HIM_RECENT : 1
EXWIFE_AND : 1
PHYSICIAN_PAIN : 1
INSTRUCTIONS_ASF : 1
LAMINECTOMY_LL : 1
OF_LOCATION : 1
NUTRITION_ADMISSION : 1
ACTIVE_OR : 1
PARTICIPATED_GROUP : 2
KNEE_ACTIVITY : 1
TYPE_CLINICAL : 1
SESSION_THE : 1
STATES_IS : 1
WHEN_DO : 1
THE_SO : 1
TABLET_ACTIVE : 1
IN_ADR : 1
TOE_NAIL : 1
AAM_DRESSED : 1
THIS_CONFIDENT : 1
HIM_VETERAN : 1
FULL_NAME : 1
AND_HERE : 1
CARE_MOIST : 1
ADEPRESSION_PLEASE : 1
NOTES_REVIEWED : 1
RUSSELL_TO : 1
CBOC_EVALUATION : 1
CONSENT_FORM : 1
IN_EVALUATION : 1
IS_VERY : 2
FROM_THESE : 1
RING_NURSES : 1
DATE_FORM : 1
DOCTOR_ADMINISTER : 1
QUIET_PTSD : 1
PRESSURE_PREVENTION : 1
IN_DESIGNED : 1
RFC_CYST : 1
BY_ARTILLERY : 1
NO_COCAINE : 1
TRIGLYCERIDE_DL : 1
CALLER_RESPONSE : 1
ARE_IN : 4
DRINK_AND : 1
DISCHARGED_LAST : 1
HOURS_PROCESS : 1
SOCKS_STARTED : 1
USED_ASSERTIVE : 1
HAVE_COPY : 1
HIM_OF : 1
ENTERED_TOE : 1
AT_CLC : 2
FROM_SATAN : 1
OR_ASSISTIVE : 1
WEIGHT_WILL : 1
DRUG_AND : 1
FIELD_WAS : 1
TO_CALLER : 3
BE_WITH : 1
ACUTELY_BACK : 1
FALL_IMPLEMENTED : 1
LONG_MONTHS : 1
MEDICATION_ADHERENCE : 1
ELEVATOR_COUNTED : 1
APPLICABLE_PSYCHOSIS : 1
TACHYCARDIA_ICDCM : 1
CALLED_HE : 1
PAIN_IT : 1
NOTE_MHICMINTENSIVE : 1
CONCERNING_MEDICATION : 1
ASSESSMENT_STABLE : 1
IF_DJD : 1
PRIOR_THE : 1
BEHIND_HEAD : 1
NAME_BOOSTER : 1
AFTERCARE_OF : 1
VET_HIS : 1
LEATHER_KIT : 1
STRATEGY_CHRONIC : 1
TO_REHAB : 1
AND_COMFORT : 1
LS_SESSIONS : 1
INITIAL_NO : 1
RIGHTS_HOSPITALS : 1
LAB_TO : 1
PROBLEMS_TREATMENT : 1
LOCATION_ROOM : 2
CLEAR_NUMBER : 1
END_SESSION : 1
TO_MEET : 3
FEELS_NEUROLOGIC : 1
VACCINE_REFUSAL : 1
ATTEMPTED_REASSURE : 1
NO_PAIN : 2
TO_ADDRESS : 1
SIGNS_HCL : 1
RETURN_THE : 1
TO_THIS : 2
OCCASIONALLY_EASY : 1
DIAGNOSED_PROSTATE : 1
BLASTS_GRENADES : 1
INITIATED_AS : 1
ASSESSMENT_OF : 3
SHARED_PROCESS : 1
BACK_RECEIVES : 1
INSIDE_ELEVATOR : 1
SOMETIMES_PAIN : 1
RESULTS_CC : 1
JOINT_WOUND : 1
ADDENDUM_LAUNDRY : 1
RIGHT_DIAL : 1
LIFE_WAS : 1
FOR_VETS : 1
MILD_IN : 1
AND_PLACE : 1
DISCHARGED_TO : 1
ASSISTANCE_NUMBER : 1
CLIENT_INSTRUCTIONS : 1
KG_PATIENT : 1
ASSESSMENT_THIS : 1
BY_SURG : 1
CONTAINS_ADVANCE : 1
CONSCIOUS_SEDATION : 2
HEADACHES_ONLY : 1
AND_CONTAINERS : 1
PATCH_TESTING : 1
SYND_HCV : 1
LAB_DRUG : 2
PROGRESS_SECTION : 1
BATTERIES_MANUFACTURERS : 1
SUGAR_AT : 1
OBJECTIVE_INHAL : 1
DOESNT_MORE : 1
HE_PATIENT : 1
DEPRESSED_SUICIDE : 1
CH_TO : 1
CHEST_IMPAIRMENT : 1
WITHIN_MENTAL : 1
EBRT_ADJUVANT : 1
REALIZE_THAT : 1
YOUR_ULTRASOUND : 1
IMPULSE_CONTROL : 1
TOLD_TO : 1
PRESSED_CORRECTLY : 1
ADEQUATELY_AND : 2
HISTORY_DEPRESSION : 1
MG_HE : 2
PHONE_METHADONE : 1
MEDICATION_AND : 2
CMC_PATHOLOGY : 1
PATIENT_REQUESTED : 2
SECONDARY_POH : 1
CASUALLY_AND : 1
TOLERATE_THE : 1
KNOW_ARE : 1
CHART_BROKEN : 1
HEALTH_STRESSOR : 1
CALLED_NURSE : 1
TO_MULTIVITAMIN : 1
ELIMINATION_BREATH : 1
AND_PTSD : 1
LAB_AND : 1
ABSTINENCE_AND : 1
TABLET_MOUTH : 5
INH_ACTIVE : 1
EYE_AND : 1
ABRASION_LACERATION : 1
PT_HAVING : 1
SAFETY_IN : 1
HE_HAS : 7
DIAGNOSIS_COMMENTS : 1
BRADEN_FOR : 2
ORIENTED_LENGTH : 1
SOME_VISION : 1
REAC_ADMISSION : 1
HOUSING_COULD : 1
OF_SISTER : 1
TWICE_NKA : 1
DISCHARGED_MULTIVITAMIN : 1
FOR_NURSING : 1
DIVORCE_YEAR : 1
HOW_HOW : 1
SLEEP_MEDICINE : 1
PAIN_AT : 1
THOUGHT_DISORDERMET : 1
INTACT_OBESITY : 1
ADDRESS_CURRENT : 1
THAT_PATIENTS : 1
NO_INFECTION : 1
THE_WINDOW : 2
STRESSOR_FINANCIAL : 1
MOBILITY_SOUTH : 1
PT_NEWLY : 1
WILL_HOME : 1
ON_LEFT : 1
SHIFT_MOBILITY : 1
APPOINTMENT_THOUGHT : 1
NEXT_ROUTINE : 1
PROSTATE_WITHOUTENCOUNTER : 1
OF_DEC : 1
MEMBERS_ALSO : 1
CAROTID_STENT : 1
HAS_COME : 1
HAD_DOING : 1
HUMBLING_HEMOGLOBIN : 1
HIGH_SCHOOL : 1
CALLER_ANCHORAGE : 1
EDUCATION_INTERDISCIPLINARY : 1
RELATIONSHIPS_CBT : 1
PER_WITH : 1
TO_BLASTS : 1
DETAILS_ARE : 1
TO_OBJECTIVE : 1
SINCE_PASSED : 1
AM_MENTAL : 1
RECORD_READING : 1
MORTARS_WHILE : 1
ONE_NEW : 1
HOUSING_BE : 1
AWAKENS_COUGH : 1
CLINIC_THOUGHT : 1
AT_ONEONONE : 1
THAT_PT : 1
REST_WRITER : 1
HEALTH_OR : 1
ADDENDUM_OTHER : 1
MODALITY_NASAL : 1
ASSISTANCE_AFTERNOON : 1
WITHOUT_SUPPORT : 1
ASSISTANCE_NEEDED : 1
PROVIDED_FOR : 3
TIME_PATIENT : 1
COLONOSCOPY_DESCRIPTION : 1
HAS_OBSERVED : 1
SEE_LPN : 1
RELATED_DISORDER : 1
PREVENTION_PROTOCOL : 1
PROGRAM_VETERAN : 2
CALLING_SCHEDULE : 1
NO_THOUGHTS : 1
VISION_VETERAN : 1
MUST_IT : 1
HAD_THERAPY : 1
WEAR_HEARING : 1
PPV_LENSECTOMY : 1
OF_LONG : 1
HE_TXS : 1
SINCE_IT : 1
PROCESS_AS : 1
MAINTAIN_AS : 1
YOUR_APPOINTMENT : 1
PROMOTION_DISEASE : 1
WHEEZES_EFFECTIVENESS : 1
SOUGHT_GROUP : 1
NO_OR : 2
ASF_SURVEY : 1
OVERSIGHT_OR : 1
THOUGHT_TACHYCARDIA : 1
AMBULATORY_ASSISTIVE : 1
OTHER_DONE : 1
GROOMED_AND : 1
RETURN_CARDS : 1
DEPENDENCE_PAIN : 1
PAC_TO : 1
FOR_PLEASE : 3
RECOVE_PRIOR : 1
REVIEW_CHART : 1
BEST_DESCRIBES : 1
TO_PERSON : 1
RESTORATIVE_PROGRAM : 1
WHEN_YOU : 1
TESTING_INPATIENT : 1
BREATH_CRACKLES : 1
MIN_SUPPER : 1
MOBILITY_INDEPENDENT : 3
HAD_FOR : 1
STARTED_DRINK : 1
ILL_BE : 1
VACCINE_INFORMATION : 1
THE_JOINT : 1
TO_CONDITION : 1
THE_PHONE : 1
ABOUT_OF : 1
SPECIFIC_STAMPED : 1
AMBULATION_BOWEL : 1
HYGIENE_GOOE : 1
MODE_OF : 1
TO_ARE : 2
HAD_PRIOR : 1
CONTACT_ONCOLOGY : 3
RECENT_PROGRESS : 1
OR_HIS : 2
TO_ONE : 1
TINNITUS_VERTIGO : 1
FACILITY_PCP : 1
HELP_VETS : 1
COIN_LESION : 1
AND_EXT : 1
TOLERATE_INCREASED : 1
BRIEF_SCREEN : 1
ATROVENT_ML : 1
STOOL_SOFTENER : 1
ND_FLU : 1
VOLUME_REPORTS : 1
SUPPLY_OF : 1
THE_PIP : 1
BUT_TO : 1
EXTRA_GIVEN : 1
OF_SKIN : 1
OF_FUNCTION : 1
REGARDING_RISKS : 1
VIAL_INH : 1
QUESTIONS_DURING : 1
OR_PENDENCE : 1
MINIMIZE_MEDICAL : 1
OF_ASSESSMENT : 1
SHARING_ABOUT : 1
RIVIERA_NEEDS : 1
THOUGHTS_CONSCIOUS : 1
SESSIONS_TO : 1
TKA_IN : 1
SET_CUTTING : 1
CBOC_DATA : 1
ASSISTIVE_TEMPERATURE : 1
TL_DISC : 1
FEELING_OUT : 1
CONTACT_FOR : 1
MH_TO : 1
COMPLAINING_OF : 2
SEX_MALE : 4
VETERAN_IN : 2
THAT_PTSD : 1
MH_CONSULT : 1
PRIMARY_CBOC : 1
PARTIAL_TAKE : 1
TREATMENT_VOLUME : 1
WILL_GROUP : 1
LIN_ASSIGNED : 1
AND_DUPLEX : 1
CANCER_TO : 1
HAD_ANY : 1
DONE_MULTIPLE : 1
YOU_INFORMED : 1
REORDERED_SUPPLY : 1
PERSONAL_SHAMPOO : 1
BLOOD_INFORMED : 1
PATIENT_ADDENDUM : 1
IDENTIFIERS_USED : 1
ASSIGNED_SPECIALIST : 1
SAY_MUST : 1
OR_HOME : 1
IS_YEAR : 2
INFORMED_PAT : 1
CALLBACK_NUMBER : 1
THE_DISCHARGE : 1
ALLERGIES_HAS : 1
MY_DOWN : 1
AND_TO : 8
RECEIVES_AN : 1
THE_PRINTED : 1
MORSE_FALL : 1
HAT_RADIATION : 1
CONSENT_103203 : 1
REGULAR_ELSE : 1
PAIN_MEDICATION : 1
ARRIVAL_AMBULATORY : 1
THESE_CAUSE : 1
CURRENT_IS : 1
SAUDI_ARABIA : 1
CONTRAST_NO : 2
PING_GROOMING : 1
CANE_LITTLE : 1
COMMENTS_ORIEN : 1
ANY_ABOUT : 1
NEEDED_OCCURING : 1
PAIN_PAIN : 2
SOME_EXTRA : 1
IN_ANTICOAGULANT : 1
PAIN_OBSERVED : 1
THERAPY_THE : 1
HOPELESS_AND : 1
WITH_ASA : 1
PROCESS_DIFFICULTY : 1
PRIMARY_PAIN : 1
UNABLE_TO : 2
BE_REACHED : 1
PROTOCOL_WAS : 1
HYDROCELE_KNEE : 1
SOME_PAIN : 1
COMMUNICATION_WAS : 1
SCAN_CONSENT : 1
CONTINUED_AND : 1
TEAMS_SWS : 1
ALCOHOL_PHYSICIAN : 1
MALE_OBJECTIVE : 1
ON_PHARM : 1
FOLLOW_THROUGH : 1
VET_THANKED : 1
MEDICATIONS_INCLUDING : 1
THYROID_ADDENDUM : 1
RIGHT_EYE : 1
TRUSTING_HEALTH : 1
EXPLAIN_AUDITORY : 1
LMWH_SURGERY : 1
UPBEAT_ON : 1
OUTPATIENT_SCREENING : 1
INTO_HOSPITAL : 1
SI_DERMATITIS : 1
SAFE_MR : 1
UMBICIAL_NEXT : 1
IS_NUMBER : 1
COMPLY_WITH : 1
INTAKE_MR : 1
TIME_OF : 6
PATIENTS_GENDER : 1
FURTHER_VETERAN : 1
BED_DURING : 1
NURDEPRESSION_SCREENING : 1
BREATH_SOUNDS : 1
MEDS_MISCELLANEOUS : 1
MOVE_FINGER : 1
LEAVE_AS : 1
GET_UP : 1
OFTEN_HIS : 1
IV_QH : 1
NOTIFIED_PATIENTS : 1
PLAN_WILL : 1
IR_EYE : 1
PHONE_MIN : 2
WANTED_TO : 2
LIVES_METHOD : 1
REVIEW_NUTRITION : 1
ICDCM_NURSES : 1
WITH_PAST : 1
PALPATION_MYOFASCIAL : 1
THERAPY_ACCORDING : 1
VETERAN_BRADEN : 1
THE_AROUND : 1
PLAN_CHANGES : 1
HOME_PATIENT : 1
MALE_HERE : 1
ROUTINE_APPT : 1
VISION_TO : 1
AREA_HOME : 1
WITHDRAWAL_ALCOHOL : 1
NO_NOTED : 2
SUICIDE_TAKE : 1
OR_ACTIVE : 1
CALM_CANCE : 1
WITH_AT : 1
THOUGHTS_LIFE : 1
BY_ACTIVE : 2
GOAL_DENTAL : 1
MEAT_OPENING : 1
ORTHOPEDIC_INTERVENTIONS : 1
THE_ORDER : 1
DRINK_AGAIN : 1
REPORT_OPERATION : 1
MD_OF : 1
RELATED_MH : 1
COMPLAINTS_PRESENT : 1
SURG_WHEN : 1
MH_MHICMINTENSIVE : 1
OF_BLOOD : 1
APPOINTMENT_THURS : 1
BATH_AMOUNT : 1
UPPER_NOW : 1
THER_AND : 1
DEPT_VA : 1
PH_RESPIRATIONS : 1
OF_TINY : 1
FEB_POSITION : 1
EXPLORE_THESE : 1
POSTAL_ON : 1
APPOINTED_PCP : 1
CONSENT_SURROGATE : 1
LUNGS_LEFT : 1
TO_ATTEND : 1
AND_PROBABLE : 1
CVA_JR : 1
IS_PUTTING : 1
PATIENT_ACKNOWLEDGED : 1
UPCOMING_ORTHO : 1
DATE_RECD : 1
BATHROOM_AFTER : 1
LIFESTYLE_VISIT : 1
CHANGES_CHECKS : 1
PHONE_NUMBER : 4
FEW_AT : 1
MORE_NO : 1
OFFERING_IN : 1
HEALTH_WITHDRAWAL : 1
FAMILY_RECOVERY : 1
PAIN_STATUS : 1
SAFE_MAY : 1
STERIOD_IR : 1
TO_PM : 1
DEC_WARFARIN : 1
OF_HOURS : 2
SENT_SHOW : 1
GETS_CALLED : 1
DRUG_RADIATION : 1
PAINFUL_MUSCLES : 1
IMPROVED_MOTIVATION : 1
PATIENT_FLAT : 1
APPOINTMENT_CONFIRMED : 1
CLEAR_IN : 1
SAYS_HAD : 1
HAVE_PLY : 1
OTHER_SIGNIFICANT : 1
THAT_ARE : 2
RISKS_CONFERRED : 1
DISKECTOMY_BLOOD : 1
INTERMITTENT_PER : 1
OPENING_AMBULATION : 1
PROVIDE_SERVICE : 1
FEW_SUGAR : 1
BLOOD_WORKING : 1
MORTARS_IEDS : 1
STATUS_ELECTIVE : 1
DEATHS_OF : 1
STEPS_WEIGHT : 1
GROUP_TO : 2
CONTINENT_THE : 1
HOSPITAL_GOWN : 1
THERE_MENTAL : 1
BARRIERS_IDENTIFIED : 1
LAW_FOR : 1
SLOWLY_REACHED : 1
BOWEL_ELIMINATION : 1
HE_LAID : 1
NEGATIVE_PT : 2
MACRODANTIN_AND : 1
NPO_SINCE : 2
TALKING_LOUD : 1
MAY_IMPAIRED : 1
TAKE_CAPSULE : 1
ADMINISTER_LOCAL : 1
MESSAGE_ON : 1
FINGER_SPREAD : 1
MACHINE_DOES : 1
PT_DISCHARGES : 1
THE_DENTURES : 1
THIAMINE_MG : 1
THROBBING_TO : 1
WITH_SOME : 1
ULA_CATHETER : 1
VIA_DATE : 1
IMPAIRED_UNRESTRICTED : 1
TIME_CONSISTENCY : 1
UNABLE_MOVE : 1
IN_NEED : 1
AND_SHOES : 1
DANE_CBOC : 1
PERSON_NO : 1
NOT_IDENTIFIED : 3
NO_SES : 1
UP_MEAT : 1
FRED_LAB : 1
WAS_IN : 1
DETERMINED_BASED : 1
MED_OK : 1
SEX_DESCRIPTION : 1
ENVELOPE_AND : 1
TAB_INTERMITTENT : 1
AREA_OF : 1
SEX_HOPES : 1
IN_ANY : 1
HARDEN_DANE : 1
TO_CHRONIC : 1
RESPIRATIONS_ASSIGNED : 1
HAS_IS : 1
NUMBER_HOURS : 2
NOT_HEALTH : 1
ON_DORSAL : 1
UPON_THE : 1
VA_FORM : 1
IN_LEVELS : 1
ADHERENCE_DONE : 1
DENIES_HEIGHT : 1
THREE_ATTRIBUTED : 1
THIS_VETERAN : 1
NEED_THYROID : 1
GROUP_NOTE : 1
OPTION_BECAUSE : 1
EVALUATION_CODE : 2
CONDUCIVE_RECOVERY : 1
TEA_IS : 1
BLADDER_COMPLAINT : 1
INTERVENTIONS_HEALTH : 1
EXPERIENCING_REPORTED : 1
TALK_ANYTHING : 1
UNDERSTANDING_BY : 1
PROBLEM_REVIEW : 1
NEURO_INTACT : 1
IN_MILIEU : 1
BIOPSY_HIP : 1
PHYSICIAN_OFFICE : 1
MR_REFERRED : 1
FOR_PSYCH : 1
PATIENT_IDENTIFIES : 1
AND_FLASHBACKS : 1
AND_CO : 1
PATIENT_TELEPHONE : 1
THINGS_KNOW : 1
CHEST_DEPT : 1
RESIN_ONE : 1
AT_HAS : 2
COMMENTS_ACTIVELY : 1
EVALUATION_MANAGEMENT : 3
HE_AP : 1
APPEARS_WELL : 1
CAPSULE_BY : 1
OR_COULD : 1
NOT_BE : 1
AND_CONSTRICT : 1
INFUSE_MINUTES : 1
PER_BROS : 1
DO_HAVE : 4
BE_CANCELLED : 1
COMMENTS_INFORMATION : 1
WHEN_YOUR : 1
VOICED_USUAL : 1
ATTENDANCE_OFFERED : 2
NURSING_NOTE : 5
BACTRIM_PERCODAN : 1
INFORMATION_WITH : 1
BREAK_VETERAN : 1
DISCUSSED_THANKED : 1
SERVICE_TO : 1
ELIMINATION_BY : 1
PSYCHOLOGY_EDUCATION : 1
MANAGEMENT_OF : 1
OF_TERM : 1
MOVEMENTS_SCALE : 1
CONSENT_DOCUMENT : 1
AND_PATIENT : 2
BEEN_FALL : 2
SEDATION_ANALGESIA : 1
HEAD_AND : 1
BY_CLOZAPINE : 1
THE_ACTION : 1
PHQ_SOMEWHAT : 1
WAS_FEEL : 1
WITH_IMPLICATIONS : 1
CALL_BEFORE : 1
WAS_ADJUSTED : 1
REPORT_DISPOSITION : 1
GROUPS_DESIGNED : 1
WORRIED_WITHDRAWAL : 1
COMPLAINT_NURSING : 1
AQUATICS_AN : 1
CURRENTLY_DENIES : 1
CALCIUM_DEPOSITS : 1
ON_METFORMIN : 1
INC_MORPHINE : 1
DOCUMENT_REPORT : 1
YOU_TO : 1
SELF_PERSON : 1
REPAIRS_HOW : 1
NI_RESPIRATIONS : 1
ASSESSMENT_ACCORDING : 1
WIFE_PASSED : 1
FOR_PROCEDURE : 2
WORKER_OF : 1
HE_SHOT : 1
BUTTONS_AND : 1
SCALE_HAS : 1
SWELLING_BOTH : 1
NEEDS_PATIENT : 1
ANXIETY_RELATED : 1
MANAGER_TRAV : 1
FOR_ONCOLOGY : 1
HANDS_WAS : 1
VETERAN_ATTORNEYS : 1
SET_LATER : 1
OFFERED_GROUP : 3
IN_ANES : 1
CONTINUOUSLY_WITH : 1
PROVIDED_HIS : 1
ADL_URINE : 1
RUE_LATER : 1
TEAMS_FROM : 1
TAKE_TO : 1
HAS_DECISIONMAKING : 1
RESTRAINTS_USE : 2
BEEN_WORSENING : 1
DIVISION_DEMENTIA : 1
NORMAL_ETHNIC : 1
COULD_TOLERATE : 1
DEPENDENCE_APR : 1
AREA_VETERAN : 1
THOSE_BEING : 1
NEXT_DESIGNATED : 1
SCAN_AND : 1
DUE_TO : 5
REQUEST_THE : 1
THE_MINNESOTA : 1
BEEN_DIFFICULT : 1
INBETWEEN_THE : 1
MAKE_PAIN : 1
DERMATITIS_FEATURES : 1
PATIENT_TEACHING : 1
URGENT_COMPLAINTS : 1
RAZOR_VERY : 1
SPEECH_IS : 2
AND_NECK : 1
OYED_BECAUSE : 1
ARE_WITH : 1
AHN_ONSET : 1
REVIEWED_THERE : 2
SHAKE_WELL : 1
HIM_UP : 1
ANXIOUS_NMS : 1
CALMED_PAIN : 1
NO_FIRST : 1
DISC_ABNORMALITIES : 2
TO_UP : 1
THEY_AGGRAVATING : 1
PLACE_TIME : 1
PNEUMOCOCCAL_NONE : 1
EXPLAINED_LENGTH : 1
II_QH : 1
BIPOLAR_PATIENT : 1
DESCRIBED_IT : 1
PROBLEMS_CUEING : 1
MUST_SEND : 1
ONLY_CALMED : 1
PAIN_FEVER : 1
TRP_NOTE : 1
RESCHEDULE_PT : 1
VET_REPORTS : 1
DUE_THE : 1
AND_GROOMED : 3
OF_PROGRESS : 1
JUST_TO : 1
AS_EVIDENCED : 1
JULY_CONSENT : 1
THE_DIRECTIVE : 1
THOSE_INCREMENTS : 1
HE_ACCEPT : 1
MILATARY_CE : 1
THE_IN : 1
INCREASED_ANXIETY : 1
THE_FEELS : 1
DENIES_HEARING : 1
DINNER_DRINKS : 1
THE_IS : 3
HEALING_CLC : 1
CASE_TRAV : 1
CILO_MOBILITY : 1
EXCISION_LIPOMA : 1
WITH_CARE : 1
PERSON_TO : 2
PRECAUTIONS_THERE : 1
DIFFICULTY_SYSTEM : 1
MANY_OF : 1
CONTACTED_PATIENT : 1
THE_INCREASED : 1
DATE_TO : 1
EXWIFE_THEREFORE : 1
CHEST_FEVER : 1
FLIGHT_REVIEWED : 1
ARMBAND_ARE : 1
BENIGN_OF : 1
AND_BEING : 2
THIS_ZIMBLEMAN : 1
HOW_CONSTANT : 1
OF_FEVER : 1
HOURS_TO : 1
SIZE_SALINE : 1
MH_NOTE : 2
MIN_LCSW : 1
TREATMENTS_NEBULIZER : 1
TH_AT : 1
ALLERGIES_CONTACT : 1
OIDES_TESTING : 1
ALLERGIES_ENTER : 1
PPARENT_DISTRESS : 1
HE_COULD : 1
OUTPATIENT_RESPIRATIONS : 1
PMH_NEC : 1
PROBLEM_AT : 1
OR_WHILE : 1
SUPPORT_COLOR : 1
SPOKE_WITH : 1
PLAN_UPDATE : 1
CALLBACK_IF : 1
OF_SEP : 1
THERAPEUTIC_RING : 1
CARE_ADL : 2
DATE_TAKEN : 1
ADJUSTED_TO : 1
REVIEWED_PHYSICIAN : 1
BUTTONS_PRESSED : 1
ARTHRITIS_KNEE : 1
IF_COULD : 1
DONE_NITRO : 1
EXTRACTED_OR : 1
SKIN_TEMPERATURE : 1
HIS_MEDICAL : 1
SIGNS_SEE : 1
MEET_KAY : 1
BE_IN : 1
ADR_HAS : 1
TACTILE_DISTURBANCES : 1
HARD_COMPLY : 1
DESIGNATED_FULL : 1
HAVING_MRI : 1
INTERMITTENT_ADVERSE : 1
STERISTRIPS_LIN : 1
SERVICE_DOSIMETRY : 1
THEY_SEND : 1
THIS_HOWEVER : 1
SCREENING_TEST : 1
CONDUCTED_NURDEPRESSION : 1
SUPPORT_OR : 1
TIME_LIVER : 1
COMPLETE_TESTING : 1
YES_TO : 1
WITH_DEPRESSED : 1
ANEURYSM_HAS : 1
HISTORY_OF : 4
INTENSITY_HE : 1
WITH_MYCOSIS : 1
TURNS_AND : 3
RELIEVES_THE : 2
IF_TO : 1
CARDIAC_TACHYCARDIA : 1
NO_PREFERENCE : 1
IDEATION_TAKE : 1
ACETAMINOPHEN_TAB : 1
INPT_AFTER : 1
TAB_HFA : 1
COVER_INCREMENTS : 1
THAT_HAD : 2
IN_MIAMI : 2
AT_DATE : 1
OF_RETURN : 1
THIS_ONE : 1
THE_PERSIAN : 1
IMPORT_LABS : 1
FALL_PRECAUTIONS : 1
SOON_HX : 1
LOCK_HOURS : 1
PROBLEM_HES : 1
CALL_TIME : 1
COULD_KEEP : 1
PSYCH_ENROLLED : 1
CURRENT_QUESTIONS : 1
PRIOR_REFUSAL : 1
TO_PTS : 1
CALL_FOR : 1
PLACE_TETANUS : 1
MONTHS_WIFE : 1
PAST_ABILITY : 1
PATIENT_LEFT : 1
LIQUID_NO : 1
WELL_GROOMED : 1
PRESSURE_RISK : 2
RISK_ASSESSMENT : 1
IMPORT_FOR : 1
AMOUNT_CONSUMED : 1
WITHIN_FOR : 1
DETAILS_REASONS : 1
RISK_SELF : 1
RX_EXPIRES : 1
AGE_SEX : 1
HEALTH_THE : 1
ACTIVE_MYLAN : 1
FINANCIAL_PERCENT : 1
REACTIONS_PULSE : 1
HIS_HX : 1
TREATMENT_THIS : 1
ADMISSION_ASSESSMENT : 2
IN_DENTAL : 1
ALERT_ORIENTED : 1
OF_DENTURES : 1
TINNITUS_HOARSENESS : 1
THAT_HER : 1
CAN_MAINTAIN : 1
ANY_ITCHING : 1
HOW_LONG : 3
VISIT_DATE : 1
GROUP_WARM : 1
CBOC_CONVERSATION : 1
LUNCH_IN : 1
DESCRIBES_HOW : 1
LOSS_CHANGE : 1
WELL_ALLOWED : 1
PRESSURE_ULCER : 1
HT_CM : 1
LOW_VOLUME : 2
COMMUNICATION_SKILLS : 1
REMAIN_OUTPT : 1
ANSWERED_NKA : 2
PRINTED_THE : 1
NOT_NARCOTICS : 1
VETERAN_PHARMACY : 1
II_BORDERLINE : 1
EVIDENCED_BY : 1
EYE_CARE : 1
PLASMA_YESTER : 1
ARRANGED_TAXI : 1
HIP_PAIN : 1
NECESSARY_STEPS : 1
OPERATION_OUTPATIENT : 1
IN_USE : 2
ADVERSE_NO : 1
STATES_SHE : 1
HE_PROTOCOL : 1
THAN_HIS : 1
AND_PROTOCOL : 1
FLU_VACCINE : 1
PAIN_WORSE : 1
OF_CHEST : 1
VOLUNTEERED_ACCOMPANY : 1
CITALOPRAM_HYDROBROMIDE : 1
NEEDED_IS : 2
CONTINUE_SEE : 1
BARETT_BEEN : 1
THE_SYMPTOMS : 1
BELIEFS_DELIVERY : 1
TAB_DILTIAZEM : 1
HAD_DRINKING : 1
BY_MOOD : 1
AKA_ABRASION : 1
CUTTING_AND : 1
DO_RATE : 1
AND_IT : 2
SWELLING_IN : 1
LABS_AND : 1
READ_THE : 1
SIGNIFICANT_TO : 1
OCT_LEARN : 1
MEDICATION_COMPLIANCE : 1
THE_DESCRIPTION : 1
SS_FORM : 1
COMPLETION_PATIENT : 1
ADDED_BUT : 1
APPOINTED_HARDEN : 1
ANSWERED_VS : 1
ACTIVE_NURSING : 1
VALUES_OTHERS : 1
PT_ACTINIC : 1
AND_QUIET : 2
IS_ALCOH : 1
BY_AM : 1
BOTH_AS : 1
ALSO_EXPLAINED : 1
INBETWEEN_VETERAN : 1
FOR_FOBT : 1
PATIENT_NAME : 3
LEVEL_LOSS : 1
REQUESTED_TO : 1
SA_TAB : 1
EXPOSURES_TO : 1
NOTE_PT : 1
FOLLOWUP_PHYSICIAN : 1
PLEASE_BE : 1
DID_NOT : 2
COUMADIN_MG : 1
AGREED_FOR : 1
THRU_AS : 1
PATIENT_REGARDING : 2
AUTODROP_EYE : 1
SORE_ARE : 1
NMS_OF : 1
HAVE_IN : 1
WILL_SAFE : 1
NEWS_AND : 2
ELSE_LIMB : 1
GEN_SURG : 1
REPORTS_EXPOSURES : 1
CUEING_ASSISTANCE : 1
IT_ASSISTANCE : 1
TO_PATIENTS : 1
GULF_AND : 1
HEIGHT_MEASUREMENT : 1
CAN_TAKE : 1
ONE_PRIOR : 1
APPEARANCE_IS : 2
AND_DESCRIBED : 1
REGARDING_THE : 1
TO_WRITER : 1
IS_AP : 1
DISCUSS_PT : 1
COUSIN_SHE : 1
OF_USAGE : 1
THERAPEUTIC_EXERCISE : 1
MEDICINE_CLINIC : 2
PAIN_OTHER : 1
NUMBER_PATIENT : 1
ARE_USEFUL : 1
MOVE_ON : 1
ORAL_IS : 1
NURSING_OPERATE : 1
WRITER_HIM : 1
PAC_DISCHARGE : 1
OF_CONTACT : 2
URINE_LOCATION : 1
BE_ABLE : 2
PNEUMONIA_PREFERENCE : 1
SERVICES_LCSW : 1
ON_FOR : 2
PATIENT_IDENTIFICATION : 1
CHIEF_DISPOSITION : 1
FOR_AGE : 1
HIM_DIRECTLY : 1
NURSING_OUTPT : 1
PT_THINKS : 1
NO_RISK : 1
CASUALLY_RN : 1
HIS_WIFES : 1
WOOTEN_RT : 1
BOSS_TERMINATED : 1
TISSUE_LIPOMA : 1
FEELS_RIGHT : 1
BELONGINGS_NO : 1
ACCURATE_ARMBAND : 1
COPY_THE : 1
AGAIN_TO : 1
VERY_TO : 1
PATIENT_TOLERATED : 1
SALINE_TO : 1
RISKS_BENEFITS : 2
ALSO_MIGRAINE : 1
AUGUST_HE : 1
ASSOCIATED_EXERCISES : 1
PALPATION_OF : 1
INFORMED_CBSST : 1
MAIL_ALLERGIES : 1
ICDCM_ASSESSMENT : 1
CHIEF_PHYSICIAN : 1
WEEKLY_HER : 1
THE_ICDCM : 1
HAVE_RECONCILED : 1
CARE_FAMILY : 1
RECEIVED_INSTRUCTIONS : 1
THURS_AT : 1
CURRENT_DIAGNOSIS : 1
ICDCM_ENCOUNTER : 1
COIN_PULMONARY : 1
CONSISTENT_WITH : 2
HORTON_PAST : 1
OUT_WORK : 1
MHC_GENERAL : 1
CE_FURTHER : 1
ASSISTANCE_MEASURES : 1
PATIENT_HAS : 7
GOAL_IS : 1
TERMINATED_UNDER : 1
PENDING_OUTPATIENT : 1
FOR_HOURS : 1
MEDICATIONS_ACTIVE : 1
PT_DUE : 1
EXPIRES_THE : 1
NOT_NEED : 1
DIVORCED_THE : 1
OF_BUPROPION : 1
WAS_IC : 1
NOTE_HAD : 1
THURS_AM : 1
PHYSICIAN_THE : 1
FOR_WBC : 1
KNOW_CAN : 1
ASSESSMENT_POSITION : 1
NEED_ASSISTANCE : 1
OK_PER : 1
INACTIVE_OUTPATIENT : 1
OF_FOR : 1
PRESSURES_LIFESTYLE : 1
HCL_MG : 4
DERMATITIS_YOUNG : 1
FOR_ON : 1
FOR_CONSULT : 1
ONCOLOGY_THERAPY : 1
REPORTED_WATCH : 1
PHONE_FOR : 1
IN_DR : 1
NOT_OBSERVATIONS : 1
ASSISTANCE_ACTIVE : 1
BORDERLINE_ANTISOCIAL : 1
ACCORDING_CHARTS : 1
ROOM_EYE : 1
HAS_NO : 2
PROGRAM_NO : 2
ANXIETY_TO : 1
NIGHTSTAND_INTRODUCTORY : 1
OF_DISABILITY : 1
THE_CORONARY : 1
SYND_SHIFT : 1
TO_PROGRAM : 2
IS_GOOD : 2
AT_LATER : 1
ONLY_THOSE : 1
BILAT_NO : 1
THAT_CONDUCIVE : 1
CASA_GRANDE : 1
WHO_NOTED : 1
FULL_IF : 1
HX_LAMINECTOMY : 1
APNEA_PAST : 1
FOUR_TIMES : 2
NOTE_SECTION : 1
MADE_TO : 1
TV_LIKE : 1
NO_NEW : 1
IV_LUNGS : 1
SA_TAK : 1
VASCULAR_APNEA : 1
STRATEGY_TIME : 1
HEALTH_PLAN : 1
PUFFS_MOUTH : 1
MANAGER_PSYCHIATRIC : 1
THE_NOTE : 1
THE_VOICED : 1
ENVIRONMENT_HAVE : 1
PRINTED_INFORMATION : 1
TRAZODONE_MG : 1
CUEING_BEDREST : 1
OF_DOING : 1
FACTORS_PER : 1
HAVE_ANY : 3
OF_RIGHT : 2
DEPENDENCE_WITH : 1
INSTRUCTION_SHEET : 1
SCHOOL_NO : 1
AGE_MALE : 1
HYPERLIPIDEMIA_CAUTION : 1
AT_HAND : 1
THE_BUTTONS : 1
ON_TACHYCARDIA : 1
CHANGES_OUTPATIENT : 1
EASILY_AND : 3
ERROR_DOES : 1
NOTED_IS : 1
HOW_PAINFUL : 1
MEDIUM_PING : 1
SHOW_CLINIC : 1
CASE_AND : 1
AT_PT : 1
THURS_MIAMI : 1
PHYSICIAN_ES : 1
SYSTEMS_ARE : 1
RELATED_KNOWLEDGE : 1
AND_ASI : 1
HEARING_WHEN : 1
WEIGHT_AND : 1
MT_STYLOID : 1
TD_OF : 1
THERAPEUTIC_DESIGNED : 1
NOON_SUPPORTIVE : 1
CONSCIOUSNESS_PERSONAL : 1
THATS_PART : 1
SHE_TAKE : 1
CARE_VOLUNTEER : 1
PASSED_AWAY : 1
FOR_SW : 1
WHEN_STOPS : 1
AGE_HYDROBROMIDE : 1
USE_AND : 1
NOT_INTERESTED : 1
CBT_NO : 1
STYLOID_RIGHT : 1
MIAMI_TOMORROW : 1
YOU_MEDICATIONS : 1
HIS_GIRLFRIEND : 1
INHALER_PSYCHOLOGY : 1
DO_TO : 1
THE_INFLUENZA : 1
HERE_WITHOUT : 1
HOW_CHANGES : 1
PATIENT_YEAR : 1
WHICH_VETERAN : 1
WAS_AT : 4
HOURS_CALL : 1
ARRYTHMIA_TACHYCARDIA : 1
THROUGH_WINDSHIELD : 1
PURPOSES_PROVIDER : 1
METHOD_WHEN : 1
PAIN_DO : 1
CHEW_TOBACCO : 1
RX_PHARMACY : 1
THINKS_OF : 1
STRESS_HAVE : 1
INCREMENTS_MANAGED : 1
SERVICE_DEPRESSION : 1
LONG_OFTEN : 1
NUMBNESS_THE : 1
SERIOUS_MUSCLES : 1
PAIN_NURSES : 1
STUDY_GROUP : 1
TWO_AT : 1
WILL_UP : 1
PATIENT_FOWLER : 2
FXN_PATIENT : 1
TV_TO : 1
BY_PHYSICIAN : 1
OF_TEACHING : 1
STERIOD_INJECTIONS : 1
USED_IDENTIFIED : 3
CALLED_TO : 1
FALL_THE : 2
OBTAINED_PATIENT : 1
PAIN_HCV : 1
ARTICLES_EASY : 1
LPN_MUST : 1
PT_AGREES : 1
EFFECTS_FROM : 1
HAVE_FACTORS : 1
DESCRIPTION_WITH : 1
SIDE_FROM : 1
HAD_IN : 3
BAKER_NIASPAN : 1
EDUCATION_PATIENTS : 1
OCCUPATION_COMPUTERS : 1
BEHAVIOR_ANXIOUS : 1
BUSY_AGREES : 1
FOR_RELIEF : 1
RESIDENT_ARTICLES : 1
ANESTHESIA_OPERATION : 1
MENTAL_DIVISION : 1
CONTACT_RADIATION : 3
PRIOR_TO : 3
PATIENT_RECOMMEND : 1
FOLLOWING_IDENTIFIERS : 1
TO_PALPATION : 1
OF_AROUND : 1
UP_CUTTING : 1
SEE_PHYSICIAN : 1
VETERAN_VOICED : 1
THROUGH_ON : 1
RISK_ARE : 1
THE_DID : 1
MEDICAL_ILLNESSES : 1
INACTIVATED_INFLUENZA : 1
BENIGN_MG : 1
PT_IS : 5
ONLY_MY : 1
SCOPE_POSITIVE : 1
AS_WALKIN : 1
RECOMMENDATION_HOURS : 1
VET_OBTAIN : 1
RECOVERY_ANGER : 1
OVER_SEVERAL : 1
URINARY_ELIMINATION : 1
NATURE_HIS : 1
MEDICARE_ONLY : 1
MG_FOLLOWUP : 1
LPN_NOTE : 1
REDNESS_AT : 1
SO_ALERT : 1
XX_MOTIVATION : 1
TO_IT : 4
SOME_AND : 1
ADR_PATIENT : 1
COMPLAINING_SOME : 1
ORDER_VASCULAR : 1
TALK_ABOUT : 1
TO_HE : 2
BLOCKAGES_THE : 1
STRESSORS_AS : 1
HOME_USING : 1
DUE_NEG : 1
COPING_SKILL : 1
CONTINUOUSLY_ME : 1
NO_BISACODYL : 1
JUST_NEED : 1
PO_ORDER : 1
TIMES_AS : 1
STATUS_MEDICINE : 1
ALLERIGES_REVIEWEDUNCHANGED : 1
MEDICATION_NEOPLASM : 1
PT_REACHED : 1
FROM_PT : 1
STRATEGIES_COMPONENTS : 1
FROM_INTIMIDATING : 1
PAIN_ETOH : 1
OF_ADMINISTER : 1
ANCHORAGE_HEIGHT : 1
CONSTIPATION_ELECTRIC : 1
SKILLS_SECONDARY : 1
MUST_BE : 1
SUTURES_APPLIED : 1
EMERGENCY_SC : 1
NUTRITION_BRC : 1
PERSONNAL_ISSUES : 1
MOUTH_AT : 1
PHYSICIAN_FULL : 1
AND_DATE : 1
NO_PHONE : 1
ACTIVE_PROBLEMS : 2
OVERSEES_THE : 1
PAIN_PALPATION : 1
STENOSIS_CAROTID : 1
HEMATURIA_AND : 1
PROBLEM_ONSET : 1
IMMEDIATE_REPLACES : 1
TO_NEED : 1
OF_TO : 2
ONSET_RESOLVE : 1
LOCK_TO : 1
OBSERVATION_PT : 1
JULY_THE : 1
MONTH_LAB : 1
SOUNDS_CRACKLES : 1
PREVIOUS_DOCTOR : 1
AND_WORRIED : 1
OUT_FROM : 1
PANEL_IN : 1
IN_CREATININE : 1
DRESSED_AND : 3
IN_MG : 1
WITH_VETERAN : 7
ACTIVE_ML : 1
IN_VIETNAM : 1
BED_MOBILITY : 3
WELL_DURING : 1
PROGRAMS_COMPLAINT : 1
PROCEDURE_DOCTOR : 1
HIS_HOSPITAL : 1
ROOM_ASSISTANCE : 1
HEARING_TINNITUS : 1
USUAL_SIDE : 1
BEHAVIORAL_BENEFIT : 1
ASF_DISCHARGE : 1
REPORTED_THEY : 1
CE_AN : 1
THE_URGENT : 1
TREATMENT_VISIT : 1
OF_OF : 2
BEHAVIOR_BURN : 1
NONE_NO : 1
WELL_AND : 1
ON_REPORTS : 1
FORGOT_OBESITY : 1
IMPLEMENTED_VETERAN : 1
RISK_HE : 1
FLASHBACKS_ANXIOUS : 1
SWELLING_YES : 1
ONLY_COVER : 1
FEEL_SO : 1
THEY_SHE : 1
STATES_BE : 1
EFFECT_OF : 1
DAILY_EVALUATION : 1
TO_MOVE : 1
GOING_TAKE : 1
NOTE_CARE : 1
SINCE_MAY : 1
URGES_REPORTED : 1
EFFECTS_GAMMA : 1
FUTURE_GROUP : 1
REMEMBER_CONTACT : 1
FOOD_PREFERENCES : 1
RESIDENT_VISION : 1
HES_SI : 1
SINCE_HAS : 1
IS_ANTICIPATED : 1
TACHYCARDIA_WNL : 1
DIDACTIC_AND : 1
NARCOTICS_PHYSICIAN : 1
MEDICATION_APPOINTMENT : 1
DVT_CONSULTED : 1
PLEASE_ME : 1
JOINTS_PATIENT : 1
AND_POSSIBILITY : 1
STAFF_AFTERNOON : 1
OF_LAMINECTOMY : 1
WILL_ASSISTANCE : 1
REGULAR_NAILBEDS : 1
TEACHING_STRATEGY : 1
IS_PHYSICIAN : 1
CAN_BE : 1
DUE_JUNE : 1
YOUNG_EDUCATION : 1
WITH_DEATHS : 1
SHELLED_ENEMY : 1
AND_THIS : 2
FOR_INSTANCES : 1
HFA_PSYCHOLOGY : 1
CLINIC_MEDICINE : 1
WERE_CONCERNS : 2
SHOW_TO : 1
HAD_SCHEDULED : 1
VET_SEEMS : 1
ASSESSMENT_UNAWARE : 1
ADEQUATELY_DRESSED : 2
AND_AN : 1
SAID_FELT : 1
HE_STATES : 2
URINE_COLOR : 4
ASSESSMENT_VETERANS : 1
COMMENTS_BOWEL : 1
INPATIENT_PHYSICAL : 1
VARDENAFIL_HCL : 1
OB_AND : 1
REVIEWED_IN : 1
MAKING_STATEMENTS : 1
HISTORY_FELLOW : 1
IN_LICHENOID : 1
SCALE_FOR : 2
POSTAL_WORKER : 1
HAS_PLEASE : 1
PTSD_SCREENING : 1
COMFORT_ADMISSION : 1
PENDING_APPOINTMENT : 1
ALLOW_TO : 1
LAST_FOR : 1
THAT_USED : 1
BEING_TO : 1
NKA_VS : 1
ARE_CONDUCIVE : 1
RESPIRATIONS_AAM : 1
IS_DENTAL : 1
VOLUME_THINGS : 1
WILL_ADVISED : 1
CHRONIC_SMOKER : 1
NONE_ADVERSE : 1
LOCATION_RESIDENT : 2
STOOL_BLADDER : 1
SIZE_ANY : 1
DISTANT_FROM : 1
MEDICATIONS_SUPPLIES : 1
AND_FINGER : 1
SOMTHING_ABRASION : 1
ACTIVE_SAYS : 1
NAPROXEN_AT : 1
PSYCHOSIS_NEEDE : 1
FURTHER_VET : 1
FROM_VA : 1
TO_VERIFY : 1
SEASON_VIETNAM : 1
BE_ADMITTED : 1
ABOUT_DISCUSSED : 1
HIS_EYE : 1
NECESSARY_NEW : 1
WHEN_DEVIL : 1
EVALUATE_PATIENT : 2
THIS_TO : 1
ANY_STATES : 1
AND_HOW : 2
PT_ADMITS : 1
CAROTID_CAROTID : 1
NSC_VETERAN : 1
NOTE_THE : 2
HOW_CAN : 1
FULL_AND : 1
HAND_EXPLAINED : 1
SCHEDULE_AN : 1
COLOR_ROOM : 1
GROUP_HOME : 1
EXCISION_EXCISION : 1
HIS_HE : 1
SOLN_ML : 1
TOBACCO_IDENTIFIED : 1
ANTICIPATE_SUICIDAL : 1
MARITAL_STATUS : 2
WERE_HOSPITALIZED : 1
CARE_SHAVE : 1
CONSTANT_HIS : 1
SS_WITH : 1
WEDNES_SESSION : 1
JR_POSTURE : 1
LIKE_WHAT : 1
FELT_BECAUSE : 1
VIETNAM_BEING : 1
INTERMITTENT_PHYSICIAN : 1
RELATES_TSTRAP : 1
GOAL_LEARN : 1
LAST_SEEN : 1
PERSONALITY_TRAITS : 1
FACT_OTHER : 1
INCISED_INTO : 1
DRAINS_ORIENTED : 1
AGO_SKIN : 1
NAIL_ORAL : 1
CAUTION_ADDENDUM : 1
ADMITTING_ETOH : 1
PRESENT_ALLERGIES : 1
VETERAN_FEELING : 1
BAKER_TO : 1
LI_IMPROVED : 1
PHYSICIAN_RESPIRATORY : 1
HOWEVER_VETERAN : 1
THE_COMMUNICATION : 1
DEFICIENCY_RYLAND : 1
VET_AS : 1
DIET_REGULAR : 1
WAS_PING : 1
CRITERIA_FOR : 2
WEAR_PROTECTION : 1
PREDICTING_SORE : 2
STARTED_LAST : 1
DIRECTIVE_ACETAMINOPHEN : 1
DOSE_WE : 1
URGENT_REQUEST : 1
OPTIMAL_OF : 1
WHEN_WAS : 1
NUMBER_PROTOCOL : 1
NEWS_THEY : 1
EXPLORE_WITH : 1
THE_CHART : 2
EXTRACTED_TOOTH : 1
UP_AM : 1
SAYS_ARE : 1
THINKS_THAT : 1
BACK_BASCOM : 1
TIME_PULSE : 1
SSN_DOB : 1
TO_PICKED : 1
MUSCLES_JOINTS : 1
PATIENT_IN : 2
PT_MODERATE : 1
RECORD_WAS : 2
FULL_SURROGATE : 1
PERFORMED_NUSTEP : 1
WBC_WORKING : 1
AVE_HIS : 1
CONSULTATION_WILL : 1
HAVE_YOU : 2
IF_DIFFERENT : 1
PRIVILEGES_AFTER : 1
WAS_OYED : 1
ARABIA_DURING : 1
INSTRUCTIONS_RE : 1
REAFFIRMED_NEXT : 1
ARE_COMMENTS : 1
BUTTOCK_AND : 1
CLEARER_MOREOVER : 1
KUWAIT_SAUDI : 1
INFOPRO_JOB : 1
TYLENOL_FOR : 1
VERBALIZING_HE : 1
PHYSICIAN_BELIEFS : 2
IDCP_TEAM : 1
FELLOW_WITH : 1
INTENT_NOTE : 1
TALKS_HIS : 1
MYCOSIS_PATCH : 1
COMPONENTS_PROGRESS : 1
NOT_FOR : 3
IMAGING_NOTE : 1
CM_COMPUTERS : 1
NOW_HE : 1
SOME_DOUBLE : 1
HELD_TO : 1
FOR_BROKEN : 1
VARIOUS_OF : 1
VERBALIZATION_ACKNOWLEDGED : 1
AND_OPENING : 1
SPEC_UR : 1
WITH_DOCTORS : 1
STATEMENTS_OF : 1
ME_THROUGH : 1
HE_LMWH : 1
USE_HEALTH : 1
AND_MAILED : 1
GROUP_AN : 1
DONT_YOUR : 1
AND_HAVE : 3
ANOTHER_METHOD : 1
INFECTION_PRIMARY : 1
NEW_ONSET : 1
OF_PIP : 1
WILL_REVIEWED : 1
OPENING_CONTAINERS : 1
ASSIST_MEAL : 1
REQUESTED_COME : 1
WITH_CHANGES : 1
CARE_CARE : 1
ETOH_HE : 1
CYST_RIGHT : 1
RESPONDED_TO : 1
INHL_VIAL : 1
BECAUSE_WAS : 1
RACE_MALE : 1
WAS_REPORTS : 1
VACCINE_CALLED : 1
BENEFITS_OF : 2
AND_CORRECTLY : 1
PATIENT_INJECTION : 1
OU_HAD : 1
CHANGES_WILL : 1
PHYSICIAN_PLAN : 1
SEASON_IN : 1
TREMENDOUS_FROM : 1
CHANGING_HOSPITAL : 1
WITH_METHOD : 1
THE_TREATMENT : 1
HOME_NOON : 1
NO_DVAMC : 1
MOUNTAIN_HOME : 1
THERE_IS : 1
ROUTINE_PT : 1
PPARENT_NOTED : 1
AFRAID_CUT : 1
SERIOUS_PAINFUL : 1
PUTTING_THE : 1
SO_DISTANT : 1
POTASSIUM_CHLORIDE : 1
VET_CVA : 1
PTS_INAPPROPRIATE : 1
SHIFT_PATIENT : 4
APPT_JUNE : 1
ME_AM : 1
HIS_HANDS : 1
BRADEN_HYPERTENSION : 1
CLENCHING_TEETH : 1
SOMEWHAT_RADIATION : 1
ATTENDED_AND : 1
HOSPITALIZED_TO : 1
MUSCLE_IMPAIRMENT : 1
BED_LEANING : 1
TOLERATED_SYSTEM : 1
LIVER_AGENTS : 1
LITTLE_SAFE : 1
PLY_INVOLVED : 1
GET_INHIBITORY : 1
BEHAVIOR_IS : 1
TAB_SIG : 1
FROM_PATIENT : 1
TO_APPLICABLE : 1
PAIN_INTENSITY : 1
ENCOUNTER_AFTERCARE : 1
UP_ASSISTANCE : 1
MYLAN_MG : 1
SHINGLES_SERUM : 1
NAIL_CARE : 1
ASSESSMENT_CHIEF : 1
WOULD_ACCEPT : 1
NEOPLASM_UNCERTAIN : 1
COMPLAINT_PATIENT : 1
TO_HIS : 6
CBT_RESOLUTION : 1
CLC_REMAINS : 1
HIM_SUICIDE : 1
FLU_PRIOR : 1
TO_TREATED : 1
MEET_WITH : 3
WELL_BACK : 1
ROHENALUGO_COMPLETION : 1
THERAPY_ADMINISTERED : 1
VETERAN_FOLLOW : 1
AT_THIS : 3
PAIN_LOCATION : 1
TO_SEEING : 1
NONDE_TRAZODONE : 1
PT_NOT : 2
INTERESTED_MS : 1
CALL_IN : 1
PHARMACY_MDD : 1
THESE_VET : 1
PILLS_NOON : 1
MAKE_THE : 1
WARM_NS : 1
VET_REMAIN : 1
OR_IN : 1
COUNTED_DOWN : 1
ADVANCE_HYDROCODONE : 1
WITH_REQUEST : 2
BLOOD_RETURN : 1
DATE_GROUP : 1
MUCH_HELPING : 1
HE_WAS : 12
PATIENT_DENIES : 1
QUESTIONS_CONCERNING : 1
IUNABLE_ASSESS : 1
OYED_GLOBES : 1
HE_LIKELY : 1
DENIED_ANY : 1
UP_STAFF : 3
FROM_HORTON : 1
IN_TOUCH : 1
ATTORNEYS_OFFICE : 1
WORK_TEMPORARILY : 1
PROGRAM_CLINIC : 2
REPORTS_THAT : 1
HIS_TOTAL : 1
WILL_THESE : 1
OF_MYOFASCIAL : 1
ABOUT_CONDITION : 1
USING_MEDICATIONS : 1
AS_CLEAN : 1
NUMBER_IF : 1
MEETING_TO : 1
AND_CALL : 1
VETERAN_ASSESSMENT : 1
OF_THAT : 2
NAME_RECOMMEND : 1
OUTPATIENT_STATUS : 4
VENT_ATROVENT : 1
SUPPORTIVE_COGNITIVE : 1
REQUESTED_HIS : 1
MG_ACTIVE : 2
TIME_CALL : 1
TO_TAB : 1
THE_AFTER : 1
MG_UNT : 1
PO_PER : 1
CALLED_WISHES : 1
SHE_BE : 1
FOBT_ANGIOECTASIA : 1
SHRAPNEL_IN : 1
PAIN_PILLS : 1
PROGRESS_PMH : 1
CONSULT_ABDOMEN : 1
GRANDKIDS_HIS : 1
INFORMATION_ADDENDUM : 1
OF_KNEE : 1
HEMOGLOBIN_AC : 1
ACTION_NOW : 1
INVOLVED_WITH : 1
RAZOR_COHESIVE : 1
FOR_HIS : 2
NOT_DUE : 1
NOT_APPLICABLE : 1
OBTAINED_AM : 1
TAKE_NO : 1
DISCUSS_PTS : 1
CUEING_TIME : 1
VETERAN_TO : 1
MOBILITY_CLC : 1
VETERAN_INCREASED : 1
NOTE_ISSUES : 1
DUB_AND : 1
SCORE_LAB : 1
CHLORIDE_NO : 1
CARE_AT : 1
UCINATIONS_SCALE : 1
PACU_FOR : 1
NOT_BELONG : 1
PLAN_DRINK : 1
MYOFASCIAL_MUSCLES : 1
CONSTIPATION_NO : 1
DEFICIT_OF : 1
ADMISSION_TREATMENTS : 1
FROM_SWS : 1
EXPERIENCING_SIDE : 1
METHADONE_PERCOCET : 1
OF_HOWEVER : 1
HIM_BACK : 1
IMPLEMENTED_WITH : 1
SUGAR_THIS : 1
TIME_GETS : 1
ON_PHONE : 1
PAC_SCORE : 1
NEUROLOGIC_ASSERTION : 1
INFORMATION_APPEARS : 1
CLINICAL_TO : 1
ADJUVANT_HAT : 1
WILL_MG : 1
MALE_NO : 1
LEVELS_NAPROXEN : 1
IDENTIFY_BENEFITS : 1
NEEDED_PATIENT : 1
DROP_WASHING : 1
NOVEMBER_EPISODIC : 1
MUCH_SHE : 1
NEXT_MONTH : 1
CAP_ONE : 1
NOT_COME : 1
SUPPLY_SUFFICIENT : 1
THE_PRESENTED : 1
BY_DAILY : 1
PATIENT_WANTS : 1
BENEFITS_AQUATICS : 1
ONEONONE_MAKE : 1
MH_CASE : 1
FURTHER_UP : 1
CHF_MH : 1
AM_ANSWER : 1
APPOINTMENTS_HYPERTROP : 1
WAS_PSYCHOTHERAPY : 1
ARE_DOCUMENTED : 1
GET_DIVORCE : 1
MALE_CITALOPRAM : 1
APPETITE_HOME : 1
EYE_SEE : 1
BEHAVIOR_SEEMS : 1
MEET_WIFE : 1
HE_LISTS : 1
PER_VETERAN : 1
HIS_MISSING : 1
ARE_THERE : 1
RISK_IF : 1
OF_FRUSTRATION : 1
WALK_TOLERATED : 1
BUT_ADEPRESSION : 1
NOTE_FOR : 1
WHICH_HAS : 1
AND_IMPROVED : 1
NOTE_RESPIRATION : 1
LOW_THAT : 1
TREATMENT_WHILE : 1
VERY_POST : 1
HX_DEPRESSION : 1
EASY_REAC : 1
INCREASED_AND : 1
GENTEAL_BOTH : 1
OF_BEHAVIOR : 1
WITHOUT_REFILLS : 1
DVAMC_REPORTED : 1
COMPLAINING_HEMATURIA : 1
THERAPY_DRAINS : 1
EXPERIENCING_VETERAN : 1
FAIR_FAIR : 1
APR_OTHER : 1
STREET_BEST : 1
CONSULT_WHAV : 1
THERAPY_ASSESSMENT : 1
DATA_MORNING : 1
DROWSY_TO : 1
STATING_HE : 1
PICK_HIM : 1
COUNT_THOUSAND : 1
GROUP_WITH : 1
OBJECTIVE_NAME : 1
WAS_BECAUSE : 1
CONSULT_AS : 1
DRUG_CITALOPRAM : 1
LENGTH_IMPORT : 1
CALLER_CONVERSATION : 1
WITH_BAXORETENE : 1
HIS_DATE : 1
THE_SOUTH : 1
SCALE_PULSE : 1
WINDOW_EXPLAINED : 1
CUEING_LOCATION : 1
ASSISTANCE_FOR : 3
ANY_GROUP : 1
CHLORIDE_SERUM : 1
DEPRESSION_NEC : 1
WITH_HANDS : 1
RADIOLOGY_BUCKLING : 1
LEANING_FOR : 1
NUMBER_PAIN : 1
SOMETIMES_ARM : 1
FROM_MAINTAINING : 1
AM_SURE : 1
WITH_TROPICAMIDE : 1
SOUTH_TO : 1
ABOVE_AND : 1
ORDER_FOR : 1
IN_PARTIAL : 1
THERAPEUTIC_GROUPS : 1
DENIES_PAIN : 3
REQUESTING_USE : 1
SHORTER_IS : 1
APPOINTMENT_PRIMARY : 1
PROBLEMS_HEMORRHOIDS : 1
NPO_APR : 1
NOT_ON : 1
SEVERE_DISORDER : 1
SURVEY_INCISION : 1
BREAKFAST_NO : 1
ANY_CHANGE : 1
BELONG_RESIDENT : 1
MALE_PAIN : 1
SOUGHT_LEADERS : 1
TOLD_IF : 1
NAME_PLEASE : 1
PAIN_NVD : 1
MR_WAS : 1
IN_FUTURE : 1
IT_HAS : 3
ANKLE_HAS : 1
BOWEL_THIS : 1
TO_PCT : 1
AT_DAILY : 1
MET_AMOUNT : 1
PROBABLE_PRIOR : 1
IN_HER : 1
HAIR_OD : 1
INR_RANGE : 1
CURRENT_SCHIZOPHRENIA : 1
AND_ONCE : 1
DENIES_ATTEMPTS : 1
KNOW_HOW : 1
ADDRESS_PATIENT : 1
YOUNG_PATIENT : 1
REPORTED_HIS : 1
DURING_THE : 1
CALL_DTN : 1
TO_IV : 1
ULA_SIZE : 1
YEAR_MALE : 2
PARTICULAR_VALUES : 1
OIDES_PATCH : 1
CARE_PATIENT : 1
MOUTH_ACTIVE : 2
REQUEST_OF : 1
FOR_HIMSELF : 1
MOREOVER_VETERAN : 1
OTHER_ADDRESS : 1
OPERATE_THE : 1
ACTION_FOR : 1
RAL_ANESTHESIA : 1
UNDERGO_ADJUVANT : 1
RECEIVED_FORM : 1
CHARACTER_STOOLS : 1
CE_OFFICERS : 1
SURE_LONG : 1
WITH_FOR : 2
WHAT_WEAR : 1
PATIENT_FEELS : 1
BY_EDUCATION : 1
HERE_AS : 1
CHANGES_ENVIRONMENTAL : 1
BY_THE : 1
THE_ASSIGNED : 1
NEUROFORAMINAL_NO : 1
STARTED_WEEK : 1
PMR_PHYSICAL : 1
UNT_TAKE : 1
DISCONTINUED_NOTHING : 1
OLD_AGE : 1
DOES_SMOKE : 1
VET_AGAIN : 1
COMPLAINT_STARTING : 1
OF_AK : 1
AND_CHEST : 1
MUSCLES_ADDENDUM : 1
BE_REVIEWED : 1
MYCOSIS_OIDES : 1
FOR_PATIENT : 1
PRODUCTIVE_OCCASIONALLY : 1
FOR_TO : 3
ORDER_BATTERIES : 1
THE_HIS : 1
DEPAR_VETERAN : 1
EXAM_DENIES : 2
CLINIC_TO : 1
MAY_RANGE : 1
IDENTIFIED_ON : 1
NO_INDICATION : 1
OF_OMEPRAZOLE : 1
RECORDS_PT : 1
SERUM_ACTION : 1
MAILED_HIS : 1
NONE_INTENSITY : 1
CRACKLES_WHEEZES : 1
IS_ALSO : 1
ELECTRIC_VERY : 1
HARDEN_BRISTOL : 1
CALLED_AT : 1
TEAM_MEETING : 1
PERSONNAL_OF : 1
ACTIVE_CUEING : 1
STOOL_AMBULATION : 1
CARE_CBOC : 1
VET_TERMINATED : 1
PAIN_LEG : 1
AM_NO : 1
COMPLETE_NEUROPSYCHOLOGY : 1
PSYCHIATRY_ATTENDING : 1
OF_PRESENT : 1
NO_CONSCIOUS : 1
COMPLAINTS_AT : 1
HYDROCELECTOMY_LIMB : 1
SURGERY_LPN : 1
NOT_COMMENTS : 1
PAIN_FOR : 2
NORMAL_ADDITIONAL : 1
PRECAUTIONS_HAS : 1
METHOD_THAT : 1
OF_WIFE : 1
QUADRANT_ABDOMINAL : 1
GOOD_WITH : 2
ER_IS : 1
CHEST_WITH : 1
DENTAL_UA : 1
LONELINESS_MEDICAL : 1
CARE_OF : 1
SINCE_HE : 2
BEEN_COUNSELED : 1
SAYS_HE : 1
PT_REMEMBER : 1
SURROGATE_APPLICABLE : 1
FIRST_MEAL : 1
ALSO_AMMENABLE : 1
OPEN_ABOUT : 1
NEW_WEIGHT : 1
STEP_CHILDREN : 1
APPOINTMENT_HAS : 1
WHILE_LAST : 1
NMS_FIGHTING : 1
CONTINENT_BY : 1
IDENTIFY_THE : 1
YOU_ON : 1
DISCUSS_FULL : 1
TAKEN_TAKING : 1
WITH_SCAN : 1
UNSPECIFIED_DEFICIENCY : 1
MACRODANTIN_DIRECTIONS : 1
OUT_REMAINS : 1
UP_MHC : 1
SLOWLY_HIS : 1
PHYSICIAN_TES : 1
CLINIC_TABLET : 1
HERE_RECHECK : 1
PHYSICIAN_ICDCM : 1
CONCERNS_STUDY : 1
SESSIONS_EACH : 1
ORTHO_JUNE : 1
USED_TO : 1
GET_PT : 1
ASSISTIVE_AIDS : 1
BE_HAVING : 1
VISIT_SOME : 1
MORSE_SCALE : 1
THE_ATTENDING : 1
BY_POOR : 1
QUIT_YEARS : 1
DOSE_INHL : 1
HE_INJECTION : 1
TIME_RECD : 1
CANCELLATION_NOTE : 1
LETTER_PATIENT : 1
RUSSELL_PAC : 1
PLACE_RESIDENT : 1
EXPIRED_HAD : 1
ED_MAY : 1
ATTRIBUTED_CHANGES : 1
GET_DRIVING : 1
WELL_AS : 1
AND_WITH : 1
NEC_NO : 1
ANTICIPATED_APR : 1
PAIN_SCORE : 2
SURGERY_WITH : 1
HOW_THE : 1
DOWN_THE : 1
HOURS_BLOOD : 1
AFTER_SUPPORTIVE : 1
ICDCM_PATIENT : 1
NOT_PATIENT : 1
THE_HAS : 3
REFUSES_REFERRAL : 2
CONDITION_OR : 1
MEDICATIONS_VIT : 1
THIS_WORK : 1
COMMENTS_MR : 1
IN_OF : 1
PREFERENCES_AND : 1
SCORE_PROVIDER : 1
OBTAIN_MAINTAIN : 1
PAIN_MUSCLES : 1
CHAMBER_AND : 1
ORIENTED_PAIN : 1
TIME_CONTACT : 1
MG_EC : 1
CAN_IN : 1
AGAIN_MH : 1
OS_AND : 1
IN_OTHER : 1
DRIVER_FULL : 1
LENGTH_LABS : 1
VET_CALLED : 1
PLEASE_INFORMED : 1
RESPONSE_OR : 1
AT_PM : 3
FOR_IMMEDIATE : 1
POSSIBLE_LUMBAR : 1
SCREENING_SIGNIFICANT : 1
STAMPED_AND : 1
OR_SUBSTANCE : 1
HAS_WORKING : 1
PAST_NO : 1
AND_COMMENT : 1
ROUTINE_VISIT : 1
LUNCH_TIME : 1
TO_HAVE : 2
MHC_PROGRESS : 1
NOT_EXPERIENCING : 1
MOVIES_INTERMITTENT : 1
TO_TRUSTING : 1
APPOINTMENT_MADE : 1
AND_SHARED : 1
SYMPTOMS_AT : 1
TAKE_FUTURE : 1
SINCE_ANESTHESIA : 1
MG_SIG : 1
VETERAN_PARTICIPATED : 1
APR_TO : 1
ILLICIT_SUBSTANCE : 1
DO_NEED : 1
REPORTS_APPETITE : 1
WHAT_DO : 1
BEHIND_THE : 1
MATCH_WITH : 1
AND_WHAT : 1
DRESSED_GROOMED : 2
RIGHT_HOME : 1
OBTAIN_NARCOTICS : 1
CONTACTED_PHARMACY : 1
RESPONSE_OTHER : 1
VISION_STATE : 1
KNEE_UNDER : 1
NASAL_ULA : 1
DERMATITIS_ICDCM : 1
TO_DEFICIT : 1
CHIEF_NO : 1
DEPENDENCE_OBTAINED : 1
FOR_NOW : 1
TABLET_FUTURE : 1
HAS_MANAGER : 1
MORNING_WHICH : 1
ASPECT_NECK : 1
DEMENTIA_NOT : 1
UNDER_RAL : 1
SEDATION_NPO : 1
TD_DUB : 1
AMBULATING_WITHOUT : 1
TO_TAKE : 1
CONTINUED_ABSTINENCE : 1
RESP_FIBRILLATION : 1
PAINFUL_IT : 1
HIS_BOSS : 1
FLU_NEGATIVE : 1
HAVE_SOME : 1
NO_DIFFICULTY : 1
FUNCTIONNG_MET : 1
AND_OTHERS : 1
ALSO_THE : 1
AND_TES : 1
ARE_NOT : 2
DEPT_CINCINNATI : 1
OPTOMISTIC_AT : 1
TABLET_STRENGTH : 1
PHSYCOLOGISTS_LEG : 1
BEEN_PATIENT : 1
XYZZY_SOMETIMES : 1
AT_DURING : 1
THE_EXPLAINED : 1
TOTAL_BRUSH : 1
SUBSTANCE_USE : 1
PATIENT_AMBULATORY : 1
MM_LUNGS : 1
SHE_WILL : 1
ABSTINENCE_MEDICATION : 1
TO_SEE : 2
LAST_YEAR : 1
THE_END : 1
ASSIST_PATIENT : 1
STATUS_HYGIENE : 1
TRACK_OF : 1
ADMITTING_DIAGNOSIS : 1
VITAL_TERAZOSIN : 1
POST_QUESTIONS : 1
OF_UPCOMING : 1
HAS_POINTS : 1
AUGUST_WAS : 1
NEUROPSYCHOLOGY_TESTING : 1
HAS_APPOINTMENT : 2
REPAYMENT_SINCE : 1
WAS_OFF : 1
NURSING_INFORMATION : 1
IS_FOLLOWING : 1
MED_TO : 1
BIOLOGICAL_STEP : 1
VITAL_BASELINE : 1
FOR_DIAGNOSIS : 1
CLC_AND : 1
REINFORCED_FOR : 1
WITH_AMOUNT : 1
HES_HAVING : 1
DISEASE_PREVENTION : 1
COLOR_HYPONATREMIAIMPROVING : 1
UPDATE_ON : 1
SURBUBAN_AND : 1
PERCENT_WITH : 1
RESOLUTION_TINY : 1
STOOL_PROBLEM : 1
STUDIES_APNEA : 1
PHYSICIAN_PLM : 1
ADEPRESSION_BE : 1
ACTIVE_OUTPATIENT : 3
DONT_IT : 1
DECISIONS_LIKE : 1
THE_PAC : 1
DAILY_THYROID : 1
THYROID_AGE : 1
CAN_WATCH : 1
ABLE_TO : 3
FAMILY_PROGRAM : 1
PATIENT_FACTORS : 1
THAT_HIS : 2
TO_VET : 1
TIME_LOBBY : 1
THROUGH_THE : 1
INFORMATION_TO : 1
LEFT_FRONT : 1
FOLLOWUP_FIRST : 1
CONCERNS_NOTED : 2
PERSON_ASSIST : 1
HEALING_MOBILITY : 1
YEAR_NEURO : 1
RIGHTS_ASSIST : 1
SEEN_OBMT : 1
THAT_NOW : 1
HIS_BIOLOGICAL : 1
CLAUDICATION_HE : 1
AND_ILLICIT : 1
IS_WALKING : 1
ON_BACK : 2
IN_SIZE : 1
ON_RECENT : 1
TELEPHONE_ISSUES : 1
PARKINSONS_SYND : 1
AN_RISK : 1
OBESITY_ICDCM : 1
IDEATION_CARE : 1
MEDICATION_SCHEDULE : 1
WITH_BP : 1
DEPRESSION_PHQ : 1
CUEING_RESIDENT : 1
SMOKE_PARTICIPATED : 1
PREVIOUS_TOLD : 1
ALLERGIES_SULFA : 1
ON_CLOTHING : 1
ENCOURAGED_VENTILATION : 1
TAB_ALBUTEROL : 1
ABOUT_HOW : 1
OU_WITH : 1
FOWLER_WITH : 1
HOME_SEE : 1
HEALTH_HOLD : 1
RELIEVES_PAIN : 2
LIMB_RELATED : 1
KIT_STARTED : 1
ORDER_AND : 1
ACTIVE_LBP : 1
CAROTID_RIGHT : 1
REPORTS_BEING : 1
TWICE_ACTIVE : 1
IF_YOU : 1
THE_ON : 1
SESSION_END : 1
CANCELLATION_CLINIC : 1
ROS_DENIES : 1
FOR_CLINIC : 1
ADDENDUM_MEDICARE : 1
TO_HERE : 1
LOCATION_IDENTIFIERS : 1
SHAMPOO_CARE : 1
STUDY_THEY : 1
GROUP_SUICIDE : 1
INABILITY_TO : 1
HE_PUTTING : 1
INFLUENZA_BLOOD : 1
AND_ARABIA : 1
SURGERY_CONSULTED : 1
VETERAN_BIRCH : 1
AND_PRESSED : 1
CITALOPRAM_DONT : 1
AS_INTERESTING : 1
WAS_SERVED : 1
IT_BEEN : 1
WEIGHT_MANAGEMENT : 1
AND_ARE : 3
RECOMMENDATION_URGENT : 1
RECD_PACU : 1
AND_THEY : 1
PT_THAT : 8
AN_FOR : 1
PATIENT_RECENT : 1
HERPES_FINANCIAL : 1
TIMES_NEEDED : 1
PSYCHIATRY_NOTE : 1
IS_ASSIGNED : 4
NURSE_TO : 1
PERSONAL_SHAVE : 1
ARRYTHMIA_HEART : 1
PERSONAL_FOOD : 1
NO_SHOW : 2
TEA_PATIENT : 1
SWS_AND : 1
FOR_SCHEDULED : 1
AROUSE_PARKINSONS : 1
FOR_TAXI : 1
FOLLOWED_CBOC : 1
EFFECT_THE : 1
EFFECTS_MEDICATION : 1
BEEN_PMH : 1
REPORTED_PLANS : 1
TO_ASSESSMENT : 1
REMOVED_FBS : 1
FALLING_AS : 1
HAVING_SYMPTOMS : 1
CLASS_IN : 1
AUGUST_THE : 1
SCHIZOPHRENIA_COMMENTS : 1
ADMISSION_CHRONIC : 1
CONSULT_OF : 1
IDENTIFIED_BRIEF : 1
CONTINENT_PATIENT : 1
MG_TAKE : 3
ON_LOCATION : 1
IF_HAVE : 1
BY_AT : 3
SCREEN_DVT : 1
THE_NECESSARY : 1
DURATION_INTERMITTENT : 1
HOME_GLAUCOMA : 1
NECK_WELL : 1
USE_WAS : 1
BARNES_PLAN : 1
HE_CURRENTLY : 2
MEET_WEEKLY : 1
PATIENT_BATHROOM : 3
IDENTIFIED_AND : 1
INFORMATION_THE : 1
TACHYCARDIA_SINUS : 2
INJECTION_REACTION : 1
HAD_ONE : 1
ADD_CONSULT : 1
TO_UNABLE : 1
TREATED_YEARS : 1
MONTHS_SINCE : 1
VET_WAS : 1
AT_AND : 3
DELIVERY_MOUTHPIECE : 1
OR_PINES : 1
NO_ACTION : 1
TO_BLIND : 1
ADJUSTED_MEET : 1
OF_MUCH : 1
ANEURYSM_CLIP : 1
UNIT_SOLN : 1
MOIST_MEDICATIONS : 1
BEEN_THAT : 1
CONTACT_ALLERGIES : 1
OR_WITHIN : 1
IS_COMPLAINING : 1
ONE_COPING : 1
MIN_LABS : 1
IS_OUTPATIENT : 1
DIAGNOSIS_SCHIZOPHRENIA : 1
NO_COUSIN : 1
AND_WISHES : 1
HE_AS : 1
NOON_IT : 1
THE_FOLLOWING : 2
VACCINE_PRIOR : 1
BY_IN : 1
TO_CUT : 1
SKIN_MEMBERS : 1
SINUS_MCADOO : 1
SOBRIETY_DEATHS : 1
CHEW_IDENTIFIED : 1
STAFF_WILL : 1
ACCOMPANY_PERSON : 1
DRINK_HIMSELF : 1
TABLET_MG : 1
APART_PROCESS : 1
SWS_BRC : 1
ALL_QUESTIONS : 1
BY_ACCURATE : 1
IS_CLEARER : 1
ENCOUNTER_FOR : 1
SEE_SHORT : 1
PLEASE_RADIATION : 3
IN_TRYING : 1
CONTROL_IN : 1
MOUTH_DAILY : 1
CM_CLASS : 1
PROBLEM_SOMETIMES : 1
NO_CHANGES : 1
AN_AND : 1
DISCHARGE_INSTRUCTIONS : 1
RESIDENCE_ANY : 1
DECOMPRESSIONS_STATES : 1
SHINGLES_CHLORIDE : 1
PALMER_EYE : 1
YES_PATIENT : 1
CALL_MIN : 3
SHIFT_WAS : 4
PLASMA_GLUCOSE : 1
QUESTIONS_YOUR : 2
DIAGNOSIS_LEFT : 1
WARM_PHYSICIAN : 1
WAS_THERE : 2
POSTAL_SERVICE : 1
WHILE_IN : 2
WHICH_THE : 1
THERE_SOMTHING : 1
ASSESSMENT_PROBLEMS : 1
TASK_ONE : 1
IS_CONTINENT : 4
PTA_SCREENING : 1
SAYS_LIKELY : 1
ADDENDUM_SHIFT : 1
DETECT_IN : 1
NUMBER_TOE : 1
NO_RX : 1
OCT_PULSE : 1
IN_FOLLOW : 1
LIVES_THE : 1
NOT_ALL : 1
TRANSFER_HEIGHT : 1
AND_NO : 1
HAD_URINE : 1
ABOVE_ISSUES : 1
CONTACTS_AND : 1
CHEST_MUSCLE : 1
OF_SPENDING : 1
HAVE_DURING : 1
YOU_THE : 1
SOUTH_SURBUBAN : 1
BE_BUT : 1
ALSO_WE : 1
DEPRESSED_WAS : 1
SOLN_INHL : 1
TIME_VET : 1
DTN_INFORMATION : 1
BEFORE_INTO : 1
BUT_HE : 2
WHAV_CALLBACK : 1
SUICIDAL_TO : 1
WAS_AND : 1
RADIATION_SERVICE : 3
PAINS_RECS : 1
ARE_BOTH : 1
ENROLLED_IN : 1
VETERAN_OFFICE : 1
EYE_EASE : 1
BEDTIME_HAS : 1
OF_WITHOUTENCOUNTER : 1
VIA_POSTAL : 1
FURTHER_REFILLS : 2
WILL_CANCELLED : 1
CLINIC_DIDACTIC : 1
THOUGHTS_SAFETY : 1
WITH_ALSO : 1
IN_TO : 5
TO_ASSESS : 1
WAS_USED : 1
FOR_VETERAN : 1
TO_SAFELY : 1
ANGER_XX : 1
OUTPATIENT_FALL : 1
INTRAOPERATIVE_REPORT : 1
JOB_DATE : 1
PLEASE_SAL : 1
POSITIVE_FOBT : 1
REHAB_UNIT : 1
PREDNISOLONE_AND : 1
MEETING_VETERAN : 1
MOVEMENT_PHYSICIAN : 1
WORK_AND : 1
CITALOPRAM_MG : 2
COLON_TRAZODONE : 1
HE_GET : 1
RESPONSE_VETERAN : 1
HE_GROUP : 1
OBSERVATIONS_HEALTH : 1
ASSESSMENT_DENTAL : 1
VETS_THAT : 1
CARE_RECOVERY : 1
CURRENT_PHONE : 1
FOR_BAL : 1
INSTRUCTIONS_WITH : 1
SUMMARY_NOTE : 1
FOLLOWED_BY : 1
STATUS_VIT : 1
FOR_INCREASED : 1
AM_FOR : 1
DEPRESSED_CAROL : 1
NO_ADDENDUM : 1
MEDICATION_PHYSICAL : 1
WHO_OTHER : 1
EASY_TO : 1
RIGHT_AKA : 1
THE_WORSE : 1
NO_PALPITATIONS : 2
STOOL_SUBMITTED : 1
ARTHRALGIA_APPOINTMENT : 1
CHANGES_HIS : 1
CONTINENT_VET : 1
MULTIVITAMIN_TAB : 1
DOCTORS_WHEN : 1
ADMINISTER_ANESTHETIC : 1
PICKED_AT : 1
IN_ALLERGIES : 1
HAND_RUSSELL : 1
REQUESTED_OF : 1
CONFIRMED_SPONSOR : 1
CONSENT_SCANNED : 1
THINKS_FOR : 1
EDUCATION_RECORD : 1
TRANSVERSE_COLON : 1
REVIEWED_WERE : 2
HIMSELF_OTHERS : 1
LONG_CALCIUM : 1
HAD_DONE : 1
CHRONIC_PAIN : 3
WILL_BE : 7
INTO_GOWN : 1
FIRESEEKING_BEHAVIOR : 1
EYE_HOME : 1
AND_REPORTS : 1
GROUP_BE : 1
DEFICIENCY_DATE : 1
HIS_STATING : 1
NO_COMPLAINT : 1
CONSULTED_CONSIDERATIONS : 1
PINS_AND : 1
LENSECTOMY_FBS : 1
LS_PROVIDED : 1
BOWEL_MOVEMENT : 1
WAR_MOVIES : 1
AND_ANTISOCIAL : 1
NOTE_DEPRESSED : 1
DISORDER_ST : 1
BAXORETENE_AND : 1
AVE_PERSONNAL : 1
EXERCISES_FROM : 1
THE_VETERANS : 3
THE_CONTROL : 1
ACTIVITY_SUPPORT : 1
ADDENDUM_INBETWEEN : 1
STRATEGIES_AS : 1
VETERAN_STATUS : 1
WITH_HER : 2
TO_PROCEDURE : 2
APPOINTMENTS_ADDENDUM : 1
PHYSICAL_DOES : 1
THE_LAUNDRY : 1
ONE_ADMISSION : 1
HAD_CHEST : 1
LOCATION_OF : 1
SYSTEM_URGENT : 1
EYE_PROBABLE : 1
TO_CARE : 2
NOTE_DRESSING : 1
ADDRESS_THE : 1
DRESSING_OF : 1
DOWN_MODE : 1
LIDS_PATIENT : 1
JUNE_STILL : 1
HE_THE : 3
DISCHARGE_SCORE : 1
AT_BIBLE : 1
LONG_HAVE : 1
WITH_BRACE : 1
DISORDERMET_WITH : 1
PARTICULAR_OTHERS : 1
HAVE_CONTINUE : 1
DIRECTIVE_ALLERGIES : 1
ST_BREAK : 1
AND_THERAPEUTIC : 1
SWS_HBPC : 1
SYSTEM_RECOMMENDATION : 2
CONTENTS_VISION : 1
LIKELY_IS : 1
DOES_PATIENT : 2
DIFFICULTY_SAFE : 1
UNCERTAIN_OF : 1
MOBILITY_PROBLEM : 1
IS_SC : 1
PRESSED_FOR : 1
LOBBY_ASSESSMENT : 1
CHEST_IN : 1
NOTE_DATE : 1
INDEPENDENT_PER : 1
HIS_ORTHO : 1
AT_TO : 1
KAY_FOR : 1
PRESSURE_SORE : 2
VETERAN_HE : 1
NOTES_FROM : 1
AREA_TALKS : 1
IS_SOMTHING : 1
PLAN_DEPRESSION : 1
SPASMS_WAS : 1
PRIOR_MEETING : 1
MENTAL_HOLD : 1
COLOR_TRANSFER : 1
HEALTH_THAN : 1
INFLUENZA_VACCINE : 1
ONCOLOGY_DEPRESSION : 1
PATIENT_FOR : 1
HOSPITAL_USEFUL : 1
TOOTH_TEETH : 1
PTSD_THERE : 1
ARTIFICIAL_INSTILL : 1
VETERAN_WAS : 1
COMES_WITH : 1
NOTE_SISTER : 1
BEING_SHELLED : 1
REPORTED_IT : 1
PAIN_INHALE : 1
LEVEL_OF : 2
REFILL_REQUEST : 1
INSTRUCTIONS_TREATED : 1
OUT_THESE : 1
MEDICATIONS_MEDICATION : 2
PHYSICIAN_FLU : 1
LPN_BE : 1
BLOOD_SUGARS : 1
RACHEL_COMPLETION : 1
DROP_IN : 1
ONCE_INSIDE : 1
AS_WELL : 4
WILL_CALL : 2
CONSULT_ABD : 1
PHYSICIAN_IS : 1
NSC_HE : 1
PHYSICIAN_WILL : 2
VICTIMS_ASSIST : 1
RT_VISIT : 1
WALKIN_WALKIN : 1
NO_ATTEMPTS : 1
SHARED_HIS : 1
HOURS_IS : 1
EVENT_DEC : 1
COMPLICATIONS_PATIENT : 1
SERVICES_NAOMI : 1
CLENCHING_PT : 1
INTERDISCIPLINARY_PLAN : 1
VACCINE_ORDERED : 1
YOU_RATE : 1
IS_WITHDRAWAL : 1
CARDS_BY : 1
BUT_HAD : 1
MULTIVITAMIN_ALBUTEROL : 1
OTHER_ENDING : 1
NAME_AND : 1
PCT_BOOSTER : 1
IMPAIRMENT_FACILITY : 1
SCREEN_SURGERY : 1
MIGRAINE_HEADACHES : 1
CENTER_HERE : 1
RTC_DEC : 1
PROVIDE_THIS : 1
JOINTS_MINUTES : 1
RETURN_VERBALIZATION : 1
IN_HIGH : 1
LIP_HAD : 1
TO_RECOVERY : 1
CALCIUM_LOWER : 1
WAS_EVALUATED : 1
ASSESSMENT_FEB : 1
BRC_ADMISSION : 1
BE_FOLLOWED : 1
COMFORT_GOAL : 1
IDENTIFICATION_CONFIRMED : 1
ORAL_ML : 1
PLASM_IN : 1
ABLE_ATTEND : 1
RIGHT_UPPER : 1
SINCE_IS : 1
IN_ENVIRONMENT : 1
USAGE_HOURS : 1
COMPLICATIONS_MENTAL : 1
BY_ONCE : 1
ABSCESS_HIS : 1
PT_PT : 1
AFTERNOON_RECEIVED : 1
IN_SINCE : 1
BE_INPT : 1
OF_GUN : 1
SHE_HAS : 1
PATIENT_HERE : 1
WELL_FOR : 1
PATIENT_PERFORMED : 1
FOR_HEALTH : 2
TOLERANCE_OTHER : 1
AND_FXN : 1
TO_LT : 1
FOR_VET : 1
RESOLVED_PT : 1
THOUGHTS_MH : 1
CURRENTLY_EXPERIENCING : 1
NAME_REACTION : 1
SURVEY_NOTE : 1
ACCEPTANCE_VETERAN : 1
STATES_IN : 1
BEEN_REFILLING : 1
ONCE_PENDING : 1
VETERAN_LISTS : 1
MARITAL_DIVORCED : 2
TO_DUE : 1
HAD_SI : 1
POST_SURGERY : 1
SECONDARY_LOCATION : 1
CONTAINERS_AMBULATION : 1
TALKING_OTHERS : 1
UNIT_LOCATION : 1
BACK_SEE : 1
ARE_EXPIRED : 1
DRIVER_YES : 1
WHEN_SEX : 1
COLOR_BLADDER : 1
VS_HE : 1
THE_SUPERVISING : 1
OF_NUMBNESS : 1
SOME_OF : 1
AND_RECEIVES : 1
COMPLAINT_DISPOSITION : 1
HOSPITAL_THEIR : 1
ANSWER_MG : 1
FOLLOWI_REPORT : 1
SOME_IMPROVEMENT : 1
FOR_REASONS : 1
HOPELESS_SHAKING : 1
AT_SITE : 1
SURFACEANTERIOR_THERAPEUTIC : 1
HE_REPORTED : 1
SUBCUTANEOUS_IN : 1
PER_ABDOMEN : 1
BE_UNTIL : 1
INTIMIDATING_PTS : 1
CONVINCED_REPORTED : 1
TO_SUICIDAL : 1
AND_RENAL : 1
CONVERSATION_HAS : 1
VETERAN_ONE : 1
THE_POSSIBILITY : 1
NOSHOW_VETERAN : 1
HE_THINKS : 2
BOTH_PATIENT : 1
SEND_IT : 1
AN_ALCOH : 1
EDUCATION_VERBALIZES : 1
DEPRESSION_CONTINUES : 1
TO_RESPIRATIONS : 1
GEC_PSYCHOLOGY : 1
CM_PATIENT : 1
ERROR_NOT : 1
AM_AT : 1
FOR_POSITIVE : 1
THE_WITH : 2
YOUR_CONDITION : 1
II_TAB : 1
INTERMITTENT_FLASHBACKS : 1
FOLLOWUP_MANAGEMENT : 1
OFFICE_SCALE : 1
TO_OBTAIN : 1
LAW_RACHEL : 1
JR_GOOD : 1
SEND_TO : 1
YOU_YOU : 2
WIFE_OF : 1
OTHER_IN : 1
INDICATION_PATIENT : 1
THE_AND : 4
WAS_FEELING : 1
THEY_SAY : 1
REGARDING_THANK : 1
ACKNOWLEDGED_SKILLS : 1
DISABILITY_PAST : 1
EXPOSURES_BLASTS : 1
ADVISE_TO : 1
VETERAN_THAT : 2
NEED_IT : 1
IF_AT : 2
TO_RESCHEDULE : 1
LAST_CLINIC : 1
PLEASE_CONTACT : 3
GAIT_LLD : 1
LETTER_BE : 1
PROCEDURE_CC : 1
NOT_BRIEF : 1
SERUM_NO : 1
FOR_RIGHTS : 1
FOR_LONG : 2
HYPERTROP_OTHER : 1
AND_VITAL : 1
COLOR_NORMAL : 1
APNEA_ENCOUNTER : 1
INPT_INSTRUCTION : 1
WITH_TO : 1
DUE_PATIENTS : 1
SEEING_PC : 1
PTS_THE : 1
PSYCHIATRIC_SUMMARY : 1
COUGH_AMBULATORY : 1
MEET_CRITERIA : 1
FOR_UMBICIAL : 1
STRENGTH_MG : 1
STATING_PHYSICIAN : 1
PAIN_THE : 2
RESIDENT_CONTINUES : 1
GET_TO : 1
THE_DOCTOR : 2
HAVING_OUTPATIENT : 1
LIVES_FOLLOWING : 1
SEDATION_ASA : 1
ETHNIC_RELIGIOUS : 1
TOOK_EXTRA : 1
HE_CALLING : 1
SPENDING_BUT : 1
PT_SLOWLY : 1
OF_TETANUS : 1
CREATININE_LEVELS : 1
BAKER_LCSW : 1
MEAL_OF : 1
TEST_PTSD : 1
CALL_TYPE : 1
DRUG_REQUEST : 1
AND_DIRECTIONS : 1
SERVICE_ASSESSMENT : 1
HAVING_WITH : 1
RESOLVE_NUTRITION : 1
CBOC_CALLER : 1
AGE_IN : 1
OA_FOR : 1
UNABLE_TALK : 1
EXAM_LIDS : 1
AND_CONTRAST : 1
ARTHRALGIA_VERIFIED : 1
HEIGHT_IN : 6
LOSS_TINNITUS : 1
IN_BED : 2
YES_NONE : 1
REPORT_LABS : 1
SAFETY_REPORT : 1
WIFES_GRANDKIDS : 1
VET_THAT : 1
PERCOCET_ROSEMONT : 1
AND_REPORTED : 1
VOICED_HIS : 1
HAS_LOW : 1
SCREENING_ISSUES : 1
MIN_OBSERVATION : 1
PT_BECAUSE : 1
SHOW_SCHEDULED : 1
HE_IN : 1
WIFE_AWAY : 1
OR_HEIGHT : 1
EVENING_VETERAN : 1
BROS_VETERAN : 1
TO_IMPROVE : 1
AND_HAD : 2
MARCH_WE : 1
WAS_REFERRED : 1
DROWSY_EASY : 1
SEVERAL_NOW : 1
CONTRACT_PATIENT : 1
THE_IDENTIFIERS : 1
APPOINTMENT_PATIENT : 1
IS_PELVIS : 1
PENCIL_HE : 1
OF_WHEN : 1
AND_BRC : 1
THAN_DOES : 1
AND_PHENYLEPHERINE : 1
REAFFIRMED_APPT : 1
HAS_TWO : 1
PASSED_NO : 1
LIKELY_THAT : 1
EXPOSED_SEX : 1
CALLED_REVIEW : 1
FOR_SHIFT : 1
STAMPED_ENVELOPE : 1
NOTE_IN : 1
GROUPS_TO : 1
THAT_IS : 7
OF_ALCOHOL : 1
THIS_GOOD : 1
PICKED_BY : 1
THE_PANEL : 1
HE_FEELS : 2
PROSTATE_CANCER : 1
ANY_TIME : 1
SCALE_PREDICTING : 2
DISORDER_PHYSICIAN : 1
PLAN_SUTURES : 1
CONTINUE_WITH : 1
ENEMY_OTHER : 1
DIVORCE_UNABLE : 1
THE_MEET : 1
FOR_MUSCLE : 1
UP_PROGRESS : 1
THE_CHANGES : 1
HAD_ATYPICAL : 1
SA_CAP : 1
TMSGOOD_ENERGY : 1
PERSON_DOWNSTAIRS : 1
THAT_HES : 1
TETANUS_TD : 1
HIS_CONDITION : 1
SYSTEMS_THAT : 1
NO_ALL : 1
OF_DO : 1
ACTIVE_RADIOLOGY : 1
QHS_PH : 1
OR_LL : 1
CLOZAPINE_MG : 1
RETURNED_IRAQ : 1
DEPENDENCE_BRUSH : 1
PHYSICIAN_ARTHRITIS : 1
IS_FIRST : 1
AND_HE : 3
PAT_MEDICATION : 1
SUFFICIENT_OF : 1
VETERANS_MEDICAL : 2
COCAINE_APR : 1
PLACED_ON : 1
ASSISTANCE_CLC : 1
NO_RESOLUTION : 1
WITH_ROUTE : 1
WILL_EXPLORE : 2
SKILLS_NEXTOFKIN : 1
LIVER_TOXIC : 1
VETERAN_AGREED : 1
CAN_TO : 1
FOR_AFTER : 1
MR_NOT : 1
PREFERENCES_INTOLERANCES : 1
TRAITS_DEC : 1
UROLOGY_IN : 1
EFFECTIVENESS_THERAPY : 1
CM_BREATHING : 1
PAIN_INFORMATION : 1
ALLERGIES_CPRS : 1
THE_THEY : 1
PAST_ECCHYMOSIS : 1
NARCOTICS_DISCUSS : 1
ARTICLES_WITHIN : 1
WANTED_BE : 1
RELATED_TO : 2
HYPOTHYROIDISM_WITH : 1
PHYSICIAN_NO : 1
THOUGHTS_NEGATIVE : 1
GRANDE_CBOC : 1
AND_OUTPATIENT : 1
ENTER_ADDITIONAL : 1
TO_ADMITS : 1
THEIR_VISION : 1
AIDS_TEMPERATURE : 1
HELP_DETECT : 1
LIVES_SINCE : 1
PHYSICIAN_PENDENCE : 1
HAVE_ADDENDUM : 1
RADIATION_ONCOLOGY : 5
EDEMA_NO : 1
APPOINTMENT_TO : 2
WAS_ONLY : 1
WHILE_THE : 1
CARE_HERE : 1
DOING_IMPROVED : 1
PLATE_AVULSION : 1
SUFFICIENT_TRAVATAN : 1
MEDICARE_WILL : 1
AM_NOT : 1
SEVERAL_GET : 1
NURSING_ASF : 1
HX_IS : 1
GUIDE_WASHING : 1
PHYSICIAN_INSTRUCTIONS : 1
NOT_HOW : 1
EVENT_NUTRITION : 1
NO_NO : 2
MS_ROHENALUGO : 1
NOT_PLASM : 1
AN_MADE : 1
NEUROPSYCHOLOGY_NEUROPSYCHOLOGIST : 1
OF_FUNCTIONNG : 1
EVENING_ADMINISTER : 1
TINY_AK : 1
INFORMATION_PACKET : 1
DOCUMENT_ENVIRONMENTAL : 1
TOOK_SOME : 1
HAS_NKA : 2
THE_TH : 1
RIGHT_CAROTID : 1
RECEIVED_NONE : 1
OFF_DAILY : 1
IN_TRANSVERSE : 1
FROM_CHAP : 1
PATIENT_TO : 2
MEMORIES_OF : 1
CHEST_AND : 1
TEAM_TO : 1
ICDCM_FOR : 1
DENTAL_GENERAL : 1
WORKLOAD_SCORE : 1
DUPLEX_FOR : 1
AVULSION_CHEMICAL : 1
CM_EMERGENCY : 1
ONLY_HE : 1
AS_UNIT : 1
SAUDI_DURING : 1
ATTEND_PAIN : 1
HUSBAND_THE : 1
INTERIM_INACTIVATED : 1
ROUTINE_SCREENING : 1
WARFARIN_DOSES : 1
SO_THAT : 1
ANSWERING_MACHINE : 1
PLAN_WHAT : 1
MALE_TO : 1
ENTER_ALLERGIES : 1
WITH_AND : 6
PHYSICIAN_BARNES : 1
PHARMACY_SERVICE : 1
VOLUME_SOME : 1
WATCH_TV : 1
PATIENT_ANY : 2
FEELS_EVEN : 1
ITCHING_PINS : 1
RETURN_INFORMED : 1
MEDICATION_SAME : 1
HAS_SEEN : 1
LUMBAR_DISKECTOMY : 1
STUDY_CALLED : 1
THE_HE : 3
UNIT_TO : 1
TO_ANTICIPATE : 1
ACQUIESCE_IMPAIRED : 1
TO_WITH : 6
IDENTIFIED_CALL : 1
IE_WHIPPLE : 1
CAN_TV : 1
CORRECTLY_FOR : 1
ADVISED_PT : 1
INFORMATION_GET : 1
CONTAINERS_REQUIRES : 1
DRIVER_CONSENT : 1
IMPROVEMENT_THERAPEUTIC : 1
IN_DURING : 1
LIDS_LASHES : 1
OFFICE_FOR : 1
HER_OTHER : 1
FBS_ANTIBIOTIC : 1
COULD_NOT : 1
OXYGEN_HE : 1
DEPRESSION_TOTAL : 1
OF_OR : 1
ALRIGHT_NEED : 1
ADDENDUM_ROHENALUGO : 1
WALK_AS : 1
EYES_ACTIVE : 1
OF_WITH : 2
ER_ON : 1
DEP_BIPOLAR : 1
OF_PROSTATE : 1
IS_RISK : 1
TOUCH_WITH : 1
NO_ALERT : 1
TASK_DEPENDENCE : 1
IS_SIGNIFICANT : 1
ABNORMALITIES_CANAL : 2
EVALUATION_VERBALIZATION : 1
HIS_STUDY : 1
HIS_CANE : 1
GET_NENT : 1
AND_HOGAR : 1
DOCUMENT_NOTE : 1
AN_SHOW : 1
TO_ANY : 2
FOR_PROGRESS : 1
CLEAN_CASUALLY : 1
IS_TO : 9
WAS_CALLING : 1
ELIGIBLE_CH : 1
MONTH_ROUTINE : 1
MAKING_SIMPLE : 1
WAS_OF : 2
STATUS_BOWEL : 1
THE_SINCE : 1
PMH_HYDROCELE : 1
OLD_HERE : 1
GIVEN_PER : 1
AND_DISEASE : 1
ABDOMINAL_PAIN : 2
ICDCM_NDA : 1
MAILED_VET : 1
CHEMICAL_MATRIXECTOMY : 1
HER_HER : 1
CONTINUE_MEDICATION : 1
PRIOR_OR : 1
WITH_CHEMICAL : 1
NOTE_RESPONSE : 1
RISK_LYMPH : 1
DENIES_PRIOR : 1
CLC_HE : 1
FINANCIAL_STABILITY : 1
IDENTIFIED_CONSENT : 1
STRESS_HORTON : 1
THE_MEDICATION : 2
CANCE_ADDENDUM : 1
ON_OXYGEN : 1
PM_NOVEMBER : 1
LIKE_BE : 1
HIS_TO : 1
MAKE_MEET : 1
HUSBANDS_ARE : 1
DRIVER_ALLERGIES : 1
OR_ZZPATIENT : 1
GIRLFRIEND_WILL : 1
ISSUES_BRACE : 1
ALLERGIES_DRUGS : 1
NEXTOFKIN_TRAUMA : 1
PATIENT_NOT : 4
BLIND_CENTER : 1
NOT_ANY : 1
REORDERED_SUFFICIENT : 1
CONTINUE_DOSE : 1
TO_AN : 3
ADMISSION_THE : 1
TEARS_DROP : 1
WHICH_HE : 1
AUTONOMIC_CHANGES : 1
EARSCANALS_CLEAR : 1
NAME_REFILL : 1
URINE_DISCHARGED : 1
MEDICATIONS_FOUR : 1
PING_AT : 1
BELOW_XD : 1
RECOVERY_MANAGEMENT : 1
OTHER_OR : 1
SHE_BEEN : 1
WITHDRAWAL_SYMPTOMS : 1
PREOPERATIVE_LOOSENING : 1
CLONIDINE_MG : 1
PATIENTS_AND : 1
POSSIBILITY_FEVER : 1
RESIDENT_ROOM : 2
HAS_QUESTIONS : 1
CHIEF_MONTH : 1
AND_RIGHT : 1
TSTRAP_ADDED : 1
RECORD_LIMITATIONS : 1
SUPPORTIVE_DONT : 1
FOR_MARCH : 1
IS_AMMENABLE : 1
AND_PROBLEMS : 1
PT_WITH : 2
MIVA_ANALYSIS : 1
VA_CE : 2
WITH_MATRIXECTOMY : 1
STATED_THAT : 3
NKA_MEDICAL : 1
PAIN_LUMBAR : 1
AND_PENCIL : 1
FOLLOWUP_SURVEY : 1
DIRECTLY_VETERAN : 1
SISTER_SHRAPNEL : 1
PAIN_MODE : 1
VERY_SUPERFICIAL : 1
ON_THOUGHT : 1
GROUP_EACH : 1
STYLOID_PROCESS : 1
THE_PAIN : 3
TELEPHONE_COLLECTION : 1
WITH_ABUSE : 1
THRU_VA : 1
PAROLE_STATED : 1
TOLERATE_SHE : 1
SURG_IT : 1
HAS_ABOUT : 1
HAS_DIFFICULTY : 1
NOTE_BUCKLING : 1
DAILY_LIVING : 1
HIS_LT : 1
OF_EDUCATION : 1
HAS_CAPACITY : 1
SEVERE_MENTAL : 1
VA_AS : 1
LYMPH_COUNT : 1
DOING_MUCH : 1
SERVED_MILATARY : 1
HERE_WITH : 1
BARETT_HAS : 1
STATUS_VETERAN : 1
IN_KUWAIT : 1
GROUP_NAME : 1
TO_FACT : 1
STERISTRIPS_IS : 1
HAVE_THE : 1
NOW_STARTED : 1
IT_WAS : 2
TRANSFER_REQUIRES : 1
LEGIONELLA_FLU : 1
ANTICIPATED_FOR : 1
TO_DENIES : 1
DOCTOR_MAY : 1
DURING_AT : 1
SHIFT_THE : 1
WAS_ADVISED : 1
IN_BUT : 1
PAIN_MED : 1
NAILBEDS_ELSE : 1
CAN_REACHED : 1
VITAMIN_TAB : 1
THIS_BACK : 1
MH_CMHP : 1
PRODUCTS_APPLICABLE : 1
ASSESSMENT_FOR : 1
UPPER_ABDOMINAL : 1
CLC_NOTE : 1
PAIN_OX : 1
PHQ_TOTAL : 1
DENIES_HOMICIDAL : 2
ABDOMEN_BENIGN : 1
IS_LOW : 2
CANCELLED_IF : 1
SMOKING_CESSATION : 1
AGREES_CONTINUE : 1
VOLUME_NEBULIZER : 1
PCT_GROUP : 1
AGREED_THIS : 1
SPEC_JUN : 1
IN_TEAM : 1
PO_QHS : 1
HAS_THERE : 2
IS_EXPERIENCING : 2
THESE_WILL : 2
DIAL_OF : 1
HAS_FRIENDS : 1
CONTAINS_DIRECTIVE : 1
PRIMARY_IS : 1
BASELINE_MANAGEABLE : 1
INHIBITORY_LIVER : 1
FAIR_NO : 1
MOBILITY_OF : 2
OF_CHART : 1
MEDICAL_EVALUATION : 1
DURING_MIN : 1
EPISODIC_MEET : 1
PAIN_WHEN : 1
LAB_PROCEDURE : 1
NEUROPSYCHOLOGIST_PHYSICAL : 1
VETERAN_REPORTS : 1
MRI_MUCH : 1
WAS_EDUCATED : 1
UNAWARE_AND : 1
ACTIVE_OCT : 1
PREOP_PPARENT : 1
ALERTMRSA_SAFETY : 1
ARE_RESTRAINTS : 2
PATIENT_NO : 2
BEDREST_NURSE : 1
PROCEDURE_THE : 2
ADJUVANT_FOR : 1
ASSISTANCE_OVERSIGHT : 1
THAT_CBSST : 1
ODY_SKIN : 1
RECALL_TO : 1
DENTAL_IMAGING : 1
NEXTOFKIN_POH : 1
HE_BE : 2
UPSET_HE : 1
DRESSED_ADEQUATELY : 1
AND_HARD : 1
ABRASION_RUSSELL : 1
NVD_DEPT : 1
HOMICIDAL_NO : 1
OU_TROPICAMIDE : 1
FOLLOWING_WERE : 1
DRINKING_MINIMIZE : 1
FOR_APR : 1
TOMORROW_SW : 1
RISK_COUNT : 1
METHOD_MOUTHPIECE : 1
THE_INFORMATION : 1
ON_WORRIED : 1
GIRLFRIEND_VETERAN : 1
SUICIDAL_TOLD : 1
NUTRITION_ALL : 1
SOCIAL_WORK : 2
GIVEN_TO : 1
OTHER_HOSPITALS : 1
MYSELF_OUT : 1
INCREMENTS_BEING : 1
HE_ME : 1
RETURN_CONSENT : 1
DONE_SHOWED : 1
OXYCODONE_MORPHINE : 1
ABRASION_NOTE : 1
EVALUATION_RETURN : 1
PREDICTING_PRESSURE : 2
OTHER_OF : 1
PTA_PTSD : 1
FORE_SKIN : 1
FOLLOWUP_LOCATION : 1
UNDERSTANDING_GEN : 1
INFORMATION_SUBMITTED : 1
MIDNIGHT_REPORT : 1
VISION_CARE : 1
HE_IS : 11
ELIMINATION_SOUNDS : 1
SERVICE_STABLE : 1
SUPERFICIAL_HE : 1
IT_HE : 1
ATTENDING_SISTER : 1
AT_NOT : 1
TO_SEEN : 1
REAL_OPTION : 1
HIS_FLIGHT : 1
AMBULATION_ASSISTIVE : 1
ANOTHER_ENCOURAGED : 1
GOWN_THATS : 1
DEFICIT_PROCEDURE : 1
APPEARS_GROOMED : 1
CBSST_GROUP : 1
OF_RETURNED : 1
STATIONED_IN : 1
TO_AND : 3
VACCINE_NONE : 1
PATIENT_REFERRAL : 2
ASSISTANCE_SET : 1
SIDE_EFFECTS : 2
EDUCATION_NOW : 1
STANDARD_OUTPATIENT : 1
DETAILS_DOCUMENTED : 1
PRIVILEGES_VERBALIZING : 1
OR_INTERNAL : 1
PROBLEM_TO : 1
SHOW_FOR : 1
VETERAN_BY : 1
HELPING_WITH : 1
MIN_AT : 1
IMPROVED_DRESSED : 1
IDENTIFICATION_IS : 1
BUCKLING_PT : 1
NURSING_ADMISSION : 1
PT_TKA : 1
CORRECTLY_NURSING : 1
DC_PLAN : 1
ALERT_PT : 1
LICHENOID_WITH : 1
OF_STATES : 1
CT_WITH : 1
ANOTHER_THAT : 1
FATHER_OVER : 1
IMPAC_SPECIFICS : 1
FOUR_AS : 1
SUPERFICIAL_IS : 1
ASSERTIVE_COMMUNICATION : 1
AM_PM : 1
HD_CALCIUM : 1
STEADILY_SUPPORT : 1
IMPLICATIONS_PNEUMONIA : 1
SMOKER_FEW : 1
THE_PROCESS : 1
ON_CHANGE : 1
OR_RX : 1
SORE_RISK : 2
GOAL_DIAGNOSIS : 1
PROGRAM_DIDACTIC : 1
EXTRA_FLUIDS : 1
HEALTH_WITH : 1
HEALTH_STATUS : 1
TO_GET : 3
APNEA_QUITE : 1
PSYCHOTHERAPY_NURDEPRESSION : 1
CALCIUM_VITAMIN : 1
YES_ALLERGIES : 1
PRIOR_DOCUMENT : 1
HYPERTENSION_NO : 1
SPUTUM_COLOR : 2
TACHYCARDIA_DIFFICULTY : 1
CAUSE_HE : 1
VA_WAL : 1
HYPERLIPIDEMIA_WITH : 1
DATE_SESSIONS : 1
EYE_DROP : 1
OF_PENIS : 1
YEARS_AGO : 1
VETERAN_KEEP : 1
TO_TRANSFER : 1
PROGRESS_PATIENT : 1
GOAL_ABOUT : 1
THE_TRANSVERSE : 1
ML_SPUTUM : 1
FOR_STOOL : 1
FOLLOWED_THEM : 1
THE_CARDS : 1
DOES_NOT : 3
NEGATIVE_ON : 1
WERE_GOING : 1
SICK_URGENT : 1
PT_DIAGNOSED : 1
PATIENT_OUTPATIENT : 1
ADMISSION_ADDENDUM : 1
DYSPHAGIC_NO : 1
PATIENT_REMAINS : 1
DEPRESSION_WHICH : 1
BE_PATIENT : 1
ECCHYMOSIS_AND : 1
CM_HE : 1
ILLNESSES_ACTIVE : 1
DATE_BLIND : 1
BUT_SWELLING : 1
JUANITA_NURSING : 1
GROUP_ARE : 1
IN_EDEMA : 1
RESP_ATRIAL : 1
BE_MAILED : 1
YOUR_PAIN : 1
OR_HER : 1
APPLICABLE_THIS : 1
NOTE_POSITION : 1
FEVER_NVD : 1
THE_SOCIAL : 1
PHYSICIAN_VETERAN : 1
THE_SHIFT : 1
THIS_PT : 2
RISK_DATE : 1
LEG_WAS : 1
ADDENDUM_WEIGHT : 1
INTERIM_INFLUENZA : 1
ANTIBIOTIC_CONTINUES : 1
HISP_WIDOWED : 1
MALE_VETERAN : 2
CONSENT_IF : 2
OF_COMPLICATIONS : 1
KG_THE : 1
SEE_PT : 1
RN_NOTE : 1
PRIMARY_STRESSORS : 1
IN_CLINIC : 1
SAYS_THE : 1
SPREAD_OBSERVATION : 1
AFTERCARE_LONG : 1
DOWN_BUTTONS : 1
ME_UNDER : 1
VETERAN_NO : 1
WITH_PAIN : 1
SITE_NOTIFY : 1
PAST_AND : 1
DRAINS_NONE : 1
HOMICIDAL_PROVIDER : 1
RACE_SEX : 1
WITHDRAWAL_VET : 1
SHAVE_NAIL : 1
ADDENDUM_CALLED : 1
POST_PROCEDURE : 1
NO_RAZOR : 1
REFUSAL_TYPE : 1
DEPRESSED_BALDWIN : 1
TAB_QHS : 1
RX_NAILBEDS : 1
ANGIOECTASIA_THE : 1
HEAD_OF : 1
STEADILY_WITHOUT : 1
SHIFT_THIS : 1
ASSOCIATED_ALCOHOL : 1
COUNSELED_REGARDING : 1
CALLER_OTHER : 1
INTELLIGENCE_STABILITY : 1
COMPLETE_DIRECTIVE : 1
AFTER_BEFORE : 1
ALCOH_RACE : 1
VENTILATION_OF : 1
NOT_ELIGIBLE : 1
TO_INCREASE : 2
EVENT_VISION : 1
CRACKLES_EFFECTIVENESS : 1
HE_AFRAID : 1
RX_THE : 1
CALLER_AREA : 3
POST_SPOKE : 1
CARDS_MAIL : 1
NUTRITION_THESE : 1
VETERAN_WILL : 2
ON_PARTICIPATED : 1
LATER_PT : 1
CAROL_RETURN : 1
SUICIDE_COORDINATOR : 1
USUAL_EFFECTS : 1
UNRESTRICTED_AMBULATING : 1
ALL_THESE : 1
IDENTIFIED_TYPE : 1
SHORTER_PT : 1
THEIR_LIVES : 1
WAL_PAIN : 1
STATED_HE : 2
ABOUT_ANYTHING : 1
TWO_FRIENDS : 1
ELIMINATION_FOLLOWED : 1
ALCOH_PATIENT : 1
PROVIDER_AHN : 1
STOOL_ASSISTIVE : 1
ENT_HEARING : 1
HAVING_FOR : 1
ALLERGIES_ADR : 1
TWO_RESCHEDULE : 1
ARE_HEARING : 1
ATTEMPTS_OR : 1
DATE_SUPERVISING : 1
GOOE_AND : 1
FOR_PREDICTING : 2
DO_NOT : 1
URINE_COLLECTED : 1
AND_RECOVE : 1
DEMENTIA_DOES : 1
BREATHING_COUGHING : 1
HAVING_PATIENT : 1
INHIBITORY_AND : 1
SORE_HYPERTENSION : 1
CONDUCIVE_TO : 1
PHONE_TO : 1
STUDY_PERFORMED : 1
PATIENT_MANAGEMENT : 1
REPORTS_CONTINUED : 1
SCORE_REPORTS : 1
SIDE_EFFECT : 1
MEDICINE_CONSULT : 1
PATIENT_FOUND : 1
CALLED_AND : 2
SHAVE_HAND : 1
ARE_CONTINUOUSLY : 1
HIS_LAST : 1
HARD_TO : 1
ROOM_HYGIENE : 1
ACCEPT_ASSISTANCE : 1
REMAINS_ON : 1
MYOFASCIAL_DATE : 1
NO_VETERAN : 2
WHO_THE : 1
NURSES_REVIEWED : 1
AND_DIVORCE : 1
WOULD_LIKE : 1
WITHOUT_OR : 1
ARE_DISCHARGED : 1
HE_THIS : 1
PATIENT_NOTE : 1
PATIENT_SEX : 1
IS_WITH : 3
PLAN_NEC : 1
IS_HES : 1
VETERAN_HIS : 2
MOIST_MEDICATION : 1
EXPIRED_WITHOUT : 1
TRY_ANOTHER : 1
IN_WAS : 2
OTHER_NAME : 1
WOULD_OR : 1
VET_WITH : 1
AROUND_AND : 1
WILL_DO : 1
ATRIAL_MEDICATIONS : 1
ABOVE_MEDICATIONS : 1
OPEN_SHARING : 1
MAINTAIN_SOBRIETY : 1
CM_DECOMPRESSIONS : 1
FUNCTIONNG_AND : 1
TREATED_CONTACTED : 1
BEEN_INFORMED : 1
STATUS_TIMES : 1
HCV_PTSD : 1
COMPARISON_HIS : 1
AM_WELL : 1
CLC_FOR : 1
STAFF_CONTINUE : 1
HAS_PMH : 1
VA_IS : 2
CHART_TREATMENT : 1
HOURS_AM : 1
TREMENDOUS_HAVE : 1
FOR_SWER : 1
HAVE_QUESTIONS : 1
SHAMPOO_ORAL : 1
HAD_SYSTEM : 1
DENIES_IN : 1
APPT_LEG : 1
HIM_HE : 1
TESTING_IN : 1
SIDE_THE : 1
CARE_POSITION : 1
UCINATIONS_ON : 1
COORDINATOR_ETOH : 1
HAND_AT : 1
ARE_AT : 1
NONE_TEARS : 1
DAILY_OR : 1
TO_MAILED : 1
COMPLETION_WILL : 1
QUIET_SCREEN : 1
SUGARS_BLOOD : 1
PAIN_PULSE : 1
EDUCATED_THE : 1
INSTRUCTIONS_SURGERY : 1
CINCINNATI_FEW : 1
CONTINENT_PRESENTED : 1
CALLED_AM : 1
SEEN_YEAR : 1
HYGIENE_SALINE : 1
HIS_MAY : 1
NEED_BE : 1
SURGERY_INITIATED : 1
TAB_TABLET : 2
CESSATION_SCHEDULED : 1
POINTS_TO : 1
PT_TOLD : 1
THE_MS : 1
BLIND_UNIT : 1
MALE_AGE : 1
MAINTAIN_SAFETY : 1
INFORMED_THIS : 1
PATIENT_MESSAGE : 1
HOSPITALIZED_FROM : 1
PAIN_ARTIFICIAL : 1
ABOVE_USING : 1
RESCHEDULE_APPT : 1
RISK_FOR : 1
OR_THE : 1
OR_VISUAL : 1
NOT_SMOKE : 1
MUCH_SHARING : 1
IC_SAFETY : 1
AND_ADEQUATELY : 2
HISTORY_ALCOHOL : 1
BE_WHEN : 1
FROM_AND : 2
INJECTION_SHINGLES : 1
CORONARY_PLAN : 1
BEGINNING_OF : 1
BEHAVIOR_OF : 1
NENT_TIMES : 1
COMPUTERS_HEALTH : 1
NO_CANCELLATION : 1
FOUND_BE : 2
DTC_PROGRAM : 2
THE_RIGHT : 1
THIS_TASK : 3
ALLERIGES_HEENT : 1
RECEIVED_SS : 1
MHC_MENTAL : 1
ANXIETY_HE : 1
CBOC_LABORATORY : 1
TIME_TO : 2
NUTRITIONAL_PNEUMONIA : 1
CLINIC_NOTE : 3
SKIN_HYPERTENSION : 1
DOSE_OF : 1
SUICIDAL_THOUGHTS : 1
HELP_HYGIENE : 1
PATIENT_SEASON : 1
ES_WITH : 1
WITH_HE : 1
RETINAL_PAIN : 1
IN_IMPAC : 1
MEAL_SUPERVISION : 1
WEEK_SOUGHT : 1
LEVELS_USES : 1
YOU_PAIN : 2
SUTURES_STERISTRIPS : 1
ETHNIC_WARM : 1
SAFETY_AND : 2
AND_STRENGTH : 1
BE_AT : 2
SUICIDE_DVT : 1
WITH_INSTRUCTIONS : 1
PULSE_AGREES : 1
TOLERATED_RECOMMENDATION : 1
TANGENTIAL_DISCUSSION : 1
ANY_HOMICIDAL : 1
ER_NOTE : 1
ACTIVE_CHRONIC : 1
DATE_THE : 2
AND_UP : 3
STATED_UNDERSTANDING : 1
INAPPROPRIATE_REQUESTED : 1
UNDERSTANDS_IS : 1
FOR_RECHECK : 1
MEDICATION_STATING : 1
DENIED_BLADDER : 1
THE_MEDICAL : 3
TO_FOR : 2
NURSE_ASSIST : 1
IN_SHOWED : 1
COCAINE_DEPENDENCE : 1
QH_NASAL : 1
HER_CAUTION : 1
AGE_CITALOPRAM : 1
ON_ANSWERING : 1
TO_THE : 14
IMPAIRED_DESCRIBE : 1
APPOINTMENT_BP : 1
CONTENTS_VETERAN : 1
MANAGER_OSAC : 1
TO_COME : 1
LIFESTYLE_CANCELLED : 1
THE_MEDICATIONS : 1
CONSISTENCY_OF : 2
PROGRAM_COMPLETION : 1
REASONS_DC : 1
OCCURING_IS : 1
EASE_DROP : 1
PER_HAS : 1
BY_MOUTH : 6
TIME_PLANS : 1
CALLED_NOW : 1
FLUIDS_BED : 1
STATEMENT_INTERIM : 1
IF_PRIOR : 1
OCCUPATION_PATIENT : 1
REVIEWED_TO : 1
TO_TALK : 1
ASSIST_FRIEND : 1
HOARSENESS_HYPERTENSION : 1
SSN_AGE : 1
FOOT_CARDIOLOGY : 1
POTASSIUM_NPO : 1
TEACHING_WAS : 1
BRC_HBPC : 1
WOULD_JUST : 1
NURSES_OF : 1
OVERSIGHT_ENCOURAGEMENT : 1
HE_USED : 1
ASSISTANCE_MOBILITY : 1
CONTROL_PANEL : 1
COPING_STRATEGIES : 1
CAUSES_SERIOUS : 1
TES_ATTENDED : 1
LEFT_FOR : 1
RIGHT_ABRASION : 1
HOME_PHONE : 2
ATROVENT_MG : 1
SCALE_POLLEN : 1
TAB_PROGRESS : 1
DENVER_MATCH : 1
PSYCHOSIS_VS : 1
GROOMING_PERSONAL : 1
JOINT_RAL : 1
HERE_THE : 1
FOLLOWING_DESCRIBES : 1
PATIENTS_COMFORT : 1
TIME_PLACE : 1
IS_CONFIRMED : 1
RESULTS_SINCE : 1
FINANCES_DIVORCE : 1
TEETH_WAS : 1
REASON_FOR : 1
CHANGES_INITIAL : 1
SC_HE : 1
MIN_ACTION : 1
AND_MEDICATION : 1
NOTE_HE : 1
IN_MOST : 1
TAKE_TABLET : 6
CANCER_PLANS : 1
MAINTAIN_BEHAVIOR : 1
IT_RIVIERA : 1
TRAV_OU : 1
TDAP_IN : 1
BY_ITSELF : 1
TRY_METHOD : 1
THE_PARTICIPATE : 1
IMPAIRMENT_NO : 1
PILLS_AT : 1
ELIGIBLE_FOR : 1
CARE_USING : 1
GROUP_ATTENDED : 2
SYND_PTSD : 1
FALL_SCALE : 1
AFTER_WILL : 1
CARE_HIS : 1
PT_PRODUCTIVE : 1
FOWLER_COMMENTS : 1
MIN_SHOW : 1
IT_PROVIDED : 1
ASSISTIVE_ELIMINATION : 1
CLONAZEPAM_TAB : 1
SEEN_FOR : 1
PATIENT_DIAGNOSIS : 1
AMBULATING_STEADILY : 1
PT_MINIMAL : 1
UNTIL_NOON : 1
AT_AS : 1
AND_MANAGEMENT : 1
NO_BARRIERS : 1
OR_INTERVENTIONS : 1
THE_THE : 4
PT_REPORT : 1
HAVE_PAIN : 2
ADDENDUM_OF : 1
THERAPEUTIC_PHYSICIAN : 1
WRITE_RESUM : 1
SHEET_DETAILS : 1
MORPHINE_BID : 1
THAT_WAS : 2
INC_MG : 1
AND_AM : 1
DUE_ABINOIDS : 1
HIS_HERNIA : 1
QUESTION_VETERAN : 1
CONSULT_REVIEWEDUNCHANGED : 1
DVT_SURGERY : 1
NOTE_MOBILITY : 1
UMBICIAL_HERNIA : 1
MANUFACTURERS_TABLET : 1
COMPLETE_AFTERCARE : 1
THE_DOSE : 1
AND_INTERMITTENT : 1
BACK_JUNE : 1
RECREATION_ASSESSMENT : 1
OF_PATIENT : 3
INSTILL_DROP : 1
HAD_DIFFICULTY : 1
WAR_AND : 1
MUSCLE_RELAXATION : 1
BUT_MORE : 1
EFFECTS_DENIES : 1
GROOMING_OTHER : 1
INCISED_CUT : 1
OR_STREET : 1
AND_FOR : 2
MOVEMENT_DISORDER : 1
FOR_TASK : 3
LABS_WBC : 1
NO_ELECTRIC : 1
UP_UROLOGY : 1
HAVE_APPOINTMENT : 1
PLEASE_LET : 1
GROUP_THEY : 1
WITH_OF : 5
WITH_WEIGHT : 1
COMMUNICATION_WITH : 1
PROCEDURE_ASF : 1
VA_CONSULTED : 1
NAOMI_LCSW : 1
KNOWN_NONVA : 1
ATYPICAL_CHEST : 2
VET_JR : 1
SAID_HE : 1
FOR_PROMOTION : 1
BEFORE_PT : 1
ANTICOAG_NOTE : 1
AS_MS : 1
MEDICATION_REFILL : 1
WIDOWED_MALE : 1
YOU_LIKE : 1
YOU_ABOUT : 1
CHAMBER_OD : 1
RECOMMENDED_FOLLOWUP : 1
TASK_TOTAL : 1
INHALER_EDUCATION : 1
VARIOUS_MEANS : 1
CE_PT : 1
DIAGNOSES_PTSD : 1
AND_NOT : 2
SHARING_HOW : 1
HPI_IS : 1
WINDOW_TO : 2
FOLLOW_AM : 1
STRENGTH_WILL : 1
SCORE_IS : 1
NEEDE_HE : 1
IN_BREATHING : 1
GROUP_PROGRAM : 1
OTHER_AND : 1
ANESTHETIC_CLINICAL : 1
TO_PLACE : 1
RELATES_ADDED : 1
LIP_DERM : 1
MR_PARTICIPATED : 1
BALDWIN_CAROL : 1
ILLICIT_USE : 1
CASUALLY_DRESSED : 2
PERCENT_OF : 1
ACKNOWLEDGED_ADDENDUM : 1
WILL_HER : 1
TEMPORARILY_HELD : 1
DOSIMETRY_CHANGES : 1
FROM_INITIAL : 1
PATIENT_ASSESSMENT : 1
REPORT_DOES : 1
THAT_LOCATION : 1
NKA_ILLNESSES : 1
PERSON_ORIENTED : 1
NO_EFFECT : 1
BEEN_MAILED : 1
TRIAGE_NOTE : 2
COMFORT_PROVIDED : 1
HE_INTENDS : 1
GIVEN_PO : 1
CHRONIC_RIGHT : 1
WILL_COVER : 1
ASSISTANCE_UP : 1
MEDICINE_ALLERIGES : 1
INPATIENT_DOSES : 1
BLOOD_BLOOD : 2
TO_REST : 1
OCCLUSION_STENOSIS : 1
WITH_MALE : 1
CESSATION_HAD : 1
AHN_MD : 1
HOURS_COMPLETE : 1
AIDS_HE : 1
AQUATICS_AS : 1
SERVICE_RETURNED : 1
PAIN_HOW : 1
CLOZAPINE_MYLAN : 1
BROS_PATIENT : 1
TREMOR_ARMS : 1
WHEN_TO : 1
WITH_WILL : 1
RESOLUTION_OF : 1
AGREES_PROCEDURE : 1
VETERANS_AS : 1
KNOWS_HIS : 1
WISHES_TO : 1
COLLECTED_SENT : 1
HISP_MALE : 1
HOWEVER_EXPIRES : 1
WALKIN_NLR : 1
BURN_ON : 1
RESOLVED_TO : 1
HE_GETS : 1
LOWER_ABNORMALITY : 1
VETERAN_TALKS : 1
TANAKA_PSYCH : 1
REVIEW_THE : 1
HE_SUICIDAL : 1
ZIMBLEMAN_SERVICES : 1
LOWER_DERM : 1
FOR_WE : 1
LESIONS_CONTACTED : 1
TEMPERATURE_MEMBERS : 1
ON_SP : 1
CHECKS_AS : 1
AC_PLASMA : 1
WIFE_NURSING : 1
ORIENTATION_ORIEN : 1
CUTTING_MEAT : 1
BY_TWICE : 1
DEPTH_AND : 1
DIFFERENT_FROM : 1
LIKE_DO : 1
NO_SEDATION : 1
HAS_PT : 1
TO_TEACHING : 1
TO_RESIDENT : 1
RISKS_SUPPORTIVE : 1
AND_HOME : 1
SUBCUTANEOUS_SWELLING : 1
PER_LPN : 1
ON_LEATHER : 1
DRUGS_PERCODAN : 1
GAUGE_SALINE : 1
TESTING_APRIL : 1
APPT_INCISED : 1
BE_IDENTIFIES : 1
ARE_OR : 1
ROOM_NUMBER : 1
VETERAN_AND : 2
EXAMINATION_APPEARS : 1
RETURN_TO : 2
HAS_ON : 1
OBSERVED_SITTING : 1
WORSENING_AFTER : 1
INSIDE_THE : 1
RECURRENT_IN : 1
UNDER_TREMENDOUS : 2
OBSERVATIONS_MENTAL : 1
NO_RESPIRATORY : 1
WHEEZES_OF : 1
ME_AND : 1
WITH_HYGIENE : 1
INCREASED_FIRESEEKING : 1
HE_BARETT : 1
CANCE_STATED : 1
BEEN_PLACED : 1
THE_ANTICOAGULANT : 1
OF_STOOLS : 1
DEATH_DENIES : 1
MORNING_HAS : 1
MET_CRITERIA : 1
SAFETY_MH : 1
ER_THE : 1
PHONE_COMPLAINTS : 1
HAND_CARE : 1
FELT_SUICIDAL : 1
HIS_TC : 1
TO_INDEPENDENT : 1
HE_ARE : 1
CONSTRICT_LEG : 1
GENERAL_NEG : 1
SURE_HOW : 1
RESIDENT_TOTAL : 1
AWAKENS_PRODUCTIVE : 1
OF_DEPRESSION : 2
CC_HERE : 1
MEDICATION_VETERAN : 1
PAST_SUPERVISOR : 1
PT_BE : 1
THIS_MOBILITY : 1
STOOLS_NORMAL : 1
WORKER_NO : 1
PAIN_TO : 2
PROTOCOL_WILL : 1
TREATMENT_TREATMENTS : 1
LEFT_ACTIVITY : 1
AND_CALLED : 1
WAL_OMEPRAZOLE : 1
NAPROXEN_BEDTIME : 1
UP_HE : 1
AND_PHYSICIAN : 1
RECEIVES_HISTORY : 1
BACTRIM_TABLET : 1
LATER_TIME : 1
CBOC_BY : 1
HOW_OFTEN : 1
LOUD_AGAIN : 1
WITHDRAWAL_FROM : 2
QH_DISCUSS : 1
STABLE_FOR : 1
PATTERN_GROOMING : 1
PAINFUL_TOUCH : 1
KNOWLEDGE_OF : 2
CONSENT_TO : 1
PRN_REORDERED : 1
WEIGHT_HE : 1
WELL_PATIENT : 1
VIAL_ORAL : 1
TAB_QH : 1
PLEASE_REPEAT : 1
ULCER_PROTOCOL : 1
SHORTER_HIS : 1
NEGATIVE_CONCERNS : 1
RECORD_MAY : 1
SMOKING_VETERAN : 1
SYMPTOMS_BEEN : 1
WITHIN_REAC : 1
LB_KG : 3
BOWEL_TEMP : 1
CONSULT_FROM : 1
WITH_BOSS : 1
PLACED_OA : 1
NOTED_TREATMENT : 1
FUTURE_HYPERTROP : 1
HIM_PLAN : 1
PROVIDER_WITH : 1
FORE_OR : 1
PINS_NEEDLES : 1
FOR_INTRODUCING : 1
MAY_BIOPSY : 1
VETERAN_THIS : 1
FOR_SOFTENER : 1
TRAVATAN_HOWEVER : 1
CHEST_BUT : 1
RECOVERY_LIFESTYLE : 1
THE_LUNCH : 1
TO_PALMAR : 1
TAB_IS : 1
BE_BY : 1
NO_SELF : 1
AFTER_AND : 1
VS_NEEDE : 1
WITH_BILLING : 1
DIAGNOSED_WITH : 1
ROUTES_AROUND : 1
OF_ARRIVAL : 1
MAKE_ENDS : 1
HE_WALKING : 1
SEDATION_LEFT : 1
LIN_IS : 1
COLOR_CLEAR : 1
AGAIN_CAME : 1
PTS_IN : 1
ELSE_HYDROCELECTOMY : 1
VETERAN_WE : 1
WITH_DIFFICULTY : 1
DATE_PAIN : 1
DESCRIBED_THOSE : 1
PATIENT_SCHEDULED : 1
WITH_HOURS : 1
OUT_SENSE : 1
HAIR_ACTIVITIES : 1
SINCE_LAST : 1
TOTAL_SOMEWHAT : 1
HIS_PTSD : 1
OLD_MALE : 2
IN_PAST : 4
OF_MOBILITY : 1
FINGER_EXAM : 1
CASE_MANAGEMENT : 1
HE_DESCRIBES : 1
FOLLOW_ON : 1
HAS_RESOLVED : 1
NEED_FOR : 4
AMBULATORY_AIDS : 1
CN_OBESITY : 1
FOR_LB : 1
CARDIOLOGY_CONSULT : 1
REPORTED_CAN : 1
STANDING_AND : 1
DC_INSTRUCTION : 1
FALL_WHAT : 1
THE_COLONOSCOPY : 1
BEHAVIORAL_AT : 1
FIELD_CHANGED : 1
BEDTIME_BEEN : 1
SAFE_OUTPT : 1
CITALOPRAM_TAB : 1
TO_REFUSE : 1
ATTENDANCE_ATTENDED : 2
THERAPEUTIC_HIP : 1
REPORT_PATIENT : 2
PROBLEMS_DISTURBANCES : 1
FRONT_CLACICLE : 1
YOU_HAVE : 5
STARTING_HX : 1
DEPRESSION_SENT : 1
BE_SEEN : 1
IS_VOLUME : 2
ONE_SURFACEANTERIOR : 1
THE_DEVIL : 1
PATIENT_OXYGEN : 1
HEIGHT_DONE : 1
ACTION_WHAT : 1
TRAZODONE_HCL : 1
AM_TO : 1
CONTINENT_CALLED : 1
OSAC_FOLLOW : 1
OFFERED_BOWLING : 1
DRESSING_EDUCATION : 1
ALCOHOL_INFORMATION : 1
SECURED_ARMBAND : 1
OF_SEVERE : 1
STENT_DENTAL : 1
OTHER_OIL : 1
IS_CONSISTENT : 1
WAS_LAST : 1
AN_ENVIRONMENT : 1
ML_OVER : 1
HYGIENE_LOCK : 1
GROWN_IN : 1
OXYCODONE_PERCOCET : 1
DIFFERENT_DEMOGRAPHICS : 1
MG_ML : 1
IS_HEALING : 1
SIGNS_BASELINE : 1
MIAMI_HE : 1
DIFFICULT_AT : 1
HAVE_YES : 1
FEELS_THIS : 1
MEDICATIONS_QUESTION : 1
THIS_BEHAVIOR : 1
FLAT_HIS : 1
MENTAL_HEALTH : 7
REACHED_BASELINE : 1
DESCRIBE_UNRESTRICTED : 1
METHOD_PATIENTS : 1
THOUGHT_SINUS : 1
VETERAN_UNDERSTANDS : 1
RECOMMEND_PLEASE : 1
BERNA_ROUTINE : 1
BE_JUST : 1
EYE_DISORDER : 1
MD_ONSET : 1
SHOES_TSTRAP : 1
HEALTH_CONVERSATION : 1
EXAM_DOES : 1
BE_ON : 1
ONE_PERSON : 2
PATIENT_PHONE : 2
UNRESTRICTED_STEADILY : 1
CUEING_NONE : 1
STRESSOR_INTELLIGENCE : 1
THIS_SUPPORTIVE : 1
PHYSICIAN_BEEN : 1
THOUGHTS_THAT : 1
REACHED_HIS : 1
HIS_HAIRBRUSH : 1
DRINKS_COLOR : 1
TO_TC : 1
MIVA_FOR : 1
CLONAZEPAM_WITH : 1
FINANCIAL_PAIN : 1
ABOUT_IN : 1
VETERAN_NAME : 1
TIMES_MUSCLE : 1
CONVERSATION_LIN : 1
CAUTION_BAXORETENE : 1
CONCENTRATING_MENTAL : 1
YEAR_OLD : 3
ORDER_SCAN : 1
WILL_REQUIRE : 1
DISCHARGE_INSTRUCTION : 1
TAKING_TAB : 1
GOING_TRY : 1
SELF_HEIGHT : 1
WERE_USED : 1
SEE_PHSYCOLOGISTS : 1
RYLAND_SOME : 1
DT_UR : 1
OPTIONS_HE : 1
DOZ_TO : 1
RESTRAINTS_IN : 2
THE_RESPONDED : 1
ANY_RESPONSE : 1
ML_COLOR : 1
COUGHING_PRESSING : 1
SYMPTOMS_PROBLEMS : 1
IS_FOR : 7
RADIATION_THERAPIST : 1
CMC_REPORT : 1
VIRUS_PAIN : 1
AT_HIS : 1
MADE_ENCOURAGED : 1
HEENT_CLEAR : 1
UPDATE_ANTICIPATED : 1
SIDE_OF : 2
DAILY_THERAPY : 1
MH_PSYCHIATRY : 1
ADMISSION_DATE : 1
REQUEST_RADIATION : 1
TO_HIMSELF : 1
SITTING_BED : 1
HIS_UMBICIAL : 1
TIMES_INTERMITTENT : 1
JUST_HIM : 1
OTHER_QUESTIONS : 1
HE_BETTER : 1
HIS_CURRENT : 1
NOT_CRITERIA : 1
CONSULT_PAIN : 1
THE_CONSENT : 1
INFUSE_OVER : 1
TAXI_MAILED : 1
UPSET_BECAUSE : 1
HE_ANOTHER : 1
CLOTHING_ANTICOAG : 1
COMPLETED_PER : 1
AND_SPREAD : 1
PROCEDURE_QUESTIONS : 1
GROUP_ADDRESS : 1
RESIDENCE_ON : 1
WAS_PROTOCOL : 1
DEPAR_HAD : 1
WIFES_AM : 1
BRUSH_HAIR : 1
SUPPORTIVE_PSYCHOTHERAPY : 2
THAT_HAVING : 1
DATE_TIME : 4
THAT_FOR : 1
HERNIA_MONTH : 1
WITH_MORPHINE : 1
NOTET_TIME : 1
BREAKFAST_BEHAVIORAL : 1
PATIENT_REASON : 1
PRESENTED_IN : 1
PROCESS_CLEARER : 1
APR_REQUESTED : 1
INTERESTED_IN : 1
POTENTIAL_INCREASED : 1
CONSENT_OBTAINED : 3
FAMILY_TYPE : 1
GRANDKIDS_AM : 1
HEARING_PROTECTION : 1
WOUND_IS : 1
AND_VASCULAR : 1
PAIN_UNAWARE : 1
HE_FOR : 1
SOCIAL_PSYCHIATRIC : 1
GROUP_PHYSICIAN : 1
BUTTONS_VETERANS : 1
CONCENTRATING_STATUS : 1
EXPIRED_OR : 1
BY_THEM : 1
BE_INFORMED : 1
PREVENTION_PAIN : 1
TOLD_HE : 1
ISTON_EVALUATION : 1
WORN_FROM : 1
DECLINED_GLAND : 1
AGAIN_ATTEMPTED : 1
WEARING_COAT : 1
NO_HI : 1
PHYSICIAN_ATTENDING : 1
DISORDER_DEPRESSED : 1
HAVE_PRN : 1
THE_COMES : 1
STREET_TIME : 1
ROUTE_TO : 1
VOLUNTEER_DVAMC : 1
EMPLOY_COPING : 1
SCANNED_THIS : 1
HAD_PROBLEMS : 1
COMPLETE_DC : 1
CHANGES_FROM : 1
II_NARCISSISTIC : 1
FOR_THIS : 6
AND_OR : 3
ALL_TRANSFER : 1
OBMT_HE : 1
OF_URINE : 1
MYLAN_TAKE : 1
IS_OF : 1
ACTION_PLAN : 1
NECESSITATE_BIOPSY : 1
OFFERING_WHICH : 1
SOCKS_NOW : 1
WEAR_IN : 1
OF_HE : 2
NURSE_INTRAOPERATIVE : 1
NOTED_NO : 1
INTENDS_TEAMS : 1
VETERAN_PRESENTED : 1
BELIEFS_HCL : 1
ME_THE : 1
SAFETY_EVIDENCED : 1
PATIENT_CONTINUE : 1
DOCTORS_SO : 1
NOTED_NEW : 1
STRESS_AND : 1
NS_CONSCIOUSNESS : 1
ACTIVITY_OR : 1
NAIL_INFORMED : 1
HOW_PATIENT : 1
NUTRITION_SWS : 1
BAXORETENE_HYPERLIPIDEMIA : 1
PAIN_MARITAL : 1
ABUSE_EXPLAIN : 1
THE_BUTTOCK : 1
BEEN_INVOLVED : 1
CHILDREN_AND : 1
DONE_LIQ : 1
CLINIC_WOOTEN : 1
WITH_MENTAL : 1
SC_DOCUMENT : 1
THAT_ROUTES : 1
METHOCARBAMOL_AND : 1
NUMBER_ENTERED : 1
OPIOID_DEPENDENCE : 1
AN_ESCAPE : 1
TO_SCHEDULED : 1
FEEDING_PROGRAM : 1
POSSIBLE_DISKECTOMY : 1
AND_UNABLE : 1
NUMBER_YES : 1
NEED_REST : 1
PLACE_DECLINED : 1
TABLET_BY : 5
EXT_LIDS : 1
BAL_ON : 1
USAGE_BLOOD : 1
ET_HE : 1
THEY_HAVE : 1
CANCELLED_HE : 1
CN_INTACT : 1
OF_YES : 1
PROBLEMS_THIS : 1
OR_SKIN : 1
VA_OFFICERS : 1
STEPS_NEW : 1
CALL_HER : 1
NEED_FURTHER : 1
TKA_MANIPULATION : 1
THAT_LIKELY : 1
HOSPITAL_THE : 1
TEETH_PT : 1
NUMBER_PULSE : 1
MEDICATIONS_OUTPATIENT : 1
DRUGS_BACTRIM : 1
FEELING_WORN : 1
THE_ST : 1
LOCATION_OFFICE : 1
TO_LEVEL : 1
URGES_PT : 1
SOMTHING_HAND : 1
AT_MIN : 1
KG_ORTHOPEDIC : 1
OTHERS_PROTECTORS : 1
ANTICIPATE_URGES : 1
TREMBLING_KNOWS : 1
CHF_HX : 1
AN_APPOINTMENT : 2
ECCHYMOSIS_IS : 1
ANXIETY_AND : 1
PROVIDER_BAKER : 1
SICK_APPOINTMENT : 1
PCT_CASA : 1
SUICIDE_PREVENTION : 1
RECENT_HE : 1
OF_HOSPITAL : 1
DUPLEX_IN : 1
INTAKE_COMMENTS : 1
THE_NONE : 1
MEET_THE : 1
SENSE_OF : 1
BASCOM_PALMER : 1
CHIEF_OF : 2
HD_MG : 1
PT_CAN : 1
BEEN_RECONCILED : 1
PATIENT_ANES : 1
THERAPEUTIC_OUTCOMES : 1
NEWTON_YES : 1
EDUCATED_ON : 1
WITH_WHO : 1
CM_HEIGHT : 1
OFF_AND : 1
THE_ABSCESS : 1
TOBACCO_INFORMED : 1
BUT_ISSUES : 1
BUSINESS_PLEASE : 1
RECS_HE : 1
CONSCIOUS_WITH : 1
VETS_AND : 1
PHONE_PROTOCOL : 1
DISCUSS_PROGRAM : 1
REASONS_FOR : 1
THESE_FACTORS : 1
PROGRESS_RESPIRATION : 1
OTHERS_BE : 1
FOR_VITAMIN : 1
WHEN_THATS : 1
IN_WITH : 1
PLACED_DEC : 1
DRESSED_NOTE : 1
MEDICATION_VENT : 1
TEETH_DEFICIENCY : 1
OFFICER_HE : 1
DEVIL_CONVERSATION : 1
LISTED_BEEN : 1
IS_HE : 2
BRISTOL_CALLER : 1
FOR_OF : 3
IS_TREMBLING : 1
TAKING_THAT : 1
NOTE_PLASMA : 1
HOW_DO : 1
RX_CLINICAL : 1
HIS_VETERAN : 1
PAC_MEMORIES : 1
TEACHING_NURSE : 1
STATES_THAT : 5
MORPHINE_MG : 1
AK_LIP : 1
USUAL_OBJECTIONS : 1
ON_DISABILITY : 1
LOCATIONS_INFOPRO : 1
NOT_CONVINCED : 1
ENCOURAGEMENT_OR : 1
BLD_CALLED : 1
SYMPTOMS_BASELINE : 1
OFFICERS_REFILLS : 1
ICDCM_TACHYCARDIA : 1
AND_OUR : 1
VISION_PENDING : 1
WITH_PATIENT : 3
RELATIONSHIP_WIFE : 1
INSTANCES_OF : 1
TO_SUICIDE : 1
APPETITE_AND : 1
CO_YES : 1
EXPERIENTIAL_ON : 1
WERE_TO : 2
ONE_POSITIVE : 1
PULSE_VET : 1
MUSCLE_SC : 1
BASELINE_LEVEL : 1
JGXMT_DATE : 1
FEELING_SUICIDAL : 1
THOUGHTS_NO : 2
PSYCHOLOGY_PATIENT : 1
TO_AGAIN : 1
LOBBY_SKIN : 1
THEM_THE : 1
FEEDING_NO : 1
DRAINAGE_HE : 1
ACTIVE_INTENT : 1
CHEST_CLONAZEPAM : 1
USE_ACTIVE : 1
HE_DENIES : 1
MEDICINE_NURSING : 2
DONE_DURING : 1
POW_NO : 1
VET_STATED : 1
WILL_ATTENDANCE : 1
COGNITIVE_RESTRUCTURING : 1
CONSULT_FOR : 1
IS_MOREOVER : 1
PREVENTION_WAS : 1
DRIVING_FALLING : 1
OCT_GOAL : 1
ISSUES_THAT : 1
AM_JULY : 1
IN_MORNING : 1
DESCRIBES_AS : 1
EXTRA_PAIN : 1
PENCIL_WHICH : 1
ALSO_TO : 1
IDEATION_BEFORE : 1
ANEMIA_SOME : 1
LYMPH_THOUSAND : 1
HIMSELF_DEATH : 1
TAB_FRI : 1
DIVISION_THAN : 1
NOTE_PREVENTION : 1
DEFICIENCY_ANEMIA : 1
HE_KNEW : 1
SSN_USED : 1
DRINK_TO : 1
RUE_AT : 1
DJD_VS : 1
TAB_TH : 1
MEETING_WITH : 1
YES_HE : 1
SCHEDULED_THE : 1
AND_SAUDI : 1
RESOLVED_ADVISED : 1
DENIES_OR : 1
UNCERTAIN_BEHAVIOR : 1
VERBALIZE_PROBLEMS : 1
DILTIAZEM_MG : 1
CULTURAL_RELIGIOUS : 1
EQUIPMENT_LIQUID : 1
REFERRED_TO : 2
RED_AND : 1
SMOKE_TO : 1
HE_ATTEMPTED : 1
NOTE_RETAINED : 1
BEEN_PROBLEMS : 1
MANAGEABLE_VITAL : 1
BRISTOL_CBOC : 1
TYLENOL_PAIN : 1
MENTAL_SEX : 1
HAVE_SUICIDAL : 1
HERE_BUT : 1
ISZESKI_DOB : 1
UP_BY : 1
HAVE_AGGRAVATING : 1
FEW_AGO : 1
AS_PER : 3
HE_GOOD : 1
WITH_ALCOHOL : 1
HYDROBROMIDE_MG : 1
DIAGNOSIS_DEP : 1
COMPLIANCE_OR : 1
REQUIRE_LMWH : 1
INH_ORAL : 1
AT_RESIDENCE : 1
PLASM_FLOATER : 1
LOCATION_DENVER : 1
AND_LL : 1
FRIEND_WHO : 1
SWS_CLC : 1
ENVIRONMENT_AND : 1
THAT_WOULD : 1
ME_KNOW : 1
NOTE_OPERATE : 1
ACCEPT_CILO : 1
PROGRAM_TYPE : 1
SX_SAYS : 1
PROCEDURE_PATIENT : 1
HAVING_SURGERY : 1
RADIATION_TREATMENT : 1
NEXT_APPOINTMENT : 1
INTERMITTENT_PT : 1
HAS_ENROLLED : 1
SYMPTOMS_TREATMENT : 1
MAY_HAVE : 1
HE_CHEST : 1
THE_HOURS : 2
LIPOMA_LIPOMA : 1
USING_PROVIDE : 1
ANY_QUESTIONS : 2
VETERAN_ABOUT : 1
THE_NEED : 2
AND_NOTIFY : 2
BUSY_SCHEDULE : 1
PROCESS_OPEN : 1
THE_ILL : 1
HYDROCELECTOMY_RELATED : 1
ROSEMONT_STREET : 1
INHAL_DOSE : 1
PATIENT_LIVES : 1
THANKED_WRITER : 1
INFLUENZA_CALLED : 1
OF_MOVEMENTS : 1
AGE_STATUS : 1
HIS_RELATIVE : 1
ANALYSIS_NEGATIVE : 1
LIN_CHIEF : 1
PERSONNEL_NORMAL : 1
THE_TO : 2
AND_HYPERLIPIDEMIA : 1
MOUTHPIECE_COMFORT : 1
CALL_WHIPPLE : 1
COLOR_REQUIRES : 1
PENDING_MEDICATIONS : 1
HYPONATREMIAIMPROVING_SPUTUM : 1
POSITION_PATIENT : 2
AND_TIME : 1
TO_PER : 1
PORTABLE_NO : 1
MD_THREE : 1
LESSON_WITH : 1
PULSE_SCORE : 1
INFORMATION_CONFIRMED : 1
HIS_RIGHTS : 1
NO_PROGRESS : 1
PLAN_IS : 1
HYPERTROPHY_OF : 1
BACK_AND : 1
YEARS_HE : 2
BRACE_SCAN : 1
SERVICE_RELATED : 1
ANXIOUS_OF : 1
LAMINECTOMY_OF : 1
FIGHTING_MR : 1
VETERAN_CANCELLED : 1
OF_NIGHT : 1
ETOH_YES : 1
TRAV_QHS : 1
VA_HE : 2
WAS_DISCHARGED : 1
PT_DID : 1
OF_DAILY : 1
COMPONENTS_OF : 1
IMMEDIATE_MENTAL : 1
VISIT_STATE : 1
DIFFICULTY_MENTAL : 1
HOWEVER_WAS : 1
HAVE_WORSENING : 1
NO_PROBLEM : 1
MEDICATION_THAT : 1
YOU_OR : 1
TERM_CALCIUM : 1
CONSTRUCTION_MOST : 1
DOES_HAVE : 3
TO_PREOP : 1
PERSON_IUNABLE : 1
NOTIFY_HUSBAND : 1
DEPENDENCE_INFORMATION : 1
NO_ADVERSE : 1
HOSPITALIZATION_ON : 1
ESCAPE_RISK : 1
AND_INSIDE : 1
MAY_NURSE : 1
DOSE_WOULD : 1
TO_BACK : 1
CONVERSATION_STATED : 1
OF_GROUP : 2
THIS_MET : 1
CHAP_MAINTAINING : 1
DOCTOR_HAS : 1
LEGIONELLA_RAPID : 1
REFILLS_REPORTS : 1
PROBLEM_THIS : 1
OTHER_CONCERNING : 1
COHESIVE_AND : 1
ENVELOPE_WAS : 1
SAYS_CONTINUOUSLY : 1
ACTINIC_HAVE : 1
UPCOMING_APPT : 1
SAFELY_IN : 1
UNDER_STRESS : 2
OMEPRAZOLE_THAT : 1
TREATMENT_IN : 1
PORTABLE_LIQUID : 1
WRITE_HIS : 1
LABS_FOR : 1
WELL_IMMEDIATE : 1
MUSCLES_DATE : 1
DEFICIENCY_THE : 1
AS_NEEDED : 2
YOU_QUESTIONS : 1
THIS_SET : 1
SESSIONS_NUMBER : 1
PATIENT_INTERDISCIPLINARY : 1
GO_TO : 1
CURRENT_RX : 1
INJECTIONS_CARE : 1
OTHER_LAB : 1
OTHER_HISTORY : 1
HE_SAID : 1
NO_DEPAR : 1
GROUP_SESSIONS : 1
FAMILY_WALK : 1
WEAR_THE : 1
DISORDER_WITH : 1
SORE_NO : 1
SUPERVISION_OVERSIGHT : 1
OF_EVENING : 1
VITAL_SIGNS : 2
BEING_DISCHARGED : 1
ISSUES_SYMPTOMS : 1
SYMPTOMS_HAVE : 1
SOUTH_UNIT : 1
VERY_CONSTIPATION : 1
NOTE_ORIENTED : 1
THIS_SWER : 1
ACTINIC_KERATOSES : 1
FROM_USUAL : 1
BEHAVIOR_VET : 1
BASCOM_PALMAR : 1
CONCERNS_SAYS : 1
TO_DAUGHTER : 1
IT_DUE : 1
EARSCANALS_TMSGOOD : 1
ABOUT_ETHNIC : 1
PALMAR_MIAMI : 1
PAIN_CONSTANT : 1
ELECTRIC_RAZOR : 1
BIBLE_GROUP : 1
OCT_PHYSICIAN : 1
MORNING_AT : 1
INCREASED_RELATED : 1
ER_HERE : 1
FALLING_PT : 1
MED_PER : 1
CHARTS_DIAGNOSIS : 1
AND_VERY : 1
BARNES_REMOVE : 1
DESCRIBED_AS : 1
YES_YES : 1
SAL_PATHOLOGY : 1
VIT_DEFICIENCY : 1
COLLECTION_DT : 1
VISIT_FROM : 1
OTHERS_WILL : 1
THEY_MUST : 1
BRC_HAVE : 1
ARE_BEING : 1
AGENTS_NO : 1
CITALOPRAM_YEAR : 1
MR_ACTIVELY : 1
LIMB_MOVEMENT : 1
ASSESSMENT_INFORMATION : 1
DISTRESS_NOTED : 1
NIASPAN_SA : 1
SCREENING_DAUGHTER : 1
HEALTH_AND : 1
UR_BLD : 1
DRUG_YEAR : 1
PATIENT_NUMBER : 1
RIGHTS_PLACE : 1
VET_MH : 1
TOLERATING_OK : 1
THAT_HAVE : 1
IN_CONSTRUCTION : 1
EXPLAINED_THE : 1
MOBILITY_ONSET : 1
EXPIRED_SCOPE : 1
DURATION_ADVERSE : 1
DESCRIBES_VERY : 1
HOME_PHYSICIAN : 1
SURGERY_DISCONTINUED : 1
TOLERANCE_HISTORY : 1
GLOBES_HE : 1
LOCATION_FULL : 1
AND_WAS : 3
CHANGE_IN : 1
HEART_WNL : 1
READING_PATIENT : 1
MENTAL_EXAM : 2
TO_NUTRITION : 1
AND_STUDIES : 1
UNDERGO_EBRT : 1
MEDICATION_QUESTION : 1
NOTE_TOLD : 1
IF_NOT : 1
GETS_VETERAN : 1
WINDSHIELD_PARTICIPATE : 1
IPTON_ICE : 1
CONTINENT_ELIMINATION : 1
DIFFICULTY_MR : 1
MCADOO_CARDIAC : 1
PROBLEMS_IDENTIFIED : 1
WILL_FOLLOW : 1
ABOUT_MEDICATIONS : 1
PH_NI : 1
NOTED_BY : 2
HOSPITAL_WHEN : 1
MYSELF_GROUP : 1
DEC_NUTRITION : 1
DOSES_NONE : 1
HOPES_AND : 1
PT_MULTIPLE : 1
SESSION_AND : 1
OR_TETANUS : 1
ARM_COMES : 1
SMOKE_OR : 1
MH_HX : 1
RESULTS_UNSPECIFIED : 1
CONTACTED_REGARDING : 1
ICDCM_YOUNG : 1
AND_JOINTS : 2
HELP_BLOCKAGES : 1
HIS_REAL : 1
OF_MEDIUM : 1
OF_EVENT : 2
WELL_PTA : 1
IF_SWELLING : 1
PATIENTS_MAY : 1
LEFT_WAS : 1
LOCK_URINARY : 1
READING_LIMITATIONS : 1
TO_APPT : 1
DRAINED_SOME : 1
VETERAN_SCALE : 1
ARE_PRODUCTIVE : 1
WERE_FROM : 1
THANK_YOU : 1
BECAUSE_GLOBES : 1
HE_ATYPICAL : 1
PATIENT_NOTIFY : 1
MUSCLES_AND : 1
BE_TREATED : 1
INTERVAL_SINCE : 1
ANY_OTHER : 1
FOR_RELAXATION : 1
RELATIONSHIPS_NO : 1
BLIND_REHAB : 2
HAS_ME : 1
LLD_PT : 1
OTHER_PERSONAL : 2
TO_FINGER : 1
SUMMARY_INTERDISCIPLINARY : 1
PATIENT_PATPU : 1
AGGRAVATING_PER : 1
WORK_SUMMARY : 1
DISCUSS_FOR : 1
WITH_STANDING : 1
BEEN_FLUIDS : 1
HEALTH_WORKER : 1
ADDITIONAL_NURSING : 1
WITH_FEATURES : 1
SHIFT_DURING : 1
IS_ALERT : 1
IDENTIFIES_THE : 1
HAS_MEET : 1
DIZZINESS_CURRENT : 1
DISCONTINUED_TO : 1
PHARM_INPATIENT : 1
DISCUSS_DATE : 1
REQUIRES_ASSISTANCE : 2
INTERDISCIPLINARY_READING : 1
TOTAL_VISION : 1
MEATUS_CARE : 1
URINE_AND : 1
ARTILLERY_LAB : 1
OVERSEES_VETERANS : 1
IS_DUE : 1
THE_STEPS : 1
BEFORE_DISCHARGES : 1
THESE_CONTACTS : 1
LAUNDRY_INBETWEEN : 1
NO_COMPLICATIONS : 1
STATUS_PSYCHOLOGY : 1
CHRONIC_INHALE : 1
COMPLAINT_PHYSICIAN : 1
LIST_APPOINTMENT : 1
OF_MENTAL : 3
OF_AQUATICS : 1
NAILBEDS_HYDROCELECTOMY : 1
BE_ALRIGHT : 1
JOINTS_DENIES : 1
FOR_AFTERCARE : 1
OUTPATIENT_INCLUDING : 1
GROOMED_VET : 1
SMOKING_HAD : 1
OBJECTIVE_WERE : 1
SURGERY_SPOKE : 1
WT_LB : 1
ORIENTED_RISK : 1
PROVIDER_BEFORE : 1
JUN_MEDICATIONS : 1
PATIENT_TOLD : 1
ABOUT_PT : 1
REST_REINFORCED : 1
ALBUTEROL_INHALER : 1
DUB_RX : 1
HAS_COMPLAINT : 2
FEATURES_WITH : 1
WELL_PT : 1
REQUESTING_ALCOHOL : 1
ML_MG : 1
MONTH_SOON : 1
SINCE_AUTODROP : 1
IT_TO : 2
PAINFUL_WAS : 1
DEPOSITS_THAT : 1
BE_RED : 1
REACTED_CARE : 1
ARABIA_THE : 1
BLASTS_FROM : 1
NOTE_DO : 1
AS_DURING : 1
RIGHT_AND : 2
OCT_CMHP : 1
NOT_PHONE : 1
NEURO_CN : 1
WORSE_MEDICATIONS : 1
TO_LEFT : 1
AMB_VESTING : 1
DIRECTIONS_CALLED : 1
CONCERNS_ABOUT : 1
HER_HYPOTHYROIDISM : 1
MISCELLANEOUS_FOR : 1
IN_FEW : 1
RENAL_MISSING : 1
FEELS_IS : 1
REORDERED_WITH : 1
FACILITATOR_AND : 1
CHRONIC_HX : 1
BECAUSE_THAT : 1
ON_TELEPHONE : 1
SESSIONS_PROVIDED : 1
TO_SWS : 1
UP_WITH : 1
HAVE_INFORMED : 1
THAT_UNSAFE : 1
MAKING_THOSE : 1
STREET_HX : 1
NITRO_DOESNT : 1
MULTIPLE_PC : 1
THATS_OF : 1
CLINIC_DIAGNOSIS : 1
PERSONAL_HYGIENE : 1
CAP_TAKE : 1
BE_PICKED : 2
STREET_HIS : 1
CODEINE_AND : 1
CALMED_STATING : 1
CALLED_BY : 1
AS_RESP : 1
DISPOSITION_OUTPATIENT : 1
SOME_STATUS : 1
TOTAL_RADIATION : 1
HE_ZOSTAVAX : 1
BUT_SAY : 1
COLOR_FOR : 1
BIT_FEELS : 1
HAS_CASE : 1
OR_THAT : 1
ACTION_COLLECTED : 1
AN_UNDERSTANDING : 1
TO_MAINTAIN : 1
VA_CINCINNATI : 1
SUPPER_LIST : 1
ATTACKS_FROM : 1
DL_FOLLOWUP : 1
IT_RESOLVED : 1
IDENTIFIERS_FULL : 1
NOON_AND : 2
HOSPITAL_ARE : 1
DESCRIPTION_LN : 1
NONE_ORDERED : 1
SUPERVISOR_AND : 1
CHRONIC_UPPER : 1
TO_METHADONE : 1
INDICATION_IS : 1
BY_NEWTON : 1
PREOPERATIVE_DIAGNOSIS : 1
HAVE_APPARENT : 1
PATIENT_HAVE : 2
BED_MIN : 1
OBJECTIVE_YOU : 1
INR_LOCATION : 1
GOWN_WHEN : 1
IN_TOMORROW : 1
REASON_VISIT : 1
WBC_RENAL : 1
PREVENTION_RECOMMENDED : 1
HE_STATIONED : 1
MAKING_DECISIONS : 1
CCRC_DISCUSS : 1
WAS_CONDUCTED : 1
LIMITATIONS_INABILITY : 1
GLAND_OR : 1
IN_AN : 1
CLONAZEPAM_REORDERED : 1
PLASMA_SINCE : 1
TEACHING_ADJUSTED : 1
DURING_PERSIAN : 1
FELLOW_PT : 1
HAS_HAD : 3
HE_FORGOT : 1
CONTINUES_TO : 1
COUMADIN_TAB : 1
IN_CLASS : 1
NUMBER_LS : 1
AFTER_VERBALIZING : 1
HERNIA_NEXT : 1
RATE_YOUR : 1
MENTAL_SOCIAL : 1
ON_THE : 7
DISCHARGED_VIA : 1
INTERVENTIONS_FOR : 2
HIP_ANKLE : 1
BREAKTHROUGH_PAINS : 1
CALL_THIS : 1
IS_KNOWS : 1
SHOW_CANCELLATION : 1
TO_HELP : 1
BECAUSE_HE : 2
SUMMARY_INITIAL : 1
OF_THE : 12
HYDROCODONE_ACETAMINOPHEN : 1
WITH_OUT : 1
PTSD_NOT : 1
AS_GOAL : 1
IMPAIRMENT_INFECTION : 1
NOT_CONSISTENCY : 1
IE_SKIN : 1
NURSE_SWELLING : 1
KERATOSES_HAVE : 1
PER_CUEING : 1
REPORTED_HE : 5
TRANSFER_NO : 1
AT_WINDOW : 1
PRIOR_ATTEMPTS : 1
CONSULT_BERNA : 1
TIME_DATE : 1
FOR_ASSESSMENT : 1
HAS_NOT : 3
THE_COULD : 1
NO_LYMPH : 1
CAUTION_WITH : 2
NOT_MEET : 1
BEST_TO : 1
TEACHING_TIME : 1
FRED_NOTIFICATION : 1
HAS_CHIEF : 2
AND_REVIEWED : 1
REVIEWEDUNCHANGED_HEENT : 1
TO_PHSYCOLOGISTS : 1
ENTERED_BY : 1
BE_ABOUT : 1
AGE_IS : 1
CALM_ADDENDUM : 1
INCREASED_BEHAVIOR : 1
LIQ_NITRO : 1
WITH_HIS : 7
NEGATIVE_TEACHING : 1
FORM_WITH : 1
DECISIONMAKING_ADDENDUM : 1
RESTRICTED_REQUEST : 1
MD_NOTIFIED : 1
ORIENTED_NO : 1
SPECIALIST_OVERSEES : 1
PROGRAM_WOOTEN : 1
PCT_GRANDE : 1
PREVENTION_COORDINATOR : 1
TO_BUSY : 1
LIKELY_FORGOT : 1
WILL_CONTINUE : 1
PRECAUTIONS_IMPLEMENTED : 1
RISKS_AND : 2
OF_DUB : 1
REMAINS_TO : 1
PERCOCET_MORPHINE : 1
WAS_NOTED : 1
OD_AND : 1
VISUAL_IMPAIRMENT : 1
OF_LLD : 1
WITHOUT_FURTHER : 1
BROKEN_PAIN : 1
YOU_THINGS : 1
SALINE_HOURS : 1
CLEAR_TMSGOOD : 1
HE_OF : 2
WITH_IMPROVEMENT : 1
BAKER_NIACIN : 1
PHQ_DEPENDENCE : 1
YOUR_HEALTH : 2
SECTION_OF : 1
YOUR_OR : 1
NOT_ABLE : 1
ATTENDING_NOTE : 2
QUIT_FEW : 1
ANOTHER_VENTILATION : 1
LL_LL : 1
MEDICINE_AS : 1
MISSING_RISK : 1
MEDICATIONS_THAT : 2
ORIENTED_TO : 1
SHOWED_LICHENOID : 1
OD_OF : 1
WHERE_HE : 1
TH_STYLOID : 1
EDUCATION_MARITAL : 1
SHARED_WITH : 1
MEANS_DOING : 1
GROUP_GLAUCOMA : 1
CONCERNING_YOUR : 1
BATH_OF : 1
THAT_BEEN : 1
SOMEWHAT_ONCOLOGY : 1
CONTINENT_OF : 1
DETERMINED_UPON : 1
TOUCH_UNABLE : 1
OF_DTC : 1
LONELINESS_PROBLEMS : 1
COGNITIVE_BENEFIT : 1
UP_AND : 1
PAIN_COMES : 1
PULSE_OX : 1
NOTE_OF : 4
THERAPIST_NOTE : 1
ORIENTED_JOINTS : 1
AREA_MOUNTAIN : 1
BED_FOR : 1
THE_STAMPED : 1
FOR_AXIS : 1
CONTINENT_ALERTMRSA : 1
OPENING_IS : 1
APPLICABLE_PRIOR : 1
TIME_CHRONIC : 1
AN_LEFT : 1
ANY_DC : 1
WAL_OF : 1
INITIAL_PLAN : 1
AND_ACTIVE : 1
COMPLICATIONS_NO : 1
WIFE_PICK : 1
MAY_OF : 1
HE_SERVED : 1
MANAGER_AND : 1
ARE_YOU : 1
NOT_CALL : 1
INITIATED_WELL : 1
PROTOCOL_STAFF : 1
ROSEMONT_BEST : 1
FEELING_AND : 1
NO_LOSS : 1
VETERAN_CALL : 1
PAIN_LAB : 1
FORM_REQUEST : 1
TREMENDOUS_STRESS : 2
PAIN_IN : 2
OPENING_THAT : 1
FOR_COMPLAINING : 1
PROGRESS_HAS : 1
PATTERN_OTHER : 1
LL_DISC : 1
WHEN_THERE : 1
IMPROVED_WITH : 1
FOR_THYROID : 2
NOTE_MD : 1
WAS_STATIONED : 1
VOICEMAIL_VET : 1
NOTED_PULSE : 1
BEHAVIORAL_PROBLEM : 1
ORDERED_ASSESSMENT : 1
TYPE_OF : 1
PROBLEM_INABILITY : 1
WHIPPLE_SKIN : 1
AND_AKA : 1
REFUSE_CITALOPRAM : 1
FAMILY_PHYSICAL : 1
MANAGED_BY : 1
NKA_II : 1
WNL_OR : 1
WITH_ANXIETY : 2
VET_AM : 1
IN_LAW : 1
GROUP_WILL : 1
REGARDING_PATPU : 1
DR_BEFORE : 1
TOLD_DO : 1
THEREFORE_ALLOW : 1
PT_THEY : 1
INHAL_UNIT : 1
IS_CURRENTLY : 1
PHYSICAL_THERAPY : 1
NO_DOCTORS : 1
ADJUSTMENT_DISORDER : 1
PHARMACY_RECURRENT : 1
EXPLORE_BILLING : 1
NDA_ARRYTHMIA : 1
LESIONS_TREATED : 1
ATTORNEYS_FOR : 1
SHOW_INCREASE : 1
WITH_HAS : 2
VETERAN_CALLED : 1
BEFORE_RESP : 1
FRUSTRATION_MADE : 1
AND_ILL : 1
AND_CHILDREN : 1
APPETITE_NO : 1
PATIENTS_CURRENT : 1
ADDENDUM_AGE : 1
HEMORRHOIDS_PATIENT : 1
USE_EVALUATION : 1
TAKE_NEEDED : 1
QHS_SLOWLY : 1
COMMENT_WALK : 1
SESSIONS_DATE : 1
TH_FRI : 1
BILAT_WHEEZE : 1
PALPITATIONS_WAS : 1
EVALUATED_THE : 1
ORDER_IS : 1
CMHP_BAKER : 1
PHONE_ENTERED : 1
FOR_SEVERAL : 1
DENTAL_VISUAL : 1
UNIT_TREMOR : 1
ASSESSMENT_STOOL : 1
FOR_RECENT : 1
AND_DOCUMENT : 1
IN_CARE : 1
SUPPORT_PERSONNEL : 1
VETERAN_NOT : 2
TRAUMA_HE : 1
SINCE_MIDNIGHT : 1
NEEDED_COMPLETE : 1
TO_TANGENTIAL : 1
REAL_BECAUSE : 1
DRAINAGE_STATES : 1
HIS_USUAL : 1
NUSTEP_AT : 1
PARTICIPATE_FAMILY : 1
NEG_PT : 1
MEDICAL_ACTIVE : 2
VERIFIED_VETERAN : 1
PROCEDURE_RESULTS : 1
NURSING_TRIAGE : 1
REPORTED_TO : 1
IS_AND : 4
WAS_WEARING : 1
PRESSURE_RETURN : 1
CONSULTED_SPECIAL : 1
RESPIRATION_ACTION : 1
DURING_SOME : 1
WILL_PICK : 1
OF_BOWEL : 1
PER_PROTOCOL : 1
WEEKLY_WITH : 1
IS_AS : 1
PATIENT_IF : 1
CHANGES_DEPTH : 1
COMPLAINT_IPTON : 1
STRETCHER_TIME : 1
PATIENT_WAS : 9
BUT_HAS : 4
PT_REQUESTING : 1
REMOVED_INTRAOCULAR : 1
CARE_HAND : 1
OBSERVED_TALKING : 1
JUST_HAVE : 1
DONE_IN : 1
MULTIPLE_SEEING : 1
SECONDARY_PAIN : 1
TELEPHONE_THAT : 1
MORE_OF : 1
PERSONAL_BED : 1
BY_ENEMY : 1
THAT_EXPIRED : 1
SMOKE_CHEW : 1
NOTE_BATHROOM : 1
HOARSENESS_SORE : 1
UNSAFE_FIRESEEKING : 1
LOW_LIKELIHOOD : 1
COMMENTS_ICDCM : 1
LAID_DAILY : 1
FOLLOW_WITH : 1
LEFT_MANIPULATION : 1
OXYGEN_FEELS : 1
SUICIDAL_BECAUSE : 1
MANAGEMENT_WHAT : 1
OF_NEUROGENIC : 1
PURPOSES_THIS : 1
DATE_HAS : 1
SATAN_IS : 1
BAY_FOR : 1
SPEC_BLD : 1
COMPLETED_AS : 1
AREA_ANCHORAGE : 1
AND_SSN : 1
AT_FOR : 1
WAS_ON : 1
IT_SHE : 1
NEWLY_WITH : 1
HE_AGREES : 1
HE_CONTINUED : 1
PATIENT_THE : 2
AND_MOVIES : 1
TAKE_DOZ : 1
ADVISED_WEAR : 1
NEGATIVE_SCORE : 1
HE_KEPT : 1
PATHOLOGY_REPORT : 1
ASF_RECOVERY : 1
LIST_INFORMATION : 1
BE_PAIN : 1
NOTE_ACTION : 1
SCALE_OF : 1
AN_NO : 1
BISACODYL_MG : 1
AM_ON : 1
SMOKING_AREA : 1
NAME_THE : 1
ASSIGNED_TO : 3
THIS_TOTAL : 1
AN_SECURED : 1
AND_HYDROCODONE : 1
HAD_PAIN : 1
RESUM_NONE : 1
HIS_BASELINE : 1
REPORTS_HE : 1
TROPICAMIDE_PHENYLEPHERINE : 1
LEANING_HEAD : 1
CONFIRMED_WITH : 1
AFTER_NOON : 1
INPATIENT_NOTE : 1
TO_MS : 1
OUTPATIENT_MUCH : 1
MANUFACTURERS_BY : 1
ULCER_NO : 1
ACQUIESCE_DESCRIBE : 1
WITH_PHYSICIAN : 3
SPOKE_MALE : 1
TO_PROBLEMS : 1
POST_HYGIENE : 1
ONLY_THAT : 1
NOTE_TELEPHONE : 1
WE_THE : 1
NEBULIZER_OF : 1
AND_DECOMPRESSIONS : 1
THEY_STATED : 1
EFFECTIVENESS_OF : 1
ONSET_PROVIDER : 1
INITIAL_EQUIPMENT : 1
RESPONSE_WOULD : 1
WHAT_YOU : 1
MORE_SYMPTOMS : 1
APPOINTMENT_ON : 2
IN_IDCP : 1
HIS_VET : 2
TOTAL_DEPENDENCE : 1
BEHAVIOR_VETERAN : 1
BEEN_PLY : 1
TIME_SERVICE : 1
YES_AND : 1
TAB_DURATION : 1
FOR_CH : 1
METFORMIN_NEWLY : 1
NOTIFY_OF : 1
ADMISSION_TO : 1
NO_SAFETY : 1
USES_NAPROXEN : 1
ALBUTEROL_HFA : 1
MAY_DRAINED : 1
SHORTER_THAN : 1
VERIFY_THIS : 1
HE_NOW : 1
REVIEWED_FROM : 1
COMING_ON : 1
MINUTES_IV : 1
PLY_WITH : 1
AND_DIFFICULTY : 1
HOW_THESE : 1
CAN_GET : 2
STATE_DOES : 1
SPECIFIC_ENVELOPE : 1
ABOUT_WITHDRAWAL : 1
INABILITY_MAINTAIN : 1
WITH_BIOLOGICAL : 1
APR_WIFE : 1
SYND_ADDENDUM : 1
THIS_MEDICATION : 1
BEST_HOW : 1
MOOD_CALMED : 1
IS_HAVING : 2
OPTIONS_SINCE : 1
GENERAL_ENT : 1
YES_RELATIONSHIP : 1
TO_CLENCHING : 1
NOTIFY_IF : 2
NOTE_INITIAL : 1
ACTIVE_POSSIBLE : 1
NOT_METFORMIN : 1
TMSGOOD_LI : 1
FIGHTING_GUN : 1
PULSE_PAIN : 1
ADDENDUM_VACCINE : 1
NEUROPSYCHOLOGIST_INPATIENT : 1
TO_NEUROPSYCHOLOGY : 1
RESPIRATION_URINE : 1
ARMBAND_RESTRAINTS : 1
PRO_CALL : 2
IS_AM : 1
NASAL_CATHETER : 1
THE_HERPES : 1
PROGRAMS_CHIEF : 1
DL_NO : 1
LOCATION_URINE : 1
HERE_THEY : 1
HAS_PROBLEMS : 1
CONTINUES_REFUSE : 1
VETERAN_IS : 4
MAJOR_CHRONIC : 1
BROKEN_CONTRACT : 1
PROBLEMS_PERTINENT : 1
MOUTH_TWICE : 1
SERVICE_PHQ : 1
OR_FURTHER : 1
DID_EAT : 1
DAILY_MANAGEMENT : 1
DECLINED_OR : 1
VESTING_NOTE : 1
BILLING_OPTIONS : 1
COMPLETE_VETERANS : 1
LIKELY_THE : 1
NIASPAN_MG : 1
HIS_RIGHT : 1
MEATUS_ZZPATIENT : 1
HE_CALLED : 1
PNEUMOCOCCAL_VACCINE : 1
AN_OF : 1
SUCH_AS : 1
CONFERRED_PHYSICIAN : 1
CLACICLE_INACTIVE : 1
SEEMS_OBTAIN : 1
IS_WAS : 1
THIS_VISIT : 1
MEAL_SET : 1
HE_STARTED : 1
CONSTANT_SEVERAL : 1
PACU_POTENTIAL : 1
MOUTH_FOUR : 1
SYMPTOMS_OF : 1
TO_YOUR : 1
SHAKE_FOR : 1
CHANGE_FROM : 1
STATES_HER : 1
MOBILITY_IUNABLE : 1
DOES_MEET : 1
INDEPENDENT_TURNS : 3
OUR_IS : 1
MANAGEMENT_MOTIVATION : 1
VERIFY_PATIENT : 1
SPASMS_PT : 1
HAD_LIQ : 1
NEW_MANAGER : 1
BIRCH_ON : 1
TOLD_ME : 1
WITH_HOME : 1
PATIENT_ADVISED : 1
REPORT_OTHER : 1
ESTABLISH_THRU : 1
ELIMINATION_PRESSURE : 1
HAS_ANSWERED : 2
OPTIMAL_LEVEL : 1
MET_FOR : 1
ADDENDUM_THAT : 1
TAB_DENTAL : 1
UNDERSTANDING_THEIR : 1
VALUES_WILL : 1
REMOVE_APPLIED : 1
SUBSTANCE_AND : 1
CM_ATYPICAL : 1
DROP_GUIDE : 1
HE_WBC : 1
COMPLICATIONS_STATUS : 1
SUMMARY_TREATMENT : 1
PC_MEDICINE : 1
EVEN_MORE : 1
MEDICATIONS_STATUS : 4
TETANUS_OF : 1
REMAINS_SP : 1
WOULD_HAVE : 1
CONTRAINDICATIONS_STRATEGY : 1
NOTE_NOT : 1
IN_VISION : 1
NOTE_EQUIPMENT : 1
SUICIDE_PCT : 1
MEDICATION_DONE : 1
AND_MH : 1
HX_OF : 2
RX_REGULAR : 1
MEDICATION_NO : 2
FOR_HAS : 1
SELF_FAMILY : 1
YOUR_REAFFIRMED : 1
ROS_ENT : 1
TO_WRITE : 1
DECOMPRESSIONS_HE : 1
IS_NOT : 4
PERSONAL_BELONGINGS : 1
PAST_HIS : 1
IMPAIRMENT_SC : 1
THE_NUMBER : 1
MODERATE_SEDATION : 1
SKIN_TOOK : 1
PSYCHOLOGY_NOTE : 2
BY_SW : 1
GROUP_DESIGNED : 1
WITH_LIN : 1
OUT_PATIENT : 1
OF_PAIN : 4
POSTURE_APPOINTMENTS : 1
ORDERED_COMPLETE : 1
VERBALIZES_UNDERSTANDING : 1
AND_CRITERIA : 1
CONVERSATION_AND : 1
VISION_ANXIETY : 1
AS_AN : 1
STATUS_YES : 1
PERCOCET_AS : 1
MDD_RECURRENT : 1
NOT_MHC : 1
THE_ELEVATOR : 1
MULTIPLE_EXPOSURES : 1
PROSTATE_FOR : 1
ONCOLOGY_THERAPIST : 1
DONT_CONSTRICT : 1
PLACE_ON : 1
IN_MAY : 1
QUICK_TO : 1
ADDENDUM_TO : 1
HYGIENE_BED : 1
ADDENDUM_ADDRESS : 1
REMAINS_BE : 1
ATTENDING_RESPONSIBLE : 1
THURS_IN : 1
PATIENT_HEALTH : 1
NORMALIZING_BEHAVIOR : 1
VET_OF : 1
AT_NOTIFY : 1
PSYCHOEDUCATION_ON : 1
HAVE_AN : 1
ACUTELY_INFECTED : 1
FOWLER_OBJECTIVE : 1
WEIGHT_PROGRAMS : 1
THAT_LEARNING : 1
DISABILITY_WITH : 1
MORE_CAN : 1
CHRONIC_TOLERATING : 1
BACK_PT : 1
SOME_NUMBNESS : 1
NVD_CHEST : 1
WELLNESS_SPECIFICS : 1
AND_STENOSIS : 1
OBSERVATIONS_CARE : 1
BE_UP : 2
ORTHOPEDIC_CONSULT : 1
COULD_BE : 1
MANY_INSTANCES : 1
KNOW_NOT : 1
POOR_IMPULSE : 1
FOR_PAINS : 1
ATTRIBUTED_THESE : 1
PELVIS_VETERAN : 1
FROM_THE : 1
HAIRBRUSH_PENCIL : 1
LETTER_TO : 2
DECREASING_INTENSITY : 1
IDENTIFIED_FRIENDS : 1
WORRIED_ABOUT : 2
PULSE_BARNES : 1
AM_PREOPERATIVE : 1
LICHENOID_DERMATITIS : 1
REPORT_DOCUMENT : 1
ADDITIONAL_ASSESSMENT : 1
FOR_STUDY : 1
CM_OCCUPATION : 1
IN_BOTH : 2
DOCUMENT_THIS : 1
SIMPLE_LIKE : 1
INTO_AROUND : 1
SPECIFICS_CONTACT : 3
TO_WEAR : 2
NOTE_EDUCATION : 1
ACTIVELY_PARTICIPATED : 1
AC_GLUCOSE : 1
TOTAL_SCORE : 1
PROGRESS_AND : 1
HAVING_WITHDRAWAL : 1
BEDTIME_ONEONONE : 1
SAFETY_INPT : 1
BRADEN_SCALE : 2
PHONE_ONE : 1
PLEASE_CALL : 1
TO_AT : 1
RIGHT_CARDIOLOGY : 1
BED_INDEPENDENT : 3
ALL_EVALUATION : 1
JUST_THE : 1
EMAIL_WAS : 1
ABILITY_VETERAN : 1
DISEASE_RECOMMENDED : 1
GAUGE_LOCK : 1
BEEN_AFTER : 1
ASSESSMENT_PAIN : 1
OF_SEX : 1
END_THE : 1
FOR_HOW : 2
IN_HOSPITAL : 1
BIRCH_RESIDENCE : 1
OIL_OUTPATIENT : 1
IT_EYE : 1
OUT_OF : 2
FOR_ROUTINE : 3
CULTURAL_PERSONAL : 1
WILL_OBSERVED : 1
PERSON_TIME : 1
LITTLE_DIFFICULTY : 1
AND_TOXIC : 1
COMPLETION_DATE : 1
RIGHT_SO : 1
NOTE_IDENTIFY : 1
PATIENT_RISK : 1
RECD_POTENTIAL : 1
DISCUSSING_HEALTH : 2
ZIMBLEMAN_MH : 1
LAUNDRY_THE : 1
INJECTION_BENIGN : 1
ANALGESIA_CONSCIOUS : 1
OF_HEMATURIA : 1
YES_WIFE : 1
THE_CLINIC : 1
MAINTAIN_HIS : 1
PHONE_WAS : 1
PAIN_COCAINE : 1
ADVISE_PATIENT : 1
INTERVENTIONS_WITHIN : 1
THE_SPECIFIC : 1
CALLED_PATIENT : 1
BELIEFS_METHOD : 1
SAYS_BUTTONS : 1
NOTHING_TO : 1
OF_FIGHTING : 1
NO_SI : 1
SCORE_DRUG : 1
THAT_INCREASINGLY : 1
TO_WEEKLY : 1
CARE_WORKER : 1
BLOODCLOTS_SUBCUTANEOUS : 1
COLON_NONDE : 1
TRANSPORT_BASCOM : 1
PHYSICAL_PROBLEM : 1
OVER_YEARS : 1
ONE_ASSIST : 1
DISCHARGE_SHEET : 1
HOME_CARE : 1
ON_THURS : 2
NKA_WT : 1
ORIENTED_VERY : 1
PAIN_SYND : 1
GOOD_NEWS : 1
UNDERSTANDS_THIS : 1
LEFT_LEG : 1
STOOL_RESIDENT : 1
VETERAN_ALSO : 3
IMAGING_CONSULT : 1
THE_SICK : 1
AND_INSTRUCTED : 1
INTRAOCULAR_RESIDENT : 1
EXCISION_ANY : 1
WASHING_AND : 1
RESPIRATIONS_THE : 1
THIS_TIME : 2
AKA_LACERATION : 1
BEEN_OBSERVED : 1
ACCURATE_SECURED : 1
LEARN_COLONOSCOPY : 1
VERBALIZING_WOULD : 1
DAUGHTER_POSTAL : 1
HUSBAND_AND : 1
YEARS_LIVES : 1
NEED_TO : 2
VET_PRESENTED : 1
AREA_HEIGHT : 1
REPORTS_HOPELESS : 1
COMES_AND : 1
BY_FOUR : 1
OF_AND : 9
THOUGHT_WITH : 1
FOR_NUMBER : 1
ANTE_DIAL : 1
BIPOLAR_DO : 1
ARE_NO : 1
NEEDLES_YOU : 1
HI_ICDCM : 1
BLOOD_AND : 1
NO_LEGIONELLA : 1
IS_CO : 1
RESPIRATORY_NOTE : 1
COPING_TO : 1
LEVEL_FUNCTIONNG : 1
MOUNTAIN_PATIENT : 1
PLANS_TO : 2
EC_TAKE : 1
LEVEL_NO : 1
HOW_ORDER : 1
URINE_CUEING : 1
PATIENT_SSN : 2
ANXIETY_NOS : 1
LB_BMI : 1
PRODUCTIVE_COUGH : 2
THIAMINE_TAB : 1
HAD_WITH : 1
HYGIENE_SPONGE : 1
MH_TRP : 1
INPT_DC : 1
NO_SIDE : 1
COUSIN_ALSO : 1
HOSPITAL_ES : 1
TOLERATE_IT : 1
PHYSICIAN_CONTACTED : 1
LOCATION_YOU : 1
OBTAINED_AT : 3
ABOUT_ITS : 1
MR_YEAR : 1
SISTER_RETAINED : 1
MEDICAL_PROBLEMS : 1
ABUSE_HGB : 1
OR_OF : 1
LEFT_TKA : 1
OFF_ON : 1
TREATMENT_DETAILS : 1
WHAT_RELIEVES : 2
BP_PATIENT : 1
REQUIRES_NO : 2
PROSTATE_PLANS : 1
SUPERVISING_RESPONSIBLE : 1
LUNGS_BILAT : 1
DESCRIBES_THE : 1
UPPER_SOCKS : 1
HYGIENE_PHYSICIAN : 1
TIMES_PARTICULAR : 1
IMPROVED_ADEQUATELY : 1
IN_OCCUPATION : 1
NERVE_INJECTION : 1
NIGHT_MAR : 1
CONTACTS_CALL : 1
ENCOURAGEMENT_CUEING : 1
REFILL_THE : 1
CONVERSATION_WITH : 2
OBSERVATION_IS : 1
VISION_PLAN : 1
HOSPITAL_VA : 1
WE_WILL : 1
THAT_VERY : 1
TOLERATING_MED : 1
UPON_VETERANS : 1
TIME_ASSESSMENT : 1
THIS_BEEN : 1
PHENYLEPHERINE_EXAM : 1
KNOWLEDGE_MENTAL : 1
CONTACTED_SERVICE : 1
THROUGH_THIS : 1
CASE_OSAC : 1
VITAMIN_PRESENT : 1
PRESENTED_TO : 1
YES_MIN : 1
THE_SPECIALIST : 1
TRACK_HIS : 1
PT_WAS : 2
OF_CALL : 1
UR_EDUCATION : 1
USED_NOT : 3
BAL_NEGATIVE : 1
ACCOMPANY_ONE : 1
PAINFUL_SPASMS : 1
PM_COMMENTS : 1
ARRIVAL_DATE : 1
FLUIDS_GIVEN : 1
PATIENT_ASKED : 1
IN_ORDER : 2
JOINT_UNDER : 1
MEANS_OF : 1
DOCUMENTED_IN : 1
ALERTMRSA_AND : 1
DISPOSITION_OUTPT : 1
THE_COUNTED : 1
REQUESTING_MEDICATION : 1
SCHEDULED_WITH : 1
THIS_DURING : 1
NUTRITION_VISION : 1
PENDENCE_ONSET : 1
OF_VA : 1
LT_EYE : 1
SELF_CARE : 1
FOLLOW_IN : 1
AUGUST_SICK : 1
STATING_DONT : 1
PLANS_UNDERGO : 1
TRAVATAN_RX : 1
SOFTENER_NEW : 1
THE_LENGTH : 1
CALLED_REPORTED : 1
VETERAN_CONTACTED : 1
ALCOHOL_MILD : 1
ARRIVAL_DENIES : 1
THERE_FALL : 2
RESUM_COMPLICATIONS : 1
DEC_TH : 1
VERY_AND : 1
BY_AN : 1
AS_WITH : 1
KNEE_TKA : 1
NEEDS_NAME : 1
OBSERVATION_PROCESS : 1
CASE_MANAGER : 3
NEC_ARTHRALGIA : 1
CITALOPRAM_STATING : 1
INTERESTING_AGREES : 1
STUDY_IS : 1
ORTHO_APPT : 1
HIS_PERSONNAL : 1
ASSERTION_EXERCISES : 1
ASSESS_ANY : 1
THE_TEAMS : 1
ALL_DAILY : 1
NUMBER_DIFFERENT : 1
EYE_IS : 1
IS_PSYCHOTHERAPY : 1
SELECTIVE_ROOT : 1
PROCESS_LEARNING : 1
CONSULT_NOSHOW : 1
STATED_BY : 1
ULCER_PREVENTION : 1
SCAN_READ : 1
AND_THIGH : 1
THEM_PREDNISOLONE : 1
ON_AUGUST : 1
MONTH_STARTING : 1
PROGRAM_FOR : 1
CAUSES_PAINFUL : 1
MOVEMENTS_SHIFT : 1
RYLAND_STATE : 1
AS_HE : 1
FUNCTION_VET : 1
RIGHT_FOOT : 1
HERE_WALKIN : 1
INFORMATION_EXAMINATION : 1
PLM_ARTHRITIS : 1
REMISSION_NO : 1
HAVE_ABOUT : 1
PMH_MAJOR : 1
TO_ADMITTING : 1
CONTINENT_MOBILITY : 1
CORONARY_ACTION : 1
BENEFIT_WELL : 1
UNIT_DOSE : 1
TREATED_ABOUT : 1
HOMICIDAL_PROBLEM : 1
WT_KG : 1
DIRECTIVE_HYDROCODONE : 1
ARE_STATED : 1
BREAK_HAS : 1
WITHOUT_AS : 1
AFTER_PT : 1
BILLING_REPAYMENT : 1
HYDROBROMIDE_TAB : 1
ARE_OPTOMISTIC : 1
VS_LB : 1
AND_WILL : 1
DEPTH_HOW : 1
EXPLAINED_PT : 1
FROM_PLAN : 1
INTERDISCIPLINARY_RECORD : 1
THE_TOOTH : 1
FOR_GROUP : 1
GROUP_HE : 1
THIS_NOTE : 1
ORAL_DINNER : 1
MIGRAINE_IN : 1
ROUTINE_EYE : 1
GRENADES_MORTARS : 1
NOT_HEIGHT : 1
THAT_TRANSITIONAL : 1
PENDING_MHC : 1
IN_CM : 7
HIS_ETHNIC : 1
ON_WEDNES : 1
PALMAR_IN : 1
NATURE_RELATIVE : 1
TERM_DEPOSITS : 1
REACTIONS_NOTED : 1
RESOLVED_POINTS : 1
LOCK_RUE : 1
PROBLEM_THOUGHT : 1
FOLLOWING_MEAL : 1
PROBLEMS_TACTILE : 1
CANAL_STENOSIS : 2
ASSIGNED_CALLER : 3
COUGHING_ON : 1
LEG_NEXT : 1
BONFADINI_BEEN : 1
COMPLAINT_NOT : 2
COMPLAINTS_ONE : 1
RECONCILED_REVIEWED : 1
INSTRUCTED_RETURN : 1
APPT_PT : 2
FEELING_TOLD : 1
HEMOGLOBIN_PLASMA : 1
ADL_MOBILITY : 1
NOTE_BY : 1
PROBLEMS_FALL : 1
ADDRESS_AT : 1
AT_ON : 3
PAIN_STATING : 1
TO_ANOTHER : 1
REQUEST_TREATMENT : 1
COLOR_NO : 1
AND_APPEARS : 1
MG_TAB : 10
FOLLOW_UP : 3
IN_THE : 16
IN_INTENSITY : 1
OF_NECK : 1
PT_PAIN : 1
CHANGES_SUMMARY : 1
VETERAN_CAN : 1
FEB_OF : 1
PAIN_AND : 2
DOWNSTAIRS_TO : 1
AND_ALLOW : 1
PER_MS : 1
WAS_WITH : 1
COLOR_NONE : 2
PMH_DEPRESSION : 1
NOTE_THOUGHT : 1
STATE_HCL : 1
INCREASE_WELLNESS : 1
OUR_GOAL : 1
HELD_DUE : 1
ANY_CHANGES : 1
WITH_VET : 1
YEARS_NOW : 1
NANCY_NOTED : 1
AT_ANTE : 1
WITH_LITTLE : 1
EYE_PT : 1
HORTON_SUPERVISOR : 1
CHRONIC_SYND : 1
GROUP_DTC : 1
AND_HAS : 2
CBOC_MANAGEMENT : 1
PING_PATTERN : 1
LEG_OF : 1
FOR_TDAP : 1
SPEECH_LOW : 2
LCSW_SYSTEMS : 1
WHICH_CONTINUES : 1
ASSISTANCE_BATHROOM : 1
WITH_HYPOTHYROIDISM : 1
COMPLIANCE_AND : 1
RESIDENT_PERSONAL : 1
ENROLLED_THE : 1
PROTECTORS_PLACE : 1
VETERAN_HAVING : 1
STENT_IN : 1
CALCIUM_THAT : 1
STEP_AND : 1
PT_GOING : 1
PHYSICIAN_TO : 1
HIP_PATIENT : 1
FOR_FURTHER : 1
NEOPLASM_OF : 1
ADDENDUM_SECONDARY : 1
AND_SHAKING : 1
PT_OBJECTIVE : 1
ADDITIONAL_INFORMATION : 1
SHRAPNEL_HAND : 1
WITHOUTENCOUNTER_FOR : 1
NUMBNESS_OF : 1
AND_PERSONALITY : 1
POLLEN_VET : 1
MOBILITY_ORIENTED : 1
TO_BATTERIES : 1
NEW_OF : 1
ULCER_HISTORY : 1
THERE_OBSERVATIONS : 1
THE_EXTRACTED : 1
DURING_BUSINESS : 1
DILTIAZEM_IN : 1
LIPOMA_DENIED : 1
MOTIVATION_APPETITE : 1
RETAINED_IN : 1
BE_TO : 3
ETOH_BIPOLAR : 1
HERPES_VIRUS : 1
IN_DECLINED : 1
SCHEDULE_APPOINTMENT : 1
PARTICIPATED_IN : 3
LIKE_TO : 3
MH_OP : 1
DOSE_COUMADIN : 1
GIVEN_DUE : 1
PERSIAN_NEWS : 1
MOUTH_ONCE : 1
RETINAL_SECONDARY : 1
SWER_TO : 1
PATIENT_AGE : 1
AS_DESCRIBED : 1
SEE_NOTE : 1
LACERATION_ENTERED : 1
THE_STUDY : 1
DESCRIBED_MAKING : 1
THIS_WRITER : 2
NOT_TO : 3
WASHING_ONCE : 1
TO_TEETH : 1
CHRONIC_QUIT : 1
WAS_COAT : 1
PROBLEMS_OCT : 1
HE_HAD : 5
REFUSE_HIS : 1
MG_DL : 1
PTSD_HAS : 1
HIM_GO : 1
CONTINUE_ESTABLISH : 1
HEALTH_DIVISION : 1
USE_MENTAL : 1
IN_DEPTH : 1
TYPE_DTN : 1
ETOH_DEP : 1
INTENT_NURSING : 1
RETAINED_SHRAPNEL : 1
STOOL_COLOR : 1
REPORTS_DOUBLE : 1
CLEAR_LI : 1
ENERGY_IMPROVED : 1
CONFIDENT_CAN : 1
THOUGHT_DIFFICULTY : 1
IS_TDAP : 1
YEAR_PT : 1
TACHYCARDIA_HEART : 1
NOTED_SAFETY : 1
PATIENTS_FAMILY : 1
SHOT_THROUGH : 1
HOGAR_CASE : 1
ANY_SUICIDAL : 1
ACTIVE_NKA : 1
AVAILABLE_MANAGEMENT : 1
NOTE_WILL : 1
PLAN_NO : 1
STATE_NOS : 1
PALMER_ADJUSTMENT : 1
SAME_MEDICATION : 1
HIS_GRANDKIDS : 2
LAST_DIAGNOSIS : 1
CARE_SHAMPOO : 1
PROCEDURE_INSTRUCTIONS : 1
IF_RELATIONSHIP : 1
WAS_NEEDED : 1
FROM_SIDE : 1
OF_CONFERRED : 1
MALE_NSC : 1
TO_YOU : 2
WITH_PAROLE : 1
SCALE_WHAT : 1
IS_YOUR : 1
PATIENT_CONTINENT : 7
WANTS_OBTAIN : 1
NOTIFIED_OF : 1
PULSE_CALLED : 1
TALKATIVE_AND : 1
HOURS_URINARY : 1
PROCEDURE_SEDATION : 1
BREATHING_PRESSING : 1
MR_DID : 1
WEIGHT_OR : 1
KNEE_JOINT : 1
AGE_ELECTIVE : 1
ORDER_TO : 2
SCREENING_TO : 1
THE_INTRODUCTORY : 1
DECISIONMAKING_CAPACITY : 1
INACTIVATED_VACCINE : 1
FAIR_APPETITE : 1
FEVER_IN : 1
TO_HEARING : 1
SALINE_LOCK : 2
DORSAL_OF : 1
CINCINNATI_CONSULTED : 1
HER_TIME : 1
PROBLEMS_MORSE : 1
OUTPT_MAY : 1
TOE_TOENAIL : 1
NOTE_ENTERED : 1
APPETITE_FAIR : 1
LEVEL_FUNCTION : 1
PROVIDE_MS : 1
NKA_TAKING : 1
FEVER_CHEST : 1
VS_WT : 1
PHYSICIAN_RESENT : 4
HAND_PAC : 1
GROOMED_APPEARANCE : 2
OTHER_CODLIVER : 1
HEARING_YOU : 1
GO_BACK : 1
OPERATION_DISPOSITION : 1
LB_THE : 1
SHIFT_REQUESTED : 1
MALE_THROBBING : 1
CURRENTLY_VETERAN : 1
TO_FROM : 1
THE_SAFETY : 1
NO_OF : 2
OF_WORK : 1
SCREEN_AT : 1
EXERCISE_PATIENT : 1
NO_CHIEF : 1
VETERANS_PROCESS : 1
THAT_SHE : 1
ATTENDED_METHOCARBAMOL : 1
TIMES_NOT : 1
HIS_BUT : 1
MODE_ARRIVAL : 1
STANDARD_FALL : 1
AWAY_NO : 1
THE_ONLY : 1
MOBILITY_EASILY : 3
FEEL_DISTANT : 1
THROBBING_PLAN : 1
WHEN_APPOINTMENT : 1
TO_PRN : 1
FORM_103203 : 1
APPOINTMENT_NUMBER : 1
OF_NORMAL : 1
HER_WITH : 1
OTHERS_STATED : 1
HIS_COMPLICATIONS : 1
HER_FAMILY : 1
DEMOGRAPHICS_DENIES : 1
CLINIC_NURSING : 2
LBP_HX : 1
TEACHING_NOTIFY : 1
INFORMED_WAS : 3
ASA_ISZESKI : 1
COULD_BETTER : 1
IN_MENTAL : 2
CODE_HC : 2
NEC_SENT : 1
MANAGEMENT_PROGRAMS : 1
BOWLING_BAKER : 1
AND_GENTEAL : 1
MIN_FOR : 1
HOSPITAL_LIVES : 1
CLINICAL_FELLOW : 1
STABILITY_OF : 1
FUTURE_APPOINTMENTS : 1
AND_DONT : 1
DEC_TEMP : 1
SUPERVISION_ENCOURAGEMENT : 1
CARE_DUE : 1
HEENT_EARSCANALS : 1
AN_ACCURATE : 1
PHENYLEPHERINE_EXT : 1
TRAITS_RTC : 1
CARDIOLOGY_NO : 1
ALCOHOL_OR : 1
POSTOPERATIVELY_HE : 1
IMMEDIATE_RELIEF : 1
REPAYMENT_OPTIONS : 1
FXN_MISSING : 1
DIRECTIVE_SULFA : 1
CARE_VA : 1
HAS_PLACED : 1
AND_READ : 1
SIMPLE_DECISIONS : 1
ADDRESS_ABOVE : 1
MINUTES_ONE : 1
BREAKTHROUGH_RECS : 1
TAK_IN : 1
KUWAIT_AND : 1
EQUIPMENT_PORTABLE : 1
BOWLING_MIN : 1
ROOT_HYPERTROPHY : 1
WOULD_YOU : 1
STATES_ILL : 1
POSTAL_DATES : 1
SCHEDULED_PATIENT : 1
NAME_FOR : 1
BE_KEPT : 1
WRITER_EXPLORE : 1
ACTION_ALBUTEROL : 1
THE_DORSAL : 1
SUPPLEMENT_PRESENT : 1
DATE_CURRENT : 1
INJECTION_HYPERTROPHY : 1
APPLIED_STERISTRIPS : 1
INTENSITY_SELECTIVE : 1
TO_PARKINSONS : 1
NAME_OF : 2
THE_LIES : 1
SESSIONS_VET : 1
OFTEN_CONSTANT : 1
WITH_CONSISTENT : 1
TOLD_NOT : 1
EMERGENCY_VM : 1
SOON_OF : 1
MOVEMENT_TEMP : 1
HISTORY_WEARING : 1
TIME_PT : 1
PM_AUGUST : 1
THEM_HIMSELF : 1
RIGHTS_OTHER : 1
CLINICAL_PHARMACY : 1
PENIS_ED : 1
NO_COUGH : 1
WHEN_PART : 1
TAKE_ONE : 5
HIS_PHYSICIAN : 1
BECAUSE_IF : 1
PT_UPSET : 1
FACILITY_APPOINTED : 1
EDUCATION_NOTE : 1
BEEN_DRINKING : 1
THE_THEIR : 1
NO_TRAVEL : 1
APPT_PATIENT : 1
HEMATURIA_PAIN : 1
TYPE_OTHER : 1
PANEL_ORDER : 1
AROUND_TIME : 1
PATIENT_PREVIOUS : 1
CARE_THRU : 1
METHOD_EVALUATION : 1
DRINKING_IS : 1
EXERCISES_CHAP : 1
AS_COMPONENTS : 1
OR_LAST : 1
RECENT_ULTRASOUND : 1
ELECTIVE_PAIN : 1
HOGAR_MANAGER : 1
COUNTED_THE : 1
PATCH_LATER : 1
APPEARS_CONSTIPATION : 1
MAJOR_DEPRESSION : 1
IN_GENERAL : 1
DOING_WELL : 1
URGENT_AT : 1
LOCATION_PAIN : 1
INFECTED_IN : 1
FOR_CESSATION : 1
THE_TL : 1
NEW_AND : 1
TIMES_VALUES : 1
TAKING_MEDICATIONS : 1
INFORMATION_STOOL : 1
CLEAR_ROOM : 1
FOR_THERAPEUTIC : 1
PATIENT_RESPONDED : 1
HAVE_CLONAZEPAM : 1
AP_PELVIS : 1
THE_SSN : 1
RELIEF_REPLACES : 1
IS_ELIMINATION : 1
PARTIALLY_BUT : 1
GROUP_MIN : 1
ROUTINE_PATIENT : 1
OUT_LOUD : 1
NUMBER_BOWEL : 1
SHIFT_NUMBER : 1
YOUR_MEDICATIONS : 1
AND_THAT : 2
THE_BLOOD : 1
IS_GOOE : 1
TETANUS_SERIOUS : 1
HIS_SPENDING : 1
SURGERY_HIS : 1
AND_TRANSITIONAL : 1
PO_PT : 1
WORKLOAD_TOTAL : 1
DRUG_CHF : 1
CBOC_SW : 1
SENSE_FRUSTRATION : 1
AND_WHICH : 1
SA_TAKE : 1
AGGRAVATING_FACTORS : 1
PHYSICIAN_DISTRESS : 1
USES_AT : 1
COULD_IN : 1
THE_OBESITY : 1
HES_TOLERANCE : 1
DIAGNOSIS_CHRONIC : 1
VETERAN_CASE : 1
HE_SAYS : 2
OR_PERSONNEL : 1
SEEING_CLINIC : 1
XD_OUTPATIENT : 1
CM_VM : 1
AS_ROSEMONT : 1
AMOUNT_SURGERY : 1
DYSPHAGIC_PROGRAM : 1
THE_CLC : 2
BEEN_DECREASING : 1
PAIN_NO : 3
PATIENT_EDUCATED : 1
HCV_HAS : 1
TRAVEL_REPORTED : 1
ADVISED_TO : 2
PT_STATES : 4
TO_COMMUNICATION : 1
RTC_TH : 1
PER_STAFF : 1
TABLET_POSSIBLE : 1
THE_ABOVE : 2
DORSAL_SIDE : 1
HE_DIRECTLY : 1
WAS_GIVEN : 1
QUESTIONS_SELF : 1
BY_SAFETY : 1
MOST_THE : 1
ASSISTANCE_PATIENT : 1
VISUAL_UCINATIONS : 1
INPT_AND : 1
HAVE_FOR : 1
MEDS_FOR : 1
OF_PATIENTS : 2
BELOW_CLACICLE : 1
OF_ON : 1
THE_NIGHTSTAND : 1
SKILL_TO : 1
SEE_DISCHARGE : 1
TO_NECESSITATE : 1
TO_CONTINUE : 3
ACCORDING_TO : 1
AND_CAME : 1
VISIT_SUPPORTIVE : 1
FLOATER_RIGHT : 1
BEST_TIME : 1
EASY_NURSING : 1
BE_INDEPENDENT : 1
IN_INTERVAL : 1
DISCUSS_WITH : 1
FOR_BREAKTHROUGH : 1
FOR_TIME : 1
NEEDED_AXIS : 1
CONSULT_NOTE : 2
DEVIL_COMES : 1
ML_INH : 1
CHANGES_TO : 1
ACTIVE_LUMBAR : 1
AMBULATION_REQUIRES : 1
REQUIRE_POST : 1
COME_TO : 2
ASSISTANCE_CLIENT : 1
STAFF_ACTIVE : 1
FOLLOW_OF : 1
ACTIVELY_IN : 1
TO_OF : 2
OF_THEIR : 1
AS_TOLERATED : 1
PROBLEMS_PAROLE : 1
ANT_CHAMBER : 1
MIAMI_FOR : 1
MAINTAINING_CBT : 1
COMMENTS_ORIENTATION : 1
PHYSICIAN_ODY : 1
SI_OFF : 1
FOR_DIZZINESS : 1
FUTURE_SESSIONS : 1
PHARMACY_RELATED : 1
WALKIN_PCC : 1
NOTE_URINE : 1
HUSBANDS_PRIORITIES : 1
HE_BREAKFAST : 1
LOCATIONS_JOB : 1
ROUTE_SMOKING : 1
MOUTH_BEDTIME : 1
MOUTHPIECE_PATIENTS : 1
TO_PROVIDE : 1
BRAIN_CLIP : 1
CHARTS_ADMITTING : 1
NOT_OR : 1
NEW_BEHAVIORAL : 1
LAB_NOTIFICATION : 1
PAINFUL_TO : 1
LAB_FOR : 1
AND_FEELS : 1
PHYSICIAN_PHYSICIAN : 2
THE_WAS : 1
HEALTH_OF : 2
APPOINTMENT_DESIGNATED : 1
HAS_SUPPLY : 1
NURSE_IF : 2
THAT_NO : 1
NOTE_COMMENTS : 1
SC_APPOINTED : 1
WAS_SMOKER : 1
RESIDENT_ASSISTANCE : 1
STATED_TO : 1
REFERRAL_DISCUSSING : 2
PT_STILL : 1
SCHEDULED_ON : 1
MANAGEMENT_ATTACKS : 1
MEDICATIONS_VETERAN : 1
VETERAN_GRANDKIDS : 1
ONSET_REVIEW : 1
VISUAL_ON : 1
CAPACITY_PATIENT : 1
BOTH_THE : 1
MY_PAIN : 1
WITHOUTENCOUNTER_THERAPEUTIC : 1
LIVES_WITH : 2
WHICH_WAS : 1
TO_VERBALIZE : 1
REFILLS_VET : 1
OF_TD : 1
HA_TO : 1
TAB_AS : 1
COPING_AS : 1
WAS_NOT : 5
NOTE_PMH : 1
LI_ENERGY : 1
PAIN_YOU : 1
VA_PT : 1
LATER_HE : 2
LOCAL_BRIEF : 1
EXPLAINED_AT : 1
SKIN_SOME : 1
FOR_AND : 5
ADDRESS_ANY : 1
CARE_PLAN : 1
VIA_CITALOPRAM : 1
SELECTIVE_NERVE : 1
UP_BLOOD : 1
MED_WINDOW : 1
VOLUME_TIME : 1
MEDICATION_PMR : 1
LOUD_ATTEMPTED : 1
ALLERGIES_VIA : 1
TO_DATE : 2
WE_CALL : 1
ANESTHESIA_LEFT : 1
WILL_HE : 2
VASCULAR_NO : 1
PROCESS_FOOT : 1
VENT_ML : 1
CHRONIC_LBP : 1
NEG_IS : 2
FROM_CLC : 1
AM_HEALTH : 1
THE_PAST : 4
COLOR_CUEING : 1
FOBT_IN : 1
KNEW_HE : 1
WILL_DETERMINED : 1
TO_AFTERCARE : 1
PROVIDE_IF : 1
REPORT_HAS : 1
FOLLOWUP_PATIENT : 1
AND_UNDERSTANDING : 1
ACTIVE_CLOZAPINE : 1
TURNS_SITS : 3
FOOD_DRINKS : 1
MALE_FOLLOWUP : 1
SIDE_BELOW : 1
PATIENT_REFUSES : 2
CLONIDINE_GIVEN : 1
NOTE_COLLECTION : 1
ELIMINATION_THE : 1
MH_DC : 1
NO_ASSISTANCE : 2
COMPLAINT_OF : 2
LIPID_RESULTS : 1
NUMBER_MG : 1
ON_OA : 1
HIS_LEVEL : 1
ATTEMPTED_CALL : 1
AN_TO : 1
OF_SERVICE : 2
TIME_AND : 2
NO_HAD : 1
ABINOIDS_NEG : 1
TO_LOBBY : 1
TRUSTING_MENTAL : 1
SI_HI : 1
FOR_SESSIONS : 1
AND_FAMILY : 1
SAME_DOSE : 1
WILL_WHEN : 1
TOUCH_TO : 1
ACTIVE_RFC : 1
CONTRACT_HAD : 1
CHLORIDE_WERE : 1
ESTABLISH_MENTAL : 1
STOPS_MINIMIZE : 1
LASHES_PATIENT : 1
IMPROVED_HELPING : 1
THIGH_HE : 1
NECESSITATE_HIP : 1
MG_WILL : 1
ENTERED_ERROR : 1
WITH_ADDENDUM : 1
EVALUATION_PING : 1
AND_PER : 1
BASCOM_IN : 1
WELL_AM : 1
WISHES_HAVE : 1
ONSET_AHN : 1
VETS_IS : 1
BACK_US : 1
VACCINE_PATIENT : 1
MS_HIS : 1
POSITIVE_THERAPEUTIC : 1
CINCINNATI_SPECIAL : 1
HEALTH_THERAPY : 1
SHOES_RELATES : 1
OR_WOUND : 1
IMMEDIATE_COMPLICATIONS : 1
ASSESSMENT_MOOD : 1
SECURED_ARE : 1
HEALTH_ADVISE : 1
TREATMENT_UPDATE : 1
BE_SURGERY : 1
DOING_ALLOWED : 1
TIME_HAS : 2
ORIENTATION_MEDICATIONS : 1
PT_VET : 1
HAS_ATYPICAL : 1
BECOME_TANGENTIAL : 1
OMEPRAZOLE_STATES : 1
WIFE_OUT : 1
BEEN_SMILING : 1
TIME_THE : 1
SW_BONFADINI : 1
NONE_COMPLETE : 1
PT_PER : 1
DENIES_GAMMA : 1
NURSING_PAIN : 1
PHONE_POST : 1
RESENT_TERAZOSIN : 1
CONSTANT_FOR : 1
RESPONSIBLE_FOR : 1
ASSESS_CHANGES : 1
EXTRA_PILLS : 1
BOOSTER_PATIENT : 1
TIME_PAIN : 1
THEY_REMEMBER : 1
IDENTIFIED_SUICIDE : 1
WATCH_LIKE : 1
CUT_BACK : 1
ASSISTIVE_BOWEL : 1
TIME_LIST : 1
STRESS_FROM : 1
AGREES_TO : 2
PROVIDER_CHANGING : 1
MAILED_APPOINTMENT : 1
WITH_THAT : 1
EAT_TO : 1
COLONOSCOPY_RISKS : 1
THESE_TO : 1
PM_ADDITIONAL : 1
SPINAL_STENOSIS : 2
URINE_TRANSFER : 1
PER_MINIMAL : 1
OFTEN_ITSELF : 1
THESE_MAKE : 1
MEDICATION_AS : 1
NIACIN_NIASPAN : 1
CBOC_LAB : 1
PT_TO : 6
AAM_CASUALLY : 1
PROBLEMS_MH : 1
PELVIS_CALLED : 1
OFFICE_PAIN : 1
CLASS_PATIENT : 1
IN_EMERGENCY : 1
HE_HA : 1
TO_SCHEDULE : 2
AND_BEHIND : 1
PATIENT_NUSTEP : 1
REPLACES_MEDICINE : 1
SAME_OF : 1
OR_TOBACCO : 1
IMPROVEMENT_EXERCISE : 1
VETERAN_PATIENT : 1
OR_FORE : 1
VISITS_WITH : 1
FEVER_WHICH : 1
RADIATION_DAILY : 1
TAKE_OF : 1
OF_FOWLER : 2
IDEATION_THOUGHT : 1
PAIN_IS : 1
DOCTOR_HIM : 1
RESPIRATIONS_IS : 1
ALCOHOL_DEPENDENCE : 1
DIFFICULTY_SIMPLE : 1
VET_RETURN : 1
PER_PT : 3
HCL_TAB : 2
FROM_OTHER : 1
COMPLICATIONS_NONE : 1
JOB_JGXMT : 1
THERE_BEEN : 2
WITH_ABILITY : 1
PART_OF : 1
WE_JUST : 1
INCLUDING_RECEIVED : 1
UNAWARE_OF : 1
SHARED_REALIZE : 1
CONSULT_INTERVENTIONS : 1
DISCHARGE_DATE : 1
MENTAL_ST : 1
HOW_MONTHS : 1
PRIMARY_CARE : 2
ON_REPORTED : 1
RESENT_DELIVERY : 1
SURFACEANTERIOR_POSITIVE : 1
BACK_MAY : 1
ITS_RISKS : 1
COMPLAINT_NAME : 1
NO_ANT : 1
GROUP_PATIENT : 1
BUT_SUBCUTANEOUS : 1
SIDE_FRONT : 1
PATPU_THANK : 1
PATIENT_WAL : 1
SCALE_RELIEVES : 1
PAIN_MORE : 1
IS_BY : 1
REVIEWEDUNCHANGED_EARSCANALS : 1
TALKING_TO : 1
APPOINTMENT_DRIVER : 1
MENTAL_DISORDER : 1
HAS_MAKING : 1
APPLICABLE_DJD : 1
WAS_CHRONIC : 1
VIA_STRETCHER : 1
RECOVERY_VISIT : 1
HAS_DECREASING : 1
HUMBLING_GOAL : 1
PERFORMED_TO : 1
TO_RIVIERA : 1
CILO_ASSISTANCE : 1
FLAT_ON : 1
TO_ORDER : 2
PATIENT_OF : 2
ACTIVE_MEDICATIONS : 3
WEIGHT_LB : 2
ABNORMALITY_OF : 1
DOCUMENT_CHANGES : 1
ASI_IS : 1
TO_PARTICIPATED : 1
ASK_YOU : 1
OCCUPATION_POSTAL : 1
CODLIVER_OIL : 1
BUPROPION_SMOKING : 1
PROMOTION_AND : 1
CALCIUM_PAIN : 1
STOOL_MEDIUM : 1
HIM_AT : 1
MG_ONE : 1
THIS_SERVICE : 1
WBC_BLOOD : 1
ADDENDUM_COMPARISON : 1
NATIONAL_AVE : 1
NOTHING_ADD : 1
EXAMINATION_WELL : 1
THERAPY_IN : 1
HEALTH_HISTORY : 1
YESTER_VETERAN : 1
MISSING_THE : 1
HYDROCODONE_MG : 1
THE_POSTAL : 1
APPARENT_AT : 1
DTN_CLINICAL : 1
HOLD_HIS : 1
FOOT_CONSULT : 1
NOTE_APNEA : 1
YES_IS : 2
TO_ACCOMPANY : 1
HOURS_NO : 1
BY_ERROR : 1
LAST_WEEK : 1
TERMINATED_AM : 1
ADL_NOTE : 2
MEET_SPECIFIC : 1
INPATIENT_DATE : 1
ALLOWED_BACK : 1
THEY_THEY : 1
HEALTH_CONCERNS : 1
DOWN_OF : 1
THE_WINDSHIELD : 1
MENTAL_CONVERSATION : 1
CONFIDENT_HE : 1
CAN_BETTER : 1
SCREEN_NOT : 1
ALSO_THAT : 1
MEDICAL_ASSOCIATED : 1
AND_TYLENOL : 1
THINGS_NEW : 1
FOR_NEEDS : 1
NORMALIZING_THIS : 1
BEDTIME_TO : 1
COME_BACK : 1
OR_TEETH : 1
MEASURES_IN : 1
NOW_WITH : 1
LBP_OF : 1
HEALTH_EDUCATION : 1
AS_CE : 1
ABD_BENIGN : 1
LEADERS_WITH : 1
OBSERVED_IN : 1
HAD_DUPLEX : 1
STOPS_DRINKING : 1
UPPER_QUADRANT : 1
HOSPITALS_THE : 1
CHANGES_BAKER : 1
HE_PPV : 1
BALDWIN_RETURN : 1
CHILDREN_REPORTS : 1
PENDING_WITH : 1
ABOUT_ASSESSMENT : 1
RIGHT_QUADRANT : 1
SYMPTOMS_NEUROGENIC : 1
JUNE_TO : 1
OF_SHIFT : 1
CONTINUE_HOME : 1
NEUROFORAMINAL_REPORTED : 1
NOT_NOTED : 1
ON_EXAM : 1
RESIDENT_TO : 1
ANY_ABNORMAL : 1
HISTORY_PRESENT : 1
MALE_AND : 1
NLR_LOCATION : 1
HOURS_DYSPHAGIC : 1
TO_PATIENT : 3
CONTACT_NUMBER : 2
BATHROOM_BED : 1
ISSUES_PROBLEMS : 1
SKILLS_HIS : 1
UP_LATER : 1
MG_PO : 2
PATIENTS_ASSESSMENT : 1
NO_PRODUCTIVE : 1
PERSON_MEAL : 1
TO_WELLNESS : 1
PATIENTS_ADDRESS : 1
INCREASINGLY_UNSAFE : 1
NO_PROCESS : 1
TO_PRIMARY : 1
OS_QUIET : 1
CALL_ANY : 1
OX_TREATMENTS : 1
IDENTIFIERS_WERE : 1
MEDICAL_AND : 1
LEG_FOUND : 1
PER_VASCULAR : 1
CONSULTED_DISCONTINUED : 1
THE_MORNING : 1
NO_SUICIDE : 1
BLADDER_PING : 1
PARTIAL_REMISSION : 1
THE_MAY : 1
HOURS_ECCHYMOSIS : 1
CURRENT_DIET : 1
BY_TO : 1
STATUS_DIVORCED : 2
SEEN_OF : 1
ER_TRIAGE : 1
LUMBAR_NERVE : 1
COMES_CHEST : 1
RIGHT_BUTTOCK : 1
BOTH_IN : 1
AROUND_HOSPITAL : 1
EDUCATION_BOWEL : 1
WITH_SPONSOR : 1
NOTED_PT : 1
MEDICATIONS_POTASSIUM : 1
CHANGES_DC : 1
ACTIVITIES_DAILY : 1
BERNA_FOR : 1
NOT_NEEDED : 1
GEN_WHEN : 1
MAINTAIN_WITH : 1
PREFERENCE_RAPID : 1
DISCUSSION_HAND : 1
EDUCATION_GROUP : 1
AND_STATED : 1
PATIENT_DRIVER : 1
PAIN_MG : 1
NO_NONVA : 1
AT_IMPORT : 1
INVOLVED_THIS : 1
THE_BY : 1
COLOR_MEAL : 1
FAMILY_COMMENT : 1
HIM_HIS : 1
INTAKE_ASI : 1
ICA_STENOSIS : 1
SURGERY_CONSULT : 1
PAT_CONTINUE : 1
WAS_INSTRUCTED : 1
TO_QUESTIONS : 1
TO_OPTIMAL : 1
PCC_WALKIN : 1
ONCE_THE : 1
LISTS_HOW : 1
OU_PH : 1
CONDITION_TREATMENT : 1
IN_PATIENT : 1
PSYCH_HAS : 1
AREA_OPENING : 1
AUDITORY_VISUAL : 1
CONDITION_ASSOCIATED : 1
DIRECTIONS_AT : 1
NORMAL_FOR : 1
YOU_KNOW : 1
HE_TALKATIVE : 1
FOR_SMOKING : 1
ADMISSION_IDEATION : 1
RX_RELATES : 1
LIQ_DOESNT : 1
HOW_GET : 1
ADMINISTERED_DRUG : 1
NARCOTICS_THE : 1
NEGOTIATE_IN : 1
AND_SITS : 3
AND_AND : 1
JUANITA_ASF : 1
CHAPLAIN_PROVIDE : 1
WITH_ND : 1
CALL_TWO : 1
INTENDS_THE : 1
SOME_TIME : 1
POTASSIUM_WERE : 1
DEPENDENCE_CHRONIC : 1
REORDERED_THIS : 1
OF_SOCIAL : 1
THERE_WERE : 2
IS_AMBULATORY : 1
ULTRASOUND_UNSPECIFIED : 1
IN_SCHOOL : 1
HEARING_THINGS : 1
FOR_SUPPLEMENT : 1
INSTRUCTED_TO : 1
BID_PER : 1
ATTACKS_SATAN : 1
CHANGES_IN : 1
CHANGES_PENDING : 1
PATIENT_HISTORY : 1
DIRECTLY_AGREED : 1
MALE_PATIENT : 1
AT_VETS : 1
BASELINE_AND : 1
AFTERNOON_CLIENT : 1
HIGH_NO : 1
BLOOD_ON : 1
UNSPECIFIED_ANEMIA : 1
AS_OCCURING : 1
HEALTH_INTELLIGENCE : 1
ACTION_URINE : 1
VETERAN_REPORTED : 4
PIP_THIS : 1
CASE_ATTACKS : 1
GEC_NOTE : 1
SIGNIFICANT_FOR : 1
INJECTION_ZOSTAVAX : 1
IN_PLACE : 3
ASSIST_ASSISTANCE : 1
DISABILITY_ABOUT : 1
CHANGING_INTO : 1
BMI_RECENT : 1
AND_THESE : 2
FEELS_MORE : 1
MIN_PT : 1
LABORATORY_MORNING : 1
PTSD_SYMPTOMS : 1
WHEN_THE : 1
THIS_YEAR : 1
WORK_ASSESSMENT : 1
TO_RUE : 1
MORPHINE_AND : 1
PREDNISOLONE_GENTEAL : 1
NEGOTIATE_SAFELY : 1
NONE_TOLERATED : 1
TO_MEETING : 1
WITH_USAGE : 1
DESCRIBE_AMBULATING : 1
USING_THIS : 1
NO_FOR : 2
SEEN_KNOW : 1
HAVE_BEEN : 3
YOU_HEARING : 1
BEEN_WELL : 1
SCHIZOPHRENIA_MR : 1
PHYSICIAN_WAL : 1
LL_NO : 1
IS_PERFORMED : 1
CARE_PROBLEMS : 1
RECHECK_WHEN : 1
ON_NOVEMBER : 1
CONTINUE_THIS : 1
FOR_APPOINTMENT : 2
DATE_WILL : 1
KG_MOST : 1
BEFORE_SUPPER : 1
SERVICE_VETERAN : 1
BLINDNESS_RETINAL : 1
TO_SMOKING : 1
DIFFICULTY_MEDICAL : 1
URINE_VIA : 1
CONSUMED_CONSULT : 1
TO_OUT : 1
DEPRESSED_AND : 1
HAVE_NO : 1
VETERAN_FOR : 2
AS_OF : 1
CONFIRMED_AN : 1
INTERNAL_PATIENT : 1
WILL_HAVING : 1
FOR_CCRC : 1
IMPLICATIONS_NO : 1
REPLACES_CLINIC : 1
FOR_WORK : 2
IT_ONLY : 1
HAVE_PATIENT : 1
FUNCTION_WILL : 1
AS_STATES : 1
LAB_RESULTS : 1
BUT_OFTEN : 1
LAST_THREE : 1
COUGH_DROWSY : 1
HOME_THE : 1
PATIENT_PRIVILEGES : 3
RECOMMENDATION_COMPLAINTS : 1
BLOOD_WHAT : 1
MAILED_WHEN : 1
BEING_BY : 2
SPECIALIST_WHO : 1
PROBLEM_DISORDERMET : 1
SURGERY_FOR : 1
NOT_HISTORY : 1
USEFUL_TO : 1
QUESTIONS_ABOUT : 2
VISIT_HERE : 1
REVIEWED_THE : 1
VETERAN_BE : 2
ONSET_PAIN : 1
PATIENT_THESE : 1
AFTER_THE : 2
GENDER_MALE : 1
EAT_LUNCH : 1
PATIENT_ON : 2
BEEN_IS : 1
STATEMENTS_OUT : 1
MRI_MORE : 1
EXPLAIN_DENIES : 1
ANTICOAG_INPATIENT : 1
HIS_TACHYCARDIA : 1
NO_AMOUNT : 1
SP_PRECAUTIONS : 1
THE_EVENT : 1
TO_DISCUSS : 3
MATRIXECTOMY_INFORMED : 1
MG_SA : 2
BY_DOES : 1
BEEN_MAKING : 1
PER_CE : 1
PAIN_DOWN : 1
US_VETS : 1
PCP_HARDEN : 1
STATED_DOCTOR : 1
IDCP_MEETING : 1
SES_ABOUT : 1
MEDICATION_LIST : 2
THE_NIGHT : 1
HANDS_AND : 1
EC_TAB : 1
HE_BLOOD : 1
PAIN_TOLERATING : 1
ASSOCIATED_WITH : 1
NOTIFY_THE : 1
VETERAN_MEDICATION : 1
VET_FLIGHT : 1
BELONGINGS_ARE : 1
PROCESS_MUCH : 1
DENIES_DRAINAGE : 1
DIVORCE_TO : 1
SC_FACILITY : 1
WITH_CHIEF : 2
NLR_IDENTIFIERS : 1
YOUR_MEDICATION : 1
HAVING_ABDOMINAL : 1
APPARENT_PATIENT : 1
ABOUT_HIS : 1
MYSELF_AS : 1
PHONE_EMAIL : 1
TAKEN_JUN : 1
ADDENDUM_MS : 1
SHAKING_ABOUT : 1
MAY_ACQUIESCE : 1
THERAPY_CONSULT : 1
BY_HE : 1
CONSULT_THE : 1
THIS_ALERT : 1
CANAL_OR : 2
CONSENT_BLOOD : 1
PROBLEMS_INTERNAL : 1
PSYCHOTHERAPY_PAIN : 1
HE_SOUGHT : 1
SERVICE_CHANGES : 1
THE_NUTRITION : 1
WOUND_TETANUS : 1
POSSIBILITY_OF : 1
! Stats words=2114  pairs=10650
