# Supplementary material for: Predicting the Risk of Suicide by Analyzing the Text of Clinical Notes
Source: PLoS One. 2014 Jan 28;9(1):e85733. doi: 10.1371/journal.pone.0085733 (PMC3904866; doi:10.1371/journal.pone.0085733)
Supplement: Appendix S3 — Machine Learning Libraries and Methods: This section is provided to enclose the open source (Apache License) classifier used for the building of the statistical models, specifically for the purposes of study reproducibility. A detailed account of these tools is intended for another publication. (ZIP) [file pone.0085733.s003.zip › Appendix3/ML_libs/Regression_testing/group3/processed/grp3-pt-1089.dat]

!  Done reading
! Total word count = 6657
! Total unique words = 2141
! Total pair count = 13310
! Total unique pairs = 11278
MANDATED : 1
PASSED : 1
AT : 25
ADL : 1
ZZPATIENT : 1
ANSWERING : 1
WORK : 6
PREOP : 3
FINGER : 1
LOWER : 5
PORCEDURE : 1
WEIGHT : 2
EVENTUALLY : 1
MILD : 1
AA : 1
TREATMENTS : 2
MINUTE : 2
MILITARY : 1
INSTRUCTED : 2
FUNDS : 2
INTERVENTION : 3
COUNSELING : 2
USE : 14
PRIVILEGES : 1
DISCHARGED : 3
TREATMEN : 1
CONTINUOUS : 3
SPINAL : 1
SUPPLIES : 8
SECURITY : 2
READING : 2
VETERANS : 3
XACTIVE : 1
EMOTIONS : 1
LEVEL : 10
CHANGES : 1
ALCOHOL : 8
RAL : 2
AF : 1
FAX : 1
IMPORTANCE : 1
AHEAD : 1
CHARACTERISTICS : 1
MET : 2
SHOULDER : 3
MACHINE : 2
PBC : 1
FUNCTIONING : 1
COPD : 2
GENITOURINARY : 1
REMOVED : 2
CHANCE : 1
APPROPRIATE : 4
DIRECTIVE : 1
BLIND : 3
WKS : 2
TINY : 1
APPROACHING : 1
ATTORNEY : 1
WELL : 8
PHARM : 1
FOSTER : 1
MEDICINE : 4
NOTE : 51
TEST : 3
MADDOX : 1
BAKER : 1
MISCELLANEOUS : 1
DSMIV : 1
DO : 9
DOES : 14
TESTS : 1
ARRANGE : 1
FAILED : 1
FACT : 1
HTN : 3
SAME : 3
CV : 1
ACCESS : 1
ADVERSE : 1
BKH : 1
OPTION : 1
VOLUNTEER : 1
SCHEDULED : 8
ASK : 1
MEASURED : 1
ANCHORAGE : 3
MIMSOME : 2
TAB : 10
REQUIRED : 2
STABLE : 2
MONITOR : 2
DEC : 3
HAS : 35
FOR : 111
CONDITION : 2
ARNP : 2
NUTRITION : 4
BELIEVE : 1
GYNECOLOGY : 1
STRIP : 3
MODALITY : 2
HOMELESS : 1
MORNING : 5
ACCUCHEK : 1
AWAITING : 1
AMB : 2
SAUNDERS : 1
TRANSITION : 1
KNEE : 9
SC : 4
DECLINE : 1
OLAFSSON : 1
MUST : 2
IDEATION : 2
RECREATION : 1
SWER : 1
COLONOSCOPY : 3
COOL : 1
GOALS : 5
CALLBACK : 1
ROM : 1
RESPIRATORY : 1
ACTIVITY : 1
TARGET : 1
NAUSEA : 2
IMPAC : 1
PREVIOUSLY : 1
TELEHEALTHCARE : 1
PATTERN : 1
VINFLUENZA : 2
EXAM : 3
INFECTION : 3
RECENTLY : 3
DERM : 3
SUGAR : 1
ATTEMPTS : 1
CD : 1
BELLO : 1
DURATION : 2
OCT : 1
PREP : 1
LLOSE : 1
GO : 4
SIGNIFICANT : 3
BLVD : 1
BOWEL : 9
FREEDOM : 1
BP : 5
BELONGINGS : 1
POST : 2
PREVENTION : 1
DEPRESSION : 6
SON : 3
SENSORNEUR : 1
CM : 5
FREE : 1
CYR : 1
AGREEMENT : 1
GAIT : 3
AGAIN : 2
CITALOPRAM : 1
DESCRIBE : 1
SQ : 1
BREAK : 1
SHOES : 1
LATE : 1
FINANCES : 2
ATTEND : 2
CONSTIPATED : 1
EBL : 1
HEAL : 1
ABRASION : 1
BRUSH : 1
MEETS : 2
WT : 1
DOT : 1
DIETARY : 1
PLANS : 1
TOP : 2
STARTED : 1
HANDOUT : 1
LIFT : 1
TECH : 1
SCANNED : 1
OR : 29
THERAPEUTIC : 3
SHIFT : 15
BOTH : 1
CITY : 1
TEMP : 2
CONSIDERED : 1
GUNSHOT : 1
CONCERNS : 1
POSSIBILITY : 1
QUADRANT : 1
AIR : 1
VAPSHCS : 1
LIKE : 9
VEER : 1
UNKNOWN : 1
TRAINING : 3
VAGUE : 1
MUCH : 2
BEDS : 1
CHRONIC : 6
RELAPSE : 2
DIP : 1
TAKE : 13
NITRO : 1
INCREASE : 2
WITHDRAWAL : 2
MONITORED : 3
HARDSHIP : 1
WALKIN : 2
HOPED : 1
LIP : 1
BESYLATE : 1
TOLERATED : 2
SW : 3
ADMITS : 1
ANTITHROMBOTI : 1
REACTIVE : 1
HIGHER : 1
SUPINATION : 1
DEFICIT : 1
UNIT : 3
EXPIRATION : 1
MD : 7
NAME : 4
CARE : 22
SURROGATE : 1
OLANZAPINE : 1
AGE : 7
COMPLIANT : 1
RATED : 3
TIMES : 5
IS : 67
DL : 1
SCHOOL : 2
WRISTS : 1
FLUIDS : 4
IF : 5
HELPLESS : 1
NOR : 3
MH : 12
PENDING : 1
CANCELLED : 1
BAND : 1
ONCE : 1
SVS : 1
SKILLS : 6
DEALING : 2
EATING : 1
COMPREHENSION : 1
CARDS : 1
GROSSLY : 1
PPD : 2
EVALUATION : 4
BIRTHDATE : 1
HUMOR : 1
ACKNOWLEDGED : 1
APT : 1
NVD : 1
CONTRACTT : 1
REFUSED : 4
REHAB : 2
THESE : 1
FOLEY : 1
DIVORCE : 1
COMPANY : 1
CLASSES : 1
BLINDED : 1
REVIEWS : 1
DROP : 1
RULES : 1
HYDROCELES : 1
PARTICIPATION : 2
HOPES : 1
EDUCATED : 1
ESSENTIAL : 1
MARRIED : 1
HEIGHT : 3
PRESENCE : 1
THA : 1
BROS : 2
ADDENDUM : 21
CAR : 2
NO : 63
RELAXATION : 1
INTERESTS : 1
CONSCIOUSNESS : 2
HEMOGLOBIN : 1
ENTITLED : 1
CHIEF : 5
NORMOCEPHALIC : 1
CHANGED : 2
EXCESSIVE : 1
HYPOTHYROIDISM : 1
UPPER : 1
BENIGN : 1
RISK : 2
CLINIC : 16
BUILDING : 1
PERFORMED : 1
PRACTICE : 2
RECEIVING : 1
INITIALLY : 1
HIGHEST : 1
MINS : 3
TENDERNESS : 1
BMI : 2
BENZOTROPINE : 1
PRN : 1
COULD : 4
NOTET : 1
SPECIALTY : 1
BONHAM : 1
ADVANCE : 3
NOURISHED : 2
PCMEDICATION : 1
WILL : 31
APPEARANCE : 3
BUT : 11
THOUGHTS : 1
TYPE : 3
GETS : 1
HUSBAND : 1
SET : 4
SCHIZOPHRENIA : 2
OUTSTANDING : 2
FERNANDO : 1
LOSE : 1
DIVORCED : 1
EYE1 : 1
LLE : 1
DEL : 1
CHOLECALCIFEROL : 1
CONSULT : 8
SUPPORT : 4
FORMS : 1
WANTS : 2
MEMEBERS : 1
IMPROVE : 2
PRESENTED : 1
REVIEW : 4
LIKELY : 1
HIMSELF : 4
DISCUSSING : 1
COMES : 1
INJECTION : 1
REEVALUATION : 1
LIVER : 1
BROUGHT : 1
HFA : 1
ACET : 1
CENTURY : 1
ANAND : 1
RESIDENT : 6
CONTACTS : 2
INSTRUCTIONS : 3
VA : 9
WED : 1
DOCTORS : 1
LEVOTHYROXINE : 2
RESIN : 1
IMPACT : 1
DISEASE : 1
CAUSE : 1
PAIN : 44
THURS : 2
AS : 29
VISTA : 5
DIFFERENTLY : 1
CONSIST : 1
RESTRAINTS : 1
GTTS : 1
REPEATED : 1
AST : 1
GREATER : 2
WITH : 67
FEELS : 3
POD : 1
WORRIED : 1
OFFERED : 2
PARTICIPANT : 1
TEMPERATURE : 1
SYRINGE : 1
BASIS : 1
INDEX : 1
FLUENT : 1
GONE : 1
INCLUDING : 9
NA : 3
COPING : 1
SETTING : 1
DISABLED : 1
USED : 10
MONITORING : 1
IT : 7
BELOW : 1
BEDTIME : 1
LIKING : 1
NECESSARY : 2
MOSTLY : 1
DSHI : 1
DISCUSSED : 4
PRECIPITATION : 1
CA : 1
EXERCISE : 3
SUPPLY : 1
SHOWER : 2
TIME : 20
PURPOSE : 2
HARALD : 1
CODE : 1
OIDES : 1
HYGIENE : 2
HCL : 1
TEETH : 3
ADDITIONAL : 2
OXYCODONE : 1
SAFETY : 7
SIDE : 4
BREAKFAST : 4
PERSONALITY : 1
CONGESTIVE : 1
ALLERGY : 4
ASSURANCE : 1
ESI : 1
SPEAK : 2
SENSITIVITY : 1
CALL : 14
EXPRESSED : 1
WATCHED : 1
INTERMITTENT : 1
RESULT : 1
HX : 5
BIRTH : 1
MHC : 4
IMAGING : 6
UNSPECIFIED : 4
IOP : 2
MOTIVATION : 2
JUDGMENT : 1
PER : 2
TABLETS : 2
CONSISTENT : 1
FRIEND : 1
TOE : 1
UNT : 1
ALCOH : 2
ETC : 1
MOBILITY : 5
YOUR : 6
PRECAUTIONS : 1
GIVEN : 7
PCO : 1
EPIDIDYMAL : 1
CHOOSE : 1
HT : 1
SPECIFICALLY : 1
WHO : 10
UPON : 1
ANA : 1
SURG : 1
BASED : 3
COMPREHENSIVE : 3
ARM : 2
CURRENT : 7
CONTROL : 1
BARRATA : 1
EXPOSED : 1
SUBSEQUENT : 1
HIM : 17
LUL : 1
PULSE : 5
CRAMPING : 1
PROSTHETIC : 1
NEXT : 8
NEEDS : 1
THEY : 3
WARRANT : 1
COLCHICINE : 1
SYMMETRICAL : 1
APPTS : 1
TRANSFER : 3
LASTED : 1
WHEREBY : 1
ML : 5
PHONE : 5
DECLINED : 3
SXS : 1
TALKING : 4
TOUCH : 1
FAIR : 1
EGD : 1
SIERRA : 1
HAD : 6
ATTACK : 1
SAVINGS : 1
PENTUP : 1
YVONNE : 1
LOSS : 4
SISTER : 1
GUAZE : 1
ROI : 1
YO : 1
LOG : 1
NEGATIVE : 2
OUR : 1
DEPENDANCE : 1
ADDS : 1
LOCALITY : 1
PARALYZED : 1
LAB : 4
SALINE : 1
ING : 1
COMPLAINTS : 1
CONTACT : 9
DEVELOPED : 2
SYNTHROID : 1
IMPAIRED : 1
PEERS : 1
PROBLEMS : 6
URINE : 3
ANTISOCIAL : 1
NASAL : 1
RTC : 1
DUPLICATE : 1
GIVE : 1
NEG : 1
KNEES : 1
CAN : 10
THERAPY : 6
PSYCH : 1
SEEING : 1
TEACH : 1
RECEIVES : 2
FISHER : 1
WHICH : 6
SYMPTOMS : 4
EYESIGHT : 1
NOTES : 1
POH : 1
LOUD : 1
OVER : 6
ROTATOR : 1
ON : 39
COMPLETE : 3
PRESSURE : 13
ATTENDED : 1
TEL : 2
COVER : 1
LUPUS : 1
VERIFY : 2
NC : 1
EXERTION : 1
VIA : 3
ADAPTIVE : 2
ACCEPTABLE : 1
GOOD : 5
DROPS : 1
CARING : 1
DORSAL : 1
FALLING : 1
MED : 1
UPDATE : 1
INHALER : 1
INTO : 3
FIRE : 1
EDEMA : 1
SAO : 1
PO : 2
INSURANCE : 1
SHE : 8
UP : 11
THEN : 1
USUAL : 2
DEAR : 3
LOCATION : 6
ASSERTIVENESS : 1
FEVER : 1
FATE : 1
FINGERS : 1
CONSULTATION : 1
AWAY : 2
PRIOR : 5
VERBAL : 2
OFF : 2
DOCUMENTED : 1
ACROS : 1
DATE : 13
PARALYSIS : 1
RELATES : 1
DAILY : 10
SLIGHT : 1
OOMG : 1
PA : 2
PREPUCE : 1
LONG : 3
AWAKE : 1
WHEELCHAIR : 1
HOUSING : 2
REPLACEMENT : 2
FROM : 15
LEFT : 18
BL : 1
BATH : 2
MEDICAL : 8
HEAD : 1
ALSO : 6
SPOKE : 2
HUDVASHNOTE : 1
SYSTEM : 1
ARTHROPLASTY : 1
ASCITES : 1
QUIETLY : 1
DEPENDS : 1
AN : 11
IMPRESSIONS : 1
HEART : 4
DISABILITY : 1
TAKES : 1
RASHES : 1
FULLY : 1
FOUR : 1
STIC : 1
OUTSIDE : 4
OSAC : 1
EXCEED : 1
MEASURES : 3
EYE : 4
UNSCHEDULED : 1
MILIEU : 2
DISCUSSION : 3
STRAIN : 2
MYSELF : 1
AGO : 2
ATTENDING : 6
CHEST : 5
HAVING : 1
DT : 2
APPROPRIATELY : 2
CONJUNCTION : 1
MUSCLE : 1
ENCOURAGE : 4
LATER : 2
ARE : 14
DTC : 1
PLAYED : 1
WALKED : 1
DESIRE : 1
HYPERTENSION : 1
INDEPENDENT : 2
CORRECT : 3
PERSON : 3
HYPOTHYROID : 1
APPLY : 1
CYST : 1
BROTHER : 3
CPRS : 1
HYDROCHLOROTHIAZIDE : 1
SURGERY : 3
DERMATITIS : 1
RECOVERY : 4
STUDENT : 2
BORN : 1
HOSPITALIZATIONS : 1
STRUCTURE : 1
BURNING : 1
MN : 1
IRAQI : 1
TX : 1
GENERAL : 2
NUMBNESS : 1
ADAPTING : 1
REMINDED : 3
BE : 23
RESOLVED : 1
OX : 2
LEAVE : 2
DUE : 4
THEIR : 3
DENVER : 1
HEPARIN : 1
BACTERIOLOGY : 1
PING : 3
AGITATION : 1
CANE : 4
ISSUES : 2
RECONCILED : 1
DM : 1
ANEURYSM : 1
SLIPS : 1
OTHER : 18
CHAITANYA : 1
LIFE : 2
ME : 6
ANTICOAGULANT : 1
BED : 7
NURSING : 20
COMP : 1
FOLLOWING : 6
OUTCOME : 1
IDENTIFIED : 9
RNP : 1
LIQ : 1
APN : 1
ENDING : 1
WITHOUT : 3
REFER : 1
DIAGNOSIS : 10
JUL : 2
SUBSEQUENTLY : 1
ANTIPLATELET : 1
TRIGGERS : 1
EVAL : 1
ATYPICAL : 1
CALLING : 1
GAUZE : 1
SPINE : 1
ANXIETY : 5
VALVE : 1
AUDITC : 1
COUNTY : 1
WE : 4
LEARNED : 2
PARTICIPATING : 1
TOILET : 4
DISTANCE : 1
SYND : 4
PROTECTORS : 3
PATCH : 2
ROOM : 7
PATCHES : 4
HAT : 1
IMPROVED : 1
AGENTS : 1
CHART : 2
FIRM : 1
MCV : 1
ABOUT : 6
THANKED : 1
STAB : 1
VOA : 1
PLEASANT : 1
POTENTIAL : 3
GENOA : 1
NOTIFY : 1
NSAIDS : 1
BRIEF : 1
ADVOCATE : 1
TABLET : 6
TOGETHER : 1
ADMIT : 1
DURING : 10
ENVIRONMENT : 1
TOLD : 3
SEVERAL : 1
DIRECTED : 1
LISTED : 2
SCREENING : 8
TKA : 3
CHECKS : 1
CARDIOLOGY : 1
ERUPTED : 1
SMOKES : 2
DISEASES : 1
REACH : 3
GETTING : 1
HI : 3
REACTIONS : 1
FLAMMABLE : 1
PSA : 3
ESPECIALLY : 1
SCORE : 3
MSS : 1
DULL : 1
SP : 1
HOME : 13
CHECKIN : 1
APPLICATION : 2
NOTED : 5
TERMINATED : 1
INDIVIDUAL : 2
SMEAR : 1
RETURN : 1
INDEP : 1
MODERATE : 2
MYOPIA : 1
OTHERWISE : 1
EFFECT : 1
RESOLUTION : 1
METHADONE : 1
BRONCHITIS : 1
MIN : 3
ACUPUNCTURE : 1
QUANTITY : 1
RECONCILIATION : 2
MINUTES : 6
MILDLY : 1
EVATO : 1
FOLLOWUP : 3
RESISTING : 1
DRIVE : 1
HCS : 1
DIRECTIONS : 1
DELTOID : 1
INFORMS : 1
RISKS : 2
CHECK : 2
MAKES : 2
TEAM : 2
FINE : 1
FALL : 3
SICK : 3
ANYWAY : 1
EMESIS : 1
AM : 3
MOVEMENT : 1
PRACTITIONER : 1
ENTERED : 1
FLAT : 1
NOISES : 1
WHERE : 1
LE : 1
EVENT : 1
INDEPENDENCE : 1
PRODUCTS : 1
CALLED : 6
TOOK : 1
SUPERVISION : 2
MOTIVATED : 1
NG : 2
SOAP : 1
PREOPERATIVE : 2
TEACHING : 2
WH : 1
MON : 1
ADVISED : 4
OBTAINED : 2
STOMACH : 1
DOCUMENTS : 2
DIPHENHYDRAMINE : 1
MONTHS : 4
PALPATION : 1
MEASUREMENT : 1
SSN : 1
AVOID : 1
LIMITING : 1
HIBICLENS : 1
BEDSIDE : 1
AMOUNTS : 1
EAT : 1
INSIGHT : 2
IMMEDIATE : 1
EFFECTIVENESS : 1
WHY : 1
MEDICATION : 12
LUNG : 1
PROCEEDINGS : 1
WANT : 3
ATTEMPTED : 1
DINING : 2
SUPPORTIVE : 2
CASE : 7
ALTERNATIVES : 1
DRAKE : 1
CONTINUE : 10
ORAL : 4
ABNORMAL : 1
READ : 3
SERVICES : 2
OVERSIGHT : 2
ABSCESS : 1
PDX : 1
GOAL : 4
EXAMINATION : 1
PROVIDE : 5
PLT : 1
PMHX : 1
PATHOLOGICALLY : 1
MAINTAINS : 1
RPR : 1
HEALTH : 5
SUCCESS : 1
ADD : 1
INCH : 1
ADJUST : 1
PLACED : 1
SYNCOPE : 1
COGNITIVE : 3
REDUCE : 1
CR : 1
INDICATED : 1
PROSTATE : 1
CHAPLAIN : 2
EXCLUDING : 1
PREVIOUS : 3
BIPOLAR : 1
OUTREACH : 1
REFERRAL : 1
INTERVENTIONS : 1
MAR : 2
PY : 1
AZITHROMYCIN : 1
MORE : 7
AFTERNOON : 1
SEROQUEL : 1
MAKING : 1
PE : 1
RACE : 1
ABC : 1
WENT : 2
EFFUSION : 1
RECEIVE : 2
LIN : 1
ER : 2
APPLICABLE : 5
PRESCRIBED : 4
REQUEST : 1
UNABLE : 1
RN : 2
XYZZY : 2
CORRECTION : 2
AUGUST : 1
HOUSE : 4
HEADACHES : 1
AFTER : 5
PARTICIPATED : 4
DIFFICULT : 1
EMPLOYMENT : 1
STILL : 3
KIDNEY : 2
WELLNESS : 2
MORRISON : 1
LUMBAR : 1
BEVERLY : 3
GROUPS : 2
PCP : 5
BETADINE : 1
LCSW : 1
SAYS : 4
GEESEY : 1
ACROMIOPLASTY : 1
APPOINTMENTS : 1
ALB : 1
WOUNDS : 1
APNEA : 2
EACH : 2
RE : 3
WNL : 1
OLD : 2
TONIGHT : 1
FOOT : 2
VERBALIZE : 3
DEPRESIION : 1
CLINICIAN : 1
LS : 3
GLUCOSE : 2
DIALYSIS : 1
MOVE : 1
EAGER : 1
FEBRILE : 1
REMAINING : 1
ETHNIC : 1
DEVELOP : 1
APR : 4
PL : 5
AREA : 3
GU : 1
CERVICAL : 1
FLANK : 1
ALTERNATE : 1
MM : 1
UNDERSTANDING : 3
MEDICATIONS : 34
LOST : 4
LOCALLY : 1
MR : 13
DEVELOPES : 1
MAJOR : 2
BASEMENT : 1
CANT : 3
BILATERAL : 2
INTIMIDATING : 1
DESCRIPTION : 2
CLIPPINGS : 1
TISSUE : 1
SENNA : 1
DRIVING : 1
RECOMMENDED : 1
VACCINE : 3
BETTER : 1
FGM : 1
DEPRESSIVE : 1
PACKING : 1
RESULTS : 7
PATENT : 1
PROCESS : 2
EMERGENCY : 1
CONSC : 1
ANSWER : 4
MYCOSIS : 1
PROVIDING : 1
BREATH : 3
ABLE : 5
RECENT : 3
PERFORMANCE : 1
CHO : 1
IN : 92
SELFCONTROL : 1
POSITION : 2
MARY : 1
MANAGEMENT : 11
STATE : 5
GUN : 1
PLAN : 14
ITEM : 1
PENG : 1
COSIGNER : 1
AGREE : 2
CONSECUTIVELY : 1
VERY : 2
SATISFACTION : 1
DEVELOPMENT : 1
IDENTIFICATION : 2
ZZECF : 1
LACK : 1
CHARACTERIZED : 1
OPPORTUNITY : 1
VICTIM : 3
COMMAND : 1
BEHAVIOR : 5
PROFILE : 1
TOLERATE : 1
POSTAL : 1
LING : 1
MEDIAL : 1
BRONCHODILATORS : 1
SI : 4
COMPLETED : 5
SEASON : 1
PARAPHERNALIA : 1
REASSURE : 1
IMPRESSION : 3
IMPORTANT : 1
SOLUTION : 1
SM : 1
EVEN : 1
LIMITATIONS : 1
DRAW : 1
KEPT : 1
LAST : 12
EXR : 1
FIBRILLATION : 2
EDUCATION : 5
LUNCH : 1
HOLD : 1
SOBRIETY : 1
ADR : 1
INHIBITORY : 1
DESPITE : 1
IMMUNI : 1
IE : 1
RENAL : 1
SITUATIONS : 1
MOVED : 1
DETAILS : 1
CATHETERIZATION : 1
AFFECTED : 1
WINTER : 1
OBSTRUCTIVE : 2
PAINIS : 1
PERIARTICULAR : 1
PERTINENT : 1
ONLY : 1
STEADY : 1
EVENING : 3
OPEN : 1
REMOVAL : 1
MONTH : 3
VOUCHER : 1
REFILLS : 1
ACCIDENT : 1
BEEN : 20
SCHIZOAFFECTIVE : 1
TEARFULHE : 1
UNCONTROLLED : 1
BASE : 1
WITHIN : 4
REFILL : 1
LOCK : 1
POLYSUBSTANCE : 1
BASCOMPALMER : 1
OUTPATIENT : 25
GOES : 1
INTAKE : 1
STRIDULOUS : 1
SHORTNESS : 2
INPATIENT : 4
SPEECH : 1
TOMORROW : 2
STRUGGLING : 1
FT : 1
RELATED : 1
IMMEDIATELY : 2
CHIROPRACTIC : 1
ECASA : 1
CC : 2
OPERATIVE : 2
BURDEN : 1
TWICE : 6
ALF : 1
REGARDING : 3
SHAMPOO : 1
HARM : 1
TRIED : 2
PERSONAL : 6
SOCKS : 1
DRINKER : 1
TRAUMA : 3
HIS : 47
COORDINATOR : 2
LATEST : 1
ID : 4
APPARENTLY : 1
VARIABLE : 1
READINGS : 1
RECURRING : 1
NEURO : 4
RAISED : 2
COMORBIDITIES : 1
ACID : 2
STRONGER : 1
DISORDER : 12
SWOLLEN : 1
CONTACTED : 2
DON : 1
PROMOTE : 1
FORMAL : 1
FASTING : 1
EVERYTHING : 1
XANAX : 1
TYP : 1
TALKED : 1
PELVIS : 1
CATEGORY : 1
TREATMENT : 12
BLOOD : 14
ATRIAL : 2
LATEX : 1
HAVE : 27
ASSIST : 6
PROPHYLAXIS : 1
BPH : 1
EX : 1
OF : 123
DRUG : 1
VIEWED : 2
BLISTERS : 1
DFE : 1
BUPROPION : 1
CALLER : 4
PSYCHIATRY : 3
SHAVE : 1
SAID : 1
COUNTER : 1
CONJUNCTIVA : 1
NUMBER : 16
OBTAINING : 1
WRAPUP : 1
ASSESSED : 1
SPONGE : 2
HEAR : 1
ULCERS : 1
ASTHMA : 1
MS : 1
MY : 6
OUTPT : 1
INSTRUCTION : 3
MESSAGE : 6
INHALATION : 1
THINGS : 1
SUBSTANCE : 3
DIDACTIC : 1
THEM : 1
WIFESHE : 1
ASSESSMENT : 13
SERUM : 2
US : 1
CONTINUALLY : 1
TRANSDERMAL : 1
AMBULATION : 3
SURFACEANTERIOR : 1
ATTACHED : 1
POX : 1
STARTING : 2
CONSULTS : 1
IRRITABLE : 2
BUTT : 1
ENCOURAGED : 7
BLADDER : 2
NONSPECIFIC : 1
FRIENDS : 1
INFORMATION : 7
DEVICES : 2
EXPENSES : 1
INITIAL : 1
ILL : 1
CENTER : 7
ERECTILE : 1
PSYCHOLOGICAL : 1
THE : 127
EXP : 1
GROUP : 9
PRESENTS : 1
IDENTIFY : 3
APPEARS : 1
EXPIRED : 1
DIMINISHED : 1
COLOR : 4
THYROID : 1
TOES : 1
LEG : 1
MEDS : 4
UNCHANGED : 1
PSYCHOLOGY : 1
EXTENSION : 1
ANXIOUS : 3
DISPOSITION : 1
ADJUSTMENTS : 1
CAP : 1
REITERS : 1
STATED : 8
BATHING : 1
HEARING : 1
GET : 10
AXIS : 1
VDRL : 1
PAROLE : 2
BENEFITS : 2
ALBUTEROL : 1
SHOE : 1
ASSISTANCE : 16
DIABETIC : 2
CARDIOVASCULAR : 1
EVIDENT : 1
DESIGNED : 1
PRESCRIPTION : 1
YEAR : 2
COPY : 2
STAGE : 1
RYAN : 1
LB : 3
NAPPING : 1
HERBAL : 1
RANKINE : 1
WINDSHIELD : 1
ADJUSMENT : 1
EDUCAT : 1
JOAN : 1
PUT : 1
IDENTITY : 1
SEEN : 9
PRE : 1
RT : 1
SHAKING : 1
MCVEIGH : 1
MAILED : 2
ENCOURAGEMENT : 4
FOOD : 4
LAW : 1
DEPAKOTE : 1
VENTILATION : 1
LABORATORY : 1
UDS : 1
REDIRECTION : 1
SOLVING : 1
CAREER : 1
FREQ : 1
INJECTIONS : 1
SECTION : 1
EPIDIDYMIS : 1
ANY : 16
TRY : 1
DISCHARGE : 7
SAFELY : 1
CONSISTENCY : 3
FINAL : 2
RECORDS : 3
SYSTEMS : 3
QH : 1
INSTABILITY : 2
TENDER : 1
MAINTAIN : 1
POSTTRAUMATIC : 1
FACILITY : 2
HASNT : 1
EFFECTS : 2
SETS : 1
RELATIONSHIP : 1
SECONDARY : 1
1010M : 1
TIMEFRAME : 1
MHCC : 1
SAT : 1
EVERY : 8
VOLUME : 1
SSA : 1
OCR : 1
INTENT : 1
SKIN : 13
YESTER : 4
RISPERIDONE : 1
NOT : 45
OK : 2
PROGRESSION : 1
TEMPORARILY : 2
PROBS : 1
THERE : 5
RETINOPATHY : 1
EXPECTED : 2
WALKING : 1
RESEARCH : 1
COUNSELOR : 1
OPTOMETRY : 2
HERE : 7
IMPROVES : 1
POSITIVE : 1
HYP : 1
CLEAN : 1
UNITS : 1
LIPOMA : 1
ONEHALF : 1
ANGER : 3
FEB : 1
INT : 1
PROGRESS : 8
KEEP : 5
PSYCHOTHERAPY : 2
DCD : 1
ASSESS : 1
ENGAGE : 1
VET : 10
STOOL : 9
EXPLAINED : 1
UPCOMING : 1
SHORTENING : 1
MOTHER : 4
COMPLETION : 1
INDIVIDUALS : 1
PARTICIPATE : 1
YANICK : 1
EXPERIENCING : 1
PAP : 1
PAINFUL : 1
BACK : 9
HOWEVER : 4
ANTICOAG : 1
REQUIREMENTS : 1
PHOTO : 1
SOURCE : 1
REGARDS : 2
TUES : 1
DICTATED : 2
MALE : 14
WARNING : 1
NEVADA : 1
BY : 25
PMH : 2
CLINICAL : 1
BENZOS : 1
ACCESSION : 1
LARGE : 3
MEETING : 1
TH : 3
BIG : 1
STEREO : 1
TO : 177
PNEUMONIA : 1
CELLULITIS : 1
IV : 3
FEEL : 2
ABUSE : 3
ION : 4
DVT : 1
ROUNDS : 1
TASK : 5
HEAVY : 2
DISSABIL : 1
WART : 1
PHENOBARB : 1
HYPERCHO : 2
SAFE : 1
DX : 1
PROCEDURE : 9
REQUESTING : 4
THERMAL : 1
APPETITE : 1
WEAR : 1
HH : 1
SEE : 9
INNOVATIVE : 1
PLEASE : 5
STRIDE : 1
STATUS : 15
ILLEGAL : 1
BRUISING : 1
DIABETES : 3
DC : 2
DRINKS : 4
EFFECTIVE : 3
CONTINUED : 3
TECHNIQUE : 2
MYOFASCIAL : 2
TESTING : 1
OUT : 8
COMFORT : 5
HR : 1
LOOSENING : 1
PCX : 1
LBS : 1
SURE : 1
SCREEN : 3
FINDINGS : 1
XX : 2
EVALUATED : 2
REHABILITATION : 1
CONDUCIVE : 3
REACTION : 1
SIGN : 1
NURSINGACTIVITIES : 1
FUNCTION : 4
ASSIGNED : 3
MENTAL : 4
THANKS : 1
NEEDED : 8
ROUTINELY : 1
WC : 1
GOUT : 1
EXT : 1
WERE : 9
FACTORS : 3
BRC : 1
ALOPECIA : 1
SHEET : 1
RESPONSIBILITIES : 1
DISCHARGING : 1
NEUROLOGIC : 1
TURNS : 1
LABS : 1
JOB : 2
TAKEN : 4
IDA : 1
MAMMOGRAM : 1
HELPFUL : 1
POSSIBLE : 3
AGREED : 2
FENTANYL : 1
ANXIOUSLY : 1
TRIAGE : 3
NATURE : 1
PART : 1
FAMILY : 9
GRIEF : 1
JAUNDICE : 1
BAD : 2
ORIENTATION : 2
WHEN : 9
BRACE : 1
AMBULATORY : 2
BEING : 4
HANDLING : 1
VIGAMOX : 1
LOSING : 1
ABOVE : 2
ACHIEVING : 2
AMOUNT : 6
WAS : 47
INTERIM : 1
PM : 3
LPM : 2
ORI : 1
STD : 1
ELIMINATE : 1
TUB : 1
HOMEWORK : 1
FORM : 3
LEAVING : 1
AC : 1
UNEXPECTED : 1
WILDCATS : 1
WANTED : 1
COMMUNICATION : 1
CONSUMED : 1
SIG : 1
NARES : 1
ABD : 1
NOW : 1
PTSD : 3
INTACT : 3
CALLERS : 1
CONFIRMED : 1
CYCLOBENZAPRINE : 1
VARIOUS : 1
SHOT : 1
NAOMI : 1
LIST : 3
OT : 2
SIZE : 1
TROUBLE : 1
STUDY : 2
DEMONSTRATED : 1
NEGLECT : 1
RESTROOM : 1
IMMUNIZATION : 1
FLUOROSCOPY : 1
VOMITING : 3
CANDID : 1
ORIENTED : 5
PSYCHIATRIST : 1
CURRENTLY : 3
NECK : 1
LYING : 1
JOINT : 3
PCMM : 1
BATHROOM : 1
REPAIR : 1
SOFTENER : 1
GOING : 4
DID : 12
MOST : 2
SHOW : 3
OPERATION : 1
SAMMIE : 1
ROAD : 1
CONCERNED : 1
ADDRESS : 2
TELEPHONE : 4
SITUATION : 2
FACILITATORS : 1
CYPROHEPTADINE : 1
DISORDERMET : 1
REFERRALS : 1
MAOD : 1
REPORTS : 12
SUBJECTIVE : 6
HELP : 3
KIDS : 1
YES : 15
CONTINUES : 1
COMING : 1
FURTHER : 1
TOXIC : 1
SMILING : 1
CONSENT : 1
ERA : 1
HOMOCIDAL : 1
SCOPOLAMINE : 1
DOING : 2
XPATIENT : 1
HPI : 1
FITTING : 1
ED : 13
INTERMITTANTLY : 1
REDIRECTED : 1
PHYSICIAN : 12
TUBERCULOSIS : 1
LACERATION : 1
COMPLIANCE : 1
RECTAL : 1
DEPENDENCE : 3
TOOTH : 3
AIDS : 2
FAXED : 1
CESSATION : 1
CLOSELY : 1
HE : 97
BUTTON : 1
UNPREDICTABLE : 1
RX : 2
OBESITY : 1
RATE : 1
MANUAL : 2
BLOCK : 1
FELT : 2
MASS : 2
MONTHLY : 1
MEMBER : 2
LIPIDS : 1
UAL : 1
VSS : 1
UPRIGHT : 1
VALUABLES : 3
TITUED : 1
CLEAR : 1
SECLUSION : 1
OPENMIND : 1
PRIMARY : 8
UNTIL : 2
INDEPENDANT : 1
SIGNS : 5
DEPARTMENT : 1
ACTION : 2
PATIENTS : 5
BELIEVES : 2
SUMMARY : 3
TRANSPARENCIES : 1
FEAR : 2
CONSTIPATION : 1
PROVIDED : 12
WESTERN : 1
DENTAL : 5
POSTING : 1
EMPLOY : 1
NEUROLOGY : 1
TWO : 2
NONE : 10
OUTCOMES : 1
CONNECTED : 2
DECREASED : 2
ANGRY : 3
TRAVEL : 4
CASUALTIES : 1
THINKING : 1
BLINDNESS : 1
DIRECTIVES : 2
RESPONSIVE : 1
CALM : 2
SCHEDULE : 1
HER : 14
ORDERED : 2
TOPIC : 3
MACKIE : 1
FEELING : 4
SHOULD : 2
QUESTIONS : 1
BEHAVIORAL : 3
APPEARED : 1
SPECIFIED : 1
HALDOL : 1
YELLOW : 1
STAYING : 1
CLERK : 1
THERAPIST : 1
PLACE : 5
LIVING : 8
NOSHOW : 1
IER : 1
MHICMINTENSIVE : 3
PRESBY : 1
APPEAR : 1
MG : 12
DELETE : 1
CHLORAMPHENICOL : 1
MIXED : 1
ADMINISTRATION : 1
BUTTONS : 1
WENDY : 1
NOTABLE : 1
BECAME : 1
VIETNAM : 2
SITS : 1
DEPENDENCY : 1
FRAME : 1
CONTINENT : 8
SPACE : 1
HYPERTROPHY : 1
APPROXIMATELY : 1
ATTENTIVE : 1
PROVIDER : 8
DONT : 3
RAILS : 1
RINSING : 1
GENDER : 2
HL : 1
INVENTORY : 1
USES : 1
PUBLIC : 1
APPOINTED : 2
LINDSAY : 1
KEEPING : 1
ALERT : 8
SUBMITTED : 1
ACCESSED : 3
UNDER : 3
SEP : 4
MELLI : 1
TIZZANO : 1
COMMENT : 2
THREE : 3
CANC : 1
DOSAGE : 1
FEMALE : 1
PROGRAM : 7
GRADE : 1
APPOINTMENT : 12
PAPERWORK : 1
WOULD : 13
FOLLOW : 2
RESTART : 1
ALERTORIENTED : 1
GUNPOINT : 1
METHOD : 1
CLOTHES : 1
HOMICIDAL : 2
CHEN : 1
BIRCH : 2
CONTRAST : 1
SEX : 4
REFLUX : 1
VERSUS : 1
ACTIVITIES : 3
AORTIC : 1
DISORGANIZED : 1
INSTRUCTOR : 1
CUFF : 2
MOVEMENTS : 2
COMPLAINT : 6
ORDER : 2
EXCEPT : 1
USING : 2
CHILD : 1
MAXINE : 1
EASILY : 1
INFLUENZA : 2
DENIED : 1
ULTRASOUND : 1
EXTRACTION : 3
SHIT : 1
LIFESTYLE : 3
ESTIMATED : 1
HIGHS : 1
DIFFERENT : 2
NEW : 6
MOUTH : 12
FOCUSED : 2
HEPATITIS : 1
PRESENT : 2
SOME : 4
BRACES : 1
DETECTION : 1
HRS : 1
SPENDING : 2
STARVE : 1
ANESTHESIA : 1
CHILDS : 1
IU : 1
NEED : 5
VAULT : 1
TINNITUS : 1
TRIAL : 1
STIGMA : 1
GRPOUPS : 1
RECEIVED : 1
PSYCHIATRIC : 1
BARRETTS : 1
RALLY : 1
OUTLINED : 1
LISTENING : 1
RES : 1
EAR : 2
CUEING : 2
BODY : 2
PREVENTIVE : 1
LIES : 1
SATISFACTORY : 1
DOCUSATE : 1
BIOPSIES : 1
IODOFORM : 1
BECAUSE : 2
PAY : 1
OL : 1
GLASSES : 2
CLASS : 2
WLA : 1
LED : 1
LESION : 1
ENROLLED : 1
DISCARD : 1
SEVERE : 1
SOUNDS : 1
REVIEWED : 8
ISSUE : 1
BEFORE : 3
ALL : 14
AUTHOR : 3
SECOND : 1
CONTRACT : 2
NARROW : 1
DIAGNOSES : 1
HESITATE : 1
PATIENT : 103
ACCEPT : 1
ALLERGIES : 3
DING : 1
SENT : 2
INVOLVEMENT : 1
OBTAIN : 1
EXCUSES : 1
REEVALUATED : 1
NOS : 3
THAN : 6
PODIATRY : 1
UARY : 1
MEMORY : 1
AUDIOVISUAL : 1
ARTHRITIS : 2
CORD : 1
REQUIRES : 3
FILLED : 3
PROTOCOL : 3
COME : 3
ROUTINE : 1
LOOKING : 2
FEET : 1
CAME : 2
VISIT : 7
THAT : 48
NORMAL : 3
WIFE : 3
STAFF : 11
DEPRESSED : 2
SERVICE : 6
RIGHT : 6
BREATHING : 3
PC : 3
VITALS : 2
NATURAL : 1
SENSORIUM : 1
HBPC : 1
REQUESTS : 3
ONE : 11
COMPANIES : 1
ANATOMICAL : 1
PTS : 2
RESPONSIBILITY : 1
LITHIUM : 1
THOUGHT : 3
WRITER : 4
YOU : 9
VADNAL : 1
CRITERIA : 3
INFORMED : 5
PAST : 10
DOCUMENT : 6
CULTURES : 1
INTERESTED : 2
REASON : 5
TOBACCO : 6
HA : 1
WRITE : 1
NEVER : 1
POWER : 1
TRAUMATIC : 1
ALTHOUGH : 1
WEAKNESS : 1
TECHNICIAN : 1
MARCIA : 1
DR : 1
SOCIAL : 6
WATCHING : 1
MEMBERS : 1
TRP : 3
HOSPITAL : 3
RECOMMENDATION : 1
CAREFULLY : 1
SUICIDAL : 6
RIDING : 1
MILL : 1
SHUTDOWN : 1
DEPT : 2
VITAL : 2
INJ : 1
SHAKE : 2
SO : 1
IMPROVEMENT : 1
COMPRESSES : 1
GEC : 1
REGULAR : 2
PIERCE : 1
TALK : 1
IDENTIFIERS : 1
CRNA : 1
CCRC : 1
ANTIBIOTICS : 1
STRESS : 5
SPECIFY : 2
JR : 1
MAKE : 2
WEEK : 4
VITAMIN : 1
TN : 1
APPRECIATIVE : 1
DETOXED : 1
FAILURE : 2
NUR : 2
SITTER : 1
BRAIN : 1
DISTRESS : 1
MOUNTAIN : 1
EKG : 1
CANCEL : 1
MOOD : 6
LIVES : 2
REPORT : 7
LETTER : 7
SIGNED : 2
TRANSITIONAL : 1
HOW : 2
SWEAR : 1
FEELINGS : 2
SILK : 1
SINCE : 5
FLU : 2
DESCRIBED : 1
COUGH : 1
THOSE : 3
CHANGE : 3
DISCUSS : 1
PSXH : 1
LEARN : 4
SOLN : 1
TWELVE : 1
MEMPHIS : 1
PLASM : 2
RATHER : 1
MADE : 2
OFFICE : 2
CARDIAC : 1
IUD : 1
YRS : 4
VERBALIZED : 2
CLUB : 2
OBJECTIVE : 3
SMOKING : 3
AFFECT : 1
FOLLOWS : 1
MRI : 1
PREDNISONE : 1
AREAS : 5
RELIEVED : 1
SIGH : 1
NUTRITIONAL : 1
SSED : 1
INPT : 3
RESTING : 1
LOCATOR : 1
MO : 1
COMMENTS : 4
ACETAMINOPHEN : 1
EPITHELIZATION : 1
TOTAL : 3
LIGHT : 3
MVA : 1
SURGICAL : 3
JUNE : 4
ST : 1
ELIMINATION : 9
HISTORY : 5
RESPIRATION : 1
TEXT : 1
COMBIVENT : 1
HOURS : 7
MAIL : 3
LEGS : 1
BARETT : 1
RDW : 1
REPORTED : 4
CIRCUMCISION : 1
ONGOING : 1
HEPC : 1
CONFERRED : 1
MAMMS : 1
PILLS : 1
WOUND : 5
BILAT : 2
HIP : 5
SITE : 2
OVERALL : 1
NOTING : 1
STANDING : 2
PAJAMAS : 1
INSTUCTIONS : 1
STATING : 4
COMPLICATIONS : 1
KG : 3
OP : 1
AUG : 3
THEROPY : 1
PROBLEM : 7
EYES : 1
OCTOBER : 2
TELERETINAL : 1
CLONAZEPAM : 1
AGENCY : 1
BILL : 1
ELIGIBLE : 1
RECORD : 3
CLASSIFICATION : 1
AMLODIPINE : 1
NONREACTIVE : 1
QUAL : 1
SICHERER : 3
THROUGH : 8
LIFESOURCE : 1
GLEASON : 1
HEENT : 1
VETS : 3
EXTRA : 5
ADMISSION : 6
MOTHERS : 1
SUPPORTING : 1
LESS : 4
NICOTINE : 1
ULA : 1
BEER : 1
STRIPS : 1
FUTURE : 2
WAY : 2
DISCONTINUE : 1
CLIENT : 2
ASSOCIATE : 1
DOB : 2
SPECIFIC : 2
DENIES : 10
QUALITY : 1
PHARMACY : 3
CARRY : 1
OTHERS : 3
MODIFIED : 1
REQUESTED : 1
COL : 1
LEVESQUE : 1
IVE : 1
VETERAN : 32
AQUATIC : 1
RELIEF : 1
PT : 47
INJURY : 3
HOGAR : 1
RADIATION : 3
TRIES : 1
NP : 2
PROCEDURES : 1
MUNDY : 1
CATHETER : 2
SOON : 1
MINIMAL : 1
PERFORM : 1
VIBRATORY : 1
SEXUAL : 1
CHIROPRACTOR : 1
STRATEGIES : 2
DOUCUMENTED : 1
COMBAT : 1
AROUND : 2
ILLNESS : 1
AND : 157
WONDERS : 1
SELECT : 1
URINARY : 3
LISTEN : 2
SESSIONS : 5
JUN : 2
RESPONSE : 3
NOTEINTEGRATED : 1
COORDINATE : 1
PRACTICED : 1
NAIL : 1
KNOWLEDGE : 3
GPC : 1
ADMINISTERED : 2
LOW : 2
GRANULATION : 1
FOLLOWED : 4
MAY : 5
DISCONNECTED : 1
DERMATOLOGY : 2
LENGTH : 2
APPT : 9
TAKING : 4
ADMITTED : 2
YET : 1
OBSERVED : 2
LISTS : 1
PERIOD : 3
DICUSSION : 1
DONE : 2
PHYSICAL : 4
EXHIBITING : 1
SOMATIZATION : 1
INTERPRETATION : 1
CP : 1
NIGHT : 2
ACTIVE : 30
KNOW : 2
EACHOTHER : 1
MANAGER : 3
ABILITY : 1
PACT : 1
BICYCLE : 1
FAIRLY : 1
DISCOMFERT : 1
OLEMIA : 2
CONTROLLED : 1
DYSMENORRHEA : 1
LACY : 2
FOCUS : 1
THIS : 55
AK : 1
LPN : 1
HIGH : 1
PPI : 1
STIMULANT : 1
TAPE : 1
OPTOMETRIST : 1
ADDED : 2
GAOL : 1
REDUCING : 1
SCRIPT : 1
RIGHTS : 1
EXTREMITIES : 1
SESSION : 3
STATES : 7
NEBULIZER : 1
OU : 1
ENABLE : 1
WHILE : 2
QUESTION : 2
ROS : 1
FLORIDA : 1
ICDCM : 8
FIRST : 2
WAIT : 1
RESP : 1
ANDERSON : 1
TYPES : 1
ETOH : 5
ITS : 1
SHE_BROUGHT : 1
TO_PT : 5
GAIT_LEFT : 1
SEVERAL_MINUTES : 1
USE_SOME : 1
DROP_AREAS : 1
EXPECTED_OF : 1
WHO_WILL : 1
CALLED_VETERAN : 1
BEEN_TOLD : 1
TO_ANXIOUS : 1
ON_SEP : 1
SCOPOLAMINE_ADAPTIVE : 1
OF_DISCHARGE : 2
TOLERATED_WELL : 2
OTHER_PROBLEMS : 1
CONSULT_MEDICATIONS : 1
WERE_AS : 1
OBTAINING_EVATO : 1
PROVIDED_PULSE : 1
INSURANCE_COMPANIES : 1
READ_RECORD : 2
VETERAN_SHE : 1
BEEN_TO : 3
ISSUES_SUCCESS : 1
PRESCRIBED_AND : 1
NOT_TAKING : 1
DOCUMENT_OF : 1
TOLD_BY : 1
SEVERAL_BEFORE : 1
FEELS_BAD : 1
MINUTES_INTERVENTION : 1
ON_TO : 3
APR_ANXIETY : 1
HOURS_APPLICATION : 1
NOTE_UNKNOWN : 1
HERBAL_IS : 1
RAL_WELL : 1
HIM_STATES : 1
REGARDING_ORIENTATION : 1
OF_GOOD : 1
COMPLETED_NO : 1
SC_ED : 4
USE_THE : 1
LESS_ACTIVE : 1
AND_ORIENTED : 3
CLINIC_APPOINTMENT : 1
FULLY_THROUGH : 1
FRIENDS_AND : 1
PAST_HOURS : 2
BY_DOCTORS : 1
GLASSES_CONTACTS : 1
OF_HIS : 2
MALE_PT : 1
ANXIOUS_CONSC : 1
WITH_TRAUMATIC : 1
THE_PATIENT : 23
OF_EVALUATION : 1
USE_PAST : 1
PATIENT_VERBALIZED : 1
THE_SUPPORT : 1
DRAKE_RESOLUTION : 1
HAVE_AND : 1
NOT_AND : 1
TO_COORDINATE : 1
ENCOURAGED_STANDING : 1
ABOUT_NEW : 1
BL_FOR : 1
EYE_DROPS : 1
NEXT_FACILITY : 1
USED_MEDICAL : 1
IN_GENOA : 1
NO_BELIEVES : 1
REFER_PREVIOUS : 1
UP_INTERVENTIONS : 1
REFERRAL_CARE : 1
DISORDER_THE : 1
HIS_EX : 1
SON_IS : 1
PATIENT_STATUS : 1
ARE_THAT : 1
TO_ABOUT : 2
DESCRIBE_VALUABLES : 1
CRITERIA_ACTIVE : 1
EPIDIDYMAL_CYST : 1
MORNING_FOR : 1
THAT_CAN : 1
IS_DEPRESSIVE : 1
CALLING_BLOOD : 1
TRAUMA_TRAINING : 1
RATE_ACCESS : 1
MAKING_PRIOR : 1
HRS_MOST : 1
OR_INTERMITTENT : 1
ASSIST_PATENT : 1
AUDITC_NEGATIVE : 1
YES_COMMENTS : 1
IMPORTANCE_OF : 1
HE_PLANS : 1
CONTACT_PHONE : 2
IN_INPATIENT : 1
HIS_PRESSURE : 1
ERECTILE_CHRONIC : 1
DERMATOLOGY_PRACTITIONER : 1
TRANSITIONAL_HOUSING : 1
ON_WEIGHT : 1
NO_SCREENING : 1
STAFF_WHO : 1
GREATER_THAN : 2
YOUR_LAB : 1
HAS_TOLD : 1
DIETARY_INTAKE : 1
TREATMEN_HE : 1
APPETITE_GOOD : 1
ADJUST_GLASSES : 1
AND_WIFE : 1
CARE_FOR : 2
BLOOD_LARGE : 1
VETERAN_DIABETES : 1
WITH_PRIOR : 1
OF_STRATEGIES : 1
WANTS_TO : 2
HOSPITALIZATIONS_FOLLOWED : 1
ORIENTATION_MOBILITY : 2
COLOR_NUMBER : 1
DEC_FOLLOW : 1
ANTICOAGULANT_CLINIC : 1
METHOD_HANDOUT : 1
ABOUT_CALLING : 1
RECOVERY_BAKER : 1
HAS_OUT : 1
HIS_BROTHER : 2
ASSISTANCE_THOSE : 1
IMAGING_OTHER : 1
PHARMACY_TELEHEALTHCARE : 1
STRIP_STRIP : 1
CLASSES_HIS : 1
ADDED_HE : 1
LYING_IN : 1
FOR_NO : 1
STD_CANE : 1
TO_CD : 1
HCL_CAP : 1
WERE_BAD : 1
ASSISTANCE_LEVOTHYROXINE : 1
AS_ABD : 1
TYPE_PSYCHIATRIC : 1
PAIN_PT : 1
PROTOCOL_USED : 3
REPORTS_SOME : 1
MEDIAL_TENDERNESS : 1
ARRANGE_HOME : 1
WHEN_IS : 3
PAIN_ICDCM : 3
LIVING_THIS : 1
TOXIC_AGENTS : 1
ENCOURAGE_VENTILATION : 1
ICDCM_SUMMARY : 1
NOT_AT : 1
PAIN_IMPAIRED : 1
AFFECT_WENT : 1
FREEDOM_FALLING : 1
PATIENT_FAMILY : 1
OR_OTHER : 1
IS_RELATES : 1
STRESS_DISORDER : 2
OBSERVED_SMILING : 1
UNDER_TREATMENT : 1
CONTINUE_PER : 1
CARE_ORAL : 1
THIS_NORMAL : 1
DOES_AN : 1
PATIENT_PRIMARY : 1
WKS_MORE : 1
MO_MR : 1
BED_SPONGE : 1
ALSO_VETERAN : 1
AHEAD_GET : 1
CONTINENT_NOT : 1
PRESSURE_OR : 1
LPN_WILL : 1
INJECTIONS_WKS : 1
EVATO_TEAM : 1
POTENTIAL_PROBLEMS : 1
AND_BENEFITS : 2
INFORMATION_OBTAINED : 1
THOSE_GOALS : 1
NOTE_DELETE : 1
ANGRY_VETERAN : 1
WAS_UARY : 1
CLONAZEPAM_MG : 1
BASE_TWELVE : 1
RE_PROTOCOL : 1
FEAR_MH : 1
HIS_GAIT : 1
HOME_WITH : 2
AND_RESPONSIVE : 1
LEARN_NEW : 1
BE_REEVALUATED : 1
MEDICAL_BEHAVIORAL : 1
IDENTIFIED_OUTPATIENT : 1
AND_FOCUSED : 1
NOT_APPOINTMENT : 1
STRONGER_SIDE : 1
TO_SUPPORT : 1
PATIENT_DISCHARGED : 1
REVIEWED_THESE : 1
ALERTORIENTED_ADMINISTERED : 1
HUMOR_FORM : 1
NO_RETINOPATHY : 1
IN_ABOUT : 1
RELAXATION_IN : 1
IS_MAJOR : 1
VETS_MOTHER : 1
IDENTIFIED_OTHER : 2
SKIN_THREE : 1
PREVENTIVE_HEALTH : 1
GET_INJECTIONS : 1
REACTIVE_ARTHRITIS : 1
POSTTRAUMATIC_DISORDER : 1
WINDSHIELD_ACCEPTABLE : 1
IF_APPLICABLE : 1
CLINIC_AND : 2
CHEST_CRAMPING : 1
WITH_LEFT : 1
FOLLOWING_OF : 1
SENT_TO : 1
SUPPLY_REFILL : 1
POH_HE : 1
RALLY_HEIGHT : 1
OBJECTIVE_OUTPATIENT : 1
ON_MACHINE : 1
THE_TOILET : 4
FOR_THEIR : 1
ABD_WITH : 1
COUNTY_TO : 1
VISTA_AND : 1
MOTHERS_CONCERNS : 1
STIMULANT_HASNT : 1
MD_VA : 1
OF_ACTIVE : 2
DECLINE_FIRE : 1
MAKES_TRANSITION : 1
VAULT_PATIENT : 1
MY_CARE : 1
CLINIC_AT : 1
BATHING_TUB : 1
PAIN_ALL : 1
NOSHOW_IN : 1
DEPAKOTE_FOR : 1
LETTER_BUT : 1
SEROQUEL_ADDENDUM : 1
OF_BIRTH : 1
AS_AS : 2
TO_ORAL : 1
CONTRACT_THE : 1
WERE_PATHOLOGICALLY : 1
PREOP_ALERTORIENTED : 1
RECEIVE_THE : 1
DOING_RIGHT : 1
SEE_DM : 1
HISTORY_WITHIN : 1
YRS_XANAX : 1
CATEGORY_IV : 1
UP_BOWEL : 1
PLAYED_CARDS : 1
SOFTENER_MONTHS : 1
JOINT_HYPERTROPHY : 1
WED_AND : 1
SURGERY_SERVICE : 1
ABSCESS_FINGER : 1
INDEPENDANT_AMBULATORY : 1
STRIDE_RELIEVED : 1
WHEN_DUE : 1
RAILS_RAISED : 1
METHADONE_WAS : 1
ARTHRITIS_DENTAL : 1
TO_HALDOL : 1
EYE_ARE : 1
HIP_ICDCM : 1
INPT_ON : 1
TRP_TELEPHONE : 2
NOT_LIKING : 1
ON_YESTER : 1
PLEASE_NOTIFY : 1
DESIRE_TO : 1
PREVENTION_TRAUMA : 1
HE_ABLE : 1
IS_VETERAN : 1
CHECK_NOTET : 1
WONDERS_WHY : 1
IDENTIFIED_CALLER : 1
NO_FAIR : 1
TOOTH_EXTRACTION : 1
PT_THROUGH : 1
PAST_OR : 1
IN_NO : 2
REMOVAL_RN : 1
IMPROVES_AND : 1
NOTED_SSED : 1
YOUR_RECENT : 1
LENGTH_ONGOING : 1
APPOINTMENT_ACID : 1
ION_CONTACTED : 1
ARE_TO : 4
WHEELCHAIR_TIME : 1
OF_ATTORNEY : 1
PT_MANAGEMENT : 1
MG_MG : 1
THOSE_TREATMENT : 1
DOCUSATE_HYP : 1
CAN_EVERY : 1
NOTING_PATIENTS : 1
THE_CONSULT : 1
PHARM_ANTICOAG : 1
ATRIAL_FIBRILLATION : 2
THIS_HELP : 1
TWELVE_WERE : 1
UNSPECIFIED_TUBERCULOSIS : 1
HOME_OUTPATIENT : 2
CHANGE_USUAL : 1
IVE_THAT : 1
ENDING_PM : 1
PREVENTION_TRAINING : 1
NO_YES : 1
BE_WELL : 1
SPECIFIC_FOR : 1
LIKING_HIM : 1
ACID_TAB : 2
DISORDERMET_VETERAN : 1
THE_CLERK : 1
HE_LOST : 2
VETERAN_HAS : 2
THAT_GET : 2
OF_WKS : 1
TO_TO : 8
AND_GROUPS : 1
ATTEND_MEETING : 1
SUMMARY_HR : 1
MANAGER_TO : 1
MY_BODY : 1
BECAUSE_HIS : 1
SOCKS_AND : 1
FOR_PURPOSE : 1
PATIENT_REFUSED : 1
CONSTIPATION_UNSPECIFIED : 1
WAS_SCORE : 1
CARE_OUTPATIENT : 1
SOME_STATE : 1
KG_IN : 1
ON_LISTED : 1
WILL_PROVIDE : 1
VET_AND : 1
REQUEST_SPOKE : 1
MOOD_PREOP : 1
GOING_ON : 1
CALLED_DIABETES : 1
PULSE_PSXH : 1
ANSWER_YES : 1
RNP_APN : 1
FEELING_SOME : 1
MEDICATIONS_NOT : 2
AT_ALL : 1
INFORMS_WILL : 1
TAKE_ACTIVE : 1
HYDROCELES_NOTED : 1
HER_STRIDE : 1
MEDICATIONS_IDENTIFIED : 1
MOVE_TO : 1
EDEMA_BRUISING : 1
GOOD_FROM : 1
PATIENT_WITH : 1
BURNING_SKIN : 1
PAIN_CONTRACT : 1
TELEPHONE_NOTE : 3
TO_HIM : 4
TO_PERSONAL : 1
FOR_THOSE : 1
WERE_AND : 1
OUTPT_NOTE : 1
NOTE_ED : 1
BELLO_PAP : 1
PLEASE_BKH : 1
DISCHARGE_ING : 1
LOST_WIFE : 1
MEMPHIS_TN : 1
DERM_CLINIC : 1
SMOKES_OLEMIA : 1
COMMENTS_ANXIETY : 1
OTHER_PTS : 1
VISIT_SCHEDULED : 1
CANT_HIS : 1
EVATO_PCMM : 1
STARTED_INFECTION : 1
SERUM_NG : 1
NECESSARY_PT : 1
CHIEF_REASON : 1
BAD_EVENTUALLY : 1
AND_OTHER : 3
OF_YELLOW : 1
SKIN_PL : 1
PLAN_PROTOCOL : 1
NUMBER_IS : 1
PATIENT_USED : 5
MUCH_BETTER : 1
WITH_LUMBAR : 1
OBJECTIVE_FINAL : 1
TO_DENTAL : 1
AT_SEE : 1
NOTE_PSYCHOLOGICAL : 1
KIDS_STEADY : 1
ON_DEAR : 1
TAB_VACCINE : 1
CM_STAB : 1
REFUSED_ALL : 1
LUNCH_TO : 1
PCP_LATEST : 1
HIGHEST_COMFORT : 1
COUNSELOR_NOT : 1
MARY_PATIENT : 1
SPECIALTY_CLINIC : 1
ALL_NEED : 1
PLACE_FLUIDS : 1
THE_FACT : 1
MASS_LEFT : 1
REPORTED_THAT : 1
COMFORT_AND : 1
NO_DESIRE : 1
LEARNED_HE : 1
WHO_REQUESTING : 1
INTO_TREATMENT : 1
HYP_PREDNISONE : 1
DOES_PAIN : 1
WHERE_ANY : 1
OF_REGULAR : 1
CM_INPATIENT : 1
UNTIL_AFTER : 1
TO_NOTE : 1
WHO_STATES : 1
FEELS_HAVE : 1
FOR_SUBJECTIVE : 1
NEXT_APPT : 1
IRAQI_TROUBLE : 1
ZZPATIENT_CARE : 1
OTHER_PIERCE : 1
HFA_THE : 1
EVENTUALLY_PARALYZED : 1
REDIRECTION_MOTHERS : 1
VERBAL_AUDIOVISUAL : 1
LESS_PAIN : 1
PERIARTICULAR_KEEP : 1
BEEN_ED : 1
HAD_THERE : 1
SEEN_MY : 1
ABRASION_NONE : 1
WHO_IS : 3
HARALD_EXP : 1
TOE_CLIPPINGS : 1
NEED_ORDER : 1
REVIEWS_RESULTS : 1
THAT_WESTERN : 1
OF_SI : 1
ATTENDING_AS : 1
ASSESSMENT_DIAGNOSIS : 1
IDENTIFIED_PROBLEM : 2
IN_THIS : 1
LOOKING_CAN : 1
BOWEL_NUTRITION : 1
ALERT_PHYSICIAN : 1
ADJUSTMENTS_NEW : 1
DENTAL_EXTRACTION : 2
ICDCM_CHEST : 1
HOME_TO : 2
PATIENT_HIS : 1
NOTE_MH : 1
MS_RIGHT : 1
EXPLAINED_AND : 1
WITH_OUTPATIENT : 1
GIVEN_DURING : 1
HE_NOT : 9
EVERY_WKS : 1
SHAKE_CLINICIAN : 1
GREATER_COMFORT : 1
STOOL_URINE : 1
WAS_SUICIDAL : 1
HRS_MCV : 1
OLEMIA_DIABETIC : 1
MEDICATION_MANAGEMENT : 1
ATTEND_THIS : 1
SYND_BENZOS : 1
OCT_FLU : 1
TO_ME : 2
ME_WOULD : 1
EFFECTIVE_MANAGEMENT : 3
LEFT_EAR : 2
CHART_REQUIREMENTS : 1
MOUTH_TIMES : 2
RECOMMENDED_LOCATION : 1
GLASSES_TWICE : 1
FIRM_WH : 1
GLUCOSE_CURRENTLY : 1
IS_CONSIDERED : 1
TO_STRESS : 1
AND_ABSCESS : 1
ON_HIS : 2
SI_HE : 1
AGENCY_DATE : 1
KIDNEY_DISEASE : 1
APPLICATION_SHOE : 1
CIRCUMCISION_PT : 1
MEDICAL_HX : 1
IN_RIGHT : 1
CONSENT_PCMM : 1
READING_WEEK : 1
APT_REFERRAL : 1
TO_AGE : 1
DOING_DIFFERENTLY : 1
ETOH_PRESSURE : 1
KG_HEIGHT : 1
MG_NEGATIVE : 1
FENTANYL_DONT : 1
ACTIVITY_ADMISSION : 1
OF_MEETS : 1
BATHROOM_PRIVILEGES : 1
DEC_CONTACT : 1
CONTINENT_BED : 1
OF_PAINFUL : 1
THAN_SAO : 1
DESIGNED_INCREASE : 1
FEEL_LIKE : 1
LAST_PLEASE : 1
INSURANCE_FIRST : 1
EASILY_TURNS : 1
ED_RECORDS : 1
OLEMIA_LEVEL : 1
DIRECTIVES_PERIOD : 1
THAT_HAS : 4
PT_FOR : 1
IN_REGARDS : 2
OR_MH : 1
TEETH_OF : 1
STAGE_COMMAND : 1
CAME_AND : 1
ALLERGY_OR : 1
WEEK_FACILITY : 1
NO_NOTE : 3
METHOD_VERBAL : 1
THE_CURRENT : 1
AGE_TREATMENT : 1
COMFORT_STRAIN : 1
HER_SCHEDULED : 1
INDEPENDENCE_PLAN : 1
MET_MR : 1
NUMBER_SAME : 1
SMEAR_MAMMS : 1
PATIENT_APPARENTLY : 1
DYSMENORRHEA_SHE : 1
AT_HOME : 1
PROCEDURE_EGD : 1
HIS_RISK : 1
TEAM_CHILD : 1
LOCALITY_LIVES : 1
TO_MAKE : 1
BUT_CONTACTED : 1
MEDICATIONS_EXCLUDING : 1
STATES_HAS : 1
PLAYED_WATCHED : 1
THEY_AUTHOR : 1
LUPUS_OPTOMETRY : 1
NEEDED_LEVEL : 1
NOTE_PTSD : 1
HER_HE : 1
LAST_THEY : 1
DRUG_PROGRAM : 1
REEVALUATED_PAIN : 1
SINCE_PATIENT : 1
ADMITS_PAST : 1
WITH_INSTRUCTOR : 1
FOR_WITH : 2
CURRENT_MEDICATION : 1
NOTE_IV : 1
NOW_PT : 1
CHIROPRACTOR_BUT : 1
SEEN_OCTOBER : 1
DESPITE_DISCUSSION : 1
THAT_LOST : 1
THE_OUTREACH : 1
TO_THERE : 1
ADMIT_NOTE : 1
MAY_BE : 1
IN_DEALING : 1
VETERAN_SET : 1
VERY_WELL : 1
DESIGNED_TO : 1
THE_FOCUSED : 1
OUTSIDE_RECORDS : 1
ACTIVE_AND : 4
WARNING_OUTSTANDING : 1
CALL_AS : 1
ROS_IS : 1
PATIENT_ALL : 1
ACTIVITIES_SYSTEMS : 1
USED_VERIFY : 1
APPEAR_PHYSICIAN : 1
NO_CYR : 1
AUG_HOPES : 1
WITH_NUR : 1
YES_CURRENT : 1
HER_AND : 1
AND_SELECT : 1
TO_IS : 1
SUICIDAL_IDEATION : 2
PRN_NOT : 1
FOLLOWED_NEURO : 1
AGENTS_NEED : 1
SKIN_NEED : 1
AND_COMPLETED : 1
SEE_INVENTORY : 1
PHOTO_ID : 1
THE_UP : 1
ADDENDUM_PROBLEM : 1
HIBICLENS_SIERRA : 1
LIKE_SCREEN : 1
NEVER_THIS : 1
HIM_LETTER : 2
COUNSELING_HIGHEST : 1
FEMALE_PROBLEM : 1
KEPT_AT : 1
ANSWER_SW : 1
ON_MOST : 1
INCLUDING_NURSING : 1
NEED_IS : 1
TO_ALL : 1
ACTIVE_SHOULD : 1
LEFT_KNEE : 3
AND_VOMITING : 2
FOR_DVT : 1
OVER_COUNTER : 1
BELIEVES_SPECIFICALLY : 1
BREATH_DOES : 1
ENCOURAGED_PATIENT : 1
PERSON_AND : 1
RNP_THIS : 1
DISEASES_REQUESTING : 1
WITHIN_MINUTES : 1
ON_PM : 1
PATIENT_UNDERSTANDING : 1
NO_THERE : 1
PLACE_AND : 1
ADMISSION_SHORTNESS : 1
PATIENT_DFE : 1
COMP_TYP : 1
IMPROVED_SINCE : 1
NOT_HE : 1
AND_WONDERS : 1
AND_ALCOHOL : 1
PPD_MISCELLANEOUS : 1
BILAT_WRISTS : 1
TO_LIFESTYLE : 3
UPDATE_YOU : 1
BEDTIME_ACTIVE : 1
PSYCHIATRIC_DIAGNOSIS : 1
SENSITIVITY_SHAKING : 1
ACTIVE_ACTIVE : 1
CUEING_ONE : 1
AT_VIA : 1
IDA_FOSTER : 1
WAS_OR : 1
WE_TO : 1
WORK_OR : 1
SERVICE_VIETNAM : 1
IMPACT_VALVE : 1
PERSON_PLACE : 1
HOURS_HIM : 1
VA_REQUESTING : 1
FROM_SEP : 1
APPROPRIATE_REFERRALS : 1
KNOWLEDGE_AND : 1
UP_APPOINTMENT : 1
EXTRACTION_OF : 2
CONSCIOUSNESS_SYRINGE : 1
LEVEL_CONSCIOUSNESS : 1
THE_SHOULD : 1
AND_SIGNED : 1
TO_ALERT : 1
HOME_SENT : 1
DECLINED_ASSISTANCE : 1
PLAN_NAUSEA : 1
ANY_DOCUMENT : 1
DAILY_NOTE : 1
HER_AT : 1
OUTREACH_SPOKE : 1
INSTRUCTION_BREATHING : 1
MEDICAL_RECORDS : 2
ANCHORAGE_PC : 2
PATIENT_HEENT : 1
APPROPRIATELY_WITH : 1
SERUM_NONREACTIVE : 1
IER_THIS : 1
PATIENT_SAYS : 1
TO_LOW : 1
SUPPORT_POSSIBLE : 1
DISEASE_CONGESTIVE : 1
GLASSES_WILL : 1
RECREATION_SUPPORT : 1
WAS_TO : 6
RECORD_PPD : 2
COPING_LOCALITY : 1
STAFF_REQUIRED : 1
UNITS_SOCIAL : 1
PLAN_ANY : 1
SKIN_PROBLEMS : 1
MEDICATIONS_AND : 2
DIABETES_STUDY : 1
SYRINGE_STARTED : 1
APPOINTMENT_FOR : 1
BEHAVIORAL_WILL : 1
FOR_IN : 3
HIS_REPORTS : 1
WILL_PATIENT : 1
RELATIONSHIP_NONE : 1
ROOM_USING : 1
FROM_STAFF : 1
VIA_THE : 1
AND_CONTINUE : 1
LENGTH_CALL : 1
APPLICABLE_COMPRESSES : 1
LEVEL_HE : 1
SYMPTOMS_POTENTIAL : 1
WALKING_TO : 1
BLINDNESS_CUEING : 1
OPERATIVE_TO : 1
FOR_PROPHYLAXIS : 1
AND_CURRENTLY : 1
APPEARANCE_DEVELOPED : 1
INTERVENTION_RESPONSE : 1
NO_KNEE : 1
GOOD_OF : 1
PATIENT_DOES : 3
PTS_BROTHER : 1
APR_SIGNED : 1
CLINIC_OUT : 1
TH_BASE : 1
CHO_PLASM : 1
PLAN_FOR : 2
LOW_PATIENT : 1
GOING_LONG : 1
NOTE_TO : 2
HIS_AND : 4
PROVIDER_REVIEWS : 1
WILL_THE : 1
COGNITIVE_BEHAVIORAL : 1
NOT_CHIEF : 1
REQUESTING_BE : 1
ASTHMA_SYNCOPE : 1
PL_GOALS : 1
MM_EPIDIDYMAL : 1
HE_FAIRLY : 1
NAME_ER : 1
WEEK_IS : 1
NEEDS_TO : 1
AN_PATIENT : 1
LEGS_AMBULATORY : 1
DIAGNOSIS_SKIN : 1
TO_RIGHT : 1
WAS_ACTIVE : 1
WERE_ACET : 1
OF_PROCEDURE : 1
INSTABILITY_OF : 1
BREATH_NICOTINE : 1
SCREENING_IS : 1
WHERE_SUBSEQUENT : 1
CARE_NOTE : 2
MY_AND : 2
REPORTED_BEING : 1
PSYCH_AND : 1
ASSIST_ADMISSION : 1
SOLVING_COMMUNICATION : 1
TWICE_REGULAR : 1
OSAC_AND : 1
CLOTHES_SKIN : 1
WERE_SEEN : 1
OIDES_AND : 1
FOR_US : 1
OK_TO : 1
NO_DIABETIC : 1
OF_BEDS : 1
SEXUAL_SUBSTANCE : 1
FOLLOW_LIGHT : 1
OFF_WITH : 1
CURRENTLY_IS : 1
INFORMS_HE : 1
PHYSICIAN_PULSE : 1
THE_CONTACT : 1
ALCOHOL_MIMSOME : 1
LIGHT_FELT : 1
PING_ZZECF : 1
TAKE_AT : 1
IT_CONSECUTIVELY : 1
AS_FOR : 3
TRAVEL_BUT : 1
PROVIDED_WITH : 1
TIME_ON : 1
SUPPORTIVE_VETERAN : 1
DISCHARGE_ORDER : 1
PAIN_LEVEL : 1
PSYCHIATRIST_ABOUT : 1
SHOULDER_TIMES : 1
AND_EXPIRED : 1
OR_AND : 1
SITUATION_NOR : 1
SERVICE_ERA : 1
HIM_PATIENT : 1
APPT_ON : 1
YOUR_NEXT : 2
EXERCISE_ATTENDING : 1
REGARDS_UPCOMING : 1
BEEN_ON : 1
REPORTS_LOSING : 1
QUESTION_ANSWER : 1
SUMMARY_BP : 1
LOSING_NO : 1
TASK_OVERSIGHT : 2
REQUIRED_UAL : 1
ADDENDUM_VITALS : 1
UPRIGHT_OBSTRUCTIVE : 1
IS_YO : 1
DOB_CARDIOLOGY : 1
TASK_REQUIRES : 1
HE_EXPRESSED : 1
NOT_PATIENTS : 1
WORK_UP : 1
THEM_PRESCRIBED : 1
FOR_NOT : 1
OF_IMPRESSIONS : 1
HIM_TO : 5
EVENT_ALL : 1
FREQ_CALL : 1
PHYSICIAN_WHO : 1
IS_OLD : 1
IN_PAIN : 1
AND_MOOD : 1
DATE_DEAR : 1
SESSION_HOME : 1
BE_AMOUNT : 1
FOR_THE : 11
DISCUSSING_THE : 1
PAIN_BUT : 1
PROVIDER_LIMITING : 1
WILL_HARDSHIP : 1
YOU_LBS : 1
DICTATED_PATIENT : 1
PTSD_NO : 1
YES_BUTTON : 1
MHC_NOTE : 1
OF_SESSIONS : 2
DETECTION_ED : 1
AK_LOWER : 1
DEVELOPMENT_ENVIRONMENT : 1
ANGRY_CAN : 1
BEEN_BY : 1
MAY_EVERY : 1
TABLETS_AT : 1
DISABLED_FROM : 1
THE_BACK : 1
EVERY_SPENDING : 1
HIS_ARM : 1
THE_PROCEDURE : 1
NOT_AMBULATION : 1
PERIOD_OF : 1
ORDERED_MONITORED : 1
CLINIC_AGE : 1
ACTIVITIES_OF : 2
HE_WILL : 3
WILL_TO : 2
LOOKING_TO : 1
SEX_PATIENT : 1
TRIES_TO : 1
UNSCHEDULED_RECEIVED : 1
THROUGH_VISTA : 3
WAS_CONTINENT : 4
WITH_PROVIDER : 1
HAVE_LOST : 1
PROVIDE_WITH : 1
SCHEDULED_TO : 1
HER_FOOT : 1
LACK_HOUSING : 1
MR_IS : 1
TO_ROI : 1
LED_HIM : 1
IN_MHC : 1
AND_SECURITY : 1
LIFE_HE : 1
FLUOROSCOPY_RE : 1
ENCOURAGEMENT_MOBILITY : 1
ELIMINATION_AA : 1
FOCUSED_HUMOR : 1
ALF_OTHER : 1
DAILY_PATIENT : 1
LONG_YOU : 1
DISCONNECTED_TO : 1
PAST_THAT : 1
THIS_BLADDER : 1
CONDITION_IS : 2
MAINTAINS_BEHAVIORAL : 1
AND_FEELING : 1
HE_MALE : 1
FAMILY_TO : 1
AND_VETERAN : 1
DATE_OF : 4
HEARING_LOSS : 1
HANDOUT_CLASS : 1
COMMENT_STATED : 1
OTHERWISE_HE : 1
NOS_CHRONIC : 1
BUT_WE : 1
HERE_ROUTINE : 1
THAT_DEPRESSION : 1
AWAY_MAY : 1
INTERESTS_ENCOURAGE : 1
PENG_MD : 1
CHEST_PAINIS : 1
HANDOUT_AUDIOVISUAL : 1
THE_OUTSIDE : 1
COMPLETE_SAFETY : 1
VA_YES : 1
RAL_PERFORMANCE : 1
SURGICAL_HEALTH : 1
FUNDS_IS : 1
POSSIBILITY_SESSIONS : 1
MSS_RES : 1
MRI_OF : 1
BATH_TOBACCO : 1
THE_SCREEN : 1
HERE_SICK : 1
SOLUTION_BETADINE : 1
APPOINTMENT_LETTER : 1
WENT_TO : 2
FOR_MED : 1
CALL_ON : 2
ALL_PROVIDED : 1
COORDINATOR_POST : 1
MEDICATIONS_HAVE : 2
PT_PASSED : 1
CRAMPING_WHICH : 1
AND_STILL : 1
SUICIDAL_HOMICIDAL : 2
RPR_VDRL : 1
WITH_TREATMENT : 1
CONTINUE_UP : 1
AIDS_NO : 1
AS_DIRECTED : 1
LIFESTYLE_LCSW : 1
STAFF_MEMEBERS : 1
SECURITY_NUMBER : 2
ME_HE : 1
MASS_RAL : 1
PROGRAM_AGE : 1
TO_IRRITABLE : 1
BACTERIOLOGY_FINAL : 1
FOR_PAIN : 6
POTENTIAL_NEED : 1
ALERT_THROUGH : 1
TH_HOPES : 1
RATED_PAIN : 1
HERBAL_MEDICATIONS : 1
FOR_ALCOH : 1
OR_PULSE : 1
ON_HE : 1
KG_BP : 1
MADDOX_IE : 1
TABLETS_MOUTH : 1
THE_SERVICE : 1
WORK_FOR : 1
HASNT_FILLED : 1
OF_PHYSICIAN : 1
SILK_TAPE : 1
IF_BP : 1
TRIAGE_WALKIN : 1
MONITOR_PMH : 1
WHEELCHAIR_OF : 1
MODALITY_ULA : 1
IDENTIFIED_PLEASE : 1
TX_ANXIETY : 1
SON_PING : 1
PATCHES_WORK : 1
RELAPSE_TRAUMA : 1
PAROLE_IN : 1
TO_VACCINE : 1
PT_HAVE : 1
INTERPRETATION_LIPOMA : 1
LIVING_SHIFT : 1
AS_DID : 1
AND_DERMATITIS : 1
GROUP_EXERCISE : 1
EYE_VISIT : 1
CITY_TRAVEL : 1
IS_LESS : 1
AND_DEPRESSED : 1
CLINIC_BEHAVIOR : 1
ID_ASSESSMENT : 1
THAN_MHC : 1
COMPLIANCE_WITH : 1
SIGNED_FOR : 1
BREATH_BUT : 1
NURSING_GROUP : 1
ASSIST_THIS : 1
OVERALL_WITH : 1
DURING_STANDING : 1
FEB_DX : 1
RECORD_MISCELLANEOUS : 1
SPEAK_PATIENT : 1
OF_OFFICE : 1
OF_LS : 1
UNIT_TAKE : 1
FOCUSED_IT : 1
BREATHING_WELL : 1
NONE_SPECIALTY : 1
HOURS_ZZECF : 1
TRIGGERS_PRECIPITATION : 1
IMPACT_AORTIC : 1
FOR_THERAPY : 2
TO_PMH : 1
POSSIBLE_HAS : 1
LOCALITY_WITHIN : 1
OF_HOUSE : 1
EXPLAINED_COMPLETED : 1
PREOPERATIVE_REQUIREMENTS : 1
YES_DETECTION : 1
PREOP_PREOP : 1
AT_THE : 2
INDEP_ADDED : 1
PREDNISONE_GTTS : 1
FOR_OTHERWISE : 1
HIS_MR : 1
FOR_DIABETES : 1
SEP_CODE : 1
OTHER_EKG : 1
ADDITIONAL_FROM : 1
FOR_CHEST : 1
DC_NOTE : 1
WITH_SUICIDAL : 1
TITUED_KNEE : 1
STATUS_INFORMATION : 1
SUBJECTIVE_PRIMARY : 1
MOST_MCV : 1
LIFESOURCE_PT : 1
HEAVY_USE : 1
CURRENT_MEDICATIONS : 1
COUNSELING_COMPREHENSIVE : 1
WELL_AT : 1
FLUOROSCOPY_PROTOCOL : 1
AND_APR : 1
POSITION_IDENTIFICATION : 1
CONTINENT_VETERAN : 2
THE_MANAGEMENT : 1
REVIEWED_INSTRUCTIONS : 1
GYNECOLOGY_INFORMATION : 1
DENIES_SUBJECTIVE : 1
STRAIN_ALL : 1
PAIN_MEDICATIONS : 1
URINE_MO : 1
WRAPUP_GROUP : 1
PATIENT_MINUTES : 1
TO_LOWER : 2
PATTERN_FUTURE : 1
HERE_HE : 1
CARDIOVASCULAR_OBSTRUCTIVE : 1
HIM_IN : 2
PCO_MOTIVATION : 1
OUTPATIENT_NOT : 2
SUICIDAL_FOLLOWED : 1
CV_GLUCOSE : 1
ID_REVIEW : 1
THE_PROBLEM : 1
BOWEL_EXTRA : 1
DURING_SHIFT : 6
APPT_WITH : 1
AND_STRESS : 1
APPLY_GUAZE : 1
SCHEDULED_COORDINATE : 1
PT_HERE : 1
MEDICATIONS_QUESTIONS : 1
APN_THIS : 1
PROFILE_TELEHEALTHCARE : 1
WAS_FOR : 3
MAKE_APPT : 1
PROCEDURE_AND : 2
SMILING_TO : 1
BROS_PROVIDED : 1
VISTA_IMAGING : 5
CHANGE_PT : 1
ALLERGIES_SEE : 1
RULES_FOLLOWING : 1
REHAB_STUDENT : 1
REMOVED_OTHER : 1
SAVINGS_CONTINUALLY : 1
SHOULD_DO : 1
MEDICATIONS_YES : 1
AUGUST_HER : 1
TO_FOLLOWING : 1
OF_OPPORTUNITY : 1
RECOMMENDATION_NP : 1
YESTER_TRIED : 1
ALCOH_OUTLINED : 1
OUTPATIENT_FAMILY : 1
TO_HOUSE : 1
PATIENT_DID : 2
REQUESTING_CONSULT : 1
TOTAL_ARTHROPLASTY : 1
ACCESSED_VISTA : 3
PUT_ON : 1
UNITS_AND : 1
PATIENT_ADDRESS : 1
PT_REPORTS : 2
FOLLOW_CLINIC : 1
NOT_THE : 2
TAKE_IN : 1
BACK_BILAT : 1
FUNCTION_STUDY : 1
TRAINING_WITH : 1
WHEN_HE : 1
UPCOMING_PATIENT : 1
NEEDED_JUNE : 1
PROVIDED_JUNE : 1
VERY_IN : 1
STATUS_GENITOURINARY : 1
TALKED_SIGNED : 1
AND_RAL : 1
ACHIEVING_GOALS : 2
PT_ENCOURAGED : 1
PING_WILL : 1
OR_FREQ : 1
ORDER_HAS : 1
AND_NOTING : 1
THIS_CHANGE : 1
FEAR_WORRIED : 1
LS_BUTTONS : 1
FINE_TO : 1
HALDOL_EVERY : 1
IDENTIFICATION_SOCIAL : 1
PATIENT_LIES : 1
LIMITATIONS_NO : 1
CLINICAL_STABLE : 1
CALLED_LEFT : 1
PROGRESS_RATE : 1
GUN_INPT : 1
MESSAGE_ANSWERING : 1
AND_CAN : 1
LEFT_MOSTLY : 1
THERAPY_DEPRESSION : 1
IS_FEELING : 2
NEXT_FOR : 1
PROVIDER_NOTING : 1
STATUS_ALERT : 1
RECEIVED_MORNING : 1
WAS_FOLLOWED : 1
WAS_THOUGHT : 1
RISPERIDONE_TAB : 1
APPEARANCE_OF : 1
NURSING_ACTIVITY : 1
ROOM_MR : 1
WAS_HISTORY : 1
AND_DOCUMENTS : 1
FILLED_ROTATOR : 1
PRESSURE_ULCERS : 1
THURS_AMOUNT : 1
MACKIE_IDENTIFIED : 1
TASK_SUPERVISION : 2
DISABILITY_HOWEVER : 1
AND_PROGRESSION : 1
WHEN_HIS : 1
SERVICE_ON : 1
EXPOSED_UNPREDICTABLE : 1
STRATEGIES_PATIENT : 1
SICK_AND : 1
RESULTS_QUAL : 1
ANY_PATCHES : 2
PPD_ACTIVE : 1
AND_FACTORS : 1
AWAKE_NUMBER : 1
PT_AGREED : 1
ARE_AS : 1
DRIVE_CAR : 1
TOP_SIDE : 1
SIGH_TRIED : 1
AMBULATORY_LEG : 1
HIS_HER : 1
MIN_DISCHARGED : 1
AN_INDIVIDUAL : 1
GOAL_FOR : 1
TASK_NO : 1
LIFESTYLE_INTERESTS : 1
MONTHS_WITH : 1
AND_TALKED : 1
STILL_PATIENT : 1
ANTISOCIAL_PERSONALITY : 1
GOAL_WILL : 1
BAD_HE : 1
CENTER_NO : 1
OF_WT : 1
OR_VERBAL : 1
THE_MOUTH : 1
GLASSES_SUBJECTIVE : 1
MINUTES_CALL : 1
ER_HE : 1
CONTINUE_TREATMENT : 1
AND_PARTICIPATED : 1
FUTURE_PL : 1
ACTIVE_VOLUME : 1
ON_BASIS : 1
DEVICES_ASSIST : 1
IN_BLIND : 1
LE_BIRCH : 1
LIVING_PATIENT : 1
MEDICATION_RECONCILIATION : 1
WITH_WOUND : 1
TO_ON : 3
SMOKING_HAS : 1
TRANSDERMAL_PATCH : 2
PROVIDE_THE : 1
ASSESSED_IN : 1
MCV_THE : 1
PRESSURE_CHEST : 1
TO_REGARDS : 1
AMBULATORY_PATIENT : 1
FOR_FIRST : 1
TRAINING_OCR : 1
TO_AMOUNTS : 1
OF_ATTENDING : 2
IN_ON : 1
PRIMARY_REASON : 1
NOT_TOLERATE : 1
HIGHER_LEVEL : 1
CLINIC_DATE : 1
ED_MEDICAL : 1
ORDERED_AND : 1
HOGAR_IS : 1
BLIND_STUDENT : 1
SILK_SOAP : 1
INDEPENDENT_NONE : 1
LIGHT_IN : 1
FLUENT_DSMIV : 1
DIAGNOSIS_PT : 1
EDUCAT_AND : 1
AND_SAFETY : 3
INPATIENT_EDUCATION : 1
MEDICAL_CELLULITIS : 1
GOAL_TEACHING : 1
IMPAIRED_NUTRITION : 1
TO_ATTENDING : 1
HIS_PATIENT : 1
GET_OF : 1
STIC_SPECIFICALLY : 1
CONTINUE_TO : 4
TESTS_WAS : 1
DATE_ADMISSION : 1
VISTA_ADDENDUM : 1
ANGRY_AFFECT : 1
COLONOSCOPY_ANATOMICAL : 1
ADDENDUM_PRESENT : 1
TO_SWEAR : 1
MAXINE_ANDERSON : 1
WAS_MEASURED : 1
AGREE_DATE : 1
COULD_COME : 1
DISORDER_MEDICATION : 1
OF_TALKING : 1
AT_AM : 2
CLIENT_IN : 1
TIME_TUES : 1
HEALTH_ATTENDING : 1
SHEET_CHIEF : 1
ONCE_LEARNED : 1
LACK_OF : 1
ED_UNIT : 1
WAS_NEGATIVE : 1
FOSTER_CALLERS : 1
MACHINE_WITH : 1
HE_BEEN : 6
DEVELOPES_OR : 1
SUPPLIES_ONE : 1
KNOW_GOALS : 1
TWO_IMMUNI : 1
PCP_FOR : 1
FEB_ADMISSION : 1
DONE_BY : 1
PSYCHOTHERAPY_MALE : 1
HX_SURGICAL : 1
CONSENT_EVATO : 1
FLU_SEASON : 1
APPT_WEEK : 1
NOTE_CALLED : 1
THERAPEUTIC_SUPPORT : 1
LIST_OF : 1
MAKE_APPROPRIATE : 1
FLANK_ABOUT : 1
PAIN_MANAGEMENT : 5
DISCUSSION_EXCUSES : 1
HAVE_WILDCATS : 1
TREATMENT_PROCEDURE : 2
PT_ROUTINELY : 1
BEEN_CLONAZEPAM : 1
THIS_AND : 1
PLASM_PLASM : 1
SO_HE : 1
PHYSICIAN_MN : 1
PROVIDE_ALL : 1
THAT_MH : 1
OF_HOUSING : 1
CHARACTERISTICS_NO : 1
YES_VERY : 1
PHARMACY_PROFILE : 1
EXPERIENCING_EFFECT : 1
LEARN_MOTIVATED : 1
COLONOSCOPY_MAY : 1
INSTRUCTED_HYDROCHLOROTHIAZIDE : 1
AND_ONE : 1
HER_UNTIL : 1
STATES_TH : 1
SAYS_WOULD : 1
CALL_HIS : 1
THA_PATIENT : 1
BLISTERS_ON : 1
HIM_PAIN : 1
THAT_SVS : 1
SERVICE_EXPLAINED : 1
HARM_TO : 1
HE_PROVIDE : 1
OF_ANTITHROMBOTI : 1
UNDERSTANDING_OPERATIVE : 1
NONE_BPH : 1
FIRST_TO : 1
SOME_WITH : 1
MEDICATION_WILL : 1
TRAVEL_FOR : 1
COPY_OF : 1
ACTIVE_SUBSEQUENTLY : 1
OBSTRUCTIVE_PHYSICIAN : 2
BLOOD_SUGAR : 1
NO_NEED : 1
SIGNS_THAT : 1
FOOT_DATE : 1
AND_RESISTING : 1
SATISFACTORY_INTERPRETATION : 1
CHEST_PAIN : 2
XYZZY_SCREENING : 1
NOTE_MEETS : 1
AND_RAISED : 1
PMH_HEPC : 1
PARTICIPATION_LEVEL : 1
TOMORROW_JUNE : 1
OL_PLASM : 2
WHICH_HER : 1
ON_PRESSURE : 1
LOCATION_OUT : 1
ROOM_PERSONAL : 1
RECOMMENDATION_MD : 1
ALCOHOL_TEST : 1
MAIL_THANKS : 1
STAGE_BEEN : 1
TO_EXAM : 1
HIM_THIS : 1
SCORE_PACT : 1
DEPENDENCE_BY : 1
REITERS_SYND : 1
OPTOMETRY_CONSULT : 1
PMH_NATURAL : 1
PREP_SOLUTION : 1
ADDENDUM_VSS : 1
APPOINTMENT_INFORMATION : 1
TISSUE_SLIGHT : 1
CALL_EYE1 : 1
WAS_LESS : 1
LIPIDS_DEPRESSION : 1
CENTER_BASED : 1
THE_DYSMENORRHEA : 1
SON_THEIR : 1
SSED_PATIENT : 1
PRESSURE_NUMBER : 1
OPTOMETRIST_MOUTH : 1
CURRENT_SIGNS : 1
WITH_ETOH : 1
DOCTORS_THAT : 1
ATTENDING_GROUP : 1
PHONE_ATTEMPTED : 1
WAS_SEEN : 1
NOTE_DT : 1
MORE_THAN : 1
UNPREDICTABLE_LOUD : 1
WHEN_VETERAN : 1
GIVEN_BOWEL : 1
SHIFT_AWAITING : 1
NA_MG : 1
PATIENT_RESPIRATORY : 1
USE_FAMILY : 1
CONFERRED_WITH : 1
PATIENTS_ID : 1
UP_FELT : 1
ASCITES_ICDCM : 1
SHOES_ASSISTANCE : 1
EXPOSED_TO : 1
READING_NEXT : 1
MIMSOME_STATE : 2
DISPOSITION_REPORT : 1
SESSION_AFTER : 1
LIES_ON : 1
HAS_OUTPT : 1
WITH_STRIPS : 1
IDENTIFICATION_NAME : 1
SECLUSION_NOTE : 1
SCHOOL_DENIES : 1
AMBULATORY_WITH : 1
HELPLESS_ALL : 1
HOUSE_SEEN : 1
DEAR_THIS : 1
TREATMENTS_VOLUME : 1
PROVIDED_CALLBACK : 1
ESTIMATED_TIME : 1
OK_DIAGNOSIS : 1
HIS_NOTE : 1
PRESSURE_ARM : 1
NONE_BRIEF : 1
MOST_CHANGE : 1
VERBALIZED_UNDERSTANDING : 2
CHRONIC_DISEASE : 1
LIFESTYLE_WELLNESS : 1
KNOWLEDGE_ADAPTING : 1
GET_GUN : 1
HIS_BACK : 2
TO_ER : 1
DECLINED_GO : 1
FOLLOWED_WHEREBY : 1
HAS_NEVER : 1
RECENTLY_MRI : 1
THE_HOSPITAL : 1
FOR_ASSISTANCE : 2
PROGRAM_AND : 2
VAPSHCS_CLINIC : 1
OBTAINED_FROM : 1
TO_BE : 2
PERSONAL_CARE : 2
HOURS_ON : 1
THIS_VIA : 1
FINANCES_DESPITE : 1
VETERANS_PHYSICIAN : 1
THE_EVENING : 1
PT_COMBIVENT : 1
CC_PATIENT : 1
IN_TN : 1
NUTRITION_REQUIRES : 1
PRN_HAVE : 1
THINKING_DISORGANIZED : 1
ETOH_RADIATION : 1
MOUTH_FOR : 4
SEROQUEL_IN : 1
SCREEN_DEPRESSION : 1
WHO_HIM : 1
ACCEPTABLE_OF : 1
STILL_AGE : 1
MONITORED_EVERY : 1
WENDY_LEVESQUE : 1
THE_DEC : 1
PATIENT_WELL : 1
BONHAM_PREVENTIVE : 1
MOTHER_APPRECIATIVE : 1
CASE_REVIEWED : 1
AND_MG : 1
OF_ANTIPLATELET : 1
THOUGHT_THAT : 1
THE_VETERAN : 2
BENEFITS_WITH : 1
LEVEL_QUALITY : 1
EXERCISE_PRESCRIPTION : 1
ALLERGY_LIST : 1
MEDICATIONS_WERE : 1
SHOWER_AND : 1
CRITERIA_MET : 1
TH_DIALYSIS : 1
CHIEF_FOOT : 1
REACH_COMPREHENSIVE : 1
NG_ML : 2
WITH_THE : 5
FOLLOWING_UP : 1
TO_TRY : 1
DIRECTED_WILL : 1
LINDSAY_MSS : 1
SUPPORTING_TO : 1
TRIAGE_DATE : 1
FOR_SHAKE : 1
PSA_NG : 1
FASTING_TIZZANO : 1
NOT_DOING : 1
FUNCTIONING_AT : 1
CHANGE_HIMSELF : 1
REQUESTING_DONT : 1
MAMMOGRAM_BE : 1
IS_DISCHARGED : 1
CONTRACT_AND : 1
WITH_ADMISSION : 1
CHAITANYA_ANAND : 1
OF_IDENTIFIED : 1
TO_BLOOD : 1
SINCE_JUNE : 1
ELIMINATION_CONSISTENCY : 1
JOAN_AMOUNT : 1
ON_AT : 2
PAIN_SUICIDAL : 1
BOWEL_MOVEMENTS : 2
VINFLUENZA_CALLED : 1
NAME_SECURITY : 1
USING_TO : 1
IS_TIME : 2
US_SUBJECTIVE : 1
THAN_CHANCE : 1
SAUNDERS_AUG : 1
ARTHRITIS_HOME : 1
HCS_NO : 1
MINUTE_WARNING : 1
MOBILITY_TEETH : 1
HOME_SW : 1
GET_HALDOL : 1
OR_MHC : 1
DRINKS_STATED : 1
LIKE_JOINT : 1
MEDICATIONS_STATES : 1
TO_WHO : 1
INTACT_VIBRATORY : 1
CHEST_WHICH : 1
BROS_ASSISTANCE : 1
BP_IS : 1
ONEHALF_TABLET : 1
HOUSING_PAIN : 1
IN_PREOPERATIVE : 1
NECK_PAIN : 1
LIFESTYLE_BAKER : 1
PRESCRIBED_PROBLEM : 1
MUST_INSURANCE : 1
DENIES_SUICIDAL : 1
TENDER_PALPATION : 1
ORIENTED_PERSON : 1
TRAUMA_SUBSTANCE : 1
MR_THIS : 1
BLOOD_DENIES : 1
CHECKIN_AREAS : 1
FOR_INTERVENTION : 1
GROUP_AS : 1
FOOD_CONSISTENCY : 1
MIN_CHRONIC : 1
FASTING_BY : 1
OX_VITAL : 1
CARE_CHECKIN : 1
GOING_MOST : 1
BACK_ON : 1
CC_PAIN : 1
RATED_AT : 1
CHOLECALCIFEROL_TAB : 1
RADIATION_DETAILS : 1
NOT_CANCEL : 1
COMPLIANCE_THE : 1
HUDVASHNOTE_AT : 1
FOR_AC : 1
OF_HEPATITIS : 1
TOOK_HIS : 1
AND_HEADACHES : 1
NSAIDS_COMMENTS : 1
OF_MAKING : 1
MEMBERS_PARTICIPATED : 1
IF_HE : 1
FRIEND_HERE : 1
UNT_SQ : 1
AMOUNT_STOOL : 5
GET_HE : 1
DEPENDENCY_PATIENT : 1
SUICIDAL_LIKE : 1
PILLS_WOULD : 1
LIVING_IS : 1
TOILET_CONSISTENCY : 1
AGREE_NUR : 1
CALL_ASSISTANCE : 1
TAKES_HIS : 1
FROM_SP : 1
CALL_APPT : 1
MANAGER_NAOMI : 1
BUILDING_IER : 1
DRIVING_TIME : 1
HAS_BEEN : 15
REPORT_EXTENSION : 1
STATED_VICTIM : 1
INTERESTED_VET : 1
UNSPECIFIED_COUNSELING : 2
DEMONSTRATED_ABILITY : 1
MONITORED_FOR : 1
SKIN_WITH : 1
OFFERED_OUTPATIENT : 1
HIBICLENS_LABORATORY : 1
SAFETY_PLAN : 1
TEMPERATURE_CLINIC : 1
WILL_RECEIVE : 1
HIS_SUBSTANCE : 1
SPENDING_STEREO : 1
PRESCRIBED_DOSAGE : 1
BLOOD_SOCIAL : 1
PRECIPITATION_ASSIST : 1
DENIES_PT : 1
AS_PATIENT : 1
THEY_BEFORE : 1
BEEN_STRUGGLING : 1
ENCOURAGED_PRACTICE : 1
SITUATION_ENABLE : 1
SKIN_COLOR : 1
KNOW_ABOUT : 1
DO_PTSD : 1
SUPPLIES_CLINIC : 1
AIDS_TRANSPARENCIES : 1
DID_WANT : 2
WAS_LING : 1
RESIDENT_OTHER : 1
TOLD_THAT : 1
COMPLETED_ANY : 1
WITH_ON : 1
ABD_PELVIS : 1
HOURS_NAPPING : 1
IMPROVE_THE : 1
COMES_IN : 1
FOCUSED_ON : 2
OF_MEDICAL : 1
WITH_OTHER : 2
EXCEED_DOSAGE : 1
OX_SURGERY : 1
IUD_GYNECOLOGY : 1
DIP_TEAM : 1
ETHNIC_NO : 1
POLYSUBSTANCE_AXIS : 1
WITH_WIFESHE : 1
TO_VITALS : 1
LESION_IT : 1
MAY_ALTERNATE : 1
LLE_STD : 1
RIGHTS_RESPONSIBILITIES : 1
EFFECTIVE_PAIN : 3
EVALUATION_WITH : 1
FOR_HER : 2
VAULT_FUNDS : 1
WHO_BLINDED : 1
PROBLEM_UNSPECIFIED : 2
DENIES_ANY : 2
LISTEN_TO : 2
NEW_SYRINGE : 1
WITH_FAMILY : 2
RESULTS_SHE : 1
TO_OR : 1
SYMPTOMS_NOTED : 1
WOULD_HIMSELF : 1
HELP_SIGNS : 1
ITS_MODIFIED : 1
PATIENT_DESCRIBE : 1
CM_ASCITES : 1
MG_CAP : 1
NO_OUTCOME : 1
WILL_COMPLICATIONS : 1
DISCUSS_SIGNS : 1
TOILET_PATIENT : 1
PHYSICIAN_STABLE : 1
FINAL_DID : 1
REPORTS_OVERALL : 1
MACHINE_REGARDS : 1
COGNITIVE_AND : 1
NEUROLOGY_FOLLOW : 1
MONTHS_LEFT : 1
MEDICAL_MEASURES : 1
NO_NOR : 2
AT_BEDTIME : 1
REACH_WILL : 1
ED_PROVIDER : 1
AUTHOR_SAMMIE : 1
OUT_HOUSE : 1
SINCE_ARE : 1
OF_NOT : 2
PATIENT_IS : 8
OF_MOUTH : 1
LABORATORY_NEVADA : 1
MOOD_DESPITE : 1
PATIENTS_RESPONSIBILITY : 1
AUDITC_WAS : 1
TO_REVIEW : 1
ANY_ACTION : 1
HL_DCD : 1
SET_ASSISTANCE : 2
SEVERE_PT : 1
BE_THROUGH : 3
SWOLLEN_MODERATE : 1
PATIENT_INVOLVEMENT : 1
HE_RALLY : 1
NOTE_WONDERS : 1
BELLO_LAST : 1
HAVING_ANY : 1
HIS_BLOOD : 1
WILL_ALERT : 1
WATCHED_ION : 1
GENDER_LEVEL : 1
CONSISTENT_APPEARANCE : 1
OF_RECOVERY : 1
ANYWAY_AND : 1
BLOOD_TAKEN : 1
PLAN_RADIATION : 1
CLUB_IMPROVE : 1
YESTER_SO : 1
MOBILITY_TO : 1
WITHDRAWAL_NOTED : 1
HX_AND : 1
MEDICINE_DOES : 1
SECOND_VET : 1
ISSUES_OF : 1
SAME_FRIEND : 1
SURE_COULD : 1
PREVIOUS_PSYCH : 1
ELIMINATION_LOSS : 1
BEEN_IN : 5
PT_MAMMOGRAM : 1
ADDENDUM_TWICE : 1
RECONCILED_THIS : 1
HAVE_SENT : 1
RESTROOM_DURING : 1
HISTORY_HPI : 1
INFORMATION_FROM : 1
DT_FOLLOWING : 1
HOLD_LATER : 1
BKH_AMBULATORY : 1
REQUESTS_LEAVE : 1
CONTINUED_FOR : 2
FUNCTION_BREAKFAST : 1
BROS_ACTIVE : 1
HE_ANY : 1
AND_THE : 6
RECREATION_AS : 1
NO_INFORMATION : 1
FEELINGS_PT : 1
CARE_AND : 1
IMMEDIATE_SURGICAL : 1
PROGRESS_NOTE : 5
THE_TREATMEN : 1
CELLULITIS_AND : 1
INFORMATION_IN : 1
IDENTIFIED_EPIDIDYMIS : 1
BMI_MASS : 1
SPEECH_DSMIV : 1
DISPOSITION_EXTENSION : 1
CANT_IVE : 1
HIS_DO : 1
LEAVING_ALLERGY : 1
SAFETY_NONE : 1
BATHING_BATH : 1
PATIENT_REVIEW : 1
PRACTICE_PROBLEM : 1
FROM_PER : 1
FOR_CARE : 1
PT_TOOK : 1
TEMP_REGULAR : 1
BELONGINGS_MEDICATIONS : 1
MD_CALLERS : 1
WORK_TIME : 1
SUGAR_READINGS : 1
HE_TO : 4
EVENING_TO : 1
NO_FROM : 1
NOT_YET : 1
AND_LIVER : 1
HUSBAND_WELL : 1
BENIGN_PROSTATE : 1
SUMMARY_ERUPTED : 1
CANE_SKILLS : 1
IN_BODY : 1
ZZPATIENT_ADL : 1
MEDICAL_SURGICAL : 2
MARRIED_AND : 1
ON_STEREO : 1
IN_EVENING : 2
GU_DOCUMENT : 1
MODERATE_INSTRUCTOR : 1
DOING_THINGS : 1
NO_SUBJECTIVE : 1
DESCRIPTION_OF : 1
LOSS_GEESEY : 1
STATUS_PT : 1
REFUSED_LONG : 1
HOWEVER_CANE : 1
FOR_SOME : 1
OPENMIND_DURING : 1
COPD_LIPIDS : 1
STATUS_OBJECTIVE : 1
PA_NO : 1
BE_ACCESSED : 3
DURATION_RADIATION : 1
DOING_ALL : 1
ON_WILL : 1
ON_OF : 1
OF_GUNSHOT : 1
ALL_PATIENTS : 1
WHEN_SMOKING : 1
MEDICATION_GOOD : 1
COMPLAINT_VETERAN : 1
RECENTLY_COMPLETED : 1
NO_ALLERGY : 1
SERVICE_AUG : 1
HIP_FOR : 1
AVOID_SOCIAL : 1
NEW_ALLERGY : 1
STAFF_NEEDED : 1
HE_NEEDS : 1
BY_CM : 1
GIVEN_LAB : 1
ELIMINATION_OF : 2
ADDRESS_BLVD : 1
IMMUNIZATION_SKIN : 1
PAIN_WART : 1
AND_LISTEN : 1
OR_GREATER : 1
BP_VETERAN : 1
LEVOTHYROXINE_NA : 1
COMMAND_BEEN : 1
CERVICAL_SPINE : 1
AQUATIC_FOR : 1
HE_DEVELOPES : 1
RESPONSIBILITIES_WERE : 1
OUTSIDE_CONSULT : 2
WOULD_SOCIAL : 1
ELIMINATION_NUTRITION : 1
ON_ASTHMA : 1
AS_JUDGMENT : 1
PRESENT_HE : 1
MOUTH_THREE : 2
CLASS_RESTRAINTS : 1
CARRY_OUT : 1
CURRENT_OF : 1
MANAGEMENT_REPORTED : 1
PRESENCE_OF : 1
WITH_ISSUES : 1
TRIAGE_OUTPATIENT : 1
LOWER_BACK : 2
ROS_PT : 1
BIRTH_TELEPHONE : 1
WAS_HIS : 2
INSTRUCTIONS_AND : 2
ID_BAND : 1
BEING_CLOSELY : 1
COMPANY_STRESS : 1
PATCHES_ED : 1
RESPIRATION_DT : 1
OUTSTANDING_WARRANT : 1
ASSESSMENT_DOES : 1
BUTTONS_HOME : 1
ANGER_WAS : 1
NOTE_HEAR : 1
HEPARIN_SOLN : 1
EXAMINATION_HE : 1
NOTE_NOTE : 2
AMBULATION_USES : 1
TO_IN : 4
HOURS_HIP : 1
EPITHELIZATION_AROUND : 1
PROCEDURE_SCREENING : 1
AND_MOBILITY : 2
HAS_RALLY : 1
REEVALUATION_APPOINTMENT : 1
RESTING_QUIETLY : 1
INSTABILITY_PROCEDURE : 1
THAT_THIS : 2
ML_SQ : 1
AN_ALF : 1
WOULD_BE : 4
AS_IN : 1
WAS_PT : 1
HE_CONTINUALLY : 1
CHEST_SYMMETRICAL : 1
WOUND_CARE : 1
NUMBER_OF : 9
REQUESTED_ADDITIONAL : 1
REMINDED_DISCARD : 1
HEIGHT_CM : 2
SURE_HE : 1
WIFESHE_SMOKES : 1
YRS_WKS : 1
SOON_AS : 1
HOWEVER_TEACH : 1
ACID_MG : 1
BLOOD_PCP : 1
VACCINE_FLU : 1
JOINT_PORCEDURE : 1
EXPENSES_BE : 1
PAIN_TOBACCO : 1
SESSIONS_CALLBACK : 1
PHYSICIAN_PARAPHERNALIA : 1
ANY_FROM : 1
RELATIONSHIP_STIGMA : 1
INTIMIDATING_OTHER : 1
WITH_MR : 2
MEMBERS_IN : 1
HOSPITAL_OUT : 1
REVIEWED_DISCUSSED : 1
CONTROL_HOLD : 1
CALL_MALE : 1
PT_GROUP : 1
UP_WITHOUT : 1
PROBLEM_NOTE : 1
MHICMINTENSIVE_CASE : 3
CALL_IF : 1
FOR_COLONOSCOPY : 1
LENGTH_OF : 1
THIS_IT : 1
DISCHARGED_PAIN : 1
HERE_FOR : 3
HIMSELF_PT : 1
HEENT_EXAM : 1
GROUP_DISCUSSION : 1
YES_STAGE : 1
CONTRACT_ANY : 1
HIS_ILLEGAL : 1
IMAGING_OR : 1
CARDIOLOGY_NOTE : 1
HEALTH_WELLNESS : 1
SKIN_TEST : 1
HOMICIDAL_IDEATION : 1
TIME_CC : 1
PC_TOMORROW : 1
MH_TELEPHONE : 2
SESSIONS_JUNE : 1
IV_INT : 1
MENTAL_ALERT : 1
THREE_DAILY : 1
COMPLAINT_REASON : 1
EMERGENCY_DEPARTMENT : 1
AFTERNOON_IRRITABLE : 1
PLANS_CONTINUE : 1
SPINE_PERIARTICULAR : 1
RIDING_HIS : 1
IDENTIFY_OFF : 1
WHO_WAS : 1
THE_PLAN : 2
NOTE_ACID : 1
EYE_GTTS : 1
HIS_IS : 1
SHOULD_BE : 1
ON_GENDER : 1
APPROPRIATE_VENTILATION : 1
CLINIC_SPECIFY : 1
HER_MOTHER : 1
FEMALE_EXCEPT : 1
DERM_HAD : 1
IS_HERE : 2
BY_PROVIDER : 1
AND_DICUSSION : 1
IMPROVEMENT_IN : 1
EXP_COSIGNER : 1
NORMAL_TREATMENT : 1
STRATEGIES_TO : 1
AND_EVALUATED : 1
OTHER_AM : 1
BENEFITS_AGREE : 1
SIGH_AGAIN : 1
NECK_PATIENT : 1
ABOUT_THE : 1
FALL_FOR : 1
MYOPIA_PRESBY : 1
JOB_CLUB : 1
PRACTICE_VETERAN : 1
NO_PATIENT : 3
VETERAN_MUST : 1
STARTING_MORE : 1
VETERAN_THANKED : 1
LOWER_MILDLY : 1
EATING_REPORTS : 1
PATIENT_FUNDS : 2
OPEN_OF : 1
IS_PING : 1
COMMENTS_DCD : 1
PATIENTS_IN : 1
ADMISSION_FEB : 1
CANE_BUT : 1
MILITARY_TRAUMA : 1
ATTENDING_PSYCHIATRY : 1
AWAY_WAIT : 1
FOR_EVALUATION : 1
LISTS_AND : 1
SERVICE_HOW : 1
RANKINE_ARNP : 1
PT_CONTACT : 1
TO_PRACTICE : 1
TIME_APPLICATION : 1
PACKING_INCH : 1
APPOINTMENT_NOT : 1
USE_ANTIPLATELET : 1
ON_AS : 1
REMOVED_PT : 1
SUBJECTIVE_TWICE : 1
FALL_IN : 2
THEY_ARE : 1
THEY_DID : 1
LAST_STEADY : 1
EVENING_WRAPUP : 1
HIS_SHIT : 1
CONDITION_HE : 1
THOUGHTS_SI : 1
AGENCY_TARGET : 1
BOWEL_ACTIVITIES : 1
SQ_FOR : 1
PATIENT_ER : 1
WITH_FERNANDO : 1
DISCHARGE_APR : 1
ADMITTED_TO : 1
NUTRITION_SHIFT : 1
DO_PT : 1
MG_ACETAMINOPHEN : 1
NOTE_WERE : 1
MARRIED_DIVORCED : 1
IS_TWICE : 1
NO_PROVIDER : 2
AND_RESPONSIBILITIES : 1
WITH_CONTRAST : 1
CONJUNCTIVA_OU : 1
TRAINING_TRANSPARENCIES : 1
GAIT_REVIEW : 1
FOR_KEEPING : 1
PROCEEDINGS_FITTING : 1
DOCUMENT_BECAUSE : 1
MILITARY_SEXUAL : 1
SHAVE_ORAL : 1
AGREEMENT_BLOOD : 1
MADE_DERMATOLOGY : 1
SMOKES_FORMAL : 1
IS_HOUSING : 1
OUTPATIENT_LIST : 1
ON_BUT : 1
ALCOHOL_USE : 2
INJURY_OR : 1
GET_IN : 2
AND_EXTRA : 1
FEEL_SICK : 1
THE_DR : 1
FLU_CLASSES : 1
PTSD_HOSPITAL : 1
LOCATION_AND : 1
HTN_ABUSE : 1
OR_ANA : 1
HE_HE : 4
DELETE_LEGS : 1
HEAVY_ETOH : 1
EKG_CPRS : 1
DRINKER_REITERS : 1
INCLUDING_ACTIVE : 1
BRONCHITIS_CRNA : 1
ENTERED_CLONAZEPAM : 1
PATIENT_MONITORED : 1
OF_SCREEN : 1
ED_NURSING : 1
LETTER_HAVE : 1
PATIENT_CRITERIA : 2
PATIENT_WOULD : 1
ABOUT_PAROLE : 1
WITH_COMPLAINT : 1
TOLERATE_PATIENT : 1
NO_ENDING : 1
PAST_HE : 1
NONE_INSTRUCTION : 1
THE_MILIEU : 1
IN_GROUP : 1
APPOINTMENT_AGE : 1
SCHOOL_WITH : 1
INTO_ATTENDED : 1
PROVIDER_PENG : 1
ADL_AMOUNT : 1
IS_BREAK : 1
CHIROPRACTIC_PROSTHETIC : 1
HIS_WIFE : 2
TEACH_TRAVEL : 1
PSXH_SURGERY : 1
DOCUMENTS_BEEN : 1
HIS_PAROLE : 1
REQUESTS_TO : 1
TO_PAST : 1
PRESENT_SI : 1
LIKE_OTHERS : 1
SCORE_URINARY : 1
LIST_AS : 1
INFORMED_THE : 1
FOR_CHIROPRACTIC : 1
SCREENING_UNCHANGED : 1
FOR_SI : 1
MOOD_CALM : 1
CM_CURRENT : 1
TO_LEAVE : 1
INJURY_PROCESS : 1
ARE_SAMMIE : 1
IN_HOUSE : 1
ENCOURAGEMENT_HOME : 1
EXCEPT_FOR : 1
IN_TWO : 1
OF_IN : 2
NEED_SURGERY : 1
VENTILATION_AND : 1
ELIMINATE_KNEE : 1
LEFT_MESSAGE : 6
BED_BATH : 1
OF_ALERT : 1
CALL_BACK : 3
ALERT_AND : 3
WENT_BED : 1
PCMM_FIRM : 1
HAS_MAILED : 1
TASK_SET : 2
LUMBAR_GENDER : 1
MORE_NUMBNESS : 1
STATUS_COL : 1
ALL_PERTINENT : 1
STRONGER_WHEN : 1
REHAB_TO : 1
ICDCM_HIP : 1
COLOR_OUTSIDE : 1
HIS_MEDICATIONS : 2
FOR_SAFETY : 1
PHYSICAL_HE : 1
FIRST_REMAINING : 1
BEEN_PHYSICIAN : 1
PT_QUIETLY : 1
TRANSFER_COORDINATOR : 2
PERIARTICULAR_STRUCTURE : 1
AN_GROUP : 1
DICUSSION_BARETT : 1
ORAL_CARE : 2
USED_BE : 1
INTERMITTENT_NUMBNESS : 1
BLOOD_PRESSURE : 10
PCP_VISIT : 1
ON_AUG : 1
OFFICE_WILL : 1
HIP_PROTECTORS : 3
CUFF_WITH : 1
TRY_AND : 1
DEPENDENCE_GOAL : 1
IMPRESSION_ANXIOUS : 1
TOPIC_HAS : 1
THYROID_PATIENT : 1
NIGHT_PATIENT : 1
PRACTICE_USING : 1
CURRENT_USE : 1
HOURS_AWAKE : 1
STRESS_VETERAN : 1
VITAMIN_COVER : 1
THE_OF : 8
PAIN_ASSESSMENT : 6
CANE_TO : 1
GO_CAREER : 1
PATIENT_EDUCATION : 2
SUBJECTIVE_IMPROVEMENT : 1
WAS_ROTATOR : 1
DAILY_FOR : 5
THERAPIST_DEVELOP : 1
TELEHEALTHCARE_RECOMMENDED : 1
MOTHER_HER : 1
LEFT_SURROGATE : 1
PCP_DO : 2
NORMOCEPHALIC_MILL : 1
HAVE_COUGH : 1
IN_AM : 1
AN_WHICH : 1
CENTER_AND : 1
ANYWAY_THAT : 1
CONSISTENCY_STOOL : 3
GENITOURINARY_STATUS : 1
TO_AQUATIC : 1
PENTUP_AT : 1
CARE_VETERAN : 1
BUT_HASNT : 1
KNEES_OF : 1
TO_MONITOR : 2
APPT_FRIEND : 1
REVIEW_ADVANCE : 1
YELLOW_CENTER : 1
WELL_CONFERRED : 1
PT_CHRONIC : 1
NO_HIM : 1
STRESS_SECONDARY : 1
HIM_ANYWAY : 1
PT_HAS : 3
IN_OCTOBER : 1
THANKED_FOR : 1
CHIEF_COMPLAINT : 5
THOUGHT_INTENT : 1
RDW_THE : 1
PCX_FOR : 1
DUE_APR : 1
VERBAL_HANDOUT : 1
PAINIS_TAKING : 1
MIN_EXAMINATION : 1
PROBLEMS_DEPENDENCY : 1
THAT_HE : 22
DEPENDENCE_BIPOLAR : 1
AC_IS : 1
PM_WAS : 1
CARDS_TEL : 1
BACK_HE : 1
ICDCM_OUTPATIENT : 1
TO_MOTIVATED : 1
ENTITLED_ANGRY : 1
THERAPY_IS : 1
MEASURES_LABS : 1
DR_AFTER : 1
USES_MANUAL : 1
PATIENT_RACE : 1
INJECTION_NO : 1
EATING_HE : 1
THE_HERBAL : 1
AREAS_LONG : 1
THE_FOR : 1
IMMUNI_VETERAN : 1
EDUCATION_SEE : 1
LOSS_OF : 1
ALSO_ON : 1
SCHEDULE_APPT : 1
THIS_THE : 7
ADVOCATE_FOR : 1
SUPPORT_FOR : 1
WAS_TOLD : 1
APPLICABLE_BY : 1
DO_YOU : 1
THE_LS : 1
HE_STILL : 1
MYCOSIS_AND : 1
NURSING_PSYCHIATRY : 1
SIERRA_NEVADA : 1
POD_BP : 1
APPARENTLY_TO : 1
LOG_INSTRUCTED : 1
DISTANCE_FEET : 1
AND_PRECIPITATION : 1
NOTE_PCO : 1
PAIN_SOCIAL : 1
TO_INCLUDING : 1
HIMSELF_TOOK : 1
DRINKS_OF : 1
TENDERNESS_RNP : 1
SPOKE_STAFF : 1
SAYS_HIS : 1
CONTINUOUS_SICHERER : 3
SUBJECTIVE_SHORTNESS : 1
OF_ICDCM : 1
ETC_AGREED : 1
HYP_LLOSE : 1
YES_CONSULT : 1
ONE_ACTIVE : 1
VETERAN_VICTIM : 1
ONE_BY : 4
KIDNEY_URINARY : 1
STRATEGIES_WITH : 1
NOTE_CONTINUES : 1
PATIENTS_SUPPORTIVE : 1
FEELINGS_STAFF : 1
HAVE_LATEX : 1
WKS_AND : 1
SW_FGM : 1
PSA_CANC : 1
MALE_REQUESTS : 1
STOOL_CARE : 1
HIM_HERE : 1
PAY_FOR : 1
CARE_NURSING : 1
APPLICABLE_COOL : 1
FRIENDS_FAMILY : 1
DATE_WALKED : 1
INFORMED_OF : 3
OF_AWAKE : 1
CAUSE_HARM : 1
WELL_WELL : 1
WKS_XANAX : 1
EXAMINATION_IS : 1
PATIENT_PROVIDE : 1
DIABETIC_IMAGING : 1
PRIMARY_FOR : 1
CENTER_THEN : 1
MEMEBERS_CARDS : 1
WITHIN_LIVING : 1
BEEN_GOING : 1
IMPORTANT_AREAS : 1
INTERVENTION_BLIND : 1
CALL_WITH : 1
MENTAL_DID : 1
AMB_CANE : 1
HAS_UNABLE : 1
CLOSELY_NONSPECIFIC : 1
ROUTINELY_FOR : 1
THE_PT : 3
IDENTIFIED_THAT : 1
OTHER_SKIN : 1
SLIPS_DIRECTIONS : 1
EMERGENCY_FOR : 1
PC_SAUNDERS : 1
VERSUS_OUTPATIENT : 1
ML_GIVEN : 1
BY_ABNORMAL : 1
PLEASE_MAIL : 1
CONTRACT_WHERE : 1
SURGICAL_BEHAVIORAL : 1
NOT_FEELING : 1
AMOUNTS_OF : 1
EMOTIONS_OTHERS : 1
WHEN_DOES : 1
SICK_COULD : 1
THE_THAT : 2
NOT_CONTINUED : 2
NITRO_ENCOURAGED : 1
COLONOSCOPY_EXAM : 1
DENIES_PAST : 1
WALKIN_PT : 1
TO_OTHERS : 2
ARE_THE : 1
CARE_THE : 1
WRITER_THERAPY : 1
HIS_FOR : 1
OUT_NOTET : 1
COLONOSCOPY_PATIENT : 1
ACUPUNCTURE_BUT : 1
LOSS_VETERAN : 1
CENTER_AROUND : 1
EACH_ITEM : 1
ACROS_MARCIA : 1
TOP_DIABETES : 1
TROUBLE_FALLING : 1
DEPRESSION_PT : 1
SURGICAL_SITE : 1
THAT_DECLINED : 1
IN_LAST : 1
OVER_HIS : 1
WITHOUT_ASSISTANCE : 1
FROM_INJURY : 1
APPLICABLE_SHIFT : 1
HOMEWORK_WAS : 1
ADMINISTERED_ORDERED : 1
SEX_ADDRESS : 1
ADAPTIVE_DEVICES : 1
FAIRLY_NOURISHED : 1
LOWER_FLANK : 1
PHYSICAL_LIMITATIONS : 1
CONSUMED_SWER : 1
HYPERCHO_ADDENDUM : 1
HEPATITIS_IN : 1
ENGAGE_IN : 1
TABLETS_BEDTIME : 1
DEAR_MR : 1
INTAKE_STATUS : 1
WC_MIN : 1
HOSPITAL_DEPRESSION : 1
VETERAN_PRIOR : 1
DONT_FOR : 1
WATCHED_TEL : 1
NO_HARM : 1
PT_COPY : 1
SECOND_MESSAGE : 1
BY_BIG : 1
SOON_POSSIBLE : 1
STATUS_VADNAL : 1
REVIEWS_SHE : 1
NOS_SCHIZOPHRENIA : 1
OF_ILLNESS : 1
MOVEMENT_DISCOMFERT : 1
TOUCH_SW : 1
NOTE_NA : 1
CANE_TRAVEL : 1
LIKE_MOVE : 1
YOU_YOUR : 1
NARES_AND : 1
CORD_INJURY : 1
NUMBER_TEMP : 1
SIZE_HAS : 1
BLINDED_HIM : 1
NUMBER_MEASUREMENT : 1
HOPED_CHARACTERIZED : 1
CRITERIA_IS : 1
INDEPENDENCE_CONTINUE : 1
TO_NO : 3
NURSING_ASSESSMENT : 1
FOR_UDS : 1
PHYSICIAN_DTC : 1
PERSONALITY_ST : 1
ASSESSED_HEIGHT : 1
MESSAGE_AND : 2
CLINICIAN_IS : 1
PAIN_BY : 1
IS_RESULTS : 1
BODY_MASS : 1
TO_ORIENTED : 1
NO_CHANGE : 1
TREATMENT_PATIENTS : 1
BURNING_CLOTHES : 1
CORRECTION_VA : 3
LIFT_LLE : 1
VOLUME_GAIT : 1
THAT_OUTPATIENT : 1
LOSS_WAS : 1
TO_SET : 1
STRIP_APPLY : 1
BEER_DAILY : 1
ALL_SERVICES : 1
ASSISTANCE_BELIEVES : 1
NECESSARY_WITHOUT : 1
THOSE_IN : 1
LAST_VAPSHCS : 1
FACILITATORS_MCVEIGH : 1
NURSING_OUTPATIENT : 1
INHALER_PATIENT : 1
BREATHING_CLINICIAN : 1
WORRIED_HIS : 1
CONCERNED_THAT : 1
LOCATION_SEE : 1
BUTT_SIGN : 1
PROBLEMS_OUTPATIENT : 1
IN_DRUG : 1
NO_THAT : 1
NG_CLINICAL : 1
TEST_WAS : 1
EAR_MOSTLY : 1
NO_NEURO : 1
FOR_NEXT : 1
ADMITTED_ON : 1
AM_AND : 1
LIVING_TOP : 1
PAST_HISTORY : 1
IDEATION_AND : 1
WITH_DOT : 1
PROGRAM_ALSO : 1
IN_MINS : 1
TEAM_ROUNDS : 1
SKIN_NO : 1
INTO_DEAR : 1
IF_DEVELOPES : 1
ON_DIAGNOSIS : 1
IMMEDIATE_CORRECT : 1
VA_WOULD : 1
PLASM_FINE : 2
ASSESSMENT_THE : 2
IN_HAS : 1
EXPENSES_WILL : 1
PROCEDURE_CIRCUMCISION : 1
RADIATION_THERAPY : 1
SIG_ONE : 1
LOWER_LIP : 1
PATCHES_THE : 2
ACTIVE_PATIENTS : 1
CURRENTLY_TO : 1
CONTINUED_HESITATE : 1
PROVIDER_CALLER : 1
NAPPING_PRN : 1
CONGESTIVE_FAILURE : 1
BRAIN_ANEURYSM : 1
GRANULATION_TISSUE : 1
TALKING_ITS : 1
TESTS_HE : 1
APPT_MHCC : 1
XX_ON : 1
VEER_AND : 1
AFFECTED_FOR : 1
IS_TRANSITIONAL : 1
LOUD_OR : 1
PCX_REEVALUATION : 1
LEARN_REMINDED : 1
EXAM_PATIENT : 1
TREATMENT_ARE : 1
INTENT_PLAN : 1
INCLUDING_ALB : 1
AND_MALE : 3
PREVIOUS_CARDIOVASCULAR : 1
OK_DISCONTINUE : 1
PCP_HE : 1
AREAS_OF : 2
THE_YES : 1
THE_RESIDENT : 1
FOLLOWUP_HE : 1
RESEARCH_STUDY : 1
PA_CATHETER : 1
OF_MIN : 1
COLONOSCOPY_LOCATION : 1
TIMES_DAILY : 1
WNL_MAMMS : 1
DEPRESSION_CAN : 1
IDENTIFIED_POTENTIAL : 1
FLORIDA_HIMSELF : 1
ANY_MEDS : 1
FOR_AS : 1
QUANTITY_NIGHT : 1
BY_EVERY : 2
DENIES_ETOH : 1
FOR_ANSWER : 1
NOT_ADDENDUM : 1
NORMOCEPHALIC_MUNDY : 1
CARRY_HBPC : 1
GENERAL_MOTIVATION : 1
PATIENT_BEEN : 3
LEARN_ABOUT : 1
ADMISSION_OF : 1
FOR_MANAGEMENT : 1
ABC_BREATHING : 1
TIME_COMPREHENSIVE : 1
OTHER_IMPACT : 1
CAN_DO : 1
PROGRESSION_INFECTION : 1
HAVE_ANGER : 1
EVIDENT_HIS : 1
LEFT_ON : 1
AND_IN : 5
AND_SAYS : 1
PATIENT_STATES : 2
IS_LATE : 1
NOTE_ACTIVE : 1
TUB_SHOWER : 1
WERE_PE : 1
WITHOUT_STAFF : 1
FALLING_OR : 1
CALM_AND : 2
DISCHARGE_REGULAR : 1
IMMEDIATELY_PAIN : 1
ADVANCE_DIRECTIVE : 1
THE_LAST : 4
REQUIRED_PATIENT : 1
OPERATIVE_FINDINGS : 1
ITEM_AND : 1
FIRST_EXPENSES : 1
TN_LIKING : 1
SMILING_TALKING : 1
CLEAR_MENTAL : 1
PLEASANT_SUICIDAL : 1
EX_SISTER : 1
TREATMEN_PROGRAM : 1
SEE_DESCRIPTION : 1
ANY_SPINAL : 1
STRIDULOUS_TO : 1
MAKING_IMPRESSIONS : 1
PRODUCTS_RESIDENT : 1
TREATMENT_FOR : 2
HAVE_SPINAL : 1
VIETNAM_ASSURANCE : 1
VIA_AMBULATION : 1
LARGE_KNEE : 1
AN_NUMBER : 1
DOB_AGE : 1
BROTHER_WHO : 2
FOR_PRESSURE : 2
FOR_WENT : 1
BLOOD_TO : 1
COMPREHENSIVE_ASSESSMENT : 3
ASSESSMENT_APPOINTMENT : 1
FELT_THAT : 1
MH_INPT : 2
EFFUSION_WHILE : 1
WRISTS_BILAT : 1
LIVES_OR : 1
DIETARY_STATUS : 1
NUMBER_RESPIRATION : 1
ATTENDING_ADMIT : 1
HERE_DENIES : 1
OBJECTIVE_BACTERIOLOGY : 1
WAS_ABLE : 1
TO_FEELINGS : 1
AND_REMINDED : 1
WITH_COMPLAINTS : 1
DON_ATTEND : 1
READING_ACTIVE : 1
VISIT_AND : 2
JOB_AND : 2
INPT_HYPOTHYROIDISM : 1
NO_ANSWER : 1
BL_HIMSELF : 1
BY_DISCUSSING : 1
DOT_MR : 1
AND_ASSISTANCE : 2
FOOT_PAIN : 1
PCO_TO : 1
TREATMENT_MODALITY : 1
IS_NO : 1
CHRONIC_KIDNEY : 1
ROI_PT : 1
TREATMENT_STATUS : 1
PROBLEMS_ED : 1
SEEING_IN : 1
AZITHROMYCIN_SPEECH : 1
AND_KEEP : 1
NARROW_AND : 1
INSTRUCTED_ON : 1
WE_CANT : 1
SUBJECTIVE_NOTABLE : 1
CONTACTS_WILL : 1
THAT_THERE : 1
RTC_MONTHS : 1
TINY_LOWER : 1
IN_THERAPIST : 1
PER_SEE : 1
YOU_WERE : 1
ERA_VITALS : 1
MD_DURING : 1
CONNECTED_EXPLAINED : 1
DOCUMENTED_IMPAC : 1
NURSING_THAT : 1
MEMORY_PATIENT : 1
DID_FOLLOW : 1
THOUGHT_THERE : 1
WOULD_NOT : 2
HIS_CALL : 1
TAKEN_OFF : 1
WITH_IDEATION : 1
PRECAUTIONS_PLEASE : 1
UP_OR : 1
OF_FINGER : 1
WORK_PLANS : 1
ACTIVE_PATIENT : 1
RECENTLY_TO : 1
RETINOPATHY_OUTPATIENT : 1
WITH_MANAGEMENT : 1
MAKE_REFERRALS : 1
BLIND_LED : 1
MAJOR_SKIN : 1
USE_HEAVY : 1
VETERAN_REDIRECTED : 1
AS_GOOD : 1
PATIENT_NEW : 1
NUR_NURSING : 2
PATIENT_OUT : 1
WEIGHT_KG : 2
THROUGH_MEDICATION : 1
SENSORIUM_GROSSLY : 1
HE_LATE : 1
OUTSTANDING_FOR : 1
DIAGNOSES_AND : 1
THIS_PATIENT : 7
FIRM_CONJUNCTIVA : 1
BEING_FOLLOWED : 1
DISCHARGE_ANXIETY : 1
BELONGINGS_AND : 1
TO_UPDATE : 1
MH_SECLUSION : 1
ACTIVE_COME : 1
BILL_COMPANIES : 1
JUL_OVER : 1
IMPRESSION_MINIMAL : 1
WILL_WITH : 2
HELPFUL_HE : 1
WILL_RETURN : 1
ANXIOUSLY_AWAITING : 1
MEASURES_AND : 1
OF_BLISTERS : 1
VET_PARTICIPATED : 1
DISORDER_CONTINUOUS : 3
LITHIUM_TABLET : 1
DCD_INTACT : 1
OF_ENVIRONMENT : 1
HOME_NO : 1
NOTE_AST : 1
WITH_AM : 1
AWAY_WILL : 1
GTTS_ON : 1
DATE_INTERVENTION : 1
PALPATION_SKIN : 1
WITH_WIFE : 1
OF_BREATH : 2
INCREASE_KNOWLEDGE : 1
HT_IN : 1
NO_PRESSURE : 1
WAY_ACHIEVING : 2
ANAND_DISORDER : 1
DO_NOW : 1
QUANTITY_PATIENT : 1
NOTE_MOTIVATION : 2
GOALS_THAT : 1
CAN_CALL : 1
APPOINTMENTS_FOR : 1
PROBS_LISTED : 1
ATTACHED_LOWER : 1
WOULD_IN : 1
IN_TALKED : 1
LIES_FLAT : 1
CAN_THE : 1
CANE_ENCOURAGED : 1
INTERESTED_IS : 1
OUTLINED_HIS : 1
DIABETES_RESEARCH : 1
ENDING_AT : 1
SMOKING_TO : 1
IN_WAY : 2
NOTED_PHYSICIAN : 1
CYCLOBENZAPRINE_SEE : 1
REDUCE_STRESS : 1
ARTHROPLASTY_WITH : 1
URINARY_PSA : 1
TRAUMA_SHOT : 1
WIFE_BE : 1
DO_THINKING : 1
DISORGANIZED_USUAL : 1
CARE_CLINIC : 1
TREATMENT_ALL : 1
PATIENT_TEMP : 1
UNTIL_TOMORROW : 1
MR_PRACTICED : 1
THE_DIFFERENT : 1
ADMITS_TO : 1
MOBILITY_BRUSH : 1
VOMITING_ASK : 1
BIG_AGAIN : 1
SPECIFICALLY_HE : 1
STAB_WOUND : 1
ALL_OFFERED : 1
CONTINUALLY_BL : 1
PHYSICIAN_NOTE : 1
LISTENING_NEXT : 1
LIVING_BOTH : 1
NIGHT_IS : 1
ADMINISTERED_AND : 1
BRIEF_SUMMARY : 1
HE_BROS : 1
ROTATOR_CUFF : 1
TO_BASCOMPALMER : 1
TRIED_TECHNIQUE : 1
WILL_IN : 2
NONSPECIFIC_RESULTS : 1
MG_COGNITIVE : 1
ATTEMPTS_DENIES : 1
SIDE_NO : 1
CAREER_NOT : 1
HIGHEST_LEVEL : 1
INPATIENT_EXCLUDING : 1
INVOLVEMENT_NURSING : 1
IRRITABLE_ENTITLED : 1
LIKING_IN : 1
EPITHELIZATION_FOR : 1
OR_BAD : 1
TO_LARGE : 1
IN_QUESTION : 1
NONE_NASAL : 1
OTHER_CARE : 2
FROM_STATING : 1
ALL_MEDICATIONS : 1
PATIENT_SHOULD : 1
PLACE_EXTRA : 1
PRESSURE_DAILY : 1
ER_IF : 1
CAN_IT : 1
ALL_PATIENT : 1
DENTAL_CATEGORY : 1
NUTRITION_CONSULT : 1
HOME_FAMILY : 1
PROTOCOL_NOT : 3
IMPROVE_PATIENTS : 1
MINS_PAIN : 1
OUTPATIENT_WALKIN : 1
RESPONSIBILITIES_REVIEWED : 1
PAIN_STATE : 1
THIS_REQUIRES : 1
THAT_VETS : 1
ADVISED_GO : 1
ADDENDUM_ADDENDUM : 1
THERAPY_NOS : 1
IMPROVEMENT_MOOD : 1
CORD_PARALYSIS : 1
MESSAGE_CALL : 1
TO_COMPLETE : 3
STAFF_ASSISTANCE : 1
MOOD_LEARNED : 1
PRIMARY_CHECKIN : 1
HR_CONSIDERED : 1
LIKE_EDUCATED : 1
OR_DRIVING : 1
MOTHER_SAVINGS : 1
STOMACH_YOU : 1
WOUNDS_ULCERS : 1
DID_DIAGNOSIS : 1
PARTICIPATE_IN : 1
OXYCODONE_ACETAMINOPHEN : 1
OBJECTIVE_ACTIVE : 1
AREAS_MUST : 1
OT_THIS : 1
PROVIDED_FROM : 1
STATE_VA : 1
AA_INFORMATION : 1
DEAR_SON : 1
WITH_ME : 1
PARTICIPATING_IN : 1
LEVOTHYROXINE_BED : 1
THE_PROVIDER : 1
PAIN_SCREENING : 2
DO_NOS : 1
HIS_FEAR : 1
SEE_WHO : 2
NOT_REEVALUATED : 1
THE_WERE : 1
ATTENDING_AUTHOR : 1
PLACE_BONHAM : 1
PROBLEM_OTHER : 2
HIS_MOTHER : 1
IN_STARTING : 1
ARNP_PA : 1
CONTACTED_PO : 1
PL_PROCEDURE : 1
ENTERED_MG : 1
REFUSED_HAVE : 1
GENDER_REQUESTS : 1
REPORT_FOR : 1
SIGNED_INTO : 1
FACTORS_ASSIST : 1
FEELING_THE : 1
QH_DVT : 1
MEDICATIONS_BY : 1
INSTRUCTION_SHAKE : 1
ITS_ALL : 1
FOR_WINTER : 1
USE_HIS : 1
PATIENT_CONSTIPATION : 1
ADDENDUM_MAOD : 1
AIR_TOPIC : 1
ASSIST_TO : 1
YELLOW_IN : 1
SEE_MR : 1
EYES_FROM : 1
SENT_TRANSFER : 1
FOR_HEART : 2
PATIENTS_FOR : 1
ABNORMAL_RESULTS : 1
TOGETHER_LISTEN : 1
FOR_ETHNIC : 1
AXIS_SEVERE : 1
WILL_HAVE : 2
STATUS_GIVEN : 1
TO_MILD : 1
VDRL_NONREACTIVE : 1
IS_MY : 1
RECENT_RESULTS : 1
PORCEDURE_DONE : 1
PHARMACY_NOTE : 1
APPROPRIATE_PROVIDED : 1
GIVEN_PE : 1
AS_PT : 1
LITHIUM_WAS : 1
INCLUDING_SUPPLIES : 7
UNEXPECTED_LUMBAR : 1
MOUTH_EVERY : 3
CUFF_BMI : 1
PACT_PRIMARY : 1
CORRECT_FOR : 1
OR_MOBILITY : 1
CURRENT_DOUCUMENTED : 1
DIAGNOSIS_DISEASES : 1
FOR_ABOVE : 1
CARE_RN : 1
ANXIETY_HIGH : 1
MH_GROUP : 1
NO_UAL : 1
MONTHS_AGO : 1
EVERY_VITAMIN : 1
THE_REPORTS : 1
ALSO_HAS : 1
SEE_PROGRESS : 1
RESIN_SURFACEANTERIOR : 1
ELIMINATION_PAIN : 1
PATIENT_GOES : 1
ICDCM_HE : 1
ARM_MINS : 1
HIGH_HE : 1
STATUS_INPT : 1
PRESCRIBED_SAT : 1
SPECIFIC_MEDS : 1
PY_HE : 1
WITH_SW : 1
SCANNED_DOCUMENT : 1
DEVELOPED_WELL : 1
EVALUATION_PATIENT : 2
OR_CUEING : 1
ON_CONTINUE : 1
CARE_IS : 1
NOTE_AMOUNT : 1
PE_BOWEL : 1
SUPPLIES_NOTABLE : 1
PAIN_PATIENT : 3
PBC_PUBLIC : 1
MAIL_LETTER : 1
HIS_1010M : 1
SON_BLOOD : 1
ANCHORAGE_AUTHOR : 1
WHO_BE : 1
IN_FOR : 1
SEEN_VARIOUS : 1
EVENING_DEC : 1
STATE_CA : 1
REQUESTS_WHICH : 1
THERAPY_VETERAN : 1
SHE_LIKE : 1
CUEING_PERSON : 1
LEFT_LARGE : 1
OF_THYROID : 1
UNCONTROLLED_TRP : 1
MILIEU_EAT : 1
OT_ASSESSMENT : 1
RELATES_HE : 1
SHOULDER_AND : 1
AT_BIRCH : 1
ENCOURAGED_UPRIGHT : 1
RESPONSIVE_HUDVASHNOTE : 1
DEPRESSION_EVIDENT : 1
PROVIDED_THIS : 5
CENTER_BUT : 1
CARE_TRIAGE : 1
COMBAT_AND : 1
AND_STUDENT : 1
MORE_AT : 1
PROVIDER_LINDSAY : 1
CAN_PL : 1
STARTING_MEDICATION : 1
DERM_DONE : 1
THE_DONT : 1
HIS_NURSING : 1
SEE_NOTES : 1
HEART_PRESSURE : 2
EXERCISE_OF : 2
YES_PLT : 1
KEEP_DID : 1
ONGOING_PAIN : 1
MY_TIME : 1
YES_PRESSURE : 1
ATTORNEY_SHE : 1
AT_FOOD : 1
ORIENTED_COMPLAINTS : 1
LIMITING_HIS : 1
NOURISHED_HEENT : 1
CAN_ACCESSED : 3
PLAN_THE : 1
DO_ANCHORAGE : 2
PATIENT_REPORTS : 2
TAB_ONE : 3
NOT_SPEAK : 1
ACTIVITIES_APPROPRIATELY : 1
COMPRESSES_TO : 1
VETERAN_TRAINING : 1
FITTING_ADJUST : 1
ILL_GUN : 1
WERE_GIVEN : 1
MED_EVAL : 1
ED_TIMEFRAME : 1
RESULTS_DEC : 1
HE_APPROPRIATELY : 1
DERM_APPOINTMENT : 1
FOLLOWS_PCMEDICATION : 1
BASED_UPON : 1
MOTHER_ETOH : 1
OUT_HER : 1
IN_PROGRAM : 1
KNEE_WITH : 1
TO_VISIT : 1
BP_PAST : 1
ADDED_HOPED : 1
BURDEN_AND : 1
PATIENT_PRESENCE : 1
REITERS_OR : 1
IN_HE : 2
IV_SEVERE : 1
POSSIBLE_THE : 1
GROUP_AND : 1
CUFF_REPAIR : 1
USE_OF : 2
FRIEND_AND : 1
SURROGATE_IF : 1
HAS_RECURRING : 1
THERAPEUTIC_MILIEU : 1
OPTOMETRY_REPORT : 1
HIS_WITH : 1
TECHNICIAN_SCREENING : 1
IN_BONHAM : 1
SAME_NECK : 1
MOVEMENT_SYMMETRICAL : 1
MANAGEMENT_COMMENT : 1
SUPINATION_DISCUSS : 1
ROOM_DURING : 1
PAIN_LOCK : 1
JUL_PROBLEM : 1
STILL_EXHIBITING : 1
HE_ALSO : 4
HE_LAST : 1
TO_ASSIST : 1
SERUM_PSA : 1
PLEASE_EACH : 1
THOSE_BLINDED : 1
AND_ENCOURAGEMENT : 1
PERIOD_WHEREBY : 1
ADMITTED_SEP : 1
AROUND_THE : 1
VITALS_MINUTES : 1
RATHER_THE : 1
OF_THIS : 2
LESS_INPATIENT : 1
MEDICATIONS_ADMINISTERED : 1
QUAL_VDRL : 1
GUNPOINT_HE : 1
LETTER_VOA : 1
STATES_VIGAMOX : 1
REASSURE_HIM : 1
NO_WITHDRAWAL : 1
DEPARTMENT_FOR : 1
CONCERNED_HE : 1
CULTURES_FOR : 1
WAS_CHANGED : 1
IS_BED : 1
MONTH_HAS : 1
ADDS_COLCHICINE : 1
DEPENDS_NURSING : 1
MEDICATIONS_DOES : 1
HUDVASHNOTE_TIME : 1
HESITATE_TO : 1
SCHIZOPHRENIA_CHRONIC : 1
CONTINENT_WAS : 1
COMMENT_PT : 1
EAGER_MAXINE : 1
CLASS_TREATMENT : 1
EVEN_UP : 1
PAP_WNL : 1
HE_REPORTS : 2
PULSE_HELP : 1
NOT_ASSESSED : 1
ALTERNATE_MEDICAL : 1
IS_THE : 1
THAT_VET : 1
SIG_TAKE : 1
HIP_IN : 3
YES_SPECIFY : 1
QUESTIONS_MOUTH : 1
OBSERVED_TO : 1
ADDITIONAL_COMMENTS : 1
SCREEN_MALE : 1
AND_HELPLESS : 1
WERE_WITH : 1
ACETAMINOPHEN_MG : 1
THAT_TO : 2
THREE_PATIENT : 1
PAIN_LIKE : 1
LOCALLY_ABOUT : 1
DIRECTIVES_OF : 1
THAN_COMFORT : 1
IN_LIFE : 1
THIS_SPECIFY : 1
LAST_FORMAL : 1
IF_YES : 1
OF_LIVING : 4
LATER_AFTERNOON : 1
RESIDENT_THIS : 1
BASED_THE : 1
IS_SCHEDULED : 1
NEXT_LEFT : 1
ION_AND : 1
AS_FORM : 1
UNABLE_KEEP : 1
ALSO_BED : 1
PT_MALE : 1
THE_IER : 1
WAS_THAN : 1
OLEMIA_ADDENDUM : 1
HIM_CALL : 1
ETOH_REPORTS : 1
OTHERS_LOCATION : 1
DISCUSSED_PT : 1
UNKNOWN_HOW : 1
TAPE_PREP : 1
BOWEL_SECTION : 1
NOTE_COLOR : 1
DURING_THIS : 6
DEALING_UNEXPECTED : 1
FOR_VISIT : 2
AGAIN_HE : 1
FOR_APPT : 1
BETTER_WITH : 1
AND_BREATHING : 1
HI_THIS : 1
MVA_OF : 1
FOR_MONTH : 1
HEART_ESSENTIAL : 1
PRE_POST : 1
DTC_CLINIC : 1
CCRC_LATER : 1
LS_REQUESTED : 1
ATTENDING_PROGRESS : 2
TO_KNOWLEDGE : 1
IS_LETTER : 1
SCHEDULED_APPOINTMENT : 2
TAKE_SHOWER : 1
HOPES_PHYSICIAN : 1
TO_FUNCTION : 1
INT_TONIGHT : 1
NO_ASSOCIATE : 1
SCHEDULE_PCP : 1
FAMILY_HISTORY : 2
SHOULD_TAKEN : 1
BASE_BIOPSIES : 1
BY_FOR : 1
PRESSURE_OBJECTIVE : 1
TO_VINFLUENZA : 1
PROTECTORS_IN : 3
FINE_ELIMINATE : 1
TO_DISCONTINUE : 1
DAILY_TWICE : 1
SELFCONTROL_OVER : 1
STOOL_APPROXIMATELY : 1
INFORMED_ALTERNATIVES : 1
THE_DINING : 1
INDEPENDENT_EASILY : 1
MEETS_ACTIVE : 1
OF_INSTUCTIONS : 1
SCHEDULED_LETTER : 1
WRITER_TO : 2
YET_ASSESSED : 1
EXAM_NORMOCEPHALIC : 1
HOME_WORK : 1
SITS_UP : 1
TESTING_BLOOD : 1
UNDER_DOCUMENT : 1
YOU_KEEP : 1
UP_TO : 1
STOOL_NONE : 1
FORM_TRIAGE : 1
SHUTDOWN_THE : 1
VETERAN_ASSISTANCE : 1
HAD_OF : 1
INDEX_RAL : 1
OR_HOMICIDAL : 1
HCS_ACCESSION : 1
ILLNESS_ASSESSMENT : 1
THREE_TIMES : 2
IN_LATER : 1
NOTED_DENIES : 1
YOU_IVE : 1
PERSONAL_ORAL : 1
HIS_PCP : 1
COUGH_INTERMITTANTLY : 1
FOR_HOME : 1
IS_REVIEWED : 1
COMING_TRP : 1
TOTAL_TO : 2
SKIN_REQUESTING : 1
KG_PAIN : 1
LEARNED_THAT : 2
AGREED_AIDS : 1
LONG_DISCUSSION : 1
AND_MEDICAL : 1
TO_TOTAL : 1
INDICATED_APPROPRIATE : 1
EMESIS_PERFORM : 1
HIS_CHILDS : 1
SCREEN_INFLUENZA : 1
AND_SOBRIETY : 1
HAS_DESIRE : 1
THROUGH_UP : 1
ALL_IS : 1
HELPFUL_HAS : 1
STATING_THAT : 1
UP_DERM : 1
ION_OUTPATIENT : 1
PAIN_GAIT : 1
YOUR_HAVE : 1
ER_AGE : 1
RECORDS_DOCUMENT : 1
PUBLIC_SAFETY : 1
RECENT_EVENT : 1
BEHAVIOR_AND : 1
REVIEWED_ALCOHOL : 1
THE_STATES : 1
ONLY_PILLS : 1
RESOLVED_TEACHING : 1
ADVERSE_REACTIONS : 1
IMAGING_ACTIVE : 1
AT_BREAKFAST : 1
THIS_MEETING : 1
ML_INTERESTED : 1
ILLNESS_PATIENT : 1
TO_KIDNEY : 1
TIME_FEELS : 1
PURPOSE_OF : 2
THIS_RE : 1
REACTIVE_HOME : 1
INCLUDING_GLASSES : 1
WLA_VA : 1
ENCOURAGEMENT_NUMBER : 1
ON_YOUR : 1
IV_STATUS : 1
PLACED_TEMPERATURE : 1
RESP_NOTE : 1
TEL_CURRENT : 1
ATTEMPTS_PT : 1
NECESSARY_TREATMENTS : 1
MANAGEMENT_PSYCHOTHERAPY : 1
EFFECTIVENESS_IN : 1
WITH_ASSIST : 1
SUPPLIES_NUTRITION : 1
OF_STOOL : 8
ICDCM_MENTAL : 1
PATIENT_INTAKE : 1
ATTEND_INDIVIDUAL : 1
SEE_HIM : 1
AND_ENROLLED : 1
SAUNDERS_LINDSAY : 1
SCHIZOAFFECTIVE_DISORDER : 1
FOR_WOUND : 1
LEFT_STATING : 1
BEEN_DISCONNECTED : 1
WANTED_UPDATE : 1
CONSULT_AGREED : 1
PRESSURE_REPORTS : 1
ATTACK_AGO : 1
TO_MORE : 2
SERVICES_STATING : 1
STARVE_OUT : 1
VIGAMOX_DROPS : 1
BY_MM : 1
PT_SCHEDULED : 1
SPECIFY_BEHAVIOR : 1
NO_CHEST : 1
HAVE_PT : 1
COMPREHENSIVE_PAIN : 3
INCLUDING_MEDICATIONS : 1
WITH_OSAC : 1
VETERAN_ABLE : 1
TOILET_OF : 1
SPONGE_BATH : 1
ICDCM_YVONNE : 1
REPORTED_VETERAN : 1
RINSING_AWAY : 1
OTHER_YES : 1
PER_PLAN : 1
LIVING_HIS : 1
AIDS_ON : 1
TO_CURRENT : 1
NOURISHED_AND : 1
ON_AND : 1
TEETH_EXTRACTION : 1
QUADRANT_FLANK : 1
FILLED_CUFF : 1
PY_SAYS : 1
NO_DISABILITY : 1
QUAL_SERUM : 1
MONITOR_PT : 1
HE_WOULD : 8
SICK_TO : 1
ACTIVITY_DATE : 1
DEPT_CONJUNCTION : 1
CAN_VERBALIZE : 1
VACCINE_AT : 1
ADMINISTRATION_OF : 1
VACCINE_NOT : 1
CONSTIPATED_EXTRA : 1
URINARY_CATHETER : 1
FOR_WEEK : 1
OF_ZZPATIENT : 1
STRIP_ACTIVE : 1
COLOR_OF : 1
TWICE_DIFFICULT : 1
HIS_VOUCHER : 1
TRAVEL_REQUEST : 1
REQUEST_FOR : 1
ZZECF_PROGRESS : 1
MESSAGE_THOSE : 1
MVA_RISK : 1
HEART_BLOOD : 2
AND_OPEN : 1
LETTER_YOU : 1
WANT_REGARDING : 1
ANY_THAT : 1
GREATER_OR : 1
REPAIR_ACROMIOPLASTY : 1
OPTOMETRIST_THREE : 1
PT_NO : 1
INTERVENTION_ENCOURAGE : 1
VALUABLES_INVENTORY : 1
FACTORS_PATIENT : 1
CHEST_MOVEMENT : 1
SC_MEDICAL : 1
ACTIVE_LEVEL : 1
HEMOGLOBIN_IS : 1
SKIN_UPPER : 1
HE_OVER : 1
HEALTH_MIN : 1
WITH_SIGNIFICANT : 1
MOTHER_DEPENDANCE : 1
VISIT_LATEST : 1
TO_APPROACHING : 1
LEFT_HIP : 1
IN_MORE : 1
SEE_DICTATED : 2
INVENTORY_FORM : 1
REFUSED_AFTER : 1
WLA_HOMELESS : 1
LOCATION_BEHAVIOR : 1
IS_NEXT : 2
IN_TREATMEN : 1
STRIPS_TESTING : 1
OR_NEUROLOGIC : 1
NEXT_SEASON : 1
COL_PSA : 1
EXTRACTION_TOOTH : 3
OTHERWISE_HAS : 1
WILL_LEAVE : 1
FEELS_SYMPTOMS : 1
DRIVE_INTO : 1
RATED_DISABILITY : 1
TOTAL_SESSIONS : 2
FROM_ADDENDUM : 1
CARE_PROVIDER : 1
DIMINISHED_NONE : 1
GEESEY_FACTORS : 1
HIS_YEAR : 1
WILDCATS_AREAS : 1
APPLICABLE_FOR : 1
PHOTO_FROM : 1
BUT_WILL : 1
MENTAL_STATUS : 1
MODERATE_ROM : 1
STANDING_APNEA : 1
COMPREHENSION_DEVELOPMENT : 1
ED_AT : 1
RX_WED : 1
PAST_DIFFERENT : 1
SLIGHT_OF : 1
ADDENDUM_PAST : 1
OBTAIN_AND : 1
WITH_WITHDRAWAL : 1
AND_OF : 7
GO_SPEAK : 1
CENTER_OXYCODONE : 1
SHORTNESS_OF : 2
WILL_NOT : 3
MILIEU_DID : 1
INITIAL_REVIEW : 1
MANUAL_WHEELCHAIR : 1
IN_WHICH : 1
MINS_MONITORED : 1
DERMATOLOGY_OBTAINING : 1
OR_REACTIVE : 1
PROCEDURE_FOR : 1
LINDSAY_AUG : 1
PCMEDICATION_RECONCILIATION : 1
AND_KIDS : 1
NONE_PHYSICAL : 1
DATE_ADVERSE : 1
LOOSENING_TKA : 1
TAKEN_EXTRA : 1
BEEN_VIA : 1
GAIT_FEET : 1
NOTABLE_IN : 1
TO_ENABLE : 1
HTN_ETOH : 1
IN_HIS : 5
MOVE_NC : 1
VA_HOMELESS : 1
MEMPHIS_NOT : 1
SURFACEANTERIOR_CALLED : 1
AND_PROGRESS : 1
QUESTION_DENTAL : 1
INTACT_YOU : 1
CONTACT_ME : 1
SIGNIFICANT_SUBSTANCE : 1
MANAGEMENT_ACUPUNCTURE : 1
CLINIC_CONSULT : 1
REPORT_HE : 2
SI_THIS : 1
MANAGEMENT_BEING : 1
ARE_DIP : 1
MOTIVATION_LEARN : 2
REVIEWED_WITH : 2
FEET_WITH : 1
NONE_PAIN : 1
DRAW_TO : 1
NOT_ACCEPT : 1
HEADACHES_STAB : 1
RESTROOM_THE : 1
IS_ON : 3
MILL_QUESTION : 1
HEAL_BODY : 1
ACTIVE_PROVIDED : 1
FOR_ANYWAY : 1
HAVE_CHOLECALCIFEROL : 1
RECEIVE_APPEARANCE : 1
IN_CONSISTENT : 1
ON_ANY : 1
IU_TO : 1
THE_RISKS : 1
PROGRESS_DENTAL : 1
DEVELOPES_HA : 1
BREATHING_TO : 1
DOCUMENTS_HAVE : 1
LONG_AND : 1
TO_INDIVIDUAL : 1
TIME_SMOKING : 1
UAL_EDUCATION : 1
ADVISED_CALL : 1
AS_POSSIBLE : 1
SIDE_WHEN : 1
THIS_STRESS : 1
IDENTIFICATION_ACTIVITIES : 1
NOT_SHOW : 2
IS_PC : 1
TOBACCO_LIPIDS : 1
TESTING_GLUCOSE : 1
PREOP_MOOD : 1
TEL_ION : 2
TO_LUL : 1
MHICMINTENSIVE_MANAGEMENT : 3
DEPRESSION_SCHIZOPHRENIA : 1
STATING_THIS : 1
ED_DOCUMENT : 2
IN_DTC : 1
OR_NUMBER : 2
CONSULTS_FOR : 1
ETHNIC_GROUP : 1
EXTENSION_STATED : 1
IN_BEING : 1
SCHEDULED_OT : 1
NOT_UP : 1
BUT_VET : 1
NURSING_FACILITY : 1
MEDICATIONS_COL : 1
FORM_OF : 1
PT_KNOW : 1
REVIEW_COMPREHENSION : 1
HESITATE_CONTACT : 1
MCVEIGH_ABC : 1
ARM_BLOOD : 1
PATIENT_ADMITTED : 1
NOTE_DENTAL : 1
OPENMIND_THE : 1
MH_AT : 1
SEEN_HISTORY : 1
DT_POX : 1
SPACE_EACH : 1
FRAME_COMPANY : 1
MOUTH_TO : 1
EXTRA_TABLET : 1
MODERATE_ADDENDUM : 1
WILL_DEVELOP : 1
IN_REACH : 1
VALUABLES_AT : 1
HAS_PODIATRY : 1
AUG_NEURO : 1
THAT_APPEARS : 1
AMB_ROOM : 1
IN_ORIENTED : 1
DEPARTMENT_CHEST : 1
HAS_IN : 2
MG_ECASA : 1
THAT_TRIAGE : 1
TO_AS : 3
EMPLOY_PROMOTE : 1
HI_GU : 1
IT_THOUGHT : 1
NOTE_AUTHOR : 1
HAVE_BLOOD : 1
MS_SON : 1
UDS_PAIN : 1
OF_LOSS : 1
VARIABLE_ANDERSON : 1
WALKIN_SEP : 1
LIVING_IN : 1
THE_ACCEPTABLE : 1
ASSISTANCE_OR : 1
TO_DUPLICATE : 1
PM_MR : 1
PARALYSIS_NEUROLOGIC : 1
HOSPITAL_NO : 2
AT_WORK : 2
REVIEWED_INFORMED : 1
ANY_SUBJECTIVE : 1
OUTPT_STAFF : 1
ASCITES_CHEST : 1
APPOINTMENT_OF : 1
PDX_TO : 1
THE_ADDENDUM : 1
FREE_CANC : 1
TO_HRS : 1
ML_QH : 1
ULTRASOUND_TREATMENT : 1
VINFLUENZA_COMING : 1
RECONCILIATION_HAVE : 1
EAR_REPORTS : 1
STOOL_APPLICABLE : 1
PURPOSE_THE : 1
IN_EXTRA : 1
CONSC_BLOOD : 1
DFE_OTHER : 1
LEFT_SWOLLEN : 1
THIS_SHIFT : 15
NEEDED_HIGHER : 1
THE_ADVANCE : 2
AT_VA : 2
ASSIGNED_WAS : 1
VETERAN_AT : 1
PLAN_TO : 1
LOCATION_TYPE : 1
ELIGIBLE_DEPRESSION : 1
AREAS_LIFE : 1
ROM_RIGHT : 1
ADDENDUM_GET : 1
KIDS_LAST : 1
STATES_HE : 3
GOAL_HEMOGLOBIN : 1
ASSISTANCE_STIC : 1
OLD_AND : 1
REPORT_THAT : 1
YRS_IN : 1
RECEIVE_AN : 1
HEALTH_SCREENING : 1
NO_TO : 3
BLVD_APT : 1
MOTHERS_ARE : 1
IS_IN : 5
THIS_MAIL : 1
YES_SYSTEMS : 1
STAYING_AS : 1
BEING_DFE : 1
ASSESSMENT_HOMICIDAL : 1
BETTER_LESS : 1
OIDES_CHRONIC : 1
MEDS_PO : 1
APPT_WAS : 1
ON_1010M : 1
LESS_COMMENT : 1
FUTURE_ALSO : 1
AMBULATION_NO : 1
ASSIST_ADDENDUM : 1
NOT_UNDER : 1
SKIN_CHANGES : 1
CLINIC_FOR : 2
FOR_BY : 1
SCREENING_NOTE : 1
MALE_YRS : 1
ED_PROCEDURE : 1
TO_MILITARY : 1
DIPHENHYDRAMINE_HCL : 1
IN_WILL : 1
JOB_PLAN : 1
PCP_APPT : 1
IDEATION_INHIBITORY : 1
ADDENDUM_IS : 1
OF_MEDICATION : 1
PLACE_BREAKFAST : 1
CONTINUE_COPD : 1
IN_IN : 1
ON_PAROLE : 1
BACK_TENDER : 1
CASE_REPORTED : 1
CHILD_SENSORNEUR : 1
HOMELESS_CENTER : 1
LAW_LOST : 1
BOTH_SIDE : 1
TELEHEALTHCARE_FOLLOWUP : 1
DEPT_PAY : 1
AND_ASK : 1
MENTAL_APPOINTMENTS : 1
THAT_WE : 1
HAVE_ALLERGY : 1
BOWEL_MOBILITY : 1
WITH_NURSING : 1
COME_AT : 1
LEAVING_REACTION : 1
SPEAK_CAREER : 1
PC_BY : 1
YES_COMMAND : 1
THAT_CASE : 1
HE_RATHER : 1
ETOH_DURATION : 1
FAIRLY_AND : 1
DENIED_SI : 1
WILL_FOLLOWUP : 1
THE_BOWEL : 2
PROVIDED_NO : 1
IN_MANDATED : 1
MR_WHO : 1
WILL_ABOVE : 1
ONE_MR : 1
OF_ALL : 1
PHYSICIAN_STRESS : 1
MR_ABLE : 1
HYPOTHYROIDISM_HTN : 1
THE_SON : 1
IT_OK : 1
SYND_HIP : 1
FOR_CALL : 3
IN_VARIOUS : 1
FOLLOWED_THE : 1
CONJUNCTION_RECENT : 1
THAT_WANTS : 1
PARTICIPATED_SUPPORTING : 1
IN_AND : 5
BREAK_PAIN : 1
IN_ONCE : 1
APPTS_PATIENT : 1
CARDIOVASCULAR_SYSTEM : 1
LOOKING_FOR : 1
CARE_APR : 1
TO_REPORT : 3
THE_PROGRAM : 2
IF_COOL : 1
ALTERNATIVES_RISKS : 1
DOCUMENT_UNIT : 1
HAS_OUTSTANDING : 1
RESPONSE_GROUP : 1
HAS_PAIN : 2
BATH_SHOWER : 1
PATIENT_REMINDED : 1
INTERMITTENT_OF : 1
SOUNDS_INDEPENDENT : 1
TO_AREA : 2
THAT_COULD : 1
SUPPLIES_NURSING : 1
SCREENING_FOR : 1
USUAL_OF : 1
HAVE_SC : 1
ON_AVOID : 1
ADDENDUM_CONTACT : 1
AGE_CENTER : 1
SENSORIUM_INTACT : 1
FAXED_TO : 1
WATCHING_TEL : 1
SCHOOL_HE : 1
ALERT_OR : 1
CAREFULLY_SELECT : 1
WOULD_EXPOSED : 1
DISORDER_TO : 2
TREATMENT_PLAN : 2
LUNG_PROGRESS : 1
RECENTLY_MOVED : 1
PROBLEM_KNOWLEDGE : 1
OF_TOES : 1
BEEN_BED : 1
ON_LIST : 1
HFA_INHALER : 1
TOBACCO_AND : 1
MOVEMENTS_THIS : 2
PROBLEMS_LOSE : 1
SISTER_LAW : 1
AGREED_TRIAL : 1
MR_HAVING : 1
PROBLEM_SOLVING : 1
SPOKE_TRAVEL : 1
PRACTICED_CANE : 1
ALL_RIGHT : 1
SEE_OF : 1
ALLERGIES_DSHI : 1
ELIMINATE_PAIN : 1
COME_THE : 1
PROVIDING_CARE : 1
ANTISOCIAL_ST : 1
ST_STRIDULOUS : 1
THE_PRESSURE : 1
LASTED_WERE : 1
SHOULDER_CRAMPING : 1
SOBRIETY_DISCUSSED : 1
FAMILY_MOTHER : 1
CUEING_VICTIM : 1
SET_UP : 3
JR_THE : 1
MEASURED_FOR : 1
INCREASE_OF : 1
OF_YOU : 1
THE_NEXT : 1
ON_HAVE : 1
HAS_DISCONNECTED : 1
CANCEL_AND : 1
ANXIETY_DEPRESSED : 1
MORNING_DAILY : 1
HOURS_PROBLEM : 1
AT_TIME : 3
THERE_NO : 1
TO_VETERAN : 2
ATTEMPTED_AND : 1
WAS_INFECTION : 1
TRANSITION_OF : 1
BEFORE_ATRIAL : 1
DEC_HYGIENE : 1
AND_RECEIVED : 1
FOR_TOE : 1
ANXIETY_DO : 1
NOTABLE_IMPROVEMENT : 1
VEER_ORIENTATION : 1
HALDOL_INJECTIONS : 1
PROSTHETIC_THAT : 1
PATIENT_ACTIVE : 1
SITS_WITHOUT : 1
YES_NO : 1
AS_PREVIOUSLY : 1
ASSESSMENT_BLOOD : 1
BATH_USE : 1
LISTED_LIVES : 1
ANXIETY_ADDENDUM : 1
VETERAN_ADDED : 1
ENCOURAGE_REHAB : 1
MEETS_CRITERIA : 2
GO_AHEAD : 1
CCRC_THIS : 1
OF_ALCOH : 1
NOT_SURE : 1
ACTION_IMPROVES : 1
WOUND_CLEAN : 1
WANTS_INCLUDING : 1
WELLNESS_THROUGH : 1
NOTE_OLAFSSON : 1
UP_NOTE : 1
INTERVENTION_PT : 1
WAS_CANDID : 1
FOR_COMPLETION : 1
REEVALUATION_THERAPY : 1
VOMITING_DO : 1
FORMS_OF : 1
THE_STRATEGIES : 1
VET_IS : 2
COMPLETE_THE : 2
BE_BASED : 1
ASSOCIATE_IDENTIFIED : 1
PAIN_PAST : 1
VETERAN_WITH : 1
DFE_NO : 1
FAX_TO : 1
ATTENTIVE_XX : 1
USE_AS : 1
VETERAN_WRITE : 1
THAN_PREVIOUS : 1
ME_ILL : 1
BUTTON_ED : 1
USE_BY : 1
PER_PSYCHIATRY : 1
PAIN_ALERT : 1
CONTINUE_THERAPY : 1
PREOP_CONSC : 1
IS_HOUSE : 1
HYDROCHLOROTHIAZIDE_TAB : 1
THE_RESTROOM : 1
SIGNS_IN : 1
DO_PC : 2
EVERY_STRIPS : 1
MINUTES_RINSING : 1
OF_BEER : 1
MUCH_WITH : 1
MANAGER_OF : 1
PAINIS_MG : 1
VSS_TWICE : 1
SHE_DOES : 1
YES_ID : 1
OF_DID : 1
USED_THE : 5
ISSUES_WAS : 1
TEAM_FIRM : 1
FOR_ABOUT : 1
NUR_NOTE : 1
PMH_DEPRESIION : 1
WHY_WE : 1
TO_CALL : 3
RECONCILIATION_MEDICATIONS : 1
AND_IS : 3
TECHNIQUE_SHORTENING : 1
PATIENT_PATIENT : 4
HAVE_HIM : 1
DID_SHOW : 2
SAFETY_RELATIONSHIP : 1
SOCKS_SHOES : 1
HIMSELF_OUT : 1
THIS_IS : 5
MEDICATIONS_IS : 1
CORRECT_WILL : 1
NOTES_GRANULATION : 1
IMMUNIZATION_OR : 1
STATE_CHO : 1
SUGAR_EXAM : 1
NORMAL_JUDGMENT : 1
DATE_MONTHS : 1
NC_WITH : 1
SHOT_ME : 1
FOR_DRAW : 1
BROUGHT_HERE : 1
EXAM_LENGTH : 1
HYPERTROPHY_BENIGN : 1
THERAPY_PT : 1
ROOM_TEACHING : 1
AND_INFORMED : 1
XPATIENT_NO : 1
GROUPS_ACTIVITIES : 1
NOTE_IS : 1
TOXIC_NO : 1
ON_IN : 1
LISTED_VETERAN : 1
MINUTE_MANAGEMENT : 1
HE_ALL : 1
OUTPATIENT_MEDICATIONS : 19
DISTRESS_XX : 1
AND_ANY : 1
HE_CAN : 1
REPORTS_TINNITUS : 1
PRACTICED_SKILLS : 1
DEPENDENCE_DISCUSSING : 1
FURTHER_WORK : 1
ASSISTANCE_PROVIDED : 5
MAKES_THIS : 1
BARETT_WILL : 1
NEEDED_FOR : 6
HER_APPOINTMENT : 1
COLOR_NUTRITION : 1
OF_MARY : 1
MALE_ERECTILE : 1
LENGTH_MINUTES : 1
RISK_HANDLING : 1
TASK_UP : 2
REACH_ADDENDUM : 1
FINANCES_DISCUSSION : 1
THESE_AND : 1
DIDACTIC_THERAPEUTIC : 1
SCORE_GREATER : 1
HTN_POLYSUBSTANCE : 1
SERVICE_IN : 1
TRANSITIONAL_PAIN : 1
MEDICINE_ISSUE : 1
REPORT_EPIDIDYMIS : 1
FAIR_NURSINGACTIVITIES : 1
NOISES_OR : 1
THAT_THE : 2
WOULD_DIFFERENT : 1
HEALTH_NOTE : 1
MORE_WITH : 1
BEFORE_LOST : 1
DISORDER_CHRONIC : 1
TAB_TAKE : 6
HIS_WILL : 1
XX_WILL : 1
ONE_TABLET : 4
MANAGEMENT_JUL : 1
PAIN_ACUPUNCTURE : 1
FEET_LPM : 1
WILL_UNDER : 1
ARM_IN : 1
PATIENT_UNIT : 1
AORTIC_VALVE : 1
FOLLOWUP_DOES : 1
MET_WITH : 1
THAT_NOT : 1
RULES_DIAGNOSIS : 1
GOOD_NO : 1
HIM_MHC : 1
HE_SHOULD : 1
THE_VA : 3
THE_OR : 1
GEC_CARE : 1
NOTE_PATIENT : 5
AND_SUPPLY : 1
MILD_HYDROCELES : 1
HUSBAND_AS : 1
VETERAN_STATED : 1
IS_THAT : 1
PAIN_CONTRACTT : 1
DEPRESSION_NOS : 1
LS_SESSION : 1
WITH_STAFF : 1
NEGATIVE_AORTIC : 1
BE_AWAY : 1
IMAGING_PT : 1
DATE_LAST : 1
MAR_ED : 1
MIXED_AND : 1
MAILED_THE : 1
THROUGH_PT : 1
BLOOD_MOUTH : 1
INITIAL_PHARMACY : 1
INFORMATION_RELATED : 1
IS_ABLE : 1
LOWER_QUADRANT : 1
NOTE_NURSING : 4
EYE1_BP : 1
ALLERGY_ADR : 1
TO_FOLLOWUP : 1
PNEUMONIA_PASSED : 1
NOR_HOMOCIDAL : 1
BEING_PRESSURE : 1
WELL_FAMILY : 1
BIOPSIES_WERE : 1
FREQ_HIS : 1
COULD_DO : 1
MOOD_ANXIOUS : 1
AND_DISCUSSED : 1
WILL_RESULT : 1
TAKING_IT : 1
SHOWER_SPONGE : 1
IN_EYES : 1
UNIT_TWO : 1
COMMUNICATION_ASSERTIVENESS : 1
CONTACTED_HIS : 1
TO_REASSURE : 1
RN_MEDICATIONS : 1
NC_HIS : 1
PT_REQUESTS : 2
HOUSE_CLOTHES : 1
MONTHS_AND : 1
LUL_FOR : 1
STEREO_PLEASE : 1
DISCOMFERT_APPETITE : 1
MAILED_VIA : 1
TO_CONSULTATION : 1
SENSORNEUR_LOSS : 1
THE_ASSESSMENT : 1
DATE_FEB : 1
STATE_REGARDING : 1
FACILITATORS_BUTT : 1
UNDERSTANDING_TWICE : 1
EVALUATION_VETERANS : 1
WAS_ENCOURAGED : 1
JUNE_TIME : 1
IS_PT : 1
REVIEWED_VETERAN : 1
DATE_NATURE : 1
ANGER_ASSISTANCE : 1
AMOUNTS_BEER : 1
ARTHROPLASTY_LOOSENING : 1
AND_DID : 1
ANGRY_STRESS : 1
CASUALTIES_FEELING : 1
YES_USE : 1
EXERCISE_EXERTION : 1
THIS_MORNING : 2
HIS_LIFESOURCE : 1
DEPRESSED_FINANCES : 1
BASIS_FOR : 1
PTSD_IS : 1
WOULD_AVOID : 1
SYMPTOMS_DENIES : 1
ROOM_DISCHARGE : 1
CASE_LACK : 1
DEPRESSION_WAS : 1
SEP_IS : 1
CHEN_MD : 1
AND_INFECTION : 1
NURSING_NURSING : 1
SHIT_AND : 1
AMOUNT_OF : 5
CALLER_MOUNTAIN : 1
LAST_AND : 1
STAYING_SEEN : 1
RELAPSE_RESULT : 1
ORIENTED_THE : 1
PAIN_NOT : 1
SPECIFICALLY_BELIEVES : 1
DENIES_CHEST : 1
NONE_LEVOTHYROXINE : 1
DISCHARGE_HAS : 1
BARRATA_CANE : 1
HIP_PCX : 1
MEDS_REVIEWED : 1
RAL_MEDICAL : 1
ADMITTED_CD : 1
RESULT_IN : 1
DEC_TELEPHONE : 1
THAT_DID : 1
PULSE_CALLER : 1
CV_TEST : 1
HAD_BEEN : 2
LOSS_KNEE : 1
ONLY_LEFT : 1
DINING_USING : 1
HE_NO : 1
OUTCOME_COMMENTS : 1
AND_MAINTAIN : 1
VISTA_OR : 1
OF_NO : 2
SAFETY_ENCOURAGE : 1
FOLLOWING_DIAGNOSIS : 1
PROCESS_HIS : 1
POH_TRAUMA : 1
OF_CARE : 3
DID_LUNCH : 1
CONSULT_PT : 2
ACTIVE_CURRENTLY : 1
CELLULITIS_ABSCESS : 1
AND_ETC : 1
READ_EACH : 1
AM_THAT : 1
PLAN_USED : 1
ONE_HOSPITALIZATIONS : 1
HOURS_PRESCRIBED : 1
PARTICIPATED_GROUP : 1
AND_PAIN : 2
SOAP_SOLUTION : 1
HYDROCHLOROTHIAZIDE_MG : 1
DEPRESSION_REFLUX : 1
TABLET_ACTIVE : 1
TAKING_FOR : 1
OF_WITHIN : 1
STOMACH_HAVE : 1
SUPPORT_NEEDED : 1
TOE_NAIL : 1
CONNECTED_FOR : 1
FIBRILLATION_ANTICOAGULANT : 1
THREE_AS : 1
INCLUDING_VERSUS : 1
DEPAKOTE_NO : 1
SCREENING_ALCOH : 1
MALE_RESPIRATORY : 1
IN_CONTRACT : 1
HE_HOPED : 1
TAB_INFLUENZA : 1
BEING_OTHER : 1
THIS_ANGRY : 1
CONSULTATION_NOTE : 1
HIM_GET : 1
PARAPHERNALIA_DISORDER : 1
ADMISSION_DX : 1
ULA_LPM : 1
KG_PHENOBARB : 1
ASSISTANCE_FLUIDS : 1
PACT_CARE : 1
LAST_ATTACK : 1
RESPONSIBILITY_KEEPING : 1
CALLER_RESPONSE : 2
ARE_IN : 2
AREAS_WITH : 1
KNEE_KNEE : 1
OLAFSSON_EXP : 1
AND_LEFT : 1
VITAL_PRIMARY : 1
THE_GENDER : 1
BILATERAL_EYES : 1
SSA_NOT : 1
IDENTIFIED_RESPONSE : 1
OF_SHOULDER : 1
ED_IMPROVES : 1
HOSPITALIZATIONS_BY : 1
OTHERS_RESIDENT : 1
FROM_HIS : 1
ANY_PRACTITIONER : 1
NOT_SCHEDULED : 1
TO_CALLER : 2
IN_AUG : 1
EMPLOYMENT_PROBLEMS : 1
MORE_FOOD : 1
YES_INFORMATION : 1
NA_NOTE : 1
ABUSE_GOAL : 1
NOTE_MHICMINTENSIVE : 1
LIGHT_SW : 1
PATIENT_PROVIDER : 1
VALUABLES_KEPT : 1
ASSESSMENT_STABLE : 1
EVERY_MEDICAL : 1
TO_ELIMINATE : 1
LEVEL_MEDICATION : 2
PROVIDED_VETERAN : 1
COMPLETE_TO : 1
HASNT_BUPROPION : 1
ADDENDUM_CONTINUE : 1
WILL_BASED : 1
PROVIDED_HER : 1
WITH_BARETT : 1
CHRONIC_DERMATITIS : 1
NO_SW : 1
HEAVY_DRINKER : 1
REQUIRED_PROTECTORS : 1
CLERK_AND : 1
CLEAR_OU : 1
LS_SESSIONS : 2
WHEN_WHEN : 1
BOWEL_CONSISTENCY : 1
HAS_THROUGH : 1
DIRECTIVES_AND : 1
OR_CURRENT : 1
FROM_POSITIVE : 1
ACTIVE_INPATIENT : 2
LOCATION_ROOM : 2
TO_PCP : 1
LEFT_WOULD : 1
PDX_SENT : 1
DEPRESSIVE_MEDICATION : 1
POSTING_TRANSFER : 1
WEAKNESS_JOINT : 1
FOR_CONSECUTIVELY : 1
NO_PAIN : 4
OR_HAS : 2
PM_STAFF : 1
FOR_BRAIN : 1
TO_THIS : 2
INFORMED_NURSING : 1
ASSESSMENT_OF : 1
WOULD_DISCHARGING : 1
CP_NUMBER : 1
BACK_RECEIVES : 1
CHOOSE_EVALUATION : 1
VITALS_IN : 1
PT_SEP : 1
LIFE_WAS : 1
DISCHARGED_TO : 2
TWO_PSYCH : 1
HE_BEHAVIOR : 1
HE_DESCRIBED : 1
FAX_HIS : 1
PMHX_ACKNOWLEDGED : 1
CA_MG : 1
NEW_ADR : 1
APPOINTMENT_TOLERATED : 1
NO_CM : 1
ED_WITH : 1
EVAL_WED : 1
TWICE_TO : 1
PARTICIPATED_QUESTION : 1
FINAL_TAKE : 1
BETADINE_HIBICLENS : 1
SYND_ICDCM : 2
PATIENT_ED : 1
ALLERGIES_POSTING : 1
IT_CAME : 1
OVER_AND : 1
IER_MORNING : 1
SUPPLIES_NOTE : 1
CONTINUE_FOLLOWING : 1
TO_WILL : 1
SUPPORTIVE_THERAPY : 1
ERECTILE_DISORDER : 1
TO_PREVIOUS : 1
MHC_XX : 1
COULD_IT : 1
PROGRESS_PCO : 1
HH_AGENCY : 1
PM_WILL : 1
WHILE_HE : 1
RECTAL_DING : 1
PNEUMONIA_PT : 1
HIS_APPOINTMENT : 1
DRINKS_TOBACCO : 1
STATED_HAS : 1
SON_RIGHT : 1
VALVE_DISORDER : 1
MEDICATION_AND : 3
IS_LYING : 1
MORE_MEDICATION : 1
AND_PLEASANT : 1
NAUSEA_AND : 2
TOLERATE_THE : 1
STRAIN_MALE : 1
ACTIVE_HE : 1
CAME_IN : 2
FOR_COMFORT : 2
AND_PT : 1
LAB_AND : 1
TABLET_MOUTH : 4
AN_ACCIDENT : 1
COMFORT_LEVEL : 1
NOTE_OUTPATIENT : 2
FAMILY_HX : 1
ON_HUMOR : 1
PILLS_LEFT : 1
BLINDED_HOWEVER : 1
PERIOD_FOLLOWED : 1
BOWEL_PHYSICIAN : 1
ABRASION_LACERATION : 1
HE_HAS : 14
PRESENT_NO : 1
STRUCTURE_COMBAT : 1
VIA_COLOR : 1
WANT_INSTRUCTION : 1
HE_RECEIVE : 1
ALLERGY_REPORTED : 1
SUPPLIES_ACTIVE : 1
CONSIDERED_OK : 1
NP_URINARY : 1
INFLUENZA_MALE : 1
MORNING_AND : 1
COORDINATE_OTHER : 1
CONTINUOUS_BEVERLY : 3
MAINTAIN_DISCUSSED : 1
ALLERGY_REVIEWED : 1
ONE_MORE : 1
IN_AT : 1
GRADE_TREATMENT : 1
WELL_SPACE : 1
PAIN_AT : 1
SMOKING_DUE : 1
THOUGHT_DISORDERMET : 1
MOBILITY_SKILLS : 1
SAFE_AND : 1
HX_MYCOSIS : 1
FREEDOM_TROUBLE : 1
APPT_GOUT : 1
BIOPSIES_PERFORMED : 1
WILL_HOME : 1
FOR_BUT : 1
OF_DEC : 1
FLUIDS_NUMBER : 1
HAS_COME : 1
LOCATOR_DOT : 1
MYOFASCIAL_SYND : 2
DISORDER_EMPLOY : 1
HIGH_SCHOOL : 1
CALLER_ANCHORAGE : 1
ELIMINATION_THIS : 1
FACT_HE : 1
DETAILS_ARE : 1
PT_DENIES : 2
MANDATED_DRUG : 1
SVS_WILL : 1
STRATEGIES_REDUCE : 1
WITHOUT_ISSUE : 1
HOWEVER_STATED : 1
TEST_STRIP : 2
PROCESS_FEELINGS : 1
RIGHT_SON : 1
WITH_MODERATE : 1
TAKING_THIS : 1
THAT_PT : 2
LIKE_HAVE : 1
MODALITY_NASAL : 1
PROVIDED_FOR : 5
COOL_TO : 1
THE_CENTER : 1
TIME_PATIENT : 3
HAS_OBSERVED : 2
BILAT_BILAT : 1
ENCOURAGE_COMPLIANCE : 1
MIN_PHYSICAL : 1
CONNECTED_AND : 1
PSYCHIATRY_DC : 1
SHAKING_HER : 1
CONJUNCTIVA_CLEAR : 1
ORI_SCRIPT : 1
FERNANDO_FROM : 1
SCREENING_NO : 1
STABLE_DEPRESSED : 1
YOUR_APPOINTMENT : 2
CHRONIC_MH : 1
TO_IOP : 1
MEDIAL_KNEE : 1
OVERSIGHT_OR : 2
MAY_WILL : 1
OFFERED_THIS : 1
PREOP_NOTE : 1
DIAGNOSIS_DIAGNOSES : 1
TO_PERSON : 1
NEXT_OF : 1
MINS_APPLICATION : 1
MOBILITY_INDEPENDENT : 1
NOTEINTEGRATED_TEAM : 1
BAKER_PATIENT : 1
TAB_ONEHALF : 1
THE_PHONE : 1
ROOM_REFUSED : 1
ORDERED_THE : 1
HTN_BLOOD : 1
MHCC_IN : 1
SUPPLIES_REASON : 1
OVER_REDIRECTION : 1
OF_BROS : 1
LOCK_YES : 1
SHOW_HER : 1
SHE_HIM : 1
BACK_PAIN : 2
GRIEF_AND : 1
TWICE_MEDS : 1
SAYS_MOTHER : 1
SW_BRONCHODILATORS : 1
PROVIDER_CHEN : 1
OR_HIS : 1
THERMAL_TOP : 1
SAME_YES : 1
ORAL_SURG : 1
REQUIRED_HIP : 1
SECONDARY_TO : 1
FACILITY_PCP : 2
CONSULT_MHC : 1
UNTIL_MON : 1
THE_GOING : 1
OTHER_FOR : 1
ACTIVE_OBTAINED : 1
PAJAMAS_AND : 1
HAVE_REMOVED : 1
PROVIDE_SUGAR : 1
MONITORED_LEVEL : 1
STOOL_SOFTENER : 1
SAFETY_PATIENT : 1
SYND_NO : 1
RTC_WITH : 1
CHANCE_THAT : 1
TIMEFRAME_COMPLETION : 1
ASSESSMENT_PATIENT : 2
STAFF_BOWEL : 1
EAGER_VARIABLE : 1
IN_BASEMENT : 1
DISCUSS_SYMPTOMS : 1
EXTRA_GIVEN : 3
OF_FUNCTION : 2
BENZOS_VA : 1
BY_WLA : 1
MRI_THE : 1
INCREASE_HIS : 1
SETS_SET : 1
OR_CHART : 1
NOTE_PSYCHIATRY : 1
PL_PROCEDURES : 1
SESSIONS_TO : 2
THANKS_PLAN : 1
THERAPY_ON : 1
PROGRESS_BLINDNESS : 1
CAUSE_NO : 1
IS_ALL : 1
ADDENDUM_LOWER : 1
PROVIDE_RECREATION : 1
CONTACT_FOR : 1
SEX_WEIGHT : 1
BED_AND : 1
OVERALL_SATISFACTION : 1
TOPIC_HE : 1
SEX_MALE : 3
OLD_WITH : 1
DSHI_DISPOSITION : 1
TREATMENT_ACTIVE : 1
TRIED_THE : 1
HE_DOING : 1
WAS_PROVIDE : 1
INSTRUCTION_BP : 1
LIN_ASSIGNED : 1
NOSHOW_THIS : 1
TELERETINAL_CONSULT : 1
BEVERLY_DURING : 1
FROM_DATE : 2
WELL_XPATIENT : 1
IS_URINARY : 1
RECORDS_NURSING : 1
IDENTIFIERS_USED : 1
WONDERS_WE : 1
REASON_ASSESSMENT : 1
YOU_COMPLETED : 1
TAKE_MR : 1
PER_SUBMITTED : 1
IS_YEAR : 1
TO_LOCATION : 1
FOR_LUPUS : 1
TEETH_RESTING : 1
DEL_MEDICAL : 1
PING_PROGRESS : 1
AND_TO : 9
RECEIVES_AN : 2
HISTORY_IS : 1
TAKES_ANGER : 1
CATHETER_NO : 1
PLAN_POSITIVE : 1
PHARMACY_COMPREHENSION : 1
OR_PROGRESS : 1
BRIEF_INSTRUCTION : 1
PAIN_MEDICATION : 1
FUNCTION_PROGRESSION : 1
LAB_SLIPS : 1
HISTORY_REFER : 1
IT_IS : 2
NOT_PENTUP : 1
FOR_INTERPRETATION : 1
DOCUMENT_CAN : 3
ADAPTIVE_TAKE : 1
PAIN_PAIN : 1
SHE_HER : 1
TO_PRECAUTIONS : 1
DISORDER_NURSING : 1
DROP_OFF : 1
OF_LAST : 1
STAFF_WHEN : 1
AND_LITHIUM : 1
SKILLS_LIVES : 1
BEFORE_HE : 1
BUTT_MCVEIGH : 1
UNABLE_TO : 1
FROM_NURSING : 3
RECOVERY_SUICIDAL : 1
THIS_FOR : 1
WORK_WELL : 1
TAKEN_AND : 1
TO_USE : 3
WAS_BOWEL : 1
DOCTORS_PT : 1
SATISFACTION_WITH : 1
GOALS_MH : 1
TAKEN_TO : 1
MEDICATIONS_INCLUDING : 7
MCV_RDW : 1
OF_CONTROLLED : 1
MY_EAR : 1
ADVISED_FOLLOWUP : 1
INDICATED_AND : 1
TIME_OF : 4
BEDS_AND : 1
SHOWER_OR : 1
THE_HIGHS : 1
NO_HOSPITAL : 1
BED_DURING : 1
BREATH_SOUNDS : 1
DATE_MS : 1
LEAVE_AS : 1
ATTACK_MONTH : 1
AND_CHRONIC : 2
MEETS_NOT : 1
WHEN_UP : 1
SHOW_NOTE : 1
WAS_VERY : 1
WANTED_TO : 1
IS_DONE : 1
STATE_MG : 1
ACUPUNCTURE_CHIROPRACTOR : 1
TO_PHYSICIAN : 1
NOTE_DICTATED : 1
ALCOHOL_STATE : 1
HAS_GOALS : 1
PATIENT_SAID : 1
FORM_ADMISSION : 1
KEEPING_SOME : 1
HOUSE_THIS : 1
PROBLEMS_LEVEL : 1
LEVEL_CARE : 1
NURSING_INTIMIDATING : 1
ORIENTATION_AND : 2
GOOD_ABD : 1
ARE_INDEP : 1
DEPT_WITH : 1
HOME_PATIENT : 1
INDEPENDANT_AND : 1
HIS_FEELINGS : 1
ROUTINE_APPT : 1
REPORTED_DISORDER : 1
TO_COMPLIANCE : 1
STANDING_OBSTRUCTIVE : 1
ACCESSION_CYR : 1
AREA_HOME : 1
TH_CENTER : 1
ICDCM_IE : 1
PAIN_JUN : 1
STATE_PROVIDE : 1
OR_ACTIVE : 1
WITH_AT : 3
MORE_INTERMITTENT : 1
BY_ACTIVE : 3
NO_HER : 1
UNEXPECTED_STRAIN : 1
NOTE_MG : 2
SCREENING_CENTER : 1
DISCUSSED_FOLLOWING : 1
LEAVE_IN : 1
COMPLETED_US : 1
WHO_BLIND : 1
MD_OF : 1
SAME_CURRENT : 1
MH_MHICMINTENSIVE : 3
PARTICIPANT_BMI : 1
PROVIDER_RESULTS : 1
ED_TO : 1
SAYS_THAT : 1
REFERRALS_APPT : 1
SESSIONS_REQUESTED : 1
ARRANGE_WITH : 1
SEE_POSTING : 1
SPECIFY_PROCEDURE : 1
IN_ED : 1
SUBMITTED_REQUEST : 1
VISIT_DIDACTIC : 1
OF_TINY : 1
THAT_NEEDS : 1
SUBSEQUENTLY_LOSE : 1
ULA_WITH : 1
ROTATOR_REPAIR : 1
POSTAL_ON : 1
VDRL_SERUM : 1
APPOINTED_PCP : 2
GPC_IDA : 1
TO_ATTEND : 1
FOR_BACK : 1
VACCINE_ML : 1
ED_PROCEDURES : 1
THEIR_PRESSURE : 1
WITHOUT_DIRECTIVES : 1
SURGERY_PT : 1
SOCIAL_MARRIED : 1
OF_INFORMATION : 1
PREVIOUS_CONSULTATION : 1
ACCEPTABLE_LEVEL : 1
AA_IDENTIFICATION : 1
ADVERSE_HE : 1
REPORT_WOULD : 1
DEPENDENCE_DISORDER : 1
SUICIDAL_OR : 1
CONSULT_REPORT : 1
UNKNOWN_DOES : 1
SPEECH_FLUENT : 1
OF_TESTS : 1
PHONE_NUMBER : 3
NOT_FOLLOW : 1
NO_NURSING : 1
CR_ATTENDING : 1
SAME_HERE : 1
IN_SC : 1
BILATERAL_FROM : 1
ICDCM_FAXED : 1
TOOTH_THE : 1
SPEAK_TO : 1
CHOOSE_HERE : 1
OF_HOURS : 4
VALVE_NONE : 1
YESTER_HE : 1
PERFORM_SETS : 1
REACH_PLAN : 1
PATIENT_FLAT : 1
OF_IMPORTANCE : 1
APPOINTMENT_CONFIRMED : 1
RESISTING_REDIRECTION : 1
JUN_ORAL : 1
ADDENDUM_PPI : 1
SEVERE_GOING : 1
LEVESQUE_LENGTH : 1
THAT_ARE : 4
THAN_POWER : 1
TABLETS_BY : 1
JOINT_IS : 1
BONHAM_HEALTH : 1
NURSING_AND : 2
BEDSIDE_SEE : 1
BIPOLAR_EMPLOY : 1
COLOR_JAUNDICE : 1
DENTAL_ORAL : 2
UNSPECIFIED_HEART : 1
EVALUATION_ONE : 1
REFILL_THIS : 1
DECREASED_NONE : 1
DIRECTIONS_LAB : 1
AM_PHYSICIAN : 1
DEVICES_THAT : 1
TO_BED : 1
NOTET_THE : 1
ENCOURAGED_VERBALIZE : 1
POSSIBLE_FOR : 1
BOWEL_ELIMINATION : 7
DENTAL_NATURAL : 1
VETERAN_YES : 1
DIVORCE_SUBJECTIVE : 1
DISCHARGE_STATES : 1
COMPLAINT_FOOT : 1
THEY_WERE : 1
INFORMED_HE : 1
MESSAGE_ON : 1
MEDICATIONS_SENNA : 1
NO_FAMILY : 1
AND_LABS : 1
DOT_WAS : 1
WHICH_WOULD : 1
ANDERSON_CHAPLAIN : 1
MED_RX : 1
WITH_SOME : 1
GROSSLY_INTACT : 1
GEC_REFERRAL : 1
HIS_WITHOUT : 1
POSSIBILITY_TOTAL : 1
REQUESTING_PROVIDER : 1
NORMAL_AS : 1
NURSINGACTIVITIES_OF : 1
MACKIE_RYAN : 1
HOME_MEDICATIONS : 2
TRAUMATIC_ALL : 1
PC_UNTIL : 1
TUBERCULOSIS_SCREENING : 1
NOT_MONTHS : 1
PERTINENT_INFORMATION : 1
MEDICAL_PLEASE : 1
GET_ENROLLED : 1
AND_SHOES : 1
AN_DURING : 1
MISCELLANEOUS_AND : 1
UNDERSTANDING_FINDINGS : 1
BY_JR : 1
INSTRUCTIONS_PROVIDED : 1
NOT_IDENTIFIED : 4
MY_ORI : 1
WAS_IN : 3
NOTED_TO : 1
MEDICATIONS_DOUCUMENTED : 1
FAIR_OF : 1
AND_PHYSICAL : 1
NO_BENZOS : 1
PSYCHOLOGICAL_PAIN : 1
ASK_DO : 1
CONSULT_PSYCHOTHERAPY : 1
ON_CHART : 1
OF_VIETNAM : 1
ML_PSA : 1
THAT_AS : 1
CARE_OUTSIDE : 1
AREA_OF : 1
PT_ELIGIBLE : 1
HEADACHES_CM : 1
PT_AT : 1
ESSENTIAL_AND : 1
SEEN_TO : 2
NUMBER_HOURS : 4
OF_INJURY : 1
THE_SHE : 2
SELECT_THE : 1
CLINIC_THE : 1
UPON_THE : 1
BASEMENT_EVERYTHING : 1
STUDY_BECAUSE : 1
OVER_CHILDS : 1
VA_FORM : 1
ACCESSION_NO : 1
DC_BREATHING : 1
ORI_WAS : 1
CONNECTED_THIS : 1
OR_FEELS : 1
EMESIS_SETS : 1
GROUP_NOTE : 2
NO_HAS : 2
PROGRAM_COORDINATOR : 1
PATCHES_SC : 1
LEVEL_PAIN : 1
CONDUCIVE_RECOVERY : 3
LACERATION_BRIEF : 1
WH_CONJUNCTIVA : 1
MD_OR : 1
DIFFERENTLY_SAYS : 1
RESOLVED_TOPIC : 1
HER_TEXT : 1
STANDING_SAFETY : 1
HE_BECAME : 1
THE_PING : 1
AND_EXPECTED : 1
PHARMACY_GENERAL : 1
TRIAGE_PATIENT : 1
IN_MILIEU : 1
COMPLAINTS_OF : 1
TEACHING_SKIN : 1
AFTER_MOOD : 1
SUICIDAL_NOR : 1
STIMULANT_BUT : 1
ALCOHOL_SCREENING : 1
MISCELLANEOUS_READ : 1
RESIN_ONE : 1
THE_HAVE : 1
NOT_INSTRUCTION : 1
JAUNDICE_OUTSIDE : 1
AND_TABLETS : 1
GENITOURINARY_NUTRITIONAL : 1
TERMINATED_VETERAN : 1
HYGIENE_NOT : 1
REFILLS_EXPIRATION : 1
SAFELY_DETOXED : 1
THE_APPT : 1
VALUABLES_FORM : 1
NOTE_THIS : 3
DURATION_ADDENDUM : 1
OU_MENTAL : 1
NOT_BE : 2
HAS_ONLY : 1
SENNA_DOCUSATE : 1
COMMENTS_INFORMATION : 1
WHEN_YOUR : 2
MR_AND : 1
NOTE_GENERAL : 1
DISTANCE_LPM : 1
APPT_COMPLAINT : 1
PROCEDURE_ION : 1
GET_HIS : 2
NURSING_NOTE : 12
INFORMATION_WITH : 1
ANSWER_LEFT : 1
THE_MALE : 1
LEVEL_LEVEL : 1
THIS_DATE : 2
MANAGEMENT_OF : 1
PROVIDE_VETERAN : 1
THIS_REPORTS : 2
AND_PATIENT : 3
BEEN_FALL : 2
AFTER_LONG : 1
PO_AND : 1
TECHNIQUE_POSITION : 1
DATE_SURGERY : 1
OR_PA : 1
NVD_THERMAL : 1
GROUPS_DESIGNED : 1
THE_DOES : 3
HE_COLOR : 1
TO_MANUAL : 1
PING_HE : 1
NEXT_IN : 1
TRAVEL_THE : 1
RECORD_MR : 1
RESIDENT_ID : 1
NOTE_CUEING : 1
CHAPLAIN_PIERCE : 1
WAS_SINCE : 1
AROUND_PLAN : 1
VISIT_MED : 1
FOR_PROCEDURE : 2
HE_SHOT : 1
ON_SOCKS : 1
EFFECTS_UNIT : 1
THE_ONE : 1
TRAINING_AIDS : 2
NOTE_DENIES : 1
DENIES_CURRENT : 1
COPD_GOAL : 1
SKIN_DIRECTIVES : 1
FOR_LAST : 1
SISTER_IN : 1
ADR_REPORTED : 1
PATIENT_THERE : 1
ANY_DERMATOLOGY : 1
PARTICIPATION_QUALITY : 1
AT_IDENTIFIED : 1
TAKE_TO : 1
RESTRAINTS_USE : 1
TKA_ION : 2
HE_AROUND : 1
BARRETTS_ETOH : 1
NORMAL_ETHNIC : 1
LAST_JOB : 1
ASSESSMENT_BY : 1
COULD_TOLERATE : 1
MOTIVATED_REMINDED : 1
WITHOUT_ADVANCE : 1
INFORMATION_PATIENT : 1
DUE_TO : 3
SKILLS_LOCALITY : 1
FULLY_ALERT : 1
DATE_AND : 1
BEHAVIOR_RELATIONSHIP : 1
AST_IU : 1
VOMITING_CHAPLAIN : 1
WITHIN_LAST : 1
COMPLAINTS_RIGHT : 1
TO_BREAKFAST : 1
IMAGING_ON : 1
PT_CONCERNED : 1
ACROMIOPLASTY_CLASSIFICATION : 1
OF_YOUR : 2
MEDICATIONS_DOCUSATE : 1
PLT_DIAGNOSIS : 1
RATE_IV : 1
LIVING_HER : 1
ARE_WITH : 1
MUST_BILL : 1
PROCEDURE_TKA : 1
HOME_PART : 1
MAMMOGRAM_SCHEDULED : 1
INTAKE_OBJECTIVE : 1
SEX_THE : 1
SHAKE_WELL : 1
IN_SCHEDULED : 1
DENIED_HI : 1
TIMES_USE : 1
TO_UP : 1
ANY_ALLERGIES : 1
TYPE_DISCHARGE : 1
PLACE_TIME : 1
AND_TEXT : 1
COMMAND_SEEN : 1
PRODUCTS_YES : 1
NO_IMMEDIATELY : 1
ENCOURAGE_WELLNESS : 1
DIAGNOSIS_MOOD : 1
WEEK_UDS : 1
INFORMATION_DESCRIBE : 1
ACCESS_TONIGHT : 1
PRESSURE_DENIES : 1
PAIN_FEVER : 1
AND_WHY : 1
SET_OF : 1
TRP_NOTE : 2
SHOES_PROVIDED : 1
OUT_HBPC : 1
AND_RECORD : 2
TWICE_PROTOCOL : 1
DUE_THE : 1
VETERAN_BILL : 1
VOA_STATING : 1
WITH_PLAN : 1
PT_DIAGNOSIS : 2
THE_DIRECTIVE : 1
TO_FUNCTIONING : 1
TEL_ALERT : 1
VITALS_FOR : 1
SITUATIONS_HIS : 1
PRACTITIONER_OBTAINING : 1
ALL_PERSONAL : 1
WAS_REMINDED : 1
REQUESTS_COMBIVENT : 1
WELL_THEY : 1
IN_WRAPUP : 1
THROUGH_IMAGING : 3
CURRENTLY_PAROLE : 1
OTHER_STAFF : 1
CAREFULLY_AND : 1
THE_TIME : 2
INTACT_LASTED : 1
WITH_CARE : 1
AMBULATION_NORMAL : 1
SECLUSION_INFORMED : 1
BED_WATCHING : 1
WILL_ARRANGE : 1
CONTACTED_PATIENT : 1
AND_ATTACHED : 1
MANUAL_PT : 1
MEDICATION_AT : 1
DELETE_BKH : 1
DATE_TO : 1
NOT_HOWEVER : 1
CHEST_FEVER : 1
BENIGN_OF : 1
TO_THAT : 1
DATE_DISCHARGE : 1
VERBALIZE_LS : 1
COMFORT_CIRCUMCISION : 1
SHE_FEELING : 1
LIFESTYLE_ENCOURAGE : 1
SITE_BY : 1
MALE_SUICIDAL : 1
OVER_THE : 2
HAD_IUD : 1
ANTITHROMBOTI_HIM : 1
REQUIREMENTS_PERIOD : 1
GOALS_MHICMINTENSIVE : 1
AND_PHARMACY : 1
MH_NOTE : 2
PT_AND : 1
ACTIVE_VETERAN : 1
PRIMARY_NURSING : 1
MONTHS_HAS : 1
OK_MAJOR : 1
APPTS_APPARENTLY : 1
TREATMENTS_NEBULIZER : 1
THE_MHC : 1
ACTIVE_EBL : 1
MORE_ACTIVE : 1
PRACTITIONER_CONSENT : 1
HE_TOBACCO : 1
HE_COULD : 2
NOTE_SENSORNEUR : 1
AS_JUNE : 1
RIGHT_SHOULDER : 1
APNEA_OBESITY : 1
CARDIAC_PLT : 1
SHORTENING_HER : 1
HEAD_HIS : 1
CLOSELY_BY : 1
LAST_READ : 1
COMPANIES_REMAINING : 1
ABUSE_AXIS : 1
SPOKE_WITH : 2
ANESTHESIA_TECHNIQUE : 1
STATES_MUCH : 1
ETOH_USE : 1
ABOVE_PHONE : 1
OF_DUE : 1
GAUZE_STRIP : 1
CARE_ADL : 1
DM_REQUIRES : 1
IT_HERE : 1
FOR_REEVALUATION : 1
TREATMENT_SCREENING : 1
POST_INSTRUCTIONS : 1
TAB_RESULTS : 1
PASSED_YESTER : 1
RESP_NA : 1
TO_STOMACH : 1
PLAN_CARE : 1
DONE_NITRO : 1
MALE_WAS : 1
MANAGEMENT_AS : 1
EXT_ACTIVE : 1
ALERTORIENTED_BLOOD : 1
BE_IN : 3
ON_ALL : 1
ASSISTANCE_PHYSICAL : 1
TIME_JUL : 1
SCRIPT_WAS : 1
IS_UNSCHEDULED : 1
LEAVE_BED : 1
APN_WRITER : 1
DULL_TOUCH : 1
AROUND_FOR : 1
WEAR_AND : 1
SCREENING_TEST : 1
MEASURES_HELP : 1
WANT_TO : 2
OF_WILL : 1
BLADDER_IS : 1
APPT_GO : 1
TURNS_AND : 1
SITE_RESTART : 1
MANAGEMENT_MIN : 1
CONSIST_OF : 1
ACETAMINOPHEN_TAB : 1
RACE_CONSTIPATION : 1
ALB_RENAL : 1
ATTENTIVE_ON : 1
TARGET_DATE : 1
RELIEF_DECREASED : 1
TAB_HFA : 1
DENTAL_TEETH : 1
SEP_FASTING : 1
KNOW_TIME : 1
XACTIVE_VARIABLE : 1
COLCHICINE_TEMPORARILY : 1
REQUESTS_THAT : 1
SERUM_MH : 1
BACK_NECK : 1
MYSELF_AT : 1
TRAINING_ON : 1
TROUBLE_OR : 1
CALLED_REPORT : 1
ON_MOTHER : 1
SICHERER_BEVERLY : 3
TRP_RECEIVING : 1
NOTED_RIGHT : 1
CLINIC_OR : 1
ON_TUES : 1
HIGHER_OF : 1
MINUTES_COMFORT : 1
PLAN_TRAINING : 1
ORAL_EXTRACTION : 1
HIS_ADDENDUM : 1
TO_PTS : 1
CALL_FOR : 1
HIS_PO : 1
HTN_BRONCHITIS : 1
PATIENT_LEFT : 1
CLINIC_STAFF : 1
BELIEVES_THAT : 1
ARNP_OF : 1
AMOUNT_CONSUMED : 1
MEMBER_NO : 1
MR_CAME : 1
YES_PROCEDURE : 1
AGE_SEX : 3
CONFIRMED_FAMILY : 1
TRAVEL_WILL : 1
NOTED_LEFT : 1
FOLLOWS_RECONCILIATION : 1
MAR_MOUTH : 1
ALERT_ORIENTED : 2
LOOSENING_INSTABILITY : 1
REPORTS_SERVICE : 1
OLD_LISTS : 1
YRS_AT : 1
IN_NOTE : 1
AND_BE : 1
LUNCH_IN : 1
COMPLETED_COPY : 1
INPATIENT_YES : 1
CHLORAMPHENICOL_DISPOSITION : 1
AUG_WEIGHT : 1
HT_CM : 1
NOTE_APPOINTED : 1
WOUND_OF : 1
COMMUNICATION_SKILLS : 1
IF_HOW : 1
PLAN_SUBMITTED : 1
NAME_POSTTRAUMATIC : 1
COGNITIVE_PATIENT : 1
IDENTIFY_HOWEVER : 1
HIP_PAIN : 1
HOME_PDX : 1
RESISTING_MOTHERS : 1
STAFF_DT : 1
GOALS_TIME : 1
IN_USE : 1
SUPPORT_AS : 1
ENCOURAGEMENT_OFFERED : 1
EDUCATION_TO : 1
ID_CP : 1
DID_KEEP : 1
INCLUDING_REASON : 1
PROCESS_ALSO : 1
NONE_WOUND : 1
NEW_WAS : 1
REASSURE_THAT : 1
BRONCHODILATORS_GOAL : 1
TOPIC_SKIN : 1
CLINIC_IDA : 1
HE_URINE : 1
THE_DIABETES : 1
CARING_HER : 1
OF_POTENTIAL : 1
REFUSED_TAKE : 1
HELP_ALCOHOL : 1
AXIS_IV : 1
IMAGING_AND : 2
NOTE_NO : 2
TO_AFTER : 1
IS_FAIRLY : 1
MD_PA : 1
RESULTS_SECOND : 1
CONTINENT_CONSUMED : 1
NEXT_PATIENT : 1
DEPRESSED_CAN : 1
PATIENT_NURSING : 1
WELL_MUCH : 1
ARE_SHE : 1
OUT_THE : 1
NOTE_OUTSIDE : 1
PAST_ATTEMPTS : 1
APPT_HE : 1
NO_ABLE : 1
PATIENT_STARTING : 1
IRRITABLE_ANGRY : 1
SKIN_SC : 1
PHARMACY_REVIEW : 1
NA_SYNTHROID : 1
WELL_WITH : 1
VISIT_JUN : 1
CARE_HOME : 2
AT_OF : 1
KNEE_NO : 1
ORIENTED_SKIN : 1
AND_KNOWLEDGE : 1
ACCESS_INT : 1
PATIENT_NAME : 2
NUMBER_SESSIONS : 1
DEALING_WITH : 2
CAN_GOING : 1
REVIEWED_MEDICAL : 1
MALE_BP : 1
EVAL_RX : 1
GONE_THROUGH : 1
NOTE_PT : 1
DID_NOT : 8
THERAPIST_WILL : 1
PUT_SOCKS : 1
GOAL_RESOLVED : 1
AFTER_CANT : 1
ASSESSMENT_HAS : 1
CANDID_IN : 1
ASSESS_BEHAVIOR : 1
OF_ADDENDUM : 1
FAMILY_MEMBER : 2
THAT_VICTIM : 1
NEURO_SENSORIUM : 1
TELEPHONE_YESTER : 1
BY_THAT : 2
POSTTRAUMATIC_STRESS : 1
BED_IN : 2
STOOL_NOT : 1
ONE_PRIOR : 1
AGAIN_URINE : 1
TO_WRITER : 1
ADDENDUM_VALUABLES : 1
REGARDING_THE : 1
FILLED_SINCE : 1
STARTING_AM : 1
THIS_FT : 1
HAS_GOING : 1
THE_ABILITY : 1
HE_SPENDING : 1
HAS_PILLS : 1
HAVE_PENTUP : 1
DISCUSSED_STILL : 1
USE_HOME : 1
DUE_AND : 1
AS_THEY : 1
WE_PATIENT : 1
MEDICINE_CLINIC : 2
NUMBER_PATIENT : 1
SVS_DEPT : 1
DISSABIL_RATED : 1
NOTE_MOOD : 1
WITH_MEMBER : 1
AFTER_MAINTAINS : 1
APPEARS_TO : 1
ANY_RELAPSE : 1
HYGIENE_APPLICABLE : 1
TAB_IN : 1
ON_HYPOTHYROIDISM : 1
GENOA_AND : 1
ROUNDS_NOTE : 1
ADDENDUM_HIS : 1
BE_ABLE : 1
MEETING_HIS : 1
NUTRITIONAL_HX : 1
TALK_FRIENDS : 1
VET_TEARFULHE : 1
PATIENT_IDENTIFICATION : 1
OTHER_ADVISED : 1
WILL_ATTEND : 1
HIS_AF : 1
TO_LAB : 1
DEPRESSION_BARRETTS : 1
NG_PSA : 1
SIGN_ABC : 1
REPORTS_SATISFACTION : 1
FUNCTIONING_WELL : 1
HIS_SITUATION : 1
AGAIN_TO : 1
OR_ON : 1
DIAGNOSIS_ANESTHESIA : 1
SUPPLIES_ALB : 1
HAS_CONSULTS : 1
HAS_THOUGHTS : 1
STRESS_AS : 1
CANCELLED_WITH : 1
THE_TECHNIQUE : 1
PATIENT_TOLERATED : 1
PARALYSIS_OR : 1
RISKS_BENEFITS : 2
COMP_ADMITTED : 1
UAL_PATIENT : 1
IS_THAN : 2
FEELING_HELPLESS : 1
COMPLIANT_INSIGHT : 1
BAD_NAME : 1
HE_WANTS : 1
COMMENTS_YRS : 1
OF_MR : 1
APPROPRIATE_APPT : 1
ONE_VETERANS : 1
AREAS_THE : 1
HAVE_RECONCILED : 1
MOTIVATION_TO : 2
IN_HOURS : 1
TO_BILATERAL : 1
FAMILY_ANXIETY : 1
HISTORY_SIGNIFICANT : 1
NO_NAUSEA : 1
NAUSEA_VOMITING : 1
CURRENT_DIAGNOSIS : 1
UNSPECIFIED_SCREENING : 1
GOOD_INTO : 1
WILL_PRE : 1
TEAM_WH : 1
AUDIOVISUAL_CLASS : 1
FOR_MO : 1
CONSISTENT_WITH : 1
TRIGGERS_AND : 1
QUESTION_ARTHRITIS : 1
FOLLOWING_TYPES : 1
PARTICIPATE_NECESSARY : 1
CIRCUMCISION_COPY : 1
YET_HEIGHT : 1
PHYSICAL_ASSISTANCE : 1
PATIENT_HAS : 4
PENDING_OUTPATIENT : 1
GENOA_CITY : 1
WAS_LOOKING : 1
APPARENTLY_GOES : 1
IN_STATED : 1
OTHER_UNSPECIFIED : 2
THE_PUBLIC : 1
TOP_RAILS : 1
QUESTIONS_DAILY : 1
ELIMINATION_DURING : 1
PHYSICIAN_THE : 1
OR_PLAN : 1
CONTINENT_APPLICABLE : 1
THAT_WORK : 1
WORK_HIM : 1
HCL_MG : 1
MEDICATION_WOUNDS : 1
GTTS_PUT : 1
OF_FOR : 2
FOR_ON : 1
MEDICAL_CLERK : 1
IS_CARE : 1
IN_DR : 1
TREATMENT_VETERAN : 1
NAOMI_PATCHES : 1
HAS_NO : 2
SHOE_LIFT : 1
LETTER_FAX : 1
NEVADA_HCS : 1
CURRENTLY_MOOD : 1
WILL_OSAC : 1
BY_MD : 1
THAT_CONDUCIVE : 3
BLADDER_BATHROOM : 1
WHY_CANT : 1
HEALTH_FOR : 1
HOSPITAL_GOING : 1
REPORTED_WAS : 1
PARALYZED_IN : 1
THEIR_BACK : 1
FOUR_TIMES : 1
AN_WITH : 1
PT_UNDERSTANDING : 1
MADE_TO : 1
FLUIDS_WERE : 1
NO_NEW : 1
COORDINATOR_DISCHARGE : 1
LEFT_REPORTS : 1
AND_PERIOD : 1
KEEP_APPOINTMENT : 1
GUN_MH : 1
PRESSURE_CUFF : 1
LOG_PERSON : 1
TAB_ACTIVE : 1
HAVE_ANY : 4
OPERATIVE_INSTABILITY : 1
COMPLAINT_FOR : 1
OF_RIGHT : 1
IN_EX : 1
FROM_VIETNAM : 1
CHARACTERISTICS_UNCHANGED : 1
DERM_NOTE : 1
COUNSELING_COMFORT : 1
AGE_MALE : 1
PROBLEMS_ESI : 1
PE_ELIMINATION : 1
ED_ASSESSMENT : 1
PROVIDER_IDENTIFIED : 1
FORMS_BY : 1
SCREENING_AUDITC : 1
COMFORT_SAFETY : 1
AND_TAKE : 1
AT_IS : 1
ATTENDING_THAT : 1
EASILY_AND : 1
DUE_DUPLICATE : 1
ABILITY_TO : 1
PRIMARY_PROVIDER : 1
REGARDING_VEER : 1
SYMMETRICAL_APPETITE : 1
CHART_ANTISOCIAL : 1
WENDY_LENGTH : 1
BREAKFAST_FOOD : 4
OUT_WITH : 1
IN_REHAB : 1
THE_CERVICAL : 1
CASE_AND : 1
AT_PT : 1
DICTATED_NOTE : 2
IN_EACHOTHER : 1
USING_REFUSED : 1
SYSTEMS_ARE : 3
INJURY_PARALYSIS : 1
OF_ANXIETY : 1
ADDENDUM_METHADONE : 1
IS_CALM : 1
ELIMINATION_NO : 1
THERAPEUTIC_DESIGNED : 1
SEEN_EVALUATED : 1
STATUS_IODOFORM : 1
PO_FLUENT : 1
PHONE_CORRECT : 1
THIS_RESULTS : 1
TEACHING_TOPIC : 2
TYPES_OF : 1
OCTOBER_PATIENT : 1
BEVERLY_STATE : 1
WHO_HAVE : 1
BREATHING_ASSIST : 1
DIRECTIVE_ACTIVE : 1
MINUTES_PAIN : 1
THE_RESEARCH : 1
IS_PSYCHIATRIST : 1
ILLEGAL_ABUSE : 1
IN_APPLICATION : 1
MINIMAL_TO : 1
REVIEW_GOOD : 1
SERVICES_OUTSIDE : 1
IS_DOING : 1
OF_CONSCIOUSNESS : 1
LOST_HIS : 2
BE_MADE : 1
MUCH_HAVE : 1
JR_PATIENT : 1
HIS_JOAN : 1
HOME_SCHEDULED : 1
DEL_CENTER : 1
AS_ORDERED : 2
WAS_AT : 1
IS_SAME : 1
TUB_BATH : 1
TREATMENT_NAUSEA : 1
THROUGH_WINDSHIELD : 1
FALL_PT : 1
APPLY_ACTIVE : 1
GOING_THROUGH : 1
PAIN_DO : 1
HAS_CHANGED : 1
LYING_HOURS : 1
ALL_MEDICINE : 1
USED_TOILET : 4
ALERT_RESPONSIVE : 1
PLAN_REASON : 1
DENIES_TYPE : 1
HOMICIDAL_INTENT : 1
NUMBNESS_THE : 1
EVENT_PERTINENT : 1
SAMMIE_FLUOROSCOPY : 1
NOS_NOS : 1
MANDATED_PROGRAM : 1
PERIOD_YES : 1
THE_BUT : 1
PARTICIPATION_PARTICIPATION : 1
AND_VOLUNTEER : 1
TO_CAR : 2
HE_SHE : 1
WESTERN_DOES : 1
TO_TRP : 1
OR_VETERAN : 1
POSITION_FOR : 1
PATIENT_HE : 2
GUNPOINT_AND : 1
TO_HESITATE : 1
SHE_IN : 1
TRIAL_SEROQUEL : 1
USED_IDENTIFIED : 3
CALLED_TO : 3
PT_OF : 1
FALL_THE : 2
ACTION_SKILLS : 1
PHYSICIAN_SSED : 1
UPON_ASSESSMENT : 1
HAS_GONE : 1
HOUSE_ORIENTATION : 1
DISCUSSION_AND : 1
APPLICATION_LIFT : 1
HAD_IN : 1
STATUS_DIETARY : 1
NOT_THEM : 1
WITH_SESSION : 1
ANESTHESIA_POSITION : 1
WELLNESS_PARTICIPATION : 1
INCH_APPLY : 1
IS_POH : 1
PCMEDICATION_MEDICATIONS : 1
UP_HRS : 1
PLEASE_PROGRAM : 1
PRIOR_TO : 4
WHILE_RIGHT : 1
FOR_ALF : 1
IS_PAIN : 1
FOLLOWING_IDENTIFIERS : 1
TO_PALPATION : 1
TRP_AND : 1
CLINIC_GPC : 1
WITH_RESIDENT : 1
CR_RENAL : 1
MEDICATIONS_IODOFORM : 1
IN_CENTER : 1
THE_DID : 1
RENAL_ATTENDING : 1
YES_HOW : 1
TIME_HIS : 1
HEIGHT_STATED : 1
OR_DENIES : 1
MALE_THE : 2
CONTINENT_POH : 1
PRESCRIBED_CYPROHEPTADINE : 1
PT_IS : 4
AS_WALKIN : 1
PROBLEMS_SUBSEQUENTLY : 1
URINARY_ELIMINATION : 1
CONSTIPATION_TUBERCULOSIS : 1
CONTINENT_TRAUMA : 1
TO_COMMENTS : 1
PARTICIPANT_IN : 1
THAT_ASSIST : 1
UPPER_EXTREMITIES : 1
METHADONE_FILLED : 1
TO_NC : 1
ADAPTING_LOW : 1
CONJUNCTION_WITH : 1
NOTE_YES : 1
DIAGNOSIS_OF : 1
MORNING_TAKE : 1
PATIENTS_PHOTO : 1
TO_HE : 4
STOOL_SENNA : 1
RESPONSIBILITY_FOR : 1
JUNE_DIALYSIS : 1
VETERAN_SUPPORTIVE : 1
TIMES_AS : 2
BUT_FILLED : 1
WITH_UNEXPECTED : 1
BLVD_GEC : 1
ELIMINATION_DOES : 1
FREE_NG : 1
ASSISTANCE_NONE : 1
ALL_SUPPORT : 1
PSYCHOTHERAPY_FOR : 1
SWEAR_ILL : 1
CONTACT_REASON : 1
LIST_COLONOSCOPY : 1
STABLE_BLOOD : 1
MUST_BE : 1
OBJECTIVE_GENITOURINARY : 1
ASSISTANCE_ASSISTANCE : 1
GRPOUPS_AND : 1
NO_PHONE : 1
IN_POSITION : 1
ACTIVE_PROBLEMS : 1
FOLEY_CATHETER : 1
CARDIAC_PREOPERATIVE : 1
MONTH_SIZE : 1
YES_EYE1 : 1
CURRENT_ALLERGY : 1
FROM_IS : 1
WAS_EVIDENT : 1
APPROACHING_ADAPTIVE : 1
TREATMENTS_ADVANCE : 1
OF_TO : 3
COMMENTS_HL : 1
SCHEDULED_FOR : 2
DCD_LASTED : 1
AND_MAY : 1
SIZE_NOT : 1
MR_TO : 2
MIMSOME_CHO : 1
LESS_CHANCE : 1
COMFORT_CV : 1
ASSISTANCE_EXTRA : 1
PATENT_TO : 1
RECENT_AND : 1
TO_SHOULDER : 1
NOT_FEEL : 1
MAY_HE : 1
FEEL_TO : 1
AM_WILL : 1
EVERY_MINUTES : 1
STAFF_PHYSICIAN : 1
WITH_VETERAN : 3
ACTIVE_ML : 1
CONTINENT_MUST : 1
DETECTION_BUTTON : 1
RADIATION_AS : 1
BED_MOBILITY : 1
AND_STAFF : 1
CONSECUTIVELY_OTHERWISE : 1
RX_MINS : 1
CONTINENT_HIP : 1
LOUD_NOISES : 1
HIS_DEAR : 1
LEVOTHYROXINE_TAB : 1
USUAL_SIDE : 1
AND_EXCUSES : 1
AND_EVERY : 1
PERSON_HYDROCHLOROTHIAZIDE : 1
CLINIC_TREATMENT : 1
NUMBER_LISTED : 1
FINGER_YANICK : 1
THE_BURDEN : 1
OF_OF : 2
DOSAGE_ROOM : 1
TO_INTERVENTION : 1
ANCHORAGE_BY : 1
AMLODIPINE_MG : 1
NO_DEPRESSION : 1
OTHER_NURSING : 1
GETS_DEPENDS : 1
STATUS_OPERATIVE : 1
BUT_DID : 1
FEELING_RELIEF : 1
TO_MOVE : 1
YOUR_SESSION : 1
WART_REMOVAL : 1
RESULTS_LETTER : 1
COORDINATOR_AT : 1
IN_LEFT : 2
THE_PBC : 1
INFORMATION_ARE : 1
MINUTE_MEDICATION : 1
PHYSICIAN_ACTION : 1
AND_POST : 1
PLACE_COMORBIDITIES : 1
HEARING_ICDCM : 1
PROGRESS_GRANULATION : 1
LEARN_CARE : 1
GIVEN_THIS : 1
KIDNEY_UNSPECIFIED : 1
COMBIVENT_WHICH : 1
DIDACTIC_AND : 1
BEHAVIOR_WHERE : 1
INFORMATION_OF : 1
PATIENT_LATEX : 1
THE_YOU : 1
PLAN_TREATMENT : 1
STATUS_COGNITIVE : 1
BLOOD_READING : 1
ADMISSION_PHARMACY : 1
CAN_BE : 5
DVT_PROPHYLAXIS : 1
EYE_PUT : 1
AND_THIS : 2
RESPIRATORY_PATIENT : 1
CANT_GET : 1
SIGNIFICANT_BRAIN : 1
HI_PT : 1
COMBAT_CASUALTIES : 1
PT_BACK : 1
PROCEDURE_LEFT : 2
MOOD_AND : 2
AT_THOSE : 1
SAID_APPT : 1
CARE_CARRY : 1
BEVERLY_MD : 3
YES_MEDICINE : 1
DSMIV_CRITERIA : 1
NEGATIVE_PACT : 1
CC_NONE : 1
GIVEN_NUMBER : 1
PAIN_VERBALIZED : 1
AND_AN : 2
HE_STATES : 2
UNSPECIFIED_COMPREHENSIVE : 1
URINE_COLOR : 2
SKILLS_WITHIN : 1
THE_ED : 1
ANGER_AT : 1
DX_SCHIZOAFFECTIVE : 1
OF_IMPORTANT : 1
SUMMARY_TO : 1
BECAME_PARALYZED : 1
SIGNS_OUTSTANDING : 1
OVER_RESISTING : 1
BENEFITS_MAKING : 1
SAFETY_ENCOURAGED : 1
PROPHYLAXIS_TREATMENTS : 1
BORN_AND : 1
NURSING_CLINIC : 1
PROGRESS_MR : 1
VETERAN_ME : 1
SALINE_PLACED : 1
MESSAGE_FOR : 2
AND_BEHAVIOR : 2
ARE_CONDUCIVE : 3
YOU_LOST : 1
TRANSFER_POST : 1
ITEM_CAREFULLY : 1
PARTICIPATED_EVENING : 1
HIS_STRONGER : 1
LOCATION_RESIDENT : 2
MELLI_COMP : 1
AND_MESSAGE : 1
MH_PSYCHOLOGY : 1
WHICH_RECEIVES : 1
MEDICATIONS_SUPPLIES : 8
TAKEN_OF : 1
PTSD_AND : 1
DEPT_WILL : 1
PT_RESPONSE : 1
FROM_VA : 1
SEP_VET : 1
TO_VERIFY : 2
REGULAR_PATIENT : 1
AND_FINGERS : 1
VA_PROVIDE : 1
ETOH_BLOOD : 1
THIS_SHE : 1
THIS_TO : 1
LOSS_ICDCM : 1
WILL_WAIT : 1
UARY_THEY : 1
THE_CONSISTENCY : 1
NONE_ELIMINATION : 1
WRITE_EVERY : 1
IF_THE : 1
NOTE_THE : 3
CONTINUED_TO : 1
SOLUTION_HIBICLENS : 1
CULTURES_ANTIBIOTICS : 1
CARE_TO : 1
SOLN_ML : 1
HIS_HE : 3
DIPHENHYDRAMINE_MG : 1
CARE_SHAVE : 1
IMPROVED_DISCHARGE : 1
PT_RESTING : 1
THIS_APPOINTMENT : 1
HAVE_PATCHES : 2
NOTED_AGE : 1
SWER_ASSIST : 1
FAMILY_SEE : 1
VARIABLE_MAXINE : 1
STRESS_WHEN : 1
ALERT_DIAGNOSIS : 1
NO_ATYPICAL : 1
SURGICAL_HX : 1
LAST_SEEN : 1
RANKINE_YANICK : 1
MEDICATIONS_REFILLS : 1
DESCRIPTION_NO : 1
PAST_FAMILY : 1
PERFORMED_GLEASON : 1
CALLERS_IF : 1
ASSISTANCE_BROS : 1
MANAGER_FENTANYL : 1
PATIENT_CHOLECALCIFEROL : 1
NUMBER_VERIFY : 1
LEAVE_SOON : 1
NO_RASHES : 1
MAILED_USING : 1
KNEE_DUE : 1
MORNING_HE : 1
NOT_RTC : 1
GENERAL_NOTE : 2
BARRATA_PRACTICED : 1
OF_HAVING : 1
WAS_FROM : 1
IS_ADVISED : 1
MR_FERNANDO : 1
PREPUCE_IN : 1
PRESCRIBED_BENZOTROPINE : 1
DISCHARGE_NOTE : 1
CLIPPINGS_BUT : 1
ADDITIONAL_TIME : 1
CASE_MH : 1
TEARFULHE_RELATES : 1
VIA_AND : 1
PROSTHETIC_OUTPATIENT : 1
DID_CANCEL : 1
HL_INTACT : 1
TOOTH_PATIENT : 1
ADDENDUM_ULTRASOUND : 1
MG_KNEE : 1
MALE_IN : 1
MONITOR_ROUTINELY : 1
PATIENT_IN : 1
BE_HARDSHIP : 1
VETERANS_FOR : 1
THINGS_DIFFERENTLY : 1
TELERETINAL_IMAGING : 1
VETERAN_ON : 1
SCRIPT_UARY : 1
VISIT_EVAL : 1
HAVE_YOU : 2
PAIN_NURSING : 1
EFFUSION_ROM : 1
EGD_ANATOMICAL : 1
UPPER_NO : 1
CALL_WAS : 1
SUPPLIES_FOR : 1
AND_SPECIFIED : 1
DISCOMFERT_GOOD : 1
PIERCE_THE : 1
MG_DAILY : 1
COGNITIVE_MEMORY : 1
SHEET_COMPLAINT : 1
ROOM_ORDER : 1
NOT_FOR : 5
THE_PERSONAL : 1
ALL_AREAS : 1
WINDSHIELD_LEVEL : 1
ALL_MODIFIED : 1
PRESSURE_OUTREACH : 1
ACCUCHEK_COMFORT : 1
RESIDENT_DIDACTIC : 1
PRESSURE_BACTERIOLOGY : 1
IMAGING_IN : 1
ANY_SUBSEQUENT : 1
VARIOUS_OF : 1
IMPAC_THERAPIST : 1
DO_IT : 2
MEDICAL_HISTORY : 1
BEEN_UNABLE : 1
ME_THROUGH : 1
DOES_ON : 1
REDIRECTION_CONCERNS : 1
AND_MAILED : 1
RELIEF_WITH : 1
WAS_INITIALLY : 1
AND_HAVE : 1
GLUCOSE_STRIP : 1
MAR_THE : 1
SUPPORT_ENCOURAGEMENT : 1
BUILDING_THIS : 1
RE_TIME : 1
FIBRILLATION_CLINIC : 1
DISCONNECTED_SCHEDULE : 1
TALK_WITH : 1
FATE_HIS : 1
WILL_REVIEWED : 1
VETERAN_PRESENT : 1
SEXUAL_TRAUMA : 1
EVALUATION_HERE : 1
CARE_CARE : 1
COUNTER_MEDICATIONS : 1
VET_IN : 1
ERUPTED_EXR : 1
BECAUSE_WAS : 1
DOES_COUGH : 1
BIRCH_IS : 1
AT_MEDICINE : 1
HER_CALL : 1
ETOH_FEELING : 1
BENEFITS_OF : 1
EVERY_BLOOD : 1
OX_PSXH : 1
FOR_ANEURYSM : 1
CHECKS_MONITORED : 1
ECASA_THAT : 1
DIAGNOSES_PROBLEMS : 1
HAVING_STATED : 1
BE_ADMITS : 1
APPROACHING_SCOPOLAMINE : 1
HAVE_INTERMITTANTLY : 1
EXR_ETOH : 1
AND_SOCIAL : 1
THE_TREATMENT : 2
SEEN_EYE : 1
MOUNTAIN_HOME : 1
THERE_IS : 1
OUT_OTHER : 1
MANAGEMENT_GAIT : 1
LIKELY_VET : 1
SHIFT_PATIENT : 12
LEVEL_PARTICIPATION : 1
SMOKING_WAS : 1
VETERAN_REVIEWED : 1
RT_IN : 1
MEDICAL_DIPHENHYDRAMINE : 1
OBTAINED_NEUROLOGY : 1
DUE_POSSIBILITY : 1
ATTENDED_AND : 1
MEASUREMENT_DT : 1
HIS_ROOM : 1
OR_STAYING : 1
UNPREDICTABLE_NOISES : 1
AND_NEGLECT : 1
TO_ADDITIONAL : 1
SPECIFIED_FORMS : 1
LIVER_AGENTS : 1
DISORDER_NONE : 1
COMFORT_IS : 1
BEHAVIOR_SAFETY : 2
TAB_SIG : 1
FROM_PATIENT : 1
UP_ASSISTANCE : 2
BASCOMPALMER_THURS : 1
PL_ACTION : 1
KG_ADDENDUM : 1
DIRECTIVE_OUTPATIENT : 1
EXCESSIVE_DURATION : 1
DURATION_CONTINUE : 1
CHANGED_SCHEDULED : 1
AROUND_BLOCK : 1
HX_ETOH : 1
PATIENT_BEING : 1
WHEN_POSSIBLE : 1
TO_HIS : 7
DESCRIPTION_TREATMENT : 1
MEDICATION_THIS : 1
IS_CONSULT : 1
WERE_REVIEWED : 3
LEG_RX : 1
DOCUMENT_TWO : 1
AT_THIS : 2
CONTINENT_PROTECTORS : 1
TAKING_THEM : 1
FEELS_SXS : 1
OF_MONITORING : 1
IMPRESSIONS_PRIOR : 1
AREAS_SEVERAL : 1
CALL_IN : 1
AS_IS : 1
RESULT_PATIENT : 1
USE_OUTPATIENT : 1
APT_GEC : 1
IN_TALKING : 1
MAKE_THE : 1
ADMISSION_GENERAL : 1
TO_PROMOTE : 1
THURS_OF : 1
SKIN_RASHES : 1
UNDER_AND : 1
MINUTE_SIGNS : 1
STABLE_ANXIOUS : 1
GROUP_DEALING : 1
GET_MEDICATIONS : 1
TWO_PREVIOUS : 1
CRITERIA_INPATIENT : 1
DECREASED_ETOH : 1
TREATMENT_GOALS : 1
VA_ALLERGIES : 2
HE_WAS : 6
SAFE_THERAPEUTIC : 1
PATIENT_DENIES : 2
TYP_ADMITTED : 1
THIS_OUTSIDE : 1
FAMILY_IS : 1
IS_INDEPENDANT : 1
UP_STAFF : 1
TIZZANO_JR : 1
OTHER_HAS : 1
THEY_THIS : 1
INSTABILITY_TKA : 1
BUT_HAVE : 2
PROGRAM_CLINIC : 1
LABORATORY_SIERRA : 1
REPORTS_THAT : 6
COMPLAINT_SEEN : 1
NEEDED_WOUND : 1
EXCEED_PRESCRIBED : 1
STAFF_HIP : 1
THE_TOTAL : 1
LEVEL_MYOFASCIAL : 1
GOALS_ASSIGNED : 1
DSHI_REPORT : 1
PERIOD_STAGE : 1
AND_CALL : 2
OF_THAT : 1
OUTPATIENT_STATUS : 10
PERSONALITY_STRIDULOUS : 1
THE_PATIENTS : 2
SITUATION_ABLE : 1
CHIROPRACTOR_MINUTE : 1
MG_ACTIVE : 1
TAPE_SOAP : 1
THAT_LETTER : 1
TIME_CALL : 1
THE_AFTER : 1
DOCUMENT_BE : 3
KNEE_BRACE : 1
LASTED_YOU : 1
PERSONAL_MEDICATIONS : 1
AND_DOES : 1
MONTH_FOR : 1
WITH_LOOSENING : 1
HIS_TOGETHER : 1
PRESBY_PMH : 1
MIXED_ANXIETY : 1
TOLERATED_VERY : 1
HAS_KNOW : 1
BIPOLAR_DISORDER : 1
MESSAGE_THAT : 1
COMES_FOR : 1
ADDENDUM_PLAN : 1
AS_PM : 1
HEMOGLOBIN_AC : 1
ML_IMPRESSION : 1
FOR_HIS : 1
EXP_NO : 1
EVERY_SURGICAL : 1
NOT_APPLICABLE : 4
TAKE_NO : 1
TIME_THIS : 1
VETERAN_TO : 5
MEDICAL_PERFORMANCE : 1
SOURCE_INFORMATION : 1
JUNE_LAST : 1
SKILLS_KNOWLEDGE : 1
CARE_AT : 1
OF_NICOTINE : 1
WRAPUP_DEALING : 1
WHILE_HERE : 1
AHEAD_AND : 1
ACKNOWLEDGED_DEPRESSION : 1
INFECTION_PT : 1
WITHOUT_PHARM : 1
DELTOID_VACCINE : 1
BEHAVIORAL_SETTING : 1
LACY_ANCHORAGE : 2
IT_FOR : 1
EXPERIENCING_SIDE : 1
SCHEDULED_DERM : 1
BEHAVIOR_CHARACTERIZED : 1
COME_OF : 1
CALL_OXYCODONE : 1
FINGERS_SHOULDER : 1
ED_IMMUNIZATION : 1
REVIEWED_AND : 1
PATIENT_YES : 1
HOME_LOG : 1
INSTRUCTOR_ADDENDUM : 1
RATED_DISSABIL : 1
SYMMETRICAL_DISCOMFERT : 1
DATE_MAR : 1
CAR_PT : 1
EVERY_WITH : 1
MALE_NO : 1
RETINOPATHY_PENDING : 1
BIRTHDATE_JUL : 1
CALL_STAFF : 1
NEXT_PLAN : 1
IMAGING_ADDENDUM : 1
INCH_GUAZE : 1
BEEN_RIDING : 1
ADDENDUM_IN : 3
HAS_MASS : 1
WOULD_STARVE : 1
THE_SKIN : 2
SOCIAL_VOLUNTEER : 1
CHEST_TAKING : 1
IMPRESSION_TO : 1
PATIENT_WANTS : 1
MH_CASE : 3
FURTHER_UP : 1
INSTRUCTIONS_OF : 1
DIABETES_COMP : 1
LOSE_HIS : 1
ARE_DOCUMENTED : 1
PRESSURE_AND : 1
MEDICINE_RESIDENT : 1
INNOVATIVE_THAT : 1
TAKEN_SPECIFIC : 1
FEAR_ABOUT : 1
CODE_TAKE : 1
TO_LISTEN : 1
IN_OT : 1
DECLINED_BROS : 1
WILL_THIS : 2
EDEMA_NOR : 1
GAOL_DICTATED : 1
ADDENDUM_SESSIONS : 2
POSSIBLE_VETERAN : 2
MILDLY_TENDER : 1
WAS_VETERAN : 3
BUT_DOES : 1
REGARDING_RE : 1
IS_LOCALLY : 1
REPEATED_PRESSURE : 1
COUGH_CHECKS : 1
TEXT_MYOPIA : 1
WHEN_SON : 1
THE_LEAVING : 1
THINGS_HE : 1
STRIDULOUS_GET : 1
MY_AGAIN : 1
FOR_ADDED : 1
TOP_MELLI : 1
NEXT_LS : 1
WE_CONTACTED : 1
IN_EPITHELIZATION : 1
OLANZAPINE_ERECTILE : 1
MALE_IS : 1
MINUTES_ONGOING : 1
STATED_WITH : 1
DENVER_FAILURE : 1
STATING_HE : 2
HX_ON : 1
OTHER_COUNSELING : 2
YES_TYPE : 1
PLAN_SOUNDS : 1
OVER_OVER : 1
IN_TH : 1
TO_CONTACT : 2
GROUP_WITH : 1
HISTORY_ADDENDUM : 1
MALE_LB : 1
CHRONIC_OF : 1
AND_SERVICES : 1
REHAB_HIM : 1
PROGRAM_PRESCRIPTION : 1
HE_EXPERIENCING : 1
PRESSURE_MOUTH : 1
AFTER_PROVIDER : 1
BETADINE_LABORATORY : 1
NOT_EXCEED : 1
BACK_MALE : 1
ASSISTANCE_FOR : 5
YANICK_ARNP : 1
PAIN_MIMSOME : 1
OR_MORE : 1
HAD_HER : 1
THOUGHTS_OF : 1
SAVINGS_HE : 1
AGO_PATIENT : 1
WAS_ADMITTED : 1
HE_HAVE : 3
HIS_MEDICINE : 1
EBL_PREPUCE : 1
TO_COMING : 1
VETERANS_CARE : 1
NEURO_PT : 1
GOUT_MONTH : 1
DENIES_SPECIFIC : 1
UNCHANGED_ADD : 1
NO_MYOFASCIAL : 1
FOR_ONE : 1
ABOVE_AND : 1
CONDITION_GETTING : 1
GOUT_ATTACK : 1
ASSURANCE_FOR : 1
THERAPEUTIC_GROUPS : 1
AGE_VETERAN : 1
DENIES_PAIN : 1
BLOOD_READINGS : 1
SENSITIVITY_AND : 1
HIMSELF_FOR : 2
EPIDIDYMIS_MEASURES : 1
MOBILITY_VETERAN : 1
FELT_ANGRY : 1
LETTER_ACID : 1
ANY_CHANGE : 1
CAN_KEEP : 1
PAIN_NVD : 1
BEEN_LEVOTHYROXINE : 1
MR_WAS : 3
PHYSICAL_VET : 1
IN_FUTURE : 1
DURING_MORNING : 1
INPATIENT_OUTPATIENT : 1
BOWEL_THIS : 2
APPEARANCE_ASSIST : 1
CONSULTATION_ID : 1
BREAK_IN : 1
IN_HER : 1
CURRENT_SCHIZOPHRENIA : 1
PSYCHOLOGICAL_ASSESSMENT : 1
GET_MH : 1
BELOW_PATIENT : 1
STRUGGLING_TO : 1
VOUCHER_SINCE : 1
REPORT_TECH : 1
HEALTH_APPOINTMENTS : 1
EAR_ESPECIALLY : 1
ADDRESS_CENTURY : 1
DURING_THE : 4
IMPAC_WILL : 1
PARAPHERNALIA_STRESS : 1
COMFORT_GLUCOSE : 1
NAPPING_TIMES : 1
YEAR_MALE : 1
PATIENT_LARGE : 1
ADDENDUM_VET : 1
CARE_PATIENT : 1
MOUTH_ACTIVE : 4
HOMICIDAL_INHIBITORY : 1
PATIENT_CALLED : 1
TKA_NEW : 1
THAN_STATED : 1
RE_VET : 1
BE_ACTIVE : 1
SUPPORTIVE_BUTT : 1
BLOOD_CURRENTLY : 1
VA_SPECIFY : 1
IS_NOURISHED : 1
WITH_FOR : 1
TO_HH : 1
SUPPORT_TREATMENT : 1
TEST_AUDITC : 1
REPAIR_WITH : 1
AND_REDUCING : 1
ANY_REPORTS : 1
BY_THE : 3
BMI_ACCUCHEK : 1
NOT_KEEP : 1
CANC_NG : 1
OF_AK : 1
CANCEL_DID : 1
MYCOSIS_OIDES : 1
FOR_PATIENT : 1
GOOD_PELVIS : 1
MEDS_AZITHROMYCIN : 1
FOR_TO : 6
HARALD_COSIGNER : 1
PRESSURE_SPOKE : 1
LCSW_SAID : 1
WAS_WORK : 1
MAY_APPROPRIATE : 1
HE_TAKES : 1
HOME_WAS : 1
RESIDENT_VISIT : 1
INFORMATION_AS : 1
TALKING_ABOUT : 1
ASSISTANCE_ELIMINATION : 2
IS_ALSO : 1
BEHAVIOR_CONTRACT : 1
SUPPORTIVE_FACILITATORS : 1
SAME_BACK : 1
STUDY_HE : 1
FACTORS_CHANGE : 1
WHO_PSYCHIATRIST : 1
READINGS_LENGTH : 1
DONT_LETTER : 1
PAIN_ACROS : 1
CRNA_PROGRESS : 1
HOMICIDAL_THOUGHT : 1
THEM_AS : 1
NP_PA : 1
PAIN_FOR : 1
PROBLEM_DEFICIT : 1
REASON_ADMISSION : 1
NO_FACTORS : 1
SHAKE_WHO : 1
URINE_NUMBER : 1
DO_MYSELF : 1
OF_PROVIDED : 1
AT_HE : 1
FAMILY_NO : 2
NOT_MORE : 1
SHE_STATED : 1
PCP_LACY : 2
HAT_TOP : 1
FOR_PERSONAL : 1
SAYS_HE : 3
SURROGATE_APPLICABLE : 1
YES_TEMPERATURE : 1
SHE_HE : 1
HYPERCHO_OLEMIA : 2
ALCOHOL_PAST : 1
TOES_AND : 1
OF_CERVICAL : 1
YOU_ON : 1
CM_MM : 1
BREATH_TRANSDERMAL : 1
PROGRAM_TRANSFER : 1
AND_PROVIDED : 1
UP_AN : 1
REFERRALS_TO : 1
NO_LOG : 1
HE_LIKE : 1
INTERVENTION_SALINE : 1
ADMINISTRATION_MEDICATION : 1
IN_WORRIED : 1
OPPORTUNITY_NEXT : 1
BROS_PROBLEMS : 1
CORRECT_ANSWER : 1
IS_MALE : 1
USED_TO : 2
SPECIFY_SITE : 1
BUT_PODIATRY : 1
AND_SHOULDER : 1
AWAKE_OF : 1
CATHETERIZATION_AND : 1
EXAM_WAS : 1
VISIT_PTS : 1
WELL_AS : 1
PATIENT_INSTRUCTED : 1
AND_WITH : 7
REACTIONS_HE : 1
PAIN_SCORE : 2
FOR_OUTPATIENT : 2
STATUS_HX : 1
MEMBER_OTHER : 1
RECENT_LAB : 1
TOBACCO_DISORDER : 3
MD_NP : 1
THE_HAS : 4
MAY_AWAY : 1
VA_BUT : 1
MEDICATIONS_EXPIRATION : 1
SI_VAGUE : 1
COPY_INSTUCTIONS : 1
WHEN_CAME : 1
RIGHT_IS : 1
OBTAIN_MAINTAIN : 1
VERBALIZE_TO : 1
IDENTIFIED_REPORT : 1
SIGNS_CARE : 1
TIME_RECENTLY : 1
ROUTINE_TOBACCO : 1
MEASURES_TO : 1
PHYSICIAN_MAR : 1
AT_PM : 2
FOR_IMMEDIATE : 1
LONG_AFTER : 1
WHEREBY_THE : 1
PAST_NO : 2
APPEARED_AFTER : 1
FUTURE_DISCHARGE : 1
LBS_MOUTH : 1
IF_OR : 1
RE_USED : 1
EPIDIDYMIS_BY : 1
TOILET_ELIMINATION : 1
INSIGHT_SOCIAL : 1
AGO_THE : 1
TO_HAVE : 4
MHC_PROGRESS : 1
ANAND_SOMATIZATION : 1
AFTER_ASSESS : 1
IT_AT : 1
DECLINED_FOOD : 1
DEPRESSED_ANGRY : 1
NO_WEAKNESS : 1
MG_SIG : 1
POST_DISCHARGE : 1
TAKE_BY : 1
APNEA_PULSE : 1
THINKING_MORE : 1
DO_FEEL : 1
INDIVIDUALS_ARE : 1
GRANULATION_SLIGHT : 1
HAS_CHRONIC : 1
ACROMIOPLASTY_WOUND : 1
REASON_CONTACT : 1
HIS_OF : 1
MANAGEMENT_LEFT : 1
ASSESSMENT_ON : 1
FOR_OR : 2
SUBSEQUENTLY_HIS : 1
IN_BILATERAL : 1
THIS_TRANSITION : 1
DIMINISHED_INDEPENDENT : 1
ABLE_IDENTIFY : 2
OUTPATIENT_SUPPORT : 1
STRIP_INCH : 1
NASAL_ULA : 1
FOR_TX : 1
IS_NORMAL : 1
PRESENTED_WRITER : 1
SHE_APPROPRIATELY : 1
CARE_ELIMINATION : 1
HAS_MANAGER : 1
UNDER_PRESSURE : 1
MAINTAINS_CONTROL : 1
VITAL_HT : 1
IS_PRESENTS : 1
TO_TAKE : 2
PASSED_OUT : 1
CHANGE_METHOD : 1
CONTACT_PT : 1
PAIN_APPOINTMENT : 1
OUTSTANDING_DENVER : 1
OUTSTANDING_CONSULTS : 1
BRONCHODILATORS_COPD : 1
ALSO_THE : 1
ELIMINATION_FLUIDS : 1
CONTACT_AND : 1
CLINIC_VISIT : 1
MEDICATIONS_WORK : 1
TRIAGE_OF : 1
PERFORM_SET : 1
DX_DISORDER : 1
TAB_TABLETS : 1
LPM_EXERCISE : 2
AN_EVALUATION : 2
OF_TOBACCO : 1
SYNTHROID_MG : 1
WEAKNESS_KNEE : 1
GIVEN_IN : 1
NAIL_CLIPPINGS : 1
BEING_UNDER : 1
DID_BEFORE : 1
VINFLUENZA_TO : 1
TO_SEE : 2
CATHETER_TOLERATED : 1
ELIMINATION_ACTIVITIES : 1
DEMONSTRATED_THE : 1
ASSIST_PATIENT : 2
FEELING_LIKE : 1
GIVEN_PT : 1
INFORMATION_ACTIVITIES : 1
AORTIC_DISORDER : 1
GLUCOSE_ON : 1
PATIENT_RECURRING : 1
CONSCIOUSNESS_ALERT : 1
MOSTLY_WHEN : 1
IMPRESSION_JUN : 1
PERIOD_SERVICE : 1
STATUS_MEMORY : 1
FOR_MY : 1
CORRECT_NOT : 1
FIRE_IN : 1
TOOTH_EXR : 1
NIGHT_CALL : 1
AT_RISK : 1
REMAINING_WILL : 1
APPT_SAME : 1
ANY_SHORTNESS : 1
UPDATE_ON : 1
RESOLUTION_TINY : 1
PATIENT_MEETS : 2
EX_IN : 1
ROUTINELY_LOCATION : 1
INJURY_HE : 1
THIS_DEAR : 1
NOT_TEACH : 1
DENIES_FOLLOWED : 1
ACTIVE_OUTPATIENT : 12
EXPRESSED_VETERAN : 1
SYMPTOMS_IMPROVED : 1
TRANSITION_AMOUNT : 1
HER_AS : 1
ABLE_TO : 4
NO_KIDS : 1
TO_VET : 1
FUNCTION_MORE : 1
AND_DEMONSTRATED : 1
ASSISTANCE_BOWEL : 2
JUN_DENTAL : 1
THROUGH_THE : 1
INFORMATION_TO : 1
PERSON_ASSIST : 1
SEEN_THIS : 1
THIS_THIS : 1
DENIES_SOURCE : 1
CHANGES_PAST : 1
HR_IS : 1
SCREEN_CURRENTLY : 1
ALL_INDEPENDENCE : 1
SUPPORTING_EACHOTHER : 1
ON_BACK : 2
ON_RECENT : 2
COORDINATOR_MVA : 1
ANCHORAGE_MACKIE : 1
WE_NEED : 1
YOU_SICK : 1
NASAL_LPM : 1
BY_WITH : 1
MR_BASCOMPALMER : 1
REPORTED_ADJUSMENT : 1
NOT_CHANGED : 1
IN_WATCHING : 1
CANE_NUMBER : 1
CALM_PLEASANT : 1
COMPLETION_IMMEDIATE : 1
VETERAN_PROVIDED : 1
SKILLS_TO : 3
RIGHT_ARM : 1
BE_COMPLETED : 1
SET_CONSIST : 1
MH_INTERIM : 1
AN_OTHER : 1
DICTATED_GAOL : 1
TAB_ALBUTEROL : 1
OR_ARTHRITIS : 1
IN_GETS : 1
AND_ENCOURAGE : 1
PHYSICIAN_DURING : 1
NEURO_HOSPITALIZATIONS : 1
DIABETIC_RETINOPATHY : 1
EYE_TECHNICIAN : 1
EXAM_MUNDY : 1
CONTINUE_RADIATION : 1
SEEN_WITHIN : 1
BRUSH_TEETH : 1
CYST_IMPRESSION : 1
BELOW_LIVES : 1
REPLACEMENT_BENIGN : 1
LOST_MOUTH : 1
WORK_PART : 1
SECTION_IDENTIFICATION : 1
TO_HOME : 1
BRUSH_ADAPTIVE : 1
VETS_APPRECIATIVE : 1
OF_ALOPECIA : 1
DOB_SSN : 1
ALCOHOL_PATIENT : 1
BROTHER_HAS : 1
TWICE_ACTIVE : 1
NONSPECIFIC_ABNORMAL : 1
DAILY_THAT : 1
SHIFT_SHIFT : 1
IN_ALSO : 1
THE_ON : 1
DEPRESIION_POLYSUBSTANCE : 1
NEEDED_EFFECTIVE : 3
MUST_COMPLETED : 1
BASEMENT_LOST : 1
DISCHARGED_CHRONIC : 1
TO_EAR : 1
AMB_STD : 1
NOTE_SKIN : 1
SHAMPOO_CARE : 1
IN_PREVENTIVE : 1
MR_ON : 1
SIDE_POSSIBLE : 1
SIGNS_SYMPTOMS : 1
VALUABLES_VAULT : 1
VA_TRIAGE : 1
WITH_EXERCISE : 2
PT_ATTENDED : 1
BE_OFF : 1
VETERAN_BIRCH : 1
DENIES_OF : 1
PROPHYLAXIS_ACTIVE : 1
REACTIONS_STATED : 1
PATIENT_DIETARY : 1
AND_ARE : 2
MEDICATION_INSTRUCTIONS : 1
HIS_SINCE : 2
CENTER_ON : 1
PT_THAT : 2
MANAGEMENT_DISCHARGED : 1
DOES_WANT : 1
THAN_GOAL : 1
IS_SIDE : 1
PAIN_RESULTS : 1
TIMES_NEEDED : 2
GETTING_BACK : 1
IS_ASSIGNED : 2
PSYCHIATRY_NOTE : 2
GROUPS_APPROPRIATELY : 1
PERSONAL_SHAVE : 1
PHONE_PATIENT : 1
BURDEN_STRESS : 1
THROUGH_DIVORCE : 1
BE_NONE : 1
RIGHT_IN : 1
SPENDING_TIME : 1
NO_SHOW : 1
COMPLETE_COMPLETE : 1
FOR_LARGE : 1
PATIENT_EXAM : 1
FOR_SCHEDULED : 2
SYNCOPE_LUNG : 1
EFFECT_THE : 1
HOMOCIDAL_CHIEF : 1
TOBACCO_CESSATION : 1
TELEPHONE_MADE : 1
IS_AGITATION : 1
ATRIAL_ANTICOAGULANT : 1
ASSERTIVENESS_SKILLS : 1
AND_FAILED : 1
IS_PULSE : 1
PROBLEMS_ALCOHOL : 1
CONTINENT_BOWEL : 1
BASIS_THE : 1
IMPAIRED_EMESIS : 1
MG_TAKE : 4
COMPLAINT_THE : 1
PROCEDURE_PT : 1
FOR_DYSMENORRHEA : 1
LING_GAIT : 1
WANT_CALL : 1
BRAIN_IN : 1
NONE_RESULTS : 1
NOTE_MEDICATIONS : 2
TAKE_HAS : 1
PATIENT_BATHROOM : 1
IDENTIFY_TRIGGERS : 1
MODALITY_SMOKING : 1
BY_MARCIA : 1
PSA_GU : 1
AUTHOR_RYAN : 1
REFUSED_TO : 2
DATE_ENCOURAGE : 1
BE_MORE : 1
AT_AND : 3
PAINFUL_BLISTERS : 1
WEEK_APPOINTED : 1
VINFLUENZA_IMMUNI : 1
HOPED_BEHAVIOR : 1
ATTACHED_TO : 1
ASSESSMENT_IS : 4
ANXIETY_NONE : 1
APPEARANCE_WELL : 1
SYNTHROID_TAB : 1
OF_SHORTENING : 1
DIAGNOSIS_SCHIZOPHRENIA : 1
HIS_LIFE : 1
DISABLED_DATE : 1
PAST_PRESCRIBED : 1
PATIENT_INFORMED : 2
INCLUDING_NUTRITION : 1
REQUESTING_MAMMOGRAM : 1
HE_AS : 1
VET_WIFE : 1
WITHDRAWAL_AND : 1
SINCE_THEY : 1
MOOD_FINANCES : 1
THE_FOLLOWING : 5
ASSISTANCE_EYE : 1
CARE_AFFECTED : 1
ASSIST_MONITORED : 1
DEVELOP_INDIVIDUAL : 1
OF_GRPOUPS : 1
STAFF_WILL : 1
USE_DEPENDS : 1
VETS_VET : 1
UNDERSTANDING_MOUTH : 1
OR_MINUTES : 1
MOUTH_DAILY : 2
VIGAMOX_EYE : 1
AIR_TEACHING : 1
PHYSICAL_EXAMINATION : 1
STOOL_ZZPATIENT : 1
ICDCM_PAIN : 1
NO_CHANGES : 1
ACHIEVING_YOUR : 2
NEED_BACK : 1
YES_PATIENT : 1
PRIMARY_CLINIC : 1
MEDICATIONS_PT : 2
SCHIZOPHRENIA_NO : 1
CALL_MIN : 1
SHIFT_WAS : 4
SWOLLEN_EFFUSION : 1
WAS_COMPLETE : 1
PSYCHOTHERAPY_IOP : 1
VIEWED_SC : 1
LESS_THAN : 3
LIGHT_REACH : 1
ARM_REPEATED : 1
TRAUMA_AIDS : 1
ANATOMICAL_LOCATION : 1
THAT_SMOKES : 1
POSTAL_SERVICE : 1
TEMPERATURE_MEDICINE : 1
ED_ARE : 1
BLOOD_NUMBER : 1
HOMOCIDAL_COMPLAINT : 1
HIS_WHO : 1
WHO_THAT : 1
ON_YES : 1
OR_UNCONTROLLED : 1
BILAT_OF : 1
IS_CONTINENT : 4
ASTHMA_HTN : 1
AGITATION_ORIENTED : 1
WITH_ANGER : 1
BUPROPION_JUNE : 1
STATUS_FLU : 1
NOT_PAJAMAS : 1
ORIENTED_ORIENTED : 1
DISCONTINUE_PLEASE : 1
NOT_ALL : 1
LUPUS_ALOPECIA : 1
VOLUNTEER_HIS : 1
AND_NO : 4
TOES_FINGERS : 1
DOCUMENT_IMMUNIZATION : 1
CONTACTS_AND : 1
PRIMARY_CALL : 1
RATHER_RECEIVE : 1
SC_AND : 1
HER_GYNECOLOGY : 1
FOR_ADAPTING : 1
ISSUE_ANTICOAG : 1
APPOINTMENT_ADDENDUM : 2
NEURO_FOLLOWED : 1
FAMILY_OTHER : 1
BUT_HE : 2
REMOVED_WITH : 1
SUICIDAL_TO : 1
VISTA_COMPLETED : 1
WAS_AND : 2
PL_HAVE : 1
NOR_ABLE : 1
FOR_PLAN : 2
HAVE_PAPERWORK : 1
SURGERY_CONNECTED : 1
OF_NARES : 1
VIA_POSTAL : 1
DORSAL_IF : 1
ON_SKIN : 2
ANY_HE : 2
MOOD_IS : 1
IN_TO : 2
OF_HELP : 1
BRUISING_NOTED : 1
TO_ASSESS : 1
AS_DIFFICULT : 1
ABOUT_MONTH : 1
ETOH_SUPINATION : 1
LARGE_TITUED : 1
RIGHTS_AND : 1
FOR_VETERAN : 4
HOURS_PING : 1
SURGERY_WOUND : 1
TUES_DURING : 1
DOUCUMENTED_YES : 1
HAS_OUTSIDE : 1
CANE_OF : 1
GROUP_EMPLOYMENT : 1
EMPLOYMENT_ACTIVE : 1
MALE_SEEN : 1
HIMSELF_THE : 1
CYST_IS : 1
WORK_AND : 1
NO_PRESENT : 1
HERE_PATIENT : 1
CORRECT_SITE : 1
HE_GET : 1
DETOXED_VET : 1
RECOVERY_INTERESTS : 1
PHONE_LISTED : 1
NOTE_GAOL : 1
AND_PROCEDURE : 1
HIS_EATING : 1
FOLLOWED_BY : 3
SURGERY_NONE : 1
DIAGNOSIS_INSTABILITY : 1
IV_PT : 1
CALL_LIGHT : 1
OUTPATIENT_USE : 2
OP_PSYCHOLOGY : 1
TEST_NURSING : 1
FEELING_ALL : 1
DYSMENORRHEA_HAD : 1
THEIR_TALKING : 1
THEIR_BLOOD : 1
NOTE_BLINDNESS : 1
SUMMARY_FAXED : 1
HPI_PT : 1
RESTART_REMOVED : 1
PULSE_BY : 1
TO_BY : 1
IDENTIFY_DROP : 1
ORIENTED_PATIENT : 1
WHEN_SHE : 1
DESCRIBED_ON : 1
MEDICAL_NURSING : 1
PROVIDER_THE : 1
TO_PL : 1
CAN_VIEWED : 2
CLINIC_SERVICE : 1
NEXT_FLU : 1
STAFF_AT : 1
APPLICABLE_DEPENDENCE : 1
KEEP_OPENMIND : 1
CHILDS_HEAD : 1
HAD_DONE : 1
MO_DID : 1
CHRONIC_PAIN : 3
DR_ALTHOUGH : 1
AGE_OR : 1
WILL_BE : 7
ED_PATIENT : 1
AND_REPORTS : 1
IS_CALLER : 1
COMPLETED_OF : 1
STATE_AS : 1
AND_TRP : 1
MARCIA_BELLO : 1
SITUATIONS_FEAR : 1
THIS_EDUCATION : 1
PT_DONT : 1
UNSPECIFIED_CONGESTIVE : 1
PSA_FREE : 1
OF_FEBRILE : 1
TUBERCULOSIS_PATIENT : 1
LS_PROVIDED : 1
RIGHT_PULSE : 1
SHE_WITH : 1
ME_OR : 1
AND_MAKE : 1
ARE_VETS : 1
TABLET_FULLY : 1
COSIGNER_DIABETIC : 1
THE_EFFECTIVENESS : 1
FOR_EFFECTIVE : 3
ASSESSMENT_SUICIDAL : 1
LIMITING_FUNCTION : 1
WITH_HER : 1
VOMITING_OTHER : 1
EVIDENT_IN : 1
PRIMARY_NP : 1
INTENT_OR : 1
STRUGGLING_PROCESS : 1
BY_BELLO : 1
GRADE_RADIATION : 1
SUICIDAL_BY : 1
OX_HELP : 1
NEW_REVIEW : 1
THE_TOES : 1
MOTHER_REPORTS : 1
TO_CARRY : 1
SAID_HIS : 1
CONTACT_NOTE : 1
REMINDED_HIM : 1
OF_NONE : 1
INTERIM_ACTIVE : 1
HE_THE : 1
VERBALIZE_PL : 1
ALERT_FREQ : 1
VERY_CANDID : 1
VADNAL_WHO : 1
NOTE_PPI : 1
DISORDERMET_WITH : 1
CONTINUE_TRAINING : 1
CHANGES_ADDENDUM : 1
PT_HIS : 1
AND_GET : 2
PHYSICIAN_IN : 1
IN_VISTA : 2
CYPROHEPTADINE_MALE : 1
ROM_WHILE : 1
ASSIST_HIM : 1
AWAY_ALTERNATE : 1
ALLERGY_REACTION : 1
CASE_TO : 1
PROBLEM_NURSING : 1
AND_THERAPEUTIC : 2
MM_CYST : 1
DOES_PATIENT : 4
SHOULD_NOW : 1
HE_SICK : 1
PT_HX : 1
CHOLECALCIFEROL_UNIT : 1
DOES_WEAR : 1
OF_STAFF : 1
BE_ADDRESS : 1
YRS_CLASSES : 1
HOWEVER_HE : 1
IOP_USE : 1
DRINKS_REASON : 1
AND_MODALITY : 1
CD_AND : 1
APPT_TO : 1
WEEK_FOR : 1
CHECKS_MINS : 1
CALL_CENTER : 1
NO_OBJECTIVE : 1
SOME_MYOFASCIAL : 1
AT_TO : 1
BACK_BUT : 1
BEHAVIOR_BY : 1
IN_NECESSARY : 1
CASUALTIES_AND : 1
VETERAN_HE : 4
POST_TELEPHONE : 1
LLOSE_PREDNISONE : 1
INFLUENZA_VACCINE : 1
ALL_CLINIC : 1
AGITATION_TO : 1
PATIENT_FOR : 2
COVER_CHIEF : 1
TOOTH_TEETH : 1
VISIT_TO : 1
VETERAN_WAS : 4
CLEAN_LIN : 1
LARGE_AMOUNTS : 1
PLAN_OF : 1
THIS_CONSULT : 1
THE_DEPARTMENT : 1
LEVEL_OF : 5
CLINIC_COME : 1
AND_WERE : 2
CYPROHEPTADINE_OLANZAPINE : 1
MEDICATIONS_MEDICATION : 1
TOGETHER_AND : 1
RENAL_NOTE : 1
HIM_THE : 2
FOR_LEFT : 1
UP_PULSE : 1
MALE_HEARING : 1
PERSONAL_NOT : 1
SIGNED_ALL : 1
NO_SUICIDAL : 1
MEDICATIONS_LETTER : 1
YEAR_MONTHLY : 1
AFTERNOON_ENTITLED : 1
HER_MYOPIA : 1
ELIMINATION_MOBILITY : 1
AS_WELL : 2
PROVIDE_THERAPEUTIC : 1
SAT_ROOM : 1
MANAGEMENT_MH : 1
ALOPECIA_CONSULT : 1
VET_LIVING : 1
OF_DOES : 1
MONITORING_AND : 1
COUNSELOR_APPLICABLE : 1
COMPANIES_FIRST : 1
INSTRUCTIONS_WILL : 1
HTN_SYNCOPE : 1
PHYSICIAN_WILL : 1
PHYSICIAN_IS : 1
LEARN_NURSING : 1
WAS_FILLED : 1
NO_ATTEMPTS : 1
OSAC_ACTIVE : 1
UNDER_ANY : 1
OF_CULTURES : 1
PATIENT_PROVIDED : 1
DIP_NOTEINTEGRATED : 1
MD_NAME : 1
DONE_WENDY : 1
LIKE_GO : 1
ENCOURAGE_BLIND : 1
CONTACT_SKIN : 1
MD_ARNP : 1
SPINAL_CORD : 1
IN_HIGH : 1
LIP_HAD : 1
EXCUSES_FINAL : 1
TO_RECOVERY : 3
WAS_EVALUATED : 1
IN_ACTIVITIES : 1
CLASSIFICATION_LIN : 1
SATISFACTORY_FOR : 1
REMAINING_EXPENSES : 1
COMFORT_GOAL : 1
PERFORMED_PATHOLOGICALLY : 1
ABLE_ATTEND : 1
SIGNS_HT : 1
PROGRESS_NOTES : 1
DIAGNOSIS_FIBRILLATION : 2
INSTRUCTION_REGARDING : 1
PT_PT : 2
LEVEL_RECONCILIATION : 1
IS_CC : 1
LIKE_HIGHS : 1
PATIENT_HERE : 2
OUT_GUNPOINT : 1
SETS_CONSIST : 1
RECOVERY_HEALTH : 1
CLUB_AND : 1
HE_HIS : 4
WELLNESS_MIN : 1
BENZOTROPINE_OLANZAPINE : 1
GEESEY_YVONNE : 1
ALSO_OOMG : 1
DISORDER_IS : 1
OF_LOWER : 1
CARE_RECOMMENDATION : 1
VIBRATORY_DULL : 1
SPENDING_MORE : 1
OFFERED_STATING : 1
STAB_NOTED : 1
SOMATIZATION_HYPERTENSION : 1
CYR_DID : 1
PAPERWORK_FOR : 1
CARE_CALLED : 1
VETERAN_INFORMS : 1
SCREENING_LEFT : 1
DECLINE_SETTING : 1
TALKING_OTHERS : 2
WITH_LESS : 1
GOALS_HOMEWORK : 1
AND_RECEIVES : 1
OF_VOUCHER : 1
ON_WOULD : 1
CANE_UPRIGHT : 1
FOR_DOING : 1
STATED_THE : 1
ANY_OF : 2
WRISTS_KNEES : 1
BASED_ON : 1
WIFE_MAY : 1
AGO_COLCHICINE : 1
BY_NONSPECIFIC : 1
ROUNDS_CHILD : 1
PATHOLOGICALLY_GRADE : 1
RELAXATION_SEEN : 1
INPT_SECLUSION : 1
MEDICATIONS_ENCOURAGED : 1
HE_REPORTED : 1
BP_PAIN : 1
INTIMIDATING_PTS : 1
CHO_OL : 1
IN_MOOD : 1
POWER_ATTORNEY : 1
ALERT_WALKING : 1
SHOULDER_SATISFACTORY : 1
CONTACTS_DICUSSION : 1
NOTE_PLEASE : 1
THERAPY_AS : 1
DENIES_MIMSOME : 1
YOU_SEEN : 1
AN_OPENMIND : 1
YES_BLOOD : 1
FAMILY_SIGNIFICANT : 2
AND_CLIENT : 1
BESYLATE_MG : 1
THE_WITH : 1
BATH_OR : 1
PROCEDURE_CHECK : 1
MOOD_BEHAVIOR : 2
TECHNIQUE_OF : 1
VISIT_DENTAL : 1
FUNCTION_AND : 1
TO_OBTAIN : 1
MET_MEDICAL : 1
ADDENDUM_MEDICAL : 1
INJURY_OCTOBER : 1
TEST_NUR : 1
PATIENTS_CASE : 1
MODIFIED_INDEPENDENCE : 1
PROVIDED_FACILITATORS : 1
MONITORED_PAIN : 1
WILL_AMOUNT : 1
ARTHRITIS_WITH : 1
CONTACT_MADE : 1
PEERS_STAFF : 1
SKIN_TIMES : 1
OF_BUT : 1
WIFE_OF : 1
TOTAL_KNEE : 1
CAP_AND : 1
OTHER_IN : 1
FEELS_FRAME : 1
STATUS_PATIENT : 1
NOTE_INTIMIDATING : 1
COORDINATE_WITH : 1
THE_AND : 5
THERAPY_BUT : 1
TOLD_DOCTORS : 1
SHIT_TOGETHER : 1
PODIATRY_OUTPT : 1
DID_ENGAGE : 1
UP_LIGHT : 1
VETERAN_THAT : 2
CHECK_REMOVED : 1
HOWEVER_EXHIBITING : 1
CHRONIC_INTERIM : 1
ADMISSION_SCHIZOAFFECTIVE : 1
CALL_PHYSICAL : 1
NOTE_AND : 3
TREATMENT_CATHETERIZATION : 1
COLOR_NORMAL : 1
RESULTS_RPR : 1
WITH_TO : 1
INPT_INSTRUCTION : 1
PTS_THE : 1
HOLD_CCRC : 1
HAD_THOUGHTS : 1
FIRE_THE : 1
OF_BIRCH : 1
INSIGHT_HIS : 1
COMMENTS_DECREASED : 1
MEDICINE_STAFF : 1
NOT_THINGS : 1
PSA_LOOKING : 1
TO_CLINIC : 1
KNOWLEDGE_ADMINISTRATION : 1
ACROS_BY : 1
REVIEWED_PATIENT : 2
NO_EXTRA : 1
BAKER_LCSW : 1
AND_DIRECTIONS : 1
QUESTION_AND : 1
OUTCOMES_OF : 1
NEEDS_GET : 1
SUPINATION_SIGNS : 1
ORIENTED_WITH : 1
HEIGHT_IN : 3
HIS_THAT : 1
IN_BED : 2
AND_SITUATIONS : 1
BY_VETERAN : 1
MAJOR_DISORDER : 1
EDUCATION_SHOULDER : 1
ICDCM_ACTIVE : 1
SESSION_THAT : 1
ML_PREPUCE : 1
HAVE_PRIMARY : 1
OUT_YESTER : 1
ALCOHOL_ALCOHOL : 1
TRIED_REASSURE : 1
CM_VITAL : 1
REMINDED_THAT : 2
TO_OUTPATIENT : 1
HE_IN : 3
SHOW_SCHEDULED : 1
GPC_FOSTER : 1
THIS_WHEN : 1
TO_IMPROVE : 1
ESTIMATED_ADDITIONAL : 1
LAST_EVENING : 1
PLACE_IN : 1
THE_IDENTIFIERS : 1
APPOINTMENT_PATIENT : 2
CLUB_THE : 2
PHONE_SAME : 1
FOR_BASED : 1
RESULTS_ANY : 1
RECONCILIATION_PHARMACY : 1
OF_THEROPY : 1
LIKELY_THAT : 1
THAT_REQUESTS : 1
PSYCHIATRY_SEE : 1
SHIFT_OF : 1
FOR_SHIFT : 1
GROUPS_TO : 1
AND_OFFERED : 1
THE_HOUSE : 1
THAT_IS : 4
LPM_WITH : 2
EDUCATION_RESP : 1
RECEIVED_THIS : 1
AMBULATION_COLOR : 1
AND_SKIN : 1
ALLERGIES_ENDING : 1
IDENTIFICATION_INFORMATION : 1
DC_ED : 1
NEUROLOGY_UP : 1
OR_SPONGE : 1
IS_PROVIDING : 1
AND_TRIED : 1
CONTINUE_WITH : 1
ROOM_WITH : 1
FOR_MUSCLE : 1
WITH_DECREASED : 1
NOTE_PREOP : 1
SITTER_HE : 1
PPD_EXT : 1
HIS_NEW : 1
ED_BY : 1
PROBLEM_COMMUNICATION : 1
SYSTEMS_THAT : 3
REACTION_SEE : 1
ALL_BELONGINGS : 1
STRESS_OF : 1
EDUCATION_NA : 1
COMMENTS_ED : 1
FOR_SHORTNESS : 1
JUNE_FILLED : 1
AND_HE : 7
MOUTH_PROTOCOL : 1
REHABILITATION_RESP : 1
NARROW_FOCUS : 1
TRIED_TO : 1
THAT_IN : 2
DISORGANIZED_THAN : 1
DOCUMENTS_IN : 1
PROGRAM_BY : 1
HER_OFFICE : 2
NO_RESOLUTION : 1
LOWER_UP : 1
EXTREMITIES_NO : 1
IMMEDIATELY_LIKE : 1
ADMINISTERED_AS : 1
LIVER_TOXIC : 1
VETERAN_AGREED : 1
EXCLUDING_SUPPLIES : 1
TUES_THE : 1
HAS_STRUGGLING : 1
THIS_NEXT : 1
SOME_NO : 1
MR_NOT : 1
GIVEN_RESIDENT : 1
FOOD_TOBACCO : 1
YES_RESIDENT : 1
HIM_FUNCTION : 1
PULSE_THAN : 1
RESEARCH_BECAUSE : 1
PPI_SKIN : 1
AND_PROFILE : 1
THERE_WAS : 1
PSYCHOTHERAPY_SEEN : 1
AS_TO : 1
SCREENING_RESULTS : 1
REQUESTING_CHAITANYA : 1
LONG_NUMBER : 1
MEASUREMENT_POX : 1
YVONNE_FACTORS : 1
RELATED_TO : 1
KNEE_EDEMA : 1
AND_OUTPATIENT : 2
RX_AND : 1
MCVEIGH_SIGN : 1
MORE_AND : 1
GUAZE_PATIENTS : 1
HAVE_LETTER : 1
DISCHARGING_ALLERGIES : 1
MORNING_IT : 1
CONSUMED_WILL : 1
PT_WOULD : 1
PHYSICIAN_PROGRESS : 1
HIS_ANGER : 1
DISCHARGING_CHLORAMPHENICOL : 1
AS_EVALUATION : 1
TEMPORARILY_DISABLED : 1
MUCH_YOU : 1
TREATMENTS_WITHOUT : 1
ED_AND : 1
RECOVERY_WAS : 1
MORNING_APPT : 1
COLONOSCOPY_IN : 1
WITHIN_HIS : 1
ABOUT_FATE : 1
PROGRAM_HE : 1
MHC_RELAPSE : 1
CALM_SAFE : 1
AND_AS : 1
OTHERS_EDUCATED : 1
NO_NO : 3
PING_DISCUSSED : 1
TINY_AK : 1
OPTOMETRY_TO : 1
LB_BP : 1
MANUAL_TIME : 1
HEENT_NORMOCEPHALIC : 1
ANTIPLATELET_ANTITHROMBOTI : 1
HOME_CALLED : 1
RIDING_BICYCLE : 1
MIMSOME_CA : 1
LAST_ONE : 2
PATIENT_TO : 7
IS_VICTIM : 1
PATIENT_CONTACT : 1
BRC_CONTINUE : 1
AM_STAFF : 1
IS_GETTING : 1
ANATOMICAL_SEE : 1
VETERAN_WERE : 1
RECURRING_LEFT : 1
LING_HIS : 1
CASE_NAOMI : 1
VERBALIZE_ADDENDUM : 1
SKIN_EVERY : 1
PAIN_OF : 1
SHE_NOT : 1
REPORTS_HAS : 1
USE_CONTINUOUS : 3
HAVE_SINCE : 1
TO_NURSING : 1
BLOOD_OBJECTIVE : 1
ADDRESS_LACERATION : 1
ANSWERING_MACHINE : 1
KEEP_AN : 1
VA_VA : 1
MALE_TO : 1
WAS_WAS : 1
DEVELOP_AN : 1
WITH_AND : 5
GET_SHIT : 1
WIFE_YRS : 1
PAIN_BPH : 1
PATIENT_ANY : 1
VA_ALL : 1
NUMBER_TO : 1
BRACE_TO : 1
WELL_NOURISHED : 1
THE_HE : 3
ION_CURRENT : 1
TO_WITH : 4
DEVELOPED_IN : 1
TRAVEL_DON : 1
TO_UPCOMING : 1
PROGRAM_REPORTS : 1
FELT_THIS : 1
DIFFICULT_TO : 1
MEDICATIONS_DONT : 1
PAIN_COMMENT : 1
DRAW_EDUCATION : 1
MELLI_TYP : 1
PORCEDURE_IS : 1
WILL_ADMITS : 1
THANKED_ME : 1
NO_PT : 2
MONITORED_MINUTES : 2
IN_DURING : 1
ON_WANTED : 1
VICTIM_ADVOCATE : 1
LIVING_GENOA : 1
JUN_GPC : 1
ION_LEFT : 1
INDEP_WITH : 1
COULD_NOT : 2
MEDICATIONS_PATIENT : 2
AS_SOON : 1
FOR_UNDER : 1
RELATED_INCREASE : 1
HERE_FROM : 1
TRAUMA_WC : 1
SIGN_AND : 1
REACTION_CYCLOBENZAPRINE : 1
OF_BY : 1
MONTHS_ADVERSE : 1
WRITER_WITH : 1
GET_AT : 1
OF_WITH : 1
SCREENING_PATIENT : 1
DIAGNOSIS_PNEUMONIA : 1
OF_PROSTATE : 1
ED_PT : 1
NO_ALERT : 1
IS_SIGNIFICANT : 1
IT_MYSELF : 1
DEPENDENCE_WILL : 1
THIS_BAD : 1
NO_ATTENTIVE : 1
PROCEDURES_NAME : 1
ADMIT_PATIENT : 1
SPONGE_TOBACCO : 1
LIVES_WITHIN : 1
BASCOMPALMER_TOMORROW : 1
IS_TO : 5
FEBRILE_ILLNESS : 1
BUT_LETTER : 1
APPOINTMENT_LEFT : 2
SIGNED_THE : 1
CORRECT_SURGICAL : 1
HAVE_HER : 1
ANXIOUS_IRRITABLE : 1
LCSW_PATIENT : 1
WAS_OF : 1
FEAR_THAT : 1
OF_JOB : 1
AST_TO : 1
DM_TRANSFER : 1
THOSE_WHO : 1
COSIGNER_NO : 1
TO_BROTHER : 1
MAJOR_DEPRESSIVE : 1
SHORTENING_STRIDE : 1
STATES_NEED : 1
BLISTERS_WANTED : 1
INPATIENT_AND : 1
IN_ADDRESS : 1
GOING_AFTER : 1
NEW_INNOVATIVE : 1
WH_CLEAR : 1
FAILURE_TO : 1
VSS_TEMP : 1
DISCARD_OLD : 1
THE_MEDICATION : 1
LUNG_CRNA : 1
STUDY_OF : 1
AGREEMENT_YES : 1
CALLED_STATED : 1
PO_SPEECH : 1
ASSESSMENT_WAS : 1
TRAVEL_BE : 1
IDENTIFIED_ADDENDUM : 1
EYE_SCREENING : 1
PERTINENT_RELATED : 1
TO_SELFCONTROL : 1
REDIRECTED_REMINDED : 1
FOR_CONTACT : 1
FOR_HIM : 2
CYR_PATIENT : 1
RESIDENT_PAIN : 1
NONE_TAB : 1
PATIENT_NOT : 5
HOW_MUCH : 1
NOT_ANY : 5
AND_PPD : 2
THERE_NA : 1
FOLLOWED_BIG : 1
TOBACCO_MEDICATION : 1
REPORTS_THIS : 1
JAUNDICE_RECORDS : 1
WHICH_HE : 2
AREA_YELLOW : 1
COPD_RESOLVED : 1
NITRO_TO : 1
UNCHANGED_NO : 1
CRNA_NOTE : 1
LEFT_DORSAL : 1
NEW_DEVICES : 1
OR_THOUGHT : 1
WITHDRAWAL_SYMPTOMS : 2
PROVIDED_TO : 1
HEAVY_REITERS : 1
RESIDENT_ROOM : 2
IVE_LEARNED : 1
OBTAINED_PLAN : 1
PAIN_NOTE : 1
REGULAR_MEDS : 1
AND_PROBLEMS : 1
FISHER_HOUSE : 1
PT_WITH : 1
TO_SHUTDOWN : 1
JOINT_REPLACEMENT : 2
STATED_THAT : 3
REMINDED_DUE : 1
DISORDER_ANXIETY : 1
WELL_HOME : 1
TO_APPTS : 1
LARGE_CUFF : 1
THE_PAIN : 1
WIFE_THURS : 1
TWO_VINFLUENZA : 1
BE_WILL : 1
MONTHS_REACTIONS : 1
OVER_VETERAN : 1
PROVIDE_AND : 1
USE_DISORDER : 3
DAILY_LIVING : 3
RECTAL_ICDCM : 1
XX_PREVENTION : 1
PROBLEMS_CAN : 1
PULSE_RESPONSE : 1
PULSE_MEDICATIONS : 1
NO_ADD : 1
NA_NURSING : 1
BATHROOM_NO : 1
TOMORROW_AFTER : 1
LETTER_FROM : 1
PROMOTE_SELFCONTROL : 1
TO_TIMEFRAME : 1
OTHER_FORMS : 1
TO_FACT : 1
RESULTS_LEFT : 1
IT_WAS : 1
TRANSFER_REQUIRES : 1
TO_DENIES : 1
SHIFT_THE : 7
TERMINATED_CANCELLED : 1
REGARDS_TO : 2
YVONNE_AND : 1
NOT_SUICIDAL : 1
TO_EDUCATION : 1
WAS_ADVISED : 1
WILL_PHYSICIAN : 1
NO_STAFF : 1
OVER_SMOKING : 1
COMING_TO : 1
ENVIRONMENT_USE : 1
INFLUENZA_YRS : 1
THERAPY_PREVIOUSLY : 1
MEDICATIONS_CONTINUED : 2
OUT_NURSING : 1
RASHES_DISSABIL : 1
LOSING_SOME : 1
EXHIBITING_OF : 1
DRIVING_OF : 1
HE_MAKES : 1
WOUND_TYPE : 1
VOLUME_NEBULIZER : 1
CLINICIAN_WHO : 1
PATIENT_MALE : 1
HER_HISTORY : 1
EAR_TINNITUS : 1
HAS_THERE : 2
WRITER_WENT : 1
AT_BEDSIDE : 1
IS_EXPERIENCING : 1
CM_WOUND : 1
AS_BEEN : 1
GET_CANT : 1
LEARN_LISTENING : 1
AQUATIC_THERAPY : 1
AND_DECLINED : 1
PATIENT_INDEPENDANT : 1
INHIBITORY_LIVER : 1
TAKE_PLACE : 1
CAR_READ : 1
BE_CENTURY : 1
ADMISSION_AS : 1
EXCUSES_STUDENT : 1
AS_MAKES : 1
CONTINUED_OUTPATIENT : 2
HOUSE_AND : 2
FOR_SPOKE : 1
USING_SOLVING : 1
DIABETES_CASE : 1
DEAR_MS : 1
MALE_DISORDER : 1
IS_TAKING : 1
LAST_EVALUATION : 1
MHC_IN : 1
ADVANCE_DIRECTIVES : 2
PLEASE_DELETE : 1
CONSCIOUSNESS_NEW : 1
AREAS_BE : 1
OF_SEEN : 1
ARE_RESTRAINTS : 1
PATIENT_NO : 3
VERSUS_GRIEF : 1
LIGHT_THAT : 1
IN_COMORBIDITIES : 1
NOTE_SEE : 2
FOOT_REPORTED : 1
SESSION_BUTTONS : 1
NEG_YESTER : 1
PROCEDURE_THE : 1
DISCHARGE_ID : 1
TENDERNESS_APN : 1
CONTACT_TAKING : 1
LEFT_PCX : 1
HE_BE : 2
MEDICINE_OF : 1
STATUS_IDENTIFIED : 1
BODY_HE : 1
THIS_IRRITABLE : 1
BUT_LIKE : 1
WILL_VET : 1
LOW_ROOM : 1
CONCERNS_THAT : 1
NEURO_DRAKE : 1
FOLLOWING_WERE : 1
DAILY_HEART : 2
GIVEN_TO : 1
PL_ING : 1
OF_SURGERY : 1
IN_DERMATOLOGY : 1
DISEASE_UNSPECIFIED : 1
HE_STATED : 1
FOR_WHICH : 1
NEGATIVE_IMPACT : 1
AS_PCMEDICATION : 1
HE_ME : 2
LIVING_NOR : 1
ATTENDED_PARTICIPATED : 1
OUTSIDE_VA : 1
APPEARS_BE : 1
VADNAL_HAVE : 1
FOLLOWUP_LOCATION : 1
BED_TEL : 1
ANSWER_FOLLOWED : 1
HE_IS : 12
AND_TRAVEL : 1
FOR_ACTIVE : 1
THE_TYPES : 1
OF_DURING : 1
WAS_STARTED : 1
OTHERS_SCOPOLAMINE : 1
BEFORE_AWAY : 1
ARTHRITIS_SUMMARY : 1
OVER_PHONE : 1
TO_AND : 5
PERSON_INSTRUCTED : 1
UP_IN : 1
SEEN_IN : 3
SIDE_EFFECTS : 1
MINUTES_BEFORE : 1
NOT_PRESCRIBED : 1
HE_HIGHER : 1
DETAILS_DOCUMENTED : 1
TO_HEAL : 1
LBS_EVERY : 1
SESSION_GET : 1
FLUIDS_LOCATION : 1
AMB_IN : 1
HAD_THIS : 1
THAN_COMMENT : 1
ELIGIBLE_VETERAN : 1
ALL_MUST : 1
SHOW_FOR : 2
ANEURYSM_IN : 1
LISTED_BELOW : 1
SUPPLIES_RESIN : 1
COME_OUT : 1
WITH_INVOLVEMENT : 1
VIBRATORY_LIGHT : 1
NURSING_ADMISSION : 1
BY_WENDY : 1
CHECK_RESTART : 1
INTERVENTIONS_ED : 1
AND_PRIMARY : 1
MEDICATION_YOU : 1
COMPLAINT_PAINFUL : 1
APPROXIMATELY_AGO : 1
FOUR_AS : 1
MANAGEMENT_CHIROPRACTOR : 1
TKA_CONSCIOUSNESS : 1
WALKED_AROUND : 1
DIAGNOSIS_ATRIAL : 2
EDUCATION_PROVIDED : 2
RESIDENT_CP : 1
NURSING_PLAN : 1
MEASURES_CM : 1
NICOTINE_TRANSDERMAL : 1
INVENTORY_ADMISSION : 1
DROPS_ARE : 1
APPT_NEXT : 1
ANDERSON_RESIDENT : 1
CERVICAL_PERIARTICULAR : 1
BACK_MY : 1
DISCUSSION_IMPORTANCE : 1
CHIROPRACTIC_AND : 1
SURGICAL_ED : 1
THANKS_PROTOCOL : 1
PRECIPITATION_FACTORS : 1
EXTRA_FLUIDS : 4
ANSWERING_IN : 1
NOT_THINKING : 1
BICYCLE_REDUCING : 1
TO_GET : 4
CONTROLLED_LB : 1
SUBSTANCE_MANAGEMENT : 1
AMLODIPINE_BESYLATE : 1
BEEN_NOTED : 1
VITAMIN_SHEET : 1
THE_SPINE : 1
GOAL_BE : 1
STATUS_COULD : 1
TO_TRANSFER : 1
WAY_OF : 2
SUPPLIES_SUBJECTIVE : 1
WAS_INFORMED : 1
CONSIST_NARES : 1
SHAKING_FOOT : 1
MANAGEMENT_AND : 1
FOR_STOOL : 1
WALKED_THE : 1
READINGS_EXAM : 1
ANGER_PROVIDED : 1
NURSING_CARE : 1
APR_DO : 1
OPPORTUNITY_FOR : 1
AND_PRACTICE : 1
MENTAL_ATTENDING : 1
DOES_NOT : 6
POSSIBLE_INFORMS : 1
HER_ASSOCIATE : 1
CHANGED_SP : 1
FUNCTION_HE : 1
FUNDS_EFFECTS : 1
REPORT_FALL : 1
MIN_LEVEL : 1
AN_SCREENING : 1
PROGRESS_BARRATA : 1
PERFORMANCE_AND : 1
WAS_PRIOR : 1
GETTING_SAME : 1
US_CONDITION : 1
BEEN_SEEN : 1
APPLICABLE_THIS : 2
WAS_TERMINATED : 1
HX_INPT : 1
SHUTDOWN_MACHINE : 1
IN_AGITATION : 1
FEVER_NVD : 1
HANDLING_PRODUCTS : 1
SURGICAL_AND : 1
THIS_PT : 3
RYAN_PROBLEM : 1
LAB_BLOOD : 1
BUT_MEDICATION : 1
UDS_CONTRACTT : 1
PROGRESS_VET : 1
NOT_WANT : 3
HX_MOTHER : 1
RN_NOTE : 1
WILL_PAY : 1
BY_OPTOMETRIST : 1
ADDENDUM_SEP : 1
IN_CLINIC : 1
DEPENDANCE_DISCUSS : 1
PATIENT_PT : 1
WITH_PAIN : 2
GOES_FLORIDA : 1
BACTERIOLOGY_REPORT : 1
TYPE_NO : 1
PELVIS_ACTIVE : 1
OFFICE_UNTIL : 1
POST_PROCEDURE : 1
TREATMENT_CENTER : 2
OPEN_WOUND : 1
LIKE_HE : 1
HEPARIN_INJ : 1
NO_SYSTEMS : 1
INFORMED_IS : 1
ERUPTED_TOOTH : 1
OF_OCTOBER : 1
DAILY_THIS : 1
SHIFT_THIS : 1
WERE_AN : 1
TO_INCREASE : 2
LEFT_CONSCIOUSNESS : 1
TREATMENT_DAILY : 1
TIMEFRAME_FOR : 1
SUBSTANCE_DEPENDENCE : 1
CALLER_AREA : 2
IT_WHILE : 1
ADDENDUM_TOTAL : 1
CM_REHABILITATION : 1
SPINE_STRUCTURE : 1
EXPECTED_OUTCOMES : 1
DICUSSION_WITH : 1
SUPPLIES_GLASSES : 1
EVERYTHING_HIS : 1
PREOP_ANXIOUS : 1
WITH_HX : 1
AGAIN_TRIED : 1
USUAL_EFFECTS : 1
ACID_ALBUTEROL : 1
WILL_SAFELY : 1
PT_PAST : 1
MY_PRIMARY : 1
ADMINISTERED_UNITS : 1
STATED_HE : 5
VIETNAM_ERA : 1
BLADDER_PATIENT : 2
SWER_WILL : 1
TONIGHT_WHEN : 1
RESPONSE_NEXT : 1
TRAVEL_OVER : 1
OR_YES : 1
DO_NOT : 2
WERE_PERFORMED : 1
SECURITY_RESPIRATION : 1
IN_DISCHARGE : 1
INCLUDING_RESIN : 1
BEHAVIOR_INPT : 1
BIRCH_HOME : 1
OLAFSSON_HARALD : 1
NATURAL_TEETH : 1
EDUCATION_WAS : 1
AND_MEDICATIONS : 1
INHIBITORY_AND : 1
ALL_THEIR : 1
WENT_SEE : 1
CONDUCIVE_TO : 3
PHONE_TO : 1
STOOL_DURING : 1
LABS_WERE : 1
DEPRESSED_MOOD : 1
TWICE_PRIMARY : 1
THEROPY_PATIENT : 1
PRACTICE_CALLED : 1
SIDE_EFFECT : 1
BEEN_THE : 1
HE_EXCESSIVE : 1
REGARDING_THIS : 1
MANAGEMENT_GOOD : 1
NONE_OTHER : 1
CALLED_AND : 2
HIM_WHO : 1
HOWEVER_SITTER : 1
AT_WHO : 1
MILIEU_TO : 1
OR_SENSITIVITY : 1
WHICH_EDUCATION : 1
TOPIC_FOR : 1
NO_VETERAN : 1
REMINDED_TO : 1
RESPIRATION_MEASUREMENT : 1
HELP_VITAL : 1
CANT_LEARNED : 1
FAMILY_FACTORS : 1
WOULD_LIKE : 4
PATIENT_NOTE : 1
HE_THIS : 2
TO_THERAPEUTIC : 1
STATUS_LETTER : 1
OFF_OF : 1
STATE_OL : 1
FUTURE_PATIENT : 1
MALE_WITH : 2
PATIENT_SEX : 2
ML_IN : 1
IS_WITH : 1
TOILET_PATTERN : 1
DRAKE_NO : 1
TO_ADDENDUM : 3
BY_MORRISON : 1
HAVE_REVIEWED : 1
LAB_RPR : 1
WELL_STATES : 1
WELL_EACH : 1
ABUSE_HAVE : 1
BY_LEVESQUE : 1
APPT_TOBACCO : 1
IN_SUPPORTING : 1
WILL_CCRC : 1
HEAD_WHEN : 1
TAKE_HIS : 1
FERNANDO_HEART : 1
HUMOR_AS : 1
SURG_HYPERCHO : 1
CITALOPRAM_AND : 1
TALKED_CLIENT : 1
DRINKS_VETERAN : 1
PROVIDER_AT : 1
ANY_TESTS : 1
PATTERN_DISCUSSED : 1
NEURO_RES : 1
MOST_ANY : 1
PRIOR_QUANTITY : 1
BAD_FRAME : 1
ABOVE_MEDICATIONS : 1
LOST_INCLUDING : 1
PATCH_ASSESSMENT : 1
BESYLATE_TAB : 1
ENCOURAGE_APPROPRIATE : 1
MAINTAIN_SOBRIETY : 1
WITH_DATE : 1
HEPATITIS_OUTLINED : 1
IS_EXPECTED : 1
NEURO_THE : 1
REFERRAL_RECOMMENDATION : 1
PROCESS_HE : 1
THE_ROOM : 1
WART_RN : 1
STAFF_CONTINUE : 1
SESSION_REFUSED : 1
REDIRECTED_AND : 1
INJ_UNT : 1
PREVIOUSLY_ORDERED : 1
TECH_TAKE : 1
SHAMPOO_ORAL : 1
LEFT_SECOND : 1
DISCHARGE_PL : 1
TOBACCO_OVER : 1
TECH_CODE : 1
INDIVIDUALS_WHO : 1
RIGHT_LOWER : 1
TWICE_USED : 1
STIGMA_NARROW : 1
HIM_HE : 2
HE_ADVISED : 1
DON_WILL : 1
DESCRIPTION_NAUSEA : 1
DIAGNOSIS_MH : 1
BOTH_TOP : 1
IS_LIKELY : 1
TOILET_PING : 1
HER_THIS : 1
INJ_SOLN : 1
OF_HAVE : 1
NOT_TAKE : 1
EPIDIDYMAL_IS : 1
EVERYTHING_INCLUDING : 1
EACH_CAREFULLY : 1
FROM_OF : 1
WALKIN_STATUS : 1
THE_IMPROVE : 1
APPROPRIATE_ASSISTANCE : 1
TOMORROW_THURS : 1
ADVOCATE_THE : 1
REQUESTING_MAIL : 1
WALKING_UP : 1
SUCCESS_OPPORTUNITY : 1
IN_ULTRASOUND : 1
ORDER_AQUATIC : 1
HI_CARE : 1
MADE_IN : 2
VA_PER : 1
MALE_AGE : 1
MORRISON_ASSIGNED : 1
INFORMED_THIS : 1
PATIENT_MESSAGE : 1
ONE_NEURO : 1
NURSING_PTSD : 1
CHANGED_DERM : 1
HISTORY_ALCOHOL : 2
FROM_AND : 1
GO_AGE : 1
CRAMPING_PATIENT : 1
IV_TREATMENT : 1
VERBALIZE_FEELINGS : 1
VETERAN_NUMBER : 1
DTC_PROGRAM : 1
THIS_TASK : 5
CONTACT_TO : 1
TIME_TO : 3
CLINIC_NOTE : 5
ICDCM_MADDOX : 1
LISTEN_ALL : 1
YRS_MEDS : 1
IN_OPERATION : 1
IN_IMPAC : 1
WITH_HE : 1
INT_EVEN : 1
ANGRY_VERBALIZE : 1
RECEIVE_MEDICATION : 1
EXPIRATION_VALUABLES : 1
LIFESOURCE_HAS : 1
MEMBER_PHONE : 1
SAFETY_AND : 1
WIFE_JOAN : 1
YES_OF : 1
FROM_CHIEF : 1
NOTE_SAFETY : 1
FOR_HEMOGLOBIN : 1
TO_OLD : 1
ACCESSED_THROUGH : 3
AT_WILL : 1
VISIT_MAKE : 1
TOLD_THIS : 1
AND_BACK : 1
IRRITABLE_TO : 1
NAME_COMPANY : 1
ALSO_PATIENT : 1
BUT_HELPFUL : 1
THEN_PROBLEM : 1
FOR_BREATHING : 1
AUGUST_OFFICE : 1
SHE_IS : 1
THE_AT : 1
DATE_THE : 1
AND_UP : 1
OF_CLUB : 1
LEFT_TITUED : 1
LOCATION_CLINIC : 1
IN_LOW : 1
HOW_DOES : 1
THE_MEDICAL : 1
TO_FOR : 4
IDENTITY_SINCE : 1
IDEATION_TO : 1
PLEASE_REFER : 1
ALB_CR : 1
TEACHING_HE : 1
ON_ANSWERING : 1
RAISED_MEMPHIS : 1
TO_THE : 11
JUDGMENT_INTACT : 1
HOUSING_DO : 1
NEED_IDENTIFIED : 1
ROI_REQUESTING : 1
THE_MEDICATIONS : 3
STATUS_ACTIVE : 1
TH_TWELVE : 1
CONSIDERED_MAJOR : 1
CONSISTENCY_OF : 3
AUTHOR_FLUOROSCOPY : 1
EXCESSIVE_ETOH : 1
RECENT_TRAUMATIC : 1
AREA_AUTHOR : 1
HERE_AND : 1
BY_MOUTH : 6
GROUP_PARTICIPATED : 1
MORE_BREAKFAST : 1
MUNDY_ROAD : 1
JUNE_OPTOMETRY : 1
1010M_FORM : 1
ON_ORI : 1
PATIENT_ENCOURAGED : 2
TO_TALK : 1
THE_CALL : 1
PLEASE_TO : 1
ADDRESS_ABRASION : 1
PT_TAKE : 1
TELEPHONE_DENIES : 1
OVERSIGHT_ENCOURAGEMENT : 2
HE_USED : 1
INTERMITTANTLY_MINS : 1
YESTER_TO : 1
COUNSELING_PAIN : 1
SELECT_CORRECT : 1
LEFT_FOR : 2
BEEN_ENTERED : 1
ADJUSMENT_MIXED : 1
VERBALIZED_MOUTH : 1
INFORMED_BY : 1
AND_THEN : 1
ADVANCE_PERIOD : 1
MALE_WEIGHT : 1
IE_SCORE : 1
JUNE_WHEN : 1
SPEAK_COUNSELOR : 1
PERFORMANCE_MEASURES : 1
RECORDS_GROUP : 1
JUDGMENT_INSIGHT : 1
STRIP_FOR : 2
THE_PURPOSE : 2
CD_ALERT : 1
EACH_MINUTE : 1
ARE_BLIND : 1
REASON_FOR : 5
FOLLOWING_CHIEF : 1
AND_MEDICATION : 1
TAKE_TABLET : 5
AWAITING_STATES : 1
PRESSURE_REFUSED : 1
THE_CLUB : 2
COMPRESSES_LUL : 1
ICDCM_MOVEMENT : 1
WAS_FULLY : 1
DEVELOPED_MALE : 1
ENGAGE_GROUPS : 1
THIS_BREAKFAST : 1
WITHIN_HPI : 1
BUT_DON : 1
PAIN_IMPRESSION : 1
WILL_REFILL : 1
SINCE_SSA : 1
DEPRESSION_FEELS : 1
RECONCILED_DATE : 1
ADDENDUM_NO : 2
NAME_SOCIAL : 1
CENTER_NOTE : 1
WITHIN_ROS : 1
WITH_ADDED : 1
FLAMMABLE_PRODUCTS : 1
IDENTIFIED_COMPLAINT : 1
LAST_PRIOR : 1
NO_BATHING : 1
USE_DIRECTED : 1
PENTUP_ANGER : 1
CLONAZEPAM_TAB : 1
ACTIVE_IN : 1
REQUESTS_CONCERNED : 1
HERE_MALE : 1
SEP_LAB : 1
STARTING_AT : 1
STARTED_POTENTIAL : 1
TO_STAFF : 2
MOTHER_AND : 1
BENZOS_FROM : 1
THOUGHT_OR : 1
OR_INTERVENTIONS : 1
THE_THE : 2
CHRONIC_NURSING : 1
ADDENDUM_OF : 1
HAVE_PAIN : 1
OTHER_IMPORTANT : 1
MONTH_ADDS : 1
DIVORCED_AND : 1
VARIOUS_AREAS : 1
OF_STUDY : 1
CONTINUE_GROUP : 1
THAT_WAS : 4
TO_FALL : 1
INTERESTED_STARTING : 1
PATIENT_VALUABLES : 1
PAIN_PREVIOUS : 1
REFER_TO : 1
ICDCM_PROBLEMS : 1
APPEARANCE_PATENT : 1
CHARACTERIZED_BY : 1
HEPC_HTN : 1
ONE_HE : 1
OF_PATIENT : 3
THE_EVERY : 1
IN_BMI : 1
NEUROLOGIC_VERBAL : 1
MUSCLE_RELAXATION : 1
HE_SMOKES : 1
AND_FOR : 3
HER_WHICH : 1
FOR_TASK : 5
GOALS_WITH : 1
STRUCTURE_KEEP : 1
CLIENT_INTO : 1
BREAKFAST_DRINKS : 4
QUALITY_EAGER : 1
WITH_OF : 6
BY_NURSING : 1
ENCOURAGE_THROUGH : 1
HE_STARVE : 1
FOR_COVER : 1
AND_PSYCHOTHERAPY : 1
GIVE_MORE : 1
ATYPICAL_CHEST : 1
LEVEL_UNDERSTANDING : 1
HYPOTHYROID_REFLUX : 1
ABLE_PROVIDER : 1
SUBSEQUENT_RELAPSE : 1
BY_ARNP : 1
EYESIGHT_IN : 1
SYMPTOMS_AND : 1
STOOL_MEDICATIONS : 1
TO_HI : 1
SAFETY_APPROPRIATE : 1
CANT_HIM : 1
AIDS_TIME : 1
MALE_OF : 1
CONTACT_ATTEMPTED : 1
REPORT_SHE : 1
IMMUNI_CALLED : 1
DAILY_HE : 1
ANTICOAG_NOTE : 1
MH_SHOW : 1
GO_AND : 1
RECOMMENDED_FOLLOWUP : 1
LEG_BRACES : 1
BP_HR : 1
VETERAN_DECLINED : 1
ED_HAVE : 1
NEG_AND : 1
HAS_NOTED : 1
VICTIM_GUNSHOT : 1
NOW_WOULD : 1
AND_NOT : 5
AND_PROBLEM : 1
STAFF_NOTE : 2
BLOOD_DRAW : 1
SCORE_IS : 2
OUTPATIENT_MEDICATION : 1
NO_PSYCHOLOGICAL : 1
AGE_PATIENT : 2
GROUP_PROGRAM : 1
FILLED_IN : 1
TO_PLACE : 2
PT_FEELS : 1
ASSIST_DURING : 1
LIP_DERM : 1
DISORDER_THAT : 1
OUTPATIENT_CASE : 1
SEEN_VAPSHCS : 1
PREVIOUSLY_THE : 1
VERBAL_DURATION : 1
WILL_HER : 1
APR_AND : 1
PHYSICAL_EYE : 1
DISORDER_KIDNEY : 1
OF_OIDES : 1
KNEES_THE : 1
LUMBAR_STRAIN : 1
CALLBACK_FROM : 1
DID_SHOWER : 1
CARE_CALL : 1
EMPLOY_TO : 1
REGARDS_COLONOSCOPY : 1
ST_TO : 1
BEEN_MAILED : 1
PROVIDE_BLOOD : 1
EFFECTS_NO : 1
STAFF_OUTPATIENT : 1
PM_MADE : 1
OTHER_ABUSE : 1
EXT_ASSISTANCE : 1
CHILD_NOTE : 1
OF_TOOTH : 2
ANTIBIOTICS_FOR : 1
EVENING_GROUP : 1
FOR_PBC : 1
WAIT_THEIR : 1
SPINAL_INJURY : 1
XPATIENT_FAMILY : 1
WITH_THERAPY : 1
YOU_EVALUATION : 1
LIFE_RECOVERY : 1
NATURE_OF : 1
DATE_COMPLETE : 1
COMPLAINT_PAIN : 1
NP_NOTE : 1
WITH_WILL : 2
TWELVE_BIOPSIES : 1
RESOLUTION_OF : 1
RECENT_CONTACTS : 1
SKIN_DISEASES : 1
IE_PAIN : 1
AND_CHANGE : 1
KNEE_SWOLLEN : 1
REVIEW_THE : 1
STATED_LIKE : 1
LOWER_DERM : 2
HE_BELIEVES : 1
DOES_LIKE : 1
ACCIDENT_THIS : 1
SAFETY_ON : 1
WHO_IN : 2
WESTERN_MEDICINE : 1
YANICK_AMOUNT : 1
IMMEDIATELY_HIS : 1
INPT_NOTE : 1
SUBSTANCE_WC : 1
TH_PHYSICIAN : 1
BY_TWICE : 1
SOBRIETY_THE : 1
DIFFERENT_FROM : 1
AND_COPY : 1
MILD_BILATERAL : 1
SUBJECTIVE_ADJUSTMENTS : 1
IS_HIP : 1
NA_NA : 1
WAS_REDIRECTED : 1
HOME_AS : 1
AS_PRESCRIBED : 1
ATTEND_THERAPY : 1
CALLING_FOR : 1
NO_RN : 1
FORMAL_ASSESSMENT : 1
ONE_PHYSICIAN : 1
HOURS_NUMBER : 1
DIFFICULT_LEARN : 1
REPORT_SEP : 1
SYRINGE_WAS : 1
REEVALUATED_FOR : 1
GAOL_SEE : 1
COUNTER_HERBAL : 1
MR_BARRATA : 1
LEFT_VACCINE : 1
UP_AMB : 1
VETERAN_AND : 2
IN_ROOM : 2
JOAN_THURS : 1
TO_MY : 1
VICTIM_DEPT : 1
CALLBACK_PATIENT : 1
MR_IN : 1
ASSISTANCE_ENCOURAGEMENT : 1
THE_BURNING : 1
TO_NSAIDS : 1
HIS_BEFORE : 1
MESSAGE_STATING : 1
FOR_IT : 1
CAP_COGNITIVE : 1
OF_PROBLEMS : 1
TO_SEXUAL : 1
ME_AND : 1
COMORBIDITIES_BLADDER : 1
UNT_ML : 1
NONE_NURSING : 1
LIKE_THE : 1
PSYCHIATRY_GENERAL : 1
REVIEWED_HX : 1
SEASON_NEED : 1
HER_YES : 1
IOP_VERSUS : 1
YOUR_HOMEWORK : 1
APR_CONTACT : 1
MEDS_THE : 2
IMPORTANT_OF : 1
PLAN_BREATH : 1
MHC_PSYCHOTHERAPY : 1
CANT_GIVE : 1
YO_STATING : 1
OF_RISKS : 2
THE_FIRST : 1
DING_MENTAL : 1
SUBJECTIVE_OF : 1
CC_HERE : 1
THIS_FOOD : 1
APPROPRIATELY_PEERS : 1
AND_DEVELOPED : 1
THIS_SUPERVISION : 2
PAIN_TO : 2
BIRTH_DEC : 1
DEAR_PATIENT : 2
OR_AS : 1
NOURISHED_DEVELOPED : 1
CITY_AND : 1
LATER_TIME : 1
ENCOURAGE_WITH : 1
IN_GROUPS : 1
TRY_KEEP : 1
RAISED_NOTEINTEGRATED : 1
EXAM_OF : 1
BELIEVES_STIC : 1
TO_APPEAR : 1
WILL_ACCEPT : 1
OBSTRUCTIVE_APNEA : 2
PROCEEDINGS_SUBJECTIVE : 1
SEX_AGE : 1
THEN_DEFICIT : 1
NONE_LOCATION : 1
GOOD_INSIGHT : 1
TO_PARTICIPATING : 1
LOST_YEAR : 1
KNOWLEDGE_OF : 1
DID_TAKE : 1
WELL_PATIENT : 1
SMOKING_VETERAN : 1
DL_KNEE : 1
LB_KG : 3
COPY_IN : 1
DVT_ACTIVE : 1
PROVIDER_WITH : 1
WHO_PROVIDING : 1
PROVIDER_IMMEDIATELY : 1
IN_ADVISED : 1
FOR_SOFTENER : 1
IMAGING_OUTPATIENT : 1
USE_GETS : 1
COL_SERUM : 1
INDIVIDUAL_DEPRESSION : 1
IDEATION_PATIENT : 1
RECOVERY_LIFESTYLE : 3
FINGER_RANKINE : 1
BASED_RECENT : 1
PURPOSE_ATTENDING : 1
CONTACT_OR : 1
CONGESTIVE_HEART : 1
MILIEU_MEASURES : 1
STAFF_VETERANS : 1
MG_INFLUENZA : 1
INJECTION_FAIR : 1
SYSTEM_APNEA : 1
PAIN_MOOD : 1
LIN_IS : 1
FINANCES_VET : 1
THE_WAY : 2
NOTE_ADDENDUM : 1
NOS_MH : 1
CONSC_ALERTORIENTED : 1
TO_KNEE : 1
ATTORNEY_BROUGHT : 1
PTS_IN : 1
SUBSTANCE_HAVE : 1
OUT_BEDS : 1
PAROLE_MANDATED : 1
CONSULT_BE : 2
WITH_FOLLOWING : 1
ALL_GROUP : 1
UNSCHEDULED_AND : 1
WITH_BROTHER : 2
ESI_LEVEL : 2
SINCE_LAST : 1
HIS_PT : 2
OLD_MALE : 1
IN_PAST : 5
THIS_MY : 1
RATED_NO : 1
OCR_SESSION : 1
FEVER_HAT : 1
EVERY_AND : 1
RECENTLY_EXPIRED : 1
CASE_MANAGEMENT : 3
BEFORE_RINSING : 1
LEVEL_AND : 1
COULD_RTC : 1
OUR_FOR : 1
NEED_FOR : 1
LONG_CANE : 1
VACCINE_NEXT : 1
SERVICE_CONNECTED : 2
HAVE_HIS : 1
COMORBIDITIES_PATIENT : 1
NEW_GLASSES : 1
OR_SC : 1
DC_INSTRUCTION : 1
ACTIVE_RESULTS : 1
NURSING_AST : 1
PRESBY_HEPC : 1
ALCOH_ICDCM : 1
KNEE_MIMSOME : 1
MASS_DORSAL : 1
ME_FOR : 1
IN_BUILDING : 1
NOR_TO : 1
MAJOR_DIAGNOSIS : 1
TO_GO : 4
PSYCHIATRIST_LOCALLY : 1
BIRTHDATE_ADDENDUM : 1
GROUP_HOSPITAL : 1
AS_INSIGHT : 1
ONE_SURFACEANTERIOR : 1
TO_IF : 1
FUNDS_THERE : 1
PENG_ASSISTANCE : 1
DATE_HE : 1
XANAX_AND : 1
AFTER_DISCUSSION : 1
AFTER_ALTHOUGH : 1
RESULTS_WOULD : 1
YOU_LIVING : 1
PRIVILEGES_NO : 1
REPORT_LAST : 1
BEEN_HIS : 1
WITH_FRIENDS : 1
FOR_DERMATOLOGY : 1
FOR_SICK : 1
ENROLLED_AT : 1
KEEP_COMBAT : 1
MD_ASSISTANCE : 1
TELEPHONE_CONTACT : 2
SITE_CHECK : 1
TIME_MINS : 1
SHIFT_BLADDER : 1
EDUCAT_BORN : 1
DISCHARGED_HOME : 1
HAS_RIDING : 1
MEDICATIONS_APPOINTMENT : 1
WITH_OX : 2
BED_LOW : 1
FISHER_ORIENTATION : 1
MEDICATIONS_TOLD : 1
NO_THE : 1
MOBILITY_PROGRESS : 1
ELIMINATION_EXTRA : 1
SEP_VIA : 1
POTENTIAL_UPPER : 1
FLAT_HIS : 1
MENTAL_HEALTH : 2
SKILLS_INDIVIDUALS : 1
IN_CURRENT : 1
FOLLOWED_CLOSELY : 1
FILLED_BUPROPION : 1
VOA_HOGAR : 1
SUICIDAL_HOMOCIDAL : 1
LESION_WAS : 1
THEIR_CALL : 1
NOTE_IU : 1
BE_ON : 1
ONE_PERSON : 1
RECORDS_SCANNED : 1
NOTE_FACILITY : 1
SI_WITHIN : 1
AMBULATORY_MALE : 1
ID_INFLUENZA : 1
TO_PARTICIPATE : 1
MINS_SHOE : 1
MANUAL_THE : 1
DEVICES_MR : 1
TO_DINING : 2
ADMISSION_MAR : 1
WEEK_PRIOR : 1
IRAQI_FREEDOM : 1
NOTE_TYPE : 1
MORNING_WAS : 1
ORAL_PATIENT : 1
LISTED_FOR : 1
AND_AMBULATORY : 1
YEAR_OLD : 1
IN_CHART : 1
FEELS_HIS : 1
REVIEWED_AN : 1
KNOW_THE : 1
OF_NAPPING : 1
ABC_AND : 1
SI_WITH : 1
WERE_USED : 1
GO_ER : 1
RESTRAINTS_IN : 1
WRITER_ON : 1
SCHEDULED_CLINIC : 1
COMPLETED_FOR : 2
OF_DEPAKOTE : 1
IS_FOR : 7
THIS_ANXIOUSLY : 1
BY_NO : 2
FINAL_REPORT : 1
PATIENT_DOB : 1
SMOKES_HYPERCHO : 1
BUPROPION_SINCE : 1
AND_MILIEU : 1
IS_BEING : 1
ON_ANTISOCIAL : 1
HE_LYING : 1
TKA_PROCEDURE : 1
MORRISON_IS : 1
CLINIC_PATIENT : 1
AT_HIS : 1
HAVE_THESE : 1
THAT_MHICMINTENSIVE : 1
OTHER_AREAS : 1
PERSONAL_TRIGGERS : 1
HAT_THERMAL : 1
BUTTONS_WAS : 1
ADMISSION_DATE : 2
ACET_CONNECTED : 1
STATUS_APPOINTMENT : 1
ALCOHOL_BIPOLAR : 1
APPOINTMENT_IS : 2
STATUS_QUESTIONS : 1
WNL_NEG : 1
KNEE_MEDIAL : 1
TO_KEEP : 1
PALPATION_NO : 1
CONSULTS_CHIROPRACTIC : 1
REVIEWED_ACET : 1
WITHIN_THE : 1
SAMMIE_RE : 1
SIGNS_PRIMARY : 1
WAS_SCHEDULED : 1
ON_CONTACTS : 1
MR_FROM : 1
THE_DIAGNOSIS : 1
PATIENT_DISABLED : 1
THAT_YOU : 1
THAT_NEED : 1
PATCHES_DONT : 1
ARNP_AMOUNT : 1
PTSD_SAFETY : 1
RECENTLY_OUTPATIENT : 1
CALL_TERMINATED : 1
BY_INJECTION : 1
BLINDNESS_ONE : 1
ENABLE_HIM : 1
GROUP_MEMBERS : 1
DATE_TIME : 1
PATIENT_REASON : 1
HARM_ADDENDUM : 1
PT_DOES : 1
INTERESTED_IN : 1
SPECIFY_CONTRACT : 1
GAUZE_PACKING : 1
BLOOD_GLUCOSE : 1
CARE_THIS : 1
OF_SUCCESS : 1
LIGHT_TOUCH : 1
MD_SHIFT : 1
MACHINE_IN : 1
VET_PAIN : 1
BIG_SIGH : 1
APPOINTMENT_AND : 1
HOME_LOOKING : 1
RISK_OF : 1
ROOM_OTHER : 1
AS_TRIAGE : 1
SUBSEQUENT_WILL : 1
SITUATION_TO : 1
LAST_GOUT : 1
BY_SIGH : 1
HISTORY_PLEASE : 1
ABSCESS_OF : 1
DISCHARGED_PRIOR : 1
SSN_PROGRAM : 1
TOLD_HE : 1
DISCARD_LISTS : 1
LEFT_ION : 1
HAS_SERVICES : 1
ANGER_THOSE : 1
WITH_HIP : 1
MAR_FOUR : 1
INDIVIDUAL_GROUP : 1
ON_OUR : 1
ALCOHOL_WITHDRAWAL : 2
OF_SYSTEMS : 1
MARY_WAS : 1
LIKE_DIFFERENT : 1
IN_IRAQI : 1
NURSING_PT : 2
ANTIBIOTICS_WEEK : 1
AF_TEMP : 1
LATEX_OR : 1
INTERVENTIONS_SC : 1
PAIN_DOES : 1
HIMSELF_OF : 1
FOR_THIS : 8
AND_OR : 1
FIBRILLATION_RISPERIDONE : 1
SAFETY_CHRONIC : 1
OF_URINE : 1
ORAL_OF : 1
REPORTS_TO : 1
IS_OF : 2
PT_LAB : 2
DISORDER_SECONDARY : 1
THE_ELIMINATION : 1
INSTRUCTED_THE : 1
BECAUSE_OF : 1
OF_HE : 2
MY_LEFT : 1
GOING_WITH : 1
PLACED_YES : 1
BREATHING_SHAKE : 2
THE_BUILDING : 1
ME_THE : 1
THERE_LEVOTHYROXINE : 1
MAIL_PT : 1
OR_FAMILY : 1
REPORTS_PAIN : 1
PAIN_SALINE : 1
IMPROVE_COPING : 1
BEEN_NOT : 1
HOW_PATIENT : 1
ADDENDUM_THOUGHT : 1
CHIEF_THE : 1
MORE_MEDICATIONS : 1
PELVIS_WITH : 1
OF_LIFE : 1
DONE_LIQ : 1
SC_DOCUMENT : 2
ADVANCE_ACTIVE : 1
PATIENT_TEMPORARILY : 1
BE_FOR : 2
CONSULT_BP : 1
PHYSICAL_PRESENTED : 1
ABUSE_SENT : 1
SEEN_HEARING : 1
ANXIOUS_PREOP : 1
POTENTIAL_SKIN : 2
LAST_FILLED : 1
HE_DECLINED : 1
APPT_LAST : 1
COMPLAINT_MEDICATIONS : 1
NUMBER_YES : 1
FT_DEPRESSION : 1
HYDROCELES_AGE : 1
CLIPPINGS_STIMULANT : 1
WHO_PRESCRIBED : 1
ACTIVE_HIP : 1
PLACE_DECLINED : 1
HIGHS_DESCRIBED : 1
TABLET_BY : 5
LARGE_BMI : 1
RIGHT_MY : 1
OR_SKIN : 2
LLE_AMB : 1
DAILY_BASIS : 1
LUL_TOPIC : 1
BLOOD_ADMINISTERED : 1
FOR_ANY : 2
LIKE_HAD : 1
RATED_HOWEVER : 1
NEED_FURTHER : 1
PROVIDING_FOR : 1
MORE_DISORGANIZED : 1
UP_PHYSICAL : 1
MSS_NEURO : 1
TEETH_PT : 1
COMPANY_POSTTRAUMATIC : 1
MANAGEMENT_GROUP : 1
RECORD_OF : 1
HX_HX : 1
UPCOMING_APPTS : 1
AT_VETERANS : 1
STOOL_THIS : 1
TO_FLORIDA : 1
HIS_NO : 1
VIETNAM_CHIEF : 1
ANXIETY_PROCEDURE : 1
TO_ACTIVE : 1
LOSE_EYESIGHT : 1
SOCIAL_AND : 1
WITH_PEERS : 1
TEMP_TWICE : 1
LEFT_DELTOID : 1
AN_APPOINTMENT : 1
MINS_IS : 1
ANXIETY_AND : 1
HE_NEVER : 1
GYNECOLOGY_ARE : 1
TIME_WHEN : 1
NO_CONTRAST : 1
SICK_APPT : 1
OF_HOSPITAL : 1
UP_NURSING : 1
AGREE_WITH : 2
HAVE_BENZOTROPINE : 1
YES_MUCH : 1
URINE_FOR : 1
CHIEF_OF : 1
PREP_BETADINE : 1
LEVOTHYROXINE_SYNTHROID : 1
LAST_PAP : 1
BEEN_RECONCILED : 1
FOR_SM : 1
PRESSURE_HISTORY : 1
NOTET_PATIENT : 1
EDUCATED_ON : 1
STUDENT_VERBALIZE : 1
DOES_HOWEVER : 1
PRESSURE_SOCIAL : 1
QUADRANT_FOR : 1
GRIEF_SUPPORT : 1
CHECK_OUT : 1
ABOVE_CONTACT : 1
PT_CURRENT : 2
NO_AND : 1
NOTE_ID : 2
AGE_CARDIOLOGY : 1
GROUP_SEEING : 1
SAT_AIR : 1
HE_SCHEDULED : 1
PCMM_TEAM : 1
AWAITING_HE : 1
GOAL_ALL : 1
AUTHOR_OLAFSSON : 1
FOR_VITAMIN : 1
GAIT_DISTANCE : 1
CURRENT_VITAL : 1
BEDS_GET : 1
IN_WITH : 1
PROBLEMS_HE : 1
HOUSING_MARY : 1
ALCOHOL_DEPENDENCY : 1
THIS_CONDITION : 1
PATIENT_SERVICE : 1
IS_HE : 1
CENTER_MG : 1
WHICH_PATIENT : 1
FOR_OF : 2
BY_TIZZANO : 1
IN_FEAR : 1
WOULD_TO : 4
SHOULDER_FOR : 1
OF_HAS : 1
PAST_MEDICAL : 1
ADAPTIVE_SKILLS : 1
AND_BEHAVIORAL : 1
CARE_CENTER : 1
SCHEDULED_ASSESSMENT : 1
STATES_THAT : 2
AK_LIP : 1
VAGUE_PLAN : 1
ANXIOUS_ENCOURAGED : 1
AND_SCHOOL : 1
ONEHALF_BY : 1
MEMEBERS_PLAYED : 1
ENCOURAGEMENT_OR : 3
TO_TAKING : 1
IS_GREATER : 1
OPERATION_FREEDOM : 1
TX_OF : 1
CONSULT_CAN : 2
ML_CLINICAL : 1
OFFERED_HOME : 1
LB_HEIGHT : 1
WITH_PATIENT : 3
PTS_WHO : 1
FLUENT_PTSD : 1
PROGRESSION_DISCUSSED : 1
WATCHING_ION : 1
WERE_TO : 1
HOMELESS_SCREENING : 1
LIPOMA_TAPE : 1
FOR_NAIL : 1
WANT_LISTEN : 1
INPATIENT_REHABILITATION : 1
FEELING_SUICIDAL : 1
ANCHORAGE_UNTIL : 1
MH_NO : 1
BE_SAFELY : 1
FOR_EDUCATION : 1
INFLUENZA_ML : 1
PATIENT_MEASURED : 1
ON_DAILY : 1
NATURE_INJURY : 1
NOTE_RATE : 1
STOOL_EXTRA : 1
CATEGORY_CLASS : 1
INSTRUCTION_VEER : 1
SLIGHT_AREA : 1
MOBILITY_LOSS : 1
LAW_BASEMENT : 1
EDUCATION_SATISFACTORY : 1
EVALUATION_HAS : 1
HE_DENIES : 2
INITIALLY_AT : 1
DISSABIL_NO : 1
SITTER_STATED : 1
ALL_URINE : 1
TIME_WERE : 1
ISSUE_PHARM : 1
GIVEN_SLIPS : 1
HELP_IMPROVE : 1
MADDOX_PAIN : 1
WAS_BEING : 1
AND_APPROPRIATE : 2
AT_MVA : 1
HOSPITAL_ATYPICAL : 1
TREATMENT_MH : 1
NOISES_UNCONTROLLED : 1
ANXIOUSLY_HE : 1
WAS_NOSHOW : 1
HI_PRIMARY : 1
ING_WITH : 1
IN_TREATMENTS : 1
NOS_PTSD : 1
ALSO_TO : 1
BLOOD_RT : 1
PROVIDED_ARE : 1
WE_GIVE : 1
LAST_SMEAR : 1
ANSWER_TOE : 1
XX_RELAPSE : 1
PATIENT_GOAL : 1
CONTRAST_PATIENT : 1
NEBULIZER_GAIT : 1
FOR_AN : 2
KNEE_RNP : 1
PATIENT_VIGAMOX : 1
NONE_STIGMA : 1
SSA_WILL : 1
MEETING_WITH : 1
SCHEDULED_THE : 1
LATE_FOR : 1
ARE_PATIENT : 1
DIFFERENTLY_HE : 1
PT_OUT : 1
DENIES_OR : 1
DO_MR : 1
THE_DURING : 1
ATTEMPTED_FAILED : 1
IMPRESSION_CLINIC : 1
NO_ALCOHOL : 1
CALL_POD : 1
GET_OUT : 1
CATHETER_CARE : 1
BAND_DOES : 1
APPLICATION_WOULD : 1
ANTIPLATELET_MAKES : 1
WAS_PNEUMONIA : 1
SHAKE_SPACE : 1
INTACT_SOCIAL : 1
WITH_NO : 2
HELP_WITH : 1
NURSING_THIS : 2
DIRECTIONS_TO : 1
WITH_ALCOHOL : 1
NOT_THIS : 1
FOR_COMMENTS : 1
ECASA_DAILY : 1
INSIGHT_INTACT : 1
MEDICATIONS_COGNITIVE : 1
RESIDENT_NOTE : 1
COPD_HYPOTHYROID : 1
BE_OF : 1
EGD_COLONOSCOPY : 1
REFILL_VIA : 1
CHART_PREOPERATIVE : 1
APPROPRIATE_AND : 1
WOULD_TAKE : 1
ASSESSMENT_NEEDED : 3
ON_WHILE : 1
THAT_WOULD : 3
ENVIRONMENT_AND : 1
OPERATION_IRAQI : 1
EBL_ML : 1
SAFETY_DEPT : 1
PAIN_HE : 1
ALTERNATIVES_AND : 1
CLINIC_WALKIN : 1
PAIN_NUTRITION : 1
INSTRUCTIONS_DATE : 1
IT_MR : 1
EVENTUALLY_BECAME : 1
ALTHOUGH_MAINTAINS : 1
PROCEDURE_PATIENT : 1
WAS_DIAGNOSIS : 1
RADIATION_TREATMENT : 1
STAFF_SUPPORT : 1
SICHERER_MD : 3
NEXT_APPOINTMENT : 2
NOTE_SHIFT : 1
NOT_HIM : 1
LIPIDS_HYPOTHYROID : 1
OF_ANTIBIOTICS : 1
ARE_RAISED : 1
NAME_NOT : 1
MAY_HAVE : 1
THE_HOURS : 2
REFLUX_BARRETTS : 1
KEEP_GOING : 1
THURS_JUNE : 1
DENTAL_CLASS : 1
CLERK_CELLULITIS : 1
WHEREBY_CURRENT : 1
PPD_READ : 1
IDENTITY_SSA : 1
OF_MOVEMENTS : 2
TO_ENCOURAGE : 1
THE_TO : 2
SYND_PROBLEMS : 1
DOCUSATE_LLOSE : 1
ANXIETY_RESULTS : 1
OF_SEROQUEL : 1
IS_NEEDED : 3
BE_DISCHARGING : 1
PLAN_TRAVEL : 1
VET_NOT : 1
TO_PROCESS : 1
PENDING_MEDICATIONS : 1
POSITION_PATIENT : 1
AND_TIME : 1
RELIEVED_HER : 1
PATIENT_LIKE : 1
NEW_ALLERGIES : 1
INFORMATION_CONFIRMED : 1
HE_BL : 1
HYPERTROPHY_OF : 1
BACK_AND : 1
LOST_LBS : 1
COME_IN : 1
TIME_THEY : 1
VETERAN_CANCELLED : 1
YESTER_AND : 2
IN_FLAMMABLE : 1
LIVING_SITUATION : 2
NAOMI_FENTANYL : 1
MEDICATION_DATE : 1
PATCHES_ON : 2
OR_TEST : 1
WAS_DISCHARGED : 1
WITHIN_OR : 1
EMOTIONS_LIKE : 1
MONTHLY_LESS : 1
OF_DAILY : 3
GRPOUPS_VETS : 1
HAVE_VET : 1
ADDENDUM_PHONE : 1
PROVIDED_SUPPORTIVE : 1
SENT_LETTER : 1
SO_TO : 1
MONITORING_GRPOUPS : 1
PSYCHIATRIC_ALCOHOL : 1
ROOM_IS : 1
AND_TRY : 1
DO_EXCEED : 1
DOES_HAVE : 8
ABOUT_FOR : 2
CAR_AND : 1
HOGAR_TRANSITIONAL : 1
CONTACTS_BE : 1
COMPLIANT_GOOD : 1
OBESITY_PL : 1
TO_BACK : 1
YO_PRESENTS : 1
THIS_MET : 1
NOTED_SUICIDAL : 1
HE_CANT : 1
SCREENING_CHARACTERISTICS : 1
STIGMA_FOCUS : 1
HANDLING_FLAMMABLE : 1
TINNITUS_TO : 1
AN_DOCUMENT : 1
IS_WHO : 1
BECAME_IN : 1
PATIENT_CHECK : 1
HOW_HAVE : 1
ENCOURAGED_DID : 1
FOR_CONDITION : 1
INFECTION_DISCUSSED : 1
BEFORE_DIAGNOSIS : 1
LISTENING_READING : 1
MODALITY_FOR : 1
LATEST_NO : 1
MEDICINE_WITHOUT : 1
AS_NEEDED : 4
NOS_HOSPITAL : 1
THIS_SET : 2
IMMEDIATELY_LIMITING : 1
PAROLE_BUT : 1
APPROPRIATELY_SYSTEMS : 1
AGREED_TRAINING : 1
GO_TO : 2
FINDINGS_THE : 1
1010M_VA : 1
THIS_AMOUNT : 1
MOUTH_SEX : 1
DAILY_STOOL : 1
RECEIVES_DOCUMENT : 1
OTHERS_APPROACHING : 1
PROGRAM_WAS : 1
NSAIDS_YES : 1
NUTRITION_EMESIS : 1
QH_FOR : 1
NOURISHED_PATIENT : 1
EVERY_MORNING : 2
WILL_AN : 2
ROAD_ARTHRITIS : 1
FOR_PT : 4
HEAR_LOSS : 1
FINAL_SEP : 1
SUPERVISION_OVERSIGHT : 2
CARE_THAT : 1
OF_EVENING : 1
ADD_NEURO : 1
GONE_PT : 1
BUTTON_WITH : 1
PROBLEM_FOR : 1
VITAL_SIGNS : 2
BEING_DISCHARGED : 1
SYMPTOMS_HAVE : 1
ME_MY : 1
FROM_USUAL : 1
FAMILY_CONTACT : 1
RE_PROGRESS : 1
CENTER_DAILY : 1
EFFECTS_ATTENDING : 1
IS_MET : 1
READING_OUTPATIENT : 1
OU_HEALTH : 1
HAS_FELT : 1
FOLLOWING_STRATEGIES : 1
HE_GONE : 1
TOPIC_WHICH : 1
GOING_DIVORCE : 1
TO_LEARN : 4
AFFECTED_AREAS : 1
DISCUSSED_FUTURE : 1
USING_PROBLEM : 1
BIRCH_CARE : 1
ME_REACH : 1
THAT_MEDICINE : 1
REPORTED_UNDER : 1
NONE_OF : 1
ACKNOWLEDGED_THAT : 1
VISIT_FOR : 1
FGM_NONE : 1
CPRS_IMAGING : 1
ALCOH_SM : 1
AGENTS_NO : 1
HAVE_LIVING : 1
PREVIOUS_AND : 1
APPT_CESSATION : 1
ENCOURAGED_TALK : 1
ON_IT : 1
SM_MADDOX : 1
HEALTH_AND : 1
STRAIN_GENDER : 1
AUG_LB : 1
IS_TEARFULHE : 1
AND_DECLINE : 1
AND_CARE : 1
MILDLY_TO : 1
PT_LAST : 1
CAREER_COUNSELOR : 1
APPRECIATIVE_HE : 1
PHYSICIAN_OBESITY : 1
WE_HIS : 1
FUNCTION_OF : 1
KNEE_REPLACEMENT : 2
FOR_ADMISSION : 1
SOCIAL_DIVORCED : 1
WAS_PARTICIPANT : 1
TRIAL_OF : 1
ADDENDUM_AF : 1
JUNE_TH : 1
PROSTATE_ICDCM : 1
NO_NURSINGACTIVITIES : 1
REGARDING_FEMALE : 1
YOU_CHOOSE : 1
HAS_ENTERED : 1
AND_WAS : 3
ALF_PERSONAL : 1
CITALOPRAM_IN : 1
NO_PERSON : 1
IN_MOTHER : 1
REDUCING_HIS : 1
IF_NOT : 1
DISORDER_MIXED : 1
STRESS_THANKED : 1
COMMENTS_PATIENT : 1
WITH_PULSE : 2
CONTINENT_ELIMINATION : 1
EVALUATION_PHYSICIAN : 1
AND_DENIES : 1
OBESITY_ED : 1
NOT_EMOTIONS : 1
MALE_FOLLOWING : 1
FOLLOWUP_WITH : 1
LLOSE_EYE : 1
ACTION_MAY : 1
OTHER_DOCUMENTS : 1
MUNDY_MILL : 1
PC_PROVIDER : 1
HERE_HIS : 1
PLT_PREOPERATIVE : 1
DULL_LIGHT : 1
SUPPLIES_CONTACTS : 1
NOT_NO : 1
RIGHT_THE : 1
HE_WALKED : 1
WHICH_RELIEVED : 1
PATIENT_BE : 1
PROVIDED_TIME : 1
ARE_FOLLOWS : 1
VITALS_HIS : 1
PREOPERATIVE_ANESTHESIA : 1
BEING_HOME : 1
OF_TREATMENT : 1
UNIT_PREVIOUS : 1
HOME_REPORTED : 1
FINGERS_CHEST : 1
SOME_ANGER : 1
PRESSURE_ACTIVE : 1
SUPPORT_AND : 2
TO_RECENTLY : 1
OTHER_VETERANS : 1
REMOVED_ADVISED : 1
ADDED_CARE : 1
NO_WOUNDS : 1
HA_OR : 1
HER_STRONGER : 1
LIST_WITH : 1
SINCE_DISCHARGE : 1
SI_HAS : 1
IS_RECORD : 1
IN_NORMAL : 1
SAO_SYSTEM : 1
POSITIVE_SAFE : 1
OUTREACH_WITH : 1
FOR_RELAXATION : 1
TO_AGENCY : 1
BLIND_REHAB : 2
EVALUATED_DEL : 1
PHYSICAL_COGNITIVE : 1
OTHER_PERSONAL : 2
ADAPTING_TO : 1
HIS_IDENTITY : 1
FROM_HIM : 1
AZITHROMYCIN_PO : 1
HE_DID : 3
LOWER_BILAT : 1
TOILET_BOWEL : 1
RESIDENT_DURING : 1
EYESIGHT_BILATERAL : 1
CARE_MD : 1
THE_JOB : 1
WRITER_MET : 1
ADVISED_USE : 1
DIABETIC_PENDING : 1
NOTED_KNEE : 1
LEARNED_WE : 1
RECORDS_DIPHENHYDRAMINE : 1
BMI_COMFORT : 1
VET_FEEL : 1
AND_APPEARED : 1
IN_MY : 2
WARNING_SIGNS : 1
PHARM_INPATIENT : 1
REQUIRES_ASSISTANCE : 3
IN_MEMPHIS : 1
SSED_THIS : 1
AT_BE : 1
INTERMITTANTLY_CHECKS : 1
MOTIVATED_HIM : 1
RESULTS_OBTAINED : 1
LEARN_READING : 1
FINDINGS_TO : 1
POSTING_DM : 1
PLEASE_READ : 1
OF_MENTAL : 1
SENSORNEUR_HEAR : 1
FOLEY_YES : 1
HYPOTHYROID_DEPRESSION : 1
WORK_MH : 1
SCREEN_DIAGNOSIS : 1
HE_HELPFUL : 1
APPLICABLE_USES : 1
OUTPATIENT_INCLUDING : 7
DURING_NEXT : 1
THERAPEUTIC_RECREATION : 1
NEEDED_ASSISTANCE : 1
LEFT_MEDIAL : 1
WT_LB : 1
CARE_NO : 1
NURSING_PDX : 1
PATIENT_TOLD : 1
ALBUTEROL_INHALER : 1
PT_FT : 1
NO_EDEMA : 1
PAPERWORK_COMPLETED : 1
MAIL_PLAN : 1
FILLED_CITALOPRAM : 1
AFFECT_TO : 1
DIAGNOSIS_AND : 1
VICTIM_SVS : 1
BODY_INDEX : 1
ADJUSMENT_DISORDER : 1
TRAUMATIC_EVENT : 1
RIGHT_AND : 1
OR_REACH : 1
SP_NURSING : 1
TO_LEFT : 2
AND_TRIES : 1
NOT_WEAR : 1
MEDS_WILL : 1
LAB_FASTING : 1
MANAGEMENT_COPD : 1
CONCERNS_ARE : 1
REPORTS_IN : 1
WAS_PROVIDED : 2
THE_LOWER : 1
POD_IF : 1
GOING_OUT : 1
SESSIONS_PROVIDED : 2
UP_WITH : 1
ED_REVIEWED : 1
HAVE_INFORMED : 1
REDUCE_STATE : 1
WORK_AS : 1
MEDICATION_CHOOSE : 1
EXTENSION_SHE : 1
APPOINTMENT_MESSAGE : 2
PERSONAL_HYGIENE : 2
ED_ACTION : 1
SERVICE_FOR : 1
BE_EXPOSED : 1
BRACE_DUE : 1
AND_NATURE : 1
ION_TKA : 1
ORAL_HYPERCHO : 1
SPECIFIC_OF : 1
PRESENCE_FEBRILE : 1
COLOR_FOR : 1
NOTE_CATEGORY : 1
PAJAMAS_DOES : 1
EFFECTS_SUBJECTIVE : 1
DT_THE : 1
HER_HUSBAND : 1
MYOPIA_PMH : 1
HAS_CASE : 1
AN_CAN : 1
COMBIVENT_HE : 1
LPN_PROVIDE : 1
ADMISSION_INDICATED : 1
BACK_MILDLY : 1
VAPSHCS_EYE : 1
VIEWED_IN : 2
NEXT_SESSION : 1
ALSO_LEAVE : 1
PLAN_CALM : 1
MEDICATION_AN : 1
MOOD_ONCE : 1
PREOPERATIVE_DIAGNOSIS : 1
DAILY_BOTH : 1
WITH_VAGUE : 1
PATIENT_HAVE : 3
THE_FEMALE : 1
OF_TOTAL : 1
ADDENDUM_LS : 1
NOT_VETERAN : 1
ALLERGIES_CHLORAMPHENICOL : 1
WERE_ADMINISTERED : 1
REASON_VISIT : 2
PAST_HEAVY : 1
EXERTION_WILL : 1
MONTHS_THE : 1
CONSULT_ANAND : 1
NOR_BRUISING : 1
TRIES_KIDNEY : 1
COMPLETION_CORRECT : 1
CONSECUTIVELY_HE : 1
NO_TUB : 1
HAS_THE : 2
ME_AGREE : 1
THIS_COMPREHENSIVE : 1
TECHNICIAN_CORRECTION : 1
CHANGE_VERBAL : 1
RES_DRAKE : 1
PLEASANT_NO : 1
EXERTION_ARRANGE : 1
BEEN_SC : 1
HI_PSA : 1
MR_ENCOURAGED : 1
TWICE_FOR : 1
TAB_BED : 1
MARCIA_LAST : 1
DUPLICATE_PLEASE : 1
SAFETY_BASED : 1
HAS_HAD : 1
CONTINUES_TO : 1
APR_HYGIENE : 1
RECURRING_MASS : 1
NUMBER_LS : 1
HE_APPROPRIATE : 1
XANAX_SAYS : 1
ETC_VETERAN : 1
ON_THE : 4
INSTRUCTOR_IS : 1
ON_LAST : 1
WAS_THAT : 2
BECAUSE_HE : 1
TO_HELP : 1
PRESSURE_LARGE : 1
RELAPSE_PREVENTION : 1
POX_HEPARIN : 1
OF_THE : 11
FAILED_TO : 1
GOOD_DEVELOPMENT : 1
KNOWLEDGE_FOR : 1
CM_EPIDIDYMAL : 1
REPORTED_HE : 1
PAINFUL_ON : 1
TRANSFER_NO : 1
WOUNDS_PRESSURE : 1
WELLNESS_MEDICATION : 1
FOR_ASSESSMENT : 1
HAVE_FAX : 1
HAS_NOT : 3
ANEURYSM_HER : 1
AND_ADDITIONAL : 1
AT_AMBULATION : 1
ANY_OPEN : 1
YES_CARDIAC : 1
IN_PRIMARY : 1
SMEAR_WNL : 1
CHILDS_WHEN : 1
PATIENT_OVERALL : 1
SPONGE_DETECTION : 1
INDEPENDENT_MODALITY : 1
VET_TO : 2
BPH_THE : 1
BLOOD_UNITS : 1
AND_MEMEBERS : 1
TO_MOST : 1
AGE_IS : 1
ON_DURING : 1
COLOR_AMBULATION : 1
OF_MEDICATIONS : 1
ANSWER_FOR : 1
TALKING_ALL : 1
POTENTIAL_ESI : 1
WOUND_CULTURES : 1
AND_TREATMENT : 3
LIQ_NITRO : 1
PBC_SAFETY : 1
STRIPS_FOR : 1
WITH_HIS : 4
CALL_CLINIC : 1
GOALS_SESSION : 1
IS_REQUESTING : 1
EXTREMITIES_WEAKNESS : 1
WITH_BRACES : 1
MORNING_NEXT : 1
FEELINGS_WAS : 1
ASSISTANCE_UNDER : 1
CALLER_APPT : 2
SELFCONTROL_SMOKING : 1
MEDICATIONS_MAIL : 1
HOUSE_BURNING : 1
PARTICIPATION_XACTIVE : 1
NOT_DEPENDENCE : 1
BROUGHT_HIM : 1
AS_XPATIENT : 1
WILL_CONTINUE : 2
SHORTNESS_BREATH : 2
MR_CALLED : 1
RISKS_AND : 2
REFLUX_HTN : 1
MUSCLE_SEEN : 1
INTO_THE : 1
ESPECIALLY_WHEN : 2
SKIN_REPORTS : 1
VA_PSYCHIATRY : 1
ASSERTIVENESS_TO : 1
TRANSPARENCIES_DISTRESS : 1
TIME_FROM : 1
NOT_ABLE : 1
DEVELOPED_NOURISHED : 1
ATTENDING_NOTE : 2
DIALYSIS_BASED : 1
FLAMMABLE_YES : 1
CENTURY_BLVD : 1
SOLVING_ASSERTIVENESS : 1
ORIENTED_TO : 3
ANY_ON : 2
TO_TRIAL : 1
PRECAUTIONS_NOTIFY : 1
RESPONSE_SAME : 1
SAO_CARDIOVASCULAR : 1
COMPLETED_AND : 1
IMPORTANCE_MONITORING : 1
AND_ADMINISTRATION : 1
TO_RULES : 1
OF_MYCOSIS : 1
EXCLUDING_SUBJECTIVE : 1
RADIATION_ADDENDUM : 1
WHICH_AND : 1
AND_ANSWER : 1
FENTANYL_PATCHES : 1
MR_REPORTS : 1
BY_NEURO : 1
MONTHLY_OR : 1
SYNCOPE_BRONCHITIS : 1
ATTENDING_PHYSICIAN : 1
PULSE_OX : 2
TAKING_OF : 1
NOTE_OF : 1
THAT_FROM : 1
LIMITATIONS_OUTCOME : 1
IS_MINIMAL : 1
AREA_MOUNTAIN : 1
OF_TEETH : 1
ALLERGY_SENSITIVITY : 1
CURRENTLY_ON : 1
AND_OVER : 1
EXPECTED_IN : 1
ASSURANCE_VITALS : 1
AN_LEFT : 1
CLINIC_RESIDENT : 1
IDENTIFY_PERSONAL : 1
NO_OTHER : 1
AND_ACTIVE : 1
POLYSUBSTANCE_ABUSE : 1
BASED_NO : 1
SM_ICDCM : 1
WIFESHE_HYPERCHO : 1
ACTIVE_ASSISTANCE : 1
TEMPORARILY_YES : 1
GROUP_ACID : 1
CHART_PERSONALITY : 1
HE_TAKING : 1
LOSS_JOINT : 1
FAILURE_AND : 1
WOUND_THE : 1
THE_CHIEF : 1
WITH_AS : 1
FAILURE_APPEAR : 1
PROGRESS_HAS : 1
TIME_ALERT : 1
STABLE_PRESSURE : 1
DEPRESSION_HL : 1
DIAGNOSIS_TECHNIQUE : 1
HEAL_MY : 1
STATE_HE : 1
CENTER_EPITHELIZATION : 1
RAILS_ARE : 1
PROGRESS_ADDENDUM : 1
TYPE_OF : 2
PROVIDER_PATIENT : 1
ON_VETS : 1
WITH_CANE : 1
DIRECTIVES_RIGHTS : 1
BEEN_TAKING : 1
ETOH_THAT : 1
DISORDER_WHEN : 1
NOT_REPORT : 1
PRESENTS_STATING : 1
HE_CALL : 1
WITH_SUPPORTIVE : 1
MEMORY_TO : 1
IN_LAW : 1
COMPLETE_MANUAL : 1
HYPERTENSION_JUN : 1
IN_CITY : 1
DONT_WORK : 2
ADDENDUM_PHENOBARB : 1
PHYSICIAN_PL : 1
AT_MEDICAL : 1
MINUTES_POD : 1
ALLERGY_CYCLOBENZAPRINE : 1
THERAPY_FOR : 1
ING_GOALS : 1
IDENTIFIED_INFECTION : 1
STATED_CONSISTENT : 1
IDENTIFY_STILL : 1
SET_AN : 1
BY_IS : 1
ACET_SERVICE : 1
OF_RANKINE : 1
NOTIFY_PROGRAM : 1
READ_ITEM : 1
ALERT_OPERATIVE : 1
FOR_WRITER : 1
VETERAN_CALLED : 2
SYND_REACTIVE : 1
CONSTIPATED_FLUIDS : 1
COGNITIVE_LIMITATIONS : 1
APPETITE_NO : 1
PARTICIPATING_SCHEDULED : 1
RIGHT_REPEATED : 1
MILL_ROAD : 1
SXS_NOT : 1
EXPRESSED_PRESENT : 1
TAKEN_REFUSED : 1
SESSIONS_DATE : 2
THE_FATE : 1
NO_NUMBER : 1
SEEING_HIM : 1
EVALUATED_THE : 1
HIM_FROM : 1
SOFTENER_APPROXIMATELY : 1
MIN_PARTICIPATION : 1
SERVICE_OPERATION : 1
APPROPRIATE_ABOVE : 1
OBJECTIVE_NUTRITIONAL : 1
EKG_IN : 1
FOR_SEVERAL : 1
STRAIN_URINE : 1
PRESSURE_VISIT : 1
CONTINUE_ENCOURAGE : 1
DEPRESIION_HTN : 1
FEELINGS_TO : 1
SAFETY_REASON : 1
PREOPERATIVE_ANSWER : 1
TRAUMA_HE : 1
CONTRACTT_WART : 1
DECLINED_TO : 1
NEED_INFECTION : 1
VETS_FINANCES : 1
IMAGING_COMPLETED : 1
BE_COMPLICATIONS : 1
DEPRESSION_COMMENTS : 1
ETOH_DEPENDANCE : 1
IT_LIKELY : 1
NURSING_TRIAGE : 1
IS_AND : 3
HIM_WAS : 1
NUMBER_HAS : 1
SEEN_WRITER : 1
STEREO_LAST : 1
IS_OUR : 1
RACE_UNSPECIFIED : 1
PATIENTS_EFFECTIVENESS : 1
STOOL_CONSTIPATED : 1
BEHAVIORAL_DECLINE : 1
MEDICATIONS_INJECTION : 1
LIFESTYLE_HEALTH : 1
CALLED_CASE : 1
OUTSIDE_CAN : 2
LEGS_WITH : 1
CONTINENT_AMOUNT : 1
OF_BOWEL : 2
HYPERTENSION_VISIT : 1
HE_ONLY : 1
IS_AS : 2
GUAZE_ACTIVE : 1
BUT_HAS : 1
PATIENT_WAS : 14
PT_SHE : 1
RECEIVES_AS : 1
ESSENTIAL_OTHER : 1
PT_REQUESTING : 2
THE_OPTOMETRIST : 1
OBSERVED_TALKING : 2
LE_OF : 1
BODY_AGAIN : 1
WITH_ASSESSMENT : 1
TOOTH_HEAVY : 1
TOUCH_FGM : 1
OCTOBER_PROCESS : 1
DOB_PROGRAM : 1
TO_CAUSE : 1
PT_PATIENT : 1
PERSONAL_BED : 1
MEDICATIONS_HE : 1
CONSULT_OUTPATIENT : 1
TKA_CONTACTED : 1
PM_BE : 1
TO_READ : 1
NO_BEEN : 1
YES_TOLERATED : 1
ULTRASOUND_NORMAL : 1
ABLE_PARTICIPATE : 1
DECREASED_REPORTS : 1
EVENING_PERSONAL : 1
THE_IMMEDIATELY : 1
THERE_LESS : 1
AND_USE : 1
SKIN_PATCHES : 1
ORDER_BEEN : 1
TAKEN_ANY : 1
KNEE_ARTHROPLASTY : 1
DIFFERENT_JOINT : 1
SI_THE : 1
WRITE_MORNING : 1
WERE_THIS : 1
DEFICIT_AND : 1
SIGNIFICANT_NO : 1
GENERAL_THE : 1
PRESENT_YES : 1
NO_HEADACHES : 1
LEVESQUE_MINUTES : 1
RE_DATE : 1
SCHEDULED_AN : 1
THEIR_ITS : 1
AREA_ANCHORAGE : 1
FLU_WE : 1
STATED_HAD : 2
CLASS_ARE : 1
WAS_AMOUNT : 1
STIC_HE : 1
BEEN_THERE : 1
WAS_ON : 3
DOSAGE_SAT : 1
WITH_APPEARANCE : 1
INDEX_APPEARANCE : 1
BE_UPON : 1
PATIENT_THE : 6
FOR_BLOOD : 6
LOW_DINING : 1
VETERANS_WRITER : 1
WEEK_TO : 1
PATIENT_RECTAL : 1
RASHES_RATED : 1
HOWEVER_STILL : 1
SOCIAL_ALCOHOL : 1
NEGATIVE_SCORE : 1
LAST_PAIN : 1
STILL_BELIEVE : 1
DOES_THE : 1
MN_MOUTH : 1
TAKING_ECASA : 1
HIM_THAT : 2
AND_RECEIVING : 1
OF_IT : 1
CONTINUE_BRONCHODILATORS : 1
ASSIGNED_TO : 3
ALL_FOR : 1
ANY_WOUND : 1
THROUGH_PAIN : 1
WOUND_LOCATION : 1
REPORTS_HE : 6
PL_ED : 4
LIST_REVIEWED : 1
NA_ACTIVITY : 1
CONFIRMED_WITH : 1
INPATIENT_NOTE : 1
PROFILE_RECOMMENDED : 1
VIA_MAIL : 1
NVD_HAT : 1
TECHNIQUE_FOR : 1
HIS_IN : 2
WITH_PHYSICIAN : 2
LOW_POSITION : 1
AS_AND : 4
CPRS_VISTA : 1
NOTING_THE : 1
THE_OUTCOMES : 1
DERMATITIS_THE : 1
WITH_SMOKES : 1
FOR_REPORTS : 1
CHARACTERIZED_NO : 1
EYE1_CONSULT : 1
WITH_TRAVEL : 1
YESTER_NURSING : 1
UNSPECIFIED_HIGHEST : 1
PROVIDER_SAUNDERS : 1
APPOINTMENT_ON : 1
CHEST_IMPRESSION : 1
CODE_ONE : 1
THE_CORRECT : 1
NUTRITION_PERFORM : 1
IODOFORM_PACKING : 1
WITH_LONG : 1
SKILLS_FISHER : 1
HIS_EYESIGHT : 1
HEALTH_PROGRESS : 1
TRIAGE_HE : 1
CARE_BREATH : 1
ALBUTEROL_HFA : 1
NEXT_WEEK : 2
VERIFY_THIS : 1
PHYSICIAN_ASSESSMENT : 1
SOLN_UNT : 1
VERBALIZED_OPERATIVE : 1
TO_AHEAD : 1
DIAGNOSIS_ALCOHOL : 1
PSYCHIATRY_ADMIT : 1
TRANSFER_AT : 1
PROBLEMS_PL : 1
LIFT_AMB : 1
COPING_SKILLS : 1
UNDER_THOSE : 1
BELIEVE_PT : 1
FUNCTION_USED : 1
THROUGH_PROCEEDINGS : 1
DIAGNOSIS_DEPENDENCE : 1
OTHER_SPECIFIED : 1
ADJUST_NEW : 1
OF_RECORDS : 1
HEART_BEING : 1
PATIENTS_PROVIDED : 1
TEETH_ADAPTIVE : 1
SKIN_ADDENDUM : 1
SHE_WOULD : 1
SOCIAL_HISTORY : 2
FOLLOWING_WITH : 2
APPRECIATIVE_SAVINGS : 1
BLOCK_HE : 1
ANGER_ISSUES : 1
AS_HAS : 2
FORM_THEROPY : 1
PSYCH_ONE : 1
NURSINGACTIVITIES_DAILY : 1
CENTURY_APT : 1
ALCOHOL_SYMPTOMS : 2
WARRANT_DENVER : 1
AUDIOVISUAL_ARE : 1
MET_REVIEWED : 1
BRACES_TIME : 1
CLINIC_RE : 1
RECONCILIATION_ADMISSION : 1
ALOPECIA_OPTOMETRY : 1
LIKE_LEARN : 1
STATES_ALL : 1
MOSTLY_ESPECIALLY : 1
DL_NO : 1
IMPROVE_SKILLS : 1
PHYSICIAN_ANY : 1
OR_ALLERGY : 1
ALL_INFORMATION : 1
GIVEN_LEFT : 1
TAKE_TABLETS : 2
THIS_FEELS : 1
VETERAN_IS : 1
VETERANS_HOME : 1
MOUTH_TWICE : 2
DID_EAT : 1
SKIN_NUR : 1
THIS_HE : 4
LEFT_LIKE : 1
PATHOLOGICALLY_GLEASON : 1
WKS_SPENDING : 1
OBTAINED_DEC : 1
HIS_RIGHT : 1
LED_TO : 1
AN_OF : 2
CONFERRED_PHYSICIAN : 1
PHENOBARB_WAS : 1
MEASURES_BY : 1
ADDENDUM_ON : 2
HAS_OPTION : 1
NUTRITIONAL_STATUS : 1
PT_SYMPTOMS : 1
HARDSHIP_ON : 1
DORSAL_SURROGATE : 1
MOUTH_FOUR : 1
SYMPTOMS_OF : 1
GOOD_ALCOHOL : 1
TO_YOUR : 1
CONSCIOUSNESS_OR : 1
CHANGE_FROM : 1
THAT_APPOINTMENT : 1
MALE_COMES : 1
ADDENDUM_PROCEDURE : 1
INDEPENDENT_TURNS : 1
BUT_CONTINUED : 1
PPI_NO : 1
TOOK_MEDICINE : 1
DROPS_THE : 1
VERIFY_PATIENT : 1
IUD_INFORMATION : 1
WALKIN_OCT : 1
WORK_HE : 1
BROTHER_BUT : 1
HAD_LIQ : 1
CHAITANYA_SOMATIZATION : 1
PAIN_WILDCATS : 1
BROTHER_WILL : 1
AND_INSTRUCTIONS : 1
TOLD_ME : 1
ONCE_THAT : 1
PATIENT_ADVISED : 1
RISPERIDONE_MG : 1
RETURN_IN : 1
USE_STRATEGIES : 1
APPOINTED_LACY : 2
ADDENDUM_THAT : 1
SP_NOTE : 1
BILATERAL_HYDROCELES : 1
NEGLECT_OF : 1
ORAL_BOWEL : 1
PATIENT_PARTICIPATED : 1
GROSSLY_VIBRATORY : 1
TIME_SCHOOL : 1
IOP_OUTPATIENT : 1
SIDE_OVER : 1
LAB_BY : 1
MEDICATIONS_STATUS : 9
DRINKS_PRIMARY : 1
WAS_ALERT : 1
URINARY_CARE : 1
LATEST_HOME : 1
WOULD_HAVE : 1
PHONE_CONTACT : 1
CONTRACTT_REMOVAL : 1
MHC_AND : 1
GUNSHOT_TO : 1
REFUSED_MEDICATIONS : 1
STAFF_AS : 1
GLUCOSE_TEST : 1
WITH_PCP : 1
CURRENTLY_TRIES : 1
CURRENT_OUTPATIENT : 1
HIS_HEAD : 1
CLINIC_MHC : 1
CHIEF_VETERAN : 1
RADIATION_CONTACT : 1
AND_MH : 3
MOVED_HI : 1
WITH_VETERANS : 1
THAN_THAT : 1
WITH_CONTINUE : 1
INJECTIONS_EVERY : 1
NUTRITION_CLINIC : 1
HX_OF : 1
MEDICATION_NO : 1
SIGNIFICANT_OTHER : 2
EXTRACTION_ERUPTED : 1
TREATMENT_PER : 1
HAS_TAKEN : 1
POWER_OF : 1
IS_NOT : 1
AUTHOR_MACKIE : 1
WELL_DEVELOPED : 1
PERSONAL_BELONGINGS : 1
HIS_SISTER : 1
OUTLINED_IN : 1
TO_MR : 2
OF_HER : 2
CONSULT_CHAITANYA : 1
PSYCHOLOGY_NOTE : 1
MODERATE_EFFUSION : 1
RESULTS_FUNCTION : 1
OPTOMETRY_CONTINUE : 1
FLANK_FOR : 1
DESPITE_OF : 1
OF_PAIN : 2
USUAL_POWER : 1
INSTUCTIONS_TO : 1
SKIN_PATIENT : 1
RETURN_TWO : 1
FACTORS_AND : 1
DECLINED_BREAKFAST : 1
PROGRAM_PT : 1
AS_AN : 1
INCLUDING_IOP : 1
TIMES_TWICE : 1
WARRANT_COUNTY : 1
GLEASON_GRADE : 1
INFECTION_SKIN : 2
HE_UNSCHEDULED : 1
INTO_PT : 1
HIS_ASSISTANCE : 1
IN_MAY : 1
ANY_CAN : 1
OF_LESION : 1
CALL_THE : 1
HYGIENE_BED : 1
SKIN_IDENTIFIED : 1
TO_FISHER : 1
SUBJECTIVE_OBJECTIVE : 1
VET_OF : 1
THE_BLOCK : 1
ALERT_IS : 1
ENABLE_TO : 1
HAVE_AN : 1
STATING_IS : 2
CHANGED_FROM : 1
DISCUSSION_OF : 1
PLAN_CONTINUE : 3
CARE_NP : 1
HAVE_ACCIDENT : 1
PAST_DRINKER : 1
TIME_DEAR : 1
CYCLOBENZAPRINE_PROGRESS : 1
BACK_PT : 1
HIS_HOME : 1
SXS_DO : 1
AMBULATION_MANUAL : 1
IN_HANDLING : 1
MAIL_BUT : 1
SKILLS_MR : 1
PROCEDURES_PATIENT : 1
THE_MONTH : 1
HEPC_DEPRESIION : 1
BP_OR : 1
ALL_OF : 1
ACTIVE_COULD : 1
GETS_FROM : 1
FOR_DEPRESSION : 1
LETTER_TO : 2
COLCHICINE_IF : 1
TO_PAPERWORK : 1
USE_FEELING : 1
NEUROLOGIC_DURATION : 1
NOTE_INFORMED : 1
USE_HX : 1
WORRIED_ABOUT : 1
FLUIDS_DURING : 1
SYND_OR : 1
MANAGEMENT_PT : 1
RALLY_IN : 1
DERMATITIS_OF : 1
STATUS_OCT : 1
MAY_FOR : 1
DRINKS_CONSISTENCY : 1
THYROID_DOES : 1
ARE_AUTHOR : 1
NO_RECORD : 1
POSITION_COMFORT : 1
CARE_CONSULT : 1
MAMMS_NEG : 1
REPLACEMENT_CATHETER : 1
OUTPATIENT_HOME : 1
SCHIZOAFFECTIVE_THAT : 1
STATUS_SERUM : 1
DID_SPEAK : 1
FOSTER_MD : 1
IMPROVES_SKILLS : 1
NONE_NARROW : 1
INHALATION_MINUTE : 1
MINS_LATER : 1
THIS_CLINIC : 1
GUNSHOT_CAR : 1
LATER_THIS : 1
DEC_PERSONAL : 1
SOMATIZATION_DISORDER : 1
BED_INDEPENDENT : 1
ACTIVE_CASE : 1
MORE_PAIN : 1
BEHAVIORAL_VOMITING : 1
OTHERS_VETERAN : 1
GAIT_KNEE : 1
VET_HAS : 1
WITH_ACROMIOPLASTY : 1
MANAGER_REPORT : 1
PROVIDER_AND : 1
SITE_ED : 1
TO_LOUD : 1
BELIEVE_THIS : 1
ELIMINATION_SECTION : 1
VETERANS_MN : 1
THEROPY_WAS : 1
PRESSURE_TO : 1
CONTROLLED_WT : 1
ASSESSMENT_SCORE : 1
SCHEDULED_ADDENDUM : 1
ACTIVE_MALE : 1
APR_PHONE : 1
OUT_OF : 3
FOR_ROUTINE : 1
DATE_BIRTH : 1
IS_MYOFASCIAL : 1
INHALER_THE : 1
AND_TOXIC : 1
BED_THE : 2
CONTACTED_RECTAL : 1
REPORT_PT : 1
APPOINTMENTS_ONE : 1
EVALUATED_AT : 1
SENT_HIM : 1
HYPOTHYROIDISM_ASTHMA : 1
NOTE_BAND : 1
THE_USED : 5
IU_HAS : 1
WITH_OVER : 1
SPECIFIC_SOURCE : 1
EXPIRED_OUTPATIENT : 1
PHENOBARB_METHADONE : 1
INVOLVEMENT_DISCHARGE : 1
LATER_IS : 1
THE_CLINIC : 2
VETERAN_AS : 1
FIRST_TIME : 1
DISCUSSED_WITH : 1
THIS_AFTERNOON : 1
RELIEVED_NO : 1
BP_MEDS : 1
TONIGHT_EVEN : 1
NO_SI : 1
BREATH_DIMINISHED : 1
TEETH_DEVICES : 1
HE_TOLD : 1
UNTIL_AUGUST : 1
THAT_DUE : 1
THE_RESPONSIBILITY : 1
SERVICES_OFFERED : 1
THOSE_WHICH : 1
TWICE_AS : 1
ON_TIME : 1
ONE_ASSIST : 1
DISCHARGE_PATIENT : 1
WHO_COMES : 1
FITTING_ADJUSTMENTS : 1
IMPRESSIONS_QUANTITY : 1
USE_HER : 1
NECESSARY_RATED : 1
PAIN_SYND : 3
CENTER_THE : 1
HAVE_COMPLETED : 1
MEDICATION_TREATMENT : 1
AGE_BREAK : 1
NOTEINTEGRATED_ROUNDS : 1
IMAGING_CONSULT : 1
OT_ON : 1
DENIES_PRESENCE : 1
AT_DEL : 1
THIS_TIME : 3
HOUSE_CAN : 1
NUMBER_BEEN : 1
BEEN_OBSERVED : 2
SIDE_ARE : 1
ON_PROBS : 1
ADDENDUM_EGD : 1
THE_XX : 1
SAYS_IS : 1
VERIFY_IDENTITY : 1
NEED_TO : 1
DIAGNOSIS_CURRENTLY : 1
VET_PRESENTED : 1
MY_SCRIPT : 1
SEEN_LOSS : 1
VIEWED_VISTA : 1
DING_ICDCM : 1
IN_CPRS : 1
RYAN_IDENTIFIED : 1
PHYSICIAN_THIS : 2
VA_SEE : 1
NOT_TAKEN : 1
GET_NEXT : 1
OF_AND : 5
RESIDENT_IMMEDIATELY : 1
AND_LIVING : 1
THOUGHT_WITH : 1
TO_KNOW : 1
FOR_NUMBER : 1
AND_COULD : 1
BE_DETOXED : 1
SEEN_AND : 1
ENCOURAGED_USE : 1
PCP_ANY : 1
UNDERSTANDING_FROM : 1
PRESCRIPTION_AND : 1
ME_SWEAR : 1
AND_DO : 1
HARDSHIP_VETS : 1
DRUG_PT : 1
PROGRAM_WLA : 1
MOUNTAIN_PATIENT : 1
PLANS_TO : 1
NOTE_HIM : 1
BELIEVES_WESTERN : 1
BEDSIDE_VALUABLES : 1
FOLLOWING_COMPLAINT : 1
WHEN_AMB : 1
PATIENT_SSN : 1
ANXIETY_NOS : 1
BEVERLY_THIS : 1
DIFFERENT_PORCEDURE : 1
MAIL_AND : 1
CLEAN_IS : 1
TIME_WIFESHE : 1
HYGIENE_SPONGE : 1
ON_MY : 1
SUBJECTIVE_FITTING : 1
MH_TRP : 2
INPT_DC : 1
MANAGEMENT_BIRTHDATE : 1
SEP_TECH : 1
REVIEW_NUMBER : 1
DERM_NURSING : 1
DESCRIBED_SPENDING : 1
PATENT_IDENTIFY : 1
HE_WORK : 1
DEPRESSION_VETERAN : 1
TO_DRIVE : 1
ALSO_EXPRESSED : 1
ALLERGIES_NO : 1
FOR_LOCATION : 1
BUT_WOULD : 1
HE_NEEDED : 1
LOOKING_DOCUMENT : 1
FEBRILE_ASSESSMENT : 1
OF_ILLEGAL : 1
WITH_INSTABILITY : 1
OR_OF : 1
LEFT_TKA : 2
ADAPTIVE_WITHIN : 1
ANY_CORD : 1
REQUIREMENTS_ANSWER : 1
HE_CHANGED : 1
ASSESS_MOOD : 1
CP_REVIEW : 1
PODIATRY_STAFF : 1
CALL_YES : 1
DOCUMENT_OR : 1
AS_ED : 1
TREATMENT_DETAILS : 1
REQUIRES_NO : 3
JUNE_BRC : 1
PART_AND : 1
PC_MORRISON : 1
SUBJECTIVE_CONDITION : 1
YOUR_STOMACH : 1
THURS_BRC : 1
ADDS_TEMPORARILY : 1
MORNING_IS : 1
EDUCATED_VETERAN : 1
IS_NECESSARY : 1
REPLACEMENT_HYPERTROPHY : 1
NOTE_SCREEN : 1
EYES_THIS : 1
ENCOURAGEMENT_CUEING : 1
HE_LOSING : 1
IN_AREAS : 1
PREVIOUS_SAO : 1
DEPENDS_FROM : 1
SINCE_STATES : 1
KNOWLEDGE_MENTAL : 1
THIS_BEEN : 1
PRESENTED_TO : 1
PT_RATED : 1
VICTIM_FOR : 1
PT_WAS : 3
APPT_STATES : 1
ORDERED_PATIENT : 1
OF_CALL : 1
NOT_MEDICATIONS : 1
USED_NOT : 3
APPEARANCE_LESION : 1
YRS_BP : 1
CARDIOLOGY_CLINIC : 1
PIERCE_FOCUSED : 1
FLUIDS_GIVEN : 4
PART_TIME : 1
MEDICATION_EDUCAT : 1
OF_GIVEN : 1
DOCUMENTED_IN : 1
HAVE_DENTAL : 1
YOUR_GOALS : 2
REMOVAL_LPN : 1
NUTRITION_AMBULATION : 1
MEDICATION_COMPLIANT : 1
SCHEDULED_WITH : 1
MHC_IOP : 1
ACCEPT_PHOTO : 1
AGREED_TO : 1
RESULTS_OF : 2
ARNP_OR : 1
CHRONIC_AND : 1
TRANSPARENCIES_NO : 1
MACHINE_MODERATE : 1
KEEP_CASUALTIES : 1
HPI_ROS : 1
HAVE_PRESCRIBED : 1
SSN_BY : 1
DENTAL_SUMMARY : 1
IN_VINFLUENZA : 1
THERE_FALL : 2
NOTED_SEX : 1
MAKES_PY : 1
NO_AT : 1
CASE_MANAGER : 3
RECEIVING_TREATMENT : 1
THAT_LAST : 1
HEALTH_VOMITING : 1
DIABETES_MANAGER : 1
CATHETER_YES : 1
CONTINUALLY_HIMSELF : 1
WITH_RECENT : 1
PT_LIKE : 1
AGO_ADDS : 1
ON_REPORT : 1
LIFE_BEFORE : 1
VETERAN_INITIALLY : 1
ADD_SENSORIUM : 1
KNEE_TENDERNESS : 1
RT_ARM : 1
MINUTES_TIME : 1
MOVEMENTS_SHIFT : 2
PLEASE_THANKS : 1
NEED_TIME : 1
WOULD_RATHER : 1
AS_HE : 3
PRESENTS_HE : 1
NEW_NO : 1
BILL_INSURANCE : 1
THE_MONTHS : 1
IN_REQUIRED : 1
OLANZAPINE_MALE : 1
SPACE_INHALATION : 1
RESTING_IN : 1
DENIES_ALCOHOL : 1
CONTINENT_MOBILITY : 1
ADJUSTMENTS_ADJUST : 1
SECURITY_LE : 1
SPENDING_ON : 1
REVIEW_OF : 2
WITH_LEG : 1
WT_KG : 1
DECREASED_ANXIETY : 1
HIS_MONTHLY : 1
SUBJECTIVE_IS : 1
STATUS_MOUTH : 1
CLASS_IV : 1
TN_NOT : 1
SKILLS_AND : 1
PROVIDE_PRE : 1
SAFELY_VET : 1
TO_INDIVIDUALS : 1
AND_WILL : 4
DT_HEPARIN : 1
FROM_PLAN : 1
SLIPS_AND : 1
SURGERY_DENIED : 1
SAFETY_CONJUNCTION : 1
FOR_GROUP : 1
HAS_WILL : 1
GROUP_HE : 1
PO_INFORMED : 1
NO_REQUIRED : 2
LETTER_ROI : 1
HE_THAT : 3
SICK_YOUR : 1
HAD_WHEN : 1
TOBACCO_COPD : 1
REPORTS_OF : 1
DIRECTED_AND : 1
USES_WHEELCHAIR : 1
HE_WITH : 1
REVIEW_MEDICAL : 1
DISORDER_VISIT : 1
TWICE_MUSCLE : 1
HER_SIDE : 1
WAS_SICK : 1
VENTILATION_HE : 1
IN_CM : 3
GIVEN_LOCATION : 1
ACCIDENT_WHICH : 1
HOPES_IN : 1
SOCIAL_FAMILY : 1
HE_MAY : 2
AM_ALERT : 1
ANXIOUS_DEPRESSED : 1
THE_MACHINE : 1
SCHOOL_THE : 1
APPLICATION_ON : 1
OPERATIVE_DIAGNOSIS : 1
NO_VOMITING : 1
PROBLEM_THOUGHT : 1
ELIMINATION_OTHER : 1
USE_MD : 1
PMH_DENTAL : 1
WITH_LOCATOR : 1
INTO_HIS : 1
ALSO_OUTSTANDING : 1
GET_VACCINE : 1
CUEING_ANA : 1
SUMMARY_EXTRACTION : 1
ASSIGNED_CALLER : 2
MEDICATION_BORN : 1
SUPPLIES_CR : 1
COMPLAINT_NOT : 1
OF_CARING : 1
SETTING_FIRE : 1
SCREENING_ON : 1
TO_REACH : 1
GLEASON_RADIATION : 1
DEVICES_TAKE : 1
LETTER_TAB : 1
NOTE_BY : 1
AND_RECENTLY : 1
AVOID_AND : 1
AT_ON : 1
OP_NOTE : 1
RESPONSE_APPT : 2
MAOD_PATIENT : 1
FOLLOW_UP : 2
MG_TAB : 7
IN_THE : 14
ACCEPT_PATIENTS : 1
PT_PAIN : 2
SIDE_RAILS : 1
VETERAN_CAN : 1
EXCEPT_THE : 1
CALLERS_NAME : 1
PAIN_AND : 3
EXHIBITING_SIGNS : 1
HIM_PY : 1
DISCHARGE_CONTACT : 1
TO_IDENTIFY : 3
ANXIETY_IN : 1
OXYCODONE_MG : 1
COMMENT_ENCOURAGED : 1
OUTPATIENT_MANAGER : 1
WAS_WITH : 1
DIFFERENT_HIM : 1
NUTRITION_THIS : 1
MEDICATION_ADMISSION : 1
TIME_WITH : 1
FOOD_PRIMARY : 1
DATE_JUL : 1
THROUGH_WALKING : 1
PAST_FROM : 1
NEEDED_BREATHING : 1
NOTE_OTHER : 1
FOR_MR : 1
OR_ADDENDUM : 2
BY_EBL : 1
STATING_HOGAR : 1
MOVED_TO : 1
VOLUNTEER_SITUATIONS : 1
HOURS_TIMES : 1
NURSING_STAFF : 1
ASSIST_THE : 1
AT_MR : 1
EXTRA_LITHIUM : 1
NOT_HAVE : 4
CHRONIC_SYND : 1
APPOINTMENT_AT : 1
AND_HAS : 3
SCOPOLAMINE_SKILLS : 1
HIS_VA : 1
ALTERNATE_EVERY : 1
PING_PATTERN : 1
DENTAL_SURG : 1
OF_PSYCHIATRIC : 1
APPOINTMENT_NECESSARY : 1
OPTION_OF : 1
MR_ANY : 1
GIVEN_OF : 1
TAKE_MEDICATION : 1
SHOW_MH : 1
ORDER_THERAPY : 1
PRIOR_THIS : 1
READ_AND : 2
ENTITLED_AFFECT : 1
MINUTES_FOR : 2
SKIN_EXTREMITIES : 1
OUT_AT : 1
COMPLICATIONS_PHYSICAL : 1
PROTECTORS_PLACE : 3
ENROLLED_THE : 1
STATUS_PROBLEM : 1
MAOD_VAULT : 1
STATES_EYE : 1
ULCERS_OTHER : 1
WEEK_IT : 1
MAILED_PRACTICE : 1
ASSESSMENT_NUMBER : 1
PT_GOING : 1
SOAP_PREP : 1
FOR_FURTHER : 1
RISK_LOSS : 1
AND_SHAKING : 1
CALLED_FAMILY : 1
ADDITIONAL_INFORMATION : 1
NUMBNESS_OF : 1
SURFACEANTERIOR_MR : 1
LACY_DO : 2
TOILET_REFUSED : 1
AUG_MSS : 1
GROUP_WAS : 1
OUTCOMES_THE : 1
FROM_HEART : 1
HOMEWORK_ASSIGNED : 1
STAFF_PLAYED : 1
NEW_OF : 1
ACTIVE_CALLED : 1
HIS_LIVING : 1
HER_NO : 1
APPROPRIATELY_THAT : 1
CANDID_TALKING : 1
PAST_SOCIAL : 1
PAIN_ACTIVE : 1
PROVIDED_INDEP : 1
OR_MEMBER : 1
ALL_MEMBERS : 1
MINUTES_DRIVING : 1
NEVADA_ACCESSION : 1
BE_TO : 4
GOALS_ON : 1
ANA_VICTIM : 1
IN_DECLINED : 1
PARTICIPATED_IN : 4
LIKE_TO : 5
WILL_FOR : 2
MH_OP : 1
PATIENTS_REVIEWED : 1
GOAL_STRAIN : 1
PATIENT_AGE : 2
FAXED_HH : 1
NONE_MODALITY : 1
SEE_NOTE : 3
STATING_MAY : 1
VETERAN_BEEN : 1
INTERPRETATION_SILK : 1
TYPE_DESCRIPTION : 1
VACCINE_GIVEN : 1
VET_INFORMED : 1
TEMP_STARTING : 1
THIS_WRITER : 2
NOT_TO : 3
SHOULDER_CHEST : 1
BIRCH_HE : 1
OF_UNDERSTANDING : 1
MEDICATIONS_PLEASE : 1
SOCIAL_SECURITY : 2
HE_HAD : 4
MORE_TIME : 1
MEDICATION_NUMBER : 1
PAIN_AS : 1
MG_DL : 1
RECORD_EXT : 1
LATEX_ALLERGY : 1
IDENTIFIED_MEDICATIONS : 1
THIS_INJURY : 1
JOINT_FOLEY : 1
WHO_ARE : 1
HAS_HEIGHT : 1
OUT_INITIAL : 1
NOTE_BESYLATE : 1
EACHOTHER_TO : 1
INCREASE_RISK : 1
STOOL_COLOR : 1
RN_LPN : 1
HIS_MEDS : 1
TYP_TO : 1
RAISED_DIP : 1
REPEATED_BLOOD : 1
TO_MENTAL : 1
PSA_ML : 1
WITH_MHC : 1
OUTSIDE_THE : 1
CHAPLAIN_RESIDENT : 1
SHOT_THROUGH : 1
THE_APR : 1
ARE_ATTACHED : 1
DISCONTINUE_PRECAUTIONS : 1
EFFECT_OVER : 1
CLIENT_SIGNED : 1
OF_LUPUS : 1
IDA_MD : 1
FT_ELIGIBLE : 1
CARE_SHAMPOO : 1
RAISED_IN : 1
KEEP_MENTAL : 1
THE_AS : 2
PROCEDURE_INSTRUCTIONS : 1
PLACE_BLADDER : 1
FROM_SIDE : 1
PRIOR_PARTICIPATING : 1
TO_YOU : 1
REGULAR_WAS : 1
FATE_OF : 1
IS_YOUR : 2
PATIENT_CONTINENT : 8
IRRITABLE_ENCOURAGED : 1
WANTS_OBTAIN : 1
STRIDE_WHICH : 1
MAMMS_YESTER : 1
RDW_PROGRAM : 1
PRESCRIPTION_PLAN : 1
PREDNISONE_EYE : 1
THAN_OR : 1
GROUP_NO : 1
SECTION_AA : 1
ANGRY_WENT : 1
WHICH_THIS : 1
OCT_YRS : 1
OOMG_DEPAKOTE : 1
MR_DID : 1
MENTAL_CLIENT : 1
SHE_HAD : 1
NP_PATIENT : 1
KNEE_JOINT : 2
AC_LESS : 1
PATIENT_ME : 1
KEEP_HEALTH : 1
URINE_NUTRITION : 1
LIST_FOR : 1
PLAN_DENIES : 1
VETS_INTERESTED : 1
PROCEDURE_SITE : 1
FLU_YRS : 1
NONE_COGNITIVE : 1
OUTSIDE_SCANNED : 1
APPT_IN : 1
SALINE_LOCK : 1
MALE_LEVEL : 1
OUTPATIENT_GRIEF : 1
ADDENDUM_LEVEL : 1
BAND_ASSESSMENT : 1
CHEN_PENG : 1
WAS_YESTER : 1
HOME_THAT : 1
WITH_OCR : 1
AS_VETERAN : 1
POX_INJ : 1
NIGHT_LIGHT : 1
SINCE_THA : 1
PACKING_STRIP : 1
THAT_TOBACCO : 1
LIPOMA_SILK : 1
NONREACTIVE_OP : 1
TIME_OVER : 1
OF_EXERTION : 1
THE_SAFETY : 1
NO_OF : 2
MEDICAL_CENTER : 1
PULSE_GREATER : 1
WITH_ACTIVE : 1
TOPIC_THREE : 1
THESE_INSTRUCTIONS : 1
LIVING_TO : 1
TO_TOPIC : 1
SKIN_ADVANCE : 1
CARE_BOWEL : 1
TIMES_NOT : 1
HIS_BUT : 2
INTACT_MARRIED : 1
AT_CARE : 1
ID_SCREEN : 1
REACH_VET : 1
ACCUCHEK_CV : 1
DINING_ROOM : 2
LOCATION_DESCRIPTION : 2
PREPUCE_INTERESTED : 1
DEFICIT_KNOWLEDGE : 1
DIALYSIS_CENTER : 1
CONTROL_WILL : 1
MANAGEMENT_ALCOH : 1
BY_HIMSELF : 1
NOTIFY_TRANSFER : 1
MOBILITY_EASILY : 1
EFFECTIVENESS_DEALING : 1
REACH_CONTINUE : 1
APR_PERSONAL : 1
THE_POSSIBLE : 1
SURG_OLEMIA : 1
WAS_NO : 1
OBTAINING_CONSENT : 1
ABLE_PC : 1
DID_CLIENT : 1
RN_WILL : 1
QUIETLY_BED : 1
APPEARED_TO : 1
HER_FAMILY : 1
SIERRA_HCS : 1
LIQ_ENCOURAGED : 1
OF_DIAGNOSIS : 1
UNIT_PSYCHIATRY : 1
DENIES_EXCESSIVE : 1
UPRIGHT_STANDING : 1
CALL_NUMBER : 1
MN_MAR : 1
ALERT_PATIENT : 1
REPLACEMENT_FOLEY : 1
IODOFORM_GAUZE : 1
ION_ALERT : 1
SECONDARY_MILITARY : 1
OF_PING : 1
OTHER_TO : 1
OF_IMPAIRED : 1
SERVICES_THE : 1
TO_REMOVED : 1
COOL_COMPRESSES : 1
EXPECTED_BLIND : 1
ERA_ASSURANCE : 1
FAILURE_ESSENTIAL : 1
CONTACT_IT : 1
ANY_STATED : 1
BRUISING_LEFT : 1
PRE_AND : 1
CONTACT_REQUESTS : 1
VIETNAM_COMPLAINT : 1
EXPIRED_MEDICATIONS : 1
SUPERVISION_ENCOURAGEMENT : 2
CARE_DUE : 1
PAROLE_WE : 1
COMPLETED_MRI : 1
ASSIST_WITH : 1
AND_WHEN : 1
PROBLEM_EXCEPT : 1
SUBMITTED_TRAVEL : 1
AN_APPEARANCE : 1
ACTIVE_PROTECTORS : 1
DETOXED_PARTICIPATED : 1
AND_AGREE : 2
MAXINE_CHAPLAIN : 1
REGULAR_AZITHROMYCIN : 1
MINIMAL_MILD : 1
SCHEDULED_VETERAN : 1
THROUGH_EDUCAT : 1
JUL_ADDENDUM : 1
RPR_QUAL : 1
BARETT_FOLLOWUP : 1
ON_SERVICES : 1
ACTIVE_SEX : 1
CHLORAMPHENICOL_DSHI : 1
DONT_MAIL : 1
MOBILITY_MR : 1
TIMES_TO : 1
RESPONSIVE_MH : 1
HE_DOES : 2
THE_LIES : 1
RAL_APPEARANCE : 1
CLIENT_ENGAGE : 1
CENTER_FOR : 1
APPROPRIATE_FOR : 1
TENDER_TO : 1
IDENTIFIED_ACTIVE : 1
SOUNDS_DIMINISHED : 1
AND_NEURO : 1
DELTOID_NOT : 1
ENCOURAGED_MAKE : 1
PATIENT_YO : 1
NONREACTIVE_MH : 1
PROCEDURE_COLONOSCOPY : 1
BP_PULSE : 1
ATYPICAL_PAINIS : 1
DRINKS_USE : 1
PATIENT_AGREEMENT : 1
ASSESSMENT_PT : 1
CANC_ML : 1
BROTHER_IS : 1
EACHOTHER_VINFLUENZA : 1
HE_BEING : 1
NOTE_SERVICE : 1
ED_LOCATOR : 1
ILL_GET : 1
TAKE_ONE : 5
STATE_THE : 1
AND_ALSO : 1
VISIT_HOME : 1
BRONCHITIS_LUNG : 1
FACILITY_APPOINTED : 2
EDUCATION_NOTE : 1
WE_ARE : 1
LEVEL_MOOD : 1
THE_THEIR : 1
NO_ASCITES : 1
GOOD_VIETNAM : 1
PUBLIC_DEPT : 1
VISTA_ACTIVE : 1
DOUCUMENTED_CARDIAC : 1
ACTIVE_PARTICIPANT : 1
AT_GUNPOINT : 1
RES_NO : 1
ZZECF_NOTE : 1
CHANCE_APPEARS : 1
AT_LIFESOURCE : 1
FROM_FUNDS : 1
AS_FOLLOWS : 1
PT_DENIED : 1
VETERAN_THE : 1
NAUSEA_NO : 1
ABILITY_SHUTDOWN : 1
STAFF_AND : 2
TEACH_CANE : 1
HER_WILL : 1
UNIT_ATTENDING : 1
OF_SHE : 1
ML_FREE : 1
MANAGER_LACK : 1
VETERAN_SEEN : 2
SOME_REGARDING : 1
LOCK_PLACED : 1
MEDICATIONS_VADNAL : 1
TAKING_AS : 1
PLAN_IN : 1
INPATIENT_MEDICATIONS : 1
BILAT_KNEES : 1
COPY_CHART : 1
MD_STATE : 1
DISCUSSING_PURPOSE : 1
LOST_EVERYTHING : 1
OUTCOME_DECREASED : 1
WILL_ASSIST : 1
IS_ELIMINATION : 1
AND_PROSTHETIC : 1
TARGET_MONTHS : 1
DISCHARGE_TELEPHONE : 1
OR_TO : 1
NUMBER_BOWEL : 2
ABNORMAL_OF : 1
THE_COUNTER : 1
VAGUE_TO : 1
IOP_FOR : 1
AND_THAT : 6
BACK_NUMBER : 1
FGM_CC : 1
YRS_THE : 1
HE_OT : 1
SETTING_IN : 1
CONTINUE_ATTENDING : 1
VERBALIZE_ED : 1
COULD_IN : 1
VETERAN_CASE : 1
AS_SEEN : 1
HOURS_ACTIVE : 1
WILDCATS_ALL : 1
HE_SAYS : 2
PAIN_DATE : 1
EVEN_WHEN : 1
ENCOURAGED_TO : 5
INTERVENTION_PAIN : 1
TEARFULHE_THAT : 1
TO_TOMORROW : 1
ASSISTANCE_WITH : 1
PAIN_NO : 2
BLIND_SHE : 1
MY_HOUSE : 1
AND_MAJOR : 1
WAIT_FOR : 1
RISK_IN : 1
ADVISED_TO : 4
BLOCK_DID : 1
OR_LESS : 1
COUNTY_FAILURE : 1
DISCUSSION_PROBLEMS : 1
PAP_SMEAR : 1
THE_ABOVE : 1
HE_DO : 2
SW_CC : 1
OTHER_SUBSTANCE : 1
LATE_HIS : 1
LOCATOR_MR : 1
AND_TIMES : 1
UNCONTROLLED_MH : 1
ADDED_TO : 1
VETERAN_OR : 2
PSXH_NONE : 1
OLEMIA_TELERETINAL : 1
NOTE_YESTER : 1
STILL_OT : 1
MEDS_FOR : 2
TOBACCO_USE : 3
BEHAVIOR_MH : 1
ASSISTANCE_OF : 1
LAST_MONTHS : 1
OF_ON : 2
OFFICE_MON : 1
AND_RETURN : 1
HX_PHARMACY : 1
BASED_BATHING : 1
RECEIVING_ALL : 1
YESTER_NOTE : 1
HERE_SI : 1
PT_NEED : 1
TO_CONTINUE : 2
MG_OTHER : 1
FINANCES_INTERESTED : 1
FOR_TIME : 1
EXPIRATION_ADDENDUM : 1
EVERY_FOR : 3
DSMIV_PTSD : 1
NOR_NOTED : 1
AMBULATION_REQUIRES : 1
TO_HOWEVER : 1
SOCIAL_NUMBER : 2
COME_TO : 1
FOR_PROBS : 1
ATTENDING_SYSTEMS : 1
MAKES_HIM : 1
LIVES_PATIENT : 1
TO_OF : 2
OF_THEIR : 1
TO_SPEAK : 1
PRESSURE_TAKEN : 1
STATES_BASE : 1
CURRENT_DENIES : 1
STATES_BETTER : 1
PAST_CURRENT : 1
MONITOR_DENTAL : 1
TOLERATED_CONFERRED : 1
PSYCHOLOGY_AMLODIPINE : 1
REQUESTED_ESTIMATED : 1
QUALITY_XACTIVE : 1
HBPC_INITIAL : 1
FOR_HUSBAND : 1
NURSING_SPECIALTY : 1
APNEA_PHYSICIAN : 2
WEAR_PAJAMAS : 1
CARING_FOR : 1
OF_ANY : 1
XYZZY_PAIN : 2
LISTS_TO : 1
DISCUSSED_DISCHARGE : 1
SICK_CALL : 1
SKIN_JAUNDICE : 1
HOME_TEMPORARILY : 1
DISCUSSED_THE : 2
AS_INDICATED : 1
TO_COLONOSCOPY : 1
OTHER_CHAPLAIN : 1
SPONGE_YES : 1
TO_PROVIDE : 2
HE_PT : 1
ADR_ADJUSMENT : 1
VET_CONTINUED : 1
SWEAR_GET : 1
VICTIM_OF : 1
OF_OTHER : 1
NO_RATED : 2
LAST_CITALOPRAM : 1
MONTH_AGO : 1
LAB_FOR : 1
ACTION_HE : 1
DISORDER_HYPERTENSION : 1
THAN_USUAL : 1
CUFF_ACCUCHEK : 1
BP_FOR : 1
PATIENT_LEVEL : 1
LB_ADDENDUM : 1
THE_WAS : 4
URINARY_HI : 1
REHAB_LED : 1
DIVORCED_NO : 1
HAS_SUPPLY : 1
THAT_VETERAN : 1
STILL_SIGNS : 1
DONT_AS : 1
DISCUSSION_EMPLOYMENT : 1
PRESSURE_PCP : 1
PRIMARY_CONSULT : 1
LIVING_WITH : 2
DERMATOLOGY_TO : 1
TO_DISCARD : 1
SPECIFIED_OF : 1
BACK_WRISTS : 1
KEPT_BEDSIDE : 1
USE_RESTROOM : 1
SINCE_WILL : 1
LETTER_RECENTLY : 1
NO_SKIN : 2
PT_STILL : 1
OT_BELIEVE : 1
SUBSTANCE_ABUSE : 2
HIMSELF_NOT : 1
PRESCRIBED_NOTE : 1
ARE_BOWEL : 1
PAIN_CHARACTERISTICS : 1
NAME_IF : 1
OCTOBER_SAYS : 1
WHICH_WAS : 1
TO_VERBALIZE : 2
MASS_INDEX : 1
HAVE_IMPROVED : 1
OUTPATIENT_REFILLS : 1
THERAPEUTIC_MEASURES : 1
CURRENT_PT : 1
ON_ATRIAL : 1
WILL_ALSO : 1
WAS_NOT : 2
SHIFT_ANXIOUSLY : 1
ASSISTANCE_TECHNICIAN : 1
LEFT_TOTAL : 1
VA_PT : 1
NEGLECT_OTHER : 1
PATCH_PATCH : 1
NUMBER_LE : 1
STARVE_HIMSELF : 1
DOES_OF : 1
PEERS_AND : 1
PATIENT_DING : 1
DESIRE_CAUSE : 1
FOR_AND : 3
YOU_SITUATION : 1
BMI_BODY : 1
PATIENT_NOSHOW : 1
CARE_PLAN : 1
NOTES_TISSUE : 1
ACTIVE_RECENTLY : 1
UNDERSTANDING_GOOD : 1
ANY_TYPE : 1
EXR_HEAVY : 1
SYSTEM_OBSTRUCTIVE : 1
LIVES_GOAL : 1
TO_DATE : 2
TOMORROW_PROVIDER : 1
PROBS_BELOW : 1
WILL_HE : 1
MOST_RDW : 1
CLINICAL_IMPRESSION : 1
CESSATION_AND : 1
THE_PAST : 5
WOUND_NOTED : 1
THE_RULES : 1
DURING_NIGHT : 1
TIME_HEAL : 1
BE_ALLERGIES : 1
WAS_SURE : 1
CHECKIN_AFFECTED : 1
NEW_SUBJECTIVE : 1
THE_WINTER : 1
NO_ENCOURAGEMENT : 1
NATURAL_PT : 1
LEFT_AND : 1
HAVE_NEW : 1
INSTRUCTION_SUMMARY : 1
MEDICATIONS_YEAR : 1
AND_ALERT : 1
TURNS_SITS : 1
BE_VIEWED : 2
FOOD_DRINKS : 4
MH_DC : 1
NO_ASSISTANCE : 3
COMPLAINT_OF : 2
ANA_ADVOCATE : 1
ONE_OR : 1
THREE_ACTIVE : 1
PLASM_TO : 1
TO_CORRECT : 1
SCREEN_FOR : 1
WINTER_ALLERGY : 1
OF_SERVICE : 2
ABOUT_INNOVATIVE : 1
YOU_CAN : 1
AFTER_YOU : 1
TIME_AND : 3
HE_LING : 1
TITUED_BRACE : 1
THERAPY_APPOINTMENT : 1
HEAR_KNEE : 1
JUN_CLINIC : 1
SON_IN : 1
ONGOING_ACROS : 1
SI_HI : 1
AND_FAMILY : 2
HOUSING_PATIENT : 1
WILL_HOLD : 1
BENZOTROPINE_CYPROHEPTADINE : 1
FOR_PHONE : 1
LACERATION_NONE : 1
FAMILY_APR : 1
DEPRESSIVE_DISORDER : 1
DIABETES_MELLI : 1
INTERIM_NOTE : 1
SPECIALTY_NOTE : 1
SCHIZOPHRENIA_MH : 1
FROM_VOA : 1
IS_LIVING : 1
CAR_INTO : 1
VETS_PHYSICAL : 1
EACH_INHALATION : 1
CURRENT_LIST : 1
BE_FUNCTIONING : 1
IN_BE : 1
DISCHARGE_THAT : 1
PATIENT_ABRASION : 1
ILLEGAL_SUBSTANCE : 1
INNOVATIVE_DEVICES : 1
BP_PMHX : 1
TALKING_CALLING : 1
ON_NSAIDS : 1
NUMBER_HE : 1
IS_IMPRESSION : 1
FORMAL_PAIN : 1
DEVELOPMENT_OF : 1
COMFORT_PROCEDURE : 1
SHOE_LLE : 1
SMOKES_LAST : 1
VA_SCREENING : 1
NAIL_STIMULANT : 1
CONTINUES_GET : 1
OF_LEFT : 1
XACTIVE_EAGER : 1
PAIN_THAN : 1
BACK_WITH : 1
PREVENTIVE_SCREENING : 1
AGE_CLINIC : 1
SEASON_WE : 1
TIME_THE : 2
BEEN_SMILING : 1
SIGNS_WARRANT : 1
HAVE_TO : 1
CLASSES_AT : 1
WAS_ORIENTED : 1
ATRIAL_RISPERIDONE : 1
ID_ADDENDUM : 1
MON_AUGUST : 1
CRITERIA_NOT : 1
GOES_TO : 1
DESCRIBE_KEPT : 1
OUR_LIST : 1
COVER_SHEET : 1
EVALUATED_IN : 1
RESULTS_YOU : 1
PRESCRIBED_PRIMARY : 1
MEASURED_LEFT : 1
INFECTION_POTENTIAL : 2
TIME_PAIN : 1
ER_DOB : 1
PT_ON : 1
RELATES_THAT : 1
SOME_ISSUES : 1
VOUCHER_THA : 1
INCLUDING_HIS : 1
FAILED_REACH : 1
BRACES_RX : 1
SATISFACTION_PAIN : 1
HIS_APPT : 1
CAME_LAST : 1
MESSAGE_HIM : 1
CONTRAST_RACE : 1
KEEPING_STATE : 1
FOR_MINUTES : 2
PMHX_VETERAN : 1
OF_ACHIEVING : 2
WED_MAILED : 1
YEAR_OR : 1
INHALATION_WARNING : 1
FACTORS_RAL : 1
TWICE_CARE : 1
SCANNED_BECAUSE : 1
EAT_TO : 1
TO_LISTENING : 1
DAILY_CONTINUES : 1
MEDICATION_AS : 1
MD_THIS : 2
PT_TO : 5
APPOINTMENT_DID : 1
PRESSURE_READING : 1
WHILE_IS : 1
STUDENT_TO : 1
IN_EMERGENCY : 1
HE_HA : 1
CLASSIFICATION_CLEAN : 1
TO_SCHEDULE : 1
GU_LOOKING : 1
HAVE_CALL : 1
MANAGEMENT_TOBACCO : 1
HEART_IS : 1
SHAVE_SHAMPOO : 1
ED_LEFT : 1
ON_OOMG : 1
ALERT_ANY : 1
VERBAL_CONTINUE : 1
PAIN_IS : 5
THIS_WITH : 3
DRINKER_SYND : 1
NOTE_AGREEMENT : 1
HIS_WAS : 1
ALCOHOL_DEPENDENCE : 1
HISTORY_ANXIETY : 1
THE_STANDING : 1
AMOUNT_SWER : 1
STOOL_USE : 1
WINTER_LEAVING : 1
COMPLICATIONS_NONE : 1
INJURY_WAS : 1
BEHAVIORAL_CONTROL : 1
THERE_BEEN : 2
TO_REPORTS : 1
BACK_SURGERY : 1
PATCH_PAIN : 2
NO_LAST : 1
FLORIDA_BY : 1
GAIT_NEW : 1
MH_HUDVASHNOTE : 1
TO_REDUCE : 1
CARDS_WATCHED : 1
ABUSE_IV : 1
PRIMARY_CARE : 7
FACT_THAT : 1
BY_THREE : 1
FOOT_HE : 1
HIM_REGARDING : 1
WOUND_TO : 1
LAST_TIME : 1
SMOKING_AS : 1
MONTH_TX : 1
HEART_FAILURE : 1
MAY_TAKEN : 1
RELAPSE_WILL : 1
DINING_IS : 1
ANTICOAGULANT_RE : 1
VERY_STATES : 1
AND_HIMSELF : 1
ROOM_THIS : 1
CA_DL : 1
IS_BY : 1
TALKING_TO : 2
AUTHOR_HARALD : 1
NO_METHOD : 1
SW_LEFT : 1
HIM_AND : 2
ULCERS_OR : 1
QUIETLY_IN : 1
DISORDER_SICHERER : 3
YOU_FEEL : 1
FALLING_STAYING : 1
FLAT_ON : 1
DISORDER_COMPLIANT : 1
CANCELLED_ASSISTANCE : 1
OF_CONSTIPATED : 1
PT_GIVEN : 1
FOR_MEDICATION : 1
PATIENT_OF : 2
BUT_MINUTE : 1
TO_ORDER : 1
ACTIVE_MEDICATIONS : 13
WEIGHT_LB : 2
DURATION_TO : 1
ASK_YOU : 1
HELPLESS_GROUP : 1
SENNA_HYP : 1
STUDENT_DID : 1
ANY_SPECIFIC : 1
ALCOH_HEPATITIS : 1
IN_MHCC : 1
NO_COMMENTS : 1
MEDICATIONS_BEEN : 1
THIS_DOB : 1
PROCEDURE_CATHETERIZATION : 1
JUL_HIS : 1
OF_PM : 1
INSIGHT_INTO : 1
ROAD_QUESTION : 1
FACTORS_NO : 1
THE_POSTAL : 1
STATUS_GAUZE : 1
OF_DOCUMENTS : 1
TEMPORARILY_IF : 1
NARES_ANY : 1
THAT_REPORTED : 1
AND_HIS : 2
INSTUCTIONS_GIVEN : 1
COMPLETED_WITH : 1
FRAME_NAME : 1
HOURS_NO : 1
LAST_WEEK : 1
YES_OBTAINED : 1
ADL_NOTE : 1
HE_EVENTUALLY : 1
THE_WINDSHIELD : 1
TAKE_ONEHALF : 1
ICDCM_GEESEY : 1
BORN_RAISED : 1
STUDENT_FINAL : 1
STUDY_THYROID : 1
THERMAL_DIABETES : 1
HIM_HOWEVER : 1
NEURO_GROSSLY : 1
HOWEVER_TAKES : 1
VETERAN_ACKNOWLEDGED : 1
BILATERAL_NOTED : 1
FOLLOWUP_HIS : 1
TO_MOVED : 1
SHIFT_TIME : 1
FIBRILLATION_MG : 1
MALE_WHO : 1
OR_SKILLS : 1
RESTART_OTHER : 1
SCHIZOPHRENIA_NOS : 1
TO_SCREEN : 1
TYPES_DOCUMENTS : 1
TEMP_AT : 1
NEEDED_TH : 1
OCTOBER_HE : 1
RIGHT_QUADRANT : 1
TREATMENT_ETC : 1
COMMENT_HE : 1
HIS_MEDICATION : 1
ANTITHROMBOTI_MAKES : 1
FOR_USE : 3
KNEE_PAIN : 1
GIVE_HIM : 1
STEADY_JOB : 1
SUICIDAL_HE : 1
YOU_CANT : 1
BPH_FOR : 1
KIDNEY_HI : 1
BEER_ON : 1
TIZZANO_THE : 1
AFTER_REVIEWS : 1
FOLLOWUP_CLINIC : 1
REVIEWED_SERVICE : 1
HIS_AN : 1
TAKING_MG : 1
PHYSICIAN_MEDICATIONS : 1
EXERCISE_PROGRAM : 1
TO_PATIENT : 3
IDENTIFIED_CHIEF : 1
CONTACT_NUMBER : 2
WOUND_CLASSIFICATION : 1
LOSS_FUNCTION : 1
SKILLS_HIS : 1
HIS_BICYCLE : 1
HE_RECEIVES : 1
AREAS_FOR : 1
SUBJECTIVE_ACTIVE : 1
REDUCING_EATING : 1
BE_TAKEN : 1
FOLLOWING_DIAGNOSES : 1
URINARY_PAIN : 1
EVERY_DAILY : 1
BRC_OPTOMETRY : 1
SOME_RELIEF : 1
AUG_TH : 1
MYSELF_BREAKFAST : 1
PRIVILEGES_STAFF : 1
TO_PRIMARY : 1
WC_MANAGEMENT : 1
PRESSURE_RT : 1
EYE_CLINIC : 1
EXTRA_WERE : 1
PROSTATE_SUMMARY : 1
ABOUT_MEDS : 1
PERSON_DURING : 1
MHCC_AUG : 1
ID_FROM : 1
TO_DROP : 1
IDENTIFIERS_WERE : 1
APPROXIMATELY_MONTHS : 1
DOCUMENTS_EKG : 1
MEDICAL_AND : 1
NO_DISTRESS : 1
HOME_VISIT : 1
NEVER_FELT : 1
TO_COORDINATOR : 1
THE_MORNING : 1
DUPLICATE_NOTE : 1
DENVER_COUNTY : 1
NURSING_HOME : 1
STRESS_CARING : 1
LETTER_THIS : 1
ASSOCIATE_PROVIDER : 1
ADVANCE_RIGHTS : 1
INSTRUCTED_MG : 1
GOALS_VETERAN : 1
SHOWER_ALSO : 1
ACTIVITIES_DAILY : 2
NURSING_DISCHARGE : 1
HIGHS_HE : 1
ALSO_DEMONSTRATED : 1
NICOTINE_PATCH : 1
REFILLS_ADDENDUM : 1
TAKE_AND : 1
FOR_LIPOMA : 1
SUPPLY_WILL : 1
VALUABLES_MAOD : 1
DEALING_ISSUES : 1
VERIFY_HIS : 1
WOULD_RECEIVE : 1
INDIVIDUAL_THERAPY : 1
MR_THAT : 1
AND_STATED : 1
IV_ACCESS : 1
ROOM_EXPECTED : 1
THE_BY : 1
WHICH_IS : 1
RESPIRATORY_STATUS : 1
CLINIC_AS : 1
SUCCESS_FOR : 1
LOCALLY_HIS : 1
AF_VSS : 1
ANY_NEW : 1
APPEAR_PARAPHERNALIA : 1
TABLET_WAS : 1
WAS_INSTRUCTED : 1
SW_CONTINUE : 1
HELP_COPING : 1
AND_PLAN : 2
LISTEN_ME : 1
RX_TIME : 1
SHE_CAME : 1
DEPENDENCY_WANTS : 1
MOTHER_THAT : 1
FOCUS_NEGLECT : 1
TO_URINARY : 1
PTSD_CRITERIA : 1
PAY_AN : 1
IN_PATIENT : 3
FEEL_EMOTIONS : 1
APPLICABLE_AMBULATION : 1
ONE_WEEK : 1
PT_VERBALIZED : 2
HBPC_PHARMACY : 1
THE_OPTION : 1
CAN_WRITE : 1
NORMAL_FOR : 1
ON_LOWER : 1
DIVORCE_PROCEEDINGS : 1
TO_HAS : 1
FOCUS_AND : 1
CHAPLAIN_VISIT : 1
GET_THE : 2
FOR_SMOKING : 1
THIS_HAS : 1
INSTABILITY_LEFT : 1
INFORMATION_YRS : 1
OPTION_LIVING : 1
PT_SEEN : 1
CATHETERIZATION_INTERVENTION : 1
PAST_SIZE : 1
OTHER_NEGATIVE : 1
NOTE_ALCOHOL : 1
FOR_NONE : 1
FOR_TESTING : 1
NO_ICDCM : 1
AND_SITS : 1
IS_OK : 2
YOU_RECENTLY : 1
PATIENT_TH : 1
PLAN_DRIVE : 1
CASE_BIRTHDATE : 1
THA_CHECK : 1
NEBULIZER_DISTANCE : 1
SUPPLIES_OUTPATIENT : 1
AND_MONITORED : 1
MON_HER : 1
ISSUES_VERY : 1
NOR_CHIEF : 1
HAVE_TAKEN : 1
CONSULT_PMHX : 1
CLOTHES_PATCHES : 1
THIS_PROGRESS : 1
BEHAVIORAL_HEALTH : 1
FROM_THIS : 2
CORRECTION_CORRECTION : 1
IN_SCHOOL : 1
DISTRESS_ATTENTIVE : 1
PREVIOUS_NOTE : 1
FOR_ALL : 1
MOUTH_MORNING : 1
SEE_DC : 1
THE_ANSWER : 1
NUR_PREOP : 1
NOTE_SEEING : 1
SCREENING_CORRECTION : 2
MALE_PATIENT : 1
TO_UNPREDICTABLE : 1
STATUS_WHO : 1
DISEASES_PROVIDER : 1
IN_IMAGING : 1
THERAPY_VET : 1
TINNITUS_LEFT : 1
HERE_LIVING : 1
ANSWER_PERIOD : 2
ABUSE_DEPENDENCE : 1
SIGNIFICANT_FOR : 1
IN_PLACE : 3
MEMBER_SIGNIFICANT : 1
BY_VA : 1
AND_INTERVENTION : 1
FUNDS_UNIT : 1
TISSUE_AREA : 1
CRITERIA_YET : 1
INDIVIDUAL_EXERCISE : 1
PRIOR_ANXIOUS : 1
HIS_SON : 1
AS_PL : 1
SOURCE_OF : 1
POSITIVE_CALM : 1
THAT_NEEDED : 1
HYPERCHO_DIABETIC : 1
IS_FOCUSED : 1
FORM_DATE : 2
NURSING_PREOP : 1
ON_SO : 1
BEDTIME_IDENTIFIED : 1
HAVE_CARE : 1
NO_FOR : 1
THE_EXPECTED : 1
BICYCLE_AND : 1
PARALYZED_FEAR : 1
HAVE_BEEN : 2
SYMPTOMS_HE : 1
OF_ALTERNATIVES : 1
OTHER_NO : 3
AND_BRUSH : 1
OOMG_OF : 1
SESSIONS_ESTIMATED : 1
EVENING_PRIOR : 1
OF_KNOW : 1
VET_COME : 1
CONTINUE_MONITOR : 2
MYOFASCIAL_PAIN : 2
TIMES_PRN : 1
FOR_APPOINTMENT : 2
TEMPORARILY_FROM : 1
UP_CLINIC : 1
SCORE_PRIMARY : 1
FEELING_BURDEN : 1
SW_MESSAGE : 1
HH_TARGET : 1
TO_OUT : 2
AS_OF : 2
SERVICE_UNKNOWN : 1
INITIALLY_EVALUATED : 1
AND_VETS : 1
FOR_WORK : 1
HIS_SXS : 1
SEP_AT : 1
HAVE_PATIENT : 1
INTACT_DULL : 1
LAB_RESULTS : 1
OFF_CONTROLLED : 1
PATIENT_PRIVILEGES : 1
OFFICE_HAVE : 1
OR_COME : 1
PROBLEM_DISORDERMET : 1
PRIOR_NIGHT : 1
DISABILITY_SITTER : 1
ELIMINATION_PHYSICIAN : 1
IN_DELTOID : 1
ION_PATIENT : 1
STEADY_AND : 1
AND_HER : 2
PERSONAL_AND : 1
PA_URINARY : 1
FELT_HE : 1
GENDER_MALE : 2
NOTE_AMLODIPINE : 1
STATUS_TO : 1
BED_APPEARED : 1
EAT_LUNCH : 1
VOMITING_AND : 1
ROOM_AIR : 1
HA_FEELS : 1
PROMOTE_OVER : 1
KNEE_MODERATE : 1
BE_SCHEDULED : 1
RINSING_MAY : 1
OF_YRS : 1
HIS_FUNCTION : 1
ANTICOAG_INPATIENT : 1
TO_POSSIBILITY : 1
CESSATION_MEDICATION : 1
DEPENDANCE_SUPINATION : 1
STOOL_ELIMINATION : 1
UNIT_TAB : 1
WRITER_FOR : 1
PAST_MONTH : 1
MESSAGE_VET : 1
PATIENT_SPECIFIC : 1
COMPREHENSION_GOOD : 1
ANXIOUS_ANGRY : 1
SIGNS_OF : 2
DEC_NEUROLOGY : 1
NUMBER_FOR : 1
KEEP_LONG : 1
SQ_QH : 1
ALL_THE : 2
PATIENT_EFFECTS : 1
RESPONSE_DISCUSSION : 1
STOOL_TOBACCO : 1
CM_NO : 1
MEDICATION_LIST : 1
THE_NIGHT : 1
BEEN_TALKING : 1
REQUESTING_CHEN : 1
ASSISTANCE_SOME : 1
HER_IUD : 1
HIM_MORE : 1
INTERESTS_WELLNESS : 1
STD_ENCOURAGED : 1
ALTHOUGH_BEHAVIORAL : 1
BLIND_DOES : 1
RECORDS_HCL : 1
THE_EMERGENCY : 1
CONTINUE_PROVIDE : 1
BARRETTS_HTN : 1
LETTER_REGARDING : 1
PLAN_AND : 1
PLAN_FUTURE : 1
LABS_REVIEWED : 1
MODIFIED_PLAN : 1
OFF_AREAS : 1
ARE_PARTICIPATED : 1
VET_COMPREHENSIVE : 1
VOMITING_NO : 1
FOOD_VETERAN : 1
STANDING_FOR : 1
UARY_SINCE : 1
LEVEL_IS : 1
ICDCM_STATUS : 1
DERMATOLOGY_ADVISED : 1
OF_APR : 2
ABOUT_HIS : 2
NORMAL_PROCEDURE : 1
SEE_VALUABLES : 1
STRESS_STATE : 1
COGNITIVE_NO : 1
DIABETIC_TELERETINAL : 1
OCR_REFUSED : 1
REPORT_MEASURES : 1
BKH_LEGS : 1
THAT_FINANCES : 1
NAME_DOB : 1
ACTIVE_TREATMENTS : 1
LARGE_OF : 1
PT_SI : 1
AN_ALCOHOL : 1
TEXT_PRESBY : 1
PROBLEMS_ACTIVE : 1
BEEN_THIS : 1
REHABILITATION_EDUCATION : 1
PA_ADDENDUM : 1
CHAPLAIN_THE : 1
IMPRESSION_STABLE : 1
! Stats words=2141  pairs=11278
