# Supplementary material for: Predicting the Risk of Suicide by Analyzing the Text of Clinical Notes
Source: PLoS One. 2014 Jan 28;9(1):e85733. doi: 10.1371/journal.pone.0085733 (PMC3904866; doi:10.1371/journal.pone.0085733)
Supplement: Appendix S3 — Machine Learning Libraries and Methods: This section is provided to enclose the open source (Apache License) classifier used for the building of the statistical models, specifically for the purposes of study reproducibility. A detailed account of these tools is intended for another publication. (ZIP) [file pone.0085733.s003.zip › Appendix3/ML_libs/Regression_testing/README_Regression.txt]

README: Regression Testing 

This folder contains scrambled data sets (to avoid re-identification of subjects) + 3 main php scripts to test.

Data sets (in XML and Text):

Group 1: Control Group 
Group 2: Suicide Positive Group
Group 3: Psyciatric Non-Suicidal Group

1. ingestFiles.php - This file uploads all the *.xml.txt files within the "group1", "group2", and "group3" folders to the durkheim/centiment API. This script can be executed by running the command: php ingestFiles.php

After running this script, it will output the XML results from the web service to a set of XML files, one for each group (e.g. testcases_group1.xml,  testcases_group2.xml, and testcases_group3.xml)

2. inferGroups.php - This file will create all the inferences on the outputted test case ids contained within the generated from the result of running the ingestFiles.php script. This script can be executed by running the command: php inferGroups.php

After running this script, it will output the XML results from the web service to a set of XML files, one for each group (e.g. inference_group1.xml, inference_group2.xml, and inference_group3.xml)

3. run_all.php - This file is equivalent to running both the ingestFiles.php and inferGroups.php. However, if the data has already been ingested and uploaded to the centiment web service (which it has), you can run inferGroups.php to see the resulting inferences.
  
� Copyright 2013, The Durkheim Project

This material is based upon work supported by the Defense Advance Research Project Agency (DARPA), and Space Warfare Systems Center Pacific under Contract N66001-11-4006. Any opinions, findings, and conclusions or recommendations expressed in this material are those of the authors(s) and do not necessarily reflect the views of the Defense Advance Research Program Agency (DARPA) and Space and Naval Warfare Systems Center Pacific.
