# Supplementary material for: Predicting the Risk of Suicide by Analyzing the Text of Clinical Notes
Source: PLoS One. 2014 Jan 28;9(1):e85733. doi: 10.1371/journal.pone.0085733 (PMC3904866; doi:10.1371/journal.pone.0085733)
Supplement: Appendix S3 — Machine Learning Libraries and Methods: This section is provided to enclose the open source (Apache License) classifier used for the building of the statistical models, specifically for the purposes of study reproducibility. A detailed account of these tools is intended for another publication. (ZIP) [file pone.0085733.s003.zip › Appendix3/ML_libs/Word_extraction/input_sample.xml]

<?xml version="1.0" encoding="ISO-8859-1" ?>
   <records>
   <record>
     <group>2</group>
     <study_id>23</study_id>
     <index_day>348</index_day>
     <visit_comment>GENERAL HOSPITAL OUTPATIENT NOTE</visit_comment>
     <notes>Clinical Reminders Activity
    Influenza Vaccine:
      Patient received . ml influenza vaccine per order.
      Primary Diagnosis
      Site of injection:  Left deltoid intramuscularly
      Lot number/manufacturer:  Fluviron: Novartis Lot#  P  Exp /
      Patient received Vaccine Information Statement (VIS) about the
      influenza vaccine, dated // Centers for Disease Control and
      Prevention.
      Level of Understanding: Good
      Temperature:
      Temp: . F (. C)</notes>
  </record>
    <record>
    <group>3</group>
    <study_id>42</study_id>
    <index_day>127</index_day>
    <visit_comment>ADMINISTRATIVE NOTE</visit_comment>
    <notes>Contacted patient regarding recent hospitalization.

	Date of discharge: //
	Date of contact:  //
	How are you doing to ? "I am feeling great"
	What questions do you have regarding your condition?  None
	What questions do you have regarding your treatment? None	
	What questions do you have regarding your medication(s)? None
	What questions or problems do you have with equipment? N/A
	What questions or problems do you have with supplies? N/A
	Confirm the patient knows when and whom to contact if symptoms deteriorate. Yes,
	patient to contact  .  Contact information given.
	Reviewed plan of care:
	__X___ Future appointments at
        // :  RHEUMATOLOGY WKAM
        // :  NHB V
	_____ Tests
	_____ Consults
	Patient had complaints regarding hospitalization
	__X___ No
	_____ Yes:  referred to</notes>

     </record>
</records>
