# Supplementary material for: Predicting the Risk of Suicide by Analyzing the Text of Clinical Notes
Source: PLoS One. 2014 Jan 28;9(1):e85733. doi: 10.1371/journal.pone.0085733 (PMC3904866; doi:10.1371/journal.pone.0085733)
Supplement: Appendix S3 — Machine Learning Libraries and Methods: This section is provided to enclose the open source (Apache License) classifier used for the building of the statistical models, specifically for the purposes of study reproducibility. A detailed account of these tools is intended for another publication. (ZIP) [file pone.0085733.s003.zip › Appendix3/ML_libs/Word_extraction/output_sample.dat]

!  Done reading
! Total word count = 162
! Total unique words = 99
! Word probability missing mass = 1 - sum_w p_w = -1.55431223447522e-15
! Total multi-word phrase count = 480
! Total unique multi-word phrases = 399
! Phrase probability missing mass = 1 - sum_wv p_wv = 2.55351295663786e-15
!  	 pairs with mi > 20
!  	 pairs with mi > 16
!  	 pairs with mi > 12
!  	 pairs with mi > 8
! 206 	 pairs with mi > 4
! 400 	 pairs with mi > 0
! 400 	 pairs with mi > -4
! 400 	 pairs with mi > -8
! 400 	 pairs with mi > -12
group, study_id
2, 23 , ORDER : 1 , TEMPERATURE : 1 , REMINDERS : 1 , RECEIVED : 2 , THE : 1 , GOOD : 1 , SITE : 1 , PRIMARY : 1 , UNDERSTANDING : 1 , LEVEL : 1 , INFLUENZA : 3 , EXP : 1 , INTRAMUSCULARLY : 1 , FLUVIRON : 1 , OF : 2 , AND : 1 , CONTROL : 1 , DELTOID : 1 , LEFT : 1 , ABOUT : 1 , GENERAL : 1 , CENTERS : 1 , ACTIVITY : 1 , TEMP : 1 , DISEASE : 1 , FOR : 1 , VACCINE : 4 , PATIENT : 2 , NOVARTIS : 1 , DIAGNOSIS : 1 , STATEMENT : 1 , HOSPITAL : 1 , OUTPATIENT : 1 , PER : 1 , PREVENTION : 1 , CLINICAL : 1 , NUMBER : 1 , INJECTION : 1 , INFORMATION : 1 , NOTE : 1 , LOT : 2 , DATED : 1 , MANUFACTURER : 1 , ML : 1 , VIS : 1 , CENTERS_FOR : 1 , DIAGNOSIS_INJECTION : 1 , PATIENT_INFORMATION : 1 , OUTPATIENT_CLINICAL : 1 , OF_DELTOID : 1 , ABOUT_INFLUENZA : 1 , PER_ORDER : 1 , OF_UNDERSTANDING : 1 , AND_OF : 1 , CONTROL_AND : 1 , ORDER_DIAGNOSIS : 1 , PRIMARY_DIAGNOSIS : 1 , OF_TEMPERATURE : 1 , OUTPATIENT_NOTE : 1 , PREVENTION_OF : 1 , PATIENT_RECEIVED : 2 , ML_PER : 1 , DATED_DISEASE : 1 , HOSPITAL_NOTE : 1 , OF_LEFT : 1 , GOOD_TEMP : 1 , VACCINE_INFORMATION : 1 , DIAGNOSIS_OF : 1 , GENERAL_OUTPATIENT : 1 , ABOUT_THE : 1 , LOT_NUMBER : 1 , OF_INJECTION : 1 , PRIMARY_SITE : 1 , LEFT_DELTOID : 1 , SITE_OF : 1 , ACTIVITY_VACCINE : 1 , OF_GOOD : 1 , NOVARTIS_PATIENT : 1 , ORDER_PRIMARY : 1 , SITE_INJECTION : 1 , THE_VACCINE : 1 , NOTE_ACTIVITY : 1 , XYZZY_OUTPATIENT : 1 , DISEASE_PREVENTION : 1 , CENTERS_DISEASE : 1 , DELTOID_NUMBER : 1 , CLINICAL_ACTIVITY : 1 , STATEMENT_ABOUT : 1 , CONTROL_PREVENTION : 1 , VACCINE_PER : 1 , INFORMATION_VIS : 1 , NUMBER_NOVARTIS : 1 , LEFT_INTRAMUSCULARLY : 1 , INFORMATION_ABOUT : 1 , GENERAL_NOTE : 1 , DISEASE_AND : 1 , NOTE_CLINICAL : 1 , PER_DIAGNOSIS : 1 , DIAGNOSIS_SITE : 1 , AND_PREVENTION : 1 , NOTE_REMINDERS : 1 , HOSPITAL_OUTPATIENT : 1 , ACTIVITY_PATIENT : 1 , FOR_AND : 1 , VIS_THE : 1 , UNDERSTANDING_GOOD : 1 , THE_INFLUENZA : 1 , DATED_FOR : 1 , INTRAMUSCULARLY_NUMBER : 1 , TEMPERATURE_TEMP : 1 , AND_LEVEL : 1 , EXP_PATIENT : 1 , CONTROL_LEVEL : 1 , CENTERS_CONTROL : 1 , REMINDERS_ACTIVITY : 1 , DISEASE_CONTROL : 1 , ORDER_SITE : 1 , LEVEL_GOOD : 1 , PER_PRIMARY : 1 , UNDERSTANDING_TEMPERATURE : 1 , RECEIVED_INFORMATION : 1 , OUTPATIENT_REMINDERS : 1 , ABOUT_VACCINE : 1 , FOR_DISEASE : 1 , PATIENT_ML : 1 , NUMBER_MANUFACTURER : 1 , NUMBER_FLUVIRON : 1 , VACCINE_FOR : 1 , PREVENTION_LEVEL : 1 , STATEMENT_THE : 1 , GOOD_TEMPERATURE : 1 , SITE_LEFT : 1 , VACCINE_PRIMARY : 1 , LOT_PATIENT : 1 , LEFT_LOT : 1 , THE_DATED : 1 , PRIMARY_OF : 1 , LEVEL_UNDERSTANDING : 1 , INFLUENZA_PER : 1 , ACTIVITY_INFLUENZA : 1 , LEVEL_OF : 1 , VIS_ABOUT : 1 , INFORMATION_STATEMENT : 1 , INJECTION_LEFT : 1 , FOR_CONTROL : 1
3, 42 , TESTS : 1 , CONTACT : 4 , DATE : 2 , AT : 1 , TREATMENT : 1 , HOW : 1 , SUPPLIES : 1 , HOSPITALIZATION : 2 , CONFIRM : 1 , MEDICATION : 1 , FEELING : 1 , REGARDING : 5 , REVIEWED : 1 , RHEUMATOLOGY : 1 , IF : 1 , THE : 1 , QUESTIONS : 5 , WKAM : 1 , HAVE : 5 , DISCHARGE : 1 , WHAT : 5 , TO : 4 , PROBLEMS : 2 , FUTURE : 1 , APPOINTMENTS : 1 , HAD : 1 , GREAT : 1 , OF : 3 , AND : 1 , OR : 2 , ADMINISTRATIVE : 1 , PATIENT : 4 , WHEN : 1 , CONDITION : 1 , NO : 1 , SYMPTOMS : 1 , REFERRED : 1 , CONSULTS : 1 , YES : 2 , KNOWS : 1 , AM : 1 , EQUIPMENT : 1 , RECENT : 1 , NONE : 3 , CARE : 1 , INFORMATION : 1 , NHB : 1 , NOTE : 1 , CONTACTED : 1 , WITH : 2 , WHOM : 1 , YOU : 6 , ARE : 1 , YOUR : 3 , DETERIORATE : 1 , DOING : 1 , GIVEN : 1 , PLAN : 1 , DO : 5 , COMPLAINTS : 1 , DOING_AM : 1 , PATIENT_KNOWS : 1 , INFORMATION_PLAN : 1 , QUESTIONS_HAVE : 3 , WHEN_AND : 1 , TEMPERATURE_ADMINISTRATIVE : 1 , FUTURE_AT : 1 , HAVE_TREATMENT : 1 , TO_INFORMATION : 1 , HAD_COMPLAINTS : 1 , PATIENT_RECENT : 1 , WHAT_YOU : 3 , QUESTIONS_YOU : 3 , DATE_HOW : 1 , CONTACTED_PATIENT : 1 , NOTE_CONTACTED : 1 , YES_CONTACT : 1 , GREAT_WHAT : 1 , FEELING_GREAT : 1 , DATE_DISCHARGE : 1 , DATE_DATE : 1 , INFORMATION_GIVEN : 1 , REFERRED_TO : 1 , HAVE_EQUIPMENT : 1 , OF_DISCHARGE : 1 , YOU_SUPPLIES : 1 , EQUIPMENT_WHAT : 1 , TO_FEELING : 1 , REVIEWED_OF : 1 , ADMINISTRATIVE_NOTE : 1 , HOSPITALIZATION_YES : 1 , AM_GREAT : 1 , AND_WHOM : 1 , OF_FUTURE : 1 , TEMPERATURE_NOTE : 1 , CONDITION_WHAT : 1 , HOSPITALIZATION_DISCHARGE : 1 , WITH_QUESTIONS : 1 , HOSPITALIZATION_NO : 1 , CONSULTS_HAD : 1 , SUPPLIES_THE : 1 , NO_TO : 1 , PROBLEMS_HAVE : 2 , WITH_CONFIRM : 1 , REGARDING_TREATMENT : 1 , GIVEN_REVIEWED : 1 , OF_APPOINTMENTS : 1 , EQUIPMENT_OR : 1 , DETERIORATE_PATIENT : 1 , CONSULTS_COMPLAINTS : 1 , YOUR_NONE : 3 , CONFIRM_THE : 1 , SYMPTOMS_PATIENT : 1 , AT_RHEUMATOLOGY : 1 , YOU_AM : 1 , PATIENT_CONTACT : 2 , OR_YOU : 2 , YOUR_TREATMENT : 1 , DATE_CONTACT : 1 , OR_PROBLEMS : 2 , PATIENT_COMPLAINTS : 1 , YES_REFERRED : 1 , APPOINTMENTS_RHEUMATOLOGY : 1 , PATIENT_AND : 1 , DATE_OF : 2 , PATIENT_HAD : 1 , YOU_YOUR : 3 , REGARDING_RECENT : 1 , HAD_HOSPITALIZATION : 1 , DO_HAVE : 5 , MEDICATION_NONE : 1 , REGARDING_YES : 1 , PLAN_CARE : 1 , APPOINTMENTS_AT : 1 , EQUIPMENT_QUESTIONS : 1 , HAVE_REGARDING : 3 , COMPLAINTS_HOSPITALIZATION : 1 , TREATMENT_WHAT : 1 , THE_PATIENT : 1 , CONTACT_DETERIORATE : 1 , WHEN_TO : 1 , DO_WITH : 2 , CONDITION_NONE : 1 , CARE_APPOINTMENTS : 1 , TO_CONTACT : 3 , TO_SYMPTOMS : 1 , SUPPLIES_PATIENT : 1 , NONE_WHAT : 3 , QUESTIONS_DO : 5 , KNOWS_WHEN : 1 , CONTACT_ARE : 1 , TO_GREAT : 1 , COMPLAINTS_NO : 1 , HAVE_WITH : 2 , REGARDING_MEDICATION : 1 , YOU_DOING : 1 , REGARDING_NONE : 3 , AM_WHAT : 1 , FEELING_QUESTIONS : 1 , IF_YES : 1 , TESTS_PATIENT : 1 , TESTS_HAD : 1 , GOOD_ADMINISTRATIVE : 1 , CONTACT_IF : 1 , AND_CONTACT : 1 , DISCHARGE_OF : 1 , DISCHARGE_CONTACT : 1 , YES_TO : 2 , HAVE_YOUR : 3 , ARE_DOING : 1 , OF_HOW : 1 , PROBLEMS_DO : 2 , YOU_REGARDING : 3 , CONSULTS_PATIENT : 1 , WITH_THE : 1 , REVIEWED_CARE : 1 , OF_CARE : 1 , DO_REGARDING : 3 , CONTACT_GIVEN : 2 , NONE_DO : 2 , MEDICATION_QUESTIONS : 1 , AT_WKAM : 1 , NONE_QUESTIONS : 3 , WHAT_PROBLEMS : 2 , INFORMATION_REVIEWED : 1 , PATIENT_HOSPITALIZATION : 1 , CONTACT_INFORMATION : 2 , YOUR_WHAT : 3 , DO_YOU : 5 , YOU_HAVE : 5 , WHAT_OR : 2 , WITH_SUPPLIES : 1 , CONFIRM_PATIENT : 1 , NO_REFERRED : 1 , REGARDING_DATE : 1 , TO_AM : 1 , TO_IF : 1 , OF_ARE : 1 , GIVEN_PLAN : 1 , HAD_REGARDING : 1 , COMPLAINTS_REGARDING : 1 , YES_PATIENT : 1 , TEMP_NOTE : 1 , CONTACT_REVIEWED : 1 , ADMINISTRATIVE_PATIENT : 1 , WITH_EQUIPMENT : 1 , QUESTIONS_PROBLEMS : 2 , DISCHARGE_DATE : 1 , CONTACT_SYMPTOMS : 1 , PATIENT_WHEN : 1 , GREAT_DO : 1 , AND_TO : 1 , OF_DATE : 1 , QUESTIONS_OR : 2 , WHAT_QUESTIONS : 5 , HOW_DOING : 1 , WHEN_WHOM : 1 , HAVE_CONFIRM : 1 , GIVEN_OF : 1 , PROBLEMS_YOU : 2 , ARE_TO : 1 , HOW_YOU : 1 , APPOINTMENTS_WKAM : 1 , HAVE_SUPPLIES : 1 , YOU_WITH : 2 , OR_DO : 2 , SUPPLIES_CONFIRM : 1 , REGARDING_YOUR : 3 , YOUR_CONDITION : 1 , DOING_FEELING : 1 , CONTACTED_RECENT : 1 , YOU_EQUIPMENT : 1 , WHOM_CONTACT : 1 , ARE_YOU : 1 , CONDITION_QUESTIONS : 1 , HAVE_MEDICATION : 1 , PLAN_FUTURE : 1 , AM_FEELING : 1 , RECENT_HOSPITALIZATION : 1 , WITH_WHAT : 1 , CONTACT_HOW : 1 , WHOM_IF : 1 , FEELING_WHAT : 1 , HOW_ARE : 1 , SYMPTOMS_DETERIORATE : 1 , NHB_PATIENT : 1 , YOUR_MEDICATION : 1 , IF_SYMPTOMS : 1 , AT_NHB : 1 , WHOM_TO : 1 , WHAT_DO : 3 , HOSPITALIZATION_OF : 1 , THE_WHEN : 1 , REVIEWED_PLAN : 1 , DETERIORATE_TO : 1 , DOING_TO : 1 , RECENT_OF : 1 , CARE_AT : 1 , TREATMENT_NONE : 1 , NO_YES : 1 , DETERIORATE_YES : 1 , SYMPTOMS_YES : 1 , IF_DETERIORATE : 1 , TREATMENT_QUESTIONS : 1 , HAVE_CONDITION : 1 , NOTE_REGARDING : 1 , REGARDING_NO : 1 , HOSPITALIZATION_DATE : 1 , PLAN_OF : 1 , NOTE_PATIENT : 1 , KNOWS_AND : 1 , MEDICATION_WHAT : 1 , FUTURE_APPOINTMENTS : 1 , THE_KNOWS : 1 , GREAT_QUESTIONS : 1 , CARE_FUTURE : 1 , NONE_OR : 1 , RECENT_DATE : 1
! Min allowed word count = 0
! Min allowed phrase count = 0
! Min allowed MI=2
! Selected words=98  pairs=317
